# Supplementary material for: SIRT2 functions as a histone delactylase and inhibits the proliferation and migration of neuroblastoma cells
Source: PubMed Central journal article supplement (PMC9174446; doi:10.1038/s41421-022-00398-y), 2022-06-07
Supplement: 41421_2022_398_MOESM2_ESM.pdf [file 41421_2022_398_MOESM2_ESM.pdf]

**Table S2. The differentially expressed genes in SIRT2 KD cells vs. control SH-SY5Y cells determined by RNA-seq.**

| entrezgene_id | ensembl_gene_id  | baseMean   | log2FoldChang | lfcSE      | pvalue     | padj       | hgnc_symbol |
|---------------|------------------|------------|---------------|------------|------------|------------|-------------|
| 7105          | ENSG00000000003  | 522.25749  | 0.76604117    | 0.11476006 | 5.10E-12   | 1.11E-10   | TSPAN6      |
| 64102         | ENSG00000000005  | 0          | NA            | NA         | NA         | NA         | TNMD        |
| 8813          | ENSG000000000419 | 669.87346  | -0.01715454   | 0.0962409  | 0.85182802 | 0.93275912 | DPM1        |
| 57147         | ENSG000000000457 | 382.345246 | 0.04768479    | 0.13671135 | 0.71002147 | 0.86084246 | SCYL3       |
| 55732         | ENSG000000000460 | 717.684591 | 0.06890152    | 0.10507083 | 0.49589731 | 0.71459926 | C1orf112    |
| 2268          | ENSG000000000938 | 0          | NA            | NA         | NA         | NA         | FGR         |
| 3075          | ENSG000000000971 | 0.15069912 | -0.01848503   | 0.38480575 | 0.84537521 | NA         | CFH         |
| 2519          | ENSG00000001036  | 686.994166 | -0.66179397   | 0.0976039  | 3.08E-12   | 6.78E-11   | FUCA2       |
| 2729          | ENSG00000001084  | 632.64089  | 0.44714347    | 0.10740671 | 1.43E-05   | 0.00013234 | GCLC        |
| 4800          | ENSG00000001167  | 2461.36269 | 0.16741695    | 0.07707723 | 0.026433   | 0.09095225 | NFYA        |
| 90529         | ENSG00000001460  | 206.91793  | 0.28472907    | 0.17363525 | 0.06613824 | 0.18395945 | STPG1       |
| 57185         | ENSG00000001461  | 464.595054 | -0.00190446   | 0.11547201 | 0.98527709 | 0.99475332 | NIPAL3      |
| 81887         | ENSG00000001497  | 1607.83224 | 0.08791981    | 0.08160718 | 0.27049096 | 0.49374742 | LAS1L       |
| 22875         | ENSG00000001561  | 0.34114673 | 0.0032349     | 0.38339629 | 0.95755819 | NA         | ENPP4       |
| 6405          | ENSG00000001617  | 78.285503  | 0.17728762    | 0.22853091 | 0.34027124 | 0.57056767 | SEMA3F      |
| 1080          | ENSG00000001626  | 0          | NA            | NA         | NA         | NA         | CFTR        |
| 54467         | ENSG00000001629  | 2573.48934 | 0.03817843    | 0.06133003 | 0.52885954 | 0.74053026 | ANKIB1      |
| 1595          | ENSG00000001630  | 2222.41897 | -0.67130252   | 0.10143806 | 9.10E-12   | 1.95E-10   | CYP51A1     |
| 889           | ENSG00000001631  | 1223.94105 | -0.08937193   | 0.08015795 | 0.25266766 | 0.47273469 | KRIT1       |
| 5893          | ENSG00000002016  | 262.810156 | 0.28589991    | 0.19817985 | 0.09409323 | 0.23820463 | RAD52       |
| NA            | ENSG00000002079  | 0.36295163 | 0.02389475    | 0.3853924  | 0.609968   | NA         | MYH16       |
| 572           | ENSG00000002330  | 612.615397 | -0.21616969   | 0.11011834 | 0.03933105 | 0.12396233 | BAD         |
| 51056         | ENSG00000002549  | 679.356735 | 0.11657886    | 0.1047543  | 0.24682341 | 0.46592963 | LAP3        |
| 4267          | ENSG00000002586  | 1167.2818  | 0.92115202    | 0.08843896 | 3.25E-26   | 1.62E-24   | CD99        |
| 9957          | ENSG00000002587  | 0          | NA            | NA         | NA         | NA         | HS3ST1      |
| 26            | ENSG00000002726  | 1.59649369 | -0.11790376   | 0.40731156 | 0.0839442  | NA         | AOC1        |
| 51384         | ENSG00000002745  | 10.6552572 | 0.19920936    | 0.39745098 | 0.2505563  | 0.47053941 | WNT16       |
| 23072         | ENSG00000002746  | 1.39252152 | 0.03814872    | 0.38081255 | 0.59606634 | NA         | HECW1       |
| 8379          | ENSG00000002822  | 1029.3429  | 0.0014247     | 0.09754116 | 0.9888484  | 0.99604194 | MAD1L1      |
| 3927          | ENSG00000002834  | 1878.39484 | 0.3237578     | 0.0685878  | 1.55E-06   | 1.70E-05   | LASP1       |
| 29916         | ENSG00000002919  | 516.298809 | -0.0465221    | 0.13121143 | 0.70480805 | 0.85803894 | SNX11       |
| 55365         | ENSG00000002933  | 0.94591501 | -0.05316797   | 0.38917212 | 0.25487635 | NA         | TMEM176A    |
| 4074          | ENSG00000003056  | 2335.43303 | 0.05282188    | 0.0638562  | 0.40222362 | 0.63040759 | M6PR        |
| 90293         | ENSG00000003096  | 1861.29804 | 1.30161763    | 0.0711288  | 8.41E-76   | 1.56E-73   | KLHL13      |
| 56603         | ENSG00000003137  | 2.06514806 | 0.09626599    | 0.39148402 | 0.28647282 | NA         | CYP26B1     |
| 3382          | ENSG00000003147  | 3340.4075  | 0.22947457    | 0.07951602 | 0.00313468 | 0.01572095 | ICA1        |

|        |                 |            |             |            |            |            |          |
|--------|-----------------|------------|-------------|------------|------------|------------|----------|
| 79007  | ENSG00000003249 | 1186.70189 | -0.11480719 | 0.07573541 | 0.12155162 | 0.28808795 | DBNDD1   |
| 57679  | ENSG00000003393 | 900.572729 | -0.30291598 | 0.1026059  | 0.00211427 | 0.01122182 | ALS2     |
| 843    | ENSG00000003400 | 1.41030328 | 0.01772516  | 0.3807661  | 0.76453093 | NA         | CASP10   |
| 8837   | ENSG00000003402 | 1082.33082 | 0.20253158  | 0.10956437 | 0.05328292 | 0.15626505 | CFLAR    |
| 7035   | ENSG00000003436 | 3.22794941 | 0.1534585   | 0.42535728 | 0.04956785 | 0.14803945 | TFPI     |
| 55471  | ENSG00000003509 | 556.49386  | 0.16927111  | 0.10750564 | 0.10055555 | 0.25028506 | NDUFAF7  |
| 10181  | ENSG00000003756 | 2663.91774 | 0.03746056  | 0.06508077 | 0.55973434 | 0.76413192 | RBM5     |
| 9108   | ENSG00000003987 | 378.749909 | -0.50434983 | 0.1277726  | 3.00E-05   | 0.00025761 | MTMR7    |
| 6542   | ENSG00000003989 | 231.078714 | 1.05003924  | 0.16727034 | 4.24E-11   | 8.49E-10   | SLC7A2   |
| 381    | ENSG00000004059 | 2965.6547  | 0.11887136  | 0.06964118 | 0.0825752  | 0.21637154 | ARF5     |
| 23098  | ENSG00000004139 | 2278.62106 | -0.50049384 | 0.06531982 | 7.19E-15   | 1.94E-13   | SARM1    |
| 26073  | ENSG00000004142 | 2037.78977 | -0.12830835 | 0.06383498 | 0.04130442 | 0.12854198 | POLDIP2  |
| 23129  | ENSG00000004399 | 191.177659 | -0.50263675 | 0.22115283 | 0.00757771 | 0.03302038 | PLXND1   |
| 204    | ENSG00000004455 | 2486.64931 | -0.16738073 | 0.06326123 | 0.00724322 | 0.03180029 | AK2      |
| 952    | ENSG00000004468 | 54.4478516 | 4.12499323  | 0.52036409 | 1.07E-16   | 3.24E-15   | CD38     |
| 2288   | ENSG00000004478 | 4840.55548 | -0.287235   | 0.068453   | 1.94E-05   | 0.00017427 | FKBP4    |
| 23028  | ENSG00000004487 | 6398.13582 | 0.13236848  | 0.06948158 | 0.05319259 | 0.15609245 | KDM1A    |
| 10180  | ENSG00000004534 | 3682.08125 | 0.29333498  | 0.06320411 | 2.47E-06   | 2.61E-05   | RBM6     |
| 84254  | ENSG00000004660 | 169.405515 | 0.15126165  | 0.17164455 | 0.32538734 | 0.55337603 | CAMKK1   |
| 5965   | ENSG00000004700 | 650.447765 | -0.06286207 | 0.13216606 | 0.61128309 | 0.79937717 | RECQL    |
| 55610  | ENSG00000004766 | 736.368084 | 0.28732975  | 0.11140861 | 0.0068929  | 0.03055299 | VPS50    |
| 126393 | ENSG00000004776 | 7.43800108 | 0.11324518  | 0.37748365 | 0.4146074  | 0.64173903 | HSPB6    |
| 115703 | ENSG00000004777 | 692.457392 | 0.09022453  | 0.10969333 | 0.39047961 | 0.61981882 | ARHGAP33 |
| 4706   | ENSG00000004779 | 1219.63778 | 0.12135268  | 0.09688213 | 0.19539465 | 0.39895336 | NDUFAB1  |
| 5166   | ENSG00000004799 | 77.5760359 | 1.50995432  | 0.32027403 | 1.85E-07   | 2.36E-06   | PDK4     |
| 85413  | ENSG00000004809 | 1.13478943 | 0.06737302  | 0.38926795 | 0.26350831 | NA         | SLC22A16 |
| 51364  | ENSG00000004838 | 65.7268928 | 0.36755196  | 0.28135591 | 0.08415883 | 0.21946783 | ZMYND10  |
| 340273 | ENSG00000004846 | 0          | NA          | NA         | NA         | NA         | ABCB5    |
| 170302 | ENSG00000004848 | 0.79999795 | -0.02985682 | 0.38372707 | 0.5462175  | NA         | ARX      |
| 10165  | ENSG00000004864 | 1673.83514 | -0.34923004 | 0.07781231 | 4.37E-06   | 4.45E-05   | SLC25A13 |
| 7982   | ENSG00000004866 | 667.359421 | -0.12379352 | 0.12590133 | 0.29609241 | 0.52268649 | ST7      |
| 93655  | ENSG00000004866 | 667.359421 | -0.12379352 | 0.12590133 | 0.29609241 | 0.52268649 | ST7      |
| 996    | ENSG00000004897 | 2135.41241 | -0.14739812 | 0.08573919 | 0.07723727 | 0.20599375 | CDC27    |
| 6521   | ENSG00000004939 | 0.173124   | -0.01911262 | 0.38486262 | 0.84537521 | NA         | SLC4A1   |
| 799    | ENSG00000004948 | 0.51313021 | 0.03090336  | 0.38602227 | 0.48239305 | NA         | CALCR    |
| 3052   | ENSG00000004961 | 317.39032  | -0.10073179 | 0.13872563 | 0.43504534 | 0.66035668 | HCCS     |
| 1856   | ENSG00000004975 | 1545.559   | 0.19684602  | 0.07791115 | 0.00978944 | 0.04080306 | DVL2     |
| 64063  | ENSG00000005001 | 2.5109304  | -0.00387812 | 0.37450917 | 0.96250013 | NA         | PRSS22   |



|        |                 |            |             |            |            |            |         |
|--------|-----------------|------------|-------------|------------|------------|------------|---------|
| 5976   | ENSG00000005007 | 3365.29931 | -0.13052159 | 0.07243368 | 0.06509765 | 0.18195793 | UPF1    |
| 8935   | ENSG00000005020 | 32.2554582 | 0.37233489  | 0.39987471 | 0.10978723 | 0.26670487 | SKAP2   |
| 292    | ENSG00000005022 | 4350.14093 | -0.08827934 | 0.05750263 | 0.1202039  | 0.28547347 | SLC25A5 |
| 55013  | ENSG00000005059 | 393.621096 | 0.08564226  | 0.12486792 | 0.46859985 | 0.69133113 | MCUB    |
| 3207   | ENSG00000005073 | 0          | NA          | NA         | NA         | NA         | HOXA11  |
| 5439   | ENSG00000005075 | 1388.43905 | -0.06444766 | 0.07622225 | 0.38800684 | 0.61697969 | POLR2J  |
| 56919  | ENSG00000005100 | 1796.76664 | 0.03832527  | 0.07730791 | 0.61355077 | 0.8012142  | DHX33   |
| 4222   | ENSG00000005102 | 0          | NA          | NA         | NA         | NA         | MEOX1   |
| 221981 | ENSG00000005108 | 1520.91559 | 0.97867338  | 0.096145   | 3.46E-25   | 1.66E-23   | THSD7A  |
| 3980   | ENSG00000005156 | 1558.11303 | 0.29397021  | 0.1230959  | 0.01146076 | 0.04643563 | LIG3    |
| 79657  | ENSG00000005175 | 518.95592  | -0.07880605 | 0.1088444  | 0.44761482 | 0.67150685 | RPAP3   |
| 6296   | ENSG00000005187 | 3.60130902 | 0.16634876  | 0.42563653 | 0.06618993 | 0.1840258  | ACSM3   |
| 81691  | ENSG00000005189 | 270.157579 | -0.02597598 | 0.17860065 | 0.86799947 | 0.94228001 | REXO5   |
| 57019  | ENSG00000005194 | 1260.36104 | -0.18662815 | 0.07688412 | 0.01307429 | 0.05164121 | CIAPIN1 |
| 56928  | ENSG00000005206 | 1345.61485 | 0.48854109  | 0.07473156 | 2.63E-11   | 5.36E-10   | SPPL2B  |
| 80256  | ENSG00000005238 | 279.240084 | 0.32444172  | 0.16408204 | 0.02876473 | 0.09712258 | FAM214B |
| 51226  | ENSG00000005243 | 52.1426431 | 0.52944713  | 0.32465189 | 0.02648486 | 0.09108332 | COPZ2   |
| 5577   | ENSG00000005249 | 1094.48274 | -0.27239383 | 0.08280694 | 0.00073467 | 0.00451543 | PRKAR2B |
| 10943  | ENSG00000005302 | 561.141127 | 0.08480974  | 0.10377643 | 0.39627237 | 0.62563597 | MSL3    |
| 1387   | ENSG00000005339 | 2814.58672 | 0.00668117  | 0.07119437 | 0.92001084 | 0.96633041 | CREBBP  |
| 9256   | ENSG00000005379 | 469.53262  | -0.40203507 | 0.15117426 | 0.00380048 | 0.01846719 | TSPOAP1 |
| 4353   | ENSG00000005381 | 0          | NA          | NA         | NA         | NA         | MPO     |
| 5444   | ENSG00000005421 | 1.17149719 | -0.00728038 | 0.37858016 | 0.91548856 | NA         | PON1    |
| 6936   | ENSG00000005436 | 687.778007 | -0.21392533 | 0.10783318 | 0.03802891 | 0.12085248 | GCFC2   |
| 84058  | ENSG00000005448 | 790.531531 | -0.27361242 | 0.10999889 | 0.00910551 | 0.03836341 | WDR54   |
| 54677  | ENSG00000005469 | 209.910003 | 0.28706959  | 0.1588458  | 0.04691857 | 0.14177038 | CROT    |
| 5244   | ENSG00000005471 | 570.279066 | 0.56321151  | 0.11304508 | 2.07E-07   | 2.63E-06   | ABCB4   |
| 55904  | ENSG00000005483 | 2651.67788 | -0.10370238 | 0.07209728 | 0.13952571 | 0.31648712 | KMT2E   |
| 57414  | ENSG00000005486 | 1676.46208 | 0.20511556  | 0.07221515 | 0.0038031  | 0.01847088 | RHBDD2  |
| 30812  | ENSG00000005513 | 0          | NA          | NA         | NA         | NA         | SOX8    |
| 25998  | ENSG00000005700 | 999.880366 | -0.08831179 | 0.08533342 | 0.28837167 | 0.51413497 | IBTK    |
| 7748   | ENSG00000005801 | 1798.09548 | -0.1051443  | 0.08778211 | 0.21788219 | 0.42968409 | ZNF195  |
| 23077  | ENSG00000005810 | 1940.61039 | -0.12328195 | 0.09621441 | 0.18477466 | 0.38350847 | MYCBP2  |
| 26224  | ENSG00000005812 | 462.67383  | -0.24177215 | 0.12667372 | 0.04230492 | 0.1311043  | FBXL3   |
| 3683   | ENSG00000005844 | 0.80812928 | 0.03486839  | 0.38584757 | 0.52993191 | NA         | ITGAL   |
| 5164   | ENSG00000005882 | 567.558978 | -0.24186873 | 0.12625783 | 0.04166108 | 0.12951361 | PDK2    |
| 3675   | ENSG00000005884 | 381.863516 | -0.18939245 | 0.19487559 | 0.25835311 | 0.47964541 | ITGA3   |
| 7543   | ENSG00000005889 | 864.739688 | -0.11870505 | 0.13652052 | 0.35088023 | 0.58113897 | ZFX     |

|        |                 |            |             |            |            |            |           |
|--------|-----------------|------------|-------------|------------|------------|------------|-----------|
| 3920   | ENSG00000005893 | 513.78676  | -0.07729745 | 0.1041893  | 0.43887825 | 0.66407447 | LAMP2     |
| 3674   | ENSG00000005961 | 59.8907763 | -0.09768843 | 0.2896718  | 0.61373777 | 0.8013529  | ITGA2B    |
| 51666  | ENSG00000005981 | 0.16735865 | 0.01897177  | 0.38482933 | 0.78225479 | NA         | ASB4      |
| 51573  | ENSG00000006007 | 798.266604 | -0.01674402 | 0.09138555 | 0.84926828 | 0.93154246 | GDE1      |
| 55049  | ENSG00000006015 | 758.350083 | -0.08642079 | 0.09722188 | 0.35709837 | 0.58712453 | REX1BD    |
| 9244   | ENSG00000006016 | 61.8489748 | -0.10735919 | 0.24103208 | 0.56891147 | 0.76956457 | CRLF1     |
| 114881 | ENSG00000006025 | 523.561338 | 0.33992168  | 0.11809195 | 0.00242303 | 0.0126209  | OSBPL7    |
| 26022  | ENSG00000006042 | 1856.94551 | 0.18661654  | 0.06825051 | 0.00518415 | 0.02394729 | TMEM98    |
| 51087  | ENSG00000006047 | 206.305464 | 1.12463665  | 0.18041394 | 5.13E-11   | 1.02E-09   | YBX2      |
| 3883   | ENSG00000006059 | 0          | NA          | NA         | NA         | NA         | KRT33A    |
| 9020   | ENSG00000006062 | 227.612787 | 0.31331594  | 0.15168267 | 0.02436763 | 0.08536592 | MAP3K14   |
| 6833   | ENSG00000006071 | 194.272813 | -0.95770047 | 0.23005141 | 3.85E-06   | 3.94E-05   | ABCC8     |
| 10368  | ENSG00000006116 | 0          | NA          | NA         | NA         | NA         | CACNG3    |
| 54972  | ENSG00000006118 | 5617.88941 | 0.14760953  | 0.05491687 | 0.00665427 | 0.02961432 | TMEM132A  |
| 163    | ENSG00000006125 | 6851.44074 | -0.16615755 | 0.06468096 | 0.0090731  | 0.03823499 | AP2B1     |
| 6863   | ENSG00000006128 | 0          | NA          | NA         | NA         | NA         | TAC1      |
| 10127  | ENSG00000006194 | 670.818903 | 0.05420103  | 0.10482681 | 0.59158716 | 0.78614128 | ZNF263    |
| 6376   | ENSG00000006210 | 313.734316 | -0.92999117 | 0.15580447 | 3.40E-10   | 6.20E-09   | CX3CL1    |
| 64847  | ENSG00000006282 | 965.032429 | -0.02793854 | 0.08392654 | 0.7308703  | 0.8712652  | SPATA20   |
| 8913   | ENSG00000006283 | 346.832957 | -2.23146606 | 0.1889428  | 2.14E-33   | 1.36E-31   | CACNA1G   |
| 51330  | ENSG00000006327 | 69.6588405 | 0.10736054  | 0.22587483 | 0.55970366 | 0.76413192 | TNFRSF12A |
| 1750   | ENSG00000006377 | 327.991941 | -0.04183869 | 0.12856686 | 0.72897907 | 0.87045369 | DLX6      |
| 4293   | ENSG00000006432 | 743.685981 | -0.15787483 | 0.11000474 | 0.1330972  | 0.30658869 | MAP3K9    |
| 5898   | ENSG00000006451 | 2139.37006 | -0.08978943 | 0.07294386 | 0.20930419 | 0.41755608 | RALA      |
| 55971  | ENSG00000006453 | 296.872796 | 0.3272981   | 0.13524158 | 0.0095479  | 0.03993894 | BAIAP2L1  |
| 80853  | ENSG00000006459 | 1051.59041 | -0.09594022 | 0.0918122  | 0.28116231 | 0.50594669 | KDM7A     |
| 2115   | ENSG00000006468 | 710.906855 | 1.2446643   | 0.10144306 | 1.29E-35   | 8.86E-34   | ETV1      |
| 55750  | ENSG00000006530 | 1046.13285 | -0.18202539 | 0.09688939 | 0.05153522 | 0.1524879  | AGK       |
| 221    | ENSG00000006534 | 32.2388291 | -0.36189796 | 0.38778772 | 0.115839   | 0.27790154 | ALDH3B1   |
| 55001  | ENSG00000006555 | 0          | NA          | NA         | NA         | NA         | TTC22     |
| 57157  | ENSG00000006576 | 1395.52342 | -0.0872433  | 0.07874223 | 0.25677851 | 0.47786189 | PHTF2     |
| 10344  | ENSG00000006606 | 0          | NA          | NA         | NA         | NA         | CCL26     |
| 9855   | ENSG00000006607 | 953.79531  | -0.19542741 | 0.10777567 | 0.05808038 | 0.16712323 | FARP2     |
| 10083  | ENSG00000006611 | 1.7521339  | -0.00083294 | 0.37612745 | 0.99046715 | NA         | USH1C     |
| 79017  | ENSG00000006625 | 1252.62514 | -0.32252039 | 0.08373125 | 7.61E-05   | 0.00059755 | GGCT      |
| 10926  | ENSG00000006634 | 1100.43046 | -0.5345773  | 0.11695166 | 1.69E-06   | 1.83E-05   | DBF4      |
| 6915   | ENSG00000006638 | 56.4984033 | -0.11018809 | 0.24881508 | 0.56401565 | 0.76665322 | TBXA2R    |
| 3475   | ENSG00000006652 | 1586.85257 | -0.19040756 | 0.09626272 | 0.04054659 | 0.12664426 | IFRD1     |

|        |                 |            |             |            |            |            |          |
|--------|-----------------|------------|-------------|------------|------------|------------|----------|
| 56891  | ENSG00000006659 | 0          | NA          | NA         | NA         | NA         | LGALS14  |
| 1352   | ENSG00000006695 | 320.853231 | 0.02231887  | 0.13996022 | 0.86518029 | 0.94028794 | COX10    |
| 9569   | ENSG00000006704 | 1442.91874 | 0.24031919  | 0.0817108  | 0.00256642 | 0.01327412 | GTF2IRD1 |
| 54623  | ENSG00000006712 | 1073.12111 | -0.10176278 | 0.07862424 | 0.18560335 | 0.38490337 | PAF1     |
| 27072  | ENSG00000006715 | 2041.58027 | 0.11662671  | 0.07420071 | 0.10918397 | 0.26566224 | VPS41    |
| 9912   | ENSG00000006740 | 10.2066999 | 0.15026294  | 0.38592485 | 0.31385641 | 0.54165894 | ARHGAP44 |
| 60528  | ENSG00000006744 | 1695.07673 | 0.01760769  | 0.07741072 | 0.81687111 | 0.91671007 | ELAC2    |
| 85477  | ENSG00000006747 | 0          | NA          | NA         | NA         | NA         | SCIN     |
| 414    | ENSG00000006756 | 529.497767 | 0.33493621  | 0.13206022 | 0.00677064 | 0.03007825 | ARSD     |
| 8228   | ENSG00000006757 | 37.8374833 | -0.3961043  | 0.42278032 | 0.09290472 | 0.23587906 | PNPLA4   |
| 8735   | ENSG00000006788 | 0.16735865 | 0.01897177  | 0.38482933 | 0.78225479 | NA         | MYH13    |
| 79602  | ENSG00000006831 | 1508.08357 | -0.27301115 | 0.07599393 | 0.00023968 | 0.00167202 | ADIPOR2  |
| 51265  | ENSG00000006837 | 45.6210287 | -0.26159406 | 0.2989673  | 0.21224603 | 0.42202458 | CDKL3    |
| 151531 | ENSG00000007001 | 1.18837386 | 0.04619176  | 0.38449686 | 0.37462067 | NA         | UPP2     |
| 10942  | ENSG00000007038 | 0.15069912 | -0.01848503 | 0.38480575 | 0.84537521 | NA         | PRSS21   |
| 57787  | ENSG00000007047 | 1055.02244 | 0.00698085  | 0.08968583 | 0.93698435 | 0.97351594 | MARK4    |
| 8842   | ENSG00000007062 | 262.590088 | 4.12432046  | 0.21234156 | 1.67E-85   | 3.73E-83   | PROM1    |
| 115098 | ENSG00000007080 | 1486.34522 | 0.06576813  | 0.08511655 | 0.428576   | 0.65447566 | CCDC124  |
| 90273  | ENSG00000007129 | 0          | NA          | NA         | NA         | NA         | CEACAM21 |
| 5048   | ENSG00000007168 | 3828.46245 | -0.24810913 | 0.06187423 | 4.62E-05   | 0.00038203 | PAFAH1B1 |
| 4843   | ENSG00000007171 | 82.1727675 | 0.72828772  | 0.30928283 | 0.00311918 | 0.01566633 | NOS2     |
| 1770   | ENSG00000007174 | 0.68981627 | 0.04028194  | 0.38714411 | 0.35752454 | NA         | DNAH9    |
| 9703   | ENSG00000007202 | 4619.26443 | -0.00068369 | 0.06072443 | 0.99045299 | 0.99676382 | KIAA0100 |
| 9058   | ENSG00000007216 | 0          | NA          | NA         | NA         | NA         | SLC13A2  |
| 8522   | ENSG00000007237 | 175.655034 | -0.55772268 | 0.209085   | 0.00219307 | 0.01159351 | GAS7     |
| 79090  | ENSG00000007255 | 112.857627 | 0.55419009  | 0.23914195 | 0.00579997 | 0.02639156 | TRAPPC6A |
| 4145   | ENSG00000007264 | 0.65754506 | 0.00334079  | 0.38192682 | 0.94271382 | NA         | MATK     |
| 1087   | ENSG00000007306 | 0          | NA          | NA         | NA         | NA         | CEACAM7  |
| 974    | ENSG00000007312 | 1.11198554 | -0.01893371 | 0.38176065 | 0.71997015 | NA         | CD79B    |
| 6329   | ENSG00000007314 | 0          | NA          | NA         | NA         | NA         | SCN4A    |
| 54879  | ENSG00000007341 | 286.405356 | -0.20466641 | 0.14592954 | 0.12829673 | 0.29899782 | ST7L     |
| 8277   | ENSG00000007350 | 4.46857995 | 0.13285024  | 0.40750751 | 0.11164106 | 0.2700997  | TKTL1    |
| 5080   | ENSG00000007372 | 1.08875469 | -0.02005498 | 0.38234577 | 0.78769956 | NA         | PAX6     |
| 113000 | ENSG00000007376 | 572.194184 | -0.14616842 | 0.10015543 | 0.1298707  | 0.30153711 | RPUSD1   |
| 64285  | ENSG00000007384 | 28.9176656 | 0.48753656  | 0.45818108 | 0.05710482 | 0.16493806 | RHBDF1   |
| 55692  | ENSG00000007392 | 2217.0873  | 0.27070709  | 0.06616955 | 3.20E-05   | 0.00027378 | LUC7L    |
| 9254   | ENSG00000007402 | 12616.1895 | 1.17729298  | 0.04680533 | 9.68E-141  | 6.00E-138  | CACNA2D2 |
| 8938   | ENSG00000007516 | 19.4703165 | 0.00094998  | 0.33609926 | 0.99783311 | 0.99926338 | BAIAP3   |

|        |                 |            |             |            |            |            |         |
|--------|-----------------|------------|-------------|------------|------------|------------|---------|
| 115939 | ENSG00000007520 | 835.59368  | 0.12086141  | 0.09368761 | 0.18362927 | 0.38196736 | TSR3    |
| 9091   | ENSG00000007541 | 1337.6419  | 0.32809533  | 0.08294103 | 4.93E-05   | 0.00040382 | PIGQ    |
| 57585  | ENSG00000007545 | 1322.06328 | 0.23901557  | 0.12094565 | 0.03594517 | 0.11573389 | CRAMP1  |
| 7005   | ENSG00000007866 | 222.546318 | 0.59686754  | 0.18125154 | 0.00027374 | 0.00188443 | TEAD3   |
| 6401   | ENSG00000007908 | 0          | NA          | NA         | NA         | NA         | SELE    |
| 55735  | ENSG00000007923 | 1627.08409 | -0.09171088 | 0.09341671 | 0.31050833 | 0.5382687  | DNAJC11 |
| 2328   | ENSG00000007933 | 0.173124   | -0.01911262 | 0.38486262 | 0.84537521 | NA         | FMO3    |
| 29116  | ENSG00000007944 | 184.143421 | -0.27903237 | 0.18670792 | 0.08765723 | 0.22621221 | MYLIP   |
| 27035  | ENSG00000007952 | 0.15069912 | -0.01848503 | 0.38480575 | 0.84537521 | NA         | NOX1    |
| 1870   | ENSG00000007968 | 984.571308 | -0.3057412  | 0.10948417 | 0.00345899 | 0.017084   | E2F2    |
| 5689   | ENSG00000008018 | 2397.67831 | 0.02385981  | 0.06487246 | 0.71095684 | 0.86118643 | PSMB1   |
| 6853   | ENSG00000008056 | 319.415649 | -2.58463072 | 0.17651173 | 8.04E-50   | 7.90E-48   | SYN1    |
| 3720   | ENSG00000008083 | 1020.76306 | 0.13029263  | 0.08192144 | 0.10346484 | 0.25569786 | JARID2  |
| 6792   | ENSG00000008086 | 688.442088 | -0.08688718 | 0.13537106 | 0.49388821 | 0.71263909 | CDKL5   |
| 57172  | ENSG00000008118 | 1.56173405 | 0.11143762  | 0.40628069 | 0.05476964 | NA         | CAMK1G  |
| 728642 | ENSG00000008128 | 964.861152 | 0.39408212  | 0.08509877 | 1.98E-06   | 2.13E-05   | CDK11A  |
| 65220  | ENSG00000008130 | 1445.55597 | 0.18613625  | 0.08802207 | 0.02959472 | 0.09931651 | NADK    |
| 7021   | ENSG00000008196 | 14644.0753 | 0.22261758  | 0.05384673 | 2.48E-05   | 0.00021768 | TFAP2B  |
| 83741  | ENSG00000008197 | 8.03869294 | -1.18968095 | 1.35853969 | 0.01023481 | 0.04220717 | TFAP2D  |
| 9940   | ENSG00000008226 | 3.94084535 | -0.01276139 | 0.37007773 | 0.89710557 | 0.95488961 | DLEC1   |
| 9265   | ENSG00000008256 | 1015.39019 | 0.13692341  | 0.11119086 | 0.19876849 | 0.40314524 | CYTH3   |
| 53616  | ENSG00000008277 | 5360.80924 | -0.29246709 | 0.06790854 | 1.17E-05   | 0.00010956 | ADAM22  |
| 6856   | ENSG00000008282 | 482.552543 | 0.15930458  | 0.11157429 | 0.13529945 | 0.30986276 | SYPL1   |
| 1534   | ENSG00000008283 | 9023.99082 | -0.2621449  | 0.06460942 | 3.74E-05   | 0.000316   | CYB561  |
| 9043   | ENSG00000008294 | 5656.40565 | -0.218432   | 0.05439874 | 4.90E-05   | 0.00040213 | SPAG9   |
| 1951   | ENSG00000008300 | 4576.13679 | 0.16622412  | 0.06552945 | 0.01004185 | 0.04160166 | CELSR3  |
| 10157  | ENSG00000008311 | 198.701469 | 2.11065757  | 0.22118727 | 8.73E-23   | 3.76E-21   | AASS    |
| 55200  | ENSG00000008323 | 7.51655365 | 0.23739888  | 0.49709332 | 0.00319401 | 0.01594194 | PLEKHG6 |
| 51188  | ENSG00000008324 | 254.22265  | -0.22038718 | 0.14958269 | 0.10860018 | 0.26446884 | SS18L2  |
| 84954  | ENSG00000008382 | 357.78067  | 0.07406921  | 0.13759985 | 0.56514466 | 0.76729419 | MPND    |
| 4257   | ENSG00000008394 | 185.469292 | 2.84532145  | 0.20905368 | 2.29E-43   | 1.93E-41   | MGST1   |
| 1407   | ENSG00000008405 | 495.842327 | 0.26726681  | 0.11578444 | 0.01519367 | 0.0582385  | CRY1    |
| 8993   | ENSG00000008438 | 0.50753074 | 0.03073847  | 0.38601592 | 0.48354038 | NA         | PGLYRP1 |
| 4784   | ENSG00000008441 | 1867.49772 | -0.16804599 | 0.09271175 | 0.06119594 | 0.1739936  | NFIX    |
| 6482   | ENSG00000008513 | 104.291504 | 1.00835682  | 0.25292093 | 7.86E-06   | 7.60E-05   | ST3GAL1 |
| 64386  | ENSG00000008516 | 11.7054491 | -0.00530444 | 0.35335029 | 0.96623257 | 0.98692619 | MMP25   |
| 9235   | ENSG00000008517 | 2.66262469 | 0.04717456  | 0.37850631 | 0.58109316 | 0.77834785 | IL32    |
| 5310   | ENSG00000008710 | 8331.79613 | -0.19859562 | 0.07160519 | 0.00471474 | 0.02212928 | PKD1    |

|        |                 |            |             |            |            |            |           |
|--------|-----------------|------------|-------------|------------|------------|------------|-----------|
| 23542  | ENSG00000008735 | 1937.36857 | -1.40573386 | 0.07507426 | 2.99E-79   | 5.99E-77   | MAPK8IP2  |
| 9862   | ENSG00000008838 | 2045.02181 | 0.10124147  | 0.07964148 | 0.19325424 | 0.39596861 | MED24     |
| 23221  | ENSG00000008853 | 874.544836 | -0.11238092 | 0.10436767 | 0.2615337  | 0.48353634 | RHOBTB2   |
| 54497  | ENSG00000008869 | 1520.28268 | -0.26314344 | 0.08000601 | 0.00074688 | 0.00458199 | HEATR5B   |
| 7095   | ENSG00000008952 | 1721.83244 | -0.56526574 | 0.08586837 | 1.52E-11   | 3.19E-10   | SEC62     |
| 6224   | ENSG00000008988 | 11401.5033 | -0.15554551 | 0.05790148 | 0.00664719 | 0.02958946 | RPS20     |
| 7812   | ENSG00000009307 | 9660.80695 | -0.25901646 | 0.05005525 | 1.71E-07   | 2.18E-06   | CSDE1     |
| 9690   | ENSG00000009335 | 2397.12182 | -0.05177619 | 0.08649633 | 0.5382258  | 0.74807128 | UBE3C     |
| 5980   | ENSG00000009413 | 1327.61395 | -0.41421587 | 0.08976599 | 1.99E-06   | 2.15E-05   | REV3L     |
| 10178  | ENSG00000009694 | 28.2087795 | 0.14948515  | 0.30794683 | 0.45279356 | 0.67610629 | TENM1     |
| 5081   | ENSG00000009709 | 0.3468566  | 4.37E-05    | 0.38336202 | 0.96804177 | NA         | PAX7      |
| 10747  | ENSG00000009724 | 52.3147006 | -0.11157856 | 0.25356484 | 0.56097396 | 0.7645572  | MASP2     |
| 389434 | ENSG00000009765 | 0          | NA          | NA         | NA         | NA         | IYD       |
| 199870 | ENSG00000009780 | 155.642215 | 0.32795198  | 0.20988819 | 0.06578041 | 0.18330641 | FAM76A    |
| 80342  | ENSG00000009790 | 11.0361529 | -0.04349014 | 0.33818413 | 0.79044705 | 0.90451433 | TRAF3IP3  |
| 29954  | ENSG00000009830 | 1132.41554 | 0.12271702  | 0.08569591 | 0.14175137 | 0.32020348 | POMT2     |
| 51534  | ENSG00000009844 | 936.680841 | -0.25812344 | 0.09445126 | 0.00466867 | 0.02194418 | VTA1      |
| 51085  | ENSG00000009950 | 75.2640447 | 0.51246862  | 0.29683969 | 0.02377351 | 0.08366474 | MLXIPL    |
| 9031   | ENSG00000009954 | 6667.82745 | -0.22590004 | 0.05190678 | 1.10E-05   | 0.0001036  | BAZ1B     |
| 10048  | ENSG00000010017 | 998.870469 | -0.03639916 | 0.10172164 | 0.70982932 | 0.860757   | RANBP9    |
| 51513  | ENSG00000010030 | 2.82795347 | -0.19639197 | 0.4580382  | 0.00823563 | 0.03540516 | ETV7      |
| 83932  | ENSG00000010072 | 470.267091 | 0.06263712  | 0.15344728 | 0.65685771 | 0.82968692 | SPRTN     |
| 51603  | ENSG00000010165 | 1720.19841 | -0.13625738 | 0.07517071 | 0.06418354 | 0.1801898  | EEF1AKNMT |
| 8798   | ENSG00000010219 | 114.234612 | 0.50542363  | 0.23864765 | 0.01096007 | 0.04469634 | DYRK4     |
| 7756   | ENSG00000010244 | 4201.57904 | 0.04904323  | 0.06425652 | 0.4392923  | 0.66465029 | ZNF207    |
| 7384   | ENSG00000010256 | 2689.73126 | 0.25068561  | 0.08823286 | 0.00344866 | 0.0170372  | UQCRC1    |
| 83930  | ENSG00000010270 | 1262.40036 | 0.12158836  | 0.07764126 | 0.10896074 | 0.26521666 | STARD3NL  |
| 928    | ENSG00000010278 | 149.40044  | 5.25288661  | 0.34868801 | 1.05E-51   | 1.09E-49   | CD9       |
| 57467  | ENSG00000010282 | 0          | NA          | NA         | NA         | NA         | HHATL     |
| 9918   | ENSG00000010292 | 4110.32174 | -0.17007203 | 0.07707286 | 0.02401966 | 0.08444978 | NCAPD2    |
| 25900  | ENSG00000010295 | 578.512704 | 0.17484976  | 0.11012013 | 0.09690668 | 0.24348114 | IFFO1     |
| 2696   | ENSG00000010310 | 118.868467 | 1.12210073  | 0.23369763 | 1.69E-07   | 2.17E-06   | GIPR      |
| 51533  | ENSG00000010318 | 77.7282934 | 0.73308741  | 0.28687426 | 0.00183722 | 0.00994825 | PHF7      |
| 56920  | ENSG00000010319 | 29.2174056 | -0.0622347  | 0.29236629 | 0.74360875 | 0.87916081 | SEMA3G    |
| 11188  | ENSG00000010322 | 3331.29885 | 0.24352616  | 0.06662884 | 0.00020284 | 0.00144087 | NISCH     |
| 23166  | ENSG00000010327 | 1.07545701 | 0.04262835  | 0.38384458 | 0.41010704 | NA         | STAB1     |
| 80199  | ENSG00000010361 | 978.176569 | 0.05668297  | 0.09391371 | 0.53421198 | 0.74539459 | FUZ       |
| 6540   | ENSG00000010379 | 2.22870597 | 0.02983046  | 0.37619956 | 0.7292228  | NA         | SLC6A13   |

|        |                 |            |             |            |            |            |           |
|--------|-----------------|------------|-------------|------------|------------|------------|-----------|
| 3423   | ENSG00000010404 | 3731.48205 | -0.38789543 | 0.06293257 | 3.89E-10   | 7.04E-09   | IDS       |
| 5646   | ENSG00000010438 | 832.509814 | -0.36236716 | 0.09924323 | 0.00015076 | 0.00110008 | PRSS3     |
| 7752   | ENSG00000010539 | 262.443247 | -0.23853846 | 0.15736548 | 0.09551447 | 0.24094177 | ZNF200    |
| 920    | ENSG00000010610 | 8.79825504 | 0.10655184  | 0.36156188 | 0.49993898 | 0.71714187 | CD4       |
| 10233  | ENSG00000010626 | 133.332005 | 0.32812958  | 0.20031151 | 0.05745315 | 0.16569347 | LRRC23    |
| 695    | ENSG00000010671 | 1.40524716 | 0.07586116  | 0.39454052 | 0.11272121 | NA         | BTK       |
| 3077   | ENSG00000010704 | 0.48617452 | -0.00656019 | 0.38315309 | 0.86579112 | NA         | HFE       |
| 22955  | ENSG00000010803 | 1049.30743 | -0.27379393 | 0.09089818 | 0.00187191 | 0.01011129 | SCMH1     |
| 2534   | ENSG00000010810 | 1124.32355 | 0.04538007  | 0.11844639 | 0.68803988 | 0.84855544 | FYN       |
| 3097   | ENSG00000010818 | 634.509393 | 0.15850418  | 0.14904397 | 0.24803139 | 0.46714855 | HIVEP2    |
| 2326   | ENSG00000010932 | 0          | NA          | NA         | NA         | NA         | FMO1      |
| 6924   | ENSG00000011007 | 1491.75083 | -0.2332513  | 0.0725738  | 0.00104064 | 0.00611377 | ELOA      |
| 11313  | ENSG00000011009 | 2714.54704 | 0.15261967  | 0.06823593 | 0.02296173 | 0.08135013 | LYPLA2    |
| 1185   | ENSG00000011021 | 1157.27746 | -0.04161886 | 0.10208356 | 0.67140836 | 0.83825699 | CLCN6     |
| 9902   | ENSG00000011028 | 3244.27644 | 1.29495506  | 0.07326335 | 6.80E-71   | 1.12E-68   | MRC2      |
| 654364 | ENSG00000011052 | 354.547354 | 0.09212357  | 0.13969649 | 0.47936292 | 0.70064538 | NME1-NME2 |
| 6534   | ENSG00000011083 | 0.67118112 | 0.02020611  | 0.38386956 | 0.77887943 | NA         | SLC6A7    |
| 10867  | ENSG00000011105 | 947.301839 | 0.0023572   | 0.08588227 | 0.98329559 | 0.99428951 | TSPAN9    |
| 55727  | ENSG00000011114 | 1070.92706 | -0.50514764 | 0.08628416 | 1.89E-09   | 3.14E-08   | BTBD7     |
| 9546   | ENSG00000011132 | 372.704706 | 0.46182864  | 0.15421224 | 0.00113861 | 0.00660334 | APBA3     |
| 54903  | ENSG00000011143 | 595.318528 | 0.17900978  | 0.11292828 | 0.09660316 | 0.24301925 | MKS1      |
| 51099  | ENSG00000011198 | 426.997305 | -0.09915573 | 0.12330491 | 0.39455789 | 0.623797   | ABHD5     |
| 3730   | ENSG00000011201 | 13.6968091 | 3.85857728  | 0.92115215 | 2.52E-06   | 2.66E-05   | ANOS1     |
| 26993  | ENSG00000011243 | 1272.87997 | 0.39873247  | 0.10101669 | 4.18E-05   | 0.00034963 | AKAP8L    |
| 54799  | ENSG00000011258 | 1881.36538 | -0.13967707 | 0.068741   | 0.03869434 | 0.12238095 | MBTD1     |
| 51096  | ENSG00000011260 | 1066.3531  | -0.13237845 | 0.08947154 | 0.12701617 | 0.2969598  | UTP18     |
| 54476  | ENSG00000011275 | 1824.37059 | 0.11260939  | 0.06937048 | 0.09888651 | 0.24730977 | RNF216    |
| 54902  | ENSG00000011295 | 984.108888 | 0.10342063  | 0.09209321 | 0.2473573  | 0.46632163 | TTC19     |
| 5725   | ENSG00000011304 | 10367.1765 | -0.05337815 | 0.05605882 | 0.33509227 | 0.56494141 | PTBP1     |
| 8193   | ENSG00000011332 | 331.55015  | -0.8387095  | 0.16460742 | 5.71E-08   | 7.77E-07   | DPF1      |
| 9066   | ENSG00000011347 | 374.678835 | -2.10171226 | 0.18055687 | 1.18E-32   | 7.34E-31   | SYT7      |
| 23395  | ENSG00000011376 | 796.466636 | 0.08458272  | 0.09366664 | 0.35209404 | 0.5820803  | LARS2     |
| 5286   | ENSG00000011405 | 1775.43401 | -0.20258361 | 0.09935678 | 0.03439178 | 0.11182118 | PIK3C2A   |
| 5329   | ENSG00000011422 | 315.46309  | 0.32764384  | 0.13535369 | 0.00955938 | 0.03997011 | PLAUR     |
| 54443  | ENSG00000011426 | 1792.99424 | -0.24302139 | 0.07544058 | 0.00098603 | 0.00583788 | ANLN      |
| 58525  | ENSG00000011451 | 2425.92402 | 0.15835092  | 0.06541091 | 0.01396498 | 0.05446535 | WIZ       |
| 23637  | ENSG00000011454 | 1201.57195 | 0.16447892  | 0.09274507 | 0.0674058  | 0.18641359 | RABGAP1   |
| 1634   | ENSG00000011465 | 18.910451  | 5.4895013   | 0.96484763 | 8.55E-09   | 1.30E-07   | DCN       |

|        |                 |            |             |            |            |            |          |
|--------|-----------------|------------|-------------|------------|------------|------------|----------|
| 54814  | ENSG00000011478 | 133.077896 | 0.55099428  | 0.20096093 | 0.00186949 | 0.01010294 | QPCTL    |
| 5536   | ENSG00000011485 | 2445.33521 | 0.10843516  | 0.07393348 | 0.13504448 | 0.30949318 | PPP5C    |
| 23177  | ENSG00000011523 | 1166.22041 | -0.25266513 | 0.08650782 | 0.00265221 | 0.01363917 | CEP68    |
| 8491   | ENSG00000011566 | 917.539105 | -0.09175889 | 0.10231482 | 0.35127879 | 0.5814593  | MAP4K3   |
| 27033  | ENSG00000011590 | 3.19665764 | -0.10741192 | 0.38977984 | 0.31545395 | 0.54331625 | ZBTB32   |
| 7305   | ENSG00000011600 | 0          | NA          | NA         | NA         | NA         | TYROBP   |
| 57146  | ENSG00000011638 | 35.497963  | 1.16978233  | 0.57085732 | 0.00254376 | 0.01317364 | TMEM159  |
| 2556   | ENSG00000011677 | 226.281937 | 0.92293884  | 0.18565608 | 9.38E-08   | 1.24E-06   | GABRA3   |
| 672    | ENSG00000012048 | 1321.21677 | -0.07765974 | 0.08261547 | 0.33512208 | 0.56494367 | BRCA1    |
| 2067   | ENSG00000012061 | 1651.92364 | 0.18693753  | 0.0826295  | 0.02072949 | 0.07504982 | ERCC1    |
| 933    | ENSG00000012124 | 0          | NA          | NA         | NA         | NA         | CD22     |
| 7869   | ENSG00000012171 | 197.240408 | 1.45609084  | 0.2081277  | 2.07E-13   | 4.94E-12   | SEMA3B   |
| 51360  | ENSG00000012174 | 1462.5026  | -0.23658458 | 0.07287083 | 0.00092307 | 0.0055312  | MBTPS2   |
| 4007   | ENSG00000012211 | 3.48272187 | 0.08948101  | 0.38390632 | 0.39270672 | 0.62191102 | PRICKLE3 |
| 4057   | ENSG00000012223 | 0          | NA          | NA         | NA         | NA         | LTF      |
| 2137   | ENSG00000012232 | 2166.50453 | 0.14853063  | 0.10701103 | 0.14850063 | 0.3308909  | EXTL3    |
| 9971   | ENSG00000012504 | 0          | NA          | NA         | NA         | NA         | NR1H4    |
| 60481  | ENSG00000012660 | 2489.4557  | -0.1449389  | 0.07286523 | 0.04245605 | 0.13144946 | ELOVL5   |
| 240    | ENSG00000012779 | 0.18922458 | 0.01954053  | 0.38488496 | 0.78225479 | NA         | ALOX5    |
| 8284   | ENSG00000012817 | 0          | NA          | NA         | NA         | NA         | KDM5D    |
| 57658  | ENSG00000012822 | 1015.97533 | 0.39488001  | 0.11075218 | 0.00019141 | 0.001367   | CALCOCO1 |
| 55148  | ENSG00000012963 | 1559.15555 | 0.08308175  | 0.08188447 | 0.29926895 | 0.52623381 | UBR7     |
| 11183  | ENSG00000012983 | 1218.25311 | -0.19883224 | 0.07854929 | 0.00957224 | 0.04001543 | MAP4K5   |
| 30845  | ENSG00000013016 | 843.444627 | -0.16998204 | 0.0992483  | 0.07553533 | 0.20246162 | EHD3     |
| 5704   | ENSG00000013275 | 2133.15911 | 0.05615326  | 0.07401605 | 0.43998201 | 0.66517856 | PSMC4    |
| 23324  | ENSG00000013288 | 359.284197 | 0.11603257  | 0.12821898 | 0.3371406  | 0.56743039 | MAN2B2   |
| 57709  | ENSG00000013293 | 405.227155 | -2.64310652 | 0.16890838 | 8.10E-57   | 9.69E-55   | SLC7A14  |
| 5010   | ENSG00000013297 | 6.88173956 | -0.32665022 | 0.54862883 | 0.05142627 | 0.15228317 | CLDN11   |
| 51629  | ENSG00000013306 | 1904.81202 | -0.07662322 | 0.07473169 | 0.29537148 | 0.52197116 | SLC25A39 |
| 9961   | ENSG00000013364 | 45.092487  | 1.02502113  | 0.41419242 | 0.00118615 | 0.00685702 | MVP      |
| 51667  | ENSG00000013374 | 1767.34085 | -0.06014552 | 0.09173854 | 0.49871387 | 0.71636861 | NUB1     |
| 5238   | ENSG00000013375 | 940.582471 | 0.09112253  | 0.10612893 | 0.37202734 | 0.60104858 | PGM3     |
| 112611 | ENSG00000013392 | 148.176601 | 0.06715888  | 0.18217338 | 0.67680994 | 0.84203356 | RWDD2A   |
| 1195   | ENSG00000013441 | 1278.21932 | -0.00194464 | 0.08932915 | 0.98121543 | 0.99355086 | CLK1     |
| 55703  | ENSG00000013503 | 308.759557 | -0.04669803 | 0.12840089 | 0.69875594 | 0.85472333 | POLR3B   |
| 23357  | ENSG00000013523 | 724.44843  | 0.29764527  | 0.11097077 | 0.00496052 | 0.02307542 | ANGEL1   |
| 9604   | ENSG00000013561 | 587.669674 | -0.07039326 | 0.10537397 | 0.48631134 | 0.70622288 | RNF14    |
| 1774   | ENSG00000013563 | 282.454604 | -0.12031308 | 0.14430913 | 0.3668985  | 0.59618256 | DNASE1L1 |

|        |                 |            |             |            |            |            |         |
|--------|-----------------|------------|-------------|------------|------------|------------|---------|
| 1663   | ENSG00000013573 | 2056.11988 | 0.4346915   | 0.0753704  | 3.96E-09   | 6.29E-08   | DDX11   |
| 50865  | ENSG00000013583 | 128.13473  | -0.00946643 | 0.20092448 | 0.95457694 | 0.98123447 | HEBP1   |
| 9052   | ENSG00000013588 | 40.9366336 | 0.43791539  | 0.43129028 | 0.07408034 | 0.19966771 | GPRC5A  |
| 10046  | ENSG00000013619 | 77.3267178 | -0.27518661 | 0.23770926 | 0.15044431 | 0.333984   | MAMLD1  |
| 923    | ENSG00000013725 | 25.7199483 | -0.14349001 | 0.32546716 | 0.45644755 | 0.67989846 | CD6     |
| 10460  | ENSG00000013810 | 2819.04517 | -0.03297277 | 0.06712349 | 0.61617739 | 0.80321678 | TACC3   |
| 23376  | ENSG00000014123 | 493.479726 | 0.10851455  | 0.11013483 | 0.30395869 | 0.53126299 | UFL1    |
| 23649  | ENSG00000014138 | 890.257201 | -0.15031596 | 0.11224568 | 0.16022156 | 0.34797983 | POLA2   |
| 23144  | ENSG00000014164 | 324.305661 | 0.27249719  | 0.13562714 | 0.03128791 | 0.10368332 | ZC3H3   |
| 823    | ENSG00000014216 | 1530.81597 | 0.18065608  | 0.08078105 | 0.02202647 | 0.07871129 | CAPN1   |
| 55     | ENSG00000014257 | 9.28305096 | 6.87689503  | 2.67095134 | 2.85E-06   | 2.99E-05   | ACP3    |
| 4190   | ENSG00000014641 | 1815.54078 | -0.16347075 | 0.08130937 | 0.03929197 | 0.12387615 | MDH1    |
| 10463  | ENSG00000014824 | 2214.50308 | 0.1028168   | 0.072163   | 0.146809   | 0.32800893 | SLC30A9 |
| 10903  | ENSG00000014914 | 27.1481218 | 0.04800993  | 0.33175268 | 0.7797047  | 0.89925062 | MTMR11  |
| 1355   | ENSG00000014919 | 1155.83653 | -0.41846556 | 0.08914586 | 1.33E-06   | 1.48E-05   | COX15   |
| 440193 | ENSG00000015133 | 1269.88805 | -0.48501518 | 0.0901976  | 3.15E-08   | 4.44E-07   | CCDC88C |
| 10138  | ENSG00000015153 | 333.602805 | -0.2985344  | 0.17426086 | 0.05452141 | 0.15905085 | YAF2    |
| 10771  | ENSG00000015171 | 1594.54389 | 0.05456395  | 0.0708483  | 0.43476096 | 0.66019092 | ZMYND11 |
| 7454   | ENSG00000015285 | 11.5414088 | 0.07150072  | 0.33899172 | 0.67508461 | 0.84091366 | WAS     |
| 1800   | ENSG00000015413 | 0.34746601 | 0.02370763  | 0.3853651  | 0.61987128 | NA         | DPEP1   |
| 637    | ENSG00000015475 | 1015.78116 | 0.0665646   | 0.08606126 | 0.42781104 | 0.65371004 | BID     |
| 9782   | ENSG00000015479 | 7730.39257 | -0.19458674 | 0.06687005 | 0.00314603 | 0.01576193 | MATR3   |
| 29881  | ENSG00000015520 | 2.90437861 | 0.00010425  | 0.37118321 | 0.99898054 | 0.99962651 | NPC1L1  |
| 64132  | ENSG00000015532 | 809.055341 | 0.15287691  | 0.09377301 | 0.09254319 | 0.2352411  | XYLT2   |
| 84220  | ENSG00000015568 | 62.9387312 | -0.10648677 | 0.25461787 | 0.5783658  | 0.77642449 | RGPD5   |
| 81551  | ENSG00000015592 | 191.522333 | -3.62439227 | 0.23358191 | 3.11E-55   | 3.65E-53   | STMN4   |
| 23386  | ENSG00000015676 | 3748.90688 | -0.12657777 | 0.07720925 | 0.09374847 | 0.23753778 | NUDCD3  |
| 3670   | ENSG00000016082 | 4648.12201 | 0.41244516  | 0.05723226 | 3.27E-13   | 7.66E-12   | ISL1    |
| 55349  | ENSG00000016391 | 366.955291 | -0.1019447  | 0.14697173 | 0.45119454 | 0.67453091 | CHDH    |
| 53832  | ENSG00000016402 | 786.8515   | -0.76489294 | 0.10754993 | 2.26E-13   | 5.36E-12   | IL20RA  |
| 1179   | ENSG00000016490 | 0          | NA          | NA         | NA         | NA         | CLCA1   |
| 22802  | ENSG00000016602 | 0          | NA          | NA         | NA         | NA         | CLCA4   |
| 55830  | ENSG00000016864 | 928.791217 | 0.05350868  | 0.09392666 | 0.55769769 | 0.76276866 | GLT8D1  |
| 27032  | ENSG00000017260 | 1954.52406 | -0.17791231 | 0.07467627 | 0.01499874 | 0.0577108  | ATP2C1  |
| 3479   | ENSG00000017427 | 0          | NA          | NA         | NA         | NA         | IGF1    |
| 92745  | ENSG00000017483 | 4.70139773 | 0.08103664  | 0.37258854 | 0.52482213 | 0.73753159 | SLC38A5 |
| 10928  | ENSG00000017797 | 1614.12733 | -0.16574664 | 0.07140997 | 0.01801117 | 0.0669806  | RALBP1  |
| 22902  | ENSG00000018189 | 1703.33649 | -0.18263828 | 0.07642938 | 0.01445483 | 0.05592508 | RUFY3   |



|        |                 |            |             |            |            |            |          |
|--------|-----------------|------------|-------------|------------|------------|------------|----------|
| 1272   | ENSG00000018236 | 3750.94004 | -0.54097325 | 0.05999916 | 6.96E-20   | 2.58E-18   | CNTN1    |
| 6556   | ENSG00000018280 | 1.45970231 | -0.00278711 | 0.37968125 | 0.96360206 | NA         | SLC11A1  |
| 25937  | ENSG00000018408 | 133.336127 | 3.55588187  | 0.26401659 | 1.89E-42   | 1.52E-40   | WWTR1    |
| 8540   | ENSG00000018510 | 1790.32872 | 0.11151824  | 0.08524923 | 0.17969059 | 0.37625976 | AGPS     |
| 646915 | ENSG00000018607 | 6.70543029 | 0.03873209  | 0.35753553 | 0.77858291 | 0.89866105 | ZNF806   |
| 63932  | ENSG00000018610 | 420.650395 | 0.0603321   | 0.12139414 | 0.60100526 | 0.79181148 | STEEP1   |
| 477    | ENSG00000018625 | 0          | NA          | NA         | NA         | NA         | ATP1A2   |
| 55622  | ENSG00000018699 | 358.407692 | 0.0111724   | 0.14464802 | 0.93468091 | 0.97292421 | TTC27    |
| 147948 | ENSG00000018869 | 79.305605  | 0.27091943  | 0.2514284  | 0.16967843 | 0.36139775 | ZNF582   |
| 23584  | ENSG00000019102 | 1.59465622 | 0.11019222  | 0.40584332 | 0.05461339 | NA         | VSIG2    |
| 23187  | ENSG00000019144 | 1472.26423 | -0.24562425 | 0.08068144 | 0.00178622 | 0.00970655 | PHLDB1   |
| 8685   | ENSG00000019169 | 0          | NA          | NA         | NA         | NA         | MARCO    |
| 1591   | ENSG00000019186 | 0          | NA          | NA         | NA         | NA         | CYP24A1  |
| 56981  | ENSG00000019485 | 465.675879 | 0.05316749  | 0.13972138 | 0.68369908 | 0.84583087 | PRDM11   |
| 57586  | ENSG00000019505 | 245.325226 | -0.99255873 | 0.17601811 | 2.24E-09   | 3.68E-08   | SYT13    |
| 6591   | ENSG00000019549 | 26.7019411 | 0.07324724  | 0.30097746 | 0.70261676 | 0.85699455 | SNAI2    |
| 972    | ENSG00000019582 | 14.3845777 | -0.40780296 | 0.55216187 | 0.06844181 | 0.18843333 | CD74     |
| 3082   | ENSG00000019991 | 163.613321 | 2.20610796  | 0.22500688 | 5.65E-24   | 2.59E-22   | HGF      |
| 54764  | ENSG00000019995 | 724.945175 | -0.06753079 | 0.10080111 | 0.48624882 | 0.70622288 | ZRANB1   |
| 23154  | ENSG00000020129 | 1671.53057 | -0.01699321 | 0.08343175 | 0.8339488  | 0.92432089 | NCDN     |
| 25960  | ENSG00000020181 | 2765.03278 | -0.3276686  | 0.06113257 | 5.41E-08   | 7.40E-07   | ADGRA2   |
| NA     | ENSG00000020219 | 0.300017   | -0.0229446  | 0.38527539 | 0.68644804 | NA         | CCT8L1P  |
| 55734  | ENSG00000020256 | 614.613217 | -0.06540489 | 0.11880494 | 0.56193405 | 0.76508177 | ZFP64    |
| 4331   | ENSG00000020426 | 284.720519 | 0.10533663  | 0.14710353 | 0.43862573 | 0.66394556 | MNAT1    |
| 23034  | ENSG00000020577 | 761.159021 | -0.3021796  | 0.13179083 | 0.01427242 | 0.05540302 | SAMD4A   |
| 864    | ENSG00000020633 | 5.70743263 | -0.24259961 | 0.46121545 | 0.10357036 | 0.25589489 | RUNX3    |
| 4361   | ENSG00000020922 | 1049.13827 | 0.09740381  | 0.13151553 | 0.43120124 | 0.65676591 | MRE11    |
| 58473  | ENSG00000021300 | 75.9357908 | 1.78228059  | 0.34422278 | 1.29E-08   | 1.93E-07   | PLEKHB1  |
| 1992   | ENSG00000021355 | 99.3855728 | 0.06744487  | 0.21782178 | 0.70753237 | 0.85903201 | SERPINB1 |
| 64816  | ENSG00000021461 | 0          | NA          | NA         | NA         | NA         | CYP3A43  |
| 11136  | ENSG00000021488 | 0.73443283 | 0.01971684  | 0.38275146 | 0.62605875 | NA         | SLC7A9   |
| 6683   | ENSG00000021574 | 1201.31972 | -0.0904456  | 0.09123704 | 0.30698147 | 0.53453681 | SPAST    |
| 9369   | ENSG00000021645 | 27.6295195 | -4.83633151 | 0.86116912 | 6.20E-10   | 1.10E-08   | NRXN3    |
| 114879 | ENSG00000021762 | 114.856294 | 0.05947005  | 0.21017445 | 0.73661246 | 0.87516565 | OSBPL5   |
| 9716   | ENSG00000021776 | 1511.4132  | 0.04900589  | 0.08350316 | 0.54879602 | 0.75527976 | AQR      |
| 1373   | ENSG00000021826 | 20.9230151 | 0.17804587  | 0.3618501  | 0.3355233  | 0.5655232  | CPS1     |
| 732    | ENSG00000021852 | 0          | NA          | NA         | NA         | NA         | C8B      |
| 2273   | ENSG00000022267 | 1852.91677 | 0.06072276  | 0.10193764 | 0.53751928 | 0.74765981 | FHL1     |

|       |                 |            |             |            |            |            |         |
|-------|-----------------|------------|-------------|------------|------------|------------|---------|
| 51507 | ENSG00000022277 | 1252.09667 | 0.11068379  | 0.0760355  | 0.13751022 | 0.31319054 | RTF2    |
| 2554  | ENSG00000022355 | 0          | NA          | NA         | NA         | NA         | GABRA1  |
| 55655 | ENSG00000022556 | 0          | NA          | NA         | NA         | NA         | NLRP2   |
| 57210 | ENSG00000022567 | 488.295554 | -0.01092961 | 0.25600475 | 0.95175609 | 0.98012235 | SLC45A4 |
| 9921  | ENSG00000022840 | 2025.58032 | 0.10056459  | 0.07174282 | 0.15422646 | 0.3394719  | RNF10   |
| 55778 | ENSG00000022976 | 310.143651 | 0.07306339  | 0.16282584 | 0.62104057 | 0.80672374 | ZNF839  |
| 64429 | ENSG00000023041 | 787.783006 | -0.12459308 | 0.134437   | 0.32094623 | 0.54869222 | ZDHHC6  |
| 57476 | ENSG00000023171 | 399.938471 | -0.15536683 | 0.14936534 | 0.25680678 | 0.47786969 | GRAMD1B |
| 6050  | ENSG00000023191 | 1032.80072 | 0.34817659  | 0.089112   | 5.71E-05   | 0.00045935 | RNH1    |
| 4719  | ENSG00000023228 | 1713.91428 | -0.20699958 | 0.08288465 | 0.01036207 | 0.04262566 | NDUFS1  |
| 9821  | ENSG00000023287 | 1258.17363 | -0.11348635 | 0.08223727 | 0.15734246 | 0.34410503 | RB1CC1  |
| 23071 | ENSG00000023318 | 608.823486 | 0.36616141  | 0.11079197 | 0.00054264 | 0.00346505 | ERP44   |
| 211   | ENSG00000023330 | 456.04724  | 0.21399245  | 0.11637968 | 0.0531784  | 0.15607387 | ALAS1   |
| 330   | ENSG00000023445 | 7.24495109 | -0.00946151 | 0.34907312 | 0.94694895 | 0.97815729 | BIRC3   |
| 11215 | ENSG00000023516 | 1431.84342 | -0.66038884 | 0.07784281 | 5.75E-18   | 1.89E-16   | AKAP11  |
| 51022 | ENSG00000023572 | 273.061735 | -0.01322646 | 0.17361864 | 0.93082526 | 0.97111825 | GLRX2   |
| 6617  | ENSG00000023608 | 416.875131 | -0.02503502 | 0.12232944 | 0.82818642 | 0.92220943 | SNAPC1  |
| 51071 | ENSG00000023697 | 487.103379 | -0.00659252 | 0.11623943 | 0.95170546 | 0.98012235 | DERA    |
| 11171 | ENSG00000023734 | 3151.45772 | -0.07728067 | 0.07491765 | 0.29237431 | 0.51842938 | STRAP   |
| 1244  | ENSG00000023839 | 14.2192028 | 0.49821083  | 0.62100181 | 0.0494541  | 0.14780908 | ABCC2   |
| 50619 | ENSG00000023892 | 6.87994977 | 0.0490935   | 0.36253248 | 0.70587634 | 0.85822936 | DEF6    |
| 51177 | ENSG00000023902 | 1369.99186 | 0.03075625  | 0.07468689 | 0.6750668  | 0.84091366 | PLEKHO1 |
| 2730  | ENSG00000023909 | 212.690357 | 0.40753395  | 0.21355903 | 0.02473091 | 0.08639925 | GCLM    |
| 23304 | ENSG00000024048 | 949.467899 | -0.09594187 | 0.09570822 | 0.30003933 | 0.52721462 | UBR2    |
| 30846 | ENSG00000024422 | 53.092055  | 0.989579    | 0.38021908 | 0.00090303 | 0.00542092 | EHD2    |
| 55635 | ENSG00000024526 | 1125.24934 | -0.39382161 | 0.08782824 | 3.85E-06   | 3.94E-05   | DEPDC1  |
| 25901 | ENSG00000024862 | 194.965663 | 0.12986884  | 0.15542012 | 0.36094523 | 0.5908055  | CCDC28A |
| 58528 | ENSG00000025039 | 378.757911 | -0.3253925  | 0.14277028 | 0.01376447 | 0.05382088 | RRAGD   |
| 3298  | ENSG00000025156 | 698.190401 | 0.06187407  | 0.10073242 | 0.52494256 | 0.73755856 | HSF2    |
| 51230 | ENSG00000025293 | 1225.9768  | -0.17178069 | 0.08106842 | 0.02987987 | 0.10005012 | PHF20   |
| 8630  | ENSG00000025423 | 48.2477944 | 0.32855953  | 0.39301209 | 0.14065216 | 0.318644   | HSD17B6 |
| 10062 | ENSG00000025434 | 60.7724877 | 0.19673482  | 0.25695218 | 0.31741287 | 0.54528282 | NR1H3   |
| 1890  | ENSG00000025708 | 145.025569 | 0.27733853  | 0.23518032 | 0.14530986 | 0.32579361 | TYMP    |
| 29781 | ENSG00000025770 | 1211.23896 | -0.1219001  | 0.09025407 | 0.16461184 | 0.35425738 | NCAPH2  |
| 10953 | ENSG00000025772 | 750.547849 | -0.104297   | 0.09577943 | 0.26006127 | 0.48180181 | TOMM34  |
| 11231 | ENSG00000025796 | 2433.83714 | -0.09678238 | 0.09589119 | 0.29638039 | 0.52297409 | SEC63   |
| 23633 | ENSG00000025800 | 1620.10039 | -0.05559749 | 0.07248477 | 0.43415506 | 0.6593919  | KPNA6   |
| 7431  | ENSG00000026025 | 8469.85449 | 3.3498333   | 0.08517701 | 0          | 0          | VIM     |

|       |                 |            |             |            |            |            |                |
|-------|-----------------|------------|-------------|------------|------------|------------|----------------|
| NA    | ENSG00000026036 | 356.667516 | 0.30072475  | 0.1278741  | 0.01239226 | 0.04952912 | RTEL1-TNFRSF6B |
| 355   | ENSG00000026103 | 18.5279679 | 1.23093267  | 0.69485981 | 0.00403213 | 0.01943571 | FAS            |
| 8635  | ENSG00000026297 | 550.150146 | 0.06961996  | 0.10651676 | 0.49692135 | 0.71500229 | RNASET2        |
| 960   | ENSG00000026508 | 25.8808342 | 0.85846246  | 0.54341814 | 0.01010569 | 0.04175278 | CD44           |
| 3755  | ENSG00000026559 | 693.217151 | 0.16607156  | 0.107064   | 0.10573009 | 0.25948603 | KCNG1          |
| 56895 | ENSG00000026652 | 885.955599 | 0.27406217  | 0.09406429 | 0.00259391 | 0.01339143 | AGPAT4         |
| 57823 | ENSG00000026751 | 0          | NA          | NA         | NA         | NA         | SLAMF7         |
| 11119 | ENSG00000026950 | 492.615627 | 0.51265369  | 0.12104117 | 8.57E-06   | 8.25E-05   | BTN3A1         |
| 4285  | ENSG00000027001 | 94.4587391 | 0.22427083  | 0.21533698 | 0.21307805 | 0.42300907 | MIPEP          |
| 5583  | ENSG00000027075 | 162.948014 | -0.34555882 | 0.17903344 | 0.02955228 | 0.09920766 | PRKCH          |
| 3645  | ENSG00000027644 | 519.272589 | 0.29901733  | 0.11763377 | 0.00742157 | 0.03246117 | INSRR          |
| 3459  | ENSG00000027697 | 695.04761  | -0.41941217 | 0.10682659 | 4.25E-05   | 0.00035533 | IFNGR1         |
| 11285 | ENSG00000027847 | 307.485797 | 0.09827361  | 0.13040156 | 0.42339842 | 0.64931782 | B4GALT7        |
| 9047  | ENSG00000027869 | 0.47495241 | 0.00526877  | 0.3831615  | 0.96705744 | NA         | SH2D2A         |
| 7444  | ENSG00000028116 | 2.19076271 | -0.05054919 | 0.37949941 | 0.55745995 | NA         | VRK2           |
| 7133  | ENSG00000028137 | 27.9191541 | -2.07499649 | 0.47258061 | 6.45E-07   | 7.55E-06   | TNFRSF1B       |
| 55591 | ENSG00000028203 | 1318.03058 | -0.16942357 | 0.08624736 | 0.04338806 | 0.13346033 | VEZT           |
| 5452  | ENSG00000028277 | 75.4965282 | -1.52167472 | 0.32455901 | 1.86E-07   | 2.37E-06   | POU2F2         |
| 65980 | ENSG00000028310 | 1581.54658 | -0.03155951 | 0.07170471 | 0.654059   | 0.82779603 | BRD9           |
| 6642  | ENSG00000028528 | 2681.03137 | -0.1226804  | 0.09005364 | 0.16034044 | 0.34816179 | SNX1           |
| 9519  | ENSG00000028839 | 692.824032 | 0.12364313  | 0.09741585 | 0.18999412 | 0.39114696 | TBPL1          |
| 56938 | ENSG00000029153 | 105.056574 | -0.37078678 | 0.25080226 | 0.06388585 | 0.17963369 | ARNTL2         |
| 9774  | ENSG00000029363 | 5197.47307 | -0.44901036 | 0.05813827 | 7.79E-15   | 2.09E-13   | BCLAF1         |
| 55334 | ENSG00000029364 | 2089.00047 | -0.33029354 | 0.07478013 | 6.42E-06   | 6.32E-05   | SLC39A9        |
| 286   | ENSG00000029534 | 232.83165  | -2.50142383 | 0.190387   | 1.32E-40   | 1.02E-38   | ANK1           |
| 3381  | ENSG00000029559 | 0          | NA          | NA         | NA         | NA         | IBSP           |
| 51106 | ENSG00000029639 | 348.325539 | 0.2235481   | 0.1274929  | 0.06239026 | 0.17647886 | TFB1M          |
| 9135  | ENSG00000029725 | 1674.87222 | -0.38620283 | 0.08317403 | 1.89E-06   | 2.04E-05   | RABEP1         |
| 3149  | ENSG00000029993 | 2064.49832 | -0.0491596  | 0.10531926 | 0.62635223 | 0.8103044  | HMGB3          |
| 23279 | ENSG00000030066 | 3193.72611 | 0.1496756   | 0.05929931 | 0.01060347 | 0.04346546 | NUP160         |
| 578   | ENSG00000030110 | 425.275248 | 0.67143305  | 0.11884456 | 4.03E-09   | 6.39E-08   | BAK1           |
| 4593  | ENSG00000030304 | 0          | NA          | NA         | NA         | NA         | MUSK           |
| 22807 | ENSG00000030419 | 60.0242662 | 0.01940254  | 0.26822041 | 0.92111483 | 0.96677343 | IKZF2          |
| 2896  | ENSG00000030582 | 1572.41997 | 0.19104043  | 0.08291848 | 0.01815015 | 0.0673082  | GRN            |
| 51306 | ENSG00000031003 | 1072.20576 | -0.21283893 | 0.10790911 | 0.03916368 | 0.1235306  | FAM13B         |
| 57514 | ENSG00000031081 | 1606.42758 | 0.29665493  | 0.09356052 | 0.00104989 | 0.00615537 | ARHGAP31       |
| 55166 | ENSG00000031691 | 186.421555 | 0.08193212  | 0.16008052 | 0.5742614  | 0.77352065 | CENPQ          |
| 6301  | ENSG00000031698 | 2633.22579 | 0.19880552  | 0.11673406 | 0.07338109 | 0.19821386 | SARS1          |

|       |                 |            |             |            |            |            |           |
|-------|-----------------|------------|-------------|------------|------------|------------|-----------|
| 8498  | ENSG00000031823 | 1208.92272 | -0.051433   | 0.10806814 | 0.61871881 | 0.80494303 | RANBP3    |
| 5926  | ENSG00000032219 | 640.527642 | -0.17930286 | 0.10861938 | 0.08443357 | 0.22003967 | ARID4A    |
| 7260  | ENSG00000032389 | 960.554997 | -0.08982784 | 0.09785361 | 0.34159754 | 0.57180671 | EIPR1     |
| 10908 | ENSG00000032444 | 1421.89642 | 0.24430585  | 0.07946142 | 0.00164543 | 0.00908077 | PNPLA6    |
| 8100  | ENSG00000032742 | 271.930969 | 0.07143753  | 0.13988759 | 0.58460192 | 0.78071566 | IFT88     |
| 56052 | ENSG00000033011 | 358.913049 | 0.10428565  | 0.13410782 | 0.40669324 | 0.6349881  | ALG1      |
| 55596 | ENSG00000033030 | 873.381434 | 0.18174492  | 0.08821878 | 0.03408491 | 0.11110783 | ZCCHC8    |
| 10061 | ENSG00000033050 | 1090.3825  | 0.15981712  | 0.08930823 | 0.06561717 | 0.18299372 | ABCF2     |
| 54480 | ENSG00000033100 | 1261.24158 | 0.07584269  | 0.09848396 | 0.42607144 | 0.6519054  | CHPF2     |
| 57554 | ENSG00000033122 | 31.2853275 | 2.0568268   | 0.54762757 | 9.41E-06   | 8.97E-05   | LRRC7     |
| 2530  | ENSG00000033170 | 612.633007 | 0.17403     | 0.10489229 | 0.08414267 | 0.21945453 | FUT8      |
| 55236 | ENSG00000033178 | 1453.32681 | 0.15514053  | 0.11146688 | 0.14548776 | 0.32597939 | UBA6      |
| 9846  | ENSG00000033327 | 2830.09033 | 0.36022397  | 0.08079775 | 4.92E-06   | 4.96E-05   | GAB2      |
| 535   | ENSG00000033627 | 1668.98167 | -0.20993788 | 0.0745248  | 0.00401214 | 0.01935818 | ATP6V0A1  |
| 8554  | ENSG00000033800 | 1079.49384 | -0.25049417 | 0.08976004 | 0.00401365 | 0.01936076 | PIAS1     |
| 9497  | ENSG00000033867 | 1513.2093  | 0.22821145  | 0.1042198  | 0.02259241 | 0.08029979 | SLC4A7    |
| 321   | ENSG00000034053 | 2615.42135 | -0.21650365 | 0.07043647 | 0.00172037 | 0.00943139 | APBA2     |
| 5606  | ENSG00000034152 | 320.308101 | -0.35185239 | 0.13828881 | 0.00618566 | 0.02778434 | MAP2K3    |
| 79645 | ENSG00000034239 | 8.88501942 | 0.43326397  | 0.66931899 | 0.03940651 | 0.12407247 | EFCAB1    |
| 9168  | ENSG00000034510 | 8127.96835 | 0.31711197  | 0.05358181 | 2.30E-09   | 3.78E-08   | TMSB10    |
| 28990 | ENSG00000034533 | 148.5496   | -0.12540968 | 0.18425696 | 0.4371341  | 0.66229404 | ASTE1     |
| 25897 | ENSG00000034677 | 720.15043  | -0.25765828 | 0.10234312 | 0.00877031 | 0.03724311 | RNF19A    |
| 8504  | ENSG00000034693 | 149.696782 | -0.33500035 | 0.20950149 | 0.05965714 | 0.17039991 | PEX3      |
| 11345 | ENSG00000034713 | 1260.17264 | 0.02198071  | 0.08037378 | 0.77444668 | 0.89612867 | GABARAPL2 |
| 4653  | ENSG00000034971 | 0          | NA          | NA         | NA         | NA         | MYOC      |
| 26751 | ENSG00000035115 | 785.698638 | -0.07597623 | 0.09339426 | 0.40085575 | 0.62929088 | SH3YL1    |
| 84908 | ENSG00000035141 | 1048.09984 | -0.14368909 | 0.09194494 | 0.10689668 | 0.26179855 | FAM136A   |
| 7414  | ENSG00000035403 | 1389.97192 | 0.49198738  | 0.07767981 | 9.91E-11   | 1.91E-09   | VCL       |
| 55789 | ENSG00000035499 | 531.613331 | 0.04910119  | 0.11857717 | 0.66365561 | 0.83407238 | DEPDC1B   |
| 23604 | ENSG00000035664 | 29.6630582 | -0.43983177 | 0.45454653 | 0.07238526 | 0.19603105 | DAPK2     |
| 8439  | ENSG00000035681 | 671.634632 | 0.03616435  | 0.11405676 | 0.74057403 | 0.87742184 | NSMAF     |
| 159   | ENSG00000035687 | 1129.04429 | -0.13608515 | 0.08684938 | 0.10716863 | 0.26223799 | ADSS2     |
| 26228 | ENSG00000035720 | 0.15069912 | -0.01848503 | 0.38480575 | 0.84537521 | NA         | STAP1     |
| 7077  | ENSG00000035862 | 7248.44363 | -0.33915255 | 0.05900531 | 5.73E-09   | 8.91E-08   | TIMP2     |
| 5981  | ENSG00000035928 | 1417.3543  | -0.25377725 | 0.09199682 | 0.00437652 | 0.02083758 | RFC1      |
| 55773 | ENSG00000036054 | 361.817628 | -0.22910692 | 0.12508143 | 0.05186647 | 0.15326642 | TBC1D23   |
| 8452  | ENSG00000036257 | 1144.55631 | -0.56011711 | 0.09190334 | 3.69E-10   | 6.71E-09   | CUL3      |
| 9172  | ENSG00000036448 | 10.3760189 | -0.15108228 | 0.37675964 | 0.34940207 | 0.58004303 | MYOM2     |

|        |                 |            |             |            |            |            |         |
|--------|-----------------|------------|-------------|------------|------------|------------|---------|
| 5009   | ENSG00000036473 | 0.5971745  | 0.04260524  | 0.38720333 | 0.38071642 | NA         | OTC     |
| 10858  | ENSG00000036530 | 2.96895349 | 0.00545388  | 0.37340512 | 0.9304077  | 0.97108152 | CYP46A1 |
| 26009  | ENSG00000036549 | 1099.03905 | -0.01626542 | 0.10683231 | 0.87315768 | 0.94441388 | ZZZ3    |
| 6570   | ENSG00000036565 | 441.228445 | -0.89014645 | 0.17719183 | 7.50E-08   | 1.01E-06   | SLC18A1 |
| 9099   | ENSG00000036672 | 120.735039 | -0.12026141 | 0.19425814 | 0.47244523 | 0.69457676 | USP2    |
| 846    | ENSG00000036828 | 0          | NA          | NA         | NA         | NA         | CASR    |
| 27175  | ENSG00000037042 | 288.328448 | 0.33928128  | 0.15727843 | 0.01809274 | 0.06717065 | TUBG2   |
| 51121  | ENSG00000037241 | 420.275519 | 0.31783034  | 0.11746827 | 0.00438526 | 0.02086918 | RPL26L1 |
| 2324   | ENSG00000037280 | 1.92999539 | -0.05878781 | 0.38259371 | 0.46698235 | NA         | FLT4    |
| 54888  | ENSG00000037474 | 2053.14281 | -0.02273196 | 0.07714035 | 0.76282118 | 0.89062391 | NSUN2   |
| 54455  | ENSG00000037637 | 568.55345  | -0.10449617 | 0.14776976 | 0.44202526 | 0.66680698 | FBXO42  |
| 4238   | ENSG00000037749 | 1765.67159 | -0.33252348 | 0.08356175 | 4.34E-05   | 0.00036124 | MFAP3   |
| 84245  | ENSG00000037757 | 543.437349 | 0.13404492  | 0.10615658 | 0.18867036 | 0.38926996 | MRI1    |
| 4234   | ENSG00000037897 | 137.293091 | 0.25940481  | 0.19660762 | 0.12615905 | 0.29546661 | METTL1  |
| 3224   | ENSG00000037965 | 71.3594469 | -0.48717889 | 0.26795523 | 0.02212717 | 0.07897159 | HOXC8   |
| 175    | ENSG00000038002 | 238.36419  | 0.70124016  | 0.17267703 | 1.08E-05   | 0.00010142 | AGA     |
| 55300  | ENSG00000038210 | 158.707765 | 0.10519775  | 0.17473068 | 0.50003711 | 0.71723078 | PI4K2B  |
| 259282 | ENSG00000038219 | 2467.28429 | -0.01313631 | 0.07944373 | 0.8650446  | 0.94028794 | BOD1L1  |
| 27430  | ENSG00000038274 | 1222.02841 | 0.19929479  | 0.07862513 | 0.00952435 | 0.03986563 | MAT2B   |
| 7092   | ENSG00000038295 | 0          | NA          | NA         | NA         | NA         | TLL1    |
| 23644  | ENSG00000038358 | 2088.90077 | 0.01321923  | 0.08340993 | 0.87210283 | 0.94409997 | EDC4    |
| 7204   | ENSG00000038382 | 4765.39225 | -0.50992188 | 0.0668971  | 1.01E-14   | 2.68E-13   | TRIO    |
| 1462   | ENSG00000038427 | 1322.93625 | 2.03440043  | 0.27223947 | 5.16E-15   | 1.41E-13   | VCAN    |
| 23274  | ENSG00000038532 | 1118.46831 | -0.00419513 | 0.09158471 | 0.96170245 | 0.98442765 | CLEC16A |
| 4481   | ENSG00000038945 | 0          | NA          | NA         | NA         | NA         | MSR1    |
| 999    | ENSG00000039068 | 15.5145344 | -3.70924472 | 1.02745286 | 2.06E-05   | 0.00018432 | CDH1    |
| 23517  | ENSG00000039123 | 1418.9486  | -0.23682704 | 0.12235422 | 0.04072666 | 0.12702999 | MTREX   |
| 1767   | ENSG00000039139 | 7.17529456 | 0.16957739  | 0.39961713 | 0.25650934 | 0.47758495 | DNAH5   |
| 9765   | ENSG00000039319 | 1411.90515 | 0.21026404  | 0.09848351 | 0.0269387  | 0.09230809 | ZFYVE16 |
| 79567  | ENSG00000039523 | 1297.82994 | -0.1483742  | 0.07966458 | 0.05652276 | 0.16356646 | RIPOR1  |
| 729    | ENSG00000039537 | 54.3485977 | -0.01831609 | 0.28451101 | 0.92147474 | 0.9670192  | C6      |
| 26064  | ENSG00000039560 | 675.980592 | 0.19951513  | 0.16620144 | 0.18235296 | 0.38010956 | RAI14   |
| 11063  | ENSG00000039600 | 0.32860161 | -0.02330333 | 0.38532616 | 0.6660926  | NA         | SOX30   |
| 11284  | ENSG00000039650 | 842.665174 | 0.15845692  | 0.12308518 | 0.17358624 | 0.36665079 | PNKP    |
| 54831  | ENSG00000039987 | 1.75061959 | 0.07016317  | 0.38717549 | 0.2951704  | NA         | BEST2   |
| 23035  | ENSG00000040199 | 397.033353 | 0.17801562  | 0.12891196 | 0.14297753 | 0.32208696 | PHLPP2  |
| 54908  | ENSG00000040275 | 859.967069 | 0.07107113  | 0.13506773 | 0.57371879 | 0.7731681  | SPDL1   |
| 27067  | ENSG00000040341 | 1042.16825 | -0.32218884 | 0.09318481 | 0.00035109 | 0.00235803 | STAU2   |

|        |                 |            |             |            |            |            |         |
|--------|-----------------|------------|-------------|------------|------------|------------|---------|
| 54896  | ENSG00000040487 | 272.423739 | -0.06120715 | 0.1465356  | 0.64870005 | 0.82469621 | SLC66A1 |
| 1497   | ENSG00000040531 | 329.709185 | -0.21980806 | 0.13478741 | 0.08050012 | 0.21235506 | CTNS    |
| 65078  | ENSG00000040608 | 125.252677 | -0.06147952 | 0.21930724 | 0.73083998 | 0.8712652  | RTN4R   |
| 79142  | ENSG00000040633 | 1220.53833 | 0.09080002  | 0.08202351 | 0.25702707 | 0.47809754 | PHF23   |
| 1008   | ENSG00000040731 | 0          | NA          | NA         | NA         | NA         | CDH10   |
| 3631   | ENSG00000040933 | 1302.92573 | -0.13672683 | 0.09894471 | 0.15158376 | 0.33557485 | INPP4A  |
| 5874   | ENSG00000041353 | 317.67437  | 0.01631336  | 0.16290091 | 0.91293548 | 0.96282372 | RAB27B  |
| 5685   | ENSG00000041357 | 2359.02582 | -0.05606941 | 0.0784587  | 0.46458627 | 0.68740335 | PSMA4   |
| 23026  | ENSG00000041515 | 366.322875 | -0.01273187 | 0.12170792 | 0.91132748 | 0.96225318 | MYO16   |
| 55341  | ENSG00000041802 | 847.151669 | 0.20105331  | 0.09507973 | 0.02882172 | 0.09722903 | LSG1    |
| 10039  | ENSG00000041880 | 184.383674 | -0.10942047 | 0.17782246 | 0.48652855 | 0.7063832  | PARP3   |
| 3371   | ENSG00000041982 | 297.283894 | 0.71387766  | 0.21240627 | 0.00015319 | 0.00111613 | TNC     |
| 90326  | ENSG00000041988 | 266.349749 | -0.02857548 | 0.14604105 | 0.83133676 | 0.92375976 | THAP3   |
| 140876 | ENSG00000042062 | 165.005993 | 2.53066251  | 0.22099629 | 1.39E-31   | 8.36E-30   | RIPOR3  |
| 55775  | ENSG00000042088 | 503.604892 | 0.23855535  | 0.12073793 | 0.03687491 | 0.118091   | TDP1    |
| 84883  | ENSG00000042286 | 230.069175 | 0.23119345  | 0.16717618 | 0.12426396 | 0.29221252 | AIFM2   |
| 56918  | ENSG00000042304 | 0          | NA          | NA         | NA         | NA         | C2orf83 |
| 55812  | ENSG00000042317 | 117.030422 | 0.33850787  | 0.22590037 | 0.07059475 | 0.19275957 | SPATA7  |
| 9440   | ENSG00000042429 | 876.850403 | -0.06211092 | 0.09202161 | 0.4862786  | 0.70622288 | MED17   |
| 54884  | ENSG00000042445 | 534.128227 | 0.21545136  | 0.11683341 | 0.0523272  | 0.15416864 | RETSAT  |
| 822    | ENSG00000042493 | 7.20768711 | 0.07797067  | 0.36033326 | 0.59441471 | 0.7877158  | CAPG    |
| 1175   | ENSG00000042753 | 1617.79918 | -0.08606046 | 0.06840013 | 0.20057622 | 0.40577467 | AP2S1   |
| 7399   | ENSG00000042781 | 22.553269  | 0.15552144  | 0.32171721 | 0.43137476 | 0.65692932 | USH2A   |
| 11055  | ENSG00000042813 | 0          | NA          | NA         | NA         | NA         | ZBPB    |
| 7038   | ENSG00000042832 | 3.55208756 | -0.24329658 | 0.49733423 | 0.01375522 | 0.05379878 | TG      |
| 10863  | ENSG00000042980 | 0          | NA          | NA         | NA         | NA         | ADAM28  |
| 8538   | ENSG00000043039 | 0          | NA          | NA         | NA         | NA         | BARX2   |
| 54165  | ENSG00000043093 | 654.433142 | 0.00052841  | 0.11474138 | 0.99827963 | 0.99941443 | DCUN1D1 |
| 23338  | ENSG00000043143 | 432.808285 | 0.49314539  | 0.12468253 | 3.01E-05   | 0.00025838 | JADE2   |
| 7546   | ENSG00000043355 | 0          | NA          | NA         | NA         | NA         | ZIC2    |
| 3937   | ENSG00000043462 | 0.15069912 | -0.01848503 | 0.38480575 | 0.84537521 | NA         | LCP2    |
| 54802  | ENSG00000043514 | 477.165889 | 0.20524468  | 0.12286663 | 0.0774267  | 0.2064157  | TRIT1   |
| 153    | ENSG00000043591 | 0          | NA          | NA         | NA         | NA         | ADRB1   |
| 2981   | ENSG00000044012 | 0          | NA          | NA         | NA         | NA         | GUCA2B  |
| 9820   | ENSG00000044090 | 1979.29205 | 0.49846603  | 0.07525676 | 1.43E-11   | 3.00E-10   | CUL7    |
| 1495   | ENSG00000044115 | 4489.99324 | 0.7758064   | 0.06378987 | 1.03E-34   | 6.90E-33   | CTNNA1  |
| 5256   | ENSG00000044446 | 543.966628 | 0.01336914  | 0.12639445 | 0.91183814 | 0.96248504 | PHKA2   |
| 54875  | ENSG00000044459 | 589.529587 | -0.28147757 | 0.11978429 | 0.01304203 | 0.0515446  | CNTLN   |

|        |                 |            |             |            |            |            |          |
|--------|-----------------|------------|-------------|------------|------------|------------|----------|
| 2042   | ENSG00000044524 | 0          | NA          | NA         | NA         | NA         | EPHA3    |
| 3309   | ENSG00000044574 | 13823.0698 | 0.91485351  | 0.09753077 | 1.10E-21   | 4.44E-20   | HSPA5    |
| 1829   | ENSG00000046604 | 117.099541 | 11.4557472  | 2.97607695 | 3.66E-18   | 1.23E-16   | DSG2     |
| 54960  | ENSG00000046647 | 441.4231   | -0.04712925 | 0.11626648 | 0.66974029 | 0.83753108 | GEMIN8   |
| 8481   | ENSG00000046651 | 929.411045 | 0.15615809  | 0.10262133 | 0.11409319 | 0.27454323 | OFD1     |
| 2824   | ENSG00000046653 | 239.990315 | -0.22879675 | 0.18002277 | 0.14948508 | 0.33230072 | GPM6B    |
| 51438  | ENSG00000046774 | 4.3388516  | -0.17441401 | 0.42520896 | 0.1254722  | 0.29435597 | MAGEC2   |
| 80243  | ENSG00000046889 | 0          | NA          | NA         | NA         | NA         | PREX2    |
| 22884  | ENSG00000047056 | 700.412302 | 0.07195947  | 0.10088602 | 0.46030007 | 0.68340593 | WDR37    |
| 64848  | ENSG00000047188 | 1242.99685 | -0.13067405 | 0.09334098 | 0.14767161 | 0.329636   | YTHDC2   |
| 56474  | ENSG00000047230 | 853.070435 | -0.1288029  | 0.09546123 | 0.16275941 | 0.35164399 | CTPS2    |
| 51606  | ENSG00000047249 | 499.892785 | 0.17224924  | 0.139609   | 0.18397192 | 0.3824796  | ATP6V1H  |
| 5431   | ENSG00000047315 | 3332.8292  | -0.10058553 | 0.05915757 | 0.08526993 | 0.22149194 | POLR2B   |
| 56204  | ENSG00000047346 | 563.325823 | -0.06386028 | 0.13860554 | 0.62367763 | 0.80810895 | FAM214A  |
| 116984 | ENSG00000047365 | 0          | NA          | NA         | NA         | NA         | ARAP2    |
| 7175   | ENSG00000047410 | 6890.71039 | 0.04294894  | 0.06286506 | 0.48899462 | 0.70870715 | TPR      |
| 1356   | ENSG00000047457 | 1.25259581 | -0.02315123 | 0.37948037 | 0.73579668 | NA         | CP       |
| 23247  | ENSG00000047578 | 570.149313 | 0.08051996  | 0.13127652 | 0.51009664 | 0.72552278 | KATNIP   |
| 84062  | ENSG00000047579 | 182.549598 | -0.19304858 | 0.16997151 | 0.20417587 | 0.41083664 | DTNBP1   |
| 7504   | ENSG00000047597 | 67.9221345 | 0.42858456  | 0.28857657 | 0.05016204 | 0.14934131 | XK       |
| 57101  | ENSG00000047617 | 0          | NA          | NA         | NA         | NA         | ANO2     |
| 57102  | ENSG00000047621 | 385.333268 | -0.45336307 | 0.13731171 | 0.00041525 | 0.00273797 | C12orf4  |
| 6322   | ENSG00000047634 | 355.067508 | 0.04567733  | 0.12772566 | 0.70535526 | 0.85803894 | SCML1    |
| 55841  | ENSG00000047644 | 531.648357 | 0.30369752  | 0.11195586 | 0.00446123 | 0.02115964 | WWC3     |
| 395    | ENSG00000047648 | 22.2990782 | 2.49051417  | 0.67857265 | 1.17E-05   | 0.00011031 | ARHGAP6  |
| 27146  | ENSG00000047662 | 11.9001715 | -0.0258292  | 0.33596925 | 0.87360464 | 0.94441388 | FAM184B  |
| 4134   | ENSG00000047849 | 3676.28725 | 0.37246058  | 0.0646153  | 4.77E-09   | 7.49E-08   | MAP4     |
| 57120  | ENSG00000047932 | 1243.78085 | -0.33061669 | 0.07671743 | 1.03E-05   | 9.76E-05   | GOPC     |
| 6098   | ENSG00000047936 | 0          | NA          | NA         | NA         | NA         | ROS1     |
| 57646  | ENSG00000048028 | 681.923024 | 0.21054415  | 0.13316873 | 0.09113269 | 0.232939   | USP28    |
| 9734   | ENSG00000048052 | 5111.19952 | 0.02535664  | 0.06860307 | 0.70838082 | 0.8597973  | HDAC9    |
| 26262  | ENSG00000048140 | 877.566856 | -0.16896245 | 0.08736816 | 0.04613242 | 0.13991007 | TSPAN17  |
| 51491  | ENSG00000048162 | 785.682552 | 0.15862267  | 0.09089862 | 0.07221926 | 0.19574701 | NOP16    |
| 57545  | ENSG00000048342 | 186.568839 | -0.63971367 | 0.19853237 | 0.00030167 | 0.00205605 | CC2D2A   |
| 50484  | ENSG00000048392 | 431.682722 | 0.65776755  | 0.11732021 | 5.35E-09   | 8.35E-08   | RRM2B    |
| 168850 | ENSG00000048405 | 717.323522 | -0.15013645 | 0.09605327 | 0.10579252 | 0.25954292 | ZNF800   |
| 608    | ENSG00000048462 | 0          | NA          | NA         | NA         | NA         | TNFRSF17 |
| 92017  | ENSG00000048471 | 490.028798 | -0.03687734 | 0.12670114 | 0.75679907 | 0.88697677 | SNX29    |

|           |                 |            |             |            |            |            |         |
|-----------|-----------------|------------|-------------|------------|------------|------------|---------|
| 55885     | ENSG00000048540 | 338.773899 | -2.02065625 | 0.1422605  | 6.35E-47   | 5.78E-45   | LMO3    |
| 55173     | ENSG00000048544 | 731.850529 | -0.32273684 | 0.09791891 | 0.00063011 | 0.00394742 | MRPS10  |
| 2978      | ENSG00000048545 | 126.778044 | -0.11640657 | 0.18858961 | 0.47772453 | 0.69938463 | GUCA1A  |
| 118142757 | ENSG00000048545 | 126.778044 | -0.11640657 | 0.18858961 | 0.47772453 | 0.69938463 | GUCA1A  |
| 51773     | ENSG00000048649 | 2682.44249 | -0.25933561 | 0.06440276 | 4.29E-05   | 0.00035718 | RSF1    |
| 55187     | ENSG00000048707 | 1197.2928  | 0.17271755  | 0.09946738 | 0.07186766 | 0.19529576 | VPS13D  |
| 10659     | ENSG00000048740 | 4.64305282 | -3.42189135 | 1.84469159 | 0.00243431 | 0.01267298 | CELF2   |
| 23196     | ENSG00000048828 | 3040.39018 | 0.00378216  | 0.06649955 | 0.95413383 | 0.98112988 | FAM120A |
| 23518     | ENSG00000048991 | 1387.37037 | -0.14893715 | 0.09463052 | 0.10411651 | 0.25686042 | R3HDM1  |
| 1298      | ENSG00000049089 | 372.937908 | 2.03736328  | 0.167181   | 2.46E-35   | 1.68E-33   | COL9A2  |
| 4254      | ENSG00000049130 | 552.830405 | -0.5835172  | 0.11633404 | 1.62E-07   | 2.09E-06   | KITLG   |
| 1161      | ENSG00000049167 | 491.322508 | 0.11977461  | 0.12111974 | 0.29714664 | 0.52379972 | ERCC8   |
| 11174     | ENSG00000049192 | 144.796862 | 1.55531361  | 0.22870556 | 8.00E-13   | 1.83E-11   | ADAMTS6 |
| 9563      | ENSG00000049239 | 1639.02776 | 0.30326019  | 0.07305553 | 2.28E-05   | 0.00020244 | H6PD    |
| 9341      | ENSG00000049245 | 709.859826 | 0.44293968  | 0.10389311 | 9.35E-06   | 8.93E-05   | VAMP3   |
| 8863      | ENSG00000049246 | 403.914149 | -0.04271589 | 0.149795   | 0.75546831 | 0.88621127 | PER3    |
| 10911     | ENSG00000049247 | 0          | NA          | NA         | NA         | NA         | UTS2    |
| 3604      | ENSG00000049249 | 0.16735865 | 0.01897177  | 0.38482933 | 0.78225479 | NA         | TNFRSF9 |
| 55040     | ENSG00000049283 | 7.80261103 | -0.09222539 | 0.37604395 | 0.44612698 | 0.67049158 | EPN3    |
| 4052      | ENSG00000049323 | 277.706265 | 2.17121798  | 0.16779716 | 1.95E-39   | 1.49E-37   | LTBP1   |
| 5954      | ENSG00000049449 | 2466.39628 | 0.43344903  | 0.07604673 | 5.91E-09   | 9.17E-08   | RCN1    |
| 2006      | ENSG00000049540 | 1739.92799 | -0.8104184  | 0.09365961 | 9.14E-19   | 3.20E-17   | ELN     |
| 5982      | ENSG00000049541 | 1266.06315 | -0.09420264 | 0.08868905 | 0.27359882 | 0.49704244 | RFC2    |
| 57492     | ENSG00000049618 | 3109.40014 | 0.07409259  | 0.06103517 | 0.21967007 | 0.43175718 | ARID1B  |
| 81037     | ENSG00000049656 | 2739.67125 | 0.06800191  | 0.07330999 | 0.34505615 | 0.57548034 | CLPTM1L |
| 23327     | ENSG00000049759 | 515.751252 | 0.15535633  | 0.27178472 | 0.43597214 | 0.66108891 | NEDD4L  |
| 50943     | ENSG00000049768 | 8.65626858 | -0.01111461 | 0.34600621 | 0.93962743 | 0.97474024 | FOXP3   |
| 89801     | ENSG00000049769 | 220.325144 | 0.36284424  | 0.18630626 | 0.02585934 | 0.08939699 | PPP1R3F |
| 3074      | ENSG00000049860 | 494.944396 | 0.00078265  | 0.11012585 | 0.99495711 | 0.99852582 | HEXB    |
| 79810     | ENSG00000049883 | 442.247475 | -0.20163524 | 0.1417367  | 0.12459195 | 0.29277559 | PTCD2   |
| 340533    | ENSG00000050030 | 41.3494138 | -2.6148848  | 0.45907531 | 7.89E-10   | 1.38E-08   | NEXMIF  |
| 51528     | ENSG00000050130 | 762.63479  | -0.33321867 | 0.11506198 | 0.00232351 | 0.0121696  | JKAMP   |
| 27122     | ENSG00000050165 | 1574.26778 | -0.08827282 | 0.09253738 | 0.32420595 | 0.55212413 | DKK3    |
| 7984      | ENSG00000050327 | 0          | NA          | NA         | NA         | NA         | ARHGEF5 |
| 9603      | ENSG00000050344 | 824.524784 | 0.1353205   | 0.09612718 | 0.14579992 | 0.32633917 | NFE2L3  |
| 63933     | ENSG00000050393 | 959.542884 | 0.02194277  | 0.08570899 | 0.79440056 | 0.90579008 | MCUR1   |
| 51474     | ENSG00000050405 | 1733.90932 | 0.59049577  | 0.07370494 | 3.63E-16   | 1.07E-14   | LIMA1   |
| 25875     | ENSG00000050426 | 794.874608 | -0.092741   | 0.10350354 | 0.35069845 | 0.58113472 | LETMD1  |



|        |                 |            |             |            |            |            |          |
|--------|-----------------|------------|-------------|------------|------------|------------|----------|
| 9498   | ENSG00000050438 | 1423.69016 | -0.80659914 | 0.08750937 | 5.72E-21   | 2.24E-19   | SLC4A8   |
| 10319  | ENSG00000050555 | 15.6316255 | -0.16730633 | 0.38657739 | 0.29109731 | 0.51718193 | LAMC3    |
| 5733   | ENSG00000050628 | 20.727972  | -0.05062699 | 0.3103139  | 0.78374339 | 0.9014745  | PTGER3   |
| 79931  | ENSG00000050730 | 0.37844916 | 0.02407552  | 0.3854191  | 0.60038877 | NA         | TNIP3    |
| 5601   | ENSG00000050748 | 727.654164 | -0.21737928 | 0.10221246 | 0.02688177 | 0.09216075 | MAPK9    |
| 91522  | ENSG00000050767 | 68.7718736 | -2.18995022 | 0.332403   | 2.95E-12   | 6.53E-11   | COL23A1  |
| 9564   | ENSG00000050820 | 1590.93779 | -0.28977012 | 0.10794613 | 0.00498094 | 0.02315412 | BCAR1    |
| 84067  | ENSG00000051009 | 425.287173 | -0.27226603 | 0.15699025 | 0.05647111 | 0.16351237 | FAM160A2 |
| 9709   | ENSG00000051108 | 1257.70256 | 1.2623568   | 0.08322306 | 6.30E-53   | 6.72E-51   | HERPUD1  |
| 9454   | ENSG00000051128 | 803.693362 | 1.17418888  | 0.09405209 | 1.03E-36   | 7.24E-35   | HOMER3   |
| 5888   | ENSG00000051180 | 429.238395 | -0.51265174 | 0.12713477 | 2.04E-05   | 0.00018249 | RAD51    |
| 10721  | ENSG00000051341 | 843.044024 | -0.52005128 | 0.13649756 | 4.97E-05   | 0.0004061  | POLQ     |
| 5291   | ENSG00000051382 | 339.978675 | -0.60828793 | 0.1455248  | 8.12E-06   | 7.84E-05   | PIK3CB   |
| 1535   | ENSG00000051523 | 486.215562 | 0.2541938   | 0.11614794 | 0.02133233 | 0.07670051 | CYBA     |
| 84321  | ENSG00000051596 | 1372.3521  | 0.00945446  | 0.07852783 | 0.89971893 | 0.95564128 | THOC3    |
| 23593  | ENSG00000051620 | 348.114864 | 1.17607989  | 0.15319189 | 1.71E-15   | 4.85E-14   | HEBP2    |
| 10198  | ENSG00000051825 | 1094.39728 | -0.22003463 | 0.10300817 | 0.02609773 | 0.09006417 | MPHOSPH9 |
| 54477  | ENSG00000052126 | 294.200214 | 0.52980516  | 0.15083629 | 0.00015468 | 0.00112579 | PLEKHA5  |
| 5652   | ENSG00000052344 | 3.30838869 | 0.07705588  | 0.38263342 | 0.42374354 | 0.64959604 | PRSS8    |
| 80143  | ENSG00000052723 | 1098.79906 | 0.19014138  | 0.13098763 | 0.12256885 | 0.28970289 | SIKE1    |
| 23223  | ENSG00000052749 | 1518.04181 | 0.03461558  | 0.07266271 | 0.62840361 | 0.81158232 | RRP12    |
| 57600  | ENSG00000052795 | 614.121929 | -0.10786509 | 0.11867297 | 0.33807253 | 0.56829936 | FNIP2    |
| 6307   | ENSG00000052802 | 844.793952 | -0.47674754 | 0.14126054 | 0.00029472 | 0.00201423 | MSMO1    |
| 55761  | ENSG00000052841 | 2474.21763 | 0.42320709  | 0.06153416 | 3.10E-12   | 6.83E-11   | TTC17    |
| 60529  | ENSG00000052850 | 8.50916519 | 0.3305188   | 0.52793543 | 0.07386363 | 0.19921891 | ALX4     |
| 23105  | ENSG00000053108 | 574.315292 | -3.13028101 | 0.12864262 | 5.95E-132  | 3.11E-129  | FSTL4    |
| 1112   | ENSG00000053254 | 2155.28088 | 0.03795375  | 0.07822407 | 0.62130372 | 0.80672374 | FOXN3    |
| 728464 | ENSG00000053328 | 18.2374059 | 2.25419839  | 0.65099415 | 2.94E-05   | 0.00025379 | METTL24  |
| 8574   | ENSG00000053371 | 645.676238 | -0.00474423 | 0.09769914 | 0.95915408 | 0.9831126  | AKR7A2   |
| 51154  | ENSG00000053372 | 1017.26832 | -0.05131192 | 0.08993293 | 0.5565381  | 0.76208295 | MRTO4    |
| 4826   | ENSG00000053438 | 11037.036  | 1.26260706  | 0.06178067 | 8.30E-94   | 2.39E-91   | NNAT     |
| 55850  | ENSG00000053501 | 231.975472 | 0.03638613  | 0.14869009 | 0.79180789 | 0.90499209 | USE1     |
| 23101  | ENSG00000053524 | 69.2547223 | -0.7343761  | 0.31496878 | 0.00317404 | 0.0158702  | MCF2L2   |
| 83714  | ENSG00000053702 | 69.6353952 | -0.16602374 | 0.23191479 | 0.37335213 | 0.60236694 | NRIP2    |
| 3909   | ENSG00000053747 | 312.503741 | 2.10468962  | 0.16271141 | 1.66E-39   | 1.27E-37   | LAMA3    |
| 55745  | ENSG00000053770 | 770.959732 | 0.01018738  | 0.10422587 | 0.92006889 | 0.96634023 | AP5M1    |
| 29945  | ENSG00000053900 | 546.038579 | 0.09353452  | 0.14492293 | 0.48621015 | 0.70622288 | ANAPC4   |
| 3784   | ENSG00000053918 | 145.441919 | -0.65520653 | 0.22573708 | 0.00081393 | 0.00494438 | KCNQ1    |

|        |                 |            |             |            |            |            |          |
|--------|-----------------|------------|-------------|------------|------------|------------|----------|
| 27095  | ENSG00000054116 | 607.884997 | 0.01833761  | 0.09953709 | 0.84953175 | 0.93154246 | TRAPPC3  |
| 9967   | ENSG00000054118 | 3181.51939 | -0.13596257 | 0.07599422 | 0.06756871 | 0.18665906 | THRAP3   |
| 29085  | ENSG00000054148 | 990.723732 | 0.09831793  | 0.0838126  | 0.22943896 | 0.44501603 | PHPT1    |
| 954    | ENSG00000054179 | 4.11503966 | -0.06800191 | 0.37246735 | 0.56170032 | 0.76502898 | ENTPD2   |
| 4065   | ENSG00000054219 | 0          | NA          | NA         | NA         | NA         | LY75     |
| 51742  | ENSG00000054267 | 1637.80979 | 0.0288795   | 0.0787222  | 0.70846604 | 0.8597973  | ARID4B   |
| 23596  | ENSG00000054277 | 597.150409 | 1.1086      | 0.11608224 | 1.53E-22   | 6.52E-21   | OPN3     |
| 10806  | ENSG00000054282 | 614.245702 | 0.00082155  | 0.13906285 | 0.99612541 | 0.99859366 | SDCCAG8  |
| 5798   | ENSG00000054356 | 945.936602 | -2.4681967  | 0.09554824 | 2.46E-148  | 1.95E-145  | PTPRN    |
| 55733  | ENSG00000054392 | 739.008641 | -0.50843445 | 0.10197489 | 2.49E-07   | 3.12E-06   | HHAT     |
| 23095  | ENSG00000054523 | 4026.26172 | -0.52134904 | 0.06227206 | 1.02E-17   | 3.31E-16   | KIF1B    |
| 2296   | ENSG00000054598 | 256.892242 | 1.89006559  | 0.16279846 | 3.01E-32   | 1.84E-30   | FOXC1    |
| 25771  | ENSG00000054611 | 375.495141 | -0.13590734 | 0.14183785 | 0.30074001 | 0.52797821 | TBC1D22A |
| 23224  | ENSG00000054654 | 5054.10325 | 0.27169424  | 0.06219983 | 9.33E-06   | 8.91E-05   | SYNE2    |
| 57475  | ENSG00000054690 | 523.843909 | 0.12587958  | 0.13523773 | 0.31967603 | 0.54727882 | PLEKHH1  |
| 10079  | ENSG00000054793 | 2484.20111 | -0.01613574 | 0.06209335 | 0.79223299 | 0.90499209 | ATP9A    |
| 23626  | ENSG00000054796 | 0          | NA          | NA         | NA         | NA         | SPO11    |
| 140689 | ENSG00000054803 | 641.347547 | 0.47752585  | 0.15007356 | 0.00060908 | 0.00383379 | CBLN4    |
| 25884  | ENSG00000054938 | 0.173124   | -0.01911262 | 0.38486262 | 0.84537521 | NA         | CHRDL2   |
| 23201  | ENSG00000054965 | 2875.29355 | -0.1187806  | 0.06052335 | 0.04642337 | 0.14061674 | FAM168A  |
| 84957  | ENSG00000054967 | 432.11455  | -0.14800838 | 0.12201797 | 0.19897677 | 0.40340274 | RELT     |
| 2581   | ENSG00000054983 | 494.169417 | 0.29230176  | 0.12406455 | 0.01252948 | 0.04992667 | GALC     |
| 51602  | ENSG00000055044 | 1658.92672 | -0.14769737 | 0.07049784 | 0.03285223 | 0.10778817 | NOP58    |
| 26099  | ENSG00000055070 | 3458.53845 | 0.01074422  | 0.06273712 | 0.86364351 | 0.93960776 | SZRD1    |
| 3757   | ENSG00000055118 | 5733.42235 | -0.36831472 | 0.05501652 | 1.29E-11   | 2.73E-10   | KCNH2    |
| 8454   | ENSG00000055130 | 1837.92104 | 0.02700972  | 0.07495279 | 0.71444204 | 0.86242659 | CUL1     |
| 10827  | ENSG00000055147 | 447.133747 | -0.05302937 | 0.12376524 | 0.64989242 | 0.82529572 | FAM114A2 |
| 26999  | ENSG00000055163 | 2706.84768 | -0.3922535  | 0.06353532 | 3.65E-10   | 6.64E-09   | CYFIP2   |
| 23118  | ENSG00000055208 | 1500.15263 | -0.21649218 | 0.09035669 | 0.01346846 | 0.05295894 | TAB2     |
| 116254 | ENSG00000055211 | 247.374487 | 0.23955431  | 0.14923882 | 0.0810791  | 0.21357208 | GINM1    |
| 5610   | ENSG00000055332 | 2149.98215 | -0.17430097 | 0.09876728 | 0.06369854 | 0.17918196 | EIF2AK2  |
| 57602  | ENSG00000055483 | 1198.5825  | -0.16012758 | 0.07945665 | 0.03911599 | 0.12343904 | USP36    |
| 58508  | ENSG00000055609 | 3285.5046  | -0.32330885 | 0.0965385  | 0.00051275 | 0.00329861 | KMT2C    |
| 55283  | ENSG00000055732 | 0          | NA          | NA         | NA         | NA         | MCOLN3   |
| 114800 | ENSG00000055813 | 0          | NA          | NA         | NA         | NA         | CCDC85A  |
| 23369  | ENSG00000055917 | 4002.26621 | -0.52529538 | 0.06690034 | 1.54E-15   | 4.36E-14   | PUM2     |
| 84545  | ENSG00000055950 | 1023.69047 | 0.04046173  | 0.0845572  | 0.62440124 | 0.80857129 | MRPL43   |
| 3700   | ENSG00000055955 | 22.1468053 | 2.57918491  | 0.74963623 | 2.60E-05   | 0.00022721 | ITIH4    |

|        |                 |            |             |            |            |            |          |
|--------|-----------------|------------|-------------|------------|------------|------------|----------|
| 3697   | ENSG00000055957 | 0.15069912 | -0.01848503 | 0.38480575 | 0.84537521 | NA         | ITIH1    |
| 54969  | ENSG00000056050 | 502.160485 | 0.00552511  | 0.10918536 | 0.95906584 | 0.9831126  | HPF1     |
| 51663  | ENSG00000056097 | 2292.22207 | -0.19586275 | 0.07115003 | 0.00500739 | 0.02324844 | ZFR      |
| 55609  | ENSG00000056277 | 418.060363 | -0.02974278 | 0.13247234 | 0.81003806 | 0.91386075 | ZNF280C  |
| 10886  | ENSG00000056291 | 252.822748 | 0.31143577  | 0.14530723 | 0.02037392 | 0.07391569 | NPFFR2   |
| 112885 | ENSG00000056487 | 2577.12924 | -1.69037074 | 0.06962925 | 2.60E-131  | 1.32E-128  | PHF21B   |
| 7185   | ENSG00000056558 | 17.1570115 | -0.02266378 | 0.32195801 | 0.89625436 | 0.95469109 | TRAF1    |
| 54542  | ENSG00000056586 | 2302.98209 | -0.29214422 | 0.08437585 | 0.00037329 | 0.00249108 | RC3H2    |
| 55540  | ENSG00000056736 | 198.716519 | 0.08070639  | 0.15932691 | 0.57875142 | 0.77656626 | IL17RB   |
| 10758  | ENSG00000056972 | 131.759239 | -0.02054497 | 0.18526224 | 0.89808302 | 0.95533575 | TRAF3IP2 |
| 8908   | ENSG00000056998 | 120.714541 | 0.99964139  | 0.24431147 | 5.00E-06   | 5.03E-05   | GYG2     |
| 131566 | ENSG00000057019 | 1022.27233 | -0.15454194 | 0.08388332 | 0.05859568 | 0.16816698 | DCBLD2   |
| 6317   | ENSG00000057149 | 0          | NA          | NA         | NA         | NA         | SERPINB3 |
| 6646   | ENSG00000057252 | 656.295207 | 0.08039376  | 0.1030782  | 0.41842591 | 0.6444567  | SOAT1    |
| 5318   | ENSG00000057294 | 172.566141 | 2.09156616  | 0.19751583 | 2.31E-27   | 1.19E-25   | PKP2     |
| 4438   | ENSG00000057468 | 0.34712721 | 0.00084574  | 0.3833641  | 0.96045798 | NA         | MSH4     |
| 2155   | ENSG00000057593 | 3.41218294 | -0.01743079 | 0.3739663  | 0.84118869 | 0.92789889 | F7       |
| 2665   | ENSG00000057608 | 3851.79871 | -0.39661192 | 0.08393636 | 1.20E-06   | 1.34E-05   | GDI2     |
| 639    | ENSG00000057657 | 0          | NA          | NA         | NA         | NA         | PRDM1    |
| 9474   | ENSG00000057663 | 319.124097 | -0.15013183 | 0.13726389 | 0.2407149  | 0.45879844 | ATG5     |
| 57458  | ENSG00000057704 | 74.5483529 | 0.20777266  | 0.24601357 | 0.28278237 | 0.50782063 | TMCC3    |
| 57095  | ENSG00000057757 | 580.76378  | -0.14487906 | 0.10563856 | 0.15166865 | 0.33565042 | PITHD1   |
| 57504  | ENSG00000057935 | 1966.53165 | 0.09987264  | 0.07299832 | 0.16352879 | 0.35261507 | MTA3     |
| 8975   | ENSG00000058056 | 1019.06324 | -0.05685573 | 0.12497295 | 0.62922332 | 0.81227084 | USP13    |
| 23200  | ENSG00000058063 | 1201.09101 | 0.4197021   | 0.09794774 | 9.10E-06   | 8.70E-05   | ATP11B   |
| 3918   | ENSG00000058085 | 0.63325157 | 0.0018705   | 0.38251164 | 0.96341566 | NA         | LAMC2    |
| 5218   | ENSG00000058091 | 1386.81721 | 0.04738595  | 0.07878819 | 0.53978561 | 0.74874827 | CDK14    |
| 29927  | ENSG00000058262 | 4988.48445 | -0.07317467 | 0.05963166 | 0.2139987  | 0.42415859 | SEC61A1  |
| 4659   | ENSG00000058272 | 1081.24199 | 0.14148447  | 0.12656546 | 0.23582753 | 0.45262825 | PPP1R12A |
| 5923   | ENSG00000058335 | 2.13990379 | -0.05283874 | 0.38368747 | 0.37470751 | NA         | RASGRF1  |
| 816    | ENSG00000058404 | 193.750718 | -1.52834595 | 0.27566789 | 1.95E-09   | 3.22E-08   | CAMK2B   |
| 9696   | ENSG00000058453 | 2331.72046 | 0.07569482  | 0.09311255 | 0.40269733 | 0.63083419 | CROCC    |
| 55718  | ENSG00000058600 | 1458.4059  | 0.11260896  | 0.10448913 | 0.26302545 | 0.48504013 | POLR3E   |
| 493    | ENSG00000058668 | 675.512434 | 0.68798791  | 0.11684364 | 9.38E-10   | 1.62E-08   | ATP2B4   |
| 9877   | ENSG00000058673 | 4326.67821 | -0.02750275 | 0.07517586 | 0.70822852 | 0.85971939 | ZC3H11A  |
| 55781  | ENSG00000058729 | 320.879833 | -0.31462318 | 0.17275704 | 0.03959027 | 0.1244606  | RIOK2    |
| 54432  | ENSG00000058799 | 225.914246 | 0.32934111  | 0.17057519 | 0.03148309 | 0.10422567 | YIPF1    |
| 55706  | ENSG00000058804 | 1248.60477 | -0.63970504 | 0.08061661 | 5.75E-16   | 1.66E-14   | NDC1     |

|        |                 |            |             |            |            |            |          |
|--------|-----------------|------------|-------------|------------|------------|------------|----------|
| 1608   | ENSG00000058866 | 6.72394865 | -0.30242382 | 0.5462797  | 0.02742102 | 0.09344437 | DGKG     |
| 84256  | ENSG00000059122 | 875.414504 | -0.065705   | 0.10286586 | 0.50644622 | 0.72214266 | FLYWCHI  |
| 64718  | ENSG00000059145 | 512.835547 | 0.14933217  | 0.14247537 | 0.2583304  | 0.47964541 | UNKL     |
| 6916   | ENSG00000059377 | 40.7290682 | -0.18149155 | 0.28992346 | 0.36694317 | 0.59618989 | TBXAS1   |
| 64761  | ENSG00000059378 | 40.8666834 | 0.71752104  | 0.40880182 | 0.01124651 | 0.04570478 | PARP12   |
| 5832   | ENSG00000059573 | 2256.46243 | -0.02106102 | 0.08289777 | 0.79391939 | 0.90579008 | ALDH18A1 |
| 6894   | ENSG00000059588 | 1924.68711 | 0.18267779  | 0.08380235 | 0.02534462 | 0.0880241  | TARBP1   |
| 5188   | ENSG00000059691 | 456.618445 | -0.03217769 | 0.13771487 | 0.80117399 | 0.90897872 | GATB     |
| 4084   | ENSG00000059728 | 253.412974 | -0.06514051 | 0.16039789 | 0.65412597 | 0.82782798 | MXD1     |
| 5128   | ENSG00000059758 | 383.8963   | -0.14068796 | 0.15060726 | 0.3085812  | 0.53621325 | CDK17    |
| 548645 | ENSG00000059769 | 178.610493 | 0.2925802   | 0.17154975 | 0.05686818 | 0.16435994 | DNAJC25  |
| 6515   | ENSG00000059804 | 0          | NA          | NA         | NA         | NA         | SLC2A3   |
| 5662   | ENSG00000059915 | 507.74821  | -1.45229797 | 0.11925719 | 3.28E-35   | 2.24E-33   | PSD      |
| 9150   | ENSG00000060069 | 526.065785 | 0.15123325  | 0.10409805 | 0.13094035 | 0.30334616 | CTDP1    |
| 8531   | ENSG00000060138 | 0.37844916 | 0.02407552  | 0.3854191  | 0.60038877 | NA         | YBX3     |
| 55359  | ENSG00000060140 | 0          | NA          | NA         | NA         | NA         | STYK1    |
| 65125  | ENSG00000060237 | 4585.13363 | -0.22060165 | 0.06268238 | 0.00035147 | 0.00235899 | WNK1     |
| NA     | ENSG00000060303 | 0.173124   | -0.01911262 | 0.38486262 | 0.84537521 | NA         | RPS17P5  |
| 55749  | ENSG00000060339 | 2286.06587 | -0.24631444 | 0.09256993 | 0.00596838 | 0.0270472  | CCAR1    |
| 11054  | ENSG00000060491 | 1089.50998 | -0.20993562 | 0.09423287 | 0.02086996 | 0.07536656 | OGFR     |
| 2769   | ENSG00000060558 | 0.40363765 | 0.01333376  | 0.38394276 | 0.83341597 | NA         | GNA15    |
| 84699  | ENSG00000060566 | 9.90042191 | -0.24332929 | 0.43741416 | 0.15366611 | 0.33878786 | CREB3L3  |
| 55650  | ENSG00000060642 | 193.436552 | -0.13173875 | 0.18636275 | 0.41781117 | 0.64393487 | PIGV     |
| 10076  | ENSG00000060656 | 2550.04441 | 0.02678722  | 0.08682615 | 0.75223583 | 0.88403749 | PTPRU    |
| 9410   | ENSG00000060688 | 867.714082 | 0.04629124  | 0.09069229 | 0.59996125 | 0.79080728 | SNRNP40  |
| 23504  | ENSG00000060709 | 3431.81884 | -0.23058553 | 0.07156748 | 0.00101885 | 0.00600176 | RIMBP2   |
| 1301   | ENSG00000060718 | 490.267549 | 3.83552145  | 0.16363982 | 4.57E-123  | 1.97E-120  | COL11A1  |
| 79832  | ENSG00000060749 | 2267.72091 | -0.24607562 | 0.07774078 | 0.00119407 | 0.00689675 | QSER1    |
| 51660  | ENSG00000060762 | 661.628377 | 0.07651055  | 0.106243   | 0.45406432 | 0.67734106 | MPC1     |
| 30     | ENSG00000060971 | 462.187471 | -0.13360574 | 0.12672745 | 0.26196478 | 0.48394839 | ACAA1    |
| 586    | ENSG00000060982 | 3771.07681 | 0.28002262  | 0.06724492 | 2.29E-05   | 0.00020285 | BCAT1    |
| 51564  | ENSG00000061273 | 1443.63289 | -0.05170517 | 0.08276971 | 0.52144558 | 0.73486861 | HDAC7    |
| 11178  | ENSG00000061337 | 580.299049 | 0.49305881  | 0.10329673 | 7.34E-07   | 8.50E-06   | LZTS1    |
| 93166  | ENSG00000061455 | 9.93435802 | -0.01861019 | 0.36635153 | 0.85819342 | 0.93665736 | PRDM6    |
| 7478   | ENSG00000061492 | 0          | NA          | NA         | NA         | NA         | WNT8A    |
| 6676   | ENSG00000061656 | 111.043499 | 0.14026568  | 0.21175571 | 0.42999153 | 0.65567843 | SPAG4    |
| 10787  | ENSG00000061676 | 3089.99289 | -0.18511641 | 0.07424467 | 0.01091634 | 0.04456382 | NCKAP1   |
| 60488  | ENSG00000061794 | 548.854146 | -0.03833955 | 0.11384764 | 0.72381839 | 0.86794586 | MRPS35   |

|           |                 |            |             |            |            |            |         |
|-----------|-----------------|------------|-------------|------------|------------|------------|---------|
| 2983      | ENSG00000061918 | 392.457977 | -0.50908701 | 0.13406549 | 5.45E-05   | 0.00044062 | GUCY1B1 |
| 6433      | ENSG00000061936 | 1785.84581 | 0.09347092  | 0.07786513 | 0.22063904 | 0.43304726 | SFSWAP  |
| 10188     | ENSG00000061938 | 1516.93714 | -0.1876973  | 0.0781505  | 0.01401183 | 0.05460511 | TNK2    |
| 23041     | ENSG00000061987 | 1064.7441  | 0.14233839  | 0.10000521 | 0.14016105 | 0.31765996 | MON2    |
| 1001      | ENSG00000062038 | 35.3013425 | -0.02961199 | 0.2943934  | 0.87384842 | 0.94444368 | CDH3    |
| 416       | ENSG00000062096 | 0.30001591 | -0.02294459 | 0.38527538 | 0.68644873 | NA         | ARSF    |
| 65056     | ENSG00000062194 | 1887.31669 | -0.35030263 | 0.07085888 | 4.68E-07   | 5.61E-06   | GPBP1   |
| 84649     | ENSG00000062282 | 91.5448866 | -0.12961917 | 0.22616063 | 0.47914353 | 0.70058277 | DGAT2   |
| 7771      | ENSG00000062370 | 274.402857 | -0.47624231 | 0.14729938 | 0.00049016 | 0.00317078 | ZNF112  |
| 1431      | ENSG00000062485 | 3265.19471 | 0.02152869  | 0.05668939 | 0.69917797 | 0.85490515 | CS      |
| 4058      | ENSG00000062524 | 42.9879408 | 1.59227675  | 0.39125139 | 3.37E-06   | 3.48E-05   | LTK     |
| 64951     | ENSG00000062582 | 1072.00943 | -0.11558578 | 0.0980526  | 0.22236573 | 0.43535977 | MRPS24  |
| 63916     | ENSG00000062598 | 809.283901 | -0.09457013 | 0.09005841 | 0.27901068 | 0.50350845 | ELMO2   |
| 23063     | ENSG00000062650 | 1294.45535 | -0.16102334 | 0.08212784 | 0.04437026 | 0.1357031  | WAPL    |
| 81671     | ENSG00000062716 | 1237.3572  | -0.1790155  | 0.07664464 | 0.01695414 | 0.06380314 | VMP1    |
| 10513     | ENSG00000062725 | 1429.57473 | -0.18467501 | 0.08762658 | 0.03002901 | 0.1003834  | APPBP2  |
| 5424      | ENSG00000062822 | 2232.27143 | -0.00749969 | 0.0785706  | 0.92154395 | 0.9670192  | POLD1   |
| 124925    | ENSG00000063015 | 453.585722 | -2.16857655 | 0.13431589 | 8.07E-60   | 1.05E-57   | SEZ6    |
| 1975      | ENSG00000063046 | 12076.6339 | -0.09713412 | 0.04951823 | 0.04793827 | 0.14408352 | EIF4B   |
| 28968     | ENSG00000063127 | 0          | NA          | NA         | NA         | NA         | SLC6A16 |
| 29998     | ENSG00000063169 | 665.624026 | 0.34280128  | 0.12337067 | 0.00326929 | 0.01627671 | BICRA   |
| 56848     | ENSG00000063176 | 723.774509 | 0.24828014  | 0.10638004 | 0.01486561 | 0.05725758 | SPHK2   |
| 6141      | ENSG00000063177 | 9448.37519 | 0.06921317  | 0.05351248 | 0.1917349  | 0.39366867 | RPL18   |
| 770       | ENSG00000063180 | 202.76199  | 0.11945433  | 0.18480751 | 0.46185454 | 0.6848938  | CA11    |
| 79763     | ENSG00000063241 | 679.692398 | 0.12937843  | 0.09704995 | 0.16810285 | 0.35916008 | ISOC2   |
| 11338     | ENSG00000063244 | 5890.03362 | 0.13165085  | 0.06594784 | 0.04282162 | 0.13230775 | U2AF2   |
| 29924     | ENSG00000063245 | 4096.97433 | -0.02830137 | 0.06222515 | 0.64415982 | 0.8223082  | EPN1    |
| 55588     | ENSG00000063322 | 1311.12798 | 0.05760742  | 0.1109367  | 0.58834762 | 0.78314772 | MED29   |
| 57491     | ENSG00000063438 | 12.5036808 | 0.23899858  | 0.42540577 | 0.18025552 | 0.37712427 | AHRR    |
| 2928      | ENSG00000063515 | 0.50586849 | 0.0145565   | 0.38307792 | 0.75000001 | NA         | GSC2    |
| 10838     | ENSG00000063587 | 412.599773 | -0.15056691 | 0.12243456 | 0.19334855 | 0.39603916 | ZNF275  |
| 105373378 | ENSG00000063587 | 412.599773 | -0.15056691 | 0.12243456 | 0.19334855 | 0.39603916 | ZNF275  |
| 8776      | ENSG00000063601 | 811.10033  | -0.08304345 | 0.09663909 | 0.37370967 | 0.60269874 | MTMR1   |
| 2817      | ENSG00000063660 | 824.27179  | 0.1544503   | 0.09358591 | 0.08848321 | 0.22759703 | GPC1    |
| 57143     | ENSG00000063761 | 159.585418 | 0.17288812  | 0.19108218 | 0.29815184 | 0.52487422 | ADCK1   |
| 3029      | ENSG00000063854 | 739.240893 | 0.13312312  | 0.11667688 | 0.23083346 | 0.44684775 | HAGH    |
| 6047      | ENSG00000063978 | 1011.35379 | -0.49598312 | 0.10165466 | 4.18E-07   | 5.06E-06   | RNF4    |
| 841       | ENSG00000064012 | 10.1675833 | -0.03235521 | 0.34797254 | 0.82822339 | 0.92220943 | CASP8   |

|       |                 |            |             |            |            |            |              |
|-------|-----------------|------------|-------------|------------|------------|------------|--------------|
| 22998 | ENSG00000064042 | 2325.52929 | -0.42326898 | 0.07456229 | 6.84E-09   | 1.05E-07   | LIMCH1       |
| 55726 | ENSG00000064102 | 493.125718 | -0.17872409 | 0.11478636 | 0.10175042 | 0.25253045 | INTS13       |
| 51768 | ENSG00000064115 | 1668.00183 | -0.49241148 | 0.06962307 | 6.20E-13   | 1.43E-11   | TM7SF3       |
| 1747  | ENSG00000064195 | 0          | NA          | NA         | NA         | NA         | DLX3         |
| 53340 | ENSG00000064199 | 228.620738 | -0.02948383 | 0.22909238 | 0.87018362 | 0.94333385 | SPA17        |
| 10077 | ENSG00000064201 | 5.55217324 | -0.02960274 | 0.3644677  | 0.80435302 | 0.91118482 | TSPAN32      |
| 8839  | ENSG00000064205 | 3.80670146 | -0.07311225 | 0.3763259  | 0.5146819  | 0.72937777 | CCN5         |
| 58524 | ENSG00000064218 | 0          | NA          | NA         | NA         | NA         | DMRT3        |
| 10402 | ENSG00000064225 | 880.784003 | -0.0345195  | 0.09020655 | 0.69279586 | 0.85156247 | ST3GAL6      |
| 9914  | ENSG00000064270 | 6.16967696 | 0.00256285  | 0.36810733 | 0.98295811 | 0.99428951 | ATP2C2       |
| 4804  | ENSG00000064300 | 295.342734 | 1.14354845  | 0.18175215 | 3.47E-11   | 7.00E-10   | NGFR         |
| 50937 | ENSG00000064309 | 969.549461 | 0.65706971  | 0.08430635 | 1.76E-15   | 4.96E-14   | CDON         |
| 6873  | ENSG00000064313 | 1063.17708 | 0.32693246  | 0.09823271 | 0.00056016 | 0.00356263 | TAF2         |
| 28996 | ENSG00000064393 | 3702.14826 | -0.39610979 | 0.05791467 | 4.32E-12   | 9.42E-11   | HIPK2        |
| 23534 | ENSG00000064419 | 2307.31014 | -0.18467444 | 0.06325192 | 0.00304099 | 0.01530912 | TNPO3        |
| NA    | ENSG00000064489 | 43.2794601 | 0.80163906  | 0.46552951 | 0.00905398 | 0.03818204 | BORCS8-MEF2B |
| 8625  | ENSG00000064490 | 662.603619 | 0.11399399  | 0.10222469 | 0.24713944 | 0.46606087 | RFXANK       |
| 54929 | ENSG00000064545 | 632.799407 | 0.09498164  | 0.09854716 | 0.31890196 | 0.54656314 | TMEM161A     |
| 9170  | ENSG00000064547 | 593.448608 | -0.27747428 | 0.10441341 | 0.0055027  | 0.0252522  | LPAR2        |
| 5476  | ENSG00000064601 | 873.981775 | 0.29957906  | 0.100924   | 0.00203934 | 0.0108794  | CTSA         |
| 10147 | ENSG00000064607 | 4262.56638 | -0.17992209 | 0.05590902 | 0.00112619 | 0.00653705 | SUGP2        |
| 6558  | ENSG00000064651 | 413.164264 | -0.40895553 | 0.14065373 | 0.00177227 | 0.00965452 | SLC12A2      |
| 28966 | ENSG00000064652 | 263.211046 | 0.09446433  | 0.14604129 | 0.48479267 | 0.70488105 | SNX24        |
| 2139  | ENSG00000064655 | 35.8034936 | 1.7345305   | 0.4518196  | 7.55E-06   | 7.34E-05   | EYA2         |
| 1265  | ENSG00000064666 | 682.942568 | 2.0063517   | 0.11477784 | 1.35E-69   | 2.17E-67   | CNN2         |
| 10347 | ENSG00000064687 | 239.634466 | 0.25169205  | 0.15883722 | 0.08118562 | 0.21379384 | ABCA7        |
| 9627  | ENSG00000064692 | 42.5708672 | -0.01984626 | 0.28159406 | 0.91571893 | 0.96423105 | SNCAIP       |
| 11218 | ENSG00000064703 | 618.985741 | -0.2858456  | 0.10796073 | 0.00561718 | 0.02567852 | DDX20        |
| 53339 | ENSG00000064726 | 1302.81584 | -0.23858069 | 0.07744354 | 0.00161606 | 0.00894855 | BTBD1        |
| 55711 | ENSG00000064763 | 177.195907 | -0.27060788 | 0.18089603 | 0.08963614 | 0.22992799 | FAR2         |
| 8537  | ENSG00000064787 | 2.8885739  | -0.13233943 | 0.40569864 | 0.17281505 | 0.36572272 | BCAS1        |
| 5449  | ENSG00000064835 | 0          | NA          | NA         | NA         | NA         | POU1F1       |
| 1117  | ENSG00000064886 | 0          | NA          | NA         | NA         | NA         | CHI3L2       |
| 22904 | ENSG00000064932 | 1151.08746 | 0.31120176  | 0.09062091 | 0.00039692 | 0.00262934 | SBNO2        |
| 5378  | ENSG00000064933 | 745.027745 | 0.02933424  | 0.10532969 | 0.77305063 | 0.89561741 | PMS1         |
| 10362 | ENSG00000064961 | 1508.2469  | 0.48680986  | 0.08202009 | 1.23E-09   | 2.09E-08   | HMG20B       |
| 10203 | ENSG00000064989 | 22.6358152 | 4.3301481   | 0.73774787 | 5.31E-10   | 9.51E-09   | CALCRL       |
| 6882  | ENSG00000064995 | 763.343545 | -0.16926744 | 0.09106562 | 0.05495953 | 0.16007004 | TAF11        |

|        |                 |            |             |            |            |            |          |
|--------|-----------------|------------|-------------|------------|------------|------------|----------|
| 23294  | ENSG00000064999 | 1563.40211 | 0.094493    | 0.07173182 | 0.17999691 | 0.37673028 | ANKS1A   |
| 8943   | ENSG00000065000 | 3687.4386  | -0.02758796 | 0.06977454 | 0.68616235 | 0.8472712  | AP3D1    |
| 7629   | ENSG00000065029 | 622.907559 | 0.12258614  | 0.11297137 | 0.25625759 | 0.47738504 | ZNF76    |
| 9351   | ENSG00000065054 | 415.78371  | -0.23908752 | 0.11762914 | 0.03183314 | 0.10508645 | SLC9A3R2 |
| 4913   | ENSG00000065057 | 502.488962 | -0.14691607 | 0.11073151 | 0.1647848  | 0.35443739 | NTHL1    |
| 54887  | ENSG00000065060 | 1404.63916 | 0.04397768  | 0.09720378 | 0.64086865 | 0.82008361 | UHRF1BP1 |
| 2773   | ENSG00000065135 | 2132.80987 | 0.10797651  | 0.06749087 | 0.10414586 | 0.25686895 | GNAI3    |
| 3843   | ENSG00000065150 | 4952.42333 | -0.27756367 | 0.06862437 | 3.79E-05   | 0.00031934 | IPO5     |
| 4942   | ENSG00000065154 | 908.070296 | -0.52976378 | 0.09041802 | 1.68E-09   | 2.82E-08   | OAT      |
| 10885  | ENSG00000065183 | 1653.83878 | -0.23901763 | 0.09162329 | 0.00705336 | 0.03116675 | WDR3     |
| 5586   | ENSG00000065243 | 894.925505 | 0.35767923  | 0.13035554 | 0.00364464 | 0.01785624 | PKN2     |
| 57418  | ENSG00000065268 | 1122.70651 | 0.05319157  | 0.08434014 | 0.51831643 | 0.73217501 | WDR18    |
| 9697   | ENSG00000065308 | 1215.9754  | -1.27178699 | 0.0872218  | 3.71E-49   | 3.57E-47   | TRAM2    |
| 9423   | ENSG00000065320 | 4.86237717 | -0.06960162 | 0.3709929  | 0.5695269  | 0.77023951 | NTN1     |
| 9340   | ENSG00000065325 | 0          | NA          | NA         | NA         | NA         | GLP2R    |
| 55388  | ENSG00000065328 | 1227.23354 | -0.48199773 | 0.07728015 | 1.89E-10   | 3.52E-09   | MCM10    |
| 1606   | ENSG00000065357 | 306.365666 | 0.1035651   | 0.15540401 | 0.46645318 | 0.68929176 | DGKA     |
| 2065   | ENSG00000065361 | 24.5879142 | 1.23173398  | 1.00989471 | 0.00641753 | 0.02870885 | ERBB3    |
| 54763  | ENSG00000065371 | 1.36392096 | -0.07227669 | 0.39347707 | 0.1370696  | NA         | ROPN1    |
| 91526  | ENSG00000065413 | 1381.86056 | -0.23589266 | 0.09813003 | 0.01252331 | 0.04991209 | ANKRD44  |
| 3735   | ENSG00000065427 | 2922.70506 | -0.26600955 | 0.06190975 | 1.28E-05   | 0.00011972 | KARS1    |
| 23536  | ENSG00000065457 | 1422.8216  | 0.08783152  | 0.09885135 | 0.35808922 | 0.5884123  | ADAT1    |
| 10954  | ENSG00000065485 | 352.600706 | 0.16475272  | 0.14257277 | 0.21264373 | 0.42247662 | PDIA5    |
| 55633  | ENSG00000065491 | 351.572959 | -0.01840028 | 0.13293932 | 0.88244601 | 0.94823075 | TBC1D22B |
| 4710   | ENSG00000065518 | 1049.36517 | 0.29256694  | 0.09219762 | 0.00105208 | 0.00616639 | NDUFB4   |
| 23013  | ENSG00000065526 | 3521.24226 | 0.03004208  | 0.07357104 | 0.67815467 | 0.84291038 | SPEN     |
| 4638   | ENSG00000065534 | 262.831142 | 0.16256215  | 0.19492455 | 0.33332972 | 0.56278287 | MYLK     |
| 55854  | ENSG00000065548 | 1267.40523 | -0.18812996 | 0.07604273 | 0.01143352 | 0.04635085 | ZC3H15   |
| 6416   | ENSG00000065559 | 613.39846  | -0.01518168 | 0.12119336 | 0.89358592 | 0.95394425 | MAP2K4   |
| 55248  | ENSG00000065600 | 876.989307 | 0.05866885  | 0.09232563 | 0.51691078 | 0.7308667  | PACC1    |
| 9892   | ENSG00000065609 | 1560.15094 | -1.39664421 | 0.09368143 | 2.48E-51   | 2.53E-49   | SNAP91   |
| 9748   | ENSG00000065613 | 871.862951 | -0.04681491 | 0.11998025 | 0.68006901 | 0.84377539 | SLK      |
| 51167  | ENSG00000065615 | 570.676382 | -0.24631609 | 0.12269062 | 0.03349968 | 0.10951287 | CYB5R4   |
| 1308   | ENSG00000065618 | 11.4494889 | 0.26702873  | 0.47686744 | 0.08322585 | 0.21772162 | COL17A1  |
| 119391 | ENSG00000065621 | 13.411335  | -0.00092756 | 0.3551063  | 0.99145686 | 0.99723721 | GSTO2    |
| 55176  | ENSG00000065665 | 360.538985 | -0.26462301 | 0.13467112 | 0.03526614 | 0.11399155 | SEC61A2  |
| 5588   | ENSG00000065675 | 84.5938824 | -0.09702974 | 0.2288866  | 0.59723508 | 0.78921427 | PRKCQ    |
| 7089   | ENSG00000065717 | 79.974157  | 0.59588755  | 0.30580021 | 0.01145822 | 0.04643563 | TLE2     |

|        |                 |            |             |            |            |            |         |
|--------|-----------------|------------|-------------|------------|------------|------------|---------|
| 51665  | ENSG00000065802 | 2043.30945 | 0.22709345  | 0.08230328 | 0.00465938 | 0.02191608 | ASB1    |
| 83641  | ENSG00000065809 | 1076.41621 | -0.26201636 | 0.09156193 | 0.00312227 | 0.01567453 | FAM107B |
| 4199   | ENSG00000065833 | 536.289859 | 0.00188523  | 0.10371536 | 0.98630321 | 0.99540871 | ME1     |
| 23216  | ENSG00000065882 | 960.958607 | 0.15472671  | 0.10280972 | 0.11798158 | 0.28184882 | TBC1D1  |
| 8621   | ENSG00000065883 | 1704.22426 | -0.12483769 | 0.10190114 | 0.20252479 | 0.40813528 | CDK13   |
| 10797  | ENSG00000065911 | 2841.32792 | 0.20068249  | 0.10848733 | 0.05351149 | 0.15675002 | MTHFD2  |
| 84679  | ENSG00000065923 | 297.299305 | 0.32895373  | 0.15775486 | 0.02209493 | 0.07889909 | SLC9A7  |
| 55810  | ENSG00000065970 | 358.811343 | 0.0652617   | 0.1254651  | 0.5835797  | 0.77994081 | FOXJ2   |
| 4904   | ENSG00000065978 | 19961.4794 | -0.26024195 | 0.05094519 | 2.48E-07   | 3.11E-06   | YBX1    |
| 5141   | ENSG00000065989 | 45.532229  | 0.4810079   | 0.35383614 | 0.0473594  | 0.14263366 | PDE4A   |
| 5525   | ENSG00000066027 | 317.738574 | -0.13606619 | 0.12810299 | 0.25881671 | 0.48030339 | PPP2R5A |
| 1496   | ENSG00000066032 | 810.834777 | -0.79066117 | 0.10302844 | 3.17E-15   | 8.86E-14   | CTNNA2  |
| 1994   | ENSG00000066044 | 2770.39049 | 0.19603842  | 0.06670241 | 0.0028199  | 0.01437112 | ELAVL1  |
| 7075   | ENSG00000066056 | 0          | NA          | NA         | NA         | NA         | TIE1    |
| 57609  | ENSG00000066084 | 1601.08568 | -0.28853912 | 0.08055587 | 0.00024    | 0.00167307 | DIP2B   |
| 6602   | ENSG00000066117 | 3068.74848 | 0.18884169  | 0.0730727  | 0.00838562 | 0.03592544 | SMARCD1 |
| 9682   | ENSG00000066135 | 1693.29473 | 0.13894396  | 0.09067111 | 0.11466058 | 0.27560769 | KDM4A   |
| 4802   | ENSG00000066136 | 817.789482 | 0.02577692  | 0.09062973 | 0.77078419 | 0.89494676 | NFYC    |
| 84217  | ENSG00000066185 | 7.83365596 | -0.05360092 | 0.35653347 | 0.70568456 | 0.85810136 | ZMYND12 |
| 6550   | ENSG00000066230 | 161.112239 | -0.22375812 | 0.17289501 | 0.14638876 | 0.32736169 | SLC9A3  |
| 25791  | ENSG00000066248 | 4.69270454 | 0.05675457  | 0.37647739 | 0.56328855 | 0.76608585 | NGEF    |
| 259266 | ENSG00000066279 | 4313.08726 | -0.23062646 | 0.06214274 | 0.0001658  | 0.00120056 | ASPM    |
| 8832   | ENSG00000066294 | 0          | NA          | NA         | NA         | NA         | CD84    |
| 64834  | ENSG00000066322 | 498.300514 | 0.09741164  | 0.13920885 | 0.45327661 | 0.67649496 | ELOVL1  |
| 6688   | ENSG00000066336 | 0.98382358 | 0.0055225   | 0.38090519 | 0.92055612 | NA         | SPI1    |
| 30834  | ENSG00000066379 | 308.48488  | 0.10873336  | 0.1420753  | 0.41050943 | 0.63818422 | POLR1H  |
| 744    | ENSG00000066382 | 356.471644 | -1.15421454 | 0.14060174 | 2.43E-17   | 7.68E-16   | MPPED2  |
| 51208  | ENSG00000066405 | 14.8028961 | -0.00294003 | 0.32927279 | 0.98425525 | 0.99457273 | CLDN18  |
| 27107  | ENSG00000066422 | 793.357869 | -0.15663786 | 0.10495241 | 0.11993794 | 0.28511487 | ZBTB11  |
| 4287   | ENSG00000066427 | 295.385633 | -0.1328854  | 0.16690905 | 0.37528349 | 0.60449338 | ATXN3   |
| 9950   | ENSG00000066455 | 470.381612 | 0.01763512  | 0.11173048 | 0.86985598 | 0.9432116  | GOLGA5  |
| 2263   | ENSG00000066468 | 77.1809794 | 1.74910838  | 0.33074966 | 8.23E-09   | 1.25E-07   | FGFR2   |
| 55631  | ENSG00000066557 | 522.053428 | 0.07096339  | 0.10822041 | 0.49499404 | 0.71386797 | LRRC40  |
| 51015  | ENSG00000066583 | 641.017598 | 0.52110061  | 0.09880346 | 5.02E-08   | 6.92E-07   | ISOC1   |
| 2009   | ENSG00000066629 | 793.517596 | -0.8051814  | 0.14373099 | 3.78E-09   | 6.02E-08   | EML1    |
| 60487  | ENSG00000066651 | 327.578968 | -0.06640872 | 0.14263069 | 0.614807   | 0.80225838 | TRMT11  |
| 55623  | ENSG00000066654 | 910.189228 | -0.03314423 | 0.11507934 | 0.76160484 | 0.88972737 | THUMPD1 |
| 91283  | ENSG00000066697 | 540.204362 | -0.00851921 | 0.11935972 | 0.93948005 | 0.97474024 | MSANTD3 |



|        |                 |            |             |            |            |            |          |
|--------|-----------------|------------|-------------|------------|------------|------------|----------|
| 26153  | ENSG00000066735 | 2239.80758 | -0.12157283 | 0.08069465 | 0.1225077  | 0.28962737 | KIF26A   |
| 55102  | ENSG00000066739 | 1446.67563 | -0.3596886  | 0.11976411 | 0.00150978 | 0.00842114 | ATG2B    |
| 10565  | ENSG00000066777 | 1260.9939  | -0.11324615 | 0.09338854 | 0.21054304 | 0.4192266  | ARFGEF1  |
| 348158 | ENSG00000066813 | 0          | NA          | NA         | NA         | NA         | ACSM2B   |
| 57623  | ENSG00000066827 | 207.849604 | -0.08003727 | 0.16779961 | 0.59473068 | 0.78785671 | ZFAT     |
| 9650   | ENSG00000066855 | 381.078602 | 0.07510212  | 0.15412956 | 0.59551648 | 0.78816266 | MTFR1    |
| 10734  | ENSG00000066923 | 406.246127 | 0.15138252  | 0.14956588 | 0.27139107 | 0.49479863 | STAG3    |
| 2235   | ENSG00000066926 | 739.17727  | 0.12237433  | 0.09589827 | 0.18757778 | 0.38786275 | FECH     |
| 4649   | ENSG00000066933 | 673.814876 | -0.53079599 | 0.12471346 | 7.26E-06   | 7.09E-05   | MYO9A    |
| 8653   | ENSG00000067048 | 0          | NA          | NA         | NA         | NA         | DDX3Y    |
| 5214   | ENSG00000067057 | 2168.77891 | -0.92773586 | 0.09907439 | 1.16E-21   | 4.69E-20   | PFKP     |
| 3422   | ENSG00000067064 | 1206.88081 | -0.23155836 | 0.11724604 | 0.03733871 | 0.11921467 | IDI1     |
| 6672   | ENSG00000067066 | 0          | NA          | NA         | NA         | NA         | SP100    |
| 1316   | ENSG00000067082 | 428.784198 | 0.15500571  | 0.1619172  | 0.29076165 | 0.51679428 | KLF6     |
| 8611   | ENSG00000067113 | 68.4823066 | 0.22617885  | 0.24143193 | 0.23945233 | 0.45732906 | PLPP1    |
| 4756   | ENSG00000067141 | 2155.3719  | 0.24392126  | 0.09361317 | 0.00710103 | 0.0313007  | NEO1     |
| 23471  | ENSG00000067167 | 1110.57695 | 0.29087731  | 0.08751372 | 0.00063004 | 0.00394742 | TRAM1    |
| 5255   | ENSG00000067177 | 754.567948 | 0.18008905  | 0.09679536 | 0.0542306  | 0.15841212 | PHKA1    |
| 7132   | ENSG00000067182 | 21.4017542 | 0.03486383  | 0.3360017  | 0.83297958 | 0.9239848  | TNFRSF1A |
| 782    | ENSG00000067191 | 469.224481 | -0.13165328 | 0.14294198 | 0.31953204 | 0.54726483 | CACNB1   |
| 7813   | ENSG00000067208 | 339.924787 | 0.1858592   | 0.13913341 | 0.15089983 | 0.33458345 | EVI5     |
| 9399   | ENSG00000067221 | 240.526851 | -0.31051449 | 0.18277907 | 0.05376317 | 0.15732467 | STOML1   |
| 5315   | ENSG00000067225 | 16335.8325 | 0.10169726  | 0.08309778 | 0.20552481 | 0.41249633 | PKM      |
| 54505  | ENSG00000067248 | 579.487487 | -0.35662355 | 0.11372374 | 0.00099328 | 0.00587207 | DHX29    |
| 30836  | ENSG00000067334 | 1063.14761 | -0.2342407  | 0.0867327  | 0.0054289  | 0.02496741 | DNTTIP2  |
| 79091  | ENSG00000067365 | 355.597026 | 0.19334079  | 0.12435905 | 0.09924115 | 0.24794665 | METTTL2  |
| 7158   | ENSG00000067369 | 3241.27528 | -0.229172   | 0.05847199 | 7.17E-05   | 0.0005674  | TP53BP1  |
| 7216   | ENSG00000067445 | 2126.12563 | 0.16496769  | 0.08538612 | 0.04735635 | 0.14263366 | TRO      |
| 51018  | ENSG00000067533 | 779.944177 | 0.24559048  | 0.12791192 | 0.04117839 | 0.12828422 | RRP15    |
| 387    | ENSG00000067560 | 5059.1076  | 0.04198217  | 0.06672532 | 0.52597028 | 0.73808697 | RHOA     |
| 1659   | ENSG00000067596 | 2038.38248 | 0.16209     | 0.0660245  | 0.01269084 | 0.05043796 | DHX8     |
| 5382   | ENSG00000067601 | 41.9520327 | 0.04226955  | 0.26189021 | 0.82769107 | 0.92210075 | PMS2P4   |
| 5590   | ENSG00000067606 | 825.816343 | -0.0048812  | 0.09703224 | 0.95773024 | 0.98264776 | PRKCZ    |
| 7544   | ENSG00000067646 | 0          | NA          | NA         | NA         | NA         | ZFY      |
| 55699  | ENSG00000067704 | 2798.39186 | 0.03385784  | 0.05986441 | 0.56750225 | 0.76896903 | IARS2    |
| 6857   | ENSG00000067715 | 949.939435 | 0.22136445  | 0.08599072 | 0.00815682 | 0.03511964 | SYT1     |
| 89795  | ENSG00000067798 | 4.60351858 | -0.03345196 | 0.37581887 | 0.68666263 | 0.84769738 | NAV3     |
| 3421   | ENSG00000067829 | 693.190618 | 0.28550484  | 0.0980937  | 0.00253864 | 0.01315056 | IDH3G    |

|        |                 |            |             |            |            |            |               |
|--------|-----------------|------------|-------------|------------|------------|------------|---------------|
| 79641  | ENSG00000067836 | 509.140247 | -0.09336163 | 0.11217582 | 0.38316841 | 0.61242739 | ROGDI         |
| 57595  | ENSG00000067840 | 2471.475   | -0.56901329 | 0.06284328 | 4.60E-20   | 1.73E-18   | PDZD4         |
| 492    | ENSG00000067842 | 272.941164 | -0.78356131 | 0.20262348 | 1.88E-05   | 0.00016926 | ATP2B3        |
| 6093   | ENSG00000067900 | 1289.70509 | -0.19450297 | 0.08187687 | 0.01480479 | 0.05705655 | ROCK1         |
| 865    | ENSG00000067955 | 1261.04809 | 0.10157601  | 0.09020137 | 0.24686755 | 0.46592963 | CBFB          |
| 5165   | ENSG00000067992 | 353.288903 | -0.2116745  | 0.20303078 | 0.21861688 | 0.43050004 | PDK3          |
| 8692   | ENSG00000068001 | 1370.18245 | 0.35902496  | 0.08632701 | 1.90E-05   | 0.00017141 | HYAL2         |
| 9759   | ENSG00000068024 | 774.733402 | -0.23792775 | 0.09986811 | 0.01332301 | 0.05247466 | HDAC4         |
| 11186  | ENSG00000068028 | 525.094579 | 0.12925926  | 0.11212139 | 0.22780028 | 0.44270325 | RASSF1        |
| 2261   | ENSG00000068078 | 16.1006639 | 1.57607468  | 0.75253213 | 0.00166665 | 0.00918252 | FGFR3         |
| 3430   | ENSG00000068079 | 0.63756822 | 0.03739676  | 0.38672729 | 0.3970149  | NA         | IFI35         |
| 63897  | ENSG00000068097 | 1017.82477 | -0.07226636 | 0.12630712 | 0.54326264 | 0.75131261 | HEATR6        |
| 80347  | ENSG00000068120 | 1198.02943 | 0.07347805  | 0.08229667 | 0.36021419 | 0.59016007 | COASY         |
| 79990  | ENSG00000068137 | 775.747067 | 0.07337566  | 0.11098837 | 0.49035394 | 0.70985933 | PLEKHH3       |
| 4205   | ENSG00000068305 | 795.020067 | -0.0762564  | 0.11758989 | 0.49269686 | 0.71179682 | MEF2A         |
| 55593  | ENSG00000068308 | 1301.70977 | 0.10068918  | 0.07452513 | 0.16852594 | 0.35979283 | OTUD5         |
| 7030   | ENSG00000068323 | 785.125103 | -0.00579835 | 0.10620291 | 0.95373622 | 0.98083958 | TFE3          |
| 4943   | ENSG00000068354 | 366.768743 | -0.08229625 | 0.12207731 | 0.4762782  | 0.69819414 | TBC1D25       |
| 2182   | ENSG00000068366 | 762.889038 | -0.8572206  | 0.11946526 | 1.19E-13   | 2.89E-12   | ACSL4         |
| 3632   | ENSG00000068383 | 264.162269 | 0.00544941  | 0.14367168 | 0.96846335 | 0.98817646 | INPP5A        |
| 27238  | ENSG00000068394 | 376.06394  | 0.33164902  | 0.12942051 | 0.00637486 | 0.02854372 | GPLOW         |
| 56850  | ENSG00000068400 | 1400.59103 | -0.02036236 | 0.07745264 | 0.78763991 | 0.90351292 | GRIPAP1       |
| 24140  | ENSG00000068438 | 683.157415 | 0.03293598  | 0.09541972 | 0.72235104 | 0.86754018 | FTSJ1         |
| 55771  | ENSG00000068489 | 2777.6694  | -0.89390983 | 0.07352523 | 8.22E-35   | 5.53E-33   | PRR11         |
| 65055  | ENSG00000068615 | 176.737115 | -0.91775351 | 0.18631778 | 1.20E-07   | 1.57E-06   | REEP1         |
| 23250  | ENSG00000068650 | 1393.43298 | 0.32198682  | 0.10648598 | 0.00160035 | 0.00887144 | ATP11A        |
| 25885  | ENSG00000068654 | 2290.92942 | -0.12421763 | 0.06525646 | 0.05322597 | 0.15616729 | POLR1A        |
| 9741   | ENSG00000068697 | 2188.71858 | 0.10356757  | 0.07703335 | 0.17024841 | 0.36213659 | LAPTM4A       |
| 57217  | ENSG00000068724 | 414.547037 | 0.14214244  | 0.12904492 | 0.24171231 | 0.45967442 | TTC7A         |
| 51447  | ENSG00000068745 | 1908.54325 | -0.0049599  | 0.06874508 | 0.93539045 | 0.97325384 | IP6K2         |
| 286749 | ENSG00000068781 | 10.3533668 | 0.41489235  | 0.64348615 | 0.04412839 | 0.13518014 | STON1-GTF2AIL |
| 55133  | ENSG00000068784 | 552.777088 | -0.49622883 | 0.11198091 | 3.67E-06   | 3.77E-05   | SRBD1         |
| 3796   | ENSG00000068796 | 2485.3682  | -0.27668353 | 0.07624887 | 0.00020666 | 0.00146589 | KIF2A         |
| 10235  | ENSG00000068831 | 151.839499 | -0.07287967 | 0.17416704 | 0.63763668 | 0.81742743 | RASGRP2       |
| 23198  | ENSG00000068878 | 2051.57876 | 0.01294517  | 0.07254034 | 0.85659391 | 0.93595581 | PSME4         |
| 57560  | ENSG00000068885 | 830.003339 | -0.08196314 | 0.10076589 | 0.39852856 | 0.62742474 | IFT80         |
| 22933  | ENSG00000068903 | 407.567552 | -1.00756519 | 0.13551936 | 1.33E-14   | 3.50E-13   | SIRT2         |
| 27248  | ENSG00000068912 | 699.109603 | 0.0903599   | 0.09647011 | 0.33345519 | 0.56294681 | ERLEC1        |

|        |                 |            |             |            |            |            |         |
|--------|-----------------|------------|-------------|------------|------------|------------|---------|
| 5526   | ENSG00000068971 | 441.292882 | -0.04012566 | 0.11543972 | 0.71372977 | 0.86192204 | PPP2R5B |
| 5837   | ENSG00000068976 | 9.22977598 | 0.14544713  | 0.37924805 | 0.35591545 | 0.58600518 | PYGM    |
| 8712   | ENSG00000068985 | 0.173124   | -0.01911262 | 0.38486262 | 0.84537521 | NA         | PAGE1   |
| 5307   | ENSG00000069011 | 0          | NA          | NA         | NA         | NA         | PITX1   |
| 57113  | ENSG00000069018 | 0          | NA          | NA         | NA         | NA         | TRPC7   |
| 375449 | ENSG00000069020 | 701.833859 | -0.06174184 | 0.11703575 | 0.57861069 | 0.77656626 | MAST4   |
| 221395 | ENSG00000069122 | 0          | NA          | NA         | NA         | NA         | ADGRF5  |
| 54549  | ENSG00000069188 | 13.5669859 | 0.1662607   | 0.37584956 | 0.33036999 | 0.55911802 | SDK2    |
| 8756   | ENSG00000069206 | 0          | NA          | NA         | NA         | NA         | ADAM7   |
| 55746  | ENSG00000069248 | 1926.57973 | -0.0792401  | 0.09314323 | 0.37955811 | 0.60845927 | NUP133  |
| 64710  | ENSG00000069275 | 15156.0847 | -0.35758215 | 0.04777685 | 4.41E-14   | 1.12E-12   | NUCKS1  |
| 55737  | ENSG00000069329 | 1806.91633 | -0.54665588 | 0.08267587 | 1.33E-11   | 2.80E-10   | VPS35   |
| 10294  | ENSG00000069345 | 1129.4183  | -0.10545552 | 0.09478533 | 0.25009929 | 0.46992802 | DNAJA2  |
| 602    | ENSG00000069399 | 10.1620828 | 4.37330518  | 1.23636141 | 6.35E-05   | 0.00050743 | BCL3    |
| 8514   | ENSG00000069424 | 400.053405 | -0.31514914 | 0.16164646 | 0.03119534 | 0.10344569 | KCNAB2  |
| 10060  | ENSG00000069431 | 45.8244256 | 2.72650378  | 0.41119329 | 1.70E-12   | 3.81E-11   | ABCC9   |
| 51083  | ENSG00000069482 | 771.510594 | -0.55639801 | 0.14234335 | 2.99E-05   | 0.0002571  | GAL     |
| 29121  | ENSG00000069493 | 107.511817 | 0.32698112  | 0.21769564 | 0.07331913 | 0.19810043 | CLEC2D  |
| 139341 | ENSG00000069509 | 218.74431  | -0.01715422 | 0.14823684 | 0.89896939 | 0.95556135 | FUNDC1  |
| 4129   | ENSG00000069535 | 26.0526863 | 0.94074456  | 0.51636464 | 0.00585121 | 0.02658299 | MAOB    |
| 6095   | ENSG00000069667 | 353.361378 | 0.01251864  | 0.19907701 | 0.94290365 | 0.97652077 | RORA    |
| 1815   | ENSG00000069696 | 5.84790272 | -0.04701102 | 0.36077718 | 0.72388179 | 0.86794586 | DRD4    |
| 7049   | ENSG00000069702 | 0          | NA          | NA         | NA         | NA         | TGFBR3  |
| 8399   | ENSG00000069764 | 0.97083619 | -0.06756019 | 0.39188254 | 0.1968697  | NA         | PLA2G10 |
| 54626  | ENSG00000069812 | 2.41875988 | 0.01519793  | 0.37877735 | 0.81813737 | NA         | HES2    |
| 483    | ENSG00000069849 | 1203.60499 | -0.131162   | 0.09138512 | 0.13841995 | 0.31479274 | ATP1B3  |
| 4734   | ENSG00000069869 | 353.959514 | 0.39364953  | 0.14084823 | 0.00265204 | 0.01363917 | NEDD4   |
| 9488   | ENSG00000069943 | 106.308801 | 0.19961567  | 0.21846124 | 0.27089411 | 0.4942105  | PIGB    |
| 5597   | ENSG00000069956 | 1220.20018 | -0.12011262 | 0.08749854 | 0.15784049 | 0.34484696 | MAPK6   |
| 10681  | ENSG00000069966 | 466.814993 | 0.00144193  | 0.11086451 | 0.99002031 | 0.99665126 | GNB5    |
| 5873   | ENSG00000069974 | 134.146443 | 0.13225685  | 0.21433932 | 0.45959276 | 0.68271342 | RAB27A  |
| 27440  | ENSG00000069998 | 1135.13869 | -0.17491128 | 0.08129481 | 0.02744302 | 0.09350327 | HDHD5   |
| 7353   | ENSG00000070010 | 1050.4857  | 0.32751343  | 0.10814555 | 0.00155628 | 0.00866346 | UFD1    |
| 4040   | ENSG00000070018 | 1949.35838 | 0.20247865  | 0.0919208  | 0.02308154 | 0.08171625 | LRP6    |
| 2984   | ENSG00000070019 | 0.173733   | 0.01914545  | 0.38484597 | 0.78225479 | NA         | GUCY2C  |
| 6343   | ENSG00000070031 | 0          | NA          | NA         | NA         | NA         | SCT     |
| 57661  | ENSG00000070047 | 1932.99978 | 0.03352335  | 0.0734507  | 0.64254706 | 0.82136499 | PHRF1   |
| 8518   | ENSG00000070061 | 2109.86293 | -0.17483353 | 0.07885134 | 0.02313241 | 0.08185251 | ELP1    |

|       |                 |            |             |            |            |            |            |
|-------|-----------------|------------|-------------|------------|------------|------------|------------|
| 4925  | ENSG00000070081 | 426.744147 | 0.03546246  | 0.11582964 | 0.74948217 | 0.88205755 | NUCB2      |
| 5217  | ENSG00000070087 | 4641.88555 | 0.32920296  | 0.06479684 | 2.46E-07   | 3.09E-06   | PFN2       |
| 5774  | ENSG00000070159 | 18.0309604 | 0.12305305  | 0.37076356 | 0.41010226 | 0.63800117 | PTPN3      |
| 6710  | ENSG00000070182 | 292.155948 | -0.36495655 | 0.13687879 | 0.00423721 | 0.02025692 | SPTB       |
| 27071 | ENSG00000070190 | 0.74967325 | -0.04343647 | 0.38756608 | 0.34471339 | NA         | DAPP1      |
| 2255  | ENSG00000070193 | 0          | NA          | NA         | NA         | NA         | FGF10      |
| 23446 | ENSG00000070214 | 926.553002 | -0.02999628 | 0.10079527 | 0.75710417 | 0.88697677 | SLC44A1    |
| 54916 | ENSG00000070269 | 313.279347 | 0.30354657  | 0.16605667 | 0.04258701 | 0.13177264 | TMEM260    |
| 23293 | ENSG00000070366 | 1005.56209 | 0.02440568  | 0.11973397 | 0.83300404 | 0.9239848  | SMG6       |
| 10640 | ENSG00000070367 | 1923.35646 | -0.12938628 | 0.08778566 | 0.12932841 | 0.30080605 | EXOC5      |
| 8218  | ENSG00000070371 | 255.14724  | 0.41616785  | 0.1779619  | 0.00884925 | 0.03748274 | CLTCL1     |
| 27006 | ENSG00000070388 | 8.76733142 | 0.22632753  | 0.43057604 | 0.16796082 | 0.35893393 | FGF22      |
| 10272 | ENSG00000070404 | 123.904378 | 0.30518756  | 0.22415515 | 0.09999335 | 0.24919835 | FSTL3      |
| 9993  | ENSG00000070413 | 1925.26211 | -0.07161079 | 0.07240117 | 0.31336324 | 0.54126787 | DGCR2      |
| 55658 | ENSG00000070423 | 885.249375 | -0.14243821 | 0.08918708 | 0.09858639 | 0.24665406 | RNF126     |
| 4335  | ENSG00000070444 | 762.947709 | -0.24058966 | 0.09415053 | 0.00820551 | 0.03530631 | MNT        |
| 79364 | ENSG00000070476 | 616.414867 | 0.0752888   | 0.09993766 | 0.43560821 | 0.66073906 | ZXDC       |
| 23210 | ENSG00000070495 | 721.019327 | -0.03525393 | 0.10835829 | 0.73362788 | 0.87316412 | JMJD6      |
| 5423  | ENSG00000070501 | 434.348914 | 0.06934981  | 0.11649066 | 0.53347137 | 0.74467543 | POLB       |
| 55808 | ENSG00000070526 | 0          | NA          | NA         | NA         | NA         | ST6GALNAC1 |
| 55062 | ENSG00000070540 | 138.655264 | 2.41118072  | 0.231852   | 1.86E-26   | 9.28E-25   | WIPI1      |
| 22844 | ENSG00000070601 | 41.7018318 | 0.48214785  | 0.40062036 | 0.05520879 | 0.16065449 | FRMPD1     |
| 57704 | ENSG00000070610 | 3015.11815 | -0.04640587 | 0.06177783 | 0.44602748 | 0.67039282 | GBA2       |
| 3340  | ENSG00000070614 | 3402.96847 | -0.06514012 | 0.07334536 | 0.364816   | 0.59432668 | NDST1      |
| 440   | ENSG00000070669 | 3028.52805 | 0.45204064  | 0.28480225 | 0.03859701 | 0.12224852 | ASNS       |
| 10947 | ENSG00000070718 | 660.474645 | -0.26742685 | 0.11455371 | 0.0140968  | 0.05488235 | AP3M2      |
| 1258  | ENSG00000070729 | 0          | NA          | NA         | NA         | NA         | CNGB1      |
| 10610 | ENSG00000070731 | 4.81375467 | 0.1556572   | 0.41257938 | 0.15730146 | 0.34408611 | ST6GALNAC2 |
| 1103  | ENSG00000070748 | 6.47669384 | -0.13593459 | 0.38354791 | 0.3468015  | 0.57746889 | CHAT       |
| 26986 | ENSG00000070756 | 15901.9091 | -0.58119017 | 0.06363414 | 2.15E-20   | 8.20E-19   | PABPC1     |
| 10420 | ENSG00000070759 | 94.5671766 | 0.26357231  | 0.24201007 | 0.17303076 | 0.36578929 | TESK2      |
| 29105 | ENSG00000070761 | 750.167084 | -0.03901886 | 0.09808595 | 0.68004629 | 0.84377539 | CFAP20     |
| 1459  | ENSG00000070770 | 1084.19274 | -0.07006034 | 0.08804964 | 0.41305857 | 0.6403849  | CSNK2A2    |
| 11099 | ENSG00000070778 | 808.980955 | 0.28616757  | 0.09850973 | 0.00258461 | 0.01335035 | PTPN21     |
| 8891  | ENSG00000070785 | 349.920402 | 0.11676949  | 0.12462526 | 0.32339177 | 0.55106868 | EIF2B3     |
| 815   | ENSG00000070808 | 0.68744131 | -0.03071099 | 0.38429993 | 0.55668345 | NA         | CAMK2A     |
| 6949  | ENSG00000070814 | 3716.30769 | -0.06870127 | 0.05499685 | 0.20672574 | 0.41386868 | TCOF1      |
| 998   | ENSG00000070831 | 3076.73866 | -0.14677917 | 0.0575316  | 0.00976434 | 0.04073267 | CDC42      |

|        |                 |            |             |            |            |            |          |
|--------|-----------------|------------|-------------|------------|------------|------------|----------|
| 26031  | ENSG00000070882 | 382.533041 | 0.0211882   | 0.14053014 | 0.87299125 | 0.94439555 | OSBPL3   |
| 2046   | ENSG00000070886 | 201.986312 | -1.60130775 | 0.21016708 | 1.86E-15   | 5.24E-14   | EPHA8    |
| 6559   | ENSG00000070915 | 1.41099212 | -0.02065922 | 0.37959921 | 0.75912992 | NA         | SLC12A3  |
| 56852  | ENSG00000070950 | 640.289048 | 0.01029006  | 0.1078947  | 0.92175849 | 0.96719317 | RAD18    |
| 490    | ENSG00000070961 | 817.570686 | -0.2426238  | 0.11638915 | 0.02814094 | 0.09543867 | ATP2B1   |
| 29850  | ENSG00000070985 | 0.52978646 | 0.01332752  | 0.38290755 | 0.74558738 | NA         | TRPM5    |
| 8440   | ENSG00000071051 | 1321.6118  | -0.12067798 | 0.07950796 | 0.11965681 | 0.28461708 | NCK2     |
| 9448   | ENSG00000071054 | 6264.79824 | -0.06823398 | 0.05753171 | 0.22645993 | 0.44088684 | MAP4K4   |
| 11320  | ENSG00000071073 | 256.89568  | 0.3047879   | 0.20733249 | 0.08366533 | 0.21849678 | MGAT4A   |
| 6160   | ENSG00000071082 | 9802.24134 | -0.02959142 | 0.05869797 | 0.60546635 | 0.79536863 | RPL31    |
| 9948   | ENSG00000071127 | 2186.97424 | 0.01264084  | 0.06837141 | 0.8518234  | 0.93275912 | WDR1     |
| 23161  | ENSG00000071189 | 713.694434 | -0.0228271  | 0.16366874 | 0.85973351 | 0.93751308 | SNX13    |
| 54860  | ENSG00000071203 | 0          | NA          | NA         | NA         | NA         | MS4A12   |
| 79658  | ENSG00000071205 | 115.141923 | 0.98580268  | 0.24924737 | 9.36E-06   | 8.93E-05   | ARHGAP10 |
| 6196   | ENSG00000071242 | 3609.60685 | 0.44644599  | 0.05511737 | 2.59E-16   | 7.71E-15   | RPS6KA2  |
| 54556  | ENSG00000071243 | 379.711828 | 0.13066525  | 0.14445686 | 0.32860738 | 0.55708539 | ING3     |
| 22846  | ENSG00000071246 | 2050.8964  | 0.22971517  | 0.07806367 | 0.00261172 | 0.01346931 | VASH1    |
| 29995  | ENSG00000071282 | 619.188481 | 0.14250355  | 0.10893239 | 0.17203619 | 0.36458    | LMCD1    |
| 114049 | ENSG00000071462 | 1511.79218 | 0.41199507  | 0.09319058 | 5.04E-06   | 5.06E-05   | BUD23    |
| 6400   | ENSG00000071537 | 1420.56722 | 0.29884612  | 0.12243976 | 0.00969126 | 0.0404533  | SEL1L    |
| 9319   | ENSG00000071539 | 1105.01941 | -0.08952824 | 0.08832065 | 0.29605562 | 0.52267989 | TRIP13   |
| 537    | ENSG00000071553 | 2096.30511 | -0.26928498 | 0.0782546  | 0.00042631 | 0.00280345 | ATP6AP1  |
| 6929   | ENSG00000071564 | 6132.53295 | 0.30831143  | 0.05039    | 6.05E-10   | 1.08E-08   | TCF3     |
| 28951  | ENSG00000071575 | 1261.36482 | -0.67953333 | 0.08482264 | 2.79E-16   | 8.27E-15   | TRIB2    |
| 26528  | ENSG00000071626 | 2814.14047 | -0.24280325 | 0.05876876 | 2.84E-05   | 0.00024625 | DAZAP1   |
| 53615  | ENSG00000071655 | 3213.30443 | -0.01038585 | 0.06575371 | 0.87683389 | 0.94566867 | MBD3     |
| 51052  | ENSG00000071677 | 0          | NA          | NA         | NA         | NA         | PRLH     |
| 6596   | ENSG00000071794 | 1338.83224 | -0.47090608 | 0.09344588 | 1.97E-07   | 2.51E-06   | HLTF     |
| 9130   | ENSG00000071859 | 893.292155 | -0.23330411 | 0.09139386 | 0.00838973 | 0.03593528 | FAM50A   |
| 60343  | ENSG00000071889 | 387.311116 | 0.11630057  | 0.11961483 | 0.30625127 | 0.53396829 | FAM3A    |
| 29894  | ENSG00000071894 | 3062.10645 | 0.36764632  | 0.06239772 | 2.26E-09   | 3.71E-08   | CPSF1    |
| 140469 | ENSG00000071909 | 0.64211671 | 0.00270554  | 0.381949   | 0.95310032 | NA         | MYO3B    |
| 79901  | ENSG00000071967 | 97.7833713 | 1.7619506   | 0.31003768 | 8.13E-10   | 1.42E-08   | CYBRD1   |
| 28513  | ENSG00000071991 | 0.29863895 | -0.02292439 | 0.3852726  | 0.68753245 | NA         | CDH19    |
| 5134   | ENSG00000071994 | 1872.24056 | -0.11230962 | 0.07121147 | 0.10815    | 0.26372861 | PDCD2    |
| 55117  | ENSG00000072041 | 1368.36171 | -0.28032158 | 0.07355256 | 9.97E-05   | 0.00075866 | SLC6A15  |
| 51109  | ENSG00000072042 | 1586.59312 | 0.07479663  | 0.07823614 | 0.32834517 | 0.55683119 | RDH11    |
| 5566   | ENSG00000072062 | 1135.31907 | -0.02346437 | 0.10033487 | 0.80759653 | 0.91292321 | PRKACA   |

|       |                 |            |             |            |            |            |          |
|-------|-----------------|------------|-------------|------------|------------|------------|----------|
| 22859 | ENSG00000072071 | 2494.89326 | -0.41806649 | 0.09956042 | 1.32E-05   | 0.0001233  | ADGRL1   |
| 6694  | ENSG00000072080 | 0          | NA          | NA         | NA         | NA         | SPP2     |
| 87    | ENSG00000072110 | 2303.7278  | -0.50723767 | 0.07985425 | 8.34E-11   | 1.62E-09   | ACTN1    |
| 23503 | ENSG00000072121 | 588.369671 | -0.18602269 | 0.12248176 | 0.10791665 | 0.2634186  | ZFYVE26  |
| 27330 | ENSG00000072133 | 1695.48937 | 0.41784285  | 0.08047376 | 1.06E-07   | 1.39E-06   | RPS6KA6  |
| 22905 | ENSG00000072134 | 1443.16292 | 0.1182982   | 0.08735735 | 0.16426112 | 0.35369445 | EPN2     |
| 26469 | ENSG00000072135 | 599.448107 | 0.07982308  | 0.11483869 | 0.46721197 | 0.69011879 | PTPN18   |
| 55679 | ENSG00000072163 | 10.0559359 | 0.06238189  | 0.35028122 | 0.68718588 | 0.84792387 | LIMS2    |
| 55515 | ENSG00000072182 | 412.841993 | -0.72563404 | 0.14203014 | 6.86E-08   | 9.24E-07   | ASIC4    |
| 10290 | ENSG00000072195 | 1254.27088 | -0.08366706 | 0.10945365 | 0.42394197 | 0.64969559 | SPEG     |
| 84708 | ENSG00000072201 | 28.3971416 | -0.1195768  | 0.30314954 | 0.539358   | 0.74850934 | LNX1     |
| 224   | ENSG00000072210 | 1074.11513 | -0.33037058 | 0.087145   | 9.21E-05   | 0.00070688 | ALDH3A2  |
| 7037  | ENSG00000072274 | 2091.27501 | 0.33683504  | 0.20297214 | 0.05333139 | 0.15638409 | TFRC     |
| 6720  | ENSG00000072310 | 2880.99457 | -0.67064184 | 0.06354504 | 1.32E-26   | 6.65E-25   | SREBF1   |
| 7224  | ENSG00000072315 | 3.43424896 | 0.07901165  | 0.37745415 | 0.48768524 | 0.70749307 | TRPC5    |
| 27125 | ENSG00000072364 | 3255.56012 | -0.19089899 | 0.07282126 | 0.00749382 | 0.03270508 | AFF4     |
| 7321  | ENSG00000072401 | 490.484788 | 0.06065207  | 0.10754539 | 0.55758289 | 0.76266422 | UBE2D1   |
| 64398 | ENSG00000072415 | 416.262618 | -0.12431758 | 0.13221646 | 0.31530138 | 0.54311334 | MPP5     |
| 9886  | ENSG00000072422 | 820.790826 | 0.24812099  | 0.10917666 | 0.01740348 | 0.06513582 | RHOBTB1  |
| 8243  | ENSG00000072501 | 7661.63632 | -0.69273237 | 0.05364369 | 8.40E-39   | 6.31E-37   | SMC1A    |
| 3028  | ENSG00000072506 | 1817.64429 | -0.01529178 | 0.07431098 | 0.83290372 | 0.9239848  | HSD17B10 |
| 2011  | ENSG00000072518 | 1090.52336 | -0.0034538  | 0.09736942 | 0.96950196 | 0.98853525 | MARK2    |
| 3161  | ENSG00000072571 | 1022.94365 | -0.34878189 | 0.13965664 | 0.00716702 | 0.03152155 | HMMR     |
| 55743 | ENSG00000072609 | 1032.36645 | 0.14140291  | 0.08840891 | 0.10003584 | 0.24927294 | CHFR     |
| 29953 | ENSG00000072657 | 5.88164387 | 5.88308178  | 2.68072459 | 7.13E-05   | 0.00056456 | TRHDE    |
| 8974  | ENSG00000072682 | 255.238779 | 0.30893436  | 0.15280009 | 0.02735726 | 0.09335537 | P4HA2    |
| 2213  | ENSG00000072694 | 0          | NA          | NA         | NA         | NA         | FCGR2B   |
| 4775  | ENSG00000072736 | 1413.3291  | -0.28253484 | 0.09958153 | 0.00319127 | 0.01593228 | NFATC3   |
| 51095 | ENSG00000072756 | 473.213469 | -0.21232016 | 0.11549664 | 0.05307819 | 0.15584893 | TRNT1    |
| 37    | ENSG00000072778 | 2143.237   | 0.35946122  | 0.07066402 | 2.16E-07   | 2.72E-06   | ACADVL   |
| 6793  | ENSG00000072786 | 738.721236 | 0.1396393   | 0.10700843 | 0.17399895 | 0.36724886 | STK10    |
| 23291 | ENSG00000072803 | 2001.67067 | -0.24099939 | 0.08568363 | 0.00381437 | 0.01850295 | FBXW11   |
| 9744  | ENSG00000072818 | 24.011114  | 0.10505754  | 0.34428877 | 0.53911066 | 0.74843996 | ACAP1    |
| 1400  | ENSG00000072832 | 8280.0118  | -0.88483889 | 0.0517195  | 2.11E-66   | 3.17E-64   | CRMP1    |
| 2121  | ENSG00000072840 | 640.501481 | 0.78815987  | 0.13918001 | 2.79E-09   | 4.50E-08   | EVC      |
| 51009 | ENSG00000072849 | 737.476587 | 0.09606153  | 0.0962525  | 0.3030654  | 0.53032436 | DERL2    |
| 54847 | ENSG00000072858 | 31.5633262 | 0.60512385  | 0.74399499 | 0.02816306 | 0.09547008 | SIDT1    |
| 54820 | ENSG00000072864 | 876.734251 | -0.36525629 | 0.09559419 | 7.63E-05   | 0.00059871 | NDE1     |

|       |                 |            |             |            |            |            |         |
|-------|-----------------|------------|-------------|------------|------------|------------|---------|
| 10335 | ENSG00000072952 | 267.365782 | -0.01950353 | 0.14213902 | 0.88156584 | 0.94772508 | IRAG1   |
| 79041 | ENSG00000072954 | 186.838923 | 0.17448433  | 0.16527796 | 0.24206059 | 0.46022827 | TMEM38A |
| 8907  | ENSG00000072958 | 2101.93321 | -0.09533768 | 0.08027072 | 0.22341436 | 0.43670355 | AP1M1   |
| 5817  | ENSG00000073008 | 1276.28796 | -0.48693144 | 0.08627439 | 6.86E-09   | 1.05E-07   | PVR     |
| 7515  | ENSG00000073050 | 649.104794 | 0.17588985  | 0.10660144 | 0.0851446  | 0.2214571  | XRCC1   |
| 949   | ENSG00000073060 | 1245.35684 | -0.52195871 | 0.09286986 | 7.11E-09   | 1.09E-07   | SCARB1  |
| 54905 | ENSG00000073067 | 7.2489666  | 0.0485584   | 0.35520935 | 0.74022554 | 0.87736188 | CYP2W1  |
| 4171  | ENSG00000073111 | 4461.12354 | -0.13124292 | 0.08305308 | 0.10461186 | 0.25761097 | MCM2    |
| 54456 | ENSG00000073146 | 2.31284792 | -0.02179237 | 0.37596095 | 0.79044881 | NA         | MOV10L1 |
| 56666 | ENSG00000073150 | 97.9047859 | 0.66309253  | 0.25586326 | 0.00202449 | 0.01081181 | PANX2   |
| 83642 | ENSG00000073169 | 672.876421 | 0.13690032  | 0.10449262 | 0.17284379 | 0.36574454 | SELENOO |
| 8626  | ENSG00000073282 | 0          | NA          | NA         | NA         | NA         | TP63    |
| 80216 | ENSG00000073331 | 45.4628923 | 0.18236104  | 0.28592593 | 0.36708071 | 0.59632206 | ALPK1   |
| 3993  | ENSG00000073350 | 199.795585 | -0.51546255 | 0.17025788 | 0.00085567 | 0.00516474 | LLGL2   |
| 5151  | ENSG00000073417 | 738.250233 | 0.84272422  | 0.11606111 | 6.54E-14   | 1.63E-12   | PDE8A   |
| 1183  | ENSG00000073464 | 639.559848 | -0.47130097 | 0.12345106 | 5.48E-05   | 0.00044339 | CLCN4   |
| 54475 | ENSG00000073536 | 747.340547 | -0.34524892 | 0.11020249 | 0.00103298 | 0.0060739  | NLE1    |
| 6389  | ENSG00000073578 | 1355.97423 | -0.09659195 | 0.07278058 | 0.17605874 | 0.37037488 | SDHA    |
| 6605  | ENSG00000073584 | 3699.44113 | 0.14256846  | 0.06916246 | 0.03625272 | 0.11649724 | SMARCE1 |
| 54752 | ENSG00000073598 | 1.29743315 | -0.01435995 | 0.38049881 | 0.81092726 | NA         | FNDC8   |
| 55876 | ENSG00000073605 | 238.875138 | 0.5361726   | 0.19483417 | 0.00190128 | 0.01023367 | GSDMB   |
| 5927  | ENSG00000073614 | 2009.0231  | -0.25176124 | 0.09256331 | 0.00495143 | 0.02304394 | KDM5A   |
| 4185  | ENSG00000073670 | 418.359885 | 0.28689377  | 0.15320232 | 0.04070691 | 0.12700504 | ADAM11  |
| 5523  | ENSG00000073711 | 179.274606 | 0.4391798   | 0.18723487 | 0.00800359 | 0.03451983 | PPP2R3A |
| 10979 | ENSG00000073712 | 1877.97123 | 0.56097801  | 0.07431959 | 1.52E-14   | 3.97E-13   | FERMT2  |
| 8647  | ENSG00000073734 | 0          | NA          | NA         | NA         | NA         | ABCB11  |
| 10170 | ENSG00000073737 | 0          | NA          | NA         | NA         | NA         | DHRS9   |
| 922   | ENSG00000073754 | 0.14931947 | -0.01844332 | 0.38480212 | 0.84537521 | NA         | CD5L    |
| 5743  | ENSG00000073756 | 0          | NA          | NA         | NA         | NA         | PTGS2   |
| 10644 | ENSG00000073792 | 0          | NA          | NA         | NA         | NA         | IGF2BP2 |
| 9175  | ENSG00000073803 | 511.759872 | -0.33816737 | 0.12025443 | 0.00296583 | 0.01499162 | MAP3K13 |
| 6480  | ENSG00000073849 | 140.890286 | 0.64256943  | 0.2031591  | 0.00037381 | 0.00249331 | ST6GAL1 |
| 30009 | ENSG00000073861 | 1.26305052 | 0.02098636  | 0.38053927 | 0.75775503 | NA         | TBX21   |
| NA    | ENSG00000073905 | 0          | NA          | NA         | NA         | NA         | VDAC1P1 |
| 10129 | ENSG00000073910 | 373.33258  | -0.18895043 | 0.20823964 | 0.28007312 | 0.5047371  | FRY     |
| 8301  | ENSG00000073921 | 1436.81393 | -0.24246886 | 0.08474634 | 0.0032651  | 0.01626735 | PICALM  |
| 4905  | ENSG00000073969 | 1366.77636 | -0.34532797 | 0.07740862 | 5.01E-06   | 5.04E-05   | NSF     |
| 2736  | ENSG00000074047 | 277.999184 | 1.2503622   | 0.15891872 | 3.46E-16   | 1.02E-14   | GLI2    |

|       |                 |            |             |            |            |            |           |
|-------|-----------------|------------|-------------|------------|------------|------------|-----------|
| 23332 | ENSG00000074054 | 3544.77656 | 0.32284316  | 0.06046341 | 6.18E-08   | 8.37E-07   | CLASP1    |
| 65993 | ENSG00000074071 | 1637.21856 | -0.25484644 | 0.07787175 | 0.00081259 | 0.00493774 | MRPS34    |
| 4854  | ENSG00000074181 | 2481.23072 | 1.45190913  | 0.08066727 | 1.68E-73   | 2.92E-71   | NOTCH3    |
| 1207  | ENSG00000074201 | 2325.89733 | -0.13897153 | 0.06648368 | 0.03327496 | 0.10890387 | CLNS1A    |
| 5522  | ENSG00000074211 | 444.271733 | -2.12856204 | 0.13865017 | 2.29E-54   | 2.55E-52   | PPP2R2C   |
| 8463  | ENSG00000074219 | 1287.24791 | 1.39424614  | 0.0891584  | 3.80E-56   | 4.52E-54   | TEAD2     |
| 8726  | ENSG00000074266 | 436.573548 | -0.05851712 | 0.11810353 | 0.60164142 | 0.79212726 | EED       |
| 54825 | ENSG00000074276 | 49.6391863 | -0.26247841 | 0.30593026 | 0.21249082 | 0.42238326 | CDHR2     |
| 6620  | ENSG00000074317 | 67.656621  | -2.19063754 | 0.33702745 | 5.64E-12   | 1.22E-10   | SNCB      |
| 7251  | ENSG00000074319 | 1242.34862 | 0.15018503  | 0.08848708 | 0.08093678 | 0.21334235 | TSG101    |
| 55421 | ENSG00000074356 | 1850.36482 | -0.04345038 | 0.1175273  | 0.69666255 | 0.85365037 | NCBP3     |
| 489   | ENSG00000074370 | 239.15968  | 0.8435844   | 0.16518924 | 5.43E-08   | 7.42E-07   | ATP2A3    |
| 771   | ENSG00000074410 | 0.83239697 | -0.0301577  | 0.3835933  | 0.5327641  | NA         | CA12      |
| 11343 | ENSG00000074416 | 75.0840853 | -0.02375429 | 0.26181164 | 0.89926753 | 0.95557174 | MGLL      |
| 59277 | ENSG00000074527 | 28.8331453 | 2.38497444  | 0.57428237 | 1.30E-06   | 1.45E-05   | NTN4      |
| 617   | ENSG00000074582 | 481.934813 | -0.11848536 | 0.12420863 | 0.3120454  | 0.5397542  | BCS1L     |
| 9891  | ENSG00000074590 | 48.1388288 | 0.6722328   | 0.36714739 | 0.01128813 | 0.04583637 | NUAK1     |
| 54878 | ENSG00000074603 | 963.201603 | 0.03537743  | 0.13727773 | 0.78394914 | 0.90160286 | DPP8      |
| 9187  | ENSG00000074621 | 268.143267 | 0.12016184  | 0.18175113 | 0.45326336 | 0.67649496 | SLC24A1   |
| 55205 | ENSG00000074657 | 3692.12362 | 0.16604936  | 0.05911421 | 0.00446021 | 0.02115964 | ZNF532    |
| 8578  | ENSG00000074660 | 9.69827898 | -0.10589967 | 0.36870791 | 0.46585575 | 0.68856963 | SCARF1    |
| 3998  | ENSG00000074695 | 2139.07164 | -0.22384713 | 0.0748236  | 0.0021962  | 0.01160698 | LMAN1     |
| 51495 | ENSG00000074696 | 2715.21549 | 0.0046409   | 0.06154531 | 0.93974292 | 0.97474024 | HACD3     |
| 26034 | ENSG00000074706 | 27.4846939 | 3.54359854  | 0.65491169 | 4.26E-09   | 6.74E-08   | IPCEF1    |
| 23140 | ENSG00000074755 | 1502.84351 | -0.08834347 | 0.08594216 | 0.29076088 | 0.51679428 | ZZEF1     |
| 50508 | ENSG00000074771 | 1.55151473 | 0.09327671  | 0.39636697 | 0.14786157 | NA         | NOX3      |
| 2023  | ENSG00000074800 | 17178.491  | -0.25343766 | 0.08214687 | 0.00150642 | 0.00841417 | ENO1      |
| 6557  | ENSG00000074803 | 10.9564616 | -0.11717093 | 0.35262433 | 0.49125682 | 0.71060078 | SLC12A1   |
| 56005 | ENSG00000074842 | 1115.3621  | 0.23908568  | 0.07883224 | 0.00191688 | 0.01029474 | MYDGF     |
| 57719 | ENSG00000074855 | 1240.29879 | 0.30715859  | 0.08184349 | 0.00011973 | 0.00089304 | ANO8      |
| 51175 | ENSG00000074935 | 690.529284 | 0.63849911  | 0.12835693 | 1.76E-07   | 2.25E-06   | TUBE1     |
| 55160 | ENSG00000074964 | 987.489544 | -0.2986516  | 0.10083981 | 0.00206595 | 0.01099527 | ARHGEF10L |
| 7294  | ENSG00000074966 | 3.78628526 | 0.08072848  | 0.38067124 | 0.43875446 | 0.66399363 | TXK       |
| 9671  | ENSG00000075035 | 155.891237 | -1.97640981 | 0.28035605 | 8.42E-14   | 2.08E-12   | WSCD2     |
| 3785  | ENSG00000075043 | 7240.76961 | -0.02274764 | 0.06917506 | 0.73798802 | 0.8762752  | KCNQ2     |
| 6865  | ENSG00000075073 | 7.12316317 | 0.1915897   | 0.4125222  | 0.20945722 | 0.41777735 | TACR2     |
| 64431 | ENSG00000075089 | 566.469264 | -0.20986239 | 0.11618482 | 0.05666652 | 0.16393463 | ACTR6     |
| 54962 | ENSG00000075131 | 270.040322 | -0.13250811 | 0.15185082 | 0.34075913 | 0.57095356 | TIPIN     |



|        |                 |            |             |            |            |            |          |
|--------|-----------------|------------|-------------|------------|------------|------------|----------|
| 6717   | ENSG00000075142 | 1699.72706 | 0.22889989  | 0.09403053 | 0.01190287 | 0.04791093 | SRI      |
| 8672   | ENSG00000075151 | 2776.68063 | -0.21149574 | 0.06430564 | 0.00082575 | 0.00500243 | EIF4G3   |
| 79023  | ENSG00000075188 | 370.647863 | 0.27955906  | 0.12594771 | 0.01849659 | 0.06829932 | NUP37    |
| 10371  | ENSG00000075213 | 154.477323 | 1.5185773   | 0.2289809  | 2.53E-12   | 5.62E-11   | SEMA3A   |
| 51512  | ENSG00000075218 | 1410.53912 | -0.12328161 | 0.07694223 | 0.10137512 | 0.25181949 | GTSE1    |
| 10512  | ENSG00000075223 | 907.262539 | 0.09290556  | 0.09593762 | 0.31804683 | 0.54566319 | SEMA3C   |
| 55020  | ENSG00000075234 | 575.711211 | -0.00054722 | 0.10101073 | 0.9929465  | 0.99767338 | TTC38    |
| 38     | ENSG00000075239 | 1173.50425 | -0.10054524 | 0.09708007 | 0.28335143 | 0.50852034 | ACAT1    |
| 23151  | ENSG00000075240 | 1337.82184 | -0.1468053  | 0.12141123 | 0.20101193 | 0.40615916 | GRAMD4   |
| 9620   | ENSG00000075275 | 71.5632308 | 4.08894336  | 1.19369178 | 7.34E-06   | 7.16E-05   | CELSR1   |
| 7479   | ENSG00000075290 | 21.0807219 | -0.17533286 | 0.33676464 | 0.37250818 | 0.60143185 | WNT8B    |
| 27332  | ENSG00000075292 | 2433.10181 | -0.12950361 | 0.0685878  | 0.05497761 | 0.1600992  | ZNF638   |
| 55972  | ENSG00000075303 | 705.024778 | -0.21538904 | 0.12843021 | 0.07388242 | 0.19924252 | SLC25A40 |
| 29090  | ENSG00000075336 | 363.158909 | -0.17282151 | 0.14026326 | 0.1839313  | 0.38247532 | TIMM21   |
| 119    | ENSG00000075340 | 2769.46776 | -0.34335052 | 0.07414969 | 2.17E-06   | 2.33E-05   | ADD2     |
| 2249   | ENSG00000075388 | 0          | NA          | NA         | NA         | NA         | FGF4     |
| 9462   | ENSG00000075391 | 550.704963 | 0.23390412  | 0.11402048 | 0.03124548 | 0.10358167 | RASAL2   |
| 9605   | ENSG00000075399 | 241.980669 | 0.12609827  | 0.17237214 | 0.41311927 | 0.6403849  | VPS9D1   |
| 7587   | ENSG00000075407 | 1001.79985 | 0.16020353  | 0.13225615 | 0.19643233 | 0.40005705 | ZNF37A   |
| 4140   | ENSG00000075413 | 2186.18178 | -0.01551579 | 0.06468496 | 0.80714571 | 0.91260538 | MARK3    |
| 5250   | ENSG00000075415 | 6442.49712 | 0.02074787  | 0.05208165 | 0.69983252 | 0.8552838  | SLC25A3  |
| 64778  | ENSG00000075420 | 486.739324 | 0.03448944  | 0.13504482 | 0.78614948 | 0.90280441 | FNDC3B   |
| 2355   | ENSG00000075426 | 80.9092892 | 0.08445769  | 0.22202711 | 0.6434075  | 0.82181194 | FOSL2    |
| 27091  | ENSG00000075429 | 256.058482 | -1.48815794 | 0.23514118 | 1.86E-11   | 3.86E-10   | CACNG5   |
| 27092  | ENSG00000075461 | 18166.637  | -0.31942555 | 0.04741632 | 1.08E-11   | 2.29E-10   | CACNG4   |
| 285527 | ENSG00000075539 | 1431.57412 | -0.02126697 | 0.10916751 | 0.83758226 | 0.92628758 | FRYL     |
| 23505  | ENSG00000075568 | 1071.45224 | 0.13857269  | 0.10085696 | 0.15425616 | 0.3394719  | TMEM131  |
| 6624   | ENSG00000075618 | 18935.9928 | 0.06969678  | 0.05435745 | 0.19552902 | 0.39918663 | FSCN1    |
| 60     | ENSG00000075624 | 50261.31   | 0.16983742  | 0.06997571 | 0.01366748 | 0.05355773 | ACTB     |
| 55034  | ENSG00000075643 | 23.0655773 | 1.69896651  | 0.55453841 | 0.00013071 | 0.00096586 | MOCOS    |
| 5337   | ENSG00000075651 | 22.0722073 | 0.8956178   | 0.77795691 | 0.0130118  | 0.05146612 | PLD1     |
| 479    | ENSG00000075673 | 0          | NA          | NA         | NA         | NA         | ATP12A   |
| 284403 | ENSG00000075702 | 781.712185 | -0.17906537 | 0.11316265 | 0.09665262 | 0.24306007 | WDR62    |
| 1739   | ENSG00000075711 | 1532.97204 | -0.05567145 | 0.09017482 | 0.5255877  | 0.73806584 | DLG1     |
| 7879   | ENSG00000075785 | 3588.78967 | 0.06515804  | 0.06259843 | 0.28947583 | 0.51546747 | RAB7A    |
| 55973  | ENSG00000075790 | 444.416132 | 0.29273531  | 0.13985656 | 0.02435486 | 0.08534096 | BCAP29   |
| 25956  | ENSG00000075826 | 261.77276  | 0.39260061  | 0.17885572 | 0.01378334 | 0.05387341 | SEC31B   |
| 9733   | ENSG00000075856 | 2120.82438 | 0.06620814  | 0.08575728 | 0.42898057 | 0.65464    | SART3    |

|           |                 |            |             |            |            |            |          |
|-----------|-----------------|------------|-------------|------------|------------|------------|----------|
| 55843     | ENSG00000075884 | 0          | NA          | NA         | NA         | NA         | ARHGAP15 |
| 113457    | ENSG00000075886 | 19.0218121 | 0.08192128  | 0.33350971 | 0.64048248 | 0.81992338 | TUBA3D   |
| 5076      | ENSG00000075891 | 1.92000503 | -0.13335149 | 0.41626229 | 0.0343628  | NA         | PAX2     |
| 23016     | ENSG00000075914 | 552.221214 | -0.07200141 | 0.10864163 | 0.48826491 | 0.70797163 | EXOSC7   |
| 22920     | ENSG00000075945 | 1104.60573 | 0.15822256  | 0.09136446 | 0.074302   | 0.20010202 | KIFAP3   |
| 23609     | ENSG00000075975 | 966.837269 | 0.03247025  | 0.0843122  | 0.69370523 | 0.85183585 | MKRN2    |
| 4175      | ENSG00000076003 | 2505.62604 | -0.50558122 | 0.08914171 | 5.63E-09   | 8.76E-08   | MCM6     |
| 25996     | ENSG00000076043 | 348.406837 | 0.3879349   | 0.13344889 | 0.00191568 | 0.01029165 | REXO2    |
| 10179     | ENSG00000076053 | 320.847963 | -0.37024875 | 0.1457832  | 0.00596726 | 0.0270472  | RBM7     |
| 5939      | ENSG00000076067 | 619.270056 | -0.16330586 | 0.11889846 | 0.14735283 | 0.32899843 | RBMS2    |
| 11176     | ENSG00000076108 | 3203.17803 | 0.08648435  | 0.08634163 | 0.30427195 | 0.53154043 | BAZ2A    |
| 25930     | ENSG00000076201 | 1474.71235 | 0.07836368  | 0.08157001 | 0.32579891 | 0.55398101 | PTPN23   |
| 4292      | ENSG00000076242 | 851.969506 | -0.05534707 | 0.0956444  | 0.54956887 | 0.75607328 | MLH1     |
| 7374      | ENSG00000076248 | 1072.39085 | -0.12228478 | 0.08052014 | 0.12019494 | 0.28547347 | UNG      |
| 2329      | ENSG00000076258 | 0.18922458 | 0.01954053  | 0.38488496 | 0.78225479 | NA         | FMO4     |
| 27252     | ENSG00000076321 | 638.005901 | -0.11793301 | 0.0986462  | 0.21525428 | 0.42582958 | KLHL20   |
| 8786      | ENSG00000076344 | 358.939169 | 0.9486891   | 0.16708937 | 1.83E-09   | 3.04E-08   | RGS11    |
| 113235    | ENSG00000076351 | 696.321209 | -0.26243118 | 0.15537677 | 0.06393402 | 0.1796757  | SLC46A1  |
| 5362      | ENSG00000076356 | 2070.80976 | -1.41962934 | 0.10198506 | 4.04E-45   | 3.53E-43   | PLXNA2   |
| 10615     | ENSG00000076382 | 2196.37902 | -0.09150245 | 0.07775979 | 0.22860697 | 0.44392309 | SPAG5    |
| 88455     | ENSG00000076513 | 641.44528  | 0.35264031  | 0.10155928 | 0.00030691 | 0.00209033 | ANKRD13A |
| 7163      | ENSG00000076554 | 1044.01618 | 0.00500821  | 0.12069489 | 0.9662185  | 0.98692619 | TPD52    |
| 32        | ENSG00000076555 | 851.620865 | 0.76483189  | 0.10996276 | 7.13E-13   | 1.64E-11   | ACACB    |
| 9618      | ENSG00000076604 | 2022.60776 | 0.21910183  | 0.08348153 | 0.00708536 | 0.03125247 | TRAF4    |
| 55824     | ENSG00000076641 | 172.216207 | -0.391021   | 0.21476546 | 0.03127269 | 0.1036502  | PAG1     |
| 55094     | ENSG00000076650 | 219.543001 | -0.25217671 | 0.15743271 | 0.07813875 | 0.20773003 | GPATCH1  |
| 3385      | ENSG00000076662 | 37.5273335 | -0.06610111 | 0.28259955 | 0.73052933 | 0.87107559 | ICAM3    |
| 22978     | ENSG00000076685 | 1084.73191 | -0.37842118 | 0.10363887 | 0.00014266 | 0.00104754 | NT5C2    |
| 4162      | ENSG00000076706 | 235.343177 | -0.4275652  | 0.18388301 | 0.00866919 | 0.03686067 | MCAM     |
| 2239      | ENSG00000076716 | 78.9627384 | 3.94094723  | 0.36658253 | 6.19E-28   | 3.31E-26   | GPC4     |
| 55796     | ENSG00000076770 | 586.744092 | 0.18064885  | 0.11923961 | 0.11047518 | 0.26795865 | MBNL3    |
| 57662     | ENSG00000076826 | 523.632237 | -0.2553772  | 0.15460442 | 0.07001275 | 0.19161995 | CAMSAP3  |
| 5909      | ENSG00000076864 | 700.363524 | -1.73806408 | 0.118482   | 7.17E-50   | 7.08E-48   | RAP1GAP  |
| 56949     | ENSG00000076924 | 1267.14395 | 0.18761927  | 0.08592674 | 0.02496505 | 0.08707922 | XAB2     |
| 9138      | ENSG00000076928 | 2101.28243 | 0.22362009  | 0.08064465 | 0.00450237 | 0.02131401 | ARHGEF1  |
| 100505585 | ENSG00000076928 | 2101.28243 | 0.22362009  | 0.08064465 | 0.00450237 | 0.02131401 | ARHGEF1  |
| 6813      | ENSG00000076944 | 11.8922777 | 0.30283313  | 0.4640626  | 0.12121697 | 0.2874665  | STXBP2   |
| 5609      | ENSG00000076984 | 1164.67709 | -0.10668704 | 0.08277333 | 0.18658322 | 0.38635899 | MAP2K7   |

|        |                 |            |             |            |            |            |          |
|--------|-----------------|------------|-------------|------------|------------|------------|----------|
| 27231  | ENSG00000077009 | 0.60792302 | -0.03597367 | 0.38657565 | 0.43415757 | NA         | NMRK2    |
| 8527   | ENSG00000077044 | 1594.05571 | 0.05057073  | 0.08287626 | 0.53262415 | 0.74391151 | DGKD     |
| 83992  | ENSG00000077063 | 0          | NA          | NA         | NA         | NA         | CTTNBP2  |
| 51412  | ENSG00000077080 | 643.565342 | -2.18930644 | 0.1219224  | 2.46E-73   | 4.20E-71   | ACTL6B   |
| 5915   | ENSG00000077092 | 161.626982 | 0.65555693  | 0.20203689 | 0.00027774 | 0.00190602 | RARB     |
| 7155   | ENSG00000077097 | 6757.45083 | -0.17475315 | 0.06013268 | 0.00321355 | 0.01602734 | TOP2B    |
| 56889  | ENSG00000077147 | 4213.0451  | -0.28500209 | 0.07032898 | 3.68E-05   | 0.00031188 | TM9SF3   |
| 4791   | ENSG00000077150 | 360.903563 | 0.75460066  | 0.1312844  | 1.86E-09   | 3.09E-08   | NFKB2    |
| 29089  | ENSG00000077152 | 1276.1892  | 0.03064216  | 0.08315804 | 0.7067078  | 0.85864725 | UBE2T    |
| 4660   | ENSG00000077157 | 836.123297 | 0.00904179  | 0.24054857 | 0.96341784 | 0.98545957 | PPP1R12B |
| 54431  | ENSG00000077232 | 1738.25832 | 0.12773393  | 0.10509367 | 0.20648373 | 0.41346761 | DNAJC10  |
| 2975   | ENSG00000077235 | 3262.3612  | 0.07542901  | 0.06472679 | 0.23700187 | 0.45395994 | GTF3C1   |
| 3566   | ENSG00000077238 | 5.5272736  | 5.40550262  | 2.88036782 | 0.00042423 | 0.0027916  | IL4R     |
| 23032  | ENSG00000077254 | 1651.26472 | -0.08588671 | 0.09357266 | 0.34268936 | 0.57288144 | USP33    |
| 5063   | ENSG00000077264 | 919.732729 | -0.85411805 | 0.08766927 | 3.45E-23   | 1.52E-21   | PAK3     |
| 827    | ENSG00000077274 | 56.892561  | 3.5506125   | 0.41096833 | 5.83E-19   | 2.07E-17   | CAPN6    |
| 1641   | ENSG00000077279 | 3161.74404 | -0.27301667 | 0.06278061 | 9.99E-06   | 9.48E-05   | DCX      |
| 6626   | ENSG00000077312 | 1613.83028 | 0.12389856  | 0.07434452 | 0.08931896 | 0.22925243 | SNRPA    |
| 9576   | ENSG00000077327 | 88.8252869 | 1.21248141  | 0.30795011 | 6.96E-06   | 6.81E-05   | SPAG6    |
| 56915  | ENSG00000077348 | 517.538707 | -0.03659178 | 0.10973917 | 0.72702171 | 0.86953012 | EXOSC5   |
| 1781   | ENSG00000077380 | 2289.45555 | 0.02159666  | 0.07297773 | 0.76406617 | 0.8914874  | DYNC1I2  |
| 54518  | ENSG00000077420 | 0          | NA          | NA         | NA         | NA         | APBB1IP  |
| 4034   | ENSG00000077454 | 1039.99916 | 0.28779446  | 0.12907708 | 0.01756394 | 0.06560027 | LRCH4    |
| 143684 | ENSG00000077458 | 687.767558 | -0.23999535 | 0.11922103 | 0.03348918 | 0.10951287 | FAM76B   |
| 51548  | ENSG00000077463 | 514.400514 | 0.13489498  | 0.12336449 | 0.24788981 | 0.46697056 | SIRT6    |
| 7299   | ENSG00000077498 | 0.173733   | 0.01914545  | 0.38484597 | 0.78225479 | NA         | TYR      |
| 10714  | ENSG00000077514 | 519.93999  | -0.1365115  | 0.10849922 | 0.1886647  | 0.38926996 | POLD3    |
| 88     | ENSG00000077522 | 272.045988 | -0.36308622 | 0.15048725 | 0.00864917 | 0.03678446 | ACTN2    |
| 832    | ENSG00000077549 | 1741.51636 | -0.21600622 | 0.07198935 | 0.00220215 | 0.01162915 | CAPZB    |
| 7107   | ENSG00000077585 | 242.238945 | 0.65318835  | 0.16983326 | 2.95E-05   | 0.00025493 | GPR137B  |
| 10003  | ENSG00000077616 | 562.401555 | 0.13348401  | 0.10233741 | 0.17568156 | 0.36989516 | NAALAD2  |
| 79960  | ENSG00000077684 | 1270.35802 | -0.21149273 | 0.10173913 | 0.03060273 | 0.10194058 | JADE1    |
| 203427 | ENSG00000077713 | 0.37844916 | 0.02407552  | 0.3854191  | 0.60038877 | NA         | SLC25A43 |
| 7319   | ENSG00000077721 | 729.26511  | 0.1220651   | 0.09373714 | 0.17761164 | 0.37273271 | UBE2A    |
| 2260   | ENSG00000077782 | 1879.49088 | 0.26873517  | 0.10616124 | 0.00826729 | 0.03549512 | FGFR1    |
| 8468   | ENSG00000077800 | 1.24242796 | 0.06894829  | 0.39263599 | 0.14569156 | NA         | FKBP6    |
| 27127  | ENSG00000077935 | 1.06616886 | 0.0030941   | 0.38073027 | 0.95600814 | NA         | SMC1B    |
| 2192   | ENSG00000077942 | 5780.99085 | 0.04317929  | 0.08499428 | 0.60243727 | 0.79259054 | FBLN1    |

|       |                 |            |             |            |            |            |           |
|-------|-----------------|------------|-------------|------------|------------|------------|-----------|
| 8516  | ENSG00000077943 | 0.34110933 | 0.02362652  | 0.3853534  | 0.62410613 | NA         | ITGA8     |
| 8530  | ENSG00000077984 | 0.173733   | 0.01914545  | 0.38484597 | 0.78225479 | NA         | CST7      |
| 4133  | ENSG00000078018 | 5136.61592 | -0.61347118 | 0.06242053 | 2.66E-23   | 1.18E-21   | MAP2      |
| 9063  | ENSG00000078043 | 588.729109 | -0.10011109 | 0.12780021 | 0.40527658 | 0.63362391 | PIAS2     |
| 273   | ENSG00000078053 | 0          | NA          | NA         | NA         | NA         | AMPH      |
| 369   | ENSG00000078061 | 606.455322 | 0.07548801  | 0.10268331 | 0.44591391 | 0.67028199 | ARAF      |
| 56922 | ENSG00000078070 | 454.191484 | -0.09208508 | 0.14003431 | 0.47691364 | 0.69881585 | MCCC1     |
| 27074 | ENSG00000078081 | 13.245468  | 0.05880614  | 0.33863548 | 0.72660703 | 0.86948287 | LAMP3     |
| 2191  | ENSG00000078098 | 1.10744684 | 0.07128808  | 0.39266921 | 0.17137223 | NA         | FAP       |
| 10529 | ENSG00000078114 | 2537.04756 | -0.07944368 | 0.08757829 | 0.35073891 | 0.58113897 | NEBL      |
| 55331 | ENSG00000078124 | 514.028314 | -0.2846236  | 0.13104752 | 0.02032113 | 0.07381383 | ACER3     |
| 3093  | ENSG00000078140 | 1778.81503 | -0.16582709 | 0.10417356 | 0.09726133 | 0.24401427 | UBE2K     |
| 5289  | ENSG00000078142 | 1194.7034  | -0.02469472 | 0.12169952 | 0.82941586 | 0.92261925 | PIK3C3    |
| 55728 | ENSG00000078177 | 1101.3846  | -0.41418753 | 0.09455512 | 5.96E-06   | 5.92E-05   | N4BP2     |
| 57103 | ENSG00000078237 | 232.653526 | -0.06188732 | 0.22455486 | 0.73297984 | 0.87261966 | TIGAR     |
| 7289  | ENSG00000078246 | 786.67814  | 0.40016795  | 0.09167665 | 6.74E-06   | 6.60E-05   | TULP3     |
| 8871  | ENSG00000078269 | 158.359626 | 1.05917566  | 0.21092023 | 5.86E-08   | 7.96E-07   | SYNJ2     |
| 108   | ENSG00000078295 | 0          | NA          | NA         | NA         | NA         | ADCY2     |
| 5527  | ENSG00000078304 | 2493.84733 | 0.15653753  | 0.07779306 | 0.03983831 | 0.12506204 | PPP2R5C   |
| NA    | ENSG00000078319 | 699.171304 | 0.03458367  | 0.09907584 | 0.71872952 | 0.86509267 | PMS2P1    |
| 54715 | ENSG00000078328 | 0.80203412 | -0.02961958 | 0.38288109 | 0.56594918 | NA         | RBFOX1    |
| 2782  | ENSG00000078369 | 12219.6523 | 0.0624537   | 0.05863644 | 0.28397602 | 0.50913467 | GNB1      |
| 3205  | ENSG00000078399 | 0          | NA          | NA         | NA         | NA         | HOXA9     |
| 1906  | ENSG00000078401 | 2.54220909 | 0.04647573  | 0.37678438 | 0.61948858 | NA         | EDN1      |
| 8028  | ENSG00000078403 | 1582.6614  | 0.0952548   | 0.09384298 | 0.29527872 | 0.52190021 | MLLT10    |
| 55063 | ENSG00000078487 | 41.7234678 | 0.1097128   | 0.27259945 | 0.57669641 | 0.77528586 | ZCWPW1    |
| 117   | ENSG00000078549 | 2292.49545 | -1.65063655 | 0.06572329 | 2.62E-140  | 1.57E-137  | ADCYAP1R1 |
| 26281 | ENSG00000078579 | 0.77127108 | 0.03225086  | 0.38522181 | 0.47166203 | NA         | FGF20     |
| 27334 | ENSG00000078589 | 0          | NA          | NA         | NA         | NA         | P2RY10    |
| 9452  | ENSG00000078596 | 59.6938139 | 1.29691767  | 0.34259439 | 1.24E-05   | 0.00011631 | ITM2A     |
| 4898  | ENSG00000078618 | 2411.00459 | 0.15615569  | 0.06820144 | 0.01990443 | 0.07267279 | NRDC      |
| 7419  | ENSG00000078668 | 1765.88737 | -0.50631385 | 0.07554042 | 8.11E-12   | 1.74E-10   | VDAC3     |
| 5108  | ENSG00000078674 | 2799.05437 | 0.07605358  | 0.07744642 | 0.31636214 | 0.54437337 | PCM1      |
| 57690 | ENSG00000078687 | 1790.38907 | -0.16814848 | 0.11983011 | 0.13603984 | 0.31101986 | TNRC6C    |
| 9139  | ENSG00000078699 | 4787.11665 | 0.62877777  | 0.05612697 | 1.15E-29   | 6.49E-28   | CBFA2T2   |
| 1620  | ENSG00000078725 | 216.106985 | 2.34063605  | 0.19180619 | 2.27E-35   | 1.56E-33   | BRINP1    |
| 83737 | ENSG00000078747 | 918.389391 | 0.05984644  | 0.10169163 | 0.54215352 | 0.75027258 | ITCH      |
| 27039 | ENSG00000078795 | 1.46869288 | -0.03087296 | 0.38162923 | 0.6164219  | NA         | PKD2L2    |

|        |                 |            |             |            |            |            |          |
|--------|-----------------|------------|-------------|------------|------------|------------|----------|
| 58476  | ENSG00000078804 | 518.154353 | -0.38936012 | 0.11145554 | 0.00025216 | 0.00175355 | TP53INP2 |
| 51150  | ENSG00000078808 | 1966.46385 | 0.0196281   | 0.07065785 | 0.77815256 | 0.8983839  | SDF4     |
| 57644  | ENSG00000078814 | 21.4103056 | 0.94770837  | 0.60686882 | 0.00815893 | 0.03512109 | MYH7B    |
| 80341  | ENSG00000078898 | 0          | NA          | NA         | NA         | NA         | BPIFB2   |
| 7161   | ENSG00000078900 | 534.878948 | -0.19471061 | 0.12876434 | 0.10697521 | 0.26192621 | TP73     |
| 54472  | ENSG00000078902 | 801.8087   | 0.10587504  | 0.11064094 | 0.3167548  | 0.54452953 | TOLLIP   |
| 51619  | ENSG00000078967 | 1151.28606 | 0.21963985  | 0.09109539 | 0.0129028  | 0.05115738 | UBE2D4   |
| 27098  | ENSG00000079101 | 31.3679018 | 2.69720218  | 0.56338284 | 6.38E-08   | 8.62E-07   | CLUL1    |
| 862    | ENSG00000079102 | 589.353149 | -0.70642968 | 0.14335563 | 1.81E-07   | 2.31E-06   | RUNX1T1  |
| 1015   | ENSG00000079112 | 0.45740913 | -0.00334167 | 0.38312944 | 0.92771444 | NA         | CDH17    |
| 9984   | ENSG00000079134 | 746.444329 | -0.0806105  | 0.10716005 | 0.43242282 | 0.65788827 | THOC1    |
| 51661  | ENSG00000079150 | 663.85192  | 0.81784993  | 0.12922794 | 4.46E-11   | 8.89E-10   | FKBP7    |
| 114880 | ENSG00000079156 | 175.298715 | 0.04991552  | 0.18293259 | 0.75730099 | 0.88697677 | OSBPL6   |
| 6507   | ENSG00000079215 | 0          | NA          | NA         | NA         | NA         | SLC1A3   |
| 7520   | ENSG00000079246 | 8350.29302 | -0.13577782 | 0.0578084  | 0.01748525 | 0.06535558 | XRCC5    |
| 56925  | ENSG00000079257 | 0.18922458 | 0.01954053  | 0.38488496 | 0.78225479 | NA         | LXN      |
| 11262  | ENSG00000079263 | 1.24279523 | 0.01529348  | 0.38130326 | 0.6299551  | NA         | SP140    |
| 8569   | ENSG00000079277 | 310.418004 | 0.02816355  | 0.14165381 | 0.83178589 | 0.92385262 | MKNK1    |
| 7145   | ENSG00000079308 | 1462.03489 | -0.20193114 | 0.1247585  | 0.08599722 | 0.22308902 | TNS1     |
| 57455  | ENSG00000079313 | 1030.26844 | 0.145774    | 0.09575377 | 0.11574729 | 0.27775826 | REXO1    |
| 56681  | ENSG00000079332 | 1944.59818 | -0.10356389 | 0.07373402 | 0.15185085 | 0.33594122 | SAR1A    |
| 8556   | ENSG00000079335 | 118.710322 | 0.52279552  | 0.24626907 | 0.01030391 | 0.0424392  | CDC14A   |
| 10411  | ENSG00000079337 | 36.3832245 | -0.67871792 | 0.44271584 | 0.01767728 | 0.06593667 | RAPGEF3  |
| 634    | ENSG00000079385 | 2.42857747 | -0.0097113  | 0.37675014 | 0.89381225 | NA         | CEACAM1  |
| 29843  | ENSG00000079387 | 683.237195 | -0.06400163 | 0.12163103 | 0.57803803 | 0.77614203 | SENPI    |
| 51207  | ENSG00000079393 | 0.62731245 | 0.01407412  | 0.38259184 | 0.72482501 | NA         | DUSP13   |
| 23152  | ENSG00000079432 | 2429.63256 | -0.24014335 | 0.08357054 | 0.00316603 | 0.01583813 | CIC      |
| 3991   | ENSG00000079435 | 214.666859 | -0.12650091 | 0.15471735 | 0.3703303  | 0.59943356 | LIPE     |
| 2222   | ENSG00000079459 | 2850.25893 | -0.55452653 | 0.09761888 | 4.54E-09   | 7.18E-08   | FDFT1    |
| 5050   | ENSG00000079462 | 1341.33184 | -0.16413434 | 0.0867012  | 0.05155794 | 0.15251371 | PAFAH1B3 |
| 4983   | ENSG00000079482 | 275.817692 | 0.5344764   | 0.15290433 | 0.00016034 | 0.00116397 | OPHN1    |
| 173    | ENSG00000079557 | 0          | NA          | NA         | NA         | NA         | AFM      |
| 3835   | ENSG00000079616 | 2178.55455 | -0.04713842 | 0.07160641 | 0.50223985 | 0.71909062 | KIF22    |
| 10590  | ENSG00000079689 | 8.77935684 | -2.00825417 | 1.15477614 | 0.00302021 | 0.01521609 | SCGN     |
| 55604  | ENSG00000079691 | 85.3424601 | 0.32891604  | 0.25638269 | 0.10242623 | 0.2538584  | CARMIL1  |
| 5236   | ENSG00000079739 | 1087.74346 | 0.08906982  | 0.08563398 | 0.28620842 | 0.51202661 | PGM1     |
| 1653   | ENSG00000079785 | 3293.11279 | -0.13994437 | 0.06446957 | 0.02752993 | 0.09371891 | DDX1     |
| 1785   | ENSG00000079805 | 2426.82839 | 0.02088204  | 0.07992746 | 0.79107352 | 0.90490742 | DNM2     |

|        |                 |            |             |            |            |            |          |
|--------|-----------------|------------|-------------|------------|------------|------------|----------|
| 2037   | ENSG00000079819 | 0.67554771 | -0.02885627 | 0.38405527 | 0.57775739 | NA         | EPB41L2  |
| 22999  | ENSG00000079841 | 124.81114  | 0.1062661   | 0.20850917 | 0.5464226  | 0.75358156 | RIMS1    |
| 26002  | ENSG00000079931 | 0          | NA          | NA         | NA         | NA         | MOXD1    |
| 8417   | ENSG00000079950 | 225.452467 | 0.43489472  | 0.18154037 | 0.00716207 | 0.03150677 | STX7     |
| 11158  | ENSG00000079974 | 498.195792 | 0.2089764   | 0.11795001 | 0.0620339  | 0.17577159 | RABL2B   |
| 9817   | ENSG00000079999 | 1252.37091 | 0.21682747  | 0.09213742 | 0.01515693 | 0.0581426  | KEAP1    |
| 55510  | ENSG00000080007 | 0.18922458 | 0.01954053  | 0.38488496 | 0.78225479 | NA         | DDX43    |
| 5794   | ENSG00000080031 | 47.6571095 | -0.34682602 | 0.31178944 | 0.11365557 | 0.27365614 | PTPRH    |
| 1638   | ENSG00000080166 | 5.92361595 | -0.12771682 | 0.38819822 | 0.31851905 | 0.54614276 | DCT      |
| 51006  | ENSG00000080189 | 1296.14199 | 0.10630464  | 0.0980157  | 0.26205075 | 0.48395112 | SLC35C2  |
| 131544 | ENSG00000080200 | 352.21187  | -0.26034594 | 0.13832659 | 0.04295816 | 0.13257414 | CRYBG3   |
| 285220 | ENSG00000080224 | 56.4056413 | -2.76518318 | 0.38410415 | 3.25E-14   | 8.34E-13   | EPHA6    |
| 6344   | ENSG00000080293 | 0          | NA          | NA         | NA         | NA         | SCTR     |
| 5991   | ENSG00000080298 | 864.558444 | -0.16388767 | 0.09675555 | 0.07930394 | 0.21006544 | RFX3     |
| 55183  | ENSG00000080345 | 2312.72068 | -0.44037994 | 0.0658535  | 1.07E-11   | 2.27E-10   | RIF1     |
| 23011  | ENSG00000080371 | 529.889392 | -0.09361278 | 0.12567272 | 0.42942368 | 0.65511463 | RAB21    |
| 8671   | ENSG00000080493 | 0.16735865 | 0.01897177  | 0.38482933 | 0.78225479 | NA         | SLC4A4   |
| 6595   | ENSG00000080503 | 1053.69307 | 0.27248052  | 0.10811907 | 0.00844374 | 0.03608096 | SMARCA2  |
| 50700  | ENSG00000080511 | 0          | NA          | NA         | NA         | NA         | RDH8     |
| 27244  | ENSG00000080546 | 418.588327 | -0.23229148 | 0.12054032 | 0.04167028 | 0.1295219  | SESN1    |
| 11043  | ENSG00000080561 | 0.55147679 | 0.03287368  | 0.38623201 | 0.45234823 | NA         | MID2     |
| 139212 | ENSG00000080572 | 0          | NA          | NA         | NA         | NA         | DNAAF6   |
| 50509  | ENSG00000080573 | 0.16735865 | 0.01897177  | 0.38482933 | 0.78225479 | NA         | COL5A3   |
| 10847  | ENSG00000080603 | 3186.09515 | -0.05947524 | 0.06209647 | 0.33198493 | 0.56118097 | SRCAP    |
| 9933   | ENSG00000080608 | 996.676611 | -0.10524337 | 0.0930026  | 0.24003016 | 0.45803582 | PUM3     |
| 1361   | ENSG00000080618 | 0.92228698 | -0.03223864 | 0.38469064 | 0.48158676 | NA         | CPB2     |
| 1136   | ENSG00000080644 | 7049.76771 | 0.82187751  | 0.07652707 | 1.22E-27   | 6.41E-26   | CHRNA3   |
| 3781   | ENSG00000080709 | 0.173733   | 0.01914545  | 0.38484597 | 0.78225479 | NA         | KCNN2    |
| 4850   | ENSG00000080802 | 545.951574 | -0.16362509 | 0.11506563 | 0.13502554 | 0.30949318 | CNOT4    |
| 5663   | ENSG00000080815 | 1192.32766 | 0.10240808  | 0.10403662 | 0.30650528 | 0.53417645 | PSEN1    |
| 1371   | ENSG00000080819 | 410.717128 | 0.22872777  | 0.13412998 | 0.06809541 | 0.18779383 | CPOX     |
| 56650  | ENSG00000080822 | 1684.63004 | 0.19038915  | 0.08211437 | 0.01751315 | 0.06544753 | CLDND1   |
| 5891   | ENSG00000080823 | 67.6147588 | 0.25399641  | 0.29858256 | 0.22494867 | 0.43877008 | MOK      |
| 3320   | ENSG00000080824 | 25120.1884 | -0.19853941 | 0.09193245 | 0.02578977 | 0.08920466 | HSP90AA1 |
| 5933   | ENSG00000080839 | 526.775021 | -0.2570275  | 0.12186531 | 0.02530743 | 0.08793099 | RBL1     |
| 22839  | ENSG00000080845 | 1865.9736  | -0.05540669 | 0.11382565 | 0.60830082 | 0.79713925 | DLGAP4   |
| 22997  | ENSG00000080854 | 4402.10165 | -0.75769387 | 0.07778785 | 4.16E-23   | 1.81E-21   | IGSF9B   |
| 3080   | ENSG00000080910 | 0          | NA          | NA         | NA         | NA         | CFHR2    |

|        |                 |            |             |            |            |            |         |
|--------|-----------------|------------|-------------|------------|------------|------------|---------|
| 114819 | ENSG00000080947 | 503.971726 | 0.19003287  | 0.1798256  | 0.23195262 | 0.44861961 | CROCCP3 |
| 10403  | ENSG00000080986 | 638.009525 | -0.32348612 | 0.11592788 | 0.00331322 | 0.01645002 | NDC80   |
| 23431  | ENSG00000081014 | 488.09659  | -0.19489132 | 0.112105   | 0.06822358 | 0.18799387 | AP4E1   |
| 54665  | ENSG00000081019 | 556.967722 | -0.22942456 | 0.11255098 | 0.03243666 | 0.10675902 | RSBN1   |
| 260425 | ENSG00000081026 | 1554.3248  | -0.53945377 | 0.07876449 | 2.66E-12   | 5.88E-11   | MAGI3   |
| 2920   | ENSG00000081041 | 0          | NA          | NA         | NA         | NA         | CXCL2   |
| 174    | ENSG00000081051 | 0          | NA          | NA         | NA         | NA         | AFP     |
| 1286   | ENSG00000081052 | 3.65652751 | -0.10834187 | 0.39460293 | 0.25898034 | 0.48036523 | COL4A4  |
| 6932   | ENSG00000081059 | 797.208293 | -0.2680825  | 0.10978015 | 0.010518   | 0.0431597  | TCF7    |
| 28962  | ENSG00000081087 | 417.27755  | -0.13340278 | 0.19792518 | 0.43031222 | 0.65586498 | OSTM1   |
| 1005   | ENSG00000081138 | 45.6243638 | 4.9569288   | 0.61771609 | 1.07E-17   | 3.47E-16   | CDH7    |
| 50939  | ENSG00000081148 | 5.90887707 | 0.00522066  | 0.36372828 | 0.9674209  | 0.98759962 | IMPG2   |
| 57092  | ENSG00000081154 | 2509.43919 | 0.01978192  | 0.07513815 | 0.78923518 | 0.90431711 | PCNP    |
| 55218  | ENSG00000081177 | 804.349149 | -0.14184785 | 0.09029486 | 0.10544088 | 0.25896844 | EXD2    |
| 384    | ENSG00000081181 | 252.970692 | -0.33826316 | 0.15567784 | 0.01733184 | 0.06491745 | ARG2    |
| 4208   | ENSG00000081189 | 247.561264 | 0.23461668  | 0.20946591 | 0.18457637 | 0.38333456 | MEF2C   |
| 5788   | ENSG00000081237 | 0.16735865 | 0.01897177  | 0.38482933 | 0.78225479 | NA         | PTPRC   |
| 779    | ENSG00000081248 | 0          | NA          | NA         | NA         | NA         | CACNA1S |
| 5317   | ENSG00000081277 | 0          | NA          | NA         | NA         | NA         | PKP1    |
| 79876  | ENSG00000081307 | 1065.22685 | 0.24557398  | 0.11144111 | 0.02094726 | 0.07555646 | UBA5    |
| 9262   | ENSG00000081320 | 169.208165 | 0.33861614  | 0.18842599 | 0.04035447 | 0.12622304 | STK17B  |
| 8555   | ENSG00000081377 | 801.278499 | 0.25055709  | 0.10266652 | 0.01114672 | 0.04534568 | CDC14B  |
| 22869  | ENSG00000081386 | 666.045287 | 0.05227552  | 0.13344377 | 0.67670597 | 0.84200981 | ZNF510  |
| 4036   | ENSG00000081479 | 2.58792426 | 0.14227898  | 0.41825569 | 0.06495332 | 0.1817081  | LRP2    |
| 440515 | ENSG00000081665 | 472.290723 | 0.08497955  | 0.12104678 | 0.45995315 | 0.68305646 | ZNF506  |
| 65094  | ENSG00000081692 | 489.802495 | 0.14226418  | 0.13642912 | 0.26448081 | 0.48671731 | JMJD4   |
| 11266  | ENSG00000081721 | 678.446028 | -0.24576999 | 0.10556415 | 0.01512916 | 0.05806977 | DUSP12  |
| 65985  | ENSG00000081760 | 704.80536  | -0.27928121 | 0.1062056  | 0.00602977 | 0.02726934 | AACS    |
| 9812   | ENSG00000081791 | 1421.86673 | -0.2494726  | 0.07762892 | 0.00100602 | 0.00593855 | DELE1   |
| 6561   | ENSG00000081800 | 0          | NA          | NA         | NA         | NA         | SLC13A1 |
| 93664  | ENSG00000081803 | 0.173733   | 0.01914545  | 0.38484597 | 0.78225479 | NA         | CADPS2  |
| 56131  | ENSG00000081818 | 278.346152 | -3.00E-05   | 0.13276381 | 0.999822   | 0.9998748  | PCDHB4  |
| 56142  | ENSG00000081842 | 18.6621312 | -0.03417761 | 0.32811157 | 0.84138627 | 0.92792546 | PCDHA6  |
| 56113  | ENSG00000081853 | 52.6094057 | 0.75923831  | 0.36181455 | 0.00519168 | 0.02397645 | PCDHGA2 |
| 51668  | ENSG00000081870 | 279.254414 | -0.21377245 | 0.14749743 | 0.11513552 | 0.27658176 | HSPB11  |
| 23239  | ENSG00000081913 | 409.395282 | -0.24122038 | 0.1246671  | 0.03997269 | 0.12529119 | PHLPP1  |
| 5205   | ENSG00000081923 | 7.40309601 | 0.13639975  | 0.40510001 | 0.16304546 | 0.35199367 | ATP8B1  |
| 3595   | ENSG00000081985 | 45.1877555 | 1.27012951  | 0.41661734 | 0.00016648 | 0.00120498 | IL12RB2 |

|        |                 |            |             |            |            |            |           |
|--------|-----------------|------------|-------------|------------|------------|------------|-----------|
| 6604   | ENSG00000082014 | 575.290538 | -0.02952218 | 0.12635476 | 0.80349602 | 0.91070264 | SMARCD3   |
| 55100  | ENSG00000082068 | 469.181568 | 0.23486136  | 0.14398027 | 0.07791935 | 0.20733904 | WDR70     |
| 2533   | ENSG00000082074 | 0          | NA          | NA         | NA         | NA         | FYB1      |
| 58538  | ENSG00000082126 | 1.34301837 | 0.02962375  | 0.38170127 | 0.62989356 | NA         | MPP4      |
| 55437  | ENSG00000082146 | 508.289317 | 0.13605217  | 0.11383237 | 0.21048511 | 0.41915333 | STRADB    |
| 9689   | ENSG00000082153 | 3990.84623 | -0.0548112  | 0.07231591 | 0.43771237 | 0.66286646 | BZW1      |
| 5241   | ENSG00000082175 | 0          | NA          | NA         | NA         | NA         | PGR       |
| 114899 | ENSG00000082196 | 209.15886  | 0.53552496  | 0.16833458 | 0.00048333 | 0.00313377 | C1QTNF3   |
| 4200   | ENSG00000082212 | 1440.67991 | -0.18890954 | 0.08901653 | 0.02880376 | 0.09722126 | ME2       |
| 55322  | ENSG00000082213 | 604.553271 | -0.24557449 | 0.10288056 | 0.01293906 | 0.05127042 | C5orf22   |
| 905    | ENSG00000082258 | 1404.67279 | 0.04949446  | 0.08183289 | 0.53646728 | 0.74722766 | CCNT2     |
| 57579  | ENSG00000082269 | 328.020699 | 0.07968105  | 0.1414794  | 0.54535192 | 0.75298369 | FAM135A   |
| 1310   | ENSG00000082293 | 81.5442538 | 2.80002626  | 0.38800121 | 1.65E-14   | 4.30E-13   | COL19A1   |
| 23136  | ENSG00000082397 | 0          | NA          | NA         | NA         | NA         | EPB41L3   |
| 22837  | ENSG00000082438 | 326.903072 | 0.52391199  | 0.1578409  | 0.00031508 | 0.0021408  | COBLL1    |
| 1741   | ENSG00000082458 | 449.765009 | -1.47425535 | 0.12933759 | 3.40E-31   | 2.01E-29   | DLG3      |
| 3776   | ENSG00000082482 | 0          | NA          | NA         | NA         | NA         | KCNK2     |
| 56256  | ENSG00000082497 | 763.452034 | -0.65707097 | 0.12867925 | 7.86E-08   | 1.05E-06   | SERTAD4   |
| 7188   | ENSG00000082512 | 1638.54081 | -0.00516736 | 0.08024672 | 0.9450322  | 0.97756908 | TRAF5     |
| 29093  | ENSG00000082515 | 294.923405 | -0.03232947 | 0.1507322  | 0.81454099 | 0.91592004 | MRPL22    |
| 25929  | ENSG00000082516 | 854.085247 | -0.12935363 | 0.09353208 | 0.15313909 | 0.33796213 | GEMIN5    |
| 4986   | ENSG00000082556 | 0          | NA          | NA         | NA         | NA         | OPRK1     |
| 4779   | ENSG00000082641 | 5667.90997 | 0.04121511  | 0.0565866  | 0.46205601 | 0.68509014 | NFE2L1    |
| 54437  | ENSG00000082684 | 1279.01962 | -0.46788737 | 0.08768236 | 4.12E-08   | 5.72E-07   | SEMA5B    |
| 2932   | ENSG00000082701 | 2076.62309 | -0.14365364 | 0.07146395 | 0.04043591 | 0.12641796 | GSK3B     |
| 3693   | ENSG00000082781 | 1671.85588 | 0.22189114  | 0.07837996 | 0.00378613 | 0.01841552 | ITGB5     |
| 23085  | ENSG00000082805 | 1740.43733 | -0.58247199 | 0.07548129 | 3.78E-15   | 1.05E-13   | ERC1      |
| 7514   | ENSG00000082898 | 5673.41673 | -0.26252171 | 0.0702656  | 0.00014047 | 0.00103258 | XPO1      |
| 10141  | ENSG00000082929 | 0.29863895 | -0.02292439 | 0.3852726  | 0.68753245 | NA         | LINC01587 |
| 11342  | ENSG00000082996 | 503.586278 | 0.21332566  | 0.11525004 | 0.05201021 | 0.15357681 | RNF13     |
| 80036  | ENSG00000083067 | 4.00900217 | 4.87082168  | 2.83506314 | 0.00081999 | 0.0049751  | TRPM3     |
| 79728  | ENSG00000083093 | 346.145041 | -0.06334658 | 0.1463259  | 0.63838651 | 0.81803815 | PALB2     |
| 23033  | ENSG00000083097 | 655.911158 | -0.51083227 | 0.12773803 | 2.34E-05   | 0.00020686 | DOPIA     |
| 57226  | ENSG00000083099 | 852.076074 | -0.65358358 | 0.09655651 | 3.36E-12   | 7.38E-11   | LYRM2     |
| 594    | ENSG00000083123 | 348.438715 | -0.21807654 | 0.16088785 | 0.13414232 | 0.30838745 | BCKDHB    |
| 7994   | ENSG00000083168 | 2154.61674 | -0.08330947 | 0.0700963  | 0.22625898 | 0.44057103 | KAT6A     |
| 79670  | ENSG00000083223 | 498.187992 | 0.07463454  | 0.13202721 | 0.54782825 | 0.75451702 | TUT7      |
| 9706   | ENSG00000083290 | 1214.47221 | 0.37485306  | 0.10253046 | 0.00014366 | 0.00105371 | ULK2      |



|       |                 |            |             |            |            |            |          |
|-------|-----------------|------------|-------------|------------|------------|------------|----------|
| 79977 | ENSG00000083307 | 0.5354285  | -0.00914583 | 0.38315739 | 0.81662091 | NA         | GRHL2    |
| 3842  | ENSG00000083312 | 5626.70964 | -0.11189409 | 0.07089791 | 0.10789372 | 0.26339503 | TNPO1    |
| 5351  | ENSG00000083444 | 1927.75691 | 0.03111174  | 0.08731331 | 0.71514519 | 0.86271551 | PLOD1    |
| 5026  | ENSG00000083454 | 317.697229 | -0.95750805 | 0.16155271 | 4.11E-10   | 7.40E-09   | P2RX5    |
| 3682  | ENSG00000083457 | 270.595236 | -0.19663141 | 0.13662331 | 0.1222365  | 0.289124   | ITGAE    |
| 22894 | ENSG00000083520 | 1848.81286 | -0.2368772  | 0.08486132 | 0.0041164  | 0.01975552 | DIS3     |
| 10464 | ENSG00000083535 | 469.502811 | -0.17344043 | 0.11662558 | 0.11713086 | 0.28025522 | PIBF1    |
| 81550 | ENSG00000083544 | 459.795588 | 0.12000892  | 0.12126528 | 0.29708842 | 0.52379226 | TDRD3    |
| NA    | ENSG00000083622 | 0          | NA          | NA         | NA         | NA         |          |
| 26747 | ENSG00000083635 | 255.086292 | 0.16770507  | 0.14144857 | 0.20176748 | 0.40724024 | NUFIP1   |
| 23047 | ENSG00000083642 | 1517.6978  | -0.39401974 | 0.07406635 | 5.61E-08   | 7.64E-07   | PDS5B    |
| 5019  | ENSG00000083720 | 1128.10279 | -0.50311109 | 0.11336129 | 3.47E-06   | 3.58E-05   | OXCT1    |
| 10325 | ENSG00000083750 | 188.42205  | 0.58620843  | 0.18833955 | 0.00051579 | 0.00331605 | RRAGB    |
| 1833  | ENSG00000083782 | 0          | NA          | NA         | NA         | NA         | EPYC     |
| 1540  | ENSG00000083799 | 563.786108 | -0.23355095 | 0.12445764 | 0.04647415 | 0.14072758 | CYLD     |
| 10998 | ENSG00000083807 | 170.04239  | 0.0683144   | 0.16503208 | 0.64769515 | 0.82431548 | SLC27A5  |
| 25799 | ENSG00000083812 | 476.338641 | -0.17398083 | 0.14887128 | 0.20290426 | 0.40881694 | ZNF324   |
| 79891 | ENSG00000083814 | 14.2852517 | 0.12233633  | 0.35194739 | 0.48124528 | 0.70210356 | ZNF671   |
| 55659 | ENSG00000083817 | 115.820474 | -0.20125252 | 0.20790517 | 0.25166434 | 0.47149344 | ZNF416   |
| 54807 | ENSG00000083828 | 172.94107  | -0.17311683 | 0.18747149 | 0.28953475 | 0.51546747 | ZNF586   |
| 55663 | ENSG00000083838 | 261.480314 | 0.25917266  | 0.16981876 | 0.08862683 | 0.22782537 | ZNF446   |
| 9422  | ENSG00000083844 | 486.379679 | -0.12460212 | 0.12672632 | 0.29587153 | 0.52252903 | ZNF264   |
| 6193  | ENSG00000083845 | 15854.2456 | -0.04577609 | 0.05546423 | 0.40610254 | 0.63436535 | RPS5     |
| 2195  | ENSG00000083857 | 1771.01747 | 1.72740459  | 0.09048784 | 1.83E-82   | 3.86E-80   | FAT1     |
| 91746 | ENSG00000083896 | 1736.17635 | 0.02446692  | 0.09391292 | 0.78730234 | 0.90331242 | YTHDC1   |
| 25978 | ENSG00000083937 | 263.397775 | 0.37757904  | 0.14508582 | 0.00493233 | 0.02298202 | CHMP2B   |
| 64744 | ENSG00000084070 | 635.478969 | -0.42599494 | 0.10880815 | 4.32E-05   | 0.00035934 | SMAP2    |
| 10450 | ENSG00000084072 | 1160.49366 | 0.06989032  | 0.08299831 | 0.38882221 | 0.61802858 | PPIE     |
| 10269 | ENSG00000084073 | 850.716367 | -0.36130665 | 0.08850086 | 2.61E-05   | 0.00022851 | ZMPSTE24 |
| 56910 | ENSG00000084090 | 2638.14275 | -0.16961556 | 0.06673621 | 0.00978402 | 0.04078904 | STARD7   |
| 84273 | ENSG00000084092 | 657.002129 | -0.13118182 | 0.108375   | 0.20612564 | 0.41317248 | NOA1     |
| 5978  | ENSG00000084093 | 800.435824 | -0.25466073 | 0.09575514 | 0.00580242 | 0.02639156 | REST     |
| 3034  | ENSG00000084110 | 12.162019  | -0.18229654 | 0.38625731 | 0.28421776 | 0.50933794 | HAL      |
| 54434 | ENSG00000084112 | 1538.75157 | 0.01240383  | 0.09974622 | 0.898687   | 0.95556135 | SSH1     |
| 2950  | ENSG00000084207 | 6206.73674 | 0.31534029  | 0.05783491 | 3.36E-08   | 4.72E-07   | GSTP1    |
| 334   | ENSG00000084234 | 6175.65934 | -0.02922233 | 0.06139102 | 0.62906829 | 0.81212356 | APLP2    |
| 57613 | ENSG00000084444 | 515.551532 | -0.00088818 | 0.1093887  | 0.99235064 | 0.99756121 | FAM234B  |
| 6579  | ENSG00000084453 | 138.595779 | 0.18515138  | 0.25222516 | 0.34150354 | 0.57180671 | SLCO1A2  |

|           |                 |            |             |            |            |            |          |
|-----------|-----------------|------------|-------------|------------|------------|------------|----------|
| 51729     | ENSG00000084463 | 1974.44436 | -0.32039033 | 0.07955085 | 3.71E-05   | 0.00031408 | WBP11    |
| 8668      | ENSG00000084623 | 4455.56933 | -0.03696552 | 0.06413426 | 0.55824622 | 0.76291851 | EIF3I    |
| 79570     | ENSG00000084628 | 1234.45822 | 0.09797057  | 0.07634075 | 0.19053737 | 0.39185876 | NKAIN1   |
| 1307      | ENSG00000084636 | 471.420813 | -0.2949289  | 0.11599641 | 0.00742426 | 0.0324658  | COL16A1  |
| 200081    | ENSG00000084652 | 2160.20057 | -0.279337   | 0.06509402 | 1.32E-05   | 0.00012298 | TXLNA    |
| 338       | ENSG00000084674 | 4.04695161 | -0.02723176 | 0.36707948 | 0.80912095 | 0.91334153 | APOB     |
| 8648      | ENSG00000084676 | 961.968592 | -0.21271437 | 0.08991455 | 0.01469442 | 0.05669726 | NCOA1    |
| 60509     | ENSG00000084693 | 1469.09927 | 0.13740134  | 0.07554343 | 0.06348446 | 0.17888533 | AGBL5    |
| 22979     | ENSG00000084710 | 1160.29873 | -0.39541749 | 0.09044721 | 6.57E-06   | 6.45E-05   | EFR3B    |
| 3797      | ENSG00000084731 | 3470.40989 | -0.33990971 | 0.06035672 | 1.12E-08   | 1.69E-07   | KIF3C    |
| 10890     | ENSG00000084733 | 3181.88843 | -0.09888916 | 0.07969838 | 0.20604638 | 0.41316859 | RAB10    |
| 2646      | ENSG00000084734 | 2.2499202  | 0.0223147   | 0.37776887 | 0.77212347 | NA         | GCKR     |
| 3030      | ENSG00000084754 | 4644.78744 | -0.02777482 | 0.05481614 | 0.60729944 | 0.79664586 | HADHA    |
| 22924     | ENSG00000084764 | 684.706263 | -0.15900224 | 0.09668022 | 0.08849211 | 0.22759703 | MAPRE3   |
| 790       | ENSG00000084774 | 3639.97359 | 0.16431739  | 0.06246512 | 0.00784813 | 0.0339749  | CAD      |
| 966       | ENSG00000085063 | 984.944389 | -0.029412   | 0.08528553 | 0.72153334 | 0.86709971 | CD59     |
| 3732      | ENSG00000085117 | 40.3095565 | -0.5014664  | 0.41737    | 0.04944658 | 0.14780908 | CD82     |
| 63035     | ENSG00000085185 | 971.220055 | 0.22921545  | 0.10416107 | 0.02197263 | 0.07856136 | BCORL1   |
| 546       | ENSG00000085224 | 4998.95273 | -0.18314058 | 0.05817525 | 0.00142616 | 0.00802923 | ATRX     |
| 102157402 | ENSG00000085231 | 273.776398 | 0.10736242  | 0.13708336 | 0.40203562 | 0.63031025 | AK6      |
| 2219      | ENSG00000085265 | 0          | NA          | NA         | NA         | NA         | FCN1     |
| 55892     | ENSG00000085274 | 443.365488 | -0.17307768 | 0.14243728 | 0.18921753 | 0.39003384 | MYNN     |
| 2122      | ENSG00000085276 | 32.8931136 | 4.07656085  | 0.67742002 | 5.43E-11   | 1.07E-09   | MECOM    |
| 9522      | ENSG00000085365 | 1430.19138 | -0.24454246 | 0.08017304 | 0.00177314 | 0.00965665 | SCAMP1   |
| 5550      | ENSG00000085377 | 1521.75335 | -0.17649159 | 0.08596517 | 0.03479301 | 0.11282988 | PREP     |
| 57531     | ENSG00000085382 | 583.866131 | 0.23682528  | 0.13017514 | 0.05236844 | 0.15426725 | HACE1    |
| 81929     | ENSG00000085415 | 898.982913 | -0.43044714 | 0.09088332 | 1.06E-06   | 1.19E-05   | SEH1L    |
| 22911     | ENSG00000085433 | 611.312439 | -0.24469343 | 0.12000568 | 0.03084473 | 0.10243712 | WDR47    |
| 57590     | ENSG00000085449 | 664.04579  | -0.00236385 | 0.10352723 | 0.98016041 | 0.99338199 | WDFY1    |
| 5016      | ENSG00000085465 | 15.2975615 | 0.1196481   | 0.33964961 | 0.51074684 | 0.72599857 | OVGP1    |
| 29957     | ENSG00000085491 | 1076.07664 | -0.421638   | 0.08164155 | 1.21E-07   | 1.58E-06   | SLC25A24 |
| 4216      | ENSG00000085511 | 850.332774 | 0.13197148  | 0.13633239 | 0.30023426 | 0.52737031 | MAP3K4   |
| 29992     | ENSG00000085514 | 16.3042177 | 0.11022157  | 0.33308097 | 0.54823534 | 0.75480124 | PILRA    |
| 57549     | ENSG00000085552 | 1534.70774 | 0.34545067  | 0.07095198 | 7.00E-07   | 8.13E-06   | IGSF9    |
| 5243      | ENSG00000085563 | 2454.71962 | 0.08340459  | 0.0718108  | 0.23726933 | 0.45434065 | ABCB1    |
| 7760      | ENSG00000085644 | 606.866627 | -0.10390282 | 0.10730134 | 0.31139665 | 0.53905904 | ZNF213   |
| 231       | ENSG00000085662 | 4142.19936 | -0.34541958 | 0.05752157 | 1.19E-09   | 2.04E-08   | AKR1B1   |
| 8895      | ENSG00000085719 | 1549.56186 | -0.14290837 | 0.08031632 | 0.06840063 | 0.18835094 | CPNE3    |

|       |                 |            |             |            |            |            |         |
|-------|-----------------|------------|-------------|------------|------------|------------|---------|
| 54700 | ENSG00000085721 | 1365.23432 | -0.29742955 | 0.0793234  | 0.00012272 | 0.00091257 | RRN3    |
| 2017  | ENSG00000085733 | 3524.39453 | 0.18839411  | 0.05684029 | 0.00079693 | 0.00485749 | CTTN    |
| 7481  | ENSG00000085741 | 5.41149357 | -0.19271736 | 0.43567528 | 0.10177579 | 0.25256182 | WNT11   |
| 4528  | ENSG00000085760 | 602.838139 | -0.14262301 | 0.11682881 | 0.19876205 | 0.40314524 | MTIF2   |
| 23259 | ENSG00000085788 | 1510.02005 | -0.09844865 | 0.11023018 | 0.34957865 | 0.58004855 | DDHD2   |
| 22996 | ENSG00000085831 | 86.0557512 | -0.26378789 | 0.22501575 | 0.15410922 | 0.33936549 | TTC39A  |
| 2060  | ENSG00000085832 | 1015.83795 | -0.07162453 | 0.11488803 | 0.51239474 | 0.7276095  | EPS15   |
| 4998  | ENSG00000085840 | 472.291088 | -0.29384023 | 0.11117969 | 0.00559555 | 0.02559734 | ORC1    |
| 4258  | ENSG00000085871 | 69.7098674 | -0.36088754 | 0.26839586 | 0.0815353  | 0.21429626 | MGST2   |
| 10523 | ENSG00000085872 | 2679.80005 | 0.04117322  | 0.06267374 | 0.50592445 | 0.72177288 | CHERP   |
| 55054 | ENSG00000085978 | 602.603366 | -0.10892833 | 0.12626202 | 0.3595241  | 0.58949503 | ATG16L1 |
| 55230 | ENSG00000085982 | 827.004033 | -0.03480821 | 0.1171201  | 0.75390252 | 0.88515954 | USP40   |
| 55624 | ENSG00000085998 | 1766.26498 | 0.36485848  | 0.07792542 | 1.67E-06   | 1.82E-05   | POMGNT1 |
| 8438  | ENSG00000085999 | 612.526345 | -0.14409842 | 0.12059126 | 0.20736085 | 0.41455455 | RAD54L  |
| 23139 | ENSG00000086015 | 2003.31035 | 0.47862151  | 0.06668975 | 3.14E-13   | 7.38E-12   | MAST2   |
| 3301  | ENSG00000086061 | 5298.95016 | 0.20781663  | 0.09363867 | 0.02194003 | 0.07847309 | DNAJA1  |
| 2683  | ENSG00000086062 | 388.750327 | 0.01656741  | 0.12308255 | 0.88801805 | 0.95125955 | B4GALT1 |
| 51510 | ENSG00000086065 | 1335.23668 | 0.02418787  | 0.07732308 | 0.75058494 | 0.8826224  | CHMP5   |
| 4799  | ENSG00000086102 | 1075.74348 | -0.07042269 | 0.08333669 | 0.38590764 | 0.61510241 | NFX1    |
| 363   | ENSG00000086159 | 31.3864409 | 0.18873974  | 0.34102104 | 0.3403152  | 0.57056767 | AQP6    |
| 27292 | ENSG00000086189 | 536.010387 | 0.01353794  | 0.12037739 | 0.90640991 | 0.95930719 | DIMT1   |
| 51194 | ENSG00000086200 | 433.875499 | -0.11365276 | 0.13581775 | 0.36941753 | 0.59883728 | IPO11   |
| 2346  | ENSG00000086205 | 0          | NA          | NA         | NA         | NA         | FOLH1   |
| 27102 | ENSG00000086232 | 5631.45315 | -0.02152883 | 0.06396853 | 0.73204244 | 0.87198139 | EIF2AK1 |
| 51314 | ENSG00000086288 | 0          | NA          | NA         | NA         | NA         | NME8    |
| 54749 | ENSG00000086289 | 575.703309 | 0.09657654  | 0.12713806 | 0.42119594 | 0.64719079 | EPDR1   |
| 29887 | ENSG00000086300 | 125.639958 | -0.02620305 | 0.18157804 | 0.86883167 | 0.94277075 | SNX10   |
| 22929 | ENSG00000086475 | 2162.05107 | -0.14820912 | 0.06854158 | 0.02779316 | 0.0944206  | SEPHS1  |
| 10573 | ENSG00000086504 | 1277.5272  | 0.00760246  | 0.08636215 | 0.92979643 | 0.97064482 | MRPL28  |
| 3049  | ENSG00000086506 | 71.0494068 | -0.10666134 | 0.2470302  | 0.57457091 | 0.77361067 | HBQ1    |
| 80271 | ENSG00000086544 | 216.868175 | 0.29227458  | 0.17495445 | 0.06079677 | 0.17313162 | ITPKC   |
| 4680  | ENSG00000086548 | 0          | NA          | NA         | NA         | NA         | CEACAM6 |
| 2196  | ENSG00000086570 | 14.842522  | -0.03808087 | 0.33531069 | 0.81662183 | 0.9166503  | FAT2    |
| 55696 | ENSG00000086589 | 925.489025 | 0.0397977   | 0.09021578 | 0.65059175 | 0.82544657 | RBM22   |
| 10959 | ENSG00000086598 | 2902.04922 | 0.23236965  | 0.08381075 | 0.00443041 | 0.02104325 | TMED2   |
| 56605 | ENSG00000086619 | 227.530237 | 0.65495023  | 0.17062442 | 3.07E-05   | 0.00026309 | ERO1B   |
| 54469 | ENSG00000086666 | 836.09206  | -0.01891679 | 0.10223552 | 0.84714496 | 0.93052693 | ZFAND6  |
| 3294  | ENSG00000086696 | 0.34746601 | 0.02370763  | 0.3853651  | 0.61987128 | NA         | HSD17B2 |

|       |                 |            |             |            |            |            |           |
|-------|-----------------|------------|-------------|------------|------------|------------|-----------|
| 55787 | ENSG00000086712 | 978.934849 | -0.17173471 | 0.08558148 | 0.03924133 | 0.12375585 | TXLNG     |
| 5475  | ENSG00000086717 | 214.183415 | -1.74975928 | 0.20354871 | 5.72E-19   | 2.03E-17   | PPEF1     |
| 7462  | ENSG00000086730 | 50.731378  | 0.18519258  | 0.29594916 | 0.36186581 | 0.59157216 | LAT2      |
| 10075 | ENSG00000086758 | 8390.39368 | -0.26702594 | 0.04996654 | 6.83E-08   | 9.21E-07   | HUWE1     |
| 9183  | ENSG00000086827 | 433.534013 | -0.18065865 | 0.12860887 | 0.13480285 | 0.3092967  | ZW10      |
| 79796 | ENSG00000086848 | 691.929871 | 0.13933033  | 0.13014374 | 0.25533023 | 0.47623877 | ALG9      |
| 4606  | ENSG00000086967 | 0.89929436 | 0.05171731  | 0.38894682 | 0.25054435 | NA         | MYBPC2    |
| 50507 | ENSG00000086991 | 71.3050622 | 0.05209877  | 0.22798853 | 0.77806055 | 0.8983839  | NOX4      |
| 8310  | ENSG00000087008 | 321.623377 | -0.0146588  | 0.13698651 | 0.90753949 | 0.95963244 | ACOX3     |
| 8898  | ENSG00000087053 | 1477.53023 | -0.26690221 | 0.08730334 | 0.00166331 | 0.00916671 | MTMR2     |
| 23645 | ENSG00000087074 | 621.30701  | 0.49552052  | 0.11952887 | 1.34E-05   | 0.00012497 | PPP1R15A  |
| 51171 | ENSG00000087076 | 128.244982 | 0.11888325  | 0.19427607 | 0.47956726 | 0.70069817 | HSD17B14  |
| 7205  | ENSG00000087077 | 27.3375461 | 0.1595089   | 0.32612701 | 0.41632264 | 0.64306408 | TRIP6     |
| 43    | ENSG00000087085 | 123.954051 | -0.7519899  | 0.21846327 | 0.00010591 | 0.00080078 | ACHE      |
| 2512  | ENSG00000087086 | 5105.78808 | 0.43133249  | 0.05306311 | 2.14E-16   | 6.39E-15   | FTL       |
| 51593 | ENSG00000087087 | 3654.33241 | 0.14513001  | 0.06930474 | 0.03319171 | 0.10866725 | SRRT      |
| 581   | ENSG00000087088 | 794.340287 | -0.02145147 | 0.09484352 | 0.8146973  | 0.91594007 | BAX       |
| 51701 | ENSG00000087095 | 265.879484 | 0.11127649  | 0.14238342 | 0.40044702 | 0.62894783 | NLK       |
| 94005 | ENSG00000087111 | 1338.64353 | -0.55301809 | 0.10216546 | 2.10E-08   | 3.04E-07   | PIGS      |
| 9509  | ENSG00000087116 | 614.015409 | -1.47985948 | 0.13623661 | 1.36E-28   | 7.47E-27   | ADAMTS2   |
| 28983 | ENSG00000087128 | 0          | NA          | NA         | NA         | NA         | TMPRSS11E |
| 56970 | ENSG00000087152 | 1851.85181 | -0.01591556 | 0.07162858 | 0.82110305 | 0.91847813 | ATXN7L3   |
| 9489  | ENSG00000087157 | 1323.87768 | 0.05798718  | 0.07540195 | 0.43329619 | 0.65859161 | PGS1      |
| 5705  | ENSG00000087191 | 3586.81115 | -0.23740415 | 0.06185593 | 9.85E-05   | 0.00075201 | PSMC5     |
| 51720 | ENSG00000087206 | 504.011171 | -0.26234222 | 0.13995207 | 0.04221342 | 0.13092298 | UIMC1     |
| 1071  | ENSG00000087237 | 0          | NA          | NA         | NA         | NA         | CETP      |
| 4313  | ENSG00000087245 | 6978.22328 | -0.38171849 | 0.06110345 | 2.40E-10   | 4.43E-09   | MMP2      |
| 4504  | ENSG00000087250 | 0          | NA          | NA         | NA         | NA         | MT3       |
| 54947 | ENSG00000087253 | 498.680355 | 0.43678651  | 0.13871134 | 0.00074336 | 0.00456317 | LPCAT2    |
| 2775  | ENSG00000087258 | 2169.49554 | -1.63680153 | 0.09553669 | 6.01E-67   | 9.10E-65   | GNAO1     |
| 55239 | ENSG00000087263 | 999.136572 | 0.09029332  | 0.0810341  | 0.25449911 | 0.47504585 | OGFOD1    |
| 6452  | ENSG00000087266 | 1797.49054 | 0.11927499  | 0.08011588 | 0.1278244  | 0.29835718 | SH3BP2    |
| 8602  | ENSG00000087269 | 925.482786 | -0.2109677  | 0.09085242 | 0.01618691 | 0.06138156 | NOP14     |
| 118   | ENSG00000087274 | 4172.13359 | 0.04514035  | 0.06298106 | 0.4691574  | 0.69153662 | ADD1      |
| 79944 | ENSG00000087299 | 355.779458 | 0.01911054  | 0.12551028 | 0.87349224 | 0.94441388 | L2HGDH    |
| 57544 | ENSG00000087301 | 444.500836 | 0.03102149  | 0.14433154 | 0.81714597 | 0.91675019 | TXNDC16   |
| 51637 | ENSG00000087302 | 1756.3891  | 0.0289054   | 0.07958161 | 0.71149979 | 0.86137148 | RTRAF     |
| 22795 | ENSG00000087303 | 58.8277439 | 2.05492782  | 0.35643806 | 5.64E-10   | 1.01E-08   | NID2      |

|           |                 |            |             |            |            |            |         |
|-----------|-----------------|------------|-------------|------------|------------|------------|---------|
| 64395     | ENSG00000087338 | 1098.0844  | 0.48753959  | 0.08280475 | 1.64E-09   | 2.75E-08   | GMCL1   |
| 10992     | ENSG00000087365 | 5512.09834 | 0.11756938  | 0.06285933 | 0.05789482 | 0.16678281 | SF3B2   |
| 57542     | ENSG00000087448 | 1643.83626 | -0.27203176 | 0.07381417 | 0.00016743 | 0.00121091 | KLHL42  |
| 2778      | ENSG00000087460 | 41601.9251 | 0.00100361  | 0.06049793 | 0.98493264 | 0.99473578 | GNAS    |
| 10059     | ENSG00000087470 | 2136.16883 | -0.13390945 | 0.06769858 | 0.0442528  | 0.13549004 | DNM1L   |
| 5744      | ENSG00000087494 | 1.78906957 | 0.1167159   | 0.40584882 | 0.09508355 | NA         | PTHLH   |
| 116154    | ENSG00000087495 | 312.836105 | -1.42525727 | 0.14723545 | 3.25E-23   | 1.43E-21   | PHACTR3 |
| 51290     | ENSG00000087502 | 392.151196 | -0.52411503 | 0.14442963 | 9.89E-05   | 0.00075342 | ERGIC2  |
| 7022      | ENSG00000087510 | 0.16735865 | 0.01897177  | 0.38482933 | 0.78225479 | NA         | TFAP2C  |
| 6790      | ENSG00000087586 | 765.992854 | -0.21661423 | 0.1097582  | 0.03866306 | 0.122321   | AURKA   |
| 57091     | ENSG00000087589 | 0.48848646 | 0.010387    | 0.3833355  | 0.7981203  | NA         | CASS4   |
| 8544      | ENSG00000087842 | 956.575602 | -0.42027642 | 0.08615633 | 5.35E-07   | 6.35E-06   | PIR     |
| 28971     | ENSG00000087884 | 174.636586 | 0.49036324  | 0.18535272 | 0.00301368 | 0.0151909  | AAMDC   |
| 5990      | ENSG00000087903 | 228.849215 | 0.49578343  | 0.22168877 | 0.00859801 | 0.03661397 | RFX2    |
| 339175    | ENSG00000087995 | 929.95825  | 0.00476228  | 0.08971049 | 0.95796523 | 0.98268084 | METTL2A |
| 6820      | ENSG00000088002 | 5.59979227 | 0.11821099  | 0.38732451 | 0.33507036 | 0.56494141 | SULT2B1 |
| 29929     | ENSG00000088035 | 239.639626 | 0.0894508   | 0.17118169 | 0.56036802 | 0.76415299 | ALG6    |
| 4849      | ENSG00000088038 | 1429.35919 | 0.18526915  | 0.09208203 | 0.03794946 | 0.12067829 | CNOT3   |
| 51206     | ENSG00000088053 | 0.51932689 | -0.00272327 | 0.38299064 | 0.95315258 | NA         | GP6     |
| 5775      | ENSG00000088179 | 682.707459 | -0.02507769 | 0.16067291 | 0.85675315 | 0.93605226 | PTPN4   |
| 8886      | ENSG00000088205 | 3125.40916 | -0.07282003 | 0.06982515 | 0.28901083 | 0.5149506  | DDX18   |
| 8570      | ENSG00000088247 | 5761.37154 | -0.08600469 | 0.06234709 | 0.16194509 | 0.35042673 | KHSRP   |
| 2767      | ENSG00000088256 | 1871.40091 | 0.0774946   | 0.07781724 | 0.30953485 | 0.53735494 | GNA11   |
| 55616     | ENSG00000088280 | 505.216931 | 0.67241763  | 0.11629878 | 1.86E-09   | 3.08E-08   | ASAP3   |
| 55741     | ENSG00000088298 | 293.008307 | 0.35152248  | 0.14464679 | 0.00863682 | 0.03676346 | EDEM2   |
| 111089941 | ENSG00000088298 | 293.008307 | 0.35152248  | 0.14464679 | 0.00863682 | 0.03676346 | EDEM2   |
| 1789      | ENSG00000088305 | 406.318402 | -0.08846948 | 0.11914287 | 0.43376533 | 0.65909763 | DNMT3B  |
| 28954     | ENSG00000088320 | 0.14931947 | -0.01844332 | 0.38480212 | 0.84537521 | NA         | REM1    |
| 22974     | ENSG00000088325 | 3194.07264 | -0.21749756 | 0.0596917  | 0.00022107 | 0.00155479 | TPX2    |
| NA        | ENSG00000088340 | 129.454837 | 1.15207406  | 0.25251269 | 5.01E-07   | 5.98E-06   | FER1L4  |
| 81572     | ENSG00000088356 | 413.61161  | 0.09268897  | 0.11694017 | 0.40570976 | 0.63390153 | PDRG1   |
| 2036      | ENSG00000088367 | 926.172462 | -0.45141995 | 0.10988528 | 1.77E-05   | 0.00016089 | EPB41L1 |
| 6564      | ENSG00000088386 | 0          | NA          | NA         | NA         | NA         | SLC15A1 |
| 23348     | ENSG00000088387 | 1046.6666  | -0.19220153 | 0.09880254 | 0.04351394 | 0.13376459 | DOCK9   |
| 55608     | ENSG00000088448 | 1667.3584  | 0.28815312  | 0.08418    | 0.00043887 | 0.00288031 | ANKRD10 |
| 23483     | ENSG00000088451 | 195.488779 | -0.13159781 | 0.16886006 | 0.38452757 | 0.61356176 | TGDS    |
| 1795      | ENSG00000088538 | 7.8122382  | 0.01009596  | 0.35344413 | 0.94497249 | 0.97756908 | DOCK3   |
| 51161     | ENSG00000088543 | 642.735177 | 0.27395049  | 0.10224506 | 0.00531508 | 0.02450642 | C3orf18 |

|        |                 |            |             |            |            |            |           |
|--------|-----------------|------------|-------------|------------|------------|------------|-----------|
| 57017  | ENSG00000088682 | 1073.38576 | -0.04053269 | 0.08247239 | 0.61533974 | 0.80264813 | COQ9      |
| 55287  | ENSG00000088726 | 0          | NA          | NA         | NA         | NA         | TMEM40    |
| 64147  | ENSG00000088727 | 103.877597 | 0.06334891  | 0.21344823 | 0.72283513 | 0.86755463 | KIF9      |
| 79822  | ENSG00000088756 | 288.663618 | 1.16864547  | 0.14909602 | 5.01E-16   | 1.46E-14   | ARHGAP28  |
| 54675  | ENSG00000088766 | 537.53324  | -0.25426736 | 0.1255741  | 0.0315222  | 0.10433774 | CRLS1     |
| 140850 | ENSG00000088782 | 0          | NA          | NA         | NA         | NA         | DEFB127   |
| 23368  | ENSG00000088808 | 556.152033 | -0.13708538 | 0.12369883 | 0.23906976 | 0.45681827 | PPP1R13B  |
| 8455   | ENSG00000088812 | 1642.12496 | 0.03335161  | 0.07150133 | 0.63657426 | 0.81722218 | ATRN      |
| 54498  | ENSG00000088826 | 178.981102 | 0.54800388  | 0.18108658 | 0.00078469 | 0.00479467 | SMOX      |
| 6614   | ENSG00000088827 | 0.34051795 | -0.00034736 | 0.38336263 | 0.96854535 | NA         | SIGLEC1   |
| 2280   | ENSG00000088832 | 2655.48901 | -0.29193314 | 0.07698399 | 0.00010472 | 0.00079333 | FKBP1A    |
| 55968  | ENSG00000088833 | 968.605552 | 0.06386157  | 0.10245236 | 0.51856212 | 0.73226139 | NSFL1C    |
| 83959  | ENSG00000088836 | 98.4035764 | 2.18656012  | 0.27903146 | 2.91E-16   | 8.60E-15   | SLC4A11   |
| 25943  | ENSG00000088854 | 835.019877 | 0.01274983  | 0.09487916 | 0.89040722 | 0.95232275 | C20orf194 |
| 79175  | ENSG00000088876 | 572.224343 | -0.03644166 | 0.10678167 | 0.72156332 | 0.86709971 | ZNF343    |
| 57593  | ENSG00000088881 | 782.379161 | 0.26507356  | 0.09308599 | 0.00326815 | 0.01627514 | EBF4      |
| 56265  | ENSG00000088882 | 3532.5501  | 0.33963799  | 0.06068597 | 1.38E-08   | 2.05E-07   | CPXM1     |
| 57506  | ENSG00000088888 | 1911.32898 | -0.23058027 | 0.06889909 | 0.00065566 | 0.00407911 | MAVS      |
| 9762   | ENSG00000088899 | 318.876858 | -0.07727193 | 0.13447073 | 0.53869723 | 0.74837075 | LZTS3     |
| 2160   | ENSG00000088926 | 0.16735865 | 0.01897177  | 0.38482933 | 0.78225479 | NA         | F11       |
| 22803  | ENSG00000088930 | 3186.24784 | 0.06333829  | 0.0698617  | 0.35738072 | 0.58754007 | XRN2      |
| 55857  | ENSG00000088970 | 556.649078 | 1.01718959  | 0.13423322 | 4.63E-15   | 1.27E-13   | KIZ       |
| 8655   | ENSG00000088986 | 2812.2686  | -0.08043118 | 0.05981179 | 0.17304467 | 0.36578929 | DYNLL1    |
| 54997  | ENSG00000088992 | 32.2182841 | 1.92141159  | 0.51006847 | 9.57E-06   | 9.11E-05   | TESC      |
| 27131  | ENSG00000089006 | 1226.14358 | -0.16004606 | 0.0842588  | 0.0509731  | 0.15127992 | SNX5      |
| 6128   | ENSG00000089009 | 23054.4307 | -0.0434937  | 0.04576921 | 0.34648396 | 0.57723082 | RPL6      |
| 55423  | ENSG00000089012 | 0          | NA          | NA         | NA         | NA         | SIRPG     |
| 8550   | ENSG00000089022 | 1108.31483 | 0.20359477  | 0.11483394 | 0.06353298 | 0.17894581 | MAPKAPK5  |
| 5027   | ENSG00000089041 | 256.761114 | -0.45597234 | 0.17392509 | 0.00339687 | 0.01681903 | P2RX7     |
| 51575  | ENSG00000089048 | 483.250392 | -0.20105124 | 0.11158522 | 0.05882987 | 0.16858119 | ESF1      |
| 10741  | ENSG00000089050 | 580.024441 | 0.07698703  | 0.10444132 | 0.44412294 | 0.66905081 | RBBP9     |
| 51433  | ENSG00000089053 | 2365.73494 | -0.0254029  | 0.07211347 | 0.71917381 | 0.86548638 | ANAPC5    |
| 9962   | ENSG00000089057 | 1123.90037 | -0.18169358 | 0.08819317 | 0.03404738 | 0.11097421 | SLC23A2   |
| 80024  | ENSG00000089060 | 178.546697 | 0.72833534  | 0.24071    | 0.00045883 | 0.00299643 | SLC8B1    |
| 29058  | ENSG00000089063 | 1547.98995 | -0.29387426 | 0.07393583 | 4.92E-05   | 0.00040306 | TMEM230   |
| 55184  | ENSG00000089091 | 162.845613 | 0.08363785  | 0.17505757 | 0.59230422 | 0.78672529 | DZANK1    |
| 84678  | ENSG00000089094 | 1186.94249 | -0.02878862 | 0.09249679 | 0.74749637 | 0.88138554 | KDM2B     |
| 26074  | ENSG00000089101 | 3.29145081 | 0.10213872  | 0.39056912 | 0.30667213 | 0.53422766 | CFAP61    |

|        |                 |            |             |            |            |            |         |
|--------|-----------------|------------|-------------|------------|------------|------------|---------|
| 64211  | ENSG00000089116 | 0          | NA          | NA         | NA         | NA         | LHX5    |
| 55617  | ENSG00000089123 | 126.779518 | 0.13764462  | 0.19476525 | 0.41410183 | 0.64130672 | TASP1   |
| 4938   | ENSG00000089127 | 212.59035  | -1.74912899 | 0.19692173 | 5.04E-20   | 1.88E-18   | OAS1    |
| 10985  | ENSG00000089154 | 7411.65121 | 0.21477917  | 0.07239911 | 0.00250057 | 0.01297707 | GCN1    |
| 6175   | ENSG00000089157 | 40712.737  | -0.07057619 | 0.05653006 | 0.20606367 | 0.41316859 | RPLP0   |
| 5829   | ENSG00000089159 | 670.104165 | 0.2697192   | 0.10537764 | 0.00761419 | 0.0331284  | PXN     |
| 23409  | ENSG00000089163 | 25.3447074 | -0.01111555 | 0.29935894 | 0.95106951 | 0.97996464 | SIRT4   |
| 22895  | ENSG00000089169 | 1071.94886 | -3.05957045 | 0.1213583  | 9.02E-142  | 5.77E-139  | RPH3A   |
| 55614  | ENSG00000089177 | 747.760016 | -0.44427696 | 0.11782252 | 7.27E-05   | 0.00057444 | KIF16B  |
| 51605  | ENSG00000089195 | 981.730704 | 0.20214985  | 0.08476444 | 0.01441832 | 0.05579472 | TRMT6   |
| 1114   | ENSG00000089199 | 5625.73052 | 0.27673948  | 0.07076962 | 6.73E-05   | 0.00053594 | CHGB    |
| 5037   | ENSG00000089220 | 3721.24647 | -0.2340627  | 0.06231905 | 0.00013816 | 0.00101823 | PEBP1   |
| 6910   | ENSG00000089225 | 0          | NA          | NA         | NA         | NA         | TBX5    |
| 8315   | ENSG00000089234 | 518.119431 | -0.09912172 | 0.11450745 | 0.36087727 | 0.59075159 | BRAP    |
| 10961  | ENSG00000089248 | 1870.97819 | 0.0773408   | 0.07153601 | 0.27142027 | 0.49480244 | ERP29   |
| 4842   | ENSG00000089250 | 140.733007 | -1.90049167 | 0.27360653 | 1.89E-13   | 4.54E-12   | NOS1    |
| 2521   | ENSG00000089280 | 14969.4256 | 0.14797503  | 0.04697924 | 0.00150275 | 0.00839611 | FUS     |
| 3476   | ENSG00000089289 | 636.136294 | -0.00679048 | 0.10731014 | 0.94581968 | 0.97800919 | IGBP1   |
| 53827  | ENSG00000089327 | 0          | NA          | NA         | NA         | NA         | FXVD5   |
| 55900  | ENSG00000089335 | 855.04795  | -0.18568558 | 0.08822628 | 0.03022391 | 0.1009669  | ZNF302  |
| 57655  | ENSG00000089351 | 3250.26322 | 0.11380878  | 0.06049266 | 0.05674474 | 0.16411308 | GRAMD1A |
| 5349   | ENSG00000089356 | 0.18922458 | 0.01954053  | 0.38488496 | 0.78225479 | NA         | FXVD3   |
| 9843   | ENSG00000089472 | 6.32793369 | 0.059961    | 0.36052813 | 0.66780322 | 0.83659884 | HEPH    |
| 29965  | ENSG00000089486 | 615.144653 | 0.07588738  | 0.11201798 | 0.47923053 | 0.70061045 | CDIP1   |
| 113540 | ENSG00000089505 | 56.897814  | 0.15913566  | 0.25711234 | 0.4165973  | 0.64309452 | CMTM1   |
| 23415  | ENSG00000089558 | 80.5122893 | -1.60477771 | 0.31129636 | 1.89E-08   | 2.75E-07   | KCNH4   |
| 23193  | ENSG00000089597 | 8233.84381 | 0.01914051  | 0.05391904 | 0.72051805 | 0.86657845 | GANAB   |
| 51291  | ENSG00000089639 | 775.105438 | -0.3819732  | 0.10870874 | 0.00023988 | 0.00167285 | GMIP    |
| 55285  | ENSG00000089682 | 451.715148 | 0.10662316  | 0.13224513 | 0.39062574 | 0.62000118 | RBM41   |
| 332    | ENSG00000089685 | 2067.14692 | -1.04473598 | 0.07452286 | 1.55E-45   | 1.37E-43   | BIRC5   |
| 3902   | ENSG00000089692 | 53.4228807 | 0.97926948  | 0.35407469 | 0.00059116 | 0.00373523 | LAG3    |
| 8079   | ENSG00000089693 | 3255.91609 | 0.07314495  | 0.05830181 | 0.20455286 | 0.4113032  | MLF2    |
| 78990  | ENSG00000089723 | 176.896046 | 0.04353749  | 0.16826758 | 0.77475554 | 0.89613481 | OTUB2   |
| 57062  | ENSG00000089737 | 2594.17559 | -0.12730391 | 0.08277484 | 0.11465033 | 0.27560769 | DDX24   |
| 7597   | ENSG00000089775 | 409.052314 | 0.00255983  | 0.12390209 | 0.98400741 | 0.99453916 | ZBTB25  |
| 25977  | ENSG00000089818 | 714.241359 | -0.51897032 | 0.10251233 | 1.54E-07   | 1.99E-06   | NECAP1  |
| 393    | ENSG00000089820 | 333.492218 | 0.33738432  | 0.14130537 | 0.01007611 | 0.04167381 | ARHGAP4 |
| 170961 | ENSG00000089847 | 12.211461  | 0.16837814  | 0.38069998 | 0.31964791 | 0.54727882 | ANKRD24 |

|       |                 |            |             |            |            |            |           |
|-------|-----------------|------------|-------------|------------|------------|------------|-----------|
| 55760 | ENSG00000089876 | 477.568162 | 0.11221772  | 0.1162449  | 0.31096678 | 0.53866926 | DHX32     |
| 23186 | ENSG00000089902 | 948.939739 | -0.14931142 | 0.08827711 | 0.08157778 | 0.21430178 | RCOR1     |
| 55668 | ENSG00000089916 | 1683.15683 | 0.1186947   | 0.07632323 | 0.11260659 | 0.27179011 | GPATCH2L  |
| 8425  | ENSG00000090006 | 1527.54642 | 0.45143951  | 0.09474603 | 8.63E-07   | 9.90E-06   | LTBP4     |
| 645   | ENSG00000090013 | 111.480064 | 1.07736196  | 0.25591091 | 2.81E-06   | 2.94E-05   | BLVRB     |
| 6548  | ENSG00000090020 | 266.901297 | 0.50268638  | 0.14563307 | 0.00020998 | 0.00148625 | SLC9A1    |
| 10558 | ENSG00000090054 | 906.221936 | 0.15417434  | 0.09553435 | 0.09540946 | 0.2407381  | SPTLC1    |
| 10914 | ENSG00000090060 | 3272.7309  | -0.37142165 | 0.07005448 | 6.32E-08   | 8.55E-07   | PAPOLA    |
| 8812  | ENSG00000090061 | 761.032017 | 0.11006048  | 0.09663261 | 0.23927786 | 0.4571163  | CCNK      |
| 57060 | ENSG00000090097 | 3758.7523  | 0.0501793   | 0.06545251 | 0.43758265 | 0.66277119 | PCBP4     |
| 5996  | ENSG00000090104 | 0          | NA          | NA         | NA         | NA         | RGS1      |
| 83719 | ENSG00000090238 | 665.245305 | -0.05258131 | 0.09962057 | 0.58394554 | 0.78020525 | YPEL3     |
| 51650 | ENSG00000090263 | 793.241511 | -0.43679379 | 0.13493663 | 0.00054822 | 0.0034928  | MRPS33    |
| 4708  | ENSG00000090266 | 1329.31158 | -0.03931201 | 0.07388361 | 0.58688845 | 0.78237765 | NDUFB2    |
| 10726 | ENSG00000090273 | 2181.45501 | -0.00282518 | 0.07921303 | 0.97194544 | 0.98950111 | NUDC      |
| 10296 | ENSG00000090316 | 1570.85396 | 0.19680097  | 0.07219623 | 0.00547617 | 0.02514982 | MAEA      |
| 3383  | ENSG00000090339 | 0.66256418 | 0.02385211  | 0.38420072 | 0.58205561 | NA         | ICAM1     |
| 29888 | ENSG00000090372 | 3835.65729 | -0.01079498 | 0.06610003 | 0.86670713 | 0.94134063 | STRN4     |
| 11213 | ENSG00000090376 | 0.34110234 | 0.02362647  | 0.38535339 | 0.62410984 | NA         | IRAK3     |
| 4069  | ENSG00000090382 | 0          | NA          | NA         | NA         | NA         | LYZ       |
| 6476  | ENSG00000090402 | 0          | NA          | NA         | NA         | NA         | SI        |
| 79594 | ENSG00000090432 | 510.562816 | -0.12642945 | 0.11757566 | 0.25765933 | 0.47887326 | MUL1      |
| 7023  | ENSG00000090447 | 454.055317 | 0.34959935  | 0.13471825 | 0.00547506 | 0.02514982 | TFAP4     |
| 10081 | ENSG00000090470 | 685.320365 | -0.22834922 | 0.09797252 | 0.01559398 | 0.05950848 | PDCD7     |
| 51324 | ENSG00000090487 | 1118.73488 | -0.1758986  | 0.08127895 | 0.02657591 | 0.0913173  | SPG21     |
| 26998 | ENSG00000090512 | 0          | NA          | NA         | NA         | NA         | FETUB     |
| 51726 | ENSG00000090520 | 1583.9047  | 0.47559125  | 0.09685865 | 3.88E-07   | 4.71E-06   | DNAJB11   |
| 55214 | ENSG00000090530 | 1.2916023  | -0.0017475  | 0.38121454 | 0.8540625  | NA         | P3H2      |
| 7066  | ENSG00000090534 | 1.10774217 | 0.07660367  | 0.39435724 | 0.13775798 | NA         | THPO      |
| 8646  | ENSG00000090539 | 24.9656752 | 1.35893396  | 0.56633113 | 0.00095343 | 0.00568221 | CHRD      |
| 2323  | ENSG00000090554 | 43.9032883 | 0.55338768  | 0.36619003 | 0.02872717 | 0.0970608  | FLT3LG    |
| 9727  | ENSG00000090565 | 1188.34521 | 0.20744834  | 0.11453468 | 0.05725361 | 0.16524755 | RAB11FIP3 |
| 84572 | ENSG00000090581 | 491.754742 | 0.24459933  | 0.11817242 | 0.02917024 | 0.09819645 | GNPTG     |
| 10795 | ENSG00000090612 | 591.847496 | 0.03080516  | 0.1087108  | 0.76853227 | 0.89330656 | ZNF268    |
| 2802  | ENSG00000090615 | 1642.62887 | 0.21365904  | 0.12442882 | 0.0689279  | 0.18930364 | GOLGA3    |
| 8761  | ENSG00000090621 | 3684.76772 | -0.27512049 | 0.06738357 | 3.25E-05   | 0.00027804 | PABPC4    |
| 30835 | ENSG00000090659 | 0          | NA          | NA         | NA         | NA         | CD209     |
| 79603 | ENSG00000090661 | 334.078864 | 0.07195313  | 0.13804571 | 0.57724514 | 0.77565483 | CERS4     |



|        |                 |            |             |            |            |            |         |
|--------|-----------------|------------|-------------|------------|------------|------------|---------|
| 57192  | ENSG00000090674 | 479.109799 | -0.0144912  | 0.1087472  | 0.88868954 | 0.95146564 | MCOLN1  |
| 84196  | ENSG00000090686 | 1988.4707  | -0.19514855 | 0.07306243 | 0.00642377 | 0.02873028 | USP48   |
| 1947   | ENSG00000090776 | 436.352276 | -0.23336968 | 0.11349803 | 0.03083398 | 0.10243712 | EFNB1   |
| 55066  | ENSG00000090857 | 1789.50866 | -0.13758886 | 0.07473202 | 0.06015382 | 0.17157157 | PDPR    |
| 16     | ENSG00000090861 | 3338.22466 | 0.29283711  | 0.10449669 | 0.00351118 | 0.01731586 | AARS1   |
| 2734   | ENSG00000090863 | 3148.31885 | -0.09404446 | 0.06742586 | 0.15597427 | 0.34213777 | GLG1    |
| 24137  | ENSG00000090889 | 1829.23689 | -0.25520748 | 0.07984699 | 0.00104879 | 0.00615074 | KIF4A   |
| 27327  | ENSG00000090905 | 2861.2442  | -0.09234472 | 0.08109404 | 0.24256933 | 0.46079811 | TNRC6A  |
| 64857  | ENSG00000090924 | 1617.49529 | 0.33086411  | 0.08834692 | 0.00011519 | 0.00086261 | PLEKHG2 |
| 10683  | ENSG00000090932 | 429.672711 | 1.14360104  | 0.13802042 | 1.30E-17   | 4.17E-16   | DLL3    |
| 57106  | ENSG00000090971 | 1049.88408 | -0.11538073 | 0.09778516 | 0.22149515 | 0.43427846 | NAT14   |
| 57605  | ENSG00000090975 | 166.372564 | -0.39597839 | 0.19150467 | 0.01823755 | 0.0674558  | PITPNM2 |
| 55763  | ENSG00000090989 | 848.63933  | -0.14851791 | 0.10623197 | 0.14409975 | 0.32391367 | EXOC1   |
| 54439  | ENSG00000091009 | 829.769488 | -0.10726314 | 0.10334622 | 0.2801695  | 0.50481908 | RBM27   |
| 5459   | ENSG00000091010 | 2.62351936 | -0.01430628 | 0.37029266 | 0.88693064 | 0.95029993 | POU4F3  |
| 114882 | ENSG00000091039 | 1534.0969  | 0.19269783  | 0.07841872 | 0.01196865 | 0.04814639 | OSBPL8  |
| 113878 | ENSG00000091073 | 256.989896 | 0.35919057  | 0.18276373 | 0.02628559 | 0.09050816 | DTX2    |
| 58484  | ENSG00000091106 | 32.1608099 | 0.14835626  | 0.3079529  | 0.45606792 | 0.67958359 | NLRC4   |
| 54517  | ENSG00000091127 | 1002.55452 | -0.2306384  | 0.10684704 | 0.02414558 | 0.08477229 | PUS7    |
| 22798  | ENSG00000091128 | 10.2512443 | -0.32701741 | 0.50086456 | 0.09037644 | 0.23142341 | LAMB4   |
| 4897   | ENSG00000091129 | 6493.24926 | -1.99646402 | 0.08442248 | 7.81E-125  | 3.44E-122  | NRCAM   |
| 3912   | ENSG00000091136 | 14987.1866 | 0.75139309  | 0.05029786 | 4.27E-51   | 4.35E-49   | LAMB1   |
| 5172   | ENSG00000091137 | 5.1145725  | 0.21780831  | 0.45722653 | 0.07344828 | 0.19834008 | SLC26A4 |
| 1811   | ENSG00000091138 | 0.37844916 | 0.02407552  | 0.3854191  | 0.60038877 | NA         | SLC26A3 |
| 1738   | ENSG00000091140 | 1663.97534 | -0.04376771 | 0.08406105 | 0.59292734 | 0.78702605 | DLD     |
| 23335  | ENSG00000091157 | 446.67366  | -0.11896795 | 0.17365523 | 0.44034544 | 0.66517856 | WDR7    |
| 9352   | ENSG00000091164 | 1188.57673 | -0.29355905 | 0.08409204 | 0.0003352  | 0.00226201 | TXNL1   |
| 3568   | ENSG00000091181 | 0.63841587 | -0.02095331 | 0.38316251 | 0.66869642 | NA         | IL5RA   |
| 368    | ENSG00000091262 | 44.1111167 | 0.3967814   | 0.37482331 | 0.09243266 | 0.23508014 | ABCC6   |
| 54918  | ENSG00000091317 | 964.764331 | 0.37576237  | 0.08613673 | 7.02E-06   | 6.87E-05   | CMTM6   |
| 3655   | ENSG00000091409 | 192.625525 | 1.86427439  | 0.58886618 | 7.09E-05   | 0.0005627  | ITGA6   |
| 11069  | ENSG00000091428 | 170.274274 | 0.65522603  | 0.24362141 | 0.00156125 | 0.00868383 | RAPGEF4 |
| 51776  | ENSG00000091436 | 774.19022  | 0.05788964  | 0.09125991 | 0.51416237 | 0.72921448 | MAP3K20 |
| 23676  | ENSG00000091482 | 0          | NA          | NA         | NA         | NA         | SMPX    |
| 2271   | ENSG00000091483 | 1549.31018 | -0.02510788 | 0.07708248 | 0.73835891 | 0.87630444 | FH      |
| 23231  | ENSG00000091490 | 43.2495412 | 1.79026968  | 0.42052847 | 1.27E-06   | 1.41E-05   | SEL1L3  |
| 7018   | ENSG00000091513 | 26.1923303 | 0.20102578  | 0.45770739 | 0.0250472  | 0.08728903 | TF      |
| 55573  | ENSG00000091527 | 1945.0432  | -0.22562937 | 0.07103587 | 0.0012063  | 0.00695729 | CDV3    |

|        |                 |            |             |            |            |            |          |
|--------|-----------------|------------|-------------|------------|------------|------------|----------|
| 51168  | ENSG00000091536 | 27.9750333 | 0.83686252  | 0.51158222 | 0.00960516 | 0.04013614 | MYO15A   |
| 54890  | ENSG00000091542 | 1735.90924 | -0.15853793 | 0.08982866 | 0.06898013 | 0.18942086 | ALKBH5   |
| 350    | ENSG00000091583 | 0          | NA          | NA         | NA         | NA         | APOH     |
| 22861  | ENSG00000091592 | 1.77586445 | 0.11350373  | 0.40444609 | 0.10090946 | NA         | NLRP1    |
| 83394  | ENSG00000091622 | 36.8650558 | 0.44633637  | 0.40162163 | 0.07008531 | 0.19173917 | PITPNM3  |
| 9552   | ENSG00000091640 | 587.151087 | 0.11750386  | 0.10264857 | 0.23462363 | 0.45154068 | SPAG7    |
| 23594  | ENSG00000091651 | 950.7034   | -0.09610486 | 0.08972347 | 0.26999466 | 0.49316601 | ORC6     |
| 79776  | ENSG00000091656 | 1563.46446 | -0.02857941 | 0.08195196 | 0.73191264 | 0.87198139 | ZFHX4    |
| 57084  | ENSG00000091664 | 0.16735865 | 0.01897177  | 0.38482933 | 0.78225479 | NA         | SLC17A6  |
| 1357   | ENSG00000091704 | 14.1017182 | 0.6266389   | 0.75661373 | 0.02965602 | 0.09943814 | CPA1     |
| 51530  | ENSG00000091732 | 633.289733 | -0.17937239 | 0.10054557 | 0.0638562  | 0.17957577 | ZC3HC1   |
| 2099   | ENSG00000091831 | 18.5037785 | 0.2911797   | 0.39474055 | 0.17452117 | 0.36815523 | ESR1     |
| 26575  | ENSG00000091844 | 349.762772 | -0.3581964  | 0.13759351 | 0.00519993 | 0.024009   | RGS17    |
| 285    | ENSG00000091879 | 67.8093508 | -0.35483489 | 0.2778292  | 0.09146504 | 0.23347687 | ANGPT2   |
| 84336  | ENSG00000091947 | 534.521006 | 0.1307369   | 0.12505628 | 0.26877988 | 0.49166446 | TMEM101  |
| 4345   | ENSG00000091972 | 687.163003 | -0.46531438 | 0.10209812 | 2.25E-06   | 2.40E-05   | CD200    |
| 151887 | ENSG00000091986 | 76.4805366 | 3.46260159  | 0.40925717 | 5.26E-19   | 1.87E-17   | CCDC80   |
| 1215   | ENSG00000092009 | 0          | NA          | NA         | NA         | NA         | CMA1     |
| 5720   | ENSG00000092010 | 793.83941  | 0.36556298  | 0.0968028  | 9.21E-05   | 0.00070708 | PSME1    |
| 55012  | ENSG00000092020 | 538.378713 | -0.38361536 | 0.10930196 | 0.00024277 | 0.00169124 | PPP2R3C  |
| 54930  | ENSG00000092036 | 416.39747  | -0.01999413 | 0.11885279 | 0.85866677 | 0.93701934 | HAUS4    |
| 84502  | ENSG00000092051 | 2702.28621 | -0.43125257 | 0.06523243 | 1.86E-11   | 3.85E-10   | JPH4     |
| 4625   | ENSG00000092054 | 0.32287603 | 0.00126362  | 0.38336747 | 0.96898071 | NA         | MYH7     |
| 1053   | ENSG00000092067 | 0          | NA          | NA         | NA         | NA         | CEBPE    |
| 23428  | ENSG00000092068 | 0.3166136  | 0.00100275  | 0.38336578 | 0.96824525 | NA         | SLC7A8   |
| 55644  | ENSG00000092094 | 499.028617 | 0.25397545  | 0.11744582 | 0.0227228  | 0.08067651 | OSGEP    |
| 51310  | ENSG00000092096 | 1778.18585 | -0.43842057 | 0.07837681 | 1.06E-08   | 1.60E-07   | SLC22A17 |
| 55072  | ENSG00000092098 | 720.75231  | 0.08809168  | 0.12938112 | 0.46994468 | 0.6922856  | RNF31    |
| 23256  | ENSG00000092108 | 748.224877 | 0.08282654  | 0.10481445 | 0.41187139 | 0.63975013 | SCFD1    |
| 55632  | ENSG00000092140 | 968.74083  | -0.03956686 | 0.09546937 | 0.66797254 | 0.83666483 | G2E3     |
| 25831  | ENSG00000092148 | 2591.27713 | -0.64798975 | 0.06381678 | 8.64E-25   | 4.08E-23   | HECTD1   |
| 3183   | ENSG00000092199 | 11014.2619 | -0.09963954 | 0.06110795 | 0.09615897 | 0.24213656 | HNRNPC   |
| 57096  | ENSG00000092200 | 2.63070417 | -0.05873686 | 0.37950679 | 0.51362568 | 0.7287659  | RPGRIP1  |
| 11198  | ENSG00000092201 | 7276.36198 | -0.0295347  | 0.0624724  | 0.63105687 | 0.81347335 | SUPT16H  |
| 9878   | ENSG00000092203 | 1057.17034 | 0.06422321  | 0.09116887 | 0.4716618  | 0.69399066 | TOX4     |
| 8487   | ENSG00000092208 | 115.849789 | -0.00495777 | 0.19376964 | 0.97508275 | 0.99122005 | GEMIN2   |
| 7051   | ENSG00000092295 | 33.5015326 | 0.14758414  | 0.30532463 | 0.45744796 | 0.68095495 | TGM1     |
| 26277  | ENSG00000092330 | 466.848439 | -0.10363706 | 0.10962417 | 0.32297729 | 0.55059885 | TINF2    |

|        |                 |            |             |            |            |            |         |
|--------|-----------------|------------|-------------|------------|------------|------------|---------|
| 1618   | ENSG00000092345 | 0          | NA          | NA         | NA         | NA         | DAZL    |
| 90665  | ENSG00000092377 | 0          | NA          | NA         | NA         | NA         | TBL1Y   |
| 57556  | ENSG00000092421 | 1171.52357 | -0.46057391 | 0.11978958 | 5.18E-05   | 0.00042165 | SEMA6A  |
| 54822  | ENSG00000092439 | 1265.38404 | -0.23542562 | 0.08171705 | 0.00312638 | 0.01569119 | TRPM7   |
| 7301   | ENSG00000092445 | 424.876839 | 0.06265595  | 0.1163143  | 0.57249568 | 0.7723153  | TYRO3   |
| 79968  | ENSG00000092470 | 650.524751 | -0.1878856  | 0.1103499  | 0.0745274  | 0.20049133 | WDR76   |
| 825    | ENSG00000092529 | 15.4555439 | 0.46866759  | 0.68790857 | 0.04034462 | 0.1262121  | CAPN3   |
| 8773   | ENSG00000092531 | 495.807452 | 0.64912411  | 0.11678426 | 7.19E-09   | 1.10E-07   | SNAP23  |
| 6913   | ENSG00000092607 | 0.15069912 | -0.01848503 | 0.38480575 | 0.84537521 | NA         | TBX15   |
| 26227  | ENSG00000092621 | 4086.67925 | 0.85138955  | 0.07962237 | 1.98E-27   | 1.03E-25   | PHGDH   |
| 1299   | ENSG00000092758 | 70.858305  | -0.28619266 | 0.27103074 | 0.16069379 | 0.34866195 | COL9A3  |
| 7430   | ENSG00000092820 | 2743.48916 | 0.07803575  | 0.06481975 | 0.22211066 | 0.43522721 | EZR     |
| 4637   | ENSG00000092841 | 4772.63191 | 0.04641563  | 0.05538374 | 0.39810042 | 0.62724844 | MYL6    |
| 26523  | ENSG00000092847 | 2047.05102 | 0.03486225  | 0.07398533 | 0.63162872 | 0.81371846 | AGO1    |
| 27285  | ENSG00000092850 | 72.8770416 | 0.06206171  | 0.22873361 | 0.73655026 | 0.87514416 | TEKT2   |
| 63967  | ENSG00000092853 | 1087.73625 | -0.65679253 | 0.09684133 | 3.07E-12   | 6.76E-11   | CLSPN   |
| 117584 | ENSG00000092871 | 521.912729 | 0.22736374  | 0.13491029 | 0.07108569 | 0.19367482 | RFFL    |
| 201294 | ENSG00000092929 | 356.330608 | -1.76517643 | 0.16750575 | 3.68E-27   | 1.89E-25   | UNC13D  |
| 79157  | ENSG00000092931 | 807.711602 | 0.28995077  | 0.11083672 | 0.00613593 | 0.02763606 | MFS11   |
| 1808   | ENSG00000092964 | 4779.91862 | -0.58152674 | 0.07284491 | 4.60E-16   | 1.35E-14   | DPYSL2  |
| 7042   | ENSG00000092969 | 14.002785  | 0.26578975  | 0.42725108 | 0.16748983 | 0.35846798 | TGFB2   |
| 55105  | ENSG00000092978 | 568.216099 | 0.04256986  | 0.1129478  | 0.69419824 | 0.85201936 | GPATCH2 |
| 10762  | ENSG00000093000 | 1980.3701  | -0.22198268 | 0.0733059  | 0.00199642 | 0.01068674 | NUP50   |
| 8318   | ENSG00000093009 | 900.409443 | -0.17186463 | 0.10213995 | 0.08009923 | 0.21143808 | CDC45   |
| 1312   | ENSG00000093010 | 1057.19898 | 0.47674041  | 0.09838428 | 5.36E-07   | 6.36E-06   | COMT    |
| 51816  | ENSG00000093072 | 9.6846022  | -0.18877255 | 0.39062628 | 0.27229743 | 0.49567676 | ADA2    |
| NA     | ENSG00000093100 | 163.634445 | -0.12134119 | 0.23506504 | 0.51506191 | 0.72955207 |         |
| 55350  | ENSG00000093134 | 0          | NA          | NA         | NA         | NA         | VNN3    |
| 55862  | ENSG00000093144 | 776.460611 | -0.27690046 | 0.09645216 | 0.00289192 | 0.01465533 | ECHDC1  |
| 9209   | ENSG00000093167 | 605.529277 | 0.12209088  | 0.09955073 | 0.20397409 | 0.41051388 | LRRFIP2 |
| 9117   | ENSG00000093183 | 1382.1905  | 0.04808656  | 0.07827336 | 0.53089155 | 0.74257279 | SEC22C  |
| 9942   | ENSG00000093217 | 229.93413  | -0.47812695 | 0.21969274 | 0.0103026  | 0.0424392  | XYLB    |
| 10013  | ENSG00000094631 | 1245.49974 | 0.05337202  | 0.11768906 | 0.63471669 | 0.81607019 | HDAC6   |
| 126370 | ENSG00000094661 | 0          | NA          | NA         | NA         | NA         | OR11I   |
| 2568   | ENSG00000094755 | 110.219282 | 0.06604363  | 0.20512813 | 0.70503455 | 0.85803894 | GABRP   |
| 3881   | ENSG00000094796 | 0          | NA          | NA         | NA         | NA         | KRT31   |
| 990    | ENSG00000094804 | 846.565189 | -0.48393745 | 0.11485509 | 1.02E-05   | 9.64E-05   | CDC6    |
| 139596 | ENSG00000094841 | 192.018553 | -0.04766275 | 0.15798443 | 0.73968891 | 0.8770894  | UPRT    |

|        |                 |            |             |            |            |            |          |
|--------|-----------------|------------|-------------|------------|------------|------------|----------|
| 8697   | ENSG00000094880 | 920.611814 | -0.04289107 | 0.08508878 | 0.60461652 | 0.79477849 | CDC23    |
| 8086   | ENSG00000094914 | 1036.5045  | 0.23213276  | 0.08209296 | 0.0037419  | 0.01824509 | AAAS     |
| 23468  | ENSG00000094916 | 9974.70667 | -0.13839723 | 0.06426474 | 0.02842603 | 0.09620819 | CBX5     |
| 2327   | ENSG00000094963 | 0          | NA          | NA         | NA         | NA         | FMO2     |
| 51430  | ENSG00000094975 | 1373.43903 | -0.12096665 | 0.07543331 | 0.10109103 | 0.25133408 | SUCO     |
| 4436   | ENSG00000095002 | 2573.33608 | -0.26043326 | 0.0732353  | 0.00028934 | 0.00197948 | MSH2     |
| 4214   | ENSG00000095015 | 2670.12307 | -0.71082041 | 0.06763362 | 1.78E-26   | 8.93E-25   | MAP3K1   |
| 1725   | ENSG00000095059 | 2468.49078 | -0.03513253 | 0.06350773 | 0.57225137 | 0.77229217 | DHPS     |
| 29911  | ENSG00000095066 | 670.072858 | 0.06319937  | 0.10982946 | 0.54838634 | 0.75487303 | HOOK2    |
| 120400 | ENSG00000095110 | 0          | NA          | NA         | NA         | NA         | NXPE1    |
| 372    | ENSG00000095139 | 2894.08521 | -0.00950174 | 0.06177007 | 0.87549476 | 0.94503896 | ARCN1    |
| 54566  | ENSG00000095203 | 46.1052914 | -2.14508194 | 0.39226232 | 2.99E-09   | 4.80E-08   | EPB41L4B |
| 55151  | ENSG00000095209 | 192.072592 | 0.05138836  | 0.19996665 | 0.76572372 | 0.89233237 | TMEM38B  |
| 5711   | ENSG00000095261 | 673.283447 | -0.24275783 | 0.11127202 | 0.02212582 | 0.07897159 | PSMD5    |
| 5742   | ENSG00000095303 | 16.9372067 | 0.51004696  | 0.56753505 | 0.05147257 | 0.15239282 | PTGS1    |
| 23511  | ENSG00000095319 | 2446.77666 | -0.09503987 | 0.07911783 | 0.21903075 | 0.43093714 | NUP188   |
| 1384   | ENSG00000095321 | 535.742726 | -0.04594193 | 0.11109091 | 0.6649009  | 0.83454529 | CRAT     |
| 10044  | ENSG00000095370 | 164.229618 | -1.58642517 | 0.24646804 | 7.97E-12   | 1.71E-10   | SH2D3C   |
| 54187  | ENSG00000095380 | 407.364721 | 0.07540513  | 0.13195325 | 0.54345169 | 0.75149877 | NANS     |
| 55357  | ENSG00000095383 | 74.4247461 | 0.4589695   | 0.26969581 | 0.03083486 | 0.10243712 | TBC1D2   |
| 25861  | ENSG00000095397 | 104.435008 | 2.26640351  | 0.27284818 | 6.64E-18   | 2.17E-16   | WHRN     |
| 5146   | ENSG00000095464 | 4.81283863 | -0.05747665 | 0.37155572 | 0.6047519  | 0.79485112 | PDE6C    |
| 55280  | ENSG00000095485 | 359.224066 | -0.09914006 | 0.15956878 | 0.49292825 | 0.71202899 | CWF19L1  |
| 57715  | ENSG00000095539 | 549.379703 | -0.10869713 | 0.11541388 | 0.32239947 | 0.54994458 | SEMA4G   |
| 9044   | ENSG00000095564 | 1469.66099 | 0.01131357  | 0.08708291 | 0.89405647 | 0.95417323 | BTAF1    |
| 64376  | ENSG00000095574 | 360.291723 | 0.04056864  | 0.1483713  | 0.76797362 | 0.89311821 | IKZF5    |
| 29760  | ENSG00000095585 | 0.31867469 | 0.00156311  | 0.38337037 | 0.96210221 | NA         | BLNK     |
| 7093   | ENSG00000095587 | 5.02055481 | -0.11774277 | 0.39017127 | 0.31279924 | 0.54072254 | TLL2     |
| 1592   | ENSG00000095596 | 0.50207596 | 0.02562368  | 0.38565771 | 0.52549886 | NA         | CYP26A1  |
| 56165  | ENSG00000095627 | 0          | NA          | NA         | NA         | NA         | TDRD1    |
| 10580  | ENSG00000095637 | 305.003757 | -0.68558363 | 0.14441044 | 4.78E-07   | 5.72E-06   | SORBS1   |
| 55118  | ENSG00000095713 | 132.551187 | -2.42599133 | 0.27494674 | 6.23E-20   | 2.32E-18   | CRTAC1   |
| 25805  | ENSG00000095739 | 483.244301 | -1.08634559 | 0.13363861 | 5.15E-17   | 1.59E-15   | BAMBI    |
| 3589   | ENSG00000095752 | 34.5656142 | 0.45248024  | 0.41581489 | 0.06754108 | 0.18665906 | IL11     |
| 53904  | ENSG00000095777 | 0          | NA          | NA         | NA         | NA         | MYO3A    |
| 51322  | ENSG00000095787 | 3804.55374 | -0.31051109 | 0.06236024 | 4.34E-07   | 5.23E-06   | WAC      |
| 1390   | ENSG00000095794 | 251.929157 | 0.35784684  | 0.15094631 | 0.00991631 | 0.04119337 | CREM     |
| 10101  | ENSG00000095906 | 1793.3488  | 0.18495115  | 0.06796377 | 0.00567449 | 0.02589278 | NUBP2    |

|        |                 |            |             |            |            |            |           |
|--------|-----------------|------------|-------------|------------|------------|------------|-----------|
| 23430  | ENSG00000095917 | 0          | NA          | NA         | NA         | NA         | TPSD1     |
| 284422 | ENSG00000095932 | 2.83971159 | -0.09934323 | 0.39119734 | 0.2958088  | 0.52251089 | SMIM24    |
| 3096   | ENSG00000095951 | 485.158986 | 0.01020434  | 0.1766054  | 0.94959545 | 0.97920861 | HIVEP1    |
| 54209  | ENSG00000095970 | 0          | NA          | NA         | NA         | NA         | TREM2     |
| 83795  | ENSG00000095981 | 0          | NA          | NA         | NA         | NA         | KCNK16    |
| 10321  | ENSG00000096006 | 0          | NA          | NA         | NA         | NA         | CRISP3    |
| 2289   | ENSG00000096060 | 968.347764 | -0.22920421 | 0.08491958 | 0.00553308 | 0.0253642  | FKBP5     |
| 6732   | ENSG00000096063 | 2074.28861 | -0.33431567 | 0.07108426 | 1.63E-06   | 1.77E-05   | SRPK1     |
| 27154  | ENSG00000096070 | 1236.45199 | 0.03661019  | 0.08066407 | 0.64309577 | 0.82167827 | BRPF3     |
| 55168  | ENSG00000096080 | 435.718723 | -0.03632647 | 0.12230578 | 0.75312635 | 0.88456232 | MRPS18A   |
| 5225   | ENSG00000096088 | 0.46899274 | -0.02782639 | 0.38571851 | 0.56951037 | NA         | PGC       |
| 28978  | ENSG00000096092 | 513.571968 | -0.54872324 | 0.11925522 | 1.43E-06   | 1.58E-05   | TMEM14A   |
| 114327 | ENSG00000096093 | 539.60449  | 0.06848033  | 0.16580268 | 0.64799663 | 0.82447067 | EFHC1     |
| 9436   | ENSG00000096264 | 0          | NA          | NA         | NA         | NA         | NCR2      |
| 3326   | ENSG00000096384 | 29152.3147 | -0.39548922 | 0.05691936 | 2.08E-12   | 4.66E-11   | HSP90AB1  |
| 4295   | ENSG00000096395 | 0          | NA          | NA         | NA         | NA         | MLN       |
| 988    | ENSG00000096401 | 1506.9979  | -0.00703306 | 0.0716254  | 0.91628762 | 0.96446211 | CDC5L     |
| 3710   | ENSG00000096433 | 375.09028  | 1.7064069   | 0.14978606 | 3.71E-31   | 2.19E-29   | ITPR3     |
| 7738   | ENSG00000096654 | 259.463075 | -0.08954598 | 0.14256488 | 0.49768658 | 0.71556647 | ZNF184    |
| 1832   | ENSG00000096696 | 0.173733   | 0.01914545  | 0.38484597 | 0.78225479 | NA         | DSP       |
| 23411  | ENSG00000096717 | 700.088915 | -0.48433516 | 0.11623247 | 1.25E-05   | 0.00011678 | SIRT1     |
| 3189   | ENSG00000096746 | 4600.5292  | 0.05252582  | 0.07469731 | 0.474264   | 0.69642496 | HNRNPH3   |
| 80173  | ENSG00000096872 | 251.576402 | 0.08183111  | 0.15988263 | 0.57438462 | 0.77352065 | IFT74     |
| 3717   | ENSG00000096968 | 165.563735 | -0.04217816 | 0.18261622 | 0.79159287 | 0.90499209 | JAK2      |
| 3594   | ENSG00000096996 | 0          | NA          | NA         | NA         | NA         | IL12RB1   |
| 25     | ENSG00000097007 | 3583.37804 | 0.00653297  | 0.06154443 | 0.91501702 | 0.96403708 | ABL1      |
| 11332  | ENSG00000097021 | 2336.35937 | -0.61337625 | 0.08269012 | 3.51E-14   | 8.97E-13   | ACOT7     |
| 51100  | ENSG00000097033 | 1003.80807 | -0.31409238 | 0.08262862 | 9.57E-05   | 0.00073257 | SH3GLB1   |
| 8317   | ENSG00000097046 | 545.141267 | -0.51714659 | 0.12413006 | 1.13E-05   | 0.0001064  | CDC7      |
| 84144  | ENSG00000097096 | 0.173124   | -0.01911262 | 0.38486262 | 0.84537521 | NA         | SYDE2     |
| 5125   | ENSG00000099139 | 0.14931947 | -0.01844332 | 0.38480212 | 0.84537521 | NA         | PCSK5     |
| 6319   | ENSG00000099194 | 12027.7078 | -0.76889773 | 0.07370918 | 3.26E-26   | 1.62E-24   | SCD       |
| 11018  | ENSG00000099203 | 350.096729 | 0.16209693  | 0.14184979 | 0.21782665 | 0.42963324 | TMED1     |
| 3983   | ENSG00000099204 | 3149.29661 | -0.17917573 | 0.06539728 | 0.00537202 | 0.02474022 | ABLM1     |
| 79956  | ENSG00000099219 | 321.64598  | 0.29287379  | 0.13227624 | 0.01804643 | 0.06707403 | ERMP1     |
| 22931  | ENSG00000099246 | 930.216463 | -0.15658336 | 0.12173878 | 0.17351102 | 0.36653625 | RAB18     |
| 8829   | ENSG00000099250 | 20.2095275 | -0.06329453 | 0.33040047 | 0.71377919 | 0.86192204 | NRP1      |
| 158160 | ENSG00000099251 | 69.1685925 | 0.34424025  | 0.26036504 | 0.0909034  | 0.23256267 | HSD17B7P2 |

|        |                 |            |             |            |            |            |           |
|--------|-----------------|------------|-------------|------------|------------|------------|-----------|
| 56952  | ENSG00000099256 | 104.19057  | 1.88235376  | 0.2833998  | 1.68E-12   | 3.76E-11   | PRTFDC1   |
| 54873  | ENSG00000099260 | 4.67014941 | 0.34438888  | 0.61776113 | 0.01905433 | 0.07005893 | PALMD     |
| 23555  | ENSG00000099282 | 304.580378 | -0.11996644 | 0.12822989 | 0.31979679 | 0.54738747 | TSPAN15   |
| 55506  | ENSG00000099284 | 2487.44578 | 0.04443189  | 0.06369805 | 0.47953149 | 0.70069817 | MACROH2A2 |
| 387680 | ENSG00000099290 | 910.85465  | 0.03864869  | 0.08950624 | 0.65772358 | 0.83026251 | WASHC2A   |
| 23031  | ENSG00000099308 | 591.692436 | -0.07084975 | 0.1102269  | 0.50081676 | 0.71803761 | MAST3     |
| 7593   | ENSG00000099326 | 1471.05783 | 0.19675159  | 0.07685886 | 0.00890542 | 0.03768041 | MZF1      |
| 79629  | ENSG00000099330 | 102.509284 | 0.16397341  | 0.21350568 | 0.35855714 | 0.5888398  | OCEL1     |
| 4650   | ENSG00000099331 | 2429.53892 | 0.00380308  | 0.07277458 | 0.95846048 | 0.98288396 | MYO9B     |
| 9424   | ENSG00000099337 | 147.564487 | -0.03156065 | 0.18531177 | 0.84450506 | 0.92965052 | KCNK6     |
| 57828  | ENSG00000099338 | 49.1796357 | 1.30066454  | 0.41727261 | 0.00012743 | 0.00094439 | CATSPERG  |
| 5714   | ENSG00000099341 | 2604.63871 | -0.07976099 | 0.06087893 | 0.18412416 | 0.3826844  | PSMD8     |
| 54620  | ENSG00000099364 | 2184.94438 | -0.06919536 | 0.08182714 | 0.38594835 | 0.61510241 | FBXL19    |
| 112755 | ENSG00000099365 | 495.098172 | -0.01431325 | 0.12737849 | 0.9041861  | 0.95807825 | STX1B     |
| 80270  | ENSG00000099377 | 54.4793218 | 0.87878234  | 0.42877315 | 0.00425723 | 0.02033792 | HSD3B7    |
| 9739   | ENSG00000099381 | 1307.28358 | -0.05048842 | 0.08792312 | 0.55433811 | 0.76027015 | SETD1A    |
| 9274   | ENSG00000099385 | 528.38595  | -0.11871339 | 0.10933811 | 0.25623784 | 0.47738504 | BCL7C     |
| 4113   | ENSG00000099399 | 5.21247095 | -0.08390827 | 0.37355326 | 0.50333537 | 0.72006071 | MAGEB2    |
| 1943   | ENSG00000099617 | 465.141271 | 0.08739839  | 0.11522618 | 0.42701081 | 0.65286501 | EFNA2     |
| 1153   | ENSG00000099622 | 4889.63036 | -0.13660346 | 0.06488642 | 0.03252284 | 0.10695396 | CIRBP     |
| 513    | ENSG00000099624 | 1193.10613 | 0.04880394  | 0.08216792 | 0.5428666  | 0.75092193 | ATP5F1D   |
| 255057 | ENSG00000099625 | 570.438944 | 0.02936302  | 0.11403561 | 0.7883815  | 0.90400376 | CBARP     |
| 83259  | ENSG00000099715 | 0          | NA          | NA         | NA         | NA         | PCDH11Y   |
| 266    | ENSG00000099721 | 0          | NA          | NA         | NA         | NA         | AMELY     |
| 5616   | ENSG00000099725 | 0          | NA          | NA         | NA         | NA         | PRKY      |
| 3483   | ENSG00000099769 | 3.70059091 | 0.17616579  | 0.42393767 | 0.13841044 | 0.31479274 | IGFALS    |
| 4670   | ENSG00000099783 | 7244.94505 | 0.01401712  | 0.07130203 | 0.84289926 | 0.92864956 | HNRNPM    |
| 51257  | ENSG00000099785 | 178.661826 | 0.50527422  | 0.19564573 | 0.00340963 | 0.0168738  | MARCHF2   |
| 4713   | ENSG00000099795 | 1216.02732 | 0.01003616  | 0.08118287 | 0.90008171 | 0.95573896 | NDUFB7    |
| 9524   | ENSG00000099797 | 1245.29758 | 0.06028654  | 0.0852682  | 0.46887031 | 0.69142165 | TECR      |
| 26517  | ENSG00000099800 | 1772.12279 | 0.01600822  | 0.07134232 | 0.82025582 | 0.91817957 | TIMM13    |
| 997    | ENSG00000099804 | 1141.55221 | 0.01398372  | 0.07987716 | 0.85865556 | 0.93701934 | CDC34     |
| 4507   | ENSG00000099810 | 1167.73084 | 0.05183845  | 0.10655188 | 0.61336377 | 0.80102272 | MTAP      |
| 126353 | ENSG00000099812 | 2.46553757 | -0.07738641 | 0.38729787 | 0.33570336 | NA         | MISP      |
| 283638 | ENSG00000099814 | 528.977794 | 0.32777646  | 0.10649354 | 0.00132107 | 0.00751221 | CEP170B   |
| 5434   | ENSG00000099817 | 2340.95868 | 0.02335563  | 0.06642138 | 0.72123843 | 0.86691933 | POLR2E    |
| 5442   | ENSG00000099821 | 1553.36095 | 0.18499288  | 0.09232696 | 0.03879572 | 0.12262339 | POLRMT    |
| 610    | ENSG00000099822 | 330.638438 | -0.31080098 | 0.14845919 | 0.02282897 | 0.08099549 | HCN2      |

|           |                 |            |             |            |            |            |          |
|-----------|-----------------|------------|-------------|------------|------------|------------|----------|
| 53841     | ENSG00000099834 | 3.27376587 | 0.03808873  | 0.3712284  | 0.72391962 | 0.86794586 | CDHR5    |
| 113177    | ENSG00000099840 | 38.6687979 | 1.09583901  | 0.52198789 | 0.00238071 | 0.01243635 | IZUMO4   |
| 8045      | ENSG00000099849 | 173.975149 | 0.16067944  | 0.21418575 | 0.3688712  | 0.59820516 | RASSF7   |
| 4616      | ENSG00000099860 | 6.53260176 | 0.20504903  | 0.436401   | 0.12728989 | 0.29752625 | GADD45B  |
| 5064      | ENSG00000099864 | 1583.18597 | -0.08217661 | 0.08416446 | 0.31587616 | 0.54382011 | PALM     |
| 8174      | ENSG00000099866 | 11.4165432 | 0.1454486   | 0.37020991 | 0.38352304 | 0.61270278 | MADCAM1  |
| 51214     | ENSG00000099869 | 33.6203711 | 1.28217301  | 0.44900432 | 0.00031983 | 0.00216791 | IGF2-AS  |
| 2872      | ENSG00000099875 | 1537.86056 | 0.16814491  | 0.07781642 | 0.02718939 | 0.09298521 | MKNK2    |
| 421       | ENSG00000099889 | 953.910118 | -0.57061405 | 0.08950023 | 5.98E-11   | 1.18E-09   | ARVCF    |
| 27037     | ENSG00000099899 | 1132.32097 | 0.0680048   | 0.0927045  | 0.45022876 | 0.67359465 | TRMT2A   |
| 5902      | ENSG00000099901 | 3697.44387 | 0.08632066  | 0.06852361 | 0.20066474 | 0.40584036 | RANBP1   |
| 29801     | ENSG00000099904 | 1425.74291 | 0.27050952  | 0.10204045 | 0.00583763 | 0.02653305 | ZDHHC8   |
| 84861     | ENSG00000099910 | 731.816878 | -0.07506445 | 0.1288832  | 0.53519184 | 0.74618455 | KLHL22   |
| 51586     | ENSG00000099917 | 1890.27822 | 0.04799115  | 0.07306332 | 0.50432534 | 0.72088002 | MED15    |
| 3053      | ENSG00000099937 | 0.48572904 | -0.01096121 | 0.38340473 | 0.81482371 | NA         | SERPIND1 |
| 9342      | ENSG00000099940 | 646.956833 | -0.05102255 | 0.12349725 | 0.66144995 | 0.8324506  | SNAP29   |
| 1399      | ENSG00000099942 | 2784.72548 | -0.01603676 | 0.05938499 | 0.78402576 | 0.90163872 | CRKL     |
| 8216      | ENSG00000099949 | 2093.92776 | 0.26841182  | 0.06421474 | 2.25E-05   | 0.00019993 | LZTR1    |
| 4320      | ENSG00000099953 | 408.546831 | 0.64155715  | 0.15151078 | 5.94E-06   | 5.90E-05   | MMP11    |
| 27443     | ENSG00000099954 | 0          | NA          | NA         | NA         | NA         | CECR2    |
| 6598      | ENSG00000099956 | 2938.5768  | 0.09714974  | 0.06924236 | 0.15390475 | 0.3390108  | SMARCB1  |
| 9127      | ENSG00000099957 | 103.836061 | -0.04754896 | 0.21634276 | 0.78873881 | 0.90411045 | P2RX6    |
| 91319     | ENSG00000099958 | 0.51350539 | 0.01481804  | 0.38307531 | 0.74411418 | NA         | DERL3    |
| 6545      | ENSG00000099960 | 0.93453969 | -0.05161064 | 0.38834234 | 0.35304854 | NA         | SLC7A4   |
| 23786     | ENSG00000099968 | 927.943534 | 0.19883485  | 0.10834699 | 0.0553358  | 0.16097686 | BCL2L13  |
| 100037417 | ENSG00000099974 | 42.112543  | -0.03397589 | 0.259969   | 0.8579906  | 0.936593   | DDTL     |
| 1652      | ENSG00000099977 | 823.115216 | 0.01037533  | 0.09267505 | 0.90936173 | 0.96089352 | DDT      |
| 100037417 | ENSG00000099977 | 823.115216 | 0.01037533  | 0.09267505 | 0.90936173 | 0.96089352 | DDT      |
| 2953      | ENSG00000099984 | 34.4067763 | 0.40183574  | 0.38948184 | 0.09165691 | 0.23379699 | GSTT2    |
| 5008      | ENSG00000099985 | 0.15069912 | -0.01848503 | 0.38480575 | 0.84537521 | NA         | OSM      |
| 23523     | ENSG00000099991 | 2272.89663 | -0.01951405 | 0.0722826  | 0.78258873 | 0.90103067 | CABIN1   |
| 83874     | ENSG00000099992 | 118.677798 | 0.1155499   | 0.20305726 | 0.50583702 | 0.72177288 | TBC1D10A |
| 56241     | ENSG00000099994 | 155.305859 | 2.93916216  | 0.24398793 | 1.63E-34   | 1.09E-32   | SUSD2    |
| 10291     | ENSG00000099995 | 2510.397   | -0.19494511 | 0.10854234 | 0.06025153 | 0.17177617 | SF3A1    |
| 2687      | ENSG00000099998 | 107.223379 | 1.1032245   | 0.25584779 | 1.66E-06   | 1.81E-05   | GGT5     |
| 200312    | ENSG00000099999 | 398.343668 | 0.4613267   | 0.14847067 | 0.0007888  | 0.00481677 | RNF215   |
| 23541     | ENSG00000100003 | 202.268499 | 0.08554277  | 0.22959188 | 0.6428578  | 0.82148002 | SEC14L2  |
| 266629    | ENSG00000100012 | 0.68114595 | 0.00157579  | 0.38130168 | 0.9744473  | NA         | SEC14L3  |

|        |                 |            |             |            |            |            |          |
|--------|-----------------|------------|-------------|------------|------------|------------|----------|
| 23384  | ENSG00000100014 | 2765.91505 | 0.02200025  | 0.06277988 | 0.72306853 | 0.86764418 | SPECC1L  |
| 23759  | ENSG00000100023 | 1674.75897 | 0.03489157  | 0.07313229 | 0.6275893  | 0.81099169 | PPIL2    |
| 51733  | ENSG00000100024 | 75.9321549 | 2.83794294  | 0.36376556 | 3.82E-16   | 1.12E-14   | UPB1     |
| 29799  | ENSG00000100027 | 783.136899 | 1.00778089  | 0.13318394 | 4.88E-15   | 1.34E-13   | YPEL1    |
| 6634   | ENSG00000100028 | 1904.9656  | 0.01834084  | 0.09750261 | 0.84682421 | 0.93052693 | SNRPD3   |
| 23481  | ENSG00000100029 | 1509.1961  | -0.14748042 | 0.07512323 | 0.04456191 | 0.13608807 | PES1     |
| 5594   | ENSG00000100030 | 1414.51626 | -0.44409874 | 0.09341561 | 9.20E-07   | 1.05E-05   | MAPK1    |
| 2678   | ENSG00000100031 | 14.9825898 | 1.17514467  | 0.8389459  | 0.00758004 | 0.03302328 | GGT1     |
| 5625   | ENSG00000100033 | 34.5219213 | 1.94878385  | 0.45563195 | 1.12E-06   | 1.25E-05   | PRODH    |
| 9647   | ENSG00000100034 | 1774.01162 | 0.01477898  | 0.08009728 | 0.85126462 | 0.93275912 | PPM1F    |
| 339665 | ENSG00000100036 | 177.377919 | -0.38502094 | 0.20518129 | 0.02889869 | 0.09740774 | SLC35E4  |
| 8940   | ENSG00000100038 | 1081.19954 | 0.39905924  | 0.08710896 | 2.47E-06   | 2.61E-05   | TOP3B    |
| 1417   | ENSG00000100053 | 0.78607846 | 0.00108047  | 0.38151834 | 0.98756414 | NA         | CRYBB3   |
| 27128  | ENSG00000100055 | 0          | NA          | NA         | NA         | NA         | CYTH4    |
| 8220   | ENSG00000100056 | 406.6422   | 0.07905359  | 0.12521447 | 0.50461667 | 0.72111066 | ESS2     |
| 1416   | ENSG00000100058 | 423.166224 | 0.06957884  | 0.1252562  | 0.55740872 | 0.76258372 | CRYBB2P1 |
| 4242   | ENSG00000100060 | 44.6750158 | -0.75810566 | 0.36630695 | 0.00551304 | 0.02528989 | MFNG     |
| 29775  | ENSG00000100065 | 275.129998 | -1.22966534 | 0.1513918  | 4.65E-17   | 1.44E-15   | CARD10   |
| NA     | ENSG00000100068 | 281.483357 | 0.16538336  | 0.13976232 | 0.20348209 | 0.40973152 | LRP5L    |
| 6576   | ENSG00000100075 | 1416.21772 | -0.44501676 | 0.09330273 | 8.54E-07   | 9.79E-06   | SLC25A1  |
| 157    | ENSG00000100077 | 4261.13671 | -0.10093708 | 0.06746379 | 0.12824175 | 0.29899782 | GRK3     |
| 50487  | ENSG00000100078 | 0.30139824 | -0.02296476 | 0.38527817 | 0.68536535 | NA         | PLA2G3   |
| 3957   | ENSG00000100079 | 0          | NA          | NA         | NA         | NA         | LGALS2   |
| 26088  | ENSG00000100083 | 1976.75024 | 0.27113519  | 0.07807574 | 0.00038086 | 0.00253648 | GGA1     |
| 7290   | ENSG00000100084 | 1524.41188 | -0.01155583 | 0.07395046 | 0.87284415 | 0.94439555 | HIRA     |
| 23616  | ENSG00000100092 | 485.694109 | 0.02482752  | 0.11238567 | 0.81824575 | 0.9171248  | SH3BP1   |
| 23544  | ENSG00000100095 | 1190.36996 | -3.2469177  | 0.11273855 | 5.07E-184  | 6.70E-181  | SEZ6L    |
| 3956   | ENSG00000100097 | 3289.99689 | 0.02618789  | 0.06123289 | 0.66525325 | 0.83470042 | LGALS1   |
| 89781  | ENSG00000100099 | 1033.98927 | 0.07661381  | 0.10164345 | 0.43490556 | 0.66027902 | HPS4     |
| 113791 | ENSG00000100100 | 105.783623 | -0.41555233 | 0.23248916 | 0.03085955 | 0.1024692  | PIK3IP1  |
| NA     | ENSG00000100101 | 3.68189037 | 0.03069668  | 0.38661547 | 0.16772812 | 0.35871254 |          |
| 402055 | ENSG00000100104 | 407.796094 | -0.3119122  | 0.16908096 | 0.03955703 | 0.12441527 | SRRD     |
| 23598  | ENSG00000100105 | 2168.10439 | -8.52E-06   | 0.0658887  | 0.99917305 | 0.99962651 | PATZ1    |
| 11078  | ENSG00000100106 | 1511.15972 | 0.22407882  | 0.08269711 | 0.00545107 | 0.02506357 | TRIOBP   |
| 24144  | ENSG00000100109 | 653.232728 | 0.12396902  | 0.13342744 | 0.3229443  | 0.55059885 | TFIP11   |
| 23464  | ENSG00000100116 | 157.299598 | 0.05184984  | 0.21449791 | 0.77266584 | 0.89561741 | GCAT     |
| 91227  | ENSG00000100121 | 0          | NA          | NA         | NA         | NA         | GGTLC2   |
| 1414   | ENSG00000100122 | 5.87299205 | -0.20985128 | 0.43167809 | 0.15274709 | 0.33739727 | CRYBB1   |



|           |                 |            |             |            |            |            |         |
|-----------|-----------------|------------|-------------|------------|------------|------------|---------|
| 129138    | ENSG00000100124 | 683.962911 | -0.17848805 | 0.10779106 | 0.08354635 | 0.21827226 | ANKRD54 |
| 51386     | ENSG00000100129 | 9305.55356 | -0.03312376 | 0.0607772  | 0.57893284 | 0.77671271 | EIF3L   |
| 4809      | ENSG00000100138 | 1389.30007 | -0.30372605 | 0.07906838 | 8.21E-05   | 0.00063781 | SNU13   |
| 85377     | ENSG00000100139 | 785.078724 | 0.08917533  | 0.09178126 | 0.31726496 | 0.54509671 | MICALL1 |
| 5435      | ENSG00000100142 | 498.235116 | -0.01438286 | 0.12210821 | 0.90009993 | 0.95573896 | POLR2F  |
| 6663      | ENSG00000100146 | 1.95634066 | 0.13473642  | 0.41171039 | 0.10912239 | NA         | SOX10   |
| 79879     | ENSG00000100147 | 280.048446 | 0.08115954  | 0.13943993 | 0.53273674 | 0.74395247 | CCDC134 |
| 9681      | ENSG00000100150 | 482.739791 | -0.13558874 | 0.12698564 | 0.25662991 | 0.47767496 | DEPDC5  |
| 9463      | ENSG00000100151 | 477.95342  | 0.24831811  | 0.12735391 | 0.0382653  | 0.12144993 | PICK1   |
| 23331     | ENSG00000100154 | 2198.93643 | -0.2089319  | 0.07783884 | 0.00602101 | 0.02723592 | TTC28   |
| 23539     | ENSG00000100156 | 24.3356508 | -0.02326601 | 0.30351485 | 0.89905272 | 0.95557174 | SLC16A8 |
| 79019     | ENSG00000100162 | 132.858973 | -0.88148067 | 0.24147987 | 3.72E-05   | 0.00031514 | CENPM   |
| 55964     | ENSG00000100167 | 1323.25787 | -0.69847065 | 0.07953833 | 3.78E-19   | 1.35E-17   | SEPTIN3 |
| 6523      | ENSG00000100170 | 1.57058864 | -0.00888322 | 0.37868862 | 0.89566899 | NA         | SLC5A1  |
| 387590    | ENSG00000100181 | 0          | NA          | NA         | NA         | NA         | TPTEP1  |
| 6527      | ENSG00000100191 | 0.3243667  | 0.00127512  | 0.38336752 | 0.96809536 | NA         | SLC5A4  |
| 11015     | ENSG00000100196 | 66.0257248 | 2.12853437  | 0.35197832 | 8.96E-11   | 1.73E-09   | KDELR3  |
| 1565      | ENSG00000100197 | 22.5976961 | 0.5094315   | 0.4968672  | 0.05325477 | 0.1562287  | CYP2D6  |
| 107987478 | ENSG00000100197 | 22.5976961 | 0.5094315   | 0.4968672  | 0.05325477 | 0.1562287  | CYP2D6  |
| 107987479 | ENSG00000100197 | 22.5976961 | 0.5094315   | 0.4968672  | 0.05325477 | 0.1562287  | CYP2D6  |
| 10521     | ENSG00000100201 | 6370.79696 | 0.00369896  | 0.05132618 | 0.97228046 | 0.98958828 | DDX17   |
| 11144     | ENSG00000100206 | 5.44860305 | 0.09355902  | 0.37782974 | 0.44690883 | 0.67095132 | DMC1    |
| 6942      | ENSG00000100207 | 848.481032 | -0.15053105 | 0.11411539 | 0.16594655 | 0.35616396 | TCF20   |
| 150274    | ENSG00000100209 | 143.535453 | -0.14041276 | 0.19747809 | 0.40542275 | 0.63375238 | HSCB    |
| 25776     | ENSG00000100211 | 166.945888 | -0.0346482  | 0.16583631 | 0.81569248 | 0.9163678  | CBY1    |
| 56993     | ENSG00000100216 | 894.698191 | -0.05528412 | 0.09006715 | 0.5270722  | 0.73901854 | TOMM22  |
| 27156     | ENSG00000100218 | 11.5682499 | 0.32847631  | 0.49456545 | 0.0974398  | 0.24443112 | RSPH14  |
| 7494      | ENSG00000100219 | 1601.7555  | 0.53520301  | 0.07649519 | 9.66E-13   | 2.20E-11   | XBP1    |
| 51493     | ENSG00000100220 | 1315.02953 | -0.15308589 | 0.07836479 | 0.04565029 | 0.13867733 | RTCB    |
| 9929      | ENSG00000100221 | 763.020616 | 0.00364273  | 0.10352261 | 0.97178255 | 0.98938604 | JOSD1   |
| 25793     | ENSG00000100225 | 1652.4625  | 0.04326056  | 0.06904278 | 0.52454878 | 0.73734087 | FBXO7   |
| 9567      | ENSG00000100226 | 973.798783 | -0.02312959 | 0.08889868 | 0.78837688 | 0.90400376 | GTPBP1  |
| 84271     | ENSG00000100227 | 1140.82876 | -0.22279268 | 0.10519829 | 0.02710781 | 0.0927914  | POLDIP3 |
| 9609      | ENSG00000100228 | 218.39745  | -0.2448649  | 0.20571252 | 0.15980176 | 0.3473723  | RAB36   |
| 7078      | ENSG00000100234 | 2090.01639 | -1.07512039 | 0.07012631 | 5.97E-54   | 6.51E-52   | TIMP3   |
| 9701      | ENSG00000100239 | 1502.86839 | 0.15220959  | 0.07543147 | 0.03846642 | 0.12197623 | PPP6R2  |
| 6305      | ENSG00000100241 | 4782.61059 | 0.07427126  | 0.06423378 | 0.24109078 | 0.45895616 | SBF1    |
| 25777     | ENSG00000100242 | 1141.93077 | -0.25212798 | 0.10919477 | 0.01563259 | 0.05962142 | SUN2    |

|        |                 |            |             |            |            |            |          |
|--------|-----------------|------------|-------------|------------|------------|------------|----------|
| 1727   | ENSG00000100243 | 1352.52794 | 0.26325742  | 0.0778352  | 0.0005401  | 0.00345019 | CYB5R3   |
| 10126  | ENSG00000100246 | 212.034733 | 0.40773237  | 0.19110104 | 0.01509252 | 0.0579852  | DNAL4    |
| 25770  | ENSG00000100249 | 0          | NA          | NA         | NA         | NA         | C22orf31 |
| 55586  | ENSG00000100253 | 4.09161237 | 0.18049553  | 0.4242033  | 0.14342309 | 0.32269382 | MIOX     |
| 91289  | ENSG00000100258 | 896.400058 | 0.22190136  | 0.10354778 | 0.02577157 | 0.0891868  | LMF2     |
| 25807  | ENSG00000100263 | 501.854954 | 0.37445085  | 0.1188844  | 0.00090352 | 0.00542222 | RHBDD3   |
| 11252  | ENSG00000100266 | 668.36082  | -0.28248338 | 0.10600485 | 0.00540968 | 0.02488478 | PACSIN2  |
| 25809  | ENSG00000100271 | 188.776207 | 0.39307332  | 0.16577498 | 0.00883162 | 0.03742405 | TTLL1    |
| 10633  | ENSG00000100276 | 1.1233646  | 0.06326018  | 0.38839755 | 0.28139386 | NA         | RASL10A  |
| 162    | ENSG00000100280 | 2796.8116  | -0.07152593 | 0.07424303 | 0.3250967  | 0.55302396 | APIB1    |
| 10042  | ENSG00000100281 | 894.139699 | -0.08662655 | 0.08614443 | 0.30139122 | 0.52872103 | HMGXB4   |
| 10043  | ENSG00000100284 | 336.079485 | 0.06110641  | 0.14480372 | 0.6489847  | 0.82497477 | TOM1     |
| 4744   | ENSG00000100285 | 1589.37017 | -1.36569484 | 0.08602658 | 8.51E-58   | 1.04E-55   | NEFH     |
| 1120   | ENSG00000100288 | 747.176922 | 0.20120708  | 0.10038646 | 0.03755584 | 0.1197345  | CHKB     |
| 638    | ENSG00000100290 | 1.00918704 | -0.02393651 | 0.38044904 | 0.71012726 | NA         | BIK      |
| 3162   | ENSG00000100292 | 38.2234353 | 0.22693615  | 0.30313095 | 0.27554801 | 0.49966845 | HMOX1    |
| 27349  | ENSG00000100294 | 140.164522 | 0.1293182   | 0.19456124 | 0.44004863 | 0.66517856 | MCAT     |
| 8563   | ENSG00000100296 | 2018.39461 | 0.12238857  | 0.06829317 | 0.06857718 | 0.18867997 | THOC5    |
| 4174   | ENSG00000100297 | 2616.55642 | -0.1049419  | 0.06527174 | 0.10163092 | 0.25236014 | MCM5     |
| 164668 | ENSG00000100298 | 0          | NA          | NA         | NA         | NA         | APOBEC3H |
| 410    | ENSG00000100299 | 339.609559 | 0.40248688  | 0.15365715 | 0.00433236 | 0.02065708 | ARSA     |
| 706    | ENSG00000100300 | 729.644049 | 0.17614613  | 0.10264773 | 0.07431676 | 0.2001033  | TSPO     |
| 23551  | ENSG00000100302 | 15.4084778 | 0.32976138  | 0.44610064 | 0.12694115 | 0.29688935 | RASD2    |
| 23170  | ENSG00000100304 | 1181.06437 | -0.22933932 | 0.0806814  | 0.00357244 | 0.01758305 | TTLL12   |
| 23492  | ENSG00000100307 | 81.5233965 | 0.47716323  | 0.28546999 | 0.02991772 | 0.10009569 | CBX7     |
| 5155   | ENSG00000100311 | 0          | NA          | NA         | NA         | NA         | PDGFB    |
| 49     | ENSG00000100312 | 0.34746601 | 0.02370763  | 0.3853651  | 0.61987128 | NA         | ACR      |
| 164633 | ENSG00000100314 | 160.512115 | -2.1039316  | 0.61164813 | 2.69E-05   | 0.00023487 | CABP7    |
| 6122   | ENSG00000100316 | 31219.3278 | -0.16574749 | 0.04853809 | 0.00055797 | 0.0035504  | RPL3     |
| 55954  | ENSG00000100319 | 227.264934 | 0.14817761  | 0.15172259 | 0.28772648 | 0.51340148 | ZMAT5    |
| 23543  | ENSG00000100320 | 11047.7787 | 0.18463865  | 0.04880315 | 0.00012586 | 0.00093314 | RBFOX2   |
| 9145   | ENSG00000100321 | 471.810445 | -0.32830109 | 0.15387177 | 0.019546   | 0.07160128 | SYNGR1   |
| 10454  | ENSG00000100324 | 490.654491 | 0.15022807  | 0.11184475 | 0.16001891 | 0.34765388 | TAB1     |
| 84164  | ENSG00000100325 | 1265.30802 | -0.09936365 | 0.08579281 | 0.23393314 | 0.45086784 | ASCC2    |
| 8897   | ENSG00000100330 | 1112.10023 | 0.07471845  | 0.11157117 | 0.48453963 | 0.70468159 | MTMR3    |
| 54471  | ENSG00000100335 | 1011.20115 | -0.0964164  | 0.08734038 | 0.25640096 | 0.47756244 | MIEF1    |
| 80832  | ENSG00000100336 | 106.291338 | 1.47005911  | 0.28087173 | 1.30E-08   | 1.94E-07   | APOL4    |
| 150379 | ENSG00000100341 | 0          | NA          | NA         | NA         | NA         | PNPLA5   |

|        |                 |            |             |            |            |            |          |
|--------|-----------------|------------|-------------|------------|------------|------------|----------|
| 8542   | ENSG00000100342 | 0.16735865 | 0.01897177  | 0.38482933 | 0.78225479 | NA         | APOL1    |
| 80339  | ENSG00000100344 | 22.2618301 | 0.12261752  | 0.34347558 | 0.49101687 | 0.71055979 | PNPLA3   |
| 4627   | ENSG00000100345 | 4881.64488 | 0.04381549  | 0.06276988 | 0.47820693 | 0.69986975 | MYH9     |
| 8911   | ENSG00000100346 | 1.28376817 | -0.07018956 | 0.38938093 | 0.25995481 | NA         | CACNA1I  |
| 25813  | ENSG00000100347 | 781.598124 | -0.02796679 | 0.08861766 | 0.74494216 | 0.87988222 | SAMM50   |
| 25828  | ENSG00000100348 | 1400.94794 | 0.06363612  | 0.07649867 | 0.396397   | 0.62570741 | TXN2     |
| 80020  | ENSG00000100350 | 1478.88908 | -0.16363785 | 0.07229352 | 0.02093307 | 0.07553876 | FOXRED2  |
| 9402   | ENSG00000100351 | 0.38789669 | 0.01214925  | 0.38385518 | 0.84879667 | NA         | GRAP2    |
| 8664   | ENSG00000100353 | 3377.48615 | 0.01704844  | 0.06601821 | 0.79346989 | 0.90556117 | EIF3D    |
| 23112  | ENSG00000100354 | 674.031383 | -0.16314045 | 0.28369998 | 0.41289201 | 0.64038252 | TNRC6B   |
| 27352  | ENSG00000100359 | 876.541306 | 0.21560947  | 0.09337886 | 0.01710516 | 0.06426176 | SGSM3    |
| 11020  | ENSG00000100360 | 814.383757 | 0.27394065  | 0.09538983 | 0.00295618 | 0.01495046 | IFT27    |
| 5816   | ENSG00000100362 | 0          | NA          | NA         | NA         | NA         | PVALB    |
| 23313  | ENSG00000100364 | 1167.60615 | -0.39042384 | 0.08618686 | 3.17E-06   | 3.30E-05   | KIAA0930 |
| 4689   | ENSG00000100365 | 0          | NA          | NA         | NA         | NA         | NCF4     |
| 1439   | ENSG00000100368 | 0          | NA          | NA         | NA         | NA         | CSF2RB   |
| 10478  | ENSG00000100372 | 322.205311 | 0.06339837  | 0.15507095 | 0.65585667 | 0.82885511 | SLC25A17 |
| 7380   | ENSG00000100373 | 0          | NA          | NA         | NA         | NA         | UPK3A    |
| 55007  | ENSG00000100376 | 626.946557 | 0.12670863  | 0.1083384  | 0.22220656 | 0.43535977 | FAM118A  |
| 79734  | ENSG00000100379 | 624.283704 | -0.43574822 | 0.11656841 | 8.59E-05   | 0.00066398 | KCTD17   |
| 6767   | ENSG00000100380 | 2232.76231 | -0.20127573 | 0.08309152 | 0.01292309 | 0.05122757 | ST13     |
| 3560   | ENSG00000100385 | 1.17832196 | 0.05379565  | 0.38759742 | 0.29472884 | NA         | IL2RB    |
| 9978   | ENSG00000100387 | 371.318198 | 0.09803136  | 0.12317146 | 0.4011279  | 0.62949876 | RBX1     |
| 2033   | ENSG00000100393 | 1309.50182 | -0.04014103 | 0.09700255 | 0.65016276 | 0.82529572 | EP300    |
| 83746  | ENSG00000100395 | 333.96561  | -0.01829754 | 0.13094967 | 0.8812178  | 0.94760765 | L3MBTL2  |
| 150356 | ENSG00000100399 | 6.43343641 | 0.12412794  | 0.37761356 | 0.39291054 | 0.6220352  | CHADL    |
| 5905   | ENSG00000100401 | 1936.16304 | -0.03751557 | 0.0841269  | 0.64651724 | 0.82387449 | RANGAP1  |
| 23264  | ENSG00000100403 | 1853.30139 | -0.22543172 | 0.07255242 | 0.00150798 | 0.00841822 | ZC3H7B   |
| 84844  | ENSG00000100410 | 403.809211 | -0.10338974 | 0.12435718 | 0.37695983 | 0.60572472 | PHF5A    |
| 50     | ENSG00000100412 | 1165.35683 | 0.25260577  | 0.08904809 | 0.00347338 | 0.01714651 | ACO2     |
| 171568 | ENSG00000100413 | 655.281113 | -0.21071332 | 0.13165079 | 0.08677017 | 0.22459479 | POLR3H   |
| 55687  | ENSG00000100416 | 1222.12153 | 0.06187434  | 0.08461157 | 0.45523538 | 0.67862874 | TRMU     |
| 5372   | ENSG00000100417 | 143.434808 | -0.01994108 | 0.18984958 | 0.90242768 | 0.95713489 | PMM1     |
| 27351  | ENSG00000100418 | 396.965959 | -0.3137653  | 0.12366811 | 0.00706516 | 0.03119804 | DESI1    |
| 64781  | ENSG00000100422 | 2872.40231 | -0.38957177 | 0.06940556 | 1.10E-08   | 1.65E-07   | CERK     |
| 23774  | ENSG00000100425 | 1393.75019 | 0.14252745  | 0.07884806 | 0.06465531 | 0.18119939 | BRD1     |
| 9889   | ENSG00000100426 | 2475.65338 | -0.10307553 | 0.06346742 | 0.09939861 | 0.24821504 | ZBED4    |
| 23209  | ENSG00000100427 | 0          | NA          | NA         | NA         | NA         | MLC1     |

|        |                 |            |             |            |            |            |          |
|--------|-----------------|------------|-------------|------------|------------|------------|----------|
| 83933  | ENSG00000100429 | 489.288982 | 0.07600757  | 0.11411903 | 0.48602144 | 0.70617338 | HDAC10   |
| 54207  | ENSG00000100433 | 18.8858456 | -2.55056247 | 0.76592006 | 4.05E-05   | 0.00034013 | KCNK10   |
| 63874  | ENSG00000100439 | 173.487296 | 0.56873147  | 0.21360234 | 0.00219951 | 0.01162136 | ABHD4    |
| 23351  | ENSG00000100441 | 1285.18397 | 0.39992266  | 0.08380543 | 9.68E-07   | 1.10E-05   | KHNYN    |
| 2287   | ENSG00000100442 | 714.661409 | -0.21771022 | 0.10634053 | 0.03259559 | 0.1071399  | FKBP3    |
| 56948  | ENSG00000100445 | 750.418345 | 0.06408137  | 0.10894112 | 0.53941069 | 0.74850934 | SDR39U1  |
| 1511   | ENSG00000100448 | 0          | NA          | NA         | NA         | NA         | CTSG     |
| 2999   | ENSG00000100450 | 0          | NA          | NA         | NA         | NA         | GZMH     |
| 3002   | ENSG00000100453 | 0          | NA          | NA         | NA         | NA         | GZMB     |
| 55147  | ENSG00000100461 | 1233.82425 | -0.00544042 | 0.09716621 | 0.95257602 | 0.98049849 | RBM23    |
| 10419  | ENSG00000100462 | 1548.55371 | 0.06761508  | 0.0758561  | 0.36540226 | 0.5947154  | PRMT5    |
| 1690   | ENSG00000100473 | 1050.9083  | 0.36190041  | 0.08484957 | 1.18E-05   | 0.00011052 | COCH     |
| 11154  | ENSG00000100478 | 110.139612 | -0.31905728 | 0.24240528 | 0.10068346 | 0.25054057 | AP4S1    |
| 5427   | ENSG00000100479 | 230.489429 | 0.01088292  | 0.16847731 | 0.94398621 | 0.97718285 | POLE2    |
| 79609  | ENSG00000100483 | 167.696066 | -0.11195886 | 0.17393724 | 0.46944187 | 0.69185312 | VCPKMT   |
| 6655   | ENSG00000100485 | 785.220862 | 0.23247896  | 0.0910071  | 0.00843106 | 0.03605781 | SOS2     |
| 8814   | ENSG00000100490 | 159.274157 | -0.2867005  | 0.29184254 | 0.17034959 | 0.36228275 | CDKL1    |
| 51199  | ENSG00000100503 | 1872.97528 | 0.00339074  | 0.09655122 | 0.97260543 | 0.98981748 | NIN      |
| 5836   | ENSG00000100504 | 111.193332 | 1.58550382  | 0.28849655 | 2.67E-09   | 4.33E-08   | PYGL     |
| 114088 | ENSG00000100505 | 226.389683 | -0.19239206 | 0.17425335 | 0.21406547 | 0.42423923 | TRIM9    |
| 5706   | ENSG00000100519 | 1054.94708 | -0.04360284 | 0.08820435 | 0.61056374 | 0.7987352  | PSMC6    |
| 64841  | ENSG00000100522 | 1006.22867 | -0.15478992 | 0.08835981 | 0.07135954 | 0.19425517 | GNPNAT1  |
| 80821  | ENSG00000100523 | 995.201824 | -0.04829937 | 0.11142679 | 0.64969621 | 0.82525848 | DDHD1    |
| 1033   | ENSG00000100526 | 280.607456 | -0.41594677 | 0.15556086 | 0.00352533 | 0.01737703 | CDKN3    |
| 10175  | ENSG00000100528 | 1427.36034 | -0.21826977 | 0.08325854 | 0.00711627 | 0.0313609  | CNIH1    |
| 10668  | ENSG00000100532 | 143.18825  | -0.09205698 | 0.19450168 | 0.58036849 | 0.77774473 | CGRRF1   |
| 51382  | ENSG00000100554 | 550.619479 | 0.22084613  | 0.11232835 | 0.03933368 | 0.12396233 | ATP6V1D  |
| 55195  | ENSG00000100557 | 0.18922458 | 0.01954053  | 0.38488496 | 0.78225479 | NA         | CCDC198  |
| 26499  | ENSG00000100558 | 2.98364397 | 0.10102331  | 0.39023597 | 0.30920641 | 0.53699712 | PLEK2    |
| 5283   | ENSG00000100564 | 395.45914  | 0.2059275   | 0.12363427 | 0.07787584 | 0.20726343 | PIGH     |
| 145497 | ENSG00000100565 | 0          | NA          | NA         | NA         | NA         | LRRC74A  |
| 5684   | ENSG00000100567 | 941.697687 | -0.15139637 | 0.10063429 | 0.11824282 | 0.28216714 | PSMA3    |
| 10490  | ENSG00000100568 | 1504.77326 | -0.06825605 | 0.0931788  | 0.44929859 | 0.67295604 | VTI1B    |
| 26520  | ENSG00000100575 | 284.817588 | -0.30440028 | 0.15987871 | 0.03571699 | 0.11513073 | TIMM9    |
| 2954   | ENSG00000100577 | 326.669864 | 0.03641286  | 0.14151904 | 0.78304046 | 0.90117013 | GSTZ1    |
| 9786   | ENSG00000100578 | 681.130725 | -0.2699684  | 0.10411449 | 0.00688115 | 0.03050772 | KIAA0586 |
| 283578 | ENSG00000100580 | 1601.88156 | -0.93335748 | 0.07555661 | 7.52E-36   | 5.23E-34   | TMED8    |
| 161394 | ENSG00000100583 | 34.1187049 | -0.41393091 | 0.5132831  | 0.07275766 | 0.19685148 | SAMD15   |

|        |                 |            |             |            |            |            |          |
|--------|-----------------|------------|-------------|------------|------------|------------|----------|
| 10598  | ENSG00000100591 | 2825.83342 | 0.0068345   | 0.08271672 | 0.9339124  | 0.97240128 | AHSA1    |
| 23002  | ENSG00000100592 | 435.726033 | -0.20065589 | 0.201521   | 0.24198809 | 0.46013453 | DAAM1    |
| 145501 | ENSG00000100593 | 2.36756011 | -0.07436187 | 0.38660919 | 0.35622998 | NA         | ISM2     |
| 9517   | ENSG00000100596 | 1689.12505 | -0.12275593 | 0.07141914 | 0.07979803 | 0.21086746 | SPTLC2   |
| 79890  | ENSG00000100599 | 4.90157512 | 0.07091501  | 0.37531539 | 0.52429693 | 0.73721128 | RIN3     |
| 5641   | ENSG00000100600 | 573.660437 | 0.19609137  | 0.11115658 | 0.06482504 | 0.18145157 | LGMN     |
| 8846   | ENSG00000100601 | 218.506802 | -0.26041648 | 0.16481076 | 0.0793774  | 0.21020391 | ALKBH1   |
| 22938  | ENSG00000100603 | 1515.30075 | -0.24196032 | 0.10387215 | 0.01513658 | 0.05808699 | SNW1     |
| 1113   | ENSG00000100604 | 19767.1564 | -0.40141561 | 0.0744951  | 3.73E-08   | 5.20E-07   | CHGA     |
| 3705   | ENSG00000100605 | 1170.34791 | -0.1217492  | 0.08753835 | 0.15209164 | 0.3363239  | ITPK1    |
| 51635  | ENSG00000100612 | 1239.12085 | -0.08221086 | 0.07728579 | 0.27696866 | 0.50137393 | DHRS7    |
| 5494   | ENSG00000100614 | 1247.8008  | -0.42735493 | 0.10174912 | 1.25E-05   | 0.00011694 | PPM1A    |
| 51804  | ENSG00000100625 | 75.0305291 | 1.14212467  | 0.37951338 | 0.00021844 | 0.00153956 | SIX4     |
| 57452  | ENSG00000100626 | 254.221116 | -0.62373819 | 0.17515064 | 9.56E-05   | 0.00073178 | GALNT16  |
| 51676  | ENSG00000100628 | 0          | NA          | NA         | NA         | NA         | ASB2     |
| 145508 | ENSG00000100629 | 316.275967 | -0.19090059 | 0.13954145 | 0.14053823 | 0.31847841 | CEP128   |
| 2079   | ENSG00000100632 | 3931.1153  | 0.11036633  | 0.0793854  | 0.15530952 | 0.3411582  | ERH      |
| 3091   | ENSG00000100644 | 4316.73049 | 0.00457093  | 0.06551011 | 0.94379598 | 0.97708788 | HIF1A    |
| 9766   | ENSG00000100647 | 381.713423 | -0.11035159 | 0.12513128 | 0.34975508 | 0.58009871 | SUSD6    |
| 6430   | ENSG00000100650 | 4244.25861 | 0.40998424  | 0.07141979 | 4.95E-09   | 7.75E-08   | SRSF5    |
| 6554   | ENSG00000100652 | 0.32399419 | -0.02327436 | 0.38532155 | 0.66851063 | NA         | SLC10A1  |
| 1983   | ENSG00000100664 | 3855.62634 | -0.30053809 | 0.08261143 | 0.00018855 | 0.00134898 | EIF5     |
| 5267   | ENSG00000100665 | 0          | NA          | NA         | NA         | NA         | SERPINA4 |
| 6547   | ENSG00000100678 | 1002.93459 | -0.34218577 | 0.0947004  | 0.00018506 | 0.00132546 | SLC8A3   |
| 23405  | ENSG00000100697 | 2053.95956 | 0.05588882  | 0.06733989 | 0.39942091 | 0.6281816  | DICER1   |
| 79038  | ENSG00000100711 | 405.605514 | 0.36538116  | 0.11807995 | 0.00112101 | 0.00651078 | ZFYVE21  |
| 4522   | ENSG00000100714 | 2042.24862 | -0.10189409 | 0.08447449 | 0.21566554 | 0.42647306 | MTHFD1   |
| 8115   | ENSG00000100721 | 0          | NA          | NA         | NA         | NA         | TCL1A    |
| 79882  | ENSG00000100722 | 1700.51238 | -0.20532874 | 0.07608679 | 0.00581215 | 0.02642978 | ZC3H14   |
| 9894   | ENSG00000100726 | 857.976629 | 0.16700857  | 0.11931327 | 0.13423443 | 0.30845623 | TELO2    |
| 22990  | ENSG00000100731 | 1918.37631 | 0.08217478  | 0.07811767 | 0.28289465 | 0.50793031 | PCNX1    |
| 623    | ENSG00000100739 | 0.4901093  | -0.00697197 | 0.38316072 | 0.85885354 | NA         | BDKRB1   |
| 51527  | ENSG00000100744 | 407.619987 | -0.27621053 | 0.11908993 | 0.01435708 | 0.05563861 | GSKIP    |
| 7443   | ENSG00000100749 | 551.460415 | -0.18721829 | 0.10773306 | 0.06904451 | 0.18952649 | VRK1     |
| 5700   | ENSG00000100764 | 1618.42255 | -0.08223681 | 0.09515988 | 0.37142337 | 0.60057374 | PSMC1    |
| 89932  | ENSG00000100767 | 33.55482   | 0.05830618  | 0.28304567 | 0.7641103  | 0.8914874  | PAPLN    |
| 9252   | ENSG00000100784 | 358.709979 | -0.17422875 | 0.14030809 | 0.18069732 | 0.37770382 | RPS6KA5  |
| 55671  | ENSG00000100796 | 1717.77046 | -0.11660431 | 0.11389622 | 0.28175237 | 0.50654372 | PPP4R3A  |

|       |                 |            |             |            |            |            |          |
|-------|-----------------|------------|-------------|------------|------------|------------|----------|
| 60686 | ENSG00000100802 | 293.310277 | -0.22600031 | 0.16331802 | 0.12490495 | 0.29330267 | C14orf93 |
| 5693  | ENSG00000100804 | 2256.68105 | -0.16189019 | 0.06235078 | 0.00843555 | 0.03606146 | PSMB5    |
| 7528  | ENSG00000100811 | 2633.25303 | -0.16398736 | 0.07536631 | 0.02617787 | 0.09027793 | YY1      |
| 22985 | ENSG00000100813 | 4928.6482  | 0.14110344  | 0.06405542 | 0.02534686 | 0.0880241  | ACIN1    |
| 57820 | ENSG00000100814 | 1645.46057 | 0.29986512  | 0.07687492 | 6.67E-05   | 0.00053193 | CCNB1IP1 |
| 9321  | ENSG00000100815 | 935.11998  | 0.20759522  | 0.09862524 | 0.02931053 | 0.09858313 | TRIP11   |
| 328   | ENSG00000100823 | 3516.91172 | -0.06847197 | 0.056341   | 0.21841774 | 0.43045674 | APEX1    |
| 8106  | ENSG00000100836 | 3842.2678  | 0.20828701  | 0.06193727 | 0.00065225 | 0.0040617  | PABPN1   |
| 10278 | ENSG00000100842 | 2000.65011 | 0.19083184  | 0.07215027 | 0.00702862 | 0.03107125 | EF5      |
| 394   | ENSG00000100852 | 890.12554  | -0.08587799 | 0.10654073 | 0.39963998 | 0.62831531 | ARHGAP5  |
| 51550 | ENSG00000100865 | 525.842681 | -0.07866902 | 0.11448165 | 0.47074354 | 0.69301557 | CINP     |
| 10202 | ENSG00000100867 | 92.0848023 | -0.76904439 | 0.24755544 | 0.00032289 | 0.00218493 | DHRS2    |
| 6729  | ENSG00000100883 | 1126.81429 | 0.08378814  | 0.09011144 | 0.33912884 | 0.56932782 | SRP54    |
| 9362  | ENSG00000100884 | 0          | NA          | NA         | NA         | NA         | CPNE6    |
| 57680 | ENSG00000100888 | 2874.10989 | 0.00057534  | 0.07382552 | 0.99445972 | 0.99838482 | CHD8     |
| 5106  | ENSG00000100889 | 1379.57731 | 0.00737202  | 0.12898111 | 0.95300272 | 0.98058207 | PCK2     |
| 9692  | ENSG00000100890 | 447.578358 | 0.13883812  | 0.15364632 | 0.32716095 | 0.55553519 | PRORP    |
| 80344 | ENSG00000100897 | 1013.00565 | -0.04230706 | 0.10157293 | 0.66493284 | 0.83454529 | DCAF11   |
| 5687  | ENSG00000100902 | 1924.62759 | 0.00821934  | 0.0770842  | 0.91457128 | 0.96388282 | PSMA6    |
| 4792  | ENSG00000100906 | 547.472187 | 0.65645948  | 0.11052266 | 7.55E-10   | 1.32E-08   | NFKBIA   |
| 51016 | ENSG00000100908 | 367.066631 | -0.01763348 | 0.12158942 | 0.87759933 | 0.94578953 | EMC9     |
| 5721  | ENSG00000100911 | 795.154762 | -0.01986207 | 0.10088618 | 0.83715617 | 0.92602467 | PSME2    |
| 84312 | ENSG00000100916 | 392.131137 | 0.08489063  | 0.15244364 | 0.54465049 | 0.75239282 | BRMS1L   |
| 9985  | ENSG00000100918 | 3332.1225  | -0.06642662 | 0.05949046 | 0.25804219 | 0.47940416 | REC8     |
| 10548 | ENSG00000100926 | 715.900421 | 0.34190189  | 0.09730958 | 0.00027185 | 0.0018734  | TM9SF1   |
| 10484 | ENSG00000100934 | 701.389579 | -0.04160387 | 0.10322933 | 0.67477494 | 0.84066152 | SEC23A   |
| 51292 | ENSG00000100938 | 1078.30851 | -0.16186872 | 0.0943908  | 0.07543282 | 0.2022854  | GMPR2    |
| 5411  | ENSG00000100941 | 1823.94536 | -0.14064416 | 0.10205837 | 0.15192797 | 0.33603688 | PNN      |
| 5875  | ENSG00000100949 | 335.331113 | 0.38162265  | 0.13697222 | 0.00283749 | 0.01444594 | RABGGTA  |
| 4776  | ENSG00000100968 | 830.293274 | 1.38288101  | 0.12442668 | 8.87E-30   | 5.07E-28   | NFATC4   |
| 5360  | ENSG00000100979 | 526.355453 | 0.6553249   | 0.11519046 | 3.33E-09   | 5.32E-08   | PLTP     |
| 63935 | ENSG00000100982 | 858.399675 | 0.52802726  | 0.08825636 | 8.20E-10   | 1.43E-08   | PCIF1    |
| 2937  | ENSG00000100983 | 1076.73395 | -0.12602501 | 0.08381503 | 0.12287632 | 0.29015309 | GSS      |
| 4318  | ENSG00000100985 | 2.29631252 | -0.07232408 | 0.38238226 | 0.44142351 | NA         | MMP9     |
| 30813 | ENSG00000100987 | 0          | NA          | NA         | NA         | NA         | VSX1     |
| 26133 | ENSG00000100991 | 1629.52212 | -0.11664261 | 0.07186199 | 0.0981255  | 0.24574727 | TRPC4AP  |
| 5834  | ENSG00000100994 | 1543.88049 | 0.16900309  | 0.07789885 | 0.02649546 | 0.09108817 | PYGB     |
| 26090 | ENSG00000100997 | 777.829949 | -0.25467561 | 0.09462782 | 0.00536051 | 0.02469294 | ABHD12   |

|        |                 |            |             |            |            |            |          |
|--------|-----------------|------------|-------------|------------|------------|------------|----------|
| 10544  | ENSG00000101000 | 10.6905885 | 0.04459441  | 0.34750158 | 0.77244447 | 0.89553101 | PROCR    |
| 9837   | ENSG00000101003 | 588.963368 | 0.04325439  | 0.14300536 | 0.74549572 | 0.88008063 | GINS1    |
| 22981  | ENSG00000101004 | 1927.68606 | 0.43778073  | 0.06781304 | 5.25E-11   | 1.04E-09   | NINL     |
| 958    | ENSG00000101017 | 1.58400581 | -0.06301475 | 0.38615781 | 0.37079477 | NA         | CD40     |
| 55245  | ENSG00000101019 | 943.013961 | 0.18953864  | 0.09550463 | 0.0401935  | 0.12587831 | UQCC1    |
| 23613  | ENSG00000101040 | 1328.12002 | -0.54916668 | 0.07687694 | 3.19E-13   | 7.49E-12   | ZMYND8   |
| 10110  | ENSG00000101049 | 46.3999598 | 0.95032949  | 0.38315147 | 0.00134481 | 0.00762748 | SGK2     |
| 51098  | ENSG00000101052 | 621.545053 | -0.02235898 | 0.10303101 | 0.81933426 | 0.91761737 | IFT52    |
| 4605   | ENSG00000101057 | 3859.8554  | -0.5009157  | 0.06142933 | 1.43E-16   | 4.29E-15   | MYBL2    |
| 140902 | ENSG00000101074 | 0          | NA          | NA         | NA         | NA         | R3HDML   |
| 3172   | ENSG00000101076 | 0          | NA          | NA         | NA         | NA         | HNF4A    |
| 57446  | ENSG00000101079 | 983.033477 | -0.52255266 | 0.08827933 | 1.21E-09   | 2.07E-08   | NDRG3    |
| 84174  | ENSG00000101082 | 0.68805294 | -0.00445254 | 0.3824501  | 0.92023421 | NA         | SLA2     |
| 55969  | ENSG00000101084 | 831.372672 | -0.17598694 | 0.0960212  | 0.05778598 | 0.16649345 | RAB51F   |
| 4773   | ENSG00000101096 | 8.6755052  | 2.89315425  | 1.08732104 | 0.0004764  | 0.00309487 | NFATC2   |
| 140730 | ENSG00000101098 | 1501.1296  | -1.18098093 | 0.08549584 | 2.27E-44   | 1.96E-42   | RIMS4    |
| 80336  | ENSG00000101104 | 890.614021 | 0.51072625  | 0.09236494 | 1.26E-08   | 1.88E-07   | PABPC1L  |
| 6789   | ENSG00000101109 | 1261.81821 | -0.06059949 | 0.08403585 | 0.45919795 | 0.68252693 | STK4     |
| 57167  | ENSG00000101115 | 204.338761 | 0.69383716  | 0.21927233 | 0.00031699 | 0.0021516  | SALL4    |
| 23394  | ENSG00000101126 | 3503.11146 | -0.18898416 | 0.060397   | 0.00151217 | 0.00842975 | ADNP     |
| 5203   | ENSG00000101132 | 531.073782 | -0.15821982 | 0.10929841 | 0.12935948 | 0.30081651 | PFDN4    |
| 55816  | ENSG00000101134 | 0          | NA          | NA         | NA         | NA         | DOK5     |
| 1477   | ENSG00000101138 | 566.98049  | -0.07433494 | 0.11234329 | 0.48750988 | 0.70734212 | CSTF1    |
| 655    | ENSG00000101144 | 2460.09876 | -1.15120478 | 0.06617148 | 9.48E-69   | 1.52E-66   | BMP7     |
| 8480   | ENSG00000101146 | 917.792662 | 0.13058386  | 0.12463201 | 0.26760943 | 0.49015612 | RAE1     |
| 7165   | ENSG00000101150 | 2660.16848 | 0.20357223  | 0.06258087 | 0.00096851 | 0.00575308 | TPD52L2  |
| 80331  | ENSG00000101152 | 1935.54042 | -0.2760166  | 0.0712729  | 7.85E-05   | 0.00061348 | DNAJC5   |
| 51497  | ENSG00000101158 | 2313.63087 | 0.42488584  | 0.08457826 | 2.52E-07   | 3.16E-06   | NELFCD   |
| 1522   | ENSG00000101160 | 176.093581 | 0.4495345   | 0.19024889 | 0.00742595 | 0.03246602 | CTSZ     |
| 24148  | ENSG00000101161 | 2262.47341 | -0.02919198 | 0.07109463 | 0.67540134 | 0.84111426 | PRPF6    |
| 81027  | ENSG00000101162 | 11.9120719 | -0.00114718 | 0.33907605 | 0.9921605  | 0.99756121 | TUBB1    |
| 51012  | ENSG00000101166 | 1649.7084  | 0.01268056  | 0.08126037 | 0.87432036 | 0.94470892 | PRELID3B |
| 11255  | ENSG00000101180 | 117.540193 | -3.09500243 | 0.26604307 | 2.12E-32   | 1.31E-30   | HRH3     |
| 26164  | ENSG00000101181 | 794.918794 | -0.00073767 | 0.11905002 | 0.99320792 | 0.99778445 | MTG2     |
| 5688   | ENSG00000101182 | 3754.79976 | -0.19114007 | 0.06905364 | 0.00483312 | 0.02257807 | PSMA7    |
| 28231  | ENSG00000101187 | 964.581687 | 0.67907865  | 0.11887533 | 2.69E-09   | 4.35E-08   | SLCO4A1  |
| 4923   | ENSG00000101188 | 2.05659011 | -0.0754969  | 0.38683708 | 0.35762108 | NA         | NTSR1    |
| 55257  | ENSG00000101189 | 563.663245 | -0.06380998 | 0.10953283 | 0.54200748 | 0.75025664 | MRGBP    |

|        |                 |            |             |            |            |            |          |
|--------|-----------------|------------|-------------|------------|------------|------------|----------|
| 10732  | ENSG00000101190 | 325.122957 | 0.14255829  | 0.14134623 | 0.27746014 | 0.50194302 | TCFL5    |
| 11083  | ENSG00000101191 | 2786.62015 | -0.09804732 | 0.05889472 | 0.09180012 | 0.23401187 | DIDO1    |
| 54994  | ENSG00000101193 | 1265.04992 | -0.25625318 | 0.08408035 | 0.00174146 | 0.00952332 | GID8     |
| 63910  | ENSG00000101194 | 0          | NA          | NA         | NA         | NA         | SLC17A9  |
| 79444  | ENSG00000101197 | 0          | NA          | NA         | NA         | NA         | BIRC7    |
| 128414 | ENSG00000101198 | 0          | NA          | NA         | NA         | NA         | NKAIN4   |
| 55738  | ENSG00000101199 | 2130.13452 | 0.49951728  | 0.08622553 | 2.77E-09   | 4.48E-08   | ARFGAP1  |
| 551    | ENSG00000101200 | 0          | NA          | NA         | NA         | NA         | AVP      |
| 57642  | ENSG00000101203 | 0.173733   | 0.01914545  | 0.38484597 | 0.78225479 | NA         | COL20A1  |
| 1137   | ENSG00000101204 | 1.05455877 | -0.06787837 | 0.39189048 | 0.19208405 | NA         | CHRNA4   |
| 1917   | ENSG00000101210 | 8678.99929 | -1.10527231 | 0.0640479  | 1.30E-67   | 2.04E-65   | EEF1A2   |
| 5753   | ENSG00000101213 | 42.6174579 | -0.62432515 | 0.38821245 | 0.01897746 | 0.06984101 | PTK6     |
| 26205  | ENSG00000101216 | 619.455837 | -0.00558547 | 0.10166859 | 0.951818   | 0.98012235 | GMEB2    |
| 54976  | ENSG00000101220 | 756.16493  | -0.16364061 | 0.09712515 | 0.08091222 | 0.21334235 | C20orf27 |
| 25876  | ENSG00000101222 | 6.86893078 | -0.18124136 | 0.40501691 | 0.23418122 | 0.45103926 | SPEF1    |
| 994    | ENSG00000101224 | 1957.25075 | -0.22433382 | 0.07904808 | 0.00364821 | 0.01786733 | CDC25B   |
| 140862 | ENSG00000101230 | 0.72521985 | 0.00222141  | 0.38233694 | 0.95839775 | NA         | ISM1     |
| 11237  | ENSG00000101236 | 889.534588 | 0.0766256   | 0.11486332 | 0.48502278 | 0.70507415 | RNF24    |
| 10139  | ENSG00000101246 | 620.854218 | 0.04159607  | 0.11860316 | 0.71318743 | 0.86188941 | ARFRP1   |
| 79133  | ENSG00000101247 | 275.547638 | 0.08149072  | 0.15447701 | 0.56500323 | 0.76722846 | NDUFAF5  |
| 80343  | ENSG00000101251 | 0.47763262 | -0.01664982 | 0.38407143 | 0.85281619 | NA         | SEL1L2   |
| 57761  | ENSG00000101255 | 725.104088 | 0.00126626  | 0.14548096 | 0.9942729  | 0.9982983  | TRIB3    |
| 9770   | ENSG00000101265 | 424.458658 | -0.24192107 | 0.11966944 | 0.03275869 | 0.10755128 | RASSF2   |
| 1457   | ENSG00000101266 | 4317.15479 | 0.04917586  | 0.06645614 | 0.45307933 | 0.67643118 | CSNK2A1  |
| 113278 | ENSG00000101276 | 0          | NA          | NA         | NA         | NA         | SLC52A3  |
| NA     | ENSG00000101278 | 2.65860855 | -0.01365037 | 0.37095451 | 0.89000117 | 0.95215008 | RPS10P5  |
| 51378  | ENSG00000101280 | 2.45573132 | -0.00133616 | 0.37224682 | 0.98719061 | NA         | ANGPT4   |
| 343637 | ENSG00000101282 | 59.9065917 | -2.11899172 | 0.40347546 | 7.25E-09   | 1.11E-07   | RSPO4    |
| 8760   | ENSG00000101290 | 1710.33655 | -0.23262677 | 0.08985255 | 0.00757345 | 0.03300907 | CDS2     |
| 128674 | ENSG00000101292 | 126.078917 | -3.15316501 | 0.28521322 | 1.52E-29   | 8.55E-28   | PROKR2   |
| 81502  | ENSG00000101294 | 2042.07993 | -0.08201064 | 0.07288668 | 0.25160009 | 0.47149344 | HM13     |
| 9751   | ENSG00000101298 | 308.336607 | -0.26049048 | 0.1532645  | 0.06288744 | 0.17758139 | SNPH     |
| 85366  | ENSG00000101306 | 25.009287  | 0.26902605  | 0.36956685 | 0.20481877 | 0.41169887 | MYLK2    |
| 10326  | ENSG00000101307 | 0.53612635 | 0.03213492  | 0.38615517 | 0.46295797 | NA         | SIRPB1   |
| 10483  | ENSG00000101310 | 1642.41483 | 0.02849869  | 0.08234781 | 0.7239489  | 0.86794586 | SEC23B   |
| 55612  | ENSG00000101311 | 14.7278584 | 3.24507432  | 0.84644964 | 1.01E-05   | 9.55E-05   | FERMT1   |
| 54363  | ENSG00000101323 | 0          | NA          | NA         | NA         | NA         | HAO1     |
| 5173   | ENSG00000101327 | 0          | NA          | NA         | NA         | NA         | PDYN     |



|        |                 |            |             |            |            |            |          |
|--------|-----------------|------------|-------------|------------|------------|------------|----------|
| 140706 | ENSG00000101331 | 61.5704556 | -0.80446246 | 0.30904998 | 0.00134237 | 0.00761582 | CCM2L    |
| 5332   | ENSG00000101333 | 782.563615 | -0.44585837 | 0.11841231 | 7.47E-05   | 0.00058802 | PLCB4    |
| 10398  | ENSG00000101335 | 0.16735865 | 0.01897177  | 0.38482933 | 0.78225479 | NA         | MYL9     |
| 3055   | ENSG00000101336 | 0.50897541 | 0.01329051  | 0.38297807 | 0.76493109 | NA         | HCK      |
| 9777   | ENSG00000101337 | 1751.96139 | -0.16326519 | 0.06753278 | 0.01381945 | 0.05397201 | TM9SF4   |
| 140711 | ENSG00000101342 | 2.35382252 | 0.04525638  | 0.3823511  | 0.51826843 | NA         | TLDC2    |
| 51340  | ENSG00000101343 | 851.741567 | -0.01786222 | 0.09156948 | 0.84003159 | 0.92739563 | CRNKL1   |
| 23509  | ENSG00000101346 | 1334.79889 | -0.03584121 | 0.07712394 | 0.63460746 | 0.81607019 | POFUT1   |
| 25939  | ENSG00000101347 | 400.166017 | -0.44677435 | 0.12592482 | 0.00017325 | 0.00124854 | SAMHD1   |
| 57144  | ENSG00000101349 | 190.533084 | -0.06326666 | 0.16177486 | 0.66406026 | 0.83431586 | PAK5     |
| 9371   | ENSG00000101350 | 1514.74329 | -0.74188105 | 0.07794041 | 3.80E-22   | 1.58E-20   | KIF3B    |
| 140699 | ENSG00000101353 | 29.6496927 | -0.04087829 | 0.31475825 | 0.81901564 | 0.9175195  | MROH8    |
| 10528  | ENSG00000101361 | 3180.10978 | 0.14431991  | 0.06247123 | 0.01916416 | 0.07035842 | NOP56    |
| 63905  | ENSG00000101363 | 959.178235 | 0.08746814  | 0.08765129 | 0.30575608 | 0.53334106 | MANBAL   |
| 3420   | ENSG00000101365 | 1444.01317 | 0.11611954  | 0.07870759 | 0.13171447 | 0.30446407 | IDH3B    |
| 22919  | ENSG00000101367 | 2342.3942  | -0.28158527 | 0.06947057 | 3.65E-05   | 0.00030954 | MAPRE1   |
| 182    | ENSG00000101384 | 306.955987 | 1.64275649  | 0.19673319 | 5.20E-18   | 1.73E-16   | JAG1     |
| 51654  | ENSG00000101391 | 423.389657 | 0.24771788  | 0.1368825  | 0.05226429 | 0.15402903 | CDK5RAP1 |
| 6640   | ENSG00000101400 | 213.510665 | -0.22748817 | 0.162131   | 0.12064709 | 0.28635462 | SNTA1    |
| 5020   | ENSG00000101405 | 0.86866502 | 0.03820342  | 0.3870704  | 0.32648034 | NA         | OXT      |
| 9675   | ENSG00000101407 | 1274.71512 | 0.05504166  | 0.07594048 | 0.4601893  | 0.68333808 | TTI1     |
| 1869   | ENSG00000101412 | 1486.99253 | -0.34811111 | 0.07546845 | 2.43E-06   | 2.58E-05   | E2F1     |
| 58490  | ENSG00000101413 | 766.528372 | -0.00965112 | 0.09917633 | 0.91874437 | 0.96558446 | RPRD1B   |
| 11264  | ENSG00000101417 | 297.113047 | 0.012177    | 0.13543453 | 0.92444315 | 0.96852469 | PXMP4    |
| 128866 | ENSG00000101421 | 1131.92402 | 0.07485527  | 0.08549474 | 0.36948509 | 0.59885502 | CHMP4B   |
| 671    | ENSG00000101425 | 0          | NA          | NA         | NA         | NA         | BPI      |
| 128821 | ENSG00000101435 | 0          | NA          | NA         | NA         | NA         | CST9L    |
| 140679 | ENSG00000101438 | 243.245608 | -3.1047327  | 0.19671936 | 2.84E-57   | 3.44E-55   | SLC32A1  |
| 1471   | ENSG00000101439 | 846.152103 | 0.37069361  | 0.09480814 | 5.29E-05   | 0.00042958 | CST3     |
| 434    | ENSG00000101440 | 0.96455001 | -0.04977631 | 0.38563191 | 0.39076061 | NA         | ASIP     |
| 1472   | ENSG00000101441 | 0          | NA          | NA         | NA         | NA         | CST4     |
| 79913  | ENSG00000101442 | 444.661982 | 0.06157159  | 0.11517238 | 0.57673406 | 0.77528586 | ACTR5    |
| 10406  | ENSG00000101443 | 0.76406384 | 0.05427165  | 0.38913569 | 0.26959566 | NA         | WFDC2    |
| 191    | ENSG00000101444 | 3444.28574 | -0.27010719 | 0.05687353 | 1.52E-06   | 1.67E-05   | AHCY     |
| 26051  | ENSG00000101445 | 1231.19524 | -0.84681292 | 0.0900513  | 9.27E-22   | 3.78E-20   | PPP1R16B |
| 10816  | ENSG00000101446 | 0          | NA          | NA         | NA         | NA         | SPINT3   |
| 81610  | ENSG00000101447 | 1026.22356 | -0.33191239 | 0.08651285 | 8.06E-05   | 0.00062747 | FAM83D   |
| 57119  | ENSG00000101448 | 0          | NA          | NA         | NA         | NA         | EPPIN    |

|        |                 |            |             |            |            |            |          |
|--------|-----------------|------------|-------------|------------|------------|------------|----------|
| 60625  | ENSG00000101452 | 483.802881 | -0.06608776 | 0.14539486 | 0.62276575 | 0.80737672 | DHX35    |
| 116092 | ENSG00000101457 | 458.364284 | 0.08057025  | 0.11698197 | 0.47044073 | 0.69270775 | DNTTIP1  |
| 84557  | ENSG00000101460 | 367.761464 | 0.12397481  | 0.12755893 | 0.30276407 | 0.52998404 | MAP1LC3A |
| 79953  | ENSG00000101463 | 0          | NA          | NA         | NA         | NA         | SYNDIG1  |
| 128869 | ENSG00000101464 | 409.360091 | 0.38637155  | 0.12678213 | 0.00123197 | 0.00707069 | PIGU     |
| 7125   | ENSG00000101470 | 2.88306901 | 0.12557839  | 0.40164935 | 0.20527491 | 0.41224389 | TNNC2    |
| 10005  | ENSG00000101473 | 352.621157 | -0.1621153  | 0.12620111 | 0.17297073 | 0.36578929 | ACOT8    |
| 57136  | ENSG00000101474 | 1329.13711 | 0.21654615  | 0.07803786 | 0.00454289 | 0.02146486 | APMAP    |
| 56853  | ENSG00000101489 | 960.355407 | -3.14855309 | 0.10788495 | 2.10E-188  | 2.98E-185  | CELF4    |
| 9658   | ENSG00000101493 | 1085.00262 | 0.34046908  | 0.13084326 | 0.00552654 | 0.02534007 | ZNF516   |
| 28316  | ENSG00000101542 | 53.2051979 | 4.60793592  | 0.5100357  | 2.97E-20   | 1.13E-18   | CDH20    |
| 22850  | ENSG00000101544 | 1353.57662 | -0.00987227 | 0.07710866 | 0.89549677 | 0.95469109 | ADNP2    |
| 79863  | ENSG00000101546 | 488.825982 | 0.02694609  | 0.10987695 | 0.79889621 | 0.90798839 | RBFA     |
| 9097   | ENSG00000101557 | 1569.27856 | -0.129439   | 0.07882097 | 0.09290857 | 0.23587906 | USP14    |
| 9218   | ENSG00000101558 | 1299.87928 | -0.44396778 | 0.08405499 | 5.95E-08   | 8.07E-07   | VAPA     |
| 64863  | ENSG00000101574 | 320.782927 | -0.10380835 | 0.14987385 | 0.45062134 | 0.67397869 | METTL4   |
| 9663   | ENSG00000101577 | 630.775745 | -0.17286202 | 0.09988786 | 0.07242748 | 0.19611863 | LPIN2    |
| 23347  | ENSG00000101596 | 2257.12996 | -0.0272327  | 0.07374576 | 0.70274417 | 0.85699455 | SMCHD1   |
| 8736   | ENSG00000101605 | 20.2637937 | 1.84374535  | 0.65137209 | 0.00020174 | 0.00143356 | MYOM1    |
| 10627  | ENSG00000101608 | 1278.00799 | 0.43097282  | 0.08407839 | 1.46E-07   | 1.89E-06   | MYL12A   |
| 79959  | ENSG00000101624 | 277.790874 | -0.19321915 | 0.14947288 | 0.15916615 | 0.34667433 | CEP76    |
| 29906  | ENSG00000101638 | 4.48889172 | 0.30012567  | 0.54940798 | 0.02331498 | 0.08241002 | ST8SIA5  |
| 55125  | ENSG00000101639 | 988.651994 | 0.03421031  | 0.10223003 | 0.72918643 | 0.87046879 | CEP192   |
| 8731   | ENSG00000101654 | 1962.85648 | -0.1172052  | 0.07198045 | 0.09704098 | 0.24361546 | RNMT     |
| 4092   | ENSG00000101665 | 384.482592 | 0.57811827  | 0.14178889 | 1.38E-05   | 0.00012839 | SMAD7    |
| 9388   | ENSG00000101670 | 4.53004691 | 0.03286598  | 0.3657035  | 0.78300919 | 0.90117013 | LIPG     |
| 284217 | ENSG00000101680 | 757.539955 | 1.62015689  | 0.11255893 | 4.34E-48   | 4.04E-46   | LAMA1    |
| 54941  | ENSG00000101695 | 39.1467287 | 0.39309867  | 0.34772477 | 0.0904589  | 0.23157478 | RNF125   |
| 23253  | ENSG00000101745 | 605.497848 | -0.48981143 | 0.13306696 | 8.87E-05   | 0.00068457 | ANKRD12  |
| 8715   | ENSG00000101746 | 590.998401 | -0.81805055 | 0.11957071 | 1.40E-12   | 3.17E-11   | NOL4     |
| 11201  | ENSG00000101751 | 829.031053 | 0.13672371  | 0.10231682 | 0.16552506 | 0.35564031 | POLI     |
| 57534  | ENSG00000101752 | 3094.74359 | -0.01903344 | 0.0681003  | 0.77588365 | 0.89695441 | MIB1     |
| 5932   | ENSG00000101773 | 1160.47144 | -0.55102496 | 0.09928615 | 9.81E-09   | 1.48E-07   | RBBP8    |
| 8780   | ENSG00000101782 | 854.912913 | -0.16559427 | 0.09276664 | 0.06523585 | 0.1822483  | RIOK3    |
| 1478   | ENSG00000101811 | 716.137123 | 0.11852521  | 0.10207614 | 0.22834326 | 0.44354125 | CSTF2    |
| 286436 | ENSG00000101812 | 0.14931947 | -0.01844332 | 0.38480212 | 0.84537521 | NA         | H2BW2    |
| 25878  | ENSG00000101825 | 0          | NA          | NA         | NA         | NA         | MXRA5    |
| 340547 | ENSG00000101842 | 0          | NA          | NA         | NA         | NA         | VSIG1    |

|        |                 |            |             |            |            |            |         |
|--------|-----------------|------------|-------------|------------|------------|------------|---------|
| 5716   | ENSG00000101843 | 425.552413 | 0.00979251  | 0.1130641  | 0.92865485 | 0.97011965 | PSMD10  |
| 115201 | ENSG00000101844 | 138.788729 | 0.07313621  | 0.1879634  | 0.65656652 | 0.82948802 | ATG4A   |
| 412    | ENSG00000101846 | 199.210105 | -0.64005624 | 0.1774862  | 7.77E-05   | 0.00060859 | STS     |
| 6907   | ENSG00000101849 | 715.055291 | -0.21263602 | 0.12042275 | 0.06128604 | 0.17419985 | TBL1X   |
| 4935   | ENSG00000101850 | 2.4308842  | 0.02264811  | 0.37477944 | 0.80037145 | NA         | GPR143  |
| 10857  | ENSG00000101856 | 1567.46034 | -0.09921803 | 0.07085381 | 0.15381151 | 0.33890581 | PGRMC1  |
| 5422   | ENSG00000101868 | 989.893352 | -0.39941852 | 0.08731579 | 2.52E-06   | 2.66E-05   | POLA1   |
| 4281   | ENSG00000101871 | 219.774955 | -0.5330573  | 0.16857686 | 0.00052343 | 0.00335645 | MID1    |
| 79576  | ENSG00000101882 | 492.910773 | 0.13897277  | 0.11774253 | 0.21458413 | 0.42492755 | NKAP    |
| 158800 | ENSG00000101883 | 0          | NA          | NA         | NA         | NA         | RHOXF1  |
| 55916  | ENSG00000101888 | 246.131176 | -0.3813111  | 0.16154048 | 0.00937922 | 0.03936614 | NXT2    |
| 2986   | ENSG00000101890 | 0.16735865 | 0.01897177  | 0.38482933 | 0.78225479 | NA         | GUCY2F  |
| 23439  | ENSG00000101892 | 0          | NA          | NA         | NA         | NA         | ATPIB4  |
| NA     | ENSG00000101898 | 86.7454913 | -0.0860214  | 0.21870102 | 0.63179517 | 0.81371846 | MCTS2P  |
| 79868  | ENSG00000101901 | 683.594193 | 0.06532828  | 0.11994232 | 0.56698179 | 0.76856463 | ALG13   |
| 5634   | ENSG00000101911 | 475.108698 | 0.35185238  | 0.11533281 | 0.00134608 | 0.00763251 | PRPS2   |
| 51311  | ENSG00000101916 | 0          | NA          | NA         | NA         | NA         | TLR8    |
| 56180  | ENSG00000101928 | 92.0405251 | 0.17643848  | 0.25036746 | 0.36291733 | 0.59271319 | MOSPD1  |
| 9949   | ENSG00000101935 | 328.012833 | -0.33796918 | 0.13776722 | 0.00834752 | 0.03578539 | AMMECR1 |
| 91851  | ENSG00000101938 | 312.971857 | 0.11204225  | 0.14185804 | 0.39466537 | 0.62391721 | CHRDL1  |
| 64743  | ENSG00000101940 | 994.151945 | 0.38241082  | 0.10077143 | 8.14E-05   | 0.0006333  | WDR13   |
| 6839   | ENSG00000101945 | 359.44314  | -0.08528874 | 0.12221326 | 0.45907009 | 0.68244796 | SUV39H1 |
| 9506   | ENSG00000101951 | 0          | NA          | NA         | NA         | NA         | PAGE4   |
| 8406   | ENSG00000101955 | 42.9840849 | 2.33517754  | 0.41384787 | 1.03E-09   | 1.77E-08   | SRPX    |
| 2742   | ENSG00000101958 | 1.79095171 | -0.09139811 | 0.39520062 | 0.15963497 | NA         | GLRA2   |
| 331    | ENSG00000101966 | 912.973659 | -0.16420707 | 0.12324762 | 0.15882709 | 0.34620189 | XIAP    |
| 10735  | ENSG00000101972 | 2311.39563 | -0.07858498 | 0.10038819 | 0.41642898 | 0.64306408 | STAG2   |
| 286410 | ENSG00000101974 | 1348.4952  | -0.2362311  | 0.09351714 | 0.00905476 | 0.03818204 | ATP11C  |
| 4168   | ENSG00000101977 | 4.46198858 | 0.09545885  | 0.38466838 | 0.36713226 | 0.59635697 | MCF2    |
| 2158   | ENSG00000101981 | 0          | NA          | NA         | NA         | NA         | F9      |
| 215    | ENSG00000101986 | 313.195619 | -0.21020134 | 0.13006024 | 0.08509224 | 0.2213782  | ABCD1   |
| 28952  | ENSG00000101997 | 256.161266 | 0.06024273  | 0.14175741 | 0.64854948 | 0.82457939 | CCDC22  |
| 778    | ENSG00000102001 | 0.95304202 | -0.03273545 | 0.3847849  | 0.49375742 | NA         | CACNA1F |
| 6855   | ENSG00000102003 | 1376.07315 | -1.41708922 | 0.08770501 | 8.87E-60   | 1.15E-57   | SYP     |
| 5355   | ENSG00000102007 | 775.176751 | 0.51487338  | 0.09477741 | 2.13E-08   | 3.08E-07   | PLP2    |
| 660    | ENSG00000102010 | 7.61767746 | -0.25943301 | 0.46913399 | 0.10292499 | 0.25477628 | BMX     |
| 51213  | ENSG00000102021 | 0          | NA          | NA         | NA         | NA         | LUZP4   |
| 5358   | ENSG00000102024 | 822.828975 | 0.52038038  | 0.09808653 | 4.25E-08   | 5.89E-07   | PLS3    |

|        |                 |            |             |            |            |            |          |
|--------|-----------------|------------|-------------|------------|------------|------------|----------|
| 8260   | ENSG00000102030 | 1372.37541 | -0.13923065 | 0.08304536 | 0.08533862 | 0.22164134 | NAA10    |
| 5973   | ENSG00000102032 | 33.8540671 | 0.35872291  | 0.37438024 | 0.11765614 | 0.28127459 | RENBP    |
| 2000   | ENSG00000102034 | 281.291987 | 0.21914657  | 0.14014009 | 0.09237032 | 0.23501245 | ELF4     |
| 6594   | ENSG00000102038 | 2229.98147 | 0.09311589  | 0.06723513 | 0.15966559 | 0.34722847 | SMARCA1  |
| 55613  | ENSG00000102043 | 23.2148994 | 0.02973861  | 0.31648115 | 0.8701664  | 0.94333385 | MTMR8    |
| 140462 | ENSG00000102048 | 58.5978112 | -0.18770397 | 0.26345659 | 0.34175981 | 0.57180929 | ASB9     |
| 340554 | ENSG00000102053 | 145.330464 | 0.06727546  | 0.1849043  | 0.67841704 | 0.84291038 | ZC3H12B  |
| 5931   | ENSG00000102054 | 2188.7971  | -0.02667724 | 0.07409095 | 0.71267771 | 0.86169546 | RBBP7    |
| 80316  | ENSG00000102055 | 0          | NA          | NA         | NA         | NA         | PPP1R2C  |
| 3750   | ENSG00000102057 | 110.176786 | 0.11388144  | 0.20778693 | 0.51651209 | 0.73056247 | KCND1    |
| 5956   | ENSG00000102076 | 0          | NA          | NA         | NA         | NA         | OPN1LW   |
| 9016   | ENSG00000102078 | 198.834616 | 0.22627274  | 0.15945959 | 0.11846532 | 0.28258066 | SLC25A14 |
| 2332   | ENSG00000102081 | 761.740246 | -0.04999539 | 0.10324062 | 0.6144676  | 0.8019364  | FMR1     |
| 11040  | ENSG00000102096 | 187.982854 | 0.19443375  | 0.16920249 | 0.2005334  | 0.40575148 | PIM2     |
| 10389  | ENSG00000102098 | 535.378406 | -0.01608737 | 0.10758476 | 0.8747425  | 0.94484382 | SCML2    |
| 7355   | ENSG00000102100 | 472.578149 | 0.15600025  | 0.1156445  | 0.15658708 | 0.34316665 | SLC35A2  |
| 10084  | ENSG00000102103 | 713.883311 | -0.17054238 | 0.10244604 | 0.08321657 | 0.21772162 | PQBP1    |
| 6247   | ENSG00000102104 | 0          | NA          | NA         | NA         | NA         | RS1      |
| 27344  | ENSG00000102109 | 1275.65621 | 0.12021859  | 0.09028977 | 0.17061444 | 0.36253512 | PCSK1N   |
| 2010   | ENSG00000102119 | 862.468128 | -0.08349478 | 0.09407135 | 0.35956877 | 0.58949503 | EMD      |
| 6901   | ENSG00000102125 | 511.572311 | 0.29592334  | 0.11473004 | 0.00671773 | 0.02986326 | TAZ      |
| 282808 | ENSG00000102128 | 6.67419048 | 0.02109424  | 0.35409178 | 0.88246636 | 0.94823075 | RAB40AL  |
| 5230   | ENSG00000102144 | 5803.02148 | -0.0510183  | 0.08258881 | 0.526053   | 0.73808697 | PGK1     |
| 2623   | ENSG00000102145 | 0          | NA          | NA         | NA         | NA         | GATA1    |
| 84061  | ENSG00000102158 | 634.400992 | 1.02428972  | 0.13770614 | 1.28E-14   | 3.38E-13   | MAGT1    |
| 6611   | ENSG00000102172 | 1888.97308 | -0.26050773 | 0.07764605 | 0.00059505 | 0.00375861 | SMS      |
| 5251   | ENSG00000102174 | 7.62091827 | 0.1474708   | 0.38842704 | 0.30963586 | 0.53743835 | PHEX     |
| 8266   | ENSG00000102178 | 1100.71638 | -0.22827888 | 0.08557316 | 0.0060818  | 0.02744208 | UBL4A    |
| 83692  | ENSG00000102181 | 657.032488 | 0.01626461  | 0.11399078 | 0.88163999 | 0.94773789 | CD99L2   |
| 8411   | ENSG00000102189 | 363.518661 | -0.22898818 | 0.13705681 | 0.07262105 | 0.19650869 | EEA1     |
| 9248   | ENSG00000102195 | 0          | NA          | NA         | NA         | NA         | GPR50    |
| 6102   | ENSG00000102218 | 263.534204 | 0.04853497  | 0.1480079  | 0.72327241 | 0.86773445 | RP2      |
| 9767   | ENSG00000102221 | 608.972063 | -0.10510298 | 0.12242614 | 0.36410326 | 0.59381904 | JADE3    |
| 5127   | ENSG00000102225 | 2731.47218 | -0.02692284 | 0.06320303 | 0.66563564 | 0.83494641 | CDK16    |
| 8237   | ENSG00000102226 | 3892.40302 | 0.00249779  | 0.06005729 | 0.96719744 | 0.98759962 | USP11    |
| 9468   | ENSG00000102230 | 598.524961 | -0.19628127 | 0.10787561 | 0.0568798  | 0.16435994 | PCYT1B   |
| 680    | ENSG00000102239 | 0.70793655 | 0.02847024  | 0.38384472 | 0.55549389 | NA         | BRS3     |
| 27336  | ENSG00000102241 | 2153.36029 | 0.09752014  | 0.06752876 | 0.14247097 | 0.3212532  | HTATSFI  |

|        |                 |            |             |            |            |            |          |
|--------|-----------------|------------|-------------|------------|------------|------------|----------|
| 51442  | ENSG00000102243 | 0          | NA          | NA         | NA         | NA         | VGLL1    |
| 959    | ENSG00000102245 | 0          | NA          | NA         | NA         | NA         | CD40LG   |
| 7076   | ENSG00000102265 | 150.459202 | 1.228408    | 0.20607472 | 2.48E-10   | 4.56E-09   | TIMP1    |
| 56062  | ENSG00000102271 | 0          | NA          | NA         | NA         | NA         | KLHL4    |
| 2564   | ENSG00000102287 | 0          | NA          | NA         | NA         | NA         | GABRE    |
| 27328  | ENSG00000102290 | 0.173124   | -0.01911262 | 0.38486262 | 0.84537521 | NA         | PCDH11X  |
| 2245   | ENSG00000102302 | 716.470669 | -0.04572344 | 0.09579539 | 0.62131965 | 0.80672374 | FGD1     |
| 5303   | ENSG00000102309 | 588.86841  | 0.26654888  | 0.10655036 | 0.00902359 | 0.03811541 | PIN4     |
| 64840  | ENSG00000102312 | 278.776128 | -0.43367582 | 0.14995658 | 0.00170472 | 0.00935593 | PORCN    |
| 347365 | ENSG00000102313 | 0.173733   | 0.01914545  | 0.38484597 | 0.78225479 | NA         | ITIH6    |
| 10916  | ENSG00000102316 | 2463.78771 | 0.43242794  | 0.06885522 | 1.67E-10   | 3.12E-09   | MAGED2   |
| 5935   | ENSG00000102317 | 2710.61691 | 0.20240909  | 0.06681475 | 0.00207695 | 0.01104441 | RBM3     |
| 11279  | ENSG00000102349 | 0.34108768 | 0.02362635  | 0.38535337 | 0.62411761 | NA         | KLF8     |
| 27286  | ENSG00000102359 | 0.67055544 | -0.02605768 | 0.38455641 | 0.57446224 | NA         | SRPX2    |
| 94121  | ENSG00000102362 | 35.8506404 | 1.69096942  | 0.62903121 | 0.00027321 | 0.00188143 | SYTL4    |
| 158866 | ENSG00000102383 | 216.458728 | -0.64921886 | 0.17468573 | 4.95E-05   | 0.00040485 | ZDHHC15  |
| 2491   | ENSG00000102384 | 439.294672 | -0.68140177 | 0.14277006 | 4.24E-07   | 5.12E-06   | CENPI    |
| 1821   | ENSG00000102385 | 75.4779277 | -0.24977137 | 0.25624398 | 0.20687425 | 0.41408243 | DRP2     |
| 54457  | ENSG00000102387 | 23.486055  | 2.07962403  | 0.58891166 | 2.44E-05   | 0.00021495 | TAF7L    |
| 51260  | ENSG00000102390 | 301.715291 | -0.15950641 | 0.14572175 | 0.2356418  | 0.45240308 | PBDC1    |
| 2717   | ENSG00000102393 | 341.413449 | 0.20102139  | 0.13236529 | 0.10511755 | 0.25849433 | GLA      |
| 51566  | ENSG00000102401 | 723.026887 | 0.08946246  | 0.09642499 | 0.33793967 | 0.56821327 | ARMCX3   |
| 56271  | ENSG00000102409 | 1193.06255 | -0.10084079 | 0.07703352 | 0.18103496 | 0.37823647 | BEX4     |
| 80183  | ENSG00000102445 | 5.30208087 | 0.42016204  | 0.79770428 | 0.00938976 | 0.03940202 | RUBCNL   |
| 259232 | ENSG00000102452 | 25.5953003 | -0.17431945 | 0.35677941 | 0.35029124 | 0.58064819 | NALCN    |
| 2259   | ENSG00000102466 | 428.088339 | -0.95646215 | 0.15840032 | 2.10E-10   | 3.90E-09   | FGF14    |
| 3356   | ENSG00000102468 | 0          | NA          | NA         | NA         | NA         | HTR2A    |
| 54602  | ENSG00000102471 | 906.871324 | -0.3523271  | 0.0961275  | 0.00014732 | 0.00107813 | NDFIP2   |
| 10673  | ENSG00000102524 | 8.06288748 | 0.21809965  | 0.42860293 | 0.16257573 | 0.35136193 | TNFSF13B |
| 22862  | ENSG00000102531 | 1829.28161 | 0.28798878  | 0.0790609  | 0.00019273 | 0.00137548 | FNDC3A   |
| 2862   | ENSG00000102539 | 1.67394001 | -0.02312954 | 0.37630969 | 0.78059233 | NA         | MLNR     |
| 81602  | ENSG00000102543 | 87.3023062 | -0.08671801 | 0.22035243 | 0.62987047 | 0.8127361  | CDADC1   |
| 81617  | ENSG00000102547 | 119.28817  | -0.1809971  | 0.20107977 | 0.29127769 | 0.51740974 | CAB39L   |
| 688    | ENSG00000102554 | 35.755824  | 0.47902059  | 0.42416816 | 0.0579709  | 0.16694071 | KLF5     |
| 8428   | ENSG00000102572 | 1466.41438 | -0.3366469  | 0.08532064 | 4.96E-05   | 0.00040539 | STK24    |
| 54     | ENSG00000102575 | 4.07344245 | 0.11812331  | 0.39272409 | 0.29278881 | 0.51892337 | ACP5     |
| 5611   | ENSG00000102580 | 625.546171 | 0.42401849  | 0.11825925 | 0.00016272 | 0.00118041 | DNAJC3   |
| 55757  | ENSG00000102595 | 898.882491 | 0.39615583  | 0.09454988 | 1.49E-05   | 0.00013723 | UGGT2    |

|        |                 |            |             |            |            |            |          |
|--------|-----------------|------------|-------------|------------|------------|------------|----------|
| 8874   | ENSG00000102606 | 2768.32145 | 0.24879778  | 0.08122148 | 0.00169337 | 0.00931425 | ARHGEF7  |
| 2254   | ENSG00000102678 | 0          | NA          | NA         | NA         | NA         | FGF9     |
| 6445   | ENSG00000102683 | 2.48861994 | 0.02683769  | 0.37316045 | 0.78221811 | NA         | SGCG     |
| 143    | ENSG00000102699 | 1258.0394  | 0.68449711  | 0.08010232 | 3.25E-18   | 1.10E-16   | PARP4    |
| 55578  | ENSG00000102710 | 1550.94222 | -0.18421014 | 0.07227843 | 0.00935765 | 0.03928391 | SUPT20H  |
| 10240  | ENSG00000102738 | 288.457907 | -0.08502912 | 0.13365273 | 0.49651262 | 0.714811   | MRPS31   |
| 10166  | ENSG00000102743 | 880.941335 | -0.32377112 | 0.09480233 | 0.00040822 | 0.00269522 | SLC25A15 |
| 3839   | ENSG00000102753 | 1100.01463 | -0.31459133 | 0.09765559 | 0.00082847 | 0.0050112  | KPNA3    |
| 2321   | ENSG00000102755 | 0.18922458 | 0.01954053  | 0.38488496 | 0.78225479 | NA         | FLT1     |
| 28984  | ENSG00000102760 | 0.99332863 | 0.03056551  | 0.38199533 | 0.61161126 | NA         | RGCC     |
| 23078  | ENSG00000102763 | 818.33271  | 0.04472657  | 0.10170138 | 0.64923437 | 0.82505828 | VWA8     |
| 160851 | ENSG00000102780 | 754.186215 | -0.32138286 | 0.10824957 | 0.0019086  | 0.01026723 | DGKH     |
| 84056  | ENSG00000102781 | 574.554527 | 0.13016808  | 0.11883175 | 0.24917976 | 0.46855526 | KATNAL1  |
| 26512  | ENSG00000102786 | 875.082191 | -0.22090529 | 0.15492832 | 0.11826561 | 0.28218758 | INTS6    |
| 730249 | ENSG00000102794 | 0          | NA          | NA         | NA         | NA         | ACOD1    |
| 79758  | ENSG00000102796 | 108.226115 | 0.10958223  | 0.21871253 | 0.5445506  | 0.75235966 | DHRS12   |
| 84935  | ENSG00000102802 | 0          | NA          | NA         | NA         | NA         | MEDAG    |
| 8848   | ENSG00000102804 | 1675.84603 | -0.12895989 | 0.07035058 | 0.06191399 | 0.17555717 | TSC22D1  |
| 1203   | ENSG00000102805 | 357.291988 | -0.01815696 | 0.13808317 | 0.88691372 | 0.95029993 | CLN5     |
| 10562  | ENSG00000102837 | 0.53441252 | 0.01348423  | 0.38343732 | 0.74516574 | NA         | OLFM4    |
| 10232  | ENSG00000102854 | 1.39831843 | -0.02778483 | 0.38200337 | 0.62527136 | NA         | MSLN     |
| 23295  | ENSG00000102858 | 1938.72521 | -0.0145803  | 0.08027843 | 0.85180403 | 0.93275912 | MGRN1    |
| 23361  | ENSG00000102870 | 1787.40838 | 0.04586654  | 0.06870056 | 0.49855431 | 0.71624312 | ZNF629   |
| 8717   | ENSG00000102871 | 156.746972 | 0.24290761  | 0.17820971 | 0.12362917 | 0.29131232 | TRADD    |
| 3299   | ENSG00000102878 | 826.530954 | 0.54092346  | 0.12721677 | 7.29E-06   | 7.11E-05   | HSF4     |
| 11151  | ENSG00000102879 | 502.56025  | -0.41569773 | 0.15629626 | 0.00364183 | 0.01785369 | CORO1A   |
| 5595   | ENSG00000102882 | 834.722044 | -0.34540194 | 0.09719756 | 0.00022977 | 0.00160857 | MAPK3    |
| 79153  | ENSG00000102886 | 47.8032838 | -0.03632281 | 0.28952577 | 0.84757748 | 0.93065124 | GDPD3    |
| 79767  | ENSG00000102890 | 80.1333897 | 0.27958844  | 0.23805532 | 0.14549036 | 0.32597939 | ELMO3    |
| 84560  | ENSG00000102891 | 0          | NA          | NA         | NA         | NA         | MT4      |
| 5257   | ENSG00000102893 | 1517.09611 | -0.44941355 | 0.08688561 | 1.06E-07   | 1.39E-06   | PHKB     |
| 57149  | ENSG00000102897 | 378.076513 | -0.22391662 | 0.12748172 | 0.06163228 | 0.17502196 | LYRM1    |
| 10204  | ENSG00000102898 | 2598.93222 | 0.03530485  | 0.07014995 | 0.60959658 | 0.79803651 | NUTF2    |
| 9688   | ENSG00000102900 | 1203.74082 | -0.02145252 | 0.09132836 | 0.80794946 | 0.9131433  | NUP93    |
| 80152  | ENSG00000102901 | 1059.50045 | 0.12144333  | 0.09567051 | 0.18990749 | 0.39109037 | CENPT    |
| 55815  | ENSG00000102904 | 46.5469561 | 0.18906647  | 0.28000519 | 0.3493254  | 0.58004303 | TSNAXIP1 |
| 10725  | ENSG00000102908 | 1372.82917 | -0.40400531 | 0.07828227 | 1.29E-07   | 1.68E-06   | NFAT5    |
| 83752  | ENSG00000102910 | 1480.28635 | -0.02441964 | 0.08649097 | 0.77108333 | 0.8951015  | LONP2    |

|        |                 |            |             |            |            |            |          |
|--------|-----------------|------------|-------------|------------|------------|------------|----------|
| 9683   | ENSG00000102921 | 768.559921 | -0.22213848 | 0.14259283 | 0.09215718 | 0.23465072 | N4BP1    |
| 869    | ENSG00000102924 | 170.062844 | -2.12330043 | 0.22375916 | 1.55E-22   | 6.58E-21   | CBLN1    |
| 23568  | ENSG00000102931 | 681.248065 | -0.52303807 | 0.09954142 | 5.43E-08   | 7.42E-07   | ARL2BP   |
| 51090  | ENSG00000102934 | 46.9777224 | -0.09836965 | 0.28000141 | 0.6122798  | 0.80024215 | PLLP     |
| 23090  | ENSG00000102935 | 4426.90019 | -1.01248655 | 0.06354687 | 5.07E-58   | 6.24E-56   | ZNF423   |
| 6367   | ENSG00000102962 | 0          | NA          | NA         | NA         | NA         | CCL22    |
| 1723   | ENSG00000102967 | 354.921385 | 0.24625203  | 0.14267115 | 0.06242233 | 0.17651923 | DHODH    |
| 6361   | ENSG00000102970 | 0.80356287 | -0.00576102 | 0.38152262 | 0.91108175 | NA         | CCL17    |
| 10664  | ENSG00000102974 | 1757.74356 | -0.22126013 | 0.08220583 | 0.00574412 | 0.02617441 | CTCF     |
| 65057  | ENSG00000102977 | 598.114928 | -0.15925771 | 0.10654591 | 0.11883673 | 0.28318716 | ACD      |
| 5432   | ENSG00000102978 | 1745.46748 | -0.1315888  | 0.06941159 | 0.05368407 | 0.15715539 | POLR2C   |
| 50855  | ENSG00000102981 | 216.805903 | -0.52592743 | 0.166087   | 0.0005249  | 0.0033637  | PARD6A   |
| 55565  | ENSG00000102984 | 326.538253 | 0.31922235  | 0.13785824 | 0.01287144 | 0.05105345 | ZNF821   |
| 4324   | ENSG00000102996 | 426.957236 | -0.10644153 | 0.13864294 | 0.40903171 | 0.63708503 | MMP15    |
| 79650  | ENSG00000103005 | 1049.35938 | -0.12223642 | 0.11744771 | 0.27292324 | 0.49654259 | USB1     |
| 80777  | ENSG00000103018 | 1024.19358 | -0.43553421 | 0.10677557 | 2.11E-05   | 0.00018856 | CYB5B    |
| 29070  | ENSG00000103021 | 116.654725 | 0.86382335  | 0.24234057 | 5.22E-05   | 0.00042488 | CCDC113  |
| 221191 | ENSG00000103023 | 0          | NA          | NA         | NA         | NA         | PRSS54   |
| 4832   | ENSG00000103024 | 514.417812 | -0.10849988 | 0.11290758 | 0.31373646 | 0.54159326 | NME3     |
| 65009  | ENSG00000103034 | 1161.56114 | -1.07306586 | 0.10421255 | 8.70E-26   | 4.23E-24   | NDRG4    |
| 5713   | ENSG00000103035 | 1867.66183 | 0.08480339  | 0.07635496 | 0.25750434 | 0.47871871 | PSMD7    |
| 79918  | ENSG00000103037 | 1126.03538 | 0.04886008  | 0.0872294  | 0.56527501 | 0.76733419 | SETD6    |
| 55238  | ENSG00000103042 | 497.48211  | 0.40919707  | 0.12421093 | 0.00049153 | 0.00317759 | SLC38A7  |
| 55697  | ENSG00000103043 | 1155.49939 | 0.2173634   | 0.0889264  | 0.01197563 | 0.0481647  | VAC14    |
| 3038   | ENSG00000103044 | 61.3755934 | -0.00243412 | 0.2708496  | 0.9879815  | 0.99589897 | HAS3     |
| 79613  | ENSG00000103047 | 288.963022 | -0.12548823 | 0.13815422 | 0.32902372 | 0.55760064 | TANGO6   |
| 25839  | ENSG00000103051 | 1641.24928 | -0.00066972 | 0.08305817 | 0.99212333 | 0.99756121 | COG4     |
| 55512  | ENSG00000103056 | 608.217601 | -2.85064854 | 0.14160543 | 1.64E-91   | 4.47E-89   | SMPD3    |
| 84138  | ENSG00000103061 | 678.804809 | 0.08300581  | 0.10671646 | 0.41835618 | 0.6444567  | SLC7A6OS |
| 9057   | ENSG00000103064 | 1022.72369 | -0.37359331 | 0.11516114 | 0.00064654 | 0.00403246 | SLC7A6   |
| 23659  | ENSG00000103066 | 182.265453 | 0.32530058  | 0.19580744 | 0.05537548 | 0.16106869 | PLA2G15  |
| 80004  | ENSG00000103067 | 3.33536588 | 0.03598659  | 0.37249045 | 0.72501701 | 0.86844186 | ESRP2    |
| 79152  | ENSG00000103089 | 2.42508199 | 0.0272696   | 0.37414243 | 0.76773843 | NA         | FA2H     |
| 79726  | ENSG00000103091 | 993.594099 | -0.03032072 | 0.11518757 | 0.76391579 | 0.89137736 | WDR59    |
| 22879  | ENSG00000103111 | 1175.33812 | 0.12903523  | 0.08264783 | 0.10933108 | 0.26588975 | MON1B    |
| 56942  | ENSG00000103121 | 446.031248 | -0.05168101 | 0.12436999 | 0.65965024 | 0.83126657 | CMC2     |
| 8312   | ENSG00000103126 | 848.654012 | -0.04571919 | 0.08642032 | 0.58651023 | 0.78217133 | AXIN1    |
| 54985  | ENSG00000103145 | 264.167571 | -0.07709639 | 0.14905581 | 0.572488   | 0.7723153  | HCFC1R1  |

|        |                 |            |             |            |            |            |          |
|--------|-----------------|------------|-------------|------------|------------|------------|----------|
| 8131   | ENSG00000103148 | 1039.49834 | 0.2361664   | 0.08691899 | 0.00520395 | 0.02401637 | NPRL3    |
| 23417  | ENSG00000103150 | 343.744796 | 0.04509051  | 0.13003388 | 0.71312755 | 0.86187687 | MLYCD    |
| 4350   | ENSG00000103152 | 522.822802 | -0.16423011 | 0.10555157 | 0.10456761 | 0.25755703 | MPG      |
| 54550  | ENSG00000103154 | 24.6831528 | -0.20913045 | 0.33894113 | 0.30367293 | 0.53104502 | NECAB2   |
| 83693  | ENSG00000103160 | 788.155588 | -0.20777089 | 0.10252269 | 0.03492402 | 0.11312533 | HSDL1    |
| 9013   | ENSG00000103168 | 1941.41263 | 0.56608168  | 0.07114988 | 6.02E-16   | 1.74E-14   | TAF1C    |
| 51172  | ENSG00000103174 | 175.838293 | 0.52151151  | 0.23055737 | 0.00732904 | 0.03209895 | NAGPA    |
| 58189  | ENSG00000103175 | 0.39948737 | -0.02383611 | 0.38540824 | 0.65894985 | NA         | WFDC1    |
| 9717   | ENSG00000103184 | 0.81326998 | -0.03812067 | 0.38409693 | 0.49180648 | NA         | SEC14L5  |
| 23406  | ENSG00000103187 | 129.659037 | -0.68803119 | 0.21521329 | 0.00029602 | 0.00202169 | COTL1    |
| 9100   | ENSG00000103194 | 1672.9629  | -0.20139785 | 0.07046206 | 0.00358764 | 0.01764473 | USP10    |
| 83716  | ENSG00000103196 | 5.92591177 | -0.0487854  | 0.36493407 | 0.6923528  | 0.85128158 | CRISPLD2 |
| 7249   | ENSG00000103197 | 4178.26911 | 0.39324987  | 0.07395901 | 5.77E-08   | 7.85E-07   | TSC2     |
| 26048  | ENSG00000103199 | 293.649293 | 0.17253876  | 0.14946987 | 0.20956712 | 0.4178638  | ZNF500   |
| NA     | ENSG00000103200 | 0.15069912 | -0.01848503 | 0.38480575 | 0.84537521 | NA         |          |
| 4833   | ENSG00000103202 | 5414.19112 | 0.48510814  | 0.05703059 | 7.67E-18   | 2.51E-16   | NME4     |
| 4363   | ENSG00000103222 | 3113.05597 | 0.01322972  | 0.07831911 | 0.86458282 | 0.94007513 | ABCC1    |
| 408050 | ENSG00000103226 | 1509.05509 | 0.36858387  | 0.10998059 | 0.00045507 | 0.00297583 | NOMO3    |
| 64788  | ENSG00000103227 | 129.367082 | 0.94011659  | 0.25576637 | 2.98E-05   | 0.00025691 | LMF1     |
| 2294   | ENSG00000103241 | 0          | NA          | NA         | NA         | NA         | FOXF1    |
| 64428  | ENSG00000103245 | 598.635149 | 0.14135779  | 0.1060087  | 0.16488749 | 0.35458137 | CIAO3    |
| 64779  | ENSG00000103248 | 277.677442 | 0.04521009  | 0.14323689 | 0.73501733 | 0.87400323 | MTHFSD   |
| 1186   | ENSG00000103249 | 1551.98637 | 0.35487566  | 0.11168227 | 0.00087096 | 0.00525065 | CLCN7    |
| 84264  | ENSG00000103253 | 481.766743 | -0.32107725 | 0.1189771  | 0.00440389 | 0.02093774 | HAGHL    |
| 65990  | ENSG00000103254 | 550.031759 | -0.10292786 | 0.10944246 | 0.32508844 | 0.55302396 | ANTKMT   |
| 8140   | ENSG00000103257 | 2442.24281 | 0.12045461  | 0.2283467  | 0.51688463 | 0.7308667  | SLC7A5   |
| 79006  | ENSG00000103260 | 426.363639 | -0.29397398 | 0.12106104 | 0.01016273 | 0.04193604 | METRN    |
| 79791  | ENSG00000103264 | 575.892449 | -0.43729977 | 0.12857459 | 0.00030398 | 0.00207106 | FBXO31   |
| 10273  | ENSG00000103266 | 1703.19734 | 0.13071617  | 0.06843346 | 0.05221966 | 0.15396613 | STUB1    |
| 9028   | ENSG00000103269 | 40.980964  | 0.34462735  | 0.35477636 | 0.12785522 | 0.29839402 | RHBDL1   |
| 4682   | ENSG00000103274 | 319.944611 | -0.12331524 | 0.12705202 | 0.30255974 | 0.52987991 | NUBP1    |
| 7329   | ENSG00000103275 | 2709.32127 | 0.09444352  | 0.07215936 | 0.18277983 | 0.38071934 | UBE2I    |
| 7783   | ENSG00000103310 | 0          | NA          | NA         | NA         | NA         | ZP2      |
| 4210   | ENSG00000103313 | 0.43880265 | -0.02654222 | 0.38563237 | 0.5780147  | NA         | MEFV     |
| 1428   | ENSG00000103316 | 30.6858606 | 1.66609361  | 0.48252735 | 3.55E-05   | 0.00030166 | CRYM     |
| 29904  | ENSG00000103319 | 898.248235 | -0.01763027 | 0.0880033  | 0.83243042 | 0.92392457 | EEF2K    |
| 6650   | ENSG00000103326 | 1877.18994 | -0.12000909 | 0.07448696 | 0.1004517  | 0.25008931 | CAPN15   |
| 9780   | ENSG00000103335 | 289.837051 | 0.34181635  | 0.21422313 | 0.05875568 | 0.16840693 | PIEZO1   |



|           |                 |            |             |            |            |            |             |
|-----------|-----------------|------------|-------------|------------|------------|------------|-------------|
| 2935      | ENSG00000103342 | 3136.39704 | -0.27895837 | 0.06601548 | 1.74E-05   | 0.00015765 | GSPT1       |
| 7727      | ENSG00000103343 | 169.073224 | 0.05375901  | 0.17513176 | 0.73122174 | 0.87162779 | ZNF174      |
| 23059     | ENSG00000103351 | 295.634513 | 0.37487461  | 0.17054212 | 0.01448906 | 0.05602473 | CLUAP1      |
| 56061     | ENSG00000103353 | 2804.94577 | -0.06932122 | 0.07306024 | 0.33325272 | 0.56270076 | UBFD1       |
| 260429    | ENSG00000103355 | 0.69252051 | 0.04040802  | 0.38716153 | 0.35603027 | NA         | PRSS33      |
| 124454    | ENSG00000103356 | 779.776589 | -0.12402963 | 0.10938695 | 0.23563538 | 0.45240308 | EARS2       |
| 6923      | ENSG00000103363 | 1768.3665  | 0.0555295   | 0.07140465 | 0.42908808 | 0.65470334 | ELOB        |
| 23062     | ENSG00000103365 | 1888.0715  | -0.09911019 | 0.09263951 | 0.26929979 | 0.49229778 | GGA2        |
| 343       | ENSG00000103375 | 0.18922458 | 0.01954053  | 0.38488496 | 0.78225479 | NA         | AQP8        |
| 55313     | ENSG00000103381 | 343.950513 | -0.51074916 | 0.13873307 | 8.49E-05   | 0.00065647 | CPPED1      |
| 57478     | ENSG00000103404 | 520.118018 | 0.01430674  | 0.13226296 | 0.91291677 | 0.96282372 | USP31       |
| 3163      | ENSG00000103415 | 447.150211 | -0.4537484  | 0.12928373 | 0.00019552 | 0.00139337 | HMOX2       |
| 9093      | ENSG00000103423 | 1003.13788 | -0.06867803 | 0.10116684 | 0.48074271 | 0.70158112 | DNAJA3      |
| 100529144 | ENSG00000103426 | 8.98066911 | 0.01442512  | 0.36498042 | 0.90535714 | 0.95855092 | CORO7-PAM16 |
| 51283     | ENSG00000103429 | 1304.93048 | -0.08874316 | 0.08968004 | 0.30823974 | 0.53579716 | BFAR        |
| 6299      | ENSG00000103449 | 0.34109801 | 0.02362643  | 0.38535338 | 0.62411213 | NA         | SALL1       |
| 27324     | ENSG00000103460 | 0          | NA          | NA         | NA         | NA         | TOX3        |
| NA        | ENSG00000103472 | 4.57064213 | 0.18613322  | 0.42683604 | 0.14252794 | 0.32128606 | RRN3P2      |
| 5934      | ENSG00000103479 | 1341.77734 | 0.24163395  | 0.1097922  | 0.02129601 | 0.07661794 | RBL2        |
| 23475     | ENSG00000103485 | 4140.83718 | 0.29469126  | 0.05378661 | 3.04E-08   | 4.29E-07   | QPRT        |
| 64131     | ENSG00000103489 | 1519.40294 | 0.0439461   | 0.07587458 | 0.55440068 | 0.76030342 | XYLT1       |
| 29108     | ENSG00000103490 | 3.95808471 | 0.11855277  | 0.39216425 | 0.30398098 | 0.53126299 | PYCARD      |
| 23322     | ENSG00000103494 | 456.668813 | -0.28310178 | 0.12724634 | 0.01796475 | 0.06684557 | RPGRIP1L    |
| 4150      | ENSG00000103495 | 6983.48869 | -0.12673078 | 0.05552897 | 0.02096223 | 0.075589   | MAZ         |
| 6810      | ENSG00000103496 | 342.728771 | 0.14085091  | 0.13638263 | 0.26796606 | 0.49058288 | STX4        |
| 10423     | ENSG00000103502 | 1110.67433 | -0.10106718 | 0.07980516 | 0.19488313 | 0.39811381 | CDIPT       |
| 10295     | ENSG00000103507 | 960.429245 | -0.01926961 | 0.0906522  | 0.82644076 | 0.92144622 | BCKDK       |
| 84148     | ENSG00000103510 | 1171.60574 | 0.06615195  | 0.08036128 | 0.39967621 | 0.62831531 | KAT8        |
| 23420     | ENSG00000103512 | 3207.27318 | 0.21057565  | 0.07849686 | 0.00608157 | 0.02744208 | NOMO1       |
| 50615     | ENSG00000103522 | 2.94641292 | -0.14308076 | 0.4133539  | 0.12759414 | 0.29804636 | IL21R       |
| 51760     | ENSG00000103528 | 93.4967349 | 1.19665109  | 0.26704438 | 6.99E-07   | 8.13E-06   | SYT17       |
| 79838     | ENSG00000103534 | 7.16324248 | -0.03589252 | 0.36721689 | 0.74227413 | 0.87857766 | TMC5        |
| 9738      | ENSG00000103540 | 1592.94939 | -0.49478901 | 0.08216883 | 7.05E-10   | 1.24E-08   | CCP110      |
| 57020     | ENSG00000103544 | 777.216493 | 0.25203797  | 0.10289561 | 0.0108141  | 0.04419191 | VPS35L      |
| 6530      | ENSG00000103546 | 5275.73957 | -0.10465368 | 0.0717609  | 0.13710005 | 0.31261521 | SLC6A2      |
| 9810      | ENSG00000103549 | 2884.66801 | -0.15863908 | 0.07209709 | 0.02486927 | 0.0867909  | RNF40       |
| 400506    | ENSG00000103550 | 1587.17162 | -0.02385874 | 0.09550838 | 0.79553101 | 0.90599479 | KNOP1       |
| 366       | ENSG00000103569 | 0          | NA          | NA         | NA         | NA         | AQP9        |

|        |                 |            |             |            |            |            |          |
|--------|-----------------|------------|-------------|------------|------------|------------|----------|
| 79719  | ENSG00000103591 | 780.42015  | -0.15473037 | 0.12645408 | 0.19362144 | 0.39643441 | AAGAB    |
| 64799  | ENSG00000103599 | 49.1662352 | 0.9957656   | 0.43678653 | 0.00201393 | 0.01076702 | IQCH     |
| 114294 | ENSG00000103642 | 69.9073986 | 0.3237777   | 0.28081185 | 0.12270302 | 0.28988186 | LACTB    |
| 10391  | ENSG00000103647 | 6.95235233 | -0.22163614 | 0.43040914 | 0.16546037 | 0.35554356 | CORO2B   |
| 1445   | ENSG00000103653 | 1820.0049  | -0.28521194 | 0.07713368 | 0.0001544  | 0.00112413 | CSK      |
| 8925   | ENSG00000103657 | 2287.39335 | -0.04168098 | 0.21799915 | 0.79169153 | 0.90499209 | HERC1    |
| 9325   | ENSG00000103671 | 350.395349 | 0.15707088  | 0.14451705 | 0.23993468 | 0.4579339  | TRIP4    |
| 123263 | ENSG00000103707 | 228.043826 | 0.05474606  | 0.15285529 | 0.69723208 | 0.85387893 | MTFMT    |
| 51285  | ENSG00000103710 | 7.83980473 | 0.04030669  | 0.36236383 | 0.75359895 | 0.88490786 | RASL12   |
| 8120   | ENSG00000103723 | 1523.16208 | -1.53505099 | 0.09896011 | 2.18E-55   | 2.58E-53   | AP3B2    |
| 23205  | ENSG00000103740 | 18.8608338 | 2.64003515  | 0.71574972 | 7.43E-06   | 7.23E-05   | ACSBG1   |
| 57722  | ENSG00000103742 | 173.034221 | 1.10050958  | 0.22808768 | 1.53E-07   | 1.98E-06   | IGDCC4   |
| 8766   | ENSG00000103769 | 2517.00483 | 0.06105983  | 0.06911611 | 0.36972549 | 0.59909782 | RAB11A   |
| 1512   | ENSG00000103811 | 277.809276 | 0.41745833  | 0.17040233 | 0.00658082 | 0.02935328 | CTSH     |
| NA     | ENSG00000103832 | 4.28220094 | 0.11343987  | 0.38594492 | 0.35628774 | 0.58627757 | GOLGA8UP |
| 64927  | ENSG00000103852 | 137.231816 | -0.31098491 | 0.23454699 | 0.10235373 | 0.25371038 | TTC23    |
| 80381  | ENSG00000103855 | 2547.14906 | 0.00995261  | 0.07860553 | 0.89886752 | 0.95556135 | CD276    |
| 2184   | ENSG00000103876 | 183.167702 | 0.07963763  | 0.17383896 | 0.60849258 | 0.79733788 | FAH      |
| 57214  | ENSG00000103888 | 8.45926903 | 0.01455865  | 0.34863819 | 0.92349587 | 0.96825748 | CEMIP    |
| 26015  | ENSG00000103932 | 1381.73058 | 0.07531968  | 0.09496958 | 0.41347837 | 0.64069125 | RPAP1    |
| 9455   | ENSG00000103942 | 532.587042 | -0.26201489 | 0.12942926 | 0.03084399 | 0.10243712 | HOMER2   |
| 30844  | ENSG00000103966 | 485.934167 | 0.12531188  | 0.10987244 | 0.23387523 | 0.45084382 | EHD4     |
| 25963  | ENSG00000103978 | 826.25512  | -0.12593993 | 0.10598751 | 0.21534274 | 0.42596211 | TMEM87A  |
| 64397  | ENSG00000103994 | 1876.3997  | -0.17124234 | 0.08708835 | 0.04305124 | 0.13277051 | ZNF106   |
| 22995  | ENSG00000103995 | 843.455649 | 0.03316584  | 0.08931943 | 0.7035514  | 0.85751377 | CEP152   |
| 79895  | ENSG00000104043 | 3.22076333 | 0.01686987  | 0.36882402 | 0.87540966 | 0.94499851 | ATP8B4   |
| 4948   | ENSG00000104044 | 69.3778356 | 0.33820213  | 0.27303287 | 0.10450944 | 0.25747762 | OCA2     |
| 56986  | ENSG00000104047 | 376.747383 | 0.16439454  | 0.13171798 | 0.1830684  | 0.38124037 | DTWD1    |
| 9333   | ENSG00000104055 | 0          | NA          | NA         | NA         | NA         | TGM5     |
| 23359  | ENSG00000104059 | 26.6067571 | 1.52097581  | 0.53204754 | 0.00025513 | 0.00177169 | FAM189A1 |
| 2553   | ENSG00000104064 | 497.977581 | -0.02371034 | 0.11532934 | 0.82850558 | 0.92220943 | GABPB1   |
| 7082   | ENSG00000104067 | 1608.66501 | 0.39924292  | 0.08146042 | 5.14E-07   | 6.12E-06   | TJP1     |
| 90427  | ENSG00000104081 | 476.703531 | 0.87180698  | 0.13445149 | 1.46E-11   | 3.06E-10   | BMF      |
| 23312  | ENSG00000104093 | 2235.89226 | -0.37328248 | 0.09735982 | 7.08E-05   | 0.00056184 | DMXL2    |
| 29106  | ENSG00000104112 | 1792.1521  | -1.84430021 | 0.07460883 | 4.75E-136  | 2.69E-133  | SCG3     |
| 55192  | ENSG00000104129 | 343.128703 | -0.00646089 | 0.13714448 | 0.95867518 | 0.98300251 | DNAJC17  |
| 8669   | ENSG00000104131 | 1356.53326 | -0.39832395 | 0.09225627 | 8.32E-06   | 8.03E-05   | EIF3J    |
| 80208  | ENSG00000104133 | 1504.95711 | 0.07148853  | 0.11550991 | 0.51701038 | 0.7309546  | SPG11    |

|        |                 |            |             |            |            |            |         |
|--------|-----------------|------------|-------------|------------|------------|------------|---------|
| 171177 | ENSG00000104140 | 30.2359747 | -0.11605393 | 0.30708708 | 0.54871276 | 0.75521756 | RHOV    |
| 57617  | ENSG00000104142 | 543.924655 | -0.24730267 | 0.10745085 | 0.01601509 | 0.06081137 | VPS18   |
| 11339  | ENSG00000104147 | 182.204259 | -0.10766154 | 0.1656696  | 0.47007374 | 0.69237291 | OIP5    |
| 7782   | ENSG00000104154 | 239.713823 | -0.23339637 | 0.16014463 | 0.10779283 | 0.26339391 | SLC30A4 |
| 26258  | ENSG00000104164 | 1252.82917 | 0.07974606  | 0.0876039  | 0.34954202 | 0.58004303 | BLOC1S6 |
| 50804  | ENSG00000104177 | 4356.15622 | 0.07864104  | 0.06780804 | 0.23922878 | 0.45707811 | MYEF2   |
| 23678  | ENSG00000104205 | 57.6788381 | 0.85706589  | 0.41682737 | 0.00421947 | 0.0201916  | SGK3    |
| 5157   | ENSG00000104213 | 18.0086244 | -0.14277316 | 0.33440439 | 0.45089835 | 0.67429441 | PDGFRL  |
| 79848  | ENSG00000104218 | 445.260742 | -0.03041667 | 0.11239699 | 0.77641222 | 0.89723881 | CSPP1   |
| 51201  | ENSG00000104219 | 104.63722  | 2.27553706  | 0.42074968 | 3.31E-09   | 5.31E-08   | ZDHHC2  |
| 55290  | ENSG00000104221 | 221.391992 | -0.08872925 | 0.15341712 | 0.52989034 | 0.74155494 | BRF2    |
| 23087  | ENSG00000104228 | 536.377267 | 0.54066325  | 0.11823005 | 1.67E-06   | 1.81E-05   | TRIM35  |
| 79752  | ENSG00000104231 | 377.358063 | -0.25310775 | 0.14485227 | 0.05811561 | 0.16717612 | ZFAND1  |
| 6101   | ENSG00000104237 | 0          | NA          | NA         | NA         | NA         | RP1     |
| 760    | ENSG00000104267 | 0          | NA          | NA         | NA         | NA         | CA2     |
| 7976   | ENSG00000104290 | 929.464841 | -0.41963843 | 0.25949469 | 0.04127316 | 0.12847387 | FZD3    |
| 55756  | ENSG00000104299 | 729.032095 | 0.2913278   | 0.1068396  | 0.00441904 | 0.02099971 | INTS9   |
| 8767   | ENSG00000104312 | 247.552701 | -0.05502319 | 0.14569214 | 0.68210782 | 0.84486322 | RIPK2   |
| 2138   | ENSG00000104313 | 2015.84856 | 0.32261074  | 0.07414888 | 8.88E-06   | 8.50E-05   | EYA1    |
| 4683   | ENSG00000104320 | 948.169285 | -0.0925804  | 0.09567375 | 0.31702375 | 0.54483775 | NBN     |
| 8989   | ENSG00000104321 | 0.34457596 | 0.00783944  | 0.38356596 | 0.90071784 | NA         | TRPA1   |
| 10404  | ENSG00000104324 | 3.07963713 | -0.21744607 | 0.47081029 | 0.02161376 | 0.07746569 | CPQ     |
| 1666   | ENSG00000104325 | 344.454656 | -0.2755874  | 0.12677024 | 0.02081852 | 0.07530345 | DECR1   |
| 793    | ENSG00000104327 | 151.402464 | -2.19054077 | 0.24666914 | 3.43E-20   | 1.30E-18   | CALB1   |
| 54928  | ENSG00000104331 | 1580.25284 | -0.11094048 | 0.07744487 | 0.14317482 | 0.32228142 | BPNT2   |
| 6422   | ENSG00000104332 | 377.779061 | 0.41458587  | 0.12478754 | 0.00043624 | 0.00286401 | SFRP1   |
| 55353  | ENSG00000104341 | 6485.63574 | -0.09738504 | 0.05504231 | 0.07361393 | 0.1986805  | LAPTM4B |
| 55284  | ENSG00000104343 | 382.962884 | 0.03701963  | 0.12693465 | 0.75829836 | 0.8876941  | UBE2W   |
| 10940  | ENSG00000104356 | 528.941448 | 0.0594978   | 0.11296476 | 0.58238426 | 0.77918294 | POP1    |
| 79815  | ENSG00000104361 | 172.971414 | 0.38032792  | 0.27807348 | 0.07204343 | 0.19555978 | NIPAL2  |
| 3551   | ENSG00000104365 | 680.684965 | 0.36794763  | 0.12102619 | 0.00132693 | 0.00753901 | IKBKB   |
| 5327   | ENSG00000104368 | 215.942327 | 0.00016386  | 0.17538809 | 0.99893658 | 0.99962651 | PLAT    |
| 56704  | ENSG00000104369 | 128.574634 | 0.39543546  | 0.23940187 | 0.04314362 | 0.13291451 | JPH1    |
| 27121  | ENSG00000104371 | 0          | NA          | NA         | NA         | NA         | DKK4    |
| 6788   | ENSG00000104375 | 190.58647  | 0.74113877  | 0.19322028 | 2.39E-05   | 0.00021102 | STK3    |
| 54332  | ENSG00000104381 | 2396.24074 | -0.53982913 | 0.06756072 | 4.89E-16   | 1.43E-14   | GDAP1   |
| 5862   | ENSG00000104388 | 1310.00354 | 0.09309453  | 0.07638096 | 0.21373426 | 0.4238788  | RAB2A   |
| 3646   | ENSG00000104408 | 4660.54109 | -0.18063782 | 0.0614454  | 0.00288172 | 0.01462605 | EIF3E   |

|        |                 |            |             |            |            |            |           |
|--------|-----------------|------------|-------------|------------|------------|------------|-----------|
| 9694   | ENSG00000104412 | 203.909896 | 0.16452964  | 0.17000494 | 0.28165064 | 0.50647591 | EMC2      |
| 54845  | ENSG00000104413 | 0          | NA          | NA         | NA         | NA         | ESRP1     |
| 8840   | ENSG00000104415 | 0          | NA          | NA         | NA         | NA         | CCN4      |
| 10397  | ENSG00000104419 | 353.489477 | 0.46197159  | 0.18580723 | 0.0050867  | 0.02356843 | NDRG1     |
| 51101  | ENSG00000104427 | 421.326762 | -0.02877555 | 0.13421326 | 0.81811881 | 0.9171248  | ZC2HC1A   |
| 3574   | ENSG00000104432 | 54.9596824 | 0.22766027  | 0.29482701 | 0.27088775 | 0.4942105  | IL7       |
| 11075  | ENSG00000104435 | 11987.5147 | -0.51868594 | 0.04679702 | 5.58E-29   | 3.09E-27   | STMN2     |
| 55156  | ENSG00000104442 | 711.77921  | -0.17220515 | 0.11873549 | 0.12591388 | 0.29508254 | ARMC1     |
| 7227   | ENSG00000104447 | 367.502097 | 1.82247724  | 0.21013736 | 2.27E-19   | 8.23E-18   | TRPS1     |
| 6674   | ENSG00000104450 | 91.0732253 | -0.09493713 | 0.27111921 | 0.62221279 | 0.80700149 | SPAG1     |
| 54108  | ENSG00000104472 | 435.666626 | 0.24380681  | 0.11726056 | 0.0286976  | 0.09699494 | CHRAC1    |
| 83988  | ENSG00000104490 | 620.887785 | -0.11818716 | 0.10788246 | 0.25056698 | 0.47053941 | NCALD     |
| 64089  | ENSG00000104497 | 144.522117 | 0.29237752  | 0.2070464  | 0.09697867 | 0.24355834 | SNX16     |
| 2765   | ENSG00000104499 | 0          | NA          | NA         | NA         | NA         | GML       |
| 51366  | ENSG00000104517 | 3686.98439 | -0.01695471 | 0.08042515 | 0.82793891 | 0.9221528  | UBR5      |
| 79792  | ENSG00000104518 | 33.1969154 | 1.08759366  | 0.47920974 | 0.00182007 | 0.00986885 | GSDMD     |
| 7264   | ENSG00000104522 | 658.572384 | -0.04081654 | 0.09799697 | 0.66576876 | 0.83494641 | GFUS      |
| 65263  | ENSG00000104524 | 181.225178 | 0.03598422  | 0.16642263 | 0.81153354 | 0.9146404  | PYCR3     |
| 1936   | ENSG00000104529 | 4992.97284 | 0.51877493  | 0.06466629 | 4.03E-16   | 1.18E-14   | EEF1D     |
| 312    | ENSG00000104537 | 0          | NA          | NA         | NA         | NA         | ANXA13    |
| 6713   | ENSG00000104549 | 1614.22143 | -0.46481384 | 0.10494724 | 4.05E-06   | 4.13E-05   | SQLE      |
| 63898  | ENSG00000104611 | 0          | NA          | NA         | NA         | NA         | SH2D4A    |
| 55174  | ENSG00000104613 | 734.921681 | 0.26424595  | 0.11721036 | 0.01756072 | 0.06560027 | INTS10    |
| 90459  | ENSG00000104626 | 573.400735 | -0.05723098 | 0.10406003 | 0.56700617 | 0.76856463 | ERII      |
| 23516  | ENSG00000104635 | 1790.01282 | -0.13143344 | 0.07174145 | 0.06189596 | 0.175546   | SLC39A14  |
| 66036  | ENSG00000104643 | 909.656443 | -0.10494222 | 0.09666104 | 0.260834   | 0.48273755 | MTMR9     |
| 23484  | ENSG00000104660 | 1470.40931 | 0.06908672  | 0.09693249 | 0.46469904 | 0.68746767 | LEPROTL1  |
| 10671  | ENSG00000104671 | 436.475235 | 0.00726629  | 0.11549524 | 0.94805863 | 0.97876335 | DCTN6     |
| 203069 | ENSG00000104679 | 678.907202 | -0.26295381 | 0.11114275 | 0.01311452 | 0.05177953 | R3HCC1    |
| 2936   | ENSG00000104687 | 1025.24562 | 0.17317218  | 0.0975953  | 0.06627961 | 0.18422352 | GSR       |
| 8797   | ENSG00000104689 | 68.9457208 | 0.74476939  | 0.3226792  | 0.00327953 | 0.01631544 | TNFRSF10A |
| 7993   | ENSG00000104691 | 207.248997 | -0.33787064 | 0.16285509 | 0.02192379 | 0.0784433  | UBXN8     |
| 5516   | ENSG00000104695 | 927.225718 | 0.08275853  | 0.0848202  | 0.31750104 | 0.54538707 | PPP2CB    |
| 157697 | ENSG00000104714 | 396.876844 | 0.19606977  | 0.12902872 | 0.1059864  | 0.25995429 | ERICH1    |
| 4741   | ENSG00000104722 | 1929.70801 | -2.26945602 | 0.07303193 | 3.12E-213  | 6.88E-210  | NEFM      |
| 7991   | ENSG00000104723 | 1628.14017 | -0.18071425 | 0.07128959 | 0.00978201 | 0.04078904 | TUSC3     |
| 9639   | ENSG00000104728 | 670.239587 | 0.11527255  | 0.11902517 | 0.30827393 | 0.53579981 | ARHGEF10  |
| 54758  | ENSG00000104731 | 1196.97362 | 0.02262777  | 0.08005159 | 0.77413983 | 0.89604057 | KLHDC4    |

|        |                 |            |             |            |            |            |          |
|--------|-----------------|------------|-------------|------------|------------|------------|----------|
| 4173   | ENSG00000104738 | 3845.36866 | -0.57615999 | 0.08518026 | 4.31E-12   | 9.42E-11   | MCM4     |
| 2515   | ENSG00000104755 | 0          | NA          | NA         | NA         | NA         | ADAM2    |
| 54793  | ENSG00000104756 | 431.681369 | -0.05025345 | 0.15446524 | 0.716717   | 0.8636823  | KCTD9    |
| 2267   | ENSG00000104760 | 1.43737226 | 0.06748064  | 0.38989989 | 0.25958163 | NA         | FGL1     |
| 427    | ENSG00000104763 | 1056.23164 | -0.04582106 | 0.08622286 | 0.58519011 | 0.78119847 | ASAH1    |
| 665    | ENSG00000104765 | 1059.21575 | -0.0113835  | 0.10793322 | 0.91015888 | 0.9614798  | BNIP3L   |
| 4125   | ENSG00000104774 | 920.056432 | 0.27429709  | 0.1076167  | 0.00774993 | 0.03359374 | MAN2B1   |
| 3783   | ENSG00000104783 | 2.34131822 | -0.00470251 | 0.37368775 | 0.95649651 | NA         | KCNN4    |
| 7288   | ENSG00000104804 | 11.4892263 | 0.08562113  | 0.35577992 | 0.57643737 | 0.77519944 | TULP2    |
| 4924   | ENSG00000104805 | 2506.53223 | 0.31350206  | 0.07887892 | 4.72E-05   | 0.00038923 | NUCB1    |
| 27294  | ENSG00000104808 | 10.8774244 | 0.33619746  | 0.48946143 | 0.10185517 | 0.25269559 | DHDH     |
| 2997   | ENSG00000104812 | 747.840621 | -0.10758129 | 0.12039148 | 0.34434485 | 0.5746805  | GYS1     |
| 11184  | ENSG00000104814 | 17.8915069 | -0.89013459 | 0.8232409  | 0.01378764 | 0.05387961 | MAP4K1   |
| 114336 | ENSG00000104818 | 0.52119901 | 0.02576573  | 0.38568143 | 0.51723676 | NA         | CGB2     |
| 1891   | ENSG00000104823 | 1458.76941 | 0.01410593  | 0.08025931 | 0.85811921 | 0.93662789 | ECH1     |
| 3191   | ENSG00000104824 | 5508.62535 | 0.18317593  | 0.08708882 | 0.030564   | 0.10186289 | HNRNPL   |
| 4793   | ENSG00000104825 | 412.546982 | 0.16573775  | 0.12744042 | 0.16773066 | 0.35871254 | NFKBIB   |
| 3972   | ENSG00000104826 | 2.9063243  | 0.14738227  | 0.41059195 | 0.16731958 | 0.35828164 | LHB      |
| 1082   | ENSG00000104827 | 0          | NA          | NA         | NA         | NA         | CGB3     |
| 10382  | ENSG00000104833 | 1233.89011 | -0.15916497 | 0.08497793 | 0.05432577 | 0.15863564 | TUBB4A   |
| 54938  | ENSG00000104835 | 466.92116  | 0.32803523  | 0.11344587 | 0.00241258 | 0.01257963 | SARS2    |
| 3743   | ENSG00000104848 | 1.6759716  | 0.04924646  | 0.38310892 | 0.48408204 | NA         | KCNA7    |
| 6625   | ENSG00000104852 | 4804.28419 | 0.0988406   | 0.05476723 | 0.0688017  | 0.18908793 | SNRNP70  |
| 1209   | ENSG00000104853 | 1409.15141 | 0.01880145  | 0.07748187 | 0.80502626 | 0.91147183 | CLPTM1   |
| 5971   | ENSG00000104856 | 50.6508871 | 0.33024846  | 0.31403361 | 0.13214088 | 0.30511168 | RELB     |
| 11129  | ENSG00000104859 | 1149.24016 | 0.20869892  | 0.08568923 | 0.01233968 | 0.04936867 | CLASRP   |
| 64130  | ENSG00000104863 | 52.440105  | -0.09861304 | 0.25024689 | 0.60521791 | 0.79522617 | LIN7B    |
| 284352 | ENSG00000104866 | 524.814086 | 0.08585905  | 0.11471187 | 0.43324494 | 0.65856418 | PPP1R37  |
| 2217   | ENSG00000104870 | 515.703439 | 0.77045285  | 0.13343003 | 1.53E-09   | 2.58E-08   | FCGRT    |
| 55011  | ENSG00000104872 | 1749.58597 | 0.13552098  | 0.09266068 | 0.13167873 | 0.30441691 | PIH1D1   |
| 1158   | ENSG00000104879 | 0.4692364  | -0.00817449 | 0.38327906 | 0.85817344 | NA         | CKM      |
| 23370  | ENSG00000104880 | 808.621081 | 0.07221607  | 0.09007756 | 0.40991557 | 0.63781075 | ARHGEF18 |
| 10848  | ENSG00000104881 | 202.826197 | 0.73170769  | 0.18899997 | 2.15E-05   | 0.00019198 | PPP1R13L |
| 92960  | ENSG00000104883 | 34.1935822 | -0.04575721 | 0.2789001  | 0.8110582  | 0.91443965 | PEX11G   |
| 2068   | ENSG00000104884 | 969.196055 | 0.10064232  | 0.09155144 | 0.25794238 | 0.47930849 | ERCC2    |
| 84444  | ENSG00000104885 | 2797.7624  | 0.27273742  | 0.07525157 | 0.00021415 | 0.00151359 | DOT1L    |
| 55111  | ENSG00000104886 | 1335.61883 | 0.10223033  | 0.08027286 | 0.19286878 | 0.39542384 | PLEKHJ1  |
| 57030  | ENSG00000104888 | 18.7966319 | 0.43233631  | 0.48703714 | 0.07678034 | 0.20499556 | SLC17A7  |

|        |                 |            |             |            |            |            |          |
|--------|-----------------|------------|-------------|------------|------------|------------|----------|
| 10535  | ENSG00000104889 | 932.711102 | -0.041798   | 0.08555475 | 0.61546536 | 0.80271053 | RNASEH2A |
| 147700 | ENSG00000104892 | 8.36904398 | 0.14546085  | 0.3828358  | 0.3388902  | 0.56911982 | KLC3     |
| 951    | ENSG00000104894 | 14.8774689 | 0.76095358  | 0.73133547 | 0.02136277 | 0.07678212 | CD37     |
| 8175   | ENSG00000104897 | 2372.12503 | 0.24847196  | 0.06561881 | 0.0001192  | 0.00088976 | SF3A2    |
| 268    | ENSG00000104899 | 1165.12369 | 0.15568889  | 0.0994192  | 0.1046155  | 0.25761097 | AMH      |
| 27120  | ENSG00000104901 | 6.10768604 | 0.3220163   | 0.56268075 | 0.03648897 | 0.11718772 | DKKL1    |
| 4066   | ENSG00000104903 | 232.510222 | -0.66826346 | 0.15788735 | 5.57E-06   | 5.56E-05   | LYL1     |
| 4946   | ENSG00000104904 | 5274.2933  | 0.11694774  | 0.06390395 | 0.06345632 | 0.17887414 | OAZ1     |
| 55621  | ENSG00000104907 | 688.902107 | 0.17356539  | 0.09816853 | 0.06706797 | 0.18576413 | TRMT1    |
| 8677   | ENSG00000104915 | 1634.37593 | -0.00661767 | 0.08546803 | 0.93597194 | 0.97325384 | STX10    |
| 56729  | ENSG00000104918 | 0          | NA          | NA         | NA         | NA         | RETN     |
| 2208   | ENSG00000104921 | 0          | NA          | NA         | NA         | NA         | FCER2    |
| 1760   | ENSG00000104936 | 1696.24342 | 0.44588108  | 0.07353757 | 6.32E-10   | 1.12E-08   | DMPK     |
| 10332  | ENSG00000104938 | 0          | NA          | NA         | NA         | NA         | CLEC4M   |
| 81492  | ENSG00000104941 | 0.45209736 | -0.02505403 | 0.38558831 | 0.57865948 | NA         | RSPH6A   |
| 79735  | ENSG00000104946 | 683.125049 | -0.10012353 | 0.10596208 | 0.32300555 | 0.55059971 | TBC1D17  |
| 259307 | ENSG00000104951 | 4.43855707 | -0.07733217 | 0.3796787  | 0.45685967 | 0.68033445 | IL4I1    |
| 79816  | ENSG00000104953 | 65.9501587 | 0.46158438  | 0.31037633 | 0.04294624 | 0.13257414 | TLE6     |
| 81576  | ENSG00000104957 | 641.126674 | 0.50499112  | 0.09916026 | 1.39E-07   | 1.80E-06   | CCDC130  |
| 53635  | ENSG00000104960 | 3381.01115 | 0.19070848  | 0.0734214  | 0.00807852 | 0.03481275 | PTOV1    |
| 166    | ENSG00000104964 | 7572.22837 | 0.15112174  | 0.05684465 | 0.00717899 | 0.03156719 | TLE5     |
| 4858   | ENSG00000104967 | 1285.95731 | -0.47181032 | 0.08387695 | 7.97E-09   | 1.21E-07   | NOVA2    |
| 6449   | ENSG00000104969 | 2531.5619  | 0.02700088  | 0.0619394  | 0.65926261 | 0.83105722 | SGTA     |
| NA     | ENSG00000104970 | 0          | NA          | NA         | NA         | NA         | KIR3DX1  |
| 10859  | ENSG00000104972 | 0          | NA          | NA         | NA         | NA         | LILRB1   |
| 81857  | ENSG00000104973 | 1482.16975 | 0.2441515   | 0.08161463 | 0.00216358 | 0.0114529  | MED25    |
| 11024  | ENSG00000104974 | 0          | NA          | NA         | NA         | NA         | LILRA1   |
| 6618   | ENSG00000104976 | 349.29738  | -0.08190476 | 0.13455492 | 0.51467772 | 0.72937777 | SNAPC2   |
| 28974  | ENSG00000104979 | 1032.93863 | 0.0056874   | 0.08452261 | 0.94555548 | 0.97783794 | C19orf53 |
| 10469  | ENSG00000104980 | 802.281934 | 0.19676497  | 0.11094974 | 0.06336256 | 0.17866872 | TIMM44   |
| 729440 | ENSG00000104983 | 134.258878 | 0.3918308   | 0.20673453 | 0.02732696 | 0.09328405 | CCDC61   |
| 9466   | ENSG00000104998 | 168.631144 | -0.00021712 | 0.16564001 | 0.99770294 | 0.99926338 | IL27RA   |
| 55723  | ENSG00000105011 | 551.846834 | -0.3716119  | 0.11560378 | 0.00071339 | 0.00439826 | ASF1B    |
| 7138   | ENSG00000105048 | 176.301571 | 0.3758017   | 0.18161437 | 0.01965592 | 0.07192429 | TNNT1    |
| 51231  | ENSG00000105053 | 381.127147 | 0.1271205   | 0.13543918 | 0.31574289 | 0.54363784 | VRK3     |
| 26017  | ENSG00000105058 | 1680.30649 | 0.02761528  | 0.06913527 | 0.68559748 | 0.8470175  | FAM32A   |
| 22870  | ENSG00000105063 | 1913.09231 | -0.07089794 | 0.07943887 | 0.36105306 | 0.59083575 | PPP6R1   |
| 84167  | ENSG00000105072 | 276.038766 | 0.17974651  | 0.14162369 | 0.1715053  | 0.3639214  | C19orf44 |

|        |                 |            |             |            |            |            |         |
|--------|-----------------|------------|-------------|------------|------------|------------|---------|
| 9441   | ENSG00000105085 | 242.03599  | -0.07971715 | 0.17306952 | 0.60482911 | 0.79489995 | MED26   |
| 93145  | ENSG00000105088 | 1148.90318 | 0.510367    | 0.09104106 | 8.11E-09   | 1.24E-07   | OLFM2   |
| 64926  | ENSG00000105122 | 0.173124   | -0.01911262 | 0.38486262 | 0.84537521 | NA         | RASAL3  |
| 10270  | ENSG00000105127 | 669.854292 | 0.17884859  | 0.10456211 | 0.07486177 | 0.20117262 | AKAP8   |
| 79852  | ENSG00000105131 | 5.91914505 | -0.00847415 | 0.35790332 | 0.94665672 | 0.97814213 | EPHX3   |
| 10994  | ENSG00000105135 | 806.898889 | -0.12800556 | 0.09955942 | 0.18216727 | 0.3798422  | ILVBL   |
| 79744  | ENSG00000105136 | 336.966858 | 0.02389821  | 0.15975502 | 0.87041698 | 0.94340743 | ZNF419  |
| 85360  | ENSG00000105137 | 616.404977 | 0.42516935  | 0.10576987 | 2.84E-05   | 0.00024661 | SYDE1   |
| 23581  | ENSG00000105141 | 0          | NA          | NA         | NA         | NA         | CASP14  |
| 6511   | ENSG00000105143 | 0          | NA          | NA         | NA         | NA         | SLC1A6  |
| 6795   | ENSG00000105146 | 8.3096471  | 0.04946678  | 0.36509856 | 0.68779288 | 0.84840902 | AURKC   |
| 10775  | ENSG00000105171 | 359.798068 | -0.2803506  | 0.12452029 | 0.01691669 | 0.06370327 | POP4    |
| 898    | ENSG00000105173 | 208.551069 | -0.33312728 | 0.16327932 | 0.02407477 | 0.08462852 | CCNE1   |
| 8725   | ENSG00000105176 | 1283.768   | 0.02129027  | 0.08038038 | 0.78808619 | 0.90384589 | URI1    |
| 9141   | ENSG00000105185 | 776.066912 | -0.03515331 | 0.10454709 | 0.72545943 | 0.86866734 | PDCD5   |
| 84079  | ENSG00000105186 | 683.861109 | -0.10191596 | 0.12904551 | 0.40187634 | 0.63031025 | ANKRD27 |
| 6217   | ENSG00000105193 | 17040.4796 | 0.03104179  | 0.05094491 | 0.53908761 | 0.74843996 | RPS16   |
| 92609  | ENSG00000105197 | 1072.54668 | -0.00771256 | 0.12123221 | 0.94433002 | 0.97728379 | TIMM50  |
| 29124  | ENSG00000105198 | 0          | NA          | NA         | NA         | NA         | LGALS13 |
| 2091   | ENSG00000105202 | 2975.15108 | 0.04397789  | 0.06645975 | 0.50265498 | 0.71947729 | FBL     |
| 9149   | ENSG00000105204 | 583.396581 | 0.44583872  | 0.13486505 | 0.00040909 | 0.00270004 | DYRK1B  |
| 1178   | ENSG00000105205 | 0          | NA          | NA         | NA         | NA         | CLC     |
| 79935  | ENSG00000105219 | 6.1674186  | -0.00402588 | 0.3592137  | 0.97281311 | 0.98992269 | CCNP    |
| 2821   | ENSG00000105220 | 5333.95789 | -0.24321658 | 0.08274472 | 0.00254953 | 0.01319319 | GPI     |
| 208    | ENSG00000105221 | 3228.23964 | 0.07235997  | 0.06185548 | 0.23473681 | 0.45159871 | AKT2    |
| 23646  | ENSG00000105223 | 3928.1534  | 0.2898498   | 0.05715497 | 2.91E-07   | 3.61E-06   | PLD3    |
| 57716  | ENSG00000105227 | 76.0454464 | 0.70859592  | 0.28736975 | 0.00243053 | 0.01265661 | PRX     |
| 51588  | ENSG00000105229 | 753.157385 | -0.01143357 | 0.10860604 | 0.91166175 | 0.96237542 | PIAS4   |
| 9253   | ENSG00000105245 | 863.025092 | 0.51513071  | 0.09781822 | 5.29E-08   | 7.25E-07   | NUMBL   |
| 10148  | ENSG00000105246 | 0.29863895 | -0.02292439 | 0.3852726  | 0.68753245 | NA         | EBI3    |
| 55702  | ENSG00000105248 | 282.22158  | -0.12272592 | 0.13686702 | 0.33598696 | 0.56592082 | YJU2    |
| 56961  | ENSG00000105251 | 3307.77644 | 0.85578663  | 0.06160514 | 1.25E-44   | 1.09E-42   | SHD     |
| 1155   | ENSG00000105254 | 1399.05263 | -0.00036994 | 0.08015006 | 0.9955125  | 0.99852582 | TBCB    |
| 79187  | ENSG00000105255 | 2200.26818 | 0.15179893  | 0.0696151  | 0.02643182 | 0.09095225 | FSD1    |
| 5438   | ENSG00000105258 | 561.580346 | 0.13169617  | 0.11508117 | 0.23064573 | 0.44661441 | POLR2I  |
| 728361 | ENSG00000105261 | 0.52158967 | 0.01056479  | 0.38325086 | 0.77480829 | NA         | OVOL3   |
| 25999  | ENSG00000105270 | 1576.31537 | -0.20925843 | 0.10003076 | 0.02974619 | 0.0997008  | CLIP3   |
| 23217  | ENSG00000105278 | 16.9632831 | -0.35428426 | 0.46811648 | 0.1052119  | 0.25869427 | ZFR2    |

|       |                 |            |             |            |            |            |          |
|-------|-----------------|------------|-------------|------------|------------|------------|----------|
| 6510  | ENSG00000105281 | 2467.97415 | 0.03413123  | 0.06936875 | 0.61760831 | 0.8042894  | SLC1A5   |
| 25865 | ENSG00000105287 | 1128.66572 | 0.12600585  | 0.08451452 | 0.126306   | 0.29571761 | PRKD2    |
| 27134 | ENSG00000105289 | 3.36002555 | 0.14026115  | 0.40566924 | 0.19658011 | 0.4001795  | TJP3     |
| 333   | ENSG00000105290 | 2864.85499 | -0.35896198 | 0.06430552 | 1.41E-08   | 2.08E-07   | APLP1    |
| 58509 | ENSG00000105298 | 989.684773 | 0.21986816  | 0.08597153 | 0.00857766 | 0.03655871 | CACTIN   |
| 26093 | ENSG00000105321 | 537.579893 | 0.31462662  | 0.12496865 | 0.0075986  | 0.03309688 | CCDC9    |
| 11100 | ENSG00000105323 | 6661.45029 | -0.07394747 | 0.05638779 | 0.1844054  | 0.38305969 | HNRNPUL1 |
| 51343 | ENSG00000105325 | 1417.35399 | 0.03182287  | 0.08406538 | 0.69872227 | 0.85472333 | FZR1     |
| 27113 | ENSG00000105327 | 366.350466 | 0.77445183  | 0.13262331 | 1.04E-09   | 1.79E-08   | BBC3     |
| 7040  | ENSG00000105329 | 62.5847985 | 0.36830055  | 0.28784079 | 0.08601088 | 0.2230953  | TGFB1    |
| 22898 | ENSG00000105339 | 259.964346 | -0.36786737 | 0.18059886 | 0.02146655 | 0.07708533 | DENND3   |
| 55101 | ENSG00000105341 | 1118.90427 | 0.06036415  | 0.09421954 | 0.50923921 | 0.72487486 | DMAC2    |
| 1089  | ENSG00000105352 | 0          | NA          | NA         | NA         | NA         | CEACAM4  |
| 10226 | ENSG00000105355 | 665.722904 | 0.27397541  | 0.09957737 | 0.0042911  | 0.02048009 | PLIN3    |
| 79784 | ENSG00000105357 | 0.173124   | -0.01911262 | 0.38486262 | 0.84537521 | NA         | MYH14    |
| 51073 | ENSG00000105364 | 975.285542 | 0.12997561  | 0.08466525 | 0.11567025 | 0.27763099 | MRPL4    |
| 27181 | ENSG00000105366 | 0          | NA          | NA         | NA         | NA         | SIGLEC8  |
| 973   | ENSG00000105369 | 0.97071832 | 0.00424683  | 0.38089891 | 0.93873791 | NA         | CD79A    |
| 3982  | ENSG00000105370 | 0          | NA          | NA         | NA         | NA         | LIM2     |
| 3386  | ENSG00000105371 | 0          | NA          | NA         | NA         | NA         | ICAM4    |
| 6223  | ENSG00000105372 | 13226.9937 | -0.05164857 | 0.0522507  | 0.31660239 | 0.54452953 | RPS19    |
| 29997 | ENSG00000105373 | 6863.74875 | 0.00541687  | 0.05366928 | 0.92014981 | 0.96637405 | NOP53    |
| 4818  | ENSG00000105374 | 0.48531136 | 0.01796065  | 0.38416958 | 0.79443464 | NA         | NKG7     |
| 7087  | ENSG00000105376 | 7.93155467 | 0.17108844  | 0.39843268 | 0.26201887 | 0.48394839 | ICAM5    |
| 2109  | ENSG00000105379 | 653.395162 | -0.24908555 | 0.10312994 | 0.01188192 | 0.04786922 | ETFB     |
| 945   | ENSG00000105383 | 0          | NA          | NA         | NA         | NA         | CD33     |
| 1048  | ENSG00000105388 | 0          | NA          | NA         | NA         | NA         | CEACAM5  |
| 1406  | ENSG00000105392 | 0          | NA          | NA         | NA         | NA         | CRX      |
| 29086 | ENSG00000105393 | 1603.42156 | 0.17019921  | 0.0714363  | 0.0152515  | 0.05840372 | BABAM1   |
| 7297  | ENSG00000105397 | 1927.61322 | 0.13962833  | 0.07808359 | 0.06776912 | 0.18713142 | TYK2     |
| 6822  | ENSG00000105398 | 0          | NA          | NA         | NA         | NA         | SULT2A1  |
| 11140 | ENSG00000105401 | 3825.9914  | 0.21984448  | 0.06491293 | 0.0005841  | 0.00369531 | CDC37    |
| 8775  | ENSG00000105402 | 1111.31706 | 0.04679656  | 0.09779112 | 0.6214621  | 0.80672374 | NAPA     |
| 10567 | ENSG00000105404 | 787.154812 | 0.33796748  | 0.10008544 | 0.00045569 | 0.00297789 | RABAC1   |
| 478   | ENSG00000105409 | 5023.86091 | -1.99776744 | 0.07749345 | 9.81E-148  | 7.48E-145  | ATP1A3   |
| 56917 | ENSG00000105419 | 1693.97059 | 0.09070641  | 0.06929392 | 0.18351833 | 0.38180295 | MEIS3    |
| 5802  | ENSG00000105426 | 5352.44547 | 0.0215015   | 0.05572426 | 0.69750362 | 0.85389371 | PTPRS    |
| 84518 | ENSG00000105427 | 40.5921481 | 0.53493235  | 0.36736747 | 0.03360634 | 0.10980726 | CNFN     |



|        |                 |            |             |            |            |            |         |
|--------|-----------------|------------|-------------|------------|------------|------------|---------|
| 148066 | ENSG00000105428 | 0.33836517 | 0.00209965  | 0.3833763  | 0.96840955 | NA         | ZNRF4   |
| 1954   | ENSG00000105429 | 4693.684   | -0.03927219 | 0.05688714 | 0.48435321 | 0.70452718 | MEGF8   |
| 10945  | ENSG00000105438 | 1939.18483 | 0.00087866  | 0.08538239 | 0.99251754 | 0.99756121 | KDELR1  |
| 9266   | ENSG00000105443 | 2740.2806  | 0.41742142  | 0.07628025 | 2.27E-08   | 3.27E-07   | CYTH2   |
| 83743  | ENSG00000105447 | 1133.16456 | -0.1193921  | 0.08699877 | 0.15852939 | 0.34569581 | GRWD1   |
| 2906   | ENSG00000105464 | 255.500287 | 0.69526066  | 0.18714888 | 4.42E-05   | 0.0003673  | GRIN2D  |
| 23546  | ENSG00000105467 | 1.0130207  | -0.02269175 | 0.38298927 | 0.63582114 | NA         | SYNGR4  |
| 6320   | ENSG00000105472 | 66.7076818 | -0.20510139 | 0.24262037 | 0.28433608 | 0.50950396 | CLEC11A |
| 93233  | ENSG00000105479 | 11.0160896 | 0.25380405  | 0.42823037 | 0.17146193 | 0.36389846 | ODAD1   |
| 22900  | ENSG00000105483 | 748.395622 | 0.68599038  | 0.10593947 | 2.28E-11   | 4.67E-10   | CARD8   |
| 3978   | ENSG00000105486 | 1421.28029 | -0.02554016 | 0.08690631 | 0.76227228 | 0.890245   | LIG1    |
| 946    | ENSG00000105492 | 0          | NA          | NA         | NA         | NA         | SIGLEC6 |
| 7728   | ENSG00000105497 | 332.2538   | -0.13848885 | 0.16423966 | 0.34938776 | 0.58004303 | ZNF175  |
| 8605   | ENSG00000105499 | 6.12424534 | -0.11239136 | 0.3878715  | 0.32428329 | 0.55216104 | PLA2G4C |
| NA     | ENSG00000105501 | 0.16735865 | 0.01897177  | 0.38482933 | 0.78225479 | NA         | SIGLEC5 |
| 56344  | ENSG00000105507 | 0          | NA          | NA         | NA         | NA         | CABP5   |
| 3036   | ENSG00000105509 | 2.3872068  | 0.07630564  | 0.38968056 | 0.28766667 | NA         | HAS1    |
| 9545   | ENSG00000105514 | 534.311746 | -0.1605977  | 0.119691   | 0.15700571 | 0.34378031 | RAB3D   |
| 1628   | ENSG00000105516 | 103.238891 | -0.61303617 | 0.2978839  | 0.00847115 | 0.0361669  | DBP     |
| 374882 | ENSG00000105518 | 422.370144 | 0.12336977  | 0.12136426 | 0.28392489 | 0.50908899 | TMEM205 |
| 828    | ENSG00000105519 | 136.301186 | 0.35125572  | 0.21034713 | 0.04946205 | 0.14780908 | CAPS    |
| 64748  | ENSG00000105520 | 1142.41697 | -0.15804261 | 0.07724692 | 0.03657485 | 0.11739928 | PLPPR2  |
| 54854  | ENSG00000105523 | 9.50195527 | 0.10836121  | 0.35721843 | 0.50771866 | 0.72359301 | FAM83E  |
| 54922  | ENSG00000105538 | 28.276517  | 0.40485686  | 0.47691892 | 0.08346203 | 0.21813816 | RASIP1  |
| 51298  | ENSG00000105549 | 0.32326427 | -0.0232685  | 0.38532065 | 0.66893092 | NA         | THEG    |
| 26291  | ENSG00000105550 | 1.31792497 | 0.07638453  | 0.39125895 | 0.21740716 | NA         | FGF21   |
| 587    | ENSG00000105552 | 555.851738 | 0.29019314  | 0.10531647 | 0.00407382 | 0.01960892 | BCAT2   |
| 54531  | ENSG00000105556 | 543.214817 | 0.18017419  | 0.14978502 | 0.19064356 | 0.39199589 | MIER2   |
| 57664  | ENSG00000105559 | 165.973303 | 2.28597424  | 0.21932686 | 1.33E-26   | 6.68E-25   | PLEKHA4 |
| 5518   | ENSG00000105568 | 5019.99324 | 0.11745925  | 0.06606856 | 0.07124486 | 0.19407647 | PPP2R1A |
| 30000  | ENSG00000105576 | 4337.85372 | -0.01807746 | 0.0781226  | 0.81244142 | 0.91506317 | TNPO2   |
| 51398  | ENSG00000105583 | 1411.46004 | 0.11223968  | 0.08001807 | 0.15152313 | 0.33547806 | WDR83OS |
| 59284  | ENSG00000105605 | 988.874497 | -0.39516286 | 0.09763621 | 2.74E-05   | 0.0002386  | CACNG7  |
| 2639   | ENSG00000105607 | 382.206703 | 0.23880831  | 0.14114221 | 0.06810057 | 0.18779383 | GCDH    |
| 10990  | ENSG00000105609 | 0          | NA          | NA         | NA         | NA         | LILRB5  |
| 10661  | ENSG00000105610 | 7.72288365 | 0.05307281  | 0.3532594  | 0.72209843 | 0.86742752 | KLF1    |
| 1777   | ENSG00000105612 | 409.790904 | 0.49842573  | 0.13051179 | 5.18E-05   | 0.00042177 | DNASE2  |
| 22983  | ENSG00000105613 | 1902.3618  | -0.17505133 | 0.08259904 | 0.02960757 | 0.09932622 | MAST1   |

|       |                 |            |             |            |            |            |         |
|-------|-----------------|------------|-------------|------------|------------|------------|---------|
| 79165 | ENSG00000105617 | 121.715251 | -0.31659618 | 0.22884669 | 0.09208519 | 0.23452762 | LENG1   |
| 26121 | ENSG00000105618 | 1318.67914 | 0.04050709  | 0.07737368 | 0.59001542 | 0.78468333 | PRPF31  |
| 29844 | ENSG00000105619 | 272.663503 | -0.03360921 | 0.14251999 | 0.79839302 | 0.90769144 | TFPT    |
| 3718  | ENSG00000105639 | 34.3148797 | 0.46484449  | 0.38022989 | 0.05898442 | 0.16891612 | JAK3    |
| 6142  | ENSG00000105640 | 17518.1918 | -0.00381475 | 0.05072471 | 0.93844237 | 0.97434175 | RPL18A  |
| 6528  | ENSG00000105641 | 12.1135218 | 0.01094918  | 0.33251867 | 0.94995674 | 0.97937756 | SLC5A5  |
| 3780  | ENSG00000105642 | 335.532131 | 0.22688603  | 0.13205533 | 0.06665334 | 0.185029   | KCNN1   |
| 27106 | ENSG00000105643 | 222.850526 | 0.60664532  | 0.16632348 | 7.37E-05   | 0.00058162 | ARRDC2  |
| 5296  | ENSG00000105647 | 3987.34775 | -0.29018088 | 0.0601742  | 1.01E-06   | 1.14E-05   | PIK3R2  |
| 5864  | ENSG00000105649 | 591.910588 | -0.44099505 | 0.11508919 | 5.80E-05   | 0.00046612 | RAB3A   |
| 5143  | ENSG00000105650 | 119.101996 | -0.36512938 | 0.28756066 | 0.08745186 | 0.22586501 | PDE4C   |
| 51477 | ENSG00000105655 | 1973.418   | 0.01482861  | 0.07081763 | 0.83269739 | 0.92397742 | ISYNA1  |
| 8178  | ENSG00000105656 | 327.171252 | -0.25103758 | 0.13644156 | 0.0482092  | 0.14474434 | ELL     |
| 23373 | ENSG00000105662 | 794.948705 | -0.04274821 | 0.09760249 | 0.64962979 | 0.82525848 | CRTC1   |
| 1311  | ENSG00000105664 | 4.0924842  | -0.10791642 | 0.38371626 | 0.37757023 | 0.60636177 | COMP    |
| 11045 | ENSG00000105668 | 0.34624801 | -0.02356563 | 0.38536324 | 0.65270996 | NA         | UPK1A   |
| 11316 | ENSG00000105669 | 2404.35032 | 0.08524959  | 0.073082   | 0.23579379 | 0.45260728 | COPE    |
| 54555 | ENSG00000105671 | 1176.86625 | -0.23989556 | 0.08778481 | 0.00489121 | 0.02280528 | DDX49   |
| 2116  | ENSG00000105672 | 9.12842975 | 0.04546527  | 0.35217803 | 0.75938414 | 0.88850157 | ETV2    |
| 495   | ENSG00000105675 | 1.75812907 | 0.11235116  | 0.40398771 | 0.09882788 | NA         | ATP4A   |
| 93436 | ENSG00000105676 | 931.097416 | -0.24690572 | 0.09739132 | 0.00857459 | 0.03655403 | ARMC6   |
| 10430 | ENSG00000105677 | 912.729861 | 0.12607079  | 0.08790577 | 0.14068989 | 0.318644   | TMEM147 |
| 26330 | ENSG00000105679 | 0.14931947 | -0.01844332 | 0.38480212 | 0.84537521 | NA         | GAPDHS  |
| NA    | ENSG00000105694 | 0          | NA          | NA         | NA         | NA         | ELOCP28 |
| 4099  | ENSG00000105695 | 0          | NA          | NA         | NA         | NA         | MAG     |
| 25789 | ENSG00000105696 | 858.512182 | -0.14035003 | 0.10571771 | 0.16554125 | 0.35564031 | TMEM59L |
| 57817 | ENSG00000105697 | 0.64036599 | -0.02529949 | 0.38298116 | 0.63542976 | NA         | HAMP    |
| 7392  | ENSG00000105698 | 1614.70238 | -0.08667765 | 0.08210944 | 0.27929346 | 0.50378964 | USF2    |
| 51599 | ENSG00000105699 | 19.2257146 | 0.07074017  | 0.31316609 | 0.70638633 | 0.85848115 | LSR     |
| 79036 | ENSG00000105700 | 1653.76152 | 0.10838297  | 0.07712556 | 0.15148382 | 0.33542846 | KXD1    |
| 23770 | ENSG00000105701 | 4599.58146 | 0.07124187  | 0.05745051 | 0.20958481 | 0.4178638  | FKBP8   |
| 57794 | ENSG00000105705 | 671.781914 | -0.04288929 | 0.10803952 | 0.67711017 | 0.84229976 | SUGP1   |
| 3249  | ENSG00000105707 | 0.3390049  | -0.00270765 | 0.38338649 | 0.98584234 | NA         | HPN     |
| 7561  | ENSG00000105708 | 106.266289 | -0.34681826 | 0.24368243 | 0.07688776 | 0.20525474 | ZNF14   |
| 6324  | ENSG00000105711 | 111.573617 | 1.34366324  | 0.26198235 | 2.45E-08   | 3.51E-07   | SCN1B   |
| 80714 | ENSG00000105717 | 73.9190789 | 0.5567518   | 0.30705876 | 0.01726867 | 0.06477791 | PBX4    |
| 2077  | ENSG00000105722 | 1365.99131 | -0.28175311 | 0.07889167 | 0.00025449 | 0.00176852 | ERF     |
| 2931  | ENSG00000105723 | 1971.08021 | 0.0611463   | 0.07700987 | 0.41844209 | 0.6444567  | GSK3A   |

|           |                 |            |             |            |            |            |         |
|-----------|-----------------|------------|-------------|------------|------------|------------|---------|
| 57130     | ENSG00000105726 | 2844.90307 | 0.23791433  | 0.06669975 | 0.00028718 | 0.00196671 | ATP13A1 |
| 64763     | ENSG00000105732 | 493.76052  | -0.09790596 | 0.11127783 | 0.35695829 | 0.58708883 | ZNF574  |
| 2901      | ENSG00000105737 | 1549.65937 | -0.2804262  | 0.08241881 | 0.00047692 | 0.0030963  | GRIK5   |
| 23094     | ENSG00000105738 | 1174.96233 | 0.10464739  | 0.22194404 | 0.56681975 | 0.76856055 | SIPA1L3 |
| 7639      | ENSG00000105750 | 298.005069 | -0.47764754 | 0.14652348 | 0.00044403 | 0.00291031 | ZNF85   |
| 23474     | ENSG00000105755 | 207.726653 | 0.33360047  | 0.16481592 | 0.02518137 | 0.08766423 | ETHE1   |
| 199731    | ENSG00000105767 | 1101.3391  | 0.07096489  | 0.08768106 | 0.40588925 | 0.63413204 | CADM4   |
| 56006     | ENSG00000105771 | 745.324751 | 0.04473279  | 0.12703418 | 0.71208704 | 0.86159535 | SMG9    |
| 23080     | ENSG00000105778 | 2238.88917 | -0.20167458 | 0.09253936 | 0.02437059 | 0.08536592 | AVL9    |
| 154661    | ENSG00000105784 | 88.0471043 | -0.32731943 | 0.28750126 | 0.12052347 | 0.28609544 | RUNDC3B |
| 79846     | ENSG00000105792 | 76.5765681 | 1.48600575  | 0.38931834 | 8.42E-06   | 8.12E-05   | CFAP69  |
| 85865     | ENSG00000105793 | 417.969134 | -0.09843122 | 0.15090163 | 0.47860842 | 0.70031648 | GTPBP10 |
| 101927446 | ENSG00000105793 | 417.969134 | -0.09843122 | 0.15090163 | 0.47860842 | 0.70031648 | GTPBP10 |
| 10156     | ENSG00000105808 | 1731.88834 | 0.02227554  | 0.08081368 | 0.76770921 | 0.89307241 | RASA4   |
| 1021      | ENSG00000105810 | 14529.6004 | 0.24600262  | 0.04873162 | 3.53E-07   | 4.33E-06   | CDK6    |
| 9512      | ENSG00000105819 | 2013.53138 | -0.05633263 | 0.07723509 | 0.45646408 | 0.67989846 | PMPCB   |
| 27000     | ENSG00000105821 | 1030.82026 | 0.02811543  | 0.08523389 | 0.73476744 | 0.87375845 | DNAJC2  |
| 7980      | ENSG00000105825 | 497.584194 | 4.36841102  | 0.15437454 | 2.51E-177  | 3.12E-174  | TFPI2   |
| 10282     | ENSG00000105829 | 451.594608 | 0.21049623  | 0.12045835 | 0.06509028 | 0.18195793 | BET1    |
| 10135     | ENSG00000105835 | 962.935483 | -0.10093482 | 0.09166716 | 0.25617866 | 0.47732763 | NAMPT   |
| 221830    | ENSG00000105849 | 528.653222 | -0.1068385  | 0.11034141 | 0.31065445 | 0.5384279  | POLR1F  |
| 5294      | ENSG00000105851 | 0.16735865 | 0.01897177  | 0.38482933 | 0.78225479 | NA         | PIK3CG  |
| 5446      | ENSG00000105852 | 0.36623983 | 0.02391775  | 0.38539601 | 0.6083452  | NA         | PON3    |
| 5445      | ENSG00000105854 | 871.296713 | 0.62268306  | 0.09507443 | 1.68E-11   | 3.49E-10   | PON2    |
| 3696      | ENSG00000105855 | 159.393303 | 1.07806936  | 0.2070012  | 2.21E-08   | 3.19E-07   | ITGB8   |
| 26959     | ENSG00000105856 | 962.471965 | 0.24345971  | 0.08995562 | 0.00557542 | 0.02551703 | HBP1    |
| 11062     | ENSG00000105865 | 291.805274 | -0.14497386 | 0.16090368 | 0.31959568 | 0.54727882 | DUS4L   |
| 6671      | ENSG00000105866 | 695.80776  | -0.65673686 | 0.13952112 | 6.23E-07   | 7.32E-06   | SP4     |
| 29062     | ENSG00000105875 | 457.071382 | 0.25476164  | 0.16913288 | 0.09334088 | 0.23674616 | WDR91   |
| 8701      | ENSG00000105877 | 1.02288836 | 0.02349086  | 0.38188096 | 0.67819013 | NA         | DNAH11  |
| 79872     | ENSG00000105879 | 934.151268 | -0.08992508 | 0.09844259 | 0.3438519  | 0.57419443 | CBLL1   |
| 1749      | ENSG00000105880 | 31.103362  | 0.11498053  | 0.30300145 | 0.55693004 | 0.76235124 | DLX5    |
| 136319    | ENSG00000105887 | 6551.62104 | -0.2816469  | 0.05856269 | 1.10E-06   | 1.24E-05   | MTPN    |
| 767558    | ENSG00000105887 | 6551.62104 | -0.2816469  | 0.05856269 | 1.10E-06   | 1.24E-05   | MTPN    |
| 256227    | ENSG00000105889 | 2.12063112 | 0.11474906  | 0.40292562 | 0.14757341 | NA         | STEAP1B |
| 401312    | ENSG00000105889 | 2.12063112 | 0.11474906  | 0.40292562 | 0.14757341 | NA         | STEAP1B |
| 5764      | ENSG00000105894 | 420.926857 | 1.29431185  | 0.1229052  | 6.14E-27   | 3.13E-25   | PTN     |
| 51678     | ENSG00000105926 | 1954.86798 | 0.35721885  | 0.09072487 | 4.91E-05   | 0.00040275 | MPP6    |

|        |                 |            |             |            |            |            |          |
|--------|-----------------|------------|-------------|------------|------------|------------|----------|
| 1687   | ENSG00000105928 | 1549.39229 | 0.09000513  | 0.08720136 | 0.28953013 | 0.51546747 | GSDME    |
| 50617  | ENSG00000105929 | 1.01765974 | 0.00026751  | 0.38026894 | 0.98595981 | NA         | ATP6V0A4 |
| 56829  | ENSG00000105939 | 1032.64287 | 0.02160381  | 0.08731548 | 0.80019123 | 0.90848606 | ZC3HAV1  |
| 79989  | ENSG00000105948 | 300.231924 | 0.13911973  | 0.14003854 | 0.28589907 | 0.51156544 | TTC26    |
| 4967   | ENSG00000105953 | 2211.76445 | 0.03074076  | 0.07430702 | 0.6742826  | 0.84019291 | OGDH     |
| 64111  | ENSG00000105954 | 0          | NA          | NA         | NA         | NA         | NPVF     |
| 11033  | ENSG00000105963 | 10.5864665 | -0.06865039 | 0.35230277 | 0.64824209 | 0.82448382 | ADAP1    |
| 22797  | ENSG00000105967 | 0          | NA          | NA         | NA         | NA         | TFEC     |
| 94239  | ENSG00000105968 | 5374.65553 | -0.04545136 | 0.06041569 | 0.44504591 | 0.66983089 | H2AZ2    |
| 858    | ENSG00000105971 | 0          | NA          | NA         | NA         | NA         | CAV2     |
| 857    | ENSG00000105974 | 0          | NA          | NA         | NA         | NA         | CAV1     |
| 4233   | ENSG00000105976 | 25.6563996 | 0.32533426  | 0.48707155 | 0.09129941 | 0.23321491 | MET      |
| 140545 | ENSG00000105982 | 69.8254586 | 0.51394282  | 0.29077715 | 0.02209999 | 0.07890295 | RNF32    |
| 64327  | ENSG00000105983 | 2374.41125 | 0.07778796  | 0.07296477 | 0.27781602 | 0.50226626 | LMBR1    |
| NA     | ENSG00000105988 | 0          | NA          | NA         | NA         | NA         | NHP2P1   |
| 7472   | ENSG00000105989 | 0          | NA          | NA         | NA         | NA         | WNT2     |
| 3198   | ENSG00000105991 | 0.16735865 | 0.01897177  | 0.38482933 | 0.78225479 | NA         | HOXA1    |
| 10049  | ENSG00000105993 | 4091.4782  | 0.22337375  | 0.06870104 | 0.00093656 | 0.00560354 | DNAJB6   |
| 3199   | ENSG00000105996 | 0          | NA          | NA         | NA         | NA         | HOXA2    |
| 3200   | ENSG00000105997 | 0          | NA          | NA         | NA         | NA         | HOXA3    |
| 3955   | ENSG00000106003 | 74.1568182 | 0.22404201  | 0.24659625 | 0.24893503 | 0.46831699 | LFNG     |
| 3202   | ENSG00000106004 | 0          | NA          | NA         | NA         | NA         | HOXA5    |
| 3203   | ENSG00000106006 | 0          | NA          | NA         | NA         | NA         | HOXA6    |
| 221927 | ENSG00000106009 | 1893.41047 | -0.02224314 | 0.07456355 | 0.75856114 | 0.88794931 | BRAT1    |
| 23288  | ENSG00000106012 | 914.63776  | 0.0976299   | 0.09269495 | 0.27791246 | 0.50239483 | IQCE     |
| 56311  | ENSG00000106013 | 33.6129877 | -0.0408289  | 0.291604   | 0.82879402 | 0.92238028 | ANKRD7   |
| 7434   | ENSG00000106018 | 2.54834583 | -0.00710735 | 0.37452758 | 0.93207977 | NA         | VIPR2    |
| 23554  | ENSG00000106025 | 104.078651 | 1.59155396  | 0.27702277 | 7.33E-10   | 1.28E-08   | TSPAN12  |
| 6742   | ENSG00000106028 | 2003.60717 | -0.00545955 | 0.0747349  | 0.94102481 | 0.97559098 | SSBP1    |
| 3209   | ENSG00000106031 | 0          | NA          | NA         | NA         | NA         | HOXA13   |
| 79974  | ENSG00000106034 | 61.3698658 | 1.82523251  | 0.36045252 | 2.84E-08   | 4.04E-07   | CPED1    |
| 2128   | ENSG00000106038 | 0          | NA          | NA         | NA         | NA         | EVX1     |
| 11112  | ENSG00000106049 | 627.882631 | 0.2402592   | 0.09955922 | 0.01225464 | 0.04906802 | HIBADH   |
| 8887   | ENSG00000106052 | 1856.61863 | 0.01734142  | 0.07201402 | 0.8072004  | 0.91260538 | TAX1BP1  |
| 54504  | ENSG00000106066 | 149.831128 | 0.99285197  | 0.19997315 | 8.75E-08   | 1.16E-06   | CPVL     |
| 1124   | ENSG00000106069 | 64.0484336 | -0.23409382 | 0.27478603 | 0.24697264 | 0.46604299 | CHN2     |
| 2887   | ENSG00000106070 | 0.16735865 | 0.01897177  | 0.38482933 | 0.78225479 | NA         | GRB10    |
| 83451  | ENSG00000106077 | 137.546931 | -0.24366751 | 0.20520019 | 0.16227169 | 0.35094147 | ABHD11   |

|        |                 |            |             |            |            |            |         |
|--------|-----------------|------------|-------------|------------|------------|------------|---------|
| 23242  | ENSG00000106078 | 6.93865314 | 0.36497182  | 0.64325696 | 0.01484918 | 0.0572054  | COBL    |
| 55033  | ENSG00000106080 | 717.765551 | 0.08338539  | 0.11230827 | 0.43783367 | 0.66289835 | FKBP14  |
| 84725  | ENSG00000106086 | 1825.77122 | 0.03478742  | 0.08195633 | 0.66464552 | 0.83444869 | PLEKHA8 |
| 6804   | ENSG00000106089 | 932.742486 | -0.75047356 | 0.10745842 | 5.89E-13   | 1.36E-11   | STX1A   |
| 10392  | ENSG00000106100 | 465.570328 | 0.36399204  | 0.11327966 | 0.00075043 | 0.00459948 | NOD1    |
| 2617   | ENSG00000106105 | 4455.76178 | 0.45807511  | 0.10356447 | 4.38E-06   | 4.46E-05   | GARS1   |
| 1395   | ENSG00000106113 | 10.9264594 | -3.76194275 | 1.09086852 | 5.91E-05   | 0.00047436 | CRHR2   |
| 2051   | ENSG00000106123 | 1.50149908 | -0.04488918 | 0.38394934 | 0.46828219 | NA         | EPHB6   |
| 84182  | ENSG00000106125 | 263.4895   | -0.10982759 | 0.14531006 | 0.41292754 | 0.64038252 | MINDY4  |
| 2692   | ENSG00000106128 | 0          | NA          | NA         | NA         | NA         | GHRHR   |
| 260294 | ENSG00000106133 | 438.823972 | 0.47601021  | 0.11889869 | 2.63E-05   | 0.00022962 | NSUN5P2 |
| 835    | ENSG00000106144 | 1742.14466 | -0.39512038 | 0.07153414 | 1.78E-08   | 2.61E-07   | CASP2   |
| 51142  | ENSG00000106153 | 6804.17905 | -0.31502007 | 0.05782978 | 3.43E-08   | 4.81E-07   | CHCHD2  |
| 6369   | ENSG00000106178 | 0          | NA          | NA         | NA         | NA         | CCL24   |
| 3315   | ENSG00000106211 | 3064.92376 | 0.47021632  | 0.0805037  | 2.28E-09   | 3.75E-08   | HSPB1   |
| 4885   | ENSG00000106236 | 2494.81023 | -0.58269978 | 0.06778114 | 2.63E-18   | 9.00E-17   | NPTX2   |
| 11333  | ENSG00000106244 | 5961.05308 | 0.13567597  | 0.06444027 | 0.0326032  | 0.10714717 | PDAP1   |
| 8896   | ENSG00000106245 | 1419.18352 | 0.0658345   | 0.07434966 | 0.36720587 | 0.59642771 | BUD31   |
| 26024  | ENSG00000106246 | 608.643632 | 0.39913382  | 0.10732515 | 0.00010521 | 0.00079639 | PTCD1   |
| 1577   | ENSG00000106258 | 76.5172849 | -0.33708299 | 0.29611641 | 0.1164007  | 0.27891182 | CYP3A5  |
| 7586   | ENSG00000106261 | 6862.67187 | 0.02916675  | 0.05566923 | 0.59742721 | 0.78921427 | ZKSCAN1 |
| 8662   | ENSG00000106263 | 4377.33425 | -0.08289541 | 0.05652303 | 0.13803874 | 0.31414184 | EIF3B   |
| 29886  | ENSG00000106266 | 684.945675 | -0.22420266 | 0.14209904 | 0.08753214 | 0.22594959 | SNX8    |
| 4521   | ENSG00000106268 | 699.901931 | 0.05425036  | 0.0966251  | 0.56257795 | 0.76559067 | NUDT1   |
| 5803   | ENSG00000106278 | 0          | NA          | NA         | NA         | NA         | PTPRZ1  |
| 6878   | ENSG00000106290 | 1974.5265  | 0.30521428  | 0.07192426 | 1.53E-05   | 0.00014009 | TAF6    |
| 8976   | ENSG00000106299 | 1728.4581  | 0.17692368  | 0.0757586  | 0.01711513 | 0.06428705 | WASL    |
| 23553  | ENSG00000106302 | 0.173733   | 0.01914545  | 0.38484597 | 0.78225479 | NA         | HYAL4   |
| 6677   | ENSG00000106304 | 0.18922458 | 0.01954053  | 0.38488496 | 0.78225479 | NA         | SPAM1   |
| 7965   | ENSG00000106305 | 518.499272 | -0.21934594 | 0.10824342 | 0.03400391 | 0.11087545 | AIMP2   |
| 7036   | ENSG00000106327 | 236.569706 | -1.18410544 | 0.16396208 | 5.34E-14   | 1.34E-12   | TFR2    |
| 29999  | ENSG00000106328 | 10.413746  | 0.18760936  | 0.38847695 | 0.2787647  | 0.50317912 | FSCN3   |
| 64598  | ENSG00000106330 | 497.215282 | 0.19863346  | 0.10958275 | 0.05809227 | 0.16713321 | MOSPD3  |
| 5078   | ENSG00000106331 | 0.34687871 | -0.00470809 | 0.38343604 | 0.96739424 | NA         | PAX4    |
| 5118   | ENSG00000106333 | 9470.52215 | 0.63421903  | 0.06059604 | 6.08E-26   | 2.99E-24   | PCOLCE  |
| 26261  | ENSG00000106336 | 18.9519765 | 0.203596    | 0.37604742 | 0.28250959 | 0.50756047 | FBXO24  |
| 10842  | ENSG00000106341 | 0          | NA          | NA         | NA         | NA         | PPP1R17 |
| 55131  | ENSG00000106344 | 2356.46362 | -0.22585667 | 0.09880188 | 0.01766055 | 0.06588665 | RBM28   |

|        |                 |            |             |            |            |            |          |
|--------|-----------------|------------|-------------|------------|------------|------------|----------|
| 84132  | ENSG00000106346 | 1112.73079 | 0.24320391  | 0.07932972 | 0.00169959 | 0.00934124 | USP42    |
| 3614   | ENSG00000106348 | 2635.58376 | -0.42906174 | 0.08581567 | 2.88E-07   | 3.58E-06   | IMPDH1   |
| 3268   | ENSG00000106351 | 170.20902  | -0.03618221 | 0.19263482 | 0.8266543  | 0.92144622 | AGFG2    |
| 23658  | ENSG00000106355 | 1351.11879 | -0.40071517 | 0.09836612 | 2.42E-05   | 0.00021288 | LSM5     |
| 5054   | ENSG00000106366 | 7.48067163 | -0.28288184 | 0.48441043 | 0.09480412 | 0.23954582 | SERPINE1 |
| 1174   | ENSG00000106367 | 2323.52018 | -0.0969482  | 0.06638305 | 0.1375419  | 0.31322672 | AP1S1    |
| 346606 | ENSG00000106384 | 0          | NA          | NA         | NA         | NA         | MOGAT3   |
| 56913  | ENSG00000106392 | 744.991669 | -0.16169959 | 0.11689384 | 0.14506009 | 0.32541747 | C1GALT1  |
| 8985   | ENSG00000106397 | 3565.05078 | 0.35706325  | 0.06517544 | 2.60E-08   | 3.70E-07   | PLOD3    |
| 6119   | ENSG00000106399 | 641.559704 | 0.0003431   | 0.10610849 | 0.99819185 | 0.99941443 | RPA3     |
| 10467  | ENSG00000106400 | 1494.64285 | 0.06497903  | 0.08125301 | 0.41361771 | 0.64081351 | ZNHIT1   |
| 24146  | ENSG00000106404 | 653.630158 | 0.50264718  | 0.09902635 | 1.53E-07   | 1.97E-06   | CLDN15   |
| 135935 | ENSG00000106410 | 0          | NA          | NA         | NA         | NA         | NOBOX    |
| 113263 | ENSG00000106415 | 1678.08452 | 0.03353935  | 0.08304605 | 0.67983078 | 0.84376374 | GLCCI1   |
| 93408  | ENSG00000106436 | 0          | NA          | NA         | NA         | NA         | MYL10    |
| 9678   | ENSG00000106443 | 2793.89569 | -0.21996464 | 0.06599644 | 0.0007026  | 0.0043385  | PHF14    |
| 4899   | ENSG00000106459 | 516.462436 | 0.03882384  | 0.11324341 | 0.72046622 | 0.86656864 | NRF1     |
| 54664  | ENSG00000106460 | 1544.10496 | 0.07809306  | 0.09867896 | 0.41330163 | 0.64061753 | TMEM106B |
| 2146   | ENSG00000106462 | 2575.32253 | 0.18065644  | 0.07341133 | 0.0121023  | 0.04856587 | EZH2     |
| 95681  | ENSG00000106477 | 901.994088 | -0.25253829 | 0.0980718  | 0.00753649 | 0.03287688 | CEP41    |
| 643641 | ENSG00000106479 | 887.719833 | 0.46235803  | 0.10661777 | 6.29E-06   | 6.21E-05   | ZNF862   |
| 6424   | ENSG00000106483 | 3.35666611 | -0.08951247 | 0.38319247 | 0.40343848 | 0.6314966  | SFRP4    |
| 4232   | ENSG00000106484 | 39.2259909 | 2.23391927  | 0.44382782 | 3.02E-08   | 4.26E-07   | MEST     |
| 4223   | ENSG00000106511 | 0          | NA          | NA         | NA         | NA         | MEOX2    |
| 57037  | ENSG00000106524 | 193.952889 | 0.44924963  | 0.1735153  | 0.00404668 | 0.01949455 | ANKMY2   |
| 653857 | ENSG00000106526 | 21.823934  | 0.04553696  | 0.30608242 | 0.80963984 | 0.91359357 | ACTR3C   |
| 11281  | ENSG00000106536 | 0          | NA          | NA         | NA         | NA         | POU6F2   |
| 27075  | ENSG00000106537 | 359.512133 | 0.36809789  | 0.13657821 | 0.00388992 | 0.0188234  | TSPAN13  |
| 5919   | ENSG00000106538 | 16.294079  | 2.23717233  | 0.70500027 | 8.46E-05   | 0.00065457 | RARRES2  |
| NA     | ENSG00000106540 | 0          | NA          | NA         | NA         | NA         |          |
| 10551  | ENSG00000106541 | 0          | NA          | NA         | NA         | NA         | AGR2     |
| 196    | ENSG00000106546 | 0          | NA          | NA         | NA         | NA         | AHR      |
| 54927  | ENSG00000106554 | 1962.84039 | -0.20117983 | 0.08009119 | 0.01006548 | 0.04165471 | CHCHD3   |
| 26157  | ENSG00000106560 | 0          | NA          | NA         | NA         | NA         | GIMAP2   |
| 28959  | ENSG00000106565 | 2.08256655 | -0.06911144 | 0.38421728 | 0.41384591 | NA         | TMEM176B |
| 2737   | ENSG00000106571 | 0          | NA          | NA         | NA         | NA         | GLI3     |
| 5683   | ENSG00000106588 | 1728.20093 | -0.24089602 | 0.08924308 | 0.00538576 | 0.02479774 | PSMA2    |
| 64983  | ENSG00000106591 | 689.678218 | 0.15142764  | 0.10170363 | 0.12200963 | 0.28884077 | MRPL32   |

|           |                 |            |             |            |            |            |         |
|-----------|-----------------|------------|-------------|------------|------------|------------|---------|
| 55744     | ENSG00000106603 | 2329.84776 | 0.17762997  | 0.06191412 | 0.00363193 | 0.01780958 | COA1    |
| 644       | ENSG00000106605 | 683.802617 | 0.03791853  | 0.10589128 | 0.71029729 | 0.86089825 | BLVRA   |
| 55665     | ENSG00000106608 | 1428.41192 | 0.03840832  | 0.07598477 | 0.60668039 | 0.79627805 | URGCP   |
| 55069     | ENSG00000106609 | 2208.88894 | 0.01613916  | 0.06939685 | 0.81398681 | 0.91592004 | TMEM248 |
| 64940     | ENSG00000106610 | 331.79688  | -0.18827703 | 0.14664618 | 0.16395498 | 0.35322761 | STAG3L4 |
| 101929736 | ENSG00000106610 | 331.79688  | -0.18827703 | 0.14664618 | 0.16395498 | 0.35322761 | STAG3L4 |
| 6009      | ENSG00000106615 | 2054.6863  | -0.26661184 | 0.07072685 | 0.00012171 | 0.00090576 | RHEB    |
| 51422     | ENSG00000106617 | 259.054248 | 0.10223945  | 0.16296633 | 0.48876924 | 0.7085856  | PRKAG2  |
| 165       | ENSG00000106624 | 1719.80409 | -0.27820906 | 0.0772898  | 0.00022904 | 0.001604   | AEBP1   |
| 5425      | ENSG00000106628 | 3089.17478 | -0.09987067 | 0.06154428 | 0.09980746 | 0.2488914  | POLD2   |
| 58498     | ENSG00000106631 | 0.46871751 | -0.02821432 | 0.38578887 | 0.54668481 | NA         | MYL7    |
| 2645      | ENSG00000106633 | 52.7268276 | 0.17582694  | 0.26195069 | 0.37351163 | 0.60252627 | GCK     |
| 9275      | ENSG00000106635 | 1194.68394 | -0.05341565 | 0.07903219 | 0.48922503 | 0.70874969 | BCL7B   |
| 10652     | ENSG00000106636 | 4174.02233 | -0.05686693 | 0.06584596 | 0.37980925 | 0.60877488 | YKT6    |
| 26608     | ENSG00000106638 | 974.366114 | 0.23336843  | 0.09019329 | 0.00766251 | 0.03329483 | TBL2    |
| 168391    | ENSG00000106648 | 0.14931947 | -0.01844332 | 0.38480212 | 0.84537521 | NA         | GALNTL5 |
| 7461      | ENSG00000106665 | 2008.25599 | 0.19325304  | 0.08202726 | 0.01575987 | 0.06002677 | CLIP2   |
| 7458      | ENSG00000106682 | 9799.18266 | -0.06029968 | 0.05120503 | 0.23572155 | 0.45251238 | EIF4H   |
| 3984      | ENSG00000106683 | 1205.46614 | 0.08275518  | 0.0849281  | 0.31798861 | 0.54561048 | LIMK1   |
| 55064     | ENSG00000106686 | 78.752443  | 0.48231871  | 0.26142262 | 0.02131781 | 0.07666221 | SPATA6L |
| 6505      | ENSG00000106688 | 77.4215168 | -0.25239404 | 0.25649286 | 0.20179917 | 0.40725211 | SLC1A1  |
| 9355      | ENSG00000106689 | 1.43280255 | -0.07694854 | 0.39114633 | 0.22102014 | NA         | LHX2    |
| 2218      | ENSG00000106692 | 773.848545 | -0.15191186 | 0.14639083 | 0.25982878 | 0.48146481 | FKTN    |
| 83856     | ENSG00000106701 | 348.327072 | -0.7904933  | 0.14881013 | 1.98E-08   | 2.89E-07   | FSD1L   |
| 79937     | ENSG00000106714 | 187.276937 | -0.99759863 | 0.21199164 | 3.06E-07   | 3.78E-06   | CNTNAP3 |
| 10927     | ENSG00000106723 | 2799.29449 | 0.03015731  | 0.07898495 | 0.70373831 | 0.85757322 | SPIN1   |
| 54981     | ENSG00000106733 | 2.21741499 | 0.06196062  | 0.38270153 | 0.45992697 | NA         | NMRK1   |
| 23731     | ENSG00000106771 | 1114.97112 | -0.09991631 | 0.09027017 | 0.25318337 | 0.47343619 | TMEM245 |
| 158471    | ENSG00000106772 | 0          | NA          | NA         | NA         | NA         | PRUNE2  |
| 1955      | ENSG00000106780 | 1008.16931 | 0.06115937  | 0.08464939 | 0.45941016 | 0.68258752 | MEGF9   |
| 9830      | ENSG00000106785 | 674.751728 | 0.11156094  | 0.0981872  | 0.23994236 | 0.4579339  | TRIM14  |
| 7464      | ENSG00000106789 | 221.766152 | -0.15712799 | 0.15527996 | 0.26702669 | 0.48945025 | CORO2A  |
| 7046      | ENSG00000106799 | 1103.94737 | -0.01533293 | 0.10417154 | 0.87707953 | 0.94574195 | TGFBR1  |
| 10952     | ENSG00000106803 | 732.102782 | 0.23001712  | 0.10694192 | 0.02469965 | 0.08632044 | SEC61B  |
| 727       | ENSG00000106804 | 405.477701 | 0.20410985  | 0.15349218 | 0.14729038 | 0.32889601 | C5      |
| 4969      | ENSG00000106809 | 1.03855236 | -0.01321531 | 0.38113483 | 0.81116657 | NA         | OGN     |
| 54829     | ENSG00000106819 | 0          | NA          | NA         | NA         | NA         | ASPN    |
| 1842      | ENSG00000106823 | 1.05688577 | -0.00814344 | 0.38096817 | 0.88172235 | NA         | ECM2    |

|        |                 |            |             |            |            |            |         |
|--------|-----------------|------------|-------------|------------|------------|------------|---------|
| 7091   | ENSG00000106829 | 1133.7881  | 0.28613864  | 0.09803318 | 0.00246887 | 0.01282596 | TLE4    |
| 26468  | ENSG00000106852 | 15.7476642 | 0.0180577   | 0.3462271  | 0.9073225  | 0.95963244 | LHX6    |
| 22949  | ENSG00000106853 | 51.5628826 | 1.54560731  | 0.41905078 | 1.51E-05   | 0.00013924 | PTGR1   |
| 64420  | ENSG00000106868 | 323.141496 | -0.15454221 | 0.13652723 | 0.22487905 | 0.43874524 | SUSD1   |
| 259    | ENSG00000106927 | 1.63974568 | 0.10137474  | 0.40018473 | 0.12131541 | NA         | AMBP    |
| 80709  | ENSG00000106948 | 380.521515 | 0.64172541  | 0.1667827  | 3.03E-05   | 0.0002597  | AKNA    |
| 944    | ENSG00000106952 | 0          | NA          | NA         | NA         | NA         | TNFSF8  |
| 1759   | ENSG00000106976 | 2971.13161 | -0.46852815 | 0.07073369 | 1.54E-11   | 3.22E-10   | DNM1    |
| 2022   | ENSG00000106991 | 551.736778 | -0.57503834 | 0.12905269 | 2.60E-06   | 2.74E-05   | ENG     |
| 203    | ENSG00000106992 | 508.808917 | -0.26522187 | 0.12361985 | 0.02291255 | 0.08124326 | AK1     |
| 55664  | ENSG00000106993 | 258.733281 | -0.18645246 | 0.13926051 | 0.14956112 | 0.33235804 | CDC37L1 |
| 6019   | ENSG00000107014 | 32.9129754 | 0.07084472  | 0.2886071  | 0.71569743 | 0.8628205  | RLN2    |
| 6013   | ENSG00000107018 | 9.22689226 | 0.17902032  | 0.38802126 | 0.28948123 | 0.51546747 | RLN1    |
| 55848  | ENSG00000107020 | 234.995409 | -0.04507115 | 0.16055676 | 0.75616543 | 0.88670553 | PLGRKT  |
| 54662  | ENSG00000107021 | 792.777381 | 0.16749626  | 0.09491217 | 0.06833047 | 0.18818386 | TBC1D13 |
| 57589  | ENSG00000107036 | 886.383135 | 0.24913299  | 0.08697287 | 0.00321541 | 0.01603259 | RIC1    |
| 23081  | ENSG00000107077 | 389.597089 | -0.00761702 | 0.12524882 | 0.94767777 | 0.97860443 | KDM4C   |
| 81704  | ENSG00000107099 | 0          | NA          | NA         | NA         | NA         | DOCK8   |
| 23189  | ENSG00000107104 | 0.34510075 | -0.00733018 | 0.3835432  | 0.94764827 | NA         | KANK1   |
| 1993   | ENSG00000107105 | 701.376317 | -1.26157455 | 0.1149113  | 5.00E-29   | 2.79E-27   | ELAVL2  |
| 23413  | ENSG00000107130 | 3447.49955 | -0.58487588 | 0.08052116 | 1.19E-13   | 2.89E-12   | NCS1    |
| 7016   | ENSG00000107140 | 319.154683 | 0.23527415  | 0.14101224 | 0.07220621 | 0.19574701 | TESK1   |
| 57582  | ENSG00000107147 | 158.57352  | -3.29243184 | 0.25784126 | 1.02E-38   | 7.62E-37   | KCNT1   |
| 768    | ENSG00000107159 | 6.28898864 | 0.04218366  | 0.36254694 | 0.74213682 | 0.87846755 | CA9     |
| 8939   | ENSG00000107164 | 2256.88024 | 0.07179793  | 0.07894505 | 0.35314634 | 0.58328533 | FUBP3   |
| 7306   | ENSG00000107165 | 22.2381529 | 0.04053948  | 0.32548867 | 0.81843488 | 0.9171248  | TYRP1   |
| 10488  | ENSG00000107175 | 547.872282 | -0.02014508 | 0.10338053 | 0.83835865 | 0.92668313 | CREB3   |
| 9827   | ENSG00000107185 | 1837.79354 | 0.09727183  | 0.07091215 | 0.16298174 | 0.35195933 | RGP1    |
| 8777   | ENSG00000107186 | 3021.9459  | 0.17889212  | 0.05682644 | 0.00145669 | 0.00817263 | MPDZ    |
| 8022   | ENSG00000107187 | 0.71866211 | 0.0519745   | 0.38872294 | 0.28945158 | NA         | LHX3    |
| 23586  | ENSG00000107201 | 43.4592356 | 0.05274899  | 0.37398337 | 0.62425752 | 0.80849071 | DDX58   |
| 8721   | ENSG00000107223 | 2440.17609 | 0.09923499  | 0.06580228 | 0.12570482 | 0.29476228 | EDF1    |
| 8395   | ENSG00000107242 | 0          | NA          | NA         | NA         | NA         | PIP5K1B |
| 169792 | ENSG00000107249 | 22.6836911 | 0.5917622   | 0.55612303 | 0.03622055 | 0.11645043 | GLIS3   |
| 573    | ENSG00000107262 | 1043.54182 | -0.47949851 | 0.08473202 | 6.45E-09   | 9.96E-08   | BAG1    |
| 2889   | ENSG00000107263 | 1821.95731 | -0.13955092 | 0.08224294 | 0.08232719 | 0.21594016 | RAPGEF1 |
| 56654  | ENSG00000107281 | 1435.15951 | -0.3990929  | 0.0972398  | 2.12E-05   | 0.0001893  | NPDC1   |
| 320    | ENSG00000107282 | 415.152238 | -2.3479612  | 0.15302982 | 2.00E-54   | 2.25E-52   | APBA1   |



|        |                 |            |             |            |            |            |           |
|--------|-----------------|------------|-------------|------------|------------|------------|-----------|
| 23064  | ENSG00000107290 | 2567.4731  | 0.16776095  | 0.06861221 | 0.01289213 | 0.05112531 | SETX      |
| 6456   | ENSG00000107295 | 1.30147618 | 0.00572748  | 0.37796443 | 0.93723114 | NA         | SH3GL2    |
| 5730   | ENSG00000107317 | 2.92301148 | 0.08636699  | 0.38268752 | 0.41807998 | 0.64419904 | PTGDS     |
| 20     | ENSG00000107331 | 3069.12995 | -0.26343642 | 0.08726054 | 0.00187383 | 0.0101161  | ABCA2     |
| 6461   | ENSG00000107338 | 1341.51989 | -1.18109626 | 0.08029803 | 6.19E-50   | 6.14E-48   | SHB       |
| 54926  | ENSG00000107341 | 2022.7277  | -0.16634712 | 0.06985348 | 0.01531842 | 0.05859213 | UBE2R2    |
| 51104  | ENSG00000107362 | 463.053243 | -0.03446764 | 0.11348475 | 0.74978614 | 0.88225829 | ABHD17B   |
| 51010  | ENSG00000107371 | 822.307656 | -0.41654093 | 0.10225902 | 2.30E-05   | 0.00020377 | EXOSC3    |
| 7763   | ENSG00000107372 | 2407.54229 | 0.20196585  | 0.07051266 | 0.0035404  | 0.01744698 | ZFAND5    |
| 1855   | ENSG00000107404 | 1833.15903 | 0.15139768  | 0.07738398 | 0.04564895 | 0.13867733 | DVL1      |
| 9124   | ENSG00000107438 | 407.94237  | 0.45504679  | 0.12444486 | 0.00011282 | 0.00084628 | PDLIM1    |
| 54619  | ENSG00000107443 | 877.232334 | 0.18547518  | 0.09015751 | 0.03429505 | 0.11161645 | CCNJ      |
| 1791   | ENSG00000107447 | 0          | NA          | NA         | NA         | NA         | DNTT      |
| 2625   | ENSG00000107485 | 5312.62841 | 0.57860979  | 0.06266647 | 8.65E-21   | 3.37E-19   | GATA3     |
| 26033  | ENSG00000107518 | 516.084631 | -0.46362423 | 0.15339114 | 0.00098422 | 0.00582939 | ATRNL1    |
| 3257   | ENSG00000107521 | 514.362674 | 0.13803212  | 0.12053055 | 0.22710191 | 0.44177223 | HPS1      |
| 5264   | ENSG00000107537 | 205.952075 | 0.05839088  | 0.15152396 | 0.67563347 | 0.84120289 | PHYH      |
| 83937  | ENSG00000107551 | 76.7871954 | 0.35318441  | 0.28111548 | 0.09539688 | 0.24073698 | RASSF4    |
| 23268  | ENSG00000107554 | 306.44503  | -0.0698141  | 0.14292942 | 0.59751953 | 0.78921427 | DNMBP     |
| 22841  | ENSG00000107560 | 778.512569 | 0.13575024  | 0.10820387 | 0.19077464 | 0.39211202 | RAB11FIP2 |
| 6387   | ENSG00000107562 | 0.33010465 | -0.00578571 | 0.3834757  | 0.96609971 | NA         | CXCL12    |
| 10613  | ENSG00000107566 | 662.154562 | -0.07797986 | 0.10289607 | 0.43072235 | 0.65613723 | ERLIN1    |
| 8661   | ENSG00000107581 | 8973.56714 | -0.09567103 | 0.04753937 | 0.04243572 | 0.131407   | EIF3A     |
| 9033   | ENSG00000107593 | 0.32378099 | -0.02327265 | 0.38532129 | 0.66863335 | NA         | PKD2L1    |
| 8029   | ENSG00000107611 | 21.2815198 | 0.56133705  | 0.79124797 | 0.02808044 | 0.09528234 | CUBN      |
| 1787   | ENSG00000107614 | 208.17772  | 0.51347345  | 0.22182895 | 0.00662649 | 0.02951717 | TRDMT1    |
| 79009  | ENSG00000107625 | 1238.17985 | -0.11398672 | 0.08200733 | 0.1558156  | 0.34200341 | DDX50     |
| 5599   | ENSG00000107643 | 1438.76007 | -0.47933898 | 0.10624356 | 2.75E-06   | 2.89E-05   | MAPK8     |
| 11196  | ENSG00000107651 | 1180.17003 | 0.02067798  | 0.11763364 | 0.85435999 | 0.93466646 | SEC23IP   |
| 11101  | ENSG00000107669 | 1019.26629 | -0.14847101 | 0.08472353 | 0.07188862 | 0.19532597 | ATE1      |
| 54780  | ENSG00000107672 | 807.00262  | 0.07700347  | 0.09026058 | 0.38049751 | 0.60938575 | NSMCE4A   |
| 59338  | ENSG00000107679 | 807.521782 | -0.10516775 | 0.09199072 | 0.23832864 | 0.4558851  | PLEKHA1   |
| 27143  | ENSG00000107719 | 399.863294 | -0.25514201 | 0.11826138 | 0.02281204 | 0.08096439 | PALD1     |
| 219699 | ENSG00000107731 | 9297.57591 | 0.26979997  | 0.04872255 | 2.38E-08   | 3.41E-07   | UNC5B     |
| 64072  | ENSG00000107736 | 90.668975  | -0.62923626 | 0.32336892 | 0.01007625 | 0.04167381 | CDH23     |
| 64115  | ENSG00000107738 | 40.2885881 | -0.05102015 | 0.32651263 | 0.76600022 | 0.89234011 | VSIR      |
| 9806   | ENSG00000107742 | 163.8965   | -0.17021987 | 0.21961356 | 0.34609103 | 0.57691531 | SPOCK2    |
| 10367  | ENSG00000107745 | 1214.2823  | 0.10770943  | 0.10647459 | 0.29270568 | 0.51883147 | MICU1     |

|        |                 |            |             |            |            |            |          |
|--------|-----------------|------------|-------------|------------|------------|------------|----------|
| 5532   | ENSG00000107758 | 876.602581 | -0.16493092 | 0.09151223 | 0.06293882 | 0.17770118 | PPP3CB   |
| 54462  | ENSG00000107771 | 741.322665 | -0.33037875 | 0.13278436 | 0.00778442 | 0.03373589 | CCSER2   |
| 657    | ENSG00000107779 | 1093.60383 | 0.103474    | 0.13000665 | 0.39651527 | 0.62574474 | BMPR1A   |
| 9562   | ENSG00000107789 | 985.808488 | -0.23481475 | 0.08425032 | 0.00419629 | 0.02009035 | MINPP1   |
| 59     | ENSG00000107796 | 40.4389988 | 0.40868304  | 0.35135605 | 0.08094966 | 0.21334235 | ACTA2    |
| 3988   | ENSG00000107798 | 516.295247 | 0.25477394  | 0.10584012 | 0.01207131 | 0.04849055 | LIPA     |
| 3195   | ENSG00000107807 | 71.8298336 | -0.31328467 | 0.30275568 | 0.14315752 | 0.32228142 | TLX1     |
| 56652  | ENSG00000107815 | 1446.63357 | -0.10278139 | 0.10309246 | 0.29957833 | 0.52654448 | TWNK     |
| 84445  | ENSG00000107816 | 1944.79336 | 0.30546897  | 0.07376009 | 2.36E-05   | 0.000209   | LZTS2    |
| 81855  | ENSG00000107819 | 1569.92053 | -0.61578592 | 0.08758137 | 5.92E-13   | 1.37E-11   | SFXN3    |
| 81621  | ENSG00000107821 | 86.4283192 | 0.25390319  | 0.27952754 | 0.21609454 | 0.42689591 | KAZALD1  |
| 6468   | ENSG00000107829 | 660.79934  | 0.15167823  | 0.11242476 | 0.15729648 | 0.34408611 | FBXW4    |
| 2253   | ENSG00000107831 | 0.18922458 | 0.01954053  | 0.38488496 | 0.78225479 | NA         | FGF8     |
| 10360  | ENSG00000107833 | 427.499808 | 0.01511653  | 0.128253   | 0.90147805 | 0.95673063 | NPM3     |
| 80351  | ENSG00000107854 | 1769.46967 | -0.08222574 | 0.07274841 | 0.24739454 | 0.46634753 | TNKS2    |
| 5309   | ENSG00000107859 | 0.73627161 | -0.04183898 | 0.38735754 | 0.35739953 | NA         | PITX3    |
| 8729   | ENSG00000107862 | 1597.3975  | 0.09123227  | 0.12699406 | 0.44694016 | 0.67095132 | GBF1     |
| 57584  | ENSG00000107863 | 1093.58476 | 0.06170602  | 0.09238261 | 0.49192167 | 0.7110834  | ARHGAP21 |
| 22849  | ENSG00000107864 | 95.3543009 | -0.49335623 | 0.24569939 | 0.01465527 | 0.0565733  | CPEB3    |
| 79176  | ENSG00000107872 | 394.955543 | -0.77062385 | 0.15038146 | 5.71E-08   | 7.77E-07   | FBXL15   |
| 79004  | ENSG00000107874 | 1545.66227 | 0.01039103  | 0.07819227 | 0.89241528 | 0.9534988  | CUEDC2   |
| 51684  | ENSG00000107882 | 643.992075 | -0.07149384 | 0.10073489 | 0.46120745 | 0.68434341 | SUFU     |
| 22852  | ENSG00000107890 | 589.865301 | 0.09773459  | 0.11577362 | 0.37607208 | 0.60513139 | ANKRD26  |
| 91452  | ENSG00000107897 | 871.991077 | -0.32438189 | 0.11140447 | 0.00226247 | 0.01190013 | ACBD5    |
| 64077  | ENSG00000107902 | 203.043685 | 0.52828168  | 0.17718314 | 0.00096332 | 0.00573256 | LHPP     |
| 23185  | ENSG00000107929 | 1569.64397 | -0.1401861  | 0.08098836 | 0.07616503 | 0.20371308 | LARP4B   |
| 23560  | ENSG00000107937 | 2410.69428 | 0.02154165  | 0.09766118 | 0.82058888 | 0.91840037 | GTPBP4   |
| 26098  | ENSG00000107938 | 1045.77848 | 0.02766785  | 0.09121021 | 0.75562563 | 0.88629101 | EDRF1    |
| 56647  | ENSG00000107949 | 818.162928 | -0.03384891 | 0.09887671 | 0.72248824 | 0.86754018 | BCCIP    |
| 55149  | ENSG00000107951 | 393.896047 | -0.19611838 | 0.16820917 | 0.19324588 | 0.39596861 | MTPAP    |
| 9148   | ENSG00000107954 | 361.392555 | -1.53461156 | 0.15908515 | 3.88E-23   | 1.69E-21   | NEURL1   |
| 9644   | ENSG00000107957 | 1684.4346  | -0.69646874 | 0.07924389 | 3.62E-19   | 1.30E-17   | SH3PXD2A |
| 10531  | ENSG00000107959 | 743.950661 | 0.01508202  | 0.09389522 | 0.87112452 | 0.94384401 | PITRM1   |
| 79991  | ENSG00000107960 | 420.198708 | 0.01068393  | 0.11951318 | 0.92601273 | 0.96919669 | STN1     |
| 1326   | ENSG00000107968 | 27.053108  | -0.01161037 | 0.31431805 | 0.94654738 | 0.97814213 | MAP3K8   |
| 22943  | ENSG00000107984 | 3027.79345 | 2.41502479  | 0.08238375 | 4.93E-190  | 7.52E-187  | DKK1     |
| 253738 | ENSG00000108001 | 65.9709196 | 1.91523583  | 0.33405691 | 5.76E-10   | 1.03E-08   | EBF3     |
| 10539  | ENSG00000108010 | 967.444931 | -0.12819976 | 0.12340481 | 0.27130899 | 0.49473993 | GLRX3    |

|           |                 |            |             |            |            |            |          |
|-----------|-----------------|------------|-------------|------------|------------|------------|----------|
| 114815    | ENSG00000108018 | 5339.48633 | 0.36831286  | 0.06755303 | 2.95E-08   | 4.17E-07   | SORCS1   |
| 54906     | ENSG00000108021 | 2500.7429  | -0.07072141 | 0.06508419 | 0.26985698 | 0.49304379 | TASOR2   |
| 7511      | ENSG00000108039 | 1247.96376 | -0.02251732 | 0.08840743 | 0.79208722 | 0.90499209 | XPNPEP1  |
| 9126      | ENSG00000108055 | 3323.49506 | -0.22629576 | 0.06316096 | 0.00027546 | 0.00189427 | SMC3     |
| 8036      | ENSG00000108061 | 671.249123 | -0.22390651 | 0.11069649 | 0.03404538 | 0.11097421 | SHOC2    |
| 7019      | ENSG00000108064 | 1145.39971 | -0.53337813 | 0.08356692 | 6.56E-11   | 1.29E-09   | TFAM     |
| 8030      | ENSG00000108091 | 940.068653 | -0.26202639 | 0.08582026 | 0.00168843 | 0.00929224 | CCDC6    |
| 8453      | ENSG00000108094 | 647.460282 | -0.10022586 | 0.09787421 | 0.288812   | 0.51478125 | CUL2     |
| 219771    | ENSG00000108100 | 1343.24795 | -0.12012368 | 0.09683171 | 0.19901611 | 0.40344126 | CCNY     |
| 27338     | ENSG00000108106 | 7284.63873 | -0.32309001 | 0.06603478 | 6.87E-07   | 7.99E-06   | UBE2S    |
| 6158      | ENSG00000108107 | 10741.321  | 0.15225408  | 0.07810816 | 0.04693561 | 0.14178748 | RPL28    |
| 57178     | ENSG00000108175 | 8135.18476 | -0.40697558 | 0.0655235  | 2.74E-10   | 5.03E-09   | ZMIZ1    |
| 56521     | ENSG00000108176 | 678.145263 | 0.03774954  | 0.09869435 | 0.69307658 | 0.8516694  | DNAJC12  |
| 10105     | ENSG00000108179 | 2232.83122 | -0.29911412 | 0.07676446 | 6.69E-05   | 0.00053345 | PPIF     |
| 64081     | ENSG00000108187 | 99.8044929 | -0.0501695  | 0.22122491 | 0.78012316 | 0.89936692 | PBLD     |
| 81619     | ENSG00000108219 | 1516.01869 | 0.1591982   | 0.08351071 | 0.05061551 | 0.15037611 | TSPAN14  |
| 9211      | ENSG00000108231 | 14.3908877 | -0.00400387 | 0.33139697 | 0.97875651 | 0.99278156 | LGI1     |
| 23232     | ENSG00000108239 | 268.826838 | -0.23544718 | 0.15223058 | 0.09107493 | 0.23285137 | TBC1D12  |
| 1562      | ENSG00000108242 | 1.10253973 | -0.00116947 | 0.37984077 | 0.98446619 | NA         | CYP2C18  |
| 25984     | ENSG00000108244 | 0          | NA          | NA         | NA         | NA         | KRT23    |
| 1411      | ENSG00000108255 | 0          | NA          | NA         | NA         | NA         | CRYBA1   |
| 57532     | ENSG00000108256 | 2429.68845 | 0.07836537  | 0.08703874 | 0.3555069  | 0.58591601 | NUFIP2   |
| 28964     | ENSG00000108262 | 2466.64162 | 0.23660009  | 0.07192665 | 0.00079012 | 0.00482338 | GIT1     |
| 6143      | ENSG00000108298 | 18930.982  | -0.06947214 | 0.04622985 | 0.12960584 | 0.30116889 | RPL19    |
| 84961     | ENSG00000108306 | 490.845181 | -0.04038784 | 0.11935399 | 0.7207976  | 0.86665199 | FBXL20   |
| 10900     | ENSG00000108309 | 1245.68196 | -1.32289646 | 0.08945383 | 1.53E-50   | 1.54E-48   | RUNDC3A  |
| 7343      | ENSG00000108312 | 3003.50275 | -0.00229401 | 0.07076586 | 0.97299383 | 0.98995885 | UBTF     |
| 1440      | ENSG00000108342 | 0.44765505 | 0.02632933  | 0.38557726 | 0.58574429 | NA         | CSF3     |
| 5709      | ENSG00000108344 | 2955.28505 | 0.09876716  | 0.07710932 | 0.19107335 | 0.39259479 | PSMD3    |
| 22794     | ENSG00000108349 | 2076.8484  | -0.48931453 | 0.06720988 | 1.38E-13   | 3.34E-12   | CASC3    |
| 51195     | ENSG00000108352 | 321.045307 | -0.03237799 | 0.13355662 | 0.79600226 | 0.90627136 | RAPGEFL1 |
| 8787      | ENSG00000108370 | 233.924087 | -0.82980921 | 0.17834306 | 5.40E-07   | 6.40E-06   | RGS9     |
| 54894     | ENSG00000108375 | 0.47596848 | -0.00794879 | 0.38324764 | 0.85634226 | NA         | RNF43    |
| 7473      | ENSG00000108379 | 160.702031 | 0.00773386  | 0.16842345 | 0.96042983 | 0.9839372  | WNT3     |
| 101929777 | ENSG00000108379 | 160.702031 | 0.00773386  | 0.16842345 | 0.96042983 | 0.9839372  | WNT3     |
| 443       | ENSG00000108381 | 0.15069912 | -0.01848503 | 0.38480575 | 0.84537521 | NA         | ASPA     |
| 5889      | ENSG00000108384 | 587.891401 | -0.17379871 | 0.10849842 | 0.09303836 | 0.23613676 | RAD51C   |
| 5414      | ENSG00000108387 | 91.5794228 | 0.09392198  | 0.21643833 | 0.60150661 | 0.79200883 | SEPTIN4  |

|        |                 |            |             |            |            |            |          |
|--------|-----------------|------------|-------------|------------|------------|------------|----------|
| 9110   | ENSG00000108389 | 3276.4592  | 0.06845533  | 0.09568087 | 0.46070197 | 0.68379794 | MTMR4    |
| 4591   | ENSG00000108395 | 1562.82161 | -0.10635381 | 0.07388489 | 0.14119894 | 0.31935557 | TRIM37   |
| 5023   | ENSG00000108405 | 0.55665916 | -0.01733583 | 0.38376366 | 0.71051265 | NA         | P2RX1    |
| 79665  | ENSG00000108406 | 2838.01604 | 0.22749573  | 0.07202889 | 0.00128598 | 0.00734213 | DHX40    |
| 8688   | ENSG00000108417 | 0          | NA          | NA         | NA         | NA         | KRT37    |
| 51174  | ENSG00000108423 | 137.330045 | 0.20011754  | 0.21607651 | 0.26658324 | 0.48900406 | TUBD1    |
| 3837   | ENSG00000108424 | 10325.9936 | -0.16078699 | 0.06670166 | 0.01422532 | 0.05527425 | KPNB1    |
| 9570   | ENSG00000108433 | 1765.51723 | -0.02067287 | 0.08394629 | 0.79940799 | 0.90803676 | GOSR2    |
| 55163  | ENSG00000108439 | 590.413344 | -0.11658967 | 0.10509883 | 0.24779864 | 0.46688746 | PNPO     |
| NA     | ENSG00000108442 | 0          | NA          | NA         | NA         | NA         | TVP23BP2 |
| 6198   | ENSG00000108443 | 1106.89647 | -0.01770188 | 0.11048593 | 0.8653819  | 0.9403131  | RPS6KB1  |
| 147166 | ENSG00000108448 | 443.78678  | 0.33450376  | 0.13414704 | 0.00764344 | 0.03322654 | TRIM16L  |
| NA     | ENSG00000108452 | 0.18922458 | 0.01954053  | 0.38488496 | 0.78225479 | NA         | ZNF29P   |
| 80279  | ENSG00000108465 | 4520.2584  | 0.29391789  | 0.05686973 | 1.71E-07   | 2.19E-06   | CDK5RAP3 |
| 10951  | ENSG00000108468 | 8228.81031 | -0.09739125 | 0.04824205 | 0.04174111 | 0.12970144 | CBX1     |
| 9400   | ENSG00000108469 | 786.913389 | 0.39159017  | 0.12756607 | 0.00111777 | 0.00649722 | RECQL5   |
| 9487   | ENSG00000108474 | 202.702783 | 0.33035714  | 0.17495837 | 0.03427897 | 0.11160073 | PIGL     |
| 2584   | ENSG00000108479 | 474.680867 | 0.17440999  | 0.11493436 | 0.11129726 | 0.26948227 | GALK1    |
| 57508  | ENSG00000108506 | 998.843274 | -0.16681757 | 0.09840021 | 0.07879057 | 0.20920837 | INTS2    |
| 23125  | ENSG00000108509 | 697.644723 | 0.16846022  | 0.13794593 | 0.18995045 | 0.39109764 | CAMTA2   |
| 9969   | ENSG00000108510 | 3437.38504 | -0.08993239 | 0.06881567 | 0.1837229  | 0.38212206 | MED13    |
| 3216   | ENSG00000108511 | 0          | NA          | NA         | NA         | NA         | HOXB6    |
| 2027   | ENSG00000108515 | 326.361343 | 0.06188744  | 0.16330428 | 0.6754775  | 0.84111426 | ENO3     |
| NA     | ENSG00000108516 | 0          | NA          | NA         | NA         | NA         |          |
| 5216   | ENSG00000108518 | 12191.1614 | 0.11428536  | 0.05714587 | 0.04334251 | 0.13334089 | PFN1     |
| 26001  | ENSG00000108523 | 960.991729 | 0.14904936  | 0.085897   | 0.07483467 | 0.20112705 | RNF167   |
| 8402   | ENSG00000108528 | 1101.07829 | 0.03524999  | 0.08417867 | 0.66840132 | 0.83697256 | SLC25A11 |
| 51655  | ENSG00000108551 | 16.4158345 | 0.04693394  | 0.32301726 | 0.79464964 | 0.90579008 | RASD1    |
| 1145   | ENSG00000108556 | 3.26730219 | -0.0658602  | 0.37454209 | 0.5553795  | 0.76129842 | CHRNE    |
| 10743  | ENSG00000108557 | 2965.64326 | -0.44128445 | 0.0888863  | 3.23E-07   | 3.97E-06   | RAI1     |
| 4927   | ENSG00000108559 | 1134.39831 | -0.21720726 | 0.12866742 | 0.07202913 | 0.19555978 | NUP88    |
| 708    | ENSG00000108561 | 3808.88665 | -0.1125761  | 0.06396481 | 0.07400147 | 0.19948222 | C1QBP    |
| 6532   | ENSG00000108576 | 4.22573552 | -0.00309949 | 0.36599784 | 0.97584988 | 0.99164422 | SLC6A4   |
| 642    | ENSG00000108578 | 886.461708 | 0.13938071  | 0.09928369 | 0.1461443  | 0.32699131 | BLMH     |
| 1362   | ENSG00000108582 | 1962.61182 | 0.07864286  | 0.10964679 | 0.45470488 | 0.67793979 | CPD      |
| 9527   | ENSG00000108587 | 1151.82578 | -0.13959385 | 0.10430533 | 0.16330719 | 0.3522953  | GOSR1    |
| 57003  | ENSG00000108588 | 2262.14771 | -0.09236173 | 0.07373669 | 0.20135556 | 0.40672921 | CCDC47   |
| 51003  | ENSG00000108590 | 119.818279 | 0.0049412   | 0.20035023 | 0.97810407 | 0.9925115  | MED31    |

|           |                 |            |             |            |            |            |                |
|-----------|-----------------|------------|-------------|------------|------------|------------|----------------|
| 1819      | ENSG00000108591 | 847.52877  | 0.1864955   | 0.10780462 | 0.07106634 | 0.19367482 | DRG2           |
| 117246    | ENSG00000108592 | 4504.28229 | 0.20980187  | 0.06079203 | 0.00046262 | 0.00301725 | FTSJ3          |
| 11216     | ENSG00000108599 | 582.932545 | 0.11327769  | 0.13258273 | 0.36178062 | 0.59153844 | AKAP10         |
| 218       | ENSG00000108602 | 8.61631266 | 0.11655443  | 0.3808104  | 0.38602937 | 0.61516648 | ALDH3A1        |
| 6603      | ENSG00000108604 | 2932.52061 | 0.39005254  | 0.06120128 | 1.04E-10   | 1.99E-09   | SMARCD2        |
| 3384      | ENSG00000108622 | 12.9722805 | -0.05457326 | 0.33361234 | 0.74925336 | 0.88205755 | ICAM2          |
| 9144      | ENSG00000108639 | 1049.49285 | 0.19461707  | 0.089259   | 0.02419628 | 0.08493526 | SYNGR2         |
| 27077     | ENSG00000108641 | 265.201554 | 0.37770185  | 0.16730909 | 0.01241976 | 0.04959348 | B9D1           |
| 55813     | ENSG00000108651 | 808.596373 | -0.0016771  | 0.11542062 | 0.98758763 | 0.99589897 | UTP6           |
| 1655      | ENSG00000108654 | 23976.2845 | 0.32059642  | 0.05033515 | 6.47E-11   | 1.27E-09   | DDX5           |
| 64149     | ENSG00000108666 | 645.277122 | 0.2620755   | 0.1078495  | 0.01109939 | 0.04520876 | C17orf75       |
| 9267      | ENSG00000108669 | 1632.48656 | -0.42332962 | 0.09358628 | 2.97E-06   | 3.11E-05   | CYTH1          |
| 5717      | ENSG00000108671 | 1803.65031 | -0.0809402  | 0.07931557 | 0.29619329 | 0.52277154 | PSMD11         |
| 3959      | ENSG00000108679 | 4039.8094  | 0.28796904  | 0.05930276 | 8.72E-07   | 9.99E-06   | LGALS3BP       |
| 40        | ENSG00000108684 | 6.50085788 | -1.89151098 | 1.54330811 | 0.00644398 | 0.02881418 | ASIC2          |
| 6354      | ENSG00000108688 | 0          | NA          | NA         | NA         | NA         | CCL7           |
| 6347      | ENSG00000108691 | 1.72932463 | 0.08712096  | 0.39265462 | 0.2408329  | NA         | CCL2           |
| 6355      | ENSG00000108700 | 0          | NA          | NA         | NA         | NA         | CCL8           |
| 6346      | ENSG00000108702 | 0          | NA          | NA         | NA         | NA         | CCL1           |
| 5193      | ENSG00000108733 | 126.152773 | -0.25400779 | 0.22105906 | 0.16521054 | 0.35517682 | PEX12          |
| 3882      | ENSG00000108759 | 0          | NA          | NA         | NA         | NA         | KRT32          |
| 79132     | ENSG00000108771 | 5.73552958 | 0.26164585  | 0.48910787 | 0.05973815 | 0.17060671 | DHX58          |
| 2648      | ENSG00000108773 | 911.06328  | 0.43553171  | 0.08797001 | 3.57E-07   | 4.37E-06   | KAT2A          |
| 5878      | ENSG00000108774 | 2056.17114 | 0.08675624  | 0.07740863 | 0.25268908 | 0.47273469 | RAB5C          |
| 4669      | ENSG00000108784 | 451.67595  | 0.05374246  | 0.13098853 | 0.66342638 | 0.83395929 | NAGLU          |
| NA        | ENSG00000108785 | 6.71529656 | 0.22714716  | 0.45536447 | 0.09937985 | 0.24819941 | HSD17B1P1      |
| 3292      | ENSG00000108786 | 60.518987  | -0.85682604 | 0.31967339 | 0.00096601 | 0.005742   | HSD17B1        |
| 6945      | ENSG00000108788 | 1006.91265 | -0.20999523 | 0.08222681 | 0.00879312 | 0.03730872 | MLX            |
| 8506      | ENSG00000108797 | 709.591932 | -0.11381142 | 0.09936468 | 0.23474483 | 0.45159871 | CNTNAP1        |
| 51225     | ENSG00000108798 | 0.16735865 | 0.01897177  | 0.38482933 | 0.78225479 | NA         | ABI3           |
| 2145      | ENSG00000108799 | 832.497208 | 0.17052681  | 0.12247292 | 0.14128511 | 0.31950382 | EZH1           |
| 1748      | ENSG00000108813 | 6.45373025 | -0.09732388 | 0.37294575 | 0.46815154 | 0.69110148 | DLX4           |
| 84687     | ENSG00000108819 | 3315.1103  | -0.15991566 | 0.05614373 | 0.00395616 | 0.01912995 | PPP1R9B        |
| 1277      | ENSG00000108821 | 500.009829 | 1.03138621  | 0.1304819  | 3.44E-16   | 1.02E-14   | COL1A1         |
| 6442      | ENSG00000108823 | 0          | NA          | NA         | NA         | NA         | SGCA           |
| 100885850 | ENSG00000108825 | 51.1148958 | -0.08388165 | 0.26412374 | 0.66323407 | 0.83380582 | PTGES3L-AARSD1 |
| 51264     | ENSG00000108826 | 845.128516 | -0.09686402 | 0.09499695 | 0.29185951 | 0.5179626  | MRPL27         |
| 10493     | ENSG00000108828 | 2347.28583 | -0.22190806 | 0.06844758 | 0.00096511 | 0.00573974 | VAT1           |

|       |                 |            |             |            |            |            |          |
|-------|-----------------|------------|-------------|------------|------------|------------|----------|
| 55379 | ENSG00000108829 | 3695.52459 | -0.07734648 | 0.0679348  | 0.24682778 | 0.46592963 | LRRC59   |
| 8153  | ENSG00000108830 | 457.902847 | 0.103395    | 0.12101032 | 0.36831197 | 0.59778383 | RND2     |
| 239   | ENSG00000108839 | 5.72761136 | -0.07503406 | 0.36923274 | 0.55826869 | 0.76291851 | ALOX12   |
| 10014 | ENSG00000108840 | 1205.31894 | 0.05628517  | 0.09518981 | 0.54220808 | 0.75027258 | HDAC5    |
| 8714  | ENSG00000108846 | 5.70309598 | 0.18040878  | 0.41583713 | 0.19039971 | 0.39167661 | ABCC3    |
| 51747 | ENSG00000108848 | 8267.54233 | -0.06375328 | 0.05477604 | 0.23314867 | 0.45004948 | LUC7L3   |
| 5539  | ENSG00000108849 | 0          | NA          | NA         | NA         | NA         | PPY      |
| 4355  | ENSG00000108852 | 555.089859 | -0.40765997 | 0.13575054 | 0.00130288 | 0.00741802 | MPP2     |
| 64750 | ENSG00000108854 | 1197.60495 | -0.06498414 | 0.07884379 | 0.39914612 | 0.62789874 | SMURF2   |
| 1845  | ENSG00000108861 | 566.253691 | -0.20773148 | 0.10780275 | 0.04360669 | 0.13394304 | DUSP3    |
| 786   | ENSG00000108878 | 14.3766637 | 0.53844089  | 0.6220397  | 0.04480104 | 0.13659944 | CACNG1   |
| 9343  | ENSG00000108883 | 2698.86246 | -0.12545443 | 0.06442647 | 0.04802943 | 0.14433562 | EFTUD2   |
| 3131  | ENSG00000108924 | 54.3366352 | -0.14889515 | 0.27958542 | 0.45091929 | 0.67429441 | HLF      |
| 9120  | ENSG00000108932 | 3.01395098 | 0.10536625  | 0.3900913  | 0.31639586 | 0.54438418 | SLC16A6  |
| 5573  | ENSG00000108946 | 4973.60772 | 0.00118055  | 0.06122997 | 0.98516087 | 0.99475332 | PRKAR1A  |
| 1949  | ENSG00000108947 | 1094.96135 | -0.39709528 | 0.09852701 | 2.94E-05   | 0.00025373 | EFNB3    |
| 54757 | ENSG00000108950 | 7.12161697 | 0.39453756  | 0.69813581 | 0.01681691 | 0.06339493 | FAM20A   |
| 7531  | ENSG00000108953 | 11987.1618 | -0.01970281 | 0.05800231 | 0.68481689 | 0.84658029 | YWHAE    |
| NA    | ENSG00000108958 | 1.5213871  | 0.02387902  | 0.37697456 | 0.76883479 | NA         |          |
| 23531 | ENSG00000108960 | 1690.44148 | -0.02409393 | 0.0737201  | 0.73818549 | 0.87629989 | MMD      |
| 29098 | ENSG00000108961 | 384.264307 | 0.02778908  | 0.12741828 | 0.81851384 | 0.9171248  | RANGRF   |
| 1801  | ENSG00000108963 | 653.075013 | -0.02932948 | 0.10868729 | 0.77755307 | 0.89804709 | DPH1     |
| 5608  | ENSG00000108984 | 1017.93641 | 0.37674072  | 0.09295461 | 2.85E-05   | 0.00024718 | MAP2K6   |
| 25979 | ENSG00000109016 | 195.379037 | 0.01110465  | 0.16274481 | 0.94113382 | 0.97559098 | DHRS7B   |
| 26118 | ENSG00000109046 | 2182.82089 | 0.88336755  | 0.08049044 | 8.67E-29   | 4.76E-27   | WSB1     |
| 5957  | ENSG00000109047 | 0          | NA          | NA         | NA         | NA         | RCVRN    |
| 4619  | ENSG00000109061 | 0          | NA          | NA         | NA         | NA         | MYH1     |
| 9368  | ENSG00000109062 | 899.51349  | -0.3068541  | 0.08901866 | 0.0003797  | 0.00252961 | SLC9A3R1 |
| 4621  | ENSG00000109063 | 54.2763923 | 0.22438087  | 0.26765418 | 0.26477905 | 0.48704028 | MYH3     |
| 26151 | ENSG00000109065 | 1115.36485 | 0.33340223  | 0.09985793 | 0.00053155 | 0.00340189 | NAT9     |
| 54868 | ENSG00000109066 | 885.523823 | 0.16898003  | 0.10263318 | 0.08717357 | 0.22540384 | TMEM104  |
| 7448  | ENSG00000109072 | 6.28865344 | 0.18131634  | 0.41351403 | 0.19957029 | 0.40423425 | VTN      |
| 7126  | ENSG00000109079 | 1203.89449 | 0.18871239  | 0.083571   | 0.02056533 | 0.07453711 | TNFAIP1  |
| 90410 | ENSG00000109083 | 439.165573 | 0.14852274  | 0.11778062 | 0.18477608 | 0.38350847 | IFT20    |
| 27346 | ENSG00000109084 | 1293.1842  | -0.41006974 | 0.08262202 | 3.53E-07   | 4.33E-06   | TMEM97   |
| 30850 | ENSG00000109089 | 1397.88679 | -0.37824975 | 0.07825834 | 7.48E-07   | 8.64E-06   | CDR2L    |
| 5376  | ENSG00000109099 | 359.443231 | 0.74169156  | 0.13495344 | 8.16E-09   | 1.24E-07   | PMP22    |
| 8456  | ENSG00000109101 | 0          | NA          | NA         | NA         | NA         | FOXN1    |

|       |                 |            |             |            |            |            |         |
|-------|-----------------|------------|-------------|------------|------------|------------|---------|
| 9094  | ENSG00000109103 | 673.451644 | 0.01655826  | 0.09690728 | 0.86066457 | 0.93799827 | UNC119  |
| 230   | ENSG00000109107 | 1146.05846 | -0.44491001 | 0.12316041 | 0.00013554 | 0.00099966 | ALDOC   |
| 6830  | ENSG00000109111 | 3490.30047 | -0.10881689 | 0.06577711 | 0.0928079  | 0.2357385  | SUPT6H  |
| 83871 | ENSG00000109113 | 2.51350838 | 0.02037207  | 0.37463075 | 0.81869811 | NA         | RAB34   |
| 57649 | ENSG00000109118 | 1137.7263  | 0.19748606  | 0.09708096 | 0.03518753 | 0.1137931  | PHF12   |
| 8929  | ENSG00000109132 | 7176.56282 | -0.46739802 | 0.04931456 | 1.19E-21   | 4.79E-20   | PHOX2B  |
| 55161 | ENSG00000109133 | 2424.65443 | -0.03399109 | 0.06669605 | 0.60442884 | 0.79458443 | TMEM33  |
| 2557  | ENSG00000109158 | 0          | NA          | NA         | NA         | NA         | GABRA4  |
| 2798  | ENSG00000109163 | 29.3927446 | -0.35182036 | 0.37457075 | 0.12402749 | 0.2918294  | GNRHR   |
| 57606 | ENSG00000109171 | 765.848127 | -0.44563782 | 0.13941975 | 0.00057581 | 0.003651   | SLAIN2  |
| 54940 | ENSG00000109180 | 1827.96054 | -0.26015171 | 0.08239014 | 0.00118806 | 0.00686604 | OCIAD1  |
| 7365  | ENSG00000109181 | 0          | NA          | NA         | NA         | NA         | UGT2B10 |
| 80157 | ENSG00000109182 | 0          | NA          | NA         | NA         | NA         | CWH43   |
| 23142 | ENSG00000109184 | 949.392359 | -0.32264191 | 0.09407333 | 0.00038727 | 0.00257143 | DCUN1D4 |
| 64854 | ENSG00000109189 | 822.371296 | -0.18382696 | 0.08887354 | 0.03309938 | 0.10843655 | USP46   |
| 6783  | ENSG00000109193 | 0          | NA          | NA         | NA         | NA         | SULT1E1 |
| 54959 | ENSG00000109205 | 0.18922458 | 0.01954053  | 0.38488496 | 0.78225479 | NA         | ODAM    |
| 26952 | ENSG00000109208 | 0          | NA          | NA         | NA         | NA         | SMR3A   |
| 26511 | ENSG00000109220 | 160.467496 | 0.01870666  | 0.16456131 | 0.9010266  | 0.95641534 | CHIC2   |
| 10874 | ENSG00000109255 | 485.245455 | -0.18365819 | 0.12184291 | 0.11074757 | 0.26844028 | NMU     |
| 57482 | ENSG00000109265 | 3535.21793 | 0.1169184   | 0.05923697 | 0.04523248 | 0.13772444 | CRACD   |
| 8649  | ENSG00000109270 | 691.663827 | -0.21774608 | 0.11350704 | 0.0438124  | 0.13439055 | LAMTOR3 |
| 5197  | ENSG00000109272 | 0          | NA          | NA         | NA         | NA         | PF4V1   |
| 4790  | ENSG00000109320 | 512.210432 | 0.07755029  | 0.10904704 | 0.45892615 | 0.68235016 | NFKB1   |
| 374   | ENSG00000109321 | 0          | NA          | NA         | NA         | NA         | AREG    |
| 4126  | ENSG00000109323 | 207.156472 | -0.15389967 | 0.15958875 | 0.28747896 | 0.513189   | MANBA   |
| 7323  | ENSG00000109332 | 4308.72507 | -0.03688782 | 0.06306656 | 0.55268953 | 0.75905858 | UBE2D3  |
| 5602  | ENSG00000109339 | 285.136244 | -0.49127708 | 0.16179641 | 0.00089201 | 0.00536447 | MAPK10  |
| 1998  | ENSG00000109381 | 780.767722 | -0.13441479 | 0.10173306 | 0.16977466 | 0.36148629 | ELF2    |
| 4717  | ENSG00000109390 | 539.110481 | 0.10563858  | 0.11199375 | 0.32724515 | 0.55563061 | NDUFC1  |
| 7350  | ENSG00000109424 | 1.7341049  | 0.07227386  | 0.38511793 | 0.3934411  | NA         | UCP1    |
| 23158 | ENSG00000109436 | 844.817758 | -0.2021346  | 0.09922215 | 0.03443602 | 0.1119467  | TBC1D9  |
| 27309 | ENSG00000109445 | 609.292423 | 0.0422794   | 0.11212053 | 0.69417247 | 0.85201936 | ZNF330  |
| 8821  | ENSG00000109452 | 37.8229174 | 0.84681629  | 0.44042117 | 0.00580143 | 0.02639156 | INPP4B  |
| 2549  | ENSG00000109458 | 546.459055 | 0.04821992  | 0.11057272 | 0.6497079  | 0.82525848 | GAB1    |
| 11275 | ENSG00000109466 | 367.428747 | -0.0490505  | 0.12318679 | 0.6733635  | 0.83953925 | KLHL2   |
| 3558  | ENSG00000109471 | 0.18922458 | 0.01954053  | 0.38488496 | 0.78225479 | NA         | IL2     |
| 1363  | ENSG00000109472 | 2150.55977 | 0.03169082  | 0.06531091 | 0.62259211 | 0.80737672 | CPE     |

|        |                 |            |             |            |            |            |          |
|--------|-----------------|------------|-------------|------------|------------|------------|----------|
| 6164   | ENSG00000109475 | 6489.64829 | -0.03284531 | 0.05395212 | 0.53838391 | 0.74816395 | RPL34    |
| 7466   | ENSG00000109501 | 582.546713 | -0.03363593 | 0.1233326  | 0.77231102 | 0.89548539 | WFS1     |
| 11199  | ENSG00000109511 | 0          | NA          | NA         | NA         | NA         | ANXA10   |
| 80273  | ENSG00000109519 | 554.032572 | -0.4173424  | 0.11314987 | 0.00011048 | 0.00083196 | GRPEL1   |
| 54433  | ENSG00000109534 | 441.017187 | -0.02138813 | 0.11345569 | 0.84115065 | 0.92789889 | GAR1     |
| 2483   | ENSG00000109536 | 487.68078  | 0.17537597  | 0.12476946 | 0.13669769 | 0.31191283 | FRG1     |
| 1182   | ENSG00000109572 | 1605.83311 | -0.28231623 | 0.10090931 | 0.00361685 | 0.01774875 | CLCN3    |
| 51166  | ENSG00000109576 | 462.975143 | -0.31401218 | 0.12666307 | 0.00839239 | 0.03593894 | AADAT    |
| 51809  | ENSG00000109586 | 711.48856  | 0.12272493  | 0.10063736 | 0.20625256 | 0.41325498 | GALNT7   |
| 1665   | ENSG00000109606 | 3946.4074  | -0.26173545 | 0.05953012 | 8.21E-06   | 7.93E-05   | DHX15    |
| 6649   | ENSG00000109610 | 0          | NA          | NA         | NA         | NA         | SOD3     |
| 51091  | ENSG00000109618 | 352.306816 | 0.37673964  | 0.15266074 | 0.0072047  | 0.0316592  | SEPSECS  |
| 8532   | ENSG00000109625 | 3.47262192 | -0.05659922 | 0.376693   | 0.57286364 | 0.7725692  | CPZ      |
| 23321  | ENSG00000109654 | 1915.05351 | -0.02413334 | 0.06986418 | 0.72472286 | 0.86844186 | TRIM2    |
| 56606  | ENSG00000109667 | 0          | NA          | NA         | NA         | NA         | SLC2A9   |
| 55294  | ENSG00000109670 | 530.156149 | -0.0441355  | 0.14643146 | 0.74282513 | 0.87875221 | FBXW7    |
| 55247  | ENSG00000109674 | 307.262669 | -0.28737984 | 0.13347133 | 0.02123851 | 0.07646018 | NEIL3    |
| 55296  | ENSG00000109680 | 106.08109  | 0.04941062  | 0.22607335 | 0.78865387 | 0.90411045 | TBC1D19  |
| 116449 | ENSG00000109684 | 0          | NA          | NA         | NA         | NA         | CLNK     |
| 7468   | ENSG00000109685 | 7533.0208  | -0.03265264 | 0.05744057 | 0.56471395 | 0.76707686 | NSD2     |
| 152503 | ENSG00000109686 | 818.442177 | 0.01708235  | 0.10372643 | 0.86555139 | 0.94044576 | SH3D19   |
| 57620  | ENSG00000109689 | 427.925431 | -0.36687639 | 0.12069152 | 0.0013258  | 0.00753476 | STIM2    |
| 579    | ENSG00000109705 | 0.51937201 | -0.02557462 | 0.38567603 | 0.54680819 | NA         | NKX3-2   |
| 10227  | ENSG00000109736 | 1588.27834 | 0.10371802  | 0.07582077 | 0.16275579 | 0.35164399 | MFSD10   |
| 2743   | ENSG00000109738 | 269.482588 | -0.05291332 | 0.13783838 | 0.67963171 | 0.84363969 | GLRB     |
| 683    | ENSG00000109743 | 22.5310946 | 0.43578084  | 0.48979146 | 0.07337062 | 0.19821257 | BST1     |
| 9693   | ENSG00000109756 | 1319.76801 | -0.11571453 | 0.09104076 | 0.18993384 | 0.39109764 | RAPGEF2  |
| 3083   | ENSG00000109758 | 25.1144172 | -0.02925327 | 0.31817529 | 0.86838062 | 0.94253385 | HGFAC    |
| 83891  | ENSG00000109762 | 336.726861 | 0.16860012  | 0.1340834  | 0.1789897  | 0.37507273 | SNX25    |
| 55805  | ENSG00000109771 | 56.9244435 | 0.10013099  | 0.27235083 | 0.60939075 | 0.79803651 | LRP2BP   |
| 55325  | ENSG00000109775 | 342.226402 | -0.11621671 | 0.15026433 | 0.39902411 | 0.62780637 | UFSP2    |
| 51274  | ENSG00000109787 | 777.787234 | 0.46405493  | 0.09612368 | 6.13E-07   | 7.21E-06   | KLF3     |
| 51088  | ENSG00000109790 | 768.170014 | 0.0416292   | 0.10466579 | 0.68021974 | 0.8437889  | KLHL5    |
| 25854  | ENSG00000109794 | 88.2378753 | 0.18159568  | 0.22064431 | 0.32052103 | 0.54831381 | FAM149A  |
| 64151  | ENSG00000109805 | 1723.26269 | -0.40600455 | 0.07866679 | 1.27E-07   | 1.65E-06   | NCAPG    |
| 7358   | ENSG00000109814 | 764.925458 | 0.49529497  | 0.09966643 | 2.72E-07   | 3.38E-06   | UGDH     |
| 10891  | ENSG00000109819 | 1.38058753 | 0.08305142  | 0.39323914 | 0.18324153 | NA         | PPARGC1A |
| 29118  | ENSG00000109832 | 113.07469  | -1.03726489 | 0.22970343 | 7.37E-07   | 8.52E-06   | DDX25    |



|           |                 |            |             |            |            |            |         |
|-----------|-----------------|------------|-------------|------------|------------|------------|---------|
| 1410      | ENSG00000109846 | 0.88111352 | 0.04023644  | 0.38511396 | 0.43011874 | NA         | CRYAB   |
| 120237    | ENSG00000109851 | 6.39698679 | 1.71864857  | 1.4450455  | 0.00671209 | 0.02984486 | DBX1    |
| 10553     | ENSG00000109854 | 0.75661163 | 0.02039878  | 0.38277281 | 0.61488206 | NA         | HTATIP2 |
| 1075      | ENSG00000109861 | 1472.23436 | 0.41934927  | 0.07897028 | 5.58E-08   | 7.61E-07   | CTSC    |
| 91057     | ENSG00000109881 | 634.810491 | 0.10421197  | 0.11373853 | 0.33752403 | 0.56783488 | CCDC34  |
| 7704      | ENSG00000109906 | 5.86486181 | 5.85787459  | 2.69371741 | 8.22E-05   | 0.00063814 | ZBTB16  |
| 26610     | ENSG00000109911 | 276.192369 | 0.06493141  | 0.13443281 | 0.60655747 | 0.79616939 | ELP4    |
| 8882      | ENSG00000109917 | 1445.79406 | 0.01209704  | 0.07921174 | 0.87162158 | 0.94401928 | ZPR1    |
| 23788     | ENSG00000109919 | 1228.23704 | -0.01990533 | 0.09582592 | 0.82986442 | 0.92286579 | MTCH2   |
| 23360     | ENSG00000109920 | 2335.50193 | 0.15118196  | 0.09179425 | 0.08971587 | 0.23005853 | FNBP4   |
| 7007      | ENSG00000109927 | 196.221605 | 0.00667454  | 0.17747865 | 0.96744621 | 0.98759962 | TECTA   |
| 116804918 | ENSG00000109927 | 196.221605 | 0.00667454  | 0.17747865 | 0.96744621 | 0.98759962 | TECTA   |
| 6309      | ENSG00000109929 | 1014.76503 | -0.39374735 | 0.09132051 | 8.65E-06   | 8.31E-05   | SC5D    |
| 56253     | ENSG00000109943 | 0          | NA          | NA         | NA         | NA         | CRTAM   |
| 79864     | ENSG00000109944 | 249.316417 | -0.15517077 | 0.15536329 | 0.27351586 | 0.49702826 | JHY     |
| 27087     | ENSG00000109956 | 1180.36134 | -1.1765512  | 0.08384933 | 1.05E-45   | 9.33E-44   | B3GAT1  |
| 3312      | ENSG00000109971 | 24242.3421 | 0.05048398  | 0.15735967 | 0.69911079 | 0.85487569 | HSPA8   |
| 5024      | ENSG00000109991 | 1.16465936 | 0.0129262   | 0.38077068 | 0.82412664 | NA         | P2RX3   |
| 4013      | ENSG00000110002 | 2.85141005 | 0.20572818  | 0.4662256  | 0.00617919 | 0.02776728 | VWA5A   |
| 3338      | ENSG00000110011 | 439.302894 | 0.24079158  | 0.11641755 | 0.0296084  | 0.09932622 | DNAJC4  |
| 54414     | ENSG00000110013 | 225.101533 | 0.11917485  | 0.15430038 | 0.39948503 | 0.62823264 | SIAE    |
| 29907     | ENSG00000110025 | 358.748659 | 0.03104178  | 0.13586427 | 0.80806739 | 0.9131433  | SNX15   |
| 9404      | ENSG00000110031 | 56.3075155 | 0.09458856  | 0.25116151 | 0.62277641 | 0.80737672 | LPXN    |
| 23220     | ENSG00000110042 | 4.28385762 | -0.06837238 | 0.37569674 | 0.51802528 | 0.73186794 | DTX4    |
| 23130     | ENSG00000110046 | 500.653219 | 0.30536238  | 0.12983498 | 0.01209153 | 0.04853248 | ATG2A   |
| 10938     | ENSG00000110047 | 928.750974 | 0.13372497  | 0.09459129 | 0.14452577 | 0.32462259 | EHD1    |
| 5007      | ENSG00000110048 | 1013.88033 | -0.18175309 | 0.08322043 | 0.02501787 | 0.08721718 | OSBP    |
| 81622     | ENSG00000110057 | 193.5367   | 0.51835565  | 0.19464986 | 0.00259364 | 0.01339143 | UNC93B1 |
| 83480     | ENSG00000110060 | 386.40288  | -0.63848525 | 0.15258349 | 7.28E-06   | 7.11E-05   | PUS3    |
| 28960     | ENSG00000110063 | 632.883007 | -0.13449852 | 0.14929448 | 0.32587361 | 0.55406054 | DCPS    |
| 51111     | ENSG00000110066 | 1035.48673 | -0.20112005 | 0.10156243 | 0.03967279 | 0.12460156 | KMT5B   |
| 55572     | ENSG00000110074 | 780.181088 | 0.0849172   | 0.09336195 | 0.35008277 | 0.58049663 | FOXRED1 |
| 55291     | ENSG00000110075 | 2331.89512 | -0.22394849 | 0.06636116 | 0.00059905 | 0.00377783 | PPP6R3  |
| 9379      | ENSG00000110076 | 1769.16533 | -2.05590412 | 0.11977348 | 2.85E-67   | 4.38E-65   | NRXN2   |
| 64231     | ENSG00000110077 | 0          | NA          | NA         | NA         | NA         | MS4A6A  |
| 51338     | ENSG00000110079 | 0          | NA          | NA         | NA         | NA         | MS4A4A  |
| 6484      | ENSG00000110080 | 427.734281 | -0.21786232 | 0.12391736 | 0.06202828 | 0.17577159 | ST3GAL4 |
| 1374      | ENSG00000110090 | 2016.07227 | -0.17093179 | 0.07239135 | 0.01603998 | 0.06089421 | CPT1A   |

|        |                 |            |             |            |            |            |           |
|--------|-----------------|------------|-------------|------------|------------|------------|-----------|
| 595    | ENSG00000110092 | 11802.8601 | 0.46388918  | 0.04840568 | 4.94E-22   | 2.03E-20   | CCND1     |
| 79080  | ENSG00000110104 | 460.223935 | 0.00958926  | 0.11474326 | 0.93112873 | 0.97127203 | CCDC86    |
| 27339  | ENSG00000110107 | 3827.62383 | -0.18709649 | 0.0541113  | 0.00046662 | 0.00304032 | PRPF19    |
| 79073  | ENSG00000110108 | 867.341365 | 0.57153026  | 0.08965667 | 6.06E-11   | 1.19E-09   | TMEM109   |
| 887    | ENSG00000110148 | 0          | NA          | NA         | NA         | NA         | CCKBR     |
| 3263   | ENSG00000110169 | 14.3807216 | 0.0156211   | 0.32487809 | 0.93058727 | 0.97111825 | HPX       |
| 10612  | ENSG00000110171 | 510.241176 | 0.07266527  | 0.11067862 | 0.49346069 | 0.712409   | TRIM3     |
| 26973  | ENSG00000110172 | 1051.95993 | -0.01000316 | 0.1371173  | 0.9363719  | 0.97351594 | CHORDC1   |
| 2348   | ENSG00000110195 | 9.62195929 | 0.15876504  | 0.38087816 | 0.33132313 | 0.56018597 | FOLR1     |
| 25906  | ENSG00000110200 | 404.07179  | -0.13963893 | 0.12170931 | 0.22526372 | 0.43906825 | ANAPC15   |
| 2352   | ENSG00000110203 | 0          | NA          | NA         | NA         | NA         | FOLR3     |
| 24145  | ENSG00000110218 | 830.531119 | -0.10196803 | 0.0962196  | 0.2728411  | 0.49643869 | PANX1     |
| 9828   | ENSG00000110237 | 1582.14066 | 0.02828405  | 0.11337194 | 0.79490931 | 0.90585603 | ARHGEF17  |
| 116519 | ENSG00000110243 | 0          | NA          | NA         | NA         | NA         | APOA5     |
| 337    | ENSG00000110244 | 0          | NA          | NA         | NA         | NA         | APOA4     |
| 345    | ENSG00000110245 | 0          | NA          | NA         | NA         | NA         | APOC3     |
| 22897  | ENSG00000110274 | 1436.87893 | 0.29970145  | 0.09728434 | 0.00141249 | 0.00797085 | CEP164    |
| 50862  | ENSG00000110315 | 604.510087 | 0.15036572  | 0.10031427 | 0.12016019 | 0.28543799 | RNF141    |
| 57562  | ENSG00000110318 | 217.483075 | 0.88121771  | 0.16482987 | 1.40E-08   | 2.06E-07   | CEP126    |
| 1982   | ENSG00000110321 | 15656.9086 | -0.01975673 | 0.05330238 | 0.70733573 | 0.85900354 | EIF4G2    |
| 3587   | ENSG00000110324 | 26.5502945 | -0.21497768 | 0.32882251 | 0.29580051 | 0.52251089 | IL10RA    |
| 374378 | ENSG00000110328 | 111.763786 | -0.24095513 | 0.20094304 | 0.16095829 | 0.34896869 | GALNT18   |
| 329    | ENSG00000110330 | 811.051819 | -0.16901828 | 0.09839598 | 0.07495729 | 0.20134749 | BIRC2     |
| 9354   | ENSG00000110344 | 1233.67794 | -0.23483098 | 0.08373238 | 0.00397017 | 0.01917902 | UBE4A     |
| 1656   | ENSG00000110367 | 3809.47553 | -0.34830445 | 0.07673295 | 3.46E-06   | 3.57E-05   | DDX6      |
| 7379   | ENSG00000110375 | 1.61243246 | 0.06586775  | 0.38733039 | 0.33307085 | NA         | UPK2      |
| 867    | ENSG00000110395 | 2378.82164 | -0.20747291 | 0.06164496 | 0.00063929 | 0.00399227 | CBL       |
| 5818   | ENSG00000110400 | 3424.53417 | -1.09831713 | 0.0646254  | 1.04E-65   | 1.51E-63   | NECTIN1   |
| 10114  | ENSG00000110422 | 645.669401 | 0.22826607  | 0.0989464  | 0.01673247 | 0.0631366  | HIPK3     |
| 25758  | ENSG00000110427 | 492.246888 | -0.02873544 | 0.1317981  | 0.81560959 | 0.91634261 | KIAA1549L |
| 26273  | ENSG00000110429 | 592.599198 | -0.37299958 | 0.10622336 | 0.00024885 | 0.00173172 | FBXO3     |
| 8050   | ENSG00000110435 | 350.393937 | -0.60766164 | 0.13841138 | 3.19E-06   | 3.31E-05   | PDHX      |
| 6506   | ENSG00000110436 | 93.7063323 | -1.6908313  | 0.32917952 | 1.89E-08   | 2.76E-07   | SLC1A2    |
| 29099  | ENSG00000110442 | 612.941592 | -0.10667629 | 0.11246128 | 0.31905646 | 0.54668625 | COMMD9    |
| 51296  | ENSG00000110446 | 10.4359458 | 1.58793322  | 1.57880572 | 0.00456031 | 0.02153176 | SLC15A3   |
| 921    | ENSG00000110448 | 0.48288597 | 0.01075364  | 0.38337498 | 0.79448031 | NA         | CD5       |
| 84680  | ENSG00000110455 | 271.829003 | 0.36037817  | 0.16692462 | 0.01676457 | 0.06323365 | ACCS      |
| 4250   | ENSG00000110484 | 0          | NA          | NA         | NA         | NA         | SCGB2A2   |

|        |                 |            |             |            |            |            |          |
|--------|-----------------|------------|-------------|------------|------------|------------|----------|
| 4192   | ENSG00000110492 | 14341.9244 | 0.62868041  | 0.04872882 | 1.69E-38   | 1.26E-36   | MDK      |
| 55626  | ENSG00000110497 | 704.983917 | -0.29945028 | 0.10697631 | 0.00344117 | 0.01700868 | AMBRA1   |
| 8567   | ENSG00000110514 | 2177.08271 | -0.34995246 | 0.0652744  | 5.08E-08   | 6.99E-07   | MADD     |
| 114971 | ENSG00000110536 | 687.496775 | 0.07067939  | 0.10953099 | 0.50072293 | 0.71795498 | PTPMT1   |
| 79829  | ENSG00000110583 | 1363.67728 | -0.08307314 | 0.10284843 | 0.40088928 | 0.62929371 | NAA40    |
| 833    | ENSG00000110619 | 1837.35724 | 0.3683656   | 0.22571175 | 0.05064528 | 0.15041952 | CARS1    |
| 5002   | ENSG00000110628 | 75.3735418 | 0.25878205  | 0.24472735 | 0.18247278 | 0.3803144  | SLC22A18 |
| 975    | ENSG00000110651 | 2886.33774 | 0.1130447   | 0.06486313 | 0.07667895 | 0.20477996 | CD81     |
| 54733  | ENSG00000110660 | 610.570392 | -0.03989219 | 0.09721403 | 0.67072233 | 0.83771678 | SLC35F2  |
| 29125  | ENSG00000110665 | 0.5141508  | -0.0102321  | 0.38328162 | 0.81789405 | NA         | C11orf21 |
| 55531  | ENSG00000110675 | 14.8563956 | 2.59521388  | 0.82734663 | 9.09E-05   | 0.00069919 | ELMOD1   |
| 796    | ENSG00000110680 | 0.48350556 | 0.01083862  | 0.383379   | 0.79316478 | NA         | CALCA    |
| 55553  | ENSG00000110693 | 8.40267497 | -0.04542883 | 0.35769744 | 0.73669124 | 0.87520684 | SOX6     |
| 10944  | ENSG00000110696 | 2712.89068 | -0.00633048 | 0.07274783 | 0.93148653 | 0.97149202 | C11orf58 |
| 9600   | ENSG00000110697 | 742.854278 | -0.24345281 | 0.1465415  | 0.07101047 | 0.19357622 | PITPNM1  |
| 6207   | ENSG00000110700 | 8232.7837  | -0.1797297  | 0.06419481 | 0.00443563 | 0.02105615 | RPS13    |
| 9049   | ENSG00000110711 | 921.007428 | 0.21877668  | 0.09829404 | 0.0210698  | 0.07596307 | AIP      |
| 4928   | ENSG00000110713 | 1996.55498 | -0.20080529 | 0.09441969 | 0.02757229 | 0.09381484 | NUP98    |
| 4728   | ENSG00000110717 | 1129.13064 | 0.22801851  | 0.08051578 | 0.00373366 | 0.01821386 | NDUFS8   |
| 10312  | ENSG00000110719 | 23.8536382 | -0.04173323 | 0.31025238 | 0.81878985 | 0.91737015 | TCIRG1   |
| 1119   | ENSG00000110721 | 517.744602 | -0.04215858 | 0.11538394 | 0.70085257 | 0.85575596 | CHKA     |
| 23086  | ENSG00000110723 | 237.850372 | -0.72449738 | 0.17165996 | 5.03E-06   | 5.05E-05   | EXPH5    |
| 11234  | ENSG00000110756 | 450.923351 | -0.06438196 | 0.12274462 | 0.57878454 | 0.77656626 | HPS5     |
| 2965   | ENSG00000110768 | 686.679346 | -0.04087787 | 0.10220385 | 0.67730437 | 0.84233177 | GTF2H1   |
| 5450   | ENSG00000110777 | 0.50207596 | 0.02562368  | 0.38565771 | 0.52549886 | NA         | POU2AF1  |
| 84867  | ENSG00000110786 | 14.6136215 | 0.19212982  | 0.3821038  | 0.28565743 | 0.51117916 | PTPN5    |
| 7450   | ENSG00000110799 | 3.29160881 | 0.22728245  | 0.48152555 | 0.01536999 | 0.05873277 | VWF      |
| 5715   | ENSG00000110801 | 519.827608 | -0.00144811 | 0.1089136  | 0.98805324 | 0.99589897 | PSMD9    |
| 10536  | ENSG00000110811 | 825.336702 | -0.00266572 | 0.0888272  | 0.97380885 | 0.99048209 | P3H3     |
| 8496   | ENSG00000110841 | 855.839492 | 0.04511532  | 0.11401696 | 0.67956002 | 0.84361793 | PPFIBP1  |
| 25766  | ENSG00000110844 | 780.653931 | 0.2438121   | 0.09169683 | 0.00608139 | 0.02744208 | PRPF40B  |
| 969    | ENSG00000110848 | 0          | NA          | NA         | NA         | NA         | CD69     |
| 11108  | ENSG00000110851 | 1084.75166 | -0.05077475 | 0.08293854 | 0.53146385 | 0.74283399 | PRDM4    |
| 9976   | ENSG00000110852 | 0          | NA          | NA         | NA         | NA         | CLEC2B   |
| 84274  | ENSG00000110871 | 459.124522 | -0.12399827 | 0.129089   | 0.30663196 | 0.53422766 | COQ5     |
| 6404   | ENSG00000110876 | 2.67161718 | -0.02088627 | 0.37356275 | 0.81986499 | 0.91788244 | SELPLG   |
| 23603  | ENSG00000110880 | 2380.41965 | -0.38084832 | 0.06969864 | 2.61E-08   | 3.73E-07   | CORO1C   |
| 41     | ENSG00000110881 | 1397.56817 | 0.34937787  | 0.08385751 | 1.87E-05   | 0.00016877 | ASIC1    |

|        |                 |            |             |            |            |            |         |
|--------|-----------------|------------|-------------|------------|------------|------------|---------|
| 1610   | ENSG00000110887 | 0.94545361 | -0.06630286 | 0.39158611 | 0.20462663 | NA         | DAO     |
| 65981  | ENSG00000110888 | 806.811019 | 0.31180871  | 0.1185521  | 0.00555675 | 0.02545505 | CAPRIN2 |
| 441631 | ENSG00000110900 | 1181.37849 | 0.38771949  | 0.10938419 | 0.00021232 | 0.00150118 | TSPAN11 |
| 83892  | ENSG00000110906 | 1767.5853  | -0.03167316 | 0.0759022  | 0.6701198  | 0.83758072 | KCTD10  |
| 4891   | ENSG00000110911 | 927.383677 | 0.01199104  | 0.09471616 | 0.89697336 | 0.95487211 | SLC11A2 |
| 9761   | ENSG00000110917 | 3918.17371 | 0.00098569  | 0.0696739  | 0.98927223 | 0.99604194 | MLEC    |
| 4598   | ENSG00000110921 | 734.035878 | -0.64403291 | 0.1216936  | 3.12E-08   | 4.40E-07   | MVK     |
| 81566  | ENSG00000110925 | 1223.32934 | 0.14527333  | 0.08516977 | 0.07966504 | 0.21062825 | CSRNP2  |
| 10645  | ENSG00000110931 | 1248.17303 | -0.2594308  | 0.10292138 | 0.00864632 | 0.03678337 | CAMKK2  |
| 51411  | ENSG00000110934 | 0          | NA          | NA         | NA         | NA         | BIN2    |
| 51561  | ENSG00000110944 | 4.00619291 | -0.03927615 | 0.3679199  | 0.73405354 | 0.87332827 | IL23A   |
| 506    | ENSG00000110955 | 12254.6537 | -0.0396781  | 0.05645817 | 0.46097988 | 0.68410808 | ATP5F1B |
| 10728  | ENSG00000110958 | 4213.61397 | 0.05972234  | 0.07927267 | 0.45043281 | 0.67378216 | PTGES3  |
| 341359 | ENSG00000110975 | 0          | NA          | NA         | NA         | NA         | SYT10   |
| 605    | ENSG00000110987 | 1799.73155 | 0.09832117  | 0.07487301 | 0.18069553 | 0.37770382 | BCL7A   |
| 65117  | ENSG00000111011 | 1642.66785 | 0.1969941   | 0.08175621 | 0.01352792 | 0.05313349 | RSRC2   |
| 1594   | ENSG00000111012 | 37.5564478 | 0.15471669  | 0.30581205 | 0.43762062 | 0.66277811 | CYP27B1 |
| 4618   | ENSG00000111046 | 0          | NA          | NA         | NA         | NA         | MYF6    |
| 4617   | ENSG00000111049 | 0          | NA          | NA         | NA         | NA         | MYF5    |
| 8825   | ENSG00000111052 | 1.92144211 | 0.10311487  | 0.39754402 | 0.19146554 | NA         | LIN7A   |
| 3875   | ENSG00000111057 | 6.20539866 | 4.22933163  | 1.6165998  | 0.00041614 | 0.00274175 | KRT18   |
| 79611  | ENSG00000111058 | 0          | NA          | NA         | NA         | NA         | ACSS3   |
| 23371  | ENSG00000111077 | 113.683945 | 0.23584041  | 0.24378569 | 0.22198755 | 0.43502894 | TNS2    |
| 2735   | ENSG00000111087 | 14.2938164 | 3.84728093  | 0.88571466 | 1.39E-06   | 1.54E-05   | GLI1    |
| 57460  | ENSG00000111110 | 0.18922458 | 0.01954053  | 0.38488496 | 0.78225479 | NA         | PPM1H   |
| 10988  | ENSG00000111142 | 2330.98353 | -0.1755746  | 0.06288719 | 0.00459042 | 0.02164819 | METAP2  |
| 4048   | ENSG00000111144 | 1999.22086 | -0.09704277 | 0.06602785 | 0.13538836 | 0.30992327 | LTA4H   |
| 2004   | ENSG00000111145 | 962.232646 | 0.72297377  | 0.1003756  | 1.33E-13   | 3.23E-12   | ELK3    |
| 6539   | ENSG00000111181 | 26.1252088 | -0.01386174 | 0.31957348 | 0.93550311 | 0.97325384 | SLC6A12 |
| 81029  | ENSG00000111186 | 116.149179 | -1.14589445 | 0.2346076  | 1.08E-07   | 1.42E-06   | WNT5B   |
| 55110  | ENSG00000111196 | 388.528726 | -0.06186044 | 0.16268371 | 0.67406438 | 0.8400928  | MAGOHB  |
| 59341  | ENSG00000111199 | 42.4655853 | 2.7039615   | 0.42659893 | 1.65E-11   | 3.44E-10   | TRPV4   |
| 55846  | ENSG00000111203 | 697.709649 | -0.05088096 | 0.11420429 | 0.63986107 | 0.81944511 | ITFG2   |
| 2305   | ENSG00000111206 | 3099.25282 | -0.19644558 | 0.0660012  | 0.00249027 | 0.01293039 | FOXMI   |
| 5554   | ENSG00000111215 | 24.2173752 | 0.29276867  | 0.37354639 | 0.17927966 | 0.37559752 | PRR4    |
| 11272  | ENSG00000111215 | 24.2173752 | 0.29276867  | 0.37354639 | 0.17927966 | 0.37559752 | PRR4    |
| 56341  | ENSG00000111218 | 8.79792492 | -3.42208217 | 1.27228974 | 0.00049525 | 0.00319742 | PRMT8   |
| 57097  | ENSG00000111224 | 141.32679  | -0.55365379 | 0.25032494 | 0.00721883 | 0.03170723 | PARP11  |

|       |                 |            |             |            |            |            |          |
|-------|-----------------|------------|-------------|------------|------------|------------|----------|
| 10094 | ENSG00000111229 | 1888.37639 | -0.36386245 | 0.07829853 | 1.97E-06   | 2.13E-05   | ARPC3    |
| 51184 | ENSG00000111231 | 397.109313 | 0.03938782  | 0.12045172 | 0.7335631  | 0.87316366 | GPN3     |
| 51699 | ENSG00000111237 | 580.52632  | -0.26934226 | 0.10469903 | 0.00730954 | 0.03204181 | VPS29    |
| 2251  | ENSG00000111241 | 0.41622699 | -0.011908   | 0.38380213 | 0.90842947 | NA         | FGF6     |
| 4633  | ENSG00000111245 | 0.16735865 | 0.01897177  | 0.38482933 | 0.78225479 | NA         | MYL2     |
| 10635 | ENSG00000111247 | 497.299307 | -0.11388052 | 0.11598433 | 0.30108091 | 0.52835924 | RAD51AP1 |
| 23316 | ENSG00000111249 | 2231.78609 | -1.64087275 | 0.07385442 | 1.75E-110  | 5.89E-108  | CUX2     |
| 10019 | ENSG00000111252 | 314.732362 | -0.93265754 | 0.13868613 | 2.59E-12   | 5.75E-11   | SH2B3    |
| 10566 | ENSG00000111254 | 4.61600344 | 0.12881711  | 0.39931718 | 0.21869423 | 0.43056392 | AKAP3    |
| 54682 | ENSG00000111261 | 494.854066 | 0.07762804  | 0.10648297 | 0.44850531 | 0.67234398 | MANSC1   |
| 3736  | ENSG00000111262 | 0          | NA          | NA         | NA         | NA         | KCNA1    |
| 80824 | ENSG00000111266 | 1509.05487 | 0.2021548   | 0.08557365 | 0.01522328 | 0.05834073 | DUSP16   |
| 1389  | ENSG00000111269 | 685.977753 | -0.32682549 | 0.11183122 | 0.0021645  | 0.0114547  | CREBL2   |
| 80724 | ENSG00000111271 | 805.824078 | 0.22943035  | 0.12152751 | 0.04603052 | 0.13970407 | ACAD10   |
| 217   | ENSG00000111275 | 1261.57088 | 0.17593911  | 0.08126273 | 0.02654754 | 0.09123563 | ALDH2    |
| 1027  | ENSG00000111276 | 1385.83813 | 0.29648652  | 0.07848381 | 0.00011058 | 0.00083228 | CDKN1B   |
| 55507 | ENSG00000111291 | 5.11030394 | -0.26922247 | 0.5131179  | 0.03215629 | 0.10595926 | GPRC5D   |
| 80018 | ENSG00000111300 | 915.871402 | 0.02207142  | 0.12727873 | 0.85577116 | 0.93566075 | NAA25    |
| 83445 | ENSG00000111305 | 0.29863895 | -0.02292439 | 0.3852726  | 0.68753245 | NA         | GSG1     |
| 6337  | ENSG00000111319 | 0          | NA          | NA         | NA         | NA         | SCNN1A   |
| 4055  | ENSG00000111321 | 0          | NA          | NA         | NA         | NA         | LTBR     |
| 79676 | ENSG00000111325 | 213.38681  | 0.12999646  | 0.15585293 | 0.36167035 | 0.59140689 | OGFOD2   |
| 8099  | ENSG00000111328 | 3591.41519 | -0.3132742  | 0.05722274 | 2.88E-08   | 4.08E-07   | CDK2AP1  |
| 4940  | ENSG00000111331 | 841.383443 | -0.67526189 | 0.10579907 | 4.26E-11   | 8.53E-10   | OAS3     |
| 4939  | ENSG00000111335 | 0.96822761 | 0.01469816  | 0.38058074 | 0.80647333 | NA         | OAS2     |
| 420   | ENSG00000111339 | 0.88508185 | -0.02256421 | 0.38270569 | 0.65529417 | NA         | ART4     |
| 4256  | ENSG00000111341 | 48.4430577 | 3.93603908  | 0.5466793  | 1.07E-14   | 2.83E-13   | MGP      |
| 8437  | ENSG00000111344 | 6.08224322 | -0.39967982 | 0.6905099  | 0.0222     | 0.07917454 | RASAL1   |
| 397   | ENSG00000111348 | 8.52290665 | -0.00405304 | 0.35345838 | 0.97421966 | 0.99074878 | ARHGDIB  |
| 2967  | ENSG00000111358 | 670.293816 | -0.02683926 | 0.1232272  | 0.81696672 | 0.91671007 | GTF2H3   |
| 1967  | ENSG00000111361 | 1491.01757 | -0.04813833 | 0.07701279 | 0.52275088 | 0.73592404 | EIF2B1   |
| 57696 | ENSG00000111364 | 1002.63086 | 0.00855993  | 0.09642197 | 0.92775984 | 0.96974634 | DDX55    |
| 81539 | ENSG00000111371 | 5879.91074 | -0.67905755 | 0.06056619 | 9.00E-30   | 5.13E-28   | SLC38A1  |
| 79785 | ENSG00000111404 | 0          | NA          | NA         | NA         | NA         | RERGL    |
| 8909  | ENSG00000111405 | 0.33942509 | 0.00599294  | 0.38348079 | 0.92248644 | NA         | ENDOU    |
| 79794 | ENSG00000111412 | 1421.54517 | 0.38419268  | 0.09160421 | 1.51E-05   | 0.00013924 | SPRING1  |
| 7421  | ENSG00000111424 | 1.71285337 | -0.02288719 | 0.37784429 | 0.76060239 | NA         | VDR      |
| 11211 | ENSG00000111432 | 0          | NA          | NA         | NA         | NA         | FZD10    |

|           |                 |            |             |            |            |            |           |
|-----------|-----------------|------------|-------------|------------|------------|------------|-----------|
| 5985      | ENSG00000111445 | 750.807164 | -0.14219623 | 0.09898899 | 0.13628676 | 0.3113874  | RFC5      |
| 2054      | ENSG00000111450 | 835.219817 | 0.20791622  | 0.1066738  | 0.0420546  | 0.13057329 | STX2      |
| 283383    | ENSG00000111452 | 1.92157058 | 0.08055634  | 0.38802455 | 0.33354437 | NA         | ADGRD1    |
| 22818     | ENSG00000111481 | 1800.69811 | -0.29802313 | 0.08859567 | 0.00052578 | 0.00336827 | COPZ1     |
| 23329     | ENSG00000111490 | 67.4019754 | -0.20322121 | 0.30429301 | 0.31674652 | 0.54452953 | TBC1D30   |
| 55832     | ENSG00000111530 | 3419.44204 | -0.15792894 | 0.06919693 | 0.01981933 | 0.07246877 | CAND1     |
| 55801     | ENSG00000111536 | 0          | NA          | NA         | NA         | NA         | IL26      |
| 3458      | ENSG00000111537 | 0          | NA          | NA         | NA         | NA         | IFNG      |
| 5869      | ENSG00000111540 | 1590.11376 | 0.25093356  | 0.08229086 | 0.00176283 | 0.00961126 | RAB5B     |
| 56890     | ENSG00000111554 | 211.072788 | 0.23127754  | 0.17330416 | 0.1348352  | 0.30933515 | MDM1      |
| 57122     | ENSG00000111581 | 1738.5538  | 0.14988528  | 0.07468872 | 0.0406671  | 0.12692727 | NUP107    |
| 4848      | ENSG00000111596 | 1208.12689 | -0.17056213 | 0.11730373 | 0.12553049 | 0.29445791 | CNOT2     |
| 8914      | ENSG00000111602 | 2941.39273 | -0.19133645 | 0.06060372 | 0.00136987 | 0.00775635 | TIMELESS  |
| 11052     | ENSG00000111605 | 3808.57951 | -0.12755102 | 0.07720697 | 0.09125901 | 0.23314174 | CPSF6     |
| 11103     | ENSG00000111615 | 962.686787 | 0.06046263  | 0.09127198 | 0.49568022 | 0.71444211 | KRR1      |
| 51258     | ENSG00000111639 | 1448.68338 | -0.07036394 | 0.07967377 | 0.3659924  | 0.59518764 | MRPL51    |
| 2597      | ENSG00000111640 | 41981.5922 | -0.31179498 | 0.04923997 | 1.59E-10   | 2.99E-09   | GAPDH     |
| 4839      | ENSG00000111641 | 1295.47275 | -0.03763451 | 0.08180336 | 0.63529439 | 0.81649547 | NOP2      |
| 1108      | ENSG00000111642 | 9925.66245 | -0.08588226 | 0.0547325  | 0.11265657 | 0.27179207 | CHD4      |
| 84519     | ENSG00000111644 | 29.1295179 | 0.11963162  | 0.30811459 | 0.53902577 | 0.74843996 | ACRBP     |
| 23074     | ENSG00000111647 | 362.543649 | -0.16847421 | 0.17250278 | 0.27219449 | 0.49553485 | UHRF1BP1L |
| 50813     | ENSG00000111652 | 953.122746 | 0.02882778  | 0.08823187 | 0.73785086 | 0.87620179 | COPS7A    |
| 51147     | ENSG00000111653 | 787.464604 | 0.23476921  | 0.11146677 | 0.02737401 | 0.09336911 | ING4      |
| 2784      | ENSG00000111664 | 209.072685 | -0.18852131 | 0.16528472 | 0.20491676 | 0.41178452 | GNB3      |
| 83461     | ENSG00000111665 | 623.881956 | 0.3496305   | 0.10500319 | 0.00051996 | 0.0033374  | CDCA3     |
| 56994     | ENSG00000111666 | 207.450735 | 0.40859796  | 0.16758569 | 0.00701275 | 0.03102877 | CHPT1     |
| 8078      | ENSG00000111667 | 2341.54813 | 0.05593223  | 0.09990056 | 0.56310692 | 0.76599528 | USP5      |
| 7167      | ENSG00000111669 | 8608.90463 | -0.31208515 | 0.06787942 | 2.86E-06   | 2.99E-05   | TPI1      |
| 79158     | ENSG00000111670 | 749.338788 | 0.10786883  | 0.09723673 | 0.25141801 | 0.47149344 | GNPTAB    |
| 84727     | ENSG00000111671 | 65.8295267 | 0.20968846  | 0.24919363 | 0.28189576 | 0.50671288 | SPSB2     |
| 105369632 | ENSG00000111671 | 65.8295267 | 0.20968846  | 0.24919363 | 0.28189576 | 0.50671288 | SPSB2     |
| 2026      | ENSG00000111674 | 2661.78006 | -0.69921479 | 0.07359033 | 4.93E-22   | 2.03E-20   | ENO2      |
| 1822      | ENSG00000111676 | 4543.93138 | 0.03383238  | 0.06075363 | 0.57021992 | 0.7706786  | ATN1      |
| 113246    | ENSG00000111678 | 2729.51542 | 0.10837683  | 0.06107297 | 0.07231345 | 0.19591682 | C12orf57  |
| 5777      | ENSG00000111679 | 5.26377636 | -0.02251008 | 0.36277216 | 0.84945481 | 0.93154246 | PTPN6     |
| 10162     | ENSG00000111684 | 240.697458 | -0.35260942 | 0.19984103 | 0.04045966 | 0.1264723  | LPCAT3    |
| 51559     | ENSG00000111696 | 242.197957 | -0.20842901 | 0.2150688  | 0.24370097 | 0.46210717 | NT5DC3    |
| 28234     | ENSG00000111700 | 0          | NA          | NA         | NA         | NA         | SLCO1B3   |

|        |                 |            |             |            |            |            |          |
|--------|-----------------|------------|-------------|------------|------------|------------|----------|
| 339    | ENSG00000111701 | 0          | NA          | NA         | NA         | NA         | APOBEC1  |
| 79923  | ENSG00000111704 | 1.79730873 | 0.04660996  | 0.38508775 | 0.41809387 | NA         | NANOG    |
| 64426  | ENSG00000111707 | 1412.75509 | -0.08347938 | 0.08304221 | 0.30256929 | 0.52987991 | SUDS3    |
| 51026  | ENSG00000111711 | 439.043704 | 0.26562268  | 0.12325521 | 0.02250497 | 0.08005423 | GOLT1B   |
| 2998   | ENSG00000111713 | 0.5972779  | -0.02732172 | 0.38586499 | 0.50076333 | NA         | GYS2     |
| 3945   | ENSG00000111716 | 12948.9701 | -0.02382206 | 0.04985254 | 0.62218753 | 0.80700149 | LDHB     |
| 5564   | ENSG00000111725 | 668.264447 | 0.03132137  | 0.10978827 | 0.76662218 | 0.8924999  | PRKAB1   |
| 55907  | ENSG00000111726 | 590.588425 | -0.03606751 | 0.10685062 | 0.72315344 | 0.86764418 | CMAS     |
| 29915  | ENSG00000111727 | 224.29375  | 0.28167879  | 0.17995584 | 0.07670975 | 0.20483464 | HCFC2    |
| 6489   | ENSG00000111728 | 142.103458 | -0.47922731 | 0.2855609  | 0.02874154 | 0.0970608  | ST8SIA1  |
| 50856  | ENSG00000111729 | 3.70376004 | 0.08805402  | 0.38278138 | 0.41753251 | 0.64375544 | CLEC4A   |
| 9847   | ENSG00000111731 | 1225.89478 | -0.31473072 | 0.08757205 | 0.00021427 | 0.00151393 | C2CD5    |
| 57379  | ENSG00000111732 | 0          | NA          | NA         | NA         | NA         | AICDA    |
| 11021  | ENSG00000111737 | 1252.41731 | -0.18539305 | 0.08802957 | 0.03014746 | 0.10072846 | RAB35    |
| 1911   | ENSG00000111752 | 2025.00212 | -0.07003312 | 0.07127535 | 0.31679814 | 0.54455685 | PHC1     |
| 1337   | ENSG00000111775 | 3892.93336 | -0.22798156 | 0.05829421 | 7.44E-05   | 0.00058583 | COX6A1   |
| NA     | ENSG00000111780 | 1.98388243 | 0.00839964  | 0.37501741 | 0.92280135 | NA         |          |
| 5992   | ENSG00000111783 | 0          | NA          | NA         | NA         | NA         | RFX4     |
| 55188  | ENSG00000111785 | 504.819782 | -0.14941944 | 0.11442916 | 0.17004776 | 0.36191941 | RIC8B    |
| 8683   | ENSG00000111786 | 3022.38086 | -0.63103631 | 0.06078666 | 8.63E-26   | 4.21E-24   | SRSF9    |
| NA     | ENSG00000111788 | 518.312109 | 0.44604543  | 0.11477291 | 4.65E-05   | 0.00038373 |          |
| 26127  | ENSG00000111790 | 514.147598 | 0.06123066  | 0.11118318 | 0.56557908 | 0.76741504 | FGFR1OP2 |
| 3820   | ENSG00000111796 | 0.16735865 | 0.01897177  | 0.38482933 | 0.78225479 | NA         | KLRB1    |
| 1303   | ENSG00000111799 | 0          | NA          | NA         | NA         | NA         | COL12A1  |
| 10384  | ENSG00000111801 | 177.842693 | 0.14821725  | 0.17306758 | 0.33772324 | 0.56802552 | BTN3A3   |
| 51567  | ENSG00000111802 | 533.506077 | -0.2079652  | 0.10985348 | 0.04717392 | 0.14221708 | TDP2     |
| 2444   | ENSG00000111816 | 29.5239557 | 0.06044742  | 0.29057571 | 0.75532417 | 0.88614698 | FRK      |
| 29940  | ENSG00000111817 | 348.605293 | 0.20528366  | 0.14447944 | 0.12427899 | 0.29221323 | DSE      |
| 51389  | ENSG00000111832 | 675.470771 | -0.06311315 | 0.09480151 | 0.49205151 | 0.71113078 | RWDD1    |
| 345895 | ENSG00000111834 | 9.45337218 | 0.01490944  | 0.3440885  | 0.92529201 | 0.96892907 | RSPH4A   |
| 4117   | ENSG00000111837 | 10.4514753 | 0.21722784  | 0.40710845 | 0.21827192 | 0.43029759 | MAK      |
| 51522  | ENSG00000111843 | 1088.13024 | 0.016327    | 0.07975379 | 0.83382168 | 0.92431452 | TMEM14C  |
| 55003  | ENSG00000111845 | 530.179299 | -0.15772416 | 0.11194541 | 0.13954785 | 0.31648712 | PAK1IP1  |
| 2651   | ENSG00000111846 | 312.498675 | 0.3253821   | 0.14996061 | 0.0183127  | 0.06768329 | GCNT2    |
| 57150  | ENSG00000111850 | 191.678029 | -0.3233674  | 0.17528915 | 0.0381365  | 0.12111865 | SMIM8    |
| 63914  | ENSG00000111850 | 191.678029 | -0.3233674  | 0.17528915 | 0.0381365  | 0.12111865 | SMIM8    |
| 4739   | ENSG00000111859 | 142.963176 | 0.00337826  | 0.25281257 | 0.98787041 | 0.99589897 | NEDD9    |
| 387119 | ENSG00000111860 | 181.804303 | 0.17623505  | 0.18151857 | 0.27130813 | 0.49473993 | CEP85L   |

|        |                 |            |             |            |            |            |         |
|--------|-----------------|------------|-------------|------------|------------|------------|---------|
| 84830  | ENSG00000111863 | 0          | NA          | NA         | NA         | NA         | ADTRP   |
| 25842  | ENSG00000111875 | 317.267318 | 0.24433051  | 0.17427927 | 0.11546308 | 0.27726792 | ASF1A   |
| 254394 | ENSG00000111877 | 273.784783 | 0.00902701  | 0.1396704  | 0.94450651 | 0.97736448 | MCM9    |
| 79632  | ENSG00000111879 | 423.593539 | -0.19136229 | 0.1174661  | 0.08581768 | 0.22271062 | FAM184A |
| 8732   | ENSG00000111880 | 817.046442 | -0.11385018 | 0.10198654 | 0.24603455 | 0.46528697 | RNGTT   |
| 4121   | ENSG00000111885 | 589.252308 | 2.65175533  | 0.11487246 | 5.10E-119  | 1.98E-116  | MAN1A1  |
| 2570   | ENSG00000111886 | 24.4405494 | 0.5591125   | 0.58704782 | 0.03993832 | 0.12522429 | GABRR2  |
| 57515  | ENSG00000111897 | 2235.92398 | -0.20412519 | 0.06595638 | 0.0016158  | 0.00894855 | SERINC1 |
| 51020  | ENSG00000111906 | 590.095193 | 0.08305402  | 0.12483076 | 0.48227258 | 0.70272483 | HDDC2   |
| 7164   | ENSG00000111907 | 0.34209262 | 0.02363404  | 0.38535456 | 0.62358548 | NA         | TPD52L1 |
| 135114 | ENSG00000111911 | 481.176965 | -0.35134169 | 0.1181704  | 0.001726   | 0.00945647 | HINT3   |
| 135112 | ENSG00000111912 | 440.194355 | 0.0190385   | 0.14293694 | 0.88649177 | 0.95015905 | NCOA7   |
| 9750   | ENSG00000111913 | 1.15110275 | -0.00344607 | 0.3801718  | 0.97223975 | NA         | RIPOR2  |
| 23328  | ENSG00000111961 | 0          | NA          | NA         | NA         | NA         | SASH1   |
| 10090  | ENSG00000111962 | 0          | NA          | NA         | NA         | NA         | UST     |
| 80329  | ENSG00000111981 | 30.5013425 | 0.17636042  | 0.37020337 | 0.3325414  | 0.56173872 | ULBP1   |
| 26271  | ENSG00000112029 | 874.136278 | -0.15467251 | 0.0895571  | 0.07500852 | 0.20145783 | FBXO5   |
| 54516  | ENSG00000112031 | 734.579704 | -0.15453004 | 0.10598751 | 0.12824164 | 0.29899782 | MTRF1L  |
| 5467   | ENSG00000112033 | 1070.31224 | 0.33954864  | 0.08163143 | 2.01E-05   | 0.00018029 | PPARD   |
| 4988   | ENSG00000112038 | 1574.16282 | -1.96536002 | 0.10185379 | 3.26E-84   | 7.11E-82   | OPRM1   |
| 2178   | ENSG00000112039 | 377.005241 | -0.00049125 | 0.12096154 | 0.99561306 | 0.99852582 | FANCE   |
| 7287   | ENSG00000112041 | 0.15069912 | -0.01848503 | 0.38480575 | 0.84537521 | NA         | TULP1   |
| 116369 | ENSG00000112053 | 0.52791311 | 0.01296299  | 0.38341368 | 0.75425252 | NA         | SLC26A8 |
| 1432   | ENSG00000112062 | 1114.74744 | -0.16352949 | 0.10375514 | 0.10073265 | 0.25062521 | MAPK14  |
| 6005   | ENSG00000112077 | 0          | NA          | NA         | NA         | NA         | RHAG    |
| 222658 | ENSG00000112078 | 3480.60352 | -0.00392077 | 0.05812949 | 0.94482828 | 0.97754449 | KCTD20  |
| 11329  | ENSG00000112079 | 763.687359 | 0.02994652  | 0.0912247  | 0.73615336 | 0.87477001 | STK38   |
| 6428   | ENSG00000112081 | 6377.67565 | -0.08509242 | 0.06849617 | 0.20743863 | 0.41458472 | SRSF3   |
| 6648   | ENSG00000112096 | 1001.36884 | -0.2292707  | 0.09808348 | 0.01530632 | 0.05855714 | SOD2    |
| 29074  | ENSG00000112110 | 515.416852 | -0.3613556  | 0.11588777 | 0.00103297 | 0.0060739  | MRPL18  |
| 3605   | ENSG00000112115 | 0          | NA          | NA         | NA         | NA         | IL17A   |
| 112744 | ENSG00000112116 | 0          | NA          | NA         | NA         | NA         | IL17F   |
| 4172   | ENSG00000112118 | 5007.08773 | -0.2991758  | 0.05302719 | 1.20E-08   | 1.81E-07   | MCM3    |
| 9025   | ENSG00000112130 | 457.445347 | -0.32679122 | 0.14357323 | 0.01380183 | 0.05391382 | RNF8    |
| 221692 | ENSG00000112137 | 318.592184 | -1.89490268 | 0.14977858 | 7.79E-38   | 5.66E-36   | PHACTR1 |
| 266727 | ENSG00000112139 | 66.8409493 | -2.22933472 | 0.43862903 | 1.33E-08   | 1.99E-07   | MDGA1   |
| 22858  | ENSG00000112144 | 712.02217  | 0.05279569  | 0.09521337 | 0.56849498 | 0.76931138 | CILK1   |
| 26268  | ENSG00000112146 | 914.224931 | 0.18084681  | 0.09251319 | 0.04366314 | 0.13403632 | FBXO9   |



|        |                 |            |             |            |            |            |         |
|--------|-----------------|------------|-------------|------------|------------|------------|---------|
| 9308   | ENSG00000112149 | 130.196442 | 0.25760487  | 0.19938968 | 0.13289728 | 0.306306   | CD83    |
| 23195  | ENSG00000112159 | 3102.87324 | -0.16726575 | 0.06244212 | 0.00656146 | 0.02927351 | MDN1    |
| 2740   | ENSG00000112164 | 204.695471 | 0.03922134  | 0.16194038 | 0.79067064 | 0.90466583 | GLP1R   |
| 55776  | ENSG00000112167 | 211.433589 | 0.06958194  | 0.15090447 | 0.61815554 | 0.80452675 | SAYSD1  |
| 653    | ENSG00000112175 | 0          | NA          | NA         | NA         | NA         | BMP5    |
| 60468  | ENSG00000112182 | 1526.20852 | -0.29951709 | 0.10083559 | 0.00187433 | 0.0101161  | BACH2   |
| 221662 | ENSG00000112183 | 5.08980011 | 3.41233259  | 2.0594212  | 0.00278906 | 0.01424321 | RBM24   |
| 10486  | ENSG00000112186 | 177.937152 | 0.81033141  | 0.22637563 | 5.55E-05   | 0.00044767 | CAP2    |
| 79865  | ENSG00000112195 | 0          | NA          | NA         | NA         | NA         | TREML2  |
| 26036  | ENSG00000112200 | 1088.86438 | -0.12610327 | 0.10851502 | 0.22463448 | 0.43844053 | ZNF451  |
| 9532   | ENSG00000112208 | 349.915431 | 0.34134072  | 0.17040505 | 0.02576415 | 0.08917669 | BAG2    |
| 51715  | ENSG00000112210 | 215.259925 | -0.18941208 | 0.15127166 | 0.17178923 | 0.36432905 | RAB23   |
| 222642 | ENSG00000112212 | 1.14950504 | 0.05651207  | 0.38624043 | 0.32144351 | NA         | TSPO2   |
| 9457   | ENSG00000112214 | 0          | NA          | NA         | NA         | NA         | FHL5    |
| 81491  | ENSG00000112218 | 155.756819 | 0.32797924  | 0.18780791 | 0.04665811 | 0.14119844 | GPR63   |
| 202559 | ENSG00000112232 | 0          | NA          | NA         | NA         | NA         | KHDRBS2 |
| 26235  | ENSG00000112234 | 530.103006 | 0.23282729  | 0.11676115 | 0.03592227 | 0.11567893 | FBXL4   |
| 892    | ENSG00000112237 | 638.881352 | -0.09241379 | 0.12160144 | 0.42271296 | 0.6487179  | CCNC    |
| 59336  | ENSG00000112238 | 0.47560797 | -0.02854873 | 0.38581796 | 0.54111271 | NA         | PRDM13  |
| 1871   | ENSG00000112242 | 1914.36769 | -0.47001882 | 0.0743048  | 1.11E-10   | 2.11E-09   | E2F3    |
| 7803   | ENSG00000112245 | 1999.57972 | -0.07049149 | 0.09425549 | 0.43885367 | 0.66407447 | PTP4A1  |
| 6492   | ENSG00000112246 | 0          | NA          | NA         | NA         | NA         | SIM1    |
| 10973  | ENSG00000112249 | 1171.12263 | -0.1792696  | 0.09331949 | 0.04711977 | 0.14216185 | ASCC3   |
| 154150 | ENSG00000112273 | 0.18922458 | 0.01954053  | 0.38488496 | 0.78225479 | NA         | HDGFL1  |
| 11149  | ENSG00000112276 | 500.093095 | -0.52069373 | 0.11686656 | 3.04E-06   | 3.17E-05   | BVES    |
| 1297   | ENSG00000112280 | 153.964683 | 2.34436923  | 0.22144869 | 2.42E-27   | 1.25E-25   | COL9A1  |
| 9439   | ENSG00000112282 | 733.404815 | 0.06001911  | 0.09808186 | 0.52731839 | 0.73910257 | MED23   |
| 8936   | ENSG00000112290 | 2010.13418 | -0.23696264 | 0.07912498 | 0.0021603  | 0.01143925 | WASF1   |
| 2822   | ENSG00000112293 | 227.625498 | -0.3137265  | 0.20399746 | 0.0717662  | 0.19512696 | GPLD1   |
| 7915   | ENSG00000112294 | 636.266592 | -0.66862974 | 0.10366046 | 2.80E-11   | 5.68E-10   | ALDH5A1 |
| 202    | ENSG00000112297 | 20.4993232 | -0.69765553 | 0.72516613 | 0.0231768  | 0.08199496 | CRYBG1  |
| 8876   | ENSG00000112299 | 0          | NA          | NA         | NA         | NA         | VNN1    |
| 8875   | ENSG00000112303 | 0          | NA          | NA         | NA         | NA         | VNN2    |
| 55856  | ENSG00000112304 | 347.637072 | 0.00520147  | 0.12248599 | 0.96517903 | 0.98622874 | ACOT13  |
| 60682  | ENSG00000112305 | 745.443392 | -0.08116644 | 0.09688398 | 0.38595816 | 0.61510241 | SMAP1   |
| 6206   | ENSG00000112306 | 6156.53409 | -0.01400127 | 0.05241011 | 0.70483604 | 0.85803894 | RPS12   |
| 81688  | ENSG00000112308 | 1151.36377 | 0.04084743  | 0.0801698  | 0.60303848 | 0.79307194 | C6orf62 |
| 135152 | ENSG00000112309 | 34.7545245 | 0.06226363  | 0.27858111 | 0.74915917 | 0.88205755 | B3GAT2  |

|        |                 |            |             |            |            |            |          |
|--------|-----------------|------------|-------------|------------|------------|------------|----------|
| 51053  | ENSG00000112312 | 841.529994 | -0.16089196 | 0.0894824  | 0.06392694 | 0.1796757  | GMNN     |
| 2070   | ENSG00000112319 | 115.596847 | 7.52525239  | 0.72756435 | 2.32E-24   | 1.08E-22   | EYA4     |
| 55084  | ENSG00000112320 | 454.767828 | -1.20677858 | 0.16592594 | 3.46E-14   | 8.86E-13   | SOBP     |
| 7101   | ENSG00000112333 | 3.13102258 | 0.09710571  | 0.38882296 | 0.33051215 | 0.5593109  | NR2E1    |
| 8724   | ENSG00000112335 | 1727.08371 | -0.04756092 | 0.06924414 | 0.48384537 | 0.70413645 | SNX3     |
| 10246  | ENSG00000112337 | 0.15069912 | -0.01848503 | 0.38480575 | 0.84537521 | NA         | SLC17A2  |
| 10767  | ENSG00000112339 | 823.842252 | 0.01549247  | 0.10574461 | 0.88010845 | 0.94683492 | HBS1L    |
| 10475  | ENSG00000112343 | 0.173733   | 0.01914545  | 0.38484597 | 0.78225479 | NA         | TRIM38   |
| 5191   | ENSG00000112357 | 210.697515 | -0.20598194 | 0.16772384 | 0.17101555 | 0.36315408 | PEX7     |
| 9841   | ENSG00000112365 | 321.194232 | -0.23133414 | 0.13255336 | 0.06198627 | 0.17568679 | ZBTB24   |
| 9896   | ENSG00000112367 | 513.843149 | 0.07731908  | 0.10971661 | 0.46264381 | 0.68555181 | FIG4     |
| 64065  | ENSG00000112378 | 0          | NA          | NA         | NA         | NA         | PERP     |
| 57221  | ENSG00000112379 | 0          | NA          | NA         | NA         | NA         | ARFGF3   |
| 117247 | ENSG00000112394 | 227.912776 | 0.19546514  | 0.18881193 | 0.23486093 | 0.45174425 | SLC16A10 |
| 51696  | ENSG00000112406 | 135.043103 | 0.18614919  | 0.20150833 | 0.28043603 | 0.5049783  | HECA     |
| 57211  | ENSG00000112414 | 0          | NA          | NA         | NA         | NA         | ADGRG6   |
| 9749   | ENSG00000112419 | 362.630757 | 0.2402947   | 0.15782362 | 0.09418559 | 0.23837761 | PHACTR2  |
| 7957   | ENSG00000112425 | 271.258658 | -0.36985448 | 0.15111624 | 0.00773578 | 0.03354707 | EPM2A    |
| 81797  | ENSG00000112462 | 0          | NA          | NA         | NA         | NA         | OR12D3   |
| 7922   | ENSG00000112473 | 1851.47466 | 0.05129955  | 0.06703503 | 0.43781504 | 0.66289835 | SLC39A7  |
| 1235   | ENSG00000112486 | 0          | NA          | NA         | NA         | NA         | CCR6     |
| 54346  | ENSG00000112494 | 0.18922458 | 0.01954053  | 0.38488496 | 0.78225479 | NA         | UNC93A   |
| 6582   | ENSG00000112499 | 0          | NA          | NA         | NA         | NA         | SLC22A2  |
| 5252   | ENSG00000112511 | 598.795874 | 0.33721192  | 0.11081718 | 0.00144239 | 0.00810451 | PHF1     |
| 51596  | ENSG00000112514 | 1465.45692 | 0.16713743  | 0.081695   | 0.03606089 | 0.11599352 | CUTA     |
| 135138 | ENSG00000112530 | 19.326547  | 0.80364546  | 0.74964355 | 0.01724173 | 0.06468908 | PACRG    |
| 9444   | ENSG00000112531 | 1824.5993  | 1.04269345  | 0.07712517 | 1.51E-42   | 1.22E-40   | QKI      |
| 168090 | ENSG00000112539 | 10.6885166 | 0.06088132  | 0.3488729  | 0.6972058  | 0.85387893 | C6orf118 |
| 10846  | ENSG00000112541 | 1012.29047 | 1.85991112  | 0.100471   | 1.37E-77   | 2.63E-75   | PDE10A   |
| 90632  | ENSG00000112541 | 1012.29047 | 1.85991112  | 0.100471   | 1.37E-77   | 2.63E-75   | PDE10A   |
| 4188   | ENSG00000112559 | 723.062544 | 0.86141651  | 0.10081798 | 2.23E-18   | 7.69E-17   | MDFI     |
| 7942   | ENSG00000112561 | 131.547356 | -0.23606654 | 0.19133498 | 0.15532797 | 0.34116096 | TFEB     |
| 64094  | ENSG00000112562 | 22.3661371 | 0.45947977  | 0.46762904 | 0.06819399 | 0.18796453 | SMOC2    |
| 896    | ENSG00000112576 | 544.332697 | -0.04290948 | 0.12957828 | 0.72397359 | 0.86794586 | CCND3    |
| 705    | ENSG00000112578 | 730.164855 | -0.18585808 | 0.10588593 | 0.06686484 | 0.18540858 | BYSL     |
| 84498  | ENSG00000112584 | 1216.22079 | 0.29992628  | 0.08110102 | 0.00015148 | 0.00110451 | FAM120B  |
| 6908   | ENSG00000112592 | 557.013182 | 0.18308458  | 0.11873782 | 0.1043661  | 0.25722378 | TBP      |
| 2979   | ENSG00000112599 | 50.1516034 | 0.44066271  | 0.31089852 | 0.05245711 | 0.15445963 | GUCA1B   |

|       |                 |            |             |            |            |            |         |
|-------|-----------------|------------|-------------|------------|------------|------------|---------|
| 5961  | ENSG00000112619 | 0.51210169 | 0.01491862  | 0.38308811 | 0.74405738 | NA         | PRPH2   |
| 23506 | ENSG00000112624 | 655.959856 | -0.43860982 | 0.11499955 | 6.29E-05   | 0.00050303 | BICRAL  |
| 5528  | ENSG00000112640 | 1347.69318 | -0.20889801 | 0.0783288  | 0.00634802 | 0.0284428  | PPP2R5D |
| 51069 | ENSG00000112651 | 299.676488 | 0.27730385  | 0.13467652 | 0.02759446 | 0.09387416 | MRPL2   |
| 5754  | ENSG00000112655 | 4768.20151 | 0.0737562   | 0.0589343  | 0.20531159 | 0.41224389 | PTK7    |
| 6722  | ENSG00000112658 | 1465.03728 | 0.24363752  | 0.07749061 | 0.00130375 | 0.00742006 | SRF     |
| 23113 | ENSG00000112659 | 1484.21831 | 0.35288265  | 0.10879048 | 0.00069993 | 0.00432742 | CUL9    |
| 10591 | ENSG00000112667 | 938.303003 | 0.43124495  | 0.0949927  | 2.72E-06   | 2.86E-05   | DNPH1   |
| 56940 | ENSG00000112679 | 310.830676 | 1.60192269  | 0.15733956 | 1.91E-25   | 9.22E-24   | DUSP22  |
| 55770 | ENSG00000112685 | 624.570637 | -0.23933758 | 0.12796156 | 0.04637313 | 0.14052892 | EXOC2   |
| 1347  | ENSG00000112695 | 1484.48855 | -0.10261692 | 0.07129325 | 0.14258832 | 0.3213258  | COX7A2  |
| 55754 | ENSG00000112697 | 2161.17001 | -0.38935534 | 0.06665572 | 2.86E-09   | 4.61E-08   | TMEM30A |
| 2762  | ENSG00000112699 | 202.848017 | -0.13717172 | 0.16030655 | 0.34500329 | 0.57544054 | GMDS    |
| 26054 | ENSG00000112701 | 1830.97556 | -0.06142494 | 0.07644363 | 0.41218478 | 0.64000085 | SENP6   |
| 3617  | ENSG00000112706 | 10.6855313 | 0.28872376  | 0.49626061 | 0.0758828  | 0.20317338 | IMPG1   |
| 7422  | ENSG00000112715 | 1904.24934 | -0.33599466 | 0.10850006 | 0.00120313 | 0.00694501 | VEGFA   |
| 8899  | ENSG00000112739 | 2525.47894 | 0.02562571  | 0.06806933 | 0.7081852  | 0.85971939 | PRPF4B  |
| 7272  | ENSG00000112742 | 793.84144  | -0.37239639 | 0.10877264 | 0.00034417 | 0.00231737 | TTK     |
| 2030  | ENSG00000112759 | 2710.3234  | -0.34453322 | 0.06266879 | 2.36E-08   | 3.39E-07   | SLC29A1 |
| 8838  | ENSG00000112761 | 0.3436116  | 0.02364564  | 0.38535635 | 0.62278312 | NA         | CCN6    |
| 11120 | ENSG00000112763 | 610.720528 | 0.25514079  | 0.11050079 | 0.01558617 | 0.05949013 | BTN2A1  |
| 3910  | ENSG00000112769 | 146.828777 | -0.56623951 | 0.27446899 | 0.00989951 | 0.04113221 | LAMA4   |
| 55603 | ENSG00000112773 | 229.935947 | -1.39047527 | 0.16797195 | 1.13E-17   | 3.64E-16   | TENT5A  |
| 53405 | ENSG00000112782 | 0          | NA          | NA         | NA         | NA         | CLIC5   |
| 57666 | ENSG00000112787 | 2259.8788  | 0.18160311  | 0.06948868 | 0.00782991 | 0.03390342 | FBRSL1  |
| 59084 | ENSG00000112796 | 0          | NA          | NA         | NA         | NA         | ENPP5   |
| 9450  | ENSG00000112799 | 0          | NA          | NA         | NA         | NA         | LY86    |
| 10279 | ENSG00000112812 | 0.18922458 | 0.01954053  | 0.38488496 | 0.78225479 | NA         | PRSS16  |
| 4224  | ENSG00000112818 | 0          | NA          | NA         | NA         | NA         | MEP1A   |
| 9096  | ENSG00000112837 | 16.6874347 | 8.11127742  | 2.69316361 | 5.60E-09   | 8.72E-08   | TBX18   |
| 55914 | ENSG00000112851 | 1118.93707 | -0.69011202 | 0.0953392  | 1.09E-13   | 2.65E-12   | ERBIN   |
| 56133 | ENSG00000112852 | 116.014449 | 0.40465603  | 0.21255814 | 0.02556467 | 0.08865635 | PCDHB2  |
| 23438 | ENSG00000112855 | 1034.19134 | 0.28193751  | 0.08041819 | 0.00033136 | 0.00223764 | HARS2   |
| 83594 | ENSG00000112874 | 360.278769 | -0.26586999 | 0.15702531 | 0.06284433 | 0.17750484 | NUDT12  |
| 55722 | ENSG00000112877 | 264.23177  | 0.01554055  | 0.14647594 | 0.91041813 | 0.96165126 | CEP72   |
| 4124  | ENSG00000112893 | 203.976244 | -0.03063302 | 0.16511555 | 0.83608748 | 0.92527105 | MAN2A1  |
| 9037  | ENSG00000112902 | 89.605942  | 0.79794551  | 0.27896573 | 0.00065208 | 0.0040617  | SEMA5A  |
| 730   | ENSG00000112936 | 11348.6044 | -1.21180138 | 0.05447234 | 1.41E-110  | 4.81E-108  | C7      |

|       |                 |            |             |            |            |            |         |
|-------|-----------------|------------|-------------|------------|------------|------------|---------|
| 11044 | ENSG00000112941 | 1084.29882 | -0.36764112 | 0.09695416 | 8.50E-05   | 0.00065695 | TENT4A  |
| 2690  | ENSG00000112964 | 0          | NA          | NA         | NA         | NA         | GHR     |
| 3157  | ENSG00000112972 | 2288.7533  | -0.37995775 | 0.20842898 | 0.03262908 | 0.10721446 | HMGCS1  |
| 1611  | ENSG00000112977 | 1576.66929 | 0.05002577  | 0.07668596 | 0.50605587 | 0.72177288 | DAP     |
| 8382  | ENSG00000112981 | 21.8909222 | 0.23508467  | 0.37696903 | 0.24092167 | 0.45885437 | NME5    |
| 10902 | ENSG00000112983 | 1327.55324 | -0.09082368 | 0.0931361  | 0.31368545 | 0.54159326 | BRD8    |
| 10112 | ENSG00000112984 | 1817.0062  | -0.04031646 | 0.08443566 | 0.62375286 | 0.80815364 | KIF20A  |
| 23530 | ENSG00000112992 | 2390.00083 | -0.18978026 | 0.06959316 | 0.00547524 | 0.02514982 | NNT     |
| 10884 | ENSG00000112996 | 678.330091 | -0.05032456 | 0.103513   | 0.61289453 | 0.80067344 | MRPS30  |
| 3313  | ENSG00000113013 | 4052.98495 | -0.02609066 | 0.0646829  | 0.68154735 | 0.84433357 | HSPA9   |
| 23107 | ENSG00000113048 | 1278.23078 | -0.41378912 | 0.07905326 | 8.54E-08   | 1.13E-06   | MRPS27  |
| 5201  | ENSG00000113068 | 664.551029 | 0.11789801  | 0.12073488 | 0.30319005 | 0.53049568 | PFDN1   |
| 1839  | ENSG00000113070 | 41.794568  | -0.56989522 | 0.40070157 | 0.0302939  | 0.10114961 | HBEGF   |
| 83697 | ENSG00000113073 | 0.81228073 | 0.02242119  | 0.38334325 | 0.76254719 | NA         | SLC4A9  |
| 4015  | ENSG00000113083 | 393.63179  | 0.69755713  | 0.12850436 | 1.34E-08   | 2.00E-07   | LOX     |
| 3003  | ENSG00000113088 | 0          | NA          | NA         | NA         | NA         | GZMK    |
| 1007  | ENSG00000113100 | 0          | NA          | NA         | NA         | NA         | CDH9    |
| 10307 | ENSG00000113108 | 357.368128 | 0.09493037  | 0.12752499 | 0.4303556  | 0.65588071 | APBB3   |
| 55374 | ENSG00000113119 | 263.594016 | 0.02831316  | 0.17268033 | 0.85587794 | 0.93567436 | TMCO6   |
| 6678  | ENSG00000113140 | 1492.72194 | 1.15497204  | 0.09695033 | 1.07E-33   | 6.89E-32   | SPARC   |
| 3550  | ENSG00000113141 | 1855.69516 | 0.05285185  | 0.08120252 | 0.50607775 | 0.72177288 | IK      |
| 3156  | ENSG00000113161 | 2813.54103 | -0.28041427 | 0.09946997 | 0.00344517 | 0.01702418 | HMGCR   |
| 10087 | ENSG00000113163 | 760.338255 | 0.12753723  | 0.09134759 | 0.15052543 | 0.33407003 | CERT1   |
| 23197 | ENSG00000113194 | 1881.86686 | -0.13520024 | 0.06667264 | 0.03925451 | 0.12377772 | FAF2    |
| 9421  | ENSG00000113196 | 4834.90309 | 0.19970942  | 0.05691263 | 0.00038836 | 0.00257691 | HAND1   |
| 56132 | ENSG00000113205 | 393.774894 | -0.16530418 | 0.12885827 | 0.17201043 | 0.36458    | PCDHB3  |
| 26167 | ENSG00000113209 | 56.9542267 | 0.84776364  | 0.38614575 | 0.00328457 | 0.01633228 | PCDHB5  |
| 56130 | ENSG00000113211 | 263.424607 | 0.8887393   | 0.15390973 | 1.20E-09   | 2.05E-08   | PCDHB6  |
| 56129 | ENSG00000113212 | 42.4700176 | 0.25604368  | 0.30527318 | 0.2249195  | 0.43877008 | PCDHB7  |
| 8622  | ENSG00000113231 | 118.221549 | -0.65524268 | 0.24728432 | 0.00172686 | 0.00945647 | PDE8B   |
| 57396 | ENSG00000113240 | 312.227087 | -0.11907697 | 0.1279307  | 0.32554393 | 0.55359488 | CLK4    |
| 56121 | ENSG00000113248 | 265.658303 | -0.19189836 | 0.15391099 | 0.17222574 | 0.36478687 | PCDHB15 |
| 26762 | ENSG00000113249 | 0.173733   | 0.01914545  | 0.38484597 | 0.78225479 | NA         | HAVCR1  |
| 2916  | ENSG00000113262 | 25.2350172 | 0.27629749  | 0.38195237 | 0.18859997 | 0.38924617 | GRM6    |
| 3702  | ENSG00000113263 | 0          | NA          | NA         | NA         | NA         | ITK     |
| 55819 | ENSG00000113269 | 1387.49191 | 0.34975436  | 0.07432207 | 1.55E-06   | 1.70E-05   | RNF130  |
| 54974 | ENSG00000113272 | 455.225346 | -0.1934923  | 0.13398096 | 0.12214173 | 0.28896853 | THG1L   |
| 411   | ENSG00000113273 | 494.126151 | -0.31433795 | 0.12478631 | 0.0074375  | 0.0324879  | ARSB    |

|       |                 |            |             |            |            |            |         |
|-------|-----------------|------------|-------------|------------|------------|------------|---------|
| 9685  | ENSG00000113282 | 1955.10607 | -0.10103749 | 0.0753185  | 0.17008753 | 0.36191941 | CLINT1  |
| 7060  | ENSG00000113296 | 231.664827 | 1.16409623  | 0.18419013 | 2.79E-11   | 5.68E-10   | THBS4   |
| 57472 | ENSG00000113300 | 1732.49712 | -0.48520201 | 0.07926784 | 3.88E-10   | 7.03E-09   | CNOT6   |
| 3593  | ENSG00000113302 | 0          | NA          | NA         | NA         | NA         | IL12B   |
| 79908 | ENSG00000113303 | 0          | NA          | NA         | NA         | NA         | BTNL8   |
| 7265  | ENSG00000113312 | 656.075457 | 0.06433844  | 0.09365666 | 0.4792684  | 0.70061045 | TTC1    |
| 4437  | ENSG00000113318 | 546.423351 | -0.29360868 | 0.10785844 | 0.00443139 | 0.02104325 | MSH3    |
| 5924  | ENSG00000113319 | 40.6883391 | 0.02800717  | 0.27020281 | 0.88605523 | 0.95015905 | RASGRF2 |
| 2566  | ENSG00000113327 | 1.25319808 | -0.04068253 | 0.38420537 | 0.46803325 | NA         | GABRG2  |
| 900   | ENSG00000113328 | 1609.3871  | -0.2506431  | 0.07336759 | 0.0004879  | 0.0031582  | CCNG1   |
| 10622 | ENSG00000113356 | 147.281889 | 0.18024299  | 0.19864621 | 0.2905911  | 0.51667585 | POLR3G  |
| 29102 | ENSG00000113360 | 1630.10001 | 0.16051769  | 0.09100847 | 0.06920466 | 0.18985349 | DROSHA  |
| 1004  | ENSG00000113361 | 0          | NA          | NA         | NA         | NA         | CDH6    |
| 4001  | ENSG00000113368 | 3215.7716  | -0.34960944 | 0.07257144 | 8.81E-07   | 1.01E-05   | LMNB1   |
| 57561 | ENSG00000113369 | 648.621295 | -0.14584727 | 0.11374173 | 0.17644307 | 0.37102603 | ARRDC3  |
| 64083 | ENSG00000113384 | 1179.99541 | -0.11043135 | 0.08134754 | 0.16432846 | 0.35376265 | GOLPH3  |
| 10923 | ENSG00000113387 | 1679.15256 | -0.13572322 | 0.08510108 | 0.10135615 | 0.2518039  | SUB1    |
| 4883  | ENSG00000113389 | 1.86888861 | 0.06712512  | 0.38520622 | 0.39568254 | NA         | NPR3    |
| 83989 | ENSG00000113391 | 1001.24028 | 0.12185453  | 0.09463216 | 0.18141605 | 0.37883323 | FAM172A |
| 28965 | ENSG00000113396 | 16.2028081 | 3.05544547  | 0.84534311 | 1.96E-05   | 0.00017575 | SLC27A6 |
| 6897  | ENSG00000113407 | 2420.14951 | 0.00228926  | 0.08388446 | 0.97851949 | 0.99267917 | TARS1   |
| 50805 | ENSG00000113430 | 0          | NA          | NA         | NA         | NA         | IRX4    |
| 4012  | ENSG00000113441 | 552.151854 | -0.23263037 | 0.11524043 | 0.0334944  | 0.10951287 | LNPEP   |
| 5144  | ENSG00000113448 | 304.64289  | -0.03357732 | 0.14762694 | 0.80205939 | 0.90951407 | PDE4D   |
| 5810  | ENSG00000113456 | 745.406641 | -0.24776425 | 0.10858385 | 0.0168775  | 0.06358709 | RAD1    |
| 55299 | ENSG00000113460 | 762.003616 | 0.14626068  | 0.09764197 | 0.12128951 | 0.28753541 | BRIX1   |
| 64902 | ENSG00000113492 | 0          | NA          | NA         | NA         | NA         | AGXT2   |
| 5618  | ENSG00000113494 | 12.8729149 | 2.7875109   | 0.94275585 | 0.00010634 | 0.00080373 | PRLR    |
| 10723 | ENSG00000113504 | 201.41572  | 1.84804381  | 0.20122164 | 2.60E-21   | 1.03E-19   | SLC12A7 |
| 3565  | ENSG00000113520 | 0          | NA          | NA         | NA         | NA         | IL4     |
| 10111 | ENSG00000113522 | 2034.80768 | 0.03879256  | 0.07706477 | 0.6089558  | 0.7978212  | RAD50   |
| 3567  | ENSG00000113525 | 0.910068   | -0.05134303 | 0.38885868 | 0.26827551 | NA         | IL5     |
| 7903  | ENSG00000113532 | 18.0830613 | 5.43550306  | 1.09029432 | 3.53E-07   | 4.33E-06   | ST8SIA4 |
| 10007 | ENSG00000113552 | 1146.02057 | -0.08419773 | 0.09707394 | 0.3692206  | 0.59862194 | GNPDA1  |
| 51294 | ENSG00000113555 | 67.1511674 | 0.37494643  | 0.34213016 | 0.10057896 | 0.2503119  | PCDH12  |
| 6500  | ENSG00000113558 | 3336.85923 | 0.01377084  | 0.05934977 | 0.81805291 | 0.9171248  | SKP1    |
| 9631  | ENSG00000113569 | 1719.58497 | -0.14647759 | 0.09699874 | 0.11785633 | 0.28165137 | NUP155  |
| 5515  | ENSG00000113575 | 2713.45316 | -0.0555644  | 0.06710595 | 0.40012721 | 0.62854504 | PPP2CA  |

|       |                 |            |             |            |            |            |           |
|-------|-----------------|------------|-------------|------------|------------|------------|-----------|
| 2246  | ENSG00000113578 | 170.44748  | -1.53621607 | 0.23598168 | 5.10E-12   | 1.11E-10   | FGF1      |
| 2908  | ENSG00000113580 | 310.164167 | 0.87126083  | 0.14196935 | 1.38E-10   | 2.62E-09   | NR3C1     |
| 56951 | ENSG00000113583 | 639.177149 | -0.30392035 | 0.10126752 | 0.00180372 | 0.00979359 | C5orf15   |
| 23398 | ENSG00000113593 | 478.242186 | 0.01397236  | 0.11065812 | 0.89541254 | 0.95469109 | PPWD1     |
| 3977  | ENSG00000113594 | 65.2625383 | 3.68117516  | 0.39489095 | 7.42E-22   | 3.04E-20   | LIFR      |
| 373   | ENSG00000113595 | 277.460655 | -0.35644061 | 0.15622212 | 0.01242695 | 0.04959996 | TRIM23    |
| 80006 | ENSG00000113597 | 406.25235  | 0.11989827  | 0.12794799 | 0.32120717 | 0.54894911 | TRAPPC13  |
| 735   | ENSG00000113600 | 0          | NA          | NA         | NA         | NA         | C9        |
| 10802 | ENSG00000113615 | 664.782376 | -0.28649905 | 0.1234944  | 0.0138326  | 0.05401276 | SEC24A    |
| 79770 | ENSG00000113621 | 600.084754 | -0.37299479 | 0.12250629 | 0.00128128 | 0.00731947 | TXNDC15   |
| 23548 | ENSG00000113638 | 494.949369 | -0.42974502 | 0.14533475 | 0.00141955 | 0.00799654 | TTC33     |
| 5917  | ENSG00000113643 | 1538.54628 | -0.06651402 | 0.09935002 | 0.48741383 | 0.70726738 | RARS1     |
| 23286 | ENSG00000113645 | 543.008522 | -0.4682785  | 0.16814792 | 0.0021103  | 0.01120673 | WWC1      |
| 9555  | ENSG00000113648 | 6446.2403  | -0.01784314 | 0.06498339 | 0.77972825 | 0.89925062 | MACROH2A1 |
| 10915 | ENSG00000113649 | 2667.3123  | -0.29956645 | 0.06493121 | 2.75E-06   | 2.89E-05   | TCERG1    |
| 1809  | ENSG00000113657 | 14256.3043 | 0.54718714  | 0.06136605 | 1.84E-19   | 6.68E-18   | DPYSL3    |
| 4090  | ENSG00000113658 | 1968.76669 | -0.11633721 | 0.09494428 | 0.2051336  | 0.41205331 | SMAD5     |
| 1452  | ENSG00000113712 | 3398.70026 | -0.00528834 | 0.06480527 | 0.93322288 | 0.97202552 | CSNK1A1   |
| 22993 | ENSG00000113716 | 2061.76038 | -0.05891545 | 0.0689863  | 0.38482019 | 0.61378186 | HMGXB3    |
| 57222 | ENSG00000113719 | 3445.24539 | -0.17511723 | 0.0644176  | 0.00557488 | 0.02551703 | ERGIC1    |
| 5159  | ENSG00000113721 | 2132.01116 | -0.12456854 | 0.0873866  | 0.14237747 | 0.32117652 | PDGFRB    |
| 1044  | ENSG00000113722 | 30.3005251 | -0.338375   | 0.37031846 | 0.13498306 | 0.30945965 | CDX1      |
| 8992  | ENSG00000113732 | 566.880119 | -0.2664261  | 0.11525952 | 0.01487522 | 0.05727678 | ATP6V0E1  |
| 662   | ENSG00000113734 | 183.740154 | -0.24586991 | 0.16315529 | 0.09518702 | 0.24026852 | BNIP1     |
| 8614  | ENSG00000113739 | 866.568266 | 0.0906492   | 0.14126187 | 0.49088652 | 0.7104748  | STC2      |
| 80315 | ENSG00000113742 | 606.951026 | -0.56334235 | 0.10749989 | 5.30E-08   | 7.26E-07   | CPEB4     |
| 3274  | ENSG00000113749 | 1.4225907  | -0.02835773 | 0.38008814 | 0.68061404 | NA         | HRH2      |
| 1627  | ENSG00000113758 | 8727.84209 | 0.13623246  | 0.05936775 | 0.02019767 | 0.07347302 | DBN1      |
| 23567 | ENSG00000113761 | 626.046463 | 0.12802009  | 0.11752541 | 0.25259454 | 0.47264695 | ZNF346    |
| 90249 | ENSG00000113763 | 824.728401 | -3.04508765 | 0.11964269 | 4.47E-144  | 3.06E-141  | UNC5A     |
| 1962  | ENSG00000113790 | 214.528707 | 0.09764155  | 0.19370637 | 0.56034499 | 0.76415299 | EHHADH    |
| 5067  | ENSG00000113805 | 54.2873514 | 1.88514523  | 0.47633096 | 3.17E-06   | 3.29E-05   | CNTN3     |
| 10051 | ENSG00000113810 | 5138.88785 | -0.22424541 | 0.06592964 | 0.00054339 | 0.00346873 | SMC4      |
| 58515 | ENSG00000113811 | 561.586588 | 0.28562189  | 0.11762691 | 0.01052148 | 0.04316015 | SELENOK   |
| 93973 | ENSG00000113812 | 793.658123 | 0.145814    | 0.09819004 | 0.12424776 | 0.29220905 | ACTR8     |
| 55171 | ENSG00000113838 | 335.590973 | -0.16411657 | 0.14838709 | 0.22942125 | 0.44501603 | TBCCD1    |
| 51300 | ENSG00000113845 | 1770.16101 | 0.19302911  | 0.07458065 | 0.00832743 | 0.03570698 | TIMMDC1   |
| 51185 | ENSG00000113851 | 603.862139 | 0.01478192  | 0.10148648 | 0.88077401 | 0.94723311 | CRBN      |

|           |                 |            |             |            |            |            |          |
|-----------|-----------------|------------|-------------|------------|------------|------------|----------|
| 3827      | ENSG00000113889 | 0.49444345 | -0.02942187 | 0.38589312 | 0.52715984 | NA         | KNG1     |
| 3273      | ENSG00000113905 | 0          | NA          | NA         | NA         | NA         | HRG      |
| 604       | ENSG00000113916 | 1.61398434 | -0.02376934 | 0.37985765 | 0.72051391 | NA         | BCL6     |
| 3081      | ENSG00000113924 | 2.33009785 | 0.0534513   | 0.37981278 | 0.5425998  | NA         | HGD      |
| 10686     | ENSG00000113946 | 0          | NA          | NA         | NA         | NA         | CLDN16   |
| 84100     | ENSG00000113966 | 453.030422 | -0.43009308 | 0.12560299 | 0.0002883  | 0.00197305 | ARL6     |
| 27031     | ENSG00000113971 | 468.487418 | 0.55010357  | 0.17042758 | 0.0003957  | 0.00262214 | NPHP3    |
| 942       | ENSG00000114013 | 0          | NA          | NA         | NA         | NA         | CD86     |
| 51421     | ENSG00000114019 | 820.81729  | 0.77037607  | 0.09244477 | 1.62E-17   | 5.20E-16   | AMOTL2   |
| 56954     | ENSG00000114021 | 615.011348 | 0.08693901  | 0.11632813 | 0.43316043 | 0.65852706 | NIT2     |
| 26355     | ENSG00000114023 | 465.369583 | -0.03399804 | 0.14984067 | 0.80420858 | 0.91111799 | FAM162A  |
| 4968      | ENSG00000114026 | 590.052718 | -0.06025787 | 0.12066596 | 0.59780215 | 0.78948244 | OGG1     |
| 3836      | ENSG00000114030 | 1146.0651  | -0.2804976  | 0.1118537  | 0.00850743 | 0.03630616 | KPNA1    |
| 5096      | ENSG00000114054 | 1225.21046 | 0.09881316  | 0.07663561 | 0.18870882 | 0.38930882 | PCCB     |
| 7337      | ENSG00000114062 | 1630.35051 | -0.26892325 | 0.08770404 | 0.00158665 | 0.00880041 | UBE3A    |
| 25852     | ENSG00000114098 | 652.606811 | -0.00340063 | 0.10090641 | 0.97129371 | 0.9892437  | ARMC8    |
| 80321     | ENSG00000114107 | 357.681963 | -0.23490262 | 0.12670926 | 0.04864013 | 0.14586156 | CEP70    |
| 5948      | ENSG00000114113 | 0.29863895 | -0.02292439 | 0.3852726  | 0.68753245 | NA         | RBP2     |
| 5947      | ENSG00000114115 | 5269.6184  | 0.16929834  | 0.05388452 | 0.00149312 | 0.00834464 | RBP1     |
| 55186     | ENSG00000114120 | 2421.12056 | 0.21124536  | 0.06639551 | 0.00120504 | 0.00695203 | SLC25A36 |
| 131890    | ENSG00000114124 | 4.45105359 | 0.38890136  | 0.7137691  | 0.01138753 | 0.0461927  | GRK7     |
| 9616      | ENSG00000114125 | 651.43392  | -0.25422365 | 0.11014773 | 0.01561908 | 0.05958135 | RNF7     |
| 7029      | ENSG00000114126 | 1926.59278 | 0.95105021  | 0.10513655 | 2.07E-20   | 7.94E-19   | TFDP2    |
| 54464     | ENSG00000114127 | 964.676613 | -0.18220127 | 0.11677214 | 0.0998047  | 0.2488914  | XRN1     |
| 8850      | ENSG00000114166 | 316.812235 | -0.31484827 | 0.13397059 | 0.01189073 | 0.04788247 | KAT2B    |
| 590       | ENSG00000114200 | 308.825779 | 0.6438985   | 0.19471849 | 0.00022843 | 0.0016003  | BCHE     |
| 5276      | ENSG00000114204 | 0          | NA          | NA         | NA         | NA         | SERPINI2 |
| 11235     | ENSG00000114209 | 503.788848 | 0.0044054   | 0.11224252 | 0.96817533 | 0.98809325 | PDCD10   |
| 79782     | ENSG00000114248 | 0.34043669 | 1.23E-05    | 0.38336209 | 0.96513672 | NA         | LRRC31   |
| 7474      | ENSG00000114251 | 68.2509491 | 0.51450943  | 0.33367158 | 0.03145056 | 0.10413538 | WNT5A    |
| 5210      | ENSG00000114268 | 252.763888 | -0.00431647 | 0.1538488  | 0.9744631  | 0.99089477 | PFKFB4   |
| 1294      | ENSG00000114270 | 86.5166681 | 0.442252    | 0.33773399 | 0.0584365  | 0.16783152 | COL7A1   |
| 2257      | ENSG00000114279 | 0.173124   | -0.01911262 | 0.38486262 | 0.84537521 | NA         | FGF12    |
| 5576      | ENSG00000114302 | 1191.59371 | -0.25197658 | 0.12719225 | 0.03510904 | 0.11357627 | PRKAR2A  |
| 3280      | ENSG00000114315 | 32.7509636 | 0.14962783  | 0.30178459 | 0.4542531  | 0.67744995 | HES1     |
| 7375      | ENSG00000114316 | 1233.50042 | -0.01219679 | 0.09026768 | 0.8886226  | 0.95146564 | USP4     |
| 107986084 | ENSG00000114316 | 1233.50042 | -0.01219679 | 0.09026768 | 0.8886226  | 0.95146564 | USP4     |
| 23527     | ENSG00000114331 | 1102.00463 | -0.67537516 | 0.08522716 | 5.74E-16   | 1.66E-14   | ACAP2    |

|        |                 |            |             |            |            |            |          |
|--------|-----------------|------------|-------------|------------|------------|------------|----------|
| 1894   | ENSG00000114346 | 1784.93654 | -0.32542034 | 0.08762601 | 0.0001311  | 0.00096797 | ECT2     |
| 2779   | ENSG00000114349 | 0          | NA          | NA         | NA         | NA         | GNAT1    |
| 2771   | ENSG00000114353 | 1807.63024 | -0.12115652 | 0.07288853 | 0.09010437 | 0.23086121 | GNAI2    |
| 10342  | ENSG00000114354 | 1761.34861 | 0.20418406  | 0.06631205 | 0.00175566 | 0.00958248 | TFG      |
| 8287   | ENSG00000114374 | 0          | NA          | NA         | NA         | NA         | USP9Y    |
| 64595  | ENSG00000114374 | 0          | NA          | NA         | NA         | NA         | USP9Y    |
| 3373   | ENSG00000114378 | 65.7941091 | 0.01040896  | 0.23956862 | 0.95731049 | 0.98264776 | HYAL1    |
| 11334  | ENSG00000114383 | 692.105951 | -0.00764251 | 0.10972108 | 0.9411705  | 0.97559098 | TUSC2    |
| 10641  | ENSG00000114388 | 780.793613 | 0.21235806  | 0.10034892 | 0.0280578  | 0.0952218  | NPRL2    |
| 6152   | ENSG00000114391 | 8120.19471 | -0.02676006 | 0.04985585 | 0.58695846 | 0.78237765 | RPL24    |
| 11068  | ENSG00000114395 | 274.338144 | -0.20620091 | 0.14010098 | 0.11274313 | 0.27188813 | CYB561D2 |
| 57415  | ENSG00000114405 | 319.645366 | -0.07226011 | 0.13505129 | 0.56647349 | 0.76820466 | C3orf14  |
| 8087   | ENSG00000114416 | 2925.63642 | 0.06434779  | 0.06247712 | 0.2969827  | 0.5236583  | FXR1     |
| 868    | ENSG00000114423 | 628.545657 | 0.34689338  | 0.1139392  | 0.0013879  | 0.00784722 | CBLB     |
| 56987  | ENSG00000114439 | 1331.65854 | 0.09554238  | 0.0977832  | 0.31236043 | 0.54011076 | BBX      |
| 55081  | ENSG00000114446 | 495.222485 | 0.3450088   | 0.12289362 | 0.00297269 | 0.01501864 | IFT57    |
| 59345  | ENSG00000114450 | 1074.36467 | -0.29324205 | 0.09049943 | 0.00082635 | 0.00500297 | GNB4     |
| 11148  | ENSG00000114455 | 0.173124   | -0.01911262 | 0.38486262 | 0.84537521 | NA         | HHLA2    |
| 84223  | ENSG00000114473 | 108.541738 | 0.27159308  | 0.22713982 | 0.14504887 | 0.32541747 | IQCG     |
| 2632   | ENSG00000114480 | 168.996963 | -0.18990224 | 0.16774181 | 0.20698498 | 0.41417369 | GBE1     |
| 27136  | ENSG00000114487 | 0          | NA          | NA         | NA         | NA         | MORC1    |
| 7372   | ENSG00000114491 | 929.015724 | -0.08566018 | 0.09867442 | 0.36813175 | 0.59754021 | UMPS     |
| 22916  | ENSG00000114503 | 3616.40677 | -0.064444   | 0.0568851  | 0.25166913 | 0.47149344 | NCBP2    |
| 8723   | ENSG00000114520 | 907.671062 | 0.09998894  | 0.08906141 | 0.24856873 | 0.46784968 | SNX4     |
| 79669  | ENSG00000114529 | 33.5954363 | 2.01662435  | 0.47922776 | 1.44E-06   | 1.59E-05   | C3orf52  |
| 23150  | ENSG00000114541 | 44.4945463 | -0.12633695 | 0.29505762 | 0.51758924 | 0.73141449 | FRMD4B   |
| 54946  | ENSG00000114544 | 747.993422 | -0.22599069 | 0.10427085 | 0.02374217 | 0.08361089 | SLC41A3  |
| 152015 | ENSG00000114547 | 9.40572923 | -0.3132766  | 0.52558812 | 0.06198005 | 0.17568679 | ROPN1B   |
| 5361   | ENSG00000114554 | 3440.91632 | -0.34943252 | 0.07989135 | 7.37E-06   | 7.18E-05   | PLXNA1   |
| 523    | ENSG00000114573 | 1305.93892 | -0.51298369 | 0.10173926 | 1.72E-07   | 2.20E-06   | ATP6V1A  |
| 80325  | ENSG00000114626 | 276.171408 | 0.34090255  | 0.16005072 | 0.019131   | 0.07027571 | ABTB1    |
| 50512  | ENSG00000114631 | 3034.8558  | -0.10842794 | 0.05880924 | 0.06155507 | 0.17488938 | PODXL2   |
| 7348   | ENSG00000114638 | 0.18922458 | 0.01954053  | 0.38488496 | 0.78225479 | NA         | UPK1B    |
| 10675  | ENSG00000114646 | 105.342697 | -0.33789525 | 0.21309633 | 0.06059201 | 0.17264764 | CSPG5    |
| 23276  | ENSG00000114648 | 685.976057 | -0.09582535 | 0.10430286 | 0.33741044 | 0.56778823 | KLHL18   |
| 22937  | ENSG00000114650 | 2475.44922 | 0.08373193  | 0.06853672 | 0.21444441 | 0.42477806 | SCAP     |
| 79825  | ENSG00000114654 | 1.04143875 | 0.05900488  | 0.39038104 | 0.19798031 | NA         | EFCC1    |
| 57501  | ENSG00000114656 | 25.2705923 | 0.13270733  | 0.31133327 | 0.49934093 | 0.71682702 | CFAP92   |



|           |                 |            |             |            |            |            |              |
|-----------|-----------------|------------|-------------|------------|------------|------------|--------------|
| 79858     | ENSG00000114670 | 64.1471507 | 0.11418229  | 0.24152554 | 0.5476458  | 0.75435339 | NEK11        |
| 11222     | ENSG00000114686 | 1981.95576 | -0.15543766 | 0.07154187 | 0.02678521 | 0.09189323 | MRPL3        |
| 57088     | ENSG00000114698 | 0          | NA          | NA         | NA         | NA         | PLSCR4       |
| 51409     | ENSG00000114735 | 870.720418 | 0.26106877  | 0.11827546 | 0.01998861 | 0.07291303 | HEMK1        |
| 1154      | ENSG00000114737 | 194.960333 | 0.77494705  | 0.17480519 | 1.75E-06   | 1.90E-05   | CISH         |
| 7867      | ENSG00000114738 | 427.996922 | 0.13430789  | 0.114882   | 0.22036459 | 0.43277467 | MAPKAPK3     |
| 93        | ENSG00000114739 | 1537.93961 | -0.1089098  | 0.07182015 | 0.12231897 | 0.28928458 | ACVR2B       |
| 57599     | ENSG00000114742 | 1262.49133 | 0.13655289  | 0.08816906 | 0.11128937 | 0.26948227 | WDR48        |
| 51122     | ENSG00000114744 | 544.970115 | -0.08376193 | 0.12745046 | 0.48486409 | 0.70489511 | COMMD2       |
| 64689     | ENSG00000114745 | 659.172769 | -0.16782774 | 0.11479263 | 0.12440277 | 0.29243495 | GORASP1      |
| 51555     | ENSG00000114757 | 118.630286 | -1.81780733 | 0.30499196 | 1.55E-10   | 2.92E-09   | PEX5L        |
| 9136      | ENSG00000114767 | 477.308815 | 0.02284552  | 0.10816004 | 0.82662665 | 0.92144622 | RRP9         |
| 10057     | ENSG00000114770 | 2113.31158 | 0.41867462  | 0.07604694 | 1.89E-08   | 2.75E-07   | ABCC5        |
| 13        | ENSG00000114771 | 0          | NA          | NA         | NA         | NA         | AADAC        |
| 84836     | ENSG00000114779 | 491.668449 | 0.00891936  | 0.11719052 | 0.93691046 | 0.97351594 | ABHD14B      |
| 10289     | ENSG00000114784 | 630.882687 | -0.22193788 | 0.10460004 | 0.02700083 | 0.09245712 | EIF1B        |
| 100526760 | ENSG00000114786 | 88.6384314 | -0.00615837 | 0.278199   | 0.97226429 | 0.98958828 | ABHD14A-ACY1 |
| 26084     | ENSG00000114790 | 121.991486 | 0.54838835  | 0.22275562 | 0.00407993 | 0.01963274 | ARHGEF26     |
| 54800     | ENSG00000114796 | 1351.46209 | 0.02908481  | 0.11812704 | 0.79403555 | 0.90579008 | KLHL24       |
| 23007     | ENSG00000114805 | 126.960851 | 0.2370349   | 0.20141784 | 0.16956734 | 0.3612387  | PLCH1        |
| 7433      | ENSG00000114812 | 11.2541091 | -0.18846025 | 0.41176714 | 0.20235944 | 0.40788492 | VIPR1        |
| 25981     | ENSG00000114841 | 189.959823 | 0.1989836   | 0.35412955 | 0.31439709 | 0.5421676  | DNAH1        |
| 6747      | ENSG00000114850 | 1513.49616 | 0.10991526  | 0.07487726 | 0.13451842 | 0.3089299  | SSR3         |
| 92999     | ENSG00000114853 | 436.039125 | -0.15550398 | 0.14543642 | 0.24662414 | 0.46578072 | ZBTB47       |
| 7134      | ENSG00000114854 | 2.06076984 | 0.05901115  | 0.38222193 | 0.47725525 | NA         | TNNC1        |
| 4820      | ENSG00000114857 | 4237.20364 | 0.06489516  | 0.0726765  | 0.36363975 | 0.59353748 | NKTR         |
| 1181      | ENSG00000114859 | 246.519936 | 0.13446475  | 0.18898981 | 0.40985125 | 0.63781072 | CLCN2        |
| 27086     | ENSG00000114861 | 1297.71254 | -0.57226327 | 0.0849266  | 5.21E-12   | 1.13E-10   | FOXP1        |
| 1981      | ENSG00000114867 | 9763.57151 | -0.09842059 | 0.05608321 | 0.07536286 | 0.20221788 | EIF4G1       |
| 28972     | ENSG00000114902 | 1129.21194 | 0.14841208  | 0.08865548 | 0.08521127 | 0.22148098 | SPCS1        |
| 6787      | ENSG00000114904 | 584.906273 | 0.48462213  | 0.11009385 | 4.39E-06   | 4.46E-05   | NEK4         |
| 6508      | ENSG00000114923 | 606.491858 | 0.34892972  | 0.1117474  | 0.00106708 | 0.00624141 | SLC4A3       |
| 54891     | ENSG00000114933 | 512.272057 | -0.01667303 | 0.11128146 | 0.87442715 | 0.94470892 | INO80D       |
| 1933      | ENSG00000114942 | 5601.2476  | -0.36254057 | 0.05403196 | 1.17E-11   | 2.48E-10   | EEF1B2       |
| 8745      | ENSG00000114948 | 459.131481 | -0.43461377 | 0.17202053 | 0.004957   | 0.02306446 | ADAM23       |
| 1716      | ENSG00000114956 | 1144.7836  | 0.01269631  | 0.08049639 | 0.87174078 | 0.94401928 | DGUOK        |
| 55233     | ENSG00000114978 | 1546.64979 | -0.024542   | 0.08009982 | 0.75326954 | 0.88464062 | MOB1A        |
| 55683     | ENSG00000114982 | 1944.97231 | -0.10557652 | 0.06786357 | 0.11362423 | 0.27361388 | KANSL3       |

|        |                 |            |             |            |            |            |         |
|--------|-----------------|------------|-------------|------------|------------|------------|---------|
| 81562  | ENSG00000114988 | 289.579161 | -0.06105158 | 0.13178692 | 0.62102614 | 0.80672374 | LMAN2L  |
| 6242   | ENSG00000114993 | 518.460699 | 0.23745716  | 0.12884742 | 0.04982129 | 0.14857274 | RTKN    |
| 150465 | ENSG00000114999 | 1810.89303 | -0.05516787 | 0.07365803 | 0.44483952 | 0.66962186 | TTL     |
| 3552   | ENSG00000115008 | 0          | NA          | NA         | NA         | NA         | IL1A    |
| 6364   | ENSG00000115009 | 0          | NA          | NA         | NA         | NA         | CCL20   |
| 200576 | ENSG00000115020 | 1821.9356  | -0.10496609 | 0.07223908 | 0.1383309  | 0.31466234 | PIKFYVE |
| 30818  | ENSG00000115041 | 30.3645276 | 0.14120033  | 0.31857821 | 0.47025942 | 0.69253479 | KCNIP3  |
| 51011  | ENSG00000115042 | 249.891133 | 0.62436175  | 0.16611375 | 4.49E-05   | 0.00037287 | FAHD2A  |
| 4691   | ENSG00000115053 | 13102.9952 | -0.28199878 | 0.04764895 | 2.41E-09   | 3.93E-08   | NCL     |
| 10120  | ENSG00000115073 | 801.805035 | 0.04776944  | 0.09912559 | 0.61901393 | 0.80522138 | ACTR1B  |
| 80255  | ENSG00000115084 | 968.990031 | 0.12105301  | 0.10547364 | 0.23258451 | 0.44940365 | SLC35F5 |
| 7535   | ENSG00000115085 | 11.6164891 | 0.14638797  | 0.3604583  | 0.4051589  | 0.63353977 | ZAP70   |
| 10096  | ENSG00000115091 | 2037.60006 | -0.12828698 | 0.08404725 | 0.11704905 | 0.28012704 | ACTR3   |
| 55240  | ENSG00000115107 | 210.716688 | -0.25330336 | 0.1567426  | 0.07573931 | 0.20287132 | STEAP3  |
| 57669  | ENSG00000115109 | 943.182552 | 0.18564576  | 0.1078998  | 0.07249958 | 0.19628706 | EPB41L5 |
| 29842  | ENSG00000115112 | 38.2518756 | 2.53235516  | 0.59433638 | 8.83E-07   | 1.01E-05   | TFCP2L1 |
| 51639  | ENSG00000115128 | 1775.26267 | -0.05491585 | 0.07260594 | 0.44018945 | 0.66517856 | SF3B6   |
| 9540   | ENSG00000115129 | 412.334106 | 0.30581956  | 0.1256938  | 0.00979672 | 0.04082482 | TP53I3  |
| 51277  | ENSG00000115137 | 279.161436 | 0.12427472  | 0.18296146 | 0.44058654 | 0.66549197 | DNAJC27 |
| 5443   | ENSG00000115138 | 0.69153686 | 0.01680424  | 0.38318935 | 0.66879163 | NA         | POMC    |
| 10254  | ENSG00000115145 | 350.055951 | 0.00390131  | 0.14308412 | 0.97769181 | 0.99244848 | STAM2   |
| 9381   | ENSG00000115155 | 2.88571501 | -0.05246782 | 0.38387485 | 0.30767401 | 0.53516122 | OTOF    |
| 2820   | ENSG00000115159 | 681.456796 | 0.3384716   | 0.14241873 | 0.01044717 | 0.04290453 | GPD2    |
| 1058   | ENSG00000115163 | 604.737691 | -0.22735081 | 0.10916219 | 0.02932384 | 0.09860761 | CENPA   |
| 9595   | ENSG00000115165 | 0.173124   | -0.01911262 | 0.38486262 | 0.84537521 | NA         | CYTIP   |
| 90     | ENSG00000115170 | 467.343992 | -0.25970607 | 0.11781309 | 0.02011883 | 0.07323992 | ACVR1   |
| 85461  | ENSG00000115183 | 2009.08016 | 0.39193752  | 0.07232745 | 3.31E-08   | 4.65E-07   | TANC1   |
| 7781   | ENSG00000115194 | 588.986664 | -2.53533635 | 0.13362791 | 1.78E-81   | 3.68E-79   | SLC30A3 |
| 4358   | ENSG00000115204 | 1722.8654  | 0.02212509  | 0.06775016 | 0.74091734 | 0.87763281 | MPV17   |
| 2976   | ENSG00000115207 | 2753.35684 | 0.18380426  | 0.07555306 | 0.01297636 | 0.05137715 | GTF3C2  |
| 8890   | ENSG00000115211 | 864.339595 | -0.02550655 | 0.08829215 | 0.76598541 | 0.89234011 | EIF2B4  |
| 29959  | ENSG00000115216 | 2028.84018 | 0.13375096  | 0.06657242 | 0.04130966 | 0.12854198 | NRBP1   |
| 3694   | ENSG00000115221 | 0          | NA          | NA         | NA         | NA         | ITGB6   |
| 64838  | ENSG00000115226 | 601.323019 | 0.89818306  | 0.10872823 | 2.31E-17   | 7.33E-16   | FNDC4   |
| 3676   | ENSG00000115232 | 217.293814 | -0.02479276 | 0.1578414  | 0.86203021 | 0.9387792  | ITGA4   |
| 10213  | ENSG00000115233 | 1201.11734 | 0.08820808  | 0.09644969 | 0.34536256 | 0.57584615 | PSMD14  |
| 9784   | ENSG00000115234 | 2429.13101 | 0.14719639  | 0.08351747 | 0.07075746 | 0.1930817  | SNX17   |
| 51130  | ENSG00000115239 | 423.552814 | -0.11809992 | 0.11482505 | 0.27980359 | 0.50438881 | ASB3    |

|           |                 |            |             |            |            |            |         |
|-----------|-----------------|------------|-------------|------------|------------|------------|---------|
| 100302652 | ENSG00000115239 | 423.552814 | -0.11809992 | 0.11482505 | 0.27980359 | 0.50438881 | ASB3    |
| 5496      | ENSG00000115241 | 6405.13818 | -0.42793488 | 0.05508204 | 3.99E-15   | 1.10E-13   | PPM1G   |
| 5136      | ENSG00000115252 | 3.91110082 | 0.05357879  | 0.38220507 | 0.37094004 | 0.60017919 | PDE1A   |
| 92840     | ENSG00000115255 | 104.823853 | 0.79696232  | 0.23314657 | 0.00010528 | 0.00079661 | REEP6   |
| 54760     | ENSG00000115257 | 117.137936 | 0.78616173  | 0.27115753 | 0.00058671 | 0.00370948 | PCSK4   |
| 2641      | ENSG00000115263 | 0          | NA          | NA         | NA         | NA         | GCG     |
| 10297     | ENSG00000115266 | 5823.33164 | -0.69421892 | 0.05794477 | 1.09E-33   | 7.03E-32   | APC2    |
| 64135     | ENSG00000115267 | 11.5726527 | 7.36195021  | 2.68153296 | 3.99E-07   | 4.84E-06   | IFIH1   |
| 6209      | ENSG00000115268 | 9123.66852 | -0.05117488 | 0.05719259 | 0.36532989 | 0.5947154  | RPS15   |
| 25801     | ENSG00000115271 | 180.296703 | 1.02213663  | 0.19556456 | 2.06E-08   | 2.99E-07   | GCA     |
| 83444     | ENSG00000115274 | 493.535195 | 0.31408857  | 0.13311032 | 0.01167774 | 0.04712905 | INO80B  |
| 7841      | ENSG00000115275 | 1579.47671 | 0.16579073  | 0.07410217 | 0.02291519 | 0.08124326 | MOGS    |
| 64427     | ENSG00000115282 | 813.489933 | 0.1178289   | 0.10701306 | 0.2516195  | 0.47149344 | TTC31   |
| 374291    | ENSG00000115286 | 1274.38196 | 0.0485762   | 0.08108712 | 0.54019507 | 0.748907   | NDUFS7  |
| 84759     | ENSG00000115289 | 260.396601 | 0.25261522  | 0.15114504 | 0.06878499 | 0.1890682  | PCGF1   |
| 2888      | ENSG00000115290 | 61.805761  | 0.31675031  | 0.27898718 | 0.13036596 | 0.30247464 | GRB14   |
| 79745     | ENSG00000115295 | 798.078734 | 0.31167659  | 0.14465733 | 0.01971992 | 0.07214518 | CLIP4   |
| 3196      | ENSG00000115297 | 971.305181 | 0.04226503  | 0.09519573 | 0.6475299  | 0.82430661 | TLX2    |
| 6711      | ENSG00000115306 | 11074.1077 | -0.43040143 | 0.05812398 | 3.52E-14   | 8.98E-13   | SPTBN1  |
| 550       | ENSG00000115307 | 1714.83322 | -0.02201321 | 0.07204637 | 0.75508847 | 0.88608005 | AUP1    |
| 57142     | ENSG00000115310 | 3890.53653 | 0.07092171  | 0.06108419 | 0.23983573 | 0.45788499 | RTN4    |
| 27429     | ENSG00000115317 | 591.343067 | -0.00211231 | 0.11425705 | 0.98361769 | 0.99439363 | HTRA2   |
| 84695     | ENSG00000115318 | 591.941938 | -0.25077412 | 0.11124467 | 0.01785452 | 0.06652275 | LOXL3   |
| 1796      | ENSG00000115325 | 217.40121  | 0.0212454   | 0.16815915 | 0.88946431 | 0.95181279 | DOK1    |
| 2591      | ENSG00000115339 | 2.68293064 | 0.05288393  | 0.37759984 | 0.57139928 | 0.77166993 | GALNT3  |
| 56655     | ENSG00000115350 | 318.162224 | -0.3325101  | 0.13402305 | 0.0079546  | 0.03433094 | POLE4   |
| 6869      | ENSG00000115353 | 1.19478899 | 0.0442412   | 0.38337837 | 0.4894765  | NA         | TACR1   |
| 55704     | ENSG00000115355 | 2746.50598 | -0.17129157 | 0.07846091 | 0.02738836 | 0.09338117 | CCDC88A |
| 33        | ENSG00000115361 | 22.5693318 | 2.64790836  | 0.59693204 | 4.41E-07   | 5.30E-06   | ACADL   |
| 84141     | ENSG00000115363 | 23.0638542 | 0.22393499  | 0.38193965 | 0.24711009 | 0.46606087 | EVA1A   |
| 9801      | ENSG00000115364 | 1024.08124 | -0.36219954 | 0.0961078  | 9.49E-05   | 0.00072665 | MRPL19  |
| 10314     | ENSG00000115365 | 2426.35681 | 0.00241678  | 0.06440647 | 0.97027689 | 0.98888633 | LANCL1  |
| 84128     | ENSG00000115368 | 1119.46975 | -0.05094892 | 0.09605207 | 0.5822557  | 0.77911602 | WDR75   |
| 2202      | ENSG00000115380 | 0          | NA          | NA         | NA         | NA         | EFEMP1  |
| 5967      | ENSG00000115386 | 0          | NA          | NA         | NA         | NA         | REG1A   |
| 55120     | ENSG00000115392 | 578.030476 | 0.10978106  | 0.10270165 | 0.26737157 | 0.48990136 | FANCL   |
| 2335      | ENSG00000115414 | 2128.04616 | 2.38331323  | 0.12652112 | 2.18E-80   | 4.46E-78   | FN1     |
| 6772      | ENSG00000115415 | 977.2243   | 0.01884332  | 0.09694069 | 0.84160344 | 0.92800104 | STAT1   |

|        |                 |            |             |            |            |            |         |
|--------|-----------------|------------|-------------|------------|------------|------------|---------|
| 2744   | ENSG00000115419 | 2118.00517 | -0.40213816 | 0.06617882 | 6.56E-10   | 1.16E-08   | GLS     |
| 64895  | ENSG00000115421 | 489.458713 | -0.43771617 | 0.12523461 | 0.00021688 | 0.0015302  | PAPOLG  |
| 1768   | ENSG00000115423 | 0          | NA          | NA         | NA         | NA         | DNAH6   |
| 55825  | ENSG00000115425 | 169.12219  | -0.11095505 | 0.18270323 | 0.48915347 | 0.70874969 | PECR    |
| 25972  | ENSG00000115446 | 402.842756 | -0.01093198 | 0.12676071 | 0.94664493 | 0.97814213 | UNC50   |
| 3485   | ENSG00000115457 | 5193.30347 | 0.44313013  | 0.05962518 | 5.17E-14   | 1.30E-12   | IGFBP2  |
| 84173  | ENSG00000115459 | 293.181961 | 0.18818153  | 0.15658307 | 0.18772772 | 0.38805147 | ELMOD3  |
| 3488   | ENSG00000115461 | 297.611845 | 1.43683161  | 0.18963907 | 2.92E-15   | 8.17E-14   | IGFBP5  |
| 9736   | ENSG00000115464 | 3901.7672  | -0.14151916 | 0.07436676 | 0.05210528 | 0.15376598 | USP34   |
| 80303  | ENSG00000115468 | 70.4573876 | 2.34994391  | 0.34598255 | 7.15E-13   | 1.64E-11   | EFHD1   |
| 3769   | ENSG00000115474 | 2.11692692 | 0.11279713  | 0.40262084 | 0.14011401 | NA         | KCNJ13  |
| 10575  | ENSG00000115484 | 2997.24705 | -0.05076929 | 0.07604883 | 0.4951444  | 0.71392913 | CCT4    |
| 2677   | ENSG00000115486 | 718.757202 | 0.15090205  | 0.11202026 | 0.15836812 | 0.34554311 | GCX     |
| 4759   | ENSG00000115488 | 0          | NA          | NA         | NA         | NA         | NEU2    |
| 23301  | ENSG00000115504 | 1117.84173 | -0.5239274  | 0.14083187 | 6.91E-05   | 0.00054937 | EHBP1   |
| 5013   | ENSG00000115507 | 22.243587  | 2.48429488  | 0.59951843 | 2.00E-06   | 2.15E-05   | OTX1    |
| 10190  | ENSG00000115514 | 337.852042 | -0.17400352 | 0.12881094 | 0.15053357 | 0.33407003 | TXNDC9  |
| 80219  | ENSG00000115520 | 164.887245 | 0.21460677  | 0.19090552 | 0.19635149 | 0.40005705 | COQ10B  |
| 10578  | ENSG00000115523 | 1.46586965 | 0.02917769  | 0.37938916 | 0.68577375 | NA         | GNLY    |
| 23451  | ENSG00000115524 | 9148.72937 | 0.02455738  | 0.07676482 | 0.74437843 | 0.87963225 | SF3B1   |
| 8869   | ENSG00000115525 | 470.459212 | -0.89570907 | 0.14070627 | 2.92E-11   | 5.91E-10   | ST3GAL5 |
| 9486   | ENSG00000115526 | 571.670494 | -0.1986068  | 0.11610357 | 0.07184565 | 0.19526459 | CHST10  |
| 79031  | ENSG00000115539 | 353.946129 | -0.00657305 | 0.12582185 | 0.95428559 | 0.98112988 | PDCL3   |
| 25843  | ENSG00000115540 | 790.785254 | -0.03860957 | 0.12621524 | 0.74494519 | 0.87988222 | MOB4    |
| 3336   | ENSG00000115541 | 2044.4852  | -0.15820681 | 0.10076086 | 0.10292328 | 0.25477628 | HSPE1   |
| 55818  | ENSG00000115548 | 745.434832 | 0.07943783  | 0.26210187 | 0.68381845 | 0.84592581 | KDM3A   |
| 84812  | ENSG00000115556 | 1043.06513 | 0.02843066  | 0.09815036 | 0.7652998  | 0.89210036 | PLCD4   |
| 51652  | ENSG00000115561 | 1267.58592 | 0.07310282  | 0.08525257 | 0.37951308 | 0.60845927 | CHMP3   |
| 7701   | ENSG00000115568 | 1474.05873 | -0.03650926 | 0.08190756 | 0.64755868 | 0.82430661 | ZNF142  |
| 7850   | ENSG00000115590 | 0          | NA          | NA         | NA         | NA         | IL1R2   |
| 53632  | ENSG00000115592 | 0          | NA          | NA         | NA         | NA         | PRKAG3  |
| 150572 | ENSG00000115593 | 0          | NA          | NA         | NA         | NA         | SMYD1   |
| 3554   | ENSG00000115594 | 0          | NA          | NA         | NA         | NA         | IL1R1   |
| 7475   | ENSG00000115596 | 242.2688   | -0.95296458 | 0.18629462 | 4.21E-08   | 5.83E-07   | WNT6    |
| 8808   | ENSG00000115598 | 0          | NA          | NA         | NA         | NA         | IL1RL2  |
| 9173   | ENSG00000115602 | 0          | NA          | NA         | NA         | NA         | IL1RL1  |
| 8809   | ENSG00000115604 | 0          | NA          | NA         | NA         | NA         | IL18R1  |
| 8807   | ENSG00000115607 | 0          | NA          | NA         | NA         | NA         | IL18RAP |

|        |                 |            |             |            |            |            |          |
|--------|-----------------|------------|-------------|------------|------------|------------|----------|
| 6549   | ENSG00000115616 | 0.14931947 | -0.01844332 | 0.38480212 | 0.84537521 | NA         | SLC9A2   |
| 2274   | ENSG00000115641 | 168.581636 | -0.31956712 | 0.17430768 | 0.03966444 | 0.12459508 | FHL2     |
| 79083  | ENSG00000115648 | 6.52603067 | -0.04205545 | 0.36226814 | 0.73768134 | 0.87612079 | MLPH     |
| 27013  | ENSG00000115649 | 1071.26253 | -0.28936134 | 0.09572924 | 0.00174518 | 0.00954102 | CNPPD1   |
| 80146  | ENSG00000115652 | 397.828715 | -0.01357849 | 0.11676407 | 0.90170929 | 0.95678213 | UXS1     |
| 10058  | ENSG00000115657 | 961.693664 | 0.242917    | 0.09865145 | 0.01068198 | 0.04376016 | ABCB6    |
| 8576   | ENSG00000115661 | 412.854792 | -0.04960397 | 0.12410204 | 0.67168521 | 0.83828612 | STK16    |
| 60482  | ENSG00000115665 | 0.96513545 | 0.01588278  | 0.3807244  | 0.771561   | NA         | SLC5A7   |
| 3069   | ENSG00000115677 | 10029.9349 | -0.12036206 | 0.05397651 | 0.02413332 | 0.08475925 | HDLBP    |
| 5510   | ENSG00000115685 | 673.558637 | -0.22256308 | 0.09991373 | 0.02066286 | 0.07486324 | PPP1R7   |
| 23178  | ENSG00000115687 | 764.669141 | -0.35701217 | 0.1366388  | 0.00502453 | 0.0233101  | PASK     |
| 10494  | ENSG00000115694 | 2258.66039 | 0.03773661  | 0.06360258 | 0.54752199 | 0.75431125 | STK25    |
| 7173   | ENSG00000115705 | 7.04333111 | 0.05111882  | 0.35391593 | 0.72919311 | 0.87046879 | TPO      |
| 5624   | ENSG00000115718 | 4.08331077 | 0.05914903  | 0.37658576 | 0.55505242 | 0.7609868  | PROC     |
| 3398   | ENSG00000115738 | 367.150738 | -0.31872409 | 0.12607344 | 0.00718823 | 0.0316008  | ID2      |
| 9014   | ENSG00000115750 | 516.641452 | 0.15489882  | 0.11836161 | 0.16826    | 0.35937974 | TAF1B    |
| 3241   | ENSG00000115756 | 1921.20108 | -0.90742491 | 0.07632941 | 2.13E-33   | 1.35E-31   | HPCAL1   |
| 4953   | ENSG00000115758 | 3960.80574 | -0.22484981 | 0.05484624 | 3.38E-05   | 0.00028767 | ODC1     |
| 57448  | ENSG00000115760 | 5252.63477 | -0.13560148 | 0.08617405 | 0.10438048 | 0.25722378 | BIRC6    |
| 79954  | ENSG00000115761 | 864.528412 | -0.16270394 | 0.088487   | 0.05823621 | 0.16740168 | NOL10    |
| 55041  | ENSG00000115762 | 1847.92908 | 0.07024903  | 0.07207847 | 0.32195606 | 0.54956623 | PLEKHB2  |
| 26003  | ENSG00000115806 | 1306.7081  | 0.02785877  | 0.08021007 | 0.72304706 | 0.86764418 | GORASP2  |
| 6801   | ENSG00000115808 | 1560.34993 | -0.12436888 | 0.08015978 | 0.11213088 | 0.2710046  | STRN     |
| 10153  | ENSG00000115816 | 2294.92407 | -0.3474522  | 0.07886195 | 6.40E-06   | 6.31E-05   | CEBPZ    |
| 23683  | ENSG00000115825 | 4074.47711 | 0.08821425  | 0.05581478 | 0.11026302 | 0.2676313  | PRKD3    |
| 80067  | ENSG00000115827 | 744.262771 | -0.00311596 | 0.13129337 | 0.97828708 | 0.99254491 | DCAF17   |
| 25797  | ENSG00000115828 | 2.19291843 | 0.01463026  | 0.37334638 | 0.87431724 | NA         | QPCT     |
| 22930  | ENSG00000115839 | 954.59661  | -0.19108031 | 0.08831071 | 0.02577914 | 0.08919746 | RAB3GAP1 |
| 8604   | ENSG00000115840 | 239.59036  | 0.12882855  | 0.16033765 | 0.37641151 | 0.6053339  | SLC25A12 |
| 151393 | ENSG00000115841 | 92.659429  | -0.32260797 | 0.24549694 | 0.09980147 | 0.2488914  | RMDN2    |
| 1746   | ENSG00000115844 | 0.53116992 | 0.01535836  | 0.38361063 | 0.72195714 | NA         | DLX2     |
| 3938   | ENSG00000115850 | 0.50565632 | 0.00490052  | 0.38258351 | 0.87118475 | NA         | LCT      |
| 1615   | ENSG00000115866 | 1379.58959 | -0.08798256 | 0.09882729 | 0.35569448 | 0.58599659 | DARS1    |
| 6432   | ENSG00000115875 | 4504.811   | 0.04316518  | 0.07454608 | 0.55575596 | 0.76147778 | SRSF7    |
| 6382   | ENSG00000115884 | 2878.14544 | -0.20414936 | 0.07387629 | 0.00498307 | 0.02315859 | SDC1     |
| 5334   | ENSG00000115896 | 137.542839 | -1.81845557 | 0.24418213 | 6.15E-15   | 1.67E-13   | PLCL1    |
| 6509   | ENSG00000115902 | 710.308797 | -0.1062713  | 0.14495878 | 0.43246869 | 0.65788827 | SLC1A4   |
| 6654   | ENSG00000115904 | 2172.88341 | -0.0637884  | 0.07039443 | 0.35159823 | 0.58169688 | SOS1     |

|        |                 |            |             |            |            |            |          |
|--------|-----------------|------------|-------------|------------|------------|------------|----------|
| 8942   | ENSG00000115919 | 0          | NA          | NA         | NA         | NA         | KYNU     |
| NA     | ENSG00000115934 | 0          | NA          | NA         | NA         | NA         |          |
| 7456   | ENSG00000115935 | 1174.63698 | 0.56262078  | 0.106347   | 4.02E-08   | 5.60E-07   | WIPF1    |
| 4999   | ENSG00000115942 | 1059.15002 | -0.34832781 | 0.10860522 | 0.00079199 | 0.00483331 | ORC2     |
| 9167   | ENSG00000115944 | 1743.34924 | -0.06678478 | 0.07136494 | 0.33955453 | 0.56999424 | COX7A2L  |
| 56902  | ENSG00000115946 | 334.361464 | -0.31540728 | 0.1533264  | 0.02454945 | 0.08588629 | PN01     |
| 5000   | ENSG00000115947 | 777.982001 | -0.11611902 | 0.10753311 | 0.25983084 | 0.48146481 | ORC4     |
| 5341   | ENSG00000115956 | 0.77422295 | -0.02883461 | 0.38364886 | 0.55985386 | NA         | PLEK     |
| 390    | ENSG00000115963 | 1090.4215  | 0.16714921  | 0.07847738 | 0.02948182 | 0.09905492 | RND3     |
| 1386   | ENSG00000115966 | 933.472385 | -0.16436449 | 0.08630843 | 0.05017215 | 0.14934131 | ATF2     |
| 63892  | ENSG00000115970 | 1149.78082 | 0.01280441  | 0.09542605 | 0.89497122 | 0.95469109 | THADA    |
| 22848  | ENSG00000115977 | 886.060486 | -0.35042314 | 0.15146801 | 0.01163468 | 0.04697436 | AAK1     |
| 66008  | ENSG00000115993 | 1292.69303 | -0.1346342  | 0.08149634 | 0.09051069 | 0.23167746 | TRAK2    |
| 54980  | ENSG00000115998 | 134.934174 | -0.39224381 | 0.21129555 | 0.02939791 | 0.09878974 | C2orf42  |
| 7072   | ENSG00000116001 | 3145.27124 | 0.04302376  | 0.06840278 | 0.52332981 | 0.73621666 | TIA1     |
| 51449  | ENSG00000116005 | 1108.17747 | -0.31014134 | 0.10890913 | 0.00286553 | 0.01457746 | PCYOX1   |
| 84634  | ENSG00000116014 | 5.06881374 | -0.14223211 | 0.40008954 | 0.23588881 | 0.45270207 | KISS1R   |
| 2034   | ENSG00000116016 | 2121.97338 | -0.35568318 | 0.09284325 | 7.55E-05   | 0.00059356 | EPAS1    |
| 1820   | ENSG00000116017 | 720.105903 | 0.61280239  | 0.1247426  | 2.58E-07   | 3.22E-06   | ARID3A   |
| 7341   | ENSG00000116030 | 2371.61591 | -0.22541422 | 0.06738066 | 0.00066619 | 0.00413813 | SUMO1    |
| 50489  | ENSG00000116031 | 27.8991691 | 0.12803755  | 0.31104194 | 0.51359038 | 0.7287659  | CD207    |
| 116444 | ENSG00000116032 | 4.31020164 | 0.16696513  | 0.41835102 | 0.15265777 | 0.33723751 | GRIN3B   |
| 25806  | ENSG00000116035 | 144.118283 | -0.13918204 | 0.18504779 | 0.3897317  | 0.61887921 | VAX2     |
| 525    | ENSG00000116039 | 83.786324  | 0.2689405   | 0.23271466 | 0.1557914  | 0.34198954 | ATP6V1B1 |
| 4780   | ENSG00000116044 | 681.117288 | 0.24071228  | 0.1123973  | 0.02475019 | 0.08645137 | NFE2L2   |
| 2956   | ENSG00000116062 | 3338.46718 | -0.34872293 | 0.06184105 | 1.06E-08   | 1.60E-07   | MSH6     |
| 65977  | ENSG00000116095 | 260.654743 | -0.03889079 | 0.20948073 | 0.83418368 | 0.92433422 | PLEKHA3  |
| 6697   | ENSG00000116096 | 296.463517 | -0.46769725 | 0.14145762 | 0.00038946 | 0.00258253 | SPR      |
| 2043   | ENSG00000116106 | 0          | NA          | NA         | NA         | NA         | EPHA4    |
| 117583 | ENSG00000116117 | 140.151917 | 0.96879934  | 0.24826967 | 1.08E-05   | 0.00010216 | PARD3B   |
| 10056  | ENSG00000116120 | 694.45934  | -0.22403599 | 0.10490987 | 0.02592972 | 0.08959345 | FARSB    |
| 7840   | ENSG00000116127 | 1478.24908 | -0.12361145 | 0.08219189 | 0.12499366 | 0.29343866 | ALMS1    |
| 607    | ENSG00000116128 | 1663.42992 | -0.00038064 | 0.09912421 | 0.99581209 | 0.99852582 | BCL9     |
| 5396   | ENSG00000116132 | 0          | NA          | NA         | NA         | NA         | PRRX1    |
| 1718   | ENSG00000116133 | 5774.71055 | -0.65133727 | 0.20622943 | 0.00036145 | 0.00241863 | DHCR24   |
| 23341  | ENSG00000116138 | 404.194185 | -0.25384788 | 0.17595005 | 0.10397555 | 0.25670421 | DNAJC16  |
| 4139   | ENSG00000116141 | 653.054945 | 0.13716576  | 0.13158607 | 0.26749718 | 0.490041   | MARK1    |
| 7143   | ENSG00000116147 | 235.474983 | -1.55321521 | 0.17327021 | 2.44E-20   | 9.30E-19   | TNR      |

|        |                 |            |             |            |            |            |         |
|--------|-----------------|------------|-------------|------------|------------|------------|---------|
| 79906  | ENSG00000116151 | 197.878985 | 0.45122635  | 0.1794951  | 0.00494472 | 0.02302891 | MORN1   |
| 2882   | ENSG00000116157 | 725.285329 | 0.20094505  | 0.10968287 | 0.05542907 | 0.16113007 | GPX7    |
| 27101  | ENSG00000116161 | 2442.54474 | 0.0098395   | 0.09060836 | 0.91191818 | 0.96251831 | CACYBP  |
| 6342   | ENSG00000116171 | 656.984452 | 0.11187462  | 0.09805862 | 0.2380379  | 0.45546069 | SCP2    |
| 25823  | ENSG00000116176 | 0          | NA          | NA         | NA         | NA         | TPSG1   |
| 60676  | ENSG00000116183 | 7.07430099 | 0.84067236  | 1.62026462 | 0.01536085 | 0.05872047 | PAPPA2  |
| 55103  | ENSG00000116191 | 966.762075 | 0.15930608  | 0.23614697 | 0.39902156 | 0.62780637 | RALGPS2 |
| 9068   | ENSG00000116194 | 5.93565993 | 0.36472652  | 0.64414349 | 0.0192299  | 0.07054757 | ANGPTL1 |
| 9731   | ENSG00000116198 | 791.952741 | 0.10613783  | 0.14135753 | 0.41873258 | 0.64465387 | CEP104  |
| 9917   | ENSG00000116199 | 2662.11144 | 0.02864804  | 0.07132354 | 0.68354377 | 0.84579696 | FAM20B  |
| 127428 | ENSG00000116205 | 746.302155 | 0.2393304   | 0.11641655 | 0.03055333 | 0.10184445 | TCEANC2 |
| 9528   | ENSG00000116209 | 1866.13279 | -0.27272442 | 0.06961224 | 6.57E-05   | 0.00052388 | TMEM59  |
| 115353 | ENSG00000116212 | 440.08428  | 0.14978283  | 0.11394084 | 0.1686769  | 0.36003762 | LRRC42  |
| 49856  | ENSG00000116213 | 1790.24119 | 0.27386984  | 0.08542041 | 0.00098243 | 0.00582528 | WRAP73  |
| 7827   | ENSG00000116218 | 0          | NA          | NA         | NA         | NA         | NPHS2   |
| 51253  | ENSG00000116221 | 1117.2577  | -0.24749357 | 0.08230031 | 0.00201348 | 0.01076702 | MRPL37  |
| 23463  | ENSG00000116237 | 2017.89527 | -0.16991379 | 0.06692161 | 0.00945181 | 0.03961214 | ICMT    |
| 6146   | ENSG00000116251 | 8102.97219 | -0.22271346 | 0.04890964 | 4.32E-06   | 4.40E-05   | RPL22   |
| 26038  | ENSG00000116254 | 228.31602  | -1.8175197  | 0.18834083 | 3.08E-23   | 1.36E-21   | CHD5    |
| 5768   | ENSG00000116260 | 1755.18281 | 0.05807217  | 0.07268861 | 0.41643585 | 0.64306408 | QSOX1   |
| 6814   | ENSG00000116266 | 358.997992 | 0.36149525  | 0.13653282 | 0.00456559 | 0.0215516  | STXBP3  |
| 148479 | ENSG00000116273 | 691.991827 | 0.03903131  | 0.09192171 | 0.66256512 | 0.83345752 | PHF13   |
| 54206  | ENSG00000116285 | 258.095816 | -0.21776672 | 0.15253742 | 0.11852845 | 0.28264477 | ERRFI1  |
| 11315  | ENSG00000116288 | 2777.86301 | -0.30425215 | 0.06200624 | 6.32E-07   | 7.41E-06   | PARK7   |
| 57535  | ENSG00000116299 | 73.7672625 | -2.97661684 | 0.35587765 | 2.81E-18   | 9.58E-17   | ELAPOR1 |
| 4985   | ENSG00000116329 | 1032.97891 | 0.58584698  | 0.0828243  | 4.86E-13   | 1.13E-11   | OPRD1   |
| 271    | ENSG00000116337 | 1635.76561 | 0.36013781  | 0.10749332 | 0.00046887 | 0.00305098 | AMPD2   |
| 6429   | ENSG00000116350 | 2377.84123 | -0.20237403 | 0.07382244 | 0.00512506 | 0.02372403 | SRSF4   |
| 51102  | ENSG00000116353 | 392.963177 | 0.11249663  | 0.14766062 | 0.40960883 | 0.63763351 | MECR    |
| 3749   | ENSG00000116396 | 169.412493 | -0.15514009 | 0.19631464 | 0.35674287 | 0.58678316 | KCNC4   |
| 80267  | ENSG00000116406 | 1626.0932  | 0.10690654  | 0.07354603 | 0.13497333 | 0.30945965 | EDEM3   |
| 79084  | ENSG00000116455 | 891.901249 | -0.14976347 | 0.09282935 | 0.09444755 | 0.23891609 | WDR77   |
| 515    | ENSG00000116459 | 1731.13275 | -0.38470541 | 0.07288981 | 7.29E-08   | 9.77E-07   | ATP5PB  |
| 5906   | ENSG00000116473 | 540.218744 | -0.35705968 | 0.12884655 | 0.00316908 | 0.01584938 | RAP1A   |
| 3065   | ENSG00000116478 | 1269.58291 | 0.0499251   | 0.07573646 | 0.5021114  | 0.71895859 | HDAC1   |
| 829    | ENSG00000116489 | 2005.21792 | -0.15558086 | 0.07118005 | 0.02593594 | 0.08959933 | CAPZA1  |
| 64766  | ENSG00000116497 | 753.58033  | 0.25719082  | 0.10988227 | 0.01432037 | 0.05554485 | S100PBP |
| 127544 | ENSG00000116514 | 253.01925  | 0.02057656  | 0.14532614 | 0.87859272 | 0.94627217 | RNF19B  |

|        |                 |            |             |            |            |            |          |
|--------|-----------------|------------|-------------|------------|------------|------------|----------|
| 10067  | ENSG00000116521 | 1835.22006 | 0.14157521  | 0.07081637 | 0.04187416 | 0.13005373 | SCAMP3   |
| 55223  | ENSG00000116525 | 135.53945  | 0.06146906  | 0.21597382 | 0.73240385 | 0.87210781 | TRIM62   |
| 55870  | ENSG00000116539 | 3122.24497 | -0.17499503 | 0.06500986 | 0.00625068 | 0.02803834 | ASH1L    |
| 58512  | ENSG00000116544 | 253.384056 | -1.20919695 | 0.16692143 | 4.53E-14   | 1.15E-12   | DLGAP3   |
| 6421   | ENSG00000116560 | 14077.1817 | -0.01009259 | 0.05059548 | 0.83594459 | 0.92522644 | SFPQ     |
| 58480  | ENSG00000116574 | 1080.43279 | -0.97378058 | 0.08612241 | 1.73E-30   | 1.02E-28   | RHOA     |
| 54856  | ENSG00000116580 | 2684.08519 | -0.02655477 | 0.07358254 | 0.7117685  | 0.86153908 | GON4L    |
| 9181   | ENSG00000116584 | 2315.82455 | -0.17787319 | 0.07525788 | 0.01576005 | 0.06002677 | ARHGEF2  |
| 28956  | ENSG00000116586 | 973.023753 | 0.07765098  | 0.08344382 | 0.34073805 | 0.57095356 | LAMTOR2  |
| 4209   | ENSG00000116604 | 1052.81652 | 0.33511087  | 0.09905087 | 0.00044773 | 0.00293169 | MEF2D    |
| 85440  | ENSG00000116641 | 2413.94306 | -0.07863067 | 0.1933864  | 0.63715702 | 0.81722218 | DOCK7    |
| 6723   | ENSG00000116649 | 1361.7876  | -0.066485   | 0.08320499 | 0.41239295 | 0.64005916 | SRM      |
| NA     | ENSG00000116652 | 21.7585068 | 0.09945458  | 0.31505196 | 0.60194327 | 0.79229168 | DLEU2L   |
| 26232  | ENSG00000116661 | 93.9491671 | -1.02653948 | 0.26819443 | 1.46E-05   | 0.00013477 | FBXO2    |
| 26270  | ENSG00000116663 | 44.8100822 | 0.03926774  | 0.26893354 | 0.8402818  | 0.92746542 | FBXO6    |
| 81563  | ENSG00000116667 | 1130.17587 | -0.10435045 | 0.13313797 | 0.40189154 | 0.63031025 | C1orf21  |
| 54823  | ENSG00000116668 | 203.515653 | 0.0660859   | 0.16413338 | 0.65695413 | 0.82971354 | SWT1     |
| 10459  | ENSG00000116670 | 938.793093 | -0.26647012 | 0.08836349 | 0.00189155 | 0.01019518 | MAD2L2   |
| 9829   | ENSG00000116675 | 1704.15804 | -0.64343563 | 0.0766631  | 1.29E-17   | 4.15E-16   | DNAJC6   |
| 3953   | ENSG00000116678 | 948.120613 | 0.87734566  | 0.10749162 | 5.45E-17   | 1.68E-15   | LEPR     |
| 10625  | ENSG00000116679 | 4349.23303 | 0.16574111  | 0.05250527 | 0.00143451 | 0.00806709 | IVNS1ABP |
| 90231  | ENSG00000116685 | 1217.34199 | -0.26224181 | 0.08035211 | 0.0008238  | 0.0049921  | KIAA2013 |
| 9927   | ENSG00000116688 | 2413.28544 | -0.17083958 | 0.06808686 | 0.01070928 | 0.04385391 | MFN2     |
| 10216  | ENSG00000116690 | 3.86660865 | 0.18140287  | 0.42876625 | 0.12034927 | 0.28578451 | PRG4     |
| 60672  | ENSG00000116691 | 456.68976  | 0.34695714  | 0.13240028 | 0.00514743 | 0.02381089 | MIIP     |
| 9887   | ENSG00000116698 | 2880.78544 | -0.23310828 | 0.061283   | 0.00011404 | 0.00085444 | SMG7     |
| 4688   | ENSG00000116701 | 0.65250675 | 0.01174478  | 0.38266871 | 0.92947371 | NA         | NCF2     |
| 5132   | ENSG00000116703 | 0.91776575 | -0.06294814 | 0.3908818  | 0.22039491 | NA         | PDC      |
| 23169  | ENSG00000116704 | 441.880607 | 0.15146722  | 0.11488269 | 0.16676928 | 0.35754295 | SLC35D1  |
| 5321   | ENSG00000116711 | 0          | NA          | NA         | NA         | NA         | PLA2G4A  |
| 1647   | ENSG00000116717 | 597.408272 | -0.40801887 | 0.10372593 | 4.26E-05   | 0.00035568 | GADD45A  |
| 65121  | ENSG00000116721 | 0          | NA          | NA         | NA         | NA         | PRAMEF1  |
| 390999 | ENSG00000116726 | 0          | NA          | NA         | NA         | NA         | PRAMEF12 |
| 79971  | ENSG00000116729 | 1206.57872 | 0.85498358  | 0.10593883 | 1.19E-16   | 3.60E-15   | WLS      |
| 7799   | ENSG00000116731 | 1160.13867 | -0.04952152 | 0.08676956 | 0.55737965 | 0.76258372 | PRDM2    |
| 5997   | ENSG00000116741 | 191.510724 | 0.20916056  | 0.1684152  | 0.166671   | 0.35740949 | RGS2     |
| 6121   | ENSG00000116745 | 0          | NA          | NA         | NA         | NA         | RPE65    |
| 6738   | ENSG00000116747 | 1023.30966 | 0.02072894  | 0.09907868 | 0.81020076 | 0.91399233 | RO60     |



|        |                 |            |             |            |            |            |          |
|--------|-----------------|------------|-------------|------------|------------|------------|----------|
| 270    | ENSG00000116748 | 0.173733   | 0.01914545  | 0.38484597 | 0.78225479 | NA         | AMPD1    |
| 51377  | ENSG00000116750 | 1339.40856 | -0.21276675 | 0.07925901 | 0.00598941 | 0.02711771 | UCHL5    |
| 10286  | ENSG00000116752 | 576.666639 | -0.21473733 | 0.10283718 | 0.02974943 | 0.0997008  | BCAS2    |
| 9295   | ENSG00000116754 | 4894.93137 | -0.04786549 | 0.05742045 | 0.39869929 | 0.62756224 | SRSF11   |
| 1491   | ENSG00000116761 | 105.516545 | 0.26632249  | 0.2422398  | 0.16891113 | 0.36034672 | CTH      |
| 79814  | ENSG00000116771 | 31.9363874 | -0.17167422 | 0.30251516 | 0.39400347 | 0.62317897 | AGMAT    |
| 56944  | ENSG00000116774 | 35.4664215 | 0.47714716  | 0.37104752 | 0.05252273 | 0.15462992 | OLFML3   |
| 51086  | ENSG00000116783 | 6.86514723 | 0.47277056  | 0.84834498 | 0.01627398 | 0.06162927 | TNNI3K   |
| 10878  | ENSG00000116785 | 0.94407361 | 0.00100349  | 0.3809701  | 0.9850961  | NA         | CFHR3    |
| 23207  | ENSG00000116786 | 1626.00539 | 0.04660439  | 0.06919557 | 0.49373017 | 0.7125217  | PLEKHM2  |
| 1429   | ENSG00000116791 | 455.485514 | 0.0521614   | 0.11364427 | 0.63168213 | 0.81371846 | CRYZ     |
| 10745  | ENSG00000116793 | 748.673034 | -0.09172139 | 0.09494221 | 0.31797398 | 0.54561048 | PHTF1    |
| 7709   | ENSG00000116809 | 905.642256 | 0.2335839   | 0.09632387 | 0.01207781 | 0.04849701 | ZBTB17   |
| 965    | ENSG00000116815 | 87.3082484 | 0.33907044  | 0.23586351 | 0.07813797 | 0.20773003 | CD58     |
| 339488 | ENSG00000116819 | 52.9286865 | 0.89918643  | 0.44939668 | 0.00439348 | 0.02089824 | TFAP2E   |
| 914    | ENSG00000116824 | 0          | NA          | NA         | NA         | NA         | CD2      |
| 8458   | ENSG00000116830 | 844.561881 | -0.39315299 | 0.14481159 | 0.00331563 | 0.01645788 | TTF2     |
| 2494   | ENSG00000116833 | 0          | NA          | NA         | NA         | NA         | NR5A2    |
| 23046  | ENSG00000116852 | 1161.8608  | -2.07174586 | 0.08626866 | 1.31E-128  | 6.33E-126  | KIF21B   |
| 252839 | ENSG00000116857 | 2159.39877 | 0.21760381  | 0.07261922 | 0.00225372 | 0.01185729 | TMEM9    |
| 54936  | ENSG00000116863 | 901.078327 | -0.11556607 | 0.08971473 | 0.18252791 | 0.3803144  | ADPRS    |
| 55700  | ENSG00000116871 | 3147.85894 | -0.0467604  | 0.07739917 | 0.53660605 | 0.74729267 | MAP7D1   |
| 10352  | ENSG00000116874 | 164.684888 | -0.22557175 | 0.19051983 | 0.17290172 | 0.36578929 | WARS2    |
| 51179  | ENSG00000116882 | 0          | NA          | NA         | NA         | NA         | HAO2     |
| 127700 | ENSG00000116885 | 89.3029836 | 0.61165022  | 0.30080211 | 0.00903377 | 0.03811782 | OSCP1    |
| 64960  | ENSG00000116898 | 691.607154 | -0.07047391 | 0.10296001 | 0.47654253 | 0.69841458 | MRPS15   |
| 149371 | ENSG00000116903 | 347.070317 | -0.34283444 | 0.12767599 | 0.00430621 | 0.02054721 | EXOC8    |
| 8443   | ENSG00000116906 | 1381.54638 | -0.02262223 | 0.07884628 | 0.76896654 | 0.89364433 | GNPAT    |
| 7257   | ENSG00000116918 | 1121.48569 | -0.16773144 | 0.0885151  | 0.05102342 | 0.15140663 | TSNAX    |
| 54955  | ENSG00000116922 | 601.947629 | 0.1109712   | 0.10384473 | 0.2666803  | 0.48908911 | C1orf109 |
| 64121  | ENSG00000116954 | 307.101022 | -0.18539512 | 0.14015241 | 0.15412585 | 0.33936549 | RRAGC    |
| 4811   | ENSG00000116962 | 2617.3088  | 0.37434578  | 0.07004101 | 5.24E-08   | 7.18E-07   | NID1     |
| 3964   | ENSG00000116977 | 1133.2305  | -0.30749104 | 0.09729609 | 0.00104378 | 0.00612859 | LGALS8   |
| 84618  | ENSG00000116981 | 1137.94895 | -0.53253059 | 0.09907622 | 2.75E-08   | 3.92E-07   | NT5C1A   |
| 51440  | ENSG00000116983 | 424.179618 | -1.91404675 | 0.13105604 | 2.01E-49   | 1.95E-47   | HPCAL4   |
| 4548   | ENSG00000116984 | 5238.79752 | -0.63339181 | 0.07806227 | 1.37E-16   | 4.13E-15   | MTR      |
| 656    | ENSG00000116985 | 305.644201 | -0.52022978 | 0.14325858 | 0.00010004 | 0.00076105 | BMP8B    |
| 4610   | ENSG00000116990 | 339.68885  | 0.98554029  | 0.14187521 | 5.13E-13   | 1.19E-11   | MYCL     |

|           |                 |            |             |            |            |            |            |
|-----------|-----------------|------------|-------------|------------|------------|------------|------------|
| 57568     | ENSG00000116991 | 1123.80243 | 0.31087823  | 0.09764489 | 0.00096796 | 0.0057515  | SIPA1L2    |
| 57829     | ENSG00000116996 | 0          | NA          | NA         | NA         | NA         | ZP4        |
| 6018      | ENSG00000117000 | 708.238689 | -0.22567945 | 0.09848239 | 0.0174423  | 0.0652444  | RLF        |
| 8564      | ENSG00000117009 | 4.77255431 | 0.15790144  | 0.40842911 | 0.1984291  | 0.4027039  | KMO        |
| 127396    | ENSG00000117010 | 87.0295829 | 0.27617957  | 0.259427   | 0.16880013 | 0.36022314 | ZNF684     |
| 9132      | ENSG00000117013 | 40.3907877 | 0.68023006  | 0.38811509 | 0.01264638 | 0.05031164 | KCNQ4      |
| 9783      | ENSG00000117016 | 2176.44444 | 0.14809689  | 0.11731927 | 0.18472533 | 0.38350847 | RIMS3      |
| 10000     | ENSG00000117020 | 4007.76123 | -0.09639775 | 0.08274298 | 0.23229091 | 0.44909196 | AKT3       |
| 2117      | ENSG00000117036 | 1065.96187 | -0.08965834 | 0.09037312 | 0.30669622 | 0.53422766 | ETV3       |
| 34        | ENSG00000117054 | 1028.62048 | -0.06111457 | 0.086086   | 0.46547221 | 0.68820095 | ACADM      |
| 81849     | ENSG00000117069 | 230.680646 | -0.19588425 | 0.16820385 | 0.19424866 | 0.39721723 | ST6GALNAC5 |
| 6504      | ENSG00000117090 | 0          | NA          | NA         | NA         | NA         | SLAMF1     |
| 962       | ENSG00000117091 | 0          | NA          | NA         | NA         | NA         | CD48       |
| 23266     | ENSG00000117114 | 8181.47226 | 0.09540355  | 0.05274987 | 0.06806829 | 0.1877746  | ADGRL2     |
| 11240     | ENSG00000117115 | 14.7607837 | 0.15330137  | 0.35587361 | 0.39809274 | 0.62724844 | PADI2      |
| 6390      | ENSG00000117118 | 627.845151 | -0.20779307 | 0.10490004 | 0.03889196 | 0.12286424 | SDHB       |
| 4237      | ENSG00000117122 | 2945.26667 | 0.12579556  | 0.06319864 | 0.0436125  | 0.13394304 | MFAP2      |
| 80135     | ENSG00000117133 | 703.953372 | 0.11304512  | 0.0974118  | 0.23006714 | 0.44597284 | RPF1       |
| 10765     | ENSG00000117139 | 4026.57681 | 0.04281855  | 0.05919218 | 0.46533375 | 0.6880988  | KDM5B      |
| 6675      | ENSG00000117143 | 859.896297 | -0.03080259 | 0.09731539 | 0.74269145 | 0.87875221 | UAP1       |
| 81569     | ENSG00000117148 | 0.80488441 | -0.03027885 | 0.38378171 | 0.54468417 | NA         | ACTL8      |
| 1486      | ENSG00000117151 | 131.599568 | 0.11485232  | 0.18708384 | 0.48321128 | 0.70357492 | CTBS       |
| 5999      | ENSG00000117152 | 4155.43711 | -0.05187465 | 0.20043415 | 0.75949781 | 0.88850157 | RGS4       |
| 59349     | ENSG00000117153 | 1052.02533 | 0.12613673  | 0.0871531  | 0.13733434 | 0.31289771 | KLHL12     |
| 84966     | ENSG00000117154 | 18.102735  | -0.88226944 | 0.74016309 | 0.01373962 | 0.05375547 | IGSF21     |
| 117178    | ENSG00000117155 | 745.62063  | -0.25444477 | 0.09803025 | 0.00708129 | 0.03124842 | SSX2IP     |
| 54680     | ENSG00000117174 | 358.599518 | 0.03717979  | 0.12143965 | 0.74831509 | 0.8819396  | ZNHIT6     |
| 26279     | ENSG00000117215 | 0.14931947 | -0.01844332 | 0.38480212 | 0.84537521 | NA         | PLA2G2D    |
| 5929      | ENSG00000117222 | 936.638451 | -0.24853334 | 0.09704171 | 0.00794499 | 0.03429692 | RBBP5      |
| 2635      | ENSG00000117226 | 0.37844916 | 0.02407552  | 0.3854191  | 0.60038877 | NA         | GBP3       |
| 2633      | ENSG00000117228 | 0.35150941 | 0.00330166  | 0.383397   | 0.93716717 | NA         | GBP1       |
| 100861548 | ENSG00000117242 | 265.487654 | 0.40171315  | 0.16890049 | 0.00843435 | 0.03606146 | PINK1-AS   |
| 57576     | ENSG00000117245 | 62.5700404 | -0.09212054 | 0.26185659 | 0.63230257 | 0.81396853 | KIF17      |
| 653519    | ENSG00000117262 | 477.602232 | -0.02264676 | 0.13743177 | 0.8587849  | 0.93709671 | GPR89A     |
| 5129      | ENSG00000117266 | 394.900357 | -0.34919934 | 0.1409029  | 0.00760641 | 0.03312361 | CDK18      |
| 8934      | ENSG00000117280 | 423.732507 | 0.11797225  | 0.12446848 | 0.31887844 | 0.54656314 | RAB29      |
| 11126     | ENSG00000117281 | 31.6389228 | 0.05617504  | 0.2922496  | 0.77068289 | 0.89494676 | CD160      |
| 1889      | ENSG00000117298 | 2061.43493 | 0.26583132  | 0.0651623  | 3.40E-05   | 0.00028989 | ECE1       |

|        |                 |            |             |            |            |            |          |
|--------|-----------------|------------|-------------|------------|------------|------------|----------|
| 3155   | ENSG00000117305 | 283.09655  | 0.05612776  | 0.15926374 | 0.69922659 | 0.85491191 | HMGCL    |
| 2582   | ENSG00000117308 | 309.971708 | -0.03884466 | 0.14727366 | 0.77419438 | 0.89604057 | GALE     |
| 3399   | ENSG00000117318 | 227.740411 | 0.21645196  | 0.15811808 | 0.13274907 | 0.3060355  | ID3      |
| 1380   | ENSG00000117322 | 0          | NA          | NA         | NA         | NA         | CR2      |
| 4179   | ENSG00000117335 | 2824.48911 | 0.13136649  | 0.07043542 | 0.0577825  | 0.16649345 | CD46     |
| 9129   | ENSG00000117360 | 1549.75198 | -0.02965488 | 0.07317051 | 0.67880253 | 0.84319072 | PRPF3    |
| 51107  | ENSG00000117362 | 3802.72613 | 0.08189753  | 0.06001194 | 0.1659137  | 0.35616336 | APH1A    |
| 64175  | ENSG00000117385 | 864.069494 | 0.12327696  | 0.10832688 | 0.23441804 | 0.45139906 | P3H1     |
| 6513   | ENSG00000117394 | 913.035833 | -0.19779961 | 0.14754842 | 0.14505761 | 0.32541747 | SLC2A1   |
| 10969  | ENSG00000117395 | 1418.44618 | 0.1794606   | 0.0954302  | 0.05194278 | 0.15342337 | EBNA1BP2 |
| 991    | ENSG00000117399 | 1431.72719 | -0.15851145 | 0.07168837 | 0.02420135 | 0.08493803 | CDC20    |
| 4352   | ENSG00000117400 | 2.08940217 | 0.09002326  | 0.39422673 | 0.20926    | NA         | MPL      |
| 9048   | ENSG00000117407 | 10.6394081 | 0.06024034  | 0.35255752 | 0.69058923 | 0.85006144 | ARTN     |
| 9670   | ENSG00000117408 | 866.424687 | -0.15049607 | 0.0983985  | 0.11280992 | 0.27198308 | IPO13    |
| 533    | ENSG00000117410 | 1764.60849 | -0.36131889 | 0.07518014 | 9.10E-07   | 1.04E-05   | ATP6V0B  |
| 8704   | ENSG00000117411 | 1817.53059 | -0.01227667 | 0.07726923 | 0.86984972 | 0.9432116  | B4GALT2  |
| 79033  | ENSG00000117419 | 903.429941 | 0.10678558  | 0.10560886 | 0.29297352 | 0.51909756 | ERI3     |
| 8643   | ENSG00000117425 | 56.4565753 | 1.15365236  | 0.36270207 | 0.00013017 | 0.00096259 | PTCH2    |
| 10327  | ENSG00000117448 | 1195.72154 | 0.12275239  | 0.08322486 | 0.13068285 | 0.30292648 | AKR1A1   |
| 5052   | ENSG00000117450 | 3419.33515 | -0.13269548 | 0.07496445 | 0.07066729 | 0.19290575 | PRDX1    |
| 8503   | ENSG00000117461 | 1858.05555 | -0.50679855 | 0.07772489 | 2.75E-11   | 5.59E-10   | PIK3R3   |
| 10103  | ENSG00000117472 | 1.30910033 | 0.07207082  | 0.39349794 | 0.12888999 | NA         | TSPAN1   |
| 8548   | ENSG00000117475 | 629.536262 | 0.15896139  | 0.1125373  | 0.13915463 | 0.31601249 | BLZF1    |
| 57821  | ENSG00000117477 | 209.838291 | 0.20501254  | 0.16226605 | 0.16309865 | 0.35207021 | CCDC181  |
| 10560  | ENSG00000117479 | 615.495664 | 0.00629858  | 0.10114964 | 0.94936968 | 0.97912847 | SLC19A2  |
| 2166   | ENSG00000117480 | 126.987561 | -0.39187802 | 0.23523248 | 0.04225126 | 0.13101983 | FAAH     |
| 387338 | ENSG00000117481 | 632.510834 | -0.03748647 | 0.11092166 | 0.72248189 | 0.86754018 | NSUN4    |
| 50999  | ENSG00000117500 | 889.697806 | 0.34794923  | 0.10848073 | 0.00080209 | 0.00488371 | TMED5    |
| 80133  | ENSG00000117501 | 0          | NA          | NA         | NA         | NA         | MROH9    |
| 1810   | ENSG00000117505 | 1689.39478 | -0.09938502 | 0.06958291 | 0.14601274 | 0.32674178 | DR1      |
| 388714 | ENSG00000117507 | 0          | NA          | NA         | NA         | NA         | FMO6P    |
| 1266   | ENSG00000117519 | 4250.65355 | 0.08058869  | 0.06574789 | 0.21411083 | 0.42428673 | CNN3     |
| 23215  | ENSG00000117523 | 8455.64627 | -0.04056187 | 0.04923993 | 0.40569283 | 0.63390153 | PRRC2C   |
| 2152   | ENSG00000117525 | 44.4653492 | 0.57998027  | 0.36430226 | 0.02294686 | 0.08131196 | F3       |
| 5825   | ENSG00000117528 | 1227.63364 | -0.27885319 | 0.09506842 | 0.00239484 | 0.01250357 | ABCD3    |
| 8674   | ENSG00000117533 | 502.998416 | 0.18465306  | 0.13732141 | 0.1489178  | 0.33152468 | VAMP4    |
| 51611  | ENSG00000117543 | 411.465641 | -0.01741174 | 0.13758358 | 0.89112588 | 0.95273684 | DPH5     |
| 356    | ENSG00000117560 | 0          | NA          | NA         | NA         | NA         | FASLG    |

|        |                 |            |             |            |            |            |          |
|--------|-----------------|------------|-------------|------------|------------|------------|----------|
| 58155  | ENSG00000117569 | 916.713083 | 0.10830721  | 0.12614882 | 0.36330767 | 0.59305778 | PTBP2    |
| 7292   | ENSG00000117586 | 23.3375293 | 0.35849965  | 0.41359646 | 0.11869375 | 0.28297093 | TNFSF4   |
| 9588   | ENSG00000117592 | 2684.03983 | 0.07980875  | 0.07172293 | 0.25765988 | 0.47887326 | PRDX6    |
| 55157  | ENSG00000117593 | 1423.89128 | -0.36917454 | 0.08026051 | 2.57E-06   | 2.71E-05   | DARS2    |
| 3290   | ENSG00000117594 | 0          | NA          | NA         | NA         | NA         | HSD11B1  |
| 3664   | ENSG00000117595 | 71.8570453 | -2.04343026 | 0.32330533 | 1.57E-11   | 3.27E-10   | IRF6     |
| 27042  | ENSG00000117597 | 905.13477  | -0.28258571 | 0.08989419 | 0.001186   | 0.00685702 | UTP25    |
| 163404 | ENSG00000117598 | 457.770438 | -1.5896545  | 0.12892935 | 5.09E-36   | 3.56E-34   | PLPPR5   |
| 9890   | ENSG00000117600 | 595.833541 | -0.27866817 | 0.10258627 | 0.00468304 | 0.0219961  | PLPPR4   |
| 462    | ENSG00000117601 | 1.5998353  | 0.05265818  | 0.38313675 | 0.43549321 | NA         | SERPINC1 |
| 11123  | ENSG00000117602 | 548.917826 | 0.66271113  | 0.12598122 | 3.61E-08   | 5.05E-07   | RCAN3    |
| 25949  | ENSG00000117614 | 818.852994 | 0.05545564  | 0.08910606 | 0.52283158 | 0.73594472 | SYF2     |
| 57035  | ENSG00000117616 | 1234.29372 | 0.19153851  | 0.09025902 | 0.02882487 | 0.09722903 | RSRP1    |
| 23443  | ENSG00000117620 | 316.510515 | 0.00280386  | 0.14391283 | 0.98310788 | 0.99428951 | SLC35A3  |
| 55758  | ENSG00000117625 | 1343.73326 | -0.16180689 | 0.08715655 | 0.05602862 | 0.16256329 | RCOR3    |
| 3925   | ENSG00000117632 | 12178.8983 | -0.10026622 | 0.05872464 | 0.08379077 | 0.21870922 | STMN1    |
| 56181  | ENSG00000117640 | 1046.13813 | -0.12232978 | 0.08099843 | 0.12356752 | 0.2912855  | MTFR1L   |
| 57134  | ENSG00000117643 | 76.4826564 | -0.08576176 | 0.2280016  | 0.64031202 | 0.81986385 | MAN1C1   |
| 4751   | ENSG00000117650 | 999.990323 | -0.04428387 | 0.08932975 | 0.60906313 | 0.79787471 | NEK2     |
| 6195   | ENSG00000117676 | 377.332392 | -0.32565615 | 0.19474581 | 0.05346599 | 0.15663988 | RPS6KA1  |
| 79947  | ENSG00000117682 | 411.465395 | 0.0584088   | 0.13979665 | 0.65463649 | 0.82810431 | DHDDS    |
| 29937  | ENSG00000117691 | 757.202679 | -0.20885801 | 0.1082133  | 0.04350904 | 0.13376459 | NENF     |
| 25936  | ENSG00000117697 | 1213.45731 | 0.00335837  | 0.08407214 | 0.9686693  | 0.98824492 | NSL1     |
| 5629   | ENSG00000117707 | 6367.06336 | -0.14325728 | 0.07339077 | 0.04645377 | 0.14068735 | PROX1    |
| 8289   | ENSG00000117713 | 5849.93855 | -0.14609065 | 0.05769664 | 0.01035083 | 0.04258823 | ARID1A   |
| 1063   | ENSG00000117724 | 12210.8841 | -0.5221726  | 0.05571459 | 2.56E-21   | 1.02E-19   | CENPF    |
| 6118   | ENSG00000117748 | 1171.58807 | -0.20280931 | 0.08177481 | 0.01102607 | 0.04494703 | RPA2     |
| 5511   | ENSG00000117751 | 1074.48506 | -0.03261867 | 0.07904802 | 0.67264921 | 0.83906698 | PPP1R8   |
| 23673  | ENSG00000117758 | 634.959186 | 0.12819773  | 0.10581361 | 0.20731501 | 0.41450466 | STX12    |
| 54996  | ENSG00000117791 | 206.126019 | 0.19590097  | 0.1824831  | 0.22234967 | 0.43535977 | MTARC2   |
| 200010 | ENSG00000117834 | 12.1006409 | 0.20295362  | 0.39715666 | 0.24685852 | 0.46592963 | SLC5A9   |
| 114883 | ENSG00000117859 | 1337.5727  | 0.05105868  | 0.07649101 | 0.49706348 | 0.71500229 | OSBPL9   |
| 51060  | ENSG00000117862 | 1033.9433  | 0.23440306  | 0.08293236 | 0.00373836 | 0.01823233 | TXNDC12  |
| 57488  | ENSG00000117868 | 1381.26584 | 0.08531068  | 0.07458023 | 0.24377735 | 0.4621195  | ESYT2    |
| 10849  | ENSG00000117877 | 160.291751 | -0.15503977 | 0.18074485 | 0.33000996 | 0.55861736 | POLR1G   |
| 23184  | ENSG00000117899 | 772.895902 | 0.03874295  | 0.10502162 | 0.70223232 | 0.85686744 | MESD     |
| 5955   | ENSG00000117906 | 2848.04673 | 0.14197034  | 0.06279023 | 0.02172199 | 0.07780545 | RCN2     |
| 1143   | ENSG00000117971 | 1056.48315 | 0.31317099  | 0.08662827 | 0.00020154 | 0.00143262 | CHRNA4   |

|        |                 |            |             |            |            |            |         |
|--------|-----------------|------------|-------------|------------|------------|------------|---------|
| 727897 | ENSG00000117983 | 1.71976341 | 0.04259761  | 0.38190092 | 0.52927044 | NA         | MUC5B   |
| 1509   | ENSG00000117984 | 1874.09081 | 0.33587724  | 0.07438988 | 3.95E-06   | 4.04E-05   | CTSD    |
| 78989  | ENSG00000118004 | 1760.92027 | -0.41727706 | 0.08252382 | 2.15E-07   | 2.72E-06   | COLEC11 |
| 10274  | ENSG00000118007 | 1281.79922 | -0.1802534  | 0.08378877 | 0.02719255 | 0.09298521 | STAG1   |
| 51146  | ENSG00000118017 | 2.0831918  | -0.11313163 | 0.39983459 | 0.18933273 | NA         | A4GNT   |
| 6794   | ENSG00000118046 | 1142.17186 | 0.29589398  | 0.0832942  | 0.00026628 | 0.00183949 | STK11   |
| 4297   | ENSG00000118058 | 3758.88564 | -0.01937376 | 0.10927814 | 0.85154427 | 0.93275912 | KMT2A   |
| 11181  | ENSG00000118094 | 0.52977536 | 0.01340197  | 0.38291275 | 0.74469277 | NA         | TREH    |
| 56912  | ENSG00000118096 | 369.787026 | 0.09177612  | 0.12762532 | 0.44626954 | 0.67062583 | IFT46   |
| 4317   | ENSG00000118113 | 0          | NA          | NA         | NA         | NA         | MMP8    |
| 335    | ENSG00000118137 | 0.15069912 | -0.01848503 | 0.38480575 | 0.84537521 | NA         | APOA1   |
| 84215  | ENSG00000118156 | 0.9809279  | -0.03757886 | 0.38418971 | 0.45799278 | NA         | ZNF541  |
| 6543   | ENSG00000118160 | 531.794755 | -1.24553982 | 0.15311076 | 3.85E-17   | 1.20E-15   | SLC8A2  |
| 11133  | ENSG00000118162 | 430.331262 | -0.03227758 | 0.12824832 | 0.78610961 | 0.90280441 | KPTN    |
| 6230   | ENSG00000118181 | 12170.5058 | 0.01388902  | 0.05307886 | 0.79214932 | 0.90499209 | RPS25   |
| 9928   | ENSG00000118193 | 1361.10994 | -0.74743635 | 0.08605792 | 7.99E-19   | 2.80E-17   | KIF14   |
| 7139   | ENSG00000118194 | 3.46996475 | 0.08669282  | 0.37933056 | 0.45219727 | 0.67536839 | TNNT2   |
| 83479  | ENSG00000118197 | 523.192853 | 0.0866014   | 0.11078514 | 0.41450101 | 0.6417034  | DDX59   |
| 23271  | ENSG00000118200 | 2130.51903 | -0.29234981 | 0.0880814  | 0.00062812 | 0.0039399  | CAMSAP2 |
| 22926  | ENSG00000118217 | 1044.96226 | 0.03063731  | 0.09973442 | 0.75127645 | 0.88327851 | ATF6    |
| 1421   | ENSG00000118231 | 0          | NA          | NA         | NA         | NA         | CRYGD   |
| 55686  | ENSG00000118242 | 135.089757 | -0.99724988 | 0.23613478 | 2.88E-06   | 3.02E-05   | MREG    |
| 7141   | ENSG00000118245 | 0          | NA          | NA         | NA         | NA         | TNP1    |
| 22868  | ENSG00000118246 | 644.203182 | -0.2997945  | 0.10154567 | 0.00213548 | 0.01131926 | FASTKD2 |
| 8828   | ENSG00000118257 | 28.2956297 | 0.90711927  | 1.24989208 | 0.01149878 | 0.04653421 | NRP2    |
| 1385   | ENSG00000118260 | 1493.595   | -0.03052634 | 0.0936356  | 0.73564888 | 0.87443975 | CREB1   |
| 8609   | ENSG00000118263 | 2513.22908 | 0.71827367  | 0.07282605 | 1.40E-23   | 6.37E-22   | KLF7    |
| 7276   | ENSG00000118271 | 0          | NA          | NA         | NA         | NA         | TTR     |
| 9331   | ENSG00000118276 | 249.095848 | 1.14234803  | 0.19157673 | 2.78E-10   | 5.11E-09   | B4GALT6 |
| 79630  | ENSG00000118292 | 8.07093576 | -0.04255829 | 0.35076292 | 0.77372893 | 0.89600234 | C1orf54 |
| 23632  | ENSG00000118298 | 35.3453528 | 0.31130532  | 0.34686623 | 0.15992606 | 0.34752825 | CA14    |
| 55259  | ENSG00000118307 | 4.98595501 | 0.08530186  | 0.37551028 | 0.48679249 | 0.70661128 | CFAP94  |
| 4033   | ENSG00000118308 | 1.00882577 | 0.05620494  | 0.38978218 | 0.2164917  | NA         | IRAG2   |
| 23120  | ENSG00000118322 | 0          | NA          | NA         | NA         | NA         | ATP10B  |
| 9789   | ENSG00000118363 | 1280.14211 | -0.26459929 | 0.11082245 | 0.01229522 | 0.04922057 | SPCS2   |
| 57558  | ENSG00000118369 | 438.938421 | 0.17034251  | 0.11813066 | 0.12904245 | 0.30038744 | USP35   |
| 6785   | ENSG00000118402 | 153.681664 | -0.15858005 | 0.18360078 | 0.32453558 | 0.55221149 | ELOVL4  |
| 27145  | ENSG00000118407 | 8.83544506 | 0.19212918  | 0.39996461 | 0.24764921 | 0.46665024 | FILIP1  |

|        |                 |            |             |            |            |            |          |
|--------|-----------------|------------|-------------|------------|------------|------------|----------|
| 9994   | ENSG00000118412 | 1039.25119 | -0.32690945 | 0.10334942 | 0.0009817  | 0.00582268 | CASP8AP2 |
| 9324   | ENSG00000118418 | 1131.85843 | 0.06449321  | 0.08183884 | 0.42031792 | 0.64619198 | HMGN3    |
| 90025  | ENSG00000118420 | 101.393494 | 0.03595837  | 0.20334652 | 0.83596821 | 0.92522644 | UBE3D    |
| 1268   | ENSG00000118432 | 25.5564887 | 1.25366561  | 0.56547333 | 0.00170423 | 0.00935593 | CNR1     |
| 81833  | ENSG00000118434 | 0          | NA          | NA         | NA         | NA         | SPACA1   |
| 81573  | ENSG00000118454 | 474.068088 | 0.28222161  | 0.11903821 | 0.01241377 | 0.0495851  | ANKRD13C |
| 84251  | ENSG00000118473 | 1011.88256 | -0.1575433  | 0.08242746 | 0.05002189 | 0.14903652 | SGIP1    |
| 23469  | ENSG00000118482 | 1383.14319 | -0.33600924 | 0.0734753  | 3.03E-06   | 3.16E-05   | PHF3     |
| 153918 | ENSG00000118491 | 0          | NA          | NA         | NA         | NA         | ZC2HC1B  |
| 79747  | ENSG00000118492 | 0.15069912 | -0.01848503 | 0.38480575 | 0.84537521 | NA         | ADGB     |
| 5325   | ENSG00000118495 | 483.082271 | 3.29302662  | 0.17029041 | 1.18E-84   | 2.60E-82   | PLAGL1   |
| 84085  | ENSG00000118496 | 542.343008 | 0.03450786  | 0.10254647 | 0.72845955 | 0.87026999 | FBXO30   |
| 7128   | ENSG00000118503 | 6.06966877 | 0.38127119  | 0.66060299 | 0.02079352 | 0.07522674 | TNFAIP3  |
| 9465   | ENSG00000118507 | 28.4774373 | -0.24327817 | 0.33607264 | 0.24615553 | 0.46542702 | AKAP7    |
| 10981  | ENSG00000118508 | 292.385766 | -0.28602853 | 0.14231724 | 0.02990879 | 0.1000827  | RAB32    |
| 4602   | ENSG00000118513 | 212.155475 | -0.14335279 | 0.15495207 | 0.31061927 | 0.53841396 | MYB      |
| 64577  | ENSG00000118514 | 7.47283966 | 0.07755272  | 0.37807924 | 0.46438262 | 0.68715328 | ALDH8A1  |
| 6446   | ENSG00000118515 | 62.1602575 | -1.69664286 | 0.36206315 | 1.67E-07   | 2.15E-06   | SGK1     |
| 81847  | ENSG00000118518 | 699.578014 | -0.01617383 | 0.09856481 | 0.86428049 | 0.93988845 | RNF146   |
| 383    | ENSG00000118520 | 0.50018037 | -0.01271546 | 0.38349606 | 0.78722594 | NA         | ARG1     |
| 1490   | ENSG00000118523 | 0          | NA          | NA         | NA         | NA         | CCN2     |
| 6943   | ENSG00000118526 | 0          | NA          | NA         | NA         | NA         | TCF21    |
| 83449  | ENSG00000118557 | 44.2208298 | -0.2391899  | 0.33726672 | 0.24905285 | 0.4684498  | PMFBP1   |
| 26234  | ENSG00000118564 | 581.436396 | 0.08564652  | 0.1038957  | 0.39213102 | 0.62144576 | FBXL5    |
| 80306  | ENSG00000118579 | 1407.19641 | -0.18937415 | 0.24233214 | 0.3201229  | 0.54785114 | MED28    |
| 9194   | ENSG00000118596 | 0.34746601 | 0.02370763  | 0.3853651  | 0.61987128 | NA         | SLC16A7  |
| 10329  | ENSG00000118600 | 202.149759 | -0.10784743 | 0.16980492 | 0.47768908 | 0.69938463 | RXYLT1   |
| 80264  | ENSG00000118620 | 280.210168 | -0.34327345 | 0.15446427 | 0.01504954 | 0.05786489 | ZNF430   |
| 8673   | ENSG00000118640 | 2.68458397 | 0.04363934  | 0.37392591 | 0.66718362 | 0.83613941 | VAMP8    |
| 64858  | ENSG00000118655 | 353.340188 | -0.37980652 | 0.12709244 | 0.00150853 | 0.00841879 | DCLRE1B  |
| 103910 | ENSG00000118680 | 2140.37942 | 0.17834787  | 0.06734405 | 0.00714187 | 0.03144527 | MYL12B   |
| 2309   | ENSG00000118689 | 2998.09001 | -0.23177357 | 0.06924988 | 0.00061501 | 0.00386377 | FOXO3    |
| 84071  | ENSG00000118690 | 62.4534746 | 0.29763841  | 0.33501766 | 0.17208836 | 0.36461546 | ARMC2    |
| 2691   | ENSG00000118702 | 0.16735865 | 0.01897177  | 0.38482933 | 0.78225479 | NA         | GHRH     |
| 6185   | ENSG00000118705 | 4579.29095 | 0.1188609   | 0.06236097 | 0.05341405 | 0.15653395 | RPN2     |
| 60436  | ENSG00000118707 | 1581.74068 | 0.3847437   | 0.0812734  | 1.23E-06   | 1.37E-05   | TGIF2    |
| 845    | ENSG00000118729 | 0          | NA          | NA         | NA         | NA         | CASQ2    |
| 118427 | ENSG00000118733 | 71.4058738 | -1.85492029 | 0.33433016 | 1.99E-09   | 3.29E-08   | OLFM3    |

|        |                 |            |             |            |            |            |          |
|--------|-----------------|------------|-------------|------------|------------|------------|----------|
| 5311   | ENSG00000118762 | 984.157051 | 0.10405655  | 0.0919184  | 0.2437588  | 0.4621195  | PKD2     |
| 9429   | ENSG00000118777 | 0          | NA          | NA         | NA         | NA         | ABCG2    |
| 6696   | ENSG00000118785 | 10.1856972 | 0.0867964   | 0.35867772 | 0.57147915 | 0.77166993 | SPP1     |
| 8987   | ENSG00000118804 | 266.895131 | 0.45237744  | 0.15840542 | 0.0018362  | 0.00994544 | STBD1    |
| 10983  | ENSG00000118816 | 5050.22306 | -0.47586968 | 0.06527842 | 1.35E-13   | 3.27E-12   | CCNI     |
| 5918   | ENSG00000118849 | 25.1218368 | 0.01641665  | 0.31697274 | 0.92908296 | 0.97031141 | RARRES1  |
| 64747  | ENSG00000118855 | 421.585209 | 0.19645334  | 0.1219997  | 0.08878573 | 0.22817472 | MFSD1    |
| 25782  | ENSG00000118873 | 2109.35413 | 0.06492463  | 0.08201617 | 0.41841631 | 0.6444567  | RAB3GAP2 |
| 196483 | ENSG00000118894 | 265.682056 | 0.00507627  | 0.14831858 | 0.97344207 | 0.99020176 | EEF2KMT  |
| 5493   | ENSG00000118898 | 23.8756172 | 0.1954757   | 0.35354188 | 0.31783028 | 0.54556488 | PPL      |
| 29855  | ENSG00000118900 | 1577.04748 | -0.13018795 | 0.07578103 | 0.07929247 | 0.21006311 | UBN1     |
| NA     | ENSG00000118903 | 0          | NA          | NA         | NA         | NA         | BTF3P11  |
| 11278  | ENSG00000118922 | 1655.23327 | -0.47242664 | 0.07192215 | 2.22E-11   | 4.56E-10   | KLF12    |
| 7347   | ENSG00000118939 | 185.095068 | -0.13770858 | 0.18503798 | 0.39565892 | 0.62508942 | UCHL3    |
| 27253  | ENSG00000118946 | 78.4617515 | -0.86896151 | 0.30207162 | 0.00050849 | 0.00327544 | PCDH17   |
| 64342  | ENSG00000118960 | 496.243609 | 0.23067748  | 0.13340505 | 0.06449843 | 0.18086909 | HS1BP3   |
| 60526  | ENSG00000118961 | 1112.60331 | -0.14936855 | 0.0961789  | 0.10784067 | 0.26339391 | LDAH     |
| 57539  | ENSG00000118965 | 1906.64976 | -0.11228192 | 0.07704804 | 0.1367471  | 0.31191797 | WDR35    |
| 894    | ENSG00000118971 | 0          | NA          | NA         | NA         | NA         | CCND2    |
| 8074   | ENSG00000118972 | 1.51652797 | 0.08755393  | 0.39515627 | 0.16226803 | NA         | FGF23    |
| NA     | ENSG00000118976 | 0.51314949 | -0.01008878 | 0.38327516 | 0.82010522 | NA         | OTUD4P1  |
| 22936  | ENSG00000118985 | 26.7637766 | 0.64227296  | 0.57388767 | 0.02816026 | 0.09547008 | ELL2     |
| NA     | ENSG00000118990 | 0          | NA          | NA         | NA         | NA         | GLRXP3   |
| 56171  | ENSG00000118997 | 30.0017969 | 0.14944207  | 0.36149475 | 0.3866789  | 0.61575643 | DNAH7    |
| 57404  | ENSG00000119004 | 210.795646 | 0.09263825  | 0.18927678 | 0.57401995 | 0.77333896 | CYP20A1  |
| 4709   | ENSG00000119013 | 476.490748 | 0.05103944  | 0.10710818 | 0.62045731 | 0.80630595 | NDUFB3   |
| 9330   | ENSG00000119041 | 1212.72093 | -0.07401102 | 0.0825048  | 0.35823288 | 0.58854144 | GTF3C3   |
| 23314  | ENSG00000119042 | 5.32276645 | -0.01658887 | 0.36812462 | 0.87198072 | 0.94401928 | SATB2    |
| 7320   | ENSG00000119048 | 582.891131 | -0.32782716 | 0.10804636 | 0.00150893 | 0.00841879 | UBE2B    |
| 140803 | ENSG00000119121 | 1.14358999 | -0.06092496 | 0.38759591 | 0.30748337 | NA         | TRPM6    |
| 9615   | ENSG00000119125 | 0          | NA          | NA         | NA         | NA         | GDA      |
| 687    | ENSG00000119138 | 150.013578 | -0.04830731 | 0.18741275 | 0.76831341 | 0.89324733 | KLF9     |
| 9414   | ENSG00000119139 | 1249.08432 | -0.66366334 | 0.10680473 | 1.28E-10   | 2.44E-09   | TJP2     |
| 84417  | ENSG00000119147 | 12.9856435 | -0.0703494  | 0.34472693 | 0.66465688 | 0.83444869 | ECRG4    |
| 9270   | ENSG00000119185 | 1357.78869 | -0.03221011 | 0.07429899 | 0.65763353 | 0.83025448 | ITGB1BP1 |
| 51692  | ENSG00000119203 | 1999.92211 | -0.21773335 | 0.08755266 | 0.01042824 | 0.04284454 | CPSF3    |
| 80235  | ENSG00000119227 | 103.506647 | 0.54512738  | 0.22881788 | 0.0051148  | 0.02368761 | PIGZ     |
| 205564 | ENSG00000119231 | 1005.05313 | -0.11829041 | 0.09074223 | 0.17899136 | 0.37507273 | SENP5    |

|        |                 |            |             |            |            |            |          |
|--------|-----------------|------------|-------------|------------|------------|------------|----------|
| 80212  | ENSG00000119242 | 899.174012 | 0.07357696  | 0.09124988 | 0.40694172 | 0.6352261  | CCDC92   |
| 84886  | ENSG00000119280 | 1178.30973 | -0.09304497 | 0.07659891 | 0.21452385 | 0.42489301 | C1orf198 |
| 440730 | ENSG00000119283 | 460.861188 | -3.44213763 | 0.16378147 | 3.85E-99   | 1.18E-96   | TRIM67   |
| 55127  | ENSG00000119285 | 3547.13784 | -0.17267216 | 0.06489539 | 0.00686867 | 0.0304592  | HEATR1   |
| 9991   | ENSG00000119314 | 1134.158   | -0.06678198 | 0.08933719 | 0.44124824 | 0.6661181  | PTBP3    |
| 5887   | ENSG00000119318 | 4124.16381 | -0.07726643 | 0.05968523 | 0.18958233 | 0.39058291 | RAD23B   |
| 23307  | ENSG00000119321 | 775.159515 | -0.1573623  | 0.15726369 | 0.27081138 | 0.49415045 | FKBP15   |
| 8727   | ENSG00000119326 | 655.33568  | -0.21459559 | 0.117366   | 0.05398059 | 0.15777474 | CTNNAL1  |
| 54942  | ENSG00000119328 | 261.844873 | 0.13329988  | 0.14099586 | 0.30935952 | 0.53712343 | ABITRAM  |
| 89891  | ENSG00000119333 | 2239.87656 | -0.02777183 | 0.06259257 | 0.65248681 | 0.82643886 | DYNC2I2  |
| 6418   | ENSG00000119335 | 9064.78308 | -0.10603985 | 0.05202327 | 0.03957231 | 0.12444359 | SET      |
| 5524   | ENSG00000119383 | 2037.08629 | 0.37569436  | 0.0952423  | 4.53E-05   | 0.00037551 | PTPA     |
| 2733   | ENSG00000119392 | 738.077863 | 0.02648915  | 0.09456117 | 0.77405113 | 0.89604057 | GLE1     |
| 51552  | ENSG00000119396 | 1281.67452 | -0.01942292 | 0.07632412 | 0.79475775 | 0.90579008 | RAB14    |
| 11064  | ENSG00000119397 | 1150.29806 | 0.08209728  | 0.08029156 | 0.2959121  | 0.52255416 | CNTRL    |
| 22954  | ENSG00000119401 | 372.260964 | 0.22311131  | 0.13667765 | 0.08001795 | 0.21130787 | TRIM32   |
| 26190  | ENSG00000119402 | 2280.63498 | -0.14571877 | 0.06581972 | 0.02451093 | 0.08581205 | FBXW2    |
| 26147  | ENSG00000119403 | 1452.21754 | -0.14328341 | 0.09182869 | 0.10771202 | 0.26327541 | PHF19    |
| 10783  | ENSG00000119408 | 607.221785 | -0.41227806 | 0.10829358 | 7.01E-05   | 0.00055703 | NEK6     |
| 54836  | ENSG00000119411 | 11.9147899 | 0.21490661  | 0.39589079 | 0.24080304 | 0.45879844 | BSPRY    |
| 5537   | ENSG00000119414 | 1060.607   | -0.13423229 | 0.08163527 | 0.09199781 | 0.23436524 | PPP6C    |
| 4702   | ENSG00000119421 | 475.547103 | -0.13309577 | 0.11144522 | 0.21109557 | 0.42012066 | NDUFA8   |
| 81932  | ENSG00000119431 | 170.000124 | -0.06191086 | 0.17456192 | 0.68840756 | 0.84869236 | HDHD3    |
| NA     | ENSG00000119440 | 0          | NA          | NA         | NA         | NA         | LCN1P1   |
| 92400  | ENSG00000119446 | 714.415444 | -0.17791425 | 0.15595382 | 0.2100778  | 0.41859431 | RBM18    |
| 57864  | ENSG00000119457 | 0.76951065 | -0.0295156  | 0.38376407 | 0.55723895 | NA         | SLC46A2  |
| 84263  | ENSG00000119471 | 395.429011 | -0.17913302 | 0.1356174  | 0.1565632  | 0.34316665 | HSDL2    |
| 79109  | ENSG00000119487 | 1906.9369  | 0.13466494  | 0.08056894 | 0.08724718 | 0.22550599 | MAPKAP1  |
| 8013   | ENSG00000119508 | 8.79956554 | 0.0704797   | 0.35349804 | 0.6477358  | 0.82431548 | NR4A3    |
| 27130  | ENSG00000119509 | 557.822217 | -0.15014907 | 0.13307958 | 0.22761251 | 0.44251172 | INVS     |
| 79695  | ENSG00000119514 | 52.7799483 | 1.45822543  | 0.36134047 | 4.06E-06   | 4.14E-05   | GALNT12  |
| 57706  | ENSG00000119522 | 901.089579 | -0.16083382 | 0.09209314 | 0.07138425 | 0.19425517 | DENND1A  |
| 85365  | ENSG00000119523 | 312.776666 | -0.07845831 | 0.1311425  | 0.52341435 | 0.73623706 | ALG2     |
| 1441   | ENSG00000119535 | 17.1629894 | 0.4016671   | 0.51418447 | 0.07964383 | 0.21062825 | CSF3R    |
| 2531   | ENSG00000119537 | 676.343998 | -0.0146182  | 0.11819342 | 0.89556003 | 0.95469109 | KDSR     |
| 9525   | ENSG00000119541 | 769.067141 | -0.00955296 | 0.09078261 | 0.91302994 | 0.96283789 | VPS4B    |
| 9480   | ENSG00000119547 | 1232.18786 | -0.35384847 | 0.08558707 | 2.13E-05   | 0.00019042 | ONECUT2  |
| 148223 | ENSG00000119559 | 523.755935 | 0.01878928  | 0.12433253 | 0.87406451 | 0.94457431 | C19orf25 |



|        |                 |            |             |            |            |            |         |
|--------|-----------------|------------|-------------|------------|------------|------------|---------|
| 84878  | ENSG00000119574 | 458.483199 | 0.13740459  | 0.12861398 | 0.25843281 | 0.47972557 | ZBTB45  |
| 56252  | ENSG00000119596 | 2988.0222  | 0.0602499   | 0.07746581 | 0.43143561 | 0.65697157 | YLPM1   |
| 26094  | ENSG00000119599 | 124.067877 | -0.0316927  | 0.23907919 | 0.86386228 | 0.93969119 | DCAF4   |
| 283571 | ENSG00000119608 | 6.27161519 | -0.21318625 | 0.43110152 | 0.15804768 | 0.34503367 | PROX2   |
| 338917 | ENSG00000119614 | 1.10518223 | 0.06168576  | 0.39096434 | 0.18060216 | NA         | VSX2    |
| 51077  | ENSG00000119616 | 782.766796 | -0.06764932 | 0.09773209 | 0.47353822 | 0.69551963 | FCF1    |
| 5228   | ENSG00000119630 | 180.220787 | 0.51552459  | 0.19026523 | 0.0022933  | 0.01203679 | PGF     |
| 83982  | ENSG00000119632 | 158.71175  | 0.30142448  | 0.17565986 | 0.05414148 | 0.15819211 | IFI27L2 |
| 80127  | ENSG00000119636 | 34.3702415 | 0.32346573  | 0.37677137 | 0.14565719 | 0.32616688 | BBOF1   |
| 91754  | ENSG00000119638 | 3148.12047 | 0.20760951  | 0.07489458 | 0.00466156 | 0.02192085 | NEK9    |
| 97     | ENSG00000119640 | 246.903468 | 0.38597694  | 0.17528215 | 0.01385698 | 0.0540973  | ACYP1   |
| 112752 | ENSG00000119650 | 230.202221 | 0.39569445  | 0.15758433 | 0.00599951 | 0.0271538  | IFT43   |
| 10577  | ENSG00000119655 | 445.335416 | 1.02823833  | 0.14160265 | 4.82E-14   | 1.22E-12   | NPC2    |
| NA     | ENSG00000119660 | 0          | NA          | NA         | NA         | NA         | DPPA5P4 |
| 83544  | ENSG00000119661 | 290.234891 | 0.15721725  | 0.19190421 | 0.34619142 | 0.57693723 | DNAL1   |
| 64207  | ENSG00000119669 | 1974.84038 | 0.45686064  | 0.06974055 | 2.64E-11   | 5.39E-10   | IRF2BPL |
| 10965  | ENSG00000119673 | 630.494637 | 0.16581212  | 0.1067654  | 0.10547789 | 0.25899521 | ACOT2   |
| 4053   | ENSG00000119681 | 406.666245 | 1.0085939   | 0.14286896 | 2.20E-13   | 5.22E-12   | LTBP2   |
| 9870   | ENSG00000119682 | 1776.04399 | 0.17023587  | 0.07966454 | 0.02882046 | 0.09722903 | AREL1   |
| 27030  | ENSG00000119684 | 735.1674   | -0.24980419 | 0.10679465 | 0.01454194 | 0.05619637 | MLH3    |
| 23093  | ENSG00000119685 | 626.998202 | -0.44723893 | 0.17448585 | 0.00429112 | 0.02048009 | TTL5    |
| 55640  | ENSG00000119686 | 1.44444657 | 0.05314176  | 0.38625921 | 0.34924497 | NA         | FLVCR2  |
| 5826   | ENSG00000119688 | 1244.27669 | 0.20329581  | 0.08091233 | 0.01008034 | 0.04167381 | ABCD4   |
| 1743   | ENSG00000119689 | 2349.37608 | 0.03166836  | 0.06581234 | 0.62561762 | 0.8095124  | DLST    |
| 57718  | ENSG00000119698 | 1.32916261 | 0.07178669  | 0.39161775 | 0.20808645 | NA         | PPP4R4  |
| 7043   | ENSG00000119699 | 183.736846 | 2.22314105  | 0.20004145 | 7.19E-30   | 4.16E-28   | TGFB3   |
| 79696  | ENSG00000119703 | 45.2292044 | -0.09043825 | 0.28656638 | 0.63876824 | 0.81845605 | ZC2HC1C |
| 81892  | ENSG00000119705 | 739.647164 | -0.02871532 | 0.09247223 | 0.74809237 | 0.88173637 | SLIRP   |
| 58517  | ENSG00000119707 | 3873.76305 | -0.14786763 | 0.0750718  | 0.04426679 | 0.13549029 | RBM25   |
| 4329   | ENSG00000119711 | 389.147313 | 0.68383404  | 0.18481118 | 4.76E-05   | 0.00039207 | ALDH6A1 |
| 8111   | ENSG00000119714 | 275.516557 | -0.96730524 | 0.1576443  | 1.16E-10   | 2.21E-09   | GPR68   |
| 2103   | ENSG00000119715 | 5.40908485 | 0.24903411  | 0.4983603  | 0.02030971 | 0.07378587 | ESRRB   |
| 8892   | ENSG00000119718 | 834.735002 | -0.22322153 | 0.09249998 | 0.01267552 | 0.05040737 | EIF2B2  |
| 55051  | ENSG00000119720 | 632.002897 | -0.23702192 | 0.12284561 | 0.0408619  | 0.12740848 | NRDE2   |
| 51004  | ENSG00000119723 | 297.798564 | -0.01366487 | 0.14385289 | 0.91731772 | 0.96503439 | COQ6    |
| 57862  | ENSG00000119725 | 860.153373 | 0.00814319  | 0.0871141  | 0.9243351  | 0.96852    | ZNF410  |
| 23433  | ENSG00000119729 | 1621.21499 | -0.60153463 | 0.10189148 | 1.06E-09   | 1.82E-08   | RHOQ    |
| 10936  | ENSG00000119737 | 101.140924 | 0.10050207  | 0.20528266 | 0.56424873 | 0.76680562 | GPR75   |

|        |                 |            |             |            |            |            |          |
|--------|-----------------|------------|-------------|------------|------------|------------|----------|
| 9913   | ENSG00000119760 | 1890.00755 | -0.04050163 | 0.06685344 | 0.53773163 | 0.74776213 | SUPT7L   |
| 114818 | ENSG00000119771 | 317.466345 | -0.90649997 | 0.14630031 | 8.69E-11   | 1.69E-09   | KLHL29   |
| 1788   | ENSG00000119772 | 5662.32045 | -0.18941097 | 0.05329689 | 0.00032843 | 0.00222014 | DNMT3A   |
| 54867  | ENSG00000119777 | 1178.16003 | 0.1147464   | 0.08952981 | 0.18753722 | 0.38786275 | TMEM214  |
| 54454  | ENSG00000119778 | 894.308237 | 0.02317594  | 0.08592154 | 0.78269387 | 0.90105949 | ATAD2B   |
| 2281   | ENSG00000119782 | 416.757909 | -0.17069577 | 0.11877288 | 0.1292797  | 0.30076329 | FKBP1B   |
| 64225  | ENSG00000119787 | 1357.73636 | -0.12529187 | 0.08995917 | 0.15132812 | 0.33531348 | ATL2     |
| 51646  | ENSG00000119801 | 733.864792 | 0.18842342  | 0.09446338 | 0.03935644 | 0.12400059 | YPEL5    |
| 25940  | ENSG00000119812 | 908.350775 | 0.09621537  | 0.26217024 | 0.62192353 | 0.80695268 | FAM98A   |
| 84272  | ENSG00000119820 | 1506.91759 | -0.10065376 | 0.119261   | 0.36979295 | 0.59912004 | YIPF4    |
| 54812  | ENSG00000119844 | 678.350224 | -0.041627   | 0.11221339 | 0.6972585  | 0.85387893 | AFTPH    |
| 29094  | ENSG00000119862 | 491.537335 | -0.48861236 | 0.13085134 | 7.39E-05   | 0.00058248 | LGALS1   |
| 25927  | ENSG00000119865 | 1447.10622 | -0.53606188 | 0.07235006 | 4.58E-14   | 1.16E-12   | CNRIP1   |
| 53335  | ENSG00000119866 | 345.67095  | 0.70459498  | 0.16008983 | 2.36E-06   | 2.51E-05   | BCL11A   |
| 9419   | ENSG00000119878 | 583.131038 | -0.29999352 | 0.1153534  | 0.00615757 | 0.02770185 | CRIP1    |
| 4072   | ENSG00000119888 | 22.7366734 | 0.13119191  | 0.31983415 | 0.49837324 | 0.71619429 | EPCAM    |
| 26503  | ENSG00000119899 | 215.795316 | 0.25874415  | 0.16493123 | 0.08224978 | 0.21582272 | SLC17A5  |
| 79627  | ENSG00000119900 | 603.001247 | 0.72112348  | 0.1075206  | 4.43E-12   | 9.66E-11   | OGFRL1   |
| 55719  | ENSG00000119906 | 868.397566 | -0.07070569 | 0.0917529  | 0.42639203 | 0.65221241 | SLF2     |
| 3416   | ENSG00000119912 | 805.762907 | -0.21617111 | 0.09251655 | 0.01579982 | 0.0601436  | IDE      |
| 6975   | ENSG00000119913 | 0          | NA          | NA         | NA         | NA         | TECTB    |
| 83401  | ENSG00000119915 | 12.9494607 | -0.00154592 | 0.33153744 | 0.99057595 | 0.99679705 | ELOVL3   |
| 3437   | ENSG00000119917 | 0.3223625  | -0.02325318 | 0.38531854 | 0.66968133 | NA         | IFIT3    |
| 159296 | ENSG00000119919 | 0          | NA          | NA         | NA         | NA         | NKX2-3   |
| 3433   | ENSG00000119922 | 10.7294149 | -2.68734937 | 1.27507052 | 0.0008578  | 0.00517603 | IFIT2    |
| 57678  | ENSG00000119927 | 742.913839 | -0.0326519  | 0.122647   | 0.77772655 | 0.89814288 | GPAM     |
| 51076  | ENSG00000119929 | 202.139733 | -0.18370298 | 0.15644119 | 0.19725891 | 0.40121304 | CUTC     |
| 5507   | ENSG00000119938 | 62.9620956 | -0.62910418 | 0.30091029 | 0.00765801 | 0.03328254 | PPP1R3C  |
| 84795  | ENSG00000119943 | 24.3766692 | -0.1095554  | 0.33914092 | 0.53597666 | 0.74664913 | PYROXD2  |
| 26507  | ENSG00000119946 | 471.467008 | -0.43786701 | 0.14670471 | 0.00123238 | 0.00707069 | CNNM1    |
| 4601   | ENSG00000119950 | 759.953398 | 0.06511741  | 0.09906896 | 0.49762847 | 0.71553478 | MXI1     |
| 10285  | ENSG00000119953 | 659.319027 | 0.01235185  | 0.11032989 | 0.90787943 | 0.95978728 | SMNDC1   |
| 80007  | ENSG00000119965 | 301.565388 | -0.1778334  | 0.1378677  | 0.16566898 | 0.35583766 | C10orf88 |
| 3070   | ENSG00000119969 | 1001.61205 | 0.04672515  | 0.12498701 | 0.69347587 | 0.85183585 | HELLS    |
| 2834   | ENSG00000119973 | 173.185912 | -2.63776156 | 0.22556672 | 6.18E-33   | 3.87E-31   | PRLHR    |
| 26123  | ENSG00000119977 | 671.176329 | 0.26104723  | 0.09967317 | 0.00654051 | 0.02918662 | TCTN3    |
| 404636 | ENSG00000119979 | 554.396248 | -0.39510462 | 0.11179466 | 0.00021447 | 0.00151478 | DENND10  |
| 60370  | ENSG00000119986 | 57.1551777 | -0.00547188 | 0.25226017 | 0.97545214 | 0.99139237 | AVPI1    |

|           |                 |            |             |            |            |            |          |
|-----------|-----------------|------------|-------------|------------|------------|------------|----------|
| 55717     | ENSG00000120008 | 1487.21575 | 0.24283317  | 0.08346304 | 0.00282788 | 0.01440808 | WDR11    |
| 79591     | ENSG00000120029 | 508.001221 | -0.26936629 | 0.11269288 | 0.01207479 | 0.0484947  | ARMH3    |
| 30819     | ENSG00000120049 | 60.089505  | -0.24115998 | 0.26424331 | 0.22822978 | 0.44340764 | KCNIP2   |
| 159686    | ENSG00000120051 | 9.91435712 | 0.11711156  | 0.3753945  | 0.40628363 | 0.63454832 | CFAP58   |
| 2805      | ENSG00000120053 | 529.41739  | -0.22496265 | 0.11140202 | 0.03415518 | 0.11127072 | GOT1     |
| 1369      | ENSG00000120054 | 0          | NA          | NA         | NA         | NA         | CPN1     |
| 79946     | ENSG00000120055 | 16.5611201 | -0.0275759  | 0.32709173 | 0.87169699 | 0.94401928 | C10orf95 |
| 6425      | ENSG00000120057 | 57.7363954 | -5.37450602 | 0.6261458  | 3.30E-18   | 1.12E-16   | SFRP5    |
| 10672     | ENSG00000120063 | 2740.08663 | -0.5154045  | 0.06658757 | 3.85E-15   | 1.07E-13   | GNA13    |
| 3218      | ENSG00000120068 | 0          | NA          | NA         | NA         | NA         | HOXB8    |
| 284058    | ENSG00000120071 | 2062.44241 | 0.12225601  | 0.06725501 | 0.06483746 | 0.18146058 | KANSL1   |
| 3215      | ENSG00000120075 | 0          | NA          | NA         | NA         | NA         | HOXB5    |
| 1394      | ENSG00000120088 | 93.5110989 | -0.88036747 | 0.29428492 | 0.0003725  | 0.00248666 | CRHR1    |
| 104909134 | ENSG00000120088 | 93.5110989 | -0.88036747 | 0.29428492 | 0.0003725  | 0.00248666 | CRHR1    |
| 3213      | ENSG00000120093 | 0.173124   | -0.01911262 | 0.38486262 | 0.84537521 | NA         | HOXB3    |
| 3211      | ENSG00000120094 | 0          | NA          | NA         | NA         | NA         | HOXB1    |
| 1843      | ENSG00000120129 | 857.343908 | 1.46950082  | 0.09975396 | 3.58E-50   | 3.57E-48   | DUSP1    |
| 79646     | ENSG00000120137 | 6763.20309 | -0.20524492 | 0.05832454 | 0.00036582 | 0.00244454 | PANK3    |
| 4488      | ENSG00000120149 | 21.0434459 | 0.23184447  | 0.37653472 | 0.24548053 | 0.46454384 | MSX2     |
| 7010      | ENSG00000120156 | 0          | NA          | NA         | NA         | NA         | TEK      |
| 10171     | ENSG00000120158 | 433.847976 | -0.07699634 | 0.11230171 | 0.4725845  | 0.69470213 | RCL1     |
| 79886     | ENSG00000120159 | 540.631999 | 0.03979337  | 0.11508011 | 0.71791384 | 0.8643386  | CAAP1    |
| 54586     | ENSG00000120160 | 0          | NA          | NA         | NA         | NA         | EQTN     |
| 79817     | ENSG00000120162 | 69.7848138 | -0.0205554  | 0.24853819 | 0.91226129 | 0.96260718 | MOB3B    |
| 11172     | ENSG00000120210 | 0.33997242 | 0.00281064  | 0.38338782 | 0.96162062 | NA         | INSL6    |
| 3641      | ENSG00000120211 | 0          | NA          | NA         | NA         | NA         | INSL4    |
| 2315      | ENSG00000120215 | 5.7289566  | -0.25973048 | 0.48181162 | 0.07259529 | 0.19646576 | MLANA    |
| 29126     | ENSG00000120217 | 20.335057  | -0.01875484 | 0.34910199 | 0.89462025 | 0.95456012 | CD274    |
| 3443      | ENSG00000120235 | 0          | NA          | NA         | NA         | NA         | IFNA6    |
| 3445      | ENSG00000120242 | 0          | NA          | NA         | NA         | NA         | IFNA8    |
| 2891      | ENSG00000120251 | 459.250026 | -1.84056563 | 0.12877631 | 1.79E-47   | 1.65E-45   | GRIA2    |
| 348995    | ENSG00000120253 | 960.836171 | -0.14039688 | 0.08683075 | 0.09639355 | 0.24263487 | NUP43    |
| 25902     | ENSG00000120254 | 786.115544 | 0.24299246  | 0.14783698 | 0.07432264 | 0.2001033  | MTHFD1L  |
| 84918     | ENSG00000120256 | 515.215183 | 0.15908704  | 0.11152627 | 0.13546429 | 0.3099898  | LRP11    |
| 80129     | ENSG00000120262 | 0          | NA          | NA         | NA         | NA         | CCDC170  |
| 5110      | ENSG00000120265 | 1052.31092 | -0.0136195  | 0.08906876 | 0.87370972 | 0.94441388 | PCMT1    |
| 57480     | ENSG00000120278 | 0          | NA          | NA         | NA         | NA         | PLEKHG1  |
| 80177     | ENSG00000120279 | 0.64236694 | -0.01780933 | 0.38349976 | 0.68678394 | NA         | MYCT1    |

|           |                 |            |             |            |            |            |           |
|-----------|-----------------|------------|-------------|------------|------------|------------|-----------|
| 80231     | ENSG00000120280 | 0          | NA          | NA         | NA         | NA         | TASL      |
| 4115      | ENSG00000120289 | 0          | NA          | NA         | NA         | NA         | MAGEB4    |
| 84418     | ENSG00000120306 | 160.84937  | 0.19246093  | 0.1847011  | 0.23533555 | 0.45219979 | CYSTM1    |
| 54853     | ENSG00000120314 | 1023.41179 | 0.04074081  | 0.08104558 | 0.60740778 | 0.7967057  | WDR55     |
| 64411     | ENSG00000120318 | 2379.06882 | -0.40966167 | 0.06413246 | 8.78E-11   | 1.70E-09   | ARAP3     |
| 56128     | ENSG00000120322 | 92.1367951 | 0.15439673  | 0.21104516 | 0.3839572  | 0.61309544 | PCDHB8    |
| 56126     | ENSG00000120324 | 282.207207 | 0.58595814  | 0.1469309  | 2.00E-05   | 0.00017934 | PCDHB10   |
| 56122     | ENSG00000120327 | 405.780244 | 0.27068115  | 0.12263434 | 0.0194878  | 0.07145408 | PCDHB14   |
| 56124     | ENSG00000120328 | 167.096544 | 0.60960253  | 0.19082337 | 0.00037387 | 0.00249331 | PCDHB12   |
| 83884     | ENSG00000120329 | 0          | NA          | NA         | NA         | NA         | SLC25A2   |
| 63923     | ENSG00000120332 | 0          | NA          | NA         | NA         | NA         | TNN       |
| 63931     | ENSG00000120333 | 504.070988 | -0.20545082 | 0.12025192 | 0.07108284 | 0.19367482 | MRPS14    |
| 91687     | ENSG00000120334 | 318.608209 | -0.05845216 | 0.14191938 | 0.6553748  | 0.82851001 | CENPL     |
| 8995      | ENSG00000120337 | 0          | NA          | NA         | NA         | NA         | TNFSF18   |
| 89866     | ENSG00000120341 | 37.215499  | 0.228893    | 0.36391082 | 0.25803351 | 0.47940416 | SEC16B    |
| 111240474 | ENSG00000120341 | 37.215499  | 0.228893    | 0.36391082 | 0.25803351 | 0.47940416 | SEC16B    |
| 92344     | ENSG00000120370 | 201.712828 | -0.06196111 | 0.15863981 | 0.66710623 | 0.83613156 | GORAB     |
| 2853      | ENSG00000120436 | 0          | NA          | NA         | NA         | NA         | GPR31     |
| 39        | ENSG00000120437 | 1374.67827 | -0.29673139 | 0.11891045 | 0.0084037  | 0.03597182 | ACAT2     |
| 6950      | ENSG00000120438 | 4294.80409 | -0.16627618 | 0.07298735 | 0.02009946 | 0.07320204 | TCP1      |
| 83887     | ENSG00000120440 | 35.3070264 | 0.08386398  | 0.29661234 | 0.66545432 | 0.83481591 | TTLL2     |
| 399979    | ENSG00000120451 | 2037.5408  | -0.18712652 | 0.09732365 | 0.0462175  | 0.14012153 | SNX19     |
| 3762      | ENSG00000120457 | 17.3650061 | -0.1379713  | 0.34524466 | 0.44838062 | 0.67234398 | KCNJ5     |
| 79684     | ENSG00000120458 | 550.13967  | 0.08344655  | 0.11044726 | 0.43061915 | 0.65606363 | MSANTD2   |
| 63970     | ENSG00000120471 | 1.63396956 | 0.06161887  | 0.38411344 | 0.42832792 | NA         | TP53AIP1  |
| 56159     | ENSG00000120498 | 0.34624801 | -0.02356563 | 0.38536324 | 0.65270996 | NA         | TEX11     |
| 407       | ENSG00000120500 | 1.45944124 | 0.07028406  | 0.38875353 | 0.30037243 | NA         | ARR3      |
| 51248     | ENSG00000120509 | 571.581987 | 0.16544791  | 0.10612832 | 0.10437294 | 0.25722378 | PDZD11    |
| 84068     | ENSG00000120519 | 118.682612 | 0.23240874  | 0.2232719  | 0.20625115 | 0.41325498 | SLC10A7   |
| 84955     | ENSG00000120526 | 653.096444 | -0.18752884 | 0.11010583 | 0.0745429  | 0.20050585 | NUDCD1    |
| 56943     | ENSG00000120533 | 1211.00101 | -0.02705449 | 0.08072863 | 0.73142849 | 0.87166875 | ENY2      |
| 84930     | ENSG00000120539 | 931.633376 | -0.25550982 | 0.08720575 | 0.00256651 | 0.01327412 | MASTL     |
| 56243     | ENSG00000120549 | 148.379528 | 2.62333394  | 0.24129862 | 8.49E-29   | 4.68E-27   | KIAA1217  |
| NA        | ENSG00000120555 | 2.39624697 | -0.04839539 | 0.377767   | 0.58892803 | NA         | SEPTIN7P9 |
| 84569     | ENSG00000120563 | 0          | NA          | NA         | NA         | NA         | LYZL1     |
| 84898     | ENSG00000120594 | 119.720045 | -0.25425581 | 0.29890465 | 0.22233592 | 0.43535977 | PLXDC2    |
| 80314     | ENSG00000120616 | 828.1884   | 0.05603617  | 0.09290604 | 0.53471352 | 0.74572704 | EPC1      |
| 440073    | ENSG00000120645 | 371.262426 | -4.75530407 | 0.21128816 | 4.91E-113  | 1.71E-110  | IQSEC3    |

|           |                 |            |             |            |            |            |           |
|-----------|-----------------|------------|-------------|------------|------------|------------|-----------|
| 84318     | ENSG00000120647 | 498.811904 | -0.17981982 | 0.13026822 | 0.14093831 | 0.31898686 | CCDC77    |
| 6883      | ENSG00000120656 | 423.27743  | -0.04450115 | 0.11421278 | 0.68237534 | 0.8449992  | TAF12     |
| 55068     | ENSG00000120658 | 174.876746 | -0.60166448 | 0.18541886 | 0.00031691 | 0.0021516  | ENOX1     |
| 8600      | ENSG00000120659 | 0          | NA          | NA         | NA         | NA         | TNFSF11   |
| 9617      | ENSG00000120662 | 192.601811 | -0.20174927 | 0.18258448 | 0.20849578 | 0.4162363  | MTRF1     |
| NA        | ENSG00000120664 | 11.7655225 | 0.09655536  | 0.3495569  | 0.56433994 | 0.76683134 | SPART-AS1 |
| 54937     | ENSG00000120669 | 28.5070653 | 0.30151217  | 0.37846802 | 0.16902965 | 0.36039348 | SOHLH2    |
| 29103     | ENSG00000120675 | 249.20731  | 0.37146513  | 0.16186376 | 0.01150006 | 0.04653421 | DNAJC15   |
| 80209     | ENSG00000120685 | 1419.8766  | -0.12958998 | 0.08471802 | 0.1160893  | 0.27839903 | PROSER1   |
| 51569     | ENSG00000120686 | 785.482465 | -0.03728861 | 0.10389224 | 0.70883951 | 0.86019792 | UFM1      |
| 11193     | ENSG00000120688 | 317.537635 | 0.06856774  | 0.12842378 | 0.57178542 | 0.77185678 | WBP4      |
| 1997      | ENSG00000120690 | 321.741567 | 0.36696264  | 0.13572379 | 0.00379998 | 0.01846719 | ELF1      |
| 4093      | ENSG00000120693 | 1117.01092 | -0.30215963 | 0.08179442 | 0.00015061 | 0.0010994  | SMAD9     |
| 10808     | ENSG00000120694 | 3490.84661 | -0.10691638 | 0.10890956 | 0.30469532 | 0.53198909 | HSPH1     |
| 84078     | ENSG00000120696 | 374.795041 | -0.12501542 | 0.1356454  | 0.32325903 | 0.55093712 | KBTBD7    |
| 29880     | ENSG00000120697 | 462.944904 | -0.05160088 | 0.11294109 | 0.63185219 | 0.81371846 | ALG5      |
| 11340     | ENSG00000120699 | 760.125469 | 0.10729422  | 0.09268248 | 0.23019674 | 0.44613689 | EXOSC8    |
| 2107      | ENSG00000120705 | 2806.21252 | -0.2631622  | 0.06619744 | 5.29E-05   | 0.00042958 | ETF1      |
| 7045      | ENSG00000120708 | 0.16735865 | 0.01897177  | 0.38482933 | 0.78225479 | NA         | TGFBI     |
| 51307     | ENSG00000120709 | 1410.50167 | -0.09312466 | 0.07352204 | 0.19626676 | 0.39997732 | FAM53C    |
| 100128966 | ENSG00000120709 | 1410.50167 | -0.09312466 | 0.07352204 | 0.19626676 | 0.39997732 | FAM53C    |
| 64374     | ENSG00000120725 | 333.050348 | -0.01207624 | 0.14285797 | 0.92667372 | 0.96932621 | SIL1      |
| 51247     | ENSG00000120727 | 2734.24196 | 0.16969027  | 0.05898303 | 0.00359296 | 0.01765775 | PAIP2     |
| 9499      | ENSG00000120729 | 0.64135813 | 0.03718182  | 0.38666599 | 0.41086295 | NA         | MYOT      |
| 51780     | ENSG00000120733 | 2745.08494 | -0.11374129 | 0.06241727 | 0.06453206 | 0.18093782 | KDM3B     |
| 1958      | ENSG00000120738 | 4996.43647 | 4.06310543  | 0.41368801 | 4.85E-24   | 2.24E-22   | EGR1      |
| 27230     | ENSG00000120742 | 2434.74932 | 0.32413002  | 0.06821109 | 1.33E-06   | 1.48E-05   | SERP1     |
| 5357      | ENSG00000120756 | 288.880579 | -0.12465289 | 0.16976512 | 0.41034583 | 0.63815925 | PLS1      |
| 22835     | ENSG00000120784 | 496.624608 | -0.38404221 | 0.1652565  | 0.01008447 | 0.04167381 | ZFP30     |
| 7181      | ENSG00000120798 | 576.21415  | 0.03062685  | 0.13077995 | 0.80445749 | 0.91118482 | NR2C1     |
| 27340     | ENSG00000120800 | 963.348902 | 0.06319517  | 0.08804338 | 0.46110034 | 0.68423565 | UTP20     |
| 7112      | ENSG00000120802 | 4038.54265 | -0.36493955 | 0.06543573 | 1.44E-08   | 2.12E-07   | TMPO      |
| 400       | ENSG00000120805 | 438.847293 | 0.04493661  | 0.12514456 | 0.70513367 | 0.85803894 | ARL1      |
| 83468     | ENSG00000120820 | 49.2276728 | 0.64859104  | 0.36002737 | 0.0128457  | 0.05099213 | GLT8D2    |
| 80298     | ENSG00000120832 | 362.394939 | 0.08458065  | 0.13486535 | 0.50463208 | 0.72111066 | MTERF2    |
| 8835      | ENSG00000120833 | 421.357819 | -0.26256633 | 0.13527989 | 0.03731991 | 0.11917383 | SOCS2     |
| 4801      | ENSG00000120837 | 709.092025 | -0.29319442 | 0.100317   | 0.00245167 | 0.01274996 | NFYB      |
| 51019     | ENSG00000120860 | 173.431773 | 0.10492392  | 0.1888564  | 0.52457492 | 0.73734087 | WASHC3    |

|        |                 |            |             |            |            |            |           |
|--------|-----------------|------------|-------------|------------|------------|------------|-----------|
| 317    | ENSG00000120868 | 767.920285 | -0.16832327 | 0.09600625 | 0.06953469 | 0.19052178 | APAF1     |
| 1846   | ENSG00000120875 | 3403.40835 | -0.44602661 | 0.06915428 | 5.00E-11   | 9.92E-10   | DUSP4     |
| 1191   | ENSG00000120885 | 21.9108667 | -0.48370572 | 0.67104545 | 0.03937525 | 0.12401014 | CLU       |
| 8795   | ENSG00000120889 | 1810.28868 | 0.13976935  | 0.07597222 | 0.06052385 | 0.17247818 | TNFRSF10B |
| 10174  | ENSG00000120896 | 785.559624 | 0.257622    | 0.12949812 | 0.03399772 | 0.11087545 | SORBS3    |
| 2185   | ENSG00000120899 | 180.616252 | 0.15673729  | 0.23933717 | 0.40825751 | 0.63640649 | PTK2B     |
| 1135   | ENSG00000120903 | 3.78621096 | -0.08248107 | 0.38584972 | 0.3416745  | 0.57180671 | CHRNA2    |
| 148    | ENSG00000120907 | 0.45187964 | 0.00140723  | 0.38312334 | 0.99378719 | NA         | ADRA1A    |
| 5533   | ENSG00000120910 | 196.713757 | -0.0881236  | 0.16498465 | 0.55287427 | 0.75919187 | PPP3CC    |
| 64236  | ENSG00000120913 | 215.305627 | -0.02158905 | 0.14921476 | 0.87425426 | 0.94470892 | PDLIM2    |
| 2053   | ENSG00000120915 | 387.329003 | 0.29710364  | 0.15906709 | 0.03994049 | 0.12522429 | EPHX2     |
| 81790  | ENSG00000120925 | 476.578082 | -0.01343496 | 0.1092176  | 0.89831298 | 0.95552914 | RNF170    |
| 4879   | ENSG00000120937 | 0.62258031 | -0.04505531 | 0.38756585 | 0.37427725 | NA         | NPPB      |
| 29914  | ENSG00000120942 | 431.434997 | -0.19323706 | 0.14645419 | 0.15187436 | 0.33595576 | UBIAD1    |
| 23435  | ENSG00000120948 | 4199.18554 | -0.01926511 | 0.08577117 | 0.81697301 | 0.91671007 | TARDBP    |
| 943    | ENSG00000120949 | 0.173124   | -0.01911262 | 0.38486262 | 0.84537521 | NA         | TNFRSF8   |
| 65122  | ENSG00000120952 | 0          | NA          | NA         | NA         | NA         | PRAMEF2   |
| 51123  | ENSG00000120963 | 664.942646 | -0.83015697 | 0.13436379 | 1.09E-10   | 2.09E-09   | ZNF706    |
| 10434  | ENSG00000120992 | 1176.55143 | -0.11924934 | 0.09669469 | 0.20177276 | 0.40724024 | LYPLA1    |
| 83690  | ENSG00000121005 | 1053.39887 | 0.84018148  | 0.10362377 | 9.11E-17   | 2.77E-15   | CRISPLD1  |
| 10987  | ENSG00000121022 | 955.115551 | -0.01342789 | 0.08991834 | 0.87716611 | 0.94574195 | COP55     |
| 157506 | ENSG00000121039 | 94.9529099 | -0.09618639 | 0.26494297 | 0.61837474 | 0.80469863 | RDH10     |
| 8288   | ENSG00000121053 | 2.50967355 | -0.122475   | 0.4052678  | 0.14170571 | NA         | EPX       |
| 8165   | ENSG00000121057 | 2384.41053 | -0.31319067 | 0.06892581 | 3.72E-06   | 3.82E-05   | AKAP1     |
| 8161   | ENSG00000121058 | 608.426203 | -0.31462872 | 0.09981326 | 0.00106014 | 0.00620629 | COIL      |
| 7706   | ENSG00000121060 | 1326.24236 | 0.10441238  | 0.09801549 | 0.27066736 | 0.49398241 | TRIM25    |
| 59342  | ENSG00000121064 | 575.479855 | 0.51800504  | 0.11850939 | 4.60E-06   | 4.66E-05   | SCPEP1    |
| 8405   | ENSG00000121067 | 963.04294  | -0.06566276 | 0.11153392 | 0.53661232 | 0.74729267 | SPOP      |
| 6909   | ENSG00000121068 | 3060.57016 | 0.68133843  | 0.06010567 | 2.24E-30   | 1.30E-28   | TBX2      |
| 10237  | ENSG00000121073 | 1010.25867 | 0.32981606  | 0.08780832 | 0.00011093 | 0.00083399 | SLC35B1   |
| 9496   | ENSG00000121075 | 24.0685901 | 2.13646531  | 0.63581549 | 3.82E-05   | 0.00032221 | TBX4      |
| NA     | ENSG00000121089 | 0.53000235 | 0.01362607  | 0.38292808 | 0.74194811 | NA         | NACA3P    |
| 56155  | ENSG00000121101 | 21.372039  | -0.03448964 | 0.30460577 | 0.85216373 | 0.93300196 | TEX14     |
| 81558  | ENSG00000121104 | 259.882569 | 0.60253702  | 0.16894701 | 0.00010048 | 0.00076377 | FAM117A   |
| 23397  | ENSG00000121152 | 1296.86791 | -0.04802993 | 0.09955691 | 0.61634942 | 0.80326549 | NCAPH     |
| 9227   | ENSG00000121207 | 0          | NA          | NA         | NA         | NA         | LRAT      |
| 23240  | ENSG00000121210 | 573.168491 | -0.14188223 | 0.10927311 | 0.1738051  | 0.36691776 | TMEM131L  |
| 84057  | ENSG00000121211 | 183.241121 | -0.23082174 | 0.17431388 | 0.13630411 | 0.3113874  | MND1      |

|        |                 |            |             |            |            |            |         |
|--------|-----------------|------------|-------------|------------|------------|------------|---------|
| 117854 | ENSG00000121236 | 0          | NA          | NA         | NA         | NA         | TRIM6   |
| 85320  | ENSG00000121270 | 13.7729283 | 0.06656442  | 0.33824625 | 0.69629209 | 0.85340714 | ABCC11  |
| 64282  | ENSG00000121274 | 314.151634 | -0.16153298 | 0.1504482  | 0.24157656 | 0.45960686 | TENT4B  |
| 113    | ENSG00000121281 | 994.014068 | 0.00927499  | 0.09700272 | 0.92214937 | 0.96738383 | ADCY7   |
| 84902  | ENSG00000121289 | 615.698644 | 0.33300729  | 0.14328507 | 0.01225164 | 0.04906593 | CEP89   |
| 57616  | ENSG00000121297 | 777.221587 | 0.03597399  | 0.09502495 | 0.69669584 | 0.85365037 | TSHZ3   |
| 55268  | ENSG00000121310 | 195.38927  | 0.08064184  | 0.20585664 | 0.64423778 | 0.82234302 | ECHDC2  |
| 50836  | ENSG00000121314 | 0.81915356 | -0.00712032 | 0.38011689 | 0.90685717 | NA         | TAS2R8  |
| 79887  | ENSG00000121316 | 9.85508768 | 0.46702557  | 0.75040772 | 0.02625165 | 0.09046946 | PLBD1   |
| 50839  | ENSG00000121318 | 24.5793946 | 0.19775705  | 0.33182453 | 0.33080652 | 0.55961812 | TAS2R10 |
| 653247 | ENSG00000121335 | 0.66900215 | 0.02598789  | 0.38362153 | 0.58754139 | NA         | PRB2    |
| 79912  | ENSG00000121350 | 368.624639 | 0.22113381  | 0.164323   | 0.13619886 | 0.31128106 | PYROXD1 |
| 3375   | ENSG00000121351 | 0          | NA          | NA         | NA         | NA         | IAPP    |
| 3764   | ENSG00000121361 | 363.932469 | 1.30671331  | 0.13438417 | 2.38E-23   | 1.06E-21   | KCNJ8   |
| 50837  | ENSG00000121377 | 0          | NA          | NA         | NA         | NA         | TAS2R7  |
| 79370  | ENSG00000121380 | 0.78914922 | -0.00349613 | 0.38198127 | 0.90760115 | NA         | BCL2L14 |
| 50835  | ENSG00000121381 | 1.19489416 | 0.05598592  | 0.38741728 | 0.28969146 | NA         | TAS2R9  |
| NA     | ENSG00000121388 | 0          | NA          | NA         | NA         | NA         |         |
| 55269  | ENSG00000121390 | 1087.8728  | -0.08252417 | 0.08732678 | 0.33146765 | 0.5603543  | PSPC1   |
| 256051 | ENSG00000121406 | 260.359865 | -0.02811003 | 0.14288333 | 0.83113175 | 0.92369221 | ZNF549  |
| 1      | ENSG00000121410 | 135.013648 | -0.05091677 | 0.1889804  | 0.75577098 | 0.88640901 | A1BG    |
| 65982  | ENSG00000121413 | 726.216728 | 0.1128204   | 0.12313631 | 0.33623829 | 0.56617316 | ZSCAN18 |
| 10520  | ENSG00000121417 | 285.749092 | 0.03914377  | 0.16219839 | 0.79096137 | 0.9048941  | ZNF211  |
| 23024  | ENSG00000121440 | 351.054683 | 3.4968401   | 0.16778293 | 2.65E-97   | 7.97E-95   | PDZRN3  |
| 353299 | ENSG00000121446 | 0          | NA          | NA         | NA         | NA         | RGSL1   |
| 89884  | ENSG00000121454 | 260.7436   | -0.03399061 | 0.13552398 | 0.78970095 | 0.9043268  | LHX4    |
| 6045   | ENSG00000121481 | 583.748372 | -0.02333246 | 0.11094947 | 0.82436059 | 0.92028551 | RNF2    |
| 81627  | ENSG00000121486 | 501.554348 | -0.39276086 | 0.1366578  | 0.00207306 | 0.01102966 | TRMT1L  |
| 26984  | ENSG00000121542 | 247.127037 | -0.28605567 | 0.1735399  | 0.06363522 | 0.17913205 | SEC22A  |
| 1475   | ENSG00000121552 | 0.18922458 | 0.01954053  | 0.38488496 | 0.78225479 | NA         | CSTA    |
| 55211  | ENSG00000121570 | 0          | NA          | NA         | NA         | NA         | DPPA4   |
| 64091  | ENSG00000121577 | 1118.3943  | 0.42512404  | 0.10210211 | 1.53E-05   | 0.00014069 | POPDC2  |
| 8702   | ENSG00000121578 | 560.53179  | 0.50266114  | 0.1345428  | 7.11E-05   | 0.00056398 | B4GALT4 |
| 80218  | ENSG00000121579 | 2365.7545  | -0.03384136 | 0.06580827 | 0.59952066 | 0.79057618 | NAA50   |
| 941    | ENSG00000121594 | 0.69493202 | 0.03154416  | 0.38626309 | 0.41391645 | NA         | CD80    |
| 81930  | ENSG00000121621 | 404.866942 | -0.27055708 | 0.1197984  | 0.01707618 | 0.06418935 | KIF18A  |
| 2703   | ENSG00000121634 | 0          | NA          | NA         | NA         | NA         | GJA8    |
| 51029  | ENSG00000121644 | 1773.70147 | -0.07466425 | 0.07512318 | 0.3102543  | 0.53796162 | DESI2   |

|        |                 |            |             |            |            |            |          |
|--------|-----------------|------------|-------------|------------|------------|------------|----------|
| 9479   | ENSG00000121653 | 1300.43883 | -1.35171049 | 0.08138178 | 5.42E-63   | 7.52E-61   | MAPK8IP1 |
| 1408   | ENSG00000121671 | 220.809296 | 0.0524849   | 0.20446976 | 0.76314986 | 0.89085039 | CRY2     |
| 9409   | ENSG00000121680 | 346.575178 | 0.1264764   | 0.14301249 | 0.33965455 | 0.57006566 | PEX16    |
| 91614  | ENSG00000121690 | 94.3578889 | 0.08324015  | 0.20947578 | 0.63706331 | 0.81722218 | DEPDC7   |
| 847    | ENSG00000121691 | 628.166417 | 0.26540097  | 0.09707607 | 0.0046198  | 0.0217557  | CAT      |
| 29990  | ENSG00000121716 | 900.209515 | 0.03030085  | 0.10231703 | 0.75968549 | 0.88853152 | PILRB    |
| 7750   | ENSG00000121741 | 3018.42368 | -0.18803466 | 0.07806143 | 0.01371934 | 0.05368874 | ZMYM2    |
| 10804  | ENSG00000121742 | 0          | NA          | NA         | NA         | NA         | GJB6     |
| 2700   | ENSG00000121743 | 0          | NA          | NA         | NA         | NA         | GJA3     |
| 64786  | ENSG00000121749 | 598.651502 | -0.00420197 | 0.10235506 | 0.96520179 | 0.98622874 | TBC1D15  |
| 576    | ENSG00000121753 | 2544.80636 | -0.46319966 | 0.07228772 | 6.58E-11   | 1.29E-09   | ADGRB2   |
| 3061   | ENSG00000121764 | 10.6594486 | 0.1253313   | 0.3713007  | 0.41730994 | 0.64361234 | HCRTR1   |
| 51538  | ENSG00000121766 | 449.003466 | -0.34775695 | 0.11460506 | 0.00142923 | 0.00804233 | ZCCHC17  |
| 2170   | ENSG00000121769 | 7.71635917 | -0.14514783 | 0.38606559 | 0.32114097 | 0.54888325 | FABP3    |
| 10657  | ENSG00000121774 | 6244.13451 | 0.03957766  | 0.05778642 | 0.48910365 | 0.70874969 | KHDRBS1  |
| 55116  | ENSG00000121775 | 403.391051 | 0.05694853  | 0.13006616 | 0.6426587  | 0.82136499 | TMEM39B  |
| 9034   | ENSG00000121797 | 0          | NA          | NA         | NA         | NA         | CCRL2    |
| 729230 | ENSG00000121807 | 0          | NA          | NA         | NA         | NA         | CCR2     |
| 84265  | ENSG00000121851 | 362.547481 | -0.10893454 | 0.12608132 | 0.35940124 | 0.58949503 | POLR3GL  |
| 2693   | ENSG00000121853 | 0          | NA          | NA         | NA         | NA         | GHSR     |
| 8743   | ENSG00000121858 | 0          | NA          | NA         | NA         | NA         | TNFSF10  |
| 51193  | ENSG00000121864 | 661.983566 | -0.31539624 | 0.10521087 | 0.00176287 | 0.00961126 | ZNF639   |
| 22865  | ENSG00000121871 | 1.54953355 | -0.02066408 | 0.38105813 | 0.71588314 | NA         | SLITRK3  |
| 5290   | ENSG00000121879 | 837.048329 | -0.23569634 | 0.11969492 | 0.03743886 | 0.11945755 | PIK3CA   |
| 23244  | ENSG00000121892 | 2732.09001 | -0.61013706 | 0.06464004 | 1.18E-21   | 4.74E-20   | PDS5A    |
| 80008  | ENSG00000121895 | 0.173733   | 0.01914545  | 0.38484597 | 0.78225479 | NA         | TMEM156  |
| 11019  | ENSG00000121897 | 205.694614 | 0.08087927  | 0.16784111 | 0.59429936 | 0.7877158  | LIAS     |
| 119587 | ENSG00000121898 | 0          | NA          | NA         | NA         | NA         | CPXM2    |
| 113452 | ENSG00000121900 | 175.430686 | -0.35174437 | 0.17711465 | 0.02553485 | 0.08857763 | TMEM54   |
| 7579   | ENSG00000121903 | 371.057318 | -0.16910659 | 0.12267424 | 0.14451324 | 0.32462259 | ZSCAN20  |
| 114784 | ENSG00000121904 | 100.687104 | -3.08814704 | 0.31635684 | 6.19E-24   | 2.83E-22   | CSMD2    |
| 3208   | ENSG00000121905 | 16.0329994 | -0.18219079 | 0.38678918 | 0.28064421 | 0.50530731 | HPCA     |
| 55791  | ENSG00000121931 | 400.807097 | -0.5364186  | 0.14721928 | 9.05E-05   | 0.00069675 | LRIF1    |
| 57413  | ENSG00000121933 | 0          | NA          | NA         | NA         | NA         | TMIGD3   |
| 23155  | ENSG00000121940 | 1038.95682 | -0.05948867 | 0.09274718 | 0.50786766 | 0.72375336 | CLCC1    |
| 29899  | ENSG00000121957 | 1289.36491 | -0.26235213 | 0.07867725 | 0.00063782 | 0.00398436 | GPSM2    |
| 79712  | ENSG00000121964 | 371.385403 | -0.18368444 | 0.17908175 | 0.24367574 | 0.4621035  | GTDC1    |
| 7852   | ENSG00000121966 | 456.809835 | -4.13856234 | 0.22878369 | 2.24E-74   | 4.01E-72   | CXCR4    |



|        |                 |            |             |            |            |            |           |
|--------|-----------------|------------|-------------|------------|------------|------------|-----------|
| 84083  | ENSG00000121988 | 274.362723 | -0.34067212 | 0.18581174 | 0.03678146 | 0.11789082 | ZRANB3    |
| 92     | ENSG00000121989 | 245.942358 | -0.28635728 | 0.15580591 | 0.04376443 | 0.13428491 | ACVR2A    |
| 51426  | ENSG00000122008 | 566.250565 | -0.31094138 | 0.11922909 | 0.00592555 | 0.02689612 | POLK      |
| 22987  | ENSG00000122012 | 1953.27118 | -1.09977393 | 0.08267928 | 2.61E-41   | 2.02E-39   | SV2C      |
| 2322   | ENSG00000122025 | 0          | NA          | NA         | NA         | NA         | FLT3      |
| 6144   | ENSG00000122026 | 10820.5641 | -0.24662728 | 0.06384724 | 7.88E-05   | 0.0006149  | RPL21     |
| 219402 | ENSG00000122033 | 226.150264 | -0.1078615  | 0.14622179 | 0.42394943 | 0.64969559 | MTIF3     |
| 2971   | ENSG00000122034 | 1288.35767 | -0.12343752 | 0.08938985 | 0.15505571 | 0.34067612 | GTF3A     |
| 387496 | ENSG00000122035 | 9.51668623 | 0.13957286  | 0.39290979 | 0.27675286 | 0.50116619 | RASL11A   |
| 5412   | ENSG00000122042 | 387.622989 | -0.25686369 | 0.11887692 | 0.02257895 | 0.08026633 | UBL3      |
| NA     | ENSG00000122043 | 0          | NA          | NA         | NA         | NA         | LINC00544 |
| 84248  | ENSG00000122068 | 1261.52606 | -0.36528511 | 0.08394996 | 7.84E-06   | 7.60E-05   | FYTTD1    |
| 130916 | ENSG00000122085 | 902.473688 | -0.15722479 | 0.10077909 | 0.10504057 | 0.2584011  | MTERF4    |
| 7512   | ENSG00000122121 | 72.3866459 | 0.53597711  | 0.28458071 | 0.01632554 | 0.06176559 | XPNPEP2   |
| 54440  | ENSG00000122122 | 0.36233267 | 0.0008537   | 0.38336412 | 0.96773832 | NA         | SASH3     |
| 4952   | ENSG00000122126 | 1731.27921 | -0.18165388 | 0.06727199 | 0.00600011 | 0.0271538  | OCRL      |
| 5047   | ENSG00000122133 | 0          | NA          | NA         | NA         | NA         | PAEP      |
| 29991  | ENSG00000122136 | 0.15069912 | -0.01848503 | 0.38480575 | 0.84537521 | NA         | OBP2A     |
| 51116  | ENSG00000122140 | 989.39985  | -0.17678877 | 0.10357595 | 0.07545362 | 0.20229727 | MRPS2     |
| 50945  | ENSG00000122145 | 20.2770022 | -0.38835454 | 0.45383964 | 0.09610874 | 0.24207151 | TBX22     |
| 2331   | ENSG00000122176 | 0.173124   | -0.01911262 | 0.38486262 | 0.84537521 | NA         | FMOD      |
| 4656   | ENSG00000122180 | 0.16735865 | 0.01897177  | 0.38482933 | 0.78225479 | NA         | MYOG      |
| 54900  | ENSG00000122188 | 0.79333025 | -0.04367995 | 0.38521218 | 0.44950511 | NA         | LAX1      |
| 5340   | ENSG00000122194 | 1.25830373 | -0.04225424 | 0.38176262 | 0.54677263 | NA         | PLG       |
| 57179  | ENSG00000122203 | 1977.61345 | -0.12260751 | 0.07161678 | 0.08105569 | 0.21356507 | KIAA1191  |
| 1314   | ENSG00000122218 | 5175.89918 | -0.19875446 | 0.06322257 | 0.00141397 | 0.00797179 | COPA      |
| 51744  | ENSG00000122223 | 0          | NA          | NA         | NA         | NA         | CD244     |
| 4063   | ENSG00000122224 | 0          | NA          | NA         | NA         | NA         | LY9       |
| 9956   | ENSG00000122254 | 15.9181193 | -0.67712142 | 0.72485277 | 0.02722522 | 0.0930328  | HS3ST2    |
| 5930   | ENSG00000122257 | 1636.06246 | -0.06136985 | 0.08651922 | 0.46567544 | 0.68839883 | RBBP6     |
| 29066  | ENSG00000122299 | 1205.77966 | -0.15782731 | 0.11199079 | 0.13935185 | 0.31622334 | ZC3H7A    |
| 5620   | ENSG00000122304 | 0.16735865 | 0.01897177  | 0.38482933 | 0.78225479 | NA         | PRM2      |
| 84947  | ENSG00000122335 | 261.073183 | -0.06703928 | 0.1478385  | 0.62227736 | 0.80703248 | SERAC1    |
| 311    | ENSG00000122359 | 702.778102 | 0.53190057  | 0.12438316 | 6.71E-06   | 6.57E-05   | ANXA11    |
| 11155  | ENSG00000122367 | 16.0050718 | -0.19324956 | 0.40496531 | 0.21901268 | 0.43093714 | LDB3      |
| 94233  | ENSG00000122375 | 0          | NA          | NA         | NA         | NA         | OPN4      |
| 54537  | ENSG00000122376 | 812.137477 | -0.48024755 | 0.09788019 | 3.87E-07   | 4.70E-06   | SHLD2     |
| 84293  | ENSG00000122378 | 2018.65487 | -0.17151941 | 0.06701813 | 0.00897076 | 0.03792452 | PRXL2A    |

|           |                 |            |             |            |            |            |           |
|-----------|-----------------|------------|-------------|------------|------------|------------|-----------|
| 7755      | ENSG00000122386 | 367.875733 | 0.0837556   | 0.12973722 | 0.49320355 | 0.71236151 | ZNF205    |
| 79903     | ENSG00000122390 | 1370.05937 | 0.24091431  | 0.08746817 | 0.00459416 | 0.0216598  | NAA60     |
| 6125      | ENSG00000122406 | 15027.6684 | -0.02985483 | 0.04863188 | 0.53391951 | 0.74519614 | RPL5      |
| 57489     | ENSG00000122417 | 485.651734 | 0.45926236  | 0.11451311 | 2.68E-05   | 0.00023401 | ODF2L     |
| 5737      | ENSG00000122420 | 37.0820644 | -0.17066989 | 0.31491483 | 0.39423997 | 0.62344341 | PTGFR     |
| 100505741 | ENSG00000122432 | 6.1176465  | 0.27580614  | 0.5083537  | 0.04427337 | 0.13549029 | SPATA1    |
| 54482     | ENSG00000122435 | 725.743569 | -0.06099765 | 0.10639188 | 0.5495316  | 0.75607328 | TRMT13    |
| 127495    | ENSG00000122477 | 59.392765  | 0.14431208  | 0.25395078 | 0.45780944 | 0.68133969 | LRRC39    |
| 25950     | ENSG00000122481 | 239.670299 | 0.06033494  | 0.15290435 | 0.66798241 | 0.83666483 | RWDD3     |
| 84146     | ENSG00000122482 | 961.848606 | -0.11323269 | 0.08452083 | 0.16904344 | 0.36039348 | ZNF644    |
| 343099    | ENSG00000122483 | 292.910795 | 0.19062902  | 0.16047531 | 0.19041632 | 0.39167661 | CCDC18    |
| 79871     | ENSG00000122484 | 568.631105 | -0.28889342 | 0.11896636 | 0.01037045 | 0.04264242 | RPAP2     |
| 80148     | ENSG00000122490 | 711.756199 | -0.18169197 | 0.09559513 | 0.04916564 | 0.14714833 | SLC66A2   |
| 27241     | ENSG00000122507 | 241.771491 | 0.02734727  | 0.18012432 | 0.86464168 | 0.94007513 | BBS9      |
| 5395      | ENSG00000122512 | 1336.27866 | -0.12235624 | 0.07314429 | 0.08810234 | 0.22680037 | PMS2      |
| 83637     | ENSG00000122515 | 2774.50752 | 0.37792066  | 0.08028739 | 1.43E-06   | 1.58E-05   | ZMIZ2     |
| 654231    | ENSG00000122543 | 0.688222   | 0.04020838  | 0.3871341  | 0.3583845  | NA         | OCM       |
| 989       | ENSG00000122545 | 4628.06854 | -0.1411079  | 0.05507677 | 0.01006083 | 0.04165471 | SEPTIN7   |
| 80820     | ENSG00000122547 | 171.580587 | 0.29156469  | 0.17593115 | 0.06240278 | 0.17648913 | EEPDI     |
| 9808      | ENSG00000122548 | 0.9749599  | -0.01781151 | 0.38087417 | 0.76347278 | NA         | KIAA0087  |
| 55975     | ENSG00000122550 | 954.246067 | -0.38367793 | 0.09977683 | 6.53E-05   | 0.00052142 | KLHL7     |
| 64224     | ENSG00000122557 | 557.07968  | 0.0487919   | 0.10980796 | 0.64332229 | 0.82181194 | HERPUD2   |
| 11335     | ENSG00000122565 | 6228.22173 | -0.16329007 | 0.06575968 | 0.01162402 | 0.04696    | CBX3      |
| 3181      | ENSG00000122566 | 28454.1571 | -0.11787959 | 0.070044   | 0.08522106 | 0.22148098 | HNRNPA2B1 |
| 644150    | ENSG00000122574 | 91.1378045 | 1.158497    | 0.27537419 | 2.60E-06   | 2.74E-05   | WIPF3     |
| 30010     | ENSG00000122584 | 53.8445284 | -1.02747806 | 0.43993987 | 0.00145748 | 0.00817306 | NXPH1     |
| 4852      | ENSG00000122585 | 2553.66933 | 0.58803574  | 0.11237583 | 5.17E-08   | 7.10E-07   | NPY       |
| 84668     | ENSG00000122591 | 49.3319628 | -0.24538137 | 0.37742253 | 0.22117297 | 0.43373822 | FAM126A   |
| 3204      | ENSG00000122592 | 0          | NA          | NA         | NA         | NA         | HOXA7     |
| 3624      | ENSG00000122641 | 1512.92148 | -0.32492417 | 0.07696811 | 1.57E-05   | 0.00014374 | INHBA     |
| 11328     | ENSG00000122642 | 2084.47256 | 0.24171855  | 0.06776615 | 0.00028537 | 0.00195569 | FKBP9     |
| 51251     | ENSG00000122643 | 715.734902 | -0.29101078 | 0.1244367  | 0.01317555 | 0.05200193 | NT5C3A    |
| 10124     | ENSG00000122644 | 230.913367 | 0.56273355  | 0.15987772 | 0.000136   | 0.00100271 | ARL4A     |
| 51622     | ENSG00000122674 | 834.116678 | 0.25564888  | 0.102371   | 0.00940639 | 0.03945512 | CCZ1      |
| 27434     | ENSG00000122678 | 715.673308 | 0.43183824  | 0.11086159 | 4.65E-05   | 0.00038373 | POLM      |
| 10268     | ENSG00000122679 | 7.26292058 | -0.08689183 | 0.37069475 | 0.50571252 | 0.72177288 | RAMP3     |
| 29960     | ENSG00000122687 | 1347.32529 | -0.35459098 | 0.08225646 | 9.76E-06   | 9.28E-05   | MRM2      |
| 7291      | ENSG00000122691 | 5415.23184 | 0.50784349  | 0.06494723 | 2.12E-15   | 5.98E-14   | TWIST1    |

|        |                 |            |             |            |            |            |          |
|--------|-----------------|------------|-------------|------------|------------|------------|----------|
| 55234  | ENSG00000122692 | 1105.15502 | 0.0050579   | 0.08259734 | 0.9497545  | 0.97932173 | SMU1     |
| 152007 | ENSG00000122694 | 349.991958 | 0.10208939  | 0.14300213 | 0.44191389 | 0.66678618 | GLIPR2   |
| 92014  | ENSG00000122696 | 332.839033 | -0.11427816 | 0.12645501 | 0.33840044 | 0.56877877 | SLC25A51 |
| 1211   | ENSG00000122705 | 2262.36463 | -0.22088765 | 0.06823523 | 0.0009843  | 0.00582939 | CLTA     |
| 8434   | ENSG00000122707 | 380.194117 | 0.25680181  | 0.12882705 | 0.03389544 | 0.11060618 | RECK     |
| 27290  | ENSG00000122711 | 0.55908305 | 0.01280346  | 0.38331087 | 0.73663191 | NA         | SPINK4   |
| 138474 | ENSG00000122728 | 1.01693633 | 0.0226591   | 0.38210562 | 0.67438295 | NA         | TAF1L    |
| 48     | ENSG00000122729 | 456.375309 | -0.11054425 | 0.10974336 | 0.29230419 | 0.51835137 | ACO1     |
| 23349  | ENSG00000122733 | 6.65235695 | 0.15036975  | 0.40305039 | 0.21968664 | 0.43175718 | PHF24    |
| 27019  | ENSG00000122735 | 8.37748049 | 0.39788262  | 0.66158237 | 0.02524701 | 0.0877849  | DNAI1    |
| 79269  | ENSG00000122741 | 1128.18868 | -0.167775   | 0.08588854 | 0.04470039 | 0.13639738 | DCAF10   |
| 1271   | ENSG00000122756 | 2829.0782  | -1.12879228 | 0.06439298 | 1.01E-69   | 1.64E-67   | CNTFR    |
| 57670  | ENSG00000122778 | 3752.42359 | 0.09429586  | 0.05442143 | 0.08007321 | 0.21142567 | KIAA1549 |
| 8805   | ENSG00000122779 | 2837.61908 | -0.03576185 | 0.07017566 | 0.61807895 | 0.80452675 | TRIM24   |
| 78996  | ENSG00000122783 | 863.315635 | -0.1127651  | 0.08499159 | 0.17169747 | 0.36421231 | CYREN    |
| 800    | ENSG00000122786 | 3621.20393 | 0.14840946  | 0.06544391 | 0.02153527 | 0.07724818 | CALD1    |
| 6718   | ENSG00000122787 | 0          | NA          | NA         | NA         | NA         | AKR1D1   |
| 170685 | ENSG00000122824 | 288.594996 | -0.03033121 | 0.13940766 | 0.81436515 | 0.91592004 | NUDT10   |
| 653509 | ENSG00000122852 | 0.173733   | 0.01914545  | 0.38484597 | 0.78225479 | NA         | SFTPA1   |
| 50674  | ENSG00000122859 | 0.15069912 | -0.01848503 | 0.38480575 | 0.84537521 | NA         | NEUROG3  |
| 5328   | ENSG00000122861 | 28.8920033 | -0.06555672 | 0.29361361 | 0.73140627 | 0.87166875 | PLAU     |
| 5552   | ENSG00000122862 | 0.29863895 | -0.02292439 | 0.3852726  | 0.68753245 | NA         | SRGN     |
| 9469   | ENSG00000122863 | 912.611218 | -0.34541639 | 0.09125697 | 9.36E-05   | 0.00071719 | CHST3    |
| 80114  | ENSG00000122870 | 365.787799 | -0.08886826 | 0.13192032 | 0.47235034 | 0.69454019 | BICC1    |
| NA     | ENSG00000122872 | 0          | NA          | NA         | NA         | NA         | ARL4API  |
| 55847  | ENSG00000122873 | 312.594921 | -0.29600217 | 0.1614569  | 0.04229272 | 0.13108695 | CISD1    |
| 1959   | ENSG00000122877 | 5.06394307 | 0.23488832  | 0.45880991 | 0.09772823 | 0.24490691 | EGR2     |
| 11319  | ENSG00000122882 | 545.972093 | 0.05048029  | 0.11622522 | 0.64842344 | 0.82455589 | ECD      |
| 5033   | ENSG00000122884 | 682.008031 | 0.49055643  | 0.12878209 | 5.55E-05   | 0.00044773 | P4HA1    |
| 8034   | ENSG00000122912 | 271.134997 | 0.03974506  | 0.16207024 | 0.78778411 | 0.90355167 | SLC25A16 |
| 11130  | ENSG00000122952 | 1278.524   | -0.11500454 | 0.09657162 | 0.21750697 | 0.42908802 | ZWINT    |
| 9559   | ENSG00000122958 | 802.817034 | -0.01671034 | 0.13479805 | 0.8859267  | 0.95015905 | VPS26A   |
| 9904   | ENSG00000122965 | 821.434725 | 0.14691319  | 0.10507052 | 0.14569635 | 0.32618095 | RBM19    |
| 11113  | ENSG00000122966 | 1388.19269 | -0.39997966 | 0.0851813  | 1.41E-06   | 1.56E-05   | CIT      |
| 28981  | ENSG00000122970 | 884.704267 | 0.15107331  | 0.11352874 | 0.16324533 | 0.35223353 | IFT81    |
| 35     | ENSG00000122971 | 99.0569615 | 0.44916084  | 0.24553622 | 0.02524274 | 0.0877849  | ACADS    |
| 84329  | ENSG00000122986 | 15.3434913 | 0.54827014  | 0.66858417 | 0.04122772 | 0.12836755 | HVCN1    |
| NA     | ENSG00000123009 | 0          | NA          | NA         | NA         | NA         | NME2P1   |

|        |                 |            |             |            |            |            |         |
|--------|-----------------|------------|-------------|------------|------------|------------|---------|
| 79039  | ENSG00000123064 | 1265.57622 | -0.14717229 | 0.08696154 | 0.08167261 | 0.21450683 | DDX54   |
| 23389  | ENSG00000123066 | 1746.93735 | -0.10080336 | 0.07344781 | 0.16157197 | 0.34999912 | MED13L  |
| 1031   | ENSG00000123080 | 901.635574 | 0.62804465  | 0.09290468 | 3.90E-12   | 8.53E-11   | CDKN2C  |
| 26994  | ENSG00000123091 | 788.80925  | -0.04131773 | 0.10034026 | 0.66895887 | 0.83720078 | RNF11   |
| 11228  | ENSG00000123094 | 771.287311 | 0.44172076  | 0.11474772 | 5.45E-05   | 0.00044062 | RASSF8  |
| 79365  | ENSG00000123095 | 6.49663573 | -0.25099086 | 0.50029873 | 0.0181695  | 0.0673422  | BHLHE41 |
| 8082   | ENSG00000123096 | 221.247834 | 0.38924106  | 0.23649427 | 0.04462406 | 0.13624829 | SSPN    |
| 3709   | ENSG00000123104 | 697.936797 | 0.28314648  | 0.12157226 | 0.01375611 | 0.05379878 | ITPR2   |
| 55297  | ENSG00000123106 | 486.484824 | 0.05255455  | 0.14332459 | 0.693515   | 0.85183585 | CCDC91  |
| 64168  | ENSG00000123119 | 81.2840671 | -0.24623719 | 0.23123812 | 0.18948168 | 0.39045835 | NECAB1  |
| 11059  | ENSG00000123124 | 399.499712 | 0.55316101  | 0.14647619 | 5.17E-05   | 0.00042123 | WWP1    |
| 23597  | ENSG00000123130 | 495.306436 | -0.06541914 | 0.12341368 | 0.57466733 | 0.77361067 | ACOT9   |
| 10549  | ENSG00000123131 | 867.417387 | 0.17608044  | 0.08840441 | 0.04046848 | 0.12647995 | PRDX4   |
| 10212  | ENSG00000123136 | 1785.50307 | -0.16313585 | 0.07284099 | 0.0218877  | 0.07835654 | DDX39A  |
| 5585   | ENSG00000123143 | 4566.56153 | -0.34951281 | 0.05371804 | 4.77E-11   | 9.48E-10   | PKN1    |
| 79002  | ENSG00000123144 | 3008.43225 | -0.05229311 | 0.06349343 | 0.40244553 | 0.63061911 | TRIR    |
| 976    | ENSG00000123146 | 434.452793 | 0.36503278  | 0.12928256 | 0.00266498 | 0.01369417 | ADGRE5  |
| 84292  | ENSG00000123154 | 265.227834 | 0.01724356  | 0.14073777 | 0.89638983 | 0.95469109 | WDR83   |
| 10755  | ENSG00000123159 | 946.058872 | 0.05744058  | 0.09155139 | 0.51877451 | 0.73239566 | GIPC1   |
| 139741 | ENSG00000123165 | 0          | NA          | NA         | NA         | NA         | ACTRT1  |
| 83446  | ENSG00000123171 | 0          | NA          | NA         | NA         | NA         | CCDC70  |
| 57213  | ENSG00000123178 | 203.893814 | 0.18171125  | 0.1594755  | 0.2108908  | 0.41983479 | SPRYD7  |
| 84650  | ENSG00000123179 | 714.285031 | -0.00956097 | 0.09915416 | 0.91946083 | 0.96585497 | EBPL    |
| 540    | ENSG00000123191 | 364.01599  | 0.13143991  | 0.12423153 | 0.26355304 | 0.48550532 | ATP7B   |
| 23091  | ENSG00000123200 | 3033.67298 | -0.10964381 | 0.0613101  | 0.06965211 | 0.19079082 | ZC3H13  |
| 2974   | ENSG00000123201 | 0.14931947 | -0.01844332 | 0.38480212 | 0.84537521 | NA         | GUCY1B2 |
| 57486  | ENSG00000123213 | 988.797933 | 0.0610368   | 0.08339239 | 0.45420961 | 0.67744995 | NLN     |
| 64105  | ENSG00000123219 | 478.481038 | 0.05806591  | 0.11412631 | 0.59487642 | 0.78787011 | CENPK   |
| 10133  | ENSG00000123240 | 401.018861 | 0.13740195  | 0.13166139 | 0.26625829 | 0.48853828 | OPTN    |
| 80760  | ENSG00000123243 | 1.84834672 | 0.05202777  | 0.38288463 | 0.42373663 | NA         | ITIH5   |
| 466    | ENSG00000123268 | 273.903881 | -0.21330089 | 0.13708557 | 0.09459504 | 0.23913934 | ATF1    |
| 10102  | ENSG00000123297 | 467.704787 | -0.03638102 | 0.11528392 | 0.74059002 | 0.87742184 | TSFM    |
| 58158  | ENSG00000123307 | 0          | NA          | NA         | NA         | NA         | NEUROD4 |
| 64333  | ENSG00000123329 | 91.2256454 | 2.74148619  | 0.36834245 | 5.86E-15   | 1.59E-13   | ARHGAP9 |
| 3071   | ENSG00000123338 | 0          | NA          | NA         | NA         | NA         | NCKAP1L |
| 4327   | ENSG00000123342 | 2.20517753 | 0.09136999  | 0.39125184 | 0.28032328 | NA         | MMP19   |
| 5204   | ENSG00000123349 | 2445.61687 | -0.14059725 | 0.06041482 | 0.01833276 | 0.06774481 | PFDN5   |
| 65244  | ENSG00000123352 | 1069.52111 | 0.09361166  | 0.0944798  | 0.30686238 | 0.53442325 | SPATS2  |

|        |                 |            |             |            |            |            |           |
|--------|-----------------|------------|-------------|------------|------------|------------|-----------|
| 29095  | ENSG00000123353 | 268.776301 | -0.02852819 | 0.15906446 | 0.84259095 | 0.928413   | ORMDL2    |
| 3164   | ENSG00000123358 | 605.758161 | 0.74946385  | 0.14473096 | 4.52E-08   | 6.24E-07   | NR4A1     |
| 5153   | ENSG00000123360 | 0          | NA          | NA         | NA         | NA         | PDE1B     |
| 3229   | ENSG00000123364 | 0.49101099 | -0.01135408 | 0.38292455 | 0.81858369 | NA         | HOXC13    |
| 1017   | ENSG00000123374 | 1297.10383 | 0.04305683  | 0.07859259 | 0.57709511 | 0.77557535 | CDK2      |
| 4035   | ENSG00000123384 | 6078.20363 | 0.46213735  | 0.05136511 | 1.21E-19   | 4.41E-18   | LRP1      |
| 3227   | ENSG00000123388 | 0.52119901 | 0.02576573  | 0.38568143 | 0.51723676 | NA         | HOXC11    |
| 60673  | ENSG00000123395 | 765.30798  | 0.19396083  | 0.09381265 | 0.03275774 | 0.10755128 | ATG101    |
| 4778   | ENSG00000123405 | 0          | NA          | NA         | NA         | NA         | NFE2      |
| 3228   | ENSG00000123407 | 0          | NA          | NA         | NA         | NA         | HOXC12    |
| 64375  | ENSG00000123411 | 393.486505 | 0.03679168  | 0.12695519 | 0.76012684 | 0.88889051 | IKZF4     |
| 23583  | ENSG00000123415 | 779.345202 | -0.21209676 | 0.10977909 | 0.04295963 | 0.13257414 | SMUG1     |
| 10376  | ENSG00000123416 | 38290.9744 | -0.23948412 | 0.05579124 | 1.39E-05   | 0.00012849 | TUBA1B    |
| 25895  | ENSG00000123427 | 152.720712 | 0.31076856  | 0.18201896 | 0.05326295 | 0.15622958 | EEF1AKMT3 |
| 55709  | ENSG00000123444 | 470.567428 | -0.19876411 | 0.12893049 | 0.1005283  | 0.25024862 | KBTBD4    |
| NA     | ENSG00000123447 | 0          | NA          | NA         | NA         | NA         | TYRL      |
| 1757   | ENSG00000123453 | 454.095949 | 0.12046257  | 0.1625576  | 0.41342896 | 0.64066701 | SARDH     |
| 1621   | ENSG00000123454 | 55435.6891 | 0.98744618  | 0.0528108  | 7.82E-79   | 1.55E-76   | DBH       |
| 64756  | ENSG00000123472 | 1168.9884  | -0.08341373 | 0.08787658 | 0.32906117 | 0.55761363 | ATPAF1    |
| 6491   | ENSG00000123473 | 734.157335 | -0.43444921 | 0.11292074 | 5.60E-05   | 0.00045174 | STIL      |
| 55355  | ENSG00000123485 | 843.327856 | -0.21606261 | 0.1082419  | 0.03687606 | 0.118091   | HJURP     |
| 3598   | ENSG00000123496 | 8.43539783 | 0.1394119   | 0.37222604 | 0.38943009 | 0.61864785 | IL13RA2   |
| 1300   | ENSG00000123500 | 2.96305376 | -0.00127599 | 0.36949505 | 0.98847317 | 0.99604194 | COL10A1   |
| 262    | ENSG00000123505 | 2000.08139 | -0.4534459  | 0.09582347 | 1.00E-06   | 1.13E-05   | AMD1      |
| 29078  | ENSG00000123545 | 404.155157 | -1.04785456 | 0.16725615 | 4.34E-11   | 8.68E-10   | NDUFAF4   |
| 85015  | ENSG00000123552 | 368.065418 | 0.04199725  | 0.14746376 | 0.7588259  | 0.88815444 | USP45     |
| 5354   | ENSG00000123560 | 3.52274042 | 0.26961314  | 0.51602203 | 0.02382069 | 0.08379476 | PLP1      |
| 6906   | ENSG00000123561 | 0          | NA          | NA         | NA         | NA         | SERPINA7  |
| 9643   | ENSG00000123562 | 3920.386   | -0.11709633 | 0.08433994 | 0.15059806 | 0.33417577 | MORF4L2   |
| 158983 | ENSG00000123569 | 0          | NA          | NA         | NA         | NA         | H2BW1     |
| 51209  | ENSG00000123570 | 112.785088 | -0.46794394 | 0.23365323 | 0.0163002  | 0.06169325 | RAB9B     |
| 203447 | ENSG00000123572 | 0.70622758 | 0.00412423  | 0.38184091 | 0.9305563  | NA         | NRK       |
| 139231 | ENSG00000123575 | 757.155308 | -0.17574313 | 0.10599856 | 0.08356624 | 0.21829549 | FAM199X   |
| 80712  | ENSG00000123576 | 0          | NA          | NA         | NA         | NA         | ESX1      |
| 4108   | ENSG00000123584 | 0          | NA          | NA         | NA         | NA         | MAGEA9    |
| 92552  | ENSG00000123594 | 0          | NA          | NA         | NA         | NA         | ATXN3L    |
| 9367   | ENSG00000123595 | 151.738696 | 0.24534333  | 0.18310819 | 0.12781277 | 0.29835718 | RAB9A     |
| 79828  | ENSG00000123600 | 402.090705 | -0.12148606 | 0.1391581  | 0.34730234 | 0.57801178 | METTL8    |

|        |                 |            |             |            |            |            |          |
|--------|-----------------|------------|-------------|------------|------------|------------|----------|
| 79809  | ENSG00000123607 | 816.439565 | 0.03264686  | 0.11958538 | 0.77460223 | 0.89613481 | TTC21B   |
| 9111   | ENSG00000123609 | 0.15069912 | -0.01848503 | 0.38480575 | 0.84537521 | NA         | NMI      |
| 7130   | ENSG00000123610 | 182.741623 | -0.09741593 | 0.1655413  | 0.5129569  | 0.72818152 | TNFAIP6  |
| 130399 | ENSG00000123612 | 8.05533593 | -0.00707557 | 0.36421241 | 0.94824595 | 0.97876335 | ACVR1C   |
| 29994  | ENSG00000123636 | 795.399797 | 0.07669732  | 0.12951316 | 0.53096514 | 0.74257279 | BAZ2B    |
| 206358 | ENSG00000123643 | 413.688076 | 0.08369465  | 0.11607976 | 0.44987507 | 0.67340229 | SLC36A1  |
| 9926   | ENSG00000123684 | 2991.19514 | -0.26449447 | 0.06359676 | 2.40E-05   | 0.00021136 | LPGAT1   |
| 55509  | ENSG00000123685 | 11.7145671 | 1.45390006  | 0.87384172 | 0.00410766 | 0.01972792 | BATF3    |
| 50486  | ENSG00000123689 | 23.9688854 | -0.27606664 | 0.35676414 | 0.19913241 | 0.40359455 | G0S2     |
| 3759   | ENSG00000123700 | 7.08512819 | 3.62934626  | 1.35682515 | 0.00072554 | 0.00446349 | KCNJ2    |
| 57826  | ENSG00000123728 | 585.097648 | -0.26723397 | 0.11380725 | 0.01362008 | 0.05341418 | RAP2C    |
| 5393   | ENSG00000123737 | 842.795156 | 0.16520947  | 0.10209304 | 0.09291305 | 0.23587906 | EXOSC9   |
| 81579  | ENSG00000123739 | 650.245827 | -0.08626001 | 0.10750568 | 0.40223436 | 0.63040759 | PLA2G12A |
| 80776  | ENSG00000123810 | 53.2590572 | -0.11363319 | 0.25513215 | 0.55464043 | 0.76057964 | B9D2     |
| 79934  | ENSG00000123815 | 673.537731 | 0.16680818  | 0.10533637 | 0.09908733 | 0.24762471 | COQ8B    |
| 5208   | ENSG00000123836 | 226.989207 | -0.08408044 | 0.20088023 | 0.62166257 | 0.80692086 | PFKFB2   |
| 722    | ENSG00000123838 | 0          | NA          | NA         | NA         | NA         | C4BPA    |
| 725    | ENSG00000123843 | 0          | NA          | NA         | NA         | NA         | C4BPB    |
| NA     | ENSG00000123870 | 61.6532559 | -0.22344078 | 0.33235036 | 0.27446787 | 0.49825626 | ZNF137P  |
| 23682  | ENSG00000123892 | 12.9250034 | 2.65865249  | 0.84856758 | 0.00010512 | 0.00079605 | RAB38    |
| 10888  | ENSG00000123901 | 1.46441736 | 0.02130092  | 0.37800852 | 0.77960751 | NA         | GPR83    |
| 27161  | ENSG00000123908 | 3322.1343  | -0.07718879 | 0.06804123 | 0.24785532 | 0.46694991 | AGO2     |
| 10608  | ENSG00000123933 | 1901.80471 | 0.0236223   | 0.08308401 | 0.77193773 | 0.89538192 | MXD4     |
| NA     | ENSG00000123965 | 10.8967658 | -0.01540309 | 0.33757854 | 0.92248496 | 0.96749493 | PMS2P5   |
| 1164   | ENSG00000123975 | 1193.81371 | 0.17937559  | 0.09849488 | 0.05923833 | 0.16954535 | CKS2     |
| 164781 | ENSG00000123977 | 0          | NA          | NA         | NA         | NA         | DAW1     |
| 2181   | ENSG00000123983 | 1750.8466  | -0.56217945 | 0.07488944 | 2.06E-14   | 5.34E-13   | ACSL3    |
| 79586  | ENSG00000123989 | 1220.83793 | -0.57532352 | 0.08890311 | 3.06E-11   | 6.18E-10   | CHPF     |
| 23549  | ENSG00000123992 | 475.706267 | 0.17613492  | 0.12386849 | 0.13233561 | 0.30543724 | DNPEP    |
| 3623   | ENSG00000123999 | 8.04318878 | 0.07164053  | 0.3656025  | 0.59566534 | 0.78816266 | INHA     |
| 116255 | ENSG00000124003 | 5.23483775 | 0.16880368  | 0.40828061 | 0.21789575 | 0.42968409 | MOGAT1   |
| 23363  | ENSG00000124006 | 2624.08663 | 0.06936702  | 0.06187506 | 0.25779934 | 0.47908756 | OBSL1    |
| 79843  | ENSG00000124019 | 2.81137807 | 0.22351985  | 0.48220921 | 0.00514577 | 0.02380881 | FAM124B  |
| 6560   | ENSG00000124067 | 616.964769 | 0.52773803  | 0.13927871 | 5.29E-05   | 0.00042979 | SLC12A4  |
| 84080  | ENSG00000124074 | 424.824752 | 0.02069018  | 0.11269993 | 0.84876086 | 0.93128058 | ENKD1    |
| 4159   | ENSG00000124089 | 0.37844916 | 0.02407552  | 0.3854191  | 0.60038877 | NA         | MC3R     |
| 140687 | ENSG00000124091 | 1.84581566 | 0.02980015  | 0.37601244 | 0.73423608 | NA         | GCNT7    |
| 140690 | ENSG00000124092 | 0          | NA          | NA         | NA         | NA         | CTCFL    |

|        |                 |            |             |            |            |            |              |
|--------|-----------------|------------|-------------|------------|------------|------------|--------------|
| NA     | ENSG00000124097 | 1.68525324 | 0.03526429  | 0.37865048 | 0.65853274 | NA         | HMGB1P1      |
| 116151 | ENSG00000124098 | 2611.39881 | 0.07444729  | 0.06838574 | 0.26874802 | 0.49165152 | FAM210B      |
| 5266   | ENSG00000124102 | 0          | NA          | NA         | NA         | NA         | PI3          |
| 200232 | ENSG00000124103 | 0          | NA          | NA         | NA         | NA         | FAM209A      |
| 90203  | ENSG00000124104 | 428.173197 | -0.36297756 | 0.13944179 | 0.0050778  | 0.02353273 | SNX21        |
| 6590   | ENSG00000124107 | 0          | NA          | NA         | NA         | NA         | SLPI         |
| 140686 | ENSG00000124116 | 0.65185969 | 0.01369813  | 0.38247831 | 0.70831419 | NA         | WFDC3        |
| 79183  | ENSG00000124120 | 819.817877 | -0.44545884 | 0.10110449 | 4.85E-06   | 4.90E-05   | TTPAL        |
| 57580  | ENSG00000124126 | 505.058007 | 0.20615661  | 0.10659797 | 0.04372711 | 0.13419116 | PREX1        |
| 3787   | ENSG00000124134 | 12.1820403 | -1.522812   | 0.84528364 | 0.00316549 | 0.01583813 | KCNS1        |
| 57468  | ENSG00000124140 | 78.888045  | -0.42103924 | 0.26592951 | 0.04363551 | 0.13397223 | SLC12A5      |
| 343578 | ENSG00000124143 | 2.63783925 | -0.02348306 | 0.37526965 | 0.78357384 | 0.9014745  | ARHGAP40     |
| 6385   | ENSG00000124145 | 285.580738 | 1.20805264  | 0.16140916 | 7.61E-15   | 2.04E-13   | SDC4         |
| 8202   | ENSG00000124151 | 657.738991 | -0.17042447 | 0.1004862  | 0.07813958 | 0.20773003 | NCOA3        |
| 51604  | ENSG00000124155 | 1782.20114 | 0.10680013  | 0.06747003 | 0.10813771 | 0.26372861 | PIGT         |
| 6407   | ENSG00000124157 | 0          | NA          | NA         | NA         | NA         | SEMG2        |
| 8785   | ENSG00000124159 | 0.16735865 | 0.01897177  | 0.38482933 | 0.78225479 | NA         | MATN4        |
| 57727  | ENSG00000124160 | 1134.25418 | -0.2011679  | 0.09120014 | 0.02285265 | 0.08105052 | NCOA5        |
| 9217   | ENSG00000124164 | 1546.72737 | -0.07844031 | 0.10935623 | 0.45264543 | 0.67593598 | VAPB         |
| 84612  | ENSG00000124171 | 78.1818345 | -0.0340734  | 0.22760812 | 0.85161306 | 0.93275912 | PARD6B       |
| 514    | ENSG00000124172 | 2966.42782 | -0.09644319 | 0.06721301 | 0.14619551 | 0.32701731 | ATP5F1E      |
| 84181  | ENSG00000124177 | 2434.25573 | 0.30177147  | 0.07932483 | 9.81E-05   | 0.00074952 | CHD6         |
| 5335   | ENSG00000124181 | 6281.18725 | -0.17598421 | 0.05397065 | 0.00097001 | 0.00576025 | PLCG1        |
| 84969  | ENSG00000124191 | 1459.70047 | 0.03557333  | 0.08178806 | 0.65685384 | 0.82968692 | TOX2         |
| 6431   | ENSG00000124193 | 5701.90035 | -0.00631512 | 0.05315665 | 0.90391767 | 0.95803483 | SRSF6        |
| 78997  | ENSG00000124194 | 610.482415 | -2.5495838  | 0.13294473 | 3.46E-83   | 7.39E-81   | GDAP1L1      |
| 149699 | ENSG00000124196 | 0          | NA          | NA         | NA         | NA         | GTSF1L       |
| 10564  | ENSG00000124198 | 1006.50004 | -0.10939763 | 0.08498876 | 0.1862925  | 0.38596943 | ARFGEF2      |
| 57169  | ENSG00000124201 | 483.165995 | -0.09265025 | 0.10640381 | 0.364017   | 0.59381904 | ZNFX1        |
| 128611 | ENSG00000124203 | 0.35660095 | 0.02381648  | 0.38538097 | 0.6140575  | NA         | ZNF831       |
| 1908   | ENSG00000124205 | 9.16108682 | 4.12434866  | 1.30089863 | 0.00019524 | 0.00139235 | EDN3         |
| 1434   | ENSG00000124207 | 2781.33811 | -0.34055481 | 0.0875397  | 6.15E-05   | 0.00049262 | CSE1L        |
| 387522 | ENSG00000124208 | 23.8278064 | -0.04767157 | 0.38517263 | 0.41225321 | 0.64004254 | PEDS1-UBE2V1 |
| 57403  | ENSG00000124209 | 713.995291 | 0.0238281   | 0.10741564 | 0.81818984 | 0.9171248  | RAB22A       |
| 5740   | ENSG00000124212 | 176.184888 | 0.03661409  | 0.19224105 | 0.82733723 | 0.92189669 | PTGIS        |
| 6780   | ENSG00000124214 | 2762.29703 | -0.19880276 | 0.06271686 | 0.00129397 | 0.00737925 | STAU1        |
| 60437  | ENSG00000124215 | 7.68492129 | 0.04619994  | 0.3619717  | 0.72149326 | 0.86709971 | CDH26        |
| 6615   | ENSG00000124216 | 55.1922062 | 1.08463423  | 0.33020707 | 0.00010186 | 0.0007737  | SNAI1        |

|           |                 |            |             |            |            |            |           |
|-----------|-----------------|------------|-------------|------------|------------|------------|-----------|
| 27304     | ENSG00000124217 | 334.133374 | -0.22527303 | 0.14471956 | 0.09167439 | 0.23381152 | MOCS3     |
| 8675      | ENSG00000124222 | 2131.46323 | 0.18949908  | 0.06931484 | 0.00540855 | 0.02488478 | STX16     |
| NA        | ENSG00000124224 | 202.910519 | 0.51904713  | 0.19510626 | 0.00260912 | 0.01345957 | PPP4R1L   |
| 56937     | ENSG00000124225 | 1198.59762 | -0.78469441 | 0.08234515 | 3.14E-22   | 1.31E-20   | PMEPA1    |
| 55905     | ENSG00000124226 | 1182.88272 | 0.0827649   | 0.08253848 | 0.30501982 | 0.53238261 | RNF114    |
| 140731    | ENSG00000124227 | 0          | NA          | NA         | NA         | NA         | ANKRD60   |
| 55661     | ENSG00000124228 | 1516.662   | 0.16191234  | 0.07025558 | 0.01909847 | 0.07019518 | DDX27     |
| 11317     | ENSG00000124232 | 0          | NA          | NA         | NA         | NA         | RBPJL     |
| 6406      | ENSG00000124233 | 0          | NA          | NA         | NA         | NA         | SEMG1     |
| 128602    | ENSG00000124237 | 0          | NA          | NA         | NA         | NA         | C20orf85  |
| 55653     | ENSG00000124243 | 115.394696 | -0.03717637 | 0.21375866 | 0.83274741 | 0.92398124 | BCAS4     |
| 60598     | ENSG00000124249 | 26.3955039 | -0.07402903 | 0.29551296 | 0.69892862 | 0.8548268  | KCNK15    |
| 27296     | ENSG00000124251 | 15.3957272 | -0.07430531 | 0.33365904 | 0.66895109 | 0.83720078 | TP53TG5   |
| 5105      | ENSG00000124253 | 0.173733   | 0.01914545  | 0.38484597 | 0.78225479 | NA         | PCK1      |
| 81030     | ENSG00000124256 | 0          | NA          | NA         | NA         | NA         | ZBP1      |
| 140825    | ENSG00000124257 | 68.3802414 | 0.29229471  | 0.25722198 | 0.14526907 | 0.32577579 | NEURL2    |
| 4109      | ENSG00000124260 | 8.04563358 | -0.93437286 | 2.24210584 | 0.01005368 | 0.04164195 | MAGEA10   |
| 4552      | ENSG00000124275 | 326.895727 | -0.1199131  | 0.17842461 | 0.44591996 | 0.67028199 | MTRR      |
| 79072     | ENSG00000124279 | 152.063375 | -0.47429841 | 0.2353495  | 0.01529827 | 0.05854681 | FASTKD3   |
| 5184      | ENSG00000124299 | 1187.04598 | -0.00368416 | 0.08467844 | 0.96399512 | 0.9857573  | PEPD      |
| 64377     | ENSG00000124302 | 81.7422249 | -0.63571903 | 0.34607206 | 0.01233825 | 0.04936867 | CHST8     |
| 23096     | ENSG00000124313 | 125.341359 | 0.5576402   | 0.20646424 | 0.00205975 | 0.01097354 | IQSEC2    |
| 6845      | ENSG00000124333 | 741.502823 | -0.13368765 | 0.09240384 | 0.13421258 | 0.30845623 | VAMP7     |
| 3581      | ENSG00000124334 | 1.84080832 | 0.02124037  | 0.37829173 | 0.77649847 | NA         | IL9R      |
| 7499      | ENSG00000124343 | 0          | NA          | NA         | NA         | NA         | XG        |
| 100132596 | ENSG00000124343 | 0          | NA          | NA         | NA         | NA         | XG        |
| 10617     | ENSG00000124356 | 1420.31869 | 0.00172443  | 0.07891597 | 0.98265553 | 0.99428951 | STAMBP    |
| 55577     | ENSG00000124357 | 595.587312 | 0.25065181  | 0.10733877 | 0.0147542  | 0.05690577 | NAGK      |
| 84693     | ENSG00000124370 | 72.4548769 | 0.23822029  | 0.25124641 | 0.22513984 | 0.43895189 | MCEE      |
| 400961    | ENSG00000124374 | 232.06362  | 0.00121269  | 0.14659613 | 0.99518692 | 0.99852582 | PAIP2B    |
| 11017     | ENSG00000124380 | 527.491101 | -0.39705354 | 0.11924314 | 0.00044719 | 0.0029291  | SNRNP27   |
| 10199     | ENSG00000124383 | 656.579426 | -0.18836212 | 0.10887091 | 0.07027492 | 0.19207251 | MPHOSPH10 |
| 27189     | ENSG00000124391 | 0.51556888 | 0.03113434  | 0.38605466 | 0.47762515 | NA         | IL17C     |
| NA        | ENSG00000124399 | 0          | NA          | NA         | NA         | NA         | NDUFB4P12 |
| 10396     | ENSG00000124406 | 2017.32468 | -0.22868491 | 0.0910347  | 0.00952092 | 0.03985969 | ATP8A1    |
| 23326     | ENSG00000124422 | 10468.7945 | -0.12138273 | 0.04866807 | 0.01187889 | 0.04786922 | USP22     |
| 79983     | ENSG00000124429 | 2.73765988 | 0.0789101   | 0.38126945 | 0.44663934 | 0.67085506 | POF1B     |
| 64344     | ENSG00000124440 | 467.003251 | 3.35228864  | 0.48304986 | 1.88E-13   | 4.51E-12   | HIF3A     |



|        |                 |            |             |            |            |            |         |
|--------|-----------------|------------|-------------|------------|------------|------------|---------|
| 79177  | ENSG00000124444 | 182.97946  | -0.03759274 | 0.17566357 | 0.8088941  | 0.91334153 | ZNF576  |
| 56269  | ENSG00000124449 | 0          | NA          | NA         | NA         | NA         | IRGC    |
| 7596   | ENSG00000124459 | 694.672715 | -0.2349045  | 0.10765948 | 0.02250767 | 0.08005423 | ZNF45   |
| 27076  | ENSG00000124466 | 3.35807478 | 0.10359202  | 0.3902883  | 0.31423552 | 0.54212505 | LYPD3   |
| 440533 | ENSG00000124467 | 0          | NA          | NA         | NA         | NA         | PSG8    |
| 1088   | ENSG00000124469 | 0          | NA          | NA         | NA         | NA         | CEACAM8 |
| 4693   | ENSG00000124479 | 2.68546129 | 0.13276317  | 0.41139336 | 0.09225466 | 0.23483865 | NDP     |
| 8239   | ENSG00000124486 | 2923.56111 | -0.1933707  | 0.06775163 | 0.00374605 | 0.01825637 | USP9X   |
| 7180   | ENSG00000124490 | 0          | NA          | NA         | NA         | NA         | CRISP2  |
| 2162   | ENSG00000124491 | 0          | NA          | NA         | NA         | NA         | F13A1   |
| 2914   | ENSG00000124493 | 2.38246573 | -0.14361402 | 0.41496076 | 0.09906832 | NA         | GRM4    |
| 55809  | ENSG00000124496 | 721.871213 | -0.15609429 | 0.09297409 | 0.08298581 | 0.21726558 | TRERF1  |
| 29993  | ENSG00000124507 | 37.1674571 | -0.9015694  | 0.45067728 | 0.00439065 | 0.02088982 | PACSIN1 |
| 10385  | ENSG00000124508 | 450.769962 | 0.1374312   | 0.11802876 | 0.22087011 | 0.43326706 | BTN2A2  |
| 23408  | ENSG00000124523 | 283.079508 | -0.03045312 | 0.15862725 | 0.83257752 | 0.92392457 | SIRT5   |
| 57380  | ENSG00000124532 | 668.618528 | -0.09241921 | 0.11491927 | 0.39821578 | 0.62727695 | MRS2    |
| 56897  | ENSG00000124535 | 1211.90486 | -0.20825888 | 0.07750804 | 0.00598084 | 0.02709036 | WRNIP1  |
| 88745  | ENSG00000124541 | 862.851039 | -0.29957031 | 0.09375997 | 0.00095254 | 0.00567859 | RRP36   |
| 54718  | ENSG00000124549 | 110.44635  | 0.43312801  | 0.24886571 | 0.03162344 | 0.10460523 | BTN2A3P |
| 696    | ENSG00000124557 | 16.5698707 | -0.3544768  | 0.45844721 | 0.11036535 | 0.2677814  | BTN1A1  |
| 6631   | ENSG00000124562 | 1498.85546 | -0.17404815 | 0.08324669 | 0.0319255  | 0.10535628 | SNRPC   |
| 10786  | ENSG00000124564 | 0.29863895 | -0.02292439 | 0.3852726  | 0.68753245 | NA         | SLC17A3 |
| 6568   | ENSG00000124568 | 0          | NA          | NA         | NA         | NA         | SLC17A1 |
| 5269   | ENSG00000124570 | 1326.70571 | -0.10265351 | 0.08602681 | 0.22046275 | 0.43280124 | SERPIN6 |
| 57510  | ENSG00000124571 | 2818.40019 | 0.00995903  | 0.07297062 | 0.89037588 | 0.95232275 | XPO5    |
| 89845  | ENSG00000124574 | 644.370679 | 0.3011675   | 0.11511681 | 0.00595668 | 0.02700795 | ABCC10  |
| 3007   | ENSG00000124575 | 1.78985855 | -0.03402492 | 0.37658058 | 0.69541495 | NA         | H1-3    |
| 5190   | ENSG00000124587 | 673.959337 | 0.12020366  | 0.10905201 | 0.2499815  | 0.46975118 | PEX6    |
| 4835   | ENSG00000124588 | 103.178768 | 0.36109406  | 0.22305474 | 0.05258135 | 0.15473361 | NQO2    |
| NA     | ENSG00000124593 | 304.08001  | 0.41813427  | 0.15445449 | 0.00318516 | 0.01591777 |         |
| 221443 | ENSG00000124596 | 438.63712  | -0.15678503 | 0.11741205 | 0.15977532 | 0.34735289 | OARD1   |
| 222643 | ENSG00000124602 | 35.0979517 | 0.64586689  | 0.44633083 | 0.02159271 | 0.07741223 | UNC5CL  |
| 57505  | ENSG00000124608 | 1129.24192 | 0.00147933  | 0.09065325 | 0.98740439 | 0.9958875  | AARS2   |
| 3024   | ENSG00000124610 | 0          | NA          | NA         | NA         | NA         | H1-1    |
| 346157 | ENSG00000124613 | 207.067703 | 0.26865744  | 0.18585008 | 0.09942458 | 0.24822342 | ZNF391  |
| 6204   | ENSG00000124614 | 8308.75052 | -0.09584436 | 0.0562675  | 0.08518418 | 0.2214571  | RPS10   |
| 4337   | ENSG00000124615 | 274.495763 | -0.2569289  | 0.1403296  | 0.04838921 | 0.14519692 | MOCS1   |
| 8970   | ENSG00000124635 | 16.1255624 | -0.19016856 | 0.35872489 | 0.32374629 | 0.55153069 | H2BC11  |

|           |                 |            |             |            |            |            |          |
|-----------|-----------------|------------|-------------|------------|------------|------------|----------|
| 9477      | ENSG00000124641 | 437.013864 | 0.09359506  | 0.12648215 | 0.43350255 | 0.65875388 | MED20    |
| 26212     | ENSG00000124657 | 0.65897915 | 0.00113328  | 0.38189975 | 0.97955736 | NA         | OR2B6    |
| 6903      | ENSG00000124659 | 360.779738 | 0.03389136  | 0.11924075 | 0.76635335 | 0.8924999  | TBCC     |
| 25803     | ENSG00000124664 | 4.06533206 | 0.09590584  | 0.37986199 | 0.42883852 | 0.65462623 | SPDEF    |
| 6954      | ENSG00000124678 | 0.30139824 | -0.02296476 | 0.38527817 | 0.68536535 | NA         | TCP11    |
| 9587      | ENSG00000124688 | 401.222093 | -0.27005682 | 0.12244904 | 0.01946463 | 0.07138231 | MAD2L1BP |
| 10930     | ENSG00000124701 | 3.57997077 | 0.10929309  | 0.38779649 | 0.34150039 | 0.57180671 | APOBEC2  |
| 116138    | ENSG00000124702 | 3536.93288 | -0.01341981 | 0.05751391 | 0.80687808 | 0.91256903 | KLHDC3   |
| 27232     | ENSG00000124713 | 23.250565  | 0.45451499  | 0.46369676 | 0.07043792 | 0.192412   | GNMT     |
| 107080644 | ENSG00000124713 | 23.250565  | 0.45451499  | 0.46369676 | 0.07043792 | 0.192412   | GNMT     |
| 1769      | ENSG00000124721 | 2.92903275 | 0.13075912  | 0.41300137 | 0.06974479 | 0.19093923 | DNAH8    |
| 54210     | ENSG00000124731 | 0          | NA          | NA         | NA         | NA         | TREM1    |
| 4201      | ENSG00000124733 | 1029.89182 | -0.10558969 | 0.09285066 | 0.24030961 | 0.45826053 | MEA1     |
| 401265    | ENSG00000124743 | 11.9416035 | -8.96E-06   | 0.33683567 | 0.9978509  | 0.99926338 | KLHL31   |
| 81578     | ENSG00000124749 | 0.16735865 | 0.01897177  | 0.38482933 | 0.78225479 | NA         | COL21A1  |
| 1026      | ENSG00000124762 | 726.915665 | 0.86846088  | 0.10398599 | 1.12E-17   | 3.63E-16   | CDKN1A   |
| 6659      | ENSG00000124766 | 11033.4505 | 0.3090284   | 0.04726132 | 4.31E-11   | 8.61E-10   | SOX4     |
| 2739      | ENSG00000124767 | 2446.84408 | 0.15627506  | 0.07954362 | 0.04456118 | 0.13608807 | GLO1     |
| 57699     | ENSG00000124772 | 4.10910488 | -0.19247522 | 0.43216481 | 0.12335197 | 0.29097102 | CPNE5    |
| 89822     | ENSG00000124780 | 0.34746601 | 0.02370763  | 0.3853651  | 0.61987128 | NA         | KCNK17   |
| 6239      | ENSG00000124782 | 244.537069 | 1.89183531  | 0.19864458 | 1.06E-22   | 4.54E-21   | RREB1    |
| 6745      | ENSG00000124783 | 1102.50738 | -0.0642419  | 0.10235354 | 0.51403177 | 0.72918564 | SSR1     |
| 83732     | ENSG00000124784 | 915.337039 | 0.00343079  | 0.0879862  | 0.96892461 | 0.98835292 | RIOK1    |
| 51299     | ENSG00000124785 | 158.258629 | 0.05010065  | 0.1799661  | 0.75403211 | 0.8852593  | NRN1     |
| 51000     | ENSG00000124786 | 210.395732 | 0.0441866   | 0.16392806 | 0.76426364 | 0.89148768 | SLC35B3  |
| 10799     | ENSG00000124787 | 77.018627  | 0.06396273  | 0.25524673 | 0.74008096 | 0.87734262 | RPP40    |
| 6310      | ENSG00000124788 | 119.920023 | 1.44272068  | 0.38508828 | 1.15E-05   | 0.00010831 | ATXN1    |
| 9972      | ENSG00000124789 | 2158.45009 | -0.24638924 | 0.06680038 | 0.00017566 | 0.00126363 | NUP153   |
| 7913      | ENSG00000124795 | 3858.2574  | -0.35866294 | 0.06278747 | 6.71E-09   | 1.03E-07   | DEK      |
| 9521      | ENSG00000124802 | 301.000847 | -0.28855896 | 0.15166231 | 0.03784997 | 0.12049799 | EEF1E1   |
| 167       | ENSG00000124812 | 0          | NA          | NA         | NA         | NA         | CRISP1   |
| 860       | ENSG00000124813 | 0.72074055 | -0.03017113 | 0.38526582 | 0.62254501 | NA         | RUNX2    |
| 221391    | ENSG00000124818 | 0          | NA          | NA         | NA         | NA         | OPN5     |
| 9247      | ENSG00000124827 | 0.99556546 | 0.02989887  | 0.38202549 | 0.61540303 | NA         | GCM2     |
| 9208      | ENSG00000124831 | 1331.80945 | -0.2213546  | 0.09350155 | 0.0144077  | 0.05578625 | LRRFIP1  |
| 93463     | ENSG00000124835 | 1.03885373 | 0.07430075  | 0.39365123 | 0.15225457 | NA         |          |
| 64284     | ENSG00000124839 | 2.16125305 | 0.00030064  | 0.3742673  | 0.99861695 | NA         | RAB17    |
| 6372      | ENSG00000124875 | 0          | NA          | NA         | NA         | NA         | CXCL6    |

|        |                 |            |             |            |            |            |          |
|--------|-----------------|------------|-------------|------------|------------|------------|----------|
| 2069   | ENSG00000124882 | 0.15069912 | -0.01848503 | 0.38480575 | 0.84537521 | NA         | EREG     |
| 84767  | ENSG00000124900 | 0          | NA          | NA         | NA         | NA         | TRIM51   |
| 26070  | ENSG00000124915 | 0.15069912 | -0.01848503 | 0.38480575 | 0.84537521 | NA         | MYRF-AS1 |
| 745    | ENSG00000124920 | 287.860345 | 1.01710708  | 0.14747941 | 6.89E-13   | 1.59E-11   | MYRF     |
| 10647  | ENSG00000124935 | 0          | NA          | NA         | NA         | NA         | SCGB1D2  |
| 4246   | ENSG00000124939 | 0          | NA          | NA         | NA         | NA         | SCGB2A1  |
| 79026  | ENSG00000124942 | 685.366807 | 3.55891435  | 0.13924581 | 2.98E-145  | 2.11E-142  | AHNAK    |
| 55831  | ENSG00000125037 | 571.905876 | 0.00838207  | 0.10852342 | 0.93701757 | 0.97351594 | EMC3     |
| 51066  | ENSG00000125046 | 102.142908 | -0.82855352 | 0.27549673 | 0.00038497 | 0.00255785 | SSUH2    |
| 7471   | ENSG00000125084 | 0          | NA          | NA         | NA         | NA         | WNT1     |
| 54436  | ENSG00000125089 | 204.373156 | -1.14539667 | 0.24596815 | 3.14E-07   | 3.88E-06   | SH3TC1   |
| 23019  | ENSG00000125107 | 4620.25619 | -0.1142016  | 0.0950153  | 0.21389804 | 0.42407686 | CNOT1    |
| 26231  | ENSG00000125122 | 29.1902449 | 0.11072843  | 0.31109228 | 0.56814408 | 0.76919502 | LRRC29   |
| 583    | ENSG00000125124 | 767.840515 | 0.20385362  | 0.09872445 | 0.03235801 | 0.10653394 | BBS2     |
| 4495   | ENSG00000125144 | 0.53474877 | 0.0320676   | 0.38614822 | 0.46394167 | NA         | MT1G     |
| 4502   | ENSG00000125148 | 176.995179 | 0.86741039  | 0.19604797 | 1.49E-06   | 1.64E-05   | MT2A     |
| 80262  | ENSG00000125149 | 413.92738  | -0.10849338 | 0.12451097 | 0.35590825 | 0.58600518 | C16orf70 |
| 2806   | ENSG00000125166 | 2328.33714 | -0.21712155 | 0.07126602 | 0.00189919 | 0.01022801 | GOT2     |
| 55715  | ENSG00000125170 | 3042.91025 | -0.91061545 | 0.06133386 | 1.15E-50   | 1.17E-48   | DOK4     |
| 9271   | ENSG00000125207 | 258.517386 | 0.40900769  | 0.15688752 | 0.00440136 | 0.02093073 | PIWIL1   |
| 2841   | ENSG00000125245 | 0.47262548 | -0.02840375 | 0.38580526 | 0.54352804 | NA         | GPR18    |
| 171425 | ENSG00000125246 | 99.3246645 | 0.60613858  | 0.24365978 | 0.0031579  | 0.01580543 | CLYBL    |
| 84899  | ENSG00000125247 | 1167.36342 | -0.00201415 | 0.08605749 | 0.97953667 | 0.99317507 | TMTC4    |
| 5911   | ENSG00000125249 | 1156.80197 | -0.47460592 | 0.08417727 | 7.40E-09   | 1.13E-07   | RAP2A    |
| 6555   | ENSG00000125255 | 0          | NA          | NA         | NA         | NA         | SLC10A2  |
| 10257  | ENSG00000125257 | 633.807716 | -0.71986446 | 0.10595032 | 2.45E-12   | 5.44E-11   | ABCC4    |
| 1948   | ENSG00000125266 | 2814.47463 | 1.43469151  | 0.07429346 | 4.19E-84   | 9.03E-82   | EFNB2    |
| 11166  | ENSG00000125285 | 0.81937543 | -0.04649727 | 0.38803309 | 0.31234927 | NA         | SOX21    |
| 9375   | ENSG00000125304 | 2077.24121 | 0.0898535   | 0.0639248  | 0.1541342  | 0.33936549 | TM9SF2   |
| 78995  | ENSG00000125319 | 140.425827 | -0.32470198 | 0.20405344 | 0.06266585 | 0.1771069  | HROB     |
| 3834   | ENSG00000125337 | 10.6896127 | -0.03844252 | 0.34462752 | 0.80414018 | 0.91109252 | KIF25    |
| 3659   | ENSG00000125347 | 67.1691869 | 1.25245958  | 0.44549291 | 0.00032439 | 0.00219428 | IRF1     |
| 65109  | ENSG00000125351 | 752.039936 | -0.09453899 | 0.09346476 | 0.2963931  | 0.52297409 | UPF3B    |
| 7737   | ENSG00000125352 | 193.66401  | -0.11237199 | 0.15750831 | 0.43318733 | 0.65852706 | RNF113A  |
| 23157  | ENSG00000125354 | 4077.46391 | -0.15953409 | 0.06018146 | 0.00724681 | 0.03180197 | SEPTIN6  |
| 55026  | ENSG00000125355 | 3.9047523  | 0.14452693  | 0.41055969 | 0.15989758 | 0.34750443 | TMEM255A |
| 4694   | ENSG00000125356 | 622.704936 | -0.20101993 | 0.1014795  | 0.03943057 | 0.12409621 | NDUFA1   |
| 265    | ENSG00000125363 | 0          | NA          | NA         | NA         | NA         | AMELX    |

|        |                 |            |             |            |            |            |           |
|--------|-----------------|------------|-------------|------------|------------|------------|-----------|
| 27109  | ENSG00000125375 | 124.94955  | -0.32895238 | 0.23136009 | 0.08191912 | 0.21504039 | DMAC2L    |
| 652    | ENSG00000125378 | 1.70717773 | 0.09098026  | 0.39488702 | 0.18213239 | NA         | BMP4      |
| 5732   | ENSG00000125384 | 390.367692 | 7.44255427  | 0.39907672 | 1.13E-76   | 2.16E-74   | PTGER2    |
| NA     | ENSG00000125385 | 0          | NA          | NA         | NA         | NA         | RPL32P21  |
| 8603   | ENSG00000125386 | 976.067992 | -0.09372316 | 0.08295676 | 0.24654133 | 0.46577702 | FAM193A   |
| 2868   | ENSG00000125388 | 168.802669 | -0.00721049 | 0.17055678 | 0.96118847 | 0.98419142 | GRK4      |
| 6662   | ENSG00000125398 | 65.4796472 | 1.42206037  | 0.30523759 | 2.61E-07   | 3.26E-06   | SOX9      |
| 64518  | ENSG00000125409 | 5.32952314 | 0.10197884  | 0.37873508 | 0.42568165 | 0.65149487 | TEKT3     |
| 4620   | ENSG00000125414 | 0          | NA          | NA         | NA         | NA         | MYH2      |
| 9953   | ENSG00000125430 | 0.16735865 | 0.01897177  | 0.38482933 | 0.78225479 | NA         | HS3ST3B1  |
| 399512 | ENSG00000125434 | 128.250619 | 0.50686734  | 0.21851736 | 0.00677659 | 0.03009552 | SLC25A35  |
| 51081  | ENSG00000125445 | 1323.69377 | -0.08854894 | 0.07414639 | 0.22310703 | 0.43623174 | MRPS7     |
| 23163  | ENSG00000125447 | 1513.75516 | -0.00991768 | 0.08219118 | 0.90106901 | 0.95641534 | GGA3      |
| 79637  | ENSG00000125449 | 330.552874 | 0.09654944  | 0.13162456 | 0.43515355 | 0.66040284 | ARMC7     |
| 79902  | ENSG00000125450 | 948.335268 | 0.10762408  | 0.1119228  | 0.31493063 | 0.5427103  | NUP85     |
| 60386  | ENSG00000125454 | 287.459813 | -0.11360032 | 0.1383574  | 0.37731408 | 0.6061395  | SLC25A19  |
| 57409  | ENSG00000125457 | 379.618903 | -0.10195669 | 0.13887161 | 0.43003118 | 0.65568848 | MIF4GD    |
| 30833  | ENSG00000125458 | 884.190383 | 0.17875288  | 0.09179159 | 0.04464461 | 0.13629004 | NT5C      |
| 55154  | ENSG00000125459 | 1035.25    | 0.22334936  | 0.09611377 | 0.016207   | 0.06143205 | MSTO1     |
| 10485  | ENSG00000125462 | 492.32162  | -0.33192921 | 0.12504891 | 0.00485716 | 0.02266901 | MIR9-1HG  |
| 7270   | ENSG00000125482 | 627.544307 | -0.13564026 | 0.11041781 | 0.1981906  | 0.4024257  | TTF1      |
| 9329   | ENSG00000125484 | 1876.83317 | -0.32783817 | 0.07180617 | 3.21E-06   | 3.34E-05   | GTF3C4    |
| 64794  | ENSG00000125485 | 526.094315 | 0.04865898  | 0.12500676 | 0.68125899 | 0.84428624 | DDX31     |
| 56751  | ENSG00000125492 | 0          | NA          | NA         | NA         | NA         | BARHL1    |
| 3802   | ENSG00000125498 | 0          | NA          | NA         | NA         | NA         | KIR2DL1   |
| 54776  | ENSG00000125503 | 1073.20122 | 0.09546881  | 0.09786081 | 0.31333838 | 0.54126787 | PPP1R12C  |
| 79143  | ENSG00000125505 | 989.979256 | 0.22666575  | 0.10299811 | 0.02202608 | 0.07871129 | MBOAT7    |
| 6725   | ENSG00000125508 | 8.85594361 | 0.04999735  | 0.35082729 | 0.74290881 | 0.87875221 | SRMS      |
| 4987   | ENSG00000125510 | 171.154617 | 0.29094938  | 0.18856102 | 0.07775724 | 0.20704652 | OPRL1     |
| NA     | ENSG00000125514 | 0          | NA          | NA         | NA         | NA         | LINC00029 |
| 56731  | ENSG00000125520 | 857.62006  | 0.28861449  | 0.09981776 | 0.0026833  | 0.01378119 | SLC2A4RG  |
| 2832   | ENSG00000125522 | 0.30139824 | -0.02296476 | 0.38527817 | 0.68536535 | NA         | NPBWR2    |
| 79025  | ENSG00000125531 | 86.0089347 | 0.68096469  | 0.28129898 | 0.00299567 | 0.01510396 | FNDC11    |
| 128408 | ENSG00000125533 | 0          | NA          | NA         | NA         | NA         | BHLHE23   |
| 79144  | ENSG00000125534 | 2097.09139 | 0.14012052  | 0.07186189 | 0.04708386 | 0.14207511 | PPDPF     |
| 3553   | ENSG00000125538 | 0.16735865 | 0.01897177  | 0.38482933 | 0.78225479 | NA         | IL1B      |
| 5342   | ENSG00000125551 | 92.5746393 | 0.05962149  | 0.21977337 | 0.74270655 | 0.87875221 | PLGLB2    |
| 27178  | ENSG00000125571 | 0          | NA          | NA         | NA         | NA         | IL37      |

|       |                 |            |             |            |            |            |          |
|-------|-----------------|------------|-------------|------------|------------|------------|----------|
| 84269 | ENSG00000125611 | 257.106172 | 0.15361369  | 0.15976481 | 0.29026212 | 0.51620656 | CHCHD5   |
| 7849  | ENSG00000125618 | 0.33656195 | -0.00108945 | 0.38336593 | 0.99872987 | NA         | PAX8     |
| 51141 | ENSG00000125629 | 398.175153 | 0.09314469  | 0.13580206 | 0.46396277 | 0.68678459 | INSIG2   |
| 84172 | ENSG00000125630 | 2154.74509 | -0.08982315 | 0.10806201 | 0.38525847 | 0.61433274 | POLR1B   |
| NA    | ENSG00000125631 | 0.50604797 | 0.01474136  | 0.3830919  | 0.74769424 | NA         | HTR5BP   |
| 54520 | ENSG00000125633 | 1706.34852 | 0.14591019  | 0.09551181 | 0.11449257 | 0.27537066 | CCDC93   |
| 23550 | ENSG00000125637 | 10.3488325 | 0.20472821  | 0.41644236 | 0.19060034 | 0.39194762 | PSD4     |
| 79085 | ENSG00000125648 | 1098.60067 | -0.17339226 | 0.0975327  | 0.06539321 | 0.18250124 | SLC25A23 |
| 5623  | ENSG00000125650 | 79.2761926 | 0.2887925   | 0.24950849 | 0.1433231  | 0.32257859 | PSPN     |
| 2962  | ENSG00000125651 | 2279.35934 | 0.01389924  | 0.07195274 | 0.84481522 | 0.92965052 | GTF2F1   |
| 84266 | ENSG00000125652 | 374.561046 | -0.12515418 | 0.12196852 | 0.27810662 | 0.50258055 | ALKBH7   |
| 8192  | ENSG00000125656 | 1089.85734 | -0.07650301 | 0.08645204 | 0.36377654 | 0.59354103 | CLPP     |
| 8744  | ENSG00000125657 | 2.64513933 | 0.06786231  | 0.3824027  | 0.45144478 | 0.67474853 | TNFSF9   |
| 2892  | ENSG00000125675 | 16.910799  | 1.14629082  | 1.00045294 | 0.00882253 | 0.03740949 | GRIA3    |
| 57187 | ENSG00000125676 | 2296.42043 | 0.12731342  | 0.07967532 | 0.10128975 | 0.25167045 | THOC2    |
| 5469  | ENSG00000125686 | 2232.53622 | -0.16537906 | 0.07400881 | 0.02254739 | 0.0801685  | MED1     |
| 9349  | ENSG00000125691 | 15831.5886 | -0.00368887 | 0.04939516 | 0.93940098 | 0.97474024 | RPL23    |
| NA    | ENSG00000125695 | 0          | NA          | NA         | NA         | NA         |          |
| 84938 | ENSG00000125703 | 207.081796 | -0.02650834 | 0.16714537 | 0.85896315 | 0.93718813 | ATG4C    |
| 970   | ENSG00000125726 | 0          | NA          | NA         | NA         | NA         | CD70     |
| 718   | ENSG00000125730 | 0          | NA          | NA         | NA         | NA         | C3       |
| 10045 | ENSG00000125731 | 7.93118069 | 0.85811982  | 1.7482914  | 0.01332497 | 0.05247466 | SH2D3A   |
| 9322  | ENSG00000125733 | 452.130311 | 0.41969031  | 0.14902704 | 0.00228661 | 0.01200804 | TRIP10   |
| 56927 | ENSG00000125734 | 545.934372 | 0.54924424  | 0.10820345 | 1.33E-07   | 1.74E-06   | GPR108   |
| 8740  | ENSG00000125735 | 0          | NA          | NA         | NA         | NA         | TNFSF14  |
| 2354  | ENSG00000125740 | 275.814582 | 6.0876067   | 0.56667602 | 2.34E-28   | 1.27E-26   | FOSB     |
| 80207 | ENSG00000125741 | 582.012627 | -0.0156512  | 0.12957864 | 0.89613788 | 0.95469109 | OPA3     |
| 6633  | ENSG00000125743 | 3784.02271 | -0.03965122 | 0.05815641 | 0.53437303 | 0.74551445 | SNRPD2   |
| 6253  | ENSG00000125744 | 938.253978 | -1.08061806 | 0.08957802 | 1.97E-34   | 1.30E-32   | RTN2     |
| 24139 | ENSG00000125746 | 322.352115 | 0.06843284  | 0.13944208 | 0.59875663 | 0.79005929 | EML2     |
| 7408  | ENSG00000125753 | 466.905661 | 0.66355596  | 0.16644581 | 1.60E-05   | 0.00014659 | VASP     |
| 8189  | ENSG00000125755 | 2688.39969 | 0.06465996  | 0.06176585 | 0.29136622 | 0.51742125 | SYMPK    |
| 56261 | ENSG00000125772 | 312.553269 | 0.19337508  | 0.14974124 | 0.16038593 | 0.34822247 | GPCPD1   |
| 27111 | ENSG00000125775 | 23.7268173 | 0.16799171  | 0.32788327 | 0.39660281 | 0.6258107  | SDCBP2   |
| 80025 | ENSG00000125779 | 859.932332 | -0.17417123 | 0.08991053 | 0.04519261 | 0.13762417 | PANK2    |
| 7053  | ENSG00000125780 | 0.33471731 | 0.02354391  | 0.38534154 | 0.62842204 | NA         | TGM3     |
| 2797  | ENSG00000125787 | 2.96826605 | -0.00830598 | 0.37188832 | 0.92811932 | 0.96985158 | GNRH2    |
| 81623 | ENSG00000125788 | 0          | NA          | NA         | NA         | NA         | DEFB126  |

|        |                 |            |             |            |            |            |         |
|--------|-----------------|------------|-------------|------------|------------|------------|---------|
| 3170   | ENSG00000125798 | 0          | NA          | NA         | NA         | NA         | FOXA2   |
| 284800 | ENSG00000125804 | 12.5026294 | 0.0619887   | 0.33856036 | 0.71328965 | 0.86190557 | FAM182A |
| 22918  | ENSG00000125810 | 0          | NA          | NA         | NA         | NA         | CD93    |
| 64412  | ENSG00000125812 | 447.512453 | -0.11599504 | 0.19096667 | 0.48271232 | 0.70315803 | GZF1    |
| 5075   | ENSG00000125813 | 0          | NA          | NA         | NA         | NA         | PAX1    |
| 63908  | ENSG00000125814 | 573.357561 | -0.59083069 | 0.11654612 | 1.20E-07   | 1.57E-06   | NAPB    |
| 10047  | ENSG00000125815 | 0          | NA          | NA         | NA         | NA         | CST8    |
| 644524 | ENSG00000125816 | 0          | NA          | NA         | NA         | NA         | NKX2-4  |
| 1059   | ENSG00000125817 | 1939.14134 | -0.4812186  | 0.0667106  | 2.30E-13   | 5.44E-12   | CENPB   |
| 9491   | ENSG00000125818 | 1273.78253 | 0.0357574   | 0.07548263 | 0.6295973  | 0.8124371  | PSMF1   |
| 4821   | ENSG00000125820 | 0          | NA          | NA         | NA         | NA         | NKX2-2  |
| 92675  | ENSG00000125821 | 824.21087  | 0.11834346  | 0.09399395 | 0.19399155 | 0.39683151 | DTD1    |
| 128817 | ENSG00000125823 | 0          | NA          | NA         | NA         | NA         | CSTL1   |
| 10616  | ENSG00000125826 | 1274.20558 | 0.08579165  | 0.08790999 | 0.31622748 | 0.54428326 | RBCK1   |
| 56255  | ENSG00000125827 | 1740.34121 | -0.26016771 | 0.07287909 | 0.0002695  | 0.00185783 | TMX4    |
| 140880 | ENSG00000125831 | 0          | NA          | NA         | NA         | NA         | CST11   |
| 140901 | ENSG00000125834 | 890.082305 | -0.04873559 | 0.08773083 | 0.56325154 | 0.76608585 | STK35   |
| 6628   | ENSG00000125835 | 5016.33246 | 0.11392433  | 0.07015756 | 0.09862105 | 0.24670807 | SNRPB   |
| 80023  | ENSG00000125841 | 1302.26265 | -0.14557493 | 0.0817118  | 0.06911833 | 0.18966912 | NRSN2   |
| 55317  | ENSG00000125843 | 185.038829 | -0.15326365 | 0.18824814 | 0.34951813 | 0.58004303 | AP5S1   |
| 6238   | ENSG00000125844 | 806.295017 | 0.2071236   | 0.10471615 | 0.03937822 | 0.12401014 | RRBP1   |
| 650    | ENSG00000125845 | 7.3953478  | 4.55754405  | 1.5356558  | 0.00014651 | 0.00107297 | BMP2    |
| 7692   | ENSG00000125846 | 415.23004  | 0.00939256  | 0.12946974 | 0.93950689 | 0.97474024 | ZNF133  |
| 23767  | ENSG00000125848 | 480.810901 | 0.0896319   | 0.13297916 | 0.4757038  | 0.69776455 | FLRT3   |
| 58495  | ENSG00000125850 | 0          | NA          | NA         | NA         | NA         | OVOL2   |
| 5126   | ENSG00000125851 | 0          | NA          | NA         | NA         | NA         | PCSK2   |
| 64096  | ENSG00000125861 | 0          | NA          | NA         | NA         | NA         | GFRA4   |
| 8195   | ENSG00000125863 | 777.486674 | -0.01119283 | 0.09527299 | 0.90279654 | 0.95739939 | MKKS    |
| 631    | ENSG00000125864 | 7.47984673 | 0.14942377  | 0.3863313  | 0.32443085 | 0.55221149 | BFSP1   |
| 11034  | ENSG00000125868 | 1349.82371 | -0.23402113 | 0.08095996 | 0.00304234 | 0.015312   | DSTN    |
| 24141  | ENSG00000125869 | 2202.55792 | -0.53618431 | 0.06910661 | 3.15E-15   | 8.80E-14   | LAMP5   |
| 6629   | ENSG00000125870 | 2393.23647 | -0.95801466 | 0.06314533 | 7.94E-53   | 8.43E-51   | SNRPB2  |
| 92667  | ENSG00000125871 | 642.159726 | 0.00324678  | 0.1097219  | 0.97696665 | 0.99216924 | MGME1   |
| 164312 | ENSG00000125872 | 0.49492041 | 0.01127072  | 0.38337735 | 0.78451667 | NA         | LRRN4   |
| 128637 | ENSG00000125875 | 1041.73863 | -0.11604882 | 0.08595855 | 0.16556297 | 0.35564848 | TBC1D20 |
| 3704   | ENSG00000125877 | 985.94097  | 0.01926586  | 0.08461913 | 0.81614608 | 0.91637704 | ITPA    |
| 6939   | ENSG00000125878 | 82.0242856 | -0.76436512 | 0.28014914 | 0.00103324 | 0.0060739  | TCF15   |
| 56914  | ENSG00000125879 | 211.169707 | -3.55504655 | 0.23077455 | 1.59E-54   | 1.80E-52   | OTOR    |

|           |                 |            |             |            |            |            |             |
|-----------|-----------------|------------|-------------|------------|------------|------------|-------------|
| 84515     | ENSG00000125885 | 1347.09337 | -0.00895423 | 0.08708916 | 0.91602071 | 0.96435405 | MCM8        |
| 140836    | ENSG00000125888 | 0          | NA          | NA         | NA         | NA         | BANF2       |
| 55321     | ENSG00000125895 | 71.694115  | 0.55317398  | 0.29350886 | 0.01523449 | 0.05837164 | TMEM74B     |
| 83541     | ENSG00000125898 | 333.957025 | -0.29823928 | 0.14871764 | 0.02909606 | 0.09799113 | FAM110A     |
| NA        | ENSG00000125899 | 0          | NA          | NA         | NA         | NA         | LINC02871   |
| 128646    | ENSG00000125900 | 0          | NA          | NA         | NA         | NA         | SIRPD       |
| 64949     | ENSG00000125901 | 1543.70336 | 0.01807411  | 0.07569922 | 0.8083632  | 0.91317199 | MRPS26      |
| 140881    | ENSG00000125903 | 0          | NA          | NA         | NA         | NA         | DEFB129     |
| 8698      | ENSG00000125910 | 0          | NA          | NA         | NA         | NA         | S1PR4       |
| 56926     | ENSG00000125912 | 2112.64871 | -0.0964729  | 0.0864257  | 0.25120394 | 0.47115582 | NCLN        |
| 4435      | ENSG00000125931 | 83.3370381 | 0.83251136  | 0.27908194 | 0.00041879 | 0.00275672 | CITED1      |
| 10236     | ENSG00000125944 | 6836.9131  | 0.01903186  | 0.06290917 | 0.85031786 | 0.93221564 | HNRNPR      |
| 80818     | ENSG00000125945 | 309.513274 | -0.04619211 | 0.12878499 | 0.70252706 | 0.85694048 | ZNF436      |
| 4149      | ENSG00000125952 | 999.792286 | -0.18166176 | 0.12802937 | 0.13091599 | 0.30332515 | MAX         |
| 100529261 | ENSG00000125954 | 21.588102  | 0.93042163  | 0.714715   | 0.01212891 | 0.04864315 | CHURC1-FNTB |
| 64860     | ENSG00000125962 | 171.361427 | -0.20871467 | 0.18579917 | 0.19894094 | 0.4033713  | ARMCX5      |
| 8200      | ENSG00000125965 | 3.89796405 | 0.14288996  | 0.4058409  | 0.20148012 | 0.40689796 | GDF5        |
| 10893     | ENSG00000125966 | 901.203606 | -3.02498867 | 0.11083662 | 3.18E-165  | 3.71E-162  | MMP24       |
| 63941     | ENSG00000125967 | 306.614823 | 0.03844558  | 0.15713152 | 0.7896001  | 0.9043268  | NECAB3      |
| 3397      | ENSG00000125968 | 213.547702 | -0.08969505 | 0.1657471  | 0.54766664 | 0.75435339 | ID1         |
| 22913     | ENSG00000125970 | 3746.57006 | 0.10555094  | 0.06523378 | 0.09593679 | 0.24179191 | RALY        |
| 83658     | ENSG00000125971 | 1475.74448 | 0.0324845   | 0.07892821 | 0.66959636 | 0.83747033 | DYNLRB1     |
| 140873    | ENSG00000125975 | 0.16735865 | 0.01897177  | 0.38482933 | 0.78225479 | NA         | C20orf173   |
| 8894      | ENSG00000125977 | 1799.83781 | 0.05246254  | 0.1014693  | 0.59290773 | 0.78702605 | EIF2S2      |
| 51614     | ENSG00000125991 | 3364.05073 | 0.22943927  | 0.06060785 | 0.0001244  | 0.00092302 | ERGIC3      |
| 140823    | ENSG00000125995 | 915.368001 | -0.03726138 | 0.09352625 | 0.68068224 | 0.84396798 | ROMO1       |
| NA        | ENSG00000125997 | 0.60279648 | -0.02752712 | 0.38588313 | 0.49730371 | NA         | BPIFB9P     |
| 128876    | ENSG00000125998 | 0.5080512  | 0.03076426  | 0.38601843 | 0.48315201 | NA         | FAM83C      |
| 92747     | ENSG00000125999 | 0          | NA          | NA         | NA         | NA         | BPIFB1      |
| 11190     | ENSG00000126001 | 2150.28656 | 0.00048346  | 0.07725331 | 0.99643069 | 0.99873692 | CEP250      |
| 5326      | ENSG00000126003 | 1030.68688 | 0.23026964  | 0.0826819  | 0.00429109 | 0.02048009 | PLAGL2      |
| 101410538 | ENSG00000126005 | 234.948488 | -0.42527942 | 0.15868349 | 0.00334827 | 0.01660326 | MMP24OS     |
| 2925      | ENSG00000126010 | 4.54894044 | -0.1477689  | 0.40253738 | 0.23219598 | 0.44897628 | GRPR        |
| 8242      | ENSG00000126012 | 4680.26162 | 0.03077105  | 0.08132212 | 0.70019481 | 0.85541355 | KDM5C       |
| 154796    | ENSG00000126016 | 316.688162 | -0.05762382 | 0.13504315 | 0.64807021 | 0.82447067 | AMOT        |
| 11070     | ENSG00000126062 | 1285.41518 | 0.00663263  | 0.09794345 | 0.94513263 | 0.97760447 | TMEM115     |
| 5690      | ENSG00000126067 | 1636.31147 | 0.14888372  | 0.08019224 | 0.05749109 | 0.16576416 | PSMB2       |
| 192669    | ENSG00000126070 | 1190.24013 | -0.09552091 | 0.09999647 | 0.32145223 | 0.54914291 | AGO3        |

|       |                 |            |             |            |            |            |         |
|-------|-----------------|------------|-------------|------------|------------|------------|---------|
| 7389  | ENSG00000126088 | 843.565844 | 0.15249512  | 0.08784445 | 0.0743479  | 0.20011698 | UROD    |
| 6487  | ENSG00000126091 | 467.772555 | 0.30065653  | 0.12577335 | 0.01113386 | 0.04530267 | ST3GAL3 |
| 79639 | ENSG00000126106 | 119.830618 | 0.21867465  | 0.24993316 | 0.26244566 | 0.48440989 | TMEM53  |
| 79654 | ENSG00000126107 | 602.980003 | 0.31709584  | 0.11838202 | 0.00474847 | 0.02224549 | HECTD3  |
| 3831  | ENSG00000126214 | 3306.20155 | -0.18223827 | 0.05870731 | 0.00166118 | 0.00915749 | KLC1    |
| 7517  | ENSG00000126215 | 616.366109 | -0.23246717 | 0.11932188 | 0.0397485  | 0.12479986 | XRCC3   |
| 10426 | ENSG00000126216 | 1002.11709 | 0.01882815  | 0.08893014 | 0.8285197  | 0.92220943 | TUBGCP3 |
| 23263 | ENSG00000126217 | 1496.34168 | -0.15757606 | 0.08871244 | 0.06734886 | 0.18634601 | MCF2L   |
| 2159  | ENSG00000126218 | 442.480383 | 0.44013894  | 0.12301343 | 0.00015888 | 0.00115419 | F10     |
| 55795 | ENSG00000126226 | 1214.70964 | 0.05106843  | 0.09232173 | 0.56963087 | 0.77027512 | PCID2   |
| 8858  | ENSG00000126231 | 4.24308067 | -0.05793452 | 0.36834836 | 0.63494677 | 0.81626022 | PROZ    |
| 57152 | ENSG00000126233 | 0          | NA          | NA         | NA         | NA         | SLURP1  |
| 79414 | ENSG00000126243 | 439.020782 | 0.00858695  | 0.14857948 | 0.95140878 | 0.98008882 | LRFN3   |
| 79713 | ENSG00000126246 | 55.6792994 | -0.11475507 | 0.28247296 | 0.55658175 | 0.76208295 | IGFLR1  |
| 826   | ENSG00000126247 | 1995.53094 | 0.30455076  | 0.06874726 | 6.50E-06   | 6.39E-05   | CAPNS1  |
| 84306 | ENSG00000126249 | 155.597408 | -0.31069793 | 0.17811243 | 0.0492454  | 0.14732036 | PDCD2L  |
| 2866  | ENSG00000126251 | 0          | NA          | NA         | NA         | NA         | GPR42   |
| 79171 | ENSG00000126254 | 1046.20742 | 0.23306225  | 0.09193839 | 0.00889128 | 0.03763666 | RBM42   |
| 84063 | ENSG00000126259 | 108.611361 | -0.47050604 | 0.2577739  | 0.02308729 | 0.08171822 | KIRREL2 |
| 10054 | ENSG00000126261 | 3876.14931 | -0.09952435 | 0.05753998 | 0.07989536 | 0.21106844 | UBA2    |
| 2867  | ENSG00000126262 | 0          | NA          | NA         | NA         | NA         | FFAR2   |
| 10870 | ENSG00000126264 | 0.82391088 | -0.00162191 | 0.38069451 | 0.9775606  | NA         | HCST    |
| 2864  | ENSG00000126266 | 0          | NA          | NA         | NA         | NA         | FFAR1   |
| 1340  | ENSG00000126267 | 1567.05576 | -0.00135779 | 0.06943927 | 0.98318241 | 0.99428951 | COX6B1  |
| 8689  | ENSG00000126337 | 0          | NA          | NA         | NA         | NA         | KRT36   |
| 7067  | ENSG00000126351 | 1192.47998 | -0.07307199 | 0.08361962 | 0.36996014 | 0.59928226 | THRA    |
| 1236  | ENSG00000126353 | 2.02974961 | 0.13306556  | 0.41465152 | 0.05731135 | NA         | CCR7    |
| 9572  | ENSG00000126368 | 79.9324967 | 0.25174672  | 0.23777111 | 0.18833918 | 0.38882927 | NR1D1   |
| 83786 | ENSG00000126391 | 610.380983 | 0.34633568  | 0.10682007 | 0.00071513 | 0.00440625 | FRMD8   |
| 25824 | ENSG00000126432 | 3805.51385 | 0.00300309  | 0.06103421 | 0.96411037 | 0.98577354 | PRDX5   |
| 83596 | ENSG00000126453 | 295.858439 | 0.9822099   | 0.15748597 | 6.08E-11   | 1.20E-09   | BCL2L1  |
| 3661  | ENSG00000126456 | 526.786538 | -0.11978478 | 0.13717789 | 0.34824704 | 0.5790012  | IRF3    |
| 3276  | ENSG00000126457 | 5519.1107  | 0.00170271  | 0.07436012 | 0.98254929 | 0.99428951 | PRMT1   |
| 6237  | ENSG00000126458 | 87.7089273 | 1.37351875  | 0.27669104 | 5.93E-08   | 8.05E-07   | RRAS    |
| 5639  | ENSG00000126460 | 5.43388866 | -0.14749742 | 0.40725319 | 0.17826838 | 0.37383412 | PRRG2   |
| 58506 | ENSG00000126461 | 2550.42549 | 0.14966668  | 0.06153385 | 0.01371986 | 0.05368874 | SCAF1   |
| 57479 | ENSG00000126464 | 1631.65521 | 0.02168369  | 0.06861082 | 0.74899385 | 0.88205755 | PRR12   |
| 60385 | ENSG00000126467 | 0          | NA          | NA         | NA         | NA         | TSKS    |



|        |                 |            |             |            |            |            |         |
|--------|-----------------|------------|-------------|------------|------------|------------|---------|
| 23769  | ENSG00000126500 | 583.344631 | 0.11279799  | 0.11371193 | 0.29910592 | 0.52612826 | FLRT1   |
| 435    | ENSG00000126522 | 409.556046 | 0.40409585  | 0.14272122 | 0.00230755 | 0.01210196 | ASL     |
| 51119  | ENSG00000126524 | 847.771244 | -0.11165895 | 0.08563485 | 0.18087808 | 0.37795923 | SBDS    |
| 1446   | ENSG00000126545 | 0          | NA          | NA         | NA         | NA         | CSN1S1  |
| 6779   | ENSG00000126549 | 0          | NA          | NA         | NA         | NA         | STATH   |
| 3346   | ENSG00000126550 | 0          | NA          | NA         | NA         | NA         | HTN1    |
| 6776   | ENSG00000126561 | 9.96039781 | -0.35801693 | 0.56022413 | 0.06109579 | 0.17383343 | STAT5A  |
| 65266  | ENSG00000126562 | 6.35899059 | 1.0993745   | 2.0743207  | 0.01049204 | 0.04307991 | WNK4    |
| 8678   | ENSG00000126581 | 782.451862 | -0.0202593  | 0.09075069 | 0.82203544 | 0.91867195 | BECN1   |
| 5582   | ENSG00000126583 | 109.503755 | 0.76029013  | 0.29148601 | 0.00145164 | 0.00814957 | PRKCG   |
| 10131  | ENSG00000126602 | 2882.939   | -0.11067813 | 0.06720833 | 0.09350416 | 0.23701577 | TRAP1   |
| 84662  | ENSG00000126603 | 505.710065 | -0.10574078 | 0.1105486  | 0.31700874 | 0.54483775 | GLIS2   |
| 84081  | ENSG00000126653 | 419.983517 | -0.18513671 | 0.11383709 | 0.08767115 | 0.22621869 | NSRP1   |
| 22826  | ENSG00000126698 | 1687.81676 | -0.10128443 | 0.06857665 | 0.13299096 | 0.30644076 | DNAJC8  |
| 27245  | ENSG00000126705 | 1091.88321 | 0.12513291  | 0.08299201 | 0.1221562  | 0.28896853 | AHDC1   |
| 2537   | ENSG00000126709 | 218.263498 | 0.96712892  | 0.19287994 | 7.03E-08   | 9.45E-07   | IFI6    |
| 117154 | ENSG00000126733 | 0          | NA          | NA         | NA         | NA         | DACH2   |
| 171017 | ENSG00000126746 | 2032.28271 | 0.21706051  | 0.06829092 | 0.00121499 | 0.00699723 | ZNF384  |
| 10436  | ENSG00000126749 | 938.206141 | -0.05608163 | 0.08848286 | 0.5141418  | 0.72921448 | EMG1    |
| 6756   | ENSG00000126752 | 0          | NA          | NA         | NA         | NA         | SSX1    |
| 8409   | ENSG00000126756 | 453.338642 | -0.06036032 | 0.11960544 | 0.59447476 | 0.7877158  | UXT     |
| 5199   | ENSG00000126759 | 19.9289739 | 0.25741648  | 0.43072869 | 0.15698057 | 0.34378031 | CFP     |
| 2002   | ENSG00000126767 | 681.132049 | -0.1622013  | 0.09765833 | 0.08518955 | 0.2214571  | ELK1    |
| 10245  | ENSG00000126768 | 681.943814 | 0.18964032  | 0.09659913 | 0.04221179 | 0.13092298 | TIMM17B |
| 64430  | ENSG00000126773 | 2311.33945 | -0.08969272 | 0.07913889 | 0.24618791 | 0.46544388 | PCNX4   |
| 22863  | ENSG00000126775 | 367.713189 | 0.27009518  | 0.12347517 | 0.02054116 | 0.07447673 | ATG14   |
| 3895   | ENSG00000126777 | 3813.35328 | -0.2167232  | 0.07130963 | 0.00194039 | 0.01041314 | KTN1    |
| 6495   | ENSG00000126778 | 2.73291672 | 0.17395879  | 0.44179679 | 0.00968968 | 0.0404533  | SIX1    |
| 57381  | ENSG00000126785 | 0.48241915 | 0.02941591  | 0.3858847  | 0.50463983 | NA         | RHOJ    |
| 9787   | ENSG00000126787 | 1151.71787 | -0.25341852 | 0.10683165 | 0.01319116 | 0.05204067 | DLGAP5  |
| 112849 | ENSG00000126790 | 183.742516 | 0.2126437   | 0.16331939 | 0.14970244 | 0.33259758 | L3HYPDH |
| 3306   | ENSG00000126803 | 271.735471 | 0.03493122  | 0.15753586 | 0.80900489 | 0.91334153 | HSPA2   |
| 22890  | ENSG00000126804 | 710.714207 | -0.28880357 | 0.11754845 | 0.0096008  | 0.04012637 | ZBTB1   |
| 57570  | ENSG00000126814 | 553.758308 | -0.36437527 | 0.13779136 | 0.0045268  | 0.02139394 | TRMT5   |
| 81537  | ENSG00000126821 | 269.974325 | -0.3613943  | 0.1490464  | 0.00845368 | 0.03610787 | SGPP1   |
| 26030  | ENSG00000126822 | 984.652921 | -0.37667628 | 0.10662844 | 0.0002268  | 0.00159055 | PLEKHG3 |
| 5858   | ENSG00000126838 | 1.13347067 | -0.04696378 | 0.38740561 | 0.30427083 | NA         | PZP     |
| 11105  | ENSG00000126856 | 0.46723714 | -0.01002979 | 0.38291395 | 0.84210182 | NA         | PRDM7   |

|           |                 |            |             |            |            |            |         |
|-----------|-----------------|------------|-------------|------------|------------|------------|---------|
| 55288     | ENSG00000126858 | 972.017619 | 0.00677917  | 0.10081868 | 0.94504914 | 0.97756908 | RHOT1   |
| 2123      | ENSG00000126860 | 2.30886449 | -0.03548369 | 0.37720263 | 0.67492142 | NA         | EVI2A   |
| 4974      | ENSG00000126861 | 3.12727196 | 0.06361256  | 0.3803864  | 0.49540157 | 0.71414424 | OMG     |
| 101927057 | ENSG00000126861 | 3.12727196 | 0.06361256  | 0.3803864  | 0.49540157 | 0.71414424 | OMG     |
| 55112     | ENSG00000126870 | 812.160667 | 0.5277448   | 0.09026392 | 1.87E-09   | 3.10E-08   | DYNC2I1 |
| 83543     | ENSG00000126878 | 431.076448 | 2.0274143   | 0.1355225  | 1.07E-51   | 1.10E-49   | AIF1L   |
| 286336    | ENSG00000126882 | 231.936617 | 0.13374583  | 0.14895821 | 0.32997135 | 0.55861736 | FAM78A  |
| 8021      | ENSG00000126883 | 1722.03632 | -0.07235602 | 0.07843007 | 0.34542121 | 0.57589553 | NUP214  |
| 30848     | ENSG00000126890 | 2.02163866 | -0.03460677 | 0.38110749 | 0.6058908  | NA         | CTAG2   |
| 554       | ENSG00000126895 | 15.194229  | -0.11904183 | 0.34095378 | 0.50793074 | 0.7237561  | AVPR2   |
| 8273      | ENSG00000126903 | 196.232939 | 0.05699192  | 0.16476243 | 0.70360215 | 0.85751377 | SLC10A3 |
| 5605      | ENSG00000126934 | 1813.26613 | 0.01761941  | 0.06859916 | 0.7946998  | 0.90579008 | MAP2K2  |
| 3188      | ENSG00000126945 | 2062.93777 | 0.02703515  | 0.08678982 | 0.74998043 | 0.8824202  | HNRNPH2 |
| 51309     | ENSG00000126947 | 272.817238 | -0.25813095 | 0.14164477 | 0.04906569 | 0.14693784 | ARMCX1  |
| 59353     | ENSG00000126950 | 238.842731 | -0.14040387 | 0.15150592 | 0.31191232 | 0.53958168 | TMEM35A |
| 55998     | ENSG00000126952 | 0.51380477 | 0.01507728  | 0.38309512 | 0.74089101 | NA         | NXF5    |
| 1678      | ENSG00000126953 | 294.148434 | -0.23552032 | 0.13537162 | 0.06194251 | 0.17561295 | TIMM8A  |
| 55906     | ENSG00000126970 | 655.803184 | -0.13975467 | 0.1073779  | 0.17396081 | 0.36720742 | ZC4H2   |
| 821       | ENSG00000127022 | 9602.36548 | -0.08212286 | 0.05947403 | 0.16166617 | 0.3500826  | CANX    |
| 54973     | ENSG00000127054 | 2175.481   | -0.02117421 | 0.07177389 | 0.76326506 | 0.89093245 | INTS11  |
| 6003      | ENSG00000127074 | 0.98605025 | 0.00607633  | 0.38006497 | 0.92025621 | NA         | RGS13   |
| 64768     | ENSG00000127080 | 489.499699 | 0.07340224  | 0.14586082 | 0.5870773  | 0.78237765 | IPPK    |
| 83744     | ENSG00000127081 | 140.937703 | -0.30424337 | 0.188952   | 0.06527801 | 0.18230796 | ZNF484  |
| 4958      | ENSG00000127083 | 0.99480918 | 0.02209923  | 0.38284268 | 0.6506095  | NA         | OMD     |
| 89846     | ENSG00000127084 | 27.2571144 | 0.32304112  | 0.36671536 | 0.1495052  | 0.33230822 | FGD3    |
| 59269     | ENSG00000127124 | 329.035206 | -1.22726671 | 0.14000584 | 1.99E-19   | 7.25E-18   | HIVEP3  |
| 79717     | ENSG00000127125 | 283.523135 | -0.63458092 | 0.14802641 | 4.72E-06   | 4.79E-05   | PPCS    |
| 1907      | ENSG00000127129 | 1.44450725 | 0.01025023  | 0.37826463 | 0.88335199 | NA         | EDN2    |
| 64919     | ENSG00000127152 | 0          | NA          | NA         | NA         | NA         | BCL11B  |
| 1350      | ENSG00000127184 | 2625.95467 | -0.14068664 | 0.06303968 | 0.02335012 | 0.08247576 | COX7C   |
| 7186      | ENSG00000127191 | 503.787105 | -0.20917822 | 0.11285194 | 0.05166899 | 0.15279665 | TRAF2   |
| 79575     | ENSG00000127220 | 616.881533 | 0.08482844  | 0.09806438 | 0.37139083 | 0.60057374 | ABHD8   |
| 5648      | ENSG00000127241 | 0          | NA          | NA         | NA         | NA         | MASP1   |
| 84239     | ENSG00000127249 | 10.0404169 | 0.50077101  | 0.98497124 | 0.00722046 | 0.03170737 | ATP13A4 |
| 57110     | ENSG00000127252 | 31.2252004 | -0.0325132  | 0.29494496 | 0.86259232 | 0.93899493 | PLAAT1  |
| 92797     | ENSG00000127311 | 67.0842107 | 0.41526849  | 0.2830938  | 0.0543402  | 0.15863564 | HELB    |
| 5908      | ENSG00000127314 | 1204.52822 | -0.12684166 | 0.08222827 | 0.1137319  | 0.27377941 | RAP1B   |
| 50616     | ENSG00000127318 | 0          | NA          | NA         | NA         | NA         | IL22    |

|        |                 |            |             |            |            |            |         |
|--------|-----------------|------------|-------------|------------|------------|------------|---------|
| 7103   | ENSG00000127324 | 4.7073598  | 0.05454146  | 0.36877643 | 0.64727712 | 0.82430661 | TSPAN8  |
| 144453 | ENSG00000127325 | 0.173124   | -0.01911262 | 0.38486262 | 0.84537521 | NA         | BEST3   |
| 117177 | ENSG00000127328 | 482.830127 | -0.32383896 | 0.15325384 | 0.02085988 | 0.07535879 | RAB3IP  |
| 5787   | ENSG00000127329 | 31.049319  | 2.58175763  | 0.50422946 | 1.87E-08   | 2.73E-07   | PTPRB   |
| 8445   | ENSG00000127334 | 2311.7898  | 0.21845641  | 0.07146456 | 0.00183782 | 0.00994882 | DYRK2   |
| 8089   | ENSG00000127337 | 405.310293 | -0.10277516 | 0.1669662  | 0.49195216 | 0.7110834  | YEATS4  |
| 50831  | ENSG00000127362 | 9.21392174 | -0.03007097 | 0.34461762 | 0.84489979 | 0.92965052 | TAS2R3  |
| 50832  | ENSG00000127364 | 94.7685875 | -0.04781038 | 0.20794863 | 0.78350783 | 0.90146111 | TAS2R4  |
| 54429  | ENSG00000127366 | 30.9821222 | -0.04856459 | 0.28463395 | 0.79942302 | 0.90803676 | TAS2R5  |
| 155051 | ENSG00000127377 | 0.70027077 | 0.00203698  | 0.38203102 | 0.85183428 | NA         | CRYGN   |
| 65999  | ENSG00000127399 | 559.676285 | 0.50138762  | 0.11274185 | 3.40E-06   | 3.51E-05   | LRRC61  |
| 56302  | ENSG00000127412 | 0.32112006 | -0.00294009 | 0.38339209 | 0.99470998 | NA         | TRPV5   |
| 3425   | ENSG00000127415 | 215.232277 | 0.81144065  | 0.21289397 | 2.26E-05   | 0.00020133 | IDUA    |
| 53834  | ENSG00000127418 | 17.3403769 | 3.11420161  | 0.71085536 | 8.72E-07   | 9.99E-06   | FGFRL1  |
| 84286  | ENSG00000127419 | 496.309024 | 0.05413504  | 0.11434185 | 0.62073945 | 0.80656694 | TMEM175 |
| 79000  | ENSG00000127423 | 101.878052 | -0.42648506 | 0.24673265 | 0.03301139 | 0.10818399 | AUNIP   |
| 5300   | ENSG00000127445 | 1358.18184 | -0.10166166 | 0.08188151 | 0.20294689 | 0.40886131 | PIN1    |
| 54850  | ENSG00000127452 | 484.157288 | 0.40044537  | 0.11823163 | 0.00036403 | 0.00243422 | FBXL12  |
| 23065  | ENSG00000127463 | 1451.31318 | -0.30569787 | 0.07310257 | 1.97E-05   | 0.00017724 | EMC1    |
| 5322   | ENSG00000127472 | 0          | NA          | NA         | NA         | NA         | PLA2G5  |
| 23352  | ENSG00000127481 | 8047.02624 | 0.22001727  | 0.05474479 | 4.84E-05   | 0.00039787 | UBR4    |
| 50809  | ENSG00000127483 | 4864.08573 | -0.0051865  | 0.06468017 | 0.93407174 | 0.97250122 | HP1BP3  |
| 30817  | ENSG00000127507 | 5.63941949 | 0.03154468  | 0.35752549 | 0.81842791 | 0.9171248  | ADGRE2  |
| 23309  | ENSG00000127511 | 1708.15326 | 0.2142061   | 0.09407545 | 0.01862008 | 0.0687042  | SIN3B   |
| 390892 | ENSG00000127515 | 0          | NA          | NA         | NA         | NA         | OR7A10  |
| 79939  | ENSG00000127526 | 1214.48917 | -0.06082334 | 0.11168854 | 0.56788646 | 0.76918607 | SLC35E1 |
| 58513  | ENSG00000127527 | 794.534741 | 0.02085737  | 0.10228542 | 0.83362187 | 0.92422788 | EPS15L1 |
| 10365  | ENSG00000127528 | 0          | NA          | NA         | NA         | NA         | KLF2    |
| 26658  | ENSG00000127529 | 0          | NA          | NA         | NA         | NA         | OR7C2   |
| 26664  | ENSG00000127530 | 0.39935548 | -0.01092807 | 0.38376568 | 0.92097753 | NA         | OR7C1   |
| 9002   | ENSG00000127533 | 2.54387008 | -0.08257224 | 0.38562861 | 0.37317167 | NA         | F2RL3   |
| 10975  | ENSG00000127540 | 1806.19343 | -0.03064821 | 0.06981881 | 0.65481265 | 0.82814932 | UQCR11  |
| 2671   | ENSG00000127554 | 564.581488 | 0.06976037  | 0.11414205 | 0.52264419 | 0.73587826 | GFER    |
| 9143   | ENSG00000127561 | 249.577372 | -0.47768319 | 0.1771738  | 0.00267755 | 0.01375518 | SYNGR3  |
| 9088   | ENSG00000127564 | 1033.71224 | -0.18284583 | 0.08759053 | 0.03178856 | 0.10503632 | PKMYT1  |
| 117166 | ENSG00000127578 | 26.9948854 | -0.00433677 | 0.31265554 | 0.97877053 | 0.99278156 | WFIKKN1 |
| 84219  | ENSG00000127580 | 411.859849 | 0.12526966  | 0.11856667 | 0.26760504 | 0.49015612 | WDR24   |
| 146330 | ENSG00000127585 | 1456.89159 | -0.25904418 | 0.08318675 | 0.0013895  | 0.00785178 | FBXL16  |

|        |                 |            |             |            |            |            |          |
|--------|-----------------|------------|-------------|------------|------------|------------|----------|
| 63922  | ENSG00000127586 | 1301.4162  | 0.31720069  | 0.09386803 | 0.00047708 | 0.0030963  | CHTF18   |
| 51764  | ENSG00000127588 | 5.67775627 | -0.1088758  | 0.37587297 | 0.4288738  | 0.65462623 | GNG13    |
| NA     | ENSG00000127589 | 1.67866563 | 0.04002483  | 0.37799829 | 0.63856675 | NA         | TUBBP1   |
| 23499  | ENSG00000127603 | 6714.41138 | -0.12846558 | 0.05241652 | 0.01334793 | 0.05255466 | MACF1    |
| 6597   | ENSG00000127616 | 10345.2533 | 0.08393891  | 0.05626683 | 0.13248879 | 0.30568409 | SMARCA4  |
| 23030  | ENSG00000127663 | 1555.38825 | -0.11738326 | 0.08061635 | 0.13569502 | 0.31033882 | KDM4B    |
| 148022 | ENSG00000127666 | 375.88941  | 0.22897009  | 0.12390404 | 0.05033907 | 0.14971174 | TICAM1   |
| 84190  | ENSG00000127720 | 40.5521515 | 0.33692951  | 0.33704655 | 0.13137981 | 0.30404473 | METTL25  |
| 27190  | ENSG00000127743 | 0.32819249 | -0.02330795 | 0.38532666 | 0.66610365 | NA         | IL17B    |
| 83460  | ENSG00000127774 | 420.434391 | -0.00236974 | 0.11698177 | 0.98209237 | 0.99406728 | EMC6     |
| 8388   | ENSG00000127780 | 0          | NA          | NA         | NA         | NA         | OR1E2    |
| 79066  | ENSG00000127804 | 764.902115 | -0.07197768 | 0.12101192 | 0.53099194 | 0.74257279 | METTL16  |
| 7277   | ENSG00000127824 | 114.618478 | -1.78645107 | 0.28078471 | 1.32E-11   | 2.79E-10   | TUBA4A   |
| 7429   | ENSG00000127831 | 1.54309679 | 0.09696304  | 0.39791336 | 0.14281108 | NA         | VIL1     |
| 14     | ENSG00000127837 | 1718.54356 | -0.0929326  | 0.08638151 | 0.26871787 | 0.49164169 | AAMP     |
| 25953  | ENSG00000127838 | 335.135951 | -0.02178182 | 0.13720101 | 0.86628077 | 0.94103211 | PNKD     |
| 55504  | ENSG00000127863 | 65.826058  | -1.381296   | 0.31626802 | 1.01E-06   | 1.14E-05   | TNFRSF19 |
| 6049   | ENSG00000127870 | 344.400953 | 0.00083509  | 0.12977359 | 0.99548097 | 0.99852582 | RNF6     |
| 1892   | ENSG00000127884 | 1078.35124 | 0.12885748  | 0.08765379 | 0.13109172 | 0.30355506 | ECHS1    |
| 90485  | ENSG00000127903 | 151.606199 | -0.31477763 | 0.19117152 | 0.05883601 | 0.16858119 | ZNF835   |
| 10142  | ENSG00000127914 | 4007.77002 | -0.06311227 | 0.06273454 | 0.30741356 | 0.53486671 | AKAP9    |
| 2791   | ENSG00000127920 | 1015.29956 | 0.99859026  | 0.09307686 | 1.05E-27   | 5.52E-26   | GNG11    |
| 7979   | ENSG00000127922 | 1541.89753 | -0.15576193 | 0.08853917 | 0.07005326 | 0.19167792 | SEM1     |
| 2792   | ENSG00000127928 | 0.18922458 | 0.01954053  | 0.38488496 | 0.78225479 | NA         | GNGT1    |
| 3092   | ENSG00000127946 | 2663.97196 | -0.53159659 | 0.06484258 | 8.98E-17   | 2.74E-15   | HIP1     |
| 5782   | ENSG00000127947 | 1751.90521 | -0.57631977 | 0.09882607 | 1.75E-09   | 2.93E-08   | PTPN12   |
| 5447   | ENSG00000127948 | 1175.83812 | -0.03891909 | 0.08306377 | 0.63062248 | 0.81317757 | POR      |
| 10875  | ENSG00000127951 | 1.90436144 | 0.1018786   | 0.39747466 | 0.19055868 | NA         | FGL2     |
| 51657  | ENSG00000127952 | 427.807057 | 0.01447254  | 0.12427493 | 0.90302379 | 0.95751119 | STYXL1   |
| 79689  | ENSG00000127954 | 9.39448695 | -0.08896486 | 0.35272056 | 0.57740871 | 0.77582208 | STEAP4   |
| 2770   | ENSG00000127955 | 843.838425 | -0.1690507  | 0.0963711  | 0.06934697 | 0.19013872 | GNAI1    |
| 5387   | ENSG00000127957 | 234.290973 | 0.25090955  | 0.17715482 | 0.11069665 | 0.26835552 | PMS2P3   |
| 5189   | ENSG00000127980 | 1215.39357 | 0.09680146  | 0.09397341 | 0.28824468 | 0.5139923  | PEX1     |
| 7978   | ENSG00000127989 | 366.041093 | -0.19973147 | 0.15175248 | 0.15050339 | 0.33407003 | MTERF1   |
| 8910   | ENSG00000127990 | 918.195391 | 0.07411376  | 0.117987   | 0.50987426 | 0.72545712 | SGCE     |
| 84060  | ENSG00000127993 | 413.541853 | 0.10903583  | 0.12674264 | 0.36231005 | 0.59197696 | RBM48    |
| 64921  | ENSG00000127995 | 1793.70137 | -0.03637368 | 0.07291489 | 0.6103089  | 0.7985846  | CASD1    |
| 163131 | ENSG00000128000 | 855.961886 | -0.20159633 | 0.1207683  | 0.07770509 | 0.20696321 | ZNF780B  |

|       |                 |            |             |            |            |            |           |
|-------|-----------------|------------|-------------|------------|------------|------------|-----------|
| 57622 | ENSG00000128011 | 550.820133 | 0.01168385  | 0.10411212 | 0.90820425 | 0.96007952 | LRFN1     |
| 7538  | ENSG00000128016 | 84.169258  | 0.47726581  | 0.24616008 | 0.01815837 | 0.06731907 | ZFP36     |
| 79644 | ENSG00000128039 | 277.548926 | -0.05785641 | 0.14545017 | 0.66527811 | 0.83470042 | SRD5A3    |
| 6691  | ENSG00000128040 | 6.79436239 | -0.17531088 | 0.40755419 | 0.2223711  | 0.43535977 | SPINK2    |
| 65997 | ENSG00000128045 | 1460.66895 | 0.111117974 | 0.07727424 | 0.14197328 | 0.32055876 | RASL11B   |
| 10606 | ENSG00000128050 | 4591.0648  | -0.33689493 | 0.0826389  | 2.85E-05   | 0.00024718 | PAICS     |
| 3791  | ENSG00000128052 | 3.23404702 | -0.10774035 | 0.39135893 | 0.29203943 | 0.51811341 | KDR       |
| 5471  | ENSG00000128059 | 1158.96101 | -0.29053753 | 0.09779723 | 0.00203551 | 0.01086189 | PPAT      |
| 85378 | ENSG00000128159 | 1599.92767 | 0.20094095  | 0.07069685 | 0.00379916 | 0.01846719 | TUBGCP6   |
| 79924 | ENSG00000128165 | 304.202371 | 1.30881077  | 0.58845622 | 0.00148635 | 0.0083162  | ADM2      |
| 85359 | ENSG00000128185 | 599.561724 | -0.03578251 | 0.10098608 | 0.71046383 | 0.86099206 | DGCR6L    |
| 54487 | ENSG00000128191 | 1293.39785 | 0.00731681  | 0.07441445 | 0.92073768 | 0.96670947 | DGCR8     |
| 57168 | ENSG00000128203 | 215.668128 | -0.1817416  | 0.15328456 | 0.19431974 | 0.39729014 | ASPHD2    |
| 29802 | ENSG00000128218 | 2.3162771  | 0.0100306   | 0.37449946 | 0.91025463 | NA         | VPREB3    |
| 23753 | ENSG00000128228 | 612.252769 | 0.65331417  | 0.11959546 | 1.22E-08   | 1.84E-07   | SDF2L1    |
| 9514  | ENSG00000128242 | 28.6918141 | -1.09487994 | 0.47755823 | 0.00170945 | 0.0093767  | GAL3ST1   |
| 7533  | ENSG00000128245 | 1973.97282 | -0.43958141 | 0.06507717 | 6.85E-12   | 1.48E-10   | YWHAH     |
| 5988  | ENSG00000128250 | 0.94612289 | 0.04084733  | 0.38743659 | 0.29648824 | NA         | RFPL1     |
| 10739 | ENSG00000128253 | 3.53486295 | 0.08316779  | 0.38031072 | 0.44940755 | 0.672975   | RFPL2     |
| NA    | ENSG00000128254 | 15.5918957 | 0.04222092  | 0.32819205 | 0.80960828 | 0.91359357 | C22orf24  |
| 29774 | ENSG00000128262 | 73.2592246 | 2.23894044  | 0.32176848 | 2.46E-13   | 5.81E-12   | POM121L9P |
| 2781  | ENSG00000128266 | 913.196898 | -0.37595308 | 0.10433897 | 0.00017548 | 0.00126278 | GNAZ      |
| 4248  | ENSG00000128268 | 546.47479  | -0.50389698 | 0.13269849 | 5.51E-05   | 0.00044492 | MGAT3     |
| 135   | ENSG00000128271 | 841.118169 | 1.49972041  | 0.10622241 | 2.41E-46   | 2.17E-44   | ADORA2A   |
| 468   | ENSG00000128272 | 5371.33571 | 0.45993973  | 0.22103311 | 0.01396245 | 0.05446535 | ATF4      |
| 53947 | ENSG00000128274 | 0          | NA          | NA         | NA         | NA         | A4GALT    |
| 10738 | ENSG00000128276 | 0          | NA          | NA         | NA         | NA         | RFPL3     |
| 11135 | ENSG00000128283 | 163.740933 | 0.45547716  | 0.2234138  | 0.01588001 | 0.06038154 | CDC42EP1  |
| 80833 | ENSG00000128284 | 5.94936346 | 3.49013628  | 2.02886205 | 0.00207986 | 0.01105395 | APOL3     |
| 2847  | ENSG00000128285 | 0          | NA          | NA         | NA         | NA         | MCHR1     |
| 8459  | ENSG00000128294 | 257.060136 | 0.14182712  | 0.16637761 | 0.34430098 | 0.57465563 | TPST2     |
| 80115 | ENSG00000128298 | 59.4439203 | 0.42137107  | 0.29420919 | 0.05572862 | 0.16188226 | BAIAP2L2  |
| 4357  | ENSG00000128309 | 2664.5767  | 0.06298999  | 0.07037183 | 0.36318792 | 0.59291108 | MPST      |
| 8484  | ENSG00000128310 | 0.31775907 | 0.00054329  | 0.38336346 | 0.97186541 | NA         | GALR3     |
| 7263  | ENSG00000128311 | 243.459064 | 0.12016446  | 0.15381632 | 0.39400993 | 0.62317897 | TST       |
| 80831 | ENSG00000128313 | 0.15069912 | -0.01848503 | 0.38480575 | 0.84537521 | NA         | APOL5     |
| 3543  | ENSG00000128322 | 0          | NA          | NA         | NA         | NA         | IGLL1     |
| 23780 | ENSG00000128335 | 178.638631 | 0.02350184  | 0.17081182 | 0.87906636 | 0.94641763 | APOL2     |

|           |                 |            |             |            |            |            |          |
|-----------|-----------------|------------|-------------|------------|------------|------------|----------|
| 5880      | ENSG00000128340 | 23.8950371 | -1.84606025 | 0.58606939 | 8.98E-05   | 0.00069156 | RAC2     |
| 3976      | ENSG00000128342 | 53.2289888 | 0.09205915  | 0.2588269  | 0.63511407 | 0.8163695  | LIF      |
| 84645     | ENSG00000128346 | 7.0434226  | 0.01426718  | 0.35451074 | 0.92038605 | 0.96646868 | C22orf23 |
| 200315    | ENSG00000128383 | 0          | NA          | NA         | NA         | NA         | APOBEC3A |
| 100913187 | ENSG00000128383 | 0          | NA          | NA         | NA         | NA         | APOBEC3A |
| 200316    | ENSG00000128394 | 34.3167508 | 0.15639655  | 0.29424662 | 0.43515159 | 0.66040284 | APOBEC3F |
| 26150     | ENSG00000128408 | 0.18922458 | 0.01954053  | 0.38488496 | 0.78225479 | NA         | RIBC2    |
| 3872      | ENSG00000128422 | 0.15069912 | -0.01848503 | 0.38480575 | 0.84537521 | NA         | KRT17    |
| NA        | ENSG00000128438 | 0          | NA          | NA         | NA         | NA         | TBC1D27P |
| 51234     | ENSG00000128463 | 1549.59332 | 0.17375751  | 0.08140047 | 0.02882566 | 0.09722903 | EMC4     |
| 7732      | ENSG00000128482 | 468.071815 | -0.25628956 | 0.12706515 | 0.03180522 | 0.10504671 | RNF112   |
| 92521     | ENSG00000128487 | 348.285102 | -0.20084097 | 0.13007283 | 0.09942699 | 0.24822342 | SPECC1   |
| 51200     | ENSG00000128510 | 0.14931947 | -0.01844332 | 0.38480212 | 0.84537521 | NA         | CPA4     |
| 9732      | ENSG00000128512 | 1230.86094 | -0.3831536  | 0.10521636 | 0.0001463  | 0.00107182 | DOCK4    |
| 25913     | ENSG00000128513 | 732.148409 | -0.2051206  | 0.14747459 | 0.13056308 | 0.30279036 | POT1     |
| 50833     | ENSG00000128519 | 0          | NA          | NA         | NA         | NA         | TAS2R16  |
| 9296      | ENSG00000128524 | 1394.63153 | -0.09400889 | 0.07585915 | 0.20564996 | 0.41264935 | ATP6V1F  |
| 51691     | ENSG00000128534 | 1636.59805 | 0.32492145  | 0.10321139 | 0.00104718 | 0.00614315 | LSM8     |
| 222256    | ENSG00000128536 | 200.270565 | 0.59669407  | 0.20860961 | 0.00111778 | 0.00649722 | CDHR3    |
| 79706     | ENSG00000128563 | 1322.32002 | 0.30376429  | 0.08101926 | 0.00012169 | 0.00090576 | PRKRIP1  |
| 7425      | ENSG00000128564 | 8353.61222 | -2.37288604 | 0.07074854 | 7.38E-248  | 2.93E-244  | VGf      |
| 5420      | ENSG00000128567 | 2054.4006  | -0.49548516 | 0.07204926 | 2.50E-12   | 5.55E-11   | PODXL    |
| 93986     | ENSG00000128573 | 0          | NA          | NA         | NA         | NA         | FOXP2    |
| 57464     | ENSG00000128578 | 121.550624 | -0.47473933 | 0.28598923 | 0.02975984 | 0.09971884 | STRIP2   |
| 64792     | ENSG00000128581 | 657.217883 | 0.09509767  | 0.10080489 | 0.32831657 | 0.55683028 | IFT22    |
| 4289      | ENSG00000128585 | 2267.27172 | -0.21025166 | 0.09481467 | 0.02175868 | 0.07792279 | MKLN1    |
| 4189      | ENSG00000128590 | 440.549245 | 0.20445599  | 0.11456023 | 0.06096447 | 0.17355935 | DNAJB9   |
| 2318      | ENSG00000128591 | 1336.30023 | 1.20827135  | 0.08345654 | 1.83E-48   | 1.71E-46   | FLNC     |
| 64101     | ENSG00000128594 | 594.963161 | -1.8021641  | 0.12626648 | 2.42E-47   | 2.22E-45   | LRRC4    |
| 813       | ENSG00000128595 | 4062.28185 | -0.20302974 | 0.0715613  | 0.00380956 | 0.01848412 | CALU     |
| 64753     | ENSG00000128596 | 1612.6278  | -0.10242717 | 0.07497554 | 0.16317492 | 0.35215821 | CCDC136  |
| 6608      | ENSG00000128602 | 1955.68639 | 0.92325746  | 0.07070479 | 9.21E-40   | 7.08E-38   | SMO      |
| 3663      | ENSG00000128604 | 52.4314596 | 0.15992155  | 0.29062107 | 0.42436991 | 0.65010417 | IRF5     |
| 10234     | ENSG00000128606 | 17.1974746 | 0.41348375  | 0.50365881 | 0.0802994  | 0.2118819  | LRRC17   |
| 23008     | ENSG00000128607 | 1176.4456  | 0.02475263  | 0.09237708 | 0.78319553 | 0.90125859 | KLHDC10  |
| 4698      | ENSG00000128609 | 1293.09977 | -0.35389862 | 0.07819716 | 3.63E-06   | 3.73E-05   | NDUFA5   |
| 389549    | ENSG00000128610 | 0          | NA          | NA         | NA         | NA         | FEZF1    |
| 611       | ENSG00000128617 | 2.80006029 | 0.08385933  | 0.38552359 | 0.37913273 | 0.6081327  | OPN1SW   |

|        |                 |            |             |            |            |            |          |
|--------|-----------------|------------|-------------|------------|------------|------------|----------|
| 6183   | ENSG00000128626 | 419.595665 | -0.16396064 | 0.11407151 | 0.13058941 | 0.30281602 | MRPS12   |
| 4430   | ENSG00000128641 | 4062.77879 | -0.23373629 | 0.0631143  | 0.00016826 | 0.00121614 | MYO1B    |
| 3231   | ENSG00000128645 | 20.6497146 | 0.96642897  | 0.5937044  | 0.00762048 | 0.0331485  | HOXD1    |
| 3232   | ENSG00000128652 | 494.130279 | -0.1105511  | 0.10766478 | 0.28387134 | 0.50903899 | HOXD3    |
| 10651  | ENSG00000128654 | 959.040636 | -0.12394709 | 0.08976717 | 0.15481456 | 0.34030142 | MTX2     |
| 50940  | ENSG00000128655 | 70.6262444 | 0.33974983  | 0.29966419 | 0.11612882 | 0.27839903 | PDE11A   |
| 1123   | ENSG00000128656 | 1320.87575 | 0.16808528  | 0.08218678 | 0.03609784 | 0.11607474 | CHN1     |
| 2571   | ENSG00000128683 | 2.0300085  | -0.03540306 | 0.38000666 | 0.62346039 | NA         | GAD1     |
| NA     | ENSG00000128692 | 0.99185888 | 0.03322072  | 0.38235116 | 0.58147144 | NA         | EIF2S2P4 |
| 64172  | ENSG00000128694 | 269.088136 | -0.13285755 | 0.15287577 | 0.34219063 | 0.57224058 | OSGEPL1  |
| 94101  | ENSG00000128699 | 790.969435 | -0.11765762 | 0.10948549 | 0.26095676 | 0.48276874 | ORMDL1   |
| 8520   | ENSG00000128708 | 772.076279 | -0.09721847 | 0.11447757 | 0.3726527  | 0.60153198 | HAT1     |
| 3235   | ENSG00000128709 | 290.693056 | -0.13994875 | 0.15075956 | 0.31124171 | 0.53888083 | HOXD9    |
| 3236   | ENSG00000128710 | 20.8463829 | 0.28435332  | 0.37873138 | 0.18660756 | 0.38635899 | HOXD10   |
| 3237   | ENSG00000128713 | 8.32933386 | 0.27460476  | 0.46901014 | 0.11218566 | 0.27107099 | HOXD11   |
| 3239   | ENSG00000128714 | 42.8218363 | 2.97002638  | 0.43215765 | 4.53E-13   | 1.06E-11   | HOXD13   |
| 8924   | ENSG00000128731 | 3780.2272  | -0.06060219 | 0.08676272 | 0.47185208 | 0.69421175 | HERC2    |
| 6638   | ENSG00000128739 | 1873.37677 | -0.22134069 | 0.07535599 | 0.0026902  | 0.01380587 | SNRPN    |
| 56984  | ENSG00000128789 | 417.999246 | -0.07321154 | 0.12037621 | 0.52070281 | 0.7341869  | PSMG2    |
| 57045  | ENSG00000128791 | 402.985173 | 0.51041422  | 0.12047527 | 8.62E-06   | 8.28E-05   | TWSG1    |
| 58504  | ENSG00000128805 | 110.189759 | 0.00629623  | 0.20717172 | 0.97274508 | 0.98990882 | ARHGAP22 |
| 57705  | ENSG00000128815 | 2.9398666  | 0.00865473  | 0.3778817  | 0.93607339 | 0.97330832 | WDFY4    |
| 440275 | ENSG00000128829 | 1324.45008 | 0.09729699  | 0.07838926 | 0.20496608 | 0.41184191 | EIF2AK4  |
| 55930  | ENSG00000128833 | 411.789839 | 0.60991307  | 0.13258582 | 1.21E-06   | 1.36E-05   | MYO5C    |
| 84952  | ENSG00000128849 | 381.842659 | 0.23415203  | 0.11992783 | 0.03953389 | 0.12436219 | CGNL1    |
| 29767  | ENSG00000128872 | 1407.08955 | -1.19474135 | 0.0835952  | 2.60E-47   | 2.38E-45   | TMOD2    |
| 146057 | ENSG00000128881 | 1147.01365 | -0.13955592 | 0.10081545 | 0.15031331 | 0.33373053 | TTBK2    |
| 80237  | ENSG00000128886 | 13.3121281 | 0.08417503  | 0.34030595 | 0.62390921 | 0.80825065 | ELL3     |
| 90416  | ENSG00000128891 | 297.30599  | -0.17641517 | 0.18969603 | 0.28259487 | 0.50762175 | CCDC32   |
| 54617  | ENSG00000128908 | 808.310192 | -0.03952445 | 0.10975359 | 0.70606689 | 0.85825065 | INO80    |
| 79664  | ENSG00000128915 | 1258.19412 | 0.07151907  | 0.12245671 | 0.53827952 | 0.74807128 | ICE2     |
| 54567  | ENSG00000128917 | 2.19397701 | 0.051928    | 0.3774275  | 0.58379402 | NA         | DLL4     |
| 8854   | ENSG00000128918 | 26.6030683 | 1.72586216  | 0.66004361 | 0.00038099 | 0.0025365  | ALDH1A2  |
| 54629  | ENSG00000128923 | 493.919212 | 0.14965646  | 0.11247697 | 0.16368348 | 0.35275692 | MINDY2   |
| 3712   | ENSG00000128928 | 1206.10077 | -0.12831461 | 0.0975483  | 0.17295267 | 0.36578929 | IVD      |
| 90417  | ENSG00000128944 | 1089.58764 | -0.11112608 | 0.09083543 | 0.20725643 | 0.41447107 | KNSTRN   |
| 1854   | ENSG00000128951 | 2418.6224  | -0.46457263 | 0.07677574 | 6.36E-10   | 1.13E-08   | DUT      |
| 79094  | ENSG00000128965 | 495.041616 | 0.36774051  | 0.51291038 | 0.08748695 | 0.22591971 | CHAC1    |

|       |                 |            |             |            |            |            |         |
|-------|-----------------|------------|-------------|------------|------------|------------|---------|
| 54982 | ENSG00000128973 | 830.463229 | -0.1988795  | 0.09482616 | 0.02961764 | 0.09932622 | CLN6    |
| 10776 | ENSG00000128989 | 4726.25565 | -0.04680784 | 0.07099351 | 0.50157542 | 0.71850227 | ARPP19  |
| 54832 | ENSG00000129003 | 2402.8753  | -0.42032586 | 0.06984581 | 8.73E-10   | 1.52E-08   | VPS13C  |
| 91860 | ENSG00000129007 | 78.6998659 | 0.20881214  | 0.22963839 | 0.26389151 | 0.4860837  | CALML4  |
| 3671  | ENSG00000129009 | 185.229672 | -0.8737119  | 0.21305407 | 5.86E-06   | 5.83E-05   | ISLR    |
| 56906 | ENSG00000129028 | 207.625098 | -0.26281457 | 0.17497825 | 0.09133532 | 0.23324658 | THAP10  |
| 4016  | ENSG00000129038 | 3.19668163 | -0.0101024  | 0.37131323 | 0.91661836 | 0.96470788 | LOXL1   |
| 51554 | ENSG00000129048 | 5.5126972  | 0.06850852  | 0.3665477  | 0.60376954 | 0.79398076 | ACKR4   |
| 25847 | ENSG00000129055 | 635.384833 | -0.14503684 | 0.10087581 | 0.13544688 | 0.30998745 | ANAPC13 |
| 8930  | ENSG00000129071 | 466.699189 | -0.0710835  | 0.13466464 | 0.57173682 | 0.77185678 | MBD4    |
| 1315  | ENSG00000129083 | 2195.64349 | 0.00087625  | 0.07849071 | 0.99125063 | 0.9971497  | COPB1   |
| 5682  | ENSG00000129084 | 1516.55043 | -0.02914168 | 0.08113897 | 0.71159941 | 0.86140448 | PSMA1   |
| 25870 | ENSG00000129103 | 1822.72861 | 0.0106935   | 0.07744118 | 0.88877031 | 0.95146564 | SUMF2   |
| 23022 | ENSG00000129116 | 1663.53611 | 0.71311192  | 0.09031787 | 6.72E-16   | 1.93E-14   | PALLD   |
| 60559 | ENSG00000129128 | 1763.12447 | 0.62468557  | 0.08485178 | 5.21E-14   | 1.31E-12   | SPCS3   |
| 8424  | ENSG00000129151 | 0          | NA          | NA         | NA         | NA         | BBOX1   |
| 4654  | ENSG00000129152 | 0.15069912 | -0.01848503 | 0.38480575 | 0.84537521 | NA         | MYOD1   |
| 26297 | ENSG00000129158 | 146.369489 | -0.00068998 | 0.22026542 | 0.99533071 | 0.99852582 | SERGEF  |
| 3746  | ENSG00000129159 | 582.971214 | -1.77992018 | 0.18214438 | 7.75E-24   | 3.53E-22   | KCNC1   |
| 7166  | ENSG00000129167 | 13.9582171 | -0.05477161 | 0.32929621 | 0.75227848 | 0.88403749 | TPH1    |
| 8048  | ENSG00000129170 | 0          | NA          | NA         | NA         | NA         | CSRP3   |
| 79733 | ENSG00000129173 | 287.532554 | -0.39274927 | 0.14494496 | 0.00340939 | 0.0168738  | E2F8    |
| 1635  | ENSG00000129187 | 861.015921 | -0.01304427 | 0.0889756  | 0.87955496 | 0.94660386 | DCTD    |
| 6665  | ENSG00000129194 | 22.6469198 | 0.32615316  | 0.41483593 | 0.14000503 | 0.3173426  | SOX15   |
| 54478 | ENSG00000129195 | 1102.48467 | 0.02341469  | 0.09078389 | 0.79150487 | 0.90499209 | PIMREG  |
| 84268 | ENSG00000129197 | 1729.24454 | 0.1875915   | 0.06754303 | 0.00475135 | 0.02225371 | RPAIN   |
| 9098  | ENSG00000129204 | 12.6900417 | -0.46790336 | 0.62828802 | 0.05106547 | 0.15148609 | USP6    |
| 6462  | ENSG00000129214 | 2.89629976 | -0.1091912  | 0.39272404 | 0.27949609 | 0.50401767 | SHBG    |
| 5338  | ENSG00000129219 | 456.516564 | 0.1326135   | 0.11593718 | 0.23002258 | 0.44593003 | PLD2    |
| 23746 | ENSG00000129221 | 0.173124   | -0.01911262 | 0.38486262 | 0.84537521 | NA         | AIPL1   |
| 968   | ENSG00000129226 | 2.92510069 | 0.07505733  | 0.38025096 | 0.46827439 | 0.69115934 | CD68    |
| 84817 | ENSG00000129235 | 632.092603 | -0.10629054 | 0.10337447 | 0.28492534 | 0.51028332 | TXNDC17 |
| 482   | ENSG00000129244 | 111.767364 | 0.1841466   | 0.19721352 | 0.27830585 | 0.50270347 | ATP1B2  |
| 9513  | ENSG00000129245 | 1525.83921 | 0.16731531  | 0.07650858 | 0.02552815 | 0.08857615 | FXR2    |
| 10749 | ENSG00000129250 | 647.414179 | 1.06908376  | 0.18745288 | 1.32E-09   | 2.24E-08   | KIF1C   |
| 9526  | ENSG00000129255 | 873.84351  | 0.0382071   | 0.08519622 | 0.65073195 | 0.8254613  | MPDU1   |
| 51105 | ENSG00000129292 | 1537.43311 | 0.05488046  | 0.07630082 | 0.46338422 | 0.68623892 | PHF20L1 |
| 23639 | ENSG00000129295 | 35.9084375 | 0.49458821  | 0.39236468 | 0.04969038 | 0.14833843 | LRRC6   |



|        |                 |            |             |            |            |            |          |
|--------|-----------------|------------|-------------|------------|------------|------------|----------|
| 904    | ENSG00000129315 | 1570.40424 | 0.11170371  | 0.09067608 | 0.20531055 | 0.41224389 | CCNT1    |
| 83448  | ENSG00000129317 | 634.016424 | -0.52967797 | 0.12110541 | 4.29E-06   | 4.37E-05   | PUS7L    |
| 65095  | ENSG00000129347 | 979.531341 | 0.12737055  | 0.08560026 | 0.126802   | 0.29662228 | KRI1     |
| 3609   | ENSG00000129351 | 18488.2578 | -0.0619924  | 0.0499976  | 0.2107875  | 0.41967125 | ILF3     |
| 57153  | ENSG00000129353 | 1324.13962 | 0.2785292   | 0.08194781 | 0.00049136 | 0.00317751 | SLC44A2  |
| 10053  | ENSG00000129354 | 0.173733   | 0.01914545  | 0.38484597 | 0.78225479 | NA         | AP1M2    |
| 1032   | ENSG00000129355 | 196.402857 | -0.41899212 | 0.17337134 | 0.00713891 | 0.03143974 | CDKN2D   |
| 57509  | ENSG00000129422 | 430.253659 | -2.80158418 | 0.21196211 | 2.51E-41   | 1.95E-39   | MTUS1    |
| 43847  | ENSG00000129437 | 2.93585794 | 0.15933053  | 0.42483867 | 0.07600293 | 0.20344011 | KLK14    |
| 27180  | ENSG00000129450 | 0          | NA          | NA         | NA         | NA         | SIGLEC9  |
| 5655   | ENSG00000129451 | 0.14931947 | -0.01844332 | 0.38480212 | 0.84537521 | NA         | KLK10    |
| 11202  | ENSG00000129455 | 0          | NA          | NA         | NA         | NA         | KLK8     |
| 25983  | ENSG00000129460 | 596.524513 | 0.19321811  | 0.11260111 | 0.07206589 | 0.19555978 | NGDN     |
| 11035  | ENSG00000129465 | 0.37844916 | 0.02407552  | 0.3854191  | 0.60038877 | NA         | RIPK3    |
| 196883 | ENSG00000129467 | 3.95266142 | 0.15932285  | 0.41332864 | 0.163683   | 0.35275692 | ADCY4    |
| 84932  | ENSG00000129472 | 672.520509 | -0.0259638  | 0.12448933 | 0.82500268 | 0.92054353 | RAB2B    |
| 599    | ENSG00000129473 | 855.652264 | -0.08946845 | 0.08958515 | 0.30369137 | 0.53104502 | BCL2L2   |
| 84962  | ENSG00000129474 | 327.324767 | 1.44272899  | 0.17565626 | 1.63E-17   | 5.22E-16   | AJUBA    |
| 112487 | ENSG00000129480 | 242.707733 | 0.03349175  | 0.14733221 | 0.80659409 | 0.91241386 | DTD2     |
| 10038  | ENSG00000129484 | 606.64096  | 0.05524543  | 0.10838667 | 0.5958899  | 0.78826859 | PARP2    |
| 25938  | ENSG00000129493 | 501.350934 | 0.39845718  | 0.35156928 | 0.08707871 | 0.22523253 | HEATR5A  |
| 3169   | ENSG00000129514 | 0          | NA          | NA         | NA         | NA         | FOXA1    |
| 58533  | ENSG00000129515 | 1239.14503 | -0.19669513 | 0.09450459 | 0.03133516 | 0.10378792 | SNX6     |
| 55837  | ENSG00000129518 | 296.194122 | -0.07569149 | 0.1311151  | 0.53812339 | 0.7480639  | EAPP     |
| 112399 | ENSG00000129521 | 54.4059118 | -0.04865545 | 0.27749014 | 0.79861029 | 0.90773005 | EGLN3    |
| 55320  | ENSG00000129534 | 531.483754 | -0.40530863 | 0.13238256 | 0.00108637 | 0.00633741 | MIS18BP1 |
| 4901   | ENSG00000129535 | 29.4961466 | -0.06463893 | 0.29313217 | 0.73462654 | 0.87374168 | NRL      |
| 6035   | ENSG00000129538 | 0          | NA          | NA         | NA         | NA         | RNASE1   |
| 4738   | ENSG00000129559 | 2140.25472 | 0.0130315   | 0.06776775 | 0.84601255 | 0.93016841 | NEDD8    |
| 1603   | ENSG00000129562 | 1194.73698 | 0.18590174  | 0.08279559 | 0.02131698 | 0.07666221 | DAD1     |
| 7011   | ENSG00000129566 | 489.154691 | 0.63097789  | 0.16555213 | 3.57E-05   | 0.00030326 | TEP1     |
| 64097  | ENSG00000129595 | 82.5745967 | 1.017115    | 0.40495907 | 0.00102231 | 0.00602039 | EPB41L4A |
| 1036   | ENSG00000129596 | 147.501343 | -0.44237529 | 0.22075393 | 0.01756145 | 0.06560027 | CDO1     |
| 7905   | ENSG00000129625 | 762.348174 | -0.05189734 | 0.1002078  | 0.59082326 | 0.78554834 | REEP5    |
| 81533  | ENSG00000129636 | 789.946235 | -0.36855015 | 0.09432339 | 5.33E-05   | 0.00043214 | ITFG1    |
| 84074  | ENSG00000129646 | 197.487532 | 0.65809931  | 0.1739943  | 3.76E-05   | 0.00031779 | QRICH2   |
| 2302   | ENSG00000129654 | 5.24381335 | 0.14653226  | 0.39843869 | 0.26155918 | 0.4835377  | FOXJ1    |
| 6397   | ENSG00000129657 | 2776.88861 | -0.08278759 | 0.06574271 | 0.20100227 | 0.40615916 | SEC14L1  |

|           |                 |            |             |            |            |            |          |
|-----------|-----------------|------------|-------------|------------|------------|------------|----------|
| 79651     | ENSG00000129667 | 449.003207 | -0.23127865 | 0.13545373 | 0.06678716 | 0.18529677 | RHBDF2   |
| 15        | ENSG00000129673 | 2.3986071  | -0.0640059  | 0.38134128 | 0.47713288 | NA         | AANAT    |
| 9459      | ENSG00000129675 | 255.368648 | 0.96617203  | 0.18226736 | 1.58E-08   | 2.32E-07   | ARHGEF6  |
| 79649     | ENSG00000129680 | 416.781593 | 0.43366926  | 0.13171717 | 0.00046073 | 0.00300783 | MAP7D3   |
| 2258      | ENSG00000129682 | 3.68571695 | 0.07129875  | 0.37694014 | 0.51513836 | 0.72960772 | FGF13    |
| 9070      | ENSG00000129691 | 740.014684 | -0.11608084 | 0.10026838 | 0.22920834 | 0.44474264 | ASH2L    |
| 80185     | ENSG00000129696 | 298.604864 | 0.14030601  | 0.15224746 | 0.31547395 | 0.54331625 | TTI2     |
| 417       | ENSG00000129744 | 0.173124   | -0.01911262 | 0.38486262 | 0.84537521 | NA         | ART1     |
| 57053     | ENSG00000129749 | 32.8968237 | -0.20342475 | 0.30459439 | 0.32091768 | 0.54869068 | CHRNA10  |
| 1028      | ENSG00000129757 | 854.449049 | 0.55412838  | 0.09982257 | 9.74E-09   | 1.47E-07   | CDKN1C   |
| 151648    | ENSG00000129810 | 380.542201 | -0.40911599 | 0.13249853 | 0.00099312 | 0.00587207 | SGO1     |
| 100101116 | ENSG00000129816 | 0          | NA          | NA         | NA         | NA         | TTY1B    |
| 6192      | ENSG00000129824 | 0          | NA          | NA         | NA         | NA         | RPS4Y1   |
| 353513    | ENSG00000129862 | 0          | NA          | NA         | NA         | NA         | VCY1B    |
| 9084      | ENSG00000129864 | 0          | NA          | NA         | NA         | NA         | VCY      |
| 203611    | ENSG00000129873 | 0          | NA          | NA         | NA         | NA         | CDY2B    |
| 1013      | ENSG00000129910 | 8.9664042  | 0.05526419  | 0.34717641 | 0.7269549  | 0.86953012 | CDH15    |
| 83855     | ENSG00000129911 | 645.94772  | -0.00833595 | 0.11783349 | 0.93995266 | 0.97488948 | KLF16    |
| 58986     | ENSG00000129925 | 989.072157 | -0.15397652 | 0.1005124  | 0.11146437 | 0.2697881  | PGAP6    |
| 83475     | ENSG00000129932 | 322.711775 | -0.11506497 | 0.13064669 | 0.34779894 | 0.57854707 | DOHH     |
| 23383     | ENSG00000129933 | 2255.6835  | 0.24130367  | 0.07057536 | 0.00049864 | 0.00321621 | MAU2     |
| 25759     | ENSG00000129946 | 756.252438 | -0.06995095 | 0.09364786 | 0.44008043 | 0.66517856 | SHC2     |
| 79948     | ENSG00000129951 | 994.016917 | 0.60392448  | 0.10299924 | 1.36E-09   | 2.30E-08   | PLPPR3   |
| 723961    | ENSG00000129965 | 0          | NA          | NA         | NA         | NA         | INS-IGF2 |
| 81926     | ENSG00000129968 | 2144.40251 | 0.11954082  | 0.06912497 | 0.07873028 | 0.20910425 | ABHD17A  |
| 3929      | ENSG00000129988 | 3.24199459 | -0.05937409 | 0.37538658 | 0.57308914 | 0.7727401  | LBP      |
| 6861      | ENSG00000129990 | 115.501083 | -1.06404506 | 0.23902172 | 9.44E-07   | 1.07E-05   | SYT5     |
| 7137      | ENSG00000129991 | 61.7410611 | -0.86644032 | 0.30951623 | 0.00067642 | 0.00419604 | TNNI3    |
| 863       | ENSG00000129993 | 2.00176869 | 0.10034808  | 0.3965826  | 0.18626772 | NA         | CBFA2T3  |
| 2593      | ENSG00000130005 | 806.38658  | 0.04998863  | 0.08945056 | 0.56614644 | 0.76789354 | GAMT     |
| 8226      | ENSG00000130021 | 249.536851 | -0.05850011 | 0.15564451 | 0.67901123 | 0.84320727 | PUDP     |
| 55780     | ENSG00000130023 | 312.417729 | 0.18480162  | 0.16975762 | 0.22497221 | 0.43877008 | ERMARD   |
| 55274     | ENSG00000130024 | 1646.70226 | 0.10115255  | 0.08726564 | 0.23381392 | 0.45077791 | PHF10    |
| 79057     | ENSG00000130032 | 0          | NA          | NA         | NA         | NA         | PRRG3    |
| 26290     | ENSG00000130035 | 0.87316756 | 0.03844629  | 0.38477768 | 0.44621224 | NA         | GALNT8   |
| 3741      | ENSG00000130037 | 0          | NA          | NA         | NA         | NA         | KCNA5    |
| 84766     | ENSG00000130038 | 158.159075 | -1.1505171  | 0.23795502 | 1.27E-07   | 1.65E-06   | CRACR2A  |
| 158046    | ENSG00000130045 | 0.84471752 | -0.00134595 | 0.38065581 | 0.98151753 | NA         | NXNL2    |

|        |                 |            |             |            |            |            |         |
|--------|-----------------|------------|-------------|------------|------------|------------|---------|
| 9754   | ENSG00000130052 | 26.5263011 | 2.04228546  | 0.57064462 | 1.85E-05   | 0.00016703 | STARD8  |
| 27112  | ENSG00000130054 | 172.647789 | -2.40311804 | 0.20260617 | 1.34E-33   | 8.57E-32   | FAM155B |
| 54857  | ENSG00000130055 | 2.62831827 | 0.02983857  | 0.37421123 | 0.7525931  | 0.88425267 | GDPD2   |
| 6303   | ENSG00000130066 | 100.997754 | 0.92874425  | 0.24467462 | 1.96E-05   | 0.00017632 | SAT1    |
| 54552  | ENSG00000130119 | 1084.97481 | -0.42879581 | 0.11330274 | 7.28E-05   | 0.00057491 | GNL3L   |
| 23677  | ENSG00000130147 | 701.390283 | -0.26683197 | 0.10441304 | 0.00771796 | 0.03347713 | SH3BP4  |
| 158747 | ENSG00000130150 | 245.844996 | 0.1282917   | 0.14419426 | 0.33708369 | 0.56738274 | MOSPD2  |
| 57572  | ENSG00000130158 | 943.362357 | 0.81263426  | 0.12497306 | 1.44E-11   | 3.01E-10   | DOCK6   |
| 51295  | ENSG00000130159 | 869.273012 | -0.1306907  | 0.10076159 | 0.17795132 | 0.37336655 | ECSIT   |
| 3949   | ENSG00000130164 | 1405.9045  | -0.00660002 | 0.10665641 | 0.94680981 | 0.97815729 | LDLR    |
| 84337  | ENSG00000130165 | 944.905403 | -0.06944037 | 0.08350648 | 0.39344664 | 0.62246703 | ELOF1   |
| 26526  | ENSG00000130167 | 0          | NA          | NA         | NA         | NA         | TSPAN16 |
| 55908  | ENSG00000130173 | 0.173733   | 0.01914545  | 0.38484597 | 0.78225479 | NA         | ANGPTL8 |
| 5589   | ENSG00000130175 | 6659.15882 | 0.47122232  | 0.05491886 | 4.28E-18   | 1.44E-16   | PRKCSH  |
| 1264   | ENSG00000130176 | 6.31226382 | -0.03509484 | 0.35803612 | 0.79212413 | 0.90499209 | CNN1    |
| 8881   | ENSG00000130177 | 1347.86102 | 0.18196244  | 0.07969651 | 0.01949575 | 0.0714584  | CDC16   |
| 84891  | ENSG00000130182 | 2.87409863 | 0.04953616  | 0.37570674 | 0.61163186 | 0.79965575 | ZSCAN10 |
| 51337  | ENSG00000130193 | 937.70229  | -0.59199917 | 0.09612366 | 2.24E-10   | 4.15E-09   | THEM6   |
| 5819   | ENSG00000130202 | 73.0003452 | 2.09179494  | 0.31074786 | 9.58E-13   | 2.19E-11   | NECTIN2 |
| 348    | ENSG00000130203 | 109.393018 | 1.67594196  | 0.26203852 | 1.17E-11   | 2.49E-10   | APOE    |
| 10452  | ENSG00000130204 | 1428.75176 | 0.00856704  | 0.09201258 | 0.92436761 | 0.96852    | TOMM40  |
| 341    | ENSG00000130208 | 11.3133074 | -0.02122711 | 0.33839197 | 0.89336438 | 0.95389529 | APOC1   |
| 10912  | ENSG00000130222 | 354.298149 | 1.07910153  | 0.13735721 | 4.89E-16   | 1.43E-14   | GADD45G |
| 57631  | ENSG00000130224 | 448.217292 | -0.09399368 | 0.12114559 | 0.41261614 | 0.64014381 | LRCH2   |
| 1804   | ENSG00000130226 | 251.776486 | -0.96892734 | 0.16914121 | 1.34E-09   | 2.27E-08   | DPP6    |
| 23039  | ENSG00000130227 | 2930.41174 | -0.29085555 | 0.09454743 | 0.00136493 | 0.00773058 | XPO7    |
| 59272  | ENSG00000130234 | 2.68881683 | -0.06166396 | 0.3839297  | 0.4242875  | 0.65002811 | ACE2    |
| 147965 | ENSG00000130244 | 230.557255 | -0.25062093 | 0.17561631 | 0.10785839 | 0.26339391 | FAM98C  |
| 9667   | ENSG00000130254 | 1825.39999 | -0.11715213 | 0.07674884 | 0.11880807 | 0.28318716 | SAFB2   |
| 25873  | ENSG00000130255 | 8593.99103 | -0.04710887 | 0.05874481 | 0.41652294 | 0.64309452 | RPL36   |
| 148229 | ENSG00000130270 | 71.872144  | 1.26393333  | 0.35128015 | 2.53E-05   | 0.00022207 | ATP8B3  |
| 2657   | ENSG00000130283 | 209.438067 | -0.25910586 | 0.16586165 | 0.08254114 | 0.21637154 | GDF1    |
| 1463   | ENSG00000130287 | 533.979634 | -2.52023294 | 0.14004483 | 1.21E-73   | 2.13E-71   | NCAN    |
| 547    | ENSG00000130294 | 12778.0325 | -0.13651502 | 0.06415758 | 0.03022942 | 0.10096828 | KIF1A   |
| 84705  | ENSG00000130299 | 1110.97836 | 0.20512791  | 0.08678005 | 0.01512675 | 0.05806977 | GTPBP3  |
| 83483  | ENSG00000130300 | 0.18922458 | 0.01954053  | 0.38488496 | 0.78225479 | NA         | PLVAP   |
| 684    | ENSG00000130303 | 23.3162049 | 0.04925309  | 0.30047807 | 0.79650192 | 0.90658744 | BST2    |
| 376497 | ENSG00000130304 | 221.540497 | 0.20254412  | 0.16784211 | 0.17966455 | 0.37624495 | SLC27A1 |

|        |                 |            |             |            |            |            |          |
|--------|-----------------|------------|-------------|------------|------------|------------|----------|
| 55695  | ENSG00000130305 | 1266.28035 | 0.07002809  | 0.07802579 | 0.35978014 | 0.58972554 | NSUN5    |
| 83878  | ENSG00000130307 | 2.72140812 | 0.02938956  | 0.37710053 | 0.70987369 | 0.860757   | USHBP1   |
| 79709  | ENSG00000130309 | 1391.22023 | -0.23728672 | 0.07891688 | 0.00207614 | 0.01104305 | COLGALT1 |
| 79016  | ENSG00000130311 | 1367.04117 | 0.20624848  | 0.09635    | 0.02671537 | 0.0917012  | DDA1     |
| 64981  | ENSG00000130312 | 666.144438 | 0.06211009  | 0.1010783  | 0.5247915  | 0.73753159 | MRPL34   |
| 25796  | ENSG00000130313 | 876.844126 | 0.2654404   | 0.09459672 | 0.00371586 | 0.01815382 | PGLS     |
| 51690  | ENSG00000130332 | 1410.66988 | 0.08373137  | 0.07896788 | 0.27910825 | 0.50354712 | LSM7     |
| 56995  | ENSG00000130338 | 1431.21226 | -0.4853112  | 0.07609806 | 7.33E-11   | 1.43E-09   | TULP4    |
| 51429  | ENSG00000130340 | 991.427415 | 0.37816861  | 0.108516   | 0.000273   | 0.00188069 | SNX9     |
| 84816  | ENSG00000130347 | 117.165414 | 0.19101632  | 0.21303223 | 0.28464813 | 0.50987892 | RTN4IP1  |
| 55278  | ENSG00000130348 | 406.400171 | -0.04791134 | 0.12209467 | 0.67792991 | 0.84273994 | QRSL1    |
| 51250  | ENSG00000130349 | 216.55262  | -0.17201919 | 0.15248257 | 0.217538   | 0.42910658 | MTRES1   |
| 83861  | ENSG00000130363 | 216.523542 | 0.2969164   | 0.18673546 | 0.0697384  | 0.19093923 | RSPH3    |
| 4142   | ENSG00000130368 | 0.3404686  | -0.00018999 | 0.38336229 | 0.96705355 | NA         | MAS1     |
| 81616  | ENSG00000130377 | 6.98792366 | -0.05993475 | 0.37776879 | 0.52983032 | 0.74152324 | ACSBG2   |
| 4298   | ENSG00000130382 | 2796.20323 | -0.1901706  | 0.06188445 | 0.00181907 | 0.00986616 | MLLT1    |
| 2527   | ENSG00000130383 | 3.70259504 | 0.16040904  | 0.42862625 | 0.05123602 | 0.15188997 | FUT5     |
| 9210   | ENSG00000130385 | 0.37844916 | 0.02407552  | 0.3854191  | 0.60038877 | NA         | BMP15    |
| 4301   | ENSG00000130396 | 3309.53745 | -0.01740808 | 0.06682396 | 0.78557582 | 0.90248778 | AFDN     |
| 81     | ENSG00000130402 | 3256.80739 | 0.3647484   | 0.0817146  | 4.74E-06   | 4.79E-05   | ACTN4    |
| 65975  | ENSG00000130413 | 89.533396  | -0.39383608 | 0.30659482 | 0.07552673 | 0.20246162 | STK33    |
| 4705   | ENSG00000130414 | 1534.86492 | 0.05716178  | 0.09169355 | 0.52233627 | 0.73570578 | NDUFA10  |
| 2056   | ENSG00000130427 | 2.32318451 | 0.05666066  | 0.38047005 | 0.5194166  | NA         | EPO      |
| 10095  | ENSG00000130429 | 691.565841 | 0.21734399  | 0.13309229 | 0.08100276 | 0.21345396 | ARPC1B   |
| 59285  | ENSG00000130433 | 0.51559444 | 0.03113559  | 0.38605479 | 0.4776066  | NA         | CACNG6   |
| 57688  | ENSG00000130449 | 985.694427 | 0.2125248   | 0.0891293  | 0.01409178 | 0.05487356 | ZSWIM6   |
| 23149  | ENSG00000130475 | 216.462022 | -0.24724442 | 0.16285133 | 0.0928688  | 0.23585726 | FCHO1    |
| 23025  | ENSG00000130477 | 2422.38778 | -2.0726662  | 0.07826923 | 1.07E-155  | 1.06E-152  | UNC13A   |
| 55201  | ENSG00000130479 | 961.386854 | -0.37516628 | 0.08994049 | 1.70E-05   | 0.00015521 | MAP1S    |
| 113730 | ENSG00000130487 | 1.46908626 | 0.07041286  | 0.38853882 | 0.30889259 | NA         | KLHDC7B  |
| 7837   | ENSG00000130508 | 8842.33745 | -0.03592214 | 0.05588776 | 0.51533949 | 0.72968723 | PXDN     |
| 170463 | ENSG00000130511 | 1290.92386 | -0.21496063 | 0.07787706 | 0.00472147 | 0.0221399  | SSBP4    |
| 9518   | ENSG00000130513 | 177.74883  | 1.28677979  | 0.2092708  | 7.33E-11   | 1.43E-09   | GDF15    |
| 54858  | ENSG00000130517 | 666.025236 | -0.24170119 | 0.11631106 | 0.02867259 | 0.09694344 | PGPEP1   |
| 80726  | ENSG00000130518 | 97.1407451 | 0.83519961  | 0.25252721 | 0.00014216 | 0.00104419 | IQC�     |
| 25804  | ENSG00000130520 | 3339.81815 | -0.38098257 | 0.06495861 | 2.54E-09   | 4.12E-08   | LSM4     |
| 3727   | ENSG00000130522 | 2119.83296 | 0.53201333  | 0.07243943 | 7.71E-14   | 1.91E-12   | JUND     |
| 3270   | ENSG00000130528 | 1.22646606 | -0.04062268 | 0.383066   | 0.52860218 | NA         | HRC      |

|           |                 |            |             |            |            |            |         |
|-----------|-----------------|------------|-------------|------------|------------|------------|---------|
| 54795     | ENSG00000130529 | 100.985189 | 1.19035172  | 0.25509425 | 2.94E-07   | 3.65E-06   | TRPM4   |
| 81061     | ENSG00000130538 | 0          | NA          | NA         | NA         | NA         | OR11H1  |
| 25830     | ENSG00000130540 | 227.85108  | -0.63555107 | 0.15947454 | 1.73E-05   | 0.00015733 | SULT4A1 |
| 79230     | ENSG00000130544 | 262.242173 | -0.12938608 | 0.15381743 | 0.35699214 | 0.58709582 | ZNF557  |
| 92359     | ENSG00000130545 | 1.15402791 | 0.00195627  | 0.37937999 | 0.97603885 | NA         | CRB3    |
| 10439     | ENSG00000130558 | 825.650436 | -1.53073771 | 0.10534272 | 6.69E-49   | 6.35E-47   | OLFM1   |
| 157922    | ENSG00000130559 | 2948.0177  | -0.12646854 | 0.06729283 | 0.05609748 | 0.16266792 | CAMSAP1 |
| 10422     | ENSG00000130560 | 1141.56888 | 0.05556478  | 0.08057546 | 0.48073053 | 0.70158112 | UBAC1   |
| 6295      | ENSG00000130561 | 0          | NA          | NA         | NA         | NA         | SAG     |
| 140685    | ENSG00000130584 | 117.627181 | 0.46953451  | 0.21773159 | 0.01146241 | 0.04643563 | ZBTB46  |
| 85441     | ENSG00000130589 | 646.731884 | 0.40812578  | 0.14269672 | 0.00209828 | 0.01114589 | HELZ2   |
| 140700    | ENSG00000130590 | 281.487209 | 0.29935335  | 0.15643378 | 0.0358634  | 0.11552685 | SAMD10  |
| 4046      | ENSG00000130592 | 30.1553752 | 0.38284978  | 0.44707761 | 0.09714267 | 0.24380906 | LSP1    |
| 7140      | ENSG00000130595 | 1.37398733 | 0.06160358  | 0.38548417 | 0.38797179 | NA         | TNNT3   |
| 7136      | ENSG00000130598 | 3.73780599 | -0.13747442 | 0.40488075 | 0.19241838 | 0.39466357 | TNNI2   |
| 283120    | ENSG00000130600 | 79266.1821 | 0.73983328  | 0.20088395 | 4.51E-05   | 0.0003744  | H19     |
| 102724852 | ENSG00000130600 | 79266.1821 | 0.73983328  | 0.20088395 | 4.51E-05   | 0.0003744  | H19     |
| 22952     | ENSG00000130612 | 0.50366145 | 0.03047707  | 0.3859845  | 0.48834145 | NA         | CYP2G1P |
| 1289      | ENSG00000130635 | 75.8244717 | 0.09202072  | 0.24118364 | 0.62688181 | 0.81066736 | COL5A1  |
| 25814     | ENSG00000130638 | 2630.69175 | -0.30539621 | 0.06871611 | 6.06E-06   | 6.00E-05   | ATXN10  |
| 10844     | ENSG00000130640 | 1884.93577 | -0.00310172 | 0.06721759 | 0.96190361 | 0.98458276 | TUBGCP2 |
| 50632     | ENSG00000130643 | 175.223835 | -1.25807966 | 0.18628886 | 1.44E-12   | 3.25E-11   | CALY    |
| 1571      | ENSG00000130649 | 1.45913899 | 0.02244385  | 0.37819378 | 0.76749814 | NA         | CYP2E1  |
| 375775    | ENSG00000130653 | 76.2496153 | 0.31314892  | 0.28355064 | 0.13565766 | 0.31030495 | PNPLA7  |
| 3050      | ENSG00000130656 | 0.70129728 | -0.01817036 | 0.38274402 | 0.68636655 | NA         | HBZ     |
| 10298     | ENSG00000130669 | 1375.88907 | 0.14924802  | 0.0810577  | 0.05942691 | 0.16984009 | PAK4    |
| 3110      | ENSG00000130675 | 2.41247224 | 0.02032553  | 0.37457639 | 0.82136493 | NA         | MNX1    |
| 26152     | ENSG00000130684 | 902.11159  | 0.11636634  | 0.08964257 | 0.18190446 | 0.37957585 | ZNF337  |
| 64793     | ENSG00000130695 | 989.755461 | -0.14648691 | 0.09122336 | 0.09765784 | 0.24479236 | CEP85   |
| 6874      | ENSG00000130699 | 619.241225 | -0.08231649 | 0.1051572  | 0.41252735 | 0.64014381 | TAF4    |
| 140628    | ENSG00000130700 | 0.9244433  | -0.06525595 | 0.39134464 | 0.2113244  | NA         | GATA5   |
| 140893    | ENSG00000130701 | 0          | NA          | NA         | NA         | NA         | RBBP8NL |
| 3911      | ENSG00000130702 | 6243.94941 | 0.9096038   | 0.08133015 | 7.79E-30   | 4.49E-28   | LAMA5   |
| 9885      | ENSG00000130703 | 723.491032 | -0.13652273 | 0.09902088 | 0.15264126 | 0.33723751 | OSBPL2  |
| 11047     | ENSG00000130706 | 1674.87752 | 0.0655781   | 0.09113269 | 0.45896991 | 0.68235016 | ADRM1   |
| 445       | ENSG00000130707 | 151.15029  | 1.12764175  | 0.22656972 | 7.02E-08   | 9.45E-07   | ASS1    |
| 59335     | ENSG00000130711 | 6.81283592 | 0.09076327  | 0.36634972 | 0.52606524 | 0.73808697 | PRDM12  |
| 23404     | ENSG00000130713 | 1049.08075 | -0.18964715 | 0.0922758  | 0.03369466 | 0.11004519 | EXOSC2  |

|        |                 |            |             |            |            |            |          |
|--------|-----------------|------------|-------------|------------|------------|------------|----------|
| 10585  | ENSG00000130714 | 891.568554 | 0.33579565  | 0.1388871  | 0.00934352 | 0.03923288 | POMT1    |
| 83549  | ENSG00000130717 | 913.165586 | -0.31125764 | 0.08427871 | 0.00014807 | 0.00108285 | UCK1     |
| 84929  | ENSG00000130720 | 0          | NA          | NA         | NA         | NA         | FIBCD1   |
| 27243  | ENSG00000130724 | 1697.63058 | 0.26980788  | 0.0695729  | 7.85E-05   | 0.00061348 | CHMP2A   |
| 9040   | ENSG00000130725 | 1621.98677 | -0.01210373 | 0.08770365 | 0.8864681  | 0.95015905 | UBE2M    |
| 10155  | ENSG00000130726 | 8361.21022 | -0.05258386 | 0.06175122 | 0.39078811 | 0.62011007 | TRIM28   |
| 84326  | ENSG00000130731 | 914.460145 | 0.17292464  | 0.08584    | 0.03857887 | 0.12221056 | METTTL26 |
| 78992  | ENSG00000130733 | 592.062377 | -0.11152689 | 0.09970231 | 0.24441583 | 0.46302016 | YIPF2    |
| 84971  | ENSG00000130734 | 608.451684 | 0.14866799  | 0.13085003 | 0.22646561 | 0.44088684 | ATG4D    |
| 1968   | ENSG00000130741 | 4716.26221 | -0.04579747 | 0.05791354 | 0.42345589 | 0.64935576 | EIF2S3   |
| 54958  | ENSG00000130748 | 453.648128 | -0.12270909 | 0.12312888 | 0.29149606 | 0.51742702 | TMEM160  |
| 23211  | ENSG00000130749 | 2123.86926 | -0.12721597 | 0.07878709 | 0.10016065 | 0.24951784 | ZC3H4    |
| 4861   | ENSG00000130751 | 27.2845974 | 0.0408432   | 0.30303244 | 0.82889488 | 0.92244079 | NPAS1    |
| 9535   | ENSG00000130755 | 0.89984857 | 0.06462883  | 0.3912593  | 0.20169955 | NA         | GMFG     |
| 4294   | ENSG00000130758 | 824.350284 | 0.36549276  | 0.10417638 | 0.00025829 | 0.00179112 | MAP3K10  |
| 27237  | ENSG00000130762 | 79.7984478 | -0.19052271 | 0.24186133 | 0.31714784 | 0.54496909 | ARHGEF16 |
| 57470  | ENSG00000130764 | 1616.51025 | -0.17041183 | 0.07549591 | 0.02109442 | 0.07603803 | LRRC47   |
| 83667  | ENSG00000130766 | 440.647231 | 0.89905316  | 0.18683255 | 2.22E-07   | 2.80E-06   | SESN2    |
| 27293  | ENSG00000130768 | 44.5866703 | -0.11119932 | 0.26718161 | 0.56766273 | 0.76899226 | SMPDL3B  |
| 93974  | ENSG00000130770 | 1254.08739 | -0.0745386  | 0.09438053 | 0.41438495 | 0.641645   | ATP5IF1  |
| 54797  | ENSG00000130772 | 155.736949 | -0.3025448  | 0.17738157 | 0.05464445 | 0.15938634 | MED18    |
| 9473   | ENSG00000130775 | 113.823395 | 0.18996059  | 0.19733259 | 0.26343452 | 0.48542909 | THEMIS2  |
| 6249   | ENSG00000130779 | 747.21408  | 0.03203126  | 0.09762657 | 0.73525412 | 0.87418001 | CLIP1    |
| 84660  | ENSG00000130783 | 12.2106881 | -0.02759061 | 0.33308731 | 0.86750931 | 0.94194356 | CCDC62   |
| 9026   | ENSG00000130787 | 1490.77562 | 0.11833315  | 0.09831824 | 0.21301458 | 0.42295929 | HIP1R    |
| 57693  | ENSG00000130803 | 813.120315 | -0.09291929 | 0.09249722 | 0.30014129 | 0.52733399 | ZNF317   |
| 56342  | ENSG00000130810 | 1138.36296 | 0.06122324  | 0.08736793 | 0.47229137 | 0.69450495 | PPAN     |
| 8666   | ENSG00000130811 | 4201.16203 | 0.17594899  | 0.05887556 | 0.00246876 | 0.01282596 | EIF3G    |
| 83854  | ENSG00000130812 | 6.49097312 | -0.26749405 | 0.48243703 | 0.08343851 | 0.21810542 | ANGPTL6  |
| 55337  | ENSG00000130813 | 200.595539 | 0.42144829  | 0.1921241  | 0.01249209 | 0.04980768 | SHFL     |
| 1786   | ENSG00000130816 | 5923.93995 | -0.29310159 | 0.0717209  | 3.07E-05   | 0.00026337 | DNMT1    |
| 79088  | ENSG00000130818 | 393.753152 | 0.05174863  | 0.1409453  | 0.69398053 | 0.8520157  | ZNF426   |
| 6535   | ENSG00000130821 | 2068.0062  | -0.25445424 | 0.07856682 | 0.00091145 | 0.00546812 | SLC6A8   |
| 139728 | ENSG00000130822 | 121.351667 | -0.99081502 | 0.23398772 | 2.81E-06   | 2.94E-05   | PNCK     |
| 1736   | ENSG00000130826 | 1971.74544 | -0.1181924  | 0.0721941  | 0.09518056 | 0.24026852 | DKC1     |
| 55558  | ENSG00000130827 | 1537.69719 | -0.17752055 | 0.11428559 | 0.10221045 | 0.25341857 | PLXNA3   |
| 1852   | ENSG00000130829 | 15.2597148 | 0.0346429   | 0.33769233 | 0.83544252 | 0.92495422 | DUSP9    |
| 4354   | ENSG00000130830 | 69.1016232 | 0.2587564   | 0.26590452 | 0.20088035 | 0.40614145 | MPP1     |

|        |                 |            |             |            |            |            |          |
|--------|-----------------|------------|-------------|------------|------------|------------|----------|
| 55422  | ENSG00000130844 | 867.60856  | -0.09699847 | 0.09355993 | 0.28408135 | 0.50919216 | ZNF331   |
| 7776   | ENSG00000130856 | 530.350892 | -0.07985035 | 0.15128749 | 0.56462569 | 0.7670095  | ZNF236   |
| 56301  | ENSG00000130876 | 8.47098171 | 0.17082426  | 0.39316404 | 0.28152868 | 0.50630249 | SLC7A10  |
| 4037   | ENSG00000130881 | 1819.26811 | 0.00293872  | 0.07907463 | 0.97044231 | 0.98888633 | LRP3     |
| 91574  | ENSG00000130921 | 524.736288 | 0.00243757  | 0.11176791 | 0.98274217 | 0.99428951 | C12orf65 |
| 25926  | ENSG00000130935 | 1441.41441 | -0.20051296 | 0.08851456 | 0.01962478 | 0.07182359 | NOL11    |
| 10277  | ENSG00000130939 | 1786.2523  | -0.02280419 | 0.06986516 | 0.73933997 | 0.87688337 | UBE4B    |
| 54897  | ENSG00000130940 | 162.678753 | 0.39432595  | 0.20013232 | 0.02294082 | 0.08130509 | CASZ1    |
| 10343  | ENSG00000130943 | 56.6846857 | 0.47774679  | 0.30573347 | 0.03623262 | 0.11647038 | PKDREJ   |
| 3293   | ENSG00000130948 | 0          | NA          | NA         | NA         | NA         | HSD17B3  |
| 54754  | ENSG00000130950 | 0          | NA          | NA         | NA         | NA         | NUTM2F   |
| 22927  | ENSG00000130956 | 280.419323 | 0.09118532  | 0.13881918 | 0.4817205  | 0.70240082 | HABP4    |
| 8789   | ENSG00000130957 | 0.33471731 | 0.02354391  | 0.38534154 | 0.62842204 | NA         | FBP2     |
| 11046  | ENSG00000130958 | 310.085806 | 0.33470964  | 0.13934532 | 0.00980336 | 0.04084389 | SLC35D2  |
| 5638   | ENSG00000130962 | 11.2239492 | 0.34881739  | 0.56275679 | 0.04393348 | 0.13469946 | PRRG1    |
| 7317   | ENSG00000130985 | 6658.8233  | -0.13758676 | 0.05319552 | 0.00898195 | 0.03796375 | UBA1     |
| 9104   | ENSG00000130988 | 3.96726212 | 0.10786403  | 0.38729746 | 0.34166581 | 0.57180671 | RGN      |
| 353497 | ENSG00000130997 | 8.26959685 | 0.12891373  | 0.39005439 | 0.29843896 | 0.52528647 | POLN     |
| 246126 | ENSG00000131002 | 0          | NA          | NA         | NA         | NA         | TXLNGY   |
| 425057 | ENSG00000131007 | 0          | NA          | NA         | NA         | NA         | TTY9B    |
| 85313  | ENSG00000131013 | 456.844425 | -0.0423109  | 0.11401284 | 0.6978161  | 0.85403149 | PPIL4    |
| 80328  | ENSG00000131015 | 3.80949374 | 0.0077451   | 0.36472169 | 0.94902706 | 0.97902958 | ULBP2    |
| 9590   | ENSG00000131016 | 3279.47946 | -0.43670437 | 0.05822945 | 3.11E-14   | 8.00E-13   | AKAP12   |
| 23345  | ENSG00000131018 | 944.316293 | 0.25006496  | 0.14450534 | 0.06114724 | 0.17392993 | SYNE1    |
| 79465  | ENSG00000131019 | 4.82876159 | -0.01494573 | 0.36209287 | 0.90151609 | 0.95673063 | ULBP3    |
| 9113   | ENSG00000131023 | 1221.69372 | -0.09167424 | 0.09100146 | 0.29949508 | 0.52648412 | LATS1    |
| 54869  | ENSG00000131037 | 161.223196 | -0.05351545 | 0.18814583 | 0.74427847 | 0.87963225 | EPS8L1   |
| 10288  | ENSG00000131042 | 0          | NA          | NA         | NA         | NA         | LILRB2   |
| 25980  | ENSG00000131043 | 857.66333  | -0.14060886 | 0.09126137 | 0.11208008 | 0.27094782 | AAR2     |
| 164395 | ENSG00000131044 | 52.787547  | 0.11009264  | 0.25186406 | 0.56767443 | 0.76899226 | TTLL9    |
| 140683 | ENSG00000131050 | 0          | NA          | NA         | NA         | NA         | BPIFA2   |
| 9584   | ENSG00000131051 | 4391.18728 | 0.08174987  | 0.05388857 | 0.12554791 | 0.29446395 | RBM39    |
| 84701  | ENSG00000131055 | 27.6857854 | 0.43329661  | 0.42586918 | 0.07768207 | 0.20692968 | COX4I2   |
| 128861 | ENSG00000131059 | 0          | NA          | NA         | NA         | NA         | BPIFA3   |
| 84905  | ENSG00000131061 | 184.594648 | 0.09540683  | 0.16076152 | 0.51431738 | 0.72927793 | ZNF341   |
| 2686   | ENSG00000131067 | 1045.44414 | -0.26332122 | 0.08989535 | 0.00251948 | 0.01306199 | GGT7     |
| 117285 | ENSG00000131068 | 0          | NA          | NA         | NA         | NA         | DEFB118  |
| 55902  | ENSG00000131069 | 383.151539 | -0.10197755 | 0.12835621 | 0.39829377 | 0.62727695 | ACSS2    |

|        |                 |            |             |            |            |            |           |
|--------|-----------------|------------|-------------|------------|------------|------------|-----------|
| 60401  | ENSG00000131080 | 136.130581 | -0.7438403  | 0.22407948 | 0.00016748 | 0.00121091 | EDA2R     |
| 23229  | ENSG00000131089 | 462.669581 | -0.50916723 | 0.13507009 | 5.97E-05   | 0.0004791  | ARHGEF9   |
| 10882  | ENSG00000131094 | 245.979429 | -0.00632879 | 0.14945107 | 0.96225476 | 0.98476398 | C1QL1     |
| 2670   | ENSG00000131095 | 3.59970135 | -0.0844431  | 0.3847686  | 0.38701749 | 0.61602672 | GFAP      |
| 5697   | ENSG00000131096 | 0.173733   | 0.01914545  | 0.38484597 | 0.78225479 | NA         | PYY       |
| 51751  | ENSG00000131097 | 0          | NA          | NA         | NA         | NA         | HIGD1B    |
| 529    | ENSG00000131100 | 1015.63818 | 0.05194657  | 0.09324863 | 0.56644346 | 0.76820466 | ATP6V1E1  |
| 7770   | ENSG00000131115 | 619.618197 | -0.21110328 | 0.10660242 | 0.03867458 | 0.12233795 | ZNF227    |
| 126299 | ENSG00000131116 | 982.703219 | -0.31254296 | 0.08663386 | 0.00020498 | 0.00145503 | ZNF428    |
| 83639  | ENSG00000131126 | 0          | NA          | NA         | NA         | NA         | TEX101    |
| 7700   | ENSG00000131127 | 576.499167 | -0.39472093 | 0.12245465 | 0.00065555 | 0.00407911 | ZNF141    |
| 6370   | ENSG00000131142 | 0.173733   | 0.01914545  | 0.38484597 | 0.78225479 | NA         | CCL25     |
| 1327   | ENSG00000131143 | 4542.78392 | 0.02106602  | 0.06003936 | 0.7243491  | 0.86820892 | COX4I1    |
| 10328  | ENSG00000131148 | 506.473768 | 0.11655639  | 0.10856839 | 0.26307611 | 0.48504013 | EMC8      |
| 23199  | ENSG00000131149 | 8850.72756 | -0.52134572 | 0.04882703 | 4.81E-27   | 2.46E-25   | GSE1      |
| NA     | ENSG00000131152 | 1.56359704 | 0.06153354  | 0.39132085 | 0.13522809 | NA         |           |
| 51659  | ENSG00000131153 | 627.021705 | -0.31398768 | 0.10108406 | 0.00123757 | 0.00709227 | GINS2     |
| 5119   | ENSG00000131165 | 2087.99249 | 0.17976979  | 0.08322408 | 0.02676042 | 0.09183996 | CHMP1A    |
| 6451   | ENSG00000131171 | 689.937087 | 0.07872982  | 0.09688249 | 0.40231687 | 0.63048711 | SH3BGRL   |
| 1349   | ENSG00000131174 | 1422.22439 | -0.00652801 | 0.0812788  | 0.93375897 | 0.97237716 | COX7B     |
| 6569   | ENSG00000131183 | 0          | NA          | NA         | NA         | NA         | SLC34A1   |
| 2161   | ENSG00000131187 | 348.607963 | -0.43705652 | 0.13507122 | 0.00055002 | 0.00350317 | F12       |
| 80758  | ENSG00000131188 | 394.20198  | -0.54491983 | 0.12273633 | 3.10E-06   | 3.23E-05   | PRR7      |
| 4772   | ENSG00000131196 | 0          | NA          | NA         | NA         | NA         | NFATC1    |
| 3620   | ENSG00000131203 | 0.29863895 | -0.02292439 | 0.3852726  | 0.68753245 | NA         | IDO1      |
| 81025  | ENSG00000131233 | 1.21613103 | 0.05045324  | 0.38902488 | 0.20730064 | NA         | GJA9      |
| 10487  | ENSG00000131236 | 3799.97427 | 0.00645142  | 0.06831401 | 0.92434215 | 0.96852    | CAP1      |
| 5538   | ENSG00000131238 | 1838.88997 | 0.1118752   | 0.07379151 | 0.1228194  | 0.2900532  | PPT1      |
| 84440  | ENSG00000131242 | 1647.45586 | -1.30569452 | 0.10528658 | 2.33E-36   | 1.64E-34   | RAB11FIP4 |
| 51132  | ENSG00000131263 | 1663.61067 | -0.31193566 | 0.06966292 | 5.08E-06   | 5.09E-05   | RLIM      |
| 1046   | ENSG00000131264 | 0          | NA          | NA         | NA         | NA         | CDX4      |
| 22     | ENSG00000131269 | 667.011638 | 0.09515485  | 0.12325546 | 0.41560605 | 0.64249293 | ABCB7     |
| 7187   | ENSG00000131323 | 1086.54022 | 0.02212517  | 0.10426056 | 0.82658476 | 0.92144622 | TRAF3     |
| 93323  | ENSG00000131351 | 251.268378 | -0.30667828 | 0.14884216 | 0.0250829  | 0.08736739 | HAUS8     |
| 84658  | ENSG00000131355 | 0          | NA          | NA         | NA         | NA         | ADGRE3    |
| 64432  | ENSG00000131368 | 1903.79521 | 0.08536392  | 0.07284279 | 0.23321364 | 0.45004948 | MRPS25    |
| 9467   | ENSG00000131370 | 537.57024  | 0.09380598  | 0.11140177 | 0.37918146 | 0.60816169 | SH3BP5    |
| 26061  | ENSG00000131373 | 217.297872 | 0.1071329   | 0.16820506 | 0.48053139 | 0.70158112 | HACL1     |



|        |                 |            |             |            |            |            |          |
|--------|-----------------|------------|-------------|------------|------------|------------|----------|
| 9779   | ENSG00000131374 | 2273.28759 | -0.19455267 | 0.09101378 | 0.02738731 | 0.09338117 | TBC1D5   |
| 23473  | ENSG00000131375 | 887.057309 | -0.11241882 | 0.11088736 | 0.28793501 | 0.51368788 | CAPN7    |
| 23180  | ENSG00000131378 | 2601.88199 | -0.21638638 | 0.06654038 | 0.00094295 | 0.00563331 | RFTN1    |
| 84077  | ENSG00000131379 | 0          | NA          | NA         | NA         | NA         | C3orf20  |
| 64145  | ENSG00000131381 | 1078.36768 | -0.03371252 | 0.07818845 | 0.65906061 | 0.83094576 | RBSN     |
| 117248 | ENSG00000131386 | 4.53908786 | 0.19692395  | 0.4509815  | 0.03552401 | 0.11461967 | GALNT15  |
| 6533   | ENSG00000131389 | 1255.62563 | -0.1268352  | 0.09917459 | 0.18464916 | 0.38340548 | SLC6A6   |
| 3748   | ENSG00000131398 | 433.275446 | -1.31162134 | 0.12872947 | 2.14E-25   | 1.03E-23   | KCNC3    |
| 9476   | ENSG00000131400 | 27.0073833 | 0.05837605  | 0.29727582 | 0.76211574 | 0.89011458 | NAPSA    |
| 256236 | ENSG00000131401 | 0.32404836 | -0.00108855 | 0.38336652 | 0.99066559 | NA         | NAPSB    |
| 7376   | ENSG00000131408 | 903.005495 | 0.47544879  | 0.11791422 | 2.31E-05   | 0.00020494 | NR1H2    |
| 94030  | ENSG00000131409 | 1648.50563 | -0.18193993 | 0.07348646 | 0.0114638  | 0.04643563 | LRRC4B   |
| 8572   | ENSG00000131435 | 846.57548  | 0.09719595  | 0.11923365 | 0.3918082  | 0.62114503 | PDLIM4   |
| 11127  | ENSG00000131437 | 869.201103 | -0.58826195 | 0.1409542  | 8.84E-06   | 8.48E-05   | KIF3A    |
| 4245   | ENSG00000131446 | 1162.60015 | 0.14878324  | 0.08143554 | 0.06138105 | 0.17444492 | MGAT1    |
| 9945   | ENSG00000131459 | 67.9292915 | -0.19060872 | 0.27271364 | 0.33853435 | 0.56881111 | GFPT2    |
| 7283   | ENSG00000131462 | 1446.70783 | -0.05035578 | 0.07542058 | 0.49561513 | 0.71440019 | TUBG1    |
| 10197  | ENSG00000131467 | 2824.76613 | -0.24226357 | 0.07442311 | 0.00088523 | 0.00532696 | PSME3    |
| 6155   | ENSG00000131469 | 9922.86196 | -0.22066539 | 0.04851388 | 4.37E-06   | 4.45E-05   | RPL27    |
| 29893  | ENSG00000131470 | 629.546314 | 0.0601363   | 0.10558304 | 0.55408319 | 0.76002561 | PSMC3IP  |
| 8639   | ENSG00000131471 | 9.09686134 | 0.48515344  | 0.75250304 | 0.03313449 | 0.10851572 | AOC3     |
| 47     | ENSG00000131473 | 8471.81551 | -0.07152383 | 0.06525972 | 0.26570659 | 0.48802762 | ACLY     |
| 84313  | ENSG00000131475 | 805.199285 | 0.18726089  | 0.0879909  | 0.02860606 | 0.09673498 | VPS25    |
| 10266  | ENSG00000131477 | 81.9367422 | -0.12120182 | 0.22525888 | 0.50759419 | 0.72355808 | RAMP2    |
| 314    | ENSG00000131480 | 19.7871494 | 0.30441486  | 0.40246937 | 0.16007605 | 0.34773993 | AOC2     |
| 2538   | ENSG00000131482 | 0          | NA          | NA         | NA         | NA         | G6PC1    |
| NA     | ENSG00000131484 | 1.55991453 | -0.0934555  | 0.39621208 | 0.1649301  | NA         |          |
| 4695   | ENSG00000131495 | 807.287269 | -0.01802584 | 0.10436618 | 0.85653751 | 0.93595581 | NDUFA2   |
| 54882  | ENSG00000131503 | 2438.63582 | -0.11737931 | 0.07463424 | 0.10842262 | 0.26429596 | ANKHD1   |
| 1729   | ENSG00000131504 | 2317.72327 | 0.11266167  | 0.08376024 | 0.1682346  | 0.35936418 | DIAPH1   |
| 80762  | ENSG00000131507 | 1920.16186 | -0.09071692 | 0.08524959 | 0.27709274 | 0.50146127 | NDFIP1   |
| 7322   | ENSG00000131508 | 1621.27851 | -0.40475172 | 0.10383802 | 4.96E-05   | 0.00040539 | UBE2D2   |
| 441543 | ENSG00000131548 | 0          | NA          | NA         | NA         | NA         | TTY6B    |
| 60412  | ENSG00000131558 | 2611.21809 | -0.04995645 | 0.06169445 | 0.41152689 | 0.63926507 | EXOC4    |
| 116983 | ENSG00000131584 | 2265.31998 | 0.21275685  | 0.08835391 | 0.01317872 | 0.05200193 | ACAP3    |
| 54991  | ENSG00000131591 | 588.444128 | 0.1863235   | 0.10891601 | 0.07393177 | 0.19932142 | C1orf159 |
| 55107  | ENSG00000131620 | 0.356286   | 0.02381422  | 0.38538061 | 0.6142166  | NA         | ANO1     |
| 8500   | ENSG00000131626 | 1207.7045  | -0.02993402 | 0.09226237 | 0.74532498 | 0.87994031 | PPFIA1   |

|           |                 |            |             |            |            |            |         |
|-----------|-----------------|------------|-------------|------------|------------|------------|---------|
| 79652     | ENSG00000131634 | 31.9782647 | -0.2777083  | 0.3320212  | 0.19754297 | 0.40156333 | TMEM204 |
| 79412     | ENSG00000131650 | 63.3957838 | -0.8824916  | 0.31821774 | 0.00070108 | 0.00433315 | KREMEN2 |
| 79228     | ENSG00000131652 | 599.772004 | 0.08720823  | 0.10392542 | 0.38343148 | 0.61266407 | THOC6   |
| 84231     | ENSG00000131653 | 3201.93291 | -0.01301723 | 0.06096261 | 0.828516   | 0.92220943 | TRAF7   |
| 56033     | ENSG00000131668 | 0          | NA          | NA         | NA         | NA         | BARX1   |
| 4814      | ENSG00000131669 | 259.009823 | -0.17494489 | 0.1470278  | 0.19638148 | 0.40005705 | NINJ1   |
| 765       | ENSG00000131686 | 0          | NA          | NA         | NA         | NA         | CA6     |
| 261734    | ENSG00000131697 | 539.40084  | -0.1151539  | 0.12148632 | 0.31648424 | 0.54448902 | NPHP4   |
| 4131      | ENSG00000131711 | 11589.2376 | -1.04496932 | 0.06075331 | 3.41E-67   | 5.21E-65   | MAP1B   |
| 84528     | ENSG00000131721 | 0          | NA          | NA         | NA         | NA         | RHOXF2  |
| 3597      | ENSG00000131724 | 121.719875 | 1.86150766  | 0.23562071 | 2.09E-16   | 6.26E-15   | IL13RA1 |
| 54521     | ENSG00000131725 | 242.085224 | 0.04010347  | 0.14575054 | 0.7672741  | 0.89280791 | WDR44   |
| 1160      | ENSG00000131730 | 9.05666656 | -0.07181636 | 0.3550682  | 0.63267005 | 0.81417935 | CKMT2   |
| 84240     | ENSG00000131732 | 409.721732 | 0.3211729   | 0.12342204 | 0.00593154 | 0.02691097 | ZCCHC9  |
| 3885      | ENSG00000131737 | 0          | NA          | NA         | NA         | NA         | KRT34   |
| 3884      | ENSG00000131738 | 0          | NA          | NA         | NA         | NA         | KRT33B  |
| 84951     | ENSG00000131746 | 0.80763644 | 0.03653866  | 0.38486192 | 0.46699599 | NA         | TNS4    |
| 7153      | ENSG00000131747 | 10879.7774 | -0.28228548 | 0.04737423 | 1.74E-09   | 2.90E-08   | TOP2A   |
| 10948     | ENSG00000131748 | 1003.25352 | 0.09019301  | 0.08938751 | 0.30047819 | 0.52765864 | STARD3  |
| 5914      | ENSG00000131759 | 995.761342 | 0.21749768  | 0.08744461 | 0.01050686 | 0.04312292 | RARA    |
| 84152     | ENSG00000131771 | 21.9190303 | 0.12961971  | 0.32980235 | 0.49334144 | 0.71236493 | PPP1R1B |
| 10656     | ENSG00000131773 | 261.814132 | 0.21134411  | 0.16852401 | 0.16227505 | 0.35094147 | KHDRBS3 |
| 9557      | ENSG00000131778 | 1453.04294 | -0.0919025  | 0.07969189 | 0.23770089 | 0.45499138 | CHD1L   |
| 8799      | ENSG00000131779 | 355.469208 | -0.1893965  | 0.13293832 | 0.12782339 | 0.29835718 | PEX11B  |
| 2330      | ENSG00000131781 | 65.7195449 | 0.06452762  | 0.23391542 | 0.7301949  | 0.87103576 | FMO5    |
| 10401     | ENSG00000131788 | 860.95666  | 0.53384453  | 0.09652383 | 1.15E-08   | 1.73E-07   | PIAS3   |
| 5565      | ENSG00000131791 | 1138.65904 | -0.01468819 | 0.07953738 | 0.85273094 | 0.93348077 | PRKAB2  |
| 100132341 | ENSG00000131797 | 476.024007 | 0.13132047  | 0.11784076 | 0.24144522 | 0.45949862 | CLUHP3  |
| 2488      | ENSG00000131808 | 0          | NA          | NA         | NA         | NA         | FSHB    |
| 5160      | ENSG00000131828 | 1078.01557 | -0.00217155 | 0.08769107 | 0.97893503 | 0.99288138 | PDHA1   |
| 10742     | ENSG00000131831 | 41.3699895 | -0.00268865 | 0.27917568 | 0.98701817 | 0.99565021 | RAI2    |
| 64087     | ENSG00000131844 | 1574.52487 | -0.14352952 | 0.08034071 | 0.06724716 | 0.18615649 | MCCC2   |
| 57343     | ENSG00000131845 | 251.751328 | -0.09796258 | 0.15032961 | 0.47772482 | 0.69938463 | ZNF304  |
| 79149     | ENSG00000131848 | 88.4203518 | -0.05106021 | 0.24848502 | 0.78574444 | 0.90256888 | ZSCAN5A |
| 7691      | ENSG00000131849 | 160.713756 | -0.1010627  | 0.17212176 | 0.5103812  | 0.72572757 | ZNF132  |
| 57663     | ENSG00000131864 | 0          | NA          | NA         | NA         | NA         | USP29   |
| 55829     | ENSG00000131871 | 738.125752 | 0.39518004  | 0.09430778 | 1.49E-05   | 0.00013707 | SELENOS |
| 22856     | ENSG00000131873 | 1380.74456 | 0.11426857  | 0.07268984 | 0.10937518 | 0.26596439 | CHSY1   |

|        |                 |            |             |            |            |            |          |
|--------|-----------------|------------|-------------|------------|------------|------------|----------|
| 6627   | ENSG00000131876 | 717.532509 | -0.12632533 | 0.1076599  | 0.22040097 | 0.43277467 | SNRPA1   |
| NA     | ENSG00000131885 | 0          | NA          | NA         | NA         | NA         | KRT17P1  |
| 3996   | ENSG00000131899 | 2117.16614 | 0.20801381  | 0.06546291 | 0.00125305 | 0.00717474 | LLGL1    |
| 8431   | ENSG00000131910 | 1.01348691 | 0.0309244   | 0.38200515 | 0.60807314 | NA         | NR0B2    |
| 79727  | ENSG00000131914 | 0.81896772 | -0.00791533 | 0.38149477 | 0.87919575 | NA         | LIN28A   |
| 55145  | ENSG00000131931 | 180.051291 | -0.02021576 | 0.17145665 | 0.89403682 | 0.95417323 | THAP1    |
| 85415  | ENSG00000131941 | 182.653341 | -0.18682495 | 0.21209521 | 0.29156967 | 0.51751138 | RHPN2    |
| 83636  | ENSG00000131943 | 647.988392 | -0.11266645 | 0.09844782 | 0.23550077 | 0.45230739 | C19orf12 |
| 91442  | ENSG00000131944 | 80.5503936 | 0.06759322  | 0.22926338 | 0.71517551 | 0.86271551 | FAAP24   |
| 341883 | ENSG00000131951 | 3.76615309 | -0.01007961 | 0.37698167 | 0.88615346 | 0.95015905 | LRRC9    |
| 55860  | ENSG00000131966 | 625.081701 | -0.01370119 | 0.09988346 | 0.88623908 | 0.95015905 | ACTR10   |
| 145447 | ENSG00000131969 | 5.95805383 | 0.3668254   | 0.67005705 | 0.01164237 | 0.04699584 | ABHD12B  |
| 2643   | ENSG00000131979 | 2572.03685 | 0.07541056  | 0.06843574 | 0.26304051 | 0.48504013 | GCH1     |
| 3958   | ENSG00000131981 | 109.519635 | 0.14463983  | 0.20816254 | 0.41082287 | 0.63847247 | LGALS3   |
| NA     | ENSG00000131982 | 0          | NA          | NA         | NA         | NA         | UBE2L2   |
| 79883  | ENSG00000132000 | 38.7137392 | -0.78279047 | 0.46217267 | 0.00997362 | 0.04137946 | PODNL1   |
| 3337   | ENSG00000132002 | 1510.88464 | 0.22900499  | 0.10988653 | 0.02934858 | 0.09864065 | DNAJB1   |
| 65249  | ENSG00000132003 | 969.742607 | 0.20716191  | 0.08836418 | 0.01584906 | 0.0603035  | ZSWIM4   |
| 84261  | ENSG00000132004 | 347.127675 | 0.36390916  | 0.13082988 | 0.00304899 | 0.01534161 | FBXW9    |
| 5989   | ENSG00000132005 | 536.202306 | -0.16133906 | 0.12420037 | 0.16833144 | 0.35949363 | RFX1     |
| 7568   | ENSG00000132010 | 61.4558057 | 0.2495826   | 0.28924423 | 0.23000167 | 0.44593003 | ZNF20    |
| 79173  | ENSG00000132016 | 228.895719 | -0.11524491 | 0.1691003  | 0.44630712 | 0.67062583 | BRME1    |
| 90379  | ENSG00000132017 | 795.10219  | 0.00251507  | 0.10504217 | 0.9811125  | 0.99355086 | DCAF15   |
| 54862  | ENSG00000132024 | 922.215853 | 0.03023369  | 0.10146497 | 0.7581655  | 0.88767331 | CC2D1A   |
| 83546  | ENSG00000132026 | 64.5619567 | -0.18113528 | 0.25975538 | 0.35516708 | 0.58555051 | RTBDN    |
| 4148   | ENSG00000132031 | 112.345655 | -0.34453416 | 0.2159435  | 0.05804576 | 0.16707209 | MATN3    |
| 6737   | ENSG00000132109 | 66.981002  | 0.26336144  | 0.27592336 | 0.19969399 | 0.40440224 | TRIM21   |
| 54558  | ENSG00000132122 | 230.962941 | 0.38101271  | 0.18864133 | 0.02152829 | 0.07723713 | SPATA6   |
| 10489  | ENSG00000132128 | 2225.8871  | 0.07929391  | 0.06812612 | 0.23725113 | 0.45434065 | LRRC41   |
| 10693  | ENSG00000132141 | 8.93044771 | 0.35086313  | 0.53379977 | 0.0769183  | 0.20530862 | CCT6B    |
| 22907  | ENSG00000132153 | 3240.7178  | 0.02180533  | 0.06256146 | 0.72494821 | 0.86844186 | DHX30    |
| 5894   | ENSG00000132155 | 2732.27077 | 0.10189395  | 0.07065816 | 0.14245983 | 0.3212532  | RAF1     |
| 6538   | ENSG00000132164 | 487.284079 | -0.26488434 | 0.12604292 | 0.02550933 | 0.08852635 | SLC6A11  |
| 5468   | ENSG00000132170 | 10.906083  | 0.25013724  | 0.47456332 | 0.07539134 | 0.20223962 | PPARG    |
| 23225  | ENSG00000132182 | 6106.49795 | -0.49441272 | 0.05743561 | 3.06E-18   | 1.04E-16   | NUP210   |
| 84824  | ENSG00000132185 | 0          | NA          | NA         | NA         | NA         | FCRLA    |
| 51478  | ENSG00000132196 | 385.240843 | -0.05884952 | 0.14098364 | 0.65255307 | 0.82647002 | HSD17B7  |
| 55556  | ENSG00000132199 | 477.134833 | 0.22441027  | 0.14626448 | 0.09594925 | 0.24179261 | ENOSF1   |

|        |                 |            |             |            |            |            |           |
|--------|-----------------|------------|-------------|------------|------------|------------|-----------|
| NA     | ENSG00000132204 | 8.50184539 | -1.58315225 | 1.23141817 | 0.00653572 | 0.02917839 | LINC00470 |
| 84034  | ENSG00000132205 | 147.23681  | 0.14734201  | 0.19523926 | 0.38172831 | 0.61081455 | EMILIN2   |
| 548593 | ENSG00000132207 | 1501.10878 | 0.29282131  | 0.07577866 | 7.86E-05   | 0.00061391 | SLX1A     |
| 23647  | ENSG00000132254 | 1533.98098 | 0.03803035  | 0.07766224 | 0.61769105 | 0.80429156 | ARFIP2    |
| 85363  | ENSG00000132256 | 29.5923731 | 5.38422323  | 0.9698527  | 6.92E-10   | 1.22E-08   | TRIM5     |
| 1262   | ENSG00000132259 | 1.24099725 | 0.08646518  | 0.39720667 | 0.10582374 | NA         | CNGA4     |
| 10346  | ENSG00000132274 | 0.34110387 | 0.02362648  | 0.38535339 | 0.62410903 | NA         | TRIM22    |
| 23378  | ENSG00000132275 | 479.580273 | -0.45713338 | 0.14503269 | 0.00068237 | 0.00422805 | RRP8      |
| 26515  | ENSG00000132286 | 873.71573  | -0.14652839 | 0.11223759 | 0.17086426 | 0.36291049 | TIMM10B   |
| 23167  | ENSG00000132294 | 1064.65033 | 0.00741265  | 0.09243928 | 0.94034732 | 0.97517789 | EFR3A     |
| 10086  | ENSG00000132297 | 0.54618237 | 0.03261825  | 0.38620504 | 0.45601618 | NA         | HHLA1     |
| 55037  | ENSG00000132300 | 1487.67955 | 0.11192679  | 0.10179788 | 0.25423355 | 0.47477349 | PTCD3     |
| 10989  | ENSG00000132305 | 2045.45807 | -0.02737785 | 0.07213111 | 0.69834554 | 0.85455335 | IMMT      |
| 51318  | ENSG00000132313 | 668.180188 | -0.33200888 | 0.10512977 | 0.00098941 | 0.00585271 | MRPL35    |
| 79781  | ENSG00000132321 | 0.33471731 | 0.02354391  | 0.38534154 | 0.62842204 | NA         | IQCA1     |
| 80895  | ENSG00000132323 | 500.813415 | 0.09183217  | 0.11764451 | 0.41259094 | 0.64014381 | ILKAP     |
| 8864   | ENSG00000132326 | 97.1995002 | -0.29605068 | 0.22194328 | 0.10786671 | 0.26339391 | PER2      |
| 10267  | ENSG00000132329 | 1471.39227 | 0.36324481  | 0.08897337 | 2.62E-05   | 0.00022926 | RAMP1     |
| 51540  | ENSG00000132330 | 1147.56593 | 0.13215108  | 0.08430403 | 0.10811018 | 0.26372572 | SCLY      |
| 5791   | ENSG00000132334 | 24.0411772 | 0.71499798  | 0.95650101 | 0.01919588 | 0.07046185 | PTPRE     |
| 5901   | ENSG00000132341 | 6954.33991 | -0.27907489 | 0.05727063 | 7.63E-07   | 8.80E-06   | RAN       |
| 5562   | ENSG00000132356 | 931.264755 | -0.22538259 | 0.10832865 | 0.02954922 | 0.09920766 | PRKAA1    |
| 84674  | ENSG00000132357 | 1.31194181 | 0.02135235  | 0.379559   | 0.77048313 | NA         | CARD6     |
| 23108  | ENSG00000132359 | 2504.23782 | 1.29059226  | 0.06546383 | 1.63E-87   | 3.77E-85   | RAP1GAP2  |
| 23277  | ENSG00000132361 | 1760.83573 | -0.00270629 | 0.0715378  | 0.96745331 | 0.98759962 | CLUH      |
| 51763  | ENSG00000132376 | 448.919359 | -0.04254015 | 0.15383753 | 0.76155657 | 0.88972737 | INPP5K    |
| 10514  | ENSG00000132382 | 2778.78763 | 0.09978604  | 0.06728594 | 0.1327013  | 0.30599649 | MYBBP1A   |
| 6117   | ENSG00000132383 | 2108.61164 | -0.22118719 | 0.09017898 | 0.0113942  | 0.04621034 | RPA1      |
| 5176   | ENSG00000132386 | 625.483781 | 2.875874    | 0.12017836 | 8.28E-128  | 3.82E-125  | SERPINF1  |
| 7326   | ENSG00000132388 | 1482.43806 | 0.22097135  | 0.08132675 | 0.00536011 | 0.02469294 | UBE2G1    |
| 60678  | ENSG00000132394 | 614.423314 | 0.11963011  | 0.10278005 | 0.22675109 | 0.44131269 | EEFSEC    |
| 57533  | ENSG00000132405 | 2243.39711 | -0.17574564 | 0.06289969 | 0.00457629 | 0.0215918  | TBC1D14   |
| 85013  | ENSG00000132406 | 427.572973 | 0.13892877  | 0.13350429 | 0.26696175 | 0.48937642 | TMEM128   |
| 51805  | ENSG00000132423 | 118.473439 | -0.00595171 | 0.19540147 | 0.9704444  | 0.98888633 | COQ3      |
| 25957  | ENSG00000132424 | 5356.32168 | 0.18726384  | 0.05242039 | 0.00030904 | 0.00210413 | PNISR     |
| 64208  | ENSG00000132429 | 306.356906 | -0.66165496 | 0.14915377 | 2.23E-06   | 2.38E-05   | POPDC3    |
| 23480  | ENSG00000132432 | 1179.0293  | -0.10054666 | 0.08446582 | 0.2217876  | 0.43480888 | SEC61G    |
| 55915  | ENSG00000132434 | 458.396178 | -0.48294398 | 0.12509479 | 4.53E-05   | 0.00037565 | LANCL2    |

|        |                 |            |             |            |            |            |         |
|--------|-----------------|------------|-------------|------------|------------|------------|---------|
| 63979  | ENSG00000132436 | 1102.11624 | -0.25241566 | 0.08493344 | 0.0022494  | 0.01184083 | FIGNL1  |
| 1644   | ENSG00000132437 | 1700.948   | -1.61525412 | 0.08853616 | 1.86E-75   | 3.41E-73   | DDC     |
| 53940  | ENSG00000132446 | 0          | NA          | NA         | NA         | NA         | FTHL17  |
| 2926   | ENSG00000132463 | 1934.64962 | -0.18677039 | 0.07870194 | 0.01514064 | 0.05809133 | GRSF1   |
| 10117  | ENSG00000132464 | 0          | NA          | NA         | NA         | NA         | ENAM    |
| 3512   | ENSG00000132465 | 0          | NA          | NA         | NA         | NA         | JCHAIN  |
| 26057  | ENSG00000132466 | 3859.10999 | -0.20141286 | 0.05531215 | 0.00021724 | 0.00153162 | ANKRD17 |
| 57050  | ENSG00000132467 | 853.897145 | 0.00806621  | 0.10288355 | 0.93675127 | 0.97351594 | UTP3    |
| 3691   | ENSG00000132470 | 40.8515741 | 0.00603457  | 0.28218191 | 0.97667042 | 0.99207153 | ITGB4   |
| 23558  | ENSG00000132471 | 2076.07091 | -0.01282282 | 0.06704263 | 0.84515387 | 0.92965052 | WBP2    |
| 3021   | ENSG00000132475 | 14152.2091 | 0.28137565  | 0.05073313 | 2.16E-08   | 3.12E-07   | H3-3B   |
| 85451  | ENSG00000132478 | 1703.47279 | 0.01992104  | 0.07921415 | 0.79802658 | 0.9074513  | UNK     |
| 91107  | ENSG00000132481 | 39.7208835 | -0.18256947 | 0.28580647 | 0.36461606 | 0.59423075 | TRIM47  |
| 9406   | ENSG00000132485 | 2404.84547 | 0.09130796  | 0.07834962 | 0.23406122 | 0.45093611 | ZRANB2  |
| 1984   | ENSG00000132507 | 8553.64109 | -0.18647062 | 0.05952892 | 0.00147628 | 0.00826683 | EIF5A   |
| 23135  | ENSG00000132510 | 2380.66821 | 0.21046625  | 0.08847436 | 0.0143316  | 0.05556751 | KDM6B   |
| 10462  | ENSG00000132514 | 0          | NA          | NA         | NA         | NA         | CLEC10A |
| 55065  | ENSG00000132517 | 1.47380488 | 0.02867712  | 0.3815687  | 0.64111572 | NA         | SLC52A1 |
| 3000   | ENSG00000132518 | 2.20425671 | 0.0901798   | 0.38881274 | 0.32703552 | NA         | GUCY2D  |
| 2874   | ENSG00000132522 | 1235.43597 | -0.13442753 | 0.0806428  | 0.08776809 | 0.22632101 | GPS2    |
| 54739  | ENSG00000132530 | 0          | NA          | NA         | NA         | NA         | XAF1    |
| 1742   | ENSG00000132535 | 921.424771 | -0.16211801 | 0.09839384 | 0.08744279 | 0.22586501 | DLG4    |
| 10247  | ENSG00000132541 | 141.55961  | -0.99794608 | 0.21369732 | 3.74E-07   | 4.56E-06   | RIDA    |
| 157680 | ENSG00000132549 | 1310.04197 | 0.10443886  | 0.08920431 | 0.22874275 | 0.44405638 | VPS13B  |
| 26166  | ENSG00000132554 | 0.76994472 | -0.03644129 | 0.38642285 | 0.53879405 | NA         | RGS22   |
| 4147   | ENSG00000132561 | 24.7958343 | 0.48205298  | 0.45413678 | 0.06014417 | 0.17157108 | MATN2   |
| 51308  | ENSG00000132563 | 1224.55472 | -0.44972679 | 0.08689319 | 1.03E-07   | 1.36E-06   | REEP2   |
| 84105  | ENSG00000132570 | 257.635586 | -0.65041914 | 0.1747307  | 4.72E-05   | 0.00038923 | PCBD2   |
| 6388   | ENSG00000132581 | 550.24919  | 0.18170575  | 0.1066871  | 0.07579147 | 0.20295623 | SDF2    |
| 2319   | ENSG00000132589 | 3510.08478 | 0.32937775  | 0.06884556 | 1.11E-06   | 1.25E-05   | FLOT2   |
| 26284  | ENSG00000132591 | 915.360659 | -0.02206928 | 0.09436062 | 0.84659883 | 0.93050362 | ERAL1   |
| 54496  | ENSG00000132600 | 689.700011 | -0.08417354 | 0.10230925 | 0.39245301 | 0.62172726 | PRMT7   |
| 51388  | ENSG00000132603 | 897.361967 | 0.00200391  | 0.09414848 | 0.98336436 | 0.99428951 | NIP7    |
| 7014   | ENSG00000132604 | 842.235828 | -0.47159358 | 0.11016091 | 7.82E-06   | 7.59E-05   | TERF2   |
| 27183  | ENSG00000132612 | 2144.15051 | -0.05666638 | 0.06662996 | 0.38734605 | 0.61635625 | VPS4A   |
| 92154  | ENSG00000132613 | 1941.43165 | -0.18099507 | 0.09042915 | 0.03898132 | 0.12307279 | MTSS2   |
| 116835 | ENSG00000132622 | 31.9438631 | -0.32242755 | 0.36450782 | 0.14891885 | 0.33152468 | HSPA12B |
| 63926  | ENSG00000132623 | 202.769397 | 0.27975871  | 0.16574477 | 0.06117569 | 0.17396096 | ANKEF1  |

|        |                 |            |             |            |            |            |          |
|--------|-----------------|------------|-------------|------------|------------|------------|----------|
| 140856 | ENSG00000132631 | 0          | NA          | NA         | NA         | NA         | SCP2D1   |
| 64773  | ENSG00000132635 | 1168.92565 | 0.40783404  | 0.08009043 | 1.86E-07   | 2.37E-06   | PCED1A   |
| 6616   | ENSG00000132639 | 1170.15003 | -1.54602786 | 0.09691944 | 2.39E-58   | 3.01E-56   | SNAP25   |
| 22903  | ENSG00000132640 | 1295.90603 | 0.54847802  | 0.08405636 | 2.39E-11   | 4.89E-10   | BTBD3    |
| 5111   | ENSG00000132646 | 3092.3559  | -0.21856895 | 0.08260057 | 0.00663296 | 0.02953564 | PCNA     |
| 29107  | ENSG00000132661 | 306.641997 | -0.18233326 | 0.13294177 | 0.14235923 | 0.32117652 | NXT1     |
| 10621  | ENSG00000132664 | 271.494921 | 0.11901101  | 0.14727759 | 0.3818139  | 0.61090223 | POLR3F   |
| 54453  | ENSG00000132669 | 45.8643257 | -0.20805958 | 0.30104119 | 0.30745723 | 0.53489578 | RIN2     |
| 5786   | ENSG00000132670 | 1761.17924 | 0.07042379  | 0.07110869 | 0.31384074 | 0.54165894 | PTPRA    |
| 6754   | ENSG00000132671 | 0          | NA          | NA         | NA         | NA         | SSTR4    |
| 7818   | ENSG00000132676 | 2117.2518  | -0.06815435 | 0.06263314 | 0.26999845 | 0.49316601 | DAP3     |
| 57127  | ENSG00000132677 | 2.69629369 | 0.08815649  | 0.38725108 | 0.34751618 | 0.57819389 | RHBG     |
| 22889  | ENSG00000132680 | 2541.72473 | 0.0695402   | 0.08687486 | 0.41630305 | 0.64306408 | KHDC4    |
| 480    | ENSG00000132681 | 0.3400998  | 0.00219723  | 0.38337765 | 0.96670829 | NA         | ATP1A4   |
| 10763  | ENSG00000132688 | 7312.74703 | -0.61177823 | 0.06096199 | 3.15E-24   | 1.45E-22   | NES      |
| 63827  | ENSG00000132692 | 110.872641 | -0.58725763 | 0.23217405 | 0.00298825 | 0.01507802 | BCAN     |
| 1401   | ENSG00000132693 | 0          | NA          | NA         | NA         | NA         | CRP      |
| 9826   | ENSG00000132694 | 1939.40012 | 0.03876404  | 0.0958967  | 0.67791978 | 0.84273994 | ARHGEF11 |
| 57111  | ENSG00000132698 | 3.16349965 | 0.21630871  | 0.46764594 | 0.03600843 | 0.11586234 | RAB25    |
| 60484  | ENSG00000132702 | 13.6365786 | 0.35320898  | 0.53905315 | 0.0736608  | 0.19875293 | HAPLN2   |
| 325    | ENSG00000132703 | 0          | NA          | NA         | NA         | NA         | APCS     |
| 79368  | ENSG00000132704 | 0          | NA          | NA         | NA         | NA         | FCRL2    |
| 50717  | ENSG00000132716 | 2366.27666 | 0.45338678  | 0.07080194 | 7.06E-11   | 1.38E-09   | DCAF8    |
| 23208  | ENSG00000132718 | 3195.52583 | -1.09403958 | 0.06354061 | 2.31E-67   | 3.62E-65   | SYT11    |
| 3508   | ENSG00000132740 | 561.505582 | -0.06380166 | 0.10742392 | 0.53537096 | 0.74627695 | IGHMBP2  |
| 91703  | ENSG00000132744 | 0.34624801 | -0.02356563 | 0.38536324 | 0.65270996 | NA         | ACY3     |
| 222    | ENSG00000132746 | 0          | NA          | NA         | NA         | NA         | ALDH3B2  |
| 9633   | ENSG00000132749 | 239.94464  | 0.28368276  | 0.17135946 | 0.06428697 | 0.18040361 | TESMIN   |
| 25974  | ENSG00000132763 | 285.861848 | 0.02919328  | 0.13743533 | 0.82099103 | 0.91847813 | MMACHC   |
| 1802   | ENSG00000132768 | 1288.32042 | -0.15407585 | 0.08966175 | 0.07659566 | 0.20464017 | DPH2     |
| 114034 | ENSG00000132773 | 339.318347 | -0.20617347 | 0.1309764  | 0.0927589  | 0.23566865 | TOE1     |
| 4678   | ENSG00000132780 | 6392.5325  | 0.07158135  | 0.05277155 | 0.17167695 | 0.36420774 | NASP     |
| 4595   | ENSG00000132781 | 567.850194 | 0.34575603  | 0.12075558 | 0.00250636 | 0.01300029 | MUTYH    |
| 56259  | ENSG00000132792 | 826.408275 | -0.07403443 | 0.09085899 | 0.4010612  | 0.62946398 | CTNBL1   |
| 64900  | ENSG00000132793 | 8.80066804 | 2.20069613  | 1.08384469 | 0.00154515 | 0.0086039  | LPIN3    |
| 140831 | ENSG00000132801 | 100.975586 | -0.20371652 | 0.21321945 | 0.25337921 | 0.47375776 | ZSWIM3   |
| 55544  | ENSG00000132819 | 896.140855 | -0.26880552 | 0.0907959  | 0.0022417  | 0.01180969 | RBM38    |
| 128434 | ENSG00000132821 | 507.699159 | -1.47954301 | 0.15508834 | 1.09E-22   | 4.67E-21   | VSTM2L   |

|        |                 |            |             |            |            |            |         |
|--------|-----------------|------------|-------------|------------|------------|------------|---------|
| 51526  | ENSG00000132823 | 393.593258 | -0.0574134  | 0.13126005 | 0.64076771 | 0.82008361 | OSER1   |
| 10955  | ENSG00000132824 | 1053.79748 | -0.08416165 | 0.08394515 | 0.30348778 | 0.53085409 | SERINC3 |
| 5509   | ENSG00000132825 | 96.2828541 | 0.4976174   | 0.23494643 | 0.01139853 | 0.04621842 | PPP1R3D |
| NA     | ENSG00000132832 | 3.61664045 | 0.2221978   | 0.46636813 | 0.05193223 | 0.15341504 |         |
| 29958  | ENSG00000132837 | 23.1249388 | 0.55593428  | 0.54505645 | 0.04109681 | 0.12808053 | DMGDH   |
| 23743  | ENSG00000132840 | 0          | NA          | NA         | NA         | NA         | BHMT2   |
| 8546   | ENSG00000132842 | 778.042907 | 0.30071181  | 0.09548013 | 0.00111802 | 0.00649722 | AP3B1   |
| 84327  | ENSG00000132846 | 819.866833 | 0.59799866  | 0.12900179 | 1.05E-06   | 1.19E-05   | ZBED3   |
| 10207  | ENSG00000132849 | 239.356119 | 0.39609695  | 0.19982881 | 0.02216014 | 0.07906081 | PATJ    |
| 163782 | ENSG00000132854 | 64.1835187 | -3.06541001 | 0.39960434 | 1.11E-15   | 3.16E-14   | KANK4   |
| 27329  | ENSG00000132855 | 1.8526157  | -0.09795016 | 0.39820621 | 0.13508234 | NA         | ANGPTL3 |
| 6860   | ENSG00000132872 | 6862.50392 | -1.10465088 | 0.0768358  | 9.07E-48   | 8.41E-46   | SYT4    |
| 8170   | ENSG00000132874 | 1.13134361 | 0.06144845  | 0.39097037 | 0.17672426 | NA         | SLC14A2 |
| 93611  | ENSG00000132879 | 541.507927 | -0.18602081 | 0.11049992 | 0.07757199 | 0.2066702  | FBXO44  |
| 79363  | ENSG00000132881 | 112.181582 | 0.30464525  | 0.27224129 | 0.13917929 | 0.31601249 | CPLANE2 |
| 842    | ENSG00000132906 | 196.375697 | 0.29734298  | 0.1678974  | 0.0490758  | 0.14693914 | CASP9   |
| 56923  | ENSG00000132911 | 0          | NA          | NA         | NA         | NA         | NMUR2   |
| 51164  | ENSG00000132912 | 1966.94826 | -0.43362077 | 0.07238245 | 1.02E-09   | 1.75E-08   | DCTN4   |
| 5145   | ENSG00000132915 | 23.9484474 | -0.07977111 | 0.30909093 | 0.67151599 | 0.83826144 | PDE6A   |
| 51761  | ENSG00000132932 | 2.13104563 | 0.14381209  | 0.42231578 | 0.02204775 | NA         | ATP8A2  |
| 23281  | ENSG00000132938 | 11.9058067 | -0.4350607  | 0.63047575 | 0.04413114 | 0.13518014 | MTUS2   |
| 9205   | ENSG00000132950 | 226.973789 | -0.19865621 | 0.17451841 | 0.19999762 | 0.40493447 | ZMYM5   |
| 10208  | ENSG00000132952 | 583.593768 | -0.21011887 | 0.12556856 | 0.07560179 | 0.20255766 | USPL1   |
| 64328  | ENSG00000132953 | 1414.90403 | 0.01816363  | 0.0914264  | 0.83868006 | 0.92674595 | XPO4    |
| 93492  | ENSG00000132958 | 1.50517803 | 0.0221318   | 0.37949143 | 0.74905281 | NA         | TPTE2   |
| 51371  | ENSG00000132963 | 1146.13741 | -0.13541462 | 0.08982987 | 0.1204917  | 0.28605424 | POMP    |
| 1024   | ENSG00000132964 | 533.552437 | -0.02616425 | 0.11010935 | 0.80307202 | 0.9104022  | CDK8    |
| 241    | ENSG00000132965 | 0.3518339  | -0.00497886 | 0.38344636 | 0.98710913 | NA         | ALOX5AP |
| NA     | ENSG00000132967 | 74.4631695 | 0.62986545  | 0.37107351 | 0.01620477 | 0.06143205 | HMGB1P5 |
| 10810  | ENSG00000132970 | 1667.85243 | 0.08274291  | 0.07921328 | 0.28501085 | 0.51037097 | WASF3   |
| 56163  | ENSG00000132972 | 0.15069912 | -0.01848503 | 0.38480575 | 0.84537521 | NA         | RNF17   |
| 2835   | ENSG00000132975 | 12.7384737 | -3.42098154 | 1.00659286 | 5.46E-05   | 0.00044198 | GPR12   |
| 1131   | ENSG00000133019 | 6683.83418 | -0.20371563 | 0.06021217 | 0.00060313 | 0.00380116 | CHRM3   |
| 4626   | ENSG00000133020 | 0          | NA          | NA         | NA         | NA         | MYH8    |
| 4628   | ENSG00000133026 | 9553.57816 | 0.26669887  | 0.0677756  | 6.30E-05   | 0.00050369 | MYH10   |
| 10400  | ENSG00000133027 | 471.681291 | 0.12096531  | 0.12755841 | 0.31462197 | 0.5422726  | PEMT    |
| 6341   | ENSG00000133028 | 1264.48964 | 0.10725028  | 0.08454859 | 0.19296823 | 0.39558686 | SCO1    |
| 23164  | ENSG00000133030 | 8392.03769 | -0.18952254 | 0.0778307  | 0.012737   | 0.05060114 | MPRIIP  |

|        |                 |            |             |            |            |            |          |
|--------|-----------------|------------|-------------|------------|------------|------------|----------|
| 1116   | ENSG00000133048 | 0.33471731 | 0.02354391  | 0.38534154 | 0.62842204 | NA         | CHI3L1   |
| 4608   | ENSG00000133055 | 0.173124   | -0.01911262 | 0.38486262 | 0.84537521 | NA         | MYBPH    |
| 5287   | ENSG00000133056 | 757.48408  | -0.15160377 | 0.09628002 | 0.1031591  | 0.2551347  | PIK3C2B  |
| 25778  | ENSG00000133059 | 872.04995  | 0.07684543  | 0.09373709 | 0.39834742 | 0.62727695 | DSTYK    |
| 1118   | ENSG00000133063 | 0.43485182 | 0.02575927  | 0.3855378  | 0.59020656 | NA         | CHIT1    |
| 254428 | ENSG00000133065 | 1112.76551 | 0.03242704  | 0.09093171 | 0.67957166 | 0.84361793 | SLC41A1  |
| 59352  | ENSG00000133067 | 2.86813471 | -0.02327039 | 0.37383332 | 0.79923071 | 0.90801909 | LGR6     |
| 9911   | ENSG00000133069 | 583.677436 | 0.07731431  | 0.12198379 | 0.50403011 | 0.72050994 | TMCC2    |
| 9201   | ENSG00000133083 | 445.941105 | -0.58845656 | 0.12612269 | 9.22E-07   | 1.05E-05   | DCLK1    |
| 8900   | ENSG00000133101 | 69.9043033 | -0.04494744 | 0.23053196 | 0.8063145  | 0.9122093  | CCNA1    |
| 57511  | ENSG00000133103 | 384.473664 | 0.25562495  | 0.16298054 | 0.0825658  | 0.21637154 | COG6     |
| 23111  | ENSG00000133104 | 580.55397  | 0.09010548  | 0.11493216 | 0.41117876 | 0.63882432 | SPART    |
| 122042 | ENSG00000133105 | 2.2094203  | 0.0994326   | 0.39771759 | 0.17149161 | NA         | RXFP2    |
| 94240  | ENSG00000133106 | 0.14931947 | -0.01844332 | 0.38480212 | 0.84537521 | NA         | EPSTI1   |
| 7223   | ENSG00000133107 | 0          | NA          | NA         | NA         | NA         | TRPC4    |
| 10631  | ENSG00000133110 | 0          | NA          | NA         | NA         | NA         | POSTN    |
| 5994   | ENSG00000133111 | 298.886878 | -0.28897334 | 0.13574461 | 0.02241961 | 0.07981428 | RFXAP    |
| 7178   | ENSG00000133112 | 24016.9141 | -0.1503269  | 0.0475074  | 0.00140514 | 0.00793566 | TPT1     |
| 55425  | ENSG00000133114 | 660.052009 | -0.12934533 | 0.10216962 | 0.18820177 | 0.38858602 | GPALPP1  |
| 161003 | ENSG00000133115 | 0          | NA          | NA         | NA         | NA         | STOML3   |
| 9365   | ENSG00000133116 | 1.7228245  | -0.07172359 | 0.38739277 | 0.33555723 | NA         | KL       |
| 5983   | ENSG00000133119 | 1369.1854  | -0.44861847 | 0.07603147 | 1.69E-09   | 2.82E-08   | RFC3     |
| 90627  | ENSG00000133121 | 509.474292 | -0.93265542 | 0.12611668 | 2.07E-14   | 5.36E-13   | STARD13  |
| 8471   | ENSG00000133124 | 0          | NA          | NA         | NA         | NA         | IRS4     |
| 79710  | ENSG00000133131 | 230.01971  | -0.0580824  | 0.14852422 | 0.6723101  | 0.83874944 | MORC4    |
| 84707  | ENSG00000133134 | 608.566992 | -0.54872392 | 0.10164134 | 2.32E-08   | 3.33E-07   | BEX2     |
| 79589  | ENSG00000133135 | 0          | NA          | NA         | NA         | NA         | RNF128   |
| NA     | ENSG00000133136 | 0          | NA          | NA         | NA         | NA         | GNG5P2   |
| 54885  | ENSG00000133138 | 5.93739281 | -0.00257001 | 0.354916   | 0.98316743 | 0.99428951 | TBC1D8B  |
| 79921  | ENSG00000133142 | 879.742477 | -0.20261206 | 0.10488048 | 0.0439943  | 0.13484427 | TCEAL4   |
| 55859  | ENSG00000133169 | 2094.83998 | -0.80037734 | 0.07891951 | 6.93E-25   | 3.29E-23   | BEX1     |
| 84923  | ENSG00000133193 | 1003.47106 | 0.17787088  | 0.09430022 | 0.05154152 | 0.1524879  | FAM104A  |
| 201266 | ENSG00000133195 | 283.744903 | -0.20778772 | 0.15161402 | 0.13435146 | 0.30858343 | SLC39A11 |
| 2048   | ENSG00000133216 | 2116.75652 | -0.30173507 | 0.08271932 | 0.00017972 | 0.00129127 | EPHB2    |
| 10250  | ENSG00000133226 | 1957.76685 | -0.04616241 | 0.08014381 | 0.55161964 | 0.75806149 | SRRM1    |
| 55643  | ENSG00000133243 | 3809.82755 | 0.13047715  | 0.05616371 | 0.0188381  | 0.06937959 | BTBD2    |
| 84106  | ENSG00000133246 | 1.86974123 | 0.12639289  | 0.4100604  | 0.08150668 | NA         | PRAM1    |
| 84787  | ENSG00000133247 | 753.718145 | 0.26205542  | 0.10197267 | 0.00753241 | 0.03286629 | KMT5C    |



|        |                 |            |             |            |            |            |          |
|--------|-----------------|------------|-------------|------------|------------|------------|----------|
| 84330  | ENSG00000133250 | 265.362814 | 0.46079526  | 0.1673412  | 0.00239959 | 0.01252178 | ZNF414   |
| 5158   | ENSG00000133256 | 112.244349 | 0.04034948  | 0.20748738 | 0.81894748 | 0.91749495 | PDE6B    |
| 23640  | ENSG00000133265 | 1437.06703 | 0.12591738  | 0.09070539 | 0.15300401 | 0.33777674 | HSPBP1   |
| 1455   | ENSG00000133275 | 2497.54403 | 0.20308351  | 0.0622375  | 0.00093524 | 0.00559735 | CSNK1G2  |
| 84250  | ENSG00000133302 | 674.637524 | 0.33031062  | 0.11031802 | 0.00170936 | 0.0093767  | SLF1     |
| 55748  | ENSG00000133313 | 810.808223 | 0.12411448  | 0.10664633 | 0.22555938 | 0.43951541 | CNDP2    |
| 28992  | ENSG00000133315 | 763.173203 | 0.10626768  | 0.10816217 | 0.3051415  | 0.53254815 | MACROD1  |
| 54663  | ENSG00000133316 | 853.569176 | 0.25219708  | 0.0896922  | 0.00376329 | 0.01832689 | WDR74    |
| 85329  | ENSG00000133317 | 0          | NA          | NA         | NA         | NA         | LGALS12  |
| 10313  | ENSG00000133318 | 3317.13383 | -0.58451356 | 0.06369921 | 1.42E-20   | 5.49E-19   | RTN3     |
| 5920   | ENSG00000133321 | 0          | NA          | NA         | NA         | NA         | PLAAT4   |
| 54979  | ENSG00000133328 | 0.31814294 | 0.00109006  | 0.38336631 | 0.9666328  | NA         | PLAAT2   |
| 4629   | ENSG00000133392 | 14.3323178 | -0.1299677  | 0.35798262 | 0.43782377 | 0.66289835 | MYH11    |
| 123811 | ENSG00000133393 | 497.478167 | -0.17077609 | 0.12296586 | 0.14148272 | 0.31988799 | CEP20    |
| 84246  | ENSG00000133398 | 598.349701 | 0.29433638  | 0.1097321  | 0.00500826 | 0.02324844 | MED10    |
| 23037  | ENSG00000133401 | 184.290378 | -0.00864476 | 0.1802802  | 0.95540953 | 0.9817074  | PDZD2    |
| 22880  | ENSG00000133422 | 1234.55873 | -0.04304991 | 0.11513204 | 0.69413137 | 0.85201936 | MORC2    |
| 9215   | ENSG00000133424 | 169.45521  | 0.22489845  | 0.18804937 | 0.17127734 | 0.36363215 | LARGE1   |
| 653689 | ENSG00000133433 | 239.166513 | 0.24554227  | 0.16955062 | 0.10637205 | 0.26080345 | GSTT2B   |
| 84700  | ENSG00000133454 | 28.3388274 | -0.17163107 | 0.31039016 | 0.3926813  | 0.62191102 | MYO18B   |
| 66035  | ENSG00000133460 | 453.686547 | -0.12532793 | 0.12429183 | 0.28523548 | 0.51070046 | SLC2A11  |
| 114904 | ENSG00000133466 | 489.323747 | 0.5237942   | 0.12118741 | 5.63E-06   | 5.62E-05   | C1QTNF6  |
| 728441 | ENSG00000133475 | 1.78740445 | 0.07744508  | 0.38968192 | 0.28656823 | NA         | GGT2     |
| 113828 | ENSG00000133477 | 0          | NA          | NA         | NA         | NA         | FAM83F   |
| 284904 | ENSG00000133488 | 0          | NA          | NA         | NA         | NA         | SEC14L4  |
| NA     | ENSG00000133519 | 185.678089 | -0.30585908 | 0.17275746 | 0.04720581 | 0.1422916  | ZDHHC8P1 |
| 474344 | ENSG00000133561 | 0          | NA          | NA         | NA         | NA         | GIMAP6   |
| 55303  | ENSG00000133574 | 0          | NA          | NA         | NA         | NA         | GIMAP4   |
| 90956  | ENSG00000133597 | 459.700111 | 0.06072094  | 0.11936471 | 0.59323339 | 0.78711401 | ADCK2    |
| 23608  | ENSG00000133606 | 1951.93216 | 0.14785404  | 0.08357857 | 0.06969078 | 0.19085983 | MKRN1    |
| 116988 | ENSG00000133612 | 3440.18166 | -0.13615602 | 0.0630829  | 0.02850053 | 0.09642745 | AGAP3    |
| 84626  | ENSG00000133619 | 501.827338 | 0.15157281  | 0.1367363  | 0.23502242 | 0.45186105 | KRBA1    |
| 79970  | ENSG00000133624 | 571.507277 | 0.21027349  | 0.13066207 | 0.08618201 | 0.22346533 | ZNF767P  |
| 57180  | ENSG00000133627 | 832.291495 | -0.14381748 | 0.09800219 | 0.1283094  | 0.29899782 | ACTR3B   |
| 4922   | ENSG00000133636 | 14.8391575 | -0.00974549 | 0.32824546 | 0.95285176 | 0.98058207 | NTS      |
| 694    | ENSG00000133639 | 1249.7922  | -0.00421976 | 0.07893791 | 0.95573041 | 0.9818048  | BTG1     |
| 84125  | ENSG00000133640 | 93.0006033 | 0.28449522  | 0.27322938 | 0.16534564 | 0.35537401 | LRRIQ1   |
| 91298  | ENSG00000133641 | 685.201374 | -0.3669532  | 0.11329283 | 0.00067473 | 0.00418724 | C12orf29 |

|        |                 |            |             |            |            |            |          |
|--------|-----------------|------------|-------------|------------|------------|------------|----------|
| 79572  | ENSG00000133657 | 2434.56607 | -0.58823019 | 0.09832872 | 6.73E-10   | 1.19E-08   | ATP13A3  |
| 6441   | ENSG00000133661 | 11.8470388 | 0.15101753  | 0.37391305 | 0.35622176 | 0.58626626 | SFTPD    |
| 84332  | ENSG00000133665 | 23.1957258 | 0.05019177  | 0.33531591 | 0.76623498 | 0.89247205 | DYDC2    |
| 80195  | ENSG00000133678 | 238.401648 | -0.19682302 | 0.16939134 | 0.1938021  | 0.39665339 | TMEM254  |
| 83857  | ENSG00000133687 | 168.538843 | 0.62168322  | 0.2155421  | 0.00097744 | 0.00579914 | TMTC1    |
| 3845   | ENSG00000133703 | 1459.37756 | 0.01371894  | 0.0746853  | 0.85274221 | 0.93348077 | KRAS     |
| 10526  | ENSG00000133704 | 1678.7958  | -0.04804994 | 0.07021652 | 0.48523371 | 0.70532909 | IPO8     |
| 51520  | ENSG00000133706 | 6723.44369 | -0.02333705 | 0.06060107 | 0.68928648 | 0.84914274 | LARS1    |
| 11005  | ENSG00000133710 | 0.18922458 | 0.01954053  | 0.38488496 | 0.78225479 | NA         | SPINK5   |
| 3612   | ENSG00000133731 | 672.822094 | -0.18056398 | 0.10456555 | 0.07203154 | 0.19555978 | IMPA1    |
| 85444  | ENSG00000133739 | 197.736547 | 0.19216053  | 0.16047377 | 0.18722655 | 0.38733835 | LRRCC1   |
| 1875   | ENSG00000133740 | 315.992666 | 0.01412416  | 0.12951801 | 0.90874672 | 0.96049944 | E2F5     |
| 759    | ENSG00000133742 | 0          | NA          | NA         | NA         | NA         | CA1      |
| 29080  | ENSG00000133773 | 361.413752 | 0.08105035  | 0.12512809 | 0.49373731 | 0.7125217  | CCDC59   |
| 23075  | ENSG00000133789 | 707.062924 | -0.04460342 | 0.09643521 | 0.63043425 | 0.81309339 | SWAP70   |
| 406    | ENSG00000133794 | 421.618981 | -0.59524921 | 0.14540901 | 1.24E-05   | 0.00011579 | ARNTL    |
| 10894  | ENSG00000133800 | 3.17594966 | 0.21551357  | 0.46807088 | 0.03198224 | 0.10552598 | LYVE1    |
| 272    | ENSG00000133805 | 92.5917105 | -0.22916381 | 0.23417179 | 0.22422888 | 0.43795047 | AMPD3    |
| 81846  | ENSG00000133812 | 1442.8789  | -0.04433055 | 0.07906503 | 0.56461248 | 0.7670095  | SBF2     |
| 9645   | ENSG00000133816 | 71.2035137 | -0.51608018 | 0.31277773 | 0.02628569 | 0.09050816 | MICAL2   |
| 84953  | ENSG00000133816 | 71.2035137 | -0.51608018 | 0.31277773 | 0.02628569 | 0.09050816 | MICAL2   |
| 22800  | ENSG00000133818 | 308.194578 | -0.20440221 | 0.14084735 | 0.11756763 | 0.28111968 | RRAS2    |
| 3295   | ENSG00000133835 | 2094.47712 | 0.15853327  | 0.08387131 | 0.05255405 | 0.15469917 | HSD17B4  |
| 196441 | ENSG00000133858 | 1420.35153 | -0.03570403 | 0.07738232 | 0.63703794 | 0.81722218 | ZFC3H1   |
| 56154  | ENSG00000133863 | 686.905644 | -1.00142063 | 0.12132476 | 1.94E-17   | 6.17E-16   | TEX15    |
| 51669  | ENSG00000133872 | 3006.29307 | -0.00886968 | 0.06389443 | 0.88752037 | 0.95077776 | SARAF    |
| 79845  | ENSG00000133874 | 441.988512 | 0.25591846  | 0.11715124 | 0.02150448 | 0.07717959 | RNF122   |
| 78986  | ENSG00000133878 | 775.691985 | -0.34186299 | 0.10480929 | 0.00067209 | 0.00417219 | DUSP26   |
| 5977   | ENSG00000133884 | 1086.5642  | 0.14680344  | 0.10083971 | 0.13113662 | 0.30358816 | DPF2     |
| 4221   | ENSG00000133895 | 1582.14557 | 0.15183387  | 0.07748321 | 0.04529943 | 0.1378648  | MEN1     |
| 11161  | ENSG00000133935 | 509.505053 | 0.06179816  | 0.1126814  | 0.56584791 | 0.76767113 | ERG28    |
| 145258 | ENSG00000133937 | 49.313173  | 0.73979054  | 0.35692669 | 0.00578028 | 0.02631501 | GSC      |
| 80017  | ENSG00000133943 | 356.275399 | -0.19122557 | 0.13380414 | 0.12616901 | 0.29546661 | DGLUCY   |
| 57578  | ENSG00000133958 | 1044.21236 | -2.15686028 | 0.10449925 | 7.29E-96   | 2.13E-93   | UNC79    |
| 8650   | ENSG00000133961 | 1144.71197 | -0.47274572 | 0.11013052 | 7.36E-06   | 7.17E-05   | NUMB     |
| 79820  | ENSG00000133962 | 0          | NA          | NA         | NA         | NA         | CATSPERB |
| 55237  | ENSG00000133980 | 0          | NA          | NA         | NA         | NA         | VRTN     |
| 51241  | ENSG00000133983 | 596.408165 | 0.00937195  | 0.10786468 | 0.93068082 | 0.97111825 | COX16    |

|        |                 |            |             |            |            |            |          |
|--------|-----------------|------------|-------------|------------|------------|------------|----------|
| 23508  | ENSG00000133985 | 212.405487 | 0.26658119  | 0.1595225  | 0.06585416 | 0.18345221 | TTC9     |
| 10001  | ENSG00000133997 | 536.076123 | 0.05672793  | 0.10918776 | 0.58849362 | 0.78323697 | MED6     |
| 1965   | ENSG00000134001 | 1390.0038  | -0.30241774 | 0.11523009 | 0.00575842 | 0.02622752 | EIF2S1   |
| 8748   | ENSG00000134007 | 0.33471731 | 0.02354391  | 0.38534154 | 0.62842204 | NA         | ADAM20   |
| 4017   | ENSG00000134013 | 175.869765 | 0.92059751  | 0.24228745 | 1.93E-05   | 0.00017329 | LOXL2    |
| 55140  | ENSG00000134014 | 733.400892 | -0.19006414 | 0.09813146 | 0.04451937 | 0.13604654 | ELP3     |
| 157310 | ENSG00000134020 | 0.69644283 | 0.04118148  | 0.38726566 | 0.34952825 | NA         | PEBP4    |
| 27299  | ENSG00000134028 | 0          | NA          | NA         | NA         | NA         | ADAMDEC1 |
| 9811   | ENSG00000134030 | 1922.75255 | -0.18689866 | 0.07108576 | 0.00736319 | 0.03222714 | CTIF     |
| 83876  | ENSG00000134042 | 5.72905871 | 0.15084192  | 0.40010722 | 0.25028437 | 0.47023123 | MRO      |
| 8932   | ENSG00000134046 | 526.188837 | -0.04952002 | 0.14010721 | 0.70229443 | 0.85686744 | MBD2     |
| 51124  | ENSG00000134049 | 764.341859 | -0.07243068 | 0.0994665  | 0.44811537 | 0.67210531 | IER3IP1  |
| 92259  | ENSG00000134056 | 285.005329 | -0.2274068  | 0.14659186 | 0.09184164 | 0.23405757 | MRPS36   |
| 891    | ENSG00000134057 | 2072.3222  | -0.18972432 | 0.08221824 | 0.01784413 | 0.06649655 | CCNB1    |
| 1022   | ENSG00000134058 | 252.934484 | 0.21820375  | 0.15232537 | 0.11803298 | 0.2818698  | CDK7     |
| 4064   | ENSG00000134061 | 0          | NA          | NA         | NA         | NA         | CD180    |
| 3656   | ENSG00000134070 | 14.8428807 | -0.16278462 | 0.35624705 | 0.37689245 | 0.60570261 | IRAK2    |
| 8536   | ENSG00000134072 | 263.045699 | -0.44884536 | 0.15463112 | 0.00157982 | 0.00876745 | CAMK1    |
| 25917  | ENSG00000134077 | 1075.89069 | -0.34915665 | 0.09083542 | 7.34E-05   | 0.00057947 | THUMPD3  |
| 7428   | ENSG00000134086 | 2079.6928  | -0.20220719 | 0.07103949 | 0.00371797 | 0.01815964 | VHL      |
| 8553   | ENSG00000134107 | 24.7408314 | -0.16421447 | 0.3421694  | 0.39173935 | 0.62114503 | BHLHE40  |
| 55207  | ENSG00000134108 | 860.570234 | -0.202482   | 0.09788864 | 0.03179678 | 0.10503632 | ARL8B    |
| 9695   | ENSG00000134109 | 629.125047 | 0.44334802  | 0.1532736  | 0.00164692 | 0.00908647 | EDEM1    |
| 27255  | ENSG00000134115 | 48.3180063 | 1.2408909   | 0.39809913 | 0.00013888 | 0.001022   | CNTN6    |
| 10752  | ENSG00000134121 | 15.2917251 | 0.11419109  | 0.38651867 | 0.3053564  | 0.5327826  | CHL1     |
| 4212   | ENSG00000134138 | 3865.13024 | -0.24423028 | 0.07471519 | 0.00083943 | 0.00507291 | MEIS2    |
| 89978  | ENSG00000134146 | 168.494973 | -0.29143116 | 0.1924021  | 0.08091908 | 0.21334235 | DPH6     |
| 79768  | ENSG00000134152 | 540.893753 | 0.39578778  | 0.13584038 | 0.00183472 | 0.00994017 | KATNBL1  |
| 56851  | ENSG00000134153 | 506.077392 | -0.16084515 | 0.11030985 | 0.12681201 | 0.29662228 | EMC7     |
| 4308   | ENSG00000134160 | 0          | NA          | NA         | NA         | NA         | TRPM1    |
| 2780   | ENSG00000134183 | 1.86981588 | 0.01826221  | 0.37632415 | 0.83263004 | NA         | GNAT2    |
| 2944   | ENSG00000134184 | 0.173733   | 0.01914545  | 0.38484597 | 0.78225479 | NA         | GSTM1    |
| 55119  | ENSG00000134186 | 2295.92231 | -0.04728251 | 0.07349723 | 0.51148945 | 0.72672234 | PRPF38B  |
| 83998  | ENSG00000134193 | 0          | NA          | NA         | NA         | NA         | REG4     |
| 10100  | ENSG00000134198 | 265.111147 | -0.02983424 | 0.14369905 | 0.82181571 | 0.91847813 | TSPAN2   |
| 7252   | ENSG00000134200 | 0.52119901 | 0.02576573  | 0.38568143 | 0.51723676 | NA         | TSHB     |
| 2949   | ENSG00000134201 | 2.14208696 | 0.08259543  | 0.39492863 | 0.11757026 | NA         | GSTM5    |
| 2947   | ENSG00000134202 | 653.86164  | 0.07100179  | 0.1073133  | 0.49120391 | 0.71060078 | GSTM3    |

|        |                 |            |             |            |            |            |           |
|--------|-----------------|------------|-------------|------------|------------|------------|-----------|
| 148281 | ENSG00000134207 | 0          | NA          | NA         | NA         | NA         | SYT6      |
| 10451  | ENSG00000134215 | 164.137192 | -0.36450929 | 0.2051354  | 0.03793944 | 0.12066663 | VAV3      |
| 27159  | ENSG00000134216 | 0          | NA          | NA         | NA         | NA         | CHIA      |
| 84722  | ENSG00000134222 | 677.28814  | -0.20864783 | 0.11370915 | 0.0531025  | 0.15587419 | PSRC1     |
| 3158   | ENSG00000134240 | 0          | NA          | NA         | NA         | NA         | HMGCS2    |
| 26191  | ENSG00000134242 | 0.84907133 | -0.04552917 | 0.38787827 | 0.31635245 | NA         | PTPN22    |
| 6272   | ENSG00000134243 | 1744.31909 | -0.25155936 | 0.07464671 | 0.00057446 | 0.00364477 | SORT1     |
| 7482   | ENSG00000134245 | 98.5776044 | 0.10434933  | 0.22202457 | 0.56747898 | 0.76896903 | WNT2B     |
| 5738   | ENSG00000134247 | 1708.95272 | 0.37441213  | 0.08419914 | 5.05E-06   | 5.07E-05   | PTGFRN    |
| 10542  | ENSG00000134248 | 964.231264 | 0.28173653  | 0.09574185 | 0.00232135 | 0.01216291 | LAMTOR5   |
| 11085  | ENSG00000134249 | 0          | NA          | NA         | NA         | NA         | ADAM30    |
| 4853   | ENSG00000134250 | 2088.28031 | 0.37083423  | 0.07039045 | 8.08E-08   | 1.08E-06   | NOTCH2    |
| 80263  | ENSG00000134253 | 194.852556 | 0.4819453   | 0.17693573 | 0.00244121 | 0.01270225 | TRIM45    |
| 10390  | ENSG00000134255 | 410.213806 | -0.09736447 | 0.12143738 | 0.39648167 | 0.62574149 | CEPT1     |
| 9398   | ENSG00000134256 | 28.5362845 | 0.86266017  | 0.641398   | 0.0128708  | 0.05105345 | CD101     |
| 79679  | ENSG00000134258 | 1.27075225 | 0.06925222  | 0.38969475 | 0.23537421 | NA         | VTCN1     |
| 4803   | ENSG00000134259 | 16.1488062 | -0.78169589 | 0.69381993 | 0.01957    | 0.07166922 | NGF       |
| 10717  | ENSG00000134262 | 305.530327 | -0.09788801 | 0.14956795 | 0.47601678 | 0.69806881 | AP4B1     |
| 8774   | ENSG00000134265 | 531.670598 | 0.11201741  | 0.11549455 | 0.30933408 | 0.53712343 | NAPG      |
| 56907  | ENSG00000134278 | 535.756381 | -0.58365209 | 0.13826195 | 7.25E-06   | 7.08E-05   | SPIRE1    |
| 51535  | ENSG00000134283 | 1302.68599 | 0.06523197  | 0.08046045 | 0.4030226  | 0.63099498 | PPHLN1    |
| 51303  | ENSG00000134285 | 413.775484 | 0.80378002  | 0.12655949 | 3.98E-11   | 8.00E-10   | FKBP11    |
| 377    | ENSG00000134287 | 3230.25757 | -0.18130485 | 0.07182869 | 0.01006261 | 0.04165471 | ARF3      |
| 79022  | ENSG00000134291 | 1741.10563 | -0.07087966 | 0.08397427 | 0.38639815 | 0.61555639 | TMEM106C  |
| 54407  | ENSG00000134294 | 4097.43031 | 0.14244247  | 0.06475126 | 0.02560499 | 0.08874965 | SLC38A2   |
| 51054  | ENSG00000134297 | 104.310177 | 0.15041918  | 0.2414662  | 0.4289058  | 0.65462623 | PLEKHA8P1 |
| 10971  | ENSG00000134308 | 11769.1522 | -0.03307593 | 0.05084601 | 0.5105092  | 0.72579739 | YWHAQ     |
| 57498  | ENSG00000134313 | 3955.53025 | -0.14458588 | 0.0543418  | 0.00714492 | 0.03144527 | KIDINS220 |
| 29841  | ENSG00000134317 | 98.3672081 | -0.07426437 | 0.21936702 | 0.67843838 | 0.84291038 | GRHL1     |
| 9475   | ENSG00000134318 | 1513.49026 | -0.28421132 | 0.08282966 | 0.00042735 | 0.00280936 | ROCK2     |
| 91543  | ENSG00000134321 | 11.7536946 | 0.41109276  | 0.58261195 | 0.05908601 | 0.16915821 | RSAD2     |
| 4613   | ENSG00000134323 | 299.795102 | 2.08715904  | 0.18166457 | 9.83E-32   | 5.91E-30   | MYCN      |
| 23175  | ENSG00000134324 | 1945.75419 | -0.37103179 | 0.07500296 | 4.33E-07   | 5.22E-06   | LPIN1     |
| 129607 | ENSG00000134326 | 15.5463065 | 0.24331092  | 0.40080459 | 0.20724318 | 0.41447107 | CMPK2     |
| 285148 | ENSG00000134330 | 830.417689 | -0.0906035  | 0.11074252 | 0.39193379 | 0.62123244 | IAH1      |
| 3939   | ENSG00000134333 | 5797.13024 | -0.43804674 | 0.18595045 | 0.00789112 | 0.03411845 | LDHA      |
| 6289   | ENSG00000134339 | 0          | NA          | NA         | NA         | NA         | SAA2      |
| 63982  | ENSG00000134343 | 26.0933054 | 1.09531305  | 0.91953115 | 0.00660545 | 0.0294499  | ANO3      |

|        |                 |            |             |            |            |            |         |
|--------|-----------------|------------|-------------|------------|------------|------------|---------|
| 3572   | ENSG00000134352 | 1147.43004 | 0.08325041  | 0.09723148 | 0.37844978 | 0.60738098 | IL6ST   |
| 10468  | ENSG00000134363 | 0          | NA          | NA         | NA         | NA         | FST     |
| 10877  | ENSG00000134365 | 0.74962837 | 0.04901693  | 0.38810411 | 0.32628015 | NA         | CFHR4   |
| 89796  | ENSG00000134369 | 1454.90205 | -1.87530389 | 0.09438128 | 5.36E-89   | 1.31E-86   | NAV1    |
| 79577  | ENSG00000134371 | 1013.3258  | 0.03055974  | 0.09405972 | 0.73788203 | 0.87620179 | CDC73   |
| 10440  | ENSG00000134375 | 1187.94288 | -0.17659361 | 0.08089367 | 0.02527453 | 0.0878468  | TIMM17A |
| 23418  | ENSG00000134376 | 136.408867 | 0.10862088  | 0.1928635  | 0.51639386 | 0.73049941 | CRB1    |
| 81494  | ENSG00000134389 | 0          | NA          | NA         | NA         | NA         | CFHR5   |
| 10595  | ENSG00000134398 | 0.46848334 | -0.00803935 | 0.38327402 | 0.86029833 | NA         | ERN2    |
| 6210   | ENSG00000134419 | 11180.2314 | -0.08105411 | 0.05369427 | 0.1258031  | 0.29492303 | RPS15A  |
| 30062  | ENSG00000134438 | 18.7532335 | 2.79953216  | 0.61000232 | 2.57E-07   | 3.22E-06   | RAX     |
| 4677   | ENSG00000134440 | 3498.50049 | 0.29566076  | 0.07469925 | 5.31E-05   | 0.00043059 | NARS1   |
| 2922   | ENSG00000134443 | 0          | NA          | NA         | NA         | NA         | GRP     |
| 57614  | ENSG00000134444 | 581.748552 | -0.23248458 | 0.10151164 | 0.01721887 | 0.06461552 | RELCH   |
| 84893  | ENSG00000134452 | 1335.46709 | 0.06903299  | 0.08050524 | 0.38084496 | 0.60984374 | FBH1    |
| 84991  | ENSG00000134453 | 1349.02521 | -0.14449722 | 0.07818614 | 0.05872205 | 0.16833485 | RBM17   |
| 3559   | ENSG00000134460 | 0          | NA          | NA         | NA         | NA         | IL2RA   |
| 54522  | ENSG00000134461 | 198.203587 | 0.01027699  | 0.15387952 | 0.94472468 | 0.97752994 | ANKRD16 |
| 79746  | ENSG00000134463 | 127.169573 | -0.1058444  | 0.19361321 | 0.52611192 | 0.73808941 | ECHDC3  |
| 3601   | ENSG00000134470 | 0          | NA          | NA         | NA         | NA         | IL15RA  |
| 902    | ENSG00000134480 | 443.139639 | -0.14074738 | 0.14317628 | 0.28904425 | 0.51496389 | CCNH    |
| 59340  | ENSG00000134489 | 1.57145922 | -0.01069123 | 0.37965719 | 0.85894273 | NA         | HRH4    |
| 85019  | ENSG00000134490 | 233.817945 | 0.04940164  | 0.15878999 | 0.73354295 | 0.87316366 | TMEM241 |
| 284252 | ENSG00000134504 | 659.840072 | 0.23502277  | 0.09977722 | 0.01447083 | 0.05597607 | KCTD1   |
| 91768  | ENSG00000134508 | 357.962423 | -1.13994918 | 0.15033982 | 3.67E-15   | 1.02E-13   | CABLES1 |
| 1794   | ENSG00000134516 | 0.37844916 | 0.02407552  | 0.3854191  | 0.60038877 | NA         | DOCK2   |
| 2012   | ENSG00000134531 | 0.94504246 | 0.01121999  | 0.38197933 | 0.74133166 | NA         | EMP1    |
| 6660   | ENSG00000134532 | 70.0984686 | 1.14952031  | 0.33680017 | 5.61E-05   | 0.00045241 | SOX5    |
| 85004  | ENSG00000134533 | 82.3789253 | 3.14772869  | 0.31681432 | 2.31E-24   | 1.08E-22   | RERG    |
| 10599  | ENSG00000134538 | 0.90005598 | -0.05128821 | 0.38884012 | 0.27034634 | NA         | SLCO1B1 |
| 3824   | ENSG00000134539 | 0          | NA          | NA         | NA         | NA         | KLRD1   |
| 3821   | ENSG00000134545 | 0          | NA          | NA         | NA         | NA         | KLRC1   |
| 80763  | ENSG00000134548 | 1.07380051 | -0.04718186 | 0.38502688 | 0.42270356 | NA         | SPX     |
| 5555   | ENSG00000134551 | 12.128728  | 0.14786015  | 0.36094331 | 0.40218715 | 0.63040759 | PRH2    |
| 4038   | ENSG00000134569 | 1105.48611 | 4.45135427  | 0.26924038 | 5.82E-63   | 8.02E-61   | LRP4    |
| 4607   | ENSG00000134571 | 0          | NA          | NA         | NA         | NA         | MYBPC3  |
| 1643   | ENSG00000134574 | 523.106783 | 0.41024944  | 0.12272936 | 0.00041243 | 0.00272117 | DDB2    |
| 53     | ENSG00000134575 | 580.140289 | -0.11151841 | 0.1281263  | 0.35457318 | 0.58505754 | ACP2    |

|        |                 |            |             |            |            |            |         |
|--------|-----------------|------------|-------------|------------|------------|------------|---------|
| 83844  | ENSG00000134588 | 0.14931947 | -0.01844332 | 0.38480212 | 0.84537521 | NA         | USP26   |
| 8933   | ENSG00000134590 | 1574.5485  | 0.32512374  | 0.07827285 | 2.13E-05   | 0.00019052 | RTL8C   |
| 9363   | ENSG00000134594 | 213.079329 | -0.47089803 | 0.17572979 | 0.00288708 | 0.01464203 | RAB33A  |
| 6658   | ENSG00000134595 | 0          | NA          | NA         | NA         | NA         | SOX3    |
| 51634  | ENSG00000134597 | 557.487773 | -0.11605616 | 0.10170182 | 0.23417397 | 0.45103926 | RBMX2   |
| 51765  | ENSG00000134602 | 654.969767 | 0.38506018  | 0.10305547 | 0.00010235 | 0.00077653 | STK26   |
| 219595 | ENSG00000134612 | 0          | NA          | NA         | NA         | NA         | FOLH1B  |
| 143689 | ENSG00000134627 | 9.39210416 | 0.13408953  | 0.36954795 | 0.40788562 | 0.63609894 | PIWIL4  |
| 4544   | ENSG00000134640 | 0          | NA          | NA         | NA         | NA         | MTNR1B  |
| 9698   | ENSG00000134644 | 3220.86012 | 0.1450988   | 0.06060849 | 0.01530067 | 0.05854681 | PUM1    |
| 90853  | ENSG00000134668 | 3.34131511 | 0.02281896  | 0.37319787 | 0.80095763 | 0.90883611 | SPOCD1  |
| 8565   | ENSG00000134684 | 2605.79062 | 0.35812776  | 0.11065692 | 0.00070871 | 0.00437352 | YARS1   |
| 1912   | ENSG00000134686 | 2400.66169 | 0.22501897  | 0.06703951 | 0.00064528 | 0.00402714 | PHC2    |
| 55143  | ENSG00000134690 | 953.821602 | -0.24765085 | 0.09335142 | 0.00608879 | 0.02746741 | CDCA8   |
| 29889  | ENSG00000134697 | 1467.73871 | 0.02415319  | 0.08305753 | 0.76654619 | 0.8924999  | GNL2    |
| 192670 | ENSG00000134698 | 860.263035 | 0.45087046  | 0.14494565 | 0.00080598 | 0.00490361 | AGO4    |
| 51361  | ENSG00000134709 | 552.044293 | -0.00541723 | 0.14748655 | 0.967539   | 0.98759962 | HOOK1   |
| 1573   | ENSG00000134716 | 132.825615 | 0.1223055   | 0.20186442 | 0.48054236 | 0.70158112 | CYP2J2  |
| 91408  | ENSG00000134717 | 1465.76677 | -0.30869155 | 0.08500054 | 0.00019257 | 0.00137484 | BTF3L4  |
| 23318  | ENSG00000134744 | 1657.0629  | -0.0762239  | 0.11039998 | 0.46880505 | 0.69137681 | TUT4    |
| 84950  | ENSG00000134748 | 1407.52301 | -0.10796995 | 0.07433242 | 0.13873304 | 0.31543588 | PRPF38A |
| 1824   | ENSG00000134755 | 0          | NA          | NA         | NA         | NA         | DSC2    |
| 1830   | ENSG00000134757 | 0          | NA          | NA         | NA         | NA         | DSG3    |
| 51444  | ENSG00000134758 | 732.578227 | -0.16148627 | 0.09322158 | 0.07282369 | 0.19700327 | RNF138  |
| 55250  | ENSG00000134759 | 1964.66937 | -0.06732083 | 0.07330703 | 0.34903817 | 0.57983064 | ELP2    |
| 1828   | ENSG00000134760 | 0.89438146 | 0.01649853  | 0.38218118 | 0.70664981 | NA         | DSG1    |
| 1825   | ENSG00000134762 | 0.15069912 | -0.01848503 | 0.38480575 | 0.84537521 | NA         | DSC3    |
| 1823   | ENSG00000134765 | 0          | NA          | NA         | NA         | NA         | DSC1    |
| 1837   | ENSG00000134769 | 435.326964 | 0.14953665  | 0.14267333 | 0.25862495 | 0.48003733 | DTNA    |
| 80206  | ENSG00000134775 | 1199.61145 | -0.01945677 | 0.08337481 | 0.81046003 | 0.91412888 | FHOD3   |
| 25941  | ENSG00000134779 | 2530.20562 | -0.18171929 | 0.0692533  | 0.00755056 | 0.03292376 | TPGS2   |
| 747    | ENSG00000134780 | 595.752736 | 0.01460867  | 0.10259749 | 0.88382694 | 0.94897201 | DAGLA   |
| 29015  | ENSG00000134802 | 232.756047 | -1.48888245 | 0.18060875 | 1.42E-17   | 4.57E-16   | SLC43A3 |
| 26519  | ENSG00000134809 | 373.763944 | -0.0334628  | 0.11833214 | 0.76547863 | 0.89220398 | TIMM10  |
| 2694   | ENSG00000134812 | 0          | NA          | NA         | NA         | NA         | CBLIF   |
| 9704   | ENSG00000134815 | 907.217255 | 0.29392627  | 0.0887505  | 0.00064578 | 0.00402903 | DHX34   |
| 187    | ENSG00000134817 | 5.05798726 | -5.38468738 | 2.71171378 | 0.0002209  | 0.00155415 | APLNR   |
| 9415   | ENSG00000134824 | 9133.67809 | -0.37677841 | 0.08211649 | 2.50E-06   | 2.65E-05   | FADS2   |

|        |                 |            |             |            |            |            |          |
|--------|-----------------|------------|-------------|------------|------------|------------|----------|
| 746    | ENSG00000134825 | 1001.05384 | 0.1103476   | 0.1075684  | 0.2855041  | 0.51095086 | TMEM258  |
| 6947   | ENSG00000134827 | 0          | NA          | NA         | NA         | NA         | TCN1     |
| 27202  | ENSG00000134830 | 6.26179199 | 0.07394434  | 0.37695379 | 0.48943804 | 0.70894726 | C5AR2    |
| 55858  | ENSG00000134851 | 1106.45966 | 0.23221041  | 0.08291905 | 0.00407376 | 0.01960892 | TMEM165  |
| 9575   | ENSG00000134852 | 856.905223 | -0.52498117 | 0.14561729 | 0.00010801 | 0.00081513 | CLOCK    |
| 5156   | ENSG00000134853 | 5413.89268 | -0.58539508 | 0.07561948 | 2.89E-15   | 8.12E-14   | PDGFRA   |
| 87769  | ENSG00000134864 | 71.1035964 | -0.07546808 | 0.26322969 | 0.6940797  | 0.85201936 | GGACT    |
| 1284   | ENSG00000134871 | 4221.69532 | 0.22072993  | 0.05668279 | 8.15E-05   | 0.0006333  | COL4A2   |
| 9071   | ENSG00000134873 | 3.9441789  | -0.22225355 | 0.45787195 | 0.08154923 | 0.21429626 | CLDN10   |
| 22873  | ENSG00000134874 | 2082.92764 | -0.18521832 | 0.08724635 | 0.02889688 | 0.09740774 | DZIP1    |
| 337867 | ENSG00000134882 | 1093.48702 | 0.08218097  | 0.08761217 | 0.33559643 | 0.56555111 | UBAC2    |
| 55082  | ENSG00000134884 | 4690.37241 | 0.30560324  | 0.05442581 | 1.37E-08   | 2.03E-07   | ARGLU1   |
| 54841  | ENSG00000134897 | 1302.90266 | -0.20665587 | 0.07774871 | 0.00652683 | 0.02915178 | BIVM     |
| 2073   | ENSG00000134899 | 1128.7562  | 0.16243324  | 0.09531164 | 0.07823257 | 0.20794939 | ERCC5    |
| 7174   | ENSG00000134900 | 1792.19138 | -0.11201443 | 0.08164514 | 0.15965939 | 0.34722847 | TPP2     |
| 79070  | ENSG00000134901 | 599.337403 | 0.08602198  | 0.10234351 | 0.38339359 | 0.61266407 | POGLUT2  |
| 79587  | ENSG00000134905 | 1000.10783 | -0.0338198  | 0.09399805 | 0.75044365 | 0.88259197 | CARS2    |
| 9743   | ENSG00000134909 | 1082.52522 | -0.22986774 | 0.08982148 | 0.00837083 | 0.03587741 | ARHGAP32 |
| 3703   | ENSG00000134910 | 2189.3331  | 0.29367466  | 0.0869421  | 0.0005094  | 0.00328028 | STT3A    |
| 11095  | ENSG00000134917 | 0          | NA          | NA         | NA         | NA         | ADAMTS8  |
| 56     | ENSG00000134940 | 7.74286318 | -0.37701518 | 0.58984567 | 0.05186163 | 0.15326642 | ACRV1    |
| 2113   | ENSG00000134954 | 1421.57476 | -1.66139485 | 0.07618178 | 1.56E-106  | 5.09E-104  | ETS1     |
| 219855 | ENSG00000134955 | 39.5466272 | 0.3536522   | 0.33655945 | 0.11744233 | 0.28096658 | SLC37A2  |
| 152831 | ENSG00000134962 | 7.51819657 | -0.07220524 | 0.3611115  | 0.6112979  | 0.79937717 | KLB      |
| 51014  | ENSG00000134970 | 1208.28112 | -0.05433153 | 0.0846647  | 0.50991317 | 0.72545712 | TMED7    |
| 324    | ENSG00000134982 | 1233.44295 | -0.50961946 | 0.09838684 | 8.52E-08   | 1.13E-06   | APC      |
| 9315   | ENSG00000134986 | 6631.0302  | 0.31815759  | 0.05058864 | 2.14E-10   | 3.97E-09   | NREP     |
| 134430 | ENSG00000134987 | 1196.72735 | -0.08886046 | 0.08923092 | 0.30642537 | 0.53411107 | WDR36    |
| 26578  | ENSG00000134996 | 1.82026699 | -0.07142347 | 0.38789106 | 0.32246275 | NA         | OSTF1    |
| 55312  | ENSG00000135002 | 272.236189 | -0.30565926 | 0.14851347 | 0.02522645 | 0.08774419 | RFK      |
| 29979  | ENSG00000135018 | 3136.26364 | -0.06842502 | 0.06532073 | 0.28826574 | 0.5139923  | UBQLN1   |
| 60560  | ENSG00000135040 | 759.688978 | -0.16467286 | 0.1459621  | 0.22047995 | 0.43280124 | NAA35    |
| 55071  | ENSG00000135045 | 309.849118 | -0.01047996 | 0.13230664 | 0.93181152 | 0.9715756  | C9orf40  |
| 301    | ENSG00000135046 | 0          | NA          | NA         | NA         | NA         | ANXA1    |
| 1514   | ENSG00000135047 | 556.992958 | 0.21560926  | 0.10382834 | 0.03070111 | 0.10216479 | CTSL     |
| 23670  | ENSG00000135048 | 11.6821917 | 0.03407082  | 0.35188952 | 0.81357324 | 0.91581805 | CEMIP2   |
| 23287  | ENSG00000135049 | 748.889694 | -0.00909451 | 0.09143501 | 0.91773523 | 0.9652015  | AGTPBP1  |
| 51280  | ENSG00000135052 | 2554.07107 | -0.12747138 | 0.07005335 | 0.06394607 | 0.1796757  | GOLM1    |

|        |                 |            |             |            |            |            |          |
|--------|-----------------|------------|-------------|------------|------------|------------|----------|
| 9413   | ENSG00000135063 | 0.15069912 | -0.01848503 | 0.38480575 | 0.84537521 | NA         | FAM189A2 |
| 29968  | ENSG00000135069 | 2721.76105 | 0.06794635  | 0.10346405 | 0.49630763 | 0.714811   | PSAT1    |
| 81689  | ENSG00000135070 | 616.49397  | -0.23477736 | 0.10592221 | 0.02067583 | 0.07489655 | ISCA1    |
| 8728   | ENSG00000135074 | 310.682872 | -0.1893053  | 0.1417346  | 0.14953811 | 0.33234414 | ADAM19   |
| 84868  | ENSG00000135077 | 3.23825709 | -0.02796289 | 0.37194222 | 0.77935458 | 0.89913327 | HAVCR2   |
| 79616  | ENSG00000135083 | 603.788844 | -0.22169847 | 0.10466178 | 0.02720979 | 0.0930121  | CCNJL    |
| 51347  | ENSG00000135090 | 517.422802 | 0.02491402  | 0.11134801 | 0.8160477  | 0.9163678  | TAOK3    |
| 84749  | ENSG00000135093 | 441.232306 | 0.21744515  | 0.15373657 | 0.12168507 | 0.28819766 | USP30    |
| 10993  | ENSG00000135094 | 1.08372236 | 0.02404129  | 0.3820154  | 0.66253461 | NA         | SDS      |
| 4440   | ENSG00000135097 | 1044.58001 | 0.38971478  | 0.11250621 | 0.0002837  | 0.00194493 | MSI1     |
| 6927   | ENSG00000135100 | 2.55400699 | -0.14020803 | 0.41423226 | 0.09497602 | NA         | HNF1A    |
| 23014  | ENSG00000135108 | 1546.85567 | 0.12938441  | 0.07152363 | 0.0654339  | 0.18258912 | FBXO21   |
| 6926   | ENSG00000135111 | 393.407248 | 0.05338044  | 0.11733071 | 0.63626929 | 0.81722218 | TBX3     |
| 8638   | ENSG00000135114 | 3.05805924 | 0.15915208  | 0.42267596 | 0.09146245 | 0.23347687 | OASL     |
| 8739   | ENSG00000135116 | 201.844411 | 4.08300446  | 0.23516817 | 1.62E-68   | 2.57E-66   | HRK      |
| 84900  | ENSG00000135119 | 388.51545  | 0.00335063  | 0.14018858 | 0.9807898  | 0.99355086 | RNFT2    |
| 5025   | ENSG00000135124 | 218.577779 | 0.73511059  | 0.21405911 | 0.00011098 | 0.00083399 | P2RX4    |
| 92558  | ENSG00000135127 | 159.555315 | -1.86044092 | 0.22635731 | 1.23E-17   | 3.96E-16   | BICDL1   |
| 1840   | ENSG00000135144 | 1080.64143 | -0.36573093 | 0.08866814 | 2.13E-05   | 0.00019042 | DTX1     |
| 10906  | ENSG00000135148 | 746.083782 | -0.17308097 | 0.09799087 | 0.06696214 | 0.18552445 | TRAFD1   |
| 9988   | ENSG00000135164 | 3556.50437 | 0.04713234  | 0.06472322 | 0.46077269 | 0.68385174 | DMTF1    |
| 4951   | ENSG00000135175 | 0          | NA          | NA         | NA         | NA         | OCM2     |
| 79161  | ENSG00000135185 | 256.883749 | 0.10763681  | 0.15985576 | 0.45922641 | 0.68252693 | TMEM243  |
| 57639  | ENSG00000135205 | 114.930719 | 0.91457815  | 0.2449192  | 2.50E-05   | 0.00021943 | CCDC146  |
| 85025  | ENSG00000135211 | 196.202009 | -0.00178442 | 0.16310323 | 0.98889098 | 0.99604194 | TMEM60   |
| 948    | ENSG00000135218 | 5.33545897 | -0.05903543 | 0.37215521 | 0.59376495 | 0.78750562 | CD36     |
| 79799  | ENSG00000135220 | 0          | NA          | NA         | NA         | NA         | UGT2A3   |
| 1447   | ENSG00000135222 | 0          | NA          | NA         | NA         | NA         | CSN2     |
| 54490  | ENSG00000135226 | 0          | NA          | NA         | NA         | NA         | UGT2B28  |
| 50640  | ENSG00000135241 | 707.689675 | 0.0280769   | 0.12314114 | 0.81229544 | 0.91499949 | PNPLA8   |
| 29923  | ENSG00000135245 | 644.173443 | 0.23236218  | 0.11853507 | 0.03884382 | 0.12275587 | HILPDA   |
| 84691  | ENSG00000135248 | 0          | NA          | NA         | NA         | NA         | FAM71F1  |
| 60561  | ENSG00000135249 | 718.59237  | -0.15087161 | 0.10166226 | 0.12268251 | 0.28988186 | RINT1    |
| 6733   | ENSG00000135250 | 1632.05697 | -0.28787003 | 0.0876815  | 0.00072066 | 0.0044362  | SRPK2    |
| 375616 | ENSG00000135253 | 41.7130235 | 0.38166398  | 0.3784806  | 0.10275137 | 0.2544735  | KCP      |
| 26136  | ENSG00000135269 | 2414.12876 | 0.63307246  | 0.06613107 | 2.98E-22   | 1.25E-20   | TES      |
| 29969  | ENSG00000135272 | 0.18922458 | 0.01954053  | 0.38488496 | 0.78225479 | NA         | MDFIC    |
| 25821  | ENSG00000135297 | 270.102639 | 0.01554939  | 0.1457822  | 0.9093106  | 0.96089067 | MTO1     |



|        |                 |            |             |            |            |            |         |
|--------|-----------------|------------|-------------|------------|------------|------------|---------|
| 577    | ENSG00000135298 | 522.964393 | -1.59584239 | 0.14968361 | 1.18E-27   | 6.22E-26   | ADGRB3  |
| 22881  | ENSG00000135299 | 404.408469 | -0.70289642 | 0.14820926 | 4.60E-07   | 5.52E-06   | ANKRD6  |
| 3351   | ENSG00000135312 | 0          | NA          | NA         | NA         | NA         | HTR1B   |
| 80759  | ENSG00000135314 | 48.4380258 | -0.067728   | 0.25245591 | 0.72204163 | 0.86742752 | KHDC1   |
| 22832  | ENSG00000135315 | 387.787858 | 0.05738026  | 0.13928941 | 0.65918909 | 0.83105493 | CEP162  |
| 10492  | ENSG00000135316 | 5628.82296 | -0.39831255 | 0.0620171  | 6.79E-11   | 1.33E-09   | SYNCRIP |
| 57231  | ENSG00000135317 | 1722.16101 | 0.05027559  | 0.10720452 | 0.62752628 | 0.81099169 | SNX14   |
| 4907   | ENSG00000135318 | 52.0425309 | 3.101905    | 0.42112598 | 1.09E-14   | 2.88E-13   | NT5E    |
| 112609 | ENSG00000135324 | 219.81082  | -0.73954699 | 0.19270495 | 2.41E-05   | 0.00021241 | MRAP2   |
| 2045   | ENSG00000135333 | 0          | NA          | NA         | NA         | NA         | EPHA7   |
| 55122  | ENSG00000135334 | 992.772979 | 0.2688933   | 0.08587488 | 0.00129646 | 0.00738916 | AKIRIN2 |
| 23595  | ENSG00000135336 | 560.206604 | -0.23578149 | 0.10928606 | 0.02377529 | 0.08366474 | ORC3    |
| 167691 | ENSG00000135338 | 174.378184 | -0.41766295 | 0.18530146 | 0.0108232  | 0.04421998 | LCA5    |
| 6885   | ENSG00000135341 | 1385.13852 | -0.0819792  | 0.07536468 | 0.26744676 | 0.48999388 | MAP3K7  |
| 1081   | ENSG00000135346 | 0          | NA          | NA         | NA         | NA         | CGA     |
| 84694  | ENSG00000135355 | 0          | NA          | NA         | NA         | NA         | GJA10   |
| 79899  | ENSG00000135362 | 16.0971495 | 0.07314347  | 0.35208409 | 0.63470693 | 0.81607019 | PRR5L   |
| 4005   | ENSG00000135363 | 8.02938913 | 0.36009271  | 0.56659786 | 0.05726964 | 0.16526977 | LMO2    |
| 51317  | ENSG00000135365 | 2036.54575 | 0.17312083  | 0.06980003 | 0.01163409 | 0.04697436 | PHF21A  |
| 55226  | ENSG00000135372 | 1386.18099 | 0.12557853  | 0.07854703 | 0.10232436 | 0.25366929 | NAT10   |
| 26298  | ENSG00000135373 | 0          | NA          | NA         | NA         | NA         | EHF     |
| 2001   | ENSG00000135374 | 0          | NA          | NA         | NA         | NA         | ELF5    |
| 79056  | ENSG00000135378 | 0          | NA          | NA         | NA         | NA         | PRRG4   |
| 4076   | ENSG00000135387 | 7376.67273 | -0.37932662 | 0.07194135 | 7.60E-08   | 1.02E-06   | CAPRIN1 |
| 517    | ENSG00000135390 | 3321.7681  | 0.02281839  | 0.05646297 | 0.68334566 | 0.84571005 | ATP5MC2 |
| 85406  | ENSG00000135392 | 1326.73555 | -0.22735969 | 0.07602954 | 0.00223955 | 0.01180149 | DNAJC14 |
| 967    | ENSG00000135404 | 3429.86802 | 0.14782703  | 0.06615844 | 0.02069776 | 0.07496232 | CD63    |
| 5630   | ENSG00000135406 | 14.0251819 | 0.84668528  | 0.7817434  | 0.01644824 | 0.06219424 | PRPH    |
| 10677  | ENSG00000135407 | 28.5926156 | 0.16956395  | 0.34111563 | 0.37860076 | 0.607525   | AVIL    |
| 269    | ENSG00000135409 | 0.7148979  | 0.02945505  | 0.38490835 | 0.51061702 | NA         | AMHR2   |
| 90070  | ENSG00000135413 | 0          | NA          | NA         | NA         | NA         | LACRT   |
| 10220  | ENSG00000135414 | 1313.6738  | -0.15065375 | 0.08021378 | 0.05441337 | 0.15876841 | GDF11   |
| 27165  | ENSG00000135423 | 57.1552192 | -0.12705571 | 0.27473894 | 0.5161772  | 0.73029706 | GLS2    |
| 3679   | ENSG00000135424 | 99.4570264 | 0.67329658  | 0.33896521 | 0.00827695 | 0.03552891 | ITGA7   |
| 9840   | ENSG00000135426 | 0          | NA          | NA         | NA         | NA         | TESPA1  |
| 84070  | ENSG00000135436 | 44.3992719 | -0.01059171 | 0.2575054  | 0.95442574 | 0.98112988 | FAM186B |
| 5959   | ENSG00000135437 | 25.3514526 | 0.08504067  | 0.30669226 | 0.65747967 | 0.83021873 | RDH5    |
| 116986 | ENSG00000135439 | 1324.84878 | -0.78227251 | 0.07956156 | 1.62E-23   | 7.33E-22   | AGAP2   |

|        |                 |            |             |            |            |            |          |
|--------|-----------------|------------|-------------|------------|------------|------------|----------|
| 2647   | ENSG00000135441 | 550.616734 | 0.04209222  | 0.108918   | 0.68777443 | 0.84840902 | BLOC1S1  |
| 3891   | ENSG00000135443 | 0          | NA          | NA         | NA         | NA         | KRT85    |
| 1019   | ENSG00000135446 | 3936.6835  | 0.04775974  | 0.05886147 | 0.41546101 | 0.64244323 | CDK4     |
| 5502   | ENSG00000135447 | 0          | NA          | NA         | NA         | NA         | PPP1R1A  |
| 10024  | ENSG00000135451 | 961.135456 | 0.05379109  | 0.10657594 | 0.60009804 | 0.79083488 | TROAP    |
| 6302   | ENSG00000135452 | 523.305381 | 0.14595191  | 0.14875816 | 0.28772737 | 0.51340148 | TSPAN31  |
| 2583   | ENSG00000135454 | 1706.12538 | -0.52644834 | 0.08056405 | 2.36E-11   | 4.84E-10   | B4GALNT1 |
| 7024   | ENSG00000135457 | 983.005971 | -0.07067763 | 0.0940359  | 0.43740716 | 0.66264578 | TFCP2    |
| 93058  | ENSG00000135469 | 501.894889 | -0.12589116 | 0.10608453 | 0.21587765 | 0.42667359 | COQ10A   |
| 23017  | ENSG00000135472 | 387.348285 | -1.18488086 | 0.14126358 | 5.23E-18   | 1.73E-16   | FAIM2    |
| 9924   | ENSG00000135473 | 1110.88387 | 0.47399124  | 0.10219927 | 1.52E-06   | 1.66E-05   | PAN2     |
| 9700   | ENSG00000135476 | 1837.77316 | -0.01900788 | 0.07780142 | 0.80144081 | 0.90902045 | ESPL1    |
| 85349  | ENSG00000135477 | 0          | NA          | NA         | NA         | NA         | KRT87P   |
| 3855   | ENSG00000135480 | 0.99626146 | 0.0153023   | 0.38222224 | 0.75501554 | NA         | KRT7     |
| 84872  | ENSG00000135482 | 349.631131 | 0.07721996  | 0.13760312 | 0.54684054 | 0.75400072 | ZC3H10   |
| 3178   | ENSG00000135486 | 43950.1918 | 0.03306932  | 0.04261039 | 0.43488692 | 0.66027902 | HNRNPA1  |
| NA     | ENSG00000135502 | 329.188955 | 0.83859474  | 0.15870501 | 2.15E-08   | 3.11E-07   | SLC26A10 |
| 91     | ENSG00000135503 | 1170.47253 | -0.12484634 | 0.09412594 | 0.17080823 | 0.36283417 | ACVR1B   |
| 10956  | ENSG00000135506 | 2419.86689 | 0.08678323  | 0.06424144 | 0.17038148 | 0.36230289 | OS9      |
| 4284   | ENSG00000135517 | 0.91194749 | -0.03735534 | 0.3845512  | 0.46467032 | NA         | MIP      |
| 23416  | ENSG00000135519 | 20.0525048 | 0.10692812  | 0.31993957 | 0.57342249 | 0.7729263  | KCNH3    |
| 84946  | ENSG00000135521 | 597.855391 | -0.08120069 | 0.11543611 | 0.45996141 | 0.68305646 | LTV1     |
| 9053   | ENSG00000135525 | 353.980543 | -1.32095039 | 0.13867852 | 1.56E-22   | 6.60E-21   | MAP7     |
| 8763   | ENSG00000135535 | 1654.69383 | 0.37805842  | 0.07322946 | 1.39E-07   | 1.80E-06   | CD164    |
| 246269 | ENSG00000135537 | 103.331422 | 0.58962703  | 0.25245968 | 0.00487367 | 0.02274074 | AFG1L    |
| 57224  | ENSG00000135540 | 0.34746601 | 0.02370763  | 0.3853651  | 0.61987128 | NA         | NHSL1    |
| 54806  | ENSG00000135541 | 827.455265 | 0.1696891   | 0.11868777 | 0.13201462 | 0.30496778 | AHI1     |
| 23493  | ENSG00000135547 | 0          | NA          | NA         | NA         | NA         | HEY2     |
| 5570   | ENSG00000135549 | 2.54084671 | 0.12073835  | 0.39994038 | 0.20834867 | NA         | PKIB     |
| 9038   | ENSG00000135569 | 0          | NA          | NA         | NA         | NA         | TAAR5    |
| 4829   | ENSG00000135577 | 0.14931947 | -0.01844332 | 0.38480212 | 0.84537521 | NA         | NMBR     |
| 6610   | ENSG00000135587 | 139.293188 | 0.34409058  | 0.22354799 | 0.064332   | 0.18047892 | SMPD2    |
| 64780  | ENSG00000135596 | 2614.21135 | 0.08957412  | 0.06609227 | 0.16899017 | 0.36039348 | MICAL1   |
| 85021  | ENSG00000135597 | 1002.59543 | 0.38668751  | 0.09629304 | 3.24E-05   | 0.00027676 | REPS1    |
| 8676   | ENSG00000135604 | 0          | NA          | NA         | NA         | NA         | STX11    |
| 7006   | ENSG00000135605 | 9.55560461 | 1.88229859  | 1.2099621  | 0.00333944 | 0.01656776 | TEC      |
| 84279  | ENSG00000135617 | 177.035102 | -0.268886   | 0.17690801 | 0.08645526 | 0.22396418 | PRADC1   |
| 10505  | ENSG00000135622 | 578.152399 | 0.13777652  | 0.11772657 | 0.21841543 | 0.43045674 | SEMA4F   |

|       |                 |            |             |            |            |            |               |
|-------|-----------------|------------|-------------|------------|------------|------------|---------------|
| 10574 | ENSG00000135624 | 5548.60492 | -0.36324795 | 0.05843364 | 3.04E-10   | 5.56E-09   | CCT7          |
| 1961  | ENSG00000135625 | 2.2990923  | 0.0500886   | 0.37980647 | 0.55697654 | NA         | EGR4          |
| 26056 | ENSG00000135631 | 453.686136 | -0.11070403 | 0.14206764 | 0.39987249 | 0.62834391 | RAB11FIP5     |
| 10322 | ENSG00000135632 | 554.323164 | 0.35145036  | 0.1390156  | 0.00661154 | 0.02947042 | SMYD5         |
| 8291  | ENSG00000135636 | 6.42108751 | -0.02210732 | 0.37204283 | 0.79846515 | 0.90769144 | DYSF          |
| 84865 | ENSG00000135637 | 469.139018 | 0.3893426   | 0.12799454 | 0.00123494 | 0.00708129 | CCDC142       |
| 2016  | ENSG00000135638 | 0.69464464 | -0.03798381 | 0.38678913 | 0.40441551 | NA         | EMX1          |
| 27345 | ENSG00000135643 | 151.556747 | 0.20658714  | 0.18030438 | 0.19477138 | 0.39796747 | KCNMB4        |
| 9958  | ENSG00000135655 | 494.223574 | -0.21747164 | 0.14433291 | 0.10247302 | 0.25394264 | USP15         |
| 2799  | ENSG00000135677 | 1457.99361 | 0.19200201  | 0.08029359 | 0.01435835 | 0.05563861 | GNS           |
| 1368  | ENSG00000135678 | 0.63890143 | -0.01817255 | 0.38287285 | 0.68787973 | NA         | CPM           |
| 4193  | ENSG00000135679 | 1661.88481 | -0.26230721 | 0.07857618 | 0.00062911 | 0.00394488 | MDM2          |
| 79786 | ENSG00000135686 | 505.697651 | 0.28227941  | 0.14676908 | 0.03702967 | 0.11843762 | KLHL36        |
| 53630 | ENSG00000135697 | 0          | NA          | NA         | NA         | NA         | BCO1          |
| 10200 | ENSG00000135698 | 205.95796  | 0.00657125  | 0.1540593  | 0.96162506 | 0.98439922 | MPHOSPH6      |
| 23563 | ENSG00000135702 | 4.70852485 | 0.11133268  | 0.39416269 | 0.27327327 | 0.49676945 | CHST5         |
| 9764  | ENSG00000135709 | 274.814413 | -0.41664853 | 0.14790751 | 0.00229055 | 0.01202554 | KIAA0513      |
| 1783  | ENSG00000135720 | 3369.68554 | 0.26577437  | 0.0667697  | 5.19E-05   | 0.00042223 | DYNC1LI2      |
| 55336 | ENSG00000135722 | 178.656548 | 0.65229367  | 0.21849113 | 0.00065016 | 0.00405376 | FBXL8         |
| 29109 | ENSG00000135723 | 973.828554 | -0.09041859 | 0.09531134 | 0.32646169 | 0.55472764 | FHOD1         |
| 92922 | ENSG00000135736 | 283.465128 | 0.77347486  | 0.16251284 | 3.70E-07   | 4.51E-06   | CCDC102A      |
| 6553  | ENSG00000135740 | 294.661608 | 0.00674854  | 0.15253035 | 0.96376187 | 0.98562039 | SLC9A5        |
| 183   | ENSG00000135744 | 33.5179136 | 0.07401296  | 0.28269972 | 0.70453254 | 0.85803894 | AGT           |
| NA    | ENSG00000135747 | 19.4295342 | -0.15672007 | 0.34303827 | 0.40786056 | 0.63609894 | ZNF670-ZNF695 |
| 80003 | ENSG00000135749 | 1226.87846 | -0.02506984 | 0.10997787 | 0.81063058 | 0.9141961  | PCNX2         |
| 3775  | ENSG00000135750 | 511.486181 | -1.22090947 | 0.14489129 | 3.66E-18   | 1.23E-16   | KCNK1         |
| 9816  | ENSG00000135763 | 1153.55887 | -0.07287659 | 0.08827233 | 0.39673229 | 0.6258107  | URB2          |
| 54583 | ENSG00000135766 | 790.445254 | -0.46013985 | 0.11819456 | 4.27E-05   | 0.0003563  | EGLN1         |
| 10753 | ENSG00000135773 | 0.84529519 | 0.02200162  | 0.3832441  | 0.76339043 | NA         | CAPN9         |
| 22796 | ENSG00000135775 | 850.278633 | -0.15243107 | 0.09497873 | 0.09702687 | 0.24361087 | COG2          |
| 23456 | ENSG00000135776 | 498.67024  | -0.15462546 | 0.110967   | 0.14437939 | 0.32440399 | ABCB10        |
| 84284 | ENSG00000135778 | 1114.31034 | -0.14732376 | 0.08361243 | 0.07054095 | 0.19264038 | NTPCR         |
| 27097 | ENSG00000135801 | 916.89916  | -0.14394027 | 0.08931641 | 0.09691384 | 0.24348114 | TAF5L         |
| 2752  | ENSG00000135821 | 2948.11752 | 0.33911481  | 0.06461299 | 9.78E-08   | 1.29E-06   | GLUL          |
| 10228 | ENSG00000135823 | 1347.76452 | -0.3727668  | 0.0785566  | 1.20E-06   | 1.34E-05   | STX6          |
| 85397 | ENSG00000135824 | 8.05069043 | -0.14897025 | 0.3906545  | 0.30146077 | 0.52877568 | RGS8          |
| 6041  | ENSG00000135828 | 0          | NA          | NA         | NA         | NA         | RNASEL        |
| 1660  | ENSG00000135829 | 8472.31585 | -0.03010269 | 0.06312053 | 0.64416905 | 0.8223082  | DHX9          |

|        |                 |            |             |            |            |            |          |
|--------|-----------------|------------|-------------|------------|------------|------------|----------|
| 57710  | ENSG00000135835 | 1300.50941 | -1.32668449 | 0.11520205 | 9.66E-32   | 5.83E-30   | KIAA1614 |
| 9857   | ENSG00000135837 | 1704.99605 | -0.36533025 | 0.10387343 | 0.00024778 | 0.00172486 | CEP350   |
| 80896  | ENSG00000135838 | 169.614355 | 0.89230034  | 0.21023441 | 3.12E-06   | 3.24E-05   | NPL      |
| 116496 | ENSG00000135842 | 124.673299 | 1.69271254  | 0.261175   | 7.35E-12   | 1.58E-10   | NIBAN1   |
| 5279   | ENSG00000135845 | 478.982339 | -0.35659943 | 0.11545659 | 0.0011605  | 0.00672438 | PIGC     |
| 3915   | ENSG00000135862 | 4459.55197 | 0.26727859  | 0.05825262 | 3.37E-06   | 3.48E-05   | LAMC1    |
| 149041 | ENSG00000135870 | 675.743743 | -0.38162747 | 0.12877396 | 0.0016214  | 0.00897563 | RC3H1    |
| 9290   | ENSG00000135898 | 0          | NA          | NA         | NA         | NA         | GPR55    |
| 3431   | ENSG00000135899 | 52.2343379 | 4.64837966  | 0.55741106 | 8.79E-18   | 2.87E-16   | SP110    |
| 65080  | ENSG00000135900 | 461.297795 | -0.16545025 | 0.11981236 | 0.1450449  | 0.32541747 | MRPL44   |
| 1144   | ENSG00000135902 | 15.4524416 | 1.39675649  | 0.82705669 | 0.00414172 | 0.01986263 | CHRND    |
| 5077   | ENSG00000135903 | 0          | NA          | NA         | NA         | NA         | PAX3     |
| 55619  | ENSG00000135905 | 752.479278 | -0.02903391 | 0.10514655 | 0.773102   | 0.89561741 | DOCK10   |
| 9654   | ENSG00000135912 | 798.385811 | -0.34613917 | 0.11627167 | 0.0017244  | 0.00945088 | TTLL4    |
| 57695  | ENSG00000135913 | 580.321087 | -0.37131536 | 0.13967328 | 0.00423544 | 0.02025333 | USP37    |
| 3357   | ENSG00000135914 | 5.46797749 | -0.12808905 | 0.39055038 | 0.31330329 | 0.54126787 | HTR2B    |
| 81618  | ENSG00000135916 | 6985.56426 | -0.0219671  | 0.05443762 | 0.68618718 | 0.8472712  | ITM2C    |
| 80704  | ENSG00000135917 | 0          | NA          | NA         | NA         | NA         | SLC19A3  |
| 5270   | ENSG00000135919 | 364.175701 | 1.06871343  | 0.13037832 | 3.01E-17   | 9.51E-16   | SERPINE2 |
| 3300   | ENSG00000135924 | 820.793491 | 0.04199897  | 0.09034598 | 0.63308336 | 0.8146565  | DNAJB2   |
| 80326  | ENSG00000135925 | 13.5056203 | -1.3508571  | 0.84623722 | 0.00471857 | 0.02213638 | WNT10A   |
| 64114  | ENSG00000135926 | 2.59326384 | 0.0573287   | 0.38148694 | 0.4816714  | 0.70240082 | TMBIM1   |
| 1593   | ENSG00000135929 | 10.5114477 | 0.05049561  | 0.34073961 | 0.75934691 | 0.88850157 | CYP27A1  |
| 9470   | ENSG00000135930 | 1589.35099 | -0.09321626 | 0.1001916  | 0.33391644 | 0.56367754 | EIF4E2   |
| 80210  | ENSG00000135931 | 610.653492 | 0.38272258  | 0.1292337  | 0.00163792 | 0.00904935 | ARMC9    |
| 51719  | ENSG00000135932 | 856.491317 | -0.20983562 | 0.1029486  | 0.03392493 | 0.11068419 | CAB39    |
| 1329   | ENSG00000135940 | 1584.84159 | 0.08824781  | 0.08166234 | 0.26887631 | 0.49179552 | COX5B    |
| 51455  | ENSG00000135945 | 804.303483 | -0.02430327 | 0.12468591 | 0.83581399 | 0.92515898 | REV1     |
| 80705  | ENSG00000135951 | 92.68385   | 0.66616502  | 0.29028122 | 0.00420789 | 0.02014102 | TSGA10   |
| 84804  | ENSG00000135953 | 449.092885 | 0.0592786   | 0.13329855 | 0.64035677 | 0.81986824 | MFSD9    |
| 55654  | ENSG00000135956 | 993.33222  | -0.01589927 | 0.08516114 | 0.84685226 | 0.93052693 | TMEM127  |
| 10913  | ENSG00000135960 | 1.52691924 | -0.00089333 | 0.37956646 | 0.9876641  | NA         | EDAR     |
| 9392   | ENSG00000135966 | 959.904998 | -0.2075049  | 0.09327101 | 0.02151712 | 0.07721099 | TGFBRAP1 |
| 9648   | ENSG00000135968 | 818.039671 | 0.34842251  | 0.10945618 | 0.00087194 | 0.00525421 | GCC2     |
| 64965  | ENSG00000135972 | 396.249344 | 0.25326511  | 0.13817854 | 0.0488842  | 0.14644564 | MRPS9    |
| 11250  | ENSG00000135973 | 0.79620076 | -0.00721012 | 0.38151312 | 0.88962119 | NA         | GPR45    |
| 79074  | ENSG00000135974 | 535.755188 | -0.14358354 | 0.1216273  | 0.21200793 | 0.42163567 | C2orf49  |
| 375248 | ENSG00000135976 | 449.536024 | 0.08975039  | 0.15012464 | 0.51650062 | 0.73056247 | ANKRD36  |

|        |                 |            |             |            |            |            |           |
|--------|-----------------|------------|-------------|------------|------------|------------|-----------|
| 26122  | ENSG00000135999 | 703.679126 | -0.2316063  | 0.10202612 | 0.01820804 | 0.0674095  | EPC2      |
| 50649  | ENSG00000136002 | 522.118712 | 1.34E-05    | 0.11898696 | 0.99911734 | 0.99962651 | ARHGEF4   |
| 23479  | ENSG00000136003 | 822.835289 | -0.0138151  | 0.08969382 | 0.87347957 | 0.94441388 | ISCU      |
| 160428 | ENSG00000136010 | 586.907613 | 0.61792421  | 0.15859233 | 2.67E-05   | 0.00023334 | ALDH1L2   |
| 55576  | ENSG00000136011 | 3.1532859  | -0.09825307 | 0.39957152 | 0.09516866 | 0.24026852 | STAB2     |
| 84101  | ENSG00000136014 | 281.847113 | 0.11591559  | 0.17256313 | 0.45162389 | 0.67491849 | USP44     |
| 55681  | ENSG00000136021 | 1171.92264 | -0.12506974 | 0.08751125 | 0.1415004  | 0.3198915  | SCYL2     |
| 10970  | ENSG00000136026 | 1328.0599  | 0.08119794  | 0.07672965 | 0.28036896 | 0.5049178  | CKAP4     |
| 10154  | ENSG00000136040 | 143.202841 | -1.5042337  | 0.23796728 | 1.94E-11   | 3.99E-10   | PLXNC1    |
| 55198  | ENSG00000136044 | 1477.60575 | 0.47334665  | 0.0799218  | 1.39E-09   | 2.34E-08   | APPL2     |
| 11137  | ENSG00000136045 | 872.583764 | -0.19210555 | 0.09528036 | 0.03688262 | 0.118091   | PWP1      |
| 55332  | ENSG00000136048 | 34.5402496 | 4.72405174  | 0.66680439 | 1.59E-13   | 3.84E-12   | DRAM1     |
| 23325  | ENSG00000136051 | 1063.69356 | 0.11865635  | 0.10252945 | 0.22974051 | 0.44547026 | WASHC4    |
| 84102  | ENSG00000136052 | 85.9345724 | -0.14879262 | 0.27272617 | 0.44857285 | 0.67234398 | SLC41A2   |
| 50853  | ENSG00000136059 | 163.714094 | 0.45348871  | 0.21316687 | 0.01299725 | 0.05142908 | VILL      |
| 2317   | ENSG00000136068 | 3331.65219 | -0.08748161 | 0.0619346  | 0.15115984 | 0.33504762 | FLNB      |
| 4752   | ENSG00000136098 | 359.92346  | 0.29191429  | 0.13104308 | 0.01747559 | 0.06534407 | NEK3      |
| 5100   | ENSG00000136099 | 15.7114922 | -0.16357174 | 0.35445154 | 0.37613685 | 0.60518654 | PCDH8     |
| 51028  | ENSG00000136100 | 1122.39819 | 0.06921167  | 0.09932137 | 0.47120996 | 0.69358302 | VPS36     |
| 79621  | ENSG00000136104 | 748.30194  | -0.25612527 | 0.11839825 | 0.02251122 | 0.08005423 | RNASEH2B  |
| 26586  | ENSG00000136108 | 2248.58404 | -0.34288963 | 0.07929817 | 9.47E-06   | 9.02E-05   | CKAP2     |
| 11061  | ENSG00000136110 | 0          | NA          | NA         | NA         | NA         | CNMD      |
| 9882   | ENSG00000136111 | 565.276447 | -0.25847158 | 0.12090646 | 0.02376076 | 0.08364327 | TBC1D4    |
| 55901  | ENSG00000136114 | 59.71724   | -0.03161587 | 0.24715465 | 0.86621983 | 0.94101743 | THSD1     |
| 79866  | ENSG00000136122 | 293.241943 | 0.11548402  | 0.13441344 | 0.35851581 | 0.58882066 | BORA      |
| 23143  | ENSG00000136141 | 887.915051 | 0.12251303  | 0.08800477 | 0.15256369 | 0.33710476 | LRCH1     |
| 8803   | ENSG00000136143 | 684.615646 | -0.04582875 | 0.11768345 | 0.68134618 | 0.84428882 | SUCLA2    |
| 55213  | ENSG00000136144 | 832.643646 | 0.07336833  | 0.09318768 | 0.41744917 | 0.64370875 | RCBTB1    |
| 29079  | ENSG00000136146 | 665.418414 | 0.01774573  | 0.10736995 | 0.86425258 | 0.93988845 | MED4      |
| 51131  | ENSG00000136147 | 2.23786561 | -0.07590221 | 0.38736235 | 0.34319693 | NA         | PHF11     |
| NA     | ENSG00000136149 | 2.07725048 | -0.10268584 | 0.39703388 | 0.20207701 | NA         | RPL13AP25 |
| 83548  | ENSG00000136152 | 688.308551 | 0.15819871  | 0.0986493  | 0.09674804 | 0.24318777 | COG3      |
| 4008   | ENSG00000136153 | 962.319575 | 0.03810011  | 0.10300545 | 0.70090899 | 0.85575596 | LMO7      |
| 8796   | ENSG00000136155 | 0          | NA          | NA         | NA         | NA         | SCEL      |
| 9445   | ENSG00000136156 | 2281.53616 | 0.02393611  | 0.06956767 | 0.72725859 | 0.86953012 | ITM2B     |
| 10253  | ENSG00000136158 | 2619.73898 | 0.54714992  | 0.0714584  | 6.85E-15   | 1.85E-13   | SPRY2     |
| 55270  | ENSG00000136159 | 491.602086 | -0.37043195 | 0.11703835 | 0.00085931 | 0.00518354 | NUDT15    |
| 1910   | ENSG00000136160 | 12.8605937 | 1.87670316  | 0.80940713 | 0.00090175 | 0.00541651 | EDNRB     |

|        |                 |            |             |            |            |            |         |
|--------|-----------------|------------|-------------|------------|------------|------------|---------|
| 1102   | ENSG00000136161 | 185.178509 | -0.56282429 | 0.2092216  | 0.00205228 | 0.01093959 | RCBTB2  |
| 3936   | ENSG00000136167 | 41.9729054 | 0.08212027  | 0.26341337 | 0.67292467 | 0.83933156 | LCP1    |
| 83852  | ENSG00000136169 | 246.450424 | 0.08275434  | 0.16127074 | 0.57260925 | 0.77240737 | SETDB2  |
| 9805   | ENSG00000136193 | 6717.9516  | -0.32913907 | 0.05312836 | 3.76E-10   | 6.82E-09   | SCRN1   |
| 79020  | ENSG00000136197 | 213.833414 | -0.06856272 | 0.16339467 | 0.64193592 | 0.82088358 | C7orf25 |
| 64759  | ENSG00000136205 | 3416.50271 | -0.8776012  | 0.07516727 | 2.80E-32   | 1.71E-30   | TNS3    |
| 285955 | ENSG00000136206 | 25.0834685 | 0.33799673  | 0.38831131 | 0.13566457 | 0.31030495 | SPDYE1  |
| 55501  | ENSG00000136213 | 1482.01675 | -0.00779982 | 0.09522395 | 0.92719154 | 0.96953959 | CHST12  |
| 10643  | ENSG00000136231 | 2062.22687 | 0.08495222  | 0.06935788 | 0.21371673 | 0.4238788  | IGF2BP3 |
| 10457  | ENSG00000136235 | 2.54920605 | 0.0224789   | 0.37686318 | 0.77173087 | NA         | GPNMB   |
| 9771   | ENSG00000136237 | 503.263619 | 0.70491609  | 0.11735203 | 4.42E-10   | 7.95E-09   | RAPGEF5 |
| 5879   | ENSG00000136238 | 5847.35436 | -0.07536461 | 0.06435909 | 0.19660786 | 0.40019493 | RAC1    |
| 11014  | ENSG00000136240 | 3093.50755 | -0.16315719 | 0.07267292 | 0.02215001 | 0.07903887 | KDELR2  |
| 11097  | ENSG00000136243 | 889.247574 | -0.02541366 | 0.09930273 | 0.79018173 | 0.90434126 | NUP42   |
| 3569   | ENSG00000136244 | 0          | NA          | NA         | NA         | NA         | IL6     |
| 55146  | ENSG00000136247 | 1114.47995 | 0.03489082  | 0.10862419 | 0.73868404 | 0.87647218 | ZDHHC4  |
| 313    | ENSG00000136250 | 1.71748819 | -0.06485623 | 0.38712854 | 0.33809145 | NA         | AOAH    |
| 28969  | ENSG00000136261 | 1590.3298  | -0.11921955 | 0.07519617 | 0.10560418 | 0.25927323 | BZW2    |
| 1607   | ENSG00000136267 | 22.7452794 | 4.29587059  | 0.78876868 | 4.98E-09   | 7.79E-08   | DGKB    |
| 9238   | ENSG00000136270 | 2010.22698 | 0.03855746  | 0.07743858 | 0.61181593 | 0.7998437  | TBRG4   |
| 54606  | ENSG00000136271 | 2361.5661  | -0.03475754 | 0.06439179 | 0.5821862  | 0.77907556 | DDX56   |
| 3364   | ENSG00000136273 | 487.532951 | -0.40770556 | 0.14317524 | 0.00213482 | 0.01131877 | HUS1    |
| 23148  | ENSG00000136274 | 1465.02321 | -0.76451753 | 0.09354066 | 6.12E-17   | 1.88E-15   | NACAD   |
| 80099  | ENSG00000136275 | 0          | NA          | NA         | NA         | NA         | C7orf69 |
| 28988  | ENSG00000136279 | 4159.96013 | -0.00285188 | 0.05839726 | 0.95919305 | 0.9831126  | DBNL    |
| 83605  | ENSG00000136280 | 1180.55026 | 0.01053158  | 0.07691744 | 0.88948211 | 0.95181279 | CCM2    |
| 64005  | ENSG00000136286 | 18.8640418 | 0.04474401  | 0.33239563 | 0.7947184  | 0.90579008 | MYO1G   |
| 80727  | ENSG00000136295 | 12191.3388 | -0.18882547 | 0.05446238 | 0.00045175 | 0.00295601 | TTYH3   |
| 221938 | ENSG00000136297 | 31.3048476 | 1.36534327  | 0.5195731  | 0.00053491 | 0.00341898 | MMD2    |
| 27141  | ENSG00000136305 | 5.73219115 | -0.10882225 | 0.40032792 | 0.14558572 | 0.32613386 | CIDEB   |
| NA     | ENSG00000136315 | 0          | NA          | NA         | NA         | NA         |         |
| 91875  | ENSG00000136319 | 536.252632 | 0.05347188  | 0.15513928 | 0.707405   | 0.85903201 | TTC5    |
| 26257  | ENSG00000136327 | 0          | NA          | NA         | NA         | NA         | NKX2-8  |
| 7080   | ENSG00000136352 | 0          | NA          | NA         | NA         | NA         | NKX2-1  |
| 85446  | ENSG00000136367 | 600.26467  | 0.20564598  | 0.1062637  | 0.0436355  | 0.13397223 | ZFHX2   |
| 10588  | ENSG00000136371 | 68.0426917 | -0.40235783 | 0.29143271 | 0.06466739 | 0.18119939 | MTHFS   |
| 11173  | ENSG00000136378 | 2479.19359 | 0.89966455  | 0.0658078  | 2.50E-43   | 2.07E-41   | ADAMTS7 |
| 58489  | ENSG00000136379 | 184.661192 | -0.21091493 | 0.1678881  | 0.16135053 | 0.34958987 | ABHD17C |

|       |                 |            |             |            |            |            |          |
|-------|-----------------|------------|-------------|------------|------------|------------|----------|
| 3658  | ENSG00000136381 | 2876.94108 | -0.10334031 | 0.07203859 | 0.14373874 | 0.32322075 | IREB2    |
| 57538 | ENSG00000136383 | 55.0480872 | 0.09576336  | 0.38576577 | 0.37141351 | 0.60057374 | ALPK3    |
| 53346 | ENSG00000136404 | 2.91224807 | 0.00505477  | 0.3745015  | 0.95358494 | 0.98082457 | TM6SF1   |
| 10518 | ENSG00000136425 | 669.845165 | -0.04697848 | 0.098341   | 0.62030883 | 0.80621861 | CIB2     |
| 10241 | ENSG00000136436 | 599.778615 | 0.31832926  | 0.11676919 | 0.00413128 | 0.01982214 | CALCOCO2 |
| 55316 | ENSG00000136444 | 1464.22839 | 0.20719741  | 0.0853276  | 0.01285764 | 0.05102931 | RSAD1    |
| 4836  | ENSG00000136448 | 2184.8563  | 0.09387211  | 0.07516618 | 0.20322798 | 0.40930371 | NMT1     |
| 84073 | ENSG00000136449 | 111.606325 | 0.4141581   | 0.27674062 | 0.05216395 | 0.15389334 | MYCBPAP  |
| 6426  | ENSG00000136450 | 11444.4215 | 0.04719528  | 0.06677194 | 0.47126923 | 0.69361881 | SRSF1    |
| 7716  | ENSG00000136451 | 2260.76358 | -0.08820756 | 0.0661656  | 0.17520274 | 0.36912205 | VEZF1    |
| 1101  | ENSG00000136457 | 13.2386537 | 0.64058607  | 0.91522878 | 0.02561858 | 0.08878125 | CHAD     |
| 51204 | ENSG00000136463 | 591.190986 | -0.02179054 | 0.10819292 | 0.83258931 | 0.92392457 | TACO1    |
| 55852 | ENSG00000136478 | 1173.22747 | -0.1557201  | 0.07917257 | 0.04408758 | 0.13508843 | TEX2     |
| 10238 | ENSG00000136485 | 11047.7436 | -0.05863877 | 0.04929292 | 0.23023337 | 0.4461643  | DCAF7    |
| 2689  | ENSG00000136487 | 0          | NA          | NA         | NA         | NA         | GH2      |
| 1442  | ENSG00000136488 | 0          | NA          | NA         | NA         | NA         | CSH1     |
| 80774 | ENSG00000136490 | 3588.18327 | 0.38069728  | 0.07021216 | 3.35E-08   | 4.69E-07   | LIMD2    |
| 83990 | ENSG00000136492 | 1435.0552  | -0.3820954  | 0.08263042 | 2.09E-06   | 2.24E-05   | BRIP1    |
| 11143 | ENSG00000136504 | 1290.80994 | -0.06111873 | 0.07678578 | 0.41601606 | 0.64286616 | KAT7     |
| 64108 | ENSG00000136514 | 0          | NA          | NA         | NA         | NA         | RTP4     |
| 86    | ENSG00000136518 | 1432.39388 | 0.13967196  | 0.0891021  | 0.10682334 | 0.26165125 | ACTL6A   |
| 4711  | ENSG00000136521 | 1065.57135 | -0.06557923 | 0.09245006 | 0.46416311 | 0.68693094 | NDUFB5   |
| 57129 | ENSG00000136522 | 583.193834 | 0.03737253  | 0.11010721 | 0.72408563 | 0.86797529 | MRPL47   |
| 6434  | ENSG00000136527 | 4688.23015 | -0.08434586 | 0.06776764 | 0.20635374 | 0.41333377 | TRA2B    |
| 6326  | ENSG00000136531 | 503.444153 | -0.28607413 | 0.12881455 | 0.01798762 | 0.0669056  | SCN2A    |
| 10716 | ENSG00000136535 | 6.687336   | 0.40551956  | 0.70734586 | 0.02030573 | 0.07378491 | TBR1     |
| 64844 | ENSG00000136536 | 1371.84368 | -0.1431787  | 0.09736132 | 0.12761612 | 0.29804636 | MARCHF7  |
| 57471 | ENSG00000136541 | 0          | NA          | NA         | NA         | NA         | ERMN     |
| 11227 | ENSG00000136542 | 0          | NA          | NA         | NA         | NA         | GALNT5   |
| 6332  | ENSG00000136546 | 2.72431821 | 0.05656952  | 0.37693513 | 0.56829906 | 0.76920816 | SCN7A    |
| 10010 | ENSG00000136560 | 412.223266 | 0.01618641  | 0.12663016 | 0.89470766 | 0.95456012 | TANK     |
| 640   | ENSG00000136573 | 48.1307517 | -0.57444772 | 0.37056406 | 0.02502219 | 0.08721718 | BLK      |
| 2626  | ENSG00000136574 | 387.367747 | -0.41468934 | 0.15834141 | 0.00410233 | 0.01971184 | GATA4    |
| 6498  | ENSG00000136603 | 929.939955 | 0.13581525  | 0.10556342 | 0.18117223 | 0.37844358 | SKIL     |
| 2058  | ENSG00000136628 | 4335.8086  | -0.0290862  | 0.07102193 | 0.67602787 | 0.84148271 | EPRS1    |
| 3142  | ENSG00000136630 | 43.5558498 | 0.97088273  | 0.38134514 | 0.0011343  | 0.00658025 | HLX      |
| 11311 | ENSG00000136631 | 1703.10946 | -0.08535743 | 0.07429844 | 0.23710283 | 0.45410948 | VPS45    |
| 3586  | ENSG00000136634 | 0          | NA          | NA         | NA         | NA         | IL10     |

|        |                 |            |             |            |            |            |           |
|--------|-----------------|------------|-------------|------------|------------|------------|-----------|
| 51133  | ENSG00000136636 | 2224.65984 | 0.20561829  | 0.0663113  | 0.00162874 | 0.00901119 | KCTD3     |
| 26750  | ENSG00000136643 | 1047.83424 | -0.3000209  | 0.10106786 | 0.00202611 | 0.01081755 | RPS6KC1   |
| 150472 | ENSG00000136682 | 474.566969 | 0.02947767  | 0.11021745 | 0.78086325 | 0.89982732 | CBWD2     |
| 56300  | ENSG00000136688 | 0          | NA          | NA         | NA         | NA         | IL36G     |
| 3557   | ENSG00000136689 | 0          | NA          | NA         | NA         | NA         | IL1RN     |
| 27179  | ENSG00000136694 | 0          | NA          | NA         | NA         | NA         | IL36A     |
| 26525  | ENSG00000136695 | 0          | NA          | NA         | NA         | NA         | IL36RN    |
| 27177  | ENSG00000136696 | 0          | NA          | NA         | NA         | NA         | IL36B     |
| 84639  | ENSG00000136697 | 0          | NA          | NA         | NA         | NA         | IL1F10    |
| 55997  | ENSG00000136698 | 0          | NA          | NA         | NA         | NA         | CFC1      |
| 55627  | ENSG00000136699 | 2221.04839 | 0.13992225  | 0.07466741 | 0.05604963 | 0.16260047 | SMPD4     |
| 55339  | ENSG00000136709 | 2045.68421 | -0.44164385 | 0.10104344 | 5.72E-06   | 5.69E-05   | WDR33     |
| 84317  | ENSG00000136710 | 454.25845  | 0.03889624  | 0.11825759 | 0.73049771 | 0.87107559 | CCDC115   |
| 79595  | ENSG00000136715 | 839.575714 | -0.18268723 | 0.0892693  | 0.03500018 | 0.11331652 | SAP130    |
| 274    | ENSG00000136717 | 2212.76325 | -0.56194253 | 0.06795639 | 4.56E-17   | 1.42E-15   | BIN1      |
| 92856  | ENSG00000136718 | 1334.05612 | -0.01173863 | 0.08692443 | 0.88900971 | 0.95165386 | IMP4      |
| 9394   | ENSG00000136720 | 1681.17913 | -0.84248585 | 0.07330297 | 2.55E-31   | 1.51E-29   | HS6ST1    |
| 56886  | ENSG00000136731 | 3845.37303 | -0.09118034 | 0.07864291 | 0.23558356 | 0.45240308 | UGGT1     |
| 2995   | ENSG00000136732 | 0          | NA          | NA         | NA         | NA         | GYPC      |
| 8027   | ENSG00000136738 | 575.692409 | -0.07784471 | 0.09923811 | 0.41605441 | 0.64287535 | STAM      |
| 2572   | ENSG00000136750 | 0          | NA          | NA         | NA         | NA         | GAD2      |
| 10006  | ENSG00000136754 | 540.631959 | 0.01309923  | 0.10650066 | 0.89940131 | 0.95557174 | ABI1      |
| 10730  | ENSG00000136758 | 3447.71752 | -0.05203374 | 0.06021727 | 0.3794728  | 0.60845927 | YME1L1    |
| 64215  | ENSG00000136770 | 335.287401 | 0.54174478  | 0.16568576 | 0.0003524  | 0.00236443 | DNAJC1    |
| 25934  | ENSG00000136783 | 206.937482 | 0.18676943  | 0.161425   | 0.20210605 | 0.4076641  | NIPSNAP3A |
| 56262  | ENSG00000136802 | 2233.99519 | -0.08130204 | 0.0671297  | 0.21859308 | 0.43050004 | LRRRC8A   |
| 1025   | ENSG00000136807 | 1071.31348 | -0.20143469 | 0.09325215 | 0.02557773 | 0.08867067 | CDK9      |
| 7295   | ENSG00000136810 | 1176.5322  | 0.25197833  | 0.08207731 | 0.00163462 | 0.00903399 | TXN       |
| 4957   | ENSG00000136811 | 1521.73537 | -0.1454552  | 0.09313148 | 0.10659219 | 0.26121406 | ODF2      |
| 23392  | ENSG00000136813 | 1863.18583 | 0.16992643  | 0.06810209 | 0.01118184 | 0.04546992 | ECPAS     |
| 27348  | ENSG00000136816 | 708.137704 | -0.16198335 | 0.124288   | 0.16692502 | 0.35783819 | TOR1B     |
| 51759  | ENSG00000136819 | 1069.31402 | -0.2188848  | 0.08727117 | 0.00985662 | 0.0409823  | C9orf78   |
| 10592  | ENSG00000136824 | 1722.24801 | -0.36773666 | 0.07655189 | 9.06E-07   | 1.03E-05   | SMC2      |
| 9314   | ENSG00000136826 | 0.173733   | 0.01914545  | 0.38484597 | 0.78225479 | NA         | KLF4      |
| 1861   | ENSG00000136827 | 1149.82874 | -0.13510597 | 0.09090987 | 0.12547108 | 0.29435597 | TOR1A     |
| 9649   | ENSG00000136828 | 793.165529 | -0.0883813  | 0.13345092 | 0.47953025 | 0.70069817 | RALGPS1   |
| 64855  | ENSG00000136830 | 921.688424 | -0.07060728 | 0.09052665 | 0.42188911 | 0.64785449 | NIBAN2    |
| 347168 | ENSG00000136834 | 0.70195379 | 0.02750895  | 0.38372988 | 0.5667643  | NA         | OR1J1     |



|        |                 |            |             |            |            |            |            |
|--------|-----------------|------------|-------------|------------|------------|------------|------------|
| 286362 | ENSG00000136839 | 0          | NA          | NA         | NA         | NA         | OR13C9     |
| 27090  | ENSG00000136840 | 251.624992 | -0.24333087 | 0.1597611  | 0.09281015 | 0.2357385  | ST6GALNAC4 |
| 7111   | ENSG00000136842 | 1694.91302 | -0.48152983 | 0.07217396 | 1.08E-11   | 2.29E-10   | TMOD1      |
| 153090 | ENSG00000136848 | 2678.05867 | -0.20118859 | 0.06276044 | 0.00112546 | 0.00653472 | DAB2IP     |
| 6812   | ENSG00000136854 | 3001.85712 | -0.19367753 | 0.0698483  | 0.00475685 | 0.02227424 | STXBP1     |
| 29988  | ENSG00000136856 | 217.680506 | 0.0959217   | 0.16160027 | 0.51499204 | 0.72955207 | SLC2A8     |
| 23452  | ENSG00000136859 | 403.470963 | -0.34762235 | 0.1609531  | 0.01715903 | 0.06443973 | ANGPTL2    |
| 55755  | ENSG00000136861 | 2875.64079 | -0.19284464 | 0.07759901 | 0.01101076 | 0.04489384 | CDK5RAP2   |
| 7539   | ENSG00000136866 | 187.539261 | -0.26579533 | 0.16165514 | 0.06930486 | 0.19007581 | ZFP37      |
| 1318   | ENSG00000136867 | 32.2459783 | 0.66715745  | 0.44707162 | 0.0198291  | 0.07247778 | SLC31A2    |
| 1317   | ENSG00000136868 | 728.328926 | 0.22618875  | 0.09935151 | 0.01817985 | 0.06735733 | SLC31A1    |
| 7099   | ENSG00000136869 | 3.00969588 | -0.07122255 | 0.39016502 | 0.22322201 | 0.43637055 | TLR4       |
| 7743   | ENSG00000136870 | 503.637734 | -0.16015484 | 0.11428881 | 0.14112474 | 0.31929662 | ZNF189     |
| 229    | ENSG00000136872 | 2.92530196 | 0.00854652  | 0.36869571 | 0.93746541 | 0.97366414 | ALDOB      |
| 55014  | ENSG00000136874 | 814.164946 | -0.05694639 | 0.10091285 | 0.55733516 | 0.76258372 | STX17      |
| 9128   | ENSG00000136875 | 1228.49802 | 0.06054404  | 0.0798071  | 0.43839481 | 0.66364665 | PRPF4      |
| 2356   | ENSG00000136877 | 981.311293 | 0.21554573  | 0.09859528 | 0.02341102 | 0.08263201 | FPGS       |
| 10868  | ENSG00000136878 | 831.016952 | -0.10351732 | 0.12337734 | 0.3744246  | 0.60355736 | USP20      |
| 570    | ENSG00000136881 | 1.11474076 | 0.07782957  | 0.39460367 | 0.13653044 | NA         | BAAT       |
| 113220 | ENSG00000136883 | 3.86977168 | -0.0279629  | 0.36995526 | 0.78665886 | 0.90294962 | KIF12      |
| 9550   | ENSG00000136888 | 1475.38139 | 0.08712581  | 0.07107742 | 0.21250361 | 0.42238326 | ATP6V1G1   |
| 54881  | ENSG00000136891 | 1026.41554 | -0.29123911 | 0.08525027 | 0.00044226 | 0.00289969 | TEX10      |
| 84253  | ENSG00000136895 | 302.060153 | 0.16216521  | 0.16011878 | 0.26498147 | 0.48718221 | GARNL3     |
| 54534  | ENSG00000136897 | 424.665054 | -0.16748248 | 0.12369695 | 0.15162291 | 0.33558862 | MRPL50     |
| 8818   | ENSG00000136908 | 1210.58348 | -0.035197   | 0.07879086 | 0.64856661 | 0.82457939 | DPM2       |
| 401551 | ENSG00000136918 | 0          | NA          | NA         | NA         | NA         | WDR38      |
| 158427 | ENSG00000136925 | 633.147926 | -0.13186222 | 0.1312977  | 0.28379232 | 0.50898929 | TSTD2      |
| 9568   | ENSG00000136928 | 0.3237694  | -0.02327256 | 0.38532127 | 0.66864002 | NA         | GABBR2     |
| 55363  | ENSG00000136929 | 0.3565367  | 0.02381602  | 0.3853809  | 0.61408995 | NA         | HEMGN      |
| 5695   | ENSG00000136930 | 1982.90634 | 0.02793473  | 0.07185336 | 0.69241575 | 0.85130623 | PSMB7      |
| 2516   | ENSG00000136931 | 2.0441195  | 0.05224442  | 0.38112862 | 0.52099165 | NA         | NR5A1      |
| 51531  | ENSG00000136932 | 111.469708 | -0.22378709 | 0.21113773 | 0.2072353  | 0.41447107 | TRMO       |
| 10244  | ENSG00000136933 | 402.855372 | 0.26756089  | 0.12818089 | 0.02639102 | 0.09083932 | RABEPK     |
| 2800   | ENSG00000136935 | 609.624148 | 0.12455022  | 0.11069003 | 0.23981624 | 0.45788499 | GOLGA1     |
| 7507   | ENSG00000136936 | 228.235939 | 0.07442888  | 0.14665739 | 0.58162157 | 0.77868762 | XPA        |
| 4686   | ENSG00000136937 | 1973.14829 | -0.18014052 | 0.08444711 | 0.02837671 | 0.09607405 | NCBP1      |
| 10541  | ENSG00000136938 | 3086.37795 | -0.13504286 | 0.06313959 | 0.02996123 | 0.10020747 | ANP32B     |
| 254973 | ENSG00000136939 | 0          | NA          | NA         | NA         | NA         | OR1L4      |

|        |                 |            |             |            |            |            |          |
|--------|-----------------|------------|-------------|------------|------------|------------|----------|
| 5082   | ENSG00000136940 | 660.916522 | -0.2007957  | 0.09683946 | 0.03175044 | 0.10495312 | PDCL     |
| 11224  | ENSG00000136942 | 8772.2788  | -0.08033186 | 0.05197185 | 0.11950101 | 0.28438287 | RPL35    |
| 1515   | ENSG00000136943 | 191.410429 | -0.04555864 | 0.15637542 | 0.74880577 | 0.88205755 | CTSV     |
| 4010   | ENSG00000136944 | 25.2840827 | 4.70954976  | 0.76765554 | 1.91E-10   | 3.57E-09   | LMX1B    |
| 81873  | ENSG00000136950 | 867.163955 | -0.08058816 | 0.08965412 | 0.35435921 | 0.58485041 | ARPC5L   |
| 5168   | ENSG00000136960 | 2.97946291 | 0.2394008   | 0.49856423 | 0.00393216 | 0.01902316 | ENPP2    |
| 79075  | ENSG00000136982 | 370.292289 | -0.23637541 | 0.1317343  | 0.05515057 | 0.16050862 | DSCC1    |
| 79139  | ENSG00000136986 | 1389.42078 | -0.46514525 | 0.08198815 | 6.19E-09   | 9.59E-08   | DERL1    |
| 4609   | ENSG00000136997 | 1875.44982 | -0.29046996 | 0.06749035 | 1.17E-05   | 0.00010998 | MYC      |
| 4856   | ENSG00000136999 | 0          | NA          | NA         | NA         | NA         | CCN3     |
| 90865  | ENSG00000137033 | 0          | NA          | NA         | NA         | NA         | IL33     |
| 90871  | ENSG00000137038 | 740.0952   | 0.02214861  | 0.1013278  | 0.82181095 | 0.91847813 | DMAC1    |
| 26953  | ENSG00000137040 | 734.551107 | -0.02531783 | 0.09883022 | 0.78958133 | 0.9043268  | RANBP6   |
| 64425  | ENSG00000137054 | 837.272231 | -0.29151577 | 0.09363875 | 0.00125755 | 0.00719638 | POLR1E   |
| 9373   | ENSG00000137055 | 1013.11458 | -0.13647832 | 0.08684843 | 0.1059198  | 0.25982306 | PLAA     |
| 3590   | ENSG00000137070 | 301.434908 | 0.38665357  | 0.16808766 | 0.01083055 | 0.04424092 | IL11RA   |
| 55833  | ENSG00000137073 | 1174.68663 | 0.01027482  | 0.08354304 | 0.89888376 | 0.95556135 | UBAP2    |
| 54840  | ENSG00000137074 | 489.644984 | -0.09255373 | 0.12548907 | 0.4338897  | 0.65914024 | APTX     |
| 152006 | ENSG00000137075 | 737.318082 | 0.32492812  | 0.10097656 | 0.00082823 | 0.0050112  | RNF38    |
| 7094   | ENSG00000137076 | 5916.20065 | 0.17644383  | 0.06195521 | 0.00385874 | 0.01869078 | TLN1     |
| 6366   | ENSG00000137077 | 0          | NA          | NA         | NA         | NA         | CCL21    |
| 27240  | ENSG00000137078 | 0.36303624 | 0.02389534  | 0.38539249 | 0.60992614 | NA         | SIT1     |
| 3452   | ENSG00000137080 | 0          | NA          | NA         | NA         | NA         | IFNA21   |
| 1761   | ENSG00000137090 | 0          | NA          | NA         | NA         | NA         | DMRT1    |
| 25822  | ENSG00000137094 | 588.080984 | -0.44431855 | 0.1128921  | 3.78E-05   | 0.00031924 | DNAJB5   |
| 26206  | ENSG00000137098 | 6.18277647 | 0.18607886  | 0.41878212 | 0.17673614 | 0.37152417 | SPAG8    |
| 11258  | ENSG00000137100 | 736.105936 | -0.29156234 | 0.10026001 | 0.00266278 | 0.01368641 | DCTN3    |
| 971    | ENSG00000137101 | 15.3814777 | 0.54047411  | 0.63382057 | 0.04404221 | 0.13497025 | CD72     |
| 51754  | ENSG00000137103 | 421.866207 | 0.41846235  | 0.16172918 | 0.00448007 | 0.02123379 | TMEM8B   |
| 9380   | ENSG00000137106 | 1385.80109 | -0.00693471 | 0.07543128 | 0.92418207 | 0.96852    | GRHPR    |
| 219    | ENSG00000137124 | 747.496909 | -0.61697889 | 0.11065243 | 7.00E-09   | 1.07E-07   | ALDH1B1  |
| 84681  | ENSG00000137133 | 308.044559 | 0.30108877  | 0.16078805 | 0.03915637 | 0.12352715 | HINT2    |
| 84904  | ENSG00000137135 | 330.109742 | 0.39043035  | 0.14430435 | 0.00350047 | 0.01727597 | ARHGEF39 |
| 347252 | ENSG00000137142 | 13300.4726 | -0.02276531 | 0.04683254 | 0.62455096 | 0.80860493 | IGFBPL1  |
| 55667  | ENSG00000137145 | 853.374391 | 0.01706006  | 0.11670696 | 0.87929327 | 0.94652699 | DENND4C  |
| 6194   | ENSG00000137154 | 23910.4138 | -0.18255294 | 0.0486177  | 0.00014965 | 0.00109357 | RPS6     |
| 10695  | ENSG00000137161 | 1126.26726 | 0.0582826   | 0.08118512 | 0.46198766 | 0.68504    | CNPY3    |
| 116113 | ENSG00000137166 | 710.065485 | 0.34082941  | 0.1038288  | 0.00063038 | 0.00394783 | FOXP4    |

|        |                 |            |             |            |            |            |          |
|--------|-----------------|------------|-------------|------------|------------|------------|----------|
| 51645  | ENSG00000137168 | 833.508834 | -0.17425631 | 0.09081208 | 0.0478384  | 0.14387052 | PPIL1    |
| 89953  | ENSG00000137171 | 510.925492 | 0.21052904  | 0.11487743 | 0.05425614 | 0.15846339 | KLC4     |
| 63971  | ENSG00000137177 | 567.605913 | 0.27730542  | 0.11194375 | 0.00942201 | 0.03949561 | KIF13A   |
| 7746   | ENSG00000137185 | 569.041262 | 0.2116677   | 0.11061462 | 0.04525923 | 0.13776361 | ZSCAN9   |
| 5292   | ENSG00000137193 | 415.895488 | -0.65916633 | 0.12312268 | 2.19E-08   | 3.15E-07   | PIM1     |
| 2766   | ENSG00000137198 | 19.6701992 | 0.38593751  | 0.45332561 | 0.09897412 | 0.24743531 | GMPR     |
| 23070  | ENSG00000137200 | 1267.1114  | -0.13749853 | 0.08816173 | 0.10845988 | 0.26431057 | CMTR1    |
| 7020   | ENSG00000137203 | 1.36525802 | -0.09760918 | 0.4006911  | 0.08918952 | NA         | TFAP2A   |
| 10864  | ENSG00000137204 | 1.07664962 | -0.02090245 | 0.38201282 | 0.5848267  | NA         | SLC22A7  |
| 25844  | ENSG00000137207 | 1799.96908 | 0.08212258  | 0.07156889 | 0.24303658 | 0.46142064 | YIPF3    |
| 81853  | ENSG00000137210 | 678.686533 | -0.18285347 | 0.09823293 | 0.05363654 | 0.15706995 | TMEM14B  |
| 55362  | ENSG00000137216 | 861.948529 | 0.11954433  | 0.14916809 | 0.38463379 | 0.6136819  | TMEM63B  |
| 10817  | ENSG00000137218 | 272.481428 | -0.15466107 | 0.14036559 | 0.23524955 | 0.45208747 | FRS3     |
| 93643  | ENSG00000137221 | 897.655388 | -0.03696484 | 0.08689189 | 0.66146499 | 0.8324506  | TJAP1    |
| 11131  | ENSG00000137225 | 0          | NA          | NA         | NA         | NA         | CAPN11   |
| 27283  | ENSG00000137251 | 0          | NA          | NA         | NA         | NA         | TINAG    |
| 3062   | ENSG00000137252 | 0.84180466 | -0.0320569  | 0.38394834 | 0.51982775 | NA         | HCRTR2   |
| 9856   | ENSG00000137261 | 55.7437362 | -0.28006965 | 0.29736213 | 0.18507435 | 0.38396685 | KIAA0319 |
| 3662   | ENSG00000137265 | 0.18922458 | 0.01954053  | 0.38488496 | 0.78225479 | NA         | IRF4     |
| 63027  | ENSG00000137266 | 64.5064706 | 0.56397921  | 0.29364285 | 0.01369109 | 0.05359848 | SLC22A23 |
| 7280   | ENSG00000137267 | 1312.36539 | -0.74983772 | 0.08846702 | 4.91E-18   | 1.64E-16   | TUBB2A   |
| 55227  | ENSG00000137269 | 41.1469585 | 1.12301872  | 0.39795438 | 0.00041853 | 0.00275595 | LRRC1    |
| 8521   | ENSG00000137270 | 1.83591866 | 0.08463931  | 0.39231667 | 0.24009992 | NA         | GCM1     |
| 2295   | ENSG00000137273 | 0          | NA          | NA         | NA         | NA         | FOXF2    |
| 670    | ENSG00000137274 | 478.478514 | 0.10343501  | 0.11529989 | 0.34718274 | 0.57794986 | BPHL     |
| 8737   | ENSG00000137275 | 530.80389  | 0.12435618  | 0.11593225 | 0.26038413 | 0.48228775 | RIPK1    |
| 347733 | ENSG00000137285 | 11902.3076 | -0.50285018 | 0.05496309 | 3.50E-20   | 1.33E-18   | TUBB2B   |
| 84300  | ENSG00000137288 | 660.462633 | -0.03998583 | 0.10815979 | 0.69909924 | 0.85487569 | UQCC2    |
| 3159   | ENSG00000137309 | 5951.55614 | -0.28426829 | 0.06306002 | 4.66E-06   | 4.72E-05   | HMGA1    |
| 6941   | ENSG00000137310 | 552.266647 | -0.10494725 | 0.10510319 | 0.29743633 | 0.52412619 | TCF19    |
| 10211  | ENSG00000137312 | 2286.81796 | -0.07475517 | 0.06461657 | 0.24020481 | 0.45820056 | FLOT1    |
| 8870   | ENSG00000137331 | 1.47656161 | -0.0565733  | 0.38506853 | 0.4071063  | NA         | IER3     |
| 9656   | ENSG00000137337 | 2272.57512 | 0.02463036  | 0.07262088 | 0.73052919 | 0.87107559 | MDC1     |
| 84547  | ENSG00000137338 | 340.43     | -0.0705586  | 0.12884246 | 0.56016469 | 0.76415299 | PGBD1    |
| 79969  | ENSG00000137343 | 1032.51101 | 0.44361434  | 0.0904031  | 4.34E-07   | 5.23E-06   | ATAT1    |
| 7172   | ENSG00000137364 | 346.18004  | -0.19687873 | 0.13518997 | 0.11857291 | 0.2827168  | TPMT     |
| 1208   | ENSG00000137392 | 0          | NA          | NA         | NA         | NA         | CLPS     |
| 255488 | ENSG00000137393 | 19.8277968 | 1.19808485  | 0.64911497 | 0.00372138 | 0.01816736 | RNF144B  |

|        |                 |            |             |            |            |            |         |
|--------|-----------------|------------|-------------|------------|------------|------------|---------|
| 11270  | ENSG00000137404 | 346.173731 | -0.00191268 | 0.12380186 | 0.98632762 | 0.99540871 | NRM     |
| 23787  | ENSG00000137409 | 2196.36782 | 0.10979097  | 0.08250463 | 0.17306774 | 0.36578929 | MTCH1   |
| 57176  | ENSG00000137411 | 1023.62704 | 0.16168665  | 0.08446473 | 0.04956228 | 0.14803945 | VARS2   |
| 129685 | ENSG00000137413 | 552.954437 | 0.20045108  | 0.12827466 | 0.09650079 | 0.24281239 | TAF8    |
| 51439  | ENSG00000137414 | 1104.98562 | -0.35058254 | 0.08530047 | 2.40E-05   | 0.00021136 | FAM8A1  |
| 347744 | ENSG00000137434 | 19.5239493 | 0.34470414  | 0.44642236 | 0.11919895 | 0.28385039 | C6orf52 |
| 9982   | ENSG00000137440 | 0          | NA          | NA         | NA         | NA         | FGFBP1  |
| 83888  | ENSG00000137441 | 0.173733   | 0.01914545  | 0.38484597 | 0.78225479 | NA         | FGFBP2  |
| 132864 | ENSG00000137449 | 123.841805 | 0.6181575   | 0.24026161 | 0.00243605 | 0.01267872 | CPEB2   |
| 85462  | ENSG00000137460 | 43.2071579 | 0.44271389  | 0.35963758 | 0.06478961 | 0.181378   | FHDC1   |
| 7097   | ENSG00000137462 | 21.4740889 | 1.59865626  | 0.56327792 | 0.00025598 | 0.00177701 | TLR2    |
| 84709  | ENSG00000137463 | 14.9480423 | -0.44007834 | 0.53788263 | 0.06821039 | 0.18798362 | MGARP   |
| 83894  | ENSG00000137473 | 2.28648112 | -0.0407789  | 0.38016519 | 0.57532206 | NA         | TTC29   |
| 4647   | ENSG00000137474 | 60.5978013 | -0.7809553  | 0.32140559 | 0.0022105  | 0.01167014 | MYO7A   |
| 9873   | ENSG00000137478 | 700.051821 | -0.33664837 | 0.09752933 | 0.00034488 | 0.00231946 | FCHSD2  |
| 408    | ENSG00000137486 | 1235.34493 | -0.79731123 | 0.08920494 | 8.11E-20   | 2.98E-18   | ARRB1   |
| 11309  | ENSG00000137491 | 2.48640729 | 0.06649655  | 0.38308505 | 0.43977902 | NA         | SLCO2B1 |
| 5612   | ENSG00000137492 | 1302.54983 | -0.51872731 | 0.08112025 | 6.08E-11   | 1.20E-09   | THAP12  |
| 338699 | ENSG00000137494 | 170.115672 | 0.46847476  | 0.19195445 | 0.00568848 | 0.02594468 | ANKRD42 |
| 10068  | ENSG00000137496 | 389.873481 | 0.2214169   | 0.13649536 | 0.08173042 | 0.21460185 | IL18BP  |
| 4926   | ENSG00000137497 | 12864.3344 | 0.20884122  | 0.05192067 | 4.89E-05   | 0.00040132 | NUMA1   |
| 60492  | ENSG00000137500 | 996.191145 | -0.10482504 | 0.09268581 | 0.24307103 | 0.4614419  | CCDC90B |
| 54843  | ENSG00000137501 | 17.033588  | 0.07440245  | 0.3334658  | 0.66786003 | 0.83661718 | SYTL2   |
| 27314  | ENSG00000137502 | 420.966405 | -0.05241925 | 0.13050077 | 0.6667407  | 0.83582576 | RAB30   |
| 58487  | ENSG00000137504 | 2918.76811 | 0.2168216   | 0.07032393 | 0.0016907  | 0.0093021  | CREBZF  |
| 2615   | ENSG00000137507 | 34.0373183 | -0.63529015 | 0.42393237 | 0.0212754  | 0.07656521 | LRRC32  |
| 5547   | ENSG00000137509 | 882.059986 | 0.22291382  | 0.08658204 | 0.00812137 | 0.0349822  | PRCP    |
| 79731  | ENSG00000137513 | 483.940987 | 0.11715418  | 0.12643081 | 0.32590343 | 0.55406376 | NARS2   |
| 55298  | ENSG00000137522 | 503.380304 | 0.24299153  | 0.12749672 | 0.04267815 | 0.1320147  | RNF121  |
| 29088  | ENSG00000137547 | 602.367594 | -0.18060814 | 0.13907588 | 0.1619458  | 0.35042673 | MRPL15  |
| 51050  | ENSG00000137558 | 655.03579  | 1.34149456  | 0.11558144 | 3.73E-32   | 2.26E-30   | PII5    |
| 7274   | ENSG00000137561 | 0          | NA          | NA         | NA         | NA         | TTPA    |
| 8836   | ENSG00000137563 | 763.44571  | 0.28493751  | 0.09425306 | 0.00177763 | 0.00967311 | GGH     |
| 81796  | ENSG00000137571 | 4.61069147 | 0.04307198  | 0.36800791 | 0.7093134  | 0.86050983 | SLCO5A1 |
| 23213  | ENSG00000137573 | 0          | NA          | NA         | NA         | NA         | SULF1   |
| 96764  | ENSG00000137574 | 944.581771 | -0.00113384 | 0.08750558 | 0.98861912 | 0.99604194 | TGS1    |
| 6386   | ENSG00000137575 | 1268.67016 | 0.60165399  | 0.07918926 | 9.31E-15   | 2.48E-13   | SDCBP   |
| 4750   | ENSG00000137601 | 385.540056 | 0.02509127  | 0.12188241 | 0.82903259 | 0.9225423  | NEK1    |

|        |                 |            |             |            |            |            |          |
|--------|-----------------|------------|-------------|------------|------------|------------|----------|
| 55601  | ENSG00000137628 | 72.7399537 | 0.25920482  | 0.25742043 | 0.19240347 | 0.39466357 | DDX60    |
| 54827  | ENSG00000137634 | 0          | NA          | NA         | NA         | NA         | NXPE4    |
| 6653   | ENSG00000137642 | 696.16855  | -0.7072943  | 0.10010707 | 3.69E-13   | 8.64E-12   | SORL1    |
| 56649  | ENSG00000137648 | 0.18922458 | 0.01954053  | 0.38488496 | 0.78225479 | NA         | TMPRSS4  |
| 84811  | ENSG00000137656 | 420.326522 | -0.04780528 | 0.11831795 | 0.67027489 | 0.83763251 | BUD13    |
| 7225   | ENSG00000137672 | 0          | NA          | NA         | NA         | NA         | TRPC6    |
| 4316   | ENSG00000137673 | 0          | NA          | NA         | NA         | NA         | MMP7     |
| 9313   | ENSG00000137674 | 0          | NA          | NA         | NA         | NA         | MMP20    |
| 64066  | ENSG00000137675 | 0          | NA          | NA         | NA         | NA         | MMP27    |
| 85016  | ENSG00000137691 | 0.16735865 | 0.01897177  | 0.38482933 | 0.78225479 | NA         | CFAP300  |
| 84259  | ENSG00000137692 | 1077.69075 | 0.05052001  | 0.096215   | 0.58827285 | 0.78310073 | DCUN1D5  |
| 10413  | ENSG00000137693 | 38.8316798 | 6.26994944  | 1.01388237 | 4.07E-10   | 7.33E-09   | YAP1     |
| 23650  | ENSG00000137699 | 17.1038828 | 0.09659913  | 0.34054198 | 0.57949566 | 0.77706744 | TRIM29   |
| 2542   | ENSG00000137700 | 961.097972 | 0.19931283  | 0.10231853 | 0.04294875 | 0.13257414 | SLC37A4  |
| 54766  | ENSG00000137707 | 0          | NA          | NA         | NA         | NA         | BTG4     |
| 25833  | ENSG00000137709 | 1.96755609 | 0.13267835  | 0.41631926 | 0.02925138 | NA         | POU2F3   |
| 5962   | ENSG00000137710 | 1869.12628 | -0.23580861 | 0.08323106 | 0.00361264 | 0.01773691 | RDX      |
| 5519   | ENSG00000137713 | 866.670118 | 0.43378903  | 0.0991512  | 5.83E-06   | 5.80E-05   | PPP2R1B  |
| 2230   | ENSG00000137714 | 271.571944 | -0.39759475 | 0.15430895 | 0.0049493  | 0.02304052 | FDX1     |
| 64776  | ENSG00000137720 | 224.387926 | 0.19215437  | 0.169131   | 0.20544734 | 0.41239126 | C11orf1  |
| 53826  | ENSG00000137726 | 2076.01554 | -0.02301857 | 0.0796011  | 0.76624844 | 0.89247205 | FXVD6    |
| 57569  | ENSG00000137727 | 2.190634   | 0.12153585  | 0.40578099 | 0.08841696 | NA         | ARHGAP20 |
| 486    | ENSG00000137731 | 2.5954829  | 0.1533084   | 0.42210407 | 0.0719571  | 0.19545849 | FXVD2    |
| 4322   | ENSG00000137745 | 0          | NA          | NA         | NA         | NA         | MMP13    |
| 84000  | ENSG00000137747 | 2.10157625 | 0.05706524  | 0.38531284 | 0.3993012  | NA         | TMPRSS13 |
| 834    | ENSG00000137752 | 0          | NA          | NA         | NA         | NA         | CASP1    |
| 838    | ENSG00000137757 | 0          | NA          | NA         | NA         | NA         | CASP5    |
| 91801  | ENSG00000137760 | 247.275301 | 0.13601041  | 0.14823753 | 0.31967814 | 0.54727882 | ALKBH8   |
| 5607   | ENSG00000137764 | 360.98644  | 0.24069595  | 0.13192275 | 0.05137801 | 0.15218103 | MAP2K5   |
| 440279 | ENSG00000137766 | 0          | NA          | NA         | NA         | NA         | UNC13C   |
| 58472  | ENSG00000137767 | 16.7890462 | 2.99653078  | 0.71932277 | 2.17E-06   | 2.33E-05   | SQOR     |
| 51496  | ENSG00000137770 | 1315.43609 | -0.20119621 | 0.09425477 | 0.02737541 | 0.09336911 | CTDSPL2  |
| 79811  | ENSG00000137776 | 2216.05444 | 0.13793024  | 0.07064991 | 0.04685049 | 0.14165097 | SLTM     |
| 7057   | ENSG00000137801 | 85.9130024 | 1.61959712  | 0.29386503 | 2.37E-09   | 3.87E-08   | THBS1    |
| 23005  | ENSG00000137802 | 1046.70031 | -0.0542549  | 0.09647448 | 0.56018502 | 0.76415299 | MAPKBP1  |
| 51203  | ENSG00000137804 | 2366.46052 | -0.19443404 | 0.07691776 | 0.00971198 | 0.04053128 | NUSAP1   |
| 51103  | ENSG00000137806 | 210.540434 | 0.00373256  | 0.18380673 | 0.98303792 | 0.99428951 | NDUFAF1  |
| 9493   | ENSG00000137807 | 1124.63954 | 0.02806606  | 0.0964069  | 0.76441637 | 0.89148768 | KIF23    |

|           |                 |            |             |            |            |            |         |
|-----------|-----------------|------------|-------------|------------|------------|------------|---------|
| NA        | ENSG00000137808 | 0          | NA          | NA         | NA         | NA         |         |
| 22801     | ENSG00000137809 | 31.7852283 | 0.00538758  | 0.33246781 | 0.97606419 | 0.99170422 | ITGA11  |
| 57082     | ENSG00000137812 | 1434.17567 | -0.52648944 | 0.11058425 | 6.94E-07   | 8.07E-06   | KNL1    |
| 55142     | ENSG00000137814 | 452.286471 | 0.01395689  | 0.12549641 | 0.90785058 | 0.95978728 | HAUS2   |
| 23168     | ENSG00000137815 | 1809.94371 | 0.10665635  | 0.07136391 | 0.12834547 | 0.29903961 | RTF1    |
| 56965     | ENSG00000137817 | 1546.74416 | -0.84424818 | 0.07641252 | 3.97E-29   | 2.22E-27   | PARP6   |
| 6176      | ENSG00000137818 | 21183.7608 | -0.07750311 | 0.04902451 | 0.11067503 | 0.26834208 | RPLP1   |
| 54852     | ENSG00000137819 | 33.2063829 | 0.39298761  | 0.39178325 | 0.09665928 | 0.24306007 | PAQR5   |
| 54839     | ENSG00000137821 | 499.876431 | -0.20827581 | 0.12556639 | 0.07806333 | 0.20763862 | LRRC49  |
| 27229     | ENSG00000137822 | 1562.81438 | -0.10408822 | 0.09488472 | 0.25661152 | 0.47767496 | TUBGCP4 |
| 55177     | ENSG00000137824 | 454.130013 | -0.23672021 | 0.12158554 | 0.03937642 | 0.12401014 | RMDN3   |
| 3706      | ENSG00000137825 | 9.02027366 | -0.03246432 | 0.3548686  | 0.8130131  | 0.91544721 | ITPKA   |
| 55075     | ENSG00000137831 | 459.410121 | 0.3007954   | 0.13438551 | 0.01660308 | 0.06268392 | UACA    |
| 4091      | ENSG00000137834 | 46.0207022 | 2.7624316   | 0.40935022 | 1.15E-12   | 2.61E-11   | SMAD6   |
| 5330      | ENSG00000137841 | 72.2448503 | -0.15131549 | 0.26362559 | 0.43865949 | 0.663946   | PLCB2   |
| 80021     | ENSG00000137842 | 285.418923 | 0.19546132  | 0.13795375 | 0.12818693 | 0.29899232 | TMEM62  |
| 56924     | ENSG00000137843 | 94.8147683 | -0.32483574 | 0.25463665 | 0.10410681 | 0.25686042 | PAK6    |
| 106821730 | ENSG00000137843 | 94.8147683 | -0.32483574 | 0.25463665 | 0.10410681 | 0.25686042 | PAK6    |
| 102       | ENSG00000137845 | 1241.42955 | -0.06985353 | 0.09620242 | 0.45238419 | 0.67559671 | ADAM10  |
| 53905     | ENSG00000137857 | 156.938478 | 0.71455744  | 0.20097951 | 7.81E-05   | 0.00061115 | DUOX1   |
| 9153      | ENSG00000137860 | 3.64663931 | -0.10012268 | 0.38631401 | 0.35831613 | 0.58854144 | SLC28A2 |
| 64220     | ENSG00000137868 | 3699.86852 | -0.79478998 | 0.07099806 | 8.37E-30   | 4.80E-28   | STRA6   |
| 1588      | ENSG00000137869 | 0          | NA          | NA         | NA         | NA         | CYP19A1 |
| 54816     | ENSG00000137871 | 924.667197 | -0.2562513  | 0.10706145 | 0.01236782 | 0.04945132 | ZNF280D |
| 80031     | ENSG00000137872 | 436.128408 | -0.12030723 | 0.13792316 | 0.34841071 | 0.57911259 | SEMA6D  |
| 10017     | ENSG00000137875 | 1.5998228  | -0.11145782 | 0.40606854 | 0.06065909 | NA         | BCL2L10 |
| 51187     | ENSG00000137876 | 2514.61034 | 0.22821174  | 0.06937975 | 0.0008146  | 0.00494694 | RSL24D1 |
| 51332     | ENSG00000137877 | 16.0490697 | 0.0548401   | 0.33728114 | 0.74086143 | 0.87763281 | SPTBN5  |
| 145781    | ENSG00000137878 | 52.118168  | -0.74685599 | 0.34157268 | 0.0043551  | 0.02075553 | GCOM1   |
| 2644      | ENSG00000137880 | 17.2632774 | -1.46330909 | 0.70564007 | 0.00193691 | 0.01039728 | GCHFR   |
| 8412      | ENSG00000137936 | 127.17502  | 0.68862965  | 0.21517477 | 0.00029188 | 0.00199549 | BCAR3   |
| 723788    | ENSG00000137936 | 127.17502  | 0.68862965  | 0.21517477 | 0.00029188 | 0.00199549 | BCAR3   |
| 79739     | ENSG00000137941 | 924.908563 | -0.04453436 | 0.10968898 | 0.67070945 | 0.83771678 | TTLL7   |
| 54874     | ENSG00000137942 | 2921.39841 | 0.15476168  | 0.05855182 | 0.00746982 | 0.03261469 | FNBP1L  |
| 56267     | ENSG00000137944 | 618.384675 | 0.11536713  | 0.10263377 | 0.24352296 | 0.46198062 | KYAT3   |
| 2959      | ENSG00000137947 | 329.809434 | 0.01386991  | 0.1268672  | 0.90890913 | 0.96056875 | GTF2B   |
| 676       | ENSG00000137948 | 0          | NA          | NA         | NA         | NA         | BRDT    |
| 5876      | ENSG00000137955 | 1215.28486 | -0.17651189 | 0.08657152 | 0.03599916 | 0.11585132 | RABGGTB |

|        |                 |            |             |            |            |            |          |
|--------|-----------------|------------|-------------|------------|------------|------------|----------|
| 10964  | ENSG00000137959 | 0.53686373 | 0.03973037  | 0.3868486  | 0.41316805 | NA         | IFI44L   |
| 54810  | ENSG00000137960 | 1.32426889 | -0.05755939 | 0.38758647 | 0.29338197 | NA         | GIPC2    |
| 9411   | ENSG00000137962 | 232.740447 | 0.48210175  | 0.16297439 | 0.00120843 | 0.00696553 | ARHGAP29 |
| 10561  | ENSG00000137965 | 4.44451348 | 5.1958381   | 2.76366752 | 0.00042505 | 0.00279607 | IFI44    |
| 204962 | ENSG00000137968 | 654.821985 | 0.34530566  | 0.10890307 | 0.00092099 | 0.00552039 | SLC44A5  |
| NA     | ENSG00000137970 | 4.46731687 | 0.05974695  | 0.37653066 | 0.56350619 | 0.76627833 | RPL7P9   |
| 9635   | ENSG00000137975 | 0          | NA          | NA         | NA         | NA         | CLCA2    |
| 58511  | ENSG00000137976 | 0.32361704 | -0.00016112 | 0.38336248 | 0.98180736 | NA         | DNASE2B  |
| 1629   | ENSG00000137992 | 571.402412 | -0.11592541 | 0.13068164 | 0.34405458 | 0.57438933 | DBT      |
| 8634   | ENSG00000137996 | 566.765984 | 0.05518611  | 0.12546724 | 0.64254425 | 0.82136499 | RTCA     |
| 26160  | ENSG00000138002 | 1092.88632 | 0.48845691  | 0.10781748 | 2.38E-06   | 2.53E-05   | IFT172   |
| 85465  | ENSG00000138018 | 2233.7795  | -0.30871212 | 0.08593638 | 0.00022073 | 0.00155346 | SELENOI  |
| 10669  | ENSG00000138028 | 932.207286 | -0.27934491 | 0.08640953 | 0.0008799  | 0.00529648 | CGREF1   |
| 3032   | ENSG00000138029 | 1479.85799 | 0.03422494  | 0.07821698 | 0.65636363 | 0.8292845  | HADHB    |
| 3795   | ENSG00000138030 | 394.334822 | 0.06781372  | 0.13820179 | 0.59971017 | 0.79066681 | KHK      |
| 109    | ENSG00000138031 | 878.3366   | -0.51341046 | 0.09463589 | 2.20E-08   | 3.18E-07   | ADCY3    |
| 5495   | ENSG00000138032 | 1086.14923 | 0.02774786  | 0.08001402 | 0.72356695 | 0.86792244 | PPM1B    |
| 87178  | ENSG00000138035 | 749.85036  | 0.18169155  | 0.09812897 | 0.05512731 | 0.16046446 | PNPT1    |
| 51626  | ENSG00000138036 | 350.142364 | 0.32675929  | 0.14416294 | 0.01432241 | 0.05554485 | DYNC2L1  |
| 3973   | ENSG00000138039 | 0.18922458 | 0.01954053  | 0.38488496 | 0.78225479 | NA         | LHCGR    |
| 80745  | ENSG00000138050 | 424.158518 | 0.10651281  | 0.14162868 | 0.41856143 | 0.64459045 | THUMPD2  |
| 1545   | ENSG00000138061 | 141.136325 | 0.07501803  | 0.18432243 | 0.64685167 | 0.82421635 | CYP1B1   |
| 391365 | ENSG00000138068 | 0          | NA          | NA         | NA         | NA         | SULT6B1  |
| 5861   | ENSG00000138069 | 1621.34838 | -0.07924793 | 0.08561575 | 0.34167514 | 0.57180671 | RAB1A    |
| 10097  | ENSG00000138071 | 4710.26485 | -0.22051042 | 0.05634877 | 7.97E-05   | 0.00062123 | ACTR2    |
| 10113  | ENSG00000138073 | 1296.89464 | 0.27808197  | 0.08922885 | 0.00132148 | 0.00751235 | PREB     |
| 8884   | ENSG00000138074 | 1516.82629 | -0.03326044 | 0.08312043 | 0.68112819 | 0.84419446 | SLC5A6   |
| 64240  | ENSG00000138075 | 2.62288524 | 0.02075514  | 0.37245614 | 0.83218655 | 0.92392457 | ABCG5    |
| 9581   | ENSG00000138078 | 2168.62101 | -0.22734387 | 0.0771297  | 0.00257199 | 0.01329555 | PREPL    |
| 6519   | ENSG00000138079 | 1.55097574 | 0.0929806   | 0.39470205 | 0.21059753 | NA         | SLC3A1   |
| 11117  | ENSG00000138080 | 7215.26682 | -0.18793854 | 0.055512   | 0.00061302 | 0.00385495 | EMILIN1  |
| 80204  | ENSG00000138081 | 2466.41915 | -0.12778891 | 0.07334215 | 0.07558395 | 0.20253722 | FBXO11   |
| 6496   | ENSG00000138083 | 2617.93489 | 0.14395663  | 0.07941664 | 0.06369262 | 0.17918196 | SIX3     |
| 51374  | ENSG00000138085 | 1480.9932  | 0.08274678  | 0.07735588 | 0.27463695 | 0.49847198 | ATRAID   |
| 79172  | ENSG00000138092 | 1789.60489 | -0.2515907  | 0.07242298 | 0.00038466 | 0.00255669 | CENPO    |
| 10128  | ENSG00000138095 | 5643.08266 | -0.20844666 | 0.0540974  | 9.03E-05   | 0.00069501 | LRPPRC   |
| 57159  | ENSG00000138100 | 60.5822755 | -1.98483356 | 0.34027046 | 3.64E-10   | 6.63E-09   | TRIM54   |
| 1838   | ENSG00000138101 | 656.744739 | -0.00307039 | 0.10029841 | 0.97385757 | 0.99048209 | DTNB     |

|        |                 |            |             |            |            |            |          |
|--------|-----------------|------------|-------------|------------|------------|------------|----------|
| 10121  | ENSG00000138107 | 3107.95307 | -0.06697938 | 0.06514287 | 0.29641349 | 0.52297409 | ACTR1A   |
| 1559   | ENSG00000138109 | 0          | NA          | NA         | NA         | NA         | CYP2C9   |
| 79847  | ENSG00000138111 | 437.107103 | -0.50141021 | 0.14777185 | 0.00025499 | 0.00177133 | MFSD13A  |
| 1558   | ENSG00000138115 | 0.18922458 | 0.01954053  | 0.38488496 | 0.78225479 | NA         | CYP2C8   |
| 26509  | ENSG00000138119 | 2.6240105  | 0.15683239  | 0.42689945 | 0.03864407 | 0.12228832 | MYOF     |
| 84171  | ENSG00000138131 | 79.6659816 | -0.06658663 | 0.21994084 | 0.71118755 | 0.86120368 | LOXL4    |
| 57559  | ENSG00000138134 | 216.59416  | 0.03452163  | 0.16147214 | 0.8149092  | 0.91598064 | STAMBPL1 |
| 9023   | ENSG00000138135 | 0          | NA          | NA         | NA         | NA         | CH25H    |
| 10660  | ENSG00000138136 | 0.33817773 | 0.00200115  | 0.38337497 | 0.96934855 | NA         | LBX1     |
| 84896  | ENSG00000138138 | 1660.00112 | -0.18443279 | 0.07449752 | 0.01132947 | 0.04598543 | ATAD1    |
| 118663 | ENSG00000138152 | 0.173733   | 0.01914545  | 0.38484597 | 0.78225479 | NA         | BTBD16   |
| 3832   | ENSG00000138160 | 2238.94734 | -0.40349932 | 0.0670896  | 9.53E-10   | 1.64E-08   | KIF11    |
| 50624  | ENSG00000138161 | 9.46963836 | 0.10230064  | 0.36058982 | 0.51467683 | 0.72937777 | CUZD1    |
| 10579  | ENSG00000138162 | 1523.68904 | -0.58538537 | 0.08919614 | 1.67E-11   | 3.47E-10   | TACC2    |
| 1847   | ENSG00000138166 | 51.7698117 | 0.1485277   | 0.25527642 | 0.44590491 | 0.67028199 | DUSP5    |
| 51063  | ENSG00000138172 | 77.6932023 | -0.0257596  | 0.22674859 | 0.88672169 | 0.95023138 | CALHM2   |
| 403    | ENSG00000138175 | 793.362228 | -0.17771988 | 0.08959431 | 0.04050567 | 0.1265563  | ARL3     |
| 55165  | ENSG00000138180 | 699.418186 | -0.42467581 | 0.09631652 | 5.07E-06   | 5.08E-05   | CEP55    |
| 9585   | ENSG00000138182 | 876.304143 | -0.20322375 | 0.09831031 | 0.03176963 | 0.10499908 | KIF20B   |
| 953    | ENSG00000138185 | 1002.34267 | 0.19118223  | 0.10029099 | 0.04814509 | 0.1446175  | ENTPD1   |
| 54536  | ENSG00000138190 | 392.039288 | -0.23908103 | 0.12589134 | 0.04358442 | 0.13391897 | EXOC6    |
| 51196  | ENSG00000138193 | 174.061657 | -0.31262029 | 0.27204599 | 0.12755432 | 0.29800727 | PLCE1    |
| 5950   | ENSG00000138207 | 5.4180837  | 0.16063624  | 0.40421716 | 0.23643391 | 0.45322211 | RBP4     |
| 51163  | ENSG00000138231 | 620.142342 | -0.03430094 | 0.11197201 | 0.74653232 | 0.8807279  | DBR1     |
| 23317  | ENSG00000138246 | 1455.32964 | 0.05565395  | 0.07831841 | 0.46820035 | 0.69110148 | DNAJC13  |
| 53836  | ENSG00000138271 | 0          | NA          | NA         | NA         | NA         | GPR87    |
| 310    | ENSG00000138279 | 742.02519  | 0.11379065  | 0.10658037 | 0.26649223 | 0.48892231 | ANXA7    |
| 317662 | ENSG00000138286 | 826.410198 | 0.17032362  | 0.09453969 | 0.06281034 | 0.17744542 | FAM149B1 |
| 51008  | ENSG00000138303 | 390.601097 | -0.22356118 | 0.12654864 | 0.06022211 | 0.17171698 | ASCC1    |
| 84647  | ENSG00000138308 | 0.83861444 | -0.01118817 | 0.38091392 | 0.84358121 | NA         | PLA2G12B |
| 22891  | ENSG00000138311 | 102.25309  | -1.27439245 | 0.24592817 | 1.98E-08   | 2.89E-07   | ZNF365   |
| 170392 | ENSG00000138315 | 0.31802559 | 0.00095554  | 0.38336542 | 0.9679205  | NA         | OIT3     |
| 140766 | ENSG00000138316 | 58.5328156 | -0.51661718 | 0.30358713 | 0.02453887 | 0.08587956 | ADAMTS14 |
| 6229   | ENSG00000138326 | 12965.1539 | -0.30252525 | 0.04930418 | 5.89E-10   | 1.05E-08   | RPS24    |
| 80312  | ENSG00000138336 | 504.881898 | -0.15217906 | 0.11699528 | 0.17081004 | 0.36283417 | TET1     |
| 1763   | ENSG00000138346 | 766.142464 | -0.28324779 | 0.12657942 | 0.01731212 | 0.06489096 | DNA2     |
| 84665  | ENSG00000138347 | 0          | NA          | NA         | NA         | NA         | MYPN     |
| 316    | ENSG00000138356 | 46.5162578 | -0.90901824 | 0.38526863 | 0.00200836 | 0.0107459  | AOX1     |



|           |                 |            |             |            |            |            |           |
|-----------|-----------------|------------|-------------|------------|------------|------------|-----------|
| 471       | ENSG00000138363 | 1641.3653  | 0.1500289   | 0.09250317 | 0.09442921 | 0.23890276 | ATIC      |
| 50485     | ENSG00000138375 | 518.146425 | 0.18797697  | 0.12208746 | 0.10383208 | 0.25644573 | SMARCAL1  |
| 580       | ENSG00000138376 | 378.281634 | 0.33441936  | 0.14989808 | 0.01524068 | 0.05837356 | BARD1     |
| 6775      | ENSG00000138378 | 21.5574355 | 0.24622015  | 0.37251846 | 0.23085632 | 0.44684775 | STAT4     |
| 2660      | ENSG00000138379 | 3.48831158 | 0.06783578  | 0.37515113 | 0.54622353 | 0.75345287 | MSTN      |
| 79800     | ENSG00000138380 | 271.914405 | 0.06401474  | 0.17005763 | 0.67560685 | 0.84120289 | CARF      |
| 54529     | ENSG00000138381 | 658.264664 | -0.47169234 | 0.11496673 | 1.71E-05   | 0.00015545 | ASNSD1    |
| 29081     | ENSG00000138382 | 462.340481 | 0.2006977   | 0.11019854 | 0.05680066 | 0.16421638 | METTL5    |
| 6741      | ENSG00000138385 | 2186.62087 | -0.13066349 | 0.07795335 | 0.08650042 | 0.22401363 | SSB       |
| 4664      | ENSG00000138386 | 1274.96011 | -0.08401987 | 0.0896192  | 0.33480044 | 0.56474327 | NAB1      |
| 65061     | ENSG00000138395 | 6.15818008 | -0.02539268 | 0.36060022 | 0.8398335  | 0.92728013 | CDK15     |
| 9360      | ENSG00000138398 | 1376.90361 | -0.37276905 | 0.09050348 | 2.16E-05   | 0.00019281 | PPIG      |
| 79675     | ENSG00000138399 | 457.284475 | -0.23880364 | 0.13592826 | 0.05934719 | 0.16966113 | FASTKD1   |
| 130752    | ENSG00000138400 | 14.5754375 | 0.2448064   | 0.40712114 | 0.20117134 | 0.40643985 | MDH1B     |
| 57520     | ENSG00000138411 | 345.34902  | -0.00935624 | 0.12412238 | 0.93560977 | 0.97325384 | HECW2     |
| 3417      | ENSG00000138413 | 1147.80504 | -0.00414275 | 0.09565623 | 0.96344916 | 0.98545957 | IDH1      |
| 29789     | ENSG00000138430 | 1686.52682 | -0.13823963 | 0.0773431  | 0.06737197 | 0.18634601 | OLA1      |
| 9541      | ENSG00000138433 | 389.161744 | 0.10695416  | 0.12036148 | 0.34951452 | 0.58004303 | CIR1      |
| 6744      | ENSG00000138434 | 1045.0858  | -0.19552875 | 0.09089954 | 0.02636669 | 0.09077131 | ITPRID2   |
| 1134      | ENSG00000138435 | 5.71943676 | 0.00711825  | 0.35787174 | 0.95896419 | 0.9831126  | CHRNA1    |
| 150864    | ENSG00000138439 | 639.876377 | -0.23181522 | 0.11026659 | 0.02764733 | 0.09400566 | FAM117B   |
| 55759     | ENSG00000138442 | 1136.62298 | -0.17271937 | 0.13869394 | 0.18001023 | 0.37673028 | WDR12     |
| 10152     | ENSG00000138443 | 3489.12813 | -0.09058313 | 0.06274783 | 0.14307072 | 0.32222162 | ABI2      |
| 3685      | ENSG00000138448 | 1393.6415  | -0.16586597 | 0.11835938 | 0.13933645 | 0.31622334 | ITGAV     |
| 30061     | ENSG00000138449 | 196.646546 | 0.43203387  | 0.16711255 | 0.00432396 | 0.02062195 | SLC40A1   |
| 55032     | ENSG00000138459 | 627.025982 | -0.55463632 | 0.12820622 | 4.98E-06   | 5.02E-05   | SLC35A5   |
| 84925     | ENSG00000138463 | 217.239003 | -0.08494665 | 0.17433002 | 0.58305071 | 0.77960143 | SLC49A4   |
| 57337     | ENSG00000138468 | 612.868962 | -0.03111954 | 0.11077457 | 0.76695641 | 0.89261979 | SENP7     |
| 9626      | ENSG00000138472 | 0          | NA          | NA         | NA         | NA         | GUCA1C    |
| 84692     | ENSG00000138483 | 0.69837401 | 0.02518644  | 0.38341849 | 0.57787734 | NA         | CCDC54    |
| 10063     | ENSG00000138495 | 389.159566 | 0.04787691  | 0.13900599 | 0.71266079 | 0.86169546 | COX17     |
| 83666     | ENSG00000138496 | 346.195857 | 0.1288254   | 0.13030873 | 0.29325511 | 0.5194341  | PARP9     |
| 55329     | ENSG00000138587 | 162.223315 | -0.07419949 | 0.17645108 | 0.63483985 | 0.81617564 | MNS1      |
| 9101      | ENSG00000138592 | 999.87625  | -0.00189567 | 0.0843202  | 0.98119686 | 0.99355086 | USP8      |
| 9728      | ENSG00000138593 | 1134.05779 | 0.27134361  | 0.0993479  | 0.00458041 | 0.02160614 | SECISBP2L |
| 29766     | ENSG00000138594 | 993.386437 | -0.00592666 | 0.10809896 | 0.95310764 | 0.98058207 | TMOD3     |
| 112268148 | ENSG00000138594 | 993.386437 | -0.00592666 | 0.10809896 | 0.95310764 | 0.98058207 | TMOD3     |
| 84888     | ENSG00000138600 | 629.339619 | -0.37458678 | 0.10455691 | 0.00018945 | 0.00135494 | SPPL2A    |

|        |                 |            |             |            |            |            |          |
|--------|-----------------|------------|-------------|------------|------------|------------|----------|
| 26035  | ENSG00000138604 | 287.060367 | 0.02720279  | 0.13880766 | 0.83460722 | 0.92451691 | GLCE     |
| 90525  | ENSG00000138606 | 1158.74173 | 0.12888956  | 0.07969019 | 0.09836321 | 0.24621828 | SHF      |
| 83464  | ENSG00000138613 | 160.915608 | 0.41488353  | 0.22979988 | 0.02985577 | 0.09998962 | APH1B    |
| 81556  | ENSG00000138614 | 871.874358 | -0.05464453 | 0.12791042 | 0.64972467 | 0.82525848 | INTS14   |
| 8483   | ENSG00000138615 | 14.2307896 | 0.02802963  | 0.32527855 | 0.87472557 | 0.94484382 | CILP     |
| 54956  | ENSG00000138617 | 214.623359 | 0.14704864  | 0.1502114  | 0.28732437 | 0.51306915 | PARP16   |
| 60490  | ENSG00000138621 | 143.59762  | -0.17572147 | 0.24541749 | 0.35801489 | 0.58833889 | PPCDC    |
| 10021  | ENSG00000138622 | 14.3298217 | -2.42878105 | 0.78276487 | 0.00010654 | 0.00080489 | HCN4     |
| 8482   | ENSG00000138623 | 122.73509  | -0.10932281 | 0.19335476 | 0.51218196 | 0.72744578 | SEMA7A   |
| 84993  | ENSG00000138629 | 1389.08566 | 0.14060446  | 0.08921611 | 0.10533683 | 0.25877695 | UBL7     |
| 83478  | ENSG00000138639 | 31.2261993 | 1.55834569  | 0.59908492 | 0.00037674 | 0.00251078 | ARHGAP24 |
| 10144  | ENSG00000138640 | 112.481191 | 0.45377837  | 0.22914427 | 0.0181903  | 0.06735733 | FAM13A   |
| 8916   | ENSG00000138641 | 109.93599  | -0.04785113 | 0.20978198 | 0.7841312  | 0.9017077  | HERC3    |
| 55008  | ENSG00000138642 | 105.603856 | 0.05535934  | 0.22445329 | 0.76276053 | 0.89060552 | HERC6    |
| 51191  | ENSG00000138646 | 212.873064 | 0.75532766  | 0.18651948 | 9.92E-06   | 9.42E-05   | HERC5    |
| 57575  | ENSG00000138650 | 68.18483   | -0.62803885 | 0.33334438 | 0.01160936 | 0.04691032 | PCDH10   |
| 64579  | ENSG00000138653 | 0          | NA          | NA         | NA         | NA         | NDST4    |
| 55345  | ENSG00000138658 | 878.046894 | 0.00367984  | 0.08779144 | 0.96660694 | 0.98715611 | ZGRF1    |
| 55435  | ENSG00000138660 | 848.741889 | 0.03354915  | 0.09503099 | 0.71639407 | 0.86350293 | AP1AR    |
| 51138  | ENSG00000138663 | 532.199023 | -0.17097566 | 0.12218731 | 0.13876635 | 0.31543588 | COPS4    |
| 3184   | ENSG00000138668 | 8045.7671  | -0.23995966 | 0.06278153 | 0.00010392 | 0.00078783 | HNRNPD   |
| 5593   | ENSG00000138669 | 0          | NA          | NA         | NA         | NA         | PRKG2    |
| 153020 | ENSG00000138670 | 0          | NA          | NA         | NA         | NA         | RASGEF1B |
| 22872  | ENSG00000138674 | 2796.41657 | 0.03703028  | 0.08177653 | 0.64379343 | 0.82204027 | SEC31A   |
| 2250   | ENSG00000138675 | 18.7920263 | 0.12124225  | 0.33415629 | 0.51421058 | 0.72923073 | FGF5     |
| 84803  | ENSG00000138678 | 0          | NA          | NA         | NA         | NA         | GPAT3    |
| 59067  | ENSG00000138684 | 0          | NA          | NA         | NA         | NA         | IL21     |
| 2247   | ENSG00000138685 | 363.372493 | -0.15970788 | 0.13098037 | 0.19627919 | 0.39997732 | FGF2     |
| 55212  | ENSG00000138686 | 284.031858 | 0.10426364  | 0.15278343 | 0.45718751 | 0.6806183  | BBS7     |
| 84162  | ENSG00000138688 | 1704.76659 | 0.27012662  | 0.07426473 | 0.00020439 | 0.00145135 | KIAA1109 |
| 658    | ENSG00000138696 | 970.591513 | -0.53311301 | 0.09273229 | 3.24E-09   | 5.20E-08   | BMPRI1B  |
| 5910   | ENSG00000138698 | 811.25595  | -0.15115535 | 0.09140101 | 0.08797932 | 0.2266307  | RAP1GDS1 |
| 55132  | ENSG00000138709 | 326.531553 | 0.04359553  | 0.14034058 | 0.73971909 | 0.8770894  | LARP1B   |
| 22915  | ENSG00000138722 | 1.03111363 | -0.00079013 | 0.37916723 | 0.99025885 | NA         | MMRN1    |
| 8654   | ENSG00000138735 | 360.560849 | 1.21486482  | 0.16407123 | 1.26E-14   | 3.32E-13   | PDE5A    |
| 11107  | ENSG00000138738 | 257.025376 | 0.45835268  | 0.17819051 | 0.00408602 | 0.01964299 | PRDM5    |
| 7222   | ENSG00000138741 | 1.48147409 | 0.10022246  | 0.4018286  | 0.07221301 | NA         | TRPC3    |
| 27163  | ENSG00000138744 | 55.7183287 | 0.33304111  | 0.29777899 | 0.12206058 | 0.28886671 | NAAA     |

|        |                 |            |             |            |            |            |          |
|--------|-----------------|------------|-------------|------------|------------|------------|----------|
| 53371  | ENSG00000138750 | 531.945492 | -0.15645432 | 0.11629326 | 0.15693526 | 0.34373985 | NUP54    |
| 4283   | ENSG00000138755 | 0          | NA          | NA         | NA         | NA         | CXCL9    |
| 55589  | ENSG00000138756 | 430.022698 | 0.33728207  | 0.15785583 | 0.01900533 | 0.06992015 | BMP2K    |
| 9908   | ENSG00000138757 | 4097.77092 | -0.18113742 | 0.06367007 | 0.00385151 | 0.01866943 | G3BP2    |
| 55752  | ENSG00000138758 | 3788.6936  | -0.18828987 | 0.06496297 | 0.0032482  | 0.01618796 | SEPTIN11 |
| 80144  | ENSG00000138759 | 4671.28705 | -1.11946122 | 0.05406592 | 3.71E-96   | 1.10E-93   | FRAS1    |
| 950    | ENSG00000138760 | 4949.77799 | 0.18917201  | 0.05466658 | 0.00047709 | 0.0030963  | SCARB2   |
| 901    | ENSG00000138764 | 1148.74058 | 0.21284139  | 0.10230024 | 0.03058915 | 0.10191246 | CCNG2    |
| 246175 | ENSG00000138767 | 509.193204 | -0.24088705 | 0.15871719 | 0.09329202 | 0.23668972 | CNOT6L   |
| 8615   | ENSG00000138768 | 1538.21833 | 0.04626145  | 0.08918314 | 0.59447927 | 0.7877158  | USO1     |
| 8999   | ENSG00000138769 | 84.606132  | 0.11211632  | 0.25234499 | 0.5600472  | 0.76415299 | CDKL2    |
| 57619  | ENSG00000138771 | 1945.91495 | -0.12333821 | 0.08772166 | 0.1479938  | 0.33012187 | SHROOM3  |
| 306    | ENSG00000138772 | 2.07802796 | 0.07411435  | 0.3851653  | 0.39405882 | NA         | ANXA3    |
| 27068  | ENSG00000138777 | 579.998048 | -0.022072   | 0.10744003 | 0.82844735 | 0.92220943 | PPA2     |
| 1062   | ENSG00000138778 | 1557.88498 | -0.49341709 | 0.07031594 | 9.31E-13   | 2.13E-11   | CENPE    |
| 79807  | ENSG00000138780 | 555.766156 | -0.21475915 | 0.13088297 | 0.07977804 | 0.21084412 | GSTCD    |
| 57117  | ENSG00000138785 | 356.699081 | -0.04798627 | 0.13941235 | 0.71049204 | 0.86099206 | INTS12   |
| 2028   | ENSG00000138792 | 0.16735865 | 0.01897177  | 0.38482933 | 0.78225479 | NA         | ENPEP    |
| 839    | ENSG00000138794 | 232.147211 | 0.46994415  | 0.2061468  | 0.0084696  | 0.0361669  | CASP6    |
| 51176  | ENSG00000138795 | 11.7798426 | 0.30055951  | 0.55293956 | 0.00721557 | 0.03169994 | LEF1     |
| 3033   | ENSG00000138796 | 1286.44456 | -0.29012879 | 0.09212087 | 0.00113961 | 0.00660722 | HADH     |
| 1950   | ENSG00000138798 | 0          | NA          | NA         | NA         | NA         | EGF      |
| 9061   | ENSG00000138801 | 1902.93936 | 0.36268142  | 0.07137238 | 2.26E-07   | 2.85E-06   | PAPSS1   |
| 10427  | ENSG00000138802 | 836.925885 | -0.1439763  | 0.08802462 | 0.09234415 | 0.2349928  | SEC24B   |
| 84103  | ENSG00000138813 | 0          | NA          | NA         | NA         | NA         | C4orf17  |
| 5530   | ENSG00000138814 | 748.854892 | -0.20496645 | 0.09628578 | 0.02746577 | 0.09356471 | PPP3CA   |
| 64116  | ENSG00000138821 | 320.993934 | 0.94700413  | 0.13564633 | 4.30E-13   | 1.00E-11   | SLC39A8  |
| 4547   | ENSG00000138823 | 4.88393185 | -0.00428062 | 0.36238045 | 0.96964561 | 0.98858077 | MTTP     |
| 2201   | ENSG00000138829 | 0          | NA          | NA         | NA         | NA         | FBN2     |
| 23162  | ENSG00000138834 | 3885.23377 | 0.30602911  | 0.06977712 | 7.94E-06   | 7.68E-05   | MAPK8IP3 |
| 5998   | ENSG00000138835 | 120.708033 | 0.07130846  | 0.19184481 | 0.6692627  | 0.83726414 | RGS3     |
| 83606  | ENSG00000138867 | 1250.87756 | 0.24441971  | 0.09851574 | 0.01008401 | 0.04167381 | GUCD1    |
| 164714 | ENSG00000138892 | 0          | NA          | NA         | NA         | NA         | TTLL8    |
| 91445  | ENSG00000138942 | 736.242862 | -0.03162853 | 0.10215224 | 0.74716291 | 0.88120985 | RNF185   |
| 85352  | ENSG00000138944 | 0.173124   | -0.01911262 | 0.38486262 | 0.84537521 | NA         | SHISAL1  |
| 64098  | ENSG00000138964 | 0.51937201 | -0.02557462 | 0.38567603 | 0.54680819 | NA         | PARVG    |
| 283358 | ENSG00000139044 | 218.785465 | -0.33718571 | 0.17598571 | 0.03124679 | 0.10358167 | B4GALNT3 |
| 5149   | ENSG00000139053 | 0.14931947 | -0.01844332 | 0.38480212 | 0.84537521 | NA         | PDE6H    |

|        |                 |            |             |            |            |            |           |
|--------|-----------------|------------|-------------|------------|------------|------------|-----------|
| 121506 | ENSG00000139055 | 0          | NA          | NA         | NA         | NA         | ERP27     |
| 2120   | ENSG00000139083 | 295.949988 | 0.62022189  | 0.14916266 | 8.69E-06   | 8.34E-05   | ETV6      |
| 23710  | ENSG00000139112 | 145.432853 | 0.36730938  | 0.19480939 | 0.03050706 | 0.10172437 | GABARAPL1 |
| 55605  | ENSG00000139116 | 8378.59343 | -0.03192756 | 0.05671484 | 0.56813822 | 0.76919502 | KIF21A    |
| 144402 | ENSG00000139117 | 5.8342597  | 0.07695163  | 0.36878857 | 0.55722586 | 0.76258372 | CPNE8     |
| 51067  | ENSG00000139131 | 296.304138 | 0.07419154  | 0.13024363 | 0.54524254 | 0.75294856 | YARS2     |
| 121512 | ENSG00000139132 | 870.97427  | -0.04554902 | 0.09662333 | 0.62535228 | 0.80924616 | FGD4      |
| 84920  | ENSG00000139133 | 149.575532 | -0.02414026 | 0.18275779 | 0.87940182 | 0.94652699 | ALG10     |
| 5288   | ENSG00000139144 | 0          | NA          | NA         | NA         | NA         | PIK3C2G   |
| 58516  | ENSG00000139146 | 2950.15106 | -0.09512785 | 0.0855925  | 0.25354179 | 0.47391189 | SINHCAF   |
| 89869  | ENSG00000139151 | 0          | NA          | NA         | NA         | NA         | PLCZ1     |
| 121536 | ENSG00000139154 | 510.234173 | 0.23214291  | 0.14358667 | 0.08048201 | 0.21233551 | AEBP2     |
| 53919  | ENSG00000139155 | 18.6034227 | 1.34996225  | 0.83843315 | 0.00366989 | 0.0179602  | SLCO1C1   |
| 254013 | ENSG00000139160 | 35.3660611 | -0.19069187 | 0.30138037 | 0.34862438 | 0.57928875 | ETFBKMT   |
| 55500  | ENSG00000139163 | 1222.96323 | -0.36746258 | 0.07734037 | 1.18E-06   | 1.32E-05   | ETNK1     |
| 85437  | ENSG00000139168 | 682.271518 | -0.00787092 | 0.10445285 | 0.93670129 | 0.97351594 | ZCRB1     |
| 84216  | ENSG00000139173 | 209.239633 | 0.05089531  | 0.15945725 | 0.72701743 | 0.86953012 | TMEM117   |
| 144165 | ENSG00000139174 | 213.12015  | -0.39256365 | 0.18240881 | 0.01511278 | 0.05803579 | PRICKLE1  |
| 51279  | ENSG00000139178 | 145.327226 | 1.42638547  | 0.2574979  | 2.38E-09   | 3.89E-08   | C1RL      |
| 4704   | ENSG00000139180 | 723.438896 | 0.05934517  | 0.13792302 | 0.65122226 | 0.82578612 | NDUFA9    |
| 9746   | ENSG00000139182 | 1240.82906 | 0.00831613  | 0.09161448 | 0.92735474 | 0.96962941 | CLSTN3    |
| 10219  | ENSG00000139187 | 71.6660616 | -0.25496889 | 0.29396579 | 0.21852646 | 0.43050004 | KLRG1     |
| 6843   | ENSG00000139190 | 165.537678 | 0.11291435  | 0.22847017 | 0.5407122  | 0.74929575 | VAMP1     |
| 55080  | ENSG00000139192 | 57.8848764 | 0.4733119   | 0.33334168 | 0.04532784 | 0.13793011 | TAPBPL    |
| 939    | ENSG00000139193 | 2.20332748 | 0.11338524  | 0.40304365 | 0.13794575 | NA         | CD27      |
| 83758  | ENSG00000139194 | 23.1982672 | 0.40510933  | 0.42450731 | 0.0911164  | 0.23292738 | RBP5      |
| 5830   | ENSG00000139197 | 822.003608 | -0.26601502 | 0.10041369 | 0.00588721 | 0.02673434 | PEX5      |
| 196500 | ENSG00000139200 | 951.03358  | -0.331998   | 0.08991007 | 0.00013966 | 0.00102739 | PIANP     |
| 55089  | ENSG00000139209 | 0          | NA          | NA         | NA         | NA         | SLC38A4   |
| 347902 | ENSG00000139211 | 0          | NA          | NA         | NA         | NA         | AMIGO2    |
| 9169   | ENSG00000139218 | 2066.39592 | -0.15465832 | 0.09543109 | 0.0935335  | 0.23705987 | SCAF11    |
| 1280   | ENSG00000139219 | 49.5433631 | 3.41016316  | 1.19760693 | 9.08E-05   | 0.00069833 | COL2A1    |
| 8499   | ENSG00000139220 | 0          | NA          | NA         | NA         | NA         | PPFIA2    |
| 23519  | ENSG00000139223 | 0          | NA          | NA         | NA         | NA         | ANP32D    |
| 84298  | ENSG00000139233 | 611.817033 | -0.1629894  | 0.1276465  | 0.17461756 | 0.36831942 | LLPH      |
| NA     | ENSG00000139239 | 6.99554107 | -0.02296309 | 0.35676504 | 0.86356335 | 0.93960776 | RPL14P1   |
| 121227 | ENSG00000139263 | 1.04366226 | 0.02700427  | 0.38148494 | 0.65366058 | NA         | LRIG3     |
| 92979  | ENSG00000139266 | 707.358792 | 0.13455098  | 0.09658281 | 0.14985571 | 0.33287611 | MARCHF9   |

|        |                 |            |             |            |            |            |          |
|--------|-----------------|------------|-------------|------------|------------|------------|----------|
| 83729  | ENSG00000139269 | 182.605731 | 4.35661836  | 1.0104815  | 6.14E-07   | 7.22E-06   | INHBE    |
| 11010  | ENSG00000139278 | 47.3285057 | -0.1882209  | 0.27147848 | 0.34560663 | 0.57615625 | GLIPR1   |
| 121278 | ENSG00000139287 | 0.37039575 | -0.01090982 | 0.38376479 | 0.90497973 | NA         | TPH2     |
| 22822  | ENSG00000139289 | 616.734235 | 1.1406246   | 0.10635276 | 9.24E-28   | 4.89E-26   | PHLDA1   |
| 55266  | ENSG00000139291 | 496.584653 | -0.28280897 | 0.12863766 | 0.01911983 | 0.07024768 | TMEM19   |
| 8549   | ENSG00000139292 | 1054.91122 | 2.60244181  | 0.11126163 | 2.75E-122  | 1.16E-119  | LGR5     |
| 374462 | ENSG00000139304 | 0          | NA          | NA         | NA         | NA         | PTPRQ    |
| 1848   | ENSG00000139318 | 2622.53785 | 0.25930185  | 0.06775398 | 9.89E-05   | 0.00075342 | DUSP6    |
| 282809 | ENSG00000139323 | 384.934598 | 0.42253376  | 0.16249954 | 0.00427005 | 0.02039427 | POC1B    |
| 160418 | ENSG00000139324 | 730.68256  | -0.03681378 | 0.11195431 | 0.73008569 | 0.8709773  | TMTC3    |
| 4060   | ENSG00000139329 | 203.183862 | 2.37715626  | 0.56841393 | 1.31E-06   | 1.45E-05   | LUM      |
| 11081  | ENSG00000139330 | 0          | NA          | NA         | NA         | NA         | KERA     |
| 6636   | ENSG00000139343 | 961.297236 | 0.17805018  | 0.08382007 | 0.02950214 | 0.09908963 | SNRPF    |
| 144193 | ENSG00000139344 | 30.3226471 | 1.60008256  | 0.49590175 | 7.21E-05   | 0.00057039 | AMDHD1   |
| 121441 | ENSG00000139350 | 651.897405 | 0.37156463  | 0.10937152 | 0.00038383 | 0.00255203 | NEDD1    |
| 50511  | ENSG00000139351 | 3.91880041 | -0.01940386 | 0.37098661 | 0.84544236 | 0.92979914 | SYCP3    |
| 429    | ENSG00000139352 | 392.54863  | 5.69404374  | 0.24344933 | 2.87E-121  | 1.19E-118  | ASCL1    |
| 283431 | ENSG00000139354 | 529.357236 | -0.43463844 | 0.12452667 | 0.00022227 | 0.00156208 | GAS2L3   |
| 114795 | ENSG00000139364 | 0          | NA          | NA         | NA         | NA         | TMEM132B |
| 121260 | ENSG00000139370 | 332.799644 | -0.0483407  | 0.12679313 | 0.68543421 | 0.84697401 | SLC15A4  |
| 6996   | ENSG00000139372 | 1403.073   | -0.10911619 | 0.07327183 | 0.12936323 | 0.30081651 | TDG      |
| 84934  | ENSG00000139405 | 402.708381 | -0.35555208 | 0.13937686 | 0.00607729 | 0.02744045 | RITA1    |
| 113675 | ENSG00000139410 | 17.4050934 | 0.02881302  | 0.32630733 | 0.87020646 | 0.94333385 | SDSL     |
| 326625 | ENSG00000139428 | 854.085699 | -0.93673629 | 0.09954988 | 7.44E-22   | 3.04E-20   | MMAB     |
| 51228  | ENSG00000139433 | 476.274364 | 0.01640952  | 0.11162829 | 0.87887044 | 0.94636578 | GLTP     |
| 9815   | ENSG00000139436 | 1183.93332 | -0.00705139 | 0.08250965 | 0.92954097 | 0.97060391 | GIT2     |
| 84260  | ENSG00000139437 | 665.68382  | 0.00686336  | 0.13001639 | 0.95477797 | 0.98139026 | TCHP     |
| 84915  | ENSG00000139438 | 2625.52636 | -1.91851422 | 0.07069022 | 2.29E-163  | 2.52E-160  | FAM222A  |
| 121643 | ENSG00000139445 | 526.496286 | -1.00479332 | 0.13613975 | 2.04E-14   | 5.30E-13   | FOXN4    |
| 9818   | ENSG00000139496 | 1686.6239  | -0.09558033 | 0.08227284 | 0.23357774 | 0.4504454  | NUP58    |
| 9107   | ENSG00000139505 | 790.23015  | -0.45215404 | 0.09948636 | 2.48E-06   | 2.62E-05   | MTMR6    |
| 283537 | ENSG00000139508 | 27.8024198 | 0.28938279  | 0.35290125 | 0.18494816 | 0.38378105 | SLC46A3  |
| 6541   | ENSG00000139514 | 4295.27353 | -0.05652278 | 0.1073012  | 0.58236432 | 0.77918294 | SLC7A1   |
| 3651   | ENSG00000139515 | 0          | NA          | NA         | NA         | NA         | PDX1     |
| 222484 | ENSG00000139517 | 167.246335 | -0.14615568 | 0.17896685 | 0.35489924 | 0.58535214 | LNX2     |
| 6821   | ENSG00000139531 | 359.371787 | -0.02173644 | 0.12554725 | 0.8537127  | 0.93418233 | SUOX     |
| 85478  | ENSG00000139537 | 20.3882352 | 0.1227822   | 0.32669394 | 0.51586671 | 0.73002854 | CCDC65   |
| 283375 | ENSG00000139540 | 3.84285716 | 0.06485967  | 0.38033218 | 0.48424835 | 0.7045162  | SLC39A5  |

|        |                 |            |             |            |            |            |           |
|--------|-----------------|------------|-------------|------------|------------|------------|-----------|
| 6895   | ENSG00000139546 | 478.963251 | 0.25540801  | 0.1129517  | 0.01769259 | 0.06596898 | TARBP2    |
| 8608   | ENSG00000139547 | 9.07287509 | 0.78181     | 1.30780556 | 0.01739428 | 0.0651137  | RDH16     |
| 50846  | ENSG00000139549 | 7.20658093 | 0.11453821  | 0.36968141 | 0.4491266  | 0.6728081  | DHH       |
| 94     | ENSG00000139567 | 82.9245198 | 0.73266778  | 0.28947803 | 0.00190001 | 0.01022965 | ACVRL1    |
| 53831  | ENSG00000139572 | 5.00381307 | 0.24621288  | 0.46960432 | 0.08784316 | 0.22642697 | GPR84     |
| 8620   | ENSG00000139574 | 23.3777089 | 0.09741093  | 0.30810874 | 0.61276608 | 0.80066379 | NPFF      |
| 79035  | ENSG00000139579 | 1131.85449 | -0.27846475 | 0.09177088 | 0.0017277  | 0.00945849 | NABP2     |
| 90634  | ENSG00000139597 | 186.385377 | 0.24288115  | 0.16797526 | 0.10784253 | 0.26339391 | N4BP2L1   |
| 1990   | ENSG00000139610 | 0          | NA          | NA         | NA         | NA         | CELA1     |
| 6601   | ENSG00000139613 | 3934.30539 | -0.08201097 | 0.07169774 | 0.24377059 | 0.4621195  | SMARCC2   |
| 675    | ENSG00000139618 | 788.276534 | -0.37002741 | 0.3125089  | 0.09447787 | 0.23893446 | BRCA2     |
| 54934  | ENSG00000139620 | 540.558461 | 0.00637045  | 0.14484105 | 0.96669252 | 0.98719269 | KANSL2    |
| 91012  | ENSG00000139624 | 558.174292 | -0.2352171  | 0.1255927  | 0.04662339 | 0.14111488 | CERS5     |
| 7786   | ENSG00000139625 | 853.067696 | -0.12714165 | 0.09214123 | 0.15454731 | 0.33997324 | MAP3K12   |
| 3695   | ENSG00000139626 | 5.25062743 | 0.09518494  | 0.38724135 | 0.33781133 | 0.56812552 | ITGB7     |
| 11226  | ENSG00000139629 | 337.556441 | 0.04887362  | 0.14238365 | 0.7124963  | 0.86169546 | GALNT6    |
| 51380  | ENSG00000139631 | 305.240268 | 0.59871489  | 0.15277421 | 2.55E-05   | 0.00022392 | CSAD      |
| 55716  | ENSG00000139636 | 954.860269 | 0.5003851   | 0.10325306 | 4.97E-07   | 5.94E-06   | LMBR1L    |
| 60314  | ENSG00000139637 | 798.300935 | -0.02825033 | 0.09017978 | 0.74644638 | 0.8807279  | MYG1      |
| 23344  | ENSG00000139641 | 1699.96089 | 0.04999345  | 0.07890933 | 0.51793554 | 0.73179327 | ESYT1     |
| 7009   | ENSG00000139644 | 4296.11525 | -0.05431277 | 0.07187683 | 0.44034553 | 0.66517856 | TMBIM6    |
| 283373 | ENSG00000139645 | 3028.20094 | 0.49310504  | 0.06488497 | 1.24E-14   | 3.28E-13   | ANKRD52   |
| 112802 | ENSG00000139648 | 0          | NA          | NA         | NA         | NA         | KRT71     |
| 283337 | ENSG00000139651 | 1096.65113 | 0.07044595  | 0.09031626 | 0.42283541 | 0.64881495 | ZNF740    |
| 79024  | ENSG00000139656 | 0.173124   | -0.01911262 | 0.38486262 | 0.84537521 | NA         | SMIM2     |
| 115825 | ENSG00000139668 | 1083.93368 | 0.31990627  | 0.10354792 | 0.0012961  | 0.00738916 | WDFY2     |
| 144983 | ENSG00000139675 | 10.2145771 | 6.72E-06    | 0.38287261 | 0.98969382 | 0.99637314 | HNRNPA1L2 |
| 10161  | ENSG00000139679 | 0.65371431 | 0.004689    | 0.38251884 | 0.91176106 | NA         | LPAR6     |
| 2098   | ENSG00000139684 | 1120.92332 | -0.06719868 | 0.08035929 | 0.39262059 | 0.6218739  | ESD       |
| 5925   | ENSG00000139687 | 1588.61794 | -0.0134073  | 0.11809906 | 0.90395222 | 0.95803483 | RB1       |
| 55206  | ENSG00000139697 | 1523.2871  | -0.22312069 | 0.08149975 | 0.00500017 | 0.02322176 | SBNO1     |
| 283385 | ENSG00000139714 | 74.7120504 | 0.12364597  | 0.22373779 | 0.49979187 | 0.7169827  | MORN3     |
| 23067  | ENSG00000139718 | 976.704914 | 0.11320527  | 0.08831225 | 0.1879919  | 0.38838712 | SETD1B    |
| 65082  | ENSG00000139719 | 644.57038  | 0.13828609  | 0.12629124 | 0.2458925  | 0.46515134 | VPS33A    |
| 79720  | ENSG00000139722 | 1098.02345 | 0.00026845  | 0.08142578 | 0.99700965 | 0.99912473 | VPS37B    |
| 54509  | ENSG00000139725 | 184.877147 | 0.08217883  | 0.19233834 | 0.62134769 | 0.80672374 | RHOF      |
| 8562   | ENSG00000139726 | 1706.2333  | -0.19312071 | 0.07757489 | 0.01088131 | 0.04443912 | DENR      |
| 81624  | ENSG00000139734 | 487.137855 | -0.15173773 | 0.11740391 | 0.17347504 | 0.36653299 | DIAPH3    |

|        |                 |            |             |            |            |            |          |
|--------|-----------------|------------|-------------|------------|------------|------------|----------|
| 122060 | ENSG00000139737 | 705.47068  | -0.1307971  | 0.09828933 | 0.16780956 | 0.35875832 | SLAIN1   |
| 64062  | ENSG00000139746 | 1997.28739 | -0.18055088 | 0.06710727 | 0.00621207 | 0.02788959 | RBM26    |
| 84530  | ENSG00000139767 | 1495.65467 | -1.03768046 | 0.07748984 | 8.99E-42   | 7.08E-40   | SRRM4    |
| 196541 | ENSG00000139780 | 0          | NA          | NA         | NA         | NA         | METTL21C |
| 10150  | ENSG00000139793 | 357.187572 | 0.31266686  | 0.13668619 | 0.01411892 | 0.05493616 | MBNL2    |
| 140432 | ENSG00000139797 | 0.47311071 | -0.03505208 | 0.38628403 | 0.496036   | NA         | RNF113B  |
| 85416  | ENSG00000139800 | 0          | NA          | NA         | NA         | NA         | ZIC5     |
| 84945  | ENSG00000139826 | 452.099368 | 0.06111883  | 0.1162168  | 0.58190287 | 0.778894   | ABHD13   |
| 55647  | ENSG00000139832 | 55.4724014 | 1.28175757  | 0.38756898 | 7.48E-05   | 0.0005886  | RAB20    |
| 79774  | ENSG00000139835 | 95.8794468 | 0.27157191  | 0.22835169 | 0.14687811 | 0.32812316 | GRTP1    |
| 8451   | ENSG00000139842 | 1706.40158 | 0.12604322  | 0.0842475  | 0.12500724 | 0.29343866 | CUL4A    |
| 319089 | ENSG00000139865 | 0          | NA          | NA         | NA         | NA         | TTC6     |
| 6751   | ENSG00000139874 | 0          | NA          | NA         | NA         | NA         | SSTR1    |
| 64403  | ENSG00000139880 | 1043.92452 | 0.03243826  | 0.08747189 | 0.7037806  | 0.85757322 | CDH24    |
| 161253 | ENSG00000139890 | 58.2214561 | 0.28604724  | 0.28746901 | 0.17295116 | 0.36578929 | REM2     |
| 643866 | ENSG00000139899 | 9.98634996 | 0.20958729  | 0.41095645 | 0.21367233 | 0.4238788  | CBLN3    |
| 283629 | ENSG00000139908 | 57.0393826 | -0.04141639 | 0.2414865  | 0.82422546 | 0.92018644 | TSSK4    |
| 4857   | ENSG00000139910 | 254.187564 | 0.06740175  | 0.17775788 | 0.66983868 | 0.83753108 | NOVA1    |
| 161247 | ENSG00000139914 | 8.01419383 | 0.02198525  | 0.34905742 | 0.88396934 | 0.94897201 | FITM1    |
| 161357 | ENSG00000139915 | 0          | NA          | NA         | NA         | NA         | MDGA2    |
| 81542  | ENSG00000139921 | 858.143545 | 0.27900717  | 0.08983599 | 0.00137148 | 0.00776322 | TMX1     |
| 122786 | ENSG00000139926 | 466.124517 | 2.27175943  | 0.12715885 | 1.65E-72   | 2.80E-70   | FRMD6    |
| 57161  | ENSG00000139946 | 0          | NA          | NA         | NA         | NA         | PELI2    |
| 6252   | ENSG00000139970 | 3075.22048 | -0.09396211 | 0.06122916 | 0.11963683 | 0.28460369 | RTN1     |
| 145407 | ENSG00000139971 | 51.7902248 | -0.06716283 | 0.27835338 | 0.72671836 | 0.86949966 | ARMH4    |
| 83851  | ENSG00000139973 | 671.600189 | -0.62304664 | 0.1424927  | 3.29E-06   | 3.41E-05   | SYT16    |
| 145389 | ENSG00000139974 | 74.0626954 | -0.0640755  | 0.27510027 | 0.7382891  | 0.87630444 | SLC38A6  |
| 122830 | ENSG00000139977 | 550.164239 | -0.15233708 | 0.12493641 | 0.1958168  | 0.39944263 | NAA30    |
| 8747   | ENSG00000139985 | 16.0009477 | 0.87847271  | 0.71150099 | 0.01424663 | 0.0553462  | ADAM21   |
| 145226 | ENSG00000139988 | 3.83916817 | 0.0682149   | 0.37539545 | 0.54181998 | 0.75017788 | RDH12    |
| 8816   | ENSG00000139990 | 1468.78421 | 0.12928004  | 0.07699836 | 0.08467035 | 0.22056982 | DCAF5    |
| 376267 | ENSG00000139998 | 723.086612 | -0.11885813 | 0.11040771 | 0.25989252 | 0.48153414 | RAB15    |
| 112840 | ENSG00000140006 | 303.949321 | -0.39170739 | 0.15448046 | 0.00562416 | 0.02570451 | WDR89    |
| 2100   | ENSG00000140009 | 33.5835089 | 0.28123845  | 0.3235757  | 0.19215549 | 0.39428741 | ESR2     |
| 27133  | ENSG00000140015 | 1.20625659 | -0.00221032 | 0.38074056 | 0.82204911 | NA         | KCNH5    |
| 85439  | ENSG00000140022 | 72.3422256 | -0.60399013 | 0.32978827 | 0.01352976 | 0.05313349 | STON2    |
| 90141  | ENSG00000140025 | 99.3882478 | 0.07178817  | 0.21647504 | 0.68978894 | 0.84944526 | EFCAB11  |
| 8477   | ENSG00000140030 | 0.18922458 | 0.01954053  | 0.38488496 | 0.78225479 | NA         | GPR65    |

|        |                 |            |             |            |            |            |           |
|--------|-----------------|------------|-------------|------------|------------|------------|-----------|
| 145482 | ENSG00000140043 | 443.489922 | 0.05071412  | 0.14192428 | 0.70216083 | 0.85686252 | PTGR2     |
| 122953 | ENSG00000140044 | 93.1128306 | 1.74392485  | 0.33593266 | 1.51E-08   | 2.22E-07   | JDP2      |
| 122481 | ENSG00000140057 | 106.31364  | -0.48941639 | 0.24093145 | 0.0138632  | 0.05410254 | AK7       |
| 90050  | ENSG00000140067 | 0          | NA          | NA         | NA         | NA         | FAM181A   |
| 123041 | ENSG00000140090 | 0          | NA          | NA         | NA         | NA         | SLC24A4   |
| 10516  | ENSG00000140092 | 0          | NA          | NA         | NA         | NA         | FBLN5     |
| 51156  | ENSG00000140093 | 0          | NA          | NA         | NA         | NA         | SERPINA10 |
| 122616 | ENSG00000140104 | 241.337038 | 0.25351318  | 0.16812259 | 0.09344502 | 0.23695669 | CLBA1     |
| 7453   | ENSG00000140105 | 1520.5333  | 0.49944137  | 0.0895886  | 9.98E-09   | 1.51E-07   | WARS1     |
| 283600 | ENSG00000140107 | 1.32137066 | 0.07872657  | 0.39199322 | 0.20799964 | NA         | SLC25A47  |
| 91833  | ENSG00000140153 | 435.389945 | 0.00987935  | 0.14162015 | 0.94133309 | 0.97559098 | WDR20     |
| 81614  | ENSG00000140157 | 1143.0522  | -0.06710905 | 0.09450713 | 0.46149455 | 0.68465911 | NIPA2     |
| 9990   | ENSG00000140199 | 693.374829 | 0.53098194  | 0.10572884 | 1.86E-07   | 2.36E-06   | SLC12A6   |
| 90527  | ENSG00000140254 | 19.7398548 | 2.029775    | 0.61119115 | 4.69E-05   | 0.00038722 | DUOXA1    |
| 4236   | ENSG00000140259 | 880.190034 | -0.04795719 | 0.08424607 | 0.55886669 | 0.7635226  | MFAP1     |
| 6938   | ENSG00000140262 | 5023.36941 | 0.16816038  | 0.0606667  | 0.00497389 | 0.02313219 | TCF12     |
| 6652   | ENSG00000140263 | 1770.98514 | -0.03789672 | 0.07696483 | 0.61424886 | 0.80178045 | SORD      |
| 10169  | ENSG00000140264 | 2894.02233 | -0.09501526 | 0.07342188 | 0.18689748 | 0.38676207 | SERF2     |
| 146050 | ENSG00000140265 | 1307.45579 | -0.17208907 | 0.08183788 | 0.03108539 | 0.10311556 | ZSCAN29   |
| 405753 | ENSG00000140274 | 2.31747265 | 0.04034072  | 0.38318097 | 0.51567308 | NA         | DUOXA2    |
| 50506  | ENSG00000140279 | 20.129113  | 3.98950056  | 0.86903106 | 2.06E-07   | 2.61E-06   | DUOX2     |
| 256586 | ENSG00000140280 | 180.250173 | -0.63352383 | 0.1869483  | 0.00017506 | 0.0012602  | LYSMD2    |
| 11001  | ENSG00000140284 | 89.8575504 | -0.58441087 | 0.26483028 | 0.00684187 | 0.03035391 | SLC27A2   |
| 2252   | ENSG00000140285 | 2.82266031 | 0.14049663  | 0.41953941 | 0.03314373 | 0.10852807 | FGF7      |
| 3067   | ENSG00000140287 | 0.34746601 | 0.02370763  | 0.3853651  | 0.61987128 | NA         | HDC       |
| 9245   | ENSG00000140297 | 0.85078897 | 0.02111374  | 0.38250161 | 0.58859804 | NA         | GCNT3     |
| 663    | ENSG00000140299 | 1478.68725 | 0.06536531  | 0.08161414 | 0.41304773 | 0.6403849  | BNIP2     |
| 2958   | ENSG00000140307 | 1039.95609 | -0.09116898 | 0.09272665 | 0.31012023 | 0.53778389 | GTF2A2    |
| 6727   | ENSG00000140319 | 3999.44554 | 0.03533861  | 0.0626531  | 0.56789504 | 0.76918607 | SRP14     |
| 22893  | ENSG00000140320 | 973.665498 | -0.11792622 | 0.09615174 | 0.20439591 | 0.41102928 | BAHD1     |
| 85455  | ENSG00000140323 | 621.163097 | -0.54655744 | 0.40200725 | 0.03495199 | 0.11318725 | DISP2     |
| 146059 | ENSG00000140326 | 730.79557  | 0.10608992  | 0.13347538 | 0.39674632 | 0.6258107  | CDAN1     |
| 7090   | ENSG00000140332 | 1707.73706 | -0.25352827 | 0.08773182 | 0.00291782 | 0.01477528 | TLE3      |
| 8125   | ENSG00000140350 | 4215.42258 | -0.04811361 | 0.07301897 | 0.50132302 | 0.71841948 | ANP32A    |
| 54939  | ENSG00000140365 | 1012.75927 | 0.14844222  | 0.08250585 | 0.06527289 | 0.18230796 | COMMD4    |
| 92912  | ENSG00000140367 | 432.964237 | 0.15572954  | 0.11896072 | 0.16812874 | 0.35917673 | UBE2Q2    |
| 9051   | ENSG00000140368 | 19.0743375 | -0.7465933  | 0.75575015 | 0.02027957 | 0.07370335 | PSTPIP1   |
| 2108   | ENSG00000140374 | 1133.69515 | -0.17424859 | 0.08679189 | 0.03893    | 0.12293032 | ETFA      |



|        |                 |            |             |            |            |            |          |
|--------|-----------------|------------|-------------|------------|------------|------------|----------|
| 597    | ENSG00000140379 | 0          | NA          | NA         | NA         | NA         | BCL2A1   |
| 10363  | ENSG00000140382 | 1378.54965 | 0.09682082  | 0.10428763 | 0.33472351 | 0.5647036  | HMG20A   |
| 49855  | ENSG00000140386 | 459.870553 | -0.16004824 | 0.11362243 | 0.13926293 | 0.31613004 | SCAPER   |
| 10099  | ENSG00000140391 | 3708.31539 | -0.11677098 | 0.05588936 | 0.03449058 | 0.11208731 | TSPAN3   |
| 80349  | ENSG00000140395 | 607.52164  | 0.01318736  | 0.10089804 | 0.89308679 | 0.95380535 | WDR61    |
| 10499  | ENSG00000140396 | 759.421766 | -0.46084444 | 0.11255174 | 1.83E-05   | 0.00016575 | NCOA2    |
| 79661  | ENSG00000140398 | 367.378013 | 0.35596297  | 0.13582564 | 0.00498931 | 0.0231822  | NEIL1    |
| 4123   | ENSG00000140400 | 1906.6537  | 0.58821087  | 0.09738464 | 4.88E-10   | 8.77E-09   | MAN2C1   |
| 55466  | ENSG00000140403 | 22.9873857 | 0.12153114  | 0.31422979 | 0.53094912 | 0.74257279 | DNAJA4   |
| 59274  | ENSG00000140406 | 1321.61276 | 0.02913502  | 0.07379509 | 0.69066298 | 0.85009948 | TLNRD1   |
| 7168   | ENSG00000140416 | 835.375646 | -0.27102392 | 0.09649219 | 0.00360022 | 0.01768467 | TPM1     |
| 3480   | ENSG00000140443 | 4465.11566 | 0.60605155  | 0.09878065 | 2.37E-10   | 4.37E-09   | IGF1R    |
| 91947  | ENSG00000140450 | 252.447811 | -0.00772692 | 0.14589557 | 0.95332139 | 0.98070602 | ARRDC4   |
| 80119  | ENSG00000140451 | 560.357108 | 0.18765076  | 0.12978775 | 0.12363154 | 0.29131232 | PIF1     |
| 9960   | ENSG00000140455 | 681.304639 | 0.09791902  | 0.10179559 | 0.31868877 | 0.54633934 | USP3     |
| 1583   | ENSG00000140459 | 2.88689944 | 0.11337458  | 0.39656328 | 0.2404944  | 0.45856886 | CYP11A1  |
| 585    | ENSG00000140463 | 434.675304 | -0.07943945 | 0.12650755 | 0.50498372 | 0.72130144 | BBS4     |
| 5371   | ENSG00000140464 | 546.370228 | 0.01536982  | 0.11959795 | 0.89273105 | 0.95357124 | PML      |
| 1543   | ENSG00000140465 | 4.29660944 | 0.03541119  | 0.37409103 | 0.71600209 | 0.86313534 | CYP1A1   |
| 170691 | ENSG00000140470 | 154.828724 | -1.15807004 | 0.21986324 | 1.32E-08   | 1.97E-07   | ADAMTS17 |
| 55180  | ENSG00000140471 | 242.22997  | 0.08299259  | 0.15589702 | 0.56119623 | 0.76470695 | LINS1    |
| 25989  | ENSG00000140474 | 1290.37894 | -0.04153223 | 0.07440296 | 0.56860797 | 0.76931138 | ULK3     |
| 653643 | ENSG00000140478 | 0.44795842 | -0.02501848 | 0.38558245 | 0.5807882  | NA         | GOLGA6D  |
| 5046   | ENSG00000140479 | 410.17157  | -0.24866798 | 0.14507113 | 0.06319079 | 0.17823504 | PCSK6    |
| 80125  | ENSG00000140481 | 171.7156   | -0.43677431 | 0.19354479 | 0.01001842 | 0.04153062 | CCDC33   |
| 60677  | ENSG00000140488 | 114.493527 | -1.51641233 | 0.25158415 | 1.31E-10   | 2.48E-09   | CELF6    |
| 10066  | ENSG00000140497 | 609.069971 | 0.41046462  | 0.11646841 | 0.00021908 | 0.00154323 | SCAMP2   |
| 1544   | ENSG00000140505 | 0          | NA          | NA         | NA         | NA         | CYP1A2   |
| 79748  | ENSG00000140506 | 0.95001248 | -0.02968431 | 0.38428612 | 0.53539752 | NA         | LMAN1L   |
| 145864 | ENSG00000140511 | 134.801866 | -0.3698471  | 0.19731293 | 0.03072852 | 0.10220515 | HAPLN3   |
| 51458  | ENSG00000140519 | 5.52006437 | -0.10053988 | 0.37616033 | 0.4422496  | 0.66698837 | RHCG     |
| 5428   | ENSG00000140521 | 1515.02571 | 0.04445189  | 0.07888685 | 0.56541261 | 0.76735248 | POLG     |
| 6017   | ENSG00000140522 | 0.38611928 | -0.01155562 | 0.38381297 | 0.89621533 | NA         | RLBP1    |
| 55215  | ENSG00000140525 | 3067.59321 | -0.24969419 | 0.06760498 | 0.00017077 | 0.0012334  | FANCI    |
| 11057  | ENSG00000140526 | 3567.20437 | -0.8393718  | 0.06268044 | 1.21E-41   | 9.49E-40   | ABHD2    |
| 56964  | ENSG00000140527 | 6.36305267 | 0.40518322  | 0.65813483 | 0.03653112 | 0.11729688 | WDR93    |
| 90381  | ENSG00000140534 | 971.618998 | -0.22429342 | 0.0965173  | 0.01604357 | 0.06089619 | TICRR    |
| 4916   | ENSG00000140538 | 11.6310775 | -4.49269962 | 1.54406589 | 4.18E-05   | 0.00035016 | NTRK3    |

|        |                 |            |             |            |            |            |          |
|--------|-----------------|------------|-------------|------------|------------|------------|----------|
| 55070  | ENSG00000140543 | 264.994312 | -0.20817081 | 0.15735726 | 0.14579064 | 0.32633917 | DET1     |
| 4240   | ENSG00000140545 | 1312.31747 | 0.56536059  | 0.0816721  | 1.49E-12   | 3.36E-11   | MFG8     |
| 374655 | ENSG00000140548 | 709.106172 | 0.24137781  | 0.10262929 | 0.01441107 | 0.05578843 | ZNF710   |
| 55898  | ENSG00000140553 | 1870.30865 | -0.1767476  | 0.07482012 | 0.01585095 | 0.0603035  | UNC45A   |
| 8128   | ENSG00000140557 | 636.558739 | -0.47631547 | 0.13567398 | 0.00018005 | 0.00129289 | ST8SIA2  |
| 55784  | ENSG00000140563 | 91.406055  | 3.6872195   | 0.8014348  | 1.45E-07   | 1.87E-06   | MCTP2    |
| 5045   | ENSG00000140564 | 688.266271 | 0.09544539  | 0.09551528 | 0.30242459 | 0.52987991 | FURIN    |
| 8826   | ENSG00000140575 | 2030.00146 | 0.15373131  | 0.10989858 | 0.14466648 | 0.32485387 | IQGAP1   |
| 64784  | ENSG00000140577 | 1266.46677 | 0.13194259  | 0.10055524 | 0.17377256 | 0.36689354 | CRTC3    |
| 79631  | ENSG00000140598 | 616.095287 | 0.05915977  | 0.1025258  | 0.54985877 | 0.75633105 | EFL1     |
| 6457   | ENSG00000140600 | 0.66106017 | -0.03839137 | 0.38686595 | 0.40270318 | NA         | SH3GL3   |
| 23478  | ENSG00000140612 | 2515.54942 | -0.04220769 | 0.06173682 | 0.48803427 | 0.70784413 | SEC11A   |
| 124404 | ENSG00000140623 | 0.50207596 | 0.02562368  | 0.38565771 | 0.52549886 | NA         | SEPTIN12 |
| 84656  | ENSG00000140632 | 1822.86106 | -0.10671054 | 0.09839148 | 0.26090467 | 0.48276874 | GLYR1    |
| 5373   | ENSG00000140650 | 1170.83426 | -0.17854774 | 0.08608737 | 0.03296215 | 0.10807232 | PMM2     |
| 6524   | ENSG00000140675 | 17.3586598 | -0.00660956 | 0.32073412 | 0.96832142 | 0.98809325 | SLC5A2   |
| 3687   | ENSG00000140678 | 0          | NA          | NA         | NA         | NA         | ITGAX    |
| 7041   | ENSG00000140682 | 480.905512 | 0.43374133  | 0.119892   | 0.00013854 | 0.00102064 | TGFB1I1  |
| 64755  | ENSG00000140688 | 1677.43598 | 0.32486343  | 0.0807778  | 3.78E-05   | 0.00031891 | RUSF1    |
| 79798  | ENSG00000140691 | 309.617274 | -0.15798809 | 0.13738395 | 0.21677046 | 0.42789035 | ARMC5    |
| 5073   | ENSG00000140694 | 485.773845 | -0.05766332 | 0.12104752 | 0.61464436 | 0.80211433 | PARN     |
| 79068  | ENSG00000140718 | 1162.277   | -0.13114428 | 0.07961897 | 0.09249237 | 0.2351722  | FTO      |
| 7385   | ENSG00000140740 | 2030.24747 | 0.0666929   | 0.069126   | 0.32757175 | 0.55599483 | UQCRC2   |
| 1039   | ENSG00000140743 | 414.050006 | -0.06509849 | 0.1298047  | 0.59291544 | 0.78702605 | CDR2     |
| 10261  | ENSG00000140749 | 10.9104554 | 0.1813837   | 0.37894606 | 0.30729252 | 0.5347968  | IGSF6    |
| 55114  | ENSG00000140750 | 998.367182 | -0.20580963 | 0.09091306 | 0.01949763 | 0.0714584  | ARHGAP17 |
| 91807  | ENSG00000140795 | 16.8469977 | 0.08737793  | 0.34467213 | 0.60288537 | 0.79296792 | MYLK3    |
| 94160  | ENSG00000140798 | 0          | NA          | NA         | NA         | NA         | ABCC12   |
| 85407  | ENSG00000140807 | 389.298962 | -1.48151375 | 0.21402062 | 3.10E-13   | 7.30E-12   | NKD1     |
| 9785   | ENSG00000140829 | 2339.47513 | 0.04150888  | 0.07644991 | 0.58077143 | 0.77801412 | DHX38    |
| 54957  | ENSG00000140830 | 410.257167 | -0.25561035 | 0.13160061 | 0.03793401 | 0.12066663 | TXNL4B   |
| 91862  | ENSG00000140832 | 1.51835697 | 0.07660256  | 0.39245408 | 0.18001508 | NA         | MARVELD3 |
| 10164  | ENSG00000140835 | 0.44946387 | -0.00197002 | 0.38312958 | 0.95034056 | NA         | CHST4    |
| 463    | ENSG00000140836 | 3080.93298 | 0.01873987  | 0.07771556 | 0.80625791 | 0.9122093  | ZFHX3    |
| 497190 | ENSG00000140839 | 3.18473798 | -0.03917056 | 0.37109716 | 0.71032784 | 0.86089825 | CLEC18B  |
| 221184 | ENSG00000140848 | 603.431673 | 0.05901324  | 0.10112267 | 0.54708119 | 0.75418804 | CPNE2    |
| 84166  | ENSG00000140853 | 44.5700766 | 0.28914116  | 0.3553337  | 0.18377164 | 0.38218336 | NLRC5    |
| 10300  | ENSG00000140854 | 792.248703 | -0.12028505 | 0.08768085 | 0.15896819 | 0.34635723 | KATNB1   |

|        |                 |            |             |            |            |            |          |
|--------|-----------------|------------|-------------|------------|------------|------------|----------|
| 3801   | ENSG00000140859 | 575.849799 | -0.38831529 | 0.10547704 | 0.00012431 | 0.00092267 | KIFC3    |
| 170692 | ENSG00000140873 | 0          | NA          | NA         | NA         | NA         | ADAMTS18 |
| 283927 | ENSG00000140876 | 66.5673918 | -0.22914955 | 0.2639857  | 0.25113804 | 0.47110579 | NUDT7    |
| 2653   | ENSG00000140905 | 810.792539 | -0.08189217 | 0.09276899 | 0.36220539 | 0.59197696 | GCSH     |
| 123920 | ENSG00000140931 | 768.332783 | 0.75668821  | 0.10456298 | 9.56E-14   | 2.35E-12   | CMTM3    |
| 146225 | ENSG00000140932 | 1.64458291 | 0.03297455  | 0.37882525 | 0.66717033 | NA         | CMTM2    |
| 1009   | ENSG00000140937 | 416.899778 | 1.47424398  | 0.16535648 | 3.54E-20   | 1.34E-18   | CDH11    |
| 8996   | ENSG00000140939 | 517.552771 | 0.17702576  | 0.10669988 | 0.08372215 | 0.21858763 | NOL3     |
| 81631  | ENSG00000140941 | 846.988161 | -0.31164607 | 0.09228124 | 0.00048524 | 0.00314507 | MAP1LC3B |
| 8720   | ENSG00000140943 | 3038.56862 | 0.10892618  | 0.06248084 | 0.07726078 | 0.20602875 | MBTPS1   |
| 1012   | ENSG00000140945 | 0          | NA          | NA         | NA         | NA         | CDH13    |
| 23174  | ENSG00000140948 | 3059.94084 | 0.25501439  | 0.06269352 | 3.73E-05   | 0.00031548 | ZCCHC14  |
| 57707  | ENSG00000140950 | 267.785441 | -0.23334377 | 0.15789193 | 0.104043   | 0.25677486 | MEAK7    |
| 161931 | ENSG00000140955 | 0.14931947 | -0.01844332 | 0.38480212 | 0.84537521 | NA         | ADAD2    |
| 29948  | ENSG00000140961 | 30.3997066 | 1.24523183  | 0.70413968 | 0.00368035 | 0.01800358 | OSGIN1   |
| 3394   | ENSG00000140968 | 0          | NA          | NA         | NA         | NA         | IRF8     |
| 89941  | ENSG00000140983 | 3729.26735 | 0.27089449  | 0.06076694 | 6.18E-06   | 6.11E-05   | RHOT2    |
| 6123   | ENSG00000140986 | 2.08236117 | -0.05495263 | 0.38030324 | 0.52611089 | NA         | RPL3L    |
| 54925  | ENSG00000140987 | 318.221877 | 0.0339583   | 0.1393832  | 0.7942466  | 0.90579008 | ZSCAN32  |
| 6187   | ENSG00000140988 | 50884.6115 | -0.17292826 | 0.0510998  | 0.00058288 | 0.0036888  | RPS2     |
| 4716   | ENSG00000140990 | 1175.28154 | 0.07348478  | 0.08718586 | 0.3873973  | 0.61635625 | NDUFB10  |
| 5170   | ENSG00000140992 | 1652.71276 | -0.22412682 | 0.0788448  | 0.00359977 | 0.01768467 | PDPK1    |
| 91151  | ENSG00000140993 | 110.563833 | -0.40878846 | 0.23762571 | 0.03584206 | 0.11549476 | TIGD7    |
| 54849  | ENSG00000140995 | 1053.63933 | -0.34894736 | 0.11235549 | 0.00111478 | 0.00648789 | DEF8     |
| 22980  | ENSG00000141002 | 1285.66023 | -0.07811244 | 0.126161   | 0.51016956 | 0.72557448 | TCF25    |
| 2588   | ENSG00000141012 | 348.584777 | 0.35037297  | 0.13644357 | 0.00592959 | 0.02690828 | GALNS    |
| 2622   | ENSG00000141013 | 602.487458 | 0.25758313  | 0.1174015  | 0.02083057 | 0.07532259 | GAS8     |
| 55090  | ENSG00000141026 | 309.222269 | 0.03750488  | 0.1318744  | 0.76341538 | 0.89095066 | MED9     |
| 9611   | ENSG00000141027 | 3230.49336 | -0.08089447 | 0.10375714 | 0.41520595 | 0.64226462 | NCOR1    |
| NA     | ENSG00000141028 | 2.05226808 | -0.11285233 | 0.39986263 | 0.18982868 | NA         | CDRT15P1 |
| 8533   | ENSG00000141030 | 988.492684 | -0.360739   | 0.08891053 | 2.91E-05   | 0.00025116 | COPS3    |
| 79018  | ENSG00000141034 | 351.116822 | 0.03551854  | 0.1292423  | 0.77134879 | 0.89515442 | GID4     |
| 57336  | ENSG00000141040 | 241.749368 | 0.0084805   | 0.18726468 | 0.96001511 | 0.98361391 | ZNF287   |
| 93649  | ENSG00000141052 | 0          | NA          | NA         | NA         | NA         | MYOCD    |
| 8844   | ENSG00000141068 | 741.319048 | 0.31360049  | 0.09648883 | 0.00076124 | 0.00465713 | KSR1     |
| 84916  | ENSG00000141076 | 1228.46498 | -0.01593897 | 0.08323101 | 0.8445867  | 0.92965052 | UTP4     |
| 57610  | ENSG00000141084 | 806.136712 | 0.24962937  | 0.1016987  | 0.01073837 | 0.04395239 | RANBP10  |
| 1506   | ENSG00000141086 | 39.9164406 | 0.30067076  | 0.368673   | 0.16768316 | 0.35871254 | CTRL     |

|        |                 |            |             |            |            |            |          |
|--------|-----------------|------------|-------------|------------|------------|------------|----------|
| 64180  | ENSG00000141096 | 0          | NA          | NA         | NA         | NA         | DPEP3    |
| 81577  | ENSG00000141098 | 900.07567  | 0.03330862  | 0.09312393 | 0.71307557 | 0.86187687 | GFOD2    |
| 28987  | ENSG00000141101 | 773.805802 | -0.76153944 | 0.10320719 | 3.29E-14   | 8.42E-13   | NOB1     |
| 5636   | ENSG00000141127 | 691.977635 | -0.38175726 | 0.09837053 | 5.71E-05   | 0.00045935 | PRPSAP2  |
| 146862 | ENSG00000141161 | 0          | NA          | NA         | NA         | NA         | UNC45B   |
| 58488  | ENSG00000141179 | 454.947399 | 0.69111114  | 0.12489232 | 7.49E-09   | 1.14E-07   | PCTP     |
| 26689  | ENSG00000141194 | 0.50778071 | 0.01499268  | 0.38310604 | 0.74337842 | NA         | OR4D1    |
| 10040  | ENSG00000141198 | 1210.41922 | 0.45487813  | 0.07760478 | 2.12E-09   | 3.49E-08   | TOM1L1   |
| 84643  | ENSG00000141200 | 0          | NA          | NA         | NA         | NA         | KIF2B    |
| 55028  | ENSG00000141219 | 1021.0432  | -0.18350223 | 0.0816809  | 0.02163361 | 0.07750287 | C17orf80 |
| 10140  | ENSG00000141232 | 529.298508 | 0.35848835  | 0.10899634 | 0.00058606 | 0.00370654 | TOB1     |
| 55275  | ENSG00000141252 | 1767.51354 | 0.09605362  | 0.08328275 | 0.23759253 | 0.45482784 | VPS53    |
| 84690  | ENSG00000141255 | 0          | NA          | NA         | NA         | NA         | SPATA22  |
| 9905   | ENSG00000141258 | 2722.01413 | 0.14172342  | 0.06595915 | 0.02908096 | 0.09795693 | SGSM2    |
| 9520   | ENSG00000141279 | 2901.75666 | 0.05254682  | 0.10013932 | 0.58781966 | 0.78276005 | NPEPPS   |
| 8631   | ENSG00000141293 | 0          | NA          | NA         | NA         | NA         | SKAP1    |
| 90506  | ENSG00000141294 | 26.9936992 | 0.01433325  | 0.28995344 | 0.94190472 | 0.97594973 | LRRC46   |
| 90507  | ENSG00000141295 | 842.073981 | 0.2906864   | 0.10231596 | 0.00313027 | 0.01570675 | SCRN2    |
| 85464  | ENSG00000141298 | 2507.13078 | -0.14347536 | 0.06975963 | 0.03628037 | 0.11654835 | SSH2     |
| 162494 | ENSG00000141314 | 154.22144  | 0.20843985  | 0.2153822  | 0.24625854 | 0.46553305 | RHBDL3   |
| 124912 | ENSG00000141316 | 0.173124   | -0.01911262 | 0.38486262 | 0.84537521 | NA         | SPACA3   |
| 22901  | ENSG00000141337 | 22.2321592 | 2.36037937  | 0.64407497 | 1.25E-05   | 0.00011694 | ARSG     |
| 10351  | ENSG00000141338 | 0.18922458 | 0.01954053  | 0.38488496 | 0.78225479 | NA         | ABCA8    |
| 92579  | ENSG00000141349 | 1176.14453 | -0.08500259 | 0.08457619 | 0.30305374 | 0.53032436 | G6PC3    |
| 1213   | ENSG00000141367 | 9781.6921  | 0.0363381   | 0.07214194 | 0.60869389 | 0.79754899 | CLTC     |
| 124773 | ENSG00000141371 | 0.3245007  | 0.0013895   | 0.38336851 | 0.96700238 | NA         | C17orf64 |
| 54828  | ENSG00000141376 | 445.577494 | 0.39987928  | 0.153911   | 0.00461863 | 0.02175536 | BCAS3    |
| 51651  | ENSG00000141378 | 943.855547 | -0.02522806 | 0.08950342 | 0.76655412 | 0.8924999  | PTRH2    |
| 6760   | ENSG00000141380 | 2088.56058 | 0.15275949  | 0.06383057 | 0.0151884  | 0.05822953 | SS18     |
| 6875   | ENSG00000141384 | 232.683527 | 0.06384873  | 0.1435983  | 0.63252776 | 0.81415276 | TAF4B    |
| 10939  | ENSG00000141385 | 1144.09488 | -0.34567687 | 0.08868049 | 5.91E-05   | 0.00047457 | AFG3L2   |
| 10650  | ENSG00000141391 | 235.812954 | -0.01472278 | 0.14622269 | 0.91224669 | 0.96260718 | PRELID3A |
| 3613   | ENSG00000141401 | 0.55789229 | -0.03299273 | 0.38624378 | 0.47434443 | NA         | IMPA2    |
| 2774   | ENSG00000141404 | 32.8859578 | 0.57310532  | 0.4517833  | 0.03459306 | 0.11230997 | GNAL     |
| 25800  | ENSG00000141424 | 3389.35537 | 0.32453684  | 0.06906077 | 1.72E-06   | 1.86E-05   | SLC39A6  |
| 55197  | ENSG00000141425 | 3242.07957 | 0.12640254  | 0.06529743 | 0.04967364 | 0.14831075 | RPRD1A   |
| 83608  | ENSG00000141428 | 266.178443 | -0.00848173 | 0.1441507  | 0.94878416 | 0.9789317  | C18orf21 |
| 2589   | ENSG00000141429 | 1236.02948 | 0.07906341  | 0.08644739 | 0.34845998 | 0.57911259 | GALNT1   |

|        |                 |            |             |            |            |            |          |
|--------|-----------------|------------|-------------|------------|------------|------------|----------|
| 80816  | ENSG00000141431 | 395.895265 | -0.03801325 | 0.15017286 | 0.78185628 | 0.90044863 | ASXL3    |
| 116    | ENSG00000141433 | 0          | NA          | NA         | NA         | NA         | ADCYAP1  |
| 4225   | ENSG00000141434 | 0.173733   | 0.01914545  | 0.38484597 | 0.78225479 | NA         | MEP1B    |
| 147407 | ENSG00000141437 | 0.8241027  | -0.05695426 | 0.38962115 | 0.26311886 | NA         | SLC25A52 |
| 64762  | ENSG00000141441 | 734.986777 | -0.16289043 | 0.28434097 | 0.41209682 | 0.63994998 | GAREM1   |
| 114799 | ENSG00000141446 | 506.403036 | -0.40180355 | 0.11228538 | 0.00017482 | 0.00125893 | ESCO1    |
| 114876 | ENSG00000141447 | 672.717855 | 0.1436695   | 0.11737002 | 0.19811887 | 0.40237519 | OSBPL1A  |
| 2627   | ENSG00000141448 | 0          | NA          | NA         | NA         | NA         | GATA6    |
| 80000  | ENSG00000141449 | 1.4925153  | -0.08233195 | 0.39311264 | 0.19374394 | NA         | GREB1L   |
| 29919  | ENSG00000141452 | 374.006048 | 0.40244581  | 0.1688796  | 0.00826064 | 0.03548193 | RMC1     |
| 27043  | ENSG00000141456 | 1592.42347 | 0.35306021  | 0.07505598 | 1.55E-06   | 1.70E-05   | PELP1    |
| 4864   | ENSG00000141458 | 658.545077 | 0.08042835  | 0.09590269 | 0.38679351 | 0.6158895  | NPC1     |
| 6563   | ENSG00000141469 | 0          | NA          | NA         | NA         | NA         | SLC14A1  |
| 409    | ENSG00000141480 | 1088.78776 | -0.38093182 | 0.08827859 | 8.87E-06   | 8.49E-05   | ARRB2    |
| 284111 | ENSG00000141485 | 0.16735865 | 0.01897177  | 0.38482933 | 0.78225479 | NA         | SLC13A5  |
| 84225  | ENSG00000141497 | 0          | NA          | NA         | NA         | NA         | ZMYND15  |
| 55135  | ENSG00000141499 | 492.393554 | -0.06257163 | 0.11523273 | 0.56822145 | 0.76919502 | WRAP53   |
| 50488  | ENSG00000141503 | 1743.35092 | 0.05781664  | 0.08224444 | 0.47218673 | 0.69445401 | MINK1    |
| 112483 | ENSG00000141504 | 534.033131 | 0.02600403  | 0.10675822 | 0.80072387 | 0.90877553 | SAT2     |
| 432    | ENSG00000141505 | 82.4651119 | -0.07560883 | 0.2294714  | 0.68078949 | 0.84396798 | ASGR1    |
| 23533  | ENSG00000141506 | 0          | NA          | NA         | NA         | NA         | PIK3R5   |
| 7157   | ENSG00000141510 | 2168.36823 | 0.44626007  | 0.09387993 | 9.34E-07   | 1.06E-05   | TP53     |
| 55036  | ENSG00000141519 | 507.193466 | 0.51573741  | 0.11964993 | 6.09E-06   | 6.03E-05   | CCDC40   |
| 396    | ENSG00000141522 | 10016.9989 | -0.1020551  | 0.05401459 | 0.05618664 | 0.16287885 | ARHGDI1A |
| 11322  | ENSG00000141524 | 280.948285 | -0.1552776  | 0.18114863 | 0.33000404 | 0.55861736 | TMC6     |
| 9123   | ENSG00000141526 | 58.2130859 | 0.02960338  | 0.2490949  | 0.8777046  | 0.94578953 | SLC16A3  |
| 79092  | ENSG00000141527 | 23.1270478 | 0.344379    | 0.40025254 | 0.12920509 | 0.30069547 | CARD14   |
| 94015  | ENSG00000141540 | 599.832879 | 0.30686275  | 0.10923601 | 0.00329883 | 0.01639909 | TTYH2    |
| 10966  | ENSG00000141542 | 319.232189 | -0.01102486 | 0.15420399 | 0.93593963 | 0.97325384 | RAB40B   |
| 9775   | ENSG00000141543 | 1526.57883 | -0.12993799 | 0.07559164 | 0.07919361 | 0.2099675  | EIF4A3   |
| 1453   | ENSG00000141551 | 4159.54363 | 0.22580526  | 0.06438153 | 0.00036867 | 0.00246278 | CSNK1D   |
| 51529  | ENSG00000141552 | 2221.05456 | 0.06893787  | 0.0715343  | 0.32703856 | 0.55537491 | ANAPC11  |
| 6904   | ENSG00000141556 | 3338.92473 | 0.02806011  | 0.08445874 | 0.73444545 | 0.87363737 | TBCD     |
| 79672  | ENSG00000141560 | 880.430328 | -0.04957309 | 0.09653991 | 0.59491341 | 0.78787011 | FN3KRP   |
| 26502  | ENSG00000141562 | 2344.29747 | 0.14205004  | 0.06933031 | 0.03966211 | 0.12459508 | NARF     |
| 57521  | ENSG00000141564 | 1468.75162 | 0.09940682  | 0.08377263 | 0.22408432 | 0.43775431 | RPTOR    |
| 3607   | ENSG00000141568 | 3620.70636 | -0.19790956 | 0.06427845 | 0.0017645  | 0.00961747 | FOXK2    |
| 201292 | ENSG00000141569 | 804.789348 | -1.64E-05   | 0.10275382 | 0.99879963 | 0.99957022 | TRIM65   |

|        |                 |            |             |            |            |            |           |
|--------|-----------------|------------|-------------|------------|------------|------------|-----------|
| 57332  | ENSG00000141570 | 738.951347 | 0.13007892  | 0.12270921 | 0.26293033 | 0.48497991 | CBX8      |
| 6398   | ENSG00000141574 | 6.87698546 | 0.12430072  | 0.38112291 | 0.37224357 | 0.60116503 | SECTM1    |
| 114804 | ENSG00000141576 | 1981.54583 | -0.1697872  | 0.09514262 | 0.06447294 | 0.18082317 | RNF157    |
| 22994  | ENSG00000141577 | 1374.51016 | 0.0933453   | 0.07694621 | 0.21595305 | 0.42670138 | CEP131    |
| 79755  | ENSG00000141579 | 10.0609654 | -0.13649305 | 0.3741684  | 0.38479408 | 0.61378186 | ZNF750    |
| 56270  | ENSG00000141580 | 2529.04748 | 0.15178493  | 0.0637599  | 0.01573341 | 0.05995981 | WDR45B    |
| 8535   | ENSG00000141582 | 546.451717 | 0.18873117  | 0.10839829 | 0.06900019 | 0.18944974 | CBX4      |
| 494470 | ENSG00000141622 | 2196.28797 | 0.20629381  | 0.07240734 | 0.00368107 | 0.01800358 | RNF165    |
| 54808  | ENSG00000141627 | 1285.45961 | -0.23978215 | 0.09897762 | 0.01188286 | 0.04786922 | DYM       |
| 5596   | ENSG00000141639 | 314.603359 | -0.12874917 | 0.14349075 | 0.33207585 | 0.56128684 | MAPK4     |
| 55520  | ENSG00000141642 | 192.432501 | -0.50214772 | 0.19965992 | 0.00410477 | 0.01971879 | ELAC1     |
| 4152   | ENSG00000141644 | 1742.9236  | 0.1017485   | 0.08092343 | 0.19848137 | 0.40276877 | MBD1      |
| 4089   | ENSG00000141646 | 1728.69127 | -0.35509373 | 0.07529958 | 1.44E-06   | 1.59E-05   | SMAD4     |
| 8792   | ENSG00000141655 | 96.9709183 | 1.44814894  | 0.4596553  | 8.68E-05   | 0.00067039 | TNFRSF11A |
| 54877  | ENSG00000141664 | 376.294318 | 0.23100714  | 0.12464346 | 0.04958665 | 0.14807331 | ZCCHC2    |
| 201456 | ENSG00000141665 | 38.2408614 | 0.43688815  | 0.40262622 | 0.07463628 | 0.2007026  | FBXO15    |
| 147381 | ENSG00000141668 | 1120.54188 | -1.01218549 | 0.09487584 | 1.88E-27   | 9.79E-26   | CBLN2     |
| 5366   | ENSG00000141682 | 600.822066 | 0.64226412  | 0.13729253 | 7.28E-07   | 8.44E-06   | PMAIP1    |
| 10609  | ENSG00000141696 | 1010.19927 | 0.06643474  | 0.09485328 | 0.47028837 | 0.69253479 | P3H4      |
| 115024 | ENSG00000141698 | 1462.11295 | -0.20041601 | 0.07523153 | 0.00649726 | 0.02903278 | NT5C3B    |
| 162427 | ENSG00000141699 | 799.308747 | 0.09753315  | 0.09842864 | 0.30636923 | 0.53408008 | RETREG3   |
| 2064   | ENSG00000141736 | 211.742003 | 0.07403267  | 0.15450736 | 0.60174121 | 0.79216856 | ERBB2     |
| 2886   | ENSG00000141738 | 0          | NA          | NA         | NA         | NA         | GRB7      |
| 84299  | ENSG00000141741 | 380.336667 | -0.05986425 | 0.12298621 | 0.60624377 | 0.79607018 | MIEN1     |
| 5409   | ENSG00000141744 | 93.7842189 | 0.0246994   | 0.21548608 | 0.89147614 | 0.95288397 | PNMT      |
| 390790 | ENSG00000141748 | 7.09632263 | 0.03931015  | 0.38621094 | 0.34100063 | 0.57126172 | ARL5C     |
| 342667 | ENSG00000141750 | 123.45179  | -0.29985112 | 0.20674486 | 0.08829274 | 0.2271726  | STAC2     |
| 3487   | ENSG00000141753 | 2966.97999 | 0.50606754  | 0.06332922 | 5.43E-16   | 1.58E-14   | IGFBP4    |
| 60681  | ENSG00000141756 | 3419.8021  | 0.29216412  | 0.05773125 | 2.98E-07   | 3.69E-06   | FKBP10    |
| 10907  | ENSG00000141759 | 1883.39339 | -0.01698539 | 0.08070882 | 0.82878591 | 0.92238028 | TXNL4A    |
| 773    | ENSG00000141837 | 0.41052975 | 0.01218565  | 0.38382487 | 0.86311641 | NA         | CACNA1A   |
| 113230 | ENSG00000141854 | 70.2391152 | -0.07911868 | 0.23188186 | 0.66851784 | 0.83701843 | MISP3     |
| 90378  | ENSG00000141858 | 1437.6605  | -0.14368539 | 0.11153872 | 0.17680761 | 0.37159566 | SAMD1     |
| 23476  | ENSG00000141867 | 1859.84562 | -0.0564888  | 0.10031462 | 0.55816571 | 0.76291851 | BRD4      |
| 29985  | ENSG00000141873 | 670.953416 | -0.66671467 | 0.09875359 | 3.74E-12   | 8.20E-11   | SLC39A3   |
| 4782   | ENSG00000141905 | 2066.15497 | -0.10190894 | 0.0852788  | 0.21968693 | 0.43175718 | NFIC      |
| 91978  | ENSG00000141933 | 495.20601  | -0.10937763 | 0.10813789 | 0.29088264 | 0.51693941 | TPGS1     |
| 8612   | ENSG00000141934 | 841.204718 | -0.49290749 | 0.09095233 | 2.42E-08   | 3.46E-07   | PLPP2     |

|        |                 |            |             |            |            |            |         |
|--------|-----------------|------------|-------------|------------|------------|------------|---------|
| 114026 | ENSG00000141946 | 0          | NA          | NA         | NA         | NA         | ZIM3    |
| 63977  | ENSG00000141956 | 461.714165 | 0.1752311   | 0.15129606 | 0.20682437 | 0.41402436 | PRDM15  |
| 5211   | ENSG00000141959 | 1607.45944 | 0.24239017  | 0.07954666 | 0.00181295 | 0.00983566 | PFKL    |
| 55527  | ENSG00000141965 | 768.462046 | 0.03948339  | 0.09259297 | 0.66209784 | 0.83297534 | FEM1A   |
| 7409   | ENSG00000141968 | 0          | NA          | NA         | NA         | NA         | VAV1    |
| 93343  | ENSG00000141971 | 823.307142 | 0.02484585  | 0.09972256 | 0.79761669 | 0.90722439 | MVB12A  |
| 117286 | ENSG00000141977 | 0.173124   | -0.01911262 | 0.38486262 | 0.84537521 | NA         | CIB3    |
| NA     | ENSG00000141979 | 0.71952772 | 0.02578377  | 0.38343699 | 0.56827864 | NA         |         |
| 6455   | ENSG00000141985 | 2403.77647 | 0.0738113   | 0.07687142 | 0.32785355 | 0.55637794 | SH3GL1  |
| 56931  | ENSG00000141994 | 743.342841 | 0.23383897  | 0.12179328 | 0.04228862 | 0.13108695 | DUS3L   |
| 91039  | ENSG00000142002 | 1176.64306 | 0.26744934  | 0.11242576 | 0.01256431 | 0.05005538 | DPP9    |
| 63946  | ENSG00000142025 | 0          | NA          | NA         | NA         | NA         | DMRTC2  |
| 90324  | ENSG00000142039 | 810.116692 | 0.04007282  | 0.0907217  | 0.6500905  | 0.82529572 | CCDC97  |
| 641649 | ENSG00000142046 | 72.8506335 | 0.88138345  | 0.29618433 | 0.00038518 | 0.0025584  | TMEM91  |
| 57677  | ENSG00000142065 | 387.169379 | -0.25941589 | 0.12707034 | 0.02988787 | 0.10005012 | ZFP14   |
| 23410  | ENSG00000142082 | 315.389372 | -0.05259906 | 0.14420777 | 0.69294079 | 0.85163509 | SIRT3   |
| 10410  | ENSG00000142089 | 9.5869203  | 0.09121288  | 0.3571328  | 0.55855909 | 0.76326279 | IFITM3  |
| 80162  | ENSG00000142102 | 96.5455013 | 0.66734369  | 0.31200352 | 0.00597615 | 0.02707622 | PGGHG   |
| 30811  | ENSG00000142149 | 639.314911 | -0.29599418 | 0.0980041  | 0.00173882 | 0.00951147 | HUNK    |
| 1291   | ENSG00000142156 | 1958.52587 | -0.07546631 | 0.09053026 | 0.39005315 | 0.61929053 | COL6A1  |
| 8389   | ENSG00000142163 | 0          | NA          | NA         | NA         | NA         | OR1E3   |
| 3454   | ENSG00000142166 | 551.732662 | -0.06505299 | 0.11552425 | 0.55407379 | 0.76002561 | IFNAR1  |
| 6647   | ENSG00000142168 | 2340.22796 | 0.19964897  | 0.07185791 | 0.00460803 | 0.0217106  | SOD1    |
| 1292   | ENSG00000142173 | 1702.64173 | 0.44143995  | 0.08434331 | 7.89E-08   | 1.05E-06   | COL6A2  |
| 150094 | ENSG00000142178 | 1.57407922 | -0.0688141  | 0.38651449 | 0.3618503  | NA         | SIK1    |
| 29947  | ENSG00000142182 | 0          | NA          | NA         | NA         | NA         | DNMT3L  |
| 7226   | ENSG00000142185 | 3.09057399 | -0.00825692 | 0.37207899 | 0.92677428 | 0.96932899 | TRPM2   |
| 57410  | ENSG00000142186 | 974.240649 | 0.07695341  | 0.08470932 | 0.35197482 | 0.58206363 | SCYL1   |
| 757    | ENSG00000142188 | 407.914319 | 0.63133817  | 0.15914714 | 1.92E-05   | 0.00017267 | TMEM50B |
| 351    | ENSG00000142192 | 14619.86   | -0.37819781 | 0.05335401 | 7.72E-13   | 1.77E-11   | APP     |
| 9980   | ENSG00000142197 | 394.94251  | -0.02009522 | 0.1178952  | 0.85702668 | 0.93609679 | DOP1B   |
| 9875   | ENSG00000142207 | 2344.42791 | -0.17993545 | 0.06521335 | 0.00505926 | 0.02345774 | URB1    |
| 207    | ENSG00000142208 | 3894.34496 | -0.10577136 | 0.05876231 | 0.06823389 | 0.18799616 | AKT1    |
| 29949  | ENSG00000142224 | 0          | NA          | NA         | NA         | NA         | IL19    |
| 2014   | ENSG00000142227 | 9.24958289 | 0.41873652  | 0.5996117  | 0.05745822 | 0.16569347 | EMP3    |
| 10055  | ENSG00000142230 | 2760.16524 | -0.2846417  | 0.07261055 | 6.28E-05   | 0.0005026  | SAE1    |
| 126147 | ENSG00000142233 | 7.47337169 | 0.9933058   | 1.68018652 | 0.01331449 | 0.05245423 | NTN5    |
| 114783 | ENSG00000142235 | 367.86484  | -0.36606706 | 0.13532613 | 0.00377321 | 0.01836688 | LMTK3   |

|        |                 |            |             |            |            |            |          |
|--------|-----------------|------------|-------------|------------|------------|------------|----------|
| 79760  | ENSG00000142252 | 234.636022 | 0.08787312  | 0.14505752 | 0.51292017 | 0.72818148 | GEMIN7   |
| 23624  | ENSG00000142273 | 0          | NA          | NA         | NA         | NA         | CBLC     |
| 126374 | ENSG00000142279 | 20.9497    | -0.14394703 | 0.38151398 | 0.32889473 | 0.5575249  | WTIP     |
| 81794  | ENSG00000142303 | 664.67577  | 0.05948079  | 0.09701566 | 0.52686962 | 0.73878671 | ADAMTS10 |
| 6531   | ENSG00000142319 | 0.68509521 | -0.0057442  | 0.38217916 | 0.84869912 | NA         | SLC6A3   |
| 57140  | ENSG00000142327 | 656.880674 | 0.34562587  | 0.13103378 | 0.00485162 | 0.02265384 | RNPEPL1  |
| 11132  | ENSG00000142330 | 903.009396 | 0.32926403  | 0.08560812 | 7.76E-05   | 0.00060795 | CAPN10   |
| 4542   | ENSG00000142347 | 14.6281857 | 1.68264561  | 1.42457764 | 0.00359147 | 0.01765651 | MYO1F    |
| NA     | ENSG00000142396 | 1145.28188 | -0.02551282 | 0.07989526 | 0.74470564 | 0.87982849 | ERVK3-1  |
| 91662  | ENSG00000142405 | 0          | NA          | NA         | NA         | NA         | NLRP12   |
| 59283  | ENSG00000142408 | 731.131873 | -0.35779175 | 0.10059148 | 0.00021994 | 0.00154849 | CACNG8   |
| 126208 | ENSG00000142409 | 808.220389 | -0.15057497 | 0.10962845 | 0.15083779 | 0.33448325 | ZNF787   |
| 90580  | ENSG00000142444 | 274.560192 | -0.02607874 | 0.14749262 | 0.84712521 | 0.93052693 | TIMM29   |
| 84467  | ENSG00000142449 | 7.57004741 | -0.0582363  | 0.37242857 | 0.58157324 | 0.77868762 | FBN3     |
| 10498  | ENSG00000142453 | 1785.28278 | 0.22560988  | 0.07768472 | 0.00297829 | 0.01503914 | CARM1    |
| 115704 | ENSG00000142459 | 489.200381 | -0.10831082 | 0.11087473 | 0.30668251 | 0.53422766 | EVI5L    |
| 9032   | ENSG00000142484 | 0.35689629 | 0.02381861  | 0.3853813  | 0.61390838 | NA         | TM4SF5   |
| 55244  | ENSG00000142494 | 131.526964 | 0.54593847  | 0.20793026 | 0.00264349 | 0.0136049  | SLC47A1  |
| 5694   | ENSG00000142507 | 1165.37026 | 0.23608283  | 0.08590366 | 0.00473822 | 0.02221322 | PSMB6    |
| 2854   | ENSG00000142511 | 0          | NA          | NA         | NA         | NA         | GPR32    |
| 89790  | ENSG00000142512 | 12.8922647 | 0.20602755  | 0.39281975 | 0.25071541 | 0.47063996 | SIGLEC10 |
| 93650  | ENSG00000142513 | 0.18922458 | 0.01954053  | 0.38488496 | 0.78225479 | NA         | ACP4     |
| 354    | ENSG00000142515 | 0          | NA          | NA         | NA         | NA         | KLK3     |
| 25888  | ENSG00000142528 | 649.908893 | -0.18476572 | 0.13005253 | 0.12979013 | 0.30146269 | ZNF473   |
| 112703 | ENSG00000142530 | 13.6638871 | 0.02752636  | 0.3309756  | 0.8734897  | 0.94441388 | FAM71E1  |
| 6205   | ENSG00000142534 | 26507.6506 | 0.19133998  | 0.04782441 | 6.00E-05   | 0.0004809  | RPS11    |
| 113091 | ENSG00000142538 | 0          | NA          | NA         | NA         | NA         | PTH2     |
| NA     | ENSG00000142539 | 0.173124   | -0.01911262 | 0.38486262 | 0.84537521 | NA         |          |
| 23521  | ENSG00000142541 | 48529.7486 | -0.00168968 | 0.05504    | 0.99048381 | 0.99676382 | RPL13A   |
| 90353  | ENSG00000142544 | 248.736692 | -0.04063574 | 0.14426729 | 0.76019273 | 0.88889389 | CTU1     |
| 51070  | ENSG00000142546 | 991.712263 | 0.18755602  | 0.0879486  | 0.02828562 | 0.09583107 | NOSIP    |
| 402665 | ENSG00000142549 | 1799.80022 | -0.21357697 | 0.06745107 | 0.00127427 | 0.00728575 | IGLON5   |
| 57333  | ENSG00000142552 | 225.246899 | 0.2804304   | 0.15860033 | 0.05195814 | 0.15344589 | RCN3     |
| 80110  | ENSG00000142556 | 253.140166 | -0.5049103  | 0.16688429 | 0.00089491 | 0.00538032 | ZNF614   |
| 6518   | ENSG00000142583 | 0.15069912 | -0.01848503 | 0.38480575 | 0.84537521 | NA         | SLC2A5   |
| 473    | ENSG00000142599 | 3555.69845 | -0.18185706 | 0.07360132 | 0.0119294  | 0.04800797 | RERE     |
| 79258  | ENSG00000142606 | 25.984368  | -1.33719976 | 0.63905709 | 0.00166069 | 0.00915735 | MMEL1    |
| 85452  | ENSG00000142609 | 7.51919866 | -0.09090965 | 0.38723333 | 0.30753485 | 0.53498391 | CFAP74   |



|        |                 |            |             |            |            |            |           |
|--------|-----------------|------------|-------------|------------|------------|------------|-----------|
| 63976  | ENSG00000142611 | 0.14931947 | -0.01844332 | 0.38480212 | 0.84537521 | NA         | PRDM16    |
| 63036  | ENSG00000142615 | 0.37844916 | 0.02407552  | 0.3854191  | 0.60038877 | NA         | CELA2A    |
| 51702  | ENSG00000142619 | 0.18922458 | 0.01954053  | 0.38488496 | 0.78225479 | NA         | PADI3     |
| 114827 | ENSG00000142621 | 56.9081009 | -0.02403759 | 0.2398634  | 0.89658678 | 0.95469109 | FHAD1     |
| 29943  | ENSG00000142623 | 0.173733   | 0.01914545  | 0.38484597 | 0.78225479 | NA         | PADI1     |
| 1969   | ENSG00000142627 | 684.824784 | -0.38238544 | 0.12741302 | 0.0014293  | 0.00804233 | EPHA2     |
| 128272 | ENSG00000142632 | 152.757694 | 0.14560222  | 0.20673934 | 0.40301132 | 0.63099498 | ARHGEF19  |
| 79180  | ENSG00000142634 | 488.814737 | -0.07449113 | 0.12168507 | 0.51759386 | 0.73141449 | EFHD2     |
| 5195   | ENSG00000142655 | 470.123124 | 0.1917893   | 0.12683941 | 0.108484   | 0.26431568 | PEX14     |
| 5226   | ENSG00000142657 | 3512.40759 | -0.45087532 | 0.07243694 | 2.23E-10   | 4.12E-09   | PGD       |
| 127294 | ENSG00000142661 | 1.13933553 | 0.02148567  | 0.38071517 | 0.70032822 | NA         | MYOM3     |
| 83442  | ENSG00000142669 | 703.857581 | 0.04464288  | 0.10053009 | 0.64617948 | 0.82370422 | SH3BGRL3  |
| 10256  | ENSG00000142675 | 41.9532046 | 0.64483897  | 0.39237846 | 0.01678441 | 0.06328444 | CNKSR1    |
| 6135   | ENSG00000142676 | 13611.7097 | -0.12928958 | 0.05032107 | 0.00939764 | 0.03942678 | RPL11     |
| 58985  | ENSG00000142677 | 0.173733   | 0.01914545  | 0.38484597 | 0.78225479 | NA         | IL22RA1   |
| 51042  | ENSG00000142684 | 284.412618 | -0.42778331 | 0.15107676 | 0.00211603 | 0.01122516 | ZNF593    |
| 127703 | ENSG00000142686 | 632.195932 | -0.56717923 | 0.11844422 | 5.38E-07   | 6.38E-06   | C1orf216  |
| 79932  | ENSG00000142687 | 1947.26409 | 0.23825247  | 0.08976537 | 0.00627659 | 0.0281482  | KIAA0319L |
| 55194  | ENSG00000142694 | 89.9961264 | 0.02698849  | 0.21124658 | 0.87849003 | 0.9462643  | EVA1B     |
| 84970  | ENSG00000142698 | 0.173124   | -0.01911262 | 0.38486262 | 0.84537521 | NA         | C1orf94   |
| 63950  | ENSG00000142700 | 6.19049428 | -0.03207846 | 0.36250371 | 0.79685999 | 0.90662359 | DMRTA2    |
| 10733  | ENSG00000142731 | 824.464748 | 0.11603515  | 0.12317893 | 0.31975629 | 0.54736538 | PLK4      |
| 9064   | ENSG00000142733 | 150.293561 | 1.00715207  | 0.20530215 | 1.16E-07   | 1.52E-06   | MAP3K6    |
| 8547   | ENSG00000142748 | 0.34624801 | -0.02356563 | 0.38536324 | 0.65270996 | NA         | FCN3      |
| 54707  | ENSG00000142751 | 838.618687 | -0.22048609 | 0.08843067 | 0.01013921 | 0.04185642 | GPN2      |
| 84958  | ENSG00000142765 | 44.2956294 | 0.82952912  | 0.37443564 | 0.00338892 | 0.01678388 | SYTL1     |
| 23038  | ENSG00000142784 | 1503.79206 | 0.35046828  | 0.07320791 | 1.04E-06   | 1.17E-05   | WDTC1     |
| 10136  | ENSG00000142789 | 0          | NA          | NA         | NA         | NA         | CELA3A    |
| 84224  | ENSG00000142794 | 505.554191 | -0.29767342 | 0.11396116 | 0.0060501  | 0.02733735 | NBPF3     |
| 3339   | ENSG00000142798 | 840.599413 | 0.42704547  | 0.11513501 | 9.84E-05   | 0.00075114 | HSPG2     |
| 23421  | ENSG00000142856 | 490.017591 | -0.0103429  | 0.10734379 | 0.91875186 | 0.96558446 | ITGB3BP   |
| 26135  | ENSG00000142864 | 9248.26989 | -0.24179693 | 0.04881695 | 5.79E-07   | 6.84E-06   | SERBP1    |
| 8915   | ENSG00000142867 | 159.390237 | 0.04157673  | 0.18422212 | 0.79835498 | 0.90769144 | BCL10     |
| 3491   | ENSG00000142871 | 226.363812 | 2.36294304  | 0.17424062 | 4.90E-43   | 4.04E-41   | CCN1      |
| 5567   | ENSG00000142875 | 1131.74708 | -0.53348953 | 0.09013592 | 1.18E-09   | 2.01E-08   | PRKACB    |
| 10026  | ENSG00000142892 | 326.014555 | -0.57793619 | 0.14201974 | 1.43E-05   | 0.00013246 | PIGK      |
| 64129  | ENSG00000142910 | 0.40000988 | -0.01273014 | 0.38391013 | 0.87965238 | NA         | TINAGL1   |
| 113451 | ENSG00000142920 | 151.878134 | -0.34133545 | 0.23403454 | 0.07340707 | 0.19825705 | AZIN2     |

|        |                 |            |             |            |            |            |           |
|--------|-----------------|------------|-------------|------------|------------|------------|-----------|
| 6202   | ENSG00000142937 | 18269.0076 | -0.05697059 | 0.04610604 | 0.21246015 | 0.42238326 | RPS8      |
| 11004  | ENSG00000142945 | 1601.48724 | -0.20148451 | 0.08198662 | 0.01170599 | 0.04721425 | KIF2C     |
| 5792   | ENSG00000142949 | 3821.11869 | 0.01469807  | 0.05501908 | 0.78993583 | 0.9043268  | PTPRF     |
| 266675 | ENSG00000142959 | 2.79924884 | 0.06907865  | 0.38044503 | 0.48173225 | 0.70240082 | BEST4     |
| 148932 | ENSG00000142961 | 177.435522 | 0.19340714  | 0.16719859 | 0.19881303 | 0.40318637 | MOB3C     |
| 1580   | ENSG00000142973 | 0          | NA          | NA         | NA         | NA         | CYP4B1    |
| 199964 | ENSG00000143001 | 0.66566499 | -0.03804996 | 0.38684084 | 0.40282748 | NA         | TMEM61    |
| 63948  | ENSG00000143006 | 0          | NA          | NA         | NA         | NA         | DMRTB1    |
| 8543   | ENSG00000143013 | 179.828985 | 0.78789045  | 0.17862432 | 1.90E-06   | 2.05E-05   | LMO4      |
| 284612 | ENSG00000143028 | 0          | NA          | NA         | NA         | NA         | SYPL2     |
| 343472 | ENSG00000143032 | 0          | NA          | NA         | NA         | NA         | BARHL2    |
| 22823  | ENSG00000143033 | 1079.13654 | 0.19040215  | 0.09419817 | 0.03683087 | 0.11801107 | MTF2      |
| 126969 | ENSG00000143036 | 178.214761 | 1.62295769  | 0.23171707 | 1.89E-13   | 4.54E-12   | SLC44A3   |
| 3321   | ENSG00000143061 | 4855.78473 | 0.08164216  | 0.05802904 | 0.15486281 | 0.34030142 | IGSF3     |
| 90874  | ENSG00000143067 | 674.091946 | -0.31790977 | 0.11515931 | 0.00368932 | 0.01803301 | ZNF697    |
| 55917  | ENSG00000143079 | 723.6113   | -0.00428337 | 0.12456082 | 0.96879256 | 0.98831985 | CTTNBP2NL |
| 85369  | ENSG00000143093 | 1262.38188 | -0.25033065 | 0.08312757 | 0.00198429 | 0.01062858 | STRIP1    |
| 3744   | ENSG00000143105 | 0          | NA          | NA         | NA         | NA         | KCNA10    |
| 5686   | ENSG00000143106 | 774.915913 | 0.0975052   | 0.10127727 | 0.31849106 | 0.54614197 | PSMA5     |
| 163479 | ENSG00000143107 | 0.50207596 | 0.02562368  | 0.38565771 | 0.52549886 | NA         | FNDC7     |
| 128346 | ENSG00000143110 | 10.438724  | 0.6325385   | 0.9825162  | 0.02337374 | 0.08251513 | C1orf162  |
| 963    | ENSG00000143119 | 0          | NA          | NA         | NA         | NA         | CD53      |
| 84432  | ENSG00000143125 | 0.16735865 | 0.01897177  | 0.38482933 | 0.78225479 | NA         | PROK1     |
| 1952   | ENSG00000143126 | 2718.41471 | -0.40999021 | 0.06558903 | 2.13E-10   | 3.96E-09   | CELSR2    |
| 8515   | ENSG00000143127 | 7.41793499 | 0.07480052  | 0.36383096 | 0.58797476 | 0.7828366  | ITGA10    |
| 23432  | ENSG00000143147 | 1905.7714  | 0.62757356  | 0.06944545 | 4.69E-20   | 1.76E-18   | GPR161    |
| 223    | ENSG00000143149 | 1095.92857 | 0.04829422  | 0.08832952 | 0.57481767 | 0.77370302 | ALDH9A1   |
| 481    | ENSG00000143153 | 5382.6407  | -0.21050403 | 0.05718262 | 0.00020736 | 0.00147034 | ATP1B1    |
| 261726 | ENSG00000143155 | 1719.27315 | -0.36294743 | 0.07442584 | 6.37E-07   | 7.46E-06   | TIPRL     |
| 29922  | ENSG00000143156 | 538.843996 | -0.15314118 | 0.10619205 | 0.13242852 | 0.30558086 | NME7      |
| 57645  | ENSG00000143157 | 3118.4887  | -0.06032561 | 0.05905645 | 0.30084301 | 0.52811231 | POGK      |
| 25874  | ENSG00000143158 | 523.585282 | 0.03571652  | 0.1069923  | 0.72906177 | 0.87045369 | MPC2      |
| 8804   | ENSG00000143162 | 374.224038 | -0.0921467  | 0.12776743 | 0.44334186 | 0.66838164 | CREG1     |
| 55827  | ENSG00000143164 | 604.846732 | 0.01186163  | 0.1088601  | 0.910482   | 0.96166753 | DCAF6     |
| 10223  | ENSG00000143167 | 0          | NA          | NA         | NA         | NA         | GPA33     |
| 6258   | ENSG00000143171 | 0          | NA          | NA         | NA         | NA         | RXRG      |
| 9095   | ENSG00000143178 | 58.0747115 | 0.31007375  | 0.28510295 | 0.1412967  | 0.31950382 | TBX19     |
| 7371   | ENSG00000143179 | 2610.92759 | 0.04245526  | 0.07156426 | 0.54658986 | 0.75371048 | UCK2      |

|        |                 |            |             |            |            |            |          |
|--------|-----------------|------------|-------------|------------|------------|------------|----------|
| 54499  | ENSG00000143183 | 2333.98677 | -0.17349319 | 0.06663412 | 0.00812767 | 0.03500174 | TMCO1    |
| 6375   | ENSG00000143184 | 0.30139824 | -0.02296476 | 0.38527817 | 0.68536535 | NA         | XCL1     |
| 6846   | ENSG00000143185 | 0          | NA          | NA         | NA         | NA         | XCL2     |
| 5451   | ENSG00000143190 | 1588.80113 | -0.12078322 | 0.08987784 | 0.16599267 | 0.35622439 | POU2F1   |
| 84944  | ENSG00000143194 | 0.14931947 | -0.01844332 | 0.38480212 | 0.84537521 | NA         | MAEL     |
| 387597 | ENSG00000143195 | 0.64639521 | 0.03389546  | 0.38619789 | 0.52618369 | NA         | ILDR2    |
| 1805   | ENSG00000143196 | 156.186749 | -0.01305689 | 0.17938019 | 0.93319607 | 0.97202552 | DPT      |
| 4259   | ENSG00000143198 | 1096.6806  | 0.10454467  | 0.08823299 | 0.22360178 | 0.43698378 | MGST3    |
| 55811  | ENSG00000143199 | 3.17560158 | 0.16355094  | 0.42387406 | 0.10301964 | 0.25491514 | ADCY10   |
| 64326  | ENSG00000143207 | 828.83205  | -0.11559967 | 0.09484347 | 0.20779696 | 0.41513359 | COP1     |
| 81607  | ENSG00000143217 | 5.16933527 | -0.05232195 | 0.36771097 | 0.66067125 | 0.83186632 | NECTIN4  |
| 51506  | ENSG00000143222 | 1176.88396 | -0.06106837 | 0.07780712 | 0.41992512 | 0.64583833 | UFC1     |
| 5498   | ENSG00000143224 | 574.154682 | 0.2285629   | 0.13236069 | 0.06504594 | 0.18187757 | PPOX     |
| 2212   | ENSG00000143226 | 0          | NA          | NA         | NA         | NA         | FCGR2A   |
| 83540  | ENSG00000143228 | 1238.62175 | -0.03246947 | 0.07812281 | 0.67056343 | 0.83767652 | NUF2     |
| 8490   | ENSG00000143248 | 51470.0919 | 0.17195814  | 0.08934584 | 0.03987803 | 0.12512313 | RGS5     |
| 6391   | ENSG00000143252 | 1447.56393 | 0.23414976  | 0.08313966 | 0.00385834 | 0.01869078 | SDHC     |
| 5202   | ENSG00000143256 | 2012.8498  | -0.02119633 | 0.07315194 | 0.76653153 | 0.8924999  | PFDN2    |
| 9970   | ENSG00000143257 | 10.8461734 | -0.06715748 | 0.35437887 | 0.65373499 | 0.82754433 | NR1I3    |
| 27005  | ENSG00000143258 | 1054.54934 | 0.31405149  | 0.08429903 | 0.00013077 | 0.0009659  | USP21    |
| 2165   | ENSG00000143278 | 0.32782306 | 0.00309619  | 0.38339363 | 0.95064653 | NA         | F13B     |
| 5546   | ENSG00000143294 | 2302.26406 | -0.12354185 | 0.06401798 | 0.05015316 | 0.14933795 | PRCC     |
| 83416  | ENSG00000143297 | 0          | NA          | NA         | NA         | NA         | FCRL5    |
| 51093  | ENSG00000143303 | 532.587958 | 0.08968432  | 0.12436386 | 0.44671116 | 0.67086136 | RRNAD1   |
| 79590  | ENSG00000143314 | 989.027516 | -0.02606869 | 0.09627865 | 0.77884972 | 0.89886014 | MRPL24   |
| 93183  | ENSG00000143315 | 1152.44505 | -0.20680722 | 0.08677119 | 0.0141558  | 0.05504726 | PIGM     |
| 844    | ENSG00000143318 | 0.50207596 | 0.02562368  | 0.38565771 | 0.52549886 | NA         | CASQ1    |
| 81875  | ENSG00000143319 | 1985.77461 | -0.19872135 | 0.08649144 | 0.01809887 | 0.06718084 | ISG20L2  |
| 1382   | ENSG00000143320 | 6488.42405 | 0.9865814   | 0.06228369 | 2.34E-57   | 2.85E-55   | CRABP2   |
| 3068   | ENSG00000143321 | 9042.01103 | 0.0807512   | 0.06086453 | 0.17303443 | 0.36578929 | HDGF     |
| 27     | ENSG00000143322 | 1834.27839 | -0.02660714 | 0.06926099 | 0.69598946 | 0.8531799  | ABL2     |
| 9213   | ENSG00000143324 | 2600.42178 | 0.06284042  | 0.07628078 | 0.40114682 | 0.62949876 | XPR1     |
| 6004   | ENSG00000143333 | 261.07749  | 0.3453465   | 0.150058   | 0.01238091 | 0.04949371 | RGS16    |
| 26092  | ENSG00000143337 | 878.913698 | -0.23247733 | 0.08832083 | 0.00668709 | 0.0297404  | TOR1AIP1 |
| 148753 | ENSG00000143340 | 2021.91447 | 0.06989033  | 0.06848709 | 0.30028851 | 0.52741891 | FAM163A  |
| 83872  | ENSG00000143341 | 24.9541458 | 8.24859988  | 3.17401811 | 9.57E-06   | 9.11E-05   | HMCN1    |
| 23179  | ENSG00000143344 | 435.124002 | 0.21046191  | 0.11260357 | 0.05017688 | 0.14934131 | RGL1     |
| 127018 | ENSG00000143353 | 227.87672  | -0.41809673 | 0.17173817 | 0.00677756 | 0.03009552 | LYPLAL1  |

|        |                 |            |             |            |            |            |          |
|--------|-----------------|------------|-------------|------------|------------|------------|----------|
| 56956  | ENSG00000143355 | 89.8429281 | 2.24754895  | 0.27642492 | 3.05E-17   | 9.62E-16   | LHX9     |
| 58497  | ENSG00000143363 | 876.515349 | 0.02820071  | 0.09505551 | 0.7602547  | 0.88889389 | PRUNE1   |
| 6097   | ENSG00000143365 | 5.79784067 | -0.27716794 | 0.50122577 | 0.0618566  | 0.17549479 | RORC     |
| 7286   | ENSG00000143367 | 282.839748 | -0.20640769 | 0.15018209 | 0.13400268 | 0.30828075 | TUFT1    |
| 10262  | ENSG00000143368 | 1964.44865 | 0.15603568  | 0.0771863  | 0.0389267  | 0.12293032 | SF3B4    |
| 1893   | ENSG00000143369 | 27.7702002 | 0.14521065  | 0.30983461 | 0.46367091 | 0.68652759 | ECM1     |
| 57592  | ENSG00000143373 | 1314.39997 | 0.06784509  | 0.08348623 | 0.40492929 | 0.63328055 | ZNF687   |
| 80222  | ENSG00000143374 | 937.707642 | -0.10449602 | 0.10109873 | 0.28299886 | 0.50802546 | TARS2    |
| 57530  | ENSG00000143375 | 301.889294 | -0.62313522 | 0.17687498 | 0.00010995 | 0.00082852 | CGN      |
| 81609  | ENSG00000143376 | 1101.44313 | -0.15653283 | 0.1154287  | 0.15381482 | 0.33890581 | SNX27    |
| 9869   | ENSG00000143379 | 2087.14096 | -0.02978833 | 0.06793505 | 0.65535567 | 0.82851001 | SETDB1   |
| 54507  | ENSG00000143382 | 42.1663919 | 0.29893126  | 0.30359819 | 0.16390471 | 0.35319533 | ADAMTSL4 |
| 4170   | ENSG00000143384 | 6147.84541 | 0.12316545  | 0.049938   | 0.01287107 | 0.05105345 | MCL1     |
| 574406 | ENSG00000143384 | 6147.84541 | 0.12316545  | 0.049938   | 0.01287107 | 0.05105345 | MCL1     |
| 1513   | ENSG00000143387 | 283.41284  | 0.2960372   | 0.1367883  | 0.02024408 | 0.07360136 | CTSK     |
| 5993   | ENSG00000143390 | 1830.38896 | 0.1294384   | 0.07673893 | 0.0852602  | 0.22149194 | RFX5     |
| 5298   | ENSG00000143393 | 1410.55897 | 0.00266979  | 0.07965442 | 0.9733691  | 0.99018833 | PI4KB    |
| 8394   | ENSG00000143398 | 1825.84779 | -0.3610312  | 0.08615523 | 1.56E-05   | 0.00014338 | PIP5K1A  |
| 81611  | ENSG00000143401 | 3691.55923 | -0.31687127 | 0.08429679 | 0.00011203 | 0.00084127 | ANP32E   |
| 55793  | ENSG00000143409 | 505.549588 | -0.17822834 | 0.13068684 | 0.14560957 | 0.32613386 | MINDY1   |
| 8416   | ENSG00000143412 | 29.1014017 | 0.05192114  | 0.29138266 | 0.78853655 | 0.90410108 | ANXA9    |
| 8991   | ENSG00000143416 | 8.58480815 | 2.06853959  | 1.10496608 | 0.00236576 | 0.0123713  | SELENBP1 |
| 29956  | ENSG00000143418 | 3712.9618  | -0.02597303 | 0.05730885 | 0.64686859 | 0.82421635 | CERS2    |
| 2029   | ENSG00000143420 | 2913.78902 | -0.41690963 | 0.07195403 | 3.51E-09   | 5.61E-08   | ENSA     |
| 645166 | ENSG00000143429 | 75.5426187 | 0.08617336  | 0.246082   | 0.65199428 | 0.82607871 | LSP1P4   |
| 10500  | ENSG00000143434 | 717.936864 | 0.42227673  | 0.14087734 | 0.00127661 | 0.00729491 | SEMA6C   |
| 65005  | ENSG00000143436 | 1229.02802 | -0.0547598  | 0.08168094 | 0.49205662 | 0.71113078 | MRPL9    |
| 405    | ENSG00000143437 | 1280.5412  | -0.12756473 | 0.08660762 | 0.12980585 | 0.30146269 | ARNT     |
| 23126  | ENSG00000143442 | 4061.05271 | -0.10916255 | 0.0868947  | 0.1964393  | 0.40005705 | POGZ     |
| 54964  | ENSG00000143443 | 178.190901 | -0.08637404 | 0.16531508 | 0.5616252  | 0.76502898 | C1orf56  |
| 51686  | ENSG00000143450 | 53.4580843 | -0.11881548 | 0.30771132 | 0.53737443 | 0.74759591 | OAZ3     |
| 84072  | ENSG00000143452 | 0          | NA          | NA         | NA         | NA         | HORMAD1  |
| 55204  | ENSG00000143457 | 555.200811 | -0.14364628 | 0.11429494 | 0.18684835 | 0.38675756 | GOLPH3L  |
| 126626 | ENSG00000143458 | 202.004747 | -0.12661255 | 0.18931107 | 0.4401926  | 0.66517856 | GABPB2   |
| 255928 | ENSG00000143469 | 983.031044 | -1.64498555 | 0.09017979 | 2.02E-75   | 3.67E-73   | SYT14    |
| 3756   | ENSG00000143473 | 2696.02239 | -0.77295357 | 0.06355991 | 1.03E-34   | 6.90E-33   | KCNH1    |
| 51514  | ENSG00000143476 | 1677.87408 | -0.42346563 | 0.08640902 | 4.63E-07   | 5.56E-06   | DTL      |
| 8444   | ENSG00000143479 | 486.449785 | -0.12574979 | 0.11340616 | 0.24476128 | 0.46347387 | DYRK3    |

|        |                 |            |             |            |            |            |          |
|--------|-----------------|------------|-------------|------------|------------|------------|----------|
| 1939   | ENSG00000143486 | 720.208235 | 0.15963556  | 0.09969276 | 0.0969814  | 0.24355834 | EIF2D    |
| 25896  | ENSG00000143493 | 955.270352 | -0.33431295 | 0.08439202 | 4.70E-05   | 0.00038746 | INTS7    |
| 79805  | ENSG00000143494 | 667.72615  | -0.27355859 | 0.12080883 | 0.01654987 | 0.0625666  | VASH2    |
| 9015   | ENSG00000143498 | 434.637067 | 0.20453031  | 0.12914503 | 0.09201807 | 0.23438676 | TAF1A    |
| 56950  | ENSG00000143499 | 1176.09973 | -0.63740041 | 0.07839301 | 1.19E-16   | 3.59E-15   | SMYD2    |
| 55061  | ENSG00000143502 | 10.3879538 | -0.16492361 | 0.38883044 | 0.29323138 | 0.5194341  | SUSD4    |
| 11221  | ENSG00000143507 | 49.9381495 | 0.48145164  | 0.34219035 | 0.04440185 | 0.13577876 | DUSP10   |
| 79802  | ENSG00000143512 | 3.53460626 | 0.09307175  | 0.38311702 | 0.40294866 | 0.63099498 | HHIPL2   |
| 7159   | ENSG00000143514 | 2311.44378 | 0.21163427  | 0.06651136 | 0.0012298  | 0.00706407 | TP53BP2  |
| 57198  | ENSG00000143515 | 2336.14789 | 0.35945406  | 0.08487602 | 1.36E-05   | 0.00012637 | ATP8B2   |
| 388698 | ENSG00000143520 | 0          | NA          | NA         | NA         | NA         | FLG2     |
| 49860  | ENSG00000143536 | 0          | NA          | NA         | NA         | NA         | CRNN     |
| 8751   | ENSG00000143537 | 1481.25519 | -0.4518985  | 0.07664028 | 1.70E-09   | 2.85E-08   | ADAM15   |
| 10899  | ENSG00000143543 | 1795.0692  | -0.23090295 | 0.07206155 | 0.00107434 | 0.00627831 | JTB      |
| 5872   | ENSG00000143545 | 1029.59292 | -0.00476804 | 0.08788273 | 0.94917738 | 0.97907226 | RAB13    |
| 6279   | ENSG00000143546 | 0          | NA          | NA         | NA         | NA         | S100A8   |
| 7170   | ENSG00000143549 | 7968.88778 | 0.04636447  | 0.0791165  | 0.5507833  | 0.75727932 | TPM3     |
| 91181  | ENSG00000143552 | 1.05937298 | 0.02341631  | 0.38189215 | 0.67321425 | NA         | NUP210L  |
| 23557  | ENSG00000143553 | 786.479623 | 0.01299976  | 0.08745391 | 0.87938543 | 0.94652699 | SNAPIN   |
| 11000  | ENSG00000143554 | 323.580502 | 0.03391061  | 0.13773489 | 0.79296096 | 0.90530242 | SLC27A3  |
| 6278   | ENSG00000143556 | 0          | NA          | NA         | NA         | NA         | S100A7   |
| 9898   | ENSG00000143569 | 6549.78825 | 0.11750296  | 0.07000863 | 0.08795914 | 0.22660814 | UBAP2L   |
| 27173  | ENSG00000143570 | 2638.69066 | 0.10652704  | 0.06231216 | 0.08378385 | 0.21870922 | SLC39A1  |
| 10456  | ENSG00000143575 | 1361.1722  | 0.1895087   | 0.08026211 | 0.01564478 | 0.05964814 | HAX1     |
| 148327 | ENSG00000143578 | 483.090078 | 0.49465018  | 0.1281301  | 4.45E-05   | 0.00036924 | CREB3L4  |
| 1944   | ENSG00000143590 | 289.587296 | 0.05876698  | 0.13335304 | 0.63829141 | 0.81801574 | EFNA3    |
| 89872  | ENSG00000143595 | 42.6756677 | -0.71882233 | 0.47166881 | 0.01517941 | 0.0582063  | AQP10    |
| 3782   | ENSG00000143603 | 27.1460338 | 0.13202401  | 0.31759666 | 0.49463913 | 0.71350347 | KCNN3    |
| 25912  | ENSG00000143612 | 5222.73332 | -0.14982847 | 0.05501099 | 0.0060517  | 0.02733735 | C1orf43  |
| 57459  | ENSG00000143614 | 1581.77935 | -0.15127189 | 0.08541121 | 0.06878307 | 0.1890682  | GATAD2B  |
| 3608   | ENSG00000143621 | 5600.22396 | 0.03899084  | 0.07163826 | 0.58159135 | 0.77868762 | ILF2     |
| 6016   | ENSG00000143622 | 599.482812 | 0.39423898  | 0.10904217 | 0.00015816 | 0.00114939 | RIT1     |
| 65123  | ENSG00000143624 | 2600.64918 | 0.32202129  | 0.06663699 | 9.42E-07   | 1.07E-05   | INTS3    |
| 5313   | ENSG00000143627 | 1.3203214  | 0.02918128  | 0.38055347 | 0.66485404 | NA         | PKLR     |
| 57657  | ENSG00000143630 | 826.517471 | -0.58260055 | 0.11409094 | 1.01E-07   | 1.33E-06   | HCN3     |
| 2312   | ENSG00000143631 | 1.13319958 | -0.05891097 | 0.38707981 | 0.31404748 | NA         | FLG      |
| 58     | ENSG00000143632 | 6.08696193 | 0.12388535  | 0.37979457 | 0.38408763 | 0.613205   | ACTA1    |
| 128061 | ENSG00000143633 | 344.91883  | -0.18918458 | 0.13282916 | 0.12765058 | 0.29808895 | C1orf131 |

|        |                 |            |             |            |            |            |          |
|--------|-----------------|------------|-------------|------------|------------|------------|----------|
| 2590   | ENSG00000143641 | 3036.43634 | 0.06315595  | 0.05908454 | 0.27943092 | 0.50394595 | GALNT2   |
| 79573  | ENSG00000143643 | 664.222096 | -0.04400832 | 0.10457985 | 0.65974121 | 0.8312756  | TTC13    |
| 51097  | ENSG00000143653 | 778.299835 | 0.17345549  | 0.09296166 | 0.05439769 | 0.15875997 | SCCPDH   |
| 1130   | ENSG00000143669 | 432.792744 | -0.39092699 | 0.19054608 | 0.01916017 | 0.0703568  | LYST     |
| 84451  | ENSG00000143674 | 386.317175 | -0.18445694 | 0.1224623  | 0.1107994  | 0.26850619 | MAP3K21  |
| 9859   | ENSG00000143702 | 8195.75229 | -0.23425907 | 0.05728799 | 3.36E-05   | 0.00028697 | CEP170   |
| 645455 | ENSG00000143702 | 8195.75229 | -0.23425907 | 0.05728799 | 3.36E-05   | 0.00028697 | CEP170   |
| 52     | ENSG00000143727 | 2215.77006 | -0.08118528 | 0.07106547 | 0.24485185 | 0.46353633 | ACPI     |
| 116841 | ENSG00000143740 | 810.178956 | -0.11783465 | 0.10144526 | 0.2271208  | 0.44177223 | SNAP47   |
| 6726   | ENSG00000143742 | 5422.6254  | -0.59491569 | 0.05620564 | 1.10E-26   | 5.57E-25   | SRP9     |
| 4931   | ENSG00000143748 | 675.260175 | -0.19014663 | 0.10308707 | 0.05476224 | 0.15963604 | NVL      |
| 163859 | ENSG00000143751 | 747.764635 | 0.11298757  | 0.09795693 | 0.23304001 | 0.44988944 | SDE2     |
| 8560   | ENSG00000143753 | 988.516592 | -0.10488339 | 0.08700207 | 0.21506032 | 0.42553074 | DEGS1    |
| 23219  | ENSG00000143756 | 1115.4723  | 0.127476    | 0.09587872 | 0.16954863 | 0.36123762 | FBXO28   |
| 375    | ENSG00000143761 | 6928.98939 | 0.10191069  | 0.05650189 | 0.06832737 | 0.18818386 | ARF1     |
| 7044   | ENSG00000143768 | 2.48345687 | 0.02305836  | 0.37301364 | 0.81113485 | NA         | LEFTY2   |
| 29097  | ENSG00000143771 | 1147.01991 | 0.26970079  | 0.09570348 | 0.00354701 | 0.01747521 | CNIH4    |
| 3707   | ENSG00000143772 | 129.065054 | 2.45204296  | 0.23074222 | 1.64E-27   | 8.61E-26   | ITPKB    |
| 2987   | ENSG00000143774 | 3058.35953 | 0.14302544  | 0.06880331 | 0.03453833 | 0.11218738 | GUK1     |
| 8476   | ENSG00000143776 | 2208.32366 | -0.31392912 | 0.06365324 | 5.33E-07   | 6.33E-06   | CDC42BPA |
| 149111 | ENSG00000143786 | 61.7528212 | 0.12390909  | 0.2483471  | 0.51994282 | 0.73349514 | CNIH3    |
| 79169  | ENSG00000143793 | 813.466581 | 0.29279302  | 0.09360466 | 0.00122787 | 0.00705909 | C1orf35  |
| 129642 | ENSG00000143797 | 2123.81289 | -0.17683531 | 0.07096842 | 0.01112083 | 0.04526821 | MBOAT2   |
| 142    | ENSG00000143799 | 11192.4889 | 0.02560961  | 0.06785549 | 0.7007811  | 0.85575596 | PARP1    |
| 5664   | ENSG00000143801 | 349.293124 | 0.01629796  | 0.14930178 | 0.90762418 | 0.95967084 | PSEN2    |
| 29920  | ENSG00000143811 | 1298.8656  | 0.05800258  | 0.08991231 | 0.50762121 | 0.72355808 | PYCR2    |
| 3930   | ENSG00000143815 | 2548.17119 | -0.22141117 | 0.07069168 | 0.00142449 | 0.00802213 | LBR      |
| 7483   | ENSG00000143816 | 0.34109985 | 0.02362645  | 0.38535338 | 0.62411116 | NA         | WNT9A    |
| 2052   | ENSG00000143819 | 147.201229 | -0.10626503 | 0.17458217 | 0.49343575 | 0.712409   | EPHX1    |
| 5972   | ENSG00000143839 | 0          | NA          | NA         | NA         | NA         | REN      |
| 9580   | ENSG00000143842 | 238.286744 | 0.66328053  | 0.16022904 | 8.44E-06   | 8.13E-05   | SOX13    |
| 55224  | ENSG00000143845 | 360.665483 | -0.2418462  | 0.15636879 | 0.08898023 | 0.22858576 | ETNK2    |
| 8497   | ENSG00000143847 | 438.053055 | 0.22774962  | 0.15527002 | 0.10795158 | 0.26343905 | PPFIA4   |
| 22874  | ENSG00000143850 | 2326.33721 | -1.20287478 | 0.20943598 | 8.97E-10   | 1.55E-08   | PLEKHA6  |
| 5778   | ENSG00000143851 | 2.19864757 | -0.04660297 | 0.38202989 | 0.50275204 | NA         | PTPN7    |
| 127833 | ENSG00000143858 | 53.2612417 | 0.74013343  | 0.3758712  | 0.00706168 | 0.0311896  | SYT2     |
| 127829 | ENSG00000143862 | 1310.26585 | -0.09216084 | 0.08441725 | 0.26238349 | 0.4843402  | ARL8A    |
| 130497 | ENSG00000143867 | 0.37844916 | 0.02407552  | 0.3854191  | 0.60038877 | NA         | OSR1     |

|        |                 |            |             |            |            |            |          |
|--------|-----------------|------------|-------------|------------|------------|------------|----------|
| 151449 | ENSG00000143869 | 77.7719032 | -0.07522024 | 0.22678555 | 0.68078945 | 0.84396798 | GDF7     |
| 10130  | ENSG00000143870 | 8959.62071 | 0.33772228  | 0.06241878 | 4.06E-08   | 5.65E-07   | PDIA6    |
| 388    | ENSG00000143878 | 1830.99057 | 0.69768776  | 0.07268199 | 1.97E-22   | 8.29E-21   | RHOB     |
| 245973 | ENSG00000143882 | 97.5960881 | 0.18994008  | 0.21773152 | 0.29409804 | 0.52027686 | ATP6V1C2 |
| 92906  | ENSG00000143889 | 1450.28812 | 0.1477011   | 0.09771745 | 0.11787689 | 0.28166658 | HNRNPLL  |
| 130589 | ENSG00000143891 | 245.362718 | 0.64716622  | 0.16294912 | 1.80E-05   | 0.00016326 | GALM     |
| 79823  | ENSG00000143919 | 223.828644 | -0.36990531 | 0.15943193 | 0.01080249 | 0.04417638 | CAMKMT   |
| 64241  | ENSG00000143921 | 2.41982694 | -0.04113889 | 0.37818899 | 0.62263279 | NA         | ABCG8    |
| 27436  | ENSG00000143924 | 5256.87091 | 0.20173272  | 0.06222795 | 0.00100791 | 0.00594792 | EML4     |
| 805    | ENSG00000143933 | 19277.067  | -0.31409099 | 0.06627204 | 1.43E-06   | 1.58E-05   | CALM2    |
| 494143 | ENSG00000143942 | 63.4155464 | -0.25303675 | 0.25230561 | 0.19857634 | 0.40288134 | CHAC2    |
| 6233   | ENSG00000143947 | 8682.01983 | -0.20853077 | 0.05398759 | 9.42E-05   | 0.00072173 | RPS27A   |
| 51057  | ENSG00000143951 | 140.611142 | 0.17337204  | 0.19483319 | 0.30258098 | 0.52987991 | WDPCP    |
| 51542  | ENSG00000143952 | 921.505888 | 0.09857614  | 0.09144946 | 0.26723713 | 0.48970026 | VPS54    |
| 130120 | ENSG00000143954 | 0          | NA          | NA         | NA         | NA         | REG3G    |
| 55252  | ENSG00000143970 | 1643.12835 | -0.03547053 | 0.22680086 | 0.84400625 | 0.92948958 | ASXL2    |
| 54465  | ENSG00000143971 | 756.402007 | -0.01233733 | 0.09033329 | 0.88715014 | 0.95048379 | ETAA1    |
| 6637   | ENSG00000143977 | 1349.2107  | -0.15952888 | 0.08402766 | 0.05126003 | 0.15192695 | SNRPG    |
| 84696  | ENSG00000143994 | 47.2926964 | 0.27143394  | 0.32741876 | 0.20632821 | 0.41333377 | ABHD1    |
| 4211   | ENSG00000143995 | 1853.24071 | -0.01769088 | 0.07746099 | 0.81450333 | 0.91592004 | MEIS1    |
| 653192 | ENSG00000144010 | 0.18922458 | 0.01954053  | 0.38488496 | 0.78225479 | NA         | TRIM43B  |
| 129868 | ENSG00000144015 | 0.16735865 | 0.01897177  | 0.38482933 | 0.78225479 | NA         | TRIM43   |
| 9391   | ENSG00000144021 | 3215.17076 | -0.07224358 | 0.06564319 | 0.2660857  | 0.48831193 | CIAO1    |
| 84874  | ENSG00000144026 | 586.703237 | 0.07413692  | 0.12099291 | 0.51901937 | 0.73254209 | ZNF514   |
| 23020  | ENSG00000144028 | 15225.4922 | -0.08850637 | 0.05931861 | 0.14540096 | 0.32596101 | SNRNP200 |
| 64969  | ENSG00000144029 | 847.439368 | 0.22711499  | 0.09741285 | 0.01574706 | 0.06000031 | MRPS5    |
| 79998  | ENSG00000144031 | 9.5784895  | 0.07896009  | 0.37560613 | 0.4774515  | 0.69924247 | ANKRD53  |
| 51002  | ENSG00000144034 | 518.282628 | -0.03144837 | 0.11282495 | 0.76954392 | 0.89405696 | TPRKB    |
| 9027   | ENSG00000144035 | 0.64813526 | -0.02080678 | 0.38311595 | 0.66495951 | NA         | NAT8     |
| 23233  | ENSG00000144036 | 452.528659 | 0.17601481  | 0.13165164 | 0.15407222 | 0.339342   | EXOC6B   |
| 94097  | ENSG00000144040 | 233.58798  | -0.19221936 | 0.17831313 | 0.22240031 | 0.43535977 | SFXN5    |
| 113419 | ENSG00000144043 | 1422.13705 | -0.49377769 | 0.10007008 | 3.19E-07   | 3.94E-06   | TEX261   |
| 165545 | ENSG00000144045 | 85.889545  | 0.09426058  | 0.21884441 | 0.60255257 | 0.79259054 | DQX1     |
| 8446   | ENSG00000144048 | 227.063222 | -0.137286   | 0.16049908 | 0.34526666 | 0.57573462 | DUSP11   |
| 84620  | ENSG00000144057 | 549.83981  | 0.03088165  | 0.13168312 | 0.80383068 | 0.91089792 | ST6GAL2  |
| 4867   | ENSG00000144061 | 86.1109387 | 1.15158874  | 0.31915514 | 2.70E-05   | 0.0002355  | NPHP1    |
| 7851   | ENSG00000144063 | 0.35662409 | 0.02381665  | 0.38538099 | 0.61404581 | NA         | MALL     |
| 55258  | ENSG00000144115 | 0          | NA          | NA         | NA         | NA         | THNSL2   |

|        |                 |            |             |            |            |            |          |
|--------|-----------------|------------|-------------|------------|------------|------------|----------|
| 5899   | ENSG00000144118 | 516.94811  | -0.36200473 | 0.11608909 | 0.00102982 | 0.00605918 | RALB     |
| 165257 | ENSG00000144119 | 0.30002146 | -0.02294464 | 0.38527539 | 0.68644526 | NA         | C1QL2    |
| 80775  | ENSG00000144120 | 367.929221 | -0.13044527 | 0.13508808 | 0.3010902  | 0.52835924 | TMEM177  |
| 284958 | ENSG00000144130 | 0.33471731 | 0.02354391  | 0.38534154 | 0.62842204 | NA         | NT5DC4   |
| 11159  | ENSG00000144134 | 197.894643 | 0.3350541   | 0.17909927 | 0.03503878 | 0.11340607 | RABL2A   |
| 6574   | ENSG00000144136 | 1738.07064 | -0.245648   | 0.08025265 | 0.00170395 | 0.00935593 | SLC20A1  |
| 129804 | ENSG00000144152 | 321.007945 | 0.02003744  | 0.14173282 | 0.88031091 | 0.94694038 | FBLN7    |
| NA     | ENSG00000144158 | 0.16735865 | 0.01897177  | 0.38482933 | 0.78225479 | NA         | SNRPA1P1 |
| 84524  | ENSG00000144161 | 546.884083 | -0.38854148 | 0.10673739 | 0.00014293 | 0.00104908 | ZC3H8    |
| 51601  | ENSG00000144182 | 90.9637322 | -0.0330953  | 0.23286483 | 0.85652909 | 0.93595581 | LIPT1    |
| NA     | ENSG00000144188 | 0          | NA          | NA         | NA         | NA         | TRIM43CP |
| 1261   | ENSG00000144191 | 0.173124   | -0.01911262 | 0.38486262 | 0.84537521 | NA         | CNGA3    |
| 151313 | ENSG00000144199 | 173.517592 | 0.3937629   | 0.1882416  | 0.0175679  | 0.06560268 | FAHD2B   |
| 129530 | ENSG00000144214 | 13.1255416 | 0.34758128  | 0.48527479 | 0.10315981 | 0.2551347  | LYG1     |
| 3899   | ENSG00000144218 | 573.467257 | -0.84154695 | 0.14036665 | 3.22E-10   | 5.90E-09   | AFF3     |
| 23190  | ENSG00000144224 | 2043.38731 | 0.02961507  | 0.08773752 | 0.72961666 | 0.87071245 | UBXN4    |
| 11249  | ENSG00000144227 | 23.6776015 | -0.43111412 | 0.44044902 | 0.07881929 | 0.20925662 | NXPH2    |
| 339745 | ENSG00000144228 | 501.72865  | 0.03010124  | 0.13540701 | 0.81315116 | 0.91549876 | SPOPL    |
| 80731  | ENSG00000144229 | 7.36281147 | -3.16336109 | 1.42683827 | 0.00122494 | 0.00704636 | THSD7B   |
| 2840   | ENSG00000144230 | 0.43109345 | 0.01211155  | 0.38375314 | 0.85851826 | NA         | GPR17    |
| 5433   | ENSG00000144231 | 1732.63084 | 0.01853487  | 0.08577654 | 0.82529018 | 0.92066374 | POLR2D   |
| 83607  | ENSG00000144233 | 1069.89543 | 0.00187058  | 0.08117501 | 0.98123163 | 0.99355086 | AMMECR1L |
| 114805 | ENSG00000144278 | 1753.09293 | -0.44015699 | 0.07656007 | 4.24E-09   | 6.72E-08   | GALNT13  |
| 8502   | ENSG00000144283 | 878.551789 | -0.24121852 | 0.09384734 | 0.00785485 | 0.03399657 | PKP4     |
| 6323   | ENSG00000144285 | 17.6961962 | -0.2418107  | 0.40917783 | 0.1933741  | 0.3960506  | SCN1A    |
| 57282  | ENSG00000144290 | 0.18922458 | 0.01954053  | 0.38488496 | 0.78225479 | NA         | SLC4A10  |
| 79634  | ENSG00000144306 | 639.550399 | -0.13922256 | 0.10329906 | 0.16052235 | 0.34848051 | SCRN3    |
| 80856  | ENSG00000144320 | 997.067941 | 0.13183188  | 0.22618928 | 0.47517492 | 0.69740127 | LNPBK    |
| 151126 | ENSG00000144331 | 8.97568024 | 1.22590508  | 1.79408303 | 0.01012774 | 0.04183108 | ZNF385B  |
| 23671  | ENSG00000144339 | 29.9643349 | -0.86924205 | 0.46323192 | 0.00617984 | 0.02776728 | TMEFF2   |
| 83879  | ENSG00000144354 | 1181.10499 | -0.41208785 | 0.08646969 | 9.60E-07   | 1.09E-05   | CDCA7    |
| 1745   | ENSG00000144355 | 2.24254199 | 0.12333057  | 0.40405214 | 0.16588926 | NA         | DLX1     |
| 130507 | ENSG00000144357 | 1192.58015 | -0.22624433 | 0.09654496 | 0.01511305 | 0.05803579 | UBR3     |
| 493911 | ENSG00000144362 | 85.9962915 | -0.12953712 | 0.23019013 | 0.48285582 | 0.7032638  | PHOSPHO2 |
| 51454  | ENSG00000144366 | 1420.87151 | 0.52519289  | 0.07714057 | 3.75E-12   | 8.22E-11   | GULP1    |
| 165215 | ENSG00000144369 | 697.791471 | -0.73343236 | 0.09676552 | 7.61E-15   | 2.04E-13   | FAM171B  |
| 3329   | ENSG00000144381 | 9196.72804 | -0.29934575 | 0.07503146 | 4.56E-05   | 0.00037768 | HSPD1    |
| 284992 | ENSG00000144395 | 272.980885 | 0.09992833  | 0.16342376 | 0.49968976 | 0.71690947 | CCDC150  |



|           |                 |            |             |            |            |            |          |
|-----------|-----------------|------------|-------------|------------|------------|------------|----------|
| 151194    | ENSG00000144401 | 397.639364 | 0.16224603  | 0.11537162 | 0.13992568 | 0.31723522 | METTL21A |
| 285175    | ENSG00000144406 | 867.168057 | -1.7917926  | 0.11058278 | 2.91E-60   | 3.85E-58   | UNC80    |
| 5746      | ENSG00000144407 | 144.073225 | 0.43556982  | 0.19784128 | 0.01168039 | 0.04713015 | PTH2R    |
| 130749    | ENSG00000144410 | 0.173124   | -0.01911262 | 0.38486262 | 0.84537521 | NA         | CPO      |
| 65065     | ENSG00000144426 | 308.788499 | 0.10027333  | 0.17678876 | 0.52313753 | 0.73618679 | NBEAL1   |
| 151050    | ENSG00000144445 | 331.164123 | 0.04654458  | 0.13710455 | 0.71691831 | 0.8637162  | KANSL1L  |
| 79582     | ENSG00000144451 | 245.582825 | -0.06954996 | 0.14113308 | 0.59502281 | 0.78790447 | SPAG16   |
| 26154     | ENSG00000144452 | 103.375637 | 0.99027957  | 0.31196479 | 0.00016665 | 0.00120582 | ABCA12   |
| 285362    | ENSG00000144455 | 208.163225 | -0.42356769 | 0.1942506  | 0.01258336 | 0.05011116 | SUMF1    |
| 100130207 | ENSG00000144455 | 208.163225 | -0.42356769 | 0.1942506  | 0.01258336 | 0.05011116 | SUMF1    |
| 57624     | ENSG00000144460 | 105.1985   | 0.01752741  | 0.19422922 | 0.91913456 | 0.96566562 | NYAP2    |
| 84236     | ENSG00000144468 | 434.604346 | 0.18776434  | 0.15509747 | 0.18496544 | 0.38378105 | RHBDD1   |
| 57007     | ENSG00000144476 | 0          | NA          | NA         | NA         | NA         | ACKR3    |
| 79054     | ENSG00000144481 | 1.20624581 | 0.01767401  | 0.38002972 | 0.78258358 | NA         | TRPM8    |
| 55502     | ENSG00000144485 | 2419.48099 | 1.34023828  | 0.06621552 | 4.16E-92   | 1.15E-89   | HES6     |
| 339768    | ENSG00000144488 | 25.1759544 | -0.37634474 | 0.40210625 | 0.10753203 | 0.26296505 | ESPNL    |
| 51281     | ENSG00000144504 | 272.701956 | 0.51750343  | 0.17138216 | 0.00086675 | 0.00522686 | ANKMY1   |
| 64708     | ENSG00000144524 | 996.70736  | 0.03351079  | 0.08296016 | 0.67987151 | 0.84376374 | COPS7B   |
| 129563    | ENSG00000144535 | 922.51443  | 0.14527523  | 0.08761663 | 0.08842087 | 0.22747277 | DIS3L2   |
| 151835    | ENSG00000144550 | 13.3983749 | -0.01816825 | 0.33879418 | 0.9072083  | 0.95963244 | CPNE9    |
| 2177      | ENSG00000144554 | 1312.80282 | 0.09346178  | 0.09639492 | 0.31619717 | 0.54427831 | FANCD2   |
| 132001    | ENSG00000144559 | 154.58678  | 0.08508886  | 0.18762826 | 0.60429862 | 0.79446588 | TAMM41   |
| 9686      | ENSG00000144560 | 2253.23706 | 0.03786446  | 0.06643861 | 0.56305041 | 0.76597094 | VGLL4    |
| 5868      | ENSG00000144566 | 852.794687 | 0.05802815  | 0.09128695 | 0.51327278 | 0.72852568 | RAB5A    |
| 79137     | ENSG00000144567 | 1731.8415  | -0.21581912 | 0.07407758 | 0.00292551 | 0.01481044 | RETREG2  |
| 58190     | ENSG00000144579 | 879.721018 | 0.37575937  | 0.092129   | 2.56E-05   | 0.00022476 | CTDSP1   |
| 9125      | ENSG00000144580 | 1857.7906  | -0.17937984 | 0.07985861 | 0.02144441 | 0.07701976 | CNOT9    |
| 57574     | ENSG00000144583 | 274.623622 | -2.47079849 | 0.17556685 | 3.33E-46   | 2.96E-44   | MARCHF4  |
| 114790    | ENSG00000144589 | 541.382149 | 0.16364496  | 0.12242067 | 0.15775449 | 0.34477297 | STK11IP  |
| 29926     | ENSG00000144591 | 505.852045 | 0.22347555  | 0.11771633 | 0.04558008 | 0.13856846 | GMPPA    |
| 80852     | ENSG00000144596 | 289.230607 | -0.74052918 | 0.16640792 | 1.73E-06   | 1.87E-05   | GRIP2    |
| 85403     | ENSG00000144597 | 1219.27976 | -0.36644264 | 0.08906623 | 2.28E-05   | 0.00020284 | EAF1     |
| 152330    | ENSG00000144619 | 1377.84281 | -0.70861248 | 0.07571913 | 1.90E-21   | 7.60E-20   | CNTN4    |
| 51143     | ENSG00000144635 | 831.656445 | 0.09956045  | 0.09839069 | 0.2951503  | 0.52176619 | DYNC1LI1 |
| 27303     | ENSG00000144642 | 1398.69634 | -0.16738123 | 0.08133411 | 0.03490208 | 0.11308412 | RBMS3    |
| 339896    | ENSG00000144644 | 0          | NA          | NA         | NA         | NA         | GADL1    |
| 114884    | ENSG00000144645 | 58.0050825 | 0.06419612  | 0.29278451 | 0.73924667 | 0.87688337 | OSBPL10  |
| 84892     | ENSG00000144647 | 516.635417 | 0.01354378  | 0.10423525 | 0.89345723 | 0.95389529 | POMGNT2  |

|        |                 |            |             |            |            |            |          |
|--------|-----------------|------------|-------------|------------|------------|------------|----------|
| 1238   | ENSG00000144648 | 7.16305007 | -0.15257672 | 0.39261031 | 0.28754265 | 0.51323739 | ACKR2    |
| 729085 | ENSG00000144649 | 12.4065413 | 3.7354242   | 0.97990607 | 1.57E-05   | 0.00014359 | GASK1A   |
| 64651  | ENSG00000144655 | 60.3491501 | 0.17590004  | 0.26366853 | 0.37464125 | 0.60375943 | CSRNP1   |
| 54977  | ENSG00000144659 | 434.229427 | -0.12053989 | 0.11323629 | 0.26458649 | 0.48686662 | SLC25A38 |
| 3680   | ENSG00000144668 | 1460.72751 | -0.79144719 | 0.08340364 | 4.50E-22   | 1.86E-20   | ITGA9    |
| 9389   | ENSG00000144671 | 2.59809514 | 0.05155757  | 0.3770724  | 0.58997084 | 0.78467664 | SLC22A14 |
| 2803   | ENSG00000144674 | 1671.86682 | -0.07831112 | 0.10087361 | 0.42008718 | 0.6460375  | GOLGA4   |
| 10217  | ENSG00000144677 | 760.282112 | 0.31840444  | 0.09484068 | 0.00051651 | 0.0033196  | CTDSPL   |
| 6769   | ENSG00000144681 | 948.070503 | 1.53438332  | 0.09369961 | 2.40E-61   | 3.26E-59   | STAC     |
| 9922   | ENSG00000144711 | 1433.27568 | -0.44794467 | 0.07544172 | 1.34E-09   | 2.27E-08   | IQSEC1   |
| 23066  | ENSG00000144712 | 405.820337 | 0.09421239  | 0.13731636 | 0.46295963 | 0.68581491 | CAND2    |
| 6161   | ENSG00000144713 | 11558.7562 | -0.16505732 | 0.04835788 | 0.00057707 | 0.00365668 | RPL32    |
| 5793   | ENSG00000144724 | 410.646533 | 0.32749016  | 0.13103373 | 0.00768892 | 0.03337303 | PTPRG    |
| 54756  | ENSG00000144730 | 11756.3676 | -0.50777844 | 0.04603348 | 8.10E-30   | 4.66E-28   | IL17RD   |
| 55164  | ENSG00000144736 | 691.092506 | -0.1199087  | 0.10731807 | 0.24353845 | 0.46198062 | SHQ1     |
| 115286 | ENSG00000144741 | 264.86607  | 0.08971131  | 0.14587526 | 0.50808559 | 0.72385596 | SLC25A26 |
| 9039   | ENSG00000144744 | 922.40159  | 0.04879374  | 0.09105697 | 0.58193275 | 0.778894   | UBA3     |
| 10550  | ENSG00000144746 | 804.416001 | -0.15061499 | 0.09442991 | 0.09921498 | 0.2479125  | ARL6IP5  |
| 7110   | ENSG00000144747 | 646.655826 | -0.27520018 | 0.13171983 | 0.02544406 | 0.08833073 | TMF1     |
| 26018  | ENSG00000144749 | 147.665497 | 0.90000741  | 0.23910552 | 2.32E-05   | 0.00020518 | LRIG1    |
| 57408  | ENSG00000144771 | 0          | NA          | NA         | NA         | NA         | LRTM1    |
| NA     | ENSG00000144785 | 248.27796  | -0.05506702 | 0.14548683 | 0.68072032 | 0.84396798 |          |
| 8994   | ENSG00000144791 | 508.194619 | 0.09926455  | 0.15496533 | 0.48433254 | 0.70452718 | LIMD1    |
| 285349 | ENSG00000144792 | 257.71153  | -0.15375218 | 0.16129621 | 0.29093461 | 0.51698545 | ZNF660   |
| 64332  | ENSG00000144802 | 54.9857979 | 0.04013505  | 0.26801669 | 0.83652784 | 0.92562282 | NFKBIZ   |
| 1295   | ENSG00000144810 | 0.64342128 | 0.02056942  | 0.38306882 | 0.64913344 | NA         | COL8A1   |
| 91775  | ENSG00000144815 | 1202.99139 | 0.15938501  | 0.08786235 | 0.06230457 | 0.17636219 | NXPE3    |
| 84873  | ENSG00000144820 | 0          | NA          | NA         | NA         | NA         | ADGRG7   |
| 22989  | ENSG00000144821 | 68.8506636 | 1.44727388  | 0.31779639 | 3.99E-07   | 4.83E-06   | MYH15    |
| 90102  | ENSG00000144824 | 326.225946 | 1.71553542  | 0.16336832 | 6.83E-27   | 3.47E-25   | PHLDB2   |
| 55347  | ENSG00000144827 | 430.681498 | 0.02165098  | 0.12468242 | 0.85615958 | 0.93593069 | ABHD10   |
| 29114  | ENSG00000144834 | 1361.79896 | -0.12649119 | 0.07962743 | 0.10393088 | 0.25665779 | TAGLN3   |
| 51365  | ENSG00000144837 | 0.65294698 | 0.0259575   | 0.38366461 | 0.58982774 | NA         | PLA1A    |
| 285282 | ENSG00000144840 | 247.484099 | 0.20274507  | 0.15219472 | 0.1461572  | 0.32699131 | RABL3    |
| 141    | ENSG00000144843 | 71.621897  | 0.08768226  | 0.23035867 | 0.63676855 | 0.81722218 | ADPRH    |
| 152404 | ENSG00000144847 | 34.0242698 | 3.29167551  | 0.5115899  | 9.88E-12   | 2.11E-10   | IGSF11   |
| 64422  | ENSG00000144848 | 660.639516 | -0.11308393 | 0.11614212 | 0.3061773  | 0.53388623 | ATG3     |
| 8856   | ENSG00000144852 | 2.87561771 | 0.1172767   | 0.39582607 | 0.25587329 | 0.47698262 | NR1I2    |

|        |                 |            |             |            |            |            |         |
|--------|-----------------|------------|-------------|------------|------------|------------|---------|
| 91653  | ENSG00000144857 | 808.200194 | 0.09557263  | 0.09841907 | 0.31517185 | 0.54297665 | BOC     |
| 58477  | ENSG00000144867 | 802.386312 | -0.29508281 | 0.11887917 | 0.00895068 | 0.03784773 | SRPRB   |
| 66000  | ENSG00000144868 | 820.679181 | 2.04368233  | 0.12032305 | 5.57E-66   | 8.25E-64   | TMEM108 |
| 185    | ENSG00000144891 | 590.016045 | -0.50945086 | 0.11219788 | 2.11E-06   | 2.26E-05   | AGTR1   |
| 116931 | ENSG00000144893 | 101.011776 | -0.4098627  | 0.27664598 | 0.05285211 | 0.15530003 | MED12L  |
| 83939  | ENSG00000144895 | 1683.73597 | -0.11258167 | 0.07653362 | 0.13276455 | 0.30603562 | EIF2A   |
| 10840  | ENSG00000144908 | 22.8358975 | -0.01999383 | 0.31084123 | 0.91117312 | 0.9621926  | ALDH1L1 |
| 114885 | ENSG00000144909 | 477.592579 | -0.22649623 | 0.11478024 | 0.03803442 | 0.12085248 | OSBPL11 |
| 7220   | ENSG00000144935 | 211.501928 | 0.16447987  | 0.2341198  | 0.3810952  | 0.61009673 | TRPC1   |
| 57552  | ENSG00000144959 | 61.0187084 | -0.01291037 | 0.25784004 | 0.94430719 | 0.97728379 | NCEH1   |
| 83893  | ENSG00000144962 | 0          | NA          | NA         | NA         | NA         | SPATA16 |
| 653333 | ENSG00000145002 | 0.49694214 | 0.01153459  | 0.38339044 | 0.7804583  | NA         | FAM86B2 |
| 4026   | ENSG00000145012 | 7.60344169 | 3.14240183  | 1.25016804 | 0.00071839 | 0.00442363 | LPP     |
| 93109  | ENSG00000145014 | 470.897925 | 0.00848269  | 0.11167994 | 0.93763816 | 0.97366414 | TMEM44  |
| 9711   | ENSG00000145016 | 750.071684 | -0.19994589 | 0.10016475 | 0.03805655 | 0.12090343 | RUBCN   |
| 275    | ENSG00000145020 | 338.829559 | 0.53446298  | 0.15365974 | 0.00017187 | 0.00124018 | AMT     |
| 6988   | ENSG00000145022 | 214.785244 | -0.48500114 | 0.17139161 | 0.00176199 | 0.00961126 | TCTA    |
| 84276  | ENSG00000145029 | 335.26582  | 0.20008075  | 0.1400904  | 0.12361533 | 0.29131232 | NICN1   |
| 90226  | ENSG00000145040 | 1.08175734 | 0.04913157  | 0.38642238 | 0.34484369 | NA         | UCN2    |
| 9730   | ENSG00000145041 | 1263.55815 | -0.03385239 | 0.07970178 | 0.66275334 | 0.83353574 | DCAF1   |
| 7873   | ENSG00000145050 | 1764.61819 | 0.67043931  | 0.09225673 | 9.53E-14   | 2.34E-12   | MANF    |
| NA     | ENSG00000145063 | 0.76401627 | -0.02749518 | 0.38342601 | 0.57911717 | NA         |         |
| NA     | ENSG00000145075 | 1.05489384 | -0.04391844 | 0.38790839 | 0.27834512 | NA         | CCDC39  |
| 9515   | ENSG00000145087 | 399.019462 | -1.02480837 | 0.17902448 | 1.22E-09   | 2.08E-08   | STXBP5L |
| 55840  | ENSG00000145088 | 22.1397012 | 0.02042242  | 0.31631019 | 0.91215596 | 0.96260718 | EAF2    |
| 286676 | ENSG00000145103 | 1.68406501 | 0.12404622  | 0.41177607 | 0.04108289 | NA         | ILDR1   |
| 116211 | ENSG00000145107 | 1.71004271 | -0.06683772 | 0.39132443 | 0.18656897 | NA         | TM4SF19 |
| 4585   | ENSG00000145113 | 5.28852537 | -0.06361994 | 0.37053243 | 0.59354046 | 0.78731315 | MUC4    |
| 9353   | ENSG00000145147 | 98.0893646 | 0.01623902  | 0.20843357 | 0.92751466 | 0.96969441 | SLIT2   |
| 8893   | ENSG00000145191 | 1482.57952 | 0.1350191   | 0.07093281 | 0.05269173 | 0.1548976  | EIF2B5  |
| 197    | ENSG00000145192 | 2.72757994 | 0.04535152  | 0.38135755 | 0.54533093 | 0.75298369 | AHSG    |
| 9718   | ENSG00000145194 | 84.1839394 | 1.28057129  | 0.29488395 | 1.21E-06   | 1.35E-05   | ECE2    |
| 90113  | ENSG00000145198 | 156.089103 | 0.13107284  | 0.20117657 | 0.44573993 | 0.67028199 | VWA5B2  |
| 1609   | ENSG00000145214 | 297.402871 | 0.35486453  | 0.1460695  | 0.00858339 | 0.03656741 | DGKQ    |
| 81608  | ENSG00000145216 | 1088.75233 | -0.0499851  | 0.08168755 | 0.53054354 | 0.74231198 | FIP1L1  |
| 10861  | ENSG00000145217 | 63.2944328 | 0.11927424  | 0.31164204 | 0.53586225 | 0.74657844 | SLC26A1 |
| 55646  | ENSG00000145220 | 382.265843 | -0.05687584 | 0.11852645 | 0.61307021 | 0.80076208 | LYAR    |
| 1060   | ENSG00000145241 | 413.697275 | -0.18634508 | 0.11647103 | 0.09218379 | 0.23468836 | CENPC   |

|           |                 |            |             |            |            |            |          |
|-----------|-----------------|------------|-------------|------------|------------|------------|----------|
| 2044      | ENSG00000145242 | 0.14931947 | -0.01844332 | 0.38480212 | 0.84537521 | NA         | EPHA5    |
| 10699     | ENSG00000145244 | 21.313988  | 3.18671044  | 0.69403896 | 2.87E-07   | 3.57E-06   | CORIN    |
| 57205     | ENSG00000145246 | 631.401508 | 0.97722113  | 0.12573659 | 1.07E-15   | 3.06E-14   | ATP10D   |
| 132299    | ENSG00000145247 | 874.525608 | -0.022651   | 0.08537523 | 0.78465538 | 0.9020424  | OCIAD2   |
| 201780    | ENSG00000145248 | 547.020945 | 0.22725835  | 0.1104414  | 0.03132823 | 0.1037823  | SLC10A4  |
| 345274    | ENSG00000145283 | 0.34746601 | 0.02370763  | 0.3853651  | 0.61987128 | NA         | SLC10A6  |
| 79966     | ENSG00000145284 | 372.739237 | -0.21101187 | 0.12266431 | 0.06854463 | 0.18864273 | SCD5     |
| 51316     | ENSG00000145287 | 0.55356856 | 0.03297301  | 0.38624244 | 0.45094446 | NA         | PLAC8    |
| 58478     | ENSG00000145293 | 917.586377 | -0.32593115 | 0.09666747 | 0.00047252 | 0.00307169 | ENOPH1   |
| 85438     | ENSG00000145309 | 0          | NA          | NA         | NA         | NA         | CABS1    |
| 2638      | ENSG00000145321 | 0          | NA          | NA         | NA         | NA         | GC       |
| 93587     | ENSG00000145331 | 148.736342 | 0.02484515  | 0.21686537 | 0.8911897  | 0.95275372 | TRMT10A  |
| 57563     | ENSG00000145332 | 688.777358 | -0.37923794 | 0.16116067 | 0.00950657 | 0.03980799 | KLHL8    |
| 6622      | ENSG00000145335 | 240.471817 | -0.34477844 | 0.2251226  | 0.06423991 | 0.18029704 | SNCA     |
| 100996939 | ENSG00000145337 | 841.862377 | 0.07457141  | 0.08798784 | 0.38431539 | 0.61337119 | PYURF    |
| 93627     | ENSG00000145348 | 599.029126 | 0.1570086   | 0.1059638  | 0.12269271 | 0.28988186 | TBCK     |
| 817       | ENSG00000145349 | 518.824952 | -0.02075756 | 0.11787574 | 0.85200857 | 0.93288356 | CAMK2D   |
| 493856    | ENSG00000145354 | 722.143973 | -0.36004126 | 0.11547613 | 0.00104251 | 0.00612296 | CISD2    |
| 115265    | ENSG00000145358 | 7.09404882 | 2.49294987  | 1.28168608 | 0.00214142 | 0.01134469 | DDIT4L   |
| 287       | ENSG00000145362 | 3981.96901 | 0.39342798  | 0.07603422 | 1.26E-07   | 1.64E-06   | ANK2     |
| 92610     | ENSG00000145365 | 424.567233 | -0.05922922 | 0.13161176 | 0.63075297 | 0.81329297 | TIFA     |
| 166378    | ENSG00000145375 | 308.09186  | -0.03168742 | 0.13960289 | 0.8065107  | 0.91237156 | SPATA5   |
| 2169      | ENSG00000145384 | 0          | NA          | NA         | NA         | NA         | FABP2    |
| 890       | ENSG00000145386 | 1289.66566 | -0.17414537 | 0.08786433 | 0.04135968 | 0.12865727 | CCNA2    |
| 57721     | ENSG00000145388 | 666.644244 | -0.33796537 | 0.14242873 | 0.01029971 | 0.0424392  | METTTL14 |
| 54532     | ENSG00000145390 | 290.626266 | 0.25025768  | 0.15609711 | 0.07886948 | 0.20933386 | USP53    |
| 80854     | ENSG00000145391 | 1198.16051 | -0.71064989 | 0.08165509 | 7.53E-19   | 2.65E-17   | SETD7    |
| 92345     | ENSG00000145414 | 229.586049 | 0.22666572  | 0.17358176 | 0.14299103 | 0.32208696 | NAF1     |
| 55016     | ENSG00000145416 | 125.771088 | -0.2171867  | 0.208304   | 0.21672712 | 0.42784737 | MARCHF1  |
| 6423      | ENSG00000145423 | 0.49887772 | 0.01178183  | 0.38340295 | 0.77665762 | NA         | SFRP2    |
| 6189      | ENSG00000145425 | 18331.709  | -0.15211358 | 0.05019904 | 0.00221852 | 0.01170933 | RPS3A    |
| 285533    | ENSG00000145428 | 198.483728 | 0.15921985  | 0.15906872 | 0.27190847 | 0.49528683 | RNF175   |
| 56034     | ENSG00000145431 | 30.8858792 | 2.03313438  | 0.4864665  | 1.80E-06   | 1.95E-05   | PDGFC    |
| 84869     | ENSG00000145439 | 663.482966 | -0.05100908 | 0.10014336 | 0.59692623 | 0.78900843 | CBR4     |
| 8001      | ENSG00000145451 | 10.7495481 | -0.4504519  | 0.65210421 | 0.04609532 | 0.13985441 | GLRA3    |
| 285440    | ENSG00000145476 | 538.50324  | -0.45360027 | 0.13234646 | 0.00026426 | 0.00182871 | CYP4V2   |
| 83853     | ENSG00000145491 | 1.03870336 | 0.05888287  | 0.39035467 | 0.19883368 | NA         | ROPN1L   |
| 4726      | ENSG00000145494 | 764.217134 | 0.13893141  | 0.09736022 | 0.13998502 | 0.3173335  | NDUFS6   |

|           |                 |            |             |            |            |            |          |
|-----------|-----------------|------------|-------------|------------|------------|------------|----------|
| 10299     | ENSG00000145495 | 5578.59489 | 0.04658448  | 0.06973896 | 0.49707795 | 0.71500229 | MARCHF6  |
| 85409     | ENSG00000145506 | 15.9334067 | 0.34953792  | 0.46436483 | 0.10921242 | 0.26569888 | NKD2     |
| 1016      | ENSG00000145526 | 2.99675661 | 0.11055188  | 0.39261616 | 0.2803424  | 0.5049178  | CDH18    |
| 170690    | ENSG00000145536 | 3.26176294 | -0.03466558 | 0.37354106 | 0.7211028  | 0.86691933 | ADAMTS16 |
| 6715      | ENSG00000145545 | 664.895624 | -0.22834338 | 0.12551843 | 0.05335301 | 0.15642438 | SRD5A1   |
| 4651      | ENSG00000145555 | 807.453954 | 1.4894105   | 0.09885091 | 2.32E-52   | 2.43E-50   | MYO10    |
| 54491     | ENSG00000145569 | 586.713731 | -1.01390987 | 0.10807863 | 8.66E-22   | 3.53E-20   | OTULINL  |
| 6167      | ENSG00000145592 | 16968.4493 | -0.07329403 | 0.05506785 | 0.17816787 | 0.37366284 | RPL37    |
| 6502      | ENSG00000145604 | 2865.13966 | 0.33517467  | 0.08747241 | 8.01E-05   | 0.00062357 | SKP2     |
| 9180      | ENSG00000145623 | 1.27964908 | 0.05379502  | 0.38671458 | 0.30663808 | NA         | OSMR     |
| 133688    | ENSG00000145626 | 0          | NA          | NA         | NA         | NA         | UGT3A1   |
| 10769     | ENSG00000145632 | 90.4627641 | 1.01729948  | 0.27313647 | 2.14E-05   | 0.00019081 | PLK2     |
| 100132916 | ENSG00000145642 | 0.52119901 | 0.02576573  | 0.38568143 | 0.51723676 | NA         | SHISAL2B |
| 3001      | ENSG00000145649 | 0          | NA          | NA         | NA         | NA         | GZMA     |
| 5295      | ENSG00000145675 | 1618.70644 | -1.38712934 | 0.08953169 | 3.45E-55   | 4.01E-53   | PIK3R1   |
| 1404      | ENSG00000145681 | 0          | NA          | NA         | NA         | NA         | HAPLN1   |
| 10184     | ENSG00000145685 | 826.368604 | -1.51231121 | 0.12831259 | 3.66E-33   | 2.30E-31   | LHFPL2   |
| 23635     | ENSG00000145687 | 784.037554 | 0.5927026   | 0.09562858 | 1.78E-10   | 3.32E-09   | SSBP2    |
| 635       | ENSG00000145692 | 3.02473945 | -0.05360609 | 0.37780344 | 0.56024586 | 0.76415299 | BHMT     |
| 256006    | ENSG00000145700 | 32.1075008 | -0.08543281 | 0.29179236 | 0.65806035 | 0.83031782 | ANKRD31  |
| 10788     | ENSG00000145703 | 267.897125 | 0.65875888  | 0.16428339 | 1.48E-05   | 0.00013614 | IQGAP2   |
| 1393      | ENSG00000145708 | 0          | NA          | NA         | NA         | NA         | CRHBP    |
| 5921      | ENSG00000145715 | 1081.66287 | -0.21869213 | 0.09235428 | 0.01441547 | 0.05579457 | RASA1    |
| 167410    | ENSG00000145721 | 0.45004261 | -0.02731475 | 0.38571429 | 0.56165931 | NA         | LIX1     |
| 54826     | ENSG00000145723 | 106.133917 | -0.74428585 | 0.24743693 | 0.00046968 | 0.00305525 | GIN1     |
| 23262     | ENSG00000145725 | 1231.26944 | -0.27080603 | 0.10824997 | 0.0088727  | 0.03756603 | PIIP5K2  |
| 5066      | ENSG00000145730 | 1226.44715 | 0.37793999  | 0.07908803 | 1.00E-06   | 1.13E-05   | PAM      |
| 55814     | ENSG00000145734 | 1732.13689 | -0.1408311  | 0.07819042 | 0.06535928 | 0.18243221 | BDP1     |
| 2966      | ENSG00000145736 | 574.035811 | -0.17023018 | 0.11965655 | 0.13326582 | 0.30691105 | GTF2H2   |
| 728340    | ENSG00000145736 | 574.035811 | -0.17023018 | 0.11965655 | 0.13326582 | 0.30691105 | GTF2H2   |
| 64924     | ENSG00000145740 | 1153.62503 | -0.1382732  | 0.08980466 | 0.11258913 | 0.27178103 | SLC30A5  |
| 689       | ENSG00000145741 | 8528.07228 | 0.0280306   | 0.05101667 | 0.57935538 | 0.77706744 | BTF3     |
| 64839     | ENSG00000145743 | 564.020133 | 0.01881729  | 0.10170587 | 0.84898367 | 0.93137282 | FBXL17   |
| 83890     | ENSG00000145757 | 8.85955804 | 0.02473621  | 0.3506018  | 0.86688206 | 0.94147909 | SPATA9   |
| 85480     | ENSG00000145777 | 37.055434  | 1.11246771  | 0.41769598 | 0.0006579  | 0.00409046 | TSLP     |
| 25816     | ENSG00000145779 | 131.951296 | 0.65080234  | 0.21065315 | 0.00046718 | 0.00304196 | TNFAIP8  |
| 56929     | ENSG00000145780 | 339.929243 | -0.08185149 | 0.1310556  | 0.5054822  | 0.7217017  | FEM1C    |
| 51397     | ENSG00000145781 | 288.519274 | -0.25637381 | 0.14562749 | 0.05628185 | 0.16308337 | COMMD10  |

|           |                 |            |             |            |            |            |              |
|-----------|-----------------|------------|-------------|------------|------------|------------|--------------|
| 9140      | ENSG00000145782 | 967.257239 | -0.4035593  | 0.10255469 | 4.30E-05   | 0.00035752 | ATG12        |
| 84466     | ENSG00000145794 | 6.44804491 | 0.22552132  | 0.44332065 | 0.13544764 | 0.30998745 | MEGF10       |
| 171019    | ENSG00000145808 | 256.092541 | 3.44116673  | 0.22999369 | 2.55E-52   | 2.66E-50   | ADAMTS19     |
| 81555     | ENSG00000145817 | 658.18634  | 0.04679943  | 0.10447908 | 0.64223756 | 0.82116344 | YIPF5        |
| 23092     | ENSG00000145819 | 366.659327 | -0.26503924 | 0.1912248  | 0.1100579  | 0.26723153 | ARHGAP26     |
| 9547      | ENSG00000145824 | 0          | NA          | NA         | NA         | NA         | CXCL14       |
| 3950      | ENSG00000145826 | 0.87431337 | 0.0632895   | 0.39095804 | 0.21028855 | NA         | LECT2        |
| 153328    | ENSG00000145832 | 0          | NA          | NA         | NA         | NA         | SLC25A48     |
| 9879      | ENSG00000145833 | 2822.38882 | 0.04614312  | 0.09589626 | 0.62013016 | 0.80605425 | DDX46        |
| NA        | ENSG00000145835 | 0          | NA          | NA         | NA         | NA         | CDKN2AIPNLP2 |
| 3578      | ENSG00000145839 | 0          | NA          | NA         | NA         | NA         | IL9          |
| 91937     | ENSG00000145850 | 0          | NA          | NA         | NA         | NA         | TIMD4        |
| 153830    | ENSG00000145860 | 2513.54096 | -0.12954615 | 0.07920947 | 0.09452913 | 0.23903363 | RNF145       |
| 114898    | ENSG00000145861 | 18.5277379 | -0.06893614 | 0.31763211 | 0.70662292 | 0.85861856 | C1QTNF2      |
| 2559      | ENSG00000145863 | 0          | NA          | NA         | NA         | NA         | GABRA6       |
| 2561      | ENSG00000145864 | 0          | NA          | NA         | NA         | NA         | GABRB2       |
| 81545     | ENSG00000145868 | 1073.26837 | 0.12008779  | 0.09634078 | 0.19782988 | 0.40199972 | FBXO38       |
| 84651     | ENSG00000145879 | 1.27833632 | 0.07076668  | 0.39314745 | 0.13508016 | NA         | SPINK7       |
| 78991     | ENSG00000145882 | 715.986145 | -0.29929547 | 0.09988428 | 0.00185284 | 0.01002735 | PCYOX1L      |
| 2741      | ENSG00000145888 | 0.173124   | -0.01911262 | 0.38486262 | 0.84537521 | NA         | GLRA1        |
| 10318     | ENSG00000145901 | 924.992111 | -0.15997271 | 0.09921414 | 0.09407289 | 0.23818352 | TNIP1        |
| 10146     | ENSG00000145907 | 3639.57371 | -0.06287319 | 0.0766817  | 0.40192774 | 0.63031025 | G3BP1        |
| 91975     | ENSG00000145908 | 1198.58214 | -0.20254123 | 0.08736551 | 0.01698335 | 0.06390093 | ZNF300       |
| 23138     | ENSG00000145911 | 105.264956 | -0.52700392 | 0.257844   | 0.01195483 | 0.04810055 | N4BP3        |
| 55651     | ENSG00000145912 | 2396.48467 | 0.0136531   | 0.06355253 | 0.83010913 | 0.92296908 | NHP2         |
| 64777     | ENSG00000145916 | 1188.51566 | -0.04288386 | 0.0833749  | 0.59809169 | 0.78965456 | RMND5B       |
| 91272     | ENSG00000145919 | 962.794017 | 0.12311837  | 0.10065825 | 0.20507942 | 0.41202791 | BOD1         |
| 10814     | ENSG00000145920 | 1870.02123 | -2.84357207 | 0.1141209  | 1.43E-138  | 8.35E-136  | CPLX2        |
| 57451     | ENSG00000145934 | 36.8102061 | -0.5977953  | 0.69355094 | 0.02739342 | 0.09338238 | TENM2        |
| 3779      | ENSG00000145936 | 0          | NA          | NA         | NA         | NA         | KCNMB1       |
| 26240     | ENSG00000145945 | 284.714461 | -0.20655278 | 0.16728447 | 0.16893069 | 0.36034672 | FAM50B       |
| 340156    | ENSG00000145949 | 23.8270171 | -0.00405097 | 0.29757871 | 0.98113785 | 0.99355086 | MYLK4        |
| 222826    | ENSG00000145975 | 0.34624801 | -0.02356563 | 0.38536324 | 0.65270996 | NA         | FAM217A      |
| 51256     | ENSG00000145979 | 308.972718 | 0.16435446  | 0.14261379 | 0.21396314 | 0.42415859 | TBC1D7       |
| 107080638 | ENSG00000145979 | 308.972718 | 0.16435446  | 0.14261379 | 0.21396314 | 0.42415859 | TBC1D7       |
| 10667     | ENSG00000145982 | 152.316738 | 0.15907952  | 0.19597518 | 0.3466588  | 0.57745009 | FARS2        |
| 54438     | ENSG00000145990 | 131.534217 | -0.33623123 | 0.20063069 | 0.05147866 | 0.15239282 | GFOD1        |
| 54901     | ENSG00000145996 | 349.641208 | -0.56611159 | 0.14571655 | 3.17E-05   | 0.00027126 | CDKAL1       |

|           |                 |            |             |            |            |            |          |
|-----------|-----------------|------------|-------------|------------|------------|------------|----------|
| 54660     | ENSG00000146001 | 19.951733  | 0.06835963  | 0.3102924  | 0.7171101  | 0.86381491 | PCDHB18P |
| 84249     | ENSG00000146005 | 94.5962292 | 0.25758435  | 0.22014541 | 0.15916391 | 0.34667433 | PSD2     |
| 26045     | ENSG00000146006 | 251.64582  | -1.48247658 | 0.17765993 | 5.82E-18   | 1.91E-16   | LRRTM2   |
| 153527    | ENSG00000146007 | 813.387229 | -0.10086201 | 0.09268446 | 0.26139442 | 0.48341399 | ZMAT2    |
| 2676      | ENSG00000146013 | 1050.35347 | -1.51108618 | 0.09784283 | 6.83E-55   | 7.83E-53   | GFRA3    |
| 26249     | ENSG00000146021 | 268.056859 | -0.21512785 | 0.15846828 | 0.13462317 | 0.30902739 | KLHL3    |
| 51473     | ENSG00000146038 | 4.23778789 | -0.06262202 | 0.38116691 | 0.46986683 | 0.69227372 | DCDC2    |
| 10050     | ENSG00000146039 | 0          | NA          | NA         | NA         | NA         | SLC17A4  |
| 255626    | ENSG00000146047 | 0          | NA          | NA         | NA         | NA         | H2BC1    |
| 353219    | ENSG00000146049 | 0          | NA          | NA         | NA         | NA         | KAAG1    |
| 81786     | ENSG00000146054 | 58.2773039 | -0.53337933 | 0.34341973 | 0.02873551 | 0.0970608  | TRIM7    |
| 90933     | ENSG00000146063 | 1172.82018 | 0.27298062  | 0.08155868 | 0.00060401 | 0.00380554 | TRIM41   |
| 192286    | ENSG00000146066 | 754.07463  | 0.15131327  | 0.09755047 | 0.10846858 | 0.26431057 | HIGD2A   |
| 54540     | ENSG00000146067 | 1300.20234 | 0.19679986  | 0.07678571 | 0.00882907 | 0.03742122 | FAM193B  |
| 7941      | ENSG00000146070 | 0          | NA          | NA         | NA         | NA         | PLA2G7   |
| 27242     | ENSG00000146072 | 138.82966  | 2.17531757  | 0.21768596 | 1.22E-24   | 5.72E-23   | TNFRSF21 |
| 22838     | ENSG00000146083 | 3324.37298 | 0.43475978  | 0.07195484 | 7.45E-10   | 1.30E-08   | RNF44    |
| 4594      | ENSG00000146085 | 534.763625 | 0.22165268  | 0.10729348 | 0.03106276 | 0.10305772 | MMUT     |
| 255426    | ENSG00000146090 | 11.4942165 | 0.21938383  | 0.40758294 | 0.21686449 | 0.42803338 | RASGEF1C |
| 79930     | ENSG00000146094 | 116.92076  | 0.14229394  | 0.22631959 | 0.43990742 | 0.66517856 | DOK3     |
| 29777     | ENSG00000146109 | 538.496386 | 0.10287249  | 0.1085957  | 0.32355722 | 0.55130327 | ABT1     |
| 170954    | ENSG00000146112 | 1468.84943 | 0.08590509  | 0.0775809  | 0.25726931 | 0.47832659 | PPP1R18  |
| 107987457 | ENSG00000146112 | 1468.84943 | 0.08590509  | 0.0775809  | 0.25726931 | 0.47832659 | PPP1R18  |
| 23500     | ENSG00000146122 | 342.127673 | 2.23366975  | 0.1460186  | 5.55E-54   | 6.09E-52   | DAAM2    |
| 5558      | ENSG00000146143 | 343.426569 | 0.06323852  | 0.12666205 | 0.59942069 | 0.79057618 | PRIM2    |
| 90523     | ENSG00000146147 | 0          | NA          | NA         | NA         | NA         | MLIP     |
| 54511     | ENSG00000146151 | 14.7707925 | -0.15483039 | 0.36017632 | 0.38659151 | 0.61566669 | HMGCLL1  |
| 51557     | ENSG00000146166 | 0          | NA          | NA         | NA         | NA         | LGSN     |
| 221472    | ENSG00000146192 | 0.18922458 | 0.01954053  | 0.38488496 | 0.78225479 | NA         | FGD2     |
| 222663    | ENSG00000146197 | 15.8696393 | -0.01409529 | 0.33521593 | 0.92973471 | 0.97064482 | SCUBE3   |
| 50636     | ENSG00000146205 | 137.71335  | -0.24746308 | 0.18601278 | 0.12856351 | 0.29941308 | ANO7     |
| 401262    | ENSG00000146215 | 0.18922458 | 0.01954053  | 0.38488496 | 0.78225479 | NA         | CRIP3    |
| 84630     | ENSG00000146216 | 1320.06876 | -1.38584275 | 0.08159525 | 1.01E-65   | 1.49E-63   | TTBK1    |
| 202500    | ENSG00000146221 | 7.63320458 | 0.22850669  | 0.45982141 | 0.08384127 | 0.21881225 | TCTE1    |
| 285855    | ENSG00000146223 | 3843.85958 | -0.14600193 | 0.08218214 | 0.06849159 | 0.18852292 | RPL7L1   |
| 4794      | ENSG00000146232 | 169.482432 | -0.16841025 | 0.17251575 | 0.27319934 | 0.49676945 | NFKBIE   |
| 51302     | ENSG00000146233 | 0          | NA          | NA         | NA         | NA         | CYP39A1  |
| 7162      | ENSG00000146242 | 452.359212 | 0.69207486  | 0.14281878 | 2.95E-07   | 3.66E-06   | TPBG     |

|        |                 |            |             |            |            |            |           |
|--------|-----------------|------------|-------------|------------|------------|------------|-----------|
| 134728 | ENSG00000146243 | 328.26349  | -0.16740763 | 0.14571568 | 0.2125563  | 0.42238752 | IRAK1BP1  |
| 55023  | ENSG00000146247 | 3301.56078 | -0.15485694 | 0.06501628 | 0.01555081 | 0.05936659 | PHIP      |
| 167681 | ENSG00000146250 | 52.716925  | 0.91218699  | 0.35422715 | 0.00116856 | 0.00676713 | PRSS35    |
| 253714 | ENSG00000146263 | 865.011652 | -0.26946313 | 0.1187552  | 0.01656405 | 0.06259633 | MMS22L    |
| 84553  | ENSG00000146267 | 850.4075   | -0.54500409 | 0.11207122 | 3.96E-07   | 4.80E-06   | FAXC      |
| 2569   | ENSG00000146276 | 0.15069912 | -0.01848503 | 0.38480575 | 0.84537521 | NA         | GABRR1    |
| 10957  | ENSG00000146278 | 523.66627  | 0.4836851   | 0.11216502 | 6.63E-06   | 6.50E-05   | PNRC1     |
| 135293 | ENSG00000146281 | 1239.00016 | 0.02149082  | 0.0808932  | 0.78457703 | 0.90201126 | PM20D2    |
| 57038  | ENSG00000146282 | 748.72841  | 0.11392153  | 0.10838706 | 0.27320938 | 0.49676945 | RARS2     |
| 256380 | ENSG00000146285 | 27.9151292 | -1.44696329 | 0.61362816 | 0.00090243 | 0.00541894 | SCML4     |
| 221322 | ENSG00000146350 | 264.944819 | 0.25246869  | 0.16972    | 0.0971948  | 0.24387819 | TBC1D32   |
| 134829 | ENSG00000146352 | 286.88909  | 0.98344861  | 0.50987664 | 0.00423952 | 0.02026308 | CLVS2     |
| 2830   | ENSG00000146360 | 0.14931947 | -0.01844332 | 0.38480212 | 0.84537521 | NA         | GPR6      |
| 154214 | ENSG00000146373 | 0.30139824 | -0.02296476 | 0.38527817 | 0.68536535 | NA         | RNF217    |
| 84870  | ENSG00000146374 | 0          | NA          | NA         | NA         | NA         | RSPO3     |
| 93663  | ENSG00000146376 | 0          | NA          | NA         | NA         | NA         | ARHGAP18  |
| 9287   | ENSG00000146378 | 0          | NA          | NA         | NA         | NA         | TAAR2     |
| 319100 | ENSG00000146383 | 0          | NA          | NA         | NA         | NA         | TAAR6     |
| 83551  | ENSG00000146385 | 0          | NA          | NA         | NA         | NA         | TAAR8     |
| 58527  | ENSG00000146386 | 54.9363137 | 0.58573297  | 0.33883828 | 0.0181162  | 0.06720935 | ABRACL    |
| 134864 | ENSG00000146399 | 0          | NA          | NA         | NA         | NA         | TAAR1     |
| 116843 | ENSG00000146409 | 0          | NA          | NA         | NA         | NA         | SLC18B1   |
| 113115 | ENSG00000146410 | 85.8013756 | -0.13879811 | 0.2230207  | 0.44571246 | 0.67028199 | MTFR2     |
| 154091 | ENSG00000146411 | 66.6173003 | 1.92511634  | 0.35242651 | 3.29E-09   | 5.27E-08   | SLC2A12   |
| 257218 | ENSG00000146414 | 986.925656 | -0.20571367 | 0.0857201  | 0.01367456 | 0.05356431 | SHPRH     |
| 51390  | ENSG00000146416 | 556.985012 | -0.28244817 | 0.10383456 | 0.00451431 | 0.02134509 | AIG1      |
| 6993   | ENSG00000146425 | 1103.78705 | -0.29289186 | 0.08722613 | 0.00054742 | 0.00348997 | DYNLT1    |
| 26230  | ENSG00000146426 | 360.843218 | 0.49482434  | 0.142407   | 0.00019669 | 0.00140068 | TIAM2     |
| 57583  | ENSG00000146433 | 2003.72789 | -0.41885109 | 0.06793535 | 3.54E-10   | 6.45E-09   | TMEM181   |
| 154197 | ENSG00000146453 | 0.56790858 | -0.00208417 | 0.3828124  | 0.94123501 | NA         | PNLDC1    |
| 9589   | ENSG00000146457 | 1500.72685 | -0.19799773 | 0.07886222 | 0.01017159 | 0.04196387 | WTAP      |
| 9202   | ENSG00000146463 | 2284.33028 | -0.11803422 | 0.07960932 | 0.12959207 | 0.30116889 | ZMYM4     |
| 7432   | ENSG00000146469 | 8.22627928 | -1.57316732 | 1.35811245 | 0.00726534 | 0.03187622 | VIP       |
| 79624  | ENSG00000146476 | 273.769169 | -0.05621778 | 0.1473777  | 0.67849187 | 0.84291038 | ARMT1     |
| 6581   | ENSG00000146477 | 0          | NA          | NA         | NA         | NA         | SLC22A3   |
| 26238  | ENSG00000146521 | 0          | NA          | NA         | NA         | NA         | LINC01558 |
| 221806 | ENSG00000146530 | 183.215622 | 1.61367476  | 0.28609104 | 8.90E-10   | 1.54E-08   | VWDE      |
| 2768   | ENSG00000146535 | 1884.21808 | -0.13511138 | 0.0695274  | 0.04790193 | 0.14399612 | GNA12     |



|        |                 |            |             |            |            |            |           |
|--------|-----------------|------------|-------------|------------|------------|------------|-----------|
| 84310  | ENSG00000146540 | 1405.69718 | 0.19407798  | 0.07700851 | 0.01001166 | 0.04151127 | C7orf50   |
| 221935 | ENSG00000146555 | 1554.06194 | 0.15578091  | 0.09033321 | 0.07576334 | 0.20290829 | SDK1      |
| NA     | ENSG00000146556 | 411.209417 | 0.29084484  | 0.12315742 | 0.01244578 | 0.04965299 | WASH2P    |
| 221960 | ENSG00000146574 | 2170.36407 | 0.16533499  | 0.07009087 | 0.01636521 | 0.06190386 | CCZ1B     |
| 79034  | ENSG00000146576 | 923.136496 | 0.20318549  | 0.11220005 | 0.05776416 | 0.16647892 | C7orf26   |
| 57786  | ENSG00000146587 | 1013.57853 | -0.36826184 | 0.08698006 | 1.31E-05   | 0.00012266 | RBAK      |
| 9586   | ENSG00000146592 | 244.94446  | -0.48631936 | 0.21088337 | 0.00734252 | 0.03214379 | CREB5     |
| 222894 | ENSG00000146618 | 0          | NA          | NA         | NA         | NA         | FERD3L    |
| 1956   | ENSG00000146648 | 669.317008 | -1.80566815 | 0.11183665 | 9.38E-60   | 1.21E-57   | EGFR      |
| 84847  | ENSG00000146666 | 5.41117012 | 0.02763548  | 0.36077058 | 0.83179331 | 0.92385262 | LINC00525 |
| 113130 | ENSG00000146670 | 1584.85369 | -0.44421201 | 0.07128125 | 2.11E-10   | 3.93E-09   | CDCA5     |
| 3486   | ENSG00000146674 | 34.3735421 | 2.72506004  | 0.50177585 | 3.49E-09   | 5.58E-08   | IGFBP3    |
| 5814   | ENSG00000146676 | 2794.47703 | 0.07834934  | 0.06672069 | 0.23430081 | 0.45122578 | PURB      |
| NA     | ENSG00000146677 | 0.47107016 | -0.00696797 | 0.38321369 | 0.8716432  | NA         | RPL32P18  |
| 3484   | ENSG00000146678 | 0          | NA          | NA         | NA         | NA         | IGFBP1    |
| 136853 | ENSG00000146700 | 61.4055851 | 1.59337892  | 0.36128457 | 7.44E-07   | 8.60E-06   | SSC4D     |
| 4191   | ENSG00000146701 | 5234.60294 | -0.03287008 | 0.06629119 | 0.61604727 | 0.80315271 | MDH2      |
| 22932  | ENSG00000146707 | 595.894387 | 0.18260976  | 0.10352047 | 0.06657717 | 0.18484342 | POMZP3    |
| 541473 | ENSG00000146722 | 12.3793694 | 0.08628856  | 0.35597064 | 0.58076084 | 0.77801412 |           |
| 2631   | ENSG00000146729 | 1264.65213 | -0.05339194 | 0.07832408 | 0.48564024 | 0.7057649  | NIPSNAP2  |
| 908    | ENSG00000146731 | 6389.4327  | -0.21365183 | 0.07059508 | 0.00204033 | 0.01088178 | CCT6A     |
| 5723   | ENSG00000146733 | 839.643551 | 0.5286667   | 0.11932931 | 3.39E-06   | 3.50E-05   | PSPH      |
| 135892 | ENSG00000146755 | 0.66943461 | 0.03059546  | 0.38616409 | 0.42784935 | NA         | TRIM50    |
| 168374 | ENSG00000146757 | 616.87195  | -0.39233424 | 0.10753792 | 0.00014007 | 0.00103004 | ZNF92     |
| 222255 | ENSG00000146776 | 238.222784 | -0.20385308 | 0.19215277 | 0.21943079 | 0.43146748 | ATXN7L1   |
| 64418  | ENSG00000146802 | 726.081073 | -0.06057819 | 0.13203083 | 0.62537108 | 0.80924616 | TMEM168   |
| 142685 | ENSG00000146809 | 0.33471731 | 0.02354391  | 0.38534154 | 0.62842204 | NA         | ASB15     |
| 55262  | ENSG00000146826 | 637.591508 | 0.19451446  | 0.10323632 | 0.04994406 | 0.14887172 | TRAPPC14  |
| 56996  | ENSG00000146828 | 1029.28729 | 0.30918673  | 0.10590461 | 0.00232162 | 0.01216291 | SLC12A9   |
| 64599  | ENSG00000146830 | 3707.48636 | 0.25969369  | 0.05827631 | 6.38E-06   | 6.29E-05   | GIGYF1    |
| 89122  | ENSG00000146833 | 315.762072 | -0.03617715 | 0.12932195 | 0.76540357 | 0.89216889 | TRIM4     |
| 56257  | ENSG00000146834 | 1256.70518 | -0.1195422  | 0.07893271 | 0.12126452 | 0.28753541 | MEPCE     |
| 7455   | ENSG00000146839 | 0.16735865 | 0.01897177  | 0.38482933 | 0.78225479 | NA         | ZAN       |
| 84928  | ENSG00000146842 | 1139.91804 | 0.07741341  | 0.10280619 | 0.43505656 | 0.66035668 | TMEM209   |
| 340351 | ENSG00000146856 | 41.2652512 | 0.10361184  | 0.32362385 | 0.57849924 | 0.77655107 | AGBL3     |
| 346673 | ENSG00000146857 | 0          | NA          | NA         | NA         | NA         | STRA8     |
| 92092  | ENSG00000146858 | 434.000893 | 0.45196466  | 0.11757679 | 5.42E-05   | 0.00043898 | ZC3HAV1L  |
| 55281  | ENSG00000146859 | 387.928877 | -0.02291551 | 0.12661283 | 0.8465081  | 0.93045544 | TMEM140   |

|        |                 |            |             |            |            |            |         |
|--------|-----------------|------------|-------------|------------|------------|------------|---------|
| 11011  | ENSG00000146872 | 1737.0424  | 0.00137043  | 0.08138282 | 0.98698533 | 0.99565021 | TLK2    |
| 2041   | ENSG00000146904 | 1.00332036 | 0.0055579   | 0.37925585 | 0.93202442 | NA         | EPHA1   |
| 64434  | ENSG00000146909 | 1332.44175 | 0.38852009  | 0.09722672 | 3.50E-05   | 0.00029733 | NOM1    |
| 285888 | ENSG00000146910 | 0          | NA          | NA         | NA         | NA         | CNPY1   |
| 54892  | ENSG00000146918 | 2201.09691 | -0.0181691  | 0.09493679 | 0.84232678 | 0.92837824 | NCAPG2  |
| 136371 | ENSG00000146926 | 0          | NA          | NA         | NA         | NA         | ASB10   |
| 57502  | ENSG00000146938 | 267.842873 | -0.96459757 | 0.16393752 | 5.38E-10   | 9.62E-09   | NLGN4X  |
| 357    | ENSG00000146950 | 130.455665 | -0.32909887 | 0.20045263 | 0.05635621 | 0.16322734 | SHROOM2 |
| 401409 | ENSG00000146955 | 3.18109652 | -0.07835945 | 0.38243106 | 0.42838612 | 0.65428642 | RAB19   |
| 51631  | ENSG00000146963 | 2184.04668 | -0.09454141 | 0.09578128 | 0.30725268 | 0.53477438 | LUC7L2  |
| 27147  | ENSG00000146966 | 700.25135  | 0.14732729  | 0.12398848 | 0.2088139  | 0.41674558 | DENND2A |
| 57393  | ENSG00000147003 | 11.5735335 | 0.00456542  | 0.33952227 | 0.9793716  | 0.99317507 | CLTRN   |
| 30011  | ENSG00000147010 | 359.196565 | -0.79196403 | 0.16760962 | 4.07E-07   | 4.92E-06   | SH3KBP1 |
| 83604  | ENSG00000147027 | 0          | NA          | NA         | NA         | NA         | TMEM47  |
| 347404 | ENSG00000147036 | 0.53262177 | 0.02083861  | 0.384376   | 0.75767191 | NA         | LANCL3  |
| 94122  | ENSG00000147041 | 1.52401327 | 0.07848063  | 0.38951113 | 0.29612947 | NA         | SYTL5   |
| 8573   | ENSG00000147044 | 818.084278 | -0.1098054  | 0.09431828 | 0.22905295 | 0.4444846  | CASK    |
| 7403   | ENSG00000147050 | 651.201108 | 0.15724134  | 0.10068992 | 0.10526287 | 0.25874017 | KDM6A   |
| 54466  | ENSG00000147059 | 17.0518024 | -0.14526405 | 0.33905317 | 0.43994788 | 0.66517856 | SPIN2A  |
| 4478   | ENSG00000147065 | 2255.30626 | -0.1032831  | 0.08238936 | 0.19882941 | 0.40318637 | MSN     |
| 8852   | ENSG00000147081 | 0          | NA          | NA         | NA         | NA         | AKAP4   |
| 85417  | ENSG00000147082 | 28.7002441 | -0.25343944 | 0.38518757 | 0.20376807 | 0.41022409 | CCNB3   |
| 55869  | ENSG00000147099 | 820.154709 | -0.12724241 | 0.09795137 | 0.17814502 | 0.37365442 | HDAC8   |
| 6567   | ENSG00000147100 | 436.205255 | 0.22838733  | 0.1234932  | 0.05024553 | 0.1495008  | SLC16A2 |
| 79742  | ENSG00000147113 | 0          | NA          | NA         | NA         | NA         | DIPK2B  |
| 7712   | ENSG00000147117 | 33.2685892 | -0.13302079 | 0.30536919 | 0.4978381  | 0.71568059 | ZNF157  |
| 7569   | ENSG00000147118 | 242.998691 | -0.20891704 | 0.14964251 | 0.12829383 | 0.29899782 | ZNF182  |
| 56548  | ENSG00000147119 | 254.31546  | 1.01532919  | 0.15351704 | 4.91E-12   | 1.07E-10   | CHST7   |
| 55634  | ENSG00000147121 | 222.873972 | 0.02215601  | 0.1564735  | 0.87781091 | 0.94578953 | KRBOX4  |
| 54539  | ENSG00000147123 | 1782.79394 | 0.08288247  | 0.07525419 | 0.26178893 | 0.48374648 | NDUFB11 |
| 7592   | ENSG00000147124 | 368.287259 | -0.23722461 | 0.12969237 | 0.05119366 | 0.15179828 | ZNF41   |
| 347517 | ENSG00000147127 | 4.99639845 | 0.02515755  | 0.36407444 | 0.83610178 | 0.92527105 | RAB41   |
| 9203   | ENSG00000147130 | 1716.31454 | 0.06659075  | 0.07471427 | 0.36389378 | 0.5936726  | ZMYM3   |
| 6872   | ENSG00000147133 | 1727.00859 | -0.09848119 | 0.09116181 | 0.26548181 | 0.48783542 | TAF1    |
| 84636  | ENSG00000147138 | 0.16735865 | 0.01897177  | 0.38482933 | 0.78225479 | NA         | GPR174  |
| 4841   | ENSG00000147140 | 17095.2703 | 0.09220809  | 0.05639778 | 0.07102627 | 0.19359269 | NONO    |
| 90060  | ENSG00000147144 | 364.186232 | 0.17326317  | 0.12397523 | 0.13912349 | 0.31599427 | CCDC120 |
| 2846   | ENSG00000147145 | 0          | NA          | NA         | NA         | NA         | LPAR4   |

|        |                 |            |             |            |            |            |            |
|--------|-----------------|------------|-------------|------------|------------|------------|------------|
| 10682  | ENSG00000147155 | 743.942675 | -0.58167444 | 0.0998021  | 1.76E-09   | 2.93E-08   | EBP        |
| 158835 | ENSG00000147160 | 0          | NA          | NA         | NA         | NA         | AWAT2      |
| 8473   | ENSG00000147162 | 3813.80779 | 0.25270629  | 0.06554022 | 8.98E-05   | 0.00069156 | OGT        |
| 29934  | ENSG00000147164 | 632.372143 | 0.07959324  | 0.11742123 | 0.47688242 | 0.69881585 | SNX12      |
| 26548  | ENSG00000147166 | 13.7024586 | -0.0560391  | 0.33909193 | 0.73183949 | 0.87194905 | ITGB1BP2   |
| 3561   | ENSG00000147168 | 0          | NA          | NA         | NA         | NA         | IL2RG      |
| 93953  | ENSG00000147174 | 15.9376848 | 0.08713231  | 0.34185744 | 0.610165   | 0.79847461 | GCNA       |
| 7552   | ENSG00000147180 | 1575.83555 | -0.16220843 | 0.07714854 | 0.03160063 | 0.1045799  | ZNF711     |
| 53336  | ENSG00000147183 | 0          | NA          | NA         | NA         | NA         | CPXCR1     |
| 1730   | ENSG00000147202 | 199.440521 | 0.23995838  | 0.16649825 | 0.1095746  | 0.26631876 | DIAPH2     |
| 56000  | ENSG00000147206 | 0.30139824 | -0.02296476 | 0.38527817 | 0.68536535 | NA         | NXF3       |
| 92129  | ENSG00000147223 | 0          | NA          | NA         | NA         | NA         | RIPPLY1    |
| 5631   | ENSG00000147224 | 895.314564 | 0.03699631  | 0.08884715 | 0.67162318 | 0.83826144 | PRPS1      |
| 55086  | ENSG00000147231 | 1.91120367 | -0.05237235 | 0.38174001 | 0.50334617 | NA         | RADX       |
| 84443  | ENSG00000147234 | 1.60863909 | 0.10434938  | 0.40355579 | 0.06090712 | NA         | FRMPD3     |
| 3358   | ENSG00000147246 | 5.28802511 | 0.07981759  | 0.37430743 | 0.51240726 | 0.7276095  | HTR2C      |
| 139818 | ENSG00000147251 | 474.334831 | -0.40287633 | 0.1145711  | 0.00022524 | 0.00158071 | DOCK11     |
| 3547   | ENSG00000147255 | 436.233945 | 0.56179098  | 0.14377767 | 2.99E-05   | 0.00025716 | IGSF1      |
| 158763 | ENSG00000147256 | 415.615818 | 0.04493366  | 0.14593095 | 0.7403205  | 0.87741689 | ARHGAP36   |
| 2719   | ENSG00000147257 | 399.020059 | 3.0754557   | 0.15443639 | 1.89E-89   | 4.74E-87   | GPC3       |
| 139760 | ENSG00000147262 | 0          | NA          | NA         | NA         | NA         | GPR119     |
| 27316  | ENSG00000147274 | 8899.90398 | -0.00805391 | 0.05958512 | 0.89049445 | 0.95232275 | RBMX       |
| 79648  | ENSG00000147316 | 468.62581  | -0.3968272  | 0.16231124 | 0.00706859 | 0.03119928 | MCPH1      |
| 9258   | ENSG00000147324 | 903.09399  | -0.28912504 | 0.26264458 | 0.15143623 | 0.33539121 | MFHAS1     |
| 26260  | ENSG00000147364 | 1047.29492 | -0.24179356 | 0.08805129 | 0.00467922 | 0.02198336 | FBXO25     |
| 89885  | ENSG00000147378 | 0          | NA          | NA         | NA         | NA         | FATE1      |
| 4103   | ENSG00000147381 | 0          | NA          | NA         | NA         | NA         | MAGEA4     |
| 50814  | ENSG00000147383 | 385.874497 | -0.20307301 | 0.13047646 | 0.09701131 | 0.24360263 | NSDHL      |
| 7739   | ENSG00000147394 | 168.354531 | 1.2334445   | 0.21275173 | 6.67E-10   | 1.18E-08   | ZNF185     |
| 1069   | ENSG00000147400 | 349.802045 | 0.05604546  | 0.13165884 | 0.65120444 | 0.82578612 | CETN2      |
| 6134   | ENSG00000147403 | 23295.5986 | 0.08596745  | 0.04801155 | 0.07077067 | 0.1930817  | RPL10      |
| 55790  | ENSG00000147408 | 1.14036012 | 0.07722112  | 0.39253222 | 0.20972802 | NA         | CSGALNACT1 |
| 526    | ENSG00000147416 | 2868.61525 | -0.4679965  | 0.0642599  | 1.45E-13   | 3.50E-12   | ATP6V1B2   |
| 55246  | ENSG00000147419 | 1137.53042 | -0.00839588 | 0.09287598 | 0.92484159 | 0.96868601 | CCDC25     |
| 79618  | ENSG00000147421 | 950.703432 | 0.30556085  | 0.09760108 | 0.00117443 | 0.00679719 | HMBOX1     |
| 1142   | ENSG00000147432 | 0          | NA          | NA         | NA         | NA         | CHRN3      |
| 8973   | ENSG00000147434 | 1.39259898 | -0.00432957 | 0.37918364 | 0.8730313  | NA         | CHRNA6     |
| 2796   | ENSG00000147437 | 22.5105389 | 0.22595058  | 0.35068699 | 0.27160925 | 0.49501447 | GNRH1      |

|        |                 |            |             |            |            |            |          |
|--------|-----------------|------------|-------------|------------|------------|------------|----------|
| 55909  | ENSG00000147439 | 241.467411 | -0.00032455 | 0.14758229 | 0.99653371 | 0.99873692 | BIN3     |
| 9046   | ENSG00000147443 | 0.15069912 | -0.01848503 | 0.38480575 | 0.84537521 | NA         | DOK2     |
| 51312  | ENSG00000147454 | 998.541148 | 0.04212669  | 0.08804004 | 0.62885088 | 0.81194855 | SLC25A37 |
| 91782  | ENSG00000147457 | 1251.09611 | -0.1067098  | 0.10305393 | 0.28141632 | 0.50624272 | CHMP7    |
| 80005  | ENSG00000147459 | 149.677828 | 1.46450598  | 0.22507414 | 7.07E-12   | 1.52E-10   | DOCK5    |
| 6770   | ENSG00000147465 | 39.3031151 | 0.02296167  | 0.27974331 | 0.90637045 | 0.95930719 | STAR     |
| 11212  | ENSG00000147471 | 558.660268 | -0.02787068 | 0.11106927 | 0.79089076 | 0.90486551 | PLPBP    |
| 11160  | ENSG00000147475 | 852.066477 | -0.05215129 | 0.10268496 | 0.59651365 | 0.78867326 | ERLIN2   |
| 54212  | ENSG00000147481 | 1.62372068 | -0.10818151 | 0.4046584  | 0.06530737 | NA         | SNTG1    |
| 137902 | ENSG00000147485 | 103.51425  | 1.17911785  | 0.24582526 | 1.58E-07   | 2.04E-06   | PXDNL    |
| 9705   | ENSG00000147488 | 0.34746601 | 0.02370763  | 0.3853651  | 0.61987128 | NA         | ST18     |
| 8601   | ENSG00000147509 | 21.8076496 | 0.48486266  | 0.48754361 | 0.05929202 | 0.1695767  | RGS20    |
| 6867   | ENSG00000147526 | 402.977045 | -0.31838167 | 0.1378739  | 0.01359014 | 0.05333894 | TACC1    |
| 51125  | ENSG00000147533 | 748.885403 | 0.02614087  | 0.10410185 | 0.79525828 | 0.90586169 | GOLGA7   |
| 84513  | ENSG00000147535 | 537.781827 | 0.36669286  | 0.11838224 | 0.00110823 | 0.00645735 | PLPP5    |
| 84296  | ENSG00000147536 | 479.604593 | 0.23924846  | 0.16923125 | 0.11495828 | 0.27628979 | GINS4    |
| 54904  | ENSG00000147548 | 3512.30673 | -0.36611597 | 0.09836897 | 0.0001126  | 0.00084495 | NSD3     |
| 85479  | ENSG00000147570 | 0          | NA          | NA         | NA         | NA         | DNAJC5B  |
| 1392   | ENSG00000147571 | 0          | NA          | NA         | NA         | NA         | CRH      |
| 84675  | ENSG00000147573 | 0          | NA          | NA         | NA         | NA         | TRIM55   |
| 137872 | ENSG00000147576 | 16.6243915 | 0.36950826  | 0.48577263 | 0.09667385 | 0.24306007 | ADHFE1   |
| 28957  | ENSG00000147586 | 219.743292 | -0.27996455 | 0.15476634 | 0.04752134 | 0.14306879 | MRPS28   |
| 5375   | ENSG00000147588 | 0          | NA          | NA         | NA         | NA         | PMP2     |
| 51110  | ENSG00000147592 | 111.846198 | 0.15390158  | 0.21071599 | 0.38499435 | 0.61396093 | LACTB2   |
| 63978  | ENSG00000147596 | 0          | NA          | NA         | NA         | NA         | PRDM14   |
| 7013   | ENSG00000147601 | 775.919886 | -0.42014165 | 0.09566483 | 5.58E-06   | 5.57E-05   | TERF1    |
| 6129   | ENSG00000147604 | 16678.158  | -0.13360118 | 0.05474046 | 0.01358814 | 0.05333894 | RPL7     |
| 115111 | ENSG00000147606 | 0.49850962 | -0.02963375 | 0.38591404 | 0.52353366 | NA         | SLC26A7  |
| 85481  | ENSG00000147613 | 0          | NA          | NA         | NA         | NA         | PSKH2    |
| 245972 | ENSG00000147614 | 0          | NA          | NA         | NA         | NA         | ATP6V0D2 |
| 55638  | ENSG00000147642 | 80.8943957 | 0.07971758  | 0.24639602 | 0.67611749 | 0.84154147 | SYBU     |
| 1807   | ENSG00000147647 | 0.89961696 | -0.05075436 | 0.38821636 | 0.35902327 | NA         | DPYS     |
| 92140  | ENSG00000147649 | 2577.06345 | -0.47484308 | 0.07298728 | 3.33E-11   | 6.73E-10   | MTDH     |
| 29967  | ENSG00000147650 | 593.077573 | -0.14615952 | 0.12573936 | 0.2172086  | 0.42858464 | LRP12    |
| 9166   | ENSG00000147654 | 262.964352 | -0.28607667 | 0.16235316 | 0.05133884 | 0.15209235 | EBAG9    |
| 340419 | ENSG00000147655 | 0.173124   | -0.01911262 | 0.38486262 | 0.84537521 | NA         | RSPO2    |
| 5440   | ENSG00000147669 | 679.15173  | 0.24389564  | 0.09773292 | 0.0097212  | 0.04056123 | POLR2K   |
| 114569 | ENSG00000147676 | 0          | NA          | NA         | NA         | NA         | MAL2     |

|           |                 |            |             |            |            |            |          |
|-----------|-----------------|------------|-------------|------------|------------|------------|----------|
| 8667      | ENSG00000147677 | 4009.10779 | 0.01050908  | 0.05587017 | 0.84988123 | 0.93178844 | EIF3H    |
| 84294     | ENSG00000147679 | 494.093892 | 0.24302814  | 0.14196009 | 0.06477481 | 0.181378   | UTP23    |
| 4715      | ENSG00000147684 | 2138.5999  | -0.04993574 | 0.06272074 | 0.41878672 | 0.6446754  | NDUFB9   |
| 83940     | ENSG00000147687 | 420.067331 | -0.12180191 | 0.11817909 | 0.27768459 | 0.50221169 | TATDN1   |
| 84985     | ENSG00000147689 | 1.40798341 | -0.03526476 | 0.38166771 | 0.58231557 | NA         | FAM83A   |
| 56169     | ENSG00000147697 | 0          | NA          | NA         | NA         | NA         | GSDMC    |
| 51059     | ENSG00000147724 | 70.2167031 | -2.87059636 | 0.3336563  | 5.87E-19   | 2.08E-17   | FAM135B  |
| 246122    | ENSG00000147753 | 0          | NA          | NA         | NA         | NA         | TTY7     |
| 100101120 | ENSG00000147761 | 0          | NA          | NA         | NA         | NA         | TTY7B    |
| 7553      | ENSG00000147789 | 597.335417 | -0.05631704 | 0.11413105 | 0.60488372 | 0.79491906 | ZNF7     |
| 80728     | ENSG00000147799 | 475.244185 | 0.10144704  | 0.1107108  | 0.3387678  | 0.5690106  | ARHGAP39 |
| 55630     | ENSG00000147804 | 247.442785 | 0.20896261  | 0.14552661 | 0.12015112 | 0.28543799 | SLC39A4  |
| 93100     | ENSG00000147813 | 73.2203921 | -0.02280735 | 0.22352752 | 0.89885932 | 0.95556135 | NAPRT    |
| 7436      | ENSG00000147852 | 254.238965 | 0.10101825  | 0.16875911 | 0.50599819 | 0.72177288 | VLDLR    |
| 50808     | ENSG00000147853 | 1155.01955 | -0.18642994 | 0.09041921 | 0.03344033 | 0.109409   | AK3      |
| 115426    | ENSG00000147854 | 1072.07724 | 0.06818746  | 0.08918706 | 0.43229256 | 0.65787255 | UHRF2    |
| 4781      | ENSG00000147862 | 4081.24638 | -0.8888183  | 0.06501776 | 1.86E-43   | 1.57E-41   | NFIB     |
| 9350      | ENSG00000147869 | 6.06266688 | 0.12606195  | 0.38072511 | 0.37630693 | 0.60526384 | CER1     |
| 123       | ENSG00000147872 | 955.86879  | 0.19268922  | 0.08691572 | 0.02271093 | 0.08064878 | PLIN2    |
| 3442      | ENSG00000147873 | 0.31716937 | 0.00152043  | 0.38337001 | 0.96328461 | NA         | IFNA5    |
| 54801     | ENSG00000147874 | 1895.62216 | -0.2312271  | 0.08706594 | 0.00624372 | 0.02801342 | HAUS6    |
| 1030      | ENSG00000147883 | 7.46355748 | 0.14158984  | 0.39254217 | 0.284643   | 0.50987892 | CDKN2B   |
| 3449      | ENSG00000147885 | 0          | NA          | NA         | NA         | NA         | IFNA16   |
| 1029      | ENSG00000147889 | 340.182156 | -0.09569161 | 0.13217485 | 0.43957424 | 0.66481822 | CDKN2A   |
| 203228    | ENSG00000147894 | 530.997305 | 0.12467275  | 0.10424235 | 0.2138241  | 0.42397262 | C9orf72  |
| 56832     | ENSG00000147896 | 0          | NA          | NA         | NA         | NA         | IFNK     |
| 84186     | ENSG00000147905 | 350.898646 | -0.15974642 | 0.15226048 | 0.25163376 | 0.47149344 | ZCCHC7   |
| 26267     | ENSG00000147912 | 883.395982 | 0.02748749  | 0.10996978 | 0.79503764 | 0.90585603 | FBXO10   |
| 10280     | ENSG00000147955 | 1794.27351 | -0.22818942 | 0.07912305 | 0.00314094 | 0.01574579 | SIGMAR1  |
| 220869    | ENSG00000147996 | 556.794527 | 0.08337389  | 0.10860288 | 0.42397221 | 0.64969559 | CBWD5    |
| 84131     | ENSG00000148019 | 1502.67799 | 0.07586109  | 0.08320409 | 0.35070191 | 0.58113472 | CEP78    |
| 4915      | ENSG00000148053 | 26.2655232 | -0.07398231 | 0.30133396 | 0.6969259  | 0.85375952 | NTRK2    |
| 414328    | ENSG00000148057 | 47.0718473 | -0.00715604 | 0.25975326 | 0.96855239 | 0.98817646 | IDNK     |
| 53358     | ENSG00000148082 | 1263.46059 | -0.4891272  | 0.08914321 | 1.68E-08   | 2.45E-07   | SHC3     |
| 549       | ENSG00000148090 | 215.894883 | 0.34312175  | 0.15819881 | 0.01733204 | 0.06491745 | AUH      |
| 84641     | ENSG00000148110 | 789.290912 | 0.06966734  | 0.09510472 | 0.44997573 | 0.67340229 | MFSD14B  |
| 84909     | ENSG00000148120 | 314.255543 | 0.25273467  | 0.15043915 | 0.0672202  | 0.18610782 | AOPEP    |
| 54886     | ENSG00000148123 | 0.16735865 | 0.01897177  | 0.38482933 | 0.78225479 | NA         | PLPPR1   |

|        |                 |            |             |            |            |            |          |
|--------|-----------------|------------|-------------|------------|------------|------------|----------|
| 138804 | ENSG00000148136 | 0          | NA          | NA         | NA         | NA         | OR13C4   |
| 58499  | ENSG00000148143 | 1458.17258 | -0.06686251 | 0.07508362 | 0.36304346 | 0.59281472 | ZNF462   |
| 58493  | ENSG00000148153 | 695.704673 | -0.49461975 | 0.13769179 | 0.00012781 | 0.00094689 | INIP     |
| 7357   | ENSG00000148154 | 463.81408  | 0.11134072  | 0.13084258 | 0.36538344 | 0.5947154  | UGCG     |
| 10880  | ENSG00000148156 | 0.18922458 | 0.01954053  | 0.38488496 | 0.78225479 | NA         | ACTL7B   |
| 401548 | ENSG00000148158 | 445.091271 | -0.22757238 | 0.11917793 | 0.04389212 | 0.13459347 | SNX30    |
| 2040   | ENSG00000148175 | 230.981618 | -0.06427241 | 0.14568626 | 0.63267152 | 0.81417935 | STOM     |
| 2934   | ENSG00000148180 | 468.649281 | 0.44917652  | 0.13908986 | 0.00054421 | 0.00347173 | GSN      |
| 92399  | ENSG00000148187 | 776.929303 | -0.09101869 | 0.0903566  | 0.29865138 | 0.52551632 | MRRF     |
| 2649   | ENSG00000148200 | 65.3029835 | 0.46143684  | 0.37324387 | 0.05830063 | 0.16751071 | NR6A1    |
| 286204 | ENSG00000148204 | 2.25754674 | 0.03989187  | 0.37727946 | 0.65195724 | NA         | CRB2     |
| 392391 | ENSG00000148215 | 0          | NA          | NA         | NA         | NA         | OR5C1    |
| 210    | ENSG00000148218 | 560.109714 | 0.3218156   | 0.1042355  | 0.00130161 | 0.00741428 | ALAD     |
| 23245  | ENSG00000148219 | 1751.91056 | -0.34016171 | 0.07213897 | 1.51E-06   | 1.66E-05   | ASTN2    |
| 114987 | ENSG00000148225 | 88.0290417 | 0.02005488  | 0.23001599 | 0.91481211 | 0.9640318  | WDR31    |
| 54107  | ENSG00000148229 | 1514.80948 | -0.45513384 | 0.07519    | 6.40E-10   | 1.13E-08   | POLE3    |
| 6836   | ENSG00000148248 | 3250.04061 | -0.12408415 | 0.08593189 | 0.13780052 | 0.31363569 | SURF4    |
| 26301  | ENSG00000148288 | 69.6230581 | -0.75015886 | 0.37973399 | 0.00650022 | 0.0290395  | GBGT1    |
| 6834   | ENSG00000148290 | 856.169801 | 0.10044403  | 0.08792249 | 0.24089889 | 0.45885437 | SURF1    |
| 6835   | ENSG00000148291 | 418.216813 | -0.11549523 | 0.14183776 | 0.37958167 | 0.60845927 | SURF2    |
| 6838   | ENSG00000148296 | 1357.28544 | -0.04738702 | 0.07468008 | 0.51710766 | 0.73098795 | SURF6    |
| 6837   | ENSG00000148297 | 1163.97541 | 0.05437931  | 0.10948128 | 0.60523766 | 0.79522617 | MED22    |
| 57109  | ENSG00000148300 | 965.529247 | 0.02282006  | 0.08578603 | 0.78562835 | 0.90248778 | REXO4    |
| 6130   | ENSG00000148303 | 24397.6652 | -0.0045151  | 0.05135793 | 0.92525516 | 0.96892907 | RPL7A    |
| 9328   | ENSG00000148308 | 1300.17439 | 0.16758974  | 0.08372008 | 0.03991954 | 0.12519819 | GTF3C5   |
| 140459 | ENSG00000148331 | 1546.82847 | -0.11556856 | 0.07891857 | 0.13405808 | 0.30828734 | ASB6     |
| 80142  | ENSG00000148334 | 1206.16116 | -0.22225762 | 0.08046769 | 0.00467205 | 0.02195486 | PTGES2   |
| 28989  | ENSG00000148335 | 684.99757  | -0.0131925  | 0.10374313 | 0.89404855 | 0.95417323 | NTMT1    |
| 25792  | ENSG00000148337 | 2519.03309 | -0.08119486 | 0.0639954  | 0.19785033 | 0.40199972 | CIZ1     |
| 114789 | ENSG00000148339 | 767.81794  | -0.38051397 | 0.10037802 | 8.29E-05   | 0.0006434  | SLC25A25 |
| 56904  | ENSG00000148341 | 1459.17377 | 0.18845217  | 0.07937054 | 0.0150917  | 0.0579852  | SH3GLB2  |
| 84895  | ENSG00000148343 | 633.287347 | 0.19096751  | 0.11470103 | 0.08063292 | 0.21267709 | MIGA2    |
| 9536   | ENSG00000148344 | 106.938928 | -0.17172101 | 0.20941976 | 0.32928522 | 0.55780556 | PTGES    |
| 3934   | ENSG00000148346 | 0          | NA          | NA         | NA         | NA         | LCN2     |
| 90678  | ENSG00000148356 | 633.184291 | 0.20884777  | 0.10934511 | 0.04585697 | 0.13926256 | LRSAM1   |
| 256158 | ENSG00000148357 | 248.861723 | 0.73507925  | 0.18578759 | 1.52E-05   | 0.00013962 | HMCN2    |
| 57720  | ENSG00000148358 | 2249.86056 | -0.00173951 | 0.07103885 | 0.9793839  | 0.99317507 | GPR107   |
| 286257 | ENSG00000148362 | 536.691694 | 0.1064322   | 0.10670027 | 0.29920581 | 0.52616941 | PAXX     |

|        |                 |            |             |            |            |            |          |
|--------|-----------------|------------|-------------|------------|------------|------------|----------|
| 91734  | ENSG00000148377 | 0.34624801 | -0.02356563 | 0.38536324 | 0.65270996 | NA         | IDI2     |
| 56623  | ENSG00000148384 | 622.629873 | 0.46281309  | 0.1111341  | 1.36E-05   | 0.00012616 | INPP5E   |
| 392399 | ENSG00000148386 | 0          | NA          | NA         | NA         | NA         | LCN9     |
| 9919   | ENSG00000148396 | 2960.85352 | -0.1087985  | 0.06401495 | 0.08393871 | 0.21898015 | SEC16A   |
| 92715  | ENSG00000148399 | 905.164267 | 0.23454201  | 0.0910985  | 0.00793617 | 0.03427672 | DPH7     |
| 4851   | ENSG00000148400 | 150.176326 | 2.2837787   | 0.28302058 | 4.08E-17   | 1.27E-15   | NOTCH1   |
| 774    | ENSG00000148408 | 1268.54985 | -2.03360792 | 0.09014189 | 6.91E-114  | 2.49E-111  | CACNA1B  |
| 138151 | ENSG00000148411 | 114.141467 | 0.46432826  | 0.23676636 | 0.01806868 | 0.067119   | NACC2    |
| 254427 | ENSG00000148426 | 39.9769396 | 3.23158147  | 0.45057086 | 5.32E-14   | 1.33E-12   | PROSER2  |
| 9712   | ENSG00000148429 | 725.539931 | 0.19791781  | 0.09208179 | 0.02660607 | 0.09138928 | USP6NL   |
| 23412  | ENSG00000148444 | 678.214576 | 0.02107377  | 0.09347369 | 0.81699937 | 0.91671007 | COMMD3   |
| 22921  | ENSG00000148450 | 926.989718 | 0.02386826  | 0.09210912 | 0.79349898 | 0.90556117 | MSRB2    |
| 23590  | ENSG00000148459 | 269.359636 | -0.41694009 | 0.15296847 | 0.00302384 | 0.01523049 | PDSS1    |
| 221061 | ENSG00000148468 | 1744.97365 | 0.12556148  | 0.07065854 | 0.07060402 | 0.19275957 | FAM171A1 |
| 80013  | ENSG00000148481 | 468.757353 | -0.31589996 | 0.13162759 | 0.01035013 | 0.04258823 | MINDY3   |
| 221074 | ENSG00000148482 | 0          | NA          | NA         | NA         | NA         | SLC39A12 |
| 653567 | ENSG00000148483 | 1.12281109 | -0.04714939 | 0.38566392 | 0.3665206  | NA         | TMEM236  |
| 6251   | ENSG00000148484 | 505.278246 | 0.57150169  | 0.11307075 | 1.41E-07   | 1.82E-06   | RSU1     |
| 338596 | ENSG00000148488 | 1.43982294 | 0.00381868  | 0.38005775 | 0.94901222 | NA         | ST8SIA6  |
| 56288  | ENSG00000148498 | 1180.14916 | -0.0190385  | 0.08221967 | 0.81127605 | 0.91456796 | PARD3    |
| 91074  | ENSG00000148513 | 0.33471731 | 0.02354391  | 0.38534154 | 0.62842204 | NA         | ANKRD30A |
| 6935   | ENSG00000148516 | 1377.77953 | 0.01496987  | 0.08123653 | 0.84746646 | 0.93065124 | ZEB1     |
| 220965 | ENSG00000148541 | 179.306472 | -0.44341728 | 0.18684555 | 0.00731976 | 0.03207953 | FAM13C   |
| 29982  | ENSG00000148572 | 264.74368  | -0.18676886 | 0.14542076 | 0.16398397 | 0.35325103 | NRBF2    |
| 29974  | ENSG00000148584 | 0.68892055 | 0.00490802  | 0.38130194 | 0.92401061 | NA         | A1CF     |
| 92211  | ENSG00000148600 | 208.628343 | -1.06890144 | 0.21210955 | 5.13E-08   | 7.05E-07   | CDHR1    |
| 26103  | ENSG00000148602 | 0          | NA          | NA         | NA         | NA         | LRIT1    |
| 5995   | ENSG00000148604 | 0          | NA          | NA         | NA         | NA         | RGR      |
| 11128  | ENSG00000148606 | 1652.13894 | -0.28080017 | 0.06968015 | 4.01E-05   | 0.00033665 | POLR3A   |
| 26091  | ENSG00000148634 | 793.509968 | 0.15487803  | 0.10608014 | 0.12830985 | 0.29899782 | HERC4    |
| 83938  | ENSG00000148655 | 20.2736789 | 0.04465153  | 0.33045135 | 0.79462509 | 0.90579008 | LRMDA    |
| 818    | ENSG00000148660 | 1397.1048  | 0.07352167  | 0.07431453 | 0.31425842 | 0.54212505 | CAMK2G   |
| 10974  | ENSG00000148671 | 0          | NA          | NA         | NA         | NA         | ADIRF    |
| 2746   | ENSG00000148672 | 1764.86136 | -0.27611381 | 0.082276   | 0.00057022 | 0.00362019 | GLUD1    |
| 27063  | ENSG00000148677 | 0          | NA          | NA         | NA         | NA         | ANKRD1   |
| 3363   | ENSG00000148680 | 0.16735865 | 0.01897177  | 0.38482933 | 0.78225479 | NA         | HTR7     |
| 10556  | ENSG00000148688 | 320.13674  | -0.06164517 | 0.12783884 | 0.60796527 | 0.79695264 | RPP30    |
| 118924 | ENSG00000148690 | 542.50492  | 0.10600862  | 0.14507947 | 0.4358257  | 0.66096789 | FRA10AC1 |

|        |                 |            |             |            |            |            |          |
|--------|-----------------|------------|-------------|------------|------------|------------|----------|
| 120    | ENSG00000148700 | 1075.3548  | 0.2859432   | 0.1135504  | 0.00821843 | 0.03534655 | ADD3     |
| 3026   | ENSG00000148702 | 0          | NA          | NA         | NA         | NA         | HABP2    |
| 11023  | ENSG00000148704 | 0          | NA          | NA         | NA         | NA         | VAX1     |
| 54788  | ENSG00000148719 | 633.430761 | 0.18283516  | 0.11604462 | 0.097453   | 0.24443331 | DNAJB12  |
| 1979   | ENSG00000148730 | 6548.47209 | -0.11101675 | 0.0612034  | 0.06603835 | 0.18375052 | EIF4EBP2 |
| 64106  | ENSG00000148734 | 3.00414779 | 0.01684629  | 0.36924773 | 0.87523251 | 0.94499851 | NPFFR1   |
| 79949  | ENSG00000148735 | 0.16735865 | 0.01897177  | 0.38482933 | 0.78225479 | NA         | PLEKHS1  |
| 6934   | ENSG00000148737 | 237.011836 | 0.90853375  | 0.18654762 | 1.58E-07   | 2.04E-06   | TCF7L2   |
| 4288   | ENSG00000148773 | 10512.8548 | -0.75635392 | 0.05396845 | 2.65E-45   | 2.33E-43   | MKI67    |
| 1586   | ENSG00000148795 | 0          | NA          | NA         | NA         | NA         | CYP17A1  |
| 9118   | ENSG00000148798 | 3873.40384 | -2.7089968  | 0.06014563 | 0          | 0          | INA      |
| 282969 | ENSG00000148803 | 120.99544  | 0.08960865  | 0.19010208 | 0.58882411 | 0.78351083 | FUOM     |
| 80313  | ENSG00000148814 | 182.582899 | 0.4691387   | 0.17786543 | 0.00328235 | 0.01632536 | LRRC27   |
| 92170  | ENSG00000148824 | 1279.21283 | -0.02258668 | 0.08388437 | 0.78172697 | 0.90040424 | MTG1     |
| 84504  | ENSG00000148826 | 0.30002379 | -0.02294466 | 0.38527539 | 0.6864438  | NA         | NKX6-2   |
| 196743 | ENSG00000148832 | 44.4893293 | 0.11980286  | 0.27098293 | 0.5416374  | 0.750006   | PAOX     |
| 9446   | ENSG00000148834 | 605.248622 | -0.05769438 | 0.10723194 | 0.57288499 | 0.7725692  | GSTO1    |
| 6877   | ENSG00000148835 | 310.864598 | -0.22602005 | 0.13314152 | 0.06922163 | 0.18987379 | TAF5     |
| 23082  | ENSG00000148840 | 1683.9368  | -0.03319545 | 0.07109183 | 0.63019025 | 0.81297489 | PPRC1    |
| 85450  | ENSG00000148841 | 392.882742 | 0.25054118  | 0.12766788 | 0.03699519 | 0.11835094 | ITPRIP   |
| 54805  | ENSG00000148842 | 608.03869  | -0.55801293 | 0.12430587 | 2.32E-06   | 2.47E-05   | CNNM2    |
| 22984  | ENSG00000148843 | 3815.15944 | -0.05934859 | 0.06058242 | 0.31926573 | 0.5469361  | PDCD11   |
| 8038   | ENSG00000148848 | 2564.99262 | -1.93601746 | 0.0791536  | 2.84E-133  | 1.53E-130  | ADAM12   |
| 6001   | ENSG00000148908 | 72.4553689 | 0.13597625  | 0.25376313 | 0.48350003 | 0.70373712 | RGS10    |
| 84280  | ENSG00000148925 | 523.16077  | -0.14244804 | 0.10987507 | 0.17482253 | 0.36867335 | BTBD10   |
| 133    | ENSG00000148926 | 52.9508049 | -0.57790757 | 0.399238   | 0.02775815 | 0.09431781 | ADM      |
| 2620   | ENSG00000148935 | 81.2374504 | 0.78828621  | 0.28819582 | 0.00096365 | 0.00573279 | GAS2     |
| 159963 | ENSG00000148942 | 0.33471731 | 0.02354391  | 0.38534154 | 0.62842204 | NA         | SLC5A12  |
| 55327  | ENSG00000148943 | 518.019265 | -0.51052297 | 0.11047958 | 1.45E-06   | 1.60E-05   | LIN7C    |
| 57689  | ENSG00000148948 | 10.9342917 | 0.1027082   | 0.35736179 | 0.52164463 | 0.73494218 | LRRC4C   |
| 196294 | ENSG00000148950 | 124.988643 | -0.39878826 | 0.20730872 | 0.02488861 | 0.08684313 | IMMP1L   |
| 6291   | ENSG00000148965 | 0          | NA          | NA         | NA         | NA         | SAA4     |
| 27315  | ENSG00000148985 | 542.84796  | 0.15259907  | 0.10453568 | 0.12893964 | 0.30021857 | PGAP2    |
| 64852  | ENSG00000149016 | 769.138924 | 0.05439249  | 0.1062264  | 0.5948493  | 0.78787011 | TUT1     |
| 7356   | ENSG00000149021 | 0          | NA          | NA         | NA         | NA         | SCGB1A1  |
| 90019  | ENSG00000149043 | 17.8641785 | -0.50776693 | 0.62119969 | 0.04558651 | 0.13856846 | SYT8     |
| 7761   | ENSG00000149050 | 88.6395329 | 0.06072086  | 0.25758793 | 0.75286397 | 0.8843065  | ZNF214   |
| 7762   | ENSG00000149054 | 0.78122969 | 0.00103505  | 0.38149724 | 0.98289957 | NA         | ZNF215   |



|        |                 |            |             |            |            |            |          |
|--------|-----------------|------------|-------------|------------|------------|------------|----------|
| 51144  | ENSG00000149084 | 815.704551 | -0.26866314 | 0.09778099 | 0.00437054 | 0.0208191  | HSD17B12 |
| 51074  | ENSG00000149089 | 303.998664 | 0.14515128  | 0.13774601 | 0.25881506 | 0.48030339 | APIP     |
| 25891  | ENSG00000149090 | 2.03544701 | 0.03351314  | 0.37964023 | 0.57428394 | NA         | PAMR1    |
| 8525   | ENSG00000149091 | 1367.17884 | -0.30980715 | 0.08824804 | 0.0002978  | 0.00203244 | DGKZ     |
| 10480  | ENSG00000149100 | 2533.82095 | 0.05046245  | 0.06417876 | 0.42559098 | 0.65142147 | EIF3M    |
| 85456  | ENSG00000149115 | 958.806484 | -0.13952779 | 0.10757248 | 0.17572149 | 0.36993999 | TNKS1BP1 |
| 10249  | ENSG00000149124 | 1.23759164 | 0.06131861  | 0.39085027 | 0.17525616 | NA         | GLYAT    |
| 710    | ENSG00000149131 | 244.87328  | 1.80962876  | 0.17027123 | 1.66E-27   | 8.64E-26   | SERPING1 |
| 338674 | ENSG00000149133 | 0          | NA          | NA         | NA         | NA         | OR5F1    |
| 6749   | ENSG00000149136 | 6828.43902 | -0.17651389 | 0.05411571 | 0.00096607 | 0.005742   | SSRP1    |
| 8501   | ENSG00000149150 | 193.621859 | 0.01574753  | 0.16931431 | 0.91878396 | 0.96558446 | SLC43A1  |
| 5795   | ENSG00000149177 | 284.009768 | 0.23205635  | 0.16608347 | 0.12106754 | 0.28721511 | PTPRJ    |
| 79096  | ENSG00000149179 | 748.978004 | 0.50726348  | 0.10666531 | 7.63E-07   | 8.80E-06   | C11orf49 |
| 84364  | ENSG00000149182 | 1230.25489 | -0.0493025  | 0.07613769 | 0.50818231 | 0.72394177 | ARFGAP2  |
| 10658  | ENSG00000149187 | 3810.15125 | -0.11267434 | 0.06475272 | 0.07698188 | 0.2054507  | CELF1    |
| 51501  | ENSG00000149196 | 561.737929 | -0.03162861 | 0.10251384 | 0.74612309 | 0.8804068  | HIKESHI  |
| 60494  | ENSG00000149201 | 18.4141217 | 0.36878002  | 0.44269676 | 0.10850528 | 0.2643325  | CCDC81   |
| 143686 | ENSG00000149212 | 692.850799 | -0.22136164 | 0.11740098 | 0.04689316 | 0.14175837 | SESN3    |
| 23052  | ENSG00000149218 | 106.21832  | -0.46835211 | 0.22420008 | 0.01341046 | 0.0527799  | ENDOD1   |
| 79780  | ENSG00000149231 | 981.746675 | -0.37929532 | 0.1090603  | 0.00027481 | 0.00189053 | CCDC82   |
| 283212 | ENSG00000149243 | 94.5346901 | 0.37847337  | 0.23893076 | 0.05217845 | 0.1539026  | KLHL35   |
| 26011  | ENSG00000149256 | 5028.42669 | 0.26270838  | 0.08567475 | 0.00162673 | 0.00900259 | TENM4    |
| 871    | ENSG00000149257 | 2584.77616 | 0.76216039  | 0.06722038 | 1.82E-30   | 1.06E-28   | SERPINH1 |
| 726    | ENSG00000149260 | 616.475378 | -0.05967824 | 0.11418308 | 0.58284747 | 0.77951315 | CAPN5    |
| 92105  | ENSG00000149262 | 759.313159 | 0.22074379  | 0.09851143 | 0.02017837 | 0.07342972 | INTS4    |
| 5058   | ENSG00000149269 | 706.433433 | 0.12997858  | 0.10825054 | 0.21031095 | 0.41893265 | PAK1     |
| 6188   | ENSG00000149273 | 23137.6585 | -0.20944104 | 0.04912619 | 1.69E-05   | 0.00015358 | RPS3     |
| 85463  | ENSG00000149289 | 906.847917 | 0.83409468  | 0.10417176 | 2.10E-16   | 6.28E-15   | ZC3H12C  |
| 54970  | ENSG00000149292 | 232.233933 | 0.04236591  | 0.15219674 | 0.7642974  | 0.89148768 | TTC12    |
| 4684   | ENSG00000149294 | 3401.7132  | -1.43748432 | 0.07035648 | 4.36E-93   | 1.24E-90   | NCAM1    |
| 1813   | ENSG00000149295 | 794.33448  | -2.51194411 | 0.10820529 | 2.18E-120  | 8.84E-118  | DRD2     |
| 91894  | ENSG00000149300 | 0.34746601 | 0.02370763  | 0.3853651  | 0.61987128 | NA         | C11orf52 |
| 9177   | ENSG00000149305 | 2.34842905 | 0.15776707  | 0.42873771 | 0.03308935 | NA         | HTR3B    |
| 4863   | ENSG00000149308 | 596.523116 | -0.21563122 | 0.10708553 | 0.03546267 | 0.11446692 | NPAT     |
| 472    | ENSG00000149311 | 2588.94007 | 0.08507896  | 0.07301984 | 0.23537319 | 0.45219979 | ATM      |
| 60496  | ENSG00000149313 | 1587.13352 | -0.34128552 | 0.08230342 | 2.08E-05   | 0.00018659 | AASDHPPT |
| 89944  | ENSG00000149328 | 660.06708  | 0.02158976  | 0.09622175 | 0.81754274 | 0.91685309 | GLB1L2   |
| 128710 | ENSG00000149346 | 327.545853 | -0.14672671 | 0.13820352 | 0.25402046 | 0.47451017 | SLX4IP   |

|           |                 |            |             |            |            |            |            |
|-----------|-----------------|------------|-------------|------------|------------|------------|------------|
| 55004     | ENSG00000149357 | 1196.11286 | 0.11964905  | 0.08722218 | 0.15893415 | 0.3463211  | LAMTOR1    |
| 283208    | ENSG00000149380 | 1.17947757 | 0.01850914  | 0.38013115 | 0.77237192 | NA         | P4HA3      |
| 2900      | ENSG00000149403 | 171.504736 | -2.55408642 | 0.20654858 | 2.82E-36   | 1.98E-34   | GRIK4      |
| 6768      | ENSG00000149418 | 0.94185167 | -0.02000688 | 0.38110359 | 0.73516374 | NA         | ST14       |
| 10525     | ENSG00000149428 | 6233.95169 | 0.3971878   | 0.10056769 | 4.25E-05   | 0.00035498 | HYOU1      |
| 92086     | ENSG00000149435 | 0          | NA          | NA         | NA         | NA         | GGTLC1     |
| NA        | ENSG00000149443 | 0          | NA          | NA         | NA         | NA         | SCP2D1-AS1 |
| 80332     | ENSG00000149451 | 0.173733   | 0.01914545  | 0.38484597 | 0.78225479 | NA         | ADAM33     |
| 9376      | ENSG00000149452 | 0.173733   | 0.01914545  | 0.38484597 | 0.78225479 | NA         | SLC22A8    |
| 57325     | ENSG00000149474 | 444.231565 | -0.03787253 | 0.14050462 | 0.77080899 | 0.89494676 | KAT14      |
| 26007     | ENSG00000149476 | 1284.64518 | 0.24465713  | 0.08075051 | 0.0019101  | 0.01027001 | TKFC       |
| 9219      | ENSG00000149480 | 2829.03533 | 0.04935703  | 0.06155504 | 0.41702552 | 0.64347381 | MTA2       |
| 51524     | ENSG00000149483 | 439.224076 | -0.23580105 | 0.12108013 | 0.03942546 | 0.12409621 | TMEM138    |
| 3992      | ENSG00000149485 | 3857.92629 | -0.38238401 | 0.06958339 | 2.05E-08   | 2.98E-07   | FADS1      |
| 117532    | ENSG00000149488 | 6.95584252 | 0.19085767  | 0.41982949 | 0.18209352 | 0.37980817 | TMC2       |
| 6094      | ENSG00000149489 | 32.9452239 | -0.22383258 | 0.36207073 | 0.26221441 | 0.48416323 | ROM1       |
| 256364    | ENSG00000149499 | 860.601191 | 0.05714263  | 0.09400905 | 0.53096763 | 0.74257279 | EML3       |
| 3619      | ENSG00000149503 | 2273.74309 | -0.23779112 | 0.06708895 | 0.00031232 | 0.00212474 | INCENP     |
| 22917     | ENSG00000149506 | 0.173733   | 0.01914545  | 0.38484597 | 0.78225479 | NA         | ZP1        |
| 219990    | ENSG00000149507 | 0          | NA          | NA         | NA         | NA         | OOSP2      |
| 932       | ENSG00000149516 | 0          | NA          | NA         | NA         | NA         | MS4A3      |
| 9651      | ENSG00000149527 | 376.88182  | -1.96604668 | 0.15495087 | 3.87E-38   | 2.84E-36   | PLCH2      |
| NA        | ENSG00000149531 | 110.123315 | -0.02974112 | 0.19765599 | 0.86034925 | 0.93787522 | FRG1BP     |
| 79869     | ENSG00000149532 | 2576.56041 | -0.05646385 | 0.07556641 | 0.44410473 | 0.66905081 | CPSF7      |
| 2206      | ENSG00000149534 | 0          | NA          | NA         | NA         | NA         | MS4A2      |
| 26229     | ENSG00000149541 | 935.776021 | 0.24792288  | 0.10646378 | 0.01511446 | 0.05803579 | B3GAT3     |
| 9538      | ENSG00000149547 | 1964.90261 | -0.21304413 | 0.06625529 | 0.00107611 | 0.00628684 | EI24       |
| 80071     | ENSG00000149548 | 164.679269 | 0.18172465  | 0.18072131 | 0.25529814 | 0.47622369 | CCDC15     |
| 1111      | ENSG00000149554 | 1068.16648 | -0.28718578 | 0.08676165 | 0.00065692 | 0.0040857  | CHEK1      |
| 9638      | ENSG00000149557 | 730.929749 | -1.39033799 | 0.10431313 | 1.49E-41   | 1.16E-39   | FEZ1       |
| 105369550 | ENSG00000149557 | 730.929749 | -1.39033799 | 0.10431313 | 1.49E-41   | 1.16E-39   | FEZ1       |
| 90952     | ENSG00000149564 | 32.9163073 | 0.2872443   | 0.33649164 | 0.18638905 | 0.38610218 | ESAM       |
| 84623     | ENSG00000149571 | 246.209805 | -0.37724237 | 0.15576045 | 0.0080762  | 0.03481275 | KIRREL3    |
| 10205     | ENSG00000149573 | 0          | NA          | NA         | NA         | NA         | MPZL2      |
| 6327      | ENSG00000149575 | 18.5791846 | 0.14621626  | 0.33746109 | 0.44032175 | 0.66517856 | SCN2B      |
| 51092     | ENSG00000149577 | 403.899749 | 0.27208653  | 0.14382371 | 0.04078426 | 0.12718637 | SIDT2      |
| 84866     | ENSG00000149582 | 454.557365 | 0.11045837  | 0.11502722 | 0.31421498 | 0.54212505 | TMEM25     |
| 6876      | ENSG00000149591 | 54.3193354 | 0.92321926  | 0.36597761 | 0.00122922 | 0.00706277 | TAGLN      |

|        |                 |            |             |            |            |            |             |
|--------|-----------------|------------|-------------|------------|------------|------------|-------------|
| 57158  | ENSG00000149596 | 3.13556017 | -0.0820709  | 0.38527045 | 0.3672852  | 0.59650772 | JPH2        |
| 128853 | ENSG00000149599 | 137.62461  | -1.01145652 | 0.22278816 | 6.78E-07   | 7.90E-06   | DUSP15      |
| 149951 | ENSG00000149600 | 506.673921 | -0.05298081 | 0.10584487 | 0.60179257 | 0.79216856 | COMMD7      |
| 128864 | ENSG00000149609 | 13.73156   | 0.01573984  | 0.3291393  | 0.92865134 | 0.97011965 | C20orf144   |
| 85449  | ENSG00000149633 | 101.753725 | 0.9125145   | 0.25668692 | 4.94E-05   | 0.00040406 | KIAA1755    |
| 128497 | ENSG00000149634 | 32.6054919 | 0.32985968  | 0.34844328 | 0.141556   | 0.3199443  | SPATA25     |
| 128506 | ENSG00000149635 | 0          | NA          | NA         | NA         | NA         | OCSTAMP     |
| 79980  | ENSG00000149636 | 472.713153 | -0.06552019 | 0.11287591 | 0.54298178 | 0.75099868 | DSN1        |
| 140710 | ENSG00000149639 | 4781.16163 | -0.15670332 | 0.06455669 | 0.01365173 | 0.05351717 | SOGA1       |
| 140894 | ENSG00000149646 | 30.9115366 | 0.09237365  | 0.30097951 | 0.63352889 | 0.81495647 | CNBD2       |
| 391253 | ENSG00000149651 | 0          | NA          | NA         | NA         | NA         | SPINT4      |
| 64405  | ENSG00000149654 | 9.80686136 | -4.19422789 | 1.22181032 | 0.00010721 | 0.00080972 | CDH22       |
| NA     | ENSG00000149656 | 0.51086009 | -0.01927154 | 0.38352315 | 0.70504665 | NA         | LINC00266-1 |
| 149986 | ENSG00000149657 | 1698.58404 | -0.09494148 | 0.07148058 | 0.17604032 | 0.37037488 | LSM14B      |
| 54915  | ENSG00000149658 | 1071.98548 | -0.16277345 | 0.08126484 | 0.04010216 | 0.12563191 | YTHDF1      |
| 81928  | ENSG00000149679 | 513.011205 | 0.2810504   | 0.13984994 | 0.03062186 | 0.10197567 | CABLES2     |
| 220064 | ENSG00000149716 | 447.496178 | -0.08176781 | 0.11998331 | 0.4721051  | 0.69438543 | LTO1        |
| 170589 | ENSG00000149735 | 0          | NA          | NA         | NA         | NA         | GPHA2       |
| 114571 | ENSG00000149742 | 0          | NA          | NA         | NA         | NA         | SLC22A9     |
| 83707  | ENSG00000149743 | 442.94398  | 0.15885038  | 0.11681536 | 0.15386018 | 0.33895025 | TRPT1       |
| 84304  | ENSG00000149761 | 426.352121 | 0.22586289  | 0.14172219 | 0.0856067  | 0.22219218 | NUDT22      |
| 83706  | ENSG00000149781 | 8.66698231 | -0.06947315 | 0.36178602 | 0.60805761 | 0.79695264 | FERMT3      |
| 5331   | ENSG00000149782 | 1288.65493 | -0.12148537 | 0.08400436 | 0.13775812 | 0.31361113 | PLCB3       |
| 740    | ENSG00000149792 | 938.774626 | -0.20187054 | 0.11313406 | 0.06069469 | 0.17286574 | MRPL49      |
| 10435  | ENSG00000149798 | 75.9470851 | 0.29515716  | 0.29703375 | 0.16579837 | 0.35599996 | CDC42EP2    |
| 2197   | ENSG00000149806 | 4588.20042 | 0.07973433  | 0.05585251 | 0.14937576 | 0.33213215 | FAU         |
| 7108   | ENSG00000149809 | 821.267887 | -0.19454686 | 0.10370731 | 0.05074372 | 0.15068933 | TM7SF2      |
| 738    | ENSG00000149823 | 2471.98153 | -0.09798057 | 0.07891063 | 0.20397394 | 0.41051388 | VPS51       |
| 6911   | ENSG00000149922 | 69.1112025 | 0.28277279  | 0.26184266 | 0.16133332 | 0.34958987 | TBX6        |
| 5531   | ENSG00000149923 | 2805.85129 | 0.1298118   | 0.06840222 | 0.05377541 | 0.15733729 | PPP4C       |
| 226    | ENSG00000149925 | 6229.78811 | -0.21199243 | 0.07623715 | 0.00454984 | 0.02148745 | ALDOA       |
| 83723  | ENSG00000149926 | 1634.90176 | -0.7065131  | 0.08281192 | 3.35E-18   | 1.13E-16   | TLCD3B      |
| 8448   | ENSG00000149927 | 185.253303 | 0.29401302  | 0.16645472 | 0.05007306 | 0.1491442  | DOC2A       |
| 8479   | ENSG00000149929 | 917.297877 | -0.31300014 | 0.09335934 | 0.00052372 | 0.00335719 | HIRIP3      |
| 9344   | ENSG00000149930 | 1549.49726 | -0.06146513 | 0.07741253 | 0.41668246 | 0.64309452 | TAOK2       |
| 124446 | ENSG00000149932 | 638.744193 | 0.2332072   | 0.10874762 | 0.02498256 | 0.08712497 | TMEM219     |
| 8091   | ENSG00000149948 | 0          | NA          | NA         | NA         | NA         | HMGA2       |
| 4314   | ENSG00000149968 | 0          | NA          | NA         | NA         | NA         | MMP3        |

|        |                 |            |             |            |            |            |           |
|--------|-----------------|------------|-------------|------------|------------|------------|-----------|
| 22866  | ENSG00000149970 | 188.766581 | -0.25747284 | 0.25720129 | 0.19350306 | 0.39626941 | CNKS2R2   |
| 53942  | ENSG00000149972 | 9.62175875 | -1.71143157 | 0.97444379 | 0.00298081 | 0.01504431 | CNTN5     |
| 51348  | ENSG00000150045 | 0.16735865 | 0.01897177  | 0.38482933 | 0.78225479 | NA         | KLRF1     |
| 51267  | ENSG00000150048 | 0          | NA          | NA         | NA         | NA         | CLEC1A    |
| 283078 | ENSG00000150051 | 0          | NA          | NA         | NA         | NA         | MKX       |
| 143098 | ENSG00000150054 | 0.34113261 | 0.0236267   | 0.38535342 | 0.6240938  | NA         | MPP7      |
| 3688   | ENSG00000150093 | 8399.74718 | 0.14991124  | 0.04790113 | 0.00160561 | 0.00889812 | ITGB1     |
| NA     | ENSG00000150175 | 0          | NA          | NA         | NA         | NA         | FRMPD2B   |
| 53828  | ENSG00000150201 | 0          | NA          | NA         | NA         | NA         | FXD4      |
| 79097  | ENSG00000150244 | 0          | NA          | NA         | NA         | NA         | TRIM48    |
| 390157 | ENSG00000150261 | 0          | NA          | NA         | NA         | NA         | OR8K1     |
| 390162 | ENSG00000150269 | 0          | NA          | NA         | NA         | NA         | OR5M9     |
| 65217  | ENSG00000150275 | 3.97022521 | 0.02968007  | 0.37056272 | 0.77464727 | 0.89613481 | PCDH15    |
| NA     | ENSG00000150276 | 0          | NA          | NA         | NA         | NA         | PPIAP26   |
| 1489   | ENSG00000150281 | 36.4981409 | 0.49563597  | 0.37845247 | 0.04696181 | 0.14179583 | CTF1      |
| 51503  | ENSG00000150316 | 519.667729 | -0.0346621  | 0.1175703  | 0.75581559 | 0.88640901 | CWC15     |
| 2209   | ENSG00000150337 | 0          | NA          | NA         | NA         | NA         | FCGR1A    |
| 84159  | ENSG00000150347 | 720.325581 | -0.878844   | 0.10264118 | 1.81E-18   | 6.25E-17   | ARID5B    |
| 57626  | ENSG00000150361 | 0.173733   | 0.01914545  | 0.38484597 | 0.78225479 | NA         | KLHL1     |
| 1006   | ENSG00000150394 | 3.21230678 | 0.06076682  | 0.38143753 | 0.44542981 | 0.67025615 | CDH8      |
| 55208  | ENSG00000150401 | 595.235897 | -0.10143639 | 0.13958535 | 0.43621865 | 0.6612819  | DCUN1D2   |
| 55002  | ENSG00000150403 | 1099.33353 | 0.01995599  | 0.08850197 | 0.81748419 | 0.91685309 | TMCO3     |
| 219854 | ENSG00000150433 | 437.671538 | 0.10404891  | 0.11521714 | 0.34387995 | 0.57419443 | TMEM218   |
| 114609 | ENSG00000150455 | 275.523825 | -0.14356486 | 0.16024845 | 0.32290678 | 0.55059885 | TIRAP     |
| 221143 | ENSG00000150456 | 60.9830237 | -0.19137472 | 0.26006148 | 0.33060116 | 0.55938713 | EEF1AKMT1 |
| 26524  | ENSG00000150457 | 0          | NA          | NA         | NA         | NA         | LATS2     |
| 10284  | ENSG00000150459 | 1016.88807 | 0.03605168  | 0.0941198  | 0.69343428 | 0.85183585 | SAP18     |
| 23284  | ENSG00000150471 | 113.538179 | -0.27804014 | 0.25655953 | 0.16093542 | 0.34896869 | ADGRL3    |
| 57536  | ENSG00000150477 | 243.566481 | -0.02645455 | 0.15151777 | 0.84823822 | 0.93095493 | KIAA1328  |
| 220108 | ENSG00000150510 | 213.376425 | 0.12769109  | 0.15888483 | 0.37755917 | 0.60636177 | FAM124A   |
| 4253   | ENSG00000150527 | 150.2633   | 0.02068229  | 0.18511665 | 0.89852637 | 0.95556135 | MIA2      |
| 3176   | ENSG00000150540 | 0.46100927 | 0.00464453  | 0.38317317 | 0.96931797 | NA         | HNMT      |
| 116372 | ENSG00000150551 | 8.27530393 | 0.28133188  | 0.4872365  | 0.08722692 | 0.22548301 | LYPD1     |
| 130576 | ENSG00000150556 | 6.39079761 | -0.05161616 | 0.3589517  | 0.70659649 | 0.85861856 | LYPD6B    |
| 27250  | ENSG00000150593 | 1327.0627  | 0.22389631  | 0.08908346 | 0.00964702 | 0.04029407 | PDCD4     |
| 150    | ENSG00000150594 | 0.82167337 | 0.01148781  | 0.38170777 | 0.82204659 | NA         | ADRA2A    |
| 2823   | ENSG00000150625 | 24.3978374 | 4.82530832  | 1.00121837 | 1.52E-08   | 2.23E-07   | GPM6A     |
| 116966 | ENSG00000150627 | 628.642236 | 0.26894762  | 0.12265799 | 0.02036824 | 0.07391569 | WDR17     |

|        |                 |            |             |            |            |            |           |
|--------|-----------------|------------|-------------|------------|------------|------------|-----------|
| 132851 | ENSG00000150628 | 3.86742618 | 0.01005886  | 0.36545111 | 0.93251717 | 0.97195497 | SPATA4    |
| 7424   | ENSG00000150630 | 0          | NA          | NA         | NA         | NA         | VEGFC     |
| 79839  | ENSG00000150636 | 63.0144628 | -0.27054218 | 0.26443078 | 0.17986338 | 0.37654209 | CCDC102B  |
| 10666  | ENSG00000150637 | 9.13821423 | -3.260779   | 1.13517386 | 0.00021533 | 0.00151978 | CD226     |
| 84735  | ENSG00000150656 | 0.37844916 | 0.02407552  | 0.3854191  | 0.60038877 | NA         | CNDP1     |
| 161835 | ENSG00000150667 | 18.7228239 | -0.19692987 | 0.35530971 | 0.31373463 | 0.54159326 | FSIP1     |
| 1740   | ENSG00000150672 | 43.8240852 | 1.1758565   | 0.42643256 | 0.00046166 | 0.00301222 | DLG2      |
| 220047 | ENSG00000150676 | 0          | NA          | NA         | NA         | NA         | CCDC83    |
| 64407  | ENSG00000150681 | 0          | NA          | NA         | NA         | NA         | RGS18     |
| 11098  | ENSG00000150687 | 30.9840434 | 0.41641523  | 0.45622892 | 0.08150516 | 0.21429626 | PRSS23    |
| 54545  | ENSG00000150712 | 526.717251 | 0.19721816  | 0.11794667 | 0.07828905 | 0.20807163 | MTMR12    |
| 151242 | ENSG00000150722 | 3.54436604 | 0.01851122  | 0.36752451 | 0.86893157 | 0.94277602 | PPP1R1C   |
| NA     | ENSG00000150732 | 0          | NA          | NA         | NA         | NA         |           |
| 341032 | ENSG00000150750 | 0          | NA          | NA         | NA         | NA         | C11orf53  |
| 22948  | ENSG00000150753 | 7396.5569  | -0.15817557 | 0.06683815 | 0.01764576 | 0.06585625 | CCT5      |
| 134145 | ENSG00000150756 | 243.271132 | -0.12104311 | 0.15778134 | 0.39833981 | 0.62727695 | ATPSCCKMT |
| 1793   | ENSG00000150760 | 1873.25905 | 0.20979604  | 0.06719308 | 0.00150683 | 0.00841417 | DOCK1     |
| 85458  | ENSG00000150764 | 855.214867 | -0.11507988 | 0.09325814 | 0.20233871 | 0.40788457 | DIXDC1    |
| 1737   | ENSG00000150768 | 1103.26953 | -0.03474542 | 0.0835424  | 0.66934053 | 0.83727912 | DLAT      |
| 120379 | ENSG00000150773 | 19.2326377 | 0.30497897  | 0.42995678 | 0.14620201 | 0.32701731 | PIH1D2    |
| 55216  | ENSG00000150776 | 1084.91566 | -0.21048668 | 0.10465042 | 0.0359948  | 0.11585132 | NKAPD1    |
| 26521  | ENSG00000150779 | 948.706418 | -0.19255667 | 0.09135372 | 0.02954089 | 0.09920298 | TIMM8B    |
| 3606   | ENSG00000150782 | 0.34112095 | 0.02362661  | 0.38535341 | 0.62409997 | NA         | IL18      |
| 56158  | ENSG00000150783 | 0.82706411 | -8.73E-06   | 0.38068677 | 0.99954138 | NA         | TEX12     |
| 5805   | ENSG00000150787 | 343.489692 | -0.13240581 | 0.12400188 | 0.25812032 | 0.47950441 | PTS       |
| 5305   | ENSG00000150867 | 378.748828 | 0.30928393  | 0.15145264 | 0.02599538 | 0.08974218 | PIP4K2A   |
| 130813 | ENSG00000150873 | 13.9508087 | 0.23462387  | 0.41582978 | 0.19070572 | 0.39208305 | C2orf50   |
| 341640 | ENSG00000150893 | 64.1987158 | 4.85970637  | 0.4835342  | 2.37E-24   | 1.10E-22   | FREM2     |
| 2308   | ENSG00000150907 | 61.1380131 | 2.65200836  | 0.35287607 | 4.11E-15   | 1.13E-13   | FOXO1     |
| 51232  | ENSG00000150938 | 0.78623954 | -0.00672434 | 0.38158221 | 0.89598968 | NA         | CRIM1     |
| 9871   | ENSG00000150961 | 1304.99227 | 0.63805262  | 0.08299176 | 3.69E-15   | 1.02E-13   | SEC24D    |
| 23457  | ENSG00000150967 | 93.8334739 | 0.15538072  | 0.24901038 | 0.41974526 | 0.64566181 | ABCB9     |
| 196383 | ENSG00000150977 | 119.302312 | 0.69805889  | 0.21740998 | 0.00027555 | 0.00189427 | RILPL2    |
| 57647  | ENSG00000150990 | 619.799095 | 0.13774305  | 0.10203265 | 0.16095784 | 0.34896869 | DHX37     |
| 7316   | ENSG00000150991 | 15311.6131 | -0.15459967 | 0.04701257 | 0.00091463 | 0.00548556 | UBC       |
| 3708   | ENSG00000150995 | 2900.36365 | -0.01608563 | 0.06707129 | 0.80718517 | 0.91260538 | ITPR1     |
| 84076  | ENSG00000151005 | 0.14931947 | -0.01844332 | 0.38480212 | 0.84537521 | NA         | TKTL2     |
| 339105 | ENSG00000151006 | 241.257434 | 0.6145476   | 0.21958267 | 0.00128269 | 0.00732544 | PRSS53    |

|           |                 |            |             |            |            |            |          |
|-----------|-----------------|------------|-------------|------------|------------|------------|----------|
| 23657     | ENSG00000151012 | 124.786585 | 2.92460947  | 0.81721611 | 1.39E-05   | 0.00012872 | SLC7A11  |
| 25819     | ENSG00000151014 | 184.326484 | -0.47241238 | 0.18565987 | 0.00419245 | 0.02007682 | NOCT     |
| 219670    | ENSG00000151023 | 3.54673989 | 0.06974561  | 0.37815918 | 0.50737287 | 0.72330803 | ENKUR    |
| 57512     | ENSG00000151025 | 18.7655004 | -2.9716497  | 0.78525201 | 8.58E-06   | 8.26E-05   | GPR158   |
| 119180    | ENSG00000151033 | 0          | NA          | NA         | NA         | NA         | LYZL2    |
| 93589     | ENSG00000151062 | 2.29108476 | -0.01937071 | 0.37847798 | 0.76547426 | NA         | CACNA2D4 |
| 196513    | ENSG00000151065 | 307.744815 | 0.10729219  | 0.13088691 | 0.38243767 | 0.61165364 | DCP1B    |
| 775       | ENSG00000151067 | 605.661902 | -1.10901539 | 0.17067154 | 7.33E-12   | 1.58E-10   | CACNA1C  |
| 100874369 | ENSG00000151067 | 605.661902 | -1.10901539 | 0.17067154 | 7.33E-12   | 1.58E-10   | CACNA1C  |
| 3742      | ENSG00000151079 | 0          | NA          | NA         | NA         | NA         | KCNA6    |
| 7068      | ENSG00000151090 | 30.0394022 | -0.39843209 | 0.38455172 | 0.09149615 | 0.23350704 | THRB     |
| 55768     | ENSG00000151092 | 375.437441 | 0.1204411   | 0.1237202  | 0.30373479 | 0.53107413 | NGLY1    |
| 54995     | ENSG00000151093 | 149.806604 | -0.41684488 | 0.19190038 | 0.01327324 | 0.05232288 | OXSM     |
| 55293     | ENSG00000151116 | 200.439161 | 0.08206708  | 0.18698501 | 0.6164172  | 0.80326549 | UEVLD    |
| 144110    | ENSG00000151117 | 108.812968 | 0.41924332  | 0.21816133 | 0.02334409 | 0.08246914 | TMEM86A  |
| 121053    | ENSG00000151131 | 499.471753 | -0.06888144 | 0.11917205 | 0.5422026  | 0.75027258 | C12orf45 |
| 90488     | ENSG00000151135 | 925.893191 | -0.025382   | 0.08826982 | 0.76673014 | 0.89256152 | TMEM263  |
| 121551    | ENSG00000151136 | 653.261822 | -1.29966612 | 0.10944903 | 1.56E-33   | 9.98E-32   | BTBD11   |
| 89910     | ENSG00000151148 | 1432.78817 | 0.10736739  | 0.08038892 | 0.17196293 | 0.36454157 | UBE3B    |
| 288       | ENSG00000151150 | 295.293845 | -1.42007417 | 0.17463099 | 3.57E-17   | 1.12E-15   | ANK3     |
| 253430    | ENSG00000151151 | 388.057697 | -0.55446019 | 0.1236793  | 2.44E-06   | 2.59E-05   | IPMK     |
| 144715    | ENSG00000151164 | 11.2833665 | 0.16785902  | 0.39777547 | 0.25960726 | 0.48121669 | RAD9B    |
| 196463    | ENSG00000151176 | 758.665327 | -0.08545411 | 0.09739533 | 0.36378321 | 0.59354103 | PLBD2    |
| 9231      | ENSG00000151208 | 3985.12963 | 0.20495899  | 0.06313635 | 0.00098328 | 0.00582682 | DLG5     |
| 4143      | ENSG00000151224 | 7.74968025 | 0.43438856  | 0.66233025 | 0.04277939 | 0.13222358 | MAT1A    |
| 114134    | ENSG00000151229 | 294.230216 | 0.06950132  | 0.1672981  | 0.64443374 | 0.822478   | SLC2A13  |
| 283464    | ENSG00000151233 | 803.387328 | 0.07529914  | 0.10767747 | 0.46673528 | 0.68965725 | GXYLT1   |
| 5756      | ENSG00000151239 | 1057.49435 | -0.00815952 | 0.10402275 | 0.93412926 | 0.97251008 | TWF1     |
| 22982     | ENSG00000151240 | 1020.6598  | -0.07121714 | 0.08319061 | 0.38023078 | 0.60925365 | DIP2C    |
| 1977      | ENSG00000151247 | 1334.72969 | -0.2471891  | 0.11088455 | 0.01944564 | 0.07132585 | EIF4E    |
| 9223      | ENSG00000151276 | 2360.7473  | 0.05035929  | 0.07911369 | 0.51592224 | 0.73004045 | MAGI1    |
| 93081     | ENSG00000151287 | 245.251941 | -0.08272441 | 0.14640477 | 0.54008621 | 0.748907   | TEX30    |
| 1456      | ENSG00000151292 | 868.867749 | -0.07331021 | 0.08787522 | 0.39077053 | 0.62011007 | CSNK1G3  |
| NA        | ENSG00000151303 | 2.54833488 | 0.13235516  | 0.41702184 | 0.01999829 | NA         |          |
| 153443    | ENSG00000151304 | 152.147098 | -0.01156179 | 0.17507389 | 0.93969533 | 0.97474024 | SRFBP1   |
| 9472      | ENSG00000151320 | 380.154328 | -0.73196487 | 0.17606236 | 6.41E-06   | 6.32E-05   | AKAP6    |
| 64067     | ENSG00000151322 | 15.2685081 | 1.45778782  | 0.78925623 | 0.00288418 | 0.01463366 | NPAS3    |
| 283635    | ENSG00000151327 | 544.3645   | 0.03865558  | 0.10720314 | 0.7082285  | 0.85971939 | FAM177A1 |

|        |                 |            |             |            |            |            |          |
|--------|-----------------|------------|-------------|------------|------------|------------|----------|
| 51562  | ENSG00000151332 | 235.882861 | 0.20036259  | 0.15158412 | 0.14913793 | 0.33171487 | MBIP     |
| 145282 | ENSG00000151338 | 0.6040165  | -0.03154773 | 0.38596638 | 0.58767911 | NA         | MIPOL1   |
| 2132   | ENSG00000151348 | 1200.10883 | 0.01544967  | 0.09096184 | 0.86255773 | 0.93899493 | EXT2     |
| 129787 | ENSG00000151353 | 816.340014 | -0.0839049  | 0.10785528 | 0.41640023 | 0.64306408 | TMEM18   |
| 55821  | ENSG00000151360 | 3.96826624 | -0.04589152 | 0.36957332 | 0.6820025  | 0.84478552 | ALLC     |
| 65987  | ENSG00000151364 | 5.62700283 | 0.05161765  | 0.36216265 | 0.69844814 | 0.85459212 | KCTD14   |
| 7069   | ENSG00000151365 | 0          | NA          | NA         | NA         | NA         | THRSP    |
| 4718   | ENSG00000151366 | 1426.25848 | 0.08598316  | 0.08563864 | 0.3029537  | 0.53022242 | NDUFC2   |
| 10873  | ENSG00000151376 | 241.658898 | 0.00601229  | 0.17452705 | 0.97039688 | 0.98888633 | ME3      |
| 343930 | ENSG00000151379 | 0          | NA          | NA         | NA         | NA         | MSGN1    |
| 81792  | ENSG00000151388 | 61.7879994 | 0.95342765  | 0.45119997 | 0.00279151 | 0.01425209 | ADAMTS12 |
| 80224  | ENSG00000151413 | 190.179937 | -0.21140453 | 0.18394298 | 0.18986048 | 0.39103414 | NUBPL    |
| 140609 | ENSG00000151414 | 652.5797   | 0.54193133  | 0.10840431 | 2.02E-07   | 2.56E-06   | NEK7     |
| 127124 | ENSG00000151418 | 0.16735865 | 0.01897177  | 0.38482933 | 0.78225479 | NA         | ATP6V1G3 |
| 2241   | ENSG00000151422 | 960.801092 | -0.28157347 | 0.09889728 | 0.00311984 | 0.01566633 | FER      |
| 63894  | ENSG00000151445 | 587.86549  | -0.09014959 | 0.10837621 | 0.38418125 | 0.61330512 | VIPAS39  |
| 57182  | ENSG00000151458 | 1093.21694 | -0.05538481 | 0.08479715 | 0.50319927 | 0.72004858 | ANKRD50  |
| 26019  | ENSG00000151461 | 853.8865   | 0.100553    | 0.09065576 | 0.25386062 | 0.47439002 | UPF2     |
| 8872   | ENSG00000151465 | 1697.78205 | 0.02822967  | 0.07153847 | 0.68829476 | 0.8486324  | CDC123   |
| 132320 | ENSG00000151466 | 354.464282 | -0.25855488 | 0.13087314 | 0.03475029 | 0.11270978 | SCLT1    |
| 83643  | ENSG00000151468 | 66.1118222 | 0.29183692  | 0.26444475 | 0.15081999 | 0.33448181 | CCDC3    |
| 132321 | ENSG00000151470 | 100.509235 | 0.01276543  | 0.23147108 | 0.94652587 | 0.97814213 | C4orf33  |
| 55691  | ENSG00000151474 | 903.106133 | -0.56802001 | 0.1183735  | 5.08E-07   | 6.06E-06   | FRMD4A   |
| 83447  | ENSG00000151475 | 0          | NA          | NA         | NA         | NA         | SLC25A31 |
| 5800   | ENSG00000151490 | 487.312368 | 0.21122103  | 0.11994407 | 0.06308583 | 0.17804949 | PTPRO    |
| 2059   | ENSG00000151491 | 181.960232 | 0.43640585  | 0.19400605 | 0.01031584 | 0.04247068 | EPS8     |
| 27034  | ENSG00000151498 | 631.423117 | -0.10790772 | 0.09953579 | 0.26080448 | 0.48273755 | ACAD8    |
| 29087  | ENSG00000151500 | 520.723651 | 0.16596178  | 0.13422447 | 0.18690901 | 0.38676207 | THYN1    |
| 112936 | ENSG00000151502 | 2392.88607 | -0.38422172 | 0.06512342 | 2.03E-09   | 3.35E-08   | VPS26B   |
| 23310  | ENSG00000151503 | 2470.46485 | -0.37463124 | 0.08964372 | 1.64E-05   | 0.0001499  | NCAPD3   |
| 143187 | ENSG00000151532 | 493.356439 | -0.4889677  | 0.11611546 | 1.02E-05   | 9.64E-05   | VTI1A    |
| 5860   | ENSG00000151552 | 793.232585 | 0.16933859  | 0.09042942 | 0.05388654 | 0.15759272 | QDPR     |
| 57700  | ENSG00000151553 | 484.621669 | -0.05097294 | 0.13951973 | 0.69357557 | 0.85183585 | FAM160B1 |
| 121601 | ENSG00000151572 | 1.53769215 | 0.11260496  | 0.40669265 | 0.05481322 | NA         | ANO4     |
| 374618 | ENSG00000151575 | 140.824795 | 0.18074645  | 0.1823721  | 0.26024418 | 0.48209565 | TEX9     |
| 79691  | ENSG00000151576 | 560.697549 | -0.04718129 | 0.14086591 | 0.7162296  | 0.86335715 | QTRT2    |
| 1814   | ENSG00000151577 | 0.34624801 | -0.02356563 | 0.38536324 | 0.65270996 | NA         | DRD3     |
| 166785 | ENSG00000151611 | 93.6189627 | 0.08391046  | 0.21442549 | 0.6393569  | 0.8190109  | MMAA     |

|        |                 |            |             |            |            |            |         |
|--------|-----------------|------------|-------------|------------|------------|------------|---------|
| 152485 | ENSG00000151612 | 837.109805 | -0.10464891 | 0.11263808 | 0.33002046 | 0.55861736 | ZNF827  |
| 5458   | ENSG00000151615 | 43.443629  | -2.48719404 | 0.45544778 | 3.13E-09   | 5.03E-08   | POU4F2  |
| 1909   | ENSG00000151617 | 124.680464 | 1.81443918  | 0.23284589 | 5.11E-16   | 1.48E-14   | EDNRA   |
| 4306   | ENSG00000151623 | 14.2639712 | 2.53760751  | 1.05045036 | 0.00050736 | 0.00326926 | NR3C2   |
| NA     | ENSG00000151631 | 0          | NA          | NA         | NA         | NA         | AKR1C6P |
| 1646   | ENSG00000151632 | 2.85994077 | -0.01180014 | 0.37293934 | 0.89625569 | 0.95469109 | AKR1C2  |
| 10570  | ENSG00000151640 | 2252.36716 | 0.07968075  | 0.06417942 | 0.20812899 | 0.41567135 | DPYSL4  |
| 27287  | ENSG00000151650 | 0          | NA          | NA         | NA         | NA         | VENTX   |
| 101    | ENSG00000151651 | 20.6681421 | 1.57045965  | 0.63078615 | 0.00063447 | 0.00396757 | ADAM8   |
| 3698   | ENSG00000151655 | 0.95429709 | 0.0026938   | 0.38167118 | 0.95671165 | NA         | ITIH2   |
| 22944  | ENSG00000151657 | 291.941728 | 0.01868133  | 0.16529455 | 0.9014782  | 0.95673063 | KIN     |
| 5281   | ENSG00000151665 | 490.87608  | -0.11250167 | 0.11576759 | 0.30715461 | 0.5346975  | PIGF    |
| 150709 | ENSG00000151687 | 42.1664356 | -0.02178334 | 0.28739123 | 0.90719047 | 0.95963244 | ANKAR   |
| 3628   | ENSG00000151689 | 200.735043 | 0.28614293  | 0.16921675 | 0.05955476 | 0.17018096 | INPP1   |
| 54842  | ENSG00000151690 | 628.203601 | -0.13366609 | 0.10756108 | 0.19316744 | 0.39591344 | MFSD6   |
| 9781   | ENSG00000151692 | 2272.19296 | 0.09765469  | 0.07209198 | 0.16809075 | 0.35916008 | RNF144A |
| 8853   | ENSG00000151693 | 2601.66634 | 0.13025326  | 0.06616027 | 0.04534567 | 0.1379632  | ASAP2   |
| 6868   | ENSG00000151694 | 1613.70957 | -0.01972344 | 0.08199113 | 0.80586073 | 0.91210433 | ADAM17  |
| 2313   | ENSG00000151702 | 5.13982123 | 2.37764317  | 1.7364849  | 0.00674745 | 0.02998195 | FLI1    |
| 3758   | ENSG00000151704 | 0.36009051 | 0.02384153  | 0.38538488 | 0.61230064 | NA         | KCNJ1   |
| 120224 | ENSG00000151715 | 151.152408 | -0.66638198 | 0.20138236 | 0.00021158 | 0.00149653 | TMEM45B |
| 80014  | ENSG00000151718 | 840.962534 | 0.4979271   | 0.09493121 | 6.31E-08   | 8.55E-07   | WWC2    |
| 79682  | ENSG00000151725 | 1275.44261 | -0.44090938 | 0.08662167 | 1.69E-07   | 2.17E-06   | CENPU   |
| 2180   | ENSG00000151726 | 1266.11564 | -0.42543128 | 0.09042711 | 1.24E-06   | 1.39E-05   | ACSL1   |
| 291    | ENSG00000151729 | 907.81997  | -0.32800155 | 0.08830204 | 0.00012992 | 0.00096106 | SLC25A4 |
| 196394 | ENSG00000151743 | 154.186753 | -0.33981682 | 0.18294422 | 0.03529445 | 0.11406449 | AMN1    |
| 636    | ENSG00000151746 | 1125.32895 | -0.10307878 | 0.09125161 | 0.2438901  | 0.4622449  | BICD1   |
| 60485  | ENSG00000151748 | 418.493376 | 0.2040817   | 0.13347826 | 0.10207811 | 0.25315371 | SAV1    |
| 160857 | ENSG00000151773 | 91.9236531 | -0.03925016 | 0.21606105 | 0.82475082 | 0.92041041 | CCDC122 |
| 387923 | ENSG00000151778 | 157.207275 | -0.60232283 | 0.19128234 | 0.00044156 | 0.00289698 | SERP2   |
| 51594  | ENSG00000151779 | 1163.10664 | 0.24556699  | 0.09123181 | 0.00549811 | 0.02523887 | NBAS    |
| 79750  | ENSG00000151789 | 322.597755 | 0.08299541  | 0.1900652  | 0.616327   | 0.80326549 | ZNF385D |
| 6999   | ENSG00000151790 | 0          | NA          | NA         | NA         | NA         | TDO2    |
| 60558  | ENSG00000151806 | 745.980851 | 0.18792096  | 0.09680667 | 0.0447907  | 0.13658891 | GUF1    |
| 341880 | ENSG00000151812 | 0.173733   | 0.01914545  | 0.38484597 | 0.78225479 | NA         | SLC35F4 |
| 2555   | ENSG00000151834 | 0          | NA          | NA         | NA         | NA         | GABRA2  |
| 26278  | ENSG00000151835 | 3012.18248 | -0.61693612 | 0.06943023 | 1.75E-19   | 6.36E-18   | SACS    |
| 729665 | ENSG00000151838 | 0.16735865 | 0.01897177  | 0.38482933 | 0.78225479 | NA         | CCDC175 |



|        |                 |            |             |            |            |            |          |
|--------|-----------------|------------|-------------|------------|------------|------------|----------|
| 5042   | ENSG00000151846 | 0          | NA          | NA         | NA         | NA         | PABPC3   |
| 55835  | ENSG00000151849 | 890.576781 | 0.15452848  | 0.1145105  | 0.15704549 | 0.34380314 | CENPJ    |
| 26272  | ENSG00000151876 | 68.2138353 | 0.18762143  | 0.27683445 | 0.3515535  | 0.58167138 | FBXO4    |
| 64417  | ENSG00000151881 | 102.217712 | 0.3618687   | 0.32044907 | 0.10476413 | 0.25791293 | TMEM267  |
| 56477  | ENSG00000151882 | 0          | NA          | NA         | NA         | NA         | CCL28    |
| 79668  | ENSG00000151883 | 647.60286  | 0.04585015  | 0.10026304 | 0.63639617 | 0.81722218 | PARP8    |
| 2674   | ENSG00000151892 | 34.5026604 | 0.54747131  | 0.45128092 | 0.04066919 | 0.12692727 | GFRA1    |
| 143384 | ENSG00000151893 | 1362.02754 | -0.0545239  | 0.08080479 | 0.48718119 | 0.70702032 | CACUL1   |
| 667    | ENSG00000151914 | 5724.095   | 0.28866969  | 0.06857832 | 1.83E-05   | 0.00016581 | DST      |
| 221336 | ENSG00000151917 | 106.093206 | 0.03269966  | 0.23432414 | 0.86187344 | 0.93871152 | BEND6    |
| 7073   | ENSG00000151923 | 1844.3605  | -0.10943603 | 0.07892887 | 0.15586211 | 0.34203123 | TIAL1    |
| 9531   | ENSG00000151929 | 304.371164 | 0.06798305  | 0.14715496 | 0.61774348 | 0.80430703 | BAG3     |
| 144423 | ENSG00000151948 | 5.68429783 | 1.59813158  | 1.72513822 | 0.00797517 | 0.03441221 | GLT1D1   |
| 121256 | ENSG00000151952 | 0          | NA          | NA         | NA         | NA         | TMEM132D |
| 166863 | ENSG00000151962 | 0          | NA          | NA         | NA         | NA         | RBM46    |
| NA     | ENSG00000151963 | 0.173733   | 0.01914545  | 0.38484597 | 0.78225479 | NA         | ZNF37CP  |
| 29970  | ENSG00000151967 | 1882.76643 | 0.51513765  | 0.08309505 | 2.18E-10   | 4.05E-09   | SCHIP1   |
| 84539  | ENSG00000152034 | 0          | NA          | NA         | NA         | NA         | MCHR2    |
| 23704  | ENSG00000152049 | 0.55157499 | 0.01184175  | 0.38326009 | 0.75076895 | NA         | KCNE4    |
| 130340 | ENSG00000152056 | 95.1864567 | 0.14901441  | 0.21957608 | 0.41030527 | 0.63815925 | AP1S3    |
| 9910   | ENSG00000152061 | 418.306379 | -0.17274519 | 0.15338735 | 0.21861557 | 0.43050004 | RABGAP1L |
| 91409  | ENSG00000152076 | 188.571013 | 0.53358152  | 0.19675862 | 0.00214136 | 0.01134469 | CCDC74B  |
| 148534 | ENSG00000152078 | 192.248734 | -0.1294197  | 0.16931118 | 0.39308045 | 0.62215525 | TLCD4    |
| 80097  | ENSG00000152082 | 2911.01149 | 0.01322421  | 0.06556614 | 0.84047006 | 0.92760529 | MZT2B    |
| 112714 | ENSG00000152086 | 9.31314226 | 0.03801839  | 0.34324449 | 0.81252298 | 0.91507108 | TUBA3E   |
| 460    | ENSG00000152092 | 242.942924 | -1.35847589 | 0.17217785 | 2.77E-16   | 8.20E-15   | ASTN1    |
| 653275 | ENSG00000152093 | 0          | NA          | NA         | NA         | NA         | CFC1B    |
| 130074 | ENSG00000152102 | 5653.819   | 0.04785081  | 0.04949745 | 0.32995163 | 0.55861736 | FAM168B  |
| 5784   | ENSG00000152104 | 235.381172 | 3.10269057  | 0.19089245 | 1.65E-60   | 2.20E-58   | PTPN14   |
| 150776 | ENSG00000152117 | 580.297242 | 0.35974084  | 0.10300272 | 0.00027987 | 0.00191934 | SMPD4BP  |
| 4249   | ENSG00000152127 | 4783.7224  | -0.37280456 | 0.05855483 | 1.04E-10   | 2.00E-09   | MGAT5    |
| 81615  | ENSG00000152128 | 20.0202864 | -0.27087578 | 0.39098143 | 0.1927605  | 0.3952427  | TMEM163  |
| 253635 | ENSG00000152133 | 669.088315 | -0.29395071 | 0.10728838 | 0.00417955 | 0.02002468 | GPATCH11 |
| 26353  | ENSG00000152137 | 29.1107337 | 1.30284536  | 0.47814331 | 0.00045416 | 0.00297084 | HSPB8    |
| 79833  | ENSG00000152147 | 629.091071 | -0.35527608 | 0.13070899 | 0.00375302 | 0.01828136 | GEMIN6   |
| 130733 | ENSG00000152154 | 53.4589305 | 0.0172993   | 0.25601981 | 0.92955871 | 0.97060391 | TMEM178A |
| 5457   | ENSG00000152192 | 42.3554163 | 1.82673606  | 0.39670138 | 2.78E-07   | 3.46E-06   | POU4F1   |
| 79596  | ENSG00000152193 | 419.128581 | -0.46024368 | 0.11793455 | 4.13E-05   | 0.00034578 | OBI1     |

|        |                 |            |             |            |            |            |          |
|--------|-----------------|------------|-------------|------------|------------|------------|----------|
| 57105  | ENSG00000152207 | 3.09894292 | 0.19911197  | 0.46106089 | 0.005882   | 0.02671679 | CYSLTR2  |
| 2895   | ENSG00000152208 | 4.48488173 | -0.05289128 | 0.37660303 | 0.56958776 | 0.77026932 | GRID2    |
| 115761 | ENSG00000152213 | 0.18922458 | 0.01954053  | 0.38488496 | 0.78225479 | NA         | ARL11    |
| 6014   | ENSG00000152214 | 183.975293 | -3.24108829 | 0.2571336  | 1.38E-37   | 9.95E-36   | RIT2     |
| 26040  | ENSG00000152217 | 623.243151 | 0.04159265  | 0.11748859 | 0.71100623 | 0.86118643 | SETBP1   |
| 120534 | ENSG00000152219 | 520.484799 | -0.4565219  | 0.12157574 | 7.57E-05   | 0.00059484 | ARL14EP  |
| 57724  | ENSG00000152223 | 822.555514 | 0.21006095  | 0.10867141 | 0.04333369 | 0.13334089 | EPG5     |
| 9050   | ENSG00000152229 | 103.407947 | 0.27542747  | 0.24189856 | 0.15486802 | 0.34030142 | PSTPIP2  |
| 498    | ENSG00000152234 | 8255.29185 | -0.11745257 | 0.05111426 | 0.02033136 | 0.0738375  | ATP5F1A  |
| 115106 | ENSG00000152240 | 574.108467 | -0.07107364 | 0.10786954 | 0.49025524 | 0.70981553 | HAUS1    |
| 147339 | ENSG00000152242 | 638.211665 | -0.1289926  | 0.10755267 | 0.21044269 | 0.41911091 | C18orf25 |
| 57405  | ENSG00000152253 | 366.418335 | -0.19382669 | 0.15635319 | 0.17351353 | 0.36653625 | SPC25    |
| 57818  | ENSG00000152254 | 1.83907284 | -0.09192542 | 0.39288796 | 0.22828405 | NA         | G6PC2    |
| 5163   | ENSG00000152256 | 502.431469 | 0.28660185  | 0.18870417 | 0.082495   | 0.21632312 | PDK1     |
| 5741   | ENSG00000152266 | 0          | NA          | NA         | NA         | NA         | PTH      |
| 5140   | ENSG00000152270 | 993.501326 | 0.45048086  | 0.10908201 | 1.65E-05   | 0.00015067 | PDE3B    |
| 83439  | ENSG00000152284 | 283.218259 | 1.32839781  | 0.15043175 | 1.01E-19   | 3.70E-18   | TCF7L1   |
| 10618  | ENSG00000152291 | 2996.64583 | -0.2271973  | 0.06460091 | 0.00035368 | 0.00237143 | TGOLN2   |
| 284948 | ENSG00000152292 | 4.71412    | 0.01781107  | 0.36244919 | 0.8865118  | 0.95015905 | SH2D6    |
| 56659  | ENSG00000152315 | 0.81358106 | -0.00736337 | 0.3808088  | 0.89651778 | NA         | KCNK13   |
| 127933 | ENSG00000152332 | 1717.05637 | -0.29592609 | 0.09255466 | 0.0009504  | 0.00567269 | UHMK1    |
| 83734  | ENSG00000152348 | 225.166528 | 0.01391122  | 0.17514919 | 0.93016492 | 0.97093028 | ATG10    |
| 134359 | ENSG00000152359 | 352.561419 | 0.01820612  | 0.13532396 | 0.88660267 | 0.95020511 | POC5     |
| 6695   | ENSG00000152377 | 5075.12994 | -2.27921588 | 0.07684656 | 1.13E-194  | 2.25E-191  | SPOCK1   |
| 167555 | ENSG00000152380 | 30.0050296 | 0.14051459  | 0.3028057  | 0.4788699  | 0.70038424 | FAM151B  |
| 117143 | ENSG00000152382 | 526.210867 | -0.09553638 | 0.11596268 | 0.38606619 | 0.61517574 | TADA1    |
| 2977   | ENSG00000152402 | 2.22571534 | -0.03058065 | 0.37471713 | 0.73958904 | NA         | GUCY1A2  |
| 143884 | ENSG00000152404 | 193.127114 | 0.091635    | 0.15989826 | 0.52634299 | 0.73825698 | CWF19L2  |
| 133746 | ENSG00000152409 | 655.968033 | -0.16985272 | 0.09756316 | 0.07125267 | 0.19407647 | JMY      |
| 9456   | ENSG00000152413 | 328.165862 | 0.08495442  | 0.19397384 | 0.61286459 | 0.80067344 | HOMER1   |
| 7518   | ENSG00000152422 | 141.576495 | -0.48966225 | 0.20715497 | 0.00640377 | 0.02865375 | XRCC4    |
| 66037  | ENSG00000152430 | 1.5016155  | 0.04242929  | 0.3822091  | 0.53699502 | NA         | BOLL     |
| 284306 | ENSG00000152433 | 61.407801  | -0.30151381 | 0.29797458 | 0.15723164 | 0.34400923 | ZNF547   |
| 374928 | ENSG00000152439 | 169.901622 | 0.44023557  | 0.20829108 | 0.0139772  | 0.05450228 | ZNF773   |
| 284309 | ENSG00000152443 | 578.4712   | 0.181612    | 0.116816   | 0.10196723 | 0.25294197 | ZNF776   |
| 10172  | ENSG00000152454 | 148.085638 | 0.04809618  | 0.17332095 | 0.7571855  | 0.88697677 | ZNF256   |
| 79723  | ENSG00000152455 | 521.212683 | -0.54673442 | 0.14098582 | 3.46E-05   | 0.00029399 | SUV39H2  |
| 64421  | ENSG00000152457 | 362.292408 | -0.50300702 | 0.16956938 | 0.00106949 | 0.00625183 | DCLRE1C  |

|        |                 |            |             |            |            |            |          |
|--------|-----------------|------------|-------------|------------|------------|------------|----------|
| 55301  | ENSG00000152463 | 0.173124   | -0.01911262 | 0.38486262 | 0.84537521 | NA         | OLAH     |
| 10557  | ENSG00000152464 | 180.529945 | -0.20012871 | 0.17653398 | 0.20092173 | 0.40615916 | RPP38    |
| 9397   | ENSG00000152465 | 350.660001 | 0.11146557  | 0.14776541 | 0.41402335 | 0.64129366 | NMT2     |
| 284312 | ENSG00000152467 | 31.5955776 | -0.15476051 | 0.30946217 | 0.43542039 | 0.66055517 | ZSCAN1   |
| 116412 | ENSG00000152475 | 66.5743725 | 0.3805402   | 0.26428938 | 0.06578335 | 0.18330641 | ZNF837   |
| 219333 | ENSG00000152484 | 747.112834 | -0.28844774 | 0.09666773 | 0.00196453 | 0.01053412 | USP12    |
| 152137 | ENSG00000152492 | 1413.11087 | 0.11331391  | 0.0876759  | 0.18353099 | 0.38180295 | CCDC50   |
| 814    | ENSG00000152495 | 2680.85821 | 0.20837593  | 0.08317172 | 0.00996434 | 0.04135825 | CAMK4    |
| 55521  | ENSG00000152503 | 400.524163 | -0.09239652 | 0.11876032 | 0.41219409 | 0.64000085 | TRIM36   |
| 678    | ENSG00000152518 | 933.973462 | 0.48166712  | 0.08537081 | 7.14E-09   | 1.09E-07   | ZFP36L2  |
| 255967 | ENSG00000152520 | 596.865541 | -0.04346339 | 0.10310698 | 0.65810403 | 0.83032012 | PAN3     |
| 130271 | ENSG00000152527 | 169.057735 | 1.65972839  | 0.23783638 | 2.05E-13   | 4.89E-12   | PLEKHH2  |
| 5213   | ENSG00000152556 | 2750.1506  | -0.10176611 | 0.07468217 | 0.16418674 | 0.35357266 | PFKM     |
| 114908 | ENSG00000152558 | 2733.21472 | -0.0662926  | 0.08056154 | 0.39930139 | 0.62809321 | TMEM123  |
| 2893   | ENSG00000152578 | 175.130663 | -0.70224324 | 0.26143116 | 0.00131893 | 0.00750219 | GRIA4    |
| 285313 | ENSG00000152580 | 0.173733   | 0.01914545  | 0.38484597 | 0.78225479 | NA         | IGSF10   |
| 79925  | ENSG00000152582 | 45.1201083 | 0.74256456  | 0.4626859  | 0.01236528 | 0.04945116 | SPEF2    |
| 8404   | ENSG00000152583 | 6.49238021 | 0.08286509  | 0.37961664 | 0.42319763 | 0.64917034 | SPARCL1  |
| 1834   | ENSG00000152591 | 0.85900754 | 0.04865624  | 0.38843866 | 0.27179449 | NA         | DSPP     |
| 1758   | ENSG00000152592 | 0.37844916 | 0.02407552  | 0.3854191  | 0.60038877 | NA         | DMP1     |
| 56955  | ENSG00000152595 | 0          | NA          | NA         | NA         | NA         | MEPE     |
| 4154   | ENSG00000152601 | 1171.61917 | 0.25836649  | 0.07793353 | 0.00067678 | 0.00419604 | MBNL1    |
| 133690 | ENSG00000152611 | 0          | NA          | NA         | NA         | NA         | CAPSL    |
| 133686 | ENSG00000152620 | 544.450331 | 0.28677911  | 0.13764775 | 0.02520427 | 0.08768238 | NADK2    |
| 23171  | ENSG00000152642 | 580.097609 | -0.30173088 | 0.10321631 | 0.00232426 | 0.0121703  | GPD1L    |
| 2697   | ENSG00000152661 | 57.8179949 | 6.70993273  | 0.84467998 | 4.99E-15   | 1.37E-13   | GJA1     |
| 10309  | ENSG00000152669 | 0.15069912 | -0.01848503 | 0.38480575 | 0.84537521 | NA         | CCNO     |
| 54514  | ENSG00000152670 | 0.34058028 | 0.00242265  | 0.38338108 | 0.96455862 | NA         | DDX4     |
| 165530 | ENSG00000152672 | 32.7457456 | 0.23920866  | 0.34508972 | 0.2535572  | 0.47391189 | CLEC4F   |
| 55676  | ENSG00000152683 | 1144.79981 | 0.0577092   | 0.08910694 | 0.50579784 | 0.72177288 | SLC30A6  |
| 53918  | ENSG00000152684 | 435.171479 | -0.04578896 | 0.14163597 | 0.72675972 | 0.86949966 | PELO     |
| 25780  | ENSG00000152689 | 1.10600457 | 0.04824209  | 0.38612995 | 0.33928934 | NA         | RASGRP3  |
| 51128  | ENSG00000152700 | 445.82993  | -0.2320982  | 0.16037581 | 0.10999432 | 0.26710984 | SAR1B    |
| 347732 | ENSG00000152705 | 9.71262777 | 0.15898587  | 0.38192542 | 0.32921681 | 0.55775099 | CATSPER3 |
| 160897 | ENSG00000152749 | 481.832901 | -0.20572605 | 0.10916551 | 0.04860781 | 0.14580805 | GPR180   |
| 200132 | ENSG00000152760 | 0          | NA          | NA         | NA         | NA         | DYNLT5   |
| 79819  | ENSG00000152763 | 19.363678  | 0.1195935   | 0.34438403 | 0.50150048 | 0.71844678 | DNAI4    |
| 118932 | ENSG00000152766 | 0          | NA          | NA         | NA         | NA         | ANKRD22  |

|           |                 |            |             |            |            |            |          |
|-----------|-----------------|------------|-------------|------------|------------|------------|----------|
| 10160     | ENSG00000152767 | 3441.40824 | -7.50E-05   | 0.09353093 | 0.99881449 | 0.99957022 | FARP1    |
| 24138     | ENSG00000152778 | 284.912673 | -0.7126277  | 0.15568178 | 9.91E-07   | 1.12E-05   | IFIT5    |
| 387700    | ENSG00000152779 | 3.5042049  | -0.11197774 | 0.39396866 | 0.27210415 | 0.49550677 | SLC16A12 |
| 53354     | ENSG00000152782 | 395.276087 | -0.27964997 | 0.13509148 | 0.02649265 | 0.09108817 | PANK1    |
| 56978     | ENSG00000152784 | 287.928718 | 0.32928495  | 0.15963853 | 0.02331904 | 0.08241002 | PRDM8    |
| 651       | ENSG00000152785 | 0          | NA          | NA         | NA         | NA         | BMP3     |
| 9987      | ENSG00000152795 | 6879.68117 | 0.21525378  | 0.07680272 | 0.0041899  | 0.02006944 | HNRNPDL  |
| 3087      | ENSG00000152804 | 33.8305926 | -0.01635105 | 0.29269434 | 0.92984251 | 0.97064482 | HHEX     |
| 7402      | ENSG00000152818 | 93.8904251 | -0.1074452  | 0.23381833 | 0.562639   | 0.7656036  | UTRN     |
| 2911      | ENSG00000152822 | 18.426401  | -0.38030531 | 0.52553957 | 0.07788049 | 0.20726343 | GRM1     |
| 5796      | ENSG00000152894 | 4.5035961  | 5.13595977  | 2.80435387 | 0.00052059 | 0.00334038 | PTPRK    |
| 9453      | ENSG00000152904 | 944.83393  | 0.04493367  | 0.08455515 | 0.58688615 | 0.78237765 | GGPS1    |
| 85445     | ENSG00000152910 | 4.77519633 | 0.15945732  | 0.40407582 | 0.23284036 | 0.4497666  | CNTNAP4  |
| 51351     | ENSG00000152926 | 3199.05991 | 0.62605925  | 0.07566941 | 3.78E-17   | 1.18E-15   | ZNF117   |
| 109504726 | ENSG00000152926 | 3199.05991 | 0.62605925  | 0.07566941 | 3.78E-17   | 1.18E-15   | ZNF117   |
| 25859     | ENSG00000152931 | 18.9638994 | 1.77925774  | 0.626918   | 0.00022717 | 0.00159256 | PART1    |
| 115827    | ENSG00000152932 | 897.828208 | -1.31793673 | 0.16973051 | 7.09E-16   | 2.03E-14   | RAB3C    |
| 160492    | ENSG00000152936 | 72.036727  | -1.33838215 | 0.31175158 | 1.43E-06   | 1.58E-05   | LMNTD1   |
| 153562    | ENSG00000152939 | 0.49552866 | -0.01729184 | 0.38338507 | 0.74005398 | NA         | MARVELD2 |
| 5884      | ENSG00000152942 | 817.586609 | 0.03095566  | 0.11553143 | 0.77968823 | 0.89925062 | RAD17    |
| 9412      | ENSG00000152944 | 433.006324 | -0.04706743 | 0.13905783 | 0.71544077 | 0.86274919 | MED21    |
| 5352      | ENSG00000152952 | 1.47022721 | 0.00275908  | 0.37913342 | 0.89081549 | NA         | PLOD2    |
| 55351     | ENSG00000152953 | 1.50394928 | 0.02043922  | 0.37890699 | 0.77464689 | NA         | STK32B   |
| 140767    | ENSG00000152954 | 475.263251 | -1.6384859  | 0.12676115 | 2.58E-39   | 1.96E-37   | NRSN1    |
| 152789    | ENSG00000152969 | 209.817797 | -1.55975262 | 0.17191805 | 9.53E-21   | 3.71E-19   | JAKMIP1  |
| 7545      | ENSG00000152977 | 418.404973 | 0.35654093  | 0.1284077  | 0.003156   | 0.01580388 | ZIC1     |
| 166647    | ENSG00000152990 | 2092.03878 | 0.38669524  | 0.08907157 | 7.80E-06   | 7.57E-05   | ADGRA3   |
| 1360      | ENSG00000153002 | 37.5185997 | 0.3188303   | 0.34522757 | 0.15142196 | 0.33539121 | CPB1     |
| 285672    | ENSG00000153006 | 495.242642 | -0.02789952 | 0.14420312 | 0.83341438 | 0.92419724 | SREK1IP1 |
| 55203     | ENSG00000153012 | 0          | NA          | NA         | NA         | NA         | LGI2     |
| 10283     | ENSG00000153015 | 381.295404 | 0.00561566  | 0.12888605 | 0.96408896 | 0.98577354 | CWC27    |
| 3140      | ENSG00000153029 | 4.10298545 | 0.08366457  | 0.38565803 | 0.37577107 | 0.60489233 | MR1      |
| 6728      | ENSG00000153037 | 630.120225 | -0.03293353 | 0.10505801 | 0.74247786 | 0.87870936 | SRP19    |
| 64946     | ENSG00000153044 | 875.5901   | 0.124991    | 0.10514097 | 0.21632846 | 0.42723041 | CENPH    |
| 9425      | ENSG00000153046 | 480.197092 | 0.14235834  | 0.1318859  | 0.25078379 | 0.47069581 | CDYL     |
| 23589     | ENSG00000153048 | 2376.2907  | -0.05226921 | 0.08257104 | 0.51578814 | 0.73002247 | CARHSP1  |
| 146279    | ENSG00000153060 | 32.154996  | -0.02295696 | 0.28605511 | 0.90282183 | 0.95739939 | TEKT5    |
| 55024     | ENSG00000153064 | 0          | NA          | NA         | NA         | NA         | BANK1    |

|           |                 |            |             |            |            |            |          |
|-----------|-----------------|------------|-------------|------------|------------|------------|----------|
| 51061     | ENSG00000153066 | 342.315981 | 0.46182681  | 0.13707466 | 0.00031888 | 0.00216365 | TXNDC11  |
| 1601      | ENSG00000153071 | 0          | NA          | NA         | NA         | NA         | DAB2     |
| 112267931 | ENSG00000153071 | 0          | NA          | NA         | NA         | NA         | DAB2     |
| 130013    | ENSG00000153086 | 4.23372703 | -0.09011032 | 0.38490387 | 0.38079931 | 0.60981987 | ACMSD    |
| 55289     | ENSG00000153093 | 43.166748  | 0.12591529  | 0.27398235 | 0.52379947 | 0.73661622 | ACOXL    |
| 10018     | ENSG00000153094 | 1918.88667 | 0.12424256  | 0.08217119 | 0.1215202  | 0.28804788 | BCL2L11  |
| 64682     | ENSG00000153107 | 1600.74874 | -0.08696789 | 0.09085224 | 0.32453487 | 0.55221149 | ANAPC1   |
| 831       | ENSG00000153113 | 1007.56576 | 0.5056576   | 0.08818957 | 3.88E-09   | 6.16E-08   | CAST     |
| 60592     | ENSG00000153130 | 721.471313 | -0.28600522 | 0.13912374 | 0.02682958 | 0.09202955 | SCOC     |
| 1047      | ENSG00000153132 | 795.5065   | -0.07102611 | 0.09496975 | 0.43960434 | 0.66481822 | CLGN     |
| 1070      | ENSG00000153140 | 507.364758 | -0.2557242  | 0.13424473 | 0.04127482 | 0.12847387 | CETN3    |
| 8467      | ENSG00000153147 | 3792.85329 | -0.11316773 | 0.06196923 | 0.06367444 | 0.17916619 | SMARCA5  |
| 221711    | ENSG00000153157 | 223.569649 | 0.27153824  | 0.17041612 | 0.07528911 | 0.20204732 | SYCP2L   |
| 654       | ENSG00000153162 | 0.173733   | 0.01914545  | 0.38484597 | 0.78225479 | NA         | BMP6     |
| 653489    | ENSG00000153165 | 10.8845418 | 0.01907129  | 0.33826423 | 0.90847576 | 0.9602642  | RGPD3    |
| 283349    | ENSG00000153179 | 678.999016 | -0.0990967  | 0.11057885 | 0.34842114 | 0.57911259 | RASSF3   |
| 3192      | ENSG00000153187 | 19288.1974 | -0.06243625 | 0.05849448 | 0.27964111 | 0.50414172 | HNRNPU   |
| 5903      | ENSG00000153201 | 2669.03668 | -0.16300258 | 0.06783815 | 0.01450804 | 0.05608721 | RANBP2   |
| 25909     | ENSG00000153207 | 3304.37776 | -0.0193936  | 0.08703505 | 0.81809179 | 0.9171248  | AHCTF1   |
| 10461     | ENSG00000153208 | 324.481427 | 0.36424924  | 0.1505908  | 0.00850562 | 0.03630616 | MERTK    |
| 84910     | ENSG00000153214 | 237.78131  | 0.20553359  | 0.16509444 | 0.16771937 | 0.35871254 | TMEM87B  |
| 343170    | ENSG00000153230 | 0          | NA          | NA         | NA         | NA         | OR14K1   |
| 5801      | ENSG00000153233 | 53.3060906 | 0.22455763  | 0.27457193 | 0.2686655  | 0.49159121 | PTPRR    |
| 4929      | ENSG00000153234 | 1.40774761 | 0.09918123  | 0.40153846 | 0.07494634 | NA         | NR4A2    |
| 130940    | ENSG00000153237 | 3.2868938  | 0.11267332  | 0.39782648 | 0.20614898 | 0.41317262 | CCDC148  |
| 22925     | ENSG00000153246 | 0          | NA          | NA         | NA         | NA         | PLA2R1   |
| 5937      | ENSG00000153250 | 1065.00325 | 0.38577397  | 0.08783857 | 6.20E-06   | 6.12E-05   | RBMS1    |
| 6328      | ENSG00000153253 | 948.546945 | -0.48165178 | 0.08882433 | 2.46E-08   | 3.52E-07   | SCN3A    |
| 55079     | ENSG00000153266 | 0          | NA          | NA         | NA         | NA         | FEZF2    |
| 10225     | ENSG00000153283 | 0.18922458 | 0.01954053  | 0.38488496 | 0.78225479 | NA         | CD96     |
| 9481      | ENSG00000153291 | 15.6538075 | -0.00964401 | 0.35136435 | 0.94212499 | 0.97606984 | SLC25A27 |
| 266977    | ENSG00000153292 | 0          | NA          | NA         | NA         | NA         | ADGRF1   |
| 221393    | ENSG00000153294 | 0          | NA          | NA         | NA         | NA         | ADGRF4   |
| 79981     | ENSG00000153303 | 20.2094069 | -1.27492972 | 0.66202634 | 0.00286877 | 0.01459023 | FRMD1    |
| 51571     | ENSG00000153310 | 1573.18476 | -0.02223023 | 0.08433345 | 0.78630273 | 0.90287569 | CYRIB    |
| 50807     | ENSG00000153317 | 3785.73849 | 0.24254132  | 0.05543951 | 9.64E-06   | 9.17E-05   | ASAP1    |
| 22878     | ENSG00000153339 | 707.198393 | -0.24001189 | 0.10521432 | 0.01728435 | 0.06482447 | TRAPPC8  |
| 153643    | ENSG00000153347 | 0.18922458 | 0.01954053  | 0.38488496 | 0.78225479 | NA         | FAM81B   |

|           |                 |            |             |            |            |            |           |
|-----------|-----------------|------------|-------------|------------|------------|------------|-----------|
| NA        | ENSG00000153363 | 231.060984 | -0.25333429 | 0.20547485 | 0.14658609 | 0.32769217 | LINC00467 |
| 125476    | ENSG00000153391 | 213.323124 | -0.06545814 | 0.15739091 | 0.64754602 | 0.82430661 | INO80C    |
| 79888     | ENSG00000153395 | 2026.35117 | -0.05756097 | 0.09179673 | 0.51710434 | 0.73098795 | LPCAT1    |
| 153478    | ENSG00000153404 | 1322.55172 | 0.63421799  | 0.08328342 | 7.44E-15   | 2.00E-13   | PLEKHG4B  |
| 57407     | ENSG00000153406 | 752.919472 | 0.02778113  | 0.09774682 | 0.76974241 | 0.89412702 | NMRAL1    |
| 124402    | ENSG00000153443 | 460.694292 | 0.07077109  | 0.11658633 | 0.52470766 | 0.73747521 | UBALD1    |
| 146556    | ENSG00000153446 | 1.14331157 | -0.03331457 | 0.38177304 | 0.59882389 | NA         | C16orf89  |
| 26175     | ENSG00000153485 | 204.857204 | -0.3867033  | 0.16820312 | 0.01080362 | 0.04417638 | TMEM251   |
| 3621      | ENSG00000153487 | 514.920206 | 0.06665057  | 0.11870157 | 0.55546601 | 0.7613434  | ING1      |
| 121793    | ENSG00000153495 | 0.51610347 | 0.03116049  | 0.38605724 | 0.47723758 | NA         | TEX29     |
| 122258    | ENSG00000153498 | 0          | NA          | NA         | NA         | NA         | SPACA7    |
| 113622    | ENSG00000153531 | 204.449508 | -0.38350691 | 0.16932898 | 0.01187985 | 0.04786922 | ADPRHL1   |
| 101928841 | ENSG00000153531 | 204.449508 | -0.38350691 | 0.16932898 | 0.01187985 | 0.04786922 | ADPRHL1   |
| 112616    | ENSG00000153551 | 462.673629 | 0.27317458  | 0.12074377 | 0.01684464 | 0.06347534 | CMTM7     |
| 25827     | ENSG00000153558 | 188.300161 | 0.03456151  | 0.1642315  | 0.81710568 | 0.91675019 | FBXL2     |
| 7342      | ENSG00000153560 | 1901.21295 | -0.01072432 | 0.06661965 | 0.86945383 | 0.94307645 | UBP1      |
| 64795     | ENSG00000153561 | 1613.68155 | -0.16026019 | 0.07141672 | 0.02220809 | 0.07918916 | RMND5A    |
| 925       | ENSG00000153563 | 75.5635511 | -0.27000976 | 0.24643936 | 0.16589917 | 0.35616336 | CD8A      |
| 22934     | ENSG00000153574 | 550.684296 | -0.16643149 | 0.10977655 | 0.11218568 | 0.27107099 | RPIA      |
| 100132565 | ENSG00000153684 | 0          | NA          | NA         | NA         | NA         | GOLGA8F   |
| 5789      | ENSG00000153707 | 311.204702 | 1.88098284  | 0.15544634 | 7.80E-35   | 5.26E-33   | PTPRD     |
| 286343    | ENSG00000153714 | 62.0423782 | 0.54535055  | 0.29449126 | 0.01682128 | 0.06339936 | LURAP1L   |
| 154043    | ENSG00000153721 | 904.321283 | 0.51932555  | 0.09057231 | 3.75E-09   | 5.97E-08   | CNKS3R3   |
| 2960      | ENSG00000153767 | 342.887746 | 0.25314764  | 0.13039829 | 0.03846801 | 0.12197623 | GTF2E1    |
| 10428     | ENSG00000153774 | 1000.73734 | -0.17781865 | 0.08349079 | 0.02887369 | 0.09737446 | CFDP1     |
| 90316     | ENSG00000153779 | 14.6606986 | 0.39329554  | 0.49662526 | 0.08804854 | 0.22670443 | TGIF2LX   |
| 55625     | ENSG00000153786 | 1213.95741 | 0.0498164   | 0.08767105 | 0.56033635 | 0.76415299 | ZDHHC7    |
| 339145    | ENSG00000153789 | 3.25594014 | -0.09457828 | 0.38571813 | 0.35989876 | 0.58982252 | CIBAR2    |
| 136895    | ENSG00000153790 | 95.1252596 | 0.93112244  | 0.27741939 | 9.87E-05   | 0.00075301 | C7orf31   |
| 9407      | ENSG00000153802 | 0.50765625 | 0.01580256  | 0.38317427 | 0.73437663 | NA         | TMRSS11D  |
| 221895    | ENSG00000153814 | 422.575724 | -0.66612932 | 0.12711987 | 3.97E-08   | 5.54E-07   | JAZF1     |
| 80790     | ENSG00000153815 | 1625.13066 | -0.13427796 | 0.07981477 | 0.08495624 | 0.22105335 | CMIP      |
| 80309     | ENSG00000153820 | 0          | NA          | NA         | NA         | NA         | SPHKAP    |
| 3773      | ENSG00000153822 | 0          | NA          | NA         | NA         | NA         | KCNJ16    |
| 55022     | ENSG00000153823 | 0          | NA          | NA         | NA         | NA         | PID1      |
| 9320      | ENSG00000153827 | 4141.76946 | 0.01859987  | 0.07044964 | 0.78913167 | 0.90431308 | TRIP12    |
| 130888    | ENSG00000153832 | 51.3033795 | 0.49615     | 0.36854246 | 0.04504724 | 0.13726573 | FBXO36    |
| 1054      | ENSG00000153879 | 1272.50481 | -0.21930772 | 0.13409412 | 0.07975615 | 0.21084103 | CEBPG     |

|        |                 |            |             |            |            |            |          |
|--------|-----------------|------------|-------------|------------|------------|------------|----------|
| 79047  | ENSG00000153885 | 2314.37495 | 0.16361678  | 0.06716739 | 0.0133062  | 0.05243199 | KCTD15   |
| 148103 | ENSG00000153896 | 210.150763 | 0.14646566  | 0.16486009 | 0.32530508 | 0.55328357 | ZNF599   |
| 255231 | ENSG00000153898 | 0.18922458 | 0.01954053  | 0.38488496 | 0.78225479 | NA         | MCOLN2   |
| 163175 | ENSG00000153902 | 10.8800846 | 0.91457968  | 1.24824271 | 0.01427615 | 0.05540667 | LGI4     |
| 23576  | ENSG00000153904 | 3672.01731 | -0.85983278 | 0.05610983 | 9.39E-54   | 1.02E-51   | DDAH1    |
| 140890 | ENSG00000153914 | 2296.80887 | -0.10624956 | 0.07052446 | 0.12482169 | 0.29314184 | SREK1    |
| 1105   | ENSG00000153922 | 1281.84933 | -0.03440979 | 0.11082206 | 0.74433256 | 0.87963225 | CHD1     |
| 9629   | ENSG00000153923 | 0          | NA          | NA         | NA         | NA         | CLCA3P   |
| 162282 | ENSG00000153930 | 0.3411051  | 0.02362649  | 0.38535339 | 0.62410837 | NA         | ANKFN1   |
| 8526   | ENSG00000153933 | 358.75566  | 0.01921011  | 0.121403   | 0.86842333 | 0.94253385 | DGKE     |
| 9653   | ENSG00000153936 | 1004.12673 | -0.32612414 | 0.1006563  | 0.00075393 | 0.00461949 | HS2ST1   |
| 124540 | ENSG00000153944 | 6806.53892 | 0.14180834  | 0.07052756 | 0.04068126 | 0.12694498 | MSI2     |
| 781    | ENSG00000153956 | 2685.53885 | 0.67244011  | 0.07327167 | 1.13E-20   | 4.39E-19   | CACNA2D1 |
| 221302 | ENSG00000153975 | 265.962128 | 0.2019746   | 0.14903769 | 0.14085183 | 0.31892169 | ZUP1     |
| 9955   | ENSG00000153976 | 0.3000162  | -0.02294459 | 0.38527538 | 0.68644854 | NA         | HS3ST3A1 |
| 284161 | ENSG00000153982 | 191.527308 | -0.17064216 | 0.18723792 | 0.29541256 | 0.52199725 | GDPD1    |
| 116150 | ENSG00000153989 | 1419.31758 | -0.0810162  | 0.08798418 | 0.34351999 | 0.57383485 | NUS1     |
| 223117 | ENSG00000153993 | 15.1463558 | 0.30088617  | 0.42265879 | 0.15458874 | 0.33998898 | SEMA3D   |
| 5529   | ENSG00000154001 | 1414.04401 | -0.13183198 | 0.09355267 | 0.14549131 | 0.32597939 | PPP2R5E  |
| 127247 | ENSG00000154007 | 0          | NA          | NA         | NA         | NA         | ASB17    |
| 10750  | ENSG00000154016 | 4.69570198 | -0.18428473 | 0.43197956 | 0.10110552 | 0.25133862 | GRAP     |
| 125206 | ENSG00000154025 | 1.3617202  | -0.01344143 | 0.38019884 | 0.82593296 | NA         | SLC5A10  |
| 26289  | ENSG00000154027 | 29.5967475 | 0.27071347  | 0.37902162 | 0.19583561 | 0.39944263 | AK5      |
| 26256  | ENSG00000154040 | 214.142584 | -0.0932489  | 0.15052287 | 0.49809341 | 0.71599575 | CABYR    |
| 55364  | ENSG00000154059 | 717.00525  | -0.12975745 | 0.13197164 | 0.29366546 | 0.51992885 | IMPACT   |
| 147463 | ENSG00000154065 | 123.104545 | 2.21360995  | 0.23481247 | 3.10E-22   | 1.29E-20   | ANKRD29  |
| 135154 | ENSG00000154079 | 117.678902 | 0.34894883  | 0.2299157  | 0.0655154  | 0.18276512 | SDHAF4   |
| 83539  | ENSG00000154080 | 53.517635  | 0.72004073  | 0.36246827 | 0.00702677 | 0.03107002 | CHST9    |
| 7070   | ENSG00000154096 | 1999.56299 | -0.8259818  | 0.06826472 | 1.92E-34   | 1.27E-32   | THY1     |
| 123872 | ENSG00000154099 | 11.585145  | 0.03180038  | 0.34218655 | 0.84225381 | 0.92836346 | DNAAF1   |
| 404550 | ENSG00000154102 | 15.6146019 | 0.08479843  | 0.32808906 | 0.6409946  | 0.82014987 | C16orf74 |
| 219899 | ENSG00000154114 | 527.539202 | 0.01489884  | 0.11319726 | 0.89160991 | 0.95294622 | TBCEL    |
| 57338  | ENSG00000154118 | 1088.09907 | -1.14553142 | 0.08837961 | 2.32E-39   | 1.76E-37   | JPH3     |
| 56172  | ENSG00000154122 | 873.284188 | -0.16499418 | 0.14082439 | 0.20598398 | 0.4130923  | ANKH     |
| 90268  | ENSG00000154124 | 850.592501 | -0.2299478  | 0.11558653 | 0.03627586 | 0.11654835 | OTULIN   |
| 84959  | ENSG00000154127 | 22.2214461 | -1.39107394 | 0.68083732 | 0.0018972  | 0.01022282 | UBASH3B  |
| 54538  | ENSG00000154133 | 1.62328417 | 0.10558046  | 0.40389383 | 0.06055386 | NA         | ROBO4    |
| 64221  | ENSG00000154134 | 248.734038 | 0.37469819  | 0.17277696 | 0.0155986  | 0.05951467 | ROBO3    |

|        |                 |            |             |            |            |            |         |
|--------|-----------------|------------|-------------|------------|------------|------------|---------|
| 116337 | ENSG00000154143 | 0.16735865 | 0.01897177  | 0.38482933 | 0.78225479 | NA         | PANX3   |
| 84897  | ENSG00000154144 | 646.708208 | 0.21631112  | 0.09580603 | 0.01949979 | 0.0714584  | TBRG1   |
| 4900   | ENSG00000154146 | 239.353804 | -0.62365458 | 0.16694402 | 4.91E-05   | 0.00040257 | NRGN    |
| 54463  | ENSG00000154153 | 101.631589 | -0.15602764 | 0.21641799 | 0.3842216  | 0.61332018 | RETREG1 |
| 1010   | ENSG00000154162 | 0.15069912 | -0.01848503 | 0.38480575 | 0.84537521 | NA         | CDH12   |
| 2838   | ENSG00000154165 | 0.173124   | -0.01911262 | 0.38486262 | 0.84537521 | NA         | GPR15   |
| 9868   | ENSG00000154174 | 2457.25191 | -0.22578282 | 0.0672256  | 0.00063453 | 0.00396757 | TOMM70  |
| 25890  | ENSG00000154175 | 13.9692711 | 0.49001724  | 0.61819312 | 0.04918329 | 0.14717895 | ABI3BP  |
| 284    | ENSG00000154188 | 58.5307633 | -0.11860369 | 0.25572937 | 0.53740992 | 0.74759591 | ANGPT1  |
| 163720 | ENSG00000154198 | 0          | NA          | NA         | NA         | NA         | CYP4Z2P |
| 26207  | ENSG00000154217 | 1229.18818 | -0.0742624  | 0.07938732 | 0.33506869 | 0.56494141 | PITPNC1 |
| 200014 | ENSG00000154222 | 629.260469 | 0.19710604  | 0.10546473 | 0.05151274 | 0.1524482  | CC2D1B  |
| 204219 | ENSG00000154227 | 0.18922458 | 0.01954053  | 0.38488496 | 0.78225479 | NA         | CERS3   |
| 5578   | ENSG00000154229 | 3779.11618 | 1.61234295  | 0.06289476 | 4.76E-146  | 3.50E-143  | PRKCA   |
| 79705  | ENSG00000154237 | 927.393482 | -0.07403442 | 0.10156198 | 0.44878416 | 0.67234598 | LRRK1   |
| 201134 | ENSG00000154240 | 191.883427 | -0.00060262 | 0.18963077 | 0.99567662 | 0.99852582 | CEP112  |
| 64090  | ENSG00000154252 | 8.13749556 | 0.14147907  | 0.38183556 | 0.35109854 | 0.58132031 | GAL3ST2 |
| 10350  | ENSG00000154258 | 0          | NA          | NA         | NA         | NA         | ABCA9   |
| 23460  | ENSG00000154262 | 0          | NA          | NA         | NA         | NA         | ABCA6   |
| 10349  | ENSG00000154263 | 0          | NA          | NA         | NA         | NA         | ABCA10  |
| 23461  | ENSG00000154265 | 158.389753 | 1.51089891  | 0.24947336 | 1.04E-10   | 2.00E-09   | ABCA5   |
| 5169   | ENSG00000154269 | 0.62270811 | 0.03703505  | 0.3867132  | 0.3983139  | NA         | ENPP3   |
| 55286  | ENSG00000154274 | 1.8203124  | 0.04654439  | 0.38022014 | 0.56539705 | NA         | C4orf19 |
| 7345   | ENSG00000154277 | 9682.52632 | 0.39484563  | 0.06082316 | 4.70E-11   | 9.34E-10   | UCHL1   |
| 375056 | ENSG00000154305 | 2085.09455 | 0.50581179  | 0.09169905 | 1.37E-08   | 2.03E-07   | MIA3    |
| 84976  | ENSG00000154309 | 280.470777 | -0.07521049 | 0.13868004 | 0.5595112  | 0.76413192 | DISP1   |
| 23043  | ENSG00000154310 | 938.065121 | -1.15766732 | 0.11851297 | 1.67E-23   | 7.55E-22   | TNIK    |
| 157739 | ENSG00000154316 | 7.8809995  | -0.00380169 | 0.35217359 | 0.97638771 | 0.99184704 | TDH     |
| 83648  | ENSG00000154319 | 1314.48601 | -1.62011091 | 0.08953173 | 2.78E-74   | 4.93E-72   | FAM167A |
| 252969 | ENSG00000154328 | 346.092694 | -0.29695742 | 0.13718107 | 0.02008468 | 0.07316932 | NEIL2   |
| 5239   | ENSG00000154330 | 0          | NA          | NA         | NA         | NA         | PGM5    |
| 89780  | ENSG00000154342 | 0.35667843 | 0.02381704  | 0.38538106 | 0.61401837 | NA         | WNT3A   |
| 84033  | ENSG00000154358 | 4609.68497 | 0.10649032  | 0.09391788 | 0.24240513 | 0.46064214 | OBSCN   |
| 91694  | ENSG00000154359 | 191.44204  | 0.56388892  | 0.18610182 | 0.00073196 | 0.00450016 | LONRF1  |
| 81559  | ENSG00000154370 | 1416.71678 | 0.16121336  | 0.08177341 | 0.04340729 | 0.13349876 | TRIM11  |
| 55740  | ENSG00000154380 | 5110.93876 | -0.31757843 | 0.07930713 | 4.09E-05   | 0.00034276 | ENAH    |
| 5506   | ENSG00000154415 | 0          | NA          | NA         | NA         | NA         | PPP1R3A |
| 126731 | ENSG00000154429 | 1124.21955 | -0.37054087 | 0.0822499  | 3.80E-06   | 3.90E-05   | CCSAP   |



|        |                 |            |             |            |            |            |          |
|--------|-----------------|------------|-------------|------------|------------|------------|----------|
| 136991 | ENSG00000154438 | 0          | NA          | NA         | NA         | NA         | ASZ1     |
| 57630  | ENSG00000154447 | 332.790623 | 0.0236721   | 0.13939464 | 0.85646237 | 0.93595581 | SH3RF1   |
| 115362 | ENSG00000154451 | 2.41491726 | -0.13218935 | 0.40972206 | 0.11394106 | NA         | GBP5     |
| 9184   | ENSG00000154473 | 3080.51521 | 0.0521786   | 0.06668173 | 0.4288224  | 0.65462623 | BUB3     |
| 2849   | ENSG00000154478 | 0.173733   | 0.01914545  | 0.38484597 | 0.78225479 | NA         | GPR26    |
| 129881 | ENSG00000154479 | 3.0016387  | 0.04198037  | 0.37492165 | 0.66725212 | 0.83616392 | CCDC173  |
| 118856 | ENSG00000154485 | 15.7565101 | -0.05431097 | 0.32452159 | 0.75873248 | 0.88809749 | MMP21    |
| 118611 | ENSG00000154493 | 0.79261673 | -0.0452504  | 0.38782936 | 0.32594236 | NA         | C10orf90 |
| 388650 | ENSG00000154511 | 150.74338  | -0.22506601 | 0.18081174 | 0.15782404 | 0.34484696 | DIPK1A   |
| 518    | ENSG00000154518 | 1871.61172 | 0.13594662  | 0.08556948 | 0.10300196 | 0.25491514 | ATP5MC3  |
| 728577 | ENSG00000154529 | 13.7700498 | -0.33413581 | 0.47290277 | 0.11013688 | 0.26735784 | CNTNAP3B |
| 728239 | ENSG00000154545 | 72.0057152 | -0.27039925 | 0.49757892 | 0.06361559 | 0.1791022  | MAGED4   |
| 135295 | ENSG00000154548 | 336.167124 | -0.10600851 | 0.14822747 | 0.43681703 | 0.6619272  | SRSF12   |
| 27295  | ENSG00000154553 | 368.078549 | 1.51890124  | 0.18122115 | 3.87E-18   | 1.30E-16   | PDLIM3   |
| 8470   | ENSG00000154556 | 558.751079 | 0.54764374  | 0.10842143 | 1.53E-07   | 1.97E-06   | SORBS2   |
| 6921   | ENSG00000154582 | 828.373304 | -0.10618431 | 0.10666455 | 0.2985395  | 0.5253702  | ELOC     |
| 23643  | ENSG00000154589 | 0          | NA          | NA         | NA         | NA         | LY96     |
| NA     | ENSG00000154608 | 28.5482779 | -0.03106711 | 0.29633185 | 0.86827343 | 0.94247428 | CEP170P1 |
| 143471 | ENSG00000154611 | 0          | NA          | NA         | NA         | NA         | PSMA8    |
| 9087   | ENSG00000154620 | 0          | NA          | NA         | NA         | NA         | TMSB4Y   |
| 1525   | ENSG00000154639 | 439.612564 | 0.17289531  | 0.13654855 | 0.17504491 | 0.36892512 | CXADR    |
| 10950  | ENSG00000154640 | 419.76188  | 0.34745231  | 0.14216863 | 0.00842951 | 0.03605781 | BTG3     |
| 54149  | ENSG00000154642 | 283.424278 | 0.64119733  | 0.17989503 | 8.97E-05   | 0.00069156 | C21orf91 |
| 140578 | ENSG00000154645 | 0.98248796 | -0.02104553 | 0.38024242 | 0.74333687 | NA         | CHODL    |
| 5651   | ENSG00000154646 | 0          | NA          | NA         | NA         | NA         | TMPRSS15 |
| 4685   | ENSG00000154654 | 89.6299859 | 0.4124038   | 0.29625926 | 0.0601901  | 0.17165037 | NCAM2    |
| 91133  | ENSG00000154655 | 200.949092 | 0.69621144  | 0.169399   | 8.86E-06   | 8.49E-05   | L3MBTL4  |
| 5137   | ENSG00000154678 | 0          | NA          | NA         | NA         | NA         | PDE1C    |
| 27342  | ENSG00000154710 | 779.01583  | 0.1126992   | 0.09309087 | 0.21207451 | 0.4217258  | RABGEF1  |
| 54148  | ENSG00000154719 | 253.466962 | -0.06518861 | 0.1555128  | 0.64572154 | 0.82359463 | MRPL39   |
| 58494  | ENSG00000154721 | 311.138981 | 0.05899183  | 0.15567202 | 0.67907085 | 0.84320727 | JAM2     |
| 522    | ENSG00000154723 | 1730.25738 | -0.19361503 | 0.07105497 | 0.00548567 | 0.0251876  | ATP5PF   |
| 2551   | ENSG00000154727 | 960.124964 | -0.18498852 | 0.09028505 | 0.03459158 | 0.11230997 | GABPA    |
| 9510   | ENSG00000154734 | 660.289265 | 1.14533728  | 0.11983472 | 1.39E-22   | 5.93E-21   | ADAMTS1  |
| 11096  | ENSG00000154736 | 95.2567617 | 1.02038361  | 0.29153537 | 5.02E-05   | 0.00040965 | ADAMTS5  |
| 80746  | ENSG00000154743 | 322.634168 | 0.03057203  | 0.13736033 | 0.81269547 | 0.91516078 | TSEN2    |
| 146857 | ENSG00000154760 | 0          | NA          | NA         | NA         | NA         | SLFN13   |
| 7476   | ENSG00000154764 | 5.88239617 | -3.75127301 | 1.66297228 | 0.00095529 | 0.00569157 | WNT7A    |

|        |                 |            |             |            |            |            |           |
|--------|-----------------|------------|-------------|------------|------------|------------|-----------|
| 7508   | ENSG00000154767 | 1284.40125 | 0.16535583  | 0.07924926 | 0.03285258 | 0.10778817 | XPC       |
| 51244  | ENSG00000154781 | 443.651136 | 0.32135469  | 0.121463   | 0.00517914 | 0.02393528 | CCDC174   |
| 152273 | ENSG00000154783 | 8.50806756 | -0.39398195 | 0.62265816 | 0.04232171 | 0.13113584 | FGD5      |
| 201163 | ENSG00000154803 | 471.07173  | 0.20569694  | 0.11912068 | 0.06872193 | 0.18899959 | FLCN      |
| 285381 | ENSG00000154813 | 486.314226 | 0.10560549  | 0.12301894 | 0.36514002 | 0.59463005 | DPH3      |
| 92106  | ENSG00000154814 | 268.504996 | 0.12808543  | 0.13885572 | 0.32273603 | 0.55037672 | OXNAD1    |
| 23228  | ENSG00000154822 | 431.904953 | -0.326502   | 0.11920559 | 0.00384407 | 0.01863793 | PLCL2     |
| 30827  | ENSG00000154832 | 1401.82034 | 0.12878446  | 0.08730754 | 0.12967677 | 0.30129841 | CXXC1     |
| 220134 | ENSG00000154839 | 297.634745 | -0.28813386 | 0.13907538 | 0.02567419 | 0.08892737 | SKA1      |
| 9989   | ENSG00000154845 | 1266.78636 | -0.12698748 | 0.08831144 | 0.1388766  | 0.31565034 | PPP4R1    |
| 147495 | ENSG00000154856 | 53.8146661 | 0.19302466  | 0.30411649 | 0.34163949 | 0.57180671 | APCDD1    |
| 63895  | ENSG00000154864 | 0          | NA          | NA         | NA         | NA         | PIEZO2    |
| 284047 | ENSG00000154874 | 12.6196644 | 2.2988497   | 1.26844044 | 0.00156088 | 0.00868383 | CCDC144B  |
| 65258  | ENSG00000154889 | 205.732309 | -0.32290757 | 0.21399046 | 0.07291948 | 0.19718174 | MPPE1     |
| NA     | ENSG00000154898 | 41.4245895 | 0.08659263  | 0.29394081 | 0.65507681 | 0.82823884 | CCDC144CP |
| 124739 | ENSG00000154914 | 0          | NA          | NA         | NA         | NA         | USP43     |
| 51560  | ENSG00000154917 | 804.544123 | -0.06999307 | 0.11992928 | 0.53666462 | 0.74729267 | RAB6B     |
| 146956 | ENSG00000154920 | 781.26572  | 0.06575321  | 0.12528122 | 0.57951057 | 0.77706744 | EME1      |
| 2047   | ENSG00000154928 | 2.11109298 | 0.06576683  | 0.38390138 | 0.42383853 | NA         | EPHB1     |
| 84532  | ENSG00000154930 | 0          | NA          | NA         | NA         | NA         | ACSS1     |
| 91369  | ENSG00000154945 | 1966.64536 | -0.01730797 | 0.06620462 | 0.78996439 | 0.9043268  | ANKRD40   |
| 7566   | ENSG00000154957 | 83.1197074 | -0.0671189  | 0.22750688 | 0.71339186 | 0.86190557 | ZNF18     |
| 56934  | ENSG00000154975 | 1.05385652 | 0.04033127  | 0.38247713 | 0.5346697  | NA         | CA10      |
| 81552  | ENSG00000154978 | 1032.48443 | 0.0855332   | 0.08288853 | 0.29077493 | 0.51679428 | VOPPI     |
| 346288 | ENSG00000154997 | 0          | NA          | NA         | NA         | NA         | SEPTIN14  |
| 139322 | ENSG00000155008 | 424.897394 | -0.12647    | 0.12310883 | 0.27679787 | 0.50120195 | APOOL     |
| 27123  | ENSG00000155011 | 79.0768814 | 3.23421623  | 0.35254724 | 3.16E-21   | 1.24E-19   | DKK2      |
| 113612 | ENSG00000155016 | 390.683476 | 0.04041952  | 0.11574302 | 0.71500464 | 0.86271551 | CYP2U1    |
| 222967 | ENSG00000155026 | 6.07411942 | 0.35384898  | 0.59507559 | 0.03825009 | 0.12144053 | RSPH10B   |
| 80028  | ENSG00000155034 | 1564.50129 | -0.11537223 | 0.07124065 | 0.09897175 | 0.24743531 | FBXL18    |
| 129684 | ENSG00000155052 | 823.574436 | -1.69510761 | 0.10633822 | 2.54E-58   | 3.15E-56   | CNTNAP5   |
| 150696 | ENSG00000155066 | 44.7355485 | 0.76148836  | 0.38390992 | 0.00648879 | 0.0290015  | PROM2     |
| NA     | ENSG00000155070 | 1.91433091 | 0.04719228  | 0.38000272 | 0.56430486 | NA         | UNC93B2   |
| 221264 | ENSG00000155085 | 125.536856 | -0.10417943 | 0.20771083 | 0.55036063 | 0.75685555 | AK9       |
| 4956   | ENSG00000155087 | 0          | NA          | NA         | NA         | NA         | ODF1      |
| 7071   | ENSG00000155090 | 648.833952 | 0.06060329  | 0.11301706 | 0.57543462 | 0.7743233  | KLF10     |
| 5799   | ENSG00000155093 | 1491.82853 | -1.47966728 | 0.10179028 | 5.87E-49   | 5.62E-47   | PTPRN2    |
| 51582  | ENSG00000155096 | 4659.29378 | 0.28405567  | 0.06387262 | 6.32E-06   | 6.24E-05   | AZIN1     |

|        |                 |            |             |            |            |            |          |
|--------|-----------------|------------|-------------|------------|------------|------------|----------|
| 528    | ENSG00000155097 | 672.494571 | -0.31006027 | 0.15345243 | 0.02717338 | 0.09295171 | ATP6V1C1 |
| 55529  | ENSG00000155099 | 227.467672 | 0.0930537   | 0.14911311 | 0.49889591 | 0.71652634 | PIP4P2   |
| 51633  | ENSG00000155100 | 436.129801 | 0.03087497  | 0.13345522 | 0.80611801 | 0.9121533  | OTUD6B   |
| 23097  | ENSG00000155111 | 1395.71639 | -0.31596852 | 0.08052892 | 5.75E-05   | 0.00046237 | CDK19    |
| 112495 | ENSG00000155115 | 737.536229 | -0.13965008 | 0.09574745 | 0.13136546 | 0.30404473 | GTF3C6   |
| 158219 | ENSG00000155158 | 103.576596 | 0.35725364  | 0.27735454 | 0.08948172 | 0.22960648 | TTC39B   |
| 55326  | ENSG00000155189 | 1730.5469  | -0.46338428 | 0.07843346 | 1.54E-09   | 2.59E-08   | AGPAT5   |
| 64210  | ENSG00000155229 | 1728.19364 | 0.03690843  | 0.07101427 | 0.59801617 | 0.78960741 | MMS19    |
| 79544  | ENSG00000155249 | 0          | NA          | NA         | NA         | NA         | OR4K1    |
| 55361  | ENSG00000155252 | 805.542819 | -0.1819079  | 0.08880031 | 0.03438431 | 0.11181524 | PI4K2A   |
| 83742  | ENSG00000155254 | 602.534534 | -0.21680093 | 0.11337068 | 0.04417658 | 0.13529846 | MARVELD1 |
| 118813 | ENSG00000155256 | 896.186635 | -0.39588611 | 0.0980996  | 2.78E-05   | 0.00024158 | ZFYVE27  |
| 401647 | ENSG00000155265 | 420.622981 | -2.32613925 | 0.15811573 | 2.78E-50   | 2.79E-48   | GOLGA7B  |
| 27201  | ENSG00000155269 | 2.77736763 | -0.09708752 | 0.39307471 | 0.25923527 | 0.48076535 | GPR78    |
| 152992 | ENSG00000155275 | 225.885284 | -0.12477954 | 0.17319799 | 0.41788466 | 0.64399811 | TRMT44   |
| 81894  | ENSG00000155287 | 295.37435  | 0.0849869   | 0.13430357 | 0.50013972 | 0.7173261  | SLC25A28 |
| 6782   | ENSG00000155304 | 1151.19563 | -0.05887378 | 0.08331312 | 0.47006186 | 0.69237291 | HSPA13   |
| 64092  | ENSG00000155307 | 0          | NA          | NA         | NA         | NA         | SAMSN1   |
| 388813 | ENSG00000155307 | 0          | NA          | NA         | NA         | NA         | SAMSN1   |
| 29761  | ENSG00000155313 | 453.702375 | 0.55211006  | 0.12624794 | 4.14E-06   | 4.22E-05   | USP25    |
| 65983  | ENSG00000155324 | 31.6085666 | 4.0212928   | 0.56913974 | 1.78E-13   | 4.29E-12   | GRAMD2B  |
| 54819  | ENSG00000155329 | 280.930549 | -0.06051874 | 0.14967433 | 0.65935845 | 0.83105722 | ZCCHC10  |
| 388272 | ENSG00000155330 | 354.020191 | -0.40815063 | 0.22049048 | 0.02753815 | 0.0937308  | C16orf87 |
| 4343   | ENSG00000155363 | 889.029877 | 0.59554417  | 0.10517239 | 4.57E-09   | 7.22E-08   | MOV10    |
| 389    | ENSG00000155366 | 609.864388 | 0.56964744  | 0.11194599 | 1.18E-07   | 1.54E-06   | RHOC     |
| 333926 | ENSG00000155367 | 7.22668368 | -0.28969642 | 0.48712013 | 0.09500048 | 0.23991343 | PPM1J    |
| 1622   | ENSG00000155368 | 1278.71225 | -0.54487118 | 0.09289272 | 1.55E-09   | 2.61E-08   | DBI      |
| 6566   | ENSG00000155380 | 2095.953   | -0.16101868 | 0.11769657 | 0.14945236 | 0.33226522 | SLC16A1  |
| 55027  | ENSG00000155393 | 399.401996 | -0.10098494 | 0.13463545 | 0.42215188 | 0.64814241 | HEATR3   |
| 378108 | ENSG00000155428 | 6.36863609 | -0.00411486 | 0.36959259 | 0.96527777 | 0.98625559 | TRIM74   |
| 84365  | ENSG00000155438 | 1037.47714 | -0.44342819 | 0.10672003 | 1.48E-05   | 0.00013627 | NIFK     |
| 5018   | ENSG00000155463 | 1510.60145 | -0.21527516 | 0.07465465 | 0.00322671 | 0.0160849  | OXA1L    |
| 9056   | ENSG00000155465 | 1.70353084 | 0.02357298  | 0.3793468  | 0.73471499 | NA         | SLC7A7   |
| 9947   | ENSG00000155495 | 22.4901132 | -1.70250223 | 0.59156932 | 0.00022166 | 0.0015584  | MAGEC1   |
| 23367  | ENSG00000155506 | 7568.55166 | -0.09698352 | 0.06205033 | 0.12416411 | 0.29208041 | LARP1    |
| 9337   | ENSG00000155508 | 1610.83452 | -0.00511237 | 0.07126708 | 0.94115176 | 0.97559098 | CNOT8    |
| 2890   | ENSG00000155511 | 0          | NA          | NA         | NA         | NA         | GRIA1    |
| 136332 | ENSG00000155530 | 159.251917 | -0.05463096 | 0.17556356 | 0.72557814 | 0.86866734 | LRGUK    |

|        |                 |            |             |            |            |            |          |
|--------|-----------------|------------|-------------|------------|------------|------------|----------|
| 133383 | ENSG00000155542 | 184.57155  | -0.27203782 | 0.17256514 | 0.07728232 | 0.20605848 | SETD9    |
| 166968 | ENSG00000155545 | 1152.76607 | -0.41378255 | 0.10856324 | 6.81E-05   | 0.00054247 | MIER3    |
| 23165  | ENSG00000155561 | 4706.01324 | 0.0038128   | 0.06193726 | 0.95091377 | 0.97985505 | NUP205   |
| 342357 | ENSG00000155592 | 605.064578 | -0.1658142  | 0.10819992 | 0.10928691 | 0.26581493 | ZKSCAN2  |
| 138241 | ENSG00000155621 | 236.52332  | 0.2141061   | 0.14833987 | 0.11694557 | 0.27994692 | C9orf85  |
| 9502   | ENSG00000155622 | 0          | NA          | NA         | NA         | NA         | XAGE2    |
| 118788 | ENSG00000155629 | 155.201582 | -0.66771024 | 0.1923419  | 0.00011838 | 0.0008846  | PIK3AP1  |
| 129831 | ENSG00000155636 | 220.763187 | -0.25708532 | 0.15649031 | 0.07128033 | 0.19409851 | RBM45    |
| 7273   | ENSG00000155657 | 319.092835 | 0.07466398  | 0.129645   | 0.54125064 | 0.74967974 | TTN      |
| 11326  | ENSG00000155659 | 0          | NA          | NA         | NA         | NA         | VSIG4    |
| 9601   | ENSG00000155660 | 5107.60898 | 0.83452722  | 0.0752242  | 2.47E-29   | 1.39E-27   | PDIA4    |
| 79831  | ENSG00000155666 | 85.0853404 | 0.13922729  | 0.21788691 | 0.43875789 | 0.66399363 | KDM8     |
| 255762 | ENSG00000155714 | 1.19233976 | 0.01955149  | 0.38005787 | 0.76257316 | NA         | PDZD9    |
| 146183 | ENSG00000155719 | 5.26384778 | 5.7040874   | 2.67821432 | 0.00011092 | 0.00083399 | OTOA     |
| 130535 | ENSG00000155729 | 279.213542 | 0.09493533  | 0.14299584 | 0.47473234 | 0.69695794 | KCTD18   |
| 285172 | ENSG00000155744 | 369.79401  | -0.13221337 | 0.1570767  | 0.35417695 | 0.58474417 | FAM126B  |
| 130540 | ENSG00000155749 | 13.5127988 | -0.10751881 | 0.34655261 | 0.52953693 | 0.7412695  | FLACC1   |
| 151254 | ENSG00000155754 | 3.12667316 | 0.11262166  | 0.39157062 | 0.30262446 | 0.52987991 | C2CD6    |
| 65062  | ENSG00000155755 | 1624.47555 | -0.0600042  | 0.0929643  | 0.50498124 | 0.72130144 | TMEM237  |
| 8324   | ENSG00000155760 | 1157.67541 | 0.06349571  | 0.08198478 | 0.42737026 | 0.65313711 | FZD7     |
| 200162 | ENSG00000155761 | 0.6645966  | -0.02196995 | 0.38320164 | 0.65254366 | NA         | SPAG17   |
| 64798  | ENSG00000155792 | 12.003612  | 0.02461826  | 0.33567957 | 0.88358435 | 0.94890373 | DEPTOR   |
| 56776  | ENSG00000155816 | 646.63559  | -0.85288943 | 0.17994027 | 3.33E-07   | 4.09E-06   | FMN2     |
| 56254  | ENSG00000155827 | 1664.79123 | -0.23744968 | 0.09425946 | 0.00914415 | 0.03850987 | RNF20    |
| 1539   | ENSG00000155833 | 0          | NA          | NA         | NA         | NA         | CYLC2    |
| 133522 | ENSG00000155846 | 103.05789  | 0.04286615  | 0.20115705 | 0.80398257 | 0.911018   | PPARGC1B |
| 9844   | ENSG00000155849 | 1063.08095 | -0.49823635 | 0.12418663 | 2.31E-05   | 0.00020482 | ELMO1    |
| 1836   | ENSG00000155850 | 823.264386 | -0.35381145 | 0.09225527 | 7.48E-05   | 0.0005886  | SLC26A2  |
| 134353 | ENSG00000155858 | 503.557362 | -0.74858303 | 0.11938606 | 7.53E-11   | 1.46E-09   | LSM11    |
| 9443   | ENSG00000155868 | 217.70634  | -0.10184408 | 0.15211157 | 0.46485977 | 0.68755165 | MED7     |
| 158297 | ENSG00000155875 | 0.34045604 | -0.0001331  | 0.38336221 | 0.9665143  | NA         | SAXO1    |
| 10670  | ENSG00000155876 | 896.038108 | -0.06724584 | 0.09058808 | 0.44431621 | 0.66924033 | RRAGA    |
| 25769  | ENSG00000155886 | 16.9855572 | 3.71272072  | 0.8632569  | 1.66E-06   | 1.81E-05   | SLC24A2  |
| 287015 | ENSG00000155890 | 0          | NA          | NA         | NA         | NA         | TRIM42   |
| 92370  | ENSG00000155893 | 425.836083 | 0.40978464  | 0.14844743 | 0.00278009 | 0.01420474 | PXYLP1   |
| 114    | ENSG00000155897 | 1.14109546 | -0.00031907 | 0.37936945 | 0.99567772 | NA         | ADCY8    |
| 5922   | ENSG00000155903 | 475.302408 | 0.04048496  | 0.13088674 | 0.74297263 | 0.8787753  | RASA2    |
| 55005  | ENSG00000155906 | 592.924729 | -0.03993217 | 0.09809216 | 0.67298823 | 0.83933156 | RMND1    |

|        |                 |            |             |            |            |            |          |
|--------|-----------------|------------|-------------|------------|------------|------------|----------|
| 154064 | ENSG00000155918 | 0          | NA          | NA         | NA         | NA         | RAET1L   |
| 6503   | ENSG00000155926 | 20.8472452 | 0.02673244  | 0.30982985 | 0.88643837 | 0.95015905 | SLA      |
| 51643  | ENSG00000155957 | 374.470373 | 0.40038954  | 0.16141499 | 0.00639249 | 0.02861621 | TMBIM4   |
| 7411   | ENSG00000155959 | 961.75353  | -0.31968324 | 0.09705085 | 0.00063656 | 0.00397899 | VBP1     |
| 116442 | ENSG00000155961 | 343.220372 | -0.19124748 | 0.16416972 | 0.19641303 | 0.40005705 | RAB39B   |
| 1193   | ENSG00000155962 | 17.9421013 | -0.01420973 | 0.32967489 | 0.93083446 | 0.97111825 | CLIC2    |
| 2334   | ENSG00000155966 | 0          | NA          | NA         | NA         | NA         | AFF2     |
| 286097 | ENSG00000155970 | 173.272668 | -0.29549914 | 0.1950248  | 0.07953369 | 0.2105454  | MICU3    |
| 23426  | ENSG00000155974 | 30.1442535 | 5.45687222  | 0.89251076 | 1.92E-11   | 3.97E-10   | GRIP1    |
| 137492 | ENSG00000155975 | 506.815749 | 0.45765232  | 0.14750053 | 0.00081606 | 0.00495428 | VPS37A   |
| 3798   | ENSG00000155980 | 1139.2903  | -0.79949811 | 0.1060973  | 8.93E-15   | 2.38E-13   | KIF5A    |
| 10     | ENSG00000156006 | 0.14931947 | -0.01844332 | 0.38480212 | 0.84537521 | NA         | NAT2     |
| 4107   | ENSG00000156009 | 0.72009102 | 0.02303266  | 0.38385915 | 0.59437427 | NA         | MAGEA8   |
| 23362  | ENSG00000156011 | 1534.66316 | -0.54022396 | 0.07621932 | 4.92E-13   | 1.14E-11   | PSD3     |
| 138199 | ENSG00000156017 | 171.497044 | 0.01307992  | 0.17272247 | 0.93364208 | 0.97236005 | CARNMT1  |
| 90550  | ENSG00000156026 | 388.251326 | -0.33733004 | 0.14393598 | 0.01128177 | 0.04581993 | MCU      |
| 91748  | ENSG00000156030 | 703.378419 | -0.1326398  | 0.10949635 | 0.20513137 | 0.41205331 | MIDEAS   |
| 118491 | ENSG00000156042 | 11.7175948 | 0.84522044  | 1.05391811 | 0.01691797 | 0.06370327 | CFAP70   |
| 9630   | ENSG00000156049 | 5.04594042 | 0.13864263  | 0.39642109 | 0.27311123 | 0.49676945 | GNA14    |
| 145483 | ENSG00000156050 | 109.175701 | -0.10468949 | 0.20708673 | 0.54749177 | 0.75431125 | FAM161B  |
| 2776   | ENSG00000156052 | 1862.75177 | -0.51817117 | 0.08196222 | 9.81E-11   | 1.89E-09   | GNAQ     |
| 11197  | ENSG00000156076 | 0          | NA          | NA         | NA         | NA         | WIF1     |
| 7363   | ENSG00000156096 | 0          | NA          | NA         | NA         | NA         | UGT2B4   |
| 83873  | ENSG00000156097 | 4.90139228 | 0.02987664  | 0.37315812 | 0.74485436 | 0.87988222 | GPR61    |
| 4325   | ENSG00000156103 | 1418.84251 | 0.03166744  | 0.07461867 | 0.66582086 | 0.83495897 | MMP16    |
| 132    | ENSG00000156110 | 394.538064 | -0.07228643 | 0.12116626 | 0.52661462 | 0.73858575 | ADK      |
| 3778   | ENSG00000156113 | 360.493914 | -3.31347362 | 0.16804776 | 1.45E-87   | 3.46E-85   | KCNMA1   |
| 10538  | ENSG00000156127 | 0          | NA          | NA         | NA         | NA         | BATF     |
| 1633   | ENSG00000156136 | 710.772421 | -0.10783578 | 0.10125122 | 0.26764047 | 0.49016772 | DCK      |
| 9508   | ENSG00000156140 | 531.708786 | 3.67125981  | 0.14943697 | 1.88E-134  | 1.04E-131  | ADAMTS3  |
| 257    | ENSG00000156150 | 0.30139824 | -0.02296476 | 0.38527817 | 0.68536535 | NA         | ALX3     |
| 286148 | ENSG00000156162 | 1139.42162 | 0.15611503  | 0.10930044 | 0.13597896 | 0.3109165  | DPY19L4  |
| 137682 | ENSG00000156170 | 250.722709 | -0.168041   | 0.14688095 | 0.21420426 | 0.42438929 | NDUFAF6  |
| 128338 | ENSG00000156171 | 394.924834 | 0.01999243  | 0.16618366 | 0.89515627 | 0.95469109 | DRAM2    |
| 157657 | ENSG00000156172 | 89.7444624 | -0.08636033 | 0.2174178  | 0.62957428 | 0.8124371  | C8orf37  |
| 5470   | ENSG00000156194 | 1.31607109 | 0.05440781  | 0.38675805 | 0.29196184 | NA         | PPEF2    |
| 161502 | ENSG00000156206 | 1.32737373 | -0.01667605 | 0.37940508 | 0.80257198 | NA         | CFAP161  |
| 57188  | ENSG00000156218 | 0          | NA          | NA         | NA         | NA         | ADAMTSL3 |

|           |                 |            |             |            |            |            |          |
|-----------|-----------------|------------|-------------|------------|------------|------------|----------|
| 419       | ENSG00000156219 | 0.38962757 | 0.02407781  | 0.38542126 | 0.60160411 | NA         | ART3     |
| 9154      | ENSG00000156222 | 0.3348156  | 0.00657317  | 0.38350531 | 0.91414739 | NA         | SLC28A1  |
| 123720    | ENSG00000156232 | 185.565394 | 0.05063786  | 0.16248513 | 0.73199014 | 0.87198139 | WHAMM    |
| 10563     | ENSG00000156234 | 0.66471966 | 0.00545819  | 0.38195458 | 0.90769313 | NA         | CXCL13   |
| 29104     | ENSG00000156239 | 622.008214 | 0.28532011  | 0.10346681 | 0.00408596 | 0.01964299 | N6AMT1   |
| 10069     | ENSG00000156253 | 393.240174 | -0.26625378 | 0.11984426 | 0.01891914 | 0.06963927 | RWDD2B   |
| 10600     | ENSG00000156256 | 846.897867 | -0.18819845 | 0.08905834 | 0.02948998 | 0.09906554 | USP16    |
| 10694     | ENSG00000156261 | 3710.294   | -0.18999689 | 0.07398794 | 0.00875392 | 0.03719011 | CCT8     |
| 56911     | ENSG00000156265 | 0.78300971 | -0.00623337 | 0.38219998 | 0.89370184 | NA         | MAP3K7CL |
| 84779     | ENSG00000156269 | 0.84544779 | 0.03692112  | 0.38467463 | 0.45953839 | NA         | NAA11    |
| 571       | ENSG00000156273 | 469.891855 | 0.30176453  | 0.15970766 | 0.03737237 | 0.1192962  | BACH1    |
| 100379661 | ENSG00000156273 | 469.891855 | 0.30176453  | 0.15970766 | 0.03737237 | 0.1192962  | BACH1    |
| 26285     | ENSG00000156282 | 0          | NA          | NA         | NA         | NA         | CLDN17   |
| 9073      | ENSG00000156284 | 0          | NA          | NA         | NA         | NA         | CLDN8    |
| 7102      | ENSG00000156298 | 372.783614 | -0.24346987 | 0.12087989 | 0.0332283  | 0.10876911 | TSPAN7   |
| 7074      | ENSG00000156299 | 1109.87917 | -0.47467525 | 0.08930733 | 4.54E-08   | 6.26E-07   | TIAM1    |
| 57466     | ENSG00000156304 | 1458.39751 | 0.07823356  | 0.07676715 | 0.29872899 | 0.52556382 | SCAF4    |
| 6103      | ENSG00000156313 | 190.650799 | 0.23066877  | 0.2060725  | 0.18757745 | 0.38786275 | RPGR     |
| 23552     | ENSG00000156345 | 253.586265 | 0.23751086  | 0.18100312 | 0.13711745 | 0.31261897 | CDK20    |
| 84108     | ENSG00000156374 | 252.878102 | -0.22263697 | 0.15442479 | 0.1142699  | 0.27493509 | PCGF6    |
| 122416    | ENSG00000156381 | 692.938321 | 0.39742321  | 0.11491105 | 0.00027661 | 0.00190026 | ANKRD9   |
| 119392    | ENSG00000156384 | 95.0482288 | -0.43398914 | 0.2365177  | 0.02628055 | 0.09050816 | SFR1     |
| 22986     | ENSG00000156395 | 20.3293309 | 0.01608191  | 0.30800566 | 0.93262447 | 0.97195551 | SORCS3   |
| 118980    | ENSG00000156398 | 323.790795 | -0.34092864 | 0.14116234 | 0.00922135 | 0.03877735 | SFXN2    |
| 9556      | ENSG00000156411 | 978.318973 | -0.15350213 | 0.09209223 | 0.08542127 | 0.22179793 | ATP5MJ   |
| 2528      | ENSG00000156413 | 0.96707992 | -0.02489566 | 0.38141133 | 0.67795312 | NA         | FUT6     |
| 122402    | ENSG00000156414 | 2.39771539 | -0.11938069 | 0.40812908 | 0.08115854 | NA         | TDRD9    |
| 8817      | ENSG00000156427 | 1.62132929 | -0.01706455 | 0.37715472 | 0.82603318 | NA         | FGF18    |
| 5097      | ENSG00000156453 | 86.6989924 | -2.60895589 | 0.3012279  | 2.48E-19   | 8.93E-18   | PCDH1    |
| 153769    | ENSG00000156463 | 0.29863895 | -0.02292439 | 0.3852726  | 0.68753245 | NA         | SH3RF2   |
| 392255    | ENSG00000156466 | 6.75839875 | 3.35479759  | 1.49705083 | 0.00165928 | 0.00915212 | GDF6     |
| 7381      | ENSG00000156467 | 2025.72449 | -0.22935766 | 0.07553921 | 0.00189802 | 0.01022448 | UQCRB    |
| 51001     | ENSG00000156469 | 213.787935 | -0.26522894 | 0.16697341 | 0.07716714 | 0.20583438 | MTERF3   |
| 9791      | ENSG00000156471 | 1072.21158 | -0.57861932 | 0.09039349 | 4.99E-11   | 9.91E-10   | PTDSS1   |
| 5521      | ENSG00000156475 | 78.2415419 | -2.67171794 | 0.34834978 | 6.43E-16   | 1.85E-14   | PPP2R2B  |
| 6156      | ENSG00000156482 | 11540.4707 | 0.01207558  | 0.05496461 | 0.82512081 | 0.92061618 | RPL30    |
| 3788      | ENSG00000156486 | 2.85743744 | -0.15519212 | 0.42205375 | 0.08770992 | 0.22627844 | KCNS2    |
| 159091    | ENSG00000156500 | 106.802045 | 0.16036656  | 0.20225475 | 0.35307476 | 0.58322456 | PABIR3   |

|        |                 |            |             |            |            |            |           |
|--------|-----------------|------------|-------------|------------|------------|------------|-----------|
| 6832   | ENSG00000156502 | 477.413092 | -0.13950159 | 0.12031072 | 0.22077629 | 0.43316867 | SUPV3L1   |
| 159090 | ENSG00000156504 | 857.369026 | -0.19656203 | 0.10033763 | 0.04178533 | 0.12979818 | PABIR2    |
| 1915   | ENSG00000156508 | 178792.759 | -0.07639208 | 0.04300203 | 0.06802283 | 0.18770138 | EEF1A1    |
| 286151 | ENSG00000156509 | 59.2658865 | -0.12097123 | 0.24574716 | 0.52497008 | 0.73755856 | FBXO43    |
| 80201  | ENSG00000156510 | 0          | NA          | NA         | NA         | NA         | HKDC1     |
| 3098   | ENSG00000156515 | 3059.69461 | -0.37696976 | 0.07823156 | 8.18E-07   | 9.41E-06   | HK1       |
| 219743 | ENSG00000156521 | 369.442265 | 0.13644336  | 0.12651617 | 0.2529992  | 0.47325073 | TYSND1    |
| 84295  | ENSG00000156531 | 1807.61791 | 0.08276452  | 0.0909554  | 0.34987407 | 0.58019905 | PHF6      |
| 135228 | ENSG00000156535 | 0          | NA          | NA         | NA         | NA         | CD109     |
| 57497  | ENSG00000156564 | 593.243258 | -0.98446734 | 0.11511618 | 1.66E-18   | 5.77E-17   | LRFN2     |
| 4838   | ENSG00000156574 | 48.4662995 | 0.5911428   | 0.35452698 | 0.01982848 | 0.07247778 | NODAL     |
| 10394  | ENSG00000156575 | 0          | NA          | NA         | NA         | NA         | PRG3      |
| 9246   | ENSG00000156587 | 628.076887 | -0.03372413 | 0.09887929 | 0.72338081 | 0.86781203 | UBE2L6    |
| 25921  | ENSG00000156599 | 1224.05149 | -0.16246035 | 0.08595217 | 0.05204438 | 0.15365484 | ZDHHC5    |
| 219541 | ENSG00000156603 | 314.918902 | -0.11309155 | 0.14021826 | 0.38446763 | 0.61356176 | MED19     |
| 60685  | ENSG00000156639 | 1496.56084 | -0.00922152 | 0.09125545 | 0.9174079  | 0.96505604 | ZFAND3    |
| 27020  | ENSG00000156642 | 630.030354 | -0.13169936 | 0.10490314 | 0.19090286 | 0.39232575 | NPTN      |
| 23522  | ENSG00000156650 | 1528.9751  | 0.66121275  | 0.09559514 | 1.22E-12   | 2.77E-11   | KAT6B     |
| 142891 | ENSG00000156671 | 801.89291  | -0.16598098 | 0.09261117 | 0.06364763 | 0.17914159 | SAMD8     |
| 80223  | ENSG00000156675 | 485.170862 | 0.10427486  | 0.13460449 | 0.40847912 | 0.63652585 | RAB11FIP1 |
| 137970 | ENSG00000156687 | 675.436565 | -1.02741753 | 0.10773427 | 1.97E-22   | 8.29E-21   | UNC5D     |
| 219970 | ENSG00000156689 | 28.6456605 | 0.40200168  | 0.41717845 | 0.09214472 | 0.23464913 | GLYATL2   |
| 10813  | ENSG00000156697 | 1184.93813 | -0.22985836 | 0.07702428 | 0.00227532 | 0.01195508 | UTP14A    |
| 9131   | ENSG00000156709 | 623.035381 | -0.04568947 | 0.11886558 | 0.68590917 | 0.8472443  | AIFM1     |
| 5603   | ENSG00000156711 | 88.1201528 | 0.15429803  | 0.25225391 | 0.42581527 | 0.65161395 | MAPK13    |
| 9530   | ENSG00000156735 | 433.158138 | -0.56111706 | 0.12858608 | 4.13E-06   | 4.21E-05   | BAG4      |
| 931    | ENSG00000156738 | 0          | NA          | NA         | NA         | NA         | MS4A1     |
| NA     | ENSG00000156755 | 0          | NA          | NA         | NA         | NA         | IGKV1OR-2 |
| 93594  | ENSG00000156787 | 438.161795 | 0.10794506  | 0.11439762 | 0.32296321 | 0.55059885 | TBC1D31   |
| 55093  | ENSG00000156795 | 331.408546 | -0.27115564 | 0.16424936 | 0.06683868 | 0.18536194 | NTAQ1     |
| 29028  | ENSG00000156802 | 1944.54807 | -0.52589469 | 0.08143439 | 4.04E-11   | 8.09E-10   | ATAD2     |
| 114907 | ENSG00000156804 | 55.4598951 | 0.32012939  | 0.28744085 | 0.13148961 | 0.30415692 | FBXO32    |
| 286053 | ENSG00000156831 | 201.567939 | 0.14050403  | 0.15931657 | 0.33261505 | 0.5618153  | NSMCE2    |
| 115509 | ENSG00000156853 | 350.911623 | -0.21840491 | 0.1318439  | 0.07641256 | 0.20422871 | ZNF689    |
| 78994  | ENSG00000156858 | 757.579653 | -0.04397793 | 0.08886801 | 0.61032955 | 0.7985846  | PRR14     |
| 64319  | ENSG00000156860 | 1482.6937  | 0.22549926  | 0.09799375 | 0.01709332 | 0.06424162 | FBRS      |
| 391059 | ENSG00000156869 | 3.35340384 | 0.23327832  | 0.48522958 | 0.016598   | 0.06267687 | FRRS1     |
| 5261   | ENSG00000156873 | 394.17112  | 0.04310258  | 0.11826714 | 0.70249912 | 0.85694048 | PHKG2     |

|        |                 |            |             |            |            |            |          |
|--------|-----------------|------------|-------------|------------|------------|------------|----------|
| 64645  | ENSG00000156875 | 1178.25024 | -0.10463225 | 0.08037256 | 0.18251677 | 0.3803144  | MFSD14A  |
| 163786 | ENSG00000156876 | 573.825616 | -0.35563672 | 0.11337972 | 0.00099529 | 0.00588222 | SASS6    |
| 1339   | ENSG00000156885 | 0.18922458 | 0.01954053  | 0.38488496 | 0.78225479 | NA         | COX6A2   |
| 3681   | ENSG00000156886 | 0          | NA          | NA         | NA         | NA         | ITGAD    |
| 139378 | ENSG00000156920 | 2.89084641 | 0.05809901  | 0.37652958 | 0.56859274 | 0.76931138 | ADGRG4   |
| 7547   | ENSG00000156925 | 0.5945563  | 0.0208396   | 0.38402101 | 0.64002282 | NA         | ZIC3     |
| 115416 | ENSG00000156928 | 521.500912 | 0.15532548  | 0.10516568 | 0.12417834 | 0.29208041 | MALSU1   |
| 23355  | ENSG00000156931 | 672.188283 | -0.3320442  | 0.13235284 | 0.00732792 | 0.03209895 | VPS8     |
| 2585   | ENSG00000156958 | 176.905975 | 0.33956049  | 0.16962126 | 0.02599518 | 0.08974218 | GALK2    |
| 375323 | ENSG00000156959 | 1273.36702 | -1.3363792  | 0.13783105 | 2.74E-23   | 1.21E-21   | LHFPL4   |
| 93010  | ENSG00000156966 | 17.1079343 | 0.04441448  | 0.32293279 | 0.80535564 | 0.91174071 | B3GNT7   |
| 255027 | ENSG00000156968 | 196.76542  | -0.6905737  | 0.19512555 | 8.61E-05   | 0.00066525 | MPV17L   |
| 701    | ENSG00000156970 | 1936.34932 | -0.00810773 | 0.08682818 | 0.92234504 | 0.96745047 | BUB1B    |
| 5147   | ENSG00000156973 | 348.210035 | -0.16974686 | 0.13199156 | 0.16975692 | 0.36148629 | PDE6D    |
| 1974   | ENSG00000156976 | 6456.18115 | -0.11203035 | 0.05661515 | 0.04524991 | 0.13775638 | EIF4A2   |
| 7862   | ENSG00000156983 | 830.871145 | -0.00500077 | 0.08614076 | 0.95146194 | 0.98008882 | BRPF1    |
| 285367 | ENSG00000156990 | 392.862349 | 0.13130224  | 0.12303174 | 0.25962417 | 0.48121669 | RPUSD3   |
| 6750   | ENSG00000157005 | 0          | NA          | NA         | NA         | NA         | SST      |
| 9797   | ENSG00000157014 | 1084.79462 | -0.15502224 | 0.09573553 | 0.09376995 | 0.23753778 | TATDN2   |
| 51738  | ENSG00000157017 | 2.68766026 | -0.05748061 | 0.38428716 | 0.38116309 | 0.61011123 | GHRL     |
| 6396   | ENSG00000157020 | 1375.09464 | -0.01858641 | 0.08165823 | 0.81510845 | 0.91599551 | SEC13    |
| NA     | ENSG00000157021 | 0          | NA          | NA         | NA         | NA         | CIBAR1P1 |
| 9941   | ENSG00000157036 | 95.1356879 | 0.47151974  | 0.24939417 | 0.02035225 | 0.07388629 | EXOGL    |
| 123803 | ENSG00000157045 | 553.241842 | 0.24138868  | 0.10826294 | 0.01984422 | 0.07251969 | NTAN1    |
| 81626  | ENSG00000157060 | 0          | NA          | NA         | NA         | NA         | SHCBP1L  |
| 23057  | ENSG00000157064 | 1518.34726 | -3.23922558 | 0.10948834 | 3.22E-194  | 5.81E-191  | NMNAT2   |
| 9372   | ENSG00000157077 | 752.024109 | -0.06577358 | 0.096958   | 0.48169466 | 0.70240082 | ZFYVE9   |
| 491    | ENSG00000157087 | 296.204686 | -0.40688578 | 0.16343783 | 0.00607671 | 0.02744045 | ATP2B2   |
| 131375 | ENSG00000157093 | 0          | NA          | NA         | NA         | NA         | LYZL4    |
| 6529   | ENSG00000157103 | 14.9689014 | 0.0250597   | 0.33783916 | 0.8791094  | 0.94641763 | SLC6A1   |
| 23049  | ENSG00000157106 | 3692.64027 | 0.03410308  | 0.0657969  | 0.59874956 | 0.79005929 | SMG1     |
| 115548 | ENSG00000157107 | 309.381581 | -0.0129378  | 0.12841448 | 0.91354056 | 0.96320586 | FCHO2    |
| 11030  | ENSG00000157110 | 357.730159 | 1.63042698  | 0.14702906 | 1.09E-29   | 6.18E-28   | RBPMS    |
| 134285 | ENSG00000157111 | 1.74784129 | 0.11187679  | 0.40303439 | 0.10602727 | NA         | TMEM171  |
| 131377 | ENSG00000157119 | 0          | NA          | NA         | NA         | NA         | KLHL40   |
| 731    | ENSG00000157131 | 0          | NA          | NA         | NA         | NA         | C8A      |
| 7079   | ENSG00000157150 | 0          | NA          | NA         | NA         | NA         | TIMP4    |
| 6854   | ENSG00000157152 | 256.215291 | -0.27559441 | 0.14578958 | 0.04032578 | 0.1262121  | SYN2     |



|        |                 |            |             |            |            |            |           |
|--------|-----------------|------------|-------------|------------|------------|------------|-----------|
| 3084   | ENSG00000157168 | 108.23448  | -1.01408724 | 0.25125487 | 6.17E-06   | 6.10E-05   | NRG1      |
| 54953  | ENSG00000157181 | 762.853441 | 0.16645349  | 0.10983042 | 0.11322893 | 0.27296015 | ODR4      |
| 1376   | ENSG00000157184 | 529.85696  | -0.15052829 | 0.10747576 | 0.14347904 | 0.32277095 | CPT2      |
| 55707  | ENSG00000157191 | 979.756064 | 0.15216107  | 0.09327901 | 0.09244371 | 0.23508014 | NECAP2    |
| 7804   | ENSG00000157193 | 2201.98847 | -0.60930984 | 0.08444656 | 1.59E-13   | 3.84E-12   | LRP8      |
| 200008 | ENSG00000157211 | 0.94964547 | 0.00243572  | 0.38167557 | 0.96079652 | NA         | CDCP2     |
| 22976  | ENSG00000157212 | 720.060133 | 0.07155116  | 0.10503944 | 0.47941438 | 0.70066897 | PAXIP1    |
| 261729 | ENSG00000157214 | 286.440889 | -0.08516514 | 0.14525588 | 0.52528084 | 0.73786263 | STEAP2    |
| 23648  | ENSG00000157216 | 1786.68093 | -0.08800935 | 0.09106608 | 0.31896107 | 0.54659755 | SSBP3     |
| 3361   | ENSG00000157219 | 0          | NA          | NA         | NA         | NA         | HTR5A     |
| 9069   | ENSG00000157224 | 1289.48032 | -0.21876557 | 0.08887291 | 0.011186   | 0.04547752 | CLDN12    |
| 4323   | ENSG00000157227 | 27.4208563 | 1.61166446  | 0.69052813 | 0.0008118  | 0.00493444 | MMP14     |
| 8321   | ENSG00000157240 | 521.669648 | 0.04280082  | 0.10689218 | 0.67756861 | 0.84255476 | FZD1      |
| 57798  | ENSG00000157259 | 1717.7799  | 0.08627437  | 0.07420695 | 0.23619254 | 0.4530211  | GATAD1    |
| 203328 | ENSG00000157303 | 1.37292794 | -0.01486915 | 0.37910267 | 0.82626189 | NA         | SUSD3     |
| NA     | ENSG00000157306 | 69.8109345 | 0.12937851  | 0.24203616 | 0.4970045  | 0.71500229 | ZFHX2-AS1 |
| 146456 | ENSG00000157315 | 10.0412497 | -0.00330494 | 0.34139322 | 0.98094119 | 0.99355086 | TMED6     |
| 348174 | ENSG00000157322 | 2.72068317 | 0.09291158  | 0.39207274 | 0.27024399 | 0.49343279 | CLEC18A   |
| 10901  | ENSG00000157326 | 309.486256 | 0.30691129  | 0.1374767  | 0.01655879 | 0.06258837 | DHRS4     |
| 728635 | ENSG00000157326 | 309.486256 | 0.30691129  | 0.1374767  | 0.01655879 | 0.06258837 | DHRS4     |
| 93190  | ENSG00000157330 | 0          | NA          | NA         | NA         | NA         | C1orf158  |
| 283971 | ENSG00000157335 | 0.90740109 | -0.05159104 | 0.38889269 | 0.2677938  | NA         | CLEC18C   |
| 221481 | ENSG00000157343 | 44.0126169 | 0.57436978  | 0.35832259 | 0.02327083 | 0.08226894 | ARMC12    |
| 11269  | ENSG00000157349 | 584.388708 | -0.04363795 | 0.1142402  | 0.68813292 | 0.84857639 | DDX19B    |
| 6483   | ENSG00000157350 | 1212.84537 | -0.2164036  | 0.10747833 | 0.03537315 | 0.11420719 | ST3GAL2   |
| 197258 | ENSG00000157353 | 379.892773 | 0.5167324   | 0.15113021 | 0.00022519 | 0.00158071 | FCSK      |
| 146433 | ENSG00000157368 | 2.69357229 | -0.13043345 | 0.40445666 | 0.18070386 | 0.37770382 | IL34      |
| 115817 | ENSG00000157379 | 169.021926 | 0.57972829  | 0.19309509 | 0.00076152 | 0.00465737 | DHRS1     |
| 776    | ENSG00000157388 | 400.428853 | -0.69319754 | 0.17043424 | 1.05E-05   | 9.88E-05   | CACNA1D   |
| 415    | ENSG00000157399 | 0.87772087 | 0.02512699  | 0.38268914 | 0.63058073 | NA         | ARSL      |
| 3815   | ENSG00000157404 | 222.404596 | -0.51899985 | 0.16221307 | 0.00047885 | 0.00310675 | KIT       |
| 54768  | ENSG00000157423 | 7.22835248 | 0.28888677  | 0.50138363 | 0.07283628 | 0.19701047 | HYDIN     |
| 132949 | ENSG00000157426 | 303.791824 | -0.05272401 | 0.13233844 | 0.67042299 | 0.83767652 | AASDH     |
| 7567   | ENSG00000157429 | 59.5646889 | -0.16491675 | 0.25833158 | 0.39874054 | 0.62756224 | ZNF19     |
| 55799  | ENSG00000157445 | 5.28697407 | -0.20022535 | 0.44111494 | 0.09986665 | 0.24900772 | CACNA2D3  |
| 54778  | ENSG00000157450 | 878.082357 | 0.28536017  | 0.123323   | 0.01429017 | 0.05545021 | RNF111    |
| 9133   | ENSG00000157456 | 1279.08251 | -0.16088709 | 0.09897985 | 0.09185732 | 0.23406746 | CCNB2     |
| 145773 | ENSG00000157470 | 34.1840393 | -0.5578361  | 0.44826318 | 0.03774335 | 0.12021642 | FAM81A    |

|        |                 |            |             |            |            |            |            |
|--------|-----------------|------------|-------------|------------|------------|------------|------------|
| 4643   | ENSG00000157483 | 585.470031 | 1.80276025  | 0.15494576 | 1.80E-32   | 1.11E-30   | MYO1E      |
| 26060  | ENSG00000157500 | 1499.2086  | -0.25165886 | 0.07809898 | 0.00097075 | 0.0057629  | APPL1      |
| 139221 | ENSG00000157502 | 0          | NA          | NA         | NA         | NA         | PWWP3B     |
| 134265 | ENSG00000157510 | 131.106075 | 1.06017373  | 0.2276937  | 3.74E-07   | 4.55E-06   | AFAP1L1    |
| 1831   | ENSG00000157514 | 504.121916 | -0.0351689  | 0.12670469 | 0.76706991 | 0.89269515 | TSC22D3    |
| 10311  | ENSG00000157538 | 1086.36315 | 0.02359339  | 0.09200965 | 0.79254532 | 0.90514041 | VPS26C     |
| 1859   | ENSG00000157540 | 1108.97349 | -0.14892873 | 0.08398892 | 0.06876291 | 0.1890682  | DYRK1A     |
| 3763   | ENSG00000157542 | 0          | NA          | NA         | NA         | NA         | KCNJ6      |
| 3772   | ENSG00000157551 | 0.173733   | 0.01914545  | 0.38484597 | 0.78225479 | NA         | KCNJ15     |
| 2078   | ENSG00000157554 | 0.14931947 | -0.01844332 | 0.38480212 | 0.84537521 | NA         | ERG        |
| 2114   | ENSG00000157557 | 367.645462 | -0.63358529 | 0.14400897 | 2.82E-06   | 2.96E-05   | ETS2       |
| 90139  | ENSG00000157570 | 3060.1594  | -0.26135488 | 0.06295205 | 2.50E-05   | 0.00021943 | TSPAN18    |
| 150082 | ENSG00000157578 | 13.6640242 | 0.2595643   | 0.41119099 | 0.18694021 | 0.3867863  | LCA5L      |
| 347734 | ENSG00000157593 | 1420.01962 | 0.12863132  | 0.07309496 | 0.0730366  | 0.19747154 | SLC35B2    |
| 84187  | ENSG00000157600 | 1492.88514 | 0.09271275  | 0.09426485 | 0.31079109 | 0.53855384 | TMEM164    |
| 4599   | ENSG00000157601 | 0.37837616 | 0.0239029   | 0.38539626 | 0.61496056 | NA         | MX1        |
| 90993  | ENSG00000157613 | 5.15925134 | 0.16597691  | 0.42123603 | 0.10101325 | 0.25117219 | CREB3L1    |
| 25966  | ENSG00000157617 | 209.886925 | -0.13414311 | 0.23174199 | 0.46877093 | 0.69137681 | C2CD2      |
| 257397 | ENSG00000157625 | 754.150862 | -0.17163411 | 0.11528578 | 0.11746617 | 0.2809883  | TAB3       |
| 124565 | ENSG00000157637 | 3384.26285 | 0.00103485  | 0.05998672 | 0.98657306 | 0.99555514 | SLC38A10   |
| 257169 | ENSG00000157653 | 8.67125087 | -0.00547558 | 0.35367253 | 0.96611081 | 0.98690343 | C9orf43    |
| 445815 | ENSG00000157654 | 64.8881017 | 1.65650924  | 0.4139666  | 3.35E-06   | 3.46E-05   | PALM2AKAP2 |
| 114991 | ENSG00000157657 | 2660.83489 | 0.00997921  | 0.06323013 | 0.87290803 | 0.94439555 | ZNF618     |
| 9162   | ENSG00000157680 | 746.774617 | -1.90824982 | 0.15601733 | 9.99E-36   | 6.91E-34   | DGKI       |
| 203197 | ENSG00000157693 | 439.032765 | -0.61035926 | 0.16824977 | 7.65E-05   | 0.00059993 | TMEM268    |
| 136306 | ENSG00000157703 | 1.59523611 | -0.00081364 | 0.38000234 | 0.98804209 | NA         | SVOPL      |
| 79856  | ENSG00000157734 | 119.265143 | -0.64570917 | 0.25811384 | 0.00263642 | 0.01357553 | SNX22      |
| 254048 | ENSG00000157741 | 1937.31684 | 0.00590292  | 0.06572638 | 0.92797869 | 0.96982181 | UBN2       |
| 673    | ENSG00000157764 | 1114.32664 | -0.17113255 | 0.12966576 | 0.16226946 | 0.35094147 | BRAF       |
| 10568  | ENSG00000157765 | 0          | NA          | NA         | NA         | NA         | SLC34A2    |
| 176    | ENSG00000157766 | 0          | NA          | NA         | NA         | NA         | ACAN       |
| 84262  | ENSG00000157778 | 785.670483 | -0.13451155 | 0.0947597  | 0.14210753 | 0.32078887 | PSMG3      |
| 9478   | ENSG00000157782 | 17.9390635 | 0.0482747   | 0.31828157 | 0.79155162 | 0.90499209 | CABP1      |
| 57728  | ENSG00000157796 | 589.94221  | 0.38565174  | 0.13476282 | 0.00222937 | 0.01175723 | WDR19      |
| 84255  | ENSG00000157800 | 1544.12894 | 0.08878093  | 0.08380594 | 0.27778332 | 0.5022529  | SLC37A3    |
| 10239  | ENSG00000157823 | 835.595883 | 0.07050315  | 0.11020408 | 0.50489247 | 0.72130144 | AP3S2      |
| 114793 | ENSG00000157827 | 2347.4924  | 0.15043489  | 0.07255633 | 0.03467291 | 0.112514   | FMNL2      |
| 150946 | ENSG00000157833 | 1039.13303 | -0.69094421 | 0.09658668 | 2.01E-13   | 4.81E-12   | GAREM2     |

|           |                 |            |             |            |            |            |          |
|-----------|-----------------|------------|-------------|------------|------------|------------|----------|
| 121665    | ENSG00000157837 | 955.413923 | -0.22372385 | 0.10383831 | 0.02476636 | 0.08649264 | SPPL3    |
| 56896     | ENSG00000157851 | 8759.00006 | -0.2381955  | 0.05843852 | 3.33E-05   | 0.00028417 | DPYSL5   |
| 92749     | ENSG00000157856 | 9.58222565 | 0.03316562  | 0.34179201 | 0.83801966 | 0.92636004 | DRC1     |
| 9364      | ENSG00000157869 | 209.657874 | -0.02620225 | 0.1642694  | 0.85834667 | 0.93677309 | RAB28    |
| 127281    | ENSG00000157870 | 875.048868 | -0.03227568 | 0.10898436 | 0.75653105 | 0.88693352 | PRXL2B   |
| 8764      | ENSG00000157873 | 5.02754008 | 0.06792205  | 0.36969591 | 0.58476494 | 0.78078479 | TNFRSF14 |
| 55229     | ENSG00000157881 | 637.848893 | 0.18561816  | 0.103971   | 0.06308911 | 0.17804949 | PANK4    |
| 130106    | ENSG00000157884 | 0          | NA          | NA         | NA         | NA         | CIB4     |
| 84465     | ENSG00000157890 | 39.221154  | -0.6990937  | 0.49540924 | 0.01789378 | 0.06663148 | MEGF11   |
| 64897     | ENSG00000157895 | 383.450927 | -0.16229573 | 0.13444272 | 0.19603374 | 0.39974691 | C12orf43 |
| 5192      | ENSG00000157911 | 421.918509 | 0.13299602  | 0.15157101 | 0.33976611 | 0.57015645 | PEX10    |
| 11079     | ENSG00000157916 | 1753.62763 | -0.17870182 | 0.07860098 | 0.0198189  | 0.07246877 | RER1     |
| 55698     | ENSG00000157927 | 1444.86375 | 0.00189604  | 0.09498189 | 0.98474203 | 0.99473578 | RADIL    |
| 6497      | ENSG00000157933 | 1590.51162 | -0.13032948 | 0.07565863 | 0.0784314  | 0.20835248 | SKI      |
| 26100     | ENSG00000157954 | 2003.78439 | 0.33024037  | 0.06689734 | 5.16E-07   | 6.14E-06   | WIPI2    |
| NA        | ENSG00000157965 | 0          | NA          | NA         | NA         | NA         | SSX8P    |
| 26119     | ENSG00000157978 | 132.739427 | 1.20524587  | 0.2142546  | 1.85E-09   | 3.07E-08   | LDLRAP1  |
| 116987    | ENSG00000157985 | 2615.36396 | -0.77773054 | 0.07120228 | 1.77E-28   | 9.63E-27   | AGAP1    |
| 200634    | ENSG00000157992 | 12.1445202 | 0.11090939  | 0.35261486 | 0.51083351 | 0.72605035 | KRTCAP3  |
| 100310846 | ENSG00000157999 | 40.3716779 | -0.27131671 | 0.32795739 | 0.20570058 | 0.41269082 | ANKRD61  |
| 5051      | ENSG00000158006 | 244.112866 | -0.35319697 | 0.17654582 | 0.02454798 | 0.08588629 | PAFAH2   |
| 2134      | ENSG00000158008 | 35.0846837 | 0.05364348  | 0.28680864 | 0.78135072 | 0.90003181 | EXTL1    |
| 7780      | ENSG00000158014 | 0.33842187 | 0.00212859  | 0.38337671 | 0.96813356 | NA         | SLC30A2  |
| 9577      | ENSG00000158019 | 449.907829 | -0.04649482 | 0.11144993 | 0.66208089 | 0.83297534 | BABAM2   |
| 84676     | ENSG00000158022 | 0.33471731 | 0.02354391  | 0.38534154 | 0.62842204 | NA         | TRIM63   |
| 144406    | ENSG00000158023 | 6.73627554 | -0.10259586 | 0.37098819 | 0.46759674 | 0.69041597 | CFAP251  |
| 63875     | ENSG00000158042 | 718.758564 | 0.08712051  | 0.11451762 | 0.42506488 | 0.65086728 | MRPL17   |
| 1844      | ENSG00000158050 | 6.91893002 | 1.72041513  | 1.78934948 | 0.00653367 | 0.02917579 | DUSP2    |
| 57822     | ENSG00000158055 | 0          | NA          | NA         | NA         | NA         | GRHL3    |
| 91544     | ENSG00000158062 | 325.343704 | 0.52470853  | 0.1350459  | 3.63E-05   | 0.00030857 | UBXN11   |
| 338323    | ENSG00000158077 | 2.18914891 | 0.02372344  | 0.3752586  | 0.78847317 | NA         | NLRP14   |
| 138639    | ENSG00000158079 | 526.732606 | 0.03453769  | 0.10741121 | 0.73864039 | 0.87647218 | PTPDC1   |
| 79623     | ENSG00000158089 | 1068.24971 | -1.74333921 | 0.09497717 | 2.20E-76   | 4.16E-74   | GALNT14  |
| 4690      | ENSG00000158092 | 278.882465 | 0.0091144   | 0.14639473 | 0.94626087 | 0.97814213 | NCK1     |
| 3242      | ENSG00000158104 | 1.34399714 | -0.04455947 | 0.38505332 | 0.40971879 | NA         | HPD      |
| 114822    | ENSG00000158106 | 456.465831 | 0.50030039  | 0.11522273 | 5.63E-06   | 5.62E-05   | RHPN1    |
| 127262    | ENSG00000158109 | 604.09066  | 0.15164435  | 0.10175044 | 0.12184969 | 0.2885531  | TPRG1L   |
| 254050    | ENSG00000158113 | 11.0710017 | 1.81874697  | 1.07751174 | 0.00263503 | 0.01357191 | LRRC43   |

|           |                 |            |             |            |            |            |         |
|-----------|-----------------|------------|-------------|------------|------------|------------|---------|
| 195827    | ENSG00000158122 | 120.007329 | 0.07907181  | 0.19256451 | 0.63659818 | 0.81722218 | PRXL2C  |
| 7498      | ENSG00000158125 | 0          | NA          | NA         | NA         | NA         | XDH     |
| 55113     | ENSG00000158156 | 9.73403924 | -0.11621248 | 0.36286838 | 0.46406371 | 0.68683506 | XKR8    |
| 26504     | ENSG00000158158 | 509.019618 | -0.03081616 | 0.11627761 | 0.78014469 | 0.89936692 | CNNM4   |
| 2140      | ENSG00000158161 | 981.212244 | 0.09645945  | 0.09870632 | 0.31221413 | 0.53995191 | EYA3    |
| 199221    | ENSG00000158163 | 227.485648 | -0.22806935 | 0.16770002 | 0.12925631 | 0.30074413 | DZIP1L  |
| 11013     | ENSG00000158164 | 886.556291 | -0.03327513 | 0.08996685 | 0.70295703 | 0.85716076 | TMSB15A |
| 2176      | ENSG00000158169 | 705.764371 | -0.1304115  | 0.11334361 | 0.22733464 | 0.44210148 | FANCC   |
| 22808     | ENSG00000158186 | 1150.25319 | 0.15237522  | 0.11205116 | 0.1546997  | 0.3401953  | MRAS    |
| 10163     | ENSG00000158195 | 2337.94384 | 0.21480667  | 0.07160191 | 0.00223534 | 0.01178559 | WASF2   |
| 171586    | ENSG00000158201 | 139.421437 | -0.46423884 | 0.22111867 | 0.01320234 | 0.05207442 | ABHD3   |
| 83850     | ENSG00000158220 | 55.1496268 | 0.10964837  | 0.2623608  | 0.57235314 | 0.7723153  | ESYT3   |
| 55179     | ENSG00000158234 | 164.265681 | -0.35447811 | 0.17746934 | 0.02471827 | 0.0863703  | FAIM    |
| 115572    | ENSG00000158246 | 27.0607011 | 0.11312244  | 0.31473902 | 0.55737404 | 0.76258372 | TENT5B  |
| 64084     | ENSG00000158258 | 477.155704 | -1.05722044 | 0.14165693 | 9.97E-15   | 2.65E-13   | CLSTN2  |
| 81035     | ENSG00000158270 | 3.70175244 | 0.1636535   | 0.41980341 | 0.13632616 | 0.3113874  | COLEC12 |
| 388591    | ENSG00000158286 | 397.988651 | -0.19524057 | 0.11956968 | 0.08473205 | 0.22069796 | RNF207  |
| 8450      | ENSG00000158290 | 1320.35846 | -0.17546634 | 0.08167426 | 0.02760374 | 0.09388964 | CUL4B   |
| 387509    | ENSG00000158292 | 942.122763 | -0.48509154 | 0.09808697 | 3.12E-07   | 3.85E-06   | GPR153  |
| 64849     | ENSG00000158296 | 7.21886994 | 0.1387266   | 0.38058261 | 0.35915647 | 0.58949503 | SLC13A3 |
| 114928    | ENSG00000158301 | 719.360531 | -0.33439862 | 0.09922439 | 0.00046808 | 0.00304681 | GPRASP2 |
| 100528062 | ENSG00000158301 | 719.360531 | -0.33439862 | 0.09922439 | 0.00046808 | 0.00304681 | GPRASP2 |
| 54933     | ENSG00000158315 | 3.03264136 | 0.02722745  | 0.37400475 | 0.77281805 | 0.89561741 | RHBDL2  |
| 26053     | ENSG00000158321 | 3270.41939 | 0.16755272  | 0.10092755 | 0.08547618 | 0.22188243 | AUTS2   |
| 57477     | ENSG00000158352 | 0          | NA          | NA         | NA         | NA         | SHROOM4 |
| 3017      | ENSG00000158373 | 101.282007 | -1.01795828 | 0.2653031  | 1.41E-05   | 0.00013044 | H2BC5   |
| 995       | ENSG00000158402 | 216.960796 | 0.24109005  | 0.15246417 | 0.08431278 | 0.21975376 | CDC25C  |
| 8365      | ENSG00000158406 | 13.6226322 | 0.10376258  | 0.35713381 | 0.51504001 | 0.72955207 | H4C8    |
| 129531    | ENSG00000158411 | 293.322932 | 0.35291408  | 0.1650644  | 0.01808395 | 0.06715058 | MITD1   |
| 9669      | ENSG00000158417 | 2767.24244 | -0.15324233 | 0.07036042 | 0.02660186 | 0.09138928 | EIF5B   |
| 158787    | ENSG00000158423 | 6.53970011 | 0.05806779  | 0.35765066 | 0.68737086 | 0.84809937 | RIBC1   |
| 286527    | ENSG00000158427 | 272.370184 | -0.16603479 | 0.14924199 | 0.2258767  | 0.4400858  | TMSB15B |
| 375307    | ENSG00000158428 | 0.16735865 | 0.01897177  | 0.38482933 | 0.78225479 | NA         | CATIP   |
| 55571     | ENSG00000158435 | 716.611149 | -0.10500336 | 0.09773439 | 0.26546081 | 0.48783542 | CNOT11  |
| 3745      | ENSG00000158445 | 685.685421 | -1.41734297 | 0.42562033 | 5.52E-05   | 0.00044565 | KCNB1   |
| 340348    | ENSG00000158457 | 463.222991 | -0.25141382 | 0.12323644 | 0.03062354 | 0.10197567 | TSPAN33 |
| 9542      | ENSG00000158458 | 171.230416 | -1.00082613 | 0.1862419  | 9.71E-09   | 1.47E-07   | NRG2    |
| 23382     | ENSG00000158467 | 415.018291 | -0.02230924 | 0.13042796 | 0.85470797 | 0.93485893 | AHCYL2  |

|        |                 |            |             |            |            |            |          |
|--------|-----------------|------------|-------------|------------|------------|------------|----------|
| 9334   | ENSG00000158470 | 2228.23424 | -0.42913149 | 0.08489072 | 2.09E-07   | 2.65E-06   | B4GALT5  |
| 912    | ENSG00000158473 | 0          | NA          | NA         | NA         | NA         | CD1D     |
| 909    | ENSG00000158477 | 0          | NA          | NA         | NA         | NA         | CD1A     |
| 9825   | ENSG00000158480 | 314.99649  | 0.10642185  | 0.12761919 | 0.37691555 | 0.60570261 | SPATA2   |
| 911    | ENSG00000158481 | 0          | NA          | NA         | NA         | NA         | CD1C     |
| NA     | ENSG00000158482 | 3.48875602 | 0.21776802  | 0.46252764 | 0.05540657 | 0.16108826 | SNX29P1  |
| NA     | ENSG00000158483 | 142.534276 | 0.03821878  | 0.18415665 | 0.81429838 | 0.91592004 | FAM86C1P |
| 910    | ENSG00000158485 | 0          | NA          | NA         | NA         | NA         | CD1B     |
| 55567  | ENSG00000158486 | 0.15069912 | -0.01848503 | 0.38480575 | 0.84537521 | NA         | DNAH3    |
| 913    | ENSG00000158488 | 0          | NA          | NA         | NA         | NA         | CD1E     |
| 57824  | ENSG00000158497 | 0          | NA          | NA         | NA         | NA         | HMHB1    |
| 1358   | ENSG00000158516 | 0.173733   | 0.01914545  | 0.38484597 | 0.78225479 | NA         | CPA2     |
| 653361 | ENSG00000158517 | 0          | NA          | NA         | NA         | NA         | NCF1     |
| 93979  | ENSG00000158525 | 0.35666205 | 0.02381692  | 0.38538104 | 0.61402664 | NA         | CPA5     |
| 90121  | ENSG00000158526 | 794.220465 | -0.13872124 | 0.09517328 | 0.13700105 | 0.31242538 | TSR2     |
| 55607  | ENSG00000158528 | 1030.17832 | -0.18647493 | 0.08521254 | 0.02452561 | 0.08584828 | PPP1R9A  |
| 124245 | ENSG00000158545 | 1868.54421 | 0.0031227   | 0.06744493 | 0.96320843 | 0.98545957 | ZC3H18   |
| 130617 | ENSG00000158552 | 297.046316 | -0.24479817 | 0.14819129 | 0.07237429 | 0.19602811 | ZFAND2B  |
| 94026  | ENSG00000158553 | 0.173733   | 0.01914545  | 0.38484597 | 0.78225479 | NA         | POM121L2 |
| 81544  | ENSG00000158555 | 164.855308 | -0.40988306 | 0.19258363 | 0.01501205 | 0.05773195 | GDPD5    |
| 1780   | ENSG00000158560 | 618.468543 | 0.83222515  | 0.13402839 | 9.51E-11   | 1.84E-09   | DYNC1I1  |
| 5207   | ENSG00000158571 | 5.52082752 | -0.05796023 | 0.36579346 | 0.64995644 | 0.82529572 | PFKFB1   |
| 212    | ENSG00000158578 | 0.18922458 | 0.01954053  | 0.38488496 | 0.78225479 | NA         | ALAS2    |
| 222068 | ENSG00000158604 | 2951.85353 | 0.09392828  | 0.06084798 | 0.11802582 | 0.2818698  | TMED4    |
| 84919  | ENSG00000158615 | 2251.50908 | 0.01043541  | 0.08271014 | 0.89802947 | 0.95533001 | PPP1R15B |
| 26958  | ENSG00000158623 | 1254.16645 | 0.15091941  | 0.07598572 | 0.04269142 | 0.1320147  | COPG2    |
| 56946  | ENSG00000158636 | 576.195705 | -0.10836746 | 0.1249092  | 0.35744814 | 0.58755353 | EMSY     |
| 90737  | ENSG00000158639 | 2.65170264 | -0.12804767 | 0.40776715 | 0.12871668 | 0.29973461 | PAGE5    |
| 137964 | ENSG00000158669 | 2136.3798  | -0.10135364 | 0.06500351 | 0.11332698 | 0.27313013 | GPAT4    |
| 168507 | ENSG00000158683 | 19.3075279 | -0.33759122 | 0.42046651 | 0.13032477 | 0.30241443 | PKD1L1   |
| 9753   | ENSG00000158691 | 761.386641 | -0.0167281  | 0.10320606 | 0.86526131 | 0.94028794 | ZSCAN12  |
| 8407   | ENSG00000158710 | 2533.79463 | -0.29626677 | 0.06344905 | 2.11E-06   | 2.26E-05   | TAGLN2   |
| 2005   | ENSG00000158711 | 758.275897 | 0.13599271  | 0.10578864 | 0.18088321 | 0.37795923 | ELK4     |
| 56833  | ENSG00000158714 | 0.15069912 | -0.01848503 | 0.38480575 | 0.84537521 | NA         | SLAMF8   |
| 85414  | ENSG00000158715 | 240.468418 | 0.27275165  | 0.15389293 | 0.05267907 | 0.1548976  | SLC45A3  |
| 54935  | ENSG00000158716 | 298.711701 | 0.18289273  | 0.14074671 | 0.16196016 | 0.35042673 | DUSP23   |
| 115992 | ENSG00000158717 | 405.199955 | -0.02410901 | 0.15260856 | 0.86219032 | 0.9388505  | RNF166   |
| NA     | ENSG00000158731 | 0          | NA          | NA         | NA         | NA         | OR10J6P  |

|           |                 |            |             |            |            |            |          |
|-----------|-----------------|------------|-------------|------------|------------|------------|----------|
| 4681      | ENSG00000158747 | 1325.7552  | -0.45907094 | 0.08812229 | 8.40E-08   | 1.12E-06   | NBL1     |
| 100532736 | ENSG00000158747 | 1325.7552  | -0.45907094 | 0.08812229 | 8.40E-08   | 1.12E-06   | NBL1     |
| 3362      | ENSG00000158748 | 160.011474 | -0.15033257 | 0.17331204 | 0.330046   | 0.55861736 | HTR6     |
| 142683    | ENSG00000158764 | 0          | NA          | NA         | NA         | NA         | ITLN2    |
| 50848     | ENSG00000158769 | 366.063042 | 0.29870323  | 0.20938666 | 0.09240056 | 0.23505924 | F11R     |
| 7391      | ENSG00000158773 | 1491.67769 | 0.05889983  | 0.07392393 | 0.41724899 | 0.64356838 | USF1     |
| 64600     | ENSG00000158786 | 0          | NA          | NA         | NA         | NA         | PLA2G2F  |
| 124044    | ENSG00000158792 | 202.913556 | 0.00012853  | 0.15301819 | 0.99987375 | 0.9998748  | SPATA2L  |
| 4817      | ENSG00000158793 | 493.862179 | 0.13917899  | 0.11735025 | 0.21253287 | 0.42238326 | NIT1     |
| 9191      | ENSG00000158796 | 1124.1486  | 0.21348486  | 0.09059124 | 0.01516183 | 0.05815016 | DEDD     |
| 92822     | ENSG00000158805 | 1310.77216 | 0.23230993  | 0.09178279 | 0.00904851 | 0.03817189 | ZNF276   |
| 10361     | ENSG00000158806 | 4.20028012 | 0.05983987  | 0.37310779 | 0.58799551 | 0.7828366  | NPM2     |
| 1896      | ENSG00000158813 | 3.13451338 | -0.08430713 | 0.38471501 | 0.38845229 | 0.61758902 | EDA      |
| 8822      | ENSG00000158815 | 17.4367339 | 0.29384154  | 0.41787335 | 0.15888548 | 0.3462911  | FGF17    |
| 127731    | ENSG00000158816 | 3.53736892 | -0.30162202 | 0.55940331 | 0.0171737  | 0.06448264 | VWA5B1   |
| 978       | ENSG00000158825 | 0          | NA          | NA         | NA         | NA         | CDA      |
| 65018     | ENSG00000158828 | 513.636128 | 0.03225156  | 0.1074257  | 0.75526273 | 0.88614698 | PINK1    |
| 8703      | ENSG00000158850 | 1407.83175 | -0.00111231 | 0.08145957 | 0.98820828 | 0.99593885 | B4GALT3  |
| 2039      | ENSG00000158856 | 445.121941 | -0.58433421 | 0.12751369 | 1.40E-06   | 1.55E-05   | DMTN     |
| 9507      | ENSG00000158859 | 873.441837 | 0.0602861   | 0.14843466 | 0.66449428 | 0.83444869 | ADAMTS4  |
| 64760     | ENSG00000158863 | 1095.35387 | 0.3480861   | 0.09348331 | 0.0001195  | 0.00089166 | FAM160B2 |
| 4720      | ENSG00000158864 | 3082.504   | 0.05089251  | 0.05880875 | 0.38124991 | 0.61019669 | NDUFS2   |
| 115584    | ENSG00000158865 | 5.08154885 | 0.24710898  | 0.47978046 | 0.06204978 | 0.17579147 | SLC5A11  |
| 2207      | ENSG00000158869 | 1.80000047 | 0.02197139  | 0.3752095  | 0.80305595 | NA         | FCER1G   |
| 336       | ENSG00000158874 | 0          | NA          | NA         | NA         | NA         | APOA2    |
| 84134     | ENSG00000158882 | 539.904817 | -0.09605994 | 0.12612759 | 0.41881155 | 0.6446754  | TOMM40L  |
| 4359      | ENSG00000158887 | 23.7636868 | -0.65021981 | 0.50778871 | 0.02568772 | 0.0889587  | MPZ      |
| 90199     | ENSG00000158901 | 0          | NA          | NA         | NA         | NA         | WFDC8    |
| 57805     | ENSG00000158941 | 4198.38537 | 0.05996704  | 0.09227438 | 0.50444285 | 0.72099605 | CCAR2    |
| 7484      | ENSG00000158955 | 0          | NA          | NA         | NA         | NA         | WNT9B    |
| 57685     | ENSG00000158966 | 3032.79018 | -0.71620054 | 0.05948157 | 5.05E-34   | 3.30E-32   | CACHD1   |
| 56990     | ENSG00000158985 | 397.616907 | 0.12786833  | 0.12568417 | 0.28149047 | 0.50630249 | CDC42SE2 |
| 51735     | ENSG00000158987 | 617.406924 | -0.27365814 | 0.11858072 | 0.01352726 | 0.05313349 | RAPGEF6  |
| 2035      | ENSG00000159023 | 3219.74375 | 0.04136727  | 0.06774511 | 0.5347504  | 0.74572704 | EPB41    |
| 54069     | ENSG00000159055 | 384.732218 | -0.05144756 | 0.12358387 | 0.65932212 | 0.83105722 | MIS18A   |
| 79053     | ENSG00000159063 | 817.49536  | 0.07608972  | 0.09125725 | 0.38858098 | 0.61774412 | ALG8     |
| 54461     | ENSG00000159069 | 1670.16497 | 0.09208888  | 0.07372429 | 0.20327181 | 0.40934965 | FBXW5    |
| 56683     | ENSG00000159079 | 1074.66485 | 0.14697898  | 0.09035392 | 0.0943841  | 0.23881909 | CFAP298  |

|           |                 |            |             |            |            |            |         |
|-----------|-----------------|------------|-------------|------------|------------|------------|---------|
| 8867      | ENSG00000159082 | 526.117603 | -0.97315349 | 0.15277643 | 2.02E-11   | 4.15E-10   | SYNJ1   |
| 94104     | ENSG00000159086 | 1656.57749 | 0.03951373  | 0.07043391 | 0.56878538 | 0.76944648 | PAXBP1  |
| 3455      | ENSG00000159110 | 287.587423 | 0.07156412  | 0.14169677 | 0.58643174 | 0.78212395 | IFNAR2  |
| 124995    | ENSG00000159111 | 1502.22884 | -0.00034704 | 0.09195985 | 0.99473379 | 0.99852582 | MRPL10  |
| 3460      | ENSG00000159128 | 1044.9163  | 0.25325615  | 0.082424   | 0.00163959 | 0.00905606 | IFNGR2  |
| 2618      | ENSG00000159131 | 3094.34318 | 0.12711341  | 0.07314082 | 0.07663662 | 0.20469446 | GART    |
| 6651      | ENSG00000159140 | 6793.93047 | -0.4511384  | 0.07777094 | 2.97E-09   | 4.78E-08   | SON     |
| 29980     | ENSG00000159147 | 484.998926 | -0.09349837 | 0.11885718 | 0.40699808 | 0.63526409 | DONSON  |
| 9900      | ENSG00000159164 | 2562.31951 | -0.47028592 | 0.07136534 | 1.93E-11   | 3.98E-10   | SV2A    |
| 3898      | ENSG00000159166 | 0          | NA          | NA         | NA         | NA         | LAD1    |
| 6781      | ENSG00000159167 | 0.173124   | -0.01911262 | 0.38486262 | 0.84537521 | NA         | STC1    |
| 7135      | ENSG00000159173 | 0.93703287 | -0.03548087 | 0.38531853 | 0.45338    | NA         | TNNI1   |
| 1465      | ENSG00000159176 | 540.276867 | 0.3983824   | 0.10773842 | 0.00011386 | 0.00085339 | CSRP1   |
| 84366     | ENSG00000159182 | 0          | NA          | NA         | NA         | NA         | PRAC1   |
| 10481     | ENSG00000159184 | 0          | NA          | NA         | NA         | NA         | HOXB13  |
| NA        | ENSG00000159186 | 0          | NA          | NA         | NA         | NA         | ATP5PO1 |
| 714       | ENSG00000159189 | 0          | NA          | NA         | NA         | NA         | C1QC    |
| 9992      | ENSG00000159197 | 1.31524186 | 0.00929914  | 0.37896592 | 0.89090372 | NA         | KCNE2   |
| 516       | ENSG00000159199 | 686.200927 | -0.13778849 | 0.12238752 | 0.23347657 | 0.45042543 | ATP5MC1 |
| 1827      | ENSG00000159200 | 260.351749 | -0.26880999 | 0.15279585 | 0.0543471  | 0.15863564 | RCAN1   |
| 65264     | ENSG00000159202 | 2162.55686 | -0.0234656  | 0.06439499 | 0.71012919 | 0.86086784 | UBE2Z   |
| 148523    | ENSG00000159208 | 8.92430247 | 0.07876939  | 0.35949942 | 0.59564827 | 0.78816266 | CIART   |
| 11267     | ENSG00000159210 | 1553.61415 | -0.18692906 | 0.08888576 | 0.03026209 | 0.10106039 | SNF8    |
| 54102     | ENSG00000159212 | 0.18922458 | 0.01954053  | 0.38488496 | 0.78225479 | NA         | CLIC6   |
| 149473    | ENSG00000159214 | 173.81325  | -0.04838275 | 0.17611829 | 0.75616699 | 0.88670553 | CCDC24  |
| 861       | ENSG00000159216 | 14.3472486 | 0.126314    | 0.35238508 | 0.46880107 | 0.69137681 | RUNX1   |
| 100506403 | ENSG00000159216 | 14.3472486 | 0.126314    | 0.35238508 | 0.46880107 | 0.69137681 | RUNX1   |
| 10642     | ENSG00000159217 | 11.839335  | -2.37821327 | 1.18783491 | 0.00082786 | 0.0050106  | IGF2BP1 |
| 2695      | ENSG00000159224 | 0          | NA          | NA         | NA         | NA         | GIP     |
| 873       | ENSG00000159228 | 791.832836 | -0.00578998 | 0.09624389 | 0.94867521 | 0.97892111 | CBR1    |
| 874       | ENSG00000159231 | 30.599798  | -0.31731534 | 0.35196228 | 0.15324613 | 0.33804794 | CBR3    |
| NA        | ENSG00000159239 | 2.92030553 | 0.08565032  | 0.38788142 | 0.34168301 | 0.57180671 |         |
| NA        | ENSG00000159247 | 6.79858016 | -0.19142116 | 0.41216588 | 0.20771436 | 0.41501037 | TUBBP5  |
| 57369     | ENSG00000159248 | 4.7729524  | -0.18098626 | 0.41970547 | 0.16954555 | 0.36123762 | GJD2    |
| 70        | ENSG00000159251 | 0          | NA          | NA         | NA         | NA         | ACTC1   |
| 23515     | ENSG00000159256 | 1012.72113 | 0.06876055  | 0.08524351 | 0.41076173 | 0.63847247 | MORC3   |
| 8208      | ENSG00000159259 | 513.044943 | -0.38313535 | 0.12414979 | 0.00107901 | 0.00630193 | CHAF1B  |
| 23562     | ENSG00000159261 | 0.30139824 | -0.02296476 | 0.38527817 | 0.68536535 | NA         | CLDN14  |

|        |                 |            |             |            |            |            |          |
|--------|-----------------|------------|-------------|------------|------------|------------|----------|
| 6493   | ENSG00000159263 | 5.71390944 | -3.02120843 | 1.51101076 | 0.00272389 | 0.01396431 | SIM2     |
| 3141   | ENSG00000159267 | 753.290229 | 0.02175541  | 0.13030387 | 0.85896176 | 0.93718813 | HLCS     |
| 342096 | ENSG00000159289 | 2.91469743 | 0.17698053  | 0.4360494  | 0.06277151 | 0.17738025 | GOLGA6A  |
| 80274  | ENSG00000159307 | 47.7977227 | -1.97329486 | 0.49479221 | 1.99E-06   | 2.14E-05   | SCUBE1   |
| 201176 | ENSG00000159314 | 75.3579481 | 0.38276091  | 0.26850784 | 0.06587365 | 0.18348074 | ARHGAP27 |
| 83440  | ENSG00000159322 | 831.653151 | -0.13636046 | 0.1021157  | 0.16436387 | 0.35380049 | ADPGK    |
| 5763   | ENSG00000159335 | 6091.35722 | -0.06022479 | 0.06548152 | 0.35118538 | 0.58135318 | PTMS     |
| 283748 | ENSG00000159337 | 0          | NA          | NA         | NA         | NA         | PLA2G4D  |
| 23569  | ENSG00000159339 | 0          | NA          | NA         | NA         | NA         | PADI4    |
| 51094  | ENSG00000159346 | 1702.55296 | 0.2699649   | 0.07118908 | 0.00011202 | 0.00084127 | ADIPOR1  |
| 51706  | ENSG00000159348 | 398.969093 | -0.21555523 | 0.12454625 | 0.06600554 | 0.18369334 | CYB5R1   |
| 5710   | ENSG00000159352 | 4445.54991 | 0.00586654  | 0.05811125 | 0.91928355 | 0.96577102 | PSMD4    |
| 23400  | ENSG00000159363 | 1301.93703 | -0.16291439 | 0.0826121  | 0.04301183 | 0.13271456 | ATP13A2  |
| 130951 | ENSG00000159374 | 0.71437841 | -0.01573492 | 0.38252123 | 0.79790796 | NA         | M1AP     |
| 5692   | ENSG00000159377 | 5038.74943 | 0.03204622  | 0.06136603 | 0.59740001 | 0.78921427 | PSMB4    |
| 79190  | ENSG00000159387 | 62.4383822 | 0.64073462  | 0.32762288 | 0.00983992 | 0.04094361 | IRX6     |
| 7832   | ENSG00000159388 | 545.346378 | 1.73054371  | 0.11337573 | 1.05E-53   | 1.13E-51   | BTG2     |
| 221223 | ENSG00000159398 | 0.54443584 | 0.03032242  | 0.38588423 | 0.55227227 | NA         | CES5A    |
| 3099   | ENSG00000159399 | 1504.01117 | 0.20896412  | 0.11061216 | 0.04819064 | 0.14471721 | HK2      |
| 715    | ENSG00000159403 | 18.7127237 | 0.19157855  | 0.37501865 | 0.29544804 | 0.52201345 | C1R      |
| 11189  | ENSG00000159409 | 1948.47176 | -1.56276695 | 0.07343471 | 1.36E-101  | 4.21E-99   | CELF3    |
| 8659   | ENSG00000159423 | 291.553626 | 0.11302889  | 0.15186118 | 0.42184652 | 0.64783923 | ALDH4A1  |
| 57519  | ENSG00000159433 | 1495.51787 | 0.6131873   | 0.09541187 | 3.80E-11   | 7.64E-10   | STARD9   |
| 117145 | ENSG00000159445 | 668.660568 | 0.17645922  | 0.09517758 | 0.05538683 | 0.16107809 | THEM4    |
| 7062   | ENSG00000159450 | 0          | NA          | NA         | NA         | NA         | TCHH     |
| 26239  | ENSG00000159455 | 0          | NA          | NA         | NA         | NA         | LCE2B    |
| 197131 | ENSG00000159459 | 874.674653 | -0.45650194 | 0.1116027  | 1.88E-05   | 0.00016962 | UBR1     |
| 267    | ENSG00000159461 | 656.391049 | -0.21211494 | 0.1107455  | 0.04474245 | 0.13648374 | AMFR     |
| 112950 | ENSG00000159479 | 433.934101 | -0.16910343 | 0.11904316 | 0.13403849 | 0.30828734 | MED8     |
| 116179 | ENSG00000159495 | 0          | NA          | NA         | NA         | NA         | TGM7     |
| 266747 | ENSG00000159496 | 11.4016277 | 0.26323285  | 0.49855302 | 0.03571722 | 0.11513073 | RGL4     |
| 6706   | ENSG00000159516 | 0          | NA          | NA         | NA         | NA         | SPRR2G   |
| 114771 | ENSG00000159527 | 0          | NA          | NA         | NA         | NA         | PGLYRP3  |
| 64843  | ENSG00000159556 | 188.655445 | -0.08850038 | 0.15871263 | 0.53942472 | 0.74850934 | ISL2     |
| 89970  | ENSG00000159579 | 665.813843 | 0.23183642  | 0.11259535 | 0.03080577 | 0.10237631 | RSPRY1   |
| 149483 | ENSG00000159588 | 12.0867291 | 0.10193288  | 0.35416602 | 0.53379421 | 0.74507367 | CCDC17   |
| 60313  | ENSG00000159592 | 1332.57452 | -0.12274219 | 0.09749252 | 0.19212847 | 0.39427275 | GPBP1L1  |
| 8883   | ENSG00000159593 | 1380.74256 | -0.07425737 | 0.07814776 | 0.33123145 | 0.56014592 | NAE1     |



|        |                 |            |             |            |            |            |           |
|--------|-----------------|------------|-------------|------------|------------|------------|-----------|
| 51249  | ENSG00000159596 | 447.52945  | -0.05803866 | 0.11583419 | 0.59837554 | 0.78991172 | TMEM69    |
| 221188 | ENSG00000159618 | 0          | NA          | NA         | NA         | NA         | ADGRG5    |
| 84229  | ENSG00000159625 | 13.0276999 | 0.0686593   | 0.35200883 | 0.65425027 | 0.82790673 | DRC7      |
| 1636   | ENSG00000159640 | 457.824699 | 0.15663848  | 0.12249301 | 0.17684722 | 0.37163689 | ACE       |
| 374739 | ENSG00000159648 | 7.31828275 | -0.01803717 | 0.35542525 | 0.89341791 | 0.95389529 | TEPP      |
| 131669 | ENSG00000159650 | 0.5290841  | 0.03179438  | 0.38612054 | 0.46790964 | NA         | UROCI     |
| 9813   | ENSG00000159658 | 636.976757 | 0.41312371  | 0.12213945 | 0.00035593 | 0.00238487 | EFCAB14   |
| 10417  | ENSG00000159674 | 10.7774803 | -0.08474818 | 0.34942173 | 0.59980948 | 0.79066681 | SPON2     |
| 84303  | ENSG00000159685 | 276.402288 | 0.03747407  | 0.14397606 | 0.77877449 | 0.8988299  | CHCHD6    |
| 1487   | ENSG00000159692 | 3029.24509 | 0.10145843  | 0.06921358 | 0.13628125 | 0.3113874  | CTBP1     |
| 55282  | ENSG00000159708 | 20.7136545 | 0.47721908  | 0.49747536 | 0.06159438 | 0.17497602 | LRRC36    |
| NA     | ENSG00000159712 | 2.29168666 | -0.03643855 | 0.37489887 | 0.69788913 | NA         | ANKRD18CP |
| 51673  | ENSG00000159713 | 208.944217 | -0.21229173 | 0.16754084 | 0.15796422 | 0.34496534 | TPPP3     |
| 29800  | ENSG00000159714 | 179.439167 | 0.72583507  | 0.19547032 | 4.10E-05   | 0.00034399 | ZDHHC1    |
| 9114   | ENSG00000159720 | 878.367148 | -0.27655114 | 0.11563294 | 0.0118319  | 0.04771238 | ATP6V0D1  |
| 181    | ENSG00000159723 | 0.64500811 | -0.03770254 | 0.386784   | 0.41114084 | NA         | AGRP      |
| 57732  | ENSG00000159733 | 29.5905768 | -0.09560861 | 0.31853516 | 0.60573056 | 0.79555768 | ZFYVE28   |
| 146206 | ENSG00000159753 | 443.963619 | -1.84036631 | 0.15881204 | 2.51E-32   | 1.54E-30   | CARMIL2   |
| 388284 | ENSG00000159761 | 83.9533237 | 0.37389605  | 0.24875958 | 0.06111215 | 0.17385505 | C16orf86  |
| 5304   | ENSG00000159763 | 0          | NA          | NA         | NA         | NA         | PIP       |
| 9715   | ENSG00000159784 | 6.43557884 | -0.14305166 | 0.38938032 | 0.30996018 | 0.53774299 | FAM131B   |
| 6002   | ENSG00000159788 | 1397.57912 | 0.20128617  | 0.12660575 | 0.09147256 | 0.23347687 | RGS12     |
| 5681   | ENSG00000159792 | 1281.80786 | 0.27953189  | 0.093004   | 0.00191245 | 0.01027725 | PSKH1     |
| 7791   | ENSG00000159840 | 864.955764 | 0.57578914  | 0.09330073 | 2.21E-10   | 4.09E-09   | ZYX       |
| 29     | ENSG00000159842 | 3980.08014 | -0.13480262 | 0.05457594 | 0.01251943 | 0.04990667 | ABR       |
| NA     | ENSG00000159860 | 0          | NA          | NA         | NA         | NA         | TCAF2P1   |
| 284348 | ENSG00000159871 | 4.47221864 | -0.11921702 | 0.38888796 | 0.32452883 | 0.55221149 | LYPD5     |
| 150275 | ENSG00000159873 | 741.054466 | 0.03906404  | 0.0999686  | 0.68652718 | 0.84763827 | CCDC117   |
| 7773   | ENSG00000159882 | 208.769231 | -0.14767354 | 0.15833537 | 0.30472322 | 0.53198909 | ZNF230    |
| 203260 | ENSG00000159884 | 115.845871 | 0.2718356   | 0.20555408 | 0.12121291 | 0.2874665  | CCDC107   |
| 7673   | ENSG00000159885 | 110.197622 | 0.08357508  | 0.22393826 | 0.64821514 | 0.82448382 | ZNF222    |
| 4882   | ENSG00000159899 | 173.347989 | 0.16253164  | 0.22112194 | 0.37216709 | 0.60109044 | NPR2      |
| NA     | ENSG00000159904 | 1.67970679 | 0.03180163  | 0.37856483 | 0.68439553 | NA         | ZNF890P   |
| 7638   | ENSG00000159905 | 101.15811  | -0.2467136  | 0.25346212 | 0.20975142 | 0.41815395 | ZNF221    |
| 353355 | ENSG00000159915 | 156.135276 | -0.03429417 | 0.18951494 | 0.83252198 | 0.92392457 | ZNF233    |
| 9310   | ENSG00000159917 | 354.235635 | 0.09701468  | 0.13693445 | 0.44871506 | 0.67234398 | ZNF235    |
| 10020  | ENSG00000159921 | 985.330268 | -0.22270409 | 0.08679009 | 0.00830676 | 0.03563374 | GNE       |
| 115650 | ENSG00000159958 | 40.3665593 | 0.30987356  | 0.32598999 | 0.15720892 | 0.34399746 | TNFRSF13C |

|        |                 |            |             |            |            |            |          |
|--------|-----------------|------------|-------------|------------|------------|------------|----------|
| 8392   | ENSG00000159961 | 0          | NA          | NA         | NA         | NA         | OR3A3    |
| 2909   | ENSG00000160007 | 4285.67442 | -0.39534359 | 0.07294816 | 3.23E-08   | 4.54E-07   | ARHGAP35 |
| 5739   | ENSG00000160013 | 186.100261 | 0.3179084   | 0.19323458 | 0.0586293  | 0.1682196  | PTGIR    |
| 808    | ENSG00000160014 | 7786.80381 | -0.24539752 | 0.05973682 | 2.96E-05   | 0.00025552 | CALM3    |
| 1676   | ENSG00000160049 | 2227.34592 | -0.19821322 | 0.07051888 | 0.0041788  | 0.02002468 | DFFA     |
| 79140  | ENSG00000160050 | 334.80692  | -0.42167865 | 0.14910394 | 0.00217905 | 0.01152249 | CCDC28B  |
| 55721  | ENSG00000160051 | 106.69828  | 0.03590314  | 0.20743207 | 0.83851043 | 0.92674595 | IQCC     |
| 56063  | ENSG00000160055 | 142.014508 | 0.26018226  | 0.20884901 | 0.14114772 | 0.31929662 | TMEM234  |
| 55108  | ENSG00000160058 | 1417.88808 | 0.06893041  | 0.07405129 | 0.34292341 | 0.57311341 | BSDC1    |
| 653121 | ENSG00000160062 | 163.069846 | -0.19049124 | 0.18070743 | 0.23094683 | 0.44697932 | ZBTB8A   |
| 83858  | ENSG00000160072 | 1154.12791 | 0.21493368  | 0.08583669 | 0.01013096 | 0.04183108 | ATAD3B   |
| 29101  | ENSG00000160075 | 1414.52757 | -0.08403793 | 0.07633812 | 0.2608123  | 0.48273755 | SSU72    |
| 118424 | ENSG00000160087 | 1426.43945 | -0.12261161 | 0.08470013 | 0.13721239 | 0.31276353 | UBE2J2   |
| 149076 | ENSG00000160094 | 1266.54487 | 0.01327574  | 0.08736365 | 0.87768945 | 0.94578953 | ZNF362   |
| 252995 | ENSG00000160097 | 54.1001293 | -1.75775326 | 0.39054084 | 4.26E-07   | 5.14E-06   | FNDC5    |
| 27151  | ENSG00000160111 | 11.0804674 | 0.59842107  | 0.97461971 | 0.02083524 | 0.07532272 | CPAMD8   |
| 2063   | ENSG00000160113 | 1713.67424 | -0.14639641 | 0.07282684 | 0.04033285 | 0.1262121  | NR2F6    |
| 126549 | ENSG00000160117 | 515.869009 | -0.52305939 | 0.10990537 | 7.14E-07   | 8.29E-06   | ANKLE1   |
| 131076 | ENSG00000160124 | 194.799588 | -0.0799693  | 0.18239269 | 0.61722259 | 0.80396906 | MIX23    |
| 203547 | ENSG00000160131 | 791.505567 | 0.26102135  | 0.10023837 | 0.00685985 | 0.03042688 | VMA21    |
| 8997   | ENSG00000160145 | 2045.55958 | -0.36008382 | 0.09802273 | 0.00013878 | 0.00102164 | KALRN    |
| 148113 | ENSG00000160161 | 54.0941054 | 0.08789454  | 0.24634591 | 0.64610004 | 0.82370422 | CILP2    |
| 645332 | ENSG00000160172 | 104.180687 | 0.00235472  | 0.20953012 | 0.99074459 | 0.99682401 | FAM86C2P |
| 9619   | ENSG00000160179 | 85.3525977 | -1.81073966 | 0.33692319 | 4.89E-09   | 7.68E-08   | ABCG1    |
| 7033   | ENSG00000160180 | 0          | NA          | NA         | NA         | NA         | TFF3     |
| 7032   | ENSG00000160181 | 0          | NA          | NA         | NA         | NA         | TFF2     |
| 7031   | ENSG00000160182 | 0          | NA          | NA         | NA         | NA         | TFF1     |
| 64699  | ENSG00000160183 | 0          | NA          | NA         | NA         | NA         | TMPRSS3  |
| 53347  | ENSG00000160185 | 0          | NA          | NA         | NA         | NA         | UBASH3A  |
| 89765  | ENSG00000160188 | 5.64931037 | -0.06610175 | 0.36570368 | 0.61232238 | 0.80024215 | RSPH1    |
| 54020  | ENSG00000160190 | 88.9501421 | -0.25624712 | 0.25085499 | 0.19106443 | 0.39259479 | SLC37A1  |
| 5152   | ENSG00000160191 | 525.333731 | -0.40107114 | 0.12209634 | 0.00051744 | 0.0033245  | PDE9A    |
| 10785  | ENSG00000160193 | 499.1987   | -0.0975298  | 0.11648224 | 0.3784008  | 0.60737234 | WDR4     |
| 4731   | ENSG00000160194 | 536.311154 | -0.08832008 | 0.12684589 | 0.45934122 | 0.68256874 | NDUFV3   |
| 5316   | ENSG00000160199 | 562.23866  | 0.0817839   | 0.14422119 | 0.54122354 | 0.74967974 | PKNOX1   |
| 875    | ENSG00000160200 | 3383.79123 | 0.1198158   | 0.05828341 | 0.03752814 | 0.11968467 | CBS      |
| 7307   | ENSG00000160201 | 1435.05198 | -0.24723251 | 0.2326483  | 0.18811696 | 0.38853222 | U2AF1    |
| 1409   | ENSG00000160202 | 0          | NA          | NA         | NA         | NA         | CRYAA    |

|           |                 |            |             |            |            |            |          |
|-----------|-----------------|------------|-------------|------------|------------|------------|----------|
| 11077     | ENSG00000160207 | 14.7367698 | 0.36863761  | 0.47830976 | 0.09961135 | 0.24855856 | HSF2BP   |
| 23076     | ENSG00000160208 | 1907.52953 | -0.15673961 | 0.07049852 | 0.02352835 | 0.08298336 | RRP1B    |
| 8566      | ENSG00000160209 | 1338.00413 | -0.02293807 | 0.09554111 | 0.80342052 | 0.91070264 | PDXK     |
| 105372824 | ENSG00000160209 | 1338.00413 | -0.02293807 | 0.09554111 | 0.80342052 | 0.91070264 | PDXK     |
| 2539      | ENSG00000160211 | 1014.02894 | 0.07419862  | 0.08891937 | 0.39237269 | 0.62167977 | G6PD     |
| 1476      | ENSG00000160213 | 575.968481 | -0.10254781 | 0.10133262 | 0.29138499 | 0.51742125 | CSTB     |
| 8568      | ENSG00000160214 | 702.796682 | 0.0303064   | 0.11445622 | 0.78235227 | 0.90086297 | RRP1     |
| 56894     | ENSG00000160216 | 2295.32885 | 0.11319463  | 0.07329448 | 0.11512568 | 0.27658176 | AGPAT3   |
| 7109      | ENSG00000160218 | 1217.18382 | -0.08340161 | 0.09539661 | 0.36595773 | 0.59518764 | TRAPPC10 |
| 139716    | ENSG00000160219 | 0          | NA          | NA         | NA         | NA         | GAB3     |
| 8209      | ENSG00000160221 | 133.645631 | -0.0838785  | 0.18722533 | 0.60777869 | 0.79695264 | GATD3A   |
| 23308     | ENSG00000160223 | 0          | NA          | NA         | NA         | NA         | ICOSLG   |
| 326       | ENSG00000160224 | 0.60687039 | 0.03538224  | 0.38650176 | 0.41848568 | NA         | AIRE     |
| 755       | ENSG00000160226 | 387.70931  | 0.33957708  | 0.12426045 | 0.00379757 | 0.01846659 | CFAP410  |
| 7617      | ENSG00000160229 | 194.519639 | -0.12977369 | 0.1728571  | 0.39954239 | 0.62826628 | ZNF66    |
| 81543     | ENSG00000160233 | 240.655458 | -0.00368047 | 0.15944842 | 0.97857704 | 0.9926868  | LRRC3    |
| 3689      | ENSG00000160255 | 0.8936208  | -0.02377628 | 0.38232713 | 0.71099375 | NA         | ITGB2    |
| 85395     | ENSG00000160256 | 419.242327 | -0.08468081 | 0.11867408 | 0.45211452 | 0.67536839 | FAM207A  |
| 5900      | ENSG00000160271 | 6052.50801 | 0.1648705   | 0.05630013 | 0.00279775 | 0.01428023 | RALGDS   |
| 10841     | ENSG00000160282 | 4.5108189  | -0.06038661 | 0.36752376 | 0.62739405 | 0.81091192 | FTCD     |
| 84221     | ENSG00000160284 | 156.483948 | 0.17543576  | 0.18060738 | 0.271661   | 0.49506331 | SPATC1L  |
| 4047      | ENSG00000160285 | 3176.81201 | -0.14053689 | 0.09237455 | 0.11606822 | 0.27838412 | LSS      |
| 7410      | ENSG00000160293 | 1241.53625 | -0.66780328 | 0.08695037 | 4.05E-15   | 1.12E-13   | VAV2     |
| 8888      | ENSG00000160294 | 3109.05491 | 0.12941246  | 0.06409204 | 0.04040925 | 0.12635452 | MCM3AP   |
| 54058     | ENSG00000160298 | 1027.40214 | 0.34264932  | 0.09605519 | 0.00022243 | 0.00156268 | C21orf58 |
| 5116      | ENSG00000160299 | 2182.72775 | 0.19420919  | 0.08246948 | 0.01578823 | 0.060111   | PCNT     |
| 23181     | ENSG00000160305 | 1445.57794 | 0.09339667  | 0.07808822 | 0.22195499 | 0.43502894 | DIP2A    |
| 6285      | ENSG00000160307 | 6.49096972 | -0.14296852 | 0.38946892 | 0.31177613 | 0.53952362 | S100B    |
| 3275      | ENSG00000160310 | 1716.14842 | 0.02495663  | 0.07053148 | 0.71952715 | 0.86580657 | PRMT2    |
| 125875    | ENSG00000160318 | 3.36051433 | -0.02625494 | 0.37211443 | 0.78877202 | 0.90411045 | CLDND2   |
| 7757      | ENSG00000160321 | 136.180962 | -0.89131515 | 0.26322983 | 9.18E-05   | 0.00070511 | ZNF208   |
| 11093     | ENSG00000160323 | 564.532031 | 0.79225384  | 0.1227806  | 2.09E-11   | 4.29E-10   | ADAMTS13 |
| 11094     | ENSG00000160325 | 754.723805 | 0.34291972  | 0.10448467 | 0.0006273  | 0.00393597 | CACFD1   |
| 11182     | ENSG00000160326 | 485.939937 | -0.32259298 | 0.13085168 | 0.00851363 | 0.03632481 | SLC2A6   |
| 388561    | ENSG00000160336 | 311.686603 | 0.15184415  | 0.14216968 | 0.24993876 | 0.46971535 | ZNF761   |
| 110116772 | ENSG00000160336 | 311.686603 | 0.15184415  | 0.14216968 | 0.24993876 | 0.46971535 | ZNF761   |
| 2220      | ENSG00000160339 | 0          | NA          | NA         | NA         | NA         | FCN2     |
| 138162    | ENSG00000160345 | 37.7893717 | 0.81069308  | 0.44730459 | 0.00791795 | 0.03421739 | C9orf116 |

|        |                 |            |             |            |            |            |            |
|--------|-----------------|------------|-------------|------------|------------|------------|------------|
| 3933   | ENSG00000160349 | 0          | NA          | NA         | NA         | NA         | LCN1       |
| 148206 | ENSG00000160352 | 1125.28826 | -0.37636669 | 0.09471551 | 3.95E-05   | 0.00033274 | ZNF714     |
| 26086  | ENSG00000160360 | 2663.12004 | -0.3098862  | 0.06833514 | 3.89E-06   | 3.99E-05   | GPSM1      |
| 126526 | ENSG00000160392 | 387.646087 | -0.01192705 | 0.12648885 | 0.9197282  | 0.96608468 | C19orf47   |
| 147746 | ENSG00000160396 | 3.38466066 | 0.06503111  | 0.37432309 | 0.56269276 | 0.7656036  | HIPK4      |
| 286207 | ENSG00000160401 | 34.8933453 | 0.10152007  | 0.30742365 | 0.59617226 | 0.78832911 | CFAP157    |
| 27433  | ENSG00000160404 | 322.187713 | 0.19404588  | 0.14295876 | 0.14247514 | 0.3212532  | TOR2A      |
| 30815  | ENSG00000160408 | 612.409493 | 0.10454851  | 0.10724597 | 0.30986569 | 0.53771847 | ST6GALNAC6 |
| 92799  | ENSG00000160410 | 866.96294  | 0.31984161  | 0.09364357 | 0.00041624 | 0.00274175 | SHKBP1     |
| 112724 | ENSG00000160439 | 374.787296 | -0.07136675 | 0.14714383 | 0.59799386 | 0.78960741 | RDH13      |
| 10444  | ENSG00000160445 | 824.323679 | 0.18640298  | 0.09404634 | 0.04065337 | 0.12691785 | ZER1       |
| 84885  | ENSG00000160446 | 366.040621 | 0.25463633  | 0.12987348 | 0.03668522 | 0.11767741 | ZDHHC12    |
| 29941  | ENSG00000160447 | 526.005527 | -0.06675154 | 0.1088921  | 0.52179415 | 0.73509876 | PKN3       |
| 57731  | ENSG00000160460 | 637.10812  | -1.77641433 | 0.11797969 | 2.26E-52   | 2.39E-50   | SPTBN4     |
| 84446  | ENSG00000160469 | 1687.97264 | -0.13609108 | 0.07308601 | 0.05752058 | 0.16582509 | BRSK1      |
| 125965 | ENSG00000160471 | 4.07397354 | -0.0972237  | 0.38393493 | 0.37450016 | 0.60363012 | COX6B2     |
| 147744 | ENSG00000160472 | 0.31807308 | 0.00101207  | 0.38336578 | 0.96737941 | NA         | TMEM190    |
| 147945 | ENSG00000160505 | 0.52119901 | 0.02576573  | 0.38568143 | 0.51723676 | NA         | NLRP4      |
| 84814  | ENSG00000160539 | 317.233174 | -0.09865015 | 0.12891045 | 0.4155157  | 0.64244323 | PLPP7      |
| 57551  | ENSG00000160551 | 3402.01972 | -0.11143727 | 0.0618169  | 0.0672863  | 0.18623888 | TAOK1      |
| 9442   | ENSG00000160563 | 322.590216 | 0.20893871  | 0.13437948 | 0.09588155 | 0.24171409 | MED27      |
| 162989 | ENSG00000160570 | 426.277269 | 0.15388203  | 0.11424977 | 0.1579364  | 0.34494256 | DEDD2      |
| 23387  | ENSG00000160584 | 860.612977 | -0.11150191 | 0.08869301 | 0.19390553 | 0.39677039 | SIK3       |
| 196264 | ENSG00000160588 | 6.16348434 | -0.31593454 | 0.55428393 | 0.0348688  | 0.1130018  | MPZL3      |
| 120425 | ENSG00000160593 | 0          | NA          | NA         | NA         | NA         | JAML       |
| 284086 | ENSG00000160602 | 76.7555261 | -0.06866281 | 0.25024119 | 0.7165568  | 0.86359415 | NEK8       |
| 116238 | ENSG00000160606 | 45.2672398 | -0.13354181 | 0.28491752 | 0.49852307 | 0.71624312 | TLCD1      |
| 9159   | ENSG00000160613 | 1892.12918 | 0.09108283  | 0.08525018 | 0.273558   | 0.49704244 | PCSK7      |
| 6294   | ENSG00000160633 | 3099.82554 | -0.10249194 | 0.07140138 | 0.14348991 | 0.32277095 | SAFB       |
| 917    | ENSG00000160654 | 0          | NA          | NA         | NA         | NA         | CD3G       |
| 6271   | ENSG00000160678 | 14.9241741 | 0.12254502  | 0.33744052 | 0.50590128 | 0.72177288 | S100A1     |
| 26097  | ENSG00000160679 | 2690.16605 | -0.09236316 | 0.0590651  | 0.11324469 | 0.27296498 | CHTOP      |
| 643    | ENSG00000160683 | 0          | NA          | NA         | NA         | NA         | CXCR5      |
| 51043  | ENSG00000160685 | 860.041277 | 0.40300771  | 0.09000139 | 3.98E-06   | 4.07E-05   | ZBTB7B     |
| 80308  | ENSG00000160688 | 1189.16778 | 0.19913823  | 0.08124036 | 0.01203995 | 0.04838417 | FLAD1      |
| 6464   | ENSG00000160691 | 9586.08119 | 0.4412578   | 0.06184655 | 4.66E-13   | 1.09E-11   | SHC1       |
| 55823  | ENSG00000160695 | 734.79319  | -0.02828636 | 0.09857084 | 0.76557184 | 0.89220778 | VPS11      |
| 79671  | ENSG00000160703 | 353.653868 | -0.11771331 | 0.142613   | 0.37253004 | 0.60143185 | NLRX1      |

|        |                 |            |             |            |            |            |          |
|--------|-----------------|------------|-------------|------------|------------|------------|----------|
| 103    | ENSG00000160710 | 7676.69872 | -0.04675698 | 0.05299555 | 0.37215199 | 0.60109044 | ADAR     |
| 3570   | ENSG00000160712 | 6.26731095 | 0.01702473  | 0.37690542 | 0.80850702 | 0.91317199 | IL6R     |
| 55585  | ENSG00000160714 | 2481.60063 | -0.31369307 | 0.06653049 | 1.62E-06   | 1.77E-05   | UBE2Q1   |
| 1141   | ENSG00000160716 | 3080.75167 | -0.81722714 | 0.06746652 | 1.66E-34   | 1.10E-32   | CHRN2    |
| 200186 | ENSG00000160741 | 904.081213 | 0.18558017  | 0.08814553 | 0.03033688 | 0.10125905 | CRTC2    |
| 55129  | ENSG00000160746 | 272.902754 | -0.08607981 | 0.14429345 | 0.51853378 | 0.73226139 | ANO10    |
| 2224   | ENSG00000160752 | 3252.75353 | -0.43567679 | 0.08425502 | 1.11E-07   | 1.46E-06   | FDPS     |
| 23623  | ENSG00000160753 | 1083.73143 | 0.04512062  | 0.08559581 | 0.58877526 | 0.78350668 | RUSC1    |
| 2630   | ENSG00000160766 | 317.911978 | 0.06235718  | 0.1453605  | 0.64394799 | 0.82218471 | GBAP1    |
| 10712  | ENSG00000160767 | 2019.20766 | 0.11722453  | 0.07609887 | 0.11634649 | 0.27881559 | FAM189B  |
| 79957  | ENSG00000160781 | 309.56672  | 1.06868069  | 0.14607315 | 3.18E-14   | 8.17E-13   | PAQR6    |
| 11243  | ENSG00000160783 | 839.858068 | 0.20575542  | 0.08726112 | 0.01500074 | 0.0577108  | PMF1     |
| 9673   | ENSG00000160785 | 1257.00936 | -0.13737517 | 0.08781769 | 0.10737285 | 0.26264053 | SLC25A44 |
| 4000   | ENSG00000160789 | 1883.85391 | 0.57151416  | 0.09104147 | 1.13E-10   | 2.15E-09   | LMNA     |
| 1234   | ENSG00000160791 | 0          | NA          | NA         | NA         | NA         | CCR5     |
| 23218  | ENSG00000160796 | 1521.24087 | 0.52805228  | 0.10239815 | 9.23E-08   | 1.22E-06   | NBEAL2   |
| 151903 | ENSG00000160799 | 474.575775 | -0.05330602 | 0.12832648 | 0.65837039 | 0.83060337 | CCDC12   |
| 5745   | ENSG00000160801 | 13.5329399 | -0.36029491 | 0.52186776 | 0.07994083 | 0.21113234 | PTH1R    |
| 56893  | ENSG00000160803 | 3542.85539 | 0.16868312  | 0.05806013 | 0.00327662 | 0.01630909 | UBQLN4   |
| 4634   | ENSG00000160808 | 3.50049941 | 0.11690241  | 0.39743939 | 0.22526591 | 0.43906825 | MYL3     |
| 221908 | ENSG00000160813 | 977.666367 | -0.0554852  | 0.10282662 | 0.5746694  | 0.77361067 | PPP1R35  |
| 54865  | ENSG00000160818 | 1624.74894 | -0.18901998 | 0.09376711 | 0.03717938 | 0.11883984 | GPATCH4  |
| 149499 | ENSG00000160838 | 3.16564577 | 0.02620411  | 0.37201488 | 0.79443001 | 0.90579008 | LRRC71   |
| 115352 | ENSG00000160856 | 0          | NA          | NA         | NA         | NA         | FCRL3    |
| 563    | ENSG00000160862 | 3.28301578 | -0.17049018 | 0.42574685 | 0.10970541 | 0.26657138 | AZGP1    |
| 2264   | ENSG00000160867 | 197.878715 | -0.1003218  | 0.15635774 | 0.48136179 | 0.7022219  | FGFR4    |
| 1576   | ENSG00000160868 | 0.18922458 | 0.01954053  | 0.38488496 | 0.78225479 | NA         | CYP3A4   |
| 1551   | ENSG00000160870 | 0.80657935 | -0.01800035 | 0.38258291 | 0.78501635 | NA         | CYP3A7   |
| 112939 | ENSG00000160877 | 1740.40738 | -0.05186891 | 0.08115193 | 0.51244446 | 0.72761026 | NACCI    |
| 1584   | ENSG00000160882 | 0          | NA          | NA         | NA         | NA         | CYP11B1  |
| 3101   | ENSG00000160883 | 2.39291242 | -0.14839312 | 0.42043244 | 0.0573652  | NA         | HK3      |
| 54742  | ENSG00000160886 | 0.33471731 | 0.02354391  | 0.38534154 | 0.62842204 | NA         | LY6K     |
| 9592   | ENSG00000160888 | 4119.64145 | 1.40499392  | 0.07029792 | 6.37E-90   | 1.64E-87   | IER2     |
| 84124  | ENSG00000160908 | 728.063276 | 0.07603178  | 0.09643699 | 0.4157269  | 0.64256946 | ZNF394   |
| 10898  | ENSG00000160917 | 1457.13813 | 0.06726212  | 0.07204268 | 0.34203586 | 0.57202996 | CPSF4    |
| 4061   | ENSG00000160932 | 895.468332 | -0.46863472 | 0.08996462 | 8.23E-08   | 1.10E-06   | LY6E     |
| 51160  | ENSG00000160948 | 1067.80928 | 0.0930513   | 0.08356178 | 0.25412487 | 0.47465989 | VPS28    |
| 4796   | ENSG00000160949 | 1380.95305 | -0.28022727 | 0.0734836  | 9.88E-05   | 0.00075342 | TONSL    |

|           |                 |            |             |            |            |            |          |
|-----------|-----------------|------------|-------------|------------|------------|------------|----------|
| 5731      | ENSG00000160951 | 41.9492801 | -0.00677873 | 0.27735524 | 0.96979239 | 0.98858357 | PTGER1   |
| 84939     | ENSG00000160953 | 2003.583   | 0.32216737  | 0.06834566 | 1.61E-06   | 1.76E-05   | PWWP3A   |
| 9401      | ENSG00000160957 | 1638.37829 | -0.17236325 | 0.07723411 | 0.02246542 | 0.07996302 | RECQL4   |
| 9684      | ENSG00000160959 | 822.326571 | 0.0920161   | 0.10477576 | 0.36161968 | 0.59140575 | LRRC14   |
| 84449     | ENSG00000160961 | 554.987953 | 0.18789464  | 0.1209076  | 0.10098914 | 0.25116589 | ZNF333   |
| 136227    | ENSG00000160963 | 150.674824 | 0.1764048   | 0.18279524 | 0.27326831 | 0.49676945 | COL26A1  |
| 84988     | ENSG00000160972 | 923.579149 | 0.16639164  | 0.08986918 | 0.05647959 | 0.16351308 | PPP1R16A |
| 8928      | ENSG00000160973 | 3.42630868 | -0.00161702 | 0.36851843 | 0.98601818 | 0.99524831 | FOXH1    |
| 80228     | ENSG00000160991 | 3828.42885 | -0.20809801 | 0.05860348 | 0.00032021 | 0.00216972 | ORAI2    |
| 54784     | ENSG00000160993 | 447.148383 | -0.09419075 | 0.12392879 | 0.42109653 | 0.64708816 | ALKBH4   |
| 126402    | ENSG00000160994 | 0          | NA          | NA         | NA         | NA         | CCDC105  |
| 10603     | ENSG00000160999 | 328.891258 | -0.36654343 | 0.13866044 | 0.00451347 | 0.02134509 | SH2B2    |
| 51149     | ENSG00000161010 | 888.505954 | 0.27611763  | 0.10966875 | 0.00840698 | 0.03597811 | MRNIP    |
| 8878      | ENSG00000161011 | 1407.14321 | 0.16574813  | 0.10066322 | 0.08761432 | 0.22613087 | SQSTM1   |
| 11282     | ENSG00000161013 | 1680.53956 | 0.06573092  | 0.08852666 | 0.44588093 | 0.67028199 | MGAT4B   |
| 6132      | ENSG00000161016 | 29172.7682 | -0.06345771 | 0.04658092 | 0.16729347 | 0.35828164 | RPL8     |
| 9794      | ENSG00000161021 | 1491.16769 | -0.06619767 | 0.12611476 | 0.57580663 | 0.7744963  | MAML1    |
| 114770    | ENSG00000161031 | 0          | NA          | NA         | NA         | NA         | PGLYRP2  |
| 222229    | ENSG00000161036 | 1576.39915 | -0.0146562  | 0.08012757 | 0.8565181  | 0.93595581 | LRWD1    |
| 222235    | ENSG00000161040 | 10.2925309 | 0.13072192  | 0.3796058  | 0.37596336 | 0.60500552 | FBXL13   |
| 222236    | ENSG00000161048 | 441.852174 | -0.34315662 | 0.14301527 | 0.00953974 | 0.03991321 | NAPEPLD  |
| 92304     | ENSG00000161055 | 0.173124   | -0.01911262 | 0.38486262 | 0.84537521 | NA         | SCGB3A1  |
| 5701      | ENSG00000161057 | 1495.93208 | 0.00860395  | 0.121759   | 0.94492034 | 0.97756908 | PSMC2    |
| 60680     | ENSG00000161082 | 794.819449 | -0.6535394  | 0.15241923 | 4.45E-06   | 4.51E-05   | CELF5    |
| 126321    | ENSG00000161091 | 923.272096 | 0.16028731  | 0.09664456 | 0.08629315 | 0.22368122 | MFSD12   |
| 102725072 | ENSG00000161103 | 10.0835096 | 0.28641281  | 0.5186988  | 0.03453315 | 0.11218738 |          |
| NA        | ENSG00000161132 | 0.47253961 | -0.00769265 | 0.38324381 | 0.86091375 | NA         |          |
| 373856    | ENSG00000161133 | 0          | NA          | NA         | NA         | NA         | USP41    |
| 113691    | ENSG00000161149 | 192.208888 | -0.35195659 | 0.16464392 | 0.01806213 | 0.067119   | TUBA3FP  |
| 150223    | ENSG00000161179 | 555.081119 | -0.18229068 | 0.10894909 | 0.07985526 | 0.2109906  | YDJC     |
| 164592    | ENSG00000161180 | 7.37950909 | 0.17989093  | 0.40709066 | 0.22607046 | 0.44033358 | CCDC116  |
| 1857      | ENSG00000161202 | 4282.10213 | 0.26427609  | 0.05778819 | 3.41E-06   | 3.51E-05   | DVL3     |
| 1173      | ENSG00000161203 | 4287.80655 | -0.23765435 | 0.05366325 | 7.56E-06   | 7.34E-05   | AP2M1    |
| 55324     | ENSG00000161204 | 727.903071 | -0.00124465 | 0.11653216 | 0.9885318  | 0.99604194 | ABCF3    |
| 5130      | ENSG00000161217 | 894.758949 | 0.10016534  | 0.09968539 | 0.29831426 | 0.52511356 | PCYT1A   |
| 126433    | ENSG00000161243 | 246.797214 | 0.12015985  | 0.21462838 | 0.501409   | 0.71841948 | FBXO27   |
| 93099     | ENSG00000161249 | 0          | NA          | NA         | NA         | NA         | DMKN     |
| 199746    | ENSG00000161265 | 153.174348 | 0.05816958  | 0.18061709 | 0.71645602 | 0.86352515 | U2AF1L4  |

|        |                 |            |             |            |            |            |          |
|--------|-----------------|------------|-------------|------------|------------|------------|----------|
| 622    | ENSG00000161267 | 530.845076 | 0.00131999  | 0.1149729  | 0.99126933 | 0.9971497  | BDH1     |
| 4868   | ENSG00000161270 | 3.28454602 | 0.01890749  | 0.37740587 | 0.79380374 | 0.90579008 | NPHS1    |
| 199745 | ENSG00000161277 | 114.783913 | -0.21946791 | 0.2202453  | 0.22777914 | 0.44270325 | THAP8    |
| 1346   | ENSG00000161281 | 0.69493202 | 0.03154416  | 0.38626309 | 0.41391645 | NA         | COX7A1   |
| 84911  | ENSG00000161298 | 395.175987 | -0.43044171 | 0.14208109 | 0.00111385 | 0.00648629 | ZNF382   |
| 115399 | ENSG00000161328 | 59.1249395 | 0.36393557  | 0.29380625 | 0.0930156  | 0.2361092  | LRRC56   |
| 57125  | ENSG00000161381 | 40.2861237 | 0.79395764  | 0.59023959 | 0.0145254  | 0.05614337 | PLXDC1   |
| 93210  | ENSG00000161395 | 271.937562 | 0.43925088  | 0.15217684 | 0.00173226 | 0.00947824 | PGAP3    |
| 22806  | ENSG00000161405 | 0          | NA          | NA         | NA         | NA         | IKZF3    |
| 2905   | ENSG00000161509 | 19.9771784 | 0.56766257  | 0.55909715 | 0.04105735 | 0.12797767 | GRIN2C   |
| 2232   | ENSG00000161513 | 344.849728 | 0.17867792  | 0.13589985 | 0.15872207 | 0.34601096 | FDXR     |
| 29115  | ENSG00000161526 | 1601.50312 | 0.14971411  | 0.09625531 | 0.10785359 | 0.26339391 | SAP30BP  |
| 51     | ENSG00000161533 | 750.892404 | -0.01847915 | 0.1014894  | 0.8496324  | 0.9315671  | ACOX1    |
| 5635   | ENSG00000161542 | 1222.78233 | 0.09456469  | 0.07814989 | 0.21664419 | 0.42772621 | PRPSAP1  |
| 114757 | ENSG00000161544 | 1280.52549 | -0.86923824 | 0.09103076 | 2.18E-22   | 9.14E-21   | CYGB     |
| 6427   | ENSG00000161547 | 9329.5588  | 0.14340656  | 0.05318345 | 0.00678021 | 0.03010054 | SRSF2    |
| 84765  | ENSG00000161551 | 180.89008  | -0.01857013 | 0.21096375 | 0.91434414 | 0.96378282 | ZNF577   |
| 55260  | ENSG00000161558 | 249.079023 | 0.64210446  | 0.16374167 | 2.25E-05   | 0.00019993 | TMEM143  |
| 317719 | ENSG00000161594 | 0.89486476 | -0.03580092 | 0.38549223 | 0.44826384 | NA         | KLHL10   |
| 147872 | ENSG00000161609 | 0          | NA          | NA         | NA         | NA         | KASH5    |
| 3060   | ENSG00000161610 | 0          | NA          | NA         | NA         | NA         | HCRT     |
| 126133 | ENSG00000161618 | 554.656889 | -0.19505205 | 0.11308151 | 0.07018247 | 0.1919256  | ALDH16A1 |
| 117159 | ENSG00000161634 | 0          | NA          | NA         | NA         | NA         | DCD      |
| 3678   | ENSG00000161638 | 3.51330291 | -0.0584799  | 0.38185938 | 0.46913186 | 0.69153662 | ITGA5    |
| 114132 | ENSG00000161640 | 0          | NA          | NA         | NA         | NA         | SIGLEC11 |
| 25946  | ENSG00000161642 | 721.990841 | 0.3158978   | 0.10520534 | 0.00174721 | 0.00954158 | ZNF385A  |
| 400709 | ENSG00000161643 | 3.36460558 | -0.0129914  | 0.36843743 | 0.90195347 | 0.95687554 | SIGLEC16 |
| 4356   | ENSG00000161647 | 303.506096 | -0.67898526 | 0.1473527  | 9.51E-07   | 1.08E-05   | MPP3     |
| 146894 | ENSG00000161649 | 0          | NA          | NA         | NA         | NA         | CD300LG  |
| 126123 | ENSG00000161652 | 0          | NA          | NA         | NA         | NA         | IZUMO2   |
| 162417 | ENSG00000161653 | 7.44165696 | 0.02683749  | 0.35624135 | 0.84704966 | 0.93052693 | NAGS     |
| 124801 | ENSG00000161654 | 724.171914 | -0.26472807 | 0.10254734 | 0.00720415 | 0.0316592  | LSM12    |
| 92591  | ENSG00000161664 | 55.3533675 | 0.32750928  | 0.28778326 | 0.1234786  | 0.29112482 | ASB16    |
| 284361 | ENSG00000161671 | 3005.40692 | -0.05487793 | 0.05798361 | 0.33793547 | 0.56821327 | EMC10    |
| 126119 | ENSG00000161677 | 254.208893 | 0.53661114  | 0.15616275 | 0.00019888 | 0.0014158  | JOSD2    |
| 50944  | ENSG00000161681 | 1082.35819 | -2.33579582 | 0.15153167 | 5.15E-55   | 5.94E-53   | SHANK1   |
| 284069 | ENSG00000161682 | 868.511912 | -0.12898327 | 0.09489908 | 0.15949409 | 0.34700764 | FAM171A2 |
| 80174  | ENSG00000161692 | 543.181304 | 0.11130205  | 0.11665084 | 0.31668785 | 0.54452953 | DBF4B    |

|        |                 |            |             |            |            |            |                 |
|--------|-----------------|------------|-------------|------------|------------|------------|-----------------|
| 113026 | ENSG00000161714 | 191.829195 | 0.04313135  | 0.24100294 | 0.81989479 | 0.91788244 | PLCD3           |
| 91010  | ENSG00000161791 | 943.448968 | -0.04941685 | 0.08648614 | 0.5569314  | 0.76235124 | FMNL3           |
| 362    | ENSG00000161798 | 6.86751148 | 0.19713175  | 0.41882748 | 0.19028783 | 0.39162973 | AQP5            |
| 29127  | ENSG00000161800 | 2541.36808 | -0.23579703 | 0.06044675 | 7.64E-05   | 0.00059936 | RACGAP1         |
| 125962 | ENSG00000161807 | 0          | NA          | NA         | NA         | NA         | OR7G1           |
| 113251 | ENSG00000161813 | 1366.31227 | -0.27421822 | 0.11239208 | 0.01041377 | 0.04280283 | LARP4           |
| 160622 | ENSG00000161835 | 57.361454  | 0.0586027   | 0.29224665 | 0.76134842 | 0.88963735 | TAMALIN         |
| 125950 | ENSG00000161847 | 1597.0023  | 0.11727874  | 0.07678066 | 0.11892536 | 0.28328481 | RAVER1          |
| 3890   | ENSG00000161849 | 0          | NA          | NA         | NA         | NA         | KRT84           |
| 3888   | ENSG00000161850 | 0          | NA          | NA         | NA         | NA         | KRT82           |
| 256126 | ENSG00000161860 | 18.9960999 | 0.01636775  | 0.34176387 | 0.91862394 | 0.96558446 | SYCE2           |
| 147841 | ENSG00000161888 | 583.724349 | 0.00211672  | 0.11761218 | 0.9857226  | 0.99508557 | SPC24           |
| 117283 | ENSG00000161896 | 0.32239579 | -0.02325345 | 0.38531858 | 0.66966207 | NA         | IP6K3           |
| 221496 | ENSG00000161904 | 1336.28971 | 0.06584985  | 0.08413165 | 0.42217462 | 0.64814241 | LEMD2           |
| 246    | ENSG00000161905 | 0.173124   | -0.01911262 | 0.38486262 | 0.84537521 | NA         | ALOX15          |
| 340205 | ENSG00000161911 | 0          | NA          | NA         | NA         | NA         | TREML1          |
| 221442 | ENSG00000161912 | 14.5523736 | 0.12086394  | 0.34289514 | 0.50233738 | 0.7191395  | ADCY10P1        |
| 115950 | ENSG00000161914 | 244.794873 | 0.53826328  | 0.16274549 | 0.00031323 | 0.00212898 | ZNF653          |
| 400569 | ENSG00000161920 | 112.367391 | 0.28644509  | 0.21172153 | 0.1091824  | 0.26566224 | MED11           |
| 58191  | ENSG00000161921 | 6.87625574 | 0.2937282   | 0.51462206 | 0.060145   | 0.17157108 | CXCL16          |
| 388325 | ENSG00000161929 | 2.39776484 | 0.05639652  | 0.38069187 | 0.5126686  | NA         | SCIMP           |
| NA     | ENSG00000161939 | 43.3854256 | 0.14476068  | 0.31311439 | 0.46303524 | 0.68582451 | RNASEK-C17orf49 |
| 255877 | ENSG00000161940 | 6.22776568 | -0.02000596 | 0.35514309 | 0.88309541 | 0.94857242 | BCL6B           |
| 433    | ENSG00000161944 | 0          | NA          | NA         | NA         | NA         | ASGR2           |
| 8741   | ENSG00000161955 | 54.6406021 | 0.10730597  | 0.29007552 | 0.58447559 | 0.7806123  | TNFSF13         |
| 26168  | ENSG00000161956 | 1648.25111 | 0.02160799  | 0.0693619  | 0.75263986 | 0.88425267 | SENP3           |
| 2256   | ENSG00000161958 | 220.450337 | 0.21828527  | 0.17298511 | 0.1582569  | 0.3453764  | FGF11           |
| 1973   | ENSG00000161960 | 18406.9446 | -0.09451516 | 0.05815894 | 0.09997674 | 0.24918825 | EIF4A1          |
| 6154   | ENSG00000161970 | 13502.7898 | -0.10761748 | 0.05283575 | 0.03759456 | 0.11981944 | RPL26           |
| 146849 | ENSG00000161973 | 0          | NA          | NA         | NA         | NA         | CCDC42          |
| 51728  | ENSG00000161980 | 456.405946 | -0.0548809  | 0.11755375 | 0.62295785 | 0.80754549 | POLR3K          |
| 79622  | ENSG00000161981 | 493.53283  | 0.04830037  | 0.12154514 | 0.67602333 | 0.84148271 | SNRNP25         |
| 146325 | ENSG00000161992 | 2.30080806 | 0.02731772  | 0.3762151  | 0.75141889 | NA         | PRR35           |
| 197335 | ENSG00000161996 | 1358.76898 | 0.47071092  | 0.07786879 | 6.62E-10   | 1.17E-08   | WDR90           |
| 339123 | ENSG00000161999 | 1236.79334 | 0.16246122  | 0.0909775  | 0.06588785 | 0.18349451 | JMJD8           |
| 124093 | ENSG00000162004 | 244.291013 | 0.21312823  | 0.18001635 | 0.1803305  | 0.37720159 | CCDC78          |
| NA     | ENSG00000162006 | 0          | NA          | NA         | NA         | NA         | MSLNL           |
| 6755   | ENSG00000162009 | 0          | NA          | NA         | NA         | NA         | SSTR5           |



|        |                 |            |             |            |            |            |          |
|--------|-----------------|------------|-------------|------------|------------|------------|----------|
| 90864  | ENSG00000162032 | 673.758071 | 0.35322235  | 0.11048931 | 0.00082203 | 0.0049857  | SPSB3    |
| 254528 | ENSG00000162039 | 14.2910806 | -0.23296875 | 0.40321429 | 0.21277851 | 0.42263393 | MEIOB    |
| 64711  | ENSG00000162040 | 0.29863895 | -0.02292439 | 0.3852726  | 0.68753245 | NA         | HS3ST6   |
| 80178  | ENSG00000162062 | 718.523539 | 0.09127797  | 0.10153291 | 0.35140808 | 0.58156116 | TEDC2    |
| 899    | ENSG00000162063 | 1128.01901 | -0.50102833 | 0.08525079 | 1.66E-09   | 2.78E-08   | CCNF     |
| 57465  | ENSG00000162065 | 1217.35571 | -0.13726783 | 0.07770714 | 0.07080321 | 0.19311736 | TBC1D24  |
| 51005  | ENSG00000162066 | 522.428028 | 0.19463506  | 0.11700055 | 0.0800895  | 0.21143808 | AMDHD2   |
| 4917   | ENSG00000162068 | 206.818508 | -0.11266086 | 0.15340268 | 0.42197645 | 0.64793845 | NTN3     |
| 146439 | ENSG00000162069 | 0          | NA          | NA         | NA         | NA         | BICDL2   |
| 124222 | ENSG00000162073 | 1271.84159 | -0.75797737 | 0.09260612 | 5.67E-17   | 1.74E-15   | PAQR4    |
| 114984 | ENSG00000162076 | 272.19473  | -0.0245778  | 0.14958365 | 0.85730209 | 0.93625109 | FLYWCH2  |
| 124220 | ENSG00000162078 | 0          | NA          | NA         | NA         | NA         | ZG16B    |
| 7627   | ENSG00000162086 | 405.177954 | -0.29022102 | 0.13908655 | 0.02461934 | 0.08611458 | ZNF75A   |
| 115    | ENSG00000162104 | 726.006066 | -0.63520428 | 0.10396167 | 2.68E-10   | 4.93E-09   | ADCY9    |
| 22941  | ENSG00000162105 | 263.564169 | -2.72340387 | 0.1814619  | 2.99E-52   | 3.11E-50   | SHANK2   |
| 81570  | ENSG00000162129 | 1421.62695 | -0.08188416 | 0.0838602  | 0.3165391  | 0.54452953 | CLPB     |
| 10825  | ENSG00000162139 | 670.367842 | -0.22706507 | 0.13527637 | 0.07207324 | 0.19555978 | NEU3     |
| 22002  | ENSG00000162144 | 894.170827 | 0.34705851  | 0.09900517 | 0.00027584 | 0.00189564 | CYB561A3 |
| 22004  | ENSG00000162148 | 32.4489353 | 0.57390886  | 0.53577381 | 0.03900475 | 0.12312718 | PPP1R32  |
| 80150  | ENSG00000162174 | 570.973268 | -0.1080778  | 0.12024997 | 0.34255802 | 0.5727584  | ASRGL1   |
| 2785   | ENSG00000162188 | 9.51935208 | -0.09281921 | 0.3593418  | 0.54541291 | 0.75298369 | GNG3     |
| 51035  | ENSG00000162191 | 2377.84118 | 0.14953155  | 0.06587784 | 0.02116596 | 0.07622857 | UBXN1    |
| 79081  | ENSG00000162194 | 182.50798  | 0.0573532   | 0.17119045 | 0.71186167 | 0.86154673 | LBHD1    |
| 283237 | ENSG00000162222 | 284.171798 | -0.0025463  | 0.14417468 | 0.98374816 | 0.99447485 | TTC9C    |
| 10629  | ENSG00000162227 | 367.855173 | -0.08063576 | 0.16519402 | 0.587506   | 0.78256674 | TAF6L    |
| 10482  | ENSG00000162231 | 1167.44141 | 0.22125772  | 0.09881654 | 0.02025942 | 0.07364363 | NXF1     |
| 6811   | ENSG00000162236 | 450.941016 | 0.26127332  | 0.11627754 | 0.01821844 | 0.06741028 | STX5     |
| 283130 | ENSG00000162241 | 169.136252 | 0.54272008  | 0.19303281 | 0.0015631  | 0.00869165 | SLC25A45 |
| 6159   | ENSG00000162244 | 16652.407  | -0.04920276 | 0.0488517  | 0.30711656 | 0.53467818 | RPL29    |
| 3699   | ENSG00000162267 | 0          | NA          | NA         | NA         | NA         | ITIH3    |
| 84447  | ENSG00000162298 | 1182.60099 | 0.33683087  | 0.09790795 | 0.00036451 | 0.00243659 | SYVN1    |
| 7542   | ENSG00000162300 | 289.180097 | 0.29304802  | 0.15442049 | 0.03795527 | 0.12067829 | ZFPL1    |
| 8986   | ENSG00000162302 | 295.5288   | 0.64904405  | 0.19375819 | 0.00019045 | 0.00136163 | RPS6KA4  |
| 4041   | ENSG00000162337 | 2823.8517  | -0.05716403 | 0.06171013 | 0.34970464 | 0.58009871 | LRP5     |
| 219931 | ENSG00000162341 | 332.676088 | 0.10340683  | 0.13559224 | 0.41402876 | 0.64129366 | TPCN2    |
| 9965   | ENSG00000162344 | 39.7394393 | 0.63804841  | 0.3832638  | 0.01692736 | 0.06372655 | FGF19    |
| 284541 | ENSG00000162365 | 0          | NA          | NA         | NA         | NA         | CYP4A22  |
| 10158  | ENSG00000162366 | 0          | NA          | NA         | NA         | NA         | PDZK1IP1 |

|        |                 |            |             |            |            |            |          |
|--------|-----------------|------------|-------------|------------|------------|------------|----------|
| 6886   | ENSG00000162367 | 0          | NA          | NA         | NA         | NA         | TAL1     |
| 51727  | ENSG00000162368 | 941.54762  | -0.20529589 | 0.09666133 | 0.02729948 | 0.09320627 | CMPK1    |
| 79656  | ENSG00000162373 | 181.929691 | -0.15373907 | 0.17320456 | 0.31864448 | 0.54631061 | BEND5    |
| 1996   | ENSG00000162374 | 3175.99639 | -1.26277919 | 0.0627298  | 3.98E-91   | 1.07E-88   | ELAVL4   |
| 65260  | ENSG00000162377 | 739.627183 | -0.3025216  | 0.10485308 | 0.00260915 | 0.01345957 | COA7     |
| 79699  | ENSG00000162378 | 1041.01853 | -0.38641202 | 0.08619626 | 4.04E-06   | 4.13E-05   | ZYG11B   |
| 6512   | ENSG00000162383 | 0.96756134 | 0.02449976  | 0.38147848 | 0.67780217 | NA         | SLC1A7   |
| 54987  | ENSG00000162384 | 621.653194 | 0.11334512  | 0.10100943 | 0.24466192 | 0.46339612 | CZIB     |
| 4116   | ENSG00000162385 | 567.293229 | 0.45933983  | 0.1055371  | 5.99E-06   | 5.94E-05   | MAGOH    |
| 26027  | ENSG00000162390 | 321.06173  | 0.05807595  | 0.14910944 | 0.67342525 | 0.83953925 | ACOT11   |
| 338094 | ENSG00000162391 | 0.51364586 | 0.01490651  | 0.38308195 | 0.74300609 | NA         | FAM151A  |
| 25973  | ENSG00000162396 | 106.380867 | -0.05773133 | 0.20824354 | 0.74051497 | 0.87742184 | PARS2    |
| 163747 | ENSG00000162398 | 0          | NA          | NA         | NA         | NA         | LEXM     |
| 7809   | ENSG00000162399 | 0.50207596 | 0.02562368  | 0.38565771 | 0.52549886 | NA         | BSND     |
| 23358  | ENSG00000162402 | 2372.13813 | 0.06387023  | 0.12204557 | 0.58254517 | 0.77929311 | USP24    |
| 8613   | ENSG00000162407 | 2591.09758 | -0.69057512 | 0.06945389 | 6.65E-24   | 3.04E-22   | PLPP3    |
| 79707  | ENSG00000162408 | 456.477265 | -0.43884464 | 0.16637146 | 0.00357022 | 0.01757647 | NOL9     |
| 5563   | ENSG00000162409 | 884.901653 | -0.39684566 | 0.08680649 | 2.59E-06   | 2.73E-05   | PRKAA2   |
| 9903   | ENSG00000162413 | 471.98262  | -0.09863194 | 0.13341777 | 0.42769343 | 0.65358066 | KLHL21   |
| 57643  | ENSG00000162415 | 395.259321 | -0.48860461 | 0.12706247 | 4.76E-05   | 0.00039207 | ZSWIM5   |
| 10691  | ENSG00000162419 | 424.20645  | -0.28913588 | 0.12618267 | 0.01483534 | 0.05716317 | GMEB1    |
| 50651  | ENSG00000162426 | 80.3717353 | -0.38439851 | 0.29906306 | 0.07895157 | 0.20949568 | SLC45A1  |
| 57190  | ENSG00000162430 | 3308.04414 | -0.17062316 | 0.06515026 | 0.00786206 | 0.03402033 | SELENON  |
| 205    | ENSG00000162433 | 376.34134  | 0.1914723   | 0.1859131  | 0.23995367 | 0.4579339  | AK4      |
| 3716   | ENSG00000162434 | 2482.28069 | -0.44545384 | 0.07220615 | 3.27E-10   | 5.98E-09   | JAK1     |
| 55225  | ENSG00000162437 | 1669.09375 | -0.04220091 | 0.07538272 | 0.56744167 | 0.76896903 | RAVER2   |
| 11330  | ENSG00000162438 | 2.80162734 | -0.01483476 | 0.37616812 | 0.84515806 | 0.92965052 | CTRC     |
| 84328  | ENSG00000162441 | 845.4091   | -0.35459344 | 0.10364227 | 0.00036335 | 0.0024305  | LZIC     |
| 116362 | ENSG00000162444 | 5.60388216 | 0.57573156  | 1.38685265 | 0.01025959 | 0.04230054 | RBP7     |
| 148930 | ENSG00000162456 | 0          | NA          | NA         | NA         | NA         | KNCN     |
| 54751  | ENSG00000162458 | 2099.10153 | 0.46320559  | 0.07946061 | 2.49E-09   | 4.06E-08   | FBLIM1   |
| 388595 | ENSG00000162460 | 0.67240293 | 0.02556207  | 0.38355592 | 0.59055641 | NA         | TMEM82   |
| 284723 | ENSG00000162461 | 85.5719436 | 0.37580054  | 0.28052315 | 0.07627938 | 0.20395995 | SLC25A34 |
| 22977  | ENSG00000162482 | 26.4656297 | 0.21866462  | 0.3355163  | 0.28993615 | 0.51590433 | AKR7A3   |
| 374946 | ENSG00000162490 | 80.8601923 | -0.80025257 | 0.27248212 | 0.00051337 | 0.00330154 | DRAXIN   |
| 10630  | ENSG00000162493 | 0          | NA          | NA         | NA         | NA         | PDPN     |
| 126755 | ENSG00000162494 | 0          | NA          | NA         | NA         | NA         | LRRC38   |
| 9249   | ENSG00000162496 | 41.2006269 | 2.04547748  | 0.4272004  | 1.10E-07   | 1.44E-06   | DHRS3    |

|           |                 |            |             |            |            |            |          |
|-----------|-----------------|------------|-------------|------------|------------|------------|----------|
| 4146      | ENSG00000162510 | 5.91789012 | -0.13600623 | 0.39613792 | 0.26500355 | 0.48718221 | MATN1    |
| 7805      | ENSG00000162511 | 0.64286122 | -0.04587562 | 0.38767119 | 0.36615328 | NA         | LAPTM5   |
| 9672      | ENSG00000162512 | 1430.85064 | 0.02733848  | 0.07953575 | 0.72601841 | 0.86899144 | SDC3     |
| 553115    | ENSG00000162517 | 827.565537 | 0.24046619  | 0.08861353 | 0.00512895 | 0.02373651 | PEF1     |
| 81493     | ENSG00000162520 | 18.052452  | -0.03332615 | 0.32476529 | 0.84835833 | 0.93099338 | SYNC     |
| 5928      | ENSG00000162521 | 5550.12153 | -0.12387974 | 0.05610324 | 0.0228239  | 0.08099199 | RBBP4    |
| 57648     | ENSG00000162522 | 856.328986 | -0.08941723 | 0.12537602 | 0.44832083 | 0.67234398 | KIAA1522 |
| 81629     | ENSG00000162526 | 51.9031474 | 0.28965873  | 0.30862091 | 0.17679588 | 0.37159566 | TSSK3    |
| 255104    | ENSG00000162542 | 65.4912099 | 1.45182861  | 0.3667106  | 5.52E-06   | 5.51E-05   | TMCO4    |
| 127733    | ENSG00000162543 | 13.3295657 | 2.77303391  | 0.87561126 | 7.99E-05   | 0.00062227 | UBXN10   |
| 55450     | ENSG00000162545 | 658.807448 | -0.49078034 | 0.10591679 | 1.45E-06   | 1.59E-05   | CAMK2N1  |
| 249       | ENSG00000162551 | 118.377604 | -0.46455314 | 0.31601794 | 0.04277137 | 0.13221938 | ALPL     |
| 54361     | ENSG00000162552 | 12.3255888 | -1.46636562 | 0.86258921 | 0.00380148 | 0.01846752 | WNT4     |
| 254173    | ENSG00000162571 | 0          | NA          | NA         | NA         | NA         | TTL10    |
| 6339      | ENSG00000162572 | 138.736894 | 0.14670659  | 0.35430493 | 0.4171477  | 0.64356223 | SCNN1D   |
| 54587     | ENSG00000162576 | 139.355201 | 0.29487955  | 0.26669008 | 0.14716828 | 0.32869736 | MXRA8    |
| 199990    | ENSG00000162585 | 1157.45014 | 0.04716214  | 0.08686683 | 0.57829939 | 0.77638786 | FAAP20   |
| 1953      | ENSG00000162591 | 599.320396 | 1.08198875  | 0.15640344 | 5.25E-13   | 1.22E-11   | MEGF6    |
| 148870    | ENSG00000162592 | 1.90316167 | 0.10396118  | 0.39730915 | 0.20083214 | NA         | CCDC27   |
| 149233    | ENSG00000162594 | 0          | NA          | NA         | NA         | NA         | IL23R    |
| 9077      | ENSG00000162595 | 22.3909994 | -0.34015426 | 0.39874543 | 0.13203682 | 0.30496778 | DIRAS3   |
| 127795    | ENSG00000162598 | 0          | NA          | NA         | NA         | NA         | C1orf87  |
| 4774      | ENSG00000162599 | 653.202607 | 0.73696432  | 0.10829476 | 2.16E-12   | 4.82E-11   | NFIA     |
| 115209    | ENSG00000162600 | 130.097135 | -0.16381971 | 0.19589623 | 0.33077325 | 0.55960955 | OMA1     |
| 114803    | ENSG00000162601 | 1530.99996 | 0.20472766  | 0.12894728 | 0.0913191  | 0.2332352  | MYSM1    |
| 83941     | ENSG00000162604 | 352.927155 | -0.08938356 | 0.12376206 | 0.44349464 | 0.66851038 | TM2D1    |
| 7398      | ENSG00000162607 | 1609.64602 | -0.519902   | 0.08206799 | 8.87E-11   | 1.72E-09   | USP1     |
| 8880      | ENSG00000162613 | 4621.87785 | 0.04148209  | 0.0730225  | 0.56355464 | 0.76627833 | FUBP1    |
| 91624     | ENSG00000162614 | 28.6085747 | 1.56976117  | 0.52364851 | 0.00015369 | 0.00111935 | NEXN     |
| 11080     | ENSG00000162616 | 195.613893 | 0.30777948  | 0.1752251  | 0.04871498 | 0.14601982 | DNAJB4   |
| 64123     | ENSG00000162618 | 0.16735865 | 0.01897177  | 0.38482933 | 0.78225479 | NA         | ADGRL4   |
| 127255    | ENSG00000162620 | 33.472964  | -0.26930068 | 0.35935565 | 0.2042199  | 0.41088053 | LRRIQ3   |
| 105378803 | ENSG00000162621 | 0.14931947 | -0.01844332 | 0.38480212 | 0.84537521 | NA         | LRRC53   |
| 127253    | ENSG00000162623 | 469.04904  | -0.37436897 | 0.11318076 | 0.00051977 | 0.00333728 | TYW3     |
| 431707    | ENSG00000162624 | 1.99137393 | 0.13373244  | 0.4169259  | 0.02804919 | NA         | LHX8     |
| 51375     | ENSG00000162627 | 666.065408 | -0.01321253 | 0.11199518 | 0.90093828 | 0.95641534 | SNX7     |
| 8707      | ENSG00000162630 | 26.4581776 | 2.45504057  | 0.52075397 | 1.52E-07   | 1.97E-06   | B3GALT2  |
| 22854     | ENSG00000162631 | 16.0107721 | 0.04462095  | 0.32141468 | 0.80526883 | 0.91169445 | NTNG1    |

|        |                 |            |             |            |            |            |          |
|--------|-----------------|------------|-------------|------------|------------|------------|----------|
| 284611 | ENSG00000162636 | 600.259791 | -0.3154394  | 0.10850621 | 0.00235394 | 0.012316   | FAM102B  |
| 113802 | ENSG00000162639 | 0          | NA          | NA         | NA         | NA         | HENMT1   |
| 254268 | ENSG00000162641 | 10.4484345 | 0.00383372  | 0.36061284 | 0.9781671  | 0.99252469 | AKNAD1   |
| 148423 | ENSG00000162642 | 529.99873  | 0.07376044  | 0.12266251 | 0.5259912  | 0.73808697 | C1orf52  |
| 126820 | ENSG00000162643 | 0          | NA          | NA         | NA         | NA         | DNAI3    |
| 2634   | ENSG00000162645 | 1.3405357  | 0.06490519  | 0.38782687 | 0.32006197 | NA         | GBP2     |
| 127002 | ENSG00000162650 | 326.159164 | -0.0067168  | 0.13451137 | 0.95649458 | 0.9821879  | ATXN7L2  |
| 115361 | ENSG00000162654 | 1.44393847 | -0.02208191 | 0.37948064 | 0.74740963 | NA         | GBP4     |
| 284695 | ENSG00000162664 | 1383.57415 | 0.04475409  | 0.0764093  | 0.55077691 | 0.75727932 | ZNF326   |
| 164045 | ENSG00000162669 | 132.065724 | 0.05479074  | 0.20978521 | 0.75699188 | 0.88697677 | HFM1     |
| 339479 | ENSG00000162670 | 0.80195464 | 0.05170262  | 0.38861068 | 0.28387399 | NA         | BRINP3   |
| 2672   | ENSG00000162676 | 2.16643338 | 0.09140788  | 0.39133367 | 0.28672559 | NA         | GFI1     |
| NA     | ENSG00000162685 | 0          | NA          | NA         | NA         | NA         | LSP1P3   |
| 343450 | ENSG00000162687 | 741.737596 | 0.32567701  | 0.09243392 | 0.00027463 | 0.00188992 | KCNT2    |
| 178    | ENSG00000162688 | 891.181089 | 0.02823624  | 0.09642328 | 0.76306122 | 0.89079933 | AGL      |
| 7412   | ENSG00000162692 | 0          | NA          | NA         | NA         | NA         | VCAM1    |
| 2135   | ENSG00000162694 | 1232.87667 | -0.09373078 | 0.08301697 | 0.24655249 | 0.46577702 | EXTL2    |
| 148867 | ENSG00000162695 | 572.012899 | -0.15859783 | 0.1094187  | 0.12835793 | 0.29903961 | SLC30A7  |
| NA     | ENSG00000162699 | 0          | NA          | NA         | NA         | NA         | DNAJA1P5 |
| 23528  | ENSG00000162702 | 1041.43358 | -0.22183646 | 0.08525216 | 0.00748751 | 0.03268473 | ZNF281   |
| 10092  | ENSG00000162704 | 2571.48347 | -0.1190581  | 0.06260055 | 0.05367782 | 0.15715539 | ARPC5    |
| 57863  | ENSG00000162706 | 50.2456642 | -3.77803608 | 0.46955937 | 7.22E-17   | 2.21E-15   | CADM3    |
| 114548 | ENSG00000162711 | 0.51805479 | -0.0147833  | 0.38308519 | 0.75798034 | NA         | NLRP3    |
| 84838  | ENSG00000162714 | 2447.74201 | -0.03708988 | 0.06992519 | 0.58889761 | 0.78351083 | ZNF496   |
| 25893  | ENSG00000162722 | 0          | NA          | NA         | NA         | NA         | TRIM58   |
| 89886  | ENSG00000162723 | 0.173124   | -0.01911262 | 0.38486262 | 0.84537521 | NA         | SLAMF9   |
| 127059 | ENSG00000162727 | 0          | NA          | NA         | NA         | NA         | OR2M5    |
| 3765   | ENSG00000162728 | 193.393514 | -3.51794757 | 0.2227838  | 3.24E-57   | 3.90E-55   | KCNJ9    |
| 93185  | ENSG00000162729 | 1039.05247 | -0.00528316 | 0.0846201  | 0.94823301 | 0.97876335 | IGSF8    |
| 4921   | ENSG00000162733 | 5160.87656 | 0.21937034  | 0.18406308 | 0.17554782 | 0.36969203 | DDR2     |
| 8682   | ENSG00000162734 | 2932.64192 | -0.53270897 | 0.06140709 | 1.50E-18   | 5.23E-17   | PEA15    |
| 5824   | ENSG00000162735 | 1490.1104  | 0.11938394  | 0.11153582 | 0.26320838 | 0.48523083 | PEX19    |
| 23385  | ENSG00000162736 | 1882.20656 | 0.06550996  | 0.08846817 | 0.44843412 | 0.67234398 | NCSTN    |
| 57216  | ENSG00000162738 | 2711.66218 | 0.02519322  | 0.06047496 | 0.67511347 | 0.84091366 | VANGL2   |
| 114836 | ENSG00000162739 | 0          | NA          | NA         | NA         | NA         | SLAMF6   |
| 25903  | ENSG00000162745 | 32.4292096 | 1.03365312  | 0.47974099 | 0.00254819 | 0.01318971 | OLFML2B  |
| 127943 | ENSG00000162746 | 2.92173933 | -0.09572563 | 0.38611335 | 0.36366137 | 0.59353748 | FCRLB    |
| 2215   | ENSG00000162747 | 0          | NA          | NA         | NA         | NA         | FCGR3B   |

|           |                 |            |             |            |            |            |          |
|-----------|-----------------|------------|-------------|------------|------------|------------|----------|
| 284525    | ENSG00000162753 | 0.91378936 | 0.05235943  | 0.3890638  | 0.24527608 | NA         | SLC9C2   |
| 126823    | ENSG00000162755 | 15.2346664 | 0.0485743   | 0.32518679 | 0.7855697  | 0.90248778 | KLHDC9   |
| 148304    | ENSG00000162757 | 350.90066  | -0.35489836 | 0.13743246 | 0.00560053 | 0.02561423 | C1orf74  |
| 4009      | ENSG00000162761 | 0          | NA          | NA         | NA         | NA         | LMX1A    |
| 440699    | ENSG00000162763 | 0          | NA          | NA         | NA         | NA         | LRRC52   |
| 28982     | ENSG00000162769 | 1195.04641 | -0.0958557  | 0.11868722 | 0.39442272 | 0.623633   | FLVCR1   |
| 149647    | ENSG00000162771 | 0.14931947 | -0.01844332 | 0.38480212 | 0.84537521 | NA         | FAM71A   |
| 467       | ENSG00000162772 | 350.308713 | 1.9673877   | 0.21157657 | 9.97E-22   | 4.05E-20   | ATF3     |
| 64783     | ENSG00000162775 | 460.465999 | -0.33810297 | 0.12161666 | 0.00327805 | 0.01631212 | RBM15    |
| 79961     | ENSG00000162777 | 1.14317494 | -0.04424769 | 0.38409198 | 0.40081813 | NA         | DENND2D  |
| 126859    | ENSG00000162779 | 2.3905836  | 0.08296977  | 0.38702321 | 0.35554863 | NA         | AXDND1   |
| 163589    | ENSG00000162782 | 6.54835896 | 2.46671601  | 1.46033191 | 0.00342289 | 0.01693099 | TDRD5    |
| 51278     | ENSG00000162783 | 874.165409 | 0.06160678  | 0.09162169 | 0.48923019 | 0.70874969 | IER5     |
| 25992     | ENSG00000162804 | 69.7706395 | 0.04277099  | 0.22391992 | 0.81588453 | 0.9163678  | SNED1    |
| 10380     | ENSG00000162813 | 639.270552 | 0.14052169  | 0.11122604 | 0.1863955  | 0.38610218 | BPNT1    |
| 128153    | ENSG00000162814 | 36.1467709 | 0.49427914  | 0.43423068 | 0.05393025 | 0.15767405 | SPATA17  |
| 79762     | ENSG00000162817 | 347.320389 | 0.9106851   | 0.14750024 | 1.02E-10   | 1.97E-09   | C1orf115 |
| 148362    | ENSG00000162819 | 812.706524 | -0.22089621 | 0.10264119 | 0.02506622 | 0.08732798 | BROX     |
| 100288142 | ENSG00000162825 | 1876.88947 | -0.29592473 | 0.0688102  | 1.19E-05   | 0.00011146 | NBPF20   |
| 51205     | ENSG00000162836 | 324.404023 | 0.26132242  | 0.15239101 | 0.06109041 | 0.17383343 | ACP6     |
| NA        | ENSG00000162840 | 0          | NA          | NA         | NA         | NA         | MT2P1    |
| 128025    | ENSG00000162843 | 0.16735865 | 0.01897177  | 0.38482933 | 0.78225479 | NA         | WDR64    |
| 55083     | ENSG00000162849 | 4666.07869 | -0.89852573 | 0.08331679 | 6.43E-28   | 3.43E-26   | KIF26B   |
| 64216     | ENSG00000162851 | 635.690803 | -0.04402934 | 0.09570979 | 0.63396857 | 0.81531966 | TFB2M    |
| 163882    | ENSG00000162852 | 1411.47595 | 0.01900067  | 0.09604246 | 0.83895408 | 0.92674595 | CNST     |
| 129285    | ENSG00000162869 | 250.339261 | 0.34858941  | 0.18141376 | 0.03005551 | 0.10045507 | PPP1R21  |
| 55220     | ENSG00000162873 | 13.8814635 | 0.28623551  | 0.4519845  | 0.13180818 | 0.30460971 | KLHDC8A  |
| 148811    | ENSG00000162877 | 6.34564116 | -0.05041258 | 0.36314585 | 0.69548322 | 0.85296328 | PM20D1   |
| 91461     | ENSG00000162878 | 427.026652 | 0.47005998  | 0.12830268 | 0.00010406 | 0.00078856 | PKDCC    |
| 165140    | ENSG00000162881 | 3.11635141 | -0.02422893 | 0.36881879 | 0.82174031 | 0.91847813 | OXER1    |
| 23498     | ENSG00000162882 | 1.29380723 | 0.03216309  | 0.38112497 | 0.62867729 | NA         | HAAO     |
| 148789    | ENSG00000162885 | 1743.17697 | -0.21828172 | 0.07143486 | 0.00182742 | 0.00990601 | B3GALNT2 |
| NA        | ENSG00000162888 | 0          | NA          | NA         | NA         | NA         | C1orf147 |
| 9261      | ENSG00000162889 | 1125.91862 | 0.5951578   | 0.08296337 | 2.28E-13   | 5.41E-12   | MAPKAPK2 |
| 50604     | ENSG00000162891 | 0          | NA          | NA         | NA         | NA         | IL20     |
| 11009     | ENSG00000162892 | 0.15069912 | -0.01848503 | 0.38480575 | 0.84537521 | NA         | IL24     |
| 9214      | ENSG00000162894 | 4.62311937 | -0.27483891 | 0.52420677 | 0.01367263 | 0.05356431 | FMR      |
| 5284      | ENSG00000162896 | 0          | NA          | NA         | NA         | NA         | PIGR     |

|        |                 |            |             |            |            |            |           |
|--------|-----------------|------------|-------------|------------|------------|------------|-----------|
| 83953  | ENSG00000162897 | 0          | NA          | NA         | NA         | NA         | FCAMR     |
| 824    | ENSG00000162909 | 2982.75895 | 0.12737458  | 0.06505601 | 0.04673155 | 0.14137754 | CAPN2     |
| 128308 | ENSG00000162910 | 556.266017 | 0.13299001  | 0.11314702 | 0.21871085 | 0.43056392 | MRPL55    |
| 574407 | ENSG00000162913 | 62.8121386 | 0.52481661  | 0.35111296 | 0.03229055 | 0.10634868 | OBSCN-AS1 |
| 80232  | ENSG00000162923 | 3894.57926 | -0.17280762 | 0.06404039 | 0.00614498 | 0.02766124 | WDR26     |
| 5966   | ENSG00000162924 | 371.482068 | 0.03998673  | 0.12974652 | 0.74407846 | 0.8795065  | REL       |
| 150962 | ENSG00000162927 | 116.12764  | -0.06961665 | 0.22650063 | 0.70269282 | 0.85699455 | PUS10     |
| 5194   | ENSG00000162928 | 446.325678 | -0.02320443 | 0.12115935 | 0.83908087 | 0.92674595 | PEX13     |
| 84542  | ENSG00000162929 | 405.809195 | 0.16120756  | 0.15428551 | 0.25313597 | 0.47339218 | KIAA1841  |
| 51127  | ENSG00000162931 | 189.472256 | 0.71125996  | 0.17483144 | 1.02E-05   | 9.64E-05   | TRIM17    |
| 130132 | ENSG00000162944 | 19.2033821 | 2.91566273  | 0.91588677 | 4.45E-05   | 0.00036941 | RFTN2     |
| 27185  | ENSG00000162946 | 311.241844 | -0.42339494 | 0.15827021 | 0.00341941 | 0.01691795 | DISC1     |
| 150596 | ENSG00000162947 | 0          | NA          | NA         | NA         | NA         | LINC01931 |
| 92291  | ENSG00000162949 | 22.9718157 | -0.44740092 | 0.50227256 | 0.0701808  | 0.1919256  | CAPN13    |
| 347730 | ENSG00000162951 | 16.5280501 | 1.26466179  | 0.76314832 | 0.0044846  | 0.02124509 | LRRTM1    |
| 51072  | ENSG00000162959 | 750.29172  | -0.19258533 | 0.1080331  | 0.06222017 | 0.17614842 | MEMO1     |
| 84661  | ENSG00000162961 | 683.155104 | 0.03024328  | 0.10104233 | 0.75725869 | 0.88697677 | DPY30     |
| 129450 | ENSG00000162971 | 340.099876 | 0.01777183  | 0.12644624 | 0.88188328 | 0.94786089 | TYW5      |
| 79568  | ENSG00000162972 | 181.401396 | 0.1144984   | 0.1648345  | 0.44208686 | 0.66680698 | MAIP1     |
| 3754   | ENSG00000162975 | 2.87043955 | -0.04588572 | 0.37600384 | 0.62872183 | 0.81183476 | KCNF1     |
| 130814 | ENSG00000162976 | 71.6366403 | 0.46677272  | 0.31425531 | 0.04236429 | 0.13122678 | SLC66A3   |
| 26225  | ENSG00000162980 | 1123.76084 | 0.10654661  | 0.09049878 | 0.22601307 | 0.44026503 | ARL5A     |
| 151354 | ENSG00000162981 | 240.251814 | 0.4392347   | 0.1783278  | 0.0059224  | 0.02688797 | LRATD1    |
| 3760   | ENSG00000162989 | 45.4379967 | -0.90073601 | 0.39994055 | 0.00262959 | 0.01354741 | KCNJ3     |
| 4760   | ENSG00000162992 | 130.970491 | 0.23027758  | 0.19986329 | 0.17945555 | 0.37588663 | NEUROD1   |
| 130162 | ENSG00000162994 | 196.037646 | 0.31967996  | 0.18986573 | 0.05412767 | 0.15818132 | CLHC1     |
| 344405 | ENSG00000162997 | 65.8610631 | 0.14427515  | 0.25049728 | 0.45467694 | 0.67793979 | PRORSD1P  |
| 2487   | ENSG00000162998 | 302.688012 | 0.38386079  | 0.13802781 | 0.00287386 | 0.01460438 | FRZB      |
| 142679 | ENSG00000162999 | 87.702068  | -0.66631651 | 0.30068873 | 0.00506247 | 0.02346713 | DUSP19    |
| 112942 | ENSG00000163001 | 409.98464  | 0.14390189  | 0.12076689 | 0.20923687 | 0.41746374 | CFAP36    |
| 129401 | ENSG00000163002 | 321.223942 | -0.32757627 | 0.14135767 | 0.01240764 | 0.04957059 | NUP35     |
| 165055 | ENSG00000163006 | 388.10475  | -0.14882418 | 0.12354465 | 0.20076099 | 0.40598289 | CCDC138   |
| 151112 | ENSG00000163012 | 1.98379226 | -0.07503058 | 0.38670646 | 0.35311588 | NA         | ZSWIM2    |
| 150726 | ENSG00000163013 | 961.503419 | -0.36777066 | 0.08855407 | 1.88E-05   | 0.00016926 | FBXO41    |
| 200420 | ENSG00000163016 | 10.0507794 | 0.12167893  | 0.36537285 | 0.44557406 | 0.67028199 | ALMS1P1   |
| 72     | ENSG00000163017 | 0.37282482 | -0.01055631 | 0.38373802 | 0.9081619  | NA         | ACTG2     |
| 80304  | ENSG00000163026 | 887.836933 | -0.19576176 | 0.11199889 | 0.06674892 | 0.1852425  | WDCP      |
| 79677  | ENSG00000163029 | 1604.4946  | -0.04609597 | 0.07681794 | 0.53955236 | 0.74863409 | SMC6      |

|           |                 |            |             |            |            |            |           |
|-----------|-----------------|------------|-------------|------------|------------|------------|-----------|
| 7447      | ENSG00000163032 | 141.573097 | 2.08758841  | 0.24627431 | 1.51E-18   | 5.27E-17   | VSNL1     |
| 90557     | ENSG00000163040 | 280.177705 | 0.14739387  | 0.15808971 | 0.3060482  | 0.53375494 | CCDC74A   |
| 3020      | ENSG00000163041 | 12438.1888 | -0.00015524 | 0.0499021  | 0.99281031 | 0.99758706 | H3-3A     |
| 554226    | ENSG00000163046 | 7.10424242 | 0.16787258  | 0.40272035 | 0.24468436 | 0.46339612 | ANKRD30BL |
| 56997     | ENSG00000163050 | 997.579021 | -0.13313194 | 0.09873194 | 0.16198405 | 0.35042673 | COQ8A     |
| 151473    | ENSG00000163053 | 173.534612 | -0.50849538 | 0.22496253 | 0.00762995 | 0.03318243 | SLC16A14  |
| 150483    | ENSG00000163060 | 0.29863895 | -0.02292439 | 0.3852726  | 0.68753245 | NA         | TEKT4     |
| 2019      | ENSG00000163064 | 0          | NA          | NA         | NA         | NA         | EN1       |
| 6443      | ENSG00000163069 | 1257.53093 | -0.31594248 | 0.07770772 | 3.17E-05   | 0.00027109 | SGCB      |
| 132671    | ENSG00000163071 | 41.4563213 | 0.16488476  | 0.33339078 | 0.39708637 | 0.62614796 | SPATA18   |
| 115677    | ENSG00000163072 | 19.7290535 | -0.02241569 | 0.32339221 | 0.89607548 | 0.95469109 | NOSTRIN   |
| 200373    | ENSG00000163075 | 0.3885105  | 0.0240703   | 0.38542007 | 0.6015462  | NA         | CFAP221   |
| 151278    | ENSG00000163081 | 0          | NA          | NA         | NA         | NA         | CCDC140   |
| 130367    | ENSG00000163082 | 50.0586851 | 0.17867616  | 0.26730672 | 0.36944396 | 0.59883728 | SGPP2     |
| 3625      | ENSG00000163083 | 0.33471731 | 0.02354391  | 0.38534154 | 0.62842204 | NA         | INHBB     |
| 129446    | ENSG00000163092 | 0          | NA          | NA         | NA         | NA         | XIRP2     |
| 129880    | ENSG00000163093 | 159.949275 | 0.37576742  | 0.19382046 | 0.02621608 | 0.09036257 | BBS5      |
| 112401    | ENSG00000163098 | 0          | NA          | NA         | NA         | NA         | BIRC8     |
| 56916     | ENSG00000163104 | 2348.21828 | -0.17897993 | 0.0674208  | 0.0069307  | 0.03070682 | SMARCD1   |
| 27306     | ENSG00000163106 | 0          | NA          | NA         | NA         | NA         | HPGDS     |
| 10611     | ENSG00000163110 | 1867.42125 | 0.27246071  | 0.0945884  | 0.00288941 | 0.01464636 | PDLIM5    |
| 5161      | ENSG00000163114 | 0          | NA          | NA         | NA         | NA         | PDHA2     |
| 285555    | ENSG00000163116 | 1.20108203 | -0.00601984 | 0.37851058 | 0.92996282 | NA         | STPG2     |
| 93082     | ENSG00000163121 | 0.173733   | 0.01914545  | 0.38484597 | 0.78225479 | NA         | NEURL3    |
| 23248     | ENSG00000163125 | 1801.72574 | -0.31234203 | 0.07611947 | 2.72E-05   | 0.00023675 | RPRD2     |
| 200539    | ENSG00000163126 | 111.865698 | 0.03527078  | 0.20654172 | 0.84089104 | 0.92777657 | ANKRD23   |
| 1520      | ENSG00000163131 | 4.42880755 | 0.15153924  | 0.40688703 | 0.20554127 | 0.41249633 | CTSS      |
| 4487      | ENSG00000163132 | 6.81236598 | 0.03088644  | 0.3568635  | 0.82087749 | 0.91847813 | MSX1      |
| 133015    | ENSG00000163138 | 323.140649 | 0.18513132  | 0.14183327 | 0.15959051 | 0.34717936 | PACRGL    |
| 149428    | ENSG00000163141 | 27.1894859 | -1.46684594 | 0.67441653 | 0.00123681 | 0.00708992 | BNIP1     |
| 114905    | ENSG00000163145 | 0.64397944 | 0.03581381  | 0.38644566 | 0.46226837 | NA         | C1QTNF7   |
| 79626     | ENSG00000163154 | 5.68146329 | 0.05089546  | 0.36051023 | 0.70925236 | 0.86048841 | TNFAIP8L2 |
| 388695    | ENSG00000163155 | 474.204549 | 0.02600217  | 0.11613958 | 0.81521344 | 0.91605316 | LYSMD1    |
| 79005     | ENSG00000163156 | 458.118701 | 0.18605435  | 0.11315164 | 0.08487392 | 0.22086812 | SCNM1     |
| 100534012 | ENSG00000163156 | 458.118701 | 0.18605435  | 0.11315164 | 0.08487392 | 0.22086812 | SCNM1     |
| 29765     | ENSG00000163157 | 9.2425594  | 0.21862463  | 0.41249217 | 0.20823678 | 0.4158149  | TMOD4     |
| 6944      | ENSG00000163159 | 1718.87005 | 0.08055096  | 0.06862957 | 0.23303474 | 0.44988944 | VPS72     |
| 2071      | ENSG00000163161 | 1854.42567 | 0.15233599  | 0.07030498 | 0.02750236 | 0.09365718 | ERCC3     |

|        |                 |            |             |            |            |            |          |
|--------|-----------------|------------|-------------|------------|------------|------------|----------|
| 284996 | ENSG00000163162 | 398.479359 | 0.22225457  | 0.11976009 | 0.05037129 | 0.14978512 | RNF149   |
| 55677  | ENSG00000163166 | 1100.19345 | -0.02531868 | 0.08579847 | 0.76123672 | 0.88962039 | IWS1     |
| 388962 | ENSG00000163170 | 201.61628  | 0.06716933  | 0.15730437 | 0.64625907 | 0.82370422 | BOLA3    |
| 10602  | ENSG00000163171 | 1606.2504  | 0.00610723  | 0.07869926 | 0.93760629 | 0.97366414 | CDC42EP3 |
| 6282   | ENSG00000163191 | 87.609111  | 10.9843322  | 2.93735994 | 1.11E-16   | 3.37E-15   | S100A11  |
| 84648  | ENSG00000163202 | 0          | NA          | NA         | NA         | NA         | LCE3D    |
| 4184   | ENSG00000163206 | 0          | NA          | NA         | NA         | NA         | SMCP     |
| 3713   | ENSG00000163207 | 0          | NA          | NA         | NA         | NA         | IVL      |
| 6707   | ENSG00000163209 | 0          | NA          | NA         | NA         | NA         | SPRR3    |
| 90957  | ENSG00000163214 | 1249.64821 | -0.02057486 | 0.09633362 | 0.83944854 | 0.92700985 | DHX57    |
| 6703   | ENSG00000163216 | 0          | NA          | NA         | NA         | NA         | SPRR2D   |
| 27302  | ENSG00000163217 | 0          | NA          | NA         | NA         | NA         | BMP10    |
| 57115  | ENSG00000163218 | 0          | NA          | NA         | NA         | NA         | PGLYRP4  |
| 9938   | ENSG00000163219 | 14.0709136 | 0.14893854  | 0.35227003 | 0.41503386 | 0.64209855 | ARHGAP25 |
| 6280   | ENSG00000163220 | 0          | NA          | NA         | NA         | NA         | S100A9   |
| 6283   | ENSG00000163221 | 0          | NA          | NA         | NA         | NA         | S100A12  |
| 7039   | ENSG00000163235 | 5.42758061 | -0.02278587 | 0.36669359 | 0.83403599 | 0.92432089 | TGFA     |
| 126668 | ENSG00000163239 | 2.0793011  | 0.09478261  | 0.39228211 | 0.27095834 | NA         | TDRD10   |
| 151195 | ENSG00000163249 | 337.291403 | 0.54864062  | 0.15097182 | 9.16E-05   | 0.00070379 | CCNYL1   |
| 7855   | ENSG00000163251 | 46.211518  | -0.48494519 | 0.34301774 | 0.04334069 | 0.13334089 | FZD5     |
| 1420   | ENSG00000163254 | 0.52119901 | 0.02576573  | 0.38568143 | 0.51723676 | NA         | CRYGC    |
| 54876  | ENSG00000163257 | 1411.20106 | 0.14516349  | 0.08558335 | 0.08171224 | 0.2145825  | DCAF16   |
| 388701 | ENSG00000163263 | 0.16735865 | 0.01897177  | 0.38482933 | 0.78225479 | NA         | C1orf189 |
| 4880   | ENSG00000163273 | 0.33468635 | -0.02324288 | 0.38531994 | 0.67674993 | NA         | NPPC     |
| 132789 | ENSG00000163281 | 488.769171 | 0.18886678  | 0.11146989 | 0.07614012 | 0.2036974  | GNPDA2   |
| 250    | ENSG00000163283 | 0.33471731 | 0.02354391  | 0.38534154 | 0.62842204 | NA         | ALPP     |
| 2565   | ENSG00000163285 | 0          | NA          | NA         | NA         | NA         | GABRG1   |
| 251    | ENSG00000163286 | 0          | NA          | NA         | NA         | NA         | ALPG     |
| 2560   | ENSG00000163288 | 2.71263968 | 0.20765234  | 0.46761039 | 0.00653964 | 0.02918662 | GABRB1   |
| 152559 | ENSG00000163291 | 932.342087 | -0.15595904 | 0.09095812 | 0.0770427  | 0.20558039 | PAQR3    |
| 152519 | ENSG00000163293 | 19.5410369 | 0.05779417  | 0.32000561 | 0.75218127 | 0.88402798 | NIPAL1   |
| 248    | ENSG00000163295 | 0          | NA          | NA         | NA         | NA         | ALPI     |
| 118429 | ENSG00000163297 | 1077.81585 | 0.4555108   | 0.08443818 | 3.14E-08   | 4.42E-07   | ANTXR2   |
| 113510 | ENSG00000163312 | 190.879778 | -0.20041573 | 0.18053053 | 0.20740468 | 0.41455862 | HELQ     |
| 51023  | ENSG00000163319 | 280.880124 | 0.14931248  | 0.14265929 | 0.25687536 | 0.47790765 | MRPS18C  |
| 8545   | ENSG00000163320 | 2463.67413 | -0.25999503 | 0.08005928 | 0.00087208 | 0.00525421 | CGGBP1   |
| 84142  | ENSG00000163322 | 150.45336  | -0.07835121 | 0.1800377  | 0.62133339 | 0.80672374 | ABRAXAS1 |
| 151556 | ENSG00000163328 | 377.433973 | 1.71218802  | 0.13706683 | 6.88E-37   | 4.91E-35   | GPR155   |



|        |                 |            |             |            |            |            |           |
|--------|-----------------|------------|-------------|------------|------------|------------|-----------|
| 92196  | ENSG00000163331 | 0.50363226 | 0.01236985  | 0.38343365 | 0.76764028 | NA         | DAPL1     |
| 10654  | ENSG00000163344 | 810.519117 | 0.10616527  | 0.09365357 | 0.24285167 | 0.4611137  | PMVK      |
| 57326  | ENSG00000163346 | 1149.44046 | 1.06640248  | 0.07946343 | 5.93E-42   | 4.71E-40   | PBXIP1    |
| 9076   | ENSG00000163347 | 0          | NA          | NA         | NA         | NA         | CLDN1     |
| 90780  | ENSG00000163348 | 2323.34178 | -0.16549089 | 0.06349814 | 0.00825754 | 0.03547631 | PYGO2     |
| 204851 | ENSG00000163349 | 1284.77312 | 0.03784238  | 0.07674629 | 0.61596783 | 0.80313338 | HIPK1     |
| 55891  | ENSG00000163352 | 2.71037926 | 0.16420915  | 0.43054495 | 0.03724782 | 0.11900108 | LENEP     |
| 127579 | ENSG00000163354 | 16.1014659 | 0.41040612  | 0.55596531 | 0.06523828 | 0.1822483  | DCST2     |
| 149095 | ENSG00000163357 | 3.97696662 | 0.21296212  | 0.45117373 | 0.08584397 | 0.22274971 | DCST1     |
| 1293   | ENSG00000163359 | 9.3882341  | -2.67370013 | 1.22614028 | 0.00073538 | 0.00451842 | COL6A3    |
| 55765  | ENSG00000163362 | 207.68932  | 0.34212956  | 0.17357366 | 0.02754787 | 0.09374783 | INAVA     |
| NA     | ENSG00000163364 | 163.164504 | -0.08068206 | 0.18452775 | 0.61742675 | 0.80410573 | LINC01116 |
| 55249  | ENSG00000163374 | 1352.68393 | -0.15562123 | 0.08639441 | 0.06402565 | 0.17979744 | YY1AP1    |
| 84541  | ENSG00000163376 | 86.0719604 | 0.21385971  | 0.26087667 | 0.28068238 | 0.50533016 | KBTBD8    |
| 151647 | ENSG00000163377 | 8.58941824 | -0.23455646 | 0.43120796 | 0.16703996 | 0.35796855 | TAF4      |
| 285203 | ENSG00000163378 | 166.194514 | -0.06700287 | 0.19788604 | 0.69101134 | 0.85031724 | EOGT      |
| 56203  | ENSG00000163380 | 1.17084403 | 0.02420981  | 0.37961559 | 0.72694653 | NA         | LMOD3     |
| 128240 | ENSG00000163382 | 1982.21204 | 0.28329697  | 0.06678002 | 1.60E-05   | 0.00014598 | NAXE      |
| 56983  | ENSG00000163389 | 893.296908 | 0.02861992  | 0.08656611 | 0.73519233 | 0.87415892 | POGLUT1   |
| 55356  | ENSG00000163393 | 102.395437 | 0.1535761   | 0.23353734 | 0.41264109 | 0.64014381 | SLC22A15  |
| 886    | ENSG00000163394 | 1.04448589 | 0.07458384  | 0.39372702 | 0.15090449 | NA         | CCKAR     |
| 91156  | ENSG00000163395 | 0.173733   | 0.01914545  | 0.38484597 | 0.78225479 | NA         | IGFN1     |
| 476    | ENSG00000163399 | 3379.58665 | 0.28393721  | 0.05798344 | 7.09E-07   | 8.23E-06   | ATP1A1    |
| 6565   | ENSG00000163406 | 34.9507478 | -0.10646899 | 0.34119086 | 0.5387595  | 0.74837139 | SLC15A2   |
| 317649 | ENSG00000163412 | 373.187573 | 0.18208713  | 0.12760127 | 0.12980826 | 0.30146269 | EIF4E3    |
| 60675  | ENSG00000163421 | 5.10823466 | 0.14387413  | 0.39310122 | 0.29400301 | 0.52021105 | PROK2     |
| 152405 | ENSG00000163424 | 0          | NA          | NA         | NA         | NA         | TEX55     |
| 116064 | ENSG00000163428 | 1377.03263 | -0.15547029 | 0.08174373 | 0.05128432 | 0.15197622 | LRRC58    |
| 11167  | ENSG00000163430 | 1696.12125 | 1.21651086  | 0.1079066  | 1.81E-30   | 1.06E-28   | FSTL1     |
| 25802  | ENSG00000163431 | 20.6221793 | 0.30487235  | 0.4028423  | 0.15935046 | 0.34688536 | LMOD1     |
| 1999   | ENSG00000163435 | 11.9853519 | 3.48695872  | 0.97154564 | 1.65E-05   | 0.00015064 | ELF3      |
| 132954 | ENSG00000163440 | 1.56028331 | -0.0253943  | 0.37981867 | 0.71068851 | NA         | PDCL2     |
| 92703  | ENSG00000163444 | 2001.79987 | 0.17486447  | 0.07996127 | 0.02519038 | 0.08767516 | TMEM183A  |
| 92691  | ENSG00000163449 | 570.209168 | -0.35388426 | 0.1058465  | 0.00048758 | 0.0031582  | TMEM169   |
| 3490   | ENSG00000163453 | 2.12875089 | -0.07186301 | 0.38481615 | 0.40358949 | NA         | IGFBP7    |
| 80128  | ENSG00000163462 | 1072.40085 | 0.0552525   | 0.0858419  | 0.51123066 | 0.72640667 | TRIM46    |
| 200185 | ENSG00000163463 | 730.97631  | 0.31528853  | 0.10850952 | 0.00238315 | 0.01244585 | KRTCAP2   |
| 3577   | ENSG00000163464 | 0          | NA          | NA         | NA         | NA         | CXCR1     |

|        |                 |            |             |             |            |            |          |
|--------|-----------------|------------|-------------|-------------|------------|------------|----------|
| 10109  | ENSG00000163466 | 2853.2754  | -0.17260524 | 0.06663144  | 0.00843764 | 0.03606263 | ARPC2    |
| 128229 | ENSG00000163467 | 3.40145801 | -0.14654707 | 0.40731725  | 0.1920392  | 0.39417108 | TSACC    |
| 7203   | ENSG00000163468 | 8310.36984 | -0.16415603 | 0.06219754  | 0.00743469 | 0.03248276 | CCT3     |
| 84283  | ENSG00000163472 | 262.239396 | -0.02812339 | 0.17608627  | 0.85583673 | 0.93567436 | TMEM79   |
| 6746   | ENSG00000163479 | 7551.93836 | 0.17599841  | 0.04960791  | 0.00035611 | 0.00238527 | SSR2     |
| 64320  | ENSG00000163481 | 420.120135 | -0.46427305 | 0.12478003  | 8.46E-05   | 0.00065457 | RNF25    |
| 27148  | ENSG00000163482 | 902.415571 | 0.07132184  | 0.11627317  | 0.52025278 | 0.73376094 | STK36    |
| 134    | ENSG00000163485 | 94.5580735 | -1.18604856 | 0.37697437  | 0.00012359 | 0.00091838 | ADORA1   |
| 152110 | ENSG00000163491 | 5.73812682 | -0.02817473 | 0.36344994  | 0.80943877 | 0.91359357 | NEK10    |
| 285025 | ENSG00000163492 | 0          | NA          | NA          | NA         | NA         | CCDC141  |
| 54738  | ENSG00000163497 | 1331.35367 | -0.94068373 | 0.08678975  | 3.24E-28   | 1.75E-26   | FEV      |
| 1412   | ENSG00000163499 | 14.6181531 | -0.07425561 | 0.33299207  | 0.6690143  | 0.83720681 | CRYBA2   |
| 3549   | ENSG00000163501 | 5.16872557 | 0.26836849  | 0.49925494  | 0.05595352 | 0.16239288 | IHH      |
| 57650  | ENSG00000163507 | 1139.31932 | -0.10433285 | 0.10218706  | 0.28866662 | 0.51460846 | CIP2A    |
| 8320   | ENSG00000163508 | 0          | NA          | NA          | NA         | NA         | EOMES    |
| 57703  | ENSG00000163510 | 730.402522 | -0.37871613 | 0.10098336  | 9.76E-05   | 0.00074641 | CWC22    |
| 64343  | ENSG00000163512 | 796.972312 | -0.135226   | 0.09806808  | 0.15292556 | 0.33767871 | AZI2     |
| 7048   | ENSG00000163513 | 139.694195 | 0.38252743  | 0.19759966  | 0.0258314  | 0.08931597 | TGFBR2   |
| 84666  | ENSG00000163515 | 0          | NA          | NA          | NA         | NA         | RETNLB   |
| 55139  | ENSG00000163516 | 739.393912 | 0.01965801  | 0.09827514  | 0.83691979 | 0.92591806 | ANKZF1   |
| 79885  | ENSG00000163517 | 209.944628 | 0.09542314  | 0.17320019  | 0.53764311 | 0.7477106  | HDAC11   |
| 83417  | ENSG00000163518 | 0          | NA          | NA          | NA         | NA         | FCRL4    |
| 50852  | ENSG00000163519 | 0.15069912 | -0.01848503 | 0.38480575  | 0.84537521 | NA         | TRAT1    |
| 2199   | ENSG00000163520 | 546.331334 | -0.17519094 | 0.12697487  | 0.14233952 | 0.32117652 | FBLN2    |
| 79411  | ENSG00000163521 | 95.4908893 | 1.15843033  | 0.24314745  | 1.94E-07   | 2.46E-06   | GLB1L    |
| 201595 | ENSG00000163527 | 1994.6363  | 0.02829681  | 0.09324585  | 0.75524703 | 0.88614698 | STT3B    |
| 131474 | ENSG00000163528 | 281.030303 | -0.60567316 | 0.14528462  | 8.64E-06   | 8.30E-05   | CHCHD4   |
| 151871 | ENSG00000163530 | 0          | NA          | NA          | NA         | NA         | DPPA2    |
| 23114  | ENSG00000163531 | 1063.2287  | -1.2923657  | 0.09355256  | 2.86E-44   | 2.46E-42   | NFASC    |
| 115350 | ENSG00000163534 | 0          | NA          | NA          | NA         | NA         | FCRL1    |
| 151246 | ENSG00000163535 | 699.497332 | -0.44752624 | 0.10241817  | 5.67E-06   | 5.65E-05   | SGO2     |
| 5274   | ENSG00000163536 | 191.985679 | 0.29055317  | 0.1772246   | 0.06505057 | 0.18187757 | SERPINI1 |
| 23122  | ENSG00000163539 | 2804.39296 | -0.4176851  | 0.07549298  | 1.60E-08   | 2.34E-07   | CLASP2   |
| 8802   | ENSG00000163541 | 673.430034 | -0.01328671 | 0.111168709 | 0.89977873 | 0.95565364 | SUCLG1   |
| 81788  | ENSG00000163545 | 8.96153288 | 0.1041716   | 0.3621522   | 0.50387535 | 0.72045005 | NUAK2    |
| 6708   | ENSG00000163554 | 0          | NA          | NA          | NA         | NA         | SPTA1    |
| 5584   | ENSG00000163558 | 1413.28547 | -0.11340423 | 0.10449689  | 0.25829831 | 0.47964541 | PRKCI    |
| 4332   | ENSG00000163563 | 0          | NA          | NA          | NA         | NA         | MNDA     |

|           |                 |            |             |            |            |            |          |
|-----------|-----------------|------------|-------------|------------|------------|------------|----------|
| 149628    | ENSG00000163564 | 0          | NA          | NA         | NA         | NA         | PYHIN1   |
| 3428      | ENSG00000163565 | 0          | NA          | NA         | NA         | NA         | IFI16    |
| 9447      | ENSG00000163568 | 0          | NA          | NA         | NA         | NA         | AIM2     |
| 151651    | ENSG00000163576 | 2.701327   | 0.15674546  | 0.42682817 | 0.0468292  | 0.14160818 | EFHB     |
| 56648     | ENSG00000163577 | 97.8959436 | 0.11461647  | 0.29956727 | 0.55558813 | 0.7613563  | EIF5A2   |
| 6514      | ENSG00000163581 | 0          | NA          | NA         | NA         | NA         | SLC2A2   |
| 200916    | ENSG00000163584 | 316.360333 | -0.06865439 | 0.14364466 | 0.60542014 | 0.79536059 | RPL22L1  |
| 2168      | ENSG00000163586 | 0          | NA          | NA         | NA         | NA         | FABP1    |
| 151742    | ENSG00000163590 | 1252.81993 | -0.19502325 | 0.07741033 | 0.01000259 | 0.04148231 | PPM1L    |
| 130026    | ENSG00000163596 | 274.560146 | -0.08780447 | 0.15342613 | 0.53112391 | 0.74260031 | ICA1L    |
| 100507246 | ENSG00000163597 | 3355.3833  | -0.62376528 | 0.06331369 | 1.96E-23   | 8.80E-22   | SNHG16   |
| 1493      | ENSG00000163599 | 0          | NA          | NA         | NA         | NA         | CTLA4    |
| 29851     | ENSG00000163600 | 0          | NA          | NA         | NA         | NA         | ICOS     |
| 23429     | ENSG00000163602 | 1464.52944 | 0.36192133  | 0.07361272 | 5.31E-07   | 6.31E-06   | RYBP     |
| 151987    | ENSG00000163605 | 1371.45073 | -0.12512738 | 0.08150763 | 0.11576447 | 0.27775826 | PPP4R2   |
| 131450    | ENSG00000163606 | 1.1902675  | -0.02624359 | 0.3824067  | 0.61976493 | NA         | CD200R1  |
| 29083     | ENSG00000163607 | 369.858482 | 0.04800822  | 0.11955494 | 0.67336125 | 0.83953925 | GTPBP8   |
| 25871     | ENSG00000163608 | 1104.01103 | -0.26435269 | 0.09160307 | 0.00288888 | 0.01464636 | NEPRO    |
| 152185    | ENSG00000163611 | 383.00383  | 0.63396591  | 0.14499674 | 3.24E-06   | 3.36E-05   | SPICE1   |
| NA        | ENSG00000163612 | 0          | NA          | NA         | NA         | NA         | FAM86KP  |
| 57577     | ENSG00000163617 | 136.579437 | 0.87512571  | 0.21848932 | 9.01E-06   | 8.62E-05   | CCDC191  |
| 8618      | ENSG00000163618 | 13.0348989 | -0.0788741  | 0.34036895 | 0.64135904 | 0.82041028 | CADPS    |
| 4825      | ENSG00000163623 | 0          | NA          | NA         | NA         | NA         | NKX6-1   |
| 1040      | ENSG00000163624 | 2.58875482 | -0.0077415  | 0.37403501 | 0.92886973 | 0.97019086 | CDS1     |
| 23001     | ENSG00000163625 | 1558.24183 | -0.04039342 | 0.11590003 | 0.71346145 | 0.86190557 | WDFY3    |
| 285521    | ENSG00000163626 | 444.06727  | 0.26286423  | 0.11655724 | 0.01764957 | 0.06585808 | COX18    |
| 5783      | ENSG00000163629 | 882.933926 | 0.54756237  | 0.08982571 | 3.88E-10   | 7.03E-09   | PTPN13   |
| 132204    | ENSG00000163630 | 8.35579812 | 2.00179557  | 1.60535936 | 0.00479779 | 0.02243415 | SYNPR    |
| 213       | ENSG00000163631 | 1.40427668 | 0.06662381  | 0.39038066 | 0.21491866 | NA         | ALB      |
| 132200    | ENSG00000163632 | 1.74956889 | 0.10306946  | 0.39945445 | 0.12203887 | NA         | C3orf49  |
| 132989    | ENSG00000163633 | 5.36401112 | 0.05891279  | 0.36628931 | 0.64587241 | 0.82368764 | C4orf36  |
| 80145     | ENSG00000163634 | 599.428966 | -0.03181293 | 0.09845264 | 0.73742831 | 0.87597758 | THOC7    |
| 6314      | ENSG00000163635 | 524.250583 | 0.14795164  | 0.14177176 | 0.26179365 | 0.48374648 | ATXN7    |
| 9861      | ENSG00000163636 | 1126.91822 | 0.10106502  | 0.08498729 | 0.22297005 | 0.43606299 | PSMD6    |
| 166336    | ENSG00000163637 | 10.5326744 | 0.17526649  | 0.40231057 | 0.233922   | 0.45086784 | PRICKLE2 |
| 56999     | ENSG00000163638 | 9905.27793 | -0.35278298 | 0.05385637 | 3.77E-11   | 7.58E-10   | ADAMTS9  |
| 152926    | ENSG00000163644 | 429.27703  | -0.4257959  | 0.13800523 | 0.00094146 | 0.00562947 | PPMIK    |
| 131831    | ENSG00000163645 | 4.25050557 | 0.00091418  | 0.36315867 | 0.99585839 | 0.99852582 | ERICH6   |

|        |                 |            |             |            |            |            |          |
|--------|-----------------|------------|-------------|------------|------------|------------|----------|
| 7401   | ENSG00000163646 | 0          | NA          | NA         | NA         | NA         | CLRN1    |
| 8833   | ENSG00000163655 | 1749.94615 | -0.42307842 | 0.08062498 | 7.62E-08   | 1.02E-06   | GMPS     |
| 25976  | ENSG00000163659 | 188.434282 | -0.08728764 | 0.17825451 | 0.57950594 | 0.77706744 | TIPARP   |
| 57018  | ENSG00000163660 | 1827.16348 | 0.25853652  | 0.07252101 | 0.00027706 | 0.00190266 | CCNL1    |
| 5806   | ENSG00000163661 | 22.080159  | 0.45923781  | 0.47056358 | 0.06855584 | 0.18864741 | PTX3     |
| 8820   | ENSG00000163666 | 26.9029056 | 0.43285977  | 0.41055796 | 0.07713679 | 0.20578109 | HESX1    |
| 85443  | ENSG00000163673 | 30.6416156 | 3.31654233  | 0.57286813 | 5.09E-10   | 9.13E-09   | DCLK3    |
| 7871   | ENSG00000163681 | 750.801554 | -0.25713626 | 0.10708221 | 0.01212035 | 0.04861862 | SLMAP    |
| 6133   | ENSG00000163682 | 8668.08523 | -0.1772415  | 0.0584261  | 0.00212876 | 0.01128963 | RPL9     |
| 201895 | ENSG00000163683 | 449.592535 | 0.05893502  | 0.1521677  | 0.67399883 | 0.84006388 | SMIM14   |
| 11102  | ENSG00000163684 | 495.530824 | -0.13346818 | 0.15555661 | 0.34617051 | 0.57693723 | RPP14    |
| 57406  | ENSG00000163686 | 123.010858 | -0.17462886 | 0.18889513 | 0.28821682 | 0.5139923  | ABHD6    |
| 1776   | ENSG00000163687 | 0          | NA          | NA         | NA         | NA         | DNASE1L3 |
| 200844 | ENSG00000163689 | 139.678154 | -0.10015084 | 0.20091737 | 0.55725822 | 0.76258372 | CFAP20DC |
| 54502  | ENSG00000163694 | 1.02328604 | 0.05874709  | 0.39031919 | 0.20106626 | NA         | RBM47    |
| 323    | ENSG00000163697 | 980.695569 | -0.40432209 | 0.11318476 | 0.00017802 | 0.00127966 | APBB2    |
| 132014 | ENSG00000163701 | 39.7660688 | 0.58222334  | 0.41371844 | 0.02821858 | 0.09562026 | IL17RE   |
| 84818  | ENSG00000163702 | 237.663058 | 1.03560868  | 0.17910663 | 9.06E-10   | 1.57E-08   | IL17RC   |
| 78987  | ENSG00000163703 | 1046.6015  | 0.36234245  | 0.10241541 | 0.00023413 | 0.00163501 | CRELD1   |
| 285368 | ENSG00000163704 | 222.475052 | -0.10233161 | 0.16479456 | 0.49116343 | 0.71060078 | PRRT3    |
| 115795 | ENSG00000163705 | 0.15069912 | -0.01848503 | 0.38480575 | 0.84537521 | NA         | FANCD2OS |
| 26577  | ENSG00000163710 | 105.377647 | 0.47334923  | 0.23331683 | 0.01506656 | 0.05791677 | PCOLCE2  |
| 23350  | ENSG00000163714 | 2849.4426  | -0.00855438 | 0.07981176 | 0.91243976 | 0.96260718 | U2SURP   |
| 64419  | ENSG00000163719 | 650.550259 | 0.18762959  | 0.10037091 | 0.05231598 | 0.15415849 | MTMR14   |
| 151613 | ENSG00000163728 | 1312.86166 | 0.55441104  | 0.08727687 | 7.31E-11   | 1.43E-09   | TTC14    |
| 2921   | ENSG00000163734 | 0          | NA          | NA         | NA         | NA         | CXCL3    |
| 6374   | ENSG00000163735 | 0          | NA          | NA         | NA         | NA         | CXCL5    |
| 5473   | ENSG00000163736 | 0          | NA          | NA         | NA         | NA         | PPBP     |
| 5196   | ENSG00000163737 | 0          | NA          | NA         | NA         | NA         | PF4      |
| 441024 | ENSG00000163738 | 261.367868 | -0.13477537 | 0.13912602 | 0.29725273 | 0.52389572 | MTHFD2L  |
| 2919   | ENSG00000163739 | 0          | NA          | NA         | NA         | NA         | CXCL1    |
| 25898  | ENSG00000163743 | 469.348848 | -0.39714204 | 0.11811269 | 0.00039841 | 0.00263835 | RCHY1    |
| 57047  | ENSG00000163746 | 0          | NA          | NA         | NA         | NA         | PLSCR2   |
| 339965 | ENSG00000163749 | 4.59341369 | -0.00530033 | 0.36411561 | 0.96117265 | 0.98419142 | CCDC158  |
| 1359   | ENSG00000163751 | 1.66388074 | 0.03581179  | 0.37899126 | 0.64944584 | NA         | CPA3     |
| 2992   | ENSG00000163754 | 215.349066 | 0.1259479   | 0.15985447 | 0.38753859 | 0.61648218 | GYG1     |
| 84343  | ENSG00000163755 | 513.754934 | -0.07225984 | 0.10886445 | 0.48794505 | 0.70776647 | HPS3     |
| 116441 | ENSG00000163762 | 0.173124   | -0.01911262 | 0.38486262 | 0.84537521 | NA         | TM4SF18  |

|        |                 |            |             |            |            |            |          |
|--------|-----------------|------------|-------------|------------|------------|------------|----------|
| 11073  | ENSG00000163781 | 2462.57842 | -0.08380666 | 0.0726533  | 0.23971954 | 0.45775127 | TOPBP1   |
| 6259   | ENSG00000163785 | 1268.65698 | 0.20704794  | 0.08526137 | 0.01269054 | 0.05043796 | RYK      |
| 54861  | ENSG00000163788 | 605.601644 | -0.16609778 | 0.10956915 | 0.11279375 | 0.27197715 | SNRK     |
| 150921 | ENSG00000163792 | 0          | NA          | NA         | NA         | NA         | TCF23    |
| 285126 | ENSG00000163793 | 56.5320828 | -1.7093179  | 0.38663308 | 6.16E-07   | 7.24E-06   | DNAJC5G  |
| 7349   | ENSG00000163794 | 32.6288283 | -0.07457027 | 0.27897379 | 0.69973826 | 0.8552838  | UCN      |
| 130557 | ENSG00000163795 | 1469.45247 | 0.24040721  | 0.07099656 | 0.00056025 | 0.00356263 | ZNF513   |
| 22950  | ENSG00000163798 | 771.627389 | 0.03265016  | 0.10204443 | 0.74094504 | 0.87763281 | SLC4A1AP |
| 151056 | ENSG00000163803 | 11.4678376 | -0.07947665 | 0.3699268  | 0.52140831 | 0.73486829 | PLB1     |
| 245711 | ENSG00000163806 | 12.0830339 | -0.03763281 | 0.34826438 | 0.80079663 | 0.90877553 | SPDYA    |
| 57456  | ENSG00000163807 | 1038.83945 | -0.21599563 | 0.24695357 | 0.2639571  | 0.48609939 | KIAA1143 |
| 56992  | ENSG00000163808 | 1081.07157 | -0.32749193 | 0.10659045 | 0.00133116 | 0.00756092 | KIF15    |
| 7047   | ENSG00000163810 | 2.85863137 | -0.14639347 | 0.41125319 | 0.15551888 | 0.34146686 | TGM4     |
| 23160  | ENSG00000163811 | 1530.89778 | -0.17865593 | 0.10486662 | 0.07569712 | 0.2027857  | WDR43    |
| 51304  | ENSG00000163812 | 1536.42355 | -0.2279705  | 0.12132859 | 0.04696272 | 0.14179583 | ZDHHC3   |
| 64866  | ENSG00000163814 | 0.44427848 | 0.01506333  | 0.38397328 | 0.81042032 | NA         | CDCP1    |
| 7123   | ENSG00000163815 | 4.76223654 | 0.05812573  | 0.3723885  | 0.60944639 | 0.79803651 | CLEC3B   |
| 54716  | ENSG00000163817 | 0.14931947 | -0.01844332 | 0.38480212 | 0.84537521 | NA         | SLC6A20  |
| 54585  | ENSG00000163818 | 343.439965 | 0.3064799   | 0.12940517 | 0.01163235 | 0.04697436 | LZTFL1   |
| 79443  | ENSG00000163820 | 435.715904 | 0.95261226  | 0.14178747 | 2.60E-12   | 5.77E-11   | FYCO1    |
| 1230   | ENSG00000163823 | 0          | NA          | NA         | NA         | NA         | CCR1     |
| 83597  | ENSG00000163825 | 0.173733   | 0.01914545  | 0.38484597 | 0.78225479 | NA         | RTP3     |
| 79442  | ENSG00000163827 | 32.150259  | 0.0006676   | 0.28955498 | 0.99905009 | 0.99962651 | LRRRC2   |
| 54859  | ENSG00000163832 | 684.957222 | -0.11541503 | 0.11949446 | 0.30861991 | 0.53621325 | ELP6     |
| 51725  | ENSG00000163833 | 0          | NA          | NA         | NA         | NA         | FBXO40   |
| 151636 | ENSG00000163840 | 484.58259  | 0.00247453  | 0.12498778 | 0.98499241 | 0.99473578 | DTX3L    |
| 7707   | ENSG00000163848 | 888.454685 | -0.21547226 | 0.09252636 | 0.01612566 | 0.06118439 | ZNF148   |
| 349565 | ENSG00000163864 | 11.3716482 | -0.53412382 | 0.71041328 | 0.03852992 | 0.1221335  | NMNAT3   |
| 113444 | ENSG00000163866 | 487.035837 | 0.02265582  | 0.11270816 | 0.83423746 | 0.92434219 | SMIM12   |
| 9204   | ENSG00000163867 | 332.248608 | -0.08118111 | 0.13737537 | 0.52489789 | 0.73755856 | ZMYM6    |
| 131601 | ENSG00000163870 | 378.985922 | 0.13219103  | 0.12644095 | 0.26825055 | 0.49101309 | TPRA1    |
| 55689  | ENSG00000163872 | 3230.42976 | 0.06684343  | 0.06253731 | 0.27802261 | 0.50254816 | YEATS2   |
| 2899   | ENSG00000163873 | 40.8086422 | -4.28828655 | 0.54640609 | 6.19E-16   | 1.79E-14   | GRIK3    |
| 80149  | ENSG00000163874 | 36.6019046 | 0.68899972  | 0.39962201 | 0.01296106 | 0.05133707 | ZC3H12A  |
| 64769  | ENSG00000163875 | 911.209264 | -0.13115176 | 0.09103241 | 0.13724964 | 0.31281251 | MEAF6    |
| 79753  | ENSG00000163877 | 475.913878 | -0.07054279 | 0.17545587 | 0.64901712 | 0.82497477 | SNIP1    |
| 7802   | ENSG00000163879 | 372.935734 | 0.25270946  | 0.16206398 | 0.08484819 | 0.22086345 | DNALI1   |
| 5437   | ENSG00000163882 | 1107.20735 | -0.03170404 | 0.08188159 | 0.69258871 | 0.85146611 | POLR2H   |

|        |                 |            |             |            |            |            |             |
|--------|-----------------|------------|-------------|------------|------------|------------|-------------|
| 28999  | ENSG00000163884 | 239.230971 | 0.07142868  | 0.14944395 | 0.6057104  | 0.79555768 | KLF15       |
| 348807 | ENSG00000163885 | 0.15069912 | -0.01848503 | 0.38480575 | 0.84537521 | NA         | CFAP100     |
| 94032  | ENSG00000163888 | 204.75336  | -1.46694757 | 0.20307379 | 4.12E-14   | 1.05E-12   | CAMK2N2     |
| 200879 | ENSG00000163898 | 1.80341675 | 0.08745899  | 0.39546778 | 0.14318956 | NA         | LIPH        |
| 90407  | ENSG00000163900 | 308.440484 | 0.36460367  | 0.16462519 | 0.01440118 | 0.05577188 | TMEM41A     |
| 6184   | ENSG00000163902 | 3133.7349  | 0.19660903  | 0.08266063 | 0.01474848 | 0.0568948  | RPN1        |
| 59343  | ENSG00000163904 | 858.89801  | 0.24764856  | 0.09879718 | 0.00931846 | 0.03914424 | SENP2       |
| 26508  | ENSG00000163909 | 0.86893111 | 0.01664743  | 0.38116958 | 0.76840041 | NA         | HEYL        |
| 55764  | ENSG00000163913 | 590.777603 | 0.07553207  | 0.12530652 | 0.52433527 | 0.73721294 | IFT122      |
| 6010   | ENSG00000163914 | 0.37844916 | 0.02407552  | 0.3854191  | 0.60038877 | NA         | RHO         |
| 646600 | ENSG00000163915 | 0          | NA          | NA         | NA         | NA         | IGF2BP2-AS1 |
| 5984   | ENSG00000163918 | 725.991845 | -0.09321938 | 0.10132298 | 0.33909698 | 0.5693225  | RFC4        |
| 116832 | ENSG00000163923 | 365.083601 | -0.15851378 | 0.12170505 | 0.16860527 | 0.35992344 | RPL39L      |
| 8314   | ENSG00000163930 | 2393.26123 | 0.1197381   | 0.06188447 | 0.04998779 | 0.1489573  | BAP1        |
| 7086   | ENSG00000163931 | 4363.6994  | -0.54798342 | 0.0642558  | 5.22E-18   | 1.73E-16   | TKT         |
| 5580   | ENSG00000163932 | 235.592521 | 0.00738884  | 0.14599621 | 0.95742677 | 0.98264776 | PRKCD       |
| 91869  | ENSG00000163933 | 616.83858  | -0.20448779 | 0.10876631 | 0.04884159 | 0.1463551  | RFT1        |
| 51460  | ENSG00000163935 | 298.373871 | -0.22457131 | 0.16506209 | 0.13053084 | 0.30275099 | SFMBT1      |
| 26354  | ENSG00000163938 | 2017.43906 | -0.1926651  | 0.07662071 | 0.0101834  | 0.04200386 | GNL3        |
| 55193  | ENSG00000163939 | 2866.19554 | -0.05945471 | 0.07994348 | 0.44136194 | 0.66615602 | PBRM1       |
| 57654  | ENSG00000163945 | 1207.55314 | 0.26788356  | 0.12398185 | 0.02114269 | 0.07618153 | UVSSA       |
| 23272  | ENSG00000163946 | 2123.93948 | -0.15561741 | 0.08614983 | 0.06310616 | 0.17807227 | TASOR       |
| 50650  | ENSG00000163947 | 128.791817 | 0.02458843  | 0.20523623 | 0.88861782 | 0.95146564 | ARHGEF3     |
| 7884   | ENSG00000163950 | 1097.30472 | -0.32388755 | 0.08852104 | 0.00016289 | 0.00118118 | SLBP        |
| 4043   | ENSG00000163956 | 1330.94636 | 0.29075273  | 0.08829728 | 0.00070679 | 0.00436302 | LRPAP1      |
| 131540 | ENSG00000163958 | 11.4195    | 0.2628518   | 0.43275087 | 0.16291191 | 0.35193514 | ZDHHC19     |
| 200931 | ENSG00000163959 | 10.7155833 | 0.19448188  | 0.40038856 | 0.24380904 | 0.46213541 | SLC51A      |
| 26043  | ENSG00000163960 | 2234.88571 | -0.12914658 | 0.0789968  | 0.09099586 | 0.23271133 | UBXN7       |
| 165918 | ENSG00000163961 | 711.833947 | -0.33970406 | 0.10215112 | 0.00054014 | 0.00345019 | RNF168      |
| 54965  | ENSG00000163964 | 534.451611 | -0.06802843 | 0.1545147  | 0.62276869 | 0.80737672 | PIGX        |
| 4241   | ENSG00000163975 | 359.039574 | 0.76042378  | 0.14314643 | 2.16E-08   | 3.12E-07   | MELTF       |
| 133060 | ENSG00000163982 | 0          | NA          | NA         | NA         | NA         | OTOP1       |
| 6286   | ENSG00000163993 | 0.69017422 | 0.03903171  | 0.3869417  | 0.37258575 | NA         | S100P       |
| 84448  | ENSG00000163995 | 104.525257 | -1.28329631 | 0.24414457 | 1.33E-08   | 1.98E-07   | ABLM2       |
| 64789  | ENSG00000164002 | 216.239719 | -0.03808378 | 0.14825602 | 0.77969021 | 0.89925062 | EXO5        |
| 149461 | ENSG00000164007 | 1.14146079 | 0.06770743  | 0.38954926 | 0.25074476 | NA         | CLDN19      |
| 79078  | ENSG00000164008 | 211.880299 | -0.33099036 | 0.22163725 | 0.07235843 | 0.19601191 | C1orf50     |
| 114625 | ENSG00000164010 | 147.951813 | -0.06130064 | 0.21218423 | 0.72724912 | 0.86953012 | ERMAP       |

|        |                 |            |             |            |            |            |         |
|--------|-----------------|------------|-------------|------------|------------|------------|---------|
| 51058  | ENSG00000164011 | 265.541884 | -0.15718393 | 0.15095392 | 0.25597024 | 0.47707369 | ZNF691  |
| 9255   | ENSG00000164022 | 1215.04669 | -0.05019541 | 0.07826859 | 0.51176596 | 0.72695902 | AIMP1   |
| 166929 | ENSG00000164023 | 1.06425219 | 0.03847341  | 0.38467702 | 0.47350963 | NA         | SGMS2   |
| 23173  | ENSG00000164024 | 1053.97649 | -0.06080594 | 0.08247791 | 0.4495938  | 0.67315229 | METAP1  |
| 79982  | ENSG00000164031 | 887.559386 | 0.69371576  | 0.12812235 | 1.40E-08   | 2.07E-07   | DNAJB14 |
| 3015   | ENSG00000164032 | 7526.31036 | 0.02361045  | 0.0536894  | 0.65782421 | 0.83028388 | H2AZ1   |
| 51705  | ENSG00000164035 | 0          | NA          | NA         | NA         | NA         | EMCN    |
| 150159 | ENSG00000164037 | 4.26473574 | 0.01670639  | 0.36944539 | 0.87377324 | 0.94441388 | SLC9B1  |
| 133308 | ENSG00000164038 | 675.373075 | -0.30044439 | 0.1299611  | 0.0136186  | 0.05341418 | SLC9B2  |
| 56898  | ENSG00000164039 | 589.877711 | 0.44455443  | 0.13379792 | 0.00039501 | 0.00261844 | BDH2    |
| 10424  | ENSG00000164040 | 770.014164 | -0.20880663 | 0.10114977 | 0.03186319 | 0.10516813 | PGRMC2  |
| 993    | ENSG00000164045 | 1076.57444 | -0.1861355  | 0.09445332 | 0.04143663 | 0.12885621 | CDC25A  |
| 820    | ENSG00000164047 | 0          | NA          | NA         | NA         | NA         | CAMP    |
| 51385  | ENSG00000164048 | 692.54264  | -0.12675992 | 0.11507114 | 0.24725955 | 0.46618165 | ZNF589  |
| 285231 | ENSG00000164049 | 5.51262989 | 0.01693555  | 0.36033481 | 0.89668148 | 0.95469109 | FBXW12  |
| 5364   | ENSG00000164050 | 2846.97158 | 0.53627767  | 0.06827151 | 1.48E-15   | 4.22E-14   | PLXNB1  |
| 79714  | ENSG00000164051 | 455.872928 | -0.28327566 | 0.12832085 | 0.01874874 | 0.0691018  | CCDC51  |
| 84126  | ENSG00000164053 | 458.206541 | 0.00703174  | 0.11071583 | 0.94799564 | 0.97876335 | ATRIP   |
| 51246  | ENSG00000164054 | 190.692626 | 0.47260352  | 0.21303423 | 0.00985731 | 0.0409823  | SHISA5  |
| 10252  | ENSG00000164056 | 60.4465313 | 0.46070134  | 0.31328393 | 0.04470036 | 0.13639738 | SPRY1   |
| 8927   | ENSG00000164061 | 1688.85755 | -1.55115614 | 0.07191999 | 3.09E-104  | 9.88E-102  | BSN     |
| 327    | ENSG00000164062 | 1669.73757 | 0.04340901  | 0.0801103  | 0.57775201 | 0.77605301 | APEH    |
| 27152  | ENSG00000164066 | 458.694472 | 0.22916521  | 0.13520472 | 0.06945746 | 0.19038905 | INTU    |
| 63891  | ENSG00000164068 | 1053.03718 | 0.18316491  | 0.08947664 | 0.03512984 | 0.11362505 | RNF123  |
| 22824  | ENSG00000164070 | 858.977165 | -0.16315786 | 0.1057341  | 0.10764145 | 0.26314781 | HSPA4L  |
| 256471 | ENSG00000164073 | 227.13419  | -0.19001771 | 0.15658552 | 0.18214017 | 0.37982563 | MFSD8   |
| 80167  | ENSG00000164074 | 217.312366 | 0.11174099  | 0.16613404 | 0.45611568 | 0.67958359 | ABHD18  |
| 79012  | ENSG00000164076 | 1180.83584 | -1.0012436  | 0.08540863 | 1.34E-32   | 8.30E-31   | CAMKV   |
| 84315  | ENSG00000164077 | 312.430314 | -0.15020346 | 0.14276488 | 0.25550518 | 0.47650319 | MON1A   |
| 4486   | ENSG00000164078 | 26.2977633 | 1.90502778  | 0.55940568 | 3.16E-05   | 0.00027078 | MST1R   |
| 23132  | ENSG00000164080 | 1396.83127 | -0.08483579 | 0.08257736 | 0.29219353 | 0.51825408 | RAD54L2 |
| 51368  | ENSG00000164081 | 418.6777   | 0.03243091  | 0.13688529 | 0.80056806 | 0.90868418 | TEX264  |
| 2912   | ENSG00000164082 | 108.275722 | -2.2939638  | 0.28086884 | 2.23E-17   | 7.07E-16   | GRM2    |
| 1849   | ENSG00000164086 | 1459.79656 | -1.03333909 | 0.08174786 | 1.63E-37   | 1.17E-35   | DUSP7   |
| 25886  | ENSG00000164087 | 376.432147 | -0.00658956 | 0.12236512 | 0.95379728 | 0.98083958 | POC1A   |
| 132160 | ENSG00000164088 | 392.27733  | 0.36809776  | 0.1274781  | 0.00216754 | 0.01146772 | PPM1M   |
| 64850  | ENSG00000164089 | 0          | NA          | NA         | NA         | NA         | ETNPPL  |
| 80335  | ENSG00000164091 | 5208.64438 | -0.4227484  | 0.05082934 | 4.58E-17   | 1.42E-15   | WDR82   |

|        |                 |            |             |            |            |            |          |
|--------|-----------------|------------|-------------|------------|------------|------------|----------|
| 5308   | ENSG00000164093 | 0          | NA          | NA         | NA         | NA         | PITX2    |
| 401152 | ENSG00000164096 | 807.660851 | -0.30403267 | 0.10994296 | 0.00378171 | 0.01839941 | C4orf3   |
| 8492   | ENSG00000164099 | 2659.26438 | 1.77949476  | 0.07697985 | 2.59E-119  | 1.03E-116  | PRSS12   |
| 9348   | ENSG00000164100 | 24.5066338 | 0.04364533  | 0.29707032 | 0.8191578  | 0.91752333 | NDST3    |
| 3148   | ENSG00000164104 | 6679.11935 | 0.30326492  | 0.05693379 | 8.02E-08   | 1.07E-06   | HMGB2    |
| 8819   | ENSG00000164105 | 371.661773 | 0.63157367  | 0.12600464 | 1.47E-07   | 1.91E-06   | SAP30    |
| 11341  | ENSG00000164106 | 6.61451978 | 0.19750107  | 0.41715601 | 0.19421204 | 0.39719274 | SCRG1    |
| 9464   | ENSG00000164107 | 9005.21868 | 1.40823789  | 0.05865674 | 2.63E-128  | 1.24E-125  | HAND2    |
| 4085   | ENSG00000164109 | 1840.78263 | -0.38737882 | 0.10189553 | 7.73E-05   | 0.0006058  | MAD2L1   |
| 308    | ENSG00000164111 | 1629.42043 | 0.46381972  | 0.09212131 | 2.13E-07   | 2.69E-06   | ANXA5    |
| 132332 | ENSG00000164112 | 0          | NA          | NA         | NA         | NA         | SMIM43   |
| 132612 | ENSG00000164113 | 0          | NA          | NA         | NA         | NA         | ADAD1    |
| 79884  | ENSG00000164114 | 739.241986 | -0.14184661 | 0.11871311 | 0.20808408 | 0.41566533 | MAP9     |
| 2982   | ENSG00000164116 | 580.137337 | 0.16334883  | 0.10380677 | 0.1017487  | 0.25253045 | GUCY1A1  |
| 26269  | ENSG00000164117 | 404.038572 | 1.37971513  | 0.12423266 | 1.09E-29   | 6.19E-28   | FBXO8    |
| 80817  | ENSG00000164118 | 1850.58205 | 1.72098378  | 0.08671149 | 9.22E-89   | 2.23E-86   | CEP44    |
| 3248   | ENSG00000164120 | 10.1526405 | 1.31928375  | 1.08072169 | 0.00679973 | 0.03018044 | HPGD     |
| 140458 | ENSG00000164122 | 0          | NA          | NA         | NA         | NA         | ASB5     |
| 152940 | ENSG00000164123 | 0.48561729 | 0.00575914  | 0.38311112 | 0.86236059 | NA         | C4orf45  |
| 55314  | ENSG00000164124 | 0.14931947 | -0.01844332 | 0.38480212 | 0.84537521 | NA         | TMEM144  |
| 51313  | ENSG00000164125 | 3.21187715 | -0.00436165 | 0.37392956 | 0.95528669 | 0.98165887 | GASK1B   |
| 4886   | ENSG00000164128 | 0          | NA          | NA         | NA         | NA         | NPY1R    |
| 4889   | ENSG00000164129 | 0          | NA          | NA         | NA         | NA         | NPY5R    |
| 80155  | ENSG00000164134 | 1517.32728 | -0.30560762 | 0.10025108 | 0.00146813 | 0.00823048 | NAA15    |
| 3600   | ENSG00000164136 | 3.88484992 | -0.08239994 | 0.38129917 | 0.43134589 | 0.65692932 | IL15     |
| 729830 | ENSG00000164142 | 55.4066488 | 1.93312451  | 0.41243949 | 1.64E-07   | 2.11E-06   | FAM160A1 |
| 27236  | ENSG00000164144 | 557.278171 | -0.01703965 | 0.104994   | 0.86376142 | 0.93963299 | ARFIP1   |
| 23379  | ENSG00000164151 | 1743.10404 | 0.16023006  | 0.07315108 | 0.0255375  | 0.08857763 | ICE1     |
| 64399  | ENSG00000164161 | 4.05310157 | 0.01641231  | 0.37384447 | 0.85224697 | 0.9330416  | HHIP     |
| 10393  | ENSG00000164162 | 133.048417 | 0.09453142  | 0.17914043 | 0.5519326  | 0.75833399 | ANAPC10  |
| 6059   | ENSG00000164163 | 1641.71932 | -0.16524076 | 0.07382486 | 0.0221842  | 0.07913243 | ABCE1    |
| 54726  | ENSG00000164164 | 1239.53545 | -0.03463034 | 0.08609324 | 0.67918897 | 0.84330115 | OTUD4    |
| 11157  | ENSG00000164167 | 261.118125 | 0.01444853  | 0.17568523 | 0.92770146 | 0.9697364  | LSM6     |
| 55751  | ENSG00000164168 | 983.317752 | -0.12741755 | 0.09083173 | 0.1479138  | 0.33006521 | TMEM184C |
| 90826  | ENSG00000164169 | 283.639045 | 0.14884719  | 0.13671089 | 0.24364703 | 0.4620932  | PRMT9    |
| 3673   | ENSG00000164171 | 388.861315 | 0.3977526   | 0.13010752 | 0.0011455  | 0.00663939 | ITGA2    |
| 4338   | ENSG00000164172 | 412.658843 | -0.38767648 | 0.1524104  | 0.00559052 | 0.02558025 | MOCS2    |
| 51151  | ENSG00000164175 | 16.9462416 | 0.088072    | 0.35006779 | 0.58890429 | 0.78351083 | SLC45A2  |



|        |                 |            |             |            |            |            |          |
|--------|-----------------|------------|-------------|------------|------------|------------|----------|
| 10085  | ENSG00000164176 | 149.715972 | -2.06677594 | 0.23104672 | 2.70E-20   | 1.03E-18   | EDIL3    |
| 153396 | ENSG00000164180 | 730.583679 | 0.05988328  | 0.11093689 | 0.57364656 | 0.77312328 | TMEM161B |
| 79993  | ENSG00000164181 | 109.977107 | 0.35963162  | 0.24326409 | 0.06690519 | 0.18544027 | ELOVL7   |
| 91942  | ENSG00000164182 | 304.757804 | 0.09746079  | 0.13516321 | 0.44122412 | 0.6661181  | NDUFAF2  |
| 133923 | ENSG00000164185 | 3.46770211 | 0.0504828   | 0.37194771 | 0.64718192 | 0.82430661 | ZNF474   |
| 92255  | ENSG00000164187 | 639.489953 | -0.21392398 | 0.11496726 | 0.0503386  | 0.14971174 | LMBRD2   |
| 202151 | ENSG00000164188 | 1.70553796 | -0.06664453 | 0.38677239 | 0.35221034 | NA         | RANBP3L  |
| 25836  | ENSG00000164190 | 1913.67103 | -0.13055053 | 0.07566125 | 0.07803936 | 0.20760269 | NIPBL    |
| 285671 | ENSG00000164197 | 0.92335854 | -0.01445502 | 0.38045929 | 0.78669419 | NA         | RNF180   |
| 84059  | ENSG00000164199 | 812.96524  | 0.36343376  | 0.11832444 | 0.00120844 | 0.00696553 | ADGRV1   |
| 91137  | ENSG00000164209 | 1339.30174 | -0.32717208 | 0.08035251 | 2.97E-05   | 0.00025568 | SLC25A46 |
| 134429 | ENSG00000164211 | 2519.72573 | 0.27772263  | 0.06882793 | 4.00E-05   | 0.00033601 | STARD4   |
| 5229   | ENSG00000164219 | 524.060122 | -0.33042414 | 0.11874018 | 0.00330483 | 0.0164248  | PGGT1B   |
| 2151   | ENSG00000164220 | 1.01344486 | 0.00310693  | 0.37996385 | 0.95929643 | NA         | F2RL2    |
| 153733 | ENSG00000164221 | 452.95321  | -0.07963516 | 0.12454827 | 0.49748328 | 0.71542971 | CCDC112  |
| 651746 | ENSG00000164236 | 8.85339891 | 0.3276223   | 0.52550247 | 0.07345781 | 0.19834008 | ANKRD33B |
| 134147 | ENSG00000164237 | 470.339962 | -0.11985976 | 0.14113302 | 0.35954121 | 0.58949503 | CMBL     |
| 401207 | ENSG00000164241 | 197.127447 | -0.09924787 | 0.20480843 | 0.56547068 | 0.76736924 | C5orf63  |
| 133619 | ENSG00000164244 | 991.460498 | 0.07662027  | 0.09448651 | 0.40306164 | 0.6310063  | PRRC1    |
| 2150   | ENSG00000164251 | 38.088838  | -0.91312331 | 0.43543073 | 0.00363037 | 0.01780629 | F2RL1    |
| 55109  | ENSG00000164252 | 1058.90144 | -0.04851319 | 0.08277915 | 0.54709043 | 0.75418804 | AGGF1    |
| 55255  | ENSG00000164253 | 791.021939 | -0.1881716  | 0.11991167 | 0.09771458 | 0.24490364 | WDR41    |
| 56979  | ENSG00000164256 | 0          | NA          | NA         | NA         | NA         | PRDM9    |
| 4724   | ENSG00000164258 | 547.214803 | 0.17324878  | 0.10844572 | 0.09544388 | 0.24079433 | NDUFS4   |
| 117156 | ENSG00000164265 | 0          | NA          | NA         | NA         | NA         | SCGB3A2  |
| 6690   | ENSG00000164266 | 0          | NA          | NA         | NA         | NA         | SPINK1   |
| 3360   | ENSG00000164270 | 1.72801861 | 0.02900077  | 0.37859304 | 0.7041367  | NA         | HTR4     |
| 11082  | ENSG00000164283 | 0          | NA          | NA         | NA         | NA         | ESM1     |
| 134266 | ENSG00000164284 | 845.535747 | -0.33739179 | 0.12420676 | 0.00397989 | 0.0192177  | GRPEL2   |
| 166979 | ENSG00000164287 | 0.173733   | 0.01914545  | 0.38484597 | 0.78225479 | NA         | CDC20B   |
| 153642 | ENSG00000164291 | 152.183757 | 0.31591673  | 0.19442948 | 0.06116231 | 0.17394786 | ARSK     |
| 22836  | ENSG00000164292 | 6413.61489 | -0.10483937 | 0.06551808 | 0.10402066 | 0.25677486 | RHOBTB3  |
| 493869 | ENSG00000164294 | 7.50195193 | 6.47062241  | 2.65366252 | 1.05E-05   | 9.92E-05   | GPX8     |
| 81789  | ENSG00000164296 | 140.451409 | -0.23606486 | 0.18563451 | 0.14647737 | 0.32752294 | TIGD6    |
| 84654  | ENSG00000164299 | 0.83570807 | -0.02152789 | 0.3825715  | 0.6114649  | NA         | SPZ1     |
| 256987 | ENSG00000164300 | 489.100832 | -0.52005983 | 0.11772486 | 3.64E-06   | 3.75E-05   | SERINC5  |
| 133121 | ENSG00000164303 | 58.6833823 | -0.07286521 | 0.2671112  | 0.70461527 | 0.85803894 | ENPP6    |
| 285782 | ENSG00000164304 | 3.36740333 | 0.03974674  | 0.37141738 | 0.71211898 | 0.86159535 | CAGE1    |

|        |                 |            |             |            |            |            |           |
|--------|-----------------|------------|-------------|------------|------------|------------|-----------|
| 836    | ENSG00000164305 | 627.791139 | -0.32560991 | 0.10705152 | 0.00148328 | 0.00830132 | CASP3     |
| 201973 | ENSG00000164306 | 312.218816 | 0.01795999  | 0.16420536 | 0.9050055  | 0.95843435 | PRIMPOL   |
| 51752  | ENSG00000164307 | 232.548195 | 0.18657282  | 0.15827009 | 0.19504697 | 0.39840749 | ERAP1     |
| 64167  | ENSG00000164308 | 6.6318146  | 0.13998287  | 0.39331509 | 0.28701979 | 0.51287694 | ERAP2     |
| 202333 | ENSG00000164309 | 23.6729538 | 0.31764191  | 0.43586792 | 0.13060894 | 0.30282593 | CMYA5     |
| 133584 | ENSG00000164318 | 40.4544751 | 2.78754718  | 0.44027163 | 1.67E-11   | 3.47E-10   | EGFLAM    |
| 57587  | ENSG00000164323 | 1467.62986 | -0.14829036 | 0.07361063 | 0.03987383 | 0.12512313 | CFAP97    |
| 134288 | ENSG00000164325 | 0          | NA          | NA         | NA         | NA         | TMEM174   |
| 9607   | ENSG00000164326 | 1.47727575 | -0.0052354  | 0.37817175 | 0.94015928 | NA         | CARTPT    |
| 253260 | ENSG00000164327 | 564.526618 | -0.24230474 | 0.12388347 | 0.03798349 | 0.12074866 | RICTOR    |
| 167153 | ENSG00000164329 | 611.11806  | -0.10606689 | 0.12423228 | 0.36583653 | 0.59508049 | TENT2     |
| 1879   | ENSG00000164330 | 102.960735 | -0.03412058 | 0.21545932 | 0.84691561 | 0.93052693 | EBF1      |
| 57763  | ENSG00000164331 | 247.758775 | 0.00917332  | 0.16366107 | 0.9518051  | 0.98012235 | ANKRA2    |
| 134510 | ENSG00000164332 | 521.056474 | -0.2405026  | 0.11140365 | 0.02345933 | 0.08277309 | UBLCP1    |
| 340069 | ENSG00000164334 | 0.64235609 | -0.00831672 | 0.38275593 | 0.80555485 | NA         | FAM170A   |
| 84135  | ENSG00000164338 | 301.160605 | 0.17278143  | 0.16769789 | 0.25201693 | 0.47192221 | UTP15     |
| 7098   | ENSG00000164342 | 0.16735865 | 0.01897177  | 0.38482933 | 0.78225479 | NA         | TLR3      |
| 3818   | ENSG00000164344 | 1.94806512 | 0.04888178  | 0.38314495 | 0.46185431 | NA         | KLKB1     |
| 10412  | ENSG00000164346 | 2308.89729 | 0.04498342  | 0.06351208 | 0.47299504 | 0.69507604 | NSA2      |
| 84340  | ENSG00000164347 | 917.788337 | -0.2845871  | 0.09561264 | 0.00205222 | 0.01093959 | GFM2      |
| 7015   | ENSG00000164362 | 401.303272 | 0.32246029  | 0.162665   | 0.02849847 | 0.09642745 | TERT      |
| 348932 | ENSG00000164363 | 0          | NA          | NA         | NA         | NA         | SLC6A18   |
| 133957 | ENSG00000164366 | 576.776097 | -0.11372723 | 0.11407947 | 0.29479693 | 0.52123439 | CCDC127   |
| 94234  | ENSG00000164379 | 0          | NA          | NA         | NA         | NA         | FOXQ1     |
| 154386 | ENSG00000164385 | 0.3404787  | -0.00022855 | 0.38336236 | 0.96741903 | NA         | LINC01600 |
| 222611 | ENSG00000164393 | 0          | NA          | NA         | NA         | NA         | ADGRF2    |
| 23305  | ENSG00000164398 | 61.5074176 | -0.5795502  | 0.37776467 | 0.02430432 | 0.08519395 | ACSL6     |
| 3562   | ENSG00000164399 | 0          | NA          | NA         | NA         | NA         | IL3       |
| 1437   | ENSG00000164400 | 0          | NA          | NA         | NA         | NA         | CSF2      |
| 23176  | ENSG00000164402 | 1837.89912 | 0.20318367  | 0.06813451 | 0.00242271 | 0.0126209  | SEPTIN8   |
| 134549 | ENSG00000164403 | 105.783575 | -0.49539618 | 0.31731056 | 0.03246962 | 0.10683204 | SHROOM1   |
| 2661   | ENSG00000164404 | 38.2874449 | -0.0820614  | 0.27473551 | 0.67181957 | 0.83832583 | GDF9      |
| 27089  | ENSG00000164405 | 2138.53575 | -0.27190331 | 0.07955917 | 0.0004617  | 0.00301222 | UQCRQ     |
| 116842 | ENSG00000164406 | 25.6487    | 0.22235983  | 0.33746937 | 0.28223913 | 0.50716641 | LEAP2     |
| 375519 | ENSG00000164411 | 0          | NA          | NA         | NA         | NA         | GJB7      |
| 10559  | ENSG00000164414 | 384.091304 | -0.11416143 | 0.13474586 | 0.36460972 | 0.59423075 | SLC35A1   |
| 2898   | ENSG00000164418 | 414.952843 | -1.03781518 | 0.15263569 | 1.26E-12   | 2.86E-11   | GRIK2     |
| 115004 | ENSG00000164430 | 2.40442519 | 0.11907397  | 0.400059   | 0.20330447 | NA         | CGAS      |

|           |                 |            |             |            |            |            |          |
|-----------|-----------------|------------|-------------|------------|------------|------------|----------|
| 2173      | ENSG00000164434 | 0          | NA          | NA         | NA         | NA         | FABP7    |
| 30012     | ENSG00000164438 | 172.65799  | -0.15558409 | 0.16710287 | 0.29993601 | 0.52707976 | TLX3     |
| 167838    | ENSG00000164440 | 0          | NA          | NA         | NA         | NA         | TXLNB    |
| 10370     | ENSG00000164442 | 1.94965725 | -0.0183244  | 0.37692774 | 0.81313113 | NA         | CITED2   |
| 221301    | ENSG00000164451 | 0          | NA          | NA         | NA         | NA         | CALHM4   |
| 6862      | ENSG00000164458 | 0.88131531 | -0.0007412  | 0.38066796 | 0.98790266 | NA         | TBXT     |
| 153222    | ENSG00000164463 | 173.494779 | 0.57433389  | 0.20111741 | 0.00122362 | 0.00704108 | CREBRF   |
| 285761    | ENSG00000164465 | 7.74077074 | 0.41173504  | 0.66908574 | 0.0355782  | 0.11473855 | DCBLD1   |
| 94081     | ENSG00000164466 | 1732.53166 | -0.22449808 | 0.09059266 | 0.01052246 | 0.04316015 | SFXN1    |
| 154075    | ENSG00000164483 | 0          | NA          | NA         | NA         | NA         | SAMD3    |
| 114801    | ENSG00000164484 | 0          | NA          | NA         | NA         | NA         | TMEM200A |
| 116379    | ENSG00000164485 | 0          | NA          | NA         | NA         | NA         | IL22RA2  |
| 168002    | ENSG00000164488 | 0          | NA          | NA         | NA         | NA         | DACT2    |
| 57107     | ENSG00000164494 | 254.682024 | -0.18032694 | 0.14269655 | 0.17210805 | 0.36461546 | PDSS2    |
| 100130988 | ENSG00000164500 | 0          | NA          | NA         | NA         | NA         | SPATA48  |
| 134957    | ENSG00000164506 | 575.373405 | -0.53929793 | 0.11307112 | 6.40E-07   | 7.49E-06   | STXBP5   |
| 221613    | ENSG00000164508 | 0          | NA          | NA         | NA         | NA         | H2AC1    |
| 133396    | ENSG00000164509 | 2.40403862 | 0.05389603  | 0.38337884 | 0.4344984  | NA         | IL31RA   |
| 79722     | ENSG00000164512 | 0.55145755 | 0.04045112  | 0.38693546 | 0.4047702  | NA         | ANKRD55  |
| 135250    | ENSG00000164520 | 0          | NA          | NA         | NA         | NA         | RAET1E   |
| 221476    | ENSG00000164530 | 0          | NA          | NA         | NA         | NA         | PII6     |
| 57057     | ENSG00000164532 | 72.0742764 | 0.42417036  | 0.27339111 | 0.04587381 | 0.13929237 | TBX20    |
| 221955    | ENSG00000164535 | 464.985138 | 0.05079088  | 0.15098376 | 0.71553732 | 0.86274919 | DAGLB    |
| 23366     | ENSG00000164542 | 538.157434 | -0.55197867 | 0.17003771 | 0.00034424 | 0.00231737 | KIAA0895 |
| 9263      | ENSG00000164543 | 802.084895 | 0.01133034  | 0.0933471  | 0.90107437 | 0.95641534 | STK17A   |
| 29896     | ENSG00000164548 | 2346.22693 | -0.08810689 | 0.06602516 | 0.1751849  | 0.36912205 | TRA2A    |
| 340286    | ENSG00000164556 | 0.18922458 | 0.01954053  | 0.38488496 | 0.78225479 | NA         | FAM183BP |
| 55568     | ENSG00000164574 | 457.302672 | -0.49275925 | 0.1679806  | 0.00122823 | 0.00705909 | GALNT10  |
| 79685     | ENSG00000164576 | 822.536208 | -0.06629765 | 0.10790787 | 0.52109636 | 0.73457437 | SAP30L   |
| 6208      | ENSG00000164587 | 15697.2975 | 0.12998251  | 0.05120748 | 0.01041843 | 0.04281309 | RPS14    |
| 348980    | ENSG00000164588 | 0          | NA          | NA         | NA         | NA         | HCN1     |
| 91977     | ENSG00000164591 | 399.209047 | 0.0488624   | 0.13206465 | 0.69512823 | 0.85273877 | MYOZ3    |
| 10466     | ENSG00000164597 | 1012.19305 | 0.38991096  | 0.11829061 | 0.00052172 | 0.00334658 | COG5     |
| 63974     | ENSG00000164600 | 0          | NA          | NA         | NA         | NA         | NEUROD6  |
| 154743    | ENSG00000164603 | 326.151965 | 0.09293093  | 0.13203841 | 0.45427145 | 0.67744995 | BMT2     |
| 54329     | ENSG00000164604 | 299.902008 | -0.88040966 | 0.20148157 | 1.72E-06   | 1.86E-05   | GPR85    |
| 10569     | ENSG00000164609 | 969.505647 | 0.56849113  | 0.13550913 | 8.59E-06   | 8.27E-05   | SLU7     |
| 6100      | ENSG00000164610 | 558.802148 | 0.12071021  | 0.10864359 | 0.24657541 | 0.46577702 | RP9      |

|        |                 |            |             |            |            |            |           |
|--------|-----------------|------------|-------------|------------|------------|------------|-----------|
| 9232   | ENSG00000164611 | 1023.02813 | -0.0361883  | 0.08441146 | 0.65986745 | 0.83138187 | PTTG1     |
| 819    | ENSG00000164615 | 740.524326 | -0.29974873 | 0.10420412 | 0.00271791 | 0.01394086 | CAMLG     |
| NA     | ENSG00000164616 | 22.6327393 | 3.74076545  | 0.66832471 | 1.96E-09   | 3.24E-08   | FBXL21P   |
| 168667 | ENSG00000164619 | 2.7437711  | 0.17469171  | 0.43225651 | 0.07964386 | 0.21062825 | BMPER     |
| 285613 | ENSG00000164620 | 506.087242 | -0.67411612 | 0.14392073 | 6.70E-07   | 7.82E-06   | RELL2     |
| 9597   | ENSG00000164621 | 0.46777338 | -0.00944564 | 0.38288077 | 0.84957036 | NA         | SMAD5-AS1 |
| 8645   | ENSG00000164626 | 84.2540828 | 0.5124552   | 0.25174517 | 0.01300851 | 0.05146338 | KCNK5     |
| 221458 | ENSG00000164627 | 20.6845616 | 0.31235763  | 0.44227393 | 0.13557496 | 0.31017149 | KIF6      |
| 7559   | ENSG00000164631 | 958.814625 | -0.112753   | 0.12610047 | 0.34294367 | 0.57311341 | ZNF12     |
| 222962 | ENSG00000164638 | 2754.11854 | 0.84958138  | 0.07385806 | 2.04E-31   | 1.22E-29   | SLC29A4   |
| 219557 | ENSG00000164645 | 0          | NA          | NA         | NA         | NA         | TEX47     |
| 26872  | ENSG00000164647 | 31.9576771 | 0.22433614  | 0.31918385 | 0.28247129 | 0.50753763 | STEAP1    |
| 55536  | ENSG00000164649 | 480.180401 | 0.98511476  | 0.12350381 | 2.03E-16   | 6.09E-15   | CDCA7L    |
| 221833 | ENSG00000164651 | 0.33873386 | 0.0022816   | 0.38337893 | 0.96667412 | NA         | SP8       |
| 54468  | ENSG00000164654 | 1156.66705 | -0.27420425 | 0.09472164 | 0.00273899 | 0.01402364 | MIOS      |
| 222223 | ENSG00000164659 | 1533.61498 | -0.08285067 | 0.08516676 | 0.31778481 | 0.54556488 | ELAPOR2   |
| 25862  | ENSG00000164663 | 908.247209 | 0.01807003  | 0.11572784 | 0.87807345 | 0.94596966 | USP49     |
| 285905 | ENSG00000164669 | 44.4734434 | 0.05145671  | 0.26393237 | 0.7913146  | 0.90493295 | INTS4P1   |
| 94120  | ENSG00000164674 | 16.0248557 | 0.04566666  | 0.32778301 | 0.79578419 | 0.90615541 | SYTL3     |
| 154865 | ENSG00000164675 | 6.56782281 | 0.57864161  | 1.04844847 | 0.02014532 | 0.0733229  | IQUB      |
| 23462  | ENSG00000164683 | 549.230581 | -0.67952932 | 0.12993682 | 4.07E-08   | 5.66E-07   | HEY1      |
| 619279 | ENSG00000164684 | 8266.54137 | 0.12769971  | 0.06353171 | 0.04171079 | 0.12962752 | ZNF704    |
| 2171   | ENSG00000164687 | 466.992782 | 0.09939399  | 0.11698524 | 0.37260208 | 0.6014992  | FABP5     |
| 6469   | ENSG00000164690 | 1.89628344 | 0.07740229  | 0.38977458 | 0.28312786 | NA         | SHH       |
| 117289 | ENSG00000164691 | 2.86014515 | 0.06221439  | 0.38227659 | 0.46021993 | 0.68333808 | TAGAP     |
| 1278   | ENSG00000164692 | 11.9322    | -0.08472336 | 0.36365001 | 0.54547838 | 0.75301218 | COL1A2    |
| 84624  | ENSG00000164694 | 0.16735865 | 0.01897177  | 0.38482933 | 0.78225479 | NA         | FNDC1     |
| 92421  | ENSG00000164695 | 0          | NA          | NA         | NA         | NA         | CHMP4C    |
| 26266  | ENSG00000164707 | 349.398022 | 0.32799686  | 0.13478622 | 0.00920554 | 0.03872729 | SLC13A4   |
| 5224   | ENSG00000164708 | 74.1789648 | 0.29494721  | 0.25512698 | 0.13973117 | 0.31686665 | PGAM2     |
| 25798  | ENSG00000164713 | 644.088798 | 0.1071095   | 0.10624162 | 0.29400839 | 0.52021105 | BRI3      |
| 22853  | ENSG00000164715 | 2014.19542 | 0.06914     | 0.06799849 | 0.30101521 | 0.52832111 | LMTK2     |
| 146861 | ENSG00000164729 | 0          | NA          | NA         | NA         | NA         | SLC35G3   |
| 1508   | ENSG00000164733 | 2119.78492 | -0.14055323 | 0.06589054 | 0.03014157 | 0.10072575 | CTSB      |
| 64321  | ENSG00000164736 | 0          | NA          | NA         | NA         | NA         | SOX17     |
| NA     | ENSG00000164740 | 0          | NA          | NA         | NA         | NA         | SEPTIN7P5 |
| 10395  | ENSG00000164741 | 54.1580132 | -0.08502012 | 0.30119581 | 0.65399654 | 0.82779603 | DLC1      |
| 107    | ENSG00000164742 | 6996.93194 | -0.80363473 | 0.04985056 | 3.43E-59   | 4.37E-57   | ADCY1     |

|        |                 |            |             |            |            |            |           |
|--------|-----------------|------------|-------------|------------|------------|------------|-----------|
| 157773 | ENSG00000164743 | 22.4798284 | 0.40322427  | 0.47740718 | 0.08805085 | 0.22670443 | C8orf48   |
| 256979 | ENSG00000164744 | 0          | NA          | NA         | NA         | NA         | SUN3      |
| 136288 | ENSG00000164746 | 0.83104738 | 0.01171515  | 0.38170116 | 0.81896071 | NA         | C7orf57   |
| 3174   | ENSG00000164749 | 46.5145765 | 1.07420316  | 0.39865189 | 0.00063067 | 0.00394838 | HNF4G     |
| 5828   | ENSG00000164751 | 446.533568 | -0.13736873 | 0.12760648 | 0.25209979 | 0.47202308 | PEX2      |
| 5885   | ENSG00000164754 | 5198.55433 | -0.0320375  | 0.05489737 | 0.54815944 | 0.75477016 | RAD21     |
| 169026 | ENSG00000164756 | 0          | NA          | NA         | NA         | NA         | SLC30A8   |
| 90390  | ENSG00000164758 | 228.804388 | -0.10207929 | 0.15727931 | 0.47561741 | 0.69768942 | MED30     |
| 4982   | ENSG00000164761 | 0          | NA          | NA         | NA         | NA         | TNFRSF11B |
| 157869 | ENSG00000164764 | 66.6745606 | -0.57024808 | 0.31128958 | 0.01584205 | 0.06029278 | SBSPON    |
| 5260   | ENSG00000164776 | 55.0218854 | 0.0974207   | 0.2842871  | 0.61786026 | 0.80440629 | PHKG1     |
| 2020   | ENSG00000164778 | 1.373176   | -0.09355926 | 0.39942046 | 0.09419964 | NA         | EN2       |
| 27012  | ENSG00000164794 | 0          | NA          | NA         | NA         | NA         | KCNV1     |
| 114788 | ENSG00000164796 | 0          | NA          | NA         | NA         | NA         | CSMD3     |
| 23514  | ENSG00000164808 | 874.89097  | 0.18176398  | 0.11909865 | 0.10569369 | 0.25942878 | SPIDR     |
| 5001   | ENSG00000164815 | 479.568272 | -0.36016758 | 0.17106828 | 0.0186773  | 0.06888969 | ORC5      |
| 1670   | ENSG00000164816 | 0          | NA          | NA         | NA         | NA         | DEFA5     |
| 54919  | ENSG00000164818 | 2140.1192  | -0.04605396 | 0.07445346 | 0.52714586 | 0.73905402 | DNAAF5    |
| 1669   | ENSG00000164821 | 0          | NA          | NA         | NA         | NA         | DEFA4     |
| 1671   | ENSG00000164822 | 0          | NA          | NA         | NA         | NA         | DEFA6     |
| 734    | ENSG00000164823 | 373.31555  | -0.39102482 | 0.15038898 | 0.0047196  | 0.02213638 | OSGIN2    |
| 1672   | ENSG00000164825 | 0          | NA          | NA         | NA         | NA         | DEFB1     |
| 23353  | ENSG00000164828 | 4339.85952 | 0.03815329  | 0.05778599 | 0.5049113  | 0.72130144 | SUN1      |
| 55074  | ENSG00000164830 | 84.2714474 | 0.18285136  | 0.23807885 | 0.33611133 | 0.56608225 | OXR1      |
| 157753 | ENSG00000164841 | 9.91612148 | 0.12399879  | 0.35977519 | 0.45896196 | 0.68235016 | TMEM74    |
| NA     | ENSG00000164845 | 2.21043564 | 0.06358325  | 0.38489367 | 0.40928205 | NA         | FAM86FP   |
| 115330 | ENSG00000164849 | 31.8523968 | -1.06103126 | 0.50730898 | 0.00273734 | 0.01401878 | GPR146    |
| 2852   | ENSG00000164850 | 45.0471998 | -0.43758328 | 0.33680698 | 0.06105984 | 0.17378098 | GPBR1     |
| 340260 | ENSG00000164853 | 0          | NA          | NA         | NA         | NA         | UNCX      |
| 202915 | ENSG00000164855 | 11.5833128 | -0.05681496 | 0.34327631 | 0.72271694 | 0.86754018 | TMEM184A  |
| 4846   | ENSG00000164867 | 21.3330576 | 0.26684595  | 0.39801487 | 0.19208283 | 0.39421985 | NOS3      |
| 10407  | ENSG00000164871 | 0          | NA          | NA         | NA         | NA         | SPAG11B   |
| 79778  | ENSG00000164877 | 130.22863  | 0.46585221  | 0.2799201  | 0.03171353 | 0.10486607 | MICALL2   |
| 761    | ENSG00000164879 | 0.14931947 | -0.01844332 | 0.38480212 | 0.84537521 | NA         | CA3       |
| 26173  | ENSG00000164880 | 8820.44384 | 0.14215501  | 0.05331978 | 0.00709968 | 0.0313007  | INTS1     |
| 1020   | ENSG00000164885 | 919.584573 | 0.09313484  | 0.09110829 | 0.29288202 | 0.51900494 | CDK5      |
| 6522   | ENSG00000164889 | 5454.38291 | 0.22816924  | 0.05650476 | 4.39E-05   | 0.00036462 | SLC4A2    |
| 157724 | ENSG00000164893 | 0          | NA          | NA         | NA         | NA         | SLC7A13   |

|        |                 |            |             |            |            |            |           |
|--------|-----------------|------------|-------------|------------|------------|------------|-----------|
| 10922  | ENSG00000164896 | 1355.14287 | 0.10609667  | 0.07484901 | 0.14843126 | 0.33077346 | FASTK     |
| 83590  | ENSG00000164897 | 1043.21519 | -0.04810047 | 0.08808876 | 0.57404047 | 0.77333896 | TMUB1     |
| 154791 | ENSG00000164898 | 295.764627 | -0.08407434 | 0.14702104 | 0.53464111 | 0.74572704 | FMC1      |
| 2636   | ENSG00000164900 | 0.70129453 | 0.02714705  | 0.38368153 | 0.56969794 | NA         | GBX1      |
| 51808  | ENSG00000164902 | 768.770156 | -0.39735636 | 0.14310071 | 0.00274615 | 0.01405297 | PHAX      |
| 501    | ENSG00000164904 | 1191.63213 | 0.35209181  | 0.09576223 | 0.00014209 | 0.00104413 | ALDH7A1   |
| 221937 | ENSG00000164916 | 1705.9571  | -0.17357989 | 0.0769872  | 0.02116649 | 0.07622857 | FOXK1     |
| 1345   | ENSG00000164919 | 1436.70927 | 0.08961881  | 0.08613021 | 0.2854523  | 0.51095035 | COX6C     |
| 116039 | ENSG00000164920 | 1.28097681 | 0.09129719  | 0.39863959 | 0.09641927 | NA         | OSR2      |
| 7534   | ENSG00000164924 | 9125.33152 | -0.04270425 | 0.05796218 | 0.45555093 | 0.67899711 | YWHAZ     |
| 79870  | ENSG00000164929 | 153.803382 | 1.01531982  | 0.30436923 | 8.78E-05   | 0.00067797 | BAALC     |
| 8323   | ENSG00000164930 | 333.510819 | -0.06605203 | 0.13185652 | 0.59271113 | 0.78702605 | FZD6      |
| 115908 | ENSG00000164932 | 82.6139721 | 0.60520115  | 0.26661535 | 0.00554684 | 0.02541556 | CTHRC1    |
| 81034  | ENSG00000164933 | 511.021044 | -0.05721452 | 0.106703   | 0.57570559 | 0.7744963  | SLC25A32  |
| 25879  | ENSG00000164934 | 1486.41796 | -0.12347738 | 0.07291952 | 0.08397198 | 0.21903814 | DCAF13    |
| 81501  | ENSG00000164935 | 0          | NA          | NA         | NA         | NA         | DCSTAMP   |
| 94241  | ENSG00000164938 | 883.527625 | 0.35475519  | 0.09812622 | 0.00017976 | 0.00129127 | TP53INP1  |
| 55656  | ENSG00000164941 | 876.677853 | 0.18957782  | 0.15327738 | 0.17660926 | 0.37133614 | INTS8     |
| 25962  | ENSG00000164944 | 1574.44096 | -0.16011193 | 0.087578   | 0.05997656 | 0.17116441 | VIRMA     |
| 158326 | ENSG00000164946 | 1166.35774 | 0.46562947  | 0.12105882 | 5.14E-05   | 0.0004192  | FREM1     |
| 2669   | ENSG00000164949 | 121.452398 | -0.93497181 | 0.23018974 | 6.38E-06   | 6.29E-05   | GEM       |
| 54704  | ENSG00000164951 | 421.228568 | -0.14645161 | 0.13539776 | 0.24645709 | 0.46573089 | PDP1      |
| 91147  | ENSG00000164953 | 293.540792 | 0.34812967  | 0.18800907 | 0.03474778 | 0.11270978 | TMEM67    |
| 9897   | ENSG00000164961 | 840.791875 | -0.12966754 | 0.12321109 | 0.2660687  | 0.48831193 | WASHC5    |
| 138716 | ENSG00000164967 | 104.037522 | -0.42854357 | 0.25084792 | 0.03413418 | 0.11122057 | RPP25L    |
| 203259 | ENSG00000164970 | 948.584678 | -0.92940278 | 0.11065063 | 6.35E-18   | 2.08E-16   | FAM219A   |
| 84688  | ENSG00000164972 | 4.65871149 | -0.0183832  | 0.3713867  | 0.843707   | 0.92928146 | C9orf24   |
| 6619   | ENSG00000164975 | 1445.83473 | 0.38680726  | 0.08462079 | 2.69E-06   | 2.83E-05   | SNAPC3    |
| 57462  | ENSG00000164976 | 799.423406 | -2.30703986 | 0.10089022 | 7.82E-117  | 2.93E-114  | MYORG     |
| 318    | ENSG00000164978 | 205.126392 | -0.12359727 | 0.15815551 | 0.39228852 | 0.62159606 | NUDT2     |
| 157378 | ENSG00000164983 | 519.424694 | -0.83150669 | 0.11257141 | 2.68E-14   | 6.91E-13   | TMEM65    |
| 11168  | ENSG00000164985 | 4355.95094 | -0.1965172  | 0.06367665 | 0.00174692 | 0.00954158 | PSIP1     |
| 203238 | ENSG00000164989 | 105.185728 | -0.02079999 | 0.21130826 | 0.90467063 | 0.95823316 | CCDC171   |
| 51271  | ENSG00000165006 | 658.39316  | -0.21902029 | 0.09630354 | 0.01849187 | 0.06829463 | UBAP1     |
| 54769  | ENSG00000165023 | 20.7159513 | 0.03061663  | 0.30832441 | 0.87061022 | 0.94350971 | DIRAS2    |
| 6850   | ENSG00000165025 | 1048.00787 | 0.21205699  | 0.07997593 | 0.00663361 | 0.02953564 | SYK       |
| 55335  | ENSG00000165028 | 202.462226 | 0.40756941  | 0.20286977 | 0.02010696 | 0.07321016 | NIPSNAP3B |
| 19     | ENSG00000165029 | 17.4524807 | 0.40310948  | 0.48426196 | 0.08743552 | 0.22586501 | ABCA1     |

|        |                 |            |             |            |            |            |          |
|--------|-----------------|------------|-------------|------------|------------|------------|----------|
| 4783   | ENSG00000165030 | 192.647532 | -0.30851099 | 0.18033251 | 0.05299004 | 0.15563616 | NFIL3    |
| 137994 | ENSG00000165046 | 81.7770544 | -0.2851271  | 0.25450924 | 0.15064865 | 0.33423321 | LETM2    |
| 55798  | ENSG00000165055 | 1472.09936 | -0.0470477  | 0.09566379 | 0.61056542 | 0.7987352  | METTTL2B |
| 5568   | ENSG00000165059 | 0          | NA          | NA         | NA         | NA         | PRKACG   |
| 2395   | ENSG00000165060 | 153.160041 | -0.34444599 | 0.19067101 | 0.03864656 | 0.12228832 | FXN      |
| 79698  | ENSG00000165061 | 45.7074162 | -0.13902259 | 0.29809628 | 0.48059761 | 0.70158112 | ZMAT4    |
| 157848 | ENSG00000165066 | 0.32374618 | -0.02327237 | 0.38532124 | 0.66865339 | NA         | NKX6-3   |
| 137835 | ENSG00000165071 | 0.173733   | 0.01914545  | 0.38484597 | 0.78225479 | NA         | TMEM71   |
| 256691 | ENSG00000165072 | 1.79120473 | 0.02878021  | 0.3815672  | 0.62134372 | NA         | MAMDC2   |
| 136242 | ENSG00000165076 | 1.38173259 | -0.02647048 | 0.38186702 | 0.64145721 | NA         | PRSS37   |
| 57094  | ENSG00000165078 | 0          | NA          | NA         | NA         | NA         | CPA6     |
| 116328 | ENSG00000165084 | 0          | NA          | NA         | NA         | NA         | C8orf34  |
| 117531 | ENSG00000165091 | 0          | NA          | NA         | NA         | NA         | TMC1     |
| 216    | ENSG00000165092 | 0          | NA          | NA         | NA         | NA         | ALDH1A1  |
| 221656 | ENSG00000165097 | 631.946829 | 0.10571877  | 0.10373086 | 0.28989097 | 0.51587019 | KDM1B    |
| 138050 | ENSG00000165102 | 777.329298 | 0.13619107  | 0.10648931 | 0.18232216 | 0.38008529 | HGSNAT   |
| 158158 | ENSG00000165105 | 380.801609 | -0.70973723 | 0.13328703 | 2.26E-08   | 3.25E-07   | RASEF    |
| 80318  | ENSG00000165113 | 196.667001 | 0.18098435  | 0.17173345 | 0.23884842 | 0.45652723 | GKAP1    |
| 55582  | ENSG00000165115 | 216.28517  | 0.08565827  | 0.17105394 | 0.57672648 | 0.77528586 | KIF27    |
| 84267  | ENSG00000165118 | 449.903468 | 0.02316463  | 0.11363747 | 0.83193824 | 0.92391014 | C9orf64  |
| 3190   | ENSG00000165119 | 15712.2025 | -0.02434375 | 0.05469925 | 0.65219481 | 0.8261929  | HNRNPK   |
| 136263 | ENSG00000165120 | 0.29863895 | -0.02292439 | 0.3852726  | 0.68753245 | NA         | SSMEM1   |
| NA     | ENSG00000165121 | 110.33797  | 0.2707977   | 0.21333196 | 0.13145993 | 0.30412372 |          |
| 79987  | ENSG00000165124 | 3.64214623 | 0.22878965  | 0.4718851  | 0.04939177 | 0.14766919 | SVEP1    |
| 55503  | ENSG00000165125 | 0          | NA          | NA         | NA         | NA         | TRPV6    |
| 135927 | ENSG00000165131 | 0          | NA          | NA         | NA         | NA         | LLCFC1   |
| 203286 | ENSG00000165138 | 938.759768 | 0.30505198  | 0.08883437 | 0.00040461 | 0.00267402 | ANKS6    |
| 2203   | ENSG00000165140 | 35.262048  | 1.76208904  | 0.44899933 | 5.49E-06   | 5.49E-05   | FBP1     |
| 84302  | ENSG00000165152 | 891.73292  | -0.52564853 | 0.09220851 | 4.42E-09   | 7.00E-08   | PGAP4    |
| 11244  | ENSG00000165156 | 1176.29375 | -0.28283049 | 0.10571501 | 0.0052307  | 0.0241342  | ZHX1     |
| 286464 | ENSG00000165164 | 0.18922458 | 0.01954053  | 0.38488496 | 0.78225479 | NA         | CFAP47   |
| 1536   | ENSG00000165168 | 16.0917065 | 2.61847523  | 0.71049925 | 1.34E-05   | 0.00012498 | CYBB     |
| 6990   | ENSG00000165169 | 140.504406 | 0.21606113  | 0.19157113 | 0.19583482 | 0.39944263 | DYNLT3   |
| 155368 | ENSG00000165171 | 15.4443141 | 0.09626966  | 0.33491696 | 0.59204475 | 0.7865913  | METTTL27 |
| 58526  | ENSG00000165175 | 1391.50989 | 0.11266014  | 0.09221459 | 0.20824279 | 0.4158149  | MID1IP1  |
| 654817 | ENSG00000165178 | 0          | NA          | NA         | NA         | NA         | NCF1C    |
| 158401 | ENSG00000165181 | 0.4819103  | -0.00539734 | 0.38311991 | 0.88361852 | NA         | SHOC1    |
| 254158 | ENSG00000165182 | 0.89037701 | -0.04737719 | 0.38810027 | 0.30457487 | NA         | CXorf58  |

|           |                 |            |             |            |            |            |          |
|-----------|-----------------|------------|-------------|------------|------------|------------|----------|
| 158405    | ENSG00000165185 | 1517.97012 | 0.01121532  | 0.07765661 | 0.88483011 | 0.94964311 | KIAA1958 |
| 139411    | ENSG00000165186 | 1.5402434  | -0.10893911 | 0.40503843 | 0.06530338 | NA         | PTCHD1   |
| 138065    | ENSG00000165188 | 0.62659733 | 0.0368787   | 0.3866636  | 0.4036524  | NA         | RNF183   |
| 140456    | ENSG00000165192 | 0.173733   | 0.01914545  | 0.38484597 | 0.78225479 | NA         | ASB11    |
| 57526     | ENSG00000165194 | 7.81696745 | 0.09037238  | 0.35952523 | 0.5547956  | 0.76068726 | PCDH19   |
| 5277      | ENSG00000165195 | 315.148349 | -0.13766193 | 0.14518711 | 0.30400346 | 0.53126299 | PIGA     |
| 2277      | ENSG00000165197 | 25.0482183 | -0.08265314 | 0.31149469 | 0.65856183 | 0.83073135 | VEGFD    |
| 158131    | ENSG00000165202 | 0.18922458 | 0.01954053  | 0.38488496 | 0.78225479 | NA         | OR1Q1    |
| 392392    | ENSG00000165204 | 0          | NA          | NA         | NA         | NA         | OR1K1    |
| 55342     | ENSG00000165209 | 977.833527 | -0.22426449 | 0.09403939 | 0.01360998 | 0.0533957  | STRBP    |
| 1365      | ENSG00000165215 | 12.6449211 | 0.13050313  | 0.35872231 | 0.44524583 | 0.67004935 | CLDN3    |
| 26130     | ENSG00000165219 | 1351.25515 | -0.46856226 | 0.08031386 | 2.35E-09   | 3.85E-08   | GAPVD1   |
| 84270     | ENSG00000165233 | 348.165471 | -0.09526364 | 0.15381065 | 0.49704328 | 0.71500229 | CARD19   |
| 65268     | ENSG00000165238 | 2412.52731 | -0.30739387 | 0.09504379 | 0.0008115  | 0.00493414 | WNK2     |
| 538       | ENSG00000165240 | 798.660948 | 0.52865658  | 0.09741124 | 2.10E-08   | 3.05E-07   | ATP7A    |
| 195828    | ENSG00000165244 | 468.468355 | -0.50538205 | 0.11372202 | 3.38E-06   | 3.49E-05   | ZNF367   |
| 22829     | ENSG00000165246 | 0          | NA          | NA         | NA         | NA         | NLGN4Y   |
| 139324    | ENSG00000165259 | 225.346524 | -0.32121009 | 0.18435609 | 0.0476618  | 0.14344814 | HDX      |
| 4712      | ENSG00000165264 | 485.372556 | 0.11123625  | 0.11353297 | 0.30520031 | 0.53260394 | NDUFB6   |
| 364       | ENSG00000165269 | 0.37844916 | 0.02407552  | 0.3854191  | 0.60038877 | NA         | AQP7     |
| 112267859 | ENSG00000165269 | 0.37844916 | 0.02407552  | 0.3854191  | 0.60038877 | NA         | AQP7     |
| 65083     | ENSG00000165271 | 1398.51253 | 0.1421368   | 0.07786482 | 0.06215155 | 0.17598767 | NOL6     |
| 360       | ENSG00000165272 | 95.4788297 | 0.46648311  | 0.24457881 | 0.02000757 | 0.07295538 | AQP3     |
| 158234    | ENSG00000165275 | 369.507474 | 0.09772868  | 0.12695612 | 0.41544539 | 0.64244323 | TRMT10B  |
| 7415      | ENSG00000165280 | 5765.96118 | 0.07409245  | 0.05957797 | 0.23883392 | 0.45652723 | VCP      |
| 84720     | ENSG00000165282 | 843.935829 | 0.12136087  | 0.10788144 | 0.24107649 | 0.45895616 | PIGO     |
| 30968     | ENSG00000165283 | 2244.89283 | -0.12887172 | 0.06427106 | 0.04177411 | 0.12978364 | STOML2   |
| 254065    | ENSG00000165288 | 1145.88971 | -0.24200092 | 0.08170329 | 0.00237332 | 0.01240429 | BRWD3    |
| 26050     | ENSG00000165300 | 254.439862 | 0.14754165  | 0.15691871 | 0.30283591 | 0.53006303 | SLITRK5  |
| 9833      | ENSG00000165304 | 1103.412   | -0.10347981 | 0.0892384  | 0.23257151 | 0.44940365 | MELK     |
| 219681    | ENSG00000165309 | 6.50278616 | -0.06882259 | 0.36862118 | 0.57667014 | 0.77528586 | ARMC3    |
| 220213    | ENSG00000165312 | 65.3695128 | 0.19162595  | 0.24627784 | 0.32166085 | 0.54929861 | OTUD1    |
| 94134     | ENSG00000165322 | 457.148032 | 0.31276956  | 0.13337995 | 0.01213543 | 0.04865943 | ARHGAP12 |
| 120114    | ENSG00000165323 | 492.649375 | -1.26219828 | 0.14960741 | 2.97E-18   | 1.01E-16   | FAT3     |
| 159989    | ENSG00000165325 | 1.71514281 | 0.03366814  | 0.37907901 | 0.65213618 | NA         | DEUP1    |
| 143279    | ENSG00000165338 | 457.621234 | -0.34782076 | 0.13103597 | 0.00460288 | 0.02169148 | HECTD2   |
| 84889     | ENSG00000165349 | 8.55055255 | 4.02212687  | 1.24279198 | 0.00017772 | 0.001278   | SLC7A3   |
| 254170    | ENSG00000165355 | 147.108441 | 0.17486957  | 0.19758899 | 0.30348734 | 0.53085409 | FBXO33   |



|        |                 |            |             |            |            |            |           |
|--------|-----------------|------------|-------------|------------|------------|------------|-----------|
| 203522 | ENSG00000165359 | 302.324472 | -0.00709402 | 0.13088083 | 0.95308308 | 0.98058207 | INTS6L    |
| 83550  | ENSG00000165370 | 0          | NA          | NA         | NA         | NA         | GPR101    |
| 9075   | ENSG00000165376 | 1.17613771 | 0.05312853  | 0.38675507 | 0.31748969 | NA         | CLDN2     |
| 145581 | ENSG00000165379 | 0.34179133 | 0.00186157  | 0.38337287 | 0.94760546 | NA         | LRFN5     |
| 474354 | ENSG00000165383 | 0          | NA          | NA         | NA         | NA         | LRRC18    |
| 171546 | ENSG00000165389 | 856.575601 | -0.11714474 | 0.08973712 | 0.17872825 | 0.3746401  | SPTSSA    |
| 7486   | ENSG00000165392 | 843.608187 | 0.07578563  | 0.1549013  | 0.59374519 | 0.78750562 | WRN       |
| 220972 | ENSG00000165406 | 522.119947 | 0.04135165  | 0.15219689 | 0.76835419 | 0.89324733 | MARCHF8   |
| 7253   | ENSG00000165409 | 1.37821731 | 0.04902936  | 0.38392253 | 0.4591067  | NA         | TSHR      |
| 1073   | ENSG00000165410 | 508.358537 | -1.59594897 | 0.13968438 | 2.23E-31   | 1.33E-29   | CFL2      |
| 10910  | ENSG00000165416 | 698.464769 | -0.26615227 | 0.10866564 | 0.0103485  | 0.04258823 | SUGT1     |
| 2957   | ENSG00000165417 | 1397.85772 | -0.24903554 | 0.10419889 | 0.01268154 | 0.05042118 | GTF2A1    |
| 219654 | ENSG00000165424 | 557.736948 | 0.82834159  | 0.11141559 | 1.91E-14   | 4.97E-13   | ZCCHC24   |
| 283209 | ENSG00000165434 | 334.703141 | -0.09097578 | 0.13802286 | 0.47986611 | 0.70107095 | PGM2L1    |
| 84457  | ENSG00000165443 | 973.383916 | -1.76179164 | 0.08810408 | 4.43E-90   | 1.16E-87   | PHYHIPL   |
| 220963 | ENSG00000165449 | 325.360432 | 0.02780763  | 0.13189055 | 0.82323533 | 0.91945578 | SLC16A9   |
| 2350   | ENSG00000165457 | 0.173733   | 0.01914545  | 0.38484597 | 0.78225479 | NA         | FOLR2     |
| 3636   | ENSG00000165458 | 2448.02166 | 0.19772467  | 0.0681216  | 0.00315445 | 0.01580013 | INPPL1    |
| 401    | ENSG00000165462 | 9030.15705 | 0.45755716  | 0.06286274 | 1.78E-13   | 4.28E-12   | PHOX2A    |
| 4153   | ENSG00000165471 | 0.35648909 | 0.02381568  | 0.38538084 | 0.614114   | NA         | MBL2      |
| 2706   | ENSG00000165474 | 0          | NA          | NA         | NA         | NA         | GJB2      |
| 51084  | ENSG00000165475 | 81.7222712 | 0.77267111  | 0.26158481 | 0.00052681 | 0.00337378 | CRYL1     |
| 221035 | ENSG00000165476 | 804.809004 | 0.29120247  | 0.09168614 | 0.00104675 | 0.00614243 | REEP3     |
| 220296 | ENSG00000165478 | 0.173124   | -0.01911262 | 0.38486262 | 0.84537521 | NA         | HEPACAM   |
| 221150 | ENSG00000165480 | 512.224791 | -0.2475952  | 0.1264812  | 0.03704704 | 0.11847409 | SKA3      |
| 221154 | ENSG00000165487 | 537.624513 | 0.08094156  | 0.10657114 | 0.42947781 | 0.65514684 | MICU2     |
| 220042 | ENSG00000165490 | 522.294102 | -0.06364118 | 0.14364814 | 0.63155265 | 0.81371846 | DDIAS     |
| 51585  | ENSG00000165494 | 1406.15709 | -0.23827533 | 0.1056881  | 0.01859793 | 0.06863521 | PCF11     |
| 63876  | ENSG00000165495 | 12.594192  | -0.02989504 | 0.34398939 | 0.84468787 | 0.92965052 | PKNOX2    |
| 140801 | ENSG00000165496 | 0          | NA          | NA         | NA         | NA         | RPL10L    |
| 122769 | ENSG00000165501 | 257.516704 | -0.44575593 | 0.14998392 | 0.00128778 | 0.00735028 | LRR1      |
| 6166   | ENSG00000165502 | 1010.14342 | 0.06018433  | 0.09413504 | 0.51038694 | 0.72572757 | RPL36AL   |
| 55172  | ENSG00000165506 | 669.430769 | -0.07837378 | 0.10133272 | 0.42171547 | 0.64775467 | DNAAF2    |
| 11067  | ENSG00000165507 | 7.08193596 | 0.63431637  | 1.22756783 | 0.01803893 | 0.06707127 | DEPP1     |
| 139081 | ENSG00000165509 | 0          | NA          | NA         | NA         | NA         | MAGEC3    |
| 220979 | ENSG00000165511 | 18.2507471 | -0.20303138 | 0.36342346 | 0.29685991 | 0.52357548 | ZNF22-AS1 |
| 7570   | ENSG00000165512 | 947.108207 | 0.00279966  | 0.09931026 | 0.97776278 | 0.99246974 | ZNF22     |
| 23588  | ENSG00000165516 | 900.799767 | 0.22514372  | 0.08988776 | 0.00985629 | 0.0409823  | KLHDC2    |

|        |                 |            |             |            |            |            |          |
|--------|-----------------|------------|-------------|------------|------------|------------|----------|
| 161436 | ENSG00000165521 | 1839.75261 | -0.0737864  | 0.07530299 | 0.31565477 | 0.5435333  | EML5     |
| 9147   | ENSG00000165525 | 1161.12649 | -0.00230587 | 0.08420024 | 0.9768543  | 0.99214102 | NEMF     |
| 84881  | ENSG00000165526 | 724.487193 | -0.25996579 | 0.10903865 | 0.01256695 | 0.05005587 | RPUSD4   |
| 382    | ENSG00000165527 | 1488.83759 | -0.22827754 | 0.07679521 | 0.0023644  | 0.01236742 | ARF6     |
| 123016 | ENSG00000165533 | 1645.12038 | 0.46116087  | 0.08058691 | 4.75E-09   | 7.47E-08   | TTC8     |
| 57156  | ENSG00000165548 | 404.031986 | -0.91848684 | 0.15445787 | 3.88E-10   | 7.03E-09   | TMEM63C  |
| 58157  | ENSG00000165553 | 0.92922319 | -0.05058936 | 0.38876113 | 0.26831827 | NA         | NGB      |
| 122945 | ENSG00000165555 | 11.0534601 | 0.01590901  | 0.33470265 | 0.92583719 | 0.9691565  | NOXRED1  |
| 1045   | ENSG00000165556 | 0          | NA          | NA         | NA         | NA         | CDX2     |
| 219287 | ENSG00000165566 | 0          | NA          | NA         | NA         | NA         | AMER2    |
| 83592  | ENSG00000165568 | 136.47361  | 0.03555263  | 0.20538224 | 0.83904315 | 0.92674595 | AKR1E2   |
| 89890  | ENSG00000165572 | 688.03291  | -0.43858266 | 0.09961499 | 5.02E-06   | 5.05E-05   | KBTBD6   |
| 6758   | ENSG00000165583 | 0          | NA          | NA         | NA         | NA         | SSX5     |
| 10214  | ENSG00000165584 | 0          | NA          | NA         | NA         | NA         | SSX3     |
| 5015   | ENSG00000165588 | 0          | NA          | NA         | NA         | NA         | OTX2     |
| 158584 | ENSG00000165591 | 3.99449654 | 0.17055395  | 0.4180074  | 0.16239323 | 0.35108224 | FAAH2    |
| 644168 | ENSG00000165606 | 830.02522  | -0.01321934 | 0.08604476 | 0.87168532 | 0.94401928 | DRGX     |
| 11164  | ENSG00000165609 | 1512.73033 | 0.02267245  | 0.09399129 | 0.80482892 | 0.91135243 | NUDT5    |
| 51339  | ENSG00000165617 | 114.129219 | -1.78945128 | 0.29736698 | 1.19E-10   | 2.26E-09   | DACT1    |
| 27199  | ENSG00000165621 | 6.88460709 | 0.03430981  | 0.35467868 | 0.81065786 | 0.9141961  | OXGR1    |
| 221044 | ENSG00000165623 | 0.173733   | 0.01914545  | 0.38484597 | 0.78225479 | NA         | UCMA     |
| 222389 | ENSG00000165626 | 372.145977 | 0.21811148  | 0.15483544 | 0.12296438 | 0.29029191 | BEND7    |
| 509    | ENSG00000165629 | 1887.80565 | -0.09194996 | 0.07006477 | 0.18158325 | 0.37906267 | ATP5F1C  |
| 8559   | ENSG00000165630 | 415.892492 | -0.13471795 | 0.12243566 | 0.24445483 | 0.46304981 | PRPF18   |
| 83860  | ENSG00000165632 | 370.148534 | -0.274081   | 0.12458131 | 0.01960942 | 0.07178059 | TAF3     |
| 196740 | ENSG00000165633 | 725.177341 | -0.1953422  | 0.0925937  | 0.02933436 | 0.09860958 | VSTM4    |
| 7417   | ENSG00000165637 | 2119.35711 | -0.11987226 | 0.06397389 | 0.05717444 | 0.16506708 | VDAC2    |
| 402381 | ENSG00000165643 | 0.44795842 | -0.02501848 | 0.38558245 | 0.5807882  | NA         | SOHLH1   |
| 118881 | ENSG00000165644 | 124.835039 | -0.57123648 | 0.22199228 | 0.00278787 | 0.01424083 | COMTD1   |
| 6571   | ENSG00000165646 | 30.266315  | -1.72001326 | 0.49440381 | 3.11E-05   | 0.00026655 | SLC18A2  |
| 118987 | ENSG00000165650 | 1102.82444 | -0.23072456 | 0.08932596 | 0.00773912 | 0.03355421 | PDZD8    |
| 84858  | ENSG00000165655 | 772.470789 | -0.80886875 | 0.10138206 | 2.76E-16   | 8.18E-15   | ZNF503   |
| 23172  | ENSG00000165660 | 500.387331 | -0.11977151 | 0.11372796 | 0.26919996 | 0.49225135 | ABRAXAS2 |
| 169714 | ENSG00000165661 | 1199.74112 | -0.30491955 | 0.08235047 | 0.00014495 | 0.00106236 | QSOX2    |
| 63877  | ENSG00000165669 | 471.52031  | -0.11784887 | 0.11296628 | 0.27435854 | 0.49810335 | FAM204A  |
| 64324  | ENSG00000165671 | 3529.82785 | -0.2222504  | 0.09969735 | 0.02057604 | 0.0745623  | NSD1     |
| 10935  | ENSG00000165672 | 2084.64083 | -0.48316834 | 0.06739188 | 3.19E-13   | 7.49E-12   | PRDX3    |
| 10495  | ENSG00000165675 | 239.515747 | -0.06221871 | 0.19262716 | 0.70749544 | 0.85903201 | ENOX2    |

|        |                 |            |             |            |            |            |          |
|--------|-----------------|------------|-------------|------------|------------|------------|----------|
| 27069  | ENSG00000165678 | 1564.76486 | -0.07800327 | 0.07003394 | 0.25687337 | 0.47790765 | GHITM    |
| 51266  | ENSG00000165682 | 0          | NA          | NA         | NA         | NA         | CLEC1B   |
| 6621   | ENSG00000165684 | 1250.8276  | 0.2055674   | 0.08050614 | 0.00891882 | 0.03772908 | SNAPC4   |
| 120939 | ENSG00000165685 | 0          | NA          | NA         | NA         | NA         | TMEM52B  |
| 23203  | ENSG00000165688 | 1513.91457 | -0.20677687 | 0.09009661 | 0.01792417 | 0.06671962 | PMPCA    |
| 10807  | ENSG00000165689 | 1198.4798  | -0.0617582  | 0.09833968 | 0.51466792 | 0.72937777 | ENTR1    |
| 90167  | ENSG00000165694 | 2.79364949 | -0.03632127 | 0.37485393 | 0.70035793 | 0.85550433 | FRMD7    |
| 158067 | ENSG00000165695 | 9.74422171 | 0.17715836  | 0.39605679 | 0.26708999 | 0.48947584 | AK8      |
| 11092  | ENSG00000165698 | 107.019156 | 0.304906    | 0.21066967 | 0.08750045 | 0.22592516 | SPACA9   |
| 7248   | ENSG00000165699 | 1393.94127 | 0.09387856  | 0.08179431 | 0.24020553 | 0.45820056 | TSC1     |
| 8328   | ENSG00000165702 | 0.47217664 | -0.00720291 | 0.38322146 | 0.86798003 | NA         | GFI1B    |
| 3251   | ENSG00000165704 | 529.380678 | -0.20668305 | 0.14352496 | 0.11908704 | 0.28363587 | HPRT1    |
| 118426 | ENSG00000165714 | 361.219984 | 0.10078186  | 0.16117138 | 0.49133891 | 0.71066297 | BORCS5   |
| 138311 | ENSG00000165716 | 1316.12058 | -0.14755867 | 0.08147457 | 0.06314403 | 0.17813182 | DIPK1B   |
| 116225 | ENSG00000165724 | 590.918101 | -0.17882466 | 0.10190943 | 0.06806219 | 0.1877746  | ZMYND19  |
| 219736 | ENSG00000165730 | 83.1110943 | 1.08438945  | 0.2656025  | 4.77E-06   | 4.82E-05   | STOX1    |
| 5979   | ENSG00000165731 | 5787.03069 | 1.41794732  | 0.09206685 | 1.14E-54   | 1.29E-52   | RET      |
| 9188   | ENSG00000165732 | 5506.14861 | -0.21713765 | 0.05291158 | 3.40E-05   | 0.00028989 | DDX21    |
| 9790   | ENSG00000165733 | 1809.70409 | -0.00572326 | 0.0706262  | 0.93357333 | 0.97233948 | BMS1     |
| 282974 | ENSG00000165752 | 420.90348  | -0.28125523 | 0.11873666 | 0.01242087 | 0.04959348 | STK32C   |
| 57608  | ENSG00000165757 | 56.874746  | -0.22382112 | 0.26630875 | 0.26348184 | 0.48542909 | JCAD     |
| 390431 | ENSG00000165762 | 0          | NA          | NA         | NA         | NA         | OR4K2    |
| 65991  | ENSG00000165775 | 1116.10387 | -0.13074866 | 0.09469892 | 0.15349278 | 0.33847913 | FUNDC2   |
| 90809  | ENSG00000165782 | 523.406873 | 0.23547979  | 0.11161124 | 0.0271193  | 0.09279871 | PIP4P1   |
| 64745  | ENSG00000165792 | 1013.69313 | 0.07537964  | 0.09188451 | 0.39874242 | 0.62756224 | METTTL17 |
| 29986  | ENSG00000165794 | 0          | NA          | NA         | NA         | NA         | SLC39A2  |
| 57447  | ENSG00000165795 | 326.051571 | 0.67489738  | 0.1554309  | 3.33E-06   | 3.45E-05   | NDRG2    |
| 84659  | ENSG00000165799 | 0.16735865 | 0.01897177  | 0.38482933 | 0.78225479 | NA         | RNASE7   |
| 55701  | ENSG00000165801 | 1652.96838 | -0.12732352 | 0.08407567 | 0.12004946 | 0.28527742 | ARHGEF40 |
| 26012  | ENSG00000165802 | 2771.97664 | 0.0470259   | 0.06677535 | 0.47870269 | 0.7003511  | NSMF     |
| 51222  | ENSG00000165804 | 1555.69108 | 0.22087279  | 0.08251787 | 0.00604757 | 0.02733735 | ZNF219   |
| 160419 | ENSG00000165805 | 2.20660589 | -0.12127001 | 0.41080128 | 0.03673019 | NA         | C12orf50 |
| 840    | ENSG00000165806 | 248.056994 | 0.32127468  | 0.18437074 | 0.04756486 | 0.14317808 | CASP7    |
| 145376 | ENSG00000165807 | 1.80139273 | -0.03908088 | 0.38020193 | 0.59126722 | NA         | PPP1R36  |
| 153579 | ENSG00000165810 | 0          | NA          | NA         | NA         | NA         | BTNL9    |
| 55088  | ENSG00000165813 | 350.132215 | 0.23548881  | 0.14657301 | 0.08111614 | 0.21363921 | CCDC186  |
| 340706 | ENSG00000165816 | 0.61751279 | 0.03585022  | 0.38655501 | 0.41235257 | NA         | VWA2     |
| 56339  | ENSG00000165819 | 1970.33342 | 0.34555013  | 0.07047723 | 5.88E-07   | 6.94E-06   | METTTL3  |

|        |                 |            |             |            |            |            |           |
|--------|-----------------|------------|-------------|------------|------------|------------|-----------|
| 6297   | ENSG00000165821 | 1103.62318 | -0.24370629 | 0.08273144 | 0.00250603 | 0.01300029 | SALL2     |
| 118471 | ENSG00000165828 | 4.98636661 | -0.06829719 | 0.37020129 | 0.58031487 | 0.77774473 | PRAP1     |
| 142940 | ENSG00000165832 | 494.873464 | -0.09265131 | 0.10719869 | 0.36673598 | 0.59606123 | TRUB1     |
| 220081 | ENSG00000165837 | 5.77840572 | 0.10246568  | 0.37389772 | 0.45598613 | 0.67958359 | ERICH6B   |
| 1557   | ENSG00000165841 | 0.45209736 | -0.02505403 | 0.38558831 | 0.57865948 | NA         | CYP2C19   |
| 53349  | ENSG00000165861 | 470.839946 | -0.09026992 | 0.12611622 | 0.44727406 | 0.67119864 | ZFYVE1    |
| 143379 | ENSG00000165863 | 2.19471467 | 0.00837943  | 0.37467418 | 0.9242075  | NA         | C10orf82  |
| 259217 | ENSG00000165868 | 1544.72148 | -1.13179115 | 0.08257965 | 1.05E-43   | 8.97E-42   | HSPA12A   |
| NA     | ENSG00000165874 | 19.8866609 | 0.04988449  | 0.34720481 | 0.75047009 | 0.88259197 | SHLD2P1   |
| 10023  | ENSG00000165879 | 82.448636  | 0.44558648  | 0.2527594  | 0.02907597 | 0.09795675 | FRAT1     |
| 80019  | ENSG00000165886 | 112.232366 | 0.24112495  | 0.22060455 | 0.18779626 | 0.38811227 | UBTD1     |
| 26287  | ENSG00000165887 | 0.48001468 | -0.0354033  | 0.38631979 | 0.49116481 | NA         | ANKRD2    |
| 144455 | ENSG00000165891 | 479.3957   | 0.46954547  | 0.133981   | 0.00019129 | 0.00136667 | E2F7      |
| 143872 | ENSG00000165895 | 28.888656  | 6.60530171  | 1.06851193 | 4.49E-10   | 8.07E-09   | ARHGAP42  |
| 122961 | ENSG00000165898 | 283.814336 | -0.08582915 | 0.13624242 | 0.49946657 | 0.71682702 | ISCA2     |
| 283310 | ENSG00000165899 | 0          | NA          | NA         | NA         | NA         | OTOGL     |
| 120071 | ENSG00000165905 | 135.593508 | 1.40588496  | 0.24816378 | 1.17E-09   | 2.00E-08   | LARGE2    |
| 29763  | ENSG00000165912 | 492.193843 | 1.12822633  | 0.11506759 | 1.27E-23   | 5.78E-22   | PACSIN3   |
| 145567 | ENSG00000165914 | 573.773947 | -0.30036227 | 0.11101152 | 0.00449698 | 0.02129357 | TTC7B     |
| 91252  | ENSG00000165915 | 928.441429 | -0.23006098 | 0.09577133 | 0.01264993 | 0.05031567 | SLC39A13  |
| 5702   | ENSG00000165916 | 1788.65053 | -0.15221699 | 0.08833841 | 0.07601573 | 0.20344694 | PSMC3     |
| 5913   | ENSG00000165917 | 0.83112686 | 0.02089355  | 0.38085822 | 0.73074749 | NA         | RAPSN     |
| 79841  | ENSG00000165923 | 20.4697377 | 0.05515624  | 0.31843626 | 0.76414489 | 0.8914874  | AGBL2     |
| 123036 | ENSG00000165929 | 0          | NA          | NA         | NA         | NA         | TC2N      |
| 53981  | ENSG00000165934 | 1339.23936 | -0.25389997 | 0.09236238 | 0.0045098  | 0.02133899 | CPSF2     |
| 341346 | ENSG00000165935 | 0.36029818 | 0.02384302  | 0.38538512 | 0.61219644 | NA         | SMCO2     |
| 64112  | ENSG00000165943 | 955.889332 | -0.38703688 | 0.08841776 | 6.56E-06   | 6.44E-05   | MOAP1     |
| 122509 | ENSG00000165948 | 147.362209 | 0.24098899  | 0.20944842 | 0.17306146 | 0.36578929 | IFI27L1   |
| 3429   | ENSG00000165949 | 41.2621299 | 1.05495374  | 0.40362309 | 0.00082242 | 0.0049857  | IFI27     |
| 145264 | ENSG00000165953 | 0          | NA          | NA         | NA         | NA         | SERPINA12 |
| 79789  | ENSG00000165959 | 179.341362 | 0.0128027   | 0.21335852 | 0.94420183 | 0.97728379 | CLMN      |
| 29951  | ENSG00000165966 | 3.79951255 | 0.08689175  | 0.38289048 | 0.41256035 | 0.64014381 | PDZRN4    |
| 9152   | ENSG00000165970 | 19.0675828 | -1.32286959 | 0.65742718 | 0.00241963 | 0.01260981 | SLC6A5    |
| 120935 | ENSG00000165972 | 18.8357248 | 0.02676577  | 0.31908751 | 0.88361877 | 0.94890373 | CCDC38    |
| 4745   | ENSG00000165973 | 796.331629 | -0.41628542 | 0.1060464  | 4.28E-05   | 0.00035718 | NELL1     |
| 9317   | ENSG00000165983 | 12.1090045 | 1.5536218   | 0.88121621 | 0.00326577 | 0.01626735 | PTER      |
| 389941 | ENSG00000165985 | 13.4284147 | 3.10135971  | 0.9902274  | 7.50E-05   | 0.00058997 | C1QL3     |
| 783    | ENSG00000165995 | 151.63063  | 0.4680142   | 0.19404457 | 0.00616647 | 0.02772326 | CACNB2    |

|        |                 |            |             |            |            |            |          |
|--------|-----------------|------------|-------------|------------|------------|------------|----------|
| 9200   | ENSG00000165996 | 263.200279 | 0.24836721  | 0.16008516 | 0.08736055 | 0.2257402  | HACD1    |
| 221079 | ENSG00000165997 | 1837.12218 | 0.06644474  | 0.07527889 | 0.36859482 | 0.59798654 | ARL5B    |
| 56935  | ENSG00000166002 | 190.814288 | 0.73267221  | 0.22043251 | 0.00016529 | 0.0011976  | SMCO4    |
| 85459  | ENSG00000166004 | 919.17644  | -0.26633255 | 0.09369346 | 0.00320751 | 0.01600127 | CEP295   |
| 3747   | ENSG00000166006 | 0          | NA          | NA         | NA         | NA         | KCNC2    |
| NA     | ENSG00000166007 | 0          | NA          | NA         | NA         | NA         | TRIM51HP |
| 79101  | ENSG00000166012 | 2034.13437 | -0.13001973 | 0.07129693 | 0.06320065 | 0.17823752 | TAF1D    |
| NA     | ENSG00000166013 | 0          | NA          | NA         | NA         | NA         | TRIM53BP |
| 25841  | ENSG00000166016 | 199.633758 | -1.6614008  | 0.18632088 | 3.65E-20   | 1.38E-18   | ABTB2    |
| 27291  | ENSG00000166024 | 339.88938  | 0.01545274  | 0.12661325 | 0.89872126 | 0.95556135 | R3HCC1L  |
| 154810 | ENSG00000166025 | 4330.27158 | -0.12386062 | 0.05484453 | 0.02239702 | 0.07975033 | AMOTL1   |
| 5654   | ENSG00000166033 | 66.6457416 | 1.85726214  | 0.32942661 | 1.10E-09   | 1.88E-08   | HTRA1    |
| 3990   | ENSG00000166035 | 0          | NA          | NA         | NA         | NA         | LIPC     |
| 9702   | ENSG00000166037 | 1032.56959 | -0.2123608  | 0.09037787 | 0.01534658 | 0.05867723 | CEP57    |
| 255394 | ENSG00000166046 | 53.66854   | 0.08467835  | 0.27673186 | 0.66459289 | 0.83444869 | TCP11L2  |
| 139135 | ENSG00000166049 | 0          | NA          | NA         | NA         | NA         | PASD1    |
| 161742 | ENSG00000166068 | 879.770018 | 0.01887959  | 0.09711488 | 0.84156181 | 0.92800104 | SPRED1   |
| 145942 | ENSG00000166069 | 0          | NA          | NA         | NA         | NA         | TMCO5A   |
| 11245  | ENSG00000166073 | 918.126618 | -0.73079414 | 0.09664142 | 8.77E-15   | 2.34E-13   | GPR176   |
| 83700  | ENSG00000166086 | 1738.51858 | -0.16153849 | 0.07269733 | 0.02343372 | 0.08269745 | JAM3     |
| 64806  | ENSG00000166090 | 0          | NA          | NA         | NA         | NA         | IL25     |
| 116173 | ENSG00000166091 | 0          | NA          | NA         | NA         | NA         | CMTM5    |
| NA     | ENSG00000166104 | 0          | NA          | NA         | NA         | NA         |          |
| 112937 | ENSG00000166105 | 213.865815 | -2.76015251 | 0.20422028 | 7.23E-43   | 5.88E-41   | GLB1L3   |
| 170689 | ENSG00000166106 | 0.53038805 | 0.03940474  | 0.38680981 | 0.41702279 | NA         | ADAMTS15 |
| 55530  | ENSG00000166111 | 274.652086 | -3.10936608 | 0.21472318 | 6.25E-49   | 5.96E-47   | SVOP     |
| 219938 | ENSG00000166118 | 0          | NA          | NA         | NA         | NA         | SPATA19  |
| 84706  | ENSG00000166123 | 1933.62728 | 0.37067895  | 0.11482527 | 0.00070185 | 0.00433655 | GPT2     |
| 81693  | ENSG00000166126 | 1.12588503 | -0.0459897  | 0.38306303 | 0.49565157 | NA         | AMN      |
| 51762  | ENSG00000166128 | 409.582957 | -0.27064582 | 0.12450459 | 0.0209494  | 0.07555646 | RAB8B    |
| 121457 | ENSG00000166130 | 356.988058 | -0.04244138 | 0.13055109 | 0.72855313 | 0.87026999 | IKBIP    |
| 27079  | ENSG00000166133 | 216.254845 | 0.30399987  | 0.20147235 | 0.07841384 | 0.20834747 | RPUSD2   |
| 55662  | ENSG00000166135 | 2003.15918 | -0.20551843 | 0.06710138 | 0.0018335  | 0.00993627 | HIF1AN   |
| 4714   | ENSG00000166136 | 1532.76589 | -0.05576679 | 0.08424681 | 0.4969279  | 0.71500229 | NDUFB8   |
| 84936  | ENSG00000166140 | 322.110496 | 0.14436812  | 0.1477952  | 0.28938843 | 0.51546747 | ZFYVE19  |
| 54866  | ENSG00000166143 | 0.173124   | -0.01911262 | 0.38486262 | 0.84537521 | NA         | PPP1R14D |
| 6692   | ENSG00000166145 | 66.3851875 | 0.61876501  | 0.31330676 | 0.01006639 | 0.04165471 | SPINT1   |
| 2200   | ENSG00000166147 | 1226.54979 | -0.43356232 | 0.08964495 | 6.29E-07   | 7.39E-06   | FBN1     |

|        |                 |            |             |            |            |            |          |
|--------|-----------------|------------|-------------|------------|------------|------------|----------|
| 552    | ENSG00000166148 | 0          | NA          | NA         | NA         | NA         | AVPR1A   |
| 123970 | ENSG00000166152 | 0          | NA          | NA         | NA         | NA         | C16orf78 |
| 120863 | ENSG00000166153 | 34.5411496 | 0.11325831  | 0.30030392 | 0.56170248 | 0.76502898 | DEPDC4   |
| 654429 | ENSG00000166159 | 4.89637704 | -0.01015455 | 0.36732039 | 0.92218399 | 0.96738383 | LRTM2    |
| 728458 | ENSG00000166160 | 0          | NA          | NA         | NA         | NA         | OPN1MW2  |
| 29117  | ENSG00000166164 | 1891.10149 | 0.01857323  | 0.0778394  | 0.80821393 | 0.91317199 | BRD7     |
| 1152   | ENSG00000166165 | 8312.94075 | -0.51159225 | 0.06178454 | 4.77E-17   | 1.48E-15   | CKB      |
| 115708 | ENSG00000166166 | 467.40254  | -0.07905896 | 0.12960822 | 0.51612361 | 0.73027332 | TRMT61A  |
| 8945   | ENSG00000166167 | 763.07839  | -0.33371614 | 0.11490533 | 0.00225195 | 0.01185112 | BTRC     |
| 27343  | ENSG00000166169 | 525.635847 | 0.10885576  | 0.12422877 | 0.3544769  | 0.58494733 | POLL     |
| 9529   | ENSG00000166170 | 763.960708 | -0.28965574 | 0.09762513 | 0.00209228 | 0.01111697 | BAG5     |
| 25911  | ENSG00000166171 | 253.312244 | 0.37751472  | 0.1487638  | 0.00593761 | 0.02693239 | DPCD     |
| 55323  | ENSG00000166173 | 274.367615 | -0.12890118 | 0.17718464 | 0.41100563 | 0.63865537 | LARP6    |
| 8539   | ENSG00000166181 | 1844.52111 | 0.09978047  | 0.07778813 | 0.19039699 | 0.39167661 | API5     |
| 374569 | ENSG00000166183 | 1.65534621 | 0.07420061  | 0.38963652 | 0.27786859 | NA         | ASPG     |
| 57567  | ENSG00000166188 | 360.783454 | -0.04605036 | 0.16493336 | 0.7572656  | 0.88697677 | ZNF319   |
| 79803  | ENSG00000166189 | 336.693065 | -0.10974566 | 0.12815665 | 0.36249474 | 0.59216926 | HPS6     |
| 123228 | ENSG00000166192 | 46.8731832 | -0.38217815 | 0.35112078 | 0.09627348 | 0.2423634  | SENP8    |
| 9221   | ENSG00000166197 | 4656.7939  | -0.32388075 | 0.05313576 | 7.20E-10   | 1.26E-08   | NOLC1    |
| 221120 | ENSG00000166199 | 222.989379 | 0.02209675  | 0.16542174 | 0.88380884 | 0.94897201 | ALKBH3   |
| 9318   | ENSG00000166200 | 1239.88703 | -0.49208372 | 0.08211144 | 8.45E-10   | 1.47E-08   | COPS2    |
| 2562   | ENSG00000166206 | 1273.49138 | -3.19875738 | 0.09909673 | 5.68E-230  | 1.61E-226  | GABRB3   |
| 121599 | ENSG00000166211 | 0          | NA          | NA         | NA         | NA         | SPIC     |
| 219793 | ENSG00000166220 | 0          | NA          | NA         | NA         | NA         | TBATA    |
| 8879   | ENSG00000166224 | 1563.05563 | 0.14722525  | 0.07098408 | 0.03433822 | 0.11170355 | SGPL1    |
| 10818  | ENSG00000166225 | 812.607213 | 0.11609134  | 0.12393654 | 0.32207293 | 0.54965002 | FRS2     |
| 10576  | ENSG00000166226 | 4320.7004  | -0.04320803 | 0.0740999  | 0.54912941 | 0.75563376 | CCT2     |
| 5092   | ENSG00000166228 | 931.538811 | -0.3055369  | 0.09967355 | 0.00144735 | 0.00813008 | PCBD1    |
| 25820  | ENSG00000166233 | 1321.63518 | -0.17217595 | 0.08892811 | 0.0461012  | 0.13985441 | ARIH1    |
| 146562 | ENSG00000166246 | 15.8127491 | -0.3954845  | 0.53813401 | 0.07320075 | 0.19780754 | C16orf71 |
| 79827  | ENSG00000166250 | 2229.50361 | -0.3054968  | 0.06540751 | 2.00E-06   | 2.16E-05   | CLMP     |
| 55800  | ENSG00000166257 | 780.372459 | -2.08127205 | 0.10391672 | 2.09E-90   | 5.53E-88   | SCN3B    |
| 1353   | ENSG00000166260 | 1274.72555 | -0.08074352 | 0.08512416 | 0.32974834 | 0.55849471 | COX11    |
| 7753   | ENSG00000166261 | 493.830715 | -0.04770488 | 0.11239198 | 0.65615073 | 0.82907086 | ZNF202   |
| 196951 | ENSG00000166262 | 72.3486432 | 0.00924345  | 0.25507708 | 0.9630764  | 0.98545957 | FAM227B  |
| 252983 | ENSG00000166263 | 531.524771 | -0.17808303 | 0.26966677 | 0.36887308 | 0.59820516 | STXBP4   |
| 116159 | ENSG00000166265 | 0.15069912 | -0.01848503 | 0.38480575 | 0.84537521 | NA         | CYYR1    |
| 8065   | ENSG00000166266 | 1023.91743 | -0.1708566  | 0.1119662  | 0.10963278 | 0.26642754 | CUL5     |

|           |                 |            |             |            |            |            |          |
|-----------|-----------------|------------|-------------|------------|------------|------------|----------|
| 196446    | ENSG00000166268 | 0          | NA          | NA         | NA         | NA         | MYRFL    |
| 54838     | ENSG00000166272 | 596.309083 | -0.02653613 | 0.10550291 | 0.79215147 | 0.90499209 | WBP1L    |
| 102724307 | ENSG00000166272 | 596.309083 | -0.02653613 | 0.10550291 | 0.79215147 | 0.90499209 | WBP1L    |
| 119032    | ENSG00000166275 | 313.566476 | -0.00994678 | 0.14662151 | 0.94037819 | 0.97517789 | BORCS7   |
| 717       | ENSG00000166278 | 0.70025675 | 0.016725    | 0.38289955 | 0.74186697 | NA         | C2       |
| 79156     | ENSG00000166289 | 50.9916888 | -0.03301562 | 0.26161403 | 0.86199492 | 0.9387792  | PLEKHF1  |
| 55273     | ENSG00000166292 | 326.330483 | 2.43469839  | 0.17884846 | 2.43E-43   | 2.03E-41   | TMEM100  |
| 119504    | ENSG00000166295 | 921.295829 | -0.21709428 | 0.09183849 | 0.01465659 | 0.0565733  | ANAPC16  |
| 6609      | ENSG00000166311 | 302.246883 | -0.04528374 | 0.18014766 | 0.77452658 | 0.89613481 | SMPD1    |
| 322       | ENSG00000166313 | 1463.57308 | -0.10480948 | 0.074568   | 0.15180757 | 0.33588293 | APBB1    |
| 79933     | ENSG00000166317 | 25.0300082 | 0.03359504  | 0.31663831 | 0.85341538 | 0.93396002 | SYNPO2L  |
| 25961     | ENSG00000166321 | 89.1001574 | 0.11627185  | 0.22100471 | 0.52255063 | 0.73580254 | NUDT13   |
| 160140    | ENSG00000166323 | 10.3770335 | -0.05440945 | 0.35087517 | 0.71511769 | 0.86271551 | C11orf65 |
| 54765     | ENSG00000166326 | 2995.6089  | 0.1054351   | 0.10557007 | 0.29916786 | 0.52614931 | TRIM44   |
| 101927581 | ENSG00000166329 | 1.86498491 | 0.07560952  | 0.38709497 | 0.35244729 | NA         | CCDC182  |
| 3611      | ENSG00000166333 | 1105.91226 | 0.04231734  | 0.07726476 | 0.5757679  | 0.7744963  | ILK      |
| 6881      | ENSG00000166337 | 1429.44304 | 0.02907167  | 0.07798182 | 0.70356393 | 0.85751377 | TAF10    |
| 1200      | ENSG00000166340 | 820.179927 | 0.13857838  | 0.12021623 | 0.22437235 | 0.43811368 | TPP1     |
| 8642      | ENSG00000166341 | 6105.67825 | -0.25183336 | 0.05442528 | 2.90E-06   | 3.04E-05   | DCHS1    |
| 81832     | ENSG00000166342 | 0          | NA          | NA         | NA         | NA         | NETO1    |
| 118490    | ENSG00000166343 | 47.1682303 | 0.1594494   | 0.27979861 | 0.42361891 | 0.64955555 | MSS51    |
| 1528      | ENSG00000166347 | 489.798007 | -0.00992536 | 0.11400314 | 0.92647303 | 0.96932621 | CYB5A    |
| 159195    | ENSG00000166348 | 591.174615 | -0.23540753 | 0.11536598 | 0.03172671 | 0.10489217 | USP54    |
| 5896      | ENSG00000166349 | 78.2591022 | -0.80255939 | 0.34302795 | 0.00261323 | 0.01347361 | RAG1     |
| 317754    | ENSG00000166351 | 0.18922458 | 0.01954053  | 0.38488496 | 0.78225479 | NA         | POTED    |
| 119710    | ENSG00000166352 | 621.264058 | -0.43509073 | 0.10487111 | 1.57E-05   | 0.00014387 | IFTAP    |
| 126248    | ENSG00000166359 | 14.4210309 | 0.14506648  | 0.3586186  | 0.41229933 | 0.64005916 | WDR88    |
| 144124    | ENSG00000166363 | 0          | NA          | NA         | NA         | NA         | OR10A5   |
| 120776    | ENSG00000166368 | 0          | NA          | NA         | NA         | NA         | OR2D2    |
| 374868    | ENSG00000166377 | 378.747709 | 0.06747588  | 0.13843375 | 0.60251936 | 0.79259054 | ATP9B    |
| 8495      | ENSG00000166387 | 400.337795 | -1.03748761 | 0.20283143 | 3.47E-08   | 4.86E-07   | PPFIBP2  |
| 80168     | ENSG00000166391 | 0          | NA          | NA         | NA         | NA         | MOGAT2   |
| 51700     | ENSG00000166394 | 16.5923783 | 0.0583635   | 0.34733345 | 0.70565146 | 0.85810136 | CYB5R2   |
| 8710      | ENSG00000166396 | 0          | NA          | NA         | NA         | NA         | SERPINB7 |
| 9710      | ENSG00000166398 | 821.699917 | 0.16672689  | 0.0902585  | 0.0573078  | 0.16533181 | GARRE1   |
| 5271      | ENSG00000166401 | 14.0487968 | 0.17764796  | 0.37952812 | 0.30739485 | 0.53486671 | SERPINB8 |
| 7275      | ENSG00000166402 | 4387.75904 | -0.46797157 | 0.05677641 | 3.48E-17   | 1.09E-15   | TUB      |
| 79608     | ENSG00000166405 | 522.50336  | -0.48725048 | 0.12294733 | 2.90E-05   | 0.00025076 | RIC3     |

|        |                 |            |             |            |            |            |          |
|--------|-----------------|------------|-------------|------------|------------|------------|----------|
| 4004   | ENSG00000166407 | 554.811193 | -0.8325246  | 0.11426462 | 5.65E-14   | 1.41E-12   | LMO1     |
| NA     | ENSG00000166408 | 0          | NA          | NA         | NA         | NA         | OR5P1P   |
| 3419   | ENSG00000166411 | 537.219685 | -0.31460118 | 0.11196845 | 0.00318977 | 0.01593228 | IDH3A    |
| 256764 | ENSG00000166415 | 0          | NA          | NA         | NA         | NA         | WDR72    |
| 1381   | ENSG00000166426 | 480.688212 | 0.36606369  | 0.12568837 | 0.00201635 | 0.01077441 | CRABP1   |
| 122618 | ENSG00000166428 | 0.71563014 | 0.02307282  | 0.38312712 | 0.59572404 | NA         | PLD4     |
| 84460  | ENSG00000166432 | 395.265776 | 0.35627477  | 0.14232355 | 0.00699088 | 0.03094578 | ZMAT1    |
| 143570 | ENSG00000166435 | 346.376775 | -0.26091132 | 0.15316948 | 0.06232829 | 0.17640417 | XRRA1    |
| 9866   | ENSG00000166436 | 532.793906 | -0.08156215 | 0.14655971 | 0.54424633 | 0.75220113 | TRIM66   |
| 254225 | ENSG00000166439 | 636.658573 | 0.03558064  | 0.10419101 | 0.72498318 | 0.86844186 | RNF169   |
| 6157   | ENSG00000166441 | 17129.6918 | -0.06467749 | 0.04458162 | 0.13875648 | 0.31543588 | RPL27A   |
| 6764   | ENSG00000166444 | 910.392535 | 0.17082324  | 0.09116678 | 0.05352961 | 0.15677997 | DENND2B  |
| 124359 | ENSG00000166446 | 1.26304592 | 0.07023556  | 0.39299654 | 0.13809485 | NA         | CDYL2    |
| 222865 | ENSG00000166448 | 693.700599 | -0.4104831  | 0.10759948 | 6.86E-05   | 0.00054557 | TMEM130  |
| 283659 | ENSG00000166450 | 939.345641 | -0.24405702 | 0.11069443 | 0.0208425  | 0.07533523 | PRTG     |
| 55839  | ENSG00000166451 | 493.219757 | -0.51285997 | 0.14230019 | 0.00011221 | 0.00084232 | CENPN    |
| 56672  | ENSG00000166452 | 223.467972 | 0.02037476  | 0.17044894 | 0.89540763 | 0.95469109 | AKIP1    |
| 23300  | ENSG00000166454 | 1550.9223  | -0.10763056 | 0.07815504 | 0.16342313 | 0.35246384 | ATMIN    |
| 123775 | ENSG00000166455 | 8.15458342 | 0.05578857  | 0.3661037  | 0.65935209 | 0.83105722 | C16orf46 |
| 440026 | ENSG00000166471 | 792.725469 | 0.07520923  | 0.11062898 | 0.4782274  | 0.69986975 | TMEM41B  |
| 114780 | ENSG00000166473 | 0.173124   | -0.01911262 | 0.38486262 | 0.84537521 | NA         | PKD1L2   |
| 123169 | ENSG00000166477 | 715.998175 | -0.72477565 | 0.09851746 | 4.16E-14   | 1.06E-12   | LEO1     |
| 7702   | ENSG00000166478 | 431.779585 | -0.19366342 | 0.13827377 | 0.13163549 | 0.30439464 | ZNF143   |
| 54495  | ENSG00000166479 | 1205.91458 | -0.01389098 | 0.08503582 | 0.86091141 | 0.9380757  | TMX3     |
| 4239   | ENSG00000166482 | 8152.64825 | 1.22702558  | 0.06614207 | 8.84E-78   | 1.72E-75   | MFAP4    |
| 7465   | ENSG00000166483 | 1031.65292 | -0.37756083 | 0.11875323 | 0.0007973  | 0.00485824 | WEE1     |
| 5598   | ENSG00000166484 | 863.352353 | 0.25172929  | 0.10560732 | 0.01293245 | 0.05125444 | MAPK7    |
| NA     | ENSG00000166492 | 0.3180506  | 0.00098569  | 0.38336561 | 0.96763183 | NA         | FAM86GP  |
| 5579   | ENSG00000166501 | 0          | NA          | NA         | NA         | NA         | PRKCB    |
| 50810  | ENSG00000166503 | 2193.05806 | -0.37767575 | 0.06759284 | 1.31E-08   | 1.96E-07   | HDGFL3   |
| 8509   | ENSG00000166507 | 437.757323 | 0.0921751   | 0.15487469 | 0.51587702 | 0.73002854 | NDST2    |
| 4176   | ENSG00000166508 | 11033.8124 | 0.06718476  | 0.05582165 | 0.22453184 | 0.43832645 | MCM7     |
| 10143  | ENSG00000166509 | 0          | NA          | NA         | NA         | NA         | CLEC3A   |
| 80323  | ENSG00000166510 | 45.0100406 | 0.0419051   | 0.27216492 | 0.82978234 | 0.922859   | CCDC68   |
| 26253  | ENSG00000166523 | 0          | NA          | NA         | NA         | NA         | CLEC4E   |
| 7551   | ENSG00000166526 | 1895.12402 | 0.2543176   | 0.07024077 | 0.00022642 | 0.00158845 | ZNF3     |
| 338339 | ENSG00000166527 | 0          | NA          | NA         | NA         | NA         | CLEC4D   |
| 7589   | ENSG00000166529 | 413.178469 | 0.16686109  | 0.12282983 | 0.15129641 | 0.33531286 | ZSCAN21  |



|        |                 |            |             |            |            |            |           |
|--------|-----------------|------------|-------------|------------|------------|------------|-----------|
| NA     | ENSG00000166530 | 0          | NA          | NA         | NA         | NA         | HSBP1P2   |
| 57494  | ENSG00000166532 | 1605.39756 | 0.04897609  | 0.08138094 | 0.53850176 | 0.74827532 | RIMKLB    |
| 144568 | ENSG00000166535 | 0.18922458 | 0.01954053  | 0.38488496 | 0.78225479 | NA         | A2ML1     |
| 146227 | ENSG00000166546 | 3.55471473 | 0.0556904   | 0.37584806 | 0.58717306 | 0.78237765 | BEAN1     |
| 7084   | ENSG00000166548 | 245.429391 | 0.33192895  | 0.17021709 | 0.02979707 | 0.09982672 | TK2       |
| 23423  | ENSG00000166557 | 1153.13003 | -0.10536872 | 0.08503435 | 0.20368599 | 0.41010046 | TMED3     |
| 146167 | ENSG00000166558 | 0          | NA          | NA         | NA         | NA         | SLC38A8   |
| 90701  | ENSG00000166562 | 516.918661 | -0.03860176 | 0.10703139 | 0.70606626 | 0.85825065 | SEC11C    |
| 339302 | ENSG00000166569 | 0          | NA          | NA         | NA         | NA         | CPLX4     |
| 2587   | ENSG00000166573 | 0          | NA          | NA         | NA         | NA         | GALR1     |
| 65084  | ENSG00000166575 | 399.169347 | -0.11594434 | 0.15968497 | 0.4228416  | 0.64881495 | TMEM135   |
| 115811 | ENSG00000166578 | 31.2082929 | 1.15127648  | 0.52280118 | 0.00196268 | 0.01052991 | IQCD      |
| 81565  | ENSG00000166579 | 457.699619 | 0.11560636  | 0.11459464 | 0.29062274 | 0.51667585 | NDEL1     |
| 201161 | ENSG00000166582 | 2420.02969 | 0.00816539  | 0.08100681 | 0.91909427 | 0.96566562 | CENPV     |
| 1014   | ENSG00000166589 | 0.15069912 | -0.01848503 | 0.38480575 | 0.84537521 | NA         | CDH16     |
| 6236   | ENSG00000166592 | 4.45275555 | 0.24292628  | 0.47686876 | 0.06465931 | 0.18119939 | RRAD      |
| 51647  | ENSG00000166595 | 1473.3152  | 0.13884048  | 0.08321764 | 0.0872656  | 0.22552422 | CIAO2B    |
| 146845 | ENSG00000166596 | 0          | NA          | NA         | NA         | NA         | CFAP52    |
| 7184   | ENSG00000166598 | 15958.0263 | 0.55140103  | 0.08400955 | 1.84E-11   | 3.82E-10   | HSP90B1   |
| 4160   | ENSG00000166603 | 8.93865668 | 0.0440981   | 0.3496991  | 0.77229561 | 0.89548539 | MC4R      |
| 10904  | ENSG00000166619 | 1207.56552 | 0.04271386  | 0.0817534  | 0.59345679 | 0.7872548  | BLCAP     |
| 89777  | ENSG00000166634 | 0          | NA          | NA         | NA         | NA         | SERPINB12 |
| 89832  | ENSG00000166664 | 206.982309 | 0.5081114   | 0.2168905  | 0.00636525 | 0.02851342 | CHRFAM7A  |
| 80063  | ENSG00000166669 | 189.660004 | 0.41858672  | 0.2031254  | 0.01718653 | 0.06451859 | ATF7IP2   |
| 4319   | ENSG00000166670 | 0          | NA          | NA         | NA         | NA         | MMP10     |
| 780776 | ENSG00000166676 | 330.711417 | -0.03022752 | 0.15841064 | 0.83251997 | 0.92392457 | TVP23A    |
| 27018  | ENSG00000166681 | 3020.12422 | -0.07551187 | 0.06223623 | 0.21808761 | 0.42997696 | BEX3      |
| 80975  | ENSG00000166682 | 22.6051055 | 1.2723861   | 0.97728158 | 0.00621331 | 0.02788959 | TMPRSS5   |
| 9382   | ENSG00000166685 | 937.37038  | -0.00012106 | 0.08990039 | 0.99786794 | 0.99926338 | COG1      |
| 144100 | ENSG00000166689 | 341.985636 | 0.5602419   | 0.14286903 | 2.83E-05   | 0.00024624 | PLEKHA7   |
| NA     | ENSG00000166693 | 0          | NA          | NA         | NA         | NA         | OR5M13P   |
| 80095  | ENSG00000166704 | 345.832087 | 0.13962897  | 0.16128165 | 0.33993135 | 0.57028903 | ZNF606    |
| 644353 | ENSG00000166707 | 169.857484 | 0.20825105  | 0.1893297  | 0.20696273 | 0.41417369 | ZCCHC18   |
| 567    | ENSG00000166710 | 1562.99793 | 0.07528788  | 0.06846828 | 0.26402253 | 0.48609939 | B2M       |
| 9640   | ENSG00000166716 | 1444.09345 | -0.23162933 | 0.07408596 | 0.00140579 | 0.00793707 | ZNF592    |
| 113201 | ENSG00000166734 | 1627.31538 | 0.03440755  | 0.07605041 | 0.6449507  | 0.82283284 | GOLM2     |
| 3359   | ENSG00000166736 | 0          | NA          | NA         | NA         | NA         | HTR3A     |
| 4837   | ENSG00000166741 | 0.173733   | 0.01914545  | 0.38484597 | 0.78225479 | NA         | NNMT      |

|        |                 |            |             |            |            |            |            |
|--------|-----------------|------------|-------------|------------|------------|------------|------------|
| 116285 | ENSG00000166743 | 0          | NA          | NA         | NA         | NA         | ACSM1      |
| 164    | ENSG00000166747 | 1374.71809 | -0.19732301 | 0.08454529 | 0.01656941 | 0.06260468 | APIG1      |
| 162394 | ENSG00000166750 | 0          | NA          | NA         | NA         | NA         | SLFN5      |
| 117155 | ENSG00000166762 | 91.3833054 | -0.49189637 | 0.296006   | 0.02816464 | 0.09547008 | CATSPER2   |
| 554225 | ENSG00000166763 | 12.1021893 | 1.8145793   | 0.87846417 | 0.00163061 | 0.00901906 | STRCP1     |
| NA     | ENSG00000166770 | 384.741464 | 0.07254564  | 0.12105567 | 0.52847328 | 0.74019836 | ZNF667-AS1 |
| 89927  | ENSG00000166780 | 840.186506 | -0.52467737 | 0.09244777 | 5.12E-09   | 8.00E-08   | BMERB1     |
| 9665   | ENSG00000166783 | 1909.05541 | 0.18472011  | 0.10998467 | 0.07924437 | 0.20999175 | MARF1      |
| 6290   | ENSG00000166787 | 0          | NA          | NA         | NA         | NA         | SAA3P      |
| 113174 | ENSG00000166788 | 636.61494  | -0.22895907 | 0.10824939 | 0.02700081 | 0.09245712 | SAAL1      |
| 219539 | ENSG00000166793 | 85.0944552 | 0.24331229  | 0.24537857 | 0.21039291 | 0.41905384 | YPEL4      |
| 5479   | ENSG00000166794 | 5278.50592 | 0.39399397  | 0.06342828 | 2.90E-10   | 5.32E-09   | PIIB       |
| 3948   | ENSG00000166796 | 0.93312285 | -0.0220967  | 0.38190803 | 0.60757747 | NA         | LDHC       |
| 84191  | ENSG00000166797 | 468.543911 | -0.15989019 | 0.11763169 | 0.15218612 | 0.33649534 | CIAO2A     |
| 160287 | ENSG00000166800 | 8.67624426 | -0.02868348 | 0.34715586 | 0.84845944 | 0.93105283 | LDHAL6A    |
| 63901  | ENSG00000166801 | 176.139606 | 3.96196011  | 0.2921695  | 1.82E-43   | 1.54E-41   | FAM111A    |
| 9768   | ENSG00000166803 | 739.404132 | -0.41047931 | 0.09297366 | 5.16E-06   | 5.16E-05   | PCLAF      |
| 374654 | ENSG00000166813 | 591.79113  | 0.36401596  | 0.10908738 | 0.00048784 | 0.0031582  | KIF7       |
| 197257 | ENSG00000166816 | 4.18586365 | 0.24872558  | 0.49109393 | 0.03964415 | 0.12457077 | LDHD       |
| 5346   | ENSG00000166819 | 10.3089048 | 0.15606641  | 0.38121582 | 0.33416203 | 0.56389725 | PLIN1      |
| 8800   | ENSG00000166821 | 218.056939 | 0.17270216  | 0.17813145 | 0.27411797 | 0.49775768 | PEX11A     |
| 124491 | ENSG00000166822 | 586.842113 | -0.18285804 | 0.12632656 | 0.12398367 | 0.29179342 | TMEM170A   |
| 55897  | ENSG00000166823 | 57.4374589 | 0.46324134  | 0.32442015 | 0.04693852 | 0.14178748 | MESPI      |
| 290    | ENSG00000166825 | 154.679631 | -0.21483335 | 0.22960957 | 0.24821981 | 0.46741467 | ANPEP      |
| 6340   | ENSG00000166828 | 0          | NA          | NA         | NA         | NA         | SCNN1G     |
| 348093 | ENSG00000166831 | 240.026894 | 1.44286606  | 0.16544785 | 2.40E-19   | 8.69E-18   | RBPMS2     |
| 89797  | ENSG00000166833 | 8005.1776  | 0.53492526  | 0.06525171 | 9.11E-17   | 2.77E-15   | NAV2       |
| 348094 | ENSG00000166839 | 278.180559 | -0.13589653 | 0.16941211 | 0.37004171 | 0.59932029 | ANKDD1A    |
| 92292  | ENSG00000166840 | 16.186122  | 0.05887029  | 0.33981254 | 0.72549773 | 0.86866734 | GLYATL1    |
| 162681 | ENSG00000166845 | 424.412588 | -0.52923843 | 0.14411946 | 8.31E-05   | 0.0006449  | C18orf54   |
| 84516  | ENSG00000166847 | 4115.88445 | -0.1385592  | 0.05956776 | 0.01848707 | 0.0682896  | DCTN5      |
| 54386  | ENSG00000166848 | 2227.94113 | -0.49304064 | 0.07181128 | 2.72E-12   | 6.02E-11   | TERF2IP    |
| 5347   | ENSG00000166851 | 1761.89544 | -0.12687541 | 0.08046415 | 0.10526969 | 0.25874017 | PLK1       |
| 10845  | ENSG00000166855 | 762.336017 | 0.25131085  | 0.10466949 | 0.01235156 | 0.04940623 | CLPX       |
| 11318  | ENSG00000166856 | 9.60212874 | 0.26052813  | 0.44808361 | 0.14190367 | 0.32043805 | GPR182     |
| 9880   | ENSG00000166860 | 871.330102 | 0.01078201  | 0.09029448 | 0.9029863  | 0.95751119 | ZBTB39     |
| 10369  | ENSG00000166862 | 136.668927 | -3.07454366 | 0.25776233 | 6.80E-34   | 4.41E-32   | CACNG2     |
| 6866   | ENSG00000166863 | 20.7669879 | -0.34482436 | 0.42403836 | 0.12470802 | 0.29301363 | TAC3       |

|           |                 |            |             |            |            |            |          |
|-----------|-----------------|------------|-------------|------------|------------|------------|----------|
| 4640      | ENSG00000166866 | 1.2465507  | -0.03277431 | 0.38265371 | 0.57241099 | NA         | MYO1A    |
| 63928     | ENSG00000166869 | 0          | NA          | NA         | NA         | NA         | CHP2     |
| 23306     | ENSG00000166881 | 1352.05965 | -0.43419614 | 0.0781878  | 1.35E-08   | 2.01E-07   | NEMP1    |
| 219983    | ENSG00000166884 | 0          | NA          | NA         | NA         | NA         | OR4D6    |
| 4665      | ENSG00000166886 | 309.78288  | -0.0941335  | 0.1389457  | 0.46643927 | 0.68929176 | NAB2     |
| 23339     | ENSG00000166887 | 2239.92182 | 0.00047049  | 0.07151217 | 0.99548404 | 0.99852582 | VPS39    |
| 6778      | ENSG00000166888 | 4.11486524 | 0.12158304  | 0.38837952 | 0.33289188 | 0.56223503 | STAT6    |
| 219988    | ENSG00000166889 | 941.687105 | 0.26172946  | 0.08619628 | 0.00179965 | 0.00977684 | PATL1    |
| 91419     | ENSG00000166896 | 122.236116 | -0.04175814 | 0.20233182 | 0.80692774 | 0.91256903 | ATP23    |
| 114794    | ENSG00000166897 | 43.1419485 | -3.05925136 | 0.45067211 | 8.16E-13   | 1.87E-11   | ELFN2    |
| 6809      | ENSG00000166900 | 459.741296 | -0.57424823 | 0.13120488 | 3.71E-06   | 3.81E-05   | STX3     |
| 54948     | ENSG00000166902 | 414.955154 | -0.08945691 | 0.12898178 | 0.46063314 | 0.68374693 | MRPL16   |
| 79837     | ENSG00000166908 | 653.012439 | 0.22325376  | 0.11845237 | 0.04703473 | 0.14194844 | PIP4K2C  |
| 54893     | ENSG00000166912 | 400.814852 | 0.02336439  | 0.12018451 | 0.8386201  | 0.92674595 | MTMR10   |
| 7529      | ENSG00000166913 | 4320.7218  | -0.2341623  | 0.06939738 | 0.00058895 | 0.00372244 | YWHAB    |
| 101927671 | ENSG00000166917 | 0          | NA          | NA         | NA         | NA         | MIR202HG |
| 84419     | ENSG00000166920 | 1.3020088  | -0.01851317 | 0.3776269  | 0.80753936 | NA         | C15orf48 |
| 6447      | ENSG00000166922 | 166.775217 | 1.67354776  | 0.20582652 | 3.19E-17   | 1.00E-15   | SCG5     |
| 26585     | ENSG00000166923 | 1.96510275 | -0.06220858 | 0.38811123 | 0.30407606 | NA         | GREM1    |
| 222950    | ENSG00000166924 | 652.226081 | -0.22491597 | 0.10637681 | 0.0272669  | 0.09311107 | NYAP1    |
| 81628     | ENSG00000166925 | 610.291673 | 0.15567691  | 0.10273952 | 0.11548358 | 0.27727493 | TSC22D4  |
| 245802    | ENSG00000166926 | 0          | NA          | NA         | NA         | NA         | MS4A6E   |
| 58475     | ENSG00000166927 | 0          | NA          | NA         | NA         | NA         | MS4A7    |
| 84689     | ENSG00000166928 | 0          | NA          | NA         | NA         | NA         | MS4A14   |
| 64232     | ENSG00000166930 | 0          | NA          | NA         | NA         | NA         | MS4A5    |
| 115752    | ENSG00000166938 | 812.67053  | -0.06605762 | 0.10320243 | 0.50479261 | 0.72128811 | DIS3L    |
| 23582     | ENSG00000166946 | 752.070874 | -0.01759859 | 0.09917267 | 0.85331796 | 0.93390491 | CCNDBP1  |
| 2038      | ENSG00000166947 | 0.18922458 | 0.01954053  | 0.38488496 | 0.78225479 | NA         | EPB42    |
| 343641    | ENSG00000166948 | 0          | NA          | NA         | NA         | NA         | TGM6     |
| 4088      | ENSG00000166949 | 897.475418 | 0.16663236  | 0.10738434 | 0.10564561 | 0.25934285 | SMAD3    |
| 83661     | ENSG00000166959 | 0          | NA          | NA         | NA         | NA         | MS4A8    |
| 374864    | ENSG00000166960 | 0.74020022 | -0.00504882 | 0.382087   | 0.94748844 | NA         | CCDC178  |
| 219995    | ENSG00000166961 | 0          | NA          | NA         | NA         | NA         | MS4A15   |
| 4130      | ENSG00000166963 | 1460.48387 | -0.19896897 | 0.07659484 | 0.00793686 | 0.03427672 | MAP1A    |
| 91433     | ENSG00000166965 | 924.06723  | 0.0008441   | 0.09398337 | 0.98030779 | 0.99338199 | RCCD1    |
| 64400     | ENSG00000166971 | 330.249143 | 0.03655046  | 0.14264888 | 0.78363126 | 0.9014745  | AKTIP    |
| 10982     | ENSG00000166974 | 958.132106 | -0.13223048 | 0.09110039 | 0.13268171 | 0.30598688 | MAPRE2   |
| 59271     | ENSG00000166979 | 45.20187   | -0.03051817 | 0.26751348 | 0.87197901 | 0.94401928 | EVA1C    |

|        |                 |            |             |            |            |            |           |
|--------|-----------------|------------|-------------|------------|------------|------------|-----------|
| NA     | ENSG00000166984 | 0.47855198 | -0.0099778  | 0.38335877 | 0.83031632 | NA         | TCP10L2   |
| 4141   | ENSG00000166986 | 4533.885   | 0.4938922   | 0.07315873 | 6.16E-12   | 1.33E-10   | MARS1     |
| 114785 | ENSG00000166987 | 1096.67389 | 0.61797626  | 0.11061397 | 6.55E-09   | 1.01E-07   | MBD6      |
| 245812 | ENSG00000166997 | 312.143346 | 0.28340277  | 0.13807851 | 0.02774395 | 0.0942857  | CNPY4     |
| 2923   | ENSG00000167004 | 5960.25857 | 0.32361104  | 0.08002901 | 3.45E-05   | 0.00029372 | PDIA3     |
| 11051  | ENSG00000167005 | 4170.5484  | -0.20839676 | 0.07348288 | 0.00380578 | 0.01847935 | NUDT21    |
| 375607 | ENSG00000167011 | 215.143167 | -0.345306   | 0.1649546  | 0.0203621  | 0.07390853 | NAT16     |
| 145645 | ENSG00000167014 | 0          | NA          | NA         | NA         | NA         | TERB2     |
| 4824   | ENSG00000167034 | 0          | NA          | NA         | NA         | NA         | NKX3-1    |
| 129049 | ENSG00000167037 | 308.039137 | -0.05771454 | 0.14679756 | 0.66923522 | 0.83726414 | SGSM1     |
| NA     | ENSG00000167046 | 13.1854438 | 0.17001326  | 0.36364226 | 0.35366978 | 0.58401019 |           |
| 150290 | ENSG00000167065 | 159.745282 | 0.20573907  | 0.17860487 | 0.19380836 | 0.39665339 | DUSP18    |
| 7008   | ENSG00000167074 | 105.430104 | 0.0532155   | 0.20831475 | 0.76265902 | 0.89054624 | TEF       |
| 150365 | ENSG00000167077 | 0.56622391 | 0.04121299  | 0.38703405 | 0.39547994 | NA         | MEI1      |
| 124872 | ENSG00000167080 | 0          | NA          | NA         | NA         | NA         | B4GALNT2  |
| 5090   | ENSG00000167081 | 1305.16483 | -0.02712542 | 0.08512834 | 0.74340003 | 0.87901881 | PBX3      |
| 2793   | ENSG00000167083 | 0          | NA          | NA         | NA         | NA         | GNGT2     |
| 5245   | ENSG00000167085 | 3563.00125 | 0.01505942  | 0.06430477 | 0.81224764 | 0.91499949 | PHB       |
| 6632   | ENSG00000167088 | 1741.72001 | 0.03675181  | 0.10226181 | 0.71030767 | 0.86089825 | SNRPD1    |
| 158248 | ENSG00000167094 | 4.41770387 | 0.12116064  | 0.38822201 | 0.33415525 | 0.56389725 | TTC16     |
| 140732 | ENSG00000167098 | 0          | NA          | NA         | NA         | NA         | SUN5      |
| 201191 | ENSG00000167100 | 1003.71944 | -0.28200197 | 0.09556289 | 0.00223855 | 0.01179939 | SAMD14    |
| 138429 | ENSG00000167103 | 87.7239145 | 0.10394809  | 0.21728725 | 0.56426427 | 0.76680562 | PIP5KL1   |
| 128859 | ENSG00000167104 | 0          | NA          | NA         | NA         | NA         | BPIFB6    |
| 162461 | ENSG00000167105 | 0.37844916 | 0.02407552  | 0.3854191  | 0.60038877 | NA         | TMEM92    |
| 399665 | ENSG00000167106 | 549.170372 | -0.18119688 | 0.28177491 | 0.36536731 | 0.5947154  | FAM102A   |
| 80221  | ENSG00000167107 | 361.053151 | 1.58334082  | 0.13254597 | 5.76E-34   | 3.76E-32   | ACSF2     |
| 2801   | ENSG00000167110 | 1481.25715 | 0.10287622  | 0.08647347 | 0.22264205 | 0.43570904 | GOLGA2    |
| 26995  | ENSG00000167112 | 898.432498 | -0.36029555 | 0.09484081 | 8.45E-05   | 0.00065457 | TRUB2     |
| 51117  | ENSG00000167113 | 705.305155 | 0.12673415  | 0.09401785 | 0.16428287 | 0.35370289 | COQ4      |
| 10999  | ENSG00000167114 | 716.356601 | 0.10929723  | 0.09519502 | 0.23598553 | 0.45280389 | SLC27A4   |
| 55018  | ENSG00000167117 | 0          | NA          | NA         | NA         | NA         | ANKRD40CL |
| 81605  | ENSG00000167118 | 1107.08697 | 0.12273998  | 0.08823619 | 0.15283714 | 0.3375586  | URM1      |
| 51148  | ENSG00000167123 | 426.357875 | 0.08082658  | 0.11808011 | 0.47242139 | 0.69457676 | CERCAM    |
| 57171  | ENSG00000167130 | 579.753896 | -0.15401735 | 0.10444379 | 0.12345648 | 0.29110727 | DOLPP1    |
| 388389 | ENSG00000167131 | 33.3659611 | 0.27228805  | 0.34333463 | 0.20638429 | 0.41335193 | CCDC103   |
| 2021   | ENSG00000167136 | 598.653851 | -0.1864428  | 0.10978906 | 0.07474749 | 0.20094718 | ENDOG     |
| 161514 | ENSG00000167139 | 0          | NA          | NA         | NA         | NA         | TBC1D21   |

|        |                 |            |             |            |            |            |          |
|--------|-----------------|------------|-------------|------------|------------|------------|----------|
| 51450  | ENSG00000167157 | 162.409592 | 1.05136201  | 0.19113977 | 4.59E-09   | 7.24E-08   | PRRX2    |
| 54578  | ENSG00000167165 | 0          | NA          | NA         | NA         | NA         | UGT1A6   |
| 56905  | ENSG00000167173 | 389.562545 | -0.20163986 | 0.13398365 | 0.10703391 | 0.26200528 | C15orf39 |
| 57611  | ENSG00000167178 | 5615.98338 | -1.16350155 | 0.06933716 | 3.46E-64   | 4.94E-62   | ISLR2    |
| 6668   | ENSG00000167182 | 552.720662 | -0.09608611 | 0.13458248 | 0.44464256 | 0.66947775 | SP2      |
| 79170  | ENSG00000167183 | 2.80742508 | 0.02826377  | 0.37109534 | 0.78616464 | 0.90280441 | PRR15L   |
| 10229  | ENSG00000167186 | 355.742255 | 0.07249214  | 0.1251613  | 0.54068124 | 0.74929575 | COQ7     |
| 51704  | ENSG00000167191 | 223.600623 | 0.4376306   | 0.16398102 | 0.00334568 | 0.01659458 | GPRC5B   |
| 1398   | ENSG00000167193 | 2073.05951 | -0.19386825 | 0.06977432 | 0.0046626  | 0.02192085 | CRK      |
| 146378 | ENSG00000167194 | 1.85940607 | 0.07739212  | 0.38730093 | 0.34878705 | NA         | C16orf92 |
| 653641 | ENSG00000167195 | 0.75689831 | 0.03380966  | 0.38651369 | 0.3822658  | NA         | GOLGA6C  |
| 26263  | ENSG00000167196 | 1336.33502 | 0.3068937   | 0.07941579 | 7.38E-05   | 0.00058207 | FBXO22   |
| 23102  | ENSG00000167202 | 1426.17031 | 0.05675323  | 0.09270232 | 0.52944173 | 0.74118854 | TBC1D2B  |
| 64127  | ENSG00000167207 | 8.81506738 | -0.17640691 | 0.41637547 | 0.16895749 | 0.36036515 | NOD2     |
| 124460 | ENSG00000167208 | 1.03647493 | 0.02178715  | 0.38186455 | 0.69088788 | NA         | SNX20    |
| 125336 | ENSG00000167210 | 0.4596103  | 0.00434526  | 0.38316676 | 0.97273885 | NA         | LOXHD1   |
| 83473  | ENSG00000167216 | 210.735076 | 0.55791753  | 0.20305279 | 0.00178091 | 0.00968567 | KATNAL2  |
| 84064  | ENSG00000167220 | 765.761963 | -0.28625    | 0.09447289 | 0.00171404 | 0.00939925 | HDHD2    |
| 7644   | ENSG00000167232 | 856.632897 | -0.11470545 | 0.13488661 | 0.36229566 | 0.59197696 | ZNF91    |
| 3481   | ENSG00000167244 | 9561.09702 | 0.82534899  | 0.4439738  | 0.00699465 | 0.03095557 | IGF2     |
| 257160 | ENSG00000167257 | 674.555559 | -0.10501052 | 0.11964896 | 0.35444885 | 0.58494733 | RNF214   |
| 51755  | ENSG00000167258 | 1310.66028 | 0.00211193  | 0.09313103 | 0.98218241 | 0.99408818 | CDK12    |
| 64174  | ENSG00000167261 | 0          | NA          | NA         | NA         | NA         | DPEP2    |
| 54920  | ENSG00000167264 | 215.843501 | 0.03543373  | 0.16883921 | 0.81804689 | 0.9171248  | DUS2     |
| 51367  | ENSG00000167272 | 269.577802 | 0.31039543  | 0.14357873 | 0.01957177 | 0.07166922 | POP5     |
| 64772  | ENSG00000167280 | 1046.99818 | 0.31139606  | 0.13002787 | 0.01067302 | 0.04373248 | ENGASE   |
| 146713 | ENSG00000167281 | 12.9459316 | 0.32303099  | 0.47374097 | 0.11342714 | 0.27329189 | RBFOX3   |
| 10632  | ENSG00000167283 | 1517.62566 | -0.00503877 | 0.07974645 | 0.94636868 | 0.97814213 | ATP5MG   |
| 915    | ENSG00000167286 | 0          | NA          | NA         | NA         | NA         | CD3D     |
| 125058 | ENSG00000167291 | 6415.9684  | -0.05566458 | 0.05051876 | 0.26589391 | 0.48827746 | TBC1D16  |
| 146705 | ENSG00000167302 | 661.216025 | 0.15316522  | 0.1103525  | 0.14669865 | 0.32786991 | TEPSIN   |
| 4645   | ENSG00000167306 | 22.5800395 | -0.10817627 | 0.32928833 | 0.55631108 | 0.76192268 | MYO5B    |
| 116969 | ENSG00000167311 | 2.93956936 | 0.03212106  | 0.37215353 | 0.75056771 | 0.8826224  | ART5     |
| 10449  | ENSG00000167315 | 1311.56762 | -0.1290284  | 0.08514888 | 0.1196293  | 0.28460369 | ACAA2    |
| 6786   | ENSG00000167323 | 589.209848 | 0.47046458  | 0.1421309  | 0.00038195 | 0.00254208 | STIM1    |
| 6240   | ENSG00000167325 | 2685.8703  | -0.36140526 | 0.07879466 | 2.66E-06   | 2.80E-05   | RRM1     |
| 81285  | ENSG00000167332 | 0          | NA          | NA         | NA         | NA         | OR51E2   |
| 55128  | ENSG00000167333 | 182.046515 | 0.46984263  | 0.2082585  | 0.00899397 | 0.03800482 | TRIM68   |

|           |                 |            |             |            |            |            |           |
|-----------|-----------------|------------|-------------|------------|------------|------------|-----------|
| 56547     | ENSG00000167346 | 0          | NA          | NA         | NA         | NA         | MMP26     |
| 282763    | ENSG00000167355 | 0.16735865 | 0.01897177  | 0.38482933 | 0.78225479 | NA         | OR51B5    |
| 390063    | ENSG00000167359 | 0          | NA          | NA         | NA         | NA         | OR51I1    |
| 390061    | ENSG00000167360 | 0          | NA          | NA         | NA         | NA         | OR51Q1    |
| 64122     | ENSG00000167363 | 455.380293 | 0.22667604  | 0.13460565 | 0.0713979  | 0.19425868 | FN3K      |
| 112476    | ENSG00000167371 | 378.519382 | 0.0637186   | 0.12540311 | 0.59154125 | 0.78613293 | PRRT2     |
| 7571      | ENSG00000167377 | 401.968963 | 0.01898357  | 0.12856337 | 0.8764589  | 0.94556523 | ZNF23     |
| 126298    | ENSG00000167378 | 1026.94303 | -0.08352581 | 0.10115949 | 0.39128347 | 0.62079681 | IRGQ      |
| 7769      | ENSG00000167380 | 566.720675 | 0.01976322  | 0.14364959 | 0.88316682 | 0.94857242 | ZNF226    |
| 7733      | ENSG00000167384 | 238.934047 | -0.42854664 | 0.15911869 | 0.00319052 | 0.01593228 | ZNF180    |
| NA        | ENSG00000167390 | 0          | NA          | NA         | NA         | NA         | POM121L3P |
| 28227     | ENSG00000167393 | 762.058597 | 0.36634667  | 0.09583505 | 7.60E-05   | 0.00059681 | PPP2R3B   |
| 79759     | ENSG00000167394 | 438.571459 | 0.11682279  | 0.1219155  | 0.31225752 | 0.53997989 | ZNF668    |
| 9726      | ENSG00000167395 | 1141.75321 | 0.00275432  | 0.07910264 | 0.97202389 | 0.9895302  | ZNF646    |
| 79001     | ENSG00000167397 | 1339.17606 | -0.18339618 | 0.07470254 | 0.0121864  | 0.04883422 | VKORC1    |
| 94235     | ENSG00000167414 | 144.181977 | 0.17325242  | 0.18784451 | 0.29149532 | 0.51742702 | GNG8      |
| 4025      | ENSG00000167419 | 0.14931947 | -0.01844332 | 0.38480212 | 0.84537521 | NA         | LPO       |
| 762       | ENSG00000167434 | 0.29863895 | -0.02292439 | 0.3852726  | 0.68753245 | NA         | CA4       |
| 55181     | ENSG00000167447 | 684.417632 | -0.1072363  | 0.10228121 | 0.27575853 | 0.49982179 | SMG8      |
| 148231    | ENSG00000167459 | 0          | NA          | NA         | NA         | NA         | LINC00905 |
| 7171      | ENSG00000167460 | 9826.22524 | 0.05356668  | 0.05294017 | 0.30997084 | 0.53774299 | TPM4      |
| 4218      | ENSG00000167461 | 830.008981 | -0.15478207 | 0.11578161 | 0.15854265 | 0.34569581 | RAB8A     |
| 2879      | ENSG00000167468 | 1624.7812  | -0.61673391 | 0.08288375 | 2.87E-14   | 7.41E-13   | GPX4      |
| 90007     | ENSG00000167470 | 2506.14231 | 0.14628665  | 0.06337513 | 0.01921158 | 0.07049338 | MIDN      |
| 126306    | ENSG00000167476 | 363.422359 | 2.42566377  | 0.15673696 | 3.43E-55   | 4.01E-53   | JSRP1     |
| 105372240 | ENSG00000167476 | 363.422359 | 2.42566377  | 0.15673696 | 3.43E-55   | 4.01E-53   | JSRP1     |
| 199786    | ENSG00000167483 | 3.27433269 | -0.03245497 | 0.37055502 | 0.75770342 | 0.88730562 | NIBAN3    |
| 55295     | ENSG00000167487 | 302.750423 | -0.12860951 | 0.15563572 | 0.365395   | 0.5947154  | KLHL26    |
| 54815     | ENSG00000167491 | 2235.81339 | -0.22776236 | 0.07910279 | 0.00317943 | 0.01589315 | GATAD2A   |
| NA        | ENSG00000167494 | 0          | NA          | NA         | NA         | NA         | NOS2P2    |
| 4597      | ENSG00000167508 | 996.075114 | -0.3132242  | 0.12336887 | 0.00713283 | 0.03141992 | MVD       |
| 81620     | ENSG00000167513 | 1026.22229 | -0.32491004 | 0.09938259 | 0.00068523 | 0.00424446 | CDT1      |
| 51693     | ENSG00000167515 | 487.204639 | -0.37949679 | 0.16273106 | 0.01003    | 0.04156122 | TRAPPC2L  |
| 29123     | ENSG00000167522 | 5748.11431 | 0.26687301  | 0.07373697 | 0.00022271 | 0.00156412 | ANKRD11   |
| 124045    | ENSG00000167523 | 148.118163 | 0.14338736  | 0.18397867 | 0.37535631 | 0.60449338 | SPATA33   |
| 124923    | ENSG00000167524 | 297.161692 | -0.03845163 | 0.13871388 | 0.76496796 | 0.89181833 | RSKR      |
| 147011    | ENSG00000167525 | 132.940662 | 0.8065229   | 0.27718492 | 0.00054807 | 0.0034928  | PROCA1    |
| 6137      | ENSG00000167526 | 31376.2646 | 0.06951121  | 0.05197643 | 0.16368042 | 0.35275692 | RPL13     |

|        |                 |            |             |            |            |            |          |
|--------|-----------------|------------|-------------|------------|------------|------------|----------|
| 121274 | ENSG00000167528 | 320.421626 | 0.41554607  | 0.16052659 | 0.00446965 | 0.02118943 | ZNF641   |
| 3906   | ENSG00000167531 | 0          | NA          | NA         | NA         | NA         | LALBA    |
| 784    | ENSG00000167535 | 1130.26827 | 0.3258852   | 0.08260553 | 5.18E-05   | 0.00042165 | CACNB3   |
| 147015 | ENSG00000167536 | 534.973497 | -0.50960469 | 0.10616177 | 6.05E-07   | 7.13E-06   | DHRS13   |
| 90313  | ENSG00000167543 | 626.832644 | 0.83597991  | 0.13807321 | 2.41E-10   | 4.44E-09   | TP53I13  |
| 8085   | ENSG00000167548 | 5312.12187 | 0.14910945  | 0.05163508 | 0.00355856 | 0.01752774 | KMT2D    |
| 84940  | ENSG00000167549 | 2016.89125 | 1.32013348  | 0.07999081 | 3.33E-62   | 4.55E-60   | CORO6    |
| 121268 | ENSG00000167550 | 72.4263769 | -0.06056058 | 0.2282001  | 0.74167471 | 0.87812748 | RHEBL1   |
| 7846   | ENSG00000167552 | 26365.6829 | -0.1795062  | 0.06237414 | 0.00350469 | 0.01729247 | TUBA1A   |
| 84790  | ENSG00000167553 | 78.6283242 | 0.37435382  | 0.24823575 | 0.06044461 | 0.17230188 | TUBA1C   |
| 162963 | ENSG00000167554 | 102.939818 | 0.36929927  | 0.25018307 | 0.06421776 | 0.18026038 | ZNF610   |
| 84436  | ENSG00000167555 | 675.513611 | -0.08614158 | 0.11425502 | 0.42856824 | 0.65447566 | ZNF528   |
| 55762  | ENSG00000167562 | 171.564197 | -0.25901632 | 0.18343334 | 0.10795085 | 0.26343905 | ZNF701   |
| 29946  | ENSG00000167565 | 135.099302 | 0.49515859  | 0.20755475 | 0.005957   | 0.02700795 | SERTAD3  |
| 57701  | ENSG00000167566 | 1602.26676 | -0.05668625 | 0.07236814 | 0.42474736 | 0.65048148 | NCKAP5L  |
| 53916  | ENSG00000167578 | 178.682582 | 0.17353484  | 0.17035331 | 0.2557736  | 0.47684158 | RAB4B    |
| 359    | ENSG00000167580 | 1.90249889 | 0.13691703  | 0.41831211 | 0.02867139 | NA         | AQP2     |
| 2819   | ENSG00000167588 | 5.92426203 | 0.04972271  | 0.3677097  | 0.67514686 | 0.84091366 | GPD1     |
| 148137 | ENSG00000167595 | 465.530214 | 0.24014714  | 0.12303547 | 0.03864141 | 0.12228832 | PROSER3  |
| 29785  | ENSG00000167600 | 0          | NA          | NA         | NA         | NA         | CYP2S1   |
| 558    | ENSG00000167601 | 0.94162468 | -0.03816095 | 0.38462091 | 0.45455056 | NA         | AXL      |
| 84807  | ENSG00000167604 | 63.8531182 | 0.05145438  | 0.25496744 | 0.78936639 | 0.90431711 | NFKBID   |
| 147798 | ENSG00000167608 | 3.50212295 | -0.04815289 | 0.37681384 | 0.59057269 | 0.78531918 | TMC4     |
| 341405 | ENSG00000167612 | 10.8405603 | 1.9106033   | 0.93423556 | 0.00157444 | 0.00874246 | ANKRD33  |
| 3903   | ENSG00000167613 | 0          | NA          | NA         | NA         | NA         | LAIR1    |
| 57348  | ENSG00000167614 | 7.10007211 | -0.15939202 | 0.39122303 | 0.28975255 | 0.51571638 | TTYH1    |
| 114823 | ENSG00000167615 | 5170.77604 | 0.32359052  | 0.05474353 | 2.38E-09   | 3.89E-08   | LENG8    |
| 148170 | ENSG00000167617 | 0.89228056 | 0.03000497  | 0.3843321  | 0.48640127 | NA         | CDC42EP5 |
| 3904   | ENSG00000167618 | 0          | NA          | NA         | NA         | NA         | LAIR2    |
| 284339 | ENSG00000167619 | 540.097735 | -1.26198504 | 0.1991413  | 2.05E-11   | 4.21E-10   | TMEM145  |
| 116115 | ENSG00000167625 | 310.673747 | -0.02394496 | 0.13008773 | 0.84408579 | 0.92948958 | ZNF526   |
| 83696  | ENSG00000167632 | 642.874246 | 0.29245042  | 0.10103709 | 0.0026265  | 0.01353851 | TRAPPC9  |
| 3811   | ENSG00000167633 | 0          | NA          | NA         | NA         | NA         | KIR3DL1  |
| 199713 | ENSG00000167634 | 0          | NA          | NA         | NA         | NA         | NLRP7    |
| 7705   | ENSG00000167635 | 2538.01683 | -0.18957776 | 0.07716637 | 0.01198064 | 0.04817509 | ZNF146   |
| 284349 | ENSG00000167637 | 267.139934 | -0.11528557 | 0.14529248 | 0.39001364 | 0.61927737 | ZNF283   |
| 94274  | ENSG00000167641 | 145.134601 | 0.99689649  | 0.22091755 | 7.90E-07   | 9.11E-06   | PPP1R14A |
| 10653  | ENSG00000167642 | 28.931429  | -0.07593251 | 0.34184504 | 0.64281684 | 0.82148002 | SPINT2   |

|        |                 |            |             |            |            |            |          |
|--------|-----------------|------------|-------------|------------|------------|------------|----------|
| 64073  | ENSG00000167644 | 0          | NA          | NA         | NA         | NA         | C19orf33 |
| 90522  | ENSG00000167645 | 762.989422 | 0.03132204  | 0.09162396 | 0.72726728 | 0.86953012 | YIF1B    |
| 352909 | ENSG00000167646 | 32.3937833 | -0.18893911 | 0.31507666 | 0.35094222 | 0.5811749  | DNAAF3   |
| 8000   | ENSG00000167653 | 1.95089704 | -0.03571095 | 0.37771029 | 0.6695401  | NA         | PSCA     |
| 85300  | ENSG00000167654 | 1348.51056 | -1.44971169 | 0.10641128 | 2.42E-43   | 2.03E-41   | ATCAY    |
| 8581   | ENSG00000167656 | 0          | NA          | NA         | NA         | NA         | LY6D     |
| 1613   | ENSG00000167657 | 819.611089 | -0.09879065 | 0.1018681  | 0.31341156 | 0.54126787 | DAPK3    |
| 1938   | ENSG00000167658 | 65029.2794 | -0.31002491 | 0.05652678 | 2.71E-08   | 3.86E-07   | EEF2     |
| 126259 | ENSG00000167664 | 266.777837 | 0.41150978  | 0.15013337 | 0.0029702  | 0.01500987 | TMIGD2   |
| 10036  | ENSG00000167670 | 1598.97874 | -0.05724975 | 0.08551918 | 0.49157502 | 0.71084901 | CHAF1A   |
| 80700  | ENSG00000167671 | 1640.39118 | -0.18574527 | 0.09820737 | 0.04971273 | 0.14834779 | UBXN6    |
| 84717  | ENSG00000167674 | 2114.21011 | -0.12528434 | 0.06860627 | 0.06314522 | 0.17813182 | HDGFL2   |
| 729359 | ENSG00000167676 | 142.438698 | 0.85214846  | 0.21081012 | 8.35E-06   | 8.06E-05   | PLIN4    |
| 10501  | ENSG00000167680 | 80.6769494 | -0.19663526 | 0.23383364 | 0.29527412 | 0.52190021 | SEMA6B   |
| 55311  | ENSG00000167685 | 931.207021 | 0.03889929  | 0.09649323 | 0.67777114 | 0.84270098 | ZNF444   |
| 64359  | ENSG00000167693 | 633.121151 | -0.14716166 | 0.11246777 | 0.16901822 | 0.36039348 | NXN      |
| 79850  | ENSG00000167695 | 526.437897 | -0.04716173 | 0.14902969 | 0.72661421 | 0.86948287 | TLCD3A   |
| 51031  | ENSG00000167699 | 996.527194 | -0.08205989 | 0.09243604 | 0.35960979 | 0.58949503 | GLOD4    |
| 113655 | ENSG00000167700 | 601.458066 | 0.23106163  | 0.10865211 | 0.02628082 | 0.09050816 | MFSD3    |
| 2875   | ENSG00000167701 | 44.9316678 | 0.36541533  | 0.33374279 | 0.10665995 | 0.26134783 | GPT      |
| 90990  | ENSG00000167702 | 845.065838 | 0.30344852  | 0.09056458 | 0.00055021 | 0.00350326 | KIFC2    |
| 124935 | ENSG00000167703 | 249.331362 | -0.56418242 | 0.16258387 | 0.0001601  | 0.00116264 | SLC43A2  |
| 83547  | ENSG00000167705 | 9.57264379 | 0.13052781  | 0.37824722 | 0.37620145 | 0.60519502 | RILP     |
| 5345   | ENSG00000167711 | 4.84422154 | 0.03304591  | 0.36448237 | 0.78963702 | 0.9043268  | SERPINF2 |
| 124997 | ENSG00000167716 | 672.24794  | 0.08730795  | 0.12103988 | 0.44667512 | 0.67085802 | WDR81    |
| 63826  | ENSG00000167720 | 296.951801 | 0.36751844  | 0.1447681  | 0.00605077 | 0.02733735 | SRR      |
| 55720  | ENSG00000167721 | 2529.92366 | -0.07556233 | 0.06855118 | 0.26259039 | 0.48463194 | TSR1     |
| 162514 | ENSG00000167723 | 1.81407516 | -0.11258364 | 0.40381775 | 0.10889324 | NA         | TRPV3    |
| 374875 | ENSG00000167733 | 352.688697 | 0.44256961  | 0.13647332 | 0.00053228 | 0.00340548 | HSD11B1L |
| 124936 | ENSG00000167740 | 258.042276 | -0.24106519 | 0.16181883 | 0.09904472 | 0.24754941 | CYB5D2   |
| 124975 | ENSG00000167741 | 0          | NA          | NA         | NA         | NA         | GGT6     |
| 84798  | ENSG00000167747 | 1506.92765 | -0.45869085 | 0.08046447 | 5.38E-09   | 8.40E-08   | C19orf48 |
| 3816   | ENSG00000167748 | 0.15069912 | -0.01848503 | 0.38480575 | 0.84537521 | NA         | KLK1     |
| 9622   | ENSG00000167749 | 0          | NA          | NA         | NA         | NA         | KLK4     |
| 3817   | ENSG00000167751 | 0.76318994 | -0.02061218 | 0.38210442 | 0.69450557 | NA         | KLK2     |
| 25818  | ENSG00000167754 | 0          | NA          | NA         | NA         | NA         | KLK5     |
| 5653   | ENSG00000167755 | 0          | NA          | NA         | NA         | NA         | KLK6     |
| 11012  | ENSG00000167757 | 0          | NA          | NA         | NA         | NA         | KLK11    |



|        |                 |            |             |            |            |            |         |
|--------|-----------------|------------|-------------|------------|------------|------------|---------|
| 26085  | ENSG00000167759 | 0          | NA          | NA         | NA         | NA         | KLK13   |
| 55769  | ENSG00000167766 | 652.408786 | 0.2105951   | 0.10228376 | 0.03232194 | 0.10643442 | ZNF83   |
| 144501 | ENSG00000167767 | 32.4318195 | 0.1632381   | 0.30258851 | 0.41724247 | 0.64356838 | KRT80   |
| 3848   | ENSG00000167768 | 0          | NA          | NA         | NA         | NA         | KRT1    |
| 125981 | ENSG00000167769 | 0          | NA          | NA         | NA         | NA         | ACER1   |
| 55611  | ENSG00000167770 | 2258.37506 | 0.16975439  | 0.06563733 | 0.00863976 | 0.0367681  | OTUB1   |
| 283248 | ENSG00000167771 | 1750.682   | 0.30956027  | 0.07257472 | 1.36E-05   | 0.00012602 | RCOR2   |
| 51129  | ENSG00000167772 | 7.27007445 | 0.13632395  | 0.38000199 | 0.36545862 | 0.59471759 | ANGPTL4 |
| NA     | ENSG00000167774 | 199.858191 | 0.07546615  | 0.23554428 | 0.68707265 | 0.84783688 |         |
| 51293  | ENSG00000167775 | 915.937564 | 0.0718527   | 0.09156474 | 0.41956435 | 0.64543356 | CD320   |
| 84926  | ENSG00000167778 | 240.333236 | 0.02171075  | 0.15823285 | 0.8816733  | 0.94773789 | SPRYD3  |
| 3489   | ENSG00000167779 | 36.7632594 | 0.05465994  | 0.27847903 | 0.77763621 | 0.89809083 | IGFBP6  |
| 8435   | ENSG00000167780 | 0.35668925 | 0.02381712  | 0.38538107 | 0.61401291 | NA         | SOAT2   |
| 148156 | ENSG00000167785 | 678.220227 | 0.1507569   | 0.11714829 | 0.17586823 | 0.37013108 | ZNF558  |
| 51475  | ENSG00000167791 | 0          | NA          | NA         | NA         | NA         | CABP2   |
| 4723   | ENSG00000167792 | 2069.01931 | 0.21234043  | 0.06943935 | 0.00185933 | 0.010057   | NDUFV1  |
| 10263  | ENSG00000167797 | 627.007661 | 0.46166339  | 0.1050812  | 4.92E-06   | 4.96E-05   | CDK2AP2 |
| 388503 | ENSG00000167798 | 0          | NA          | NA         | NA         | NA         | C3P1    |
| 254552 | ENSG00000167799 | 57.5468415 | 0.95812927  | 0.3220253  | 0.00033739 | 0.00227446 | NUDT8   |
| 347853 | ENSG00000167800 | 0.18922458 | 0.01954053  | 0.38488496 | 0.78225479 | NA         | TBX10   |
| NA     | ENSG00000167807 | 19.145921  | 0.06042791  | 0.32184232 | 0.74304433 | 0.87880772 |         |
| 7001   | ENSG00000167815 | 4608.57407 | -0.09609985 | 0.05982456 | 0.10183066 | 0.25266637 | PRDX2   |
| 81168  | ENSG00000167822 | 0          | NA          | NA         | NA         | NA         | OR8J3   |
| 10798  | ENSG00000167825 | 0          | NA          | NA         | NA         | NA         | OR5I1   |
| 7775   | ENSG00000167840 | 303.076675 | -0.06088712 | 0.1439977  | 0.6470744  | 0.82430661 | ZNF232  |
| 79003  | ENSG00000167842 | 660.994742 | -0.04021833 | 0.10090011 | 0.67832122 | 0.84291038 | MIS12   |
| 10871  | ENSG00000167850 | 0          | NA          | NA         | NA         | NA         | CD300C  |
| 11314  | ENSG00000167851 | 0.37844916 | 0.02407552  | 0.3854191  | 0.60038877 | NA         | CD300A  |
| 83659  | ENSG00000167858 | 0          | NA          | NA         | NA         | NA         | TEKT1   |
| 283987 | ENSG00000167861 | 1764.95477 | -0.23258264 | 0.11353716 | 0.03111488 | 0.10319613 | HID1    |
| 3396   | ENSG00000167862 | 429.499747 | -0.12157483 | 0.11710893 | 0.27466945 | 0.49848536 | MRPL58  |
| 10476  | ENSG00000167863 | 1511.89699 | -0.12190973 | 0.07359867 | 0.09177746 | 0.23401187 | ATP5PD  |
| 92162  | ENSG00000167874 | 21.2401478 | 0.07472903  | 0.31740247 | 0.68814241 | 0.84857639 | TMEM88  |
| 2125   | ENSG00000167880 | 5.4003877  | 0.17229613  | 0.42265891 | 0.13729951 | 0.31285428 | EVPL    |
| 6730   | ENSG00000167881 | 1981.88493 | 0.03364264  | 0.06679409 | 0.60959597 | 0.79803651 | SRP68   |
| 146664 | ENSG00000167889 | 595.694659 | -1.09465958 | 0.11212485 | 1.89E-23   | 8.50E-22   | MGAT5B  |
| 147138 | ENSG00000167895 | 5.05574237 | -0.00319067 | 0.37170622 | 0.96929331 | 0.98853525 | TMC8    |
| 7083   | ENSG00000167900 | 1144.94678 | -0.32614046 | 0.08421051 | 6.90E-05   | 0.00054874 | TK1     |

|           |                 |            |             |            |            |            |          |
|-----------|-----------------|------------|-------------|------------|------------|------------|----------|
| 137695    | ENSG00000167904 | 301.412379 | 0.05448014  | 0.14705372 | 0.68910566 | 0.8490152  | TMEM68   |
| 1581      | ENSG00000167910 | 0          | NA          | NA         | NA         | NA         | CYP7A1   |
| 100505501 | ENSG00000167912 | 108.856334 | -0.00182592 | 0.19545674 | 0.98814502 | 0.99592568 |          |
| 284110    | ENSG00000167914 | 0.16735865 | 0.01897177  | 0.38482933 | 0.78225479 | NA         | GSDMA    |
| 192666    | ENSG00000167916 | 0          | NA          | NA         | NA         | NA         | KRT24    |
| 147184    | ENSG00000167920 | 24.571699  | -1.45294383 | 0.63683393 | 0.00108883 | 0.00634992 | TMEM99   |
| 84514     | ENSG00000167925 | 355.95757  | 0.12402765  | 0.12815029 | 0.30460835 | 0.53198909 | GHDC     |
| 83986     | ENSG00000167930 | 2051.25733 | 0.08031754  | 0.07559994 | 0.27889274 | 0.5033414  | FAM234A  |
| 50964     | ENSG00000167941 | 0          | NA          | NA         | NA         | NA         | SOST     |
| 90850     | ENSG00000167962 | 1945.49209 | -0.09642422 | 0.07067583 | 0.1645803  | 0.35422793 | ZNF598   |
| 25837     | ENSG00000167964 | 232.967325 | -0.11981691 | 0.15441537 | 0.39549572 | 0.62498088 | RAB26    |
| 64223     | ENSG00000167965 | 1030.37328 | -0.02490194 | 0.08359207 | 0.76117757 | 0.88962039 | MLST8    |
| 1877      | ENSG00000167967 | 714.543687 | 0.37706256  | 0.09694369 | 5.62E-05   | 0.00045276 | E4F1     |
| 1775      | ENSG00000167968 | 41.568589  | 0.17286895  | 0.29717462 | 0.39170523 | 0.62114503 | DNASE1L2 |
| 1632      | ENSG00000167969 | 696.695418 | 0.20156066  | 0.10737215 | 0.05012876 | 0.1492877  | ECI1     |
| 57524     | ENSG00000167971 | 471.760722 | 0.25731141  | 0.17691367 | 0.10114543 | 0.25140633 | CASKIN1  |
| 21        | ENSG00000167972 | 3501.8039  | -0.31146802 | 0.06127306 | 2.50E-07   | 3.13E-06   | ABCA3    |
| 54442     | ENSG00000167977 | 858.674748 | -0.11622921 | 0.12029217 | 0.30776571 | 0.53524471 | KCTD5    |
| 23524     | ENSG00000167978 | 18705.3409 | -0.06964811 | 0.06293827 | 0.26130885 | 0.4833008  | SRRM2    |
| 146434    | ENSG00000167981 | 109.470787 | -0.06445372 | 0.20595573 | 0.7099076  | 0.860757   | ZNF597   |
| 197358    | ENSG00000167984 | 18.2360684 | -0.06564362 | 0.32248806 | 0.71535783 | 0.86274919 | NLRC3    |
| 54949     | ENSG00000167985 | 414.552187 | 0.08865648  | 0.13980186 | 0.49631435 | 0.714811   | SDHAF2   |
| 1642      | ENSG00000167986 | 7257.56575 | -0.0652346  | 0.05619283 | 0.24025506 | 0.45820056 | DDB1     |
| 55048     | ENSG00000167987 | 565.242059 | -0.04241798 | 0.1377451  | 0.74022986 | 0.87736188 | VPS37C   |
| 220001    | ENSG00000167992 | 242.093362 | -0.30927647 | 0.16520993 | 0.03792298 | 0.12066567 | VWCE     |
| 5866      | ENSG00000167994 | 106.304273 | 0.14956453  | 0.20161473 | 0.38542555 | 0.6145004  | RAB3IL1  |
| 7439      | ENSG00000167995 | 58.9809717 | 0.11028274  | 0.27317139 | 0.57467107 | 0.77361067 | BEST1    |
| 2495      | ENSG00000167996 | 13907.4443 | 0.24925901  | 0.05136304 | 9.16E-07   | 1.05E-05   | FTH1     |
| 26580     | ENSG00000168000 | 520.963674 | 0.13036895  | 0.12370324 | 0.2655273  | 0.48787384 | BSCL2    |
| 5436      | ENSG00000168002 | 1300.57709 | -0.08496583 | 0.08429639 | 0.30094859 | 0.52825091 | POLR2G   |
| 6520      | ENSG00000168003 | 1411.88939 | 0.52982876  | 0.09575658 | 1.16E-08   | 1.75E-07   | SLC3A2   |
| 117245    | ENSG00000168004 | 0          | NA          | NA         | NA         | NA         | PLAAT5   |
| 144097    | ENSG00000168005 | 1429.77029 | 0.17370687  | 0.08294155 | 0.0317941  | 0.10503632 | SPINDOC  |
| 89849     | ENSG00000168010 | 463.023312 | 0.37997254  | 0.1525012  | 0.00667815 | 0.02971397 | ATG16L2  |
| 26005     | ENSG00000168014 | 1200.64953 | -0.3907496  | 0.07800041 | 2.98E-07   | 3.69E-06   | C2CD3    |
| 9881      | ENSG00000168016 | 9.05639305 | 0.03300338  | 0.35579703 | 0.8103458  | 0.914052   | TRANK1   |
| 199223    | ENSG00000168026 | 89.3959611 | 0.27126341  | 0.24397821 | 0.16234701 | 0.35102057 | TTC21A   |
| 3921      | ENSG00000168028 | 21203.3365 | -0.20825645 | 0.04900469 | 1.78E-05   | 0.00016176 | RPSA     |

|        |                 |            |             |            |            |            |           |
|--------|-----------------|------------|-------------|------------|------------|------------|-----------|
| 956    | ENSG00000168032 | 1.37675766 | 0.02715541  | 0.38025224 | 0.68672835 | NA         | ENTPD3    |
| 1499   | ENSG00000168036 | 4585.42883 | 0.15816254  | 0.08814503 | 0.06514662 | 0.18206915 | CTNNB1    |
| 54986  | ENSG00000168038 | 94.8523529 | -0.09223038 | 0.21069711 | 0.59974969 | 0.79066681 | ULK4      |
| 8772   | ENSG00000168040 | 438.712329 | -0.18143869 | 0.11208417 | 0.08968926 | 0.23002002 | FADD      |
| 4054   | ENSG00000168056 | 2732.88401 | 0.30252273  | 0.0722916  | 1.98E-05   | 0.00017734 | LTBP3     |
| 10004  | ENSG00000168060 | 2.87521398 | 0.13072423  | 0.4036099  | 0.19165273 | 0.39354068 | NAALADL1  |
| 29901  | ENSG00000168061 | 354.673278 | -0.19523232 | 0.13626406 | 0.12393817 | 0.29179226 | SAC3D1    |
| 116071 | ENSG00000168062 | 1.60253421 | 0.08104892  | 0.39121639 | 0.26020817 | NA         | BATF2     |
| 55867  | ENSG00000168065 | 0.16735865 | 0.01897177  | 0.38482933 | 0.78225479 | NA         | SLC22A11  |
| 7536   | ENSG00000168066 | 5487.78247 | 0.00054879  | 0.05698849 | 0.99316563 | 0.99778445 | SF1       |
| 5871   | ENSG00000168067 | 438.95639  | 0.08971855  | 0.15508104 | 0.52777993 | 0.73958565 | MAP4K2    |
| 283129 | ENSG00000168070 | 0          | NA          | NA         | NA         | NA         | MAJIN     |
| 283234 | ENSG00000168071 | 10.4222872 | 0.1892069   | 0.40521703 | 0.2261415  | 0.44042873 | CCDC88B   |
| 51435  | ENSG00000168077 | 160.928758 | 0.73812856  | 0.19970195 | 4.27E-05   | 0.0003563  | SCARA3    |
| 55872  | ENSG00000168078 | 719.438265 | 0.00875535  | 0.09416437 | 0.92153181 | 0.9670192  | PBK       |
| 286133 | ENSG00000168079 | 0.50832795 | 0.03077797  | 0.38601977 | 0.48294583 | NA         | SCARA5    |
| 5368   | ENSG00000168081 | 0          | NA          | NA         | NA         | NA         | PNOC      |
| 10980  | ENSG00000168090 | 2326.22901 | 0.06728712  | 0.08822745 | 0.43379521 | 0.65909763 | COPS6     |
| 5049   | ENSG00000168092 | 2361.9719  | -0.15580848 | 0.07448316 | 0.0326403  | 0.10723051 | PAFAH1B2  |
| 124401 | ENSG00000168096 | 772.69248  | 0.27711825  | 0.0960038  | 0.00280508 | 0.01431399 | ANKS3     |
| 84309  | ENSG00000168101 | 511.935171 | -0.21185537 | 0.10847434 | 0.04105559 | 0.12797767 | NUDT16L1  |
| 57691  | ENSG00000168116 | 473.678974 | -0.41180357 | 0.11896166 | 0.00026555 | 0.00183572 | KIAA1586  |
| 5867   | ENSG00000168118 | 987.773681 | -0.13425213 | 0.08242193 | 0.09613011 | 0.24209462 | RAB4A     |
| NA     | ENSG00000168122 | 0          | NA          | NA         | NA         | NA         | ZNF355P   |
| 4992   | ENSG00000168124 | 4.64970397 | 0.02716374  | 0.36502312 | 0.82125186 | 0.91847813 | OR1F1     |
| NA     | ENSG00000168126 | 0.45209736 | -0.02505403 | 0.38558831 | 0.57865948 | NA         | OR2W6P    |
| NA     | ENSG00000168129 | 0          | NA          | NA         | NA         | NA         | DHFRP3    |
| 81697  | ENSG00000168131 | 0          | NA          | NA         | NA         | NA         | OR2B2     |
| 3761   | ENSG00000168135 | 11.5876665 | 0.04703806  | 0.3366934  | 0.7801464  | 0.89936692 | KCNJ4     |
| 55209  | ENSG00000168137 | 4318.22695 | 0.13828063  | 0.06327361 | 0.02667956 | 0.09159412 | SETD5     |
| 114990 | ENSG00000168140 | 332.318708 | -0.91438615 | 0.14160092 | 1.59E-11   | 3.32E-10   | VASN      |
| 222584 | ENSG00000168143 | 0          | NA          | NA         | NA         | NA         | FAM83B    |
| 8290   | ENSG00000168148 | 0.4877242  | -0.00640555 | 0.38314294 | 0.86753788 | NA         | H3-4      |
| 79725  | ENSG00000168152 | 116.863432 | -0.14791101 | 0.22064054 | 0.4141001  | 0.64130672 | THAP9     |
| 4993   | ENSG00000168158 | 0.15069912 | -0.01848503 | 0.38480575 | 0.84537521 | NA         | OR2C1     |
| 149603 | ENSG00000168159 | 2380.45996 | 0.23496701  | 0.06866511 | 0.00049694 | 0.00320628 | RNF187    |
| 84376  | ENSG00000168172 | 1555.96272 | -0.52747512 | 0.11437698 | 1.43E-06   | 1.58E-05   | HOOK3     |
| 93487  | ENSG00000168175 | 1952.43058 | 0.03346414  | 0.07468077 | 0.64838642 | 0.82455589 | MAPK1IP1L |

|        |                 |            |             |            |            |            |         |
|--------|-----------------|------------|-------------|------------|------------|------------|---------|
| 54541  | ENSG00000168209 | 1721.18331 | 0.56686452  | 0.11940438 | 6.73E-07   | 7.85E-06   | DDIT4   |
| 3516   | ENSG00000168214 | 1696.45818 | -0.06996872 | 0.07769013 | 0.35709755 | 0.58712453 | RBPJ    |
| 55788  | ENSG00000168216 | 303.37     | 0.12155652  | 0.13464091 | 0.3350785  | 0.56494141 | LMBRD1  |
| 29063  | ENSG00000168228 | 189.232077 | 0.21364396  | 0.17420631 | 0.16891308 | 0.36034672 | ZCCHC4  |
| 5729   | ENSG00000168229 | 0.75689831 | 0.03380966  | 0.38651369 | 0.3822658  | NA         | PTGDR   |
| 125488 | ENSG00000168234 | 349.473378 | -0.17605988 | 0.13080161 | 0.15092755 | 0.33460752 | TTC39C  |
| 132158 | ENSG00000168237 | 235.663699 | -0.31807194 | 0.18485633 | 0.0503207  | 0.14970202 | GLYCTK  |
| 2786   | ENSG00000168243 | 6390.49018 | -0.58690074 | 0.0646741  | 3.60E-20   | 1.36E-18   | GNG4    |
| 92181  | ENSG00000168246 | 1377.79274 | 0.0941733   | 0.08732106 | 0.26834662 | 0.49109833 | UBTD2   |
| NA     | ENSG00000168255 | 504.45199  | 0.02755089  | 0.14018026 | 0.83404801 | 0.92432089 | POLR2J3 |
| 28511  | ENSG00000168256 | 2221.25752 | 0.07437291  | 0.06917603 | 0.2752744  | 0.49935486 | NKIRAS2 |
| 7266   | ENSG00000168259 | 1700.13719 | -0.1145359  | 0.08182724 | 0.15145009 | 0.33539121 | DNAJC7  |
| 169522 | ENSG00000168263 | 4.51682814 | 0.08037776  | 0.37232638 | 0.52558506 | 0.73806584 | KCNV2   |
| 359948 | ENSG00000168264 | 2601.19714 | -0.28338528 | 0.07038801 | 4.06E-05   | 0.00034085 | IRF2BP2 |
| 256297 | ENSG00000168267 | 0.14931947 | -0.01844332 | 0.38480212 | 0.84537521 | NA         | PTF1A   |
| 64943  | ENSG00000168268 | 7860.09182 | 0.20278676  | 0.06095362 | 0.00074629 | 0.0045798  | NT5DC2  |
| 2299   | ENSG00000168269 | 0          | NA          | NA         | NA         | NA         | FOXI1   |
| 440957 | ENSG00000168273 | 112.691352 | 0.07126118  | 0.22171465 | 0.69583514 | 0.8531799  | SMIM4   |
| 388753 | ENSG00000168275 | 315.341695 | -0.18750038 | 0.13424755 | 0.13495586 | 0.30945965 | COA6    |
| 3800   | ENSG00000168280 | 4571.81814 | -0.92596227 | 0.07285794 | 8.09E-38   | 5.86E-36   | KIF5C   |
| 4247   | ENSG00000168282 | 553.307654 | -0.37105883 | 0.10608823 | 0.00026365 | 0.00182576 | MGAT2   |
| 648    | ENSG00000168283 | 1507.40692 | 0.04044091  | 0.08812494 | 0.63766756 | 0.81742743 | BMI1    |
| 57215  | ENSG00000168286 | 1206.67452 | -0.04143148 | 0.08027676 | 0.59706843 | 0.78909124 | THAP11  |
| 27249  | ENSG00000168288 | 1053.16591 | -0.27514389 | 0.09572059 | 0.00290108 | 0.01469803 | MMADHC  |
| 5162   | ENSG00000168291 | 896.908116 | -0.30445972 | 0.08590277 | 0.00026778 | 0.00184791 | PDHB    |
| 54899  | ENSG00000168297 | 228.558545 | -0.26864252 | 0.15375877 | 0.05584861 | 0.16214719 | PXK     |
| 3008   | ENSG00000168298 | 2.01685815 | 0.06174029  | 0.381431   | 0.48420728 | NA         | H1-4    |
| 115294 | ENSG00000168300 | 630.687425 | 0.24934448  | 0.10979777 | 0.01748489 | 0.06535558 | PCMTD1  |
| 200845 | ENSG00000168301 | 179.228609 | -0.25167413 | 0.17878117 | 0.11137225 | 0.26959803 | KCTD6   |
| 136647 | ENSG00000168303 | 642.67488  | 0.05727071  | 0.11234269 | 0.59442107 | 0.7877158  | MPLKIP  |
| 8309   | ENSG00000168306 | 0.15069912 | -0.01848503 | 0.38480575 | 0.84537521 | NA         | ACOX2   |
| 11170  | ENSG00000168309 | 0.58687465 | -0.02575243 | 0.38410181 | 0.63655746 | NA         | FAM107A |
| 3660   | ENSG00000168310 | 257.913087 | 0.15309696  | 0.14522705 | 0.25460548 | 0.47519969 | IRF2    |
| 4336   | ENSG00000168314 | 1.56061342 | -0.02098207 | 0.3801929  | 0.73489371 | NA         | MOBP    |
| 1524   | ENSG00000168329 | 0          | NA          | NA         | NA         | NA         | CX3CR1  |
| 492307 | ENSG00000168333 | 0          | NA          | NA         | NA         | NA         | PPDPFL  |
| 165904 | ENSG00000168334 | 0.58994281 | 0.02421937  | 0.383846   | 0.64003656 | NA         | XIRP1   |
| 84684  | ENSG00000168348 | 4053.57029 | 1.71565295  | 0.07083693 | 1.04E-130  | 5.14E-128  | INSM2   |

|        |                 |            |             |            |            |            |           |
|--------|-----------------|------------|-------------|------------|------------|------------|-----------|
| 123099 | ENSG00000168350 | 16.2273942 | -0.27137929 | 0.41862935 | 0.17045761 | 0.36235712 | DEGS2     |
| 11280  | ENSG00000168356 | 14.7669358 | 0.6651124   | 0.73803656 | 0.02820633 | 0.09559509 | SCN11A    |
| 732275 | ENSG00000168367 | 0          | NA          | NA         | NA         | NA         | LINC00917 |
| 378    | ENSG00000168374 | 2571.60518 | 0.0290212   | 0.07209399 | 0.68238797 | 0.8449992  | ARF4      |
| 4735   | ENSG00000168385 | 6587.45554 | 0.00501827  | 0.06596397 | 0.93941283 | 0.97474024 | SEPTIN2   |
| 11259  | ENSG00000168386 | 37.9699368 | 2.10741559  | 0.42553064 | 4.56E-08   | 6.29E-07   | FILIP1L   |
| 84879  | ENSG00000168389 | 186.679011 | -0.18822887 | 0.20789251 | 0.28262886 | 0.50763685 | MFSD2A    |
| 1841   | ENSG00000168393 | 1013.98748 | -0.20174336 | 0.08133863 | 0.01095039 | 0.04467526 | DTYMK     |
| 6890   | ENSG00000168394 | 2.8433397  | 0.22865042  | 0.4871942  | 0.00480407 | 0.02245825 | TAP1      |
| 84289  | ENSG00000168395 | 1143.85059 | 0.03464131  | 0.10996087 | 0.74316751 | 0.87884863 | ING5      |
| 23192  | ENSG00000168397 | 1503.54024 | 0.24546391  | 0.07881959 | 0.00143576 | 0.0080718  | ATG4B     |
| 624    | ENSG00000168398 | 30.9903809 | -0.73454359 | 0.46314984 | 0.01379786 | 0.05390894 | BDKRB2    |
| 197259 | ENSG00000168404 | 38.358814  | 1.43018586  | 0.43180839 | 6.44E-05   | 0.00051436 | MLKL      |
| NA     | ENSG00000168405 | 27.2624534 | 1.18532167  | 0.54693572 | 0.00199495 | 0.01068279 | CMAHP     |
| 55159  | ENSG00000168411 | 1491.9132  | -0.24591604 | 0.09511687 | 0.00743428 | 0.03248276 | RFWD3     |
| 4543   | ENSG00000168412 | 6.84163408 | 1.94781098  | 1.35084729 | 0.00482492 | 0.02254772 | MTNR1A    |
| 93107  | ENSG00000168418 | 0.16735865 | 0.01897177  | 0.38482933 | 0.78225479 | NA         | KCNG4     |
| 399    | ENSG00000168421 | 0          | NA          | NA         | NA         | NA         | RHOH      |
| 377007 | ENSG00000168427 | 1.00931534 | 0.00167771  | 0.37995553 | 0.97801625 | NA         | KLHL30    |
| 91949  | ENSG00000168434 | 324.837546 | 0.26295323  | 0.13276549 | 0.03434434 | 0.11170355 | COG7      |
| 51362  | ENSG00000168438 | 607.509532 | -0.02490953 | 0.1018407  | 0.79899707 | 0.90801363 | CDC40     |
| 10963  | ENSG00000168439 | 4270.0072  | -0.06592353 | 0.08826193 | 0.44207267 | 0.66680698 | STIP1     |
| 6338   | ENSG00000168447 | 0          | NA          | NA         | NA         | NA         | SCNN1B    |
| 55806  | ENSG00000168453 | 160.323909 | -2.4637599  | 0.72909373 | 2.64E-05   | 0.00023038 | HR        |
| 84203  | ENSG00000168454 | 0.70013361 | 0.02121893  | 0.38367343 | 0.60571412 | NA         | TXNDC2    |
| 11031  | ENSG00000168461 | 229.458011 | -0.31559767 | 0.16939588 | 0.03788516 | 0.1205713  | RAB31     |
| 80346  | ENSG00000168476 | 704.943734 | -0.01480692 | 0.09690304 | 0.87356235 | 0.94441388 | REEP4     |
| 7148   | ENSG00000168477 | 11.515266  | -0.27036021 | 0.51643642 | 0.01543022 | 0.05895159 | TNXB      |
| 203190 | ENSG00000168481 | 26.8666841 | -1.66914712 | 0.5938506  | 0.00026709 | 0.00184444 | LGI3      |
| 6440   | ENSG00000168484 | 2.07205005 | -0.03838997 | 0.38020194 | 0.57449899 | NA         | SFTPC     |
| 649    | ENSG00000168487 | 711.615527 | 0.15162055  | 0.10989056 | 0.14907082 | 0.33163994 | BMP1      |
| 11273  | ENSG00000168488 | 4877.03235 | 0.43565072  | 0.06137274 | 6.23E-13   | 1.44E-11   | ATXN2L    |
| 9796   | ENSG00000168490 | 237.585901 | -0.89715932 | 0.18987135 | 3.32E-07   | 4.08E-06   | PHYHIP    |
| 256309 | ENSG00000168491 | 18.5089661 | 1.15201947  | 0.74263298 | 0.00567731 | 0.02589969 | CCDC110   |
| 661    | ENSG00000168495 | 2434.6086  | -0.27194088 | 0.07649719 | 0.00027743 | 0.0019046  | POLR3D    |
| 2237   | ENSG00000168496 | 2513.30313 | -0.41263456 | 0.06195529 | 1.42E-11   | 2.98E-10   | FEN1      |
| 8436   | ENSG00000168497 | 0.173733   | 0.01914545  | 0.38484597 | 0.78225479 | NA         | CAVIN2    |
| 23255  | ENSG00000168502 | 491.291707 | 0.06372829  | 0.13156737 | 0.60700068 | 0.79648767 | MTCL1     |

|        |                 |            |             |            |            |            |          |
|--------|-----------------|------------|-------------|------------|------------|------------|----------|
| 2637   | ENSG00000168505 | 0.48176888 | 0.00243862  | 0.38304173 | 0.89348694 | NA         | GBX2     |
| 148738 | ENSG00000168509 | 0.173733   | 0.01914545  | 0.38484597 | 0.78225479 | NA         | HJV      |
| 10648  | ENSG00000168515 | 0          | NA          | NA         | NA         | NA         | SCGB1D1  |
| 124790 | ENSG00000168517 | 76.1098792 | 0.03091586  | 0.24915578 | 0.87125525 | 0.94385192 | HEXIM2   |
| 2339   | ENSG00000168522 | 1176.35255 | -0.58829511 | 0.09171517 | 4.40E-11   | 8.78E-10   | FNTA     |
| 347735 | ENSG00000168528 | 933.847079 | 0.57759938  | 0.10267274 | 5.94E-09   | 9.21E-08   | SERINC2  |
| 4632   | ENSG00000168530 | 0          | NA          | NA         | NA         | NA         | MYL1     |
| 60684  | ENSG00000168538 | 1014.23232 | 0.09976308  | 0.13529046 | 0.43043867 | 0.65595693 | TRAPPC11 |
| 1128   | ENSG00000168539 | 2.79472673 | -0.0373209  | 0.37764807 | 0.6095755  | 0.79803651 | CHRM1    |
| 1281   | ENSG00000168542 | 463.992435 | 6.96888398  | 0.49083983 | 1.56E-46   | 1.42E-44   | COL3A1   |
| 2675   | ENSG00000168546 | 5.43274031 | -0.14723662 | 0.39949235 | 0.24229685 | 0.4605892  | GFRA2    |
| 3622   | ENSG00000168556 | 130.007809 | 0.40811946  | 0.20997197 | 0.02309034 | 0.08171822 | ING2     |
| 55602  | ENSG00000168564 | 548.537672 | -0.10618844 | 0.10412414 | 0.2873408  | 0.51306915 | CDKN2AIP |
| 154007 | ENSG00000168566 | 395.819998 | 0.24242246  | 0.12539908 | 0.04033973 | 0.1262121  | SNRNP48  |
| 79064  | ENSG00000168569 | 412.038843 | 0.12387864  | 0.13210722 | 0.31782819 | 0.54556488 | TMEM223  |
| 6575   | ENSG00000168575 | 731.896517 | -0.19875535 | 0.12046829 | 0.08138687 | 0.21415324 | SLC20A2  |
| 1418   | ENSG00000168582 | 0          | NA          | NA         | NA         | NA         | CRYGA    |
| 83657  | ENSG00000168589 | 0.34746601 | 0.02370763  | 0.3853651  | 0.61987128 | NA         | DYNLRB2  |
| 79089  | ENSG00000168591 | 586.078149 | 0.11815772  | 0.10804743 | 0.25428036 | 0.47479259 | TMUB2    |
| 11086  | ENSG00000168594 | 1.75978561 | -0.05439265 | 0.38342907 | 0.46148969 | NA         | ADAM29   |
| 6774   | ENSG00000168610 | 1235.07659 | 0.17206331  | 0.08733837 | 0.04283108 | 0.13230775 | STAT3    |
| 90204  | ENSG00000168612 | 194.440801 | -0.04218372 | 0.16208352 | 0.77306344 | 0.89561741 | ZSWIM1   |
| 8754   | ENSG00000168615 | 729.625608 | -0.13065833 | 0.09997483 | 0.17520158 | 0.36912205 | ADAM9    |
| 8749   | ENSG00000168619 | 0.173124   | -0.01911262 | 0.38486262 | 0.84537521 | NA         | ADAM18   |
| 2668   | ENSG00000168621 | 0          | NA          | NA         | NA         | NA         | GDNF     |
| NA     | ENSG00000168630 | 0          | NA          | NA         | NA         | NA         | SPINT5P  |
| 135656 | ENSG00000168631 | 0          | NA          | NA         | NA         | NA         | MUCL3    |
| 164237 | ENSG00000168634 | 0          | NA          | NA         | NA         | NA         | WFDC13   |
| 8313   | ENSG00000168646 | 282.793558 | -0.20377002 | 0.15618036 | 0.15162381 | 0.33558862 | AXIN2    |
| 4725   | ENSG00000168653 | 3156.24468 | 0.04501536  | 0.07462736 | 0.53941629 | 0.74850934 | NDUFS5   |
| 200403 | ENSG00000168658 | 0          | NA          | NA         | NA         | NA         | VWA3B    |
| 90075  | ENSG00000168661 | 190.233626 | -0.15601209 | 0.17798326 | 0.32091055 | 0.54869068 | ZNF30    |
| 167127 | ENSG00000168671 | 11.1924977 | -0.06723187 | 0.35483403 | 0.64532734 | 0.82320416 | UGT3A2   |
| 157638 | ENSG00000168672 | 0.86430786 | 0.03673462  | 0.38459125 | 0.45892896 | NA         | LRATD2   |
| 753    | ENSG00000168675 | 966.072292 | -0.5359648  | 0.09453336 | 5.12E-09   | 8.00E-08   | LDLRAD4  |
| 146212 | ENSG00000168676 | 109.225717 | 0.84834188  | 0.2424734  | 7.08E-05   | 0.00056222 | KCTD19   |
| 9122   | ENSG00000168679 | 17.5010063 | 0.10249244  | 0.32780223 | 0.57951036 | 0.77706744 | SLC16A4  |
| 3575   | ENSG00000168685 | 0          | NA          | NA         | NA         | NA         | IL7R     |

|           |                 |            |             |            |            |            |           |
|-----------|-----------------|------------|-------------|------------|------------|------------|-----------|
| 29100     | ENSG00000168701 | 439.303752 | 0.10283068  | 0.12220287 | 0.37489089 | 0.60411267 | TMEM208   |
| 53353     | ENSG00000168702 | 12.2180446 | 0.07608161  | 0.35466717 | 0.61697262 | 0.80383089 | LRP1B     |
| 128488    | ENSG00000168703 | 0          | NA          | NA         | NA         | NA         | WFDC12    |
| 10768     | ENSG00000168710 | 2074.9398  | 0.06799438  | 0.0760709  | 0.36226659 | 0.59197696 | AHCYL1    |
| 134218    | ENSG00000168724 | 634.456243 | 0.01605692  | 0.1070084  | 0.87677874 | 0.94566867 | DNAJC21   |
| 11142     | ENSG00000168734 | 596.277948 | 0.29549286  | 0.117047   | 0.00788458 | 0.03410292 | PKIG      |
| 255743    | ENSG00000168743 | 4.56993529 | 0.22345952  | 0.47244814 | 0.01432296 | 0.05554485 | NPNT      |
| 140834    | ENSG00000168746 | 0          | NA          | NA         | NA         | NA         | LINC01620 |
| 101927242 | ENSG00000168746 | 0          | NA          | NA         | NA         | NA         | LINC01620 |
| 766       | ENSG00000168748 | 1.15648962 | 0.03374533  | 0.38179791 | 0.59354971 | NA         | CA7       |
| 51252     | ENSG00000168754 | 0.173124   | -0.01911262 | 0.38486262 | 0.84537521 | NA         | FAM178B   |
| 64591     | ENSG00000168757 | 0          | NA          | NA         | NA         | NA         | TSPY2     |
| 54910     | ENSG00000168758 | 1807.57523 | 0.28118765  | 0.08067749 | 0.00035566 | 0.00238387 | SEMA4C    |
| 26505     | ENSG00000168763 | 989.81821  | 0.11230412  | 0.08379929 | 0.17026261 | 0.36213659 | CNNM3     |
| 2948      | ENSG00000168765 | 225.522134 | 0.87281666  | 0.16266393 | 1.26E-08   | 1.89E-07   | GSTM4     |
| 54790     | ENSG00000168769 | 933.20701  | -0.00829584 | 0.09267642 | 0.92600632 | 0.96919669 | TET2      |
| 80319     | ENSG00000168772 | 453.155237 | -0.11870682 | 0.11720194 | 0.28652009 | 0.51226085 | CXXC4     |
| 79867     | ENSG00000168778 | 165.470273 | 0.81638012  | 0.18914673 | 2.70E-06   | 2.84E-05   | TCTN2     |
| 6474      | ENSG00000168779 | 1301.94728 | 1.45487665  | 0.090245   | 1.57E-59   | 2.02E-57   | SHOX2     |
| 9677      | ENSG00000168781 | 719.961053 | -0.60732165 | 0.18337624 | 0.00024195 | 0.00168611 | PPIP5K1   |
| 10098     | ENSG00000168785 | 637.441137 | -0.37894968 | 0.10236931 | 0.0001177  | 0.00088019 | TSPAN5    |
| 116236    | ENSG00000168792 | 127.088314 | 0.85962215  | 0.2259631  | 2.14E-05   | 0.00019061 | ABHD15    |
| 9925      | ENSG00000168795 | 1086.04599 | -0.02241082 | 0.08516023 | 0.78706482 | 0.90324885 | ZBTB5     |
| 54921     | ENSG00000168802 | 1465.07403 | -0.18157599 | 0.10807577 | 0.0790833  | 0.20976104 | CHTF8     |
| 113455421 | ENSG00000168802 | 1465.07403 | -0.18157599 | 0.10807577 | 0.0790833  | 0.20976104 | CHTF8     |
| 161823    | ENSG00000168803 | 315.349077 | 0.06499523  | 0.14953466 | 0.6378976  | 0.81760985 | ADAL      |
| 9836      | ENSG00000168806 | 631.684819 | -0.54100044 | 0.10703654 | 1.49E-07   | 1.93E-06   | LCMT2     |
| 6645      | ENSG00000168807 | 636.4291   | 0.15619008  | 0.14767683 | 0.25147491 | 0.47149344 | SNTB2     |
| 3592      | ENSG00000168811 | 19.732868  | 0.32691188  | 0.42107015 | 0.13817725 | 0.31440929 | IL12A     |
| 22847     | ENSG00000168813 | 964.481305 | -0.11853337 | 0.09126066 | 0.18042932 | 0.37732873 | ZNF507    |
| 53407     | ENSG00000168818 | 454.344922 | -0.1771459  | 0.11702997 | 0.11100374 | 0.26893566 | STX18     |
| 27065     | ENSG00000168824 | 1462.23224 | -1.70543645 | 0.08656211 | 1.53E-87   | 3.62E-85   | NSG1      |
| 166793    | ENSG00000168826 | 185.378948 | 0.9746664   | 0.20614272 | 2.90E-07   | 3.60E-06   | ZBTB49    |
| 85476     | ENSG00000168827 | 1137.88323 | 0.21645071  | 0.09628961 | 0.02001907 | 0.07297048 | GFM1      |
| 392309    | ENSG00000168828 | 0          | NA          | NA         | NA         | NA         | OR13J1    |
| 3354      | ENSG00000168830 | 145.640777 | -1.39372384 | 0.2259268  | 5.86E-11   | 1.16E-09   | HTR1E     |
| 56884     | ENSG00000168843 | 404.952492 | -1.31037927 | 0.13546177 | 3.73E-23   | 1.63E-21   | FSTL5     |
| NA        | ENSG00000168852 | 14.4180301 | 0.1227247   | 0.34840429 | 0.48812449 | 0.70792323 | TPTE2P5   |

|        |                 |            |             |            |            |            |               |
|--------|-----------------|------------|-------------|------------|------------|------------|---------------|
| 55308  | ENSG00000168872 | 1417.58166 | 0.18905132  | 0.07841099 | 0.01367915 | 0.05357172 | DDX19A        |
| 84913  | ENSG00000168874 | 40.2975651 | 0.07081705  | 0.28782151 | 0.71460876 | 0.86245136 | ATOX8         |
| 8403   | ENSG00000168875 | 5.95559713 | -0.10000687 | 0.37345347 | 0.46227548 | 0.6851832  | SOX14         |
| 54851  | ENSG00000168876 | 182.79467  | 0.22729988  | 0.1709169  | 0.13674383 | 0.31191797 | ANKRD49       |
| 6439   | ENSG00000168878 | 0.64021618 | 0.02085573  | 0.38403002 | 0.77165456 | NA         | SFTP8         |
| 10713  | ENSG00000168883 | 1221.89476 | -0.05866875 | 0.07886152 | 0.44686194 | 0.67093544 | USP39         |
| 79155  | ENSG00000168884 | 506.05146  | 0.03095088  | 0.11173111 | 0.77286986 | 0.89561741 | TNIP2         |
| 388969 | ENSG00000168887 | 1137.5556  | 0.21835533  | 0.09414031 | 0.01658713 | 0.06264775 | C2orf68       |
| 129303 | ENSG00000168890 | 93.7211341 | 0.22510651  | 0.21762942 | 0.21455532 | 0.4249129  | TMEM150A      |
| 51255  | ENSG00000168894 | 348.074214 | 0.09273499  | 0.12925346 | 0.44649745 | 0.6707435  | RNF181        |
| 10791  | ENSG00000168899 | 44.9541133 | 0.75386981  | 0.40337543 | 0.00826281 | 0.03548357 | VAMP5         |
| 10917  | ENSG00000168903 | 0          | NA          | NA         | NA         | NA         | BTNL3         |
| 123355 | ENSG00000168904 | 259.509066 | -0.20786627 | 0.15646838 | 0.14428807 | 0.32427223 | LRRC28        |
| 4144   | ENSG00000168906 | 13070.0074 | -0.68242584 | 0.21303086 | 0.00028744 | 0.00196781 | MAT2A         |
| 255189 | ENSG00000168907 | 0.18922458 | 0.01954053  | 0.38488496 | 0.78225479 | NA         | PLA2G4F       |
| 375704 | ENSG00000168913 | 157.469023 | -0.77615262 | 0.20159658 | 2.13E-05   | 0.00019042 | ENHO          |
| 57507  | ENSG00000168916 | 1402.82247 | -0.03817342 | 0.08058982 | 0.6273754  | 0.81091192 | ZNF608        |
| 80723  | ENSG00000168917 | 283.434019 | -0.74191392 | 0.1463673  | 8.27E-08   | 1.10E-06   | SLC35G2       |
| 3635   | ENSG00000168918 | 12.3103653 | -0.00528734 | 0.34581047 | 0.96964626 | 0.98858077 | INPP5D        |
| 3954   | ENSG00000168924 | 1926.23154 | -0.05048989 | 0.07684831 | 0.50171899 | 0.71856283 | LETM1         |
| 1504   | ENSG00000168925 | 0.36166929 | 0.00714652  | 0.38353093 | 0.918697   | NA         | CTRB1         |
| 440387 | ENSG00000168928 | 0.173733   | 0.01914545  | 0.38484597 | 0.78225479 | NA         | CTRB2         |
| 57093  | ENSG00000168930 | 0          | NA          | NA         | NA         | NA         | TRIM49        |
| 92305  | ENSG00000168936 | 989.410119 | 0.48995431  | 0.11049468 | 3.75E-06   | 3.85E-05   | TMEM129       |
| 5480   | ENSG00000168938 | 236.75505  | 1.46543611  | 0.17255441 | 1.78E-18   | 6.19E-17   | PPIC          |
| 10251  | ENSG00000168939 | 50.3418084 | 0.22696637  | 0.28039276 | 0.26674841 | 0.48915731 | SPRY3         |
| 153241 | ENSG00000168944 | 654.954237 | -0.23860522 | 0.10024665 | 0.01340571 | 0.05277169 | CEP120        |
| 29091  | ENSG00000168952 | 0.15069912 | -0.01848503 | 0.38480575 | 0.84537521 | NA         | STXBP6        |
| 79853  | ENSG00000168955 | 0.99819238 | 0.00770367  | 0.37932145 | 0.90586153 | NA         | TM4SF20       |
| 56947  | ENSG00000168958 | 989.727447 | -0.02924539 | 0.08521253 | 0.72369913 | 0.86794586 | MFF           |
| 2915   | ENSG00000168959 | 1.39377048 | -0.01541691 | 0.38025183 | 0.79378053 | NA         | GRM5          |
| 3965   | ENSG00000168961 | 22.0788684 | 0.22977381  | 0.36791414 | 0.25498198 | 0.47574957 | LGALS9        |
| NA     | ENSG00000168967 | 0          | NA          | NA         | NA         | NA         | PMCHL1        |
| 8681   | ENSG00000168970 | 346.688251 | -0.02002576 | 0.14083189 | 0.87736248 | 0.94576863 | JMJD7-PLA2G4B |
| NA     | ENSG00000168992 | 0          | NA          | NA         | NA         | NA         | OR7E102P      |
| 10815  | ENSG00000168993 | 683.368527 | -2.15800703 | 0.16024678 | 1.32E-42   | 1.07E-40   | CPLX1         |
| 221749 | ENSG00000168994 | 11.5413155 | 0.27425041  | 0.45965975 | 0.12700945 | 0.2969598  | PXDC1         |
| 27036  | ENSG00000168995 | 0          | NA          | NA         | NA         | NA         | SIGLEC7       |



|        |                 |            |             |            |            |            |         |
|--------|-----------------|------------|-------------|------------|------------|------------|---------|
| 23620  | ENSG00000169006 | 0          | NA          | NA         | NA         | NA         | NTSR2   |
| 1876   | ENSG00000169016 | 1094.57103 | 0.12349952  | 0.09012904 | 0.15851058 | 0.34569581 | E2F6    |
| 10116  | ENSG00000169018 | 1620.97157 | -0.30539284 | 0.07581015 | 3.80E-05   | 0.00032056 | FEM1B   |
| 54951  | ENSG00000169019 | 112.915298 | 0.09483678  | 0.20333918 | 0.58353691 | 0.77994081 | COMMD8  |
| 521    | ENSG00000169020 | 752.03865  | -0.17376715 | 0.10414024 | 0.08209643 | 0.21544882 | ATP5ME  |
| 7386   | ENSG00000169021 | 954.178672 | -0.14059409 | 0.08209143 | 0.07911929 | 0.20982153 | UQCRFS1 |
| 84179  | ENSG00000169026 | 6.95593021 | 0.18387837  | 0.41091973 | 0.21315525 | 0.42306924 | SLC49A3 |
| 1285   | ENSG00000169031 | 0.88851901 | 0.02796225  | 0.38351453 | 0.64030088 | NA         | COL4A3  |
| 5604   | ENSG00000169032 | 535.382115 | -0.1239871  | 0.13960314 | 0.34478129 | 0.57516697 | MAP2K1  |
| 5650   | ENSG00000169035 | 0          | NA          | NA         | NA         | NA         | KLK7    |
| 5370   | ENSG00000169040 | 0          | NA          | NA         | NA         | NA         | PMCHL2  |
| 3187   | ENSG00000169045 | 14186.9775 | 0.01512785  | 0.05791833 | 0.65947864 | 0.8311559  | HNRNPH1 |
| 3667   | ENSG00000169047 | 292.647965 | -0.46416864 | 0.18943202 | 0.00551474 | 0.0252918  | IRS1    |
| 4204   | ENSG00000169057 | 1999.20199 | -0.04268438 | 0.09609619 | 0.64472649 | 0.82270219 | MECP2   |
| 51481  | ENSG00000169059 | 0          | NA          | NA         | NA         | NA         | VCX3A   |
| 65110  | ENSG00000169062 | 1384.0694  | -0.00569683 | 0.08750926 | 0.94581164 | 0.97800919 | UPF3A   |
| 79740  | ENSG00000169064 | 0.16735865 | 0.01897177  | 0.38482933 | 0.78225479 | NA         | ZBBX    |
| 345651 | ENSG00000169067 | 0          | NA          | NA         | NA         | NA         | ACTBL2  |
| 4920   | ENSG00000169071 | 611.31879  | -0.37406201 | 0.11461549 | 0.00060558 | 0.00381422 | ROR2    |
| NA     | ENSG00000169075 | 0.32361177 | 0.00180997  | 0.38337295 | 0.963754   | NA         | BRD7P3  |
| 367    | ENSG00000169083 | 0          | NA          | NA         | NA         | NA         | AR      |
| 207063 | ENSG00000169084 | 504.191765 | 0.25034313  | 0.11613945 | 0.02332998 | 0.08243399 | DHRX    |
| 254778 | ENSG00000169085 | 0.52119901 | 0.02576573  | 0.38568143 | 0.51723676 | NA         | VXN     |
| 79663  | ENSG00000169087 | 217.369908 | 0.17207612  | 0.15473616 | 0.22416679 | 0.43787232 | HSPBAP1 |
| 8623   | ENSG00000169093 | 291.816986 | 0.13703728  | 0.14574152 | 0.30954786 | 0.53735494 | ASMTL   |
| 293    | ENSG00000169100 | 21608.8393 | 0.10206171  | 0.05609298 | 0.06593809 | 0.1835829  | SLC25A6 |
| 113189 | ENSG00000169105 | 631.99791  | 0.32825158  | 0.10771422 | 0.00145699 | 0.00817263 | CHST14  |
| 25849  | ENSG00000169116 | 0          | NA          | NA         | NA         | NA         | PARM1   |
| 53944  | ENSG00000169118 | 996.424451 | -0.06644929 | 0.08781636 | 0.4363344  | 0.66138547 | CSNK1G1 |
| 90362  | ENSG00000169122 | 219.024376 | 0.01255774  | 0.1478742  | 0.92892781 | 0.97020045 | FAM110B |
| 55130  | ENSG00000169126 | 0.14931947 | -0.01844332 | 0.38480212 | 0.84537521 | NA         | ODAD2   |
| 84632  | ENSG00000169129 | 43.5474237 | 0.06565478  | 0.30920212 | 0.72775975 | 0.86981806 | AFAP1L2 |
| 6940   | ENSG00000169131 | 389.693301 | 0.05517539  | 0.13336699 | 0.65999773 | 0.83146071 | ZNF354A |
| 22809  | ENSG00000169136 | 254.543312 | -0.05883101 | 0.15448401 | 0.67648856 | 0.84184489 | ATF5    |
| 7336   | ENSG00000169139 | 1234.0358  | -0.24009718 | 0.11114825 | 0.02353147 | 0.08298336 | UBE2V2  |
| 137362 | ENSG00000169154 | 0          | NA          | NA         | NA         | NA         | GOT1L1  |
| 23099  | ENSG00000169155 | 500.986569 | 0.26621373  | 0.11613449 | 0.01588363 | 0.06038154 | ZBTB43  |
| NA     | ENSG00000169164 | 0          | NA          | NA         | NA         | NA         |         |

|        |                 |            |             |            |            |            |          |
|--------|-----------------|------------|-------------|------------|------------|------------|----------|
| 126129 | ENSG00000169169 | 2547.00349 | -0.10444712 | 0.06096636 | 0.08253899 | 0.21637154 | CPT1C    |
| 255738 | ENSG00000169174 | 6.59502432 | 2.58542503  | 1.2917935  | 0.00187386 | 0.0101161  | PCSK9    |
| 23214  | ENSG00000169180 | 2926.22964 | -0.32677245 | 0.08030741 | 2.99E-05   | 0.00025716 | XPO6     |
| 146395 | ENSG00000169181 | 3.257549   | -0.00834531 | 0.36931265 | 0.933761   | 0.97237716 | GSG1L    |
| 4330   | ENSG00000169184 | 112.575834 | 1.06395644  | 0.26587031 | 6.61E-06   | 6.48E-05   | MN1      |
| 27301  | ENSG00000169188 | 464.158335 | 0.06223659  | 0.13027681 | 0.61231508 | 0.80024215 | APEX2    |
| 197370 | ENSG00000169189 | 608.762765 | -0.0030437  | 0.09720622 | 0.97102842 | 0.98911805 | NSMCE1   |
| 90693  | ENSG00000169193 | 172.870319 | -0.11393195 | 0.17396594 | 0.46152602 | 0.68465911 | CCDC126  |
| 3596   | ENSG00000169194 | 1.87494329 | 0.1010284   | 0.40282411 | 0.05228604 | NA         | IL13     |
| 440353 | ENSG00000169203 | 774.752107 | 0.20615317  | 0.11209286 | 0.0538383  | 0.15749807 | NPIP12   |
| 26533  | ENSG00000169208 | 0.16735865 | 0.01897177  | 0.38482933 | 0.78225479 | NA         | OR10G3   |
| 5865   | ENSG00000169213 | 245.339412 | 0.06178728  | 0.14700645 | 0.65017843 | 0.82529572 | RAB3B    |
| 343169 | ENSG00000169214 | 0          | NA          | NA         | NA         | NA         | OR6F1    |
| 10421  | ENSG00000169217 | 2553.30466 | -0.13919654 | 0.07009656 | 0.04317363 | 0.1329863  | CD2BP2   |
| 284654 | ENSG00000169218 | 1.84967541 | -0.13051236 | 0.41476694 | 0.037638   | NA         | RSPO1    |
| 10636  | ENSG00000169220 | 216.104117 | 0.16980943  | 0.17088551 | 0.26705474 | 0.48945645 | RGS14    |
| 26000  | ENSG00000169221 | 1416.49127 | -0.03302727 | 0.07585266 | 0.65615275 | 0.82907086 | TBC1D10B |
| 10960  | ENSG00000169223 | 1879.34775 | 0.23331918  | 0.06831667 | 0.00051135 | 0.00329066 | LMAN2    |
| 148823 | ENSG00000169224 | 0          | NA          | NA         | NA         | NA         | GCSAML   |
| 53917  | ENSG00000169228 | 701.102992 | -0.06065513 | 0.10455646 | 0.54578374 | 0.75327648 | RAB24    |
| 27166  | ENSG00000169230 | 3808.52123 | -0.03328356 | 0.06305188 | 0.59539404 | 0.78816266 | PRELID1  |
| 7059   | ENSG00000169231 | 1194.48011 | 0.279776    | 0.08230288 | 0.00048839 | 0.00316034 | THBS3    |
| 11238  | ENSG00000169239 | 99.9994337 | 0.27588821  | 0.24806369 | 0.1590778  | 0.34655798 | CA5B     |
| 55974  | ENSG00000169241 | 464.714799 | 0.06880103  | 0.10926185 | 0.51185294 | 0.72703053 | SLC50A1  |
| 1942   | ENSG00000169242 | 437.460902 | -0.20054334 | 0.11890609 | 0.07515232 | 0.20173481 | EFNA1    |
| 3627   | ENSG00000169245 | 0          | NA          | NA         | NA         | NA         | CXCL10   |
| 23117  | ENSG00000169246 | 660.994367 | 0.20421872  | 0.11304289 | 0.0581325  | 0.16720045 | NPIP3    |
| 79628  | ENSG00000169247 | 1.33990564 | -0.04870425 | 0.38792374 | 0.38932232 | NA         | SH3TC2   |
| 6373   | ENSG00000169248 | 0.15069912 | -0.01848503 | 0.38480575 | 0.84537521 | NA         | CXCL11   |
| 8233   | ENSG00000169249 | 220.56668  | 0.00925777  | 0.15644882 | 0.94948692 | 0.97919849 | ZRSR2    |
| 51068  | ENSG00000169251 | 865.335125 | -0.22586972 | 0.09663794 | 0.01543487 | 0.058958   | NMD3     |
| 154    | ENSG00000169252 | 5.23279836 | -0.02349839 | 0.36608261 | 0.83703455 | 0.92594176 | ADRB2    |
| NA     | ENSG00000169253 | 0          | NA          | NA         | NA         | NA         |          |
| 8706   | ENSG00000169255 | 171.484643 | 2.27892911  | 0.23990138 | 1.01E-22   | 4.34E-21   | B3GALNT1 |
| 114787 | ENSG00000169258 | 1849.28632 | -0.98391403 | 0.07680341 | 2.01E-38   | 1.50E-36   | GPRIN1   |
| 8988   | ENSG00000169271 | 0          | NA          | NA         | NA         | NA         | HSPB3    |
| 7881   | ENSG00000169282 | 35.4148637 | 0.16297786  | 0.2886731  | 0.41763569 | 0.64376444 | KCNAB1   |
| 65008  | ENSG00000169288 | 241.986751 | -0.24289142 | 0.15622278 | 0.08777798 | 0.22632101 | MRPL1    |

|        |                 |            |             |            |            |            |          |
|--------|-----------------|------------|-------------|------------|------------|------------|----------|
| 126669 | ENSG00000169291 | 2.94205353 | 0.01787123  | 0.37248821 | 0.85439067 | 0.93466646 | SHE      |
| 190    | ENSG00000169297 | 0          | NA          | NA         | NA         | NA         | NR0B1    |
| 55276  | ENSG00000169299 | 373.87724  | 0.13185535  | 0.12485976 | 0.26121772 | 0.48317728 | PGM2     |
| 202374 | ENSG00000169302 | 25.1416858 | -0.00083021 | 0.30814183 | 0.99433083 | 0.99830594 | STK32A   |
| 11141  | ENSG00000169306 | 0          | NA          | NA         | NA         | NA         | IL1RAPL1 |
| 64805  | ENSG00000169313 | 1.06970021 | 0.06073329  | 0.3907427  | 0.18811887 | NA         | P2RY12   |
| 150248 | ENSG00000169314 | 3.88048685 | 0.03585436  | 0.36656339 | 0.76198721 | 0.89001685 | C22orf15 |
| NA     | ENSG00000169325 | 0          | NA          | NA         | NA         | NA         | GUSBP12  |
| 390445 | ENSG00000169327 | 0          | NA          | NA         | NA         | NA         | OR5AU1   |
| 23251  | ENSG00000169330 | 129.197138 | 0.36618528  | 0.20964945 | 0.04038808 | 0.12630824 | MINAR1   |
| 204474 | ENSG00000169340 | 0          | NA          | NA         | NA         | NA         | PDILT    |
| 7369   | ENSG00000169344 | 0          | NA          | NA         | NA         | NA         | UMOD     |
| 2813   | ENSG00000169347 | 0          | NA          | NA         | NA         | NA         | GP2      |
| 9197   | ENSG00000169359 | 523.034209 | 0.11259958  | 0.11309927 | 0.29765909 | 0.5243318  | SLC33A1  |
| 10073  | ENSG00000169371 | 280.831677 | -0.10150975 | 0.13881439 | 0.43181711 | 0.65745157 | SNUPN    |
| 8738   | ENSG00000169372 | 158.510172 | -0.46685272 | 0.21806356 | 0.01189097 | 0.04788247 | CRADD    |
| 25942  | ENSG00000169375 | 1608.25054 | -0.14262094 | 0.08392056 | 0.08094548 | 0.21334235 | SIN3A    |
| 200894 | ENSG00000169379 | 244.713798 | 0.15847416  | 0.15117328 | 0.25393265 | 0.47447954 | ARL13B   |
| 6036   | ENSG00000169385 | 0          | NA          | NA         | NA         | NA         | RNASE2   |
| 64100  | ENSG00000169393 | 0          | NA          | NA         | NA         | NA         | ELSPBP1  |
| 6037   | ENSG00000169397 | 0          | NA          | NA         | NA         | NA         | RNASE3   |
| 5747   | ENSG00000169398 | 2575.57792 | 0.03002085  | 0.08285532 | 0.71136084 | 0.86130838 | PTK2     |
| 728194 | ENSG00000169402 | 3.29690753 | 0.11728821  | 0.40498978 | 0.12696663 | 0.29691395 | RSPH10B2 |
| 5724   | ENSG00000169403 | 6.81615427 | 0.10291758  | 0.37200312 | 0.46630224 | 0.68917137 | PTAFR    |
| 5780   | ENSG00000169410 | 1299.37574 | -0.28080207 | 0.08255723 | 0.00048104 | 0.0031199  | PTPN9    |
| 6039   | ENSG00000169413 | 0          | NA          | NA         | NA         | NA         | RNASE6   |
| 4881   | ENSG00000169418 | 2.4167718  | 0.01717039  | 0.37595718 | 0.8354662  | NA         | NPR1     |
| 51305  | ENSG00000169427 | 6.90702877 | -0.01696567 | 0.35192698 | 0.90385478 | 0.95803392 | KCNK9    |
| 3576   | ENSG00000169429 | 0          | NA          | NA         | NA         | NA         | CXCL8    |
| 6335   | ENSG00000169432 | 429.656812 | 2.6253469   | 0.14361612 | 7.54E-76   | 1.41E-73   | SCN9A    |
| 166824 | ENSG00000169435 | 0          | NA          | NA         | NA         | NA         | RASSF6   |
| 169044 | ENSG00000169436 | 1.17522906 | -0.03111975 | 0.38143648 | 0.62258339 | NA         | COL22A1  |
| 6383   | ENSG00000169439 | 1722.08994 | -1.58320859 | 0.11217474 | 2.30E-46   | 2.07E-44   | SDC2     |
| 1043   | ENSG00000169442 | 0          | NA          | NA         | NA         | NA         | CD52     |
| 93380  | ENSG00000169446 | 619.998881 | -0.42879745 | 0.12423284 | 0.00026189 | 0.00181487 | MMGT1    |
| 6699   | ENSG00000169469 | 0          | NA          | NA         | NA         | NA         | SPRR1B   |
| 6698   | ENSG00000169474 | 0          | NA          | NA         | NA         | NA         | SPRR1A   |
| 122740 | ENSG00000169484 | 0          | NA          | NA         | NA         | NA         | OR4K14   |

|        |                 |            |             |            |            |            |          |
|--------|-----------------|------------|-------------|------------|------------|------------|----------|
| 81127  | ENSG00000169488 | 0          | NA          | NA         | NA         | NA         | OR4K15   |
| 83877  | ENSG00000169490 | 289.648514 | -0.04045195 | 0.14945611 | 0.76775893 | 0.89307241 | TM2D2    |
| 203100 | ENSG00000169495 | 0.31809377 | 0.00103576  | 0.38336594 | 0.96715256 | NA         | HTRA4    |
| 59339  | ENSG00000169499 | 326.805791 | 0.4503031   | 0.19559933 | 0.00858109 | 0.03656547 | PLEKHA2  |
| 25932  | ENSG00000169504 | 3145.78088 | 0.36999576  | 0.09379632 | 4.60E-05   | 0.00038084 | CLIC4    |
| 151258 | ENSG00000169507 | 0          | NA          | NA         | NA         | NA         | SLC38A11 |
| 1880   | ENSG00000169508 | 0.32429952 | -0.02327681 | 0.38532192 | 0.66833494 | NA         | GPR183   |
| 54544  | ENSG00000169509 | 0          | NA          | NA         | NA         | NA         | CRCT1    |
| 83987  | ENSG00000169515 | 5.77651257 | 0.16908771  | 0.40844079 | 0.21735659 | 0.428834   | CCDC8    |
| 196074 | ENSG00000169519 | 307.80849  | 0.01771454  | 0.14908207 | 0.8985883  | 0.95556135 | METTL15  |
| 129025 | ENSG00000169548 | 0.3225948  | -0.02325506 | 0.38531882 | 0.66954696 | NA         | ZNF280A  |
| 143662 | ENSG00000169550 | 0.85361557 | 0.03055138  | 0.38453456 | 0.49607004 | NA         | MUC15    |
| 54967  | ENSG00000169551 | 5.42832209 | 0.05774386  | 0.36665698 | 0.64848578 | 0.82457939 | CT55     |
| 9839   | ENSG00000169554 | 1166.42194 | -0.07589059 | 0.12148715 | 0.50913425 | 0.72482947 | ZEB2     |
| 2705   | ENSG00000169562 | 0          | NA          | NA         | NA         | NA         | GJB1     |
| 5093   | ENSG00000169564 | 4292.59474 | 0.01731157  | 0.05868203 | 0.76587061 | 0.89234011 | PCBP1    |
| 3094   | ENSG00000169567 | 3178.33582 | -0.05340858 | 0.06224301 | 0.38390724 | 0.61306501 | HINT1    |
| 285605 | ENSG00000169570 | 130.716478 | 0.34309924  | 0.2149445  | 0.05828858 | 0.16750367 | DTWD2    |
| 7441   | ENSG00000169575 | 0          | NA          | NA         | NA         | NA         | VPREB1   |
| 9022   | ENSG00000169583 | 0.70498675 | 0.05128     | 0.38860286 | 0.29567183 | NA         | CLIC3    |
| 283899 | ENSG00000169592 | 1377.21237 | -0.1604111  | 0.1032589  | 0.1057774  | 0.25953792 | INO80E   |
| 646    | ENSG00000169594 | 0.97492369 | 0.00557836  | 0.38007023 | 0.92670034 | NA         | BNC1     |
| 1677   | ENSG00000169598 | 300.26987  | 0.01815434  | 0.15653027 | 0.90002656 | 0.95573896 | DFFB     |
| 27247  | ENSG00000169599 | 238.80385  | -0.25110203 | 0.14839898 | 0.06570905 | 0.18315081 | NFU1     |
| 84168  | ENSG00000169604 | 2090.68199 | 0.90453341  | 0.0721893  | 8.56E-37   | 6.09E-35   | ANTXR1   |
| 56287  | ENSG00000169605 | 0          | NA          | NA         | NA         | NA         | GKN1     |
| 150468 | ENSG00000169607 | 725.18605  | -0.37760274 | 0.11340402 | 0.00046714 | 0.00304196 | CKAP2L   |
| 123207 | ENSG00000169609 | 746.359196 | 0.24221025  | 0.2883244  | 0.24315411 | 0.46155545 | C15orf40 |
| 83640  | ENSG00000169612 | 420.000335 | -0.13946056 | 0.11374466 | 0.19825815 | 0.40248048 | RAMAC    |
| 10887  | ENSG00000169618 | 1.70753617 | 0.11354004  | 0.40738421 | 0.04738105 | NA         | PROKR1   |
| 200558 | ENSG00000169621 | 71.4550092 | 0.62194196  | 0.29458745 | 0.00754773 | 0.03291867 | APLF     |
| 552900 | ENSG00000169627 | 698.330479 | -0.00471658 | 0.10172982 | 0.96066404 | 0.98407795 | BOLA2B   |
| 654483 | ENSG00000169627 | 698.330479 | -0.00471658 | 0.10172982 | 0.96066404 | 0.98407795 | BOLA2B   |
| 727851 | ENSG00000169629 | 100.547723 | -0.21458137 | 0.23420325 | 0.25436902 | 0.47484771 | RGPD8    |
| 23119  | ENSG00000169635 | 692.897957 | 0.61067653  | 0.09803078 | 1.39E-10   | 2.62E-09   | HIC2     |
| 7798   | ENSG00000169641 | 987.121227 | 0.01115436  | 0.10423656 | 0.91261876 | 0.96264321 | LUZP1    |
| 284004 | ENSG00000169660 | 728.879134 | 0.22694604  | 0.09960137 | 0.01808069 | 0.06715058 | HEXD     |
| NA     | ENSG00000169662 | 1.13919152 | 0.01776856  | 0.38013248 | 0.78070577 | NA         | BCRP6    |

|        |                 |            |             |            |            |            |            |
|--------|-----------------|------------|-------------|------------|------------|------------|------------|
| NA     | ENSG00000169668 | 42.3483586 | 0.06900453  | 0.2667603  | 0.72286016 | 0.86755463 | BCRP2      |
| 1816   | ENSG00000169676 | 0          | NA          | NA         | NA         | NA         | DRD5       |
| 699    | ENSG00000169679 | 1207.70933 | -0.18342137 | 0.09280571 | 0.04118156 | 0.12828422 | BUB1       |
| 83985  | ENSG00000169682 | 980.394971 | 0.13243846  | 0.0983079  | 0.16368021 | 0.35275692 | SPNS1      |
| 201255 | ENSG00000169683 | 814.473204 | 0.35339561  | 0.10224994 | 0.00032525 | 0.00219936 | LRRC45     |
| 1138   | ENSG00000169684 | 989.157297 | -0.01381107 | 0.09277972 | 0.8772424  | 0.94574195 | CHRNA5     |
| 4490   | ENSG00000169688 | 0          | NA          | NA         | NA         | NA         | MT1B       |
| 201254 | ENSG00000169689 | 950.809773 | 0.0920807   | 0.08989172 | 0.2922232  | 0.51825408 | CENPX      |
| 10555  | ENSG00000169692 | 579.897154 | 0.12890735  | 0.10179744 | 0.18891387 | 0.38965081 | AGPAT2     |
| 79058  | ENSG00000169696 | 769.670561 | 0.08578912  | 0.09284007 | 0.34117207 | 0.57145242 | ASPSCR1    |
| 2815   | ENSG00000169704 | 0          | NA          | NA         | NA         | NA         | GP9        |
| 2194   | ENSG00000169710 | 20167.9208 | -0.42822698 | 0.0692989  | 9.86E-10   | 1.70E-08   | FASN       |
| 7555   | ENSG00000169714 | 5475.61881 | -0.05480724 | 0.05338409 | 0.29638241 | 0.52297409 | CNBP       |
| 4493   | ENSG00000169715 | 1.29633656 | -0.02000461 | 0.37876945 | 0.77925424 | NA         | MT1E       |
| 140625 | ENSG00000169717 | 0          | NA          | NA         | NA         | NA         | ACTRT2     |
| 64118  | ENSG00000169718 | 2289.16358 | 0.30363084  | 0.07576468 | 4.22E-05   | 0.00035303 | DUS1L      |
| 2873   | ENSG00000169727 | 4108.14277 | 0.07443553  | 0.05401145 | 0.16337392 | 0.35239601 | GPS1       |
| 5986   | ENSG00000169733 | 1078.69796 | 0.1940799   | 0.10483423 | 0.05385331 | 0.15751876 | RFNG       |
| 51181  | ENSG00000169738 | 885.085509 | -0.32221493 | 0.08622256 | 0.00012097 | 0.00090156 | DCXR       |
| 7580   | ENSG00000169740 | 384.814694 | -0.07965891 | 0.12362978 | 0.49523725 | 0.7139953  | ZNF32      |
| 9079   | ENSG00000169744 | 201.381685 | 0.20431309  | 0.18102451 | 0.20161864 | 0.40709482 | LDB2       |
| 5881   | ENSG00000169750 | 1592.80283 | -0.29956832 | 0.07323886 | 2.86E-05   | 0.00024757 | RAC3       |
| 145957 | ENSG00000169752 | 11.4602532 | 0.1182751   | 0.35470063 | 0.4854981  | 0.70561001 | NRG4       |
| 3987   | ENSG00000169756 | 1128.73807 | 0.27521491  | 0.10085558 | 0.00457454 | 0.0215887  | LIMS1      |
| 123591 | ENSG00000169758 | 49.5145025 | 0.56365293  | 0.35625385 | 0.02491867 | 0.08693273 | TMEM266    |
| 22871  | ENSG00000169760 | 79.7558712 | -0.09042378 | 0.24489009 | 0.63206277 | 0.81381825 | NLGN1      |
| 202018 | ENSG00000169762 | 432.925049 | 0.06445646  | 0.13966104 | 0.62005652 | 0.8060491  | TAPT1      |
| NA     | ENSG00000169763 | 0          | NA          | NA         | NA         | NA         | PRYP3      |
| 7360   | ENSG00000169764 | 380.86374  | -0.02651091 | 0.11863799 | 0.81341477 | 0.91569162 | UGP2       |
| 50834  | ENSG00000169777 | 0          | NA          | NA         | NA         | NA         | TAS2R1     |
| 84894  | ENSG00000169783 | 252.751379 | -1.886323   | 0.22410538 | 2.29E-18   | 7.86E-17   | LINGO1     |
| 9081   | ENSG00000169789 | 0          | NA          | NA         | NA         | NA         | PRY        |
| 159163 | ENSG00000169800 | 0          | NA          | NA         | NA         | NA         | RBMY1F     |
| 442862 | ENSG00000169807 | 0          | NA          | NA         | NA         | NA         | PRY2       |
| NA     | ENSG00000169811 | 0          | NA          | NA         | NA         | NA         | RBMY1HP    |
| 3185   | ENSG00000169813 | 4702.37203 | 0.03322659  | 0.0594658  | 0.57248249 | 0.7723153  | HNRNPF     |
| 686    | ENSG00000169814 | 441.465563 | 0.22173248  | 0.13277281 | 0.07444389 | 0.20030974 | BTD        |
| 55454  | ENSG00000169826 | 940.448364 | 0.25749095  | 0.08504035 | 0.00186442 | 0.01008177 | CSGALNACT2 |

|        |                 |            |             |            |            |            |          |
|--------|-----------------|------------|-------------|------------|------------|------------|----------|
| 6870   | ENSG00000169836 | 0.16735865 | 0.01897177  | 0.38482933 | 0.78225479 | NA         | TACR3    |
| 219409 | ENSG00000169840 | 0          | NA          | NA         | NA         | NA         | GSX1     |
| NA     | ENSG00000169849 | 0          | NA          | NA         | NA         | NA         | TSPY14P  |
| 5099   | ENSG00000169851 | 7.82589174 | 0.06814153  | 0.37290092 | 0.54854093 | 0.75503345 | PCDH7    |
| 6091   | ENSG00000169855 | 1001.62983 | -0.07528395 | 0.14810137 | 0.57996075 | 0.77743886 | ROBO1    |
| 3175   | ENSG00000169856 | 0.49687332 | -0.02955746 | 0.38590719 | 0.52474722 | NA         | ONECUT1  |
| 57099  | ENSG00000169857 | 195.95589  | -0.13501569 | 0.15879285 | 0.34920586 | 0.57998769 | AVEN     |
| 5028   | ENSG00000169860 | 3.01298285 | 0.18759872  | 0.44383995 | 0.05337541 | 0.15645711 | P2RY1    |
| 1501   | ENSG00000169862 | 0          | NA          | NA         | NA         | NA         | CTNND2   |
| 81844  | ENSG00000169871 | 11.3585229 | 0.11059551  | 0.35459271 | 0.50826572 | 0.7239622  | TRIM56   |
| 140453 | ENSG00000169876 | 0          | NA          | NA         | NA         | NA         | MUC17    |
| 51327  | ENSG00000169877 | 0          | NA          | NA         | NA         | NA         | AHSP     |
| 7480   | ENSG00000169884 | 0.69723612 | 0.03065898  | 0.38448208 | 0.58082614 | NA         | WNT10B   |
| 163688 | ENSG00000169885 | 6.53402955 | -0.03045907 | 0.35986537 | 0.81370149 | 0.91591045 | CALML6   |
| 9185   | ENSG00000169891 | 48.7365805 | -0.21074422 | 0.28166297 | 0.29965101 | 0.52662556 | REPS2    |
| 4584   | ENSG00000169894 | 0.68684686 | 0.00320496  | 0.38127506 | 0.94988598 | NA         | MUC3A    |
| 94056  | ENSG00000169895 | 1114.44307 | -0.20933005 | 0.09727934 | 0.02566232 | 0.08890176 | SYAP1    |
| 3684   | ENSG00000169896 | 0          | NA          | NA         | NA         | NA         | ITGAM    |
| 260434 | ENSG00000169900 | 0          | NA          | NA         | NA         | NA         | PYDC1    |
| 8460   | ENSG00000169902 | 559.39648  | 0.50611427  | 0.11005352 | 1.65E-06   | 1.80E-05   | TPST1    |
| 7104   | ENSG00000169903 | 0          | NA          | NA         | NA         | NA         | TM4SF4   |
| 163590 | ENSG00000169905 | 2262.74478 | -0.084054   | 0.07089769 | 0.22720249 | 0.4418878  | TOR1AIP2 |
| 795    | ENSG00000169906 | 0          | NA          | NA         | NA         | NA         | S100G    |
| 4071   | ENSG00000169908 | 0.34746601 | 0.02370763  | 0.3853651  | 0.61987128 | NA         | TM4SF1   |
| 23252  | ENSG00000169914 | 664.431119 | 0.10702565  | 0.12628446 | 0.37019659 | 0.59943356 | OTUD3    |
| 161725 | ENSG00000169918 | 252.786475 | -0.52607689 | 0.15188354 | 0.00018462 | 0.0013233  | OTUD7A   |
| 2990   | ENSG00000169919 | 1112.92759 | 0.0532934   | 0.08319463 | 0.51237168 | 0.7276095  | GUSB     |
| 8019   | ENSG00000169925 | 2713.42236 | 0.23320105  | 0.080796   | 0.003103   | 0.01559038 | BRD3     |
| 51621  | ENSG00000169926 | 2147.84476 | -0.17454301 | 0.07520594 | 0.01770657 | 0.06600871 | KLF13    |
| 9758   | ENSG00000169933 | 0          | NA          | NA         | NA         | NA         | FRMPD4   |
| 23414  | ENSG00000169946 | 26.121443  | 3.75699376  | 0.74539666 | 2.42E-08   | 3.46E-07   | ZFPM2    |
| 92595  | ENSG00000169951 | 407.702036 | 0.19640202  | 0.11938588 | 0.08336134 | 0.21800589 | ZNF764   |
| 159119 | ENSG00000169953 | 0          | NA          | NA         | NA         | NA         | HSFY2    |
| 65988  | ENSG00000169955 | 445.214915 | -0.0465216  | 0.14789563 | 0.73271663 | 0.87239916 | ZNF747   |
| 79724  | ENSG00000169957 | 1315.66771 | -0.01025882 | 0.09414413 | 0.90965122 | 0.96107209 | ZNF768   |
| 83756  | ENSG00000169962 | 9.25751943 | 0.10740134  | 0.35779217 | 0.50839272 | 0.72403357 | TAS1R3   |
| 131616 | ENSG00000169964 | 159.317602 | -0.06624102 | 0.1689854  | 0.66146428 | 0.8324506  | TMEM42   |
| 10746  | ENSG00000169967 | 942.243284 | -0.04974501 | 0.09349991 | 0.58214356 | 0.77907104 | MAP3K2   |

|        |                 |            |             |            |            |            |          |
|--------|-----------------|------------|-------------|------------|------------|------------|----------|
| 126789 | ENSG00000169972 | 259.802826 | -0.1791477  | 0.13972454 | 0.16732883 | 0.35828164 | PUSL1    |
| 83443  | ENSG00000169976 | 1086.53545 | 0.39535216  | 0.09742401 | 2.65E-05   | 0.00023154 | SF3B5    |
| 7584   | ENSG00000169981 | 304.980794 | 0.10162711  | 0.1448063  | 0.44870988 | 0.67234398 | ZNF35    |
| 201798 | ENSG00000169989 | 35.8675381 | 0.22188486  | 0.32540219 | 0.28636446 | 0.51225386 | TIGD4    |
| 126917 | ENSG00000169991 | 126.726728 | -0.71598274 | 0.24296421 | 0.00059716 | 0.00376716 | IFFO2    |
| 57555  | ENSG00000169992 | 3191.43242 | -0.22227366 | 0.0716507  | 0.00156789 | 0.00871099 | NLGN2    |
| 4648   | ENSG00000169994 | 0.15069912 | -0.01848503 | 0.38480575 | 0.84537521 | NA         | MYO7B    |
| 1107   | ENSG00000170004 | 4013.71651 | 0.08716638  | 0.06643534 | 0.18335843 | 0.38156401 | CHD3     |
| 201799 | ENSG00000170006 | 39.5874761 | 3.15723937  | 0.6190836  | 1.24E-08   | 1.86E-07   | TMEM154  |
| 25924  | ENSG00000170011 | 173.511122 | 0.01326916  | 0.17398644 | 0.93299559 | 0.97202552 | MYRIP    |
| 214    | ENSG00000170017 | 3175.75883 | 0.55594491  | 0.05876278 | 1.08E-21   | 4.40E-20   | ALCAM    |
| 7532   | ENSG00000170027 | 10941.0307 | -0.27675726 | 0.0469854  | 2.84E-09   | 4.57E-08   | YWHAG    |
| 10477  | ENSG00000170035 | 1491.01472 | -0.03844674 | 0.07216347 | 0.58751671 | 0.78256674 | UBE2E3   |
| 116840 | ENSG00000170037 | 1014.85622 | 0.10797781  | 0.09945044 | 0.26093812 | 0.48276874 | CNTROB   |
| 58485  | ENSG00000170043 | 1066.4037  | 0.21119953  | 0.08025937 | 0.00706143 | 0.0311896  | TRAPPC1  |
| 131368 | ENSG00000170044 | 1.53473883 | 0.02335072  | 0.37723536 | 0.76964634 | NA         | ZPLD1    |
| 9196   | ENSG00000170049 | 432.926489 | 0.27285526  | 0.12602054 | 0.02154473 | 0.07726816 | KCNAB3   |
| 327657 | ENSG00000170054 | 0          | NA          | NA         | NA         | NA         | SERPINA9 |
| 285596 | ENSG00000170074 | 0.83002665 | 0.02308492  | 0.38355603 | 0.61702622 | NA         | FAM153A  |
| 9283   | ENSG00000170075 | 4.59426043 | 0.10330928  | 0.38855657 | 0.31444033 | 0.54217557 | GPR37L1  |
| 375484 | ENSG00000170085 | 705.408885 | -0.05801656 | 0.10681108 | 0.57085622 | 0.77109827 | SIMC1    |
| 201931 | ENSG00000170088 | 403.079904 | -0.323453   | 0.13714252 | 0.01131976 | 0.04595542 | TMEM192  |
| NA     | ENSG00000170089 | 261.953525 | -0.2766912  | 0.14907175 | 0.04330741 | 0.13329491 |          |
| 51617  | ENSG00000170091 | 3676.24809 | -3.60652643 | 0.08080996 | 0          | 0          | NSG2     |
| 442590 | ENSG00000170092 | 22.1720714 | -0.21669939 | 0.34814443 | 0.28643364 | 0.51225526 | SPDYE5   |
| 866    | ENSG00000170099 | 0          | NA          | NA         | NA         | NA         | SERPINA6 |
| 197320 | ENSG00000170100 | 968.956706 | 0.20202294  | 0.12703139 | 0.09119322 | 0.23300366 | ZNF778   |
| 123606 | ENSG00000170113 | 1439.25411 | -0.24225795 | 0.08831973 | 0.00471781 | 0.02213638 | NIPA1    |
| 2298   | ENSG00000170122 | 31.1991243 | 0.15944877  | 0.2969006  | 0.42787725 | 0.65375395 | FOXD4    |
| 2848   | ENSG00000170128 | 2.75418029 | -0.1088411  | 0.39392267 | 0.26974893 | 0.49289177 | GPR25    |
| 7324   | ENSG00000170142 | 1609.93466 | -0.23306497 | 0.07860527 | 0.00240135 | 0.01252769 | UBE2E1   |
| 220988 | ENSG00000170144 | 11732.2763 | 0.02156966  | 0.07701866 | 0.77618697 | 0.89709598 | HNRNPA3  |
| 23235  | ENSG00000170145 | 1209.51707 | 0.63749969  | 0.0872855  | 7.80E-14   | 1.93E-12   | SIK2     |
| 57484  | ENSG00000170153 | 4892.26885 | -0.3516516  | 0.07717077 | 3.10E-06   | 3.23E-05   | RNF150   |
| 9720   | ENSG00000170160 | 26.6654547 | -0.24766194 | 0.40554249 | 0.19373399 | 0.39662392 | CCDC144A |
| 554249 | ENSG00000170161 | 157.920818 | 0.12442403  | 0.17180023 | 0.41864524 | 0.64464626 |          |
| 245806 | ENSG00000170162 | 0          | NA          | NA         | NA         | NA         | VGLL2    |
| 3233   | ENSG00000170166 | 110.895706 | -0.06068292 | 0.19738483 | 0.71903702 | 0.86537424 | HOXD4    |

|        |                 |            |             |            |            |            |         |
|--------|-----------------|------------|-------------|------------|------------|------------|---------|
| 1140   | ENSG00000170175 | 347.920122 | 0.28780182  | 0.12878623 | 0.01742958 | 0.06522123 | CHRN1   |
| 3238   | ENSG00000170178 | 0.52119901 | 0.02576573  | 0.38568143 | 0.51723676 | NA         | HOXD12  |
| 2993   | ENSG00000170180 | 0          | NA          | NA         | NA         | NA         | GYPA    |
| 84640  | ENSG00000170185 | 661.141091 | -0.16722699 | 0.10559617 | 0.09850287 | 0.24653676 | USP38   |
| 9121   | ENSG00000170190 | 0          | NA          | NA         | NA         | NA         | SLC16A5 |
| 140838 | ENSG00000170191 | 193.963764 | -0.38167523 | 0.17138143 | 0.01320587 | 0.052078   | NANP    |
| 255239 | ENSG00000170209 | 3.6548343  | 0.03573914  | 0.36980932 | 0.74612701 | 0.8804068  | ANKK1   |
| 147    | ENSG00000170214 | 0          | NA          | NA         | NA         | NA         | ADRA1B  |
| 56985  | ENSG00000170222 | 151.869628 | -0.13606017 | 0.18373097 | 0.39837145 | 0.62727695 | ADPRM   |
| 2172   | ENSG00000170231 | 13.5403007 | -1.40015846 | 0.89714664 | 0.0048841  | 0.02278406 | FABP6   |
| 114825 | ENSG00000170234 | 435.142426 | -0.25429442 | 0.12263336 | 0.02799325 | 0.09501899 | PWWP2A  |
| 373509 | ENSG00000170236 | 14.7368343 | 0.16727824  | 0.36264676 | 0.35936017 | 0.58949503 | USP50   |
| 55031  | ENSG00000170242 | 1699.19162 | 0.34740635  | 0.09480423 | 0.00015101 | 0.00110145 | USP47   |
| 10015  | ENSG00000170248 | 2151.15264 | -0.20057578 | 0.08252442 | 0.0126427  | 0.0503071  | PDCD6IP |
| 259249 | ENSG00000170255 | 0          | NA          | NA         | NA         | NA         | MRGPRX1 |
| 7988   | ENSG00000170260 | 475.065549 | 0.11023644  | 0.11145054 | 0.30140297 | 0.52872103 | ZNF212  |
| 56246  | ENSG00000170262 | 0          | NA          | NA         | NA         | NA         | MRAP    |
| 84140  | ENSG00000170264 | 337.301988 | -0.28227405 | 0.13349542 | 0.02364843 | 0.08332657 | FAM161A |
| 8427   | ENSG00000170265 | 1270.03515 | -0.04956355 | 0.10354645 | 0.6181204  | 0.80452675 | ZNF282  |
| 2720   | ENSG00000170266 | 884.735583 | 0.30935376  | 0.11816633 | 0.00578906 | 0.02634892 | GLB1    |
| 84520  | ENSG00000170270 | 237.122116 | -0.40514312 | 0.15641712 | 0.00464057 | 0.02184314 | GON7    |
| 10826  | ENSG00000170271 | 270.786797 | 0.46180177  | 0.16095985 | 0.00169839 | 0.00933926 | FAXDC2  |
| 10491  | ENSG00000170275 | 1833.20069 | 0.19146552  | 0.07907075 | 0.01323237 | 0.05217216 | CRTAP   |
| 3316   | ENSG00000170276 | 0.173124   | -0.01911262 | 0.38486262 | 0.84537521 | NA         | HSPB2   |
| 202865 | ENSG00000170279 | 0          | NA          | NA         | NA         | NA         | C7orf33 |
| 54714  | ENSG00000170289 | 0.18922458 | 0.01954053  | 0.38488496 | 0.78225479 | NA         | CNGB3   |
| 6588   | ENSG00000170290 | 0.66943461 | 0.03059546  | 0.38616409 | 0.42784935 | NA         | SLN     |
| 23587  | ENSG00000170291 | 830.810254 | 0.22543688  | 0.08801797 | 0.00840132 | 0.03596938 | ELP5    |
| 152189 | ENSG00000170293 | 75.8223806 | 0.28357767  | 0.26234835 | 0.16031886 | 0.34815303 | CMTM8   |
| 11337  | ENSG00000170296 | 3235.76641 | 0.09277744  | 0.06562615 | 0.15069872 | 0.33428696 | GABARAP |
| 284194 | ENSG00000170298 | 0          | NA          | NA         | NA         | NA         | LGALS9B |
| 9482   | ENSG00000170310 | 217.878986 | 0.1189251   | 0.15733837 | 0.40883335 | 0.63702612 | STX8    |
| 983    | ENSG00000170312 | 1832.92836 | -0.37250499 | 0.07387225 | 2.64E-07   | 3.29E-06   | CDK1    |
| 7314   | ENSG00000170315 | 12350.8112 | -0.10094091 | 0.04640433 | 0.02836205 | 0.0960408  | UBB     |
| 4798   | ENSG00000170322 | 1287.76843 | 0.11452285  | 0.07892985 | 0.13818795 | 0.31440929 | NFRKB   |
| 2167   | ENSG00000170323 | 0          | NA          | NA         | NA         | NA         | FABP4   |
| 143162 | ENSG00000170324 | 4.9949858  | 0.19906643  | 0.4458268  | 0.07597106 | 0.20338223 | FRMPD2  |
| 56980  | ENSG00000170325 | 392.513088 | -0.14477981 | 0.12848008 | 0.23059236 | 0.44655466 | PRDM10  |



|        |                 |            |             |            |            |            |          |
|--------|-----------------|------------|-------------|------------|------------|------------|----------|
| 10678  | ENSG00000170340 | 304.614223 | -0.14850641 | 0.13320168 | 0.23320337 | 0.45004948 | B3GNT2   |
| 2353   | ENSG00000170345 | 927.495378 | 2.61893509  | 0.2914582  | 1.54E-20   | 5.94E-19   | FOS      |
| 10972  | ENSG00000170348 | 3406.03136 | 0.25683411  | 0.07611086 | 0.00057878 | 0.00366632 | TMED10   |
| 401428 | ENSG00000170356 | 0          | NA          | NA         | NA         | NA         | OR2A20P  |
| 6419   | ENSG00000170364 | 428.93572  | -0.21890776 | 0.12259035 | 0.05865467 | 0.16825136 | SETMAR   |
| 4086   | ENSG00000170365 | 297.485371 | -0.09071956 | 0.1787617  | 0.56488828 | 0.76715609 | SMAD1    |
| 1473   | ENSG00000170367 | 0          | NA          | NA         | NA         | NA         | CST5     |
| 1470   | ENSG00000170369 | 0          | NA          | NA         | NA         | NA         | CST2     |
| 2018   | ENSG00000170370 | 0          | NA          | NA         | NA         | NA         | EMX2     |
| 1469   | ENSG00000170373 | 0          | NA          | NA         | NA         | NA         | CST1     |
| 121340 | ENSG00000170374 | 3.50947625 | -0.0761553  | 0.37940605 | 0.46969062 | 0.69206549 | SP7      |
| 285966 | ENSG00000170379 | 0.35628637 | 0.02381422  | 0.38538061 | 0.61421642 | NA         | TCAF2    |
| 9723   | ENSG00000170381 | 0.75016689 | -0.00543912 | 0.38183361 | 0.8995577  | NA         | SEMA3E   |
| 10446  | ENSG00000170382 | 109.085332 | -0.20726015 | 0.22268887 | 0.25672147 | 0.47780055 | LRRN2    |
| 7779   | ENSG00000170385 | 573.829622 | -0.67184148 | 0.11290804 | 6.62E-10   | 1.17E-08   | SLC30A1  |
| 166614 | ENSG00000170390 | 753.578605 | -0.29133631 | 0.10856343 | 0.00497667 | 0.02313971 | DCLK2    |
| 91752  | ENSG00000170396 | 232.672743 | -0.72006807 | 0.16349616 | 2.26E-06   | 2.41E-05   | ZNF804A  |
| NA     | ENSG00000170409 | 0          | NA          | NA         | NA         | NA         |          |
| 55890  | ENSG00000170412 | 10.4091984 | 3.55844558  | 1.1749026  | 0.00017106 | 0.00123504 | GPRC5C   |
| 130827 | ENSG00000170417 | 71.7372274 | 0.09580265  | 0.23540181 | 0.60933286 | 0.79803651 | TMEM182  |
| 222008 | ENSG00000170419 | 19.1455709 | -0.31041756 | 0.42728611 | 0.13895263 | 0.31571462 | VSTM2A   |
| 3856   | ENSG00000170421 | 0          | NA          | NA         | NA         | NA         | KRT8     |
| 196374 | ENSG00000170423 | 0          | NA          | NA         | NA         | NA         | KRT78    |
| 136    | ENSG00000170425 | 30.0239335 | -0.05546562 | 0.28620175 | 0.77161474 | 0.89527792 | ADORA2B  |
| 121214 | ENSG00000170426 | 0          | NA          | NA         | NA         | NA         | SDR9C7   |
| 4255   | ENSG00000170430 | 283.218713 | 0.1148444   | 0.14162279 | 0.3829023  | 0.61227467 | MGMT     |
| 196410 | ENSG00000170439 | 0          | NA          | NA         | NA         | NA         | METTTL7B |
| 3892   | ENSG00000170442 | 0          | NA          | NA         | NA         | NA         | KRT86    |
| 3035   | ENSG00000170445 | 2403.9034  | 0.01362874  | 0.06312154 | 0.8273322  | 0.92189669 | HARS1    |
| 152518 | ENSG00000170448 | 549.676088 | 0.0786919   | 0.10692964 | 0.44405167 | 0.66905081 | NFXL1    |
| 9119   | ENSG00000170454 | 0          | NA          | NA         | NA         | NA         | KRT75    |
| 160518 | ENSG00000170456 | 793.237341 | -0.178674   | 0.13521826 | 0.15679513 | 0.34358464 | DENND5B  |
| 929    | ENSG00000170458 | 20.5041188 | 1.15438401  | 0.61333435 | 0.00375117 | 0.01827681 | CD14     |
| 202052 | ENSG00000170464 | 591.239359 | 0.00672421  | 0.13201461 | 0.95986677 | 0.98360159 | DNAJC18  |
| 286887 | ENSG00000170465 | 0          | NA          | NA         | NA         | NA         | KRT6C    |
| 79697  | ENSG00000170468 | 430.057133 | -0.13767952 | 0.11303879 | 0.20152368 | 0.40694451 | RIOX1    |
| 202051 | ENSG00000170469 | 42.0820082 | 0.09452936  | 0.26446239 | 0.62700701 | 0.81067573 | SPATA24  |
| 57148  | ENSG00000170471 | 2605.10351 | -0.04415677 | 0.06012107 | 0.45702633 | 0.68052466 | RALGAPB  |

|        |                 |            |             |            |            |            |           |
|--------|-----------------|------------|-------------|------------|------------|------------|-----------|
| 84305  | ENSG00000170473 | 419.034116 | -0.0495058  | 0.11608343 | 0.65333484 | 0.82730171 | PYM1      |
| 51237  | ENSG00000170476 | 0.8230849  | -0.00547373 | 0.38077018 | 0.92289514 | NA         | MZB1      |
| 3851   | ENSG00000170477 | 0          | NA          | NA         | NA         | NA         | KRT4      |
| 9963   | ENSG00000170482 | 7.90429217 | 0.20158279  | 0.4104864  | 0.21561415 | 0.42641394 | SLC23A1   |
| 121391 | ENSG00000170484 | 0          | NA          | NA         | NA         | NA         | KRT74     |
| 4862   | ENSG00000170485 | 29.8829652 | -0.07919062 | 0.3217465  | 0.66007363 | 0.83146071 | NPAS2     |
| 140807 | ENSG00000170486 | 0          | NA          | NA         | NA         | NA         | KRT72     |
| 3814   | ENSG00000170498 | 1.67792723 | 0.06154521  | 0.38500862 | 0.39937632 | NA         | KISS1     |
| 164832 | ENSG00000170500 | 183.558136 | 0.0345242   | 0.16630439 | 0.8191077  | 0.91752333 | LONRF2    |
| 53343  | ENSG00000170502 | 418.315325 | -0.06552342 | 0.13184395 | 0.59566295 | 0.78816266 | NUDT9     |
| 345275 | ENSG00000170509 | 14.9677522 | 0.26379989  | 0.4019622  | 0.19332036 | 0.3960223  | HSD17B13  |
| 5036   | ENSG00000170515 | 3821.64546 | -0.05284576 | 0.07156394 | 0.45167445 | 0.67494322 | PA2G4     |
| 170712 | ENSG00000170516 | 0          | NA          | NA         | NA         | NA         | COX7B2    |
| 79071  | ENSG00000170522 | 1463.10695 | -0.33319258 | 0.1162638  | 0.00254562 | 0.01317983 | ELOVL6    |
| 3889   | ENSG00000170523 | 0          | NA          | NA         | NA         | NA         | KRT83     |
| 5209   | ENSG00000170525 | 572.714701 | 0.00710597  | 0.14177984 | 0.95882133 | 0.98310156 | PFKFB3    |
| 79905  | ENSG00000170537 | 100.076654 | 0.18712621  | 0.22784434 | 0.31318053 | 0.54124579 | TMC7      |
| 23204  | ENSG00000170540 | 5351.04922 | -0.286684   | 0.0518263  | 2.29E-08   | 3.29E-07   | ARL6IP1   |
| 5272   | ENSG00000170542 | 8.22735833 | -0.18585081 | 0.39656173 | 0.25960343 | 0.48121669 | SERPINB9  |
| 57228  | ENSG00000170545 | 26.1705334 | -0.10986598 | 0.32587276 | 0.55370101 | 0.75980255 | SMAGP     |
| 79192  | ENSG00000170549 | 0          | NA          | NA         | NA         | NA         | IRX1      |
| 1000   | ENSG00000170558 | 3106.0314  | 1.0272181   | 0.06135669 | 9.13E-64   | 1.29E-61   | CDH2      |
| 153572 | ENSG00000170561 | 0          | NA          | NA         | NA         | NA         | IRX2      |
| 133418 | ENSG00000170571 | 616.416884 | 0.11252573  | 0.0988461  | 0.23882392 | 0.45652723 | EMB       |
| 10736  | ENSG00000170577 | 29.3309238 | 0.23940226  | 0.33016879 | 0.25554405 | 0.47650319 | SIX2      |
| 9229   | ENSG00000170579 | 0.71501162 | -0.04064198 | 0.38714626 | 0.37606669 | NA         | DLGAP1    |
| 6773   | ENSG00000170581 | 800.652759 | 0.30527244  | 0.10003939 | 0.00152594 | 0.0085017  | STAT2     |
| 134492 | ENSG00000170584 | 548.04027  | -0.09536623 | 0.12975567 | 0.43335586 | 0.65863186 | NUDCD2    |
| 26145  | ENSG00000170604 | 1312.62008 | 0.02096173  | 0.08788657 | 0.80722337 | 0.91260538 | IRF2BP1   |
| 441639 | ENSG00000170605 | 0          | NA          | NA         | NA         | NA         | OR9K2     |
| 3308   | ENSG00000170606 | 2893.27686 | -0.35657451 | 0.08035705 | 5.44E-06   | 5.44E-05   | HSPA4     |
| 3171   | ENSG00000170608 | 5.30711147 | 0.00098151  | 0.35887432 | 0.99597878 | 0.99859366 | FOXA3     |
| 153745 | ENSG00000170613 | 0          | NA          | NA         | NA         | NA         | FAM71B    |
| 375611 | ENSG00000170615 | 9.68397929 | 1.2953348   | 1.36035894 | 0.00880275 | 0.03734159 | SLC26A5   |
| 28991  | ENSG00000170619 | 565.564101 | 0.04189975  | 0.09933045 | 0.66326227 | 0.83380582 | COMMD5    |
| 6444   | ENSG00000170624 | 74.3437157 | 0.00622106  | 0.25513455 | 0.97575468 | 0.99159826 | SGCD      |
| 121355 | ENSG00000170627 | 23.151985  | -1.95412553 | 0.61637529 | 7.90E-05   | 0.00061601 | GTSF1     |
| 349152 | ENSG00000170629 | 362.628805 | -0.23624593 | 0.13779251 | 0.06531185 | 0.18235113 | DPY19L2P2 |

|           |                 |            |             |            |            |            |         |
|-----------|-----------------|------------|-------------|------------|------------|------------|---------|
| 7564      | ENSG00000170631 | 153.071349 | -0.00373758 | 0.18731935 | 0.98206668 | 0.99406728 | ZNF16   |
| 83787     | ENSG00000170632 | 939.880534 | -0.22185436 | 0.10278484 | 0.02465063 | 0.08617946 | ARMC10  |
| 80196     | ENSG00000170633 | 603.033588 | 0.03296072  | 0.11521855 | 0.7650925  | 0.89191112 | RNF34   |
| 98        | ENSG00000170634 | 118.453314 | 0.03742741  | 0.18755837 | 0.82051252 | 0.91836671 | ACYP2   |
| 80305     | ENSG00000170638 | 1441.9526  | -0.09245122 | 0.08051135 | 0.23902785 | 0.45678218 | TRABD   |
| 11016     | ENSG00000170653 | 925.095631 | 0.07515401  | 0.09602376 | 0.4201837  | 0.64613584 | ATF7    |
| 100271927 | ENSG00000170667 | 1141.41506 | 0.1197955   | 0.09802019 | 0.20620369 | 0.41324052 | RASA4B  |
| 9306      | ENSG00000170677 | 652.692117 | 0.52780444  | 0.1089639  | 4.62E-07   | 5.55E-06   | SOCS6   |
| 347273    | ENSG00000170681 | 153.006944 | -0.13703721 | 0.17498064 | 0.37810239 | 0.60702282 | CAVIN4  |
| 26496     | ENSG00000170683 | 0          | NA          | NA         | NA         | NA         | OR10A3  |
| 162979    | ENSG00000170684 | 19.7357671 | 0.42543104  | 0.49083921 | 0.07837909 | 0.20828302 | ZNF296  |
| NA        | ENSG00000170688 | 0          | NA          | NA         | NA         | NA         | OR5E1P  |
| 3219      | ENSG00000170689 | 0          | NA          | NA         | NA         | NA         | HOXB9   |
| 284076    | ENSG00000170703 | 0          | NA          | NA         | NA         | NA         | TTLL6   |
| 5429      | ENSG00000170734 | 626.244774 | 0.0362626   | 0.27034457 | 0.8532285  | 0.93385853 | POLH    |
| 143425    | ENSG00000170743 | 19.4946776 | 2.46743912  | 0.62493743 | 4.71E-06   | 4.77E-05   | SYT9    |
| 3790      | ENSG00000170745 | 4.19961508 | 0.28997988  | 0.55691392 | 0.00620984 | 0.02788666 | KCNS3   |
| 27288     | ENSG00000170748 | 0.16735865 | 0.01897177  | 0.38482933 | 0.78225479 | NA         | RBMXL2  |
| 3799      | ENSG00000170759 | 4809.14291 | -0.24712449 | 0.05450513 | 4.53E-06   | 4.60E-05   | KIF5B   |
| 2861      | ENSG00000170775 | 211.131079 | 1.81428456  | 0.18072118 | 8.09E-25   | 3.83E-23   | GPR37   |
| 11214     | ENSG00000170776 | 2129.27642 | 0.21519275  | 0.08300226 | 0.00782716 | 0.03389892 | AKAP13  |
| 89882     | ENSG00000170777 | 0          | NA          | NA         | NA         | NA         | TPD52L3 |
| 55038     | ENSG00000170779 | 1006.24629 | -0.41691439 | 0.08417224 | 3.69E-07   | 4.50E-06   | CDCA4   |
| 283297    | ENSG00000170782 | 0          | NA          | NA         | NA         | NA         | OR10A4  |
| 195814    | ENSG00000170786 | 0          | NA          | NA         | NA         | NA         | SDR16C5 |
| 143241    | ENSG00000170788 | 0.85833586 | 0.04613547  | 0.38538553 | 0.40603712 | NA         | DYDC1   |
| 341276    | ENSG00000170790 | 0          | NA          | NA         | NA         | NA         | OR10A2  |
| 79145     | ENSG00000170791 | 100.262932 | -0.07431098 | 0.23488783 | 0.68894778 | 0.84898907 | CHCHD7  |
| 94031     | ENSG00000170801 | 2.27953673 | -0.15767178 | 0.43003068 | 0.01919798 | NA         | HTRA3   |
| 3344      | ENSG00000170802 | 474.22979  | -0.41720219 | 0.11547745 | 0.00014742 | 0.00107846 | FOXN2   |
| 442721    | ENSG00000170807 | 0.50818559 | 0.03077092  | 0.38601908 | 0.48305186 | NA         | LMOD2   |
| 8419      | ENSG00000170819 | 0          | NA          | NA         | NA         | NA         | BFSP2   |
| 2492      | ENSG00000170820 | 0          | NA          | NA         | NA         | NA         | FSHR    |
| NA        | ENSG00000170827 | 2.0221701  | 0.03281618  | 0.3767489  | 0.70355011 | NA         | CELP    |
| 84669     | ENSG00000170832 | 1277.81613 | -0.2029806  | 0.08905857 | 0.01884299 | 0.06938475 | USP32   |
| 1056      | ENSG00000170835 | 41.7098787 | 0.25562132  | 0.31230241 | 0.22747008 | 0.44227817 | CEL     |
| 8493      | ENSG00000170836 | 876.377947 | -0.12922933 | 0.08509028 | 0.11881708 | 0.28318716 | PPM1D   |
| 2850      | ENSG00000170837 | 375.013675 | -0.25905564 | 0.123219   | 0.0259129  | 0.08955568 | GPR27   |

|        |                 |            |             |            |            |            |          |
|--------|-----------------|------------|-------------|------------|------------|------------|----------|
| NA     | ENSG00000170846 | 457.383903 | -0.13837176 | 0.12705668 | 0.24576918 | 0.46496238 |          |
| 5675   | ENSG00000170848 | 0          | NA          | NA         | NA         | NA         | PSG6     |
| 25948  | ENSG00000170852 | 1475.54325 | -0.2140699  | 0.08006192 | 0.00615923 | 0.02770185 | KBTBD2   |
| 84864  | ENSG00000170854 | 527.300537 | -0.21417458 | 0.12913092 | 0.0770512  | 0.20558039 | RIOX2    |
| 51499  | ENSG00000170855 | 333.746306 | -0.20349095 | 0.13528094 | 0.10693762 | 0.2618665  | TRIAP1   |
| 79166  | ENSG00000170858 | 0          | NA          | NA         | NA         | NA         | LILRP2   |
| 27258  | ENSG00000170860 | 665.977471 | -0.33991535 | 0.10443393 | 0.00069512 | 0.00430169 | LSM3     |
| 9778   | ENSG00000170871 | 998.91637  | 0.01432969  | 0.10257442 | 0.88583718 | 0.95015905 | KIAA0232 |
| 9788   | ENSG00000170873 | 401.863248 | -0.54049312 | 0.14929824 | 9.78E-05   | 0.00074748 | MTSS1    |
| 79188  | ENSG00000170876 | 1484.91216 | -0.39600421 | 0.07635267 | 1.14E-07   | 1.50E-06   | TMEM43   |
| 11236  | ENSG00000170881 | 522.159125 | -0.11070522 | 0.10555967 | 0.2739229  | 0.49754008 | RNF139   |
| 6203   | ENSG00000170889 | 10831.0395 | -0.1112736  | 0.0490427  | 0.0220835  | 0.07887246 | RPS9     |
| 5319   | ENSG00000170890 | 0.36265744 | 0.00119746  | 0.38336636 | 0.9645027  | NA         | PLA2G1B  |
| 54360  | ENSG00000170891 | 115.675067 | -0.00409768 | 0.20128044 | 0.98020387 | 0.99338199 | CYTL1    |
| 79042  | ENSG00000170892 | 899.206127 | -0.25500112 | 0.09210905 | 0.00416501 | 0.01996949 | TSEN34   |
| 7200   | ENSG00000170893 | 1.87644317 | -0.06322292 | 0.38708455 | 0.33781037 | NA         | TRH      |
| 2941   | ENSG00000170899 | 774.480054 | -0.5543777  | 0.09866614 | 6.58E-09   | 1.01E-07   | GSTA4    |
| 84437  | ENSG00000170903 | 850.25664  | -0.1308926  | 0.10708804 | 0.20215925 | 0.40772996 | MSANTD4  |
| 4696   | ENSG00000170906 | 510.68271  | 0.09871706  | 0.11504966 | 0.36861771 | 0.59798654 | NDUFA3   |
| 126014 | ENSG00000170909 | 1.2677063  | 0.03906889  | 0.38264176 | 0.53563598 | NA         | OSCAR    |
| 85315  | ENSG00000170915 | 605.44267  | -0.49863329 | 0.11136239 | 2.94E-06   | 3.07E-05   | PAQR8    |
| 11162  | ENSG00000170917 | 220.939489 | -0.00672792 | 0.16747897 | 0.96319047 | 0.98545957 | NUDT6    |
| NA     | ENSG00000170919 | 479.158149 | 0.58629626  | 0.13330817 | 3.34E-06   | 3.46E-05   | TPT1-AS1 |
| 390883 | ENSG00000170920 | 0          | NA          | NA         | NA         | NA         | OR7G3    |
| 26115  | ENSG00000170921 | 2657.5517  | -0.05796517 | 0.0998356  | 0.54601168 | 0.75333225 | TANC2    |
| 390882 | ENSG00000170923 | 0          | NA          | NA         | NA         | NA         | OR7G2    |
| 56156  | ENSG00000170925 | 0          | NA          | NA         | NA         | NA         | TEX13B   |
| 5314   | ENSG00000170927 | 40.8107718 | -0.13108846 | 0.28647204 | 0.50683525 | 0.72264544 | PKHD1    |
| 125963 | ENSG00000170929 | 0          | NA          | NA         | NA         | NA         | OR1M1    |
| 392517 | ENSG00000170935 | 0          | NA          | NA         | NA         | NA         | NCBP2L   |
| 120526 | ENSG00000170946 | 343.196436 | 0.06734579  | 0.15402231 | 0.63544285 | 0.8165276  | DNAJC24  |
| 85509  | ENSG00000170948 | 0          | NA          | NA         | NA         | NA         | MBD3L1   |
| 90338  | ENSG00000170949 | 553.320797 | 0.10563911  | 0.12727724 | 0.37865384 | 0.60756103 | ZNF160   |
| 5232   | ENSG00000170950 | 0          | NA          | NA         | NA         | NA         | PGK2     |
| 219858 | ENSG00000170953 | 0          | NA          | NA         | NA         | NA         | OR8B12   |
| 55786  | ENSG00000170954 | 183.697425 | -0.04070591 | 0.17189737 | 0.78992985 | 0.9043268  | ZNF415   |
| 112464 | ENSG00000170955 | 0          | NA          | NA         | NA         | NA         | CAVIN3   |
| 1084   | ENSG00000170956 | 0          | NA          | NA         | NA         | NA         | CEACAM3  |

|           |                 |            |             |            |            |            |           |
|-----------|-----------------|------------|-------------|------------|------------|------------|-----------|
| 341019    | ENSG00000170959 | 1.3736986  | 0.03881598  | 0.38199749 | 0.56108184 | NA         | DCDC1     |
| 3037      | ENSG00000170961 | 0.35651483 | 0.02381586  | 0.38538087 | 0.614101   | NA         | HAS2      |
| 80310     | ENSG00000170962 | 219.651156 | 0.78406635  | 0.16791573 | 5.67E-07   | 6.71E-06   | PDGFD     |
| 10761     | ENSG00000170965 | 3.29634248 | -0.01844288 | 0.36953426 | 0.85934224 | 0.9374775  | PLAC1     |
| 414301    | ENSG00000170967 | 0.18922458 | 0.01954053  | 0.38488496 | 0.78225479 | NA         | DDI1      |
| NA        | ENSG00000170983 | 0.47455697 | -0.02849777 | 0.38581349 | 0.54195944 | NA         | LINC00208 |
| 1901      | ENSG00000170989 | 5.34543424 | 3.74593527  | 1.70641036 | 0.00106185 | 0.00621448 | S1PR1     |
| 90161     | ENSG00000171004 | 2483.50465 | 0.81337677  | 0.07836478 | 5.83E-26   | 2.88E-24   | HS6ST2    |
| 219875    | ENSG00000171014 | 0          | NA          | NA         | NA         | NA         | OR4D5     |
| 26108     | ENSG00000171016 | 571.766813 | -0.08988502 | 0.11919475 | 0.42643646 | 0.65221241 | PYGO1     |
| 80131     | ENSG00000171017 | 0.16735865 | 0.01897177  | 0.38482933 | 0.78225479 | NA         | LRRC8E    |
| 5569      | ENSG00000171033 | 659.725302 | -0.28261935 | 0.11071675 | 0.00743975 | 0.03249057 | PKIA      |
| 286046    | ENSG00000171044 | 147.749066 | -0.21504409 | 0.24917681 | 0.26781428 | 0.49039551 | XKR6      |
| 203062    | ENSG00000171045 | 280.37473  | -0.03471011 | 0.18029097 | 0.82535306 | 0.92066374 | TSNARE1   |
| 2358      | ENSG00000171049 | 0          | NA          | NA         | NA         | NA         | FPR2      |
| 2357      | ENSG00000171051 | 0          | NA          | NA         | NA         | NA         | FPR1      |
| 160065    | ENSG00000171053 | 0          | NA          | NA         | NA         | NA         | PATE1     |
| 347468    | ENSG00000171054 | 0.48994503 | -0.00693475 | 0.38315951 | 0.85942445 | NA         | OR13H1    |
| 9637      | ENSG00000171055 | 526.376855 | 0.06176695  | 0.10682596 | 0.54789953 | 0.75451702 | FEZ2      |
| 83595     | ENSG00000171056 | 291.798051 | -1.4986547  | 0.16123557 | 1.24E-21   | 4.96E-20   | SOX7      |
| 203076    | ENSG00000171060 | 0          | NA          | NA         | NA         | NA         | C8orf74   |
| 53838     | ENSG00000171067 | 626.247559 | -0.15354008 | 0.1007123  | 0.11337248 | 0.2732066  | C11orf24  |
| 100125556 | ENSG00000171084 | 82.772385  | -0.07126738 | 0.2236463  | 0.69437933 | 0.85208349 | FAM86JP   |
| 238       | ENSG00000171094 | 5182.08604 | -1.05705027 | 0.05799607 | 4.14E-75   | 7.46E-73   | ALK       |
| 883       | ENSG00000171097 | 251.705928 | 0.10954893  | 0.15749851 | 0.44633257 | 0.67062583 | KYAT1     |
| 4534      | ENSG00000171100 | 89.9338077 | 0.3416254   | 0.30005154 | 0.11373437 | 0.27377941 | MTM1      |
| 284367    | ENSG00000171101 | 0          | NA          | NA         | NA         | NA         | SIGLEC17P |
| 29989     | ENSG00000171102 | 0          | NA          | NA         | NA         | NA         | OBP2B     |
| 55006     | ENSG00000171103 | 480.573884 | 0.09223721  | 0.11531309 | 0.40199568 | 0.63031025 | TRMT61B   |
| 3643      | ENSG00000171105 | 530.989676 | 0.10719305  | 0.28793948 | 0.58478927 | 0.78078479 | INSR      |
| 55669     | ENSG00000171109 | 1098.48276 | 0.1300738   | 0.09276247 | 0.14834412 | 0.33065355 | MFN1      |
| 155038    | ENSG00000171115 | 0          | NA          | NA         | NA         | NA         | GIMAP8    |
| 100506164 | ENSG00000171116 | 1.13976687 | -0.06245039 | 0.39108221 | 0.18895555 | NA         | HSFX1     |
| 4902      | ENSG00000171119 | 101.697659 | -0.07235435 | 0.20590453 | 0.67632148 | 0.84170926 | NRTN      |
| 27094     | ENSG00000171121 | 60.3891718 | -0.21130972 | 0.2630185  | 0.2873601  | 0.51306915 | KCNMB3    |
| 2525      | ENSG00000171124 | 1.8243984  | -0.04306502 | 0.38052105 | 0.56737642 | NA         | FUT3      |
| 170850    | ENSG00000171126 | 33.0356508 | 0.97445919  | 0.45610026 | 0.00297902 | 0.01503914 | KCNG3     |
| 155066    | ENSG00000171130 | 2152.91888 | -0.25015585 | 0.07531637 | 0.00068636 | 0.00425014 | ATP6V0E2  |

|        |                 |            |             |            |            |            |           |
|--------|-----------------|------------|-------------|------------|------------|------------|-----------|
| 5581   | ENSG00000171132 | 328.191775 | -0.21875661 | 0.14284362 | 0.09757699 | 0.24466031 | PRKCE     |
| 26248  | ENSG00000171133 | 0          | NA          | NA         | NA         | NA         | OR2K2     |
| 84522  | ENSG00000171135 | 689.119232 | -0.15949508 | 0.09973559 | 0.09696608 | 0.24355834 | JAGN1     |
| 117579 | ENSG00000171136 | 0.173733   | 0.01914545  | 0.38484597 | 0.78225479 | NA         | RLN3      |
| 10474  | ENSG00000171148 | 1797.95468 | 0.18799424  | 0.07428712 | 0.00980928 | 0.04085998 | TADA3     |
| 9655   | ENSG00000171150 | 718.857381 | -0.04240653 | 0.10435646 | 0.67184379 | 0.83832583 | SOCS5     |
| 29071  | ENSG00000171155 | 210.36947  | 0.16637404  | 0.15503972 | 0.239442   | 0.45732906 | C1GALT1C1 |
| 79095  | ENSG00000171159 | 632.91868  | 0.28671708  | 0.09941426 | 0.00275866 | 0.01410612 | C9orf16   |
| 118812 | ENSG00000171160 | 521.78199  | 0.21090469  | 0.11909298 | 0.06181336 | 0.17539718 | MORN4     |
| 79894  | ENSG00000171161 | 897.663058 | -0.23144737 | 0.09242225 | 0.00950141 | 0.0397948  | ZNF672    |
| 55657  | ENSG00000171163 | 936.425377 | 0.21813157  | 0.09155509 | 0.01398347 | 0.05451602 | ZNF692    |
| 203245 | ENSG00000171169 | 254.098811 | -0.0638286  | 0.14725738 | 0.63793349 | 0.81760985 | NAIF1     |
| 64080  | ENSG00000171174 | 24.0977835 | 0.23894127  | 0.36002671 | 0.24825817 | 0.46743944 | RBKS      |
| 26245  | ENSG00000171180 | 0.173733   | 0.01914545  | 0.38484597 | 0.78225479 | NA         | OR2M4     |
| 2897   | ENSG00000171189 | 0.16735865 | 0.01897177  | 0.38482933 | 0.78225479 | NA         | GRIK1     |
| 4589   | ENSG00000171195 | 0          | NA          | NA         | NA         | NA         | MUC7      |
| 58503  | ENSG00000171199 | 0          | NA          | NA         | NA         | NA         | OPRPN     |
| 10879  | ENSG00000171201 | 0          | NA          | NA         | NA         | NA         | SMR3B     |
| 84233  | ENSG00000171202 | 193.988057 | -0.03031366 | 0.15739613 | 0.83409339 | 0.92432089 | TMEM126A  |
| 55863  | ENSG00000171204 | 332.105923 | 0.05770862  | 0.14455847 | 0.66766279 | 0.83652856 | TMEM126B  |
| 81603  | ENSG00000171206 | 913.095726 | -0.27351522 | 0.10650078 | 0.00729314 | 0.03198408 | TRIM8     |
| 81831  | ENSG00000171208 | 1464.77985 | -0.61089561 | 0.09832457 | 1.49E-10   | 2.81E-09   | NETO2     |
| 1448   | ENSG00000171209 | 0          | NA          | NA         | NA         | NA         | CSN3      |
| 49861  | ENSG00000171217 | 16.6310814 | 0.03864302  | 0.31940366 | 0.83189176 | 0.92391014 | CLDN20    |
| 55561  | ENSG00000171219 | 236.174961 | 0.20706421  | 0.14906378 | 0.13112451 | 0.30358816 | CDC42BPG  |
| 51282  | ENSG00000171222 | 990.467289 | -0.03736652 | 0.08490722 | 0.65118513 | 0.82578612 | SCAND1    |
| 3726   | ENSG00000171223 | 1722.72581 | 0.28268669  | 0.07454772 | 0.00010781 | 0.00081388 | JUNB      |
| 219738 | ENSG00000171224 | 291.265337 | -0.08021824 | 0.13958224 | 0.53624231 | 0.74696675 | FAM241B   |
| 140738 | ENSG00000171227 | 2.07889136 | -0.02173606 | 0.37788953 | 0.77487526 | NA         | TMEM37    |
| 7364   | ENSG00000171234 | 0          | NA          | NA         | NA         | NA         | UGT2B7    |
| 116844 | ENSG00000171236 | 3.39388008 | -0.15255637 | 0.41398273 | 0.15138717 | 0.33539121 | LRG1      |
| 79801  | ENSG00000171241 | 396.228911 | -0.12384823 | 0.12639469 | 0.29763108 | 0.52432966 | SHCBP1    |
| 25928  | ENSG00000171243 | 13.1276958 | 0.0803825   | 0.33825461 | 0.64202453 | 0.82094397 | SOSTDC1   |
| 4884   | ENSG00000171246 | 0.61831094 | -0.03593288 | 0.38658432 | 0.43088585 | NA         | NPTX1     |
| 283742 | ENSG00000171262 | 1187.22842 | -0.10356771 | 0.11000461 | 0.32441062 | 0.55221149 | FAM98B    |
| 90594  | ENSG00000171291 | 302.904868 | -0.02519732 | 0.16183575 | 0.86247977 | 0.93899493 | ZNF439    |
| 126070 | ENSG00000171295 | 195.642081 | 0.00011928  | 0.169127   | 0.99829641 | 0.99941443 | ZNF440    |
| 2548   | ENSG00000171298 | 2330.19486 | 0.21506421  | 0.07941127 | 0.00556809 | 0.02549524 | GAA       |

|        |                 |            |             |            |            |            |          |
|--------|-----------------|------------|-------------|------------|------------|------------|----------|
| 124583 | ENSG00000171302 | 1598.31272 | -0.08432143 | 0.1086561  | 0.4167852  | 0.64320305 | CANT1    |
| 3777   | ENSG00000171303 | 419.16107  | -2.59829379 | 0.15465835 | 1.41E-64   | 2.04E-62   | KCNK3    |
| 84287  | ENSG00000171307 | 539.153326 | -0.0456374  | 0.10741075 | 0.6570982  | 0.82978985 | ZDHHC16  |
| 50515  | ENSG00000171310 | 269.159255 | -0.58298297 | 0.20521005 | 0.00120358 | 0.00694559 | CHST11   |
| 51013  | ENSG00000171311 | 330.33166  | 0.08098611  | 0.13197421 | 0.51355427 | 0.7287659  | EXOSC1   |
| 5223   | ENSG00000171314 | 4467.71393 | -0.42687307 | 0.08113296 | 6.98E-08   | 9.39E-07   | PGAM1    |
| 55636  | ENSG00000171316 | 3126.00829 | 0.14878534  | 0.20856425 | 0.39912163 | 0.62789874 | CHD7     |
| 157570 | ENSG00000171320 | 378.59052  | -0.19601571 | 0.16319312 | 0.1820596  | 0.37980817 | ESCO2    |
| 3880   | ENSG00000171345 | 0.92180311 | -0.05028412 | 0.38870729 | 0.27104919 | NA         | KRT19    |
| 3866   | ENSG00000171346 | 0          | NA          | NA         | NA         | NA         | KRT15    |
| 541468 | ENSG00000171357 | 37.6424885 | 0.10335307  | 0.28967398 | 0.5992     | 0.79043404 | LURAP1   |
| 8687   | ENSG00000171360 | 0          | NA          | NA         | NA         | NA         | KRT38    |
| 1184   | ENSG00000171365 | 526.102273 | -0.38290112 | 0.12234646 | 0.00093111 | 0.00557431 | CLCN5    |
| 11076  | ENSG00000171368 | 307.572064 | -0.63702012 | 0.1363872  | 8.04E-07   | 9.26E-06   | TPPP     |
| 3752   | ENSG00000171385 | 2.85046178 | -0.01451295 | 0.37335799 | 0.87297343 | 0.94439555 | KCND3    |
| 8862   | ENSG00000171388 | 127.980964 | 1.73263792  | 0.2387161  | 3.07E-14   | 7.91E-13   | APLN     |
| 84616  | ENSG00000171396 | 0          | NA          | NA         | NA         | NA         | KRTAP4-4 |
| 3860   | ENSG00000171401 | 0          | NA          | NA         | NA         | NA         | KRT13    |
| 170626 | ENSG00000171402 | 0          | NA          | NA         | NA         | NA         | XAGE3    |
| 3857   | ENSG00000171403 | 0          | NA          | NA         | NA         | NA         | KRT9     |
| 170627 | ENSG00000171405 | 0          | NA          | NA         | NA         | NA         | XAGE5    |
| 27115  | ENSG00000171408 | 90.7161746 | 1.30446928  | 0.27354682 | 1.67E-07   | 2.15E-06   | PDE7B    |
| 64979  | ENSG00000171421 | 248.782216 | -0.13808579 | 0.14808085 | 0.31103806 | 0.53866926 | MRPL36   |
| 51545  | ENSG00000171425 | 373.507409 | -0.13647315 | 0.12684643 | 0.25308921 | 0.47334935 | ZNF581   |
| 9      | ENSG00000171428 | 28.3168071 | -0.05181381 | 0.29834794 | 0.78336521 | 0.90135811 | NAT1     |
| 54474  | ENSG00000171431 | 0          | NA          | NA         | NA         | NA         | KRT20    |
| 392465 | ENSG00000171433 | 0          | NA          | NA         | NA         | NA         | GLOD5    |
| 283455 | ENSG00000171435 | 114.080587 | 0.35941553  | 0.21023777 | 0.04477316 | 0.13655643 | KSR2     |
| 147807 | ENSG00000171443 | 87.8279157 | -0.20785745 | 0.2433988  | 0.27917465 | 0.50362112 | ZNF524   |
| 4163   | ENSG00000171444 | 970.395578 | -0.05103405 | 0.09703594 | 0.58591439 | 0.7817695  | MCC      |
| 342574 | ENSG00000171446 | 0          | NA          | NA         | NA         | NA         | KRT27    |
| 57684  | ENSG00000171448 | 415.604773 | -0.09451416 | 0.12073598 | 0.40818519 | 0.63640649 | ZBTB26   |
| 8941   | ENSG00000171450 | 754.396459 | -1.63912016 | 0.10021106 | 3.13E-61   | 4.19E-59   | CDK5R2   |
| 92126  | ENSG00000171451 | 518.204329 | -0.23743023 | 0.11293933 | 0.02724779 | 0.09307784 | DSEL     |
| 9533   | ENSG00000171453 | 444.312172 | 0.24358065  | 0.12536691 | 0.03946358 | 0.12418039 | POLR1C   |
| 171023 | ENSG00000171456 | 3492.24361 | 0.01081107  | 0.08892783 | 0.90158237 | 0.9567498  | ASXL1    |
| 392390 | ENSG00000171459 | 0          | NA          | NA         | NA         | NA         | OR1L6    |
| 65989  | ENSG00000171462 | 57.2038104 | -0.40003533 | 0.30210303 | 0.07021027 | 0.1919487  | DLK2     |

|        |                 |            |             |            |            |            |             |
|--------|-----------------|------------|-------------|------------|------------|------------|-------------|
| 54811  | ENSG00000171466 | 832.736276 | -0.19773021 | 0.11145128 | 0.06281246 | 0.17744542 | ZNF562      |
| 24149  | ENSG00000171467 | 1244.68112 | -0.23114183 | 0.07959562 | 0.00293094 | 0.01483038 | ZNF318      |
| 93134  | ENSG00000171469 | 738.880543 | 0.06215466  | 0.0984568  | 0.51426655 | 0.72925798 | ZNF561      |
| 147179 | ENSG00000171475 | 981.571764 | 0.23896684  | 0.13173515 | 0.0528785  | 0.15535456 | WIPF2       |
| 84525  | ENSG00000171476 | 2.34923132 | 0.08052168  | 0.38684956 | 0.36184912 | NA         | HOPX        |
| 729201 | ENSG00000171478 | 0.173733   | 0.01914545  | 0.38484597 | 0.78225479 | NA         | SPACA5B     |
| 26735  | ENSG00000171481 | 0          | NA          | NA         | NA         | NA         | OR1L3       |
| NA     | ENSG00000171483 | 0.15069912 | -0.01848503 | 0.38480575 | 0.84537521 | NA         | SSX6P       |
| 126206 | ENSG00000171487 | 0          | NA          | NA         | NA         | NA         | NLRP5       |
| 84230  | ENSG00000171488 | 459.923502 | -0.91791042 | 0.12202033 | 8.16E-15   | 2.18E-13   | LRRC8C      |
| 389852 | ENSG00000171489 | 0          | NA          | NA         | NA         | NA         | SPACA5      |
| 26156  | ENSG00000171490 | 2747.05217 | -0.36099189 | 0.06321093 | 6.69E-09   | 1.03E-07   | RSL1D1      |
| 55144  | ENSG00000171492 | 613.733486 | -0.19516818 | 0.12128135 | 0.08876628 | 0.22815429 | LRRC8D      |
| 133558 | ENSG00000171495 | 0.93555031 | -0.01646483 | 0.38151541 | 0.76418188 | NA         | MROH2B      |
| 138881 | ENSG00000171496 | 0          | NA          | NA         | NA         | NA         | OR1L8       |
| 5481   | ENSG00000171497 | 1015.12945 | 0.1068678   | 0.09250202 | 0.23291429 | 0.44986562 | PPID        |
| 138882 | ENSG00000171501 | 0          | NA          | NA         | NA         | NA         | OR1N2       |
| 255631 | ENSG00000171502 | 1.92307328 | 0.13013286  | 0.41147964 | 0.0782998  | NA         | COL24A1     |
| 2110   | ENSG00000171503 | 474.65502  | 0.12201297  | 0.14528398 | 0.36447188 | 0.594135   | ETFDH       |
| 138883 | ENSG00000171505 | 0          | NA          | NA         | NA         | NA         | OR1N1       |
| 59350  | ENSG00000171509 | 0.14931947 | -0.01844332 | 0.38480212 | 0.84537521 | NA         | RXFP1       |
| 23566  | ENSG00000171517 | 79.5843338 | 0.58025519  | 0.27224432 | 0.00828623 | 0.03555628 | LPAR3       |
| 5734   | ENSG00000171522 | 0.34624801 | -0.02356563 | 0.38536324 | 0.65270996 | NA         | PTGER4      |
| 6902   | ENSG00000171530 | 1644.68168 | 0.09618797  | 0.0810359  | 0.2246998  | 0.4385072  | TBCA        |
| 4761   | ENSG00000171532 | 3.0009515  | 0.07981591  | 0.38325908 | 0.4130919  | 0.6403849  | NEUROD2     |
| 4135   | ENSG00000171533 | 1524.09456 | -1.5577278  | 0.07978558 | 5.45E-86   | 1.23E-83   | MAP6        |
| 23440  | ENSG00000171540 | 0.49167029 | -0.00731448 | 0.3831721  | 0.85359874 | NA         | OTP         |
| 9427   | ENSG00000171551 | 74.9264526 | 4.58489632  | 0.45847334 | 2.47E-24   | 1.15E-22   | ECEL1       |
| 598    | ENSG00000171552 | 868.13671  | -0.07335706 | 0.08635454 | 0.37906576 | 0.60807444 | BCL2L1      |
| 2266   | ENSG00000171557 | 0          | NA          | NA         | NA         | NA         | FGG         |
| 2243   | ENSG00000171560 | 0          | NA          | NA         | NA         | NA         | FGA         |
| 341152 | ENSG00000171561 | 0.173733   | 0.01914545  | 0.38484597 | 0.78225479 | NA         | OR2AT4      |
| 2244   | ENSG00000171564 | 0          | NA          | NA         | NA         | NA         | FGB         |
| 5356   | ENSG00000171566 | 984.964447 | -0.03383522 | 0.102137   | 0.73026986 | 0.87106623 | PLRG1       |
| NA     | ENSG00000171570 | 7.47175324 | 0.19460226  | 0.4137992  | 0.20868925 | 0.4165387  | RAB4B-EGLN2 |
| 201514 | ENSG00000171574 | 195.076392 | -0.02586344 | 0.16161543 | 0.86070391 | 0.93799827 | ZNF584      |
| 1826   | ENSG00000171587 | 0          | NA          | NA         | NA         | NA         | DSCAM       |
| 64446  | ENSG00000171595 | 0          | NA          | NA         | NA         | NA         | DNAI2       |



|           |                 |            |             |            |            |            |            |
|-----------|-----------------|------------|-------------|------------|------------|------------|------------|
| 10316     | ENSG00000171596 | 12.8065149 | 0.11571055  | 0.354941   | 0.49326726 | 0.71236151 | NMUR1      |
| 22883     | ENSG00000171603 | 3953.46809 | -0.20428347 | 0.06275589 | 0.00095579 | 0.00569287 | CLSTN1     |
| 51523     | ENSG00000171604 | 2127.38352 | -0.13388924 | 0.07337356 | 0.06215452 | 0.17598767 | CXXC5      |
| 10782     | ENSG00000171606 | 244.828715 | -0.42402377 | 0.15174053 | 0.00239671 | 0.01251004 | ZNF274     |
| 5293      | ENSG00000171608 | 133.617658 | 0.54004773  | 0.21873774 | 0.00408291 | 0.01964231 | PIK3CD     |
| 171558    | ENSG00000171611 | 0          | NA          | NA         | NA         | NA         | PTCRA      |
| 84275     | ENSG00000171612 | 431.957938 | -0.40521098 | 0.11968239 | 0.00035856 | 0.00240088 | SLC25A33   |
| 8507      | ENSG00000171617 | 1168.2968  | 0.09543553  | 0.11301737 | 0.37727301 | 0.60612976 | ENC1       |
| 80176     | ENSG00000171621 | 41.2320921 | -0.42059498 | 0.34071214 | 0.07074434 | 0.1930817  | SPSB1      |
| 5031      | ENSG00000171631 | 19.7641453 | 0.01441495  | 0.32565714 | 0.93582419 | 0.97325384 | P2RY6      |
| 2186      | ENSG00000171634 | 5242.89871 | -0.18494388 | 0.05968238 | 0.00156475 | 0.00869842 | BPTF       |
| 170591    | ENSG00000171643 | 0          | NA          | NA         | NA         | NA         | S100Z      |
| 284307    | ENSG00000171649 | 162.107403 | 0.34248069  | 0.202761   | 0.04930831 | 0.14748635 | ZIK1       |
| 27197     | ENSG00000171657 | 0.32279419 | -0.02325667 | 0.38531906 | 0.66943166 | NA         | GPR82      |
| 344887    | ENSG00000171658 | 0          | NA          | NA         | NA         | NA         | NMRAL2P    |
| 2857      | ENSG00000171659 | 0.48406658 | -0.00538943 | 0.38311431 | 0.88309449 | NA         | GPR34      |
| 220070    | ENSG00000171671 | 0          | NA          | NA         | NA         | NA         | SHANK2-AS3 |
| 57449     | ENSG00000171680 | 1601.48298 | 0.37526112  | 0.10402391 | 0.00017323 | 0.00124854 | PLEKHG5    |
| 55729     | ENSG00000171681 | 1424.77885 | -0.4089201  | 0.11156747 | 0.00012346 | 0.00091773 | ATF7IP     |
| 198437    | ENSG00000171695 | 10.052071  | 0.13555194  | 0.37705154 | 0.37768658 | 0.60649953 | LKAAEAR1   |
| 10287     | ENSG00000171700 | 297.62989  | 0.17296524  | 0.14151482 | 0.18802713 | 0.38838712 | RGS19      |
| 6919      | ENSG00000171703 | 630.05897  | 0.34373132  | 0.11311047 | 0.00143384 | 0.0080656  | TCEA2      |
| 1673      | ENSG00000171711 | 0          | NA          | NA         | NA         | NA         | DEFB4A     |
| 100289462 | ENSG00000171711 | 0          | NA          | NA         | NA         | NA         | DEFB4A     |
| 203859    | ENSG00000171714 | 638.202699 | -0.60876702 | 0.14992437 | 1.35E-05   | 0.00012586 | ANO5       |
| 102723370 | ENSG00000171714 | 638.202699 | -0.60876702 | 0.14992437 | 1.35E-05   | 0.00012586 | ANO5       |
| 8841      | ENSG00000171720 | 1241.70782 | 0.07485484  | 0.08479437 | 0.36560944 | 0.59480864 | HDAC3      |
| 284680    | ENSG00000171722 | 63.161059  | -2.26422477 | 0.35831882 | 1.46E-11   | 3.06E-10   | SPATA46    |
| 10243     | ENSG00000171723 | 448.895033 | -0.48301998 | 0.12076927 | 2.56E-05   | 0.00022476 | GPHN       |
| 57687     | ENSG00000171724 | 181.712789 | -1.15795777 | 0.20334189 | 1.30E-09   | 2.20E-08   | VAT1L      |
| 55092     | ENSG00000171729 | 457.113838 | -0.01722493 | 0.12193309 | 0.880591   | 0.94713457 | TMEM51     |
| 23261     | ENSG00000171735 | 838.505028 | -0.58699431 | 0.10067699 | 1.72E-09   | 2.87E-08   | CAMTA1     |
| 3960      | ENSG00000171747 | 2.57822357 | -0.0279604  | 0.37702859 | 0.7211761  | 0.86691933 | LGALS4     |
| 151827    | ENSG00000171757 | 204.151107 | -0.38427708 | 0.18976262 | 0.02086041 | 0.07535879 | LRRC34     |
| 5053      | ENSG00000171759 | 2.61596974 | 0.17637302  | 0.44264197 | 0.01111043 | 0.04524446 | PAH        |
| 79029     | ENSG00000171763 | 340.112352 | 0.04762192  | 0.14143445 | 0.71784837 | 0.8643386  | SPATA5L1   |
| 2628      | ENSG00000171766 | 205.740952 | 0.48177667  | 0.17881157 | 0.00268659 | 0.01379448 | GATM       |
| 93426     | ENSG00000171772 | 0.85676824 | -0.01016063 | 0.38083338 | 0.8579291  | NA         | SYCE1      |

|        |                 |            |             |            |            |            |          |
|--------|-----------------|------------|-------------|------------|------------|------------|----------|
| 115861 | ENSG00000171773 | 0          | NA          | NA         | NA         | NA         | NXNL1    |
| 115727 | ENSG00000171777 | 0.30139824 | -0.02296476 | 0.38527817 | 0.68536535 | NA         | RASGRP4  |
| 4807   | ENSG00000171786 | 14.8621908 | 0.31541116  | 0.43391054 | 0.13951623 | 0.31648712 | NHLH1    |
| 200172 | ENSG00000171790 | 29.0458599 | 0.12777393  | 0.2986228  | 0.51839502 | 0.73221886 | SLFNL1   |
| 596    | ENSG00000171791 | 926.287796 | -0.81020172 | 0.09114766 | 1.14E-19   | 4.17E-18   | BCL2     |
| 83695  | ENSG00000171792 | 610.676351 | -0.28334992 | 0.13177339 | 0.02137016 | 0.07679476 | RHNO1    |
| 1503   | ENSG00000171793 | 1792.03756 | 0.16239872  | 0.09634048 | 0.08130633 | 0.21402647 | CTPS1    |
| 8433   | ENSG00000171794 | 0          | NA          | NA         | NA         | NA         | UTF1     |
| 85442  | ENSG00000171798 | 59.258124  | 0.21317004  | 0.2661521  | 0.28646484 | 0.51225526 | KNDC1    |
| 83889  | ENSG00000171804 | 0.29863895 | -0.02292439 | 0.3852726  | 0.68753245 | NA         | WDR87    |
| 92342  | ENSG00000171806 | 150.667122 | -0.42370582 | 0.19969717 | 0.01464343 | 0.05655552 | METTTL18 |
| 54777  | ENSG00000171811 | 71.6098725 | 0.46278589  | 0.29639928 | 0.03826369 | 0.12144993 | CFAP46   |
| 1296   | ENSG00000171812 | 124.981805 | 0.05408461  | 0.20013408 | 0.75235249 | 0.8840721  | COL8A2   |
| 170394 | ENSG00000171813 | 404.395889 | -0.39622248 | 0.12148517 | 0.00057125 | 0.00362556 | PWWP2B   |
| 29930  | ENSG00000171815 | 2.30262893 | 0.17361184  | 0.4406657  | 0.01298917 | NA         | PCDHB1   |
| 163255 | ENSG00000171817 | 55.7709356 | 0.14009824  | 0.26437292 | 0.47555034 | 0.69768942 | ZNF540   |
| 10218  | ENSG00000171819 | 0.14931947 | -0.01844332 | 0.38480212 | 0.84537521 | NA         | ANGPTL7  |
| 144699 | ENSG00000171823 | 400.341114 | 0.09347492  | 0.12178811 | 0.41866266 | 0.64464626 | FBXL14   |
| 5394   | ENSG00000171824 | 1888.99561 | 0.12701622  | 0.07957918 | 0.10267681 | 0.2543206  | EXOSC10  |
| 148268 | ENSG00000171827 | 335.331771 | -0.64642842 | 0.14210453 | 1.37E-06   | 1.53E-05   | ZNF570   |
| 4815   | ENSG00000171840 | 0.29863895 | -0.02292439 | 0.3852726  | 0.68753245 | NA         | NINJ2    |
| 4300   | ENSG00000171843 | 357.818931 | -0.181115   | 0.1477829  | 0.18265734 | 0.38050416 | MLLT3    |
| 55138  | ENSG00000171847 | 3.29187655 | 0.07510127  | 0.38533167 | 0.35932192 | 0.58949503 | FAM90A1  |
| 6241   | ENSG00000171848 | 3549.32203 | -0.27815801 | 0.10232023 | 0.00465637 | 0.02190715 | RRM2     |
| 51112  | ENSG00000171853 | 1725.51072 | 0.17193919  | 0.07539208 | 0.01994719 | 0.07281548 | TRAPPC12 |
| 3456   | ENSG00000171855 | 0          | NA          | NA         | NA         | NA         | IFNB1    |
| 6227   | ENSG00000171858 | 8616.26043 | 0.00412752  | 0.05519175 | 0.94051678 | 0.97527063 | RPS21    |
| 719    | ENSG00000171860 | 2.95601563 | -0.11153525 | 0.40053597 | 0.14889178 | 0.33152468 | C3AR1    |
| 55178  | ENSG00000171861 | 302.29297  | -0.16532116 | 0.15204076 | 0.23465589 | 0.45155897 | MRM3     |
| 5728   | ENSG00000171862 | 1953.60805 | -0.56049324 | 0.11186217 | 1.78E-07   | 2.27E-06   | PTEN     |
| 6201   | ENSG00000171863 | 19662.929  | -0.02192682 | 0.04669575 | 0.63099533 | 0.81344688 | RPS7     |
| 23627  | ENSG00000171864 | 0          | NA          | NA         | NA         | NA         | PRND     |
| 246243 | ENSG00000171865 | 2191.00047 | 0.1859844   | 0.07103894 | 0.00767178 | 0.03332779 | RNASEH1  |
| 5621   | ENSG00000171867 | 214.302672 | -1.09819835 | 0.18063984 | 1.38E-10   | 2.62E-09   | PRNP     |
| 128209 | ENSG00000171872 | 0          | NA          | NA         | NA         | NA         | KLF17    |
| 146    | ENSG00000171873 | 0.16735865 | 0.01897177  | 0.38482933 | 0.78225479 | NA         | ADRA1D   |
| 84978  | ENSG00000171877 | 390.688653 | -0.72093815 | 0.15057908 | 3.57E-07   | 4.37E-06   | FRMD5    |
| 361    | ENSG00000171885 | 3.95056174 | -0.04357075 | 0.3709579  | 0.6814371  | 0.84429601 | AQP4     |

|        |                 |            |             |            |            |            |            |
|--------|-----------------|------------|-------------|------------|------------|------------|------------|
| 554202 | ENSG00000171889 | 0          | NA          | NA         | NA         | NA         | MIR31HG    |
| 57834  | ENSG00000171903 | 0          | NA          | NA         | NA         | NA         | CYP4F11    |
| 83660  | ENSG00000171914 | 1419.12171 | 0.13541623  | 0.12145441 | 0.23887804 | 0.45653986 | TLN2       |
| 654346 | ENSG00000171916 | 0          | NA          | NA         | NA         | NA         | LGALS9C    |
| 51030  | ENSG00000171928 | 535.421588 | -0.05466627 | 0.1099461  | 0.60236827 | 0.79259054 | TVP23B     |
| 10517  | ENSG00000171931 | 2.5882608  | 0.16635213  | 0.42766217 | 0.08340137 | 0.21803706 | FBXW10     |
| 26532  | ENSG00000171936 | 0          | NA          | NA         | NA         | NA         | OR10H3     |
| 7764   | ENSG00000171940 | 523.976576 | 0.64784289  | 0.13730628 | 6.09E-07   | 7.17E-06   | ZNF217     |
| 26538  | ENSG00000171942 | 0          | NA          | NA         | NA         | NA         | OR10H2     |
| 653464 | ENSG00000171943 | 432.529927 | -0.3505104  | 0.12451824 | 0.0028161  | 0.01435545 | SRGAP2C    |
| 390054 | ENSG00000171944 | 0          | NA          | NA         | NA         | NA         | OR52A5     |
| 7857   | ENSG00000171951 | 342.925517 | -1.4373638  | 0.14320866 | 9.58E-25   | 4.51E-23   | SCG2       |
| 91647  | ENSG00000171953 | 336.500918 | -0.08777581 | 0.12515564 | 0.45709255 | 0.680528   | ATPAF2     |
| 126410 | ENSG00000171954 | 0          | NA          | NA         | NA         | NA         | CYP4F22    |
| 27023  | ENSG00000171956 | 0          | NA          | NA         | NA         | NA         | FOXB1      |
| 10465  | ENSG00000171960 | 979.880901 | -0.07549782 | 0.08854045 | 0.37985655 | 0.60880151 | PPIH       |
| 83450  | ENSG00000171962 | 150.592761 | 0.09426875  | 0.19385792 | 0.57433272 | 0.77352065 | DRC3       |
| 126295 | ENSG00000171970 | 64.1934265 | -0.10877719 | 0.25238273 | 0.57029384 | 0.7706786  | ZNF57      |
| 149840 | ENSG00000171984 | 46.3254907 | -0.06298307 | 0.2609744  | 0.74211071 | 0.87846755 | SHLD1      |
| 143501 | ENSG00000171987 | 0          | NA          | NA         | NA         | NA         | C11orf40   |
| 221037 | ENSG00000171988 | 1974.43185 | 0.09353192  | 0.11221032 | 0.38386325 | 0.61304411 | JMJD1C     |
| 92483  | ENSG00000171989 | 0.70177513 | 0.02815439  | 0.38381803 | 0.55959831 | NA         | LDHAL6B    |
| 11346  | ENSG00000171992 | 2603.32219 | -0.76757124 | 0.06541461 | 1.79E-32   | 1.11E-30   | SYNPO      |
| NA     | ENSG00000171999 | 0          | NA          | NA         | NA         | NA         | OR52P2P    |
| 80032  | ENSG00000172000 | 104.715725 | -0.49840283 | 0.25618366 | 0.01626256 | 0.06159779 | ZNF556     |
| 4118   | ENSG00000172005 | 0          | NA          | NA         | NA         | NA         | MAL        |
| 115196 | ENSG00000172006 | 169.905875 | -0.01747829 | 0.16221515 | 0.90432338 | 0.9581211  | ZNF554     |
| 83452  | ENSG00000172007 | 246.571619 | 0.15714349  | 0.15818406 | 0.27559954 | 0.49971621 | RAB33B     |
| 7064   | ENSG00000172009 | 1873.1541  | 0.09850892  | 0.08475069 | 0.23353818 | 0.45043378 | THOP1      |
| NA     | ENSG00000172014 | 15.1255468 | 0.0925997   | 0.33636116 | 0.60224757 | 0.79255716 | ANKRD20A4P |
| 5068   | ENSG00000172016 | 0          | NA          | NA         | NA         | NA         | REG3A      |
| 2596   | ENSG00000172020 | 543.044175 | -1.55652537 | 0.11620732 | 5.37E-42   | 4.28E-40   | GAP43      |
| 5968   | ENSG00000172023 | 0          | NA          | NA         | NA         | NA         | REG1B      |
| 253152 | ENSG00000172031 | 36.3915727 | 0.1352225   | 0.28482043 | 0.49647762 | 0.714811   | EPHX4      |
| 3913   | ENSG00000172037 | 1694.02835 | 0.13003604  | 0.09574517 | 0.16077323 | 0.34879615 | LAMB2      |
| 10869  | ENSG00000172046 | 2456.93788 | 0.0271      | 0.06674928 | 0.68078018 | 0.84396798 | USP19      |
| 5859   | ENSG00000172053 | 4226.33008 | 0.20561191  | 0.07541665 | 0.00539106 | 0.02481554 | QARS1      |
| 94103  | ENSG00000172057 | 770.022555 | 0.24544111  | 0.09431701 | 0.00714481 | 0.03144527 | ORMDL3     |

|        |                 |            |             |            |            |            |           |
|--------|-----------------|------------|-------------|------------|------------|------------|-----------|
| 8293   | ENSG00000172058 | 360.954275 | 0.04361224  | 0.18957887 | 0.79320881 | 0.9054599  | SERF1A    |
| 8462   | ENSG00000172059 | 197.062192 | -0.33045902 | 0.1644095  | 0.02609646 | 0.09006417 | KLF11     |
| 131578 | ENSG00000172061 | 0          | NA          | NA         | NA         | NA         | LRRC15    |
| 6606   | ENSG00000172062 | 1039.22618 | -0.38182154 | 0.09463468 | 3.00E-05   | 0.00025785 | SMN1      |
| 9451   | ENSG00000172071 | 842.421174 | 0.53807593  | 0.09406311 | 3.86E-09   | 6.14E-08   | EIF2AK3   |
| 200523 | ENSG00000172073 | 0.33895101 | 0.00238255  | 0.38338048 | 0.96571076 | NA         | TEX37     |
| 126308 | ENSG00000172081 | 552.435997 | -0.036625   | 0.12144601 | 0.74947183 | 0.88205755 | MOB3A     |
| 51315  | ENSG00000172086 | 346.156124 | -0.01943214 | 0.12712009 | 0.86864702 | 0.94267349 | KRCC1     |
| 10201  | ENSG00000172113 | 496.992878 | -0.10809086 | 0.12903632 | 0.37250693 | 0.60143185 | NME6      |
| 54205  | ENSG00000172115 | 2370.62012 | -0.51265552 | 0.08359395 | 3.33E-10   | 6.08E-09   | CYCS      |
| 926    | ENSG00000172116 | 0          | NA          | NA         | NA         | NA         | CD8B      |
| 55106  | ENSG00000172123 | 0          | NA          | NA         | NA         | NA         | SLFN12    |
| 794    | ENSG00000172137 | 0          | NA          | NA         | NA         | NA         | CALB2     |
| 285335 | ENSG00000172139 | 0          | NA          | NA         | NA         | NA         | SLC9C1    |
| 8383   | ENSG00000172146 | 0          | NA          | NA         | NA         | NA         | OR1A1     |
| NA     | ENSG00000172148 | 0          | NA          | NA         | NA         | NA         | OR7A2P    |
| 26189  | ENSG00000172150 | 0          | NA          | NA         | NA         | NA         | OR1A2     |
| 120586 | ENSG00000172154 | 0          | NA          | NA         | NA         | NA         | OR8I2     |
| 353134 | ENSG00000172155 | 0          | NA          | NA         | NA         | NA         | LCE1D     |
| 6356   | ENSG00000172156 | 0          | NA          | NA         | NA         | NA         | CCL11     |
| 257019 | ENSG00000172159 | 119.161014 | -1.4050869  | 0.25329864 | 2.27E-09   | 3.73E-08   | FRMD3     |
| 6641   | ENSG00000172164 | 20.4206881 | 2.13651124  | 0.63435713 | 4.06E-05   | 0.00034088 | SNTB1     |
| 27085  | ENSG00000172167 | 338.134329 | 0.11245866  | 0.13058037 | 0.35982774 | 0.58975484 | MTBP      |
| 79736  | ENSG00000172171 | 100.627827 | -0.30528513 | 0.22807808 | 0.10325087 | 0.25526319 | TEFM      |
| 28998  | ENSG00000172172 | 363.848654 | 0.14874045  | 0.13735316 | 0.24610954 | 0.46538442 | MRPL13    |
| 10892  | ENSG00000172175 | 460.270467 | 0.13344777  | 0.12616675 | 0.26268392 | 0.48471437 | MALT1     |
| 5617   | ENSG00000172179 | 0.67639953 | -0.00104602 | 0.38188924 | 0.9880707  | NA         | PRL       |
| 3669   | ENSG00000172183 | 16.8228166 | -0.01961518 | 0.34704511 | 0.889494   | 0.95181279 | ISG20     |
| NA     | ENSG00000172186 | 0          | NA          | NA         | NA         | NA         | HMGNI1P35 |
| 219429 | ENSG00000172188 | 0          | NA          | NA         | NA         | NA         | OR4C11    |
| 154141 | ENSG00000172197 | 269.912577 | 0.87820442  | 0.1586165  | 4.91E-09   | 7.69E-08   | MBOAT1    |
| 219417 | ENSG00000172199 | 0          | NA          | NA         | NA         | NA         | OR8U1     |
| 3400   | ENSG00000172201 | 15.2390727 | 0.35556084  | 0.48479268 | 0.101164   | 0.25142098 | ID4       |
| 119764 | ENSG00000172208 | 0          | NA          | NA         | NA         | NA         | OR4X2     |
| 2845   | ENSG00000172209 | 29.0942494 | 1.46536138  | 0.7146591  | 0.00170426 | 0.00935593 | GPR22     |
| 10663  | ENSG00000172215 | 3.47099464 | 0.01355262  | 0.36773504 | 0.90348704 | 0.95785538 | CXCR6     |
| 1051   | ENSG00000172216 | 226.177126 | 0.48886494  | 0.45949714 | 0.05792877 | 0.1668564  | CEBPB     |
| 566    | ENSG00000172232 | 10.0282826 | 0.43219562  | 0.64400011 | 0.04446555 | 0.13591073 | AZU1      |

|        |                 |            |             |            |            |            |           |
|--------|-----------------|------------|-------------|------------|------------|------------|-----------|
| 7177   | ENSG00000172236 | 0          | NA          | NA         | NA         | NA         | TPSAB1    |
| 474    | ENSG00000172238 | 1.37372765 | 0.03116858  | 0.37977055 | 0.665074   | NA         | ATOH1     |
| 10605  | ENSG00000172239 | 1965.79285 | 0.12446381  | 0.07950923 | 0.10950568 | 0.26621648 | PAIP1     |
| 64581  | ENSG00000172243 | 0          | NA          | NA         | NA         | NA         | CLEC7A    |
| 375444 | ENSG00000172244 | 207.080718 | -0.21687268 | 0.19500616 | 0.19675106 | 0.40043787 | C5orf34   |
| 114900 | ENSG00000172247 | 60.5534006 | 0.18708057  | 0.26104811 | 0.34381534 | 0.57418319 | C1QTNF4   |
| 94009  | ENSG00000172250 | 4.0452977  | -0.18037811 | 0.42691959 | 0.12357611 | 0.2912855  | SERHL     |
| 257194 | ENSG00000172260 | 208.410673 | -2.00292794 | 0.19141595 | 9.75E-27   | 4.95E-25   | NEGR1     |
| 7690   | ENSG00000172262 | 695.526697 | 0.01412002  | 0.09560056 | 0.87903551 | 0.94641763 | ZNF131    |
| 140733 | ENSG00000172264 | 87.70858   | 0.2963022   | 0.2647344  | 0.14436164 | 0.32440083 | MACROD2   |
| 1798   | ENSG00000172269 | 975.131398 | 0.37741573  | 0.10474862 | 0.00017449 | 0.00125705 | DPAGT1    |
| 682    | ENSG00000172270 | 8014.21055 | 0.12521965  | 0.05595837 | 0.02408481 | 0.08463382 | BSG       |
| 25988  | ENSG00000172273 | 478.609482 | 0.17238459  | 0.10863316 | 0.09762338 | 0.24473689 | HINFP     |
| NA     | ENSG00000172283 | 0          | NA          | NA         | NA         | NA         | PRYP4     |
| 9085   | ENSG00000172288 | 0          | NA          | NA         | NA         | NA         | CDY1      |
| 390201 | ENSG00000172289 | 0          | NA          | NA         | NA         | NA         | OR10V1    |
| 253782 | ENSG00000172292 | 3125.76533 | -0.37615966 | 0.06290099 | 1.27E-09   | 2.16E-08   | CERS6     |
| NA     | ENSG00000172294 | 0          | NA          | NA         | NA         | NA         | CSPG4P4Y  |
| 55304  | ENSG00000172296 | 0          | NA          | NA         | NA         | NA         | SPTLC3    |
| NA     | ENSG00000172297 | 0          | NA          | NA         | NA         | NA         | GOLGA2P3Y |
| 55352  | ENSG00000172301 | 391.437589 | -0.36597092 | 0.12001793 | 0.00128941 | 0.00735746 | COPRS     |
| 112858 | ENSG00000172315 | 407.892875 | -0.28940496 | 0.11659394 | 0.00893909 | 0.03780678 | TP53RK    |
| 8708   | ENSG00000172318 | 51.2415604 | -0.66602701 | 0.33194508 | 0.00817585 | 0.0351863  | B3GALT1   |
| 219982 | ENSG00000172320 | 0          | NA          | NA         | NA         | NA         | OR5A1     |
| 160364 | ENSG00000172322 | 0          | NA          | NA         | NA         | NA         | CLEC12A   |
| 219981 | ENSG00000172324 | 0          | NA          | NA         | NA         | NA         | OR5A2     |
| 669    | ENSG00000172331 | 509.629    | 0.05363039  | 0.12150777 | 0.64266454 | 0.82136499 | BPGM      |
| 10248  | ENSG00000172336 | 786.443095 | -0.19938538 | 0.09008896 | 0.02221393 | 0.07919574 | POP7      |
| 199857 | ENSG00000172339 | 124.996089 | -0.09200708 | 0.35534349 | 0.55716098 | 0.76256028 | ALG14     |
| 8801   | ENSG00000172340 | 373.559499 | 0.53812094  | 0.12700978 | 7.91E-06   | 7.65E-05   | SUCLG2    |
| NA     | ENSG00000172342 | 0          | NA          | NA         | NA         | NA         | CSPG4P3Y  |
| 80765  | ENSG00000172345 | 53.9746848 | 0.18588751  | 0.31215411 | 0.35825779 | 0.58854144 | STARD5    |
| 27254  | ENSG00000172346 | 81.5559032 | -0.24015253 | 0.22682521 | 0.19572402 | 0.39935567 | CSDC2     |
| 10231  | ENSG00000172348 | 0          | NA          | NA         | NA         | NA         | RCAN2     |
| 3603   | ENSG00000172349 | 5.39595836 | 0.22582536  | 0.46225505 | 0.06570791 | 0.18315081 | IL16      |
| 64137  | ENSG00000172350 | 46.3367579 | 0.63666288  | 0.39488042 | 0.01790484 | 0.06666016 | ABCG4     |
| 253175 | ENSG00000172352 | 0          | NA          | NA         | NA         | NA         | CDY1B     |
| 2783   | ENSG00000172354 | 5221.91239 | -0.12535231 | 0.05709061 | 0.02644027 | 0.09096149 | GNB2      |

|        |                 |            |             |            |            |            |         |
|--------|-----------------|------------|-------------|------------|------------|------------|---------|
| 220136 | ENSG00000172361 | 13.2840674 | 0.28094344  | 0.43093775 | 0.15851085 | 0.34569581 | CFAP53  |
| 390191 | ENSG00000172362 | 0          | NA          | NA         | NA         | NA         | OR5B12  |
| 390190 | ENSG00000172365 | 0          | NA          | NA         | NA         | NA         | OR5B2   |
| 84331  | ENSG00000172366 | 449.159389 | -0.2564791  | 0.13544633 | 0.0421069  | 0.13069475 | MCRIP2  |
| 79849  | ENSG00000172367 | 0.30139824 | -0.02296476 | 0.38527817 | 0.68536535 | NA         | PDZD3   |
| 9854   | ENSG00000172375 | 585.3053   | 0.07578071  | 0.10254087 | 0.44355137 | 0.66854511 | C2CD2L  |
| 219954 | ENSG00000172377 | 0          | NA          | NA         | NA         | NA         | OR9I1   |
| 9915   | ENSG00000172379 | 1816.62644 | -0.09641217 | 0.08022726 | 0.21859274 | 0.43050004 | ARNT2   |
| 55970  | ENSG00000172380 | 1207.19986 | 0.06656568  | 0.07960801 | 0.39315537 | 0.62217456 | GNG12   |
| 83886  | ENSG00000172382 | 173.601398 | 1.03251415  | 0.22184528 | 3.81E-07   | 4.63E-06   | PRSS27  |
| 51778  | ENSG00000172399 | 10.301981  | 1.73933444  | 0.97081261 | 0.00288469 | 0.01463366 | MYOZ2   |
| 171024 | ENSG00000172403 | 3937.61208 | 0.61072641  | 0.05704543 | 3.02E-27   | 1.55E-25   | SYNPO2  |
| 150353 | ENSG00000172404 | 4.48924974 | 0.28052433  | 0.51469847 | 0.04671602 | 0.14135211 | DNAJB7  |
| 10978  | ENSG00000172409 | 241.235435 | -0.13599692 | 0.14957242 | 0.32200375 | 0.54960035 | CLP1    |
| 10022  | ENSG00000172410 | 0.16735865 | 0.01897177  | 0.38482933 | 0.78225479 | NA         | INSL5   |
| 146779 | ENSG00000172421 | 0          | NA          | NA         | NA         | NA         | EFCAB3  |
| 143941 | ENSG00000172425 | 17.9661746 | -0.02520142 | 0.31757349 | 0.88647    | 0.95015905 | TTC36   |
| 221421 | ENSG00000172426 | 15.2062442 | 0.13922598  | 0.34371785 | 0.45213255 | 0.67536839 | RSPH9   |
| 150678 | ENSG00000172428 | 417.431076 | 0.002379    | 0.11672495 | 0.98416267 | 0.99453916 | COPS9   |
| 54676  | ENSG00000172432 | 1459.47081 | -0.05087283 | 0.0901351  | 0.56079621 | 0.76437187 | GTPBP2  |
| 55277  | ENSG00000172456 | 64.4940333 | -0.81157077 | 0.30896228 | 0.00121712 | 0.00700743 | FGGY    |
| 283189 | ENSG00000172457 | 0          | NA          | NA         | NA         | NA         | OR9G4   |
| 53342  | ENSG00000172458 | 76.1793902 | -0.96274499 | 0.30977436 | 0.00021718 | 0.00153162 | IL17D   |
| 219493 | ENSG00000172459 | 0          | NA          | NA         | NA         | NA         | OR5AR1  |
| 124221 | ENSG00000172460 | 0          | NA          | NA         | NA         | NA         | PRSS30P |
| 10690  | ENSG00000172461 | 465.6709   | -0.37538557 | 0.12936478 | 0.00200947 | 0.01074897 | FUT9    |
| 338675 | ENSG00000172464 | 0          | NA          | NA         | NA         | NA         | OR5AP2  |
| 9338   | ENSG00000172465 | 144.504103 | -0.09483494 | 0.17606298 | 0.54350962 | 0.75149877 | TCEAL1  |
| 7572   | ENSG00000172466 | 2615.14411 | -0.24414836 | 0.0630192  | 8.39E-05   | 0.00064987 | ZNF24   |
| 86614  | ENSG00000172468 | 0          | NA          | NA         | NA         | NA         | HSFY1   |
| 79694  | ENSG00000172469 | 405.224806 | 0.01564316  | 0.12977321 | 0.89889484 | 0.95556135 | MANEA   |
| 142684 | ENSG00000172476 | 55.2378656 | 0.02120891  | 0.24694939 | 0.91248756 | 0.96260718 | RAB40A  |
| 79919  | ENSG00000172478 | 0          | NA          | NA         | NA         | NA         | MAB21L4 |
| 189    | ENSG00000172482 | 0          | NA          | NA         | NA         | NA         | AGXT    |
| 219477 | ENSG00000172487 | 0          | NA          | NA         | NA         | NA         | OR8J1   |
| 390154 | ENSG00000172489 | 0          | NA          | NA         | NA         | NA         | OR5T3   |
| 4299   | ENSG00000172493 | 788.796244 | -0.13856131 | 0.10845845 | 0.18147421 | 0.37887491 | AFF1    |
| 134526 | ENSG00000172497 | 0.36240779 | 0.00094427  | 0.38336464 | 0.96688599 | NA         | ACOT12  |

|        |                 |            |             |            |            |            |         |
|--------|-----------------|------------|-------------|------------|------------|------------|---------|
| 9158   | ENSG00000172500 | 1206.24246 | 0.00961854  | 0.07725663 | 0.89971504 | 0.95564128 | FIBP    |
| 57571  | ENSG00000172508 | 17.3609886 | 0.5102489   | 0.63636377 | 0.04213557 | 0.13072239 | CARNS1  |
| 284433 | ENSG00000172519 | 0          | NA          | NA         | NA         | NA         | OR10H5  |
| 54971  | ENSG00000172530 | 458.950671 | 0.15631567  | 0.12095898 | 0.17276945 | 0.36566523 | BANP    |
| 5499   | ENSG00000172531 | 2813.05143 | -0.1548693  | 0.06158689 | 0.01073154 | 0.04393598 | PPP1CA  |
| 3054   | ENSG00000172534 | 5352.28426 | -0.02370377 | 0.06379516 | 0.73274494 | 0.87239916 | HCFC1   |
| 170370 | ENSG00000172538 | 0          | NA          | NA         | NA         | NA         | FAM170B |
| 1521   | ENSG00000172543 | 0.29863895 | -0.02292439 | 0.3852726  | 0.68753245 | NA         | CTSW    |
| 348938 | ENSG00000172548 | 139.768394 | 0.71828595  | 0.20440736 | 8.97E-05   | 0.00069156 | NIPAL4  |
| 118430 | ENSG00000172551 | 0          | NA          | NA         | NA         | NA         | MUCL1   |
| 54221  | ENSG00000172554 | 9.02195092 | 4.1466744   | 1.32573523 | 7.18E-05   | 0.00056816 | SNTG2   |
| 408263 | ENSG00000172568 | 0.30139824 | -0.02296476 | 0.38527817 | 0.68536535 | NA         | FNDC9   |
| 5139   | ENSG00000172572 | 3604.16999 | 1.29947669  | 0.07552859 | 2.56E-67   | 3.97E-65   | PDE3A   |
| 10125  | ENSG00000172575 | 139.587435 | -0.07822945 | 0.18102318 | 0.62325737 | 0.8078282  | RASGRP1 |
| 89857  | ENSG00000172578 | 0          | NA          | NA         | NA         | NA         | KLHL6   |
| 118487 | ENSG00000172586 | 448.615182 | -0.34796351 | 0.1250031  | 0.00315705 | 0.01580516 | CHCHD1  |
| 122704 | ENSG00000172590 | 821.092939 | 0.05570466  | 0.0928173  | 0.53681991 | 0.74734999 | MRPL52  |
| 10924  | ENSG00000172594 | 0          | NA          | NA         | NA         | NA         | SMPDL3A |
| 27289  | ENSG00000172602 | 32.5787561 | 0.33082091  | 0.37371492 | 0.14236717 | 0.32117652 | RND1    |
| 5883   | ENSG00000172613 | 373.421877 | 0.19255865  | 0.14162205 | 0.14275076 | 0.32165532 | RAD9A   |
| 30008  | ENSG00000172638 | 447.171516 | 0.36101528  | 0.12878797 | 0.00287784 | 0.01461386 | EFEMP2  |
| 121275 | ENSG00000172640 | 3.08338977 | 0.09510866  | 0.38516411 | 0.37680598 | 0.60570261 | OR10AD1 |
| 729092 | ENSG00000172650 | 154.312881 | 0.29525466  | 0.22035844 | 0.10702325 | 0.26200528 | AGAP5   |
| 253725 | ENSG00000172661 | 867.520848 | 0.15776678  | 0.09133677 | 0.07509501 | 0.20160826 | WASHC2C |
| 80194  | ENSG00000172663 | 281.771099 | 0.79224471  | 0.17055648 | 6.09E-07   | 7.17E-06   | TMEM134 |
| 64393  | ENSG00000172667 | 1141.69091 | 0.1251132   | 0.08864999 | 0.14669226 | 0.32786991 | ZMAT3   |
| 93550  | ENSG00000172671 | 161.944445 | -0.01566897 | 0.19679982 | 0.9246627  | 0.96862095 | ZFAND4  |
| 387357 | ENSG00000172673 | 0          | NA          | NA         | NA         | NA         | THEMIS  |
| 4342   | ENSG00000172680 | 0          | NA          | NA         | NA         | NA         | MOS     |
| 148203 | ENSG00000172687 | 546.259974 | -0.09528306 | 0.12021099 | 0.40294055 | 0.63099498 | ZNF738  |
| 341116 | ENSG00000172689 | 0          | NA          | NA         | NA         | NA         | MS4A10  |
| 91607  | ENSG00000172716 | 0.32334531 | 0.00163257  | 0.38337096 | 0.96545193 | NA         | SLFN11  |
| 161142 | ENSG00000172717 | 0.35361408 | 0.0039586   | 0.38341258 | 0.93089565 | NA         | FAM71D  |
| 6363   | ENSG00000172724 | 0          | NA          | NA         | NA         | NA         | CCL19   |
| 57175  | ENSG00000172725 | 1192.98626 | 0.12888733  | 0.0834008  | 0.11349355 | 0.27336554 | CORO1B  |
| 84750  | ENSG00000172728 | 165.067078 | 0.1472793   | 0.17674803 | 0.3479     | 0.57861815 | FUT10   |
| 55222  | ENSG00000172731 | 672.45122  | 0.16662256  | 0.0973193  | 0.07642107 | 0.20422871 | LRRC20  |
| 80198  | ENSG00000172732 | 925.862125 | 0.36318036  | 0.09770531 | 0.00011753 | 0.00087928 | MUS81   |

|        |                 |            |             |            |            |            |           |
|--------|-----------------|------------|-------------|------------|------------|------------|-----------|
| 29942  | ENSG00000172733 | 187.123476 | -0.00091139 | 0.15707826 | 0.99390824 | 0.99814114 | PURG      |
| 221468 | ENSG00000172738 | 8.12619093 | 0.11687337  | 0.38743757 | 0.33861847 | 0.56890427 | TMEM217   |
| 390199 | ENSG00000172742 | 0.29863895 | -0.02292439 | 0.3852726  | 0.68753245 | NA         | OR4D9     |
| NA     | ENSG00000172746 | 0.173124   | -0.01911262 | 0.38486262 | 0.84537521 | NA         | RPL12P13  |
| 169270 | ENSG00000172748 | 183.045825 | 0.15675279  | 0.19056113 | 0.34365631 | 0.57400025 | ZNF596    |
| 256076 | ENSG00000172752 | 0.16735865 | 0.01897177  | 0.38482933 | 0.78225479 | NA         | COL6A5    |
| 1072   | ENSG00000172757 | 17996.4755 | 0.04105983  | 0.04816907 | 0.39146623 | 0.62088815 | CFL1      |
| 23023  | ENSG00000172765 | 435.550662 | 0.12111767  | 0.12954152 | 0.32053143 | 0.54831381 | TMCC1     |
| 79612  | ENSG00000172766 | 804.175179 | 0.00739657  | 0.10650363 | 0.94336663 | 0.97689827 | NAA16     |
| 441608 | ENSG00000172769 | 0          | NA          | NA         | NA         | NA         | OR5B3     |
| 90288  | ENSG00000172771 | 4.95306072 | 0.04635511  | 0.36504001 | 0.71280271 | 0.86173942 | EFCAB12   |
| 81341  | ENSG00000172772 | 0          | NA          | NA         | NA         | NA         | OR10W1    |
| 80011  | ENSG00000172775 | 1509.96302 | -0.01383947 | 0.07566174 | 0.85130655 | 0.93275912 | PSME3IP1  |
| 339122 | ENSG00000172780 | 60.5350603 | 1.39246937  | 0.33479869 | 2.67E-06   | 2.81E-05   | RAB43     |
| 283985 | ENSG00000172782 | 6.1119881  | -0.05032637 | 0.36522035 | 0.68613149 | 0.8472712  | FADS6     |
| 55871  | ENSG00000172785 | 431.272381 | -0.02748879 | 0.11314877 | 0.79853056 | 0.90769144 | CBWD1     |
| 3222   | ENSG00000172789 | 131.583363 | -0.59725324 | 0.23447493 | 0.00274454 | 0.01404842 | HOXC5     |
| 326624 | ENSG00000172794 | 1.30199031 | -0.08404756 | 0.39649408 | 0.11552913 | NA         | RAB37     |
| 167227 | ENSG00000172795 | 1926.22128 | 0.02250076  | 0.10363978 | 0.82272283 | 0.91918127 | DCP2      |
| NA     | ENSG00000172799 | 0          | NA          | NA         | NA         | NA         | ZBTB8OSP2 |
| 254122 | ENSG00000172803 | 143.912883 | 0.22872861  | 0.18647452 | 0.16109501 | 0.34915229 | SNX32     |
| 6169   | ENSG00000172809 | 9033.85189 | -0.13299796 | 0.05493485 | 0.01564561 | 0.05964814 | RPL38     |
| 9420   | ENSG00000172817 | 246.232395 | -0.02913342 | 0.15712991 | 0.83787223 | 0.92628758 | CYP7B1    |
| 5017   | ENSG00000172818 | 0.37844916 | 0.02407552  | 0.3854191  | 0.60038877 | NA         | OVOL1     |
| 5916   | ENSG00000172819 | 886.974119 | 0.40100685  | 0.08876425 | 3.31E-06   | 3.43E-05   | RARG      |
| 283848 | ENSG00000172824 | 96.5527907 | 0.2893324   | 0.22772166 | 0.12194078 | 0.28873433 | CES4A     |
| 23491  | ENSG00000172828 | 40.9436801 | 0.9879794   | 0.42743183 | 0.00187718 | 0.01012594 | CES3      |
| 54961  | ENSG00000172830 | 256.137612 | 0.18552912  | 0.15074346 | 0.18032922 | 0.37720159 | SSH3      |
| 8824   | ENSG00000172831 | 817.295026 | 0.15468381  | 0.1191719  | 0.17177561 | 0.36432905 | CES2      |
| 57546  | ENSG00000172840 | 565.863951 | -0.01362096 | 0.1513797  | 0.91168578 | 0.96237542 | PDP2      |
| 6670   | ENSG00000172845 | 1996.22077 | -0.1570005  | 0.06779602 | 0.01828135 | 0.06760522 | SP3       |
| 3849   | ENSG00000172867 | 0          | NA          | NA         | NA         | NA         | KRT2      |
| 1657   | ENSG00000172869 | 815.008121 | -0.43007092 | 0.12771633 | 0.00034912 | 0.00234635 | DMXL1     |
| 254042 | ENSG00000172878 | 196.128049 | -0.00684744 | 0.17328376 | 0.96342409 | 0.98545957 | METAP1D   |
| 285268 | ENSG00000172888 | 1117.18726 | 0.02584606  | 0.08150412 | 0.74581406 | 0.8802926  | ZNF621    |
| 51162  | ENSG00000172889 | 477.999809 | -0.16593578 | 0.11393509 | 0.12621792 | 0.29554626 | EGFL7     |
| 55191  | ENSG00000172890 | 644.794708 | 0.5534381   | 0.11523169 | 5.27E-07   | 6.27E-06   | NADSYN1   |
| 1717   | ENSG00000172893 | 2027.59417 | -0.66758228 | 0.08897977 | 1.60E-14   | 4.19E-13   | DHCR7     |



|           |                 |            |             |            |            |            |             |
|-----------|-----------------|------------|-------------|------------|------------|------------|-------------|
| 399923    | ENSG00000172900 | 0          | NA          | NA         | NA         | NA         | ACTE1P      |
| 206338    | ENSG00000172901 | 9.31475304 | 0.0590432   | 0.3643685  | 0.64402801 | 0.82223396 | LVRN        |
| NA        | ENSG00000172912 | 0          | NA          | NA         | NA         | NA         | COX6B1P3    |
| 26960     | ENSG00000172915 | 3096.40872 | 0.52981409  | 0.05963499 | 2.43E-19   | 8.78E-18   | NBEA        |
| 84153     | ENSG00000172922 | 1284.02081 | -0.13337976 | 0.07450885 | 0.06770654 | 0.18698467 | RNASEH2C    |
| 26579     | ENSG00000172927 | 1.08299052 | 0.03431385  | 0.38421053 | 0.57393189 | NA         | MYEOV       |
| 338692    | ENSG00000172932 | 867.789023 | 0.15263208  | 0.09078693 | 0.0833026  | 0.21789368 | ANKRD13D    |
| 116535    | ENSG00000172935 | 1.78698867 | -0.0040706  | 0.37779845 | 0.95394306 | NA         | MRGPRF      |
| 4615      | ENSG00000172936 | 769.41061  | 0.08399494  | 0.09181794 | 0.3474427  | 0.57819389 | MYD88       |
| 116512    | ENSG00000172938 | 0.49044334 | 0.01388611  | 0.38307155 | 0.76199047 | NA         | MRGPRD      |
| 9943      | ENSG00000172939 | 1517.96541 | 0.00633168  | 0.0847551  | 0.9394831  | 0.97474024 | OXSR1       |
| 9390      | ENSG00000172940 | 1.37620723 | 0.00697379  | 0.37804349 | 0.92248536 | NA         | SLC22A13    |
| 23133     | ENSG00000172943 | 1120.42421 | -0.12665986 | 0.0847799  | 0.12547187 | 0.29435597 | PHF8        |
| 253558    | ENSG00000172954 | 682.230172 | -0.42756445 | 0.1349716  | 0.00071493 | 0.00440625 | LCLAT1      |
| 130       | ENSG00000172955 | 4.59289199 | 0.1432414   | 0.40265933 | 0.23067844 | 0.44663416 | ADH6        |
| 541471    | ENSG00000172965 | 52.1884114 | -0.77585133 | 0.37354431 | 0.00517427 | 0.02392393 | MIR4435-2HG |
| 150165    | ENSG00000172967 | 0          | NA          | NA         | NA         | NA         | XKR3        |
| 100288801 | ENSG00000172969 | 0.84210987 | 0.01615443  | 0.38118446 | 0.77437227 | NA         | FRG2C       |
| NA        | ENSG00000172971 | 1.54598581 | 0.09392177  | 0.39689612 | 0.14890243 | NA         | UNC93B3     |
| NA        | ENSG00000172974 | 2.6369726  | -0.20165643 | 0.46175246 | 0.00878606 | 0.03728674 | VDAC2P5     |
| 10524     | ENSG00000172977 | 635.73658  | 0.05900082  | 0.10178921 | 0.54827885 | 0.75480124 | KAT5        |
| 344558    | ENSG00000172985 | 44.5855955 | -0.07283601 | 0.25996874 | 0.7041044  | 0.85774517 | SH3RF3      |
| 727936    | ENSG00000172986 | 72.5520704 | 2.05139103  | 0.30380653 | 9.99E-13   | 2.28E-11   | GXYLT2      |
| 60495     | ENSG00000172987 | 11.0496166 | 7.31307848  | 2.66398423 | 3.68E-07   | 4.50E-06   | HPSE2       |
| 79877     | ENSG00000172992 | 1233.98632 | 0.12517338  | 0.09267187 | 0.16406869 | 0.35339516 | DCAKD       |
| 10777     | ENSG00000172995 | 11.9847789 | -0.08982225 | 0.35934523 | 0.54618061 | 0.75345287 | ARPP21      |
| 93624     | ENSG00000173011 | 485.484342 | 0.00229331  | 0.1434622  | 0.98745689 | 0.99588983 | TADA2B      |
| 257236    | ENSG00000173013 | 6.34400257 | 0.21774352  | 0.43814425 | 0.14155115 | 0.3199443  | CCDC96      |
| 156       | ENSG00000173020 | 1501.69032 | -0.1961131  | 0.07109985 | 0.00493434 | 0.02298598 | GRK2        |
| 5970      | ENSG00000173039 | 1451.37746 | -0.08795868 | 0.08054756 | 0.26344715 | 0.48542909 | RELA        |
| 132884    | ENSG00000173040 | 51.3746475 | -0.08479279 | 0.2576998  | 0.65875846 | 0.83073135 | EVC2        |
| 340252    | ENSG00000173041 | 531.194794 | 0.16710411  | 0.12543903 | 0.15825033 | 0.3453764  | ZNF680      |
| 283450    | ENSG00000173064 | 4159.7452  | -0.04567721 | 0.06376753 | 0.4670939  | 0.69008437 | HECTD4      |
| 55731     | ENSG00000173065 | 606.941008 | 0.16212557  | 0.10132088 | 0.09668498 | 0.24306007 | FAM222B     |
| 54796     | ENSG00000173068 | 35.9050392 | -0.30382836 | 0.41046983 | 0.15133049 | 0.33531348 | BNC2        |
| NA        | ENSG00000173077 | 0.94820793 | -0.01598938 | 0.38145775 | 0.77103862 | NA         | DELEC1      |
| 339403    | ENSG00000173080 | 3.85861295 | 0.14283707  | 0.40568929 | 0.20222942 | 0.40778604 | RXFP4       |
| 10855     | ENSG00000173083 | 0          | NA          | NA         | NA         | NA         | HPSE        |

|        |                 |            |             |            |            |            |          |
|--------|-----------------|------------|-------------|------------|------------|------------|----------|
| 27235  | ENSG00000173085 | 121.926149 | 0.03831113  | 0.20210748 | 0.82409885 | 0.92009686 | COQ2     |
| 160762 | ENSG00000173093 | 0          | NA          | NA         | NA         | NA         | CCDC63   |
| 3310   | ENSG00000173110 | 0          | NA          | NA         | NA         | NA         | HSPA6    |
| 51504  | ENSG00000173113 | 3153.42723 | -0.03957748 | 0.06254516 | 0.5213781  | 0.73486829 | TRMT112  |
| 54674  | ENSG00000173114 | 403.954394 | 1.57885376  | 0.14400068 | 5.13E-29   | 2.85E-27   | LRRN3    |
| 22992  | ENSG00000173120 | 1817.18544 | 0.11944993  | 0.08663526 | 0.15691254 | 0.34373985 | KDM2A    |
| 142827 | ENSG00000173124 | 0          | NA          | NA         | NA         | NA         | ACSM6    |
| 203054 | ENSG00000173137 | 171.352177 | 0.20388128  | 0.18116909 | 0.20224872 | 0.40778604 | ADCK5    |
| 78988  | ENSG00000173141 | 643.137685 | -0.12256858 | 0.09987243 | 0.20286784 | 0.40878509 | MRPL57   |
| 64318  | ENSG00000173145 | 806.673192 | -0.47714737 | 0.09564507 | 2.56E-07   | 3.20E-06   | NOC3L    |
| 2101   | ENSG00000173153 | 812.98635  | -0.06880129 | 0.10221692 | 0.48338343 | 0.70370318 | ESRRA    |
| 29984  | ENSG00000173156 | 0          | NA          | NA         | NA         | NA         | RHOD     |
| 80070  | ENSG00000173157 | 37.644992  | 0.25334764  | 0.31011519 | 0.23138603 | 0.44769835 | ADAMTS20 |
| 150684 | ENSG00000173163 | 136.205017 | 0.04880888  | 0.18553935 | 0.76470981 | 0.8916054  | COMMD1   |
| 65059  | ENSG00000173166 | 688.564088 | -0.33691056 | 0.11978464 | 0.00297824 | 0.01503914 | RAPH1    |
| 4580   | ENSG00000173171 | 828.451482 | 0.14646896  | 0.10143732 | 0.1340677  | 0.30828734 | MTX1     |
| 111    | ENSG00000173175 | 183.834542 | -0.47799769 | 0.19708789 | 0.00562863 | 0.02571904 | ADCY5    |
| 54625  | ENSG00000173193 | 287.198605 | 0.50994112  | 0.15409833 | 0.00033626 | 0.00226841 | PARP14   |
| 10800  | ENSG00000173198 | 0.33471731 | 0.02354391  | 0.38534154 | 0.62842204 | NA         | CYSLTR1  |
| 165631 | ENSG00000173200 | 0.14931947 | -0.01844332 | 0.38480212 | 0.84537521 | NA         | PARP15   |
| 1163   | ENSG00000173207 | 2772.48252 | 0.02708844  | 0.0613269  | 0.65503526 | 0.82823884 | CKS1B    |
| 225    | ENSG00000173208 | 709.09776  | 0.247824    | 0.1051477  | 0.01404708 | 0.05473174 | ABCD2    |
| 130872 | ENSG00000173209 | 1454.48198 | 0.31377065  | 0.0863292  | 0.00018504 | 0.00132546 | AHSA2P   |
| 22885  | ENSG00000173210 | 21.1518038 | 0.4157182   | 0.45959747 | 0.08517653 | 0.2214571  | ABLIM3   |
| 126868 | ENSG00000173212 | 3.03057773 | 0.09276338  | 0.38544275 | 0.37630055 | 0.60526384 | MAB21L3  |
| 260334 | ENSG00000173213 | 0.87518259 | -0.02812402 | 0.38332521 | 0.55074935 | NA         | TUBB8B   |
| 91749  | ENSG00000173214 | 469.493442 | -0.16892399 | 0.15374681 | 0.22864697 | 0.44394937 | MFSD4B   |
| 81839  | ENSG00000173218 | 445.096979 | 0.31569106  | 0.11894101 | 0.00512219 | 0.02371628 | VANGL1   |
| 2745   | ENSG00000173221 | 51.5303908 | -0.25671334 | 0.28509028 | 0.21375541 | 0.4238788  | GLRX     |
| 9657   | ENSG00000173226 | 473.171384 | 0.36044578  | 0.12415812 | 0.00211567 | 0.01122516 | IQCB1    |
| 91683  | ENSG00000173227 | 1.53927943 | 0.02803555  | 0.38109342 | 0.65873963 | NA         | SYT12    |
| 2804   | ENSG00000173230 | 1907.52814 | -0.04191634 | 0.08596317 | 0.615819   | 0.8030134  | GOLGB1   |
| NA     | ENSG00000173231 | 0          | NA          | NA         | NA         | NA         | TERF1P1  |
| 254439 | ENSG00000173237 | 0          | NA          | NA         | NA         | NA         | C11orf86 |
| 340654 | ENSG00000173239 | 0          | NA          | NA         | NA         | NA         | LIPM     |
| 134391 | ENSG00000173250 | 0          | NA          | NA         | NA         | NA         | GPR151   |
| 10655  | ENSG00000173253 | 0          | NA          | NA         | NA         | NA         | DMRT2    |
| 158399 | ENSG00000173258 | 333.340359 | -0.1419734  | 0.15639469 | 0.31809683 | 0.54567516 | ZNF483   |

|        |                 |            |             |            |            |            |          |
|--------|-----------------|------------|-------------|------------|------------|------------|----------|
| 153770 | ENSG00000173261 | 16.2589978 | 0.05065891  | 0.32854927 | 0.7736427  | 0.8959822  | PLAC8L1  |
| 144195 | ENSG00000173262 | 0          | NA          | NA         | NA         | NA         | SLC2A14  |
| 56834  | ENSG00000173264 | 572.836683 | 0.15737088  | 0.12164236 | 0.17193662 | 0.36452474 | GPR137   |
| 6623   | ENSG00000173267 | 0.173733   | 0.01914545  | 0.38484597 | 0.78225479 | NA         | SNCG     |
| 79812  | ENSG00000173269 | 1.4613793  | -0.06232146 | 0.38500179 | 0.40217421 | NA         | MMRN2    |
| 653784 | ENSG00000173272 | 837.149445 | -0.15370986 | 0.08632573 | 0.06719949 | 0.18607646 | MZT2A    |
| 8658   | ENSG00000173273 | 2970.13628 | -0.15902615 | 0.06230501 | 0.00948751 | 0.03974498 | TNKS     |
| 203523 | ENSG00000173275 | 159.141029 | 0.02465899  | 0.17150017 | 0.87366133 | 0.94441388 | ZNF449   |
| 49854  | ENSG00000173276 | 551.446363 | -0.46939394 | 0.12130635 | 4.58E-05   | 0.00037907 | ZBTB21   |
| 79660  | ENSG00000173281 | 1218.79387 | -0.40719256 | 0.08537651 | 9.55E-07   | 1.09E-05   | PPP1R3B  |
| 391109 | ENSG00000173285 | 0          | NA          | NA         | NA         | NA         | OR10K1   |
| 286042 | ENSG00000173295 | 142.637573 | 0.38787527  | 0.19619774 | 0.02323865 | 0.08218445 | FAM86B3P |
| 344561 | ENSG00000173302 | 0.74831009 | -0.04237872 | 0.38743592 | 0.3510469  | NA         | GPR148   |
| 56977  | ENSG00000173320 | 1450.30554 | 0.24038797  | 0.10608878 | 0.01821414 | 0.06741028 | STOX2    |
| 4296   | ENSG00000173327 | 1039.22008 | 0.21805874  | 0.08917111 | 0.01158338 | 0.04681489 | MAP3K11  |
| 10221  | ENSG00000173334 | 246.289707 | -0.04083296 | 0.16330782 | 0.78122745 | 0.90003181 | TRIB1    |
| 128822 | ENSG00000173335 | 0          | NA          | NA         | NA         | NA         | CST9     |
| 10089  | ENSG00000173338 | 7.00761611 | 0.0952657   | 0.3700009  | 0.49464406 | 0.71350347 | KCNK7    |
| 84826  | ENSG00000173349 | 54.9052306 | -0.01399833 | 0.38367646 | 0.69005226 | 0.84966405 | SFT2D3   |
| NA     | ENSG00000173357 | 0          | NA          | NA         | NA         | NA         |          |
| NA     | ENSG00000173366 | 5.51001601 | 0.24021459  | 0.47413587 | 0.06082522 | 0.17318776 |          |
| 713    | ENSG00000173369 | 0          | NA          | NA         | NA         | NA         | C1QB     |
| 712    | ENSG00000173372 | 0          | NA          | NA         | NA         | NA         | C1QA     |
| 79625  | ENSG00000173376 | 65.1572149 | 1.82321487  | 0.3310653  | 2.49E-09   | 4.06E-08   | NDNF     |
| 132141 | ENSG00000173389 | 0.37844916 | 0.02407552  | 0.3854191  | 0.60038877 | NA         | IQCF1    |
| 4973   | ENSG00000173391 | 0          | NA          | NA         | NA         | NA         | OLR1     |
| 256710 | ENSG00000173401 | 4.6483808  | 0.00608348  | 0.36287963 | 0.96135857 | 0.98422798 | GLIPR1L1 |
| 1605   | ENSG00000173402 | 2246.68062 | -0.13733007 | 0.06626873 | 0.03520976 | 0.11384642 | DAG1     |
| 3642   | ENSG00000173404 | 1.53892252 | 0.04892919  | 0.38152842 | 0.52454881 | NA         | INSM1    |
| 1600   | ENSG00000173406 | 25.394526  | -3.00639689 | 0.64488049 | 1.76E-07   | 2.25E-06   | DAB1     |
| 64801  | ENSG00000173409 | 421.986335 | -0.04955694 | 0.12678072 | 0.67789499 | 0.84273994 | ARV1     |
| 51126  | ENSG00000173418 | 683.512073 | -0.07405616 | 0.09294903 | 0.40973612 | 0.63778163 | NAA20    |
| 339834 | ENSG00000173421 | 1.09660671 | 0.03490317  | 0.38340376 | 0.52786228 | NA         | IHO1     |
| 122665 | ENSG00000173431 | 0          | NA          | NA         | NA         | NA         | RNASE8   |
| 6288   | ENSG00000173432 | 0          | NA          | NA         | NA         | NA         | SAA1     |
| 440574 | ENSG00000173436 | 666.916446 | -0.25671964 | 0.1302298  | 0.03523801 | 0.11391919 | MICOS10  |
| 254102 | ENSG00000173442 | 824.197775 | 1.44126244  | 0.11377624 | 7.34E-38   | 5.35E-36   | EHBP1L1  |
| 83591  | ENSG00000173451 | 324.283578 | 0.07363066  | 0.13438584 | 0.55824278 | 0.76291851 | THAP2    |

|           |                 |            |             |            |            |            |           |
|-----------|-----------------|------------|-------------|------------|------------|------------|-----------|
| 256130    | ENSG00000173452 | 0.50634052 | 0.03067938  | 0.38601017 | 0.48443161 | NA         | TMEM196   |
| 79102     | ENSG00000173456 | 1077.52259 | -0.05708613 | 0.07796014 | 0.457056   | 0.68052466 | RNF26     |
| 26472     | ENSG00000173457 | 2745.48148 | 0.02410691  | 0.06444431 | 0.70530484 | 0.85803894 | PPP1R14B  |
| 122651    | ENSG00000173464 | 0          | NA          | NA         | NA         | NA         | RNASE11   |
| 10534     | ENSG00000173465 | 400.843313 | -0.00120124 | 0.12784389 | 0.99106209 | 0.99704234 | ZNRD2     |
| 155465    | ENSG00000173467 | 0          | NA          | NA         | NA         | NA         | AGR3      |
| 6599      | ENSG00000173473 | 6850.15966 | 0.16973483  | 0.05524234 | 0.00191248 | 0.01027725 | SMARCC1   |
| 147687    | ENSG00000173480 | 399.735216 | -0.20675886 | 0.14066584 | 0.1126622  | 0.27179207 | ZNF417    |
| 5797      | ENSG00000173482 | 509.59629  | -1.37829252 | 0.14415346 | 9.63E-23   | 4.14E-21   | PTPRM     |
| 2286      | ENSG00000173486 | 484.564506 | 0.06360256  | 0.11370406 | 0.55871597 | 0.76342457 | FKBP2     |
| 7423      | ENSG00000173511 | 828.457558 | 0.14487587  | 0.10413693 | 0.14800575 | 0.33012187 | VEGFB     |
| 79834     | ENSG00000173517 | 1035.85016 | 0.22295387  | 0.11937843 | 0.04877259 | 0.14617043 | PEAK1     |
| 8793      | ENSG00000173530 | 0.173733   | 0.01914545  | 0.38484597 | 0.78225479 | NA         | TNFRSF10D |
| 4485      | ENSG00000173531 | 263.816129 | 0.877307    | 0.19525256 | 1.05E-06   | 1.18E-05   | MST1      |
| 8794      | ENSG00000173535 | 0.44795842 | -0.02501848 | 0.38558245 | 0.5807882  | NA         | TNFRSF10C |
| 29925     | ENSG00000173540 | 867.138815 | 0.22154859  | 0.10094496 | 0.02265601 | 0.08051141 | GMPPB     |
| 92597     | ENSG00000173542 | 1232.54862 | -0.25764419 | 0.08371866 | 0.00157642 | 0.00875104 | MOB1B     |
| 90441     | ENSG00000173545 | 513.314364 | -0.0203314  | 0.11063472 | 0.8469648  | 0.93052693 | ZNF622    |
| 1464      | ENSG00000173546 | 77.2891716 | 0.25638786  | 0.24691596 | 0.18882468 | 0.38950735 | CSPG4     |
| 257364    | ENSG00000173548 | 1025.88579 | 0.22137238  | 0.08450011 | 0.00715632 | 0.03148844 | SNX33     |
| 339778    | ENSG00000173557 | 15.6116354 | -0.56046615 | 0.64095222 | 0.039883   | 0.12512313 | FAM166C   |
| 64859     | ENSG00000173559 | 47.1707612 | -0.33519397 | 0.31673225 | 0.12672374 | 0.29648573 | NABP1     |
| 165082    | ENSG00000173567 | 13.2380406 | 0.03799265  | 0.334483   | 0.82333928 | 0.91945578 | ADGRF3    |
| 126204    | ENSG00000173572 | 0          | NA          | NA         | NA         | NA         | NLRP13    |
| 1106      | ENSG00000173575 | 2836.08718 | 0.10352498  | 0.08260904 | 0.19918748 | 0.40366492 | CHD2      |
| 2829      | ENSG00000173578 | 1.03543838 | 0.02903081  | 0.38173321 | 0.63000381 | NA         | XCR1      |
| 29903     | ENSG00000173581 | 573.835455 | -0.03244221 | 0.11360385 | 0.76445748 | 0.89148768 | CCDC106   |
| 10803     | ENSG00000173585 | 0.173733   | 0.01914545  | 0.38484597 | 0.78225479 | NA         | CCR9      |
| 51134     | ENSG00000173588 | 294.514658 | 0.30645777  | 0.15517078 | 0.03057977 | 0.10189834 | CEP83     |
| 27284     | ENSG00000173597 | 0.50854511 | 0.03078872  | 0.38602082 | 0.48278419 | NA         | SULT1B1   |
| 11163     | ENSG00000173598 | 1454.25714 | 0.30428108  | 0.08110241 | 0.00012026 | 0.00089661 | NUDT4     |
| 5091      | ENSG00000173599 | 991.277983 | 0.01572589  | 0.0854007  | 0.85143798 | 0.93275912 | PC        |
| 10941     | ENSG00000173610 | 0          | NA          | NA         | NA         | NA         | UGT2A1    |
| 286205    | ENSG00000173611 | 507.428652 | -0.19301958 | 0.11895512 | 0.08681738 | 0.22465852 | SCAI      |
| 222545    | ENSG00000173612 | 0          | NA          | NA         | NA         | NA         | GPRC6A    |
| 64802     | ENSG00000173614 | 191.582347 | 0.17544258  | 0.18440116 | 0.27903868 | 0.50351318 | NMNAT1    |
| 78999     | ENSG00000173621 | 809.972551 | -0.41498465 | 0.10256889 | 2.60E-05   | 0.00022751 | LRFN4     |
| 100128327 | ENSG00000173626 | 0          | NA          | NA         | NA         | NA         | TRAPPC3L  |

|           |                 |            |             |            |            |            |            |
|-----------|-----------------|------------|-------------|------------|------------|------------|------------|
| 403314    | ENSG00000173627 | 0.16735865 | 0.01897177  | 0.38482933 | 0.78225479 | NA         | APOBEC4    |
| 6573      | ENSG00000173638 | 1192.92682 | -0.21542237 | 0.08984795 | 0.01343933 | 0.05286207 | SLC19A1    |
| 27129     | ENSG00000173641 | 89.139932  | -1.08478882 | 0.29532572 | 2.37E-05   | 0.00020971 | HSPB7      |
| 9986      | ENSG00000173653 | 412.472314 | -0.01114984 | 0.11342001 | 0.91637747 | 0.96450552 | RCE1       |
| 7388      | ENSG00000173660 | 5146.50585 | -0.08401407 | 0.05460859 | 0.11969438 | 0.28467232 | UQCRH      |
| 80835     | ENSG00000173662 | 1.19363074 | -0.00731775 | 0.37939456 | 0.90922581 | NA         | TAS1R1     |
| 390992    | ENSG00000173673 | 0.31646653 | 0.00081478  | 0.38336468 | 0.9700455  | NA         | HES3       |
| 1964      | ENSG00000173674 | 2473.79619 | -0.13762596 | 0.06772378 | 0.03877614 | 0.12260057 | EIF1AX     |
| 100310812 | ENSG00000173678 | 6.43363564 | 0.0312741   | 0.38672691 | 0.11258499 | 0.27178103 | SPDYE2B    |
| 26737     | ENSG00000173679 | 0          | NA          | NA         | NA         | NA         | OR1L1      |
| 256643    | ENSG00000173681 | 253.631495 | -0.17819385 | 0.16808439 | 0.23655851 | 0.45337334 | BCLAF3     |
| 5707      | ENSG00000173692 | 2059.08397 | -0.01176204 | 0.0951562  | 0.89750959 | 0.95508423 | PSMD1      |
| 10149     | ENSG00000173698 | 22.8577788 | 0.25112942  | 0.35654103 | 0.23330171 | 0.45017563 | ADGRG2     |
| 130560    | ENSG00000173699 | 0          | NA          | NA         | NA         | NA         | SPATA3     |
| 56667     | ENSG00000173702 | 0.52119901 | 0.02576573  | 0.38568143 | 0.51723676 | NA         | MUC13      |
| 26032     | ENSG00000173705 | 31.0289255 | 1.5014769   | 0.50875703 | 0.00019518 | 0.00139235 | SUSD5      |
| 57493     | ENSG00000173706 | 236.866546 | 1.2939322   | 0.17494266 | 1.30E-14   | 3.43E-13   | HEG1       |
| 124857    | ENSG00000173714 | 4.03003492 | -0.05584076 | 0.37532679 | 0.58405284 | 0.78020525 | WFIKKN2    |
| 79703     | ENSG00000173715 | 245.871032 | 0.29994512  | 0.16541011 | 0.0445237  | 0.13604654 | C11orf80   |
| 9804      | ENSG00000173726 | 10106.1511 | -0.24972486 | 0.04721458 | 9.11E-08   | 1.21E-06   | TOMM20     |
| NA        | ENSG00000173727 | 19.453169  | -0.16705312 | 0.34123378 | 0.386521   | 0.61565323 |            |
| 200159    | ENSG00000173728 | 1.91344469 | -0.0070394  | 0.3760225  | 0.92942498 | NA         | C1orf100   |
| 3267      | ENSG00000173744 | 1146.4842  | -0.1541323  | 0.08815627 | 0.0721622  | 0.1956941  | AGFG1      |
| 6777      | ENSG00000173757 | 1742.49418 | 0.25024477  | 0.08197571 | 0.00174654 | 0.00954158 | STAT5B     |
| 924       | ENSG00000173762 | 1.29934018 | 0.09125185  | 0.39877176 | 0.09270252 | NA         | CD7        |
| 375337    | ENSG00000173769 | 0          | NA          | NA         | NA         | NA         | TOPAZ1     |
| 1267      | ENSG00000173786 | 1943.92455 | 0.09517705  | 0.07222296 | 0.17972853 | 0.37629949 | CNP        |
| 3728      | ENSG00000173801 | 1462.3583  | 0.65896204  | 0.09256336 | 2.85E-13   | 6.72E-12   | JUP        |
| 9001      | ENSG00000173805 | 4.84920484 | 0.0396741   | 0.36348282 | 0.75482418 | 0.8858747  | HAP1       |
| 91646     | ENSG00000173809 | 7.17529182 | -0.03087355 | 0.36188919 | 0.80142529 | 0.90902045 | TDRD12     |
| NA        | ENSG00000173810 | 0          | NA          | NA         | NA         | NA         | PPIAP7     |
| 100874114 | ENSG00000173811 | 4.14839482 | 0.1287227   | 0.3942593  | 0.28445715 | 0.50967487 | CCDC13-AS1 |
| 10209     | ENSG00000173812 | 7093.66333 | 0.20505255  | 0.06411078 | 0.0011793  | 0.00682338 | EIF1       |
| 284131    | ENSG00000173818 | 468.012302 | 0.54291864  | 0.12546016 | 5.17E-06   | 5.17E-05   | ENDOV      |
| 57674     | ENSG00000173821 | 3490.51085 | 0.28985583  | 0.08904485 | 0.00081976 | 0.0049751  | RNF213     |
| 220359    | ENSG00000173825 | 75.7949162 | 0.19426028  | 0.2335348  | 0.3024423  | 0.52987991 | TIGD3      |
| 81033     | ENSG00000173826 | 97.8600851 | -2.18656428 | 0.25941257 | 2.41E-18   | 8.27E-17   | KCNH6      |
| 162333    | ENSG00000173838 | 1.12816751 | -0.02393095 | 0.38168695 | 0.67645623 | NA         | MARCHF10   |

|        |                 |            |             |            |            |            |          |
|--------|-----------------|------------|-------------|------------|------------|------------|----------|
| 1263   | ENSG00000173846 | 165.283217 | 0.21177572  | 0.17894094 | 0.18145785 | 0.37887491 | PLK3     |
| 10276  | ENSG00000173848 | 943.47472  | -0.28924513 | 0.09828947 | 0.00226431 | 0.0119067  | NET1     |
| 23333  | ENSG00000173852 | 1297.16522 | -0.00257404 | 0.09097715 | 0.97540999 | 0.99139237 | DPY19L1  |
| NA     | ENSG00000173862 | 1.03867714 | -0.0343278  | 0.38474401 | 0.45647693 | NA         |          |
| NA     | ENSG00000173867 | 31.5855053 | 0.02900002  | 0.31450021 | 0.87491305 | 0.94487915 |          |
| 162466 | ENSG00000173868 | 0.51937201 | -0.02557462 | 0.38567603 | 0.54680819 | NA         | PHOSPHO1 |
| 163049 | ENSG00000173875 | 773.370756 | 0.08507487  | 0.13876973 | 0.5109983  | 0.72623254 | ZNF791   |
| 80012  | ENSG00000173889 | 802.082483 | -0.01134266 | 0.09431853 | 0.89880937 | 0.95556135 | PHC3     |
| 26996  | ENSG00000173890 | 18.3429212 | -0.13212974 | 0.3324401  | 0.48192153 | 0.70262515 | GPR160   |
| 84733  | ENSG00000173894 | 4269.08078 | 0.15357779  | 0.05483686 | 0.00465328 | 0.02189778 | CBX2     |
| 6712   | ENSG00000173898 | 4793.18964 | -0.02762808 | 0.09003256 | 0.75148146 | 0.88344203 | SPTBN2   |
| 27333  | ENSG00000173905 | 2036.3951  | 0.02334712  | 0.06993384 | 0.73553832 | 0.87436071 | GOLIM4   |
| 162605 | ENSG00000173908 | 0          | NA          | NA         | NA         | NA         | KRT28    |
| 83759  | ENSG00000173914 | 690.828509 | 0.03146984  | 0.09615075 | 0.73610162 | 0.87476826 | RBM4B    |
| 84833  | ENSG00000173915 | 1037.35569 | -0.20885556 | 0.08380926 | 0.0104364  | 0.04286918 | ATP5MK   |
| 3212   | ENSG00000173917 | 0.15069912 | -0.01848503 | 0.38480575 | 0.84537521 | NA         | HOXB2    |
| 114897 | ENSG00000173918 | 163.499377 | -0.93436301 | 0.20400038 | 6.30E-07   | 7.39E-06   | C1QTNF1  |
| 115123 | ENSG00000173926 | 60.6316742 | -1.04773692 | 0.3665157  | 0.00038314 | 0.00254912 | MARCHF3  |
| 126074 | ENSG00000173928 | 43.3299626 | 0.01229418  | 0.25654576 | 0.95034777 | 0.97957708 | SWSAP1   |
| 353189 | ENSG00000173930 | 55.2730184 | 0.10321949  | 0.25899053 | 0.5959692  | 0.78826859 | SLCO4C1  |
| 5936   | ENSG00000173933 | 2647.66129 | -0.24697828 | 0.07800943 | 0.00119351 | 0.00689552 | RBM4     |
| 128344 | ENSG00000173947 | 0          | NA          | NA         | NA         | NA         | PIFO     |
| 152002 | ENSG00000173950 | 790.826531 | 0.03133351  | 0.09523918 | 0.73545064 | 0.87432359 | XXYLT1   |
| NA     | ENSG00000173954 | 0          | NA          | NA         | NA         | NA         | SNURFL   |
| 165324 | ENSG00000173960 | 865.365644 | 0.05610159  | 0.08823472 | 0.51415243 | 0.72921448 | UBXN2A   |
| NA     | ENSG00000173966 | 0          | NA          | NA         | NA         | NA         |          |
| 84839  | ENSG00000173976 | 0          | NA          | NA         | NA         | NA         | RAX2     |
| 220416 | ENSG00000173988 | 29.1743014 | 0.23439677  | 0.34096136 | 0.26097252 | 0.48276874 | LRRC63   |
| 8557   | ENSG00000173991 | 23.3041162 | 0.05920391  | 0.30303805 | 0.7562025  | 0.88670553 | TCAP     |
| 9973   | ENSG00000173992 | 276.77501  | 0.21525118  | 0.15526842 | 0.12900096 | 0.30032609 | CCS      |
| 375387 | ENSG00000174004 | 45.3833886 | 1.09256958  | 0.40260715 | 0.00057475 | 0.00364546 | NRROS    |
| 84984  | ENSG00000174007 | 83.3230411 | 0.16734278  | 0.22094421 | 0.35891683 | 0.58923542 | CEP19    |
| 80311  | ENSG00000174010 | 286.785069 | -0.37447609 | 0.13870738 | 0.0037336  | 0.01821386 | KLHL15   |
| 200933 | ENSG00000174013 | 1161.47419 | -0.42358617 | 0.08564067 | 3.75E-07   | 4.57E-06   | FBXO45   |
| 220082 | ENSG00000174015 | 0          | NA          | NA         | NA         | NA         | CBY2     |
| 169966 | ENSG00000174016 | 0          | NA          | NA         | NA         | NA         | TENT5D   |
| 2787   | ENSG00000174021 | 1336.18427 | 0.30788144  | 0.08264191 | 0.00013202 | 0.00097444 | GNG5     |
| NA     | ENSG00000174028 | 55.1751419 | -0.2777742  | 0.30055743 | 0.18907498 | 0.38986152 | FAM3C2P  |

|        |                 |            |             |            |            |            |          |
|--------|-----------------|------------|-------------|------------|------------|------------|----------|
| 253512 | ENSG00000174032 | 218.67651  | 0.55114382  | 0.18356353 | 0.0008262  | 0.00500297 | SLC25A30 |
| 138724 | ENSG00000174038 | 3.49022519 | 0.04834291  | 0.3792808  | 0.55959225 | 0.76413192 | C9orf131 |
| 947    | ENSG00000174059 | 6.92931541 | 0.04957304  | 0.36180734 | 0.70499509 | 0.85803894 | CD34     |
| 8722   | ENSG00000174080 | 605.358415 | 0.48814439  | 0.11827567 | 1.47E-05   | 0.00013594 | CTSF     |
| 253827 | ENSG00000174099 | 79.0265256 | 7.22893452  | 0.83679429 | 1.84E-17   | 5.86E-16   | MSRB3    |
| 23592  | ENSG00000174106 | 538.229601 | 0.25325503  | 0.12092564 | 0.02691082 | 0.09224441 | LEMD3    |
| 283951 | ENSG00000174109 | 318.753615 | 0.04328015  | 0.1310062  | 0.72708853 | 0.86953012 | C16orf91 |
| 81793  | ENSG00000174123 | 0.14931947 | -0.01844332 | 0.38480212 | 0.84537521 | NA         | TLR10    |
| 7096   | ENSG00000174125 | 7.6155168  | 0.1028715   | 0.37057426 | 0.46879507 | 0.69137681 | TLR1     |
| 10333  | ENSG00000174130 | 2.22155685 | 0.0613082   | 0.38165025 | 0.48097066 | NA         | TLR6     |
| 345757 | ENSG00000174132 | 183.386744 | 0.46665431  | 0.17790774 | 0.00346373 | 0.01710316 | FAM174A  |
| 285704 | ENSG00000174136 | 1004.24228 | -0.28138206 | 0.08248373 | 0.00046333 | 0.00302086 | RGMB     |
| 152877 | ENSG00000174137 | 103.711103 | 0.07903021  | 0.22472555 | 0.66650437 | 0.83560485 | FAM53A   |
| 57495  | ENSG00000174145 | 0          | NA          | NA         | NA         | NA         | NWD2     |
| 284613 | ENSG00000174151 | 255.442716 | -0.00221192 | 0.16968945 | 0.98711278 | 0.99567688 | CYB561D1 |
| 2940   | ENSG00000174156 | 0          | NA          | NA         | NA         | NA         | GSTA3    |
| 254359 | ENSG00000174165 | 428.624349 | -0.149356   | 0.12571641 | 0.20700334 | 0.41417369 | ZDHHC24  |
| NA     | ENSG00000174171 | 2.54269252 | -0.17296645 | 0.43485956 | 0.04234011 | NA         |          |
| 54931  | ENSG00000174173 | 557.350517 | -0.09795566 | 0.10312423 | 0.32328807 | 0.55093929 | TRMT10C  |
| 6403   | ENSG00000174175 | 0          | NA          | NA         | NA         | NA         | SELP     |
| 348180 | ENSG00000174177 | 324.139701 | 0.06978781  | 0.1316721  | 0.57340749 | 0.7729263  | CTU2     |
| 23269  | ENSG00000174197 | 2464.71239 | -0.18688398 | 0.07810436 | 0.01419998 | 0.05519743 | MGA      |
| 144577 | ENSG00000174206 | 134.535725 | -0.33368831 | 0.22626483 | 0.074199   | 0.19988632 | C12orf66 |
| 392509 | ENSG00000174225 | 0.70148749 | 0.00128865  | 0.38181396 | 0.97734568 | NA         | ARL13A   |
| 169166 | ENSG00000174226 | 0.68271199 | 0.04027334  | 0.38711563 | 0.36252232 | NA         | SNX31    |
| 54872  | ENSG00000174227 | 1178.02682 | 0.11504278  | 0.08711427 | 0.17504403 | 0.36892512 | PIGG     |
| 10594  | ENSG00000174231 | 11195.7811 | -0.1261609  | 0.04822291 | 0.00831812 | 0.03567479 | PRPF8    |
| 112    | ENSG00000174233 | 2154.65697 | 0.02705083  | 0.06768236 | 0.68537161 | 0.8469494  | ADCY6    |
| 387849 | ENSG00000174236 | 7.49560803 | 0.20100517  | 0.41697988 | 0.19726982 | 0.40121304 | REP15    |
| 5306   | ENSG00000174238 | 1268.08161 | -0.11313472 | 0.10824808 | 0.27484973 | 0.4987213  | PITPNA   |
| 9416   | ENSG00000174243 | 2310.6222  | -0.08374463 | 0.10025373 | 0.38528975 | 0.61433325 | DDX23    |
| 7634   | ENSG00000174255 | 0.69197381 | -0.00049013 | 0.38183012 | 0.99325142 | NA         | ZNF80    |
| 741    | ENSG00000174276 | 220.84773  | -0.06997984 | 0.15930368 | 0.62792558 | 0.81117654 | ZNHIT2   |
| 344191 | ENSG00000174279 | 3.00685641 | 0.23092792  | 0.4836506  | 0.01744236 | 0.0652444  | EVX2     |
| 57659  | ENSG00000174282 | 1018.46376 | 0.15810753  | 0.09069901 | 0.07255914 | 0.19642152 | ZBTB4    |
| 8711   | ENSG00000174292 | 60.2648844 | 0.13921265  | 0.24516385 | 0.46752744 | 0.69041597 | TNK1     |
| 23051  | ENSG00000174306 | 1052.69621 | -0.05310363 | 0.10878481 | 0.6096291  | 0.79803651 | ZHX3     |
| 23612  | ENSG00000174307 | 525.024673 | 0.59742667  | 0.13264282 | 1.96E-06   | 2.11E-05   | PHLDA3   |

|        |                 |            |             |            |            |            |              |
|--------|-----------------|------------|-------------|------------|------------|------------|--------------|
| NA     | ENSG00000174325 | 0          | NA          | NA         | NA         | NA         | DIRC1        |
| 162515 | ENSG00000174326 | 4.15658738 | 0.04487263  | 0.36812958 | 0.70548522 | 0.85803894 | SLC16A11     |
| 201232 | ENSG00000174327 | 51.0276253 | 0.16866779  | 0.27958062 | 0.40085468 | 0.62929088 | SLC16A13     |
| 148979 | ENSG00000174332 | 11.0980439 | -1.77998122 | 0.94778518 | 0.002463   | 0.01280216 | GLIS1        |
| 134083 | ENSG00000174339 | 0          | NA          | NA         | NA         | NA         | OR2Y1        |
| 55584  | ENSG00000174343 | 0          | NA          | NA         | NA         | NA         | CHRNA9       |
| 127435 | ENSG00000174348 | 15.0421397 | 0.23817275  | 0.39084471 | 0.22594115 | 0.44016814 | PODN         |
| 378108 | ENSG00000174353 | 766.913428 | 0.08276135  | 0.09101597 | 0.34962177 | 0.58007157 | STAG3L3      |
| 340024 | ENSG00000174358 | 0          | NA          | NA         | NA         | NA         | SLC6A19      |
| 128439 | ENSG00000174365 | 228.817742 | 0.29432759  | 0.15331523 | 0.03598936 | 0.11585132 | SNHG11       |
| NA     | ENSG00000174370 | 17.0210227 | -0.25376593 | 0.39758797 | 0.20095091 | 0.40615916 | C11orf45     |
| 9156   | ENSG00000174371 | 1598.34578 | -0.5899588  | 0.0853102  | 1.44E-12   | 3.25E-11   | EXO1         |
| 253959 | ENSG00000174373 | 1324.83827 | 0.28352682  | 0.07896186 | 0.00023748 | 0.00165785 | RALGAPA1     |
| NA     | ENSG00000174384 | 65.6321635 | -0.03779666 | 0.23120083 | 0.83666564 | 0.9256885  | PMS2P6       |
| NA     | ENSG00000174403 | 14.78654   | 0.18459528  | 0.38054412 | 0.29618461 | 0.52277154 | MIR1-1HG-AS1 |
| 3981   | ENSG00000174405 | 451.952561 | -0.08702939 | 0.1162155  | 0.4486704  | 0.67234398 | LIG4         |
| NA     | ENSG00000174407 | 1.22135173 | -0.05687993 | 0.38754548 | 0.30779291 | NA         | MIR1-1HG     |
| NA     | ENSG00000174408 | 0          | NA          | NA         | NA         | NA         | PPIAP24      |
| 7201   | ENSG00000174417 | 7.79982031 | 0.18128896  | 0.40833187 | 0.2199424  | 0.43209275 | TRHR         |
| NA     | ENSG00000174418 | 0          | NA          | NA         | NA         | NA         | RPL35P9      |
| 389524 | ENSG00000174428 | 600.718882 | 0.22001646  | 0.10679663 | 0.0316171  | 0.10460523 | GTF2IRD2B    |
| 137735 | ENSG00000174429 | 0          | NA          | NA         | NA         | NA         | ABRA         |
| 488    | ENSG00000174437 | 7347.54522 | 0.02634354  | 0.06087803 | 0.71192197 | 0.86156715 | ATP2A2       |
| 55055  | ENSG00000174442 | 982.641896 | -0.44260029 | 0.09343567 | 1.01E-06   | 1.14E-05   | ZWILCH       |
| 6124   | ENSG00000174444 | 37387.6133 | 0.03474432  | 0.05254466 | 0.50797337 | 0.7237561  | RPL4         |
| 10302  | ENSG00000174446 | 149.846792 | -0.10276247 | 0.17088273 | 0.50106451 | 0.71823711 | SNAPC5       |
| 147323 | ENSG00000174448 | 2.11408623 | 0.06968243  | 0.38387942 | 0.41946714 | NA         | STARD6       |
| 283685 | ENSG00000174450 | 0          | NA          | NA         | NA         | NA         | GOLGA6L2     |
| 402117 | ENSG00000174453 | 0          | NA          | NA         | NA         | NA         | VWC2L        |
| 400073 | ENSG00000174456 | 320.040548 | 0.01750319  | 0.14225292 | 0.89446148 | 0.95445145 | C12orf76     |
| 170261 | ENSG00000174460 | 137.81006  | -0.46306035 | 0.21228785 | 0.0110632  | 0.04508913 | ZCCHC12      |
| 26047  | ENSG00000174469 | 290.283875 | -0.50855709 | 0.2145485  | 0.00573135 | 0.0261222  | CNTNAP2      |
| 442117 | ENSG00000174473 | 13.8020884 | -0.05422016 | 0.3326429  | 0.75035897 | 0.88256592 | GALNTL6      |
| 158038 | ENSG00000174482 | 116.101847 | -0.3718705  | 0.21305207 | 0.03952726 | 0.12436105 | LINGO2       |
| 582    | ENSG00000174483 | 496.376364 | 0.31366437  | 0.11124429 | 0.00313303 | 0.01571666 | BBS1         |
| 10260  | ENSG00000174485 | 541.795414 | -0.50727053 | 0.13339894 | 5.35E-05   | 0.00043351 | DENND4A      |
| NA     | ENSG00000174495 | 0          | NA          | NA         | NA         | NA         | PPIAP80      |
| 9543   | ENSG00000174498 | 118.648978 | 0.58820366  | 0.27601942 | 0.00787775 | 0.03408079 | IGDCC3       |



|        |                 |            |             |            |            |            |           |
|--------|-----------------|------------|-------------|------------|------------|------------|-----------|
| 257144 | ENSG00000174500 | 4.85700299 | 0.23318518  | 0.47153804 | 0.05939059 | 0.16976075 | GCSAM     |
| 400986 | ENSG00000174501 | 342.596887 | -0.23845692 | 0.16704423 | 0.11148562 | 0.26980661 | ANKRD36C  |
| 115019 | ENSG00000174502 | 0.53035984 | 0.03940331  | 0.38680964 | 0.41703988 | NA         | SLC26A9   |
| 148808 | ENSG00000174514 | 69.1607622 | -0.79037467 | 0.39238596 | 0.00547202 | 0.0251482  | MFSD4A    |
| 246330 | ENSG00000174516 | 232.299849 | -0.24713404 | 0.1555842  | 0.08151169 | 0.21429626 | PELI3     |
| 148014 | ENSG00000174521 | 408.032895 | -5.2097965  | 0.21867539 | 6.14E-126  | 2.77E-123  | TTC9B     |
| 283446 | ENSG00000174527 | 17.3233516 | -0.2368008  | 0.43357279 | 0.15321877 | 0.33804794 | MYO1H     |
| 388730 | ENSG00000174529 | 96.6594998 | -0.32555701 | 0.23740491 | 0.0909967  | 0.23271133 | TMEM81    |
| 65003  | ENSG00000174547 | 809.828783 | 0.02496129  | 0.11146663 | 0.81590993 | 0.9163678  | MRPL11    |
| 55554  | ENSG00000174562 | 0          | NA          | NA         | NA         | NA         | KLK15     |
| 53833  | ENSG00000174564 | 32.8113182 | 0.53635409  | 0.43707432 | 0.04212281 | 0.13070323 | IL20RB    |
| 127845 | ENSG00000174567 | 16.3792258 | 0.05937741  | 0.32694077 | 0.73929783 | 0.87688337 | GOLT1A    |
| NA     | ENSG00000174572 | 0.18922458 | 0.01954053  | 0.38488496 | 0.78225479 | NA         | RPL10P2   |
| 79647  | ENSG00000174574 | 1224.43924 | -0.22001848 | 0.08929937 | 0.01108665 | 0.04516613 | AKIRIN1   |
| 266743 | ENSG00000174576 | 5.0039016  | 0.18351023  | 0.42171989 | 0.16469952 | 0.3543692  | NPAS4     |
| 55167  | ENSG00000174579 | 763.066776 | -0.26743706 | 0.1539538  | 0.05716576 | 0.16506603 | MSL2      |
| 162968 | ENSG00000174586 | 227.608571 | 0.24848206  | 0.16114947 | 0.0888969  | 0.22841422 | ZNF497    |
| 133022 | ENSG00000174599 | 168.604158 | -0.10580182 | 0.17308746 | 0.4921454  | 0.71115547 | TRAM1L1   |
| 1240   | ENSG00000174600 | 13.9026916 | -2.04498438 | 0.87245047 | 0.00083413 | 0.00504237 | CMKLR1    |
| 90806  | ENSG00000174606 | 1072.59794 | -0.16749899 | 0.11240063 | 0.11808202 | 0.28192478 | ANGEL2    |
| 7368   | ENSG00000174607 | 151.680865 | -0.50741735 | 0.2051717  | 0.004516   | 0.02134799 | UGT8      |
| 339855 | ENSG00000174611 | 11.728127  | -0.07779876 | 0.34447181 | 0.63721911 | 0.81722218 | KY        |
| 124152 | ENSG00000174628 | 87.3747096 | 0.11821333  | 0.22389453 | 0.52217018 | 0.73552406 | IQCK      |
| 6578   | ENSG00000174640 | 1.38677075 | 0.00988362  | 0.37925781 | 0.87965884 | NA         | SLCO2A1   |
| 10781  | ENSG00000174652 | 776.635534 | -0.0146622  | 0.09942552 | 0.87766485 | 0.94578953 | ZNF266    |
| 125958 | ENSG00000174667 | 0          | NA          | NA         | NA         | NA         | OR7D4     |
| 3177   | ENSG00000174669 | 582.329704 | 0.18632816  | 0.10734124 | 0.07016484 | 0.1919256  | SLC29A2   |
| 9024   | ENSG00000174672 | 1079.66193 | -1.46422628 | 0.09537192 | 2.68E-54   | 2.98E-52   | BRSK2     |
| NA     | ENSG00000174677 | 0          | NA          | NA         | NA         | NA         | VN1R6P    |
| NA     | ENSG00000174678 | 0          | NA          | NA         | NA         | NA         | FAM47DP   |
| NA     | ENSG00000174680 | 3.61628275 | 0.15565515  | 0.4233615  | 0.07468097 | 0.20079555 | GRIK1-AS1 |
| 11041  | ENSG00000174684 | 806.925089 | -0.08921798 | 0.08808914 | 0.29732158 | 0.52397052 | B4GAT1    |
| 153339 | ENSG00000174695 | 1702.13623 | -0.38247887 | 0.08852978 | 8.60E-06   | 8.27E-05   | TMEM167A  |
| 3952   | ENSG00000174697 | 0.84934393 | 0.04950338  | 0.38855591 | 0.26958967 | NA         | LEP       |
| 285590 | ENSG00000174705 | 2436.52228 | 0.28034185  | 0.0643762  | 9.99E-06   | 9.48E-05   | SH3PXD2B  |
| NA     | ENSG00000174715 | 0          | NA          | NA         | NA         | NA         | PPIAP72   |
| 55196  | ENSG00000174718 | 411.038618 | -0.18831933 | 0.13749377 | 0.1406916  | 0.318644   | RESF1     |
| 51574  | ENSG00000174720 | 858.337441 | -0.00275677 | 0.10003084 | 0.97639943 | 0.99184704 | LARP7     |

|        |                 |            |             |            |            |            |            |
|--------|-----------------|------------|-------------|------------|------------|------------|------------|
| 143282 | ENSG00000174721 | 147.58555  | -0.64444805 | 0.20541827 | 0.00040642 | 0.00268511 | FGFBP3     |
| 9975   | ENSG00000174738 | 1006.67113 | -0.27672121 | 0.09790464 | 0.00336067 | 0.01665642 | NR1D2      |
| 140886 | ENSG00000174740 | 1.07741191 | 0.02469562  | 0.38188171 | 0.66691784 | NA         | PABPC5     |
| 25855  | ENSG00000174744 | 509.766041 | 0.00693222  | 0.11889859 | 0.95201299 | 0.98012235 | BRMS1      |
| 6138   | ENSG00000174748 | 24083.2592 | 0.03489426  | 0.05231326 | 0.50128496 | 0.71841948 | RPL15      |
| 132720 | ENSG00000174749 | 149.840608 | -0.16622946 | 0.17936924 | 0.29377139 | 0.52006999 | FAM241A    |
| 3265   | ENSG00000174775 | 760.117673 | -0.29623487 | 0.09853657 | 0.00180338 | 0.00979359 | HRAS       |
| 151790 | ENSG00000174776 | 0.69493202 | 0.03154416  | 0.38626309 | 0.41391645 | NA         | WDR49      |
| 6731   | ENSG00000174780 | 2801.07398 | -0.22771625 | 0.06638992 | 0.00047438 | 0.00308276 | SRP72      |
| 126006 | ENSG00000174788 | 0.34746601 | 0.02370763  | 0.3853651  | 0.61987128 | NA         | PCP2       |
| 9610   | ENSG00000174791 | 78.0723206 | -0.53270769 | 0.34151094 | 0.02868804 | 0.09697916 | RIN1       |
| 152816 | ENSG00000174792 | 1.2186262  | 0.011649    | 0.38062608 | 0.84212455 | NA         | ODAPH      |
| 152815 | ENSG00000174796 | 267.186811 | -0.04841205 | 0.16068224 | 0.73970114 | 0.8770894  | THAP6      |
| 9662   | ENSG00000174799 | 538.996492 | 0.01692037  | 0.11007506 | 0.87362981 | 0.94441388 | CEP135     |
| 8322   | ENSG00000174804 | 70.9202892 | 0.30537668  | 0.25296121 | 0.12559202 | 0.29453259 | FZD4       |
| 57124  | ENSG00000174807 | 315.650888 | 0.07388874  | 0.15252001 | 0.59868332 | 0.79005929 | CD248      |
| 685    | ENSG00000174808 | 0          | NA          | NA         | NA         | NA         | BTC        |
| 5174   | ENSG00000174827 | 386.77279  | -4.3638571  | 0.19174236 | 1.31E-115  | 4.81E-113  | PDZK1      |
| 2015   | ENSG00000174837 | 0          | NA          | NA         | NA         | NA         | ADGRE1     |
| 201627 | ENSG00000174839 | 817.972827 | 0.07069773  | 0.10947294 | 0.50100227 | 0.71823519 | DENND6A    |
| 201626 | ENSG00000174840 | 758.493689 | 0.00278346  | 0.10940481 | 0.97981829 | 0.99328572 | PDE12      |
| 11146  | ENSG00000174842 | 196.451478 | 0.00099683  | 0.1635795  | 0.99576313 | 0.99852582 | GLMN       |
| 201625 | ENSG00000174844 | 1.93322063 | 0.01430367  | 0.3808549  | 0.65351262 | NA         | DNAH12     |
| 10897  | ENSG00000174851 | 820.452811 | -0.02266276 | 0.10586416 | 0.82244577 | 0.91897523 | YIF1A      |
| 254263 | ENSG00000174871 | 744.792277 | -0.10166497 | 0.09371529 | 0.26956078 | 0.4927127  | CNIH2      |
| 277    | ENSG00000174876 | 0          | NA          | NA         | NA         | NA         | AMY1B      |
| 171389 | ENSG00000174885 | 0          | NA          | NA         | NA         | NA         | NLRP6      |
| 126328 | ENSG00000174886 | 1812.97756 | -0.03077189 | 0.06905571 | 0.64456569 | 0.8225499  | NDUFA11    |
| 51319  | ENSG00000174891 | 674.799164 | 0.35316317  | 0.0978244  | 0.0001834  | 0.0013155  | RSRC1      |
| 257062 | ENSG00000174898 | 0.86773468 | -0.03757764 | 0.38469315 | 0.46173226 | NA         | CATSPERD   |
| 152078 | ENSG00000174899 | 33.1478635 | 1.09179822  | 0.46427516 | 0.00151507 | 0.00844355 | SLC66A1L   |
| 81876  | ENSG00000174903 | 2337.1451  | -0.00390134 | 0.06748694 | 0.95283717 | 0.98058207 | RAB1B      |
| NA     | ENSG00000174912 | 3.20296728 | 0.23380462  | 0.48097459 | 0.03649122 | 0.11718772 | METTLL15P1 |
| 390174 | ENSG00000174914 | 0          | NA          | NA         | NA         | NA         | OR9G1      |
| 81490  | ENSG00000174915 | 699.021698 | 0.06995227  | 0.10040344 | 0.47088911 | 0.69316219 | PTDSS2     |
| 125988 | ENSG00000174917 | 475.786846 | 0.05960979  | 0.11313207 | 0.58167473 | 0.77870625 | MICOS13    |
| 285315 | ENSG00000174928 | 64.9463171 | -0.16010978 | 0.24134208 | 0.39956975 | 0.62826628 | C3orf33    |
| NA     | ENSG00000174930 | 0          | NA          | NA         | NA         | NA         | VN2R1P     |

|        |                 |            |             |            |            |            |         |
|--------|-----------------|------------|-------------|------------|------------|------------|---------|
| 219482 | ENSG00000174937 | 0          | NA          | NA         | NA         | NA         | OR5M3   |
| 26470  | ENSG00000174938 | 2104.18632 | -2.09367136 | 0.0779     | 2.76E-160  | 2.88E-157  | SEZ6L2  |
| 253982 | ENSG00000174939 | 657.528455 | -2.67469834 | 0.13399581 | 6.88E-90   | 1.75E-87   | ASPHD1  |
| 253980 | ENSG00000174943 | 625.622598 | 0.53055065  | 0.13881427 | 4.83E-05   | 0.00039707 | KCTD13  |
| 9934   | ENSG00000174944 | 0.40091344 | -0.01266455 | 0.3839044  | 0.88153981 | NA         | P2RY14  |
| 155185 | ENSG00000174945 | 8.35457453 | -0.15392319 | 0.39661869 | 0.25945029 | 0.48111914 | AMZ1    |
| 29909  | ENSG00000174946 | 0          | NA          | NA         | NA         | NA         | GPR171  |
| 344758 | ENSG00000174948 | 0.16735865 | 0.01897177  | 0.38482933 | 0.78225479 | NA         | GPR149  |
| 388611 | ENSG00000174950 | 0.15069912 | -0.01848503 | 0.38480575 | 0.84537521 | NA         | CD164L2 |
| 2523   | ENSG00000174951 | 27.0325603 | 0.06326843  | 0.29964486 | 0.7416499  | 0.87812748 | FUT1    |
| 170506 | ENSG00000174953 | 1873.8311  | 0.0428377   | 0.08249824 | 0.59567309 | 0.78816266 | DHX36   |
| 282775 | ENSG00000174957 | 0          | NA          | NA         | NA         | NA         | OR5J2   |
| 84107  | ENSG00000174963 | 142.499491 | 0.34969488  | 0.25187067 | 0.08020532 | 0.21166182 | ZIC4    |
| 282770 | ENSG00000174970 | 0          | NA          | NA         | NA         | NA         | OR10AG1 |
| NA     | ENSG00000174977 | 0          | NA          | NA         | NA         | NA         |         |
| 219431 | ENSG00000174982 | 0          | NA          | NA         | NA         | NA         | OR4S2   |
| 26259  | ENSG00000174989 | 1650.71525 | 0.62911652  | 0.07524657 | 1.79E-17   | 5.70E-16   | FBXW8   |
| 763    | ENSG00000174990 | 0          | NA          | NA         | NA         | NA         | CAS5A   |
| 653808 | ENSG00000174992 | 0          | NA          | NA         | NA         | NA         | ZG16    |
| 64837  | ENSG00000174996 | 1449.14552 | 0.11967954  | 0.07425172 | 0.09932044 | 0.24808862 | KLC2    |
| 6580   | ENSG00000175003 | 0.32459315 | 0.00146341  | 0.3833692  | 0.96629595 | NA         | SLC22A1 |
| 387718 | ENSG00000175018 | 0          | NA          | NA         | NA         | NA         | TEX36   |
| 1488   | ENSG00000175029 | 2857.04934 | 0.0600494   | 0.06745806 | 0.36548842 | 0.59471759 | CTBP2   |
| 9435   | ENSG00000175040 | 2.22879901 | -0.06657069 | 0.3821461  | 0.45926665 | NA         | CHST2   |
| 79683  | ENSG00000175048 | 207.698422 | 0.37720424  | 0.18307182 | 0.019893   | 0.07265777 | ZDHHC14 |
| 545    | ENSG00000175054 | 863.292066 | -0.32378655 | 0.11601496 | 0.00330708 | 0.01642774 | ATR     |
| 125144 | ENSG00000175061 | 6279.98307 | -0.15044662 | 0.05131696 | 0.00307024 | 0.01543288 | SNHG29  |
| 11065  | ENSG00000175063 | 1527.91879 | -0.11505362 | 0.08942512 | 0.18533159 | 0.38437996 | UBE2C   |
| 147409 | ENSG00000175065 | 0          | NA          | NA         | NA         | NA         | DSG4    |
| 256356 | ENSG00000175066 | 552.055511 | 0.14898345  | 0.13997171 | 0.25250639 | 0.47252657 | GK5     |
| 80124  | ENSG00000175073 | 409.623632 | -0.00143054 | 0.12137259 | 0.98915511 | 0.99604194 | VCPIP1  |
| 132112 | ENSG00000175077 | 0          | NA          | NA         | NA         | NA         | RTP1    |
| 1674   | ENSG00000175084 | 0.36303109 | 0.0238953   | 0.38539249 | 0.60992868 | NA         | DES     |
| 149420 | ENSG00000175087 | 421.633107 | -0.24608694 | 0.1689353  | 0.10350172 | 0.25575714 | PDIK1L  |
| 92369  | ENSG00000175093 | 211.691316 | -0.72599105 | 0.17392473 | 6.17E-06   | 6.11E-05   | SPSB4   |
| 5897   | ENSG00000175097 | 412.146536 | -5.81958757 | 0.25391788 | 9.59E-118  | 3.66E-115  | RAG2    |
| 7189   | ENSG00000175104 | 859.167889 | -0.87742024 | 0.1076856  | 5.94E-17   | 1.82E-15   | TRAF6   |
| 55279  | ENSG00000175105 | 200.137375 | 0.06622968  | 0.15986455 | 0.64966838 | 0.82525848 | ZNF654  |

|        |                 |            |             |            |            |            |            |
|--------|-----------------|------------|-------------|------------|------------|------------|------------|
| 201158 | ENSG00000175106 | 106.699942 | 0.09629167  | 0.20787375 | 0.58354725 | 0.77994081 | TVP23C     |
| 56945  | ENSG00000175110 | 441.510668 | 0.15848837  | 0.1164077  | 0.15286038 | 0.33757234 | MRPS22     |
| 55690  | ENSG00000175115 | 1458.17105 | 0.38016798  | 0.0861183  | 5.70E-06   | 5.67E-05   | PACS1      |
| 149708 | ENSG00000175121 | 0          | NA          | NA         | NA         | NA         | WFDC5      |
| 65108  | ENSG00000175130 | 10554.7279 | -0.14848315 | 0.04665711 | 0.0013318  | 0.00756237 | MARCKSL1   |
| 80851  | ENSG00000175137 | 1233.18118 | -0.06648781 | 0.07761001 | 0.38106366 | 0.61009547 | SH3BP5L    |
| 26696  | ENSG00000175143 | 0          | NA          | NA         | NA         | NA         | OR2T1      |
| 200197 | ENSG00000175147 | 450.197706 | 0.48627616  | 0.15827557 | 0.00082249 | 0.0049857  | TMEM51-AS1 |
| 388403 | ENSG00000175155 | 660.81639  | -1.005454   | 0.11952308 | 5.23E-18   | 1.73E-16   | YPEL2      |
| 253559 | ENSG00000175161 | 180.959636 | 0.3967208   | 0.23894177 | 0.04320971 | 0.13305613 | CADM2      |
| 28     | ENSG00000175164 | 0          | NA          | NA         | NA         | NA         | ABO        |
| 5708   | ENSG00000175166 | 3699.13876 | -0.02149291 | 0.07584431 | 0.77148204 | 0.89520433 | PSMD2      |
| NA     | ENSG00000175170 | 23.3839078 | 0.05998249  | 0.31438522 | 0.74693576 | 0.88109908 | FAM182B    |
| 22843  | ENSG00000175175 | 1391.85264 | -0.37207139 | 0.09206336 | 3.03E-05   | 0.0002598  | PPM1E      |
| 131408 | ENSG00000175182 | 965.372829 | -0.20502212 | 0.08699301 | 0.0152855  | 0.05851134 | FAM131A    |
| 1466   | ENSG00000175183 | 574.896512 | 0.97438198  | 0.12700314 | 2.39E-15   | 6.71E-14   | CSRP2      |
| 3626   | ENSG00000175189 | 9.75951403 | 0.39626736  | 0.56747614 | 0.06581353 | 0.18336477 | INHBC      |
| 55486  | ENSG00000175193 | 605.771916 | -0.15255008 | 0.11395217 | 0.15926859 | 0.34685937 | PARL       |
| 1649   | ENSG00000175197 | 184.241881 | 0.92471445  | 0.29719411 | 0.00023017 | 0.0016108  | DDIT3      |
| 5095   | ENSG00000175198 | 310.762731 | 0.16180604  | 0.16874574 | 0.28698444 | 0.51285995 | PCCA       |
| 123346 | ENSG00000175202 | 0.173733   | 0.01914545  | 0.38484597 | 0.78225479 | NA         | HIGD2B     |
| 10540  | ENSG00000175203 | 2134.31819 | 0.30000086  | 0.09216093 | 0.00078281 | 0.00478467 | DCTN2      |
| 4878   | ENSG00000175206 | 123.589801 | -2.07816213 | 0.26858001 | 6.70E-16   | 1.93E-14   | NPPA       |
| 79797  | ENSG00000175213 | 256.090369 | 0.07533672  | 0.14857214 | 0.58309002 | 0.77960145 | ZNF408     |
| 10106  | ENSG00000175215 | 3313.91439 | 0.24660314  | 0.07103449 | 0.00040404 | 0.00267119 | CTDSP2     |
| 9793   | ENSG00000175216 | 6002.79563 | -0.31726604 | 0.07674402 | 2.32E-05   | 0.00020552 | CKAP5      |
| 392    | ENSG00000175220 | 1293.7054  | -0.07433811 | 0.07874613 | 0.33426466 | 0.56397745 | ARHGAP1    |
| 10025  | ENSG00000175221 | 1195.32097 | -0.02023622 | 0.07514643 | 0.78292393 | 0.90115512 | MED16      |
| 9776   | ENSG00000175224 | 1286.63334 | -0.08135811 | 0.10077106 | 0.40177707 | 0.63028837 | ATG13      |
| 89792  | ENSG00000175229 | 370.084461 | 0.24213989  | 0.1435386  | 0.06812855 | 0.18781025 | GAL3ST3    |
| 148345 | ENSG00000175262 | 3.82802516 | -0.07984808 | 0.38492317 | 0.37096761 | 0.60017919 | C1orf127   |
| 8534   | ENSG00000175264 | 59.1293702 | -3.8007809  | 0.458265   | 5.69E-18   | 1.88E-16   | CHST1      |
| 23015  | ENSG00000175265 | 3610.09106 | 0.21002674  | 0.06110539 | 0.0004944  | 0.00319403 | GOLGA8A    |
| 146177 | ENSG00000175267 | 7.5104178  | 0.13020489  | 0.39836262 | 0.21891558 | 0.43081814 | VWA3A      |
| 9537   | ENSG00000175274 | 1459.39348 | -0.36189293 | 0.10227804 | 0.00023165 | 0.00161997 | TP53I11    |
| 378708 | ENSG00000175279 | 179.713524 | 0.13394828  | 0.16256203 | 0.36419818 | 0.59387751 | CENPS      |
| 22845  | ENSG00000175283 | 219.760974 | -0.09874976 | 0.15394958 | 0.48279084 | 0.70322078 | DOLK       |
| 254295 | ENSG00000175287 | 0.14931947 | -0.01844332 | 0.38480212 | 0.84537521 | NA         | PHYHD1     |

|        |                 |            |             |            |            |            |            |
|--------|-----------------|------------|-------------|------------|------------|------------|------------|
| 117144 | ENSG00000175294 | 0.86172829 | 0.03799542  | 0.38472774 | 0.45126332 | NA         | CATSPER1   |
| NA     | ENSG00000175302 | 0          | NA          | NA         | NA         | NA         | ANKRD30BP1 |
| 9134   | ENSG00000175305 | 206.225099 | -0.28863118 | 0.20032921 | 0.09251938 | 0.23521072 | CCNE2      |
| 85007  | ENSG00000175309 | 457.545493 | 0.26899067  | 0.11726813 | 0.0158553  | 0.06030849 | PHYKPL     |
| 257629 | ENSG00000175311 | 0          | NA          | NA         | NA         | NA         | ANKS4B     |
| 1474   | ENSG00000175315 | 0.84909805 | 0.02962074  | 0.38439909 | 0.50670033 | NA         | CST6       |
| 196996 | ENSG00000175318 | 12.0776643 | 0.13811326  | 0.3876213  | 0.31506781 | 0.54289729 | GRAMD2A    |
| NA     | ENSG00000175319 | 0          | NA          | NA         | NA         | NA         | NF1P5      |
| 162655 | ENSG00000175322 | 480.263549 | 0.20969859  | 0.12118657 | 0.06767137 | 0.18691355 | ZNF519     |
| 27257  | ENSG00000175324 | 621.274714 | -0.22802483 | 0.0983289  | 0.01614111 | 0.06123127 | LSM1       |
| 5626   | ENSG00000175325 | 0.18922458 | 0.01954053  | 0.38488496 | 0.78225479 | NA         | PROP1      |
| 91464  | ENSG00000175329 | 1.45662398 | -0.02534541 | 0.38091292 | 0.68693583 | NA         | ISX        |
| 8815   | ENSG00000175334 | 2142.01451 | 0.03229663  | 0.07077821 | 0.64145361 | 0.82042546 | BANF1      |
| 319    | ENSG00000175336 | 0.4964018  | -0.01055555 | 0.38285916 | 0.82391731 | NA         | APOF       |
| 1139   | ENSG00000175344 | 1589.53485 | 0.2760389   | 0.08068891 | 0.00045529 | 0.00297629 | CHRNA7     |
| 56674  | ENSG00000175348 | 301.836787 | -0.22825523 | 0.13338052 | 0.06691366 | 0.18544027 | TMEM9B     |
| 56675  | ENSG00000175352 | 108.481661 | 0.21802475  | 0.21287247 | 0.22198586 | 0.43502894 | NRIP3      |
| 5771   | ENSG00000175354 | 423.930849 | -0.06302185 | 0.11991581 | 0.57912809 | 0.7768696  | PTPN2      |
| 57758  | ENSG00000175356 | 32.1768887 | 0.22692176  | 0.38148109 | 0.24150568 | 0.45956961 | SCUBE2     |
| 84285  | ENSG00000175376 | 515.949696 | -0.04884172 | 0.10399955 | 0.62476134 | 0.80877365 | EIF1AD     |
| 4087   | ENSG00000175387 | 1536.43956 | -0.30165292 | 0.07773391 | 7.14E-05   | 0.00056533 | SMAD2      |
| 8665   | ENSG00000175390 | 5204.46157 | 0.14601517  | 0.05337132 | 0.00576555 | 0.02625394 | EIF3F      |
| 219749 | ENSG00000175395 | 474.352291 | -0.17561152 | 0.11224732 | 0.10099806 | 0.25116589 | ZNF25      |
| 121130 | ENSG00000175398 | 0          | NA          | NA         | NA         | NA         | OR10P1     |
| 285598 | ENSG00000175414 | 2603.37955 | -0.28727988 | 0.20139621 | 0.09591809 | 0.24177549 | ARL10      |
| 1212   | ENSG00000175416 | 538.502902 | -0.50435629 | 0.13547556 | 7.43E-05   | 0.00058524 | CLTB       |
| 5122   | ENSG00000175426 | 5.49100605 | -3.67398681 | 1.73254651 | 0.00135097 | 0.00765587 | PCSK1      |
| 4023   | ENSG00000175445 | 3.31003049 | 0.21663377  | 0.47617538 | 0.00451231 | 0.02134509 | LPL        |
| 317671 | ENSG00000175449 | 49.0021121 | -0.25213759 | 0.36478278 | 0.22229066 | 0.43535977 | RFESD      |
| 64770  | ENSG00000175455 | 3347.76527 | -0.06351879 | 0.07723507 | 0.40041816 | 0.62894783 | CCDC14     |
| 374403 | ENSG00000175463 | 23.4324705 | 0.50787491  | 0.5269882  | 0.05309689 | 0.15587419 | TBC1D10C   |
| 9092   | ENSG00000175467 | 1882.95198 | 0.2356442   | 0.09452834 | 0.0099552  | 0.04132895 | SART1      |
| 55844  | ENSG00000175470 | 776.858614 | -0.10197087 | 0.09810329 | 0.28150658 | 0.50630249 | PPP2R2D    |
| 79772  | ENSG00000175471 | 79.9944846 | 0.2593207   | 0.24968967 | 0.18628228 | 0.38596943 | MCTP1      |
| 57804  | ENSG00000175482 | 94.9787764 | 0.49584815  | 0.25667723 | 0.01705974 | 0.06413972 | POLD4      |
| 120787 | ENSG00000175485 | 0.36244485 | 0.00098593  | 0.38336489 | 0.96649389 | NA         | OR52W1     |
| 126364 | ENSG00000175489 | 0          | NA          | NA         | NA         | NA         | LRRC25     |
| 57628  | ENSG00000175497 | 21.5056274 | 2.07009092  | 0.57229121 | 1.60E-05   | 0.00014659 | DPP10      |

|           |                 |            |             |            |            |            |           |
|-----------|-----------------|------------|-------------|------------|------------|------------|-----------|
| 23529     | ENSG00000175505 | 11.5601592 | 0.14893412  | 0.37067034 | 0.37275248 | 0.60164409 | CLCF1     |
| NA        | ENSG00000175509 | 0.55365942 | 0.03297732  | 0.38624289 | 0.45088369 | NA         | ACRP1     |
| 254187    | ENSG00000175513 | 0.16735865 | 0.01897177  | 0.38482933 | 0.78225479 | NA         | TSGA10IP  |
| 390212    | ENSG00000175514 | 0          | NA          | NA         | NA         | NA         | GPR152    |
| 143630    | ENSG00000175518 | 0          | NA          | NA         | NA         | NA         | UBQLNL    |
| 50613     | ENSG00000175520 | 0          | NA          | NA         | NA         | NA         | UBQLN3    |
| 5406      | ENSG00000175535 | 0          | NA          | NA         | NA         | NA         | PNLIP     |
| 387787    | ENSG00000175536 | 74.7192834 | -0.06392536 | 0.23809773 | 0.73126233 | 0.87162779 | LIPT2     |
| 10008     | ENSG00000175538 | 0          | NA          | NA         | NA         | NA         | KCNE3     |
| 57010     | ENSG00000175544 | 1.35294443 | 0.00802665  | 0.37866486 | 0.90485094 | NA         | CABP4     |
| 144245    | ENSG00000175548 | 616.130215 | 0.06993985  | 0.14283868 | 0.60151154 | 0.79200883 | ALG10B    |
| 10589     | ENSG00000175550 | 1083.42408 | 0.09480102  | 0.08941515 | 0.2757897  | 0.49983261 | DRAP1     |
| 79836     | ENSG00000175556 | 0.49037226 | 0.01381349  | 0.38306631 | 0.76290694 | NA         | LONRF3    |
| 7352      | ENSG00000175564 | 62.0252933 | 0.14750843  | 0.25800156 | 0.45045598 | 0.67378216 | UCP3      |
| 7351      | ENSG00000175567 | 583.507772 | 0.82520138  | 0.14841503 | 4.60E-09   | 7.25E-08   | UCP2      |
| 83638     | ENSG00000175573 | 365.983922 | 0.21300331  | 0.13023657 | 0.08148936 | 0.21429626 | C11orf68  |
| 80227     | ENSG00000175575 | 518.520428 | 0.16375559  | 0.10957287 | 0.11847308 | 0.28258066 | PAAF1     |
| 51642     | ENSG00000175581 | 400.269392 | -0.15993985 | 0.13379531 | 0.20051873 | 0.40575148 | MRPL48    |
| 5870      | ENSG00000175582 | 1766.26052 | -0.26372123 | 0.08237135 | 0.00101604 | 0.00598698 | RAB6A     |
| 5029      | ENSG00000175591 | 14.4848203 | 0.05358756  | 0.34467665 | 0.73783943 | 0.87620179 | P2RY2     |
| 8061      | ENSG00000175592 | 13.2455086 | 0.42368682  | 0.59102611 | 0.05850006 | 0.16796543 | FOSL1     |
| 2072      | ENSG00000175595 | 438.843018 | -0.20570968 | 0.14451669 | 0.12311737 | 0.29054555 | ERCC4     |
| 79783     | ENSG00000175600 | 51.434978  | 0.2210259   | 0.27387633 | 0.27568503 | 0.49980793 | SUGCT     |
| 11007     | ENSG00000175602 | 579.968377 | -0.75908249 | 0.10595806 | 1.62E-13   | 3.90E-12   | CCDC85B   |
| NA        | ENSG00000175604 | 0.33471731 | 0.02354391  | 0.38534154 | 0.62842204 | NA         |           |
| 54968     | ENSG00000175606 | 354.198421 | -0.08747059 | 0.15069697 | 0.527172   | 0.73905402 | TMEM70    |
| 100128782 | ENSG00000175611 | 96.2714561 | 0.17271655  | 0.24043616 | 0.36732809 | 0.59652854 | LINC00476 |
| 119765    | ENSG00000175619 | 0          | NA          | NA         | NA         | NA         | OR4B1     |
| 6199      | ENSG00000175634 | 853.627858 | 0.18024583  | 0.09173827 | 0.04279977 | 0.13226595 | RPS6KB2   |
| 116028    | ENSG00000175643 | 450.437786 | -0.2056785  | 0.12081633 | 0.07205199 | 0.19555978 | RMI2      |
| 5619      | ENSG00000175646 | 0          | NA          | NA         | NA         | NA         | PRM1      |
| NA        | ENSG00000175658 | 0          | NA          | NA         | NA         | NA         | DRD5P2    |
| 146691    | ENSG00000175662 | 722.731915 | -0.05552225 | 0.10949362 | 0.59579259 | 0.7882452  | TOM1L2    |
| 122046    | ENSG00000175664 | 0          | NA          | NA         | NA         | NA         | TEX26     |
| 100132979 | ENSG00000175676 | 0          | NA          | NA         | NA         | NA         | GOLGA8DP  |
| 58492     | ENSG00000175691 | 144.633377 | -0.24384805 | 0.20846106 | 0.16054401 | 0.3484894  | ZNF77     |
| 165829    | ENSG00000175697 | 41.3917297 | 1.27527663  | 0.40357334 | 0.00012408 | 0.00092131 | GPR156    |
| 256369    | ENSG00000175699 | 0          | NA          | NA         | NA         | NA         | CCDC197   |

|        |                 |            |             |            |            |            |           |
|--------|-----------------|------------|-------------|------------|------------|------------|-----------|
| 205251 | ENSG00000175701 | 123.490693 | 0.13346144  | 0.20750216 | 0.44559059 | 0.67028199 | MTLN      |
| 126695 | ENSG00000175707 | 0.173733   | 0.01914545  | 0.38484597 | 0.78225479 | NA         | KDF1      |
| 146712 | ENSG00000175711 | 207.948093 | 0.19225591  | 0.16150721 | 0.18953252 | 0.39052085 | B3GNTL1   |
| 139804 | ENSG00000175718 | 0.34624801 | -0.02356563 | 0.38536324 | 0.65270996 | NA         | RBMXL3    |
| 22877  | ENSG00000175727 | 1812.40708 | -0.22824763 | 0.10110459 | 0.01885411 | 0.06941278 | MLXIP     |
| 283171 | ENSG00000175728 | 0          | NA          | NA         | NA         | NA         | LINC02873 |
| NA     | ENSG00000175730 | 0.83487678 | 0.03685432  | 0.38459835 | 0.46326182 | NA         | BAK1P1    |
| NA     | ENSG00000175741 | 0.5211355  | 0.01049697  | 0.38324774 | 0.77582193 | NA         | RWDD4P2   |
| 7025   | ENSG00000175745 | 2245.47569 | 1.1929386   | 0.07088348 | 1.71E-64   | 2.45E-62   | NR2F1     |
| 400360 | ENSG00000175746 | 0          | NA          | NA         | NA         | NA         | C15orf54  |
| NA     | ENSG00000175749 | 0.14931947 | -0.01844332 | 0.38480212 | 0.84537521 | NA         | EIF3KP1   |
| 54998  | ENSG00000175756 | 1301.965   | -0.16643929 | 0.07705386 | 0.02725927 | 0.09310102 | AURKAIP1  |
| 158135 | ENSG00000175764 | 316.125599 | -0.02259211 | 0.13978503 | 0.86114388 | 0.93812292 | TTLL11    |
| 253314 | ENSG00000175766 | 0.14931947 | -0.01844332 | 0.38480212 | 0.84537521 | NA         | EIF4E1B   |
| 401505 | ENSG00000175768 | 1200.80271 | -0.06378922 | 0.07888216 | 0.40804962 | 0.63630468 | TOMM5     |
| NA     | ENSG00000175772 | 14.3715132 | -0.39778844 | 0.55940718 | 0.06736435 | 0.18634601 | LINC01106 |
| NA     | ENSG00000175773 | 0.53947826 | -0.00667326 | 0.38308251 | 0.99653506 | NA         | ZBTB44-DT |
| 400359 | ENSG00000175779 | 0.15069912 | -0.01848503 | 0.38480575 | 0.84537521 | NA         | LINC02694 |
| 55508  | ENSG00000175782 | 518.897543 | -0.32340508 | 0.11788298 | 0.00381908 | 0.0185213  | SLC35E3   |
| 145270 | ENSG00000175785 | 514.816304 | -1.36569216 | 0.12249555 | 6.52E-30   | 3.78E-28   | PRIMA1    |
| 169841 | ENSG00000175787 | 167.330465 | -0.34086462 | 0.18186821 | 0.0338949  | 0.11060618 | ZNF169    |
| 8607   | ENSG00000175792 | 2116.86092 | -0.12147296 | 0.06730819 | 0.06650092 | 0.18468341 | RUVBL1    |
| 2810   | ENSG00000175793 | 2.63792138 | 0.08366915  | 0.38952631 | 0.30837174 | 0.53592286 | SFN       |
| NA     | ENSG00000175800 | 0          | NA          | NA         | NA         | NA         | OR52B3P   |
| 4482   | ENSG00000175806 | 83.3837072 | 0.15740835  | 0.2253115  | 0.39280037 | 0.62197758 | MSRA      |
| 158506 | ENSG00000175809 | 0          | NA          | NA         | NA         | NA         | CBLL2     |
| 643677 | ENSG00000175820 | 13.4395951 | 0.07283579  | 0.33473152 | 0.67685692 | 0.84203921 | CCDC168   |
| 23399  | ENSG00000175826 | 2243.72521 | -0.08744935 | 0.06751104 | 0.18772525 | 0.38805147 | CTDNBP1   |
| 2118   | ENSG00000175832 | 1429.28015 | 0.29817199  | 0.07265698 | 2.84E-05   | 0.00024625 | ETV4      |
| NA     | ENSG00000175841 | 0          | NA          | NA         | NA         | NA         | FAM172BP  |
| 375757 | ENSG00000175854 | 147.857053 | 0.35361156  | 0.19622306 | 0.03792697 | 0.12066567 | SWI5      |
| 202309 | ENSG00000175857 | 0          | NA          | NA         | NA         | NA         | GAPT      |
| 10458  | ENSG00000175866 | 533.741527 | 0.37083241  | 0.1252835  | 0.00170077 | 0.0093446  | BAIAP2    |
| 797    | ENSG00000175868 | 55.1385881 | -0.34830339 | 0.28162993 | 0.09946692 | 0.24826063 | CALCB     |
| 200407 | ENSG00000175874 | 1.55971086 | -0.03247983 | 0.38287115 | 0.46128998 | NA         | CREG2     |
| 135886 | ENSG00000175877 | 0.33889064 | 0.0023549   | 0.38338005 | 0.96597464 | NA         | TMEM270   |
| 3234   | ENSG00000175879 | 369.174002 | -0.22220596 | 0.15097829 | 0.10801155 | 0.26355297 | HOXD8     |
| NA     | ENSG00000175886 | 1.02247641 | 0.03650131  | 0.38191249 | 0.57430161 | NA         | RPL7AP66  |

|        |                 |            |             |            |            |            |           |
|--------|-----------------|------------|-------------|------------|------------|------------|-----------|
| 340481 | ENSG00000175893 | 1452.38766 | -0.05575109 | 0.0881073  | 0.51481876 | 0.72951962 | ZDHHC21   |
| 54084  | ENSG00000175894 | 107.05391  | -0.87729281 | 0.36228791 | 0.00180662 | 0.00980395 | TSPEAR    |
| 79666  | ENSG00000175895 | 134.768725 | 0.09170224  | 0.18283039 | 0.56969332 | 0.77030706 | PLEKHF2   |
| 2      | ENSG00000175899 | 2.87869126 | -0.01565114 | 0.37620961 | 0.84077918 | 0.92773074 | A2M       |
| 379    | ENSG00000175906 | 173.918671 | 0.62704901  | 0.18867482 | 0.00022763 | 0.00159523 | ARL4D     |
| 285489 | ENSG00000175920 | 5.76785446 | -0.0782688  | 0.36934625 | 0.54219846 | 0.75027258 | DOK7      |
| 57633  | ENSG00000175928 | 534.122833 | 0.00370828  | 0.11687195 | 0.97824103 | 0.99254491 | LRRN1     |
| 63893  | ENSG00000175931 | 2678.02522 | -0.15456201 | 0.07324077 | 0.03141566 | 0.10403717 | UBE2O     |
| 93129  | ENSG00000175938 | 155.748753 | 0.02996956  | 0.17584737 | 0.84927077 | 0.93154246 | ORAI3     |
| 340359 | ENSG00000175946 | 0          | NA          | NA         | NA         | NA         | KLHL38    |
| NA     | ENSG00000175967 | 0.30139824 | -0.02296476 | 0.38527817 | 0.68536535 | NA         | LINC02880 |
| 84747  | ENSG00000175970 | 1506.38765 | -0.08103635 | 0.08923909 | 0.35018774 | 0.58060182 | UNC119B   |
| 163259 | ENSG00000175984 | 0.34669998 | 0.02366913  | 0.38535997 | 0.62115904 | NA         | DENND2C   |
| 400224 | ENSG00000175985 | 39.5467083 | -0.43486034 | 0.37463378 | 0.0709599  | 0.19346495 | PLEKHD1   |
| NA     | ENSG00000176007 | 0          | NA          | NA         | NA         | NA         | FAM220BP  |
| 56676  | ENSG00000176009 | 0.66235055 | -0.0195514  | 0.38294208 | 0.6679054  | NA         | ASCL3     |
| 84617  | ENSG00000176014 | 391.147795 | 0.53364833  | 0.14142419 | 5.56E-05   | 0.00044851 | TUBB6     |
| 116068 | ENSG00000176018 | 335.216414 | -0.09962452 | 0.16928131 | 0.51070288 | 0.72599857 | LYSMD3    |
| 386724 | ENSG00000176020 | 155.385306 | 0.21119652  | 0.20058912 | 0.2194896  | 0.43154035 | AMIGO3    |
| 126792 | ENSG00000176022 | 986.902355 | -0.14230403 | 0.08848204 | 0.0975805  | 0.24466031 | B3GALT6   |
| 79898  | ENSG00000176024 | 76.631781  | -0.30242726 | 0.28634356 | 0.14842529 | 0.33077346 | ZNF613    |
| 56673  | ENSG00000176029 | 0.89389376 | 0.01361547  | 0.38205178 | 0.71945716 | NA         | C11orf16  |
| 344805 | ENSG00000176040 | 0.18922458 | 0.01954053  | 0.38488496 | 0.78225479 | NA         | TMPRSS7   |
| NA     | ENSG00000176043 | 0          | NA          | NA         | NA         | NA         |           |
| 26471  | ENSG00000176046 | 0.14931947 | -0.01844332 | 0.38480212 | 0.84537521 | NA         | NUPR1     |
| 9832   | ENSG00000176049 | 785.325659 | -0.42971466 | 0.09730281 | 4.84E-06   | 4.89E-05   | JAKMIP2   |
| NA     | ENSG00000176054 | 6.28092594 | 0.077268    | 0.37092126 | 0.54597196 | 0.75333225 | RPL23P2   |
| 153364 | ENSG00000176055 | 391.194337 | -0.16502215 | 0.11761771 | 0.13934402 | 0.31622334 | MBLAC2    |
| 286262 | ENSG00000176058 | 351.026319 | -0.18082539 | 0.13702335 | 0.15642316 | 0.34292104 | TPRN      |
| 23630  | ENSG00000176076 | 3.67451544 | 0.03958305  | 0.36872319 | 0.72972144 | 0.87078512 | KCNE5     |
| 257101 | ENSG00000176083 | 0          | NA          | NA         | NA         | NA         | ZNF683    |
| 113829 | ENSG00000176087 | 1955.46255 | 0.10879598  | 0.0678294  | 0.10319122 | 0.25514879 | SLC35A4   |
| 55057  | ENSG00000176092 | 45.0417082 | -0.09111132 | 0.34215893 | 0.58709212 | 0.78237765 | CRYBG2    |
| 9807   | ENSG00000176095 | 1606.00581 | 0.00311832  | 0.08690573 | 0.97175945 | 0.98938604 | IP6K1     |
| 8636   | ENSG00000176101 | 877.822097 | -0.20087555 | 0.09197302 | 0.02411101 | 0.08469589 | SSNA1     |
| 1479   | ENSG00000176102 | 734.346278 | -0.14830111 | 0.1028099  | 0.13358428 | 0.30743129 | CSTF3     |
| 7525   | ENSG00000176105 | 614.673868 | 0.44987204  | 0.10360569 | 6.47E-06   | 6.36E-05   | YES1      |
| 79643  | ENSG00000176108 | 493.429939 | 0.04064785  | 0.10842774 | 0.69677491 | 0.85365037 | CHMP6     |



|           |                 |            |             |            |            |            |          |
|-----------|-----------------|------------|-------------|------------|------------|------------|----------|
| NA        | ENSG00000176115 | 0          | NA          | NA         | NA         | NA         | AQP7P4   |
| 10301     | ENSG00000176124 | 145.444262 | -0.06729628 | 0.18295943 | 0.67416971 | 0.84017129 | DLEU1    |
| 100874074 | ENSG00000176124 | 145.444262 | -0.06729628 | 0.18295943 | 0.67416971 | 0.84017129 | DLEU1    |
| 402682    | ENSG00000176125 | 82.6446373 | 0.043327    | 0.22787871 | 0.81511596 | 0.91599551 | UFSP1    |
| NA        | ENSG00000176134 | 0.5972779  | -0.02732172 | 0.38586499 | 0.50076333 | NA         |          |
| 4161      | ENSG00000176136 | 0          | NA          | NA         | NA         | NA         | MC5R     |
| 55254     | ENSG00000176142 | 552.89655  | 1.07587632  | 0.14505319 | 1.38E-14   | 3.62E-13   | TMEM39A  |
| 55346     | ENSG00000176148 | 565.797055 | -0.12381946 | 0.10408145 | 0.21479135 | 0.42508333 | TCP11L1  |
| 2877      | ENSG00000176153 | 2.55742763 | -0.07445035 | 0.38759497 | 0.33070897 | NA         | GPX2     |
| 284001    | ENSG00000176155 | 1704.20078 | -0.07191994 | 0.08308834 | 0.37454244 | 0.60364923 | CCDC57   |
| 124535    | ENSG00000176160 | 0.30139824 | -0.02296476 | 0.38527817 | 0.68536535 | NA         | HSF5     |
| 2290      | ENSG00000176165 | 0          | NA          | NA         | NA         | NA         | FOXG1    |
| 8877      | ENSG00000176170 | 36.1772329 | 2.43111005  | 0.44338224 | 2.68E-09   | 4.35E-08   | SPHK1    |
| 664       | ENSG00000176171 | 1230.43746 | -0.10202519 | 0.11412709 | 0.34796092 | 0.57864958 | BNIP3    |
| 150350    | ENSG00000176177 | 0          | NA          | NA         | NA         | NA         | ENTHD1   |
| 339344    | ENSG00000176182 | 217.641868 | 0.19918414  | 0.1538373  | 0.1573448  | 0.34410503 | MYPOP    |
| NA        | ENSG00000176183 | 0          | NA          | NA         | NA         | NA         |          |
| 1149      | ENSG00000176194 | 0          | NA          | NA         | NA         | NA         | CIDEA    |
| 390442    | ENSG00000176198 | 0          | NA          | NA         | NA         | NA         | OR11H4   |
| 219986    | ENSG00000176200 | 0          | NA          | NA         | NA         | NA         | OR4D11   |
| 80059     | ENSG00000176204 | 192.111171 | -1.21666469 | 0.19289202 | 2.81E-11   | 5.70E-10   | LRRTM4   |
| 79915     | ENSG00000176208 | 605.033864 | -0.20384783 | 0.10973408 | 0.05190381 | 0.15335394 | ATAD5    |
| 114926    | ENSG00000176209 | 425.641967 | -0.02553547 | 0.14184013 | 0.84531069 | 0.92970586 | SMIM19   |
| 122748    | ENSG00000176219 | 0          | NA          | NA         | NA         | NA         | OR11H6   |
| 342908    | ENSG00000176222 | 53.7205254 | -0.0072297  | 0.2692825  | 0.96791623 | 0.98788302 | ZNF404   |
| 25914     | ENSG00000176225 | 748.620601 | 0.13424845  | 0.10883672 | 0.19754325 | 0.40156333 | RTTN     |
| 390436    | ENSG00000176230 | 0          | NA          | NA         | NA         | NA         | OR4K17   |
| 126541    | ENSG00000176231 | 0          | NA          | NA         | NA         | NA         | OR10H4   |
| NA        | ENSG00000176232 | 0          | NA          | NA         | NA         | NA         |          |
| 221060    | ENSG00000176236 | 2.54082223 | -0.05947596 | 0.37825898 | 0.53946919 | NA         | RPP38-DT |
| 390058    | ENSG00000176239 | 0          | NA          | NA         | NA         | NA         | OR51B6   |
| NA        | ENSG00000176243 | 0          | NA          | NA         | NA         | NA         | CDV3P1   |
| 414149    | ENSG00000176244 | 254.475961 | -0.22823711 | 0.1492017  | 0.09599113 | 0.24186741 | ACBD7    |
| 122742    | ENSG00000176246 | 0          | NA          | NA         | NA         | NA         | OR4L1    |
| 29882     | ENSG00000176248 | 1051.05133 | 0.03343174  | 0.09309938 | 0.71203495 | 0.86159535 | ANAPC2   |
| 390433    | ENSG00000176253 | 0          | NA          | NA         | NA         | NA         | OR4K13   |
| 127540    | ENSG00000176256 | 0          | NA          | NA         | NA         | NA         | HMGB4    |
| 339487    | ENSG00000176261 | 295.855338 | -0.22405998 | 0.15632207 | 0.11525045 | 0.27682433 | ZBTB8OS  |

|        |                 |            |             |            |            |            |          |
|--------|-----------------|------------|-------------|------------|------------|------------|----------|
| NA     | ENSG00000176268 | 8.70616966 | 0.18634112  | 0.40649485 | 0.23110528 | 0.44719874 | CYCSP34  |
| 441308 | ENSG00000176269 | 0.65871511 | 0.02516691  | 0.38354497 | 0.59695666 | NA         | OR4F21   |
| 159371 | ENSG00000176273 | 285.110353 | 0.07111989  | 0.1535367  | 0.61410248 | 0.80172357 | SLC35G1  |
| 79317  | ENSG00000176281 | 0          | NA          | NA         | NA         | NA         | OR4K5    |
| NA     | ENSG00000176289 | 0          | NA          | NA         | NA         | NA         | IDSP1    |
| 283617 | ENSG00000176290 | 0          | NA          | NA         | NA         | NA         | OR4K3    |
| 7694   | ENSG00000176293 | 51.592909  | 0.09679065  | 0.26337768 | 0.61988765 | 0.80593519 | ZNF135   |
| 390429 | ENSG00000176294 | 0          | NA          | NA         | NA         | NA         | OR4N2    |
| 441670 | ENSG00000176299 | 0          | NA          | NA         | NA         | NA         | OR4M1    |
| 283150 | ENSG00000176302 | 0.16735865 | 0.01897177  | 0.38482933 | 0.78225479 | NA         | FOXR1    |
| NA     | ENSG00000176312 | 0          | NA          | NA         | NA         | NA         | OR4H12P  |
| NA     | ENSG00000176318 | 0          | NA          | NA         | NA         | NA         | FOXN3P1  |
| NA     | ENSG00000176320 | 0          | NA          | NA         | NA         | NA         |          |
| 1351   | ENSG00000176340 | 3745.9193  | 0.00973052  | 0.0619707  | 0.87454868 | 0.94478878 | COX8A    |
| NA     | ENSG00000176343 | 0.46658771 | -0.00768756 | 0.38326124 | 0.86582814 | NA         | RPL37AP8 |
| NA     | ENSG00000176349 | 22.5694439 | -1.49919455 | 0.60288538 | 0.00071196 | 0.00439081 |          |
| 255061 | ENSG00000176358 | 0          | NA          | NA         | NA         | NA         | TAC4     |
| 54993  | ENSG00000176371 | 592.535571 | 0.12052311  | 0.12082233 | 0.29311444 | 0.51927766 | ZSCAN2   |
| NA     | ENSG00000176378 | 0.83404269 | -0.00965768 | 0.38153684 | 0.85309719 | NA         | PFN1P10  |
| 285800 | ENSG00000176381 | 58.8311416 | -0.1095846  | 0.26015999 | 0.57028862 | 0.7706786  | PRR18    |
| 79369  | ENSG00000176383 | 53.7438299 | 1.38017594  | 0.57075533 | 0.00073821 | 0.00453296 | B3GNT4   |
| 246184 | ENSG00000176386 | 407.69078  | -0.00856314 | 0.12042302 | 0.93902548 | 0.97474024 | CDC26    |
| 3291   | ENSG00000176387 | 44.9881432 | 0.07635793  | 0.25829621 | 0.69307976 | 0.8516694  | HSD11B2  |
| 51379  | ENSG00000176390 | 463.526352 | 0.11595936  | 0.11175707 | 0.27812609 | 0.50258055 | CRLF3    |
| 6051   | ENSG00000176393 | 1454.00084 | 0.27589434  | 0.08004655 | 0.00041464 | 0.00273488 | RNPEP    |
| 163126 | ENSG00000176396 | 324.790252 | -0.3158957  | 0.1350001  | 0.01215251 | 0.04871807 | EID2     |
| 63951  | ENSG00000176399 | 0          | NA          | NA         | NA         | NA         | DMRTA1   |
| 126272 | ENSG00000176401 | 82.0332386 | -0.18794877 | 0.2447385  | 0.32699604 | 0.55535024 | EID2B    |
| 349149 | ENSG00000176402 | 1.00807697 | 0.00468448  | 0.37999709 | 0.93862016 | NA         | GJC3     |
| 9699   | ENSG00000176406 | 354.477245 | -1.85279531 | 0.14589215 | 5.03E-38   | 3.68E-36   | RIMS2    |
| 56888  | ENSG00000176407 | 863.202088 | -0.22852058 | 0.09080878 | 0.00925322 | 0.03889487 | KCMF1    |
| 84277  | ENSG00000176410 | 219.164454 | -0.08345928 | 0.15030403 | 0.54481029 | 0.75256117 | DNAJC30  |
| 283377 | ENSG00000176422 | 237.3548   | 0.06262913  | 0.1522944  | 0.65478229 | 0.82814932 | SPRYD4   |
| 155382 | ENSG00000176428 | 296.52136  | 0.13365895  | 0.13388954 | 0.28667883 | 0.51245229 | VPS37D   |
| 161198 | ENSG00000176435 | 0          | NA          | NA         | NA         | NA         | CLEC14A  |
| 161176 | ENSG00000176438 | 807.09916  | -0.40121777 | 0.11158881 | 0.00016534 | 0.0011976  | SYNE3    |
| 1196   | ENSG00000176444 | 2128.24397 | 0.11935044  | 0.064636   | 0.06104746 | 0.17377066 | CLK2     |
| 254531 | ENSG00000176454 | 648.949948 | 0.17122138  | 0.10242439 | 0.08228987 | 0.21587082 | LPCAT4   |

|           |                 |            |             |            |            |            |           |
|-----------|-----------------|------------|-------------|------------|------------|------------|-----------|
| 28232     | ENSG00000176463 | 179.562297 | -0.51046513 | 0.22943227 | 0.00828691 | 0.03555628 | SLCO3A1   |
| 284346    | ENSG00000176472 | 16.3084999 | 0.27727427  | 0.42270645 | 0.1634634  | 0.35251239 | ZNF575    |
| 79446     | ENSG00000176473 | 197.821213 | -0.13207723 | 0.16630051 | 0.37690586 | 0.60570261 | WDR25     |
| 112869    | ENSG00000176476 | 150.137727 | -0.27170304 | 0.18478794 | 0.09386723 | 0.23775385 | SGF29     |
| 11145     | ENSG00000176485 | 182.455994 | -0.33097132 | 0.1908842  | 0.04681082 | 0.14159576 | PLAAT3    |
| 148252    | ENSG00000176490 | 1489.52987 | -0.54417626 | 0.11354694 | 5.56E-07   | 6.59E-06   | DIRAS1    |
| 390195    | ENSG00000176495 | 0          | NA          | NA         | NA         | NA         | OR5AN1    |
| 392133    | ENSG00000176510 | 0          | NA          | NA         | NA         | NA         | OR10AC1   |
| NA        | ENSG00000176515 | 0          | NA          | NA         | NA         | NA         |           |
| 653583    | ENSG00000176531 | 228.258895 | -0.28982561 | 0.19611372 | 0.08649327 | 0.22401363 | PHLDB3    |
| 222171    | ENSG00000176532 | 0.8079061  | -0.00822484 | 0.3808485  | 0.88438785 | NA         | PRR15     |
| 2788      | ENSG00000176533 | 330.391078 | 0.7514349   | 0.1525209  | 1.70E-07   | 2.17E-06   | GNG7      |
| 79346     | ENSG00000176540 | 0          | NA          | NA         | NA         | NA         | OR4C5     |
| 205717    | ENSG00000176542 | 643.301865 | -0.07320089 | 0.12157419 | 0.52447778 | 0.73730881 | USF3      |
| 256144    | ENSG00000176547 | 0          | NA          | NA         | NA         | NA         | OR4C3     |
| 256148    | ENSG00000176555 | 0          | NA          | NA         | NA         | NA         | OR4S1     |
| 124817    | ENSG00000176563 | 19.2925267 | -0.16858943 | 0.35289096 | 0.37024114 | 0.59943356 | CNTD1     |
| 138009    | ENSG00000176566 | 0.173733   | 0.01914545  | 0.38484597 | 0.78225479 | NA         | DCAF4L2   |
| 390113    | ENSG00000176567 | 0          | NA          | NA         | NA         | NA         | OR4X1     |
| 168975    | ENSG00000176571 | 0          | NA          | NA         | NA         | NA         | CNBD1     |
| 375940    | ENSG00000176584 | 0          | NA          | NA         | NA         | NA         | DMBT1L1   |
| 100128398 | ENSG00000176593 | 248.677764 | -0.08748516 | 0.18479962 | 0.587176   | 0.78237765 |           |
| 9920      | ENSG00000176595 | 778.021049 | 0.31266394  | 0.10485383 | 0.0018829  | 0.01015404 | KBTBD11   |
| 84002     | ENSG00000176597 | 594.023637 | 0.35774051  | 0.10847882 | 0.00056997 | 0.0036198  | B3GNT5    |
| 80122     | ENSG00000176601 | 0          | NA          | NA         | NA         | NA         | MAP3K19   |
| 283598    | ENSG00000176605 | 0          | NA          | NA         | NA         | NA         | C14orf177 |
| 84823     | ENSG00000176619 | 6707.91687 | -0.00182554 | 0.06212126 | 0.88595766 | 0.95015905 | LMNB2     |
| 51115     | ENSG00000176623 | 611.897368 | 0.19555643  | 0.10861724 | 0.05999783 | 0.17120049 | RMDN1     |
| 51320     | ENSG00000176624 | 1632.67339 | -0.06170416 | 0.07449712 | 0.39782403 | 0.62701213 | MEX3C     |
| 150280    | ENSG00000176635 | 0          | NA          | NA         | NA         | NA         | HORMAD2   |
| 220441    | ENSG00000176641 | 1139.79409 | 0.58801649  | 0.0856477  | 2.10E-12   | 4.68E-11   | RNF152    |
| NA        | ENSG00000176654 | 0          | NA          | NA         | NA         | NA         | NANOGP1   |
| 4642      | ENSG00000176658 | 342.417237 | -0.4525475  | 0.14179262 | 0.00060653 | 0.00381897 | MYO1D     |
| 284756    | ENSG00000176659 | 0          | NA          | NA         | NA         | NA         | C20orf197 |
| 2300      | ENSG00000176678 | 0          | NA          | NA         | NA         | NA         | FOXL1     |
| 90655     | ENSG00000176679 | 0          | NA          | NA         | NA         | NA         | TGIF2LY   |
| 9884      | ENSG00000176681 | 133.90541  | 0.34862794  | 0.20060533 | 0.04395771 | 0.13475294 | LRRC37A   |
| 2303      | ENSG00000176692 | 0.35686611 | 0.02381839  | 0.38538127 | 0.61392362 | NA         | FOXC2     |

|        |                 |            |             |            |            |            |           |
|--------|-----------------|------------|-------------|------------|------------|------------|-----------|
| 81099  | ENSG00000176695 | 0.30139824 | -0.02296476 | 0.38527817 | 0.68536535 | NA         | OR4F17    |
| 627    | ENSG00000176697 | 24.4547915 | 3.43616925  | 0.63693089 | 4.59E-09   | 7.24E-08   | BDNF      |
| NA     | ENSG00000176700 | 334.754704 | -0.05863268 | 0.31208087 | 0.74908799 | 0.88205755 | SCAND2P   |
| 79635  | ENSG00000176714 | 160.182043 | 0.09505595  | 0.1904545  | 0.56574777 | 0.76758775 | CCDC121   |
| 197322 | ENSG00000176715 | 829.953097 | 0.15300695  | 0.10572133 | 0.13175825 | 0.30452978 | ACSF3     |
| NA     | ENSG00000176716 | 0          | NA          | NA         | NA         | NA         | OR10AB1P  |
| 666    | ENSG00000176720 | 70.9896025 | -0.19191798 | 0.24812535 | 0.32040736 | 0.54819611 | BOK       |
| 283933 | ENSG00000176723 | 56.429291  | 0.11867992  | 0.27777165 | 0.54795788 | 0.754545   | ZNF843    |
| 83869  | ENSG00000176728 | 0          | NA          | NA         | NA         | NA         | TTY14     |
| 401466 | ENSG00000176731 | 455.127631 | 0.04424224  | 0.11460498 | 0.68679015 | 0.84769917 | RBIS      |
| 375189 | ENSG00000176732 | 24.0580812 | 0.30424106  | 0.38173686 | 0.16521809 | 0.35517682 | PFN4      |
| 283111 | ENSG00000176742 | 0          | NA          | NA         | NA         | NA         | OR51V1    |
| 158809 | ENSG00000176746 | 2.28252939 | -0.04545442 | 0.38037891 | 0.56303576 | NA         | MAGEB6    |
| 283110 | ENSG00000176748 | 0          | NA          | NA         | NA         | NA         | OR52Z1    |
| 8851   | ENSG00000176749 | 1159.60435 | -0.80141518 | 0.08472276 | 5.54E-22   | 2.27E-20   | CDK5R1    |
| NA     | ENSG00000176752 | 0          | NA          | NA         | NA         | NA         | OR51A1P   |
| 644809 | ENSG00000176753 | 2.88483091 | 0.0695805   | 0.37839631 | 0.50512054 | 0.72144493 | C15orf56  |
| NA     | ENSG00000176754 | 0          | NA          | NA         | NA         | NA         | LINC00303 |
| NA     | ENSG00000176761 | 9.74065866 | 0.01037137  | 0.34471301 | 0.94835238 | 0.97876335 | ZNF285B   |
| 256536 | ENSG00000176769 | 0.3000209  | -0.02294463 | 0.38527539 | 0.68644561 | NA         | TCERG1L   |
| 344148 | ENSG00000176771 | 157.158516 | 1.11587599  | 0.21941136 | 3.99E-08   | 5.56E-07   | NCKAP5    |
| 286514 | ENSG00000176774 | 0          | NA          | NA         | NA         | NA         | MAGEB18   |
| 140596 | ENSG00000176782 | 0          | NA          | NA         | NA         | NA         | DEFB104A  |
| 80230  | ENSG00000176783 | 936.991424 | 0.24312651  | 0.0832577  | 0.0027313  | 0.01399146 | RUFY1     |
| 119678 | ENSG00000176787 | 0          | NA          | NA         | NA         | NA         | OR52E2    |
| 10409  | ENSG00000176788 | 1467.83015 | -0.3861137  | 0.07924331 | 6.07E-07   | 7.15E-06   | BASP1     |
| 55894  | ENSG00000176797 | 0          | NA          | NA         | NA         | NA         | DEFB103A  |
| 414325 | ENSG00000176797 | 0          | NA          | NA         | NA         | NA         | DEFB103A  |
| 119682 | ENSG00000176798 | 0          | NA          | NA         | NA         | NA         | OR51L1    |
| 374819 | ENSG00000176809 | 576.012169 | 0.20874965  | 0.15545079 | 0.14103467 | 0.31912955 | LRRC37A3  |
| NA     | ENSG00000176812 | 0          | NA          | NA         | NA         | NA         | METTL1P1  |
| 360132 | ENSG00000176826 | 0.16735865 | 0.01897177  | 0.38482933 | 0.78225479 | NA         | FKBP9P1   |
| 54621  | ENSG00000176834 | 521.526171 | 0.17170593  | 0.13265296 | 0.16724028 | 0.35828164 | VSIG10    |
| 284424 | ENSG00000176840 | 10.0467854 | -0.37217834 | 0.54736312 | 0.07029092 | 0.19208977 | MIR7-3HG  |
| 10265  | ENSG00000176842 | 181.144196 | -0.21080453 | 0.16720824 | 0.1601757  | 0.34791832 | IRX5      |
| 284207 | ENSG00000176845 | 151.556128 | -0.04396288 | 0.19136538 | 0.78980622 | 0.9043268  | METRNL    |
| 157769 | ENSG00000176853 | 1098.91869 | -0.0822035  | 0.09703513 | 0.38043916 | 0.60938575 | FAM91A1   |
| NA     | ENSG00000176855 | 0          | NA          | NA         | NA         | NA         | KRT18P28  |

|           |                 |            |             |            |            |            |           |
|-----------|-----------------|------------|-------------|------------|------------|------------|-----------|
| NA        | ENSG00000176857 | 0.54648734 | 0.03263277  | 0.38620655 | 0.45580981 | NA         | GJA1P1    |
| NA        | ENSG00000176868 | 8.65900385 | 0.39058596  | 0.64788645 | 0.03344927 | 0.10942019 |           |
| 55884     | ENSG00000176871 | 1727.75474 | -0.35756534 | 0.07143751 | 3.34E-07   | 4.10E-06   | WSB2      |
| NA        | ENSG00000176882 | 0          | NA          | NA         | NA         | NA         |           |
| 2902      | ENSG00000176884 | 952.679746 | -4.21189377 | 0.13144577 | 5.63E-227  | 1.40E-223  | GRIN1     |
| 6664      | ENSG00000176887 | 6480.31137 | 0.64338861  | 0.05257313 | 5.68E-35   | 3.85E-33   | SOX11     |
| 7298      | ENSG00000176890 | 3232.68996 | -0.19694744 | 0.06447646 | 0.00191729 | 0.01029474 | TYMS      |
| 81282     | ENSG00000176893 | 0          | NA          | NA         | NA         | NA         | OR51G2    |
| 5827      | ENSG00000176894 | 261.496851 | -0.44908313 | 0.15320896 | 0.00144905 | 0.0081373  | PXMP2     |
| 119687    | ENSG00000176895 | 0          | NA          | NA         | NA         | NA         | OR51A7    |
| 170082    | ENSG00000176896 | 45.3573948 | -0.19151664 | 0.29604438 | 0.34641902 | 0.57719207 | TCEANC    |
| 401665    | ENSG00000176900 | 0          | NA          | NA         | NA         | NA         | OR51T1    |
| 9240      | ENSG00000176903 | 1568.10326 | -0.24408022 | 0.07220258 | 0.00056395 | 0.00358502 | PNMA1     |
| 401663    | ENSG00000176904 | 0          | NA          | NA         | NA         | NA         | OR51H1    |
| 56892     | ENSG00000176907 | 0          | NA          | NA         | NA         | NA         | TCIM      |
| 284358    | ENSG00000176909 | 41.6678267 | 0.46483845  | 0.41232682 | 0.0619012  | 0.175546   | MAMSTR    |
| NA        | ENSG00000176912 | 39.4301531 | -0.02281546 | 0.27589075 | 0.90377425 | 0.95800026 | TYMSOS    |
| 23141     | ENSG00000176915 | 1903.25711 | 0.14508813  | 0.07790712 | 0.05699194 | 0.16463601 | ANKLE2    |
| 733       | ENSG00000176919 | 2.43328913 | -0.0570374  | 0.37746952 | 0.5593085  | NA         | C8G       |
| 2524      | ENSG00000176920 | 37.6659502 | 0.20946199  | 0.38754613 | 0.24762797 | 0.46665024 | FUT2      |
| 119692    | ENSG00000176922 | 0          | NA          | NA         | NA         | NA         | OR51S1    |
| NA        | ENSG00000176923 | 0          | NA          | NA         | NA         | NA         | OR7A15P   |
| 119694    | ENSG00000176925 | 0          | NA          | NA         | NA         | NA         | OR51F2    |
| 374786    | ENSG00000176927 | 12.9439131 | 0.14734118  | 0.37496014 | 0.36163985 | 0.59140575 | EFCAB5    |
| 51301     | ENSG00000176928 | 4.07060528 | 0.32066555  | 0.59079402 | 0.01527047 | 0.05846508 | GCNT4     |
| NA        | ENSG00000176933 | 11.4575629 | -0.06783142 | 0.34795652 | 0.6686006  | 0.83706921 | TOB2P1    |
| 200958    | ENSG00000176945 | 54.4547559 | 0.38719498  | 0.32429826 | 0.08678144 | 0.22459479 | MUC20     |
| 51078     | ENSG00000176946 | 912.67351  | -0.04883606 | 0.08634676 | 0.56100958 | 0.7645572  | THAP4     |
| NA        | ENSG00000176951 | 0          | NA          | NA         | NA         | NA         | OR51N1P   |
| 84901     | ENSG00000176953 | 1421.19052 | -0.06608377 | 0.07673383 | 0.3756306  | 0.60471528 | NFATC2IP  |
| 4062      | ENSG00000176956 | 0          | NA          | NA         | NA         | NA         | LY6H      |
| NA        | ENSG00000176970 | 0          | NA          | NA         | NA         | NA         | RPL7L1P11 |
| 387758    | ENSG00000176971 | 0          | NA          | NA         | NA         | NA         | FIBIN     |
| 23625     | ENSG00000176973 | 1126.83045 | -0.19211619 | 0.09881491 | 0.04368976 | 0.13409727 | FAM89B    |
| 6470      | ENSG00000176974 | 449.964824 | -0.08206369 | 0.11767789 | 0.46271403 | 0.6855676  | SHMT1     |
| 29952     | ENSG00000176978 | 1637.04306 | -0.12155777 | 0.07189784 | 0.0848575  | 0.22086345 | DPP7      |
| 166655    | ENSG00000176979 | 0          | NA          | NA         | NA         | NA         | TRIM60    |
| 107984399 | ENSG00000176984 | 1.85647236 | 0.02509684  | 0.37544933 | 0.77544964 | NA         |           |

|           |                 |            |             |            |            |            |           |
|-----------|-----------------|------------|-------------|------------|------------|------------|-----------|
| 9632      | ENSG00000176986 | 2812.8122  | 0.02370897  | 0.0782524  | 0.75806132 | 0.8876261  | SEC24C    |
| 158521    | ENSG00000176988 | 0.18922458 | 0.01954053  | 0.38488496 | 0.78225479 | NA         | FMR1NB    |
| 140775    | ENSG00000176994 | 1333.71668 | -0.05883785 | 0.07986748 | 0.45397308 | 0.67730681 | SMCR8     |
| NA        | ENSG00000176998 | 0.173124   | -0.01911262 | 0.38486262 | 0.84537521 | NA         | HCG4      |
| 4524      | ENSG00000177000 | 1262.81584 | 0.2495337   | 0.0938531  | 0.00600671 | 0.02717743 | MTHFR     |
| 503618    | ENSG00000177023 | 0          | NA          | NA         | NA         | NA         | DEFB104B  |
| 147685    | ENSG00000177025 | 4.01393402 | 0.0736889   | 0.37435921 | 0.53249637 | 0.7437975  | C19orf18  |
| 10522     | ENSG00000177030 | 1372.26944 | -0.24581859 | 0.08022256 | 0.00168552 | 0.00927879 | DEAF1     |
| 345778    | ENSG00000177034 | 1277.25592 | 0.01790034  | 0.07880115 | 0.81632689 | 0.9165257  | MTX3      |
| 283232    | ENSG00000177042 | 219.63907  | 0.11060369  | 0.15752823 | 0.44182156 | 0.66669757 | TMEM80    |
| 147912    | ENSG00000177045 | 471.61984  | 2.43641023  | 0.13718297 | 7.93E-72   | 1.33E-69   | SIX5      |
| 3467      | ENSG00000177047 | 0.14931947 | -0.01844332 | 0.38480212 | 0.84537521 | NA         | IFNW1     |
| 23403     | ENSG00000177051 | 641.601916 | 0.12678533  | 0.113272   | 0.24082095 | 0.45879844 | FBXO46    |
| 54503     | ENSG00000177054 | 718.833545 | -0.21375702 | 0.09899999 | 0.02520009 | 0.08768238 | ZDHHC13   |
| 153129    | ENSG00000177058 | 295.376671 | 0.20950518  | 0.16166081 | 0.15200779 | 0.33617597 | SLC38A9   |
| 340485    | ENSG00000177076 | 57.6576559 | 0.20893587  | 0.27422762 | 0.3017185  | 0.52913363 | ACER2     |
| 84942     | ENSG00000177082 | 956.584469 | 0.19237292  | 0.09287731 | 0.03250601 | 0.10692141 | WDR73     |
| 5426      | ENSG00000177084 | 3163.16045 | -0.01578743 | 0.07650416 | 0.83225443 | 0.92392457 | POLE      |
| 150368    | ENSG00000177096 | 257.936623 | 0.18867211  | 0.14968207 | 0.17050409 | 0.36238863 | PHETA2    |
| 6330      | ENSG00000177098 | 31.1090983 | 0.85824602  | 0.49075871 | 0.00769827 | 0.03339901 | SCN4B     |
| 57453     | ENSG00000177103 | 33.5582165 | -0.27776971 | 0.34068709 | 0.19760648 | 0.4016507  | DSCAML1   |
| 391       | ENSG00000177105 | 372.924376 | 0.06778681  | 0.13243538 | 0.58721701 | 0.78237765 | RHOG      |
| 64787     | ENSG00000177106 | 52.4574056 | -0.1163546  | 0.2751284  | 0.55148969 | 0.75793541 | EPS8L2    |
| 283576    | ENSG00000177108 | 245.095978 | -2.38111014 | 0.1753444  | 4.00E-43   | 3.31E-41   | ZDHHC22   |
| 100129827 | ENSG00000177112 | 1.80708766 | -0.0356991  | 0.37677633 | 0.68136958 | NA         | IRAG1-AS1 |
| 196527    | ENSG00000177119 | 1771.47421 | -0.0424325  | 0.07011855 | 0.53758271 | 0.747679   | ANO6      |
| 403341    | ENSG00000177125 | 783.784376 | -0.29826439 | 0.10163794 | 0.00226807 | 0.01192329 | ZBTB34    |
| 440556    | ENSG00000177133 | 0          | NA          | NA         | NA         | NA         | PRDM16-DT |
| 171483    | ENSG00000177138 | 0          | NA          | NA         | NA         | NA         | FAM9B     |
| 1068      | ENSG00000177143 | 0          | NA          | NA         | NA         | NA         | CETN1     |
| 440672    | ENSG00000177144 | 82.2124532 | -0.05678066 | 0.23522426 | 0.75889836 | 0.88818685 | NUDT4B    |
| 125228    | ENSG00000177150 | 314.539921 | -0.2959458  | 0.16180954 | 0.04310027 | 0.13284284 | FAM210A   |
| 403244    | ENSG00000177151 | 0          | NA          | NA         | NA         | NA         | OR2T35    |
| 6888      | ENSG00000177156 | 1290.38618 | -0.16703532 | 0.08114001 | 0.0349056  | 0.11308412 | TALDO1    |
| 8408      | ENSG00000177169 | 1728.06963 | 0.3799313   | 0.10724964 | 0.00021912 | 0.00154323 | ULK1      |
| NA        | ENSG00000177173 | 6.09728451 | 0.13480198  | 0.38935174 | 0.31911892 | 0.54674606 | NAP1L4P1  |
| 127066    | ENSG00000177174 | 0          | NA          | NA         | NA         | NA         | OR14C36   |
| 284716    | ENSG00000177181 | 472.533069 | -0.77017584 | 0.14864529 | 4.07E-08   | 5.65E-07   | RIMKLA    |

|           |                 |            |             |            |            |            |            |
|-----------|-----------------|------------|-------------|------------|------------|------------|------------|
| 157807    | ENSG00000177182 | 65.6694504 | -0.8227494  | 0.44666119 | 0.00647234 | 0.02893446 | CLVS1      |
| 391196    | ENSG00000177186 | 0          | NA          | NA         | NA         | NA         | OR2M7      |
| 6197      | ENSG00000177189 | 864.120331 | -0.08266523 | 0.10680271 | 0.41871036 | 0.64465387 | RPS6KA3    |
| 374907    | ENSG00000177191 | 7.36240267 | 0.10148517  | 0.37379349 | 0.45992131 | 0.68305646 | B3GNT8     |
| 80324     | ENSG00000177192 | 540.505555 | -0.04152546 | 0.11192868 | 0.69192357 | 0.85101966 | PUS1       |
| NA        | ENSG00000177197 | 0          | NA          | NA         | NA         | NA         | PCNPP5     |
| 80205     | ENSG00000177200 | 1970.95217 | -0.36510279 | 0.07939137 | 2.45E-06   | 2.60E-05   | CHD9       |
| 127064    | ENSG00000177201 | 0          | NA          | NA         | NA         | NA         | OR2T12     |
| 171169    | ENSG00000177202 | 2.03263474 | 0.06810864  | 0.38235125 | 0.45283665 | NA         | SPACA4     |
| 391195    | ENSG00000177212 | 0          | NA          | NA         | NA         | NA         | OR2T33     |
| 347862    | ENSG00000177225 | 1401.25178 | 0.21987866  | 0.07555464 | 0.00295567 | 0.01495046 | GATD1      |
| NA        | ENSG00000177233 | 0          | NA          | NA         | NA         | NA         | OR2M1P     |
| 404216    | ENSG00000177234 | 0.15069912 | -0.01848503 | 0.38480575 | 0.84537521 | NA         | LINC01561  |
| 493829    | ENSG00000177238 | 0.14931947 | -0.01844332 | 0.38480212 | 0.84537521 | NA         | TRIM72     |
| 11253     | ENSG00000177239 | 1402.91117 | 0.08235844  | 0.08499623 | 0.32074116 | 0.54862527 | MAN1B1     |
| 55894     | ENSG00000177243 | 0          | NA          | NA         | NA         | NA         | DEFB103B   |
| 1673      | ENSG00000177257 | 0          | NA          | NA         | NA         | NA         | DEFB4B     |
| 100289462 | ENSG00000177257 | 0          | NA          | NA         | NA         | NA         | DEFB4B     |
| NA        | ENSG00000177261 | 0          | NA          | NA         | NA         | NA         | ENSAP3     |
| 3738      | ENSG00000177272 | 68.2447376 | -4.52573839 | 0.4689857  | 7.08E-23   | 3.06E-21   | KCNA3      |
| 127608    | ENSG00000177275 | 0          | NA          | NA         | NA         | NA         | OR2AJ1     |
| 8325      | ENSG00000177283 | 23.0488539 | 1.35457361  | 0.62076908 | 0.00167158 | 0.00920716 | FZD8       |
| 219770    | ENSG00000177291 | 1.14391802 | -0.00477282 | 0.38048857 | 0.93391025 | NA         | GJD4       |
| 162517    | ENSG00000177294 | 0          | NA          | NA         | NA         | NA         | FBXO39     |
| 53842     | ENSG00000177300 | 0          | NA          | NA         | NA         | NA         | CLDN22     |
| 3737      | ENSG00000177301 | 1.32085411 | -0.01339762 | 0.38120608 | 0.64923384 | NA         | KCNA2      |
| 7156      | ENSG00000177302 | 2073.18505 | -0.29537943 | 0.08096892 | 0.00018299 | 0.00131301 | TOP3A      |
| 57513     | ENSG00000177303 | 762.737416 | 0.13225878  | 0.09891642 | 0.16630021 | 0.35680721 | CASKIN2    |
| NA        | ENSG00000177306 | 0          | NA          | NA         | NA         | NA         | OR7E125P   |
| 253461    | ENSG00000177311 | 656.936961 | -0.39439734 | 0.10831529 | 0.00014298 | 0.00104908 | ZBTB38     |
| 139105    | ENSG00000177324 | 0.16735865 | 0.01897177  | 0.38482933 | 0.78225479 | NA         | BEND2      |
| 286122    | ENSG00000177335 | 35.6889534 | -1.61377851 | 0.45929877 | 2.83E-05   | 0.00024558 | C8orf31    |
| NA        | ENSG00000177337 | 60.6322512 | 0.36163397  | 0.28007184 | 0.08805365 | 0.22670443 | DLGAP1-AS1 |
| NA        | ENSG00000177338 | 0          | NA          | NA         | NA         | NA         | LINC00469  |
| 79857     | ENSG00000177340 | 4.73809702 | 0.03781085  | 0.37057026 | 0.72906625 | 0.87045369 |            |
| 645683    | ENSG00000177350 | 0.32472341 | 0.00156183  | 0.38337017 | 0.96535514 | NA         | RPL13AP3   |
| 64925     | ENSG00000177352 | 540.457806 | -0.18294578 | 0.12299966 | 0.11528417 | 0.2768718  | CCDC71     |
| 118461    | ENSG00000177354 | 2.42144075 | 0.08769662  | 0.38783799 | 0.34084348 | NA         | C10orf71   |

|           |                 |            |             |            |            |            |           |
|-----------|-----------------|------------|-------------|------------|------------|------------|-----------|
| NA        | ENSG00000177359 | 19.2801758 | 0.00442035  | 0.34196163 | 0.97971498 | 0.9932825  |           |
| 221091    | ENSG00000177363 | 6.57073337 | 0.26922097  | 0.48077034 | 0.09025504 | 0.23114238 | LRRN4CL   |
| 124871    | ENSG00000177369 | 0          | NA          | NA         | NA         | NA         |           |
| 29928     | ENSG00000177370 | 334.040669 | 0.0986485   | 0.12459998 | 0.40297845 | 0.63099498 | TIMM22    |
| 3090      | ENSG00000177374 | 150.393755 | -1.03850765 | 0.20957356 | 8.39E-08   | 1.12E-06   | HIC1      |
| 8541      | ENSG00000177380 | 672.495239 | -0.28818886 | 0.10315209 | 0.00361406 | 0.01773946 | PPFIA3    |
| 64110     | ENSG00000177383 | 1859.77247 | -0.10020556 | 0.06654132 | 0.12586724 | 0.29503851 | MAGEF1    |
| 89766     | ENSG00000177398 | 0.14931947 | -0.01844332 | 0.38480212 | 0.84537521 | NA         | UMODL1    |
| NA        | ENSG00000177400 | 0          | NA          | NA         | NA         | NA         | OR7E8P    |
| 100049716 | ENSG00000177406 | 0.32256794 | -0.02325484 | 0.38531879 | 0.66956249 | NA         | NINJ2-AS1 |
| 219285    | ENSG00000177409 | 2.84477125 | 0.19288227  | 0.45200142 | 0.02371077 | 0.08352659 | SAMD9L    |
| 441951    | ENSG00000177410 | 1420.06795 | -0.02897811 | 0.08478464 | 0.72508475 | 0.86844186 | ZFAS1     |
| 148581    | ENSG00000177414 | 0          | NA          | NA         | NA         | NA         | UBE2U     |
| NA        | ENSG00000177418 | 0.15069912 | -0.01848503 | 0.38480575 | 0.84537521 | NA         |           |
| 5074      | ENSG00000177425 | 0.173733   | 0.01914545  | 0.38484597 | 0.78225479 | NA         | PAWR      |
| 7050      | ENSG00000177426 | 386.604549 | 0.6851492   | 0.14538417 | 5.68E-07   | 6.72E-06   | TGIF1     |
| 125170    | ENSG00000177427 | 228.515918 | -0.02854077 | 0.15048519 | 0.83566081 | 0.92509265 | MIEF2     |
| 266812    | ENSG00000177432 | 398.766977 | -0.09610869 | 0.11928434 | 0.39560405 | 0.62505251 | NAP1L5    |
| NA        | ENSG00000177447 | 0          | NA          | NA         | NA         | NA         | CBX3P1    |
| NA        | ENSG00000177452 | 0          | NA          | NA         | NA         | NA         |           |
| 167359    | ENSG00000177453 | 2.48472207 | -0.08395096 | 0.39013164 | 0.23334115 | NA         | NIM1K     |
| 930       | ENSG00000177455 | 0.49179166 | 0.02819073  | 0.38571158 | 0.57316017 | NA         | CD19      |
| 203111    | ENSG00000177459 | 9.64689267 | 3.75194209  | 1.11230822 | 7.85E-05   | 0.0006137  | ERICH5    |
| 343172    | ENSG00000177462 | 0          | NA          | NA         | NA         | NA         | OR2T8     |
| 7182      | ENSG00000177463 | 3484.13496 | -0.07548395 | 0.06512178 | 0.23695126 | 0.45390682 | NR2C2     |
| 2828      | ENSG00000177464 | 0.14931947 | -0.01844332 | 0.38480212 | 0.84537521 | NA         | GPR4      |
| 122970    | ENSG00000177465 | 28.8827229 | -0.25996358 | 0.33762856 | 0.22236513 | 0.43535977 | ACOT4     |
| 167826    | ENSG00000177468 | 0          | NA          | NA         | NA         | NA         | OLIG3     |
| 284119    | ENSG00000177469 | 25.2812529 | 2.97220508  | 0.58676036 | 2.93E-08   | 4.15E-07   | CAVIN1    |
| 81469     | ENSG00000177476 | 0          | NA          | NA         | NA         | NA         | OR2G3     |
| 10425     | ENSG00000177479 | 2388.86662 | 0.03018109  | 0.06493227 | 0.63697288 | 0.81722218 | ARIH2     |
| 375316    | ENSG00000177483 | 15.9115939 | 0.35555615  | 0.45344655 | 0.1122794  | 0.27126441 | RBM44     |
| 10009     | ENSG00000177485 | 700.086381 | -0.13901363 | 0.09689572 | 0.1374416  | 0.31307018 | ZBTB33    |
| 81470     | ENSG00000177489 | 0          | NA          | NA         | NA         | NA         | OR2G2     |
| 79413     | ENSG00000177494 | 0          | NA          | NA         | NA         | NA         | ZBED2     |
| 51480     | ENSG00000177504 | 0          | NA          | NA         | NA         | NA         | VCX2      |
| 79191     | ENSG00000177508 | 506.61005  | -0.36678414 | 0.11649859 | 0.00091788 | 0.0055034  | IRX3      |
| 51046     | ENSG00000177511 | 1647.09059 | -2.40737672 | 0.09251207 | 1.77E-150  | 1.59E-147  | ST8SIA3   |



|           |                 |            |             |            |            |            |              |
|-----------|-----------------|------------|-------------|------------|------------|------------|--------------|
| 56475     | ENSG00000177519 | 89.5924147 | 1.9746695   | 0.26784198 | 1.19E-14   | 3.14E-13   | RPRM         |
| 127623    | ENSG00000177535 | 0          | NA          | NA         | NA         | NA         | OR2B11       |
| 79751     | ENSG00000177542 | 1318.55728 | 0.05279339  | 0.08812255 | 0.5373679  | 0.74759591 | SLC25A22     |
| 79874     | ENSG00000177548 | 286.708156 | 0.09431805  | 0.13924935 | 0.46688128 | 0.68982161 | RABEP2       |
| 4808      | ENSG00000177551 | 5.86674893 | 0.15501412  | 0.40341508 | 0.23403282 | 0.45093611 | NHLH2        |
| 102724659 | ENSG00000177553 | 0          | NA          | NA         | NA         | NA         | C1orf167-AS1 |
| 475       | ENSG00000177556 | 273.852098 | 0.32643878  | 0.14731719 | 0.01628658 | 0.0616652  | ATOX1        |
| 148109    | ENSG00000177558 | 0          | NA          | NA         | NA         | NA         | FAM187B      |
| 79718     | ENSG00000177565 | 2224.73087 | 0.24848625  | 0.0736161  | 0.00057689 | 0.00365668 | TBL1XR1      |
| 401474    | ENSG00000177570 | 2.7509509  | -0.03777846 | 0.37858287 | 0.62733486 | 0.81091192 | SAMD12       |
| 9332      | ENSG00000177575 | 0          | NA          | NA         | NA         | NA         | CD163        |
| 497661    | ENSG00000177576 | 543.799057 | 0.29142053  | 0.29772977 | 0.17068981 | 0.36265644 | C18orf32     |
| NA        | ENSG00000177586 | 0          | NA          | NA         | NA         | NA         | OR7E149P     |
| NA        | ENSG00000177590 | 0          | NA          | NA         | NA         | NA         | GIMAP3P      |
| 55367     | ENSG00000177595 | 971.183866 | 0.46990927  | 0.0935261  | 2.20E-07   | 2.77E-06   | PIDD1        |
| 100288208 | ENSG00000177596 | 0.173124   | -0.01911262 | 0.38486262 | 0.84537521 | NA         |              |
| 126069    | ENSG00000177599 | 88.5315782 | 0.05166081  | 0.22240693 | 0.77738394 | 0.8979563  | ZNF491       |
| 6181      | ENSG00000177600 | 15990.9288 | 0.07325675  | 0.05488973 | 0.17701627 | 0.37183726 | RPLP2        |
| 83903     | ENSG00000177602 | 246.752081 | -0.45152953 | 0.16845919 | 0.00306225 | 0.01540108 | HASPIN       |
| 3725      | ENSG00000177606 | 3279.88248 | 1.38357637  | 0.07450324 | 5.31E-78   | 1.04E-75   | JUN          |
| 23283     | ENSG00000177613 | 1217.33717 | 0.04318291  | 0.08450639 | 0.60001934 | 0.79083131 | CSTF2T       |
| 79605     | ENSG00000177614 | 493.514419 | -2.76185956 | 0.14544326 | 9.69E-82   | 2.02E-79   | PGBD5        |
| 121273    | ENSG00000177627 | 0          | NA          | NA         | NA         | NA         | C12orf54     |
| 2629      | ENSG00000177628 | 817.570956 | -0.24269225 | 0.10617111 | 0.01702719 | 0.06404159 | GBA          |
| 255082    | ENSG00000177640 | 58.9788998 | 0.54260438  | 0.32951354 | 0.02423791 | 0.08501712 | CASC2        |
| 28976     | ENSG00000177646 | 947.09921  | 0.09538828  | 0.09638521 | 0.30672934 | 0.53423845 | ACAD9        |
| 23765     | ENSG00000177663 | 8.02665796 | -0.00969145 | 0.36754441 | 0.92180792 | 0.96719389 | IL17RA       |
| 57104     | ENSG00000177666 | 915.478539 | 0.159695    | 0.09828273 | 0.09257981 | 0.23530405 | PNPLA2       |
| 619373    | ENSG00000177669 | 5.6979679  | 0.00199759  | 0.35614405 | 0.99017707 | 0.99673744 | MBOAT4       |
| 165100    | ENSG00000177673 | 0          | NA          | NA         | NA         | NA         | TEX44        |
| 57085     | ENSG00000177674 | 289.802193 | 0.29459467  | 0.14030534 | 0.02375331 | 0.08363188 | AGTRAP       |
| 283316    | ENSG00000177675 | 66.8901971 | -1.62773687 | 0.32670054 | 4.01E-08   | 5.58E-07   | CD163L1      |
| 222183    | ENSG00000177679 | 1867.87004 | -1.28886019 | 0.07742423 | 3.11E-63   | 4.37E-61   | SRRM3        |
| 168451    | ENSG00000177683 | 788.042842 | -0.18287504 | 0.10379918 | 0.06641621 | 0.18449981 | THAP5        |
| 245928    | ENSG00000177684 | 0          | NA          | NA         | NA         | NA         | DEFB114      |
| 283229    | ENSG00000177685 | 56.8845131 | 0.07179637  | 0.24336508 | 0.70838359 | 0.8597973  | CRACR2B      |
| 387082    | ENSG00000177688 | 1.80509735 | 0.0043994   | 0.37717304 | 0.9549297  | NA         | SUMO4        |
| 139422    | ENSG00000177689 | 0          | NA          | NA         | NA         | NA         | MAGEB10      |

|           |                 |            |             |            |            |            |              |
|-----------|-----------------|------------|-------------|------------|------------|------------|--------------|
| 54943     | ENSG00000177692 | 26.1388594 | 0.13141477  | 0.31455766 | 0.501362   | 0.71841948 | DNAJC28      |
| 26682     | ENSG00000177693 | 0          | NA          | NA         | NA         | NA         | OR4F4        |
| 254827    | ENSG00000177694 | 9.15259905 | 0.04900351  | 0.35798506 | 0.72122151 | 0.86691933 | NAALADL2     |
| 977       | ENSG00000177697 | 2117.06785 | 0.15598968  | 0.07123685 | 0.02579022 | 0.08920466 | CD151        |
| 100129540 | ENSG00000177699 | 0.9574744  | 0.00409411  | 0.3809187  | 0.94080245 | NA         |              |
| 5441      | ENSG00000177700 | 674.707739 | 0.05837515  | 0.09406311 | 0.52273823 | 0.73592404 | POLR2L       |
| 56975     | ENSG00000177706 | 1.06813846 | 0.07576372  | 0.39404622 | 0.14540818 | NA         | FAM20C       |
| 25945     | ENSG00000177707 | 251.834745 | 1.68023228  | 0.20103718 | 4.63E-18   | 1.55E-16   | NECTIN3      |
| 83650     | ENSG00000177710 | 3.35071816 | 0.07061938  | 0.37555213 | 0.53199747 | 0.74324553 | SLC35G5      |
| 389289    | ENSG00000177721 | 4.93245147 | 0.28499973  | 0.51628438 | 0.04833253 | 0.14507071 | ANXA2R       |
| NA        | ENSG00000177725 | 3.03394831 | -0.22087344 | 0.47324085 | 0.02207339 | 0.07885057 |              |
| 9772      | ENSG00000177728 | 2875.79175 | 0.14561814  | 0.10154569 | 0.13634278 | 0.31138953 | TMEM94       |
| 2314      | ENSG00000177731 | 1106.95657 | 0.23729946  | 0.10373725 | 0.01730595 | 0.06488097 | FLII         |
| 6666      | ENSG00000177732 | 2918.07477 | 0.02061789  | 0.05965568 | 0.72701665 | 0.86953012 | SOX12        |
| 10949     | ENSG00000177733 | 8256.38798 | 0.00072717  | 0.05122317 | 0.9892657  | 0.99604194 | HNRNPA0      |
| NA        | ENSG00000177736 | 0.16735865 | 0.01897177  | 0.38482933 | 0.78225479 | NA         | FXNP2        |
| 648987    | ENSG00000177738 | 19.8758208 | -0.07767644 | 0.32611901 | 0.66404877 | 0.83431586 |              |
| 285525    | ENSG00000177752 | 2.51737687 | -0.05619384 | 0.37866156 | 0.54684104 | NA         | YIPF7        |
| 400728    | ENSG00000177757 | 15.1733586 | -0.34710794 | 0.46055711 | 0.1126542  | 0.27179207 | FAM87B       |
| NA        | ENSG00000177770 | 0          | NA          | NA         | NA         | NA         | CDKN2AIPNLP1 |
| NA        | ENSG00000177776 | 0          | NA          | NA         | NA         | NA         | RPS2P2       |
| 105373159 | ENSG00000177788 | 421.933511 | -0.26861197 | 0.12257823 | 0.02033703 | 0.07384457 |              |
| 58529     | ENSG00000177791 | 8.93885014 | 0.00854525  | 0.34491854 | 0.95739484 | 0.98264776 | MYOZ1        |
| NA        | ENSG00000177800 | 1.02477112 | 0.00735648  | 0.38089199 | 0.89488303 | NA         | TMEM78       |
| NA        | ENSG00000177803 | 0          | NA          | NA         | NA         | NA         | YWHAQP4      |
| 3766      | ENSG00000177807 | 5.39696165 | 0.10409247  | 0.38911836 | 0.30224945 | 0.52973755 | KCNJ10       |
| NA        | ENSG00000177822 | 136.106673 | -0.06075003 | 0.19094874 | 0.71267991 | 0.86169546 | TENM3-AS1    |
| 66005     | ENSG00000177830 | 1379.22897 | 0.09536966  | 0.07491265 | 0.19426405 | 0.39721723 | CHID1        |
| 56127     | ENSG00000177839 | 259.040779 | 0.50964086  | 0.18750948 | 0.00224722 | 0.01183251 | PCDHB9       |
| 253639    | ENSG00000177842 | 290.129056 | -0.31909032 | 0.16338885 | 0.03077338 | 0.10232007 | ZNF620       |
| 9849      | ENSG00000177853 | 1064.73753 | -0.00351107 | 0.09737215 | 0.96931908 | 0.98853525 | ZNF518A      |
| 8269      | ENSG00000177854 | 108.14198  | -0.05425207 | 0.23073934 | 0.76765436 | 0.89306101 | TMEM187      |
| NA        | ENSG00000177855 | 0.55699435 | 0.01254336  | 0.38329678 | 0.74045158 | NA         | CACYBPP2     |
| 374969    | ENSG00000177868 | 273.242375 | -0.18074631 | 0.1428207  | 0.17144071 | 0.36389846 | SVBP         |
| 285267    | ENSG00000177873 | 147.980965 | -0.34008698 | 0.21646074 | 0.06140846 | 0.17449782 | ZNF619       |
| 387856    | ENSG00000177875 | 96.2873142 | 0.19647711  | 0.21182467 | 0.26967216 | 0.4928325  | CCDC184      |
| 1176      | ENSG00000177879 | 588.543771 | 0.0673004   | 0.09848877 | 0.48014094 | 0.70142083 | AP3S1        |
| 2885      | ENSG00000177885 | 3317.36699 | -0.12350747 | 0.06503281 | 0.05343676 | 0.15657737 | GRB2         |

|           |                 |            |             |            |            |            |           |
|-----------|-----------------|------------|-------------|------------|------------|------------|-----------|
| 360023    | ENSG00000177888 | 624.041524 | 0.01325716  | 0.10650255 | 0.89781383 | 0.95520304 | ZBTB41    |
| 7334      | ENSG00000177889 | 2684.5713  | -0.22535936 | 0.0735021  | 0.00175088 | 0.00955901 | UBE2N     |
| 645961    | ENSG00000177910 | 0          | NA          | NA         | NA         | NA         | SPATA31C2 |
| 151188    | ENSG00000177917 | 639.229563 | -0.09811164 | 0.1005297  | 0.3111162  | 0.53874253 | ARL6IP6   |
| 30832     | ENSG00000177932 | 752.778999 | -0.36012456 | 0.10094283 | 0.00020918 | 0.00148165 | ZNF354C   |
| 93661     | ENSG00000177938 | 0          | NA          | NA         | NA         | NA         | CAPZA3    |
| 158056    | ENSG00000177943 | 229.886693 | 0.18596131  | 0.32951096 | 0.35627344 | 0.58627757 | MAMDC4    |
| 92806     | ENSG00000177946 | 287.517387 | 0.01471538  | 0.14484049 | 0.91390919 | 0.96354333 | CENPBD1   |
| 113746    | ENSG00000177947 | 0          | NA          | NA         | NA         | NA         | ODF3      |
| 51272     | ENSG00000177951 | 839.026956 | -0.13448645 | 0.09672617 | 0.15005936 | 0.33324129 | BET1L     |
| 6232      | ENSG00000177954 | 15199.7056 | 0.01375877  | 0.05332236 | 0.79527716 | 0.90586169 | RPS27     |
| 60626     | ENSG00000177963 | 2070.53393 | -0.05806299 | 0.07282927 | 0.41642195 | 0.64306408 | RIC8A     |
| 55272     | ENSG00000177971 | 1115.65763 | -0.13272001 | 0.07985427 | 0.09059952 | 0.23187492 | IMP3      |
| 140461    | ENSG00000177981 | 397.96259  | -0.10563637 | 0.13165516 | 0.39180109 | 0.62114503 | ASB8      |
| 389812    | ENSG00000177984 | 21.976351  | 0.22715623  | 0.36405008 | 0.26200282 | 0.48394839 | LCN15     |
| 440836    | ENSG00000177989 | 147.67754  | 1.3535063   | 0.25022898 | 5.45E-09   | 8.49E-08   | ODF3B     |
| 283417    | ENSG00000177990 | 369.737752 | -0.5533726  | 0.14598421 | 4.81E-05   | 0.00039523 | DPY19L2   |
| 286234    | ENSG00000177992 | 0.56767373 | 0.02627943  | 0.38574813 | 0.49686938 | NA         | SPATA31E1 |
| 100874123 | ENSG00000177993 | 0          | NA          | NA         | NA         | NA         | ZNRF3-AS1 |
| 129852    | ENSG00000177994 | 1.2900775  | 0.05530874  | 0.38725416 | 0.29245582 | NA         | C2orf73   |
| 285601    | ENSG00000178015 | 25.0505794 | 0.10081365  | 0.31834132 | 0.59502711 | 0.78790447 | GPR150    |
| 388951    | ENSG00000178021 | 0.173733   | 0.01914545  | 0.38484597 | 0.78225479 | NA         | TSPYL6    |
| 388886    | ENSG00000178026 | 324.155259 | 0.10722901  | 0.15064848 | 0.44088439 | 0.66584047 | LRRRC75B  |
| 55929     | ENSG00000178028 | 696.846485 | 0.04509587  | 0.1189142  | 0.69001327 | 0.84966405 | DMAPI     |
| 92949     | ENSG00000178031 | 4.46867511 | -0.00495475 | 0.37143599 | 0.95505417 | 0.98157246 | ADAMTSL1  |
| 254228    | ENSG00000178033 | 0.52980934 | 0.01391988  | 0.3829495  | 0.73845638 | NA         | CALHM5    |
| 3615      | ENSG00000178035 | 3804.00475 | -0.20198138 | 0.05698296 | 0.00033247 | 0.00224436 | IMPDH2    |
| 259173    | ENSG00000178038 | 33.6413268 | -0.45647764 | 0.38733692 | 0.06302228 | 0.1779115  | ALS2CL    |
| 4291      | ENSG00000178053 | 249.43568  | 0.18466391  | 0.15407508 | 0.19042906 | 0.39167661 | MLF1      |
| 339906    | ENSG00000178055 | 0.99047471 | -0.01444432 | 0.38065914 | 0.80629562 | NA         | PRSS42P   |
| 25915     | ENSG00000178057 | 861.65808  | 0.28310332  | 0.09482742 | 0.00201896 | 0.01078516 | NDUFAF3   |
| 205327    | ENSG00000178074 | 332.571802 | -0.06814183 | 0.12461085 | 0.56191381 | 0.76508177 | C2orf69   |
| 54762     | ENSG00000178075 | 100.192459 | 0.22776724  | 0.28721169 | 0.26499409 | 0.48718221 | GRAMD1C   |
| 55620     | ENSG00000178078 | 32.9163827 | 0.26267142  | 0.32221209 | 0.22067076 | 0.43304726 | STAP2     |
| 89837     | ENSG00000178081 | 37.0258738 | 0.18161583  | 0.30639753 | 0.37289157 | 0.60181964 | ULK4P3    |
| NA        | ENSG00000178082 | 0.15069912 | -0.01848503 | 0.38480575 | 0.84537521 | NA         | TWF1P1    |
| 170572    | ENSG00000178084 | 0          | NA          | NA         | NA         | NA         | HTR3C     |
| 83983     | ENSG00000178093 | 46.3112331 | 0.22030681  | 0.28769334 | 0.28408508 | 0.50919216 | TSSK6     |

|        |                 |            |             |            |            |            |          |
|--------|-----------------|------------|-------------|------------|------------|------------|----------|
| 51027  | ENSG00000178096 | 225.38797  | -0.07679046 | 0.15740327 | 0.59182154 | 0.78640007 | BOLA1    |
| 9659   | ENSG00000178104 | 606.560892 | -0.51431019 | 0.14291317 | 0.00011362 | 0.00085193 | PDE4DIP  |
| 1662   | ENSG00000178105 | 569.771021 | -0.00170071 | 0.10622644 | 0.98518542 | 0.99475332 | DDX10    |
| NA     | ENSG00000178107 | 0          | NA          | NA         | NA         | NA         |          |
| 727909 | ENSG00000178115 | 17.811858  | -0.15017575 | 0.35386073 | 0.40539643 | 0.63375238 | GOLGA8Q  |
| 728047 | ENSG00000178115 | 17.811858  | -0.15017575 | 0.35386073 | 0.40539643 | 0.63375238 | GOLGA8Q  |
| 286187 | ENSG00000178125 | 0.61572015 | 0.03581773  | 0.38655464 | 0.41248855 | NA         | PPP1R42  |
| 4729   | ENSG00000178127 | 849.445464 | 0.04230764  | 0.09453417 | 0.6449546  | 0.82283284 | NDUFV2   |
| NA     | ENSG00000178130 | 0          | NA          | NA         | NA         | NA         | FAM27E5  |
| NA     | ENSG00000178146 | 0          | NA          | NA         | NA         | NA         | GK4P     |
| 55152  | ENSG00000178149 | 583.926125 | 0.18695161  | 0.11014704 | 0.07616651 | 0.20371308 | DALRD3   |
| 163071 | ENSG00000178150 | 84.9688136 | -0.36995689 | 0.29013503 | 0.08517278 | 0.2214571  | ZNF114   |
| NA     | ENSG00000178162 | 0.30001968 | -0.02294462 | 0.38527539 | 0.68644637 | NA         | FAR2P2   |
| 85460  | ENSG00000178163 | 345.653942 | 0.09294919  | 0.1431088  | 0.48436244 | 0.70452718 | ZNF518B  |
| 205147 | ENSG00000178171 | 301.080897 | -2.99041783 | 0.19567966 | 1.97E-54   | 2.22E-52   | AMER3    |
| 404203 | ENSG00000178172 | 0          | NA          | NA         | NA         | NA         | SPINK6   |
| 167465 | ENSG00000178175 | 0          | NA          | NA         | NA         | NA         | ZNF366   |
| 254251 | ENSG00000178177 | 708.67627  | 0.07847516  | 0.11658765 | 0.48039207 | 0.70158112 | LCORL    |
| 84552  | ENSG00000178184 | 362.464798 | 0.43956712  | 0.13072346 | 0.00035126 | 0.00235839 | PARD6G   |
| 285676 | ENSG00000178187 | 83.7212085 | 0.27249372  | 0.23716384 | 0.1547672  | 0.34030142 | ZNF454   |
| 25970  | ENSG00000178188 | 1906.05307 | 0.1775946   | 0.07644537 | 0.0176867  | 0.06595943 | SH2B1    |
| 340152 | ENSG00000178199 | 3.00970201 | 0.06521518  | 0.38488569 | 0.31772081 | 0.54552842 | ZC3H12D  |
| 57191  | ENSG00000178201 | 23.8000168 | 0.07637734  | 0.30463056 | 0.68971921 | 0.84943947 | VN1R1    |
| 143888 | ENSG00000178202 | 882.547625 | 0.1879248   | 0.12035511 | 0.09952916 | 0.24838472 | POGLUT3  |
| 5339   | ENSG00000178209 | 4494.05147 | -0.15787711 | 0.05554513 | 0.00404034 | 0.01947059 | PLEC     |
| 387694 | ENSG00000178217 | 1.15754537 | 0.01898254  | 0.38117088 | 0.74436376 | NA         | SH2D4B   |
| 285498 | ENSG00000178222 | 67.6988493 | 0.31387269  | 0.30653173 | 0.14653471 | 0.32761423 | RNF212   |
| 146547 | ENSG00000178226 | 1.83570253 | 0.02716197  | 0.37757679 | 0.73354996 | NA         | PRSS36   |
| 125919 | ENSG00000178229 | 135.850066 | 0.15854057  | 0.19031618 | 0.3389905  | 0.56924008 | ZNF543   |
| 441151 | ENSG00000178233 | 654.385093 | -0.73472218 | 0.10080006 | 6.80E-14   | 1.70E-12   | TMEM151B |
| 63917  | ENSG00000178234 | 1220.90531 | 0.08394954  | 0.07601121 | 0.26143312 | 0.4834405  | GALNT11  |
| 114798 | ENSG00000178235 | 0          | NA          | NA         | NA         | NA         | SLITRK1  |
| NA     | ENSG00000178243 | 0          | NA          | NA         | NA         | NA         | C9orf62  |
| 388882 | ENSG00000178248 | 0          | NA          | NA         | NA         | NA         | FAM230I  |
| 11180  | ENSG00000178252 | 5923.21604 | -0.04359711 | 0.05393973 | 0.40834571 | 0.63646625 | WDR6     |
| 58531  | ENSG00000178257 | 0          | NA          | NA         | NA         | NA         | PRM3     |
| 7142   | ENSG00000178279 | 0          | NA          | NA         | NA         | NA         | TNP2     |
| 653423 | ENSG00000178287 | 0          | NA          | NA         | NA         | NA         | SPAG11A  |

|           |                 |            |             |            |            |            |               |
|-----------|-----------------|------------|-------------|------------|------------|------------|---------------|
| 348654    | ENSG00000178295 | 1953.9692  | -0.27458683 | 0.07196624 | 9.93E-05   | 0.00075606 | GEN1          |
| 360200    | ENSG00000178297 | 3.62242559 | 0.011204    | 0.37398944 | 0.89921944 | 0.95557174 | TMPRSS9       |
| 282679    | ENSG00000178301 | 31.1660451 | 0.00425374  | 0.28225597 | 0.98401284 | 0.99453916 | AQP11         |
| 8834      | ENSG00000178307 | 406.091682 | -0.15586596 | 0.1186422  | 0.16592832 | 0.35616336 | TMEM11        |
| 117608    | ENSG00000178338 | 267.58527  | 0.1787644   | 0.13986398 | 0.16922679 | 0.36066812 | ZNF354B       |
| 26251     | ENSG00000178342 | 3.62822109 | 0.09387814  | 0.38708198 | 0.35469227 | 0.58520537 | KCNG2         |
| 152573    | ENSG00000178343 | 37.0273374 | 2.65777414  | 0.45646857 | 3.98E-10   | 7.20E-09   | SHISA3        |
| 120775    | ENSG00000178358 | 0          | NA          | NA         | NA         | NA         | OR2D3         |
| 810       | ENSG00000178363 | 0          | NA          | NA         | NA         | NA         | CALML3        |
| 51806     | ENSG00000178372 | 0          | NA          | NA         | NA         | NA         | CALML5        |
| 90637     | ENSG00000178381 | 153.021007 | 0.07248617  | 0.190775   | 0.66292665 | 0.83370086 | ZFAND2A       |
| 389072    | ENSG00000178385 | 557.478782 | 0.02717492  | 0.1227291  | 0.8161483  | 0.91637704 | PLEKHM3       |
| 7766      | ENSG00000178386 | 157.686027 | 0.16873993  | 0.20479371 | 0.33226364 | 0.56141294 | ZNF223        |
| 3350      | ENSG00000178394 | 0          | NA          | NA         | NA         | NA         | HTR1A         |
| 164127    | ENSG00000178395 | 0          | NA          | NA         | NA         | NA         | CCDC185       |
| 84792     | ENSG00000178397 | 462.718483 | -0.24229023 | 0.14151921 | 0.06467101 | 0.18119939 | FAM220A       |
| 79962     | ENSG00000178401 | 25.8097226 | 2.51503656  | 0.53093399 | 1.33E-07   | 1.73E-06   | DNAJC22       |
| 63973     | ENSG00000178403 | 4832.88079 | 0.72273079  | 0.0590019  | 3.87E-35   | 2.63E-33   | NEUROG2       |
| 100653515 | ENSG00000178404 | 3.9586743  | -0.01482645 | 0.36579177 | 0.89575342 | 0.95469109 | CEP295NL      |
| 57673     | ENSG00000178409 | 410.011449 | -0.16271595 | 0.1187466  | 0.14827001 | 0.33052552 | BEND3         |
| 284241    | ENSG00000178412 | 0.79971516 | -0.00577684 | 0.38215497 | 0.90182286 | NA         |               |
| 221294    | ENSG00000178425 | 310.678291 | 0.34931916  | 0.14391017 | 0.00870668 | 0.03700527 | NT5DC1        |
| NA        | ENSG00000178429 | 8.13463755 | -0.03591301 | 0.34816673 | 0.81096556 | 0.91443142 | RPS3AP5       |
| NA        | ENSG00000178440 | 347.72363  | 0.28963725  | 0.13734364 | 0.02364979 | 0.08332657 | TIMM23B-AGAP6 |
| 2731      | ENSG00000178445 | 921.526129 | -0.04904717 | 0.14212078 | 0.70897894 | 0.8603145  | GLDC          |
| 84987     | ENSG00000178449 | 217.891213 | 0.07396535  | 0.17312549 | 0.63330126 | 0.81478111 | COX14         |
| 246705    | ENSG00000178457 | 0          | NA          | NA         | NA         | NA         | LINC00314     |
| NA        | ENSG00000178458 | 1.02058948 | -0.02089271 | 0.38105229 | 0.72518351 | NA         | H3P16         |
| 157777    | ENSG00000178460 | 11.998771  | -0.14410901 | 0.36571766 | 0.39632473 | 0.62564311 | MCMDC2        |
| 79861     | ENSG00000178462 | 0          | NA          | NA         | NA         | NA         | TUBAL3        |
| NA        | ENSG00000178464 | 1.10850786 | -0.02630484 | 0.38212841 | 0.64133864 | NA         | RPL10P16      |
| 54681     | ENSG00000178467 | 2.02986455 | 0.00455933  | 0.37747651 | 0.94929687 | NA         | P4HTM         |
| 114131    | ENSG00000178473 | 0          | NA          | NA         | NA         | NA         | UCN3          |
| 196403    | ENSG00000178498 | 1483.80602 | 0.15981212  | 0.07789947 | 0.03603043 | 0.11591433 | DTX3          |
| 55175     | ENSG00000178502 | 353.436117 | -0.3780579  | 0.14023487 | 0.00374567 | 0.01825637 | KLHL11        |
| NA        | ENSG00000178503 | 0          | NA          | NA         | NA         | NA         | NECAP1P1      |
| 258       | ENSG00000178522 | 0          | NA          | NA         | NA         | NA         | AMBN          |
| 404217    | ENSG00000178531 | 1741.0163  | 0.27929322  | 0.07595966 | 0.0001719  | 0.00124018 | CTXN1         |

|        |                 |            |             |            |            |            |          |
|--------|-----------------|------------|-------------|------------|------------|------------|----------|
| 788    | ENSG00000178537 | 327.552836 | -0.08887706 | 0.12872159 | 0.46275813 | 0.6855676  | SLC25A20 |
| 767    | ENSG00000178538 | 14.4124011 | 0.19458446  | 0.40923703 | 0.19534759 | 0.39889833 | CA8      |
| NA     | ENSG00000178556 | 0          | NA          | NA         | NA         | NA         | CKS1BP6  |
| 940    | ENSG00000178562 | 0          | NA          | NA         | NA         | NA         | CD28     |
| 9852   | ENSG00000178567 | 1219.58778 | -0.23766852 | 0.09326953 | 0.00844692 | 0.03608673 | EPM2AIP1 |
| 2066   | ENSG00000178568 | 19.0197734 | 0.22346855  | 0.37948092 | 0.25415176 | 0.47466543 | ERBB4    |
| 4094   | ENSG00000178573 | 5.80681331 | -0.13203792 | 0.394185   | 0.2709755  | 0.49431353 | MAF      |
| 56998  | ENSG00000178585 | 783.613576 | 0.23271545  | 0.09703105 | 0.01299583 | 0.05142908 | CTNNBIP1 |
| 150681 | ENSG00000178586 | 0          | NA          | NA         | NA         | NA         | OR6B3    |
| 245938 | ENSG00000178591 | 0          | NA          | NA         | NA         | NA         | DEFB125  |
| NA     | ENSG00000178596 | 0          | NA          | NA         | NA         | NA         | GAPDHP29 |
| 768239 | ENSG00000178597 | 0          | NA          | NA         | NA         | NA         | PSAPL1   |
| 150677 | ENSG00000178602 | 0          | NA          | NA         | NA         | NA         | OTOS     |
| 8225   | ENSG00000178605 | 907.194906 | -0.03227419 | 0.09229158 | 0.71253599 | 0.86169546 | GTPBP6   |
| 2081   | ENSG00000178607 | 438.586292 | 0.16004513  | 0.14648791 | 0.23598751 | 0.45280389 | ERN1     |
| 2859   | ENSG00000178623 | 20.8811978 | 0.27035331  | 0.44415168 | 0.14250728 | 0.32128606 | GPR35    |
| NA     | ENSG00000178631 | 11.1330842 | 0.09712437  | 0.3502562  | 0.56049104 | 0.7641659  | ACTG1P1  |
| NA     | ENSG00000178636 | 0          | NA          | NA         | NA         | NA         |          |
| 282966 | ENSG00000178645 | 2.77882287 | 0.04409403  | 0.37491078 | 0.6554463  | 0.8285476  | C10orf53 |
| NA     | ENSG00000178654 | 0          | NA          | NA         | NA         | NA         | PPIAP33  |
| NA     | ENSG00000178660 | 0.81287042 | 0.0158478   | 0.38192767 | 0.7585084  | NA         | ARMC10P1 |
| 80034  | ENSG00000178662 | 685.688279 | -0.47750757 | 0.13168209 | 0.00011522 | 0.00086261 | CSRNP3   |
| 349075 | ENSG00000178665 | 303.673093 | -0.39662059 | 0.17101086 | 0.0098593  | 0.0409823  | ZNF713   |
| 84875  | ENSG00000178685 | 16.4922579 | -0.13769662 | 0.36261043 | 0.41342912 | 0.64066701 | PARP10   |
| 284254 | ENSG00000178690 | 0          | NA          | NA         | NA         | NA         | DYNAP    |
| 23512  | ENSG00000178691 | 1458.52906 | -0.31678833 | 0.08142427 | 6.42E-05   | 0.00051305 | SUZ12    |
| 63899  | ENSG00000178694 | 299.504689 | -0.25978412 | 0.17176334 | 0.09011034 | 0.23086121 | NSUN3    |
| 115207 | ENSG00000178695 | 727.36454  | -1.38422368 | 0.10117289 | 1.25E-43   | 1.07E-41   | KCTD12   |
| 200895 | ENSG00000178700 | 261.412173 | -0.00488548 | 0.14951975 | 0.97061608 | 0.9889696  | DHFR2    |
| NA     | ENSG00000178715 | 0.99877021 | 0.00589672  | 0.37927292 | 0.92785106 | NA         |          |
| 54913  | ENSG00000178718 | 750.968163 | -1.12892707 | 0.11091136 | 2.79E-25   | 1.34E-23   | RPP25    |
| 2907   | ENSG00000178719 | 1834.31787 | -0.21139755 | 0.07248744 | 0.00292716 | 0.014815   | GRINA    |
| 285668 | ENSG00000178722 | 0.50544106 | 0.03058872  | 0.38599731 | 0.48636788 | NA         | C5orf64  |
| NA     | ENSG00000178723 | 0          | NA          | NA         | NA         | NA         | GLULP4   |
| 7056   | ENSG00000178726 | 0          | NA          | NA         | NA         | NA         | THBD     |
| 2814   | ENSG00000178732 | 1.67230964 | -0.02201813 | 0.37758524 | 0.77598962 | NA         | GP5      |
| 729420 | ENSG00000178734 | 0          | NA          | NA         | NA         | NA         | LMO7DN   |
| 9377   | ENSG00000178741 | 1205.93733 | -0.08974061 | 0.0774458  | 0.23620434 | 0.4530211  | COX5A    |

|           |                 |            |             |            |            |            |             |
|-----------|-----------------|------------|-------------|------------|------------|------------|-------------|
| 415117    | ENSG00000178750 | 0.64944402 | -0.03790105 | 0.3868082  | 0.40861375 | NA         | STX19       |
| 151176    | ENSG00000178752 | 159.363113 | 0.60521133  | 0.19076745 | 0.00040715 | 0.00268901 | ERFE        |
| 57184     | ENSG00000178761 | 1321.46143 | 0.36058016  | 0.08534605 | 1.41E-05   | 0.00013058 | FAM219B     |
| NA        | ENSG00000178762 | 0          | NA          | NA         | NA         | NA         | H2BC2P      |
| 22882     | ENSG00000178764 | 95.709881  | 0.2493036   | 0.22397487 | 0.1769986  | 0.37183726 | ZHX2        |
| 1370      | ENSG00000178772 | 0          | NA          | NA         | NA         | NA         | CPN2        |
| 27132     | ENSG00000178773 | 0.14931947 | -0.01844332 | 0.38480212 | 0.84537521 | NA         | CPNE7       |
| 389336    | ENSG00000178776 | 0          | NA          | NA         | NA         | NA         | C5orf46     |
| 124599    | ENSG00000178789 | 0          | NA          | NA         | NA         | NA         | CD300LB     |
| 220032    | ENSG00000178795 | 0.45209736 | -0.02505403 | 0.38558831 | 0.57865948 | NA         | GDPD4       |
| 284485    | ENSG00000178796 | 17.6792732 | -1.87449337 | 0.74150695 | 0.00043536 | 0.00285919 | RIIAD1      |
| 4351      | ENSG00000178802 | 614.142434 | 0.07230608  | 0.12742272 | 0.54718425 | 0.75424436 | MPI         |
| 646023    | ENSG00000178803 | 59.4252054 | 1.22287889  | 0.33795407 | 2.57E-05   | 0.00022491 | ADORA2A-AS1 |
| 132243    | ENSG00000178804 | 0          | NA          | NA         | NA         | NA         | H1-8        |
| 375593    | ENSG00000178809 | 77.6077269 | 1.35220552  | 0.33928722 | 4.93E-06   | 4.97E-05   | TRIM73      |
| 26873     | ENSG00000178814 | 4.16176063 | -0.05688562 | 0.37759508 | 0.55313247 | 0.75940406 | OPLAH       |
| 339456    | ENSG00000178821 | 18.9688713 | 0.15265624  | 0.36312525 | 0.3803023  | 0.60931904 | TMEM52      |
| 135932    | ENSG00000178826 | 13.8066179 | 0.19653608  | 0.3929892  | 0.25891419 | 0.48036523 | TMEM139     |
| 54546     | ENSG00000178828 | 0          | NA          | NA         | NA         | NA         | RNF186      |
| 100286922 | ENSG00000178836 | 0          | NA          | NA         | NA         | NA         |             |
| 124989    | ENSG00000178852 | 38.0833892 | -0.45748603 | 0.42355368 | 0.06478582 | 0.181378   | EFCAB13     |
| 9242      | ENSG00000178860 | 0          | NA          | NA         | NA         | NA         | MSC         |
| 81575     | ENSG00000178878 | 342.544949 | 0.87680656  | 0.16340565 | 1.25E-08   | 1.88E-07   | APOLD1      |
| 144347    | ENSG00000178882 | 50.2192123 | 0.29356156  | 0.33953213 | 0.17666644 | 0.37141698 | RFLNA       |
| 100533183 | ENSG00000178882 | 50.2192123 | 0.29356156  | 0.33953213 | 0.17666644 | 0.37141698 | RFLNA       |
| 54512     | ENSG00000178896 | 804.376664 | -0.11354536 | 0.1032947  | 0.2522505  | 0.47222371 | EXOSC4      |
| 147991    | ENSG00000178904 | 1646.86979 | -0.20246679 | 0.08477176 | 0.0141025  | 0.05489379 | DPY19L3     |
| 6879      | ENSG00000178913 | 2144.98048 | -0.14862783 | 0.06490948 | 0.02003335 | 0.07300914 | TAF7        |
| 285346    | ENSG00000178917 | 206.794026 | -0.07330227 | 0.16701682 | 0.62505544 | 0.80894324 | ZNF852      |
| 2304      | ENSG00000178919 | 0          | NA          | NA         | NA         | NA         | FOXE1       |
| 5198      | ENSG00000178921 | 1609.91528 | -0.21474545 | 0.08388559 | 0.00870921 | 0.03700808 | PFAS        |
| 81888     | ENSG00000178922 | 269.014884 | 0.20104167  | 0.13897299 | 0.1199985  | 0.28519048 | HYI         |
| 79415     | ENSG00000178927 | 1615.49228 | 0.06776012  | 0.0837221  | 0.4075869  | 0.63598301 | CYBC1       |
| 284355    | ENSG00000178928 | 0          | NA          | NA         | NA         | NA         | TPRX1       |
| 3963      | ENSG00000178934 | 0          | NA          | NA         | NA         | NA         | LGALS7B     |
| 653499    | ENSG00000178934 | 0          | NA          | NA         | NA         | NA         | LGALS7B     |
| 79818     | ENSG00000178935 | 122.989779 | -0.09772392 | 0.23637468 | 0.59945525 | 0.79057618 | ZNF552      |
| 399668    | ENSG00000178947 | 51.1277134 | 1.92212867  | 0.36382455 | 8.43E-09   | 1.28E-07   | SMIM10L2A   |

|        |                 |            |             |            |            |            |           |
|--------|-----------------|------------|-------------|------------|------------|------------|-----------|
| 2580   | ENSG00000178950 | 1757.38279 | 0.25039367  | 0.0854147  | 0.00258406 | 0.01335035 | GAK       |
| 51341  | ENSG00000178951 | 615.990795 | -0.14552209 | 0.1093421  | 0.16254746 | 0.35133911 | ZBTB7A    |
| 7284   | ENSG00000178952 | 5608.60468 | 0.00307405  | 0.0584192  | 0.95829477 | 0.98281563 | TUFM      |
| 127254 | ENSG00000178965 | 82.4621485 | -4.14240759 | 0.45025211 | 1.72E-21   | 6.88E-20   | ERICH3    |
| 80010  | ENSG00000178966 | 537.731556 | -0.50446282 | 0.11135197 | 2.27E-06   | 2.42E-05   | RMI1      |
| 80169  | ENSG00000178971 | 598.205937 | 0.14460162  | 0.10714656 | 0.15930126 | 0.34688536 | CTC1      |
| 55030  | ENSG00000178974 | 531.715302 | 0.00412126  | 0.10387165 | 0.9682412  | 0.98809325 | FBXO34    |
| 284029 | ENSG00000178977 | 11.5001909 | -0.19950976 | 0.40754473 | 0.22280644 | 0.43585878 | LINC00324 |
| 6415   | ENSG00000178980 | 1171.34182 | -0.06602582 | 0.08825161 | 0.44099805 | 0.66591075 | SELENOW   |
| 27335  | ENSG00000178982 | 2078.607   | 0.03629485  | 0.07173068 | 0.60718196 | 0.79658855 | EIF3K     |
| 114932 | ENSG00000178988 | 1465.90644 | -0.34644477 | 0.07977445 | 8.61E-06   | 8.28E-05   | MRFAP1L1  |
| 112574 | ENSG00000178996 | 315.368381 | -0.25398243 | 0.14160814 | 0.05277947 | 0.15510956 | SNX18     |
| 161829 | ENSG00000178997 | 2.35970785 | -0.015353   | 0.37955794 | 0.82841235 | NA         | EXD1      |
| 9212   | ENSG00000178999 | 1062.47032 | 0.19504698  | 0.08576775 | 0.01950908 | 0.07147926 | AURKB     |
| 80834  | ENSG00000179002 | 0          | NA          | NA         | NA         | NA         | TAS1R2    |
| 317761 | ENSG00000179008 | 37.251711  | -0.17361667 | 0.32207078 | 0.38267328 | 0.61198112 | C14orf39  |
| 93621  | ENSG00000179010 | 5287.97478 | -0.14548128 | 0.05495673 | 0.00743109 | 0.03248133 | MRFAP1    |
| 285237 | ENSG00000179021 | 301.966148 | 0.01501105  | 0.13120161 | 0.90403942 | 0.95807607 | C3orf38   |
| 127707 | ENSG00000179023 | 0.74951642 | -0.04342943 | 0.38756505 | 0.34479115 | NA         | KLHDC7A   |
| 84314  | ENSG00000179029 | 167.976762 | 0.14162906  | 0.17315358 | 0.36049997 | 0.5904664  | TMEM107   |
| NA     | ENSG00000179031 | 0.50207596 | 0.02562368  | 0.38565771 | 0.52549886 | NA         | NSA2P3    |
| NA     | ENSG00000179038 | 0.51331499 | 0.01065258  | 0.38327774 | 0.77572498 | NA         |           |
| 23212  | ENSG00000179041 | 798.013271 | -0.04973847 | 0.10154533 | 0.61005244 | 0.79837997 | RRS1      |
| 283849 | ENSG00000179044 | 13.074799  | -0.30330918 | 0.46177226 | 0.12202431 | 0.28884077 | EXOC3L1   |
| 205860 | ENSG00000179046 | 0          | NA          | NA         | NA         | NA         | TRIML2    |
| 55920  | ENSG00000179051 | 7879.45498 | -0.13436141 | 0.05221272 | 0.00933564 | 0.0392081  | RCC2      |
| 286365 | ENSG00000179055 | 0          | NA          | NA         | NA         | NA         | OR13D1    |
| 283284 | ENSG00000179057 | 13.9376939 | 0.02319388  | 0.35867137 | 0.85985286 | 0.93754016 | IGSF22    |
| 375759 | ENSG00000179058 | 11.2339888 | 0.23797935  | 0.42017416 | 0.18948251 | 0.39045835 | C9orf50   |
| 132625 | ENSG00000179059 | 0          | NA          | NA         | NA         | NA         | ZFP42     |
| NA     | ENSG00000179066 | 2.34946023 | 0.12116545  | 0.40584433 | 0.1273233  | NA         |           |
| 220388 | ENSG00000179071 | 14.4512556 | -0.31428922 | 0.43420106 | 0.13900572 | 0.31576294 | CCDC89    |
| 9288   | ENSG00000179073 | 0          | NA          | NA         | NA         | NA         | TAAR3P    |
| NA     | ENSG00000179082 | 2.70042498 | 0.06189462  | 0.37958819 | 0.51518812 | 0.72962613 | C9orf106  |
| 286499 | ENSG00000179083 | 1.27253463 | 0.00909548  | 0.38021527 | 0.8813383  | NA         | FAM133A   |
| 54344  | ENSG00000179085 | 435.743132 | 0.11815744  | 0.11244445 | 0.27179039 | 0.49516265 | DPM3      |
| 374470 | ENSG00000179088 | 0          | NA          | NA         | NA         | NA         | C12orf42  |
| 1537   | ENSG00000179091 | 1769.73695 | 0.07003656  | 0.07593157 | 0.34722372 | 0.57794986 | CYC1      |



|           |                 |            |             |            |            |            |            |
|-----------|-----------------|------------|-------------|------------|------------|------------|------------|
| 5187      | ENSG00000179094 | 564.422331 | 0.22155136  | 0.16870503 | 0.14316518 | 0.32228142 | PER1       |
| 3355      | ENSG00000179097 | 0          | NA          | NA         | NA         | NA         | HTR1F      |
| NA        | ENSG00000179101 | 0.15069912 | -0.01848503 | 0.38480575 | 0.84537521 | NA         | H3P47      |
| 160335    | ENSG00000179104 | 1281.59639 | 0.01526997  | 0.07401726 | 0.83412506 | 0.92432089 | TMTC2      |
| 84667     | ENSG00000179111 | 56.4329878 | 2.05893123  | 0.36261721 | 8.22E-10   | 1.43E-08   | HES7       |
| 2193      | ENSG00000179115 | 3345.21397 | 0.06690827  | 0.07376539 | 0.35576255 | 0.58599659 | FARSA      |
| 144108    | ENSG00000179119 | 656.23932  | 0.22431801  | 0.10009713 | 0.02000195 | 0.07294827 | SPTY2D1    |
| NA        | ENSG00000179131 | 0.6511535  | 0.00367376  | 0.38250135 | 0.93040605 | NA         |            |
| 256815    | ENSG00000179133 | 1.5351185  | 0.04633005  | 0.38477194 | 0.41931537 | NA         | C10orf67   |
| 55095     | ENSG00000179134 | 2208.11035 | 0.06768027  | 0.07604445 | 0.36434047 | 0.59405941 | SAMD4B     |
| 284034    | ENSG00000179136 | 0          | NA          | NA         | NA         | NA         | LINC00670  |
| NA        | ENSG00000179141 | 0.53290632 | 0.01988167  | 0.38349612 | 0.67961517 | NA         | MTUS2-AS1  |
| 1585      | ENSG00000179142 | 0          | NA          | NA         | NA         | NA         | CYP11B2    |
| 168537    | ENSG00000179144 | 0          | NA          | NA         | NA         | NA         | GIMAP7     |
| 59344     | ENSG00000179148 | 11.254009  | -0.2813108  | 0.45112703 | 0.13650941 | 0.31158286 | ALOXE3     |
| 80153     | ENSG00000179151 | 1410.2616  | 0.04560574  | 0.08091417 | 0.56302375 | 0.76597094 | EDC3       |
| 285343    | ENSG00000179152 | 583.456601 | 0.03166483  | 0.11523643 | 0.77405505 | 0.89604057 | TCAIM      |
| NA        | ENSG00000179157 | 0          | NA          | NA         | NA         | NA         | RPS2P28    |
| 2517      | ENSG00000179163 | 196.522354 | 0.28486217  | 0.16846175 | 0.05994198 | 0.17111821 | FUCA1      |
| 222659    | ENSG00000179165 | 0.36242552 | 0.00096442  | 0.38336476 | 0.96669627 | NA         | PXT1       |
| 199720    | ENSG00000179168 | 28.2343118 | 0.06050883  | 0.30467315 | 0.74937042 | 0.88205755 | GGN        |
| NA        | ENSG00000179170 | 0          | NA          | NA         | NA         | NA         | OR7E97P    |
| 343069    | ENSG00000179172 | 0          | NA          | NA         | NA         | NA         | HNRNPCL1   |
| 128218    | ENSG00000179178 | 0          | NA          | NA         | NA         | NA         | TMEM125    |
| 144348    | ENSG00000179195 | 5997.23696 | -0.15267676 | 0.05162702 | 0.00285498 | 0.01452751 | ZNF664     |
| 284369    | ENSG00000179213 | 0          | NA          | NA         | NA         | NA         | SIGLECL1   |
| 811       | ENSG00000179218 | 12294.0813 | 0.46733936  | 0.08772421 | 4.44E-08   | 6.14E-07   | CALR       |
| NA        | ENSG00000179219 | 1.12402921 | 0.01595474  | 0.38002808 | 0.80244378 | NA         | LINC00311  |
| 9500      | ENSG00000179222 | 7550.86403 | -0.08741783 | 0.07065281 | 0.20763481 | 0.41489321 | MAGED1     |
| 100506127 | ENSG00000179240 | 726.416163 | 0.15913266  | 0.11034485 | 0.13155471 | 0.30427203 | GVQW3      |
| 143458    | ENSG00000179241 | 1526.45758 | -1.36549354 | 0.08560313 | 2.42E-58   | 3.02E-56   | LDLRAD3    |
| 1002      | ENSG00000179242 | 9.55487673 | -0.19943457 | 0.40467819 | 0.2316801  | 0.44822361 | CDH4       |
| 100128310 | ENSG00000179253 | 0          | NA          | NA         | NA         | NA         |            |
| 440087    | ENSG00000179256 | 1.63855702 | -0.03819293 | 0.38062094 | 0.59839428 | NA         | SMCO3      |
| 5886      | ENSG00000179262 | 1894.56579 | 0.15274661  | 0.07637416 | 0.04110732 | 0.12809316 | RAD23A     |
| 388939    | ENSG00000179270 | 2.89148372 | -0.079196   | 0.38455459 | 0.39900513 | 0.62780637 | PCARE      |
| 90480     | ENSG00000179271 | 1403.45061 | 0.13590058  | 0.07207769 | 0.05486614 | 0.15989192 | GADD45GIP1 |
| NA        | ENSG00000179277 | 68.345089  | 0.59025778  | 0.37456741 | 0.02292811 | 0.08127455 | MEIS3P1    |

|           |                 |            |             |            |            |            |             |
|-----------|-----------------|------------|-------------|------------|------------|------------|-------------|
| 199699    | ENSG00000179284 | 473.324187 | -0.65797757 | 0.12596832 | 4.38E-08   | 6.06E-07   | DAND5       |
| 256472    | ENSG00000179292 | 265.050419 | -1.75638498 | 0.16423192 | 8.45E-28   | 4.48E-26   | TMEM151A    |
| 5781      | ENSG00000179295 | 3835.19586 | -0.26856873 | 0.0753589  | 0.00026815 | 0.00184983 | PTPN11      |
| 79730     | ENSG00000179299 | 162.373971 | 0.13565824  | 0.20450825 | 0.43494322 | 0.66028567 | NSUN7       |
| 203430    | ENSG00000179300 | 0          | NA          | NA         | NA         | NA         | RTL3        |
| 727866    | ENSG00000179304 | 340.5227   | -0.18055851 | 0.18084205 | 0.25692251 | 0.47795055 | FAM156B     |
| 23302     | ENSG00000179314 | 2.90451731 | -0.03512095 | 0.37367039 | 0.71732891 | 0.86394741 | WSCD1       |
| 54734     | ENSG00000179331 | 495.989912 | -0.99608536 | 0.11393182 | 3.11E-19   | 1.12E-17   | RAB39A      |
| 1198      | ENSG00000179335 | 1394.05994 | 0.23118073  | 0.08348394 | 0.00448237 | 0.0212396  | CLK3        |
| NA        | ENSG00000179342 | 0.66399629 | 0.0038693   | 0.3819207  | 0.93405804 | NA         |             |
| 3119      | ENSG00000179344 | 0          | NA          | NA         | NA         | NA         | HLA-DQB1    |
| 2624      | ENSG00000179348 | 19449.3206 | 0.23476393  | 0.06334832 | 0.00016978 | 0.0012267  | GATA2       |
| 10620     | ENSG00000179361 | 792.023112 | 0.55658972  | 0.09345276 | 8.83E-10   | 1.53E-08   | ARID3B      |
| NA        | ENSG00000179362 | 0.67183493 | 0.0229586   | 0.38322735 | 0.6051825  | NA         | HMGN2P46    |
| 203562    | ENSG00000179363 | 3.35785905 | 0.12451246  | 0.39617323 | 0.2651833  | 0.48737717 | TMEM31      |
| 23241     | ENSG00000179364 | 2191.65402 | 0.21935349  | 0.0635224  | 0.00045714 | 0.0029864  | PACS2       |
| NA        | ENSG00000179381 | 0          | NA          | NA         | NA         | NA         | OR4K11P     |
| 255520    | ENSG00000179387 | 1424.34005 | -0.36922683 | 0.08017991 | 2.38E-06   | 2.53E-05   | ELMOD2      |
| 1960      | ENSG00000179388 | 12.4128668 | 2.16250147  | 0.8722672  | 0.00053464 | 0.00341837 | EGR3        |
| 257044    | ENSG00000179397 | 7.69749471 | 0.20514492  | 0.42672746 | 0.15761862 | 0.34451398 | CATSPERE    |
| 2262      | ENSG00000179399 | 21.501492  | -0.01632313 | 0.32123629 | 0.92425248 | 0.96852    | GPC5        |
| 64856     | ENSG00000179403 | 177.651169 | -0.26563356 | 0.18976407 | 0.10749002 | 0.26289472 | VWA1        |
| 285908    | ENSG00000179406 | 523.825486 | -0.1711253  | 0.10704599 | 0.09501007 | 0.23991343 | LINC00174   |
| 165721    | ENSG00000179407 | 4.87236174 | 0.00617433  | 0.35949169 | 0.96346684 | 0.98545957 | DNAJB8      |
| 50628     | ENSG00000179409 | 909.030725 | -0.27932431 | 0.10159203 | 0.0042341  | 0.02025179 | GEMIN4      |
| 101060301 | ENSG00000179412 | 0          | NA          | NA         | NA         | NA         | HNRNPCL4    |
| NA        | ENSG00000179420 | 0.18922458 | 0.01954053  | 0.38488496 | 0.78225479 | NA         | OR6W1P      |
| 541472    | ENSG00000179428 | 0          | NA          | NA         | NA         | NA         | IL6-AS1     |
| 24147     | ENSG00000179431 | 798.647224 | -1.62689418 | 0.12112825 | 3.02E-42   | 2.41E-40   | FJX1        |
| NA        | ENSG00000179443 | 0          | NA          | NA         | NA         | NA         | OR13C6P     |
| 100130264 | ENSG00000179447 | 0          | NA          | NA         | NA         | NA         | SLC24A3-AS1 |
| 100287948 | ENSG00000179452 | 0          | NA          | NA         | NA         | NA         | LINC01699   |
| 54813     | ENSG00000179454 | 297.54259  | 0.08740362  | 0.15189045 | 0.53330772 | 0.74452219 | KLHL28      |
| 7681      | ENSG00000179455 | 250.055144 | 0.41219287  | 0.15845071 | 0.00443623 | 0.02105615 | MKRN3       |
| 10472     | ENSG00000179456 | 1433.13736 | 1.02984975  | 0.07977821 | 5.56E-39   | 4.19E-37   | ZBTB18      |
| NA        | ENSG00000179460 | 0          | NA          | NA         | NA         | NA         | EEF1A1P27   |
| 135924    | ENSG00000179468 | 0          | NA          | NA         | NA         | NA         | OR9A2       |
| 122525    | ENSG00000179476 | 17.7043895 | -0.10880737 | 0.32490075 | 0.55963034 | 0.76413192 | C14orf28    |

|           |                 |            |             |            |            |            |           |
|-----------|-----------------|------------|-------------|------------|------------|------------|-----------|
| 242       | ENSG00000179477 | 14.6827427 | -0.24104684 | 0.41117629 | 0.19604523 | 0.39974691 | ALOX12B   |
| 246213    | ENSG00000179520 | 0          | NA          | NA         | NA         | NA         | SLC17A8   |
| 645212    | ENSG00000179523 | 180.533377 | 0.20517275  | 0.16879917 | 0.17593999 | 0.37020356 | EIF3J-DT  |
| 81858     | ENSG00000179526 | 638.66546  | 0.2202354   | 0.10301036 | 0.02615003 | 0.0902133  | SHARPIN   |
| 85474     | ENSG00000179528 | 72.8635169 | 1.87843063  | 0.37583559 | 3.00E-08   | 4.24E-07   | LBX2      |
| 144132    | ENSG00000179532 | 610.059391 | 0.63758882  | 0.12463206 | 8.49E-08   | 1.13E-06   | DNHD1     |
| 139065    | ENSG00000179542 | 0          | NA          | NA         | NA         | NA         | SLITRK4   |
| 3352      | ENSG00000179546 | 0.54607335 | 0.03261306  | 0.38620451 | 0.45608999 | NA         | HTR1D     |
| 79571     | ENSG00000179562 | 846.802083 | -0.15794458 | 0.10471597 | 0.11611584 | 0.27839903 | GCC1      |
| 132228    | ENSG00000179564 | 0.82952557 | -0.01007874 | 0.38156424 | 0.84666063 | NA         | LSMEM2    |
| NA        | ENSG00000179571 | 0          | NA          | NA         | NA         | NA         | NBPF17P   |
| NA        | ENSG00000179577 | 0          | NA          | NA         | NA         | NA         |           |
| 146310    | ENSG00000179580 | 0.78820934 | -0.02799992 | 0.38348471 | 0.55826532 | NA         | RNF151    |
| 4261      | ENSG00000179583 | 47.2976088 | -0.52064332 | 0.37757367 | 0.03752118 | 0.11968171 | CIITA     |
| 161882    | ENSG00000179588 | 594.123098 | -0.48357852 | 0.13042441 | 8.30E-05   | 0.00064426 | ZFPM1     |
| 247       | ENSG00000179593 | 0          | NA          | NA         | NA         | NA         | ALOX15B   |
| 201164    | ENSG00000179598 | 285.199802 | -0.30273737 | 0.14855502 | 0.0266795  | 0.09159412 | PLD6      |
| 122876    | ENSG00000179600 | 0          | NA          | NA         | NA         | NA         | GPHB5     |
| 2918      | ENSG00000179603 | 287.770769 | -1.97191662 | 0.26492043 | 3.57E-15   | 9.93E-14   | GRM8      |
| 23580     | ENSG00000179604 | 991.078853 | 0.5692286   | 0.09885061 | 2.78E-09   | 4.49E-08   | CDC42EP4  |
| NA        | ENSG00000179611 | 0.69605637 | 0.02462452  | 0.3833564  | 0.58388227 | NA         | DGKZP1    |
| 121129    | ENSG00000179615 | 0          | NA          | NA         | NA         | NA         | OR2AP1    |
| 341418    | ENSG00000179626 | 0          | NA          | NA         | NA         | NA         | OR6C4     |
| 100128927 | ENSG00000179627 | 152.36081  | 0.23353367  | 0.19253967 | 0.16233526 | 0.35102057 | ZBTB42    |
| 144811    | ENSG00000179630 | 69.2353143 | 0.17401127  | 0.27862059 | 0.3848     | 0.61378186 | LACC1     |
| 84232     | ENSG00000179632 | 2065.75267 | 0.08411744  | 0.07808197 | 0.27144303 | 0.49480244 | MAF1      |
| 122664    | ENSG00000179636 | 0          | NA          | NA         | NA         | NA         | TPPP2     |
| 2205      | ENSG00000179639 | 0          | NA          | NA         | NA         | NA         | FCER1A    |
| 388394    | ENSG00000179673 | 0.90361723 | 0.03142195  | 0.38455169 | 0.48209261 | NA         | RPRML     |
| 80117     | ENSG00000179674 | 0          | NA          | NA         | NA         | NA         | ARL14     |
| 221241    | ENSG00000179676 | 0          | NA          | NA         | NA         | NA         | LINC00305 |
| 341416    | ENSG00000179695 | 0          | NA          | NA         | NA         | NA         | OR6C2     |
| 340390    | ENSG00000179698 | 49.4527267 | 0.28287897  | 0.30957721 | 0.18610884 | 0.38570975 | WDR97     |
| 126205    | ENSG00000179709 | 0          | NA          | NA         | NA         | NA         | NLRP8     |
| 91523     | ENSG00000179715 | 0          | NA          | NA         | NA         | NA         | PCED1B    |
| 729614    | ENSG00000179743 | 195.686389 | 0.12449152  | 0.16150106 | 0.39646172 | 0.62574149 |           |
| 9582      | ENSG00000179750 | 0          | NA          | NA         | NA         | NA         | APOBEC3B  |
| 342898    | ENSG00000179751 | 0          | NA          | NA         | NA         | NA         | SYCN      |

|        |                 |            |             |            |            |            |            |
|--------|-----------------|------------|-------------|------------|------------|------------|------------|
| NA     | ENSG00000179755 | 0          | NA          | NA         | NA         | NA         |            |
| 51268  | ENSG00000179761 | 58.244991  | 0.17757284  | 0.27623858 | 0.37639541 | 0.6053339  | PIPOX      |
| 158381 | ENSG00000179766 | 0.34034124 | 0.00295036  | 0.38339048 | 0.96028375 | NA         | ATP8B5P    |
| 2307   | ENSG00000179772 | 0          | NA          | NA         | NA         | NA         | FOXS1      |
| 220202 | ENSG00000179774 | 5.74044398 | 0.1420166   | 0.39389395 | 0.29023627 | 0.51620656 | ATOH7      |
| 1003   | ENSG00000179776 | 0.18922458 | 0.01954053  | 0.38488496 | 0.78225479 | NA         | CDH5       |
| 116135 | ENSG00000179796 | 1.88087679 | 0.13537473  | 0.41739912 | 0.03033852 | NA         | LRRC3B     |
| NA     | ENSG00000179799 | 0.16735865 | 0.01897177  | 0.38482933 | 0.78225479 | NA         | OR7E22P    |
| 144809 | ENSG00000179813 | 0          | NA          | NA         | NA         | NA         | FAM216B    |
| 117196 | ENSG00000179817 | 0          | NA          | NA         | NA         | NA         | MRGPRX4    |
| 400960 | ENSG00000179818 | 449.892744 | 0.14393821  | 0.12953145 | 0.23749604 | 0.45473088 | PCBP1-AS1  |
| 91663  | ENSG00000179820 | 932.859474 | 0.07107029  | 0.09475616 | 0.43933117 | 0.66465842 | MYADM      |
| 117195 | ENSG00000179826 | 0          | NA          | NA         | NA         | NA         | MRGPRX3    |
| 727957 | ENSG00000179832 | 590.214703 | -0.01613226 | 0.09918332 | 0.86509302 | 0.94028794 | MROH1      |
| 9792   | ENSG00000179833 | 545.513217 | 0.41252415  | 0.1684047  | 0.00662216 | 0.02950451 | SERTAD2    |
| 644997 | ENSG00000179840 | 0          | NA          | NA         | NA         | NA         | PIK3CD-AS1 |
| 9495   | ENSG00000179841 | 114.952985 | -0.52963338 | 0.23556933 | 0.00738621 | 0.0323208  | AKAP5      |
| 284353 | ENSG00000179846 | 21.7445841 | -1.19596755 | 0.56437732 | 0.00220057 | 0.01162386 | NKPD1      |
| 126326 | ENSG00000179855 | 15.4075157 | 0.11611457  | 0.34369753 | 0.51440759 | 0.72931984 | GIPC3      |
| 284023 | ENSG00000179859 | 124.764377 | 0.03822938  | 0.22052117 | 0.83360608 | 0.92422788 | RNF227     |
| 163732 | ENSG00000179862 | 31.6353214 | 0.28784165  | 0.34299984 | 0.18688979 | 0.38676207 | CITED4     |
| 154664 | ENSG00000179869 | 0          | NA          | NA         | NA         | NA         | ABCA13     |
| 204801 | ENSG00000179873 | 0          | NA          | NA         | NA         | NA         | NLRP11     |
| 84948  | ENSG00000179886 | 526.2292   | -0.09827178 | 0.10301758 | 0.32081648 | 0.54867706 | TIGD5      |
| 23042  | ENSG00000179889 | 1409.48356 | -0.29102525 | 0.09143997 | 0.00101086 | 0.00596003 | PDXDC1     |
| NA     | ENSG00000179899 | 491.841297 | 0.06423514  | 0.12060421 | 0.57559259 | 0.77444446 | PHC1P1     |
| 127003 | ENSG00000179902 | 0.64103849 | 0.00333272  | 0.38196039 | 0.94259469 | NA         | C1orf194   |
| 7710   | ENSG00000179909 | 18.3044164 | -0.24276811 | 0.37571657 | 0.23281334 | 0.4497582  | ZNF154     |
| 22864  | ENSG00000179912 | 1639.14087 | 0.16962576  | 0.21677145 | 0.34797722 | 0.57864958 | R3HDM2     |
| 10331  | ENSG00000179913 | 3.93265368 | -0.09593285 | 0.3845475  | 0.38116576 | 0.61011123 | B3GNT3     |
| 55600  | ENSG00000179914 | 0          | NA          | NA         | NA         | NA         | ITLN1      |
| 9378   | ENSG00000179915 | 335.179935 | -2.53722638 | 0.23209789 | 2.79E-29   | 1.57E-27   | NRXN1      |
| 22928  | ENSG00000179918 | 704.169253 | -0.34180547 | 0.09710692 | 0.0002642  | 0.00182871 | SEPHS2     |
| 121364 | ENSG00000179919 | 0          | NA          | NA         | NA         | NA         | OR10A7     |
| 151306 | ENSG00000179921 | 9.8742744  | -0.1470023  | 0.37447196 | 0.36673989 | 0.59606123 | GPBAR1     |
| 147808 | ENSG00000179922 | 183.103075 | 0.0680656   | 0.15923041 | 0.63965902 | 0.81929212 | ZNF784     |
| 127665 | ENSG00000179930 | 11.9308662 | 0.04457722  | 0.33529941 | 0.79184917 | 0.90499209 | ZNF648     |
| 55017  | ENSG00000179933 | 420.218065 | 0.02408445  | 0.11985336 | 0.83332744 | 0.92415967 | C14orf119  |

|        |                 |            |             |            |            |            |            |
|--------|-----------------|------------|-------------|------------|------------|------------|------------|
| 1237   | ENSG00000179934 | 0          | NA          | NA         | NA         | NA         | CCR8       |
| NA     | ENSG00000179935 | 3.38017786 | -0.05173074 | 0.3728049  | 0.63499887 | 0.81627431 | LINC00652  |
| 653073 | ENSG00000179938 | 2.43438211 | 0.12857222  | 0.41291282 | 0.05511344 | NA         | GOLGA8J    |
| 79738  | ENSG00000179941 | 558.932668 | 0.00644261  | 0.11049964 | 0.95276591 | 0.98058207 | BBS10      |
| 84922  | ENSG00000179943 | 585.51575  | 0.0652645   | 0.11743929 | 0.55994272 | 0.76415299 | FIZ1       |
| 22827  | ENSG00000179950 | 2590.73393 | 0.11191533  | 0.06388052 | 0.07556958 | 0.20252608 | PUF60      |
| 284297 | ENSG00000179954 | 25.3155096 | 0.10250823  | 0.31093769 | 0.59454709 | 0.78775306 | SSC5D      |
| 79077  | ENSG00000179958 | 763.843985 | -0.44007011 | 0.09390789 | 1.30E-06   | 1.45E-05   | DCTPP1     |
| 51333  | ENSG00000179965 | 216.796361 | -0.0714475  | 0.15896812 | 0.62056133 | 0.80638832 | ZNF771     |
| NA     | ENSG00000179967 | 1.15669714 | 0.01660958  | 0.37989121 | 0.7970795  | NA         | PPP1R14BP3 |
| NA     | ENSG00000179978 | 651.283275 | 0.45418347  | 0.11462153 | 3.33E-05   | 0.00028437 | NAIPP2     |
| 10194  | ENSG00000179981 | 571.580633 | 0.28736203  | 0.10504279 | 0.00434735 | 0.02072355 | TSHZ1      |
| 118672 | ENSG00000179988 | 88.3200295 | 0.07210176  | 0.21894215 | 0.69045471 | 0.85000133 | PSTK       |
| 441251 | ENSG00000179994 | 0.173733   | 0.01914545  | 0.38484597 | 0.78225479 | NA         | SPDYE7P    |
| NA     | ENSG00000179997 | 0          | NA          | NA         | NA         | NA         | RPA3P1     |
| 122809 | ENSG00000180008 | 1220.58791 | -0.13627833 | 0.1026029  | 0.16709532 | 0.35804851 | SOCS4      |
| 284273 | ENSG00000180011 | 763.34358  | 0.08297409  | 0.13214732 | 0.50330423 | 0.72006071 | ZADH2      |
| NA     | ENSG00000180015 | 23.6220553 | -0.19890674 | 0.34196536 | 0.32110317 | 0.54886593 |            |
| 8387   | ENSG00000180016 | 0          | NA          | NA         | NA         | NA         | OR1E1      |
| NA     | ENSG00000180019 | 0.34624801 | -0.02356563 | 0.38536324 | 0.65270996 | NA         |            |
| 197407 | ENSG00000180035 | 1078.71749 | 0.25976032  | 0.09523052 | 0.00477681 | 0.02234661 | ZNF48      |
| NA     | ENSG00000180042 | 0          | NA          | NA         | NA         | NA         | OR1R1P     |
| 284418 | ENSG00000180043 | 0          | NA          | NA         | NA         | NA         | FAM71E2    |
| 401097 | ENSG00000180044 | 8.00148977 | -0.22481678 | 0.4337138  | 0.15692102 | 0.34373985 | C3orf80    |
| 137814 | ENSG00000180053 | 0          | NA          | NA         | NA         | NA         | NKX2-6     |
| 284417 | ENSG00000180061 | 0.33471731 | 0.02354391  | 0.38534154 | 0.62842204 | NA         | TMEM150B   |
| NA     | ENSG00000180066 | 0.14931947 | -0.01844332 | 0.38480212 | 0.84537521 | NA         | LINC02870  |
| NA     | ENSG00000180068 | 0          | NA          | NA         | NA         | NA         | OR3A4P     |
| 253650 | ENSG00000180071 | 284.590223 | -0.74640904 | 0.17264058 | 2.94E-06   | 3.08E-05   | ANKRD18A   |
| 259239 | ENSG00000180083 | 0          | NA          | NA         | NA         | NA         | WFDC11     |
| 255043 | ENSG00000180089 | 68.9736613 | 0.09992781  | 0.23528227 | 0.59462239 | 0.78780021 | TMEM86B    |
| 4994   | ENSG00000180090 | 0          | NA          | NA         | NA         | NA         | OR3A1      |
| 1731   | ENSG00000180096 | 42.8669524 | -0.0586965  | 0.26715798 | 0.75960455 | 0.88850157 | SEPTIN1    |
| 54952  | ENSG00000180098 | 318.635882 | 0.07278233  | 0.15711603 | 0.61263538 | 0.80056246 | TRNAU1AP   |
| 11336  | ENSG00000180104 | 985.074731 | -0.00409414 | 0.08136009 | 0.95817692 | 0.98274556 | EXOC3      |
| NA     | ENSG00000180105 | 0          | NA          | NA         | NA         | NA         | ACER2P1    |
| 221400 | ENSG00000180113 | 0.34746601 | 0.02370763  | 0.3853651  | 0.61987128 | NA         | TDRD6      |
| 283461 | ENSG00000180116 | 1.40567573 | -0.04465103 | 0.38346077 | 0.48196492 | NA         | C12orf40   |

|        |                 |            |             |            |            |            |           |
|--------|-----------------|------------|-------------|------------|------------|------------|-----------|
| 122011 | ENSG00000180138 | 0          | NA          | NA         | NA         | NA         | CSNK1A1L  |
| NA     | ENSG00000180139 | 3.3182044  | -0.01220471 | 0.37152256 | 0.8969254  | 0.95487211 | ACTA2-AS1 |
| NA     | ENSG00000180150 | 0          | NA          | NA         | NA         | NA         | HMG2P9    |
| NA     | ENSG00000180152 | 0          | NA          | NA         | NA         | NA         | XIAPP3    |
| 66004  | ENSG00000180155 | 98.9214791 | 0.81732916  | 0.40423669 | 0.00482549 | 0.02254772 | LYNX1     |
| NA     | ENSG00000180172 | 0          | NA          | NA         | NA         | NA         | RPS12P23  |
| 7054   | ENSG00000180176 | 3.3145817  | -0.09817112 | 0.38473276 | 0.37592694 | 0.60500552 | TH        |
| NA     | ENSG00000180178 | 0          | NA          | NA         | NA         | NA         | FAR2P1    |
| 9282   | ENSG00000180182 | 1567.43842 | 0.12942215  | 0.1001616  | 0.18065114 | 0.37770382 | MED14     |
| 81889  | ENSG00000180185 | 472.846964 | 0.01321433  | 0.1305284  | 0.91532986 | 0.96406776 | FAHD1     |
| NA     | ENSG00000180189 | 3.3529607  | -0.00565818 | 0.36674214 | 0.9577635  | 0.98264776 | HMGB1P14  |
| 157695 | ENSG00000180190 | 359.833354 | -0.01460011 | 0.12602701 | 0.89722466 | 0.95488961 | TDRP      |
| 1104   | ENSG00000180198 | 1655.01184 | -0.07401262 | 0.07090484 | 0.28755781 | 0.51323739 | RCC1      |
| 259240 | ENSG00000180205 | 0          | NA          | NA         | NA         | NA         | WFDC9     |
| 29895  | ENSG00000180209 | 1.12172923 | -0.06172621 | 0.39092167 | 0.19353557 | NA         | MYLPF     |
| 2147   | ENSG00000180210 | 0.51122455 | 0.00365648  | 0.38254769 | 0.88431555 | NA         | F2        |
| NA     | ENSG00000180211 | 0.34624801 | -0.02356563 | 0.38536324 | 0.65270996 | NA         |           |
| 196472 | ENSG00000180219 | 0.173124   | -0.01911262 | 0.38486262 | 0.84537521 | NA         | FAM71C    |
| NA     | ENSG00000180221 | 0.3415213  | 0.00281377  | 0.38338784 | 0.96082379 | NA         | TPT1P10   |
| 8575   | ENSG00000180228 | 1220.16625 | 0.40592436  | 0.08610775 | 1.26E-06   | 1.41E-05   | PRKRA     |
| 283755 | ENSG00000180229 | 1547.21601 | 0.2993656   | 0.08551793 | 0.00032055 | 0.0021709  | HERC2P3   |
| NA     | ENSG00000180230 | 0          | NA          | NA         | NA         | NA         | NACAP2    |
| 223082 | ENSG00000180233 | 372.934192 | -0.0701957  | 0.12663967 | 0.55783199 | 0.76280883 | ZNRF2     |
| 10692  | ENSG00000180245 | 4.4787083  | 0.19286042  | 0.43480143 | 0.11162823 | 0.2700997  | RRH       |
| 389015 | ENSG00000180251 | 0.32398763 | -0.02327431 | 0.38532154 | 0.6685144  | NA         | SLC9A4    |
| 125893 | ENSG00000180257 | 151.809504 | -0.06457057 | 0.19771618 | 0.70193493 | 0.85663955 | ZNF816    |
| 149830 | ENSG00000180259 | 0          | NA          | NA         | NA         | NA         | PRNT      |
| 55785  | ENSG00000180263 | 488.475947 | 0.12707776  | 0.11770892 | 0.2565701  | 0.47765326 | FGD6      |
| 347088 | ENSG00000180264 | 8.74215519 | -0.06860179 | 0.35309262 | 0.65174572 | 0.82602754 | ADGRD2    |
| 124274 | ENSG00000180269 | 0.47363805 | -0.0284531  | 0.38580958 | 0.54270361 | NA         | GPR139    |
| 284365 | ENSG00000180279 | 0.94190373 | -0.00195309 | 0.38007536 | 0.97438512 | NA         | LINC01869 |
| NA     | ENSG00000180284 | 0          | NA          | NA         | NA         | NA         | CNEP1R1P1 |
| 200150 | ENSG00000180287 | 1075.5625  | -0.33213768 | 0.09209488 | 0.0001954  | 0.00139298 | PLD5      |
| 4947   | ENSG00000180304 | 2343.38975 | 0.19104498  | 0.07763182 | 0.01189634 | 0.04789434 | OAZ2      |
| 140832 | ENSG00000180305 | 0          | NA          | NA         | NA         | NA         | WFDC10A   |
| 285848 | ENSG00000180316 | 2.68070602 | 0.0797623   | 0.38451956 | 0.39832451 | 0.62727695 | PNPLA1    |
| 8092   | ENSG00000180318 | 49.2713853 | 0.5102025   | 0.33546522 | 0.03372254 | 0.11011441 | ALX1      |
| 124808 | ENSG00000180329 | 560.884881 | -0.06210764 | 0.10486403 | 0.53740104 | 0.74759591 | CCDC43    |

|           |                 |            |             |            |            |            |           |
|-----------|-----------------|------------|-------------|------------|------------|------------|-----------|
| 386618    | ENSG00000180332 | 0          | NA          | NA         | NA         | NA         | KCTD4     |
| 284071    | ENSG00000180336 | 194.177523 | 0.07150606  | 0.21614629 | 0.69053611 | 0.85004879 | MEIOC     |
| 2535      | ENSG00000180340 | 653.182278 | 0.91352665  | 0.10239316 | 7.30E-20   | 2.70E-18   | FZD2      |
| 166815    | ENSG00000180346 | 176.648586 | 0.16733352  | 0.17076077 | 0.27408087 | 0.49773588 | TIGD2     |
| 223075    | ENSG00000180347 | 0          | NA          | NA         | NA         | NA         | ITPRID1   |
| 3059      | ENSG00000180353 | 1.37636305 | -0.02475218 | 0.38030679 | 0.70427314 | NA         | HCLS1     |
| 222166    | ENSG00000180354 | 1194.05878 | -0.27078503 | 0.09181963 | 0.00232006 | 0.01216116 | MTURN     |
| 23060     | ENSG00000180357 | 2949.30181 | -0.14651361 | 0.05871738 | 0.01150023 | 0.04653421 | ZNF609    |
| 5062      | ENSG00000180370 | 2425.34129 | -0.10549187 | 0.0801524  | 0.17799386 | 0.37341632 | PAK2      |
| 285331    | ENSG00000180376 | 397.645146 | -0.1399905  | 0.17746565 | 0.37212355 | 0.60109044 | CCDC66    |
| 245937    | ENSG00000180383 | 0          | NA          | NA         | NA         | NA         | DEFB124   |
| NA        | ENSG00000180385 | 140.436615 | -0.1733669  | 0.20572159 | 0.31823033 | 0.54576013 | EMC3-AS1  |
| 100505724 | ENSG00000180386 | 0          | NA          | NA         | NA         | NA         | KRTAP9-7  |
| NA        | ENSG00000180389 | 0          | NA          | NA         | NA         | NA         | ATP5F1EP2 |
| 90411     | ENSG00000180398 | 2464.93948 | -0.17520711 | 0.06759784 | 0.0083726  | 0.03587741 | MCFD2     |
| NA        | ENSG00000180409 | 0          | NA          | NA         | NA         | NA         | OR10AA1P  |
| 283860    | ENSG00000180422 | 24.9669085 | 0.93061251  | 0.61981879 | 0.00948103 | 0.0397262  | LINC00304 |
| 283254    | ENSG00000180423 | 65.040768  | 0.05306474  | 0.2478162  | 0.78054972 | 0.89965693 | HARBI1    |
| 245936    | ENSG00000180424 | 0          | NA          | NA         | NA         | NA         | DEFB123   |
| 54494     | ENSG00000180425 | 127.895747 | 0.04371315  | 0.19435932 | 0.79580906 | 0.90615541 | C11orf71  |
| 1582      | ENSG00000180432 | 0.92826579 | 0.0036884   | 0.38036159 | 0.94948299 | NA         | CYP8B1    |
| 128371    | ENSG00000180433 | 0          | NA          | NA         | NA         | NA         | OR6K6     |
| NA        | ENSG00000180437 | 0          | NA          | NA         | NA         | NA         | OR6K4P    |
| 348825    | ENSG00000180438 | 0.173733   | 0.01914545  | 0.38484597 | 0.78225479 | NA         | TPRXL     |
| 400120    | ENSG00000180440 | 66.2521795 | 1.12672742  | 0.3119105  | 2.96E-05   | 0.00025541 | SERTM1    |
| 2619      | ENSG00000180447 | 122.109095 | 0.83564818  | 0.2383453  | 7.04E-05   | 0.00055875 | GAS1      |
| 23526     | ENSG00000180448 | 115.609763 | -0.15042103 | 0.21839219 | 0.40396894 | 0.63202774 | ARHGAP45  |
| NA        | ENSG00000180458 | 25.252641  | 0.02910502  | 0.2940009  | 0.88023668 | 0.94691188 |           |
| 219960    | ENSG00000180475 | 0          | NA          | NA         | NA         | NA         | OR10Q1    |
| 51276     | ENSG00000180479 | 97.9194221 | 0.05506128  | 0.2127816  | 0.75730767 | 0.88697677 | ZNF571    |
| 144321    | ENSG00000180481 | 1.22161593 | 0.08649353  | 0.3971884  | 0.10725541 | NA         | GLIPR1L2  |
| 245932    | ENSG00000180483 | 0          | NA          | NA         | NA         | NA         | DEFB119   |
| 374986    | ENSG00000180488 | 502.065946 | -0.02532836 | 0.10953615 | 0.80839639 | 0.91317199 | MIGA1     |
| 3753      | ENSG00000180509 | 0.47260901 | -0.01593465 | 0.38332663 | 0.76502704 | NA         | KCNE1     |
| NA        | ENSG00000180525 | 1.38665865 | -0.02485663 | 0.37808655 | 0.743302   | NA         | DIP2C-AS1 |
| 8204      | ENSG00000180530 | 0.16735865 | 0.01897177  | 0.38482933 | 0.78225479 | NA         | NRIP1     |
| 201516    | ENSG00000180532 | 0          | NA          | NA         | NA         | NA         | ZSCAN4    |
| 168620    | ENSG00000180535 | 50.5888911 | 0.05669178  | 0.25493304 | 0.76878913 | 0.8934905  | BHLHA15   |

|        |                 |            |             |            |            |            |           |
|--------|-----------------|------------|-------------|------------|------------|------------|-----------|
| 221687 | ENSG00000180537 | 420.980636 | 0.2523717   | 0.14995958 | 0.0670066  | 0.18562007 | RNF182    |
| NA     | ENSG00000180539 | 10.2417841 | -0.09672766 | 0.37461972 | 0.4495663  | 0.67315229 | C9orf139  |
| 85453  | ENSG00000180543 | 2088.63914 | -0.31366649 | 0.06985195 | 4.73E-06   | 4.79E-05   | TSPYL5    |
| 2529   | ENSG00000180549 | 1.33189532 | 0.00355429  | 0.37788968 | 0.96130846 | NA         | FUT7      |
| 8334   | ENSG00000180573 | 104.280308 | -1.23978232 | 0.2538739  | 9.88E-08   | 1.30E-06   | H2AC6     |
| 255308 | ENSG00000180574 | 6.31684192 | -0.01986001 | 0.35592302 | 0.88255498 | 0.94827461 | EIF2S3B   |
| NA     | ENSG00000180581 | 0          | NA          | NA         | NA         | NA         | SRP9P1    |
| 387640 | ENSG00000180592 | 465.518325 | 0.35593015  | 0.11851671 | 0.0015583  | 0.00867227 | SKIDA1    |
| 8347   | ENSG00000180596 | 8.36139519 | -0.47752063 | 0.76233643 | 0.03071123 | 0.10216479 | H2BC4     |
| NA     | ENSG00000180610 | 1.17723217 | 0.01418799  | 0.3797094  | 0.82630723 | NA         | ZBTB12BP  |
| 151963 | ENSG00000180611 | 49.8297485 | 0.18024391  | 0.27228123 | 0.36767759 | 0.59703579 | MB21D2    |
| 170825 | ENSG00000180613 | 1.11954738 | -0.05801677 | 0.39009015 | 0.21465513 | NA         | GSX2      |
| 6752   | ENSG00000180616 | 158.007519 | 0.53363439  | 0.20366672 | 0.00281211 | 0.01433879 | SSTR2     |
| 84622  | ENSG00000180626 | 543.754834 | 0.06413344  | 0.11184347 | 0.54960125 | 0.75607328 | ZNF594    |
| 84333  | ENSG00000180628 | 155.909149 | 0.30694077  | 0.19043031 | 0.06478429 | 0.181378   | PCGF5     |
| 146802 | ENSG00000180638 | 2.25589684 | -0.00964389 | 0.372044   | 0.91882671 | NA         | SLC47A2   |
| 5551   | ENSG00000180644 | 0.66468534 | 0.02522022  | 0.38353444 | 0.5953632  | NA         | PRF1      |
| 79541  | ENSG00000180658 | 0          | NA          | NA         | NA         | NA         | OR2A4     |
| 4081   | ENSG00000180660 | 3253.87191 | 1.09579909  | 0.0624558  | 8.89E-70   | 1.46E-67   | MAB21L1   |
| NA     | ENSG00000180662 | 0          | NA          | NA         | NA         | NA         | RPL21P8   |
| NA     | ENSG00000180663 | 0          | NA          | NA         | NA         | NA         | VN1R3     |
| 55432  | ENSG00000180667 | 743.853941 | 0.07839043  | 0.09095583 | 0.37557142 | 0.60466908 | YOD1      |
| NA     | ENSG00000180673 | 0          | NA          | NA         | NA         | NA         | EXOC5P1   |
| 169200 | ENSG00000180694 | 607.837034 | -1.2175623  | 0.11846806 | 9.31E-26   | 4.52E-24   | TMEM64    |
| 152065 | ENSG00000180697 | 0.37844916 | 0.02407552  | 0.3854191  | 0.60038877 | NA         | C3orf22   |
| 391107 | ENSG00000180708 | 0          | NA          | NA         | NA         | NA         | OR10K2    |
| NA     | ENSG00000180712 | 5.29754517 | -0.16528602 | 0.41339048 | 0.16846839 | 0.35970865 | LINC02363 |
| NA     | ENSG00000180714 | 0          | NA          | NA         | NA         | NA         | OR5AZ1P   |
| 1132   | ENSG00000180720 | 8.28806334 | -0.30948627 | 0.51528045 | 0.07222117 | 0.19574701 | CHRM4     |
| NA     | ENSG00000180723 | 0          | NA          | NA         | NA         | NA         | OR51A9P   |
| 387914 | ENSG00000180730 | 1.24840401 | 0.03481126  | 0.38284651 | 0.54911218 | NA         | SHISA2    |
| 53637  | ENSG00000180739 | 0.53606622 | 0.0137271   | 0.38291855 | 0.73918762 | NA         | S1PR5     |
| 119467 | ENSG00000180745 | 0          | NA          | NA         | NA         | NA         | CLRN3     |
| NA     | ENSG00000180747 | 687.615873 | 0.16659939  | 0.11013326 | 0.11356485 | 0.27350408 | SMG1P3    |
| 80045  | ENSG00000180758 | 184.612004 | -0.25211927 | 0.39555863 | 0.20485339 | 0.41169887 | GPR157    |
| NA     | ENSG00000180764 | 21.1220891 | 0.45814606  | 0.46833382 | 0.06891262 | 0.18928789 | PIPSL     |
| 166012 | ENSG00000180767 | 24.6241461 | -0.12790199 | 0.33549556 | 0.48960481 | 0.70913707 | CHST13    |
| 404201 | ENSG00000180769 | 34.419185  | -0.12417324 | 0.30053327 | 0.52546073 | 0.73801083 | WDFY3-AS2 |



|        |                 |            |             |            |            |            |             |
|--------|-----------------|------------|-------------|------------|------------|------------|-------------|
| NA     | ENSG00000180770 | 0          | NA          | NA         | NA         | NA         | OR7E129P    |
| 186    | ENSG00000180772 | 0          | NA          | NA         | NA         | NA         | AGTR2       |
| 120103 | ENSG00000180773 | 1038.54171 | 0.25060441  | 0.11181147 | 0.01881925 | 0.06934881 | SLC36A4     |
| 253832 | ENSG00000180776 | 624.531024 | 0.03097953  | 0.12124579 | 0.78886371 | 0.90411045 | ZDHHC20     |
| 374860 | ENSG00000180777 | 0          | NA          | NA         | NA         | NA         | ANKRD30B    |
| 143503 | ENSG00000180785 | 0          | NA          | NA         | NA         | NA         | OR51E1      |
| 124961 | ENSG00000180787 | 580.977625 | -0.01202293 | 0.10911501 | 0.90716344 | 0.95963244 | ZFP3        |
| 79642  | ENSG00000180801 | 66.863363  | 3.0551786   | 0.44650985 | 4.17E-13   | 9.75E-12   | ARSJ        |
| NA     | ENSG00000180803 | 0.18922458 | 0.01954053  | 0.38488496 | 0.78225479 | NA         |             |
| 3225   | ENSG00000180806 | 117.410496 | -0.56838695 | 0.21565108 | 0.00237735 | 0.01242206 | HOXC9       |
| 389840 | ENSG00000180815 | 39.0212482 | 0.93373907  | 0.40741468 | 0.00227506 | 0.01195508 | MAP3K15     |
| 5464   | ENSG00000180817 | 2297.41951 | -0.2823732  | 0.07405103 | 9.89E-05   | 0.00075342 | PPA1        |
| 3226   | ENSG00000180818 | 7.84022109 | -0.03772491 | 0.35494966 | 0.78526861 | 0.90233576 | HOXC10      |
| 389362 | ENSG00000180822 | 383.605681 | 0.10408722  | 0.14075753 | 0.42729194 | 0.65306772 | PSMG4       |
| 27319  | ENSG00000180828 | 0          | NA          | NA         | NA         | NA         | BHLHE22     |
| 79929  | ENSG00000180834 | 79.1665653 | -0.14023766 | 0.26201564 | 0.47075458 | 0.69301557 | MAP6D1      |
| 255193 | ENSG00000180846 | 2.99092271 | 0.09847653  | 0.3913117  | 0.29650048 | 0.52308105 | CSNK1G2-AS1 |
| 10224  | ENSG00000180855 | 143.439139 | -0.07584806 | 0.17986591 | 0.63389313 | 0.81527549 | ZNF443      |
| NA     | ENSG00000180861 | 0          | NA          | NA         | NA         | NA         | LINC01559   |
| NA     | ENSG00000180867 | 288.00526  | -0.04156297 | 0.14027159 | 0.74927816 | 0.88205755 | PDIA3P1     |
| 439927 | ENSG00000180869 | 0.34624801 | -0.02356563 | 0.38536324 | 0.65270996 | NA         | LINC01555   |
| 3579   | ENSG00000180871 | 0          | NA          | NA         | NA         | NA         | CXCR2       |
| 245915 | ENSG00000180872 | 0          | NA          | NA         | NA         | NA         | DEFB112     |
| 64388  | ENSG00000180875 | 8.76611368 | 3.53259639  | 1.14982269 | 0.00019115 | 0.00136617 | GREM2       |
| 160298 | ENSG00000180878 | 2.49885388 | 0.042267    | 0.37624632 | 0.64988007 | NA         | C11orf42    |
| 6748   | ENSG00000180879 | 1473.75234 | 0.05247547  | 0.07599566 | 0.48214794 | 0.70272402 | SSR4        |
| 84698  | ENSG00000180881 | 101.393379 | 0.109006    | 0.22613656 | 0.55372908 | 0.75980255 | CAPS2       |
| 126375 | ENSG00000180884 | 423.249074 | -0.04701673 | 0.11567668 | 0.6688301  | 0.83720078 | ZNF792      |
| 404093 | ENSG00000180891 | 660.287167 | 0.14873899  | 0.13311783 | 0.23297507 | 0.44988944 | CUEDC1      |
| 23513  | ENSG00000180900 | 3081.86958 | 0.30349745  | 0.0751345  | 3.68E-05   | 0.00031188 | SCRIB       |
| 23510  | ENSG00000180901 | 1194.70123 | -0.00782492 | 0.08100749 | 0.92083533 | 0.96670947 | KCTD2       |
| 728294 | ENSG00000180902 | 466.113112 | 0.27750323  | 0.11457717 | 0.0109534  | 0.04467835 | D2HGDH      |
| NA     | ENSG00000180909 | 0          | NA          | NA         | NA         | NA         | OR52B1P     |
| 83866  | ENSG00000180910 | 0          | NA          | NA         | NA         | NA         | TTY11       |
| NA     | ENSG00000180913 | 0          | NA          | NA         | NA         | NA         | OR56B3P     |
| 5021   | ENSG00000180914 | 104.909575 | -0.21192737 | 0.20833381 | 0.22804625 | 0.44313786 | OXTR        |
| 55783  | ENSG00000180917 | 499.644819 | -0.00201297 | 0.10703976 | 0.98300951 | 0.99428951 | CMTR2       |
| 196335 | ENSG00000180919 | 0          | NA          | NA         | NA         | NA         | OR56B4      |

|        |                 |            |             |            |            |            |           |
|--------|-----------------|------------|-------------|------------|------------|------------|-----------|
| 286077 | ENSG00000180921 | 14.332492  | 0.07004287  | 0.33683133 | 0.6841648  | 0.84603775 | FAM83H    |
| NA     | ENSG00000180926 | 0          | NA          | NA         | NA         | NA         | OR7E18P   |
| 118442 | ENSG00000180929 | 39.2110754 | 0.31021248  | 0.34377309 | 0.16062777 | 0.34855682 | GPR62     |
| 120796 | ENSG00000180934 | 0          | NA          | NA         | NA         | NA         | OR56A1    |
| 137209 | ENSG00000180938 | 97.5133237 | -0.30984965 | 0.23846105 | 0.10786156 | 0.26339391 | ZNF572    |
| NA     | ENSG00000180953 | 68.1776296 | -0.08227454 | 0.2567261  | 0.66711131 | 0.83613156 | ST20      |
| 23760  | ENSG00000180957 | 2383.81611 | -0.10321647 | 0.08336737 | 0.20411283 | 0.41075144 | PITPNB    |
| 90843  | ENSG00000180964 | 703.240524 | -0.28863777 | 0.10301899 | 0.00351605 | 0.01733557 | TCEAL8    |
| 390081 | ENSG00000180974 | 0          | NA          | NA         | NA         | NA         | OR52E4    |
| 255252 | ENSG00000180979 | 390.566071 | 0.38276258  | 0.1385257  | 0.00301579 | 0.01519768 | LRRC57    |
| 390077 | ENSG00000180988 | 0          | NA          | NA         | NA         | NA         | OR52N2    |
| 64928  | ENSG00000180992 | 464.278271 | -0.0870748  | 0.1139048  | 0.42258941 | 0.64862864 | MRPL14    |
| 283554 | ENSG00000180998 | 340.167967 | -0.01433098 | 0.15148344 | 0.91697361 | 0.96477469 | GPR137C   |
| 92346  | ENSG00000180999 | 0          | NA          | NA         | NA         | NA         | C1orf105  |
| 79473  | ENSG00000181001 | 0          | NA          | NA         | NA         | NA         | OR52N1    |
| 166379 | ENSG00000181004 | 60.1615785 | 0.07768878  | 0.25046015 | 0.68570941 | 0.84710303 | BBS12     |
| 284406 | ENSG00000181007 | 339.265949 | -0.1123818  | 0.14455516 | 0.40011481 | 0.62854504 | ZFP82     |
| 390075 | ENSG00000181009 | 0          | NA          | NA         | NA         | NA         | OR52N5    |
| 286006 | ENSG00000181016 | 7.74939829 | 0.23658436  | 0.45945652 | 0.08890194 | 0.22841422 | LSMEM1    |
| NA     | ENSG00000181017 | 0          | NA          | NA         | NA         | NA         | OR56B2P   |
| 1728   | ENSG00000181019 | 300.731008 | 1.90312067  | 0.1741797  | 5.95E-29   | 3.29E-27   | NQO1      |
| 387748 | ENSG00000181023 | 0          | NA          | NA         | NA         | NA         | OR56B1    |
| 64782  | ENSG00000181026 | 992.393848 | 0.12716296  | 0.08168115 | 0.11179174 | 0.27034959 | AEN       |
| 79147  | ENSG00000181027 | 865.023287 | 0.02074685  | 0.12532894 | 0.86443231 | 0.94000203 | FKRP      |
| 126003 | ENSG00000181029 | 586.517554 | 0.01855085  | 0.10667727 | 0.85762677 | 0.93650256 | TRAPPC5   |
| 9501   | ENSG00000181031 | 85.8101536 | 0.18758484  | 0.26839573 | 0.34485112 | 0.5752351  | RPH3AL    |
| 284439 | ENSG00000181035 | 161.647071 | 0.09288901  | 0.19672272 | 0.58418538 | 0.78032976 | SLC25A42  |
| 343413 | ENSG00000181036 | 1.1727418  | 0.05198808  | 0.38669146 | 0.35522169 | NA         | FCRL6     |
| 124512 | ENSG00000181038 | 509.802798 | 0.11823531  | 0.11406184 | 0.27754163 | 0.50204466 | METTL23   |
| 284129 | ENSG00000181045 | 572.678715 | 0.30140022  | 0.11196994 | 0.00476221 | 0.02228879 | SLC26A11  |
| 25994  | ENSG00000181061 | 880.822966 | -0.00909171 | 0.09350429 | 0.91670572 | 0.96473288 | HIGD1A    |
| 1129   | ENSG00000181072 | 212.005103 | -1.33473864 | 0.20855651 | 1.26E-11   | 2.65E-10   | CHRM2     |
| 390072 | ENSG00000181074 | 0          | NA          | NA         | NA         | NA         | OR52N4    |
| 225689 | ENSG00000181085 | 218.026975 | 0.3945329   | 0.17801258 | 0.01306547 | 0.05162695 | MAPK15    |
| 79813  | ENSG00000181090 | 2061.19762 | -0.01085312 | 0.07409079 | 0.88063465 | 0.94713457 | EHMT1     |
| 9370   | ENSG00000181092 | 0          | NA          | NA         | NA         | NA         | ADIPOQ    |
| NA     | ENSG00000181097 | 11.0186777 | 0.02202053  | 0.34035234 | 0.89257988 | 0.95351371 | LINC02878 |
| NA     | ENSG00000181101 | 0          | NA          | NA         | NA         | NA         | ENTR1P2   |

|           |                 |            |             |            |            |            |            |
|-----------|-----------------|------------|-------------|------------|------------|------------|------------|
| 2149      | ENSG00000181104 | 1619.22178 | 0.27591009  | 0.0789128  | 0.00034488 | 0.00231946 | F2R        |
| NA        | ENSG00000181109 | 0          | NA          | NA         | NA         | NA         | OR52P1P    |
| NA        | ENSG00000181123 | 0.14931947 | -0.01844332 | 0.38480212 | 0.84537521 | NA         |            |
| 352962    | ENSG00000181126 | 0          | NA          | NA         | NA         | NA         | HLA-V      |
| 286075    | ENSG00000181135 | 269.394862 | 0.09742254  | 0.13759851 | 0.44858008 | 0.67234398 | ZNF707     |
| 101928160 | ENSG00000181135 | 269.394862 | 0.09742254  | 0.13759851 | 0.44858008 | 0.67234398 | ZNF707     |
| 94025     | ENSG00000181143 | 0          | NA          | NA         | NA         | NA         | MUC16      |
| 4869      | ENSG00000181163 | 11970.9025 | -0.10231861 | 0.05696795 | 0.06969655 | 0.19085983 | NPM1       |
| 439941    | ENSG00000181171 | 0          | NA          | NA         | NA         | NA         | FER1L6-AS1 |
| 64219     | ENSG00000181191 | 1032.86235 | -0.27988698 | 0.08581821 | 0.00079437 | 0.00484634 | PJA1       |
| 55526     | ENSG00000181192 | 1929.69234 | -0.11211636 | 0.07679355 | 0.13552273 | 0.31008775 | DHTKD1     |
| 5179      | ENSG00000181195 | 0          | NA          | NA         | NA         | NA         | PENK       |
| NA        | ENSG00000181201 | 8.73575637 | -0.02108797 | 0.34935677 | 0.8844318  | 0.94936574 | H2BU2P     |
| 100127950 | ENSG00000181211 | 0          | NA          | NA         | NA         | NA         | HECW1-IT1  |
| 26492     | ENSG00000181214 | 0          | NA          | NA         | NA         | NA         | OR8G2P     |
| 389197    | ENSG00000181215 | 22.1002061 | -1.23093023 | 0.61981995 | 0.00283225 | 0.01442665 | C4orf50    |
| 92815     | ENSG00000181218 | 438.88889  | -0.40241204 | 0.12887641 | 0.00090054 | 0.00541088 | H2AW       |
| 155061    | ENSG00000181220 | 791.759867 | -0.00759922 | 0.10166858 | 0.93720983 | 0.97354401 | ZNF746     |
| 5430      | ENSG00000181222 | 6309.58508 | -0.09550821 | 0.05746419 | 0.09235075 | 0.2349928  | POLR2A     |
| NA        | ENSG00000181227 | 4.7765237  | -0.05816224 | 0.38148147 | 0.49348094 | 0.712409   | DLSTP1     |
| 92293     | ENSG00000181234 | 0          | NA          | NA         | NA         | NA         | TMEM132C   |
| 284427    | ENSG00000181240 | 2.85705093 | 0.06205243  | 0.38062176 | 0.49876961 | 0.71639681 | SLC25A41   |
| NA        | ENSG00000181260 | 0          | NA          | NA         | NA         | NA         | MTHFD2P7   |
| 219902    | ENSG00000181264 | 577.25941  | -0.19557501 | 0.11219064 | 0.06696273 | 0.18552445 | TLCD5      |
| 390181    | ENSG00000181273 | 0          | NA          | NA         | NA         | NA         | OR5AK2     |
| 23401     | ENSG00000181274 | 258.087195 | 0.37305798  | 0.1506413  | 0.00712073 | 0.0313736  | FRAT2      |
| NA        | ENSG00000181282 | 0          | NA          | NA         | NA         | NA         | OR5AK3P    |
| 284114    | ENSG00000181284 | 131.493821 | 0.81144959  | 0.21226632 | 2.22E-05   | 0.00019748 | TMEM102    |
| 124842    | ENSG00000181291 | 0.84989367 | -0.00687349 | 0.38140222 | 0.8954221  | NA         | TMEM132E   |
| NA        | ENSG00000181296 | 0          | NA          | NA         | NA         | NA         | OR5G1P     |
| 79692     | ENSG00000181315 | 866.505341 | -0.06716498 | 0.10084063 | 0.48928258 | 0.70877384 | ZNF322     |
| 347736    | ENSG00000181322 | 19.3258722 | -0.12189316 | 0.33250939 | 0.51163283 | 0.72687381 | NME9       |
| 374768    | ENSG00000181323 | 0          | NA          | NA         | NA         | NA         | SPEM1      |
| NA        | ENSG00000181325 | 0          | NA          | NA         | NA         | NA         | OR9G3P     |
| 341208    | ENSG00000181333 | 5.13375642 | 0.08367849  | 0.37402108 | 0.50490337 | 0.72130144 | HEPHL1     |
| 388341    | ENSG00000181350 | 107.670477 | 0.13845062  | 0.19779131 | 0.41661824 | 0.64309452 | LRRC75A    |
| NA        | ENSG00000181355 | 0          | NA          | NA         | NA         | NA         | OFCC1      |
| NA        | ENSG00000181358 | 0          | NA          | NA         | NA         | NA         | CTAGE10P   |

|           |                 |            |             |            |            |            |           |
|-----------|-----------------|------------|-------------|------------|------------|------------|-----------|
| NA        | ENSG00000181359 | 0.173733   | 0.01914545  | 0.38484597 | 0.78225479 | NA         | HSP90AA6P |
| 219484    | ENSG00000181371 | 0          | NA          | NA         | NA         | NA         | OR5M8     |
| 6357      | ENSG00000181374 | 0          | NA          | NA         | NA         | NA         | CCL13     |
| 255101    | ENSG00000181378 | 41.344527  | 0.1617374   | 0.28208492 | 0.41936435 | 0.64519864 | CFAP65    |
| 91351     | ENSG00000181381 | 151.43721  | 1.01019871  | 0.25400768 | 7.83E-06   | 7.59E-05   | DDX60L    |
| 163183    | ENSG00000181392 | 5.77539532 | 0.07773831  | 0.36718175 | 0.56028589 | 0.76415299 | SYNE4     |
| 79701     | ENSG00000181396 | 1384.12168 | -0.0099912  | 0.07804262 | 0.89528601 | 0.95469109 | OGFOD3    |
| 100287171 | ENSG00000181404 | 411.562682 | 0.2297367   | 0.1278522  | 0.05608157 | 0.16266792 | WASHC1    |
| 2837      | ENSG00000181408 | 8.62510678 | 0.0281355   | 0.34541093 | 0.85737522 | 0.93627941 | UTS2R     |
| 9625      | ENSG00000181409 | 1238.1999  | -0.27534756 | 0.09945203 | 0.00401489 | 0.01936202 | AATK      |
| 23109     | ENSG00000181418 | 95.007888  | -0.67819907 | 0.24849742 | 0.00130027 | 0.0074088  | DDN       |
| 55511     | ENSG00000181433 | 0          | NA          | NA         | NA         | NA         | SAGE1     |
| 168544    | ENSG00000181444 | 54.9595238 | 0.06523081  | 0.25614352 | 0.73546303 | 0.87432359 | ZNF467    |
| 6657      | ENSG00000181449 | 68.0509386 | 4.46922308  | 0.45674691 | 2.30E-23   | 1.03E-21   | SOX2      |
| 339500    | ENSG00000181450 | 519.30085  | -0.1238104  | 0.12426435 | 0.29042642 | 0.51645247 | ZNF678    |
| 55076     | ENSG00000181458 | 209.184167 | -0.52470294 | 0.17648786 | 0.00100236 | 0.00592224 | TMEM45A   |
| 5912      | ENSG00000181467 | 306.213339 | 0.56456752  | 0.14016913 | 1.81E-05   | 0.00016349 | RAP2B     |
| 57621     | ENSG00000181472 | 298.15669  | -0.3143921  | 0.13702848 | 0.01377024 | 0.05383283 | ZBTB2     |
| 84282     | ENSG00000181481 | 0          | NA          | NA         | NA         | NA         | RNF135    |
| 219874    | ENSG00000181499 | 0          | NA          | NA         | NA         | NA         | OR6T1     |
| NA        | ENSG00000181511 | 0          | NA          | NA         | NA         | NA         | GLRX5P1   |
| 79777     | ENSG00000181513 | 72.9160482 | -0.09324249 | 0.23806567 | 0.61870526 | 0.80494303 | ACBD4     |
| NA        | ENSG00000181514 | 0          | NA          | NA         | NA         | NA         |           |
| 338662    | ENSG00000181518 | 0          | NA          | NA         | NA         | NA         | OR8D4     |
| 6448      | ENSG00000181523 | 831.755972 | 0.15234726  | 0.14353655 | 0.25154023 | 0.47149344 | SGSH      |
| NA        | ENSG00000181524 | 4.98735765 | 0.03294239  | 0.36924084 | 0.76715463 | 0.89274138 | RPL24P4   |
| 10586     | ENSG00000181541 | 30.5128033 | 7.04804454  | 1.3304378  | 2.37E-09   | 3.88E-08   | MAB21L2   |
| 2187      | ENSG00000181544 | 182.357067 | -0.3066106  | 0.18934452 | 0.0635114  | 0.17891043 | FANCB     |
| 64184     | ENSG00000181552 | 0          | NA          | NA         | NA         | NA         | EDDM3B    |
| 29072     | ENSG00000181555 | 2277.54618 | -0.12668091 | 0.08054528 | 0.10720817 | 0.2623024  | SETD2     |
| 10876     | ENSG00000181562 | 0          | NA          | NA         | NA         | NA         | EDDM3A    |
| 221416    | ENSG00000181577 | 0.9842078  | -0.01042811 | 0.38036263 | 0.86059005 | NA         | C6orf223  |
| 259236    | ENSG00000181585 | 67.3509605 | -0.82460502 | 0.31090921 | 0.00111693 | 0.00649658 | TMIE      |
| 399664    | ENSG00000181588 | 1290.95477 | -0.17003755 | 0.07825823 | 0.02618738 | 0.09029505 | MEX3D     |
| 390066    | ENSG00000181609 | 0          | NA          | NA         | NA         | NA         | OR52D1    |
| 51649     | ENSG00000181610 | 1229.76516 | 0.06955838  | 0.07757759 | 0.36022371 | 0.59016007 | MRPS23    |
| 390067    | ENSG00000181616 | 0          | NA          | NA         | NA         | NA         | OR52H1    |
| 260436    | ENSG00000181617 | 0          | NA          | NA         | NA         | NA         | FDCSP     |

|        |                 |            |             |            |            |            |           |
|--------|-----------------|------------|-------------|------------|------------|------------|-----------|
| 64582  | ENSG00000181619 | 185.925787 | -0.06542462 | 0.16192719 | 0.65489372 | 0.82814932 | GPR135    |
| 79008  | ENSG00000181625 | 31.3138021 | 0.73082647  | 0.5894244  | 0.02071923 | 0.07502636 | SLX1B     |
| 342850 | ENSG00000181626 | 1.50834298 | 0.05574805  | 0.38471721 | 0.41390417 | NA         | ANKRD62   |
| 53829  | ENSG00000181631 | 0.36291009 | 0.02389445  | 0.38539235 | 0.60998858 | NA         | P2RY13    |
| 9966   | ENSG00000181634 | 0          | NA          | NA         | NA         | NA         | TNFSF15   |
| 286128 | ENSG00000181638 | 656.937882 | 0.0402812   | 0.12994064 | 0.74344586 | 0.87902062 | ZFP41     |
| 7262   | ENSG00000181649 | 0.46756584 | -0.00823939 | 0.38328691 | 0.85770315 | NA         | PHLDA2    |
| 285973 | ENSG00000181652 | 178.24959  | -0.6798449  | 0.18348205 | 4.75E-05   | 0.00039098 | ATG9B     |
| 54112  | ENSG00000181656 | 1.38849842 | -0.07830509 | 0.39181065 | 0.21714084 | NA         | GPR88     |
| 284459 | ENSG00000181666 | 1097.53844 | 0.07121386  | 0.10335869 | 0.47499518 | 0.69724063 | ZNF875    |
| 5324   | ENSG00000181690 | 3.76136559 | -0.05441754 | 0.37329282 | 0.60953064 | 0.79803651 | PLAG1     |
| 219469 | ENSG00000181693 | 0          | NA          | NA         | NA         | NA         | OR8H1     |
| 390155 | ENSG00000181698 | 0          | NA          | NA         | NA         | NA         | OR5T1     |
| 286451 | ENSG00000181704 | 1456.28472 | 0.09255932  | 0.08702034 | 0.27489686 | 0.49876121 | YIPF6     |
| NA     | ENSG00000181705 | 0          | NA          | NA         | NA         | NA         |           |
| 219464 | ENSG00000181718 | 0          | NA          | NA         | NA         | NA         | OR5T2     |
| 26137  | ENSG00000181722 | 320.326352 | -0.05743686 | 0.32040765 | 0.74383398 | 0.87932229 | ZBTB20    |
| 284383 | ENSG00000181733 | 0          | NA          | NA         | NA         | NA         | OR2Z1     |
| NA     | ENSG00000181741 | 0.15069912 | -0.01848503 | 0.38480575 | 0.84537521 | NA         | FDX1P1    |
| 205428 | ENSG00000181744 | 5.54732603 | 0.02224828  | 0.35748316 | 0.87019674 | 0.94333385 | DIPK2A    |
| 90355  | ENSG00000181751 | 488.531097 | -0.00459831 | 0.11560343 | 0.96574976 | 0.98663622 | MACIR     |
| 219453 | ENSG00000181752 | 0          | NA          | NA         | NA         | NA         | OR8K5     |
| 57463  | ENSG00000181754 | 231.65756  | 0.25631233  | 0.16877932 | 0.0906502  | 0.23197471 | AMIGO1    |
| 390152 | ENSG00000181761 | 0          | NA          | NA         | NA         | NA         | OR8H3     |
| 390151 | ENSG00000181767 | 0          | NA          | NA         | NA         | NA         | OR8H2     |
| 2827   | ENSG00000181773 | 92.3138266 | 0.02925579  | 0.20849728 | 0.86888362 | 0.94277555 | GPR3      |
| 169693 | ENSG00000181778 | 0          | NA          | NA         | NA         | NA         | TMEM252   |
| NA     | ENSG00000181780 | 0          | NA          | NA         | NA         | NA         | OR5J1P    |
| 284451 | ENSG00000181781 | 1.68375986 | 0.02490047  | 0.37966438 | 0.71417112 | NA         | ODF3L2    |
| 219447 | ENSG00000181785 | 0          | NA          | NA         | NA         | NA         | OR5AS1    |
| 284382 | ENSG00000181786 | 0          | NA          | NA         | NA         | NA         | ACTL9     |
| 6478   | ENSG00000181788 | 478.319269 | -0.07972163 | 0.11020239 | 0.44932705 | 0.67295604 | SIAH2     |
| 22820  | ENSG00000181789 | 2108.35671 | 0.11915378  | 0.07256872 | 0.09463614 | 0.23921278 | COPG1     |
| 575    | ENSG00000181790 | 319.766484 | -2.34859364 | 0.48306668 | 5.23E-08   | 7.18E-07   | ADGRB1    |
| 151477 | ENSG00000181798 | 28.1981045 | -0.00815845 | 0.28832172 | 0.9642134  | 0.98582808 | LINC00471 |
| 414196 | ENSG00000181800 | 0          | NA          | NA         | NA         | NA         | CELF2-AS1 |
| 341799 | ENSG00000181803 | 0          | NA          | NA         | NA         | NA         | OR6S1     |
| 285195 | ENSG00000181804 | 0          | NA          | NA         | NA         | NA         | SLC9A9    |

|           |                 |            |             |            |            |            |           |
|-----------|-----------------|------------|-------------|------------|------------|------------|-----------|
| 84967     | ENSG00000181817 | 346.159379 | -0.19659095 | 0.12902625 | 0.10423021 | 0.2570084  | LSM10     |
| NA        | ENSG00000181819 | 2.17927467 | -0.00446207 | 0.37459335 | 0.95729961 | NA         | KCTD9P2   |
| 768211    | ENSG00000181826 | 89.5597205 | 0.64937982  | 0.27310055 | 0.0036445  | 0.01785624 | RELL1     |
| 64864     | ENSG00000181827 | 1780.78048 | -0.10903446 | 0.06885754 | 0.10707903 | 0.26208338 | RFX7      |
| 55343     | ENSG00000181830 | 332.083829 | -0.02353203 | 0.13028445 | 0.84772562 | 0.93071088 | SLC35C1   |
| NA        | ENSG00000181837 | 0          | NA          | NA         | NA         | NA         | OR5D17P   |
| 201633    | ENSG00000181847 | 0.66695587 | -0.02130958 | 0.38247053 | 0.65852154 | NA         | TIGIT     |
| 10193     | ENSG00000181852 | 1167.15139 | -0.00343373 | 0.0819198  | 0.96505341 | 0.98622874 | RNF41     |
| 6517      | ENSG00000181856 | 54.1381088 | 0.40095563  | 0.30946114 | 0.07307715 | 0.19752734 | SLC2A4    |
| 94033     | ENSG00000181867 | 0          | NA          | NA         | NA         | NA         | FTMT      |
| 200205    | ENSG00000181873 | 292.164632 | -0.66769775 | 0.17048432 | 2.09E-05   | 0.00018709 | IBA57     |
| 1366      | ENSG00000181885 | 6.01955361 | 0.20245197  | 0.43969465 | 0.10004879 | 0.24927389 | CLDN7     |
| 79673     | ENSG00000181894 | 217.353203 | -0.0363944  | 0.15738697 | 0.7989291  | 0.90798839 | ZNF329    |
| 94039     | ENSG00000181896 | 199.337755 | -0.51769209 | 0.20337758 | 0.00359182 | 0.01765651 | ZNF101    |
| 219432    | ENSG00000181903 | 0          | NA          | NA         | NA         | NA         | OR4C6     |
| 134553    | ENSG00000181904 | 1717.0416  | -0.4448621  | 0.08215641 | 2.88E-08   | 4.08E-07   | C5orf24   |
| 100996455 | ENSG00000181908 | 12.511603  | 1.41677314  | 0.91705511 | 0.00485301 | 0.022655   | LINC02724 |
| 84890     | ENSG00000181915 | 1523.46028 | -0.15484425 | 0.07683059 | 0.03941052 | 0.12407247 | ADO       |
| 51287     | ENSG00000181924 | 946.382278 | 0.08104793  | 0.08290552 | 0.31704394 | 0.54483775 | COA4      |
| 81300     | ENSG00000181927 | 0          | NA          | NA         | NA         | NA         | OR4P4     |
| 5571      | ENSG00000181929 | 734.139098 | 0.09279928  | 0.09741278 | 0.32493768 | 0.55284827 | PRKAG1    |
| 64785     | ENSG00000181938 | 306.369817 | -0.35735224 | 0.14022296 | 0.00609193 | 0.02747164 | GIN53     |
| 81309     | ENSG00000181939 | 0          | NA          | NA         | NA         | NA         | OR4C15    |
| NA        | ENSG00000181943 | 0          | NA          | NA         | NA         | NA         | OR4A21P   |
| NA        | ENSG00000181950 | 0          | NA          | NA         | NA         | NA         | OR4A13P   |
| 81328     | ENSG00000181958 | 0          | NA          | NA         | NA         | NA         | OR4A15    |
| 81327     | ENSG00000181961 | 0          | NA          | NA         | NA         | NA         | OR4A16    |
| 119774    | ENSG00000181963 | 0          | NA          | NA         | NA         | NA         | OR52K2    |
| 4762      | ENSG00000181965 | 0          | NA          | NA         | NA         | NA         | NEUROG1   |
| NA        | ENSG00000181977 | 0          | NA          | NA         | NA         | NA         | PYY3      |
| 91050     | ENSG00000181982 | 0.62151788 | -0.03202751 | 0.38600238 | 0.58906207 | NA         | CCDC149   |
| 729786    | ENSG00000181984 | 0.14931947 | -0.01844332 | 0.38480212 | 0.84537521 | NA         | GOLGA8CP  |
| 64963     | ENSG00000181991 | 553.921746 | -0.14774655 | 0.11370252 | 0.17237504 | 0.36498622 | MRPS11    |
| 283197    | ENSG00000181995 | 0          | NA          | NA         | NA         | NA         | LINC00301 |
| NA        | ENSG00000181997 | 0          | NA          | NA         | NA         | NA         | AQP7P2    |
| NA        | ENSG00000182000 | 0          | NA          | NA         | NA         | NA         | PPIAP73   |
| 6635      | ENSG00000182004 | 2565.94832 | -0.06401591 | 0.07045915 | 0.35382225 | 0.58420717 | SNRPE     |
| 219790    | ENSG00000182010 | 1031.64382 | -0.5174003  | 0.09057982 | 4.22E-09   | 6.69E-08   | RTKN2     |

|           |                 |            |             |            |            |            |         |
|-----------|-----------------|------------|-------------|------------|------------|------------|---------|
| 55228     | ENSG00000182013 | 1490.04436 | -0.09587527 | 0.10111267 | 0.3241597  | 0.55209275 | PNMA8A  |
| 100996643 | ENSG00000182021 | 0          | NA          | NA         | NA         | NA         |         |
| 51363     | ENSG00000182022 | 4.27808858 | -0.15119338 | 0.40685125 | 0.20205708 | 0.40760676 | CHST15  |
| 149685    | ENSG00000182035 | 0          | NA          | NA         | NA         | NA         | ADIG    |
| 124590    | ENSG00000182040 | 37.5426893 | -0.07006912 | 0.28496308 | 0.71559479 | 0.86274919 | USH1G   |
| 7221      | ENSG00000182048 | 0          | NA          | NA         | NA         | NA         | TRPC2   |
| 25834     | ENSG00000182050 | 5.33362753 | 0.12342893  | 0.3980785  | 0.24015226 | 0.45820056 | MGAT4C  |
| 283116    | ENSG00000182053 | 0          | NA          | NA         | NA         | NA         | TRIM49B |
| 3418      | ENSG00000182054 | 3691.76718 | 0.11464076  | 0.0605282  | 0.05506531 | 0.16031256 | IDH2    |
| NA        | ENSG00000182057 | 6.91463229 | -0.12570449 | 0.39268441 | 0.27357822 | 0.49704244 | OGFRP1  |
| 23538     | ENSG00000182070 | 0          | NA          | NA         | NA         | NA         | OR52A1  |
| 374308    | ENSG00000182077 | 0.18922458 | 0.01954053  | 0.38488496 | 0.78225479 | NA         | PTCHD3  |
| 389090    | ENSG00000182083 | 0          | NA          | NA         | NA         | NA         | OR6B2   |
| 91304     | ENSG00000182087 | 3248.51821 | 0.14511279  | 0.05987227 | 0.01411371 | 0.05492662 | TMEM259 |
| 7485      | ENSG00000182093 | 724.346543 | -0.18353512 | 0.09378729 | 0.04307011 | 0.13277051 | GET1    |
| 84629     | ENSG00000182095 | 3425.73376 | 0.12276687  | 0.11326114 | 0.25079261 | 0.47069581 | TNRC18  |
| 220382    | ENSG00000182103 | 97.6466835 | 0.34417726  | 0.23920538 | 0.07633536 | 0.20405465 | FAM181B |
| 161291    | ENSG00000182107 | 11.4869414 | 0.08417693  | 0.34864321 | 0.60783764 | 0.79695264 | TMEM30B |
| 28955     | ENSG00000182108 | 553.316365 | 0.13908587  | 0.10908645 | 0.18321121 | 0.38141767 | DEXI    |
| 441234    | ENSG00000182111 | 0          | NA          | NA         | NA         | NA         | ZNF716  |
| 55505     | ENSG00000182117 | 1127.70837 | -0.06844401 | 0.07900693 | 0.37620313 | 0.60519502 | NOP10   |
| 375061    | ENSG00000182118 | 359.503341 | -0.4916544  | 0.1278803  | 4.75E-05   | 0.00039098 | FAM89A  |
| 30820     | ENSG00000182132 | 18.0714717 | -0.06676313 | 0.3220748  | 0.71102744 | 0.86118643 | KCNIP1  |
| 11022     | ENSG00000182134 | 831.340508 | -0.17795952 | 0.09129015 | 0.04427241 | 0.13549029 | TDRKH   |
| 7562      | ENSG00000182141 | 303.623023 | 0.13605624  | 0.13516613 | 0.28194841 | 0.5067358  | ZNF708  |
| 9798      | ENSG00000182149 | 2013.0859  | 0.19186416  | 0.08008603 | 0.01421085 | 0.05522884 | IST1    |
| 375748    | ENSG00000182150 | 925.235786 | -0.25881415 | 0.09193419 | 0.00364505 | 0.01785624 | ERCC6L2 |
| 64975     | ENSG00000182154 | 590.069026 | -0.21780913 | 0.10006551 | 0.02374313 | 0.08361089 | MRPL41  |
| 339221    | ENSG00000182156 | 0          | NA          | NA         | NA         | NA         | ENPP7   |
| 64764     | ENSG00000182158 | 2471.66241 | 1.07320361  | 0.0941473  | 5.43E-31   | 3.20E-29   | CREB3L2 |
| 286530    | ENSG00000182162 | 0          | NA          | NA         | NA         | NA         | P2RY8   |
| NA        | ENSG00000182165 | 173.423334 | 0.36371719  | 0.18392605 | 0.02531119 | 0.08793099 | TP53TG1 |
| 8633      | ENSG00000182168 | 7605.56612 | 0.43773103  | 0.05192813 | 1.71E-17   | 5.45E-16   | UNC5C   |
| 386746    | ENSG00000182170 | 0          | NA          | NA         | NA         | NA         | MRGPRG  |
| 283989    | ENSG00000182173 | 842.331359 | -0.31749773 | 0.08794749 | 0.00020066 | 0.00142693 | TSEN54  |
| 56963     | ENSG00000182175 | 174.81107  | 1.17104116  | 0.20102712 | 6.01E-10   | 1.07E-08   | RGMA    |
| 401036    | ENSG00000182177 | 0          | NA          | NA         | NA         | NA         | ASB18   |
| 7318      | ENSG00000182179 | 42.9432151 | 0.75707205  | 0.37383547 | 0.00604117 | 0.02731466 | UBA7    |

|           |                 |            |             |            |            |            |          |
|-----------|-----------------|------------|-------------|------------|------------|------------|----------|
| 51021     | ENSG00000182180 | 1556.37419 | -0.03553084 | 0.07685629 | 0.63632642 | 0.81722218 | MRPS16   |
| 348378    | ENSG00000182183 | 3.95628535 | -0.01376179 | 0.36756407 | 0.89639252 | 0.95469109 | SHISAL2A |
| 5890      | ENSG00000182185 | 59.227752  | 0.01488809  | 0.2673024  | 0.9400679  | 0.97495803 | RAD51B   |
| 1419      | ENSG00000182187 | 0          | NA          | NA         | NA         | NA         | CRYGB    |
| 23641     | ENSG00000182195 | 289.783368 | 0.01790221  | 0.18449971 | 0.91316447 | 0.96291167 | LDOC1    |
| 51329     | ENSG00000182196 | 1573.59852 | -0.40746217 | 0.08324023 | 5.10E-07   | 6.09E-06   | ARL6IP4  |
| 2131      | ENSG00000182197 | 361.99283  | 0.26287274  | 0.14011602 | 0.04320215 | 0.13305349 | EXT1     |
| 6472      | ENSG00000182199 | 3508.57273 | -0.09656275 | 0.07123311 | 0.16730985 | 0.35828164 | SHMT2    |
| 81532     | ENSG00000182208 | 595.266848 | -0.10406058 | 0.10042403 | 0.2808741  | 0.50556476 | MOB2     |
| 84439     | ENSG00000182218 | 54.2051084 | -0.02334005 | 0.24348518 | 0.89998849 | 0.95573896 | HHIPL1   |
| 10159     | ENSG00000182220 | 968.436711 | -0.14400477 | 0.1034821  | 0.14754421 | 0.32938867 | ATP6AP2  |
| 326340    | ENSG00000182223 | 25.8384814 | 0.37844988  | 0.40154415 | 0.10658236 | 0.26121406 | ZAR1     |
| 124637    | ENSG00000182224 | 242.188592 | -0.22542615 | 0.1631519  | 0.12607954 | 0.29536168 | CYB5D1   |
| 202134    | ENSG00000182230 | 0          | NA          | NA         | NA         | NA         | FAM153B  |
| 25825     | ENSG00000182240 | 0          | NA          | NA         | NA         | NA         | BACE2    |
| 7325      | ENSG00000182247 | 377.647697 | -0.128183   | 0.1268838  | 0.28346436 | 0.508585   | UBE2E2   |
| 23336     | ENSG00000182253 | 292.982484 | 0.03439019  | 0.13512596 | 0.78666755 | 0.90294962 | SYNM     |
| 3739      | ENSG00000182255 | 0.99919462 | 0.02216778  | 0.38208598 | 0.68033314 | NA         | KCNA4    |
| 2567      | ENSG00000182256 | 13.3646285 | -0.15982661 | 0.37145202 | 0.3508548  | 0.58113897 | GABRG3   |
| NA        | ENSG00000182257 | 7.70011931 | -0.07737177 | 0.35624483 | 0.60898207 | 0.7978212  | PRR34    |
| 338322    | ENSG00000182261 | 0          | NA          | NA         | NA         | NA         | NLRP10   |
| 55137     | ENSG00000182263 | 368.221708 | 0.24303665  | 0.17796393 | 0.12323659 | 0.29076157 | FIGN     |
| 284359    | ENSG00000182264 | 4.67687247 | -0.08607206 | 0.37630398 | 0.47460818 | 0.69683765 | IZUMO1   |
| 388364    | ENSG00000182271 | 0          | NA          | NA         | NA         | NA         | TMIGD1   |
| 338707    | ENSG00000182272 | 3182.09222 | 0.31211196  | 0.07101316 | 7.48E-06   | 7.28E-05   | B4GALNT4 |
| 8905      | ENSG00000182287 | 2012.21003 | -0.81546793 | 0.07525838 | 4.39E-28   | 2.36E-26   | AP1S2    |
| 65265     | ENSG00000182307 | 1227.47903 | 0.13144819  | 0.0904871  | 0.13511832 | 0.30959088 | C8orf33  |
| 285429    | ENSG00000182308 | 20.7800974 | 0.50008736  | 0.50334609 | 0.05558713 | 0.16154221 | DCAF4L1  |
| 147650    | ENSG00000182310 | 81.6803017 | 0.27718408  | 0.24663974 | 0.15636644 | 0.34283458 | SPACA6   |
| 653657    | ENSG00000182315 | 0          | NA          | NA         | NA         | NA         | MBD3L3   |
| 342945    | ENSG00000182318 | 244.372207 | -0.28056858 | 0.16666548 | 0.06121702 | 0.17402861 | ZSCAN22  |
| 3770      | ENSG00000182324 | 103.563117 | 0.24969986  | 0.21566039 | 0.1667416  | 0.35752225 | KCNJ14   |
| 26233     | ENSG00000182325 | 664.551777 | 0.13025514  | 0.10355643 | 0.19125343 | 0.3929241  | FBXL6    |
| 716       | ENSG00000182326 | 6.70878014 | 0.528381    | 0.9755501  | 0.01819055 | 0.06735733 | C1S      |
| 388323    | ENSG00000182327 | 10.280095  | -0.03120427 | 0.33980783 | 0.84490639 | 0.92965052 | GLTPD2   |
| 100652824 | ENSG00000182329 | 1.39341735 | -0.00640538 | 0.37787071 | 0.9280557  | NA         | KIAA2012 |
| 391002    | ENSG00000182330 | 0          | NA          | NA         | NA         | NA         | PRAMEF8  |
| 8513      | ENSG00000182333 | 0          | NA          | NA         | NA         | NA         | LIPF     |



|        |                 |            |             |            |            |            |          |
|--------|-----------------|------------|-------------|------------|------------|------------|----------|
| 120066 | ENSG00000182334 | 0          | NA          | NA         | NA         | NA         | OR5P3    |
| 267012 | ENSG00000182346 | 0          | NA          | NA         | NA         | NA         | DAOA     |
| NA     | ENSG00000182347 | 0.14931947 | -0.01844332 | 0.38480212 | 0.84537521 | NA         | PDSS1P1  |
| 219578 | ENSG00000182348 | 0          | NA          | NA         | NA         | NA         | ZNF804B  |
| NA     | ENSG00000182351 | 0          | NA          | NA         | NA         | NA         | CRIP1P4  |
| NA     | ENSG00000182352 | 0          | NA          | NA         | NA         | NA         | C17orf77 |
| 143879 | ENSG00000182359 | 54.3976142 | -0.84701693 | 0.47366698 | 0.00672625 | 0.02989443 | KBTD3    |
| 54059  | ENSG00000182362 | 146.066889 | 0.22511645  | 0.18308936 | 0.16248612 | 0.35124479 | YBEY     |
| NA     | ENSG00000182365 | 0          | NA          | NA         | NA         | NA         | OR5F2P   |
| 157693 | ENSG00000182366 | 7.17890443 | 0.15193715  | 0.38867343 | 0.30769073 | 0.53516122 | FAM87A   |
| 2055   | ENSG00000182372 | 462.080764 | 0.02137378  | 0.12088127 | 0.85366545 | 0.93418215 | CLN8     |
| 339059 | ENSG00000182376 | 12.6812496 | 0.14866636  | 0.35815437 | 0.40552085 | 0.6337561  |          |
| 55344  | ENSG00000182378 | 1141.14497 | -0.06632543 | 0.10865796 | 0.52323437 | 0.73618679 | PLCXD1   |
| 11247  | ENSG00000182379 | 54.3502495 | 0.07301886  | 0.25761036 | 0.70596662 | 0.85825065 | NXP4     |
| NA     | ENSG00000182383 | 0          | NA          | NA         | NA         | NA         | RPL27AP5 |
| 785    | ENSG00000182389 | 285.602162 | 0.03954366  | 0.14720283 | 0.77213602 | 0.89539725 | CACNB4   |
| 282618 | ENSG00000182393 | 0          | NA          | NA         | NA         | NA         | IFNL1    |
| 196968 | ENSG00000182397 | 13.4340685 | 0.04878237  | 0.33814619 | 0.77093628 | 0.89504218 | DNM1P46  |
| 122553 | ENSG00000182400 | 327.481473 | -0.16283478 | 0.16686533 | 0.2770056  | 0.50139504 | TRAPPC6B |
| 161779 | ENSG00000182405 | 237.504823 | 0.15630158  | 0.14521926 | 0.2435525  | 0.46198062 | PGBD4    |
| 9426   | ENSG00000182415 | 0          | NA          | NA         | NA         | NA         | CDY2A    |
| 55666  | ENSG00000182446 | 3259.61263 | 0.17480209  | 0.06738616 | 0.00825622 | 0.03547631 | NPLOC4   |
| 131149 | ENSG00000182447 | 0          | NA          | NA         | NA         | NA         | OTOL1    |
| 50801  | ENSG00000182450 | 15.0354422 | -0.58731483 | 0.6667727  | 0.03557196 | 0.11473707 | KCNK4    |
| 400629 | ENSG00000182459 | 4.65008364 | 0.04356094  | 0.36530198 | 0.72614363 | 0.86907701 | TEX19    |
| 128553 | ENSG00000182463 | 301.407617 | -1.97828066 | 0.20031661 | 3.07E-24   | 1.42E-22   | TSHZ2    |
| 147968 | ENSG00000182472 | 24.2407431 | 0.88999648  | 0.58072849 | 0.00984174 | 0.04094361 | CAPN12   |
| 23265  | ENSG00000182473 | 4844.61964 | 0.08950502  | 0.05961226 | 0.12947082 | 0.30096087 | EXOC7    |
| NA     | ENSG00000182477 | 0          | NA          | NA         | NA         | NA         | OR2B8P   |
| 3838   | ENSG00000182481 | 5279.43138 | -0.14091831 | 0.08262018 | 0.07959502 | 0.21058343 | KPNA2    |
| NA     | ENSG00000182484 | 761.114637 | 0.17055558  | 0.09573108 | 0.06549937 | 0.18274611 | WASH6P   |
| 654816 | ENSG00000182487 | 0.16735865 | 0.01897177  | 0.38482933 | 0.78225479 | NA         | NCF1B    |
| 402415 | ENSG00000182489 | 9.83489309 | 0.22716885  | 0.41747802 | 0.19573259 | 0.39935567 | XKRX     |
| 633    | ENSG00000182492 | 1.58966381 | -0.03842805 | 0.38062286 | 0.58822104 | NA         | BGN      |
| 79598  | ENSG00000182504 | 805.357981 | 0.00025833  | 0.08814226 | 0.99832375 | 0.99941443 | CEP97    |
| 340596 | ENSG00000182508 | 0.30001698 | -0.0229446  | 0.38527539 | 0.68644806 | NA         | LHFPL1   |
| 2242   | ENSG00000182511 | 10.1700202 | -0.0741799  | 0.36562157 | 0.57507665 | 0.77394659 | FES      |
| 51218  | ENSG00000182512 | 798.741952 | -0.24443326 | 0.08956011 | 0.0048921  | 0.02280528 | GLRX5    |

|           |                 |            |             |            |            |            |              |
|-----------|-----------------|------------|-------------|------------|------------|------------|--------------|
| 90736     | ENSG00000182518 | 225.624207 | -0.02525673 | 0.16003577 | 0.86108849 | 0.93812292 | FAM104B      |
| 387332    | ENSG00000182521 | 0.173733   | 0.01914545  | 0.38484597 | 0.78225479 | NA         | TBPL2        |
| NA        | ENSG00000182531 | 0.34746601 | 0.02370763  | 0.3853651  | 0.61987128 | NA         | OR7E115P     |
| 859       | ENSG00000182533 | 0.14931947 | -0.01844332 | 0.38480212 | 0.84537521 | NA         | CAV3         |
| 439921    | ENSG00000182534 | 2412.18614 | -0.51794971 | 0.07050798 | 7.79E-14   | 1.93E-12   | MXRA7        |
| 3985      | ENSG00000182541 | 895.990305 | -0.50354385 | 0.1088796  | 1.45E-06   | 1.59E-05   | LIMK2        |
| 84975     | ENSG00000182544 | 339.009834 | -0.01326855 | 0.13784566 | 0.91673936 | 0.96473288 | MFSD5        |
| 338879    | ENSG00000182545 | 2.95933702 | 0.01496225  | 0.3700817  | 0.88649058 | 0.95015905 | RNASE10      |
| 55256     | ENSG00000182551 | 1292.294   | -0.10899725 | 0.08240002 | 0.175047   | 0.36892512 | ADII         |
| 201965    | ENSG00000182552 | 659.400821 | -0.13792341 | 0.10960195 | 0.18813948 | 0.38853827 | RWDD4        |
| 201305    | ENSG00000182557 | 0          | NA          | NA         | NA         | NA         | SPNS3        |
| NA        | ENSG00000182565 | 0          | NA          | NA         | NA         | NA         | OR4C2P       |
| 339390    | ENSG00000182566 | 0          | NA          | NA         | NA         | NA         | CLEC4G       |
| 6304      | ENSG00000182568 | 2198.09648 | 0.64269725  | 0.11230529 | 2.82E-09   | 4.55E-08   | SATB1        |
| NA        | ENSG00000182574 | 0          | NA          | NA         | NA         | NA         | CSGALNACT2P1 |
| 11248     | ENSG00000182575 | 0.83842976 | -0.00906171 | 0.38082224 | 0.87298405 | NA         | NXPH3        |
| 1436      | ENSG00000182578 | 1.62959926 | -0.07203796 | 0.39059462 | 0.24848065 | NA         | CSF1R        |
| 2049      | ENSG00000182580 | 251.126465 | -0.87621469 | 0.20115883 | 1.90E-06   | 2.05E-05   | EPHB3        |
| 26609     | ENSG00000182583 | 0.173124   | -0.01911262 | 0.38486262 | 0.84537521 | NA         | VCX          |
| 255324    | ENSG00000182585 | 0.72092638 | 0.02647699  | 0.38352105 | 0.56127935 | NA         | EPGN         |
| 114042    | ENSG00000182586 | 1.5275847  | 0.07309172  | 0.38803268 | 0.32338244 | NA         | LINC00334    |
| 337880    | ENSG00000182591 | 0          | NA          | NA         | NA         | NA         | KRTAP11-1    |
| 389084    | ENSG00000182600 | 40.2047055 | -0.66211481 | 0.44464713 | 0.01910202 | 0.07019524 | SNORC        |
| 9951      | ENSG00000182601 | 0          | NA          | NA         | NA         | NA         | HS3ST4       |
| 22906     | ENSG00000182606 | 1786.36708 | -0.19695246 | 0.07094072 | 0.0046376  | 0.02183436 | TRAK1        |
| 83882     | ENSG00000182612 | 48.121086  | 1.02249708  | 0.39742704 | 0.00095983 | 0.00571346 | TSPAN10      |
| 285659    | ENSG00000182613 | 0          | NA          | NA         | NA         | NA         | OR2V2        |
| 23236     | ENSG00000182621 | 220.247798 | -0.0306117  | 0.15562833 | 0.82854753 | 0.92220943 | PLCB1        |
| NA        | ENSG00000182625 | 0          | NA          | NA         | NA         | NA         |              |
| 348235    | ENSG00000182628 | 1730.77793 | -0.99955528 | 0.0799092  | 9.43E-37   | 6.68E-35   | SKA2         |
| 51289     | ENSG00000182631 | 0.6228022  | -0.04506827 | 0.38756783 | 0.3741287  | NA         | RXFP3        |
| 414194    | ENSG00000182632 | 431.969655 | 0.33023656  | 0.12150813 | 0.00407399 | 0.01960892 | CCNYL2       |
| 390265    | ENSG00000182634 | 0          | NA          | NA         | NA         | NA         | OR10G7       |
| 4692      | ENSG00000182636 | 122.324227 | 2.45360424  | 0.26520853 | 1.55E-21   | 6.21E-20   | NDN          |
| 374355    | ENSG00000182645 | 0          | NA          | NA         | NA         | NA         | CCDC172      |
| 100506380 | ENSG00000182648 | 175.206685 | 0.23700954  | 0.23712804 | 0.21311567 | 0.42303301 | LINC01006    |
| NA        | ENSG00000182652 | 0          | NA          | NA         | NA         | NA         | OR4Q3        |
| 50863     | ENSG00000182667 | 3.92580813 | 0.20624412  | 0.46746261 | 0.00395862 | 0.0191359  | NTM          |

|           |                 |            |             |            |            |            |           |
|-----------|-----------------|------------|-------------|------------|------------|------------|-----------|
| 7267      | ENSG00000182670 | 6270.72896 | -0.53569988 | 0.06081708 | 5.25E-19   | 1.87E-17   | TTC3      |
| 9312      | ENSG00000182674 | 0          | NA          | NA         | NA         | NA         | KCNB2     |
| 116729    | ENSG00000182676 | 1.68915012 | 0.09460189  | 0.39444981 | 0.22138417 | NA         | PPP1R27   |
| 283870    | ENSG00000182685 | 68.1956213 | 0.02218538  | 0.24130194 | 0.90750757 | 0.95963244 | BRICD5    |
| 8811      | ENSG00000182687 | 1.89698084 | 0.04621535  | 0.38011388 | 0.56749294 | NA         | GALR2     |
| 389075    | ENSG00000182698 | 0          | NA          | NA         | NA         | NA         | RESP18    |
| 492311    | ENSG00000182700 | 84.046996  | -0.20477609 | 0.22922057 | 0.27111488 | 0.49452232 | IGIP      |
| 25987     | ENSG00000182704 | 778.304601 | 0.37735652  | 0.0923568  | 2.47E-05   | 0.00021739 | TSKU      |
| NA        | ENSG00000182707 | 0          | NA          | NA         | NA         | NA         | FXYD6P3   |
| 100272147 | ENSG00000182712 | 74.7021254 | -0.13793868 | 0.22704024 | 0.45345703 | 0.67663865 | CMC4      |
| 302       | ENSG00000182718 | 1091.19499 | 0.95920695  | 0.1107401  | 6.51E-19   | 2.29E-17   | ANXA2     |
| NA        | ENSG00000182722 | 0.36237696 | 0.00090817  | 0.38336443 | 0.96722566 | NA         | SEPHS1P1  |
| 9628      | ENSG00000182732 | 0.173733   | 0.01914545  | 0.38484597 | 0.78225479 | NA         | RGS6      |
| 3214      | ENSG00000182742 | 0          | NA          | NA         | NA         | NA         | HOXB4     |
| 340146    | ENSG00000182747 | 749.365496 | -1.26765064 | 0.11927204 | 2.22E-27   | 1.15E-25   | SLC35D3   |
| 164091    | ENSG00000182749 | 534.606489 | 0.09780473  | 0.11035771 | 0.3552001  | 0.58555629 | PAQR7     |
| 5069      | ENSG00000182752 | 68.6738558 | 0.04364174  | 0.26779302 | 0.82179087 | 0.91847813 | PAPPA     |
| 389692    | ENSG00000182759 | 0.74659737 | -0.03303578 | 0.38644226 | 0.4112877  | NA         | MAFA      |
| 51335     | ENSG00000182768 | 2987.97264 | -0.02431481 | 0.05855425 | 0.67377985 | 0.83989647 | NGRN      |
| 2894      | ENSG00000182771 | 264.391328 | -1.69983788 | 0.15889652 | 7.95E-28   | 4.23E-26   | GRID1     |
| 6218      | ENSG00000182774 | 13759.354  | -0.1388492  | 0.0514415  | 0.00639476 | 0.0286199  | RPS17     |
| NA        | ENSG00000182776 | 0          | NA          | NA         | NA         | NA         |           |
| 338442    | ENSG00000182782 | 0.61725667 | -0.01616397 | 0.38340632 | 0.71508012 | NA         | HCAR2     |
| 343563    | ENSG00000182783 | 0          | NA          | NA         | NA         | NA         | OR2T29    |
| 55231     | ENSG00000182791 | 6.2090406  | 0.04011627  | 0.35746265 | 0.77304752 | 0.89561741 | CCDC87    |
| 221357    | ENSG00000182793 | 0          | NA          | NA         | NA         | NA         | GSTA5     |
| 79098     | ENSG00000182795 | 4.11138321 | 0.27884768  | 0.51886602 | 0.03654239 | 0.11731408 | C1orf116  |
| 440104    | ENSG00000182796 | 542.378911 | 0.40737386  | 0.11057039 | 0.00011728 | 0.00087769 | TMEM198B  |
| 645864    | ENSG00000182798 | 0.64893849 | -0.03787929 | 0.38680562 | 0.40888116 | NA         | MAGEB17   |
| 1397      | ENSG00000182809 | 2193.94354 | -0.52046323 | 0.06795965 | 7.16E-15   | 1.93E-13   | CRIP2     |
| 55794     | ENSG00000182810 | 222.853385 | 0.22504724  | 0.16727384 | 0.13487664 | 0.30939444 | DDX28     |
| NA        | ENSG00000182814 | 0          | NA          | NA         | NA         | NA         | FUNDC2P2  |
| 337959    | ENSG00000182816 | 0          | NA          | NA         | NA         | NA         | KRTAP13-2 |
| 642643    | ENSG00000182824 | 0.33471731 | 0.02354391  | 0.38534154 | 0.62842204 | NA         | FAM230E   |
| 64746     | ENSG00000182827 | 1393.86311 | -0.13595276 | 0.07262066 | 0.05636595 | 0.16323171 | ACBD3     |
| 29035     | ENSG00000182831 | 1894.57746 | -0.27359139 | 0.07028962 | 7.28E-05   | 0.00057491 | C16orf72  |
| 345557    | ENSG00000182836 | 3215.9047  | -1.19766158 | 0.06759487 | 2.32E-71   | 3.87E-69   | PLCXD3    |
| 91695     | ENSG00000182841 | 228.792835 | 0.27652857  | 0.15114884 | 0.04634684 | 0.14047072 | RRP7BP    |

|           |                 |            |             |            |            |            |            |
|-----------|-----------------|------------|-------------|------------|------------|------------|------------|
| 284013    | ENSG00000182853 | 3.15406849 | -0.02567856 | 0.3716976  | 0.79673682 | 0.90658744 | VMO1       |
| 390649    | ENSG00000182854 | 0.14931947 | -0.01844332 | 0.38480212 | 0.84537521 | NA         | OR4F15     |
| 79087     | ENSG00000182858 | 590.945071 | 0.27328623  | 0.14419561 | 0.04033895 | 0.1262121  | ALG12      |
| 3932      | ENSG00000182866 | 0          | NA          | NA         | NA         | NA         | LCK        |
| 50614     | ENSG00000182870 | 0          | NA          | NA         | NA         | NA         | GALNT9     |
| 80781     | ENSG00000182871 | 1291.08811 | -0.00151768 | 0.08451586 | 0.98495952 | 0.99473578 | COL18A1    |
| 8241      | ENSG00000182872 | 2207.04903 | -0.08133003 | 0.06805043 | 0.22427772 | 0.43800275 | RBM10      |
| 100506504 | ENSG00000182873 | 58.5663039 | 0.29860578  | 0.32099988 | 0.16960171 | 0.36127312 | PRKCZ-AS1  |
| 222487    | ENSG00000182885 | 0          | NA          | NA         | NA         | NA         | ADGRG3     |
| NA        | ENSG00000182888 | 0.14931947 | -0.01844332 | 0.38480212 | 0.84537521 | NA         | RPS27AP20  |
| 2747      | ENSG00000182890 | 0.34111665 | 0.02362658  | 0.3853534  | 0.62410225 | NA         | GLUD2      |
| 339168    | ENSG00000182896 | 0          | NA          | NA         | NA         | NA         | TMEM95     |
| 126637    | ENSG00000182898 | 0          | NA          | NA         | NA         | NA         | TCHHL1     |
| 6165      | ENSG00000182899 | 6276.01539 | 0.01254535  | 0.05224009 | 0.92453796 | 0.96857287 | RPL35A     |
| 6000      | ENSG00000182901 | 178.687389 | -1.74892312 | 0.19755763 | 6.50E-20   | 2.41E-18   | RGS7       |
| 83733     | ENSG00000182902 | 3.75382409 | 0.09097394  | 0.38110037 | 0.42614263 | 0.65196405 | SLC25A18   |
| 170960    | ENSG00000182903 | 668.600993 | 0.18013489  | 0.09861928 | 0.05844691 | 0.16783712 | ZNF721     |
| NA        | ENSG00000182912 | 250.158656 | -0.18242409 | 0.32875837 | 0.36072598 | 0.59064153 | TSPEAR-AS2 |
| 56849     | ENSG00000182916 | 419.494361 | -0.27437792 | 0.11895457 | 0.01489813 | 0.05734884 | TCEAL7     |
| 28970     | ENSG00000182919 | 469.126672 | -0.02204004 | 0.14252773 | 0.86663204 | 0.94131062 | C11orf54   |
| NA        | ENSG00000182921 | 0          | NA          | NA         | NA         | NA         | CCDC75P1   |
| 80254     | ENSG00000182923 | 487.373047 | -0.13809158 | 0.10930784 | 0.18653346 | 0.38634762 | CEP63      |
| 280664    | ENSG00000182931 | 0          | NA          | NA         | NA         | NA         | WFDC10B    |
| 6734      | ENSG00000182934 | 2406.61691 | 0.23387133  | 0.06920794 | 0.00058277 | 0.0036888  | SRPRA      |
| 347741    | ENSG00000182938 | 0          | NA          | NA         | NA         | NA         | OTOP3      |
| 2130      | ENSG00000182944 | 8113.9076  | 0.07945057  | 0.05635693 | 0.1544292  | 0.33975109 | EWSR1      |
| 161753    | ENSG00000182950 | 1.80988999 | 0.0855585   | 0.39189238 | 0.25050022 | NA         | ODF3L1     |
| 10473     | ENSG00000182952 | 1330.48353 | -0.15352355 | 0.08049677 | 0.05081352 | 0.15087402 | HMGN4      |
| 221178    | ENSG00000182957 | 339.106348 | 0.30086306  | 0.14646932 | 0.02591427 | 0.08955568 | SPATA13    |
| 10052     | ENSG00000182963 | 1653.73281 | 0.1171334   | 0.09821602 | 0.21718093 | 0.42857268 | GJC1       |
| NA        | ENSG00000182965 | 0          | NA          | NA         | NA         | NA         | NPM1P14    |
| 6656      | ENSG00000182968 | 0          | NA          | NA         | NA         | NA         | SOX1       |
| 25904     | ENSG00000182973 | 774.036403 | -0.07695428 | 0.10941419 | 0.46211261 | 0.68512286 | CNOT10     |
| NA        | ENSG00000182974 | 0          | NA          | NA         | NA         | NA         | OR4M2B     |
| 9112      | ENSG00000182979 | 5988.28778 | 0.27457211  | 0.05779718 | 1.51E-06   | 1.66E-05   | MTA1       |
| 389114    | ENSG00000182983 | 300.31674  | 0.04226168  | 0.13029861 | 0.72955123 | 0.87068674 | ZNF662     |
| 23705     | ENSG00000182985 | 3686.35791 | -0.54360001 | 0.06641659 | 9.83E-17   | 2.99E-15   | CADM1      |
| 162967    | ENSG00000182986 | 1296.86085 | -0.13257804 | 0.0865134  | 0.11508591 | 0.27652954 | ZNF320     |

|        |                 |            |             |            |            |            |            |
|--------|-----------------|------------|-------------|------------|------------|------------|------------|
| 144608 | ENSG00000182993 | 39.0566859 | 0.17576946  | 0.32309272 | 0.38047231 | 0.60938575 | C12orf60   |
| 5831   | ENSG00000183010 | 3447.90184 | 0.50039068  | 0.08183751 | 3.99E-10   | 7.21E-09   | PYCR1      |
| 84316  | ENSG00000183011 | 699.259752 | -0.04687215 | 0.09690647 | 0.61622537 | 0.80322655 | NAA38      |
| 124976 | ENSG00000183018 | 46.6823325 | -0.42365113 | 0.39366423 | 0.07843673 | 0.20835248 | SPNS2      |
| 199675 | ENSG00000183019 | 0.14931947 | -0.01844332 | 0.38480212 | 0.84537521 | NA         | MCEMP1     |
| 161    | ENSG00000183020 | 2222.3679  | -0.17690089 | 0.0834091  | 0.02931159 | 0.09858313 | AP2A2      |
| NA     | ENSG00000183022 | 0          | NA          | NA         | NA         | NA         | TPM3P8     |
| 6546   | ENSG00000183023 | 97.9832383 | -0.94117601 | 0.29011116 | 0.00013872 | 0.00102161 | SLC8A1     |
| 8390   | ENSG00000183024 | 0          | NA          | NA         | NA         | NA         | OR1G1      |
| 89874  | ENSG00000183032 | 0          | NA          | NA         | NA         | NA         | SLC25A21   |
| 92736  | ENSG00000183034 | 0          | NA          | NA         | NA         | NA         | OTOP2      |
| 1538   | ENSG00000183035 | 0          | NA          | NA         | NA         | NA         | CYLC1      |
| 5121   | ENSG00000183036 | 0.173124   | -0.01911262 | 0.38486262 | 0.84537521 | NA         | PCP4       |
| 18     | ENSG00000183044 | 1417.46512 | -0.66242276 | 0.08268382 | 2.91E-16   | 8.60E-15   | ABAT       |
| 1468   | ENSG00000183048 | 785.754966 | 0.05179308  | 0.08975674 | 0.55345964 | 0.75964298 | SLC25A10   |
| 57118  | ENSG00000183049 | 708.124266 | -0.17458133 | 0.11522053 | 0.1111431  | 0.26924042 | CAMK1D     |
| 729540 | ENSG00000183054 | 860.462356 | -0.15649157 | 0.10548123 | 0.12164525 | 0.28819117 | RGPD6      |
| NA     | ENSG00000183055 | 0          | NA          | NA         | NA         | NA         | FAM133CP   |
| 145748 | ENSG00000183060 | 202.17867  | -0.16619834 | 0.17096535 | 0.27605083 | 0.50016881 | LYSMD4     |
| 164684 | ENSG00000183066 | 9.59951775 | -0.06689328 | 0.35110151 | 0.6632172  | 0.83380582 | WBP2NL     |
| 150084 | ENSG00000183067 | 0.9298696  | 0.00937803  | 0.38200548 | 0.84585339 | NA         | IGSF5      |
| 1482   | ENSG00000183072 | 0          | NA          | NA         | NA         | NA         | NKX2-5     |
| 125061 | ENSG00000183077 | 453.925712 | 0.0980781   | 0.113376   | 0.36549594 | 0.59471759 | AFMID      |
| 2621   | ENSG00000183087 | 1118.17219 | -0.35891313 | 0.08602655 | 1.78E-05   | 0.00016151 | GAS6       |
| 166752 | ENSG00000183090 | 0.173124   | -0.01911262 | 0.38486262 | 0.84537521 | NA         | FREM3      |
| 4703   | ENSG00000183091 | 21.7846093 | -0.0730346  | 0.30794126 | 0.69458437 | 0.85228239 | NEB        |
| 57596  | ENSG00000183092 | 6200.48128 | 0.62930014  | 0.06441651 | 4.41E-23   | 1.92E-21   | BEGAIN     |
| 10082  | ENSG00000183098 | 1037.19608 | -0.14145602 | 0.13079458 | 0.24828008 | 0.46743944 | GPC6       |
| 389337 | ENSG00000183111 | 258.33703  | 0.41181784  | 0.16171726 | 0.00515068 | 0.02382041 | ARHGEF37   |
| 163933 | ENSG00000183114 | 3.18077887 | 0.24723647  | 0.50048853 | 0.01436346 | 0.05564753 | FAM43B     |
| 64478  | ENSG00000183117 | 0          | NA          | NA         | NA         | NA         | CSMD1      |
| NA     | ENSG00000183122 | 0          | NA          | NA         | NA         | NA         | OR2A3P     |
| 119395 | ENSG00000183128 | 0.45049191 | -0.02733669 | 0.38571609 | 0.56128806 | NA         | CALHM3     |
| 11251  | ENSG00000183134 | 4.61036505 | 0.07344575  | 0.37378476 | 0.53723911 | 0.74759591 | PTGDR2     |
| 285753 | ENSG00000183137 | 515.678155 | -0.40938753 | 0.13850346 | 0.00151035 | 0.00842196 | CEP57L1    |
| 53820  | ENSG00000183145 | 5.34379603 | 0.19593501  | 0.4322084  | 0.13363379 | 0.3075034  | RIPPLY3    |
| NA     | ENSG00000183146 | 0          | NA          | NA         | NA         | NA         | PRORY      |
| NA     | ENSG00000183148 | 1.49319474 | -0.05783425 | 0.39048926 | 0.16515854 | NA         | ANKRD20A2P |

|           |                 |            |             |            |            |            |           |
|-----------|-----------------|------------|-------------|------------|------------|------------|-----------|
| 2842      | ENSG00000183150 | 87.5812986 | -1.4166223  | 0.33891376 | 2.05E-06   | 2.20E-05   | GPR19     |
| 125111    | ENSG00000183153 | 57.8579662 | 0.27587726  | 0.31206127 | 0.19712719 | 0.40108743 | GJD3      |
| 102723701 | ENSG00000183154 | 2.08694033 | 0.08914678  | 0.39094022 | 0.28568966 | NA         |           |
| 5877      | ENSG00000183155 | 364.855272 | -0.41059359 | 0.12560703 | 0.00053355 | 0.00341254 | RABIF     |
| 338773    | ENSG00000183160 | 1464.34697 | -0.49174017 | 0.07258829 | 5.10E-12   | 1.11E-10   | TMEM119   |
| 2188      | ENSG00000183161 | 615.902127 | 0.05566112  | 0.11094945 | 0.60091472 | 0.79174845 | FANCF     |
| 83698     | ENSG00000183166 | 0.74084089 | 0.04259458  | 0.38746842 | 0.33153098 | NA         | CALN1     |
| NA        | ENSG00000183169 | 0          | NA          | NA         | NA         | NA         | POM121L1P |
| NA        | ENSG00000183171 | 0.50081678 | -0.02974107 | 0.38592371 | 0.52183155 | NA         |           |
| 91689     | ENSG00000183172 | 179.920641 | -0.36119079 | 0.18582018 | 0.02722423 | 0.0930328  | SMDT1     |
| 200959    | ENSG00000183185 | 0          | NA          | NA         | NA         | NA         | GABRR3    |
| 126567    | ENSG00000183186 | 259.087312 | 0.08201372  | 0.14166329 | 0.53416779 | 0.74539459 | C2CD4C    |
| 4166      | ENSG00000183196 | 6.50725897 | 0.0001403   | 0.35792586 | 0.99835658 | 0.99941443 | CHST6     |
| NA        | ENSG00000183199 | 0.37844916 | 0.02407552  | 0.3854191  | 0.60038877 | NA         | HSP90AB3P |
| 388468    | ENSG00000183206 | 0          | NA          | NA         | NA         | NA         | POTEC     |
| 10856     | ENSG00000183207 | 3267.49111 | -0.0769629  | 0.06279436 | 0.21461133 | 0.42493901 | RUVBL2    |
| 390637    | ENSG00000183208 | 50.944386  | -0.28314974 | 0.2985247  | 0.18121066 | 0.378484   | GDPGP1    |
| 29119     | ENSG00000183230 | 1.95964608 | -0.09244964 | 0.39567729 | 0.18279773 | NA         | CTNNA3    |
| NA        | ENSG00000183239 | 0.62281892 | -0.04506767 | 0.38756765 | 0.37413999 | NA         |           |
| NA        | ENSG00000183242 | 2.32339574 | 0.16804855  | 0.43703502 | 0.01376837 | NA         | WT1-AS    |
| 150221    | ENSG00000183246 | 1.27594059 | 0.04712006  | 0.38669214 | 0.32115792 | NA         | RIMBP3C   |
| 80164     | ENSG00000183248 | 1421.96355 | 0.29190567  | 0.09679058 | 0.00178339 | 0.00969646 | PRR36     |
| NA        | ENSG00000183249 | 0          | NA          | NA         | NA         | NA         | NF1P3     |
| 84536     | ENSG00000183250 | 143.566392 | -0.39579906 | 0.20651129 | 0.02547023 | 0.08840612 | LINC01547 |
| 79339     | ENSG00000183251 | 0          | NA          | NA         | NA         | NA         | OR51B4    |
| 754       | ENSG00000183255 | 3824.58761 | 0.03757725  | 0.05343429 | 0.47877357 | 0.70035842 | PTTG1IP   |
| 51428     | ENSG00000183258 | 1397.32833 | 0.1660517   | 0.08421041 | 0.04306489 | 0.13277051 | DDX41     |
| 140701    | ENSG00000183260 | 0          | NA          | NA         | NA         | NA         | ABHD16B   |
| 390079    | ENSG00000183269 | 0          | NA          | NA         | NA         | NA         | OR52E8    |
| 160777    | ENSG00000183273 | 0.16735865 | 0.01897177  | 0.38482933 | 0.78225479 | NA         | CCDC60    |
| 5343      | ENSG00000183281 | 66.8019665 | 0.02636458  | 0.2320165  | 0.88813123 | 0.95127807 | PLGLB1    |
| 9802      | ENSG00000183283 | 1409.60354 | 0.1063095   | 0.08276416 | 0.18836657 | 0.38884536 | DAZAP2    |
| 147372    | ENSG00000183287 | 173.623839 | -1.31987244 | 0.21432024 | 6.63E-11   | 1.30E-09   | CCBE1     |
| 9403      | ENSG00000183291 | 1368.1843  | -0.15215822 | 0.07965795 | 0.05046875 | 0.14998501 | SELENOF   |
| 150527    | ENSG00000183292 | 0          | NA          | NA         | NA         | NA         | PRSS40A   |
| 646743    | ENSG00000183292 | 0          | NA          | NA         | NA         | NA         | PRSS40A   |
| NA        | ENSG00000183298 | 1.13550476 | -0.03439825 | 0.38119686 | 0.60753377 | NA         | RPSAP19   |
| 120065    | ENSG00000183303 | 0          | NA          | NA         | NA         | NA         | OR5P2     |

|           |                 |            |             |            |            |            |           |
|-----------|-----------------|------------|-------------|------------|------------|------------|-----------|
| 171482    | ENSG00000183304 | 0          | NA          | NA         | NA         | NA         | FAM9A     |
| 266740    | ENSG00000183305 | 881.252936 | -0.51348747 | 0.11562946 | 3.34E-06   | 3.46E-05   | MAGEA2B   |
| 27439     | ENSG00000183307 | 238.799174 | -1.32439814 | 0.16156031 | 2.34E-17   | 7.39E-16   | TMEM121B  |
| NA        | ENSG00000183308 | 1.96235268 | -0.04398916 | 0.37897764 | 0.59876214 | NA         |           |
| 9831      | ENSG00000183309 | 1128.71671 | -0.12237347 | 0.08476308 | 0.13830036 | 0.31462897 | ZNF623    |
| 127068    | ENSG00000183310 | 0          | NA          | NA         | NA         | NA         | OR2T34    |
| 338751    | ENSG00000183313 | 0          | NA          | NA         | NA         | NA         | OR52L1    |
| 284656    | ENSG00000183317 | 142.735155 | -1.55226283 | 0.97925863 | 0.00332039 | 0.01647737 | EPHA10    |
| 388333    | ENSG00000183318 | 0          | NA          | NA         | NA         | NA         | SPDYE4    |
| 202243    | ENSG00000183323 | 299.760637 | -0.25291979 | 0.1491481  | 0.06487628 | 0.18151817 | CCDC125   |
| 283677    | ENSG00000183324 | 0          | NA          | NA         | NA         | NA         | REC114    |
| 552900    | ENSG00000183336 | 477.37078  | -0.00147351 | 0.13222623 | 0.98931465 | 0.99604194 | BOLA2     |
| 54880     | ENSG00000183337 | 2913.81868 | -0.01233759 | 0.08238089 | 0.87688773 | 0.94566867 | BCOR      |
| 8690      | ENSG00000183340 | 256.046049 | 0.20147875  | 0.15844579 | 0.16300904 | 0.35195933 | JRKL      |
| 219621    | ENSG00000183346 | 50.9948343 | 0.00089343  | 0.25461116 | 0.9978654  | 0.99926338 | CABCOCO1  |
| 163351    | ENSG00000183347 | 0.49008205 | -0.00828035 | 0.38275294 | 0.84705846 | NA         | GBP6      |
| 158358    | ENSG00000183354 | 613.373373 | -0.13922118 | 0.11202212 | 0.19159747 | 0.39346794 | KIAA2026  |
| 341277    | ENSG00000183378 | 0          | NA          | NA         | NA         | NA         | OVCH2     |
| 646658    | ENSG00000183379 | 0.14931947 | -0.01844332 | 0.38480212 | 0.84537521 | NA         | SYNDIG1L  |
| 2275      | ENSG00000183386 | 216.839551 | -0.33024555 | 0.15925611 | 0.02249359 | 0.08003652 | FHL3      |
| 120793    | ENSG00000183389 | 0          | NA          | NA         | NA         | NA         | OR56A4    |
| 5367      | ENSG00000183395 | 0.34746601 | 0.02370763  | 0.3853651  | 0.61987128 | NA         | PMCH      |
| 440955    | ENSG00000183396 | 0.173733   | 0.01914545  | 0.38484597 | 0.78225479 | NA         | TMEM89    |
| 100128569 | ENSG00000183397 | 10.6974654 | 0.19708328  | 0.39555933 | 0.25552079 | 0.47650319 | C19orf71  |
| 126075    | ENSG00000183401 | 56.3465642 | 0.33277442  | 0.28726674 | 0.11767454 | 0.28128469 | CCDC159   |
| 54101     | ENSG00000183421 | 0.66333729 | 0.00158865  | 0.38130712 | 0.97431639 | NA         | RIPK4     |
| 345193    | ENSG00000183423 | 3.11784857 | 0.14673233  | 0.41199684 | 0.1522651  | 0.33663244 | LRIT3     |
| 9284      | ENSG00000183426 | 2178.91567 | 0.13164073  | 0.07050357 | 0.05743543 | 0.16567591 | NPIPA1    |
| 642799    | ENSG00000183426 | 2178.91567 | 0.13164073  | 0.07050357 | 0.05743543 | 0.16567591 | NPIPA1    |
| 10946     | ENSG00000183431 | 2064.72768 | -0.25082029 | 0.08516101 | 0.00246207 | 0.01280072 | SF3A3     |
| NA        | ENSG00000183432 | 0          | NA          | NA         | NA         | NA         | ZBTB8OSP1 |
| 51270     | ENSG00000183434 | 0.29863895 | -0.02292439 | 0.3852726  | 0.68753245 | NA         | TFDP3     |
| 391712    | ENSG00000183439 | 0.70350977 | -0.04037975 | 0.3871535  | 0.37490811 | NA         | TRIM61    |
| NA        | ENSG00000183444 | 41.8999704 | 0.05755485  | 0.26242981 | 0.76684628 | 0.89261979 | OR7E38P   |
| 2903      | ENSG00000183454 | 0          | NA          | NA         | NA         | NA         | GRIN2A    |
| NA        | ENSG00000183458 | 1707.62447 | 0.42273476  | 0.08104768 | 9.26E-08   | 1.23E-06   | PKD1P3    |
| 646625    | ENSG00000183463 | 0          | NA          | NA         | NA         | NA         | URAD      |
| 286023    | ENSG00000183470 | 0          | NA          | NA         | NA         | NA         |           |

|        |                 |            |             |            |            |            |             |
|--------|-----------------|------------|-------------|------------|------------|------------|-------------|
| 728340 | ENSG00000183474 | 1070.69753 | 0.09265866  | 0.091351   | 0.29662484 | 0.52325392 | GTF2H2C     |
| 140460 | ENSG00000183475 | 357.105754 | -0.22577618 | 0.13459501 | 0.07221512 | 0.19574701 | ASB7        |
| 646892 | ENSG00000183476 | 21.2075591 | 0.18275889  | 0.334205   | 0.36048215 | 0.5904664  | SH2D7       |
| 11219  | ENSG00000183479 | 8.32235357 | -0.06549389 | 0.36669979 | 0.61050156 | 0.7987352  | TREX2       |
| 29933  | ENSG00000183484 | 0.67813863 | 0.00201297  | 0.38127911 | 0.96796511 | NA         | GPR132      |
| 4600   | ENSG00000183486 | 0          | NA          | NA         | NA         | NA         | MX2         |
| 57634  | ENSG00000183495 | 3821.61799 | -0.02216248 | 0.05937145 | 0.70459866 | 0.85803894 | EP400       |
| 84206  | ENSG00000183496 | 1909.00365 | 0.32876382  | 0.06795378 | 8.53E-07   | 9.79E-06   | MEX3B       |
| NA     | ENSG00000183506 | 1086.86217 | 0.15130766  | 0.15032468 | 0.27278616 | 0.49638425 | PI4KAP2     |
| 54855  | ENSG00000183508 | 0.48674198 | 0.01127224  | 0.38339997 | 0.7864547  | NA         | TENT5C      |
| 493753 | ENSG00000183513 | 689.34976  | 0.0287561   | 0.10294749 | 0.77280314 | 0.89561741 | COA5        |
| NA     | ENSG00000183514 | 0          | NA          | NA         | NA         | NA         | TDGF1P2     |
| 51118  | ENSG00000183520 | 842.189234 | -0.08066967 | 0.09850859 | 0.39595411 | 0.62540637 | UTP11       |
| 8624   | ENSG00000183527 | 265.838524 | -0.28309486 | 0.1567402  | 0.04714193 | 0.14220708 | PSMG1       |
| 253143 | ENSG00000183530 | 1800.18372 | -0.22808034 | 0.08068785 | 0.00372133 | 0.01816736 | PRR14L      |
| 378832 | ENSG00000183535 | 1.70346212 | -0.0263742  | 0.37665076 | 0.7499803  | NA         | COL18A1-AS1 |
| 8302   | ENSG00000183542 | 0          | NA          | NA         | NA         | NA         | KLRC4       |
| 54988  | ENSG00000183549 | 0          | NA          | NA         | NA         | NA         | ACSM5       |
| 399814 | ENSG00000183559 | 0          | NA          | NA         | NA         | NA         | C10orf120   |
| 390243 | ENSG00000183560 | 0          | NA          | NA         | NA         | NA         | IZUMO1R     |
| NA     | ENSG00000183562 | 5.63414418 | -0.12360921 | 0.38785469 | 0.33222153 | 0.56138959 |             |
| 317716 | ENSG00000183566 | 0          | NA          | NA         | NA         | NA         | BPIFA4P     |
| 253190 | ENSG00000183569 | 26.2186865 | 0.07221953  | 0.31236504 | 0.700407   | 0.8555116  | SERHL2      |
| 54039  | ENSG00000183570 | 905.062567 | -0.95520975 | 0.13613263 | 3.06E-13   | 7.23E-12   | PCBP3       |
| 145814 | ENSG00000183571 | 0.4479964  | 0.02634439  | 0.38557832 | 0.58562477 | NA         | PGPEP1L     |
| 84193  | ENSG00000183576 | 606.650351 | -0.23638342 | 0.10518962 | 0.01907146 | 0.07010892 | SETD3       |
| 388121 | ENSG00000183578 | 1.62877765 | 0.04686899  | 0.3828543  | 0.50010504 | NA         | TNFAIP8L3   |
| 84133  | ENSG00000183579 | 451.18227  | 0.07232069  | 0.11112043 | 0.49712954 | 0.71502465 | ZNRF3       |
| 23194  | ENSG00000183580 | 799.15552  | 0.56792935  | 0.11949725 | 6.53E-07   | 7.64E-06   | FBXL7       |
| NA     | ENSG00000183586 | 0          | NA          | NA         | NA         | NA         | HMG3P1      |
| 128989 | ENSG00000183597 | 288.814562 | -0.23805204 | 0.16469849 | 0.10851755 | 0.2643325  | TANGO2      |
| 653604 | ENSG00000183598 | 4.56898049 | -0.09629338 | 0.38440524 | 0.38151357 | 0.61056943 | H3C13       |
| 595101 | ENSG00000183604 | 542.704554 | 0.11340265  | 0.12231395 | 0.32803069 | 0.55648815 | SMG1P5      |
| 119559 | ENSG00000183605 | 388.155232 | -0.13972306 | 0.12562703 | 0.23795844 | 0.45535257 | SFXN4       |
| 200504 | ENSG00000183607 | 0          | NA          | NA         | NA         | NA         | GKN2        |
| 84734  | ENSG00000183615 | 9.49116109 | 0.54746156  | 0.80730728 | 0.03168835 | 0.10480027 | FAM167B     |
| 116541 | ENSG00000183617 | 203.530296 | -0.10782347 | 0.15339013 | 0.44203063 | 0.66680698 | MRPL54      |
| 220929 | ENSG00000183621 | 97.4255286 | 0.06571326  | 0.20348937 | 0.70503767 | 0.85803894 | ZNF438      |



|           |                 |            |             |            |            |            |           |
|-----------|-----------------|------------|-------------|------------|------------|------------|-----------|
| 56941     | ENSG00000183624 | 638.867134 | -0.22392539 | 0.1056091  | 0.02694508 | 0.09231401 | HMCES     |
| 1232      | ENSG00000183625 | 0          | NA          | NA         | NA         | NA         | CCR3      |
| 105377067 | ENSG00000183625 | 0          | NA          | NA         | NA         | NA         | CCR3      |
| 8214      | ENSG00000183628 | 100.826678 | 0.55621206  | 0.25213645 | 0.00756369 | 0.03297377 | DGCR6     |
| 283768    | ENSG00000183629 | 0          | NA          | NA         | NA         | NA         | GOLGA8G   |
| 100130613 | ENSG00000183631 | 0          | NA          | NA         | NA         | NA         | PRR32     |
| 24150     | ENSG00000183632 | 16.1842529 | -0.24492703 | 0.39041187 | 0.218635   | 0.43050004 | TP53TG3   |
| 102723655 | ENSG00000183632 | 16.1842529 | -0.24492703 | 0.39041187 | 0.218635   | 0.43050004 | TP53TG3   |
| 102723713 | ENSG00000183632 | 16.1842529 | -0.24492703 | 0.39041187 | 0.218635   | 0.43050004 | TP53TG3   |
| 102724101 | ENSG00000183632 | 16.1842529 | -0.24492703 | 0.39041187 | 0.218635   | 0.43050004 | TP53TG3   |
| 102724127 | ENSG00000183632 | 16.1842529 | -0.24492703 | 0.39041187 | 0.218635   | 0.43050004 | TP53TG3   |
| 94137     | ENSG00000183638 | 5.61302993 | 0.1493574   | 0.39942894 | 0.25712386 | 0.47814578 | RP1L1     |
| 337879    | ENSG00000183640 | 0          | NA          | NA         | NA         | NA         | KRTAP8-1  |
| 145858    | ENSG00000183643 | 0.60279648 | -0.02752712 | 0.38588313 | 0.49730371 | NA         | C15orf32  |
| 399949    | ENSG00000183644 | 0.50207596 | 0.02562368  | 0.38565771 | 0.52549886 | NA         | HOATZ     |
| 348327    | ENSG00000183647 | 223.712586 | -0.01264424 | 0.16380931 | 0.93172742 | 0.9715756  | ZNF530    |
| 4707      | ENSG00000183648 | 335.903068 | -0.28513905 | 0.12920994 | 0.01869577 | 0.06893219 | NDUFB1    |
| 441061    | ENSG00000183654 | 836.940151 | -1.17085801 | 0.09787517 | 6.14E-34   | 3.99E-32   | MARCHF11  |
| 64410     | ENSG00000183655 | 602.648348 | -0.09406624 | 0.10773814 | 0.36113867 | 0.59092711 | KLHL25    |
| 407738    | ENSG00000183662 | 0.16735865 | 0.01897177  | 0.38482933 | 0.78225479 | NA         | TAF1      |
| NA        | ENSG00000183663 | 0          | NA          | NA         | NA         | NA         | GAPDHP30  |
| 55039     | ENSG00000183665 | 289.98739  | 0.20048785  | 0.15370822 | 0.15381039 | 0.33890581 | TRMT12    |
| 728411    | ENSG00000183666 | 284.8359   | 0.16691142  | 0.15790118 | 0.24559542 | 0.46467796 | GUSBP1    |
| 5678      | ENSG00000183668 | 0          | NA          | NA         | NA         | NA         | PSG9      |
| 2825      | ENSG00000183671 | 13.6967807 | 0.04221513  | 0.34937051 | 0.7796528  | 0.89925062 | GPR1      |
| NA        | ENSG00000183674 | 0          | NA          | NA         | NA         | NA         | LINC00518 |
| 353500    | ENSG00000183682 | 130.331849 | -0.22868713 | 0.19493095 | 0.17411914 | 0.36742436 | BMP8A     |
| 10189     | ENSG00000183684 | 2385.95601 | 0.26001227  | 0.08755041 | 0.00224266 | 0.01181162 | ALYREF    |
| 359845    | ENSG00000183688 | 1653.66952 | 0.33919367  | 0.07659365 | 5.98E-06   | 5.93E-05   | RFLNB     |
| 80258     | ENSG00000183690 | 13.7750127 | 0.71964844  | 0.77071215 | 0.02414305 | 0.08477229 | EFHC2     |
| 9241      | ENSG00000183691 | 0          | NA          | NA         | NA         | NA         | NOG       |
| 117194    | ENSG00000183695 | 0          | NA          | NA         | NA         | NA         | MRGPRX2   |
| 7378      | ENSG00000183696 | 82.6515048 | 0.01241706  | 0.22603636 | 0.94729638 | 0.97843954 | UPP1      |
| NA        | ENSG00000183704 | 0          | NA          | NA         | NA         | NA         | SLC9B1P1  |
| 283694    | ENSG00000183706 | 0          | NA          | NA         | NA         | NA         | OR4N4     |
| 282616    | ENSG00000183709 | 0          | NA          | NA         | NA         | NA         | IFNL2     |
| 4978      | ENSG00000183715 | 1.18815028 | 0.06717315  | 0.39222996 | 0.15327856 | NA         | OPCML     |
| 84851     | ENSG00000183718 | 656.182941 | 0.00700202  | 0.1119826  | 0.94893184 | 0.97900074 | TRIM52    |

|           |                 |            |             |            |            |            |           |
|-----------|-----------------|------------|-------------|------------|------------|------------|-----------|
| 10186     | ENSG00000183722 | 126.66632  | 0.0204      | 0.19132454 | 0.90349323 | 0.95785538 | LHFPL6    |
| 146223    | ENSG00000183723 | 1066.72043 | 0.20333415  | 0.08461731 | 0.01363161 | 0.05344884 | CMTM4     |
| 23585     | ENSG00000183726 | 1011.94453 | 0.0290556   | 0.08455879 | 0.72528511 | 0.86857346 | TMEM50A   |
| 344018    | ENSG00000183733 | 1.02999244 | 0.03390006  | 0.3815362  | 0.60064137 | NA         | FIGLA     |
| 430       | ENSG00000183734 | 0          | NA          | NA         | NA         | NA         | ASCL2     |
| 29110     | ENSG00000183735 | 528.001095 | -0.18126435 | 0.11099386 | 0.08685592 | 0.22472894 | TBK1      |
| 23466     | ENSG00000183741 | 1014.91667 | -0.24866338 | 0.08538821 | 0.00274685 | 0.01405297 | CBX6      |
| 346389    | ENSG00000183742 | 0.36122628 | -0.00938616 | 0.38365907 | 0.92306001 | NA         | MACC1     |
| 123876    | ENSG00000183747 | 0          | NA          | NA         | NA         | NA         | ACSM2A    |
| 10607     | ENSG00000183751 | 981.934489 | 0.19749443  | 0.09670863 | 0.03456711 | 0.11226248 | TBL3      |
| 9083      | ENSG00000183753 | 0          | NA          | NA         | NA         | NA         | BPY2      |
| 390928    | ENSG00000183760 | 0          | NA          | NA         | NA         | NA         | ACP7      |
| 83999     | ENSG00000183762 | 709.281892 | 0.5825542   | 0.11737135 | 2.16E-07   | 2.73E-06   | KREMEN1   |
| 10293     | ENSG00000183763 | 302.701009 | -0.04207861 | 0.14215569 | 0.74887582 | 0.88205755 | TRAIP     |
| 11200     | ENSG00000183765 | 283.094731 | 0.00029895  | 0.1496135  | 0.99923868 | 0.99963176 | CHEK2     |
| 668       | ENSG00000183770 | 0          | NA          | NA         | NA         | NA         | FOXL2     |
| 150209    | ENSG00000183773 | 39.9955936 | 0.1891163   | 0.30378423 | 0.35434173 | 0.58485041 | AIFM3     |
| 57528     | ENSG00000183775 | 25.1264103 | -0.06896403 | 0.30254519 | 0.71536661 | 0.86274919 | KCTD16    |
| 10317     | ENSG00000183778 | 75.5655546 | -0.07770025 | 0.29181203 | 0.6840146  | 0.84597592 | B3GALT5   |
| 80139     | ENSG00000183779 | 190.57416  | -1.41074038 | 0.19794753 | 9.11E-14   | 2.24E-12   | ZNF703    |
| 148641    | ENSG00000183780 | 392.628697 | -1.82970776 | 0.13489259 | 5.07E-43   | 4.16E-41   | SLC35F3   |
| 386617    | ENSG00000183783 | 0          | NA          | NA         | NA         | NA         | KCTD8     |
| NA        | ENSG00000183784 | 0          | NA          | NA         | NA         | NA         | DOCK8-AS1 |
| 51807     | ENSG00000183785 | 38.2014817 | -0.1922599  | 0.32512115 | 0.3404433  | 0.57071357 | TUBA8     |
| 100288332 | ENSG00000183793 | 24.3014879 | -0.1862385  | 0.40354043 | 0.23496489 | 0.45186105 | NPIPA5    |
| 90187     | ENSG00000183798 | 56.3057157 | -0.49273219 | 0.3204256  | 0.03505683 | 0.11342589 | EMILIN3   |
| 283298    | ENSG00000183801 | 0.44808424 | 0.02634827  | 0.38557859 | 0.58559402 | NA         | OLFML1    |
| 221303    | ENSG00000183807 | 32.5547868 | 2.36937783  | 0.47570963 | 3.97E-08   | 5.54E-07   | FAM162B   |
| 389677    | ENSG00000183808 | 1362.28683 | -0.03092918 | 0.09195066 | 0.72808996 | 0.87004185 | RBM12B    |
| 1233      | ENSG00000183813 | 0          | NA          | NA         | NA         | NA         | CCR4      |
| 286826    | ENSG00000183814 | 448.991986 | -0.11691845 | 0.11720607 | 0.29393792 | 0.52021105 | LIN9      |
| 107985578 | ENSG00000183822 | 0          | NA          | NA         | NA         | NA         | NCF4-AS1  |
| 114781    | ENSG00000183826 | 432.235308 | -0.17104354 | 0.13363928 | 0.1704172  | 0.36231003 | BTBD9     |
| 256281    | ENSG00000183828 | 94.9110855 | -0.05992958 | 0.21205522 | 0.73396271 | 0.87327664 | NUDT14    |
| 339416    | ENSG00000183831 | 116.495445 | 0.08893599  | 0.18999031 | 0.59190992 | 0.78646482 | ANKRD45   |
| 89876     | ENSG00000183833 | 143.417404 | 0.38667709  | 0.22488095 | 0.03933805 | 0.12396233 | CFAP91    |
| 29944     | ENSG00000183837 | 56.0348515 | -0.87040695 | 0.3393478  | 0.00129319 | 0.00737693 | PNMA3     |
| 2863      | ENSG00000183840 | 6.00777454 | 1.98895326  | 1.91822416 | 0.00704353 | 0.03113025 | GPR39     |

|           |                 |            |             |            |            |            |             |
|-----------|-----------------|------------|-------------|------------|------------|------------|-------------|
| 54097     | ENSG00000183844 | 0          | NA          | NA         | NA         | NA         | FAM3B       |
| 100129543 | ENSG00000183850 | 166.932057 | -0.2055263  | 0.18282898 | 0.20083115 | 0.40608337 | ZNF730      |
| 55243     | ENSG00000183853 | 0          | NA          | NA         | NA         | NA         | KIRREL1     |
| 128239    | ENSG00000183856 | 2726.38364 | 0.2348702   | 0.06033777 | 7.97E-05   | 0.00062137 | IQGAP3      |
| 1260      | ENSG00000183862 | 0          | NA          | NA         | NA         | NA         | CNGA2       |
| 10766     | ENSG00000183864 | 471.910589 | 0.07714513  | 0.12317642 | 0.5093292  | 0.72495095 | TOB2        |
| 6331      | ENSG00000183873 | 145.925391 | -0.72211182 | 0.19605779 | 4.65E-05   | 0.00038373 | SCN5A       |
| 340075    | ENSG00000183876 | 0          | NA          | NA         | NA         | NA         | ARSI        |
| 7404      | ENSG00000183878 | 0          | NA          | NA         | NA         | NA         | UTY         |
| 149563    | ENSG00000183888 | 0          | NA          | NA         | NA         | NA         | SRARP       |
| NA        | ENSG00000183889 | 3359.91575 | -0.20828063 | 0.1002947  | 0.03080348 | 0.10237631 |             |
| 130502    | ENSG00000183891 | 111.84851  | 0.25079921  | 0.2114047  | 0.15982258 | 0.3473795  | TTC32       |
| 219527    | ENSG00000183908 | 0.14931947 | -0.01844332 | 0.38480212 | 0.84537521 | NA         | LRRC55      |
| NA        | ENSG00000183909 | 0          | NA          | NA         | NA         | NA         | OR4G2P      |
| NA        | ENSG00000183911 | 0.173733   | 0.01914545  | 0.38484597 | 0.78225479 | NA         | RPL21P132   |
| 146754    | ENSG00000183914 | 11.8334534 | 0.16545937  | 0.4066389  | 0.19676758 | 0.40043787 | DNAH2       |
| 4068      | ENSG00000183918 | 0          | NA          | NA         | NA         | NA         | SH2D1A      |
| 100288072 | ENSG00000183921 | 0.18922458 | 0.01954053  | 0.38488496 | 0.78225479 | NA         | SDR42E2     |
| NA        | ENSG00000183929 | 90.1944052 | -0.15734297 | 0.22407801 | 0.38959918 | 0.61876783 | DUSP5P1     |
| 93164     | ENSG00000183935 | 43.4496271 | -0.16832391 | 0.28530918 | 0.4006072  | 0.6290998  | HTR7P1      |
| NA        | ENSG00000183938 | 0          | NA          | NA         | NA         | NA         | TRBV21OR9-2 |
| 5613      | ENSG00000183943 | 1193.03794 | 0.0690996   | 0.09266628 | 0.44344604 | 0.66848792 | PRKX        |
| 387893    | ENSG00000183955 | 1115.92505 | -0.2151225  | 0.10282345 | 0.02932941 | 0.09860958 | KMT5A       |
| 131096    | ENSG00000183960 | 501.342653 | -0.31865283 | 0.1116691  | 0.00276331 | 0.01412629 | KCNH8       |
| 6525      | ENSG00000183963 | 632.082081 | 0.2999592   | 0.09979838 | 0.00180475 | 0.00979648 | SMTN        |
| 283869    | ENSG00000183971 | 121.220949 | -0.10280374 | 0.19728241 | 0.54299779 | 0.75099868 | NPW         |
| 151649    | ENSG00000183977 | 5.55463117 | 0.0602902   | 0.36496604 | 0.64604706 | 0.82370422 | PP2D1       |
| 28958     | ENSG00000183978 | 407.471486 | 0.07619686  | 0.11699642 | 0.49466937 | 0.71350347 | COA3        |
| 256933    | ENSG00000183979 | 25.4317907 | 0.35271198  | 0.38398128 | 0.12408994 | 0.29194169 | NPB         |
| NA        | ENSG00000183981 | 0          | NA          | NA         | NA         | NA         | MAGEA13P    |
| 256435    | ENSG00000184005 | 353.177909 | -0.10213322 | 0.15095229 | 0.46045089 | 0.68357869 | ST6GALNAC3  |
| 8073      | ENSG00000184007 | 2536.76397 | -0.32936649 | 0.06225721 | 7.89E-08   | 1.05E-06   | PTP4A2      |
| 71        | ENSG00000184009 | 35005.2675 | 0.09164841  | 0.05152944 | 0.07229325 | 0.19588883 | ACTG1       |
| 7113      | ENSG00000184012 | 0          | NA          | NA         | NA         | NA         | TMPRSS2     |
| 23258     | ENSG00000184014 | 2035.28055 | -0.0216186  | 0.09772543 | 0.81729081 | 0.91682968 | DENND5A     |
| 127069    | ENSG00000184022 | 0.16735865 | 0.01897177  | 0.38482933 | 0.78225479 | NA         | OR2T10      |
| 10281     | ENSG00000184029 | 0          | NA          | NA         | NA         | NA         | DSCR4       |
| 337976    | ENSG00000184032 | 0          | NA          | NA         | NA         | NA         | KRTAP20-2   |

|        |                 |            |             |            |            |            |            |
|--------|-----------------|------------|-------------|------------|------------|------------|------------|
| 1485   | ENSG00000184033 | 0.34746601 | 0.02370763  | 0.3853651  | 0.61987128 | NA         | CTAG1B     |
| 56616  | ENSG00000184047 | 1243.15823 | -0.03334015 | 0.09257128 | 0.70979727 | 0.860757   | DIABLO     |
| NA     | ENSG00000184055 | 0          | NA          | NA         | NA         | NA         | OR7E87P    |
| 26276  | ENSG00000184056 | 188.012496 | 0.19306063  | 0.18531844 | 0.23517847 | 0.45199466 | VPS33B     |
| 6899   | ENSG00000184058 | 4.59591499 | 0.00181957  | 0.36722786 | 0.98902418 | 0.99604194 | TBX1       |
| 55803  | ENSG00000184060 | 9.71966644 | -0.06891831 | 0.36813944 | 0.57786718 | 0.77608611 | ADAP2      |
| NA     | ENSG00000184068 | 43.6268152 | -0.07432663 | 0.27610491 | 0.70019738 | 0.85541355 | SREBF2-AS1 |
| 29796  | ENSG00000184076 | 795.10979  | -0.08241164 | 0.09100843 | 0.35070053 | 0.58113472 | UQCR10     |
| 54954  | ENSG00000184083 | 435.818461 | 0.06766321  | 0.12396187 | 0.56485266 | 0.76715609 | FAM120C    |
| NA     | ENSG00000184084 | 0          | NA          | NA         | NA         | NA         |            |
| NA     | ENSG00000184100 | 0.67935032 | 0.0029718   | 0.38128818 | 0.95334318 | NA         | BRD7P2     |
| NA     | ENSG00000184106 | 0          | NA          | NA         | NA         | NA         | TREML3P    |
| 339976 | ENSG00000184108 | 0          | NA          | NA         | NA         | NA         | TRIML1     |
| 8663   | ENSG00000184110 | 18975.8737 | -0.07107432 | 0.0510278  | 0.15933313 | 0.34688536 | EIF3C      |
| NA     | ENSG00000184111 | 0          | NA          | NA         | NA         | NA         | RPL11P4    |
| 7122   | ENSG00000184113 | 13.0200556 | 0.04455294  | 0.33436326 | 0.7942049  | 0.90579008 | CLDN5      |
| NA     | ENSG00000184115 | 0          | NA          | NA         | NA         | NA         |            |
| 8508   | ENSG00000184117 | 3907.22328 | 0.04429369  | 0.05809635 | 0.44242593 | 0.66720358 | NIPSNAP1   |
| NA     | ENSG00000184139 | 0          | NA          | NA         | NA         | NA         | RPL7AP28   |
| 390648 | ENSG00000184140 | 0          | NA          | NA         | NA         | NA         | OR4F6      |
| 6900   | ENSG00000184144 | 159.393348 | -2.87591259 | 0.28020175 | 6.25E-26   | 3.07E-24   | CNTN2      |
| 163778 | ENSG00000184148 | 0          | NA          | NA         | NA         | NA         | SPRR4      |
| 220074 | ENSG00000184154 | 182.932525 | 0.25718273  | 0.17026628 | 0.09179522 | 0.23401187 | LRTOMT     |
| 127385 | ENSG00000184155 | 0          | NA          | NA         | NA         | NA         | OR10J5     |
| 3786   | ENSG00000184156 | 453.84702  | 0.04591886  | 0.11152275 | 0.66779697 | 0.83659884 | KCNQ3      |
| 152    | ENSG00000184160 | 292.145786 | -0.97091501 | 0.14892451 | 9.68E-12   | 2.07E-10   | ADRA2C     |
| 126382 | ENSG00000184162 | 207.619321 | -0.20574215 | 0.17357231 | 0.18304418 | 0.38122995 | NR2C2AP    |
| 388581 | ENSG00000184163 | 6.21831818 | 0.20294806  | 0.42503995 | 0.17209795 | 0.36461546 | C1QTNF12   |
| 79174  | ENSG00000184164 | 1185.59647 | 0.82247605  | 0.09018945 | 1.39E-20   | 5.38E-19   | CRELD2     |
| 4991   | ENSG00000184166 | 0          | NA          | NA         | NA         | NA         | OR1D2      |
| 152579 | ENSG00000184178 | 273.097461 | -0.20151032 | 0.14808276 | 0.13892828 | 0.31571462 | SCFD2      |
| 140739 | ENSG00000184182 | 649.498047 | 0.09855795  | 0.11166106 | 0.35586468 | 0.58600518 | UBE2F      |
| 3768   | ENSG00000184185 | 16.3435109 | -0.13809988 | 0.34481884 | 0.44985768 | 0.67340229 | KCNJ12     |
| NA     | ENSG00000184188 | 0.33471731 | 0.02354391  | 0.38534154 | 0.62842204 | NA         |            |
| 54328  | ENSG00000184194 | 1404.6745  | 0.14032003  | 0.0839047  | 0.08642527 | 0.22393591 | GPR173     |
| 5504   | ENSG00000184203 | 587.061225 | -0.23236807 | 0.13135043 | 0.05868202 | 0.16825136 | PPP1R2     |
| 64061  | ENSG00000184205 | 584.028612 | 0.10438592  | 0.11624601 | 0.34618175 | 0.57693723 | TSPYL2     |
| 643707 | ENSG00000184206 | 82.0495501 | 0.36951517  | 0.26032763 | 0.07076949 | 0.1930817  | GOLGA6L4   |

|           |                 |            |             |            |            |            |           |
|-----------|-----------------|------------|-------------|------------|------------|------------|-----------|
| 283871    | ENSG00000184207 | 722.05622  | -0.22700484 | 0.10524498 | 0.02434137 | 0.08530875 | PGP       |
| 79640     | ENSG00000184208 | 540.121829 | 0.25813076  | 0.10596717 | 0.01107912 | 0.04514474 | C22orf46  |
| 11066     | ENSG00000184209 | 350.458852 | 0.24670947  | 0.13768159 | 0.05433834 | 0.15863564 | SNRNP35   |
| 347516    | ENSG00000184210 | 0          | NA          | NA         | NA         | NA         | DGAT2L6   |
| 3654      | ENSG00000184216 | 3075.13251 | 0.03633327  | 0.06278929 | 0.55894165 | 0.7635226  | IRAK1     |
| 84319     | ENSG00000184220 | 503.653533 | -0.12659944 | 0.14255068 | 0.33723494 | 0.56754103 | CMSS1     |
| 116448    | ENSG00000184221 | 0          | NA          | NA         | NA         | NA         | OLIG1     |
| 100505621 | ENSG00000184224 | 11.7123317 | 0.17978398  | 0.38688393 | 0.28943388 | 0.51546747 | C11orf72  |
| 5101      | ENSG00000184226 | 179.55354  | -1.51955517 | 0.28875995 | 9.28E-09   | 1.41E-07   | PCDH9     |
| 641371    | ENSG00000184227 | 111.443143 | 0.03629501  | 0.19689286 | 0.83149917 | 0.9237845  | ACOT1     |
| 220323    | ENSG00000184232 | 454.642888 | -0.27319859 | 0.11958113 | 0.01577337 | 0.06006594 | OAF       |
| 220       | ENSG00000184254 | 1010.96357 | 0.86279711  | 0.12524498 | 8.49E-13   | 1.94E-11   | ALDH1A3   |
| 8338      | ENSG00000184260 | 44.8612721 | -0.0103628  | 0.25846629 | 0.95551307 | 0.9817278  | H2AC20    |
| 56660     | ENSG00000184261 | 49.9536157 | -0.38371738 | 0.33915063 | 0.09368448 | 0.23741219 | KCNK12    |
| 317772    | ENSG00000184270 | 1.54581079 | 0.03668979  | 0.38135524 | 0.58959859 | NA         | H2AC21    |
| 5463      | ENSG00000184271 | 258.331553 | 0.01675698  | 0.16119063 | 0.9100288  | 0.96139357 | POU6F1    |
| NA        | ENSG00000184274 | 0.36301683 | 0.0238952   | 0.38539247 | 0.60993574 | NA         | LINC00315 |
| 245911    | ENSG00000184276 | 0.14931947 | -0.01844332 | 0.38480212 | 0.84537521 | NA         | DEFB108B  |
| 80213     | ENSG00000184277 | 551.904922 | -0.29028838 | 0.12162075 | 0.01154986 | 0.04670794 | TM2D3     |
| 10078     | ENSG00000184281 | 705.467645 | 0.05916767  | 0.10076223 | 0.54351088 | 0.75149877 | TSSC4     |
| 4070      | ENSG00000184292 | 0          | NA          | NA         | NA         | NA         | TACSTD2   |
| 160365    | ENSG00000184293 | 0          | NA          | NA         | NA         | NA         | CLECL1    |
| 4990      | ENSG00000184302 | 122.591414 | -0.48337463 | 0.23785409 | 0.01438484 | 0.05571951 | SIX6      |
| NA        | ENSG00000184303 | 0          | NA          | NA         | NA         | NA         | DRD5P1    |
| 5587      | ENSG00000184304 | 3.05149192 | 0.19920663  | 0.44688349 | 0.06947046 | 0.19039838 | PRKD1     |
| 401145    | ENSG00000184305 | 48.5963035 | -0.81547834 | 0.37824871 | 0.00380938 | 0.01848412 | CCSER1    |
| 254887    | ENSG00000184307 | 264.96224  | -0.0199554  | 0.13910153 | 0.87663024 | 0.94566867 | ZDHHC23   |
| 374977    | ENSG00000184313 | 39.6542778 | 0.38445967  | 0.39841183 | 0.10170968 | 0.25249251 | MROH7     |
| NA        | ENSG00000184319 | 261.260526 | -0.02688116 | 0.15280958 | 0.84685882 | 0.93052693 | RPL23AP82 |
| 79470     | ENSG00000184321 | 0          | NA          | NA         | NA         | NA         | OR51J1    |
| 338324    | ENSG00000184330 | 0          | NA          | NA         | NA         | NA         | S100A7A   |
| 26576     | ENSG00000184343 | 29.6986025 | 0.18927905  | 0.3422335  | 0.33849084 | 0.56881111 | SRPK3     |
| 9573      | ENSG00000184344 | 0          | NA          | NA         | NA         | NA         | GDF3      |
| 389123    | ENSG00000184345 | 0          | NA          | NA         | NA         | NA         | IQCF2     |
| 6586      | ENSG00000184347 | 12980.3199 | 0.02277674  | 0.05287328 | 0.6641661  | 0.83431586 | SLIT3     |
| 1946      | ENSG00000184349 | 592.804258 | 0.72412801  | 0.17842056 | 9.90E-06   | 9.41E-05   | EFNA5     |
| 116534    | ENSG00000184350 | 21.3618245 | -0.28997091 | 0.39545759 | 0.17363332 | 0.3667112  | MRGPRE    |
| 337882    | ENSG00000184351 | 0          | NA          | NA         | NA         | NA         | KRTAP19-1 |

|        |                 |            |             |            |            |            |            |
|--------|-----------------|------------|-------------|------------|------------|------------|------------|
| 3009   | ENSG00000184357 | 2.30186897 | -0.04535901 | 0.3761815  | 0.63075496 | NA         | H1-5       |
| 124783 | ENSG00000184361 | 0.53636214 | 0.01011868  | 0.38269945 | 0.78318813 | NA         | SPATA32    |
| 11187  | ENSG00000184363 | 8.47080239 | -0.41950536 | 0.65833226 | 0.04013296 | 0.12570856 | PKP3       |
| 256714 | ENSG00000184368 | 390.924221 | -0.45660401 | 0.14376637 | 0.00062934 | 0.00394505 | MAP7D2     |
| 1435   | ENSG00000184371 | 34.1983067 | 1.19436467  | 0.60900225 | 0.00259547 | 0.01339596 | CSF1       |
| 10584  | ENSG00000184374 | 0          | NA          | NA         | NA         | NA         | COLEC10    |
| 84517  | ENSG00000184378 | 27.4991528 | 0.04433165  | 0.29445711 | 0.81801588 | 0.9171248  | ACTRT3     |
| 8398   | ENSG00000184381 | 145.843255 | 0.60677866  | 0.20867924 | 0.00094097 | 0.00562823 | PLA2G6     |
| 84441  | ENSG00000184384 | 106.587466 | -1.17569501 | 0.24857503 | 2.21E-07   | 2.79E-06   | MAML2      |
| 150147 | ENSG00000184385 | 0          | NA          | NA         | NA         | NA         | UMODL1-AS1 |
| 645974 | ENSG00000184388 | 0.30139824 | -0.02296476 | 0.38527817 | 0.68536535 | NA         | PABPC1L2B  |
| 127550 | ENSG00000184389 | 0.91126447 | 0.06383254  | 0.39112218 | 0.20226405 | NA         | A3GALT2    |
| 390437 | ENSG00000184394 | 0          | NA          | NA         | NA         | NA         | OR4N5      |
| 26039  | ENSG00000184402 | 1302.91603 | -0.10784683 | 0.1000177  | 0.26292987 | 0.48497991 | SS18L1     |
| 3751   | ENSG00000184408 | 0.35653705 | 0.02381602  | 0.3853809  | 0.61408977 | NA         | KCND2      |
| NA     | ENSG00000184414 | 1.37425861 | -0.0186538  | 0.38077972 | 0.75583429 | NA         | IRS3P      |
| NA     | ENSG00000184423 | 0          | NA          | NA         | NA         | NA         | RPL23AP38  |
| 116447 | ENSG00000184428 | 669.284017 | 0.05095941  | 0.09564657 | 0.58294159 | 0.77951315 | TOP1MT     |
| 9276   | ENSG00000184432 | 2442.90757 | -0.07075992 | 0.07101524 | 0.31027696 | 0.53796162 | COPB2      |
| 64922  | ENSG00000184434 | 0.4990887  | 0.01258375  | 0.38346215 | 0.76502333 | NA         | LRRC19     |
| 80764  | ENSG00000184436 | 527.303755 | -0.28740552 | 0.11570132 | 0.00878399 | 0.03728592 | THAP7      |
| NA     | ENSG00000184441 | 90.1645305 | 0.00409555  | 0.21479513 | 0.98678625 | 0.99565021 |            |
| 9735   | ENSG00000184445 | 2140.93762 | -0.03318274 | 0.07872645 | 0.66573967 | 0.83494641 | KNTC1      |
| 2826   | ENSG00000184451 | 57.130177  | -0.10165589 | 0.25437626 | 0.59569048 | 0.78816266 | CCR10      |
| 400746 | ENSG00000184454 | 0          | NA          | NA         | NA         | NA         | NCMAP      |
| 254240 | ENSG00000184459 | 0          | NA          | NA         | NA         | NA         | BPIFC      |
| 253769 | ENSG00000184465 | 1859.77795 | 0.23836318  | 0.07245135 | 0.00079596 | 0.00485434 | WDR27      |
| 10587  | ENSG00000184470 | 407.845579 | 0.00916757  | 0.12626148 | 0.93971713 | 0.97474024 | TXNRD2     |
| 390664 | ENSG00000184471 | 0          | NA          | NA         | NA         | NA         | C1QTNF8    |
| 390083 | ENSG00000184478 | 0          | NA          | NA         | NA         | NA         | OR56A3     |
| 4303   | ENSG00000184481 | 349.309463 | -0.17474881 | 0.164094   | 0.23678134 | 0.45366893 | FOXO4      |
| 5454   | ENSG00000184486 | 753.335003 | -1.25098719 | 0.1016366  | 8.51E-36   | 5.90E-34   | POU3F2     |
| 11156  | ENSG00000184489 | 410.099589 | 0.26193001  | 0.13703866 | 0.04023984 | 0.12600355 | PTP4A3     |
| 200350 | ENSG00000184492 | 5.8573231  | 0.18765166  | 0.4159029  | 0.1956001  | 0.39920852 | FOXD4L1    |
| 348013 | ENSG00000184497 | 62.5917727 | 1.66012474  | 0.36011555 | 2.61E-07   | 3.26E-06   | TMEM255B   |
| 5627   | ENSG00000184500 | 520.060001 | 0.33728209  | 0.10972767 | 0.00130301 | 0.00741802 | PROS1      |
| 2520   | ENSG00000184502 | 0          | NA          | NA         | NA         | NA         | GAST       |
| 256646 | ENSG00000184507 | 0.9593479  | -0.01907145 | 0.3809965  | 0.74718274 | NA         | NUTM1      |

|        |                 |            |             |            |            |            |             |
|--------|-----------------|------------|-------------|------------|------------|------------|-------------|
| 374659 | ENSG00000184508 | 236.429843 | -0.34344991 | 0.16427629 | 0.02075104 | 0.07510044 | HDDC3       |
| 340542 | ENSG00000184515 | 1.27492684 | 0.03450414  | 0.38293094 | 0.5471287  | NA         | BEX5        |
| 162239 | ENSG00000184517 | 374.358775 | -0.21858839 | 0.14026336 | 0.09261466 | 0.23536248 | ZFP1        |
| NA     | ENSG00000184523 | 3.96947903 | 0.18006847  | 0.43466482 | 0.08182239 | 0.21481489 | PTGER4P2    |
| 51286  | ENSG00000184524 | 431.371413 | -0.77825243 | 0.14656695 | 2.08E-08   | 3.02E-07   | CEND1       |
| 352999 | ENSG00000184530 | 1.35830311 | 0.00386659  | 0.37877003 | 0.95501466 | NA         | C6orf58     |
| 201140 | ENSG00000184544 | 0          | NA          | NA         | NA         | NA         | DHRS7C      |
| 1850   | ENSG00000184545 | 519.558894 | -0.87271244 | 0.11266378 | 1.56E-15   | 4.43E-14   | DUSP8       |
| 9021   | ENSG00000184557 | 137.37167  | 0.50012483  | 0.21533641 | 0.00690861 | 0.03061578 | SOCS3       |
| 201243 | ENSG00000184560 | 0.173124   | -0.01911262 | 0.38486262 | 0.84537521 | NA         | SPEM2       |
| 84189  | ENSG00000184564 | 474.453411 | 1.67712755  | 0.121458   | 1.89E-44   | 1.64E-42   | SLITRK6     |
| NA     | ENSG00000184566 | 0          | NA          | NA         | NA         | NA         |             |
| 440822 | ENSG00000184571 | 0          | NA          | NA         | NA         | NA         | PIWIL3      |
| 57121  | ENSG00000184574 | 5.62594584 | -0.00068712 | 0.35586821 | 0.9940063  | 0.99818216 | LPAR5       |
| 11260  | ENSG00000184575 | 4157.69294 | 0.01813693  | 0.06173765 | 0.76864653 | 0.8933771  | XPOT        |
| 340061 | ENSG00000184584 | 13.377469  | -0.13968245 | 0.35913115 | 0.4166808  | 0.64309452 | STING1      |
| 5142   | ENSG00000184588 | 1292.45247 | 0.01875686  | 0.09120672 | 0.83345448 | 0.92419724 | PDE4B       |
| 284467 | ENSG00000184599 | 0.83752982 | 0.01555468  | 0.38115542 | 0.7824946  | NA         | TAFA3       |
| 400258 | ENSG00000184601 | 9.01464274 | -0.14629586 | 0.37813579 | 0.35488174 | 0.58535214 | C14orf180   |
| 8303   | ENSG00000184602 | 725.536913 | 0.21914574  | 0.09648456 | 0.0187112  | 0.06897625 | SNN         |
| 83656  | ENSG00000184608 | 1.1513741  | -0.00401811 | 0.37950367 | 0.94927846 | NA         | FAM167A-AS1 |
| 90134  | ENSG00000184611 | 51.4866377 | -1.16607565 | 0.35045913 | 7.79E-05   | 0.00060943 | KCNH7       |
| NA     | ENSG00000184612 | 0.71350263 | 0.0420622   | 0.38737624 | 0.34118409 | NA         | RPL7P26     |
| 4753   | ENSG00000184613 | 99.489288  | 1.25081799  | 0.26018273 | 1.35E-07   | 1.75E-06   | NELL2       |
| NA     | ENSG00000184616 | 0.51567365 | 0.03113947  | 0.38605517 | 0.47754913 | NA         | SPDYE12P    |
| NA     | ENSG00000184617 | 2.76198497 | 0.00756053  | 0.37373066 | 0.93500735 | 0.97306034 | ZNF840P     |
| 124751 | ENSG00000184619 | 852.768494 | 0.29689244  | 0.09351766 | 0.00103556 | 0.00608576 | KRBA2       |
| NA     | ENSG00000184624 | 0          | NA          | NA         | NA         | NA         | ZNF72P      |
| 9968   | ENSG00000184634 | 2022.78771 | 0.15437401  | 0.09058232 | 0.07921441 | 0.20996844 | MED12       |
| 81931  | ENSG00000184635 | 237.618736 | -0.33937723 | 0.15531071 | 0.016768   | 0.06323456 | ZNF93       |
| 10801  | ENSG00000184640 | 9865.67133 | -0.23913979 | 0.05976063 | 4.91E-05   | 0.00040257 | SEPTIN9     |
| 203074 | ENSG00000184647 | 0          | NA          | NA         | NA         | NA         | PRSS55      |
| 146852 | ENSG00000184650 | 0          | NA          | NA         | NA         | NA         | ODF4        |
| 349334 | ENSG00000184659 | 7.50019949 | 0.25858226  | 0.45966431 | 0.12047028 | 0.28603762 | FOXD4L4     |
| 157313 | ENSG00000184661 | 487.066211 | -0.54693151 | 0.12149823 | 2.29E-06   | 2.44E-05   | CDCA2       |
| NA     | ENSG00000184669 | 11.2742338 | -0.06455166 | 0.34525792 | 0.68697821 | 0.84777704 | OR7E14P     |
| 138046 | ENSG00000184672 | 0.54592432 | 0.03260597  | 0.38620377 | 0.45619093 | NA         | RALYL       |
| 139285 | ENSG00000184675 | 400.574117 | 0.01953092  | 0.11689241 | 0.8606184  | 0.93799827 | AMER1       |

|        |                 |            |             |            |            |            |             |
|--------|-----------------|------------|-------------|------------|------------|------------|-------------|
| 9923   | ENSG00000184677 | 1488.93641 | -0.23097703 | 0.07894376 | 0.00272808 | 0.01398219 | ZBTB40      |
| 8349   | ENSG00000184678 | 147.674066 | 0.04306285  | 0.17652338 | 0.78487831 | 0.90209627 | H2BC21      |
| 9074   | ENSG00000184697 | 10.1693576 | -0.24546042 | 0.43725618 | 0.15431249 | 0.33953197 | CLDN6       |
| 390059 | ENSG00000184698 | 0          | NA          | NA         | NA         | NA         | OR51M1      |
| 5413   | ENSG00000184702 | 1745.80015 | -0.08252941 | 0.09140151 | 0.35112002 | 0.58132031 | SEPTIN5     |
| 56478  | ENSG00000184708 | 724.270413 | 0.13809796  | 0.10191363 | 0.15963469 | 0.34722847 | EIF4ENIF1   |
| 389816 | ENSG00000184709 | 10.2568001 | -2.86047035 | 1.01403745 | 0.00029665 | 0.0020253  | LRRC26      |
| 619189 | ENSG00000184716 | 1.14012245 | -0.03623364 | 0.38219595 | 0.56803734 | NA         | SERINC4     |
| 55328  | ENSG00000184719 | 0.71148248 | 0.00456663  | 0.3818398  | 0.92335791 | NA         | RNLS        |
| 337966 | ENSG00000184724 | 0          | NA          | NA         | NA         | NA         | KRTAP6-1    |
| 55911  | ENSG00000184730 | 1.48490281 | -0.00830353 | 0.37725882 | 0.91165979 | NA         | APOBR       |
| 642273 | ENSG00000184731 | 0.51618059 | 0.03116426  | 0.38605761 | 0.47718172 | NA         | FAM110C     |
| 168400 | ENSG00000184735 | 0.51384646 | -0.00893201 | 0.38272151 | 0.83199937 | NA         | DDX53       |
| NA     | ENSG00000184741 | 0          | NA          | NA         | NA         | NA         | OR5AQ1P     |
| 25923  | ENSG00000184743 | 622.552165 | 0.23385393  | 0.10788815 | 0.02358091 | 0.08312815 | ATL3        |
| 55967  | ENSG00000184752 | 516.624794 | 0.06398156  | 0.10743455 | 0.53562284 | 0.74647226 | NDUFA12     |
| NA     | ENSG00000184761 | 0          | NA          | NA         | NA         | NA         | PRSS40B     |
| 641515 | ENSG00000184774 | 2.11634394 | 0.05690135  | 0.37899318 | 0.54361741 | NA         | MGAT4EP     |
| 644538 | ENSG00000184785 | 1.43460945 | 0.05921468  | 0.38615675 | 0.36893512 | NA         | SMIM10      |
| 6991   | ENSG00000184786 | 45.0833911 | -0.15859181 | 0.26895794 | 0.42172616 | 0.64775467 | DYNLT2      |
| 7327   | ENSG00000184787 | 5701.44118 | 0.17701834  | 0.06005494 | 0.00287257 | 0.01460438 | UBE2G2      |
| 340562 | ENSG00000184788 | 31.1553601 | -0.04098428 | 0.28544505 | 0.82939691 | 0.92261925 | SATL1       |
| NA     | ENSG00000184789 | 0          | NA          | NA         | NA         | NA         | OR4C10P     |
| 23762  | ENSG00000184792 | 310.34526  | -0.47417382 | 0.16932499 | 0.00197188 | 0.01057066 | OSBP2       |
| NA     | ENSG00000184795 | 0.14931947 | -0.01844332 | 0.38480212 | 0.84537521 | NA         | UNC93B5     |
| NA     | ENSG00000184809 | 12.4730782 | 0.50296726  | 0.77973674 | 0.03066522 | 0.10208021 | B3GALT5-AS1 |
| 286753 | ENSG00000184811 | 0.173733   | 0.01914545  | 0.38484597 | 0.78225479 | NA         | TRARG1      |
| 389151 | ENSG00000184814 | 0          | NA          | NA         | NA         | NA         | PRR23B      |
| 201501 | ENSG00000184828 | 126.973011 | -2.18281079 | 0.24744817 | 6.83E-20   | 2.53E-18   | ZBTB7C      |
| 79135  | ENSG00000184831 | 216.490802 | -0.30114764 | 0.16818093 | 0.04621633 | 0.14012153 | APOO        |
| 51334  | ENSG00000184838 | 67.0792203 | 0.88139015  | 0.31332204 | 0.00061292 | 0.00385495 | PRR16       |
| 54732  | ENSG00000184840 | 1406.06908 | 0.20683921  | 0.07510985 | 0.00493031 | 0.022978   | TMED9       |
| NA     | ENSG00000184844 | 0.14931947 | -0.01844332 | 0.38480212 | 0.84537521 | NA         | CYCSP45     |
| 1812   | ENSG00000184845 | 0          | NA          | NA         | NA         | NA         | DRD1        |
| 54143  | ENSG00000184856 | 0          | NA          | NA         | NA         | NA         | LINC00308   |
| 25880  | ENSG00000184857 | 253.992065 | -0.05784206 | 0.14534685 | 0.66621492 | 0.83537685 | TMEM186     |
| 93517  | ENSG00000184860 | 0          | NA          | NA         | NA         | NA         | SDR42E1     |
| 155435 | ENSG00000184863 | 2513.35098 | 0.15305236  | 0.08137978 | 0.05414731 | 0.15819211 | RBM33       |



|           |                 |            |             |            |            |            |          |
|-----------|-----------------|------------|-------------|------------|------------|------------|----------|
| 9823      | ENSG00000184867 | 904.648283 | -0.07560555 | 0.09129383 | 0.3932147  | 0.62221883 | ARMCX2   |
| 90135     | ENSG00000184887 | 275.770945 | -0.21769351 | 0.14471213 | 0.10314917 | 0.2551347  | BTBD6    |
| 6736      | ENSG00000184895 | 0          | NA          | NA         | NA         | NA         | SRY      |
| 8971      | ENSG00000184897 | 4930.70881 | -0.1047148  | 0.07285366 | 0.14278817 | 0.32170307 | H1-10    |
| 375287    | ENSG00000184898 | 139.202552 | 0.3184646   | 0.20222714 | 0.06689689 | 0.18544027 | RBM43    |
| 6612      | ENSG00000184900 | 2200.18901 | -0.23166151 | 0.06536452 | 0.00031914 | 0.00216466 | SUMO3    |
| 83943     | ENSG00000184903 | 204.137626 | 0.11853357  | 0.15996643 | 0.41580153 | 0.64263476 | IMMP2L   |
| 140597    | ENSG00000184905 | 139.444792 | -0.57265496 | 0.21446543 | 0.00211169 | 0.01121109 | TCEAL2   |
| 101929583 | ENSG00000184906 | 0          | NA          | NA         | NA         | NA         |          |
| 1188      | ENSG00000184908 | 6.27169319 | 0.31189137  | 0.56086025 | 0.02677068 | 0.09185925 | CLCNKB   |
| 63947     | ENSG00000184911 | 1.19666822 | -0.0414823  | 0.38309698 | 0.50942755 | NA         | DMRTC1B  |
| 728656    | ENSG00000184911 | 1.19666822 | -0.0414823  | 0.38309698 | 0.50942755 | NA         | DMRTC1B  |
| 3714      | ENSG00000184916 | 369.699271 | -1.95640496 | 0.20705043 | 1.68E-22   | 7.10E-21   | JAG2     |
| 752       | ENSG00000184922 | 201.528357 | -0.03473515 | 0.18393474 | 0.82819151 | 0.92220943 | FMNL1    |
| 728118    | ENSG00000184923 | 102.21806  | 0.11791756  | 0.21076928 | 0.50568463 | 0.72177288 | NUTM2A   |
| 391356    | ENSG00000184924 | 577.992404 | 0.05873617  | 0.10678113 | 0.56756801 | 0.76899226 | PTRHD1   |
| 286256    | ENSG00000184925 | 9.03797507 | -0.04281605 | 0.34828584 | 0.77603845 | 0.89702883 | LCN12    |
| 8590      | ENSG00000184933 | 0          | NA          | NA         | NA         | NA         | OR6A2    |
| 7490      | ENSG00000184937 | 4.47748108 | 5.26076808  | 2.7375239  | 0.00035063 | 0.00235573 | WT1      |
| 146198    | ENSG00000184939 | 1225.69728 | 0.04108719  | 0.09964754 | 0.67017712 | 0.83758072 | ZFP90    |
| 375318    | ENSG00000184945 | 0          | NA          | NA         | NA         | NA         | AQP12A   |
| 646851    | ENSG00000184949 | 171.545492 | 0.39170876  | 0.2907501  | 0.07024338 | 0.19201277 | FAM227A  |
| 390327    | ENSG00000184954 | 0          | NA          | NA         | NA         | NA         | OR6C70   |
| 4588      | ENSG00000184956 | 6.20369479 | 0.02150508  | 0.35757858 | 0.87488755 | 0.94487915 | MUC6     |
| NA        | ENSG00000184961 | 0          | NA          | NA         | NA         | NA         | RPL7AP49 |
| 79050     | ENSG00000184967 | 438.346426 | 0.06538223  | 0.11751679 | 0.5596695  | 0.76413192 | NOC4L    |
| 11274     | ENSG00000184979 | 131.748891 | 1.56709155  | 0.2213309  | 1.18E-13   | 2.88E-12   | USP18    |
| 4700      | ENSG00000184983 | 366.601492 | -0.10595847 | 0.12732997 | 0.3766837  | 0.60567343 | NDUFA6   |
| 1133      | ENSG00000184984 | 3.56860837 | -0.05907882 | 0.37590939 | 0.56685215 | 0.76856055 | CHRM5    |
| 57537     | ENSG00000184985 | 49.0363914 | 0.19684127  | 0.30695787 | 0.33484171 | 0.56474327 | SORCS2   |
| 80757     | ENSG00000184986 | 128.260741 | -0.39246328 | 0.22507756 | 0.03663248 | 0.11754623 | TMEM121  |
| 113277    | ENSG00000184988 | 0.4953803  | 0.01133127  | 0.38338033 | 0.78358522 | NA         | TMEM106A |
| 10572     | ENSG00000184990 | 910.699564 | 0.11408733  | 0.09632978 | 0.22147438 | 0.43427846 | SIVA1    |
| 83868     | ENSG00000184991 | 0          | NA          | NA         | NA         | NA         | TTY13    |
| 140707    | ENSG00000184992 | 1028.68559 | -0.34311365 | 0.12151052 | 0.00280779 | 0.01432239 | BRI3BP   |
| 338376    | ENSG00000184995 | 0          | NA          | NA         | NA         | NA         | IFNE     |
| 387775    | ENSG00000184999 | 0.173733   | 0.01914545  | 0.38484597 | 0.78225479 | NA         | SLC22A10 |
| 8694      | ENSG00000185000 | 895.206931 | -0.28297689 | 0.10143078 | 0.00370695 | 0.01811477 | DGAT1    |

|           |                 |            |             |            |            |            |          |
|-----------|-----------------|------------|-------------|------------|------------|------------|----------|
| 222546    | ENSG00000185002 | 0.173733   | 0.01914545  | 0.38484597 | 0.78225479 | NA         | RFX6     |
| 6092      | ENSG00000185008 | 30.0403479 | 0.74160356  | 0.59086171 | 0.01859725 | 0.06863521 | ROBO2    |
| 26985     | ENSG00000185009 | 1513.96524 | -0.15200119 | 0.07040225 | 0.02786626 | 0.09465274 | AP3M1    |
| 2157      | ENSG00000185010 | 34.3821576 | 0.07396313  | 0.29602682 | 0.70225447 | 0.85686744 | F8       |
| 93034     | ENSG00000185013 | 1.8047487  | -0.07260544 | 0.38611241 | 0.36056885 | NA         | NT5C1B   |
| 377677    | ENSG00000185015 | 14.0202798 | 1.05851162  | 2.42316457 | 0.00695732 | 0.03081786 | CA13     |
| 22888     | ENSG00000185019 | 233.05984  | 0.14992659  | 0.15018132 | 0.27806809 | 0.50258055 | UBOX5    |
| 23764     | ENSG00000185022 | 97.1099057 | 0.3789454   | 0.23712148 | 0.05089665 | 0.15109824 | MAFF     |
| 2972      | ENSG00000185024 | 1386.40714 | -0.24066869 | 0.10187997 | 0.01390632 | 0.05425789 | BRF1     |
| 389257    | ENSG00000185028 | 2.13839055 | 0.03444476  | 0.37885719 | 0.66170889 | NA         | LRRC14B  |
| NA        | ENSG00000185031 | 2.2609842  | -0.05448502 | 0.38086488 | 0.51586056 | NA         | SLC2A3P2 |
| 10509     | ENSG00000185033 | 618.530548 | 0.0739042   | 0.14308055 | 0.57801162 | 0.77614203 | SEMA4B   |
| NA        | ENSG00000185037 | 0.173124   | -0.01911262 | 0.38486262 | 0.84537521 | NA         | ZNF733P  |
| 339766    | ENSG00000185038 | 0.16735865 | 0.01897177  | 0.38482933 | 0.78225479 | NA         | MROH2A   |
| 285955    | ENSG00000185040 | 15.0107804 | -0.01823109 | 0.3247951  | 0.91512655 | 0.96403708 | SPDYE16  |
| 102723555 | ENSG00000185040 | 15.0107804 | -0.01823109 | 0.3247951  | 0.91512655 | 0.96403708 | SPDYE16  |
| 10519     | ENSG00000185043 | 195.144565 | 0.31871033  | 0.16828296 | 0.03530394 | 0.11407657 | CIB1     |
| 56899     | ENSG00000185046 | 28.3534607 | 0.36987607  | 0.40413685 | 0.11133985 | 0.26955249 | ANKS1B   |
| 7469      | ENSG00000185049 | 944.551671 | 0.05666827  | 0.08472572 | 0.49331041 | 0.71236493 | NELFA    |
| 57419     | ENSG00000185052 | 0          | NA          | NA         | NA         | NA         | SLC24A3  |
| 137868    | ENSG00000185053 | 0          | NA          | NA         | NA         | NA         | SGCZ     |
| 100130771 | ENSG00000185055 | 8.82384784 | -0.45334981 | 0.67796909 | 0.0428333  | 0.13230775 | EFCAB10  |
| 133491    | ENSG00000185056 | 0          | NA          | NA         | NA         | NA         | C5orf47  |
| NA        | ENSG00000185065 | 35.3591223 | 0.12375     | 0.296775   | 0.53074928 | 0.74249512 |          |
| 51350     | ENSG00000185069 | 0          | NA          | NA         | NA         | NA         | KRT76    |
| 23768     | ENSG00000185070 | 0          | NA          | NA         | NA         | NA         | FLRT2    |
| NA        | ENSG00000185074 | 0          | NA          | NA         | NA         | NA         | OR7E31P  |
| NA        | ENSG00000185078 | 0          | NA          | NA         | NA         | NA         | RPL9P14  |
| 80789     | ENSG00000185085 | 623.451788 | -0.18722274 | 0.11662676 | 0.09105094 | 0.23282002 | INTS5    |
| 51065     | ENSG00000185088 | 616.523669 | 0.44354429  | 0.11835959 | 8.15E-05   | 0.00063367 | RPS27L   |
| 149175    | ENSG00000185090 | 1697.94856 | -1.19743996 | 0.08235274 | 7.23E-49   | 6.83E-47   | MANEAL   |
| 122622    | ENSG00000185100 | 138.586873 | 0.25221541  | 0.20469678 | 0.14824623 | 0.33050962 | ADSS1    |
| 338440    | ENSG00000185101 | 4.41560161 | 0.0886088   | 0.3809813  | 0.4232507  | 0.64919165 | ANO9     |
| 11124     | ENSG00000185104 | 913.2714   | -0.14497566 | 0.09559243 | 0.11667257 | 0.27939454 | FAF1     |
| 255275    | ENSG00000185105 | 29.0944599 | -0.0299087  | 0.28846102 | 0.87461175 | 0.94480547 | MYADML2  |
| 131583    | ENSG00000185112 | 88.9090385 | -0.30781696 | 0.24851212 | 0.11818705 | 0.28210313 | FAM43A   |
| 56160     | ENSG00000185115 | 396.485912 | 0.23832863  | 0.13201506 | 0.05392799 | 0.15767405 | NSMCE3   |
| 3297      | ENSG00000185122 | 1655.78715 | 0.05752903  | 0.09098754 | 0.51579914 | 0.73002247 | HSF1     |

|           |                 |            |             |            |            |            |           |
|-----------|-----------------|------------|-------------|------------|------------|------------|-----------|
| 387263    | ENSG00000185127 | 631.288799 | 0.0485589   | 0.09672487 | 0.60466941 | 0.79479535 | C6orf120  |
| 5813      | ENSG00000185129 | 689.702996 | -0.03780296 | 0.10242223 | 0.70090701 | 0.85575596 | PURA      |
| 8340      | ENSG00000185130 | 1.9458894  | -0.04901211 | 0.38348595 | 0.47203446 | NA         | H2BC13    |
| 27124     | ENSG00000185133 | 232.888103 | -0.12140456 | 0.16036319 | 0.40338658 | 0.63146519 | INPP5J    |
| 4887      | ENSG00000185149 | 77.8650269 | -0.17083771 | 0.23180228 | 0.35959066 | 0.58949503 | NPY2R     |
| 83881     | ENSG00000185155 | 7.92556308 | 0.08300061  | 0.36188303 | 0.56981108 | 0.77039833 | MIXL1     |
| 162387    | ENSG00000185156 | 0          | NA          | NA         | NA         | NA         | MFSD6L    |
| 114659    | ENSG00000185158 | 205.097826 | 0.26416575  | 0.15608885 | 0.06358884 | 0.17907774 | LRRC37B   |
| 317781    | ENSG00000185163 | 716.784358 | 0.28343333  | 0.12886514 | 0.01914596 | 0.07031764 | DDX51     |
| 283820    | ENSG00000185164 | 2212.21279 | 0.14012881  | 0.09734033 | 0.13646875 | 0.31153759 | NOMO2     |
| 102723728 | ENSG00000185164 | 2212.21279 | 0.14012881  | 0.09734033 | 0.13646875 | 0.31153759 | NOMO2     |
| NA        | ENSG00000185168 | 27.7763353 | -0.56611258 | 0.50712392 | 0.03870961 | 0.12240974 | LINC00482 |
| 653437    | ENSG00000185176 | 0.93243087 | 0.01447017  | 0.38162763 | 0.80425453 | NA         | AQP12B    |
| 90827     | ENSG00000185177 | 0          | NA          | NA         | NA         | NA         | ZNF479    |
| 390535    | ENSG00000185182 | 0          | NA          | NA         | NA         | NA         | GOLGA8EP  |
| NA        | ENSG00000185186 | 1.01749276 | 0.05370793  | 0.38930842 | 0.22860634 | NA         | LINC00313 |
| 59307     | ENSG00000185187 | 201.910913 | 0.21012647  | 0.17069256 | 0.16911228 | 0.36046278 | SIGIRR    |
| 340371    | ENSG00000185189 | 676.315182 | 0.75365252  | 0.09921816 | 6.50E-15   | 1.76E-13   | NRBP2     |
| 400668    | ENSG00000185198 | 0.34624801 | -0.02356563 | 0.38536324 | 0.65270996 | NA         | PRSS57    |
| 10581     | ENSG00000185201 | 19.2602839 | 3.25960097  | 0.78872339 | 2.35E-06   | 2.50E-05   | IFITM2    |
| NA        | ENSG00000185203 | 3.23861798 | -0.19903463 | 0.45031535 | 0.05556704 | 0.16150749 | WASIR1    |
| 7127      | ENSG00000185215 | 204.677464 | -0.70698487 | 0.19917833 | 7.78E-05   | 0.00060901 | TNFAIP2   |
| 353274    | ENSG00000185219 | 1782.53829 | -0.15300191 | 0.07007534 | 0.02616576 | 0.09025186 | ZNF445    |
| 267002    | ENSG00000185220 | 144.768293 | -0.1134581  | 0.17906541 | 0.47308923 | 0.69516297 | PGBD2     |
| NA        | ENSG00000185221 | 0          | NA          | NA         | NA         | NA         | GAPDHP24  |
| 51186     | ENSG00000185222 | 580.699443 | 0.26878532  | 0.10395266 | 0.00708838 | 0.03125883 | TCEAL9    |
| 4158      | ENSG00000185231 | 0          | NA          | NA         | NA         | NA         | MC2R      |
| 9230      | ENSG00000185236 | 2209.70032 | 0.2045623   | 0.06920239 | 0.00262758 | 0.01354055 | RAB11B    |
| 10196     | ENSG00000185238 | 967.415107 | 0.27789995  | 0.09287298 | 0.00199676 | 0.01068674 | PRMT3     |
| 2811      | ENSG00000185245 | 25.8790055 | 0.70348269  | 0.51261263 | 0.02010104 | 0.07320204 | GP1BA     |
| 55015     | ENSG00000185246 | 504.603999 | 0.12204746  | 0.10872516 | 0.24159476 | 0.45960686 | PRPF39    |
| 4110      | ENSG00000185247 | 0          | NA          | NA         | NA         | NA         | MAGEA11   |
| 285755    | ENSG00000185250 | 44.8994184 | 0.61224032  | 0.51217843 | 0.03102152 | 0.10295552 | PPIL6     |
| 7625      | ENSG00000185252 | 1291.26407 | 0.20695773  | 0.07935645 | 0.00761329 | 0.0331284  | ZNF74     |
| 285600    | ENSG00000185261 | 39.0825019 | 0.11192371  | 0.28243894 | 0.56933536 | 0.77008546 | KIAA0825  |
| 283991    | ENSG00000185262 | 761.654459 | -0.050364   | 0.12985985 | 0.67990176 | 0.84376374 | UBALD2    |
| 339669    | ENSG00000185264 | 0          | NA          | NA         | NA         | NA         | TEX33     |
| 441549    | ENSG00000185267 | 19.3801977 | 0.44963905  | 0.52607776 | 0.06632367 | 0.18429434 | CDNF      |

|        |                 |            |             |            |            |            |           |
|--------|-----------------|------------|-------------|------------|------------|------------|-----------|
| 147111 | ENSG00000185269 | 45.056738  | -1.60278273 | 0.43751182 | 1.57E-05   | 0.00014401 | NOTUM     |
| 123103 | ENSG00000185271 | 0.33471731 | 0.02354391  | 0.38534154 | 0.62842204 | NA         | KLHL33    |
| 54033  | ENSG00000185272 | 0.173733   | 0.01914545  | 0.38484597 | 0.78225479 | NA         | RBM11     |
| 64409  | ENSG00000185274 | 0          | NA          | NA         | NA         | NA         | GALNT17   |
| NA     | ENSG00000185275 | 0.14931947 | -0.01844332 | 0.38480212 | 0.84537521 | NA         | CD24P4    |
| 84614  | ENSG00000185278 | 1375.8642  | 0.01393217  | 0.08061881 | 0.8597029  | 0.93751308 | ZBTB37    |
| 389493 | ENSG00000185290 | 0          | NA          | NA         | NA         | NA         | NUPR2     |
| 3563   | ENSG00000185291 | 1.48550844 | -0.00791088 | 0.37724569 | 0.91578172 | NA         | IL3RA     |
| 162540 | ENSG00000185294 | 1.07548859 | -0.07448626 | 0.39363112 | 0.16128604 | NA         | SPPL2C    |
| NA     | ENSG00000185296 | 0          | NA          | NA         | NA         | NA         |           |
| 339230 | ENSG00000185298 | 1543.84495 | -0.00825895 | 0.08005925 | 0.91519207 | 0.96403708 | CCDC137   |
| 729238 | ENSG00000185303 | 0.3439991  | 0.02364859  | 0.3853568  | 0.62257909 | NA         | SFTPA2    |
| 729857 | ENSG00000185304 | 461.89828  | -0.09875814 | 0.1156569  | 0.36970316 | 0.59909782 | RGPD2     |
| 54622  | ENSG00000185305 | 232.359316 | -0.64069508 | 0.25691375 | 0.00265737 | 0.01366216 | ARL15     |
| 115749 | ENSG00000185306 | 0.18922458 | 0.01954053  | 0.38488496 | 0.78225479 | NA         | C12orf56  |
| 6336   | ENSG00000185313 | 0          | NA          | NA         | NA         | NA         | SCN10A    |
| NA     | ENSG00000185319 | 0          | NA          | NA         | NA         | NA         | SSXP4     |
| 8558   | ENSG00000185324 | 1237.17356 | 0.22620331  | 0.08081859 | 0.00414001 | 0.01985924 | CDK10     |
| 284186 | ENSG00000185332 | 16.0889605 | 0.23404292  | 0.38543589 | 0.23254684 | 0.44940365 | TMEM105   |
| 8651   | ENSG00000185338 | 15.2603331 | -0.2703479  | 0.41104986 | 0.18017587 | 0.37700128 | SOCS1     |
| 6948   | ENSG00000185339 | 53.668979  | 0.03327561  | 0.25146986 | 0.8627382  | 0.93907741 | TCN2      |
| 10634  | ENSG00000185340 | 373.005909 | -0.05813141 | 0.13959516 | 0.65367331 | 0.82751905 | GAS2L1    |
| 23545  | ENSG00000185344 | 1073.90479 | 0.05816664  | 0.0815853  | 0.46551373 | 0.68821106 | ATP6V0A2  |
| 5071   | ENSG00000185345 | 69.0674787 | 1.33023739  | 0.32731087 | 3.62E-06   | 3.73E-05   | PRKN      |
| 283643 | ENSG00000185347 | 416.95994  | -0.22116822 | 0.13698898 | 0.08262542 | 0.21646485 | TEDC1     |
| 266722 | ENSG00000185352 | 753.227377 | -3.94756715 | 0.15531304 | 6.46E-144  | 4.27E-141  | HS6ST3    |
| 9146   | ENSG00000185359 | 3560.73636 | 0.14750039  | 0.08885154 | 0.08778973 | 0.22632101 | HGS       |
| 126282 | ENSG00000185361 | 361.905952 | -0.15148367 | 0.13740984 | 0.23631832 | 0.45308809 | TNFAIP8L1 |
| 26693  | ENSG00000185372 | 0          | NA          | NA         | NA         | NA         | OR2V1     |
| 5892   | ENSG00000185379 | 381.917745 | -0.12228523 | 0.11958314 | 0.27937914 | 0.50389837 | RAD51D    |
| 26333  | ENSG00000185385 | 0          | NA          | NA         | NA         | NA         | OR7A17    |
| 5600   | ENSG00000185386 | 857.754062 | -0.61830185 | 0.09856352 | 1.00E-10   | 1.93E-09   | MAPK11    |
| NA     | ENSG00000185390 | 0          | NA          | NA         | NA         | NA         | FGF7P2    |
| 93349  | ENSG00000185404 | 25.8341823 | -1.17160837 | 0.58468298 | 0.0027716  | 0.014165   | SP140L    |
| 51263  | ENSG00000185414 | 1168.98739 | -0.41231041 | 0.12017968 | 0.00029548 | 0.00201868 | MRPL30    |
| 123283 | ENSG00000185418 | 326.689902 | -0.24866228 | 0.12990191 | 0.04119971 | 0.12832059 | TARS3     |
| 64754  | ENSG00000185420 | 470.692478 | 0.07770377  | 0.11166693 | 0.46754116 | 0.69041597 | SMYD3     |
| 25840  | ENSG00000185432 | 723.680362 | 0.93157111  | 0.13706236 | 1.54E-12   | 3.47E-11   | METTL7A   |

|        |                 |            |             |            |            |            |            |
|--------|-----------------|------------|-------------|------------|------------|------------|------------|
| 54072  | ENSG00000185433 | 0          | NA          | NA         | NA         | NA         | LINC00158  |
| 163702 | ENSG00000185436 | 88.1072329 | 0.74712452  | 0.27866723 | 0.00123293 | 0.0070718  | IFNLR1     |
| 6450   | ENSG00000185437 | 44.5511888 | -0.06176245 | 0.28598861 | 0.74714129 | 0.88120985 | SH3BGR     |
| 400451 | ENSG00000185442 | 173.434523 | -0.92745788 | 0.20462703 | 7.97E-07   | 9.18E-06   | FAM174B    |
| 158724 | ENSG00000185448 | 0          | NA          | NA         | NA         | NA         | FAM47A     |
| 374920 | ENSG00000185453 | 379.203549 | -0.08046664 | 0.12505531 | 0.49526227 | 0.7139953  | ZSWIM9     |
| 402569 | ENSG00000185467 | 0.16735865 | 0.01897177  | 0.38482933 | 0.78225479 | NA         | KPNA7      |
| 374395 | ENSG00000185475 | 339.377018 | -0.10683342 | 0.13380536 | 0.39345873 | 0.62246703 | TMEM179B   |
| 285513 | ENSG00000185477 | 94.9159404 | 0.43358507  | 0.25040053 | 0.03207913 | 0.10577528 | GPRIN3     |
| 3854   | ENSG00000185479 | 0          | NA          | NA         | NA         | NA         | KRT6B      |
| 55010  | ENSG00000185480 | 397.453293 | -0.64337275 | 0.12685517 | 1.04E-07   | 1.37E-06   | PARPBP     |
| 246329 | ENSG00000185482 | 22.2697336 | -0.03625128 | 0.31367854 | 0.84080274 | 0.92773074 | STAC3      |
| 4919   | ENSG00000185483 | 584.85229  | 0.18392195  | 0.11371839 | 0.08994833 | 0.23053894 | ROR1       |
| 255812 | ENSG00000185485 | 490.71557  | 0.49844325  | 0.12405527 | 2.28E-05   | 0.00020244 | SDHAP1     |
| NA     | ENSG00000185495 | 108.255408 | 0.18233424  | 0.21205418 | 0.30575712 | 0.53334106 | SEPTIN7P13 |
| 4582   | ENSG00000185499 | 45.5174046 | 0.31465804  | 0.3326658  | 0.15303964 | 0.33781781 | MUC1       |
| 80233  | ENSG00000185504 | 1707.22483 | -0.01032643 | 0.08158405 | 0.89603919 | 0.95469109 | FAAP100    |
| 3665   | ENSG00000185507 | 182.703771 | 0.69130178  | 0.18450121 | 3.99E-05   | 0.00033586 | IRF7       |
| 26013  | ENSG00000185513 | 629.26258  | 0.55798514  | 0.12004943 | 1.11E-06   | 1.25E-05   | L3MBTL1    |
| 79184  | ENSG00000185515 | 368.789041 | -0.26701004 | 0.12852584 | 0.02687703 | 0.09216043 | BRCC3      |
| 9899   | ENSG00000185518 | 0.34746601 | 0.02370763  | 0.3853651  | 0.61987128 | NA         | SV2B       |
| 348487 | ENSG00000185519 | 97.8016112 | -0.2105663  | 0.21403158 | 0.23872307 | 0.45646355 | FAM131C    |
| 256329 | ENSG00000185522 | 16.8491188 | 0.3570003   | 0.49579901 | 0.09470757 | 0.23933234 | LMNTD2     |
| 149643 | ENSG00000185523 | 1.15092985 | 0.01828074  | 0.37930053 | 0.78918978 | NA         | SPATA45    |
| 5148   | ENSG00000185527 | 0.32599697 | -0.02328245 | 0.38532298 | 0.66758559 | NA         | PDE6G      |
| 5592   | ENSG00000185532 | 242.686794 | 0.90483884  | 0.16820077 | 1.15E-08   | 1.73E-07   | PRKG1      |
| 7026   | ENSG00000185551 | 1.71977115 | 0.111473    | 0.40324436 | 0.10891299 | NA         | NR2F2      |
| 8788   | ENSG00000185559 | 45139.4219 | 0.66226724  | 0.06303163 | 2.17E-26   | 1.08E-24   | DLK1       |
| 727910 | ENSG00000185561 | 38.7211128 | 0.98294353  | 0.4044011  | 0.00149304 | 0.00834464 | TLCD2      |
| 4045   | ENSG00000185565 | 1440.59178 | -0.24312569 | 0.07624453 | 0.00111183 | 0.00647645 | LSAMP      |
| 113146 | ENSG00000185567 | 156.064936 | -0.070087   | 0.22672747 | 0.69977522 | 0.8552838  | AHNAK2     |
| 169611 | ENSG00000185585 | 15.3884041 | -0.13295626 | 0.34771076 | 0.45844823 | 0.68183005 | OLFML2A    |
| 6667   | ENSG00000185591 | 2287.17592 | 0.16732269  | 0.06663817 | 0.01074259 | 0.04395401 | SP1        |
| 145946 | ENSG00000185594 | 0          | NA          | NA         | NA         | NA         | SPATA8     |
| NA     | ENSG00000185596 | 871.111462 | 0.18125506  | 0.10146042 | 0.06361126 | 0.1791022  | WASH3P     |
| NA     | ENSG00000185607 | 0.64878957 | 0.00236416  | 0.38248516 | 0.95453482 | NA         | ACTBP7     |
| 64976  | ENSG00000185608 | 287.221412 | -0.13783699 | 0.1481351  | 0.31184465 | 0.53954807 | MRPL40     |
| 440097 | ENSG00000185610 | 0.173124   | -0.01911262 | 0.38486262 | 0.84537521 | NA         | DBX2       |

|           |                 |            |             |            |            |            |          |
|-----------|-----------------|------------|-------------|------------|------------|------------|----------|
| 389119    | ENSG00000185614 | 125.499162 | -1.0083741  | 0.25925724 | 1.17E-05   | 0.00010998 | INKA1    |
| 64714     | ENSG00000185615 | 123.28823  | 0.6697616   | 0.21450327 | 0.00040014 | 0.00264888 | PDIA2    |
| 10336     | ENSG00000185619 | 2453.42921 | 0.21913483  | 0.06728571 | 0.00092631 | 0.00554888 | PCGF3    |
| 89782     | ENSG00000185621 | 154.606895 | 0.36428463  | 0.22478358 | 0.05158965 | 0.15258477 | LMLN     |
| 5034      | ENSG00000185624 | 8348.96359 | 0.2557326   | 0.05210657 | 7.35E-07   | 8.52E-06   | P4HB     |
| 5719      | ENSG00000185627 | 1622.79039 | -0.05669513 | 0.07206695 | 0.42226283 | 0.64822768 | PSMD13   |
| 5087      | ENSG00000185630 | 3761.16543 | -1.28067018 | 0.06430864 | 2.94E-89   | 7.30E-87   | PBX1     |
| NA        | ENSG00000185631 | 0.35735973 | 0.02382194  | 0.38538182 | 0.61367454 | NA         | RPL14P6  |
| 56901     | ENSG00000185633 | 77.7162175 | -0.85730406 | 0.33922514 | 0.00145299 | 0.00815481 | NDUFA4L2 |
| 399694    | ENSG00000185634 | 26.4233697 | -0.18544297 | 0.34637157 | 0.33744401 | 0.56779656 | SHC4     |
| NA        | ENSG00000185638 | 0          | NA          | NA         | NA         | NA         | FTH1P14  |
| 338785    | ENSG00000185640 | 0          | NA          | NA         | NA         | NA         | KRT79    |
| NA        | ENSG00000185641 | 0.32562574 | 0.00212452  | 0.38337695 | 0.95997109 | NA         |          |
| 677       | ENSG00000185650 | 111.995097 | 0.75423422  | 0.28896552 | 0.0014693  | 0.00823474 | ZFP36L1  |
| 7332      | ENSG00000185651 | 1691.02245 | -0.10393678 | 0.07510743 | 0.15778462 | 0.34480085 | UBE2L3   |
| 4908      | ENSG00000185652 | 0.35668631 | 0.0238171   | 0.38538106 | 0.6140144  | NA         | NTF3     |
| 54014     | ENSG00000185658 | 2247.9003  | -0.00443643 | 0.06571874 | 0.94476495 | 0.97752994 | BRWD1    |
| 644994    | ENSG00000185662 | 0          | NA          | NA         | NA         | NA         | SMIM23   |
| 6490      | ENSG00000185664 | 78.2085079 | 0.11881748  | 0.24022526 | 0.52823142 | 0.73996408 | PMEL     |
| 8224      | ENSG00000185666 | 331.873266 | -3.03717077 | 0.54324275 | 8.77E-10   | 1.52E-08   | SYN3     |
| 5453      | ENSG00000185668 | 0          | NA          | NA         | NA         | NA         | POU3F1   |
| 333929    | ENSG00000185669 | 6.07182568 | -0.01397691 | 0.35497095 | 0.91743558 | 0.96505604 | SNAI3    |
| 79842     | ENSG00000185670 | 65.5639782 | -0.19738216 | 0.27198014 | 0.32238474 | 0.54994458 | ZBTB3    |
| 254773    | ENSG00000185674 | 1.28826906 | -0.01473589 | 0.37948775 | 0.82255434 | NA         | LYG2     |
| 254956    | ENSG00000185681 | 0.34746601 | 0.02370763  | 0.3853651  | 0.61987128 | NA         | MORN5    |
| NA        | ENSG00000185684 | 569.634842 | 0.4265808   | 0.10710733 | 3.30E-05   | 0.00028159 | EP400P1  |
| 23532     | ENSG00000185686 | 8506.16818 | 0.11744979  | 0.04986492 | 0.01761077 | 0.06573804 | PRAME    |
| 404220    | ENSG00000185689 | 6.10922617 | 0.03511164  | 0.36278597 | 0.78281653 | 0.90108377 | C6orf201 |
| 4603      | ENSG00000185697 | 298.926067 | -0.26208415 | 0.13879786 | 0.0420897  | 0.13066181 | MYBL1    |
| 100101118 | ENSG00000185700 | 0          | NA          | NA         | NA         | NA         | TTY8B    |
| NA        | ENSG00000185701 | 0          | NA          | NA         | NA         | NA         | OR5M5P   |
| NA        | ENSG00000185710 | 22.3622181 | -0.07603636 | 0.39271078 | 0.18313695 | 0.38130308 | SMG1P4   |
| 730094    | ENSG00000185716 | 521.370773 | 0.11717983  | 0.11101362 | 0.27011913 | 0.49334102 | MOSMO    |
| 4733      | ENSG00000185721 | 776.957261 | -0.16828718 | 0.10770262 | 0.10264647 | 0.25430894 | DRG1     |
| 51479     | ENSG00000185722 | 2123.56841 | -0.05237096 | 0.07090143 | 0.45173293 | 0.67497976 | ANKFY1   |
| 253943    | ENSG00000185728 | 1383.2439  | 0.03709009  | 0.12149723 | 0.74847497 | 0.88197086 | YTHDF3   |
| 79943     | ENSG00000185730 | 670.99254  | -0.00759061 | 0.11084328 | 0.94178659 | 0.97592427 | ZNF696   |
| 105       | ENSG00000185736 | 334.035633 | -0.27687621 | 0.16241876 | 0.05884197 | 0.16858119 | ADARB2   |

|           |                 |            |             |            |            |            |           |
|-----------|-----------------|------------|-------------|------------|------------|------------|-----------|
| 10718     | ENSG00000185737 | 46.2201847 | -1.65466579 | 0.38863882 | 1.38E-06   | 1.54E-05   | NRG3      |
| 6345      | ENSG00000185739 | 0          | NA          | NA         | NA         | NA         | SRL       |
| 399947    | ENSG00000185742 | 1.57252297 | -0.03734208 | 0.37994987 | 0.61925401 | NA         | C11orf87  |
| 3434      | ENSG00000185745 | 20.9111975 | 0.3004639   | 0.39191926 | 0.16736212 | 0.35828164 | IFIT1     |
| 159013    | ENSG00000185753 | 321.319957 | 0.27452931  | 0.1317393  | 0.02611391 | 0.09010434 | CXorf38   |
| 100132463 | ENSG00000185758 | 0          | NA          | NA         | NA         | NA         | CLDN24    |
| 56479     | ENSG00000185760 | 270.118701 | -0.25332059 | 0.14778728 | 0.06251074 | 0.17671887 | KCNQ5     |
| 339366    | ENSG00000185761 | 2.26042715 | 0.10704501  | 0.40457972 | 0.04544843 | NA         | ADAMTSL5  |
| 80333     | ENSG00000185774 | 1.07582017 | -0.01671425 | 0.38215846 | 0.74013154 | NA         | KCNIP4    |
| 389730    | ENSG00000185775 | 0          | NA          | NA         | NA         | NA         | SPATA31A6 |
| 10933     | ENSG00000185787 | 4848.24447 | 0.02605187  | 0.06416789 | 0.68113237 | 0.84419446 | MORF4L1   |
| 338321    | ENSG00000185792 | 0          | NA          | NA         | NA         | NA         | NLRP9     |
| 348793    | ENSG00000185798 | 137.698483 | 0.00941946  | 0.17823979 | 0.95365795 | 0.98083958 | WDR53     |
| 1762      | ENSG00000185800 | 1532.50529 | 0.41764324  | 0.0790693  | 6.53E-08   | 8.82E-07   | DMWD      |
| 79581     | ENSG00000185803 | 1089.18458 | 0.00540826  | 0.08519706 | 0.94935677 | 0.97912847 | SLC52A2   |
| 51227     | ENSG00000185808 | 203.41391  | -0.23847258 | 0.16204905 | 0.10333321 | 0.25540436 | PIGP      |
| 10320     | ENSG00000185811 | 63.3613344 | 5.04785615  | 0.58814524 | 5.64E-20   | 2.10E-18   | IKZF1     |
| 5833      | ENSG00000185813 | 857.406329 | -0.2771544  | 0.11729287 | 0.01274467 | 0.05062147 | PCYT2     |
| 339983    | ENSG00000185818 | 1222.77007 | 0.03064353  | 0.07655118 | 0.67582731 | 0.84136185 | NAT8L     |
| 390326    | ENSG00000185821 | 0          | NA          | NA         | NA         | NA         | OR6C76    |
| 23742     | ENSG00000185823 | 0          | NA          | NA         | NA         | NA         | NPAP1     |
| 10134     | ENSG00000185825 | 1768.38083 | -0.27687057 | 0.07951374 | 0.00036089 | 0.00241568 | BCAP31    |
| 51326     | ENSG00000185829 | 539.381177 | 0.07345063  | 0.15669337 | 0.60811825 | 0.79695264 | ARL17A    |
| NA        | ENSG00000185834 | 0.31679374 | 0.0011946   | 0.38336714 | 0.96640738 | NA         | RPL12P4   |
| 100130717 | ENSG00000185837 | 4.06052668 | -0.0476876  | 0.37045582 | 0.67053186 | 0.83767652 | HDHD5-AS1 |
| 54584     | ENSG00000185838 | 254.004554 | 0.10032977  | 0.14186299 | 0.447107   | 0.67106427 | GNB1L     |
| NA        | ENSG00000185839 | 0.16735865 | 0.01897177  | 0.38482933 | 0.78225479 | NA         |           |
| 127602    | ENSG00000185842 | 481.556644 | -0.10186286 | 0.12698556 | 0.3942052  | 0.62343812 | DNAH14    |
| 100131138 | ENSG00000185847 | 7.45233305 | -0.15201105 | 0.40770027 | 0.19411963 | 0.39704468 | LINC01405 |
| 339512    | ENSG00000185860 | 0.56660955 | 0.00913976  | 0.38298795 | 0.79124371 | NA         | CCDC190   |
| 2124      | ENSG00000185862 | 3.39793369 | 0.03084916  | 0.3705591  | 0.77176037 | 0.89531784 | EVI2B     |
| 100505993 | ENSG00000185863 | 0          | NA          | NA         | NA         | NA         | TMEM210   |
| 440345    | ENSG00000185864 | 382.69427  | 0.51807465  | 0.16234505 | 0.00049411 | 0.00319318 | NPIP4     |
| 374899    | ENSG00000185869 | 247.187148 | -0.20527929 | 0.16054724 | 0.15801763 | 0.34501645 | ZNF829    |
| 132724    | ENSG00000185873 | 0          | NA          | NA         | NA         | NA         | TMPRSS11B |
| 79896     | ENSG00000185875 | 172.472517 | -0.23199826 | 0.21441956 | 0.19556581 | 0.39920852 | THNSL1    |
| 140691    | ENSG00000185880 | 582.671416 | 0.18134397  | 0.13658454 | 0.15510052 | 0.34073683 | TRIM69    |
| 527       | ENSG00000185883 | 2350.54646 | -0.03449433 | 0.07250177 | 0.62696737 | 0.81067573 | ATP6V0C   |

|        |                 |            |             |            |            |            |           |
|--------|-----------------|------------|-------------|------------|------------|------------|-----------|
| 8519   | ENSG00000185885 | 0.16735865 | 0.01897177  | 0.38482933 | 0.78225479 | NA         | IFITM1    |
| 339501 | ENSG00000185888 | 0          | NA          | NA         | NA         | NA         | PRSS38    |
| 3916   | ENSG00000185896 | 1892.06774 | -0.07873883 | 0.07936756 | 0.30999423 | 0.53774299 | LAMP1     |
| 2865   | ENSG00000185897 | 0          | NA          | NA         | NA         | NA         | FFAR3     |
| 338398 | ENSG00000185899 | 0          | NA          | NA         | NA         | NA         | TAS2R60   |
| 84197  | ENSG00000185900 | 1295.98698 | -0.66684134 | 0.08845659 | 1.22E-14   | 3.23E-13   | POMK      |
| NA     | ENSG00000185903 | 2.04435331 | -0.0198972  | 0.37775949 | 0.79329593 | NA         | OR11N1P   |
| 84856  | ENSG00000185904 | 935.919208 | 0.03126826  | 0.09288307 | 0.72938064 | 0.87058789 | LINC00839 |
| 283897 | ENSG00000185905 | 0          | NA          | NA         | NA         | NA         | C16orf54  |
| 200942 | ENSG00000185909 | 856.03825  | -0.52712379 | 0.09967635 | 4.52E-08   | 6.24E-07   | KLHDC8B   |
| 257240 | ENSG00000185915 | 4.72386909 | -0.10021948 | 0.38431256 | 0.38102639 | 0.61008503 | KLHL34    |
| 54093  | ENSG00000185917 | 509.978352 | 0.24007178  | 0.14365296 | 0.0707868  | 0.19309914 | SETD4     |
| 5727   | ENSG00000185920 | 944.880237 | 0.09221033  | 0.11171363 | 0.38690034 | 0.61601017 | PTCH1     |
| 146760 | ENSG00000185924 | 2.29083902 | -0.07191458 | 0.38227526 | 0.44397118 | NA         | RTN4RL1   |
| 119749 | ENSG00000185926 | 0          | NA          | NA         | NA         | NA         | OR4C46    |
| 255022 | ENSG00000185933 | 1.02846556 | 0.02192143  | 0.38179602 | 0.69190042 | NA         | CALHM1    |
| 439915 | ENSG00000185940 | 2.17244002 | 0.07612488  | 0.38508202 | 0.39421107 | NA         | KRTAP5-5  |
| 286183 | ENSG00000185942 | 2.71208092 | 0.07089374  | 0.37875443 | 0.49693892 | 0.71500229 | NKAIN3    |
| 55599  | ENSG00000185946 | 352.739121 | 0.10053934  | 0.13302721 | 0.42074557 | 0.64669911 | RNPC3     |
| 10308  | ENSG00000185947 | 110.183576 | -0.33929369 | 0.21225553 | 0.0589304  | 0.16878577 | ZNF267    |
| 8660   | ENSG00000185950 | 5522.17919 | 0.62243625  | 0.05171891 | 7.68E-34   | 4.96E-32   | IRS2      |
| 402573 | ENSG00000185955 | 3.82930458 | 0.02707166  | 0.36674564 | 0.81483542 | 0.91598064 | C7orf61   |
| 121006 | ENSG00000185958 | 3.70062887 | 0.13742642  | 0.41161885 | 0.10473015 | 0.25786128 | FAM186A   |
| 6473   | ENSG00000185960 | 0          | NA          | NA         | NA         | NA         | SHOX      |
| 353142 | ENSG00000185962 | 0          | NA          | NA         | NA         | NA         | LCE3A     |
| 23299  | ENSG00000185963 | 1568.31614 | -0.19004896 | 0.08258294 | 0.01821621 | 0.06741028 | BICD2     |
| 353145 | ENSG00000185966 | 0          | NA          | NA         | NA         | NA         | LCE3E     |
| 881    | ENSG00000185972 | 1.57535977 | -0.03615585 | 0.38067973 | 0.61058017 | NA         | CCIN      |
| 55217  | ENSG00000185973 | 416.073259 | -0.04712913 | 0.13053858 | 0.7001969  | 0.85541355 | TMLHE     |
| 6011   | ENSG00000185974 | 13.383329  | 0.04566492  | 0.34338433 | 0.77491423 | 0.89613481 | GRK1      |
| 245939 | ENSG00000185982 | 0          | NA          | NA         | NA         | NA         | DEFB128   |
| 84631  | ENSG00000185985 | 0          | NA          | NA         | NA         | NA         | SLITRK2   |
| NA     | ENSG00000185986 | 385.533452 | 0.00944983  | 0.12388598 | 0.93692737 | 0.97351594 | SDHAP3    |
| 126520 | ENSG00000185988 | 1.38696581 | 0.01023845  | 0.37995175 | 0.87077323 | NA         | PLK5      |
| 22821  | ENSG00000185989 | 322.252002 | -0.47557968 | 0.13886768 | 0.00025003 | 0.00173934 | RASA3     |
| 84859  | ENSG00000186001 | 1156.04773 | -0.20872588 | 0.0934138  | 0.02084784 | 0.07534082 | LRCH3     |
| 93273  | ENSG00000186007 | 0          | NA          | NA         | NA         | NA         | LEMD1     |
| NA     | ENSG00000186008 | 0          | NA          | NA         | NA         | NA         | RPS4XP21  |



|           |                 |            |             |            |            |            |           |
|-----------|-----------------|------------|-------------|------------|------------|------------|-----------|
| 496       | ENSG00000186009 | 0.76972557 | -0.04329735 | 0.38756885 | 0.340737   | NA         | ATP4B     |
| 51079     | ENSG00000186010 | 3171.16699 | 0.10798286  | 0.05976691 | 0.06743878 | 0.18646699 | NDUFA13   |
| 84924     | ENSG00000186017 | 340.084723 | -0.03894389 | 0.16588238 | 0.79323581 | 0.9054599  | ZNF566    |
| NA        | ENSG00000186019 | 171.435653 | -0.57667197 | 0.21785639 | 0.00221925 | 0.0117101  |           |
| 57711     | ENSG00000186020 | 625.918443 | -0.04285665 | 0.12411015 | 0.71420526 | 0.8622791  | ZNF529    |
| 342909    | ENSG00000186026 | 268.56155  | -0.06325553 | 0.15703361 | 0.65803877 | 0.83031782 | ZNF284    |
| 285242    | ENSG00000186038 | 0          | NA          | NA         | NA         | NA         | HTR3E     |
| 220107    | ENSG00000186047 | 0.4988949  | -0.01359831 | 0.38305388 | 0.7848689  | NA         | DLEU7     |
| 103689915 | ENSG00000186047 | 0.4988949  | -0.01359831 | 0.38305388 | 0.7848689  | NA         | DLEU7     |
| 319101    | ENSG00000186049 | 0          | NA          | NA         | NA         | NA         | KRT73     |
| 6887      | ENSG00000186051 | 8.20094784 | 0.12843713  | 0.37258243 | 0.40774839 | 0.63603571 | TAL2      |
| 100129196 | ENSG00000186056 | 16.1270499 | 0.01829203  | 0.3410132  | 0.90967605 | 0.96107209 | MATN1-AS1 |
| 64853     | ENSG00000186063 | 1313.68191 | 0.20698429  | 0.0797577  | 0.00790789 | 0.03418139 | AIDA      |
| 84529     | ENSG00000186073 | 281.778307 | -0.77888613 | 0.1783695  | 2.28E-06   | 2.43E-05   | CDIN1     |
| 146722    | ENSG00000186074 | 0          | NA          | NA         | NA         | NA         | CD300LF   |
| 124626    | ENSG00000186075 | 0          | NA          | NA         | NA         | NA         | ZBPB2     |
| NA        | ENSG00000186076 | 1.19952539 | -0.06487716 | 0.39166475 | 0.17292621 | NA         |           |
| 3852      | ENSG00000186081 | 0          | NA          | NA         | NA         | NA         | KRT5      |
| NA        | ENSG00000186082 | 0.16735865 | 0.01897177  | 0.38482933 | 0.78225479 | NA         | KRT18P14  |
| 653149    | ENSG00000186086 | 242.028032 | 0.56306741  | 0.16102687 | 0.00014703 | 0.00107641 | NBPF6     |
| 54103     | ENSG00000186088 | 261.537611 | 0.36609569  | 0.15611328 | 0.01037035 | 0.04264242 | GSAP      |
| 200909    | ENSG00000186090 | 0          | NA          | NA         | NA         | NA         | HTR3D     |
| 79501     | ENSG00000186092 | 0          | NA          | NA         | NA         | NA         | OR4F5     |
| 84871     | ENSG00000186094 | 13.353661  | 0.21667355  | 0.39691314 | 0.23443629 | 0.45139906 | AGBL4     |
| 503582    | ENSG00000186103 | 0.33471731 | 0.02354391  | 0.38534154 | 0.62842204 | NA         | ARGFX     |
| 120227    | ENSG00000186104 | 289.993507 | -0.08508086 | 0.1577542  | 0.55290138 | 0.75919187 | CYP2R1    |
| 100130733 | ENSG00000186105 | 2.80995163 | 0.12639883  | 0.40287689 | 0.18766131 | 0.38799505 | LRRC70    |
| 157567    | ENSG00000186106 | 429.407846 | -0.53296853 | 0.13376014 | 2.36E-05   | 0.00020827 | ANKRD46   |
| 23396     | ENSG00000186111 | 1111.47298 | -0.11355452 | 0.09953298 | 0.23650263 | 0.45331004 | PIP5K1C   |
| 219436    | ENSG00000186113 | 0          | NA          | NA         | NA         | NA         | OR5D14    |
| 8529      | ENSG00000186115 | 0          | NA          | NA         | NA         | NA         | CYP4F2    |
| 374973    | ENSG00000186118 | 2.45093186 | 0.08100945  | 0.38370706 | 0.41039592 | NA         | TEX38     |
| 219438    | ENSG00000186119 | 0          | NA          | NA         | NA         | NA         | OR5D18    |
| NA        | ENSG00000186124 | 0          | NA          | NA         | NA         | NA         | OR9M1P    |
| 10773     | ENSG00000186130 | 499.671686 | -0.39618009 | 0.12137121 | 0.00056645 | 0.00359974 | ZBTB6     |
| 130355    | ENSG00000186132 | 81.1117838 | -0.09013648 | 0.22149189 | 0.61813643 | 0.80452675 | C2orf76   |
| 353164    | ENSG00000186136 | 1.01332516 | 0.02939345  | 0.38193292 | 0.62120384 | NA         | TAS2R42   |
| 10623     | ENSG00000186141 | 986.397048 | -0.05088745 | 0.08218017 | 0.52686749 | 0.73878671 | POLR3C    |

|        |                 |            |             |            |            |            |           |
|--------|-----------------|------------|-------------|------------|------------|------------|-----------|
| 339779 | ENSG00000186143 | 0          | NA          | NA         | NA         | NA         | PRR30     |
| 644414 | ENSG00000186146 | 0          | NA          | NA         | NA         | NA         | DEFB131A  |
| NA     | ENSG00000186148 | 0          | NA          | NA         | NA         | NA         |           |
| 164153 | ENSG00000186150 | 1.52613919 | -0.05270386 | 0.38448056 | 0.42811681 | NA         | UBL4B     |
| NA     | ENSG00000186152 | 0          | NA          | NA         | NA         | NA         | LILRP1    |
| 51741  | ENSG00000186153 | 359.154759 | -0.06354111 | 0.16215182 | 0.66410598 | 0.83431586 | WVOX      |
| 199974 | ENSG00000186160 | 0          | NA          | NA         | NA         | NA         | CYP4Z1    |
| NA     | ENSG00000186162 | 123.02061  | -0.07526247 | 0.19441394 | 0.65268631 | 0.82653324 | CIDCEP1   |
| 207147 | ENSG00000186163 | 0          | NA          | NA         | NA         | NA         |           |
| 338657 | ENSG00000186166 | 272.580467 | 0.17521546  | 0.15441166 | 0.21471491 | 0.42507156 | CENATAC   |
| 283149 | ENSG00000186174 | 680.295408 | -0.00216107 | 0.1375363  | 0.9852641  | 0.99475332 | BCL9L     |
| 51082  | ENSG00000186184 | 1257.01395 | -0.16825996 | 0.07517939 | 0.02228614 | 0.07942465 | POLR1D    |
| 146909 | ENSG00000186185 | 1810.8973  | 0.04814703  | 0.07129496 | 0.49239608 | 0.71141409 | KIF18B    |
| 84937  | ENSG00000186187 | 1109.56443 | 0.0904994   | 0.09858862 | 0.34241339 | 0.57256482 | ZNRF1     |
| 338557 | ENSG00000186188 | 0          | NA          | NA         | NA         | NA         | FFAR4     |
| 359710 | ENSG00000186190 | 0          | NA          | NA         | NA         | NA         | BPIFB3    |
| 149954 | ENSG00000186191 | 0          | NA          | NA         | NA         | NA         | BPIFB4    |
| 89958  | ENSG00000186193 | 2235.40542 | -0.68711936 | 0.06997755 | 2.28E-23   | 1.02E-21   | SAPCD2    |
| 128178 | ENSG00000186197 | 10.5354018 | 1.0164805   | 2.12504542 | 0.01158151 | 0.04681489 | EDARADD   |
| 123264 | ENSG00000186198 | 0.47437202 | -0.00764478 | 0.3832367  | 0.86108696 | NA         | SLC51B    |
| 66002  | ENSG00000186204 | 0          | NA          | NA         | NA         | NA         | CYP4F12   |
| 64757  | ENSG00000186205 | 702.169735 | -0.40220083 | 0.1302269  | 0.0010153  | 0.00598444 | MTARC1    |
| 254910 | ENSG00000186207 | 0          | NA          | NA         | NA         | NA         | LCE5A     |
| 345079 | ENSG00000186212 | 0.16735865 | 0.01897177  | 0.38482933 | 0.78225479 | NA         | SOWAHB    |
| 55330  | ENSG00000186222 | 368.9723   | -0.19082875 | 0.13017112 | 0.118003   | 0.28186606 | BLOC1S4   |
| 353135 | ENSG00000186226 | 0          | NA          | NA         | NA         | NA         | LCE1E     |
| 388567 | ENSG00000186230 | 296.497594 | 0.11236864  | 0.13493489 | 0.37349154 | 0.60252627 | ZNF749    |
| 114792 | ENSG00000186231 | 55.7207741 | -0.10238358 | 0.26767185 | 0.59706469 | 0.78909124 | KLHL32    |
| NA     | ENSG00000186234 | 0.14931947 | -0.01844332 | 0.38480212 | 0.84537521 | NA         | FAM86MP   |
| 151174 | ENSG00000186235 | 0.6463683  | 0.00271477  | 0.38249497 | 0.94800508 | NA         | LINC02610 |
| NA     | ENSG00000186244 | 0          | NA          | NA         | NA         | NA         |           |
| 57496  | ENSG00000186260 | 1240.38901 | -0.37539246 | 0.09478768 | 4.17E-05   | 0.00034889 | MRTFB     |
| 151888 | ENSG00000186265 | 0.67290387 | 0.0274814   | 0.38380982 | 0.57165405 | NA         | BTLA      |
| NA     | ENSG00000186268 | 0          | NA          | NA         | NA         | NA         | OR10D4P   |
| 7565   | ENSG00000186272 | 138.886739 | 0.22310319  | 0.19919116 | 0.19186887 | 0.39390298 | ZNF17     |
| 55693  | ENSG00000186280 | 74.6636524 | 0.17412792  | 0.25081604 | 0.37033461 | 0.59943356 | KDM4D     |
| 150763 | ENSG00000186281 | 1.79378296 | 0.00907106  | 0.37784869 | 0.90233359 | NA         | GPAT2     |
| 64222  | ENSG00000186283 | 725.911237 | 0.2811149   | 0.1379694  | 0.02888642 | 0.09740083 | TOR3A     |

|           |                 |            |             |            |            |            |           |
|-----------|-----------------|------------|-------------|------------|------------|------------|-----------|
| 340529    | ENSG00000186288 | 0.173733   | 0.01914545  | 0.38484597 | 0.78225479 | NA         | PABPC1L2A |
| 2558      | ENSG00000186297 | 0.14931947 | -0.01844332 | 0.38480212 | 0.84537521 | NA         | GABRA5    |
| 5501      | ENSG00000186298 | 3057.70181 | -0.15567963 | 0.07231445 | 0.02835591 | 0.09603639 | PPP1CC    |
| 148254    | ENSG00000186300 | 271.656777 | -0.03877729 | 0.15238569 | 0.78057935 | 0.89965693 | ZNF555    |
| NA        | ENSG00000186301 | 34.011486  | 1.56709731  | 0.50171753 | 0.00011093 | 0.00083399 | MST1P2    |
| 128360    | ENSG00000186306 | 0          | NA          | NA         | NA         | NA         | OR10T2    |
| 4675      | ENSG00000186310 | 88.370793  | -0.81234751 | 0.26217725 | 0.00030088 | 0.00205204 | NAP1L3    |
| 340591    | ENSG00000186312 | 259.258147 | -0.46786385 | 0.16259125 | 0.00161444 | 0.00894457 | CA5BP1    |
| 153768    | ENSG00000186314 | 162.114506 | -0.25093899 | 0.21162596 | 0.15846312 | 0.34567436 | PRELID2   |
| 23621     | ENSG00000186318 | 2360.025   | -0.22074362 | 0.06884842 | 0.00109848 | 0.00640428 | BACE1     |
| 388531    | ENSG00000186326 | 1.73633161 | -0.08056338 | 0.39348829 | 0.17401971 | NA         | RGS9BP    |
| NA        | ENSG00000186328 | 0          | NA          | NA         | NA         | NA         |           |
| 389177    | ENSG00000186329 | 0          | NA          | NA         | NA         | NA         | TMEM212   |
| 285641    | ENSG00000186334 | 0.173733   | 0.01914545  | 0.38484597 | 0.78225479 | NA         | SLC36A3   |
| 153201    | ENSG00000186335 | 0.16735865 | 0.01897177  | 0.38482933 | 0.78225479 | NA         | SLC36A2   |
| 7058      | ENSG00000186340 | 0.66295541 | -0.03787121 | 0.38676331 | 0.41297456 | NA         | THBS2     |
| 6256      | ENSG00000186350 | 855.616271 | -0.56288168 | 0.09033588 | 1.56E-10   | 2.92E-09   | RXRA      |
| 353322    | ENSG00000186352 | 69.7945178 | 0.40483608  | 0.30826158 | 0.07035063 | 0.19222647 | ANKRD37   |
| 200035    | ENSG00000186364 | 80.2931966 | -0.0394906  | 0.22607199 | 0.8278144  | 0.92210075 | NUDT17    |
| 100127206 | ENSG00000186367 | 2.96509162 | 0.23875254  | 0.49784971 | 0.00399119 | 0.01926649 | MINAR2    |
| NA        | ENSG00000186369 | 7.97774504 | -0.05531809 | 0.36642138 | 0.64995088 | 0.82529572 | LINC00643 |
| 7626      | ENSG00000186376 | 328.328804 | 0.00603817  | 0.13757564 | 0.96366272 | 0.98556979 | ZNF75D    |
| 260293    | ENSG00000186377 | 0          | NA          | NA         | NA         | NA         | CYP4X1    |
| 353288    | ENSG00000186393 | 0          | NA          | NA         | NA         | NA         | KRT26     |
| 3858      | ENSG00000186395 | 207.16851  | -0.39834855 | 0.18325277 | 0.01412214 | 0.05493788 | KRT10     |
| 101059918 | ENSG00000186399 | 42.4979129 | 0.22406933  | 0.3112507  | 0.28191012 | 0.50671288 | GOLGA8R   |
| 342510    | ENSG00000186407 | 0.30001757 | -0.0229446  | 0.38527539 | 0.68644769 | NA         | CD300E    |
| 728621    | ENSG00000186409 | 70.8113313 | -0.17768837 | 0.26073523 | 0.36462526 | 0.59423075 | CCDC30    |
| 55922     | ENSG00000186416 | 496.72453  | -0.19893782 | 0.10713315 | 0.05239277 | 0.15429309 | NKRF      |
| 342035    | ENSG00000186417 | 0.45209736 | -0.02505403 | 0.38558831 | 0.57865948 | NA         | GLDN      |
| 2204      | ENSG00000186431 | 0.16735865 | 0.01897177  | 0.38482933 | 0.78225479 | NA         | FCAR      |
| 3840      | ENSG00000186432 | 927.382454 | -0.81649126 | 0.10688491 | 3.98E-15   | 1.10E-13   | KPNA4     |
| 10345     | ENSG00000186439 | 0          | NA          | NA         | NA         | NA         | TRDN      |
| 128366    | ENSG00000186440 | 0          | NA          | NA         | NA         | NA         | OR6P1     |
| 3850      | ENSG00000186442 | 0          | NA          | NA         | NA         | NA         | KRT3      |
| 115560    | ENSG00000186446 | 127.485711 | -0.35601334 | 0.20411786 | 0.04198394 | 0.1303743  | ZNF501    |
| 10168     | ENSG00000186448 | 998.321287 | -0.15369137 | 0.1018217  | 0.1161924  | 0.27851362 | ZNF197    |
| 110354863 | ENSG00000186448 | 998.321287 | -0.15369137 | 0.1018217  | 0.1161924  | 0.27851362 | ZNF197    |

|        |                 |            |             |            |            |            |            |
|--------|-----------------|------------|-------------|------------|------------|------------|------------|
| 353324 | ENSG00000186451 | 5.48314062 | 0.03604082  | 0.3607403  | 0.78501124 | 0.90214452 | SPATA12    |
| 283471 | ENSG00000186452 | 0.29863895 | -0.02292439 | 0.3852726  | 0.68753245 | NA         | TMPRSS12   |
| 653140 | ENSG00000186453 | 13.7261209 | 0.56998755  | 0.67311445 | 0.03768955 | 0.12006434 | FAM228A    |
| 400830 | ENSG00000186458 | 0          | NA          | NA         | NA         | NA         | DEFB132    |
| 4674   | ENSG00000186462 | 0          | NA          | NA         | NA         | NA         | NAP1L2     |
| NA     | ENSG00000186466 | 0          | NA          | NA         | NA         | NA         | AQP7P1     |
| 6228   | ENSG00000186468 | 14272.0525 | -0.12893917 | 0.0554864  | 0.01868839 | 0.06891779 | RPS23      |
| 54331  | ENSG00000186469 | 1077.83888 | 0.8228366   | 0.09450778 | 5.90E-19   | 2.08E-17   | GNG2       |
| 11118  | ENSG00000186470 | 564.073303 | 0.93890128  | 0.14456618 | 1.19E-11   | 2.51E-10   | BTN3A2     |
| 158798 | ENSG00000186471 | 0          | NA          | NA         | NA         | NA         | AKAP14     |
| 27445  | ENSG00000186472 | 2192.13244 | 0.63271467  | 0.06448949 | 2.45E-23   | 1.09E-21   | PCLO       |
| 43849  | ENSG00000186474 | 0          | NA          | NA         | NA         | NA         | KLK12      |
| 401190 | ENSG00000186479 | 0          | NA          | NA         | NA         | NA         | RGS7BP     |
| 3638   | ENSG00000186480 | 1586.78974 | -0.20341605 | 0.12141062 | 0.07617804 | 0.20371644 | INSIG1     |
| NA     | ENSG00000186481 | 0.46052845 | -0.02780411 | 0.38575284 | 0.5537291  | NA         | ANKRD20A5P |
| 23040  | ENSG00000186487 | 1420.70072 | -0.83550274 | 0.09824595 | 3.22E-18   | 1.10E-16   | MYT1L      |
| 153571 | ENSG00000186493 | 0          | NA          | NA         | NA         | NA         | C5orf38    |
| 252884 | ENSG00000186496 | 48.3320433 | 0.41665335  | 0.31567158 | 0.06631822 | 0.18429434 | ZNF396     |
| 84065  | ENSG00000186501 | 882.256106 | 0.16436259  | 0.09207657 | 0.06567765 | 0.18311476 | TMEM222    |
| NA     | ENSG00000186508 | 0          | NA          | NA         | NA         | NA         | OR9I2P     |
| 219956 | ENSG00000186509 | 0          | NA          | NA         | NA         | NA         | OR9Q1      |
| 1187   | ENSG00000186510 | 18.2783153 | 0.07706258  | 0.33308321 | 0.66040822 | 0.83169348 | CLCNKA     |
| 219957 | ENSG00000186513 | 0          | NA          | NA         | NA         | NA         | OR9Q2      |
| 257106 | ENSG00000186517 | 10.3468901 | 0.20619582  | 0.3970425  | 0.24482071 | 0.4635216  | ARHGAP30   |
| 151011 | ENSG00000186522 | 865.345586 | 0.42759594  | 0.0906762  | 1.19E-06   | 1.34E-05   | SEPTIN10   |
| 85002  | ENSG00000186523 | 100.017046 | 0.58503071  | 0.24347765 | 0.00422534 | 0.0202148  | FAM86B1    |
| 11283  | ENSG00000186526 | 0          | NA          | NA         | NA         | NA         | CYP4F8     |
| 4051   | ENSG00000186529 | 0.77034759 | -0.0147326  | 0.3819582  | 0.77486312 | NA         | CYP4F3     |
| 114826 | ENSG00000186532 | 596.581273 | 0.02361112  | 0.10719465 | 0.81956068 | 0.91771554 | SMYD4      |
| NA     | ENSG00000186543 | 0          | NA          | NA         | NA         | NA         | CROCCP5    |
| 245908 | ENSG00000186562 | 0          | NA          | NA         | NA         | NA         | DEFB105A   |
| 2306   | ENSG00000186564 | 0.51937201 | -0.02557462 | 0.38567603 | 0.54680819 | NA         | FOXD2      |
| 23131  | ENSG00000186566 | 2026.29109 | -0.14085018 | 0.0789294  | 0.0678217  | 0.18722451 | GPATCH8    |
| 56971  | ENSG00000186567 | 15.3887747 | 0.38524397  | 0.50597252 | 0.08640836 | 0.22393591 | CEACAM19   |
| 245910 | ENSG00000186572 | 0          | NA          | NA         | NA         | NA         | DEFB107A   |
| 503614 | ENSG00000186572 | 0          | NA          | NA         | NA         | NA         | DEFB107A   |
| 4771   | ENSG00000186575 | 771.677045 | -0.19718159 | 0.09716687 | 0.03537222 | 0.11420719 | NF2        |
| 221491 | ENSG00000186577 | 196.740763 | -0.26912975 | 0.17686126 | 0.08618733 | 0.22346533 | SMIM29     |

|           |                 |            |             |            |            |            |          |
|-----------|-----------------|------------|-------------|------------|------------|------------|----------|
| 245909    | ENSG00000186579 | 0          | NA          | NA         | NA         | NA         | DEFB106A |
| 375686    | ENSG00000186583 | 0.85196166 | -0.01053786 | 0.3808599  | 0.85264278 | NA         | SPATC1   |
| 7328      | ENSG00000186591 | 2945.29801 | 0.24083157  | 0.06719266 | 0.00026729 | 0.00184516 | UBE2H    |
| 84981     | ENSG00000186594 | 41.1665137 | 1.33714804  | 0.46016138 | 0.00024372 | 0.00169721 | MIR22HG  |
| 245908    | ENSG00000186599 | 0          | NA          | NA         | NA         | NA         | DEFB105B |
| 504180    | ENSG00000186599 | 0          | NA          | NA         | NA         | NA         | DEFB105B |
| 84842     | ENSG00000186603 | 38.9065801 | 0.56536984  | 0.39226812 | 0.03036804 | 0.10131192 | HPDL     |
| 100129075 | ENSG00000186615 | 57.623058  | 0.15637625  | 0.2734179  | 0.43163694 | 0.65722769 | KTN1-AS1 |
| 11104     | ENSG00000186625 | 286.85903  | 0.09501153  | 0.15331402 | 0.49897034 | 0.71658137 | KATNA1   |
| 123722    | ENSG00000186628 | 4.27302986 | 0.05268248  | 0.37707547 | 0.58630981 | 0.78206176 | FSD2     |
| 116985    | ENSG00000186635 | 1681.95777 | 0.01812982  | 0.09453727 | 0.84406641 | 0.92948958 | ARAP1    |
| 347240    | ENSG00000186638 | 315.286575 | -0.13346193 | 0.14610329 | 0.32208826 | 0.54965002 | KIF24    |
| 5138      | ENSG00000186642 | 238.438106 | -1.28363723 | 0.23052972 | 2.01E-09   | 3.32E-08   | PDE2A    |
| 643862    | ENSG00000186645 | 4.20381132 | -0.03110807 | 0.37119558 | 0.76266488 | 0.89054624 | SPDYE17  |
| 100101268 | ENSG00000186645 | 4.20381132 | -0.03110807 | 0.37119558 | 0.76266488 | 0.89054624 | SPDYE17  |
| 102723849 | ENSG00000186645 | 4.20381132 | -0.03110807 | 0.37119558 | 0.76266488 | 0.89054624 | SPDYE17  |
| 90668     | ENSG00000186648 | 591.426961 | -0.67485917 | 0.11351097 | 6.78E-10   | 1.19E-08   | CARMIL3  |
| 5553      | ENSG00000186652 | 0          | NA          | NA         | NA         | NA         | PRG2     |
| 55615     | ENSG00000186654 | 58.3317858 | 0.03725265  | 0.24755959 | 0.84529532 | 0.92970586 | PRR5     |
| 80829     | ENSG00000186660 | 1902.35327 | -0.16197794 | 0.07146878 | 0.02088288 | 0.07538507 | ZFP91    |
| 284018    | ENSG00000186665 | 475.118767 | -0.29889984 | 0.11470927 | 0.00614225 | 0.02765826 | C17orf58 |
| 144233    | ENSG00000186666 | 260.923503 | -0.21073906 | 0.15928299 | 0.14481984 | 0.32509907 | BCDIN3D  |
| 139599    | ENSG00000186675 | 4.38811121 | -0.03293176 | 0.36801134 | 0.76965618 | 0.89407919 | MAGEE2   |
| NA        | ENSG00000186676 | 0.50207596 | 0.02562368  | 0.38565771 | 0.52549886 | NA         | EEF1GP1  |
| NA        | ENSG00000186678 | 0          | NA          | NA         | NA         | NA         |          |
| 339761    | ENSG00000186684 | 62.6280985 | 0.81187596  | 0.33287175 | 0.00196448 | 0.01053412 | CYP27C1  |
| 90624     | ENSG00000186687 | 678.288686 | -0.21487612 | 0.15376062 | 0.12496375 | 0.29340601 | LYRM7    |
| NA        | ENSG00000186704 | 2.9043025  | 0.11130381  | 0.39280042 | 0.28793966 | 0.51368788 | DTX2P1   |
| 387885    | ENSG00000186710 | 6.18567993 | -0.11815879 | 0.37882825 | 0.39591579 | 0.62539564 | CFAP73   |
| 493860    | ENSG00000186714 | 0          | NA          | NA         | NA         | NA         | CCDC73   |
| 11223     | ENSG00000186715 | 20.0591453 | 0.75798981  | 0.73035407 | 0.02129778 | 0.07661794 | MST1L    |
| 613       | ENSG00000186716 | 1912.53912 | -0.20387419 | 0.09782781 | 0.03065189 | 0.10205296 | BCR      |
| 26539     | ENSG00000186723 | 0          | NA          | NA         | NA         | NA         | OR10H1   |
| 758       | ENSG00000186732 | 21.3574941 | -0.19842601 | 0.3862775  | 0.25836545 | 0.47964541 | MPPED1   |
| NA        | ENSG00000186743 | 0          | NA          | NA         | NA         | NA         | TPI1P3   |
| 25794     | ENSG00000186765 | 5.12274503 | -0.01747448 | 0.36231898 | 0.88584004 | 0.95015905 | FSCN2    |
| 399823    | ENSG00000186766 | 0          | NA          | NA         | NA         | NA         | FOXI2    |
| 139886    | ENSG00000186767 | 405.365644 | -0.31469946 | 0.13615225 | 0.01317609 | 0.05200193 | SPIN4    |

|           |                 |            |             |            |            |            |           |
|-----------|-----------------|------------|-------------|------------|------------|------------|-----------|
| 654254    | ENSG00000186777 | 62.8146109 | -0.73678401 | 0.35426543 | 0.00561359 | 0.02566803 | ZNF732    |
| 474343    | ENSG00000186787 | 124.295165 | -0.00425045 | 0.18789013 | 0.97798819 | 0.99249544 | SPIN2B    |
| 389762    | ENSG00000186788 | 0          | NA          | NA         | NA         | NA         | SPATA31D3 |
| 2301      | ENSG00000186790 | 3.23040893 | 0.03882731  | 0.37742807 | 0.65684059 | 0.82968692 | FOXE3     |
| 8372      | ENSG00000186792 | 129.177798 | -0.06652147 | 0.18093382 | 0.67584596 | 0.84136185 | HYAL3     |
| 338567    | ENSG00000186795 | 0          | NA          | NA         | NA         | NA         | KCNK18    |
| 3446      | ENSG00000186803 | 0.173733   | 0.01914545  | 0.38484597 | 0.78225479 | NA         | IFNA10    |
| 147645    | ENSG00000186806 | 71.6180565 | -0.29643327 | 0.25841459 | 0.13953246 | 0.31648712 | VSIG10L   |
| 2833      | ENSG00000186810 | 0          | NA          | NA         | NA         | NA         | CXCR3     |
| 84307     | ENSG00000186812 | 1769.82942 | 0.07268955  | 0.08133384 | 0.36086499 | 0.59075159 | ZNF397    |
| 100101467 | ENSG00000186814 | 828.439005 | -0.05506232 | 0.11036967 | 0.60150558 | 0.79200883 | ZSCAN30   |
| 53373     | ENSG00000186815 | 854.363751 | 0.41085334  | 0.1284439  | 0.0006767  | 0.00419604 | TPCN1     |
| 11006     | ENSG00000186818 | 0          | NA          | NA         | NA         | NA         | LILRB4    |
| 408029    | ENSG00000186825 | 0.32450141 | 0.00139008  | 0.38336851 | 0.9669968  | NA         | CDRT15P3  |
| 7293      | ENSG00000186827 | 0          | NA          | NA         | NA         | NA         | TNFRSF4   |
| NA        | ENSG00000186831 | 0.173733   | 0.01914545  | 0.38484597 | 0.78225479 | NA         | KRT17P2   |
| 3868      | ENSG00000186832 | 0          | NA          | NA         | NA         | NA         | KRT16     |
| 10614     | ENSG00000186834 | 643.103088 | 0.11193561  | 0.10197261 | 0.25492888 | 0.47571378 | HEXIM1    |
| 348303    | ENSG00000186838 | 10.9116456 | 0.1256982   | 0.3665329  | 0.42837653 | 0.65428642 | SELENOV   |
| 353131    | ENSG00000186844 | 0          | NA          | NA         | NA         | NA         | LCE1A     |
| 3861      | ENSG00000186847 | 0          | NA          | NA         | NA         | NA         | KRT14     |
| 129293    | ENSG00000186854 | 1.10382659 | -0.02405627 | 0.38060958 | 0.69120644 | NA         | TRABD2A   |
| 105374836 | ENSG00000186854 | 1.10382659 | -0.02405627 | 0.38060958 | 0.69120644 | NA         | TRABD2A   |
| 83902     | ENSG00000186860 | 0          | NA          | NA         | NA         | NA         | KRTAP17-1 |
| 79955     | ENSG00000186862 | 205.985526 | -0.55100876 | 0.16454552 | 0.00025815 | 0.00179082 | PDZD7     |
| 23275     | ENSG00000186866 | 721.940635 | 0.20234659  | 0.1238295  | 0.08354503 | 0.21827226 | POFUT2    |
| 84109     | ENSG00000186867 | 0.15069912 | -0.01848503 | 0.38480575 | 0.84537521 | NA         | QRFPR     |
| 4137      | ENSG00000186868 | 1298.31481 | -1.37699016 | 0.08503332 | 5.09E-60   | 6.68E-58   | MAPT      |
| 54821     | ENSG00000186871 | 389.99423  | -0.28447645 | 0.12832836 | 0.01812215 | 0.06721694 | ERCC6L    |
| 138805    | ENSG00000186881 | 0          | NA          | NA         | NA         | NA         | OR13F1    |
| NA        | ENSG00000186886 | 0          | NA          | NA         | NA         | NA         | OR5D3P    |
| 200728    | ENSG00000186889 | 65.4852636 | -0.26730825 | 0.25187953 | 0.17505348 | 0.36892512 | TMEM17    |
| 8784      | ENSG00000186891 | 0.37844916 | 0.02407552  | 0.3854191  | 0.60038877 | NA         | TNFRSF18  |
| 2248      | ENSG00000186895 | 0          | NA          | NA         | NA         | NA         | FGF3      |
| 338761    | ENSG00000186897 | 89.7310998 | 0.45140609  | 0.27236589 | 0.03445823 | 0.11200054 | C1QL4     |
| 349667    | ENSG00000186907 | 73.5022455 | -0.01747245 | 0.24402624 | 0.92506783 | 0.96882104 | RTN4RL2   |
| 23390     | ENSG00000186908 | 1407.28836 | 0.18155316  | 0.08079209 | 0.02149598 | 0.07716307 | ZDHHC17   |
| 256394    | ENSG00000186910 | 0          | NA          | NA         | NA         | NA         | SERPINA11 |

|           |                 |            |             |            |            |            |           |
|-----------|-----------------|------------|-------------|------------|------------|------------|-----------|
| 5030      | ENSG00000186912 | 8.65798831 | 0.6872621   | 1.17182842 | 0.01977566 | 0.07233574 | P2RY4     |
| 55893     | ENSG00000186918 | 1421.60753 | 0.3969186   | 0.10612034 | 9.68E-05   | 0.00074059 | ZNF395    |
| 353174    | ENSG00000186919 | 9.45190671 | -0.09643965 | 0.36307195 | 0.51874893 | 0.73239566 | ZACN      |
| 337979    | ENSG00000186924 | 0          | NA          | NA         | NA         | NA         | KRTAP22-1 |
| 337973    | ENSG00000186925 | 0          | NA          | NA         | NA         | NA         | KRTAP19-6 |
| 337967    | ENSG00000186930 | 0          | NA          | NA         | NA         | NA         | KRTAP6-2  |
| NA        | ENSG00000186940 | 0          | NA          | NA         | NA         | NA         | CHCHD2P9  |
| 138802    | ENSG00000186943 | 0          | NA          | NA         | NA         | NA         | OR13C8    |
| 5465      | ENSG00000186951 | 517.916366 | -0.25805951 | 0.14506544 | 0.05337995 | 0.15645711 | PPARA     |
| 642987    | ENSG00000186952 | 16.3238789 | 0.03951127  | 0.33159745 | 0.81774761 | 0.91703101 | TMEM232   |
| 387978    | ENSG00000186960 | 0          | NA          | NA         | NA         | NA         | LINC01551 |
| 337969    | ENSG00000186965 | 0          | NA          | NA         | NA         | NA         | KRTAP19-2 |
| 337971    | ENSG00000186967 | 0          | NA          | NA         | NA         | NA         | KRTAP19-4 |
| 254950    | ENSG00000186970 | 0          | NA          | NA         | NA         | NA         | KRTAP15-1 |
| 284827    | ENSG00000186971 | 0          | NA          | NA         | NA         | NA         | KRTAP13-4 |
| 440585    | ENSG00000186973 | 0          | NA          | NA         | NA         | NA         | FAM183A   |
| 64800     | ENSG00000186976 | 13.1864624 | 1.04905771  | 0.87110031 | 0.0098989  | 0.04113221 | EFCAB6    |
| 337972    | ENSG00000186977 | 0          | NA          | NA         | NA         | NA         | KRTAP19-5 |
| 337963    | ENSG00000186980 | 0          | NA          | NA         | NA         | NA         | KRTAP23-1 |
| 256949    | ENSG00000186994 | 1.48093186 | 0.06638933  | 0.38841369 | 0.24651703 | NA         | KANK3     |
| 129080    | ENSG00000186998 | 157.384111 | -0.03825749 | 0.20073499 | 0.8215678  | 0.91847813 | EMID1     |
| 10881     | ENSG00000187003 | 0.72077386 | 0.05211251  | 0.38874868 | 0.28818718 | NA         | ACTL7A    |
| 337977    | ENSG00000187005 | 0          | NA          | NA         | NA         | NA         | KRTAP21-1 |
| 6007      | ENSG00000187010 | 2.80418962 | -0.02113247 | 0.37434995 | 0.81333278 | 0.91565127 | RHD       |
| NA        | ENSG00000187012 | 0          | NA          | NA         | NA         | NA         | LINC00207 |
| 388407    | ENSG00000187013 | 21.1369187 | 0.42014729  | 0.46764812 | 0.08307384 | 0.21743865 | LINC02875 |
| 83715     | ENSG00000187017 | 5.66734383 | 0.08161964  | 0.37954179 | 0.44428847 | 0.66924033 | ESPN      |
| 5407      | ENSG00000187021 | 0.78963195 | 0.0447097   | 0.38778241 | 0.30924938 | NA         | PNLIPRP1  |
| 138428    | ENSG00000187024 | 129.998251 | 0.04030214  | 0.2090358  | 0.81985149 | 0.91788244 | PTRH1     |
| 337978    | ENSG00000187026 | 0          | NA          | NA         | NA         | NA         | KRTAP21-2 |
| 344658    | ENSG00000187033 | 0.173124   | -0.01911262 | 0.38486262 | 0.84537521 | NA         | SAMD7     |
| 353345    | ENSG00000187037 | 0          | NA          | NA         | NA         | NA         | GPR141    |
| 164656    | ENSG00000187045 | 9.53535932 | 0.13249891  | 0.37011143 | 0.4084802  | 0.63652585 | TMPRSS6   |
| 1579      | ENSG00000187048 | 0          | NA          | NA         | NA         | NA         | CYP4A11   |
| 51259     | ENSG00000187049 | 277.845683 | -0.10310154 | 0.14661201 | 0.44567123 | 0.67028199 | TMEM216   |
| 91582     | ENSG00000187051 | 493.50925  | -0.10632683 | 0.10931879 | 0.30936035 | 0.53712343 | RPS19BP1  |
| 339967    | ENSG00000187054 | 1.71253596 | 0.03169261  | 0.3799317  | 0.65977011 | NA         | TMPRSS11A |
| 100130348 | ENSG00000187066 | 13.0144815 | -0.04430693 | 0.34701807 | 0.77247451 | 0.89553101 | TMEM262   |

|        |                 |            |             |            |            |            |           |
|--------|-----------------|------------|-------------|------------|------------|------------|-----------|
| 285382 | ENSG00000187068 | 62.6694408 | -0.30434955 | 0.26756699 | 0.13647042 | 0.31153759 | C3orf70   |
| 7003   | ENSG00000187079 | 2579.14235 | 0.15002864  | 0.09094726 | 0.08929931 | 0.22925243 | TEAD1     |
| 391191 | ENSG00000187080 | 0.15069912 | -0.01848503 | 0.38480575 | 0.84537521 | NA         | OR2AK2    |
| 503841 | ENSG00000187082 | 0          | NA          | NA         | NA         | NA         | DEFB106B  |
| 5333   | ENSG00000187091 | 163.914752 | 0.66990316  | 0.19061332 | 0.00010191 | 0.00077375 | PLCD1     |
| 885    | ENSG00000187094 | 0          | NA          | NA         | NA         | NA         | CCK       |
| 957    | ENSG00000187097 | 338.597341 | 0.26146694  | 0.17160393 | 0.08854161 | 0.22766532 | ENTPD5    |
| 4286   | ENSG00000187098 | 98.6040078 | 1.22595997  | 0.36509986 | 5.98E-05   | 0.00048    | MITF      |
| NA     | ENSG00000187103 | 0          | NA          | NA         | NA         | NA         | FUNDC2P3  |
| 399671 | ENSG00000187105 | 12.5717164 | -0.19384824 | 0.42347838 | 0.14887106 | 0.33152468 | HEATR4    |
| 4673   | ENSG00000187109 | 8809.29183 | -0.12818735 | 0.06739479 | 0.05293234 | 0.15548973 | NAP1L1    |
| 353514 | ENSG00000187116 | 0          | NA          | NA         | NA         | NA         | LILRA5    |
| 152100 | ENSG00000187118 | 406.463511 | 0.22294198  | 0.13368542 | 0.07456803 | 0.20054626 | CMC1      |
| 6585   | ENSG00000187122 | 2188.36514 | -2.36746114 | 0.07990765 | 4.88E-194  | 8.07E-191  | SLIT1     |
| 130574 | ENSG00000187123 | 251.222158 | 0.18002509  | 0.16372606 | 0.22399409 | 0.43762114 | LYPD6     |
| 1645   | ENSG00000187134 | 41.4053194 | -0.00221632 | 0.26110431 | 0.98922993 | 0.99604194 | AKR1C1    |
| 342865 | ENSG00000187135 | 0          | NA          | NA         | NA         | NA         | VSTM2B    |
| 27022  | ENSG00000187140 | 0.80827351 | 0.0274469   | 0.38417302 | 0.5339441  | NA         | FOXD3     |
| 374955 | ENSG00000187144 | 0.32373548 | -0.02327229 | 0.38532123 | 0.66865955 | NA         | SPATA21   |
| 55182  | ENSG00000187147 | 1570.30424 | -0.03713435 | 0.07227201 | 0.59977493 | 0.79066681 | RNF220    |
| 253935 | ENSG00000187151 | 0          | NA          | NA         | NA         | NA         | ANGPTL5   |
| 57698  | ENSG00000187164 | 720.060749 | -0.01550065 | 0.09704814 | 0.86809665 | 0.94233395 | SHTN1     |
| 341567 | ENSG00000187166 | 0.3164871  | 0.00084348  | 0.38336483 | 0.96977064 | NA         | H1-7      |
| 199834 | ENSG00000187170 | 0          | NA          | NA         | NA         | NA         | LCE4A     |
| NA     | ENSG00000187172 | 0          | NA          | NA         | NA         | NA         | BAGE2     |
| 353139 | ENSG00000187173 | 0          | NA          | NA         | NA         | NA         | LCE2A     |
| 353332 | ENSG00000187175 | 0          | NA          | NA         | NA         | NA         | KRTAP12-1 |
| 353140 | ENSG00000187180 | 0          | NA          | NA         | NA         | NA         | LCE2C     |
| 388282 | ENSG00000187185 | 0          | NA          | NA         | NA         | NA         |           |
| 730098 | ENSG00000187186 | 60.4956779 | -0.03191833 | 0.24801335 | 0.86485919 | 0.94026008 |           |
| 339327 | ENSG00000187187 | 179.094901 | -0.04340544 | 0.19389793 | 0.79462833 | 0.90579008 | ZNF546    |
| 23270  | ENSG00000187189 | 1927.06718 | -0.10403291 | 0.09375705 | 0.25166307 | 0.47149344 | TSPYL4    |
| 57054  | ENSG00000187191 | 0          | NA          | NA         | NA         | NA         | DAZ3      |
| 4501   | ENSG00000187193 | 73.2154307 | 0.50004443  | 0.27596331 | 0.02142917 | 0.07697895 | MT1X      |
| 2650   | ENSG00000187210 | 0.33471731 | 0.02354391  | 0.38534154 | 0.62842204 | NA         | GCNT1     |
| 353141 | ENSG00000187223 | 0          | NA          | NA         | NA         | NA         | LCE2D     |
| NA     | ENSG00000187229 | 0          | NA          | NA         | NA         | NA         |           |
| 91404  | ENSG00000187231 | 1192.64581 | -0.1143958  | 0.11194736 | 0.28414617 | 0.50925565 | SESTD1    |



|        |                 |            |             |            |            |            |            |
|--------|-----------------|------------|-------------|------------|------------|------------|------------|
| 353143 | ENSG00000187238 | 0          | NA          | NA         | NA         | NA         | LCE3B      |
| 23048  | ENSG00000187239 | 899.310639 | -0.55898199 | 0.11765788 | 6.64E-07   | 7.75E-06   | FNBP1      |
| 79659  | ENSG00000187240 | 416.364232 | 0.62634974  | 0.1567612  | 1.72E-05   | 0.00015613 | DYNC2H1    |
| 3859   | ENSG00000187242 | 0          | NA          | NA         | NA         | NA         | KRT12      |
| 81557  | ENSG00000187243 | 1789.22848 | 0.05197849  | 0.09925316 | 0.58862079 | 0.78335367 | MAGED4B    |
| 4059   | ENSG00000187244 | 4.61042887 | 0.32826967  | 0.59474043 | 0.01710025 | 0.06425549 | BCAM       |
| 222194 | ENSG00000187257 | 941.815393 | -0.35984319 | 0.09772812 | 0.00013341 | 0.00098435 | RSBN1L     |
| 387129 | ENSG00000187258 | 0          | NA          | NA         | NA         | NA         | NPSR1      |
| 349136 | ENSG00000187260 | 723.088566 | 0.17025075  | 0.09329015 | 0.05964912 | 0.17039991 | WDR86      |
| 2057   | ENSG00000187266 | 455.057203 | 0.19416674  | 0.11283434 | 0.07131001 | 0.19415268 | EPOR       |
| 171484 | ENSG00000187268 | 0          | NA          | NA         | NA         | NA         | FAM9C      |
| 83901  | ENSG00000187272 | 0          | NA          | NA         | NA         | NA         | KRTAP9-8   |
| 63924  | ENSG00000187288 | 0.173733   | 0.01914545  | 0.38484597 | 0.78225479 | NA         | CIDEC      |
| 1630   | ENSG00000187323 | 180.057789 | -1.65480759 | 0.20902025 | 1.85E-16   | 5.55E-15   | DCC        |
| 51616  | ENSG00000187325 | 728.58987  | -0.26018401 | 0.09474594 | 0.0044148  | 0.0209846  | TAF9B      |
| 56123  | ENSG00000187372 | 182.500069 | 0.6538422   | 0.17865785 | 6.15E-05   | 0.00049262 | PCDHB13    |
| 9863   | ENSG00000187391 | 425.186061 | -0.20525231 | 0.13735696 | 0.10833221 | 0.26410801 | MAGI2      |
| 338645 | ENSG00000187398 | 13.2746931 | 0.14771686  | 0.35752414 | 0.4097764  | 0.63779429 | LUZP2      |
| 375612 | ENSG00000187416 | 99.3878923 | -2.61907924 | 0.2951907  | 4.82E-20   | 1.81E-18   | LHFPL3     |
| 11261  | ENSG00000187446 | 869.377843 | 0.29545419  | 0.09724548 | 0.00164388 | 0.0090747  | CHP1       |
| NA     | ENSG00000187472 | 0          | NA          | NA         | NA         | NA         |            |
| 2359   | ENSG00000187474 | 0          | NA          | NA         | NA         | NA         | FPR3       |
| 3010   | ENSG00000187475 | 0          | NA          | NA         | NA         | NA         | H1-6       |
| 387763 | ENSG00000187479 | 2099.93155 | 1.11744461  | 0.0727657  | 3.80E-54   | 4.19E-52   | C11orf96   |
| NA     | ENSG00000187481 | 0          | NA          | NA         | NA         | NA         | HSD3BP1    |
| 388007 | ENSG00000187483 | 0          | NA          | NA         | NA         | NA         | SERPINA13P |
| 3767   | ENSG00000187486 | 111.316202 | -0.42145841 | 0.2189423  | 0.02272761 | 0.08067916 | KCNJ11     |
| 389118 | ENSG00000187492 | 0.38566494 | 0.00705828  | 0.38352517 | 0.90845506 | NA         | CDHR4      |
| 1282   | ENSG00000187498 | 2462.60831 | 0.9047211   | 0.07780492 | 4.77E-32   | 2.88E-30   | COL4A1     |
| NA     | ENSG00000187504 | 0.51435463 | 0.01620069  | 0.3831885  | 0.72798278 | NA         | RPL7P48    |
| 440107 | ENSG00000187510 | 0          | NA          | NA         | NA         | NA         | PLEKHG7    |
| 2701   | ENSG00000187513 | 1.69878526 | -0.07085894 | 0.3870089  | 0.34489856 | NA         | GJA4       |
| 5757   | ENSG00000187514 | 31910.0334 | -0.0987373  | 0.0526453  | 0.05815819 | 0.16725009 | PTMA       |
| 25763  | ENSG00000187516 | 0          | NA          | NA         | NA         | NA         | H2AP       |
| 51182  | ENSG00000187522 | 312.619888 | -0.14237114 | 0.14260115 | 0.28088913 | 0.50556476 | HSPA14     |
| 344905 | ENSG00000187527 | 0.56767373 | 0.02627943  | 0.38574813 | 0.49686938 | NA         | ATP13A5    |
| 51547  | ENSG00000187531 | 665.479814 | 0.12219065  | 0.11168778 | 0.25246184 | 0.47248778 | SIRT7      |
| 401137 | ENSG00000187533 | 0          | NA          | NA         | NA         | NA         | PRR27      |

|           |                 |            |             |            |            |            |           |
|-----------|-----------------|------------|-------------|------------|------------|------------|-----------|
| NA        | ENSG00000187534 | 0.14931947 | -0.01844332 | 0.38480212 | 0.84537521 | NA         | PRR13P5   |
| 9742      | ENSG00000187535 | 870.550948 | -0.02359514 | 0.08903796 | 0.78455533 | 0.90201126 | IFT140    |
| NA        | ENSG00000187536 | 0          | NA          | NA         | NA         | NA         | TPM3P7    |
| 404785    | ENSG00000187537 | 7.40334748 | -0.18639137 | 0.41576655 | 0.19231563 | 0.39457518 | POTEG     |
| 343071    | ENSG00000187545 | 0          | NA          | NA         | NA         | NA         | PRAMEF10  |
| 392636    | ENSG00000187546 | 0.34687852 | 0.00028476  | 0.3833622  | 0.96576209 | NA         | AGMO      |
| 646643    | ENSG00000187550 | 4.63712248 | -0.05432129 | 0.36712428 | 0.66009766 | 0.83146071 | SBK2      |
| 340665    | ENSG00000187553 | 0.36295525 | 0.02389477  | 0.3853924  | 0.60996621 | NA         | CYP26C1   |
| 7100      | ENSG00000187554 | 22.4097577 | 0.16629482  | 0.38304071 | 0.30707644 | 0.53465526 | TLR5      |
| 7874      | ENSG00000187555 | 2699.42483 | -0.34183649 | 0.06187024 | 2.06E-08   | 2.99E-07   | USP7      |
| 342977    | ENSG00000187556 | 23.753633  | -0.3318693  | 0.43375282 | 0.12474075 | 0.29302114 | NANOS3    |
| 286380    | ENSG00000187559 | 2.76380768 | 0.10343029  | 0.39981911 | 0.1417232  | 0.32019418 | FOXD4L3   |
| 378884    | ENSG00000187566 | 0          | NA          | NA         | NA         | NA         | NHLRC1    |
| 359787    | ENSG00000187569 | 0          | NA          | NA         | NA         | NA         | DPPA3     |
| 341947    | ENSG00000187581 | 0.63433561 | 0.00268403  | 0.3825192  | 0.94833541 | NA         | COX8C     |
| 84069     | ENSG00000187583 | 2.76114498 | 0.00247887  | 0.37524666 | 0.97742384 | 0.99232877 | PLEKHN1   |
| NA        | ENSG00000187589 | 0          | NA          | NA         | NA         | NA         | TERF1P2   |
| 201181    | ENSG00000187595 | 50.8190373 | 1.37445241  | 0.40327814 | 4.92E-05   | 0.00040282 | ZNF385C   |
| 101805491 | ENSG00000187600 | 0.16735865 | 0.01897177  | 0.38482933 | 0.78225479 | NA         | LINC02583 |
| 28986     | ENSG00000187601 | 285.214796 | 0.10259657  | 0.13912495 | 0.42958719 | 0.6552631  | MAGEH1    |
| 200424    | ENSG00000187605 | 2592.9195  | 0.17132374  | 0.05996269 | 0.00380701 | 0.01848083 | TET3      |
| 57335     | ENSG00000187607 | 1394.09174 | -0.39518742 | 0.09240288 | 1.01E-05   | 9.56E-05   | ZNF286A   |
| 9636      | ENSG00000187608 | 15.6407638 | -0.13797871 | 0.34687115 | 0.44789712 | 0.67182875 | ISG15     |
| 54932     | ENSG00000187609 | 186.192083 | 0.96756335  | 0.18268962 | 1.61E-08   | 2.36E-07   | EXD3      |
| 390148    | ENSG00000187612 | 0          | NA          | NA         | NA         | NA         | OR5W2     |
| 389827    | ENSG00000187616 | 1.02319012 | 0.00696526  | 0.38088185 | 0.9004305  | NA         | MYMK      |
| NA        | ENSG00000187621 | 0          | NA          | NA         | NA         | NA         | TCL6      |
| 400566    | ENSG00000187624 | 28.5210004 | -0.05011119 | 0.30393749 | 0.78770479 | 0.90351292 | C17orf97  |
| 387032    | ENSG00000187626 | 200.305341 | 0.03584743  | 0.15521793 | 0.80140488 | 0.90902045 | ZKSCAN4   |
| 400966    | ENSG00000187627 | 118.860418 | 1.06271309  | 0.28220953 | 1.72E-05   | 0.00015645 | RGPD1     |
| 317749    | ENSG00000187630 | 155.713964 | 0.40135848  | 0.18999097 | 0.01622917 | 0.06149481 | DHRS4L2   |
| 148398    | ENSG00000187634 | 345.717047 | -0.32402795 | 0.15660662 | 0.0230607  | 0.08165702 | SAMD11    |
| 84808     | ENSG00000187642 | 3.59646748 | 0.01543991  | 0.36895294 | 0.88611428 | 0.95015905 | PERM1     |
| 400673    | ENSG00000187650 | 161.992422 | 0.24506282  | 0.1863797  | 0.13336592 | 0.30706508 | VMAC      |
| NA        | ENSG00000187653 | 0          | NA          | NA         | NA         | NA         | TMSB4XP8  |
| NA        | ENSG00000187657 | 0          | NA          | NA         | NA         | NA         | TSPY13P   |
| 100190949 | ENSG00000187658 | 0          | NA          | NA         | NA         | NA         | C5orf52   |
| 404037    | ENSG00000187664 | 54.8566452 | 0.11964289  | 0.40439259 | 0.15323914 | 0.33804794 | HAPLN4    |

|           |                 |            |             |            |            |            |           |
|-----------|-----------------|------------|-------------|------------|------------|------------|-----------|
| 26059     | ENSG00000187672 | 162.014242 | -0.24775425 | 0.18611788 | 0.1282424  | 0.29899782 | ERC2      |
| 145173    | ENSG00000187676 | 327.049033 | 0.1910632   | 0.12942314 | 0.11633236 | 0.27881542 | B3GLCT    |
| 81848     | ENSG00000187678 | 810.85265  | -0.15132296 | 0.0952568  | 0.1003899  | 0.24996681 | SPRY4     |
| 3266      | ENSG00000187682 | 1.94795485 | 0.13737587  | 0.41535593 | 0.06556439 | NA         | ERAS      |
| NA        | ENSG00000187686 | 3.62409428 | 0.01224251  | 0.37236046 | 0.89770352 | 0.9551369  | KRT18P59  |
| 51393     | ENSG00000187688 | 8.75692912 | 0.11305815  | 0.375051   | 0.42092329 | 0.64692215 | TRPV2     |
| 401138    | ENSG00000187689 | 0          | NA          | NA         | NA         | NA         | AMTN      |
| 340602    | ENSG00000187690 | 10.8410997 | 0.12205298  | 0.35650632 | 0.47163847 | 0.69399066 | EZHIP     |
| 84281     | ENSG00000187699 | 76.1093231 | 0.21212996  | 0.23060908 | 0.25759425 | 0.47884098 | C2orf88   |
| 403239    | ENSG00000187701 | 0          | NA          | NA         | NA         | NA         | OR2T27    |
| 94107     | ENSG00000187713 | 792.199989 | -0.05304332 | 0.09259076 | 0.5532349  | 0.75941303 | TMEM203   |
| 6572      | ENSG00000187714 | 493.436339 | -1.00080332 | 0.12960442 | 1.55E-15   | 4.40E-14   | SLC18A3   |
| 166348    | ENSG00000187715 | 1.0860262  | -0.03571045 | 0.38482539 | 0.43320026 | NA         | KBTBD12   |
| 79875     | ENSG00000187720 | 97.7754247 | -1.81138762 | 0.27557731 | 3.17E-12   | 6.96E-11   | THSD4     |
| NA        | ENSG00000187721 | 0          | NA          | NA         | NA         | NA         | GTF2IP3   |
| 374407    | ENSG00000187726 | 8.69944145 | 0.08954564  | 0.37291166 | 0.49015761 | 0.70978228 | DNAJB13   |
| 2563      | ENSG00000187730 | 49.5137396 | -0.81067592 | 0.40005328 | 0.00517641 | 0.02392821 | GABRD     |
| 278       | ENSG00000187733 | 0          | NA          | NA         | NA         | NA         | AMY1C     |
| 6917      | ENSG00000187735 | 1634.56867 | -0.43855393 | 0.07231173 | 6.32E-10   | 1.12E-08   | TCEA1     |
| 79840     | ENSG00000187736 | 603.881301 | -0.16584028 | 0.12975386 | 0.17302411 | 0.36578929 | NHEJ1     |
| 2175      | ENSG00000187741 | 1493.33075 | -0.20724022 | 0.08802961 | 0.01532138 | 0.05859217 | FANCA     |
| 79048     | ENSG00000187742 | 1684.04873 | -0.29043608 | 0.08825601 | 0.00069898 | 0.00432419 | SECISBP2  |
| 340980    | ENSG00000187747 | 0          | NA          | NA         | NA         | NA         | OR52B6    |
| 389766    | ENSG00000187753 | 1.00770394 | 0.03798146  | 0.38215804 | 0.55883654 | NA         | C9orf153  |
| 280658    | ENSG00000187754 | 0          | NA          | NA         | NA         | NA         | SSX7      |
| 124       | ENSG00000187758 | 0          | NA          | NA         | NA         | NA         | ADH1A     |
| NA        | ENSG00000187762 | 0          | NA          | NA         | NA         | NA         | HSPE1P11  |
| NA        | ENSG00000187763 | 0          | NA          | NA         | NA         | NA         | OR2B7P    |
| 10507     | ENSG00000187764 | 930.69582  | -0.24819148 | 0.0925015  | 0.005561   | 0.02546867 | SEMA4D    |
| 386681    | ENSG00000187766 | 0          | NA          | NA         | NA         | NA         | KRTAP10-8 |
| 389421    | ENSG00000187772 | 366.02265  | -0.29883213 | 0.12873072 | 0.01341934 | 0.05280437 | LIN28B    |
| 125704    | ENSG00000187773 | 0          | NA          | NA         | NA         | NA         | DIPK1C    |
| 8632      | ENSG00000187775 | 38.6836298 | 0.30765956  | 0.41301797 | 0.14912043 | 0.33171312 | DNAH17    |
| 10445     | ENSG00000187778 | 1113.19844 | 0.11297709  | 0.08083605 | 0.15229491 | 0.33666083 | MCRS1     |
| 643236    | ENSG00000187783 | 0.37844916 | 0.02407552  | 0.3854191  | 0.60038877 | NA         | TMEM72    |
| 57697     | ENSG00000187790 | 154.242325 | 0.37118866  | 0.22785972 | 0.04921763 | 0.14725949 | FANCM     |
| 100129969 | ENSG00000187791 | 0.173124   | -0.01911262 | 0.38486262 | 0.84537521 | NA         | FAM205C   |
| 7621      | ENSG00000187792 | 358.527547 | 0.1654457   | 0.12278351 | 0.15457288 | 0.33998898 | ZNF70     |

|           |                 |            |             |            |            |            |          |
|-----------|-----------------|------------|-------------|------------|------------|------------|----------|
| 64170     | ENSG00000187796 | 752.451805 | 0.0708074   | 0.11023911 | 0.50234649 | 0.7191395  | CARD9    |
| 375033    | ENSG00000187800 | 160.11904  | -0.32886547 | 0.25802593 | 0.1019812  | 0.252945   | PEAR1    |
| 65243     | ENSG00000187801 | 230.190052 | 0.0314719   | 0.15958325 | 0.82997697 | 0.92292025 | ZFP69B   |
| 338949    | ENSG00000187806 | 0          | NA          | NA         | NA         | NA         | TMEM202  |
| 347454    | ENSG00000187808 | 4.68917404 | 0.04165224  | 0.36986844 | 0.71030811 | 0.86089825 | SOWAHD   |
| NA        | ENSG00000187812 | 0          | NA          | NA         | NA         | NA         |          |
| 339559    | ENSG00000187815 | 168.599148 | -0.2282113  | 0.17463994 | 0.14162724 | 0.3200324  | ZFP69    |
| 391723    | ENSG00000187821 | 0          | NA          | NA         | NA         | NA         | HELT     |
| 340595    | ENSG00000187823 | 0.173733   | 0.01914545  | 0.38484597 | 0.78225479 | NA         | RTL4     |
| 388335    | ENSG00000187824 | 83.5122995 | -0.03300836 | 0.23804187 | 0.85809148 | 0.93662789 | TMEM220  |
| 388960    | ENSG00000187833 | 0          | NA          | NA         | NA         | NA         | C2orf78  |
| 3006      | ENSG00000187837 | 83.1612413 | -0.49726406 | 0.25768907 | 0.01701426 | 0.06400509 | H1-2     |
| 57048     | ENSG00000187838 | 585.684295 | 0.54401109  | 0.11050049 | 2.97E-07   | 3.67E-06   | PLSCR3   |
| 1978      | ENSG00000187840 | 1891.78963 | -0.16889042 | 0.0863557  | 0.04434117 | 0.13565472 | EIF4EBP1 |
| NA        | ENSG00000187847 | 0          | NA          | NA         | NA         | NA         | OR7E25P  |
| 22953     | ENSG00000187848 | 0.3435056  | 0.02364483  | 0.38535622 | 0.62283903 | NA         | P2RX2    |
| 121549    | ENSG00000187855 | 0.173124   | -0.01911262 | 0.38486262 | 0.84537521 | NA         | ASCL4    |
| 390323    | ENSG00000187857 | 0          | NA          | NA         | NA         | NA         | OR6C75   |
| 550631    | ENSG00000187860 | 145.628109 | 0.21232346  | 0.18470807 | 0.19027079 | 0.39162973 | CCDC157  |
| 164118    | ENSG00000187862 | 3.73744928 | -0.01984875 | 0.36576482 | 0.86149043 | 0.93844892 | TTC24    |
| 116224    | ENSG00000187866 | 303.513514 | -0.05740975 | 0.13374465 | 0.64613081 | 0.82370422 | PABIR1   |
| 342979    | ENSG00000187867 | 249.067848 | 0.51204298  | 0.15363252 | 0.00031315 | 0.00212898 | PALM3    |
| NA        | ENSG00000187870 | 0          | NA          | NA         | NA         | NA         | RNFT1P3  |
| 389400    | ENSG00000187871 | 0          | NA          | NA         | NA         | NA         | GFRAL    |
| 199920    | ENSG00000187889 | 2.76715221 | 0.03837586  | 0.37799264 | 0.63135826 | 0.81365039 | FYB2     |
| 392459    | ENSG00000187893 | 0          | NA          | NA         | NA         | NA         | CXXC1P1  |
| NA        | ENSG00000187900 | 0          | NA          | NA         | NA         | NA         | OR5H7P   |
| 729956    | ENSG00000187902 | 78.0895738 | -1.74279365 | 0.29041826 | 1.43E-10   | 2.70E-09   | SHISA7   |
| NA        | ENSG00000187904 | 0.45209736 | -0.02505403 | 0.38558831 | 0.57865948 | NA         |          |
| 400891    | ENSG00000187905 | 2.84418523 | -0.0011301  | 0.3708319  | 0.98924211 | 0.99604194 | LRRC74B  |
| 1755      | ENSG00000187908 | 1.03458168 | 0.0506224   | 0.38552444 | 0.35142596 | NA         | DMBT1    |
| 388512    | ENSG00000187912 | 0          | NA          | NA         | NA         | NA         | CLEC17A  |
| 390064    | ENSG00000187918 | 0          | NA          | NA         | NA         | NA         | OR51I2   |
| 414332    | ENSG00000187922 | 1.06573756 | 0.04978228  | 0.38642528 | 0.3445109  | NA         | LCN10    |
| 401944    | ENSG00000187942 | 25.4595071 | 0.05598461  | 0.3300006  | 0.74783226 | 0.88161596 | LDLRAD2  |
| 401027    | ENSG00000187944 | 6.95647971 | 0.03158882  | 0.35719271 | 0.81914092 | 0.91752333 | C2orf66  |
| 341350    | ENSG00000187950 | 0.173733   | 0.01914545  | 0.38484597 | 0.78225479 | NA         | OVCH1    |
| 100288637 | ENSG00000187951 | 492.929071 | 0.13796217  | 0.1359025  | 0.27728367 | 0.50167437 |          |

|           |                 |            |             |            |            |            |            |
|-----------|-----------------|------------|-------------|------------|------------|------------|------------|
| NA        | ENSG00000187952 | 0.32427719 | 0.00119291  | 0.38336686 | 0.96888079 | NA         | HS6ST1P1   |
| NA        | ENSG00000187953 | 410.922911 | 0.12294973  | 0.11593138 | 0.26590894 | 0.48827746 | PMS2CL     |
| 50626     | ENSG00000187954 | 1104.2157  | 0.06485009  | 0.09054689 | 0.46167586 | 0.68473119 | CYHR1      |
| 7373      | ENSG00000187955 | 1.42887348 | 0.10356603  | 0.40306616 | 0.0690672  | NA         | COL14A1    |
| 92737     | ENSG00000187957 | 1.55831389 | -0.09505766 | 0.39662707 | 0.16243725 | NA         | DNER       |
| 642843    | ENSG00000187959 | 0.37844916 | 0.02407552  | 0.3854191  | 0.60038877 | NA         | CPSF4L     |
| 339451    | ENSG00000187961 | 739.821805 | 0.02393993  | 0.09226987 | 0.79000968 | 0.9043268  | KLHL17     |
| 389874    | ENSG00000187969 | 0          | NA          | NA         | NA         | NA         | ZCCHC13    |
| NA        | ENSG00000187979 | 0.56767373 | 0.02627943  | 0.38574813 | 0.49686938 | NA         | FAM230D    |
| 391013    | ENSG00000187980 | 0          | NA          | NA         | NA         | NA         | PLA2G2C    |
| NA        | ENSG00000187984 | 2.29286552 | 0.04980121  | 0.38371094 | 0.46617227 | NA         | ANKRD19P   |
| 222696    | ENSG00000187987 | 181.909219 | 0.64093898  | 0.18684887 | 0.00015015 | 0.00109643 | ZSCAN23    |
| NA        | ENSG00000187988 | 0.34746601 | 0.02370763  | 0.3853651  | 0.61987128 | NA         | KCTD9P3    |
| 126432    | ENSG00000187994 | 123.520675 | 0.59569643  | 0.27246289 | 0.00683912 | 0.03034851 | RINL       |
| 100141515 | ENSG00000187997 | 0          | NA          | NA         | NA         | NA         | C17orf99   |
| NA        | ENSG00000187999 | 0.16735865 | 0.01897177  | 0.38482933 | 0.78225479 | NA         | HNRNPA1P61 |
| 162998    | ENSG00000188000 | 0.35704327 | 0.02381967  | 0.38538147 | 0.61383419 | NA         | OR7D2      |
| 285386    | ENSG00000188001 | 0.173124   | -0.01911262 | 0.38486262 | 0.84537521 | NA         | TPRG1      |
| NA        | ENSG00000188002 | 183.336213 | 0.02635569  | 0.15912362 | 0.85678977 | 0.93605226 |            |
| 284677    | ENSG00000188004 | 12.47467   | -0.1370155  | 0.36471567 | 0.41191416 | 0.63976648 | SNHG28     |
| 729967    | ENSG00000188010 | 248.063206 | 0.03252636  | 0.14398692 | 0.80869227 | 0.91327725 | MORN2      |
| 285093    | ENSG00000188011 | 3.12131613 | 0.04457994  | 0.37786446 | 0.61502268 | 0.80239693 | RTP5       |
| NA        | ENSG00000188013 | 20.6368497 | 0.44099669  | 0.5109431  | 0.07206484 | 0.19555978 | MEIS3P2    |
| 6274      | ENSG00000188015 | 0.33471731 | 0.02354391  | 0.38534154 | 0.62842204 | NA         | S100A3     |
| 29978     | ENSG00000188021 | 1319.34999 | -0.02962943 | 0.07612204 | 0.69111895 | 0.85035049 | UBQLN2     |
| 353116    | ENSG00000188026 | 429.505785 | 0.41642903  | 0.12856297 | 0.00058261 | 0.0036888  | RILPL1     |
| 392360    | ENSG00000188029 | 0          | NA          | NA         | NA         | NA         | CTSL3P     |
| 646457    | ENSG00000188032 | 0          | NA          | NA         | NA         | NA         | C19orf67   |
| 57474     | ENSG00000188033 | 167.562452 | 0.20919124  | 0.19073498 | 0.20723858 | 0.41447107 | ZNF490     |
| 1180      | ENSG00000188037 | 0          | NA          | NA         | NA         | NA         | CLCN1      |
| 123904    | ENSG00000188038 | 1.98674645 | 0.09856895  | 0.3998048  | 0.10747501 | NA         | NRN1L      |
| 284434    | ENSG00000188039 | 0.34117358 | 0.02362701  | 0.38535347 | 0.62407208 | NA         | NWD1       |
| 10123     | ENSG00000188042 | 560.993558 | -0.21272783 | 0.11023086 | 0.04295368 | 0.13257414 | ARL4C      |
| 168433    | ENSG00000188050 | 0          | NA          | NA         | NA         | NA         | RNF133     |
| 100130519 | ENSG00000188051 | 11.7560591 | 0.39316763  | 0.60153495 | 0.05219045 | 0.15390289 | TMEM221    |
| 285852    | ENSG00000188056 | 0          | NA          | NA         | NA         | NA         | TREML4     |
| 115273    | ENSG00000188060 | 28.1191833 | 0.12488936  | 0.29853919 | 0.52725373 | 0.73906416 | RAB42      |
| 7477      | ENSG00000188064 | 0.15069912 | -0.01848503 | 0.38480575 | 0.84537521 | NA         | WNT7B      |

|        |                 |            |             |            |            |            |           |
|--------|-----------------|------------|-------------|------------|------------|------------|-----------|
| 65998  | ENSG00000188070 | 2096.82517 | -0.16247466 | 0.06776203 | 0.01476231 | 0.05692599 | C11orf95  |
| 147199 | ENSG00000188076 | 0          | NA          | NA         | NA         | NA         | SCGB1C1   |
| NA     | ENSG00000188078 | 0          | NA          | NA         | NA         | NA         |           |
| NA     | ENSG00000188086 | 0.48437198 | 0.00977975  | 0.38330854 | 0.807476   | NA         | PRSS45P   |
| 123745 | ENSG00000188089 | 0          | NA          | NA         | NA         | NA         | PLA2G4E   |
| 51463  | ENSG00000188092 | 259.347232 | 0.44930145  | 0.16603811 | 0.00287544 | 0.01460542 | GPR89B    |
| 145873 | ENSG00000188095 | 2.62408805 | -0.04650319 | 0.37637428 | 0.62147004 | 0.80672374 | MESP2     |
| 643161 | ENSG00000188100 | 0          | NA          | NA         | NA         | NA         | FAM25A    |
| NA     | ENSG00000188101 | 0          | NA          | NA         | NA         | NA         | ALOX15P2  |
| 346007 | ENSG00000188107 | 2.01109226 | 0.05326836  | 0.38301945 | 0.46516719 | NA         | EYS       |
| 647024 | ENSG00000188112 | 0.83757895 | -0.03117678 | 0.3837275  | 0.52283675 | NA         | C6orf132  |
| 1617   | ENSG00000188120 | 0          | NA          | NA         | NA         | NA         | DAZ1      |
| 338755 | ENSG00000188124 | 0          | NA          | NA         | NA         | NA         | OR2AG2    |
| 6300   | ENSG00000188130 | 641.724295 | -0.88898547 | 0.10112682 | 2.42E-19   | 8.73E-18   | MAPK12    |
| 401498 | ENSG00000188133 | 50.2420772 | -0.73456406 | 0.41147092 | 0.01002228 | 0.04153792 | TMEM215   |
| 441457 | ENSG00000188152 | 21.236359  | 0.00787571  | 0.32377478 | 0.96633677 | 0.98698181 | NUTM2G    |
| 1287   | ENSG00000188153 | 0.9406116  | 0.06504731  | 0.39124699 | 0.20236004 | NA         | COL4A5    |
| 386674 | ENSG00000188155 | 0          | NA          | NA         | NA         | NA         | KRTAP10-6 |
| 375790 | ENSG00000188157 | 2014.08388 | -0.4607871  | 0.06826684 | 6.66E-12   | 1.44E-10   | AGRN      |
| 4810   | ENSG00000188158 | 1005.12526 | -0.01897438 | 0.10407603 | 0.84870214 | 0.93126766 | NHS       |
| 340990 | ENSG00000188162 | 0.14931947 | -0.01844332 | 0.38480212 | 0.84537521 | NA         | OTOG      |
| 401565 | ENSG00000188163 | 6.52873372 | -0.03127133 | 0.35612579 | 0.81829659 | 0.9171248  | FAM166A   |
| 643853 | ENSG00000188167 | 58.5056222 | -0.64030095 | 0.31131649 | 0.00793372 | 0.03427672 | TMPPE     |
| 199777 | ENSG00000188171 | 138.243206 | 0.06057303  | 0.1846119  | 0.70960481 | 0.86070548 | ZNF626    |
| 253012 | ENSG00000188175 | 1.97246452 | -0.01170005 | 0.37459631 | 0.89203485 | NA         | HEPACAM2  |
| 342527 | ENSG00000188176 | 0.29863895 | -0.02292439 | 0.3852726  | 0.68753245 | NA         | SMTNL2    |
| 376940 | ENSG00000188177 | 530.889368 | -0.08423275 | 0.15223502 | 0.54563566 | 0.7531245  | ZC3H6     |
| NA     | ENSG00000188185 | 542.551556 | 0.00373299  | 0.10735686 | 0.9720923  | 0.98954906 | LINC00265 |
| 389541 | ENSG00000188186 | 1052.57103 | 0.04776804  | 0.08846252 | 0.57969488 | 0.77720951 | LAMTOR4   |
| 5575   | ENSG00000188191 | 2440.87846 | -0.0643508  | 0.06908571 | 0.34318515 | 0.57337207 | PRKAR1B   |
| 729262 | ENSG00000188199 | 53.2737858 | 0.37360241  | 0.30783105 | 0.09116438 | 0.23298963 | NUTM2B    |
| 374383 | ENSG00000188211 | 710.245663 | -0.72048928 | 0.10946481 | 1.03E-11   | 2.19E-10   | NCR3LG1   |
| 123879 | ENSG00000188215 | 243.704068 | 0.06369874  | 0.15785669 | 0.65876493 | 0.83073135 | DCUN1D3   |
| 445582 | ENSG00000188219 | 0.93488885 | -0.01830083 | 0.38087361 | 0.75923893 | NA         | POTEE     |
| NA     | ENSG00000188223 | 9.45392371 | -0.02795971 | 0.36904291 | 0.79460484 | 0.90579008 |           |
| 390927 | ENSG00000188227 | 534.926869 | 0.0247701   | 0.12348466 | 0.83332678 | 0.92415967 | ZNF793    |
| 10383  | ENSG00000188229 | 5726.92823 | -0.10588917 | 0.05978663 | 0.07257187 | 0.19642919 | TUBB4B    |
| 119016 | ENSG00000188234 | 419.258937 | -0.09557853 | 0.14822632 | 0.48319471 | 0.70357492 | AGAP4     |

|           |                 |            |             |            |            |            |          |
|-----------|-----------------|------------|-------------|------------|------------|------------|----------|
| 25845     | ENSG00000188242 | 187.804745 | 0.08466666  | 0.16233857 | 0.56362397 | 0.76627833 |          |
| 170622    | ENSG00000188243 | 654.672943 | -0.25584791 | 0.10168579 | 0.00886055 | 0.03752258 | COMMD6   |
| 5320      | ENSG00000188257 | 0          | NA          | NA         | NA         | NA         | PLA2G2A  |
| 400935    | ENSG00000188263 | 0.80833901 | -0.00835916 | 0.38085242 | 0.88250937 | NA         | IL17REL  |
| 123688    | ENSG00000188266 | 40.7523706 | 0.717657    | 0.399991   | 0.01050244 | 0.04311366 | HYKK     |
| 26659     | ENSG00000188269 | 0          | NA          | NA         | NA         | NA         | OR7A5    |
| 643338    | ENSG00000188277 | 85.9114398 | -0.18989805 | 0.22606338 | 0.30363611 | 0.531042   | C15orf62 |
| NA        | ENSG00000188280 | 0          | NA          | NA         | NA         | NA         | FAM230G  |
| 285180    | ENSG00000188282 | 4.05995382 | 0.29892364  | 0.56234355 | 0.01466769 | 0.05660512 | RUFY4    |
| 163087    | ENSG00000188283 | 204.919683 | -0.10326782 | 0.17143962 | 0.4995901  | 0.71690059 | ZNF383   |
| 57801     | ENSG00000188290 | 128.727018 | -2.18617726 | 0.2327514  | 4.14E-22   | 1.72E-20   | HES4     |
| 374918    | ENSG00000188293 | 0          | NA          | NA         | NA         | NA         | IGFL1    |
| 79862     | ENSG00000188295 | 416.861066 | 0.11671757  | 0.12729627 | 0.33094074 | 0.55979745 | ZNF669   |
| 374872    | ENSG00000188305 | 2.51616042 | -0.00324804 | 0.37121721 | 0.9720491  | NA         | PEAK3    |
| 344657    | ENSG00000188306 | 3.40165696 | 0.0346672   | 0.3710835  | 0.74389224 | 0.87933877 | LRRIQ4   |
| 401541    | ENSG00000188312 | 399.585351 | -0.4936886  | 0.14141144 | 0.00018228 | 0.00130843 | CENPP    |
| 5359      | ENSG00000188313 | 30.1465739 | 3.08150422  | 0.60429933 | 1.35E-08   | 2.01E-07   | PLSCR1   |
| NA        | ENSG00000188314 | 0          | NA          | NA         | NA         | NA         | OR7D1P   |
| 375341    | ENSG00000188315 | 221.194293 | 0.08701528  | 0.20989721 | 0.62170774 | 0.8069267  | C3orf62  |
| 387712    | ENSG00000188316 | 2.39501451 | 0.05440127  | 0.38412491 | 0.43353401 | NA         | ENO4     |
| 84527     | ENSG00000188321 | 387.501186 | -0.0564411  | 0.12287768 | 0.6258894  | 0.80978006 | ZNF559   |
| 388228    | ENSG00000188322 | 3825.59496 | -0.08961901 | 0.06120934 | 0.13773939 | 0.31360448 | SBK1     |
| 283365    | ENSG00000188324 | 0          | NA          | NA         | NA         | NA         | OR6C6    |
| 100131137 | ENSG00000188334 | 0          | NA          | NA         | NA         | NA         | BSPH1    |
| 10991     | ENSG00000188338 | 37.6868208 | 0.22276744  | 0.33206411 | 0.28096157 | 0.50564928 | SLC38A3  |
| 81442     | ENSG00000188340 | 0          | NA          | NA         | NA         | NA         | OR6N2    |
| 2963      | ENSG00000188342 | 513.72323  | 0.14103254  | 0.11461467 | 0.19691587 | 0.40069856 | GTF2F2   |
| 137392    | ENSG00000188343 | 271.121271 | -0.5955133  | 0.15659302 | 4.08E-05   | 0.00034254 | CIBAR1   |
| 54914     | ENSG00000188352 | 876.129948 | -0.10316359 | 0.08911299 | 0.23174705 | 0.44830942 | FOCAD    |
| NA        | ENSG00000188365 | 1.48022204 | -0.04721801 | 0.38436184 | 0.44515493 | NA         |          |
| 284338    | ENSG00000188368 | 20.9231813 | 0.09356134  | 0.31413475 | 0.62278696 | 0.80737672 | PRR19    |
| 7784      | ENSG00000188372 | 104.509726 | 1.00281399  | 0.26456355 | 1.79E-05   | 0.0001619  | ZP3      |
| 387695    | ENSG00000188373 | 0          | NA          | NA         | NA         | NA         | C10orf99 |
| 440093    | ENSG00000188375 | 0.37844916 | 0.02407552  | 0.3854191  | 0.60038877 | NA         | H3-5     |
| 3440      | ENSG00000188379 | 0          | NA          | NA         | NA         | NA         | IFNA2    |
| NA        | ENSG00000188383 | 2.36346797 | 0.10828532  | 0.39758601 | 0.21310758 | NA         | GPAT2P2  |
| 282973    | ENSG00000188385 | 79.8459509 | -0.36129596 | 0.26395101 | 0.07812622 | 0.20773003 | JAKMIP3  |
| 5535      | ENSG00000188386 | 0          | NA          | NA         | NA         | NA         | PPP3R2   |

|           |                 |            |             |            |            |            |             |
|-----------|-----------------|------------|-------------|------------|------------|------------|-------------|
| 100133220 | ENSG00000188388 | 8.08522151 | 0.00496618  | 0.35059841 | 0.97480445 | 0.99114028 | GOLGA6L3    |
| 5133      | ENSG00000188389 | 1.38237915 | 0.0317034   | 0.37963765 | 0.66358205 | NA         | PDCD1       |
| 387836    | ENSG00000188393 | 0          | NA          | NA         | NA         | NA         | CLEC2A      |
| 2844      | ENSG00000188394 | 0.15069912 | -0.01848503 | 0.38480575 | 0.84537521 | NA         | GPR21       |
| 343521    | ENSG00000188396 | 0.68304084 | -0.01111829 | 0.38155519 | 0.83537345 | NA         | DYNLT4      |
| NA        | ENSG00000188399 | 0          | NA          | NA         | NA         | NA         | ANKRD36P1   |
| NA        | ENSG00000188403 | 0          | NA          | NA         | NA         | NA         | IGHV1OR15-9 |
| 6402      | ENSG00000188404 | 0          | NA          | NA         | NA         | NA         | SELL        |
| 347541    | ENSG00000188408 | 0          | NA          | NA         | NA         | NA         | MAGEB5      |
| 1121      | ENSG00000188419 | 687.681952 | -0.2023677  | 0.11237926 | 0.05885393 | 0.16859111 | CHM         |
| 339345    | ENSG00000188425 | 1.00245096 | -0.02492772 | 0.38055569 | 0.69887298 | NA         | NANOS2      |
| 63915     | ENSG00000188428 | 322.33704  | -0.02449834 | 0.13345579 | 0.84426509 | 0.92958651 | BLOC1S5     |
| NA        | ENSG00000188438 | 0          | NA          | NA         | NA         | NA         | DEFB108F    |
| NA        | ENSG00000188439 | 0          | NA          | NA         | NA         | NA         | OR4P1P      |
| NA        | ENSG00000188451 | 0.50211935 | 0.01195435  | 0.38340609 | 0.77280437 | NA         | SRP72P2     |
| 375298    | ENSG00000188452 | 17.9997604 | 0.06012679  | 0.31928402 | 0.74273847 | 0.87875221 | CERKL       |
| NA        | ENSG00000188459 | 0.33856635 | 0.00220071  | 0.38337774 | 0.96744578 | NA         | WASF4P      |
| NA        | ENSG00000188460 | 0          | NA          | NA         | NA         | NA         | ACTBP11     |
| 283652    | ENSG00000188467 | 1.96593827 | -0.04694562 | 0.38168285 | 0.52680511 | NA         | SLC24A5     |
| 389792    | ENSG00000188483 | 163.734387 | 0.31938872  | 0.18579248 | 0.05052935 | 0.15014263 | IER5L       |
| 3014      | ENSG00000188486 | 4143.97036 | -0.09840044 | 0.05777265 | 0.08474179 | 0.22069796 | H2AX        |
| 387755    | ENSG00000188487 | 15.1211704 | 0.71732885  | 0.69582304 | 0.0240821  | 0.08463382 | INSC        |
| 5104      | ENSG00000188488 | 149.57733  | -2.1437361  | 0.23341287 | 2.57E-21   | 1.02E-19   | SERPINA5    |
| 284325    | ENSG00000188493 | 322.88195  | 0.15144644  | 0.15138641 | 0.27602751 | 0.50016881 | C19orf54    |
| 197021    | ENSG00000188501 | 10.6645192 | -0.21826874 | 0.41627814 | 0.19656354 | 0.4001795  | LCTL        |
| 342897    | ENSG00000188505 | 6.50332862 | -0.07576329 | 0.36842795 | 0.56207334 | 0.76518802 | NCCRP1      |
| 388533    | ENSG00000188508 | 0          | NA          | NA         | NA         | NA         | KRTDAP      |
| 348645    | ENSG00000188511 | 31.4747708 | -2.07835842 | 0.49531893 | 1.63E-06   | 1.78E-05   | C22orf34    |
| NA        | ENSG00000188512 | 0          | NA          | NA         | NA         | NA         |             |
| 84570     | ENSG00000188517 | 0          | NA          | NA         | NA         | NA         | COL25A1     |
| 644815    | ENSG00000188522 | 174.816988 | 0.29845773  | 0.17259401 | 0.05307009 | 0.15584823 | FAM83G      |
| 389799    | ENSG00000188523 | 11.8145361 | 0.1409379   | 0.35640975 | 0.42706059 | 0.65286501 | CFAP77      |
| NA        | ENSG00000188525 | 0.36294433 | 0.02389469  | 0.38539239 | 0.60997161 | NA         |             |
| 10772     | ENSG00000188529 | 4357.57525 | 0.04684816  | 0.06664184 | 0.47561052 | 0.69768942 | SRSF10      |
| 3040      | ENSG00000188536 | 0.30139824 | -0.02296476 | 0.38527817 | 0.68536535 | NA         | HBA2        |
| 285193    | ENSG00000188542 | 123.087393 | 0.20812732  | 0.21571834 | 0.24749664 | 0.46645136 | DUSP28      |
| 388115    | ENSG00000188549 | 318.702348 | 0.22741913  | 0.19673436 | 0.17999939 | 0.37673028 | CCDC9B      |
| 4077      | ENSG00000188554 | 1769.51138 | -0.06788312 | 0.07774671 | 0.37199599 | 0.60104858 | NBR1        |



|           |                 |            |             |            |            |            |           |
|-----------|-----------------|------------|-------------|------------|------------|------------|-----------|
| 391211    | ENSG00000188558 | 0          | NA          | NA         | NA         | NA         | OR2G6     |
| 57186     | ENSG00000188559 | 835.914914 | -0.12315604 | 0.08697878 | 0.14545968 | 0.32597939 | RALGAPA2  |
| 27158     | ENSG00000188566 | 964.590685 | 0.33495758  | 0.09875101 | 0.00043321 | 0.00284601 | NDOR1     |
| 345630    | ENSG00000188573 | 778.318411 | -0.83515338 | 0.13612614 | 1.46E-10   | 2.75E-09   | FBLL1     |
| 154215    | ENSG00000188580 | 0          | NA          | NA         | NA         | NA         | NKAIN2    |
| 81851     | ENSG00000188581 | 0          | NA          | NA         | NA         | NA         | KRTAP1-1  |
| 344838    | ENSG00000188582 | 28.7677677 | 1.01442088  | 0.50319146 | 0.00357709 | 0.01760154 | PAQR9     |
| 400797    | ENSG00000188585 | 0          | NA          | NA         | NA         | NA         | CLEC20A   |
| 144535    | ENSG00000188596 | 3.99120327 | 0.2270698   | 0.46785555 | 0.05832015 | 0.16752161 | CFAP54    |
| NA        | ENSG00000188599 | 268.288429 | 0.00292948  | 0.13906025 | 0.98197725 | 0.99406451 | NPIPP1    |
| 1201      | ENSG00000188603 | 468.634514 | 0.07326398  | 0.11168235 | 0.49351559 | 0.712409   | CLN3      |
| 653820    | ENSG00000188610 | 301.495986 | -0.4298222  | 0.15130264 | 0.002034   | 0.01085677 | FAM72B    |
| 56624     | ENSG00000188611 | 148.006976 | 0.52389124  | 0.29891076 | 0.0213394  | 0.07671201 | ASAH2     |
| 6613      | ENSG00000188612 | 5806.38188 | -0.23542121 | 0.05791347 | 3.84E-05   | 0.00032333 | SUMO2     |
| 340719    | ENSG00000188613 | 1117.45078 | 0.74261734  | 0.08301841 | 8.06E-20   | 2.97E-18   | NANOS1    |
| 340784    | ENSG00000188620 | 0          | NA          | NA         | NA         | NA         | HMX3      |
| 388555    | ENSG00000188624 | 0          | NA          | NA         | NA         | NA         | IGFL3     |
| 653720    | ENSG00000188626 | 10.315969  | 0.04635457  | 0.34065556 | 0.77698878 | 0.89765663 | GOLGA8M   |
| 7730      | ENSG00000188629 | 46.2028634 | -0.33775871 | 0.30915683 | 0.12206948 | 0.28886671 | ZNF177    |
| 84247     | ENSG00000188636 | 2159.91674 | 0.08780872  | 0.07249851 | 0.21589115 | 0.42667359 | RTL6      |
| 1806      | ENSG00000188641 | 956.86507  | -0.24078765 | 0.09273854 | 0.00729866 | 0.03200117 | DPYD      |
| 140576    | ENSG00000188643 | 1.11896681 | -0.01229829 | 0.37984734 | 0.84604941 | NA         | S100A16   |
| NA        | ENSG00000188646 | 0          | NA          | NA         | NA         | NA         |           |
| 375743    | ENSG00000188647 | 2089.08553 | -0.36517541 | 0.08189177 | 4.75E-06   | 4.80E-05   | PTAR1     |
| 387707    | ENSG00000188649 | 4.20506458 | -0.09927049 | 0.38739421 | 0.33587099 | 0.56585025 | CC2D2B    |
| 390443    | ENSG00000188655 | 0          | NA          | NA         | NA         | NA         | RNASE9    |
| NA        | ENSG00000188656 | 0          | NA          | NA         | NA         | NA         | TSPY7P    |
| 283726    | ENSG00000188659 | 25.91281   | 0.42718547  | 0.48584539 | 0.07746427 | 0.20648812 | SAXO2     |
| NA        | ENSG00000188660 | 1.87161035 | -0.02319256 | 0.37843127 | 0.75321352 | NA         | LINC00319 |
| NA        | ENSG00000188662 | 0          | NA          | NA         | NA         | NA         | H1-9P     |
| NA        | ENSG00000188668 | 0          | NA          | NA         | NA         | NA         | OR7E90P   |
| 6006      | ENSG00000188672 | 10.0833596 | -0.03767367 | 0.35044145 | 0.7976658  | 0.90722825 | RHCE      |
| 389073    | ENSG00000188674 | 0          | NA          | NA         | NA         | NA         | C2orf80   |
| 169355    | ENSG00000188676 | 0          | NA          | NA         | NA         | NA         | IDO2      |
| 29780     | ENSG00000188677 | 398.747572 | -0.05783013 | 0.12431238 | 0.62210098 | 0.80696197 | PARVB     |
| 100132288 | ENSG00000188681 | 312.200194 | 0.33553472  | 0.14173522 | 0.01073998 | 0.04395239 | TEKT4P2   |
| 100233156 | ENSG00000188681 | 312.200194 | 0.33553472  | 0.14173522 | 0.01073998 | 0.04395239 | TEKT4P2   |
| 57835     | ENSG00000188687 | 76.5130619 | 0.64422127  | 0.36647499 | 0.01357843 | 0.0533141  | SLC4A5    |

|        |                 |            |             |            |            |            |             |
|--------|-----------------|------------|-------------|------------|------------|------------|-------------|
| 7390   | ENSG00000188690 | 819.768402 | 0.01958349  | 0.0912016  | 0.82566425 | 0.92091178 | UROS        |
| 390084 | ENSG00000188691 | 0          | NA          | NA         | NA         | NA         | OR56A5      |
| 613126 | ENSG00000188693 | 8.7777055  | -0.01897026 | 0.35423911 | 0.88974242 | 0.95202525 | CYP51A1-AS1 |
| 643803 | ENSG00000188694 | 0          | NA          | NA         | NA         | NA         | KRTAP24-1   |
| 51114  | ENSG00000188706 | 746.776726 | -0.16339133 | 0.09177096 | 0.06612103 | 0.18393735 | ZDHHC9      |
| 113763 | ENSG00000188707 | 384.943558 | 0.54243854  | 0.1276598  | 7.39E-06   | 7.20E-05   | ZBED6CL     |
| 347148 | ENSG00000188710 | 8.98511539 | -0.29087737 | 0.52205335 | 0.04434761 | 0.13565472 | QRFP        |
| NA     | ENSG00000188712 | 0          | NA          | NA         | NA         | NA         | OR13D3P     |
| 338599 | ENSG00000188716 | 0          | NA          | NA         | NA         | NA         | DUSP29      |
| 643155 | ENSG00000188725 | 1178.21433 | 0.07508762  | 0.10388071 | 0.45315926 | 0.67644871 | SMIM15      |
| 344901 | ENSG00000188729 | 0          | NA          | NA         | NA         | NA         | OSTN        |
| 375567 | ENSG00000188730 | 0          | NA          | NA         | NA         | NA         | VWC2        |
| 340277 | ENSG00000188732 | 642.95557  | -0.17665727 | 0.10212583 | 0.07203665 | 0.19555978 | FAM221A     |
| 144404 | ENSG00000188735 | 964.728111 | 0.28513142  | 0.10726699 | 0.00550356 | 0.0252522  | TMEM120B    |
| 401024 | ENSG00000188738 | 24.3465881 | -0.03577885 | 0.30607313 | 0.84608295 | 0.93019427 | FSIP2       |
| 23029  | ENSG00000188739 | 899.338063 | -0.53303452 | 0.10743284 | 2.49E-07   | 3.13E-06   | RBM34       |
| 10811  | ENSG00000188747 | 18.8213837 | 1.87312455  | 0.61523381 | 0.00012936 | 0.00095766 | NOXA1       |
| NA     | ENSG00000188755 | 0.173124   | -0.01911262 | 0.38486262 | 0.84537521 | NA         | TBC1D3P2    |
| 130612 | ENSG00000188760 | 626.38942  | -1.00851968 | 0.13851727 | 4.17E-14   | 1.06E-12   | TMEM198     |
| 440603 | ENSG00000188761 | 16.4081812 | 0.07939731  | 0.36396394 | 0.54205223 | 0.75026624 | BCL2L15     |
| 8326   | ENSG00000188763 | 66.6976943 | -0.03415297 | 0.22987593 | 0.85169438 | 0.93275912 | FZD9        |
| NA     | ENSG00000188765 | 0          | NA          | NA         | NA         | NA         | TMSB4XP2    |
| 399473 | ENSG00000188766 | 318.325193 | -0.0483687  | 0.14182219 | 0.71342369 | 0.86190557 | SPRED3      |
| 26254  | ENSG00000188770 | 0          | NA          | NA         | NA         | NA         | OPTC        |
| 349633 | ENSG00000188771 | 0.14931947 | -0.01844332 | 0.38480212 | 0.84537521 | NA         | PLET1       |
| 155    | ENSG00000188778 | 0          | NA          | NA         | NA         | NA         | ADRB3       |
| 390598 | ENSG00000188779 | 71.1995907 | 0.57269308  | 0.287639   | 0.01150221 | 0.04653421 | SKOR1       |
| 378807 | ENSG00000188782 | 0.18922458 | 0.01954053  | 0.38488496 | 0.78225479 | NA         | CATSPER4    |
| 5549   | ENSG00000188783 | 1.41277326 | 0.08182413  | 0.39286045 | 0.18490829 | NA         | PRELP       |
| 30814  | ENSG00000188784 | 0          | NA          | NA         | NA         | NA         | PLA2G2E     |
| 147694 | ENSG00000188785 | 411.985131 | -0.08889042 | 0.15145061 | 0.52238261 | 0.73571881 | ZNF548      |
| 4520   | ENSG00000188786 | 561.960936 | -0.24038378 | 0.15341853 | 0.08525566 | 0.22149194 | MTF1        |
| 127391 | ENSG00000188800 | 0          | NA          | NA         | NA         | NA         | TMCO2       |
| NA     | ENSG00000188801 | 0.30139824 | -0.02296476 | 0.38527817 | 0.68536535 | NA         | ZNF322P1    |
| 388336 | ENSG00000188803 | 0          | NA          | NA         | NA         | NA         | SHISA6      |
| 199953 | ENSG00000188807 | 1171.0333  | -0.28854182 | 0.09005868 | 0.0009489  | 0.00566542 | TMEM201     |
| 387921 | ENSG00000188811 | 530.935021 | -0.02784954 | 0.1105749  | 0.79124641 | 0.90493295 | NHLRC3      |
| 3167   | ENSG00000188816 | 2.77966984 | 0.20924479  | 0.46923597 | 0.0060925  | 0.02747164 | HMX2        |

|        |                 |            |             |            |            |            |           |
|--------|-----------------|------------|-------------|------------|------------|------------|-----------|
| 132203 | ENSG00000188817 | 0          | NA          | NA         | NA         | NA         | SNTN      |
| 79844  | ENSG00000188818 | 96.9443703 | -0.80858592 | 0.2893005  | 0.00075578 | 0.00462944 | ZDHHC11   |
| 441168 | ENSG00000188820 | 1.40002076 | -0.02075353 | 0.37955003 | 0.75889573 | NA         | CALHM6    |
| 1269   | ENSG00000188822 | 0.9967882  | 0.00664525  | 0.38006109 | 0.91293995 | NA         | CNR2      |
| NA     | ENSG00000188825 | 102.787097 | 0.00107753  | 0.20531024 | 0.99612738 | 0.99859366 | LINC00910 |
| 84464  | ENSG00000188827 | 630.458234 | 0.09302495  | 0.09975861 | 0.33481226 | 0.56474327 | SLX4      |
| NA     | ENSG00000188828 | 9.31050253 | 0.18364839  | 0.39703782 | 0.26187173 | 0.48384571 | GLRA4     |
| NA     | ENSG00000188831 | 0          | NA          | NA         | NA         | NA         | DPPA3P2   |
| 377841 | ENSG00000188833 | 9.757961   | 0.35123166  | 0.52410806 | 0.08207441 | 0.21541955 | ENTPD8    |
| 9045   | ENSG00000188846 | 10455.0667 | -0.04480762 | 0.04816831 | 0.34932119 | 0.58004303 | RPL14     |
| 389206 | ENSG00000188848 | 1799.57883 | -0.40152163 | 0.07052257 | 6.56E-09   | 1.01E-07   | BEND4     |
| NA     | ENSG00000188850 | 0          | NA          | NA         | NA         | NA         |           |
| NA     | ENSG00000188856 | 0.66261589 | -0.02369954 | 0.38272313 | 0.63558227 | NA         | RPSAP47   |
| 149297 | ENSG00000188859 | 67.7597592 | 1.08049086  | 0.29925474 | 3.18E-05   | 0.00027234 | FAM78B    |
| 147837 | ENSG00000188868 | 31.7439915 | 0.08038904  | 0.29061445 | 0.67905824 | 0.84320727 | ZNF563    |
| 342125 | ENSG00000188869 | 6.33149251 | 0.02624361  | 0.35650228 | 0.84945288 | 0.93154246 | TMC3      |
| NA     | ENSG00000188873 | 0.15069912 | -0.01848503 | 0.38480575 | 0.84537521 | NA         | RPL10AP2  |
| 340441 | ENSG00000188877 | 0          | NA          | NA         | NA         | NA         | POTEA     |
| 85302  | ENSG00000188878 | 372.634461 | 0.18887498  | 0.13392788 | 0.13163841 | 0.30439464 | FBF1      |
| 346689 | ENSG00000188883 | 19.1646025 | -0.17259837 | 0.34001795 | 0.37542854 | 0.60453716 | KLRG2     |
| 431705 | ENSG00000188886 | 0.18922458 | 0.01954053  | 0.38488496 | 0.78225479 | NA         | ASTL      |
| 339287 | ENSG00000188895 | 2184.82679 | -0.21765439 | 0.06659111 | 0.00089613 | 0.00538601 | MSL1      |
| 400499 | ENSG00000188897 | 27.2057953 | -0.23858806 | 0.39219095 | 0.21860011 | 0.43050004 |           |
| 120892 | ENSG00000188906 | 109.389211 | 1.08439396  | 0.26687576 | 5.11E-06   | 5.12E-05   | LRRK2     |
| 390259 | ENSG00000188909 | 3.35861435 | -0.15949122 | 0.42157949 | 0.10671699 | 0.26142302 | BSX       |
| 2707   | ENSG00000188910 | 0.36303115 | 0.0238953   | 0.38539249 | 0.60992866 | NA         | GJB3      |
| 642938 | ENSG00000188916 | 1.18374889 | -0.02672335 | 0.38111485 | 0.66921013 | NA         | INSYN2A   |
| 79979  | ENSG00000188917 | 212.094616 | 0.07054544  | 0.15640851 | 0.622069   | 0.80696197 | TRMT2B    |
| 401494 | ENSG00000188921 | 62.4983342 | 0.40577981  | 0.28244837 | 0.05916543 | 0.16936116 | HACD4     |
| 257177 | ENSG00000188931 | 21.1274391 | 0.01531404  | 0.30735046 | 0.93590267 | 0.97325384 | CFAP126   |
| NA     | ENSG00000188933 | 8.69922755 | 0.00825658  | 0.3481437  | 0.95761361 | 0.98264776 | USP32P1   |
| 60506  | ENSG00000188937 | 0          | NA          | NA         | NA         | NA         | NYX       |
| 158293 | ENSG00000188938 | 969.169309 | 0.00615292  | 0.09332249 | 0.94669423 | 0.97814213 | FAM120AOS |
| 257313 | ENSG00000188958 | 0.30139824 | -0.02296476 | 0.38527817 | 0.68536535 | NA         | UTS2B     |
| 401546 | ENSG00000188959 | 0          | NA          | NA         | NA         | NA         | C9orf152  |
| 26155  | ENSG00000188976 | 4629.14409 | -0.05913262 | 0.06379095 | 0.34708219 | 0.57783927 | NOC2L     |
| 345222 | ENSG00000188981 | 5.03352153 | 0.03721576  | 0.36362572 | 0.76780868 | 0.89307241 | MSANTD1   |
| 126767 | ENSG00000188984 | 0          | NA          | NA         | NA         | NA         | AADA3L3   |

|           |                 |            |             |            |            |            |          |
|-----------|-----------------|------------|-------------|------------|------------|------------|----------|
| NA        | ENSG00000188985 | 67.9254194 | -0.14149625 | 0.41416335 | 0.11245043 | 0.27161145 | DHFRP1   |
| 25920     | ENSG00000188986 | 1738.53803 | -0.03847211 | 0.06973807 | 0.57431556 | 0.77352065 | NELFB    |
| 729025    | ENSG00000188991 | 0          | NA          | NA         | NA         | NA         | SLC15A5  |
| 149998    | ENSG00000188992 | 3.09577389 | 0.02362963  | 0.37212595 | 0.81205077 | 0.91493482 | LIPI     |
| 339977    | ENSG00000188993 | 6.0194751  | 0.09246411  | 0.37364764 | 0.48311718 | 0.70354116 | LRRC66   |
| 23036     | ENSG00000188994 | 1894.18285 | -0.08708086 | 0.0954033  | 0.34467437 | 0.57503696 | ZNF292   |
| 135458    | ENSG00000188996 | 2.02332216 | 0.03500669  | 0.37654975 | 0.69096363 | NA         | HUS1B    |
| 283219    | ENSG00000188997 | 215.729401 | -0.24115854 | 0.18462922 | 0.13537305 | 0.30992327 | KCTD21   |
| 374897    | ENSG00000189001 | 0.53238261 | -0.01818742 | 0.38336655 | 0.72877183 | NA         | SBSN     |
| NA        | ENSG00000189002 | 0          | NA          | NA         | NA         | NA         | PROS2P   |
| 134637    | ENSG00000189007 | 339.952496 | -0.13693    | 0.13683919 | 0.28292059 | 0.50793092 | ADAT2    |
| 3805      | ENSG00000189013 | 0          | NA          | NA         | NA         | NA         | KIR2DL4  |
| NA        | ENSG00000189014 | 11.6837505 | 0.00936588  | 0.3464606  | 0.95297519 | 0.98058207 | SHLD2P3  |
| 139604    | ENSG00000189023 | 0          | NA          | NA         | NA         | NA         | MAGEB16  |
| 391104    | ENSG00000189030 | 0.5063993  | 0.01486836  | 0.38310111 | 0.74606538 | NA         | VHLL     |
| 63904     | ENSG00000189037 | 0          | NA          | NA         | NA         | NA         | DUSP21   |
| 163081    | ENSG00000189042 | 197.33139  | -0.00165968 | 0.18417365 | 0.99066755 | 0.99679705 | ZNF567   |
| 4697      | ENSG00000189043 | 2556.84013 | 0.03805456  | 0.06242713 | 0.53723912 | 0.74759591 | NDUFA4   |
| 728780    | ENSG00000189045 | 23.994756  | 0.84030801  | 0.63955755 | 0.01415423 | 0.05504726 | ANKDD1B  |
| 121642    | ENSG00000189046 | 610.44218  | 0.38303789  | 0.10178961 | 9.27E-05   | 0.00071088 | ALKBH2   |
| 51136     | ENSG00000189050 | 216.335368 | -0.22547205 | 0.15335622 | 0.10764655 | 0.26314781 | RNFT1    |
| 643904    | ENSG00000189051 | 1.32702544 | 0.00669838  | 0.37907339 | 0.92036681 | NA         | RNF222   |
| 93659     | ENSG00000189052 | 0.15069912 | -0.01848503 | 0.38480575 | 0.84537521 | NA         | CGB5     |
| 5649      | ENSG00000189056 | 2471.5358  | -0.86379455 | 0.08488477 | 4.26E-25   | 2.03E-23   | RELN     |
| 374393    | ENSG00000189057 | 420.280982 | -0.86768999 | 0.14785103 | 6.85E-10   | 1.21E-08   | FAM111B  |
| 347       | ENSG00000189058 | 0          | NA          | NA         | NA         | NA         | APOD     |
| 3005      | ENSG00000189060 | 7673.74942 | -0.17887034 | 0.08749764 | 0.03533451 | 0.11413817 | H1-0     |
| 645037    | ENSG00000189064 | 0.34047096 | -0.00019945 | 0.38336231 | 0.96714319 | NA         | GAGE2A   |
| 729447    | ENSG00000189064 | 0.34047096 | -0.00019945 | 0.38336231 | 0.96714319 | NA         | GAGE2A   |
| 100101629 | ENSG00000189064 | 0.34047096 | -0.00019945 | 0.38336231 | 0.96714319 | NA         | GAGE2A   |
| 9516      | ENSG00000189067 | 973.038757 | -0.48568054 | 0.10499743 | 1.52E-06   | 1.66E-05   | LITAF    |
| 284415    | ENSG00000189068 | 0          | NA          | NA         | NA         | NA         | VSTM1    |
| 83862     | ENSG00000189077 | 328.861523 | 0.01139485  | 0.14849985 | 0.93477224 | 0.97292421 | TMEM120A |
| 196528    | ENSG00000189079 | 1580.26271 | -0.06973844 | 0.08302039 | 0.38905944 | 0.61827567 | ARID2    |
| NA        | ENSG00000189089 | 2.45617409 | 0.06276569  | 0.38019947 | 0.50054333 | NA         | RIMKLBP1 |
| 100133093 | ENSG00000189090 | 0          | NA          | NA         | NA         | NA         | FAM25G   |
| 23450     | ENSG00000189091 | 5582.32177 | -0.18723228 | 0.05799915 | 0.00108298 | 0.00631952 | SF3B3    |
| 345062    | ENSG00000189099 | 0          | NA          | NA         | NA         | NA         | PRSS48   |

|           |                 |            |             |            |            |            |            |
|-----------|-----------------|------------|-------------|------------|------------|------------|------------|
| 26280     | ENSG00000189108 | 0          | NA          | NA         | NA         | NA         | IL1RAPL2   |
| 388552    | ENSG00000189114 | 114.024209 | -0.38792971 | 0.21596726 | 0.03386754 | 0.1105697  | BLOC1S3    |
| 80320     | ENSG00000189120 | 2.10272856 | 0.14110165  | 0.41697607 | 0.0638867  | NA         | SP6        |
| 340120    | ENSG00000189127 | 9.58732186 | 2.47455378  | 1.01198682 | 0.00066524 | 0.00413424 | ANKRD34B   |
| 219348    | ENSG00000189129 | 19.3864316 | 1.0693438   | 0.64773085 | 0.00618046 | 0.02776728 | PLAC9      |
| 170062    | ENSG00000189132 | 0          | NA          | NA         | NA         | NA         | FAM47B     |
| 222698    | ENSG00000189134 | 0          | NA          | NA         | NA         | NA         | NKAPL      |
| 388165    | ENSG00000189136 | 92.8174414 | 0.38476704  | 0.29633276 | 0.07773294 | 0.2070096  | UBE2Q2P1   |
| 84075     | ENSG00000189139 | 0          | NA          | NA         | NA         | NA         | FSCB       |
| 1364      | ENSG00000189143 | 87.0016942 | 0.38895429  | 0.28013645 | 0.06780918 | 0.18721599 | CLDN4      |
| 126231    | ENSG00000189144 | 108.472649 | -0.04487141 | 0.20559436 | 0.79493827 | 0.90585603 | ZNF573     |
| NA        | ENSG00000189145 | 0          | NA          | NA         | NA         | NA         | RPL32P36   |
| NA        | ENSG00000189149 | 6.73257459 | -0.06922771 | 0.36056644 | 0.6212714  | 0.80672374 | CRYM-AS1   |
| 400581    | ENSG00000189152 | 0.4721408  | -0.0076152  | 0.38324107 | 0.86212392 | NA         | GRAPL      |
| 100129583 | ENSG00000189157 | 66.7724351 | -0.05377902 | 0.24301547 | 0.77395323 | 0.89604057 | FAM47E     |
| 51155     | ENSG00000189159 | 3336.44928 | 0.02056661  | 0.06339475 | 0.74370499 | 0.87922221 | JPT1       |
| 84503     | ENSG00000189164 | 154.516216 | -0.48346075 | 0.19737871 | 0.00518415 | 0.02394729 | ZNF527     |
| NA        | ENSG00000189166 | 0.16735865 | 0.01897177  | 0.38482933 | 0.78225479 | NA         | TNRC18P3   |
| 646799    | ENSG00000189167 | 0.47250969 | -0.00768687 | 0.38324361 | 0.86100405 | NA         | ZAR1L      |
| 386685    | ENSG00000189169 | 0          | NA          | NA         | NA         | NA         | KRTAP10-12 |
| 6284      | ENSG00000189171 | 22.6208288 | 0.04035508  | 0.30390001 | 0.83164352 | 0.92378968 | S100A13    |
| 7581      | ENSG00000189180 | 1254.46866 | -0.26238337 | 0.09148315 | 0.00306938 | 0.01543248 | ZNF33A     |
| 401994    | ENSG00000189181 | 0          | NA          | NA         | NA         | NA         | OR14I1     |
| 374454    | ENSG00000189182 | 0          | NA          | NA         | NA         | NA         | KRT77      |
| 54510     | ENSG00000189184 | 854.549029 | -0.08387878 | 0.10509917 | 0.40519125 | 0.63354042 | PCDH18     |
| 347442    | ENSG00000189186 | 0          | NA          | NA         | NA         | NA         | DCAF8L2    |
| 162966    | ENSG00000189190 | 179.569096 | 0.36085493  | 0.19757044 | 0.03503927 | 0.11340607 | ZNF600     |
| 284697    | ENSG00000189195 | 108.13369  | -0.27320656 | 0.21176586 | 0.12518432 | 0.29381959 | BTBD8      |
| 100287879 | ENSG00000189196 | 0          | NA          | NA         | NA         | NA         | LINC00994  |
| NA        | ENSG00000189212 | 174.578214 | -0.7453385  | 0.18298965 | 9.06E-06   | 8.67E-05   | DPY19L2P1  |
| 4128      | ENSG00000189221 | 263.872752 | 0.88138098  | 0.17500343 | 7.23E-08   | 9.70E-07   | MAOA       |
| 654433    | ENSG00000189223 | 0.34746601 | 0.02370763  | 0.3853651  | 0.61987128 | NA         | PAX8-AS1   |
| 145853    | ENSG00000189227 | 272.478075 | 0.13621449  | 0.14672702 | 0.31519466 | 0.54297665 | C15orf61   |
| NA        | ENSG00000189229 | 11.2335194 | 0.03552379  | 0.3370907  | 0.83163749 | 0.92378968 |            |
| 389643    | ENSG00000189233 | 0.16735865 | 0.01897177  | 0.38482933 | 0.78225479 | NA         | NUGGC      |
| 100507206 | ENSG00000189238 | 0          | NA          | NA         | NA         | NA         | LINC00943  |
| 7259      | ENSG00000189241 | 1176.57817 | -0.11470028 | 0.08063781 | 0.14522865 | 0.32572196 | TSPYL1     |
| 139067    | ENSG00000189252 | 0          | NA          | NA         | NA         | NA         | SPANXN3    |

|           |                 |            |             |            |            |            |                  |
|-----------|-----------------|------------|-------------|------------|------------|------------|------------------|
| 642446    | ENSG00000189253 | 0          | NA          | NA         | NA         | NA         | TRIM64B          |
| 55629     | ENSG00000189266 | 2792.84977 | 0.16939257  | 0.06108273 | 0.00494953 | 0.02304052 | PNRC2            |
| 51233     | ENSG00000189269 | 7.21049358 | 0.14752279  | 0.38231911 | 0.34302181 | 0.57318007 | DRICH1           |
| 399827    | ENSG00000189275 | 0.29863895 | -0.02292439 | 0.3852726  | 0.68753245 | NA         | LINC01164        |
| 2709      | ENSG00000189280 | 0.69493202 | 0.03154416  | 0.38626309 | 0.41391645 | NA         | GJB5             |
| 2272      | ENSG00000189283 | 105.572749 | 0.3944641   | 0.23711538 | 0.04269185 | 0.1320147  | FHIT             |
| 285016    | ENSG00000189292 | 2.52739347 | 0.02258703  | 0.37271808 | 0.81436162 | NA         | ALKAL2           |
| NA        | ENSG00000189295 | 0          | NA          | NA         | NA         | NA         | VKRD62P1-PARP4P3 |
| 80317     | ENSG00000189298 | 210.712833 | 0.00831251  | 0.15291658 | 0.95377282 | 0.98083958 | ZKSCAN3          |
| 139628    | ENSG00000189299 | 246.578014 | -0.24134432 | 0.15002028 | 0.07954881 | 0.2105454  | FOXR2            |
| 27341     | ENSG00000189306 | 697.854968 | -0.06172982 | 0.11033731 | 0.5581971  | 0.76291851 | RRP7A            |
| 132660    | ENSG00000189308 | 430.269743 | -0.12369055 | 0.12214225 | 0.2836642  | 0.50881632 | LIN54            |
| 441239    | ENSG00000189316 | 3.21305998 | -0.09297622 | 0.38344365 | 0.39775403 | 0.62695161 |                  |
| 9679      | ENSG00000189319 | 1268.06821 | -0.04906499 | 0.09067823 | 0.576633   | 0.77528586 | FAM53B           |
| 389558    | ENSG00000189320 | 2.14863989 | -0.06068254 | 0.38033313 | 0.50365621 | NA         | FAM180A          |
| 389384    | ENSG00000189325 | 0          | NA          | NA         | NA         | NA         | BNIP5            |
| 441525    | ENSG00000189326 | 0          | NA          | NA         | NA         | NA         | SPANXN4          |
| 494141    | ENSG00000189332 | 0          | NA          | NA         | NA         | NA         | SLC25A51P4       |
| 57402     | ENSG00000189334 | 0          | NA          | NA         | NA         | NA         | S100A14          |
| 23254     | ENSG00000189337 | 273.021141 | 0.40582791  | 0.18937131 | 0.01476539 | 0.05692682 | KAZN             |
| 728661    | ENSG00000189339 | 4967.96791 | 0.08795575  | 0.05694445 | 0.11843518 | 0.28255821 | SLC35E2B         |
| NA        | ENSG00000189343 | 18.331099  | -0.00973004 | 0.31619369 | 0.95504367 | 0.98157246 | RPS2P46          |
| 646508    | ENSG00000189348 | 0          | NA          | NA         | NA         | NA         | FAM90A27P        |
| 165186    | ENSG00000189350 | 77.9812223 | -0.30674432 | 0.26917643 | 0.13251753 | 0.30570716 | TOGARAM2         |
| 389761    | ENSG00000189357 | 0          | NA          | NA         | NA         | NA         | SPATA31D4        |
| 100131211 | ENSG00000189362 | 276.570098 | -0.40611236 | 0.39195623 | 0.08722414 | 0.22548301 | NEMP2            |
| 200810    | ENSG00000189366 | 9.11356466 | 0.3692222   | 0.57465702 | 0.05830791 | 0.16751071 | ALG1L            |
| 9729      | ENSG00000189367 | 735.827033 | -1.67425056 | 0.15594785 | 4.89E-28   | 2.62E-26   | KIAA0408         |
| 23708     | ENSG00000189369 | 327.037146 | -0.31284178 | 0.12896035 | 0.00976904 | 0.04074368 | GSPT2            |
| NA        | ENSG00000189372 | 0          | NA          | NA         | NA         | NA         |                  |
| 254272    | ENSG00000189375 | 0          | NA          | NA         | NA         | NA         | TBC1D28          |
| 84933     | ENSG00000189376 | 409.175524 | -0.16991786 | 0.12107355 | 0.13778624 | 0.31363569 | C8orf76          |
| 284340    | ENSG00000189377 | 0          | NA          | NA         | NA         | NA         | CXCL17           |
| NA        | ENSG00000189398 | 6.22266874 | -0.09567934 | 0.37694956 | 0.44997836 | 0.67340229 | OR7E12P          |
| 139562    | ENSG00000189401 | 0.18922458 | 0.01954053  | 0.38488496 | 0.78225479 | NA         | OTUD6A           |
| 3146      | ENSG00000189403 | 12218.3021 | -0.14878696 | 0.05791617 | 0.00789161 | 0.03411845 | HMGB1            |
| 8510      | ENSG00000189409 | 11.0349952 | 1.34509327  | 1.1599925  | 0.00708441 | 0.03125247 | MMP23B           |
| 400745    | ENSG00000189410 | 32.2296199 | -0.46586462 | 0.41379876 | 0.06236105 | 0.17644655 | SH2D5            |

|        |                 |            |             |            |            |            |           |
|--------|-----------------|------------|-------------|------------|------------|------------|-----------|
| NA     | ENSG00000189419 | 17.2923491 | 0.03644138  | 0.31988281 | 0.84064362 | 0.92770994 | SPATA41   |
| 139735 | ENSG00000189420 | 158.020322 | -0.28929993 | 0.19212849 | 0.08294603 | 0.21719009 | ZFP92     |
| NA     | ENSG00000189423 | 121.561373 | 0.03941578  | 0.22719602 | 0.83091417 | 0.92360004 | USP32P3   |
| 9437   | ENSG00000189430 | 0          | NA          | NA         | NA         | NA         | NCR1      |
| 644943 | ENSG00000189431 | 12.2987401 | -0.86874117 | 0.87847267 | 0.01676262 | 0.06323365 | RASSF10   |
| 127534 | ENSG00000189433 | 0.36304042 | 0.02389537  | 0.3853925  | 0.60992407 | NA         | GJB4      |
| NA     | ENSG00000194297 | 0          | NA          | NA         | NA         | NA         | RNU1-75P  |
| 574452 | ENSG00000194717 | 0          | NA          | NA         | NA         | NA         | MIR494    |
| NA     | ENSG00000195024 | 0          | NA          | NA         | NA         | NA         | RNU1-15P  |
| NA     | ENSG00000195401 | 0          | NA          | NA         | NA         | NA         |           |
| 284521 | ENSG00000196071 | 0          | NA          | NA         | NA         | NA         | OR2L13    |
| 282991 | ENSG00000196072 | 402.79382  | -0.46915645 | 0.15095208 | 0.00075659 | 0.00463152 | BLOC1S2   |
| 10388  | ENSG00000196074 | 148.312695 | 0.05120714  | 0.22914246 | 0.78234013 | 0.90086297 | SYCP2     |
| 440519 | ENSG00000196081 | 177.570079 | -0.23405423 | 0.1714829  | 0.12636113 | 0.29581177 | ZNF724    |
| 3556   | ENSG00000196083 | 0.53092972 | 0.01187066  | 0.38331447 | 0.7553138  | NA         | IL1RAP    |
| NA     | ENSG00000196085 | 0          | NA          | NA         | NA         | NA         | SMIM7P1   |
| 11122  | ENSG00000196090 | 18.9382718 | -3.82218398 | 0.88113228 | 1.41E-06   | 1.56E-05   | PTPRT     |
| 4604   | ENSG00000196091 | 0          | NA          | NA         | NA         | NA         | MYBPC1    |
| 5079   | ENSG00000196092 | 743.998386 | -2.70726864 | 0.13881837 | 4.50E-86   | 1.03E-83   | PAX5      |
| NA     | ENSG00000196096 | 2.39598147 | 0.09416575  | 0.39613267 | 0.17933514 | NA         | SPAG16-DT |
| 403278 | ENSG00000196098 | 0          | NA          | NA         | NA         | NA         | OR5K4     |
| 390261 | ENSG00000196099 | 0          | NA          | NA         | NA         | NA         | OR6M1     |
| 50859  | ENSG00000196104 | 23.4238734 | 2.24390558  | 0.55517664 | 2.99E-06   | 3.12E-05   | SPOCK3    |
| 163223 | ENSG00000196109 | 2.50636778 | -0.08976281 | 0.38853179 | 0.32721887 | NA         | ZNF676    |
| 374879 | ENSG00000196110 | 127.66978  | -0.04179207 | 0.17994194 | 0.79160515 | 0.90499209 | ZNF699    |
| NA     | ENSG00000196114 | 0.44795842 | -0.02501848 | 0.38558245 | 0.5807882  | NA         | IFITM3P3  |
| NA     | ENSG00000196115 | 0          | NA          | NA         | NA         | NA         | ADAM5     |
| 23424  | ENSG00000196116 | 164.636951 | 0.36355214  | 0.19495938 | 0.03222852 | 0.10617966 | TDRD7     |
| 90835  | ENSG00000196118 | 132.049657 | 0.44170203  | 0.20498542 | 0.01276411 | 0.05068852 | CCDC189   |
| 390275 | ENSG00000196119 | 0          | NA          | NA         | NA         | NA         | OR8A1     |
| 653319 | ENSG00000196123 | 1666.31447 | 0.1186638   | 0.07581716 | 0.11047892 | 0.26795865 | KIAA0895L |
| 3123   | ENSG00000196126 | 0          | NA          | NA         | NA         | NA         | HLA-DRB1  |
| 317701 | ENSG00000196131 | 0          | NA          | NA         | NA         | NA         | VN1R2     |
| 4661   | ENSG00000196132 | 551.144667 | -1.05471734 | 0.12654051 | 9.40E-18   | 3.06E-16   | MYT1      |
| 12     | ENSG00000196136 | 0.67266818 | 0.00970948  | 0.38267945 | 0.82290888 | NA         | SERPINA3  |
| 8644   | ENSG00000196139 | 9.25808076 | 0.17740356  | 0.39108001 | 0.28176494 | 0.50654372 | AKRIC3    |
| 26010  | ENSG00000196141 | 323.091597 | 0.29815063  | 0.1546721  | 0.03495455 | 0.11318725 | SPATS2L   |
| NA     | ENSG00000196143 | 1.35190218 | 0.0514076   | 0.38444859 | 0.43248709 | NA         | OR11H13P  |

|        |                 |            |             |            |            |            |          |
|--------|-----------------|------------|-------------|------------|------------|------------|----------|
| 58500  | ENSG00000196150 | 418.777426 | -0.05629207 | 0.13763374 | 0.65870274 | 0.83073135 | ZNF250   |
| 151525 | ENSG00000196151 | 148.308688 | -0.14064972 | 0.18411396 | 0.38344001 | 0.61266407 | WDSUB1   |
| 7633   | ENSG00000196152 | 144.268313 | -0.02380682 | 0.18358965 | 0.88153077 | 0.94772508 | ZNF79    |
| 6275   | ENSG00000196154 | 33.6763122 | -0.61526456 | 0.43767349 | 0.02599119 | 0.08974218 | S100A4   |
| 25894  | ENSG00000196155 | 1576.67656 | 0.12361644  | 0.1033748  | 0.21422675 | 0.42438929 | PLEKHG4  |
| 85290  | ENSG00000196156 | 0          | NA          | NA         | NA         | NA         | KRTAP4-3 |
| 79633  | ENSG00000196159 | 92.3464074 | -0.12625831 | 0.2372758  | 0.50068333 | 0.71795498 | FAT4     |
| NA     | ENSG00000196166 | 0.34624801 | -0.02356563 | 0.38536324 | 0.65270996 | NA         | C8orf86  |
| 399948 | ENSG00000196167 | 0.33471731 | 0.02354391  | 0.38534154 | 0.62842204 | NA         | COLCA1   |
| 124602 | ENSG00000196169 | 17.0749825 | 2.64465164  | 0.72907906 | 1.26E-05   | 0.00011776 | KIF19    |
| 81448  | ENSG00000196171 | 0          | NA          | NA         | NA         | NA         | OR6K2    |
| 148213 | ENSG00000196172 | 467.72776  | -0.5264011  | 0.14305015 | 8.01E-05   | 0.00062369 | ZNF681   |
| 36     | ENSG00000196177 | 435.734031 | 0.17657379  | 0.12449681 | 0.13326808 | 0.30691105 | ACADSB   |
| 83931  | ENSG00000196182 | 1541.8801  | 0.42820794  | 0.07080234 | 7.33E-10   | 1.28E-08   | STK40    |
| NA     | ENSG00000196183 | 1.15217991 | -0.00364109 | 0.37949693 | 0.95399678 | NA         | RPS2P4   |
| 26476  | ENSG00000196184 | 0          | NA          | NA         | NA         | NA         | OR10J1   |
| 9725   | ENSG00000196187 | 405.982053 | 2.56768667  | 0.17622416 | 1.50E-49   | 1.46E-47   | TMEM63A  |
| 1510   | ENSG00000196188 | 1.48390247 | 0.03434546  | 0.38072464 | 0.60904738 | NA         | CTSE     |
| 64218  | ENSG00000196189 | 47.6171664 | 0.14868192  | 0.26444684 | 0.45189761 | 0.67512414 | SEMA4A   |
| 646962 | ENSG00000196196 | 0          | NA          | NA         | NA         | NA         | HRCT1    |
| 54737  | ENSG00000196199 | 1011.11028 | -0.161719   | 0.08951353 | 0.06253185 | 0.17675338 | MPHOSPH8 |
| 441191 | ENSG00000196204 | 585.146994 | -0.16234017 | 0.11826961 | 0.1479759  | 0.33012187 | RNF216P1 |
| NA     | ENSG00000196205 | 131.992795 | -0.2063957  | 0.20876065 | 0.24086673 | 0.45883782 | EEF1A1P5 |
| 9687   | ENSG00000196208 | 3878.44446 | -0.02578421 | 0.0838437  | 0.75189262 | 0.88379345 | GREB1    |
| 284759 | ENSG00000196209 | 0          | NA          | NA         | NA         | NA         | SIRPB2   |
| 90321  | ENSG00000196214 | 300.38659  | -0.18778897 | 0.19434319 | 0.26150256 | 0.48352384 | ZNF766   |
| 6261   | ENSG00000196218 | 85.1101413 | 0.18715703  | 0.43214443 | 0.11648127 | 0.27907117 | RYR1     |
| 9901   | ENSG00000196220 | 389.266332 | 0.10167822  | 0.1934855  | 0.54497    | 0.75267698 | SRGAP3   |
| 387266 | ENSG00000196224 | 0          | NA          | NA         | NA         | NA         | KRTAP5-3 |
| 63939  | ENSG00000196227 | 591.044626 | -1.05170947 | 0.12505395 | 4.96E-18   | 1.65E-16   | FAM217B  |
| 442038 | ENSG00000196228 | 0          | NA          | NA         | NA         | NA         | SULT1C3  |
| 203068 | ENSG00000196230 | 43349.6101 | -0.12195643 | 0.05418859 | 0.02231296 | 0.07950595 | TUBB     |
| 84458  | ENSG00000196233 | 1189.68921 | -0.1552557  | 0.27759546 | 0.43259929 | 0.65796603 | LCOR     |
| 6829   | ENSG00000196235 | 3294.39986 | 0.18619802  | 0.06571827 | 0.00402137 | 0.01938859 | SUPT5H   |
| 63929  | ENSG00000196236 | 228.110194 | -0.07562049 | 0.1488446  | 0.58057757 | 0.77797237 | XPNPEP3  |
| 401992 | ENSG00000196240 | 0          | NA          | NA         | NA         | NA         | OR2T2    |
| 81472  | ENSG00000196242 | 0          | NA          | NA         | NA         | NA         | OR2C3    |
| 148824 | ENSG00000196242 | 0          | NA          | NA         | NA         | NA         | OR2C3    |



|           |                 |            |             |            |            |            |           |
|-----------|-----------------|------------|-------------|------------|------------|------------|-----------|
| 439916    | ENSG00000196243 | 0          | NA          | NA         | NA         | NA         | LINC00615 |
| 51427     | ENSG00000196247 | 1110.27823 | -0.41310221 | 0.08336062 | 3.68E-07   | 4.49E-06   | ZNF107    |
| 219873    | ENSG00000196248 | 0          | NA          | NA         | NA         | NA         | OR10S1    |
| 389376    | ENSG00000196260 | 0          | NA          | NA         | NA         | NA         | SFTA2     |
| 5478      | ENSG00000196262 | 23909.4215 | -0.21153754 | 0.05669612 | 0.00015224 | 0.00110963 | PPIA      |
| 57573     | ENSG00000196263 | 208.336067 | -0.0810928  | 0.1848066  | 0.61525282 | 0.80259162 | ZNF471    |
| 441911    | ENSG00000196266 | 0          | NA          | NA         | NA         | NA         | OR10J3    |
| 162962    | ENSG00000196267 | 108.117164 | 0.16854623  | 0.23697298 | 0.37205028 | 0.60104858 | ZNF836    |
| 284443    | ENSG00000196268 | 306.279794 | -0.00565959 | 0.14226665 | 0.96481114 | 0.98622874 | ZNF493    |
| 283601    | ENSG00000196273 | 3.91222055 | -0.21861656 | 0.45852439 | 0.07150544 | 0.19452459 | LINC00523 |
| NA        | ENSG00000196274 | 0.15069912 | -0.01848503 | 0.38480575 | 0.84537521 | NA         |           |
| 84163     | ENSG00000196275 | 505.566565 | 0.32165718  | 0.10822973 | 0.00190306 | 0.01024051 | GTF2IRD2  |
| 2917      | ENSG00000196277 | 359.759849 | -0.03196735 | 0.17370314 | 0.83475818 | 0.92454439 | GRM7      |
| 8464      | ENSG00000196284 | 155.901856 | 0.04308292  | 0.17642318 | 0.78479039 | 0.90204747 | SUPT3H    |
| 441925    | ENSG00000196289 | 0          | NA          | NA         | NA         | NA         | BECN2     |
| 60491     | ENSG00000196290 | 566.688524 | -0.12996925 | 0.1041363  | 0.1932479  | 0.39596861 | NIF3L1    |
| NA        | ENSG00000196295 | 1020.31406 | 0.28832961  | 0.09467226 | 0.00163468 | 0.00903399 | GARS1-DT  |
| 487       | ENSG00000196296 | 59.5332015 | 0.01630584  | 0.29981345 | 0.9326843  | 0.97195551 | ATP2A1    |
| NA        | ENSG00000196301 | 0          | NA          | NA         | NA         | NA         | HLA-DRB9  |
| NA        | ENSG00000196302 | 102.113297 | 0.27688617  | 0.24350778 | 0.15426808 | 0.3394719  | GUSBP15   |
| 3376      | ENSG00000196305 | 4775.72618 | 0.3043026   | 0.08748578 | 0.00034434 | 0.00231737 | IARS1     |
| 84278     | ENSG00000196312 | 1377.66564 | 0.05775346  | 0.13580779 | 0.65026996 | 0.82529572 | MFSD14C   |
| 9883      | ENSG00000196313 | 4923.29598 | -0.01025384 | 0.05430165 | 0.82745919 | 0.92198082 | POM121    |
| 29068     | ENSG00000196323 | 1081.36377 | 0.01054453  | 0.11095205 | 0.92194985 | 0.96729164 | ZBTB44    |
| 55340     | ENSG00000196329 | 0          | NA          | NA         | NA         | NA         | GIMAP5    |
| 56164     | ENSG00000196335 | 10.8145382 | 0.1185405   | 0.3729554  | 0.42026553 | 0.64619198 | STK31     |
| 94027     | ENSG00000196337 | 3.04438347 | 0.10604707  | 0.39288286 | 0.27331103 | 0.49679256 | CGB7      |
| 54413     | ENSG00000196338 | 247.75333  | -0.39669862 | 0.1671434  | 0.00857472 | 0.03655403 | NLGN3     |
| 283159    | ENSG00000196341 | 0          | NA          | NA         | NA         | NA         | OR8D1     |
| 131       | ENSG00000196344 | 0          | NA          | NA         | NA         | NA         | ADH7      |
| 55888     | ENSG00000196345 | 524.021272 | -0.0936727  | 0.12672474 | 0.43265701 | 0.65797295 | ZKSCAN7   |
| 100287226 | ENSG00000196350 | 0.64926934 | -0.03789353 | 0.38680731 | 0.40870612 | NA         | ZNF729    |
| 1604      | ENSG00000196352 | 0          | NA          | NA         | NA         | NA         | CD55      |
| 131034    | ENSG00000196353 | 87.0350409 | -1.77064365 | 0.29389569 | 1.14E-10   | 2.18E-09   | CPNE4     |
| 147929    | ENSG00000196357 | 62.5638395 | -0.08572131 | 0.23949152 | 0.64739925 | 0.82430661 | ZNF565    |
| 84628     | ENSG00000196358 | 88.2717509 | 0.18056675  | 0.30576785 | 0.37155572 | 0.60060191 | NTNG2     |
| 1995      | ENSG00000196361 | 4137.86925 | -0.91181377 | 0.07115285 | 2.13E-38   | 1.58E-36   | ELAVL3    |
| 11091     | ENSG00000196363 | 1551.41516 | -0.05039243 | 0.07092693 | 0.46915147 | 0.69153662 | WDR5      |

|           |                 |            |             |            |            |            |           |
|-----------|-----------------|------------|-------------|------------|------------|------------|-----------|
| NA        | ENSG00000196364 | 0          | NA          | NA         | NA         | NA         | PRSS29P   |
| 9361      | ENSG00000196365 | 3395.37522 | 0.07495663  | 0.05837695 | 0.1939954  | 0.39683151 | LONP1     |
| 158055    | ENSG00000196366 | 16.1655484 | -0.23554834 | 0.38467828 | 0.23354098 | 0.45043378 | C9orf163  |
| 8295      | ENSG00000196367 | 6536.3733  | -0.10984828 | 0.05334393 | 0.03738228 | 0.1192962  | TRRAP     |
| 55190     | ENSG00000196368 | 420.96925  | -0.11897136 | 0.11737611 | 0.28660607 | 0.5123684  | NUDT11    |
| 647135    | ENSG00000196369 | 1030.7164  | -0.43115728 | 0.09437741 | 2.35E-06   | 2.50E-05   | SRGAP2B   |
| 2526      | ENSG00000196371 | 76.3628149 | 0.07318664  | 0.23422045 | 0.69573265 | 0.85316371 | FUT4      |
| 79754     | ENSG00000196372 | 909.470214 | -0.25701658 | 0.08669413 | 0.00227927 | 0.01197266 | ASB13     |
| 222553    | ENSG00000196376 | 1.34775073 | -0.04155115 | 0.38271622 | 0.52040837 | NA         | SLC35F1   |
| 80778     | ENSG00000196378 | 87.0817792 | -0.16643457 | 0.24475449 | 0.38304418 | 0.61240159 | ZNF34     |
| 163115    | ENSG00000196381 | 100.838208 | -0.12956583 | 0.26302005 | 0.50395191 | 0.72045005 | ZNF781    |
| NA        | ENSG00000196383 | 0          | NA          | NA         | NA         | NA         | OR4Q2     |
| 7699      | ENSG00000196387 | 294.211099 | -0.01475674 | 0.15975699 | 0.91783927 | 0.9652015  | ZNF140    |
| 388324    | ENSG00000196388 | 7.45147874 | 0.07682923  | 0.35953537 | 0.60251596 | 0.79259054 | INCA1     |
| NA        | ENSG00000196390 | 0          | NA          | NA         | NA         | NA         |           |
| 342132    | ENSG00000196391 | 236.010063 | -0.57925059 | 0.16961076 | 0.00018443 | 0.00132241 | ZNF774    |
| NA        | ENSG00000196395 | 0          | NA          | NA         | NA         | NA         |           |
| 5770      | ENSG00000196396 | 1088.54858 | -0.04415827 | 0.08129391 | 0.57776351 | 0.77605301 | PTPN1     |
| NA        | ENSG00000196403 | 0          | NA          | NA         | NA         | NA         | OR10D1P   |
| 51466     | ENSG00000196405 | 2708.25843 | -0.05416944 | 0.06726804 | 0.41286784 | 0.64038252 | EVL       |
| 64648     | ENSG00000196406 | 0          | NA          | NA         | NA         | NA         | SPANXD    |
| 284486    | ENSG00000196407 | 0.36325155 | 0.02389685  | 0.38539273 | 0.60981965 | NA         | THEM5     |
| 124056    | ENSG00000196408 | 2.36430715 | 0.11586212  | 0.4003901  | 0.18719163 | NA         | NOXO1     |
| 2050      | ENSG00000196411 | 1448.1558  | 2.42016174  | 0.092731   | 1.94E-151  | 1.83E-148  | EPHB4     |
| 5657      | ENSG00000196415 | 0          | NA          | NA         | NA         | NA         | PRTN3     |
| 91661     | ENSG00000196417 | 230.402875 | 0.04060891  | 0.17275905 | 0.7935071  | 0.90556117 | ZNF765    |
| 7678      | ENSG00000196418 | 379.128489 | -0.22293282 | 0.13072946 | 0.06876954 | 0.1890682  | ZNF124    |
| 2547      | ENSG00000196419 | 2834.7753  | -0.12569762 | 0.09319542 | 0.16366814 | 0.35275692 | XRCC6     |
| 6276      | ENSG00000196420 | 0          | NA          | NA         | NA         | NA         | S100A5    |
| 284739    | ENSG00000196421 | 66.5641943 | 0.24992968  | 0.24781666 | 0.20054431 | 0.40575148 | C20orf204 |
| 9858      | ENSG00000196422 | 1639.89707 | 0.02246613  | 0.07876259 | 0.77285543 | 0.89561741 | PPP1R26   |
| 148545    | ENSG00000196427 | 146.999886 | 0.93034518  | 0.26556294 | 5.81E-05   | 0.0004672  | NBPF4     |
| 9819      | ENSG00000196428 | 475.197898 | -0.06905767 | 0.13174013 | 0.57583644 | 0.7744963  | TSC22D2   |
| 1413      | ENSG00000196431 | 0          | NA          | NA         | NA         | NA         | CRYBA4    |
| 438       | ENSG00000196433 | 0.173733   | 0.01914545  | 0.38484597 | 0.78225479 | NA         | ASMT      |
| 440348    | ENSG00000196436 | 0.49335459 | -0.01684786 | 0.38404234 | 0.84749744 | NA         | NPIPB15   |
| 148266    | ENSG00000196437 | 268.751324 | -0.19111421 | 0.15578466 | 0.17806632 | 0.37352884 | ZNF569    |
| 100131755 | ENSG00000196440 | 683.949022 | -0.02171721 | 0.10133559 | 0.82240217 | 0.91897523 | ARMCX4    |

|           |                 |            |             |            |            |            |          |
|-----------|-----------------|------------|-------------|------------|------------|------------|----------|
| 79693     | ENSG00000196449 | 693.485474 | -0.02166566 | 0.09710289 | 0.81671509 | 0.9166503  | YRDC     |
| 27153     | ENSG00000196453 | 497.535325 | -0.28728971 | 0.10878948 | 0.00571359 | 0.02604725 | ZNF777   |
| 30849     | ENSG00000196455 | 647.888832 | -0.15613415 | 0.12018477 | 0.17008462 | 0.36191941 | PIK3R4   |
| 285971    | ENSG00000196456 | 504.30229  | 0.22783055  | 0.12790721 | 0.05823272 | 0.16740168 | ZNF775   |
| 100289635 | ENSG00000196458 | 819.490411 | -0.26887036 | 0.11339524 | 0.01263355 | 0.05028078 | ZNF605   |
| 6399      | ENSG00000196459 | 466.488702 | -0.48884488 | 0.14564478 | 0.0003014  | 0.00205487 | TRAPPC2  |
| 731220    | ENSG00000196460 | 1.39562213 | -0.05561223 | 0.38872542 | 0.26074571 | NA         | RFX8     |
| 140465    | ENSG00000196465 | 2128.24818 | 0.06126339  | 0.0729094  | 0.39246534 | 0.62172726 | MYL6B    |
| 90576     | ENSG00000196466 | 96.0645502 | -0.20670867 | 0.24138192 | 0.27957459 | 0.5040676  | ZNF799   |
| 8823      | ENSG00000196468 | 0          | NA          | NA         | NA         | NA         | FGF16    |
| 6477      | ENSG00000196470 | 624.803207 | 0.04096653  | 0.10861052 | 0.6949118  | 0.85252598 | SIAH1    |
| NA        | ENSG00000196472 | 0          | NA          | NA         | NA         | NA         |          |
| 2712      | ENSG00000196475 | 0          | NA          | NA         | NA         | NA         | GK2      |
| 140680    | ENSG00000196476 | 331.153876 | 0.20919969  | 0.12819435 | 0.08276211 | 0.2167657  | C20orf96 |
| 2104      | ENSG00000196482 | 2067.68979 | 0.12301824  | 0.07756604 | 0.10541859 | 0.25894574 | ESRRG    |
| 79711     | ENSG00000196497 | 1783.46503 | -0.05718824 | 0.07502605 | 0.43553463 | 0.66067796 | IPO4     |
| 9612      | ENSG00000196498 | 5171.34423 | 0.05777238  | 0.06976555 | 0.39982262 | 0.62831531 | NCOR2    |
| 6817      | ENSG00000196502 | 9.40902836 | 0.13652097  | 0.39550988 | 0.26348719 | 0.48542909 | SULT1A1  |
| 132946    | ENSG00000196503 | 0.173124   | -0.01911262 | 0.38486262 | 0.84537521 | NA         | ARL9     |
| 55660     | ENSG00000196504 | 2677.9917  | 0.03008446  | 0.07279717 | 0.679789   | 0.84376374 | PRPF40A  |
| 54834     | ENSG00000196505 | 338.083423 | -0.39148634 | 0.1393622  | 0.00252566 | 0.01309017 | GDAP2    |
| 85012     | ENSG00000196507 | 272.524198 | -0.21782192 | 0.14572424 | 0.10478547 | 0.25792917 | TCEAL3   |
| 51434     | ENSG00000196510 | 1094.73484 | -0.08742164 | 0.08800962 | 0.30644084 | 0.53411107 | ANAPC7   |
| 27010     | ENSG00000196511 | 84.6064932 | 0.04381831  | 0.21730065 | 0.80841452 | 0.91317199 | TPK1     |
| 6536      | ENSG00000196517 | 269.85889  | 1.82362041  | 0.25694449 | 8.88E-14   | 2.19E-12   | SLC6A9   |
| 60312     | ENSG00000196526 | 6738.74318 | -0.16410678 | 0.05036719 | 0.00100291 | 0.0059237  | AFAP1    |
| 4666      | ENSG00000196531 | 10875.5626 | 0.02262594  | 0.05004724 | 0.66305581 | 0.83375759 | NACA     |
| NA        | ENSG00000196534 | 0          | NA          | NA         | NA         | NA         | OR9K1P   |
| 399687    | ENSG00000196535 | 1295.86121 | -0.24546579 | 0.07955992 | 0.00156993 | 0.00871989 | MYO18A   |
| 343173    | ENSG00000196539 | 0          | NA          | NA         | NA         | NA         | OR2T3    |
| 165679    | ENSG00000196542 | 189.069947 | 0.3845637   | 0.17960482 | 0.01610653 | 0.06112347 | SPTSSB   |
| 54785     | ENSG00000196544 | 186.836319 | -0.02539557 | 0.16049693 | 0.8607181  | 0.93799827 | BORCS6   |
| 4122      | ENSG00000196547 | 1892.96651 | -0.1153528  | 0.07072896 | 0.09607139 | 0.24200817 | MAN2A2   |
| 4311      | ENSG00000196549 | 34.0103746 | -0.43514484 | 0.41170752 | 0.07347026 | 0.19834672 | MME      |
| 729533    | ENSG00000196550 | 349.493146 | -0.48154252 | 0.1314754  | 0.00010062 | 0.00076454 | FAM72A   |
| 440184    | ENSG00000196553 | 0.173733   | 0.01914545  | 0.38484597 | 0.78225479 | NA         | CCDC196  |
| 8912      | ENSG00000196557 | 0          | NA          | NA         | NA         | NA         | CACNA1H  |
| 55959     | ENSG00000196562 | 1878.155   | -2.08816806 | 0.08079744 | 1.74E-148  | 1.43E-145  | SULF2    |

|           |                 |            |             |            |            |            |             |
|-----------|-----------------|------------|-------------|------------|------------|------------|-------------|
| NA        | ENSG00000196564 | 0          | NA          | NA         | NA         | NA         | BLOC1S6P1   |
| 3048      | ENSG00000196565 | 0          | NA          | NA         | NA         | NA         | HBG2        |
| NA        | ENSG00000196566 | 0          | NA          | NA         | NA         | NA         |             |
| 3908      | ENSG00000196569 | 0          | NA          | NA         | NA         | NA         | LAMA2       |
| 345456    | ENSG00000196570 | 0.34057487 | -0.00047727 | 0.38336304 | 0.96977705 | NA         | PFN3        |
| 23654     | ENSG00000196576 | 4635.92879 | -0.19397138 | 0.07496299 | 0.00823972 | 0.0354151  | PLXNB2      |
| 81050     | ENSG00000196578 | 0          | NA          | NA         | NA         | NA         | OR5AC2      |
| 55966     | ENSG00000196581 | 22.0036629 | -2.83770735 | 0.77892699 | 1.32E-05   | 0.0001233  | AJAP1       |
| 7516      | ENSG00000196584 | 1626.9507  | -0.08908419 | 0.07694113 | 0.23682556 | 0.45370983 | XRCC2       |
| 4646      | ENSG00000196586 | 1279.1522  | 0.24342045  | 0.07758977 | 0.00133691 | 0.00758921 | MYO6        |
| 57591     | ENSG00000196588 | 336.549875 | 0.07896742  | 0.15765897 | 0.58403211 | 0.78020525 | MRTFA       |
| 729458    | ENSG00000196589 | 0          | NA          | NA         | NA         | NA         | MBD3L2B     |
| 3066      | ENSG00000196591 | 5043.8138  | 0.05431184  | 0.05829903 | 0.34673388 | 0.57745322 | HDAC2       |
| NA        | ENSG00000196593 | 1.3933945  | -0.06015007 | 0.38588951 | 0.37463236 | NA         | ANKRD20A19P |
| 158431    | ENSG00000196597 | 106.163383 | -0.11293636 | 0.237261   | 0.54605197 | 0.75333225 | ZNF782      |
| 387601    | ENSG00000196600 | 0.33471731 | 0.02354391  | 0.38534154 | 0.62842204 | NA         | SLC22A25    |
| 728378    | ENSG00000196604 | 0.18922458 | 0.01954053  | 0.38488496 | 0.78225479 | NA         | POTEF       |
| 162993    | ENSG00000196605 | 98.0294702 | 0.501885    | 0.2507982  | 0.01448116 | 0.05600512 | ZNF846      |
| 100505555 | ENSG00000196605 | 98.0294702 | 0.501885    | 0.2507982  | 0.01448116 | 0.05600512 | ZNF846      |
| 4312      | ENSG00000196611 | 0          | NA          | NA         | NA         | NA         | MMP1        |
| 125       | ENSG00000196616 | 0.70829826 | 0.02419826  | 0.38327581 | 0.58592423 | NA         | ADH1B       |
| 7366      | ENSG00000196620 | 0          | NA          | NA         | NA         | NA         | UGT2B15     |
| 6925      | ENSG00000196628 | 12673.6232 | -0.23149599 | 0.05427509 | 1.44E-05   | 0.00013269 | TCF4        |
| 65267     | ENSG00000196632 | 226.874103 | -0.18727436 | 0.1946628  | 0.26332894 | 0.48536289 | WNK3        |
| 106182249 | ENSG00000196634 | 0          | NA          | NA         | NA         | NA         | LUADT1      |
| 57001     | ENSG00000196636 | 347.73718  | 0.04111755  | 0.12214733 | 0.72735449 | 0.86958199 | SDHAF3      |
| 3269      | ENSG00000196639 | 0.18922458 | 0.01954053  | 0.38488496 | 0.78225479 | NA         | HRH1        |
| 55684     | ENSG00000196642 | 3813.06809 | -0.04686428 | 0.06012665 | 0.42720098 | 0.652979   | RABL6       |
| 7695      | ENSG00000196646 | 176.286977 | -0.19197268 | 0.18995395 | 0.24432691 | 0.4628959  | ZNF136      |
| 23660     | ENSG00000196652 | 887.570344 | 0.03348194  | 0.0961438  | 0.71979427 | 0.86597043 | ZKSCAN5     |
| 91392     | ENSG00000196653 | 170.787235 | -0.12204991 | 0.16635285 | 0.41468974 | 0.64180766 | ZNF502      |
| 51399     | ENSG00000196655 | 775.701737 | 0.09635126  | 0.09239067 | 0.28284692 | 0.50789057 | TRAPPC4     |
| NA        | ENSG00000196656 | 1370.06871 | -0.04749416 | 0.0797156  | 0.54188457 | 0.75019119 |             |
| 150737    | ENSG00000196659 | 249.837971 | 0.34587524  | 0.15297547 | 0.01369139 | 0.05359848 | TTC30B      |
| 55532     | ENSG00000196660 | 91.6883939 | 0.46549705  | 0.27530636 | 0.03078117 | 0.10232882 | SLC30A10    |
| 9895      | ENSG00000196663 | 764.203704 | 0.5998391   | 0.11565882 | 6.40E-08   | 8.65E-07   | TECPR2      |
| 51284     | ENSG00000196664 | 0          | NA          | NA         | NA         | NA         | TLR7        |
| 399888    | ENSG00000196666 | 2.78108551 | 0.02531872  | 0.37163223 | 0.80360691 | 0.91070264 | FAM180B     |

|           |                 |            |             |            |            |            |           |
|-----------|-----------------|------------|-------------|------------|------------|------------|-----------|
| 100287569 | ENSG00000196668 | 6.99384931 | 0.24974389  | 0.46546914 | 0.09176182 | 0.23400444 | LINC00173 |
| 643836    | ENSG00000196670 | 903.909129 | 0.02779117  | 0.09670644 | 0.76742749 | 0.89288602 | ZFP62     |
| 112479    | ENSG00000196678 | 612.386357 | -0.16979288 | 0.10515417 | 0.09230647 | 0.2349404  | ERI2      |
| 54543     | ENSG00000196683 | 1089.7402  | 0.04836994  | 0.096805   | 0.60643051 | 0.79607018 | TOMM7     |
| 84941     | ENSG00000196684 | 0          | NA          | NA         | NA         | NA         | HSH2D     |
| 7442      | ENSG00000196689 | 228.689719 | 0.04336387  | 0.14547332 | 0.74837314 | 0.88195564 | TRPV1     |
| 7582      | ENSG00000196693 | 1057.23808 | -0.39588973 | 0.09139595 | 7.84E-06   | 7.60E-05   | ZNF33B    |
| 283970    | ENSG00000196696 | 165.217127 | 0.62944199  | 0.20957392 | 0.00065111 | 0.00405715 |           |
| 57473     | ENSG00000196700 | 1895.81508 | 0.31030904  | 0.07074741 | 7.88E-06   | 7.62E-05   | ZNF512B   |
| 51321     | ENSG00000196704 | 1111.3987  | -0.24073012 | 0.09329275 | 0.00763786 | 0.03320955 | AMZ2      |
| 170959    | ENSG00000196705 | 923.829995 | 0.11299517  | 0.09717296 | 0.22926937 | 0.44481755 | ZNF431    |
| 389658    | ENSG00000196711 | 0          | NA          | NA         | NA         | NA         | ALKAL1    |
| 4763      | ENSG00000196712 | 2617.00127 | -0.09467004 | 0.08632533 | 0.25955991 | 0.48121669 | NF1       |
| 154807    | ENSG00000196715 | 1723.13746 | -0.2680727  | 0.07945447 | 0.00054698 | 0.0034883  | VKORC1L1  |
| 147686    | ENSG00000196724 | 8.79941896 | 0.24434016  | 0.48248185 | 0.04211862 | 0.13070323 | ZNF418    |
| 1612      | ENSG00000196730 | 1373.55278 | 0.01845611  | 0.07497267 | 0.80280408 | 0.91020247 | DAPK1     |
| 353132    | ENSG00000196734 | 0.173124   | -0.01911262 | 0.38486262 | 0.84537521 | NA         | LCE1B     |
| 3117      | ENSG00000196735 | 0          | NA          | NA         | NA         | NA         | HLA-DQA1  |
| 85301     | ENSG00000196739 | 174.993325 | -1.347993   | 0.19556559 | 4.79E-13   | 1.12E-11   | COL27A1   |
| NA        | ENSG00000196741 | 44.5197113 | 0.18449943  | 0.30067819 | 0.36500909 | 0.59446563 | LINC01560 |
| 2760      | ENSG00000196743 | 407.377164 | 0.38139733  | 0.11996556 | 0.00080135 | 0.0048814  | GM2A      |
| 8329      | ENSG00000196747 | 5.80107887 | -0.2241277  | 0.44636492 | 0.1210442  | 0.28719408 | H2AC13    |
| 389383    | ENSG00000196748 | 0.49160492 | -0.00761637 | 0.38272042 | 0.85526143 | NA         | CLPSL2    |
| 6273      | ENSG00000196754 | 0.63354864 | 0.00212699  | 0.38251372 | 0.95865884 | NA         | S100A2    |
| 388796    | ENSG00000196756 | 701.04475  | 0.07233896  | 0.09454954 | 0.43027608 | 0.65586029 | SNHG17    |
| 90592     | ENSG00000196757 | 288.667931 | 0.02342592  | 0.14103968 | 0.85937013 | 0.9374775  | ZNF700    |
| 401040    | ENSG00000196758 | 0          | NA          | NA         | NA         | NA         |           |
| 5456      | ENSG00000196767 | 0          | NA          | NA         | NA         | NA         | POU3F4    |
| 284532    | ENSG00000196772 | 0          | NA          | NA         | NA         | NA         | OR14A16   |
| 961       | ENSG00000196776 | 1178.39384 | -0.17022181 | 0.10150381 | 0.08123392 | 0.21389263 | CD47      |
| 390036    | ENSG00000196778 | 0          | NA          | NA         | NA         | NA         | OR52K1    |
| 7088      | ENSG00000196781 | 1916.39821 | 0.10650347  | 0.08292867 | 0.18845464 | 0.3889867  | TLE1      |
| 55534     | ENSG00000196782 | 2375.50094 | -0.32085327 | 0.06763894 | 1.38E-06   | 1.53E-05   | MAML3     |
| 8969      | ENSG00000196787 | 57.3099036 | -0.8628971  | 0.32533907 | 0.00105258 | 0.00616751 | H2AC11    |
| 29966     | ENSG00000196792 | 526.187295 | -0.10555157 | 0.13421524 | 0.40012109 | 0.62854504 | STRN3     |
| 8187      | ENSG00000196793 | 311.079221 | -0.53790812 | 0.18627497 | 0.00123232 | 0.00707069 | ZNF239    |
| NA        | ENSG00000196796 | 0.34746601 | 0.02370763  | 0.3853651  | 0.61987128 | NA         | NPIP10P   |
| 408187    | ENSG00000196800 | 0          | NA          | NA         | NA         | NA         | SPINK14   |

|        |                 |            |             |            |            |            |          |
|--------|-----------------|------------|-------------|------------|------------|------------|----------|
| 6701   | ENSG00000196805 | 0          | NA          | NA         | NA         | NA         | SPRR2B   |
| NA     | ENSG00000196810 | 504.390882 | -0.08950089 | 0.13205646 | 0.46911991 | 0.69153662 | CTBP1-DT |
| 1146   | ENSG00000196811 | 0.14931947 | -0.01844332 | 0.38480212 | 0.84537521 | NA         | CHRNA1   |
| 80345  | ENSG00000196812 | 245.630462 | -0.01888709 | 0.1393011  | 0.88375368 | 0.94897201 | ZSCAN16  |
| 89853  | ENSG00000196814 | 1013.14032 | -0.09133961 | 0.09384559 | 0.31509387 | 0.54289729 | MVB12B   |
| 64771  | ENSG00000196821 | 1684.4389  | 0.04176307  | 0.07761064 | 0.5834721  | 0.77994081 | ILRUN    |
| NA     | ENSG00000196826 | 0          | NA          | NA         | NA         | NA         |          |
| 390439 | ENSG00000196832 | 0.62178598 | -0.04501091 | 0.38755918 | 0.37478114 | NA         | OR11G2   |
| 653269 | ENSG00000196834 | 0          | NA          | NA         | NA         | NA         | POT1     |
| 100    | ENSG00000196839 | 146.963754 | 0.3407159   | 0.18895748 | 0.03969602 | 0.12465479 | ADA      |
| 10865  | ENSG00000196843 | 90.0176547 | 0.45241765  | 0.25438571 | 0.02747182 | 0.09356925 | ARID5A   |
| 399967 | ENSG00000196844 | 0.173733   | 0.01914545  | 0.38484597 | 0.78225479 | NA         | PATE2    |
| 160760 | ENSG00000196850 | 568.298632 | 0.06511165  | 0.10207354 | 0.50896708 | 0.72469548 | PPTC7    |
| 390792 | ENSG00000196859 | 0          | NA          | NA         | NA         | NA         | KRT39    |
| 387990 | ENSG00000196860 | 1.1264234  | -0.00654307 | 0.38052282 | 0.90997405 | NA         | TOMM20L  |
| 285190 | ENSG00000196862 | 17.7085264 | 0.19300388  | 0.366484   | 0.31325864 | 0.54126787 | RGPD4    |
| 374354 | ENSG00000196865 | 1186.30094 | -0.18679092 | 0.07715929 | 0.01330163 | 0.05242437 | NHLRC2   |
| 3013   | ENSG00000196866 | 0.7534956  | -0.03327829 | 0.38646938 | 0.40782637 | NA         | H2AC7    |
| 140612 | ENSG00000196867 | 254.258062 | 0.01098868  | 0.18991977 | 0.94836984 | 0.97876335 | ZFP28    |
| 343990 | ENSG00000196872 | 52.3697297 | 2.01735431  | 0.3754165  | 4.75E-09   | 7.47E-08   | CRACDL   |
| 445571 | ENSG00000196873 | 384.723517 | 0.11067859  | 0.12677079 | 0.35506675 | 0.58548241 | CBWD3    |
| 6334   | ENSG00000196876 | 821.717781 | -0.76279953 | 0.10284844 | 2.38E-14   | 6.15E-13   | SCN8A    |
| 3914   | ENSG00000196878 | 1.65839172 | -0.05277493 | 0.38343898 | 0.46101376 | NA         | LAMB3    |
| 128312 | ENSG00000196890 | 57.8471066 | -0.32942402 | 0.28120276 | 0.11697163 | 0.27997551 | H2BU1    |
| NA     | ENSG00000196893 | 0          | NA          | NA         | NA         | NA         |          |
| 389320 | ENSG00000196900 | 0          | NA          | NA         | NA         | NA         | TEX43    |
| 3841   | ENSG00000196911 | 495.74099  | 0.17420228  | 0.13296925 | 0.16197632 | 0.35042673 | KPNA5    |
| 57730  | ENSG00000196912 | 325.036199 | 0.24500774  | 0.14350751 | 0.06502771 | 0.18187757 | ANKRD36B |
| 23365  | ENSG00000196914 | 4117.05242 | -0.36263979 | 0.06013293 | 9.61E-10   | 1.65E-08   | ARHGEF12 |
| 27198  | ENSG00000196917 | 0          | NA          | NA         | NA         | NA         | HCAR1    |
| 286101 | ENSG00000196922 | 848.703656 | -0.2527223  | 0.11019665 | 0.01630014 | 0.06169325 | ZNF252P  |
| 9260   | ENSG00000196923 | 866.664539 | -0.0074821  | 0.09149676 | 0.93209725 | 0.97175748 | PDLIM7   |
| 2316   | ENSG00000196924 | 13880.1579 | 0.62516256  | 0.04860418 | 2.22E-38   | 1.64E-36   | FLNA     |
| 219623 | ENSG00000196932 | 29.8430221 | -0.81549272 | 0.50407685 | 0.01061309 | 0.04349591 | TMEM26   |
| NA     | ENSG00000196933 | 0.14931947 | -0.01844332 | 0.38480212 | 0.84537521 | NA         | RPS26P11 |
| 57522  | ENSG00000196935 | 862.0233   | 0.58582932  | 0.10851885 | 2.09E-08   | 3.03E-07   | SRGAP1   |
| 10447  | ENSG00000196937 | 400.889548 | -0.41883903 | 0.14642454 | 0.00197394 | 0.01057888 | FAM3C    |
| 161424 | ENSG00000196943 | 1353.96025 | -0.03948142 | 0.07573177 | 0.594254   | 0.7877158  | NOP9     |

|           |                 |            |             |            |            |            |           |
|-----------|-----------------|------------|-------------|------------|------------|------------|-----------|
| 127074    | ENSG00000196944 | 0          | NA          | NA         | NA         | NA         | OR2T4     |
| 440077    | ENSG00000196946 | 0.34746601 | 0.02370763  | 0.3853651  | 0.61987128 | NA         | ZNF705A   |
| 57181     | ENSG00000196950 | 1430.97038 | -0.19699511 | 0.0940021  | 0.03041106 | 0.10142132 | SLC39A10  |
| 100129858 | ENSG00000196951 | 71.0171262 | -0.20976845 | 0.29931471 | 0.3049759  | 0.5323528  | SCOC-AS1  |
| 837       | ENSG00000196954 | 0.5897162  | -0.03106455 | 0.38592535 | 0.59281556 | NA         | CASP4     |
| 160       | ENSG00000196961 | 1545.56114 | 0.09481175  | 0.09605873 | 0.30860746 | 0.53621325 | AP2A1     |
| 199704    | ENSG00000196967 | 313.182644 | -0.11019882 | 0.19206094 | 0.50579949 | 0.72177288 | ZNF585A   |
| 170384    | ENSG00000196968 | 294.820592 | -0.24462205 | 0.1496398  | 0.07481832 | 0.20111035 | FUT11     |
| 55999     | ENSG00000196970 | 0.52119901 | 0.02576573  | 0.38568143 | 0.51723676 | NA         | NXF4      |
| 644596    | ENSG00000196972 | 7.77442052 | -0.00248133 | 0.35435911 | 0.98345415 | 0.99432963 | SMIM10L2B |
| 307       | ENSG00000196975 | 276.586207 | 0.93903915  | 0.15171873 | 8.83E-11   | 1.71E-09   | ANXA4     |
| 8270      | ENSG00000196976 | 371.02623  | 0.01774594  | 0.12299459 | 0.87991032 | 0.94676614 | LAGE3     |
| 401554    | ENSG00000196979 | 0.71683569 | 0.02258975  | 0.38381088 | 0.59908846 | NA         | GPRACR    |
| 54554     | ENSG00000196981 | 317.2767   | 0.09858333  | 0.14361015 | 0.45972263 | 0.6828552  | WDR5B     |
| 642968    | ENSG00000196990 | 1881.63497 | -0.40140431 | 0.06872665 | 2.77E-09   | 4.48E-08   | FAM163B   |
| 100507607 | ENSG00000196993 | 17.3961523 | 0.53163167  | 0.62854707 | 0.04544641 | 0.13822733 | NPIP8     |
| 11152     | ENSG00000196998 | 740.803379 | 0.24571246  | 0.09942123 | 0.01029578 | 0.04243214 | WDR45     |
| 51108     | ENSG00000197006 | 2649.1153  | -0.07005578 | 0.06066716 | 0.24171594 | 0.45967442 | METTL9    |
| 7697      | ENSG00000197008 | 601.650048 | -0.06840122 | 0.09967232 | 0.4765575  | 0.69841458 | ZNF138    |
| 353088    | ENSG00000197013 | 219.647235 | -0.54116354 | 0.18784182 | 0.00123018 | 0.00706421 | ZNF429    |
| 388566    | ENSG00000197016 | 360.914998 | -0.07860025 | 0.12446591 | 0.50342765 | 0.72011569 | ZNF470    |
| 29950     | ENSG00000197019 | 58.7901742 | 0.39499343  | 0.29273936 | 0.0703821  | 0.192286   | SERTAD1   |
| 163227    | ENSG00000197020 | 339.993637 | -0.41757057 | 0.1406309  | 0.00141298 | 0.00797085 | ZNF100    |
| 541578    | ENSG00000197021 | 286.026246 | -0.01914437 | 0.15348693 | 0.89054657 | 0.95232275 | EOLA2     |
| NA        | ENSG00000197023 | 0          | NA          | NA         | NA         | NA         | OR51A6P   |
| 57541     | ENSG00000197024 | 683.668388 | -0.16217567 | 0.11374786 | 0.13330117 | 0.30695163 | ZNF398    |
| 221785    | ENSG00000197037 | 940.194347 | -0.05981155 | 0.08926782 | 0.49028791 | 0.70981553 | ZSCAN25   |
| NA        | ENSG00000197038 | 0          | NA          | NA         | NA         | NA         | RBM1A3P   |
| 309       | ENSG00000197043 | 1899.64312 | -0.17802166 | 0.07321175 | 0.01310486 | 0.05175169 | ANXA6     |
| 126068    | ENSG00000197044 | 147.259228 | -0.35050963 | 0.20597333 | 0.04640921 | 0.14061674 | ZNF441    |
| 2764      | ENSG00000197045 | 1724.38522 | -0.55671136 | 0.08531854 | 2.33E-11   | 4.77E-10   | GMFB      |
| 284266    | ENSG00000197046 | 0          | NA          | NA         | NA         | NA         | SIGLEC15  |
| 147923    | ENSG00000197050 | 318.208584 | -0.51862549 | 0.1512186  | 0.00021136 | 0.00149549 | ZNF420    |
| 284390    | ENSG00000197054 | 33.6465798 | 0.14516409  | 0.33504265 | 0.44285131 | 0.66774358 | ZNF763    |
| 79830     | ENSG00000197056 | 379.061925 | -0.17271751 | 0.12531589 | 0.14367292 | 0.32310935 | ZMYM1     |
| 401124    | ENSG00000197057 | 0          | NA          | NA         | NA         | NA         | DTHD1     |
| 8364      | ENSG00000197061 | 2.34312805 | -0.06514319 | 0.38272177 | 0.45196845 | NA         | H4C3      |
| 7741      | ENSG00000197062 | 283.664302 | 0.11865589  | 0.20290455 | 0.49221059 | 0.71119788 | ZSCAN26   |

|        |                 |            |             |            |            |            |            |
|--------|-----------------|------------|-------------|------------|------------|------------|------------|
| 4097   | ENSG00000197063 | 1757.72805 | 0.14992341  | 0.06760354 | 0.02421031 | 0.08495446 | MAFG       |
| NA     | ENSG00000197067 | 0          | NA          | NA         | NA         | NA         | OR2T32P    |
| 92714  | ENSG00000197070 | 448.34799  | 0.48055327  | 0.12589541 | 5.52E-05   | 0.00044598 | ARRDC1     |
| 85379  | ENSG00000197077 | 724.216707 | 0.30433309  | 0.09878197 | 0.00138913 | 0.00785178 | KIAA1671   |
| 3886   | ENSG00000197079 | 0          | NA          | NA         | NA         | NA         | KRT35      |
| 3482   | ENSG00000197081 | 4425.94249 | 0.03737642  | 0.05907842 | 0.52341853 | 0.73623706 | IGF2R      |
| NA     | ENSG00000197083 | 0.34656964 | -0.02344504 | 0.38534777 | 0.6613171  | NA         | ZNF300P1   |
| 353133 | ENSG00000197084 | 0          | NA          | NA         | NA         | NA         | LCE1C      |
| 404744 | ENSG00000197085 | 0          | NA          | NA         | NA         | NA         | NPSR1-AS1  |
| NA     | ENSG00000197092 | 0          | NA          | NA         | NA         | NA         | GOLGA6L16P |
| 79690  | ENSG00000197093 | 276.148286 | 0.64373038  | 0.15882037 | 1.30E-05   | 0.00012108 | GAL3ST4    |
| NA     | ENSG00000197099 | 0          | NA          | NA         | NA         | NA         |            |
| 1778   | ENSG00000197102 | 16304.2961 | 0.24731051  | 0.05719719 | 1.21E-05   | 0.00011374 | DYNC1H1    |
| 388662 | ENSG00000197106 | 223.856853 | -2.17554786 | 0.21300005 | 1.08E-25   | 5.25E-24   | SLC6A17    |
| 282617 | ENSG00000197110 | 0          | NA          | NA         | NA         | NA         | IFNL3      |
| 5094   | ENSG00000197111 | 10324.5624 | -0.01240309 | 0.04836596 | 0.79400393 | 0.90579008 | PCBP2      |
| 84619  | ENSG00000197114 | 643.361119 | 0.36564775  | 0.10011823 | 0.00014984 | 0.00109459 | ZGPAT      |
| 123096 | ENSG00000197119 | 3942.63193 | 0.49948938  | 0.06430198 | 3.26E-15   | 9.08E-14   | SLC25A29   |
| 80055  | ENSG00000197121 | 2204.09832 | -0.5239867  | 0.07893834 | 1.19E-11   | 2.52E-10   | PGAP1      |
| 6714   | ENSG00000197122 | 4961.47782 | 0.14716129  | 0.06104504 | 0.0146113  | 0.05644239 | SRC        |
| 168417 | ENSG00000197123 | 6.04430401 | -0.22293922 | 0.44048227 | 0.13984647 | 0.31709188 | ZNF679     |
| 91120  | ENSG00000197124 | 221.694227 | 0.00071111  | 0.15392241 | 0.99707574 | 0.99913206 | ZNF682     |
| 26493  | ENSG00000197125 | 0          | NA          | NA         | NA         | NA         | OR8B8      |
| 400720 | ENSG00000197128 | 230.257688 | -0.15110177 | 0.19247924 | 0.36304321 | 0.59281472 | ZNF772     |
| 113835 | ENSG00000197134 | 89.7711906 | -0.35127437 | 0.31011348 | 0.10763513 | 0.26314781 | ZNF257     |
| 399909 | ENSG00000197136 | 2303.7076  | 0.28629606  | 0.06802795 | 1.86E-05   | 0.00016751 | PCNX3      |
| 203102 | ENSG00000197140 | 25.8599949 | -0.28375934 | 0.43352038 | 0.14543853 | 0.32597939 | ADAM32     |
| 51703  | ENSG00000197142 | 0.80612149 | -0.00727628 | 0.38082098 | 0.89768298 | NA         | ACSL5      |
| 23507  | ENSG00000197147 | 1000.29155 | -0.50136929 | 0.10340365 | 4.83E-07   | 5.78E-06   | LRRC8B     |
| NA     | ENSG00000197149 | 7.27574921 | -0.03718276 | 0.35098642 | 0.79955832 | 0.90807929 |            |
| 11194  | ENSG00000197150 | 975.047591 | 0.0661081   | 0.10130164 | 0.49914318 | 0.71669126 | ABCB8      |
| 8356   | ENSG00000197153 | 2.86198723 | -0.09319768 | 0.39089866 | 0.29387064 | 0.52019927 | H3C12      |
| 27044  | ENSG00000197157 | 4929.87644 | -0.03037919 | 0.05241223 | 0.55880347 | 0.76349156 | SND1       |
| NA     | ENSG00000197161 | 0          | NA          | NA         | NA         | NA         | OR4C4P     |
| 146540 | ENSG00000197162 | 654.490539 | 0.1872325   | 0.11115166 | 0.0777937  | 0.2071028  | ZNF785     |
| 6799   | ENSG00000197165 | 0          | NA          | NA         | NA         | NA         | SULT1A2    |
| 341676 | ENSG00000197168 | 18.1734469 | 1.71117313  | 0.64921616 | 0.00044216 | 0.00289969 | NEK5       |
| 5718   | ENSG00000197170 | 1441.41913 | -0.15515204 | 0.08339204 | 0.05616579 | 0.16284223 | PSMD12     |



|           |                 |            |             |            |            |            |            |
|-----------|-----------------|------------|-------------|------------|------------|------------|------------|
| 101929006 | ENSG00000197171 | 0          | NA          | NA         | NA         | NA         |            |
| 4105      | ENSG00000197172 | 1042.39153 | 0.43741387  | 0.08329978 | 7.30E-08   | 9.78E-07   | MAGEA6     |
| 100129345 | ENSG00000197176 | 0          | NA          | NA         | NA         | NA         | LINC02291  |
| 84435     | ENSG00000197177 | 0.34624801 | -0.02356563 | 0.38536324 | 0.65270996 | NA         | ADGRA1     |
| 158960    | ENSG00000197180 | 23.2587319 | -0.07526297 | 0.30411356 | 0.69116641 | 0.85035049 |            |
| 55124     | ENSG00000197181 | 4.8365582  | 0.18989055  | 0.4261557  | 0.14923729 | 0.33189865 | PIWIL2     |
| 400931    | ENSG00000197182 | 163.668495 | -0.52871712 | 0.22413829 | 0.00566996 | 0.02588997 | MIRLET7BHG |
| 140688    | ENSG00000197183 | 1527.69138 | -0.02605702 | 0.08393712 | 0.74954938 | 0.88208433 | NOL4L      |
| NA        | ENSG00000197185 | 0          | NA          | NA         | NA         | NA         | SSXP1      |
| 375791    | ENSG00000197191 | 44.3664394 | 0.63926119  | 0.44627866 | 0.0229844  | 0.0814159  | CYSRT1     |
| 6583      | ENSG00000197208 | 5.17591352 | 0.04943108  | 0.36997343 | 0.66266934 | 0.83353574 | SLC22A4    |
| NA        | ENSG00000197210 | 5.96875521 | 3.9574274   | 1.7321715  | 0.00088832 | 0.00534395 |            |
| 342933    | ENSG00000197213 | 0.173733   | 0.01914545  | 0.38484597 | 0.78225479 | NA         | ZSCAN5B    |
| NA        | ENSG00000197214 | 0.15069912 | -0.01848503 | 0.38480575 | 0.84537521 | NA         | TCEA1P1    |
| 9583      | ENSG00000197217 | 1973.084   | 0.05221903  | 0.06913687 | 0.44307299 | 0.66802706 | ENTPD4     |
| 10438     | ENSG00000197223 | 299.578972 | -0.014502   | 0.13306772 | 0.90665272 | 0.95941063 | C1D        |
| 23061     | ENSG00000197226 | 2322.04984 | 0.0942743   | 0.07223162 | 0.18437429 | 0.38303517 | TBC1D9B    |
| 26740     | ENSG00000197233 | 0          | NA          | NA         | NA         | NA         | OR1J2      |
| 8363      | ENSG00000197238 | 45.6077213 | -0.00348571 | 0.38068474 | 0.93948196 | 0.97474024 | H4C11      |
| 155184    | ENSG00000197241 | 0          | NA          | NA         | NA         | NA         | SLC2A7     |
| 79927     | ENSG00000197245 | 21.2723428 | -0.32867539 | 0.42379746 | 0.13418601 | 0.30845214 | FAM110D    |
| 5265      | ENSG00000197249 | 0          | NA          | NA         | NA         | NA         | SERPINA1   |
| 401253    | ENSG00000197251 | 0.98055222 | 0.00600475  | 0.3793004  | 0.92649228 | NA         | LINC00336  |
| 64499     | ENSG00000197253 | 0          | NA          | NA         | NA         | NA         | TPSB2      |
| NA        | ENSG00000197254 | 0          | NA          | NA         | NA         | NA         |            |
| 25959     | ENSG00000197256 | 1696.02236 | -0.01948077 | 0.10791526 | 0.84898576 | 0.93137282 | KANK2      |
| NA        | ENSG00000197258 | 4.05024091 | -0.15409509 | 0.40744512 | 0.20525323 | 0.41224389 | EIF4BP6    |
| 135398    | ENSG00000197261 | 0.96944804 | 0.0519479   | 0.38613807 | 0.35679999 | NA         | C6orf141   |
| 2961      | ENSG00000197265 | 560.256188 | -0.01422945 | 0.10144186 | 0.88281591 | 0.94840089 | GTF2E2     |
| 246778    | ENSG00000197272 | 0.15069912 | -0.01848503 | 0.38480575 | 0.84537521 | NA         | IL27       |
| 2980      | ENSG00000197273 | 0          | NA          | NA         | NA         | NA         | GUCA2A     |
| 25788     | ENSG00000197275 | 281.325852 | -0.41033533 | 0.14685181 | 0.00249606 | 0.01295705 | RAD54B     |
| 7718      | ENSG00000197279 | 12.1106976 | 0.18213193  | 0.37549447 | 0.31365838 | 0.54159326 | ZNF165     |
| 8831      | ENSG00000197283 | 1126.4483  | -0.17086721 | 0.09206709 | 0.05527155 | 0.16081355 | SYNGAP1    |
| 100190938 | ENSG00000197291 | 116.025822 | -0.66782756 | 0.22509097 | 0.0006529  | 0.00406446 | RAMP2-AS1  |
| 128486    | ENSG00000197296 | 298.716911 | -0.19908156 | 0.1561647  | 0.16158574 | 0.34999912 | FITM2      |
| 641       | ENSG00000197299 | 768.599347 | -0.31738467 | 0.0908525  | 0.00031239 | 0.00212474 | BLM        |
| 100129940 | ENSG00000197301 | 0          | NA          | NA         | NA         | NA         | HMGA2-AS1  |

|        |                 |            |             |            |            |            |           |
|--------|-----------------|------------|-------------|------------|------------|------------|-----------|
| 124411 | ENSG00000197302 | 432.83212  | -0.2217969  | 0.14978183 | 0.10636518 | 0.26080345 | ZNF720    |
| 399717 | ENSG00000197308 | 458.071944 | 0.47860273  | 0.14254422 | 0.00031567 | 0.00214407 | GATA3-AS1 |
| 26497  | ENSG00000197309 | 0          | NA          | NA         | NA         | NA         | OR10D3    |
| 84301  | ENSG00000197312 | 1308.36146 | -0.06665671 | 0.07994193 | 0.39346568 | 0.62246703 | DDI2      |
| NA     | ENSG00000197320 | 0.173733   | 0.01914545  | 0.38484597 | 0.78225479 | NA         |           |
| 6840   | ENSG00000197321 | 594.648025 | 1.48890611  | 0.12629567 | 3.62E-33   | 2.28E-31   | SVIL      |
| 400591 | ENSG00000197322 | 0          | NA          | NA         | NA         | NA         | C17orf102 |
| 51592  | ENSG00000197323 | 1569.71625 | -0.19654371 | 0.08579676 | 0.01852182 | 0.06837978 | TRIM33    |
| 26020  | ENSG00000197324 | 1152.26715 | 0.24268944  | 0.07884038 | 0.00163153 | 0.00902162 | LRP10     |
| 57162  | ENSG00000197329 | 825.994168 | 0.12098396  | 0.10373668 | 0.22556179 | 0.43951541 | PELI1     |
| NA     | ENSG00000197332 | 81.1217835 | -0.18484148 | 0.26419126 | 0.34908329 | 0.57985703 |           |
| NA     | ENSG00000197334 | 0          | NA          | NA         | NA         | NA         |           |
| 79027  | ENSG00000197343 | 2573.62988 | -0.13666701 | 0.0746725  | 0.06177106 | 0.17534507 | ZNF655    |
| 219927 | ENSG00000197345 | 596.584415 | 0.00339608  | 0.10384875 | 0.97435153 | 0.9908321  | MRPL21    |
| 137797 | ENSG00000197353 | 0          | NA          | NA         | NA         | NA         | LYPD2     |
| 91373  | ENSG00000197355 | 486.264863 | -0.68687124 | 0.12005615 | 2.53E-09   | 4.11E-08   | UAP1L1    |
| NA     | ENSG00000197358 | 0          | NA          | NA         | NA         | NA         | BNIP3P1   |
| 148198 | ENSG00000197360 | 0.9480641  | -0.06797803 | 0.39193571 | 0.19890261 | NA         | ZNF98     |
| 283807 | ENSG00000197361 | 6.181953   | 0.1254054   | 0.39022368 | 0.30174486 | 0.52913363 | FBXL22    |
| 136051 | ENSG00000197362 | 451.736699 | -0.06639258 | 0.10936338 | 0.5257921  | 0.73808697 | ZNF786    |
| 340385 | ENSG00000197363 | 373.163577 | 0.03929999  | 0.14218264 | 0.76693459 | 0.89261979 | ZNF517    |
| NA     | ENSG00000197364 | 0          | NA          | NA         | NA         | NA         | S100A7L2  |
| 171392 | ENSG00000197372 | 277.812618 | 0.0411826   | 0.15398177 | 0.77134431 | 0.89515442 | ZNF675    |
| 6584   | ENSG00000197375 | 299.026848 | 0.02381252  | 0.15965664 | 0.87074913 | 0.94350971 | SLC22A5   |
| NA     | ENSG00000197376 | 0.173124   | -0.01911262 | 0.38486262 | 0.84537521 | NA         |           |
| 147906 | ENSG00000197380 | 799.482017 | -0.10312115 | 0.08939325 | 0.23486603 | 0.45174425 | DACT3     |
| 104    | ENSG00000197381 | 897.147649 | -1.2678691  | 0.12309852 | 6.30E-26   | 3.09E-24   | ADARB1    |
| 344787 | ENSG00000197385 | 3.28994562 | 0.05411987  | 0.37752635 | 0.5580412  | 0.76291851 | ZNF860    |
| 3064   | ENSG00000197386 | 2830.77042 | -0.10315261 | 0.08294433 | 0.2018715  | 0.40731522 | HTT       |
| 128372 | ENSG00000197403 | 0          | NA          | NA         | NA         | NA         | OR6N1     |
| 728    | ENSG00000197405 | 0.34109461 | 0.02362641  | 0.38535338 | 0.62411393 | NA         | C5AR1     |
| 1735   | ENSG00000197406 | 120.020797 | 4.61464382  | 0.34363317 | 8.61E-42   | 6.81E-40   | DIO3      |
| 1555   | ENSG00000197408 | 0          | NA          | NA         | NA         | NA         | CYP2B6    |
| 8351   | ENSG00000197409 | 1.02142397 | -0.00016943 | 0.38155016 | 0.99724909 | NA         | H3C4      |
| 54798  | ENSG00000197410 | 0          | NA          | NA         | NA         | NA         | DCHS2     |
| 79674  | ENSG00000197415 | 1.78145877 | 0.0057804   | 0.37797608 | 0.93629417 | NA         | VEPH1     |
| 646486 | ENSG00000197416 | 0          | NA          | NA         | NA         | NA         | FABP12    |
| 23729  | ENSG00000197417 | 511.491632 | -0.07791243 | 0.11102778 | 0.46272645 | 0.6855676  | SHPK      |

|        |                 |            |             |            |            |            |           |
|--------|-----------------|------------|-------------|------------|------------|------------|-----------|
| NA     | ENSG00000197421 | 11.2878594 | 5.35995768  | 1.43906756 | 9.11E-06   | 8.70E-05   | GGT3P     |
| 390038 | ENSG00000197428 | 0          | NA          | NA         | NA         | NA         | OR51D1    |
| 3652   | ENSG00000197429 | 261.140833 | -0.14713241 | 0.15492294 | 0.29800731 | 0.52474847 | IPP       |
| 93377  | ENSG00000197430 | 0          | NA          | NA         | NA         | NA         | OPALIN    |
| 441933 | ENSG00000197437 | 0          | NA          | NA         | NA         | NA         | OR13G1    |
| 4217   | ENSG00000197442 | 278.849992 | -0.81247014 | 0.15129085 | 1.40E-08   | 2.07E-07   | MAP3K5    |
| 55753  | ENSG00000197444 | 1360.94846 | -0.96714853 | 0.08861596 | 1.37E-28   | 7.49E-27   | OGDHL     |
| 1572   | ENSG00000197446 | 0.18922458 | 0.01954053  | 0.38488496 | 0.78225479 | NA         | CYP2F1    |
| 373156 | ENSG00000197448 | 922.048516 | 0.42154791  | 0.08539657 | 4.01E-07   | 4.86E-06   | GSTK1     |
| 3182   | ENSG00000197451 | 5452.59265 | -0.2180465  | 0.06053452 | 0.00026017 | 0.00180356 | HNRNPAB   |
| 81466  | ENSG00000197454 | 0.173733   | 0.01914545  | 0.38484597 | 0.78225479 | NA         | OR2L5     |
| 50861  | ENSG00000197457 | 3395.72038 | -0.80691959 | 0.06789635 | 2.67E-33   | 1.69E-31   | STMN3     |
| 5154   | ENSG00000197461 | 2.05258534 | -0.03692088 | 0.3759929  | 0.68397674 | NA         | PDGFA     |
| NA     | ENSG00000197462 | 0.173733   | 0.01914545  | 0.38484597 | 0.78225479 | NA         |           |
| 2996   | ENSG00000197465 | 1.88832085 | 0.11020293  | 0.39945066 | 0.18654202 | NA         | GYPE      |
| 1305   | ENSG00000197467 | 1.93619754 | 0.11337097  | 0.40415247 | 0.11947396 | NA         | COL13A1   |
| NA     | ENSG00000197468 | 0          | NA          | NA         | NA         | NA         | OR7E85BP  |
| 6693   | ENSG00000197471 | 2.40960067 | 0.09609494  | 0.39451071 | 0.21269724 | NA         | SPN       |
| 57116  | ENSG00000197472 | 275.897166 | -0.17339594 | 0.14206028 | 0.18779353 | 0.38811227 | ZNF695    |
| 1587   | ENSG00000197475 | 0          | NA          | NA         | NA         | NA         | ADAM3A    |
| NA     | ENSG00000197476 | 0          | NA          | NA         | NA         | NA         |           |
| 56125  | ENSG00000197479 | 39.5402771 | 0.89335352  | 0.51009964 | 0.00706719 | 0.03119928 | PCDHB11   |
| 89887  | ENSG00000197483 | 200.351265 | 0.03190233  | 0.16394617 | 0.83075089 | 0.92347029 | ZNF628    |
| 85569  | ENSG00000197487 | 0          | NA          | NA         | NA         | NA         | GALP      |
| 81031  | ENSG00000197496 | 118.857386 | 0.53823904  | 0.2499805  | 0.00903179 | 0.03811757 | SLC2A10   |
| 79788  | ENSG00000197497 | 82.011314  | -0.10948774 | 0.23702841 | 0.5580583  | 0.76291851 | ZNF665    |
| 84154  | ENSG00000197498 | 576.071889 | -0.18624537 | 0.12449912 | 0.11265205 | 0.27179207 | RPF2      |
| 144360 | ENSG00000197503 | 0          | NA          | NA         | NA         | NA         | LINC00477 |
| 64078  | ENSG00000197506 | 0          | NA          | NA         | NA         | NA         | SLC28A3   |
| 400823 | ENSG00000197520 | 0          | NA          | NA         | NA         | NA         | FAM177B   |
| 142678 | ENSG00000197530 | 921.948999 | 0.59856671  | 0.12476972 | 4.74E-07   | 5.67E-06   | MIB2      |
| 391112 | ENSG00000197532 | 0          | NA          | NA         | NA         | NA         | OR6Y1     |
| 4644   | ENSG00000197535 | 1238.31225 | -0.4576993  | 0.10534038 | 5.90E-06   | 5.86E-05   | MYO5A     |
| NA     | ENSG00000197536 | 37.9864218 | 0.6716406   | 0.48721065 | 0.02088266 | 0.07538507 | IRF1-AS1  |
| 3004   | ENSG00000197540 | 0.16735865 | 0.01897177  | 0.38482933 | 0.78225479 | NA         | GZMM      |
| 10533  | ENSG00000197548 | 329.838722 | -0.07019317 | 0.14548753 | 0.60217629 | 0.79251592 | ATG7      |
| 649179 | ENSG00000197549 | 0          | NA          | NA         | NA         | NA         | PRAMENP   |
| NA     | ENSG00000197550 | 2.66353136 | -0.08606225 | 0.38657027 | 0.36104782 | 0.59083575 |           |

|        |                 |            |             |            |            |            |           |
|--------|-----------------|------------|-------------|------------|------------|------------|-----------|
| 26037  | ENSG00000197555 | 3790.0146  | -0.33202245 | 0.06092802 | 3.25E-08   | 4.57E-07   | SIPA1L1   |
| 92104  | ENSG00000197557 | 217.513815 | 0.16782021  | 0.15745197 | 0.24252028 | 0.46074905 | TTC30A    |
| NA     | ENSG00000197558 | 110.904496 | 0.37817968  | 0.26872739 | 0.06810366 | 0.18779383 | SSPOP     |
| 1991   | ENSG00000197561 | 0          | NA          | NA         | NA         | NA         | ELANE     |
| 57799  | ENSG00000197562 | 505.64391  | -0.1218279  | 0.11423945 | 0.26288649 | 0.48497991 | RAB40C    |
| 23556  | ENSG00000197563 | 613.737238 | -0.01616729 | 0.11426099 | 0.88206072 | 0.9479489  | PIGN      |
| 1288   | ENSG00000197565 | 0.77735646 | -0.00320859 | 0.38207188 | 0.93334478 | NA         | COL4A6    |
| 57547  | ENSG00000197566 | 116.323563 | -0.32073988 | 0.20480315 | 0.06682611 | 0.185353   | ZNF624    |
| 11147  | ENSG00000197568 | 72.205216  | 0.1342231   | 0.24114689 | 0.48040415 | 0.70158112 | HHLA3     |
| NA     | ENSG00000197575 | 0          | NA          | NA         | NA         | NA         | RPS17P2   |
| 3201   | ENSG00000197576 | 0          | NA          | NA         | NA         | NA         | HOXA4     |
| 10210  | ENSG00000197579 | 503.168137 | -0.16713298 | 0.10814867 | 0.10623096 | 0.26052192 | TOPORS    |
| 83875  | ENSG00000197580 | 30.7120308 | 0.64943474  | 0.49543805 | 0.02465764 | 0.08618877 | BCO2      |
| NA     | ENSG00000197582 | 0.32248618 | -0.02325418 | 0.38531869 | 0.66960978 | NA         | GPX1P1    |
| 10242  | ENSG00000197584 | 2.41415358 | 0.1045837   | 0.39692663 | 0.2065756  | NA         | KCNMB2    |
| NA     | ENSG00000197585 | 0.5456005  | 0.02195801  | 0.38368909 | 0.65343716 | NA         |           |
| 955    | ENSG00000197586 | 967.100798 | 0.0723541   | 0.10212356 | 0.46300224 | 0.68582451 | ENTPD6    |
| 127343 | ENSG00000197587 | 0          | NA          | NA         | NA         | NA         | DMBX1     |
| 606293 | ENSG00000197588 | 0          | NA          | NA         | NA         | NA         | KLKP1     |
| 391189 | ENSG00000197591 | 0          | NA          | NA         | NA         | NA         | OR11L1    |
| 5167   | ENSG00000197594 | 0          | NA          | NA         | NA         | NA         | ENPP1     |
| 400165 | ENSG00000197595 | 0          | NA          | NA         | NA         | NA         | ATP11AUN  |
| 645811 | ENSG00000197599 | 6.90956304 | 0.03491695  | 0.36654866 | 0.76099078 | 0.88953379 | CCDC154   |
| 84188  | ENSG00000197601 | 1536.555   | 0.11323365  | 0.08066434 | 0.15115922 | 0.33504762 | FAR1      |
| 65250  | ENSG00000197603 | 641.073671 | -0.07190649 | 0.12262002 | 0.52957785 | 0.74127448 | CPLANE1   |
| 284371 | ENSG00000197608 | 291.875089 | 0.06825769  | 0.15318559 | 0.62795022 | 0.81117654 | ZNF841    |
| 8076   | ENSG00000197614 | 0          | NA          | NA         | NA         | NA         | MFAP5     |
| 4624   | ENSG00000197616 | 0          | NA          | NA         | NA         | NA         | MYH6      |
| NA     | ENSG00000197617 | 0.36293605 | 0.02389464  | 0.38539238 | 0.60997572 | NA         | VN1R5     |
| 284370 | ENSG00000197619 | 156.647051 | -0.04771493 | 0.20248503 | 0.78002075 | 0.89936692 | ZNF615    |
| 91966  | ENSG00000197620 | 152.502532 | -0.08979874 | 0.17562673 | 0.56428236 | 0.76680562 | EOLA1     |
| 56882  | ENSG00000197622 | 2563.3211  | -0.31767926 | 0.06831046 | 2.21E-06   | 2.36E-05   | CDC42SE1  |
| NA     | ENSG00000197627 | 0          | NA          | NA         | NA         | NA         | UBE2Q2P12 |
| 219972 | ENSG00000197629 | 0          | NA          | NA         | NA         | NA         | MPEG1     |
| 5055   | ENSG00000197632 | 0          | NA          | NA         | NA         | NA         | SERPINB2  |
| 1803   | ENSG00000197635 | 0.48453952 | 0.02955208  | 0.38589984 | 0.50215184 | NA         | DPP4      |
| 5275   | ENSG00000197641 | 0          | NA          | NA         | NA         | NA         | SERPINB13 |
| NA     | ENSG00000197644 | 0          | NA          | NA         | NA         | NA         |           |

|        |                 |            |             |            |            |            |           |
|--------|-----------------|------------|-------------|------------|------------|------------|-----------|
| 80380  | ENSG00000197646 | 0.66053232 | 0.02589183  | 0.38363366 | 0.5899582  | NA         | PDCD1LG2  |
| 163059 | ENSG00000197647 | 46.9820195 | -0.1492263  | 0.27307232 | 0.45039194 | 0.67378216 | ZNF433    |
| 196477 | ENSG00000197651 | 0          | NA          | NA         | NA         | NA         | CCER1     |
| 196385 | ENSG00000197653 | 31.4802143 | -0.03053573 | 0.30481328 | 0.86754711 | 0.94194356 | DNAH10    |
| 283238 | ENSG00000197658 | 0          | NA          | NA         | NA         | NA         | SLC22A24  |
| NA     | ENSG00000197665 | 0.15069912 | -0.01848503 | 0.38480575 | 0.84537521 | NA         |           |
| NA     | ENSG00000197670 | 5.18153268 | 0.06244514  | 0.36432679 | 0.64010825 | 0.81965584 |           |
| NA     | ENSG00000197674 | 0          | NA          | NA         | NA         | NA         | OR51C1P   |
| 388818 | ENSG00000197683 | 0          | NA          | NA         | NA         | NA         | KRTAP26-1 |
| NA     | ENSG00000197692 | 0.14931947 | -0.01844332 | 0.38480212 | 0.84537521 | NA         | CBX3P7    |
| 6709   | ENSG00000197694 | 9661.70154 | -0.26963825 | 0.0679409  | 5.31E-05   | 0.00043086 | SPTAN1    |
| 4828   | ENSG00000197696 | 222.678989 | 0.19046923  | 0.16086439 | 0.1919759  | 0.39408192 | NMB       |
| 55742  | ENSG00000197702 | 426.513646 | 0.07693961  | 0.11646549 | 0.49013852 | 0.70978228 | PARVA     |
| 57565  | ENSG00000197705 | 150.221193 | 1.59222645  | 0.21271804 | 5.56E-15   | 1.52E-13   | KLHL14    |
| 254783 | ENSG00000197706 | 0          | NA          | NA         | NA         | NA         | OR6C74    |
| 92689  | ENSG00000197712 | 158.310782 | 1.49230652  | 0.26738888 | 1.77E-09   | 2.94E-08   | FAM114A1  |
| 6120   | ENSG00000197713 | 793.900292 | -0.11553453 | 0.09969443 | 0.22932896 | 0.44488965 | RPE       |
| 10794  | ENSG00000197714 | 54.3411729 | 0.56988767  | 0.33568954 | 0.02022755 | 0.07355471 | ZNF460    |
| 1379   | ENSG00000197721 | 0          | NA          | NA         | NA         | NA         | CR1L      |
| 5253   | ENSG00000197724 | 1437.25357 | 0.08130736  | 0.08085021 | 0.30392283 | 0.53126299 | PHF2      |
| 6231   | ENSG00000197728 | 4250.44369 | 0.00641397  | 0.07119763 | 0.92812426 | 0.96985158 | RPS26     |
| 283579 | ENSG00000197734 | 0.16735865 | 0.01897177  | 0.38482933 | 0.78225479 | NA         | C14orf178 |
| NA     | ENSG00000197744 | 1.56482097 | -0.00544317 | 0.37739752 | 0.94054094 | NA         | PTMAP2    |
| 404552 | ENSG00000197745 | 0          | NA          | NA         | NA         | NA         | SCGB1D4   |
| 5660   | ENSG00000197746 | 9212.6643  | -0.16884805 | 0.04750647 | 0.00033726 | 0.0022744  | PSAP      |
| 6281   | ENSG00000197747 | 0.173733   | 0.01914545  | 0.38484597 | 0.78225479 | NA         | S100A10   |
| 80217  | ENSG00000197748 | 32.7317276 | -0.11486388 | 0.32071246 | 0.54263495 | 0.75070618 | CFAP43    |
| 222662 | ENSG00000197753 | 101.618311 | -0.24956232 | 0.22442859 | 0.17632324 | 0.37081334 | LHFPL5    |
| 6168   | ENSG00000197756 | 13517.2458 | -0.10791917 | 0.05796531 | 0.05868445 | 0.16825136 | RPL37A    |
| 3223   | ENSG00000197757 | 239.809744 | -0.51228849 | 0.15662954 | 0.00038328 | 0.00254917 | HOXC6     |
| 114112 | ENSG00000197763 | 185.273422 | 0.27878307  | 0.18437241 | 0.08538219 | 0.22172547 | TXNRD3    |
| 1675   | ENSG00000197766 | 8.26095679 | -0.01238383 | 0.34958164 | 0.93072139 | 0.97111825 | CFD       |
| 441476 | ENSG00000197768 | 2.422914   | 0.06671136  | 0.38173898 | 0.46613122 | NA         | STPG3     |
| 440738 | ENSG00000197769 | 0.60003487 | -0.03562272 | 0.38653687 | 0.4387237  | NA         | MAP1LC3C  |
| 79892  | ENSG00000197771 | 1577.40208 | -0.15539608 | 0.07958048 | 0.04561225 | 0.13860424 | MCMBP     |
| 197342 | ENSG00000197774 | 881.848574 | 0.98106644  | 0.14671609 | 3.01E-12   | 6.65E-11   | EME2      |
| 122773 | ENSG00000197776 | 49.9256516 | -0.18722119 | 0.3006367  | 0.35526156 | 0.58560895 | KLHDC1    |
| 347344 | ENSG00000197779 | 607.433046 | -0.07119995 | 0.15041008 | 0.60802789 | 0.79695264 | ZNF81     |

|           |                 |            |             |            |            |            |           |
|-----------|-----------------|------------|-------------|------------|------------|------------|-----------|
| 6884      | ENSG00000197780 | 286.425296 | -0.3718552  | 0.14179797 | 0.00471114 | 0.02211763 | TAF13     |
| 284323    | ENSG00000197782 | 482.934208 | -0.62636547 | 0.13807379 | 1.52E-06   | 1.66E-05   | ZNF780A   |
| 55210     | ENSG00000197785 | 1206.47886 | 0.09377074  | 0.08712116 | 0.2692763  | 0.49229778 | ATAD3A    |
| 219965    | ENSG00000197786 | 0          | NA          | NA         | NA         | NA         | OR5B17    |
| 119772    | ENSG00000197790 | 0          | NA          | NA         | NA         | NA         | OR52M1    |
| NA        | ENSG00000197794 | 0          | NA          | NA         | NA         | NA         | IGKV7-3   |
| 79607     | ENSG00000197798 | 318.873372 | 0.00985078  | 0.12767821 | 0.93576347 | 0.97325384 | FAM118B   |
| 92283     | ENSG00000197808 | 161.522447 | -0.29370479 | 0.23517789 | 0.12250244 | 0.28962737 | ZNF461    |
| NA        | ENSG00000197813 | 3.52794107 | 0.23358666  | 0.47921639 | 0.03878491 | 0.12260878 |           |
| NA        | ENSG00000197815 | 23.053928  | -0.21795546 | 0.34391883 | 0.2864886  | 0.51225526 |           |
| 100499483 | ENSG00000197816 | 68.4578716 | 0.48289101  | 0.30170052 | 0.03312957 | 0.10851572 | CCDC180   |
| 23315     | ENSG00000197818 | 444.343719 | 0.22087301  | 0.11743832 | 0.04772913 | 0.14360721 | SLC9A8    |
| 100506658 | ENSG00000197822 | 384.801861 | 0.5845177   | 0.14318431 | 1.33E-05   | 0.00012333 | OCLN      |
| 255119    | ENSG00000197826 | 0.31710024 | -0.00155351 | 0.38337104 | 0.99273608 | NA         | CFAP299   |
| 121504    | ENSG00000197837 | 24.555644  | 0.41199688  | 0.46667602 | 0.08455161 | 0.22028941 | H4-16     |
| 1553      | ENSG00000197838 | 0          | NA          | NA         | NA         | NA         | CYP2A13   |
| 339318    | ENSG00000197841 | 288.690337 | -0.14391274 | 0.13685976 | 0.25899531 | 0.48036523 | ZNF181    |
| NA        | ENSG00000197847 | 16.9931649 | 1.89879433  | 0.77354018 | 0.00049472 | 0.00319506 | SLC22A20P |
| 26494     | ENSG00000197849 | 0          | NA          | NA         | NA         | NA         | OR8G1     |
| 55924     | ENSG00000197852 | 410.718624 | 0.26851365  | 0.15079068 | 0.0521826  | 0.1539026  | INKA2     |
| 51710     | ENSG00000197857 | 134.359941 | 0.28417491  | 0.19965704 | 0.09820194 | 0.24587665 | ZNF44     |
| 8733      | ENSG00000197858 | 1998.94071 | 0.13272226  | 0.07140525 | 0.05850863 | 0.16796572 | GPAA1     |
| 9719      | ENSG00000197859 | 1452.87456 | 0.57548122  | 0.07754121 | 3.86E-14   | 9.84E-13   | ADAMTSL2  |
| 54557     | ENSG00000197860 | 353.177321 | -0.40360114 | 0.13338544 | 0.00124069 | 0.00710808 | SGTB      |
| 388536    | ENSG00000197863 | 141.969345 | -0.25325653 | 0.22696299 | 0.17222474 | 0.36478687 | ZNF790    |
| NA        | ENSG00000197866 | 0          | NA          | NA         | NA         | NA         | OR5M12P   |
| 5544      | ENSG00000197870 | 0          | NA          | NA         | NA         | NA         | PRB3      |
| 81553     | ENSG00000197872 | 99.9289679 | 0.71776249  | 0.29866622 | 0.0028332  | 0.01442779 | CYRIA     |
| 4641      | ENSG00000197879 | 1505.2315  | 0.82280562  | 0.10877811 | 6.99E-15   | 1.89E-13   | MYO1C     |
| 259283    | ENSG00000197880 | 0          | NA          | NA         | NA         | NA         | MDS2      |
| NA        | ENSG00000197882 | 0.16735865 | 0.01897177  | 0.38482933 | 0.78225479 | NA         | OR7E13P   |
| 28512     | ENSG00000197885 | 477.904934 | -0.43719135 | 0.13879978 | 0.00073584 | 0.00451981 | NKIRAS1   |
| 219958    | ENSG00000197887 | 0          | NA          | NA         | NA         | NA         | OR1S2     |
| 7367      | ENSG00000197888 | 0          | NA          | NA         | NA         | NA         | UGT2B17   |
| 644890    | ENSG00000197889 | 9.01466693 | 0.04725023  | 0.35436255 | 0.74585403 | 0.8802926  | MEIG1     |
| 116085    | ENSG00000197891 | 0.51520883 | 0.03111672  | 0.38605293 | 0.47788656 | NA         | SLC22A12  |
| 23303     | ENSG00000197892 | 911.497709 | 0.13197447  | 0.10434863 | 0.18862512 | 0.38925758 | KIF13B    |
| 4892      | ENSG00000197893 | 0.18922458 | 0.01954053  | 0.38488496 | 0.78225479 | NA         | NRAP      |

|           |                 |            |              |             |            |            |           |
|-----------|-----------------|------------|--------------|-------------|------------|------------|-----------|
| 128       | ENSG00000197894 | 2418.84874 | 0.15931906   | 0.09676339  | 0.08860668 | 0.2278031  | ADH5      |
| 9356      | ENSG00000197901 | 0          | NA           | NA          | NA         | NA         | SLC22A6   |
| 85236     | ENSG00000197903 | 175.607414 | -0.52248475  | 0.17917326  | 0.00120077 | 0.0069334  | H2BC12    |
| 7004      | ENSG00000197905 | 325.803088 | -0.68290658  | 0.13987847  | 2.48E-07   | 3.11E-06   | TEAD4     |
| 6687      | ENSG00000197912 | 2334.57712 | 0.11467407   | 0.07986131  | 0.1421905  | 0.32093965 | SPG7      |
| 388697    | ENSG00000197915 | 2.40279159 | -0.10350488  | 0.39420512  | 0.25412705 | NA         | HRNR      |
| 3439      | ENSG00000197919 | 0          | NA           | NA          | NA         | NA         | IFNA1     |
| 388585    | ENSG00000197921 | 0.14931947 | -0.01844332  | 0.38480212  | 0.84537521 | NA         | HES5      |
| NA        | ENSG00000197927 | 1.57908417 | -0.0019652   | 0.37827053  | 0.97640547 | NA         | NBEAP2    |
| 342926    | ENSG00000197928 | 395.166623 | -0.33170314  | 0.12892598  | 0.0061457  | 0.02766124 | ZNF677    |
| 30001     | ENSG00000197930 | 1448.7654  | 0.78589174   | 0.08464808  | 3.26E-21   | 1.28E-19   | ERO1A     |
| 55552     | ENSG00000197933 | 103.24668  | -0.24422207  | 0.25568702  | 0.21589598 | 0.42667359 | ZNF823    |
| 100996571 | ENSG00000197934 | 3.51221084 | -0.11707323  | 0.39525633  | 0.247172   | 0.46606087 | CYYR1-AS1 |
| 282890    | ENSG00000197935 | 0.44956412 | -0.02729138  | 0.38571238  | 0.56205533 | NA         | ZNF311    |
| 84671     | ENSG00000197937 | 314.4331   | 0.23975209   | 0.16378419  | 0.10499462 | 0.25832009 | ZNF347    |
| 79310     | ENSG00000197938 | 0          | NA           | NA          | NA         | NA         | OR5H2     |
| 5336      | ENSG00000197943 | 0          | NA           | NA          | NA         | NA         | PLCG2     |
| 89848     | ENSG00000197948 | 505.65873  | 0.62775779   | 0.11526413  | 1.44E-08   | 2.13E-07   | FCHSD1    |
| 58491     | ENSG00000197951 | 559.27917  | 0.14094807   | 0.10586453  | 0.16575256 | 0.35597865 | ZNF71     |
| 344752    | ENSG00000197953 | 0          | NA           | NA          | NA         | NA         | AADAACL2  |
| 6277      | ENSG00000197956 | 531.020088 | 0.80326142   | 0.111108407 | 9.02E-14   | 2.22E-12   | S100A6    |
| 6136      | ENSG00000197958 | 13253.3119 | -0.35966398  | 0.0540761   | 2.00E-11   | 4.12E-10   | RPL12     |
| 26052     | ENSG00000197959 | 139.30292  | -1.21908669  | 0.22132189  | 3.40E-09   | 5.43E-08   | DNM3      |
| 7675      | ENSG00000197961 | 1108.61813 | 0.14812225   | 0.11360604  | 0.17191331 | 0.36451957 | ZNF121    |
| 9019      | ENSG00000197965 | 2795.07067 | -0.05487424  | 0.07136474  | 0.43340385 | 0.65865433 | MPZL1     |
| 23230     | ENSG00000197969 | 1728.11678 | -0.111108345 | 0.10657747  | 0.2768325  | 0.50121841 | VPS13A    |
| 4155      | ENSG00000197971 | 1.18477697 | 0.01659746   | 0.37998305  | 0.7952965  | NA         | MBP       |
| 8227      | ENSG00000197976 | 1744.49181 | 0.42559266   | 0.07059324  | 7.98E-10   | 1.39E-08   | AKAP17A   |
| 54898     | ENSG00000197977 | 354.683714 | -0.42583224  | 0.14367762  | 0.00140093 | 0.00791414 | ELOVL2    |
| 440295    | ENSG00000197978 | 1199.94044 | 0.38510562   | 0.08687245  | 5.12E-06   | 5.12E-05   | GOLGA6L9  |
| 389170    | ENSG00000197980 | 7.7966061  | 0.18304268   | 0.40367865  | 0.2340562  | 0.45093611 | LEKR1     |
| 127687    | ENSG00000197982 | 852.070992 | 0.11328571   | 0.08838198  | 0.18817996 | 0.38858143 | C1orf122  |
| NA        | ENSG00000197984 | 0          | NA           | NA          | NA         | NA         | OR51A8P   |
| 85028     | ENSG00000197989 | 390.881949 | -0.0840445   | 0.12788055  | 0.48228668 | 0.70272483 | SNHG12    |
| NA        | ENSG00000197990 | 0          | NA           | NA          | NA         | NA         | ZNF734P   |
| NA        | ENSG00000197991 | 0          | NA           | NA          | NA         | NA         |           |
| 283420    | ENSG00000197992 | 0          | NA           | NA          | NA         | NA         | CLEC9A    |
| 3792      | ENSG00000197993 | 8.72398493 | 0.37162457   | 0.59911942  | 0.03987261 | 0.12512313 | KEL       |

|        |                 |            |             |            |            |            |           |
|--------|-----------------|------------|-------------|------------|------------|------------|-----------|
| 55035  | ENSG00000198000 | 843.058288 | -0.17482993 | 0.1245004  | 0.13672993 | 0.31191797 | NOL8      |
| 51135  | ENSG00000198001 | 203.242689 | 0.0656126   | 0.17079965 | 0.66917919 | 0.83726414 | IRAK4     |
| 115948 | ENSG00000198003 | 43.2869664 | 0.08014055  | 0.27665954 | 0.68230886 | 0.8449992  | ODAD3     |
| 9228   | ENSG00000198010 | 7.18519105 | -0.22499853 | 0.44765485 | 0.11270084 | 0.27181918 | DLGAP2    |
| 28977  | ENSG00000198015 | 1542.98232 | 0.10349084  | 0.08326467 | 0.20315575 | 0.40924055 | MRPL42    |
| 57089  | ENSG00000198018 | 534.181383 | 0.08868026  | 0.11624186 | 0.42396113 | 0.64969559 | ENTPD7    |
| NA     | ENSG00000198019 | 0.33471731 | 0.02354391  | 0.38534154 | 0.62842204 | NA         | FCGR1B    |
| 30014  | ENSG00000198021 | 0          | NA          | NA         | NA         | NA         | SPANXA1   |
| NA     | ENSG00000198022 | 0          | NA          | NA         | NA         | NA         | SAGE2P    |
| 63925  | ENSG00000198026 | 624.545987 | 0.06545583  | 0.10535211 | 0.51864955 | 0.73233273 | ZNF335    |
| 147741 | ENSG00000198028 | 3.72966254 | -0.29129736 | 0.55510892 | 0.0092831  | 0.03900397 | ZNF560    |
| 7278   | ENSG00000198033 | 0.14931947 | -0.01844332 | 0.38480212 | 0.84537521 | NA         | TUBA3C    |
| 6191   | ENSG00000198034 | 24610.8826 | -0.1354961  | 0.0499134  | 0.00610459 | 0.02751988 | RPS4X     |
| 10793  | ENSG00000198039 | 416.295424 | -0.25478592 | 0.12457198 | 0.02999679 | 0.10030952 | ZNF273    |
| 7637   | ENSG00000198040 | 1733.96685 | 0.08277134  | 0.08841377 | 0.33623085 | 0.56617316 | ZNF84     |
| 84549  | ENSG00000198042 | 757.821249 | -0.11404267 | 0.11630909 | 0.30212149 | 0.52960685 | MAK16     |
| 63934  | ENSG00000198046 | 300.76475  | -0.05124205 | 0.16828609 | 0.73381297 | 0.87327664 | ZNF667    |
| 553    | ENSG00000198049 | 0.50207596 | 0.02562368  | 0.38565771 | 0.52549886 | NA         | AVPR1B    |
| 140885 | ENSG00000198053 | 86.5485941 | 0.05545036  | 0.21299579 | 0.7547103  | 0.88583526 | SIRPA     |
| 84677  | ENSG00000198054 | 0          | NA          | NA         | NA         | NA         | DSCR8     |
| 2870   | ENSG00000198055 | 1292.30543 | -0.33214605 | 0.07743124 | 1.13E-05   | 0.0001061  | GRK6      |
| 5557   | ENSG00000198056 | 663.928004 | -0.36748261 | 0.09674386 | 8.33E-05   | 0.000646   | PRIM1     |
| 54708  | ENSG00000198060 | 1044.83291 | -0.35408435 | 0.10094898 | 0.00026571 | 0.0018362  | MARCHF5   |
| 23784  | ENSG00000198062 | 19.9494421 | 0.01739909  | 0.30995005 | 0.92661059 | 0.96932621 | POTEH     |
| 613037 | ENSG00000198064 | 94.7066051 | 0.52708638  | 0.35987288 | 0.03348344 | 0.10951287 | NPIPB13   |
| 57016  | ENSG00000198074 | 0          | NA          | NA         | NA         | NA         | AKR1B10   |
| 27233  | ENSG00000198075 | 1037.34853 | 0.60933669  | 0.08841695 | 1.65E-12   | 3.71E-11   | SULT1C4   |
| 1549   | ENSG00000198077 | 0.37859049 | -0.02359453 | 0.38537326 | 0.6731922  | NA         | CYP2A7    |
| 7541   | ENSG00000198081 | 287.507088 | -0.16402098 | 0.1480713  | 0.22841269 | 0.44363268 | ZBTB14    |
| 81870  | ENSG00000198083 | 0          | NA          | NA         | NA         | NA         | KRTAP9-9  |
| 23607  | ENSG00000198087 | 345.096189 | 0.2903903   | 0.13954573 | 0.02506718 | 0.08732798 | CD2AP     |
| 54830  | ENSG00000198088 | 103.023071 | 0.34663071  | 0.22691639 | 0.06533813 | 0.18239884 | NUP62CL   |
| 9814   | ENSG00000198089 | 675.357182 | 0.1845609   | 0.11091967 | 0.08158374 | 0.21430178 | SF11      |
| 81871  | ENSG00000198090 | 0          | NA          | NA         | NA         | NA         | KRTAP4-6  |
| 389208 | ENSG00000198092 | 0          | NA          | NA         | NA         | NA         | TMPRSS11F |
| 65251  | ENSG00000198093 | 220.291904 | -0.05306868 | 0.16935817 | 0.72558241 | 0.86866734 | ZNF649    |
| 127    | ENSG00000198099 | 0.18922458 | 0.01954053  | 0.38488496 | 0.78225479 | NA         | ADH4      |
| 254879 | ENSG00000198104 | 0          | NA          | NA         | NA         | NA         | OR2T6     |



|        |                 |            |             |            |            |            |          |
|--------|-----------------|------------|-------------|------------|------------|------------|----------|
| 57209  | ENSG00000198105 | 620.669499 | -0.13873028 | 0.14542977 | 0.29934093 | 0.52631373 | ZNF248   |
| NA     | ENSG00000198106 | 26.6206484 | -0.24132744 | 0.34368085 | 0.24873349 | 0.46802661 |          |
| 337876 | ENSG00000198108 | 0          | NA          | NA         | NA         | NA         | CHSY3    |
| 54863  | ENSG00000198113 | 17.745418  | -0.05959338 | 0.32059001 | 0.74081553 | 0.87763281 | TOR4A    |
| 1902   | ENSG00000198121 | 68.706676  | 1.09672265  | 0.36314852 | 0.00023218 | 0.00162314 | LPAR1    |
| 4151   | ENSG00000198125 | 3.07656568 | -0.04292809 | 0.37214507 | 0.68673128 | 0.84769738 | MB       |
| 391192 | ENSG00000198128 | 0          | NA          | NA         | NA         | NA         | OR2L3    |
| 245910 | ENSG00000198129 | 0          | NA          | NA         | NA         | NA         | DEFB107B |
| 503614 | ENSG00000198129 | 0          | NA          | NA         | NA         | NA         | DEFB107B |
| 26275  | ENSG00000198130 | 464.049455 | -0.03585776 | 0.1088205  | 0.73032898 | 0.87106623 | HIBCH    |
| 27300  | ENSG00000198131 | 12.7350944 | -0.18792661 | 0.37404388 | 0.30429618 | 0.53154043 | ZNF544   |
| 161145 | ENSG00000198133 | 64.5508939 | 0.15495602  | 0.25869707 | 0.42901689 | 0.65464506 | TMEM229B |
| NA     | ENSG00000198134 | 0          | NA          | NA         | NA         | NA         | PTMAP9   |
| 65124  | ENSG00000198142 | 299.581826 | -0.06465402 | 0.1382088  | 0.61577148 | 0.80301072 | SOWAHC   |
| 54989  | ENSG00000198146 | 1311.11966 | -0.54200065 | 0.09603517 | 5.83E-09   | 9.05E-08   | ZNF770   |
| NA     | ENSG00000198153 | 23.8830399 | -0.46116156 | 0.45480111 | 0.06733667 | 0.18634601 | ZNF849P  |
| 642280 | ENSG00000198155 | 111.191622 | -0.31103636 | 0.23333328 | 0.10170346 | 0.25249251 | ZNF876P  |
| 728741 | ENSG00000198156 | 9.9070415  | -0.00433003 | 0.35921754 | 0.97043429 | 0.98888633 | NPIP6    |
| 79366  | ENSG00000198157 | 51.545056  | 2.76058648  | 0.36603991 | 2.80E-15   | 7.86E-14   | HMG5     |
| 57708  | ENSG00000198160 | 698.683819 | 0.02666763  | 0.10071872 | 0.78476489 | 0.90204747 | MIER1    |
| 10905  | ENSG00000198162 | 1314.52378 | -0.06763047 | 0.08693517 | 0.42371608 | 0.64959604 | MAN1A2   |
| 258010 | ENSG00000198168 | 521.025529 | -0.16982701 | 0.11703579 | 0.12603236 | 0.29528602 | SVIP     |
| 90987  | ENSG00000198169 | 489.424921 | 0.26605683  | 0.11838891 | 0.01785906 | 0.06652719 | ZNF251   |
| 65992  | ENSG00000198171 | 662.66659  | 0.00335731  | 0.10827421 | 0.97572746 | 0.99159826 | DDR6K1   |
| 442444 | ENSG00000198173 | 0          | NA          | NA         | NA         | NA         | FAM47C   |
| 7027   | ENSG00000198176 | 1931.42738 | -0.31416043 | 0.06593546 | 1.27E-06   | 1.41E-05   | TFDP1    |
| 170482 | ENSG00000198178 | 0          | NA          | NA         | NA         | NA         | CLEC4C   |
| 84775  | ENSG00000198182 | 335.993007 | -0.01065633 | 0.13429385 | 0.9316831  | 0.9715756  | ZNF607   |
| 51297  | ENSG00000198183 | 0          | NA          | NA         | NA         | NA         | BPIFA1   |
| 55713  | ENSG00000198185 | 662.208164 | -0.38703649 | 0.11428006 | 0.00037432 | 0.00249543 | ZNF334   |
| 51170  | ENSG00000198189 | 805.15581  | -0.08119193 | 0.09258968 | 0.3655235  | 0.59471759 | HSD17B11 |
| 23334  | ENSG00000198198 | 1654.24756 | 0.20896962  | 0.08367259 | 0.01030753 | 0.04244527 | SZT2     |
| 6819   | ENSG00000198203 | 0.66943461 | 0.03059546  | 0.38616409 | 0.42784935 | NA         | SULT1C2  |
| 7789   | ENSG00000198205 | 130.832255 | 0.21295082  | 0.19812387 | 0.21109792 | 0.42012066 | ZXDA     |
| 83694  | ENSG00000198208 | 195.693195 | -1.20577111 | 0.23679594 | 3.31E-08   | 4.65E-07   | RPS6KL1  |
| NA     | ENSG00000198211 | 0          | NA          | NA         | NA         | NA         |          |
| 777    | ENSG00000198216 | 0.32360239 | 0.00418348  | 0.38342001 | 0.93761449 | NA         | CACNA1E  |
| NA     | ENSG00000198217 | 0          | NA          | NA         | NA         | NA         | OR51H2P  |

|           |                 |            |             |            |            |            |          |
|-----------|-----------------|------------|-------------|------------|------------|------------|----------|
| 54870     | ENSG00000198218 | 1997.16814 | 0.04864874  | 0.09857527 | 0.61074655 | 0.79891947 | QRICH1   |
| NA        | ENSG00000198221 | 33.8950485 | 0.33739955  | 0.41059653 | 0.13064872 | 0.30288275 | AFDN-DT  |
| 1438      | ENSG00000198223 | 0          | NA          | NA         | NA         | NA         | CSF2RA   |
| NA        | ENSG00000198225 | 0.49663606 | -0.01036196 | 0.3828476  | 0.8263336  | NA         | FKBP1C   |
| 11325     | ENSG00000198231 | 4978.72775 | -0.02791363 | 0.07046209 | 0.68558718 | 0.8470175  | DDX42    |
| NA        | ENSG00000198237 | 208.932401 | 0.25825855  | 0.18792834 | 0.11613056 | 0.27839903 | GUSBP13  |
| 6147      | ENSG00000198242 | 6013.89043 | -0.13409497 | 0.06119267 | 0.02385859 | 0.08389835 | RPL23A   |
| 55315     | ENSG00000198246 | 220.277784 | -0.19078079 | 0.15919255 | 0.18658871 | 0.38635899 | SLC29A3  |
| NA        | ENSG00000198251 | 0          | NA          | NA         | NA         | NA         | CYP2A7P2 |
| 6815      | ENSG00000198252 | 293.6808   | 0.24521817  | 0.13563704 | 0.0526168  | 0.154792   | STYX     |
| 59286     | ENSG00000198258 | 1498.39515 | 0.07283462  | 0.0718385  | 0.30218661 | 0.52967421 | UBL5     |
| NA        | ENSG00000198261 | 0          | NA          | NA         | NA         | NA         | OR5BB1P  |
| 9931      | ENSG00000198265 | 2666.11023 | -0.27231783 | 0.07656516 | 0.00027914 | 0.001915   | HELZ     |
| 89894     | ENSG00000198270 | 171.607413 | 0.01696985  | 0.18802183 | 0.91714786 | 0.96490686 | TMEM116  |
| 85289     | ENSG00000198271 | 0          | NA          | NA         | NA         | NA         | KRTAP4-5 |
| 54963     | ENSG00000198276 | 1051.12198 | 0.0504869   | 0.0905932  | 0.56702853 | 0.76856463 | UCKL1    |
| NA        | ENSG00000198277 | 0          | NA          | NA         | NA         | NA         |          |
| 219968    | ENSG00000198283 | 0.18922458 | 0.01954053  | 0.38488496 | 0.78225479 | NA         | OR5B21   |
| 255330    | ENSG00000198284 | 0          | NA          | NA         | NA         | NA         | NUP210P1 |
| 84433     | ENSG00000198286 | 42.0597646 | -0.39439646 | 0.40679024 | 0.09415193 | 0.23832283 | CARD11   |
| 220992    | ENSG00000198298 | 151.212527 | -0.25458859 | 0.19554681 | 0.1316562  | 0.30440031 | ZNF485   |
| 5178      | ENSG00000198300 | 624.752108 | -0.56200741 | 0.11773042 | 5.86E-07   | 6.92E-06   | PEG3     |
| 55153     | ENSG00000198301 | 1011.43093 | -0.00366763 | 0.09433461 | 0.96717516 | 0.98759962 | SDAD1    |
| NA        | ENSG00000198312 | 0.14931947 | -0.01844332 | 0.38480212 | 0.84537521 | NA         | BMS1P9   |
| 7745      | ENSG00000198315 | 2203.27703 | 0.03444118  | 0.0700558  | 0.6176623  | 0.80429156 | ZKSCAN8  |
| 144717    | ENSG00000198324 | 459.702047 | -0.01011115 | 0.14071549 | 0.93774064 | 0.97366414 | PHETA1   |
| 100288797 | ENSG00000198326 | 0.18922458 | 0.01954053  | 0.38488496 | 0.78225479 | NA         | TMEM239  |
| 219844    | ENSG00000198331 | 101.417896 | -0.1781836  | 0.20704166 | 0.30801698 | 0.53554973 | HYLS1    |
| 4635      | ENSG00000198336 | 0.61294449 | -0.03619595 | 0.38660045 | 0.43128479 | NA         | MYL4     |
| 79973     | ENSG00000198342 | 23.8896358 | -0.33603911 | 0.43669672 | 0.1220294  | 0.28884077 | ZNF442   |
| 126017    | ENSG00000198346 | 177.671882 | -0.02500685 | 0.17615352 | 0.87238412 | 0.94419841 | ZNF813   |
| 3221      | ENSG00000198353 | 540.639701 | -0.35415667 | 0.11439526 | 0.00113055 | 0.00656041 | HOXC4    |
| 340578    | ENSG00000198354 | 0.14931947 | -0.01844332 | 0.38480212 | 0.84537521 | NA         | DCAF12L2 |
| 415116    | ENSG00000198355 | 1255.32322 | -0.64387626 | 0.0899442  | 2.22E-13   | 5.26E-12   | PIM3     |
| 439       | ENSG00000198356 | 1050.18104 | 0.32011829  | 0.10159503 | 0.00105362 | 0.00617176 | GET3     |
| 101928372 | ENSG00000198358 | 0          | NA          | NA         | NA         | NA         |          |
| 444       | ENSG00000198363 | 1043.11008 | -0.0922503  | 0.08917565 | 0.28691794 | 0.51278731 | ASPH     |
| NA        | ENSG00000198367 | 0          | NA          | NA         | NA         | NA         | OR7A11P  |

|           |                 |            |             |            |            |            |           |
|-----------|-----------------|------------|-------------|------------|------------|------------|-----------|
| 200734    | ENSG00000198369 | 1693.82808 | -0.12326254 | 0.06893787 | 0.06871478 | 0.18899959 | SPRED2    |
| 11060     | ENSG00000198373 | 752.05824  | -0.39852333 | 0.0961389  | 1.78E-05   | 0.00016106 | WWP2      |
| 2673      | ENSG00000198380 | 713.420784 | -0.38417313 | 0.12103484 | 0.00079617 | 0.00485434 | GFPT1     |
| 7405      | ENSG00000198382 | 398.564253 | -0.32508591 | 0.13366097 | 0.0092337  | 0.03882105 | UVRAG     |
| 140258    | ENSG00000198390 | 0          | NA          | NA         | NA         | NA         | KRTAP13-1 |
| 7574      | ENSG00000198393 | 435.29259  | 0.23462928  | 0.16136448 | 0.10845671 | 0.26431057 | ZNF26     |
| 131920    | ENSG00000198398 | 0          | NA          | NA         | NA         | NA         | TMEM207   |
| 50618     | ENSG00000198399 | 751.482202 | 0.03225326  | 0.09194238 | 0.71852928 | 0.86497305 | ITSN2     |
| 4914      | ENSG00000198400 | 315.261049 | 0.01509602  | 0.14622378 | 0.91223623 | 0.96260718 | NTRK1     |
| NA        | ENSG00000198406 | 164.382057 | 0.32394917  | 0.25263337 | 0.10506744 | 0.25840943 | BZW1P2    |
| 10724     | ENSG00000198408 | 3035.00274 | -0.04585223 | 0.0729367  | 0.52320596 | 0.73618679 | OGA       |
| NA        | ENSG00000198414 | 0.16735865 | 0.01897177  | 0.38482933 | 0.78225479 | NA         | TATDN2P1  |
| NA        | ENSG00000198416 | 91.5710988 | -0.25316377 | 0.23098501 | 0.17769314 | 0.37286428 | ZNF658B   |
| 4494      | ENSG00000198417 | 12.8421094 | 0.23727538  | 0.41022801 | 0.20227179 | 0.4077911  | MT1F      |
| 9747      | ENSG00000198420 | 5835.12369 | -0.08961587 | 0.06175639 | 0.14096257 | 0.31900278 | TCAF1     |
| 7620      | ENSG00000198429 | 158.079043 | -0.15642738 | 0.17564266 | 0.31552547 | 0.54335781 | ZNF69     |
| 7296      | ENSG00000198431 | 3283.96486 | 0.2046819   | 0.07071154 | 0.00320678 | 0.01600127 | TXNRD1    |
| 441478    | ENSG00000198435 | 349.898121 | -0.05669339 | 0.1342288  | 0.65167818 | 0.82602754 | NRARP     |
| 147949    | ENSG00000198440 | 99.0274618 | 0.06034964  | 0.20269455 | 0.72713841 | 0.86953012 | ZNF583    |
| 85285     | ENSG00000198443 | 0          | NA          | NA         | NA         | NA         | KRTAP4-1  |
| 150160    | ENSG00000198445 | 0          | NA          | NA         | NA         | NA         | CCT8L2    |
| NA        | ENSG00000198452 | 0          | NA          | NA         | NA         | NA         | OR14L1P   |
| 374900    | ENSG00000198453 | 312.124317 | -0.09155523 | 0.14515934 | 0.49408138 | 0.71286267 | ZNF568    |
| NA        | ENSG00000198454 | 0.16735865 | 0.01897177  | 0.38482933 | 0.78225479 | NA         | LINC02692 |
| 158586    | ENSG00000198455 | 336.61456  | 0.07080263  | 0.13368063 | 0.57152685 | 0.77168182 | ZXDB      |
| 147657    | ENSG00000198464 | 467.964414 | 0.18706864  | 0.13853908 | 0.14722493 | 0.32878688 | ZNF480    |
| 84914     | ENSG00000198466 | 911.900913 | 0.0128667   | 0.09675625 | 0.89150364 | 0.95288397 | ZNF587    |
| 7169      | ENSG00000198467 | 165.877597 | 0.71664637  | 0.22054558 | 0.00023107 | 0.00161651 | TPM2      |
| 642946    | ENSG00000198468 | 114.625787 | -0.23550874 | 0.21009114 | 0.18325032 | 0.38145907 | FLVCR1-DT |
| 344892    | ENSG00000198471 | 0          | NA          | NA         | NA         | NA         | RTP2      |
| 83699     | ENSG00000198478 | 859.610262 | -0.90338898 | 0.10826404 | 1.12E-17   | 3.63E-16   | SH3BGRL2  |
| 388558    | ENSG00000198482 | 234.093874 | -0.10790757 | 0.15985352 | 0.45935775 | 0.68256874 | ZNF808    |
| 148741    | ENSG00000198483 | 0          | NA          | NA         | NA         | NA         | ANKRD35   |
| 192134    | ENSG00000198488 | 0.173124   | -0.01911262 | 0.38486262 | 0.84537521 | NA         | B3GNT6    |
| 101929106 | ENSG00000198491 | 0          | NA          | NA         | NA         | NA         |           |
| 51441     | ENSG00000198492 | 2092.46723 | -0.02939835 | 0.07967756 | 0.70537789 | 0.85803894 | YTHDF2    |
| 10230     | ENSG00000198496 | 60.5020031 | 0.19508587  | 0.2547942  | 0.32039236 | 0.54819611 | NBR2      |
| 55319     | ENSG00000198498 | 420.941921 | 0.12218688  | 0.11505538 | 0.26560782 | 0.48795885 | TMA16     |

|        |                 |            |             |            |            |            |           |
|--------|-----------------|------------|-------------|------------|------------|------------|-----------|
| 3127   | ENSG00000198502 | 0          | NA          | NA         | NA         | NA         | HLA-DRB5  |
| 51062  | ENSG00000198513 | 399.974539 | -0.57935217 | 0.12629539 | 1.39E-06   | 1.54E-05   | ATL1      |
| 1259   | ENSG00000198515 | 1.3093995  | -0.01594918 | 0.37938199 | 0.81069756 | NA         | CNGA1     |
| 7975   | ENSG00000198517 | 372.928653 | -0.58239517 | 0.1946797  | 0.00076357 | 0.00466845 | MAFK      |
| 339541 | ENSG00000198520 | 28.8736237 | 0.1623618   | 0.32053111 | 0.41343043 | 0.64066701 | ARMH1     |
| 7594   | ENSG00000198521 | 884.977049 | -0.40530286 | 0.0901914  | 3.67E-06   | 3.77E-05   | ZNF43     |
| 11321  | ENSG00000198522 | 1049.08286 | 0.01461195  | 0.0817732  | 0.85469762 | 0.93485893 | GPN1      |
| 5350   | ENSG00000198523 | 0.173733   | 0.01914545  | 0.38484597 | 0.78225479 | NA         | PLN       |
| NA     | ENSG00000198526 | 0          | NA          | NA         | NA         | NA         | PABPC1P2  |
| 145741 | ENSG00000198535 | 1.71937656 | -0.06004075 | 0.38610862 | 0.36968488 | NA         | C2CD4A    |
| 7576   | ENSG00000198538 | 306.370688 | -0.11780645 | 0.13809501 | 0.35929375 | 0.58949503 | ZNF28     |
| 9358   | ENSG00000198542 | 0          | NA          | NA         | NA         | NA         | ITGBL1    |
| 118472 | ENSG00000198546 | 519.116298 | 0.04581735  | 0.10677278 | 0.65571037 | 0.82872301 | ZNF511    |
| 284805 | ENSG00000198547 | 0.16735865 | 0.01897177  | 0.38482933 | 0.78225479 | NA         | C20orf203 |
| 199692 | ENSG00000198551 | 390.736144 | -0.13193063 | 0.13637067 | 0.29951745 | 0.52648412 | ZNF627    |
| 283518 | ENSG00000198553 | 16.8401497 | 0.10891023  | 0.33092346 | 0.55612465 | 0.76171992 | KCNRG     |
| 11169  | ENSG00000198554 | 893.711287 | 0.00717941  | 0.10060205 | 0.94134317 | 0.97559098 | WDHD1     |
| NA     | ENSG00000198555 | 1.19523293 | -0.00843647 | 0.38136715 | 0.87247901 | NA         |           |
| 285989 | ENSG00000198556 | 504.553281 | 0.14908582  | 0.14774904 | 0.27418939 | 0.49784182 | ZNF789    |
| 1500   | ENSG00000198561 | 2061.84129 | 0.00114213  | 0.08786126 | 0.99023674 | 0.99673744 | CTNND1    |
| 7919   | ENSG00000198563 | 8747.86023 | 0.21084763  | 0.05044152 | 2.46E-05   | 0.00021609 | DDX39B    |
| 142680 | ENSG00000198569 | 19.6418446 | 0.26448499  | 0.37261992 | 0.21020321 | 0.41876008 | SLC34A3   |
| 343035 | ENSG00000198570 | 1222.62289 | -2.48122558 | 0.0955352  | 8.01E-150  | 6.91E-147  | RD3       |
| 64663  | ENSG00000198573 | 0          | NA          | NA         | NA         | NA         | SPANXC    |
| 117157 | ENSG00000198574 | 0          | NA          | NA         | NA         | NA         | SH2D1B    |
| 23237  | ENSG00000198576 | 393.832363 | 0.23326066  | 0.16853354 | 0.12313039 | 0.29054555 | ARC       |
| NA     | ENSG00000198580 | 6.01350941 | -0.05787295 | 0.36792637 | 0.63680514 | 0.81722218 |           |
| 131870 | ENSG00000198585 | 1323.76538 | 0.05373801  | 0.075284   | 0.46722155 | 0.69011879 | NUDT16    |
| 9874   | ENSG00000198586 | 922.779718 | 0.03782058  | 0.10152628 | 0.70019233 | 0.85541355 | TLK1      |
| 987    | ENSG00000198589 | 1440.19502 | -0.01962834 | 0.08173127 | 0.80603962 | 0.9121533  | LRBA      |
| NA     | ENSG00000198590 | 21.1878033 | 0.9711524   | 0.61303427 | 0.00798947 | 0.03446641 | C3orf35   |
| 9745   | ENSG00000198597 | 1002.97042 | 0.63590881  | 0.10144906 | 1.01E-10   | 1.94E-09   | ZNF536    |
| 4326   | ENSG00000198598 | 181.071728 | 0.21221092  | 0.17030857 | 0.1639553  | 0.35322761 | MMP17     |
| 391194 | ENSG00000198601 | 0          | NA          | NA         | NA         | NA         | OR2M2     |
| 11177  | ENSG00000198604 | 2012.25032 | 0.33314875  | 0.08867425 | 0.00010924 | 0.00082342 | BAZ1A     |
| 1109   | ENSG00000198610 | 0          | NA          | NA         | NA         | NA         | AKR1C4    |
| 10920  | ENSG00000198612 | 1172.1204  | -0.20385569 | 0.08878149 | 0.01804281 | 0.06707314 | COPS8     |
| NA     | ENSG00000198618 | 1.81768097 | -0.07487825 | 0.38913232 | 0.29849152 | NA         | PPIAP22   |

|        |                 |            |             |            |            |            |           |
|--------|-----------------|------------|-------------|------------|------------|------------|-----------|
| 26112  | ENSG00000198624 | 13.17697   | 0.20269175  | 0.37878616 | 0.28036615 | 0.5049178  | CCDC69    |
| 4194   | ENSG00000198625 | 2275.23389 | -0.1814957  | 0.10268471 | 0.06562502 | 0.18299372 | MDM4      |
| 6262   | ENSG00000198626 | 430.081686 | -3.24041039 | 0.21504379 | 2.50E-53   | 2.68E-51   | RYR2      |
| 147658 | ENSG00000198633 | 2.05190235 | 0.0763992   | 0.38703754 | 0.34516056 | NA         | ZNF534    |
| 55958  | ENSG00000198642 | 1169.42374 | -0.15001895 | 0.08117903 | 0.05806001 | 0.16708886 | KLHL9     |
| 131177 | ENSG00000198643 | 0.15069912 | -0.01848503 | 0.38480575 | 0.84537521 | NA         | FAM3D     |
| 23054  | ENSG00000198646 | 2012.9477  | -0.39258057 | 0.07873305 | 3.33E-07   | 4.10E-06   | NCOA6     |
| 27347  | ENSG00000198648 | 773.918721 | -0.30935616 | 0.09349698 | 0.00062322 | 0.00391285 | STK39     |
| 6898   | ENSG00000198650 | 0.15069912 | -0.01848503 | 0.38480575 | 0.84537521 | NA         | TAT       |
| NA     | ENSG00000198658 | 3.23180956 | 0.07005272  | 0.37964132 | 0.48893868 | 0.70868961 | ABHD17AP1 |
| 221477 | ENSG00000198663 | 2493.27337 | -0.1502889  | 0.06329744 | 0.01596194 | 0.06062114 | C6orf89   |
| 801    | ENSG00000198668 | 6427.56432 | -0.70605738 | 0.06040927 | 3.34E-32   | 2.03E-30   | CALM1     |
| 4018   | ENSG00000198670 | 0          | NA          | NA         | NA         | NA         | LPA       |
| NA     | ENSG00000198671 | 0          | NA          | NA         | NA         | NA         |           |
| 338811 | ENSG00000198673 | 6.39570601 | 0.25527823  | 0.48296039 | 0.05649915 | 0.16353915 | TAFA2     |
| 79490  | ENSG00000198674 | 0          | NA          | NA         | NA         | NA         | OR10G6    |
| 9652   | ENSG00000198677 | 2849.86639 | -0.2135295  | 0.0658722  | 0.00098322 | 0.00582682 | TTC37     |
| NA     | ENSG00000198678 | 0          | NA          | NA         | NA         | NA         | OR5BS1P   |
| 286319 | ENSG00000198680 | 334.887738 | 0.22272148  | 0.14241298 | 0.09153281 | 0.23357054 | TUSC1     |
| 4100   | ENSG00000198681 | 0.15069912 | -0.01848503 | 0.38480575 | 0.84537521 | NA         | MAGEA1    |
| 9060   | ENSG00000198682 | 57.5197515 | 0.35065108  | 0.29158367 | 0.10309614 | 0.25507263 | PAPSS2    |
| 23434  | ENSG00000198685 | 0.68219046 | 0.04060292  | 0.38717358 | 0.35756446 | NA         | LINC01565 |
| 10479  | ENSG00000198689 | 422.712602 | -0.26334839 | 0.13488096 | 0.03607249 | 0.11601202 | SLC9A6    |
| 22909  | ENSG00000198690 | 1291.24806 | 0.00022067  | 0.0965905  | 0.99912696 | 0.99962651 | FAN1      |
| 24     | ENSG00000198691 | 0.747933   | 0.01552071  | 0.38292809 | 0.7287086  | NA         | ABCA4     |
| 9086   | ENSG00000198692 | 0          | NA          | NA         | NA         | NA         | EIF1AY    |
| 4541   | ENSG00000198695 | 9202.72782 | -0.02403816 | 0.09646349 | 0.79672647 | 0.90658744 | MT-ND6    |
| 55705  | ENSG00000198700 | 5452.62862 | -0.11933186 | 0.07525591 | 0.1053298  | 0.25877695 | IPO9      |
| NA     | ENSG00000198703 | 0          | NA          | NA         | NA         | NA         | OR10R3P   |
| 257202 | ENSG00000198704 | 0          | NA          | NA         | NA         | NA         | GPX6      |
| 80184  | ENSG00000198707 | 1008.39569 | 0.14130658  | 0.11122836 | 0.18412829 | 0.3826844  | CEP290    |
| 619518 | ENSG00000198711 | 56.6295732 | 0.05858466  | 0.24349905 | 0.75732794 | 0.88697677 | SSBP3-AS1 |
| 4513   | ENSG00000198712 | 98080.0834 | 0.43628689  | 0.07477176 | 1.76E-09   | 2.93E-08   | MT-CO2    |
| 112770 | ENSG00000198715 | 693.886299 | 0.22420604  | 0.10787489 | 0.02989032 | 0.10005012 | GLMP      |
| 23116  | ENSG00000198718 | 220.297447 | -0.02620079 | 0.18365707 | 0.86957233 | 0.94311021 | TOGARAM1  |
| 28514  | ENSG00000198719 | 62.2257167 | 3.28474291  | 0.37725529 | 2.77E-19   | 9.95E-18   | DLL1      |
| 124930 | ENSG00000198720 | 2476.38341 | 0.25668876  | 0.06436143 | 5.12E-05   | 0.00041735 | ANKRD13B  |
| 10455  | ENSG00000198721 | 553.420737 | 0.22505178  | 0.11972456 | 0.04736243 | 0.14263366 | ECI2      |

|        |                 |            |             |            |            |            |          |
|--------|-----------------|------------|-------------|------------|------------|------------|----------|
| 10497  | ENSG00000198722 | 1321.82054 | -0.02318705 | 0.07396085 | 0.74711021 | 0.88120985 | UNC13B   |
| 374877 | ENSG00000198723 | 37.7988345 | 0.13194192  | 0.28842252 | 0.50629792 | 0.72198309 | TEX45    |
| 4519   | ENSG00000198727 | 57491.1905 | -0.16247671 | 0.06028146 | 0.00631659 | 0.02830836 | MT-CYB   |
| 8861   | ENSG00000198728 | 3378.67561 | 0.31830041  | 0.05762432 | 2.23E-08   | 3.21E-07   | LDB1     |
| 81706  | ENSG00000198729 | 0          | NA          | NA         | NA         | NA         | PPP1R14C |
| 9646   | ENSG00000198730 | 2344.62192 | 0.04286331  | 0.07508117 | 0.56143209 | 0.76492328 | CTR9     |
| 64093  | ENSG00000198732 | 43.0363606 | 0.08911869  | 0.28637925 | 0.64748925 | 0.82430661 | SMOC1    |
| 2153   | ENSG00000198734 | 0          | NA          | NA         | NA         | NA         | F5       |
| 51734  | ENSG00000198736 | 294.305987 | -0.19270404 | 0.13301436 | 0.12119155 | 0.2874665  | MSRB1    |
| NA     | ENSG00000198738 | 0          | NA          | NA         | NA         | NA         | SMIM11P1 |
| 347731 | ENSG00000198739 | 0          | NA          | NA         | NA         | NA         | LRRTM3   |
| 22834  | ENSG00000198740 | 828.478201 | -0.27634918 | 0.103333   | 0.00532848 | 0.02455678 | ZNF652   |
| 57154  | ENSG00000198742 | 1036.01847 | -0.12585837 | 0.08146128 | 0.11344919 | 0.27329189 | SMURF1   |
| 6526   | ENSG00000198743 | 637.701612 | -0.14244775 | 0.10553531 | 0.15945464 | 0.34700764 | SLC5A3   |
| NA     | ENSG00000198744 | 2.8638861  | 0.0603525   | 0.37583909 | 0.56704884 | 0.76856463 | MTCO3P12 |
| 63906  | ENSG00000198746 | 227.918208 | 0.16686533  | 0.18851955 | 0.31009672 | 0.53778389 | GPATCH3  |
| 9578   | ENSG00000198752 | 3254.9315  | -0.06169795 | 0.08516678 | 0.45671299 | 0.68021813 | CDC42BPB |
| 5365   | ENSG00000198753 | 371.114115 | -0.95409588 | 0.15371297 | 7.37E-11   | 1.43E-09   | PLXNB3   |
| 64064  | ENSG00000198754 | 41.8092442 | -0.79718251 | 0.43532147 | 0.00779238 | 0.03376301 | OXCT2    |
| 4736   | ENSG00000198755 | 11673.3115 | -0.11924827 | 0.05325076 | 0.02364198 | 0.08332657 | RPL10A   |
| 23127  | ENSG00000198756 | 201.966325 | 0.21285477  | 0.16569903 | 0.15423132 | 0.3394719  | COLGALT2 |
| 79574  | ENSG00000198758 | 0          | NA          | NA         | NA         | NA         | EPS8L3   |
| 25975  | ENSG00000198759 | 0.15069912 | -0.01848503 | 0.38480575 | 0.84537521 | NA         | EGFL6    |
| 4536   | ENSG00000198763 | 72947.0136 | -0.27663529 | 0.09010233 | 0.00177498 | 0.00966134 | MT-ND2   |
| 6847   | ENSG00000198765 | 0          | NA          | NA         | NA         | NA         | SYCP1    |
| 164284 | ENSG00000198768 | 0.69958169 | 0.02707939  | 0.38367853 | 0.57143862 | NA         | APCDD1L  |
| 92241  | ENSG00000198771 | 0.14931947 | -0.01844332 | 0.38480212 | 0.84537521 | NA         | RCSD1    |
| 9182   | ENSG00000198774 | 2.63218231 | 0.11061433  | 0.39563201 | 0.24820236 | 0.46741467 | RASSF9   |
| 26049  | ENSG00000198780 | 351.067587 | -0.80140384 | 0.13537856 | 5.90E-10   | 1.05E-08   | FAM169A  |
| 91603  | ENSG00000198783 | 376.726368 | 0.26305345  | 0.12657513 | 0.0273481  | 0.09334015 | ZNF830   |
| 116443 | ENSG00000198785 | 15.3716447 | -0.10391541 | 0.33476068 | 0.56373653 | 0.76632633 | GRIN3A   |
| 4540   | ENSG00000198786 | 51500.145  | -0.08368088 | 0.07474662 | 0.25819409 | 0.47950675 | MT-ND5   |
| NA     | ENSG00000198787 | 0          | NA          | NA         | NA         | NA         | OR7E103P |
| 4583   | ENSG00000198788 | 0          | NA          | NA         | NA         | NA         | MUC2     |
| 29883  | ENSG00000198791 | 2075.92493 | -0.38257163 | 0.07803807 | 5.18E-07   | 6.16E-06   | CNOT7    |
| 25829  | ENSG00000198792 | 524.073847 | -0.16791953 | 0.11039575 | 0.1112917  | 0.26948227 | TMEM184B |
| 2475   | ENSG00000198793 | 2567.9306  | -0.02842896 | 0.0844503  | 0.72923896 | 0.87047115 | MTOR     |
| 192683 | ENSG00000198794 | 2215.46485 | -0.65094197 | 0.06814999 | 3.42E-22   | 1.42E-20   | SCAMP5   |

|           |                 |            |             |            |            |            |           |
|-----------|-----------------|------------|-------------|------------|------------|------------|-----------|
| 25925     | ENSG00000198795 | 453.689888 | 0.38456198  | 0.14601957 | 0.00444344 | 0.02108533 | ZNF521    |
| 115701    | ENSG00000198796 | 5.61411006 | 5.86194866  | 2.66817996 | 7.17E-05   | 0.00056753 | ALPK2     |
| 57795     | ENSG00000198797 | 53.214555  | -3.2226162  | 0.45289673 | 7.59E-14   | 1.88E-12   | BRINP2    |
| 4114      | ENSG00000198798 | 0          | NA          | NA         | NA         | NA         | MAGEB3    |
| 9860      | ENSG00000198799 | 541.16988  | -0.30050379 | 0.11897287 | 0.00768071 | 0.0333547  | LRIG2     |
| 4512      | ENSG00000198804 | 265616.416 | 0.13758536  | 0.04548416 | 0.00234593 | 0.01227733 | MT-CO1    |
| 4860      | ENSG00000198805 | 863.62433  | -0.32851166 | 0.08788843 | 0.00011843 | 0.00088464 | PNP       |
| 5083      | ENSG00000198807 | 0          | NA          | NA         | NA         | NA         | PAX9      |
| 376132    | ENSG00000198812 | 0          | NA          | NA         | NA         | NA         | LRRC10    |
| 2710      | ENSG00000198814 | 201.076396 | 0.05830863  | 0.15939262 | 0.68879707 | 0.8489088  | GK        |
| 22887     | ENSG00000198815 | 1751.15486 | -0.11609742 | 0.08732053 | 0.17144436 | 0.36389846 | FOXJ3     |
| 140467    | ENSG00000198816 | 1564.19847 | 0.10993127  | 0.07435155 | 0.13307696 | 0.30657768 | ZNF358    |
| 113402    | ENSG00000198818 | 456.337563 | 1.02695159  | 0.12063249 | 2.22E-18   | 7.65E-17   | SFT2D1    |
| 919       | ENSG00000198821 | 5.51154977 | -0.08749626 | 0.37200881 | 0.50165816 | 0.71856283 | CD247     |
| 2913      | ENSG00000198822 | 9.16615361 | -0.01948325 | 0.34759274 | 0.89470679 | 0.95456012 | GRM3      |
| 283489    | ENSG00000198824 | 956.737779 | -0.45676475 | 0.10129085 | 2.85E-06   | 2.99E-05   | CHAMP1    |
| 22876     | ENSG00000198825 | 2742.29961 | -0.19938626 | 0.07174722 | 0.00459507 | 0.0216598  | INPP5F    |
| 9824      | ENSG00000198826 | 2254.914   | -0.59135681 | 0.12120107 | 3.16E-07   | 3.89E-06   | ARHGAP11A |
| 56670     | ENSG00000198829 | 0          | NA          | NA         | NA         | NA         | SUCNR1    |
| 3151      | ENSG00000198830 | 9112.33729 | -0.46333062 | 0.05136866 | 8.51E-20   | 3.13E-18   | HMG2      |
| 140606    | ENSG00000198832 | 250.777898 | 0.18615459  | 0.15509778 | 0.18897766 | 0.38974187 | SELENOM   |
| 51465     | ENSG00000198833 | 1084.14498 | -0.1785153  | 0.08004856 | 0.02239762 | 0.07975033 | UBE2J1    |
| 57165     | ENSG00000198835 | 27.869716  | 0.0370979   | 0.29031898 | 0.84807176 | 0.93095493 | GJC2      |
| 4976      | ENSG00000198836 | 1840.15507 | -0.54835869 | 0.09724563 | 5.92E-09   | 9.18E-08   | OPA1      |
| 9909      | ENSG00000198837 | 2555.70492 | 0.08990513  | 0.07646714 | 0.23041296 | 0.44633794 | DENND4B   |
| 6263      | ENSG00000198838 | 30.8325622 | -0.25059848 | 0.33962225 | 0.23339245 | 0.45030693 | RYS3      |
| 11179     | ENSG00000198839 | 452.356912 | -0.35317032 | 0.11991093 | 0.00186986 | 0.01010294 | ZNF277    |
| 4537      | ENSG00000198840 | 10161.8723 | -0.10582789 | 0.08734311 | 0.21296258 | 0.42289836 | MT-ND3    |
| 112970    | ENSG00000198841 | 230.746342 | 0.11889168  | 0.15320921 | 0.39765051 | 0.62683824 | KTI12     |
| 92235     | ENSG00000198842 | 0          | NA          | NA         | NA         | NA         | STYXL2    |
| 51714     | ENSG00000198843 | 716.682826 | -0.25452419 | 0.13055541 | 0.03715676 | 0.11878666 | SELENOT   |
| 22899     | ENSG00000198844 | 0.16735865 | 0.01897177  | 0.38482933 | 0.78225479 | NA         | ARHGEF15  |
| 9760      | ENSG00000198846 | 938.451958 | 0.05090143  | 0.08283305 | 0.53135538 | 0.7427669  | TOX       |
| 1066      | ENSG00000198848 | 0          | NA          | NA         | NA         | NA         | CES1      |
| 916       | ENSG00000198851 | 0          | NA          | NA         | NA         | NA         | CD3E      |
| 9853      | ENSG00000198853 | 892.678664 | -0.05579578 | 0.10701445 | 0.58540616 | 0.78132918 | RUSC2     |
| 100129271 | ENSG00000198854 | 0          | NA          | NA         | NA         | NA         | C1orf68   |
| 11153     | ENSG00000198855 | 72.3927849 | 0.21051123  | 0.24049101 | 0.27170719 | 0.495102   | FICD      |

|           |                 |            |             |            |            |            |           |
|-----------|-----------------|------------|-------------|------------|------------|------------|-----------|
| 58505     | ENSG00000198856 | 924.732818 | 0.15373391  | 0.08600668 | 0.06646284 | 0.18460348 | OSTC      |
| NA        | ENSG00000198857 | 1.50088203 | -0.00795158 | 0.37605697 | 0.92070917 | NA         | HSD3BP5   |
| 91300     | ENSG00000198858 | 621.630992 | 0.29063411  | 0.10124823 | 0.00285015 | 0.01450666 | R3HDM4    |
| 116461    | ENSG00000198860 | 898.444873 | 0.18245219  | 0.09042951 | 0.03765416 | 0.11997086 | TSEN15    |
| 26046     | ENSG00000198862 | 1337.45313 | -0.30115298 | 0.08912385 | 0.00049596 | 0.003201   | LTN1      |
| 146923    | ENSG00000198863 | 433.485232 | -0.1436491  | 0.11858668 | 0.20164965 | 0.40711601 | RUNDC1    |
| 100129792 | ENSG00000198865 | 354.215428 | -0.08528275 | 0.14680044 | 0.52800861 | 0.73970419 | CCDC152   |
| NA        | ENSG00000198868 | 0.32417112 | -0.02327578 | 0.38532176 | 0.66840881 | NA         | MTND4LP30 |
| 169436    | ENSG00000198870 | 29.7380799 | -0.34590324 | 0.37014878 | 0.12766441 | 0.29808895 | STKLD1    |
| 2869      | ENSG00000198873 | 349.780582 | -0.44998182 | 0.14145626 | 0.00063772 | 0.00398436 | GRK5      |
| 55253     | ENSG00000198874 | 566.458803 | -0.02963058 | 0.10496638 | 0.76696016 | 0.89261979 | TYW1      |
| 25853     | ENSG00000198876 | 1677.16778 | 0.14945163  | 0.07095561 | 0.03202811 | 0.10562461 | DCAF12    |
| 57713     | ENSG00000198879 | 878.743796 | -2.18249145 | 0.10206281 | 1.29E-102  | 4.07E-100  | SFMBT2    |
| 142689    | ENSG00000198881 | 2.69770731 | 0.13763045  | 0.40995838 | 0.14386669 | 0.3234718  | ASB12     |
| 114824    | ENSG00000198883 | 0          | NA          | NA         | NA         | NA         | PNMA5     |
| 150771    | ENSG00000198885 | 501.323514 | -0.15938317 | 0.12582015 | 0.17882173 | 0.37479645 | ITPRIPL1  |
| 4538      | ENSG00000198886 | 104890.627 | 0.0843407   | 0.05504274 | 0.10788698 | 0.26339503 | MT-ND4    |
| 23137     | ENSG00000198887 | 1059.4413  | -0.26188455 | 0.11217805 | 0.01426298 | 0.05539728 | SMC5      |
| 4535      | ENSG00000198888 | 45730.9262 | -0.20497941 | 0.07851728 | 0.00768492 | 0.03336297 | MT-ND1    |
| 139170    | ENSG00000198889 | 0          | NA          | NA         | NA         | NA         | DCAF12L1  |
| 55170     | ENSG00000198890 | 1358.03713 | -0.21783373 | 0.08984974 | 0.01243607 | 0.04962421 | PRMT6     |
| 149345    | ENSG00000198892 | 161.548455 | 0.06105297  | 0.17386987 | 0.69483418 | 0.85248347 | SHISA4    |
| 85457     | ENSG00000198894 | 597.595184 | -0.23910587 | 0.12654997 | 0.04456473 | 0.13608807 | CIPC      |
| 830       | ENSG00000198898 | 1385.28356 | -0.3206051  | 0.1112783  | 0.00251957 | 0.01306199 | CAPZA2    |
| 4508      | ENSG00000198899 | 57837.5034 | 0.05842909  | 0.07199323 | 0.40909552 | 0.63710637 | MT-ATP6   |
| 7150      | ENSG00000198900 | 2714.06263 | -0.15423253 | 0.07576685 | 0.03753467 | 0.11968626 | TOP1      |
| 9055      | ENSG00000198901 | 3574.19917 | -0.19308766 | 0.07958586 | 0.01294215 | 0.05127242 | PRC1      |
| 80823     | ENSG00000198908 | 204.162652 | -0.62982475 | 0.22966541 | 0.00143782 | 0.00808111 | BHLHB9    |
| 4215      | ENSG00000198909 | 1317.9889  | -0.17503486 | 0.10116645 | 0.07213562 | 0.19564875 | MAP3K3    |
| 3897      | ENSG00000198910 | 4384.36524 | -2.59167258 | 0.07836554 | 3.54E-241  | 1.17E-237  | L1CAM     |
| 6721      | ENSG00000198911 | 4762.58512 | -0.40384699 | 0.07291835 | 1.62E-08   | 2.37E-07   | SREBF2    |
| 339448    | ENSG00000198912 | 551.801202 | 0.03509184  | 0.11120521 | 0.74256255 | 0.87870936 | C1orf174  |
| 5455      | ENSG00000198914 | 260.263113 | 4.90564279  | 0.24849302 | 1.59E-87   | 3.71E-85   | POU3F3    |
| 221002    | ENSG00000198915 | 1.00287065 | -6.68E-05   | 0.37920934 | 0.9991813  | NA         | RASGEF1A  |
| 51490     | ENSG00000198917 | 1067.21663 | 0.11400414  | 0.09922489 | 0.23460022 | 0.45153942 | SPOUT1    |
| 6170      | ENSG00000198918 | 10130.3335 | -0.08102999 | 0.05988478 | 0.17008284 | 0.36191941 | RPL39     |
| 9666      | ENSG00000198919 | 1028.35495 | -0.13218797 | 0.09909899 | 0.1660398  | 0.35628699 | DZIP3     |
| 9851      | ENSG00000198920 | 570.051545 | -0.16620697 | 0.13079838 | 0.17478702 | 0.36863767 | KIAA0753  |



|           |                 |            |             |            |            |            |           |
|-----------|-----------------|------------|-------------|------------|------------|------------|-----------|
| NA        | ENSG00000198923 | 0          | NA          | NA         | NA         | NA         |           |
| 9937      | ENSG00000198924 | 611.740924 | -0.47854731 | 0.12620449 | 5.73E-05   | 0.00046135 | DCLRE1A   |
| 79065     | ENSG00000198925 | 1197.06118 | 0.06798105  | 0.08307931 | 0.4012791  | 0.62960674 | ATG9A     |
| 9722      | ENSG00000198929 | 270.50543  | -1.2712507  | 0.15682517 | 5.19E-17   | 1.60E-15   | NOS1AP    |
| 158511    | ENSG00000198930 | 424.150097 | -0.38353618 | 0.12447478 | 0.00110254 | 0.00642609 | CSAG1     |
| 353       | ENSG00000198931 | 800.591211 | 0.13466852  | 0.09618434 | 0.14795746 | 0.33012187 | APRT      |
| 9737      | ENSG00000198932 | 402.050694 | -0.37845329 | 0.12522466 | 0.00134794 | 0.00764088 | GPRASP1   |
| 9755      | ENSG00000198933 | 1091.10619 | 0.1705198   | 0.08254336 | 0.03423663 | 0.11149947 | TBKBP1    |
| 57692     | ENSG00000198934 | 148.444315 | 0.17601697  | 0.1801914  | 0.26907585 | 0.49211513 | MAGEE1    |
| 154467    | ENSG00000198937 | 568.906753 | -0.36130532 | 0.103042   | 0.0002624  | 0.00181772 | CCDC167   |
| 4514      | ENSG00000198938 | 98239.8613 | -0.09426941 | 0.06653311 | 0.15323606 | 0.33804794 | MT-CO3    |
| 80108     | ENSG00000198939 | 14.6130443 | 0.22213159  | 0.39955956 | 0.22950554 | 0.44510165 | ZFP2      |
| 134548    | ENSG00000198944 | 14.232951  | -0.06736075 | 0.33273245 | 0.69753303 | 0.85389371 | SOWAHA    |
| 84456     | ENSG00000198945 | 168.766827 | 0.17105031  | 0.17602308 | 0.27470456 | 0.49850348 | L3MBTL3   |
| 1756      | ENSG00000198947 | 552.615257 | 1.48368943  | 0.1563498  | 1.93E-22   | 8.14E-21   | DMD       |
| 9848      | ENSG00000198948 | 219.869689 | -0.26492217 | 0.24895932 | 0.1756084  | 0.36978038 | MFAP3L    |
| 101928198 | ENSG00000198948 | 219.869689 | -0.26492217 | 0.24895932 | 0.1756084  | 0.36978038 | MFAP3L    |
| 4668      | ENSG00000198951 | 312.491905 | 0.01648413  | 0.13402681 | 0.89668482 | 0.95469109 | NAGA      |
| 23381     | ENSG00000198952 | 3653.8172  | 0.20319539  | 0.05776548 | 0.00037079 | 0.00247606 | SMG5      |
| 26128     | ENSG00000198954 | 513.611153 | -0.15897169 | 0.11538498 | 0.14716089 | 0.32869736 | KIFBP     |
| 7052      | ENSG00000198959 | 306.996327 | 2.87852525  | 0.20484535 | 2.80E-46   | 2.50E-44   | TGM2      |
| 54470     | ENSG00000198960 | 415.435884 | 0.12059364  | 0.1160734  | 0.27571295 | 0.49980793 | ARMCX6    |
| 9867      | ENSG00000198961 | 1669.2489  | -0.43793381 | 0.07928566 | 1.59E-08   | 2.34E-07   | PJA2      |
| 6096      | ENSG00000198963 | 1167.3719  | -0.65926036 | 0.09073067 | 9.58E-14   | 2.35E-12   | RORB      |
| 259230    | ENSG00000198964 | 171.726866 | -0.22634687 | 0.18189595 | 0.15708985 | 0.34385069 | SGMS1     |
| 343406    | ENSG00000198965 | 0          | NA          | NA         | NA         | NA         | OR10R2    |
| 128368    | ENSG00000198967 | 0          | NA          | NA         | NA         | NA         | OR10Z1    |
| 406887    | ENSG00000198972 | 0          | NA          | NA         | NA         | NA         | MIRLET7E  |
| 494324    | ENSG00000198973 | 0          | NA          | NA         | NA         | NA         | MIR375    |
| 407034    | ENSG00000198974 | 0          | NA          | NA         | NA         | NA         | MIR30E    |
| 406882    | ENSG00000198975 | 0          | NA          | NA         | NA         | NA         | MIRLET7A2 |
| 554210    | ENSG00000198976 | 0          | NA          | NA         | NA         | NA         | MIR429    |
| 494329    | ENSG00000198982 | 0          | NA          | NA         | NA         | NA         | MIR380    |
| 554213    | ENSG00000198983 | 0          | NA          | NA         | NA         | NA         | MIR449A   |
| 442910    | ENSG00000198984 | 0          | NA          | NA         | NA         | NA         | MIR345    |
| 406951    | ENSG00000198987 | 0          | NA          | NA         | NA         | NA         | MIR16-2   |
| 442908    | ENSG00000198995 | 0          | NA          | NA         | NA         | NA         | MIR340    |
| 406901    | ENSG00000198997 | 0          | NA          | NA         | NA         | NA         | MIR107    |

|        |                 |   |    |    |    |    |           |
|--------|-----------------|---|----|----|----|----|-----------|
| 554212 | ENSG00000199001 | 0 | NA | NA | NA | NA | MIR448    |
| 442915 | ENSG00000199005 | 0 | NA | NA | NA | NA | MIR370    |
| 574433 | ENSG00000199012 | 0 | NA | NA | NA | NA | MIR412    |
| 494326 | ENSG00000199015 | 0 | NA | NA | NA | NA | MIR377    |
| 406904 | ENSG00000199017 | 0 | NA | NA | NA | NA | MIR1-1    |
| 494330 | ENSG00000199020 | 0 | NA | NA | NA | NA | MIR381    |
| 442907 | ENSG00000199023 | 0 | NA | NA | NA | NA | MIR339    |
| 406896 | ENSG00000199024 | 0 | NA | NA | NA | NA | MIR103A2  |
| 442914 | ENSG00000199025 | 0 | NA | NA | NA | NA | MIR369    |
| 406885 | ENSG00000199030 | 0 | NA | NA | NA | NA | MIRLET7C  |
| 442916 | ENSG00000199031 | 0 | NA | NA | NA | NA | MIR371A   |
| 494337 | ENSG00000199032 | 0 | NA | NA | NA | NA | MIR425    |
| 406895 | ENSG00000199035 | 0 | NA | NA | NA | NA | MIR103A1  |
| 407002 | ENSG00000199036 | 0 | NA | NA | NA | NA | MIR219A1  |
| 406992 | ENSG00000199038 | 0 | NA | NA | NA | NA | MIR210    |
| 442904 | ENSG00000199043 | 0 | NA | NA | NA | NA | MIR335    |
| 494327 | ENSG00000199047 | 0 | NA | NA | NA | NA | MIR378A   |
| 494323 | ENSG00000199051 | 0 | NA | NA | NA | NA | MIR361    |
| 442898 | ENSG00000199053 | 0 | NA | NA | NA | NA | MIR324    |
| 442891 | ENSG00000199059 | 0 | NA | NA | NA | NA | MIR135B   |
| 406894 | ENSG00000199065 | 0 | NA | NA | NA | NA | MIR101-2  |
| 442897 | ENSG00000199069 | 0 | NA | NA | NA | NA | MIR323A   |
| 406888 | ENSG00000199072 | 0 | NA | NA | NA | NA | MIRLET7F1 |
| 407015 | ENSG00000199075 | 0 | NA | NA | NA | NA | MIR26A1   |
| 406918 | ENSG00000199077 | 0 | NA | NA | NA | NA | MIR129-2  |
| 442890 | ENSG00000199080 | 0 | NA | NA | NA | NA | MIR133B   |
| 442909 | ENSG00000199082 | 0 | NA | NA | NA | NA | MIR342    |
| 406940 | ENSG00000199085 | 0 | NA | NA | NA | NA | MIR148A   |
| 494328 | ENSG00000199088 | 0 | NA | NA | NA | NA | MIR379    |
| 442900 | ENSG00000199090 | 0 | NA | NA | NA | NA | MIR326    |
| 574434 | ENSG00000199092 | 0 | NA | NA | NA | NA | MIR410    |
| 407032 | ENSG00000199094 | 0 | NA | NA | NA | NA | MIR30C2   |
| 442917 | ENSG00000199095 | 0 | NA | NA | NA | NA | MIR372    |
| 442895 | ENSG00000199102 | 0 | NA | NA | NA | NA | MIR302C   |
| 442911 | ENSG00000199104 | 0 | NA | NA | NA | NA | MIR346    |
| 574413 | ENSG00000199107 | 0 | NA | NA | NA | NA | MIR409    |
| 693121 | ENSG00000199109 | 0 | NA | NA | NA | NA | MIR411    |
| 407017 | ENSG00000199121 | 0 | NA | NA | NA | NA | MIR26B    |

|           |                 |   |    |    |    |    |            |
|-----------|-----------------|---|----|----|----|----|------------|
| 442892    | ENSG00000199122 | 0 | NA | NA | NA | NA | MIR148B    |
| 494332    | ENSG00000199127 | 0 | NA | NA | NA | NA | MIR383     |
| 100126355 | ENSG00000199130 | 0 | NA | NA | NA | NA | MIR365A    |
| 554214    | ENSG00000199132 | 0 | NA | NA | NA | NA | MIR450A1   |
| 406886    | ENSG00000199133 | 0 | NA | NA | NA | NA | MIRLET7D   |
| 406893    | ENSG00000199135 | 0 | NA | NA | NA | NA | MIR101-1   |
| 442918    | ENSG00000199143 | 0 | NA | NA | NA | NA | MIR373     |
| 442896    | ENSG00000199145 | 0 | NA | NA | NA | NA | MIR302D    |
| 406890    | ENSG00000199150 | 0 | NA | NA | NA | NA | MIRLET7G   |
| 442905    | ENSG00000199151 | 0 | NA | NA | NA | NA | MIR337     |
| 407033    | ENSG00000199153 | 0 | NA | NA | NA | NA | MIR30D     |
| 494334    | ENSG00000199156 | 0 | NA | NA | NA | NA | MIR422A    |
| 406990    | ENSG00000199157 | 0 | NA | NA | NA | NA | MIR208A    |
| 407053    | ENSG00000199158 | 0 | NA | NA | NA | NA | MIR96      |
| 406913    | ENSG00000199161 | 0 | NA | NA | NA | NA | MIR126     |
| 406881    | ENSG00000199165 | 0 | NA | NA | NA | NA | MIRLET7A1  |
| 442919    | ENSG00000199168 | 0 | NA | NA | NA | NA | MIR374A    |
| 442912    | ENSG00000199169 | 0 | NA | NA | NA | NA | MIR367     |
| 442903    | ENSG00000199172 | 0 | NA | NA | NA | NA | MIR331     |
| 407035    | ENSG00000199177 | 0 | NA | NA | NA | NA | MIR31      |
| 406891    | ENSG00000199179 | 0 | NA | NA | NA | NA | MIRLET7I   |
| NA        | ENSG00000199196 | 0 | NA | NA | NA | NA |            |
| NA        | ENSG00000199197 | 0 | NA | NA | NA | NA | RN7SKP72   |
| NA        | ENSG00000199200 | 0 | NA | NA | NA | NA |            |
| NA        | ENSG00000199201 | 0 | NA | NA | NA | NA |            |
| NA        | ENSG00000199202 | 0 | NA | NA | NA | NA | RNA5SP289  |
| NA        | ENSG00000199203 | 0 | NA | NA | NA | NA |            |
| NA        | ENSG00000199204 | 0 | NA | NA | NA | NA |            |
| 26766     | ENSG00000199212 | 0 | NA | NA | NA | NA | RNU105C    |
| NA        | ENSG00000199217 | 0 | NA | NA | NA | NA | RNU6-1123P |
| NA        | ENSG00000199218 | 0 | NA | NA | NA | NA | RN7SKP184  |
| NA        | ENSG00000199219 | 0 | NA | NA | NA | NA | RNU6-500P  |
| NA        | ENSG00000199220 | 0 | NA | NA | NA | NA |            |
| NA        | ENSG00000199222 | 0 | NA | NA | NA | NA |            |
| NA        | ENSG00000199223 | 0 | NA | NA | NA | NA |            |
| NA        | ENSG00000199224 | 0 | NA | NA | NA | NA |            |
| NA        | ENSG00000199226 | 0 | NA | NA | NA | NA | RNU6-50P   |
| NA        | ENSG00000199231 | 0 | NA | NA | NA | NA |            |

|           |                 |          |             |            |            |    |             |
|-----------|-----------------|----------|-------------|------------|------------|----|-------------|
| NA        | ENSG00000199237 | 0        | NA          | NA         | NA         | NA | RNU6-834P   |
| NA        | ENSG00000199240 | 0        | NA          | NA         | NA         | NA | RNA5SP46    |
| NA        | ENSG00000199241 | 0        | NA          | NA         | NA         | NA |             |
| NA        | ENSG00000199245 | 0        | NA          | NA         | NA         | NA |             |
| NA        | ENSG00000199246 | 0        | NA          | NA         | NA         | NA | RNU6-896P   |
| NA        | ENSG00000199248 | 0        | NA          | NA         | NA         | NA | RNU6-28P    |
| NA        | ENSG00000199251 | 0        | NA          | NA         | NA         | NA | RNU6-664P   |
| NA        | ENSG00000199260 | 0        | NA          | NA         | NA         | NA | RNU6-874P   |
| NA        | ENSG00000199263 | 0        | NA          | NA         | NA         | NA |             |
| NA        | ENSG00000199266 | 0        | NA          | NA         | NA         | NA | SNORA60     |
| NA        | ENSG00000199272 | 0        | NA          | NA         | NA         | NA | RNU6-349P   |
| NA        | ENSG00000199273 | 0        | NA          | NA         | NA         | NA |             |
| NA        | ENSG00000199276 | 0        | NA          | NA         | NA         | NA | RNA5SP26    |
| NA        | ENSG00000199279 | 0        | NA          | NA         | NA         | NA | RNU6-661P   |
| NA        | ENSG00000199282 | 0        | NA          | NA         | NA         | NA |             |
| NA        | ENSG00000199283 | 0        | NA          | NA         | NA         | NA | RNU1-58P    |
| NA        | ENSG00000199285 | 0        | NA          | NA         | NA         | NA |             |
| NA        | ENSG00000199286 | 0        | NA          | NA         | NA         | NA | RNU6-1094P  |
| NA        | ENSG00000199289 | 0        | NA          | NA         | NA         | NA | RNU6-502P   |
| NA        | ENSG00000199290 | 0        | NA          | NA         | NA         | NA |             |
| NA        | ENSG00000199291 | 0        | NA          | NA         | NA         | NA |             |
| NA        | ENSG00000199293 | 0        | NA          | NA         | NA         | NA | SNORA21     |
| NA        | ENSG00000199295 | 0        | NA          | NA         | NA         | NA | RNU6-1312P  |
| NA        | ENSG00000199299 | 0        | NA          | NA         | NA         | NA | RNA5SP430   |
| NA        | ENSG00000199301 | 0        | NA          | NA         | NA         | NA | RNU6-208P   |
| NA        | ENSG00000199303 | 0        | NA          | NA         | NA         | NA |             |
| NA        | ENSG00000199306 | 0        | NA          | NA         | NA         | NA | RNU6-858P   |
| NA        | ENSG00000199308 | 0        | NA          | NA         | NA         | NA | RNU6-222P   |
| 100033808 | ENSG00000199311 | 0        | NA          | NA         | NA         | NA | SNORD115-34 |
| NA        | ENSG00000199313 | 0        | NA          | NA         | NA         | NA | RNU4-82P    |
| NA        | ENSG00000199315 | 0        | NA          | NA         | NA         | NA | RNA5SP347   |
| NA        | ENSG00000199318 | 0        | NA          | NA         | NA         | NA | RNA5SP52    |
| NA        | ENSG00000199319 | 0.173124 | -0.01911262 | 0.38486262 | 0.84537521 | NA | RN7SKP25    |
| NA        | ENSG00000199321 | 0        | NA          | NA         | NA         | NA |             |
| NA        | ENSG00000199322 | 0        | NA          | NA         | NA         | NA | RNA5SP183   |
| NA        | ENSG00000199325 | 0        | NA          | NA         | NA         | NA | RNU4-39P    |
| NA        | ENSG00000199326 | 0        | NA          | NA         | NA         | NA | RNU6-1298P  |
| NA        | ENSG00000199327 | 0        | NA          | NA         | NA         | NA | RNU6-230P   |

|           |                 |            |             |            |            |    |            |
|-----------|-----------------|------------|-------------|------------|------------|----|------------|
| NA        | ENSG00000199331 | 0          | NA          | NA         | NA         | NA |            |
| NA        | ENSG00000199332 | 0          | NA          | NA         | NA         | NA |            |
| NA        | ENSG00000199335 | 0          | NA          | NA         | NA         | NA | RNU6-204P  |
| NA        | ENSG00000199347 | 0          | NA          | NA         | NA         | NA | RNU5E-1    |
| NA        | ENSG00000199348 | 0          | NA          | NA         | NA         | NA | RNU6-766P  |
| NA        | ENSG00000199349 | 0          | NA          | NA         | NA         | NA |            |
| NA        | ENSG00000199350 | 0          | NA          | NA         | NA         | NA | RNA5SP432  |
| 100169751 | ENSG00000199352 | 0.15069912 | -0.01848503 | 0.38480575 | 0.84537521 | NA | RNA5S1     |
| NA        | ENSG00000199354 | 0          | NA          | NA         | NA         | NA | RNA5SP273  |
| NA        | ENSG00000199357 | 0          | NA          | NA         | NA         | NA |            |
| NA        | ENSG00000199360 | 0          | NA          | NA         | NA         | NA | RNU6-1115P |
| NA        | ENSG00000199361 | 0          | NA          | NA         | NA         | NA | RNU1-150P  |
| NA        | ENSG00000199362 | 0          | NA          | NA         | NA         | NA |            |
| NA        | ENSG00000199363 | 0          | NA          | NA         | NA         | NA | SNORA63E   |
| NA        | ENSG00000199364 | 0          | NA          | NA         | NA         | NA | RNA5SP327  |
| NA        | ENSG00000199366 | 0          | NA          | NA         | NA         | NA |            |
| NA        | ENSG00000199368 | 0          | NA          | NA         | NA         | NA | RNU6-1084P |
| NA        | ENSG00000199370 | 0          | NA          | NA         | NA         | NA |            |
| NA        | ENSG00000199373 | 0          | NA          | NA         | NA         | NA | RNA5SP453  |
| 26828     | ENSG00000199377 | 0          | NA          | NA         | NA         | NA | RNU5F-1    |
| NA        | ENSG00000199378 | 0          | NA          | NA         | NA         | NA |            |
| NA        | ENSG00000199381 | 0          | NA          | NA         | NA         | NA | RNU6-79P   |
| NA        | ENSG00000199385 | 0          | NA          | NA         | NA         | NA | RNU6-369P  |
| 767583    | ENSG00000199390 | 0          | NA          | NA         | NA         | NA | SNORD114-7 |
| NA        | ENSG00000199392 | 0          | NA          | NA         | NA         | NA |            |
| NA        | ENSG00000199394 | 0          | NA          | NA         | NA         | NA | RNU6-600P  |
| NA        | ENSG00000199395 | 0          | NA          | NA         | NA         | NA | RNA5SP93   |
| NA        | ENSG00000199398 | 0          | NA          | NA         | NA         | NA |            |
| NA        | ENSG00000199400 | 0          | NA          | NA         | NA         | NA | RNY4P19    |
| NA        | ENSG00000199402 | 0          | NA          | NA         | NA         | NA | RNA5SP308  |
| 109617001 | ENSG00000199405 | 0          | NA          | NA         | NA         | NA | SNORA1B    |
| NA        | ENSG00000199407 | 0          | NA          | NA         | NA         | NA | RNA5SP301  |
| NA        | ENSG00000199409 | 0          | NA          | NA         | NA         | NA |            |
| NA        | ENSG00000199410 | 0          | NA          | NA         | NA         | NA |            |
| NA        | ENSG00000199411 | 0          | NA          | NA         | NA         | NA |            |
| NA        | ENSG00000199415 | 0.14931947 | -0.01844332 | 0.38480212 | 0.84537521 | NA | RNA5SP370  |
| NA        | ENSG00000199420 | 0          | NA          | NA         | NA         | NA | RN7SKP170  |
| NA        | ENSG00000199422 | 0          | NA          | NA         | NA         | NA | VTRNA3-1P  |

|           |                 |          |            |            |            |    |             |
|-----------|-----------------|----------|------------|------------|------------|----|-------------|
| NA        | ENSG00000199424 | 0        | NA         | NA         | NA         | NA |             |
| NA        | ENSG00000199426 | 0        | NA         | NA         | NA         | NA | RNU1-108P   |
| 692053    | ENSG00000199436 | 0        | NA         | NA         | NA         | NA | SNORD9      |
| NA        | ENSG00000199440 | 0        | NA         | NA         | NA         | NA |             |
| NA        | ENSG00000199442 | 0        | NA         | NA         | NA         | NA |             |
| NA        | ENSG00000199444 | 0        | NA         | NA         | NA         | NA |             |
| NA        | ENSG00000199446 | 0        | NA         | NA         | NA         | NA | RNU6-543P   |
| NA        | ENSG00000199448 | 0        | NA         | NA         | NA         | NA | RNU6-845P   |
| NA        | ENSG00000199450 | 0        | NA         | NA         | NA         | NA | RNA5SP276   |
| NA        | ENSG00000199454 | 0        | NA         | NA         | NA         | NA | RNA5SP388   |
| NA        | ENSG00000199455 | 0        | NA         | NA         | NA         | NA | RNA5SP191   |
| NA        | ENSG00000199458 | 0        | NA         | NA         | NA         | NA | RNU4-35P    |
| NA        | ENSG00000199459 | 0        | NA         | NA         | NA         | NA |             |
| NA        | ENSG00000199460 | 0        | NA         | NA         | NA         | NA | RNU6-1216P  |
| NA        | ENSG00000199461 | 0        | NA         | NA         | NA         | NA |             |
| NA        | ENSG00000199466 | 0        | NA         | NA         | NA         | NA |             |
| NA        | ENSG00000199468 | 0        | NA         | NA         | NA         | NA | RNU6-556P   |
| NA        | ENSG00000199469 | 0        | NA         | NA         | NA         | NA | RNU1-62P    |
| NA        | ENSG00000199470 | 0        | NA         | NA         | NA         | NA |             |
| NA        | ENSG00000199471 | 0        | NA         | NA         | NA         | NA |             |
| NA        | ENSG00000199472 | 0        | NA         | NA         | NA         | NA |             |
| NA        | ENSG00000199473 | 0        | NA         | NA         | NA         | NA |             |
| NA        | ENSG00000199474 | 0        | NA         | NA         | NA         | NA |             |
| NA        | ENSG00000199475 | 0        | NA         | NA         | NA         | NA | RN7SKP104   |
| NA        | ENSG00000199476 | 0        | NA         | NA         | NA         | NA |             |
| 677814    | ENSG00000199477 | 0        | NA         | NA         | NA         | NA | SNORA31     |
| NA        | ENSG00000199480 | 0        | NA         | NA         | NA         | NA | RNA5SP389   |
| NA        | ENSG00000199482 | 0        | NA         | NA         | NA         | NA | RNU6-633P   |
| NA        | ENSG00000199483 | 0        | NA         | NA         | NA         | NA | RNU4-15P    |
| NA        | ENSG00000199487 | 0        | NA         | NA         | NA         | NA |             |
| NA        | ENSG00000199488 | 0        | NA         | NA         | NA         | NA | RNU1-70P    |
| 100033801 | ENSG00000199489 | 0        | NA         | NA         | NA         | NA | SNORD115-25 |
| NA        | ENSG00000199490 | 0        | NA         | NA         | NA         | NA |             |
| NA        | ENSG00000199492 | 0        | NA         | NA         | NA         | NA | RNU6-1313P  |
| NA        | ENSG00000199497 | 0.173733 | 0.01914545 | 0.38484597 | 0.78225479 | NA | RNU1-94P    |
| NA        | ENSG00000199506 | 0        | NA         | NA         | NA         | NA | RNU6-247P   |
| NA        | ENSG00000199508 | 0        | NA         | NA         | NA         | NA | RNA5SP110   |
| NA        | ENSG00000199509 | 0        | NA         | NA         | NA         | NA | RNA5SP477   |

|        |                 |   |    |    |    |    |             |
|--------|-----------------|---|----|----|----|----|-------------|
| NA     | ENSG00000199512 | 0 | NA | NA | NA | NA | RNU6-212P   |
| NA     | ENSG00000199514 | 0 | NA | NA | NA | NA | RNU6-235P   |
| NA     | ENSG00000199515 | 0 | NA | NA | NA | NA |             |
| NA     | ENSG00000199516 | 0 | NA | NA | NA | NA |             |
| NA     | ENSG00000199520 | 0 | NA | NA | NA | NA | RNU6-386P   |
| NA     | ENSG00000199523 | 0 | NA | NA | NA | NA | RNA5SP226   |
| NA     | ENSG00000199525 | 0 | NA | NA | NA | NA | RNA5SP295   |
| NA     | ENSG00000199529 | 0 | NA | NA | NA | NA | RNU6-462P   |
| NA     | ENSG00000199530 | 0 | NA | NA | NA | NA |             |
| NA     | ENSG00000199535 | 0 | NA | NA | NA | NA | RNA5SP305   |
| NA     | ENSG00000199536 | 0 | NA | NA | NA | NA | RNU6-315P   |
| NA     | ENSG00000199540 | 0 | NA | NA | NA | NA |             |
| NA     | ENSG00000199545 | 0 | NA | NA | NA | NA | RNA5SP195   |
| NA     | ENSG00000199546 | 0 | NA | NA | NA | NA |             |
| NA     | ENSG00000199550 | 0 | NA | NA | NA | NA |             |
| NA     | ENSG00000199551 | 0 | NA | NA | NA | NA | RNU6-545P   |
| NA     | ENSG00000199552 | 0 | NA | NA | NA | NA |             |
| NA     | ENSG00000199556 | 0 | NA | NA | NA | NA | RNA5SP361   |
| NA     | ENSG00000199562 | 0 | NA | NA | NA | NA | RNU6-37P    |
| NA     | ENSG00000199564 | 0 | NA | NA | NA | NA | RNA5SP502   |
| NA     | ENSG00000199565 | 0 | NA | NA | NA | NA |             |
| NA     | ENSG00000199566 | 0 | NA | NA | NA | NA |             |
| NA     | ENSG00000199567 | 0 | NA | NA | NA | NA |             |
| 26831  | ENSG00000199568 | 0 | NA | NA | NA | NA | RNU5A-1     |
| NA     | ENSG00000199570 | 0 | NA | NA | NA | NA | RNU6-228P   |
| NA     | ENSG00000199571 | 0 | NA | NA | NA | NA |             |
| NA     | ENSG00000199572 | 0 | NA | NA | NA | NA | RNA5SP174   |
| 595100 | ENSG00000199574 | 0 | NA | NA | NA | NA | SNORD18C    |
| 767577 | ENSG00000199575 | 0 | NA | NA | NA | NA | SNORD114-1  |
| NA     | ENSG00000199577 | 0 | NA | NA | NA | NA | RNU6-822P   |
| NA     | ENSG00000199580 | 0 | NA | NA | NA | NA |             |
| NA     | ENSG00000199584 | 0 | NA | NA | NA | NA |             |
| NA     | ENSG00000199585 | 0 | NA | NA | NA | NA | RNA5SP119   |
| NA     | ENSG00000199591 | 0 | NA | NA | NA | NA |             |
| NA     | ENSG00000199592 | 0 | NA | NA | NA | NA | RNA5SP321   |
| 767592 | ENSG00000199593 | 0 | NA | NA | NA | NA | SNORD114-14 |
| NA     | ENSG00000199594 | 0 | NA | NA | NA | NA | RNU6-1301P  |
| NA     | ENSG00000199595 | 0 | NA | NA | NA | NA |             |

|           |                 |            |             |            |            |            |            |
|-----------|-----------------|------------|-------------|------------|------------|------------|------------|
| NA        | ENSG00000199598 | 0          | NA          | NA         | NA         | NA         | RNU6-859P  |
| NA        | ENSG00000199601 | 0          | NA          | NA         | NA         | NA         | RNU6-562P  |
| NA        | ENSG00000199603 | 0          | NA          | NA         | NA         | NA         | RNU6-951P  |
| NA        | ENSG00000199605 | 0          | NA          | NA         | NA         | NA         | RNY4P24    |
| NA        | ENSG00000199609 | 0          | NA          | NA         | NA         | NA         | RNA5SP124  |
| NA        | ENSG00000199620 | 0          | NA          | NA         | NA         | NA         | RNA5SP258  |
| NA        | ENSG00000199622 | 0          | NA          | NA         | NA         | NA         | RN7SKP20   |
| NA        | ENSG00000199626 | 0          | NA          | NA         | NA         | NA         | RNU6-989P  |
| NA        | ENSG00000199627 | 0          | NA          | NA         | NA         | NA         | RNU6-1010P |
| NA        | ENSG00000199629 | 0          | NA          | NA         | NA         | NA         | RNU1-14P   |
| NA        | ENSG00000199630 | 0          | NA          | NA         | NA         | NA         |            |
| 26818     | ENSG00000199631 | 0          | NA          | NA         | NA         | NA         | SNORD33    |
| NA        | ENSG00000199633 | 0          | NA          | NA         | NA         | NA         |            |
| NA        | ENSG00000199634 | 0          | NA          | NA         | NA         | NA         | RNU4-79P   |
| NA        | ENSG00000199635 | 0          | NA          | NA         | NA         | NA         |            |
| NA        | ENSG00000199636 | 0          | NA          | NA         | NA         | NA         |            |
| NA        | ENSG00000199638 | 0          | NA          | NA         | NA         | NA         | RNA5SP319  |
| NA        | ENSG00000199640 | 0          | NA          | NA         | NA         | NA         | RN7SKP294  |
| NA        | ENSG00000199643 | 0          | NA          | NA         | NA         | NA         | RNU4-90P   |
| NA        | ENSG00000199645 | 0          | NA          | NA         | NA         | NA         | RNU6-1330P |
| NA        | ENSG00000199646 | 0          | NA          | NA         | NA         | NA         | RNU6-1272P |
| NA        | ENSG00000199652 | 0          | NA          | NA         | NA         | NA         | RNU1-35P   |
| NA        | ENSG00000199664 | 0          | NA          | NA         | NA         | NA         | RNU6-1266P |
| 109616984 | ENSG00000199666 | 0          | NA          | NA         | NA         | NA         | SNORD3G    |
| NA        | ENSG00000199667 | 0          | NA          | NA         | NA         | NA         |            |
| NA        | ENSG00000199668 | 0          | NA          | NA         | NA         | NA         |            |
| NA        | ENSG00000199672 | 0          | NA          | NA         | NA         | NA         | RNU4-21P   |
| NA        | ENSG00000199673 | 0          | NA          | NA         | NA         | NA         | SNORD16    |
| NA        | ENSG00000199674 | 0          | NA          | NA         | NA         | NA         | RNU6-862P  |
| NA        | ENSG00000199676 | 0          | NA          | NA         | NA         | NA         |            |
| NA        | ENSG00000199677 | 0          | NA          | NA         | NA         | NA         |            |
| NA        | ENSG00000199683 | 0.15069912 | -0.01848503 | 0.38480575 | 0.84537521 | NA         | RN7SKP185  |
| NA        | ENSG00000199687 | 0          | NA          | NA         | NA         | NA         | RNU1-38P   |
| NA        | ENSG00000199691 | 2.78253675 | 0.12034343  | 0.39932476 | 0.21966157 | 0.43175718 | RN7SKP173  |
| NA        | ENSG00000199695 | 0          | NA          | NA         | NA         | NA         | RNU6-1128P |
| NA        | ENSG00000199697 | 0          | NA          | NA         | NA         | NA         | RNU6-446P  |
| NA        | ENSG00000199698 | 0          | NA          | NA         | NA         | NA         |            |
| NA        | ENSG00000199700 | 0          | NA          | NA         | NA         | NA         | RNU6-223P  |



|           |    |                 |            |            |           |            |            |            |
|-----------|----|-----------------|------------|------------|-----------|------------|------------|------------|
|           | NA | ENSG00000199701 | 0          | NA         | NA        | NA         | NA         |            |
|           | NA | ENSG00000199702 | 0          | NA         | NA        | NA         | NA         | RNU6-170P  |
|           | NA | ENSG00000199705 | 0          | NA         | NA        | NA         | NA         |            |
|           | NA | ENSG00000199709 | 0          | NA         | NA        | NA         | NA         | RNU4-23P   |
|           | NA | ENSG00000199710 | 0          | NA         | NA        | NA         | NA         |            |
|           | NA | ENSG00000199711 | 0          | NA         | NA        | NA         | NA         |            |
| 100033437 | NA | ENSG00000199712 | 0          | NA         | NA        | NA         | NA         | SNORD115-2 |
|           | NA | ENSG00000199713 | 0          | NA         | NA        | NA         | NA         |            |
|           | NA | ENSG00000199715 | 0          | NA         | NA        | NA         | NA         |            |
|           | NA | ENSG00000199716 | 0          | NA         | NA        | NA         | NA         |            |
|           | NA | ENSG00000199719 | 3.25044116 | 0.07247012 | 0.3798361 | 0.47935997 | 0.70064538 | RN7SKP74   |
|           | NA | ENSG00000199728 | 0          | NA         | NA        | NA         | NA         | RNU6-655P  |
|           | NA | ENSG00000199730 | 0          | NA         | NA        | NA         | NA         | RN7SKP95   |
|           | NA | ENSG00000199731 | 0          | NA         | NA        | NA         | NA         | RNU6-1079P |
|           | NA | ENSG00000199732 | 0          | NA         | NA        | NA         | NA         |            |
|           | NA | ENSG00000199733 | 0          | NA         | NA        | NA         | NA         | RNA5SP307  |
|           | NA | ENSG00000199735 | 0          | NA         | NA        | NA         | NA         | RNU6-227P  |
|           | NA | ENSG00000199739 | 0          | NA         | NA        | NA         | NA         | RNU6-552P  |
|           | NA | ENSG00000199740 | 0          | NA         | NA        | NA         | NA         |            |
| 26815     | NA | ENSG00000199744 | 0          | NA         | NA        | NA         | NA         | SNORD36A   |
|           | NA | ENSG00000199751 | 0          | NA         | NA        | NA         | NA         |            |
|           | NA | ENSG00000199753 | 0          | NA         | NA        | NA         | NA         | SNORD104   |
|           | NA | ENSG00000199755 | 0          | NA         | NA        | NA         | NA         |            |
|           | NA | ENSG00000199756 | 0          | NA         | NA        | NA         | NA         |            |
|           | NA | ENSG00000199762 | 0          | NA         | NA        | NA         | NA         |            |
|           | NA | ENSG00000199764 | 0          | NA         | NA        | NA         | NA         |            |
|           | NA | ENSG00000199765 | 0          | NA         | NA        | NA         | NA         | RNU6-363P  |
|           | NA | ENSG00000199767 | 0          | NA         | NA        | NA         | NA         | RNU6-78P   |
|           | NA | ENSG00000199771 | 0          | NA         | NA        | NA         | NA         | RNA5SP426  |
|           | NA | ENSG00000199773 | 0          | NA         | NA        | NA         | NA         | RNU1-76P   |
|           | NA | ENSG00000199780 | 0          | NA         | NA        | NA         | NA         |            |
|           | NA | ENSG00000199781 | 0          | NA         | NA        | NA         | NA         |            |
| 100033446 | NA | ENSG00000199782 | 0          | NA         | NA        | NA         | NA         | SNORD115-9 |
|           | NA | ENSG00000199783 | 0          | NA         | NA        | NA         | NA         |            |
|           | NA | ENSG00000199784 | 0          | NA         | NA        | NA         | NA         | RNU6-1287P |
| 619565    | NA | ENSG00000199785 | 0          | NA         | NA        | NA         | NA         | SNORA52    |
|           | NA | ENSG00000199786 | 0          | NA         | NA        | NA         | NA         | RNA5SP188  |
| 109616959 | NA | ENSG00000199787 | 0          | NA         | NA        | NA         | NA         | SNORA80C   |

|           |                 |   |    |    |    |    |             |
|-----------|-----------------|---|----|----|----|----|-------------|
| NA        | ENSG00000199788 | 0 | NA | NA | NA | NA | RNY3P2      |
| NA        | ENSG00000199790 | 0 | NA | NA | NA | NA | RNU6-836P   |
| NA        | ENSG00000199791 | 0 | NA | NA | NA | NA | RNU6-451P   |
| NA        | ENSG00000199792 | 0 | NA | NA | NA | NA | RNU6-1233P  |
| NA        | ENSG00000199796 | 0 | NA | NA | NA | NA | RNU6-924P   |
| NA        | ENSG00000199797 | 0 | NA | NA | NA | NA |             |
| 767581    | ENSG00000199798 | 0 | NA | NA | NA | NA | SNORD114-5  |
| NA        | ENSG00000199801 | 0 | NA | NA | NA | NA |             |
| NA        | ENSG00000199803 | 0 | NA | NA | NA | NA | RNU6-1159P  |
| NA        | ENSG00000199804 | 0 | NA | NA | NA | NA | RNA5SP383   |
| NA        | ENSG00000199805 | 0 | NA | NA | NA | NA | RNU1-134P   |
| NA        | ENSG00000199806 | 0 | NA | NA | NA | NA | RNA5SP491   |
| NA        | ENSG00000199809 | 0 | NA | NA | NA | NA | RNA5SP374   |
| NA        | ENSG00000199812 | 0 | NA | NA | NA | NA | RNU6-428P   |
| NA        | ENSG00000199814 | 0 | NA | NA | NA | NA | RNU6-1260P  |
| NA        | ENSG00000199815 | 0 | NA | NA | NA | NA |             |
| NA        | ENSG00000199824 | 0 | NA | NA | NA | NA | RNU6-199P   |
| NA        | ENSG00000199827 | 0 | NA | NA | NA | NA | RNU6-1290P  |
| NA        | ENSG00000199831 | 0 | NA | NA | NA | NA | RN7SKP291   |
| NA        | ENSG00000199832 | 0 | NA | NA | NA | NA |             |
| 100033603 | ENSG00000199833 | 0 | NA | NA | NA | NA | SNORD115-21 |
| NA        | ENSG00000199836 | 0 | NA | NA | NA | NA | RNU1-47P    |
| NA        | ENSG00000199839 | 0 | NA | NA | NA | NA | RNA5SP150   |
| NA        | ENSG00000199840 | 0 | NA | NA | NA | NA |             |
| NA        | ENSG00000199843 | 0 | NA | NA | NA | NA | RNA5SP358   |
| NA        | ENSG00000199845 | 0 | NA | NA | NA | NA | RNA5SP375   |
| NA        | ENSG00000199846 | 0 | NA | NA | NA | NA | RNU1-72P    |
| NA        | ENSG00000199849 | 0 | NA | NA | NA | NA | RNU5F-6P    |
| NA        | ENSG00000199851 | 0 | NA | NA | NA | NA |             |
| NA        | ENSG00000199855 | 0 | NA | NA | NA | NA | RNU6-490P   |
| NA        | ENSG00000199856 | 0 | NA | NA | NA | NA |             |
| NA        | ENSG00000199857 | 0 | NA | NA | NA | NA |             |
| NA        | ENSG00000199858 | 0 | NA | NA | NA | NA | RNU6-1120P  |
| NA        | ENSG00000199859 | 0 | NA | NA | NA | NA | RNU6-582P   |
| NA        | ENSG00000199862 | 0 | NA | NA | NA | NA |             |
| NA        | ENSG00000199865 | 0 | NA | NA | NA | NA | RNU6-495P   |
| NA        | ENSG00000199866 | 0 | NA | NA | NA | NA |             |
| NA        | ENSG00000199867 | 0 | NA | NA | NA | NA |             |

|        |                 |   |    |    |    |    |             |
|--------|-----------------|---|----|----|----|----|-------------|
| NA     | ENSG00000199872 | 0 | NA | NA | NA | NA | RNU6-942P   |
| NA     | ENSG00000199874 | 0 | NA | NA | NA | NA | RNA5SP452   |
| NA     | ENSG00000199875 | 0 | NA | NA | NA | NA |             |
| NA     | ENSG00000199878 | 0 | NA | NA | NA | NA | RN7SKP149   |
| NA     | ENSG00000199879 | 0 | NA | NA | NA | NA | RNVU1-22    |
| NA     | ENSG00000199880 | 0 | NA | NA | NA | NA | RNU6-888P   |
| NA     | ENSG00000199881 | 0 | NA | NA | NA | NA |             |
| NA     | ENSG00000199883 | 0 | NA | NA | NA | NA | RN7SKP90    |
| NA     | ENSG00000199884 | 0 | NA | NA | NA | NA |             |
| NA     | ENSG00000199885 | 0 | NA | NA | NA | NA | RNU6-330P   |
| NA     | ENSG00000199886 | 0 | NA | NA | NA | NA | RNU6-249P   |
| NA     | ENSG00000199890 | 0 | NA | NA | NA | NA |             |
| NA     | ENSG00000199892 | 0 | NA | NA | NA | NA | RNU1-17P    |
| NA     | ENSG00000199894 | 0 | NA | NA | NA | NA |             |
| NA     | ENSG00000199895 | 0 | NA | NA | NA | NA |             |
| NA     | ENSG00000199899 | 0 | NA | NA | NA | NA |             |
| NA     | ENSG00000199901 | 0 | NA | NA | NA | NA |             |
| NA     | ENSG00000199903 | 0 | NA | NA | NA | NA | RNU6-1273P  |
| NA     | ENSG00000199905 | 0 | NA | NA | NA | NA | RNU6-492P   |
| NA     | ENSG00000199906 | 0 | NA | NA | NA | NA | RNU5B-2P    |
| NA     | ENSG00000199911 | 0 | NA | NA | NA | NA |             |
| NA     | ENSG00000199912 | 0 | NA | NA | NA | NA |             |
| 767594 | ENSG00000199914 | 0 | NA | NA | NA | NA | SNORD114-16 |
| NA     | ENSG00000199920 | 0 | NA | NA | NA | NA | RNU4-44P    |
| NA     | ENSG00000199921 | 0 | NA | NA | NA | NA | RNU6-161P   |
| NA     | ENSG00000199924 | 0 | NA | NA | NA | NA | RNU6-1252P  |
| NA     | ENSG00000199927 | 0 | NA | NA | NA | NA |             |
| NA     | ENSG00000199929 | 0 | NA | NA | NA | NA | RNA5SP405   |
| NA     | ENSG00000199932 | 0 | NA | NA | NA | NA | RNU1-18P    |
| NA     | ENSG00000199933 | 0 | NA | NA | NA | NA | RNY1P16     |
| NA     | ENSG00000199934 | 0 | NA | NA | NA | NA |             |
| NA     | ENSG00000199936 | 0 | NA | NA | NA | NA |             |
| NA     | ENSG00000199938 | 0 | NA | NA | NA | NA |             |
| NA     | ENSG00000199940 | 0 | NA | NA | NA | NA | RN7SKP75    |
| 767597 | ENSG00000199942 | 0 | NA | NA | NA | NA | SNORD114-19 |
| NA     | ENSG00000199944 | 0 | NA | NA | NA | NA | RNU6-653P   |
| NA     | ENSG00000199949 | 0 | NA | NA | NA | NA |             |
| NA     | ENSG00000199953 | 0 | NA | NA | NA | NA | RNA5SP443   |

|           |                 |   |    |    |    |    |             |
|-----------|-----------------|---|----|----|----|----|-------------|
| NA        | ENSG00000199959 | 0 | NA | NA | NA | NA |             |
| 100033451 | ENSG00000199960 | 0 | NA | NA | NA | NA | SNORD115-14 |
| 677849    | ENSG00000199961 | 0 | NA | NA | NA | NA | SNORD1B     |
| NA        | ENSG00000199962 | 0 | NA | NA | NA | NA |             |
| NA        | ENSG00000199963 | 0 | NA | NA | NA | NA | RNU6-605P   |
| NA        | ENSG00000199964 | 0 | NA | NA | NA | NA |             |
| 100033440 | ENSG00000199970 | 0 | NA | NA | NA | NA | SNORD115-3  |
| NA        | ENSG00000199971 | 0 | NA | NA | NA | NA | RNU6-797P   |
| NA        | ENSG00000199975 | 0 | NA | NA | NA | NA | RN7SKP243   |
| NA        | ENSG00000199977 | 0 | NA | NA | NA | NA |             |
| NA        | ENSG00000199979 | 0 | NA | NA | NA | NA |             |
| NA        | ENSG00000199985 | 0 | NA | NA | NA | NA | RNA5SP264   |
| NA        | ENSG00000199986 | 0 | NA | NA | NA | NA | RNU6-486P   |
| 56664     | ENSG00000199990 | 0 | NA | NA | NA | NA | VTRNA1-1    |
| NA        | ENSG00000199994 | 0 | NA | NA | NA | NA | RNA5SP145   |
| NA        | ENSG00000200003 | 0 | NA | NA | NA | NA | RNU6-986P   |
| NA        | ENSG00000200008 | 0 | NA | NA | NA | NA |             |
| NA        | ENSG00000200011 | 0 | NA | NA | NA | NA |             |
| NA        | ENSG00000200013 | 0 | NA | NA | NA | NA | RNU6-623P   |
| NA        | ENSG00000200021 | 0 | NA | NA | NA | NA | RNA5SP448   |
| NA        | ENSG00000200024 | 0 | NA | NA | NA | NA |             |
| NA        | ENSG00000200026 | 0 | NA | NA | NA | NA |             |
| NA        | ENSG00000200028 | 0 | NA | NA | NA | NA | RNA5SP98    |
| NA        | ENSG00000200029 | 0 | NA | NA | NA | NA | RNU6-642P   |
| NA        | ENSG00000200033 | 0 | NA | NA | NA | NA | RNU6-403P   |
| NA        | ENSG00000200034 | 0 | NA | NA | NA | NA | RNU4-73P    |
| NA        | ENSG00000200036 | 0 | NA | NA | NA | NA | RNA5SP65    |
| NA        | ENSG00000200040 | 0 | NA | NA | NA | NA |             |
| NA        | ENSG00000200041 | 0 | NA | NA | NA | NA |             |
| NA        | ENSG00000200047 | 0 | NA | NA | NA | NA | RN7SKP115   |
| NA        | ENSG00000200048 | 0 | NA | NA | NA | NA | RNU6-812P   |
| NA        | ENSG00000200049 | 0 | NA | NA | NA | NA |             |
| NA        | ENSG00000200051 | 0 | NA | NA | NA | NA |             |
| NA        | ENSG00000200052 | 0 | NA | NA | NA | NA |             |
| NA        | ENSG00000200058 | 0 | NA | NA | NA | NA | RNA5SP218   |
| NA        | ENSG00000200059 | 0 | NA | NA | NA | NA |             |
| NA        | ENSG00000200060 | 0 | NA | NA | NA | NA |             |
| NA        | ENSG00000200062 | 0 | NA | NA | NA | NA | RNU4-58P    |

|        |                 |            |             |            |            |    |             |
|--------|-----------------|------------|-------------|------------|------------|----|-------------|
| NA     | ENSG00000200063 | 0          | NA          | NA         | NA         | NA |             |
| NA     | ENSG00000200064 | 0          | NA          | NA         | NA         | NA | RNY4P9      |
| NA     | ENSG00000200065 | 0          | NA          | NA         | NA         | NA |             |
| NA     | ENSG00000200070 | 0          | NA          | NA         | NA         | NA | RNU4-80P    |
| NA     | ENSG00000200072 | 0          | NA          | NA         | NA         | NA |             |
| NA     | ENSG00000200075 | 0          | NA          | NA         | NA         | NA |             |
| NA     | ENSG00000200079 | 0          | NA          | NA         | NA         | NA | RNA5SP326   |
| NA     | ENSG00000200084 | 0          | NA          | NA         | NA         | NA | SNORD68     |
| NA     | ENSG00000200085 | 0          | NA          | NA         | NA         | NA |             |
| NA     | ENSG00000200086 | 0          | NA          | NA         | NA         | NA | RNU6-433P   |
| 26768  | ENSG00000200087 | 2.46684816 | -0.00368137 | 0.37209828 | 0.96765836 | NA | SNORA73B    |
| 767612 | ENSG00000200089 | 0          | NA          | NA         | NA         | NA | SNORD114-31 |
| NA     | ENSG00000200090 | 0          | NA          | NA         | NA         | NA |             |
| NA     | ENSG00000200091 | 0          | NA          | NA         | NA         | NA | RN7SKP163   |
| NA     | ENSG00000200095 | 0          | NA          | NA         | NA         | NA | RNU6-181P   |
| NA     | ENSG00000200097 | 0          | NA          | NA         | NA         | NA | RNU6-1167P  |
| NA     | ENSG00000200101 | 0          | NA          | NA         | NA         | NA | RNU6-508P   |
| NA     | ENSG00000200102 | 0          | NA          | NA         | NA         | NA | RNU6-252P   |
| NA     | ENSG00000200105 | 0          | NA          | NA         | NA         | NA | RNU6-251P   |
| NA     | ENSG00000200106 | 0          | NA          | NA         | NA         | NA | RNU6-984P   |
| NA     | ENSG00000200107 | 0          | NA          | NA         | NA         | NA | RNU6-1249P  |
| NA     | ENSG00000200108 | 0          | NA          | NA         | NA         | NA | RNU6-774P   |
| NA     | ENSG00000200112 | 0          | NA          | NA         | NA         | NA |             |
| NA     | ENSG00000200113 | 0          | NA          | NA         | NA         | NA |             |
| NA     | ENSG00000200114 | 0          | NA          | NA         | NA         | NA | RNA5SP123   |
| NA     | ENSG00000200118 | 0          | NA          | NA         | NA         | NA |             |
| NA     | ENSG00000200120 | 0          | NA          | NA         | NA         | NA |             |
| NA     | ENSG00000200121 | 0          | NA          | NA         | NA         | NA |             |
| NA     | ENSG00000200131 | 0          | NA          | NA         | NA         | NA | RN7SKP77    |
| NA     | ENSG00000200132 | 0          | NA          | NA         | NA         | NA | RNU6-1021P  |
| NA     | ENSG00000200135 | 0          | NA          | NA         | NA         | NA |             |
| NA     | ENSG00000200138 | 0          | NA          | NA         | NA         | NA | RNY1P10     |
| NA     | ENSG00000200139 | 0          | NA          | NA         | NA         | NA | RNU6-778P   |
| NA     | ENSG00000200142 | 0          | NA          | NA         | NA         | NA |             |
| NA     | ENSG00000200146 | 0          | NA          | NA         | NA         | NA | RNU6-544P   |
| NA     | ENSG00000200150 | 0          | NA          | NA         | NA         | NA |             |
| NA     | ENSG00000200151 | 0          | NA          | NA         | NA         | NA | RN7SKP231   |
| NA     | ENSG00000200152 | 0          | NA          | NA         | NA         | NA | RNU6-216P   |

|        |                 |   |    |    |    |    |            |
|--------|-----------------|---|----|----|----|----|------------|
| NA     | ENSG00000200153 | 0 | NA | NA | NA | NA | RNU6-23P   |
| 26832  | ENSG00000200156 | 0 | NA | NA | NA | NA | RNU5B-1    |
| NA     | ENSG00000200161 | 0 | NA | NA | NA | NA | RN7SKP145  |
| NA     | ENSG00000200162 | 0 | NA | NA | NA | NA |            |
| NA     | ENSG00000200164 | 0 | NA | NA | NA | NA |            |
| NA     | ENSG00000200168 | 0 | NA | NA | NA | NA | RNA5SP350  |
| NA     | ENSG00000200169 | 0 | NA | NA | NA | NA | RNU5D-1    |
| NA     | ENSG00000200170 | 0 | NA | NA | NA | NA |            |
| NA     | ENSG00000200171 | 0 | NA | NA | NA | NA |            |
| NA     | ENSG00000200174 | 0 | NA | NA | NA | NA |            |
| NA     | ENSG00000200175 | 0 | NA | NA | NA | NA | RNU6-1309P |
| NA     | ENSG00000200176 | 0 | NA | NA | NA | NA | RNU1-19P   |
| NA     | ENSG00000200179 | 0 | NA | NA | NA | NA |            |
| NA     | ENSG00000200183 | 0 | NA | NA | NA | NA | RNU6-238P  |
| NA     | ENSG00000200184 | 0 | NA | NA | NA | NA | RNU1-20P   |
| NA     | ENSG00000200189 | 0 | NA | NA | NA | NA | RNU6-832P  |
| NA     | ENSG00000200191 | 0 | NA | NA | NA | NA |            |
| NA     | ENSG00000200197 | 0 | NA | NA | NA | NA | RNU1-21P   |
| NA     | ENSG00000200198 | 0 | NA | NA | NA | NA | RN7SKP211  |
| NA     | ENSG00000200201 | 0 | NA | NA | NA | NA |            |
| NA     | ENSG00000200204 | 0 | NA | NA | NA | NA | RNU1-22P   |
| NA     | ENSG00000200206 | 0 | NA | NA | NA | NA |            |
| NA     | ENSG00000200208 | 0 | NA | NA | NA | NA |            |
| NA     | ENSG00000200209 | 0 | NA | NA | NA | NA |            |
| NA     | ENSG00000200211 | 0 | NA | NA | NA | NA | RNY4P27    |
| NA     | ENSG00000200213 | 0 | NA | NA | NA | NA | RNU6-992P  |
| 767566 | ENSG00000200215 | 0 | NA | NA | NA | NA | SNORD113-6 |
| NA     | ENSG00000200216 | 0 | NA | NA | NA | NA | RNU6-745P  |
| NA     | ENSG00000200217 | 0 | NA | NA | NA | NA | RNU6-839P  |
| NA     | ENSG00000200218 | 0 | NA | NA | NA | NA | RNU6-697P  |
| NA     | ENSG00000200220 | 0 | NA | NA | NA | NA | RNU6-179P  |
| NA     | ENSG00000200222 | 0 | NA | NA | NA | NA |            |
| NA     | ENSG00000200224 | 0 | NA | NA | NA | NA | RNU6-626P  |
| NA     | ENSG00000200225 | 0 | NA | NA | NA | NA | RNA5SP382  |
| NA     | ENSG00000200227 | 0 | NA | NA | NA | NA | RNA5SP197  |
| NA     | ENSG00000200231 | 0 | NA | NA | NA | NA | RNU1-23P   |
| NA     | ENSG00000200235 | 0 | NA | NA | NA | NA |            |
| NA     | ENSG00000200237 | 0 | NA | NA | NA | NA |            |

|        |                 |            |             |            |            |    |             |
|--------|-----------------|------------|-------------|------------|------------|----|-------------|
| NA     | ENSG00000200238 | 0          | NA          | NA         | NA         | NA | RNA5SP133   |
| NA     | ENSG00000200241 | 0          | NA          | NA         | NA         | NA |             |
| NA     | ENSG00000200243 | 0          | NA          | NA         | NA         | NA | RN7SKP79    |
| NA     | ENSG00000200246 | 0          | NA          | NA         | NA         | NA | RNA5SP263   |
| NA     | ENSG00000200247 | 0          | NA          | NA         | NA         | NA | RNU6-254P   |
| NA     | ENSG00000200248 | 0          | NA          | NA         | NA         | NA | RNA5SP214   |
| NA     | ENSG00000200250 | 0          | NA          | NA         | NA         | NA | RNU6-1147P  |
| NA     | ENSG00000200252 | 0          | NA          | NA         | NA         | NA |             |
| NA     | ENSG00000200253 | 0          | NA          | NA         | NA         | NA | RNU6-529P   |
| NA     | ENSG00000200254 | 0          | NA          | NA         | NA         | NA | RNU6-536P   |
| NA     | ENSG00000200256 | 0          | NA          | NA         | NA         | NA |             |
| NA     | ENSG00000200257 | 0          | NA          | NA         | NA         | NA | RNU6-97P    |
| 26816  | ENSG00000200259 | 0          | NA          | NA         | NA         | NA | SNORD35A    |
| NA     | ENSG00000200261 | 0          | NA          | NA         | NA         | NA |             |
| NA     | ENSG00000200262 | 0          | NA          | NA         | NA         | NA |             |
| NA     | ENSG00000200267 | 0          | NA          | NA         | NA         | NA | RNU6-66P    |
| NA     | ENSG00000200269 | 0          | NA          | NA         | NA         | NA | RNU6-838P   |
| NA     | ENSG00000200274 | 0          | NA          | NA         | NA         | NA | RNU4-32P    |
| NA     | ENSG00000200275 | 0          | NA          | NA         | NA         | NA | RNA5SP199   |
| NA     | ENSG00000200278 | 0          | NA          | NA         | NA         | NA | RNA5SP352   |
| 767588 | ENSG00000200279 | 0          | NA          | NA         | NA         | NA | SNORD114-10 |
| NA     | ENSG00000200281 | 0          | NA          | NA         | NA         | NA | RNU6-624P   |
| NA     | ENSG00000200283 | 0          | NA          | NA         | NA         | NA |             |
| NA     | ENSG00000200287 | 0          | NA          | NA         | NA         | NA |             |
| NA     | ENSG00000200288 | 0          | NA          | NA         | NA         | NA |             |
| NA     | ENSG00000200291 | 0          | NA          | NA         | NA         | NA |             |
| NA     | ENSG00000200293 | 0.15069912 | -0.01848503 | 0.38480575 | 0.84537521 | NA | RNA5SP393   |
| NA     | ENSG00000200294 | 0          | NA          | NA         | NA         | NA |             |
| NA     | ENSG00000200295 | 0          | NA          | NA         | NA         | NA | RNU6-527P   |
| NA     | ENSG00000200296 | 0          | NA          | NA         | NA         | NA | RNU1-83P    |
| NA     | ENSG00000200298 | 0          | NA          | NA         | NA         | NA |             |
| NA     | ENSG00000200301 | 0          | NA          | NA         | NA         | NA | RNA5SP483   |
| NA     | ENSG00000200303 | 0          | NA          | NA         | NA         | NA | RNU6-940P   |
| NA     | ENSG00000200304 | 0          | NA          | NA         | NA         | NA | RNU6-1255P  |
| NA     | ENSG00000200305 | 0          | NA          | NA         | NA         | NA |             |
| NA     | ENSG00000200309 | 0          | NA          | NA         | NA         | NA |             |
| NA     | ENSG00000200310 | 0          | NA          | NA         | NA         | NA | RNA5SP215   |
| NA     | ENSG00000200312 | 0          | NA          | NA         | NA         | NA | RN7SKP255   |

|           |                 |   |    |    |    |    |            |
|-----------|-----------------|---|----|----|----|----|------------|
| NA        | ENSG00000200313 | 0 | NA | NA | NA | NA | RNA5-8SP7  |
| NA        | ENSG00000200314 | 0 | NA | NA | NA | NA |            |
| NA        | ENSG00000200318 | 0 | NA | NA | NA | NA | SNORD3P1   |
| NA        | ENSG00000200320 | 0 | NA | NA | NA | NA | SNORA63    |
| NA        | ENSG00000200325 | 0 | NA | NA | NA | NA |            |
| NA        | ENSG00000200326 | 0 | NA | NA | NA | NA | RNA5SP391  |
| NA        | ENSG00000200327 | 0 | NA | NA | NA | NA | RNA5SP62   |
| NA        | ENSG00000200331 | 0 | NA | NA | NA | NA | RNU6-183P  |
| NA        | ENSG00000200332 | 0 | NA | NA | NA | NA |            |
| NA        | ENSG00000200334 | 0 | NA | NA | NA | NA |            |
| NA        | ENSG00000200336 | 0 | NA | NA | NA | NA | RNA5SP333  |
| NA        | ENSG00000200338 | 0 | NA | NA | NA | NA | RNU1-49P   |
| NA        | ENSG00000200340 | 0 | NA | NA | NA | NA | RNU1-105P  |
| NA        | ENSG00000200344 | 0 | NA | NA | NA | NA |            |
| NA        | ENSG00000200345 | 0 | NA | NA | NA | NA | RNU6-485P  |
| NA        | ENSG00000200350 | 0 | NA | NA | NA | NA | RNU6-1285P |
| NA        | ENSG00000200351 | 0 | NA | NA | NA | NA |            |
| NA        | ENSG00000200354 | 0 | NA | NA | NA | NA | SNORA71D   |
| NA        | ENSG00000200355 | 0 | NA | NA | NA | NA |            |
| NA        | ENSG00000200356 | 0 | NA | NA | NA | NA | RNU6-833P  |
| NA        | ENSG00000200360 | 0 | NA | NA | NA | NA | RNU6-792P  |
| NA        | ENSG00000200361 | 0 | NA | NA | NA | NA |            |
| NA        | ENSG00000200366 | 0 | NA | NA | NA | NA | RNU6-511P  |
| 767568    | ENSG00000200367 | 0 | NA | NA | NA | NA | SNORD113-8 |
| NA        | ENSG00000200369 | 0 | NA | NA | NA | NA | RNU6-666P  |
| NA        | ENSG00000200372 | 0 | NA | NA | NA | NA | RNU5E-8P   |
| NA        | ENSG00000200376 | 0 | NA | NA | NA | NA | RNU5E-10P  |
| NA        | ENSG00000200377 | 0 | NA | NA | NA | NA |            |
| NA        | ENSG00000200378 | 0 | NA | NA | NA | NA | RNU5B-4P   |
| NA        | ENSG00000200379 | 0 | NA | NA | NA | NA | RN7SKP45   |
| NA        | ENSG00000200385 | 0 | NA | NA | NA | NA |            |
| NA        | ENSG00000200388 | 0 | NA | NA | NA | NA | RNU6-618P  |
| NA        | ENSG00000200389 | 0 | NA | NA | NA | NA | RNU6-509P  |
| NA        | ENSG00000200390 | 0 | NA | NA | NA | NA |            |
| NA        | ENSG00000200391 | 0 | NA | NA | NA | NA |            |
| NA        | ENSG00000200393 | 0 | NA | NA | NA | NA | RNU6-698P  |
| 100124536 | ENSG00000200394 | 0 | NA | NA | NA | NA | SNORA38B   |
| NA        | ENSG00000200397 | 0 | NA | NA | NA | NA |            |



|           |                 |            |            |            |            |    |             |
|-----------|-----------------|------------|------------|------------|------------|----|-------------|
| NA        | ENSG00000200398 | 0          | NA         | NA         | NA         | NA | SNORD115-24 |
| NA        | ENSG00000200403 | 0          | NA         | NA         | NA         | NA | RNU6-1099P  |
| 767603    | ENSG00000200406 | 0          | NA         | NA         | NA         | NA | SNORD114-23 |
| NA        | ENSG00000200407 | 0          | NA         | NA         | NA         | NA | RNU6-1169P  |
| NA        | ENSG00000200408 | 0          | NA         | NA         | NA         | NA | RNA5SP74    |
| NA        | ENSG00000200411 | 0          | NA         | NA         | NA         | NA | RNA5SP346   |
| 767606    | ENSG00000200413 | 0          | NA         | NA         | NA         | NA | SNORD114-26 |
| NA        | ENSG00000200418 | 0          | NA         | NA         | NA         | NA | SNORA63B    |
| NA        | ENSG00000200419 | 0          | NA         | NA         | NA         | NA |             |
| NA        | ENSG00000200421 | 0          | NA         | NA         | NA         | NA |             |
| NA        | ENSG00000200422 | 0          | NA         | NA         | NA         | NA |             |
| NA        | ENSG00000200424 | 0          | NA         | NA         | NA         | NA | RNU6-1155P  |
| NA        | ENSG00000200427 | 0          | NA         | NA         | NA         | NA |             |
| NA        | ENSG00000200428 | 0          | NA         | NA         | NA         | NA |             |
| NA        | ENSG00000200431 | 0          | NA         | NA         | NA         | NA | RNU4-81P    |
| NA        | ENSG00000200432 | 0          | NA         | NA         | NA         | NA |             |
| NA        | ENSG00000200434 | 0          | NA         | NA         | NA         | NA | RNA5-8SP2   |
| NA        | ENSG00000200436 | 0          | NA         | NA         | NA         | NA |             |
| NA        | ENSG00000200437 | 0          | NA         | NA         | NA         | NA | RNU6-799P   |
| NA        | ENSG00000200443 | 0          | NA         | NA         | NA         | NA | RNU6-1066P  |
| NA        | ENSG00000200444 | 0          | NA         | NA         | NA         | NA | RNU6-1339P  |
| NA        | ENSG00000200446 | 0          | NA         | NA         | NA         | NA | RNU6-1085P  |
| NA        | ENSG00000200448 | 0          | NA         | NA         | NA         | NA |             |
| NA        | ENSG00000200455 | 0          | NA         | NA         | NA         | NA | RNU6-1112P  |
| NA        | ENSG00000200456 | 0          | NA         | NA         | NA         | NA | RNU6-1097P  |
| NA        | ENSG00000200462 | 0          | NA         | NA         | NA         | NA | RNU6-727P   |
| 727676    | ENSG00000200463 | 0          | NA         | NA         | NA         | NA | SNORD118    |
| NA        | ENSG00000200468 | 0          | NA         | NA         | NA         | NA | RNA5SP403   |
| NA        | ENSG00000200469 | 0          | NA         | NA         | NA         | NA | RNU6-112P   |
| NA        | ENSG00000200471 | 0          | NA         | NA         | NA         | NA | RNU6-1125P  |
| NA        | ENSG00000200472 | 0.33471731 | 0.02354391 | 0.38534154 | 0.62842204 | NA | RN7SKP44    |
| NA        | ENSG00000200473 | 0          | NA         | NA         | NA         | NA | RNA5SP507   |
| NA        | ENSG00000200475 | 0          | NA         | NA         | NA         | NA | RN7SKP162   |
| 100033815 | ENSG00000200478 | 0          | NA         | NA         | NA         | NA | SNORD115-41 |
| 767609    | ENSG00000200480 | 0          | NA         | NA         | NA         | NA | SNORD114-28 |
| NA        | ENSG00000200483 | 0          | NA         | NA         | NA         | NA | RNU6-1017P  |
| NA        | ENSG00000200484 | 0          | NA         | NA         | NA         | NA | RNU6-1244P  |
| NA        | ENSG00000200485 | 0          | NA         | NA         | NA         | NA |             |

|           |                 |                 |    |    |    |    |             |
|-----------|-----------------|-----------------|----|----|----|----|-------------|
| 100033448 | ENSG00000200486 | 0               | NA | NA | NA | NA | SNORD115-11 |
|           | NA              | ENSG00000200487 | 0  | NA | NA | NA | RNA5SP322   |
|           | NA              | ENSG00000200488 | 0  | NA | NA | NA | RN7SKP203   |
|           | NA              | ENSG00000200492 | 0  | NA | NA | NA |             |
|           | NA              | ENSG00000200494 | 0  | NA | NA | NA |             |
|           | NA              | ENSG00000200495 | 0  | NA | NA | NA | RNU6-1205P  |
|           | NA              | ENSG00000200496 | 0  | NA | NA | NA |             |
|           | NA              | ENSG00000200502 | 0  | NA | NA | NA |             |
| 100033442 | ENSG00000200503 | 0               | NA | NA | NA | NA | SNORD115-5  |
|           | NA              | ENSG00000200506 | 0  | NA | NA | NA |             |
|           | NA              | ENSG00000200508 | 0  | NA | NA | NA |             |
|           | NA              | ENSG00000200516 | 0  | NA | NA | NA | RNA5SP378   |
|           | NA              | ENSG00000200520 | 0  | NA | NA | NA | RNU6-1214P  |
|           | NA              | ENSG00000200521 | 0  | NA | NA | NA |             |
|           | NA              | ENSG00000200522 | 0  | NA | NA | NA | RNU6-957P   |
|           | NA              | ENSG00000200525 | 0  | NA | NA | NA | RNU6-1209P  |
|           | NA              | ENSG00000200526 | 0  | NA | NA | NA | RNY4P14     |
|           | NA              | ENSG00000200527 | 0  | NA | NA | NA | RNA5SP457   |
|           | NA              | ENSG00000200528 | 0  | NA | NA | NA | RNU6-1331P  |
|           | NA              | ENSG00000200530 | 0  | NA | NA | NA | SNORD35B    |
| 594839    | ENSG00000200534 | 0               | NA | NA | NA | NA | SNORA33     |
|           | NA              | ENSG00000200536 | 0  | NA | NA | NA |             |
|           | NA              | ENSG00000200537 | 0  | NA | NA | NA | RNY4P6      |
|           | NA              | ENSG00000200538 | 0  | NA | NA | NA |             |
|           | NA              | ENSG00000200544 | 0  | NA | NA | NA |             |
|           | NA              | ENSG00000200545 | 0  | NA | NA | NA |             |
|           | NA              | ENSG00000200547 | 0  | NA | NA | NA |             |
|           | NA              | ENSG00000200550 | 0  | NA | NA | NA | RNU6-137P   |
|           | NA              | ENSG00000200553 | 0  | NA | NA | NA |             |
|           | NA              | ENSG00000200554 | 0  | NA | NA | NA | RNU6-1020P  |
|           | NA              | ENSG00000200555 | 0  | NA | NA | NA | RNU6-525P   |
|           | NA              | ENSG00000200556 | 0  | NA | NA | NA | RNU6-103P   |
|           | NA              | ENSG00000200558 | 0  | NA | NA | NA | RNA5SP429   |
|           | NA              | ENSG00000200560 | 0  | NA | NA | NA | RNU6-288P   |
|           | NA              | ENSG00000200563 | 0  | NA | NA | NA | RNU6-640P   |
| 100033813 | ENSG00000200564 | 0               | NA | NA | NA | NA | SNORD115-39 |
|           | NA              | ENSG00000200566 | 0  | NA | NA | NA | RNU5F-7P    |
|           | NA              | ENSG00000200570 | 0  | NA | NA | NA | RNU6-829P   |

|           |    |                 |            |            |            |            |    |             |
|-----------|----|-----------------|------------|------------|------------|------------|----|-------------|
|           | NA | ENSG00000200571 | 0          | NA         | NA         | NA         | NA | RNU6-1284P  |
|           | NA | ENSG00000200572 | 0          | NA         | NA         | NA         | NA |             |
|           | NA | ENSG00000200575 | 0          | NA         | NA         | NA         | NA | RNU6-414P   |
|           | NA | ENSG00000200579 | 0          | NA         | NA         | NA         | NA |             |
|           | NA | ENSG00000200587 | 0          | NA         | NA         | NA         | NA | RNA5SP514   |
|           | NA | ENSG00000200591 | 0          | NA         | NA         | NA         | NA |             |
| 100033807 | NA | ENSG00000200593 | 0          | NA         | NA         | NA         | NA | SNORD115-33 |
|           | NA | ENSG00000200594 | 0          | NA         | NA         | NA         | NA | RNU6-824P   |
|           | NA | ENSG00000200597 | 0          | NA         | NA         | NA         | NA | RNVU1-33    |
|           | NA | ENSG00000200600 | 0          | NA         | NA         | NA         | NA |             |
|           | NA | ENSG00000200601 | 0          | NA         | NA         | NA         | NA | RNA5SP50    |
|           | NA | ENSG00000200605 | 0          | NA         | NA         | NA         | NA |             |
| 767589    | NA | ENSG00000200608 | 0          | NA         | NA         | NA         | NA | SNORD114-11 |
|           | NA | ENSG00000200610 | 0          | NA         | NA         | NA         | NA |             |
| 767605    | NA | ENSG00000200612 | 0          | NA         | NA         | NA         | NA | SNORD114-25 |
|           | NA | ENSG00000200613 | 0          | NA         | NA         | NA         | NA | RNA5SP349   |
|           | NA | ENSG00000200615 | 0          | NA         | NA         | NA         | NA |             |
|           | NA | ENSG00000200616 | 0          | NA         | NA         | NA         | NA |             |
|           | NA | ENSG00000200619 | 0          | NA         | NA         | NA         | NA | RNA5SP447   |
|           | NA | ENSG00000200620 | 0          | NA         | NA         | NA         | NA |             |
|           | NA | ENSG00000200622 | 0          | NA         | NA         | NA         | NA | RNU6-1059P  |
| 595098    | NA | ENSG00000200623 | 0          | NA         | NA         | NA         | NA | SNORD18A    |
|           | NA | ENSG00000200626 | 0          | NA         | NA         | NA         | NA | RNA5SP325   |
|           | NA | ENSG00000200629 | 0          | NA         | NA         | NA         | NA | RNY1P11     |
|           | NA | ENSG00000200630 | 0          | NA         | NA         | NA         | NA |             |
| 767567    | NA | ENSG00000200632 | 0          | NA         | NA         | NA         | NA | SNORD113-7  |
|           | NA | ENSG00000200635 | 0          | NA         | NA         | NA         | NA |             |
| 767608    | NA | ENSG00000200636 | 0          | NA         | NA         | NA         | NA | SNORD114-27 |
|           | NA | ENSG00000200637 | 0          | NA         | NA         | NA         | NA | RNU5F-3P    |
| 100033811 | NA | ENSG00000200638 | 0          | NA         | NA         | NA         | NA | SNORD115-37 |
|           | NA | ENSG00000200645 | 0          | NA         | NA         | NA         | NA | RNU6-1210P  |
|           | NA | ENSG00000200646 | 0          | NA         | NA         | NA         | NA |             |
|           | NA | ENSG00000200648 | 0          | NA         | NA         | NA         | NA | RNU6-226P   |
|           | NA | ENSG00000200650 | 0          | NA         | NA         | NA         | NA | RNA5SP114   |
|           | NA | ENSG00000200651 | 0          | NA         | NA         | NA         | NA |             |
|           | NA | ENSG00000200652 | 0          | NA         | NA         | NA         | NA |             |
|           | NA | ENSG00000200653 | 0.16735865 | 0.01897177 | 0.38482933 | 0.78225479 | NA | RNU4-92P    |
| 677795    | NA | ENSG00000200656 | 0          | NA         | NA         | NA         | NA | SNORA5B     |

|           |                 |                 |            |             |            |            |             |
|-----------|-----------------|-----------------|------------|-------------|------------|------------|-------------|
| 100033422 | ENSG00000200661 | 0               | NA         | NA          | NA         | NA         | SNORD116-10 |
|           | NA              | ENSG00000200664 | 0          | NA          | NA         | NA         |             |
|           | NA              | ENSG00000200665 | 0          | NA          | NA         | NA         | RNU6-1188P  |
|           | NA              | ENSG00000200670 | 0          | NA          | NA         | NA         | RNU6-912P   |
|           | NA              | ENSG00000200673 | 0          | NA          | NA         | NA         | RN7SKP174   |
|           | NA              | ENSG00000200674 | 0.66980615 | -0.02102309 | 0.3830816  | 0.65829298 | NA          |
|           | NA              | ENSG00000200677 | 0          | NA          | NA         | NA         | NA          |
| 100033441 | ENSG00000200680 | 0               | NA         | NA          | NA         | NA         | SNORD115-4  |
|           | NA              | ENSG00000200681 | 0          | NA          | NA         | NA         | RNU6-263P   |
|           | NA              | ENSG00000200683 | 0          | NA          | NA         | NA         | RNU6-379P   |
|           | NA              | ENSG00000200685 | 0          | NA          | NA         | NA         |             |
|           | NA              | ENSG00000200686 | 0          | NA          | NA         | NA         | RNY3P3      |
|           | NA              | ENSG00000200687 | 0          | NA          | NA         | NA         | RNA5SP335   |
|           | NA              | ENSG00000200688 | 0          | NA          | NA         | NA         |             |
|           | NA              | ENSG00000200693 | 0.34758969 | -0.00123046 | 0.38336747 | 0.98009982 | NA          |
|           | NA              | ENSG00000200701 | 0          | NA          | NA         | NA         | RNU6-674P   |
|           | NA              | ENSG00000200702 | 0          | NA          | NA         | NA         |             |
|           | NA              | ENSG00000200703 | 0          | NA          | NA         | NA         | RNU6-873P   |
|           | NA              | ENSG00000200706 | 0          | NA          | NA         | NA         |             |
|           | NA              | ENSG00000200708 | 0          | NA          | NA         | NA         | RN7SKP93    |
|           | NA              | ENSG00000200709 | 0          | NA          | NA         | NA         | RNA5SP27    |
|           | NA              | ENSG00000200711 | 0          | NA          | NA         | NA         | RNA5SP28    |
|           | NA              | ENSG00000200713 | 0          | NA          | NA         | NA         | RNU6-682P   |
|           | NA              | ENSG00000200714 | 0          | NA          | NA         | NA         |             |
|           | NA              | ENSG00000200718 | 0          | NA          | NA         | NA         | RN7SKP103   |
|           | NA              | ENSG00000200719 | 0          | NA          | NA         | NA         | RNA5SP260   |
|           | NA              | ENSG00000200720 | 0          | NA          | NA         | NA         | RNU6-931P   |
| 100033445 | ENSG00000200726 | 0               | NA         | NA          | NA         | NA         | SNORD115-8  |
|           | NA              | ENSG00000200728 | 0          | NA          | NA         | NA         | RNU6-271P   |
|           | NA              | ENSG00000200731 | 0          | NA          | NA         | NA         | RNU1-124P   |
|           | NA              | ENSG00000200732 | 0          | NA          | NA         | NA         | RNU6-194P   |
|           | NA              | ENSG00000200733 | 0          | NA          | NA         | NA         |             |
|           | NA              | ENSG00000200737 | 0          | NA          | NA         | NA         |             |
|           | NA              | ENSG00000200738 | 0          | NA          | NA         | NA         | RNA5SP472   |
|           | NA              | ENSG00000200741 | 0          | NA          | NA         | NA         | RNA5SP161   |
|           | NA              | ENSG00000200742 | 0          | NA          | NA         | NA         |             |
|           | NA              | ENSG00000200745 | 0          | NA          | NA         | NA         | RNU1-31P    |
|           | NA              | ENSG00000200750 | 0          | NA          | NA         | NA         |             |

|           |    |                 |            |             |            |            |    |             |
|-----------|----|-----------------|------------|-------------|------------|------------|----|-------------|
|           | NA | ENSG00000200752 | 0          | NA          | NA         | NA         | NA |             |
|           | NA | ENSG00000200753 | 0          | NA          | NA         | NA         | NA |             |
|           | NA | ENSG00000200754 | 0          | NA          | NA         | NA         | NA |             |
|           | NA | ENSG00000200755 | 0          | NA          | NA         | NA         | NA | RNA5SP68    |
|           | NA | ENSG00000200756 | 0          | NA          | NA         | NA         | NA | RNU6-236P   |
| 100033454 | NA | ENSG00000200757 | 0          | NA          | NA         | NA         | NA | SNORD115-16 |
|           | NA | ENSG00000200759 | 0          | NA          | NA         | NA         | NA | RNU6-884P   |
|           | NA | ENSG00000200761 | 0          | NA          | NA         | NA         | NA | RN7SKP113   |
|           | NA | ENSG00000200763 | 0          | NA          | NA         | NA         | NA | RNU6-961P   |
|           | NA | ENSG00000200764 | 0          | NA          | NA         | NA         | NA |             |
|           | NA | ENSG00000200769 | 0.15069912 | -0.01848503 | 0.38480575 | 0.84537521 | NA |             |
|           | NA | ENSG00000200774 | 0          | NA          | NA         | NA         | NA | RNU6-478P   |
|           | NA | ENSG00000200779 | 0          | NA          | NA         | NA         | NA | RNU6-105P   |
|           | NA | ENSG00000200783 | 0          | NA          | NA         | NA         | NA | RN7SKP180   |
| 319103    | NA | ENSG00000200785 | 0          | NA          | NA         | NA         | NA | SNORD8      |
|           | NA | ENSG00000200786 | 0          | NA          | NA         | NA         | NA | RNA5SP234   |
|           | NA | ENSG00000200788 | 0          | NA          | NA         | NA         | NA |             |
|           | NA | ENSG00000200789 | 0          | NA          | NA         | NA         | NA | RNU1-65P    |
| 677846    | NA | ENSG00000200792 | 0.16735865 | 0.01897177  | 0.38482933 | 0.78225479 | NA | SNORA80A    |
|           | NA | ENSG00000200794 | 0          | NA          | NA         | NA         | NA | RN7SKP250   |
| 26835     | NA | ENSG00000200795 | 0          | NA          | NA         | NA         | NA | RNU4-1      |
|           | NA | ENSG00000200796 | 0          | NA          | NA         | NA         | NA | RNU6-753P   |
|           | NA | ENSG00000200799 | 0          | NA          | NA         | NA         | NA | RNU6-770P   |
|           | NA | ENSG00000200800 | 0          | NA          | NA         | NA         | NA | RNU1-130P   |
| 100036565 | NA | ENSG00000200801 | 0          | NA          | NA         | NA         | NA | SNORD115-28 |
|           | NA | ENSG00000200806 | 0          | NA          | NA         | NA         | NA | RNA5SP275   |
|           | NA | ENSG00000200807 | 0          | NA          | NA         | NA         | NA | RNU1-32P    |
| 100033443 | NA | ENSG00000200812 | 0          | NA          | NA         | NA         | NA | SNORD115-6  |
|           | NA | ENSG00000200814 | 0          | NA          | NA         | NA         | NA | RNU6-595P   |
|           | NA | ENSG00000200815 | 0          | NA          | NA         | NA         | NA | RNU6-1091P  |
| 677820    | NA | ENSG00000200816 | 0          | NA          | NA         | NA         | NA | SNORA38     |
|           | NA | ENSG00000200817 | 0          | NA          | NA         | NA         | NA | RNU6-899P   |
|           | NA | ENSG00000200818 | 0          | NA          | NA         | NA         | NA | RNU6-1204P  |
|           | NA | ENSG00000200822 | 0          | NA          | NA         | NA         | NA |             |
| 767578    | NA | ENSG00000200823 | 0          | NA          | NA         | NA         | NA | SNORD114-2  |
|           | NA | ENSG00000200827 | 0          | NA          | NA         | NA         | NA | RNU6-324P   |
|           | NA | ENSG00000200829 | 0          | NA          | NA         | NA         | NA |             |
|           | NA | ENSG00000200830 | 0          | NA          | NA         | NA         | NA | RN7SKP134   |

|       |                 |          |            |            |            |    |            |
|-------|-----------------|----------|------------|------------|------------|----|------------|
| NA    | ENSG00000200831 | 0        | NA         | NA         | NA         | NA | SNORD36B   |
| NA    | ENSG00000200832 | 0        | NA         | NA         | NA         | NA | SNORD114-4 |
| NA    | ENSG00000200834 | 0        | NA         | NA         | NA         | NA |            |
| NA    | ENSG00000200839 | 0        | NA         | NA         | NA         | NA | RNA5SP48   |
| NA    | ENSG00000200840 | 0        | NA         | NA         | NA         | NA | RNU6-82P   |
| NA    | ENSG00000200842 | 0        | NA         | NA         | NA         | NA |            |
| NA    | ENSG00000200847 | 0.173733 | 0.01914545 | 0.38484597 | 0.78225479 | NA |            |
| NA    | ENSG00000200849 | 0        | NA         | NA         | NA         | NA |            |
| NA    | ENSG00000200852 | 0        | NA         | NA         | NA         | NA | RNA5SP499  |
| NA    | ENSG00000200855 | 0        | NA         | NA         | NA         | NA |            |
| NA    | ENSG00000200857 | 0        | NA         | NA         | NA         | NA |            |
| NA    | ENSG00000200860 | 0        | NA         | NA         | NA         | NA |            |
| NA    | ENSG00000200867 | 0        | NA         | NA         | NA         | NA | RN7SKP36   |
| NA    | ENSG00000200869 | 0        | NA         | NA         | NA         | NA | RNU6-457P  |
| NA    | ENSG00000200871 | 0        | NA         | NA         | NA         | NA | RNU6-810P  |
| NA    | ENSG00000200872 | 0        | NA         | NA         | NA         | NA | RNA5SP456  |
| NA    | ENSG00000200873 | 0        | NA         | NA         | NA         | NA | RNA5SP399  |
| NA    | ENSG00000200874 | 0        | NA         | NA         | NA         | NA |            |
| NA    | ENSG00000200875 | 0        | NA         | NA         | NA         | NA | RNU6-340P  |
| NA    | ENSG00000200877 | 0        | NA         | NA         | NA         | NA | RNU6-560P  |
| 85391 | ENSG00000200879 | 0        | NA         | NA         | NA         | NA | SNORD14E   |
| NA    | ENSG00000200882 | 0        | NA         | NA         | NA         | NA | RNU6-681P  |
| NA    | ENSG00000200883 | 0        | NA         | NA         | NA         | NA |            |
| NA    | ENSG00000200884 | 0        | NA         | NA         | NA         | NA |            |
| NA    | ENSG00000200885 | 0        | NA         | NA         | NA         | NA | RNU1-146P  |
| NA    | ENSG00000200887 | 0        | NA         | NA         | NA         | NA | RNU6-598P  |
| NA    | ENSG00000200888 | 0        | NA         | NA         | NA         | NA |            |
| NA    | ENSG00000200889 | 0        | NA         | NA         | NA         | NA | RNU4-13P   |
| NA    | ENSG00000200890 | 0        | NA         | NA         | NA         | NA | RNA5SP99   |
| NA    | ENSG00000200891 | 0        | NA         | NA         | NA         | NA |            |
| NA    | ENSG00000200893 | 0        | NA         | NA         | NA         | NA | RNU6-944P  |
| NA    | ENSG00000200895 | 0        | NA         | NA         | NA         | NA | RN7SKP245  |
| NA    | ENSG00000200897 | 0        | NA         | NA         | NA         | NA |            |
| NA    | ENSG00000200898 | 0        | NA         | NA         | NA         | NA | RNU6-1243P |
| NA    | ENSG00000200902 | 0        | NA         | NA         | NA         | NA | RNU6-627P  |
| NA    | ENSG00000200903 | 0        | NA         | NA         | NA         | NA | RNU1-42P   |
| NA    | ENSG00000200906 | 0        | NA         | NA         | NA         | NA | RNU6-854P  |
| 94161 | ENSG00000200913 | 0        | NA         | NA         | NA         | NA | SNORD46    |

|           |                 |            |             |            |            |    |             |
|-----------|-----------------|------------|-------------|------------|------------|----|-------------|
| NA        | ENSG00000200914 | 0          | NA          | NA         | NA         | NA | RNA5SP435   |
| NA        | ENSG00000200917 | 0          | NA          | NA         | NA         | NA | RNU6-553P   |
| NA        | ENSG00000200922 | 0          | NA          | NA         | NA         | NA |             |
| NA        | ENSG00000200924 | 0          | NA          | NA         | NA         | NA | RNU6-1048P  |
| NA        | ENSG00000200926 | 0          | NA          | NA         | NA         | NA | RNU6-960P   |
| NA        | ENSG00000200935 | 0          | NA          | NA         | NA         | NA | RNU6-1090P  |
| NA        | ENSG00000200941 | 0          | NA          | NA         | NA         | NA | RNU6-694P   |
| NA        | ENSG00000200942 | 0          | NA          | NA         | NA         | NA | RNU6-501P   |
| 100033806 | ENSG00000200949 | 0          | NA          | NA         | NA         | NA | SNORD115-32 |
| NA        | ENSG00000200953 | 0          | NA          | NA         | NA         | NA |             |
| NA        | ENSG00000200957 | 0          | NA          | NA         | NA         | NA | RNU6-801P   |
| 26821     | ENSG00000200959 | 0          | NA          | NA         | NA         | NA | SNORA74A    |
| NA        | ENSG00000200963 | 0          | NA          | NA         | NA         | NA | RNU6-289P   |
| NA        | ENSG00000200966 | 1.32469153 | -0.01993956 | 0.37965136 | 0.76529411 | NA | RN7SKP87    |
| NA        | ENSG00000200969 | 0          | NA          | NA         | NA         | NA |             |
| NA        | ENSG00000200972 | 0          | NA          | NA         | NA         | NA | RNU5A-8P    |
| NA        | ENSG00000200974 | 0          | NA          | NA         | NA         | NA | RNU4-87P    |
| NA        | ENSG00000200975 | 0          | NA          | NA         | NA         | NA | RNU1-7P     |
| NA        | ENSG00000200976 | 0          | NA          | NA         | NA         | NA |             |
| NA        | ENSG00000200982 | 0          | NA          | NA         | NA         | NA |             |
| 619562    | ENSG00000200983 | 0          | NA          | NA         | NA         | NA | SNORA3A     |
| NA        | ENSG00000200985 | 0          | NA          | NA         | NA         | NA | RNA5SP493   |
| NA        | ENSG00000200986 | 0          | NA          | NA         | NA         | NA | RNU6-819P   |
| 100033804 | ENSG00000200987 | 0          | NA          | NA         | NA         | NA | SNORD115-30 |
| NA        | ENSG00000200991 | 0          | NA          | NA         | NA         | NA |             |
| NA        | ENSG00000200997 | 0          | NA          | NA         | NA         | NA | RNVU1-34    |
| NA        | ENSG00000200998 | 0          | NA          | NA         | NA         | NA |             |
| NA        | ENSG00000200999 | 0          | NA          | NA         | NA         | NA |             |
| NA        | ENSG00000201000 | 0          | NA          | NA         | NA         | NA | RNA5SP516   |
| NA        | ENSG00000201001 | 0          | NA          | NA         | NA         | NA | RNU6-270P   |
| NA        | ENSG00000201003 | 0          | NA          | NA         | NA         | NA |             |
| NA        | ENSG00000201006 | 0          | NA          | NA         | NA         | NA |             |
| NA        | ENSG00000201009 | 0          | NA          | NA         | NA         | NA |             |
| NA        | ENSG00000201010 | 0          | NA          | NA         | NA         | NA | RN7SKP224   |
| NA        | ENSG00000201012 | 0          | NA          | NA         | NA         | NA |             |
| NA        | ENSG00000201013 | 0          | NA          | NA         | NA         | NA |             |
| NA        | ENSG00000201014 | 0          | NA          | NA         | NA         | NA | RNA5SP232   |
| NA        | ENSG00000201015 | 0          | NA          | NA         | NA         | NA | RNU6-280P   |

|           |                 |   |    |    |    |    |           |
|-----------|-----------------|---|----|----|----|----|-----------|
| NA        | ENSG00000201016 | 0 | NA | NA | NA | NA | RNU6-374P |
| NA        | ENSG00000201021 | 0 | NA | NA | NA | NA | RNU6-743P |
| NA        | ENSG00000201023 | 0 | NA | NA | NA | NA | RNY3P11   |
| 109617014 | ENSG00000201025 | 0 | NA | NA | NA | NA | SNORD74B  |
| NA        | ENSG00000201026 | 0 | NA | NA | NA | NA |           |
| NA        | ENSG00000201027 | 0 | NA | NA | NA | NA | RN7SKP107 |
| NA        | ENSG00000201028 | 0 | NA | NA | NA | NA | RNU6-151P |
| NA        | ENSG00000201031 | 0 | NA | NA | NA | NA |           |
| NA        | ENSG00000201032 | 0 | NA | NA | NA | NA | RNU6-704P |
| NA        | ENSG00000201033 | 0 | NA | NA | NA | NA | RNU1-96P  |
| NA        | ENSG00000201034 | 0 | NA | NA | NA | NA |           |
| NA        | ENSG00000201035 | 0 | NA | NA | NA | NA | RNA5SP469 |
| NA        | ENSG00000201036 | 0 | NA | NA | NA | NA |           |
| NA        | ENSG00000201041 | 0 | NA | NA | NA | NA | RNA5SP242 |
| NA        | ENSG00000201042 | 0 | NA | NA | NA | NA |           |
| NA        | ENSG00000201044 | 0 | NA | NA | NA | NA | RNU6-268P |
| NA        | ENSG00000201047 | 0 | NA | NA | NA | NA |           |
| NA        | ENSG00000201048 | 0 | NA | NA | NA | NA |           |
| NA        | ENSG00000201050 | 0 | NA | NA | NA | NA | RNU6-668P |
| NA        | ENSG00000201059 | 0 | NA | NA | NA | NA | RNA5SP336 |
| NA        | ENSG00000201065 | 0 | NA | NA | NA | NA | RNU6-461P |
| NA        | ENSG00000201066 | 0 | NA | NA | NA | NA | RN7SKP280 |
| NA        | ENSG00000201070 | 0 | NA | NA | NA | NA | RNU4-84P  |
| NA        | ENSG00000201071 | 0 | NA | NA | NA | NA |           |
| NA        | ENSG00000201074 | 0 | NA | NA | NA | NA |           |
| NA        | ENSG00000201075 | 0 | NA | NA | NA | NA |           |
| NA        | ENSG00000201076 | 0 | NA | NA | NA | NA | RNU4-51P  |
| NA        | ENSG00000201077 | 0 | NA | NA | NA | NA | RNU6-188P |
| NA        | ENSG00000201078 | 0 | NA | NA | NA | NA | RN7SKP214 |
| NA        | ENSG00000201085 | 0 | NA | NA | NA | NA | RNU6-173P |
| NA        | ENSG00000201086 | 0 | NA | NA | NA | NA | RNA5SP394 |
| NA        | ENSG00000201088 | 0 | NA | NA | NA | NA |           |
| NA        | ENSG00000201095 | 0 | NA | NA | NA | NA | RNU6-266P |
| NA        | ENSG00000201096 | 0 | NA | NA | NA | NA | RNA5SP387 |
| NA        | ENSG00000201097 | 0 | NA | NA | NA | NA | RNU6-366P |
| 6084      | ENSG00000201098 | 0 | NA | NA | NA | NA | RNY1      |
| NA        | ENSG00000201102 | 0 | NA | NA | NA | NA |           |
| NA        | ENSG00000201109 | 0 | NA | NA | NA | NA | RNA5SP245 |



|           |                 |            |             |            |           |    |             |
|-----------|-----------------|------------|-------------|------------|-----------|----|-------------|
| NA        | ENSG00000201113 | 0          | NA          | NA         | NA        | NA | RNU6-647P   |
| NA        | ENSG00000201114 | 0          | NA          | NA         | NA        | NA |             |
| NA        | ENSG00000201118 | 0          | NA          | NA         | NA        | NA |             |
| NA        | ENSG00000201119 | 0          | NA          | NA         | NA        | NA | RNU1-33P    |
| NA        | ENSG00000201121 | 0          | NA          | NA         | NA        | NA | RNY1P12     |
| 109617023 | ENSG00000201129 | 0          | NA          | NA         | NA        | NA | SNORA58B    |
| NA        | ENSG00000201133 | 0          | NA          | NA         | NA        | NA |             |
| NA        | ENSG00000201134 | 0          | NA          | NA         | NA        | NA |             |
| NA        | ENSG00000201135 | 0          | NA          | NA         | NA        | NA | RNU6-777P   |
| NA        | ENSG00000201136 | 0          | NA          | NA         | NA        | NA | RNU6-353P   |
| NA        | ENSG00000201140 | 0          | NA          | NA         | NA        | NA | RN7SKP128   |
| NA        | ENSG00000201142 | 0          | NA          | NA         | NA        | NA | RNU1-151P   |
| 100033816 | ENSG00000201143 | 0          | NA          | NA         | NA        | NA | SNORD115-42 |
| NA        | ENSG00000201145 | 0          | NA          | NA         | NA        | NA | RNA5SP175   |
| NA        | ENSG00000201148 | 0          | NA          | NA         | NA        | NA | RNA5SP42    |
| NA        | ENSG00000201151 | 0          | NA          | NA         | NA        | NA |             |
| NA        | ENSG00000201153 | 0          | NA          | NA         | NA        | NA | RNU6-371P   |
| NA        | ENSG00000201155 | 0          | NA          | NA         | NA        | NA | RNU1-24P    |
| NA        | ENSG00000201157 | 0          | NA          | NA         | NA        | NA |             |
| NA        | ENSG00000201160 | 0          | NA          | NA         | NA        | NA |             |
| NA        | ENSG00000201161 | 0          | NA          | NA         | NA        | NA | RN7SKP10    |
| NA        | ENSG00000201162 | 0          | NA          | NA         | NA        | NA | RNU6-454P   |
| NA        | ENSG00000201164 | 0          | NA          | NA         | NA        | NA | RNU4-36P    |
| NA        | ENSG00000201165 | 0          | NA          | NA         | NA        | NA | RNU6-1229P  |
| NA        | ENSG00000201168 | 0          | NA          | NA         | NA        | NA | RNA5SP368   |
| NA        | ENSG00000201170 | 0          | NA          | NA         | NA        | NA | RNU1-132P   |
| NA        | ENSG00000201176 | 0          | NA          | NA         | NA        | NA | RNU6-853P   |
| NA        | ENSG00000201178 | 0          | NA          | NA         | NA        | NA |             |
| NA        | ENSG00000201179 | 0          | NA          | NA         | NA        | NA | RNU6-1322P  |
| NA        | ENSG00000201180 | 0          | NA          | NA         | NA        | NA | RNU6-115P   |
| NA        | ENSG00000201182 | 0          | NA          | NA         | NA        | NA | RNU6-670P   |
| 101954272 | ENSG00000201183 | 0          | NA          | NA         | NA        | NA | RNVU1-3     |
| NA        | ENSG00000201184 | 0          | NA          | NA         | NA        | NA | RNU4-68P    |
| NA        | ENSG00000201185 | 0          | NA          | NA         | NA        | NA | RNA5SP202   |
| NA        | ENSG00000201186 | 0          | NA          | NA         | NA        | NA | RNU4-33P    |
| NA        | ENSG00000201196 | 0          | NA          | NA         | NA        | NA |             |
| NA        | ENSG00000201198 | 0          | NA          | NA         | NA        | NA | RNU6-879P   |
| NA        | ENSG00000201201 | 0.92036559 | -0.05022512 | 0.38869686 | 0.2715874 | NA | RN7SKP118   |

|           |                 |   |    |    |    |    |             |
|-----------|-----------------|---|----|----|----|----|-------------|
| NA        | ENSG00000201207 | 0 | NA | NA | NA | NA |             |
| NA        | ENSG00000201208 | 0 | NA | NA | NA | NA |             |
| NA        | ENSG00000201209 | 0 | NA | NA | NA | NA |             |
| NA        | ENSG00000201210 | 0 | NA | NA | NA | NA | RNA5SP139   |
| NA        | ENSG00000201216 | 0 | NA | NA | NA | NA |             |
| NA        | ENSG00000201217 | 0 | NA | NA | NA | NA |             |
| NA        | ENSG00000201218 | 0 | NA | NA | NA | NA |             |
| NA        | ENSG00000201221 | 0 | NA | NA | NA | NA | RNU4-40P    |
| NA        | ENSG00000201223 | 0 | NA | NA | NA | NA | RNU6-1305P  |
| NA        | ENSG00000201228 | 0 | NA | NA | NA | NA |             |
| 109616971 | ENSG00000201229 | 0 | NA | NA | NA | NA | SNORA63D    |
| NA        | ENSG00000201231 | 0 | NA | NA | NA | NA | RNU4-50P    |
| NA        | ENSG00000201239 | 0 | NA | NA | NA | NA |             |
| 767585    | ENSG00000201240 | 0 | NA | NA | NA | NA | SNORD114-9  |
| NA        | ENSG00000201241 | 0 | NA | NA | NA | NA | RNU6-978P   |
| NA        | ENSG00000201242 | 0 | NA | NA | NA | NA | RNY1P1      |
| NA        | ENSG00000201243 | 0 | NA | NA | NA | NA | RNU6-654P   |
| NA        | ENSG00000201245 | 0 | NA | NA | NA | NA |             |
| 767591    | ENSG00000201247 | 0 | NA | NA | NA | NA | SNORD114-13 |
| NA        | ENSG00000201253 | 0 | NA | NA | NA | NA | RNU4-10P    |
| NA        | ENSG00000201255 | 0 | NA | NA | NA | NA | RNU6-990P   |
| NA        | ENSG00000201260 | 0 | NA | NA | NA | NA | RNU6-1075P  |
| 767582    | ENSG00000201263 | 0 | NA | NA | NA | NA | SNORD114-6  |
| 114655    | ENSG00000201264 | 0 | NA | NA | NA | NA | SNORD73B    |
| NA        | ENSG00000201270 | 0 | NA | NA | NA | NA | RNU6-755P   |
| NA        | ENSG00000201271 | 0 | NA | NA | NA | NA | RNU1-112P   |
| NA        | ENSG00000201273 | 0 | NA | NA | NA | NA | RNU6-776P   |
| NA        | ENSG00000201274 | 0 | NA | NA | NA | NA | RNA5SP192   |
| NA        | ENSG00000201277 | 0 | NA | NA | NA | NA |             |
| NA        | ENSG00000201279 | 0 | NA | NA | NA | NA |             |
| NA        | ENSG00000201282 | 0 | NA | NA | NA | NA |             |
| NA        | ENSG00000201285 | 0 | NA | NA | NA | NA | RNA5SP524   |
| NA        | ENSG00000201287 | 0 | NA | NA | NA | NA | RN7SKP171   |
| NA        | ENSG00000201288 | 0 | NA | NA | NA | NA | RNU6-1047P  |
| NA        | ENSG00000201289 | 0 | NA | NA | NA | NA | RN7SKP76    |
| NA        | ENSG00000201291 | 0 | NA | NA | NA | NA | RNU1-34P    |
| NA        | ENSG00000201292 | 0 | NA | NA | NA | NA | RNU6-153P   |
| NA        | ENSG00000201294 | 0 | NA | NA | NA | NA | RNU6-1019P  |

|           |                 |   |    |    |    |    |             |
|-----------|-----------------|---|----|----|----|----|-------------|
| NA        | ENSG00000201296 | 0 | NA | NA | NA | NA | RNU4-41P    |
| NA        | ENSG00000201297 | 0 | NA | NA | NA | NA |             |
| NA        | ENSG00000201298 | 0 | NA | NA | NA | NA | RNU6-1164P  |
| 100036564 | ENSG00000201300 | 0 | NA | NA | NA | NA | SNORD115-27 |
| NA        | ENSG00000201301 | 0 | NA | NA | NA | NA | RNA5SP130   |
| 26783     | ENSG00000201302 | 0 | NA | NA | NA | NA | SNORA65     |
| NA        | ENSG00000201308 | 0 | NA | NA | NA | NA | RNU6-512P   |
| NA        | ENSG00000201309 | 0 | NA | NA | NA | NA |             |
| NA        | ENSG00000201311 | 0 | NA | NA | NA | NA |             |
| NA        | ENSG00000201312 | 0 | NA | NA | NA | NA | RNA5SP72    |
| NA        | ENSG00000201314 | 0 | NA | NA | NA | NA |             |
| NA        | ENSG00000201315 | 0 | NA | NA | NA | NA | RN7SKP227   |
| NA        | ENSG00000201316 | 0 | NA | NA | NA | NA |             |
| NA        | ENSG00000201317 | 0 | NA | NA | NA | NA | RNU4-59P    |
| 767611    | ENSG00000201318 | 0 | NA | NA | NA | NA | SNORD114-30 |
| 100169760 | ENSG00000201321 | 0 | NA | NA | NA | NA | RNA5S9      |
| NA        | ENSG00000201324 | 0 | NA | NA | NA | NA | RNU6-361P   |
| NA        | ENSG00000201325 | 0 | NA | NA | NA | NA | RNA5SP142   |
| 100033799 | ENSG00000201326 | 0 | NA | NA | NA | NA | SNORD115-22 |
| NA        | ENSG00000201329 | 0 | NA | NA | NA | NA |             |
| 692092    | ENSG00000201330 | 0 | NA | NA | NA | NA | SNORD32B    |
| 100033800 | ENSG00000201331 | 0 | NA | NA | NA | NA | SNORD115-23 |
| NA        | ENSG00000201339 | 0 | NA | NA | NA | NA |             |
| NA        | ENSG00000201340 | 0 | NA | NA | NA | NA |             |
| NA        | ENSG00000201341 | 0 | NA | NA | NA | NA | RNU6-421P   |
| NA        | ENSG00000201342 | 0 | NA | NA | NA | NA | RNU4-38P    |
| NA        | ENSG00000201343 | 0 | NA | NA | NA | NA |             |
| NA        | ENSG00000201346 | 0 | NA | NA | NA | NA |             |
| NA        | ENSG00000201347 | 0 | NA | NA | NA | NA | RNA5SP69    |
| 26767     | ENSG00000201348 | 0 | NA | NA | NA | NA | RNU105B     |
| NA        | ENSG00000201351 | 0 | NA | NA | NA | NA |             |
| NA        | ENSG00000201354 | 0 | NA | NA | NA | NA |             |
| NA        | ENSG00000201356 | 0 | NA | NA | NA | NA | RNA5SP500   |
| NA        | ENSG00000201358 | 0 | NA | NA | NA | NA | RN7SKP193   |
| NA        | ENSG00000201361 | 0 | NA | NA | NA | NA | RNA5SP433   |
| NA        | ENSG00000201363 | 0 | NA | NA | NA | NA |             |
| NA        | ENSG00000201364 | 0 | NA | NA | NA | NA | RN7SKP37    |
| NA        | ENSG00000201365 | 0 | NA | NA | NA | NA |             |

|           |                 |            |            |            |            |    |            |
|-----------|-----------------|------------|------------|------------|------------|----|------------|
| NA        | ENSG00000201367 | 0          | NA         | NA         | NA         | NA | RNU6-522P  |
| NA        | ENSG00000201368 | 0          | NA         | NA         | NA         | NA |            |
| NA        | ENSG00000201370 | 0          | NA         | NA         | NA         | NA |            |
| NA        | ENSG00000201371 | 0          | NA         | NA         | NA         | NA |            |
| NA        | ENSG00000201372 | 0          | NA         | NA         | NA         | NA | RNU6-1251P |
| NA        | ENSG00000201376 | 0          | NA         | NA         | NA         | NA |            |
| NA        | ENSG00000201377 | 0          | NA         | NA         | NA         | NA | RNY4P23    |
| NA        | ENSG00000201379 | 0          | NA         | NA         | NA         | NA | RNU4-76P   |
| NA        | ENSG00000201382 | 0          | NA         | NA         | NA         | NA | RNU6-558P  |
| NA        | ENSG00000201384 | 0          | NA         | NA         | NA         | NA |            |
| NA        | ENSG00000201386 | 0          | NA         | NA         | NA         | NA | RNU6-1163P |
| 109616972 | ENSG00000201388 | 0          | NA         | NA         | NA         | NA | SNORA68B   |
| NA        | ENSG00000201390 | 0          | NA         | NA         | NA         | NA | RNU6-1141P |
| NA        | ENSG00000201392 | 0          | NA         | NA         | NA         | NA | RNU6-1078P |
| NA        | ENSG00000201393 | 0          | NA         | NA         | NA         | NA |            |
| NA        | ENSG00000201394 | 0          | NA         | NA         | NA         | NA | RNA5SP140  |
| NA        | ENSG00000201395 | 0          | NA         | NA         | NA         | NA | RN7SKP257  |
| NA        | ENSG00000201398 | 0          | NA         | NA         | NA         | NA |            |
| NA        | ENSG00000201403 | 0          | NA         | NA         | NA         | NA | SNORD14B   |
| NA        | ENSG00000201405 | 0          | NA         | NA         | NA         | NA |            |
| NA        | ENSG00000201407 | 0          | NA         | NA         | NA         | NA |            |
| NA        | ENSG00000201410 | 0          | NA         | NA         | NA         | NA |            |
| NA        | ENSG00000201412 | 0          | NA         | NA         | NA         | NA |            |
| NA        | ENSG00000201413 | 0          | NA         | NA         | NA         | NA | RNA5SP141  |
| NA        | ENSG00000201415 | 0          | NA         | NA         | NA         | NA | RNA5SP204  |
| NA        | ENSG00000201420 | 0          | NA         | NA         | NA         | NA | RNA5SP512  |
| NA        | ENSG00000201421 | 0          | NA         | NA         | NA         | NA |            |
| NA        | ENSG00000201423 | 0          | NA         | NA         | NA         | NA | RN7SKP246  |
| NA        | ENSG00000201426 | 0          | NA         | NA         | NA         | NA |            |
| NA        | ENSG00000201428 | 0.18922458 | 0.01954053 | 0.38488496 | 0.78225479 | NA | RN7SKP71   |
| NA        | ENSG00000201431 | 0          | NA         | NA         | NA         | NA | RNU6-1277P |
| NA        | ENSG00000201432 | 0          | NA         | NA         | NA         | NA |            |
| NA        | ENSG00000201433 | 0          | NA         | NA         | NA         | NA | RNU6-335P  |
| NA        | ENSG00000201435 | 0          | NA         | NA         | NA         | NA | RNU4-24P   |
| NA        | ENSG00000201436 | 0          | NA         | NA         | NA         | NA | RNU6-660P  |
| NA        | ENSG00000201439 | 0          | NA         | NA         | NA         | NA | RNU4-67P   |
| NA        | ENSG00000201440 | 0          | NA         | NA         | NA         | NA | RNA5SP515  |
| NA        | ENSG00000201441 | 0          | NA         | NA         | NA         | NA | RNU6-646P  |

|           |                 |   |    |    |    |    |             |
|-----------|-----------------|---|----|----|----|----|-------------|
| NA        | ENSG00000201442 | 0 | NA | NA | NA | NA |             |
| NA        | ENSG00000201443 | 0 | NA | NA | NA | NA | RNU6-309P   |
| NA        | ENSG00000201444 | 0 | NA | NA | NA | NA | RNU6-1082P  |
| NA        | ENSG00000201447 | 0 | NA | NA | NA | NA | RNA5SP509   |
| 109616970 | ENSG00000201448 | 0 | NA | NA | NA | NA | SNORA63C    |
| NA        | ENSG00000201451 | 0 | NA | NA | NA | NA |             |
| NA        | ENSG00000201452 | 0 | NA | NA | NA | NA | RNU6-1317P  |
| 677834    | ENSG00000201457 | 0 | NA | NA | NA | NA | SNORA55     |
| NA        | ENSG00000201458 | 0 | NA | NA | NA | NA | RNU4-4P     |
| NA        | ENSG00000201464 | 0 | NA | NA | NA | NA |             |
| NA        | ENSG00000201465 | 0 | NA | NA | NA | NA |             |
| NA        | ENSG00000201466 | 0 | NA | NA | NA | NA |             |
| NA        | ENSG00000201467 | 0 | NA | NA | NA | NA |             |
| NA        | ENSG00000201469 | 0 | NA | NA | NA | NA | RNA5SP379   |
| NA        | ENSG00000201470 | 0 | NA | NA | NA | NA | RNY4P7      |
| NA        | ENSG00000201474 | 0 | NA | NA | NA | NA | RNU6-164P   |
| NA        | ENSG00000201476 | 0 | NA | NA | NA | NA | RNA5SP353   |
| 100033455 | ENSG00000201482 | 0 | NA | NA | NA | NA | SNORD115-17 |
| NA        | ENSG00000201483 | 0 | NA | NA | NA | NA |             |
| 26804     | ENSG00000201487 | 0 | NA | NA | NA | NA | SNORD45B    |
| NA        | ENSG00000201489 | 0 | NA | NA | NA | NA |             |
| NA        | ENSG00000201491 | 0 | NA | NA | NA | NA | RNU4-75P    |
| NA        | ENSG00000201492 | 0 | NA | NA | NA | NA | RNA5SP78    |
| NA        | ENSG00000201493 | 0 | NA | NA | NA | NA | RNU1-141P   |
| NA        | ENSG00000201496 | 0 | NA | NA | NA | NA | RN7SKP275   |
| NA        | ENSG00000201498 | 0 | NA | NA | NA | NA |             |
| NA        | ENSG00000201499 | 0 | NA | NA | NA | NA | RNU6-312P   |
| NA        | ENSG00000201500 | 0 | NA | NA | NA | NA |             |
| NA        | ENSG00000201501 | 0 | NA | NA | NA | NA |             |
| NA        | ENSG00000201502 | 0 | NA | NA | NA | NA |             |
| NA        | ENSG00000201510 | 0 | NA | NA | NA | NA | RN7SKP217   |
| NA        | ENSG00000201511 | 0 | NA | NA | NA | NA |             |
| NA        | ENSG00000201512 | 0 | NA | NA | NA | NA | SNORA71C    |
| NA        | ENSG00000201516 | 0 | NA | NA | NA | NA |             |
| NA        | ENSG00000201517 | 0 | NA | NA | NA | NA | RNU6-707P   |
| NA        | ENSG00000201518 | 0 | NA | NA | NA | NA | RNA5SP513   |
| NA        | ENSG00000201519 | 0 | NA | NA | NA | NA | RNU6-645P   |
| NA        | ENSG00000201523 | 0 | NA | NA | NA | NA | RNA5SP205   |

|           |                 |            |            |           |            |    |             |
|-----------|-----------------|------------|------------|-----------|------------|----|-------------|
| NA        | ENSG00000201524 | 0          | NA         | NA        | NA         | NA | RNU6-450P   |
| NA        | ENSG00000201527 | 0          | NA         | NA        | NA         | NA | RNA5SP478   |
| NA        | ENSG00000201529 | 0          | NA         | NA        | NA         | NA |             |
| NA        | ENSG00000201532 | 0          | NA         | NA        | NA         | NA | RNA5SP194   |
| NA        | ENSG00000201533 | 0          | NA         | NA        | NA         | NA | RN7SKP237   |
| NA        | ENSG00000201535 | 0          | NA         | NA        | NA         | NA |             |
| NA        | ENSG00000201541 | 0          | NA         | NA        | NA         | NA |             |
| NA        | ENSG00000201542 | 0          | NA         | NA        | NA         | NA |             |
| 692157    | ENSG00000201544 | 0          | NA         | NA        | NA         | NA | SNORA16B    |
| NA        | ENSG00000201545 | 0          | NA         | NA        | NA         | NA | RNU4-85P    |
| NA        | ENSG00000201547 | 0          | NA         | NA        | NA         | NA |             |
| NA        | ENSG00000201548 | 0          | NA         | NA        | NA         | NA |             |
| NA        | ENSG00000201549 | 0          | NA         | NA        | NA         | NA |             |
| NA        | ENSG00000201550 | 0          | NA         | NA        | NA         | NA | RNU6-726P   |
| NA        | ENSG00000201554 | 0          | NA         | NA        | NA         | NA |             |
| NA        | ENSG00000201555 | 0          | NA         | NA        | NA         | NA |             |
| 767593    | ENSG00000201557 | 0          | NA         | NA        | NA         | NA | SNORD114-15 |
| 101954276 | ENSG00000201558 | 0.85016097 | 0.06074473 | 0.3904457 | 0.22300825 | NA | RNVU1-6     |
| NA        | ENSG00000201560 | 0          | NA         | NA        | NA         | NA | RNU6-973P   |
| NA        | ENSG00000201563 | 0          | NA         | NA        | NA         | NA |             |
| NA        | ENSG00000201564 | 0          | NA         | NA        | NA         | NA | RN7SKP50    |
| NA        | ENSG00000201565 | 0          | NA         | NA        | NA         | NA |             |
| NA        | ENSG00000201566 | 0          | NA         | NA        | NA         | NA |             |
| NA        | ENSG00000201567 | 0          | NA         | NA        | NA         | NA | RNA5SP510   |
| 767595    | ENSG00000201569 | 0          | NA         | NA        | NA         | NA | SNORD114-17 |
| NA        | ENSG00000201570 | 0          | NA         | NA        | NA         | NA | RNU4-56P    |
| NA        | ENSG00000201573 | 0          | NA         | NA        | NA         | NA |             |
| NA        | ENSG00000201574 | 0          | NA         | NA        | NA         | NA | RNU1-93P    |
| NA        | ENSG00000201579 | 0          | NA         | NA        | NA         | NA | RNU6-343P   |
| NA        | ENSG00000201581 | 0          | NA         | NA        | NA         | NA | RN7SKP78    |
| NA        | ENSG00000201583 | 0          | NA         | NA        | NA         | NA | RN7SKP191   |
| NA        | ENSG00000201584 | 0          | NA         | NA        | NA         | NA |             |
| NA        | ENSG00000201586 | 0          | NA         | NA        | NA         | NA | RNU6-593P   |
| NA        | ENSG00000201591 | 0          | NA         | NA        | NA         | NA | RNU6-99P    |
| NA        | ENSG00000201592 | 0          | NA         | NA        | NA         | NA |             |
| NA        | ENSG00000201594 | 0          | NA         | NA        | NA         | NA | RNA5SP517   |
| NA        | ENSG00000201595 | 0          | NA         | NA        | NA         | NA | RNA5SP132   |
| NA        | ENSG00000201596 | 0          | NA         | NA        | NA         | NA |             |

|           |                 |   |    |    |    |    |             |
|-----------|-----------------|---|----|----|----|----|-------------|
| NA        | ENSG00000201598 | 0 | NA | NA | NA | NA | RNU6-219P   |
| NA        | ENSG00000201600 | 0 | NA | NA | NA | NA | RN7SKP124   |
| NA        | ENSG00000201602 | 0 | NA | NA | NA | NA |             |
| NA        | ENSG00000201604 | 0 | NA | NA | NA | NA | RNU6-740P   |
| NA        | ENSG00000201607 | 0 | NA | NA | NA | NA | RNU4-16P    |
| NA        | ENSG00000201608 | 0 | NA | NA | NA | NA | RNU4-42P    |
| NA        | ENSG00000201609 | 0 | NA | NA | NA | NA | RNU4-28P    |
| NA        | ENSG00000201610 | 0 | NA | NA | NA | NA | RNA5SP84    |
| NA        | ENSG00000201612 | 0 | NA | NA | NA | NA | RN7SKP15    |
| NA        | ENSG00000201613 | 0 | NA | NA | NA | NA | RNU6-200P   |
| NA        | ENSG00000201616 | 0 | NA | NA | NA | NA | RNU1-91P    |
| NA        | ENSG00000201618 | 0 | NA | NA | NA | NA | RNA5SP505   |
| NA        | ENSG00000201619 | 0 | NA | NA | NA | NA |             |
| NA        | ENSG00000201620 | 0 | NA | NA | NA | NA | RNA5SP51    |
| NA        | ENSG00000201622 | 0 | NA | NA | NA | NA | RNU6-621P   |
| NA        | ENSG00000201623 | 0 | NA | NA | NA | NA | RNU6-923P   |
| NA        | ENSG00000201624 | 0 | NA | NA | NA | NA |             |
| NA        | ENSG00000201627 | 0 | NA | NA | NA | NA |             |
| NA        | ENSG00000201628 | 0 | NA | NA | NA | NA | RNU4-7P     |
| NA        | ENSG00000201633 | 0 | NA | NA | NA | NA |             |
| 100033822 | ENSG00000201634 | 0 | NA | NA | NA | NA | SNORD115-48 |
| NA        | ENSG00000201635 | 0 | NA | NA | NA | NA |             |
| NA        | ENSG00000201638 | 0 | NA | NA | NA | NA | RNY4P16     |
| NA        | ENSG00000201640 | 0 | NA | NA | NA | NA | RN7SKP28    |
| NA        | ENSG00000201641 | 0 | NA | NA | NA | NA | RNU6-1187P  |
| NA        | ENSG00000201642 | 0 | NA | NA | NA | NA | RNU6-865P   |
| 677801    | ENSG00000201643 | 0 | NA | NA | NA | NA | SNORA14A    |
| NA        | ENSG00000201644 | 0 | NA | NA | NA | NA |             |
| NA        | ENSG00000201648 | 0 | NA | NA | NA | NA | RNU4-91P    |
| NA        | ENSG00000201649 | 0 | NA | NA | NA | NA | RNY4P34     |
| 101954275 | ENSG00000201654 | 0 | NA | NA | NA | NA | RNU6-7      |
| NA        | ENSG00000201658 | 0 | NA | NA | NA | NA | RNU6-283P   |
| NA        | ENSG00000201659 | 0 | NA | NA | NA | NA | RNU12-2P    |
| NA        | ENSG00000201660 | 0 | NA | NA | NA | NA |             |
| NA        | ENSG00000201662 | 0 | NA | NA | NA | NA | RNU6-60P    |
| NA        | ENSG00000201663 | 0 | NA | NA | NA | NA |             |
| NA        | ENSG00000201665 | 0 | NA | NA | NA | NA | RN7SKP6     |
| NA        | ENSG00000201666 | 0 | NA | NA | NA | NA |             |

|           |                 |   |    |    |    |    |             |
|-----------|-----------------|---|----|----|----|----|-------------|
| NA        | ENSG00000201668 | 0 | NA | NA | NA | NA |             |
| NA        | ENSG00000201671 | 0 | NA | NA | NA | NA | RNA5SP90    |
| 767564    | ENSG00000201672 | 0 | NA | NA | NA | NA | SNORD113-4  |
| NA        | ENSG00000201674 | 0 | NA | NA | NA | NA |             |
| 26819     | ENSG00000201675 | 0 | NA | NA | NA | NA | SNORD32A    |
| NA        | ENSG00000201676 | 0 | NA | NA | NA | NA |             |
| 100033453 | ENSG00000201679 | 0 | NA | NA | NA | NA | SNORD115-15 |
| NA        | ENSG00000201680 | 0 | NA | NA | NA | NA |             |
| NA        | ENSG00000201683 | 0 | NA | NA | NA | NA |             |
| NA        | ENSG00000201684 | 0 | NA | NA | NA | NA | RN7SKP239   |
| NA        | ENSG00000201687 | 0 | NA | NA | NA | NA | RNU6-1107P  |
| 767610    | ENSG00000201689 | 0 | NA | NA | NA | NA | SNORD114-29 |
| NA        | ENSG00000201690 | 0 | NA | NA | NA | NA | RNY1P2      |
| NA        | ENSG00000201699 | 0 | NA | NA | NA | NA | RNVU1-24    |
| 767563    | ENSG00000201700 | 0 | NA | NA | NA | NA | SNORD113-3  |
| NA        | ENSG00000201701 | 0 | NA | NA | NA | NA |             |
| NA        | ENSG00000201704 | 0 | NA | NA | NA | NA | RNA5SP396   |
| NA        | ENSG00000201707 | 0 | NA | NA | NA | NA | RNU6-818P   |
| NA        | ENSG00000201708 | 0 | NA | NA | NA | NA | RNA5SP359   |
| NA        | ENSG00000201709 | 0 | NA | NA | NA | NA | RNU6-686P   |
| NA        | ENSG00000201710 | 0 | NA | NA | NA | NA |             |
| NA        | ENSG00000201711 | 0 | NA | NA | NA | NA | RNU6-1303P  |
| NA        | ENSG00000201713 | 0 | NA | NA | NA | NA | RNA5SP125   |
| NA        | ENSG00000201715 | 0 | NA | NA | NA | NA | RN7SKP133   |
| NA        | ENSG00000201723 | 0 | NA | NA | NA | NA |             |
| NA        | ENSG00000201724 | 0 | NA | NA | NA | NA |             |
| NA        | ENSG00000201725 | 0 | NA | NA | NA | NA | RNU6-304P   |
| NA        | ENSG00000201727 | 0 | NA | NA | NA | NA | RNA5SP173   |
| NA        | ENSG00000201728 | 0 | NA | NA | NA | NA | RNA5SP479   |
| NA        | ENSG00000201733 | 0 | NA | NA | NA | NA |             |
| NA        | ENSG00000201736 | 0 | NA | NA | NA | NA | RNA5SP160   |
| NA        | ENSG00000201737 | 0 | NA | NA | NA | NA | RNU1-133P   |
| NA        | ENSG00000201741 | 0 | NA | NA | NA | NA |             |
| NA        | ENSG00000201742 | 0 | NA | NA | NA | NA | RNU6-563P   |
| NA        | ENSG00000201744 | 0 | NA | NA | NA | NA | RNU6-34P    |
| NA        | ENSG00000201746 | 0 | NA | NA | NA | NA | RNU6-828P   |
| NA        | ENSG00000201747 | 0 | NA | NA | NA | NA | RNU6-534P   |
| NA        | ENSG00000201749 | 0 | NA | NA | NA | NA |             |



|        |                 |            |             |            |            |    |            |
|--------|-----------------|------------|-------------|------------|------------|----|------------|
| NA     | ENSG00000201752 | 0          | NA          | NA         | NA         | NA | RNU6-119P  |
| 26797  | ENSG00000201754 | 0          | NA          | NA         | NA         | NA | SNORD52    |
| NA     | ENSG00000201756 | 0          | NA          | NA         | NA         | NA |            |
| NA     | ENSG00000201758 | 0          | NA          | NA         | NA         | NA | RN7SKP55   |
| NA     | ENSG00000201761 | 0          | NA          | NA         | NA         | NA | RNU6-336P  |
| NA     | ENSG00000201763 | 0          | NA          | NA         | NA         | NA | RNA5SP267  |
| NA     | ENSG00000201766 | 0          | NA          | NA         | NA         | NA | RNA5SP302  |
| NA     | ENSG00000201770 | 0          | NA          | NA         | NA         | NA | RNU6-384P  |
| 677796 | ENSG00000201772 | 0          | NA          | NA         | NA         | NA | SNORA5C    |
| NA     | ENSG00000201774 | 0          | NA          | NA         | NA         | NA |            |
| NA     | ENSG00000201775 | 0          | NA          | NA         | NA         | NA | RNU6-1325P |
| NA     | ENSG00000201778 | 0          | NA          | NA         | NA         | NA |            |
| NA     | ENSG00000201780 | 0          | NA          | NA         | NA         | NA | RNU6-275P  |
| NA     | ENSG00000201782 | 0          | NA          | NA         | NA         | NA | RN7SKP226  |
| 692233 | ENSG00000201785 | 0          | NA          | NA         | NA         | NA | SNORD117   |
| NA     | ENSG00000201786 | 0          | NA          | NA         | NA         | NA |            |
| NA     | ENSG00000201788 | 0          | NA          | NA         | NA         | NA |            |
| NA     | ENSG00000201790 | 0          | NA          | NA         | NA         | NA | RNA5SP189  |
| NA     | ENSG00000201791 | 0          | NA          | NA         | NA         | NA |            |
| NA     | ENSG00000201793 | 0.74659737 | -0.03303578 | 0.38644226 | 0.4112877  | NA | RN7SKP9    |
| NA     | ENSG00000201794 | 0          | NA          | NA         | NA         | NA | RN7SKP130  |
| NA     | ENSG00000201796 | 0          | NA          | NA         | NA         | NA | RNU6-392P  |
| NA     | ENSG00000201800 | 0          | NA          | NA         | NA         | NA |            |
| NA     | ENSG00000201801 | 0          | NA          | NA         | NA         | NA | RNU5E-4P   |
| NA     | ENSG00000201805 | 0          | NA          | NA         | NA         | NA | RNU6-1180P |
| NA     | ENSG00000201806 | 0.14931947 | -0.01844332 | 0.38480212 | 0.84537521 | NA | RNU4-8P    |
| NA     | ENSG00000201807 | 0          | NA          | NA         | NA         | NA |            |
| NA     | ENSG00000201809 | 0          | NA          | NA         | NA         | NA |            |
| NA     | ENSG00000201810 | 0          | NA          | NA         | NA         | NA |            |
| NA     | ENSG00000201811 | 0          | NA          | NA         | NA         | NA |            |
| NA     | ENSG00000201812 | 0          | NA          | NA         | NA         | NA | RNA5SP488  |
| NA     | ENSG00000201813 | 0          | NA          | NA         | NA         | NA | RNU6-915P  |
| NA     | ENSG00000201815 | 0          | NA          | NA         | NA         | NA | RNU6-526P  |
| NA     | ENSG00000201816 | 0          | NA          | NA         | NA         | NA |            |
| NA     | ENSG00000201818 | 0          | NA          | NA         | NA         | NA | RNY4P17    |
| NA     | ENSG00000201820 | 0          | NA          | NA         | NA         | NA |            |
| NA     | ENSG00000201821 | 0          | NA          | NA         | NA         | NA | RNU4-9P    |
| NA     | ENSG00000201822 | 0          | NA          | NA         | NA         | NA | RNA5SP149  |

|           |                 |   |    |    |    |    |             |
|-----------|-----------------|---|----|----|----|----|-------------|
| 26801     | ENSG00000201823 | 0 | NA | NA | NA | NA | SNORD48     |
| NA        | ENSG00000201825 | 0 | NA | NA | NA | NA | RNU6-1131P  |
| NA        | ENSG00000201826 | 0 | NA | NA | NA | NA | RNU6-867P   |
| NA        | ENSG00000201827 | 0 | NA | NA | NA | NA |             |
| NA        | ENSG00000201830 | 0 | NA | NA | NA | NA |             |
| 338433    | ENSG00000201831 | 0 | NA | NA | NA | NA | SNORD115-1  |
| 767579    | ENSG00000201839 | 0 | NA | NA | NA | NA | SNORD114-3  |
| NA        | ENSG00000201843 | 0 | NA | NA | NA | NA |             |
| NA        | ENSG00000201846 | 0 | NA | NA | NA | NA | RNA5SP166   |
| 109616978 | ENSG00000201847 | 0 | NA | NA | NA | NA | SNORD31B    |
| NA        | ENSG00000201850 | 0 | NA | NA | NA | NA |             |
| NA        | ENSG00000201852 | 0 | NA | NA | NA | NA | RNU6-702P   |
| NA        | ENSG00000201856 | 0 | NA | NA | NA | NA | RNA5SP331   |
| NA        | ENSG00000201860 | 0 | NA | NA | NA | NA |             |
| NA        | ENSG00000201861 | 0 | NA | NA | NA | NA | RNA5SP298   |
| NA        | ENSG00000201863 | 0 | NA | NA | NA | NA |             |
| NA        | ENSG00000201867 | 0 | NA | NA | NA | NA |             |
| NA        | ENSG00000201868 | 0 | NA | NA | NA | NA |             |
| NA        | ENSG00000201869 | 0 | NA | NA | NA | NA | RNU6-294P   |
| NA        | ENSG00000201875 | 0 | NA | NA | NA | NA | RN7SKP178   |
| NA        | ENSG00000201876 | 0 | NA | NA | NA | NA | RNA5SP97    |
| NA        | ENSG00000201881 | 0 | NA | NA | NA | NA |             |
| NA        | ENSG00000201882 | 0 | NA | NA | NA | NA |             |
| NA        | ENSG00000201884 | 0 | NA | NA | NA | NA |             |
| NA        | ENSG00000201892 | 0 | NA | NA | NA | NA |             |
| NA        | ENSG00000201894 | 0 | NA | NA | NA | NA | RNU6-967P   |
| NA        | ENSG00000201896 | 0 | NA | NA | NA | NA | RN7SKP153   |
| NA        | ENSG00000201898 | 0 | NA | NA | NA | NA |             |
| 767604    | ENSG00000201899 | 0 | NA | NA | NA | NA | SNORD114-24 |
| NA        | ENSG00000201900 | 0 | NA | NA | NA | NA | RNY1P13     |
| NA        | ENSG00000201901 | 0 | NA | NA | NA | NA | RN7SKP48    |
| 100033812 | ENSG00000201907 | 0 | NA | NA | NA | NA | SNORD115-38 |
| NA        | ENSG00000201909 | 0 | NA | NA | NA | NA | RNU6-590P   |
| NA        | ENSG00000201910 | 0 | NA | NA | NA | NA | RNU1-140P   |
| NA        | ENSG00000201912 | 0 | NA | NA | NA | NA | RN7SKP189   |
| NA        | ENSG00000201913 | 0 | NA | NA | NA | NA |             |
| NA        | ENSG00000201916 | 0 | NA | NA | NA | NA |             |
| NA        | ENSG00000201919 | 0 | NA | NA | NA | NA | RNU6-1022P  |

|           |                 |          |            |            |            |    |             |
|-----------|-----------------|----------|------------|------------|------------|----|-------------|
| NA        | ENSG00000201920 | 0        | NA         | NA         | NA         | NA | RNA5SP442   |
| NA        | ENSG00000201922 | 0        | NA         | NA         | NA         | NA | RNU1-43P    |
| NA        | ENSG00000201923 | 0        | NA         | NA         | NA         | NA | RNA5SP485   |
| NA        | ENSG00000201931 | 0        | NA         | NA         | NA         | NA | RNA5SP172   |
| NA        | ENSG00000201933 | 0        | NA         | NA         | NA         | NA |             |
| NA        | ENSG00000201938 | 0        | NA         | NA         | NA         | NA |             |
| NA        | ENSG00000201939 | 0        | NA         | NA         | NA         | NA | RNA5SP224   |
| NA        | ENSG00000201942 | 0        | NA         | NA         | NA         | NA | RNA5SP363   |
| 100033447 | ENSG00000201943 | 0        | NA         | NA         | NA         | NA | SNORD115-10 |
| NA        | ENSG00000201944 | 0        | NA         | NA         | NA         | NA |             |
| NA        | ENSG00000201945 | 0        | NA         | NA         | NA         | NA |             |
| 767569    | ENSG00000201950 | 0        | NA         | NA         | NA         | NA | SNORD113-9  |
| NA        | ENSG00000201954 | 0        | NA         | NA         | NA         | NA | RNU6-673P   |
| NA        | ENSG00000201955 | 0        | NA         | NA         | NA         | NA | RNY3P1      |
| NA        | ENSG00000201957 | 0        | NA         | NA         | NA         | NA |             |
| NA        | ENSG00000201962 | 0        | NA         | NA         | NA         | NA | RNA5SP126   |
| NA        | ENSG00000201965 | 0        | NA         | NA         | NA         | NA |             |
| NA        | ENSG00000201966 | 0        | NA         | NA         | NA         | NA | RNA5-8SP4   |
| NA        | ENSG00000201967 | 0        | NA         | NA         | NA         | NA | RN7SKP22    |
| NA        | ENSG00000201968 | 0        | NA         | NA         | NA         | NA | RNA5SP138   |
| 100033460 | ENSG00000201969 | 0        | NA         | NA         | NA         | NA | SNORD115-20 |
| NA        | ENSG00000201980 | 0        | NA         | NA         | NA         | NA |             |
| NA        | ENSG00000201984 | 0        | NA         | NA         | NA         | NA |             |
| NA        | ENSG00000201987 | 0        | NA         | NA         | NA         | NA |             |
| NA        | ENSG00000201988 | 0        | NA         | NA         | NA         | NA |             |
| NA        | ENSG00000201990 | 0        | NA         | NA         | NA         | NA |             |
| 100033809 | ENSG00000201992 | 0        | NA         | NA         | NA         | NA | SNORD115-35 |
| 677808    | ENSG00000201998 | 0.173733 | 0.01914545 | 0.38484597 | 0.78225479 | NA | SNORA23     |
| NA        | ENSG00000201999 | 0        | NA         | NA         | NA         | NA | RNA5SP428   |
| NA        | ENSG00000202000 | 0        | NA         | NA         | NA         | NA | RNU1-36P    |
| NA        | ENSG00000202001 | 0        | NA         | NA         | NA         | NA |             |
| NA        | ENSG00000202008 | 0        | NA         | NA         | NA         | NA |             |
| NA        | ENSG00000202014 | 0        | NA         | NA         | NA         | NA |             |
| NA        | ENSG00000202016 | 0        | NA         | NA         | NA         | NA | RNU6-619P   |
| NA        | ENSG00000202017 | 0        | NA         | NA         | NA         | NA | RNU6-806P   |
| NA        | ENSG00000202019 | 0        | NA         | NA         | NA         | NA |             |
| NA        | ENSG00000202023 | 0        | NA         | NA         | NA         | NA |             |
| NA        | ENSG00000202024 | 0        | NA         | NA         | NA         | NA | RNU6-934P   |

|        |                 |            |            |            |            |    |             |
|--------|-----------------|------------|------------|------------|------------|----|-------------|
| NA     | ENSG00000202025 | 0          | NA         | NA         | NA         | NA | RNU6-1240P  |
| NA     | ENSG00000202026 | 0          | NA         | NA         | NA         | NA | RNU6-1134P  |
| NA     | ENSG00000202027 | 0          | NA         | NA         | NA         | NA |             |
| NA     | ENSG00000202029 | 0          | NA         | NA         | NA         | NA | RNU6-580P   |
| 94162  | ENSG00000202031 | 0          | NA         | NA         | NA         | NA | SNORD38A    |
| NA     | ENSG00000202034 | 0          | NA         | NA         | NA         | NA | RNU6-399P   |
| NA     | ENSG00000202035 | 0          | NA         | NA         | NA         | NA |             |
| NA     | ENSG00000202039 | 0          | NA         | NA         | NA         | NA | RNU6-215P   |
| NA     | ENSG00000202041 | 0          | NA         | NA         | NA         | NA |             |
| NA     | ENSG00000202044 | 0          | NA         | NA         | NA         | NA | RNA5SP223   |
| NA     | ENSG00000202046 | 0          | NA         | NA         | NA         | NA |             |
| NA     | ENSG00000202047 | 0          | NA         | NA         | NA         | NA | RNA5SP324   |
| 767598 | ENSG00000202048 | 0          | NA         | NA         | NA         | NA | SNORD114-20 |
| NA     | ENSG00000202050 | 0          | NA         | NA         | NA         | NA | RNU6-391P   |
| NA     | ENSG00000202051 | 0          | NA         | NA         | NA         | NA | RNU6-382P   |
| NA     | ENSG00000202054 | 0          | NA         | NA         | NA         | NA | RNA5SP152   |
| NA     | ENSG00000202056 | 0          | NA         | NA         | NA         | NA | RNA5SP19    |
| NA     | ENSG00000202058 | 2.00237687 | 0.04693819 | 0.38082646 | 0.54798347 | NA | RN7SKP80    |
| NA     | ENSG00000202059 | 0          | NA         | NA         | NA         | NA |             |
| NA     | ENSG00000202060 | 0          | NA         | NA         | NA         | NA | RNA5SP455   |
| NA     | ENSG00000202063 | 0          | NA         | NA         | NA         | NA | RNA5SP79    |
| NA     | ENSG00000202069 | 0          | NA         | NA         | NA         | NA | RNU4-66P    |
| NA     | ENSG00000202070 | 0          | NA         | NA         | NA         | NA | RNU6-1175P  |
| NA     | ENSG00000202071 | 0          | NA         | NA         | NA         | NA |             |
| NA     | ENSG00000202074 | 0          | NA         | NA         | NA         | NA | RNU6-715P   |
| NA     | ENSG00000202078 | 0          | NA         | NA         | NA         | NA |             |
| NA     | ENSG00000202079 | 0          | NA         | NA         | NA         | NA |             |
| NA     | ENSG00000202081 | 0          | NA         | NA         | NA         | NA | RNU6-1280P  |
| NA     | ENSG00000202082 | 0          | NA         | NA         | NA         | NA | RNU6-290P   |
| NA     | ENSG00000202089 | 0          | NA         | NA         | NA         | NA | RNU6-1306P  |
| NA     | ENSG00000202092 | 0          | NA         | NA         | NA         | NA | RNA5SP190   |
| NA     | ENSG00000202093 | 0          | NA         | NA         | NA         | NA | SNORD58C    |
| NA     | ENSG00000202095 | 0          | NA         | NA         | NA         | NA | RNU6-1172P  |
| NA     | ENSG00000202099 | 0          | NA         | NA         | NA         | NA | RNU6-234P   |
| NA     | ENSG00000202100 | 0          | NA         | NA         | NA         | NA |             |
| NA     | ENSG00000202103 | 0          | NA         | NA         | NA         | NA | RNU4-12P    |
| 56663  | ENSG00000202111 | 0          | NA         | NA         | NA         | NA | VTRNA1-2    |
| NA     | ENSG00000202112 | 0          | NA         | NA         | NA         | NA | RNU6-690P   |

|           |                 |   |    |    |    |    |             |
|-----------|-----------------|---|----|----|----|----|-------------|
| NA        | ENSG00000202119 | 0 | NA | NA | NA | NA | RNU6-302P   |
| NA        | ENSG00000202124 | 0 | NA | NA | NA | NA | RNY4P3      |
| NA        | ENSG00000202125 | 0 | NA | NA | NA | NA | RNU1-100P   |
| NA        | ENSG00000202137 | 0 | NA | NA | NA | NA |             |
| NA        | ENSG00000202141 | 0 | NA | NA | NA | NA |             |
| 767596    | ENSG00000202142 | 0 | NA | NA | NA | NA | SNORD114-18 |
| NA        | ENSG00000202144 | 0 | NA | NA | NA | NA |             |
| NA        | ENSG00000202146 | 0 | NA | NA | NA | NA |             |
| NA        | ENSG00000202147 | 0 | NA | NA | NA | NA | RNA5SP329   |
| NA        | ENSG00000202150 | 0 | NA | NA | NA | NA | RNU6-407P   |
| NA        | ENSG00000202151 | 0 | NA | NA | NA | NA | RNY4P28     |
| NA        | ENSG00000202157 | 0 | NA | NA | NA | NA | RNU4-11P    |
| NA        | ENSG00000202159 | 0 | NA | NA | NA | NA | RNU6-742P   |
| NA        | ENSG00000202160 | 0 | NA | NA | NA | NA | RNU5E-7P    |
| NA        | ENSG00000202164 | 0 | NA | NA | NA | NA | RNA5SP117   |
| NA        | ENSG00000202167 | 0 | NA | NA | NA | NA | RNU1-114P   |
| NA        | ENSG00000202169 | 0 | NA | NA | NA | NA |             |
| NA        | ENSG00000202172 | 0 | NA | NA | NA | NA | RNU6-1327P  |
| NA        | ENSG00000202174 | 0 | NA | NA | NA | NA | RNA5-8SP5   |
| NA        | ENSG00000202175 | 0 | NA | NA | NA | NA | RNA5SP128   |
| NA        | ENSG00000202177 | 0 | NA | NA | NA | NA |             |
| NA        | ENSG00000202182 | 0 | NA | NA | NA | NA |             |
| NA        | ENSG00000202183 | 0 | NA | NA | NA | NA |             |
| NA        | ENSG00000202184 | 0 | NA | NA | NA | NA | RNU6-1283P  |
| NA        | ENSG00000202186 | 0 | NA | NA | NA | NA | RNU6-497P   |
| NA        | ENSG00000202187 | 0 | NA | NA | NA | NA | RNA5SP355   |
| 100033805 | ENSG00000202188 | 0 | NA | NA | NA | NA | SNORD115-31 |
| 109616992 | ENSG00000202189 | 0 | NA | NA | NA | NA | SNORA30B    |
| NA        | ENSG00000202190 | 0 | NA | NA | NA | NA |             |
| 767561    | ENSG00000202191 | 0 | NA | NA | NA | NA | SNORD113-1  |
| NA        | ENSG00000202193 | 0 | NA | NA | NA | NA | RNA5SP427   |
| NA        | ENSG00000202195 | 0 | NA | NA | NA | NA |             |
| NA        | ENSG00000202198 | 0 | NA | NA | NA | NA |             |
| NA        | ENSG00000202199 | 0 | NA | NA | NA | NA | RNU1-115P   |
| NA        | ENSG00000202200 | 0 | NA | NA | NA | NA |             |
| NA        | ENSG00000202205 | 0 | NA | NA | NA | NA | RNU6-1034P  |
| NA        | ENSG00000202206 | 0 | NA | NA | NA | NA | RNU6-169P   |
| NA        | ENSG00000202211 | 0 | NA | NA | NA | NA |             |

|           |                 |   |    |    |    |    |             |
|-----------|-----------------|---|----|----|----|----|-------------|
| NA        | ENSG00000202215 | 0 | NA | NA | NA | NA | RNU1-51P    |
| NA        | ENSG00000202216 | 0 | NA | NA | NA | NA |             |
| NA        | ENSG00000202217 | 0 | NA | NA | NA | NA | RN7SKP47    |
| NA        | ENSG00000202222 | 0 | NA | NA | NA | NA |             |
| NA        | ENSG00000202224 | 0 | NA | NA | NA | NA |             |
| NA        | ENSG00000202225 | 0 | NA | NA | NA | NA | RNA5SP240   |
| NA        | ENSG00000202227 | 0 | NA | NA | NA | NA | RNU6-282P   |
| NA        | ENSG00000202229 | 0 | NA | NA | NA | NA | RNU6-1138P  |
| NA        | ENSG00000202231 | 0 | NA | NA | NA | NA |             |
| NA        | ENSG00000202233 | 0 | NA | NA | NA | NA |             |
| NA        | ENSG00000202237 | 0 | NA | NA | NA | NA | RNU6-53P    |
| NA        | ENSG00000202239 | 0 | NA | NA | NA | NA | RNU6-396P   |
| NA        | ENSG00000202240 | 0 | NA | NA | NA | NA | RNU6-737P   |
| NA        | ENSG00000202241 | 0 | NA | NA | NA | NA | RN7SKP186   |
| NA        | ENSG00000202242 | 0 | NA | NA | NA | NA | RNU6-1276P  |
| NA        | ENSG00000202245 | 0 | NA | NA | NA | NA | RNU6-728P   |
| NA        | ENSG00000202249 | 0 | NA | NA | NA | NA | RNU5E-5P    |
| NA        | ENSG00000202251 | 0 | NA | NA | NA | NA |             |
| 85389     | ENSG00000202252 | 0 | NA | NA | NA | NA | SNORD14C    |
| NA        | ENSG00000202254 | 0 | NA | NA | NA | NA |             |
| NA        | ENSG00000202255 | 0 | NA | NA | NA | NA |             |
| NA        | ENSG00000202259 | 0 | NA | NA | NA | NA | RNU6-1318P  |
| NA        | ENSG00000202260 | 0 | NA | NA | NA | NA | RN7SKP69    |
| 100033818 | ENSG00000202261 | 0 | NA | NA | NA | NA | SNORD115-44 |
| NA        | ENSG00000202263 | 0 | NA | NA | NA | NA | RNA5SP22    |
| NA        | ENSG00000202264 | 0 | NA | NA | NA | NA | RNA5SP77    |
| NA        | ENSG00000202265 | 0 | NA | NA | NA | NA | RNU6-596P   |
| NA        | ENSG00000202268 | 0 | NA | NA | NA | NA |             |
| NA        | ENSG00000202269 | 0 | NA | NA | NA | NA |             |
| 767590    | ENSG00000202270 | 0 | NA | NA | NA | NA | SNORD114-12 |
| NA        | ENSG00000202272 | 0 | NA | NA | NA | NA |             |
| NA        | ENSG00000202273 | 0 | NA | NA | NA | NA |             |
| NA        | ENSG00000202275 | 0 | NA | NA | NA | NA |             |
| NA        | ENSG00000202276 | 0 | NA | NA | NA | NA |             |
| NA        | ENSG00000202279 | 0 | NA | NA | NA | NA |             |
| NA        | ENSG00000202281 | 0 | NA | NA | NA | NA | RNA5SP235   |
| NA        | ENSG00000202283 | 0 | NA | NA | NA | NA |             |
| NA        | ENSG00000202285 | 0 | NA | NA | NA | NA | RNU6-117P   |

|        |                 |   |    |    |    |    |             |
|--------|-----------------|---|----|----|----|----|-------------|
| NA     | ENSG00000202290 | 0 | NA | NA | NA | NA | RNA5SP37    |
| 767600 | ENSG00000202293 | 0 | NA | NA | NA | NA | SNORD114-22 |
| NA     | ENSG00000202296 | 0 | NA | NA | NA | NA | RNU6-1335P  |
| NA     | ENSG00000202297 | 0 | NA | NA | NA | NA | RNY3P12     |
| NA     | ENSG00000202300 | 0 | NA | NA | NA | NA | RNU6-487P   |
| NA     | ENSG00000202304 | 0 | NA | NA | NA | NA | RNU6-1130P  |
| NA     | ENSG00000202306 | 0 | NA | NA | NA | NA |             |
| NA     | ENSG00000202308 | 0 | NA | NA | NA | NA | RNU6-996P   |
| NA     | ENSG00000202309 | 0 | NA | NA | NA | NA |             |
| NA     | ENSG00000202310 | 0 | NA | NA | NA | NA |             |
| NA     | ENSG00000202313 | 0 | NA | NA | NA | NA | RNU1-64P    |
| 692075 | ENSG00000202314 | 0 | NA | NA | NA | NA | SNORD6      |
| NA     | ENSG00000202317 | 0 | NA | NA | NA | NA | RNU1-84P    |
| NA     | ENSG00000202318 | 0 | NA | NA | NA | NA |             |
| NA     | ENSG00000202322 | 0 | NA | NA | NA | NA | RNA5SP131   |
| NA     | ENSG00000202324 | 0 | NA | NA | NA | NA | RNA5SP366   |
| NA     | ENSG00000202329 | 0 | NA | NA | NA | NA | RNU6-609P   |
| NA     | ENSG00000202331 | 0 | NA | NA | NA | NA | RNA5SP167   |
| NA     | ENSG00000202332 | 0 | NA | NA | NA | NA |             |
| NA     | ENSG00000202334 | 0 | NA | NA | NA | NA | RNA5SP238   |
| NA     | ENSG00000202335 | 0 | NA | NA | NA | NA |             |
| NA     | ENSG00000202336 | 0 | NA | NA | NA | NA | RNU6-359P   |
| NA     | ENSG00000202339 | 0 | NA | NA | NA | NA | RNU4-45P    |
| NA     | ENSG00000202341 | 0 | NA | NA | NA | NA | RNU6-1051P  |
| NA     | ENSG00000202343 | 0 | NA | NA | NA | NA |             |
| NA     | ENSG00000202344 | 0 | NA | NA | NA | NA | RN7SKP208   |
| NA     | ENSG00000202345 | 0 | NA | NA | NA | NA |             |
| NA     | ENSG00000202347 | 0 | NA | NA | NA | NA | RNU1-16P    |
| NA     | ENSG00000202350 | 0 | NA | NA | NA | NA | RNU6-326P   |
| NA     | ENSG00000202351 | 0 | NA | NA | NA | NA | RN7SKP204   |
| 6085   | ENSG00000202354 | 0 | NA | NA | NA | NA | RNY3        |
| NA     | ENSG00000202356 | 0 | NA | NA | NA | NA | RNA5SP277   |
| NA     | ENSG00000202357 | 0 | NA | NA | NA | NA |             |
| NA     | ENSG00000202358 | 0 | NA | NA | NA | NA | RNU6-652P   |
| NA     | ENSG00000202360 | 0 | NA | NA | NA | NA | RN7SKP249   |
| NA     | ENSG00000202361 | 0 | NA | NA | NA | NA |             |
| NA     | ENSG00000202363 | 0 | NA | NA | NA | NA | SNORA62     |
| NA     | ENSG00000202368 | 0 | NA | NA | NA | NA |             |

|           |                 |            |             |            |            |    |           |
|-----------|-----------------|------------|-------------|------------|------------|----|-----------|
| NA        | ENSG00000202374 | 0          | NA          | NA         | NA         | NA |           |
| 109623459 | ENSG00000202377 | 0          | NA          | NA         | NA         | NA | SNORA25B  |
| NA        | ENSG00000202379 | 0          | NA          | NA         | NA         | NA |           |
| NA        | ENSG00000202380 | 0          | NA          | NA         | NA         | NA | RNU1-55P  |
| NA        | ENSG00000202382 | 0          | NA          | NA         | NA         | NA |           |
| NA        | ENSG00000202383 | 0          | NA          | NA         | NA         | NA | RNA5SP279 |
| NA        | ENSG00000202385 | 0          | NA          | NA         | NA         | NA |           |
| NA        | ENSG00000202386 | 0          | NA          | NA         | NA         | NA | RNA5SP211 |
| NA        | ENSG00000202388 | 0          | NA          | NA         | NA         | NA |           |
| NA        | ENSG00000202389 | 0          | NA          | NA         | NA         | NA |           |
| NA        | ENSG00000202392 | 0          | NA          | NA         | NA         | NA | RN7SKP292 |
| NA        | ENSG00000202395 | 0          | NA          | NA         | NA         | NA | RN7SKP1   |
| NA        | ENSG00000202398 | 0          | NA          | NA         | NA         | NA | RNU6-61P  |
| NA        | ENSG00000202399 | 0          | NA          | NA         | NA         | NA |           |
| 25826     | ENSG00000202400 | 0          | NA          | NA         | NA         | NA | SNORD82   |
| NA        | ENSG00000202402 | 0          | NA          | NA         | NA         | NA |           |
| NA        | ENSG00000202406 | 0.18922458 | 0.01954053  | 0.38488496 | 0.78225479 | NA | RN7SKP187 |
| NA        | ENSG00000202407 | 0          | NA          | NA         | NA         | NA |           |
| NA        | ENSG00000202408 | 0          | NA          | NA         | NA         | NA | RNVU1-21  |
| NA        | ENSG00000202410 | 0          | NA          | NA         | NA         | NA |           |
| NA        | ENSG00000202411 | 0          | NA          | NA         | NA         | NA | RNA5SP259 |
| NA        | ENSG00000202412 | 0          | NA          | NA         | NA         | NA | RNY3P13   |
| NA        | ENSG00000202414 | 0          | NA          | NA         | NA         | NA |           |
| NA        | ENSG00000202415 | 0          | NA          | NA         | NA         | NA | RN7SKP269 |
| NA        | ENSG00000202417 | 0          | NA          | NA         | NA         | NA |           |
| NA        | ENSG00000202422 | 0          | NA          | NA         | NA         | NA | RNA5SP30  |
| NA        | ENSG00000202423 | 0          | NA          | NA         | NA         | NA | RNU6-827P |
| NA        | ENSG00000202427 | 0          | NA          | NA         | NA         | NA | RNU6-744P |
| NA        | ENSG00000202428 | 0          | NA          | NA         | NA         | NA | RNU6-108P |
| NA        | ENSG00000202429 | 0          | NA          | NA         | NA         | NA | RNU4-48P  |
| NA        | ENSG00000202430 | 0          | NA          | NA         | NA         | NA | RNA5SP88  |
| NA        | ENSG00000202431 | 0          | NA          | NA         | NA         | NA | RNU6-438P |
| NA        | ENSG00000202433 | 0          | NA          | NA         | NA         | NA | RNU6-54P  |
| NA        | ENSG00000202434 | 0          | NA          | NA         | NA         | NA |           |
| NA        | ENSG00000202438 | 0          | NA          | NA         | NA         | NA |           |
| NA        | ENSG00000202440 | 0          | NA          | NA         | NA         | NA |           |
| NA        | ENSG00000202441 | 0.14931947 | -0.01844332 | 0.38480212 | 0.84537521 | NA | RNY4P10   |
| NA        | ENSG00000202444 | 0          | NA          | NA         | NA         | NA | RNU5E-6P  |



|        |                 |   |    |    |    |    |            |
|--------|-----------------|---|----|----|----|----|------------|
| NA     | ENSG00000202445 | 0 | NA | NA | NA | NA | RNU6-669P  |
| NA     | ENSG00000202449 | 0 | NA | NA | NA | NA |            |
| NA     | ENSG00000202459 | 0 | NA | NA | NA | NA |            |
| NA     | ENSG00000202461 | 0 | NA | NA | NA | NA |            |
| NA     | ENSG00000202468 | 0 | NA | NA | NA | NA | RNU4-17P   |
| NA     | ENSG00000202469 | 0 | NA | NA | NA | NA |            |
| NA     | ENSG00000202470 | 0 | NA | NA | NA | NA |            |
| NA     | ENSG00000202471 | 0 | NA | NA | NA | NA | RNU4-20P   |
| NA     | ENSG00000202472 | 0 | NA | NA | NA | NA | RNA5SP248  |
| NA     | ENSG00000202473 | 0 | NA | NA | NA | NA | RN7SKP81   |
| NA     | ENSG00000202474 | 0 | NA | NA | NA | NA | RNA5SP283  |
| NA     | ENSG00000202476 | 0 | NA | NA | NA | NA |            |
| NA     | ENSG00000202478 | 0 | NA | NA | NA | NA | RNU6-81P   |
| NA     | ENSG00000202479 | 0 | NA | NA | NA | NA |            |
| NA     | ENSG00000202485 | 0 | NA | NA | NA | NA | RNU6-499P  |
| NA     | ENSG00000202490 | 0 | NA | NA | NA | NA | RNU6-597P  |
| NA     | ENSG00000202491 | 0 | NA | NA | NA | NA | RNU6-716P  |
| NA     | ENSG00000202495 | 0 | NA | NA | NA | NA |            |
| NA     | ENSG00000202497 | 0 | NA | NA | NA | NA | RNU6-898P  |
| NA     | ENSG00000202498 | 0 | NA | NA | NA | NA |            |
| NA     | ENSG00000202502 | 0 | NA | NA | NA | NA | RNA5SP151  |
| 26817  | ENSG00000202503 | 0 | NA | NA | NA | NA | SNORD34    |
| NA     | ENSG00000202508 | 0 | NA | NA | NA | NA |            |
| NA     | ENSG00000202512 | 0 | NA | NA | NA | NA | RN7SKP230  |
| NA     | ENSG00000202513 | 0 | NA | NA | NA | NA | RNU6-805P  |
| NA     | ENSG00000202514 | 0 | NA | NA | NA | NA |            |
| 56662  | ENSG00000202515 | 0 | NA | NA | NA | NA | VTRNA1-3   |
| NA     | ENSG00000202517 | 0 | NA | NA | NA | NA |            |
| NA     | ENSG00000202522 | 0 | NA | NA | NA | NA |            |
| NA     | ENSG00000202523 | 0 | NA | NA | NA | NA |            |
| NA     | ENSG00000202528 | 0 | NA | NA | NA | NA | RNU6-650P  |
| 595099 | ENSG00000202529 | 0 | NA | NA | NA | NA | SNORD18B   |
| NA     | ENSG00000202532 | 0 | NA | NA | NA | NA | RNU6-395P  |
| NA     | ENSG00000202533 | 0 | NA | NA | NA | NA |            |
| NA     | ENSG00000202534 | 0 | NA | NA | NA | NA | RNU6-1329P |
| NA     | ENSG00000202536 | 0 | NA | NA | NA | NA |            |
| NA     | ENSG00000202537 | 0 | NA | NA | NA | NA |            |
| 26834  | ENSG00000202538 | 0 | NA | NA | NA | NA | RNU4-2     |

|           |                 |            |             |            |            |            |              |
|-----------|-----------------|------------|-------------|------------|------------|------------|--------------|
| NA        | ENSG00000202542 | 0          | NA          | NA         | NA         | NA         |              |
| 664612    | ENSG00000202560 | 0          | NA          | NA         | NA         | NA         | MIR539       |
| 693122    | ENSG00000202566 | 0          | NA          | NA         | NA         | NA         | MIR421       |
| 574447    | ENSG00000202569 | 0          | NA          | NA         | NA         | NA         | MIR146B      |
| 693167    | ENSG00000202601 | 0          | NA          | NA         | NA         | NA         | MIR582       |
| 574441    | ENSG00000202609 | 0          | NA          | NA         | NA         | NA         | MIR488       |
| NA        | ENSG00000203258 | 0.16735865 | 0.01897177  | 0.38482933 | 0.78225479 | NA         |              |
| NA        | ENSG00000203262 | 0          | NA          | NA         | NA         | NA         |              |
| NA        | ENSG00000203266 | 0          | NA          | NA         | NA         | NA         |              |
| NA        | ENSG00000203279 | 9.76262612 | 0.10495272  | 0.35665667 | 0.51884778 | 0.73240412 |              |
| 100128531 | ENSG00000203280 | 0          | NA          | NA         | NA         | NA         | KIAA1671-AS1 |
| NA        | ENSG00000203286 | 0.69020615 | 0.00613976  | 0.38192084 | 0.89704592 | NA         |              |
| 109729141 | ENSG00000203288 | 45.3216208 | -0.5015411  | 0.34355352 | 0.03749383 | 0.1196137  | TDRKH-AS1    |
| NA        | ENSG00000203307 | 0.89608518 | 0.04469613  | 0.38496371 | 0.40125479 | NA         | FAM78B-AS1   |
| NA        | ENSG00000203321 | 0.84255051 | 0.03666442  | 0.38463912 | 0.46277423 | NA         | CARNMT1-AS1  |
| NA        | ENSG00000203325 | 0.15069912 | -0.01848503 | 0.38480575 | 0.84537521 | NA         |              |
| 170958    | ENSG00000203326 | 236.07309  | 0.12555669  | 0.1846215  | 0.43813695 | 0.66330691 | ZNF525       |
| NA        | ENSG00000203327 | 7.39300655 | -0.01633107 | 0.35189342 | 0.90734664 | 0.95963244 |              |
| NA        | ENSG00000203334 | 0          | NA          | NA         | NA         | NA         |              |
| NA        | ENSG00000203335 | 0          | NA          | NA         | NA         | NA         |              |
| 105378716 | ENSG00000203356 | 0.34109944 | 0.02362644  | 0.38535338 | 0.62411138 | NA         | LINC01562    |
| NA        | ENSG00000203362 | 8.37344345 | -0.18057821 | 0.39659584 | 0.26202488 | 0.48394839 | POLH-AS1     |
| NA        | ENSG00000203363 | 0.34746601 | 0.02370763  | 0.3853651  | 0.61987128 | NA         | GPR160P1     |
| NA        | ENSG00000203364 | 0          | NA          | NA         | NA         | NA         |              |
| NA        | ENSG00000203387 | 0          | NA          | NA         | NA         | NA         | SNF8P1       |
| NA        | ENSG00000203392 | 44.9908564 | 0.23871617  | 0.29099456 | 0.2496883  | 0.46933358 |              |
| NA        | ENSG00000203395 | 0          | NA          | NA         | NA         | NA         |              |
| NA        | ENSG00000203396 | 0          | NA          | NA         | NA         | NA         |              |
| NA        | ENSG00000203397 | 0.8282343  | 0.01216318  | 0.38173245 | 0.81198921 | NA         | SHISA5P2     |
| NA        | ENSG00000203402 | 0          | NA          | NA         | NA         | NA         |              |
| NA        | ENSG00000203408 | 0          | NA          | NA         | NA         | NA         | OR6C71P      |
| NA        | ENSG00000203411 | 0          | NA          | NA         | NA         | NA         |              |
| NA        | ENSG00000203413 | 0          | NA          | NA         | NA         | NA         | ACTBP6       |
| NA        | ENSG00000203414 | 0.14931947 | -0.01844332 | 0.38480212 | 0.84537521 | NA         | BTBD7P1      |
| NA        | ENSG00000203416 | 0          | NA          | NA         | NA         | NA         | FAM32BP      |
| NA        | ENSG00000203434 | 0          | NA          | NA         | NA         | NA         |              |
| NA        | ENSG00000203435 | 2.35011189 | 0.04085406  | 0.37434019 | 0.6788896  | NA         | E2F3P2       |
| NA        | ENSG00000203436 | 0          | NA          | NA         | NA         | NA         |              |

|           |                 |            |             |            |            |            |            |
|-----------|-----------------|------------|-------------|------------|------------|------------|------------|
| NA        | ENSG00000203437 | 0.34113746 | 0.02362674  | 0.38535343 | 0.62409123 | NA         |            |
| 106478991 | ENSG00000203441 | 4.4585776  | 0.05560565  | 0.3719583  | 0.62490469 | 0.80885366 | LINC00449  |
| NA        | ENSG00000203446 | 0.6208875  | -0.01840553 | 0.38295181 | 0.69702053 | NA         | SUGCT-AS1  |
| NA        | ENSG00000203462 | 0          | NA          | NA         | NA         | NA         |            |
| NA        | ENSG00000203469 | 0.36296777 | 0.00145226  | 0.38336853 | 0.96210322 | NA         |            |
| NA        | ENSG00000203472 | 0.15069912 | -0.01848503 | 0.38480575 | 0.84537521 | NA         |            |
| 64423     | ENSG00000203485 | 913.899191 | -0.28333865 | 0.09260445 | 0.00156595 | 0.00870266 | INF2       |
| NA        | ENSG00000203489 | 0.15069912 | -0.01848503 | 0.38480575 | 0.84537521 | NA         | HMGB1P39   |
| NA        | ENSG00000203492 | 0          | NA          | NA         | NA         | NA         |            |
| NA        | ENSG00000203496 | 0          | NA          | NA         | NA         | NA         |            |
| NA        | ENSG00000203497 | 52.4502943 | 0.09688736  | 0.26665788 | 0.61973266 | 0.80578648 | PDCD4-AS1  |
| NA        | ENSG00000203498 | 0          | NA          | NA         | NA         | NA         |            |
| 642574    | ENSG00000203499 | 4.37456158 | -0.10521568 | 0.38561538 | 0.35501021 | 0.58543783 | IQANK1     |
| NA        | ENSG00000203506 | 25.9426369 | -0.06017761 | 0.30977092 | 0.74523612 | 0.87993124 | RBMS3-AS2  |
| NA        | ENSG00000203520 | 0.16735865 | 0.01897177  | 0.38482933 | 0.78225479 | NA         |            |
| NA        | ENSG00000203523 | 0          | NA          | NA         | NA         | NA         | TAS2R2P    |
| 101927447 | ENSG00000203527 | 0          | NA          | NA         | NA         | NA         | SCUBE1-AS1 |
| NA        | ENSG00000203531 | 0.50756658 | 0.03074024  | 0.38601609 | 0.48351361 | NA         |            |
| NA        | ENSG00000203546 | 14.9053587 | -0.39105716 | 0.53009971 | 0.07977857 | 0.21084412 |            |
| NA        | ENSG00000203560 | 0          | NA          | NA         | NA         | NA         | OR52J1P    |
| NA        | ENSG00000203565 | 0          | NA          | NA         | NA         | NA         |            |
| NA        | ENSG00000203573 | 0          | NA          | NA         | NA         | NA         |            |
| 26184     | ENSG00000203581 | 1.36135297 | 0.03410779  | 0.37996684 | 0.64030339 | NA         | OR1F2P     |
| 100507175 | ENSG00000203585 | 0          | NA          | NA         | NA         | NA         | LINC02408  |
| NA        | ENSG00000203588 | 0.48819159 | -0.0065213  | 0.38314647 | 0.86576387 | NA         | IGBP1-AS1  |
| NA        | ENSG00000203593 | 0          | NA          | NA         | NA         | NA         |            |
| 101978719 | ENSG00000203601 | 0          | NA          | NA         | NA         | NA         | LINC00970  |
| NA        | ENSG00000203605 | 0          | NA          | NA         | NA         | NA         |            |
| NA        | ENSG00000203616 | 1.22892552 | -0.03221908 | 0.3826028  | 0.57854601 | NA         | RHOT1P2    |
| 2812      | ENSG00000203618 | 221.886881 | 0.06256602  | 0.15756611 | 0.66460608 | 0.83444869 | GP1BB      |
| NA        | ENSG00000203620 | 1.85354485 | 0.02141132  | 0.37798452 | 0.77884469 | NA         |            |
| NA        | ENSG00000203635 | 1.0366024  | 0.02185682  | 0.3818712  | 0.68993517 | NA         |            |
| NA        | ENSG00000203643 | 0          | NA          | NA         | NA         | NA         |            |
| NA        | ENSG00000203644 | 24.7422266 | -0.42079078 | 0.41967021 | 0.08321426 | 0.21772162 |            |
| 100820709 | ENSG00000203645 | 0.173124   | -0.01911262 | 0.38486262 | 0.84537521 | NA         | LINC00501  |
| NA        | ENSG00000203647 | 0          | NA          | NA         | NA         | NA         |            |
| NA        | ENSG00000203648 | 0          | NA          | NA         | NA         | NA         |            |
| 101928287 | ENSG00000203650 | 22.4725383 | -0.30040432 | 0.39231876 | 0.16640834 | 0.356962   | LINC01285  |

|           |                 |            |             |            |            |            |             |
|-----------|-----------------|------------|-------------|------------|------------|------------|-------------|
| 401993    | ENSG00000203661 | 0          | NA          | NA         | NA         | NA         | OR2T5       |
| 26246     | ENSG00000203663 | 1.18857405 | -0.00828753 | 0.38052827 | 0.88628064 | NA         | OR2L2       |
| 441932    | ENSG00000203664 | 0          | NA          | NA         | NA         | NA         | OR2W5P      |
| 84288     | ENSG00000203666 | 195.862871 | -0.13702468 | 0.17696772 | 0.3816738  | 0.6107766  | EFCAB2      |
| 116228    | ENSG00000203667 | 1009.18932 | -0.25018633 | 0.0921967  | 0.00502507 | 0.0233101  | COX20       |
| 1122      | ENSG00000203668 | 2191.72575 | -0.4311898  | 0.09239803 | 1.48E-06   | 1.62E-05   | CHML        |
| 23596     | ENSG00000203668 | 2191.72575 | -0.4311898  | 0.09239803 | 1.48E-06   | 1.62E-05   | CHML        |
| 574432    | ENSG00000203684 | 2.64512127 | 0.04106861  | 0.37552362 | 0.66537299 | 0.83476667 | IBA57-DT    |
| 375057    | ENSG00000203685 | 9.79637966 | 0.04399185  | 0.34166208 | 0.78711755 | 0.90325712 | STUM        |
| 441178    | ENSG00000203688 | 2.82342767 | -0.0657187  | 0.37918655 | 0.50335292 | 0.72006071 | LINC02487   |
| 6953      | ENSG00000203690 | 0.173733   | 0.01914545  | 0.38484597 | 0.78225479 | NA         | TCP10L3     |
| 388743    | ENSG00000203697 | 0.34706974 | -0.02334524 | 0.38533535 | 0.6762196  | NA         | CAPN8       |
| 128387    | ENSG00000203705 | 361.749859 | 0.30466423  | 0.15663538 | 0.03284271 | 0.10778817 | TATDN3      |
| NA        | ENSG00000203706 | 56.9840651 | -0.17260172 | 0.25439798 | 0.37505    | 0.60431998 | SERTAD4-AS1 |
| NA        | ENSG00000203709 | 63.0231255 | -0.23395991 | 0.25106276 | 0.2319402  | 0.44861961 | MIR29B2CHG  |
| 1378      | ENSG00000203710 | 0          | NA          | NA         | NA         | NA         | CR1         |
| 100130967 | ENSG00000203711 | 10.1782314 | 0.04772016  | 0.3523614  | 0.74925648 | 0.88205755 | C6orf99     |
| 554279    | ENSG00000203721 | 0.66329621 | -0.0236254  | 0.38271394 | 0.63618766 | NA         | LINC00862   |
| 353091    | ENSG00000203722 | 1.13250251 | 0.06450809  | 0.38888264 | 0.27168088 | NA         | RAET1G      |
| 388722    | ENSG00000203724 | 44.4299226 | 0.70298238  | 0.37612455 | 0.00967959 | 0.04042159 | C1orf53     |
| 389432    | ENSG00000203727 | 0          | NA          | NA         | NA         | NA         | SAMD5       |
| 388719    | ENSG00000203729 | 0          | NA          | NA         | NA         | NA         | LINC00272   |
| 127670    | ENSG00000203730 | 1.03528245 | 0.02217544  | 0.38190372 | 0.68565319 | NA         | TEDDM1      |
| 100126572 | ENSG00000203733 | 0          | NA          | NA         | NA         | NA         | GJE1        |
| 345930    | ENSG00000203734 | 2.11418982 | 0.00383731  | 0.37533968 | 0.96487873 | NA         | ECT2L       |
| 9293      | ENSG00000203737 | 0          | NA          | NA         | NA         | NA         | GPR52       |
| 101928673 | ENSG00000203739 | 43.8958869 | 0.3962983   | 0.34149283 | 0.08652708 | 0.22405342 | PRDX6-AS1   |
| 149281    | ENSG00000203740 | 0.33971012 | 0.00270698  | 0.38338593 | 0.96261173 | NA         | METTL11B    |
| 2214      | ENSG00000203747 | 0          | NA          | NA         | NA         | NA         | FCGR3A      |
| 253582    | ENSG00000203756 | 0          | NA          | NA         | NA         | NA         | TMEM244     |
| 391114    | ENSG00000203757 | 0          | NA          | NA         | NA         | NA         | OR6K3       |
| NA        | ENSG00000203758 | 0          | NA          | NA         | NA         | NA         | OR10T1P     |
| 387103    | ENSG00000203760 | 289.675973 | 0.23650806  | 0.15262889 | 0.09074888 | 0.23219728 | CENPW       |
| NA        | ENSG00000203761 | 131.772535 | 0.31766083  | 0.19609863 | 0.06161581 | 0.17501182 | MSTO2P      |
| 503542    | ENSG00000203772 | 42.2334349 | -0.80465532 | 0.42121893 | 0.00661942 | 0.02949895 | SPRN        |
| 619208    | ENSG00000203778 | 135.079538 | 0.09494336  | 0.20077528 | 0.58074732 | 0.77801412 | FAM229B     |
| 92565     | ENSG00000203780 | 5.06454    | 0.1776593   | 0.42669533 | 0.10669164 | 0.26139321 | FANK1       |
| NA        | ENSG00000203781 | 0          | NA          | NA         | NA         | NA         | S100A7P1    |

|           |                 |            |             |            |            |            |              |
|-----------|-----------------|------------|-------------|------------|------------|------------|--------------|
| 4014      | ENSG00000203782 | 0          | NA          | NA         | NA         | NA         | LORICRIN     |
| 574414    | ENSG00000203783 | 0          | NA          | NA         | NA         | NA         | PRR9         |
| 149018    | ENSG00000203784 | 0          | NA          | NA         | NA         | NA         | LELP1        |
| 6704      | ENSG00000203785 | 0          | NA          | NA         | NA         | NA         | SPRR2E       |
| 448834    | ENSG00000203786 | 0          | NA          | NA         | NA         | NA         | KPRP         |
| 399818    | ENSG00000203791 | 257.676594 | -0.29780193 | 0.15450733 | 0.03470936 | 0.11261384 | EEF1AKMT2    |
| 118670    | ENSG00000203795 | 0          | NA          | NA         | NA         | NA         | FAM24A       |
| 8528      | ENSG00000203797 | 2.0504227  | -0.04896227 | 0.37926474 | 0.56923272 | NA         | DDO          |
| NA        | ENSG00000203799 | 1.84799025 | 0.04674527  | 0.38174718 | 0.52705153 | NA         | CCDC162P     |
| 387111    | ENSG00000203801 | 1.48460441 | -0.0566891  | 0.38529305 | 0.39601673 | NA         | LINC00222    |
| NA        | ENSG00000203804 | 9.12769133 | -0.05245096 | 0.35925196 | 0.7017986  | 0.85652585 | ADAMTSL4-AS1 |
| 196051    | ENSG00000203805 | 4.43935481 | -0.16943806 | 0.42821148 | 0.08336747 | 0.21800589 | PLPP4        |
| 154442    | ENSG00000203808 | 149.231411 | -0.48363486 | 0.20308501 | 0.00623909 | 0.02799899 | BVES-AS1     |
| 100113403 | ENSG00000203809 | 17.6024994 | -0.23789997 | 0.41013355 | 0.19783965 | 0.40199972 | LIN28B-AS1   |
| 126961    | ENSG00000203811 | 83.4568125 | -1.24845961 | 0.26845749 | 3.07E-07   | 3.79E-06   | H3C14        |
| 8337      | ENSG00000203812 | 19.6318295 | 0.03209741  | 0.38686882 | NA         | NA         | H2AC18       |
| 440689    | ENSG00000203814 | 30.8221836 | -0.15812268 | 0.3148089  | 0.42450412 | 0.65018652 | H2BC18       |
| NA        | ENSG00000203825 | 0          | NA          | NA         | NA         | NA         |              |
| 119548    | ENSG00000203837 | 0          | NA          | NA         | NA         | NA         | PNLIPRP3     |
| NA        | ENSG00000203855 | 0          | NA          | NA         | NA         | NA         | HSD3BP4      |
| 3283      | ENSG00000203857 | 0          | NA          | NA         | NA         | NA         | HSD3B1       |
| NA        | ENSG00000203858 | 0          | NA          | NA         | NA         | NA         | HSD3BP2      |
| 3284      | ENSG00000203859 | 0          | NA          | NA         | NA         | NA         | HSD3B2       |
| 388667    | ENSG00000203864 | 0          | NA          | NA         | NA         | NA         | LINC02868    |
| 84852     | ENSG00000203865 | 111.946112 | 0.04857957  | 0.22915873 | 0.78840611 | 0.90400376 | ATP1A1-AS1   |
| 282996    | ENSG00000203867 | 1051.384   | -0.00472065 | 0.0817706  | 0.95345871 | 0.98074558 | RBM20        |
| 100132963 | ENSG00000203870 | 0          | NA          | NA         | NA         | NA         | SMIM9        |
| 206412    | ENSG00000203872 | 23.0733747 | 0.09091674  | 0.30743964 | 0.63566384 | 0.81670577 | C6orf163     |
| NA        | ENSG00000203875 | 3164.98281 | -0.04021408 | 0.07133843 | 0.56541965 | 0.76735248 | SNHG5        |
| 100505933 | ENSG00000203876 | 4.90780552 | 0.03203307  | 0.36157291 | 0.804592   | 0.91124017 | ADD3-AS1     |
| 134701    | ENSG00000203877 | 207.96704  | -0.73719051 | 0.19172432 | 2.35E-05   | 0.00020759 | RIPPLY2      |
| 149620    | ENSG00000203878 | 0          | NA          | NA         | NA         | NA         | CHIAP2       |
| 2664      | ENSG00000203879 | 5936.05558 | -0.24504538 | 0.05081793 | 1.11E-06   | 1.25E-05   | GDI1         |
| 55251     | ENSG00000203880 | 1841.33204 | -0.04794613 | 0.08036842 | 0.54100696 | 0.74955154 | PCMTD2       |
| 54345     | ENSG00000203883 | 0.70234143 | 0.00341976  | 0.38183495 | 0.94213787 | NA         | SOX18        |
| 54923     | ENSG00000203896 | 252.749206 | 0.22761334  | 0.14840473 | 0.09563154 | 0.24117576 | LIME1        |
| 642864    | ENSG00000203897 | 0          | NA          | NA         | NA         | NA         | SPATA42      |
| 100130587 | ENSG00000203900 | 0.34051569 | -0.00034141 | 0.38336262 | 0.96848892 | NA         |              |

|           |                 |            |             |            |            |            |             |
|-----------|-----------------|------------|-------------|------------|------------|------------|-------------|
| 441161    | ENSG00000203907 | 0          | NA          | NA         | NA         | NA         | OEEP        |
| 154288    | ENSG00000203908 | 0          | NA          | NA         | NA         | NA         | KHDC3L      |
| 340168    | ENSG00000203909 | 0          | NA          | NA         | NA         | NA         | DPPA5       |
| 388649    | ENSG00000203910 | 0.18922458 | 0.01954053  | 0.38488496 | 0.78225479 | NA         | C1orf146    |
| NA        | ENSG00000203914 | 0.16735865 | 0.01897177  | 0.38482933 | 0.78225479 | NA         | HSP90B3P    |
| 494118    | ENSG00000203923 | 0          | NA          | NA         | NA         | NA         | SPANXN1     |
| 728712    | ENSG00000203926 | 0          | NA          | NA         | NA         | NA         | SPANXA2     |
| NA        | ENSG00000203930 | 706.619838 | -0.17355218 | 0.15268113 | 0.21359997 | 0.42378234 | LINC00632   |
| 347487    | ENSG00000203933 | 0          | NA          | NA         | NA         | NA         | CXorf66     |
| 414157    | ENSG00000203942 | 0.18922458 | 0.01954053  | 0.38488496 | 0.78225479 | NA         | C10orf62    |
| 148418    | ENSG00000203943 | 50.6671663 | 0.31620114  | 0.30715542 | 0.14451103 | 0.32462259 | SAMD13      |
| 26071     | ENSG00000203950 | 993.182835 | 0.34371622  | 0.08343131 | 2.36E-05   | 0.00020827 | RTL8A       |
| 347475    | ENSG00000203952 | 3.98718959 | 0.20647611  | 0.44781699 | 0.08708461 | 0.22523253 | CCDC160     |
| 400757    | ENSG00000203963 | 0          | NA          | NA         | NA         | NA         | C1orf141    |
| 84455     | ENSG00000203965 | 180.480856 | 0.07797186  | 0.17534993 | 0.61795139 | 0.80447215 | EFCAB7      |
| 245913    | ENSG00000203970 | 0          | NA          | NA         | NA         | NA         | DEFB110     |
| NA        | ENSG00000203971 | 0          | NA          | NA         | NA         | NA         |             |
| 389396    | ENSG00000203972 | 0.16735865 | 0.01897177  | 0.38482933 | 0.78225479 | NA         | GLYATL3     |
| 388633    | ENSG00000203985 | 0          | NA          | NA         | NA         | NA         | LDLRAD1     |
| 100133077 | ENSG00000203987 | 1.61125817 | -0.10583626 | 0.40142466 | 0.12672416 | NA         |             |
| 727940    | ENSG00000203989 | 0          | NA          | NA         | NA         | NA         | RHOXF2B     |
| 85026     | ENSG00000203993 | 315.702611 | 0.15004096  | 0.13860543 | 0.24595616 | 0.46518306 | ARRDC1-AS1  |
| 440590    | ENSG00000203995 | 174.44121  | -0.15648226 | 0.16848275 | 0.30017673 | 0.52733399 | ZYG11A      |
| 284751    | ENSG00000203999 | 275.309881 | 0.50514763  | 0.1606872  | 0.00061445 | 0.00386236 | LINC01270   |
| 138307    | ENSG00000204001 | 0          | NA          | NA         | NA         | NA         | LCN8        |
| NA        | ENSG00000204003 | 0          | NA          | NA         | NA         | NA         |             |
| 284546    | ENSG00000204006 | 0          | NA          | NA         | NA         | NA         | C1orf185    |
| 360203    | ENSG00000204007 | 0          | NA          | NA         | NA         | NA         | GLT6D1      |
| 439996    | ENSG00000204010 | 0.15069912 | -0.01848503 | 0.38480575 | 0.84537521 | NA         | IFIT1B      |
| NA        | ENSG00000204011 | 0          | NA          | NA         | NA         | NA         | COL5A1-AS1  |
| 203413    | ENSG00000204019 | 0          | NA          | NA         | NA         | NA         | CT83        |
| 643418    | ENSG00000204020 | 0          | NA          | NA         | NA         | NA         | LIPN        |
| 643414    | ENSG00000204021 | 0          | NA          | NA         | NA         | NA         | LIPK        |
| 142910    | ENSG00000204022 | 0          | NA          | NA         | NA         | NA         | LIPJ        |
| 100329135 | ENSG00000204025 | 1.08255373 | 0.05607251  | 0.38976327 | 0.21070257 | NA         | TRPC5OS     |
| NA        | ENSG00000204031 | 0          | NA          | NA         | NA         | NA         | LCN1P2      |
| 340745    | ENSG00000204033 | 1.61614074 | -0.09757152 | 0.3974854  | 0.15210627 | NA         | LRIT2       |
| 109729184 | ENSG00000204044 | 46.7613863 | -0.43262566 | 0.3515118  | 0.06689509 | 0.18544027 | SLC12A5-AS1 |

|           |                 |            |             |            |            |            |           |
|-----------|-----------------|------------|-------------|------------|------------|------------|-----------|
| NA        | ENSG00000204049 | 1.22788028 | 0.01823213  | 0.38022092 | 0.77283183 | NA         |           |
| 221424    | ENSG00000204052 | 44.1925979 | 0.10681445  | 0.28273765 | 0.58744379 | 0.78256674 | LRRC73    |
| NA        | ENSG00000204053 | 0          | NA          | NA         | NA         | NA         | MYCLP1    |
| NA        | ENSG00000204054 | 302.690865 | 0.08986846  | 0.14324362 | 0.49967844 | 0.71690947 | LINC00963 |
| NA        | ENSG00000204055 | 1.25686791 | -0.05755156 | 0.3858471  | 0.38486497 | NA         |           |
| 100132074 | ENSG00000204060 | 89.2050536 | -0.34727907 | 0.23189698 | 0.06800623 | 0.18768167 | FOXO6     |
| 340543    | ENSG00000204065 | 293.232678 | -0.29035951 | 0.13997042 | 0.02541514 | 0.08824579 | TCEAL5    |
| 90196     | ENSG00000204070 | 313.1477   | -0.06457944 | 0.14593503 | 0.63127252 | 0.8136456  | SYS1      |
| 158931    | ENSG00000204071 | 2.41939602 | -0.05224609 | 0.37827401 | 0.56952389 | NA         | TCEAL6    |
| NA        | ENSG00000204072 | 0          | NA          | NA         | NA         | NA         | ARMCX7P   |
| 3633      | ENSG00000204084 | 386.645625 | 0.57735019  | 0.13370475 | 4.86E-06   | 4.90E-05   | INPP5B    |
| 29935     | ENSG00000204086 | 1.62561171 | 0.02838365  | 0.37940571 | 0.69677524 | NA         | RPA4      |
| 732253    | ENSG00000204091 | 109.773133 | -1.02636359 | 0.23961128 | 2.16E-06   | 2.31E-05   | TDRG1     |
| NA        | ENSG00000204092 | 31.3610613 | -1.3352491  | 0.47471636 | 0.0003431  | 0.0023114  | LINC00951 |
| 129807    | ENSG00000204099 | 15.629894  | -0.41008674 | 0.52810896 | 0.07365839 | 0.19875293 | NEU4      |
| 9935      | ENSG00000204103 | 57.6762759 | 1.31880337  | 0.34639637 | 1.15E-05   | 0.00010836 | MAFB      |
| 26146     | ENSG00000204104 | 340.017718 | 0.36655501  | 0.19263002 | 0.02927361 | 0.09848879 | TRAF3IP1  |
| NA        | ENSG00000204110 | 0.49034168 | -0.01094288 | 0.3829019  | 0.82405874 | NA         | LINC02520 |
| NA        | ENSG00000204113 | 0.32444695 | 0.00134473  | 0.38336811 | 0.96743017 | NA         | BMP2KL    |
| 53344     | ENSG00000204116 | 175.789763 | 0.08864327  | 0.18151438 | 0.58036024 | 0.77774473 | CHIC1     |
| 100287792 | ENSG00000204117 | 0.18922458 | 0.01954053  | 0.38488496 | 0.78225479 | NA         |           |
| 645996    | ENSG00000204118 | 0          | NA          | NA         | NA         | NA         | NAP1L6P   |
| 26058     | ENSG00000204120 | 1596.00386 | -0.41297682 | 0.09476323 | 6.62E-06   | 6.49E-05   | GIGYF2    |
| NA        | ENSG00000204121 | 0          | NA          | NA         | NA         | NA         | ECEL1P1   |
| 257407    | ENSG00000204128 | 175.508947 | -0.03175912 | 0.18518626 | 0.84317419 | 0.9288493  | C2orf72   |
| 55680     | ENSG00000204130 | 442.885167 | -0.54688969 | 0.11678517 | 9.70E-07   | 1.10E-05   | RUFY2     |
| 340527    | ENSG00000204131 | 1359.39403 | 0.08927849  | 0.08551231 | 0.28382867 | 0.50900848 | NHSL2     |
| 392490    | ENSG00000204131 | 1359.39403 | 0.08927849  | 0.08551231 | 0.28382867 | 0.50900848 | NHSL2     |
| 2681      | ENSG00000204136 | 164.982164 | -0.94115262 | 0.19888333 | 3.04E-07   | 3.76E-06   | GGTA1     |
| 65979     | ENSG00000204138 | 1695.72051 | -0.02884711 | 0.07632328 | 0.69908829 | 0.85487569 | PHACTR4   |
| 340204    | ENSG00000204140 | 0          | NA          | NA         | NA         | NA         | CLPSL1    |
| 653308    | ENSG00000204147 | 567.524269 | -0.24592667 | 0.15316118 | 0.0788437  | 0.20929342 | ASAH2B    |
| 58483     | ENSG00000204148 | 0          | NA          | NA         | NA         | NA         | LINC00474 |
| 414189    | ENSG00000204149 | 641.904687 | 0.19824816  | 0.10657662 | 0.05238997 | 0.15429309 | AGAP6     |
| 100652748 | ENSG00000204152 | 389.432129 | 0.04997866  | 0.12211244 | 0.66676483 | 0.83582576 | TIMM23B   |
| 84243     | ENSG00000204160 | 731.08727  | -0.06619089 | 0.10925839 | 0.5252708  | 0.73786263 | ZDHHC18   |
| 170371    | ENSG00000204161 | 0          | NA          | NA         | NA         | NA         | TMEM273   |
| 158830    | ENSG00000204165 | 0          | NA          | NA         | NA         | NA         | CXorf65   |

|           |                 |            |             |            |            |            |           |
|-----------|-----------------|------------|-------------|------------|------------|------------|-----------|
| 642517    | ENSG00000204172 | 428.060713 | 0.24414701  | 0.12016461 | 0.03200493 | 0.10558327 | AGAP9     |
| 652972    | ENSG00000204173 | 1.16601517 | -0.00703431 | 0.38037911 | 0.90452519 | NA         | LRRC37A5P |
| 5540      | ENSG00000204174 | 0.69675292 | 0.02298921  | 0.3839153  | 0.59834713 | NA         | NPY4R     |
| 9721      | ENSG00000204175 | 30.4689553 | 0.9975471   | 0.53232719 | 0.00477064 | 0.02232299 | GPRIN2    |
| 83849     | ENSG00000204176 | 18.5927666 | -0.21163999 | 0.40078715 | 0.22275921 | 0.4358511  | SYT15     |
| 399761    | ENSG00000204177 | 321.192274 | -0.00742598 | 0.13454349 | 0.95198159 | 0.98012235 | BMS1P1    |
| 55219     | ENSG00000204178 | 895.208482 | -0.37214397 | 0.09273456 | 3.37E-05   | 0.0002871  | MACO1     |
| 26095     | ENSG00000204179 | 27.8719757 | -0.29838105 | 0.37139479 | 0.17089085 | 0.36292812 | PTPN20    |
| NA        | ENSG00000204183 | 0.173124   | -0.01911262 | 0.38486262 | 0.84537521 | NA         | GDF5-AS1  |
| 57683     | ENSG00000204186 | 815.44751  | -0.32001898 | 0.10699615 | 0.0017859  | 0.00970655 | ZDBF2     |
| 449520    | ENSG00000204188 | 0.85183244 | 0.0162954   | 0.38188389 | 0.75356296 | NA         | GGNBP1    |
| 255220    | ENSG00000204193 | 0          | NA          | NA         | NA         | NA         | TXNDC8    |
| NA        | ENSG00000204194 | 3.42688125 | 0.04309508  | 0.37971794 | 0.59479757 | 0.78787011 | RPL12P1   |
| 158833    | ENSG00000204195 | 0          | NA          | NA         | NA         | NA         | AWAT1     |
| NA        | ENSG00000204196 | 0.34624801 | -0.02356563 | 0.38536324 | 0.65270996 | NA         | RPL12P16  |
| 1616      | ENSG00000204209 | 2441.87321 | -0.09765878 | 0.06443045 | 0.12385404 | 0.29169785 | DAXX      |
| 113523636 | ENSG00000204209 | 2441.87321 | -0.09765878 | 0.06443045 | 0.12385404 | 0.29169785 | DAXX      |
| 659       | ENSG00000204217 | 2159.77044 | -0.32382462 | 0.06624302 | 6.65E-07   | 7.77E-06   | BMPR2     |
| 6920      | ENSG00000204219 | 9.31560075 | 1.18512121  | 1.50598859 | 0.00920855 | 0.03873173 | TCEA3     |
| 10471     | ENSG00000204220 | 945.53148  | -0.00179095 | 0.09024317 | 0.98296934 | 0.99428951 | PFDN6     |
| 6015      | ENSG00000204227 | 985.891521 | 0.1705309   | 0.08311263 | 0.03549333 | 0.11453931 | RING1     |
| 7923      | ENSG00000204228 | 84.6740845 | 0.58692328  | 0.28178151 | 0.00903086 | 0.03811757 | HSD17B8   |
| 6257      | ENSG00000204231 | 1163.20793 | -0.00085181 | 0.08035027 | 0.99092967 | 0.99695967 | RXRB      |
| 339229    | ENSG00000204237 | 746.148645 | 0.09758588  | 0.11260296 | 0.36491484 | 0.59440972 | OXLD1     |
| 100128239 | ENSG00000204241 | 25.2862957 | -0.19864687 | 0.33359245 | 0.32447029 | 0.55221149 | LINC02731 |
| 138803    | ENSG00000204246 | 0          | NA          | NA         | NA         | NA         | OR13C3    |
| 1302      | ENSG00000204248 | 103.275525 | 0.47871977  | 0.29684228 | 0.03236291 | 0.10653394 | COL11A2   |
| 414319    | ENSG00000204250 | 0          | NA          | NA         | NA         | NA         | LINC00587 |
| 3111      | ENSG00000204252 | 0.32291469 | 0.00129779  | 0.38336776 | 0.96865395 | NA         | HLA-DOA   |
| NA        | ENSG00000204253 | 1.63660251 | 0.02613906  | 0.37923633 | 0.71809995 | NA         | HNRNPCP2  |
| 6046      | ENSG00000204256 | 5229.15646 | 0.2109022   | 0.05751253 | 0.00020905 | 0.00148124 | BRD2      |
| 3108      | ENSG00000204257 | 11.0027819 | 0.7454281   | 0.94116254 | 0.02114575 | 0.07618153 | HLA-DMA   |
| 100507463 | ENSG00000204261 | 3.20331856 | 0.03455801  | 0.3734787  | 0.72254315 | 0.86754018 | PSMB8-AS1 |
| 1290      | ENSG00000204262 | 66.9243645 | 0.45156273  | 0.30779198 | 0.04659612 | 0.14105386 | COL5A2    |
| 5696      | ENSG00000204264 | 37.6057281 | 0.17118559  | 0.29156214 | 0.39700275 | 0.62606586 | PSMB8     |
| 6891      | ENSG00000204267 | 160.043391 | 0.34620043  | 0.21413853 | 0.05585251 | 0.16214719 | TAP2      |
| 169981    | ENSG00000204271 | 560.790883 | 0.19558422  | 0.11192201 | 0.06710028 | 0.18582768 | SPIN3     |
| 550643    | ENSG00000204272 | 419.415152 | 0.12984945  | 0.12546947 | 0.27315818 | 0.49676945 | NBDY      |



|           |                 |            |             |            |            |            |           |
|-----------|-----------------|------------|-------------|------------|------------|------------|-----------|
| 100996291 | ENSG00000204277 | 0.64084514 | 0.00289197  | 0.38136785 | 0.95418768 | NA         | LINC01993 |
| 283999    | ENSG00000204278 | 8.61055269 | 0.15252667  | 0.38196971 | 0.33417143 | 0.56389725 | TMEM235   |
| 139793    | ENSG00000204279 | 0.30001564 | -0.02294458 | 0.38527538 | 0.68644889 | NA         | PAGE3     |
| 400624    | ENSG00000204283 | 6.14101164 | -0.04375929 | 0.37202451 | 0.66442369 | 0.83444869 | LINC01973 |
| 3122      | ENSG00000204287 | 0          | NA          | NA         | NA         | NA         | HLA-DRA   |
| 56244     | ENSG00000204290 | 0          | NA          | NA         | NA         | NA         | BTNL2     |
| 1306      | ENSG00000204291 | 0          | NA          | NA         | NA         | NA         | COL15A1   |
| 10665     | ENSG00000204296 | 0          | NA          | NA         | NA         | NA         | TSBP1     |
| 338661    | ENSG00000204300 | 0          | NA          | NA         | NA         | NA         | TMEM225   |
| 4855      | ENSG00000204301 | 226.546945 | -0.33094984 | 0.17776191 | 0.03588639 | 0.11558215 | NOTCH4    |
| 5089      | ENSG00000204304 | 1769.04627 | 0.25678932  | 0.07961771 | 0.00095803 | 0.00570447 | PBX2      |
| 177       | ENSG00000204305 | 85.4713429 | 0.19479307  | 0.22944875 | 0.29583492 | 0.52251089 | AGER      |
| 6048      | ENSG00000204308 | 890.667048 | 0.01204224  | 0.09000105 | 0.89108194 | 0.95273684 | RNF5      |
| 10554     | ENSG00000204310 | 2465.60218 | -0.0623665  | 0.06608486 | 0.33757044 | 0.56786481 | AGPAT1    |
| 494513    | ENSG00000204311 | 40.8338211 | 0.52249464  | 0.39415055 | 0.04122499 | 0.12836755 | PJKK      |
| 80863     | ENSG00000204314 | 100.049057 | 0.60089311  | 0.24654686 | 0.00368458 | 0.0180143  | PRRT1     |
| 100507547 | ENSG00000204314 | 100.049057 | 0.60089311  | 0.24654686 | 0.00368458 | 0.0180143  | PRRT1     |
| 63943     | ENSG00000204315 | 93.2126766 | -0.15734834 | 0.20798309 | 0.36921427 | 0.59862194 | FKBP1     |
| 64978     | ENSG00000204316 | 985.949724 | 0.06701155  | 0.0966045  | 0.47398901 | 0.69607269 | MRPL38    |
| 643008    | ENSG00000204323 | 14.1185683 | 0.02204598  | 0.3331282  | 0.89663196 | 0.95469109 | SMIM5     |
| 285141    | ENSG00000204334 | 1.020046   | 0.05850572  | 0.38757233 | 0.313004   | NA         | ERICH2    |
| 389058    | ENSG00000204335 | 0          | NA          | NA         | NA         | NA         | SP5       |
| NA        | ENSG00000204338 | 1.75524888 | -0.01958176 | 0.37682227 | 0.80619051 | NA         | CYP21A1P  |
| 8859      | ENSG00000204344 | 357.072769 | 0.29588605  | 0.13134348 | 0.01623374 | 0.06150035 | STK19     |
| 100131439 | ENSG00000204345 | 0          | NA          | NA         | NA         | NA         | CD300LD   |
| 388419    | ENSG00000204347 | 0.62399897 | -0.03619255 | 0.38661507 | 0.4273305  | NA         | BTBD17    |
| 1797      | ENSG00000204348 | 511.597788 | 0.13877791  | 0.1099726  | 0.18744972 | 0.38775961 | DXO       |
| 6499      | ENSG00000204351 | 1492.87787 | 0.28881885  | 0.08052266 | 0.0002377  | 0.00165882 | SKIV2L    |
| NA        | ENSG00000204352 | 43.0585812 | 0.53982087  | 0.35846757 | 0.03036443 | 0.10131192 | C9orf129  |
| 7936      | ENSG00000204356 | 1305.42385 | 0.19897401  | 0.07614952 | 0.00760844 | 0.03312519 | NELFE     |
| 120406    | ENSG00000204361 | 0.18922458 | 0.01954053  | 0.38488496 | 0.78225479 | NA         | NXPE2     |
| 400743    | ENSG00000204362 | 0          | NA          | NA         | NA         | NA         | LINC02783 |
| 494197    | ENSG00000204363 | 0          | NA          | NA         | NA         | NA         | SPANXN5   |
| 221527    | ENSG00000204366 | 1131.25474 | -0.01206027 | 0.09274683 | 0.89262147 | 0.95351371 | ZBTB12    |
| NA        | ENSG00000204368 | 0          | NA          | NA         | NA         | NA         |           |
| 6392      | ENSG00000204370 | 745.835332 | -0.00229616 | 0.0975629  | 0.98005752 | 0.99338199 | SDHD      |
| 10919     | ENSG00000204371 | 2908.70712 | 0.09517687  | 0.06177118 | 0.11822478 | 0.28215801 | EHMT2     |
| 653220    | ENSG00000204379 | 353.813255 | -1.09741853 | 0.1440367  | 3.02E-15   | 8.44E-14   | XAGE1A    |

|           |                 |            |             |            |            |            |           |
|-----------|-----------------|------------|-------------|------------|------------|------------|-----------|
| 100129029 | ENSG00000204380 | 11.2961098 | 0.03199383  | 0.33998257 | 0.84467964 | 0.92965052 | PKP4-AS1  |
| 143903    | ENSG00000204381 | 217.455872 | 1.67433881  | 0.19843692 | 2.36E-18   | 8.11E-17   | LAYN      |
| 653067    | ENSG00000204382 | 1.60690846 | 0.04707782  | 0.38111878 | 0.54091693 | NA         | XAGE1B    |
| 80736     | ENSG00000204385 | 1.47948131 | 0.03726333  | 0.38295883 | 0.50725379 | NA         | SLC44A4   |
| 4758      | ENSG00000204386 | 444.949237 | -0.36896483 | 0.13508717 | 0.00342832 | 0.01695359 | NEU1      |
| 50854     | ENSG00000204387 | 1733.15093 | 0.1175847   | 0.07763375 | 0.12160199 | 0.2881729  | SNHG32    |
| 3304      | ENSG00000204388 | 1484.45397 | 0.49886804  | 0.26920471 | 0.01988978 | 0.07265777 | HSPA1B    |
| 3303      | ENSG00000204389 | 1840.74147 | 0.56381923  | 0.23275768 | 0.00431272 | 0.02057329 | HSPA1A    |
| 3305      | ENSG00000204390 | 54.9302597 | 0.23665846  | 0.27405554 | 0.24506402 | 0.46389372 | HSPA1L    |
| 57819     | ENSG00000204392 | 675.062708 | 0.06729285  | 0.10485522 | 0.50541641 | 0.72165971 | LSM2      |
| 149950    | ENSG00000204393 | 0          | NA          | NA         | NA         | NA         | NOL4L-DT  |
| 7407      | ENSG00000204394 | 3540.45801 | 0.21847594  | 0.06786781 | 0.00102694 | 0.00604406 | VAR51     |
| 80737     | ENSG00000204396 | 10.0723146 | 0.15412082  | 0.38539783 | 0.31241551 | 0.54015893 | VWA7      |
| 114769    | ENSG00000204397 | 0          | NA          | NA         | NA         | NA         | CARD16    |
| NA        | ENSG00000204398 | 0          | NA          | NA         | NA         | NA         |           |
| NA        | ENSG00000204399 | 0          | NA          | NA         | NA         | NA         |           |
| 100506742 | ENSG00000204403 | 0          | NA          | NA         | NA         | NA         | CASP12    |
| 55777     | ENSG00000204406 | 520.902178 | -0.15946741 | 0.30650285 | 0.42319721 | 0.64917034 | MBD5      |
| 4439      | ENSG00000204410 | 758.084608 | 0.49458131  | 0.09947964 | 2.68E-07   | 3.34E-06   | MSH5      |
| 1444      | ENSG00000204414 | 0          | NA          | NA         | NA         | NA         | CSHL1     |
| 80739     | ENSG00000204420 | 6.03638886 | 0.16253691  | 0.40393116 | 0.23408221 | 0.45093611 | MPIG6B    |
| 80740     | ENSG00000204421 | 1.4729201  | 0.06935505  | 0.39038739 | 0.20951455 | NA         | LY6G6C    |
| NA        | ENSG00000204422 | 0          | NA          | NA         | NA         | NA         |           |
| 259215    | ENSG00000204424 | 0          | NA          | NA         | NA         | NA         | LY6G6F    |
| 7920      | ENSG00000204427 | 535.510558 | 0.28332001  | 0.10836201 | 0.0062856  | 0.02818224 | ABHD16A   |
| 80741     | ENSG00000204428 | 27.5209044 | 0.20689134  | 0.32615356 | 0.31433845 | 0.5421676  | LY6G5C    |
| NA        | ENSG00000204429 | 0.18922458 | 0.01954053  | 0.38488496 | 0.78225479 | NA         |           |
| NA        | ENSG00000204434 | 0.47049773 | -0.02830157 | 0.38579648 | 0.54521756 | NA         | POTEKP    |
| 1460      | ENSG00000204435 | 1881.12656 | 0.31335607  | 0.08226473 | 9.34E-05   | 0.00071649 | CSNK2B    |
| NA        | ENSG00000204437 | 0          | NA          | NA         | NA         | NA         | CTSLP6    |
| 7918      | ENSG00000204438 | 502.854767 | -0.07256581 | 0.13971767 | 0.57597881 | 0.77463528 | GPANK1    |
| 57827     | ENSG00000204439 | 390.209298 | 0.14207193  | 0.13124214 | 0.24910769 | 0.46846413 | C6orf47   |
| 728215    | ENSG00000204442 | 866.619538 | -0.08271821 | 0.08585307 | 0.32162551 | 0.54929628 | FAM155A   |
| 55937     | ENSG00000204444 | 36.0486289 | 0.21716454  | 0.30163236 | 0.29438434 | 0.52061418 | APOM      |
| 401535    | ENSG00000204446 | 0.5972779  | -0.02732172 | 0.38586499 | 0.50076333 | NA         | LINC02872 |
| 642612    | ENSG00000204449 | 0          | NA          | NA         | NA         | NA         | TRIM49C   |
| 120146    | ENSG00000204450 | 0          | NA          | NA         | NA         | NA         | TRIM64    |
| NA        | ENSG00000204455 | 0          | NA          | NA         | NA         | NA         | TRIM51BP  |

|           |                 |            |             |            |            |            |           |
|-----------|-----------------|------------|-------------|------------|------------|------------|-----------|
| NA        | ENSG00000204456 | 0          | NA          | NA         | NA         | NA         |           |
| 151121    | ENSG00000204460 | 0.18922458 | 0.01954053  | 0.38488496 | 0.78225479 | NA         | LINC01854 |
| 7917      | ENSG00000204463 | 6371.21001 | 0.17535989  | 0.06155512 | 0.0038843  | 0.01880082 | BAG6      |
| 727684    | ENSG00000204464 | 0          | NA          | NA         | NA         | NA         | C1orf195  |
| 7916      | ENSG00000204469 | 10714.3544 | 0.16222107  | 0.04743602 | 0.00056783 | 0.00360737 | PRRC2A    |
| NA        | ENSG00000204471 | 0          | NA          | NA         | NA         | NA         | TBC1D3P4  |
| 199       | ENSG00000204472 | 0          | NA          | NA         | NA         | NA         | AIF1      |
| 259197    | ENSG00000204475 | 0          | NA          | NA         | NA         | NA         | NCR3      |
| 645425    | ENSG00000204478 | 0          | NA          | NA         | NA         | NA         | PRAMEF20  |
| 391004    | ENSG00000204479 | 0          | NA          | NA         | NA         | NA         | PRAMEF17  |
| 645414    | ENSG00000204480 | 0          | NA          | NA         | NA         | NA         | PRAMEF19  |
| 729528    | ENSG00000204481 | 0          | NA          | NA         | NA         | NA         | PRAMEF14  |
| 7940      | ENSG00000204482 | 1.21358277 | -0.00117298 | 0.38068136 | 0.91953419 | NA         | LST1      |
| 4795      | ENSG00000204498 | 646.118882 | -0.03082098 | 0.12315017 | 0.79194643 | 0.90499209 | NFKBIL1   |
| 653619    | ENSG00000204501 | 0          | NA          | NA         | NA         | NA         | PRAMEF15  |
| 343070    | ENSG00000204505 | 0          | NA          | NA         | NA         | NA         | PRAMEF9   |
| 441871    | ENSG00000204510 | 0          | NA          | NA         | NA         | NA         | PRAMEF7   |
| 401250    | ENSG00000204511 | 0.18922458 | 0.01954053  | 0.38488496 | 0.78225479 | NA         | MCCD1     |
| 730051    | ENSG00000204514 | 399.177505 | -0.36821692 | 0.19938851 | 0.03250756 | 0.10692141 | ZNF814    |
| 4277      | ENSG00000204516 | 0          | NA          | NA         | NA         | NA         | MICB      |
| 343066    | ENSG00000204518 | 0          | NA          | NA         | NA         | NA         | AADA4L4   |
| 90233     | ENSG00000204519 | 401.141732 | -0.47215068 | 0.16003195 | 0.00124441 | 0.00712732 | ZNF551    |
| 100507436 | ENSG00000204520 | 0          | NA          | NA         | NA         | NA         | MICA      |
| 390980    | ENSG00000204524 | 232.670435 | -0.03853072 | 0.15312428 | 0.7827046  | 0.90105949 | ZNF805    |
| 3107      | ENSG00000204525 | 509.037216 | 1.19443164  | 0.11672778 | 1.56E-25   | 7.55E-24   | HLA-C     |
| NA        | ENSG00000204528 | 0          | NA          | NA         | NA         | NA         | PSORS1C3  |
| NA        | ENSG00000204529 | 0          | NA          | NA         | NA         | NA         | GUCY2EP   |
| 5460      | ENSG00000204531 | 2.68213873 | 0.04115475  | 0.376934   | 0.64810709 | 0.82447067 | POU5F1    |
| 649137    | ENSG00000204532 | 0          | NA          | NA         | NA         | NA         | ZSCAN5C   |
| 54535     | ENSG00000204536 | 396.325561 | 0.29592165  | 0.14224996 | 0.02478676 | 0.08654862 | CCHCR1    |
| 170680    | ENSG00000204538 | 0          | NA          | NA         | NA         | NA         | PSORS1C2  |
| 1041      | ENSG00000204539 | 0          | NA          | NA         | NA         | NA         | CDSN      |
| 170679    | ENSG00000204540 | 0          | NA          | NA         | NA         | NA         | PSORS1C1  |
| 29113     | ENSG00000204542 | 0          | NA          | NA         | NA         | NA         | C6orf15   |
| 394263    | ENSG00000204544 | 0          | NA          | NA         | NA         | NA         | MUC21     |
| 245935    | ENSG00000204547 | 0          | NA          | NA         | NA         | NA         | DEFB122   |
| 245934    | ENSG00000204548 | 0          | NA          | NA         | NA         | NA         | DEFB121   |
| NA        | ENSG00000204555 | 0          | NA          | NA         | NA         | NA         | CFTRP3    |

|           |                 |            |             |            |            |            |           |
|-----------|-----------------|------------|-------------|------------|------------|------------|-----------|
| NA        | ENSG00000204556 | 3.6981796  | 0.10333135  | 0.39059326 | 0.31180589 | 0.53952807 |           |
| 8449      | ENSG00000204560 | 1041.44261 | -0.03840697 | 0.09769803 | 0.68339148 | 0.845714   | DHX16     |
| 221545    | ENSG00000204564 | 173.338585 | -0.18128114 | 0.16741752 | 0.2276885  | 0.44257273 | C6orf136  |
| 28973     | ENSG00000204568 | 566.329695 | -0.38792741 | 0.1406752  | 0.00299386 | 0.01509866 | MRPS18B   |
| 5514      | ENSG00000204569 | 1923.98578 | -0.61392404 | 0.08373132 | 6.96E-14   | 1.73E-12   | PPP1R10   |
| 440051    | ENSG00000204571 | 0          | NA          | NA         | NA         | NA         | KRTAP5-11 |
| 387273    | ENSG00000204572 | 0.14931947 | -0.01844332 | 0.38480212 | 0.84537521 | NA         | KRTAP5-10 |
| 23        | ENSG00000204574 | 2563.25362 | -0.03278613 | 0.06766732 | 0.62195926 | 0.80695268 | ABCF1     |
| 80742     | ENSG00000204576 | 1132.46923 | -0.15730434 | 0.07975082 | 0.04342904 | 0.13354497 | PRR3      |
| 11025     | ENSG00000204577 | 1.56561859 | -0.02688328 | 0.37794866 | 0.73059694 | NA         | LILRB3    |
| 102725035 | ENSG00000204577 | 1.56561859 | -0.02688328 | 0.37794866 | 0.73059694 | NA         | LILRB3    |
| 107987425 | ENSG00000204577 | 1.56561859 | -0.02688328 | 0.37794866 | 0.73059694 | NA         | LILRB3    |
| 107987462 | ENSG00000204577 | 1.56561859 | -0.02688328 | 0.37794866 | 0.73059694 | NA         | LILRB3    |
| 780       | ENSG00000204580 | 605.68724  | 0.78194665  | 0.16139352 | 2.33E-07   | 2.93E-06   | DDR1      |
| 400997    | ENSG00000204581 | 6.70143712 | 0.1882635   | 0.4096735  | 0.21917825 | 0.43105634 | ACOXL-AS1 |
| 100507055 | ENSG00000204583 | 0          | NA          | NA         | NA         | NA         | LRCOL1    |
| NA        | ENSG00000204584 | 2.3213679  | 0.0229678   | 0.37691629 | 0.7787354  | NA         |           |
| 440894    | ENSG00000204588 | 3.15051756 | -0.04147031 | 0.37685431 | 0.64479319 | 0.82273439 | LINC01123 |
| 2794      | ENSG00000204590 | 2163.22276 | -0.33373952 | 0.07877426 | 1.44E-05   | 0.0001328  | GNL1      |
| 3133      | ENSG00000204592 | 112.867827 | 2.62485841  | 0.27358241 | 6.09E-23   | 2.64E-21   | HLA-E     |
| 503834    | ENSG00000204595 | 0          | NA          | NA         | NA         | NA         | DPRX      |
| 56658     | ENSG00000204599 | 321.595599 | -0.07802698 | 0.17555434 | 0.61599197 | 0.80313338 | TRIM39    |
| 116437    | ENSG00000204603 | 0.49101175 | -0.02928285 | 0.38588267 | 0.52914013 | NA         | LINC01257 |
| 90333     | ENSG00000204604 | 288.978781 | 0.14124516  | 0.1350598  | 0.26327431 | 0.48530728 | ZNF468    |
| 89870     | ENSG00000204610 | 0          | NA          | NA         | NA         | NA         | TRIM15    |
| 90317     | ENSG00000204611 | 337.971397 | -0.01048297 | 0.13905943 | 0.93438237 | 0.97267151 | ZNF616    |
| 442425    | ENSG00000204612 | 0          | NA          | NA         | NA         | NA         | FOXB2     |
| 10107     | ENSG00000204613 | 0.16735865 | 0.01897177  | 0.38482933 | 0.78225479 | NA         | TRIM10    |
| 135644    | ENSG00000204614 | 0.18922458 | 0.01954053  | 0.38488496 | 0.78225479 | NA         | TRIM40    |
| 11074     | ENSG00000204616 | 0.16735865 | 0.01897177  | 0.38482933 | 0.78225479 | NA         | TRIM31    |
| 80352     | ENSG00000204618 | 43.1399357 | 0.59298959  | 0.36716154 | 0.02139258 | 0.07686143 | RNF39     |
| 6992      | ENSG00000204619 | 687.271808 | -0.34875443 | 0.10256472 | 0.00040094 | 0.00265244 | PPP1R11   |
| NA        | ENSG00000204620 | 11.4561692 | 0.08345113  | 0.34227619 | 0.62459025 | 0.80860493 |           |
| NA        | ENSG00000204622 | 4.52429247 | -0.03395698 | 0.36577002 | 0.77163571 | 0.89527792 | HLA-J     |
| 80862     | ENSG00000204623 | 313.767055 | 0.07200613  | 0.14087364 | 0.58349335 | 0.77994081 | ZNRD1ASP  |
| 57540     | ENSG00000204624 | 846.415246 | -2.02552679 | 0.11884004 | 2.54E-66   | 3.79E-64   | DISP3     |
| 10255     | ENSG00000204625 | 0.173124   | -0.01911262 | 0.38486262 | 0.84537521 | NA         | HCG9      |
| 10399     | ENSG00000204628 | 28128.9094 | 0.05249021  | 0.05458372 | 0.33324081 | 0.56270076 | RACK1     |

|        |                 |            |             |            |            |            |            |
|--------|-----------------|------------|-------------|------------|------------|------------|------------|
| 3135   | ENSG00000204632 | 0.14931947 | -0.01844332 | 0.38480212 | 0.84537521 | NA         | HLA-G      |
| 11138  | ENSG00000204634 | 556.71771  | 1.19121229  | 0.12270712 | 3.07E-23   | 1.36E-21   | TBC1D8     |
| NA     | ENSG00000204637 | 0          | NA          | NA         | NA         | NA         | ARPP19P2   |
| 129521 | ENSG00000204640 | 0          | NA          | NA         | NA         | NA         | NMS        |
| 3134   | ENSG00000204642 | 0.91404668 | -0.00896902 | 0.3812081  | 0.86891107 | NA         | HLA-F      |
| 346171 | ENSG00000204644 | 0          | NA          | NA         | NA         | NA         | ZFP57      |
| 280660 | ENSG00000204648 | 0          | NA          | NA         | NA         | NA         | SSX9P      |
| 147081 | ENSG00000204650 | 1009.93247 | -0.10476    | 0.08665001 | 0.21373079 | 0.4238788  | LINC02210  |
| NA     | ENSG00000204652 | 0          | NA          | NA         | NA         | NA         | RPS26P8    |
| 554235 | ENSG00000204653 | 138.21949  | -1.70376183 | 0.24127235 | 1.19E-13   | 2.89E-12   | ASPDH      |
| 4340   | ENSG00000204655 | 0.15069912 | -0.01848503 | 0.38480575 | 0.84537521 | NA         | MOG        |
| 7932   | ENSG00000204657 | 2.13817174 | 0.06313732  | 0.38200839 | 0.47386831 | NA         | OR2H2      |
| NA     | ENSG00000204658 | 0          | NA          | NA         | NA         | NA         | CST9LP2    |
| 646019 | ENSG00000204659 | 2.63491305 | 0.08611121  | 0.39268695 | 0.23666649 | 0.45349268 | CBY3       |
| 285679 | ENSG00000204661 | 0.7961785  | -0.0042968  | 0.38212318 | 0.92706881 | NA         | C5orf60    |
| NA     | ENSG00000204662 | 0          | NA          | NA         | NA         | NA         | CST9LP1    |
| 164380 | ENSG00000204663 | 0          | NA          | NA         | NA         | NA         | CST13P     |
| 400710 | ENSG00000204666 | 0.8566524  | 0.04855441  | 0.38842135 | 0.27272764 | NA         |            |
| 138240 | ENSG00000204669 | 0          | NA          | NA         | NA         | NA         | C9orf57    |
| NA     | ENSG00000204670 | 0          | NA          | NA         | NA         | NA         | IGKV1OR2-3 |
| 386653 | ENSG00000204671 | 0          | NA          | NA         | NA         | NA         | IL31       |
| 84335  | ENSG00000204673 | 1453.21489 | -0.0678032  | 0.08017877 | 0.38658148 | 0.61566669 | AKT1S1     |
| 653316 | ENSG00000204677 | 3.92878899 | -0.10959775 | 0.38811972 | 0.33555136 | 0.5655232  | FAM153CP   |
| 2550   | ENSG00000204681 | 770.717538 | 0.62110545  | 0.12050745 | 7.05E-08   | 9.47E-07   | GABBR1     |
| 399726 | ENSG00000204682 | 347.007603 | 0.82177902  | 0.13216385 | 9.04E-11   | 1.75E-09   | MIR1915HG  |
| 284788 | ENSG00000204684 | 0          | NA          | NA         | NA         | NA         |            |
| NA     | ENSG00000204685 | 160.318572 | -0.02912105 | 0.17320515 | 0.84937371 | 0.93154246 | STARD7-AS1 |
| 116511 | ENSG00000204687 | 0          | NA          | NA         | NA         | NA         | MAS1L      |
| 26716  | ENSG00000204688 | 0          | NA          | NA         | NA         | NA         | OR2H1      |
| 26531  | ENSG00000204694 | 0          | NA          | NA         | NA         | NA         | OR11A1     |
| 442191 | ENSG00000204695 | 0          | NA          | NA         | NA         | NA         | OR14J1     |
| NA     | ENSG00000204697 | 0          | NA          | NA         | NA         | NA         | OR2U1P     |
| NA     | ENSG00000204699 | 0          | NA          | NA         | NA         | NA         | UBTFL3     |
| 26707  | ENSG00000204700 | 0          | NA          | NA         | NA         | NA         | OR2J2      |
| 442186 | ENSG00000204701 | 0          | NA          | NA         | NA         | NA         | OR2J3      |
| 442185 | ENSG00000204702 | 0          | NA          | NA         | NA         | NA         | OR2J1      |
| 442184 | ENSG00000204703 | 0          | NA          | NA         | NA         | NA         | OR2B3      |
| 26692  | ENSG00000204704 | 0          | NA          | NA         | NA         | NA         | OR2W1      |

|           |                 |            |             |            |            |            |             |
|-----------|-----------------|------------|-------------|------------|------------|------------|-------------|
| NA        | ENSG00000204705 | 0          | NA          | NA         | NA         | NA         | UBTFL5      |
| NA        | ENSG00000204706 | 5.7859449  | 0.04847669  | 0.36203485 | 0.71536693 | 0.86274919 | MAMDC2-AS1  |
| NA        | ENSG00000204709 | 0.45209736 | -0.02505403 | 0.38558831 | 0.57865948 | NA         | LINC01556   |
| 387778    | ENSG00000204710 | 0          | NA          | NA         | NA         | NA         | SPDYC       |
| 138255    | ENSG00000204711 | 0          | NA          | NA         | NA         | NA         | C9orf135    |
| 5987      | ENSG00000204713 | 2477.71545 | -0.09670379 | 0.06393463 | 0.124731   | 0.29302114 | TRIM27      |
| NA        | ENSG00000204718 | 0          | NA          | NA         | NA         | NA         | CNN2P12     |
| 340895    | ENSG00000204740 | 0.56767373 | 0.02627943  | 0.38574813 | 0.49686938 | NA         | MALRD1      |
| NA        | ENSG00000204745 | 20.4013739 | 0.20295917  | 0.36563841 | 0.29694732 | 0.5236583  |             |
| NA        | ENSG00000204754 | 0          | NA          | NA         | NA         | NA         | LINC01951   |
| 100268168 | ENSG00000204758 | 2.87227254 | -0.00715993 | 0.37239544 | 0.93769195 | 0.97366414 |             |
| 64901     | ENSG00000204764 | 224.145589 | 0.0671173   | 0.18377896 | 0.67839613 | 0.84291038 | RANBP17     |
| 100131897 | ENSG00000204767 | 1.62332779 | -0.10774728 | 0.40471665 | 0.06293501 | NA         | INSYN2B     |
| NA        | ENSG00000204776 | 0          | NA          | NA         | NA         | NA         | IGKV1OR-3   |
| NA        | ENSG00000204778 | 17.5187644 | -0.05644151 | 0.34199931 | 0.72763603 | 0.86981375 | CBWD4P      |
| 653427    | ENSG00000204779 | 3.97332606 | -0.00830487 | 0.36775332 | 0.93723126 | 0.97354401 | FOXDL5      |
| NA        | ENSG00000204780 | 0          | NA          | NA         | NA         | NA         | IGKV1OR9-1  |
| NA        | ENSG00000204787 | 0          | NA          | NA         | NA         | NA         | REG1CP      |
| NA        | ENSG00000204789 | 117.863517 | 0.34646526  | 0.22066108 | 0.06068362 | 0.17285902 | ZNF204P     |
| NA        | ENSG00000204790 | 0.16735865 | 0.01897177  | 0.38482933 | 0.78225479 | NA         |             |
| NA        | ENSG00000204791 | 31.0774475 | -0.71786568 | 0.47586191 | 0.01631915 | 0.0617532  | SMPD5       |
| NA        | ENSG00000204792 | 68.0364568 | -0.05833747 | 0.22577707 | 0.74883912 | 0.88205755 | LINC01291   |
| NA        | ENSG00000204801 | 0          | NA          | NA         | NA         | NA         | FGF7P7      |
| NA        | ENSG00000204802 | 92.608758  | 0.00481816  | 0.26640035 | 0.98198943 | 0.99406451 |             |
| NA        | ENSG00000204814 | 0.15069912 | -0.01848503 | 0.38480575 | 0.84537521 | NA         |             |
| 83538     | ENSG00000204815 | 85.1947479 | 0.48838916  | 0.26855734 | 0.02201333 | 0.07869268 | ODAD4       |
| NA        | ENSG00000204816 | 0          | NA          | NA         | NA         | NA         | FGF7P5      |
| NA        | ENSG00000204818 | 0          | NA          | NA         | NA         | NA         | ADGRF5P2    |
| 116540    | ENSG00000204822 | 746.933638 | 0.12024345  | 0.09995384 | 0.21278681 | 0.42263393 | MRPL53      |
| 100128098 | ENSG00000204832 | 0          | NA          | NA         | NA         | NA         | ST8SIA6-AS1 |
| NA        | ENSG00000204837 | 24.8475453 | -0.14528455 | 0.32690854 | 0.45147614 | 0.67474853 | FGF7P3      |
| 642475    | ENSG00000204839 | 57.6015709 | 0.21567992  | 0.27243615 | 0.28549738 | 0.51095086 | MROH6       |
| 6311      | ENSG00000204842 | 1346.89733 | 0.15796011  | 0.08510944 | 0.05668334 | 0.16395938 | ATXN2       |
| 1639      | ENSG00000204843 | 5161.35735 | -0.18422868 | 0.05573094 | 0.00065072 | 0.00405601 | DCTN1       |
| 647060    | ENSG00000204849 | 0          | NA          | NA         | NA         | NA         | SPATA31A1   |
| NA        | ENSG00000204850 | 14.3811596 | -0.00808861 | 0.35740352 | 0.94835044 | 0.97876335 |             |
| 57469     | ENSG00000204851 | 146.314609 | -0.0203309  | 0.1934233  | 0.90203287 | 0.95687554 | PNMA8B      |
| 79600     | ENSG00000204852 | 682.060466 | 0.10173053  | 0.10856916 | 0.3285659  | 0.55706267 | TCTN1       |

|           |                 |            |             |            |            |            |              |
|-----------|-----------------|------------|-------------|------------|------------|------------|--------------|
| 29902     | ENSG00000204856 | 542.277406 | -0.10566613 | 0.11324811 | 0.32789361 | 0.55639832 | FAM216A      |
| 3104      | ENSG00000204859 | 431.638899 | 0.41073223  | 0.15219312 | 0.00336529 | 0.01667518 | ZBTB48       |
| NA        | ENSG00000204860 | 138.867279 | -0.60033652 | 0.22848816 | 0.00217136 | 0.01148486 | FAM201A      |
| 147920    | ENSG00000204866 | 0          | NA          | NA         | NA         | NA         | IGFL2        |
| 444882    | ENSG00000204869 | 0.173124   | -0.01911262 | 0.38486262 | 0.84537521 | NA         | IGFL4        |
| 51471     | ENSG00000204872 | 0.18922458 | 0.01954053  | 0.38488496 | 0.78225479 | NA         | NAT8B        |
| 83900     | ENSG00000204873 | 0          | NA          | NA         | NA         | NA         | KRTAP9-3     |
| NA        | ENSG00000204876 | 0          | NA          | NA         | NA         | NA         |              |
| 728224    | ENSG00000204880 | 0          | NA          | NA         | NA         | NA         | KRTAP4-8     |
| 2843      | ENSG00000204882 | 0.95047514 | -0.05304929 | 0.38916907 | 0.25367556 | NA         | GPR20        |
| 728255    | ENSG00000204887 | 0          | NA          | NA         | NA         | NA         | KRTAP1-4     |
| 125115    | ENSG00000204889 | 0          | NA          | NA         | NA         | NA         | KRT40        |
| NA        | ENSG00000204894 | 0          | NA          | NA         | NA         | NA         |              |
| 147183    | ENSG00000204897 | 0          | NA          | NA         | NA         | NA         | KRT25        |
| 440145    | ENSG00000204899 | 773.677476 | -0.26720857 | 0.09853713 | 0.00483665 | 0.02258926 | MZT1         |
| 724087    | ENSG00000204904 | 1.85127649 | 0.04458732  | 0.38120659 | 0.55237706 | NA         | LINC01545    |
| 643394    | ENSG00000204909 | 0.14931947 | -0.01844332 | 0.38480212 | 0.84537521 | NA         | SPINK9       |
| 100505591 | ENSG00000204913 | 0.52985576 | 0.01340518  | 0.38291283 | 0.74463734 | NA         | LRRC3C       |
| NA        | ENSG00000204915 | 0          | NA          | NA         | NA         | NA         | MFFP3        |
| 122183    | ENSG00000204919 | 0          | NA          | NA         | NA         | NA         | PRR20A       |
| 7711      | ENSG00000204920 | 148.460559 | 0.06127998  | 0.18823355 | 0.70959047 | 0.86070548 | ZNF155       |
| 790955    | ENSG00000204922 | 363.965795 | -0.058443   | 0.12479217 | 0.61962459 | 0.80569877 | UQCC3        |
| 554251    | ENSG00000204923 | 105.410898 | 0.03427237  | 0.19863792 | 0.84218074 | 0.92836346 | FBXO48       |
| 643226    | ENSG00000204928 | 0          | NA          | NA         | NA         | NA         | GRXCR2       |
| 101927533 | ENSG00000204929 | 4.24264568 | 0.00902674  | 0.36428499 | 0.94125734 | 0.97559098 |              |
| 392307    | ENSG00000204930 | 0.72631173 | 0.01461167  | 0.38232703 | 0.78672146 | NA         | FAM221B      |
| NA        | ENSG00000204933 | 0          | NA          | NA         | NA         | NA         | CD177P1      |
| 401431    | ENSG00000204934 | 204.14043  | 0.16126695  | 0.15716041 | 0.26063129 | 0.48260891 | ATP6V0E2-AS1 |
| 57126     | ENSG00000204936 | 0          | NA          | NA         | NA         | NA         | CD177        |
| 5673      | ENSG00000204941 | 0          | NA          | NA         | NA         | NA         | PSG5         |
| 100289678 | ENSG00000204946 | 892.523704 | 0.15724374  | 0.0888347  | 0.06864793 | 0.18884842 | ZNF783       |
| 155054    | ENSG00000204947 | 117.404186 | 0.01583064  | 0.20070454 | 0.92668345 | 0.96932621 | ZNF425       |
| 100131726 | ENSG00000204949 | 0.16735865 | 0.01897177  | 0.38482933 | 0.78225479 | NA         | FAM83A-AS1   |
| 390205    | ENSG00000204950 | 11.8108903 | -0.17556904 | 0.38610559 | 0.29603013 | 0.52267989 | LRRC10B      |
| 494188    | ENSG00000204952 | 0          | NA          | NA         | NA         | NA         | FBXO47       |
| 728568    | ENSG00000204954 | 284.107948 | 0.09677296  | 0.14931154 | 0.48211109 | 0.70272402 | C12orf73     |
| 56114     | ENSG00000204956 | 41.7915446 | 0.08330248  | 0.26654125 | 0.66922612 | 0.83726414 | PCDHGA1      |
| NA        | ENSG00000204959 | 0          | NA          | NA         | NA         | NA         | ARHGEF34P    |

|           |                 |            |             |            |            |            |           |
|-----------|-----------------|------------|-------------|------------|------------|------------|-----------|
| 338436    | ENSG00000204960 | 0.14931947 | -0.01844332 | 0.38480212 | 0.84537521 | NA         | BLACE     |
| 9752      | ENSG00000204961 | 8.16419195 | -0.39674454 | 0.67122915 | 0.02715946 | 0.09292009 | PCDHA9    |
| 56140     | ENSG00000204962 | 124.332498 | -0.66150805 | 0.22370989 | 0.00068725 | 0.00425427 | PCDHA8    |
| 56141     | ENSG00000204963 | 21.4381297 | -0.06255987 | 0.31030263 | 0.73423591 | 0.87349286 | PCDHA7    |
| 56143     | ENSG00000204965 | 24.0710221 | -0.0662624  | 0.3092015  | 0.7227812  | 0.86755463 | PCDHA5    |
| 56144     | ENSG00000204967 | 157.816204 | 0.06810323  | 0.17635517 | 0.66489656 | 0.83454529 | PCDHA4    |
| 56146     | ENSG00000204969 | 142.529158 | 0.09491364  | 0.17555038 | 0.54413233 | 0.75209596 | PCDHA2    |
| 56147     | ENSG00000204970 | 27.1219304 | -0.00485553 | 0.29877411 | 0.97755497 | 0.99237749 | PCDHA1    |
| NA        | ENSG00000204971 | 0          | NA          | NA         | NA         | NA         |           |
| 10206     | ENSG00000204977 | 833.966628 | -0.25786625 | 0.11450271 | 0.01788791 | 0.06662215 | TRIM13    |
| 100170765 | ENSG00000204978 | 0          | NA          | NA         | NA         | NA         | ERICH4    |
| 503497    | ENSG00000204979 | 0          | NA          | NA         | NA         | NA         | MS4A13    |
| NA        | ENSG00000204982 | 0          | NA          | NA         | NA         | NA         | PRSS3P4   |
| 5644      | ENSG00000204983 | 0          | NA          | NA         | NA         | NA         | PRSS1     |
| NA        | ENSG00000204989 | 0          | NA          | NA         | NA         | NA         | OR4D8P    |
| NA        | ENSG00000204990 | 0.173124   | -0.01911262 | 0.38486262 | 0.84537521 | NA         |           |
| 84501     | ENSG00000204991 | 589.830083 | -0.46838224 | 0.10833797 | 6.55E-06   | 6.44E-05   | SPIRE2    |
| NA        | ENSG00000204993 | 0          | NA          | NA         | NA         | NA         | CRTC1P1   |
| 441376    | ENSG00000205002 | 2.97792685 | 0.23933132  | 0.49848727 | 0.00393856 | 0.01904948 | AARD      |
| 400558    | ENSG00000205015 | 0.30139824 | -0.02296476 | 0.38527817 | 0.68536535 | NA         | LINC02138 |
| NA        | ENSG00000205018 | 0          | NA          | NA         | NA         | NA         |           |
| 390748    | ENSG00000205022 | 0          | NA          | NA         | NA         | NA         | PABPN1L   |
| NA        | ENSG00000205025 | 0          | NA          | NA         | NA         | NA         | OR5G5P    |
| 390144    | ENSG00000205029 | 0          | NA          | NA         | NA         | NA         | OR5D16    |
| 26338     | ENSG00000205030 | 0          | NA          | NA         | NA         | NA         | OR5L2     |
| 440040    | ENSG00000205035 | 0          | NA          | NA         | NA         | NA         |           |
| 400553    | ENSG00000205037 | 82.5402522 | 0.09918332  | 0.30413629 | 0.60517217 | 0.79522617 |           |
| 93035     | ENSG00000205038 | 0.14931947 | -0.01844332 | 0.38480212 | 0.84537521 | NA         | PKHD1L1   |
| NA        | ENSG00000205041 | 60.0910708 | -0.04596738 | 0.24091209 | 0.80554853 | 0.91190704 |           |
| NA        | ENSG00000205044 | 0          | NA          | NA         | NA         | NA         |           |
| 100506736 | ENSG00000205045 | 0          | NA          | NA         | NA         | NA         |           |
| 400952    | ENSG00000205054 | 3.38415093 | -0.09283552 | 0.39384954 | 0.13144232 | 0.30411845 | LINC01121 |
| NA        | ENSG00000205056 | 0          | NA          | NA         | NA         | NA         | LINC02397 |
| 574016    | ENSG00000205057 | 0          | NA          | NA         | NA         | NA         | CLLU1-AS1 |
| 84912     | ENSG00000205060 | 3308.45786 | -0.00756255 | 0.06114193 | 0.89719639 | 0.95488961 | SLC35B4   |
| 3963      | ENSG00000205076 | 0          | NA          | NA         | NA         | NA         | LGALS7    |
| 653499    | ENSG00000205076 | 0          | NA          | NA         | NA         | NA         | LGALS7    |
| 100130958 | ENSG00000205078 | 29.7349183 | 0.40894427  | 0.38637765 | 0.08745439 | 0.22586501 | SYCE1L    |



|           |                 |            |             |            |            |            |            |
|-----------|-----------------|------------|-------------|------------|------------|------------|------------|
| 79583     | ENSG00000205084 | 264.968205 | -0.0254054  | 0.14736224 | 0.85080365 | 0.93249058 | TMEM231    |
| 346653    | ENSG00000205085 | 15.3614627 | -0.06783374 | 0.34239723 | 0.67535129 | 0.84111426 | FAM71F2    |
| 400950    | ENSG00000205086 | 33.7346619 | 0.0385041   | 0.29045153 | 0.84226523 | 0.92836346 | C2orf91    |
| 645121    | ENSG00000205089 | 4.59024297 | -0.05001064 | 0.36583992 | 0.68674597 | 0.84769738 | CCNI2      |
| 339453    | ENSG00000205090 | 125.275887 | -0.03037416 | 0.19941674 | 0.85660714 | 0.93595581 | TMEM240    |
| 448831    | ENSG00000205097 | 2.8287159  | 0.0945773   | 0.39288114 | 0.2597402  | 0.48138679 | FRG2       |
| NA        | ENSG00000205100 | 0          | NA          | NA         | NA         | NA         | HSP90AA4P  |
| NA        | ENSG00000205105 | 0          | NA          | NA         | NA         | NA         | COX17P1    |
| 374387    | ENSG00000205106 | 0          | NA          | NA         | NA         | NA         | LINC02716  |
| 259308    | ENSG00000205108 | 3.53478474 | 0.02338491  | 0.36781749 | 0.83515282 | 0.92475394 | FAM205A    |
| 344387    | ENSG00000205111 | 35.4564556 | -0.14069823 | 0.31051843 | 0.47210043 | 0.69438543 | CDKL4      |
| 643965    | ENSG00000205116 | 10.729126  | -0.03430632 | 0.3374612  | 0.8329667  | 0.9239848  | TMEM88B    |
| 390110    | ENSG00000205126 | 2.10594681 | 0.0990863   | 0.3996738  | 0.10167793 | NA         | ACCSL      |
| 441054    | ENSG00000205129 | 8.59712268 | 0.2105712   | 0.4200688  | 0.19033532 | 0.39167661 | C4orf47    |
| 286144    | ENSG00000205133 | 360.09082  | 0.00757778  | 0.13320632 | 0.95223619 | 0.98019954 | TRIQQ      |
| 644096    | ENSG00000205138 | 301.018547 | -0.14810399 | 0.13903476 | 0.25180496 | 0.47165884 | SDHAF1     |
| 138715    | ENSG00000205143 | 3.19611991 | 0.02110297  | 0.36953972 | 0.84364689 | 0.92926684 | ARID3C     |
| 55851     | ENSG00000205155 | 443.884627 | 0.07771727  | 0.13214063 | 0.53158875 | 0.74286115 | PSENE1     |
| NA        | ENSG00000205174 | 0          | NA          | NA         | NA         | NA         | C7orf66    |
| NA        | ENSG00000205176 | 0          | NA          | NA         | NA         | NA         | REXO1L1P   |
| 100131378 | ENSG00000205177 | 1.49027968 | -0.00723017 | 0.37722093 | 0.92291141 | NA         | C11orf91   |
| 149837    | ENSG00000205181 | 45.4486501 | -2.18828654 | 0.40681264 | 4.68E-09   | 7.36E-08   | LINC00654  |
| NA        | ENSG00000205184 | 0          | NA          | NA         | NA         | NA         | SLC10A5P1  |
| 646480    | ENSG00000205186 | 0          | NA          | NA         | NA         | NA         | FABP9      |
| 65986     | ENSG00000205189 | 847.781415 | -0.00567366 | 0.10295684 | 0.95300749 | 0.98058207 | ZBTB10     |
| 201725    | ENSG00000205208 | 1028.64596 | 0.11429228  | 0.09236044 | 0.20241915 | 0.40796383 | C4orf46    |
| 284402    | ENSG00000205209 | 50.842098  | 0.53362916  | 0.51847831 | 0.04429736 | 0.13554282 | SCGB2B2    |
| 339184    | ENSG00000205212 | 48.5823395 | -0.90259929 | 0.45523877 | 0.00442473 | 0.02102172 | CCDC144NL  |
| 55366     | ENSG00000205213 | 441.066501 | 0.33166189  | 0.13826022 | 0.00997053 | 0.04137529 | LGR4       |
| NA        | ENSG00000205215 | 0          | NA          | NA         | NA         | NA         | KRT17P7    |
| 5699      | ENSG00000205220 | 152.998434 | -0.24546957 | 0.18182247 | 0.12535141 | 0.29417696 | PSMB10     |
| 5212      | ENSG00000205221 | 0          | NA          | NA         | NA         | NA         | VIT        |
| 100506376 | ENSG00000205231 | 0          | NA          | NA         | NA         | NA         | TTLL10-AS1 |
| NA        | ENSG00000205236 | 85.5467879 | 0.91972194  | 0.36783369 | 0.00137966 | 0.00780393 |            |
| 441273    | ENSG00000205238 | 146.297597 | 0.01919313  | 0.1764057  | 0.90374374 | 0.95800026 | SPDYE2     |
| NA        | ENSG00000205240 | 0          | NA          | NA         | NA         | NA         | OR7E36P    |
| 1874      | ENSG00000205250 | 2183.73184 | 0.30186518  | 0.0697758  | 1.05E-05   | 9.94E-05   | E2F4       |
| NA        | ENSG00000205266 | 0          | NA          | NA         | NA         | NA         | KRT17P5    |

|           |                 |            |             |            |            |            |             |
|-----------|-----------------|------------|-------------|------------|------------|------------|-------------|
| NA        | ENSG00000205267 | 0          | NA          | NA         | NA         | NA         | DGAT2L7P    |
| 5150      | ENSG00000205268 | 1201.59341 | -0.05923456 | 0.08915613 | 0.49326721 | 0.71236151 | PDE7A       |
| 100113407 | ENSG00000205269 | 882.04586  | -0.25160063 | 0.09415745 | 0.00569375 | 0.02596278 | TMEM170B    |
| NA        | ENSG00000205274 | 0.18922458 | 0.01954053  | 0.38488496 | 0.78225479 | NA         | TRBV20OR9-2 |
| 10071     | ENSG00000205277 | 2.89809442 | -0.25405354 | 0.51690153 | 0.00080222 | 0.00488371 | MUC12       |
| 613212    | ENSG00000205279 | 0          | NA          | NA         | NA         | NA         | CTXN3       |
| 100505477 | ENSG00000205293 | 0.14931947 | -0.01844332 | 0.38480212 | 0.84537521 | NA         | LINC01602   |
| NA        | ENSG00000205300 | 0          | NA          | NA         | NA         | NA         |             |
| 152586    | ENSG00000205301 | 0          | NA          | NA         | NA         | NA         | MGAT4D      |
| 6643      | ENSG00000205302 | 674.76614  | -0.22125865 | 0.10395501 | 0.0265013  | 0.09109249 | SNX2        |
| 100316904 | ENSG00000205307 | 21.2919997 | 0.01069653  | 0.30850417 | 0.95570663 | 0.9818048  | SAP25       |
| 56953     | ENSG00000205309 | 306.998286 | 0.21635878  | 0.17051162 | 0.1558865  | 0.34204692 | NT5M        |
| NA        | ENSG00000205312 | 0          | NA          | NA         | NA         | NA         | KRT17P4     |
| NA        | ENSG00000205318 | 1.0121396  | 0.03785925  | 0.38213069 | 0.56024448 | NA         | GCNT2P1     |
| 84324     | ENSG00000205323 | 802.700177 | -0.11318985 | 0.09258425 | 0.20715537 | 0.41443608 | SARNP       |
| NA        | ENSG00000205325 | 0          | NA          | NA         | NA         | NA         |             |
| 403284    | ENSG00000205327 | 0          | NA          | NA         | NA         | NA         | OR6C68      |
| 403282    | ENSG00000205328 | 0          | NA          | NA         | NA         | NA         | OR6C65      |
| 254786    | ENSG00000205329 | 0          | NA          | NA         | NA         | NA         | OR6C3       |
| 390321    | ENSG00000205330 | 0          | NA          | NA         | NA         | NA         | OR6C1       |
| NA        | ENSG00000205331 | 0          | NA          | NA         | NA         | NA         | OR6C72P     |
| NA        | ENSG00000205333 | 0          | NA          | NA         | NA         | NA         | GOLGA2P1    |
| 100129995 | ENSG00000205334 | 2.11376986 | -0.08086298 | 0.38714667 | 0.34982452 | NA         | LINC01460   |
| 9289      | ENSG00000205336 | 40.3597794 | -0.55613756 | 0.43993157 | 0.03677426 | 0.11788679 | ADGRG1      |
| 10527     | ENSG00000205339 | 6883.37071 | -0.37052294 | 0.05029918 | 1.03E-13   | 2.53E-12   | IPO7        |
| 54458     | ENSG00000205352 | 400.75805  | 0.00444685  | 0.11996022 | 0.9698136  | 0.98858357 | PRR13       |
| 25851     | ENSG00000205356 | 1525.75031 | 0.39183132  | 0.13263797 | 0.00159833 | 0.00886272 | TECPR1      |
| 4496      | ENSG00000205358 | 0          | NA          | NA         | NA         | NA         | MT1H        |
| 133482    | ENSG00000205359 | 0          | NA          | NA         | NA         | NA         | SLCO6A1     |
| NA        | ENSG00000205360 | 0          | NA          | NA         | NA         | NA         | MT1CP       |
| NA        | ENSG00000205361 | 0          | NA          | NA         | NA         | NA         | MT1DP       |
| 4489      | ENSG00000205362 | 0.173124   | -0.01911262 | 0.38486262 | 0.84537521 | NA         | MT1A        |
| 388135    | ENSG00000205363 | 75.2910582 | -1.41785741 | 0.42016304 | 4.23E-05   | 0.00035365 | INSYN1      |
| 4499      | ENSG00000205364 | 0          | NA          | NA         | NA         | NA         | MT1M        |
| 126536    | ENSG00000205396 | 0          | NA          | NA         | NA         | NA         | LINC00661   |
| 3426      | ENSG00000205403 | 0          | NA          | NA         | NA         | NA         | CFI         |
| 390078    | ENSG00000205409 | 0          | NA          | NA         | NA         | NA         | OR52E6      |
| NA        | ENSG00000205412 | 0          | NA          | NA         | NA         | NA         | HNRNPA1P20  |

|           |                 |            |             |            |            |            |            |
|-----------|-----------------|------------|-------------|------------|------------|------------|------------|
| 54809     | ENSG00000205413 | 33.8784539 | -0.56290899 | 0.44560246 | 0.03688558 | 0.118091   | SAMD9      |
| NA        | ENSG00000205414 | 0.16735865 | 0.01897177  | 0.38482933 | 0.78225479 | NA         |            |
| 3853      | ENSG00000205420 | 0          | NA          | NA         | NA         | NA         | KRT6A      |
| 255919    | ENSG00000205423 | 261.497396 | 0.23449114  | 0.14174968 | 0.0744498  | 0.20030974 | CNEP1R1    |
| NA        | ENSG00000205424 | 2.97842005 | -0.06656431 | 0.37712515 | 0.52634059 | 0.73825698 | PCBP3-AS1  |
| 3887      | ENSG00000205426 | 0          | NA          | NA         | NA         | NA         | KRT81      |
| NA        | ENSG00000205433 | 0          | NA          | NA         | NA         | NA         | SNRPGP6    |
| 91828     | ENSG00000205436 | 0.16735865 | 0.01897177  | 0.38482933 | 0.78225479 | NA         | EXOC3L4    |
| 386683    | ENSG00000205439 | 0          | NA          | NA         | NA         | NA         | KRTAP12-3  |
| 100129669 | ENSG00000205442 | 0          | NA          | NA         | NA         | NA         | IZUMO3     |
| 497048    | ENSG00000205444 | 0          | NA          | NA         | NA         | NA         |            |
| 386679    | ENSG00000205445 | 0          | NA          | NA         | NA         | NA         | KRTAP10-2  |
| NA        | ENSG00000205449 | 0          | NA          | NA         | NA         | NA         | NBPF22P    |
| NA        | ENSG00000205452 | 0          | NA          | NA         | NA         | NA         |            |
| 729264    | ENSG00000205456 | 12.0571254 | -0.103549   | 0.35029095 | 0.53526286 | 0.74623113 | TP53TG3D   |
| 102723655 | ENSG00000205456 | 12.0571254 | -0.103549   | 0.35029095 | 0.53526286 | 0.74623113 | TP53TG3D   |
| 102723713 | ENSG00000205456 | 12.0571254 | -0.103549   | 0.35029095 | 0.53526286 | 0.74623113 | TP53TG3D   |
| 102724101 | ENSG00000205456 | 12.0571254 | -0.103549   | 0.35029095 | 0.53526286 | 0.74623113 | TP53TG3D   |
| 102724127 | ENSG00000205456 | 12.0571254 | -0.103549   | 0.35029095 | 0.53526286 | 0.74623113 | TP53TG3D   |
| 653550    | ENSG00000205457 | 0          | NA          | NA         | NA         | NA         | TP53TG3C   |
| 102723655 | ENSG00000205457 | 0          | NA          | NA         | NA         | NA         | TP53TG3C   |
| 102723713 | ENSG00000205457 | 0          | NA          | NA         | NA         | NA         | TP53TG3C   |
| 102724101 | ENSG00000205457 | 0          | NA          | NA         | NA         | NA         | TP53TG3C   |
| 102724127 | ENSG00000205457 | 0          | NA          | NA         | NA         | NA         | TP53TG3C   |
| 92270     | ENSG00000205464 | 96.2089794 | 0.04836806  | 0.21939749 | 0.79121402 | 0.90493295 | ATP6AP1L   |
| 317762    | ENSG00000205476 | 1789.40605 | -0.1117641  | 0.08600779 | 0.18161617 | 0.37909151 | CCDC85C    |
| 100505767 | ENSG00000205482 | 20.3211031 | 0.03735304  | 0.31122463 | 0.84123575 | 0.92789889 | SPDYE18    |
| 100133091 | ENSG00000205485 | 298.311702 | -0.08882873 | 0.18761168 | 0.58585864 | 0.7817695  |            |
| NA        | ENSG00000205488 | 0          | NA          | NA         | NA         | NA         | CALML3-AS1 |
| NA        | ENSG00000205494 | 0          | NA          | NA         | NA         | NA         | OR52A4P    |
| 119679    | ENSG00000205495 | 0          | NA          | NA         | NA         | NA         | OR52J3     |
| 401667    | ENSG00000205496 | 0          | NA          | NA         | NA         | NA         | OR51A2     |
| 401666    | ENSG00000205497 | 0          | NA          | NA         | NA         | NA         | OR51A4     |
| 100129724 | ENSG00000205500 | 2.06379365 | 0.03001433  | 0.38128642 | 0.64968935 | NA         | MAPRE3-AS1 |
| 388125    | ENSG00000205502 | 4.68532141 | -0.04055094 | 0.36568531 | 0.73727224 | 0.87584464 | C2CD4B     |
| 57139     | ENSG00000205517 | 358.017323 | 0.41625487  | 0.13073248 | 0.00071148 | 0.00438925 | RGL3       |
| 4676      | ENSG00000205531 | 2633.73349 | -0.10470429 | 0.06894323 | 0.12264903 | 0.28985787 | NAP1L4     |
| NA        | ENSG00000205534 | 105.3034   | -0.06392977 | 0.38453056 | 0.41495128 | 0.64205213 | SMG1P2     |

|           |                 |            |             |            |            |            |           |
|-----------|-----------------|------------|-------------|------------|------------|------------|-----------|
| NA        | ENSG00000205537 | 0          | NA          | NA         | NA         | NA         |           |
| 7114      | ENSG00000205542 | 2702.13783 | 0.61315204  | 0.06229393 | 2.08E-23   | 9.32E-22   | TMSB4X    |
| 254863    | ENSG00000205544 | 402.760891 | 0.12565221  | 0.11818073 | 0.26401762 | 0.48609939 | TMEM256   |
| NA        | ENSG00000205549 | 0.75047983 | -0.04347263 | 0.38757139 | 0.34431439 | NA         | C9orf92   |
| 100144603 | ENSG00000205559 | 94.7683719 | 0.14073264  | 0.21904269 | 0.43743306 | 0.66264578 | CHKB-DT   |
| 1375      | ENSG00000205560 | 639.583464 | 0.386645    | 0.11659064 | 0.00048684 | 0.00315442 | CPT1B     |
| NA        | ENSG00000205562 | 0          | NA          | NA         | NA         | NA         |           |
| 6606      | ENSG00000205571 | 1156.55922 | -0.05630142 | 0.11882571 | 0.61733928 | 0.8040446  | SMN2      |
| 6607      | ENSG00000205571 | 1156.55922 | -0.05630142 | 0.11882571 | 0.61733928 | 0.8040446  | SMN2      |
| 8293      | ENSG00000205572 | 597.691192 | -0.37798365 | 0.41507501 | 0.1043697  | 0.25722378 | SERF1B    |
| 728492    | ENSG00000205572 | 597.691192 | -0.37798365 | 0.41507501 | 0.1043697  | 0.25722378 | SERF1B    |
| NA        | ENSG00000205578 | 25.2433216 | -0.03787716 | 0.29837526 | 0.83962337 | 0.92709972 | POM121B   |
| NA        | ENSG00000205579 | 0          | NA          | NA         | NA         | NA         | DYNLL1P1  |
| 3150      | ENSG00000205581 | 7352.35954 | 0.17371977  | 0.0499451  | 0.0004461  | 0.00292292 | HMGNI     |
| NA        | ENSG00000205583 | 220.68313  | 0.2745394   | 0.15432603 | 0.05182951 | 0.15320285 | STAG3L1   |
| NA        | ENSG00000205584 | 0.31177432 | 0.00117239  | 0.38336728 | 0.96390626 | NA         |           |
| 283463    | ENSG00000205592 | 8.77580797 | 0.04647282  | 0.37296822 | 0.64804289 | 0.82447067 | MUC19     |
| 414918    | ENSG00000205593 | 227.664407 | 0.14359854  | 0.17152853 | 0.34947591 | 0.58004303 | DENND6B   |
| NA        | ENSG00000205596 | 0          | NA          | NA         | NA         | NA         |           |
| 728689    | ENSG00000205609 | 147.730103 | -0.08947205 | 0.36135968 | 0.54508205 | 0.75277933 | EIF3CL    |
| 107985433 | ENSG00000205611 | 14.2610525 | -0.22967585 | 0.41064299 | 0.1964001  | 0.40005705 | LINC01597 |
| NA        | ENSG00000205622 | 0.51891447 | 0.00905376  | 0.38272017 | 0.8223472  | NA         |           |
| NA        | ENSG00000205625 | 0          | NA          | NA         | NA         | NA         |           |
| 401337    | ENSG00000205628 | 0          | NA          | NA         | NA         | NA         | LINC01446 |
| 51451     | ENSG00000205629 | 436.8227   | 0.22011335  | 0.11735477 | 0.04835926 | 0.14512897 | LCMT1     |
| 100128946 | ENSG00000205632 | 0          | NA          | NA         | NA         | NA         | LINC01310 |
| 400932    | ENSG00000205634 | 6.64558863 | -0.02502363 | 0.35351372 | 0.85776398 | 0.93653665 | LINC00898 |
| 100113404 | ENSG00000205636 | 0          | NA          | NA         | NA         | NA         | LINC00583 |
| 388931    | ENSG00000205639 | 3.03917239 | 0.00606451  | 0.37214502 | 0.95126853 | 0.98008882 | MFSD2B    |
| 425054    | ENSG00000205642 | 0.8622178  | 0.03413631  | 0.38407784 | 0.48192307 | NA         | VCX3B     |
| 150383    | ENSG00000205643 | 152.646085 | 0.23057768  | 0.20408212 | 0.18516071 | 0.38410586 | CDPF1     |
| NA        | ENSG00000205644 | 0.79037561 | -0.00857012 | 0.38089464 | 0.87942776 | NA         |           |
| 3347      | ENSG00000205649 | 0          | NA          | NA         | NA         | NA         | HTN3      |
| NA        | ENSG00000205653 | 0          | NA          | NA         | NA         | NA         |           |
| 91750     | ENSG00000205659 | 379.72568  | 0.24875892  | 0.1399959  | 0.05580588 | 0.16205922 | LIN52     |
| 347527    | ENSG00000205667 | 0          | NA          | NA         | NA         | NA         | ARSH      |
| 641372    | ENSG00000205669 | 0.14931947 | -0.01844332 | 0.38480212 | 0.84537521 | NA         | ACOT6     |
| 54065     | ENSG00000205670 | 150.654459 | 0.07637777  | 0.37605803 | 0.51455261 | 0.72937777 | SMIM11A   |

|           |                 |            |             |            |            |            |            |
|-----------|-----------------|------------|-------------|------------|------------|------------|------------|
| 253017    | ENSG00000205678 | 0          | NA          | NA         | NA         | NA         | TECRL      |
| NA        | ENSG00000205682 | 0          | NA          | NA         | NA         | NA         |            |
| 8110      | ENSG00000205683 | 87.6363297 | -0.98318382 | 0.26817236 | 2.87E-05   | 0.00024886 | DPF3       |
| 100287284 | ENSG00000205693 | 1.67548751 | 0.03326149  | 0.37897726 | 0.66693942 | NA         | MANSC4     |
| NA        | ENSG00000205695 | 0          | NA          | NA         | NA         | NA         |            |
| 642394    | ENSG00000205696 | 0.67850399 | 0.00447323  | 0.38246378 | 0.91645901 | NA         | ADARB2-AS1 |
| NA        | ENSG00000205702 | 58.9422821 | 0.53269532  | 0.38858674 | 0.03665825 | 0.1176099  | CYP2D7     |
| NA        | ENSG00000205704 | 37.5683937 | -0.31148288 | 0.32409423 | 0.15480398 | 0.34030142 | LINC00634  |
| 144363    | ENSG00000205707 | 146.580451 | -0.36820267 | 0.20494608 | 0.03624373 | 0.11648721 | ETFRF1     |
| 100130311 | ENSG00000205710 | 17.4412041 | 0.17663219  | 0.34995778 | 0.36032352 | 0.59027484 | C17orf107  |
| NA        | ENSG00000205716 | 0          | NA          | NA         | NA         | NA         | FAM183DP   |
| 653656    | ENSG00000205718 | 0.16735865 | 0.01897177  | 0.38482933 | 0.78225479 | NA         | MBD3L4     |
| 6453      | ENSG00000205726 | 1138.82018 | -0.51089886 | 0.14277682 | 0.00012391 | 0.00092038 | ITSN1      |
| 162073    | ENSG00000205730 | 522.976569 | 0.10214629  | 0.12485919 | 0.38719699 | 0.61623231 | ITPRIPL2   |
| 107984285 | ENSG00000205740 | 34.493796  | -0.14070665 | 0.296164   | 0.47724791 | 0.69909912 |            |
| 79958     | ENSG00000205744 | 21.5361354 | 0.75185128  | 0.59236165 | 0.0190402  | 0.07001995 | DENND1C    |
| NA        | ENSG00000205745 | 0          | NA          | NA         | NA         | NA         |            |
| NA        | ENSG00000205746 | 1302.75495 | 0.33350625  | 0.10539179 | 0.00097395 | 0.00578019 | PKD1P4     |
| NA        | ENSG00000205754 | 0          | NA          | NA         | NA         | NA         | SLCO1B7    |
| 64109     | ENSG00000205755 | 0          | NA          | NA         | NA         | NA         | CRLF2      |
| 9946      | ENSG00000205758 | 510.483772 | -0.11875617 | 0.10700034 | 0.24662432 | 0.46578072 | CRYZL1     |
| 441212    | ENSG00000205763 | 221.590473 | 0.05218015  | 0.14597252 | 0.70016144 | 0.85541355 | RP9P       |
| 285636    | ENSG00000205765 | 995.366497 | -0.34553402 | 0.09806808 | 0.00025677 | 0.00178187 | C5orf51    |
| NA        | ENSG00000205767 | 0          | NA          | NA         | NA         | NA         |            |
| 440278    | ENSG00000205771 | 18.9732673 | 0.15462382  | 0.3526526  | 0.40098923 | 0.62940082 | CATSPER2P1 |
| 2543      | ENSG00000205777 | 0          | NA          | NA         | NA         | NA         | GAGE1      |
| 645432    | ENSG00000205784 | 0          | NA          | NA         | NA         | NA         | ARRDC5     |
| 100128682 | ENSG00000205786 | 0          | NA          | NA         | NA         | NA         | LINC01531  |
| 100131094 | ENSG00000205790 | 16.1155037 | 0.63480477  | 0.71640398 | 0.03102158 | 0.10295552 | DPP9-AS1   |
| 503693    | ENSG00000205791 | 16.6304075 | -0.0797781  | 0.32273811 | 0.66147095 | 0.8324506  | LOH12CR2   |
| 344967    | ENSG00000205794 | 0          | NA          | NA         | NA         | NA         |            |
| 192668    | ENSG00000205795 | 4.3071191  | 0.07394161  | 0.38546495 | 0.35176131 | 0.58182113 | CYS1       |
| 403313    | ENSG00000205808 | 388.697089 | -0.14842706 | 0.12440633 | 0.20609677 | 0.41317248 | PLPP6      |
| 3822      | ENSG00000205809 | 0          | NA          | NA         | NA         | NA         | KLRC2      |
| 3823      | ENSG00000205810 | 0          | NA          | NA         | NA         | NA         | KLRC3      |
| NA        | ENSG00000205822 | 4.35767379 | 0.10863637  | 0.39026431 | 0.30657264 | 0.53422766 | TPTE2P6    |
| NA        | ENSG00000205830 | 0          | NA          | NA         | NA         | NA         |            |
| 342346    | ENSG00000205832 | 2.98950586 | 0.0808532   | 0.38385722 | 0.4103647  | 0.63815925 | C16orf96   |

|           |                 |            |             |            |            |            |              |
|-----------|-----------------|------------|-------------|------------|------------|------------|--------------|
| 647309    | ENSG00000205835 | 0          | NA          | NA         | NA         | NA         | GMNC         |
| 400941    | ENSG00000205837 | 0          | NA          | NA         | NA         | NA         | LINC00487    |
| 153657    | ENSG00000205838 | 7.91895163 | 0.07363526  | 0.37200658 | 0.53998168 | 0.74887232 | TTC23L       |
| 93978     | ENSG00000205846 | 0          | NA          | NA         | NA         | NA         | CLEC6A       |
| 79315     | ENSG00000205847 | 0          | NA          | NA         | NA         | NA         | OR7E91P      |
| 10737     | ENSG00000205853 | 11.7180319 | 0.14151209  | 0.37538129 | 0.37025326 | 0.59943356 | RFPL3S       |
| 150297    | ENSG00000205856 | 0          | NA          | NA         | NA         | NA         | C22orf42     |
| 360030    | ENSG00000205857 | 0          | NA          | NA         | NA         | NA         | NANOGNB      |
| 100506049 | ENSG00000205858 | 0          | NA          | NA         | NA         | NA         | LRRC72       |
| 542767    | ENSG00000205861 | 1.03670879 | -0.00919083 | 0.38057052 | 0.87137982 | NA         | PCOTH        |
| 387911    | ENSG00000205863 | 0          | NA          | NA         | NA         | NA         | C1QTNF9B     |
| 440023    | ENSG00000205864 | 0          | NA          | NA         | NA         | NA         | KRTAP5-6     |
| 100132464 | ENSG00000205865 | 0          | NA          | NA         | NA         | NA         | FAM99B       |
| 387742    | ENSG00000205866 | 0          | NA          | NA         | NA         | NA         | FAM99A       |
| 440021    | ENSG00000205867 | 0          | NA          | NA         | NA         | NA         | KRTAP5-2     |
| 387264    | ENSG00000205869 | 16.2337564 | -1.07425047 | 0.77937507 | 0.00864706 | 0.03678337 | KRTAP5-1     |
| NA        | ENSG00000205871 | 0.80331222 | -0.00593024 | 0.38078992 | 0.91660053 | NA         | RPS3AP47     |
| NA        | ENSG00000205879 | 1.76652586 | 0.08916685  | 0.39615261 | 0.13993453 | NA         | FAM90A2P     |
| 613211    | ENSG00000205882 | 0          | NA          | NA         | NA         | NA         | DEFB134      |
| 613209    | ENSG00000205883 | 0          | NA          | NA         | NA         | NA         | DEFB135      |
| 613210    | ENSG00000205884 | 0          | NA          | NA         | NA         | NA         | DEFB136      |
| 283314    | ENSG00000205885 | 64.5655088 | 0.14093297  | 0.28159867 | 0.47724066 | 0.69909912 | C1RL-AS1     |
| 100128770 | ENSG00000205890 | 0.32425478 | 0.00117146  | 0.3833667  | 0.96908568 | NA         |              |
| NA        | ENSG00000205897 | 4.30642117 | 0.06816772  | 0.37203838 | 0.57086146 | 0.77109827 | OR7E136P     |
| NA        | ENSG00000205898 | 3.63509304 | 0.0415513   | 0.37317168 | 0.68698142 | 0.84777704 |              |
| 727857    | ENSG00000205899 | 0          | NA          | NA         | NA         | NA         | BHLHA9       |
| 100131017 | ENSG00000205903 | 3739.96162 | -0.1257336  | 0.07110481 | 0.07163198 | 0.19481541 | ZNF316       |
| 100128788 | ENSG00000205913 | 18.3640462 | 0.08299413  | 0.32636105 | 0.65032989 | 0.82529572 | SRRM2-AS1    |
| 57135     | ENSG00000205916 | 0          | NA          | NA         | NA         | NA         | DAZ4         |
| NA        | ENSG00000205918 | 438.491441 | 0.24805166  | 0.11616574 | 0.02484512 | 0.08672186 | PDPK2P       |
| 390874    | ENSG00000205922 | 0          | NA          | NA         | NA         | NA         | ONECUT3      |
| 752014    | ENSG00000205923 | 0          | NA          | NA         | NA         | NA         | CEMP1        |
| 10215     | ENSG00000205927 | 0          | NA          | NA         | NA         | NA         | OLIG2        |
| 56245     | ENSG00000205929 | 2.93323207 | 0.02951638  | 0.37253508 | 0.76556241 | 0.89220778 | C21orf62     |
| NA        | ENSG00000205930 | 58.9223842 | 0.15798274  | 0.27761627 | 0.42705633 | 0.65286501 | C21orf62-AS1 |
| NA        | ENSG00000205936 | 0          | NA          | NA         | NA         | NA         | PPP1R12BP2   |
| 10921     | ENSG00000205937 | 4494.67392 | 0.00490575  | 0.06530172 | 0.94136662 | 0.97559098 | RNPS1        |
| NA        | ENSG00000205940 | 8.74768383 | -0.21723323 | 0.41934544 | 0.19310932 | 0.3958352  | HSP90AB2P    |

|           |                 |            |             |            |            |            |           |
|-----------|-----------------|------------|-------------|------------|------------|------------|-----------|
| 57055     | ENSG00000205944 | 0          | NA          | NA         | NA         | NA         | DAZ2      |
| 391622    | ENSG00000205946 | 0.16735865 | 0.01897177  | 0.38482933 | 0.78225479 | NA         | USP17L6P  |
| NA        | ENSG00000205955 | 0.84232392 | 0.01659916  | 0.38121629 | 0.76831796 | NA         | HSP90AA5P |
| NA        | ENSG00000205959 | 3.78418819 | 0.15247952  | 0.41436074 | 0.14855843 | 0.33098252 |           |
| NA        | ENSG00000205971 | 0.47363781 | -0.02845309 | 0.38580958 | 0.5427038  | NA         |           |
| NA        | ENSG00000205976 | 0.55138487 | 0.01181637  | 0.3832588  | 0.75114255 | NA         |           |
| 57523     | ENSG00000205978 | 1268.26474 | 0.29131687  | 0.08731261 | 0.00059664 | 0.00376622 | NYNRIN    |
| 131118    | ENSG00000205981 | 469.963562 | 0.16530319  | 0.12686383 | 0.16694706 | 0.35784677 | DNAJC19   |
| 387733    | ENSG00000206013 | 0.173733   | 0.01914545  | 0.38484597 | 0.78225479 | NA         | IFITM5    |
| NA        | ENSG00000206014 | 0          | NA          | NA         | NA         | NA         | OR7E161P  |
| 284274    | ENSG00000206026 | 0          | NA          | NA         | NA         | NA         | SMIM21    |
| NA        | ENSG00000206028 | 16.5482393 | -0.16770941 | 0.36613777 | 0.35167274 | 0.58172313 |           |
| 641517    | ENSG00000206034 | 0          | NA          | NA         | NA         | NA         | DEFB109B  |
| NA        | ENSG00000206042 | 0          | NA          | NA         | NA         | NA         | DEFA7P    |
| 644041    | ENSG00000206043 | 0          | NA          | NA         | NA         | NA         | C18orf63  |
| 1667      | ENSG00000206047 | 0          | NA          | NA         | NA         | NA         | DEFA1     |
| 220164    | ENSG00000206052 | 818.813428 | -0.05583527 | 0.24756399 | 0.76604786 | 0.89234321 | DOK6      |
| 90861     | ENSG00000206053 | 2932.18821 | -0.2108632  | 0.06317703 | 0.00070216 | 0.00433711 | JPT2      |
| NA        | ENSG00000206062 | 0.173733   | 0.01914545  | 0.38484597 | 0.78225479 | NA         |           |
| NA        | ENSG00000206066 | 0          | NA          | NA         | NA         | NA         | IGLL3P    |
| 255349    | ENSG00000206069 | 0.6906061  | 0.01674122  | 0.38323095 | 0.65806079 | NA         | TMEM211   |
| 89778     | ENSG00000206072 | 0          | NA          | NA         | NA         | NA         | SERPINB11 |
| 6318      | ENSG00000206073 | 0          | NA          | NA         | NA         | NA         | SERPINB4  |
| 5268      | ENSG00000206075 | 0          | NA          | NA         | NA         | NA         | SERPINB5  |
| 653082    | ENSG00000206077 | 368.167322 | -0.71622905 | 0.13572855 | 2.86E-08   | 4.06E-07   | ZDHHC11B  |
| NA        | ENSG00000206090 | 0          | NA          | NA         | NA         | NA         |           |
| 728299    | ENSG00000206102 | 0          | NA          | NA         | NA         | NA         | KRTAP19-8 |
| 337985    | ENSG00000206104 | 0          | NA          | NA         | NA         | NA         | KRTAP20-3 |
| 100151643 | ENSG00000206105 | 0          | NA          | NA         | NA         | NA         | KRTAP20-4 |
| 100288287 | ENSG00000206106 | 0          | NA          | NA         | NA         | NA         | KRTAP22-2 |
| 643812    | ENSG00000206107 | 0          | NA          | NA         | NA         | NA         | KRTAP27-1 |
| 402160    | ENSG00000206113 | 1.58898392 | 0.04313051  | 0.38063193 | 0.567313   | NA         | CFAP99    |
| NA        | ENSG00000206120 | 21.7032862 | 0.49603614  | 0.49795074 | 0.05661805 | 0.16381831 | EGFEM1P   |
| 728047    | ENSG00000206127 | 121.094345 | 0.67143829  | 0.27297844 | 0.00271    | 0.01390391 | GOLGA80   |
| 642484    | ENSG00000206129 | 1.72373679 | -0.04431607 | 0.38505299 | 0.41859324 | NA         |           |
| 645426    | ENSG00000206140 | 20.7660514 | 1.45770285  | 0.61783334 | 0.00098884 | 0.00585105 | TMEM191C  |
| 100996335 | ENSG00000206142 | 0.45808616 | 0.00126518  | 0.38310474 | 0.98724547 | NA         | FAM230H   |
| NA        | ENSG00000206144 | 0.49322054 | 0.0149268   | 0.38314382 | 0.74765203 | NA         | MAPK6P1   |

|           |                 |            |             |            |            |            |            |
|-----------|-----------------|------------|-------------|------------|------------|------------|------------|
| NA        | ENSG00000206145 | 0.33471731 | 0.02354391  | 0.38534154 | 0.62842204 | NA         | P2RX6P     |
| NA        | ENSG00000206147 | 0.173124   | -0.01911262 | 0.38486262 | 0.84537521 | NA         | RPL23AP57  |
| 440248    | ENSG00000206149 | 909.407173 | 0.02379931  | 0.09849492 | 0.80409218 | 0.91109017 | HERC2P9    |
| 440163    | ENSG00000206150 | 0.18922458 | 0.01954053  | 0.38488496 | 0.78225479 | NA         | RNASE13    |
| NA        | ENSG00000206159 | 0          | NA          | NA         | NA         | NA         | GYG2P1     |
| NA        | ENSG00000206168 | 0.52457699 | 0.01099992  | 0.38327131 | 0.76830712 | NA         |            |
| 3039      | ENSG00000206172 | 0.34746601 | 0.02370763  | 0.3853651  | 0.61987128 | NA         | HBA1       |
| 3042      | ENSG00000206177 | 0          | NA          | NA         | NA         | NA         | HBM        |
| NA        | ENSG00000206178 | 0.173733   | 0.01914545  | 0.38484597 | 0.78225479 | NA         | HBZP1      |
| 51224     | ENSG00000206181 | 1.13761627 | -0.00537635 | 0.37954972 | 0.93228938 | NA         | ELOA2      |
| 100128714 | ENSG00000206187 | 0          | NA          | NA         | NA         | NA         | LINC02346  |
| 57194     | ENSG00000206190 | 0          | NA          | NA         | NA         | NA         | ATP10A     |
| NA        | ENSG00000206192 | 0          | NA          | NA         | NA         | NA         | ANKRD20A9P |
| 503637    | ENSG00000206195 | 1640.92773 | -0.12284731 | 0.07433628 | 0.09160676 | 0.23372918 | DUXAP8     |
| 389161    | ENSG00000206199 | 0          | NA          | NA         | NA         | NA         | ANKUB1     |
| 23617     | ENSG00000206203 | 0          | NA          | NA         | NA         | NA         | TSSK2      |
| NA        | ENSG00000206228 | 0.64047942 | 0.00308824  | 0.38195794 | 0.94667208 | NA         | HNRNPA1P4  |
| NA        | ENSG00000206249 | 0          | NA          | NA         | NA         | NA         |            |
| 729627    | ENSG00000206260 | 0          | NA          | NA         | NA         | NA         | PRR23A     |
| 401089    | ENSG00000206262 | 0          | NA          | NA         | NA         | NA         | FOXL2NB    |
| 10866     | ENSG00000206337 | 0          | NA          | NA         | NA         | NA         | HCP5       |
| NA        | ENSG00000206341 | 22.7566104 | 0.04638782  | 0.30915092 | 0.8044972  | 0.91118482 | HLA-H      |
| 253018    | ENSG00000206344 | 10.0210693 | -0.24922237 | 0.43493046 | 0.15634921 | 0.34283458 | HCG27      |
| 100652833 | ENSG00000206356 | 0          | NA          | NA         | NA         | NA         |            |
| 131873    | ENSG00000206384 | 0.173733   | 0.01914545  | 0.38484597 | 0.78225479 | NA         | COL6A6     |
| NA        | ENSG00000206417 | 32.0093521 | -0.00979981 | 0.28012798 | 0.95761906 | 0.98264776 | H1-10-AS1  |
| 201475    | ENSG00000206418 | 381.910483 | 0.21448384  | 0.13281176 | 0.08448316 | 0.22013999 | RAB12      |
| 339291    | ENSG00000206422 | 0          | NA          | NA         | NA         | NA         | LRRC30     |
| 645369    | ENSG00000206432 | 83.8974756 | 2.0895972   | 0.35193606 | 1.51E-10   | 2.85E-09   | TMEM200C   |
| NA        | ENSG00000206448 | 0.14931947 | -0.01844332 | 0.38480212 | 0.84537521 | NA         | PPIAP30    |
| 442194    | ENSG00000206474 | 0          | NA          | NA         | NA         | NA         | OR10C1     |
| 3105      | ENSG00000206503 | 4970.10161 | 0.21330246  | 0.0582596  | 0.00020624 | 0.00146348 | HLA-A      |
| 201562    | ENSG00000206527 | 638.637055 | -0.50289636 | 0.10529803 | 7.01E-07   | 8.14E-06   | HACD2      |
| 55779     | ENSG00000206530 | 756.151421 | -0.07819608 | 0.11515913 | 0.47548327 | 0.6976474  | CFAP44     |
| 344807    | ENSG00000206531 | 0          | NA          | NA         | NA         | NA         | CD200R1L   |
| 348801    | ENSG00000206535 | 84.2233853 | 0.50554403  | 0.25697966 | 0.01536738 | 0.05873277 | LNP1       |
| 403277    | ENSG00000206536 | 0          | NA          | NA         | NA         | NA         | OR5K3      |
| 389136    | ENSG00000206538 | 0          | NA          | NA         | NA         | NA         | VGLL3      |



|           |                 |            |             |            |            |            |             |
|-----------|-----------------|------------|-------------|------------|------------|------------|-------------|
| NA        | ENSG00000206549 | 7.10266875 | 0.09224829  | 0.36731412 | 0.51762968 | 0.73141449 |             |
| 100506275 | ENSG00000206552 | 0          | NA          | NA         | NA         | NA         | KRBOX1-AS1  |
| 131405    | ENSG00000206557 | 55.6493955 | 0.78698326  | 0.32353542 | 0.00222522 | 0.01173844 | TRIM71      |
| 152098    | ENSG00000206559 | 18.9874476 | 0.05544334  | 0.32634164 | 0.75500688 | 0.8860367  | ZCWPW2      |
| 23243     | ENSG00000206560 | 951.87656  | 0.0814757   | 0.1049345  | 0.42038576 | 0.6462065  | ANKRD28     |
| 8292      | ENSG00000206561 | 141.389627 | 0.04046695  | 0.18627235 | 0.80502414 | 0.91147183 | COLQ        |
| 131965    | ENSG00000206562 | 402.53255  | -0.33967371 | 0.1409755  | 0.00941714 | 0.03948351 | METTL6      |
| NA        | ENSG00000206567 | 153.081606 | -0.03434828 | 0.19049629 | 0.83252322 | 0.92392457 |             |
| 440944    | ENSG00000206573 | 360.071032 | -0.28235105 | 0.12940155 | 0.01996498 | 0.07286703 | THUMPD3-AS1 |
| 114786    | ENSG00000206579 | 0.29863895 | -0.02292439 | 0.3852726  | 0.68753245 | NA         | XKR4        |
| NA        | ENSG00000206582 | 0          | NA          | NA         | NA         | NA         |             |
| NA        | ENSG00000206583 | 0          | NA          | NA         | NA         | NA         | RNU6-1292P  |
| 26864     | ENSG00000206585 | 0          | NA          | NA         | NA         | NA         | RNVU1-7     |
| NA        | ENSG00000206587 | 0          | NA          | NA         | NA         | NA         | RNU6-46P    |
| NA        | ENSG00000206590 | 0          | NA          | NA         | NA         | NA         | RNU6-132P   |
| NA        | ENSG00000206592 | 0          | NA          | NA         | NA         | NA         |             |
| NA        | ENSG00000206593 | 0          | NA          | NA         | NA         | NA         | RNU6-47P    |
| NA        | ENSG00000206595 | 0          | NA          | NA         | NA         | NA         | RNU6-877P   |
| 692158    | ENSG00000206597 | 0          | NA          | NA         | NA         | NA         | SNORA57     |
| NA        | ENSG00000206598 | 0          | NA          | NA         | NA         | NA         | RNU6-1286P  |
| NA        | ENSG00000206599 | 0          | NA          | NA         | NA         | NA         | RNU6-841P   |
| NA        | ENSG00000206600 | 0          | NA          | NA         | NA         | NA         | RNU6-25P    |
| NA        | ENSG00000206601 | 0          | NA          | NA         | NA         | NA         | RNU6-431P   |
| 26791     | ENSG00000206602 | 0          | NA          | NA         | NA         | NA         | SNORD58A    |
| 109616964 | ENSG00000206603 | 0          | NA          | NA         | NA         | NA         | SNORA22B    |
| NA        | ENSG00000206604 | 0          | NA          | NA         | NA         | NA         | RNU6-425P   |
| NA        | ENSG00000206605 | 0          | NA          | NA         | NA         | NA         | RNU6-946P   |
| NA        | ENSG00000206606 | 0          | NA          | NA         | NA         | NA         | RNU6-1296P  |
| 100033423 | ENSG00000206609 | 0          | NA          | NA         | NA         | NA         | SNORD116-11 |
| 26820     | ENSG00000206611 | 0          | NA          | NA         | NA         | NA         | SNORD24     |
| 677793    | ENSG00000206612 | 0          | NA          | NA         | NA         | NA         | SNORA2A     |
| NA        | ENSG00000206613 | 0          | NA          | NA         | NA         | NA         | RNU6-1336P  |
| NA        | ENSG00000206614 | 0          | NA          | NA         | NA         | NA         | RNU6-477P   |
| NA        | ENSG00000206615 | 0          | NA          | NA         | NA         | NA         | RNU6-338P   |
| NA        | ENSG00000206616 | 0          | NA          | NA         | NA         | NA         | RNU6-741P   |
| NA        | ENSG00000206617 | 0          | NA          | NA         | NA         | NA         | RNY1P5      |
| NA        | ENSG00000206618 | 0          | NA          | NA         | NA         | NA         | RNU6-1264P  |
| 692085    | ENSG00000206620 | 0          | NA          | NA         | NA         | NA         | SNORD45C    |

|           |                 |            |             |            |            |    |             |
|-----------|-----------------|------------|-------------|------------|------------|----|-------------|
| NA        | ENSG00000206621 | 0          | NA          | NA         | NA         | NA | SNORD116-14 |
| 26779     | ENSG00000206622 | 0          | NA          | NA         | NA         | NA | SNORA69     |
| NA        | ENSG00000206623 | 0          | NA          | NA         | NA         | NA | RNU6-979P   |
| NA        | ENSG00000206624 | 0          | NA          | NA         | NA         | NA | RNU1-39P    |
| NA        | ENSG00000206627 | 0          | NA          | NA         | NA         | NA | RNU6-969P   |
| NA        | ENSG00000206629 | 0          | NA          | NA         | NA         | NA | RNU1-63P    |
| 26788     | ENSG00000206630 | 0          | NA          | NA         | NA         | NA | SNORD60     |
| NA        | ENSG00000206631 | 0          | NA          | NA         | NA         | NA | RNU6-657P   |
| 100302743 | ENSG00000206633 | 0          | NA          | NA         | NA         | NA | SNORA80B    |
| 677807    | ENSG00000206634 | 0          | NA          | NA         | NA         | NA | SNORA22     |
| NA        | ENSG00000206635 | 0          | NA          | NA         | NA         | NA | RNU6-1062P  |
| NA        | ENSG00000206636 | 0          | NA          | NA         | NA         | NA |             |
| 109616993 | ENSG00000206637 | 0          | NA          | NA         | NA         | NA | SNORA70H    |
| NA        | ENSG00000206638 | 0          | NA          | NA         | NA         | NA | RNU6-672P   |
| NA        | ENSG00000206639 | 0          | NA          | NA         | NA         | NA |             |
| NA        | ENSG00000206640 | 0          | NA          | NA         | NA         | NA |             |
| NA        | ENSG00000206641 | 0          | NA          | NA         | NA         | NA | RNU6-449P   |
| NA        | ENSG00000206644 | 0          | NA          | NA         | NA         | NA | RNU6-1279P  |
| NA        | ENSG00000206645 | 0          | NA          | NA         | NA         | NA |             |
| NA        | ENSG00000206646 | 0          | NA          | NA         | NA         | NA |             |
| NA        | ENSG00000206647 | 0.15069912 | -0.01848503 | 0.38480575 | 0.84537521 | NA |             |
| NA        | ENSG00000206649 | 0          | NA          | NA         | NA         | NA |             |
| 100379132 | ENSG00000206650 | 0          | NA          | NA         | NA         | NA | SNORA70G    |
| NA        | ENSG00000206651 | 0          | NA          | NA         | NA         | NA |             |
| 26871     | ENSG00000206652 | 0          | NA          | NA         | NA         | NA | RNU1-1      |
| NA        | ENSG00000206654 | 0          | NA          | NA         | NA         | NA | RNU6-608P   |
| NA        | ENSG00000206656 | 0          | NA          | NA         | NA         | NA | SNORD116-17 |
| NA        | ENSG00000206658 | 0          | NA          | NA         | NA         | NA | RNU6-1039P  |
| NA        | ENSG00000206659 | 0          | NA          | NA         | NA         | NA |             |
| NA        | ENSG00000206660 | 0          | NA          | NA         | NA         | NA |             |
| NA        | ENSG00000206661 | 0          | NA          | NA         | NA         | NA |             |
| NA        | ENSG00000206662 | 0          | NA          | NA         | NA         | NA |             |
| NA        | ENSG00000206663 | 0          | NA          | NA         | NA         | NA |             |
| NA        | ENSG00000206665 | 0          | NA          | NA         | NA         | NA | RNU6-573P   |
| NA        | ENSG00000206669 | 0          | NA          | NA         | NA         | NA |             |
| NA        | ENSG00000206671 | 0          | NA          | NA         | NA         | NA | RNU6-471P   |
| NA        | ENSG00000206672 | 0          | NA          | NA         | NA         | NA |             |
| NA        | ENSG00000206674 | 0          | NA          | NA         | NA         | NA | RNU6-945P   |

|        |                 |            |             |            |            |    |             |
|--------|-----------------|------------|-------------|------------|------------|----|-------------|
| NA     | ENSG00000206675 | 0          | NA          | NA         | NA         | NA | RNU6-32P    |
| NA     | ENSG00000206676 | 0          | NA          | NA         | NA         | NA |             |
| NA     | ENSG00000206677 | 0          | NA          | NA         | NA         | NA |             |
| NA     | ENSG00000206678 | 0          | NA          | NA         | NA         | NA | RNU6-144P   |
| NA     | ENSG00000206679 | 0          | NA          | NA         | NA         | NA |             |
| 6083   | ENSG00000206680 | 0          | NA          | NA         | NA         | NA | SNORD21     |
| NA     | ENSG00000206681 | 0          | NA          | NA         | NA         | NA | RNU6-730P   |
| NA     | ENSG00000206682 | 0          | NA          | NA         | NA         | NA |             |
| NA     | ENSG00000206684 | 0          | NA          | NA         | NA         | NA | RNU6-157P   |
| NA     | ENSG00000206685 | 0          | NA          | NA         | NA         | NA | RNU6-1189P  |
| NA     | ENSG00000206686 | 0          | NA          | NA         | NA         | NA | RNU6-1036P  |
| NA     | ENSG00000206687 | 0          | NA          | NA         | NA         | NA | RNU1-109P   |
| NA     | ENSG00000206688 | 0          | NA          | NA         | NA         | NA | SNORD116-18 |
| NA     | ENSG00000206690 | 0          | NA          | NA         | NA         | NA |             |
| NA     | ENSG00000206692 | 0          | NA          | NA         | NA         | NA |             |
| 677835 | ENSG00000206693 | 0          | NA          | NA         | NA         | NA | SNORA56     |
| NA     | ENSG00000206695 | 0          | NA          | NA         | NA         | NA | RNU6-442P   |
| NA     | ENSG00000206697 | 0          | NA          | NA         | NA         | NA | RNY1P8      |
| NA     | ENSG00000206698 | 0.15069912 | -0.01848503 | 0.38480575 | 0.84537521 | NA | RNU1-73P    |
| NA     | ENSG00000206699 | 0          | NA          | NA         | NA         | NA |             |
| NA     | ENSG00000206700 | 0          | NA          | NA         | NA         | NA | RNU6-723P   |
| NA     | ENSG00000206701 | 0          | NA          | NA         | NA         | NA | RNU6-1040P  |
| NA     | ENSG00000206702 | 0          | NA          | NA         | NA         | NA | RNU1-11P    |
| NA     | ENSG00000206703 | 0          | NA          | NA         | NA         | NA | RNU6-128P   |
| NA     | ENSG00000206704 | 0          | NA          | NA         | NA         | NA |             |
| NA     | ENSG00000206705 | 0          | NA          | NA         | NA         | NA |             |
| NA     | ENSG00000206708 | 0          | NA          | NA         | NA         | NA | RNU6-1227P  |
| NA     | ENSG00000206709 | 0          | NA          | NA         | NA         | NA | RNU6-1080P  |
| NA     | ENSG00000206710 | 0          | NA          | NA         | NA         | NA | RNU6-147P   |
| NA     | ENSG00000206711 | 0          | NA          | NA         | NA         | NA |             |
| NA     | ENSG00000206712 | 0          | NA          | NA         | NA         | NA | RNU6-26P    |
| NA     | ENSG00000206713 | 0          | NA          | NA         | NA         | NA |             |
| NA     | ENSG00000206714 | 0          | NA          | NA         | NA         | NA |             |
| NA     | ENSG00000206715 | 0          | NA          | NA         | NA         | NA | RNU6-444P   |
| NA     | ENSG00000206716 | 0          | NA          | NA         | NA         | NA | RNU6-133P   |
| NA     | ENSG00000206717 | 0          | NA          | NA         | NA         | NA |             |
| NA     | ENSG00000206718 | 0          | NA          | NA         | NA         | NA | RNU6-546P   |
| NA     | ENSG00000206719 | 0          | NA          | NA         | NA         | NA |             |

|        |                 |   |    |    |    |    |            |
|--------|-----------------|---|----|----|----|----|------------|
| NA     | ENSG00000206721 | 0 | NA | NA | NA | NA |            |
| NA     | ENSG00000206722 | 0 | NA | NA | NA | NA | RNU6-1074P |
| NA     | ENSG00000206723 | 0 | NA | NA | NA | NA | RNU6-1056P |
| NA     | ENSG00000206724 | 0 | NA | NA | NA | NA | RNU6-756P  |
| NA     | ENSG00000206725 | 0 | NA | NA | NA | NA | RNU6-1027P |
| NA     | ENSG00000206726 | 0 | NA | NA | NA | NA | RNU6-259P  |
| NA     | ENSG00000206728 | 0 | NA | NA | NA | NA |            |
| NA     | ENSG00000206729 | 0 | NA | NA | NA | NA | RNU6-1126P |
| NA     | ENSG00000206730 | 0 | NA | NA | NA | NA | RNU6-468P  |
| NA     | ENSG00000206731 | 0 | NA | NA | NA | NA |            |
| NA     | ENSG00000206732 | 0 | NA | NA | NA | NA | RNU6-936P  |
| NA     | ENSG00000206733 | 0 | NA | NA | NA | NA | RNU6-641P  |
| NA     | ENSG00000206734 | 0 | NA | NA | NA | NA |            |
| NA     | ENSG00000206738 | 0 | NA | NA | NA | NA |            |
| NA     | ENSG00000206739 | 0 | NA | NA | NA | NA |            |
| NA     | ENSG00000206741 | 0 | NA | NA | NA | NA |            |
| NA     | ENSG00000206743 | 0 | NA | NA | NA | NA | RNU6-484P  |
| NA     | ENSG00000206744 | 0 | NA | NA | NA | NA | RNU6-620P  |
| NA     | ENSG00000206745 | 0 | NA | NA | NA | NA | RNU6-643P  |
| NA     | ENSG00000206746 | 0 | NA | NA | NA | NA | RNU6-142P  |
| NA     | ENSG00000206747 | 0 | NA | NA | NA | NA | RNU6-245P  |
| NA     | ENSG00000206749 | 0 | NA | NA | NA | NA | RNU6-1083P |
| NA     | ENSG00000206751 | 0 | NA | NA | NA | NA |            |
| NA     | ENSG00000206752 | 0 | NA | NA | NA | NA | RNU6-1323P |
| 594837 | ENSG00000206754 | 0 | NA | NA | NA | NA | SNORD101   |
| 677813 | ENSG00000206755 | 0 | NA | NA | NA | NA | SNORA30    |
| NA     | ENSG00000206756 | 0 | NA | NA | NA | NA |            |
| NA     | ENSG00000206758 | 0 | NA | NA | NA | NA | RNU6-317P  |
| NA     | ENSG00000206759 | 0 | NA | NA | NA | NA | RNU6-787P  |
| 574040 | ENSG00000206760 | 0 | NA | NA | NA | NA | SNORA6     |
| NA     | ENSG00000206762 | 0 | NA | NA | NA | NA | RNU6-418P  |
| NA     | ENSG00000206763 | 0 | NA | NA | NA | NA | RNU6-10P   |
| NA     | ENSG00000206764 | 0 | NA | NA | NA | NA | RNU6-152P  |
| NA     | ENSG00000206765 | 0 | NA | NA | NA | NA | RNU6-203P  |
| NA     | ENSG00000206766 | 0 | NA | NA | NA | NA | RNU6-435P  |
| NA     | ENSG00000206767 | 0 | NA | NA | NA | NA | RNU6-949P  |
| NA     | ENSG00000206768 | 0 | NA | NA | NA | NA |            |
| NA     | ENSG00000206769 | 0 | NA | NA | NA | NA | RNU6-116P  |

|           |                 |   |    |    |    |    |           |
|-----------|-----------------|---|----|----|----|----|-----------|
| NA        | ENSG00000206770 | 0 | NA | NA | NA | NA |           |
| NA        | ENSG00000206772 | 0 | NA | NA | NA | NA | RNU6-44P  |
| NA        | ENSG00000206774 | 0 | NA | NA | NA | NA | RNU6-211P |
| 26812     | ENSG00000206775 | 0 | NA | NA | NA | NA | SNORD37   |
| NA        | ENSG00000206776 | 0 | NA | NA | NA | NA |           |
| NA        | ENSG00000206777 | 0 | NA | NA | NA | NA | RNU6-637P |
| NA        | ENSG00000206778 | 0 | NA | NA | NA | NA | RNU6-213P |
| NA        | ENSG00000206779 | 0 | NA | NA | NA | NA |           |
| 109616994 | ENSG00000206780 | 0 | NA | NA | NA | NA | SNORA75B  |
| NA        | ENSG00000206781 | 0 | NA | NA | NA | NA |           |
| NA        | ENSG00000206782 | 0 | NA | NA | NA | NA | RNU6-224P |
| NA        | ENSG00000206784 | 0 | NA | NA | NA | NA |           |
| NA        | ENSG00000206786 | 0 | NA | NA | NA | NA | RNU6-701P |
| NA        | ENSG00000206787 | 0 | NA | NA | NA | NA | RNU6-76P  |
| NA        | ENSG00000206788 | 0 | NA | NA | NA | NA | RNU6-629P |
| NA        | ENSG00000206790 | 0 | NA | NA | NA | NA |           |
| NA        | ENSG00000206791 | 0 | NA | NA | NA | NA | RNU1-129P |
| NA        | ENSG00000206792 | 0 | NA | NA | NA | NA |           |
| NA        | ENSG00000206795 | 0 | NA | NA | NA | NA |           |
| NA        | ENSG00000206796 | 0 | NA | NA | NA | NA | RNU6-811P |
| NA        | ENSG00000206797 | 0 | NA | NA | NA | NA |           |
| 692063    | ENSG00000206799 | 0 | NA | NA | NA | NA | SNORA32   |
| NA        | ENSG00000206800 | 0 | NA | NA | NA | NA | RNY3P7    |
| NA        | ENSG00000206801 | 0 | NA | NA | NA | NA | RNU6-639P |
| NA        | ENSG00000206802 | 0 | NA | NA | NA | NA | RNU6-926P |
| NA        | ENSG00000206803 | 0 | NA | NA | NA | NA | RNU6-968P |
| NA        | ENSG00000206805 | 0 | NA | NA | NA | NA |           |
| NA        | ENSG00000206806 | 0 | NA | NA | NA | NA |           |
| NA        | ENSG00000206807 | 0 | NA | NA | NA | NA | RNU6-815P |
| NA        | ENSG00000206808 | 0 | NA | NA | NA | NA |           |
| 574042    | ENSG00000206811 | 0 | NA | NA | NA | NA | SNORA10   |
| NA        | ENSG00000206812 | 0 | NA | NA | NA | NA | RNU6-38P  |
| NA        | ENSG00000206813 | 0 | NA | NA | NA | NA |           |
| NA        | ENSG00000206814 | 0 | NA | NA | NA | NA |           |
| NA        | ENSG00000206815 | 0 | NA | NA | NA | NA | RNU6-483P |
| NA        | ENSG00000206816 | 0 | NA | NA | NA | NA |           |
| NA        | ENSG00000206817 | 0 | NA | NA | NA | NA |           |
| NA        | ENSG00000206818 | 0 | NA | NA | NA | NA | RNU6-849P |

|        |                 |   |    |    |    |    |            |
|--------|-----------------|---|----|----|----|----|------------|
| NA     | ENSG00000206819 | 0 | NA | NA | NA | NA | RNU6-260P  |
| NA     | ENSG00000206820 | 0 | NA | NA | NA | NA | RNU1-138P  |
| NA     | ENSG00000206822 | 0 | NA | NA | NA | NA |            |
| NA     | ENSG00000206824 | 0 | NA | NA | NA | NA |            |
| NA     | ENSG00000206826 | 0 | NA | NA | NA | NA | RNU6-974P  |
| NA     | ENSG00000206827 | 0 | NA | NA | NA | NA | RNU6-1032P |
| NA     | ENSG00000206828 | 0 | NA | NA | NA | NA | RNVU1-30   |
| NA     | ENSG00000206832 | 0 | NA | NA | NA | NA | RNU6V      |
| NA     | ENSG00000206833 | 0 | NA | NA | NA | NA | RNU6-20P   |
| 677792 | ENSG00000206834 | 0 | NA | NA | NA | NA | SNORA1     |
| NA     | ENSG00000206835 | 0 | NA | NA | NA | NA | RNU1-74P   |
| NA     | ENSG00000206836 | 0 | NA | NA | NA | NA | RNU6-1029P |
| 654319 | ENSG00000206838 | 0 | NA | NA | NA | NA | SNORA5A    |
| NA     | ENSG00000206839 | 0 | NA | NA | NA | NA | RNU6-746P  |
| NA     | ENSG00000206840 | 0 | NA | NA | NA | NA |            |
| NA     | ENSG00000206841 | 0 | NA | NA | NA | NA | RNU6-409P  |
| NA     | ENSG00000206842 | 0 | NA | NA | NA | NA | RNU6-413P  |
| NA     | ENSG00000206843 | 0 | NA | NA | NA | NA | RNU6-206P  |
| NA     | ENSG00000206844 | 0 | NA | NA | NA | NA |            |
| NA     | ENSG00000206845 | 0 | NA | NA | NA | NA | RNU6-209P  |
| NA     | ENSG00000206846 | 0 | NA | NA | NA | NA |            |
| NA     | ENSG00000206847 | 0 | NA | NA | NA | NA |            |
| NA     | ENSG00000206848 | 0 | NA | NA | NA | NA | RNU6-890P  |
| NA     | ENSG00000206849 | 0 | NA | NA | NA | NA |            |
| NA     | ENSG00000206850 | 0 | NA | NA | NA | NA |            |
| NA     | ENSG00000206852 | 0 | NA | NA | NA | NA | RNU6-895P  |
| NA     | ENSG00000206853 | 0 | NA | NA | NA | NA |            |
| NA     | ENSG00000206854 | 0 | NA | NA | NA | NA | RNY3P5     |
| NA     | ENSG00000206855 | 0 | NA | NA | NA | NA | RNU6-571P  |
| NA     | ENSG00000206857 | 0 | NA | NA | NA | NA | RNU6-214P  |
| NA     | ENSG00000206858 | 0 | NA | NA | NA | NA |            |
| NA     | ENSG00000206859 | 0 | NA | NA | NA | NA | RNU6-767P  |
| NA     | ENSG00000206862 | 0 | NA | NA | NA | NA |            |
| NA     | ENSG00000206863 | 0 | NA | NA | NA | NA | RNU5A-6P   |
| NA     | ENSG00000206864 | 0 | NA | NA | NA | NA | RNU6-207P  |
| NA     | ENSG00000206865 | 0 | NA | NA | NA | NA |            |
| NA     | ENSG00000206866 | 0 | NA | NA | NA | NA | RNU6-187P  |
| NA     | ENSG00000206867 | 0 | NA | NA | NA | NA | RNU6-356P  |

|           |                 |                 |          |            |            |            |            |
|-----------|-----------------|-----------------|----------|------------|------------|------------|------------|
| 100337591 | ENSG00000206869 | 0               | NA       | NA         | NA         | NA         | SNORA70F   |
|           | NA              | ENSG00000206870 | 0        | NA         | NA         | NA         | RNU6-398P  |
|           | NA              | ENSG00000206871 | 0        | NA         | NA         | NA         | RNU6-533P  |
|           | NA              | ENSG00000206875 | 0        | NA         | NA         | NA         | RNU6-761P  |
|           | NA              | ENSG00000206877 | 0        | NA         | NA         | NA         | RNU6-1103P |
|           | NA              | ENSG00000206878 | 0.173733 | 0.01914545 | 0.38484597 | 0.78225479 | NA         |
|           | NA              | ENSG00000206880 | 0        | NA         | NA         | NA         | RNU6-1310P |
|           | NA              | ENSG00000206881 | 0        | NA         | NA         | NA         | RNU6-190P  |
|           | NA              | ENSG00000206882 | 0        | NA         | NA         | NA         | RNA5SP87   |
| 654321    | ENSG00000206885 | 0               | NA       | NA         | NA         | NA         | SNORA75    |
|           | NA              | ENSG00000206886 | 0        | NA         | NA         | NA         |            |
|           | NA              | ENSG00000206887 | 0        | NA         | NA         | NA         | RNU6-1008P |
|           | NA              | ENSG00000206888 | 0        | NA         | NA         | NA         | RNU6-48P   |
|           | NA              | ENSG00000206889 | 0        | NA         | NA         | NA         | RNU6-1200P |
|           | NA              | ENSG00000206891 | 0        | NA         | NA         | NA         | RNU6-217P  |
|           | NA              | ENSG00000206892 | 0        | NA         | NA         | NA         | RNU6-42P   |
|           | NA              | ENSG00000206895 | 0        | NA         | NA         | NA         |            |
|           | NA              | ENSG00000206896 | 0        | NA         | NA         | NA         | RNU6-1124P |
| 109616977 | ENSG00000206897 | 0               | NA       | NA         | NA         | NA         | SNORA9B    |
|           | NA              | ENSG00000206898 | 0        | NA         | NA         | NA         |            |
|           | NA              | ENSG00000206899 | 0        | NA         | NA         | NA         | RNU6-36P   |
|           | NA              | ENSG00000206900 | 0        | NA         | NA         | NA         | RNU6-98P   |
|           | NA              | ENSG00000206901 | 0        | NA         | NA         | NA         |            |
| 109617003 | ENSG00000206903 | 0               | NA       | NA         | NA         | NA         | SNORA24B   |
|           | NA              | ENSG00000206905 | 0        | NA         | NA         | NA         |            |
|           | NA              | ENSG00000206906 | 0        | NA         | NA         | NA         | RNU6-458P  |
|           | NA              | ENSG00000206907 | 0        | NA         | NA         | NA         | RNU6-1013P |
|           | NA              | ENSG00000206908 | 0        | NA         | NA         | NA         | RNU1-136P  |
| 109616973 | ENSG00000206909 | 0               | NA       | NA         | NA         | NA         | SNORA70J   |
| 677812    | ENSG00000206910 | 0               | NA       | NA         | NA         | NA         | SNORA29    |
|           | NA              | ENSG00000206911 | 0        | NA         | NA         | NA         |            |
|           | NA              | ENSG00000206912 | 0        | NA         | NA         | NA         |            |
|           | NA              | ENSG00000206913 | 0        | NA         | NA         | NA         |            |
|           | NA              | ENSG00000206914 | 0        | NA         | NA         | NA         |            |
|           | NA              | ENSG00000206915 | 0        | NA         | NA         | NA         | RNU6-439P  |
|           | NA              | ENSG00000206917 | 0        | NA         | NA         | NA         | RNU1-52P   |
|           | NA              | ENSG00000206918 | 0        | NA         | NA         | NA         | RNU6-1181P |
|           | NA              | ENSG00000206920 | 0        | NA         | NA         | NA         | RNY1P6     |

|           |                 |            |            |            |            |    |            |
|-----------|-----------------|------------|------------|------------|------------|----|------------|
| NA        | ENSG00000206921 | 0          | NA         | NA         | NA         | NA | RNU6-481P  |
| NA        | ENSG00000206922 | 0          | NA         | NA         | NA         | NA | RNU6-80P   |
| NA        | ENSG00000206923 | 0          | NA         | NA         | NA         | NA | RNU6-432P  |
| NA        | ENSG00000206924 | 0          | NA         | NA         | NA         | NA | RNU6-689P  |
| NA        | ENSG00000206925 | 0          | NA         | NA         | NA         | NA |            |
| NA        | ENSG00000206926 | 0          | NA         | NA         | NA         | NA | RNU6-1024P |
| NA        | ENSG00000206929 | 0          | NA         | NA         | NA         | NA |            |
| NA        | ENSG00000206931 | 0          | NA         | NA         | NA         | NA | RNU6-1042P |
| NA        | ENSG00000206935 | 0          | NA         | NA         | NA         | NA | RNU6-514P  |
| NA        | ENSG00000206936 | 0.18922458 | 0.01954053 | 0.38488496 | 0.78225479 | NA | RNU4-52P   |
| 100124537 | ENSG00000206937 | 0          | NA         | NA         | NA         | NA | SNORA70B   |
| NA        | ENSG00000206938 | 0          | NA         | NA         | NA         | NA | RNU4-31P   |
| NA        | ENSG00000206939 | 0          | NA         | NA         | NA         | NA | RNU6-281P  |
| 6079      | ENSG00000206941 | 0          | NA         | NA         | NA         | NA | SNORD15A   |
| NA        | ENSG00000206944 | 0          | NA         | NA         | NA         | NA | RNU6-708P  |
| 109616963 | ENSG00000206947 | 0          | NA         | NA         | NA         | NA | SNORA20B   |
| 677817    | ENSG00000206948 | 0          | NA         | NA         | NA         | NA | SNORA36A   |
| NA        | ENSG00000206949 | 0          | NA         | NA         | NA         | NA | RNU6-1324P |
| NA        | ENSG00000206950 | 0          | NA         | NA         | NA         | NA |            |
| NA        | ENSG00000206951 | 0          | NA         | NA         | NA         | NA |            |
| NA        | ENSG00000206952 | 0          | NA         | NA         | NA         | NA | SNORA50A   |
| NA        | ENSG00000206954 | 0          | NA         | NA         | NA         | NA | RNU6-1201P |
| NA        | ENSG00000206957 | 0          | NA         | NA         | NA         | NA |            |
| NA        | ENSG00000206958 | 0          | NA         | NA         | NA         | NA |            |
| NA        | ENSG00000206959 | 0          | NA         | NA         | NA         | NA |            |
| NA        | ENSG00000206960 | 0          | NA         | NA         | NA         | NA | RNU6-793P  |
| NA        | ENSG00000206961 | 0          | NA         | NA         | NA         | NA |            |
| NA        | ENSG00000206962 | 0          | NA         | NA         | NA         | NA | RNU6-74P   |
| NA        | ENSG00000206963 | 0          | NA         | NA         | NA         | NA | RNU6-675P  |
| NA        | ENSG00000206964 | 0          | NA         | NA         | NA         | NA |            |
| NA        | ENSG00000206965 | 0          | NA         | NA         | NA         | NA | RNU6-5P    |
| NA        | ENSG00000206967 | 0          | NA         | NA         | NA         | NA |            |
| NA        | ENSG00000206969 | 0          | NA         | NA         | NA         | NA | RNU6-1316P |
| NA        | ENSG00000206970 | 0          | NA         | NA         | NA         | NA | RNU6-474P  |
| NA        | ENSG00000206972 | 0          | NA         | NA         | NA         | NA | RNU6-17P   |
| NA        | ENSG00000206973 | 0          | NA         | NA         | NA         | NA | RNU6-1145P |
| NA        | ENSG00000206974 | 0          | NA         | NA         | NA         | NA | RNU6-1144P |
| NA        | ENSG00000206976 | 0          | NA         | NA         | NA         | NA |            |



|           |                 |            |             |            |            |    |            |
|-----------|-----------------|------------|-------------|------------|------------|----|------------|
| NA        | ENSG00000206977 | 0          | NA          | NA         | NA         | NA |            |
| NA        | ENSG00000206978 | 0          | NA          | NA         | NA         | NA |            |
| 26787     | ENSG00000206979 | 0          | NA          | NA         | NA         | NA | SNORD61    |
| NA        | ENSG00000206980 | 0          | NA          | NA         | NA         | NA | RNU6-662P  |
| NA        | ENSG00000206981 | 0          | NA          | NA         | NA         | NA | RNU6-40P   |
| NA        | ENSG00000206982 | 0          | NA          | NA         | NA         | NA |            |
| NA        | ENSG00000206983 | 0          | NA          | NA         | NA         | NA | RNU6-49P   |
| NA        | ENSG00000206985 | 0          | NA          | NA         | NA         | NA | RNU6-198P  |
| NA        | ENSG00000206987 | 0          | NA          | NA         | NA         | NA |            |
| 26785     | ENSG00000206989 | 0          | NA          | NA         | NA         | NA | SNORD63    |
| NA        | ENSG00000206990 | 0          | NA          | NA         | NA         | NA |            |
| NA        | ENSG00000206991 | 0          | NA          | NA         | NA         | NA | RNU6-610P  |
| NA        | ENSG00000206992 | 0          | NA          | NA         | NA         | NA | RNU6-574P  |
| NA        | ENSG00000206995 | 0          | NA          | NA         | NA         | NA |            |
| NA        | ENSG00000206996 | 0          | NA          | NA         | NA         | NA | RNU6-842P  |
| NA        | ENSG00000206997 | 0          | NA          | NA         | NA         | NA | RNU6-524P  |
| NA        | ENSG00000206998 | 0          | NA          | NA         | NA         | NA |            |
| NA        | ENSG00000206999 | 0          | NA          | NA         | NA         | NA | RNU6-622P  |
| NA        | ENSG00000207000 | 0          | NA          | NA         | NA         | NA | RNU6-820P  |
| NA        | ENSG00000207001 | 0          | NA          | NA         | NA         | NA | SNORD116-2 |
| NA        | ENSG00000207002 | 0          | NA          | NA         | NA         | NA |            |
| NA        | ENSG00000207003 | 0          | NA          | NA         | NA         | NA | RNU6-611P  |
| NA        | ENSG00000207004 | 0          | NA          | NA         | NA         | NA | RNU6-301P  |
| NA        | ENSG00000207007 | 0          | NA          | NA         | NA         | NA | RNU6-891P  |
| 677833    | ENSG00000207008 | 0          | NA          | NA         | NA         | NA | SNORA54    |
| NA        | ENSG00000207009 | 0          | NA          | NA         | NA         | NA |            |
| NA        | ENSG00000207010 | 0          | NA          | NA         | NA         | NA | RNU6-318P  |
| NA        | ENSG00000207011 | 0          | NA          | NA         | NA         | NA | RNY4P13    |
| NA        | ENSG00000207012 | 0          | NA          | NA         | NA         | NA | RNU6-72P   |
| NA        | ENSG00000207013 | 0          | NA          | NA         | NA         | NA | RNU6-804P  |
| NA        | ENSG00000207014 | 0          | NA          | NA         | NA         | NA | SNORD116-3 |
| 100124535 | ENSG00000207016 | 0          | NA          | NA         | NA         | NA | SNORA36C   |
| NA        | ENSG00000207019 | 0          | NA          | NA         | NA         | NA | RNU6-167P  |
| NA        | ENSG00000207020 | 0          | NA          | NA         | NA         | NA |            |
| NA        | ENSG00000207021 | 0          | NA          | NA         | NA         | NA |            |
| NA        | ENSG00000207022 | 0.14931947 | -0.01844332 | 0.38480212 | 0.84537521 | NA |            |
| NA        | ENSG00000207023 | 0          | NA          | NA         | NA         | NA | RNU6-975P  |
| NA        | ENSG00000207024 | 0          | NA          | NA         | NA         | NA |            |

|           |                 |   |    |    |    |    |            |
|-----------|-----------------|---|----|----|----|----|------------|
| NA        | ENSG00000207025 | 0 | NA | NA | NA | NA |            |
| NA        | ENSG00000207026 | 0 | NA | NA | NA | NA | RNU6-472P  |
| NA        | ENSG00000207027 | 0 | NA | NA | NA | NA |            |
| NA        | ENSG00000207029 | 0 | NA | NA | NA | NA | RNU6-43P   |
| 26789     | ENSG00000207031 | 0 | NA | NA | NA | NA | SNORD59A   |
| NA        | ENSG00000207032 | 0 | NA | NA | NA | NA |            |
| NA        | ENSG00000207033 | 0 | NA | NA | NA | NA | RNU6-154P  |
| NA        | ENSG00000207034 | 0 | NA | NA | NA | NA |            |
| NA        | ENSG00000207036 | 0 | NA | NA | NA | NA | RNY3P14    |
| NA        | ENSG00000207037 | 0 | NA | NA | NA | NA | RNU6-339P  |
| NA        | ENSG00000207039 | 0 | NA | NA | NA | NA |            |
| NA        | ENSG00000207042 | 0 | NA | NA | NA | NA | RNU6-196P  |
| NA        | ENSG00000207044 | 0 | NA | NA | NA | NA | RNU6-1226P |
| NA        | ENSG00000207045 | 0 | NA | NA | NA | NA | RNU6-532P  |
| NA        | ENSG00000207046 | 0 | NA | NA | NA | NA | RNU6-886P  |
| NA        | ENSG00000207047 | 0 | NA | NA | NA | NA | SNORD51    |
| NA        | ENSG00000207049 | 0 | NA | NA | NA | NA |            |
| 619499    | ENSG00000207051 | 0 | NA | NA | NA | NA | SNORA27    |
| NA        | ENSG00000207052 | 0 | NA | NA | NA | NA | RNU6-378P  |
| NA        | ENSG00000207053 | 0 | NA | NA | NA | NA | RNU6-937P  |
| NA        | ENSG00000207056 | 0 | NA | NA | NA | NA | RNU1-8P    |
| NA        | ENSG00000207058 | 0 | NA | NA | NA | NA | RNU6-784P  |
| NA        | ENSG00000207060 | 0 | NA | NA | NA | NA | RNU6-480P  |
| NA        | ENSG00000207061 | 0 | NA | NA | NA | NA |            |
| 109616962 | ENSG00000207062 | 0 | NA | NA | NA | NA | SNORA15B-1 |
| NA        | ENSG00000207063 | 0 | NA | NA | NA | NA | SNORD116-1 |
| NA        | ENSG00000207065 | 0 | NA | NA | NA | NA | RNU5A-2P   |
| 26775     | ENSG00000207067 | 0 | NA | NA | NA | NA | SNORA72    |
| NA        | ENSG00000207068 | 0 | NA | NA | NA | NA | RNU6-463P  |
| NA        | ENSG00000207069 | 0 | NA | NA | NA | NA |            |
| NA        | ENSG00000207071 | 0 | NA | NA | NA | NA | RNU6-1207P |
| NA        | ENSG00000207072 | 0 | NA | NA | NA | NA | RNU6-39P   |
| NA        | ENSG00000207073 | 0 | NA | NA | NA | NA |            |
| NA        | ENSG00000207075 | 0 | NA | NA | NA | NA |            |
| NA        | ENSG00000207076 | 0 | NA | NA | NA | NA | RNU6-1113P |
| NA        | ENSG00000207077 | 0 | NA | NA | NA | NA | RNU6-1119P |
| NA        | ENSG00000207080 | 0 | NA | NA | NA | NA |            |
| NA        | ENSG00000207081 | 0 | NA | NA | NA | NA | RNU6-616P  |

|           |                 |   |    |    |    |    |            |
|-----------|-----------------|---|----|----|----|----|------------|
| NA        | ENSG00000207082 | 0 | NA | NA | NA | NA | RNU6-171P  |
| NA        | ENSG00000207083 | 0 | NA | NA | NA | NA | RNU6-22P   |
| NA        | ENSG00000207084 | 0 | NA | NA | NA | NA |            |
| NA        | ENSG00000207086 | 0 | NA | NA | NA | NA |            |
| NA        | ENSG00000207087 | 0 | NA | NA | NA | NA | RNU6-242P  |
| 677797    | ENSG00000207088 | 0 | NA | NA | NA | NA | SNORA7B    |
| NA        | ENSG00000207089 | 0 | NA | NA | NA | NA | RNU6-921P  |
| NA        | ENSG00000207090 | 0 | NA | NA | NA | NA | RNU6-517P  |
| NA        | ENSG00000207091 | 0 | NA | NA | NA | NA |            |
| NA        | ENSG00000207092 | 0 | NA | NA | NA | NA |            |
| NA        | ENSG00000207093 | 0 | NA | NA | NA | NA | SNORD116-8 |
| NA        | ENSG00000207094 | 0 | NA | NA | NA | NA |            |
| NA        | ENSG00000207095 | 0 | NA | NA | NA | NA | RNU6-424P  |
| NA        | ENSG00000207097 | 0 | NA | NA | NA | NA | RNU6-614P  |
| NA        | ENSG00000207098 | 0 | NA | NA | NA | NA |            |
| NA        | ENSG00000207099 | 0 | NA | NA | NA | NA | RNU6-166P  |
| NA        | ENSG00000207100 | 0 | NA | NA | NA | NA |            |
| NA        | ENSG00000207101 | 0 | NA | NA | NA | NA |            |
| NA        | ENSG00000207104 | 0 | NA | NA | NA | NA | RNU6-434P  |
| NA        | ENSG00000207105 | 0 | NA | NA | NA | NA |            |
| NA        | ENSG00000207108 | 0 | NA | NA | NA | NA |            |
| 109617024 | ENSG00000207109 | 0 | NA | NA | NA | NA | SNORD38C   |
| NA        | ENSG00000207110 | 0 | NA | NA | NA | NA | RNVU1-32   |
| 684959    | ENSG00000207112 | 0 | NA | NA | NA | NA | SNORA25    |
| NA        | ENSG00000207113 | 0 | NA | NA | NA | NA | RNU6-16P   |
| NA        | ENSG00000207114 | 0 | NA | NA | NA | NA | RNU6-348P  |
| NA        | ENSG00000207115 | 0 | NA | NA | NA | NA | RNU6-364P  |
| NA        | ENSG00000207116 | 0 | NA | NA | NA | NA | RNU6-31P   |
| NA        | ENSG00000207117 | 0 | NA | NA | NA | NA |            |
| 85390     | ENSG00000207118 | 0 | NA | NA | NA | NA | SNORD14D   |
| NA        | ENSG00000207119 | 0 | NA | NA | NA | NA |            |
| NA        | ENSG00000207121 | 0 | NA | NA | NA | NA | RNU6-1230P |
| NA        | ENSG00000207122 | 0 | NA | NA | NA | NA | RNU6-591P  |
| NA        | ENSG00000207123 | 0 | NA | NA | NA | NA |            |
| NA        | ENSG00000207124 | 0 | NA | NA | NA | NA | RNU6-163P  |
| NA        | ENSG00000207127 | 0 | NA | NA | NA | NA |            |
| NA        | ENSG00000207128 | 0 | NA | NA | NA | NA | RNU6-729P  |
| NA        | ENSG00000207129 | 0 | NA | NA | NA | NA | RNA5SP187  |

|        |                 |   |    |    |    |    |             |
|--------|-----------------|---|----|----|----|----|-------------|
| NA     | ENSG00000207130 | 0 | NA | NA | NA | NA |             |
| NA     | ENSG00000207131 | 0 | NA | NA | NA | NA |             |
| NA     | ENSG00000207132 | 0 | NA | NA | NA | NA |             |
| NA     | ENSG00000207134 | 0 | NA | NA | NA | NA | RNU6-106P   |
| NA     | ENSG00000207135 | 0 | NA | NA | NA | NA | RNU6-452P   |
| NA     | ENSG00000207136 | 0 | NA | NA | NA | NA | RNU6-769P   |
| NA     | ENSG00000207137 | 0 | NA | NA | NA | NA | SNORD116-13 |
| NA     | ENSG00000207138 | 0 | NA | NA | NA | NA | RNU6-869P   |
| NA     | ENSG00000207139 | 0 | NA | NA | NA | NA |             |
| NA     | ENSG00000207142 | 0 | NA | NA | NA | NA |             |
| NA     | ENSG00000207144 | 0 | NA | NA | NA | NA | RNU6-1297P  |
| 677805 | ENSG00000207145 | 0 | NA | NA | NA | NA | SNORA18     |
| NA     | ENSG00000207146 | 0 | NA | NA | NA | NA |             |
| NA     | ENSG00000207147 | 0 | NA | NA | NA | NA |             |
| NA     | ENSG00000207148 | 0 | NA | NA | NA | NA |             |
| NA     | ENSG00000207149 | 0 | NA | NA | NA | NA | RNU6-465P   |
| NA     | ENSG00000207150 | 0 | NA | NA | NA | NA | RNU6-185P   |
| NA     | ENSG00000207151 | 0 | NA | NA | NA | NA |             |
| NA     | ENSG00000207153 | 0 | NA | NA | NA | NA | RNU6-933P   |
| NA     | ENSG00000207154 | 0 | NA | NA | NA | NA | RNU1-46P    |
| NA     | ENSG00000207155 | 0 | NA | NA | NA | NA | RNY1P14     |
| NA     | ENSG00000207156 | 0 | NA | NA | NA | NA | RNU6-505P   |
| NA     | ENSG00000207157 | 0 | NA | NA | NA | NA | RNY3P4      |
| NA     | ENSG00000207158 | 0 | NA | NA | NA | NA | RNU6-929P   |
| NA     | ENSG00000207160 | 0 | NA | NA | NA | NA | RNU6-1289P  |
| NA     | ENSG00000207161 | 0 | NA | NA | NA | NA |             |
| NA     | ENSG00000207162 | 0 | NA | NA | NA | NA | RNU6-549P   |
| NA     | ENSG00000207163 | 0 | NA | NA | NA | NA | RNU6-905P   |
| NA     | ENSG00000207164 | 0 | NA | NA | NA | NA |             |
| 26778  | ENSG00000207165 | 0 | NA | NA | NA | NA | SNORA70     |
| 26780  | ENSG00000207166 | 0 | NA | NA | NA | NA | SNORA68     |
| NA     | ENSG00000207167 | 0 | NA | NA | NA | NA | RNU6-1340P  |
| 677803 | ENSG00000207168 | 0 | NA | NA | NA | NA | SNORA15     |
| NA     | ENSG00000207169 | 0 | NA | NA | NA | NA | RNU6-24P    |
| NA     | ENSG00000207170 | 0 | NA | NA | NA | NA | RNU6-1215P  |
| NA     | ENSG00000207171 | 0 | NA | NA | NA | NA |             |
| NA     | ENSG00000207172 | 0 | NA | NA | NA | NA | RNU6-1162P  |
| NA     | ENSG00000207173 | 0 | NA | NA | NA | NA |             |

|           |                 |            |             |            |            |    |             |
|-----------|-----------------|------------|-------------|------------|------------|----|-------------|
| NA        | ENSG00000207174 | 0          | NA          | NA         | NA         | NA | SNORD116-15 |
| NA        | ENSG00000207175 | 0          | NA          | NA         | NA         | NA | RNU1-67P    |
| NA        | ENSG00000207176 | 0          | NA          | NA         | NA         | NA |             |
| NA        | ENSG00000207177 | 0          | NA          | NA         | NA         | NA |             |
| NA        | ENSG00000207178 | 0          | NA          | NA         | NA         | NA | RNU6-1122P  |
| NA        | ENSG00000207180 | 0          | NA          | NA         | NA         | NA | RNU6-411P   |
| 677802    | ENSG00000207181 | 0          | NA          | NA         | NA         | NA | SNORA14B    |
| NA        | ENSG00000207182 | 0          | NA          | NA         | NA         | NA | RNU1-44P    |
| NA        | ENSG00000207183 | 0          | NA          | NA         | NA         | NA | RNU6-843P   |
| NA        | ENSG00000207185 | 0          | NA          | NA         | NA         | NA | RNU6-1157P  |
| NA        | ENSG00000207186 | 0          | NA          | NA         | NA         | NA | RNA5SP122   |
| 109616960 | ENSG00000207187 | 0          | NA          | NA         | NA         | NA | SNORA10B    |
| NA        | ENSG00000207189 | 0          | NA          | NA         | NA         | NA |             |
| NA        | ENSG00000207190 | 0          | NA          | NA         | NA         | NA | RNU6-809P   |
| NA        | ENSG00000207191 | 0          | NA          | NA         | NA         | NA | SNORD116-5  |
| NA        | ENSG00000207192 | 0          | NA          | NA         | NA         | NA | RNU6-649P   |
| NA        | ENSG00000207193 | 0          | NA          | NA         | NA         | NA |             |
| NA        | ENSG00000207194 | 0          | NA          | NA         | NA         | NA | RNU6-1026P  |
| NA        | ENSG00000207195 | 0          | NA          | NA         | NA         | NA |             |
| NA        | ENSG00000207196 | 0          | NA          | NA         | NA         | NA |             |
| NA        | ENSG00000207197 | 0          | NA          | NA         | NA         | NA | SNORD116-12 |
| NA        | ENSG00000207198 | 0          | NA          | NA         | NA         | NA | RNU6-1195P  |
| 109616979 | ENSG00000207199 | 0          | NA          | NA         | NA         | NA |             |
| NA        | ENSG00000207200 | 0          | NA          | NA         | NA         | NA | RNU6-45P    |
| NA        | ENSG00000207201 | 0          | NA          | NA         | NA         | NA | RNU1-148P   |
| NA        | ENSG00000207202 | 0          | NA          | NA         | NA         | NA | RNU6-800P   |
| NA        | ENSG00000207203 | 0          | NA          | NA         | NA         | NA | RNU6-71P    |
| NA        | ENSG00000207204 | 0          | NA          | NA         | NA         | NA | RNU6-393P   |
| 101954267 | ENSG00000207205 | 0.16735865 | 0.01897177  | 0.38482933 | 0.78225479 | NA | RNVU1-15    |
| NA        | ENSG00000207206 | 0          | NA          | NA         | NA         | NA | RNU6-1035P  |
| NA        | ENSG00000207207 | 0          | NA          | NA         | NA         | NA |             |
| NA        | ENSG00000207208 | 0          | NA          | NA         | NA         | NA | RNU6-790P   |
| NA        | ENSG00000207209 | 0          | NA          | NA         | NA         | NA |             |
| NA        | ENSG00000207210 | 0          | NA          | NA         | NA         | NA |             |
| NA        | ENSG00000207214 | 0          | NA          | NA         | NA         | NA | RNU6-102P   |
| 109617016 | ENSG00000207215 | 0          | NA          | NA         | NA         | NA | SNORD3H     |
| 109616999 | ENSG00000207217 | 0.173124   | -0.01911262 | 0.38486262 | 0.84537521 | NA | SNORA80D    |
| NA        | ENSG00000207218 | 0          | NA          | NA         | NA         | NA |             |

|           |    |                 |   |    |    |    |    |             |
|-----------|----|-----------------|---|----|----|----|----|-------------|
|           | NA | ENSG00000207220 | 0 | NA | NA | NA | NA | RNU1-57P    |
| 100379250 | NA | ENSG00000207221 | 0 | NA | NA | NA | NA | SNORA70E    |
|           | NA | ENSG00000207222 | 0 | NA | NA | NA | NA | RNU6-456P   |
|           | NA | ENSG00000207223 | 0 | NA | NA | NA | NA |             |
|           | NA | ENSG00000207225 | 0 | NA | NA | NA | NA | RNU6-692P   |
|           | NA | ENSG00000207227 | 0 | NA | NA | NA | NA | RNU6-900P   |
|           | NA | ENSG00000207229 | 0 | NA | NA | NA | NA |             |
|           | NA | ENSG00000207231 | 0 | NA | NA | NA | NA |             |
| 677819    | NA | ENSG00000207233 | 0 | NA | NA | NA | NA | SNORA37     |
|           | NA | ENSG00000207234 | 0 | NA | NA | NA | NA | RNU6-125P   |
|           | NA | ENSG00000207235 | 0 | NA | NA | NA | NA |             |
|           | NA | ENSG00000207237 | 0 | NA | NA | NA | NA | RNU6-110P   |
|           | NA | ENSG00000207240 | 0 | NA | NA | NA | NA |             |
| 26805     | NA | ENSG00000207241 | 0 | NA | NA | NA | NA | SNORD45A    |
|           | NA | ENSG00000207242 | 0 | NA | NA | NA | NA | RNU6-1065P  |
|           | NA | ENSG00000207243 | 0 | NA | NA | NA | NA |             |
|           | NA | ENSG00000207244 | 0 | NA | NA | NA | NA |             |
|           | NA | ENSG00000207245 | 0 | NA | NA | NA | NA | SNORD116-29 |
|           | NA | ENSG00000207247 | 0 | NA | NA | NA | NA |             |
|           | NA | ENSG00000207248 | 0 | NA | NA | NA | NA | RNU6-1005P  |
|           | NA | ENSG00000207249 | 0 | NA | NA | NA | NA |             |
|           | NA | ENSG00000207251 | 0 | NA | NA | NA | NA | RNU6-342P   |
|           | NA | ENSG00000207252 | 0 | NA | NA | NA | NA |             |
|           | NA | ENSG00000207255 | 0 | NA | NA | NA | NA | RNU6-1117P  |
|           | NA | ENSG00000207256 | 0 | NA | NA | NA | NA | RNU6-880P   |
|           | NA | ENSG00000207258 | 0 | NA | NA | NA | NA |             |
|           | NA | ENSG00000207260 | 0 | NA | NA | NA | NA | RNU6-35P    |
|           | NA | ENSG00000207261 | 0 | NA | NA | NA | NA | RNU6-738P   |
|           | NA | ENSG00000207263 | 0 | NA | NA | NA | NA | SNORD116-16 |
|           | NA | ENSG00000207264 | 0 | NA | NA | NA | NA | RNU6-15P    |
|           | NA | ENSG00000207265 | 0 | NA | NA | NA | NA |             |
|           | NA | ENSG00000207266 | 0 | NA | NA | NA | NA | RNU6-1241P  |
|           | NA | ENSG00000207267 | 0 | NA | NA | NA | NA | RNU6-1081P  |
| 100124538 | NA | ENSG00000207268 | 0 | NA | NA | NA | NA | SNORA70C    |
|           | NA | ENSG00000207269 | 0 | NA | NA | NA | NA | RN7SKP62    |
|           | NA | ENSG00000207270 | 0 | NA | NA | NA | NA | RNU6-601P   |
|           | NA | ENSG00000207271 | 0 | NA | NA | NA | NA |             |
| 109617008 | NA | ENSG00000207274 | 0 | NA | NA | NA | NA | SNORA70I    |

|        |                 |   |    |    |    |    |             |
|--------|-----------------|---|----|----|----|----|-------------|
| NA     | ENSG00000207275 | 0 | NA | NA | NA | NA | RNU6-441P   |
| NA     | ENSG00000207276 | 0 | NA | NA | NA | NA | RNU6-1160P  |
| NA     | ENSG00000207277 | 0 | NA | NA | NA | NA | RNA5SP284   |
| NA     | ENSG00000207278 | 0 | NA | NA | NA | NA | RNU6-831P   |
| NA     | ENSG00000207279 | 0 | NA | NA | NA | NA | SNORD116-24 |
| 6082   | ENSG00000207280 | 0 | NA | NA | NA | NA | SNORD20     |
| NA     | ENSG00000207281 | 0 | NA | NA | NA | NA |             |
| NA     | ENSG00000207282 | 0 | NA | NA | NA | NA |             |
| NA     | ENSG00000207283 | 0 | NA | NA | NA | NA |             |
| NA     | ENSG00000207286 | 0 | NA | NA | NA | NA |             |
| NA     | ENSG00000207287 | 0 | NA | NA | NA | NA | RNU6-1274P  |
| NA     | ENSG00000207290 | 0 | NA | NA | NA | NA |             |
| NA     | ENSG00000207291 | 0 | NA | NA | NA | NA | RNU6-30P    |
| NA     | ENSG00000207292 | 0 | NA | NA | NA | NA |             |
| NA     | ENSG00000207293 | 0 | NA | NA | NA | NA |             |
| NA     | ENSG00000207295 | 0 | NA | NA | NA | NA | RNU6-851P   |
| NA     | ENSG00000207296 | 0 | NA | NA | NA | NA | RNU6-140P   |
| 692076 | ENSG00000207297 | 0 | NA | NA | NA | NA | SNORD7      |
| NA     | ENSG00000207298 | 0 | NA | NA | NA | NA | RNU6-83P    |
| NA     | ENSG00000207299 | 0 | NA | NA | NA | NA |             |
| NA     | ENSG00000207300 | 0 | NA | NA | NA | NA |             |
| NA     | ENSG00000207302 | 0 | NA | NA | NA | NA |             |
| NA     | ENSG00000207303 | 0 | NA | NA | NA | NA |             |
| 654320 | ENSG00000207304 | 0 | NA | NA | NA | NA | SNORA8      |
| NA     | ENSG00000207305 | 0 | NA | NA | NA | NA |             |
| NA     | ENSG00000207306 | 0 | NA | NA | NA | NA | RNU6-1152P  |
| NA     | ENSG00000207307 | 0 | NA | NA | NA | NA | RNU6-145P   |
| NA     | ENSG00000207308 | 0 | NA | NA | NA | NA | RNU6-878P   |
| NA     | ENSG00000207309 | 0 | NA | NA | NA | NA | RNU4-70P    |
| NA     | ENSG00000207310 | 0 | NA | NA | NA | NA | RNU6-1127P  |
| NA     | ENSG00000207312 | 0 | NA | NA | NA | NA | RNU6-429P   |
| 677794 | ENSG00000207313 | 0 | NA | NA | NA | NA | SNORA2B     |
| NA     | ENSG00000207316 | 0 | NA | NA | NA | NA |             |
| NA     | ENSG00000207317 | 0 | NA | NA | NA | NA |             |
| NA     | ENSG00000207318 | 0 | NA | NA | NA | NA | RNU6-1184P  |
| NA     | ENSG00000207319 | 0 | NA | NA | NA | NA |             |
| NA     | ENSG00000207320 | 0 | NA | NA | NA | NA |             |
| NA     | ENSG00000207321 | 0 | NA | NA | NA | NA | RNU6-160P   |

|           |                 |   |    |    |    |    |            |
|-----------|-----------------|---|----|----|----|----|------------|
| NA        | ENSG00000207322 | 0 | NA | NA | NA | NA | RNU1-89P   |
| NA        | ENSG00000207323 | 0 | NA | NA | NA | NA | RNU6-901P  |
| NA        | ENSG00000207325 | 0 | NA | NA | NA | NA | RNY1P4     |
| NA        | ENSG00000207326 | 0 | NA | NA | NA | NA |            |
| NA        | ENSG00000207327 | 0 | NA | NA | NA | NA | RNU6-883P  |
| NA        | ENSG00000207328 | 0 | NA | NA | NA | NA | RNU6-636P  |
| NA        | ENSG00000207329 | 0 | NA | NA | NA | NA |            |
| NA        | ENSG00000207330 | 0 | NA | NA | NA | NA | RNU6-73P   |
| NA        | ENSG00000207331 | 0 | NA | NA | NA | NA | RNU6-1263P |
| NA        | ENSG00000207332 | 0 | NA | NA | NA | NA | RNU6-146P  |
| NA        | ENSG00000207333 | 0 | NA | NA | NA | NA | RNU6-680P  |
| NA        | ENSG00000207336 | 0 | NA | NA | NA | NA | RNU6-658P  |
| NA        | ENSG00000207338 | 0 | NA | NA | NA | NA | RNU6-296P  |
| 101954273 | ENSG00000207340 | 0 | NA | NA | NA | NA | RNVU1-1    |
| NA        | ENSG00000207341 | 0 | NA | NA | NA | NA | RNA5SP64   |
| NA        | ENSG00000207342 | 0 | NA | NA | NA | NA |            |
| NA        | ENSG00000207343 | 0 | NA | NA | NA | NA | RNU6-225P  |
| 109616965 | ENSG00000207344 | 0 | NA | NA | NA | NA | SNORA22C   |
| NA        | ENSG00000207345 | 0 | NA | NA | NA | NA | RNU6-1222P |
| NA        | ENSG00000207347 | 0 | NA | NA | NA | NA | RNU6-306P  |
| 101954269 | ENSG00000207349 | 0 | NA | NA | NA | NA | RNVU1-17   |
| NA        | ENSG00000207351 | 0 | NA | NA | NA | NA |            |
| NA        | ENSG00000207352 | 0 | NA | NA | NA | NA | RNU6-540P  |
| NA        | ENSG00000207355 | 0 | NA | NA | NA | NA | RNU6-1257P |
| NA        | ENSG00000207356 | 0 | NA | NA | NA | NA |            |
| NA        | ENSG00000207359 | 0 | NA | NA | NA | NA | RNU6-925P  |
| NA        | ENSG00000207360 | 0 | NA | NA | NA | NA | RNU6-14P   |
| NA        | ENSG00000207361 | 0 | NA | NA | NA | NA | RNU6-178P  |
| NA        | ENSG00000207362 | 0 | NA | NA | NA | NA | RNU6-422P  |
| NA        | ENSG00000207363 | 0 | NA | NA | NA | NA |            |
| NA        | ENSG00000207364 | 0 | NA | NA | NA | NA | RNU6-939P  |
| NA        | ENSG00000207365 | 0 | NA | NA | NA | NA |            |
| NA        | ENSG00000207366 | 0 | NA | NA | NA | NA | RNU6-297P  |
| NA        | ENSG00000207367 | 0 | NA | NA | NA | NA | RNU6-29P   |
| NA        | ENSG00000207368 | 0 | NA | NA | NA | NA |            |
| NA        | ENSG00000207369 | 0 | NA | NA | NA | NA | RNU6-665P  |
| NA        | ENSG00000207370 | 0 | NA | NA | NA | NA |            |
| NA        | ENSG00000207371 | 0 | NA | NA | NA | NA |            |



|        |                 |   |    |    |    |    |             |
|--------|-----------------|---|----|----|----|----|-------------|
| NA     | ENSG00000207375 | 0 | NA | NA | NA | NA | SNORD116-23 |
| NA     | ENSG00000207378 | 0 | NA | NA | NA | NA | RNU6-748P   |
| NA     | ENSG00000207379 | 0 | NA | NA | NA | NA |             |
| NA     | ENSG00000207380 | 0 | NA | NA | NA | NA |             |
| NA     | ENSG00000207381 | 0 | NA | NA | NA | NA | RNU6-950P   |
| NA     | ENSG00000207382 | 0 | NA | NA | NA | NA |             |
| NA     | ENSG00000207383 | 0 | NA | NA | NA | NA |             |
| NA     | ENSG00000207384 | 0 | NA | NA | NA | NA |             |
| NA     | ENSG00000207385 | 0 | NA | NA | NA | NA | RNU6-310P   |
| NA     | ENSG00000207386 | 0 | NA | NA | NA | NA |             |
| NA     | ENSG00000207387 | 0 | NA | NA | NA | NA |             |
| NA     | ENSG00000207391 | 0 | NA | NA | NA | NA |             |
| 677806 | ENSG00000207392 | 0 | NA | NA | NA | NA | SNORA20     |
| NA     | ENSG00000207393 | 0 | NA | NA | NA | NA | RNU6-136P   |
| NA     | ENSG00000207394 | 0 | NA | NA | NA | NA | RNU6-1060P  |
| NA     | ENSG00000207395 | 0 | NA | NA | NA | NA |             |
| NA     | ENSG00000207397 | 0 | NA | NA | NA | NA | RNU6-1179P  |
| NA     | ENSG00000207399 | 0 | NA | NA | NA | NA | RNU6-1011P  |
| NA     | ENSG00000207401 | 0 | NA | NA | NA | NA |             |
| NA     | ENSG00000207402 | 0 | NA | NA | NA | NA | RNU6-959P   |
| NA     | ENSG00000207403 | 0 | NA | NA | NA | NA |             |
| NA     | ENSG00000207404 | 0 | NA | NA | NA | NA |             |
| 26784  | ENSG00000207405 | 0 | NA | NA | NA | NA | SNORA64     |
| 619569 | ENSG00000207406 | 0 | NA | NA | NA | NA | SNORA41     |
| NA     | ENSG00000207407 | 0 | NA | NA | NA | NA |             |
| NA     | ENSG00000207408 | 0 | NA | NA | NA | NA |             |
| NA     | ENSG00000207410 | 0 | NA | NA | NA | NA |             |
| NA     | ENSG00000207411 | 0 | NA | NA | NA | NA |             |
| NA     | ENSG00000207412 | 0 | NA | NA | NA | NA | RNU6-455P   |
| NA     | ENSG00000207414 | 0 | NA | NA | NA | NA | RNU6-768P   |
| NA     | ENSG00000207415 | 0 | NA | NA | NA | NA | RNU6-1151P  |
| NA     | ENSG00000207416 | 0 | NA | NA | NA | NA |             |
| NA     | ENSG00000207417 | 0 | NA | NA | NA | NA |             |
| NA     | ENSG00000207419 | 0 | NA | NA | NA | NA |             |
| NA     | ENSG00000207420 | 0 | NA | NA | NA | NA |             |
| NA     | ENSG00000207421 | 0 | NA | NA | NA | NA | SNORD38B    |
| NA     | ENSG00000207422 | 0 | NA | NA | NA | NA | RNU6-813P   |
| NA     | ENSG00000207425 | 0 | NA | NA | NA | NA |             |

|        |                 |   |    |    |    |    |            |
|--------|-----------------|---|----|----|----|----|------------|
| NA     | ENSG00000207426 | 0 | NA | NA | NA | NA |            |
| NA     | ENSG00000207428 | 0 | NA | NA | NA | NA | RNU6-95P   |
| NA     | ENSG00000207431 | 0 | NA | NA | NA | NA | RNU6-906P  |
| NA     | ENSG00000207432 | 0 | NA | NA | NA | NA |            |
| NA     | ENSG00000207433 | 0 | NA | NA | NA | NA | RNU6-246P  |
| NA     | ENSG00000207434 | 0 | NA | NA | NA | NA | RNU6-1072P |
| NA     | ENSG00000207435 | 0 | NA | NA | NA | NA | RNU6-114P  |
| NA     | ENSG00000207438 | 0 | NA | NA | NA | NA |            |
| NA     | ENSG00000207439 | 0 | NA | NA | NA | NA |            |
| NA     | ENSG00000207440 | 0 | NA | NA | NA | NA | RNU6-541P  |
| NA     | ENSG00000207441 | 0 | NA | NA | NA | NA | RNU6-21P   |
| NA     | ENSG00000207442 | 0 | NA | NA | NA | NA | SNORD116-6 |
| NA     | ENSG00000207443 | 0 | NA | NA | NA | NA | RNU6-417P  |
| 319139 | ENSG00000207444 | 0 | NA | NA | NA | NA | SNORD56B   |
| 114599 | ENSG00000207445 | 0 | NA | NA | NA | NA | SNORD15B   |
| NA     | ENSG00000207448 | 0 | NA | NA | NA | NA | RNU6-520P  |
| NA     | ENSG00000207449 | 0 | NA | NA | NA | NA | RNU6-19P   |
| NA     | ENSG00000207450 | 0 | NA | NA | NA | NA |            |
| NA     | ENSG00000207451 | 0 | NA | NA | NA | NA | RNU6-291P  |
| NA     | ENSG00000207452 | 0 | NA | NA | NA | NA | RNU6-606P  |
| NA     | ENSG00000207453 | 0 | NA | NA | NA | NA | RNU6-535P  |
| NA     | ENSG00000207454 | 0 | NA | NA | NA | NA | RNU6-1104P |
| NA     | ENSG00000207455 | 0 | NA | NA | NA | NA | RNU6-331P  |
| NA     | ENSG00000207456 | 0 | NA | NA | NA | NA | RNU6-997P  |
| NA     | ENSG00000207457 | 0 | NA | NA | NA | NA | RNU6-476P  |
| NA     | ENSG00000207458 | 0 | NA | NA | NA | NA | RNY3P9     |
| NA     | ENSG00000207459 | 0 | NA | NA | NA | NA | RNU6-1311P |
| NA     | ENSG00000207461 | 0 | NA | NA | NA | NA | RNU6-253P  |
| NA     | ENSG00000207462 | 0 | NA | NA | NA | NA | RNU6-376P  |
| NA     | ENSG00000207466 | 0 | NA | NA | NA | NA |            |
| NA     | ENSG00000207467 | 0 | NA | NA | NA | NA |            |
| 641451 | ENSG00000207468 | 0 | NA | NA | NA | NA | SNORA19    |
| NA     | ENSG00000207472 | 0 | NA | NA | NA | NA | RNU6-41P   |
| NA     | ENSG00000207473 | 0 | NA | NA | NA | NA |            |
| NA     | ENSG00000207474 | 0 | NA | NA | NA | NA | RNY1P7     |
| 677823 | ENSG00000207475 | 0 | NA | NA | NA | NA | SNORA80E   |
| NA     | ENSG00000207476 | 0 | NA | NA | NA | NA | RNU6-286P  |
| NA     | ENSG00000207480 | 0 | NA | NA | NA | NA |            |

|           |                 |   |    |    |    |    |            |
|-----------|-----------------|---|----|----|----|----|------------|
| NA        | ENSG00000207481 | 0 | NA | NA | NA | NA |            |
| NA        | ENSG00000207483 | 0 | NA | NA | NA | NA | RNU6-1067P |
| NA        | ENSG00000207484 | 0 | NA | NA | NA | NA |            |
| NA        | ENSG00000207486 | 0 | NA | NA | NA | NA | RNU6-1044P |
| NA        | ENSG00000207488 | 0 | NA | NA | NA | NA |            |
| NA        | ENSG00000207490 | 0 | NA | NA | NA | NA | RNU6-987P  |
| NA        | ENSG00000207492 | 0 | NA | NA | NA | NA | RNU6-713P  |
| 677827    | ENSG00000207493 | 0 | NA | NA | NA | NA | SNORA46    |
| NA        | ENSG00000207494 | 0 | NA | NA | NA | NA |            |
| NA        | ENSG00000207495 | 0 | NA | NA | NA | NA | RNY3P10    |
| 619563    | ENSG00000207496 | 0 | NA | NA | NA | NA | SNORA7A    |
| NA        | ENSG00000207497 | 0 | NA | NA | NA | NA |            |
| NA        | ENSG00000207499 | 0 | NA | NA | NA | NA |            |
| 26771     | ENSG00000207500 | 0 | NA | NA | NA | NA | SNORD102   |
| 101954266 | ENSG00000207501 | 0 | NA | NA | NA | NA | RNVU1-14   |
| NA        | ENSG00000207502 | 0 | NA | NA | NA | NA |            |
| NA        | ENSG00000207503 | 0 | NA | NA | NA | NA |            |
| NA        | ENSG00000207504 | 0 | NA | NA | NA | NA | RNU6-1031P |
| NA        | ENSG00000207505 | 0 | NA | NA | NA | NA | RNU6-1105P |
| NA        | ENSG00000207508 | 0 | NA | NA | NA | NA | RNU6-1237P |
| NA        | ENSG00000207512 | 0 | NA | NA | NA | NA |            |
| NA        | ENSG00000207515 | 0 | NA | NA | NA | NA | RNU6-555P  |
| 109617005 | ENSG00000207516 | 0 | NA | NA | NA | NA | SNORA41B   |
| NA        | ENSG00000207518 | 0 | NA | NA | NA | NA | RNU6-59P   |
| 26782     | ENSG00000207523 | 0 | NA | NA | NA | NA | SNORA66    |
| NA        | ENSG00000207524 | 0 | NA | NA | NA | NA | RNU6-33P   |
| NA        | ENSG00000207525 | 0 | NA | NA | NA | NA |            |
| 693129    | ENSG00000207546 | 0 | NA | NA | NA | NA | MIR548C    |
| 407014    | ENSG00000207547 | 0 | NA | NA | NA | NA | MIR25      |
| 406999    | ENSG00000207548 | 0 | NA | NA | NA | NA | MIR217     |
| 574481    | ENSG00000207549 | 0 | NA | NA | NA | NA | MIR521-2   |
| 407056    | ENSG00000207550 | 0 | NA | NA | NA | NA | MIR99B     |
| 693193    | ENSG00000207551 | 0 | NA | NA | NA | NA | MIR608     |
| 693218    | ENSG00000207552 | 0 | NA | NA | NA | NA | MIR633     |
| 693232    | ENSG00000207554 | 0 | NA | NA | NA | NA | MIR647     |
| 693163    | ENSG00000207559 | 0 | NA | NA | NA | NA | MIR578     |
| 693220    | ENSG00000207561 | 0 | NA | NA | NA | NA | MIR635     |
| 407042    | ENSG00000207562 | 0 | NA | NA | NA | NA | MIR34C     |

|           |                 |   |    |    |    |    |          |
|-----------|-----------------|---|----|----|----|----|----------|
| 407011    | ENSG00000207563 | 0 | NA | NA | NA | NA | MIR23B   |
| 406986    | ENSG00000207568 | 0 | NA | NA | NA | NA | MIR203A  |
| 574034    | ENSG00000207569 | 0 | NA | NA | NA | NA | MIR433   |
| 693200    | ENSG00000207571 | 0 | NA | NA | NA | NA | MIR615   |
| 693134    | ENSG00000207573 | 0 | NA | NA | NA | NA | MIR550A2 |
| 724031    | ENSG00000207574 | 0 | NA | NA | NA | NA | MIR661   |
| 693234    | ENSG00000207575 | 0 | NA | NA | NA | NA | MIR649   |
| 693172    | ENSG00000207577 | 0 | NA | NA | NA | NA | MIR587   |
| 693168    | ENSG00000207578 | 0 | NA | NA | NA | NA | MIR583   |
| 724032    | ENSG00000207579 | 0 | NA | NA | NA | NA | MIR662   |
| 574468    | ENSG00000207580 | 0 | NA | NA | NA | NA | MIR526B  |
| 406978    | ENSG00000207581 | 0 | NA | NA | NA | NA | MIR199B  |
| 407030    | ENSG00000207582 | 0 | NA | NA | NA | NA | MIR30B   |
| 693191    | ENSG00000207583 | 0 | NA | NA | NA | NA | MIR606   |
| 574457    | ENSG00000207585 | 0 | NA | NA | NA | NA | MIR181D  |
| 406926    | ENSG00000207586 | 0 | NA | NA | NA | NA | MIR135A2 |
| 664613    | ENSG00000207587 | 0 | NA | NA | NA | NA | MIR544A  |
| 693178    | ENSG00000207588 | 0 | NA | NA | NA | NA | MIR593   |
| 574513    | ENSG00000207589 | 0 | NA | NA | NA | NA | MIR508   |
| 406997    | ENSG00000207590 | 0 | NA | NA | NA | NA | MIR215   |
| 574467    | ENSG00000207594 | 0 | NA | NA | NA | NA | MIR520A  |
| 406954    | ENSG00000207595 | 0 | NA | NA | NA | NA | MIR181A2 |
| 574443    | ENSG00000207597 | 0 | NA | NA | NA | NA | MIR490   |
| 406909    | ENSG00000207598 | 0 | NA | NA | NA | NA | MIR124-3 |
| 574461    | ENSG00000207599 | 0 | NA | NA | NA | NA | MIR520E  |
| 693183    | ENSG00000207600 | 0 | NA | NA | NA | NA | MIR598   |
| 406989    | ENSG00000207604 | 0 | NA | NA | NA | NA | MIR206   |
| 406966    | ENSG00000207605 | 0 | NA | NA | NA | NA | MIR191   |
| 693139    | ENSG00000207606 | 0 | NA | NA | NA | NA | MIR554   |
| 406983    | ENSG00000207607 | 0 | NA | NA | NA | NA | MIR200A  |
| 406914    | ENSG00000207608 | 0 | NA | NA | NA | NA | MIR127   |
| 574444    | ENSG00000207609 | 0 | NA | NA | NA | NA | MIR491   |
| 406941    | ENSG00000207611 | 0 | NA | NA | NA | NA | MIR149   |
| 693189    | ENSG00000207612 | 0 | NA | NA | NA | NA | MIR604   |
| 406957    | ENSG00000207613 | 0 | NA | NA | NA | NA | MIR181C  |
| 406968    | ENSG00000207614 | 0 | NA | NA | NA | NA | MIR193A  |
| 574462    | ENSG00000207616 | 0 | NA | NA | NA | NA | MIR515-1 |
| 100422842 | ENSG00000207617 | 0 | NA | NA | NA | NA | MIR3074  |

|           |                 |   |    |    |    |    |           |
|-----------|-----------------|---|----|----|----|----|-----------|
| 693170    | ENSG00000207619 | 0 | NA | NA | NA | NA | MIR585    |
| 574499    | ENSG00000207620 | 0 | NA | NA | NA | NA | MIR516A2  |
| 693204    | ENSG00000207622 | 0 | NA | NA | NA | NA | MIR619    |
| 406969    | ENSG00000207624 | 0 | NA | NA | NA | NA | MIR194-1  |
| 406916    | ENSG00000207625 | 0 | NA | NA | NA | NA | MIR128-2  |
| 693147    | ENSG00000207626 | 0 | NA | NA | NA | NA | MIR562    |
| 693166    | ENSG00000207627 | 0 | NA | NA | NA | NA | MIR581    |
| 723779    | ENSG00000207628 | 0 | NA | NA | NA | NA | MIR651    |
| 574475    | ENSG00000207629 | 0 | NA | NA | NA | NA | MIR526A1  |
| 407045    | ENSG00000207630 | 0 | NA | NA | NA | NA | MIR7-3    |
| 693226    | ENSG00000207631 | 0 | NA | NA | NA | NA | MIR641    |
| 693173    | ENSG00000207632 | 0 | NA | NA | NA | NA | MIR588    |
| 574508    | ENSG00000207633 | 0 | NA | NA | NA | NA | MIR505    |
| 574494    | ENSG00000207634 | 0 | NA | NA | NA | NA | MIR521-1  |
| 574501    | ENSG00000207635 | 0 | NA | NA | NA | NA | MIR499A   |
| 693180    | ENSG00000207637 | 0 | NA | NA | NA | NA | MIR595    |
| 407055    | ENSG00000207638 | 0 | NA | NA | NA | NA | MIR99A    |
| 574455    | ENSG00000207639 | 0 | NA | NA | NA | NA | MIR193B   |
| 574515    | ENSG00000207641 | 0 | NA | NA | NA | NA | MIR510    |
| 693156    | ENSG00000207642 | 0 | NA | NA | NA | NA | MIR571    |
| 574459    | ENSG00000207644 | 0 | NA | NA | NA | NA | MIR512-2  |
| 574458    | ENSG00000207645 | 0 | NA | NA | NA | NA | MIR512-1  |
| 724025    | ENSG00000207646 | 0 | NA | NA | NA | NA | MIR655    |
| 406944    | ENSG00000207647 | 0 | NA | NA | NA | NA | MIR153-1  |
| 406930    | ENSG00000207649 | 0 | NA | NA | NA | NA | MIR138-2  |
| 693155    | ENSG00000207650 | 0 | NA | NA | NA | NA | MIR570    |
| 407020    | ENSG00000207651 | 0 | NA | NA | NA | NA | MIR28     |
| 693206    | ENSG00000207652 | 0 | NA | NA | NA | NA | MIR621    |
| 693143    | ENSG00000207653 | 0 | NA | NA | NA | NA | MIR558    |
| 406915    | ENSG00000207654 | 0 | NA | NA | NA | NA | MIR128-1  |
| 574442    | ENSG00000207656 | 0 | NA | NA | NA | NA | MIR489    |
| 100500895 | ENSG00000207688 | 0 | NA | NA | NA | NA | MIR548AA2 |
| 693126    | ENSG00000207689 | 0 | NA | NA | NA | NA | MIR548A2  |
| 406959    | ENSG00000207691 | 0 | NA | NA | NA | NA | MIR183    |
| 693177    | ENSG00000207692 | 0 | NA | NA | NA | NA | MIR592    |
| 693187    | ENSG00000207693 | 0 | NA | NA | NA | NA | MIR602    |
| 406960    | ENSG00000207695 | 0 | NA | NA | NA | NA | MIR184    |
| 724029    | ENSG00000207696 | 0 | NA | NA | NA | NA | MIR659    |

|           |                 |          |            |            |            |    |           |
|-----------|-----------------|----------|------------|------------|------------|----|-----------|
| 693158    | ENSG00000207697 | 0        | NA         | NA         | NA         | NA | MIR573    |
| 407036    | ENSG00000207698 | 0        | NA         | NA         | NA         | NA | MIR32     |
| 574491    | ENSG00000207699 | 0        | NA         | NA         | NA         | NA | MIR518A2  |
| 693182    | ENSG00000207701 | 0        | NA         | NA         | NA         | NA | MIR597    |
| 406993    | ENSG00000207702 | 0        | NA         | NA         | NA         | NA | MIR211    |
| 407044    | ENSG00000207703 | 0        | NA         | NA         | NA         | NA | MIR7-2    |
| 100500863 | ENSG00000207704 | 0        | NA         | NA         | NA         | NA | MIR548AA1 |
| 406917    | ENSG00000207705 | 0        | NA         | NA         | NA         | NA | MIR129-1  |
| 574472    | ENSG00000207706 | 0        | NA         | NA         | NA         | NA | MIR518F   |
| 406933    | ENSG00000207708 | 0        | NA         | NA         | NA         | NA | MIR141    |
| 574470    | ENSG00000207711 | 0        | NA         | NA         | NA         | NA | MIR525    |
| 693212    | ENSG00000207712 | 0        | NA         | NA         | NA         | NA | MIR627    |
| 406985    | ENSG00000207713 | 0        | NA         | NA         | NA         | NA | MIR200C   |
| 693169    | ENSG00000207714 | 0        | NA         | NA         | NA         | NA | MIR584    |
| 693157    | ENSG00000207716 | 0        | NA         | NA         | NA         | NA | MIR572    |
| 693136    | ENSG00000207717 | 0        | NA         | NA         | NA         | NA | MIR551B   |
| 693208    | ENSG00000207719 | 0        | NA         | NA         | NA         | NA | MIR623    |
| 406962    | ENSG00000207721 | 0.173733 | 0.01914545 | 0.38484597 | 0.78225479 | NA | MIR186    |
| 574473    | ENSG00000207722 | 0        | NA         | NA         | NA         | NA | MIR520B   |
| 407007    | ENSG00000207725 | 0        | NA         | NA         | NA         | NA | MIR222    |
| 619556    | ENSG00000207726 | 0        | NA         | NA         | NA         | NA | MIR455    |
| 693123    | ENSG00000207728 | 0        | NA         | NA         | NA         | NA | MIR449B   |
| 693141    | ENSG00000207729 | 0        | NA         | NA         | NA         | NA | MIR556    |
| 406984    | ENSG00000207730 | 0        | NA         | NA         | NA         | NA | MIR200B   |
| 574511    | ENSG00000207731 | 0        | NA         | NA         | NA         | NA | MIR506    |
| 407000    | ENSG00000207732 | 0        | NA         | NA         | NA         | NA | MIR218-1  |
| 574479    | ENSG00000207734 | 0        | NA         | NA         | NA         | NA | MIR517A   |
| 574482    | ENSG00000207735 | 0        | NA         | NA         | NA         | NA | MIR520D   |
| 724027    | ENSG00000207736 | 0        | NA         | NA         | NA         | NA | MIR657    |
| 406956    | ENSG00000207737 | 0        | NA         | NA         | NA         | NA | MIR181B2  |
| 574476    | ENSG00000207738 | 0        | NA         | NA         | NA         | NA | MIR520C   |
| 407001    | ENSG00000207739 | 0        | NA         | NA         | NA         | NA | MIR218-2  |
| 693175    | ENSG00000207741 | 0        | NA         | NA         | NA         | NA | MIR590    |
| 619555    | ENSG00000207742 | 0        | NA         | NA         | NA         | NA | MIR487A   |
| 574453    | ENSG00000207743 | 0        | NA         | NA         | NA         | NA | MIR495    |
| 406903    | ENSG00000207744 | 0        | NA         | NA         | NA         | NA | MIR10B    |
| 693160    | ENSG00000207746 | 0        | NA         | NA         | NA         | NA | MIR575    |
| 407023    | ENSG00000207749 | 0        | NA         | NA         | NA         | NA | MIR299    |

|           |                 |            |            |            |            |            |          |
|-----------|-----------------|------------|------------|------------|------------|------------|----------|
| 693138    | ENSG00000207750 | 0          | NA         | NA         | NA         | NA         | MIR553   |
| NA        | ENSG00000207751 | 17.2169031 | 0.09170739 | 0.32486456 | 0.61999763 | 0.80602536 |          |
| 406976    | ENSG00000207752 | 0          | NA         | NA         | NA         | NA         | MIR199A1 |
| 664616    | ENSG00000207754 | 0          | NA         | NA         | NA         | NA         | MIR487B  |
| 574505    | ENSG00000207755 | 0          | NA         | NA         | NA         | NA         | MIR450A2 |
| 693165    | ENSG00000207756 | 0          | NA         | NA         | NA         | NA         | MIR580   |
| 407050    | ENSG00000207757 | 0          | NA         | NA         | NA         | NA         | MIR93    |
| 693124    | ENSG00000207758 | 0          | NA         | NA         | NA         | NA         | MIR532   |
| 406995    | ENSG00000207759 | 0          | NA         | NA         | NA         | NA         | MIR181A1 |
| 574408    | ENSG00000207761 | 0          | NA         | NA         | NA         | NA         | MIR329-1 |
| 574409    | ENSG00000207762 | 0          | NA         | NA         | NA         | NA         | MIR329-2 |
| 693202    | ENSG00000207763 | 0          | NA         | NA         | NA         | NA         | MIR617   |
| 693211    | ENSG00000207766 | 0          | NA         | NA         | NA         | NA         | MIR626   |
| 574498    | ENSG00000207767 | 0          | NA         | NA         | NA         | NA         | MIR516A1 |
| 406964    | ENSG00000207768 | 0          | NA         | NA         | NA         | NA         | MIR188   |
| 693171    | ENSG00000207769 | 0          | NA         | NA         | NA         | NA         | MIR586   |
| 693133    | ENSG00000207771 | 0          | NA         | NA         | NA         | NA         | MIR550A1 |
| 693227    | ENSG00000207773 | 0          | NA         | NA         | NA         | NA         | MIR642A  |
| 693125    | ENSG00000207775 | 0          | NA         | NA         | NA         | NA         | MIR548A1 |
| 693135    | ENSG00000207776 | 0          | NA         | NA         | NA         | NA         | MIR551A  |
| 100616357 | ENSG00000207778 | 0          | NA         | NA         | NA         | NA         | MIR3591  |
| 406949    | ENSG00000207779 | 0          | NA         | NA         | NA         | NA         | MIR15B   |
| 693233    | ENSG00000207780 | 0          | NA         | NA         | NA         | NA         | MIR648   |
| 693210    | ENSG00000207781 | 0          | NA         | NA         | NA         | NA         | MIR625   |
| 406942    | ENSG00000207782 | 0          | NA         | NA         | NA         | NA         | MIR150   |
| 664617    | ENSG00000207784 | 0          | NA         | NA         | NA         | NA         | MIR542   |
| 574502    | ENSG00000207785 | 0          | NA         | NA         | NA         | NA         | MIR500A  |
| 574466    | ENSG00000207788 | 0          | NA         | NA         | NA         | NA         | MIR519C  |
| 407016    | ENSG00000207789 | 0          | NA         | NA         | NA         | NA         | MIR26A2  |
| 406963    | ENSG00000207797 | 0          | NA         | NA         | NA         | NA         | MIR187   |
| 406998    | ENSG00000207798 | 0          | NA         | NA         | NA         | NA         | MIR216A  |
| 574484    | ENSG00000207799 | 0          | NA         | NA         | NA         | NA         | MIR520G  |
| 574507    | ENSG00000207800 | 0          | NA         | NA         | NA         | NA         | MIR504   |
| 693231    | ENSG00000207802 | 0          | NA         | NA         | NA         | NA         | MIR646   |
| 574488    | ENSG00000207803 | 0          | NA         | NA         | NA         | NA         | MIR518A1 |
| 693184    | ENSG00000207804 | 0          | NA         | NA         | NA         | NA         | MIR599   |
| 619552    | ENSG00000207805 | 0          | NA         | NA         | NA         | NA         | MIR483   |
| 407052    | ENSG00000207807 | 0          | NA         | NA         | NA         | NA         | MIR95    |

|           |                 |   |    |    |    |    |          |
|-----------|-----------------|---|----|----|----|----|----------|
| 407018    | ENSG00000207808 | 0 | NA | NA | NA | NA | MIR27A   |
| 574463    | ENSG00000207810 | 0 | NA | NA | NA | NA | MIR519E  |
| 407041    | ENSG00000207811 | 0 | NA | NA | NA | NA | MIR34B   |
| 693190    | ENSG00000207813 | 0 | NA | NA | NA | NA | MIR605   |
| 406939    | ENSG00000207814 | 0 | NA | NA | NA | NA | MIR147A  |
| 693148    | ENSG00000207815 | 0 | NA | NA | NA | NA | MIR563   |
| 406908    | ENSG00000207816 | 0 | NA | NA | NA | NA | MIR124-2 |
| 406898    | ENSG00000207818 | 0 | NA | NA | NA | NA | MIR105-2 |
| 664614    | ENSG00000207820 | 0 | NA | NA | NA | NA | MIR545   |
| 693225    | ENSG00000207821 | 0 | NA | NA | NA | NA | MIR640   |
| 574469    | ENSG00000207825 | 0 | NA | NA | NA | NA | MIR519B  |
| 693181    | ENSG00000207826 | 0 | NA | NA | NA | NA | MIR596   |
| 407029    | ENSG00000207827 | 0 | NA | NA | NA | NA | MIR30A   |
| 574483    | ENSG00000207837 | 0 | NA | NA | NA | NA | MIR517B  |
| 574492    | ENSG00000207838 | 0 | NA | NA | NA | NA | MIR517C  |
| 693120    | ENSG00000207839 | 0 | NA | NA | NA | NA | MIR33B   |
| 574493    | ENSG00000207861 | 0 | NA | NA | NA | NA | MIR520H  |
| 574474    | ENSG00000207862 | 0 | NA | NA | NA | NA | MIR518B  |
| 406912    | ENSG00000207863 | 0 | NA | NA | NA | NA | MIR125B2 |
| 407019    | ENSG00000207864 | 0 | NA | NA | NA | NA | MIR27B   |
| 574517    | ENSG00000207866 | 0 | NA | NA | NA | NA | MIR514A2 |
| 574516    | ENSG00000207868 | 0 | NA | NA | NA | NA | MIR514A1 |
| 574460    | ENSG00000207869 | 0 | NA | NA | NA | NA | MIR498   |
| 407006    | ENSG00000207870 | 0 | NA | NA | NA | NA | MIR221   |
| 100313822 | ENSG00000207871 | 0 | NA | NA | NA | NA | MIR513B  |
| 574509    | ENSG00000207873 | 0 | NA | NA | NA | NA | MIR513A1 |
| 693195    | ENSG00000207874 | 0 | NA | NA | NA | NA | MIR610   |
| NA        | ENSG00000207922 | 0 | NA | NA | NA | NA |          |
| 693144    | ENSG00000207923 | 0 | NA | NA | NA | NA | MIR559   |
| 406973    | ENSG00000207924 | 0 | NA | NA | NA | NA | MIR196A2 |
| 574485    | ENSG00000207925 | 0 | NA | NA | NA | NA | MIR516B2 |
| 406925    | ENSG00000207926 | 0 | NA | NA | NA | NA | MIR135A1 |
| 407028    | ENSG00000207927 | 0 | NA | NA | NA | NA | MIR302A  |
| 693188    | ENSG00000207930 | 0 | NA | NA | NA | NA | MIR603   |
| 693162    | ENSG00000207931 | 0 | NA | NA | NA | NA | MIR577   |
| 407039    | ENSG00000207932 | 0 | NA | NA | NA | NA | MIR33A   |
| 407046    | ENSG00000207933 | 0 | NA | NA | NA | NA | MIR9-1   |
| 724024    | ENSG00000207934 | 0 | NA | NA | NA | NA | MIR654   |



|        |                 |            |            |            |           |    |          |
|--------|-----------------|------------|------------|------------|-----------|----|----------|
| 406987 | ENSG00000207935 | 0          | NA         | NA         | NA        | NA | MIR204   |
| 574445 | ENSG00000207938 | 0          | NA         | NA         | NA        | NA | MIR511   |
| 693152 | ENSG00000207940 | 0          | NA         | NA         | NA        | NA | MIR567   |
| 693137 | ENSG00000207941 | 0          | NA         | NA         | NA        | NA | MIR552   |
| 406927 | ENSG00000207942 | 0          | NA         | NA         | NA        | NA | MIR136   |
| 693219 | ENSG00000207943 | 0          | NA         | NA         | NA        | NA | MIR634   |
| 693159 | ENSG00000207944 | 0          | NA         | NA         | NA        | NA | MIR574   |
| 574490 | ENSG00000207946 | 0          | NA         | NA         | NA        | NA | MIR516B1 |
| 406943 | ENSG00000207947 | 0          | NA         | NA         | NA        | NA | MIR152   |
| 442901 | ENSG00000207948 | 0          | NA         | NA         | NA        | NA | MIR328   |
| 693146 | ENSG00000207951 | 0          | NA         | NA         | NA        | NA | MIR561   |
| 693209 | ENSG00000207952 | 0          | NA         | NA         | NA        | NA | MIR624   |
| 406929 | ENSG00000207954 | 0          | NA         | NA         | NA        | NA | MIR138-1 |
| NA     | ENSG00000207955 | 1.13471309 | 0.01599169 | 0.38001474 | 0.8021103 | NA |          |
| 693164 | ENSG00000207956 | 0          | NA         | NA         | NA        | NA | MIR579   |
| 406897 | ENSG00000207957 | 0          | NA         | NA         | NA        | NA | MIR105-1 |
| 724026 | ENSG00000207959 | 0          | NA         | NA         | NA        | NA | MIR656   |
| 406945 | ENSG00000207960 | 0          | NA         | NA         | NA        | NA | MIR153-2 |
| 574454 | ENSG00000207961 | 0          | NA         | NA         | NA        | NA | MIR496   |
| 407031 | ENSG00000207962 | 0          | NA         | NA         | NA        | NA | MIR30C1  |
| 693154 | ENSG00000207963 | 0          | NA         | NA         | NA        | NA | MIR569   |
| 693214 | ENSG00000207965 | 0          | NA         | NA         | NA        | NA | MIR629   |
| 693205 | ENSG00000207967 | 0          | NA         | NA         | NA        | NA | MIR620   |
| 574512 | ENSG00000207969 | 0          | NA         | NA         | NA        | NA | MIR507   |
| 724030 | ENSG00000207970 | 0          | NA         | NA         | NA        | NA | MIR660   |
| 406911 | ENSG00000207971 | 0          | NA         | NA         | NA        | NA | MIR125B1 |
| 693223 | ENSG00000207972 | 0          | NA         | NA         | NA        | NA | MIR638   |
| 693174 | ENSG00000207973 | 0          | NA         | NA         | NA        | NA | MIR589   |
| 693142 | ENSG00000207974 | 0          | NA         | NA         | NA        | NA | MIR557   |
| 406955 | ENSG00000207975 | 0          | NA         | NA         | NA        | NA | MIR181B1 |
| 693192 | ENSG00000207976 | 0          | NA         | NA         | NA        | NA | MIR607   |
| 406946 | ENSG00000207978 | 0          | NA         | NA         | NA        | NA | MIR154   |
| 574497 | ENSG00000207979 | 0          | NA         | NA         | NA        | NA | MIR527   |
| 407010 | ENSG00000207980 | 0          | NA         | NA         | NA        | NA | MIR23A   |
| 574480 | ENSG00000207981 | 0          | NA         | NA         | NA        | NA | MIR519D  |
| 693128 | ENSG00000207982 | 0          | NA         | NA         | NA        | NA | MIR548B  |
| 693198 | ENSG00000207983 | 0          | NA         | NA         | NA        | NA | MIR613   |
| 574510 | ENSG00000207984 | 0          | NA         | NA         | NA        | NA | MIR513A2 |

|           |                 |   |    |    |    |    |           |
|-----------|-----------------|---|----|----|----|----|-----------|
| 574487    | ENSG00000207987 | 0 | NA | NA | NA | NA | MIR518E   |
| 693161    | ENSG00000207988 | 0 | NA | NA | NA | NA | MIR576    |
| 574450    | ENSG00000207989 | 0 | NA | NA | NA | NA | MIR493    |
| 406958    | ENSG00000207990 | 0 | NA | NA | NA | NA | MIR182    |
| 693186    | ENSG00000207991 | 0 | NA | NA | NA | NA | MIR601    |
| 574496    | ENSG00000207992 | 0 | NA | NA | NA | NA | MIR519A1  |
| 406924    | ENSG00000207993 | 0 | NA | NA | NA | NA | MIR134    |
| 406892    | ENSG00000207994 | 0 | NA | NA | NA | NA | MIR100    |
| 442899    | ENSG00000207995 | 0 | NA | NA | NA | NA | MIR325    |
| 407027    | ENSG00000207996 | 0 | NA | NA | NA | NA | MIR301A   |
| 693229    | ENSG00000207997 | 0 | NA | NA | NA | NA | MIR644A   |
| 574514    | ENSG00000208000 | 0 | NA | NA | NA | NA | MIR509-1  |
| 574038    | ENSG00000208001 | 0 | NA | NA | NA | NA | MIR431    |
| 693228    | ENSG00000208002 | 0 | NA | NA | NA | NA | MIR643    |
| 693132    | ENSG00000208003 | 0 | NA | NA | NA | NA | MIR549A   |
| 574410    | ENSG00000208004 | 0 | NA | NA | NA | NA | MIR323B   |
| 574506    | ENSG00000208005 | 0 | NA | NA | NA | NA | MIR503    |
| 406950    | ENSG00000208006 | 0 | NA | NA | NA | NA | MIR16-1   |
| 406910    | ENSG00000208008 | 0 | NA | NA | NA | NA | MIR125A   |
| 406919    | ENSG00000208009 | 0 | NA | NA | NA | NA | MIR130A   |
| 406889    | ENSG00000208012 | 0 | NA | NA | NA | NA | MIRLET7F2 |
| 724022    | ENSG00000208013 | 0 | NA | NA | NA | NA | MIR652    |
| 724023    | ENSG00000208014 | 0 | NA | NA | NA | NA | MIR653    |
| 574030    | ENSG00000208015 | 0 | NA | NA | NA | NA | MIR362    |
| 406932    | ENSG00000208017 | 0 | NA | NA | NA | NA | MIR140    |
| 693230    | ENSG00000208018 | 0 | NA | NA | NA | NA | MIR645    |
| 693203    | ENSG00000208022 | 0 | NA | NA | NA | NA | MIR618    |
| 406961    | ENSG00000208023 | 0 | NA | NA | NA | NA | MIR185    |
| 406977    | ENSG00000208024 | 0 | NA | NA | NA | NA | MIR199A2  |
| 693176    | ENSG00000208025 | 0 | NA | NA | NA | NA | MIR591    |
| 574436    | ENSG00000208027 | 0 | NA | NA | NA | NA | MIR485    |
| 693201    | ENSG00000208028 | 0 | NA | NA | NA | NA | MIR616    |
| 693127    | ENSG00000208032 | 0 | NA | NA | NA | NA | MIR548A3  |
| 693194    | ENSG00000208033 | 0 | NA | NA | NA | NA | MIR609    |
| 406900    | ENSG00000208036 | 0 | NA | NA | NA | NA | MIR106B   |
| NA        | ENSG00000208037 | 0 | NA | NA | NA | NA | MIR320A   |
| 109616967 | ENSG00000208308 | 0 | NA | NA | NA | NA | SNORA40B  |
| 692225    | ENSG00000208772 | 0 | NA | NA | NA | NA | SNORD94   |

|           |                 |            |             |            |            |          |            |
|-----------|-----------------|------------|-------------|------------|------------|----------|------------|
| 8944      | ENSG00000208797 | 0          | NA          | NA         | NA         | NA       | SNORD73A   |
| 677816    | ENSG00000208839 | 0          | NA          | NA         | NA         | NA       | SNORA35    |
| 692226    | ENSG00000208883 | 0          | NA          | NA         | NA         | NA       | SNORD96B   |
| 677829    | ENSG00000208892 | 0          | NA          | NA         | NA         | NA       | SNORA49    |
| NA        | ENSG00000209042 | 0          | NA          | NA         | NA         | NA       | SNORD12C   |
| NA        | ENSG00000209082 | 0          | NA          | NA         | NA         | NA       | MT-TL1     |
| 116938    | ENSG00000209480 | 0          | NA          | NA         | NA         | NA       | SNORD83B   |
| 116937    | ENSG00000209482 | 0.15069912 | -0.01848503 | 0.38480575 | 0.84537521 | NA       | SNORD83A   |
| 652965    | ENSG00000209582 | 0          | NA          | NA         | NA         | NA       | SNORA48    |
| 692229    | ENSG00000209645 | 0          | NA          | NA         | NA         | NA       | SNORD105   |
| 26810     | ENSG00000209702 | 0          | NA          | NA         | NA         | NA       | SNORD41    |
| NA        | ENSG00000210049 | 0.34746601 | 0.02370763  | 0.3853651  | 0.61987128 | NA       | MT-TF      |
| NA        | ENSG00000210077 | 0          | NA          | NA         | NA         | NA       | MT-TV      |
| NA        | ENSG00000210082 | 125227.312 | 0.48733973  | 0.09429628 | 9.85E-08   | 1.30E-06 | MT-RNR2    |
| NA        | ENSG00000210100 | 0          | NA          | NA         | NA         | NA       | MT-TI      |
| NA        | ENSG00000210107 | 0.47237597 | -0.03501478 | 0.38628028 | 0.496551   | NA       | MT-TQ      |
| NA        | ENSG00000210112 | 0          | NA          | NA         | NA         | NA       | MT-TM      |
| NA        | ENSG00000210117 | 0          | NA          | NA         | NA         | NA       | MT-TW      |
| NA        | ENSG00000210127 | 2.31913423 | 0.04038395  | 0.37525791 | 0.67277406 | NA       | MT-TA      |
| NA        | ENSG00000210135 | 0.4920739  | 0.01062491  | 0.38334076 | 0.79320141 | NA       | MT-TN      |
| NA        | ENSG00000210140 | 0.68208768 | 0.00452981  | 0.38130786 | 0.92966277 | NA       | MT-TC      |
| NA        | ENSG00000210144 | 0.15069912 | -0.01848503 | 0.38480575 | 0.84537521 | NA       | MT-TY      |
| 113219467 | ENSG00000210151 | 0.32443212 | 0.00133214  | 0.3833368  | 0.96755054 | NA       | MT-TS1     |
| NA        | ENSG00000210154 | 0          | NA          | NA         | NA         | NA       | MT-TD      |
| NA        | ENSG00000210156 | 0          | NA          | NA         | NA         | NA       | MT-TK      |
| NA        | ENSG00000210164 | 0          | NA          | NA         | NA         | NA       | MT-TG      |
| NA        | ENSG00000210174 | 0          | NA          | NA         | NA         | NA       | MT-TR      |
| NA        | ENSG00000210176 | 0          | NA          | NA         | NA         | NA       | MT-TH      |
| NA        | ENSG00000210181 | 0          | NA          | NA         | NA         | NA       | RNU6ATAC4P |
| NA        | ENSG00000210184 | 0          | NA          | NA         | NA         | NA       | MT-TS2     |
| NA        | ENSG00000210191 | 0          | NA          | NA         | NA         | NA       | MT-TL2     |
| NA        | ENSG00000210194 | 0          | NA          | NA         | NA         | NA       | MT-TE      |
| NA        | ENSG00000210195 | 0          | NA          | NA         | NA         | NA       | MT-TT      |
| NA        | ENSG00000210196 | 0          | NA          | NA         | NA         | NA       | MT-TP      |
| NA        | ENSG00000210678 | 0          | NA          | NA         | NA         | NA       | RNU6ATAC2P |
| NA        | ENSG00000210709 | 0          | NA          | NA         | NA         | NA       | RNU6ATAC3P |
| 406972    | ENSG00000210741 | 0          | NA          | NA         | NA         | NA       | MIR196A1   |
| NA        | ENSG00000210825 | 0          | NA          | NA         | NA         | NA       | SNORA40    |

|           |                 |            |             |            |            |            |             |
|-----------|-----------------|------------|-------------|------------|------------|------------|-------------|
| NA        | ENSG00000210839 | 0          | NA          | NA         | NA         | NA         | RNU6ATAC5P  |
| NA        | ENSG00000210841 | 0          | NA          | NA         | NA         | NA         | RNU6ATAC26P |
| 406965    | ENSG00000211137 | 0          | NA          | NA         | NA         | NA         | MIR190A     |
| 2878      | ENSG00000211445 | 163.401311 | -1.20905838 | 0.23966548 | 4.34E-08   | 6.01E-07   | GPX3        |
| 1734      | ENSG00000211448 | 7.6221866  | 0.00124153  | 0.36115535 | 0.9945766  | 0.99845164 | DIO2        |
| 280636    | ENSG00000211450 | 992.006301 | -0.27555063 | 0.0914747  | 0.00186572 | 0.01008609 | SELENOH     |
| 114814    | ENSG00000211451 | 18.7678091 | 0.01639362  | 0.31817013 | 0.9293525  | 0.97049075 | GNRHR2      |
| 1733      | ENSG00000211452 | 1.28850183 | 0.02995256  | 0.38153639 | 0.56886766 | NA         | DIO1        |
| NA        | ENSG00000211454 | 25.8700232 | 0.05485562  | 0.31674917 | 0.7659564  | 0.89234011 | AKR7L       |
| 23012     | ENSG00000211455 | 754.97295  | 0.12307075  | 0.10832977 | 0.23624575 | 0.45303651 | STK38L      |
| 22908     | ENSG00000211456 | 1005.86115 | 0.3098123   | 0.09145039 | 0.00047135 | 0.00306508 | SACM1L      |
| NA        | ENSG00000211459 | 17086.4398 | 0.22349174  | 0.05098906 | 9.64E-06   | 9.17E-05   | MT-RNR1     |
| 7247      | ENSG00000211460 | 1339.47789 | 0.02782407  | 0.08166179 | 0.72744444 | 0.86963712 | TSN         |
| NA        | ENSG00000211491 | 0          | NA          | NA         | NA         | NA         | MIR320D1    |
| NA        | ENSG00000211513 | 0          | NA          | NA         | NA         | NA         | MIR320E     |
| 768216    | ENSG00000211514 | 0          | NA          | NA         | NA         | NA         | MIR454      |
| 100126319 | ENSG00000211520 | 0          | NA          | NA         | NA         | NA         | MIR216B     |
| 574486    | ENSG00000211532 | 0          | NA          | NA         | NA         | NA         | MIR526A2    |
| 574503    | ENSG00000211538 | 0          | NA          | NA         | NA         | NA         | MIR501      |
| NA        | ENSG00000211543 | 0          | NA          | NA         | NA         | NA         | MIR320B1    |
| 100422915 | ENSG00000211563 | 0          | NA          | NA         | NA         | NA         | MIR3065     |
| 100313777 | ENSG00000211568 | 0          | NA          | NA         | NA         | NA         | MIR670      |
| 768222    | ENSG00000211574 | 0          | NA          | NA         | NA         | NA         | MIR770      |
| 100126348 | ENSG00000211575 | 0          | NA          | NA         | NA         | NA         | MIR760      |
| 768218    | ENSG00000211578 | 0          | NA          | NA         | NA         | NA         | MIR766      |
| 100313778 | ENSG00000211579 | 0          | NA          | NA         | NA         | NA         | MIR759      |
| 768217    | ENSG00000211580 | 0          | NA          | NA         | NA         | NA         | MIR769      |
| 768220    | ENSG00000211581 | 0          | NA          | NA         | NA         | NA         | MIR765      |
| 768212    | ENSG00000211582 | 0          | NA          | NA         | NA         | NA         | MIR758      |
| 768215    | ENSG00000211583 | 0          | NA          | NA         | NA         | NA         | MIR767      |
| 55652     | ENSG00000211584 | 255.763616 | -0.19400138 | 0.16243066 | 0.18628149 | 0.38596943 | SLC48A1     |
| 768219    | ENSG00000211590 | 0          | NA          | NA         | NA         | NA         | MIR802      |
| 100313837 | ENSG00000211591 | 0          | NA          | NA         | NA         | NA         | MIR762      |
| NA        | ENSG00000211592 | 0          | NA          | NA         | NA         | NA         | IGKC        |
| NA        | ENSG00000211593 | 0          | NA          | NA         | NA         | NA         | IGKJ5       |
| NA        | ENSG00000211594 | 0          | NA          | NA         | NA         | NA         | IGKJ4       |
| NA        | ENSG00000211595 | 0          | NA          | NA         | NA         | NA         | IGKJ3       |
| NA        | ENSG00000211596 | 0          | NA          | NA         | NA         | NA         | IGKJ2       |

|    |                 |            |             |           |            |    |           |
|----|-----------------|------------|-------------|-----------|------------|----|-----------|
| NA | ENSG00000211597 | 0          | NA          | NA        | NA         | NA | IGKJ1     |
| NA | ENSG00000211598 | 0          | NA          | NA        | NA         | NA | IGKV4-1   |
| NA | ENSG00000211599 | 0          | NA          | NA        | NA         | NA | IGKV5-2   |
| NA | ENSG00000211611 | 0          | NA          | NA        | NA         | NA | IGKV6-21  |
| NA | ENSG00000211623 | 0          | NA          | NA        | NA         | NA | IGKV2D-26 |
| NA | ENSG00000211625 | 0          | NA          | NA        | NA         | NA | IGKV3D-20 |
| NA | ENSG00000211626 | 0          | NA          | NA        | NA         | NA | IGKV6D-41 |
| NA | ENSG00000211632 | 0          | NA          | NA        | NA         | NA | IGKV3D-11 |
| NA | ENSG00000211633 | 0          | NA          | NA        | NA         | NA | IGKV1D-42 |
| NA | ENSG00000211637 | 0          | NA          | NA        | NA         | NA | IGLV4-69  |
| NA | ENSG00000211638 | 0          | NA          | NA        | NA         | NA | IGLV8-61  |
| NA | ENSG00000211639 | 0          | NA          | NA        | NA         | NA | IGLV4-60  |
| NA | ENSG00000211640 | 0          | NA          | NA        | NA         | NA | IGLV6-57  |
| NA | ENSG00000211641 | 0          | NA          | NA        | NA         | NA | IGLV11-55 |
| NA | ENSG00000211642 | 0          | NA          | NA        | NA         | NA | IGLV10-54 |
| NA | ENSG00000211643 | 0          | NA          | NA        | NA         | NA | IGLV5-52  |
| NA | ENSG00000211644 | 0          | NA          | NA        | NA         | NA | IGLV1-51  |
| NA | ENSG00000211645 | 0.29863895 | -0.02292439 | 0.3852726 | 0.68753245 | NA | IGLV1-50  |
| NA | ENSG00000211647 | 0          | NA          | NA        | NA         | NA | IGLV5-48  |
| NA | ENSG00000211648 | 0          | NA          | NA        | NA         | NA | IGLV1-47  |
| NA | ENSG00000211649 | 0          | NA          | NA        | NA         | NA | IGLV7-46  |
| NA | ENSG00000211650 | 0          | NA          | NA        | NA         | NA | IGLV5-45  |
| NA | ENSG00000211651 | 0          | NA          | NA        | NA         | NA | IGLV1-44  |
| NA | ENSG00000211652 | 0          | NA          | NA        | NA         | NA | IGLV7-43  |
| NA | ENSG00000211653 | 0          | NA          | NA        | NA         | NA | IGLV1-40  |
| NA | ENSG00000211654 | 0          | NA          | NA        | NA         | NA | IGLV5-37  |
| NA | ENSG00000211655 | 0          | NA          | NA        | NA         | NA | IGLV1-36  |
| NA | ENSG00000211656 | 0          | NA          | NA        | NA         | NA | IGLV2-33  |
| NA | ENSG00000211657 | 0          | NA          | NA        | NA         | NA | IGLV3-32  |
| NA | ENSG00000211658 | 0          | NA          | NA        | NA         | NA | IGLV3-27  |
| NA | ENSG00000211659 | 0          | NA          | NA        | NA         | NA | IGLV3-25  |
| NA | ENSG00000211660 | 0          | NA          | NA        | NA         | NA | IGLV2-23  |
| NA | ENSG00000211661 | 0          | NA          | NA        | NA         | NA | IGLV3-22  |
| NA | ENSG00000211662 | 0          | NA          | NA        | NA         | NA | IGLV3-21  |
| NA | ENSG00000211663 | 0          | NA          | NA        | NA         | NA | IGLV3-19  |
| NA | ENSG00000211664 | 0          | NA          | NA        | NA         | NA | IGLV2-18  |
| NA | ENSG00000211665 | 0          | NA          | NA        | NA         | NA | IGLV3-16  |
| NA | ENSG00000211666 | 0          | NA          | NA        | NA         | NA | IGLV2-14  |

|        |                 |            |             |            |            |            |          |
|--------|-----------------|------------|-------------|------------|------------|------------|----------|
| NA     | ENSG00000211667 | 0          | NA          | NA         | NA         | NA         | IGLV3-12 |
| NA     | ENSG00000211668 | 0          | NA          | NA         | NA         | NA         | IGLV2-11 |
| NA     | ENSG00000211669 | 0          | NA          | NA         | NA         | NA         | IGLV3-10 |
| NA     | ENSG00000211670 | 0          | NA          | NA         | NA         | NA         | IGLV3-9  |
| NA     | ENSG00000211672 | 0          | NA          | NA         | NA         | NA         | IGLV4-3  |
| NA     | ENSG00000211673 | 0          | NA          | NA         | NA         | NA         | IGLV3-1  |
| NA     | ENSG00000211674 | 0          | NA          | NA         | NA         | NA         | IGLJ1    |
| NA     | ENSG00000211675 | 0          | NA          | NA         | NA         | NA         | IGLC1    |
| NA     | ENSG00000211676 | 0          | NA          | NA         | NA         | NA         | IGLJ2    |
| NA     | ENSG00000211677 | 0          | NA          | NA         | NA         | NA         | IGLC2    |
| NA     | ENSG00000211678 | 0          | NA          | NA         | NA         | NA         | IGLJ3    |
| NA     | ENSG00000211679 | 0          | NA          | NA         | NA         | NA         | IGLC3    |
| NA     | ENSG00000211680 | 0          | NA          | NA         | NA         | NA         | IGLJ4    |
| NA     | ENSG00000211681 | 0          | NA          | NA         | NA         | NA         | IGLJ5    |
| NA     | ENSG00000211682 | 0          | NA          | NA         | NA         | NA         | IGLJ6    |
| NA     | ENSG00000211683 | 3.33260119 | -0.01399309 | 0.36746709 | 0.89738075 | 0.95499834 |          |
| NA     | ENSG00000211684 | 0          | NA          | NA         | NA         | NA         | IGLJ7    |
| NA     | ENSG00000211685 | 0          | NA          | NA         | NA         | NA         | IGLC7    |
| NA     | ENSG00000211687 | 0          | NA          | NA         | NA         | NA         | TRGJ2    |
| NA     | ENSG00000211688 | 0          | NA          | NA         | NA         | NA         | TRGJP2   |
| 445347 | ENSG00000211689 | 0          | NA          | NA         | NA         | NA         | TRGC1    |
| NA     | ENSG00000211691 | 0          | NA          | NA         | NA         | NA         | TRGJP    |
| NA     | ENSG00000211692 | 0          | NA          | NA         | NA         | NA         | TRGJP1   |
| NA     | ENSG00000211693 | 0          | NA          | NA         | NA         | NA         | TRGV11   |
| NA     | ENSG00000211694 | 0          | NA          | NA         | NA         | NA         | TRGV10   |
| NA     | ENSG00000211695 | 0          | NA          | NA         | NA         | NA         | TRGV9    |
| NA     | ENSG00000211696 | 0          | NA          | NA         | NA         | NA         | TRGV8    |
| NA     | ENSG00000211697 | 0          | NA          | NA         | NA         | NA         | TRGV5    |
| NA     | ENSG00000211698 | 0          | NA          | NA         | NA         | NA         | TRGV4    |
| NA     | ENSG00000211699 | 0.14931947 | -0.01844332 | 0.38480212 | 0.84537521 | NA         | TRGV3    |
| NA     | ENSG00000211701 | 0          | NA          | NA         | NA         | NA         | TRGV1    |
| NA     | ENSG00000211706 | 0          | NA          | NA         | NA         | NA         | TRBV6-1  |
| NA     | ENSG00000211707 | 0          | NA          | NA         | NA         | NA         | TRBV7-1  |
| NA     | ENSG00000211710 | 0          | NA          | NA         | NA         | NA         | TRBV4-1  |
| NA     | ENSG00000211713 | 0          | NA          | NA         | NA         | NA         | TRBV6-4  |
| NA     | ENSG00000211714 | 0          | NA          | NA         | NA         | NA         | TRBV7-3  |
| NA     | ENSG00000211715 | 0          | NA          | NA         | NA         | NA         | TRBV5-3  |
| NA     | ENSG00000211716 | 0          | NA          | NA         | NA         | NA         | TRBV9    |

|    |                 |          |             |            |            |    |          |
|----|-----------------|----------|-------------|------------|------------|----|----------|
| NA | ENSG00000211717 | 0        | NA          | NA         | NA         | NA | TRBV10-1 |
| NA | ENSG00000211720 | 0        | NA          | NA         | NA         | NA | TRBV11-1 |
| NA | ENSG00000211721 | 0        | NA          | NA         | NA         | NA | TRBV6-5  |
| NA | ENSG00000211724 | 0        | NA          | NA         | NA         | NA | TRBV6-6  |
| NA | ENSG00000211725 | 0        | NA          | NA         | NA         | NA | TRBV5-5  |
| NA | ENSG00000211727 | 0        | NA          | NA         | NA         | NA | TRBV7-6  |
| NA | ENSG00000211728 | 0        | NA          | NA         | NA         | NA | TRBV5-6  |
| NA | ENSG00000211731 | 0        | NA          | NA         | NA         | NA | TRBV5-7  |
| NA | ENSG00000211734 | 0        | NA          | NA         | NA         | NA | TRBV5-1  |
| NA | ENSG00000211739 | 0        | NA          | NA         | NA         | NA | TRBV12-2 |
| NA | ENSG00000211745 | 0        | NA          | NA         | NA         | NA | TRBV4-2  |
| NA | ENSG00000211746 | 0        | NA          | NA         | NA         | NA | TRBV19   |
| NA | ENSG00000211747 | 0        | NA          | NA         | NA         | NA | TRBV20-1 |
| NA | ENSG00000211749 | 0.173124 | -0.01911262 | 0.38486262 | 0.84537521 | NA | TRBV23-1 |
| NA | ENSG00000211750 | 0        | NA          | NA         | NA         | NA | TRBV24-1 |
| NA | ENSG00000211751 | 0        | NA          | NA         | NA         | NA | TRBC1    |
| NA | ENSG00000211752 | 0        | NA          | NA         | NA         | NA | TRBV27   |
| NA | ENSG00000211753 | 0        | NA          | NA         | NA         | NA | TRBV28   |
| NA | ENSG00000211764 | 0        | NA          | NA         | NA         | NA | TRBJ2-1  |
| NA | ENSG00000211765 | 0        | NA          | NA         | NA         | NA | TRBJ2-2  |
| NA | ENSG00000211766 | 0        | NA          | NA         | NA         | NA | TRBJ2-2P |
| NA | ENSG00000211767 | 0        | NA          | NA         | NA         | NA | TRBJ2-3  |
| NA | ENSG00000211768 | 0        | NA          | NA         | NA         | NA | TRBJ2-4  |
| NA | ENSG00000211769 | 0        | NA          | NA         | NA         | NA | TRBJ2-5  |
| NA | ENSG00000211770 | 0        | NA          | NA         | NA         | NA | TRBJ2-6  |
| NA | ENSG00000211771 | 0        | NA          | NA         | NA         | NA | TRBJ2-7  |
| NA | ENSG00000211772 | 0        | NA          | NA         | NA         | NA | TRBC2    |
| NA | ENSG00000211776 | 0        | NA          | NA         | NA         | NA | TRAV2    |
| NA | ENSG00000211777 | 0        | NA          | NA         | NA         | NA | TRAV3    |
| NA | ENSG00000211778 | 0        | NA          | NA         | NA         | NA | TRAV4    |
| NA | ENSG00000211779 | 0        | NA          | NA         | NA         | NA | TRAV5    |
| NA | ENSG00000211780 | 0        | NA          | NA         | NA         | NA | TRAV6    |
| NA | ENSG00000211781 | 0        | NA          | NA         | NA         | NA | TRAV7    |
| NA | ENSG00000211782 | 0        | NA          | NA         | NA         | NA | TRAV8-1  |
| NA | ENSG00000211783 | 0        | NA          | NA         | NA         | NA | TRAV9-1  |
| NA | ENSG00000211784 | 0        | NA          | NA         | NA         | NA | TRAV10   |
| NA | ENSG00000211785 | 0        | NA          | NA         | NA         | NA | TRAV12-1 |
| NA | ENSG00000211786 | 0        | NA          | NA         | NA         | NA | TRAV8-2  |

|    |                 |   |    |    |    |    |             |
|----|-----------------|---|----|----|----|----|-------------|
| NA | ENSG00000211787 | 0 | NA | NA | NA | NA | TRAV8-3     |
| NA | ENSG00000211788 | 0 | NA | NA | NA | NA | TRAV13-1    |
| NA | ENSG00000211789 | 0 | NA | NA | NA | NA | TRAV12-2    |
| NA | ENSG00000211790 | 0 | NA | NA | NA | NA | TRAV8-4     |
| NA | ENSG00000211791 | 0 | NA | NA | NA | NA | TRAV13-2    |
| NA | ENSG00000211792 | 0 | NA | NA | NA | NA | TRAV14DV4   |
| NA | ENSG00000211793 | 0 | NA | NA | NA | NA | TRAV9-2     |
| NA | ENSG00000211794 | 0 | NA | NA | NA | NA | TRAV12-3    |
| NA | ENSG00000211795 | 0 | NA | NA | NA | NA | TRAV8-6     |
| NA | ENSG00000211796 | 0 | NA | NA | NA | NA | TRAV16      |
| NA | ENSG00000211797 | 0 | NA | NA | NA | NA | TRAV17      |
| NA | ENSG00000211798 | 0 | NA | NA | NA | NA | TRAV18      |
| NA | ENSG00000211799 | 0 | NA | NA | NA | NA | TRAV19      |
| NA | ENSG00000211800 | 0 | NA | NA | NA | NA | TRAV20      |
| NA | ENSG00000211801 | 0 | NA | NA | NA | NA | TRAV21      |
| NA | ENSG00000211802 | 0 | NA | NA | NA | NA | TRAV22      |
| NA | ENSG00000211803 | 0 | NA | NA | NA | NA | TRAV23DV6   |
| NA | ENSG00000211804 | 0 | NA | NA | NA | NA | TRDV1       |
| NA | ENSG00000211805 | 0 | NA | NA | NA | NA | TRAV24      |
| NA | ENSG00000211806 | 0 | NA | NA | NA | NA | TRAV25      |
| NA | ENSG00000211807 | 0 | NA | NA | NA | NA | TRAV26-1    |
| NA | ENSG00000211808 | 0 | NA | NA | NA | NA | TRAV8-7     |
| NA | ENSG00000211809 | 0 | NA | NA | NA | NA | TRAV27      |
| NA | ENSG00000211810 | 0 | NA | NA | NA | NA | TRAV29DV5   |
| NA | ENSG00000211812 | 0 | NA | NA | NA | NA | TRAV26-2    |
| NA | ENSG00000211813 | 0 | NA | NA | NA | NA | TRAV34      |
| NA | ENSG00000211814 | 0 | NA | NA | NA | NA | TRAV35      |
| NA | ENSG00000211815 | 0 | NA | NA | NA | NA | TRAV36DV7   |
| NA | ENSG00000211816 | 0 | NA | NA | NA | NA | TRAV38-1    |
| NA | ENSG00000211817 | 0 | NA | NA | NA | NA | TRAV38-2DV8 |
| NA | ENSG00000211818 | 0 | NA | NA | NA | NA | TRAV39      |
| NA | ENSG00000211819 | 0 | NA | NA | NA | NA | TRAV40      |
| NA | ENSG00000211820 | 0 | NA | NA | NA | NA | TRAV41      |
| NA | ENSG00000211821 | 0 | NA | NA | NA | NA | TRDV2       |
| NA | ENSG00000211825 | 0 | NA | NA | NA | NA | TRDJ1       |
| NA | ENSG00000211826 | 0 | NA | NA | NA | NA | TRDJ4       |
| NA | ENSG00000211827 | 0 | NA | NA | NA | NA | TRDJ2       |
| NA | ENSG00000211828 | 0 | NA | NA | NA | NA | TRDJ3       |



|    |                 |   |    |    |    |    |        |
|----|-----------------|---|----|----|----|----|--------|
| NA | ENSG00000211829 | 0 | NA | NA | NA | NA | TRDC   |
| NA | ENSG00000211831 | 0 | NA | NA | NA | NA | TRAJ61 |
| NA | ENSG00000211832 | 0 | NA | NA | NA | NA | TRAJ59 |
| NA | ENSG00000211833 | 0 | NA | NA | NA | NA | TRAJ58 |
| NA | ENSG00000211834 | 0 | NA | NA | NA | NA | TRAJ57 |
| NA | ENSG00000211835 | 0 | NA | NA | NA | NA | TRAJ56 |
| NA | ENSG00000211836 | 0 | NA | NA | NA | NA | TRAJ54 |
| NA | ENSG00000211837 | 0 | NA | NA | NA | NA | TRAJ53 |
| NA | ENSG00000211838 | 0 | NA | NA | NA | NA | TRAJ52 |
| NA | ENSG00000211839 | 0 | NA | NA | NA | NA | TRAJ50 |
| NA | ENSG00000211840 | 0 | NA | NA | NA | NA | TRAJ49 |
| NA | ENSG00000211841 | 0 | NA | NA | NA | NA | TRAJ48 |
| NA | ENSG00000211842 | 0 | NA | NA | NA | NA | TRAJ47 |
| NA | ENSG00000211843 | 0 | NA | NA | NA | NA | TRAJ46 |
| NA | ENSG00000211844 | 0 | NA | NA | NA | NA | TRAJ45 |
| NA | ENSG00000211845 | 0 | NA | NA | NA | NA | TRAJ44 |
| NA | ENSG00000211846 | 0 | NA | NA | NA | NA | TRAJ43 |
| NA | ENSG00000211847 | 0 | NA | NA | NA | NA | TRAJ42 |
| NA | ENSG00000211848 | 0 | NA | NA | NA | NA | TRAJ41 |
| NA | ENSG00000211849 | 0 | NA | NA | NA | NA | TRAJ40 |
| NA | ENSG00000211850 | 0 | NA | NA | NA | NA | TRAJ39 |
| NA | ENSG00000211851 | 0 | NA | NA | NA | NA | TRAJ38 |
| NA | ENSG00000211854 | 0 | NA | NA | NA | NA | TRAJ35 |
| NA | ENSG00000211855 | 0 | NA | NA | NA | NA | TRAJ34 |
| NA | ENSG00000211856 | 0 | NA | NA | NA | NA | TRAJ33 |
| NA | ENSG00000211857 | 0 | NA | NA | NA | NA | TRAJ32 |
| NA | ENSG00000211858 | 0 | NA | NA | NA | NA | TRAJ31 |
| NA | ENSG00000211859 | 0 | NA | NA | NA | NA | TRAJ30 |
| NA | ENSG00000211860 | 0 | NA | NA | NA | NA | TRAJ29 |
| NA | ENSG00000211861 | 0 | NA | NA | NA | NA | TRAJ28 |
| NA | ENSG00000211862 | 0 | NA | NA | NA | NA | TRAJ27 |
| NA | ENSG00000211863 | 0 | NA | NA | NA | NA | TRAJ26 |
| NA | ENSG00000211864 | 0 | NA | NA | NA | NA | TRAJ25 |
| NA | ENSG00000211865 | 0 | NA | NA | NA | NA | TRAJ24 |
| NA | ENSG00000211866 | 0 | NA | NA | NA | NA | TRAJ23 |
| NA | ENSG00000211867 | 0 | NA | NA | NA | NA | TRAJ22 |
| NA | ENSG00000211868 | 0 | NA | NA | NA | NA | TRAJ21 |
| NA | ENSG00000211869 | 0 | NA | NA | NA | NA | TRAJ20 |

|    |                 |            |             |            |            |    |          |
|----|-----------------|------------|-------------|------------|------------|----|----------|
| NA | ENSG00000211870 | 0          | NA          | NA         | NA         | NA | TRAJ19   |
| NA | ENSG00000211871 | 0          | NA          | NA         | NA         | NA | TRAJ18   |
| NA | ENSG00000211872 | 0          | NA          | NA         | NA         | NA | TRAJ17   |
| NA | ENSG00000211873 | 0          | NA          | NA         | NA         | NA | TRAJ16   |
| NA | ENSG00000211875 | 0          | NA          | NA         | NA         | NA | TRAJ14   |
| NA | ENSG00000211876 | 0          | NA          | NA         | NA         | NA | TRAJ13   |
| NA | ENSG00000211877 | 0          | NA          | NA         | NA         | NA | TRAJ12   |
| NA | ENSG00000211878 | 0          | NA          | NA         | NA         | NA | TRAJ11   |
| NA | ENSG00000211879 | 0          | NA          | NA         | NA         | NA | TRAJ10   |
| NA | ENSG00000211880 | 0          | NA          | NA         | NA         | NA | TRAJ9    |
| NA | ENSG00000211881 | 0          | NA          | NA         | NA         | NA | TRAJ8    |
| NA | ENSG00000211882 | 0          | NA          | NA         | NA         | NA | TRAJ7    |
| NA | ENSG00000211883 | 0          | NA          | NA         | NA         | NA | TRAJ6    |
| NA | ENSG00000211884 | 0          | NA          | NA         | NA         | NA | TRAJ5    |
| NA | ENSG00000211885 | 0          | NA          | NA         | NA         | NA | TRAJ4    |
| NA | ENSG00000211886 | 0          | NA          | NA         | NA         | NA | TRAJ3    |
| NA | ENSG00000211887 | 0          | NA          | NA         | NA         | NA | TRAJ2    |
| NA | ENSG00000211888 | 0          | NA          | NA         | NA         | NA | TRAJ1    |
| NA | ENSG00000211890 | 0          | NA          | NA         | NA         | NA | IGHA2    |
| NA | ENSG00000211891 | 0          | NA          | NA         | NA         | NA | IGHE     |
| NA | ENSG00000211892 | 0          | NA          | NA         | NA         | NA | IGHG4    |
| NA | ENSG00000211893 | 0          | NA          | NA         | NA         | NA | IGHG2    |
| NA | ENSG00000211895 | 0.14931947 | -0.01844332 | 0.38480212 | 0.84537521 | NA | IGHA1    |
| NA | ENSG00000211896 | 0.3244501  | 0.0013474   | 0.38336813 | 0.9674047  | NA | IGHG1    |
| NA | ENSG00000211897 | 0          | NA          | NA         | NA         | NA | IGHG3    |
| NA | ENSG00000211898 | 0          | NA          | NA         | NA         | NA | IGHD     |
| NA | ENSG00000211899 | 0          | NA          | NA         | NA         | NA | IGHM     |
| NA | ENSG00000211900 | 0          | NA          | NA         | NA         | NA | IGHJ6    |
| NA | ENSG00000211904 | 0          | NA          | NA         | NA         | NA | IGHJ2    |
| NA | ENSG00000211905 | 0          | NA          | NA         | NA         | NA | IGHJ1    |
| NA | ENSG00000211907 | 0          | NA          | NA         | NA         | NA | IGHD1-26 |
| NA | ENSG00000211909 | 0          | NA          | NA         | NA         | NA | IGHD5-24 |
| NA | ENSG00000211911 | 0          | NA          | NA         | NA         | NA | IGHD3-22 |
| NA | ENSG00000211912 | 0          | NA          | NA         | NA         | NA | IGHD2-21 |
| NA | ENSG00000211914 | 0          | NA          | NA         | NA         | NA | IGHD6-19 |
| NA | ENSG00000211915 | 0          | NA          | NA         | NA         | NA | IGHD5-18 |
| NA | ENSG00000211917 | 0          | NA          | NA         | NA         | NA | IGHD3-16 |
| NA | ENSG00000211918 | 0          | NA          | NA         | NA         | NA | IGHD2-15 |

|    |                 |            |             |            |            |            |          |
|----|-----------------|------------|-------------|------------|------------|------------|----------|
| NA | ENSG00000211920 | 0          | NA          | NA         | NA         | NA         | IGHD6-13 |
| NA | ENSG00000211921 | 0          | NA          | NA         | NA         | NA         | IGHD5-12 |
| NA | ENSG00000211923 | 0          | NA          | NA         | NA         | NA         | IGHD3-10 |
| NA | ENSG00000211924 | 0          | NA          | NA         | NA         | NA         | IGHD3-9  |
| NA | ENSG00000211925 | 0          | NA          | NA         | NA         | NA         | IGHD2-8  |
| NA | ENSG00000211930 | 0          | NA          | NA         | NA         | NA         | IGHD3-3  |
| NA | ENSG00000211931 | 0          | NA          | NA         | NA         | NA         | IGHD2-2  |
| NA | ENSG00000211933 | 0          | NA          | NA         | NA         | NA         | IGHV6-1  |
| NA | ENSG00000211934 | 0          | NA          | NA         | NA         | NA         | IGHV1-2  |
| NA | ENSG00000211935 | 0          | NA          | NA         | NA         | NA         | IGHV1-3  |
| NA | ENSG00000211937 | 0          | NA          | NA         | NA         | NA         | IGHV2-5  |
| NA | ENSG00000211938 | 0          | NA          | NA         | NA         | NA         | IGHV3-7  |
| NA | ENSG00000211941 | 0          | NA          | NA         | NA         | NA         | IGHV3-11 |
| NA | ENSG00000211942 | 0          | NA          | NA         | NA         | NA         | IGHV3-13 |
| NA | ENSG00000211943 | 0          | NA          | NA         | NA         | NA         | IGHV3-15 |
| NA | ENSG00000211944 | 0          | NA          | NA         | NA         | NA         | IGHV3-16 |
| NA | ENSG00000211945 | 0          | NA          | NA         | NA         | NA         | IGHV1-18 |
| NA | ENSG00000211946 | 0          | NA          | NA         | NA         | NA         | IGHV3-20 |
| NA | ENSG00000211947 | 0          | NA          | NA         | NA         | NA         | IGHV3-21 |
| NA | ENSG00000211949 | 0          | NA          | NA         | NA         | NA         | IGHV3-23 |
| NA | ENSG00000211950 | 0          | NA          | NA         | NA         | NA         | IGHV1-24 |
| NA | ENSG00000211951 | 0          | NA          | NA         | NA         | NA         | IGHV2-26 |
| NA | ENSG00000211952 | 0          | NA          | NA         | NA         | NA         | IGHV4-28 |
| NA | ENSG00000211955 | 1.45179463 | 0.01900771  | 0.37885436 | 0.78970841 | NA         | IGHV3-33 |
| NA | ENSG00000211956 | 12.338686  | 0.15511534  | 0.37499464 | 0.35427843 | 0.58481438 | IGHV4-34 |
| NA | ENSG00000211957 | 0.76437655 | -0.02307021 | 0.38373951 | 0.60708111 | NA         | IGHV3-35 |
| NA | ENSG00000211958 | 2.27613262 | 0.05802668  | 0.37919282 | 0.53243445 | NA         | IGHV3-38 |
| NA | ENSG00000211959 | 0.15069912 | -0.01848503 | 0.38480575 | 0.84537521 | NA         | IGHV4-39 |
| NA | ENSG00000211961 | 1.18566459 | 0.01896899  | 0.38015591 | 0.76681443 | NA         | IGHV1-45 |
| NA | ENSG00000211962 | 5.97503313 | 0.14812238  | 0.39526151 | 0.28037698 | 0.5049178  | IGHV1-46 |
| NA | ENSG00000211964 | 0          | NA          | NA         | NA         | NA         | IGHV3-48 |
| NA | ENSG00000211965 | 0          | NA          | NA         | NA         | NA         | IGHV3-49 |
| NA | ENSG00000211966 | 0          | NA          | NA         | NA         | NA         | IGHV5-51 |
| NA | ENSG00000211967 | 0          | NA          | NA         | NA         | NA         | IGHV3-53 |
| NA | ENSG00000211968 | 0          | NA          | NA         | NA         | NA         | IGHV1-58 |
| NA | ENSG00000211970 | 0          | NA          | NA         | NA         | NA         | IGHV4-61 |
| NA | ENSG00000211972 | 0          | NA          | NA         | NA         | NA         | IGHV3-66 |
| NA | ENSG00000211973 | 0          | NA          | NA         | NA         | NA         | IGHV1-69 |

|           |                 |            |            |            |            |            |            |
|-----------|-----------------|------------|------------|------------|------------|------------|------------|
| NA        | ENSG00000211974 | 0          | NA         | NA         | NA         | NA         | IGHV2-70D  |
| NA        | ENSG00000211976 | 0          | NA         | NA         | NA         | NA         | IGHV3-73   |
| NA        | ENSG00000211978 | 0          | NA         | NA         | NA         | NA         | IGHV5-78   |
| NA        | ENSG00000211979 | 0          | NA         | NA         | NA         | NA         | IGHV7-81   |
| 100500887 | ENSG00000211991 | 0          | NA         | NA         | NA         | NA         | MIR676     |
| 100126333 | ENSG00000211997 | 0          | NA         | NA         | NA         | NA         | MIR708     |
| 100126301 | ENSG00000212013 | 0          | NA         | NA         | NA         | NA         | MIR509-2   |
| 100126337 | ENSG00000212014 | 0          | NA         | NA         | NA         | NA         | MIR509-3   |
| 100422884 | ENSG00000212017 | 0          | NA         | NA         | NA         | NA         | MIR548U    |
| 100616354 | ENSG00000212024 | 0          | NA         | NA         | NA         | NA         | MIR550A3   |
| 100126317 | ENSG00000212027 | 0          | NA         | NA         | NA         | NA         | MIR374B    |
| 102465854 | ENSG00000212036 | 0          | NA         | NA         | NA         | NA         | MIR548BA   |
| 100126335 | ENSG00000212040 | 0          | NA         | NA         | NA         | NA         | MIR543     |
| NA        | ENSG00000212051 | 0          | NA         | NA         | NA         | NA         | MIR320C2   |
| 100313838 | ENSG00000212100 | 0          | NA         | NA         | NA         | NA         | MIR764     |
| 100126318 | ENSG00000212102 | 0          | NA         | NA         | NA         | NA         | MIR301B    |
| 83942     | ENSG00000212122 | 1.83880827 | 0.09057265 | 0.39681034 | 0.13153654 | NA         | TSSK1B     |
| 163154    | ENSG00000212123 | 40.4799834 | 0.15194566 | 0.28111467 | 0.44654984 | 0.67077141 | PRR22      |
| 259294    | ENSG00000212124 | 6.68558122 | 0.38481437 | 0.65033043 | 0.03001163 | 0.1003422  | TAS2R19    |
| NA        | ENSG00000212125 | 6.11039886 | 0.14715573 | 0.39049783 | 0.30697385 | 0.53453681 | TAS2R15P   |
| 259296    | ENSG00000212126 | 1.51884284 | 0.02451317 | 0.37925517 | 0.73143546 | NA         | TAS2R50    |
| 50840     | ENSG00000212127 | 31.424637  | -0.330237  | 0.3539733  | 0.14087851 | 0.31892169 | TAS2R14    |
| 106707243 | ENSG00000212127 | 31.424637  | -0.330237  | 0.3539733  | 0.14087851 | 0.31892169 | TAS2R14    |
| 50838     | ENSG00000212128 | 1.96005034 | 0.11217192 | 0.40103568 | 0.16668453 | NA         | TAS2R13    |
| NA        | ENSG00000212133 | 0          | NA         | NA         | NA         | NA         | RNU6-1168P |
| NA        | ENSG00000212134 | 0          | NA         | NA         | NA         | NA         |            |
| 692108    | ENSG00000212135 | 0          | NA         | NA         | NA         | NA         | SNORD67    |
| NA        | ENSG00000212136 | 0          | NA         | NA         | NA         | NA         | RNU6-696P  |
| NA        | ENSG00000212138 | 0          | NA         | NA         | NA         | NA         | RNA5SP372  |
| NA        | ENSG00000212140 | 0          | NA         | NA         | NA         | NA         | RNU6-1320P |
| NA        | ENSG00000212144 | 0          | NA         | NA         | NA         | NA         |            |
| NA        | ENSG00000212145 | 0          | NA         | NA         | NA         | NA         |            |
| NA        | ENSG00000212146 | 0          | NA         | NA         | NA         | NA         | RNU6-910P  |
| NA        | ENSG00000212147 | 0          | NA         | NA         | NA         | NA         | RNU6-1106P |
| NA        | ENSG00000212149 | 0          | NA         | NA         | NA         | NA         |            |
| NA        | ENSG00000212153 | 0          | NA         | NA         | NA         | NA         | RNU1-82P   |
| NA        | ENSG00000212156 | 0          | NA         | NA         | NA         | NA         | RNU6-576P  |
| NA        | ENSG00000212157 | 0          | NA         | NA         | NA         | NA         | RNU6-1319P |

|           |                 |            |            |            |            |    |            |
|-----------|-----------------|------------|------------|------------|------------|----|------------|
| 692107    | ENSG00000212158 | 0          | NA         | NA         | NA         | NA | SNORD66    |
| NA        | ENSG00000212160 | 0          | NA         | NA         | NA         | NA | RNU6-205P  |
| NA        | ENSG00000212161 | 0          | NA         | NA         | NA         | NA |            |
| NA        | ENSG00000212163 | 0          | NA         | NA         | NA         | NA | SNORD91A   |
| NA        | ENSG00000212165 | 0          | NA         | NA         | NA         | NA |            |
| NA        | ENSG00000212167 | 0          | NA         | NA         | NA         | NA | RNU6-763P  |
| NA        | ENSG00000212168 | 0          | NA         | NA         | NA         | NA |            |
| NA        | ENSG00000212170 | 0          | NA         | NA         | NA         | NA | RNU1-77P   |
| NA        | ENSG00000212171 | 0          | NA         | NA         | NA         | NA | RNA5SP86   |
| NA        | ENSG00000212172 | 0          | NA         | NA         | NA         | NA | RNU1-149P  |
| NA        | ENSG00000212175 | 0.18922458 | 0.01954053 | 0.38488496 | 0.78225479 | NA |            |
| NA        | ENSG00000212176 | 0          | NA         | NA         | NA         | NA | RNA5SP207  |
| NA        | ENSG00000212181 | 0          | NA         | NA         | NA         | NA |            |
| NA        | ENSG00000212182 | 0          | NA         | NA         | NA         | NA |            |
| NA        | ENSG00000212184 | 0          | NA         | NA         | NA         | NA | RNU6-440P  |
| NA        | ENSG00000212186 | 0          | NA         | NA         | NA         | NA | RNU6-258P  |
| NA        | ENSG00000212187 | 0          | NA         | NA         | NA         | NA |            |
| NA        | ENSG00000212189 | 0          | NA         | NA         | NA         | NA | RNU6-328P  |
| NA        | ENSG00000212190 | 0          | NA         | NA         | NA         | NA | RNU6-298P  |
| NA        | ENSG00000212191 | 0          | NA         | NA         | NA         | NA |            |
| NA        | ENSG00000212195 | 0          | NA         | NA         | NA         | NA |            |
| NA        | ENSG00000212199 | 0          | NA         | NA         | NA         | NA | RNU6-127P  |
| NA        | ENSG00000212204 | 0          | NA         | NA         | NA         | NA | RNA5SP91   |
| NA        | ENSG00000212205 | 0          | NA         | NA         | NA         | NA |            |
| NA        | ENSG00000212206 | 0          | NA         | NA         | NA         | NA |            |
| NA        | ENSG00000212207 | 0          | NA         | NA         | NA         | NA | RNU6-1321P |
| NA        | ENSG00000212211 | 0          | NA         | NA         | NA         | NA |            |
| 109616969 | ENSG00000212214 | 0          | NA         | NA         | NA         | NA | SNORA48B   |
| NA        | ENSG00000212215 | 0          | NA         | NA         | NA         | NA | RNU6-913P  |
| NA        | ENSG00000212219 | 0          | NA         | NA         | NA         | NA | RNU6-604P  |
| NA        | ENSG00000212221 | 0          | NA         | NA         | NA         | NA | RNU6-220P  |
| NA        | ENSG00000212224 | 0          | NA         | NA         | NA         | NA |            |
| NA        | ENSG00000212226 | 0          | NA         | NA         | NA         | NA | RNU6-907P  |
| NA        | ENSG00000212228 | 0          | NA         | NA         | NA         | NA |            |
| NA        | ENSG00000212229 | 0          | NA         | NA         | NA         | NA |            |
| 692086    | ENSG00000212232 | 2.05322451 | -0.0234758 | 0.37561835 | 0.78397318 | NA | SNORD17    |
| NA        | ENSG00000212237 | 0          | NA         | NA         | NA         | NA | RNA5SP18   |
| NA        | ENSG00000212238 | 0          | NA         | NA         | NA         | NA | RNA5SP244  |

|           |                 |   |    |    |    |    |            |
|-----------|-----------------|---|----|----|----|----|------------|
| NA        | ENSG00000212240 | 0 | NA | NA | NA | NA | RNU6-930P  |
| NA        | ENSG00000212241 | 0 | NA | NA | NA | NA |            |
| NA        | ENSG00000212242 | 0 | NA | NA | NA | NA | RNA5SP219  |
| NA        | ENSG00000212246 | 0 | NA | NA | NA | NA | RNU6-360P  |
| NA        | ENSG00000212247 | 0 | NA | NA | NA | NA | RNU6-278P  |
| NA        | ENSG00000212248 | 0 | NA | NA | NA | NA | RNU6-750P  |
| NA        | ENSG00000212249 | 0 | NA | NA | NA | NA |            |
| NA        | ENSG00000212251 | 0 | NA | NA | NA | NA | RNA5SP376  |
| NA        | ENSG00000212257 | 0 | NA | NA | NA | NA | RNU6-1176P |
| NA        | ENSG00000212258 | 0 | NA | NA | NA | NA | RNA5SP176  |
| NA        | ENSG00000212259 | 0 | NA | NA | NA | NA | RNU6-308P  |
| NA        | ENSG00000212260 | 0 | NA | NA | NA | NA | RNU6-724P  |
| 109616981 | ENSG00000212264 | 0 | NA | NA | NA | NA | SNORD65C   |
| NA        | ENSG00000212265 | 0 | NA | NA | NA | NA | RNA5SP185  |
| NA        | ENSG00000212266 | 0 | NA | NA | NA | NA |            |
| NA        | ENSG00000212269 | 0 | NA | NA | NA | NA | RNU6-788P  |
| NA        | ENSG00000212270 | 0 | NA | NA | NA | NA |            |
| NA        | ENSG00000212273 | 0 | NA | NA | NA | NA |            |
| NA        | ENSG00000212276 | 0 | NA | NA | NA | NA | RNA5SP292  |
| NA        | ENSG00000212278 | 0 | NA | NA | NA | NA |            |
| NA        | ENSG00000212279 | 0 | NA | NA | NA | NA |            |
| NA        | ENSG00000212280 | 0 | NA | NA | NA | NA | RNA5SP256  |
| NA        | ENSG00000212282 | 0 | NA | NA | NA | NA | RNU6-578P  |
| 692205    | ENSG00000212283 | 0 | NA | NA | NA | NA | SNORD89    |
| NA        | ENSG00000212289 | 0 | NA | NA | NA | NA | RNA5SP339  |
| NA        | ENSG00000212292 | 0 | NA | NA | NA | NA | RNU6-239P  |
| NA        | ENSG00000212293 | 0 | NA | NA | NA | NA |            |
| 109617011 | ENSG00000212295 | 0 | NA | NA | NA | NA | SNORD28B   |
| 619564    | ENSG00000212296 | 0 | NA | NA | NA | NA | SNORD72    |
| NA        | ENSG00000212297 | 0 | NA | NA | NA | NA | RNU6-821P  |
| NA        | ENSG00000212298 | 0 | NA | NA | NA | NA | RNU6-1009P |
| NA        | ENSG00000212302 | 0 | NA | NA | NA | NA |            |
| NA        | ENSG00000212303 | 0 | NA | NA | NA | NA | RNU6-1154P |
| 692057    | ENSG00000212304 | 0 | NA | NA | NA | NA | SNORD12    |
| NA        | ENSG00000212305 | 0 | NA | NA | NA | NA | RNU6-679P  |
| NA        | ENSG00000212306 | 0 | NA | NA | NA | NA |            |
| NA        | ENSG00000212308 | 0 | NA | NA | NA | NA | RNA5SP23   |
| NA        | ENSG00000212309 | 0 | NA | NA | NA | NA | SNORD70B   |

|    |                 |            |            |            |            |    |             |
|----|-----------------|------------|------------|------------|------------|----|-------------|
| NA | ENSG00000212312 | 0          | NA         | NA         | NA         | NA | RNA5SP109   |
| NA | ENSG00000212314 | 0          | NA         | NA         | NA         | NA | RNU6-1307P  |
| NA | ENSG00000212316 | 0          | NA         | NA         | NA         | NA | RNU6-1228P  |
| NA | ENSG00000212319 | 0          | NA         | NA         | NA         | NA |             |
| NA | ENSG00000212321 | 0          | NA         | NA         | NA         | NA |             |
| NA | ENSG00000212324 | 0          | NA         | NA         | NA         | NA | RNU6-129P   |
| NA | ENSG00000212325 | 0          | NA         | NA         | NA         | NA |             |
| NA | ENSG00000212327 | 0          | NA         | NA         | NA         | NA | RNU6-882P   |
| NA | ENSG00000212329 | 0          | NA         | NA         | NA         | NA | RNU6-316P   |
| NA | ENSG00000212330 | 0          | NA         | NA         | NA         | NA | RNU6-244P   |
| NA | ENSG00000212331 | 0          | NA         | NA         | NA         | NA | RNA5SP297   |
| NA | ENSG00000212332 | 0          | NA         | NA         | NA         | NA | RNU6-780P   |
| NA | ENSG00000212333 | 0          | NA         | NA         | NA         | NA | RNA5SP213   |
| NA | ENSG00000212335 | 0          | NA         | NA         | NA         | NA |             |
| NA | ENSG00000212336 | 0          | NA         | NA         | NA         | NA | RNA5SP210   |
| NA | ENSG00000212338 | 0          | NA         | NA         | NA         | NA |             |
| NA | ENSG00000212340 | 0          | NA         | NA         | NA         | NA | RNU6-739P   |
| NA | ENSG00000212342 | 0          | NA         | NA         | NA         | NA |             |
| NA | ENSG00000212344 | 0          | NA         | NA         | NA         | NA | RNU6-823P   |
| NA | ENSG00000212345 | 0          | NA         | NA         | NA         | NA | RNU6-700P   |
| NA | ENSG00000212347 | 0          | NA         | NA         | NA         | NA |             |
| NA | ENSG00000212348 | 0          | NA         | NA         | NA         | NA | RNU6-1300P  |
| NA | ENSG00000212354 | 0          | NA         | NA         | NA         | NA | RNU6-1242P  |
| NA | ENSG00000212358 | 0          | NA         | NA         | NA         | NA | RNU6-837P   |
| NA | ENSG00000212359 | 0          | NA         | NA         | NA         | NA | RNU6-550P   |
| NA | ENSG00000212360 | 0          | NA         | NA         | NA         | NA | RNU6-1177P  |
| NA | ENSG00000212363 | 0          | NA         | NA         | NA         | NA |             |
| NA | ENSG00000212365 | 0          | NA         | NA         | NA         | NA | RNA5SP332   |
| NA | ENSG00000212366 | 0          | NA         | NA         | NA         | NA | RNU6-1246P  |
| NA | ENSG00000212368 | 0          | NA         | NA         | NA         | NA | RNU6-1000P  |
| NA | ENSG00000212370 | 0          | NA         | NA         | NA         | NA | RNU6-482P   |
| NA | ENSG00000212371 | 0.69465532 | 0.00250623 | 0.38183794 | 0.95712618 | NA |             |
| NA | ENSG00000212373 | 0          | NA         | NA         | NA         | NA | RNA5SP171   |
| NA | ENSG00000212374 | 0          | NA         | NA         | NA         | NA | RNU6-401P   |
| NA | ENSG00000212377 | 0          | NA         | NA         | NA         | NA |             |
| NA | ENSG00000212378 | 0          | NA         | NA         | NA         | NA |             |
| NA | ENSG00000212379 | 0          | NA         | NA         | NA         | NA | RNU6-269P   |
| NA | ENSG00000212380 | 0          | NA         | NA         | NA         | NA | SNORD115-45 |

|           |                 |            |            |            |            |    |            |
|-----------|-----------------|------------|------------|------------|------------|----|------------|
| NA        | ENSG00000212382 | 0          | NA         | NA         | NA         | NA | RNU6-159P  |
| NA        | ENSG00000212383 | 0          | NA         | NA         | NA         | NA |            |
| 767562    | ENSG00000212384 | 0          | NA         | NA         | NA         | NA | SNORD113-2 |
| NA        | ENSG00000212385 | 0          | NA         | NA         | NA         | NA | RNU6-817P  |
| NA        | ENSG00000212387 | 0          | NA         | NA         | NA         | NA | RNU6-1055P |
| NA        | ENSG00000212388 | 0          | NA         | NA         | NA         | NA | RNU6-796P  |
| NA        | ENSG00000212389 | 0          | NA         | NA         | NA         | NA | RNU6-1275P |
| NA        | ENSG00000212391 | 0          | NA         | NA         | NA         | NA |            |
| NA        | ENSG00000212392 | 0          | NA         | NA         | NA         | NA |            |
| NA        | ENSG00000212395 | 0          | NA         | NA         | NA         | NA |            |
| NA        | ENSG00000212396 | 0          | NA         | NA         | NA         | NA | RNA5SP323  |
| NA        | ENSG00000212397 | 0          | NA         | NA         | NA         | NA |            |
| NA        | ENSG00000212398 | 0          | NA         | NA         | NA         | NA | RNU6-1248P |
| 677841    | ENSG00000212402 | 0          | NA         | NA         | NA         | NA | SNORA74B   |
| NA        | ENSG00000212404 | 0          | NA         | NA         | NA         | NA |            |
| NA        | ENSG00000212407 | 0          | NA         | NA         | NA         | NA | RNU6-663P  |
| NA        | ENSG00000212409 | 0          | NA         | NA         | NA         | NA | RNY4P18    |
| NA        | ENSG00000212410 | 0          | NA         | NA         | NA         | NA | RNU6-932P  |
| NA        | ENSG00000212411 | 0          | NA         | NA         | NA         | NA |            |
| NA        | ENSG00000212413 | 0          | NA         | NA         | NA         | NA | RNU11-3P   |
| 109616982 | ENSG00000212414 | 0          | NA         | NA         | NA         | NA | SNORD77B   |
| NA        | ENSG00000212415 | 0          | NA         | NA         | NA         | NA |            |
| NA        | ENSG00000212418 | 0          | NA         | NA         | NA         | NA | RNY4P36    |
| NA        | ENSG00000212420 | 0          | NA         | NA         | NA         | NA | RNU6-1111P |
| NA        | ENSG00000212421 | 0          | NA         | NA         | NA         | NA |            |
| NA        | ENSG00000212422 | 0          | NA         | NA         | NA         | NA |            |
| NA        | ENSG00000212424 | 0          | NA         | NA         | NA         | NA | RNU1-119P  |
| NA        | ENSG00000212425 | 0          | NA         | NA         | NA         | NA | RNA5SP105  |
| NA        | ENSG00000212428 | 0          | NA         | NA         | NA         | NA |            |
| NA        | ENSG00000212429 | 0          | NA         | NA         | NA         | NA | RNU11-6P   |
| NA        | ENSG00000212432 | 0          | NA         | NA         | NA         | NA |            |
| NA        | ENSG00000212433 | 0          | NA         | NA         | NA         | NA | RNA5SP252  |
| NA        | ENSG00000212434 | 0          | NA         | NA         | NA         | NA |            |
| NA        | ENSG00000212440 | 0          | NA         | NA         | NA         | NA |            |
| NA        | ENSG00000212441 | 0          | NA         | NA         | NA         | NA | RNU6-1269P |
| NA        | ENSG00000212442 | 0          | NA         | NA         | NA         | NA | RNU6-243P  |
| 677832    | ENSG00000212443 | 0.36234858 | 0.00087365 | 0.38336423 | 0.96755054 | NA | SNORA53    |
| NA        | ENSG00000212445 | 0          | NA         | NA         | NA         | NA |            |



|        |                 |   |    |    |    |    |            |
|--------|-----------------|---|----|----|----|----|------------|
| NA     | ENSG00000212446 | 0 | NA | NA | NA | NA | RNU6-131P  |
| 692206 | ENSG00000212447 | 0 | NA | NA | NA | NA | SNORD90    |
| NA     | ENSG00000212448 | 0 | NA | NA | NA | NA |            |
| NA     | ENSG00000212451 | 0 | NA | NA | NA | NA | RNU11-4P   |
| 692109 | ENSG00000212452 | 0 | NA | NA | NA | NA | SNORD69    |
| NA     | ENSG00000212454 | 0 | NA | NA | NA | NA | RNA5SP286  |
| NA     | ENSG00000212455 | 0 | NA | NA | NA | NA |            |
| NA     | ENSG00000212457 | 0 | NA | NA | NA | NA | RNU6-644P  |
| NA     | ENSG00000212458 | 0 | NA | NA | NA | NA |            |
| NA     | ENSG00000212459 | 0 | NA | NA | NA | NA | RNU6-695P  |
| NA     | ENSG00000212460 | 0 | NA | NA | NA | NA | RNU6-460P  |
| NA     | ENSG00000212461 | 0 | NA | NA | NA | NA |            |
| 677800 | ENSG00000212464 | 0 | NA | NA | NA | NA | SNORA12    |
| NA     | ENSG00000212466 | 0 | NA | NA | NA | NA | RNU6-952P  |
| NA     | ENSG00000212468 | 0 | NA | NA | NA | NA | RNU6-754P  |
| NA     | ENSG00000212469 | 0 | NA | NA | NA | NA | RNU6-1158P |
| NA     | ENSG00000212473 | 0 | NA | NA | NA | NA | RNU1-101P  |
| NA     | ENSG00000212475 | 0 | NA | NA | NA | NA | RNU6-400P  |
| NA     | ENSG00000212479 | 0 | NA | NA | NA | NA |            |
| NA     | ENSG00000212482 | 0 | NA | NA | NA | NA | RNU6-530P  |
| NA     | ENSG00000212485 | 0 | NA | NA | NA | NA | RNU6-1197P |
| NA     | ENSG00000212489 | 0 | NA | NA | NA | NA | RNU6-1109P |
| NA     | ENSG00000212490 | 0 | NA | NA | NA | NA |            |
| NA     | ENSG00000212493 | 0 | NA | NA | NA | NA | SNORD19    |
| NA     | ENSG00000212495 | 0 | NA | NA | NA | NA | RNU6-332P  |
| NA     | ENSG00000212496 | 0 | NA | NA | NA | NA | RNU6-1093P |
| NA     | ENSG00000212497 | 0 | NA | NA | NA | NA | RNA5SP465  |
| 692201 | ENSG00000212498 | 0 | NA | NA | NA | NA | SNORD86    |
| NA     | ENSG00000212499 | 0 | NA | NA | NA | NA | RNA5SP300  |
| NA     | ENSG00000212505 | 0 | NA | NA | NA | NA | RNA5SP299  |
| NA     | ENSG00000212510 | 0 | NA | NA | NA | NA | RNU6-972P  |
| NA     | ENSG00000212511 | 0 | NA | NA | NA | NA |            |
| NA     | ENSG00000212512 | 0 | NA | NA | NA | NA |            |
| NA     | ENSG00000212517 | 0 | NA | NA | NA | NA |            |
| NA     | ENSG00000212518 | 0 | NA | NA | NA | NA | RNU11-5P   |
| NA     | ENSG00000212520 | 0 | NA | NA | NA | NA | RNU6-1250P |
| NA     | ENSG00000212521 | 0 | NA | NA | NA | NA | RNU6-918P  |
| NA     | ENSG00000212525 | 0 | NA | NA | NA | NA | RNA5SP212  |

|        |                 |   |    |    |    |    |             |
|--------|-----------------|---|----|----|----|----|-------------|
| NA     | ENSG00000212526 | 0 | NA | NA | NA | NA | RNU6-466P   |
| NA     | ENSG00000212527 | 0 | NA | NA | NA | NA | RNA5SP63    |
| NA     | ENSG00000212528 | 0 | NA | NA | NA | NA | SNORD115-47 |
| NA     | ENSG00000212529 | 0 | NA | NA | NA | NA |             |
| NA     | ENSG00000212532 | 0 | NA | NA | NA | NA |             |
| NA     | ENSG00000212533 | 0 | NA | NA | NA | NA |             |
| 692110 | ENSG00000212534 | 0 | NA | NA | NA | NA | SNORD70     |
| NA     | ENSG00000212535 | 0 | NA | NA | NA | NA | RNU6-808P   |
| NA     | ENSG00000212536 | 0 | NA | NA | NA | NA | RNA5SP474   |
| NA     | ENSG00000212538 | 0 | NA | NA | NA | NA |             |
| NA     | ENSG00000212539 | 0 | NA | NA | NA | NA |             |
| NA     | ENSG00000212541 | 0 | NA | NA | NA | NA | RNU6-510P   |
| NA     | ENSG00000212542 | 0 | NA | NA | NA | NA | RNA5SP496   |
| NA     | ENSG00000212545 | 0 | NA | NA | NA | NA | RNU6-337P   |
| NA     | ENSG00000212546 | 0 | NA | NA | NA | NA | RNU6-995P   |
| NA     | ENSG00000212549 | 0 | NA | NA | NA | NA | RNA5SP354   |
| NA     | ENSG00000212550 | 0 | NA | NA | NA | NA | RNU1-78P    |
| NA     | ENSG00000212551 | 0 | NA | NA | NA | NA |             |
| NA     | ENSG00000212553 | 0 | NA | NA | NA | NA |             |
| NA     | ENSG00000212555 | 0 | NA | NA | NA | NA | RNU6-192P   |
| NA     | ENSG00000212556 | 0 | NA | NA | NA | NA |             |
| NA     | ENSG00000212558 | 0 | NA | NA | NA | NA |             |
| NA     | ENSG00000212559 | 0 | NA | NA | NA | NA | RNA5SP35    |
| NA     | ENSG00000212560 | 0 | NA | NA | NA | NA | RNU6-630P   |
| NA     | ENSG00000212561 | 0 | NA | NA | NA | NA | RNU6-381P   |
| NA     | ENSG00000212564 | 0 | NA | NA | NA | NA | RNU6-1326P  |
| NA     | ENSG00000212565 | 0 | NA | NA | NA | NA |             |
| NA     | ENSG00000212567 | 0 | NA | NA | NA | NA |             |
| NA     | ENSG00000212568 | 0 | NA | NA | NA | NA | RNU6-1254P  |
| NA     | ENSG00000212569 | 0 | NA | NA | NA | NA |             |
| NA     | ENSG00000212571 | 0 | NA | NA | NA | NA | RNA5SP482   |
| NA     | ENSG00000212572 | 0 | NA | NA | NA | NA | RNU6-903P   |
| NA     | ENSG00000212576 | 0 | NA | NA | NA | NA | RNA5SP467   |
| NA     | ENSG00000212579 | 0 | NA | NA | NA | NA |             |
| NA     | ENSG00000212580 | 0 | NA | NA | NA | NA |             |
| NA     | ENSG00000212581 | 0 | NA | NA | NA | NA |             |
| NA     | ENSG00000212584 | 0 | NA | NA | NA | NA | RNU6-587P   |
| NA     | ENSG00000212586 | 0 | NA | NA | NA | NA |             |

|           |                 |            |             |            |            |            |            |
|-----------|-----------------|------------|-------------|------------|------------|------------|------------|
| 109616968 | ENSG00000212587 | 0          | NA          | NA         | NA         | NA         | SNORA40C   |
| 677810    | ENSG00000212588 | 0          | NA          | NA         | NA         | NA         | SNORA26    |
| NA        | ENSG00000212589 | 0          | NA          | NA         | NA         | NA         |            |
| NA        | ENSG00000212590 | 0          | NA          | NA         | NA         | NA         |            |
| NA        | ENSG00000212593 | 0          | NA          | NA         | NA         | NA         |            |
| NA        | ENSG00000212594 | 0          | NA          | NA         | NA         | NA         |            |
| NA        | ENSG00000212595 | 0          | NA          | NA         | NA         | NA         | RNA5SP525  |
| NA        | ENSG00000212597 | 0          | NA          | NA         | NA         | NA         | RNU6-876P  |
| NA        | ENSG00000212598 | 0          | NA          | NA         | NA         | NA         |            |
| NA        | ENSG00000212599 | 0          | NA          | NA         | NA         | NA         | RNU6-279P  |
| NA        | ENSG00000212601 | 0          | NA          | NA         | NA         | NA         | RNA5SP53   |
| NA        | ENSG00000212604 | 0          | NA          | NA         | NA         | NA         |            |
| NA        | ENSG00000212605 | 0          | NA          | NA         | NA         | NA         | RNU1-56P   |
| 677826    | ENSG00000212607 | 0.18922458 | 0.01954053  | 0.38488496 | 0.78225479 | NA         | SNORA3B    |
| NA        | ENSG00000212608 | 0          | NA          | NA         | NA         | NA         |            |
| NA        | ENSG00000212609 | 0          | NA          | NA         | NA         | NA         | RNU1-139P  |
| NA        | ENSG00000212610 | 0          | NA          | NA         | NA         | NA         |            |
| NA        | ENSG00000212611 | 0          | NA          | NA         | NA         | NA         |            |
| NA        | ENSG00000212612 | 0          | NA          | NA         | NA         | NA         | RNU6-1239P |
| NA        | ENSG00000212615 | 0          | NA          | NA         | NA         | NA         |            |
| NA        | ENSG00000212618 | 0          | NA          | NA         | NA         | NA         |            |
| NA        | ENSG00000212620 | 0          | NA          | NA         | NA         | NA         |            |
| NA        | ENSG00000212623 | 0          | NA          | NA         | NA         | NA         | RNU6-493P  |
| NA        | ENSG00000212624 | 0          | NA          | NA         | NA         | NA         |            |
| NA        | ENSG00000212625 | 0          | NA          | NA         | NA         | NA         | RNA5SP397  |
| NA        | ENSG00000212626 | 0          | NA          | NA         | NA         | NA         |            |
| NA        | ENSG00000212628 | 0          | NA          | NA         | NA         | NA         | RNA5SP241  |
| NA        | ENSG00000212643 | 27.2680034 | -0.00961403 | 0.38325266 | 0.78938444 | 0.90431711 | ZRSR2P1    |
| 100505753 | ENSG00000212657 | 0          | NA          | NA         | NA         | NA         | KRTAP16-1  |
| 100533177 | ENSG00000212658 | 0          | NA          | NA         | NA         | NA         | KRTAP29-1  |
| 100507608 | ENSG00000212659 | 0          | NA          | NA         | NA         | NA         | KRTAP9-6   |
| NA        | ENSG00000212663 | 0          | NA          | NA         | NA         | NA         |            |
| NA        | ENSG00000212664 | 2.74670479 | -0.05154414 | 0.37512204 | 0.61128703 | 0.79937717 |            |
| 338799    | ENSG00000212694 | 330.975236 | 0.19306495  | 0.14038367 | 0.13897693 | 0.31573369 | LINC01089  |
| NA        | ENSG00000212695 | 0.173733   | 0.01914545  | 0.38484597 | 0.78225479 | NA         |            |
| 64693     | ENSG00000212710 | 0          | NA          | NA         | NA         | NA         | CTAGE1     |
| NA        | ENSG00000212712 | 2.43988    | 0.01019985  | 0.37445534 | 0.90859895 | NA         |            |
| NA        | ENSG00000212717 | 0          | NA          | NA         | NA         | NA         | DEFB117    |

|           |                 |            |             |            |            |            |            |
|-----------|-----------------|------------|-------------|------------|------------|------------|------------|
| 339263    | ENSG00000212719 | 276.0483   | 0.02761054  | 0.14635759 | 0.83916943 | 0.92675321 | LINC02693  |
| 653240    | ENSG00000212721 | 0          | NA          | NA         | NA         | NA         | KRTAP4-11  |
| 100132386 | ENSG00000212722 | 0          | NA          | NA         | NA         | NA         | KRTAP4-9   |
| 730755    | ENSG00000212724 | 0          | NA          | NA         | NA         | NA         | KRTAP2-3   |
| 81872     | ENSG00000212725 | 0          | NA          | NA         | NA         | NA         | KRTAP2-1   |
| NA        | ENSG00000212743 | 0.52978722 | 0.01376682  | 0.38293852 | 0.74030017 | NA         | LINC02656  |
| 441518    | ENSG00000212747 | 522.807144 | -0.44467526 | 0.110906   | 2.77E-05   | 0.00024084 | RTL8B      |
| 283673    | ENSG00000212766 | 8.03575157 | -0.15174294 | 0.38350356 | 0.33132022 | 0.56018597 | EWSAT1     |
| NA        | ENSG00000212769 | 0          | NA          | NA         | NA         | NA         | HMG2P8     |
| NA        | ENSG00000212789 | 0          | NA          | NA         | NA         | NA         | ST13P5     |
| NA        | ENSG00000212802 | 1.70399282 | 0.03597974  | 0.37805124 | 0.66278317 | NA         | RPL15P3    |
| 402317    | ENSG00000212807 | 0          | NA          | NA         | NA         | NA         | OR2A42     |
| NA        | ENSG00000212829 | 0.173124   | -0.01911262 | 0.38486262 | 0.84537521 | NA         | RPS26P3    |
| NA        | ENSG00000212856 | 0          | NA          | NA         | NA         | NA         | TTY2B      |
| 727800    | ENSG00000212864 | 266.037082 | -0.08844006 | 0.14534084 | 0.50973135 | 0.72536724 | RNF208     |
| 85293     | ENSG00000212899 | 0          | NA          | NA         | NA         | NA         | KRTAP3-3   |
| 83897     | ENSG00000212900 | 0          | NA          | NA         | NA         | NA         | KRTAP3-2   |
| 83896     | ENSG00000212901 | 0          | NA          | NA         | NA         | NA         | KRTAP3-1   |
| 4539      | ENSG00000212907 | 10526.4715 | -0.10706663 | 0.05631185 | 0.05019831 | 0.14938269 | MT-ND4L    |
| 54627     | ENSG00000212916 | 128.826283 | -0.78849626 | 0.25030087 | 0.00026518 | 0.0018338  | MAP10      |
| NA        | ENSG00000212930 | 0          | NA          | NA         | NA         | NA         |            |
| NA        | ENSG00000212932 | 0          | NA          | NA         | NA         | NA         | RPL23AP4   |
| 386684    | ENSG00000212933 | 0          | NA          | NA         | NA         | NA         | KRTAP12-4  |
| 386682    | ENSG00000212935 | 0          | NA          | NA         | NA         | NA         | KRTAP10-3  |
| 337968    | ENSG00000212938 | 0          | NA          | NA         | NA         | NA         | KRTAP6-3   |
| NA        | ENSG00000212939 | 0          | NA          | NA         | NA         | NA         |            |
| NA        | ENSG00000212951 | 0.3235666  | 0.0017811   | 0.38337261 | 0.96403034 | NA         |            |
| NA        | ENSG00000212952 | 7.69959972 | 0.08198605  | 0.36649586 | 0.5555989  | 0.7613563  |            |
| NA        | ENSG00000212961 | 0.34746601 | 0.02370763  | 0.3853651  | 0.61987128 | NA         | HNRNPA1P40 |
| 339803    | ENSG00000212978 | 135.575299 | 0.38560933  | 0.21494349 | 0.03426203 | 0.11156386 |            |
| NA        | ENSG00000212989 | 0          | NA          | NA         | NA         | NA         |            |
| 5462      | ENSG00000212993 | 2.83576885 | 0.10165852  | 0.39197368 | 0.28032836 | 0.5049178  | POU5F1B    |
| NA        | ENSG00000212994 | 0.63986519 | -0.02081523 | 0.38314397 | 0.66991272 | NA         | RPS26P6    |
| NA        | ENSG00000213003 | 0          | NA          | NA         | NA         | NA         | BTF3P12    |
| NA        | ENSG00000213005 | 0          | NA          | NA         | NA         | NA         | PTTG3P     |
| NA        | ENSG00000213013 | 0          | NA          | NA         | NA         | NA         | RPS15AP36  |
| NA        | ENSG00000213014 | 0.66089049 | 0.00409269  | 0.38193143 | 0.93028673 | NA         | VN2R17P    |
| 51157     | ENSG00000213015 | 893.335246 | 0.20498519  | 0.09497708 | 0.02573774 | 0.08910082 | ZNF580     |

|        |                 |            |             |            |            |            |            |
|--------|-----------------|------------|-------------|------------|------------|------------|------------|
| NA     | ENSG00000213016 | 0          | NA          | NA         | NA         | NA         |            |
| NA     | ENSG00000213018 | 2.08468623 | 0.06532423  | 0.38272907 | 0.45113518 | NA         | PABPN1P1   |
| 81856  | ENSG00000213020 | 230.46799  | -0.1648196  | 0.17435176 | 0.28719247 | 0.51295451 | ZNF611     |
| 284366 | ENSG00000213022 | 0          | NA          | NA         | NA         | NA         | KLK9       |
| 84258  | ENSG00000213023 | 259.137832 | -0.66863736 | 0.15902605 | 6.12E-06   | 6.06E-05   | SYT3       |
| 23636  | ENSG00000213024 | 2734.78533 | -0.04464442 | 0.06511439 | 0.47527153 | 0.69749147 | NUP62      |
| NA     | ENSG00000213025 | 0.46427351 | -0.0076353  | 0.38326478 | 0.86721182 | NA         | COX20P1    |
| NA     | ENSG00000213026 | 0          | NA          | NA         | NA         | NA         | CFL1P4     |
| NA     | ENSG00000213028 | 1.54062275 | -0.00754278 | 0.37624286 | 0.92369286 | NA         |            |
| 94115  | ENSG00000213030 | 0.173733   | 0.01914545  | 0.38484597 | 0.78225479 | NA         | CGB8       |
| NA     | ENSG00000213032 | 0          | NA          | NA         | NA         | NA         | NDUFA3P3   |
| NA     | ENSG00000213033 | 4.28484873 | 0.10275379  | 0.38657999 | 0.35947133 | 0.58949503 | AURKAP1    |
| NA     | ENSG00000213035 | 0          | NA          | NA         | NA         | NA         | RPL23AP80  |
| NA     | ENSG00000213036 | 0          | NA          | NA         | NA         | NA         |            |
| NA     | ENSG00000213041 | 0.173733   | 0.01914545  | 0.38484597 | 0.78225479 | NA         |            |
| NA     | ENSG00000213045 | 0          | NA          | NA         | NA         | NA         |            |
| NA     | ENSG00000213046 | 0.173733   | 0.01914545  | 0.38484597 | 0.78225479 | NA         | EEF1A1P32  |
| 163486 | ENSG00000213047 | 231.884795 | 0.6672605   | 0.199729   | 0.00018788 | 0.00134469 | DENND1B    |
| NA     | ENSG00000213048 | 0          | NA          | NA         | NA         | NA         | OR5S1P     |
| NA     | ENSG00000213049 | 0.46746036 | -0.00785167 | 0.38326714 | 0.86324876 | NA         | HNRNPA1P34 |
| NA     | ENSG00000213050 | 0          | NA          | NA         | NA         | NA         | TPM3P1     |
| NA     | ENSG00000213051 | 0          | NA          | NA         | NA         | NA         | RPL5P5     |
| NA     | ENSG00000213055 | 0          | NA          | NA         | NA         | NA         | EEF1B2P7   |
| 400798 | ENSG00000213057 | 54.0619982 | 0.42259532  | 0.30889785 | 0.06050212 | 0.17244104 | C1orf220   |
| NA     | ENSG00000213058 | 0          | NA          | NA         | NA         | NA         |            |
| NA     | ENSG00000213060 | 1.02576835 | 0.0052515   | 0.37921714 | 0.93582806 | NA         |            |
| NA     | ENSG00000213061 | 0.67997283 | 0.02431813  | 0.38336266 | 0.58986099 | NA         | PFN1P11    |
| NA     | ENSG00000213062 | 83.4149193 | -0.23705511 | 0.22944012 | 0.20432864 | 0.41096092 |            |
| NA     | ENSG00000213063 | 0          | NA          | NA         | NA         | NA         | RPL29P7    |
| 375035 | ENSG00000213064 | 1519.48211 | -0.0919173  | 0.10297962 | 0.35308015 | 0.58322456 | SFT2D2     |
| NA     | ENSG00000213065 | 0          | NA          | NA         | NA         | NA         |            |
| 11116  | ENSG00000213066 | 879.948845 | -0.71077197 | 0.08817594 | 1.77E-16   | 5.32E-15   | CEP43      |
| NA     | ENSG00000213067 | 0.14931947 | -0.01844332 | 0.38480212 | 0.84537521 | NA         |            |
| NA     | ENSG00000213068 | 0          | NA          | NA         | NA         | NA         |            |
| NA     | ENSG00000213069 | 0          | NA          | NA         | NA         | NA         | KRT8P40    |
| NA     | ENSG00000213070 | 0          | NA          | NA         | NA         | NA         | HMGB3P6    |
| 80350  | ENSG00000213071 | 0.50207596 | 0.02562368  | 0.38565771 | 0.52549886 | NA         | LPAL2      |
| NA     | ENSG00000213073 | 0          | NA          | NA         | NA         | NA         | CHP1P2     |

|        |                 |            |             |            |            |            |            |
|--------|-----------------|------------|-------------|------------|------------|------------|------------|
| 641311 | ENSG00000213075 | 0          | NA          | NA         | NA         | NA         | RPL31P11   |
| NA     | ENSG00000213076 | 0          | NA          | NA         | NA         | NA         |            |
| NA     | ENSG00000213078 | 0.68982227 | 0.04028222  | 0.38714415 | 0.35752131 | NA         |            |
| 22828  | ENSG00000213079 | 1467.63894 | 0.09589241  | 0.07459092 | 0.19019311 | 0.39151601 | SCAF8      |
| NA     | ENSG00000213080 | 0.14931947 | -0.01844332 | 0.38480212 | 0.84537521 | NA         |            |
| NA     | ENSG00000213081 | 0.32247871 | -0.02325412 | 0.38531868 | 0.66961411 | NA         | ARPC1BP1   |
| NA     | ENSG00000213082 | 0          | NA          | NA         | NA         | NA         | PPP1R14BP2 |
| NA     | ENSG00000213083 | 0          | NA          | NA         | NA         | NA         | VPS26CP1   |
| 25790  | ENSG00000213085 | 1.84915154 | -0.10390519 | 0.39767812 | 0.19008535 | NA         | CFAP45     |
| NA     | ENSG00000213087 | 0          | NA          | NA         | NA         | NA         |            |
| 2532   | ENSG00000213088 | 3.75057221 | -0.30159846 | 0.56969761 | 0.00877203 | 0.03724311 | ACKR1      |
| NA     | ENSG00000213089 | 0.18922458 | 0.01954053  | 0.38488496 | 0.78225479 | NA         | PDCL3P5    |
| NA     | ENSG00000213090 | 2.73444438 | 0.13160455  | 0.40791356 | 0.14485784 | 0.32514759 | SCYL2P1    |
| NA     | ENSG00000213091 | 0          | NA          | NA         | NA         | NA         | PHBP1      |
| 9534   | ENSG00000213096 | 642.576847 | 0.21996872  | 0.11451565 | 0.04358053 | 0.13391897 | ZNF254     |
| NA     | ENSG00000213100 | 0          | NA          | NA         | NA         | NA         | KRT18P68   |
| NA     | ENSG00000213104 | 0.45209736 | -0.02505403 | 0.38558831 | 0.57865948 | NA         | NPM1P46    |
| NA     | ENSG00000213107 | 0          | NA          | NA         | NA         | NA         | AHCYP5     |
| NA     | ENSG00000213108 | 0          | NA          | NA         | NA         | NA         | BTF3L4P3   |
| NA     | ENSG00000213109 | 14.127704  | -0.95766086 | 0.87764462 | 0.01279097 | 0.05078505 |            |
| NA     | ENSG00000213110 | 0          | NA          | NA         | NA         | NA         | RNF11P1    |
| NA     | ENSG00000213111 | 0          | NA          | NA         | NA         | NA         | COX5BP2    |
| NA     | ENSG00000213113 | 0          | NA          | NA         | NA         | NA         | TUBB8P8    |
| NA     | ENSG00000213115 | 0          | NA          | NA         | NA         | NA         |            |
| NA     | ENSG00000213117 | 0          | NA          | NA         | NA         | NA         | MEMO1P2    |
| NA     | ENSG00000213118 | 0          | NA          | NA         | NA         | NA         | CHCHD2P4   |
| NA     | ENSG00000213120 | 0          | NA          | NA         | NA         | NA         | LIN28AP1   |
| NA     | ENSG00000213121 | 1.7099929  | 0.05301345  | 0.38363269 | 0.45777663 | NA         |            |
| NA     | ENSG00000213122 | 0          | NA          | NA         | NA         | NA         | RPL23AP46  |
| 255758 | ENSG00000213123 | 208.507629 | 0.14654917  | 0.16760538 | 0.33212583 | 0.5613235  | DYNLT2B    |
| NA     | ENSG00000213126 | 0          | NA          | NA         | NA         | NA         | TXNL4AP1   |
| NA     | ENSG00000213128 | 0          | NA          | NA         | NA         | NA         | RPL32P31   |
| NA     | ENSG00000213130 | 0          | NA          | NA         | NA         | NA         | EEF1DP5    |
| NA     | ENSG00000213131 | 19.1605197 | -0.15642237 | 0.33734166 | 0.41426623 | 0.64151123 | YWHAZP4    |
| NA     | ENSG00000213133 | 0.34746601 | 0.02370763  | 0.3853651  | 0.61987128 | NA         | PPP1R14BP5 |
| NA     | ENSG00000213137 | 0          | NA          | NA         | NA         | NA         | ARF1P2     |
| 1427   | ENSG00000213139 | 31.0211557 | -0.07313628 | 0.28696571 | 0.70413788 | 0.85774517 | CRYGS      |
| NA     | ENSG00000213140 | 0          | NA          | NA         | NA         | NA         | ELK2AP     |

|           |                 |            |             |            |            |            |           |
|-----------|-----------------|------------|-------------|------------|------------|------------|-----------|
| NA        | ENSG00000213144 | 1.44264563 | -0.00314235 | 0.37834837 | 0.96325604 | NA         |           |
| 1396      | ENSG00000213145 | 11.3318131 | -0.09849807 | 0.34987652 | 0.55040397 | 0.75686268 | CRIP1     |
| NA        | ENSG00000213147 | 4.87444824 | 0.03350749  | 0.38697799 | 0.12399749 | 0.29179342 | RPL23AP60 |
| NA        | ENSG00000213148 | 0          | NA          | NA         | NA         | NA         | JPT1P1    |
| NA        | ENSG00000213149 | 0.8593066  | 0.01676755  | 0.38119569 | 0.76654753 | NA         | CNN2P9    |
| NA        | ENSG00000213150 | 0          | NA          | NA         | NA         | NA         |           |
| NA        | ENSG00000213152 | 1.15592065 | 0.0352035   | 0.38305248 | 0.54219027 | NA         | RPL7AP60  |
| NA        | ENSG00000213153 | 0          | NA          | NA         | NA         | NA         |           |
| NA        | ENSG00000213155 | 0          | NA          | NA         | NA         | NA         |           |
| NA        | ENSG00000213157 | 0          | NA          | NA         | NA         | NA         | RPL32P10  |
| NA        | ENSG00000213158 | 0          | NA          | NA         | NA         | NA         | GAPDHP36  |
| NA        | ENSG00000213159 | 0          | NA          | NA         | NA         | NA         | CEND1P1   |
| 151230    | ENSG00000213160 | 1830.60004 | -0.27660308 | 0.07524392 | 0.00017235 | 0.00124295 | KLHL23    |
| 100526832 | ENSG00000213160 | 1830.60004 | -0.27660308 | 0.07524392 | 0.00017235 | 0.00124295 | KLHL23    |
| NA        | ENSG00000213167 | 0          | NA          | NA         | NA         | NA         |           |
| NA        | ENSG00000213169 | 0          | NA          | NA         | NA         | NA         |           |
| NA        | ENSG00000213170 | 0          | NA          | NA         | NA         | NA         | SAR1AP2   |
| 339398    | ENSG00000213171 | 6.84545883 | -4.03956835 | 1.66068599 | 0.00059691 | 0.00376677 | LINGO4    |
| NA        | ENSG00000213172 | 0          | NA          | NA         | NA         | NA         |           |
| NA        | ENSG00000213174 | 0          | NA          | NA         | NA         | NA         |           |
| NA        | ENSG00000213176 | 0          | NA          | NA         | NA         | NA         | RPL13P6   |
| NA        | ENSG00000213177 | 0          | NA          | NA         | NA         | NA         | PRDX2P4   |
| NA        | ENSG00000213178 | 357.700735 | -0.47111755 | 0.17999874 | 0.0034347  | 0.01698093 | RPL22P1   |
| NA        | ENSG00000213179 | 0          | NA          | NA         | NA         | NA         | RPL17P41  |
| NA        | ENSG00000213180 | 0          | NA          | NA         | NA         | NA         | RPL36AP48 |
| NA        | ENSG00000213181 | 0          | NA          | NA         | NA         | NA         | OR10N1P   |
| NA        | ENSG00000213182 | 0          | NA          | NA         | NA         | NA         | OR10D5P   |
| NA        | ENSG00000213183 | 0.16735865 | 0.01897177  | 0.38482933 | 0.78225479 | NA         | RPS7P8    |
| NA        | ENSG00000213184 | 0          | NA          | NA         | NA         | NA         |           |
| 196792    | ENSG00000213185 | 35.3017019 | 0.02525348  | 0.27272354 | 0.89766079 | 0.9551369  | FAM24B    |
| 286827    | ENSG00000213186 | 192.341465 | -0.19323273 | 0.16237869 | 0.18793018 | 0.38830813 | TRIM59    |
| NA        | ENSG00000213187 | 0          | NA          | NA         | NA         | NA         | COPS5P1   |
| NA        | ENSG00000213188 | 3.9410326  | 0.20719752  | 0.44481934 | 0.09945117 | 0.24825255 | YBX1P4    |
| NA        | ENSG00000213189 | 84.3499718 | -0.27947272 | 0.28590134 | 0.17959559 | 0.37614023 | BTF3L4P2  |
| 10962     | ENSG00000213190 | 4882.74612 | -0.33268468 | 0.07935951 | 1.75E-05   | 0.0001591  | MLLT11    |
| NA        | ENSG00000213194 | 0          | NA          | NA         | NA         | NA         | CDK7P1    |
| NA        | ENSG00000213197 | 0          | NA          | NA         | NA         | NA         | NUDCP1    |
| 9311      | ENSG00000213199 | 149.927656 | 0.37918234  | 0.23330178 | 0.04811681 | 0.14455444 | ASIC3     |

|        |                 |            |             |            |            |            |           |
|--------|-----------------|------------|-------------|------------|------------|------------|-----------|
| NA     | ENSG00000213201 | 0          | NA          | NA         | NA         | NA         | FABP5P10  |
| 170575 | ENSG00000213203 | 0          | NA          | NA         | NA         | NA         | GIMAP1    |
| NA     | ENSG00000213204 | 5.90451971 | 0.03213549  | 0.36230751 | 0.80192346 | 0.90941191 |           |
| NA     | ENSG00000213205 | 0          | NA          | NA         | NA         | NA         | STRADBP1  |
| NA     | ENSG00000213209 | 0          | NA          | NA         | NA         | NA         |           |
| NA     | ENSG00000213210 | 0          | NA          | NA         | NA         | NA         | RPL32P17  |
| NA     | ENSG00000213211 | 0          | NA          | NA         | NA         | NA         | KRT18P64  |
| NA     | ENSG00000213212 | 3.33913556 | 0.08038533  | 0.38259757 | 0.42838089 | 0.65428642 | NCLP1     |
| 84960  | ENSG00000213213 | 45.4045536 | 0.35855508  | 0.3779914  | 0.11851502 | 0.28264477 | CCDC183   |
| 445328 | ENSG00000213214 | 0.16735865 | 0.01897177  | 0.38482933 | 0.78225479 | NA         | ARHGEF35  |
| 26211  | ENSG00000213215 | 0.49540215 | 0.00752424  | 0.38315145 | 0.82277631 | NA         | OR2F1     |
| NA     | ENSG00000213216 | 0.173124   | -0.01911262 | 0.38486262 | 0.84537521 | NA         |           |
| 1443   | ENSG00000213218 | 0          | NA          | NA         | NA         | NA         | CSH2      |
| 728489 | ENSG00000213221 | 260.819764 | 0.04513018  | 0.15951478 | 0.75695702 | 0.88697677 | DNLZ      |
| NA     | ENSG00000213222 | 40.1761839 | -0.16350274 | 0.29720126 | 0.41457774 | 0.64173903 | TOMM40P4  |
| NA     | ENSG00000213225 | 0          | NA          | NA         | NA         | NA         | NOC2LP1   |
| NA     | ENSG00000213226 | 0.50767003 | 0.03074537  | 0.38601659 | 0.48343636 | NA         |           |
| NA     | ENSG00000213228 | 3.05222448 | -0.1443781  | 0.41869935 | 0.06466674 | 0.18119939 | RPL12P38  |
| 9623   | ENSG00000213231 | 0          | NA          | NA         | NA         | NA         | TCL1B     |
| NA     | ENSG00000213232 | 0          | NA          | NA         | NA         | NA         | PPP1R2P10 |
| NA     | ENSG00000213233 | 0          | NA          | NA         | NA         | NA         | RPL23AP62 |
| NA     | ENSG00000213234 | 0.173124   | -0.01911262 | 0.38486262 | 0.84537521 | NA         | ST13P10   |
| NA     | ENSG00000213235 | 0.51414327 | -0.01023103 | 0.38328157 | 0.81791057 | NA         | EEF1A1P16 |
| NA     | ENSG00000213236 | 0          | NA          | NA         | NA         | NA         | YWHAZP2   |
| NA     | ENSG00000213237 | 0.173733   | 0.01914545  | 0.38484597 | 0.78225479 | NA         | PTMAP10   |
| NA     | ENSG00000213238 | 0          | NA          | NA         | NA         | NA         |           |
| NA     | ENSG00000213239 | 0          | NA          | NA         | NA         | NA         | NPM1P32   |
| NA     | ENSG00000213244 | 33.0493188 | -0.03978877 | 0.28174972 | 0.83456196 | 0.92451691 | H3P4      |
| 6827   | ENSG00000213246 | 1560.76905 | -0.08763068 | 0.08960316 | 0.31090621 | 0.53864136 | SUPT4H1   |
| NA     | ENSG00000213247 | 0          | NA          | NA         | NA         | NA         |           |
| NA     | ENSG00000213250 | 0.14931947 | -0.01844332 | 0.38480212 | 0.84537521 | NA         | RBMS2P1   |
| NA     | ENSG00000213252 | 0          | NA          | NA         | NA         | NA         |           |
| NA     | ENSG00000213253 | 0.51528081 | 0.01588328  | 0.38315771 | 0.73078657 | NA         | RPL12P42  |
| NA     | ENSG00000213260 | 0          | NA          | NA         | NA         | NA         | YWHAZP5   |
| NA     | ENSG00000213261 | 0.16735865 | 0.01897177  | 0.38482933 | 0.78225479 | NA         | EEF1B2P6  |
| NA     | ENSG00000213262 | 0          | NA          | NA         | NA         | NA         | VDAC2P3   |
| NA     | ENSG00000213264 | 0          | NA          | NA         | NA         | NA         | NIP7P2    |
| 114960 | ENSG00000213265 | 0          | NA          | NA         | NA         | NA         | TSGA13    |



|       |                 |            |             |            |            |            |              |
|-------|-----------------|------------|-------------|------------|------------|------------|--------------|
| NA    | ENSG00000213269 | 0          | NA          | NA         | NA         | NA         | RPS6P26      |
| NA    | ENSG00000213270 | 0          | NA          | NA         | NA         | NA         | RPL6P25      |
| NA    | ENSG00000213272 | 0.49759159 | -0.029592   | 0.38591039 | 0.52418284 | NA         | RPL7AP9      |
| NA    | ENSG00000213275 | 0          | NA          | NA         | NA         | NA         | IFITM9P      |
| NA    | ENSG00000213277 | 0.44795842 | -0.02501848 | 0.38558245 | 0.5807882  | NA         | MARCKSL1P1   |
| NA    | ENSG00000213279 | 0.32233294 | -0.02325294 | 0.3853185  | 0.66969844 | NA         |              |
| NA    | ENSG00000213280 | 0          | NA          | NA         | NA         | NA         |              |
| 4893  | ENSG00000213281 | 1479.32735 | 0.07640423  | 0.08046305 | 0.3310047  | 0.55985791 | NRAS         |
| NA    | ENSG00000213285 | 0          | NA          | NA         | NA         | NA         | RPL23AP45    |
| NA    | ENSG00000213287 | 0          | NA          | NA         | NA         | NA         |              |
| NA    | ENSG00000213290 | 1.28175491 | -0.0186554  | 0.3786825  | 0.79358113 | NA         | PGK1P2       |
| NA    | ENSG00000213291 | 0          | NA          | NA         | NA         | NA         |              |
| NA    | ENSG00000213293 | 0          | NA          | NA         | NA         | NA         |              |
| NA    | ENSG00000213295 | 0          | NA          | NA         | NA         | NA         | RPL22P10     |
| NA    | ENSG00000213296 | 0          | NA          | NA         | NA         | NA         |              |
| NA    | ENSG00000213297 | 57.205732  | -0.01537657 | 0.37554971 | 0.8475428  | 0.93065124 | ZNF625-ZNF20 |
| NA    | ENSG00000213300 | 4.38569108 | 0.08047679  | 0.37244908 | 0.52444023 | 0.73730826 | HNRNPA3P6    |
| NA    | ENSG00000213301 | 0          | NA          | NA         | NA         | NA         | HMGB3P11     |
| NA    | ENSG00000213302 | 0          | NA          | NA         | NA         | NA         |              |
| NA    | ENSG00000213303 | 1.50835317 | 0.01953588  | 0.37782723 | 0.79729578 | NA         |              |
| NA    | ENSG00000213304 | 5.01699043 | 0.01167659  | 0.36185982 | 0.92699572 | 0.96945838 |              |
| NA    | ENSG00000213305 | 0          | NA          | NA         | NA         | NA         | HNRNPCP6     |
| NA    | ENSG00000213307 | 1.83645378 | 0.01976025  | 0.37651416 | 0.80975585 | NA         | RPL18P11     |
| NA    | ENSG00000213309 | 0          | NA          | NA         | NA         | NA         | RPL9P18      |
| NA    | ENSG00000213310 | 0          | NA          | NA         | NA         | NA         | CYCSP19      |
| NA    | ENSG00000213312 | 0          | NA          | NA         | NA         | NA         | RPL7AP34     |
| NA    | ENSG00000213315 | 0.14931947 | -0.01844332 | 0.38480212 | 0.84537521 | NA         |              |
| 4056  | ENSG00000213316 | 3.19837301 | 0.01718981  | 0.37086867 | 0.86655906 | 0.94128288 | LTC4S        |
| NA    | ENSG00000213318 | 0          | NA          | NA         | NA         | NA         |              |
| NA    | ENSG00000213326 | 1.43675806 | -0.00343999 | 0.37859179 | 0.95918045 | NA         | RPS7P11      |
| NA    | ENSG00000213328 | 0          | NA          | NA         | NA         | NA         |              |
| NA    | ENSG00000213331 | 0.173733   | 0.01914545  | 0.38484597 | 0.78225479 | NA         |              |
| NA    | ENSG00000213332 | 0          | NA          | NA         | NA         | NA         | SLC25A5P6    |
| NA    | ENSG00000213333 | 0.35668774 | 0.02381711  | 0.38538107 | 0.61401367 | NA         | NPM1P50      |
| NA    | ENSG00000213335 | 0          | NA          | NA         | NA         | NA         | CLNS1AP1     |
| 51239 | ENSG00000213337 | 304.233303 | 0.00522962  | 0.13273644 | 0.96752504 | 0.98759962 | ANKRD39      |
| 81890 | ENSG00000213339 | 599.150016 | 0.22704933  | 0.09954015 | 0.01794866 | 0.06679822 | QTRT1        |
| 1147  | ENSG00000213341 | 753.492862 | -0.27674443 | 0.10126711 | 0.00446891 | 0.02118943 | CHUK         |

|       |                 |            |             |            |            |            |            |
|-------|-----------------|------------|-------------|------------|------------|------------|------------|
| NA    | ENSG00000213343 | 0          | NA          | NA         | NA         | NA         | RPL21P18   |
| NA    | ENSG00000213344 | 1.66244426 | 0.01289225  | 0.37556555 | 0.87856525 | NA         | PCNPP3     |
| 83463 | ENSG00000213347 | 535.893469 | 0.38220672  | 0.10913524 | 0.00025307 | 0.00175924 | MXD3       |
| NA    | ENSG00000213352 | 0          | NA          | NA         | NA         | NA         | GAPDHP44   |
| NA    | ENSG00000213355 | 0          | NA          | NA         | NA         | NA         | CNN2P8     |
| NA    | ENSG00000213358 | 0          | NA          | NA         | NA         | NA         |            |
| NA    | ENSG00000213361 | 0          | NA          | NA         | NA         | NA         |            |
| NA    | ENSG00000213362 | 0.34118024 | 0.02362706  | 0.38535348 | 0.62406855 | NA         | FTH1P12    |
| NA    | ENSG00000213363 | 0          | NA          | NA         | NA         | NA         | RPS3P6     |
| NA    | ENSG00000213365 | 1.83663988 | -0.00612791 | 0.37611102 | 0.93791053 | NA         |            |
| 2946  | ENSG00000213366 | 464.681261 | 0.67100197  | 0.12576736 | 2.36E-08   | 3.38E-07   | GSTM2      |
| NA    | ENSG00000213368 | 0          | NA          | NA         | NA         | NA         | ST13P11    |
| NA    | ENSG00000213370 | 0          | NA          | NA         | NA         | NA         | RANP6      |
| NA    | ENSG00000213371 | 0.18922458 | 0.01954053  | 0.38488496 | 0.78225479 | NA         | NAP1L1P3   |
| NA    | ENSG00000213373 | 0          | NA          | NA         | NA         | NA         | LINC00671  |
| NA    | ENSG00000213376 | 0          | NA          | NA         | NA         | NA         | GAPDHP71   |
| 84342 | ENSG00000213380 | 1449.29705 | 0.00151827  | 0.07172511 | 0.98302729 | 0.99428951 | COG8       |
| NA    | ENSG00000213383 | 0          | NA          | NA         | NA         | NA         |            |
| NA    | ENSG00000213384 | 0          | NA          | NA         | NA         | NA         | EIF4E2P1   |
| NA    | ENSG00000213385 | 19.4496388 | 0.0573526   | 0.31458567 | 0.7577429  | 0.88730562 |            |
| NA    | ENSG00000213386 | 1.33860123 | 0.06340102  | 0.38594526 | 0.37761587 | NA         |            |
| 84986 | ENSG00000213390 | 788.356784 | -0.24582697 | 0.09375318 | 0.00660438 | 0.0294499  | ARHGAP19   |
| NA    | ENSG00000213393 | 0          | NA          | NA         | NA         | NA         |            |
| NA    | ENSG00000213394 | 1.16082574 | 0.01846621  | 0.38015171 | 0.77267721 | NA         | RPSAP46    |
| 55559 | ENSG00000213397 | 359.753191 | -0.23371762 | 0.13208068 | 0.0580037  | 0.16698875 | HAUS7      |
| 3931  | ENSG00000213398 | 90.2332081 | 0.57980471  | 0.2785394  | 0.00919094 | 0.03869005 | LCAT       |
| NA    | ENSG00000213399 | 1.49127727 | -0.03418512 | 0.37950117 | 0.64838336 | NA         | RPS2P17    |
| NA    | ENSG00000213400 | 0          | NA          | NA         | NA         | NA         | RPL12P18   |
| 4111  | ENSG00000213401 | 1274.302   | -0.601275   | 0.07822952 | 4.63E-15   | 1.27E-13   | MAGEA12    |
| 5790  | ENSG00000213402 | 6.35520851 | 0.03886443  | 0.38591773 | 0.3669693  | 0.59618989 | PTPRCAP    |
| NA    | ENSG00000213403 | 0          | NA          | NA         | NA         | NA         | CISD1P1    |
| NA    | ENSG00000213406 | 1.82697718 | 0.04566138  | 0.38024497 | 0.56907949 | NA         | ANXA2P1    |
| NA    | ENSG00000213409 | 0.34624801 | -0.02356563 | 0.38536324 | 0.65270996 | NA         | C1QBPP2    |
| NA    | ENSG00000213411 | 2.02046179 | 0.00697498  | 0.37414321 | 0.93823868 | NA         | RBM22P2    |
| NA    | ENSG00000213412 | 0.55276188 | 0.03293474  | 0.38623842 | 0.45148476 | NA         | HNRNPA1P33 |
| 79037 | ENSG00000213413 | 15.3475149 | -0.10613981 | 0.33899042 | 0.54986487 | 0.75633105 | PVRIG      |
| NA    | ENSG00000213414 | 0          | NA          | NA         | NA         | NA         |            |
| 83755 | ENSG00000213416 | 0          | NA          | NA         | NA         | NA         | KRTAP4-12  |

|        |                 |            |             |            |            |            |           |
|--------|-----------------|------------|-------------|------------|------------|------------|-----------|
| 85294  | ENSG00000213417 | 0          | NA          | NA         | NA         | NA         | KRTAP2-4  |
| 221914 | ENSG00000213420 | 2154.78016 | 0.19506281  | 0.07650907 | 0.00919279 | 0.03869005 | GPC2      |
| NA     | ENSG00000213421 | 0          | NA          | NA         | NA         | NA         |           |
| NA     | ENSG00000213423 | 0          | NA          | NA         | NA         | NA         | RBMX2P2   |
| 125113 | ENSG00000213424 | 0.30001683 | -0.0229446  | 0.38527539 | 0.68644815 | NA         | KRT222    |
| NA     | ENSG00000213430 | 0.173124   | -0.01911262 | 0.38486262 | 0.84537521 | NA         | HSPD1P1   |
| NA     | ENSG00000213431 | 0          | NA          | NA         | NA         | NA         |           |
| NA     | ENSG00000213432 | 0          | NA          | NA         | NA         | NA         | RPL17P34  |
| NA     | ENSG00000213433 | 1.51456752 | -0.05449132 | 0.3829632  | 0.47123388 | NA         | RPLP1P6   |
| NA     | ENSG00000213434 | 0.29863895 | -0.02292439 | 0.3852726  | 0.68753245 | NA         | VTI1BP2   |
| NA     | ENSG00000213435 | 0          | NA          | NA         | NA         | NA         | ATP6V0CP3 |
| NA     | ENSG00000213438 | 0          | NA          | NA         | NA         | NA         | YBX2P1    |
| NA     | ENSG00000213439 | 0          | NA          | NA         | NA         | NA         | OR5AC1    |
| NA     | ENSG00000213440 | 0          | NA          | NA         | NA         | NA         | H2AZP1    |
| NA     | ENSG00000213442 | 1.15084481 | -0.03612456 | 0.38126044 | 0.59448301 | NA         | RPL18AP3  |
| NA     | ENSG00000213443 | 18.8744719 | 0.01866423  | 0.3111201  | 0.92080637 | 0.96670947 | NPM1P7    |
| 6494   | ENSG00000213445 | 766.829874 | 0.2448997   | 0.09720562 | 0.00905842 | 0.03818933 | SIPA1     |
| NA     | ENSG00000213448 | 0          | NA          | NA         | NA         | NA         | RPS23P2   |
| NA     | ENSG00000213449 | 0          | NA          | NA         | NA         | NA         | GAPDHP28  |
| NA     | ENSG00000213450 | 0          | NA          | NA         | NA         | NA         | VDAC1P7   |
| NA     | ENSG00000213451 | 0          | NA          | NA         | NA         | NA         | OR6C69P   |
| NA     | ENSG00000213452 | 0          | NA          | NA         | NA         | NA         | AKR1B1P2  |
| NA     | ENSG00000213453 | 1.47032194 | 0.02276794  | 0.37812784 | 0.7648725  | NA         | FTH1P3    |
| NA     | ENSG00000213455 | 0          | NA          | NA         | NA         | NA         | PPIAP82   |
| NA     | ENSG00000213461 | 0          | NA          | NA         | NA         | NA         | RPL32P15  |
| 2086   | ENSG00000213462 | 1774.71355 | 0.81017884  | 0.07959395 | 4.78E-25   | 2.28E-23   | ERV3-1    |
| 55333  | ENSG00000213463 | 1674.81883 | -0.15529409 | 0.08189308 | 0.05176718 | 0.15304141 | SYNJ2BP   |
| 402    | ENSG00000213465 | 812.752187 | 0.20957563  | 0.10187119 | 0.03257196 | 0.10707998 | ARL2      |
| NA     | ENSG00000213467 | 0          | NA          | NA         | NA         | NA         | HMGB1P37  |
| 286467 | ENSG00000213468 | 0.78598915 | -0.05618249 | 0.38943957 | 0.27411323 | NA         | FIRRE     |
| NA     | ENSG00000213470 | 0          | NA          | NA         | NA         | NA         |           |
| 440307 | ENSG00000213471 | 3.93761092 | 0.0597632   | 0.37134175 | 0.60935878 | 0.79803651 | TLL13P    |
| NA     | ENSG00000213478 | 0.15069912 | -0.01848503 | 0.38480575 | 0.84537521 | NA         | CFL1P2    |
| NA     | ENSG00000213480 | 0          | NA          | NA         | NA         | NA         |           |
| NA     | ENSG00000213483 | 0          | NA          | NA         | NA         | NA         | NDUFAF4P2 |
| NA     | ENSG00000213484 | 0          | NA          | NA         | NA         | NA         | EIF4A1P8  |
| NA     | ENSG00000213486 | 0.14931947 | -0.01844332 | 0.38480212 | 0.84537521 | NA         |           |
| NA     | ENSG00000213487 | 0          | NA          | NA         | NA         | NA         | ASS1P4    |

|        |                 |            |             |            |            |            |            |
|--------|-----------------|------------|-------------|------------|------------|------------|------------|
| NA     | ENSG00000213488 | 0          | NA          | NA         | NA         | NA         |            |
| NA     | ENSG00000213489 | 0          | NA          | NA         | NA         | NA         | FBLIM1P1   |
| NA     | ENSG00000213492 | 0.65554998 | 0.00621457  | 0.38199582 | 0.89490489 | NA         | NT5C3AP1   |
| NA     | ENSG00000213493 | 0          | NA          | NA         | NA         | NA         | ACTN4P1    |
| NA     | ENSG00000213495 | 0          | NA          | NA         | NA         | NA         | RPL26P13   |
| NA     | ENSG00000213498 | 0          | NA          | NA         | NA         | NA         | TPT1P13    |
| NA     | ENSG00000213500 | 0          | NA          | NA         | NA         | NA         | LAP3P2     |
| NA     | ENSG00000213509 | 0.30139824 | -0.02296476 | 0.38527817 | 0.68536535 | NA         | PPIAP16    |
| 388646 | ENSG00000213512 | 0.79131617 | 0.03204319  | 0.38412803 | 0.49832917 | NA         | GBP7       |
| NA     | ENSG00000213513 | 15.1023345 | 0.04838942  | 0.32748047 | 0.78423189 | 0.90175162 | IMPDH1P5   |
| NA     | ENSG00000213514 | 1.49729339 | -0.05443285 | 0.38426693 | 0.43148938 | NA         |            |
| 494115 | ENSG00000213516 | 530.206634 | -0.17670975 | 0.10649762 | 0.08291753 | 0.21714412 | RBMXL1     |
| NA     | ENSG00000213519 | 0          | NA          | NA         | NA         | NA         |            |
| NA     | ENSG00000213522 | 0          | NA          | NA         | NA         | NA         | RAC1P5     |
| 10011  | ENSG00000213523 | 513.079791 | 0.18537856  | 0.10973866 | 0.07752387 | 0.20659149 | SRA1       |
| NA     | ENSG00000213525 | 0          | NA          | NA         | NA         | NA         | FAM32CP    |
| NA     | ENSG00000213526 | 0.173733   | 0.01914545  | 0.38484597 | 0.78225479 | NA         | SETP8      |
| NA     | ENSG00000213527 | 0          | NA          | NA         | NA         | NA         |            |
| NA     | ENSG00000213529 | 0.97052787 | 0.00672425  | 0.38010738 | 0.91165704 | NA         | RPL32P22   |
| NA     | ENSG00000213530 | 0          | NA          | NA         | NA         | NA         | MTHFD2P5   |
| 375346 | ENSG00000213533 | 557.23226  | 0.33338502  | 0.1470897  | 0.01500779 | 0.05772675 | STIMATE    |
| NA     | ENSG00000213536 | 0          | NA          | NA         | NA         | NA         | GNG5P1     |
| NA     | ENSG00000213538 | 0.34049892 | -0.00029432 | 0.3833625  | 0.96804247 | NA         | KRT8P41    |
| NA     | ENSG00000213539 | 0          | NA          | NA         | NA         | NA         | YBX1P6     |
| NA     | ENSG00000213540 | 0.51502513 | 0.01574321  | 0.3831466  | 0.73253979 | NA         | TXN2P1     |
| NA     | ENSG00000213542 | 8.62010971 | 0.00489508  | 0.3507561  | 0.97522891 | 0.99131784 |            |
| NA     | ENSG00000213543 | 16.974375  | 0.14017019  | 0.34108754 | 0.45286086 | 0.67615589 | RARRES2P2  |
| NA     | ENSG00000213547 | 0          | NA          | NA         | NA         | NA         | VN1R64P    |
| NA     | ENSG00000213548 | 0          | NA          | NA         | NA         | NA         | PPIAP81    |
| NA     | ENSG00000213549 | 0          | NA          | NA         | NA         | NA         |            |
| 23234  | ENSG00000213551 | 1563.0524  | -0.08939217 | 0.07517391 | 0.22471284 | 0.4385072  | DNAJC9     |
| NA     | ENSG00000213553 | 4.71887604 | -0.06614611 | 0.36937927 | 0.59392108 | 0.78752771 | RPLP0P6    |
| NA     | ENSG00000213556 | 0          | NA          | NA         | NA         | NA         |            |
| NA     | ENSG00000213557 | 0          | NA          | NA         | NA         | NA         |            |
| NA     | ENSG00000213558 | 0          | NA          | NA         | NA         | NA         | HMG2P32    |
| NA     | ENSG00000213559 | 0          | NA          | NA         | NA         | NA         | HNRNPA1P64 |
| NA     | ENSG00000213560 | 0          | NA          | NA         | NA         | NA         |            |
| NA     | ENSG00000213561 | 0          | NA          | NA         | NA         | NA         |            |

|           |                 |            |             |            |            |            |               |
|-----------|-----------------|------------|-------------|------------|------------|------------|---------------|
| 414919    | ENSG00000213563 | 878.3981   | 0.03205297  | 0.12842628 | 0.79207132 | 0.90499209 | C8orf82       |
| NA        | ENSG00000213568 | 0.173124   | -0.01911262 | 0.38486262 | 0.84537521 | NA         | HNRNPA1P13    |
| NA        | ENSG00000213569 | 0          | NA          | NA         | NA         | NA         | GTF3C6P2      |
| NA        | ENSG00000213574 | 0          | NA          | NA         | NA         | NA         | LDHAP5        |
| 594855    | ENSG00000213578 | 1.37318581 | -0.06365564 | 0.38903377 | 0.26062872 | NA         | CPLX3         |
| NA        | ENSG00000213579 | 0          | NA          | NA         | NA         | NA         |               |
| 7416      | ENSG00000213585 | 2911.58355 | -0.1108116  | 0.07021557 | 0.10830367 | 0.26407088 | VDAC1         |
| NA        | ENSG00000213587 | 0.14931947 | -0.01844332 | 0.38480212 | 0.84537521 | NA         |               |
| 221504    | ENSG00000213588 | 478.062707 | 0.01011927  | 0.10894627 | 0.92369121 | 0.96829936 | ZBTB9         |
| NA        | ENSG00000213590 | 0.98117059 | 0.00591694  | 0.38091992 | 0.91486631 | NA         |               |
| NA        | ENSG00000213592 | 0.16735865 | 0.01897177  | 0.38482933 | 0.78225479 | NA         | PPIAP42       |
| 51075     | ENSG00000213593 | 1436.32912 | -0.11130115 | 0.07812068 | 0.14530713 | 0.32579361 | TMX2          |
| NA        | ENSG00000213594 | 0          | NA          | NA         | NA         | NA         | GAPDHP25      |
| NA        | ENSG00000213598 | 0          | NA          | NA         | NA         | NA         |               |
| 100526830 | ENSG00000213599 | 727.446596 | 0.27047786  | 0.10764328 | 0.00867081 | 0.03686067 | SLX1A-SULT1A3 |
| NA        | ENSG00000213600 | 1.57550856 | -0.01171765 | 0.37822963 | 0.86937718 | NA         |               |
| NA        | ENSG00000213601 | 0.14931947 | -0.01844332 | 0.38480212 | 0.84537521 | NA         | KRT18P19      |
| NA        | ENSG00000213604 | 0          | NA          | NA         | NA         | NA         |               |
| NA        | ENSG00000213605 | 0          | NA          | NA         | NA         | NA         |               |
| NA        | ENSG00000213606 | 0.34624801 | -0.02356563 | 0.38536324 | 0.65270996 | NA         | AKR1B10P1     |
| NA        | ENSG00000213607 | 0          | NA          | NA         | NA         | NA         | OR4A45P       |
| NA        | ENSG00000213608 | 2.58897634 | 0.01872981  | 0.37453292 | 0.83462815 | 0.92451691 | SLC25A14P1    |
| NA        | ENSG00000213609 | 0.35679693 | 0.02381789  | 0.38538119 | 0.61395854 | NA         | RPL7AP50      |
| NA        | ENSG00000213612 | 0.6779813  | 0.00427905  | 0.38246031 | 0.91999704 | NA         | FAM220CP      |
| NA        | ENSG00000213613 | 1.31934267 | 0.03382043  | 0.37997875 | 0.64322393 | NA         | RPL11P3       |
| 3073      | ENSG00000213614 | 873.206428 | 0.13667349  | 0.09705969 | 0.14563456 | 0.32615303 | HEXA          |
| 4722      | ENSG00000213619 | 1028.34211 | -0.04896632 | 0.09126097 | 0.57995278 | 0.77743886 | NDUFS3        |
| NA        | ENSG00000213620 | 0          | NA          | NA         | NA         | NA         |               |
| NA        | ENSG00000213621 | 0.79065602 | -0.00860872 | 0.38089551 | 0.87888958 | NA         | RPSAP54       |
| 54741     | ENSG00000213625 | 713.143844 | 0.22898852  | 0.10566409 | 0.02380109 | 0.08374066 | LEPROT        |
| 81606     | ENSG00000213626 | 681.393725 | -0.21331059 | 0.13169213 | 0.08354529 | 0.21827226 | LBH           |
| NA        | ENSG00000213630 | 0          | NA          | NA         | NA         | NA         | BOLA3P3       |
| 113179    | ENSG00000213638 | 211.955337 | -0.22888096 | 0.17178591 | 0.13538025 | 0.30992327 | ADAT3         |
| 5500      | ENSG00000213639 | 3539.88623 | -0.13451738 | 0.06173601 | 0.0271166  | 0.09279871 | PPP1CB        |
| NA        | ENSG00000213640 | 0.32312235 | 0.00146839  | 0.38336929 | 0.96702258 | NA         | EEF1DP4       |
| NA        | ENSG00000213641 | 0          | NA          | NA         | NA         | NA         | RPL7AP4       |
| NA        | ENSG00000213642 | 0          | NA          | NA         | NA         | NA         |               |
| NA        | ENSG00000213643 | 0          | NA          | NA         | NA         | NA         | VN1R37P       |

|        |                 |            |             |            |            |            |            |
|--------|-----------------|------------|-------------|------------|------------|------------|------------|
| NA     | ENSG00000213644 | 0          | NA          | NA         | NA         | NA         | SAPCD2P1   |
| NA     | ENSG00000213645 | 1.14813969 | 0.04277189  | 0.38601194 | 0.36236452 | NA         | SLC25A1P3  |
| 445329 | ENSG00000213648 | 32.8277827 | -0.42887393 | 0.38028269 | 0.07538694 | 0.20223962 | SULT1A4    |
| NA     | ENSG00000213650 | 0          | NA          | NA         | NA         | NA         |            |
| NA     | ENSG00000213652 | 0          | NA          | NA         | NA         | NA         | HMGB3P30   |
| NA     | ENSG00000213653 | 0          | NA          | NA         | NA         | NA         | RPL22P22   |
| 63940  | ENSG00000213654 | 21.616749  | -0.20859899 | 0.34460779 | 0.30200773 | 0.52950101 | GP3SM3     |
| NA     | ENSG00000213655 | 0          | NA          | NA         | NA         | NA         |            |
| NA     | ENSG00000213657 | 0          | NA          | NA         | NA         | NA         | RPL31P44   |
| 27040  | ENSG00000213658 | 25.6625682 | -0.00312734 | 0.29578451 | 0.98500903 | 0.99473578 | LAT        |
| NA     | ENSG00000213659 | 0          | NA          | NA         | NA         | NA         | RSU1P3     |
| NA     | ENSG00000213661 | 0          | NA          | NA         | NA         | NA         |            |
| NA     | ENSG00000213663 | 0          | NA          | NA         | NA         | NA         |            |
| NA     | ENSG00000213664 | 0          | NA          | NA         | NA         | NA         | RPS16P8    |
| NA     | ENSG00000213667 | 0.46950302 | -0.02825288 | 0.38579224 | 0.54603537 | NA         | PGGT1BP1   |
| NA     | ENSG00000213669 | 0.173733   | 0.01914545  | 0.38484597 | 0.78225479 | NA         |            |
| NA     | ENSG00000213671 | 0          | NA          | NA         | NA         | NA         | OLA1P2     |
| 51517  | ENSG00000213672 | 654.546773 | -0.19458156 | 0.096593   | 0.03692657 | 0.11818408 | NCKIPSD    |
| NA     | ENSG00000213673 | 0          | NA          | NA         | NA         | NA         | SLC25A5P3  |
| 1388   | ENSG00000213676 | 1037.86059 | 0.14682154  | 0.0947872  | 0.10972551 | 0.26658757 | ATF6B      |
| NA     | ENSG00000213683 | 0.15069912 | -0.01848503 | 0.38480575 | 0.84537521 | NA         |            |
| NA     | ENSG00000213684 | 0          | NA          | NA         | NA         | NA         | LDHBP2     |
| 11277  | ENSG00000213689 | 4.21698298 | -0.03280701 | 0.3869203  | 0.14903095 | 0.33158843 | TREX1      |
| NA     | ENSG00000213690 | 0.37844916 | 0.02407552  | 0.3854191  | 0.60038877 | NA         |            |
| NA     | ENSG00000213693 | 35.6312547 | 0.21051371  | 0.31424028 | 0.30910656 | 0.53687071 | SEC14L1P1  |
| 1903   | ENSG00000213694 | 279.651583 | 1.0163126   | 0.1766792  | 1.14E-09   | 1.95E-08   | S1PR3      |
| 286223 | ENSG00000213694 | 279.651583 | 1.0163126   | 0.1766792  | 1.14E-09   | 1.95E-08   | S1PR3      |
| NA     | ENSG00000213695 | 0.78462509 | -0.00651183 | 0.38157883 | 0.89925907 | NA         | RPS7P14    |
| NA     | ENSG00000213697 | 0          | NA          | NA         | NA         | NA         | CTBP2P6    |
| NA     | ENSG00000213698 | 0          | NA          | NA         | NA         | NA         | CAPZA1P3   |
| 54978  | ENSG00000213699 | 767.563497 | -0.15046041 | 0.09309781 | 0.09486018 | 0.23964543 | SLC35F6    |
| NA     | ENSG00000213700 | 0.14931947 | -0.01844332 | 0.38480212 | 0.84537521 | NA         | RPL17P50   |
| NA     | ENSG00000213701 | 0          | NA          | NA         | NA         | NA         | SETP22     |
| NA     | ENSG00000213703 | 0.173733   | 0.01914545  | 0.38484597 | 0.78225479 | NA         |            |
| NA     | ENSG00000213704 | 0          | NA          | NA         | NA         | NA         | EEF1A1P15  |
| NA     | ENSG00000213706 | 0.31817515 | 0.00112425  | 0.38336655 | 0.96630546 | NA         | RHOG2P     |
| NA     | ENSG00000213707 | 0.35694857 | 0.02381899  | 0.38538136 | 0.61388199 | NA         | HMGB1P10   |
| NA     | ENSG00000213708 | 0          | NA          | NA         | NA         | NA         | SLC16A14P1 |

|           |                 |            |             |             |            |            |            |
|-----------|-----------------|------------|-------------|-------------|------------|------------|------------|
| NA        | ENSG00000213711 | 0          | NA          | NA          | NA         | NA         | PHBP7      |
| NA        | ENSG00000213713 | 142.449475 | -0.14357419 | 0.18245459  | 0.37035567 | 0.59943356 | PIGCP1     |
| 388799    | ENSG00000213714 | 1.04239802 | 0.04448868  | 0.38799694  | 0.25925947 | NA         | FAM209B    |
| NA        | ENSG00000213716 | 0          | NA          | NA          | NA         | NA         | FABP5P5    |
| NA        | ENSG00000213717 | 0          | NA          | NA          | NA         | NA         |            |
| 1192      | ENSG00000213719 | 1143.35282 | 0.08283313  | 0.07850765  | 0.2814189  | 0.50624272 | CLIC1      |
| NA        | ENSG00000213721 | 0          | NA          | NA          | NA         | NA         | HMG2P30    |
| 23564     | ENSG00000213722 | 1397.06535 | 0.75137716  | 0.08072833  | 2.40E-21   | 9.57E-20   | DDAH2      |
| NA        | ENSG00000213724 | 0          | NA          | NA          | NA         | NA         | PRDX2P2    |
| NA        | ENSG00000213726 | 0          | NA          | NA          | NA         | NA         | RPS2P52    |
| NA        | ENSG00000213727 | 0          | NA          | NA          | NA         | NA         |            |
| NA        | ENSG00000213729 | 0          | NA          | NA          | NA         | NA         | RPS16P2    |
| NA        | ENSG00000213730 | 0          | NA          | NA          | NA         | NA         | POLD2P1    |
| NA        | ENSG00000213731 | 0          | NA          | NA          | NA         | NA         | RAB5CP1    |
| NA        | ENSG00000213735 | 0          | NA          | NA          | NA         | NA         | ANAPC10P1  |
| NA        | ENSG00000213736 | 0          | NA          | NA          | NA         | NA         | BRI3P2     |
| NA        | ENSG00000213739 | 0          | NA          | NA          | NA         | NA         | PPIAP68    |
| NA        | ENSG00000213740 | 0          | NA          | NA          | NA         | NA         | SERBP1P1   |
| 6235      | ENSG00000213741 | 2230.18127 | -0.1403533  | 0.0655343   | 0.02959463 | 0.09931651 | RPS29      |
| 102724826 | ENSG00000213742 | 77.7597914 | -0.08505254 | 0.24472119  | 0.65219085 | 0.8261929  | ZNF337-AS1 |
| NA        | ENSG00000213744 | 0          | NA          | NA          | NA         | NA         | RPS10P14   |
| NA        | ENSG00000213747 | 0          | NA          | NA          | NA         | NA         | WASHC3P1   |
| NA        | ENSG00000213750 | 0          | NA          | NA          | NA         | NA         |            |
| NA        | ENSG00000213752 | 0          | NA          | NA          | NA         | NA         |            |
| 65996     | ENSG00000213753 | 936.79531  | 0.08274101  | 0.11919548  | 0.46717685 | 0.69011879 | CENPBD1P1  |
| NA        | ENSG00000213754 | 0.79021863 | -0.00588941 | 0.38148532  | 0.90980542 | NA         | KPNA4P1    |
| NA        | ENSG00000213755 | 0          | NA          | NA          | NA         | NA         |            |
| NA        | ENSG00000213757 | 0.173733   | 0.01914545  | 0.38484597  | 0.78225479 | NA         | RPS3AP20   |
| 10720     | ENSG00000213759 | 0          | NA          | NA          | NA         | NA         | UGT2B11    |
| 534       | ENSG00000213760 | 188.873735 | -0.09492689 | 0.16762447  | 0.52781216 | 0.73958565 | ATP6V1G2   |
| NA        | ENSG00000213761 | 0          | NA          | NA          | NA         | NA         | MT1P1      |
| 7693      | ENSG00000213762 | 575.532074 | -0.17697513 | 0.111172341 | 0.0964302  | 0.24269634 | ZNF134     |
| NA        | ENSG00000213763 | 0          | NA          | NA          | NA         | NA         | ACTBP2     |
| NA        | ENSG00000213770 | 0.18922458 | 0.01954053  | 0.38488496  | 0.78225479 | NA         | FAM210CP   |
| NA        | ENSG00000213771 | 0          | NA          | NA          | NA         | NA         | KRT8P37    |
| NA        | ENSG00000213772 | 0          | NA          | NA          | NA         | NA         | EIF1P7     |
| NA        | ENSG00000213774 | 0          | NA          | NA          | NA         | NA         |            |
| NA        | ENSG00000213777 | 5.73884123 | -0.04704687 | 0.365678    | 0.70028662 | 0.8554699  |            |

|           |                 |            |             |            |            |            |            |
|-----------|-----------------|------------|-------------|------------|------------|------------|------------|
| NA        | ENSG00000213778 | 0          | NA          | NA         | NA         | NA         | HNRNPA1P32 |
| NA        | ENSG00000213779 | 0.15069912 | -0.01848503 | 0.38480575 | 0.84537521 | NA         |            |
| 2968      | ENSG00000213780 | 478.941874 | -0.06719831 | 0.13031039 | 0.58263099 | 0.77930283 | GTF2H4     |
| NA        | ENSG00000213781 | 0          | NA          | NA         | NA         | NA         | PSMC1P2    |
| 51202     | ENSG00000213782 | 1100.18097 | 0.01259518  | 0.0823004  | 0.87642725 | 0.94556523 | DDX47      |
| NA        | ENSG00000213783 | 0          | NA          | NA         | NA         | NA         | RPL35P4    |
| NA        | ENSG00000213785 | 0          | NA          | NA         | NA         | NA         | AKR1B1P3   |
| NA        | ENSG00000213786 | 0          | NA          | NA         | NA         | NA         | NHP2P2     |
| NA        | ENSG00000213787 | 0          | NA          | NA         | NA         | NA         | RPL7AP38   |
| NA        | ENSG00000213790 | 0.173733   | 0.01914545  | 0.38484597 | 0.78225479 | NA         | OLA1P1     |
| NA        | ENSG00000213791 | 0.14931947 | -0.01844332 | 0.38480212 | 0.84537521 | NA         |            |
| 388559    | ENSG00000213793 | 110.645082 | 0.02488418  | 0.2088788  | 0.8885404  | 0.95146564 | ZNF888     |
| NA        | ENSG00000213798 | 0          | NA          | NA         | NA         | NA         |            |
| 91664     | ENSG00000213799 | 180.570319 | -0.1255455  | 0.15917267 | 0.38497347 | 0.61396093 | ZNF845     |
| 399669    | ENSG00000213801 | 36.9702429 | 0.12074679  | 0.28198446 | 0.54157401 | 0.74998089 | ZNF321P    |
| 22914     | ENSG00000213809 | 0          | NA          | NA         | NA         | NA         | KLRK1      |
| 100528032 | ENSG00000213809 | 0          | NA          | NA         | NA         | NA         | KLRK1      |
| NA        | ENSG00000213816 | 0.31669143 | 0.00108965  | 0.38336636 | 0.96741287 | NA         | CNN2P4     |
| NA        | ENSG00000213820 | 0          | NA          | NA         | NA         | NA         | RPL13P2    |
| 729767    | ENSG00000213822 | 0          | NA          | NA         | NA         | NA         | CEACAM18   |
| NA        | ENSG00000213830 | 9.81294184 | 0.05673927  | 0.34479205 | 0.72455655 | 0.86838238 | CFL1P5     |
| NA        | ENSG00000213839 | 79.4430472 | -0.10161537 | 0.21745974 | 0.570842   | 0.77109827 | TMX2P1     |
| NA        | ENSG00000213842 | 3.07835548 | 0.10801965  | 0.39075469 | 0.31091335 | 0.53864136 | SUGT1P2    |
| NA        | ENSG00000213849 | 0          | NA          | NA         | NA         | NA         |            |
| NA        | ENSG00000213851 | 0.173124   | -0.01911262 | 0.38486262 | 0.84537521 | NA         |            |
| 2013      | ENSG00000213853 | 1076.84093 | 0.39328573  | 0.1024897  | 6.64E-05   | 0.00052919 | EMP2       |
| NA        | ENSG00000213854 | 0          | NA          | NA         | NA         | NA         | CNN2P6     |
| NA        | ENSG00000213856 | 0          | NA          | NA         | NA         | NA         | VDAC1P2    |
| NA        | ENSG00000213857 | 0.15069912 | -0.01848503 | 0.38480575 | 0.84537521 | NA         | ACTBP15    |
| 147040    | ENSG00000213859 | 104.175664 | 0.06212217  | 0.21423992 | 0.72858793 | 0.87026999 | KCTD11     |
| NA        | ENSG00000213860 | 1.89236396 | 0.06217847  | 0.38791412 | 0.30455868 | NA         | RPL21P75   |
| NA        | ENSG00000213862 | 0.98669936 | 0.00648608  | 0.38007331 | 0.91493578 | NA         |            |
| NA        | ENSG00000213864 | 0.16735865 | 0.01897177  | 0.38482933 | 0.78225479 | NA         | EEF1B2P2   |
| NA        | ENSG00000213866 | 1.97321455 | -0.04817123 | 0.378034   | 0.59124168 | NA         | YBX1P10    |
| NA        | ENSG00000213867 | 0          | NA          | NA         | NA         | NA         |            |
| NA        | ENSG00000213871 | 0.16735865 | 0.01897177  | 0.38482933 | 0.78225479 | NA         | TAF9BP1    |
| NA        | ENSG00000213872 | 1.30826521 | -0.01573367 | 0.37846067 | 0.82534721 | NA         | RPL32P11   |
| NA        | ENSG00000213873 | 0          | NA          | NA         | NA         | NA         | PPIAP86    |



|           |                 |            |             |            |            |            |           |
|-----------|-----------------|------------|-------------|------------|------------|------------|-----------|
| NA        | ENSG00000213875 | 0          | NA          | NA         | NA         | NA         |           |
| NA        | ENSG00000213876 | 0          | NA          | NA         | NA         | NA         | RPL7AP64  |
| NA        | ENSG00000213877 | 0          | NA          | NA         | NA         | NA         | CFL1P7    |
| NA        | ENSG00000213880 | 0          | NA          | NA         | NA         | NA         | RPL7AP7   |
| NA        | ENSG00000213881 | 0          | NA          | NA         | NA         | NA         | NPM1P6    |
| NA        | ENSG00000213882 | 0          | NA          | NA         | NA         | NA         | CYB5AP4   |
| NA        | ENSG00000213885 | 2.20322494 | 0.01493855  | 0.37672598 | 0.85203056 | NA         | RPL13AP7  |
| 10537     | ENSG00000213886 | 0          | NA          | NA         | NA         | NA         | UBD       |
| NA        | ENSG00000213888 | 291.083887 | 0.12071099  | 0.14044775 | 0.35584551 | 0.58600518 | LINC01521 |
| 147699    | ENSG00000213889 | 56.5823059 | 0.20491882  | 0.26410293 | 0.30395072 | 0.53126299 | PPM1N     |
| NA        | ENSG00000213891 | 0.15069912 | -0.01848503 | 0.38480575 | 0.84537521 | NA         | RPL3P6    |
| 388551    | ENSG00000213892 | 0          | NA          | NA         | NA         | NA         | CEACAM16  |
| NA        | ENSG00000213896 | 0          | NA          | NA         | NA         | NA         |           |
| NA        | ENSG00000213900 | 0          | NA          | NA         | NA         | NA         | RPS17P1   |
| 151295    | ENSG00000213901 | 45.0972829 | 0.610509    | 0.38353071 | 0.02042216 | 0.0740588  | SLC23A3   |
| 1241      | ENSG00000213903 | 226.117413 | 0.30900661  | 0.20044991 | 0.07306771 | 0.19752734 | LTB4R     |
| 100996307 | ENSG00000213904 | 13.8740357 | 0.09306564  | 0.3433429  | 0.58718816 | 0.78237765 | LIPE-AS1  |
| 101930071 | ENSG00000213904 | 13.8740357 | 0.09306564  | 0.3433429  | 0.58718816 | 0.78237765 | LIPE-AS1  |
| 56413     | ENSG00000213906 | 185.369451 | 0.41675868  | 0.18132333 | 0.00981616 | 0.04086329 | LTB4R2    |
| NA        | ENSG00000213908 | 0          | NA          | NA         | NA         | NA         | CYP2A7P1  |
| NA        | ENSG00000213911 | 0          | NA          | NA         | NA         | NA         | OR2G1P    |
| NA        | ENSG00000213916 | 0.29863895 | -0.02292439 | 0.3852726  | 0.68753245 | NA         | RPL13P    |
| NA        | ENSG00000213917 | 0.14931947 | -0.01844332 | 0.38480212 | 0.84537521 | NA         | RPL5P8    |
| 1773      | ENSG00000213918 | 1175.14154 | 0.23837066  | 0.11899232 | 0.03463457 | 0.11242635 | DNASE1    |
| 145553    | ENSG00000213920 | 150.638346 | 0.21510736  | 0.19233068 | 0.19785924 | 0.40199972 | MDP1      |
| 342900    | ENSG00000213921 | 0          | NA          | NA         | NA         | NA         | LEUTX     |
| 1454      | ENSG00000213923 | 2091.90777 | 0.00495163  | 0.0762371  | 0.94873286 | 0.97892968 | CSNK1E    |
| NA        | ENSG00000213924 | 0          | NA          | NA         | NA         | NA         | HNRNPH1P2 |
| NA        | ENSG00000213925 | 0          | NA          | NA         | NA         | NA         | NPM1P33   |
| NA        | ENSG00000213926 | 0          | NA          | NA         | NA         | NA         | MSRB1P1   |
| 10850     | ENSG00000213927 | 2.34827369 | -0.08973895 | 0.39126542 | 0.28067271 | NA         | CCL27     |
| 10379     | ENSG00000213928 | 156.3608   | 0.19631209  | 0.23052873 | 0.29298662 | 0.51909756 | IRF9      |
| 2592      | ENSG00000213930 | 435.062377 | 0.07585722  | 0.1155023  | 0.49183287 | 0.71106639 | GALT      |
| 3046      | ENSG00000213931 | 0.18922458 | 0.01954053  | 0.38488496 | 0.78225479 | NA         | HBE1      |
| 3047      | ENSG00000213934 | 0          | NA          | NA         | NA         | NA         | HBG1      |
| NA        | ENSG00000213935 | 0.16735865 | 0.01897177  | 0.38482933 | 0.78225479 | NA         | RPL22P16  |
| 9080      | ENSG00000213937 | 11.3211188 | -0.2257742  | 0.40630263 | 0.21493077 | 0.42531683 | CLDN9     |
| NA        | ENSG00000213938 | 0.16735865 | 0.01897177  | 0.38482933 | 0.78225479 | NA         | SEPHS1P6  |

|           |                 |            |             |            |            |            |          |
|-----------|-----------------|------------|-------------|------------|------------|------------|----------|
| NA        | ENSG00000213939 | 0.173124   | -0.01911262 | 0.38486262 | 0.84537521 | NA         |          |
| NA        | ENSG00000213940 | 0.18922458 | 0.01954053  | 0.38488496 | 0.78225479 | NA         |          |
| NA        | ENSG00000213942 | 0          | NA          | NA         | NA         | NA         |          |
| NA        | ENSG00000213943 | 0.66434116 | 0.02547961  | 0.38356952 | 0.59354996 | NA         | KRT18P17 |
| NA        | ENSG00000213946 | 0          | NA          | NA         | NA         | NA         | DNAJB1P1 |
| 3672      | ENSG00000213949 | 1214.54639 | -0.27783672 | 0.0959158  | 0.00268835 | 0.01379995 | ITGA1    |
| NA        | ENSG00000213950 | 0          | NA          | NA         | NA         | NA         | RPS10P2  |
| NA        | ENSG00000213954 | 0          | NA          | NA         | NA         | NA         | ATP5PDP3 |
| NA        | ENSG00000213956 | 0          | NA          | NA         | NA         | NA         |          |
| NA        | ENSG00000213958 | 0          | NA          | NA         | NA         | NA         | KRT18P29 |
| NA        | ENSG00000213959 | 0          | NA          | NA         | NA         | NA         |          |
| NA        | ENSG00000213962 | 0.173124   | -0.01911262 | 0.38486262 | 0.84537521 | NA         | API5P2   |
| 100130691 | ENSG00000213963 | 89.1721461 | 0.2804865   | 0.2573316  | 0.1605649  | 0.34849661 |          |
| NA        | ENSG00000213964 | 0          | NA          | NA         | NA         | NA         | CHCHD4P4 |
| 390916    | ENSG00000213965 | 367.7578   | -0.07374757 | 0.12336128 | 0.52686007 | 0.73878671 | NUDT19   |
| 730087    | ENSG00000213967 | 153.696113 | -0.27217923 | 0.18082253 | 0.08818269 | 0.22694831 | ZNF726   |
| NA        | ENSG00000213970 | 1.15324519 | -0.0082652  | 0.38154881 | 0.87082059 | NA         |          |
| NA        | ENSG00000213972 | 0          | NA          | NA         | NA         | NA         |          |
| 7652      | ENSG00000213973 | 3.60116057 | -0.30413985 | 0.58224485 | 0.0020164  | 0.01077441 | ZNF99    |
| NA        | ENSG00000213976 | 1.63900793 | 0.02162228  | 0.38143364 | 0.71071874 | NA         |          |
| 30851     | ENSG00000213977 | 631.512519 | 0.47399787  | 0.11069462 | 7.82E-06   | 7.59E-05   | TAX1BP3  |
| NA        | ENSG00000213979 | 0.18922458 | 0.01954053  | 0.38488496 | 0.78225479 | NA         | RPL7AP14 |
| NA        | ENSG00000213981 | 0.34109932 | 0.02362644  | 0.38535338 | 0.62411144 | NA         |          |
| 8906      | ENSG00000213983 | 998.013216 | 0.35732021  | 0.08950379 | 3.91E-05   | 0.00032924 | APIG2    |
| NA        | ENSG00000213985 | 0          | NA          | NA         | NA         | NA         |          |
| NA        | ENSG00000213987 | 0          | NA          | NA         | NA         | NA         |          |
| 7643      | ENSG00000213988 | 270.777332 | -0.14410345 | 0.15071084 | 0.29711874 | 0.52379916 | ZNF90    |
| NA        | ENSG00000213994 | 0.18922458 | 0.01954053  | 0.38488496 | 0.78225479 | NA         |          |
| 55739     | ENSG00000213995 | 965.196737 | 0.02096069  | 0.08998389 | 0.81143703 | 0.9146069  | NAXD     |
| 53345     | ENSG00000213996 | 115.946634 | 0.24675656  | 0.20737704 | 0.1608262  | 0.3488699  | TM6SF2   |
| NA        | ENSG00000213997 | 4.72208887 | 0.0581262   | 0.37361763 | 0.59954683 | 0.79057618 | PGAM1P7  |
| 4207      | ENSG00000213999 | 18.9874483 | 1.3785341   | 0.66885896 | 0.00216043 | 0.01143925 | MEF2B    |
| 100271849 | ENSG00000213999 | 18.9874483 | 1.3785341   | 0.66885896 | 0.00216043 | 0.01143925 | MEF2B    |
| NA        | ENSG00000214003 | 0          | NA          | NA         | NA         | NA         | ATP5PBP3 |
| NA        | ENSG00000214009 | 0          | NA          | NA         | NA         | NA         | PCNAP3   |
| NA        | ENSG00000214012 | 0.68955477 | 0.04027251  | 0.38714314 | 0.35759988 | NA         | KRT18P38 |
| 2595      | ENSG00000214013 | 411.005766 | -0.25485337 | 0.13315895 | 0.04051327 | 0.1265601  | GANC     |
| NA        | ENSG00000214015 | 0          | NA          | NA         | NA         | NA         | RPL32P23 |

|           |                 |            |             |            |            |            |           |
|-----------|-----------------|------------|-------------|------------|------------|------------|-----------|
| NA        | ENSG00000214016 | 0.80871517 | 0.01382444  | 0.38179842 | 0.78833545 | NA         | RPSAP61   |
| NA        | ENSG00000214018 | 1.6106412  | 0.08125948  | 0.39373116 | 0.16813231 | NA         | RRM2P3    |
| NA        | ENSG00000214019 | 0          | NA          | NA         | NA         | NA         | RBM39P1   |
| NA        | ENSG00000214020 | 0          | NA          | NA         | NA         | NA         | FTLP4     |
| 26140     | ENSG00000214021 | 712.370388 | 0.47003161  | 0.11712315 | 2.54E-05   | 0.00022262 | TTLL3     |
| 29803     | ENSG00000214022 | 5893.27957 | -0.07127904 | 0.05464787 | 0.18396436 | 0.3824796  | REPIN1    |
| NA        | ENSG00000214024 | 0          | NA          | NA         | NA         | NA         | RPL23AP29 |
| NA        | ENSG00000214025 | 0          | NA          | NA         | NA         | NA         | ATP5BPB4  |
| 6150      | ENSG00000214026 | 1072.16137 | 0.07126968  | 0.08114349 | 0.36869894 | 0.59806941 | MRPL23    |
| 107987373 | ENSG00000214026 | 1072.16137 | 0.07126968  | 0.08114349 | 0.36869894 | 0.59806941 | MRPL23    |
| NA        | ENSG00000214027 | 0          | NA          | NA         | NA         | NA         | ARPC3P5   |
| 101060200 | ENSG00000214029 | 588.45483  | -0.26890936 | 0.11724801 | 0.01545677 | 0.05903028 | ZNF891    |
| NA        | ENSG00000214031 | 0          | NA          | NA         | NA         | NA         | CLDN7P1   |
| NA        | ENSG00000214035 | 0          | NA          | NA         | NA         | NA         |           |
| NA        | ENSG00000214039 | 0.30139824 | -0.02296476 | 0.38527817 | 0.68536535 | NA         | LINC02418 |
| NA        | ENSG00000214041 | 0.62429291 | -0.03620507 | 0.38661649 | 0.42716672 | NA         | PGAM1P4   |
| 3444      | ENSG00000214042 | 0          | NA          | NA         | NA         | NA         | IFNA7     |
| 100128554 | ENSG00000214043 | 0.15069912 | -0.01848503 | 0.38480575 | 0.84537521 | NA         | LINC02347 |
| NA        | ENSG00000214045 | 0          | NA          | NA         | NA         | NA         | IMPDH1P2  |
| 79086     | ENSG00000214046 | 810.706274 | -0.10192404 | 0.09322396 | 0.25893047 | 0.48036523 | SMIM7     |
| NA        | ENSG00000214047 | 0          | NA          | NA         | NA         | NA         | RPS11P7   |
| NA        | ENSG00000214049 | 0          | NA          | NA         | NA         | NA         | UCA1      |
| 157574    | ENSG00000214050 | 59.8438595 | -0.06836922 | 0.24208853 | 0.7150598  | 0.86271551 | FBXO16    |
| NA        | ENSG00000214051 | 0          | NA          | NA         | NA         | NA         | ARF4P3    |
| NA        | ENSG00000214062 | 0.6525625  | 0.00378442  | 0.38194312 | 0.93526549 | NA         | RPL7P17   |
| 7106      | ENSG00000214063 | 727.834029 | -0.38058196 | 0.09858709 | 6.22E-05   | 0.00049784 | TSPAN4    |
| NA        | ENSG00000214064 | 0          | NA          | NA         | NA         | NA         | RPL6P5    |
| NA        | ENSG00000214067 | 0          | NA          | NA         | NA         | NA         |           |
| NA        | ENSG00000214070 | 0.49001835 | -0.00695139 | 0.38316005 | 0.85916919 | NA         | MANEALP1  |
| NA        | ENSG00000214071 | 0          | NA          | NA         | NA         | NA         |           |
| NA        | ENSG00000214073 | 0          | NA          | NA         | NA         | NA         | RPL21P17  |
| NA        | ENSG00000214074 | 0          | NA          | NA         | NA         | NA         | RPL23AP39 |
| NA        | ENSG00000214076 | 51.7545599 | 0.28922597  | 0.29875581 | 0.17403813 | 0.36729246 | CPSF1P1   |
| NA        | ENSG00000214077 | 8.64226993 | -0.14327376 | 0.38111754 | 0.34922041 | 0.57998769 | GNAQP1    |
| 8904      | ENSG00000214078 | 1890.75207 | 0.10422278  | 0.07528282 | 0.1575241  | 0.34438327 | CPNE1     |
| 100132708 | ENSG00000214081 | 0          | NA          | NA         | NA         | NA         | CYP4F30P  |
| 339231    | ENSG00000214087 | 932.08671  | 0.13997916  | 0.09032788 | 0.11075868 | 0.26844028 | ARL16     |
| NA        | ENSG00000214089 | 0.15069912 | -0.01848503 | 0.38480575 | 0.84537521 | NA         | RPL9P21   |

|        |                 |            |             |            |            |            |            |
|--------|-----------------|------------|-------------|------------|------------|------------|------------|
| NA     | ENSG00000214093 | 0          | NA          | NA         | NA         | NA         |            |
| 255798 | ENSG00000214097 | 0          | NA          | NA         | NA         | NA         | SMCO1      |
| 389033 | ENSG00000214100 | 0.94612289 | 0.04084733  | 0.38743659 | 0.29648824 | NA         | PLAC9P1    |
| 494551 | ENSG00000214102 | 3.08607282 | 0.02730683  | 0.37397776 | 0.77214474 | 0.89539725 | WEE2       |
| NA     | ENSG00000214106 | 113.257997 | 0.32305304  | 0.237684   | 0.09347561 | 0.23697459 | PAXIP1-AS2 |
| 4112   | ENSG00000214107 | 0.36247517 | 0.00101876  | 0.3833651  | 0.96618489 | NA         | MAGEB1     |
| NA     | ENSG00000214108 | 0          | NA          | NA         | NA         | NA         | TPT1P5     |
| NA     | ENSG00000214110 | 39.4004264 | 0.51162634  | 0.39692896 | 0.04471852 | 0.13643171 | LDHAP4     |
| NA     | ENSG00000214111 | 0          | NA          | NA         | NA         | NA         | PAFAH1B2P1 |
| 57128  | ENSG00000214113 | 329.130616 | 0.12921442  | 0.13541166 | 0.30785096 | 0.53534604 | LYRM4      |
| 26292  | ENSG00000214114 | 339.681637 | 0.03438096  | 0.13491543 | 0.78726953 | 0.90331242 | MYCBP      |
| NA     | ENSG00000214121 | 1.74761498 | 0.02715803  | 0.37924262 | 0.70795672 | NA         | PRDX1P1    |
| NA     | ENSG00000214124 | 0          | NA          | NA         | NA         | NA         | SNRPEP9    |
| NA     | ENSG00000214125 | 1.0293629  | -0.02113024 | 0.38105657 | 0.72239388 | NA         |            |
| 155006 | ENSG00000214128 | 0.18922458 | 0.01954053  | 0.38488496 | 0.78225479 | NA         | TMEM213    |
| NA     | ENSG00000214132 | 0          | NA          | NA         | NA         | NA         |            |
| 220729 | ENSG00000214135 | 370.145345 | 0.31888521  | 0.1354768  | 0.01170194 | 0.04720749 |            |
| 768206 | ENSG00000214140 | 784.766118 | -0.56901282 | 0.11672527 | 3.48E-07   | 4.27E-06   | PRCD       |
| NA     | ENSG00000214141 | 0.59910558 | -0.03505719 | 0.38648421 | 0.44284155 | NA         | ACTN4P2    |
| NA     | ENSG00000214142 | 0.15069912 | -0.01848503 | 0.38480575 | 0.84537521 | NA         | RPL7P60    |
| NA     | ENSG00000214144 | 0          | NA          | NA         | NA         | NA         |            |
| NA     | ENSG00000214145 | 1.47173764 | -0.00453468 | 0.37857034 | 0.94649096 | NA         | LINC00887  |
| 647323 | ENSG00000214146 | 1.91917504 | -0.01936451 | 0.37889039 | 0.69599421 | NA         | LINC02026  |
| NA     | ENSG00000214147 | 0          | NA          | NA         | NA         | NA         |            |
| 10195  | ENSG00000214160 | 752.328049 | 0.16873117  | 0.09595554 | 0.06910867 | 0.18966883 | ALG3       |
| NA     | ENSG00000214161 | 0          | NA          | NA         | NA         | NA         | SDC4P      |
| 201283 | ENSG00000214174 | 273.800661 | -0.07819412 | 0.15175581 | 0.57385414 | 0.77329798 | AMZ2P1     |
| NA     | ENSG00000214176 | 551.141302 | 0.41101249  | 0.11247072 | 0.00013051 | 0.00096474 | PLEKHM1P1  |
| NA     | ENSG00000214178 | 0          | NA          | NA         | NA         | NA         | PPIAP23    |
| NA     | ENSG00000214182 | 4.56068645 | -0.04471105 | 0.36669275 | 0.7093819  | 0.86054032 | PTMAP5     |
| 644903 | ENSG00000214184 | 13.2353952 | 0.0826349   | 0.34091472 | 0.63008829 | 0.81291141 | GCC2-AS1   |
| NA     | ENSG00000214185 | 0.34746601 | 0.02370763  | 0.3853651  | 0.61987128 | NA         | XPOTP1     |
| 338069 | ENSG00000214188 | 2.15608119 | 0.06894122  | 0.38427357 | 0.40993738 | NA         | ST7-OT4    |
| NA     | ENSG00000214189 | 0.91463859 | -0.03833207 | 0.38458547 | 0.46186443 | NA         | ZNF788P    |
| NA     | ENSG00000214190 | 0.14931947 | -0.01844332 | 0.38480212 | 0.84537521 | NA         | RNF152P1   |
| NA     | ENSG00000214192 | 0          | NA          | NA         | NA         | NA         | UBE2V1P2   |
| 79729  | ENSG00000214193 | 216.090058 | -0.06321476 | 0.15948015 | 0.66035357 | 0.83167744 | SH3D21     |
| 401397 | ENSG00000214194 | 477.399112 | -0.12557919 | 0.11373678 | 0.2467091  | 0.46580781 | SMIM30     |

|        |                 |            |             |            |            |            |            |
|--------|-----------------|------------|-------------|------------|------------|------------|------------|
| NA     | ENSG00000214195 | 0          | NA          | NA         | NA         | NA         | HMG2P31    |
| NA     | ENSG00000214198 | 11.6756884 | -0.20079459 | 0.40038897 | 0.2351536  | 0.45199063 | TTC41P     |
| NA     | ENSG00000214199 | 1.15721144 | 0.01748923  | 0.38008496 | 0.78431936 | NA         | EEF1A1P12  |
| NA     | ENSG00000214200 | 0          | NA          | NA         | NA         | NA         | TPM3P2     |
| NA     | ENSG00000214203 | 1.20218695 | 0.08460756  | 0.39662327 | 0.11224147 | NA         | RPS4XP1    |
| NA     | ENSG00000214204 | 0          | NA          | NA         | NA         | NA         | HNRNPA1P43 |
| NA     | ENSG00000214207 | 0          | NA          | NA         | NA         | NA         | KRT18P10   |
| NA     | ENSG00000214210 | 0          | NA          | NA         | NA         | NA         |            |
| NA     | ENSG00000214211 | 0          | NA          | NA         | NA         | NA         | CTAGE14P   |
| 255809 | ENSG00000214212 | 3.35547558 | 0.02740828  | 0.37207456 | 0.78600602 | 0.90280441 | C19orf38   |
| 654502 | ENSG00000214216 | 0.34624801 | -0.02356563 | 0.38536324 | 0.65270996 | NA         | IQCJ       |
| NA     | ENSG00000214222 | 0          | NA          | NA         | NA         | NA         | TUBBP2     |
| 664709 | ENSG00000214223 | 39.3522711 | 0.14104168  | 0.28225949 | 0.47884779 | 0.70038424 | HNRNPA1P10 |
| 339210 | ENSG00000214226 | 46.2076024 | 0.59715767  | 0.40501534 | 0.02557321 | 0.08867049 | C17orf67   |
| 646951 | ENSG00000214237 | 0.173733   | 0.01914545  | 0.38484597 | 0.78225479 | NA         | MINDY4B    |
| NA     | ENSG00000214243 | 9.54704351 | -0.00831918 | 0.3415935  | 0.95583955 | 0.98182017 |            |
| NA     | ENSG00000214244 | 0          | NA          | NA         | NA         | NA         | SETP21     |
| NA     | ENSG00000214245 | 0          | NA          | NA         | NA         | NA         | PUDPP3     |
| NA     | ENSG00000214248 | 4.31753413 | 0.2094701   | 0.44883762 | 0.08697947 | 0.22501926 |            |
| NA     | ENSG00000214249 | 0.18922458 | 0.01954053  | 0.38488496 | 0.78225479 | NA         | CTAGE11P   |
| NA     | ENSG00000214252 | 0          | NA          | NA         | NA         | NA         | AZGP1P2    |
| 51024  | ENSG00000214253 | 1667.06274 | -0.06006022 | 0.08076717 | 0.44585699 | 0.67028199 | FIS1       |
| NA     | ENSG00000214254 | 0          | NA          | NA         | NA         | NA         |            |
| NA     | ENSG00000214255 | 0          | NA          | NA         | NA         | NA         | RPS2P6     |
| NA     | ENSG00000214259 | 0          | NA          | NA         | NA         | NA         |            |
| 84832  | ENSG00000214262 | 0          | NA          | NA         | NA         | NA         | ANKRD36BP1 |
| NA     | ENSG00000214263 | 0          | NA          | NA         | NA         | NA         | RPSAP53    |
| NA     | ENSG00000214264 | 0          | NA          | NA         | NA         | NA         | KCTD9P4    |
| NA     | ENSG00000214265 | 1.68535678 | 0.01563509  | 0.37594913 | 0.85096929 | NA         |            |
| NA     | ENSG00000214266 | 0          | NA          | NA         | NA         | NA         | STARP1     |
| NA     | ENSG00000214268 | 0          | NA          | NA         | NA         | NA         | RPS3AP33   |
| NA     | ENSG00000214269 | 0          | NA          | NA         | NA         | NA         | LGMNP1     |
| NA     | ENSG00000214273 | 24.840552  | 0.20194235  | 0.35193877 | 0.31156451 | 0.5392515  | AGGF1P1    |
| 283    | ENSG00000214274 | 10.4987192 | 0.5344585   | 0.80770794 | 0.03212879 | 0.10588625 | ANG        |
| NA     | ENSG00000214278 | 0          | NA          | NA         | NA         | NA         |            |
| NA     | ENSG00000214279 | 50.2538721 | 0.21056641  | 0.31889131 | 0.304285   | 0.53154043 | SCART1     |
| NA     | ENSG00000214280 | 0          | NA          | NA         | NA         | NA         |            |
| NA     | ENSG00000214281 | 0          | NA          | NA         | NA         | NA         | HMG2P39    |

|           |                 |            |             |            |            |            |            |
|-----------|-----------------|------------|-------------|------------|------------|------------|------------|
| NA        | ENSG00000214282 | 0          | NA          | NA         | NA         | NA         | KRT8P14    |
| NA        | ENSG00000214283 | 0          | NA          | NA         | NA         | NA         | RAD51AP1P1 |
| 594857    | ENSG00000214285 | 0          | NA          | NA         | NA         | NA         | NPS        |
| NA        | ENSG00000214286 | 0          | NA          | NA         | NA         | NA         | PDCL3P3    |
| NA        | ENSG00000214288 | 0          | NA          | NA         | NA         | NA         | HMGB3P13   |
| NA        | ENSG00000214289 | 0          | NA          | NA         | NA         | NA         | RPL39P5    |
| 120376    | ENSG00000214290 | 1.55448531 | 0.11111676  | 0.40618985 | 0.05487934 | NA         | COLCA2     |
| 100505854 | ENSG00000214293 | 182.543486 | -0.03188608 | 0.17403499 | 0.83578132 | 0.92515898 | APTR       |
| NA        | ENSG00000214295 | 0          | NA          | NA         | NA         | NA         | FOXO1B     |
| NA        | ENSG00000214297 | 0          | NA          | NA         | NA         | NA         | ALDOAP2    |
| NA        | ENSG00000214298 | 0          | NA          | NA         | NA         | NA         | MRPS21P6   |
| 441272    | ENSG00000214300 | 11.6935516 | -0.10261918 | 0.36646175 | 0.48652084 | 0.7063832  | SPDYE3     |
| NA        | ENSG00000214301 | 0          | NA          | NA         | NA         | NA         |            |
| NA        | ENSG00000214305 | 0          | NA          | NA         | NA         | NA         |            |
| 255374    | ENSG00000214309 | 37.5220598 | -0.13894469 | 0.28227285 | 0.48246043 | 0.70289433 | MBLAC1     |
| 646282    | ENSG00000214313 | 0          | NA          | NA         | NA         | NA         | AZGP1P1    |
| NA        | ENSG00000214318 | 0          | NA          | NA         | NA         | NA         | ATP5MC1P6  |
| NA        | ENSG00000214319 | 0          | NA          | NA         | NA         | NA         | CXADRP1    |
| NA        | ENSG00000214321 | 0          | NA          | NA         | NA         | NA         | CBX1P4     |
| NA        | ENSG00000214322 | 0          | NA          | NA         | NA         | NA         | CBX1P2     |
| 285311    | ENSG00000214324 | 0          | NA          | NA         | NA         | NA         | C3orf56    |
| NA        | ENSG00000214326 | 0          | NA          | NA         | NA         | NA         | RPL31P1    |
| NA        | ENSG00000214329 | 0          | NA          | NA         | NA         | NA         | SLC9B1P2   |
| NA        | ENSG00000214330 | 0          | NA          | NA         | NA         | NA         | ABCD1P5    |
| NA        | ENSG00000214331 | 192.395345 | 0.207743    | 0.17072983 | 0.17443248 | 0.36800727 | PDPR2P     |
| NA        | ENSG00000214335 | 0          | NA          | NA         | NA         | NA         | CTAGE16P   |
| 344167    | ENSG00000214336 | 99.9040422 | 1.50112846  | 0.25831155 | 5.14E-10   | 9.22E-09   | FOXI3      |
| 387104    | ENSG00000214338 | 1351.51598 | -0.51920152 | 0.08551076 | 4.79E-10   | 8.61E-09   | SOGA3      |
| NA        | ENSG00000214342 | 0          | NA          | NA         | NA         | NA         | ATP5PBP2   |
| 390651    | ENSG00000214344 | 0          | NA          | NA         | NA         | NA         | OR4F13P    |
| 390877    | ENSG00000214347 | 0          | NA          | NA         | NA         | NA         |            |
| NA        | ENSG00000214351 | 0          | NA          | NA         | NA         | NA         | OR1X5P     |
| 100130894 | ENSG00000214353 | 4.31783643 | 0.04041513  | 0.36512399 | 0.74451988 | 0.87966141 | VAC14-AS1  |
| NA        | ENSG00000214354 | 0          | NA          | NA         | NA         | NA         | PAFAH1B1P1 |
| 54492     | ENSG00000214357 | 722.594723 | -0.47104004 | 0.10092876 | 1.29E-06   | 1.44E-05   | NEURL1B    |
| NA        | ENSG00000214359 | 0.14931947 | -0.01844332 | 0.38480212 | 0.84537521 | NA         | RPL18P10   |
| 285588    | ENSG00000214360 | 0.76327836 | -0.02803428 | 0.38357327 | 0.5725126  | NA         | EFCAB9     |
| NA        | ENSG00000214362 | 0          | NA          | NA         | NA         | NA         | RPS3AP36   |

|           |                 |            |             |            |            |            |            |
|-----------|-----------------|------------|-------------|------------|------------|------------|------------|
| NA        | ENSG00000214366 | 0          | NA          | NA         | NA         | NA         | EIF4EP5    |
| 79441     | ENSG00000214367 | 556.23494  | -0.23832793 | 0.13563302 | 0.059273   | 0.16956407 | HAUS3      |
| NA        | ENSG00000214369 | 0.68873783 | 0.02688154  | 0.38368135 | 0.57440369 | NA         | CYB5AP2    |
| NA        | ENSG00000214374 | 0          | NA          | NA         | NA         | NA         | RPLP2P1    |
| 387804    | ENSG00000214376 | 47.4804855 | 0.82001016  | 0.43346546 | 0.00631488 | 0.02830708 | VSTM5      |
| NA        | ENSG00000214380 | 0          | NA          | NA         | NA         | NA         | NFYBP1     |
| 677779    | ENSG00000214381 | 0          | NA          | NA         | NA         | NA         | LINC00488  |
| NA        | ENSG00000214389 | 4.02925636 | 0.01548882  | 0.36687163 | 0.89215554 | 0.95335233 | RPS3AP26   |
| NA        | ENSG00000214391 | 1.75377942 | 0.05927535  | 0.38330851 | 0.44989284 | NA         | TUBAP2     |
| 644246    | ENSG00000214401 | 10.9997927 | 0.15903677  | 0.37075991 | 0.35881731 | 0.58913444 | KANSL1-AS1 |
| 107984142 | ENSG00000214401 | 10.9997927 | 0.15903677  | 0.37075991 | 0.35881731 | 0.58913444 | KANSL1-AS1 |
| 401562    | ENSG00000214402 | 1.40050562 | 0.01283911  | 0.37915544 | 0.84761242 | NA         | LCNL1      |
| NA        | ENSG00000214405 | 0          | NA          | NA         | NA         | NA         | RAP1BP2    |
| 152225    | ENSG00000214407 | 0          | NA          | NA         | NA         | NA         | LINC02085  |
| 92482     | ENSG00000214413 | 581.420338 | -0.3935062  | 0.10617343 | 0.00011049 | 0.00083196 | BBIP1      |
| 390231    | ENSG00000214414 | 0          | NA          | NA         | NA         | NA         | TRIM77     |
| 346562    | ENSG00000214415 | 0          | NA          | NA         | NA         | NA         | GNAT3      |
| NA        | ENSG00000214417 | 0          | NA          | NA         | NA         | NA         | KRT18P13   |
| NA        | ENSG00000214424 | 0          | NA          | NA         | NA         | NA         | FAM149B1P1 |
| NA        | ENSG00000214425 | 1411.75109 | -0.03137629 | 0.08065599 | 0.69030429 | 0.84992163 | LRRRC37A4P |
| NA        | ENSG00000214428 | 0          | NA          | NA         | NA         | NA         | NPM1P10    |
| NA        | ENSG00000214429 | 0          | NA          | NA         | NA         | NA         | CYCSP6     |
| 101926911 | ENSG00000214432 | 4.54244455 | 0.06427351  | 0.37642592 | 0.53036403 | 0.74211315 | VPS33B-DT  |
| NA        | ENSG00000214433 | 0.36251418 | 0.00105952  | 0.38336537 | 0.9658012  | NA         | GOLGA2P8   |
| NA        | ENSG00000214434 | 0          | NA          | NA         | NA         | NA         | NIFKP1     |
| 57412     | ENSG00000214435 | 662.540774 | 0.05066991  | 0.10707215 | 0.62264922 | 0.80737672 | AS3MT      |
| NA        | ENSG00000214439 | 24.0773501 | 0.08185531  | 0.30082388 | 0.67133686 | 0.83825699 | FAM185BP   |
| 100528020 | ENSG00000214447 | 8.69317782 | -0.01806679 | 0.38336033 | 0.66299595 | 0.83373516 | FAM187A    |
| NA        | ENSG00000214455 | 17.7064662 | 0.18988084  | 0.36625685 | 0.31619597 | 0.54427831 | RCN1P2     |
| 440503    | ENSG00000214456 | 263.133276 | 0.81156399  | 0.17262475 | 4.41E-07   | 5.30E-06   | PLIN5      |
| NA        | ENSG00000214457 | 2.19481549 | -0.06209172 | 0.3804731  | 0.49852193 | NA         | RPL7P29    |
| NA        | ENSG00000214460 | 0          | NA          | NA         | NA         | NA         | TPT1P6     |
| NA        | ENSG00000214465 | 1.35192447 | 0.00530725  | 0.37772008 | 0.94264593 | NA         | SMARCE1P6  |
| NA        | ENSG00000214484 | 0          | NA          | NA         | NA         | NA         | RPSAP28    |
| NA        | ENSG00000214485 | 2.37046275 | 0.03608934  | 0.37701835 | 0.67828317 | NA         | RPL7P1     |
| NA        | ENSG00000214487 | 0          | NA          | NA         | NA         | NA         | OR7E148P   |
| 730005    | ENSG00000214491 | 0          | NA          | NA         | NA         | NA         | SEC14L6    |
| 153218    | ENSG00000214510 | 0          | NA          | NA         | NA         | NA         | SPINK13    |

|           |                 |            |             |            |            |            |            |
|-----------|-----------------|------------|-------------|------------|------------|------------|------------|
| 613227    | ENSG00000214511 | 0          | NA          | NA         | NA         | NA         | HIGD1C     |
| 344022    | ENSG00000214513 | 0          | NA          | NA         | NA         | NA         | NOTO       |
| 284116    | ENSG00000214514 | 0          | NA          | NA         | NA         | NA         | KRT42P     |
| 51400     | ENSG00000214517 | 1182.36744 | -0.15684432 | 0.10072709 | 0.10577052 | 0.25953792 | PPME1      |
| 728279    | ENSG00000214518 | 0          | NA          | NA         | NA         | NA         | KRTAP2-2   |
| NA        | ENSG00000214525 | 0          | NA          | NA         | NA         | NA         |            |
| NA        | ENSG00000214526 | 0          | NA          | NA         | NA         | NA         |            |
| 10809     | ENSG00000214530 | 175.587082 | -0.02764368 | 0.19223415 | 0.86616883 | 0.94101356 | STARD10    |
| NA        | ENSG00000214533 | 0          | NA          | NA         | NA         | NA         | KRT18P33   |
| 100131539 | ENSG00000214534 | 14.3467206 | 0.14473835  | 0.36178281 | 0.40654623 | 0.63480853 | ZNF705E    |
| NA        | ENSG00000214535 | 2.30334045 | -0.00484068 | 0.37492742 | 0.95301179 | NA         | RPS15AP1   |
| NA        | ENSG00000214541 | 0.14931947 | -0.01844332 | 0.38480212 | 0.84537521 | NA         | RPS4XP3    |
| NA        | ENSG00000214544 | 0.173733   | 0.01914545  | 0.38484597 | 0.78225479 | NA         | GTF2IRD2P1 |
| NA        | ENSG00000214546 | 0.68997216 | 0.02455669  | 0.38336419 | 0.58563167 | NA         |            |
| 55384     | ENSG00000214548 | 14.1077774 | 1.1609832   | 1.19157407 | 0.00859038 | 0.03658936 | MEG3       |
| NA        | ENSG00000214549 | 0          | NA          | NA         | NA         | NA         | SDHCP2     |
| NA        | ENSG00000214552 | 0          | NA          | NA         | NA         | NA         | COPS8P2    |
| 342666    | ENSG00000214553 | 0.93053149 | 0.05166487  | 0.38896823 | 0.24547883 | NA         | LRRC37A11P |
| NA        | ENSG00000214558 | 0.173733   | 0.01914545  | 0.38484597 | 0.78225479 | NA         |            |
| NA        | ENSG00000214559 | 0.60279648 | -0.02752712 | 0.38588313 | 0.49730371 | NA         |            |
| NA        | ENSG00000214560 | 0          | NA          | NA         | NA         | NA         | RPL21P41   |
| NA        | ENSG00000214561 | 0.16735865 | 0.01897177  | 0.38482933 | 0.78225479 | NA         | RBBP4P4    |
| 728130    | ENSG00000214562 | 129.794377 | 0.09108133  | 0.19589071 | 0.59013134 | 0.78478489 | NUTM2D     |
| NA        | ENSG00000214563 | 1.72187153 | 0.05470169  | 0.38286697 | 0.472432   | NA         | GAPDHP15   |
| 64506     | ENSG00000214575 | 89.2899332 | -0.20929564 | 0.23250304 | 0.26423273 | 0.48643065 | CPEB1      |
| NA        | ENSG00000214578 | 2.59214877 | 0.01366397  | 0.37130266 | 0.8921821  | 0.95335233 | HMG2P15    |
| NA        | ENSG00000214581 | 0          | NA          | NA         | NA         | NA         | ZNF971P    |
| NA        | ENSG00000214584 | 0          | NA          | NA         | NA         | NA         | PGGT1BP2   |
| NA        | ENSG00000214593 | 0.16735865 | 0.01897177  | 0.38482933 | 0.78225479 | NA         |            |
| 400954    | ENSG00000214595 | 341.963102 | 0.43671847  | 0.21798843 | 0.01811133 | 0.06720935 | EML6       |
| NA        | ENSG00000214602 | 0          | NA          | NA         | NA         | NA         | CTBP2P5    |
| NA        | ENSG00000214604 | 0          | NA          | NA         | NA         | NA         | NPM1P36    |
| NA        | ENSG00000214607 | 0          | NA          | NA         | NA         | NA         | ADAM24P    |
| NA        | ENSG00000214612 | 0          | NA          | NA         | NA         | NA         | RPS19P1    |
| NA        | ENSG00000214614 | 0          | NA          | NA         | NA         | NA         |            |
| 386757    | ENSG00000214617 | 4.37696392 | -0.01741718 | 0.36818752 | 0.87073556 | 0.94350971 | SLC6A10P   |
| NA        | ENSG00000214626 | 0.16735865 | 0.01897177  | 0.38482933 | 0.78225479 | NA         | POLR3DP1   |
| NA        | ENSG00000214628 | 0          | NA          | NA         | NA         | NA         | NDUFB5P2   |



|           |                 |            |             |            |            |            |           |
|-----------|-----------------|------------|-------------|------------|------------|------------|-----------|
| NA        | ENSG00000214629 | 0.173124   | -0.01911262 | 0.38486262 | 0.84537521 | NA         | RPSAP6    |
| NA        | ENSG00000214641 | 0          | NA          | NA         | NA         | NA         |           |
| 245927    | ENSG00000214642 | 0          | NA          | NA         | NA         | NA         | DEFB113   |
| 403339    | ENSG00000214643 | 0          | NA          | NA         | NA         | NA         | DEFB133   |
| NA        | ENSG00000214646 | 0          | NA          | NA         | NA         | NA         | COMMD4P1  |
| NA        | ENSG00000214650 | 3.48180665 | 0.03796883  | 0.37020741 | 0.72982413 | 0.87081915 |           |
| NA        | ENSG00000214651 | 0.46509046 | -0.00779003 | 0.38327031 | 0.86477702 | NA         |           |
| 442319    | ENSG00000214652 | 202.335791 | -2.07909426 | 0.19909022 | 1.11E-26   | 5.63E-25   | ZNF727    |
| NA        | ENSG00000214653 | 0.4678512  | -0.00937694 | 0.38287696 | 0.85044634 | NA         | HNRNPA3P3 |
| 100288842 | ENSG00000214654 | 96.6442562 | -0.29755074 | 0.26624852 | 0.14314171 | 0.32228142 | B3GALT9   |
| 23053     | ENSG00000214655 | 2531.7332  | 0.21000787  | 0.08375221 | 0.01007937 | 0.04167381 | ZSWIM8    |
| NA        | ENSG00000214657 | 0          | NA          | NA         | NA         | NA         | RPLP1P5   |
| NA        | ENSG00000214659 | 1.83260047 | -0.00693068 | 0.37613305 | 0.92997993 | NA         | KRT8P26   |
| NA        | ENSG00000214660 | 0          | NA          | NA         | NA         | NA         | SLC29A4P2 |
| NA        | ENSG00000214668 | 0          | NA          | NA         | NA         | NA         | SLC29A4P1 |
| NA        | ENSG00000214669 | 0          | NA          | NA         | NA         | NA         |           |
| NA        | ENSG00000214671 | 0          | NA          | NA         | NA         | NA         | RPL6P12   |
| NA        | ENSG00000214676 | 0          | NA          | NA         | NA         | NA         | RPL9P16   |
| 389124    | ENSG00000214681 | 0          | NA          | NA         | NA         | NA         | IQCF5     |
| NA        | ENSG00000214684 | 0          | NA          | NA         | NA         | NA         | ANKRD49P4 |
| 440956    | ENSG00000214686 | 0          | NA          | NA         | NA         | NA         | IQCF6     |
| 414152    | ENSG00000214688 | 3.73343558 | -0.08236355 | 0.38135728 | 0.43682525 | 0.6619272  | C10orf105 |
| 388942    | ENSG00000214691 | 0          | NA          | NA         | NA         | NA         | LINC01913 |
| 100271715 | ENSG00000214694 | 16.2501367 | 0.13147245  | 0.37651959 | 0.37404264 | 0.60313768 | ARHGEF33  |
| NA        | ENSG00000214695 | 0          | NA          | NA         | NA         | NA         | NPAP1P2   |
| 728858    | ENSG00000214700 | 0.68134019 | 0.03153177  | 0.38362055 | 0.54560468 | NA         | C12orf71  |
| NA        | ENSG00000214702 | 0          | NA          | NA         | NA         | NA         | COMMD4P2  |
| 7866      | ENSG00000214706 | 1086.98559 | -0.01033615 | 0.09186387 | 0.90592784 | 0.95895045 | IFRD2     |
| 105371730 | ENSG00000214708 | 1.87543203 | 0.04379848  | 0.37989449 | 0.58387616 | NA         |           |
| 440854    | ENSG00000214711 | 27.477529  | 0.42350085  | 0.40242505 | 0.08126203 | 0.21393825 | CAPN14    |
| 9189      | ENSG00000214717 | 1379.20765 | 0.04534455  | 0.0733429  | 0.53122922 | 0.74269521 | ZBED1     |
| NA        | ENSG00000214719 | 182.452958 | 0.06677077  | 0.16231859 | 0.65147758 | 0.82589873 |           |
| NA        | ENSG00000214720 | 0          | NA          | NA         | NA         | NA         | KRT18P49  |
| 440356    | ENSG00000214725 | 2.88798423 | 0.04656839  | 0.3748457  | 0.64135128 | 0.82041028 | CDIPTOSP  |
| NA        | ENSG00000214727 | 0          | NA          | NA         | NA         | NA         | RPL5P35   |
| 100188893 | ENSG00000214736 | 1612.46838 | 0.11174219  | 0.07611294 | 0.13410198 | 0.30833044 | TOMM6     |
| NA        | ENSG00000214743 | 0          | NA          | NA         | NA         | NA         | MRPS5P3   |
| NA        | ENSG00000214745 | 0          | NA          | NA         | NA         | NA         | GOT2P6    |

|           |                 |            |             |            |            |            |            |
|-----------|-----------------|------------|-------------|------------|------------|------------|------------|
| NA        | ENSG00000214748 | 0          | NA          | NA         | NA         | NA         |            |
| 221092    | ENSG00000214753 | 3322.32394 | -0.31238483 | 0.06491492 | 1.00E-06   | 1.14E-05   | HNRNPUL2   |
| NA        | ENSG00000214754 | 0          | NA          | NA         | NA         | NA         |            |
| 751071    | ENSG00000214756 | 117.567644 | -0.28055227 | 0.20816725 | 0.11173446 | 0.27024401 | CSKMT      |
| NA        | ENSG00000214759 | 0          | NA          | NA         | NA         | NA         |            |
| NA        | ENSG00000214760 | 0.18922458 | 0.01954053  | 0.38488496 | 0.78225479 | NA         | RPL21P1    |
| NA        | ENSG00000214761 | 0          | NA          | NA         | NA         | NA         | HNRNPA1P15 |
| NA        | ENSG00000214765 | 429.972681 | 0.02172076  | 0.11704006 | 0.84642714 | 0.930418   | SEPTIN7P2  |
| NA        | ENSG00000214770 | 17.7855011 | -0.1598517  | 0.35435831 | 0.38471273 | 0.61375849 |            |
| NA        | ENSG00000214772 | 0          | NA          | NA         | NA         | NA         |            |
| NA        | ENSG00000214773 | 1.19390019 | 0.02093411  | 0.37945015 | 0.75983452 | NA         |            |
| NA        | ENSG00000214776 | 99.4999408 | 0.49646603  | 0.25093898 | 0.01554149 | 0.05934241 |            |
| 728588    | ENSG00000214782 | 0          | NA          | NA         | NA         | NA         | MS4A18     |
| 84820     | ENSG00000214783 | 221.377483 | 0.5126286   | 0.17474123 | 0.00117083 | 0.00677834 | POLR2J4    |
| NA        | ENSG00000214784 | 0.64019408 | 0.00320517  | 0.38196024 | 0.94471299 | NA         | RPS3AP21   |
| 643680    | ENSG00000214787 | 0.34746601 | 0.02370763  | 0.3853651  | 0.61987128 | NA         | MS4A4E     |
| NA        | ENSG00000214788 | 0          | NA          | NA         | NA         | NA         |            |
| NA        | ENSG00000214794 | 0          | NA          | NA         | NA         | NA         | KRT18P42   |
| NA        | ENSG00000214796 | 160.988111 | -0.03452079 | 0.18831373 | 0.83147987 | 0.9237845  | TUBA5P     |
| NA        | ENSG00000214797 | 0          | NA          | NA         | NA         | NA         |            |
| 101927588 | ENSG00000214803 | 0.44795842 | -0.02501848 | 0.38558245 | 0.5807882  | NA         |            |
| NA        | ENSG00000214807 | 0          | NA          | NA         | NA         | NA         | NPM1P31    |
| NA        | ENSG00000214810 | 0          | NA          | NA         | NA         | NA         | CYCSP55    |
| NA        | ENSG00000214812 | 0          | NA          | NA         | NA         | NA         |            |
| 654463    | ENSG00000214814 | 0.78971444 | -0.02838152 | 0.38353241 | 0.55442832 | NA         | FER1L6     |
| NA        | ENSG00000214815 | 0          | NA          | NA         | NA         | NA         | IMPDH1P3   |
| 256223    | ENSG00000214819 | 0          | NA          | NA         | NA         | NA         | CDRT15L2   |
| NA        | ENSG00000214820 | 34.1471152 | -0.04482979 | 0.28591814 | 0.81383123 | 0.91592004 | MPRIPP1    |
| NA        | ENSG00000214821 | 0          | NA          | NA         | NA         | NA         | HMGB1P4    |
| 644945    | ENSG00000214822 | 0          | NA          | NA         | NA         | NA         | KRT16P3    |
| NA        | ENSG00000214823 | 0.16735865 | 0.01897177  | 0.38482933 | 0.78225479 | NA         | NXT1P1     |
| NA        | ENSG00000214825 | 0          | NA          | NA         | NA         | NA         | EI24P3     |
| NA        | ENSG00000214826 | 294.963162 | 0.5206525   | 0.14721908 | 0.00014461 | 0.00106026 | DDX12P     |
| 4515      | ENSG00000214827 | 32.1529604 | 0.62614952  | 0.50803673 | 0.02923147 | 0.0983637  | MTCP1      |
| NA        | ENSG00000214832 | 1.77371833 | -0.02125034 | 0.37868323 | 0.76476108 | NA         | UPF3AP2    |
| NA        | ENSG00000214835 | 0          | NA          | NA         | NA         | NA         | RPL23AP6   |
| 731275    | ENSG00000214837 | 84.7191572 | 0.08033141  | 0.22220472 | 0.66046696 | 0.83169726 | LINC01347  |
| 729475    | ENSG00000214842 | 15.6849197 | 0.25982956  | 0.41551387 | 0.18428767 | 0.38289533 | RAD51AP2   |

|           |                 |            |             |            |            |            |            |
|-----------|-----------------|------------|-------------|------------|------------|------------|------------|
| NA        | ENSG00000214843 | 0          | NA          | NA         | NA         | NA         | ZFYVE9P2   |
| NA        | ENSG00000214846 | 0.18922458 | 0.01954053  | 0.38488496 | 0.78225479 | NA         |            |
| 253128    | ENSG00000214851 | 1.27432045 | 0.02820054  | 0.37997313 | 0.68137278 | NA         | LINC00612  |
| NA        | ENSG00000214853 | 0          | NA          | NA         | NA         | NA         | PPIAP79    |
| 342       | ENSG00000214855 | 0          | NA          | NA         | NA         | NA         | APOC1P1    |
| NA        | ENSG00000214856 | 0          | NA          | NA         | NA         | NA         | KRT16P1    |
| NA        | ENSG00000214857 | 0          | NA          | NA         | NA         | NA         | SEM1P1     |
| 645027    | ENSG00000214860 | 0.18922458 | 0.01954053  | 0.38488496 | 0.78225479 | NA         | EVPLL      |
| 728597    | ENSG00000214866 | 0.44921812 | -0.02727446 | 0.385711   | 0.56234214 | NA         | DCDC2C     |
| NA        | ENSG00000214867 | 0.75005161 | -0.04345344 | 0.38756857 | 0.34452604 | NA         | SRSF9P1    |
| NA        | ENSG00000214869 | 0          | NA          | NA         | NA         | NA         | TPM3P4     |
| NA        | ENSG00000214870 | 116.454789 | 0.42014909  | 0.2311394  | 0.02873356 | 0.0970608  |            |
| 219537    | ENSG00000214872 | 1.53767149 | 0.04287627  | 0.38197172 | 0.54070507 | NA         | SMTNL1     |
| NA        | ENSG00000214875 | 0          | NA          | NA         | NA         | NA         | MED28P1    |
| NA        | ENSG00000214878 | 0          | NA          | NA         | NA         | NA         | RPL5P31    |
| NA        | ENSG00000214880 | 0          | NA          | NA         | NA         | NA         | OR7E5P     |
| NA        | ENSG00000214881 | 0          | NA          | NA         | NA         | NA         | TMEM14DP   |
| NA        | ENSG00000214883 | 0          | NA          | NA         | NA         | NA         |            |
| NA        | ENSG00000214886 | 0          | NA          | NA         | NA         | NA         | FAM177A1P1 |
| NA        | ENSG00000214888 | 0.173124   | -0.01911262 | 0.38486262 | 0.84537521 | NA         |            |
| NA        | ENSG00000214889 | 1.90034975 | 0.00458731  | 0.37994414 | 0.94230162 | NA         | RPS9P1     |
| NA        | ENSG00000214890 | 0          | NA          | NA         | NA         | NA         |            |
| 646754    | ENSG00000214891 | 0          | NA          | NA         | NA         | NA         | TRIM64C    |
| NA        | ENSG00000214892 | 0          | NA          | NA         | NA         | NA         | USP8P1     |
| 401247    | ENSG00000214894 | 0          | NA          | NA         | NA         | NA         | LINC00243  |
| NA        | ENSG00000214896 | 0          | NA          | NA         | NA         | NA         | RPSAP55    |
| 649238    | ENSG00000214897 | 0          | NA          | NA         | NA         | NA         | PNMA6E     |
| 283551    | ENSG00000214900 | 12.0552442 | 0.03283006  | 0.33562125 | 0.84463216 | 0.92965052 | LINC01588  |
| NA        | ENSG00000214903 | 0          | NA          | NA         | NA         | NA         | RPS15AP3   |
| NA        | ENSG00000214904 | 0          | NA          | NA         | NA         | NA         | DUTP8      |
| NA        | ENSG00000214908 | 0          | NA          | NA         | NA         | NA         |            |
| NA        | ENSG00000214914 | 0.49690527 | -0.01002159 | 0.38282802 | 0.83061891 | NA         | RPL23AP3   |
| 105377213 | ENSG00000214915 | 0          | NA          | NA         | NA         | NA         |            |
| NA        | ENSG00000214917 | 0          | NA          | NA         | NA         | NA         |            |
| NA        | ENSG00000214919 | 0          | NA          | NA         | NA         | NA         |            |
| 285830    | ENSG00000214922 | 0          | NA          | NA         | NA         | NA         | HLA-F-AS1  |
| NA        | ENSG00000214925 | 0          | NA          | NA         | NA         | NA         | RPL36AP52  |
| 389763    | ENSG00000214929 | 0          | NA          | NA         | NA         | NA         | SPATA31D1  |

|           |                 |            |             |            |            |            |           |
|-----------|-----------------|------------|-------------|------------|------------|------------|-----------|
| NA        | ENSG00000214930 | 0          | NA          | NA         | NA         | NA         | KRT8P6    |
| 101059953 | ENSG00000214940 | 256.161994 | 0.10807368  | 0.15637791 | 0.44993237 | 0.67340229 | NPIPA8    |
| 125150    | ENSG00000214941 | 568.182134 | 0.01473129  | 0.11094292 | 0.89069688 | 0.95243215 | ZSWIM7    |
| NA        | ENSG00000214942 | 0          | NA          | NA         | NA         | NA         |           |
| 2856      | ENSG00000214943 | 0          | NA          | NA         | NA         | NA         | GPR33     |
| 64283     | ENSG00000214944 | 61.4586217 | 2.53004429  | 0.40732522 | 3.43E-11   | 6.92E-10   | ARHGEF28  |
| 353149    | ENSG00000214946 | 0.60532396 | -0.02121039 | 0.38407222 | 0.65053735 | NA         | TBC1D26   |
| 100130742 | ENSG00000214954 | 4.06145901 | 0.0747937   | 0.37424507 | 0.52584681 | 0.73808697 | LRRC69    |
| NA        | ENSG00000214955 | 0.91717808 | 0.03781994  | 0.3846207  | 0.43318092 | NA         |           |
| 729920    | ENSG00000214960 | 17.0353143 | 0.09684545  | 0.34572902 | 0.56532882 | 0.76733419 | CRPPA     |
| NA        | ENSG00000214961 | 0          | NA          | NA         | NA         | NA         | NT5DC1P2  |
| 101059938 | ENSG00000214967 | 89.6398324 | -0.33325794 | 0.29918195 | 0.12128548 | 0.28753541 | NPIPA7    |
| NA        | ENSG00000214970 | 0          | NA          | NA         | NA         | NA         |           |
| NA        | ENSG00000214973 | 0          | NA          | NA         | NA         | NA         | CHCHD3P3  |
| NA        | ENSG00000214975 | 0.84773771 | 0.01679071  | 0.38121986 | 0.76587381 | NA         | PPIAP29   |
| NA        | ENSG00000214976 | 0.173124   | -0.01911262 | 0.38486262 | 0.84537521 | NA         | VDAC2P1   |
| 644070    | ENSG00000214978 | 0          | NA          | NA         | NA         | NA         | GSG1L2    |
| NA        | ENSG00000214980 | 0          | NA          | NA         | NA         | NA         |           |
| NA        | ENSG00000214988 | 0.96637686 | 0.00492566  | 0.38006989 | 0.9351896  | NA         | RPL7AP26  |
| NA        | ENSG00000214992 | 1.18128754 | -0.00939625 | 0.37961409 | 0.88249342 | NA         | AKAP17BP  |
| NA        | ENSG00000214998 | 0.51332338 | 0.01568239  | 0.38314718 | 0.73449382 | NA         | CCNB2P1   |
| 107985075 | ENSG00000214999 | 56.1753787 | -0.73510342 | 0.33208497 | 0.00411383 | 0.01974798 |           |
| NA        | ENSG00000215000 | 0          | NA          | NA         | NA         | NA         | GAPDHP77  |
| NA        | ENSG00000215002 | 0          | NA          | NA         | NA         | NA         | RPL23AP59 |
| NA        | ENSG00000215003 | 0          | NA          | NA         | NA         | NA         | RPL15P20  |
| NA        | ENSG00000215004 | 0          | NA          | NA         | NA         | NA         | MESTP4    |
| NA        | ENSG00000215005 | 0.16735865 | 0.01897177  | 0.38482933 | 0.78225479 | NA         | HSPD1P7   |
| NA        | ENSG00000215006 | 0.14931947 | -0.01844332 | 0.38480212 | 0.84537521 | NA         | CHCHD2P2  |
| NA        | ENSG00000215007 | 0          | NA          | NA         | NA         | NA         | DNAJA1P3  |
| 341392    | ENSG00000215009 | 0.173733   | 0.01914545  | 0.38484597 | 0.78225479 | NA         | ACSM4     |
| 79680     | ENSG00000215012 | 615.098441 | -0.49812719 | 0.10225555 | 4.38E-07   | 5.27E-06   | RTL10     |
| NA        | ENSG00000215014 | 5.92651438 | 0.07825792  | 0.37351225 | 0.52107664 | 0.73457437 |           |
| NA        | ENSG00000215016 | 0          | NA          | NA         | NA         | NA         | RPL24P7   |
| 340267    | ENSG00000215018 | 6.46770906 | -0.01274471 | 0.35621376 | 0.92295133 | 0.96783056 | COL28A1   |
| 11331     | ENSG00000215021 | 6047.57123 | 0.02623391  | 0.05117033 | 0.60644177 | 0.79607018 | PHB2      |
| 100130357 | ENSG00000215022 | 28.8351307 | 0.10470353  | 0.29663859 | 0.59274711 | 0.78702605 |           |
| NA        | ENSG00000215023 | 1.02152406 | 0.03735049  | 0.38526288 | 0.41681256 | NA         |           |
| 100996648 | ENSG00000215029 | 0          | NA          | NA         | NA         | NA         | TCP11X2   |

|           |                 |            |             |            |            |            |            |
|-----------|-----------------|------------|-------------|------------|------------|------------|------------|
| NA        | ENSG00000215030 | 1.13537101 | -0.03400386 | 0.38114482 | 0.61153613 | NA         | RPL13P12   |
| NA        | ENSG00000215032 | 0          | NA          | NA         | NA         | NA         | GNL3LP1    |
| NA        | ENSG00000215034 | 0          | NA          | NA         | NA         | NA         | DSTNP4     |
| NA        | ENSG00000215035 | 0          | NA          | NA         | NA         | NA         | FDPSP5     |
| NA        | ENSG00000215037 | 0          | NA          | NA         | NA         | NA         | VENTXP2    |
| 678655    | ENSG00000215039 | 152.986009 | 0.14837393  | 0.19335169 | 0.37537089 | 0.60449338 | CD27-AS1   |
| 84461     | ENSG00000215041 | 1235.31683 | 0.09360526  | 0.07604781 | 0.20955907 | 0.4178638  | NEURL4     |
| NA        | ENSG00000215043 | 0          | NA          | NA         | NA         | NA         | GLULP6     |
| 392862    | ENSG00000215045 | 47.1513959 | 0.03102433  | 0.26197203 | 0.87335711 | 0.94441388 | GRID2IP    |
| NA        | ENSG00000215049 | 3.6101615  | 0.09709218  | 0.39142343 | 0.29280984 | 0.51892337 | PRDX2P1    |
| NA        | ENSG00000215054 | 0          | NA          | NA         | NA         | NA         | HNRNPCP10  |
| NA        | ENSG00000215057 | 1.0853586  | -0.02650093 | 0.38204026 | 0.64386118 | NA         | PKMP5      |
| NA        | ENSG00000215063 | 0          | NA          | NA         | NA         | NA         | RPL21P2    |
| NA        | ENSG00000215065 | 1.66487886 | 0.00283161  | 0.37683608 | 0.97179148 | NA         | DUSP8P1    |
| 100506713 | ENSG00000215067 | 40.7555524 | 0.10339905  | 0.2710653  | 0.59788772 | 0.78954289 | ALOX12-AS1 |
| 153684    | ENSG00000215068 | 8.91700902 | 0.70603386  | 1.2953889  | 0.01729389 | 0.06484798 |            |
| NA        | ENSG00000215070 | 0.68017423 | 0.00485055  | 0.38190717 | 0.91810992 | NA         | XRCC6P5    |
| NA        | ENSG00000215085 | 0          | NA          | NA         | NA         | NA         | GTF3C6P1   |
| NA        | ENSG00000215086 | 0          | NA          | NA         | NA         | NA         | NPM1P24    |
| NA        | ENSG00000215088 | 0          | NA          | NA         | NA         | NA         | RPS5P3     |
| NA        | ENSG00000215089 | 0          | NA          | NA         | NA         | NA         | KRT18P11   |
| NA        | ENSG00000215093 | 0          | NA          | NA         | NA         | NA         | EEF1A1P29  |
| NA        | ENSG00000215094 | 0          | NA          | NA         | NA         | NA         |            |
| NA        | ENSG00000215096 | 0          | NA          | NA         | NA         | NA         | IFITM8P    |
| NA        | ENSG00000215097 | 25.0591861 | 0.37405244  | 0.44120286 | 0.10638997 | 0.26081514 |            |
| NA        | ENSG00000215102 | 0          | NA          | NA         | NA         | NA         | TERF1P4    |
| NA        | ENSG00000215105 | 223.327004 | -0.62582713 | 0.1775059  | 0.00010911 | 0.00082274 | TTC3P1     |
| NA        | ENSG00000215110 | 0          | NA          | NA         | NA         | NA         | UGT2B25P   |
| 401507    | ENSG00000215112 | 0          | NA          | NA         | NA         | NA         | FAM74A1    |
| 100132994 | ENSG00000215113 | 1.65320114 | 0.00123053  | 0.37908198 | 0.98652474 | NA         | CXorf49B   |
| 137886    | ENSG00000215114 | 1276.17356 | 0.02732157  | 0.08035604 | 0.72820545 | 0.87007881 | UBXN2B     |
| 100130361 | ENSG00000215115 | 0.89591684 | -0.03845544 | 0.3871124  | 0.33943682 | NA         | CXorf49    |
| 26138     | ENSG00000215117 | 0          | NA          | NA         | NA         | NA         | LINC00588  |
| NA        | ENSG00000215120 | 0.45103924 | -0.02736338 | 0.38571827 | 0.56083663 | NA         | SOCS6P1    |
| NA        | ENSG00000215124 | 0          | NA          | NA         | NA         | NA         | AMD1P4     |
| 644019    | ENSG00000215126 | 151.638017 | 0.09184431  | 0.19339809 | 0.58365387 | 0.77995982 | CBWD6      |
| NA        | ENSG00000215127 | 0          | NA          | NA         | NA         | NA         | SYT14P1    |
| 646174    | ENSG00000215131 | 0          | NA          | NA         | NA         | NA         | C16orf90   |

|           |                 |            |             |            |            |            |             |
|-----------|-----------------|------------|-------------|------------|------------|------------|-------------|
| 441666    | ENSG00000215146 | 498.964779 | -0.52821509 | 0.12422915 | 7.51E-06   | 7.31E-05   |             |
| 360226    | ENSG00000215148 | 0          | NA          | NA         | NA         | NA         | PRSS41      |
| NA        | ENSG00000215149 | 0          | NA          | NA         | NA         | NA         | KRT18P32    |
| NA        | ENSG00000215151 | 0          | NA          | NA         | NA         | NA         | ABCD1P2     |
| 652276    | ENSG00000215154 | 284.72367  | 0.0992285   | 0.13418217 | 0.43011982 | 0.65577324 |             |
| NA        | ENSG00000215156 | 25.8207923 | 0.60788428  | 0.5104498  | 0.03295246 | 0.10807232 |             |
| NA        | ENSG00000215158 | 436.352681 | 0.4283522   | 0.14909829 | 0.00185918 | 0.010057   |             |
| NA        | ENSG00000215160 | 1.13281437 | -0.00655196 | 0.37958718 | 0.91759201 | NA         | OR7E122P    |
| 100996279 | ENSG00000215162 | 0          | NA          | NA         | NA         | NA         | LINC00269   |
| NA        | ENSG00000215165 | 7.94174874 | -0.05592762 | 0.35066162 | 0.71223368 | 0.86168158 | TCEA1P3     |
| NA        | ENSG00000215168 | 0          | NA          | NA         | NA         | NA         | ATXN7L3P1   |
| 286430    | ENSG00000215174 | 0          | NA          | NA         | NA         | NA         | NLRP2B      |
| NA        | ENSG00000215177 | 0          | NA          | NA         | NA         | NA         | IGLV8OR8-1  |
| NA        | ENSG00000215179 | 0          | NA          | NA         | NA         | NA         | MAPK6P4     |
| 4586      | ENSG00000215182 | 0          | NA          | NA         | NA         | NA         | MUC5AC      |
| 692094    | ENSG00000215183 | 0.34624801 | -0.02356563 | 0.38536324 | 0.65270996 | NA         | MSMP        |
| NA        | ENSG00000215184 | 0          | NA          | NA         | NA         | NA         | RPS12P16    |
| 55889     | ENSG00000215186 | 1.50428714 | 0.07583353  | 0.39216036 | 0.19117802 | NA         | GOLGA6B     |
| 730112    | ENSG00000215187 | 0.84867351 | -0.01149317 | 0.38094199 | 0.83855243 | NA         | FAM166B     |
| 728411    | ENSG00000215190 | 396.373189 | 0.12054041  | 0.12681792 | 0.31426311 | 0.54212505 | LINC00680   |
| 55670     | ENSG00000215193 | 1476.47037 | -0.17375207 | 0.09791719 | 0.06559402 | 0.18295872 | PEX26       |
| NA        | ENSG00000215196 | 1.18789347 | 0.00727652  | 0.3795259  | 0.9095914  | NA         | BASP1-AS1   |
| NA        | ENSG00000215197 | 0          | NA          | NA         | NA         | NA         | PGAM4P1     |
| NA        | ENSG00000215198 | 1.08434987 | -0.02504966 | 0.38102203 | 0.68648595 | NA         |             |
| NA        | ENSG00000215199 | 0          | NA          | NA         | NA         | NA         | YWHAZP6     |
| 389207    | ENSG00000215203 | 0.173124   | -0.01911262 | 0.38486262 | 0.84537521 | NA         | GRXCR1      |
| NA        | ENSG00000215206 | 0          | NA          | NA         | NA         | NA         | TRBV24OR9-2 |
| NA        | ENSG00000215208 | 0          | NA          | NA         | NA         | NA         | KRT18P60    |
| NA        | ENSG00000215210 | 0          | NA          | NA         | NA         | NA         | RBMXP2      |
| 134121    | ENSG00000215217 | 1.99972096 | -0.03590766 | 0.37898781 | 0.64149781 | NA         | C5orf49     |
| 134111    | ENSG00000215218 | 186.371687 | 1.16374168  | 0.18399946 | 2.72E-11   | 5.53E-10   | UBE2QL1     |
| NA        | ENSG00000215221 | 0.34212501 | 0.00303883  | 0.38339218 | 0.95867139 | NA         | UBA52P6     |
| NA        | ENSG00000215223 | 0          | NA          | NA         | NA         | NA         | CYP51A1P3   |
| NA        | ENSG00000215227 | 0          | NA          | NA         | NA         | NA         | NUTF2P5     |
| NA        | ENSG00000215231 | 0          | NA          | NA         | NA         | NA         | LINC01020   |
| NA        | ENSG00000215236 | 0          | NA          | NA         | NA         | NA         | RPL7P33     |
| NA        | ENSG00000215237 | 1.7781983  | 0.01178458  | 0.37700959 | 0.87938015 | NA         |             |
| 101927905 | ENSG00000215241 | 8.4043027  | 0.22937079  | 0.45035567 | 0.1145739  | 0.27548308 | LINC02449   |

|           |                 |            |             |            |            |            |           |
|-----------|-----------------|------------|-------------|------------|------------|------------|-----------|
| 399715    | ENSG00000215244 | 2.22567018 | -0.02734668 | 0.3747338  | 0.7615274  | NA         | LINC02649 |
| 100506688 | ENSG00000215246 | 4.38218518 | -0.01269459 | 0.3639852  | 0.91340514 | 0.96311427 |           |
| 60493     | ENSG00000215251 | 496.838133 | -0.31806705 | 0.11979734 | 0.00501926 | 0.02329407 | FASTKD5   |
| 440270    | ENSG00000215252 | 2312.39779 | 0.04719455  | 0.08792249 | 0.60412761 | 0.79429369 | GOLGA8B   |
| 55449     | ENSG00000215256 | 349.458936 | -0.19842699 | 0.1510529  | 0.15171823 | 0.33572269 | DHRS4-AS1 |
| 157855    | ENSG00000215262 | 0          | NA          | NA         | NA         | NA         | KCNU1     |
| NA        | ENSG00000215263 | 0.173733   | 0.01914545  | 0.38484597 | 0.78225479 | NA         |           |
| NA        | ENSG00000215264 | 0          | NA          | NA         | NA         | NA         | RPL10AP3  |
| NA        | ENSG00000215267 | 0          | NA          | NA         | NA         | NA         | AKR1C7P   |
| NA        | ENSG00000215268 | 0.16735865 | 0.01897177  | 0.38482933 | 0.78225479 | NA         |           |
| NA        | ENSG00000215270 | 70.761601  | 0.58587027  | 0.30728808 | 0.01302926 | 0.05151466 | TOMM40P2  |
| 57594     | ENSG00000215271 | 266.175833 | 0.01601676  | 0.18929409 | 0.92652508 | 0.96932621 | HOMEZ     |
| 102724473 | ENSG00000215274 | 0          | NA          | NA         | NA         | NA         | GAGE10    |
| 100507650 | ENSG00000215277 | 0          | NA          | NA         | NA         | NA         | RNF212B   |
| NA        | ENSG00000215278 | 0          | NA          | NA         | NA         | NA         | RPS7P6    |
| NA        | ENSG00000215283 | 2.54244931 | 0.12025979  | 0.40216205 | 0.18066164 | NA         | HMGB3P24  |
| NA        | ENSG00000215284 | 0          | NA          | NA         | NA         | NA         | CHMP5P1   |
| NA        | ENSG00000215286 | 0          | NA          | NA         | NA         | NA         | SRSF6P1   |
| NA        | ENSG00000215288 | 0          | NA          | NA         | NA         | NA         |           |
| NA        | ENSG00000215296 | 0          | NA          | NA         | NA         | NA         | TMCO5B    |
| NA        | ENSG00000215297 | 0          | NA          | NA         | NA         | NA         |           |
| 1654      | ENSG00000215301 | 8833.96739 | 0.01383785  | 0.07996328 | 0.86090232 | 0.9380757  | DDX3X     |
| NA        | ENSG00000215302 | 70.7489008 | 0.482249    | 0.2893753  | 0.02989401 | 0.10005012 |           |
| NA        | ENSG00000215304 | 25.8961171 | 0.37270129  | 0.40880004 | 0.11053592 | 0.26806413 |           |
| 64601     | ENSG00000215305 | 1435.76967 | 0.08034763  | 0.0763632  | 0.28321845 | 0.50832767 | VPS16     |
| NA        | ENSG00000215310 | 0          | NA          | NA         | NA         | NA         |           |
| NA        | ENSG00000215311 | 0          | NA          | NA         | NA         | NA         | NPM1P12   |
| NA        | ENSG00000215313 | 0          | NA          | NA         | NA         | NA         | RPL6P30   |
| NA        | ENSG00000215317 | 0          | NA          | NA         | NA         | NA         | THUMPD1P1 |
| NA        | ENSG00000215319 | 0          | NA          | NA         | NA         | NA         | EIF5P1    |
| NA        | ENSG00000215325 | 0.173124   | -0.01911262 | 0.38486262 | 0.84537521 | NA         | ASS1P10   |
| NA        | ENSG00000215326 | 0.14931947 | -0.01844332 | 0.38480212 | 0.84537521 | NA         | GPX1P2    |
| NA        | ENSG00000215333 | 0          | NA          | NA         | NA         | NA         | KRT18P23  |
| NA        | ENSG00000215339 | 0          | NA          | NA         | NA         | NA         | ZNF705CP  |
| 728957    | ENSG00000215343 | 0          | NA          | NA         | NA         | NA         | ZNF705D   |
| NA        | ENSG00000215347 | 4.14286591 | -0.0400297  | 0.36863918 | 0.72391651 | 0.86794586 | SLC25A5P1 |
| NA        | ENSG00000215349 | 0          | NA          | NA         | NA         | NA         | MRPL3P1   |
| NA        | ENSG00000215351 | 0          | NA          | NA         | NA         | NA         | PPIAP1    |

|           |                 |            |             |            |            |            |            |
|-----------|-----------------|------------|-------------|------------|------------|------------|------------|
| NA        | ENSG00000215353 | 0          | NA          | NA         | NA         | NA         | C1QBPP1    |
| NA        | ENSG00000215354 | 0.16735865 | 0.01897177  | 0.38482933 | 0.78225479 | NA         | FAM90A24P  |
| 100132396 | ENSG00000215356 | 0.14931947 | -0.01844332 | 0.38480212 | 0.84537521 | NA         | ZNF705B    |
| NA        | ENSG00000215357 | 0          | NA          | NA         | NA         | NA         | HSPD1P8    |
| 100379220 | ENSG00000215367 | 0          | NA          | NA         | NA         | NA         | TMED11P    |
| NA        | ENSG00000215368 | 0          | NA          | NA         | NA         | NA         | BOD1P2     |
| NA        | ENSG00000215369 | 0          | NA          | NA         | NA         | NA         | RPL37P3    |
| NA        | ENSG00000215371 | 0          | NA          | NA         | NA         | NA         | DEFB108C   |
| 100131980 | ENSG00000215372 | 0.173733   | 0.01914545  | 0.38484597 | 0.78225479 | NA         | ZNF705G    |
| NA        | ENSG00000215373 | 0          | NA          | NA         | NA         | NA         | FAM90A5P   |
| NA        | ENSG00000215374 | 11.7615666 | 0.06511074  | 0.34167082 | 0.69600386 | 0.8531799  | FAM66B     |
| 4636      | ENSG00000215375 | 127.286358 | 0.35485309  | 0.21748154 | 0.05259429 | 0.15474873 | MYL5       |
| 170949    | ENSG00000215378 | 0          | NA          | NA         | NA         | NA         | DEFT1P     |
| 100287083 | ENSG00000215378 | 0          | NA          | NA         | NA         | NA         | DEFT1P     |
| NA        | ENSG00000215380 | 0          | NA          | NA         | NA         | NA         |            |
| NA        | ENSG00000215381 | 0          | NA          | NA         | NA         | NA         |            |
| NA        | ENSG00000215386 | 308.320114 | 0.35446317  | 0.15405328 | 0.01200943 | 0.04828105 | MIR99AHG   |
| NA        | ENSG00000215388 | 3.89116872 | -0.13553768 | 0.39965519 | 0.24270675 | 0.46101503 | ACTG1P3    |
| 85508     | ENSG00000215397 | 392.197149 | -2.33808614 | 0.14295662 | 2.59E-61   | 3.49E-59   | SCRT2      |
| NA        | ENSG00000215398 | 0          | NA          | NA         | NA         | NA         |            |
| NA        | ENSG00000215399 | 0.16735865 | 0.01897177  | 0.38482933 | 0.78225479 | NA         | HMGB3P7    |
| 100506241 | ENSG00000215403 | 0          | NA          | NA         | NA         | NA         |            |
| NA        | ENSG00000215409 | 0.18922458 | 0.01954053  | 0.38488496 | 0.78225479 | NA         |            |
| NA        | ENSG00000215414 | 0          | NA          | NA         | NA         | NA         | PSMA6P1    |
| 407975    | ENSG00000215417 | 152.116571 | 0.31870037  | 0.18412745 | 0.04938837 | 0.14766919 | MIR17HG    |
| NA        | ENSG00000215418 | 0          | NA          | NA         | NA         | NA         | PEX12P1    |
| 55628     | ENSG00000215421 | 404.954755 | -0.09267811 | 0.1153434  | 0.39865674 | 0.62756224 | ZNF407     |
| 114044    | ENSG00000215424 | 511.11691  | -0.07181428 | 0.11103347 | 0.49837593 | 0.71619429 | MCM3AP-AS1 |
| 79716     | ENSG00000215440 | 308.410488 | 1.10359231  | 0.19805805 | 2.59E-09   | 4.20E-08   | NPEPL1     |
| NA        | ENSG00000215441 | 0          | NA          | NA         | NA         | NA         | CTAGE12P   |
| NA        | ENSG00000215444 | 0          | NA          | NA         | NA         | NA         |            |
| NA        | ENSG00000215448 | 0          | NA          | NA         | NA         | NA         | SRMP1      |
| NA        | ENSG00000215450 | 0          | NA          | NA         | NA         | NA         |            |
| NA        | ENSG00000215452 | 2.85587856 | -0.13955806 | 0.41152154 | 0.10494267 | 0.25822431 | ZNF663P    |
| 386672    | ENSG00000215454 | 0          | NA          | NA         | NA         | NA         | KRTAP10-4  |
| 386677    | ENSG00000215455 | 0          | NA          | NA         | NA         | NA         | KRTAP10-1  |
| NA        | ENSG00000215456 | 0          | NA          | NA         | NA         | NA         | BCRP4      |
| NA        | ENSG00000215457 | 0          | NA          | NA         | NA         | NA         | RPS8P3     |



|           |                 |            |             |            |            |            |                |
|-----------|-----------------|------------|-------------|------------|------------|------------|----------------|
| 284837    | ENSG00000215458 | 2.28862127 | 0.08921451  | 0.38930804 | 0.31301734 | NA         | AATBC          |
| NA        | ENSG00000215464 | 0.33471731 | 0.02354391  | 0.38534154 | 0.62842204 | NA         |                |
| NA        | ENSG00000215467 | 0          | NA          | NA         | NA         | NA         | RPL27AP        |
| 100526842 | ENSG00000215472 | 527.747042 | -0.37511981 | 0.12301915 | 0.00125746 | 0.00719638 | RPL17-C18orf32 |
| 652991    | ENSG00000215474 | 0.45209736 | -0.02505403 | 0.38558831 | 0.57865948 | NA         | SKOR2          |
| 283514    | ENSG00000215475 | 7.81519494 | 0.02461417  | 0.35157863 | 0.86720091 | 0.94172228 | SIAH3          |
| NA        | ENSG00000215477 | 0          | NA          | NA         | NA         | NA         | RCN1P1         |
| NA        | ENSG00000215478 | 2.82331881 | 0.04878227  | 0.37496469 | 0.62937002 | 0.81240737 | CES5AP1        |
| NA        | ENSG00000215480 | 0          | NA          | NA         | NA         | NA         | OR7E37P        |
| NA        | ENSG00000215481 | 32.6155171 | 1.43847067  | 0.54260549 | 0.00045013 | 0.00294639 | BCRP3          |
| NA        | ENSG00000215482 | 0.16735865 | 0.01897177  | 0.38482933 | 0.78225479 | NA         | CALM2P3        |
| 400123    | ENSG00000215483 | 0.89366342 | 0.01993227  | 0.38138215 | 0.72520142 | NA         | LINC00598      |
| 646982    | ENSG00000215483 | 0.89366342 | 0.01993227  | 0.38138215 | 0.72520142 | NA         | LINC00598      |
| NA        | ENSG00000215486 | 0          | NA          | NA         | NA         | NA         | ARL2BPP3       |
| NA        | ENSG00000215492 | 8.58498044 | -0.11176051 | 0.36647267 | 0.46466444 | 0.68746767 | HNRNPA1P7      |
| NA        | ENSG00000215493 | 42.7657751 | -0.16357742 | 0.27686478 | 0.41105995 | 0.63868974 |                |
| 642633    | ENSG00000215498 | 1.05411307 | 0.02191026  | 0.38272245 | 0.65690483 | NA         | FAM230B        |
| NA        | ENSG00000215506 | 0          | NA          | NA         | NA         | NA         | TPTE2P4        |
| NA        | ENSG00000215512 | 0.173124   | -0.01911262 | 0.38486262 | 0.84537521 | NA         |                |
| NA        | ENSG00000215515 | 1.88049103 | -0.00286    | 0.37460839 | 0.97224018 | NA         | IFIT1P1        |
| NA        | ENSG00000215520 | 0.16735865 | 0.01897177  | 0.38482933 | 0.78225479 | NA         | RPS4XP4        |
| 388795    | ENSG00000215529 | 1.41362842 | -0.05701801 | 0.3892164  | 0.23200329 | NA         | EFCAB8         |
| 193629    | ENSG00000215533 | 1.39660999 | 0.09583482  | 0.40036792 | 0.08016837 | NA         | LINC00189      |
| NA        | ENSG00000215537 | 0          | NA          | NA         | NA         | NA         | ZNF736P11Y     |
| NA        | ENSG00000215544 | 0.87976259 | 0.04953635  | 0.38858998 | 0.26382368 | NA         | BCRP7          |
| 245930    | ENSG00000215545 | 0          | NA          | NA         | NA         | NA         | DEFB116        |
| NA        | ENSG00000215546 | 0          | NA          | NA         | NA         | NA         | DKKL1P1        |
| 245929    | ENSG00000215547 | 0          | NA          | NA         | NA         | NA         | DEFB115        |
| NA        | ENSG00000215548 | 41.7358524 | 0.00979811  | 0.26830647 | 0.96107498 | 0.98419142 | FRG1JP         |
| NA        | ENSG00000215553 | 0          | NA          | NA         | NA         | NA         | KRT18P3        |
| 391267    | ENSG00000215559 | 52.4209059 | 0.09638555  | 0.26444452 | 0.62036617 | 0.80624033 | ANKRD20A11P    |
| 83863     | ENSG00000215560 | 0          | NA          | NA         | NA         | NA         | TTY5           |
| NA        | ENSG00000215562 | 0          | NA          | NA         | NA         | NA         | CNN2P7         |
| NA        | ENSG00000215567 | 0          | NA          | NA         | NA         | NA         |                |
| 128954    | ENSG00000215568 | 0          | NA          | NA         | NA         | NA         | GAB4           |
| NA        | ENSG00000215571 | 0          | NA          | NA         | NA         | NA         | GRK6P1         |
| NA        | ENSG00000215572 | 0.37844916 | 0.02407552  | 0.3854191  | 0.60038877 | NA         | ESRRAP1        |
| 286554    | ENSG00000215580 | 0          | NA          | NA         | NA         | NA         | BCORP1         |

|           |                 |            |             |            |            |            |                      |
|-----------|-----------------|------------|-------------|------------|------------|------------|----------------------|
| NA        | ENSG00000215583 | 0          | NA          | NA         | NA         | NA         | ASS1P6               |
| NA        | ENSG00000215586 | 0.15069912 | -0.01848503 | 0.38480575 | 0.84537521 | NA         |                      |
| NA        | ENSG00000215589 | 0.32258223 | -0.02325496 | 0.3853188  | 0.66955423 | NA         | KANK1P1              |
| 400831    | ENSG00000215595 | 1.71552169 | 0.10418925  | 0.40064253 | 0.11967258 | NA         | C20orf202            |
| NA        | ENSG00000215601 | 0          | NA          | NA         | NA         | NA         | TSPY24P              |
| NA        | ENSG00000215603 | 0          | NA          | NA         | NA         | NA         | ZNF92P1Y             |
| NA        | ENSG00000215604 | 0          | NA          | NA         | NA         | NA         | ZNF962P              |
| NA        | ENSG00000215606 | 0          | NA          | NA         | NA         | NA         | KRT18P35             |
| 3166      | ENSG00000215612 | 352.640864 | -1.3007418  | 0.16004094 | 4.33E-17   | 1.35E-15   | HMX1                 |
| NA        | ENSG00000215630 | 170.743059 | 0.42589959  | 0.18640838 | 0.00981215 | 0.04086329 | GUSBP9               |
| 2642      | ENSG00000215644 | 7.26148169 | 3.04692572  | 1.4290027  | 0.00141748 | 0.00798717 | GCGR                 |
| NA        | ENSG00000215692 | 3.94573101 | -0.02880153 | 0.37164719 | 0.77422344 | 0.89604057 |                      |
| 6248      | ENSG00000215695 | 60.7957539 | -0.31063157 | 0.26801024 | 0.12922154 | 0.3006985  | RSC1A1               |
| 51032     | ENSG00000215704 | 0          | NA          | NA         | NA         | NA         | CELA2B               |
| 729515    | ENSG00000215712 | 205.306782 | 0.0775444   | 0.15492023 | 0.58546245 | 0.78135175 | TMEM242              |
| 56900     | ENSG00000215717 | 374.131479 | -0.06328137 | 0.12562276 | 0.59319033 | 0.78711401 | TMEM167B             |
| NA        | ENSG00000215720 | 0.16735865 | 0.01897177  | 0.38482933 | 0.78225479 | NA         | MFFP1                |
| NA        | ENSG00000215734 | 0          | NA          | NA         | NA         | NA         | MRPL20P1             |
| NA        | ENSG00000215760 | 0          | NA          | NA         | NA         | NA         | TAF9BP2              |
| NA        | ENSG00000215765 | 0          | NA          | NA         | NA         | NA         |                      |
| 109286553 | ENSG00000215769 | 216.822782 | -0.01651458 | 0.15174479 | 0.90466949 | 0.95823316 | P27P1-BPTFP1-KPNA2P3 |
| NA        | ENSG00000215771 | 0          | NA          | NA         | NA         | NA         | LRRC37A14P           |
| 728833    | ENSG00000215784 | 356.623787 | -0.36051632 | 0.12803041 | 0.0027576  | 0.01410435 | FAM72D               |
| NA        | ENSG00000215785 | 0.18922458 | 0.01954053  | 0.38488496 | 0.78225479 | NA         | CFL1P6               |
| 8718      | ENSG00000215788 | 685.529058 | 0.40463904  | 0.10034805 | 2.87E-05   | 0.00024864 | TNFRSF25             |
| 9906      | ENSG00000215790 | 461.641447 | -0.09816768 | 0.11681119 | 0.37651325 | 0.60544844 | SLC35E2A             |
| NA        | ENSG00000215795 | 1.38939472 | 0.06219495  | 0.38558464 | 0.38545127 | NA         |                      |
| NA        | ENSG00000215796 | 3.4821216  | 0.08476594  | 0.3806662  | 0.44370207 | 0.66872145 |                      |
| NA        | ENSG00000215800 | 0          | NA          | NA         | NA         | NA         | RSL24D1P4            |
| NA        | ENSG00000215802 | 0          | NA          | NA         | NA         | NA         | RFKP1                |
| NA        | ENSG00000215805 | 0.50800477 | 0.03076196  | 0.38601821 | 0.48318662 | NA         |                      |
| NA        | ENSG00000215807 | 0          | NA          | NA         | NA         | NA         | KRT18P65             |
| 339535    | ENSG00000215808 | 2.06390512 | -0.06260221 | 0.38330054 | 0.43557986 | NA         | LINC01139            |
| NA        | ENSG00000215811 | 0.52119901 | 0.02576573  | 0.38568143 | 0.51723676 | NA         | BTNL10               |
| NA        | ENSG00000215812 | 0.173124   | -0.01911262 | 0.38486262 | 0.84537521 | NA         | ZNF847P              |
| 643136    | ENSG00000215817 | 1.83614433 | -0.03019137 | 0.37786471 | 0.70498839 | NA         | ZC3H11B              |
| NA        | ENSG00000215819 | 0          | NA          | NA         | NA         | NA         | KRT18P12             |
| NA        | ENSG00000215833 | 0          | NA          | NA         | NA         | NA         | QRSL1P1              |

|           |                 |            |             |            |            |            |            |
|-----------|-----------------|------------|-------------|------------|------------|------------|------------|
| 116123    | ENSG00000215834 | 0          | NA          | NA         | NA         | NA         | FMO9P      |
| NA        | ENSG00000215835 | 0          | NA          | NA         | NA         | NA         |            |
| NA        | ENSG00000215837 | 99.3153088 | 0.7504218   | 0.28655626 | 0.00147306 | 0.00825345 | SDHAP2     |
| 440700    | ENSG00000215838 | 1.19528713 | -0.00735224 | 0.37856065 | 0.91452091 | NA         |            |
| NA        | ENSG00000215840 | 2.44085616 | -0.02624511 | 0.37481935 | 0.77024747 | NA         |            |
| NA        | ENSG00000215841 | 0          | NA          | NA         | NA         | NA         |            |
| 100131187 | ENSG00000215845 | 174.191736 | 0.0022967   | 0.17182069 | 0.98923139 | 0.99604194 | TSTD1      |
| NA        | ENSG00000215846 | 0          | NA          | NA         | NA         | NA         | MPTX1      |
| 126638    | ENSG00000215853 | 0          | NA          | NA         | NA         | NA         | RPTN       |
| NA        | ENSG00000215859 | 8.53544453 | -0.16334617 | 0.38830299 | 0.29777768 | 0.52444821 | PDZK1P1    |
| NA        | ENSG00000215861 | 0          | NA          | NA         | NA         | NA         |            |
| 343505    | ENSG00000215864 | 0          | NA          | NA         | NA         | NA         | NBPF7      |
| 100996702 | ENSG00000215866 | 12.0873988 | 0.15536359  | 0.37458239 | 0.35142826 | 0.58156116 | LINC01356  |
| NA        | ENSG00000215867 | 0          | NA          | NA         | NA         | NA         | KRT18P57   |
| 100129138 | ENSG00000215869 | 0          | NA          | NA         | NA         | NA         |            |
| NA        | ENSG00000215871 | 0          | NA          | NA         | NA         | NA         |            |
| NA        | ENSG00000215873 | 0          | NA          | NA         | NA         | NA         | FEN1P1     |
| NA        | ENSG00000215874 | 0          | NA          | NA         | NA         | NA         | CAPNS1P1   |
| NA        | ENSG00000215875 | 4.21928322 | 0.02754855  | 0.36550706 | 0.8173839  | 0.91683043 | ST13P20    |
| NA        | ENSG00000215878 | 0          | NA          | NA         | NA         | NA         | MARCKSL1P2 |
| 105370369 | ENSG00000215881 | 0          | NA          | NA         | NA         | NA         | LINC02337  |
| 606495    | ENSG00000215883 | 442.961435 | 0.07721338  | 0.12494019 | 0.51392229 | 0.72910576 | CYB5RL     |
| NA        | ENSG00000215887 | 0.14931947 | -0.01844332 | 0.38480212 | 0.84537521 | NA         | ZNF859P    |
| NA        | ENSG00000215893 | 0.18922458 | 0.01954053  | 0.38488496 | 0.78225479 | NA         | RPL23AP17  |
| NA        | ENSG00000215895 | 0          | NA          | NA         | NA         | NA         | HSPA5P1    |
| NA        | ENSG00000215899 | 0          | NA          | NA         | NA         | NA         |            |
| NA        | ENSG00000215900 | 0          | NA          | NA         | NA         | NA         | SELENOWP1  |
| NA        | ENSG00000215905 | 0          | NA          | NA         | NA         | NA         |            |
| 646262    | ENSG00000215906 | 0.14931947 | -0.01844332 | 0.38480212 | 0.84537521 | NA         | LACTBL1    |
| 84809     | ENSG00000215908 | 1384.52649 | 0.15990534  | 0.07716642 | 0.03428467 | 0.11160095 | CROCCP2    |
| NA        | ENSG00000215909 | 0          | NA          | NA         | NA         | NA         | BRWD1P1    |
| 284498    | ENSG00000215910 | 0.30139824 | -0.02296476 | 0.38527817 | 0.68536535 | NA         | C1orf167   |
| 100287898 | ENSG00000215912 | 31.8369345 | 0.40853617  | 0.38908086 | 0.08816538 | 0.22693321 | TTC34      |
| NA        | ENSG00000215914 | 1.15870974 | -0.06238404 | 0.39108797 | 0.18690653 | NA         | MMP23A     |
| 219293    | ENSG00000215915 | 34.5617032 | -0.49699573 | 0.40709215 | 0.05044067 | 0.14992403 | ATAD3C     |
| 100126331 | ENSG00000215930 | 0          | NA          | NA         | NA         | NA         | MIR942     |
| 100126346 | ENSG00000215938 | 0          | NA          | NA         | NA         | NA         | MIR190B    |
| 100126316 | ENSG00000215939 | 0          | NA          | NA         | NA         | NA         | MIR873     |

|           |                 |            |             |            |            |    |          |
|-----------|-----------------|------------|-------------|------------|------------|----|----------|
| 100126342 | ENSG00000215943 | 0          | NA          | NA         | NA         | NA | MIR892A  |
| 100126349 | ENSG00000215952 | 0          | NA          | NA         | NA         | NA | MIR921   |
| 100126297 | ENSG00000215957 | 0          | NA          | NA         | NA         | NA | MIR300   |
| 100126354 | ENSG00000215961 | 0          | NA          | NA         | NA         | NA | MIR297   |
| 100126310 | ENSG00000215966 | 0          | NA          | NA         | NA         | NA | MIR876   |
| 100126350 | ENSG00000215973 | 0          | NA          | NA         | NA         | NA | MIR933   |
| 100126336 | ENSG00000215991 | 0          | NA          | NA         | NA         | NA | MIR208B  |
| 100126302 | ENSG00000216001 | 0          | NA          | NA         | NA         | NA | MIR450B  |
| 100126306 | ENSG00000216005 | 0          | NA          | NA         | NA         | NA | MIR888   |
| 100126343 | ENSG00000216009 | 0          | NA          | NA         | NA         | NA | MIR874   |
| 100126296 | ENSG00000216031 | 0          | NA          | NA         | NA         | NA | MIR298   |
| 100126327 | ENSG00000216035 | 0          | NA          | NA         | NA         | NA | MIR938   |
| 100126341 | ENSG00000216056 | 0          | NA          | NA         | NA         | NA | MIR891A  |
| 100126340 | ENSG00000216058 | 0          | NA          | NA         | NA         | NA | MIR944   |
| 100126324 | ENSG00000216060 | 0          | NA          | NA         | NA         | NA | MIR934   |
| 100126304 | ENSG00000216064 | 0          | NA          | NA         | NA         | NA | MIR891B  |
| 100126309 | ENSG00000216069 | 0          | NA          | NA         | NA         | NA | MIR875   |
| 100126303 | ENSG00000216075 | 0          | NA          | NA         | NA         | NA | MIR890   |
| 100126347 | ENSG00000216077 | 0          | NA          | NA         | NA         | NA | MIR887   |
| 100126307 | ENSG00000216098 | 0          | NA          | NA         | NA         | NA | MIR892B  |
| 100126345 | ENSG00000216099 | 0          | NA          | NA         | NA         | NA | MIR889   |
| 100126314 | ENSG00000216101 | 0          | NA          | NA         | NA         | NA | MIR877   |
| 100126334 | ENSG00000216135 | 0          | NA          | NA         | NA         | NA | MIR885   |
| 100126339 | ENSG00000216141 | 0          | NA          | NA         | NA         | NA | MIR941-2 |
| 100302114 | ENSG00000216171 | 0          | NA          | NA         | NA         | NA | MIR513C  |
| 100126308 | ENSG00000216179 | 0          | NA          | NA         | NA         | NA | MIR541   |
| 103504737 | ENSG00000216191 | 0          | NA          | NA         | NA         | NA | MIR8485  |
| 100126320 | ENSG00000216192 | 0          | NA          | NA         | NA         | NA | MIR920   |
| NA        | ENSG00000216265 | 0          | NA          | NA         | NA         | NA | FABP12P1 |
| NA        | ENSG00000216285 | 0.16735865 | 0.01897177  | 0.38482933 | 0.78225479 | NA |          |
| 160313    | ENSG00000216306 | 0          | NA          | NA         | NA         | NA | KRT19P2  |
| NA        | ENSG00000216307 | 0          | NA          | NA         | NA         | NA |          |
| NA        | ENSG00000216316 | 0.34746601 | 0.02370763  | 0.3853651  | 0.61987128 | NA |          |
| NA        | ENSG00000216324 | 0          | NA          | NA         | NA         | NA |          |
| NA        | ENSG00000216331 | 0.15069912 | -0.01848503 | 0.38480575 | 0.84537521 | NA | H1-12P   |
| NA        | ENSG00000216347 | 0          | NA          | NA         | NA         | NA | RPL10P10 |
| NA        | ENSG00000216352 | 0          | NA          | NA         | NA         | NA |          |
| NA        | ENSG00000216359 | 0          | NA          | NA         | NA         | NA |          |

|           |                 |            |             |            |            |            |           |
|-----------|-----------------|------------|-------------|------------|------------|------------|-----------|
| NA        | ENSG00000216360 | 1.6134449  | -0.01296272 | 0.3780556  | 0.85765896 | NA         |           |
| NA        | ENSG00000216364 | 0          | NA          | NA         | NA         | NA         | MRPL42P2  |
| NA        | ENSG00000216365 | 0          | NA          | NA         | NA         | NA         | RPL37P15  |
| NA        | ENSG00000216368 | 0          | NA          | NA         | NA         | NA         |           |
| NA        | ENSG00000216378 | 0          | NA          | NA         | NA         | NA         |           |
| NA        | ENSG00000216412 | 0.16735865 | 0.01897177  | 0.38482933 | 0.78225479 | NA         | RPL12P2   |
| NA        | ENSG00000216425 | 0          | NA          | NA         | NA         | NA         | PIMREGP2  |
| NA        | ENSG00000216436 | 0          | NA          | NA         | NA         | NA         | H2AC2P    |
| NA        | ENSG00000216439 | 0          | NA          | NA         | NA         | NA         | DUTP5     |
| NA        | ENSG00000216444 | 0          | NA          | NA         | NA         | NA         | RAET1M    |
| NA        | ENSG00000216471 | 0.173124   | -0.01911262 | 0.38486262 | 0.84537521 | NA         | RPSAP43   |
| NA        | ENSG00000216475 | 0          | NA          | NA         | NA         | NA         |           |
| NA        | ENSG00000216480 | 0.15069912 | -0.01848503 | 0.38480575 | 0.84537521 | NA         |           |
| 10437     | ENSG00000216490 | 71.8731021 | 0.23079253  | 0.28837163 | 0.26274778 | 0.48478712 | IFI30     |
| NA        | ENSG00000216516 | 0          | NA          | NA         | NA         | NA         |           |
| NA        | ENSG00000216518 | 0          | NA          | NA         | NA         | NA         | EEF1GP6   |
| NA        | ENSG00000216519 | 0          | NA          | NA         | NA         | NA         |           |
| NA        | ENSG00000216523 | 0          | NA          | NA         | NA         | NA         |           |
| NA        | ENSG00000216548 | 0          | NA          | NA         | NA         | NA         |           |
| NA        | ENSG00000216560 | 0.55204536 | -0.03285021 | 0.38624163 | 0.4747674  | NA         | LINC00955 |
| 147710    | ENSG00000216588 | 0          | NA          | NA         | NA         | NA         | IGSF23    |
| NA        | ENSG00000216613 | 0          | NA          | NA         | NA         | NA         |           |
| NA        | ENSG00000216616 | 0          | NA          | NA         | NA         | NA         |           |
| 105378052 | ENSG00000216621 | 0          | NA          | NA         | NA         | NA         |           |
| NA        | ENSG00000216624 | 0          | NA          | NA         | NA         | NA         | GAPDHP72  |
| NA        | ENSG00000216629 | 0          | NA          | NA         | NA         | NA         | OR2W4P    |
| NA        | ENSG00000216636 | 0.32356082 | -0.02326285 | 0.38532    | 0.66898875 | NA         | RPL7P25   |
| NA        | ENSG00000216639 | 2.25469978 | 0.04659599  | 0.37882602 | 0.58867105 | NA         |           |
| NA        | ENSG00000216642 | 0          | NA          | NA         | NA         | NA         |           |
| 729431    | ENSG00000216649 | 0          | NA          | NA         | NA         | NA         | GAGE12E   |
| NA        | ENSG00000216657 | 0.16735865 | 0.01897177  | 0.38482933 | 0.78225479 | NA         | GLRX3P2   |
| NA        | ENSG00000216663 | 0          | NA          | NA         | NA         | NA         |           |
| NA        | ENSG00000216671 | 0          | NA          | NA         | NA         | NA         | CCNYL3    |
| NA        | ENSG00000216676 | 0          | NA          | NA         | NA         | NA         | RPL8P1    |
| NA        | ENSG00000216687 | 0.52447023 | 0.03156791  | 0.38609757 | 0.47125001 | NA         |           |
| NA        | ENSG00000216708 | 0          | NA          | NA         | NA         | NA         | CIR1P3    |
| NA        | ENSG00000216710 | 0          | NA          | NA         | NA         | NA         | COX6A1P3  |
| NA        | ENSG00000216713 | 0          | NA          | NA         | NA         | NA         | MTND4P13  |

|           |                 |            |             |            |            |            |            |
|-----------|-----------------|------------|-------------|------------|------------|------------|------------|
| NA        | ENSG00000216718 | 0          | NA          | NA         | NA         | NA         |            |
| NA        | ENSG00000216721 | 0          | NA          | NA         | NA         | NA         |            |
| NA        | ENSG00000216723 | 0.88471814 | 0.04011137  | 0.38505365 | 0.43126485 | NA         | NUDT19P3   |
| NA        | ENSG00000216740 | 0          | NA          | NA         | NA         | NA         | ANXA2P3    |
| NA        | ENSG00000216753 | 0          | NA          | NA         | NA         | NA         | HMGA1P7    |
| NA        | ENSG00000216754 | 0          | NA          | NA         | NA         | NA         |            |
| NA        | ENSG00000216762 | 0          | NA          | NA         | NA         | NA         | VN1R13P    |
| 730101    | ENSG00000216775 | 761.690256 | -0.25895315 | 0.12650398 | 0.02961491 | 0.09932622 |            |
| NA        | ENSG00000216777 | 0          | NA          | NA         | NA         | NA         | PRRC2CP1   |
| NA        | ENSG00000216781 | 0          | NA          | NA         | NA         | NA         |            |
| NA        | ENSG00000216802 | 0          | NA          | NA         | NA         | NA         |            |
| NA        | ENSG00000216809 | 6.63446133 | -0.01882492 | 0.35530275 | 0.88921874 | 0.95177491 |            |
| NA        | ENSG00000216811 | 0          | NA          | NA         | NA         | NA         |            |
| NA        | ENSG00000216813 | 0          | NA          | NA         | NA         | NA         |            |
| NA        | ENSG00000216817 | 0          | NA          | NA         | NA         | NA         | R3HDM2P2   |
| NA        | ENSG00000216819 | 1.10520193 | -0.02636999 | 0.38214116 | 0.64047329 | NA         | TUBB2BP1   |
| NA        | ENSG00000216824 | 0          | NA          | NA         | NA         | NA         | ZNF736P10Y |
| NA        | ENSG00000216829 | 0          | NA          | NA         | NA         | NA         | FGF7P4     |
| NA        | ENSG00000216835 | 0          | NA          | NA         | NA         | NA         | RBMXP1     |
| NA        | ENSG00000216844 | 0          | NA          | NA         | NA         | NA         |            |
| NA        | ENSG00000216853 | 0          | NA          | NA         | NA         | NA         | MTCYBP36   |
| NA        | ENSG00000216854 | 0          | NA          | NA         | NA         | NA         | RPL17P26   |
| NA        | ENSG00000216859 | 0          | NA          | NA         | NA         | NA         | DHFRP5     |
| 285780    | ENSG00000216863 | 0.60279648 | -0.02752712 | 0.38588313 | 0.49730371 | NA         | LY86-AS1   |
| NA        | ENSG00000216866 | 2.82874106 | -0.02422852 | 0.37387866 | 0.79264229 | 0.90514695 | RPS2P55    |
| NA        | ENSG00000216867 | 4.11715032 | 0.00497455  | 0.3685205  | 0.96509933 | 0.98622874 | RPL22P12   |
| 100506302 | ENSG00000216895 | 44.1196346 | 0.26786846  | 0.29891675 | 0.2038181  | 0.41028318 |            |
| NA        | ENSG00000216901 | 0.55358119 | 0.03297361  | 0.3862425  | 0.45093601 | NA         | ZNF603P    |
| NA        | ENSG00000216902 | 0          | NA          | NA         | NA         | NA         |            |
| NA        | ENSG00000216904 | 0          | NA          | NA         | NA         | NA         | SOCS5P5    |
| NA        | ENSG00000216906 | 3.67687678 | -0.0140044  | 0.36629331 | 0.89996148 | 0.95573896 |            |
| NA        | ENSG00000216913 | 0          | NA          | NA         | NA         | NA         |            |
| NA        | ENSG00000216915 | 4.66287691 | -0.03259013 | 0.3681573  | 0.77027785 | 0.89464422 | GPR89P     |
| NA        | ENSG00000216917 | 0          | NA          | NA         | NA         | NA         |            |
| 285095    | ENSG00000216921 | 0          | NA          | NA         | NA         | NA         | FAM240C    |
| 79741     | ENSG00000216937 | 59.6934489 | 0.04652329  | 0.26292362 | 0.80909524 | 0.91334153 | CCDC7      |
| NA        | ENSG00000216938 | 0          | NA          | NA         | NA         | NA         | RPL7P58    |
| NA        | ENSG00000216966 | 0          | NA          | NA         | NA         | NA         |            |

|           |                 |            |             |            |            |            |           |
|-----------|-----------------|------------|-------------|------------|------------|------------|-----------|
| NA        | ENSG00000216977 | 1.05049561 | 0.07487801  | 0.39380527 | 0.14953923 | NA         | RPL21P65  |
| NA        | ENSG00000216990 | 0.65261538 | 0.00428339  | 0.38251133 | 0.9192028  | NA         | HSPD1P10  |
| NA        | ENSG00000216998 | 0          | NA          | NA         | NA         | NA         | CYP2AC1P  |
| NA        | ENSG00000217004 | 0          | NA          | NA         | NA         | NA         |           |
| NA        | ENSG00000217026 | 0.51646628 | 0.03117823  | 0.38605898 | 0.47697493 | NA         | RPL10P1   |
| NA        | ENSG00000217027 | 0.173733   | 0.01914545  | 0.38484597 | 0.78225479 | NA         | TPT1P4    |
| NA        | ENSG00000217030 | 0.47055672 | -0.00685577 | 0.38321005 | 0.87339215 | NA         |           |
| NA        | ENSG00000217041 | 0          | NA          | NA         | NA         | NA         |           |
| NA        | ENSG00000217044 | 0          | NA          | NA         | NA         | NA         | MTCO3P31  |
| NA        | ENSG00000217060 | 0          | NA          | NA         | NA         | NA         |           |
| NA        | ENSG00000217067 | 0          | NA          | NA         | NA         | NA         |           |
| NA        | ENSG00000217078 | 0          | NA          | NA         | NA         | NA         |           |
| NA        | ENSG00000217083 | 0          | NA          | NA         | NA         | NA         | MTCO2P33  |
| NA        | ENSG00000217085 | 0          | NA          | NA         | NA         | NA         | HMGB3P19  |
| NA        | ENSG00000217089 | 0          | NA          | NA         | NA         | NA         | RPS29P13  |
| NA        | ENSG00000217094 | 0.34624801 | -0.02356563 | 0.38536324 | 0.65270996 | NA         | PPIAP31   |
| NA        | ENSG00000217120 | 0          | NA          | NA         | NA         | NA         |           |
| 96459     | ENSG00000217128 | 376.315027 | -0.25266907 | 0.12591159 | 0.03300383 | 0.1081771  | FNIP1     |
| NA        | ENSG00000217130 | 0.15069912 | -0.01848503 | 0.38480575 | 0.84537521 | NA         |           |
| NA        | ENSG00000217135 | 0          | NA          | NA         | NA         | NA         |           |
| NA        | ENSG00000217139 | 0          | NA          | NA         | NA         | NA         |           |
| NA        | ENSG00000217159 | 0.7962167  | -0.03601432 | 0.38378766 | 0.50853159 | NA         | LARP1P1   |
| NA        | ENSG00000217160 | 0          | NA          | NA         | NA         | NA         | MTCO2P31  |
| NA        | ENSG00000217165 | 122.283799 | 0.03329355  | 0.1901379  | 0.84165578 | 0.92800104 | ANKRD18EP |
| NA        | ENSG00000217169 | 0          | NA          | NA         | NA         | NA         | MTHFD2P2  |
| NA        | ENSG00000217178 | 0          | NA          | NA         | NA         | NA         |           |
| NA        | ENSG00000217179 | 0          | NA          | NA         | NA         | NA         | MTCYBP2   |
| NA        | ENSG00000217181 | 0.86544337 | 0.01264277  | 0.38162063 | 0.80763127 | NA         |           |
| NA        | ENSG00000217195 | 0          | NA          | NA         | NA         | NA         |           |
| NA        | ENSG00000217227 | 0          | NA          | NA         | NA         | NA         | TFGP1     |
| NA        | ENSG00000217228 | 0          | NA          | NA         | NA         | NA         | GSTA12P   |
| NA        | ENSG00000217231 | 0          | NA          | NA         | NA         | NA         |           |
| 100131390 | ENSG00000217236 | 0          | NA          | NA         | NA         | NA         | SP9       |
| NA        | ENSG00000217239 | 0          | NA          | NA         | NA         | NA         |           |
| NA        | ENSG00000217241 | 1.56139271 | 0.04740664  | 0.38178937 | 0.52433301 | NA         | CBX3P9    |
| NA        | ENSG00000217261 | 0          | NA          | NA         | NA         | NA         | POM121L4P |
| NA        | ENSG00000217268 | 0          | NA          | NA         | NA         | NA         | TXNP7     |
| NA        | ENSG00000217272 | 0          | NA          | NA         | NA         | NA         | RAB1AP2   |

|        |                 |            |             |            |            |            |           |
|--------|-----------------|------------|-------------|------------|------------|------------|-----------|
| NA     | ENSG00000217275 | 2.07342903 | -0.08401142 | 0.3916968  | 0.25126885 | NA         |           |
| NA     | ENSG00000217289 | 0          | NA          | NA         | NA         | NA         |           |
| NA     | ENSG00000217314 | 0          | NA          | NA         | NA         | NA         | UQCRFS1P3 |
| NA     | ENSG00000217315 | 0          | NA          | NA         | NA         | NA         | OR2W2P    |
| NA     | ENSG00000217325 | 0.77930636 | -0.05579178 | 0.38936192 | 0.27749971 | NA         | PRELID1P1 |
| NA     | ENSG00000217327 | 0          | NA          | NA         | NA         | NA         | RPS7P5    |
| NA     | ENSG00000217330 | 0          | NA          | NA         | NA         | NA         | SSXP10    |
| NA     | ENSG00000217331 | 0          | NA          | NA         | NA         | NA         |           |
| NA     | ENSG00000217334 | 0          | NA          | NA         | NA         | NA         |           |
| NA     | ENSG00000217372 | 0          | NA          | NA         | NA         | NA         | TUBB4BP7  |
| NA     | ENSG00000217377 | 0          | NA          | NA         | NA         | NA         | AK4P5     |
| NA     | ENSG00000217379 | 0          | NA          | NA         | NA         | NA         |           |
| NA     | ENSG00000217385 | 0          | NA          | NA         | NA         | NA         | PSMC1P11  |
| NA     | ENSG00000217404 | 0          | NA          | NA         | NA         | NA         | RPS4XP9   |
| NA     | ENSG00000217408 | 0          | NA          | NA         | NA         | NA         | PRELID1P2 |
| NA     | ENSG00000217414 | 0          | NA          | NA         | NA         | NA         | DDX18P3   |
| NA     | ENSG00000217416 | 0          | NA          | NA         | NA         | NA         | ISCA1P1   |
| 644186 | ENSG00000217442 | 4.73292387 | 0.14739866  | 0.40158596 | 0.23987039 | 0.4579071  | SYCE3     |
| NA     | ENSG00000217447 | 5.15870146 | -0.08284257 | 0.37401847 | 0.5037185  | 0.72032399 |           |
| NA     | ENSG00000217455 | 0          | NA          | NA         | NA         | NA         |           |
| NA     | ENSG00000217477 | 0          | NA          | NA         | NA         | NA         |           |
| NA     | ENSG00000217482 | 0          | NA          | NA         | NA         | NA         | HMGB1P17  |
| NA     | ENSG00000217483 | 0          | NA          | NA         | NA         | NA         |           |
| NA     | ENSG00000217488 | 0          | NA          | NA         | NA         | NA         |           |
| NA     | ENSG00000217495 | 0          | NA          | NA         | NA         | NA         |           |
| NA     | ENSG00000217512 | 0.31840912 | 0.00134736  | 0.38336834 | 0.96416911 | NA         |           |
| NA     | ENSG00000217514 | 0          | NA          | NA         | NA         | NA         |           |
| NA     | ENSG00000217527 | 0          | NA          | NA         | NA         | NA         | RPS16P5   |
| NA     | ENSG00000217539 | 0.173124   | -0.01911262 | 0.38486262 | 0.84537521 | NA         | IQCB2P    |
| 51192  | ENSG00000217555 | 376.15948  | 0.08866544  | 0.12288736 | 0.44684421 | 0.67093544 | CKLF      |
| NA     | ENSG00000217557 | 0          | NA          | NA         | NA         | NA         |           |
| NA     | ENSG00000217566 | 0.50263983 | 0.01201925  | 0.38340946 | 0.77180889 | NA         | TDGF1P4   |
| NA     | ENSG00000217576 | 0          | NA          | NA         | NA         | NA         |           |
| NA     | ENSG00000217585 | 0          | NA          | NA         | NA         | NA         | MDH1P2    |
| NA     | ENSG00000217612 | 0.14931947 | -0.01844332 | 0.38480212 | 0.84537521 | NA         |           |
| NA     | ENSG00000217624 | 0.31717148 | 0.00152207  | 0.38337002 | 0.9632689  | NA         | YWHAZP10  |
| NA     | ENSG00000217631 | 0          | NA          | NA         | NA         | NA         |           |
| NA     | ENSG00000217643 | 0.68054822 | 0.00378461  | 0.38129864 | 0.94096209 | NA         | PTGES3P2  |



|           |                 |            |             |            |            |            |            |
|-----------|-----------------|------------|-------------|------------|------------|------------|------------|
| NA        | ENSG00000217644 | 0          | NA          | NA         | NA         | NA         |            |
| NA        | ENSG00000217646 | 0.45005284 | -0.02731525 | 0.38571434 | 0.56165085 | NA         | H2BC16P    |
| NA        | ENSG00000217648 | 24.229422  | 0.08284647  | 0.31798941 | 0.65771525 | 0.83026251 |            |
| NA        | ENSG00000217653 | 0.18922458 | 0.01954053  | 0.38488496 | 0.78225479 | NA         | PIMREGP3   |
| NA        | ENSG00000217680 | 0          | NA          | NA         | NA         | NA         | UBE2V1P15  |
| NA        | ENSG00000217684 | 0          | NA          | NA         | NA         | NA         | RPS3AP24   |
| NA        | ENSG00000217686 | 0          | NA          | NA         | NA         | NA         | NUS1P4     |
| NA        | ENSG00000217702 | 0          | NA          | NA         | NA         | NA         |            |
| NA        | ENSG00000217707 | 0          | NA          | NA         | NA         | NA         | SERPINB8P1 |
| NA        | ENSG00000217716 | 0.30139824 | -0.02296476 | 0.38527817 | 0.68536535 | NA         | RPS10P3    |
| NA        | ENSG00000217718 | 0          | NA          | NA         | NA         | NA         | NDUFB4P4   |
| NA        | ENSG00000217733 | 0.52927395 | 0.01289467  | 0.38340413 | 0.75406451 | NA         | CCT7P1     |
| NA        | ENSG00000217746 | 0          | NA          | NA         | NA         | NA         |            |
| NA        | ENSG00000217767 | 0.18922458 | 0.01954053  | 0.38488496 | 0.78225479 | NA         | NDUFAB1P1  |
| NA        | ENSG00000217769 | 0.15069912 | -0.01848503 | 0.38480575 | 0.84537521 | NA         |            |
| NA        | ENSG00000217770 | 0          | NA          | NA         | NA         | NA         | FEM1AP3    |
| NA        | ENSG00000217776 | 0          | NA          | NA         | NA         | NA         |            |
| NA        | ENSG00000217783 | 0.47031663 | -0.00724891 | 0.38322842 | 0.8678452  | NA         | LDHAL6FP   |
| NA        | ENSG00000217786 | 0          | NA          | NA         | NA         | NA         |            |
| NA        | ENSG00000217791 | 0          | NA          | NA         | NA         | NA         | ASS1P9     |
| 100288175 | ENSG00000217801 | 0.80281899 | -0.02852996 | 0.38352083 | 0.55099016 | NA         |            |
| NA        | ENSG00000217805 | 0          | NA          | NA         | NA         | NA         |            |
| NA        | ENSG00000217809 | 0          | NA          | NA         | NA         | NA         | FAT1P1     |
| NA        | ENSG00000217811 | 0          | NA          | NA         | NA         | NA         | HNRNPDP2   |
| NA        | ENSG00000217824 | 0          | NA          | NA         | NA         | NA         | SNRPEP6    |
| NA        | ENSG00000217825 | 0          | NA          | NA         | NA         | NA         |            |
| NA        | ENSG00000217835 | 0          | NA          | NA         | NA         | NA         | RBMXP5     |
| NA        | ENSG00000217862 | 0.18922458 | 0.01954053  | 0.38488496 | 0.78225479 | NA         | H4C10P     |
| NA        | ENSG00000217874 | 0.18922458 | 0.01954053  | 0.38488496 | 0.78225479 | NA         | OR4F7P     |
| NA        | ENSG00000217878 | 0          | NA          | NA         | NA         | NA         |            |
| NA        | ENSG00000217889 | 0.36301913 | 0.02389522  | 0.38539247 | 0.6099346  | NA         | KRT18P48   |
| NA        | ENSG00000217896 | 0          | NA          | NA         | NA         | NA         | ZNF839P1   |
| NA        | ENSG00000217897 | 0          | NA          | NA         | NA         | NA         | HSPE1P8    |
| NA        | ENSG00000217929 | 0.47332114 | -0.00784195 | 0.38324917 | 0.85858079 | NA         | CICP18     |
| 51025     | ENSG00000217930 | 310.924695 | -0.09758454 | 0.13966456 | 0.45217604 | 0.67536839 | PAM16      |
| NA        | ENSG00000217950 | 0          | NA          | NA         | NA         | NA         | NOC2LP2    |
| NA        | ENSG00000218014 | 0          | NA          | NA         | NA         | NA         | KRT19P1    |
| NA        | ENSG00000218016 | 0.64089481 | -0.02493598 | 0.3829378  | 0.63895518 | NA         | ZNF192P2   |

|           |                 |                 |             |             |            |            |             |          |
|-----------|-----------------|-----------------|-------------|-------------|------------|------------|-------------|----------|
| 100291105 | ENSG00000218018 | 8.89811663      | 0.01552414  | 0.35770139  | 0.90740975 | 0.95963244 | RBM38-AS1   |          |
|           | NA              | ENSG00000218020 | 0           | NA          | NA         | NA         | THAP12P5    |          |
|           | NA              | ENSG00000218027 | 0           | NA          | NA         | NA         |             |          |
|           | NA              | ENSG00000218029 | 0           | NA          | NA         | NA         |             |          |
|           | NA              | ENSG00000218048 | 0           | NA          | NA         | NA         |             |          |
|           | NA              | ENSG00000218049 | 0           | NA          | NA         | NA         | RPL31P33    |          |
|           | NA              | ENSG00000218052 | 0.14931947  | -0.01844332 | 0.38480212 | 0.84537521 | ADAMTS7P4   |          |
|           | NA              | ENSG00000218069 | 0.173733    | 0.01914545  | 0.38484597 | 0.78225479 | RSL24D1P1   |          |
|           | NA              | ENSG00000218073 | 1.5736362   | -0.02499118 | 0.37978965 | 0.71303771 | NA          |          |
|           | NA              | ENSG00000218089 | 0           | NA          | NA         | NA         | DNAJA1P4    |          |
|           | NA              | ENSG00000218107 | 0           | NA          | NA         | NA         | NA          |          |
| 283165    | ENSG00000218109 | 6.99050677      | 0.07694715  | 0.36803673  | 0.5637087  | 0.76632633 | KIRREL3-AS3 |          |
|           | NA              | ENSG00000218125 | 0           | NA          | NA         | NA         |             |          |
|           | NA              | ENSG00000218143 | 0           | NA          | NA         | NA         | ERHP2       |          |
|           | NA              | ENSG00000218153 | 0.52119901  | 0.02576573  | 0.38568143 | 0.51723676 | KRT18P22    |          |
|           | NA              | ENSG00000218173 | 0           | NA          | NA         | NA         |             |          |
|           | NA              | ENSG00000218175 | 0           | NA          | NA         | NA         |             |          |
|           | NA              | ENSG00000218180 | 0.18922458  | 0.01954053  | 0.38488496 | 0.78225479 | SLC25A5P7   |          |
|           | NA              | ENSG00000218186 | 0.15069912  | -0.01848503 | 0.38480575 | 0.84537521 | KRT8P43     |          |
|           | NA              | ENSG00000218187 | 0           | NA          | NA         | NA         |             |          |
|           | NA              | ENSG00000218189 | 0           | NA          | NA         | NA         | POM121L14P  |          |
|           | NA              | ENSG00000218194 | 0           | NA          | NA         | NA         | HLFP1       |          |
|           | NA              | ENSG00000218198 | 0           | NA          | NA         | NA         | RPS20P32    |          |
|           | NA              | ENSG00000218208 | 0.68446305  | 0.00077645  | 0.38184508 | 0.98570493 | RPS27AP11   |          |
|           | NA              | ENSG00000218213 | 0           | NA          | NA         | NA         | FTH1P26     |          |
|           | NA              | ENSG00000218226 | 49.9381039  | -0.11517865 | 0.25831158 | 0.55116287 | 0.75759119  | TATDN2P2 |
|           | NA              | ENSG00000218227 | 0.31815833  | 0.00110652  | 0.38336643 | 0.96647518 | NA          |          |
|           | NA              | ENSG00000218233 | 1.89010707  | 0.02281537  | 0.37698188 | 0.77806452 | NA          |          |
|           | NA              | ENSG00000218261 | 0           | NA          | NA         | NA         | NEPNP       |          |
|           | NA              | ENSG00000218265 | 0           | NA          | NA         | NA         | RPA3P2      |          |
|           | NA              | ENSG00000218265 | 0           | NA          | NA         | NA         | RPS4XP7     |          |
|           | NA              | ENSG00000218274 | 0           | NA          | NA         | NA         |             |          |
|           | NA              | ENSG00000218281 | 0           | NA          | NA         | NA         | H2AC9P      |          |
|           | NA              | ENSG00000218283 | 2.46972102  | 0.02768093  | 0.37342725 | 0.77428284 | NA          |          |
|           | NA              | ENSG00000218300 | 0           | NA          | NA         | NA         | MORF4L1P1   |          |
|           | NA              | ENSG00000218300 | 0           | NA          | NA         | NA         | RPL22P14    |          |
| 168448    | ENSG00000218305 | 0               | NA          | NA          | NA         | NA         | CDC14C      |          |
|           | NA              | ENSG00000218313 | 0           | NA          | NA         | NA         |             |          |
| 55714     | ENSG00000218336 | 5146.33303      | -0.13262079 | 0.06477302  | 0.03737956 | 0.1192962  | TENM3       |          |
|           | NA              | ENSG00000218337 | 0           | NA          | NA         | NA         |             |          |

|           |                 |            |             |            |            |            |            |
|-----------|-----------------|------------|-------------|------------|------------|------------|------------|
| NA        | ENSG00000218347 | 0          | NA          | NA         | NA         | NA         | HNRNPA1P1  |
| NA        | ENSG00000218350 | 0          | NA          | NA         | NA         | NA         | LYPLA1P3   |
| NA        | ENSG00000218351 | 0          | NA          | NA         | NA         | NA         | RPS3AP23   |
| 101927722 | ENSG00000218357 | 0          | NA          | NA         | NA         | NA         | LINC01644  |
| 646024    | ENSG00000218358 | 1.60389567 | -0.03312308 | 0.38026019 | 0.63811433 | NA         | RAET1K     |
| NA        | ENSG00000218359 | 0          | NA          | NA         | NA         | NA         | SUMO2P13   |
| NA        | ENSG00000218363 | 0          | NA          | NA         | NA         | NA         | SLC25A20P1 |
| NA        | ENSG00000218410 | 0          | NA          | NA         | NA         | NA         |            |
| 100130449 | ENSG00000218416 | 6.78826594 | 0.15633342  | 0.39542493 | 0.27841248 | 0.5027948  |            |
| NA        | ENSG00000218418 | 4.59905399 | 0.03316413  | 0.37011118 | 0.76087124 | 0.88944647 |            |
| NA        | ENSG00000218424 | 0          | NA          | NA         | NA         | NA         | NDUFS5P1   |
| NA        | ENSG00000218426 | 3.56097685 | 0.0409468   | 0.37224037 | 0.69877078 | 0.85472333 |            |
| NA        | ENSG00000218428 | 0.173124   | -0.01911262 | 0.38486262 | 0.84537521 | NA         | NIP7P3     |
| NA        | ENSG00000218454 | 0          | NA          | NA         | NA         | NA         | HNRNPA1P19 |
| NA        | ENSG00000218459 | 0          | NA          | NA         | NA         | NA         | RPS27P15   |
| NA        | ENSG00000218472 | 0          | NA          | NA         | NA         | NA         |            |
| NA        | ENSG00000218475 | 0          | NA          | NA         | NA         | NA         | ACTG1P18   |
| NA        | ENSG00000218476 | 0          | NA          | NA         | NA         | NA         |            |
| NA        | ENSG00000218483 | 0          | NA          | NA         | NA         | NA         |            |
| NA        | ENSG00000218490 | 0          | NA          | NA         | NA         | NA         | FCF1P10    |
| NA        | ENSG00000218499 | 0          | NA          | NA         | NA         | NA         |            |
| NA        | ENSG00000218502 | 0          | NA          | NA         | NA         | NA         | H2AZP3     |
| 29092     | ENSG00000218510 | 297.124922 | 0.15385845  | 0.14173923 | 0.24241757 | 0.46064214 | LINC00339  |
| NA        | ENSG00000218512 | 0          | NA          | NA         | NA         | NA         | SPTLC1P2   |
| NA        | ENSG00000218520 | 0          | NA          | NA         | NA         | NA         |            |
| NA        | ENSG00000218521 | 0          | NA          | NA         | NA         | NA         |            |
| NA        | ENSG00000218536 | 0.6999497  | -0.01718311 | 0.38329024 | 0.67568154 | NA         |            |
| NA        | ENSG00000218537 | 65.4255531 | 0.74443191  | 0.30255875 | 0.00229877 | 0.01205913 | MIF-AS1    |
| NA        | ENSG00000218549 | 0          | NA          | NA         | NA         | NA         | OR4K12P    |
| NA        | ENSG00000218561 | 0.62202697 | -0.03610217 | 0.3866043  | 0.42856872 | NA         |            |
| NA        | ENSG00000218565 | 0          | NA          | NA         | NA         | NA         |            |
| NA        | ENSG00000218574 | 0          | NA          | NA         | NA         | NA         | HNRNPA1P37 |
| NA        | ENSG00000218577 | 0          | NA          | NA         | NA         | NA         |            |
| NA        | ENSG00000218582 | 0.14931947 | -0.01844332 | 0.38480212 | 0.84537521 | NA         | GAPDHP63   |
| NA        | ENSG00000218586 | 0.80514139 | 0.01675331  | 0.38201148 | 0.74481663 | NA         |            |
| NA        | ENSG00000218596 | 0          | NA          | NA         | NA         | NA         |            |
| NA        | ENSG00000218617 | 0          | NA          | NA         | NA         | NA         |            |
| NA        | ENSG00000218631 | 5.57096437 | 0.2252937   | 0.44743964 | 0.11963389 | 0.28460369 |            |

|           |                 |            |             |            |            |            |            |
|-----------|-----------------|------------|-------------|------------|------------|------------|------------|
| NA        | ENSG00000218632 | 0.16735865 | 0.01897177  | 0.38482933 | 0.78225479 | NA         | RPL7P28    |
| NA        | ENSG00000218643 | 0          | NA          | NA         | NA         | NA         | RPL5P20    |
| NA        | ENSG00000218672 | 0          | NA          | NA         | NA         | NA         |            |
| NA        | ENSG00000218676 | 0.33890284 | 0.00236051  | 0.38338014 | 0.9659211  | NA         | BRD7P4     |
| NA        | ENSG00000218682 | 0.52322475 | 0.01080523  | 0.38326207 | 0.77121538 | NA         |            |
| NA        | ENSG00000218689 | 0          | NA          | NA         | NA         | NA         | RPL5P21    |
| NA        | ENSG00000218690 | 1.78238135 | 0.02287173  | 0.37745933 | 0.77009478 | NA         | H2AC10P    |
| NA        | ENSG00000218698 | 0          | NA          | NA         | NA         | NA         | ST13P16    |
| NA        | ENSG00000218713 | 0.52119901 | 0.02576573  | 0.38568143 | 0.51723676 | NA         |            |
| NA        | ENSG00000218716 | 0          | NA          | NA         | NA         | NA         | RPL12P23   |
| NA        | ENSG00000218725 | 0          | NA          | NA         | NA         | NA         | B3GALNT2P1 |
| NA        | ENSG00000218728 | 0          | NA          | NA         | NA         | NA         | KRT18P44   |
| NA        | ENSG00000218730 | 0          | NA          | NA         | NA         | NA         |            |
| NA        | ENSG00000218732 | 0          | NA          | NA         | NA         | NA         |            |
| 100505876 | ENSG00000218739 | 843.86169  | -0.27284136 | 0.09519867 | 0.00296186 | 0.01497538 | CEBPZOS    |
| NA        | ENSG00000218748 | 0          | NA          | NA         | NA         | NA         | DBIP1      |
| NA        | ENSG00000218749 | 0          | NA          | NA         | NA         | NA         |            |
| NA        | ENSG00000218754 | 0          | NA          | NA         | NA         | NA         | RPL18AP8   |
| NA        | ENSG00000218757 | 0.16735865 | 0.01897177  | 0.38482933 | 0.78225479 | NA         |            |
| NA        | ENSG00000218766 | 0          | NA          | NA         | NA         | NA         |            |
| NA        | ENSG00000218772 | 0          | NA          | NA         | NA         | NA         | FAM8A6P    |
| NA        | ENSG00000218776 | 0          | NA          | NA         | NA         | NA         | MTATP6P31  |
| NA        | ENSG00000218792 | 0          | NA          | NA         | NA         | NA         | HSPD1P16   |
| NA        | ENSG00000218793 | 0          | NA          | NA         | NA         | NA         |            |
| NA        | ENSG00000218803 | 0.173733   | 0.01914545  | 0.38484597 | 0.78225479 | NA         | GSTM2P1    |
| NA        | ENSG00000218806 | 0          | NA          | NA         | NA         | NA         |            |
| NA        | ENSG00000218809 | 0          | NA          | NA         | NA         | NA         |            |
| NA        | ENSG00000218813 | 0          | NA          | NA         | NA         | NA         |            |
| 100129278 | ENSG00000218819 | 0          | NA          | NA         | NA         | NA         | TDRD15     |
| 56903     | ENSG00000218823 | 2.9535857  | -0.13543208 | 0.40748522 | 0.16174358 | 0.35019582 | PAPOLB     |
| NA        | ENSG00000218834 | 0          | NA          | NA         | NA         | NA         |            |
| 654835    | ENSG00000218839 | 0          | NA          | NA         | NA         | NA         | FAM138C    |
| NA        | ENSG00000218857 | 0.32385085 | -0.02327321 | 0.38532137 | 0.66859313 | NA         |            |
| NA        | ENSG00000218868 | 0          | NA          | NA         | NA         | NA         | CNN3P1     |
| NA        | ENSG00000218870 | 0          | NA          | NA         | NA         | NA         | SLC25A6P6  |
| NA        | ENSG00000218872 | 0          | NA          | NA         | NA         | NA         |            |
| NA        | ENSG00000218890 | 0          | NA          | NA         | NA         | NA         | NUFIP1P1   |
| 163033    | ENSG00000218891 | 638.680699 | -0.0023611  | 0.11031614 | 0.98094979 | 0.99355086 | ZNF579     |

|        |                 |            |             |            |            |            |            |
|--------|-----------------|------------|-------------|------------|------------|------------|------------|
| NA     | ENSG00000218893 | 0          | NA          | NA         | NA         | NA         | SUMO2P12   |
| NA     | ENSG00000218896 | 2.5592567  | 0.12268155  | 0.40696321 | 0.11740189 | NA         | TUBB8P2    |
| NA     | ENSG00000218902 | 0.173733   | 0.01914545  | 0.38484597 | 0.78225479 | NA         | PTMAP3     |
| NA     | ENSG00000218965 | 0          | NA          | NA         | NA         | NA         | NACAP7     |
| NA     | ENSG00000218976 | 0          | NA          | NA         | NA         | NA         | IMPDH1P9   |
| NA     | ENSG00000218980 | 0.34109166 | 0.02362638  | 0.38535338 | 0.6241155  | NA         | FTH1P15    |
| NA     | ENSG00000218986 | 0          | NA          | NA         | NA         | NA         |            |
| NA     | ENSG00000218991 | 0          | NA          | NA         | NA         | NA         | CCNG1P1    |
| NA     | ENSG00000218996 | 0.54284536 | 0.01460441  | 0.38350971 | 0.729486   | NA         | ARL4AP5    |
| NA     | ENSG00000219023 | 0.15069912 | -0.01848503 | 0.38480575 | 0.84537521 | NA         |            |
| NA     | ENSG00000219027 | 0.83517202 | 0.03689958  | 0.38460543 | 0.46284099 | NA         | RPS3AP2    |
| NA     | ENSG00000219039 | 0          | NA          | NA         | NA         | NA         |            |
| NA     | ENSG00000219061 | 0          | NA          | NA         | NA         | NA         | TRIM51FP   |
| 23436  | ENSG00000219073 | 0          | NA          | NA         | NA         | NA         | CELA3B     |
| NA     | ENSG00000219074 | 0.32544565 | 0.00202449  | 0.38337559 | 0.96092894 | NA         | SOD1P1     |
| NA     | ENSG00000219085 | 0.49264394 | -0.00722003 | 0.38270186 | 0.86014067 | NA         | NPM1P37    |
| NA     | ENSG00000219087 | 0          | NA          | NA         | NA         | NA         | MTND4LP19  |
| NA     | ENSG00000219088 | 0          | NA          | NA         | NA         | NA         |            |
| NA     | ENSG00000219095 | 0          | NA          | NA         | NA         | NA         | DHFRP6     |
| NA     | ENSG00000219102 | 0.5347768  | 0.01352512  | 0.38343967 | 0.7445493  | NA         | HNRNPA3P12 |
| NA     | ENSG00000219133 | 0.49836565 | -0.0100828  | 0.3828274  | 0.82943076 | NA         |            |
| NA     | ENSG00000219135 | 0          | NA          | NA         | NA         | NA         | RPL23AP48  |
| NA     | ENSG00000219139 | 0          | NA          | NA         | NA         | NA         | TYMSP1     |
| NA     | ENSG00000219146 | 1.31259863 | -0.02180688 | 0.37871676 | 0.76316898 | NA         | RPS4XP8    |
| NA     | ENSG00000219149 | 0          | NA          | NA         | NA         | NA         | PPIAP87    |
| NA     | ENSG00000219150 | 0          | NA          | NA         | NA         | NA         |            |
| NA     | ENSG00000219159 | 0          | NA          | NA         | NA         | NA         |            |
| NA     | ENSG00000219163 | 0.65935157 | -0.01944381 | 0.38293944 | 0.66970376 | NA         | HMGB1P20   |
| NA     | ENSG00000219186 | 0          | NA          | NA         | NA         | NA         | FTH1P19    |
| NA     | ENSG00000219188 | 0.32330434 | 0.00160361  | 0.38337065 | 0.96572895 | NA         | CACYBPP3   |
| NA     | ENSG00000219190 | 0          | NA          | NA         | NA         | NA         |            |
| 440400 | ENSG00000219200 | 1305.1164  | 0.22297479  | 0.0862964  | 0.00794002 | 0.03428291 | RNASEK     |
| NA     | ENSG00000219201 | 0.34624801 | -0.02356563 | 0.38536324 | 0.65270996 | NA         |            |
| NA     | ENSG00000219222 | 0          | NA          | NA         | NA         | NA         | RPL12P47   |
| NA     | ENSG00000219240 | 0          | NA          | NA         | NA         | NA         |            |
| NA     | ENSG00000219249 | 0          | NA          | NA         | NA         | NA         | AMZ2P2     |
| NA     | ENSG00000219253 | 0          | NA          | NA         | NA         | NA         | RPS6P7     |
| NA     | ENSG00000219257 | 0          | NA          | NA         | NA         | NA         | NPM1P38    |

|           |                 |            |             |            |            |            |          |
|-----------|-----------------|------------|-------------|------------|------------|------------|----------|
| NA        | ENSG00000219262 | 0          | NA          | NA         | NA         | NA         | OR2E1P   |
| NA        | ENSG00000219273 | 0          | NA          | NA         | NA         | NA         |          |
| NA        | ENSG00000219274 | 0          | NA          | NA         | NA         | NA         | RPS20P2  |
| NA        | ENSG00000219280 | 0          | NA          | NA         | NA         | NA         | VN1R8P   |
| NA        | ENSG00000219284 | 0          | NA          | NA         | NA         | NA         |          |
| NA        | ENSG00000219294 | 1.50072686 | -0.00828843 | 0.37606684 | 0.91740304 | NA         | PIP5K1P1 |
| NA        | ENSG00000219297 | 0          | NA          | NA         | NA         | NA         | MRPL42P3 |
| NA        | ENSG00000219298 | 0          | NA          | NA         | NA         | NA         |          |
| NA        | ENSG00000219302 | 0          | NA          | NA         | NA         | NA         |          |
| NA        | ENSG00000219314 | 0          | NA          | NA         | NA         | NA         |          |
| NA        | ENSG00000219329 | 0          | NA          | NA         | NA         | NA         |          |
| NA        | ENSG00000219355 | 1.35495839 | -0.01601537 | 0.37825024 | 0.82409655 | NA         | RPL31P52 |
| NA        | ENSG00000219361 | 1.43985925 | 0.01810535  | 0.37922207 | 0.79333022 | NA         | RPSAP72  |
| NA        | ENSG00000219368 | 0          | NA          | NA         | NA         | NA         | ZNF299P  |
| NA        | ENSG00000219375 | 0          | NA          | NA         | NA         | NA         |          |
| NA        | ENSG00000219384 | 0          | NA          | NA         | NA         | NA         |          |
| NA        | ENSG00000219387 | 0          | NA          | NA         | NA         | NA         | ATF1P1   |
| NA        | ENSG00000219391 | 0          | NA          | NA         | NA         | NA         |          |
| NA        | ENSG00000219392 | 4.5127044  | 0.04277149  | 0.36555791 | 0.72898057 | 0.87045369 | ZNF602P  |
| NA        | ENSG00000219395 | 7.45527809 | -0.094664   | 0.36465286 | 0.519288   | 0.73285078 | HSPA8P15 |
| NA        | ENSG00000219404 | 1.24527375 | 0.08666632  | 0.39727072 | 0.10514675 | NA         |          |
| NA        | ENSG00000219409 | 0          | NA          | NA         | NA         | NA         |          |
| NA        | ENSG00000219410 | 23.7326601 | -0.2549216  | 0.4198376  | 0.18017773 | 0.37700128 |          |
| NA        | ENSG00000219430 | 0          | NA          | NA         | NA         | NA         | MBL3P    |
| NA        | ENSG00000219433 | 0.173124   | -0.01911262 | 0.38486262 | 0.84537521 | NA         | BTBD10P2 |
| 25858     | ENSG00000219435 | 3.28315173 | -0.07599728 | 0.38414957 | 0.40357217 | 0.63160382 | CATSPERZ |
| 25817     | ENSG00000219438 | 21.7335374 | 3.16052492  | 0.64168426 | 6.68E-08   | 9.02E-07   | TAF5     |
| 101928254 | ENSG00000219445 | 0          | NA          | NA         | NA         | NA         |          |
| NA        | ENSG00000219451 | 0          | NA          | NA         | NA         | NA         | RPL23P8  |
| NA        | ENSG00000219453 | 0          | NA          | NA         | NA         | NA         |          |
| NA        | ENSG00000219463 | 0          | NA          | NA         | NA         | NA         | RPSAP42  |
| NA        | ENSG00000219470 | 4.49866953 | -0.11946792 | 0.39312616 | 0.28708238 | 0.51288829 |          |
| 55672     | ENSG00000219481 | 3284.4437  | -0.36036228 | 0.07010555 | 1.63E-07   | 2.10E-06   | NBPF1    |
| NA        | ENSG00000219487 | 0          | NA          | NA         | NA         | NA         |          |
| NA        | ENSG00000219491 | 0          | NA          | NA         | NA         | NA         | TPT1P8   |
| NA        | ENSG00000219492 | 0          | NA          | NA         | NA         | NA         |          |
| NA        | ENSG00000219500 | 0          | NA          | NA         | NA         | NA         |          |
| NA        | ENSG00000219507 | 0          | NA          | NA         | NA         | NA         | FTH1P8   |

|           |                 |            |             |            |            |            |            |
|-----------|-----------------|------------|-------------|------------|------------|------------|------------|
| NA        | ENSG00000219529 | 3.42890212 | 0.04173347  | 0.3763345  | 0.65089746 | 0.82558532 |            |
| NA        | ENSG00000219532 | 0          | NA          | NA         | NA         | NA         | SELENOKP2  |
| 729852    | ENSG00000219545 | 324.213193 | -0.13972097 | 0.14627522 | 0.300187   | 0.52733399 | UMAD1      |
| NA        | ENSG00000219547 | 0.30139824 | -0.02296476 | 0.38527817 | 0.68536535 | NA         | RPL17P25   |
| NA        | ENSG00000219549 | 0          | NA          | NA         | NA         | NA         |            |
| NA        | ENSG00000219553 | 0.46916637 | -0.00654056 | 0.38320011 | 0.87830359 | NA         |            |
| NA        | ENSG00000219559 | 0          | NA          | NA         | NA         | NA         |            |
| NA        | ENSG00000219565 | 1.53473045 | -0.03007277 | 0.37785673 | 0.70362365 | NA         | ZNF259P1   |
| NA        | ENSG00000219575 | 0          | NA          | NA         | NA         | NA         |            |
| NA        | ENSG00000219582 | 0          | NA          | NA         | NA         | NA         | HNRNPA1P58 |
| NA        | ENSG00000219592 | 0          | NA          | NA         | NA         | NA         | NCSTNP1    |
| NA        | ENSG00000219604 | 0          | NA          | NA         | NA         | NA         |            |
| 648791    | ENSG00000219607 | 3.85033024 | 0.10421368  | 0.3857289  | 0.36597631 | 0.59518764 | PPP1R3G    |
| NA        | ENSG00000219608 | 0          | NA          | NA         | NA         | NA         | HIGD1AP16  |
| NA        | ENSG00000219619 | 0          | NA          | NA         | NA         | NA         |            |
| NA        | ENSG00000219622 | 0          | NA          | NA         | NA         | NA         |            |
| 375190    | ENSG00000219626 | 270.959871 | 0.11129349  | 0.1560391  | 0.43519999 | 0.66041111 | FAM228B    |
| NA        | ENSG00000219627 | 0          | NA          | NA         | NA         | NA         | CYCSP17    |
| NA        | ENSG00000219642 | 0.16735865 | 0.01897177  | 0.38482933 | 0.78225479 | NA         | BMPR1AP1   |
| NA        | ENSG00000219653 | 0          | NA          | NA         | NA         | NA         | GCNT1P4    |
| 101928464 | ENSG00000219665 | 68.8082338 | 0.43927128  | 0.2750065  | 0.0400426  | 0.12546513 | ZNF433-AS1 |
| NA        | ENSG00000219666 | 0          | NA          | NA         | NA         | NA         |            |
| NA        | ENSG00000219669 | 0          | NA          | NA         | NA         | NA         | BECN1P2    |
| NA        | ENSG00000219681 | 0          | NA          | NA         | NA         | NA         |            |
| NA        | ENSG00000219682 | 0          | NA          | NA         | NA         | NA         |            |
| NA        | ENSG00000219693 | 0          | NA          | NA         | NA         | NA         | FGF7P8     |
| NA        | ENSG00000219699 | 0          | NA          | NA         | NA         | NA         |            |
| NA        | ENSG00000219700 | 0          | NA          | NA         | NA         | NA         | PTCHD3P3   |
| NA        | ENSG00000219702 | 0          | NA          | NA         | NA         | NA         |            |
| NA        | ENSG00000219703 | 0          | NA          | NA         | NA         | NA         | RAP1BP3    |
| NA        | ENSG00000219712 | 0          | NA          | NA         | NA         | NA         |            |
| NA        | ENSG00000219722 | 0          | NA          | NA         | NA         | NA         | RPL26P20   |
| NA        | ENSG00000219736 | 0          | NA          | NA         | NA         | NA         |            |
| NA        | ENSG00000219738 | 0          | NA          | NA         | NA         | NA         | CD83P1     |
| NA        | ENSG00000219747 | 1.9698745  | 0.09626412  | 0.39594222 | 0.19786547 | NA         | RPL32P16   |
| NA        | ENSG00000219755 | 0.51937201 | -0.02557462 | 0.38567603 | 0.54680819 | NA         |            |
| NA        | ENSG00000219757 | 0          | NA          | NA         | NA         | NA         |            |
| NA        | ENSG00000219758 | 0          | NA          | NA         | NA         | NA         |            |

|           |                 |            |             |            |            |            |           |
|-----------|-----------------|------------|-------------|------------|------------|------------|-----------|
| NA        | ENSG00000219770 | 0          | NA          | NA         | NA         | NA         | VN1R11P   |
| NA        | ENSG00000219773 | 0.16735865 | 0.01897177  | 0.38482933 | 0.78225479 | NA         | RPSAP45   |
| NA        | ENSG00000219776 | 0          | NA          | NA         | NA         | NA         | RPL21P67  |
| NA        | ENSG00000219784 | 0          | NA          | NA         | NA         | NA         |           |
| NA        | ENSG00000219790 | 0.15069912 | -0.01848503 | 0.38480575 | 0.84537521 | NA         | OSTCP6    |
| NA        | ENSG00000219797 | 0.173124   | -0.01911262 | 0.38486262 | 0.84537521 | NA         | PPIAP9    |
| NA        | ENSG00000219806 | 0          | NA          | NA         | NA         | NA         | ATP5BPB6  |
| NA        | ENSG00000219807 | 0          | NA          | NA         | NA         | NA         | ARF1P1    |
| NA        | ENSG00000219814 | 0          | NA          | NA         | NA         | NA         | RPL23AP47 |
| NA        | ENSG00000219863 | 0          | NA          | NA         | NA         | NA         | RPL31P28  |
| NA        | ENSG00000219867 | 0          | NA          | NA         | NA         | NA         |           |
| NA        | ENSG00000219870 | 0          | NA          | NA         | NA         | NA         | BRK1P1    |
| NA        | ENSG00000219881 | 0.68114187 | 0.03133575  | 0.38359295 | 0.54742297 | NA         | GAPDHP42  |
| NA        | ENSG00000219891 | 74.8321943 | -2.09071332 | 0.31249502 | 1.53E-12   | 3.45E-11   | ZSCAN12P1 |
| NA        | ENSG00000219902 | 1.28719212 | -0.03915242 | 0.38240675 | 0.54300906 | NA         | RPL35P3   |
| 102723968 | ENSG00000219926 | 0          | NA          | NA         | NA         | NA         | OR7E104P  |
| NA        | ENSG00000219928 | 0          | NA          | NA         | NA         | NA         |           |
| NA        | ENSG00000219930 | 0.173124   | -0.01911262 | 0.38486262 | 0.84537521 | NA         | GAPDHP67  |
| NA        | ENSG00000219932 | 0          | NA          | NA         | NA         | NA         | RPL12P8   |
| NA        | ENSG00000219940 | 0          | NA          | NA         | NA         | NA         | SPTLC1P3  |
| NA        | ENSG00000219941 | 0          | NA          | NA         | NA         | NA         | KRT18P50  |
| NA        | ENSG00000219951 | 0.173124   | -0.01911262 | 0.38486262 | 0.84537521 | NA         |           |
| NA        | ENSG00000219986 | 0          | NA          | NA         | NA         | NA         | BTF3P7    |
| NA        | ENSG00000219992 | 0          | NA          | NA         | NA         | NA         |           |
| NA        | ENSG00000219993 | 0          | NA          | NA         | NA         | NA         |           |
| 645191    | ENSG00000220008 | 27.4055297 | -0.13642361 | 0.3197438  | 0.48101548 | 0.70187153 | LINGO3    |
| NA        | ENSG00000220030 | 0          | NA          | NA         | NA         | NA         |           |
| NA        | ENSG00000220069 | 0          | NA          | NA         | NA         | NA         | RPL7P27   |
| NA        | ENSG00000220076 | 0          | NA          | NA         | NA         | NA         |           |
| NA        | ENSG00000220091 | 0.173733   | 0.01914545  | 0.38484597 | 0.78225479 | NA         | LAP3P1    |
| NA        | ENSG00000220105 | 0.18922458 | 0.01954053  | 0.38488496 | 0.78225479 | NA         |           |
| NA        | ENSG00000220110 | 0          | NA          | NA         | NA         | NA         |           |
| NA        | ENSG00000220113 | 0          | NA          | NA         | NA         | NA         | MTCYBP4   |
| NA        | ENSG00000220125 | 0          | NA          | NA         | NA         | NA         | MRPL32P1  |
| NA        | ENSG00000220130 | 0          | NA          | NA         | NA         | NA         |           |
| NA        | ENSG00000220131 | 0          | NA          | NA         | NA         | NA         |           |
| NA        | ENSG00000220132 | 0          | NA          | NA         | NA         | NA         | CPSF1P2   |
| NA        | ENSG00000220139 | 0          | NA          | NA         | NA         | NA         |           |



|           |                 |            |             |            |            |            |            |
|-----------|-----------------|------------|-------------|------------|------------|------------|------------|
| NA        | ENSG00000220154 | 0          | NA          | NA         | NA         | NA         |            |
| NA        | ENSG00000220157 | 0.33471731 | 0.02354391  | 0.38534154 | 0.62842204 | NA         | HNRNPA1P12 |
| 400579    | ENSG00000220161 | 4.40635603 | 0.1148059   | 0.38728622 | 0.34446945 | 0.57474341 | LINC02076  |
| NA        | ENSG00000220181 | 0          | NA          | NA         | NA         | NA         | MTRES1P1   |
| NA        | ENSG00000220184 | 0          | NA          | NA         | NA         | NA         | HMGB3P18   |
| 100125288 | ENSG00000220201 | 36.1930791 | 0.30008376  | 0.33457614 | 0.16908165 | 0.36043622 | ZGLP1      |
| NA        | ENSG00000220204 | 0          | NA          | NA         | NA         | NA         |            |
| 6844      | ENSG00000220205 | 696.706342 | -0.24454326 | 0.09838387 | 0.00994219 | 0.04129223 | VAMP2      |
| NA        | ENSG00000220212 | 0          | NA          | NA         | NA         | NA         | OR4F1P     |
| NA        | ENSG00000220237 | 0          | NA          | NA         | NA         | NA         | RPS24P12   |
| NA        | ENSG00000220240 | 0          | NA          | NA         | NA         | NA         |            |
| NA        | ENSG00000220248 | 0          | NA          | NA         | NA         | NA         | ZNF402P    |
| NA        | ENSG00000220256 | 0          | NA          | NA         | NA         | NA         |            |
| NA        | ENSG00000220267 | 0          | NA          | NA         | NA         | NA         | ACTBP8     |
| NA        | ENSG00000220291 | 0          | NA          | NA         | NA         | NA         |            |
| NA        | ENSG00000220305 | 20.4784293 | 0.34437533  | 0.42542712 | 0.12615053 | 0.29546661 | HNRNPH1P1  |
| NA        | ENSG00000220311 | 0          | NA          | NA         | NA         | NA         | RPL35AP18  |
| NA        | ENSG00000220323 | 186.531156 | 0.15689766  | 0.23024175 | 0.399789   | 0.62831531 | H2BC19P    |
| NA        | ENSG00000220326 | 0          | NA          | NA         | NA         | NA         |            |
| NA        | ENSG00000220340 | 0          | NA          | NA         | NA         | NA         | MTCO1P56   |
| NA        | ENSG00000220343 | 0          | NA          | NA         | NA         | NA         | PPIAP74    |
| NA        | ENSG00000220347 | 0          | NA          | NA         | NA         | NA         | H3P28      |
| NA        | ENSG00000220349 | 0          | NA          | NA         | NA         | NA         |            |
| NA        | ENSG00000220370 | 0          | NA          | NA         | NA         | NA         |            |
| NA        | ENSG00000220377 | 0          | NA          | NA         | NA         | NA         | GSTA8P     |
| NA        | ENSG00000220378 | 0          | NA          | NA         | NA         | NA         | KRT8P42    |
| NA        | ENSG00000220392 | 0.50453099 | 0.01225229  | 0.38342169 | 0.76823569 | NA         | FCF1P5     |
| NA        | ENSG00000220412 | 0          | NA          | NA         | NA         | NA         |            |
| NA        | ENSG00000220418 | 0          | NA          | NA         | NA         | NA         | TUBB3P1    |
| NA        | ENSG00000220446 | 0          | NA          | NA         | NA         | NA         |            |
| NA        | ENSG00000220447 | 0          | NA          | NA         | NA         | NA         |            |
| NA        | ENSG00000220472 | 0.16735865 | 0.01897177  | 0.38482933 | 0.78225479 | NA         |            |
| NA        | ENSG00000220483 | 0          | NA          | NA         | NA         | NA         | SLC25A51P1 |
| NA        | ENSG00000220494 | 0.15069912 | -0.01848503 | 0.38480575 | 0.84537521 | NA         | YAP1P1     |
| NA        | ENSG00000220505 | 0          | NA          | NA         | NA         | NA         | EIF4EBP2P3 |
| NA        | ENSG00000220506 | 0.50585511 | -0.00897271 | 0.3832277  | 0.83732675 | NA         |            |
| NA        | ENSG00000220514 | 0          | NA          | NA         | NA         | NA         | MTND4LP20  |
| NA        | ENSG00000220515 | 0          | NA          | NA         | NA         | NA         | PGAM1P10   |

|           |                 |            |             |            |            |            |           |
|-----------|-----------------|------------|-------------|------------|------------|------------|-----------|
| NA        | ENSG00000220517 | 0          | NA          | NA         | NA         | NA         | ASS1P1    |
| NA        | ENSG00000220522 | 1.10362928 | -0.05557351 | 0.38634575 | 0.3352858  | NA         |           |
| NA        | ENSG00000220537 | 0          | NA          | NA         | NA         | NA         |           |
| NA        | ENSG00000220540 | 0          | NA          | NA         | NA         | NA         |           |
| NA        | ENSG00000220541 | 0          | NA          | NA         | NA         | NA         | PPIHP2    |
| NA        | ENSG00000220553 | 0          | NA          | NA         | NA         | NA         | RPL5P19   |
| NA        | ENSG00000220556 | 0          | NA          | NA         | NA         | NA         |           |
| NA        | ENSG00000220557 | 0          | NA          | NA         | NA         | NA         | HMGB1P13  |
| NA        | ENSG00000220563 | 0.75689831 | 0.03380966  | 0.38651369 | 0.3822658  | NA         | PKMP3     |
| 100128264 | ENSG00000220575 | 0          | NA          | NA         | NA         | NA         | HTR5A-AS1 |
| NA        | ENSG00000220581 | 0          | NA          | NA         | NA         | NA         | VN1R12P   |
| NA        | ENSG00000220583 | 1.20161491 | -0.0064851  | 0.38041373 | 0.91117821 | NA         | RPL35P2   |
| NA        | ENSG00000220585 | 0          | NA          | NA         | NA         | NA         | DDX18P6   |
| NA        | ENSG00000220586 | 0.18922458 | 0.01954053  | 0.38488496 | 0.78225479 | NA         | TUBBP9    |
| NA        | ENSG00000220598 | 0          | NA          | NA         | NA         | NA         | SSR1P1    |
| NA        | ENSG00000220600 | 0          | NA          | NA         | NA         | NA         |           |
| NA        | ENSG00000220614 | 0          | NA          | NA         | NA         | NA         |           |
| NA        | ENSG00000220635 | 0          | NA          | NA         | NA         | NA         | KRASP1    |
| NA        | ENSG00000220643 | 0          | NA          | NA         | NA         | NA         |           |
| NA        | ENSG00000220660 | 0          | NA          | NA         | NA         | NA         |           |
| NA        | ENSG00000220666 | 0          | NA          | NA         | NA         | NA         | RCC2P7    |
| NA        | ENSG00000220685 | 7.62878001 | -0.02685563 | 0.35135489 | 0.85179747 | 0.93275912 |           |
| NA        | ENSG00000220694 | 1.16319198 | 0.01599884  | 0.38096791 | 0.78314453 | NA         |           |
| NA        | ENSG00000220695 | 0.34719557 | 0.00093922  | 0.38336462 | 0.95957396 | NA         |           |
| NA        | ENSG00000220702 | 0          | NA          | NA         | NA         | NA         |           |
| 442179    | ENSG00000220721 | 0.3238689  | -0.02327336 | 0.38532139 | 0.66858275 | NA         | OR1F12    |
| NA        | ENSG00000220725 | 0          | NA          | NA         | NA         | NA         |           |
| NA        | ENSG00000220730 | 0          | NA          | NA         | NA         | NA         | H3P27     |
| NA        | ENSG00000220733 | 0          | NA          | NA         | NA         | NA         | MTND3P20  |
| NA        | ENSG00000220734 | 0          | NA          | NA         | NA         | NA         |           |
| NA        | ENSG00000220739 | 0          | NA          | NA         | NA         | NA         |           |
| NA        | ENSG00000220744 | 4.27417473 | -0.01999813 | 0.36629978 | 0.85942073 | 0.93748116 | RPL5P18   |
| NA        | ENSG00000220745 | 0          | NA          | NA         | NA         | NA         |           |
| NA        | ENSG00000220748 | 0          | NA          | NA         | NA         | NA         |           |
| NA        | ENSG00000220749 | 1.29749634 | -0.01373206 | 0.37946878 | 0.83363666 | NA         | RPL21P28  |
| NA        | ENSG00000220758 | 0          | NA          | NA         | NA         | NA         | VN1R10P   |
| NA        | ENSG00000220771 | 0.173124   | -0.01911262 | 0.38486262 | 0.84537521 | NA         | BOLA2P3   |
| NA        | ENSG00000220773 | 0          | NA          | NA         | NA         | NA         | RPSAP44   |

|           |                 |            |             |            |            |            |             |
|-----------|-----------------|------------|-------------|------------|------------|------------|-------------|
| NA        | ENSG00000220785 | 66.2861611 | -0.00530863 | 0.26256936 | 0.97610735 | 0.99170422 | MTMR9LP     |
| NA        | ENSG00000220793 | 2.35421347 | 0.01310014  | 0.37326647 | 0.88865626 | NA         | RPL21P119   |
| NA        | ENSG00000220804 | 121.679046 | 0.16230901  | 0.20275733 | 0.34789447 | 0.57861815 | LINC01881   |
| NA        | ENSG00000220831 | 0          | NA          | NA         | NA         | NA         | NDUFA5P9    |
| NA        | ENSG00000220842 | 0          | NA          | NA         | NA         | NA         | RPL21P16    |
| NA        | ENSG00000220848 | 16.9862194 | -0.59154503 | 0.80039594 | 0.0279555  | 0.09492335 | RPS18P9     |
| NA        | ENSG00000220867 | 0.48860557 | 0.01127378  | 0.38339436 | 0.78520781 | NA         | HSPE1P26    |
| NA        | ENSG00000220868 | 0          | NA          | NA         | NA         | NA         | MRPL35P1    |
| NA        | ENSG00000220871 | 0          | NA          | NA         | NA         | NA         | DNAJC19P6   |
| NA        | ENSG00000220875 | 0.15069912 | -0.01848503 | 0.38480575 | 0.84537521 | NA         | H3C9P       |
| NA        | ENSG00000220884 | 0          | NA          | NA         | NA         | NA         | MESTP1      |
| 648691    | ENSG00000220891 | 4.13108996 | -0.0167601  | 0.36421878 | 0.88632344 | 0.95015905 |             |
| NA        | ENSG00000220908 | 0          | NA          | NA         | NA         | NA         | LINC02531   |
| NA        | ENSG00000220913 | 0          | NA          | NA         | NA         | NA         |             |
| NA        | ENSG00000220918 | 0          | NA          | NA         | NA         | NA         |             |
| NA        | ENSG00000220920 | 0          | NA          | NA         | NA         | NA         |             |
| NA        | ENSG00000220924 | 0.173733   | 0.01914545  | 0.38484597 | 0.78225479 | NA         | OSTCP4      |
| NA        | ENSG00000220925 | 0.34119222 | 0.02362715  | 0.38535349 | 0.62406221 | NA         | IGBP1-AS2   |
| NA        | ENSG00000220937 | 0.32400505 | -0.02327445 | 0.38532156 | 0.66850437 | NA         | HNRNPA1P41  |
| NA        | ENSG00000220948 | 0          | NA          | NA         | NA         | NA         | TRIM51GP    |
| NA        | ENSG00000220949 | 0          | NA          | NA         | NA         | NA         |             |
| NA        | ENSG00000220960 | 0          | NA          | NA         | NA         | NA         |             |
| NA        | ENSG00000220986 | 0          | NA          | NA         | NA         | NA         |             |
| NA        | ENSG00000220988 | 0          | NA          | NA         | NA         | NA         | SNORD88C    |
| NA        | ENSG00000221015 | 0          | NA          | NA         | NA         | NA         | RNU6ATAC29P |
| 100302255 | ENSG00000221017 | 0          | NA          | NA         | NA         | NA         | MIR1323     |
| NA        | ENSG00000221023 | 0          | NA          | NA         | NA         | NA         | RNU6ATAC19P |
| 100302229 | ENSG00000221025 | 0          | NA          | NA         | NA         | NA         | MIR1250     |
| 100302158 | ENSG00000221028 | 0          | NA          | NA         | NA         | NA         | MIR1231     |
| NA        | ENSG00000221031 | 0          | NA          | NA         | NA         | NA         |             |
| 100302184 | ENSG00000221033 | 0          | NA          | NA         | NA         | NA         | MIR1272     |
| 100422837 | ENSG00000221036 | 0          | NA          | NA         | NA         | NA         | MIR1193     |
| NA        | ENSG00000221038 | 0          | NA          | NA         | NA         | NA         | RNU6ATAC7P  |
| 100302118 | ENSG00000221039 | 0          | NA          | NA         | NA         | NA         | MIR1286     |
| NA        | ENSG00000221040 | 0          | NA          | NA         | NA         | NA         |             |
| NA        | ENSG00000221042 | 0          | NA          | NA         | NA         | NA         |             |
| NA        | ENSG00000221043 | 0          | NA          | NA         | NA         | NA         |             |
| NA        | ENSG00000221044 | 0          | NA          | NA         | NA         | NA         |             |

|           |                 |   |    |    |    |    |             |
|-----------|-----------------|---|----|----|----|----|-------------|
| NA        | ENSG00000221046 | 0 | NA | NA | NA | NA | RNU6ATAC38P |
| 100302202 | ENSG00000221052 | 0 | NA | NA | NA | NA | MIR1266     |
| 100302128 | ENSG00000221055 | 0 | NA | NA | NA | NA | MIR1302-3   |
| NA        | ENSG00000221059 | 0 | NA | NA | NA | NA | RNU6ATAC6P  |
| NA        | ENSG00000221060 | 0 | NA | NA | NA | NA |             |
| 100302150 | ENSG00000221063 | 0 | NA | NA | NA | NA | MIR1296     |
| 692214    | ENSG00000221066 | 0 | NA | NA | NA | NA | SNORD111    |
| NA        | ENSG00000221081 | 0 | NA | NA | NA | NA | MIR320D2    |
| NA        | ENSG00000221083 | 0 | NA | NA | NA | NA |             |
| 100302146 | ENSG00000221091 | 0 | NA | NA | NA | NA | MIR1302-5   |
| NA        | ENSG00000221093 | 0 | NA | NA | NA | NA |             |
| 100124539 | ENSG00000221102 | 0 | NA | NA | NA | NA | SNORA11B    |
| NA        | ENSG00000221114 | 0 | NA | NA | NA | NA | RNU6ATAC30P |
| 692213    | ENSG00000221116 | 0 | NA | NA | NA | NA | SNORD110    |
| 100187716 | ENSG00000221120 | 0 | NA | NA | NA | NA | MIR1224     |
| NA        | ENSG00000221125 | 0 | NA | NA | NA | NA |             |
| NA        | ENSG00000221139 | 0 | NA | NA | NA | NA |             |
| NA        | ENSG00000221148 | 0 | NA | NA | NA | NA |             |
| 109617000 | ENSG00000221164 | 0 | NA | NA | NA | NA | SNORA11F    |
| 100302175 | ENSG00000221176 | 0 | NA | NA | NA | NA | MIR1207     |
| NA        | ENSG00000221184 | 0 | NA | NA | NA | NA |             |
| 100313772 | ENSG00000221187 | 0 | NA | NA | NA | NA | MIR548M     |
| 100302208 | ENSG00000221200 | 0 | NA | NA | NA | NA | MIR1253     |
| 100302279 | ENSG00000221203 | 0 | NA | NA | NA | NA | MIR1262     |
| NA        | ENSG00000221206 | 0 | NA | NA | NA | NA | RNU6ATAC15P |
| 100313921 | ENSG00000221214 | 0 | NA | NA | NA | NA | MIR548E     |
| NA        | ENSG00000221216 | 0 | NA | NA | NA | NA | RNU6ATAC27P |
| 100302270 | ENSG00000221227 | 0 | NA | NA | NA | NA | MIR1305     |
| 100302275 | ENSG00000221230 | 0 | NA | NA | NA | NA | MIR548L     |
| 100302268 | ENSG00000221238 | 0 | NA | NA | NA | NA | MIR1285-2   |
| 100302172 | ENSG00000221240 | 0 | NA | NA | NA | NA | MIR1258     |
| 692202    | ENSG00000221241 | 0 | NA | NA | NA | NA | SNORD88A    |
| NA        | ENSG00000221245 | 0 | NA | NA | NA | NA |             |
| 100302148 | ENSG00000221251 | 0 | NA | NA | NA | NA | MIR1263     |
| NA        | ENSG00000221255 | 0 | NA | NA | NA | NA | RNU6ATAC37P |
| 100302281 | ENSG00000221261 | 0 | NA | NA | NA | NA | MIR1208     |
| 100302288 | ENSG00000221263 | 0 | NA | NA | NA | NA | MIR548P     |
| 100302112 | ENSG00000221264 | 0 | NA | NA | NA | NA | MIR1284     |

|           |                 |   |    |    |    |    |             |
|-----------|-----------------|---|----|----|----|----|-------------|
| 100302193 | ENSG00000221265 | 0 | NA | NA | NA | NA | MIR1255A    |
| 100302223 | ENSG00000221269 | 0 | NA | NA | NA | NA | MIR1302-8   |
| 100302280 | ENSG00000221273 | 0 | NA | NA | NA | NA | MIR1237     |
| 100302277 | ENSG00000221275 | 0 | NA | NA | NA | NA | MIR548I2    |
| 100302134 | ENSG00000221287 | 0 | NA | NA | NA | NA | MIR1289-2   |
| 100313824 | ENSG00000221288 | 0 | NA | NA | NA | NA | MIR663B     |
| 100422849 | ENSG00000221296 | 0 | NA | NA | NA | NA | MIR548T     |
| NA        | ENSG00000221300 | 0 | NA | NA | NA | NA |             |
| 677845    | ENSG00000221303 | 0 | NA | NA | NA | NA | SNORA79     |
| 100302186 | ENSG00000221305 | 0 | NA | NA | NA | NA | MIR548I3    |
| 100302113 | ENSG00000221325 | 0 | NA | NA | NA | NA | MIR1200     |
| 100313841 | ENSG00000221331 | 0 | NA | NA | NA | NA | MIR548Q     |
| NA        | ENSG00000221332 | 0 | NA | NA | NA | NA |             |
| 100313770 | ENSG00000221333 | 0 | NA | NA | NA | NA | MIR548K     |
| NA        | ENSG00000221340 | 0 | NA | NA | NA | NA | RNU6ATAC18P |
| NA        | ENSG00000221345 | 0 | NA | NA | NA | NA |             |
| 100302239 | ENSG00000221348 | 0 | NA | NA | NA | NA | MIR548F5    |
| 100302124 | ENSG00000221355 | 0 | NA | NA | NA | NA | MIR1288     |
| NA        | ENSG00000221363 | 0 | NA | NA | NA | NA | RNU6ATAC20P |
| 100302201 | ENSG00000221365 | 0 | NA | NA | NA | NA | MIR1228     |
| 100313938 | ENSG00000221369 | 0 | NA | NA | NA | NA | MIR548G     |
| 100302116 | ENSG00000221371 | 0 | NA | NA | NA | NA | MIR1265     |
| NA        | ENSG00000221375 | 0 | NA | NA | NA | NA | RNU6ATAC23P |
| NA        | ENSG00000221381 | 0 | NA | NA | NA | NA | SNORD88B    |
| NA        | ENSG00000221387 | 0 | NA | NA | NA | NA | RNU6ATAC8P  |
| 100302178 | ENSG00000221390 | 0 | NA | NA | NA | NA | MIR1295A    |
| 100302140 | ENSG00000221393 | 0 | NA | NA | NA | NA | MIR1302-6   |
| 100302156 | ENSG00000221394 | 0 | NA | NA | NA | NA | MIR1229     |
| 109616985 | ENSG00000221400 | 0 | NA | NA | NA | NA | SNORD3J     |
| NA        | ENSG00000221406 | 0 | NA | NA | NA | NA | MIR320B2    |
| 100302226 | ENSG00000221410 | 0 | NA | NA | NA | NA | MIR1238     |
| 100302283 | ENSG00000221411 | 0 | NA | NA | NA | NA | MIR1227     |
| 677847    | ENSG00000221420 | 0 | NA | NA | NA | NA | SNORA81     |
| 100302265 | ENSG00000221421 | 0 | NA | NA | NA | NA | MIR1283-1   |
| 100302181 | ENSG00000221430 | 0 | NA | NA | NA | NA | MIR1294     |
| 100302159 | ENSG00000221436 | 0 | NA | NA | NA | NA | MIR548F3    |
| NA        | ENSG00000221439 | 0 | NA | NA | NA | NA | RNU4ATAC16P |
| NA        | ENSG00000221440 | 0 | NA | NA | NA | NA | RNU6ATAC31P |

|           |                 |            |            |           |            |    |             |
|-----------|-----------------|------------|------------|-----------|------------|----|-------------|
| 100313895 | ENSG00000221442 | 0          | NA         | NA        | NA         | NA | MIR548F4    |
| 100302246 | ENSG00000221445 | 0          | NA         | NA        | NA         | NA | MIR1301     |
| NA        | ENSG00000221455 | 0          | NA         | NA        | NA         | NA |             |
| 100302259 | ENSG00000221456 | 0          | NA         | NA        | NA         | NA | MIR1202     |
| 100124540 | ENSG00000221459 | 0          | NA         | NA        | NA         | NA | SNORA11C    |
| NA        | ENSG00000221461 | 0          | NA         | NA        | NA         | NA |             |
| 100302214 | ENSG00000221463 | 0          | NA         | NA        | NA         | NA | MIR1277     |
| 100302203 | ENSG00000221464 | 0          | NA         | NA        | NA         | NA | MIR1271     |
| 100616252 | ENSG00000221466 | 0          | NA         | NA        | NA         | NA | MIR548AJ2   |
| NA        | ENSG00000221468 | 0          | NA         | NA        | NA         | NA | RNU6ATAC11P |
| 100302217 | ENSG00000221476 | 0          | NA         | NA        | NA         | NA | MIR1827     |
| 100302289 | ENSG00000221479 | 0          | NA         | NA        | NA         | NA | MIR1251     |
| 677815    | ENSG00000221491 | 0          | NA         | NA        | NA         | NA | SNORA2C     |
| NA        | ENSG00000221493 | 0          | NA         | NA        | NA         | NA | MIR320C1    |
| 100302191 | ENSG00000221494 | 0          | NA         | NA        | NA         | NA | MIR548I4    |
| NA        | ENSG00000221496 | 0          | NA         | NA        | NA         | NA |             |
| NA        | ENSG00000221498 | 0          | NA         | NA        | NA         | NA |             |
| 594838    | ENSG00000221500 | 0          | NA         | NA        | NA         | NA | SNORD100    |
| 100302219 | ENSG00000221502 | 0          | NA         | NA        | NA         | NA | MIR1245A    |
| NA        | ENSG00000221507 | 0          | NA         | NA        | NA         | NA | RNU6ATAC40P |
| 100313829 | ENSG00000221510 | 0          | NA         | NA        | NA         | NA | MIR548O     |
| NA        | ENSG00000221514 | 0          | NA         | NA        | NA         | NA | SNORD111B   |
| NA        | ENSG00000221518 | 0          | NA         | NA        | NA         | NA | RNU6ATAC16P |
| 100302218 | ENSG00000221520 | 0          | NA         | NA        | NA         | NA | MIR1285-1   |
| 100302157 | ENSG00000221525 | 0          | NA         | NA        | NA         | NA | MIR1185-1   |
| NA        | ENSG00000221527 | 0          | NA         | NA        | NA         | NA | RNU6ATAC41P |
| 100302111 | ENSG00000221533 | 0          | NA         | NA        | NA         | NA | MIR1184-1   |
| 100313830 | ENSG00000221537 | 0          | NA         | NA        | NA         | NA | MIR548H1    |
| 692212    | ENSG00000221539 | 0          | NA         | NA        | NA         | NA | SNORD99     |
| 100302256 | ENSG00000221540 | 0          | NA         | NA        | NA         | NA | MIR1180     |
| 100313835 | ENSG00000221545 | 0          | NA         | NA        | NA         | NA | MIR1255B2   |
| 100302205 | ENSG00000221548 | 0          | NA         | NA        | NA         | NA | MIR1283-2   |
| 100302284 | ENSG00000221552 | 0          | NA         | NA        | NA         | NA | MIR1303     |
| NA        | ENSG00000221562 | 0          | NA         | NA        | NA         | NA | RNU6ATAC10P |
| 100302177 | ENSG00000221563 | 0          | NA         | NA        | NA         | NA | MIR1269A    |
| NA        | ENSG00000221564 | 0          | NA         | NA        | NA         | NA | RNU6ATAC42P |
| NA        | ENSG00000221571 | 1.19076087 | 0.05150712 | 0.3839823 | 0.44961789 | NA | RNU6ATAC35P |
| NA        | ENSG00000221574 | 0          | NA         | NA        | NA         | NA | RNU6ATAC33P |

|           |                 |          |            |            |            |    |             |
|-----------|-----------------|----------|------------|------------|------------|----|-------------|
| NA        | ENSG00000221583 | 0        | NA         | NA         | NA         | NA | RNU6ATAC21P |
| 100302232 | ENSG00000221585 | 0        | NA         | NA         | NA         | NA | MIR1226     |
| 100302228 | ENSG00000221586 | 0        | NA         | NA         | NA         | NA | MIR1261     |
| 100302192 | ENSG00000221594 | 0        | NA         | NA         | NA         | NA | MIR548F1    |
| 100302149 | ENSG00000221598 | 0        | NA         | NA         | NA         | NA | MIR1249     |
| NA        | ENSG00000221601 | 0        | NA         | NA         | NA         | NA | RNU4ATAC2P  |
| 100302220 | ENSG00000221604 | 0        | NA         | NA         | NA         | NA | MIR1293     |
| NA        | ENSG00000221611 | 0        | NA         | NA         | NA         | NA |             |
| 100302209 | ENSG00000221614 | 0        | NA         | NA         | NA         | NA | MIR1185-2   |
| 100313884 | ENSG00000221616 | 0        | NA         | NA         | NA         | NA | MIR548H4    |
| 100302130 | ENSG00000221628 | 0        | NA         | NA         | NA         | NA | MIR1302-4   |
| 100302235 | ENSG00000221630 | 0        | NA         | NA         | NA         | NA | MIR1179     |
| NA        | ENSG00000221633 | 0        | NA         | NA         | NA         | NA |             |
| 100302121 | ENSG00000221634 | 0        | NA         | NA         | NA         | NA | MIR1276     |
| NA        | ENSG00000221638 | 0        | NA         | NA         | NA         | NA |             |
| NA        | ENSG00000221639 | 0        | NA         | NA         | NA         | NA |             |
| 100302233 | ENSG00000221641 | 0        | NA         | NA         | NA         | NA | MIR1268A    |
| 677843    | ENSG00000221643 | 0        | NA         | NA         | NA         | NA | SNORA77     |
| 100302160 | ENSG00000221649 | 0        | NA         | NA         | NA         | NA | MIR1233-1   |
| 100302286 | ENSG00000221650 | 0        | NA         | NA         | NA         | NA | MIR1267     |
| 100188847 | ENSG00000221656 | 0        | NA         | NA         | NA         | NA | MIR1225     |
| 100302276 | ENSG00000221662 | 0        | NA         | NA         | NA         | NA | MIR1290     |
| 100302152 | ENSG00000221669 | 0        | NA         | NA         | NA         | NA | MIR548N     |
| NA        | ENSG00000221673 | 0        | NA         | NA         | NA         | NA |             |
| 100151684 | ENSG00000221676 | 0        | NA         | NA         | NA         | NA | RNU6ATAC    |
| 100302163 | ENSG00000221680 | 0        | NA         | NA         | NA         | NA | MIR1278     |
| 100302123 | ENSG00000221697 | 0        | NA         | NA         | NA         | NA | MIR1275     |
| 100302287 | ENSG00000221698 | 0        | NA         | NA         | NA         | NA | MIR548H3    |
| 100313774 | ENSG00000221703 | 0        | NA         | NA         | NA         | NA | MIR302E     |
| 101340250 | ENSG00000221705 | 0        | NA         | NA         | NA         | NA | SNORA11E    |
| 100302153 | ENSG00000221710 | 0        | NA         | NA         | NA         | NA | MIR1298     |
| NA        | ENSG00000221711 | 0        | NA         | NA         | NA         | NA |             |
| 677799    | ENSG00000221716 | 0.173733 | 0.01914545 | 0.38484597 | 0.78225479 | NA | SNORA11     |
| 109616997 | ENSG00000221719 | 0        | NA         | NA         | NA         | NA | SNORA3C     |
| NA        | ENSG00000221725 | 0        | NA         | NA         | NA         | NA | RNU6ATAC25P |
| 100302204 | ENSG00000221737 | 0        | NA         | NA         | NA         | NA | MIR548I1    |
| 100302211 | ENSG00000221739 | 0        | NA         | NA         | NA         | NA | MIR1203     |
| 692210    | ENSG00000221740 | 0        | NA         | NA         | NA         | NA | SNORD93     |

|           |                 |            |             |            |            |            |             |
|-----------|-----------------|------------|-------------|------------|------------|------------|-------------|
| 100302250 | ENSG00000221745 | 0          | NA          | NA         | NA         | NA         | MIR1197     |
| NA        | ENSG00000221750 | 0          | NA          | NA         | NA         | NA         | SNORA11G    |
| NA        | ENSG00000221753 | 0          | NA          | NA         | NA         | NA         |             |
| 100302236 | ENSG00000221754 | 0          | NA          | NA         | NA         | NA         | MIR1260A    |
| 100313914 | ENSG00000221760 | 0          | NA          | NA         | NA         | NA         | MIR548J     |
| 100302125 | ENSG00000221763 | 0          | NA          | NA         | NA         | NA         | MIR1289-1   |
| 100302147 | ENSG00000221768 | 0          | NA          | NA         | NA         | NA         | MIR1302-7   |
| 100302161 | ENSG00000221771 | 0          | NA          | NA         | NA         | NA         | MIR1205     |
| 100313771 | ENSG00000221782 | 0          | NA          | NA         | NA         | NA         | MIR548F2    |
| 100302122 | ENSG00000221783 | 0          | NA          | NA         | NA         | NA         | MIR1183     |
| 100302136 | ENSG00000221788 | 0          | NA          | NA         | NA         | NA         | MIR1252     |
| 100302254 | ENSG00000221792 | 0          | NA          | NA         | NA         | NA         | MIR1282     |
| 100313773 | ENSG00000221801 | 0          | NA          | NA         | NA         | NA         | MIR548H2    |
| 692091    | ENSG00000221803 | 0          | NA          | NA         | NA         | NA         | SNORD23     |
| NA        | ENSG00000221806 | 0          | NA          | NA         | NA         | NA         | RNU6ATAC34P |
| 100302155 | ENSG00000221808 | 0          | NA          | NA         | NA         | NA         | MIR1256     |
| 135946    | ENSG00000221813 | 0          | NA          | NA         | NA         | NA         | OR6B1       |
| 101929145 | ENSG00000221817 | 32.5235264 | 0.46267393  | 0.40073744 | 0.06339583 | 0.17873714 | PPP3CB-AS1  |
| 64641     | ENSG00000221818 | 0          | NA          | NA         | NA         | NA         | EBF2        |
| 750       | ENSG00000221819 | 11.397096  | -0.33296804 | 0.49111991 | 0.10074275 | 0.25062521 | GAS8-AS1    |
| 441150    | ENSG00000221821 | 55.9427432 | 0.02898045  | 0.24483749 | 0.87957776 | 0.94660386 | C6orf226    |
| 5534      | ENSG00000221823 | 1271.21303 | -0.41372109 | 0.08509651 | 5.89E-07   | 6.96E-06   | PPP3R1      |
| 5671      | ENSG00000221826 | 0          | NA          | NA         | NA         | NA         | PSG3        |
| 2189      | ENSG00000221829 | 806.10855  | 0.11780885  | 0.1015536  | 0.22903207 | 0.4444846  | FANCG       |
| 393046    | ENSG00000221836 | 0          | NA          | NA         | NA         | NA         | OR2A5       |
| 386676    | ENSG00000221837 | 0          | NA          | NA         | NA         | NA         | KRTAP10-9   |
| 9179      | ENSG00000221838 | 676.362576 | 0.30335291  | 0.1024462  | 0.00206393 | 0.01098988 | AP4M1       |
| 81318     | ENSG00000221840 | 0          | NA          | NA         | NA         | NA         | OR4A5       |
| 84226     | ENSG00000221843 | 126.638141 | -0.04635398 | 0.21211679 | 0.79191467 | 0.90499209 | C2orf16     |
| NA        | ENSG00000221844 | 0          | NA          | NA         | NA         | NA         | DPP3P2      |
| NA        | ENSG00000221845 | 0.34624801 | -0.02356563 | 0.38536324 | 0.65270996 | NA         | C7orf65     |
| NA        | ENSG00000221849 | 0          | NA          | NA         | NA         | NA         |             |
| 83895     | ENSG00000221852 | 0          | NA          | NA         | NA         | NA         | KRTAP1-5    |
| 259287    | ENSG00000221855 | 0          | NA          | NA         | NA         | NA         | TAS2R41     |
| NA        | ENSG00000221857 | 0          | NA          | NA         | NA         | NA         |             |
| 346525    | ENSG00000221858 | 0          | NA          | NA         | NA         | NA         | OR2A12      |
| 353333    | ENSG00000221859 | 0          | NA          | NA         | NA         | NA         | KRTAP10-10  |
| 353323    | ENSG00000221864 | 0          | NA          | NA         | NA         | NA         | KRTAP12-2   |



|           |                 |            |             |            |            |            |                |
|-----------|-----------------|------------|-------------|------------|------------|------------|----------------|
| 91584     | ENSG00000221866 | 1058.48952 | -0.19336662 | 0.09676797 | 0.03812237 | 0.12109316 | PLXNA4         |
| 4102      | ENSG00000221867 | 1168.8206  | -0.28164704 | 0.09019061 | 0.00127323 | 0.00728187 | MAGEA3         |
| 1052      | ENSG00000221869 | 2.52149837 | 0.12743502  | 0.40447058 | 0.17379993 | NA         | CEBPD          |
| 100529240 | ENSG00000221874 | 6.68955792 | -0.15133945 | 0.41078408 | 0.17578315 | 0.37003052 | ZNF816-ZNF321P |
| 5676      | ENSG00000221878 | 0          | NA          | NA         | NA         | NA         | PSG7           |
| NA        | ENSG00000221879 | 0          | NA          | NA         | NA         | NA         | MRPS21P3       |
| 81850     | ENSG00000221880 | 0          | NA          | NA         | NA         | NA         | KRTAP1-3       |
| 4995      | ENSG00000221882 | 0          | NA          | NA         | NA         | NA         | OR3A2          |
| NA        | ENSG00000221883 | 39.5078298 | 0.38430562  | 0.33679806 | 0.09347596 | 0.23697459 | ARIH2OS        |
| 63920     | ENSG00000221886 | 146.051623 | -0.28022798 | 0.18827753 | 0.08852407 | 0.22764971 | ZBED8          |
| 284293    | ENSG00000221887 | 3.70838057 | 0.04625416  | 0.37678034 | 0.61690006 | 0.80378914 | HMSD           |
| 26188     | ENSG00000221888 | 0.173124   | -0.01911262 | 0.38486262 | 0.84537521 | NA         | OR1C1          |
| 23467     | ENSG00000221890 | 238.961553 | -1.04918117 | 0.16818417 | 5.34E-11   | 1.06E-09   | NPTXR          |
| NA        | ENSG00000221891 | 0          | NA          | NA         | NA         | NA         | FAM218BP       |
| 285877    | ENSG00000221900 | 0          | NA          | NA         | NA         | NA         | POM121L12      |
| 221786    | ENSG00000221909 | 438.28123  | -0.00844118 | 0.11228959 | 0.93651182 | 0.97351594 | FAM200A        |
| 135948    | ENSG00000221910 | 0          | NA          | NA         | NA         | NA         | OR2F2          |
| 5520      | ENSG00000221914 | 1044.96876 | -0.46535142 | 0.11255819 | 1.53E-05   | 0.00014009 | PPP2R2A        |
| 55150     | ENSG00000221916 | 16.4727595 | -0.03198996 | 0.32879041 | 0.85088621 | 0.93252955 | C19orf73       |
| 400713    | ENSG00000221923 | 176.48532  | 0.05780493  | 0.16361511 | 0.69815705 | 0.85439402 | ZNF880         |
| 10626     | ENSG00000221926 | 597.431726 | 0.1873444   | 0.10652642 | 0.06673035 | 0.18521687 | TRIM16         |
| NA        | ENSG00000221930 | 0          | NA          | NA         | NA         | NA         | DENND10P1      |
| 390260    | ENSG00000221931 | 0          | NA          | NA         | NA         | NA         | OR6X1          |
| NA        | ENSG00000221932 | 0          | NA          | NA         | NA         | NA         | HEPN1          |
| 392138    | ENSG00000221933 | 0          | NA          | NA         | NA         | NA         | OR2A25         |
| 259286    | ENSG00000221937 | 0          | NA          | NA         | NA         | NA         | TAS2R40        |
| 135941    | ENSG00000221938 | 0          | NA          | NA         | NA         | NA         | OR2A14         |
| 200765    | ENSG00000221944 | 264.24073  | 0.31464573  | 0.16023813 | 0.03067947 | 0.10211051 | TIGD1          |
| 53822     | ENSG00000221946 | 3.71834869 | -0.11897853 | 0.39473239 | 0.27297076 | 0.49658353 | FXYP7          |
| 389668    | ENSG00000221947 | 11.5524662 | -0.17027268 | 0.38150035 | 0.30815208 | 0.53572881 | XKR9           |
| NA        | ENSG00000221949 | 15.0195459 | 0.06138944  | 0.33250346 | 0.72583067 | 0.86885969 | LINC01465      |
| 388759    | ENSG00000221953 | 69.6309914 | 0.30232322  | 0.25826291 | 0.13300209 | 0.30644076 | C1orf229       |
| 283093    | ENSG00000221954 | 0          | NA          | NA         | NA         | NA         | OR4C12         |
| 84561     | ENSG00000221955 | 4.31780287 | 0.09015544  | 0.38591913 | 0.3590275  | 0.58936832 | SLC12A8        |
| 3809      | ENSG00000221957 | 0          | NA          | NA         | NA         | NA         | KIR2DS4        |
| 645843    | ENSG00000221962 | 0          | NA          | NA         | NA         | NA         | TMEM14EP       |
| 80830     | ENSG00000221963 | 0.15069912 | -0.01848503 | 0.38480575 | 0.84537521 | NA         | APOL6          |
| 3995      | ENSG00000221968 | 296.635403 | 0.48774938  | 0.16299066 | 0.00105463 | 0.00617586 | FADS3          |

|           |                 |            |             |            |            |            |              |
|-----------|-----------------|------------|-------------|------------|------------|------------|--------------|
| 346528    | ENSG00000221970 | 0          | NA          | NA         | NA         | NA         | OR2A1        |
| NA        | ENSG00000221971 | 0.16735865 | 0.01897177  | 0.38482933 | 0.78225479 | NA         | TTC4P1       |
| 26686     | ENSG00000221977 | 0          | NA          | NA         | NA         | NA         | OR4E2        |
| 81669     | ENSG00000221978 | 6528.61421 | 0.28451769  | 0.04858671 | 3.53E-09   | 5.63E-08   | CCNL2        |
| 7311      | ENSG00000221983 | 9137.22856 | -0.00111161 | 0.05332775 | 0.97955896 | 0.99317507 | UBA52        |
| 343263    | ENSG00000221986 | 0.50428395 | 0.00482722  | 0.38258522 | 0.87319974 | NA         | MYBPHL       |
| 9374      | ENSG00000221988 | 780.517122 | -0.10621547 | 0.0977783  | 0.26039649 | 0.48228775 | PPT2         |
| 442361    | ENSG00000221989 | 0          | NA          | NA         | NA         | NA         | OR2A2        |
| NA        | ENSG00000221990 | 100.442066 | 0.26303408  | 0.21443233 | 0.14397675 | 0.32368257 | EXOC3-AS1    |
| 57232     | ENSG00000221994 | 74.8947395 | -0.16112801 | 0.24623434 | 0.40048382 | 0.62895583 | ZNF630       |
| 9220      | ENSG00000221995 | 63.9533703 | -0.08887841 | 0.2466164  | 0.6392762  | 0.81896041 | TIAF1        |
| 143496    | ENSG00000221996 | 0          | NA          | NA         | NA         | NA         | OR52B4       |
| NA        | ENSG00000222000 | 0          | NA          | NA         | NA         | NA         |              |
| 101928881 | ENSG00000222001 | 0          | NA          | NA         | NA         | NA         |              |
| 285941    | ENSG00000222004 | 0          | NA          | NA         | NA         | NA         | LINC02860    |
| 388948    | ENSG00000222005 | 0.36701983 | 0.02382057  | 0.38538344 | 0.61481641 | NA         | LINC01118    |
| NA        | ENSG00000222007 | 0          | NA          | NA         | NA         | NA         |              |
| 149478    | ENSG00000222009 | 41.4597109 | 0.48003162  | 0.36472394 | 0.04981624 | 0.14857274 | BTBD19       |
| 222234    | ENSG00000222011 | 190.418364 | 0.23285913  | 0.17204887 | 0.12996541 | 0.3016864  | FAM185A      |
| 105375614 | ENSG00000222012 | 10.2555369 | -0.14279337 | 0.37419389 | 0.374315   | 0.60343844 |              |
| 84084     | ENSG00000222014 | 1.39783073 | 0.08870895  | 0.39502375 | 0.17213974 | NA         | RAB6C        |
| NA        | ENSG00000222017 | 0          | NA          | NA         | NA         | NA         |              |
| 101928147 | ENSG00000222018 | 4.34016114 | 0.01680204  | 0.37569796 | 0.84493617 | 0.92965052 | FAM243A      |
| 100130015 | ENSG00000222019 | 66.6959797 | 0.29516148  | 0.26347541 | 0.14569545 | 0.32618095 | URAHP        |
| 101928111 | ENSG00000222020 | 1.15815286 | 0.02050556  | 0.38119359 | 0.72779469 | NA         | HDAC4-AS1    |
| NA        | ENSG00000222022 | 0          | NA          | NA         | NA         | NA         |              |
| NA        | ENSG00000222024 | 0.173733   | 0.01914545  | 0.38484597 | 0.78225479 | NA         |              |
| 122706    | ENSG00000222028 | 0          | NA          | NA         | NA         | NA         | PSMB11       |
| 101927285 | ENSG00000222030 | 0          | NA          | NA         | NA         | NA         | LINC01793    |
| NA        | ENSG00000222031 | 0          | NA          | NA         | NA         | NA         |              |
| NA        | ENSG00000222032 | 0          | NA          | NA         | NA         | NA         |              |
| 440925    | ENSG00000222033 | 0.18922458 | 0.01954053  | 0.38488496 | 0.78225479 | NA         | LINC01124    |
| NA        | ENSG00000222035 | 2.89376591 | 0.14806224  | 0.41375497 | 0.13402031 | 0.30828555 | KIAA2012-AS1 |
| 641455    | ENSG00000222036 | 74.2739505 | 0.0422023   | 0.23700985 | 0.82114027 | 0.91847813 | POTEM        |
| NA        | ENSG00000222037 | 0          | NA          | NA         | NA         | NA         | IGLC6        |
| 653781    | ENSG00000222038 | 0.18922458 | 0.01954053  | 0.38488496 | 0.78225479 | NA         | POTEJ        |
| 112597    | ENSG00000222041 | 4.79691766 | -0.1360213  | 0.40612221 | 0.15821558 | 0.34536221 | CYTOR        |
| NA        | ENSG00000222042 | 0          | NA          | NA         | NA         | NA         |              |

|           |                 |            |             |            |            |            |            |
|-----------|-----------------|------------|-------------|------------|------------|------------|------------|
| NA        | ENSG00000222043 | 1.96734445 | 0.08732322  | 0.39321341 | 0.22383159 | NA         |            |
| NA        | ENSG00000222044 | 0.70858511 | 0.00150344  | 0.38180125 | 0.97385949 | NA         |            |
| 149069    | ENSG00000222046 | 4.02866615 | 0.10453609  | 0.38514052 | 0.36994303 | 0.59928226 | DCDC2B     |
| 414236    | ENSG00000222047 | 0.173733   | 0.01914545  | 0.38484597 | 0.78225479 | NA         | C10orf55   |
| NA        | ENSG00000222051 | 0          | NA          | NA         | NA         | NA         | RNU6-1165P |
| NA        | ENSG00000222054 | 0          | NA          | NA         | NA         | NA         | RNA5SP177  |
| NA        | ENSG00000222057 | 0          | NA          | NA         | NA         | NA         | RNU4-62P   |
| NA        | ENSG00000222067 | 0          | NA          | NA         | NA         | NA         | RNU4-86P   |
| NA        | ENSG00000222068 | 0          | NA          | NA         | NA         | NA         | RN7SKP154  |
| NA        | ENSG00000222069 | 0.18922458 | 0.01954053  | 0.38488496 | 0.78225479 | NA         | RN7SKP285  |
| 100302129 | ENSG00000222071 | 0          | NA          | NA         | NA         | NA         | MIR1915    |
| NA        | ENSG00000222072 | 0          | NA          | NA         | NA         | NA         |            |
| NA        | ENSG00000222076 | 0          | NA          | NA         | NA         | NA         | RNU2-3P    |
| NA        | ENSG00000222078 | 0          | NA          | NA         | NA         | NA         | RN7SKP110  |
| NA        | ENSG00000222087 | 0          | NA          | NA         | NA         | NA         | RNU6-721P  |
| NA        | ENSG00000222092 | 0          | NA          | NA         | NA         | NA         | RNU6-908P  |
| NA        | ENSG00000222094 | 0          | NA          | NA         | NA         | NA         | RNU2-65P   |
| NA        | ENSG00000222095 | 0          | NA          | NA         | NA         | NA         |            |
| NA        | ENSG00000222099 | 0          | NA          | NA         | NA         | NA         | RN7SKP32   |
| NA        | ENSG00000222102 | 0          | NA          | NA         | NA         | NA         | RN7SKP232  |
| NA        | ENSG00000222107 | 0          | NA          | NA         | NA         | NA         | RN7SKP117  |
| NA        | ENSG00000222111 | 0          | NA          | NA         | NA         | NA         | RN7SKP148  |
| NA        | ENSG00000222112 | 5.74632255 | -0.09583636 | 0.37390536 | 0.46874924 | 0.69137681 | RN7SKP16   |
| NA        | ENSG00000222114 | 0          | NA          | NA         | NA         | NA         | RNU6-985P  |
| NA        | ENSG00000222118 | 0          | NA          | NA         | NA         | NA         | RNA5SP487  |
| NA        | ENSG00000222122 | 0          | NA          | NA         | NA         | NA         | RNU6-648P  |
| NA        | ENSG00000222123 | 0          | NA          | NA         | NA         | NA         | RNA5SP390  |
| NA        | ENSG00000222126 | 0          | NA          | NA         | NA         | NA         | RNU2-9P    |
| NA        | ENSG00000222129 | 0          | NA          | NA         | NA         | NA         | RNA5SP36   |
| NA        | ENSG00000222139 | 0          | NA          | NA         | NA         | NA         | RNU6-380P  |
| NA        | ENSG00000222145 | 0          | NA          | NA         | NA         | NA         |            |
| NA        | ENSG00000222146 | 0          | NA          | NA         | NA         | NA         | RNU4-37P   |
| NA        | ENSG00000222148 | 0          | NA          | NA         | NA         | NA         | RNY4P30    |
| NA        | ENSG00000222150 | 0          | NA          | NA         | NA         | NA         | RNA5SP239  |
| NA        | ENSG00000222154 | 0          | NA          | NA         | NA         | NA         | RN7SKP218  |
| NA        | ENSG00000222160 | 0          | NA          | NA         | NA         | NA         |            |
| NA        | ENSG00000222162 | 0          | NA          | NA         | NA         | NA         | RN7SKP151  |
| NA        | ENSG00000222164 | 2.16009336 | 0.0413543   | 0.37992607 | 0.59880857 | NA         | RN7SKP266  |

|           |                 |            |             |            |            |    |           |
|-----------|-----------------|------------|-------------|------------|------------|----|-----------|
| NA        | ENSG00000222170 | 0          | NA          | NA         | NA         | NA | RNU6-257P |
| NA        | ENSG00000222174 | 0          | NA          | NA         | NA         | NA | RN7SKP146 |
| NA        | ENSG00000222177 | 0          | NA          | NA         | NA         | NA | RNU4-30P  |
| NA        | ENSG00000222178 | 0          | NA          | NA         | NA         | NA | RNA5SP181 |
| NA        | ENSG00000222179 | 0          | NA          | NA         | NA         | NA | RN7SKP26  |
| NA        | ENSG00000222182 | 0          | NA          | NA         | NA         | NA | RNA5SP156 |
| NA        | ENSG00000222185 | 0          | NA          | NA         | NA         | NA |           |
| NA        | ENSG00000222202 | 0          | NA          | NA         | NA         | NA | RNU4-26P  |
| NA        | ENSG00000222205 | 0          | NA          | NA         | NA         | NA | RNA5SP266 |
| NA        | ENSG00000222206 | 0          | NA          | NA         | NA         | NA |           |
| NA        | ENSG00000222207 | 0          | NA          | NA         | NA         | NA | RNA5SP407 |
| NA        | ENSG00000222208 | 0          | NA          | NA         | NA         | NA | RNA5SP129 |
| NA        | ENSG00000222209 | 0          | NA          | NA         | NA         | NA | RNA5SP56  |
| NA        | ENSG00000222210 | 0          | NA          | NA         | NA         | NA | RN7SKP65  |
| NA        | ENSG00000222213 | 0          | NA          | NA         | NA         | NA | RNU6-588P |
| NA        | ENSG00000222220 | 0          | NA          | NA         | NA         | NA | RN7SKP129 |
| NA        | ENSG00000222222 | 0          | NA          | NA         | NA         | NA | RNU2-17P  |
| NA        | ENSG00000222224 | 0          | NA          | NA         | NA         | NA |           |
| NA        | ENSG00000222230 | 0          | NA          | NA         | NA         | NA | RNA5SP158 |
| NA        | ENSG00000222231 | 0          | NA          | NA         | NA         | NA | RNU2-54P  |
| NA        | ENSG00000222232 | 0          | NA          | NA         | NA         | NA | RNA5SP89  |
| NA        | ENSG00000222236 | 0          | NA          | NA         | NA         | NA | RNA5SP163 |
| NA        | ENSG00000222238 | 0          | NA          | NA         | NA         | NA | RNU2-43P  |
| NA        | ENSG00000222240 | 0          | NA          | NA         | NA         | NA | RN7SKP156 |
| NA        | ENSG00000222244 | 0          | NA          | NA         | NA         | NA | RNA5SP431 |
| 100302126 | ENSG00000222246 | 0          | NA          | NA         | NA         | NA | MIR1471   |
| NA        | ENSG00000222248 | 0          | NA          | NA         | NA         | NA | RNA5SP201 |
| NA        | ENSG00000222249 | 0          | NA          | NA         | NA         | NA | RNU6-262P |
| NA        | ENSG00000222251 | 0          | NA          | NA         | NA         | NA | RNA5SP95  |
| NA        | ENSG00000222255 | 0          | NA          | NA         | NA         | NA | RNU6-101P |
| NA        | ENSG00000222257 | 0          | NA          | NA         | NA         | NA | RN7SKP199 |
| NA        | ENSG00000222259 | 0.30139824 | -0.02296476 | 0.38527817 | 0.68536535 | NA | RN7SKP114 |
| NA        | ENSG00000222266 | 0          | NA          | NA         | NA         | NA | RNU6-757P |
| NA        | ENSG00000222267 | 0          | NA          | NA         | NA         | NA | RNU6-892P |
| NA        | ENSG00000222268 | 0          | NA          | NA         | NA         | NA | RNA5SP425 |
| NA        | ENSG00000222276 | 0          | NA          | NA         | NA         | NA | RNU2-33P  |
| NA        | ENSG00000222281 | 0          | NA          | NA         | NA         | NA | RN7SKP111 |
| NA        | ENSG00000222282 | 0          | NA          | NA         | NA         | NA | RNU6-584P |

|           |                 |            |             |            |            |    |            |
|-----------|-----------------|------------|-------------|------------|------------|----|------------|
| NA        | ENSG00000222285 | 0          | NA          | NA         | NA         | NA | RNA5SP193  |
| NA        | ENSG00000222287 | 0          | NA          | NA         | NA         | NA | RNU6-1043P |
| NA        | ENSG00000222293 | 0          | NA          | NA         | NA         | NA | RNU2-36P   |
| NA        | ENSG00000222297 | 0          | NA          | NA         | NA         | NA | RNU6-1156P |
| NA        | ENSG00000222300 | 0          | NA          | NA         | NA         | NA | RNU2-21P   |
| NA        | ENSG00000222302 | 0          | NA          | NA         | NA         | NA | RNA5SP371  |
| NA        | ENSG00000222303 | 0          | NA          | NA         | NA         | NA | RNU6-935P  |
| NA        | ENSG00000222305 | 0          | NA          | NA         | NA         | NA |            |
| NA        | ENSG00000222308 | 0          | NA          | NA         | NA         | NA | RNA5SP198  |
| NA        | ENSG00000222312 | 0          | NA          | NA         | NA         | NA | RNA5SP178  |
| NA        | ENSG00000222313 | 0          | NA          | NA         | NA         | NA | RN7SKP267  |
| NA        | ENSG00000222317 | 0.14931947 | -0.01844332 | 0.38480212 | 0.84537521 | NA | RNA5SP118  |
| NA        | ENSG00000222320 | 0          | NA          | NA         | NA         | NA | RNU6-1050P |
| 100302144 | ENSG00000222321 | 0          | NA          | NA         | NA         | NA | MIR1912    |
| NA        | ENSG00000222327 | 0          | NA          | NA         | NA         | NA | RNU6-855P  |
| NA        | ENSG00000222328 | 0          | NA          | NA         | NA         | NA | RNU2-2P    |
| NA        | ENSG00000222335 | 0          | NA          | NA         | NA         | NA |            |
| NA        | ENSG00000222337 | 0          | NA          | NA         | NA         | NA | RN7SKP225  |
| NA        | ENSG00000222338 | 0          | NA          | NA         | NA         | NA | RNU6-174P  |
| NA        | ENSG00000222343 | 0.173124   | -0.01911262 | 0.38486262 | 0.84537521 | NA | RN7SKP139  |
| NA        | ENSG00000222344 | 0          | NA          | NA         | NA         | NA | RNU6-613P  |
| NA        | ENSG00000222345 | 0          | NA          | NA         | NA         | NA | SNORD19C   |
| NA        | ENSG00000222346 | 0          | NA          | NA         | NA         | NA | RNA5SP237  |
| NA        | ENSG00000222351 | 0          | NA          | NA         | NA         | NA | RNY1P15    |
| NA        | ENSG00000222352 | 0          | NA          | NA         | NA         | NA | RN7SKP221  |
| NA        | ENSG00000222355 | 0          | NA          | NA         | NA         | NA | RNU2-29P   |
| NA        | ENSG00000222356 | 0          | NA          | NA         | NA         | NA | RNU6-710P  |
| NA        | ENSG00000222357 | 0          | NA          | NA         | NA         | NA | RNU2-20P   |
| NA        | ENSG00000222361 | 0          | NA          | NA         | NA         | NA | RNU6-1186P |
| NA        | ENSG00000222363 | 0          | NA          | NA         | NA         | NA | RNU4-34P   |
| NA        | ENSG00000222365 | 0          | NA          | NA         | NA         | NA | SNORD12B   |
| 677818    | ENSG00000222370 | 0          | NA          | NA         | NA         | NA | SNORA36B   |
| NA        | ENSG00000222371 | 0          | NA          | NA         | NA         | NA | RN7SKP202  |
| NA        | ENSG00000222375 | 0          | NA          | NA         | NA         | NA | RN7SKP127  |
| NA        | ENSG00000222376 | 0          | NA          | NA         | NA         | NA | RN7SKP152  |
| NA        | ENSG00000222378 | 0          | NA          | NA         | NA         | NA | RNA5SP44   |
| NA        | ENSG00000222383 | 0          | NA          | NA         | NA         | NA | RNA5SP203  |
| NA        | ENSG00000222385 | 0          | NA          | NA         | NA         | NA | RN7SKP158  |

|    |                 |            |             |            |            |    |            |
|----|-----------------|------------|-------------|------------|------------|----|------------|
| NA | ENSG00000222386 | 0          | NA          | NA         | NA         | NA | RN7SKP86   |
| NA | ENSG00000222389 | 0          | NA          | NA         | NA         | NA | RNU2-28P   |
| NA | ENSG00000222394 | 0          | NA          | NA         | NA         | NA |            |
| NA | ENSG00000222395 | 0          | NA          | NA         | NA         | NA |            |
| NA | ENSG00000222397 | 0          | NA          | NA         | NA         | NA | RN7SKP229  |
| NA | ENSG00000222398 | 0          | NA          | NA         | NA         | NA | RNU6-554P  |
| NA | ENSG00000222404 | 0          | NA          | NA         | NA         | NA | RN7SKP281  |
| NA | ENSG00000222405 | 0          | NA          | NA         | NA         | NA | RNU4-65P   |
| NA | ENSG00000222407 | 0          | NA          | NA         | NA         | NA | RNA5SP80   |
| NA | ENSG00000222412 | 0          | NA          | NA         | NA         | NA |            |
| NA | ENSG00000222413 | 0          | NA          | NA         | NA         | NA | RN7SKP125  |
| NA | ENSG00000222414 | 0          | NA          | NA         | NA         | NA | RNU2-59P   |
| NA | ENSG00000222416 | 0          | NA          | NA         | NA         | NA | RNA5SP274  |
| NA | ENSG00000222418 | 0          | NA          | NA         | NA         | NA | RNA5SP113  |
| NA | ENSG00000222419 | 0          | NA          | NA         | NA         | NA | RNA5SP511  |
| NA | ENSG00000222421 | 0          | NA          | NA         | NA         | NA |            |
| NA | ENSG00000222426 | 0          | NA          | NA         | NA         | NA | RNU2-50P   |
| NA | ENSG00000222427 | 0          | NA          | NA         | NA         | NA | RNA5SP338  |
| NA | ENSG00000222428 | 0          | NA          | NA         | NA         | NA | RNA5SP231  |
| NA | ENSG00000222429 | 0          | NA          | NA         | NA         | NA | RNU6-955P  |
| NA | ENSG00000222430 | 0          | NA          | NA         | NA         | NA |            |
| NA | ENSG00000222431 | 0          | NA          | NA         | NA         | NA | RNU6-141P  |
| NA | ENSG00000222432 | 0          | NA          | NA         | NA         | NA |            |
| NA | ENSG00000222436 | 0          | NA          | NA         | NA         | NA | RN7SKP278  |
| NA | ENSG00000222438 | 0          | NA          | NA         | NA         | NA | RNU6-1077P |
| NA | ENSG00000222439 | 0          | NA          | NA         | NA         | NA | RNU6-994P  |
| NA | ENSG00000222440 | 0          | NA          | NA         | NA         | NA | RNU2-26P   |
| NA | ENSG00000222445 | 0          | NA          | NA         | NA         | NA | RN7SKP56   |
| NA | ENSG00000222448 | 1.06384732 | -0.04580978 | 0.3855422  | 0.38707725 | NA | RN7SKP150  |
| NA | ENSG00000222449 | 0          | NA          | NA         | NA         | NA | RNU6-1140P |
| NA | ENSG00000222451 | 0          | NA          | NA         | NA         | NA | RN7SKP143  |
| NA | ENSG00000222452 | 0          | NA          | NA         | NA         | NA | RN7SKP59   |
| NA | ENSG00000222455 | 0          | NA          | NA         | NA         | NA | RNA5SP296  |
| NA | ENSG00000222457 | 0          | NA          | NA         | NA         | NA | RNU6-121P  |
| NA | ENSG00000222459 | 0          | NA          | NA         | NA         | NA | RNA5SP293  |
| NA | ENSG00000222460 | 0.78537931 | -0.00582577 | 0.38218284 | 0.90072855 | NA | RN7SKP271  |
| NA | ENSG00000222465 | 0.173733   | 0.01914545  | 0.38484597 | 0.78225479 | NA | RNU2-5P    |
| NA | ENSG00000222467 | 0          | NA          | NA         | NA         | NA |            |

|           |                 |            |             |            |            |    |            |
|-----------|-----------------|------------|-------------|------------|------------|----|------------|
| NA        | ENSG00000222468 | 0          | NA          | NA         | NA         | NA | RNA5SP261  |
| NA        | ENSG00000222472 | 0          | NA          | NA         | NA         | NA | RN7SKP7    |
| NA        | ENSG00000222477 | 0          | NA          | NA         | NA         | NA | RNU2-23P   |
| NA        | ENSG00000222486 | 0          | NA          | NA         | NA         | NA | RNU6-77P   |
| NA        | ENSG00000222488 | 0          | NA          | NA         | NA         | NA | RNU6-285P  |
| 109616976 | ENSG00000222489 | 0          | NA          | NA         | NA         | NA | SNORA79B   |
| NA        | ENSG00000222490 | 0          | NA          | NA         | NA         | NA | RNU6-712P  |
| NA        | ENSG00000222496 | 0          | NA          | NA         | NA         | NA | RN7SKP200  |
| NA        | ENSG00000222499 | 0          | NA          | NA         | NA         | NA | RN7SKP177  |
| NA        | ENSG00000222500 | 0          | NA          | NA         | NA         | NA | RNA5SP475  |
| NA        | ENSG00000222501 | 0          | NA          | NA         | NA         | NA | RNU4-25P   |
| NA        | ENSG00000222503 | 0          | NA          | NA         | NA         | NA |            |
| NA        | ENSG00000222506 | 0          | NA          | NA         | NA         | NA |            |
| NA        | ENSG00000222509 | 0          | NA          | NA         | NA         | NA |            |
| NA        | ENSG00000222511 | 0          | NA          | NA         | NA         | NA |            |
| NA        | ENSG00000222514 | 0          | NA          | NA         | NA         | NA | RN7SKP223  |
| NA        | ENSG00000222515 | 0.95724298 | -0.01721412 | 0.38161959 | 0.75195952 | NA | RN7SKP240  |
| NA        | ENSG00000222520 | 0          | NA          | NA         | NA         | NA | RNA5SP451  |
| NA        | ENSG00000222522 | 0          | NA          | NA         | NA         | NA | RNU6-519P  |
| NA        | ENSG00000222524 | 0          | NA          | NA         | NA         | NA | RN7SKP109  |
| NA        | ENSG00000222529 | 0          | NA          | NA         | NA         | NA |            |
| 100302115 | ENSG00000222532 | 0          | NA          | NA         | NA         | NA | MIR1468    |
| NA        | ENSG00000222533 | 0          | NA          | NA         | NA         | NA | RNU6-705P  |
| NA        | ENSG00000222536 | 0          | NA          | NA         | NA         | NA | RNU2-39P   |
| NA        | ENSG00000222543 | 0          | NA          | NA         | NA         | NA | RN7SKP220  |
| NA        | ENSG00000222544 | 0          | NA          | NA         | NA         | NA | RNU6-735P  |
| NA        | ENSG00000222546 | 0          | NA          | NA         | NA         | NA | RNA5SP251  |
| NA        | ENSG00000222552 | 0          | NA          | NA         | NA         | NA | RNA5SP60   |
| NA        | ENSG00000222558 | 0          | NA          | NA         | NA         | NA | RNU6-1064P |
| NA        | ENSG00000222560 | 0          | NA          | NA         | NA         | NA | RNU4-43P   |
| NA        | ENSG00000222561 | 0          | NA          | NA         | NA         | NA | RNU6-1025P |
| NA        | ENSG00000222574 | 0          | NA          | NA         | NA         | NA | RN7SKP61   |
| NA        | ENSG00000222578 | 0          | NA          | NA         | NA         | NA | RNA5SP345  |
| NA        | ENSG00000222579 | 0          | NA          | NA         | NA         | NA |            |
| NA        | ENSG00000222581 | 0          | NA          | NA         | NA         | NA | RNU2-47P   |
| NA        | ENSG00000222582 | 0          | NA          | NA         | NA         | NA | RNU2-66P   |
| NA        | ENSG00000222583 | 0          | NA          | NA         | NA         | NA | RN7SKP222  |
| NA        | ENSG00000222585 | 0          | NA          | NA         | NA         | NA | RNA5SP494  |

|    |                 |   |    |    |    |    |            |
|----|-----------------|---|----|----|----|----|------------|
| NA | ENSG00000222588 | 0 | NA | NA | NA | NA |            |
| NA | ENSG00000222589 | 0 | NA | NA | NA | NA | RN7SKP159  |
| NA | ENSG00000222592 | 0 | NA | NA | NA | NA | RNU6-887P  |
| NA | ENSG00000222594 | 0 | NA | NA | NA | NA | RN7SKP235  |
| NA | ENSG00000222598 | 0 | NA | NA | NA | NA | RNU2-49P   |
| NA | ENSG00000222601 | 0 | NA | NA | NA | NA |            |
| NA | ENSG00000222604 | 0 | NA | NA | NA | NA |            |
| NA | ENSG00000222607 | 0 | NA | NA | NA | NA | RNU6-628P  |
| NA | ENSG00000222608 | 0 | NA | NA | NA | NA | RNA5SP504  |
| NA | ENSG00000222609 | 0 | NA | NA | NA | NA | RNU4-69P   |
| NA | ENSG00000222610 | 0 | NA | NA | NA | NA | RNU6-402P  |
| NA | ENSG00000222612 | 0 | NA | NA | NA | NA | RNU2-52P   |
| NA | ENSG00000222613 | 0 | NA | NA | NA | NA |            |
| NA | ENSG00000222614 | 0 | NA | NA | NA | NA |            |
| NA | ENSG00000222616 | 0 | NA | NA | NA | NA | RN7SKP27   |
| NA | ENSG00000222617 | 0 | NA | NA | NA | NA | RN7SKP254  |
| NA | ENSG00000222623 | 0 | NA | NA | NA | NA | RNU6-1100P |
| NA | ENSG00000222624 | 0 | NA | NA | NA | NA | RNU2-15P   |
| NA | ENSG00000222626 | 0 | NA | NA | NA | NA | RNU2-48P   |
| NA | ENSG00000222627 | 0 | NA | NA | NA | NA | RNU2-37P   |
| NA | ENSG00000222629 | 0 | NA | NA | NA | NA | RNU2-42P   |
| NA | ENSG00000222630 | 0 | NA | NA | NA | NA | RN7SKP131  |
| NA | ENSG00000222635 | 0 | NA | NA | NA | NA | RNU6-1203P |
| NA | ENSG00000222636 | 0 | NA | NA | NA | NA | RN7SKP54   |
| NA | ENSG00000222640 | 0 | NA | NA | NA | NA | RNU2-51P   |
| NA | ENSG00000222644 | 0 | NA | NA | NA | NA | RNU2-16P   |
| NA | ENSG00000222649 | 0 | NA | NA | NA | NA |            |
| NA | ENSG00000222650 | 0 | NA | NA | NA | NA | RNU2-70P   |
| NA | ENSG00000222652 | 0 | NA | NA | NA | NA | RNU6-248P  |
| NA | ENSG00000222658 | 0 | NA | NA | NA | NA |            |
| NA | ENSG00000222659 | 0 | NA | NA | NA | NA | RNU2-8P    |
| NA | ENSG00000222663 | 0 | NA | NA | NA | NA | RNU4-55P   |
| NA | ENSG00000222664 | 0 | NA | NA | NA | NA | RN7SKP123  |
| NA | ENSG00000222666 | 0 | NA | NA | NA | NA |            |
| NA | ENSG00000222667 | 0 | NA | NA | NA | NA | RNU6-394P  |
| NA | ENSG00000222675 | 0 | NA | NA | NA | NA | RNA5SP146  |
| NA | ENSG00000222678 | 0 | NA | NA | NA | NA | RN7SKP213  |
| NA | ENSG00000222679 | 0 | NA | NA | NA | NA | RNU6-1267P |



|           |                 |            |             |            |            |    |            |
|-----------|-----------------|------------|-------------|------------|------------|----|------------|
| NA        | ENSG00000222682 | 0          | NA          | NA         | NA         | NA | RNA5SP38   |
| NA        | ENSG00000222685 | 0.32402662 | -0.02327462 | 0.38532159 | 0.66849196 | NA | RN7SKP119  |
| NA        | ENSG00000222686 | 0          | NA          | NA         | NA         | NA | RNU4-72P   |
| NA        | ENSG00000222691 | 0          | NA          | NA         | NA         | NA | RNU6-733P  |
| NA        | ENSG00000222693 | 0          | NA          | NA         | NA         | NA | RN7SKP120  |
| NA        | ENSG00000222698 | 0          | NA          | NA         | NA         | NA |            |
| NA        | ENSG00000222701 | 0          | NA          | NA         | NA         | NA |            |
| NA        | ENSG00000222704 | 0          | NA          | NA         | NA         | NA | RN7SKP182  |
| NA        | ENSG00000222705 | 0          | NA          | NA         | NA         | NA | RN7SKP39   |
| NA        | ENSG00000222706 | 0          | NA          | NA         | NA         | NA | RN7SKP89   |
| NA        | ENSG00000222713 | 0          | NA          | NA         | NA         | NA | RN7SKP51   |
| NA        | ENSG00000222714 | 0          | NA          | NA         | NA         | NA | RN7SKP38   |
| 100302222 | ENSG00000222715 | 0          | NA          | NA         | NA         | NA | MIR1911    |
| NA        | ENSG00000222721 | 0          | NA          | NA         | NA         | NA | RN7SKP188  |
| NA        | ENSG00000222724 | 0          | NA          | NA         | NA         | NA | RNU2-63P   |
| NA        | ENSG00000222726 | 0.14931947 | -0.01844332 | 0.38480212 | 0.84537521 | NA | RNU2-7P    |
| NA        | ENSG00000222727 | 0          | NA          | NA         | NA         | NA | RNU4-64P   |
| NA        | ENSG00000222733 | 0          | NA          | NA         | NA         | NA | RNY4P29    |
| NA        | ENSG00000222736 | 0          | NA          | NA         | NA         | NA | RNU4-6P    |
| NA        | ENSG00000222740 | 0          | NA          | NA         | NA         | NA | RNA5SP328  |
| NA        | ENSG00000222741 | 0          | NA          | NA         | NA         | NA | RNA5SP229  |
| NA        | ENSG00000222743 | 0          | NA          | NA         | NA         | NA | RNU6-1190P |
| NA        | ENSG00000222744 | 0          | NA          | NA         | NA         | NA | RN7SKP166  |
| NA        | ENSG00000222747 | 0          | NA          | NA         | NA         | NA | RNA5SP25   |
| NA        | ENSG00000222750 | 0          | NA          | NA         | NA         | NA | RNU4-46P   |
| NA        | ENSG00000222755 | 0          | NA          | NA         | NA         | NA | RN7SKP206  |
| NA        | ENSG00000222760 | 0          | NA          | NA         | NA         | NA | RNU4-53P   |
| NA        | ENSG00000222761 | 0          | NA          | NA         | NA         | NA | RNU6-684P  |
| NA        | ENSG00000222764 | 0          | NA          | NA         | NA         | NA | RN7SKP106  |
| NA        | ENSG00000222765 | 0          | NA          | NA         | NA         | NA | RNU2-40P   |
| NA        | ENSG00000222767 | 0          | NA          | NA         | NA         | NA |            |
| NA        | ENSG00000222774 | 0          | NA          | NA         | NA         | NA | RN7SKP121  |
| NA        | ENSG00000222777 | 0          | NA          | NA         | NA         | NA | RNU6-233P  |
| NA        | ENSG00000222778 | 0          | NA          | NA         | NA         | NA | RNA5SP144  |
| NA        | ENSG00000222783 | 0          | NA          | NA         | NA         | NA | RN7SKP212  |
| NA        | ENSG00000222784 | 0          | NA          | NA         | NA         | NA | RN7SKP91   |
| NA        | ENSG00000222788 | 0          | NA          | NA         | NA         | NA | RNU2-38P   |
| NA        | ENSG00000222790 | 0          | NA          | NA         | NA         | NA | RNU4-14P   |

|           |                 |            |            |            |            |    |            |
|-----------|-----------------|------------|------------|------------|------------|----|------------|
| NA        | ENSG00000222791 | 0          | NA         | NA         | NA         | NA | RNU6-67P   |
| NA        | ENSG00000222795 | 0          | NA         | NA         | NA         | NA | RNU4-83P   |
| NA        | ENSG00000222796 | 0          | NA         | NA         | NA         | NA | RNU6-383P  |
| NA        | ENSG00000222800 | 0.69493202 | 0.03154416 | 0.38626309 | 0.41391645 | NA | RNU2-62P   |
| NA        | ENSG00000222806 | 0          | NA         | NA         | NA         | NA | RNA5SP225  |
| NA        | ENSG00000222808 | 0          | NA         | NA         | NA         | NA | RNU4-47P   |
| NA        | ENSG00000222810 | 0.16735865 | 0.01897177 | 0.38482933 | 0.78225479 | NA | RNU2-68P   |
| NA        | ENSG00000222821 | 0          | NA         | NA         | NA         | NA | RNU4-27P   |
| NA        | ENSG00000222826 | 0          | NA         | NA         | NA         | NA | RN7SKP286  |
| 100302139 | ENSG00000222831 | 0          | NA         | NA         | NA         | NA | MIR1537    |
| NA        | ENSG00000222832 | 0          | NA         | NA         | NA         | NA | RNA5SP120  |
| NA        | ENSG00000222838 | 0          | NA         | NA         | NA         | NA | RNA5SP136  |
| NA        | ENSG00000222842 | 0          | NA         | NA         | NA         | NA | RN7SKP168  |
| NA        | ENSG00000222844 | 0          | NA         | NA         | NA         | NA | RNU6-321P  |
| NA        | ENSG00000222845 | 0          | NA         | NA         | NA         | NA | RN7SKP42   |
| NA        | ENSG00000222849 | 0          | NA         | NA         | NA         | NA | RNA5SP21   |
| NA        | ENSG00000222852 | 0          | NA         | NA         | NA         | NA |            |
| NA        | ENSG00000222858 | 0          | NA         | NA         | NA         | NA | RNU6-920P  |
| NA        | ENSG00000222859 | 0          | NA         | NA         | NA         | NA | RN7SKP136  |
| NA        | ENSG00000222862 | 0          | NA         | NA         | NA         | NA | RNU6-1086P |
| NA        | ENSG00000222869 | 0          | NA         | NA         | NA         | NA | RNU6-565P  |
| NA        | ENSG00000222870 | 0          | NA         | NA         | NA         | NA | RNU6-1328P |
| NA        | ENSG00000222872 | 0          | NA         | NA         | NA         | NA | RNU4-78P   |
| NA        | ENSG00000222874 | 0          | NA         | NA         | NA         | NA | RN7SKP33   |
| NA        | ENSG00000222880 | 0          | NA         | NA         | NA         | NA | RN7SKP261  |
| NA        | ENSG00000222881 | 0          | NA         | NA         | NA         | NA |            |
| NA        | ENSG00000222883 | 0          | NA         | NA         | NA         | NA |            |
| NA        | ENSG00000222889 | 0          | NA         | NA         | NA         | NA | RN7SKP29   |
| NA        | ENSG00000222890 | 0          | NA         | NA         | NA         | NA | RNU6-1068P |
| NA        | ENSG00000222895 | 0          | NA         | NA         | NA         | NA | RNU6-1133P |
| NA        | ENSG00000222898 | 0.3632361  | 0.00164107 | 0.38337041 | 0.96032434 | NA | RN7SKP97   |
| NA        | ENSG00000222909 | 0          | NA         | NA         | NA         | NA | RNU6-193P  |
| NA        | ENSG00000222915 | 0          | NA         | NA         | NA         | NA | RNU6-564P  |
| NA        | ENSG00000222920 | 0          | NA         | NA         | NA         | NA | RNA5SP29   |
| NA        | ENSG00000222921 | 0          | NA         | NA         | NA         | NA | RNA5SP104  |
| NA        | ENSG00000222922 | 0          | NA         | NA         | NA         | NA | RNA5SP501  |
| NA        | ENSG00000222923 | 0          | NA         | NA         | NA         | NA | RNU2-41P   |
| NA        | ENSG00000222924 | 0          | NA         | NA         | NA         | NA | RNU6-1148P |

|           |                 |            |             |            |            |    |            |
|-----------|-----------------|------------|-------------|------------|------------|----|------------|
| NA        | ENSG00000222931 | 0          | NA          | NA         | NA         | NA | RN7SKP205  |
| NA        | ENSG00000222932 | 0          | NA          | NA         | NA         | NA | RNU6-172P  |
| NA        | ENSG00000222934 | 0          | NA          | NA         | NA         | NA | RN7SKP284  |
| NA        | ENSG00000222937 | 0          | NA          | NA         | NA         | NA | SNORD63B   |
| NA        | ENSG00000222940 | 0          | NA          | NA         | NA         | NA | RNU6-370P  |
| NA        | ENSG00000222941 | 0          | NA          | NA         | NA         | NA |            |
| NA        | ENSG00000222942 | 0          | NA          | NA         | NA         | NA | RN7SKP58   |
| NA        | ENSG00000222950 | 0          | NA          | NA         | NA         | NA | RN7SKP262  |
| NA        | ENSG00000222952 | 0          | NA          | NA         | NA         | NA | RNA5SP41   |
| NA        | ENSG00000222955 | 0          | NA          | NA         | NA         | NA | RNA5SP265  |
| 100302141 | ENSG00000222958 | 0          | NA          | NA         | NA         | NA | MIR1913    |
| NA        | ENSG00000222960 | 0          | NA          | NA         | NA         | NA | RNU6-272P  |
| NA        | ENSG00000222966 | 0          | NA          | NA         | NA         | NA |            |
| NA        | ENSG00000222969 | 0          | NA          | NA         | NA         | NA | RN7SKP8    |
| NA        | ENSG00000222971 | 0          | NA          | NA         | NA         | NA | RNA5SP222  |
| NA        | ENSG00000222972 | 0          | NA          | NA         | NA         | NA | RNU6-651P  |
| NA        | ENSG00000222973 | 0          | NA          | NA         | NA         | NA | RNU2-25P   |
| NA        | ENSG00000222974 | 0          | NA          | NA         | NA         | NA | RN7SKP228  |
| NA        | ENSG00000222976 | 0          | NA          | NA         | NA         | NA | RN7SKP94   |
| NA        | ENSG00000222979 | 0          | NA          | NA         | NA         | NA | RN7SKP167  |
| NA        | ENSG00000222982 | 0          | NA          | NA         | NA         | NA | RN7SKP216  |
| NA        | ENSG00000222983 | 0          | NA          | NA         | NA         | NA | RNA5SP127  |
| NA        | ENSG00000222985 | 0          | NA          | NA         | NA         | NA | RNU2-14P   |
| NA        | ENSG00000222986 | 0          | NA          | NA         | NA         | NA | RNU5A-5P   |
| NA        | ENSG00000222987 | 0          | NA          | NA         | NA         | NA | RN7SKP68   |
| NA        | ENSG00000222990 | 0          | NA          | NA         | NA         | NA | RNU4-22P   |
| NA        | ENSG00000222997 | 0          | NA          | NA         | NA         | NA |            |
| NA        | ENSG00000222998 | 0.66802237 | -0.02113486 | 0.38309791 | 0.65745094 | NA | RN7SKP259  |
| NA        | ENSG00000223001 | 0          | NA          | NA         | NA         | NA | RNU2-61P   |
| NA        | ENSG00000223003 | 0          | NA          | NA         | NA         | NA | RNA5SP184  |
| NA        | ENSG00000223004 | 0          | NA          | NA         | NA         | NA |            |
| NA        | ENSG00000223006 | 0          | NA          | NA         | NA         | NA | RN7SKP137  |
| NA        | ENSG00000223007 | 0          | NA          | NA         | NA         | NA | RN7SKP73   |
| NA        | ENSG00000223012 | 0          | NA          | NA         | NA         | NA | RN7SKP264  |
| NA        | ENSG00000223013 | 0          | NA          | NA         | NA         | NA | RNA5SP344  |
| NA        | ENSG00000223015 | 0          | NA          | NA         | NA         | NA | RNU6-1135P |
| NA        | ENSG00000223019 | 0          | NA          | NA         | NA         | NA | RNA5SP306  |
| NA        | ENSG00000223023 | 0          | NA          | NA         | NA         | NA |            |

|           |                 |            |             |            |            |    |            |
|-----------|-----------------|------------|-------------|------------|------------|----|------------|
| NA        | ENSG00000223024 | 0          | NA          | NA         | NA         | NA | RNU6-55P   |
| NA        | ENSG00000223026 | 0          | NA          | NA         | NA         | NA | RN7SKP247  |
| NA        | ENSG00000223027 | 0          | NA          | NA         | NA         | NA |            |
| NA        | ENSG00000223037 | 0          | NA          | NA         | NA         | NA | RNU6-284P  |
| NA        | ENSG00000223039 | 0.15069912 | -0.01848503 | 0.38480575 | 0.84537521 | NA | RN7SKP268  |
| NA        | ENSG00000223040 | 0          | NA          | NA         | NA         | NA | RN7SKP144  |
| NA        | ENSG00000223042 | 0          | NA          | NA         | NA         | NA | RN7SKP161  |
| NA        | ENSG00000223044 | 0          | NA          | NA         | NA         | NA | RNU6-130P  |
| NA        | ENSG00000223046 | 0          | NA          | NA         | NA         | NA | RNA5SP369  |
| NA        | ENSG00000223047 | 0          | NA          | NA         | NA         | NA | RNU6-847P  |
| NA        | ENSG00000223056 | 0          | NA          | NA         | NA         | NA | RN7SKP169  |
| NA        | ENSG00000223060 | 0          | NA          | NA         | NA         | NA |            |
| NA        | ENSG00000223062 | 0          | NA          | NA         | NA         | NA | RNU6-1245P |
| NA        | ENSG00000223064 | 0          | NA          | NA         | NA         | NA | RNU6-325P  |
| NA        | ENSG00000223075 | 0          | NA          | NA         | NA         | NA | RN7SKP126  |
| NA        | ENSG00000223076 | 0          | NA          | NA         | NA         | NA | RNA5SP31   |
| NA        | ENSG00000223078 | 0          | NA          | NA         | NA         | NA | RNU2-55P   |
| NA        | ENSG00000223080 | 0          | NA          | NA         | NA         | NA |            |
| NA        | ENSG00000223086 | 0          | NA          | NA         | NA         | NA | RNA5SP155  |
| NA        | ENSG00000223087 | 0          | NA          | NA         | NA         | NA | RNU6-602P  |
| NA        | ENSG00000223088 | 0          | NA          | NA         | NA         | NA | RMRPP5     |
| NA        | ENSG00000223092 | 0          | NA          | NA         | NA         | NA | RNA5SP115  |
| NA        | ENSG00000223096 | 0          | NA          | NA         | NA         | NA | RNU5E-9P   |
| NA        | ENSG00000223107 | 0          | NA          | NA         | NA         | NA | RNU2-72P   |
| 100302119 | ENSG00000223109 | 0          | NA          | NA         | NA         | NA | MIR1538    |
| NA        | ENSG00000223113 | 0          | NA          | NA         | NA         | NA | RNA5SP247  |
| NA        | ENSG00000223117 | 0          | NA          | NA         | NA         | NA | RN7SKP296  |
| NA        | ENSG00000223118 | 0          | NA          | NA         | NA         | NA | RN7SKP102  |
| NA        | ENSG00000223120 | 0          | NA          | NA         | NA         | NA | RN7SKP181  |
| NA        | ENSG00000223125 | 0          | NA          | NA         | NA         | NA | RNU2-32P   |
| NA        | ENSG00000223126 | 0          | NA          | NA         | NA         | NA | RN7SKP263  |
| NA        | ENSG00000223128 | 0          | NA          | NA         | NA         | NA | RN7SKP140  |
| NA        | ENSG00000223131 | 0          | NA          | NA         | NA         | NA | RNA5SP304  |
| NA        | ENSG00000223136 | 0          | NA          | NA         | NA         | NA | RN7SKP207  |
| NA        | ENSG00000223138 | 0          | NA          | NA         | NA         | NA | RNA5SP450  |
| NA        | ENSG00000223142 | 0          | NA          | NA         | NA         | NA | RN7SKP252  |
| NA        | ENSG00000223145 | 0.46642426 | -0.00765639 | 0.38326013 | 0.86631803 | NA | RN7SKP112  |
| NA        | ENSG00000223152 | 0          | NA          | NA         | NA         | NA | RNU4-88P   |

|        |                 |            |             |            |            |    |            |
|--------|-----------------|------------|-------------|------------|------------|----|------------|
| NA     | ENSG00000223156 | 0          | NA          | NA         | NA         | NA | RNU2-18P   |
| NA     | ENSG00000223158 | 0          | NA          | NA         | NA         | NA | RNY1P3     |
| NA     | ENSG00000223162 | 0          | NA          | NA         | NA         | NA | RNA5SP280  |
| NA     | ENSG00000223168 | 0          | NA          | NA         | NA         | NA | RN7SKP142  |
| NA     | ENSG00000223169 | 0          | NA          | NA         | NA         | NA | RNA5SP209  |
| NA     | ENSG00000223174 | 0          | NA          | NA         | NA         | NA | RN7SKP17   |
| NA     | ENSG00000223175 | 0          | NA          | NA         | NA         | NA | RNU4-61P   |
| NA     | ENSG00000223177 | 0          | NA          | NA         | NA         | NA | RNA5SP39   |
| NA     | ENSG00000223179 | 0          | NA          | NA         | NA         | NA | RNU6-373P  |
| NA     | ENSG00000223181 | 0          | NA          | NA         | NA         | NA | RNU6-1199P |
| NA     | ENSG00000223188 | 0          | NA          | NA         | NA         | NA |            |
| NA     | ENSG00000223189 | 0          | NA          | NA         | NA         | NA | RNU6-177P  |
| NA     | ENSG00000223190 | 0          | NA          | NA         | NA         | NA | RN7SKP100  |
| NA     | ENSG00000223191 | 0          | NA          | NA         | NA         | NA | RNU6-293P  |
| NA     | ENSG00000223197 | 0          | NA          | NA         | NA         | NA | RNU6-1001P |
| NA     | ENSG00000223198 | 0.48892093 | -0.00888829 | 0.38278429 | 0.83951731 | NA | RNU2-22P   |
| NA     | ENSG00000223202 | 0          | NA          | NA         | NA         | NA | RN7SKP297  |
| NA     | ENSG00000223203 | 0          | NA          | NA         | NA         | NA | RNA5SP221  |
| NA     | ENSG00000223212 | 0          | NA          | NA         | NA         | NA | RNU4-74P   |
| NA     | ENSG00000223215 | 0          | NA          | NA         | NA         | NA | RNU6-607P  |
| NA     | ENSG00000223217 | 0          | NA          | NA         | NA         | NA | RNU6-938P  |
| NA     | ENSG00000223220 | 0          | NA          | NA         | NA         | NA |            |
| NA     | ENSG00000223223 | 0          | NA          | NA         | NA         | NA | RN7SKP192  |
| 692111 | ENSG00000223224 | 0          | NA          | NA         | NA         | NA | SNORD71    |
| NA     | ENSG00000223225 | 0          | NA          | NA         | NA         | NA | RNU6-1054P |
| NA     | ENSG00000223229 | 0          | NA          | NA         | NA         | NA | RN7SKP270  |
| NA     | ENSG00000223238 | 0          | NA          | NA         | NA         | NA | RNA5SP294  |
| NA     | ENSG00000223245 | 0          | NA          | NA         | NA         | NA | RNU4-63P   |
| NA     | ENSG00000223247 | 0          | NA          | NA         | NA         | NA | RNU2-64P   |
| NA     | ENSG00000223254 | 0          | NA          | NA         | NA         | NA |            |
| NA     | ENSG00000223258 | 0          | NA          | NA         | NA         | NA | RNU6-575P  |
| NA     | ENSG00000223259 | 0          | NA          | NA         | NA         | NA | RNA5SP508  |
| NA     | ENSG00000223260 | 0          | NA          | NA         | NA         | NA | RN7SKP194  |
| NA     | ENSG00000223262 | 0          | NA          | NA         | NA         | NA | RNA5SP492  |
| NA     | ENSG00000223263 | 0          | NA          | NA         | NA         | NA | RNU6-387P  |
| NA     | ENSG00000223265 | 0          | NA          | NA         | NA         | NA | RNU6-592P  |
| NA     | ENSG00000223269 | 0          | NA          | NA         | NA         | NA | RN7SKP53   |
| NA     | ENSG00000223271 | 0          | NA          | NA         | NA         | NA |            |

|           |                 |            |             |            |            |            |             |
|-----------|-----------------|------------|-------------|------------|------------|------------|-------------|
| NA        | ENSG00000223273 | 0          | NA          | NA         | NA         | NA         | RN7SKP172   |
| NA        | ENSG00000223274 | 0          | NA          | NA         | NA         | NA         | RNA5SP498   |
| NA        | ENSG00000223280 | 0          | NA          | NA         | NA         | NA         | RNU6-57P    |
| NA        | ENSG00000223281 | 0          | NA          | NA         | NA         | NA         | RN7SKP85    |
| NA        | ENSG00000223282 | 0          | NA          | NA         | NA         | NA         | RN7SKP165   |
| NA        | ENSG00000223284 | 0          | NA          | NA         | NA         | NA         | RNU6-195P   |
| NA        | ENSG00000223287 | 0          | NA          | NA         | NA         | NA         | RNU6-954P   |
| NA        | ENSG00000223290 | 0          | NA          | NA         | NA         | NA         | RNA5SP107   |
| NA        | ENSG00000223293 | 0          | NA          | NA         | NA         | NA         | RNA5SP270   |
| NA        | ENSG00000223294 | 0          | NA          | NA         | NA         | NA         |             |
| NA        | ENSG00000223298 | 0          | NA          | NA         | NA         | NA         | RNY3P8      |
| NA        | ENSG00000223299 | 0          | NA          | NA         | NA         | NA         | RN7SKP108   |
| NA        | ENSG00000223300 | 0          | NA          | NA         | NA         | NA         |             |
| NA        | ENSG00000223302 | 0          | NA          | NA         | NA         | NA         |             |
| NA        | ENSG00000223305 | 0.84651169 | 0.03464869  | 0.3842593  | 0.46799444 | NA         | RN7SKP30    |
| NA        | ENSG00000223306 | 0          | NA          | NA         | NA         | NA         | RNU6-1304P  |
| NA        | ENSG00000223308 | 0          | NA          | NA         | NA         | NA         | RN7SKP101   |
| NA        | ENSG00000223309 | 0          | NA          | NA         | NA         | NA         | RNU6-722P   |
| NA        | ENSG00000223313 | 0          | NA          | NA         | NA         | NA         | RNU6-516P   |
| NA        | ENSG00000223315 | 0          | NA          | NA         | NA         | NA         | RN7SKP279   |
| NA        | ENSG00000223318 | 0          | NA          | NA         | NA         | NA         | RNA5SP111   |
| NA        | ENSG00000223321 | 0          | NA          | NA         | NA         | NA         | RN7SKP293   |
| NA        | ENSG00000223324 | 0          | NA          | NA         | NA         | NA         | RN7SKP273   |
| NA        | ENSG00000223327 | 0          | NA          | NA         | NA         | NA         | RNU2-71P    |
| NA        | ENSG00000223330 | 0          | NA          | NA         | NA         | NA         | RNU6-1052P  |
| NA        | ENSG00000223335 | 0          | NA          | NA         | NA         | NA         | RNU6-603P   |
| NA        | ENSG00000223336 | 0          | NA          | NA         | NA         | NA         | RNU2-6P     |
| NA        | ENSG00000223341 | 0          | NA          | NA         | NA         | NA         | RN7SKP3     |
| NA        | ENSG00000223342 | 0          | NA          | NA         | NA         | NA         |             |
| NA        | ENSG00000223343 | 0.16735865 | 0.01897177  | 0.38482933 | 0.78225479 | NA         |             |
| NA        | ENSG00000223344 | 0          | NA          | NA         | NA         | NA         |             |
| NA        | ENSG00000223345 | 27.6405536 | -0.06703144 | 0.29443788 | 0.72566861 | 0.8687181  | H2BP1       |
| NA        | ENSG00000223349 | 0          | NA          | NA         | NA         | NA         | KLF2P3      |
| NA        | ENSG00000223350 | 0          | NA          | NA         | NA         | NA         | IGLV9-49    |
| 100874221 | ENSG00000223351 | 0          | NA          | NA         | NA         | NA         | ZNF385D-AS2 |
| NA        | ENSG00000223353 | 0          | NA          | NA         | NA         | NA         |             |
| NA        | ENSG00000223356 | 7.96595784 | 0.00900339  | 0.34969749 | 0.95206601 | 0.98012607 |             |
| 339926    | ENSG00000223358 | 0          | NA          | NA         | NA         | NA         | EHHADH-AS1  |

|           |                 |            |             |            |            |            |             |
|-----------|-----------------|------------|-------------|------------|------------|------------|-------------|
| NA        | ENSG00000223360 | 0          | NA          | NA         | NA         | NA         |             |
| NA        | ENSG00000223361 | 0.90918509 | -0.03391386 | 0.3851015  | 0.47160422 | NA         | FTH1P10     |
| NA        | ENSG00000223362 | 0          | NA          | NA         | NA         | NA         | CDY15P      |
| NA        | ENSG00000223368 | 0          | NA          | NA         | NA         | NA         |             |
| NA        | ENSG00000223373 | 0          | NA          | NA         | NA         | NA         |             |
| NA        | ENSG00000223374 | 11.2723755 | 0.03238206  | 0.33853507 | 0.84475771 | 0.92965052 |             |
| NA        | ENSG00000223375 | 0          | NA          | NA         | NA         | NA         |             |
| NA        | ENSG00000223377 | 0          | NA          | NA         | NA         | NA         |             |
| NA        | ENSG00000223379 | 0.5972779  | -0.02732172 | 0.38586499 | 0.50076333 | NA         |             |
| NA        | ENSG00000223381 | 0          | NA          | NA         | NA         | NA         | LINC02661   |
| NA        | ENSG00000223382 | 0.15069912 | -0.01848503 | 0.38480575 | 0.84537521 | NA         | LINC01778   |
| NA        | ENSG00000223383 | 0          | NA          | NA         | NA         | NA         | H2ACP1      |
| 105374219 | ENSG00000223387 | 0.30139824 | -0.02296476 | 0.38527817 | 0.68536535 | NA         | LINC02068   |
| NA        | ENSG00000223389 | 0.3568361  | 0.02381818  | 0.38538123 | 0.61393876 | NA         | SDCBP2P1    |
| NA        | ENSG00000223390 | 0.34746601 | 0.02370763  | 0.3853651  | 0.61987128 | NA         |             |
| NA        | ENSG00000223391 | 0          | NA          | NA         | NA         | NA         | RDXP2       |
| 100874194 | ENSG00000223392 | 0          | NA          | NA         | NA         | NA         | CLDN10-AS1  |
| NA        | ENSG00000223393 | 11.3865264 | 0.30652604  | 0.45551237 | 0.12996276 | 0.3016864  |             |
| NA        | ENSG00000223394 | 1.31590251 | -0.05699797 | 0.38733107 | 0.29357696 | NA         | TRBV29OR9-2 |
| NA        | ENSG00000223395 | 0          | NA          | NA         | NA         | NA         | RBM22P7     |
| NA        | ENSG00000223396 | 6.97288504 | 0.09515153  | 0.38023574 | 0.41918997 | 0.64500768 | RPS10P7     |
| NA        | ENSG00000223398 | 0          | NA          | NA         | NA         | NA         |             |
| NA        | ENSG00000223400 | 0          | NA          | NA         | NA         | NA         |             |
| NA        | ENSG00000223402 | 0          | NA          | NA         | NA         | NA         |             |
| 100507257 | ENSG00000223403 | 23.951595  | 0.30432621  | 0.39504594 | 0.16198151 | 0.35042673 | MEG9        |
| NA        | ENSG00000223404 | 0          | NA          | NA         | NA         | NA         | LINC00397   |
| NA        | ENSG00000223407 | 0          | NA          | NA         | NA         | NA         | USP9YP18    |
| NA        | ENSG00000223409 | 0          | NA          | NA         | NA         | NA         | RPL17P17    |
| NA        | ENSG00000223410 | 0          | NA          | NA         | NA         | NA         |             |
| NA        | ENSG00000223416 | 0.173733   | 0.01914545  | 0.38484597 | 0.78225479 | NA         | RPS26P15    |
| 399939    | ENSG00000223417 | 0          | NA          | NA         | NA         | NA         | TRIM49D1    |
| NA        | ENSG00000223418 | 0          | NA          | NA         | NA         | NA         | LIMK2P1     |
| NA        | ENSG00000223419 | 0          | NA          | NA         | NA         | NA         |             |
| NA        | ENSG00000223421 | 0          | NA          | NA         | NA         | NA         |             |
| NA        | ENSG00000223422 | 0          | NA          | NA         | NA         | NA         |             |
| NA        | ENSG00000223427 | 0.18922458 | 0.01954053  | 0.38488496 | 0.78225479 | NA         | RBM7P1      |
| NA        | ENSG00000223428 | 0          | NA          | NA         | NA         | NA         |             |
| NA        | ENSG00000223429 | 0          | NA          | NA         | NA         | NA         |             |

|           |                 |            |             |            |            |            |            |
|-----------|-----------------|------------|-------------|------------|------------|------------|------------|
| NA        | ENSG00000223430 | 0          | NA          | NA         | NA         | NA         |            |
| NA        | ENSG00000223431 | 0.37844916 | 0.02407552  | 0.3854191  | 0.60038877 | NA         | MTND6P21   |
| NA        | ENSG00000223432 | 0          | NA          | NA         | NA         | NA         |            |
| NA        | ENSG00000223433 | 0          | NA          | NA         | NA         | NA         | RPS29P9    |
| NA        | ENSG00000223436 | 0          | NA          | NA         | NA         | NA         |            |
| NA        | ENSG00000223437 | 0          | NA          | NA         | NA         | NA         | TMSB4XP3   |
| NA        | ENSG00000223438 | 0          | NA          | NA         | NA         | NA         |            |
| NA        | ENSG00000223440 | 0          | NA          | NA         | NA         | NA         |            |
| 101927761 | ENSG00000223442 | 1.00238525 | -0.01772782 | 0.38071748 | 0.76744566 | NA         | TH2LCRR    |
| 377630    | ENSG00000223443 | 4.02423274 | -0.03655252 | 0.36942436 | 0.74014525 | 0.87736188 | USP17L2    |
| 401447    | ENSG00000223443 | 4.02423274 | -0.03655252 | 0.36942436 | 0.74014525 | 0.87736188 | USP17L2    |
| NA        | ENSG00000223445 | 0          | NA          | NA         | NA         | NA         | RPL6P21    |
| NA        | ENSG00000223446 | 0          | NA          | NA         | NA         | NA         |            |
| NA        | ENSG00000223450 | 0          | NA          | NA         | NA         | NA         |            |
| NA        | ENSG00000223452 | 0          | NA          | NA         | NA         | NA         | HMG2P18    |
| NA        | ENSG00000223455 | 0          | NA          | NA         | NA         | NA         |            |
| NA        | ENSG00000223457 | 0          | NA          | NA         | NA         | NA         | HTATSFP1   |
| 104326189 | ENSG00000223458 | 0          | NA          | NA         | NA         | NA         | LMO7DN-IT1 |
| NA        | ENSG00000223459 | 779.4286   | 0.07605035  | 0.10028401 | 0.4326193  | 0.65796603 | TCAF1P1    |
| NA        | ENSG00000223460 | 0          | NA          | NA         | NA         | NA         | GAPDHP69   |
| NA        | ENSG00000223461 | 1.21600684 | 0.00920354  | 0.38136272 | 0.86238152 | NA         |            |
| NA        | ENSG00000223462 | 0          | NA          | NA         | NA         | NA         |            |
| NA        | ENSG00000223466 | 0          | NA          | NA         | NA         | NA         | LINC01825  |
| NA        | ENSG00000223467 | 0          | NA          | NA         | NA         | NA         | CALM1P1    |
| NA        | ENSG00000223469 | 0          | NA          | NA         | NA         | NA         |            |
| NA        | ENSG00000223470 | 0          | NA          | NA         | NA         | NA         | LINC02629  |
| NA        | ENSG00000223475 | 0.54931949 | 0.03276729  | 0.38622052 | 0.45390192 | NA         |            |
| NA        | ENSG00000223476 | 1.40806841 | -0.02362453 | 0.37959761 | 0.73175577 | NA         | VN1R42P    |
| 100506100 | ENSG00000223478 | 17.2811994 | 0.04199309  | 0.32482869 | 0.81422334 | 0.91592004 |            |
| NA        | ENSG00000223479 | 0          | NA          | NA         | NA         | NA         | LINC02238  |
| 728190    | ENSG00000223482 | 715.993684 | -0.17713277 | 0.09195961 | 0.04681836 | 0.14159698 | NUTM2A-AS1 |
| NA        | ENSG00000223484 | 0.33471731 | 0.02354391  | 0.38534154 | 0.62842204 | NA         | TRPC6P     |
| NA        | ENSG00000223485 | 0          | NA          | NA         | NA         | NA         | LINC01615  |
| NA        | ENSG00000223486 | 94.8901182 | -0.38906272 | 0.23213448 | 0.04228719 | 0.13108695 |            |
| NA        | ENSG00000223487 | 0          | NA          | NA         | NA         | NA         | FRMPD4-AS1 |
| NA        | ENSG00000223488 | 0          | NA          | NA         | NA         | NA         | MAPK6P2    |
| NA        | ENSG00000223489 | 0.173124   | -0.01911262 | 0.38486262 | 0.84537521 | NA         | NEFHP1     |
| NA        | ENSG00000223490 | 0          | NA          | NA         | NA         | NA         | CHCHD2P5   |



|           |                 |            |             |            |            |            |              |
|-----------|-----------------|------------|-------------|------------|------------|------------|--------------|
| NA        | ENSG00000223492 | 0          | NA          | NA         | NA         | NA         |              |
| NA        | ENSG00000223495 | 0          | NA          | NA         | NA         | NA         |              |
| 118460    | ENSG00000223496 | 1134.10124 | -0.05924326 | 0.09179646 | 0.50563434 | 0.72177288 | EXOSC6       |
| NA        | ENSG00000223497 | 0          | NA          | NA         | NA         | NA         | H2BL1P       |
| NA        | ENSG00000223498 | 0          | NA          | NA         | NA         | NA         | SLC35C2P1    |
| NA        | ENSG00000223500 | 0          | NA          | NA         | NA         | NA         | RNF14P4      |
| 6293      | ENSG00000223501 | 996.000258 | 0.19541044  | 0.08992023 | 0.02519335 | 0.08767516 | VPS52        |
| 102724719 | ENSG00000223502 | 1.61683869 | 0.06782035  | 0.38784229 | 0.31996005 | NA         |              |
| NA        | ENSG00000223503 | 2.01396185 | 0.03252578  | 0.37716246 | 0.70036407 | NA         |              |
| 102723883 | ENSG00000223504 | 0          | NA          | NA         | NA         | NA         |              |
| NA        | ENSG00000223505 | 0.70241524 | 0.0204724   | 0.38358235 | 0.6136607  | NA         | RPL35AP5     |
| NA        | ENSG00000223506 | 0          | NA          | NA         | NA         | NA         | SLC20A1P1    |
| NA        | ENSG00000223508 | 47.2763945 | -0.14425801 | 0.27488071 | 0.46474846 | 0.68748952 | RPL23AP53    |
| NA        | ENSG00000223509 | 121.640788 | -0.06973168 | 0.1839557  | 0.6649613  | 0.83454529 |              |
| 146822    | ENSG00000223510 | 6.54528855 | 0.10560417  | 0.37000565 | 0.46912999 | 0.69153662 | CDRT15       |
| NA        | ENSG00000223511 | 0          | NA          | NA         | NA         | NA         |              |
| NA        | ENSG00000223513 | 0          | NA          | NA         | NA         | NA         | ATP6V0E1P2   |
| NA        | ENSG00000223514 | 0          | NA          | NA         | NA         | NA         |              |
| NA        | ENSG00000223516 | 0          | NA          | NA         | NA         | NA         | AFF2-IT1     |
| NA        | ENSG00000223517 | 0          | NA          | NA         | NA         | NA         |              |
| NA        | ENSG00000223518 | 1.85914298 | -0.0251385  | 0.37652447 | 0.76222134 | NA         | CSNK1A1P1    |
| NA        | ENSG00000223519 | 0.34746601 | 0.02370763  | 0.3853651  | 0.61987128 | NA         | KIF28P       |
| NA        | ENSG00000223522 | 12.8630942 | 0.1091994   | 0.35676027 | 0.50612711 | 0.72179139 |              |
| NA        | ENSG00000223523 | 0          | NA          | NA         | NA         | NA         |              |
| NA        | ENSG00000223525 | 0          | NA          | NA         | NA         | NA         | RABGAP1L-IT1 |
| NA        | ENSG00000223528 | 0.37844916 | 0.02407552  | 0.3854191  | 0.60038877 | NA         |              |
| NA        | ENSG00000223529 | 0.18922458 | 0.01954053  | 0.38488496 | 0.78225479 | NA         | EEF1A1P8     |
| NA        | ENSG00000223530 | 0          | NA          | NA         | NA         | NA         |              |
| 106480429 | ENSG00000223534 | 0          | NA          | NA         | NA         | NA         | HLA-DQB1-AS1 |
| NA        | ENSG00000223536 | 0          | NA          | NA         | NA         | NA         |              |
| NA        | ENSG00000223537 | 0          | NA          | NA         | NA         | NA         |              |
| NA        | ENSG00000223538 | 0          | NA          | NA         | NA         | NA         |              |
| NA        | ENSG00000223539 | 0          | NA          | NA         | NA         | NA         |              |
| NA        | ENSG00000223540 | 0          | NA          | NA         | NA         | NA         | RPS15AP5     |
| NA        | ENSG00000223542 | 0          | NA          | NA         | NA         | NA         |              |
| NA        | ENSG00000223543 | 0.33471731 | 0.02354391  | 0.38534154 | 0.62842204 | NA         | TCEAL4P1     |
| NA        | ENSG00000223544 | 0          | NA          | NA         | NA         | NA         |              |
| NA        | ENSG00000223546 | 93.6105015 | -0.08600651 | 0.21972362 | 0.63264437 | 0.81417935 | LINC00630    |

|           |                 |            |             |            |            |            |           |
|-----------|-----------------|------------|-------------|------------|------------|------------|-----------|
| 284391    | ENSG00000223547 | 166.666395 | -0.08229366 | 0.19942687 | 0.627882   | 0.81117654 | ZNF844    |
| NA        | ENSG00000223548 | 0          | NA          | NA         | NA         | NA         | ACSL6-AS1 |
| NA        | ENSG00000223549 | 4.18685113 | -0.07610207 | 0.37926935 | 0.47540764 | 0.69758802 | MTND5P28  |
| NA        | ENSG00000223550 | 0          | NA          | NA         | NA         | NA         | SNRPBP1   |
| NA        | ENSG00000223551 | 2.53546304 | 0.00529394  | 0.37291615 | 0.95601687 | NA         | TMSB4XP4  |
| NA        | ENSG00000223552 | 0          | NA          | NA         | NA         | NA         | CCR5AS    |
| NA        | ENSG00000223553 | 0.56767373 | 0.02627943  | 0.38574813 | 0.49686938 | NA         | SMPD4P1   |
| NA        | ENSG00000223554 | 0          | NA          | NA         | NA         | NA         |           |
| NA        | ENSG00000223555 | 0          | NA          | NA         | NA         | NA         | USP9YP23  |
| NA        | ENSG00000223558 | 0.45209736 | -0.02505403 | 0.38558831 | 0.57865948 | NA         | TRIM60P17 |
| NA        | ENSG00000223559 | 0.173733   | 0.01914545  | 0.38484597 | 0.78225479 | NA         |           |
| 646588    | ENSG00000223561 | 1.91334719 | -0.03903027 | 0.3779375  | 0.64375862 | NA         |           |
| NA        | ENSG00000223563 | 0          | NA          | NA         | NA         | NA         |           |
| NA        | ENSG00000223564 | 0          | NA          | NA         | NA         | NA         | CYP4F32P  |
| NA        | ENSG00000223565 | 0          | NA          | NA         | NA         | NA         |           |
| NA        | ENSG00000223566 | 0.15069912 | -0.01848503 | 0.38480575 | 0.84537521 | NA         | TNRC18P2  |
| NA        | ENSG00000223568 | 0          | NA          | NA         | NA         | NA         | RPL3P11   |
| 100288520 | ENSG00000223569 | 0          | NA          | NA         | NA         | NA         | USP17L15  |
| NA        | ENSG00000223570 | 0          | NA          | NA         | NA         | NA         |           |
| NA        | ENSG00000223571 | 3.42460049 | 0.01291799  | 0.36833776 | 0.90671408 | 0.95942439 | DHRX-IT1  |
| 548596    | ENSG00000223572 | 515.606104 | -1.33967196 | 0.13632977 | 4.95E-24   | 2.28E-22   | CKMT1A    |
| NA        | ENSG00000223573 | 12.8866305 | 1.57470321  | 1.09256685 | 0.00417834 | 0.02002468 | TINCR     |
| NA        | ENSG00000223574 | 0          | NA          | NA         | NA         | NA         | TPMTP4    |
| NA        | ENSG00000223575 | 0          | NA          | NA         | NA         | NA         | RBMX2P3   |
| NA        | ENSG00000223576 | 0          | NA          | NA         | NA         | NA         |           |
| 105376386 | ENSG00000223581 | 0          | NA          | NA         | NA         | NA         | LINC02665 |
| NA        | ENSG00000223583 | 2.68027957 | -0.06785215 | 0.3802188  | 0.48392658 | 0.70415528 |           |
| NA        | ENSG00000223584 | 0          | NA          | NA         | NA         | NA         | TVP23CP1  |
| NA        | ENSG00000223586 | 0          | NA          | NA         | NA         | NA         | LINC01312 |
| NA        | ENSG00000223587 | 0          | NA          | NA         | NA         | NA         | LINC01986 |
| NA        | ENSG00000223589 | 0          | NA          | NA         | NA         | NA         |           |
| NA        | ENSG00000223592 | 0          | NA          | NA         | NA         | NA         | FNDC3CP   |
| NA        | ENSG00000223593 | 0.15069912 | -0.01848503 | 0.38480575 | 0.84537521 | NA         |           |
| NA        | ENSG00000223595 | 0          | NA          | NA         | NA         | NA         | LYPLA1P1  |
| 105374644 | ENSG00000223597 | 0          | NA          | NA         | NA         | NA         | LINC02142 |
| NA        | ENSG00000223598 | 0.14931947 | -0.01844332 | 0.38480212 | 0.84537521 | NA         |           |
| NA        | ENSG00000223599 | 1.50674681 | 0.07590311  | 0.39217373 | 0.19043684 | NA         |           |
| NA        | ENSG00000223600 | 0          | NA          | NA         | NA         | NA         | EEF1A1P41 |

|           |                 |            |             |            |            |            |           |
|-----------|-----------------|------------|-------------|------------|------------|------------|-----------|
| 340900    | ENSG00000223601 | 0.52348248 | 0.03151913  | 0.38609263 | 0.47197437 | NA         | EBLN1     |
| NA        | ENSG00000223602 | 0.34746601 | 0.02370763  | 0.3853651  | 0.61987128 | NA         |           |
| NA        | ENSG00000223603 | 0          | NA          | NA         | NA         | NA         | CRPP1     |
| NA        | ENSG00000223604 | 0          | NA          | NA         | NA         | NA         | RPL17P13  |
| NA        | ENSG00000223605 | 0          | NA          | NA         | NA         | NA         |           |
| NA        | ENSG00000223608 | 0          | NA          | NA         | NA         | NA         | DSCR4-IT1 |
| 3045      | ENSG00000223609 | 0          | NA          | NA         | NA         | NA         | HBD       |
| 170067    | ENSG00000223611 | 7.50005863 | -0.31952073 | 0.51546815 | 0.07912725 | 0.20982153 | SUPT20HL2 |
| NA        | ENSG00000223612 | 0          | NA          | NA         | NA         | NA         |           |
| 730291    | ENSG00000223614 | 0          | NA          | NA         | NA         | NA         | ZNF735    |
| NA        | ENSG00000223615 | 0          | NA          | NA         | NA         | NA         |           |
| NA        | ENSG00000223617 | 0          | NA          | NA         | NA         | NA         | LINC00370 |
| NA        | ENSG00000223619 | 0.34120383 | 0.02362724  | 0.38535351 | 0.62405605 | NA         | MTCO1P17  |
| NA        | ENSG00000223620 | 0          | NA          | NA         | NA         | NA         | RBM48P1   |
| NA        | ENSG00000223621 | 0.14931947 | -0.01844332 | 0.38480212 | 0.84537521 | NA         | AK4P4     |
| NA        | ENSG00000223622 | 0          | NA          | NA         | NA         | NA         | GSTA6P    |
| NA        | ENSG00000223623 | 0          | NA          | NA         | NA         | NA         |           |
| NA        | ENSG00000223624 | 0          | NA          | NA         | NA         | NA         |           |
| NA        | ENSG00000223625 | 0          | NA          | NA         | NA         | NA         | CYCSP32   |
| 104266956 | ENSG00000223626 | 0          | NA          | NA         | NA         | NA         | LINC01044 |
| NA        | ENSG00000223628 | 0          | NA          | NA         | NA         | NA         |           |
| 449491    | ENSG00000223629 | 0          | NA          | NA         | NA         | NA         | DEFA8P    |
| NA        | ENSG00000223631 | 0.14931947 | -0.01844332 | 0.38480212 | 0.84537521 | NA         | LINC01120 |
| NA        | ENSG00000223634 | 0.30001544 | -0.02294458 | 0.38527538 | 0.68644902 | NA         |           |
| NA        | ENSG00000223635 | 0          | NA          | NA         | NA         | NA         |           |
| 159125    | ENSG00000223637 | 0          | NA          | NA         | NA         | NA         | RBMV2EP   |
| 342931    | ENSG00000223638 | 0          | NA          | NA         | NA         | NA         | RFPL4A    |
| NA        | ENSG00000223640 | 0          | NA          | NA         | NA         | NA         | RPL30P3   |
| NA        | ENSG00000223641 | 0          | NA          | NA         | NA         | NA         | TTY17C    |
| NA        | ENSG00000223642 | 0.15069912 | -0.01848503 | 0.38480575 | 0.84537521 | NA         |           |
| NA        | ENSG00000223643 | 0          | NA          | NA         | NA         | NA         |           |
| 101928012 | ENSG00000223646 | 1.31148895 | 0.03049385  | 0.38020957 | 0.65822698 | NA         |           |
| 105374449 | ENSG00000223647 | 0          | NA          | NA         | NA         | NA         | LINC01946 |
| NA        | ENSG00000223648 | 0          | NA          | NA         | NA         | NA         | IGHV3-64  |
| NA        | ENSG00000223649 | 0.15069912 | -0.01848503 | 0.38480575 | 0.84537521 | NA         |           |
| NA        | ENSG00000223650 | 2.21372618 | 0.04807925  | 0.37933298 | 0.57378937 | NA         | UHRF2P1   |
| NA        | ENSG00000223651 | 0          | NA          | NA         | NA         | NA         |           |
| NA        | ENSG00000223652 | 0.48883602 | -0.0140209  | 0.38312405 | 0.78256163 | NA         |           |

|           |                 |            |             |            |            |            |            |
|-----------|-----------------|------------|-------------|------------|------------|------------|------------|
| NA        | ENSG00000223653 | 2.0451234  | -0.05496907 | 0.3819712  | 0.48765454 | NA         |            |
| NA        | ENSG00000223656 | 0          | NA          | NA         | NA         | NA         | HMGB3P10   |
| NA        | ENSG00000223657 | 0          | NA          | NA         | NA         | NA         | KRT8P51    |
| 728819    | ENSG00000223658 | 77.4108021 | 0.14428141  | 0.23278313 | 0.44107248 | 0.66597245 | C1GALT1C1L |
| NA        | ENSG00000223660 | 0          | NA          | NA         | NA         | NA         |            |
| 100874190 | ENSG00000223662 | 0          | NA          | NA         | NA         | NA         | SAMSN1-AS1 |
| NA        | ENSG00000223663 | 0.16735865 | 0.01897177  | 0.38482933 | 0.78225479 | NA         | NDUFB4P8   |
| NA        | ENSG00000223665 | 0          | NA          | NA         | NA         | NA         |            |
| NA        | ENSG00000223668 | 0.14931947 | -0.01844332 | 0.38480212 | 0.84537521 | NA         | EEF1A1P24  |
| NA        | ENSG00000223669 | 0.34624801 | -0.02356563 | 0.38536324 | 0.65270996 | NA         |            |
| NA        | ENSG00000223671 | 0          | NA          | NA         | NA         | NA         | RPL34P3    |
| NA        | ENSG00000223672 | 0          | NA          | NA         | NA         | NA         |            |
| NA        | ENSG00000223675 | 0.16735865 | 0.01897177  | 0.38482933 | 0.78225479 | NA         |            |
| NA        | ENSG00000223676 | 0          | NA          | NA         | NA         | NA         | RPL34P26   |
| NA        | ENSG00000223677 | 0          | NA          | NA         | NA         | NA         | OR2AD1P    |
| NA        | ENSG00000223679 | 0          | NA          | NA         | NA         | NA         |            |
| NA        | ENSG00000223683 | 0          | NA          | NA         | NA         | NA         | RPSAP65    |
| NA        | ENSG00000223684 | 0          | NA          | NA         | NA         | NA         | IFNWP18    |
| 100874188 | ENSG00000223685 | 1.1507877  | -0.00795968 | 0.38043264 | 0.89199196 | NA         | LINC00571  |
| NA        | ENSG00000223688 | 0          | NA          | NA         | NA         | NA         | RPS24P14   |
| NA        | ENSG00000223691 | 0          | NA          | NA         | NA         | NA         |            |
| 100862692 | ENSG00000223692 | 0.79262331 | -0.0043429  | 0.38213066 | 0.92623271 | NA         | DIP2A-IT1  |
| NA        | ENSG00000223694 | 0.50781267 | 0.03075244  | 0.38601728 | 0.4833299  | NA         | ADH5P3     |
| NA        | ENSG00000223695 | 1.22914326 | 0.07310554  | 0.39071032 | 0.23155706 | NA         |            |
| NA        | ENSG00000223697 | 10.8255901 | -0.10404421 | 0.34941376 | 0.5367751  | 0.74734999 |            |
| NA        | ENSG00000223698 | 0          | NA          | NA         | NA         | NA         | GOLGA6L11P |
| 100652739 | ENSG00000223701 | 0          | NA          | NA         | NA         | NA         | RAET1E-AS1 |
| NA        | ENSG00000223702 | 0          | NA          | NA         | NA         | NA         | ZDHHC20P2  |
| NA        | ENSG00000223703 | 0          | NA          | NA         | NA         | NA         |            |
| NA        | ENSG00000223704 | 8.24215986 | -0.09317042 | 0.37113436 | 0.48452054 | 0.70468159 | LINC01422  |
| 155400    | ENSG00000223705 | 2627.42775 | 0.45971731  | 0.07266687 | 1.14E-10   | 2.18E-09   | NSUN5P1    |
| NA        | ENSG00000223707 | 0.173733   | 0.01914545  | 0.38484597 | 0.78225479 | NA         | SFR1P2     |
| NA        | ENSG00000223709 | 0          | NA          | NA         | NA         | NA         | TRIM64EP   |
| NA        | ENSG00000223710 | 0          | NA          | NA         | NA         | NA         | CRYGGP     |
| NA        | ENSG00000223711 | 0          | NA          | NA         | NA         | NA         |            |
| 105373185 | ENSG00000223714 | 0.14931947 | -0.01844332 | 0.38480212 | 0.84537521 | NA         | LINC02601  |
| NA        | ENSG00000223715 | 0.84950558 | 0.04951069  | 0.38855717 | 0.26952443 | NA         | LINC01208  |
| NA        | ENSG00000223716 | 0          | NA          | NA         | NA         | NA         |            |

|           |                 |            |             |            |            |            |            |
|-----------|-----------------|------------|-------------|------------|------------|------------|------------|
| NA        | ENSG00000223717 | 0          | NA          | NA         | NA         | NA         | DNAJA1P1   |
| NA        | ENSG00000223718 | 1.33313692 | -0.01990605 | 0.37853961 | 0.78305313 | NA         |            |
| NA        | ENSG00000223719 | 0          | NA          | NA         | NA         | NA         |            |
| NA        | ENSG00000223720 | 0          | NA          | NA         | NA         | NA         |            |
| NA        | ENSG00000223721 | 0          | NA          | NA         | NA         | NA         | UQCRFS1P2  |
| NA        | ENSG00000223722 | 0          | NA          | NA         | NA         | NA         | IFITM3P2   |
| NA        | ENSG00000223723 | 0          | NA          | NA         | NA         | NA         | TFDP1P2    |
| NA        | ENSG00000223724 | 0          | NA          | NA         | NA         | NA         | RAD17P2    |
| NA        | ENSG00000223725 | 0.78641457 | -0.00711801 | 0.38152951 | 0.89090037 | NA         |            |
| NA        | ENSG00000223726 | 0          | NA          | NA         | NA         | NA         |            |
| NA        | ENSG00000223727 | 0          | NA          | NA         | NA         | NA         |            |
| NA        | ENSG00000223728 | 0          | NA          | NA         | NA         | NA         |            |
| 105376310 | ENSG00000223729 | 0.79051527 | -0.03681989 | 0.38394091 | 0.50577854 | NA         | LINC02247  |
| NA        | ENSG00000223730 | 1.00162917 | -0.02141708 | 0.38101579 | 0.72119984 | NA         |            |
| 100130302 | ENSG00000223731 | 0          | NA          | NA         | NA         | NA         | SUPT20HL1  |
| NA        | ENSG00000223732 | 0          | NA          | NA         | NA         | NA         |            |
| NA        | ENSG00000223733 | 0          | NA          | NA         | NA         | NA         | RPL18AP14  |
| NA        | ENSG00000223734 | 0.49826236 | -0.01024142 | 0.38283645 | 0.82742988 | NA         | LAPTM4A-DT |
| NA        | ENSG00000223735 | 0          | NA          | NA         | NA         | NA         | OR51B3P    |
| NA        | ENSG00000223738 | 0          | NA          | NA         | NA         | NA         |            |
| NA        | ENSG00000223739 | 0          | NA          | NA         | NA         | NA         | RPS15AP15  |
| NA        | ENSG00000223740 | 0          | NA          | NA         | NA         | NA         |            |
| NA        | ENSG00000223741 | 0          | NA          | NA         | NA         | NA         | PSMD4P1    |
| NA        | ENSG00000223742 | 0          | NA          | NA         | NA         | NA         |            |
| NA        | ENSG00000223744 | 0          | NA          | NA         | NA         | NA         | RBMV2GP    |
| NA        | ENSG00000223745 | 366.916629 | 0.71223407  | 0.13590673 | 3.57E-08   | 4.99E-07   | CCDC18-AS1 |
| NA        | ENSG00000223746 | 0          | NA          | NA         | NA         | NA         | ELOCP30    |
| NA        | ENSG00000223749 | 13.2078237 | 0.17099064  | 0.36290041 | 0.35367351 | 0.58401019 | MIR503HG   |
| NA        | ENSG00000223750 | 0          | NA          | NA         | NA         | NA         | SIRPB3P    |
| NA        | ENSG00000223751 | 0.35629188 | 0.02381426  | 0.38538062 | 0.61421363 | NA         |            |
| NA        | ENSG00000223753 | 0          | NA          | NA         | NA         | NA         |            |
| NA        | ENSG00000223754 | 0.34746601 | 0.02370763  | 0.3853651  | 0.61987128 | NA         |            |
| NA        | ENSG00000223756 | 21.127984  | -0.119967   | 0.35798324 | 0.46124223 | 0.68434385 | TSSC2      |
| 285103    | ENSG00000223760 | 0          | NA          | NA         | NA         | NA         | MED15P9    |
| NA        | ENSG00000223761 | 0          | NA          | NA         | NA         | NA         |            |
| 100130417 | ENSG00000223764 | 439.563355 | 0.25488752  | 0.12184559 | 0.02699058 | 0.09245391 | LINC02593  |
| NA        | ENSG00000223765 | 0          | NA          | NA         | NA         | NA         | LINC01626  |
| 642852    | ENSG00000223768 | 1620.87011 | -0.20072064 | 0.09737482 | 0.03256693 | 0.10707998 | LINC00205  |

|           |                 |            |             |            |            |            |              |
|-----------|-----------------|------------|-------------|------------|------------|------------|--------------|
| 101927356 | ENSG00000223770 | 0.8227359  | 0.02001962  | 0.38151963 | 0.72234582 | NA         | CACNA2D1-AS1 |
| NA        | ENSG00000223772 | 0          | NA          | NA         | NA         | NA         | GEMIN8P3     |
| 401577    | ENSG00000223773 | 21.9064866 | 0.40227841  | 0.46434635 | 0.08962313 | 0.22992799 | CD99P1       |
| NA        | ENSG00000223774 | 0          | NA          | NA         | NA         | NA         |              |
| 100287902 | ENSG00000223776 | 2.91499284 | -0.03526122 | 0.37229701 | 0.7285824  | 0.87026999 | LGALS8-AS1   |
| NA        | ENSG00000223777 | 0          | NA          | NA         | NA         | NA         |              |
| NA        | ENSG00000223779 | 0          | NA          | NA         | NA         | NA         |              |
| NA        | ENSG00000223782 | 0          | NA          | NA         | NA         | NA         | RPS21P8      |
| NA        | ENSG00000223783 | 0          | NA          | NA         | NA         | NA         | LINC01983    |
| NA        | ENSG00000223784 | 0          | NA          | NA         | NA         | NA         | LINP1        |
| 101928516 | ENSG00000223786 | 0          | NA          | NA         | NA         | NA         |              |
| NA        | ENSG00000223787 | 0.16735865 | 0.01897177  | 0.38482933 | 0.78225479 | NA         |              |
| NA        | ENSG00000223788 | 0          | NA          | NA         | NA         | NA         | DIS3L2P1     |
| 100874092 | ENSG00000223791 | 3.1125237  | 0.01454855  | 0.37012816 | 0.88948317 | 0.95181279 | UBE2E1-AS1   |
| NA        | ENSG00000223794 | 0          | NA          | NA         | NA         | NA         | COX5BP8      |
| NA        | ENSG00000223795 | 0          | NA          | NA         | NA         | NA         |              |
| 285266    | ENSG00000223797 | 23.8829829 | 0.23879842  | 0.35606691 | 0.24963148 | 0.46927124 | ENTPD3-AS1   |
| NA        | ENSG00000223799 | 7.07489387 | -0.00137306 | 0.36191059 | 0.98857948 | 0.99604194 | IL10RB-DT    |
| NA        | ENSG00000223800 | 0          | NA          | NA         | NA         | NA         |              |
| 10715     | ENSG00000223802 | 271.002221 | -0.54540925 | 0.15623844 | 0.00015779 | 0.00114714 | CERS1        |
| NA        | ENSG00000223803 | 0.15069912 | -0.01848503 | 0.38480575 | 0.84537521 | NA         | RPS20P14     |
| NA        | ENSG00000223804 | 0.48738179 | 0.01111128  | 0.38338641 | 0.78771732 | NA         |              |
| 400866    | ENSG00000223806 | 0          | NA          | NA         | NA         | NA         | LINC00114    |
| NA        | ENSG00000223807 | 0.173124   | -0.01911262 | 0.38486262 | 0.84537521 | NA         | BOLA3P4      |
| NA        | ENSG00000223808 | 0          | NA          | NA         | NA         | NA         |              |
| NA        | ENSG00000223809 | 0          | NA          | NA         | NA         | NA         |              |
| NA        | ENSG00000223810 | 0          | NA          | NA         | NA         | NA         | KRT8P28      |
| NA        | ENSG00000223811 | 0          | NA          | NA         | NA         | NA         |              |
| NA        | ENSG00000223812 | 423.275632 | -0.53893542 | 0.11886773 | 2.02E-06   | 2.18E-05   |              |
| NA        | ENSG00000223813 | 2.05608862 | 0.08116655  | 0.39225957 | 0.22650649 | NA         |              |
| NA        | ENSG00000223814 | 0          | NA          | NA         | NA         | NA         |              |
| NA        | ENSG00000223815 | 0          | NA          | NA         | NA         | NA         | DIAPH3-AS2   |
| NA        | ENSG00000223816 | 0          | NA          | NA         | NA         | NA         | IGKV1OR2-2   |
| NA        | ENSG00000223817 | 0          | NA          | NA         | NA         | NA         | CDH23-AS1    |
| NA        | ENSG00000223819 | 0          | NA          | NA         | NA         | NA         | PPIAP89      |
| 142913    | ENSG00000223820 | 10.7187896 | 0.47120466  | 0.6579734  | 0.04535632 | 0.13797445 | CFLIP1       |
| NA        | ENSG00000223822 | 0.30001612 | -0.02294459 | 0.38527538 | 0.6864486  | NA         | EEF1A1P1     |
| 254099    | ENSG00000223823 | 0          | NA          | NA         | NA         | NA         | LINC01342    |

|           |    |                 |            |             |            |            |            |            |
|-----------|----|-----------------|------------|-------------|------------|------------|------------|------------|
|           | NA | ENSG00000223824 | 0          | NA          | NA         | NA         | NA         | TERF1P6    |
|           | NA | ENSG00000223825 | 0.4675734  | -0.00964178 | 0.38289175 | 0.84706536 | NA         | DAZAP2P1   |
|           | NA | ENSG00000223826 | 0          | NA          | NA         | NA         | NA         | LINC01870  |
|           | NA | ENSG00000223828 | 0          | NA          | NA         | NA         | NA         | BANF1P4    |
| 105375267 | NA | ENSG00000223829 | 0          | NA          | NA         | NA         | NA         |            |
|           | NA | ENSG00000223831 | 0          | NA          | NA         | NA         | NA         |            |
|           | NA | ENSG00000223834 | 3.39676651 | -0.02028503 | 0.37445815 | 0.81852464 | 0.9171248  |            |
|           | NA | ENSG00000223836 | 0          | NA          | NA         | NA         | NA         |            |
|           | NA | ENSG00000223837 | 1.62364463 | 0.08787009  | 0.39814998 | 0.07834099 | NA         |            |
|           | NA | ENSG00000223838 | 0          | NA          | NA         | NA         | NA         |            |
| 100133036 | NA | ENSG00000223839 | 43.7183142 | -0.11118834 | 0.31306599 | 0.55706599 | 0.76248287 | FAM95B1    |
|           | NA | ENSG00000223841 | 0          | NA          | NA         | NA         | NA         |            |
|           | NA | ENSG00000223842 | 2.29144709 | -0.1421394  | 0.41713849 | 0.0653179  | NA         |            |
|           | NA | ENSG00000223843 | 0          | NA          | NA         | NA         | NA         | EFCAB6-AS1 |
|           | NA | ENSG00000223845 | 0.173733   | 0.01914545  | 0.38484597 | 0.78225479 | NA         | VN1R40P    |
|           | NA | ENSG00000223847 | 0          | NA          | NA         | NA         | NA         |            |
|           | NA | ENSG00000223849 | 1.24539674 | -0.08415118 | 0.39640573 | 0.12101916 | NA         |            |
| 103752554 | NA | ENSG00000223850 | 0          | NA          | NA         | NA         | NA         | MYCNUT     |
| 441307    | NA | ENSG00000223855 | 0.56803228 | -0.00224154 | 0.38247003 | 0.94737375 | NA         |            |
|           | NA | ENSG00000223856 | 0          | NA          | NA         | NA         | NA         | RAB9AP2    |
|           | NA | ENSG00000223859 | 0          | NA          | NA         | NA         | NA         |            |
|           | NA | ENSG00000223861 | 0.34123463 | 0.00270047  | 0.38338578 | 0.96190638 | NA         |            |
| 105374774 | NA | ENSG00000223863 | 0          | NA          | NA         | NA         | NA         | LINC01805  |
|           | NA | ENSG00000223864 | 0          | NA          | NA         | NA         | NA         | NPM1P19    |
| 3115      | NA | ENSG00000223865 | 6.30225922 | 2.25867138  | 1.49364492 | 0.00410033 | 0.01970701 | HLA-DPB1   |
|           | NA | ENSG00000223866 | 0          | NA          | NA         | NA         | NA         |            |
|           | NA | ENSG00000223867 | 0          | NA          | NA         | NA         | NA         |            |
|           | NA | ENSG00000223869 | 0          | NA          | NA         | NA         | NA         |            |
|           | NA | ENSG00000223870 | 0          | NA          | NA         | NA         | NA         |            |
|           | NA | ENSG00000223872 | 0.18922458 | 0.01954053  | 0.38488496 | 0.78225479 | NA         |            |
|           | NA | ENSG00000223873 | 0          | NA          | NA         | NA         | NA         | SAP18P2    |
|           | NA | ENSG00000223874 | 0          | NA          | NA         | NA         | NA         | LINC01921  |
|           | NA | ENSG00000223875 | 0          | NA          | NA         | NA         | NA         | NBEAP3     |
|           | NA | ENSG00000223876 | 0          | NA          | NA         | NA         | NA         | RPS27P1    |
|           | NA | ENSG00000223877 | 0          | NA          | NA         | NA         | NA         | RPS8P10    |
|           | NA | ENSG00000223878 | 6.7095777  | -0.01139483 | 0.35450692 | 0.93203202 | 0.97175445 | PPIAP53    |
|           | NA | ENSG00000223880 | 0          | NA          | NA         | NA         | NA         | LINC01078  |
|           | NA | ENSG00000223881 | 0          | NA          | NA         | NA         | NA         |            |

|           |                 |            |             |            |            |            |           |
|-----------|-----------------|------------|-------------|------------|------------|------------|-----------|
| 100873982 | ENSG00000223882 | 0          | NA          | NA         | NA         | NA         | ABCC5-AS1 |
| 105378785 | ENSG00000223883 | 0          | NA          | NA         | NA         | NA         | LINC01707 |
| 101929452 | ENSG00000223884 | 1.96196807 | -0.01020743 | 0.37393921 | 0.9077989  | NA         |           |
| NA        | ENSG00000223885 | 0          | NA          | NA         | NA         | NA         | FAM90A13P |
| NA        | ENSG00000223886 | 4.09229832 | 0.10896149  | 0.38388489 | 0.37717923 | 0.60602818 |           |
| NA        | ENSG00000223889 | 0          | NA          | NA         | NA         | NA         |           |
| NA        | ENSG00000223890 | 0          | NA          | NA         | NA         | NA         |           |
| 100505783 | ENSG00000223891 | 137.464025 | -0.06473117 | 0.19148959 | 0.69537062 | 0.85294273 | OSER1-DT  |
| NA        | ENSG00000223893 | 0          | NA          | NA         | NA         | NA         | GNL2P1    |
| NA        | ENSG00000223896 | 0          | NA          | NA         | NA         | NA         | CCNJ2P2   |
| NA        | ENSG00000223897 | 0          | NA          | NA         | NA         | NA         |           |
| NA        | ENSG00000223899 | 0.34624801 | -0.02356563 | 0.38536324 | 0.65270996 | NA         | SEC13P1   |
| NA        | ENSG00000223901 | 1.50170741 | 0.02043117  | 0.37789977 | 0.78831546 | NA         |           |
| NA        | ENSG00000223903 | 0          | NA          | NA         | NA         | NA         | RPL23P4   |
| NA        | ENSG00000223904 | 0          | NA          | NA         | NA         | NA         | HMGB1P12  |
| NA        | ENSG00000223905 | 0          | NA          | NA         | NA         | NA         |           |
| NA        | ENSG00000223906 | 0.34624801 | -0.02356563 | 0.38536324 | 0.65270996 | NA         |           |
| NA        | ENSG00000223908 | 0          | NA          | NA         | NA         | NA         |           |
| 414201    | ENSG00000223910 | 0.34746601 | 0.02370763  | 0.3853651  | 0.61987128 | NA         | ZNF32-AS3 |
| NA        | ENSG00000223911 | 0          | NA          | NA         | NA         | NA         |           |
| NA        | ENSG00000223912 | 0          | NA          | NA         | NA         | NA         | EEF1A1P36 |
| NA        | ENSG00000223914 | 0          | NA          | NA         | NA         | NA         | LINC02471 |
| NA        | ENSG00000223915 | 0          | NA          | NA         | NA         | NA         | DPPA2P1   |
| NA        | ENSG00000223916 | 0          | NA          | NA         | NA         | NA         |           |
| NA        | ENSG00000223917 | 0          | NA          | NA         | NA         | NA         |           |
| NA        | ENSG00000223918 | 0          | NA          | NA         | NA         | NA         |           |
| NA        | ENSG00000223920 | 0          | NA          | NA         | NA         | NA         |           |
| NA        | ENSG00000223921 | 0          | NA          | NA         | NA         | NA         | MTND1P27  |
| NA        | ENSG00000223922 | 3.26228294 | -0.03749147 | 0.36978845 | 0.73231422 | 0.87210781 | ASS1P2    |
| 105373878 | ENSG00000223923 | 4.76217287 | 0.03346822  | 0.36329935 | 0.7903856  | 0.90449619 | TNS1-AS1  |
| NA        | ENSG00000223928 | 0          | NA          | NA         | NA         | NA         | NUP35P1   |
| NA        | ENSG00000223930 | 1.82753414 | 0.02161115  | 0.37788203 | 0.77212512 | NA         |           |
| NA        | ENSG00000223931 | 0          | NA          | NA         | NA         | NA         |           |
| NA        | ENSG00000223935 | 1.78016184 | 0.01172033  | 0.37854457 | 0.86522126 | NA         | LGALSL-DT |
| NA        | ENSG00000223940 | 0.51423473 | 0.01253084  | 0.38289555 | 0.75919031 | NA         | KRT8P8    |
| 100874330 | ENSG00000223941 | 0          | NA          | NA         | NA         | NA         | LINC01014 |
| NA        | ENSG00000223942 | 0          | NA          | NA         | NA         | NA         |           |
| NA        | ENSG00000223944 | 0          | NA          | NA         | NA         | NA         |           |



|           |                 |            |             |            |            |            |            |
|-----------|-----------------|------------|-------------|------------|------------|------------|------------|
| NA        | ENSG00000223945 | 6.81922397 | 0.01900666  | 0.35318329 | 0.89521614 | 0.95469109 |            |
| NA        | ENSG00000223946 | 0          | NA          | NA         | NA         | NA         |            |
| NA        | ENSG00000223947 | 0.51174488 | -0.00985885 | 0.38277279 | 0.82072807 | NA         |            |
| NA        | ENSG00000223948 | 0          | NA          | NA         | NA         | NA         |            |
| 101927034 | ENSG00000223949 | 97.6824618 | 0.42331629  | 0.28195561 | 0.04997562 | 0.14894341 | ROR1-AS1   |
| NA        | ENSG00000223951 | 0          | NA          | NA         | NA         | NA         | H2ACP2     |
| 114902    | ENSG00000223953 | 56.8215656 | -0.38492833 | 0.28716521 | 0.0738357  | 0.19917068 | C1QTNF5    |
| NA        | ENSG00000223955 | 0          | NA          | NA         | NA         | NA         | MTND6P1    |
| 105378744 | ENSG00000223956 | 23.6666259 | 0.18484798  | 0.33651247 | 0.35476199 | 0.58527174 | LINC01767  |
| NA        | ENSG00000223958 | 0          | NA          | NA         | NA         | NA         |            |
| 172       | ENSG00000223959 | 732.043106 | 0.19362798  | 0.1057113  | 0.05630754 | 0.16311018 | AFG3L1P    |
| 101927027 | ENSG00000223960 | 826.376857 | -0.10470128 | 0.1032268  | 0.29063017 | 0.51667585 | CHROMR     |
| NA        | ENSG00000223962 | 0          | NA          | NA         | NA         | NA         | UBBP3      |
| NA        | ENSG00000223963 | 3.56311567 | -0.25284902 | 0.49756127 | 0.03556369 | 0.11472905 | THAP12P8   |
| NA        | ENSG00000223965 | 0          | NA          | NA         | NA         | NA         | ZNF587P1   |
| NA        | ENSG00000223967 | 0          | NA          | NA         | NA         | NA         |            |
| NA        | ENSG00000223968 | 0          | NA          | NA         | NA         | NA         |            |
| NA        | ENSG00000223969 | 15.6645285 | 0.01811821  | 0.33797009 | 0.91145719 | 0.96229611 |            |
| NA        | ENSG00000223970 | 0          | NA          | NA         | NA         | NA         |            |
| 84771     | ENSG00000223972 | 0.33471731 | 0.02354391  | 0.38534154 | 0.62842204 | NA         | DDX11L1    |
| 727856    | ENSG00000223972 | 0.33471731 | 0.02354391  | 0.38534154 | 0.62842204 | NA         | DDX11L1    |
| 100287102 | ENSG00000223972 | 0.33471731 | 0.02354391  | 0.38534154 | 0.62842204 | NA         | DDX11L1    |
| 100287596 | ENSG00000223972 | 0.33471731 | 0.02354391  | 0.38534154 | 0.62842204 | NA         | DDX11L1    |
| 102725121 | ENSG00000223972 | 0.33471731 | 0.02354391  | 0.38534154 | 0.62842204 | NA         | DDX11L1    |
| NA        | ENSG00000223973 | 0          | NA          | NA         | NA         | NA         | PAFAH1B1P2 |
| NA        | ENSG00000223974 | 1.48700662 | -0.00198232 | 0.37692629 | 0.9784422  | NA         | BNIP3P42   |
| NA        | ENSG00000223975 | 0          | NA          | NA         | NA         | NA         |            |
| NA        | ENSG00000223976 | 0          | NA          | NA         | NA         | NA         | EXTL2P1    |
| NA        | ENSG00000223977 | 0          | NA          | NA         | NA         | NA         |            |
| NA        | ENSG00000223978 | 0          | NA          | NA         | NA         | NA         | ZNF736P1Y  |
| 105371564 | ENSG00000223979 | 2.20626596 | -0.02178127 | 0.37593148 | 0.79455609 | NA         | SMCR2      |
| NA        | ENSG00000223982 | 0          | NA          | NA         | NA         | NA         | SNRPD2P2   |
| NA        | ENSG00000223984 | 0.34030368 | 0.00229548  | 0.38337911 | 0.9657716  | NA         | HNRNPRP1   |
| 727944    | ENSG00000223985 | 0          | NA          | NA         | NA         | NA         | LINC01874  |
| NA        | ENSG00000223986 | 0          | NA          | NA         | NA         | NA         |            |
| NA        | ENSG00000223987 | 0          | NA          | NA         | NA         | NA         | RPL26P28   |
| NA        | ENSG00000223989 | 0          | NA          | NA         | NA         | NA         |            |
| NA        | ENSG00000223991 | 0          | NA          | NA         | NA         | NA         |            |

|           |                 |                 |             |             |            |            |            |              |
|-----------|-----------------|-----------------|-------------|-------------|------------|------------|------------|--------------|
| 101929646 | ENSG00000223993 | 0               | NA          | NA          | NA         | NA         | LINC02647  |              |
|           | NA              | ENSG00000223995 | 0           | NA          | NA         | NA         | RPL32P35   |              |
|           | NA              | ENSG00000223997 | 0           | NA          | NA         | NA         | TRDD1      |              |
|           | NA              | ENSG00000223999 | 0           | NA          | NA         | NA         |            |              |
|           | NA              | ENSG00000224000 | 0           | NA          | NA         | NA         |            |              |
|           | NA              | ENSG00000224001 | 0           | NA          | NA         | NA         |            |              |
|           | NA              | ENSG00000224003 | 7.30382162  | -0.13423703 | 0.37927822 | 0.36921188 | 0.59862194 | YES1P1       |
|           | NA              | ENSG00000224004 | 0           | NA          | NA         | NA         | NA         | ATP5F1CP1    |
|           | NA              | ENSG00000224007 | 0.15069912  | -0.01848503 | 0.38480575 | 0.84537521 | NA         | USP12P2      |
| 101927796 | ENSG00000224008 | 64.0644645      | -0.02577112 | 0.23637134  | 0.8887027  | 0.95146564 | LINC01441  |              |
|           | NA              | ENSG00000224011 | 0           | NA          | NA         | NA         | NA         |              |
|           | NA              | ENSG00000224012 | 0           | NA          | NA         | NA         | NA         |              |
|           | NA              | ENSG00000224014 | 0           | NA          | NA         | NA         | NA         |              |
|           | NA              | ENSG00000224015 | 0           | NA          | NA         | NA         | NA         |              |
|           | NA              | ENSG00000224016 | 0           | NA          | NA         | NA         | NA         |              |
| 101928773 | ENSG00000224017 | 2.61248463      | 0.17028776  | 0.42991563  | 0.07953859 | 0.2105454  | LINC01449  |              |
|           | NA              | ENSG00000224018 | 0           | NA          | NA         | NA         | NA         |              |
|           | NA              | ENSG00000224019 | 1.1231839   | -0.00386503 | 0.37871884 | 0.95437589 | NA         | RPL21P32     |
|           | NA              | ENSG00000224020 | 24.747923   | 0.08251599  | 0.30587952 | 0.66649437 | 0.83560485 | MIR181A2HG   |
| 399821    | ENSG00000224023 | 11.0095021      | -0.03757872 | 0.33823464  | 0.81669454 | 0.9166503  | EDRF1-DT   |              |
|           | NA              | ENSG00000224025 | 0           | NA          | NA         | NA         | NA         |              |
|           | NA              | ENSG00000224027 | 0           | NA          | NA         | NA         | NA         |              |
|           | NA              | ENSG00000224028 | 0           | NA          | NA         | NA         | NA         | LINC01853    |
|           | NA              | ENSG00000224029 | 0           | NA          | NA         | NA         | NA         |              |
|           | NA              | ENSG00000224031 | 0.49642464  | -0.02953651 | 0.38590531 | 0.52508093 | NA         | TCEAL3-AS1   |
|           | NA              | ENSG00000224032 | 624.940892  | 0.12185339  | 0.11498054 | 0.26658608 | 0.48900406 | EPB41L4A-AS1 |
|           | NA              | ENSG00000224033 | 0           | NA          | NA         | NA         | NA         | CDY8P        |
| 110806285 | ENSG00000224034 | 0               | NA          | NA          | NA         | NA         | LINC02561  |              |
|           | NA              | ENSG00000224035 | 0           | NA          | NA         | NA         | NA         | SFPQP1       |
|           | NA              | ENSG00000224038 | 0           | NA          | NA         | NA         | NA         |              |
|           | NA              | ENSG00000224039 | 0.16735865  | 0.01897177  | 0.38482933 | 0.78225479 | NA         | CDYLP1       |
|           | NA              | ENSG00000224040 | 0           | NA          | NA         | NA         | NA         | HMG1P4       |
|           | NA              | ENSG00000224041 | 0           | NA          | NA         | NA         | NA         | IGKV3D-15    |
|           | NA              | ENSG00000224042 | 0           | NA          | NA         | NA         | NA         | MTND4P6      |
|           | NA              | ENSG00000224043 | 72.0011582  | -0.13146925 | 0.24143431 | 0.4870579  | 0.70694482 | CCNT2-AS1    |
|           | NA              | ENSG00000224045 | 0           | NA          | NA         | NA         | NA         | PAEPP1       |
| 101927420 | ENSG00000224046 | 18.6136457      | -0.28372113 | 0.39185994  | 0.18106972 | 0.37826927 |            |              |
| 101929282 | ENSG00000224048 | 0               | NA          | NA          | NA         | NA         | LINC02612  |              |

|           |                 |            |             |            |            |            |             |
|-----------|-----------------|------------|-------------|------------|------------|------------|-------------|
| NA        | ENSG00000224049 | 0          | NA          | NA         | NA         | NA         |             |
| 80772     | ENSG00000224051 | 431.855698 | 0.17180548  | 0.11987543 | 0.13143066 | 0.30411845 | CPTP        |
| NA        | ENSG00000224054 | 0          | NA          | NA         | NA         | NA         |             |
| NA        | ENSG00000224055 | 0.14931947 | -0.01844332 | 0.38480212 | 0.84537521 | NA         | GAPDHP55    |
| 100507500 | ENSG00000224057 | 2.19227875 | -0.13657614 | 0.41436447 | 0.07176138 | NA         | EGFR-AS1    |
| NA        | ENSG00000224058 | 0          | NA          | NA         | NA         | NA         |             |
| NA        | ENSG00000224059 | 0          | NA          | NA         | NA         | NA         | HSPA8P16    |
| NA        | ENSG00000224060 | 0          | NA          | NA         | NA         | NA         | ARSLP1      |
| NA        | ENSG00000224061 | 0          | NA          | NA         | NA         | NA         | SRSF3P4     |
| NA        | ENSG00000224062 | 0          | NA          | NA         | NA         | NA         | TUBB4BP5    |
| NA        | ENSG00000224063 | 0          | NA          | NA         | NA         | NA         |             |
| NA        | ENSG00000224064 | 0          | NA          | NA         | NA         | NA         | RPL32P6     |
| NA        | ENSG00000224065 | 0          | NA          | NA         | NA         | NA         | SRIP2       |
| NA        | ENSG00000224066 | 1.49604177 | 0.03652739  | 0.38138636 | 0.59080985 | NA         |             |
| NA        | ENSG00000224067 | 0          | NA          | NA         | NA         | NA         |             |
| NA        | ENSG00000224069 | 0          | NA          | NA         | NA         | NA         |             |
| NA        | ENSG00000224070 | 0          | NA          | NA         | NA         | NA         | HMGNI1P6    |
| NA        | ENSG00000224071 | 0          | NA          | NA         | NA         | NA         | DNMT3AP1    |
| NA        | ENSG00000224072 | 2.33078691 | 0.04006334  | 0.37513519 | 0.67571959 | NA         | VEZTP1      |
| 152024    | ENSG00000224074 | 0.18922458 | 0.01954053  | 0.38488496 | 0.78225479 | NA         | LINC00691   |
| 252954    | ENSG00000224075 | 0          | NA          | NA         | NA         | NA         | TTY2        |
| NA        | ENSG00000224076 | 0          | NA          | NA         | NA         | NA         |             |
| NA        | ENSG00000224077 | 0.14931947 | -0.01844332 | 0.38480212 | 0.84537521 | NA         |             |
| NA        | ENSG00000224078 | 2060.94913 | -0.79891022 | 0.08615776 | 3.52E-21   | 1.38E-19   | SNHG14      |
| NA        | ENSG00000224079 | 1.51976176 | 0.0243727   | 0.37701773 | 0.7643735  | NA         |             |
| NA        | ENSG00000224080 | 2.17155187 | 0.04971538  | 0.37916933 | 0.56940692 | NA         | UBE2FP1     |
| 101928079 | ENSG00000224081 | 113.151324 | 1.7013831   | 0.3072169  | 1.82E-09   | 3.03E-08   | SLC44A3-AS1 |
| NA        | ENSG00000224082 | 0          | NA          | NA         | NA         | NA         | UBTFL8      |
| NA        | ENSG00000224083 | 0          | NA          | NA         | NA         | NA         | MTCO1P11    |
| NA        | ENSG00000224085 | 0          | NA          | NA         | NA         | NA         | RPL23AP41   |
| NA        | ENSG00000224086 | 245.590029 | -0.86385443 | 0.24653026 | 6.17E-05   | 0.00049391 | PPM1F-AS1   |
| NA        | ENSG00000224087 | 0          | NA          | NA         | NA         | NA         | POTEF-AS1   |
| 728036    | ENSG00000224089 | 0          | NA          | NA         | NA         | NA         | CT47A10     |
| 100129175 | ENSG00000224090 | 14.4664207 | 0.10686799  | 0.34214955 | 0.54562545 | 0.7531245  |             |
| NA        | ENSG00000224091 | 0          | NA          | NA         | NA         | NA         |             |
| NA        | ENSG00000224092 | 0          | NA          | NA         | NA         | NA         |             |
| NA        | ENSG00000224093 | 5.53157209 | 0.10924264  | 0.38647276 | 0.33591655 | 0.56585025 | BCAR3-AS1   |
| NA        | ENSG00000224094 | 0.97111956 | 0.00670475  | 0.38010583 | 0.911919   | NA         | RPS24P8     |

|           |                 |            |             |            |            |            |             |
|-----------|-----------------|------------|-------------|------------|------------|------------|-------------|
| 105373519 | ENSG00000224095 | 0          | NA          | NA         | NA         | NA         | LINC01935   |
| NA        | ENSG00000224097 | 6.65517067 | 0.4909616   | 0.84194565 | 0.02354699 | 0.08302334 |             |
| NA        | ENSG00000224099 | 0.3237537  | 0.00189789  | 0.38337402 | 0.96291217 | NA         |             |
| NA        | ENSG00000224100 | 0          | NA          | NA         | NA         | NA         |             |
| 100861514 | ENSG00000224101 | 0          | NA          | NA         | NA         | NA         | ELMO1-AS1   |
| NA        | ENSG00000224104 | 0          | NA          | NA         | NA         | NA         |             |
| NA        | ENSG00000224106 | 0          | NA          | NA         | NA         | NA         | CYP4F25P    |
| 100129515 | ENSG00000224107 | 0          | NA          | NA         | NA         | NA         | ETDB        |
| 347549    | ENSG00000224109 | 14.2539697 | 5.74933715  | 1.42144699 | 2.07E-06   | 2.22E-05   | CENPVL3     |
| NA        | ENSG00000224110 | 0          | NA          | NA         | NA         | NA         | MTRF1LP2    |
| NA        | ENSG00000224114 | 0.78950904 | -0.0363109  | 0.383861   | 0.51018091 | NA         |             |
| 285954    | ENSG00000224116 | 7.1285099  | -0.05612062 | 0.35992929 | 0.6832085  | 0.84559306 | INHBA-AS1   |
| NA        | ENSG00000224117 | 0.173733   | 0.01914545  | 0.38484597 | 0.78225479 | NA         | PTPN2P2     |
| NA        | ENSG00000224121 | 0.29863895 | -0.02292439 | 0.3852726  | 0.68753245 | NA         | ATG12P2     |
| 100861520 | ENSG00000224122 | 0          | NA          | NA         | NA         | NA         | POU6F2-AS1  |
| NA        | ENSG00000224124 | 0          | NA          | NA         | NA         | NA         | POM121L10P  |
| NA        | ENSG00000224126 | 2.36232789 | 0.03646324  | 0.37650717 | 0.68237961 | NA         | UBE2SP2     |
| NA        | ENSG00000224127 | 0.16735865 | 0.01897177  | 0.38482933 | 0.78225479 | NA         |             |
| NA        | ENSG00000224128 | 0.64788017 | -0.0378337  | 0.38680023 | 0.40944178 | NA         | LINC01248   |
| NA        | ENSG00000224129 | 0          | NA          | NA         | NA         | NA         | DPPA2P2     |
| NA        | ENSG00000224132 | 0          | NA          | NA         | NA         | NA         |             |
| NA        | ENSG00000224134 | 0          | NA          | NA         | NA         | NA         |             |
| NA        | ENSG00000224136 | 0          | NA          | NA         | NA         | NA         |             |
| NA        | ENSG00000224137 | 0          | NA          | NA         | NA         | NA         | LINC01857   |
| NA        | ENSG00000224138 | 10.4444738 | -0.0359079  | 0.33969233 | 0.8229652  | 0.91934852 |             |
| NA        | ENSG00000224141 | 0          | NA          | NA         | NA         | NA         | MIR548XHG   |
| NA        | ENSG00000224142 | 0.73281975 | 0.02387551  | 0.383934   | 0.58231019 | NA         | AMMECR1-IT1 |
| NA        | ENSG00000224144 | 0          | NA          | NA         | NA         | NA         | ASH2LP1     |
| NA        | ENSG00000224149 | 0.173733   | 0.01914545  | 0.38484597 | 0.78225479 | NA         |             |
| NA        | ENSG00000224151 | 0          | NA          | NA         | NA         | NA         | USP9YP28    |
| NA        | ENSG00000224152 | 49.8672724 | 0.12636744  | 0.27423489 | 0.52283976 | 0.73594472 |             |
| 105374250 | ENSG00000224153 | 0          | NA          | NA         | NA         | NA         | LINC02054   |
| NA        | ENSG00000224155 | 0          | NA          | NA         | NA         | NA         |             |
| 414760    | ENSG00000224157 | 0.65859991 | 0.0053266   | 0.38196456 | 0.90972226 | NA         | HCG14       |
| NA        | ENSG00000224159 | 0          | NA          | NA         | NA         | NA         | HMGB1P9     |
| NA        | ENSG00000224160 | 0          | NA          | NA         | NA         | NA         | CICP10      |
| NA        | ENSG00000224161 | 0          | NA          | NA         | NA         | NA         | RPS26P54    |
| NA        | ENSG00000224162 | 0          | NA          | NA         | NA         | NA         | UQCRHP3     |

|           |    |                 |            |             |            |            |            |             |
|-----------|----|-----------------|------------|-------------|------------|------------|------------|-------------|
|           | NA | ENSG00000224163 | 0.18922458 | 0.01954053  | 0.38488496 | 0.78225479 | NA         |             |
| 105374978 |    | ENSG00000224164 | 0          | NA          | NA         | NA         | NA         | LINC02828   |
| 729723    |    | ENSG00000224165 | 45.5748379 | -0.0275778  | 0.37233415 | 0.77337181 | 0.89577306 | DNAJC27-AS1 |
|           | NA | ENSG00000224166 | 0          | NA          | NA         | NA         | NA         | PRYP1       |
|           | NA | ENSG00000224167 | 28.3592436 | -0.20145898 | 0.32726394 | 0.32141115 | 0.54914291 | LINC01357   |
|           | NA | ENSG00000224169 | 0          | NA          | NA         | NA         | NA         | HSFY6P      |
|           | NA | ENSG00000224172 | 0.36243771 | 0.00097804  | 0.38336484 | 0.96656812 | NA         |             |
| 102724373 |    | ENSG00000224173 | 0.71110961 | 0.04126209  | 0.38727898 | 0.3463189  | NA         | LINC02831   |
|           | NA | ENSG00000224174 | 0          | NA          | NA         | NA         | NA         |             |
| 100874055 |    | ENSG00000224177 | 0          | NA          | NA         | NA         | NA         | LINC00570   |
|           | NA | ENSG00000224183 | 2.74776497 | 0.0615966   | 0.38308281 | 0.45315721 | 0.67644871 | SDHDP6      |
| 100506457 |    | ENSG00000224184 | 0.82655224 | -0.01878093 | 0.38174649 | 0.65854394 | NA         | MIR3681HG   |
|           | NA | ENSG00000224185 | 2.07109398 | -0.10860709 | 0.39840419 | 0.19737117 | NA         | SNX18P9     |
| 100996485 |    | ENSG00000224186 | 102.907277 | -0.01030154 | 0.20589833 | 0.95140364 | 0.98008882 | C5orf66     |
|           | NA | ENSG00000224187 | 0          | NA          | NA         | NA         | NA         | LINC01991   |
|           | NA | ENSG00000224188 | 0          | NA          | NA         | NA         | NA         | UBE2D3P4    |
| 401022    |    | ENSG00000224189 | 344.699151 | 0.26407778  | 0.13711037 | 0.03889669 | 0.12286424 | HAGLR       |
| 728327    |    | ENSG00000224190 | 0          | NA          | NA         | NA         | NA         | LINC02667   |
|           | NA | ENSG00000224192 | 0          | NA          | NA         | NA         | NA         | SEZ6L-AS1   |
|           | NA | ENSG00000224194 | 0          | NA          | NA         | NA         | NA         |             |
|           | NA | ENSG00000224195 | 0.173733   | 0.01914545  | 0.38484597 | 0.78225479 | NA         |             |
|           | NA | ENSG00000224203 | 0          | NA          | NA         | NA         | NA         | RPS23P10    |
| 100873942 |    | ENSG00000224204 | 0          | NA          | NA         | NA         | NA         | PHEX-AS1    |
|           | NA | ENSG00000224205 | 0.18922458 | 0.01954053  | 0.38488496 | 0.78225479 | NA         |             |
|           | NA | ENSG00000224207 | 0          | NA          | NA         | NA         | NA         |             |
|           | NA | ENSG00000224208 | 0          | NA          | NA         | NA         | NA         | ZCRB1P1     |
|           | NA | ENSG00000224209 | 0          | NA          | NA         | NA         | NA         | LINC00466   |
|           | NA | ENSG00000224210 | 0          | NA          | NA         | NA         | NA         | TRIM60P5Y   |
| 105376453 |    | ENSG00000224215 | 0.52998506 | 0.01384906  | 0.38294405 | 0.73927086 | NA         |             |
|           | NA | ENSG00000224216 | 3.53634863 | -0.061169   | 0.37828422 | 0.53577026 | 0.74651885 |             |
|           | NA | ENSG00000224217 | 0          | NA          | NA         | NA         | NA         | PRPF4BP1    |
|           | NA | ENSG00000224218 | 0          | NA          | NA         | NA         | NA         |             |
|           | NA | ENSG00000224219 | 0          | NA          | NA         | NA         | NA         | SEC61GP1    |
|           | NA | ENSG00000224220 | 0          | NA          | NA         | NA         | NA         | DTNB-AS1    |
|           | NA | ENSG00000224221 | 0          | NA          | NA         | NA         | NA         | RPS6P8      |
|           | NA | ENSG00000224222 | 0.18922458 | 0.01954053  | 0.38488496 | 0.78225479 | NA         | LINC02636   |
| 285878    |    | ENSG00000224223 | 0.61835393 | -0.03593597 | 0.38658478 | 0.43083373 | NA         | VSTM2A-OT1  |
|           | NA | ENSG00000224224 | 0          | NA          | NA         | NA         | NA         | HAUS1P2     |

|           |                 |            |             |            |            |            |             |
|-----------|-----------------|------------|-------------|------------|------------|------------|-------------|
| 26247     | ENSG00000224227 | 0.14931947 | -0.01844332 | 0.38480212 | 0.84537521 | NA         | OR2L1P      |
| NA        | ENSG00000224228 | 0          | NA          | NA         | NA         | NA         |             |
| NA        | ENSG00000224231 | 0.32602257 | 0.00233004  | 0.38337996 | 0.95800211 | NA         | LINC01832   |
| NA        | ENSG00000224232 | 1.01893608 | 0.04663879  | 0.38602719 | 0.36725605 | NA         | KCTD5P1     |
| NA        | ENSG00000224233 | 0          | NA          | NA         | NA         | NA         | OR2J4P      |
| NA        | ENSG00000224236 | 0          | NA          | NA         | NA         | NA         | MRRFP1      |
| NA        | ENSG00000224237 | 0          | NA          | NA         | NA         | NA         | MICOS10P3   |
| NA        | ENSG00000224238 | 0.16735865 | 0.01897177  | 0.38482933 | 0.78225479 | NA         | WARS2-IT1   |
| NA        | ENSG00000224239 | 3.26312911 | 0.18036785  | 0.42976118 | 0.11249963 | 0.27167728 |             |
| NA        | ENSG00000224240 | 0          | NA          | NA         | NA         | NA         | CYCSP49     |
| 100505996 | ENSG00000224243 | 0          | NA          | NA         | NA         | NA         | SOX1-OT     |
| NA        | ENSG00000224244 | 0          | NA          | NA         | NA         | NA         | KRT224P     |
| NA        | ENSG00000224245 | 0          | NA          | NA         | NA         | NA         |             |
| NA        | ENSG00000224247 | 0          | NA          | NA         | NA         | NA         |             |
| NA        | ENSG00000224250 | 0          | NA          | NA         | NA         | NA         |             |
| NA        | ENSG00000224251 | 1.11812717 | 0.07553147  | 0.39405537 | 0.1407611  | NA         |             |
| NA        | ENSG00000224252 | 0          | NA          | NA         | NA         | NA         |             |
| NA        | ENSG00000224254 | 0          | NA          | NA         | NA         | NA         | MTCO1P39    |
| NA        | ENSG00000224255 | 0.33957539 | 0.00265221  | 0.38338496 | 0.96313524 | NA         | PDCL3P6     |
| NA        | ENSG00000224256 | 0          | NA          | NA         | NA         | NA         |             |
| 100885780 | ENSG00000224257 | 0          | NA          | NA         | NA         | NA         | VWC2L-IT1   |
| NA        | ENSG00000224259 | 0          | NA          | NA         | NA         | NA         | LINC01133   |
| NA        | ENSG00000224260 | 0          | NA          | NA         | NA         | NA         |             |
| NA        | ENSG00000224261 | 4.00140256 | 0.06352854  | 0.37266024 | 0.58371187 | 0.77995982 | RPSAP18     |
| NA        | ENSG00000224263 | 0          | NA          | NA         | NA         | NA         | CYCSP12     |
| NA        | ENSG00000224265 | 0          | NA          | NA         | NA         | NA         | LINC02633   |
| NA        | ENSG00000224267 | 0          | NA          | NA         | NA         | NA         |             |
| NA        | ENSG00000224269 | 0          | NA          | NA         | NA         | NA         |             |
| 284930    | ENSG00000224271 | 94.4190305 | -0.09554987 | 0.21112595 | 0.58751605 | 0.78256674 |             |
| NA        | ENSG00000224272 | 8.08908668 | 0.09370204  | 0.36762979 | 0.51311823 | 0.72835843 |             |
| NA        | ENSG00000224273 | 1.21319313 | 0.01662056  | 0.3798127  | 0.79748653 | NA         |             |
| NA        | ENSG00000224274 | 0          | NA          | NA         | NA         | NA         | ENSAP1      |
| 107985210 | ENSG00000224276 | 0          | NA          | NA         | NA         | NA         | ARHGEF2-AS1 |
| NA        | ENSG00000224277 | 0          | NA          | NA         | NA         | NA         |             |
| NA        | ENSG00000224278 | 0          | NA          | NA         | NA         | NA         |             |
| NA        | ENSG00000224279 | 0          | NA          | NA         | NA         | NA         | RPS29P31    |
| NA        | ENSG00000224280 | 0.35665592 | 0.02381688  | 0.38538103 | 0.61402974 | NA         |             |
| 100303728 | ENSG00000224281 | 32.3144523 | 0.38810005  | 0.40755491 | 0.09898945 | 0.24744245 | SLC25A5-AS1 |

|           |                 |            |             |            |            |            |            |
|-----------|-----------------|------------|-------------|------------|------------|------------|------------|
| NA        | ENSG00000224282 | 0          | NA          | NA         | NA         | NA         |            |
| 284688    | ENSG00000224286 | 0          | NA          | NA         | NA         | NA         | LINC01142  |
| 151507    | ENSG00000224287 | 17.5396891 | -0.11385334 | 0.40562325 | 0.08789222 | 0.22652398 | MSL3P1     |
| NA        | ENSG00000224288 | 0          | NA          | NA         | NA         | NA         | MTCYBP11   |
| NA        | ENSG00000224289 | 0          | NA          | NA         | NA         | NA         | IFIT6P     |
| NA        | ENSG00000224291 | 0          | NA          | NA         | NA         | NA         | RPL38P6    |
| 101927635 | ENSG00000224292 | 0.67184513 | -0.02055535 | 0.38302845 | 0.66291562 | NA         |            |
| 101927501 | ENSG00000224294 | 0.32313296 | -0.0232594  | 0.38531948 | 0.66923586 | NA         | PINCR      |
| NA        | ENSG00000224295 | 0          | NA          | NA         | NA         | NA         | OLFM5P     |
| NA        | ENSG00000224296 | 0          | NA          | NA         | NA         | NA         | MRPL49P1   |
| NA        | ENSG00000224297 | 0          | NA          | NA         | NA         | NA         |            |
| NA        | ENSG00000224299 | 0          | NA          | NA         | NA         | NA         | MTATP6P16  |
| NA        | ENSG00000224300 | 0          | NA          | NA         | NA         | NA         | OR51P1P    |
| 105378328 | ENSG00000224301 | 0          | NA          | NA         | NA         | NA         |            |
| NA        | ENSG00000224302 | 0.173124   | -0.01911262 | 0.38486262 | 0.84537521 | NA         |            |
| 101929331 | ENSG00000224307 | 0          | NA          | NA         | NA         | NA         |            |
| 101927988 | ENSG00000224308 | 0          | NA          | NA         | NA         | NA         | LINC01527  |
| NA        | ENSG00000224309 | 0          | NA          | NA         | NA         | NA         | ANKRD30BP2 |
| 400511    | ENSG00000224310 | 0          | NA          | NA         | NA         | NA         | LINC01567  |
| NA        | ENSG00000224311 | 0          | NA          | NA         | NA         | NA         |            |
| NA        | ENSG00000224312 | 0          | NA          | NA         | NA         | NA         | MCCD1P2    |
| NA        | ENSG00000224314 | 0          | NA          | NA         | NA         | NA         | TCERG1P1   |
| NA        | ENSG00000224315 | 0          | NA          | NA         | NA         | NA         | RPL7P7     |
| NA        | ENSG00000224316 | 2.4897624  | 0.05910798  | 0.38096766 | 0.49954437 | NA         | GTF2IP5    |
| 101927174 | ENSG00000224318 | 0.50207596 | 0.02562368  | 0.38565771 | 0.52549886 | NA         | CHL1-AS2   |
| NA        | ENSG00000224321 | 0.33471731 | 0.02354391  | 0.38534154 | 0.62842204 | NA         | RPL12P14   |
| NA        | ENSG00000224322 | 0          | NA          | NA         | NA         | NA         |            |
| NA        | ENSG00000224323 | 0.5148346  | -0.00898771 | 0.38272121 | 0.83098234 | NA         | DPRXP1     |
| NA        | ENSG00000224324 | 0          | NA          | NA         | NA         | NA         | THAP5P1    |
| NA        | ENSG00000224326 | 0          | NA          | NA         | NA         | NA         |            |
| 106478956 | ENSG00000224328 | 0          | NA          | NA         | NA         | NA         | MDC1-AS1   |
| 100874059 | ENSG00000224329 | 0          | NA          | NA         | NA         | NA         | LINC00297  |
| NA        | ENSG00000224330 | 0          | NA          | NA         | NA         | NA         |            |
| NA        | ENSG00000224331 | 0          | NA          | NA         | NA         | NA         |            |
| NA        | ENSG00000224333 | 0.95646236 | -0.01863645 | 0.38096748 | 0.75266611 | NA         | GAPDHP20   |
| NA        | ENSG00000224334 | 0          | NA          | NA         | NA         | NA         |            |
| NA        | ENSG00000224335 | 0          | NA          | NA         | NA         | NA         |            |
| NA        | ENSG00000224336 | 0          | NA          | NA         | NA         | NA         | FAM197Y1   |

|           |                 |            |             |            |            |            |              |
|-----------|-----------------|------------|-------------|------------|------------|------------|--------------|
| NA        | ENSG00000224337 | 0          | NA          | NA         | NA         | NA         | FAM8A3P      |
| NA        | ENSG00000224338 | 0          | NA          | NA         | NA         | NA         | MTCYBP45     |
| NA        | ENSG00000224339 | 0          | NA          | NA         | NA         | NA         | SC4MOP       |
| NA        | ENSG00000224340 | 0          | NA          | NA         | NA         | NA         |              |
| NA        | ENSG00000224341 | 0.85309685 | 0.01901538  | 0.38066665 | 0.75399489 | NA         | AKR7A2P2     |
| NA        | ENSG00000224342 | 0.173733   | 0.01914545  | 0.38484597 | 0.78225479 | NA         |              |
| NA        | ENSG00000224344 | 0          | NA          | NA         | NA         | NA         | KNOP1P3      |
| NA        | ENSG00000224346 | 0.6699741  | 0.02073756  | 0.38371054 | 0.6285661  | NA         | BICD1P1      |
| 104355296 | ENSG00000224347 | 0          | NA          | NA         | NA         | NA         | SCEL-AS1     |
| NA        | ENSG00000224348 | 0          | NA          | NA         | NA         | NA         |              |
| 105377849 | ENSG00000224349 | 0.15069912 | -0.01848503 | 0.38480575 | 0.84537521 | NA         | FAM135A-AS1  |
| NA        | ENSG00000224351 | 0          | NA          | NA         | NA         | NA         | CDKN2AIPNLP3 |
| NA        | ENSG00000224352 | 0          | NA          | NA         | NA         | NA         |              |
| NA        | ENSG00000224353 | 0          | NA          | NA         | NA         | NA         | ACE3P        |
| NA        | ENSG00000224354 | 0.50322552 | -0.02985279 | 0.38593381 | 0.52006541 | NA         | MTND2P5      |
| NA        | ENSG00000224356 | 5.03120717 | -0.11169278 | 0.38776106 | 0.33808656 | 0.56829936 |              |
| NA        | ENSG00000224357 | 0          | NA          | NA         | NA         | NA         | ATG3P1       |
| NA        | ENSG00000224358 | 20.1768922 | -0.00949942 | 0.31208242 | 0.95660705 | 0.98225256 | TMCO1-AS1    |
| NA        | ENSG00000224359 | 0          | NA          | NA         | NA         | NA         |              |
| NA        | ENSG00000224361 | 0          | NA          | NA         | NA         | NA         |              |
| NA        | ENSG00000224363 | 0.18922458 | 0.01954053  | 0.38488496 | 0.78225479 | NA         |              |
| NA        | ENSG00000224365 | 0          | NA          | NA         | NA         | NA         |              |
| NA        | ENSG00000224366 | 0          | NA          | NA         | NA         | NA         |              |
| NA        | ENSG00000224367 | 0          | NA          | NA         | NA         | NA         | OACYLP       |
| NA        | ENSG00000224368 | 0          | NA          | NA         | NA         | NA         | ARAFP2       |
| NA        | ENSG00000224370 | 0          | NA          | NA         | NA         | NA         |              |
| NA        | ENSG00000224371 | 0          | NA          | NA         | NA         | NA         |              |
| NA        | ENSG00000224372 | 0          | NA          | NA         | NA         | NA         | HLA-N        |
| NA        | ENSG00000224373 | 0          | NA          | NA         | NA         | NA         | IGHV4-59     |
| NA        | ENSG00000224374 | 0          | NA          | NA         | NA         | NA         |              |
| NA        | ENSG00000224375 | 0          | NA          | NA         | NA         | NA         |              |
| NA        | ENSG00000224376 | 9.4691991  | 0.17107158  | 0.39900466 | 0.25471515 | 0.47535965 |              |
| 100507059 | ENSG00000224382 | 0          | NA          | NA         | NA         | NA         | LINC00703    |
| 92340     | ENSG00000224383 | 35.0168054 | 0.53891446  | 0.46562881 | 0.04354688 | 0.1338451  | PRR29        |
| NA        | ENSG00000224384 | 0          | NA          | NA         | NA         | NA         |              |
| NA        | ENSG00000224387 | 1.16510418 | -0.05918119 | 0.38734949 | 0.3116684  | NA         |              |
| NA        | ENSG00000224388 | 0          | NA          | NA         | NA         | NA         | BACE2-IT1    |
| 721       | ENSG00000224389 | 17.4200656 | -0.14643291 | 0.36001121 | 0.39826081 | 0.62727695 | C4B          |



|           |                 |            |             |            |            |            |             |
|-----------|-----------------|------------|-------------|------------|------------|------------|-------------|
| NA        | ENSG00000224391 | 0          | NA          | NA         | NA         | NA         | LINC01280   |
| NA        | ENSG00000224394 | 0          | NA          | NA         | NA         | NA         | GPC6-AS2    |
| NA        | ENSG00000224396 | 0          | NA          | NA         | NA         | NA         | METTL15P3   |
| NA        | ENSG00000224397 | 0          | NA          | NA         | NA         | NA         | PELATON     |
| NA        | ENSG00000224400 | 0          | NA          | NA         | NA         | NA         |             |
| NA        | ENSG00000224401 | 4.6286131  | -0.08243319 | 0.37962239 | 0.45602648 | 0.67958359 | RPL7P57     |
| NA        | ENSG00000224402 | 0.95733758 | -0.01686007 | 0.38083389 | 0.77545972 | NA         | OR6D1P      |
| NA        | ENSG00000224403 | 0          | NA          | NA         | NA         | NA         | DPPA2P3     |
| NA        | ENSG00000224404 | 0          | NA          | NA         | NA         | NA         |             |
| 100861573 | ENSG00000224405 | 0          | NA          | NA         | NA         | NA         | LINC00572   |
| 253573    | ENSG00000224406 | 0          | NA          | NA         | NA         | NA         | LINC02052   |
| NA        | ENSG00000224407 | 0.69493202 | 0.03154416  | 0.38626309 | 0.41391645 | NA         |             |
| NA        | ENSG00000224408 | 0          | NA          | NA         | NA         | NA         | USP9YP22    |
| NA        | ENSG00000224409 | 0          | NA          | NA         | NA         | NA         |             |
| NA        | ENSG00000224410 | 0          | NA          | NA         | NA         | NA         |             |
| NA        | ENSG00000224411 | 1.42244027 | -0.02593626 | 0.38004838 | 0.70228473 | NA         | HSP90AA2P   |
| NA        | ENSG00000224412 | 0          | NA          | NA         | NA         | NA         |             |
| NA        | ENSG00000224413 | 0          | NA          | NA         | NA         | NA         |             |
| NA        | ENSG00000224414 | 0.35659101 | 0.02381641  | 0.38538096 | 0.61406252 | NA         |             |
| NA        | ENSG00000224415 | 0.82777605 | 0.0181196   | 0.38135516 | 0.74783819 | NA         |             |
| NA        | ENSG00000224416 | 0          | NA          | NA         | NA         | NA         | IFNA22P     |
| NA        | ENSG00000224417 | 0          | NA          | NA         | NA         | NA         |             |
| NA        | ENSG00000224418 | 6.51171554 | -0.18846856 | 0.41605075 | 0.19453981 | 0.39761717 | STK24-AS1   |
| NA        | ENSG00000224419 | 0          | NA          | NA         | NA         | NA         | KRT18P27    |
| 199800    | ENSG00000224420 | 42.5033782 | 0.4815034   | 0.3483838  | 0.04609105 | 0.13985441 | ADM5        |
| NA        | ENSG00000224421 | 0          | NA          | NA         | NA         | NA         | ATP5MFP1    |
| 100506637 | ENSG00000224424 | 25.2864903 | 0.53142654  | 0.50977618 | 0.04701379 | 0.14190683 | PRKAR2A-AS1 |
| NA        | ENSG00000224425 | 0          | NA          | NA         | NA         | NA         | SSBP3P2     |
| NA        | ENSG00000224426 | 0          | NA          | NA         | NA         | NA         | SLC31A1P1   |
| NA        | ENSG00000224427 | 0          | NA          | NA         | NA         | NA         |             |
| NA        | ENSG00000224429 | 9.29067529 | -0.00364027 | 0.34882092 | 0.97807326 | 0.9925115  | LINC00539   |
| NA        | ENSG00000224430 | 0.47461446 | -0.02850056 | 0.38581374 | 0.541913   | NA         | MKRN5P      |
| NA        | ENSG00000224431 | 9.0126869  | 0.04321297  | 0.34727761 | 0.78135826 | 0.90003181 |             |
| NA        | ENSG00000224435 | 1.0457032  | 0.03506906  | 0.38167144 | 0.58862719 | NA         | NF1P6       |
| NA        | ENSG00000224436 | 0          | NA          | NA         | NA         | NA         |             |
| NA        | ENSG00000224437 | 0          | NA          | NA         | NA         | NA         | PIGUP1      |
| NA        | ENSG00000224438 | 1.0723641  | 0.0603688   | 0.3879175  | 0.29859419 | NA         | RPL23AP14   |
| NA        | ENSG00000224439 | 0          | NA          | NA         | NA         | NA         | RPSAP10     |

|           |                 |            |             |            |            |            |              |
|-----------|-----------------|------------|-------------|------------|------------|------------|--------------|
| 100129239 | ENSG00000224440 | 0          | NA          | NA         | NA         | NA         | CXorf51A     |
| NA        | ENSG00000224442 | 0.18922458 | 0.01954053  | 0.38488496 | 0.78225479 | NA         | RPL4P7       |
| NA        | ENSG00000224443 | 0          | NA          | NA         | NA         | NA         | NME2P2       |
| 101928270 | ENSG00000224445 | 0          | NA          | NA         | NA         | NA         | LINC01708    |
| NA        | ENSG00000224447 | 0          | NA          | NA         | NA         | NA         | H3P26        |
| NA        | ENSG00000224448 | 1.13556611 | -0.03750149 | 0.38147944 | 0.58130796 | NA         |              |
| NA        | ENSG00000224451 | 0          | NA          | NA         | NA         | NA         | ATP5PBP1     |
| NA        | ENSG00000224452 | 0.91014391 | 0.05219359  | 0.38903261 | 0.24668733 | NA         | RSL24D1P6    |
| NA        | ENSG00000224458 | 0          | NA          | NA         | NA         | NA         | GUSBP6       |
| 110806303 | ENSG00000224459 | 0          | NA          | NA         | NA         | NA         | SLC25A34-AS1 |
| NA        | ENSG00000224462 | 0          | NA          | NA         | NA         | NA         | C4BPAP1      |
| NA        | ENSG00000224463 | 0          | NA          | NA         | NA         | NA         | RPL39P14     |
| NA        | ENSG00000224464 | 0          | NA          | NA         | NA         | NA         | PGAM1P6      |
| NA        | ENSG00000224465 | 0          | NA          | NA         | NA         | NA         | SOCS2P2      |
| NA        | ENSG00000224466 | 0          | NA          | NA         | NA         | NA         | CDCA4P2      |
| NA        | ENSG00000224467 | 0          | NA          | NA         | NA         | NA         | TANK-AS1     |
| 110841583 | ENSG00000224468 | 0.81197071 | -0.00888041 | 0.3808656  | 0.87530438 | NA         | LAMC1-AS1    |
| NA        | ENSG00000224469 | 0          | NA          | NA         | NA         | NA         |              |
| 342371    | ENSG00000224470 | 1305.43241 | 0.24824758  | 0.07528252 | 0.00075683 | 0.00463154 | ATXN1L       |
| NA        | ENSG00000224471 | 0          | NA          | NA         | NA         | NA         | MTCO3P19     |
| NA        | ENSG00000224473 | 0          | NA          | NA         | NA         | NA         | CCND3P1      |
| NA        | ENSG00000224475 | 0          | NA          | NA         | NA         | NA         |              |
| NA        | ENSG00000224476 | 0          | NA          | NA         | NA         | NA         | RPL36P16     |
| NA        | ENSG00000224477 | 0          | NA          | NA         | NA         | NA         |              |
| NA        | ENSG00000224478 | 0          | NA          | NA         | NA         | NA         |              |
| NA        | ENSG00000224479 | 1.5516088  | 0.06944829  | 0.38836829 | 0.30953441 | NA         |              |
| NA        | ENSG00000224481 | 0          | NA          | NA         | NA         | NA         |              |
| NA        | ENSG00000224482 | 0          | NA          | NA         | NA         | NA         | HSFY4P       |
| NA        | ENSG00000224484 | 1.22136847 | -0.08445014 | 0.39645482 | 0.12246073 | NA         |              |
| NA        | ENSG00000224485 | 0          | NA          | NA         | NA         | NA         | USP9YP7      |
| NA        | ENSG00000224486 | 0          | NA          | NA         | NA         | NA         |              |
| NA        | ENSG00000224488 | 0.32421355 | -0.02327612 | 0.38532181 | 0.66838439 | NA         | SAMM50P1     |
| NA        | ENSG00000224490 | 0.15069912 | -0.01848503 | 0.38480575 | 0.84537521 | NA         | TTC21B-AS1   |
| NA        | ENSG00000224493 | 0          | NA          | NA         | NA         | NA         |              |
| NA        | ENSG00000224494 | 3.2607497  | 0.00181362  | 0.37182551 | 0.98701856 | 0.99565021 | HNRNPA3P14   |
| NA        | ENSG00000224497 | 0.72646532 | 0.00305538  | 0.38234587 | 0.943323   | NA         | RPL36P4      |
| NA        | ENSG00000224498 | 0          | NA          | NA         | NA         | NA         | MAPKAPK5P1   |
| NA        | ENSG00000224500 | 0          | NA          | NA         | NA         | NA         |              |

|           |                 |            |             |            |            |            |           |
|-----------|-----------------|------------|-------------|------------|------------|------------|-----------|
| 101929662 | ENSG00000224504 | 0          | NA          | NA         | NA         | NA         |           |
| NA        | ENSG00000224505 | 0          | NA          | NA         | NA         | NA         |           |
| 643623    | ENSG00000224506 | 0          | NA          | NA         | NA         | NA         | LINC02523 |
| 102724691 | ENSG00000224509 | 0          | NA          | NA         | NA         | NA         | MRPS9-AS2 |
| NA        | ENSG00000224510 | 0          | NA          | NA         | NA         | NA         | POLR2KP2  |
| 100874146 | ENSG00000224511 | 0.88357265 | 0.02876825  | 0.38423005 | 0.538054   | NA         | LINC00365 |
| NA        | ENSG00000224513 | 0          | NA          | NA         | NA         | NA         |           |
| 285375    | ENSG00000224514 | 0          | NA          | NA         | NA         | NA         | LINC00620 |
| NA        | ENSG00000224515 | 0          | NA          | NA         | NA         | NA         |           |
| NA        | ENSG00000224516 | 0          | NA          | NA         | NA         | NA         |           |
| 100874082 | ENSG00000224517 | 0          | NA          | NA         | NA         | NA         | HTR2A-AS1 |
| NA        | ENSG00000224518 | 0          | NA          | NA         | NA         | NA         |           |
| NA        | ENSG00000224519 | 0          | NA          | NA         | NA         | NA         | HMG1P19   |
| NA        | ENSG00000224520 | 0.14931947 | -0.01844332 | 0.38480212 | 0.84537521 | NA         | KRT8P45   |
| NA        | ENSG00000224521 | 0.64674811 | 0.03717848  | 0.38671395 | 0.39515878 | NA         |           |
| NA        | ENSG00000224523 | 0          | NA          | NA         | NA         | NA         |           |
| NA        | ENSG00000224524 | 0          | NA          | NA         | NA         | NA         | CYCSP42   |
| NA        | ENSG00000224525 | 0.32239256 | -0.02325342 | 0.38531857 | 0.66966395 | NA         |           |
| NA        | ENSG00000224529 | 0          | NA          | NA         | NA         | NA         |           |
| NA        | ENSG00000224530 | 0          | NA          | NA         | NA         | NA         | PPIAP10   |
| 221710    | ENSG00000224531 | 577.634874 | -0.19203374 | 0.10983614 | 0.06735888 | 0.18634601 | SMIM13    |
| NA        | ENSG00000224532 | 0          | NA          | NA         | NA         | NA         |           |
| 100507404 | ENSG00000224533 | 19.2691107 | 0.0462608   | 0.31590495 | 0.80190155 | 0.90941191 | TMLHE-AS1 |
| 101927830 | ENSG00000224533 | 19.2691107 | 0.0462608   | 0.31590495 | 0.80190155 | 0.90941191 | TMLHE-AS1 |
| 105372907 | ENSG00000224535 | 0.37844916 | 0.02407552  | 0.3854191  | 0.60038877 | NA         | LINC02771 |
| NA        | ENSG00000224536 | 5.06027624 | -0.02699633 | 0.36167748 | 0.82930604 | 0.92261925 |           |
| NA        | ENSG00000224537 | 0          | NA          | NA         | NA         | NA         | MEP1AP4   |
| NA        | ENSG00000224539 | 0          | NA          | NA         | NA         | NA         | SAGE4P    |
| NA        | ENSG00000224540 | 0.62341723 | -0.01960215 | 0.38306004 | 0.6832063  | NA         | TFDP1P1   |
| NA        | ENSG00000224541 | 0          | NA          | NA         | NA         | NA         |           |
| NA        | ENSG00000224543 | 1.09267826 | 0.04697824  | 0.38588699 | 0.3488314  | NA         | SNRPGP15  |
| NA        | ENSG00000224545 | 0          | NA          | NA         | NA         | NA         |           |
| NA        | ENSG00000224546 | 0.14931947 | -0.01844332 | 0.38480212 | 0.84537521 | NA         | EIF4BP3   |
| NA        | ENSG00000224547 | 0          | NA          | NA         | NA         | NA         | ZNF619P1  |
| NA        | ENSG00000224548 | 0          | NA          | NA         | NA         | NA         |           |
| NA        | ENSG00000224549 | 0          | NA          | NA         | NA         | NA         |           |
| NA        | ENSG00000224550 | 0          | NA          | NA         | NA         | NA         | NDUFA4P1  |
| NA        | ENSG00000224551 | 0.14931947 | -0.01844332 | 0.38480212 | 0.84537521 | NA         | HMGB3P21  |

|           |                 |            |             |            |            |            |             |
|-----------|-----------------|------------|-------------|------------|------------|------------|-------------|
| NA        | ENSG00000224553 | 0          | NA          | NA         | NA         | NA         | RPS26P20    |
| NA        | ENSG00000224555 | 0          | NA          | NA         | NA         | NA         |             |
| NA        | ENSG00000224556 | 0          | NA          | NA         | NA         | NA         |             |
| 3116      | ENSG00000224557 | 0          | NA          | NA         | NA         | NA         | HLA-DPB2    |
| 101927994 | ENSG00000224559 | 0          | NA          | NA         | NA         | NA         | LINC01087   |
| NA        | ENSG00000224560 | 0          | NA          | NA         | NA         | NA         |             |
| 100873917 | ENSG00000224563 | 0          | NA          | NA         | NA         | NA         | LPP-AS1     |
| NA        | ENSG00000224565 | 0          | NA          | NA         | NA         | NA         | LINC01754   |
| NA        | ENSG00000224566 | 0.47093117 | -0.02832274 | 0.38579833 | 0.54486272 | NA         | FAM96AP2    |
| NA        | ENSG00000224567 | 0          | NA          | NA         | NA         | NA         |             |
| 105373537 | ENSG00000224568 | 6.34408818 | 0.03621558  | 0.35810901 | 0.79242119 | 0.90505074 | LINC01886   |
| NA        | ENSG00000224569 | 0          | NA          | NA         | NA         | NA         |             |
| NA        | ENSG00000224570 | 0.49068283 | 0.01410388  | 0.38308738 | 0.75923825 | NA         |             |
| NA        | ENSG00000224571 | 0          | NA          | NA         | NA         | NA         | USP9YP13    |
| NA        | ENSG00000224573 | 0.14931947 | -0.01844332 | 0.38480212 | 0.84537521 | NA         |             |
| 100874236 | ENSG00000224574 | 0          | NA          | NA         | NA         | NA         | COL18A1-AS2 |
| 102724224 | ENSG00000224577 | 9.50058577 | 0.10599372  | 0.37009801 | 0.46242501 | 0.68532996 | LINC01117   |
| NA        | ENSG00000224578 | 65.6356981 | -0.2453812  | 0.25039037 | 0.20993283 | 0.41838949 | HNRNPA1P48  |
| NA        | ENSG00000224579 | 0          | NA          | NA         | NA         | NA         |             |
| 100507362 | ENSG00000224582 | 0          | NA          | NA         | NA         | NA         | LINC01015   |
| NA        | ENSG00000224583 | 0          | NA          | NA         | NA         | NA         |             |
| NA        | ENSG00000224584 | 0.14931947 | -0.01844332 | 0.38480212 | 0.84537521 | NA         | UBE2V1P13   |
| NA        | ENSG00000224585 | 0          | NA          | NA         | NA         | NA         |             |
| 2880      | ENSG00000224586 | 0          | NA          | NA         | NA         | NA         | GPX5        |
| NA        | ENSG00000224589 | 0          | NA          | NA         | NA         | NA         | ORC1P1      |
| NA        | ENSG00000224590 | 0          | NA          | NA         | NA         | NA         | MTND3P16    |
| NA        | ENSG00000224592 | 0.14931947 | -0.01844332 | 0.38480212 | 0.84537521 | NA         | MIR3659HG   |
| NA        | ENSG00000224593 | 0          | NA          | NA         | NA         | NA         |             |
| NA        | ENSG00000224594 | 1.38762801 | 0.06142557  | 0.38569782 | 0.38250049 | NA         | RPL29P19    |
| NA        | ENSG00000224595 | 0          | NA          | NA         | NA         | NA         |             |
| NA        | ENSG00000224596 | 18.3452836 | -0.16969237 | 0.35282763 | 0.36644084 | 0.59567278 | ZMIZ1-AS1   |
| 102724316 | ENSG00000224597 | 367.626791 | -0.17738019 | 0.128498   | 0.14159111 | 0.3199872  | SVIL-AS1    |
| NA        | ENSG00000224598 | 0.62319117 | -0.01925364 | 0.38302634 | 0.68710731 | NA         | RPS5P2      |
| NA        | ENSG00000224599 | 1.7213829  | 0.10636544  | 0.40157085 | 0.11429917 | NA         | BMS1P12     |
| NA        | ENSG00000224600 | 0          | NA          | NA         | NA         | NA         |             |
| NA        | ENSG00000224602 | 0          | NA          | NA         | NA         | NA         | RPS26P5     |
| NA        | ENSG00000224603 | 0          | NA          | NA         | NA         | NA         |             |
| NA        | ENSG00000224604 | 0          | NA          | NA         | NA         | NA         |             |

|           |                 |            |             |            |            |            |           |
|-----------|-----------------|------------|-------------|------------|------------|------------|-----------|
| NA        | ENSG00000224605 | 0          | NA          | NA         | NA         | NA         |           |
| NA        | ENSG00000224606 | 0          | NA          | NA         | NA         | NA         | TGFA-IT1  |
| NA        | ENSG00000224607 | 0          | NA          | NA         | NA         | NA         | IGKV1D-27 |
| 729467    | ENSG00000224609 | 14.6337328 | -0.30713543 | 0.43908131 | 0.13894782 | 0.31571462 | FGGY-DT   |
| NA        | ENSG00000224610 | 0          | NA          | NA         | NA         | NA         |           |
| NA        | ENSG00000224611 | 0          | NA          | NA         | NA         | NA         |           |
| NA        | ENSG00000224612 | 0          | NA          | NA         | NA         | NA         |           |
| 101928436 | ENSG00000224613 | 0.84134105 | -0.00503736 | 0.38003772 | 0.93406259 | NA         |           |
| NA        | ENSG00000224614 | 17.9022596 | 0.14051876  | 0.332586   | 0.46172576 | 0.684754   | TNK2-AS1  |
| NA        | ENSG00000224616 | 294.491415 | 0.5417263   | 0.25373554 | 0.0091976  | 0.0387021  | RTCA-AS1  |
| NA        | ENSG00000224617 | 0          | NA          | NA         | NA         | NA         |           |
| NA        | ENSG00000224618 | 0          | NA          | NA         | NA         | NA         |           |
| NA        | ENSG00000224620 | 0          | NA          | NA         | NA         | NA         | MEF2AP1   |
| NA        | ENSG00000224621 | 0.173733   | 0.01914545  | 0.38484597 | 0.78225479 | NA         |           |
| NA        | ENSG00000224622 | 0          | NA          | NA         | NA         | NA         | OR9R1P    |
| NA        | ENSG00000224625 | 0          | NA          | NA         | NA         | NA         | TUBB8P6   |
| NA        | ENSG00000224626 | 0          | NA          | NA         | NA         | NA         |           |
| NA        | ENSG00000224627 | 0          | NA          | NA         | NA         | NA         | RPL37P10  |
| NA        | ENSG00000224628 | 0          | NA          | NA         | NA         | NA         |           |
| NA        | ENSG00000224629 | 1.47436363 | 0.01268709  | 0.37884825 | 0.8546637  | NA         |           |
| NA        | ENSG00000224630 | 0          | NA          | NA         | NA         | NA         |           |
| NA        | ENSG00000224631 | 0.51937201 | -0.02557462 | 0.38567603 | 0.54680819 | NA         | RPS27AP16 |
| NA        | ENSG00000224632 | 0          | NA          | NA         | NA         | NA         | NUDT19P2  |
| NA        | ENSG00000224634 | 0          | NA          | NA         | NA         | NA         | ZNF736P6Y |
| NA        | ENSG00000224635 | 24.2359365 | -0.24087752 | 0.34553897 | 0.24899441 | 0.46838429 |           |
| NA        | ENSG00000224637 | 0          | NA          | NA         | NA         | NA         | PDSS1P2   |
| NA        | ENSG00000224640 | 0          | NA          | NA         | NA         | NA         | SRSF1P1   |
| NA        | ENSG00000224643 | 0          | NA          | NA         | NA         | NA         |           |
| NA        | ENSG00000224644 | 0          | NA          | NA         | NA         | NA         |           |
| NA        | ENSG00000224645 | 0          | NA          | NA         | NA         | NA         |           |
| NA        | ENSG00000224646 | 0          | NA          | NA         | NA         | NA         | RPS28P5   |
| NA        | ENSG00000224647 | 0.37844916 | 0.02407552  | 0.3854191  | 0.60038877 | NA         |           |
| NA        | ENSG00000224648 | 0          | NA          | NA         | NA         | NA         | LINC01627 |
| NA        | ENSG00000224649 | 0          | NA          | NA         | NA         | NA         |           |
| NA        | ENSG00000224650 | 0          | NA          | NA         | NA         | NA         | IGHV3-74  |
| 401109    | ENSG00000224652 | 0          | NA          | NA         | NA         | NA         | LINC00885 |
| NA        | ENSG00000224653 | 0          | NA          | NA         | NA         | NA         |           |
| 101927801 | ENSG00000224655 | 0          | NA          | NA         | NA         | NA         | LINC01823 |

|           |                 |            |             |            |            |            |             |
|-----------|-----------------|------------|-------------|------------|------------|------------|-------------|
| NA        | ENSG00000224656 | 0          | NA          | NA         | NA         | NA         | SMSP1       |
| NA        | ENSG00000224657 | 0          | NA          | NA         | NA         | NA         | RBMY2BP     |
| NA        | ENSG00000224658 | 0          | NA          | NA         | NA         | NA         |             |
| 26749     | ENSG00000224659 | 0          | NA          | NA         | NA         | NA         | GAGE12J     |
| 729396    | ENSG00000224659 | 0          | NA          | NA         | NA         | NA         | GAGE12J     |
| 100505696 | ENSG00000224660 | 262.767332 | 0.00262006  | 0.14104756 | 0.98404491 | 0.99453916 | SH3BP5-AS1  |
| NA        | ENSG00000224661 | 0.15069912 | -0.01848503 | 0.38480575 | 0.84537521 | NA         |             |
| NA        | ENSG00000224662 | 0          | NA          | NA         | NA         | NA         | ATP6V1G1P3  |
| NA        | ENSG00000224664 | 0          | NA          | NA         | NA         | NA         | RPL36AP53   |
| NA        | ENSG00000224666 | 0          | NA          | NA         | NA         | NA         | ETV7-AS1    |
| NA        | ENSG00000224667 | 0          | NA          | NA         | NA         | NA         |             |
| NA        | ENSG00000224668 | 3.14262918 | -0.0928869  | 0.39170205 | 0.27708531 | 0.50146127 | IPO8P1      |
| NA        | ENSG00000224669 | 0.59932108 | -0.03506707 | 0.38648533 | 0.44270383 | NA         |             |
| NA        | ENSG00000224670 | 0          | NA          | NA         | NA         | NA         |             |
| NA        | ENSG00000224671 | 0          | NA          | NA         | NA         | NA         |             |
| NA        | ENSG00000224672 | 0.36290211 | 0.0238944   | 0.38539235 | 0.60999253 | NA         | RPL17P10    |
| NA        | ENSG00000224674 | 0          | NA          | NA         | NA         | NA         | EIF3EP2     |
| 100144595 | ENSG00000224675 | 7.60753133 | 0.28848314  | 0.49297303 | 0.0879296  | 0.22659089 |             |
| NA        | ENSG00000224677 | 0.29863895 | -0.02292439 | 0.3852726  | 0.68753245 | NA         | PDIA3P2     |
| NA        | ENSG00000224678 | 0          | NA          | NA         | NA         | NA         | GAPDHP46    |
| NA        | ENSG00000224679 | 0          | NA          | NA         | NA         | NA         | MED15P4     |
| NA        | ENSG00000224680 | 2.01145721 | 0.01519405  | 0.37402209 | 0.8671925  | NA         | PLA2G12AP1  |
| NA        | ENSG00000224681 | 0          | NA          | NA         | NA         | NA         |             |
| NA        | ENSG00000224682 | 0.18922458 | 0.01954053  | 0.38488496 | 0.78225479 | NA         | SOCS5P2     |
| NA        | ENSG00000224683 | 0          | NA          | NA         | NA         | NA         | RPL36AP29   |
| NA        | ENSG00000224685 | 0          | NA          | NA         | NA         | NA         |             |
| NA        | ENSG00000224686 | 0          | NA          | NA         | NA         | NA         | ELOCP23     |
| 100302401 | ENSG00000224687 | 7.30549335 | -0.21423009 | 0.42540472 | 0.17734    | 0.3723552  | RASAL2-AS1  |
| NA        | ENSG00000224688 | 0.173733   | 0.01914545  | 0.38484597 | 0.78225479 | NA         | E2F6P2      |
| NA        | ENSG00000224689 | 0          | NA          | NA         | NA         | NA         | ZNF812P     |
| NA        | ENSG00000224690 | 0          | NA          | NA         | NA         | NA         | UBE2D3P3    |
| NA        | ENSG00000224691 | 0          | NA          | NA         | NA         | NA         |             |
| NA        | ENSG00000224692 | 0          | NA          | NA         | NA         | NA         |             |
| NA        | ENSG00000224695 | 0          | NA          | NA         | NA         | NA         | MTND6P7     |
| NA        | ENSG00000224697 | 0          | NA          | NA         | NA         | NA         | NEFMP1      |
| NA        | ENSG00000224699 | 49.4206972 | 0.83829387  | 0.3605034  | 0.00253592 | 0.0131399  | LAMTOR5-AS1 |
| NA        | ENSG00000224700 | 0          | NA          | NA         | NA         | NA         |             |
| NA        | ENSG00000224701 | 0          | NA          | NA         | NA         | NA         | MED28P4     |

|           |                 |                 |             |             |            |            |            |            |
|-----------|-----------------|-----------------|-------------|-------------|------------|------------|------------|------------|
|           | NA              | ENSG00000224702 | 0           | NA          | NA         | NA         | NA         | LMX1A-AS2  |
|           | NA              | ENSG00000224706 | 0           | NA          | NA         | NA         | NA         | RPS17P13   |
| 100874268 | ENSG00000224707 | 0               | NA          | NA          | NA         | NA         | NA         | E2F3-IT1   |
|           | NA              | ENSG00000224709 | 0.16735865  | 0.01897177  | 0.38482933 | 0.78225479 | NA         | OR11M1P    |
|           | NA              | ENSG00000224711 | 0           | NA          | NA         | NA         | NA         | LINC01706  |
| 642778    | ENSG00000224712 | 20.3013345      | 0.02643912  | 0.32420925  | 0.88262628 | 0.94829441 | NA         | NPIPA3     |
|           | NA              | ENSG00000224713 | 37.7914757  | 0.09283745  | 0.28338932 | 0.63615674 | 0.81722218 |            |
| 101928887 | ENSG00000224714 | 0               | NA          | NA          | NA         | NA         | NA         | LINC02671  |
| 339685    | ENSG00000224715 | 0               | NA          | NA          | NA         | NA         | NA         |            |
| 284577    | ENSG00000224717 | 0.34624801      | -0.02356563 | 0.38536324  | 0.65270996 | NA         | NA         | LEMD1-DT   |
| 101928751 | ENSG00000224718 | 0.86562001      | -0.0370931  | 0.38692692  | 0.35638876 | NA         | NA         | LINC01657  |
|           | NA              | ENSG00000224719 | 0           | NA          | NA         | NA         | NA         |            |
| 102724153 | ENSG00000224721 | 0.18922458      | 0.01954053  | 0.38488496  | 0.78225479 | NA         | NA         |            |
|           | NA              | ENSG00000224722 | 0           | NA          | NA         | NA         | NA         |            |
|           | NA              | ENSG00000224723 | 0           | NA          | NA         | NA         | NA         | GUSBP10    |
|           | NA              | ENSG00000224725 | 0           | NA          | NA         | NA         | NA         | CEP57L1P1  |
|           | NA              | ENSG00000224727 | 1.8479973   | 0.02286051  | 0.37741867 | 0.77305436 | NA         | FCF1P7     |
|           | NA              | ENSG00000224728 | 45.909699   | 0.00498722  | 0.26238811 | 0.98095975 | 0.99355086 | IMPDH1P8   |
| 100129845 | ENSG00000224729 | 42.0912748      | 0.08744454  | 0.28424872  | 0.6546227  | 0.82810431 | NA         | PCOLCE-AS1 |
|           | NA              | ENSG00000224730 | 0           | NA          | NA         | NA         | NA         | LILRB1-AS1 |
|           | NA              | ENSG00000224731 | 0           | NA          | NA         | NA         | NA         |            |
|           | NA              | ENSG00000224732 | 0           | NA          | NA         | NA         | NA         | MAGEA7P    |
|           | NA              | ENSG00000224733 | 0           | NA          | NA         | NA         | NA         |            |
|           | NA              | ENSG00000224735 | 0           | NA          | NA         | NA         | NA         |            |
|           | NA              | ENSG00000224738 | 21.163845   | 0.18250648  | 0.33712589 | 0.35941138 | 0.58949503 |            |
|           | NA              | ENSG00000224739 | 0           | NA          | NA         | NA         | NA         |            |
| 100507064 | ENSG00000224743 | 0               | NA          | NA          | NA         | NA         | NA         | TEX26-AS1  |
|           | NA              | ENSG00000224745 | 0.46663069  | -0.00769573 | 0.38326153 | 0.86569968 | NA         |            |
|           | NA              | ENSG00000224746 | 2.14205078  | 0.02119413  | 0.37743841 | 0.7881691  | NA         |            |
|           | NA              | ENSG00000224747 | 1.23019482  | 0.04225075  | 0.38313189 | 0.5034346  | NA         | MTCYBP21   |
|           | NA              | ENSG00000224750 | 0           | NA          | NA         | NA         | NA         |            |
|           | NA              | ENSG00000224751 | 0           | NA          | NA         | NA         | NA         | SHMT1P1    |
|           | NA              | ENSG00000224752 | 0           | NA          | NA         | NA         | NA         | VN1R21P    |
|           | NA              | ENSG00000224755 | 0           | NA          | NA         | NA         | NA         | HMGNI1P34  |
| 103695432 | ENSG00000224758 | 0.18922458      | 0.01954053  | 0.38488496  | 0.78225479 | NA         | NA         | LINC01167  |
|           | NA              | ENSG00000224760 | 0           | NA          | NA         | NA         | NA         | C1DP3      |
|           | NA              | ENSG00000224761 | 0           | NA          | NA         | NA         | NA         | CCNYL4     |
|           | NA              | ENSG00000224762 | 0           | NA          | NA         | NA         | NA         |            |

|           |                 |            |             |            |            |            |            |
|-----------|-----------------|------------|-------------|------------|------------|------------|------------|
| NA        | ENSG00000224763 | 5.06837498 | 0.12863709  | 0.38734614 | 0.33589174 | 0.56585025 | FDPSP8     |
| NA        | ENSG00000224764 | 0          | NA          | NA         | NA         | NA         |            |
| NA        | ENSG00000224765 | 0          | NA          | NA         | NA         | NA         |            |
| NA        | ENSG00000224769 | 0.14931947 | -0.01844332 | 0.38480212 | 0.84537521 | NA         | MUC20P1    |
| NA        | ENSG00000224771 | 0          | NA          | NA         | NA         | NA         | ATP2B2-IT2 |
| NA        | ENSG00000224773 | 0.173124   | -0.01911262 | 0.38486262 | 0.84537521 | NA         | HSPA8P7    |
| NA        | ENSG00000224775 | 0.87891101 | -0.00714193 | 0.38136081 | 0.8916731  | NA         | BRAFP1     |
| NA        | ENSG00000224776 | 0          | NA          | NA         | NA         | NA         | RPSAP50    |
| NA        | ENSG00000224777 | 0          | NA          | NA         | NA         | NA         | OR4F2P     |
| NA        | ENSG00000224778 | 0          | NA          | NA         | NA         | NA         | CENPIP1    |
| NA        | ENSG00000224781 | 0          | NA          | NA         | NA         | NA         | EIF4A2P4   |
| NA        | ENSG00000224783 | 0          | NA          | NA         | NA         | NA         | MIPEPP2    |
| NA        | ENSG00000224784 | 0          | NA          | NA         | NA         | NA         | S100A15A   |
| NA        | ENSG00000224785 | 0          | NA          | NA         | NA         | NA         |            |
| NA        | ENSG00000224786 | 9.21456282 | -0.00252371 | 0.34536758 | 0.98477259 | 0.99473578 | CETN4P     |
| 101928298 | ENSG00000224788 | 0          | NA          | NA         | NA         | NA         | LINC02670  |
| NA        | ENSG00000224789 | 0          | NA          | NA         | NA         | NA         |            |
| NA        | ENSG00000224790 | 35.5340107 | 0.19679197  | 0.33094427 | 0.32897761 | 0.55760064 |            |
| NA        | ENSG00000224791 | 0          | NA          | NA         | NA         | NA         | KRT18P39   |
| 100506840 | ENSG00000224792 | 0          | NA          | NA         | NA         | NA         | IQCF4P     |
| NA        | ENSG00000224794 | 0          | NA          | NA         | NA         | NA         |            |
| NA        | ENSG00000224795 | 0          | NA          | NA         | NA         | NA         | NTM-AS1    |
| NA        | ENSG00000224796 | 0          | NA          | NA         | NA         | NA         | RPL32P1    |
| NA        | ENSG00000224797 | 0          | NA          | NA         | NA         | NA         |            |
| NA        | ENSG00000224799 | 0          | NA          | NA         | NA         | NA         |            |
| NA        | ENSG00000224800 | 0          | NA          | NA         | NA         | NA         | RPS27AP6   |
| NA        | ENSG00000224802 | 0.34746601 | 0.02370763  | 0.3853651  | 0.61987128 | NA         | TUBB4BP2   |
| 100874253 | ENSG00000224805 | 0.50055867 | 0.01175768  | 0.38339599 | 0.77582196 | NA         | LINC00853  |
| NA        | ENSG00000224806 | 0          | NA          | NA         | NA         | NA         | ARL5AP4    |
| NA        | ENSG00000224807 | 13.1984747 | 2.84677267  | 0.82888538 | 3.76E-05   | 0.00031775 | DUX4L9     |
| NA        | ENSG00000224808 | 0          | NA          | NA         | NA         | NA         | SRGAP3-AS1 |
| NA        | ENSG00000224809 | 0          | NA          | NA         | NA         | NA         | BEND3P2    |
| NA        | ENSG00000224810 | 2.59554277 | 0.07782464  | 0.38415066 | 0.40719216 | 0.63551703 |            |
| 220980    | ENSG00000224812 | 0.32363263 | 0.00014669  | 0.38336241 | 0.9788693  | NA         | TMEM72-AS1 |
| NA        | ENSG00000224814 | 0          | NA          | NA         | NA         | NA         |            |
| NA        | ENSG00000224815 | 0          | NA          | NA         | NA         | NA         |            |
| NA        | ENSG00000224816 | 0          | NA          | NA         | NA         | NA         | NAP1L4P2   |
| NA        | ENSG00000224817 | 0          | NA          | NA         | NA         | NA         |            |



|           |                 |            |             |            |            |            |              |
|-----------|-----------------|------------|-------------|------------|------------|------------|--------------|
| NA        | ENSG00000224818 | 0          | NA          | NA         | NA         | NA         |              |
| NA        | ENSG00000224819 | 0          | NA          | NA         | NA         | NA         |              |
| NA        | ENSG00000224820 | 0          | NA          | NA         | NA         | NA         | BTF3P4       |
| NA        | ENSG00000224821 | 0.3178922  | 0.00077587  | 0.38336443 | 0.96963996 | NA         | COL4A2-AS2   |
| NA        | ENSG00000224822 | 0          | NA          | NA         | NA         | NA         | THRB-IT1     |
| NA        | ENSG00000224825 | 24.1897787 | -0.1328453  | 0.32250573 | 0.48921978 | 0.70874969 | RORB-AS1     |
| NA        | ENSG00000224826 | 0          | NA          | NA         | NA         | NA         | USP21P1      |
| NA        | ENSG00000224827 | 0.173124   | -0.01911262 | 0.38486262 | 0.84537521 | NA         | LINC00265-2P |
| NA        | ENSG00000224829 | 0          | NA          | NA         | NA         | NA         | TOMM20P1     |
| NA        | ENSG00000224830 | 0          | NA          | NA         | NA         | NA         | OR2X1P       |
| NA        | ENSG00000224831 | 4.87115348 | 0.02342021  | 0.36854215 | 0.8326032  | 0.92392457 | TMEM183B     |
| 101927869 | ENSG00000224832 | 0          | NA          | NA         | NA         | NA         | LINC01689    |
| NA        | ENSG00000224834 | 0          | NA          | NA         | NA         | NA         | BTF3P9       |
| NA        | ENSG00000224836 | 0          | NA          | NA         | NA         | NA         |              |
| NA        | ENSG00000224837 | 0          | NA          | NA         | NA         | NA         | GCSHP5       |
| NA        | ENSG00000224839 | 0          | NA          | NA         | NA         | NA         | RPL12P17     |
| NA        | ENSG00000224842 | 0.16735865 | 0.01897177  | 0.38482933 | 0.78225479 | NA         |              |
| 100133205 | ENSG00000224843 | 16.8593636 | 0.08990887  | 0.34240932 | 0.60010177 | 0.79083488 | LINC00240    |
| NA        | ENSG00000224844 | 0.47656228 | -0.00780495 | 0.38277525 | 0.86510058 | NA         |              |
| NA        | ENSG00000224846 | 0.16735865 | 0.01897177  | 0.38482933 | 0.78225479 | NA         | NQO2-AS1     |
| NA        | ENSG00000224848 | 32.4361627 | -0.06417804 | 0.28695331 | 0.7381147  | 0.87628404 |              |
| NA        | ENSG00000224851 | 0          | NA          | NA         | NA         | NA         | LINC00502    |
| NA        | ENSG00000224852 | 0          | NA          | NA         | NA         | NA         | MTND5P24     |
| NA        | ENSG00000224853 | 0          | NA          | NA         | NA         | NA         | LINC00393    |
| NA        | ENSG00000224854 | 0          | NA          | NA         | NA         | NA         | CDKN2A-DT    |
| 100873941 | ENSG00000224855 | 0          | NA          | NA         | NA         | NA         | OPA1-AS1     |
| NA        | ENSG00000224856 | 0.34746601 | 0.02370763  | 0.3853651  | 0.61987128 | NA         | RPL35AP36    |
| NA        | ENSG00000224857 | 0          | NA          | NA         | NA         | NA         | LINC01691    |
| NA        | ENSG00000224858 | 1.58532672 | 0.02021671  | 0.37801557 | 0.78784802 | NA         | RPL29P11     |
| NA        | ENSG00000224860 | 0.31936606 | 0.00202045  | 0.38337572 | 0.95771722 | NA         | GXYLT1P2     |
| NA        | ENSG00000224861 | 6.68070243 | 0.0954803   | 0.36986267 | 0.49632219 | 0.714811   | YBX1P1       |
| 101929651 | ENSG00000224863 | 0          | NA          | NA         | NA         | NA         | LINC01398    |
| NA        | ENSG00000224864 | 0          | NA          | NA         | NA         | NA         |              |
| 101928782 | ENSG00000224865 | 0          | NA          | NA         | NA         | NA         |              |
| NA        | ENSG00000224866 | 0          | NA          | NA         | NA         | NA         | USP9YP25     |
| NA        | ENSG00000224869 | 0          | NA          | NA         | NA         | NA         |              |
| 148413    | ENSG00000224870 | 576.209986 | -0.03442841 | 0.10703801 | 0.73603407 | 0.87474039 | MRPL20-AS1   |
| NA        | ENSG00000224875 | 0.34746601 | 0.02370763  | 0.3853651  | 0.61987128 | NA         | EML4-AS1     |

|           |                 |            |             |            |            |            |             |
|-----------|-----------------|------------|-------------|------------|------------|------------|-------------|
| NA        | ENSG00000224876 | 0          | NA          | NA         | NA         | NA         |             |
| 284184    | ENSG00000224877 | 1027.92589 | -0.21408509 | 0.08134166 | 0.00696395 | 0.03084037 | NDUFAF8     |
| NA        | ENSG00000224879 | 0          | NA          | NA         | NA         | NA         |             |
| NA        | ENSG00000224880 | 0          | NA          | NA         | NA         | NA         | MTCYBP29    |
| NA        | ENSG00000224881 | 0.77299323 | -0.0286294  | 0.38362353 | 0.56201145 | NA         |             |
| NA        | ENSG00000224883 | 0.16735865 | 0.01897177  | 0.38482933 | 0.78225479 | NA         |             |
| NA        | ENSG00000224884 | 0          | NA          | NA         | NA         | NA         |             |
| NA        | ENSG00000224885 | 5.78349884 | -0.23419926 | 0.45447899 | 0.11125981 | 0.26948227 | EIPR1-IT1   |
| NA        | ENSG00000224886 | 0          | NA          | NA         | NA         | NA         |             |
| NA        | ENSG00000224887 | 0          | NA          | NA         | NA         | NA         | NFYCP2      |
| NA        | ENSG00000224888 | 63.6619389 | 0.46356244  | 0.29483311 | 0.03779233 | 0.12033379 |             |
| NA        | ENSG00000224891 | 0.87314552 | -0.02553402 | 0.38379111 | 0.55438207 | NA         | ARL14EPP1   |
| NA        | ENSG00000224892 | 14.2468406 | -0.1017592  | 0.33610257 | 0.56825058 | 0.76919502 | RPS4XP16    |
| NA        | ENSG00000224893 | 0.44795842 | -0.02501848 | 0.38558245 | 0.5807882  | NA         | LINC02840   |
| NA        | ENSG00000224895 | 0          | NA          | NA         | NA         | NA         | VPS26BP1    |
| NA        | ENSG00000224896 | 0          | NA          | NA         | NA         | NA         | SIGLEC30P   |
| 401398    | ENSG00000224897 | 39.3593642 | -0.14960138 | 0.30390598 | 0.44861916 | 0.67234398 | POT1-AS1    |
| 101928283 | ENSG00000224897 | 39.3593642 | -0.14960138 | 0.30390598 | 0.44861916 | 0.67234398 | POT1-AS1    |
| NA        | ENSG00000224899 | 0.32009762 | 0.00241203  | 0.38338141 | 0.95395759 | NA         | LINC02830   |
| NA        | ENSG00000224901 | 0          | NA          | NA         | NA         | NA         |             |
| 729442    | ENSG00000224902 | 0          | NA          | NA         | NA         | NA         | GAGE12H     |
| NA        | ENSG00000224903 | 59.4591005 | 0.02099228  | 0.23941502 | 0.91234863 | 0.96260718 | RNF32-AS1   |
| NA        | ENSG00000224904 | 0          | NA          | NA         | NA         | NA         | SBF1P2      |
| NA        | ENSG00000224905 | 27.7609887 | 0.08216658  | 0.29680533 | 0.67136992 | 0.83825699 |             |
| NA        | ENSG00000224906 | 0          | NA          | NA         | NA         | NA         | SRP14P1     |
| NA        | ENSG00000224907 | 0          | NA          | NA         | NA         | NA         | RPL21P91    |
| NA        | ENSG00000224908 | 0          | NA          | NA         | NA         | NA         | TIMM8BP2    |
| 102723617 | ENSG00000224910 | 0          | NA          | NA         | NA         | NA         | LINC01766   |
| 439994    | ENSG00000224914 | 270.618255 | -0.00022592 | 0.16983283 | 0.99750396 | 0.99926338 | LINC00863   |
| NA        | ENSG00000224916 | 0.16735865 | 0.01897177  | 0.38482933 | 0.78225479 | NA         | APOC4-APOC2 |
| NA        | ENSG00000224917 | 0          | NA          | NA         | NA         | NA         |             |
| NA        | ENSG00000224918 | 0          | NA          | NA         | NA         | NA         |             |
| NA        | ENSG00000224919 | 0          | NA          | NA         | NA         | NA         |             |
| NA        | ENSG00000224920 | 0          | NA          | NA         | NA         | NA         | TACC1P1     |
| 387486    | ENSG00000224924 | 0          | NA          | NA         | NA         | NA         | LINC00320   |
| NA        | ENSG00000224927 | 0          | NA          | NA         | NA         | NA         | NDUFA5P10   |
| NA        | ENSG00000224928 | 9.90934203 | -0.37580326 | 0.54348223 | 0.07420175 | 0.19988632 | KRT8P30     |
| NA        | ENSG00000224931 | 0          | NA          | NA         | NA         | NA         |             |

|           |                 |            |             |            |            |            |           |
|-----------|-----------------|------------|-------------|------------|------------|------------|-----------|
| 105377389 | ENSG00000224932 | 0          | NA          | NA         | NA         | NA         | LINC02262 |
| NA        | ENSG00000224933 | 0          | NA          | NA         | NA         | NA         | LINC01034 |
| NA        | ENSG00000224934 | 42.9763956 | -0.06840088 | 0.27623276 | 0.72252606 | 0.86754018 |           |
| NA        | ENSG00000224935 | 0          | NA          | NA         | NA         | NA         |           |
| NA        | ENSG00000224936 | 0          | NA          | NA         | NA         | NA         | SUCLA2P1  |
| 100302691 | ENSG00000224939 | 1.01097059 | -0.02323531 | 0.38128041 | 0.6962577  | NA         | LINC00184 |
| 401399    | ENSG00000224940 | 6738.86043 | -0.53508443 | 0.05720688 | 2.95E-21   | 1.17E-19   | PRRT4     |
| NA        | ENSG00000224942 | 0          | NA          | NA         | NA         | NA         | EEDP1     |
| NA        | ENSG00000224943 | 0          | NA          | NA         | NA         | NA         | LINC02819 |
| NA        | ENSG00000224944 | 0          | NA          | NA         | NA         | NA         | CASC6     |
| NA        | ENSG00000224945 | 27.286563  | 0.16183658  | 0.3128159  | 0.41888501 | 0.64468844 |           |
| NA        | ENSG00000224946 | 0          | NA          | NA         | NA         | NA         |           |
| NA        | ENSG00000224947 | 0          | NA          | NA         | NA         | NA         | VN1R25P   |
| NA        | ENSG00000224948 | 0          | NA          | NA         | NA         | NA         | ATP5MC1P8 |
| NA        | ENSG00000224949 | 0          | NA          | NA         | NA         | NA         | RPL37P24  |
| NA        | ENSG00000224950 | 17.7647748 | 0.54298794  | 0.57196722 | 0.04559894 | 0.13858501 |           |
| NA        | ENSG00000224953 | 0          | NA          | NA         | NA         | NA         | SRIP3     |
| NA        | ENSG00000224955 | 0          | NA          | NA         | NA         | NA         | KCTD10P1  |
| 101927215 | ENSG00000224957 | 27.2910964 | 0.56840715  | 0.51300041 | 0.03960884 | 0.12447954 | LINC01266 |
| 572558    | ENSG00000224958 | 0.18922458 | 0.01954053  | 0.38488496 | 0.78225479 | NA         | PGM5-AS1  |
| 139420    | ENSG00000224960 | 0.34091    | 0.00315391  | 0.38339458 | 0.95833444 | NA         | PPP4R3C   |
| NA        | ENSG00000224961 | 0          | NA          | NA         | NA         | NA         | LINC01752 |
| NA        | ENSG00000224962 | 0          | NA          | NA         | NA         | NA         | PSAT1P4   |
| NA        | ENSG00000224963 | 1.06380027 | -0.04515194 | 0.38598854 | 0.37949612 | NA         | ECMPX     |
| NA        | ENSG00000224964 | 0          | NA          | NA         | NA         | NA         | TRAPPC2P3 |
| NA        | ENSG00000224965 | 0.15069912 | -0.01848503 | 0.38480575 | 0.84537521 | NA         | LINC02586 |
| NA        | ENSG00000224966 | 0          | NA          | NA         | NA         | NA         | TBC1D3P6  |
| NA        | ENSG00000224967 | 0.34746601 | 0.02370763  | 0.3853651  | 0.61987128 | NA         |           |
| NA        | ENSG00000224968 | 0          | NA          | NA         | NA         | NA         | LINC01645 |
| NA        | ENSG00000224969 | 0.49887657 | -0.02965193 | 0.38591578 | 0.5232295  | NA         |           |
| NA        | ENSG00000224970 | 0          | NA          | NA         | NA         | NA         |           |
| NA        | ENSG00000224971 | 0          | NA          | NA         | NA         | NA         | SUMO2P3   |
| NA        | ENSG00000224972 | 0          | NA          | NA         | NA         | NA         |           |
| 100506195 | ENSG00000224973 | 0          | NA          | NA         | NA         | NA         | LARGE-AS1 |
| 8552      | ENSG00000224975 | 34.7514337 | 0.05576992  | 0.27756422 | 0.7747358  | 0.89613481 | INE1      |
| NA        | ENSG00000224976 | 0          | NA          | NA         | NA         | NA         | PARP4P2   |
| 105371620 | ENSG00000224977 | 0          | NA          | NA         | NA         | NA         | LINC02776 |
| NA        | ENSG00000224978 | 0          | NA          | NA         | NA         | NA         | CD84P1    |

|           |    |                 |            |             |            |            |            |              |
|-----------|----|-----------------|------------|-------------|------------|------------|------------|--------------|
|           | NA | ENSG00000224980 | 0          | NA          | NA         | NA         | NA         | RPL23AP85    |
|           | NA | ENSG00000224981 | 0          | NA          | NA         | NA         | NA         |              |
| 387890    |    | ENSG00000224982 | 3.38918822 | 0.11584596  | 0.39876926 | 0.21915925 | 0.43105634 | TMEM233      |
|           | NA | ENSG00000224984 | 0          | NA          | NA         | NA         | NA         |              |
|           | NA | ENSG00000224985 | 35.9524383 | 0.02118829  | 0.27207091 | 0.91433477 | 0.96378282 |              |
|           | NA | ENSG00000224986 | 2.0860091  | -0.03792699 | 0.37956606 | 0.62215657 | NA         | PPP1R8P1     |
|           | NA | ENSG00000224987 | 0          | NA          | NA         | NA         | NA         |              |
|           | NA | ENSG00000224988 | 0          | NA          | NA         | NA         | NA         |              |
|           | NA | ENSG00000224989 | 0          | NA          | NA         | NA         | NA         | FAM41AY1     |
|           | NA | ENSG00000224992 | 0          | NA          | NA         | NA         | NA         |              |
|           | NA | ENSG00000224993 | 0.9474504  | -0.05292136 | 0.3891452  | 0.25475846 | NA         | RPL29P12     |
| 101928770 |    | ENSG00000224995 | 0          | NA          | NA         | NA         | NA         | LINC01526    |
|           | NA | ENSG00000224999 | 0          | NA          | NA         | NA         | NA         | VTA1P1       |
|           | NA | ENSG00000225000 | 0          | NA          | NA         | NA         | NA         |              |
|           | NA | ENSG00000225002 | 0          | NA          | NA         | NA         | NA         |              |
|           | NA | ENSG00000225003 | 0          | NA          | NA         | NA         | NA         | OR51A5P      |
|           | NA | ENSG00000225005 | 0          | NA          | NA         | NA         | NA         |              |
|           | NA | ENSG00000225006 | 0          | NA          | NA         | NA         | NA         |              |
|           | NA | ENSG00000225007 | 0          | NA          | NA         | NA         | NA         |              |
|           | NA | ENSG00000225008 | 0.18922458 | 0.01954053  | 0.38488496 | 0.78225479 | NA         | TWF1P2       |
|           | NA | ENSG00000225011 | 0.51937201 | -0.02557462 | 0.38567603 | 0.54680819 | NA         |              |
|           | NA | ENSG00000225012 | 0          | NA          | NA         | NA         | NA         |              |
|           | NA | ENSG00000225014 | 0          | NA          | NA         | NA         | NA         | KCTD9P1      |
|           | NA | ENSG00000225016 | 0          | NA          | NA         | NA         | NA         | LINC00328-2P |
|           | NA | ENSG00000225017 | 0          | NA          | NA         | NA         | NA         |              |
|           | NA | ENSG00000225018 | 0          | NA          | NA         | NA         | NA         |              |
|           | NA | ENSG00000225022 | 0.173124   | -0.01911262 | 0.38486262 | 0.84537521 | NA         | UBE2D3P1     |
|           | NA | ENSG00000225024 | 0          | NA          | NA         | NA         | NA         | RPL37P11     |
|           | NA | ENSG00000225025 | 0          | NA          | NA         | NA         | NA         | KIF4CP       |
|           | NA | ENSG00000225026 | 0          | NA          | NA         | NA         | NA         |              |
|           | NA | ENSG00000225027 | 0          | NA          | NA         | NA         | NA         | IFNWP4       |
|           | NA | ENSG00000225028 | 0.16735865 | 0.01897177  | 0.38482933 | 0.78225479 | NA         |              |
|           | NA | ENSG00000225031 | 1.51000981 | 0.06635974  | 0.38726835 | 0.33910898 | NA         | EIF4BP7      |
| 102723566 |    | ENSG00000225032 | 20.3011622 | -0.00717203 | 0.32568568 | 0.9647768  | 0.98622874 |              |
|           | NA | ENSG00000225036 | 0          | NA          | NA         | NA         | NA         | CDK4P1       |
| 100874078 |    | ENSG00000225037 | 0          | NA          | NA         | NA         | NA         | EIF1AX-AS1   |
|           | NA | ENSG00000225039 | 0.48489342 | -0.00623942 | 0.38314339 | 0.87071299 | NA         | LINC01058    |
|           | NA | ENSG00000225043 | 1.6381137  | 0.0032387   | 0.37911613 | 0.9621751  | NA         | RPL18AP2     |

|           |                 |            |             |            |            |            |            |
|-----------|-----------------|------------|-------------|------------|------------|------------|------------|
| NA        | ENSG00000225044 | 0          | NA          | NA         | NA         | NA         |            |
| NA        | ENSG00000225045 | 0          | NA          | NA         | NA         | NA         | MTND5P27   |
| NA        | ENSG00000225046 | 0          | NA          | NA         | NA         | NA         |            |
| 102724929 | ENSG00000225050 | 0          | NA          | NA         | NA         | NA         |            |
| NA        | ENSG00000225051 | 1.35014193 | 0.00233574  | 0.37767629 | 0.97512905 | NA         | HMGB3P22   |
| NA        | ENSG00000225053 | 0          | NA          | NA         | NA         | NA         | PRPF38AP1  |
| NA        | ENSG00000225055 | 0          | NA          | NA         | NA         | NA         |            |
| NA        | ENSG00000225056 | 0          | NA          | NA         | NA         | NA         |            |
| NA        | ENSG00000225057 | 0.49109567 | -0.01125422 | 0.38291818 | 0.81983988 | NA         |            |
| NA        | ENSG00000225058 | 0          | NA          | NA         | NA         | NA         |            |
| NA        | ENSG00000225062 | 0.14931947 | -0.01844332 | 0.38480212 | 0.84537521 | NA         | CATIP-AS1  |
| NA        | ENSG00000225063 | 0.15069912 | -0.01848503 | 0.38480575 | 0.84537521 | NA         | TMCC2-AS1  |
| NA        | ENSG00000225064 | 0          | NA          | NA         | NA         | NA         | LINC01802  |
| NA        | ENSG00000225066 | 0          | NA          | NA         | NA         | NA         | MDM4P1     |
| NA        | ENSG00000225067 | 0.46777978 | -0.00944049 | 0.38288048 | 0.84963583 | NA         | RPL23AP2   |
| NA        | ENSG00000225069 | 0          | NA          | NA         | NA         | NA         |            |
| NA        | ENSG00000225071 | 0.173124   | -0.01911262 | 0.38486262 | 0.84537521 | NA         | RPS26P58   |
| NA        | ENSG00000225072 | 0          | NA          | NA         | NA         | NA         | OR7E116P   |
| NA        | ENSG00000225075 | 0          | NA          | NA         | NA         | NA         |            |
| NA        | ENSG00000225076 | 0.15069912 | -0.01848503 | 0.38480575 | 0.84537521 | NA         | WWC3-AS1   |
| NA        | ENSG00000225077 | 9.10052051 | 0.02178517  | 0.34574262 | 0.88826243 | 0.95136723 | LINC00337  |
| NA        | ENSG00000225078 | 0          | NA          | NA         | NA         | NA         |            |
| NA        | ENSG00000225079 | 0.37844916 | 0.02407552  | 0.3854191  | 0.60038877 | NA         | FTH1P22    |
| NA        | ENSG00000225080 | 5.92566018 | -0.0612256  | 0.36605899 | 0.6333034  | 0.81478111 | PFN1P4     |
| NA        | ENSG00000225082 | 0.46769402 | -0.00952184 | 0.38288502 | 0.84859741 | NA         | DAP3P1     |
| NA        | ENSG00000225083 | 0          | NA          | NA         | NA         | NA         | GRTP1-AS1  |
| 101927839 | ENSG00000225084 | 0          | NA          | NA         | NA         | NA         |            |
| NA        | ENSG00000225085 | 0          | NA          | NA         | NA         | NA         |            |
| NA        | ENSG00000225087 | 0.88540989 | 0.00266136  | 0.37995814 | 0.96428607 | NA         |            |
| NA        | ENSG00000225091 | 0          | NA          | NA         | NA         | NA         | SNORA71A   |
| NA        | ENSG00000225092 | 0.15069912 | -0.01848503 | 0.38480575 | 0.84537521 | NA         |            |
| NA        | ENSG00000225093 | 0.48972691 | -0.01114109 | 0.38291516 | 0.82166018 | NA         | RPL3P7     |
| NA        | ENSG00000225094 | 1.75994114 | -0.01594806 | 0.37775073 | 0.83033421 | NA         | SETP20     |
| NA        | ENSG00000225096 | 42.1125097 | 0.1136449   | 0.29867563 | 0.5606291  | 0.76430161 |            |
| NA        | ENSG00000225098 | 0          | NA          | NA         | NA         | NA         | BCRP1      |
| NA        | ENSG00000225099 | 0          | NA          | NA         | NA         | NA         | ATP6V1E1P1 |
| NA        | ENSG00000225100 | 0          | NA          | NA         | NA         | NA         | DPY19L2P5  |
| NA        | ENSG00000225101 | 0.37368897 | -0.02365038 | 0.38537936 | 0.66101672 | NA         | OR52K3P    |

|           |                 |            |             |            |            |            |            |
|-----------|-----------------|------------|-------------|------------|------------|------------|------------|
| NA        | ENSG00000225102 | 0          | NA          | NA         | NA         | NA         |            |
| NA        | ENSG00000225105 | 0          | NA          | NA         | NA         | NA         | LINC01076  |
| NA        | ENSG00000225106 | 0          | NA          | NA         | NA         | NA         |            |
| NA        | ENSG00000225107 | 0          | NA          | NA         | NA         | NA         |            |
| NA        | ENSG00000225108 | 11.3658144 | -0.14520576 | 0.36629257 | 0.39258951 | 0.6218739  | ZBTB45P1   |
| 105373377 | ENSG00000225110 | 0          | NA          | NA         | NA         | NA         | PNMA6F     |
| NA        | ENSG00000225111 | 0          | NA          | NA         | NA         | NA         |            |
| NA        | ENSG00000225112 | 0          | NA          | NA         | NA         | NA         |            |
| NA        | ENSG00000225113 | 0.50207596 | 0.02562368  | 0.38565771 | 0.52549886 | NA         |            |
| NA        | ENSG00000225116 | 0          | NA          | NA         | NA         | NA         |            |
| NA        | ENSG00000225117 | 0          | NA          | NA         | NA         | NA         | ARSDP1     |
| NA        | ENSG00000225118 | 0          | NA          | NA         | NA         | NA         |            |
| NA        | ENSG00000225121 | 0          | NA          | NA         | NA         | NA         | EEF1B2P5   |
| NA        | ENSG00000225122 | 0          | NA          | NA         | NA         | NA         |            |
| NA        | ENSG00000225123 | 0.3399237  | 0.00210885  | 0.3833764  | 0.96755054 | NA         |            |
| NA        | ENSG00000225124 | 0          | NA          | NA         | NA         | NA         | RPL23AP36  |
| NA        | ENSG00000225125 | 7.68657974 | 0.03377092  | 0.35066517 | 0.82099129 | 0.91847813 | RANP4      |
| NA        | ENSG00000225126 | 0          | NA          | NA         | NA         | NA         | CAMTA1-AS1 |
| 105372556 | ENSG00000225127 | 58.1614283 | 4.97975275  | 0.5401819  | 7.32E-21   | 2.86E-19   | LINC00237  |
| 105375380 | ENSG00000225128 | 0          | NA          | NA         | NA         | NA         | LINC00972  |
| NA        | ENSG00000225129 | 0          | NA          | NA         | NA         | NA         |            |
| NA        | ENSG00000225131 | 0          | NA          | NA         | NA         | NA         | PSME2P2    |
| NA        | ENSG00000225133 | 0.50924877 | 0.01581638  | 0.38316998 | 0.73302079 | NA         | MORF4L1P4  |
| NA        | ENSG00000225136 | 0          | NA          | NA         | NA         | NA         | PGBD4P5    |
| NA        | ENSG00000225137 | 0.16735865 | 0.01897177  | 0.38482933 | 0.78225479 | NA         | DYNC1I2P1  |
| NA        | ENSG00000225138 | 87.6957567 | 0.01279894  | 0.22227203 | 0.94524923 | 0.97766426 | SLC9A3-AS1 |
| 101930421 | ENSG00000225140 | 1.09646102 | -0.07821572 | 0.39457129 | 0.14964361 | NA         |            |
| NA        | ENSG00000225142 | 0          | NA          | NA         | NA         | NA         |            |
| NA        | ENSG00000225144 | 0          | NA          | NA         | NA         | NA         |            |
| NA        | ENSG00000225146 | 1.01331561 | 0.05686793  | 0.38717863 | 0.32264269 | NA         |            |
| NA        | ENSG00000225147 | 0          | NA          | NA         | NA         | NA         | RPS12P10   |
| NA        | ENSG00000225148 | 0          | NA          | NA         | NA         | NA         |            |
| NA        | ENSG00000225151 | 3793.04202 | 0.44226527  | 0.06337161 | 1.44E-12   | 3.25E-11   | GOLGA2P7   |
| NA        | ENSG00000225152 | 0          | NA          | NA         | NA         | NA         |            |
| NA        | ENSG00000225154 | 0          | NA          | NA         | NA         | NA         | TUBAP9     |
| NA        | ENSG00000225155 | 0.173733   | 0.01914545  | 0.38484597 | 0.78225479 | NA         | TOMM22P5   |
| NA        | ENSG00000225156 | 361.091086 | 0.76498793  | 0.16148975 | 4.19E-07   | 5.07E-06   |            |
| NA        | ENSG00000225158 | 0          | NA          | NA         | NA         | NA         | HSPE1P24   |

|           |    |                 |            |             |            |            |            |           |
|-----------|----|-----------------|------------|-------------|------------|------------|------------|-----------|
|           | NA | ENSG00000225159 | 1.0040907  | 0.00653982  | 0.37928094 | 0.92003268 | NA         | NPM1P39   |
|           | NA | ENSG00000225165 | 0          | NA          | NA         | NA         | NA         | RTRAFP2   |
| 102724849 | NA | ENSG00000225166 | 0          | NA          | NA         | NA         | NA         |           |
|           | NA | ENSG00000225167 | 0          | NA          | NA         | NA         | NA         | TXNP2     |
|           | NA | ENSG00000225169 | 0.16735865 | 0.01897177  | 0.38482933 | 0.78225479 | NA         | BRI3P1    |
|           | NA | ENSG00000225170 | 0          | NA          | NA         | NA         | NA         |           |
|           | NA | ENSG00000225171 | 6.63491773 | 0.25842467  | 0.46261544 | 0.11604503 | 0.27836217 | DUTP6     |
|           | NA | ENSG00000225172 | 0          | NA          | NA         | NA         | NA         |           |
|           | NA | ENSG00000225173 | 1.56443207 | -0.02905715 | 0.38133999 | 0.64411314 | NA         |           |
| 100287366 | NA | ENSG00000225174 | 0          | NA          | NA         | NA         | NA         | OSTM1-AS1 |
|           | NA | ENSG00000225175 | 0          | NA          | NA         | NA         | NA         |           |
|           | NA | ENSG00000225176 | 0          | NA          | NA         | NA         | NA         | ATP5MGP4  |
|           | NA | ENSG00000225177 | 0.14931947 | -0.01844332 | 0.38480212 | 0.84537521 | NA         |           |
|           | NA | ENSG00000225178 | 41.6990038 | -0.26697906 | 0.30997342 | 0.20811107 | 0.41567135 | RPSAP58   |
| 100874179 | NA | ENSG00000225179 | 0.14931947 | -0.01844332 | 0.38480212 | 0.84537521 | NA         | LINC00457 |
| 388428    | NA | ENSG00000225180 | 5.43522015 | 0.00335938  | 0.35831922 | 0.98158078 | 0.99385367 | PVALEF    |
|           | NA | ENSG00000225181 | 0          | NA          | NA         | NA         | NA         |           |
|           | NA | ENSG00000225182 | 0          | NA          | NA         | NA         | NA         |           |
|           | NA | ENSG00000225183 | 0          | NA          | NA         | NA         | NA         |           |
|           | NA | ENSG00000225185 | 0.16735865 | 0.01897177  | 0.38482933 | 0.78225479 | NA         | PPIAP8    |
|           | NA | ENSG00000225187 | 3.28601622 | -0.19989578 | 0.45083611 | 0.05492064 | 0.16002724 |           |
|           | NA | ENSG00000225189 | 0          | NA          | NA         | NA         | NA         | REREP1Y   |
| 9842      | NA | ENSG00000225190 | 412.475347 | 0.33557282  | 0.15308089 | 0.01671152 | 0.06306953 | PLEKHM1   |
|           | NA | ENSG00000225191 | 0          | NA          | NA         | NA         | NA         |           |
|           | NA | ENSG00000225192 | 1.12635377 | -0.07766164 | 0.39447535 | 0.14780676 | NA         | ZNF33BP1  |
|           | NA | ENSG00000225193 | 0.15069912 | -0.01848503 | 0.38480575 | 0.84537521 | NA         | RPS12P26  |
| 100188953 | NA | ENSG00000225194 | 2.67842579 | 0.00488997  | 0.3733491  | 0.95895665 | 0.9831126  | LINC00092 |
|           | NA | ENSG00000225195 | 0          | NA          | NA         | NA         | NA         |           |
|           | NA | ENSG00000225196 | 0          | NA          | NA         | NA         | NA         | RPL10P17  |
|           | NA | ENSG00000225198 | 0          | NA          | NA         | NA         | NA         | SSXP3     |
|           | NA | ENSG00000225200 | 0.14931947 | -0.01844332 | 0.38480212 | 0.84537521 | NA         |           |
|           | NA | ENSG00000225203 | 0          | NA          | NA         | NA         | NA         |           |
|           | NA | ENSG00000225205 | 2.82767633 | 0.07777766  | 0.38277648 | 0.43052895 | 0.65604411 |           |
| 400765    | NA | ENSG00000225206 | 473.448945 | -0.68300871 | 0.12864971 | 2.63E-08   | 3.75E-07   | MIR137HG  |
|           | NA | ENSG00000225208 | 0.173124   | -0.01911262 | 0.38486262 | 0.84537521 | NA         |           |
| 102723427 | NA | ENSG00000225209 | 0          | NA          | NA         | NA         | NA         |           |
| 503638    | NA | ENSG00000225210 | 1376.08788 | -0.25119662 | 0.07891963 | 0.00111611 | 0.00649375 | DUXAP9    |
|           | NA | ENSG00000225212 | 0          | NA          | NA         | NA         | NA         | AKR1B1P6  |

|           |                 |            |             |            |            |            |              |
|-----------|-----------------|------------|-------------|------------|------------|------------|--------------|
| NA        | ENSG00000225213 | 0          | NA          | NA         | NA         | NA         |              |
| NA        | ENSG00000225214 | 0.18922458 | 0.01954053  | 0.38488496 | 0.78225479 | NA         |              |
| NA        | ENSG00000225215 | 0          | NA          | NA         | NA         | NA         | SMARCE1P1    |
| NA        | ENSG00000225216 | 0          | NA          | NA         | NA         | NA         |              |
| NA        | ENSG00000225217 | 0          | NA          | NA         | NA         | NA         | HSPA7        |
| NA        | ENSG00000225218 | 0          | NA          | NA         | NA         | NA         |              |
| NA        | ENSG00000225221 | 0          | NA          | NA         | NA         | NA         | PLA2G12AP2   |
| NA        | ENSG00000225222 | 0          | NA          | NA         | NA         | NA         | CHCHD4P5     |
| NA        | ENSG00000225224 | 1.30863607 | -0.006689   | 0.38107176 | 0.90143956 | NA         | RPS27AP12    |
| NA        | ENSG00000225225 | 0          | NA          | NA         | NA         | NA         | ARL2BPP10    |
| NA        | ENSG00000225226 | 0          | NA          | NA         | NA         | NA         | LINC01795    |
| NA        | ENSG00000225230 | 11.4284272 | 0.01246937  | 0.33447045 | 0.94217306 | 0.97606984 |              |
| 100506159 | ENSG00000225231 | 0          | NA          | NA         | NA         | NA         | LINC02470    |
| NA        | ENSG00000225233 | 0.16735865 | 0.01897177  | 0.38482933 | 0.78225479 | NA         |              |
| NA        | ENSG00000225234 | 33.9342812 | 0.24473866  | 0.31838958 | 0.24648504 | 0.46573936 | TRAPPC12-AS1 |
| 100874118 | ENSG00000225235 | 0          | NA          | NA         | NA         | NA         | INTS6L-AS1   |
| NA        | ENSG00000225236 | 0          | NA          | NA         | NA         | NA         |              |
| NA        | ENSG00000225238 | 0          | NA          | NA         | NA         | NA         | GEMIN7P1     |
| NA        | ENSG00000225239 | 0          | NA          | NA         | NA         | NA         | RPL21P107    |
| NA        | ENSG00000225240 | 0          | NA          | NA         | NA         | NA         |              |
| NA        | ENSG00000225242 | 0          | NA          | NA         | NA         | NA         | COX6B1P7     |
| NA        | ENSG00000225243 | 0          | NA          | NA         | NA         | NA         |              |
| NA        | ENSG00000225244 | 0          | NA          | NA         | NA         | NA         |              |
| NA        | ENSG00000225246 | 9.17236373 | 0.22285193  | 0.41902523 | 0.1925404  | 0.39487302 | RPS2P1       |
| NA        | ENSG00000225249 | 0          | NA          | NA         | NA         | NA         | LINC00378    |
| NA        | ENSG00000225251 | 0          | NA          | NA         | NA         | NA         | RPL5P25      |
| NA        | ENSG00000225253 | 0          | NA          | NA         | NA         | NA         |              |
| NA        | ENSG00000225254 | 7.23424043 | -0.23273834 | 0.4431531  | 0.13916896 | 0.31601249 | ARMC8P1      |
| NA        | ENSG00000225255 | 1.51136524 | -0.09197075 | 0.39580176 | 0.16900401 | NA         | PSLNR        |
| NA        | ENSG00000225256 | 0          | NA          | NA         | NA         | NA         | TRAPPC2P5    |
| NA        | ENSG00000225258 | 0          | NA          | NA         | NA         | NA         |              |
| NA        | ENSG00000225259 | 0          | NA          | NA         | NA         | NA         | ST13P6       |
| 100874086 | ENSG00000225263 | 0          | NA          | NA         | NA         | NA         | PCDH9-AS3    |
| NA        | ENSG00000225264 | 57.3485385 | -0.17616933 | 0.25244321 | 0.36447667 | 0.594135   | ZNRF2P2      |
| NA        | ENSG00000225265 | 53.1339667 | 0.22144118  | 0.27991355 | 0.27821198 | 0.50266148 | TAF1A-AS1    |
| NA        | ENSG00000225267 | 0          | NA          | NA         | NA         | NA         | RPL8P2       |
| NA        | ENSG00000225269 | 0          | NA          | NA         | NA         | NA         | LINC00705    |
| NA        | ENSG00000225270 | 0          | NA          | NA         | NA         | NA         | CICP12       |



|           |                 |            |             |            |            |            |            |
|-----------|-----------------|------------|-------------|------------|------------|------------|------------|
| NA        | ENSG00000225271 | 0          | NA          | NA         | NA         | NA         | NOLC1P1    |
| NA        | ENSG00000225272 | 0          | NA          | NA         | NA         | NA         |            |
| NA        | ENSG00000225275 | 0          | NA          | NA         | NA         | NA         | NUP210P2   |
| NA        | ENSG00000225276 | 0          | NA          | NA         | NA         | NA         | MTND1P18   |
| NA        | ENSG00000225279 | 1.30062608 | 0.02531727  | 0.38125    | 0.67977044 | NA         |            |
| NA        | ENSG00000225280 | 0          | NA          | NA         | NA         | NA         |            |
| NA        | ENSG00000225282 | 2.05498416 | -0.10930545 | 0.39835598 | 0.20070237 | NA         |            |
| NA        | ENSG00000225284 | 0          | NA          | NA         | NA         | NA         |            |
| NA        | ENSG00000225285 | 1.49492374 | 0.07799617  | 0.38943468 | 0.29629746 | NA         | LINC01770  |
| NA        | ENSG00000225286 | 0          | NA          | NA         | NA         | NA         |            |
| NA        | ENSG00000225287 | 0          | NA          | NA         | NA         | NA         | OFD1P13Y   |
| NA        | ENSG00000225289 | 0          | NA          | NA         | NA         | NA         | RPL29P29   |
| NA        | ENSG00000225292 | 0.47030951 | -0.00724744 | 0.38322837 | 0.8678682  | NA         |            |
| NA        | ENSG00000225293 | 0          | NA          | NA         | NA         | NA         | ABCD1P4    |
| NA        | ENSG00000225294 | 0          | NA          | NA         | NA         | NA         | OSTCP2     |
| NA        | ENSG00000225295 | 0.44911035 | -0.02726919 | 0.38571057 | 0.56243155 | NA         | MTND4P4    |
| NA        | ENSG00000225297 | 0          | NA          | NA         | NA         | NA         |            |
| 54088     | ENSG00000225298 | 0          | NA          | NA         | NA         | NA         | LINC00113  |
| NA        | ENSG00000225299 | 0          | NA          | NA         | NA         | NA         |            |
| NA        | ENSG00000225300 | 1.4000691  | 0.05176033  | 0.38427192 | 0.43545126 | NA         |            |
| NA        | ENSG00000225303 | 0          | NA          | NA         | NA         | NA         |            |
| NA        | ENSG00000225304 | 0          | NA          | NA         | NA         | NA         |            |
| NA        | ENSG00000225308 | 0          | NA          | NA         | NA         | NA         | ASS1P11    |
| NA        | ENSG00000225310 | 0          | NA          | NA         | NA         | NA         | DNAJC19P4  |
| NA        | ENSG00000225311 | 0          | NA          | NA         | NA         | NA         |            |
| NA        | ENSG00000225313 | 34.5486097 | -0.08824941 | 0.27858877 | 0.64916982 | 0.8250291  |            |
| NA        | ENSG00000225314 | 0          | NA          | NA         | NA         | NA         |            |
| NA        | ENSG00000225315 | 0          | NA          | NA         | NA         | NA         |            |
| 100874136 | ENSG00000225316 | 0          | NA          | NA         | NA         | NA         | LINC00350  |
| 101929663 | ENSG00000225321 | 0          | NA          | NA         | NA         | NA         | LINC01427  |
| NA        | ENSG00000225323 | 0          | NA          | NA         | NA         | NA         | HBAP1      |
| NA        | ENSG00000225325 | 0          | NA          | NA         | NA         | NA         |            |
| NA        | ENSG00000225326 | 0          | NA          | NA         | NA         | NA         | USP9YP19   |
| 645836    | ENSG00000225327 | 0          | NA          | NA         | NA         | NA         | USP17L3    |
| NA        | ENSG00000225328 | 0.3183039  | 0.00125185  | 0.38336753 | 0.96508379 | NA         | LINC01594  |
| 723809    | ENSG00000225329 | 0          | NA          | NA         | NA         | NA         | LHFPL3-AS2 |
| NA        | ENSG00000225330 | 0.36299585 | 0.02389506  | 0.38539245 | 0.60994612 | NA         |            |
| NA        | ENSG00000225331 | 2.81061214 | -0.0014679  | 0.36988217 | 0.986905   | 0.99565021 | LINC01678  |

|           |                 |            |             |            |            |            |             |
|-----------|-----------------|------------|-------------|------------|------------|------------|-------------|
| NA        | ENSG00000225333 | 0.62252342 | -0.04504891 | 0.3875647  | 0.37435963 | NA         |             |
| NA        | ENSG00000225334 | 0.33471731 | 0.02354391  | 0.38534154 | 0.62842204 | NA         | LINC02813   |
| NA        | ENSG00000225335 | 21.8581632 | 0.04469351  | 0.32808611 | 0.79802828 | 0.9074513  |             |
| NA        | ENSG00000225336 | 0          | NA          | NA         | NA         | NA         | HMGB3P1     |
| NA        | ENSG00000225337 | 0          | NA          | NA         | NA         | NA         |             |
| NA        | ENSG00000225338 | 0.65880711 | 0.00538841  | 0.38137611 | 0.91628214 | NA         | RPL23AP18   |
| NA        | ENSG00000225339 | 24.233458  | 0.66899714  | 0.52308918 | 0.02449057 | 0.08575589 |             |
| NA        | ENSG00000225341 | 0          | NA          | NA         | NA         | NA         |             |
| NA        | ENSG00000225342 | 7.43566175 | 0.089348    | 0.36159473 | 0.55085088 | 0.75731976 | LRRK2-DT    |
| NA        | ENSG00000225343 | 0          | NA          | NA         | NA         | NA         | RPL21P66    |
| NA        | ENSG00000225344 | 0          | NA          | NA         | NA         | NA         |             |
| NA        | ENSG00000225345 | 80.849438  | -1.68635925 | 0.28210556 | 1.63E-10   | 3.06E-09   | SNX18P3     |
| NA        | ENSG00000225347 | 0          | NA          | NA         | NA         | NA         | SLC25A5P8   |
| NA        | ENSG00000225349 | 0          | NA          | NA         | NA         | NA         | ANKRD49P2   |
| NA        | ENSG00000225350 | 0          | NA          | NA         | NA         | NA         | FREM2-AS1   |
| NA        | ENSG00000225352 | 0          | NA          | NA         | NA         | NA         | RPL31P53    |
| NA        | ENSG00000225354 | 0          | NA          | NA         | NA         | NA         | RPL7AP52    |
| NA        | ENSG00000225355 | 0          | NA          | NA         | NA         | NA         | ARL6IP1P2   |
| NA        | ENSG00000225356 | 0          | NA          | NA         | NA         | NA         |             |
| NA        | ENSG00000225357 | 0.44795842 | -0.02501848 | 0.38558245 | 0.5807882  | NA         | RPF2P1      |
| NA        | ENSG00000225358 | 0.66107024 | 0.00172508  | 0.38189971 | 0.96970227 | NA         | MIPEPP1     |
| NA        | ENSG00000225359 | 0          | NA          | NA         | NA         | NA         |             |
| NA        | ENSG00000225360 | 0          | NA          | NA         | NA         | NA         |             |
| 100506599 | ENSG00000225361 | 23.2898059 | 0.04857324  | 0.31661028 | 0.78935101 | 0.90431711 | PPP1R26-AS1 |
| 196993    | ENSG00000225362 | 0.52119901 | 0.02576573  | 0.38568143 | 0.51723676 | NA         | CT62        |
| NA        | ENSG00000225364 | 0          | NA          | NA         | NA         | NA         | ATP6V0E1P1  |
| NA        | ENSG00000225365 | 0.75034912 | -0.04346677 | 0.38757053 | 0.34437896 | NA         |             |
| NA        | ENSG00000225366 | 0.18922458 | 0.01954053  | 0.38488496 | 0.78225479 | NA         | TDGF1P3     |
| NA        | ENSG00000225369 | 0.16735865 | 0.01897177  | 0.38482933 | 0.78225479 | NA         | CAPZA1P2    |
| NA        | ENSG00000225370 | 0          | NA          | NA         | NA         | NA         |             |
| NA        | ENSG00000225371 | 2.32046736 | -0.06603572 | 0.38199755 | 0.46077475 | NA         | CICP8       |
| 101928470 | ENSG00000225376 | 2.28905031 | 0.00491548  | 0.3745314  | 0.95560879 | NA         | TMEM246-AS1 |
| 100507459 | ENSG00000225377 | 119.507689 | 0.02735384  | 0.21111544 | 0.87796727 | 0.94590663 | NRSN2-AS1   |
| NA        | ENSG00000225378 | 0          | NA          | NA         | NA         | NA         |             |
| NA        | ENSG00000225380 | 0          | NA          | NA         | NA         | NA         | IGKV1OR9-2  |
| NA        | ENSG00000225381 | 0          | NA          | NA         | NA         | NA         | RPS5P7      |
| 207107    | ENSG00000225383 | 0          | NA          | NA         | NA         | NA         | SFTA1P      |
| NA        | ENSG00000225384 | 0          | NA          | NA         | NA         | NA         |             |

|           |                 |            |             |            |            |            |           |
|-----------|-----------------|------------|-------------|------------|------------|------------|-----------|
| NA        | ENSG00000225385 | 0          | NA          | NA         | NA         | NA         |           |
| 105377003 | ENSG00000225386 | 0          | NA          | NA         | NA         | NA         |           |
| NA        | ENSG00000225387 | 0          | NA          | NA         | NA         | NA         |           |
| 100294720 | ENSG00000225391 | 10.9335035 | -0.46547399 | 0.66629933 | 0.04493475 | 0.13694401 |           |
| NA        | ENSG00000225392 | 0          | NA          | NA         | NA         | NA         | MRPL36P1  |
| NA        | ENSG00000225393 | 11.2169358 | 0.10453436  | 0.34999884 | 0.53729466 | 0.74759591 |           |
| NA        | ENSG00000225394 | 0          | NA          | NA         | NA         | NA         |           |
| 105373251 | ENSG00000225396 | 0          | NA          | NA         | NA         | NA         | FAM236D   |
| NA        | ENSG00000225397 | 0          | NA          | NA         | NA         | NA         |           |
| NA        | ENSG00000225398 | 0          | NA          | NA         | NA         | NA         | PGM5P4    |
| NA        | ENSG00000225399 | 0.173124   | -0.01911262 | 0.38486262 | 0.84537521 | NA         |           |
| NA        | ENSG00000225400 | 7.62704308 | 0.07045426  | 0.35641751 | 0.63787103 | 0.81760985 | RAB28P5   |
| NA        | ENSG00000225401 | 3.18618358 | 0.19004114  | 0.44490528 | 0.05256841 | 0.15471849 | TGIF2P1   |
| NA        | ENSG00000225402 | 0          | NA          | NA         | NA         | NA         |           |
| NA        | ENSG00000225404 | 0          | NA          | NA         | NA         | NA         | RPL26P34  |
| NA        | ENSG00000225405 | 0          | NA          | NA         | NA         | NA         | RPS15AP17 |
| NA        | ENSG00000225406 | 0          | NA          | NA         | NA         | NA         | ELF2P4    |
| NA        | ENSG00000225407 | 0.72121913 | 0.05213541  | 0.3887527  | 0.28798408 | NA         |           |
| NA        | ENSG00000225408 | 0.14931947 | -0.01844332 | 0.38480212 | 0.84537521 | NA         |           |
| NA        | ENSG00000225411 | 4.92309224 | -0.07665188 | 0.37268918 | 0.52921379 | 0.74097401 |           |
| NA        | ENSG00000225413 | 0          | NA          | NA         | NA         | NA         | LINC02557 |
| NA        | ENSG00000225415 | 0.44795842 | -0.02501848 | 0.38558245 | 0.5807882  | NA         | ACKR4P1   |
| NA        | ENSG00000225416 | 0          | NA          | NA         | NA         | NA         |           |
| NA        | ENSG00000225417 | 0          | NA          | NA         | NA         | NA         |           |
| NA        | ENSG00000225418 | 0          | NA          | NA         | NA         | NA         | AKR1C5P   |
| NA        | ENSG00000225419 | 0.51736407 | 0.03122208  | 0.3860633  | 0.47632631 | NA         | RPL21P3   |
| 101928371 | ENSG00000225420 | 0.70347132 | 0.02998844  | 0.38332112 | 0.543852   | NA         |           |
| NA        | ENSG00000225421 | 0          | NA          | NA         | NA         | NA         |           |
| NA        | ENSG00000225422 | 0          | NA          | NA         | NA         | NA         | RBMS1P1   |
| NA        | ENSG00000225423 | 0          | NA          | NA         | NA         | NA         | TNPO1P1   |
| NA        | ENSG00000225424 | 0          | NA          | NA         | NA         | NA         |           |
| NA        | ENSG00000225427 | 0          | NA          | NA         | NA         | NA         | LINC00331 |
| NA        | ENSG00000225428 | 0          | NA          | NA         | NA         | NA         | NDUFB4P7  |
| 101928233 | ENSG00000225431 | 0.16735865 | 0.01897177  | 0.38482933 | 0.78225479 | NA         | LINC01671 |
| NA        | ENSG00000225433 | 0          | NA          | NA         | NA         | NA         | MTND1P12  |
| 100507540 | ENSG00000225434 | 5.88591587 | 0.07799943  | 0.37458713 | 0.51754147 | 0.73141449 | LINC01504 |
| 101929239 | ENSG00000225437 | 0          | NA          | NA         | NA         | NA         | PACRG-AS2 |
| NA        | ENSG00000225438 | 0          | NA          | NA         | NA         | NA         | KRT41P    |

|           |                 |            |             |            |            |            |             |
|-----------|-----------------|------------|-------------|------------|------------|------------|-------------|
| 100507171 | ENSG00000225439 | 300.494594 | -0.58543908 | 0.15963685 | 7.12E-05   | 0.00056436 | BOLA3-AS1   |
| NA        | ENSG00000225442 | 0.48562828 | 0.01087426  | 0.38337501 | 0.79137861 | NA         | MPRIP-AS1   |
| NA        | ENSG00000225443 | 0          | NA          | NA         | NA         | NA         |             |
| 105374596 | ENSG00000225444 | 0          | NA          | NA         | NA         | NA         | LINC01867   |
| NA        | ENSG00000225446 | 1.02279267 | -0.01931631 | 0.38179966 | 0.72117377 | NA         | LINC01763   |
| NA        | ENSG00000225447 | 1.75007813 | -0.02188176 | 0.37768664 | 0.77621553 | NA         | RPS15AP10   |
| NA        | ENSG00000225448 | 0.14931947 | -0.01844332 | 0.38480212 | 0.84537521 | NA         |             |
| 100131320 | ENSG00000225449 | 2.79532757 | 0.16117923  | 0.42633197 | 0.07417139 | 0.19985881 | RAB6C-AS1   |
| NA        | ENSG00000225450 | 0.55062598 | 0.03282918  | 0.38622697 | 0.45302687 | NA         |             |
| NA        | ENSG00000225451 | 0          | NA          | NA         | NA         | NA         |             |
| NA        | ENSG00000225455 | 0          | NA          | NA         | NA         | NA         | TPI1P4      |
| NA        | ENSG00000225457 | 0.16735865 | 0.01897177  | 0.38482933 | 0.78225479 | NA         |             |
| NA        | ENSG00000225458 | 0          | NA          | NA         | NA         | NA         |             |
| NA        | ENSG00000225460 | 0          | NA          | NA         | NA         | NA         |             |
| NA        | ENSG00000225462 | 0.18922458 | 0.01954053  | 0.38488496 | 0.78225479 | NA         | FDPSPI      |
| NA        | ENSG00000225463 | 0          | NA          | NA         | NA         | NA         | ZNF70P1     |
| NA        | ENSG00000225465 | 316.859414 | -0.44164094 | 0.14810174 | 0.0012595  | 0.00720544 | RFPL1S      |
| NA        | ENSG00000225466 | 0          | NA          | NA         | NA         | NA         | OFD1P10Y    |
| NA        | ENSG00000225469 | 0          | NA          | NA         | NA         | NA         |             |
| 554203    | ENSG00000225470 | 832.206629 | -0.13009834 | 0.1008693  | 0.18052994 | 0.37749937 | JPX         |
| NA        | ENSG00000225471 | 0          | NA          | NA         | NA         | NA         |             |
| NA        | ENSG00000225472 | 17.2692997 | -1.88132753 | 0.69202527 | 0.0003402  | 0.00229264 |             |
| NA        | ENSG00000225473 | 0.15069912 | -0.01848503 | 0.38480575 | 0.84537521 | NA         | ATP13A4-AS1 |
| NA        | ENSG00000225475 | 0          | NA          | NA         | NA         | NA         |             |
| NA        | ENSG00000225476 | 0          | NA          | NA         | NA         | NA         | MTCO3P5     |
| NA        | ENSG00000225477 | 0          | NA          | NA         | NA         | NA         |             |
| NA        | ENSG00000225478 | 0          | NA          | NA         | NA         | NA         |             |
| 100874337 | ENSG00000225479 | 0          | NA          | NA         | NA         | NA         | PLCB1-IT1   |
| NA        | ENSG00000225480 | 0          | NA          | NA         | NA         | NA         |             |
| NA        | ENSG00000225482 | 0          | NA          | NA         | NA         | NA         | RPS6P14     |
| NA        | ENSG00000225483 | 0          | NA          | NA         | NA         | NA         | RPL22P4     |
| 101060691 | ENSG00000225484 | 186.235056 | -0.27531884 | 0.18378919 | 0.08795443 | 0.22660814 | NUTM2B-AS1  |
| NA        | ENSG00000225486 | 0.16735865 | 0.01897177  | 0.38482933 | 0.78225479 | NA         |             |
| NA        | ENSG00000225487 | 0          | NA          | NA         | NA         | NA         | RPL35AP7    |
| NA        | ENSG00000225488 | 0          | NA          | NA         | NA         | NA         |             |
| NA        | ENSG00000225489 | 3.41510953 | 0.06950394  | 0.37870816 | 0.50102697 | 0.71823519 |             |
| NA        | ENSG00000225491 | 0          | NA          | NA         | NA         | NA         | UBE2Q2P4Y   |
| 400759    | ENSG00000225492 | 0.64550788 | -0.02592504 | 0.38372989 | 0.6104625  | NA         | GBP1P1      |

|           |                 |                 |             |             |            |            |            |             |
|-----------|-----------------|-----------------|-------------|-------------|------------|------------|------------|-------------|
|           | NA              | ENSG00000225493 | 0.47306532  | -0.00779343 | 0.38324742 | 0.85933897 | NA         | LINC01107   |
|           | NA              | ENSG00000225496 | 0.29863895  | -0.02292439 | 0.3852726  | 0.68753245 | NA         | RTRAFP1     |
| 101929310 | ENSG00000225497 | 0               | NA          | NA          | NA         | NA         | NA         | KCNMA1-AS2  |
|           | NA              | ENSG00000225498 | 0.50739314  | 0.03073164  | 0.38601526 | 0.48364319 | NA         |             |
|           | NA              | ENSG00000225499 | 0           | NA          | NA         | NA         | NA         | RPL15P4     |
|           | NA              | ENSG00000225501 | 0           | NA          | NA         | NA         | NA         | SNRPF3      |
|           | NA              | ENSG00000225502 | 0           | NA          | NA         | NA         | NA         | GAPDHP16    |
|           | NA              | ENSG00000225505 | 0           | NA          | NA         | NA         | NA         |             |
|           | NA              | ENSG00000225506 | 0.64115605  | 0.00324257  | 0.38137201 | 0.94882331 | NA         | CYP4A22-AS1 |
|           | NA              | ENSG00000225507 | 17.7611509  | -0.15579024 | 0.35627008 | 0.39142514 | 0.62087262 |             |
|           | NA              | ENSG00000225508 | 0           | NA          | NA         | NA         | NA         | SSXP5       |
|           | NA              | ENSG00000225509 | 0           | NA          | NA         | NA         | NA         | AIFM1P1     |
|           | NA              | ENSG00000225510 | 0.34114803  | 0.02362682  | 0.38535344 | 0.62408562 | NA         | PCDH8P1     |
|           | NA              | ENSG00000225511 | 0.93085068  | -0.04637774 | 0.38638589 | 0.38666774 | NA         | LINC00475   |
|           | NA              | ENSG00000225513 | 0.90044881  | 0.03969117  | 0.38503326 | 0.43099147 | NA         |             |
|           | NA              | ENSG00000225514 | 0           | NA          | NA         | NA         | NA         | MTND1P34    |
| 100289150 | ENSG00000225516 | 0               | NA          | NA          | NA         | NA         | NA         | FAM197Y5    |
|           | NA              | ENSG00000225518 | 23.7447099  | 0.32333204  | 0.42039302 | 0.13716985 | 0.3127025  | LINC01703   |
|           | NA              | ENSG00000225519 | 0           | NA          | NA         | NA         | NA         |             |
|           | NA              | ENSG00000225521 | 0           | NA          | NA         | NA         | NA         | SNED1-AS1   |
|           | NA              | ENSG00000225522 | 0           | NA          | NA         | NA         | NA         |             |
|           | NA              | ENSG00000225523 | 0           | NA          | NA         | NA         | NA         | IGKV6D-21   |
| 100129480 | ENSG00000225526 | 5.9417651       | 0.09954011  | 0.37059049  | 0.48164566 | 0.70240082 |            | MKRN2OS     |
|           | NA              | ENSG00000225527 | 1.31799014  | 0.01011431  | 0.3770045  | 0.89620885 | NA         |             |
|           | NA              | ENSG00000225528 | 0           | NA          | NA         | NA         | NA         |             |
|           | NA              | ENSG00000225530 | 0           | NA          | NA         | NA         | NA         | SP3P        |
|           | NA              | ENSG00000225531 | 0           | NA          | NA         | NA         | NA         |             |
|           | NA              | ENSG00000225532 | 0.5075908   | 0.01540407  | 0.38314148 | 0.73926451 | NA         |             |
|           | NA              | ENSG00000225533 | 2.5319083   | 0.10395016  | 0.39337861 | 0.27127118 | NA         | PAWRP1      |
| 102724386 | ENSG00000225535 | 0               | NA          | NA          | NA         | NA         | NA         | LINC01393   |
|           | NA              | ENSG00000225536 | 0           | NA          | NA         | NA         | NA         | STIP1P3     |
|           | NA              | ENSG00000225537 | 0           | NA          | NA         | NA         | NA         |             |
|           | NA              | ENSG00000225538 | 0           | NA          | NA         | NA         | NA         | OR5BE1P     |
|           | NA              | ENSG00000225539 | 0           | NA          | NA         | NA         | NA         | LINC01821   |
| 100874216 | ENSG00000225542 | 0               | NA          | NA          | NA         | NA         | NA         | ZNF385D-AS1 |
|           | NA              | ENSG00000225544 | 1.36446158  | 0.06328391  | 0.38587702 | 0.37750587 | NA         |             |
|           | NA              | ENSG00000225545 | 0           | NA          | NA         | NA         | NA         |             |
| 105375475 | ENSG00000225546 | 3.57660607      | -0.25352998 | 0.4982603   | 0.0353312  | 0.11413817 |            | LINC02476   |

|           |                 |            |             |            |            |            |              |
|-----------|-----------------|------------|-------------|------------|------------|------------|--------------|
| 105377007 | ENSG00000225548 | 0          | NA          | NA         | NA         | NA         | LINC01980    |
| NA        | ENSG00000225549 | 0.14931947 | -0.01844332 | 0.38480212 | 0.84537521 | NA         | SELENOKP3    |
| NA        | ENSG00000225551 | 0          | NA          | NA         | NA         | NA         |              |
| NA        | ENSG00000225552 | 0          | NA          | NA         | NA         | NA         | NAALADL2-AS1 |
| NA        | ENSG00000225555 | 2.65895479 | -0.02371348 | 0.37829351 | 0.75086654 | 0.88290122 |              |
| 100191040 | ENSG00000225556 | 0.52208014 | 0.03144967  | 0.3860856  | 0.473009   | NA         | C2CD4D       |
| NA        | ENSG00000225557 | 0.5161511  | 0.03116282  | 0.38605747 | 0.47720307 | NA         | MTCO3P20     |
| NA        | ENSG00000225558 | 0          | NA          | NA         | NA         | NA         | UBE2D3P2     |
| NA        | ENSG00000225559 | 1.301514   | 0.01076485  | 0.37812791 | 0.88183692 | NA         |              |
| 105379268 | ENSG00000225560 | 0          | NA          | NA         | NA         | NA         | FAM197Y8     |
| NA        | ENSG00000225561 | 0          | NA          | NA         | NA         | NA         | LINC01710    |
| NA        | ENSG00000225563 | 0          | NA          | NA         | NA         | NA         |              |
| 101928496 | ENSG00000225564 | 0          | NA          | NA         | NA         | NA         | LINC01492    |
| NA        | ENSG00000225568 | 0          | NA          | NA         | NA         | NA         |              |
| NA        | ENSG00000225569 | 0          | NA          | NA         | NA         | NA         | CCT4P2       |
| NA        | ENSG00000225570 | 0          | NA          | NA         | NA         | NA         |              |
| 100506413 | ENSG00000225572 | 1.52668696 | -0.00602835 | 0.37735975 | 0.93467931 | NA         | DOCK4-AS1    |
| NA        | ENSG00000225573 | 0.34746601 | 0.02370763  | 0.3853651  | 0.61987128 | NA         | RPL35P5      |
| NA        | ENSG00000225574 | 0          | NA          | NA         | NA         | NA         | DRAXINP1     |
| 100874001 | ENSG00000225578 | 1.10656477 | -0.02773151 | 0.38127358 | 0.65573564 | NA         | NCBP2-AS1    |
| NA        | ENSG00000225579 | 15.2986869 | 0.23466954  | 0.38653662 | 0.23405293 | 0.45093611 | EDNRB-AS1    |
| NA        | ENSG00000225580 | 0.3400695  | 0.00218227  | 0.38337744 | 0.9668509  | NA         | PA2G4P5      |
| NA        | ENSG00000225581 | 0          | NA          | NA         | NA         | NA         | TRIM53AP     |
| NA        | ENSG00000225582 | 0          | NA          | NA         | NA         | NA         |              |
| NA        | ENSG00000225583 | 0          | NA          | NA         | NA         | NA         |              |
| NA        | ENSG00000225585 | 0          | NA          | NA         | NA         | NA         | IPPKP1       |
| NA        | ENSG00000225588 | 0          | NA          | NA         | NA         | NA         |              |
| NA        | ENSG00000225591 | 0.30001859 | -0.02294461 | 0.38527539 | 0.68644705 | NA         |              |
| NA        | ENSG00000225594 | 0          | NA          | NA         | NA         | NA         |              |
| NA        | ENSG00000225595 | 1.82075889 | -0.10638678 | 0.40138642 | 0.12019794 | NA         | LINC01623    |
| NA        | ENSG00000225598 | 0          | NA          | NA         | NA         | NA         |              |
| 100873935 | ENSG00000225602 | 0          | NA          | NA         | NA         | NA         | MTOR-AS1     |
| NA        | ENSG00000225603 | 0          | NA          | NA         | NA         | NA         |              |
| NA        | ENSG00000225605 | 0          | NA          | NA         | NA         | NA         |              |
| NA        | ENSG00000225606 | 0          | NA          | NA         | NA         | NA         |              |
| NA        | ENSG00000225609 | 0          | NA          | NA         | NA         | NA         | CDY20P       |
| NA        | ENSG00000225610 | 0          | NA          | NA         | NA         | NA         |              |
| 729083    | ENSG00000225611 | 0.54696598 | 0.03265554  | 0.38620891 | 0.4554863  | NA         | LINC02158    |

|           |                 |            |             |            |            |            |             |
|-----------|-----------------|------------|-------------|------------|------------|------------|-------------|
| 105375589 | ENSG00000225612 | 0          | NA          | NA         | NA         | NA         |             |
| NA        | ENSG00000225613 | 0          | NA          | NA         | NA         | NA         | LINCMD1     |
| 84627     | ENSG00000225614 | 721.435231 | -0.46137721 | 0.11173082 | 1.58E-05   | 0.0001442  | ZNF469      |
| NA        | ENSG00000225615 | 0          | NA          | NA         | NA         | NA         | RBMV2UP     |
| NA        | ENSG00000225616 | 0          | NA          | NA         | NA         | NA         |             |
| 730811    | ENSG00000225619 | 15.1167691 | -0.22965456 | 0.39452754 | 0.22852474 | 0.44380686 | MYT1L-AS1   |
| NA        | ENSG00000225620 | 0          | NA          | NA         | NA         | NA         |             |
| NA        | ENSG00000225622 | 0          | NA          | NA         | NA         | NA         | PPIAP17     |
| 100874313 | ENSG00000225623 | 0          | NA          | NA         | NA         | NA         | AGBL4-IT1   |
| NA        | ENSG00000225624 | 0          | NA          | NA         | NA         | NA         | TBL1Y1P1    |
| NA        | ENSG00000225625 | 0          | NA          | NA         | NA         | NA         |             |
| NA        | ENSG00000225626 | 0          | NA          | NA         | NA         | NA         | C9orf135-DT |
| NA        | ENSG00000225630 | 251.222957 | -0.08121356 | 0.1708016  | 0.59436655 | 0.7877158  | MTND2P28    |
| NA        | ENSG00000225632 | 0          | NA          | NA         | NA         | NA         |             |
| NA        | ENSG00000225636 | 1.42772675 | -0.00172838 | 0.37868009 | 0.97889848 | NA         | HNRNPA3P15  |
| NA        | ENSG00000225637 | 0          | NA          | NA         | NA         | NA         |             |
| NA        | ENSG00000225638 | 0          | NA          | NA         | NA         | NA         | PABPC1P12   |
| NA        | ENSG00000225639 | 0          | NA          | NA         | NA         | NA         | PGAM1P2     |
| 101929207 | ENSG00000225640 | 0          | NA          | NA         | NA         | NA         | LINC01729   |
| NA        | ENSG00000225642 | 0.18922458 | 0.01954053  | 0.38488496 | 0.78225479 | NA         | SNRPEP5     |
| NA        | ENSG00000225643 | 0.16735865 | 0.01897177  | 0.38482933 | 0.78225479 | NA         |             |
| NA        | ENSG00000225644 | 0          | NA          | NA         | NA         | NA         | RPL35AP4    |
| NA        | ENSG00000225647 | 0.44795842 | -0.02501848 | 0.38558245 | 0.5807882  | NA         |             |
| NA        | ENSG00000225648 | 345.218417 | -0.30238489 | 0.13076222 | 0.0134902  | 0.05302011 | SBDSP1      |
| 100506474 | ENSG00000225649 | 1.66015737 | -0.05369632 | 0.38204694 | 0.49445196 | NA         |             |
| NA        | ENSG00000225650 | 0          | NA          | NA         | NA         | NA         | EIF2S2P5    |
| NA        | ENSG00000225652 | 0          | NA          | NA         | NA         | NA         | KCNMA1-AS3  |
| NA        | ENSG00000225653 | 0          | NA          | NA         | NA         | NA         | RNF19BPY    |
| NA        | ENSG00000225655 | 0          | NA          | NA         | NA         | NA         |             |
| NA        | ENSG00000225656 | 0          | NA          | NA         | NA         | NA         |             |
| 105372682 | ENSG00000225657 | 0          | NA          | NA         | NA         | NA         | LINC01716   |
| NA        | ENSG00000225658 | 0          | NA          | NA         | NA         | NA         | TAF13P2     |
| NA        | ENSG00000225660 | 0          | NA          | NA         | NA         | NA         |             |
| NA        | ENSG00000225661 | 0          | NA          | NA         | NA         | NA         | RPL14P5     |
| NA        | ENSG00000225662 | 0          | NA          | NA         | NA         | NA         |             |
| 348262    | ENSG00000225663 | 2962.94983 | -0.25830534 | 0.0715984  | 0.0002337  | 0.00163258 | MCRIP1      |
| NA        | ENSG00000225664 | 0          | NA          | NA         | NA         | NA         | YWHAZP8     |
| NA        | ENSG00000225665 | 0          | NA          | NA         | NA         | NA         | SAR1AP3     |

|           |                 |            |             |            |            |            |            |
|-----------|-----------------|------------|-------------|------------|------------|------------|------------|
| NA        | ENSG00000225669 | 0          | NA          | NA         | NA         | NA         | RPL23AP27  |
| NA        | ENSG00000225670 | 11.1760636 | -0.4383448  | 0.96671338 | 0.00034674 | 0.00233118 | CADM3-AS1  |
| NA        | ENSG00000225671 | 0          | NA          | NA         | NA         | NA         | FCF1P6     |
| NA        | ENSG00000225672 | 0          | NA          | NA         | NA         | NA         | CCNT2P1    |
| NA        | ENSG00000225673 | 0          | NA          | NA         | NA         | NA         |            |
| NA        | ENSG00000225674 | 0          | NA          | NA         | NA         | NA         | IPO7P2     |
| 105378732 | ENSG00000225675 | 9.01125237 | 0.02055041  | 0.34450699 | 0.89625321 | 0.95469109 | LINC01771  |
| 105372988 | ENSG00000225676 | 0          | NA          | NA         | NA         | NA         |            |
| NA        | ENSG00000225678 | 0          | NA          | NA         | NA         | NA         |            |
| NA        | ENSG00000225680 | 0          | NA          | NA         | NA         | NA         |            |
| NA        | ENSG00000225681 | 0          | NA          | NA         | NA         | NA         |            |
| 729658    | ENSG00000225683 | 0          | NA          | NA         | NA         | NA         | PACRG-AS3  |
| 100128385 | ENSG00000225684 | 19.8681288 | 0.0335389   | 0.34255754 | 0.83483935 | 0.92454439 | FAM225B    |
| NA        | ENSG00000225685 | 0          | NA          | NA         | NA         | NA         | TSPY5P     |
| NA        | ENSG00000225689 | 1.75022987 | 0.05418162  | 0.38388111 | 0.40988928 | NA         |            |
| NA        | ENSG00000225690 | 0          | NA          | NA         | NA         | NA         | TREML5P    |
| NA        | ENSG00000225693 | 2.50128236 | -0.04362762 | 0.37939863 | 0.59271316 | NA         | LAGE3P1    |
| NA        | ENSG00000225695 | 0.99255688 | 0.02179525  | 0.38206078 | 0.68516788 | NA         | HNRNPA1P35 |
| 65010     | ENSG00000225697 | 321.654158 | 0.20353226  | 0.1797964  | 0.19985187 | 0.40468067 | SLC26A6    |
| NA        | ENSG00000225698 | 0          | NA          | NA         | NA         | NA         | IGHV3-72   |
| NA        | ENSG00000225701 | 0          | NA          | NA         | NA         | NA         | EIF4A1P13  |
| NA        | ENSG00000225703 | 0.15069912 | -0.01848503 | 0.38480575 | 0.84537521 | NA         |            |
| NA        | ENSG00000225705 | 0          | NA          | NA         | NA         | NA         |            |
| 101929407 | ENSG00000225706 | 14.1535733 | 0.35090406  | 0.52300745 | 0.07779925 | 0.2071028  | PTPRD-AS1  |
| NA        | ENSG00000225708 | 0          | NA          | NA         | NA         | NA         |            |
| NA        | ENSG00000225710 | 0          | NA          | NA         | NA         | NA         | PDE4DIPP8  |
| NA        | ENSG00000225711 | 0          | NA          | NA         | NA         | NA         |            |
| NA        | ENSG00000225712 | 0          | NA          | NA         | NA         | NA         | ATP5MC2P1  |
| NA        | ENSG00000225713 | 0          | NA          | NA         | NA         | NA         | RPL30P1    |
| NA        | ENSG00000225715 | 0.15069912 | -0.01848503 | 0.38480575 | 0.84537521 | NA         | PSMA1P1    |
| NA        | ENSG00000225716 | 0          | NA          | NA         | NA         | NA         | ELOCP13    |
| NA        | ENSG00000225718 | 0          | NA          | NA         | NA         | NA         |            |
| NA        | ENSG00000225719 | 0          | NA          | NA         | NA         | NA         | NMNAT1P2   |
| NA        | ENSG00000225720 | 0          | NA          | NA         | NA         | NA         |            |
| NA        | ENSG00000225721 | 4.82103826 | -0.00764079 | 0.36007989 | 0.95025723 | 0.97957708 |            |
| NA        | ENSG00000225722 | 0          | NA          | NA         | NA         | NA         | RPL24P9    |
| NA        | ENSG00000225723 | 0          | NA          | NA         | NA         | NA         | MTND6P15   |
| NA        | ENSG00000225724 | 0          | NA          | NA         | NA         | NA         | ASH2LP3    |



|           |                 |            |             |            |            |            |             |
|-----------|-----------------|------------|-------------|------------|------------|------------|-------------|
| 100132103 | ENSG00000225725 | 0.81854482 | -0.0316102  | 0.38385563 | 0.5288158  | NA         | FAM66E      |
| NA        | ENSG00000225726 | 0.98310848 | -0.01888568 | 0.38162052 | 0.73225781 | NA         |             |
| NA        | ENSG00000225727 | 0          | NA          | NA         | NA         | NA         |             |
| NA        | ENSG00000225728 | 0          | NA          | NA         | NA         | NA         | TMEM230P1   |
| NA        | ENSG00000225730 | 0          | NA          | NA         | NA         | NA         | ADGRF5-AS1  |
| NA        | ENSG00000225731 | 0.48948684 | -0.0085758  | 0.382768   | 0.84339796 | NA         | PDE9A-AS1   |
| 100505641 | ENSG00000225733 | 2511.68439 | 0.01291629  | 0.06156766 | 0.83243173 | 0.92392457 | FGD5-AS1    |
| NA        | ENSG00000225735 | 0          | NA          | NA         | NA         | NA         | NEK4P1      |
| NA        | ENSG00000225738 | 0          | NA          | NA         | NA         | NA         | NRG3-AS1    |
| NA        | ENSG00000225739 | 0.15069912 | -0.01848503 | 0.38480575 | 0.84537521 | NA         | NPM1P18     |
| NA        | ENSG00000225740 | 0          | NA          | NA         | NA         | NA         | ELOCP6      |
| NA        | ENSG00000225741 | 0          | NA          | NA         | NA         | NA         |             |
| NA        | ENSG00000225742 | 0.33608176 | -0.00686371 | 0.38352161 | 0.95534792 | NA         | LINC02036   |
| NA        | ENSG00000225744 | 0          | NA          | NA         | NA         | NA         |             |
| NA        | ENSG00000225746 | 20.6212301 | -0.14720061 | 0.36010996 | 0.39027622 | 0.61954555 | MEG8        |
| NA        | ENSG00000225750 | 0          | NA          | NA         | NA         | NA         |             |
| NA        | ENSG00000225751 | 0          | NA          | NA         | NA         | NA         |             |
| NA        | ENSG00000225752 | 0          | NA          | NA         | NA         | NA         |             |
| NA        | ENSG00000225755 | 0          | NA          | NA         | NA         | NA         |             |
| 138948    | ENSG00000225756 | 619.609941 | 0.93089808  | 0.11034644 | 4.96E-18   | 1.65E-16   | DBH-AS1     |
| NA        | ENSG00000225758 | 0          | NA          | NA         | NA         | NA         | RPS17P17    |
| 100861522 | ENSG00000225759 | 0          | NA          | NA         | NA         | NA         | LINC00489   |
| NA        | ENSG00000225760 | 23.0359556 | -0.04703309 | 0.30533001 | 0.80055207 | 0.90868418 | LINC00431   |
| NA        | ENSG00000225761 | 0.16735865 | 0.01897177  | 0.38482933 | 0.78225479 | NA         |             |
| NA        | ENSG00000225762 | 0.15069912 | -0.01848503 | 0.38480575 | 0.84537521 | NA         | LINC01389   |
| NA        | ENSG00000225764 | 0          | NA          | NA         | NA         | NA         | P3H2-AS1    |
| NA        | ENSG00000225765 | 0          | NA          | NA         | NA         | NA         | LINC01831   |
| NA        | ENSG00000225766 | 0.54947034 | -0.00369597 | 0.38248157 | 0.89300819 | NA         | DHRS4L1     |
| NA        | ENSG00000225767 | 0          | NA          | NA         | NA         | NA         | FAF1-AS1    |
| 101927523 | ENSG00000225768 | 0          | NA          | NA         | NA         | NA         | LINC02620   |
| NA        | ENSG00000225769 | 0.32367593 | -0.02327181 | 0.38532116 | 0.66869384 | NA         | CROCCP1     |
| NA        | ENSG00000225770 | 0          | NA          | NA         | NA         | NA         | RPS29P3     |
| NA        | ENSG00000225774 | 0          | NA          | NA         | NA         | NA         | SIRPAP1     |
| NA        | ENSG00000225775 | 0          | NA          | NA         | NA         | NA         |             |
| NA        | ENSG00000225777 | 0          | NA          | NA         | NA         | NA         | DDX39AP1    |
| 219731    | ENSG00000225778 | 5.53322937 | 0.21099196  | 0.45473253 | 0.05396847 | 0.15776255 | PROSER2-AS1 |
| NA        | ENSG00000225779 | 0.14931947 | -0.01844332 | 0.38480212 | 0.84537521 | NA         |             |
| 346517    | ENSG00000225781 | 0          | NA          | NA         | NA         | NA         | OR6V1       |

|           |                 |            |             |            |            |            |            |
|-----------|-----------------|------------|-------------|------------|------------|------------|------------|
| 440823    | ENSG00000225783 | 4208.13599 | 0.77842486  | 0.07743833 | 1.81E-24   | 8.50E-23   | MIAT       |
| NA        | ENSG00000225785 | 0          | NA          | NA         | NA         | NA         |            |
| NA        | ENSG00000225787 | 0          | NA          | NA         | NA         | NA         | LSM3P3     |
| NA        | ENSG00000225790 | 0.55480891 | 0.03072068  | 0.38591774 | 0.54880681 | NA         |            |
| 401264    | ENSG00000225791 | 198.18707  | -0.33635299 | 0.1625188  | 0.02234071 | 0.07957623 | TRAM2-AS1  |
| NA        | ENSG00000225792 | 32.1073424 | 0.48352766  | 0.41261925 | 0.05564345 | 0.16168221 |            |
| NA        | ENSG00000225793 | 13.8850998 | -0.10437518 | 0.33874623 | 0.55560348 | 0.7613563  | TMEM30A-DT |
| NA        | ENSG00000225794 | 0.173733   | 0.01914545  | 0.38484597 | 0.78225479 | NA         |            |
| NA        | ENSG00000225795 | 0          | NA          | NA         | NA         | NA         |            |
| NA        | ENSG00000225796 | 0          | NA          | NA         | NA         | NA         | MTND4P23   |
| NA        | ENSG00000225797 | 0          | NA          | NA         | NA         | NA         | UBDP1      |
| NA        | ENSG00000225798 | 0.5297845  | -0.00813747 | 0.38311826 | 0.8318161  | NA         |            |
| NA        | ENSG00000225801 | 0          | NA          | NA         | NA         | NA         | RABEPKP1   |
| NA        | ENSG00000225802 | 0          | NA          | NA         | NA         | NA         | WARS1P1    |
| NA        | ENSG00000225803 | 0          | NA          | NA         | NA         | NA         | MRPS11P1   |
| 100129216 | ENSG00000225805 | 0          | NA          | NA         | NA         | NA         | DEFB131B   |
| NA        | ENSG00000225806 | 11.1345735 | 0.02289177  | 0.34176434 | 0.88690881 | 0.95029993 |            |
| NA        | ENSG00000225807 | 0          | NA          | NA         | NA         | NA         |            |
| NA        | ENSG00000225808 | 0.84932067 | 0.04547707  | 0.38527552 | 0.4111475  | NA         | DNAJC19P5  |
| NA        | ENSG00000225809 | 0          | NA          | NA         | NA         | NA         | RBMV2KP    |
| NA        | ENSG00000225811 | 0          | NA          | NA         | NA         | NA         |            |
| NA        | ENSG00000225813 | 0          | NA          | NA         | NA         | NA         |            |
| NA        | ENSG00000225814 | 0          | NA          | NA         | NA         | NA         | GRPEL2P2   |
| NA        | ENSG00000225815 | 0          | NA          | NA         | NA         | NA         |            |
| NA        | ENSG00000225816 | 0          | NA          | NA         | NA         | NA         | GTF3AP5    |
| NA        | ENSG00000225818 | 0          | NA          | NA         | NA         | NA         |            |
| NA        | ENSG00000225819 | 0          | NA          | NA         | NA         | NA         |            |
| NA        | ENSG00000225822 | 1.22797924 | 0.07066985  | 0.38992006 | 0.23546238 | NA         | UBXN7-AS1  |
| NA        | ENSG00000225823 | 0          | NA          | NA         | NA         | NA         | RPL7P45    |
| NA        | ENSG00000225825 | 0          | NA          | NA         | NA         | NA         | IGHD6-25   |
| 79100     | ENSG00000225826 | 0          | NA          | NA         | NA         | NA         | LINC00626  |
| NA        | ENSG00000225827 | 0          | NA          | NA         | NA         | NA         | SFTPA3P    |
| 100128071 | ENSG00000225828 | 318.830067 | 0.24243119  | 0.1353706  | 0.05506704 | 0.16031256 | FAM229A    |
| 2074      | ENSG00000225830 | 541.065097 | -0.28609448 | 0.13764592 | 0.02481947 | 0.08664758 | ERCC6      |
| NA        | ENSG00000225831 | 0          | NA          | NA         | NA         | NA         | RPS18P1    |
| NA        | ENSG00000225832 | 0          | NA          | NA         | NA         | NA         |            |
| 104798195 | ENSG00000225833 | 0          | NA          | NA         | NA         | NA         |            |
| NA        | ENSG00000225836 | 0.14931947 | -0.01844332 | 0.38480212 | 0.84537521 | NA         |            |

|           |                 |            |             |            |            |            |            |
|-----------|-----------------|------------|-------------|------------|------------|------------|------------|
| NA        | ENSG00000225839 | 0          | NA          | NA         | NA         | NA         | TRMT2B-AS1 |
| NA        | ENSG00000225840 | 0          | NA          | NA         | NA         | NA         |            |
| NA        | ENSG00000225842 | 0          | NA          | NA         | NA         | NA         | GGCTP3     |
| NA        | ENSG00000225843 | 0.36269315 | 0.00122946  | 0.38336661 | 0.96420141 | NA         | NIPA2P1    |
| NA        | ENSG00000225846 | 0          | NA          | NA         | NA         | NA         |            |
| NA        | ENSG00000225849 | 1.59115451 | 0.00569985  | 0.37795395 | 0.93824725 | NA         | MKRN7P     |
| NA        | ENSG00000225850 | 3.95911767 | -0.0077925  | 0.36381488 | 0.94604397 | 0.97814213 |            |
| NA        | ENSG00000225851 | 0          | NA          | NA         | NA         | NA         | HLA-S      |
| NA        | ENSG00000225854 | 0          | NA          | NA         | NA         | NA         |            |
| 284618    | ENSG00000225855 | 227.264542 | 0.3008621   | 0.1801399  | 0.05932789 | 0.1696304  | RUSC1-AS1  |
| NA        | ENSG00000225856 | 0          | NA          | NA         | NA         | NA         | PCNPP2     |
| NA        | ENSG00000225857 | 3.49105842 | 0.00149331  | 0.36551515 | 0.99136899 | 0.99719939 | LINC02816  |
| NA        | ENSG00000225858 | 0          | NA          | NA         | NA         | NA         | MATR3P1    |
| NA        | ENSG00000225864 | 0          | NA          | NA         | NA         | NA         |            |
| NA        | ENSG00000225867 | 0          | NA          | NA         | NA         | NA         |            |
| 100631378 | ENSG00000225868 | 4.49678278 | 0.08035572  | 0.3745555  | 0.51001217 | 0.72545712 | WDR87BP    |
| NA        | ENSG00000225869 | 0.32337182 | 0.00165105  | 0.38337115 | 0.9652751  | NA         |            |
| NA        | ENSG00000225870 | 0.67501404 | 0.00231223  | 0.3818758  | 0.96009631 | NA         | LINC00368  |
| NA        | ENSG00000225871 | 0          | NA          | NA         | NA         | NA         |            |
| 644050    | ENSG00000225872 | 31.7924837 | -0.02262747 | 0.28106698 | 0.9046393  | 0.95823316 | LINC01529  |
| 102724231 | ENSG00000225873 | 1.55863536 | 0.01202775  | 0.37716458 | 0.87616391 | NA         | C3orf86    |
| NA        | ENSG00000225876 | 0          | NA          | NA         | NA         | NA         |            |
| 100289650 | ENSG00000225877 | 0          | NA          | NA         | NA         | NA         | PSG8-AS1   |
| NA        | ENSG00000225878 | 0          | NA          | NA         | NA         | NA         | SERBP1P2   |
| NA        | ENSG00000225879 | 0          | NA          | NA         | NA         | NA         |            |
| 79854     | ENSG00000225880 | 26.1645917 | 0.08077925  | 0.29527332 | 0.67723406 | 0.84229976 | LINC00115  |
| 100506937 | ENSG00000225881 | 0          | NA          | NA         | NA         | NA         |            |
| 105373144 | ENSG00000225882 | 0          | NA          | NA         | NA         | NA         | LINC01456  |
| NA        | ENSG00000225883 | 0.51937201 | -0.02557462 | 0.38567603 | 0.54680819 | NA         | BMS1P11    |
| 729254    | ENSG00000225884 | 0          | NA          | NA         | NA         | NA         |            |
| NA        | ENSG00000225885 | 0.15069912 | -0.01848503 | 0.38480575 | 0.84537521 | NA         |            |
| NA        | ENSG00000225886 | 0          | NA          | NA         | NA         | NA         |            |
| NA        | ENSG00000225889 | 21.4558565 | 0.08089796  | 0.31405962 | 0.66713521 | 0.83613156 |            |
| NA        | ENSG00000225891 | 9.40650732 | 0.00916846  | 0.35003489 | 0.95219535 | 0.98019954 | DHDDS-AS1  |
| NA        | ENSG00000225893 | 1.45548612 | -0.00348842 | 0.37857291 | 0.95860288 | NA         |            |
| NA        | ENSG00000225895 | 0          | NA          | NA         | NA         | NA         | TRAPPC2P8  |
| NA        | ENSG00000225896 | 0          | NA          | NA         | NA         | NA         | ELOCP36    |
| NA        | ENSG00000225898 | 0          | NA          | NA         | NA         | NA         |            |

|           |                 |            |             |            |            |            |           |
|-----------|-----------------|------------|-------------|------------|------------|------------|-----------|
| 441581    | ENSG00000225899 | 0.50781819 | 0.03075272  | 0.38601731 | 0.48332579 | NA         | FRG2B     |
| NA        | ENSG00000225900 | 0          | NA          | NA         | NA         | NA         | HSPE1P13  |
| NA        | ENSG00000225901 | 0          | NA          | NA         | NA         | NA         | MTND2P9   |
| NA        | ENSG00000225903 | 0          | NA          | NA         | NA         | NA         |           |
| NA        | ENSG00000225904 | 0          | NA          | NA         | NA         | NA         | MORF4L1P7 |
| NA        | ENSG00000225905 | 0.70300415 | 0.02828893  | 0.3838345  | 0.55881987 | NA         |           |
| NA        | ENSG00000225906 | 0          | NA          | NA         | NA         | NA         |           |
| NA        | ENSG00000225907 | 0          | NA          | NA         | NA         | NA         | RPS27P16  |
| NA        | ENSG00000225911 | 0          | NA          | NA         | NA         | NA         |           |
| NA        | ENSG00000225912 | 0.18922458 | 0.01954053  | 0.38488496 | 0.78225479 | NA         | RPL26P36  |
| NA        | ENSG00000225913 | 0.50620141 | 0.03067247  | 0.38600949 | 0.48453605 | NA         |           |
| 414764    | ENSG00000225914 | 0.91687121 | -0.03748945 | 0.38442301 | 0.46559331 | NA         | TSBP1-AS1 |
| NA        | ENSG00000225916 | 0          | NA          | NA         | NA         | NA         |           |
| NA        | ENSG00000225918 | 0.30002133 | -0.02294463 | 0.38527539 | 0.68644534 | NA         | RPL7P59   |
| 105373199 | ENSG00000225919 | 0          | NA          | NA         | NA         | NA         | LINC01745 |
| NA        | ENSG00000225920 | 16.168589  | 0.08166284  | 0.33895106 | 0.63705507 | 0.81722218 | RIMKLBP2  |
| 51406     | ENSG00000225921 | 1209.8548  | -0.06089928 | 0.09029193 | 0.48742273 | 0.70726738 | NOL7      |
| NA        | ENSG00000225922 | 0          | NA          | NA         | NA         | NA         | RPL21P92  |
| NA        | ENSG00000225923 | 0          | NA          | NA         | NA         | NA         |           |
| 105378049 | ENSG00000225924 | 0          | NA          | NA         | NA         | NA         | TAB2-AS1  |
| NA        | ENSG00000225925 | 0          | NA          | NA         | NA         | NA         |           |
| NA        | ENSG00000225928 | 0          | NA          | NA         | NA         | NA         | CACYBPP1  |
| 105373100 | ENSG00000225929 | 0          | NA          | NA         | NA         | NA         |           |
| 26082     | ENSG00000225930 | 108.266863 | 0.52988427  | 0.22576695 | 0.00583888 | 0.02653305 | LINC02249 |
| NA        | ENSG00000225931 | 0          | NA          | NA         | NA         | NA         |           |
| 100128553 | ENSG00000225932 | 0          | NA          | NA         | NA         | NA         | CTAGE4    |
| NA        | ENSG00000225933 | 0          | NA          | NA         | NA         | NA         | RPS14P5   |
| NA        | ENSG00000225934 | 0.37844916 | 0.02407552  | 0.3854191  | 0.60038877 | NA         | FAM133FP  |
| NA        | ENSG00000225935 | 0          | NA          | NA         | NA         | NA         | BANF1P5   |
| NA        | ENSG00000225936 | 0          | NA          | NA         | NA         | NA         |           |
| 50652     | ENSG00000225937 | 0          | NA          | NA         | NA         | NA         | PCA3      |
| NA        | ENSG00000225938 | 0          | NA          | NA         | NA         | NA         |           |
| NA        | ENSG00000225940 | 0          | NA          | NA         | NA         | NA         | C5orf67   |
| 101927362 | ENSG00000225942 | 0          | NA          | NA         | NA         | NA         | LINC01875 |
| NA        | ENSG00000225943 | 0          | NA          | NA         | NA         | NA         |           |
| NA        | ENSG00000225944 | 0          | NA          | NA         | NA         | NA         | RIOK3P1   |
| NA        | ENSG00000225945 | 0.173124   | -0.01911262 | 0.38486262 | 0.84537521 | NA         |           |
| NA        | ENSG00000225947 | 0          | NA          | NA         | NA         | NA         |           |

|           |                 |            |             |            |            |            |            |
|-----------|-----------------|------------|-------------|------------|------------|------------|------------|
| NA        | ENSG00000225948 | 0.173124   | -0.01911262 | 0.38486262 | 0.84537521 | NA         | LINC02648  |
| NA        | ENSG00000225949 | 0          | NA          | NA         | NA         | NA         |            |
| 4909      | ENSG00000225950 | 0.16735865 | 0.01897177  | 0.38482933 | 0.78225479 | NA         | NTF4       |
| 107080620 | ENSG00000225951 | 3.3328097  | 0.06010609  | 0.37524176 | 0.5727208  | 0.77250532 | ODF2-AS1   |
| NA        | ENSG00000225952 | 0          | NA          | NA         | NA         | NA         |            |
| 150538    | ENSG00000225953 | 0.18922458 | 0.01954053  | 0.38488496 | 0.78225479 | NA         | SATB2-AS1  |
| NA        | ENSG00000225956 | 0.16735865 | 0.01897177  | 0.38482933 | 0.78225479 | NA         |            |
| NA        | ENSG00000225957 | 0          | NA          | NA         | NA         | NA         |            |
| NA        | ENSG00000225959 | 0          | NA          | NA         | NA         | NA         | MTND4P3    |
| NA        | ENSG00000225960 | 0          | NA          | NA         | NA         | NA         |            |
| NA        | ENSG00000225963 | 2.01216704 | 0.06847135  | 0.38846116 | 0.29634815 | NA         |            |
| NA        | ENSG00000225964 | 0.3941765  | 0.02407869  | 0.38542215 | 0.60587058 | NA         | NRIR       |
| NA        | ENSG00000225965 | 0          | NA          | NA         | NA         | NA         |            |
| 392617    | ENSG00000225968 | 163.996284 | -2.50784558 | 0.29125476 | 4.54E-19   | 1.62E-17   | ELFN1      |
| NA        | ENSG00000225969 | 0.97758668 | -0.0335786  | 0.3825872  | 0.57352113 | NA         | ABHD11-AS1 |
| NA        | ENSG00000225970 | 0          | NA          | NA         | NA         | NA         |            |
| NA        | ENSG00000225971 | 0          | NA          | NA         | NA         | NA         | RPS3AP51   |
| NA        | ENSG00000225972 | 1.56597428 | 0.07430329  | 0.3891668  | 0.29629551 | NA         | MTND1P23   |
| 101928527 | ENSG00000225973 | 117.537914 | 0.25046012  | 0.20770853 | 0.15563593 | 0.34168605 | PIGBOS1    |
| NA        | ENSG00000225974 | 0          | NA          | NA         | NA         | NA         |            |
| 101927621 | ENSG00000225975 | 39.416628  | -0.20208902 | 0.31469608 | 0.3216318  | 0.54929628 | LINC01534  |
| NA        | ENSG00000225976 | 0          | NA          | NA         | NA         | NA         | CKS1BP2    |
| NA        | ENSG00000225978 | 0          | NA          | NA         | NA         | NA         | HAR1A      |
| NA        | ENSG00000225979 | 0.18922458 | 0.01954053  | 0.38488496 | 0.78225479 | NA         |            |
| NA        | ENSG00000225980 | 0          | NA          | NA         | NA         | NA         | OR7E19P    |
| NA        | ENSG00000225981 | 0.16735865 | 0.01897177  | 0.38482933 | 0.78225479 | NA         |            |
| NA        | ENSG00000225982 | 0          | NA          | NA         | NA         | NA         |            |
| NA        | ENSG00000225984 | 0.16735865 | 0.01897177  | 0.38482933 | 0.78225479 | NA         | HMGB1P26   |
| 101929329 | ENSG00000225988 | 17.5879362 | 0.07670625  | 0.32997155 | 0.66889196 | 0.83720078 | LAMP5-AS1  |
| NA        | ENSG00000225990 | 0          | NA          | NA         | NA         | NA         | SNRPEP7    |
| NA        | ENSG00000225991 | 1.0288088  | 0.02290042  | 0.38189063 | 0.67896777 | NA         | RPL23AP34  |
| NA        | ENSG00000225992 | 0          | NA          | NA         | NA         | NA         | TRGVA      |
| NA        | ENSG00000225997 | 0          | NA          | NA         | NA         | NA         | OR4A8      |
| NA        | ENSG00000225999 | 0          | NA          | NA         | NA         | NA         | NDUFA12P1  |
| NA        | ENSG00000226002 | 3.64757041 | -0.00440841 | 0.37030403 | 0.96327751 | 0.98545957 | GTF2IP14   |
| NA        | ENSG00000226003 | 0.14931947 | -0.01844332 | 0.38480212 | 0.84537521 | NA         | PPIAP37    |
| 105378020 | ENSG00000226004 | 0          | NA          | NA         | NA         | NA         | LINC02528  |
| NA        | ENSG00000226005 | 0          | NA          | NA         | NA         | NA         | LINC02660  |

|           |                 |            |             |            |            |            |              |
|-----------|-----------------|------------|-------------|------------|------------|------------|--------------|
| NA        | ENSG00000226007 | 13.9032076 | -0.03899305 | 0.33390352 | 0.81538468 | 0.91614181 |              |
| NA        | ENSG00000226009 | 10.6751662 | -0.03738047 | 0.33991053 | 0.81600431 | 0.9163678  | KCNIP2-AS1   |
| NA        | ENSG00000226010 | 0.82734129 | -0.00142625 | 0.38202732 | 0.97634821 | NA         |              |
| NA        | ENSG00000226011 | 0          | NA          | NA         | NA         | NA         | OFD1P1Y      |
| NA        | ENSG00000226012 | 0          | NA          | NA         | NA         | NA         |              |
| NA        | ENSG00000226013 | 0          | NA          | NA         | NA         | NA         | MRPS18BP1    |
| NA        | ENSG00000226014 | 0          | NA          | NA         | NA         | NA         |              |
| NA        | ENSG00000226015 | 12.3221505 | 0.50736158  | 0.63930457 | 0.04722615 | 0.14233128 | CCT8P1       |
| NA        | ENSG00000226016 | 0          | NA          | NA         | NA         | NA         | RPL36AP55    |
| NA        | ENSG00000226017 | 0          | NA          | NA         | NA         | NA         | PRICKLE2-AS3 |
| NA        | ENSG00000226020 | 0          | NA          | NA         | NA         | NA         | CDK2AP2P3    |
| NA        | ENSG00000226022 | 0          | NA          | NA         | NA         | NA         |              |
| 255313    | ENSG00000226023 | 0          | NA          | NA         | NA         | NA         | CT47A6       |
| 728062    | ENSG00000226023 | 0          | NA          | NA         | NA         | NA         | CT47A6       |
| NA        | ENSG00000226024 | 0          | NA          | NA         | NA         | NA         | COX5BP7      |
| 400696    | ENSG00000226025 | 0          | NA          | NA         | NA         | NA         |              |
| 101928118 | ENSG00000226026 | 3.80597868 | -0.1628058  | 0.41814253 | 0.12718481 | 0.29731903 |              |
| NA        | ENSG00000226028 | 0          | NA          | NA         | NA         | NA         | PFN1P12      |
| 107984921 | ENSG00000226029 | 125.29408  | 0.18693586  | 0.1998959  | 0.27538445 | 0.49946315 | LINC01772    |
| NA        | ENSG00000226030 | 0          | NA          | NA         | NA         | NA         | HLA-DQB3     |
| 100129662 | ENSG00000226031 | 0          | NA          | NA         | NA         | NA         | FGF13-AS1    |
| NA        | ENSG00000226032 | 0          | NA          | NA         | NA         | NA         |              |
| NA        | ENSG00000226034 | 0          | NA          | NA         | NA         | NA         | NANOGNBP1    |
| NA        | ENSG00000226036 | 0          | NA          | NA         | NA         | NA         |              |
| 105370308 | ENSG00000226037 | 0          | NA          | NA         | NA         | NA         | LINC01040    |
| NA        | ENSG00000226038 | 0          | NA          | NA         | NA         | NA         | PPIAP21      |
| NA        | ENSG00000226040 | 5.73348479 | -0.59327192 | 1.36829314 | 0.01269571 | 0.05044718 |              |
| NA        | ENSG00000226041 | 0          | NA          | NA         | NA         | NA         |              |
| NA        | ENSG00000226042 | 0          | NA          | NA         | NA         | NA         | CDY10P       |
| NA        | ENSG00000226043 | 0          | NA          | NA         | NA         | NA         |              |
| NA        | ENSG00000226045 | 0          | NA          | NA         | NA         | NA         |              |
| NA        | ENSG00000226046 | 0          | NA          | NA         | NA         | NA         | AP1S2P1      |
| NA        | ENSG00000226047 | 0          | NA          | NA         | NA         | NA         |              |
| NA        | ENSG00000226048 | 0          | NA          | NA         | NA         | NA         | YBX1P8       |
| NA        | ENSG00000226049 | 1.33991867 | 0.00860218  | 0.37782418 | 0.90672743 | NA         | TLK2P1       |
| 253264    | ENSG00000226051 | 1.0193287  | -0.04966541 | 0.38586347 | 0.38208303 | NA         | ZNF503-AS1   |
| 729987    | ENSG00000226053 | 27.4133085 | -0.107741   | 0.30969707 | 0.57472458 | 0.77363021 | LINC01776    |
| NA        | ENSG00000226054 | 2.67366754 | -0.12562251 | 0.4028593  | 0.1893234  | 0.39021154 | MEMO1P1      |

|           |                 |            |             |            |            |            |              |
|-----------|-----------------|------------|-------------|------------|------------|------------|--------------|
| NA        | ENSG00000226055 | 6.05221364 | -0.16661889 | 0.40023252 | 0.25402079 | 0.47451017 | PAICSP1      |
| NA        | ENSG00000226056 | 0.173733   | 0.01914545  | 0.38484597 | 0.78225479 | NA         | MTND4P32     |
| NA        | ENSG00000226057 | 0          | NA          | NA         | NA         | NA         | PHF2P2       |
| NA        | ENSG00000226058 | 0          | NA          | NA         | NA         | NA         |              |
| NA        | ENSG00000226059 | 0          | NA          | NA         | NA         | NA         | HMGB3P20     |
| NA        | ENSG00000226061 | 0          | NA          | NA         | NA         | NA         | PCMTD1P1     |
| NA        | ENSG00000226063 | 0.69493202 | 0.03154416  | 0.38626309 | 0.41391645 | NA         |              |
| NA        | ENSG00000226064 | 0          | NA          | NA         | NA         | NA         | PGBD4P6      |
| NA        | ENSG00000226065 | 0          | NA          | NA         | NA         | NA         | ZBTB45P2     |
| NA        | ENSG00000226066 | 0          | NA          | NA         | NA         | NA         | ZP3P2        |
| NA        | ENSG00000226067 | 6.36069059 | -0.04111386 | 0.35665114 | 0.76640846 | 0.8924999  | LINC00623    |
| NA        | ENSG00000226068 | 0          | NA          | NA         | NA         | NA         | HNRNPA3P4    |
| NA        | ENSG00000226070 | 17.5747756 | -0.34731614 | 0.45121593 | 0.11576527 | 0.27775826 |              |
| NA        | ENSG00000226072 | 0          | NA          | NA         | NA         | NA         |              |
| NA        | ENSG00000226074 | 0.173733   | 0.01914545  | 0.38484597 | 0.78225479 | NA         | PRSS44P      |
| NA        | ENSG00000226075 | 0          | NA          | NA         | NA         | NA         | PHKG1P1      |
| NA        | ENSG00000226078 | 0          | NA          | NA         | NA         | NA         |              |
| 105377959 | ENSG00000226079 | 0          | NA          | NA         | NA         | NA         |              |
| NA        | ENSG00000226080 | 0.15069912 | -0.01848503 | 0.38480575 | 0.84537521 | NA         | RPL6P4       |
| NA        | ENSG00000226081 | 0          | NA          | NA         | NA         | NA         | USP12PX      |
| NA        | ENSG00000226082 | 0          | NA          | NA         | NA         | NA         |              |
| 100129213 | ENSG00000226083 | 0          | NA          | NA         | NA         | NA         | SLC39A12-AS1 |
| NA        | ENSG00000226084 | 0.81161749 | -0.00647173 | 0.38078718 | 0.90902796 | NA         |              |
| NA        | ENSG00000226085 | 51.0160513 | 0.04319963  | 0.26142092 | 0.82348595 | 0.91956781 | UQCRFS1P1    |
| NA        | ENSG00000226086 | 0.15069912 | -0.01848503 | 0.38480575 | 0.84537521 | NA         | EIF3LP3      |
| NA        | ENSG00000226087 | 1.66744935 | 0.00270462  | 0.37651618 | 0.96642304 | NA         |              |
| NA        | ENSG00000226088 | 0.31741637 | 0.00170164  | 0.38337191 | 0.96154688 | NA         | HHLA3-AS1    |
| NA        | ENSG00000226089 | 0          | NA          | NA         | NA         | NA         |              |
| 389634    | ENSG00000226091 | 8.72206867 | 0.15383671  | 0.38660969 | 0.31382004 | 0.54165894 | LINC00937    |
| NA        | ENSG00000226092 | 0          | NA          | NA         | NA         | NA         | RBMV2AP      |
| NA        | ENSG00000226093 | 0          | NA          | NA         | NA         | NA         | RPS28P8      |
| NA        | ENSG00000226094 | 0.173733   | 0.01914545  | 0.38484597 | 0.78225479 | NA         | RPL7P3       |
| NA        | ENSG00000226096 | 0          | NA          | NA         | NA         | NA         |              |
| 101927769 | ENSG00000226097 | 0          | NA          | NA         | NA         | NA         |              |
| NA        | ENSG00000226098 | 0          | NA          | NA         | NA         | NA         | SEC11B       |
| 101928205 | ENSG00000226101 | 0.83772003 | 0.02747102  | 0.38326223 | 0.54390533 | NA         | LINC02097    |
| NA        | ENSG00000226102 | 0          | NA          | NA         | NA         | NA         | SEPTIN7P3    |
| NA        | ENSG00000226107 | 2.61596396 | -0.03832792 | 0.37305483 | 0.70327906 | 0.85733066 | RPL36AP54    |

|           |                 |            |             |            |            |            |            |
|-----------|-----------------|------------|-------------|------------|------------|------------|------------|
| NA        | ENSG00000226108 | 0          | NA          | NA         | NA         | NA         | RAB28P1    |
| NA        | ENSG00000226110 | 0          | NA          | NA         | NA         | NA         |            |
| NA        | ENSG00000226112 | 0          | NA          | NA         | NA         | NA         | FCF1P4     |
| NA        | ENSG00000226113 | 0          | NA          | NA         | NA         | NA         |            |
| NA        | ENSG00000226114 | 0          | NA          | NA         | NA         | NA         | NDUFB4P5   |
| NA        | ENSG00000226115 | 0          | NA          | NA         | NA         | NA         |            |
| NA        | ENSG00000226116 | 0          | NA          | NA         | NA         | NA         | USP9YP6    |
| NA        | ENSG00000226117 | 0          | NA          | NA         | NA         | NA         |            |
| NA        | ENSG00000226118 | 0          | NA          | NA         | NA         | NA         | MTND3P1    |
| NA        | ENSG00000226119 | 0          | NA          | NA         | NA         | NA         | C3orf49P1  |
| NA        | ENSG00000226121 | 2.6641049  | -0.06587773 | 0.37975774 | 0.49641283 | 0.714811   | AHCTF1P1   |
| 100129427 | ENSG00000226122 | 0.18922458 | 0.01954053  | 0.38488496 | 0.78225479 | NA         | DDC-AS1    |
| 348751    | ENSG00000226124 | 0          | NA          | NA         | NA         | NA         | FTCDNL1    |
| 151475    | ENSG00000226125 | 1.2196833  | 0.06263997  | 0.39120018 | 0.16800124 | NA         | LINC01907  |
| NA        | ENSG00000226126 | 0          | NA          | NA         | NA         | NA         | PSMC1P12   |
| NA        | ENSG00000226128 | 0.14931947 | -0.01844332 | 0.38480212 | 0.84537521 | NA         | RPL26P9    |
| NA        | ENSG00000226130 | 0          | NA          | NA         | NA         | NA         |            |
| NA        | ENSG00000226131 | 0          | NA          | NA         | NA         | NA         | PPIAP66    |
| NA        | ENSG00000226132 | 0          | NA          | NA         | NA         | NA         | RPS3AP46   |
| NA        | ENSG00000226133 | 0          | NA          | NA         | NA         | NA         | LINC02794  |
| NA        | ENSG00000226134 | 0.14931947 | -0.01844332 | 0.38480212 | 0.84537521 | NA         |            |
| 440465    | ENSG00000226137 | 946.510848 | 0.18822354  | 0.09466113 | 0.03991426 | 0.12519819 | BAIAP2-DT  |
| NA        | ENSG00000226138 | 0          | NA          | NA         | NA         | NA         |            |
| 102724039 | ENSG00000226140 | 0          | NA          | NA         | NA         | NA         | LINC02654  |
| NA        | ENSG00000226141 | 0          | NA          | NA         | NA         | NA         |            |
| NA        | ENSG00000226142 | 0          | NA          | NA         | NA         | NA         | RPL35P8    |
| NA        | ENSG00000226143 | 0          | NA          | NA         | NA         | NA         |            |
| NA        | ENSG00000226144 | 0          | NA          | NA         | NA         | NA         | RPS27AP3   |
| NA        | ENSG00000226145 | 0          | NA          | NA         | NA         | NA         | KRT16P6    |
| NA        | ENSG00000226147 | 1.56129357 | 0.00812197  | 0.38067602 | 0.8883197  | NA         | TUBBP10    |
| NA        | ENSG00000226148 | 0.65218758 | 0.01982308  | 0.38365259 | 0.64152528 | NA         | SLC25A39P1 |
| NA        | ENSG00000226149 | 0          | NA          | NA         | NA         | NA         |            |
| NA        | ENSG00000226153 | 1.0888034  | -0.05495975 | 0.38648933 | 0.34233108 | NA         | CHP1P3     |
| NA        | ENSG00000226156 | 0          | NA          | NA         | NA         | NA         | RPL23AP76  |
| NA        | ENSG00000226157 | 0          | NA          | NA         | NA         | NA         | OR52E3P    |
| NA        | ENSG00000226158 | 0.52119901 | 0.02576573  | 0.38568143 | 0.51723676 | NA         | CLCP2      |
| 101926924 | ENSG00000226159 | 0          | NA          | NA         | NA         | NA         | LINC01375  |
| NA        | ENSG00000226160 | 0          | NA          | NA         | NA         | NA         |            |



|           |                 |            |             |            |            |            |           |
|-----------|-----------------|------------|-------------|------------|------------|------------|-----------|
| NA        | ENSG00000226161 | 0.68115569 | 0.03137359  | 0.38359832 | 0.5470756  | NA         | EIF4A1P5  |
| NA        | ENSG00000226163 | 0          | NA          | NA         | NA         | NA         |           |
| NA        | ENSG00000226164 | 0          | NA          | NA         | NA         | NA         | FGFR3P6   |
| NA        | ENSG00000226166 | 0          | NA          | NA         | NA         | NA         |           |
| 100287722 | ENSG00000226167 | 21.0683222 | -0.18369714 | 0.33597469 | 0.35480607 | 0.58529579 | AP4B1-AS1 |
| NA        | ENSG00000226168 | 0          | NA          | NA         | NA         | NA         |           |
| NA        | ENSG00000226169 | 0          | NA          | NA         | NA         | NA         |           |
| 105378933 | ENSG00000226172 | 0          | NA          | NA         | NA         | NA         |           |
| 647310    | ENSG00000226174 | 27.1109534 | -0.06770922 | 0.32941931 | 0.69397032 | 0.8520157  | TEX22     |
| NA        | ENSG00000226179 | 4.08316213 | 0.05700514  | 0.37053738 | 0.62868943 | 0.81183476 | LINC00685 |
| 100129215 | ENSG00000226180 | 49.8927228 | 0.1505098   | 0.27184697 | 0.44851694 | 0.67234398 |           |
| NA        | ENSG00000226181 | 0          | NA          | NA         | NA         | NA         |           |
| NA        | ENSG00000226183 | 0          | NA          | NA         | NA         | NA         | RANP7     |
| NA        | ENSG00000226185 | 0          | NA          | NA         | NA         | NA         | TRIM64FP  |
| NA        | ENSG00000226186 | 0.34699735 | 0.00062706  | 0.38336311 | 0.96252575 | NA         | ELOCP21   |
| NA        | ENSG00000226188 | 0          | NA          | NA         | NA         | NA         | HNRNPA1P3 |
| NA        | ENSG00000226191 | 0          | NA          | NA         | NA         | NA         | CLK3P2    |
| NA        | ENSG00000226193 | 0          | NA          | NA         | NA         | NA         |           |
| NA        | ENSG00000226194 | 0.70665095 | 0.00414704  | 0.38184083 | 0.93018142 | NA         | LINC02519 |
| NA        | ENSG00000226196 | 0          | NA          | NA         | NA         | NA         | GAPDHP75  |
| NA        | ENSG00000226197 | 5.49849191 | -0.53430882 | 1.1690015  | 0.0105373  | 0.04321207 |           |
| NA        | ENSG00000226199 | 0          | NA          | NA         | NA         | NA         |           |
| NA        | ENSG00000226200 | 115.186779 | -0.5513927  | 0.30965415 | 0.0181895  | 0.06735733 | SGMS1-AS1 |
| 101926955 | ENSG00000226203 | 0          | NA          | NA         | NA         | NA         | LINC01733 |
| NA        | ENSG00000226204 | 0          | NA          | NA         | NA         | NA         |           |
| NA        | ENSG00000226205 | 0.44795842 | -0.02501848 | 0.38558245 | 0.5807882  | NA         | RPS3AP27  |
| NA        | ENSG00000226206 | 0          | NA          | NA         | NA         | NA         |           |
| NA        | ENSG00000226207 | 0          | NA          | NA         | NA         | NA         |           |
| NA        | ENSG00000226208 | 0          | NA          | NA         | NA         | NA         |           |
| NA        | ENSG00000226209 | 0          | NA          | NA         | NA         | NA         | RBISP1    |
| 100288778 | ENSG00000226210 | 405.393221 | 0.28182873  | 0.12292594 | 0.01523724 | 0.05837164 | WASH8P    |
| NA        | ENSG00000226211 | 0          | NA          | NA         | NA         | NA         |           |
| NA        | ENSG00000226212 | 0          | NA          | NA         | NA         | NA         | TRGV6     |
| NA        | ENSG00000226213 | 0          | NA          | NA         | NA         | NA         | UBQLN4P2  |
| NA        | ENSG00000226216 | 0          | NA          | NA         | NA         | NA         | RPS12P5   |
| NA        | ENSG00000226217 | 0          | NA          | NA         | NA         | NA         | RPL19P1   |
| NA        | ENSG00000226218 | 0          | NA          | NA         | NA         | NA         |           |
| NA        | ENSG00000226220 | 10.2795501 | -0.00107544 | 0.3429364  | 0.99248458 | 0.99756121 | CICP22    |

|           |                 |            |             |            |            |            |              |
|-----------|-----------------|------------|-------------|------------|------------|------------|--------------|
| NA        | ENSG00000226221 | 3.91459995 | 0.06614115  | 0.37132069 | 0.58260933 | 0.77930283 | RPL26P19     |
| NA        | ENSG00000226222 | 0          | NA          | NA         | NA         | NA         | H2BP7        |
| NA        | ENSG00000226223 | 0          | NA          | NA         | NA         | NA         | TSPY16P      |
| NA        | ENSG00000226226 | 0          | NA          | NA         | NA         | NA         | PRELID3BP1   |
| NA        | ENSG00000226229 | 0.53691404 | 0.01471475  | 0.38298965 | 0.72720758 | NA         | RPLP0P1      |
| NA        | ENSG00000226230 | 0          | NA          | NA         | NA         | NA         |              |
| NA        | ENSG00000226232 | 18.1060577 | -0.10150706 | 0.33728726 | 0.56801258 | 0.76919502 | NPIPB14P     |
| NA        | ENSG00000226233 | 0          | NA          | NA         | NA         | NA         |              |
| NA        | ENSG00000226234 | 0          | NA          | NA         | NA         | NA         | KRT18P24     |
| 284576    | ENSG00000226235 | 0          | NA          | NA         | NA         | NA         | LEMD1-AS1    |
| 100506834 | ENSG00000226237 | 3.54764464 | 0.10441775  | 0.3892161  | 0.32036607 | 0.54819611 | GAS1RR       |
| NA        | ENSG00000226238 | 0          | NA          | NA         | NA         | NA         |              |
| NA        | ENSG00000226239 | 16.7742595 | -0.15237336 | 0.35080909 | 0.40653467 | 0.63480853 |              |
| 100874151 | ENSG00000226240 | 0          | NA          | NA         | NA         | NA         | LINC00381    |
| NA        | ENSG00000226241 | 0.36290805 | 0.02389444  | 0.38539235 | 0.60998959 | NA         |              |
| NA        | ENSG00000226242 | 0          | NA          | NA         | NA         | NA         | RPS17P8      |
| NA        | ENSG00000226243 | 0          | NA          | NA         | NA         | NA         | RPL37AP1     |
| 414197    | ENSG00000226245 | 1.38086085 | -0.07617508 | 0.39112589 | 0.22430827 | NA         | ZNF32-AS1    |
| NA        | ENSG00000226246 | 0          | NA          | NA         | NA         | NA         | KRT18P36     |
| NA        | ENSG00000226247 | 0.29863895 | -0.02292439 | 0.3852726  | 0.68753245 | NA         | SUPT4H1P1    |
| 105378044 | ENSG00000226249 | 0          | NA          | NA         | NA         | NA         |              |
| NA        | ENSG00000226250 | 0          | NA          | NA         | NA         | NA         | LINC00408    |
| 101929541 | ENSG00000226251 | 0          | NA          | NA         | NA         | NA         | LINC02608    |
| NA        | ENSG00000226252 | 0          | NA          | NA         | NA         | NA         |              |
| NA        | ENSG00000226253 | 0          | NA          | NA         | NA         | NA         | MRPL35P3     |
| NA        | ENSG00000226254 | 0          | NA          | NA         | NA         | NA         | PTP4A1P3     |
| NA        | ENSG00000226255 | 0          | NA          | NA         | NA         | NA         | UBE2V2P1     |
| 101927347 | ENSG00000226258 | 0          | NA          | NA         | NA         | NA         | GRM7-AS3     |
| NA        | ENSG00000226259 | 281.023031 | -0.10178748 | 0.14489826 | 0.44711184 | 0.67106427 | GTF2H2B      |
| NA        | ENSG00000226261 | 0.64727773 | -0.04636002 | 0.38776164 | 0.35991035 | NA         | PIMREGP1     |
| NA        | ENSG00000226262 | 0          | NA          | NA         | NA         | NA         | PHKBP1       |
| NA        | ENSG00000226263 | 0.18922458 | 0.01954053  | 0.38488496 | 0.78225479 | NA         | ISM1-AS1     |
| 29994     | ENSG00000226266 | 18.1933278 | -0.09685777 | 0.3279584  | 0.59542558 | 0.78816266 |              |
| NA        | ENSG00000226268 | 0.64968336 | 0.00293168  | 0.38249129 | 0.94406956 | NA         |              |
| NA        | ENSG00000226270 | 0          | NA          | NA         | NA         | NA         | ZNF736P2Y    |
| 100874239 | ENSG00000226272 | 0          | NA          | NA         | NA         | NA         | ARHGAP26-AS1 |
| NA        | ENSG00000226273 | 0          | NA          | NA         | NA         | NA         | STUB1P1      |
| NA        | ENSG00000226276 | 0.60090956 | -0.03513988 | 0.3864936  | 0.44169068 | NA         |              |

|           |                 |            |             |            |            |            |           |
|-----------|-----------------|------------|-------------|------------|------------|------------|-----------|
| NA        | ENSG00000226277 | 0          | NA          | NA         | NA         | NA         |           |
| NA        | ENSG00000226278 | 0.68558444 | -0.02072785 | 0.38300054 | 0.65059311 | NA         | PSPHP1    |
| NA        | ENSG00000226279 | 0.15069912 | -0.01848503 | 0.38480575 | 0.84537521 | NA         | RPL12P10  |
| NA        | ENSG00000226280 | 0          | NA          | NA         | NA         | NA         |           |
| NA        | ENSG00000226281 | 0.16735865 | 0.01897177  | 0.38482933 | 0.78225479 | NA         |           |
| NA        | ENSG00000226284 | 0.75100748 | -0.04349626 | 0.38757485 | 0.34405416 | NA         | ARPC3P1   |
| NA        | ENSG00000226285 | 0          | NA          | NA         | NA         | NA         | NUP35P2   |
| NA        | ENSG00000226286 | 0          | NA          | NA         | NA         | NA         |           |
| 84222     | ENSG00000226287 | 12.9675153 | 0.05171554  | 0.33177095 | 0.76597633 | 0.89234011 | TMEM191A  |
| 143502    | ENSG00000226288 | 0.14931947 | -0.01844332 | 0.38480212 | 0.84537521 | NA         | OR52I2    |
| NA        | ENSG00000226289 | 0          | NA          | NA         | NA         | NA         | CDCA4P3   |
| NA        | ENSG00000226291 | 0.32315891 | 0.00149649  | 0.38336956 | 0.96675376 | NA         |           |
| NA        | ENSG00000226292 | 0          | NA          | NA         | NA         | NA         | RPS3AP10  |
| NA        | ENSG00000226296 | 0          | NA          | NA         | NA         | NA         |           |
| NA        | ENSG00000226297 | 0          | NA          | NA         | NA         | NA         | RPL17P14  |
| NA        | ENSG00000226298 | 0          | NA          | NA         | NA         | NA         | RAD23BP3  |
| NA        | ENSG00000226299 | 0          | NA          | NA         | NA         | NA         | RPSAP62   |
| NA        | ENSG00000226301 | 0          | NA          | NA         | NA         | NA         | PDCL3P1   |
| NA        | ENSG00000226302 | 0.18922458 | 0.01954053  | 0.38488496 | 0.78225479 | NA         |           |
| NA        | ENSG00000226304 | 0          | NA          | NA         | NA         | NA         |           |
| 4888      | ENSG00000226306 | 2.28161452 | -0.01362115 | 0.37585331 | 0.86483557 | NA         | NPY6R     |
| NA        | ENSG00000226307 | 0          | NA          | NA         | NA         | NA         | HNRNPDLP1 |
| NA        | ENSG00000226308 | 4.0816852  | -0.10849996 | 0.39009496 | 0.31798323 | 0.54561048 |           |
| NA        | ENSG00000226309 | 0          | NA          | NA         | NA         | NA         | SMARCE1P2 |
| NA        | ENSG00000226310 | 5.22404824 | 0.11172271  | 0.38056062 | 0.39669665 | 0.6258107  |           |
| 65072     | ENSG00000226312 | 2.45947532 | -0.00168255 | 0.37126324 | 0.98479353 | NA         | CFLAR-AS1 |
| NA        | ENSG00000226313 | 0          | NA          | NA         | NA         | NA         | MTCYBP12  |
| 651302    | ENSG00000226314 | 52.7369131 | -0.20566706 | 0.28744505 | 0.31173712 | 0.53950318 | ZNF192P1  |
| 100874137 | ENSG00000226317 | 0          | NA          | NA         | NA         | NA         | LINC00351 |
| NA        | ENSG00000226318 | 12.1097912 | -0.30658312 | 0.47365614 | 0.11344834 | 0.27329189 | RPS3AP38  |
| 101928114 | ENSG00000226320 | 0          | NA          | NA         | NA         | NA         | LINC01811 |
| 728763    | ENSG00000226321 | 0.173733   | 0.01914545  | 0.38484597 | 0.78225479 | NA         | CROCC2    |
| NA        | ENSG00000226323 | 0          | NA          | NA         | NA         | NA         |           |
| NA        | ENSG00000226324 | 0          | NA          | NA         | NA         | NA         |           |
| NA        | ENSG00000226327 | 0.16735865 | 0.01897177  | 0.38482933 | 0.78225479 | NA         | RPSAP49   |
| 100506714 | ENSG00000226328 | 88.6428701 | 0.37464385  | 0.24236776 | 0.05680083 | 0.16421638 | NUP50-DT  |
| NA        | ENSG00000226329 | 0          | NA          | NA         | NA         | NA         |           |
| NA        | ENSG00000226330 | 0.173733   | 0.01914545  | 0.38484597 | 0.78225479 | NA         |           |

|           |                 |            |             |            |            |            |            |
|-----------|-----------------|------------|-------------|------------|------------|------------|------------|
| NA        | ENSG00000226331 | 0          | NA          | NA         | NA         | NA         | RPL23AP28  |
| NA        | ENSG00000226332 | 12.6288793 | 0.29797566  | 0.45703198 | 0.12974158 | 0.30141369 |            |
| NA        | ENSG00000226334 | 0          | NA          | NA         | NA         | NA         |            |
| NA        | ENSG00000226336 | 0          | NA          | NA         | NA         | NA         | MRPS16P3   |
| NA        | ENSG00000226337 | 0          | NA          | NA         | NA         | NA         | TMEM252-DT |
| NA        | ENSG00000226338 | 0          | NA          | NA         | NA         | NA         |            |
| NA        | ENSG00000226339 | 0          | NA          | NA         | NA         | NA         | RPS26P56   |
| NA        | ENSG00000226340 | 5.32386747 | 0.04678331  | 0.36325728 | 0.71875946 | 0.86509267 | USP8P2     |
| NA        | ENSG00000226341 | 0          | NA          | NA         | NA         | NA         | MTCYBP39   |
| NA        | ENSG00000226342 | 12.6442957 | -0.19757981 | 0.39205845 | 0.26073779 | 0.48269458 | NMD3P1     |
| NA        | ENSG00000226344 | 0          | NA          | NA         | NA         | NA         | CST12P     |
| NA        | ENSG00000226345 | 0          | NA          | NA         | NA         | NA         |            |
| NA        | ENSG00000226348 | 0.34686234 | 0.00017627  | 0.38336207 | 0.96678785 | NA         | VN2R10P    |
| NA        | ENSG00000226349 | 0          | NA          | NA         | NA         | NA         |            |
| NA        | ENSG00000226352 | 1.27798097 | -0.05723098 | 0.38749632 | 0.29992069 | NA         | PSPC1-AS2  |
| NA        | ENSG00000226353 | 0          | NA          | NA         | NA         | NA         | TAF9P1     |
| NA        | ENSG00000226355 | 0          | NA          | NA         | NA         | NA         |            |
| NA        | ENSG00000226356 | 0          | NA          | NA         | NA         | NA         | RPS6P20    |
| NA        | ENSG00000226358 | 0          | NA          | NA         | NA         | NA         | KRT8P38    |
| NA        | ENSG00000226359 | 6.33972393 | -0.04826416 | 0.35942089 | 0.72239245 | 0.86754018 | ACTG1P24   |
| NA        | ENSG00000226360 | 0.49056306 | 0.01395654  | 0.38307655 | 0.7610912  | NA         | RPL10AP6   |
| NA        | ENSG00000226361 | 0.14931947 | -0.01844332 | 0.38480212 | 0.84537521 | NA         | TERF1P5    |
| NA        | ENSG00000226363 | 7.33957565 | -0.02022732 | 0.35609572 | 0.88011742 | 0.94683492 | HAGLROS    |
| 105371831 | ENSG00000226364 | 0          | NA          | NA         | NA         | NA         | LINC02089  |
| NA        | ENSG00000226366 | 0          | NA          | NA         | NA         | NA         | CCDC12P1   |
| 93654     | ENSG00000226367 | 0          | NA          | NA         | NA         | NA         | ST7-AS2    |
| NA        | ENSG00000226369 | 0          | NA          | NA         | NA         | NA         | USP9YP11   |
| 104355140 | ENSG00000226370 | 0          | NA          | NA         | NA         | NA         | LINC00375  |
| 139425    | ENSG00000226372 | 0.92810934 | 0.05156487  | 0.38895007 | 0.2463133  | NA         | DCAF8L1    |
| 105376672 | ENSG00000226374 | 0          | NA          | NA         | NA         | NA         | LINC01345  |
| NA        | ENSG00000226375 | 0.35673044 | 0.02381742  | 0.38538111 | 0.61399211 | NA         |            |
| NA        | ENSG00000226376 | 0          | NA          | NA         | NA         | NA         |            |
| NA        | ENSG00000226377 | 0          | NA          | NA         | NA         | NA         |            |
| NA        | ENSG00000226380 | 1.49530725 | 0.07565215  | 0.39456425 | 0.10705957 | NA         |            |
| 101929378 | ENSG00000226383 | 0          | NA          | NA         | NA         | NA         | LINC01876  |
| NA        | ENSG00000226386 | 0.83685934 | 0.03717035  | 0.38464818 | 0.46033501 | NA         | PARD3-AS1  |
| 100505890 | ENSG00000226387 | 0          | NA          | NA         | NA         | NA         | SORCS3-AS1 |
| NA        | ENSG00000226388 | 0          | NA          | NA         | NA         | NA         | ELL2P4     |

|           |                 |            |             |            |            |            |             |
|-----------|-----------------|------------|-------------|------------|------------|------------|-------------|
| NA        | ENSG00000226389 | 0          | NA          | NA         | NA         | NA         | MAPK6P6     |
| NA        | ENSG00000226390 | 18.4202542 | 0.29957646  | 0.4006909  | 0.16475022 | 0.35442346 | KCNQ2-AS1   |
| NA        | ENSG00000226392 | 0          | NA          | NA         | NA         | NA         | MTATP6P21   |
| NA        | ENSG00000226393 | 2.56481711 | -0.07114091 | 0.3842019  | 0.41041294 | 0.63818422 | IFNA20P     |
| NA        | ENSG00000226394 | 0          | NA          | NA         | NA         | NA         |             |
| NA        | ENSG00000226395 | 0          | NA          | NA         | NA         | NA         | MRPS21P5    |
| NA        | ENSG00000226396 | 4.06317067 | -0.01362167 | 0.36394817 | 0.90750577 | 0.95963244 |             |
| NA        | ENSG00000226397 | 0.15069912 | -0.01848503 | 0.38480575 | 0.84537521 | NA         | C12orf77    |
| NA        | ENSG00000226398 | 0          | NA          | NA         | NA         | NA         |             |
| NA        | ENSG00000226400 | 0          | NA          | NA         | NA         | NA         |             |
| NA        | ENSG00000226401 | 0          | NA          | NA         | NA         | NA         |             |
| NA        | ENSG00000226403 | 0          | NA          | NA         | NA         | NA         |             |
| NA        | ENSG00000226405 | 0          | NA          | NA         | NA         | NA         |             |
| NA        | ENSG00000226406 | 0          | NA          | NA         | NA         | NA         | RBMX2P1     |
| NA        | ENSG00000226407 | 0          | NA          | NA         | NA         | NA         | RPL23P11    |
| NA        | ENSG00000226409 | 0          | NA          | NA         | NA         | NA         |             |
| NA        | ENSG00000226410 | 0.16735865 | 0.01897177  | 0.38482933 | 0.78225479 | NA         |             |
| NA        | ENSG00000226411 | 0          | NA          | NA         | NA         | NA         |             |
| NA        | ENSG00000226412 | 0          | NA          | NA         | NA         | NA         | LINC02628   |
| NA        | ENSG00000226413 | 0.67362775 | 0.02087366  | 0.38371582 | 0.62560828 | NA         | OR8T1P      |
| NA        | ENSG00000226414 | 0          | NA          | NA         | NA         | NA         | MTCYBP38    |
| NA        | ENSG00000226415 | 3.28203127 | 0.01774048  | 0.36936816 | 0.86876036 | 0.94274493 | TPI1P1      |
| 100133545 | ENSG00000226416 | 33.058406  | 0.34401429  | 0.3650098  | 0.13019312 | 0.30214427 | MRPL23-AS1  |
| 100506392 | ENSG00000226419 | 184.885947 | -0.23369651 | 0.21795511 | 0.19616977 | 0.39991863 | SLC16A1-AS1 |
| NA        | ENSG00000226420 | 0          | NA          | NA         | NA         | NA         | IGLV3-4     |
| NA        | ENSG00000226421 | 0.173733   | 0.01914545  | 0.38484597 | 0.78225479 | NA         | SLC25A5P5   |
| NA        | ENSG00000226423 | 0          | NA          | NA         | NA         | NA         |             |
| NA        | ENSG00000226425 | 0          | NA          | NA         | NA         | NA         |             |
| NA        | ENSG00000226426 | 0          | NA          | NA         | NA         | NA         |             |
| NA        | ENSG00000226427 | 0.173733   | 0.01914545  | 0.38484597 | 0.78225479 | NA         | HMG2P7      |
| NA        | ENSG00000226428 | 0          | NA          | NA         | NA         | NA         | RPL15P13    |
| NA        | ENSG00000226429 | 0.48387421 | -0.00596871 | 0.38313553 | 0.87486428 | NA         |             |
| 392197    | ENSG00000226430 | 2.97975002 | -0.02506305 | 0.37566274 | 0.77066439 | 0.89494676 | USP17L7     |
| NA        | ENSG00000226431 | 0          | NA          | NA         | NA         | NA         |             |
| NA        | ENSG00000226432 | 0          | NA          | NA         | NA         | NA         |             |
| NA        | ENSG00000226433 | 0          | NA          | NA         | NA         | NA         |             |
| 348840    | ENSG00000226435 | 0          | NA          | NA         | NA         | NA         | ANKRD18DP   |
| NA        | ENSG00000226436 | 0          | NA          | NA         | NA         | NA         | H3P43       |

|           |                 |            |             |            |            |            |            |
|-----------|-----------------|------------|-------------|------------|------------|------------|------------|
| NA        | ENSG00000226438 | 0          | NA          | NA         | NA         | NA         |            |
| NA        | ENSG00000226439 | 0          | NA          | NA         | NA         | NA         |            |
| NA        | ENSG00000226440 | 0          | NA          | NA         | NA         | NA         | LAMA4-AS1  |
| NA        | ENSG00000226441 | 0          | NA          | NA         | NA         | NA         | PLCL2-AS1  |
| NA        | ENSG00000226442 | 0          | NA          | NA         | NA         | NA         |            |
| NA        | ENSG00000226443 | 0          | NA          | NA         | NA         | NA         | GAPDHP32   |
| NA        | ENSG00000226444 | 0          | NA          | NA         | NA         | NA         | ACTR3BP7   |
| NA        | ENSG00000226445 | 17.6309419 | 0.04323413  | 0.31862557 | 0.81450597 | 0.91592004 |            |
| NA        | ENSG00000226446 | 0          | NA          | NA         | NA         | NA         | NOTCH2P1   |
| NA        | ENSG00000226447 | 0          | NA          | NA         | NA         | NA         | ZNF25-DT   |
| NA        | ENSG00000226448 | 0          | NA          | NA         | NA         | NA         | RPL7AP51   |
| NA        | ENSG00000226449 | 0          | NA          | NA         | NA         | NA         | CDY5P      |
| NA        | ENSG00000226450 | 6.02711038 | 0.0555562   | 0.36428802 | 0.67045517 | 0.83767652 | CYP2D8P    |
| NA        | ENSG00000226453 | 1.91688065 | -0.09783149 | 0.40156942 | 0.06096536 | NA         | LINC02542  |
| NA        | ENSG00000226454 | 0.15069912 | -0.01848503 | 0.38480575 | 0.84537521 | NA         |            |
| NA        | ENSG00000226455 | 0.18922458 | 0.01954053  | 0.38488496 | 0.78225479 | NA         |            |
| NA        | ENSG00000226457 | 0.34746601 | 0.02370763  | 0.3853651  | 0.61987128 | NA         | RPL22P3    |
| NA        | ENSG00000226461 | 0          | NA          | NA         | NA         | NA         | OR10G5P    |
| NA        | ENSG00000226465 | 6.24618708 | 0.01813865  | 0.36690712 | 0.87252973 | 0.94430258 |            |
| NA        | ENSG00000226466 | 0          | NA          | NA         | NA         | NA         | RPA2P2     |
| NA        | ENSG00000226468 | 0.18922458 | 0.01954053  | 0.38488496 | 0.78225479 | NA         |            |
| NA        | ENSG00000226469 | 9.6263414  | 0.12791969  | 0.36237562 | 0.44209572 | 0.66680698 | ADAM1B     |
| NA        | ENSG00000226470 | 0          | NA          | NA         | NA         | NA         | RPS29P33   |
| NA        | ENSG00000226471 | 4.05782835 | 0.06660981  | 0.3724427  | 0.57250207 | 0.7723153  |            |
| NA        | ENSG00000226472 | 5.64156308 | 0.10398646  | 0.37988944 | 0.41362187 | 0.64081351 |            |
| NA        | ENSG00000226473 | 0          | NA          | NA         | NA         | NA         | PPIAP62    |
| NA        | ENSG00000226474 | 0          | NA          | NA         | NA         | NA         |            |
| 105378763 | ENSG00000226476 | 13.0911528 | 0.29151971  | 0.45270742 | 0.13639461 | 0.31147203 | LINC01748  |
| NA        | ENSG00000226477 | 0          | NA          | NA         | NA         | NA         |            |
| NA        | ENSG00000226478 | 0          | NA          | NA         | NA         | NA         | UPF3AP1    |
| 79134     | ENSG00000226479 | 914.317682 | 0.01491963  | 0.09162783 | 0.86795018 | 0.94227807 | TMEM185B   |
| NA        | ENSG00000226480 | 0          | NA          | NA         | NA         | NA         | OR7H1P     |
| NA        | ENSG00000226481 | 0          | NA          | NA         | NA         | NA         | ACTR3BP2   |
| 100874095 | ENSG00000226482 | 0          | NA          | NA         | NA         | NA         | ADIPOQ-AS1 |
| NA        | ENSG00000226483 | 0          | NA          | NA         | NA         | NA         |            |
| 101928627 | ENSG00000226484 | 0.14931947 | -0.01844332 | 0.38480212 | 0.84537521 | NA         |            |
| NA        | ENSG00000226485 | 0.34624801 | -0.02356563 | 0.38536324 | 0.65270996 | NA         | RBM22P3    |
| NA        | ENSG00000226486 | 0          | NA          | NA         | NA         | NA         | LINC01035  |

|           |                 |            |             |            |            |            |             |
|-----------|-----------------|------------|-------------|------------|------------|------------|-------------|
| NA        | ENSG00000226487 | 0          | NA          | NA         | NA         | NA         |             |
| NA        | ENSG00000226488 | 0          | NA          | NA         | NA         | NA         | LINC01824   |
| NA        | ENSG00000226489 | 0          | NA          | NA         | NA         | NA         |             |
| NA        | ENSG00000226490 | 0          | NA          | NA         | NA         | NA         |             |
| NA        | ENSG00000226491 | 0.49721202 | 0.01156937  | 0.38339218 | 0.77992354 | NA         | FTOPI       |
| NA        | ENSG00000226493 | 0          | NA          | NA         | NA         | NA         | RPL26P27    |
| 284835    | ENSG00000226496 | 0          | NA          | NA         | NA         | NA         | LINC00323   |
| 101928280 | ENSG00000226497 | 0          | NA          | NA         | NA         | NA         | LINC02549   |
| NA        | ENSG00000226498 | 0.61931334 | -0.01612571 | 0.38339741 | 0.71513477 | NA         | RPSAP21     |
| NA        | ENSG00000226499 | 0          | NA          | NA         | NA         | NA         |             |
| NA        | ENSG00000226500 | 0          | NA          | NA         | NA         | NA         |             |
| NA        | ENSG00000226501 | 0.48992088 | -0.01096504 | 0.38290407 | 0.8238685  | NA         | USF1P1      |
| NA        | ENSG00000226502 | 0          | NA          | NA         | NA         | NA         | KRT8P27     |
| NA        | ENSG00000226504 | 0          | NA          | NA         | NA         | NA         | TMEM167AP1  |
| 101929551 | ENSG00000226506 | 0          | NA          | NA         | NA         | NA         |             |
| NA        | ENSG00000226507 | 0          | NA          | NA         | NA         | NA         | IPMKP1      |
| 105373984 | ENSG00000226508 | 16.7662703 | -0.05982654 | 0.32966752 | 0.73035215 | 0.87106623 | LINC01918   |
| NA        | ENSG00000226509 | 0          | NA          | NA         | NA         | NA         |             |
| 100862728 | ENSG00000226510 | 0.49766606 | -0.01069175 | 0.38286343 | 0.82182424 | NA         | UPK1A-AS1   |
| NA        | ENSG00000226515 | 0          | NA          | NA         | NA         | NA         |             |
| 654412    | ENSG00000226516 | 0          | NA          | NA         | NA         | NA         | FAM138B     |
| NA        | ENSG00000226519 | 1.9789895  | 0.08881696  | 0.39447387 | 0.19418073 | NA         | LINC00390   |
| NA        | ENSG00000226520 | 0          | NA          | NA         | NA         | NA         | KIRREL1-IT1 |
| NA        | ENSG00000226521 | 0          | NA          | NA         | NA         | NA         |             |
| NA        | ENSG00000226522 | 0          | NA          | NA         | NA         | NA         | HDAC9-AS1   |
| NA        | ENSG00000226523 | 0.173124   | -0.01911262 | 0.38486262 | 0.84537521 | NA         |             |
| NA        | ENSG00000226525 | 0.173733   | 0.01914545  | 0.38484597 | 0.78225479 | NA         | RPS7P10     |
| NA        | ENSG00000226526 | 1.64528514 | -0.0413262  | 0.38140817 | 0.56234506 | NA         |             |
| NA        | ENSG00000226527 | 0          | NA          | NA         | NA         | NA         |             |
| NA        | ENSG00000226529 | 0          | NA          | NA         | NA         | NA         | MTND1P1     |
| NA        | ENSG00000226530 | 137.288453 | -0.3463028  | 0.25642258 | 0.08483938 | 0.22086345 |             |
| NA        | ENSG00000226532 | 0          | NA          | NA         | NA         | NA         |             |
| NA        | ENSG00000226533 | 0          | NA          | NA         | NA         | NA         | BTBD9-AS1   |
| NA        | ENSG00000226534 | 0          | NA          | NA         | NA         | NA         |             |
| NA        | ENSG00000226535 | 0          | NA          | NA         | NA         | NA         |             |
| NA        | ENSG00000226536 | 0          | NA          | NA         | NA         | NA         | SETP15      |
| NA        | ENSG00000226537 | 0          | NA          | NA         | NA         | NA         | OR7E33P     |
| NA        | ENSG00000226539 | 0          | NA          | NA         | NA         | NA         | MLXP1       |

|        |                 |            |             |            |            |            |           |
|--------|-----------------|------------|-------------|------------|------------|------------|-----------|
| NA     | ENSG00000226540 | 0          | NA          | NA         | NA         | NA         | GAPDHP73  |
| NA     | ENSG00000226541 | 0          | NA          | NA         | NA         | NA         |           |
| NA     | ENSG00000226542 | 0          | NA          | NA         | NA         | NA         |           |
| NA     | ENSG00000226543 | 0          | NA          | NA         | NA         | NA         | MYL6P1    |
| NA     | ENSG00000226544 | 0.15069912 | -0.01848503 | 0.38480575 | 0.84537521 | NA         | RPL7P22   |
| NA     | ENSG00000226545 | 0          | NA          | NA         | NA         | NA         |           |
| NA     | ENSG00000226547 | 0          | NA          | NA         | NA         | NA         | SSU72P1   |
| NA     | ENSG00000226548 | 0.173733   | 0.01914545  | 0.38484597 | 0.78225479 | NA         |           |
| NA     | ENSG00000226549 | 0.173124   | -0.01911262 | 0.38486262 | 0.84537521 | NA         | SCDP1     |
| NA     | ENSG00000226552 | 0          | NA          | NA         | NA         | NA         |           |
| NA     | ENSG00000226553 | 0          | NA          | NA         | NA         | NA         | IMPDH1P7  |
| NA     | ENSG00000226554 | 0          | NA          | NA         | NA         | NA         | MTCL1P1   |
| NA     | ENSG00000226555 | 0          | NA          | NA         | NA         | NA         | AGKP1     |
| NA     | ENSG00000226556 | 0          | NA          | NA         | NA         | NA         | NPM1P49   |
| NA     | ENSG00000226557 | 0.3168347  | 0.00123421  | 0.38336745 | 0.96602793 | NA         | TRAF6P1   |
| NA     | ENSG00000226558 | 0          | NA          | NA         | NA         | NA         |           |
| NA     | ENSG00000226562 | 94.3077868 | -0.44370682 | 0.24319968 | 0.02572959 | 0.08908813 | CYP4F26P  |
| NA     | ENSG00000226564 | 0.173733   | 0.01914545  | 0.38484597 | 0.78225479 | NA         | FTH1P20   |
| NA     | ENSG00000226565 | 0          | NA          | NA         | NA         | NA         |           |
| NA     | ENSG00000226566 | 0          | NA          | NA         | NA         | NA         |           |
| 285370 | ENSG00000226567 | 0          | NA          | NA         | NA         | NA         | LINC00606 |
| NA     | ENSG00000226570 | 0          | NA          | NA         | NA         | NA         |           |
| NA     | ENSG00000226571 | 0          | NA          | NA         | NA         | NA         |           |
| 26792  | ENSG00000226572 | 0          | NA          | NA         | NA         | NA         | SNORD57   |
| NA     | ENSG00000226573 | 0          | NA          | NA         | NA         | NA         |           |
| NA     | ENSG00000226576 | 0.85785741 | 0.03582101  | 0.38433212 | 0.4583511  | NA         |           |
| NA     | ENSG00000226577 | 0          | NA          | NA         | NA         | NA         | MICC      |
| NA     | ENSG00000226578 | 0.16735865 | 0.01897177  | 0.38482933 | 0.78225479 | NA         |           |
| NA     | ENSG00000226579 | 0          | NA          | NA         | NA         | NA         | MTCYBP31  |
| NA     | ENSG00000226580 | 0          | NA          | NA         | NA         | NA         | RPL39P40  |
| NA     | ENSG00000226581 | 31.3699414 | -0.16843254 | 0.3009835  | 0.40201475 | 0.63031025 | LINC02848 |
| NA     | ENSG00000226582 | 0          | NA          | NA         | NA         | NA         | UBE2V1P5  |
| NA     | ENSG00000226587 | 0          | NA          | NA         | NA         | NA         |           |
| NA     | ENSG00000226590 | 0          | NA          | NA         | NA         | NA         | UBE2V1P10 |
| NA     | ENSG00000226592 | 0          | NA          | NA         | NA         | NA         |           |
| NA     | ENSG00000226594 | 0          | NA          | NA         | NA         | NA         |           |
| NA     | ENSG00000226595 | 0          | NA          | NA         | NA         | NA         |           |
| NA     | ENSG00000226597 | 0.14931947 | -0.01844332 | 0.38480212 | 0.84537521 | NA         | IFNWP9    |



|           |                 |            |             |            |            |            |            |
|-----------|-----------------|------------|-------------|------------|------------|------------|------------|
| NA        | ENSG00000226599 | 0          | NA          | NA         | NA         | NA         |            |
| NA        | ENSG00000226601 | 0          | NA          | NA         | NA         | NA         |            |
| NA        | ENSG00000226604 | 31.3872232 | -0.23096064 | 0.31573904 | 0.26829856 | 0.49105566 | PAPPA-AS2  |
| NA        | ENSG00000226605 | 0          | NA          | NA         | NA         | NA         |            |
| NA        | ENSG00000226608 | 0          | NA          | NA         | NA         | NA         | FTLP3      |
| NA        | ENSG00000226609 | 7.45037276 | -0.04018391 | 0.35485499 | 0.77599738 | 0.89702883 |            |
| NA        | ENSG00000226611 | 0          | NA          | NA         | NA         | NA         | OFD1P2Y    |
| NA        | ENSG00000226616 | 0          | NA          | NA         | NA         | NA         | OR52M2P    |
| NA        | ENSG00000226617 | 0.91199506 | 0.01691085  | 0.38189687 | 0.74424177 | NA         | RPL21P110  |
| NA        | ENSG00000226619 | 0          | NA          | NA         | NA         | NA         |            |
| NA        | ENSG00000226620 | 0.14931947 | -0.01844332 | 0.38480212 | 0.84537521 | NA         | LINC00343  |
| NA        | ENSG00000226621 | 0          | NA          | NA         | NA         | NA         |            |
| NA        | ENSG00000226622 | 0          | NA          | NA         | NA         | NA         |            |
| NA        | ENSG00000226624 | 0.18922458 | 0.01954053  | 0.38488496 | 0.78225479 | NA         |            |
| NA        | ENSG00000226625 | 0.32387604 | -0.02327341 | 0.3853214  | 0.66857863 | NA         | RBM17P1    |
| NA        | ENSG00000226626 | 0          | NA          | NA         | NA         | NA         | NOP56P2    |
| 100874198 | ENSG00000226627 | 0.50659506 | -0.01027026 | 0.38329545 | 0.80875327 | NA         | SHANK2-AS1 |
| 147093    | ENSG00000226629 | 0          | NA          | NA         | NA         | NA         | LINC00974  |
| NA        | ENSG00000226631 | 0.66862451 | 0.02061825  | 0.38370025 | 0.63018051 | NA         | SLC9A3P3   |
| NA        | ENSG00000226632 | 0.34624801 | -0.02356563 | 0.38536324 | 0.65270996 | NA         | UBE2V1P1   |
| NA        | ENSG00000226633 | 0          | NA          | NA         | NA         | NA         | PPIAP28    |
| NA        | ENSG00000226636 | 0          | NA          | NA         | NA         | NA         |            |
| NA        | ENSG00000226640 | 0          | NA          | NA         | NA         | NA         |            |
| NA        | ENSG00000226641 | 0          | NA          | NA         | NA         | NA         | SHISA5P1   |
| NA        | ENSG00000226642 | 0.16735865 | 0.01897177  | 0.38482933 | 0.78225479 | NA         | ACTG1P12   |
| NA        | ENSG00000226643 | 0          | NA          | NA         | NA         | NA         |            |
| NA        | ENSG00000226644 | 3.56624903 | 0.18685638  | 0.43734442 | 0.08642451 | 0.22393591 |            |
| NA        | ENSG00000226645 | 0          | NA          | NA         | NA         | NA         |            |
| NA        | ENSG00000226646 | 0          | NA          | NA         | NA         | NA         | RPL7P37    |
| NA        | ENSG00000226647 | 6.67883915 | 0.05401194  | 0.358642   | 0.70133188 | 0.85616691 |            |
| NA        | ENSG00000226648 | 66.9284908 | 0.30196603  | 0.25657309 | 0.13195483 | 0.30491309 | PLCG1-AS1  |
| NA        | ENSG00000226649 | 0          | NA          | NA         | NA         | NA         |            |
| 285643    | ENSG00000226650 | 4.44360202 | -0.11563661 | 0.38807755 | 0.33486088 | 0.56474327 | KIF4B      |
| NA        | ENSG00000226652 | 0          | NA          | NA         | NA         | NA         | PSMD10P2   |
| NA        | ENSG00000226653 | 0          | NA          | NA         | NA         | NA         | OR13Z1P    |
| NA        | ENSG00000226655 | 0          | NA          | NA         | NA         | NA         |            |
| NA        | ENSG00000226658 | 0          | NA          | NA         | NA         | NA         | RPL23AP30  |
| 101929574 | ENSG00000226659 | 0          | NA          | NA         | NA         | NA         |            |

|           |                 |            |             |            |            |            |             |
|-----------|-----------------|------------|-------------|------------|------------|------------|-------------|
| NA        | ENSG00000226660 | 0          | NA          | NA         | NA         | NA         | TRBV2       |
| NA        | ENSG00000226661 | 0          | NA          | NA         | NA         | NA         |             |
| NA        | ENSG00000226662 | 0          | NA          | NA         | NA         | NA         | CHMP1AP1    |
| NA        | ENSG00000226663 | 0.34746601 | 0.02370763  | 0.3853651  | 0.61987128 | NA         | MTND4P10    |
| NA        | ENSG00000226664 | 0          | NA          | NA         | NA         | NA         |             |
| NA        | ENSG00000226665 | 0          | NA          | NA         | NA         | NA         | SSR1P2      |
| NA        | ENSG00000226666 | 0          | NA          | NA         | NA         | NA         | HSPA9P1     |
| NA        | ENSG00000226668 | 0          | NA          | NA         | NA         | NA         |             |
| NA        | ENSG00000226669 | 1.72594584 | 0.09030032  | 0.39376557 | 0.2263492  | NA         |             |
| NA        | ENSG00000226670 | 0          | NA          | NA         | NA         | NA         | BCAS2P3     |
| NA        | ENSG00000226671 | 0          | NA          | NA         | NA         | NA         |             |
| 102216342 | ENSG00000226673 | 0          | NA          | NA         | NA         | NA         | LINC01108   |
| 401014    | ENSG00000226674 | 0          | NA          | NA         | NA         | NA         | TEX41       |
| 105378385 | ENSG00000226676 | 0          | NA          | NA         | NA         | NA         | LINC02679   |
| NA        | ENSG00000226677 | 0.15069912 | -0.01848503 | 0.38480575 | 0.84537521 | NA         | IGBP1P1     |
| NA        | ENSG00000226679 | 0          | NA          | NA         | NA         | NA         |             |
| NA        | ENSG00000226680 | 0          | NA          | NA         | NA         | NA         |             |
| NA        | ENSG00000226681 | 0          | NA          | NA         | NA         | NA         |             |
| NA        | ENSG00000226683 | 0          | NA          | NA         | NA         | NA         | PWWP2AP1    |
| 100507170 | ENSG00000226685 | 2.48247225 | 0.036634    | 0.37843395 | 0.65466607 | NA         | CT47A12     |
| 101927667 | ENSG00000226686 | 34.9908919 | -0.11842489 | 0.32398612 | 0.52768234 | 0.7395082  | LINC01535   |
| 728558    | ENSG00000226688 | 593.951853 | 0.22037906  | 0.12151103 | 0.05494781 | 0.16005939 | ENTPD1-AS1  |
| 102725191 | ENSG00000226690 | 0          | NA          | NA         | NA         | NA         |             |
| NA        | ENSG00000226693 | 0          | NA          | NA         | NA         | NA         | NXNP1       |
| NA        | ENSG00000226694 | 0          | NA          | NA         | NA         | NA         |             |
| NA        | ENSG00000226695 | 0          | NA          | NA         | NA         | NA         | ANKRD20A10P |
| 104355426 | ENSG00000226696 | 22.9522894 | 0.1175803   | 0.31789394 | 0.54130278 | 0.74969963 | LENG8-AS1   |
| NA        | ENSG00000226698 | 0          | NA          | NA         | NA         | NA         |             |
| NA        | ENSG00000226699 | 0.34624801 | -0.02356563 | 0.38536324 | 0.65270996 | NA         |             |
| NA        | ENSG00000226700 | 0          | NA          | NA         | NA         | NA         | MTND4P25    |
| NA        | ENSG00000226701 | 0.15069912 | -0.01848503 | 0.38480575 | 0.84537521 | NA         | RPL15P14    |
| NA        | ENSG00000226702 | 0          | NA          | NA         | NA         | NA         | MIR217HG    |
| NA        | ENSG00000226703 | 0          | NA          | NA         | NA         | NA         | NPM1P4      |
| NA        | ENSG00000226705 | 0          | NA          | NA         | NA         | NA         | SDCBPP1     |
| 101928525 | ENSG00000226706 | 8.19248821 | 0.06956191  | 0.35668834 | 0.64041727 | 0.8198928  |             |
| NA        | ENSG00000226707 | 0          | NA          | NA         | NA         | NA         |             |
| NA        | ENSG00000226708 | 0          | NA          | NA         | NA         | NA         |             |
| NA        | ENSG00000226709 | 0          | NA          | NA         | NA         | NA         | FGF12-AS3   |

|           |                 |            |             |            |            |            |               |
|-----------|-----------------|------------|-------------|------------|------------|------------|---------------|
| NA        | ENSG00000226711 | 57.5487647 | 0.25360213  | 0.28874139 | 0.2218988  | 0.43498392 | FAM66C        |
| NA        | ENSG00000226715 | 2.8975707  | -0.0521819  | 0.37495681 | 0.60921085 | 0.79799662 | LINC01709     |
| NA        | ENSG00000226716 | 0          | NA          | NA         | NA         | NA         |               |
| 101929428 | ENSG00000226717 | 0          | NA          | NA         | NA         | NA         | PTPRD-AS2     |
| NA        | ENSG00000226718 | 0          | NA          | NA         | NA         | NA         | SNRPGP8       |
| NA        | ENSG00000226721 | 3.89307042 | -0.04956401 | 0.37488656 | 0.62125333 | 0.80672374 | EEF1DP2       |
| 100874182 | ENSG00000226722 | 0          | NA          | NA         | NA         | NA         | LINC00424     |
| NA        | ENSG00000226723 | 0          | NA          | NA         | NA         | NA         |               |
| NA        | ENSG00000226724 | 0          | NA          | NA         | NA         | NA         |               |
| 101928345 | ENSG00000226725 | 0.15069912 | -0.01848503 | 0.38480575 | 0.84537521 | NA         | PABPC1L2B-AS1 |
| NA        | ENSG00000226726 | 0          | NA          | NA         | NA         | NA         | TMEM256P2     |
| NA        | ENSG00000226729 | 0          | NA          | NA         | NA         | NA         | RPL35AP30     |
| 100505985 | ENSG00000226733 | 0          | NA          | NA         | NA         | NA         |               |
| NA        | ENSG00000226734 | 0          | NA          | NA         | NA         | NA         | SNRPGP12      |
| NA        | ENSG00000226739 | 0          | NA          | NA         | NA         | NA         |               |
| 100507657 | ENSG00000226741 | 0          | NA          | NA         | NA         | NA         | LINC02554     |
| 440498    | ENSG00000226742 | 129.670343 | -0.09281372 | 0.18893804 | 0.57140301 | 0.77166993 | HSBP1L1       |
| NA        | ENSG00000226744 | 0          | NA          | NA         | NA         | NA         |               |
| NA        | ENSG00000226745 | 0          | NA          | NA         | NA         | NA         | OAZ1P1        |
| 140771    | ENSG00000226746 | 7.09865435 | -0.14881635 | 0.38742874 | 0.31661155 | 0.54452953 | SMCR5         |
| 101927196 | ENSG00000226747 | 0.30139824 | -0.02296476 | 0.38527817 | 0.68536535 | NA         | FSIP2-AS2     |
| NA        | ENSG00000226750 | 0          | NA          | NA         | NA         | NA         |               |
| 253039    | ENSG00000226752 | 670.023118 | -0.34615276 | 0.11990742 | 0.00231054 | 0.01211448 | CUTALP        |
| NA        | ENSG00000226753 | 0          | NA          | NA         | NA         | NA         | FOXN3P2       |
| 100507564 | ENSG00000226754 | 18.7260617 | 0.02215093  | 0.31411188 | 0.90511619 | 0.95850041 |               |
| NA        | ENSG00000226755 | 0          | NA          | NA         | NA         | NA         | VPS25P1       |
| NA        | ENSG00000226756 | 0.55299285 | 0.0329457   | 0.38623957 | 0.45132993 | NA         |               |
| 100192379 | ENSG00000226757 | 0          | NA          | NA         | NA         | NA         |               |
| 104472714 | ENSG00000226758 | 0.32345011 | 0.00170447  | 0.38337174 | 0.96476382 | NA         | DISC1-IT1     |
| 101926890 | ENSG00000226759 | 0          | NA          | NA         | NA         | NA         | DAB1-AS1      |
| 259292    | ENSG00000226761 | 0          | NA          | NA         | NA         | NA         | TAS2R46       |
| 105376354 | ENSG00000226762 | 0          | NA          | NA         | NA         | NA         | LINC02668     |
| 100170229 | ENSG00000226763 | 20.3962499 | 0.41890735  | 0.45091432 | 0.08427017 | 0.21970042 | SRRM5         |
| NA        | ENSG00000226764 | 0          | NA          | NA         | NA         | NA         |               |
| NA        | ENSG00000226765 | 0          | NA          | NA         | NA         | NA         | RPSAP33       |
| NA        | ENSG00000226766 | 0          | NA          | NA         | NA         | NA         | FABP7P1       |
| NA        | ENSG00000226767 | 0          | NA          | NA         | NA         | NA         |               |
| NA        | ENSG00000226769 | 0          | NA          | NA         | NA         | NA         | GAPDHP54      |

|           |                 |                 |             |             |            |            |              |            |
|-----------|-----------------|-----------------|-------------|-------------|------------|------------|--------------|------------|
| 100506682 | ENSG00000226770 | 0               | NA          | NA          | NA         | NA         |              |            |
|           | NA              | ENSG00000226771 | 0           | NA          | NA         | NA         |              |            |
|           | NA              | ENSG00000226772 | 0           | NA          | NA         | NA         |              |            |
|           | NA              | ENSG00000226773 | 0           | NA          | NA         | NA         |              |            |
|           | NA              | ENSG00000226774 | 0           | NA          | NA         | NA         | HIKESHIP1    |            |
|           | NA              | ENSG00000226776 | 0           | NA          | NA         | NA         | KRTAP3-4P    |            |
| 9834      | ENSG00000226777 | 28.4801459      | -4.24712151 | 0.64697654  | 4.68E-12   | 1.02E-10   | FAM30A       |            |
|           | NA              | ENSG00000226779 | 0           | NA          | NA         | NA         | NAALADL2-AS2 |            |
|           | NA              | ENSG00000226780 | 0           | NA          | NA         | NA         |              |            |
|           | NA              | ENSG00000226781 | 0           | NA          | NA         | NA         | TBCAP1       |            |
|           | NA              | ENSG00000226782 | 0           | NA          | NA         | NA         |              |            |
|           | NA              | ENSG00000226783 | 0           | NA          | NA         | NA         | TLK1P1       |            |
| 441531    | ENSG00000226784 | 0.69249601      | -0.03077728 | 0.38619256  | 0.44510896 | NA         | PGAM4        |            |
|           | NA              | ENSG00000226789 | 0           | NA          | NA         | NA         | WBP11P2      |            |
|           | NA              | ENSG00000226790 | 0           | NA          | NA         | NA         | HNRNPA3P1    |            |
|           | NA              | ENSG00000226791 | 0           | NA          | NA         | NA         | LINC02611    |            |
| 647166    | ENSG00000226792 | 0               | NA          | NA          | NA         | NA         | C13orf42     |            |
|           | NA              | ENSG00000226794 | 0           | NA          | NA         | NA         | MTND1P20     |            |
|           | NA              | ENSG00000226797 | 1.76882166  | 0.03250732  | 0.3796508  | 0.6583459  | NA           |            |
|           | NA              | ENSG00000226798 | 0.37844916  | 0.02407552  | 0.3854191  | 0.60038877 | NA           |            |
| 404665    | ENSG00000226800 | 27.6496064      | 0.13586734  | 0.31952218  | 0.48613992 | 0.70618541 | CACTIN-AS1   |            |
|           | NA              | ENSG00000226801 | 0           | NA          | NA         | NA         | OSTCP8       |            |
|           | NA              | ENSG00000226802 | 0           | NA          | NA         | NA         | RUVBL2P1     |            |
|           | NA              | ENSG00000226803 | 7.65102622  | -0.05289337 | 0.3530714  | 0.71931782 | 0.86560718   | ZNF451-AS1 |
|           | NA              | ENSG00000226804 | 0           | NA          | NA         | NA         | NA           |            |
| 100507600 | ENSG00000226806 | 0               | NA          | NA          | NA         | NA         | LCT-AS1      |            |
| 389690    | ENSG00000226807 | 0               | NA          | NA          | NA         | NA         | MROH5        |            |
| 100506835 | ENSG00000226808 | 0               | NA          | NA          | NA         | NA         | LINC00840    |            |
|           | NA              | ENSG00000226810 | 0           | NA          | NA         | NA         |              |            |
|           | NA              | ENSG00000226812 | 0           | NA          | NA         | NA         |              |            |
| 105373600 | ENSG00000226813 | 0               | NA          | NA          | NA         | NA         | LINC01941    |            |
|           | NA              | ENSG00000226814 | 0           | NA          | NA         | NA         |              |            |
|           | NA              | ENSG00000226816 | 1.56340527  | 0.10799441  | 0.40495841 | 0.05778775 | NA           |            |
|           | NA              | ENSG00000226818 | 0           | NA          | NA         | NA         | SLC6A6P1     |            |
|           | NA              | ENSG00000226819 | 9.10847     | 0.16339701  | 0.38069955 | 0.32734932 | 0.55571237   | MEIS1-AS3  |
|           | NA              | ENSG00000226820 | 0           | NA          | NA         | NA         |              |            |
|           | NA              | ENSG00000226822 | 0           | NA          | NA         | NA         | LINC02785    |            |
|           | NA              | ENSG00000226823 | 1.86022918  | -0.0019789  | 0.37567266 | 0.9794191  | NA           | SUGT1P1    |

|           |                 |            |             |            |            |            |              |
|-----------|-----------------|------------|-------------|------------|------------|------------|--------------|
| NA        | ENSG00000226824 | 6.786408   | -0.16989229 | 0.40202616 | 0.24641918 | 0.46570362 |              |
| NA        | ENSG00000226825 | 0          | NA          | NA         | NA         | NA         | LINC01509    |
| NA        | ENSG00000226827 | 0          | NA          | NA         | NA         | NA         | NPM1P1       |
| 339529    | ENSG00000226828 | 0.34746601 | 0.02370763  | 0.3853651  | 0.61987128 | NA         | LINC02774    |
| 105375341 | ENSG00000226829 | 0          | NA          | NA         | NA         | NA         |              |
| NA        | ENSG00000226831 | 0          | NA          | NA         | NA         | NA         | MED15P3      |
| 112267877 | ENSG00000226833 | 21.5132438 | 0.05224156  | 0.32113372 | 0.7732846  | 0.89572433 |              |
| 107985092 | ENSG00000226835 | 0          | NA          | NA         | NA         | NA         | ARHGAP29-AS1 |
| NA        | ENSG00000226836 | 0          | NA          | NA         | NA         | NA         | RPL32P19     |
| NA        | ENSG00000226837 | 0          | NA          | NA         | NA         | NA         | HMGB1P32     |
| NA        | ENSG00000226838 | 0          | NA          | NA         | NA         | NA         |              |
| NA        | ENSG00000226839 | 0          | NA          | NA         | NA         | NA         | MTND6P11     |
| NA        | ENSG00000226840 | 0.34746601 | 0.02370763  | 0.3853651  | 0.61987128 | NA         | PAICSP3      |
| NA        | ENSG00000226842 | 0          | NA          | NA         | NA         | NA         |              |
| NA        | ENSG00000226843 | 0          | NA          | NA         | NA         | NA         |              |
| NA        | ENSG00000226845 | 0          | NA          | NA         | NA         | NA         | EEF1GP3      |
| 100885781 | ENSG00000226846 | 0          | NA          | NA         | NA         | NA         | LINC00348    |
| NA        | ENSG00000226847 | 0          | NA          | NA         | NA         | NA         | PRPS1P1      |
| NA        | ENSG00000226849 | 40.3441287 | 0.10588352  | 0.33331408 | 0.56244999 | 0.76552855 |              |
| NA        | ENSG00000226851 | 0          | NA          | NA         | NA         | NA         |              |
| NA        | ENSG00000226853 | 4.09336472 | 0.04520702  | 0.36667584 | 0.71067821 | 0.86111248 |              |
| NA        | ENSG00000226854 | 0          | NA          | NA         | NA         | NA         |              |
| NA        | ENSG00000226855 | 0          | NA          | NA         | NA         | NA         | RPSAP17      |
| 100506797 | ENSG00000226856 | 3.32899015 | 0.13414157  | 0.40471476 | 0.18905523 | 0.38986131 | THORLNC      |
| NA        | ENSG00000226857 | 0          | NA          | NA         | NA         | NA         | DUTP3        |
| NA        | ENSG00000226859 | 0.14931947 | -0.01844332 | 0.38480212 | 0.84537521 | NA         | LINC02051    |
| NA        | ENSG00000226860 | 0          | NA          | NA         | NA         | NA         | RBX1P1       |
| NA        | ENSG00000226861 | 1.16092296 | 0.04195916  | 0.38339317 | 0.49813239 | NA         |              |
| NA        | ENSG00000226862 | 0.173124   | -0.01911262 | 0.38486262 | 0.84537521 | NA         |              |
| NA        | ENSG00000226863 | 0          | NA          | NA         | NA         | NA         | SHROOM2P1    |
| 100130887 | ENSG00000226864 | 28.8110058 | 0.26607291  | 0.3404286  | 0.21477428 | 0.42508333 | ATE1-AS1     |
| NA        | ENSG00000226868 | 0          | NA          | NA         | NA         | NA         |              |
| 645591    | ENSG00000226869 | 0          | NA          | NA         | NA         | NA         | LHFPL3-AS1   |
| NA        | ENSG00000226870 | 0.5360515  | 0.03213127  | 0.38615479 | 0.46301126 | NA         |              |
| NA        | ENSG00000226871 | 0          | NA          | NA         | NA         | NA         |              |
| NA        | ENSG00000226872 | 0          | NA          | NA         | NA         | NA         |              |
| NA        | ENSG00000226873 | 0          | NA          | NA         | NA         | NA         | CDY14P       |
| NA        | ENSG00000226874 | 4.31667438 | -0.05801402 | 0.36895428 | 0.63133215 | 0.81365039 |              |

|           |                 |            |             |            |            |            |            |
|-----------|-----------------|------------|-------------|------------|------------|------------|------------|
| NA        | ENSG00000226875 | 0.34624801 | -0.02356563 | 0.38536324 | 0.65270996 | NA         | ZNF877P    |
| NA        | ENSG00000226876 | 0.16735865 | 0.01897177  | 0.38482933 | 0.78225479 | NA         | SMYD3-AS1  |
| NA        | ENSG00000226877 | 0.34624801 | -0.02356563 | 0.38536324 | 0.65270996 | NA         |            |
| NA        | ENSG00000226878 | 0          | NA          | NA         | NA         | NA         | GSTM3P2    |
| NA        | ENSG00000226881 | 0          | NA          | NA         | NA         | NA         | H3P44      |
| NA        | ENSG00000226883 | 0.34114398 | 0.02362679  | 0.38535344 | 0.62408777 | NA         |            |
| NA        | ENSG00000226884 | 0          | NA          | NA         | NA         | NA         | RPS29P10   |
| NA        | ENSG00000226885 | 0          | NA          | NA         | NA         | NA         | E2F6P3     |
| NA        | ENSG00000226886 | 0          | NA          | NA         | NA         | NA         |            |
| 100288413 | ENSG00000226887 | 40.1618648 | -0.08477808 | 0.30392578 | 0.65436939 | 0.8279776  | ERVMER34-1 |
| NA        | ENSG00000226888 | 0          | NA          | NA         | NA         | NA         | RPLP1P10   |
| NA        | ENSG00000226889 | 0.18922458 | 0.01954053  | 0.38488496 | 0.78225479 | NA         |            |
| NA        | ENSG00000226890 | 0.53737785 | 0.01402437  | 0.38347452 | 0.7382242  | NA         |            |
| NA        | ENSG00000226891 | 11.0671848 | 0.10315629  | 0.3650918  | 0.49059599 | 0.71015792 | LINC01359  |
| NA        | ENSG00000226899 | 0          | NA          | NA         | NA         | NA         |            |
| NA        | ENSG00000226900 | 2.79197249 | 0.03827639  | 0.37552372 | 0.68294576 | 0.84542609 |            |
| NA        | ENSG00000226902 | 0          | NA          | NA         | NA         | NA         | CHCHD2P1   |
| 101928616 | ENSG00000226903 | 0          | NA          | NA         | NA         | NA         | LINC00354  |
| NA        | ENSG00000226904 | 0.66236754 | 0.00168688  | 0.38189625 | 0.97035772 | NA         |            |
| NA        | ENSG00000226905 | 0          | NA          | NA         | NA         | NA         |            |
| 114761    | ENSG00000226906 | 0          | NA          | NA         | NA         | NA         | TTY4       |
| NA        | ENSG00000226908 | 0          | NA          | NA         | NA         | NA         | H2BP6      |
| NA        | ENSG00000226912 | 0          | NA          | NA         | NA         | NA         | ISCA2P1    |
| 100132677 | ENSG00000226913 | 19.9799434 | -1.58218476 | 0.71842211 | 0.00122724 | 0.00705749 | BSN-DT     |
| NA        | ENSG00000226915 | 0.14931947 | -0.01844332 | 0.38480212 | 0.84537521 | NA         | RPL19P4    |
| 103106903 | ENSG00000226917 | 0.38418777 | 0.0240106   | 0.38541141 | 0.60571348 | NA         | LINC01276  |
| NA        | ENSG00000226918 | 0          | NA          | NA         | NA         | NA         |            |
| NA        | ENSG00000226919 | 3.83238407 | -0.2682492  | 0.51763188 | 0.02424802 | 0.08501712 |            |
| NA        | ENSG00000226920 | 0          | NA          | NA         | NA         | NA         |            |
| 100874178 | ENSG00000226921 | 0          | NA          | NA         | NA         | NA         | LINC00454  |
| NA        | ENSG00000226925 | 0          | NA          | NA         | NA         | NA         | IL1R1-AS1  |
| NA        | ENSG00000226926 | 0.173733   | 0.01914545  | 0.38484597 | 0.78225479 | NA         | PDZPH1P    |
| NA        | ENSG00000226927 | 0          | NA          | NA         | NA         | NA         |            |
| NA        | ENSG00000226928 | 0          | NA          | NA         | NA         | NA         | RPS14P4    |
| 255313    | ENSG00000226929 | 0          | NA          | NA         | NA         | NA         | CT47A11    |
| NA        | ENSG00000226930 | 0          | NA          | NA         | NA         | NA         | GTF2IP2    |
| NA        | ENSG00000226933 | 0          | NA          | NA         | NA         | NA         | NRBF2P2    |
| 118421    | ENSG00000226935 | 0          | NA          | NA         | NA         | NA         | LINC00161  |

|           |                 |            |             |            |            |            |            |
|-----------|-----------------|------------|-------------|------------|------------|------------|------------|
| NA        | ENSG00000226937 | 15.4606686 | -0.11929792 | 0.3372889  | 0.51285561 | 0.72814193 | CEP164P1   |
| NA        | ENSG00000226938 | 0          | NA          | NA         | NA         | NA         |            |
| NA        | ENSG00000226939 | 0.15069912 | -0.01848503 | 0.38480575 | 0.84537521 | NA         |            |
| 378951    | ENSG00000226941 | 0          | NA          | NA         | NA         | NA         | RBMY1J     |
| NA        | ENSG00000226942 | 2.43558913 | 0.08124013  | 0.38737464 | 0.34818836 | NA         | IL9RP3     |
| NA        | ENSG00000226943 | 0          | NA          | NA         | NA         | NA         | ALG1L5P    |
| 102724450 | ENSG00000226944 | 2.58385475 | -0.05251516 | 0.3801726  | 0.53785739 | 0.74784181 | RNF207-AS1 |
| NA        | ENSG00000226945 | 0          | NA          | NA         | NA         | NA         |            |
| NA        | ENSG00000226946 | 0          | NA          | NA         | NA         | NA         |            |
| NA        | ENSG00000226947 | 0          | NA          | NA         | NA         | NA         | LCEP4      |
| NA        | ENSG00000226948 | 0          | NA          | NA         | NA         | NA         | RPS4XP2    |
| NA        | ENSG00000226949 | 0          | NA          | NA         | NA         | NA         | OR6K5P     |
| 57291     | ENSG00000226950 | 998.827254 | -0.63594405 | 0.08626857 | 4.70E-14   | 1.19E-12   | DANCR      |
| NA        | ENSG00000226952 | 0          | NA          | NA         | NA         | NA         |            |
| 101928161 | ENSG00000226953 | 17.3837109 | 0.11371743  | 0.33993892 | 0.5286103  | 0.74033801 | NCKAP5-AS2 |
| NA        | ENSG00000226954 | 0.36232394 | 0.00084255  | 0.38336406 | 0.96784325 | NA         |            |
| NA        | ENSG00000226955 | 0          | NA          | NA         | NA         | NA         |            |
| NA        | ENSG00000226956 | 0          | NA          | NA         | NA         | NA         |            |
| NA        | ENSG00000226957 | 1.14925299 | -0.00569115 | 0.37941693 | 0.92915392 | NA         |            |
| NA        | ENSG00000226960 | 0          | NA          | NA         | NA         | NA         | MTCO1P21   |
| NA        | ENSG00000226961 | 0          | NA          | NA         | NA         | NA         | PPIAP60    |
| NA        | ENSG00000226962 | 0          | NA          | NA         | NA         | NA         | RAC1P6     |
| NA        | ENSG00000226963 | 0.173733   | 0.01914545  | 0.38484597 | 0.78225479 | NA         |            |
| NA        | ENSG00000226964 | 11.9238066 | 0.23587367  | 0.44730838 | 0.13299578 | 0.30644076 | RHEBP2     |
| NA        | ENSG00000226965 | 0.5041705  | 0.01220819  | 0.38341936 | 0.76891162 | NA         |            |
| NA        | ENSG00000226967 | 0          | NA          | NA         | NA         | NA         | HAUS4P1    |
| NA        | ENSG00000226968 | 0          | NA          | NA         | NA         | NA         | LINC00423  |
| NA        | ENSG00000226969 | 0          | NA          | NA         | NA         | NA         |            |
| NA        | ENSG00000226970 | 0.18922458 | 0.01954053  | 0.38488496 | 0.78225479 | NA         | NEDD8P1    |
| NA        | ENSG00000226971 | 0          | NA          | NA         | NA         | NA         |            |
| NA        | ENSG00000226972 | 0.15069912 | -0.01848503 | 0.38480575 | 0.84537521 | NA         | RPL12P19   |
| NA        | ENSG00000226973 | 0          | NA          | NA         | NA         | NA         |            |
| NA        | ENSG00000226976 | 0.15069912 | -0.01848503 | 0.38480575 | 0.84537521 | NA         | COX6A1P2   |
| NA        | ENSG00000226977 | 0.53956067 | 0.0140528   | 0.38347044 | 0.73660658 | NA         | HMG1P24    |
| 100874021 | ENSG00000226978 | 0          | NA          | NA         | NA         | NA         | MAGI2-AS2  |
| 4049      | ENSG00000226979 | 0.70415399 | 0.051231    | 0.38859409 | 0.296127   | NA         | LTA        |
| NA        | ENSG00000226981 | 0.16735865 | 0.01897177  | 0.38482933 | 0.78225479 | NA         | ABHD17AP6  |
| NA        | ENSG00000226982 | 0          | NA          | NA         | NA         | NA         | CENPC1     |

|           |                 |            |             |            |            |            |            |
|-----------|-----------------|------------|-------------|------------|------------|------------|------------|
| 339622    | ENSG00000226983 | 0          | NA          | NA         | NA         | NA         | LINC01692  |
| NA        | ENSG00000226984 | 0.173124   | -0.01911262 | 0.38486262 | 0.84537521 | NA         |            |
| 100133123 | ENSG00000226985 | 0.14931947 | -0.01844332 | 0.38480212 | 0.84537521 | NA         | LINC01203  |
| NA        | ENSG00000226986 | 0          | NA          | NA         | NA         | NA         | PRELID1P5  |
| NA        | ENSG00000226987 | 0          | NA          | NA         | NA         | NA         |            |
| NA        | ENSG00000226989 | 0          | NA          | NA         | NA         | NA         |            |
| NA        | ENSG00000226990 | 0          | NA          | NA         | NA         | NA         |            |
| NA        | ENSG00000226991 | 0          | NA          | NA         | NA         | NA         |            |
| NA        | ENSG00000226992 | 0          | NA          | NA         | NA         | NA         |            |
| NA        | ENSG00000226994 | 0          | NA          | NA         | NA         | NA         |            |
| 100507629 | ENSG00000226995 | 0          | NA          | NA         | NA         | NA         | LINC00658  |
| NA        | ENSG00000226996 | 0          | NA          | NA         | NA         | NA         |            |
| NA        | ENSG00000226998 | 0          | NA          | NA         | NA         | NA         | MTATP6P30  |
| NA        | ENSG00000226999 | 0          | NA          | NA         | NA         | NA         |            |
| NA        | ENSG00000227000 | 0          | NA          | NA         | NA         | NA         | HSPD1P14   |
| NA        | ENSG00000227001 | 1.57173642 | -0.0135981  | 0.37861896 | 0.84585039 | NA         | NBPF2P     |
| NA        | ENSG00000227002 | 0          | NA          | NA         | NA         | NA         | SNRPEP10   |
| NA        | ENSG00000227004 | 0          | NA          | NA         | NA         | NA         |            |
| NA        | ENSG00000227006 | 3.00905492 | 0.13105772  | 0.40520288 | 0.17851817 | 0.37431837 |            |
| 101929390 | ENSG00000227007 | 0.14931947 | -0.01844332 | 0.38480212 | 0.84537521 | NA         | LINC01247  |
| NA        | ENSG00000227008 | 1.51536177 | 0.02290817  | 0.3780969  | 0.76334348 | NA         | RPS24P19   |
| NA        | ENSG00000227009 | 0          | NA          | NA         | NA         | NA         | FUNDC2P4   |
| 100506650 | ENSG00000227011 | 0          | NA          | NA         | NA         | NA         | LINC02876  |
| NA        | ENSG00000227012 | 0          | NA          | NA         | NA         | NA         | LINC02527  |
| NA        | ENSG00000227013 | 0          | NA          | NA         | NA         | NA         | OR7E96P    |
| NA        | ENSG00000227014 | 15.5487225 | -0.01424629 | 0.335411   | 0.92815383 | 0.96985158 | FKBP14-AS1 |
| NA        | ENSG00000227015 | 0          | NA          | NA         | NA         | NA         |            |
| NA        | ENSG00000227016 | 0          | NA          | NA         | NA         | NA         | LINC02796  |
| NA        | ENSG00000227017 | 0.18922458 | 0.01954053  | 0.38488496 | 0.78225479 | NA         |            |
| NA        | ENSG00000227018 | 0          | NA          | NA         | NA         | NA         | IL6STP1    |
| NA        | ENSG00000227019 | 0          | NA          | NA         | NA         | NA         | OR7E101P   |
| NA        | ENSG00000227021 | 0          | NA          | NA         | NA         | NA         |            |
| NA        | ENSG00000227023 | 0          | NA          | NA         | NA         | NA         | OR51A3P    |
| 100128590 | ENSG00000227028 | 3.98809953 | -0.13461329 | 0.40321232 | 0.20635439 | 0.41333377 | SLC8A1-AS1 |
| NA        | ENSG00000227029 | 0          | NA          | NA         | NA         | NA         |            |
| NA        | ENSG00000227032 | 1.05059888 | 0.03045601  | 0.38188279 | 0.61396593 | NA         | RPS2P36    |
| NA        | ENSG00000227033 | 0          | NA          | NA         | NA         | NA         |            |
| NA        | ENSG00000227034 | 0          | NA          | NA         | NA         | NA         |            |



|           |                 |            |             |            |            |            |           |
|-----------|-----------------|------------|-------------|------------|------------|------------|-----------|
| NA        | ENSG00000227035 | 0          | NA          | NA         | NA         | NA         | MTATP6P18 |
| 400619    | ENSG00000227036 | 12.69786   | 0.14242618  | 0.3636611  | 0.40896501 | 0.6370813  | LINC00511 |
| 100499467 | ENSG00000227036 | 12.69786   | 0.14242618  | 0.3636611  | 0.40896501 | 0.6370813  | LINC00511 |
| NA        | ENSG00000227038 | 1.63250366 | 0.05463046  | 0.38791859 | 0.31570362 | NA         | GTF2IP7   |
| 100505746 | ENSG00000227039 | 0.81384596 | 0.01394074  | 0.38179551 | 0.78681743 | NA         | ITGB2-AS1 |
| NA        | ENSG00000227040 | 0          | NA          | NA         | NA         | NA         |           |
| NA        | ENSG00000227042 | 0          | NA          | NA         | NA         | NA         |           |
| NA        | ENSG00000227043 | 0          | NA          | NA         | NA         | NA         | LINC01682 |
| NA        | ENSG00000227045 | 1.24388552 | -0.03153075 | 0.38228938 | 0.59368921 | NA         |           |
| NA        | ENSG00000227047 | 0          | NA          | NA         | NA         | NA         |           |
| NA        | ENSG00000227048 | 0          | NA          | NA         | NA         | NA         |           |
| NA        | ENSG00000227050 | 0          | NA          | NA         | NA         | NA         |           |
| 56967     | ENSG00000227051 | 4646.14616 | -0.39002348 | 0.09078521 | 9.33E-06   | 8.91E-05   | C14orf132 |
| 102724094 | ENSG00000227053 | 0          | NA          | NA         | NA         | NA         | MUC12-AS1 |
| NA        | ENSG00000227054 | 0          | NA          | NA         | NA         | NA         | FDX1P2    |
| NA        | ENSG00000227055 | 0          | NA          | NA         | NA         | NA         |           |
| NA        | ENSG00000227056 | 0.15069912 | -0.01848503 | 0.38480575 | 0.84537521 | NA         | RPL6P2    |
| 9277      | ENSG00000227057 | 1599.35003 | 0.02129496  | 0.07797327 | 0.7809934  | 0.8998656  | WDR46     |
| NA        | ENSG00000227058 | 0          | NA          | NA         | NA         | NA         |           |
| 647589    | ENSG00000227059 | 0          | NA          | NA         | NA         | NA         | ANHX      |
| 100506757 | ENSG00000227060 | 3.00672511 | 0.01330547  | 0.36941674 | 0.89936979 | 0.95557174 | LINC00629 |
| NA        | ENSG00000227061 | 0          | NA          | NA         | NA         | NA         |           |
| NA        | ENSG00000227062 | 0          | NA          | NA         | NA         | NA         |           |
| NA        | ENSG00000227063 | 0          | NA          | NA         | NA         | NA         | RPL41P1   |
| NA        | ENSG00000227064 | 0          | NA          | NA         | NA         | NA         | NAA20P1   |
| NA        | ENSG00000227066 | 0          | NA          | NA         | NA         | NA         |           |
| NA        | ENSG00000227067 | 0.15069912 | -0.01848503 | 0.38480575 | 0.84537521 | NA         | DPPA3P1   |
| NA        | ENSG00000227068 | 0          | NA          | NA         | NA         | NA         |           |
| NA        | ENSG00000227069 | 0          | NA          | NA         | NA         | NA         | CNN2P2    |
| NA        | ENSG00000227070 | 0          | NA          | NA         | NA         | NA         | EPS15-AS1 |
| NA        | ENSG00000227071 | 0          | NA          | NA         | NA         | NA         | FOCAD-AS1 |
| NA        | ENSG00000227072 | 0          | NA          | NA         | NA         | NA         |           |
| NA        | ENSG00000227073 | 0          | NA          | NA         | NA         | NA         | SDHDP2    |
| NA        | ENSG00000227075 | 0          | NA          | NA         | NA         | NA         |           |
| NA        | ENSG00000227076 | 0          | NA          | NA         | NA         | NA         |           |
| NA        | ENSG00000227077 | 0.18922458 | 0.01954053  | 0.38488496 | 0.78225479 | NA         |           |
| NA        | ENSG00000227078 | 0.60003103 | -0.03562255 | 0.38653685 | 0.43872594 | NA         | LINC02094 |
| NA        | ENSG00000227080 | 0.64096572 | 0.00298932  | 0.38136894 | 0.95269762 | NA         |           |

|           |                 |            |             |            |            |            |             |
|-----------|-----------------|------------|-------------|------------|------------|------------|-------------|
| NA        | ENSG00000227081 | 3.53991008 | -0.19572974 | 0.44432915 | 0.07442826 | 0.2003061  |             |
| NA        | ENSG00000227082 | 0.15069912 | -0.01848503 | 0.38480575 | 0.84537521 | NA         | LINC02798   |
| NA        | ENSG00000227083 | 0.64252159 | 0.00260047  | 0.38194671 | 0.95486473 | NA         |             |
| NA        | ENSG00000227087 | 0.33471731 | 0.02354391  | 0.38534154 | 0.62842204 | NA         | RBMX2P5     |
| NA        | ENSG00000227088 | 0          | NA          | NA         | NA         | NA         |             |
| NA        | ENSG00000227089 | 0          | NA          | NA         | NA         | NA         |             |
| NA        | ENSG00000227090 | 0          | NA          | NA         | NA         | NA         |             |
| NA        | ENSG00000227091 | 2.62983453 | 0.00952018  | 0.37593586 | 0.90918919 | 0.96081355 | SLC6A17-AS1 |
| NA        | ENSG00000227094 | 0          | NA          | NA         | NA         | NA         |             |
| NA        | ENSG00000227096 | 0          | NA          | NA         | NA         | NA         | HMGB3P8     |
| NA        | ENSG00000227097 | 40.7856012 | -0.07516298 | 0.27861145 | 0.69739138 | 0.85389371 | RPS28P7     |
| 105373757 | ENSG00000227098 | 0          | NA          | NA         | NA         | NA         |             |
| NA        | ENSG00000227101 | 0          | NA          | NA         | NA         | NA         |             |
| NA        | ENSG00000227102 | 0          | NA          | NA         | NA         | NA         | OR2AS1P     |
| NA        | ENSG00000227104 | 0          | NA          | NA         | NA         | NA         | PIGQP1      |
| NA        | ENSG00000227105 | 0          | NA          | NA         | NA         | NA         | PARP1P1     |
| NA        | ENSG00000227107 | 7.21150011 | -0.04040104 | 0.35507186 | 0.7744268  | 0.89612867 |             |
| NA        | ENSG00000227108 | 0          | NA          | NA         | NA         | NA         | IGHD1-14    |
| NA        | ENSG00000227109 | 0          | NA          | NA         | NA         | NA         | CRIP1P3     |
| 101927394 | ENSG00000227110 | 43.20445   | 0.12149997  | 0.27724748 | 0.53872133 | 0.74837075 | LMCD1-AS1   |
| NA        | ENSG00000227113 | 0          | NA          | NA         | NA         | NA         |             |
| 100287225 | ENSG00000227115 | 0.29863895 | -0.02292439 | 0.3852726  | 0.68753245 | NA         | LINC01630   |
| 101929664 | ENSG00000227117 | 0          | NA          | NA         | NA         | NA         | HORMAD2-AS1 |
| NA        | ENSG00000227118 | 0          | NA          | NA         | NA         | NA         | BTF3P13     |
| NA        | ENSG00000227120 | 0          | NA          | NA         | NA         | NA         |             |
| NA        | ENSG00000227121 | 0          | NA          | NA         | NA         | NA         | LINC02672   |
| NA        | ENSG00000227123 | 0          | NA          | NA         | NA         | NA         | RPL12P44    |
| 100131827 | ENSG00000227124 | 246.527675 | 0.01561183  | 0.15280676 | 0.91235328 | 0.96260718 | ZNF717      |
| NA        | ENSG00000227125 | 0          | NA          | NA         | NA         | NA         |             |
| NA        | ENSG00000227128 | 0          | NA          | NA         | NA         | NA         | LBX1-AS1    |
| NA        | ENSG00000227131 | 0          | NA          | NA         | NA         | NA         |             |
| NA        | ENSG00000227133 | 0.34624801 | -0.02356563 | 0.38536324 | 0.65270996 | NA         |             |
| NA        | ENSG00000227134 | 0          | NA          | NA         | NA         | NA         | OTX2P2      |
| NA        | ENSG00000227138 | 0          | NA          | NA         | NA         | NA         |             |
| NA        | ENSG00000227139 | 0          | NA          | NA         | NA         | NA         |             |
| 728386    | ENSG00000227140 | 0          | NA          | NA         | NA         | NA         | USP17L5     |
| NA        | ENSG00000227141 | 4.540005   | 0.23674788  | 0.47929515 | 0.04554314 | 0.13847905 |             |
| NA        | ENSG00000227143 | 0          | NA          | NA         | NA         | NA         | LINC01153   |

|           |                 |                 |             |             |            |            |            |
|-----------|-----------------|-----------------|-------------|-------------|------------|------------|------------|
| 100996941 | ENSG00000227145 | 0               | NA          | NA          | NA         | NA         | IL21-AS1   |
|           | NA              | ENSG00000227148 | 0           | NA          | NA         | NA         |            |
|           | NA              | ENSG00000227149 | 0           | NA          | NA         | NA         | MTCO1P44   |
|           | NA              | ENSG00000227150 | 0           | NA          | NA         | NA         |            |
| 81458     | ENSG00000227152 | 0               | NA          | NA          | NA         | NA         | OR2T7      |
|           | NA              | ENSG00000227154 | 0           | NA          | NA         | NA         | MKRN6P     |
|           | NA              | ENSG00000227155 | 0           | NA          | NA         | NA         |            |
|           | NA              | ENSG00000227157 | 2.81998671  | -0.07045477 | 0.38304498 | 0.43216563 | 0.65772984 |
|           | NA              | ENSG00000227158 | 0           | NA          | NA         | NA         |            |
|           | NA              | ENSG00000227159 | 0           | NA          | NA         | NA         | DDX11L16   |
|           | NA              | ENSG00000227160 | 0           | NA          | NA         | NA         | THEM7P     |
|           | NA              | ENSG00000227161 | 0           | NA          | NA         | NA         |            |
|           | NA              | ENSG00000227163 | 0           | NA          | NA         | NA         |            |
| 283089    | ENSG00000227165 | 4.72871727      | -0.04754158 | 0.36996355  | 0.67434392 | 0.84019291 | WDR11-AS1  |
|           | NA              | ENSG00000227166 | 0           | NA          | NA         | NA         | STSP1      |
|           | NA              | ENSG00000227167 | 0           | NA          | NA         | NA         |            |
|           | NA              | ENSG00000227169 | 0           | NA          | NA         | NA         |            |
|           | NA              | ENSG00000227170 | 0           | NA          | NA         | NA         |            |
|           | NA              | ENSG00000227172 | 0           | NA          | NA         | NA         |            |
|           | NA              | ENSG00000227173 | 0           | NA          | NA         | NA         | MYL6P3     |
|           | NA              | ENSG00000227175 | 0           | NA          | NA         | NA         |            |
|           | NA              | ENSG00000227176 | 0.97970455  | 0.00307808  | 0.38086652 | 0.95561186 | NSA2P5     |
|           | NA              | ENSG00000227177 | 0           | NA          | NA         | NA         | AIMP1P2    |
| 441897    | ENSG00000227179 | 0               | NA          | NA          | NA         | NA         | PGBP       |
|           | NA              | ENSG00000227180 | 0           | NA          | NA         | NA         | LRRC2P1    |
| 105371644 | ENSG00000227181 | 0               | NA          | NA          | NA         | NA         | LINC01688  |
|           | NA              | ENSG00000227182 | 0           | NA          | NA         | NA         | VN1R28P    |
|           | NA              | ENSG00000227183 | 0.69150377  | -0.00046625 | 0.38183062 | 0.99364896 | HDGFP1     |
|           | NA              | ENSG00000227186 | 0           | NA          | NA         | NA         |            |
|           | NA              | ENSG00000227187 | 0           | NA          | NA         | NA         | RPL21P31   |
| 104502417 | ENSG00000227188 | 0.86023743      | 0.02030224  | 0.38147111  | 0.71987968 | NA         | MGAT3-AS1  |
|           | NA              | ENSG00000227189 | 3.05676145  | -0.13117069 | 0.40229882 | 0.20981168 | 0.41823207 |
|           | NA              | ENSG00000227191 | 0           | NA          | NA         | NA         | TRGC2      |
|           | NA              | ENSG00000227192 | 0.68208227  | 0.0405981   | 0.38717295 | 0.35761729 | NA         |
|           | NA              | ENSG00000227193 | 0.16735865  | 0.01897177  | 0.38482933 | 0.78225479 | NA         |
| 284801    | ENSG00000227195 | 1.62177795      | -0.07317329 | 0.38760182  | 0.34107446 | NA         | MIR663AHG  |
|           | NA              | ENSG00000227196 | 0           | NA          | NA         | NA         | IGHD4-23   |
|           | NA              | ENSG00000227197 | 0           | NA          | NA         | NA         |            |

|           |                 |            |             |            |            |            |             |
|-----------|-----------------|------------|-------------|------------|------------|------------|-------------|
| NA        | ENSG00000227198 | 0          | NA          | NA         | NA         | NA         | C6orf47-AS1 |
| 93653     | ENSG00000227199 | 61.7066704 | 0.40653623  | 0.29496302 | 0.06444519 | 0.18077091 | ST7-AS1     |
| NA        | ENSG00000227200 | 0          | NA          | NA         | NA         | NA         |             |
| NA        | ENSG00000227201 | 2.12081179 | -0.00081631 | 0.37531161 | 0.99066742 | NA         | CNN2P1      |
| NA        | ENSG00000227203 | 0.173124   | -0.01911262 | 0.38486262 | 0.84537521 | NA         | SUB1P1      |
| NA        | ENSG00000227204 | 0          | NA          | NA         | NA         | NA         | RBMY2JP     |
| NA        | ENSG00000227205 | 0          | NA          | NA         | NA         | NA         | PFN1P9      |
| NA        | ENSG00000227206 | 0          | NA          | NA         | NA         | NA         |             |
| NA        | ENSG00000227207 | 0          | NA          | NA         | NA         | NA         | RPL31P12    |
| NA        | ENSG00000227209 | 0          | NA          | NA         | NA         | NA         | WARS2P1     |
| 101928222 | ENSG00000227210 | 37.7676393 | -0.07235952 | 0.29113814 | 0.70543401 | 0.85803894 |             |
| NA        | ENSG00000227211 | 0.18922458 | 0.01954053  | 0.38488496 | 0.78225479 | NA         | H3P45       |
| NA        | ENSG00000227212 | 56.8625999 | 0.08223616  | 0.24684103 | 0.66735803 | 0.83619952 | PFN1P6      |
| 100874231 | ENSG00000227213 | 0          | NA          | NA         | NA         | NA         | SPATA13-AS1 |
| NA        | ENSG00000227214 | 4.49818285 | 0.08320467  | 0.37330539 | 0.51046715 | 0.72578961 | HCG15       |
| NA        | ENSG00000227215 | 0.49156725 | -0.01080825 | 0.38289021 | 0.82543505 | NA         |             |
| NA        | ENSG00000227217 | 0          | NA          | NA         | NA         | NA         |             |
| NA        | ENSG00000227218 | 9.03033981 | -0.09427937 | 0.35974326 | 0.53881156 | 0.74839131 |             |
| NA        | ENSG00000227220 | 0          | NA          | NA         | NA         | NA         |             |
| NA        | ENSG00000227224 | 0          | NA          | NA         | NA         | NA         |             |
| NA        | ENSG00000227225 | 0          | NA          | NA         | NA         | NA         | MTND1P14    |
| NA        | ENSG00000227227 | 1.01425678 | 0.02744101  | 0.38241689 | 0.6201241  | NA         |             |
| NA        | ENSG00000227230 | 14.0158672 | -0.26009721 | 0.45365451 | 0.12949853 | 0.30099003 |             |
| 653635    | ENSG00000227232 | 422.487934 | 0.21889135  | 0.11593459 | 0.0471661  | 0.1422151  | WASH7P      |
| NA        | ENSG00000227233 | 0          | NA          | NA         | NA         | NA         | CICP17      |
| 728695    | ENSG00000227234 | 0          | NA          | NA         | NA         | NA         | SPANXB1     |
| NA        | ENSG00000227236 | 2.77339532 | -0.12245195 | 0.4027311  | 0.18041481 | 0.37732873 |             |
| NA        | ENSG00000227237 | 0          | NA          | NA         | NA         | NA         |             |
| NA        | ENSG00000227238 | 0.15069912 | -0.01848503 | 0.38480575 | 0.84537521 | NA         | TTC39DP     |
| NA        | ENSG00000227240 | 0          | NA          | NA         | NA         | NA         |             |
| NA        | ENSG00000227241 | 0          | NA          | NA         | NA         | NA         |             |
| NA        | ENSG00000227242 | 0.7359353  | 0.042374    | 0.38743642 | 0.33395337 | NA         |             |
| NA        | ENSG00000227243 | 0          | NA          | NA         | NA         | NA         | SLAMF6P1    |
| 100507058 | ENSG00000227244 | 0          | NA          | NA         | NA         | NA         | LINC00845   |
| NA        | ENSG00000227245 | 1.12583452 | -0.00405983 | 0.38036536 | 0.94450961 | NA         |             |
| NA        | ENSG00000227247 | 0          | NA          | NA         | NA         | NA         | TRIM60P13   |
| NA        | ENSG00000227248 | 0          | NA          | NA         | NA         | NA         | FAM155A-IT1 |
| NA        | ENSG00000227249 | 0          | NA          | NA         | NA         | NA         |             |

|           |    |                 |            |             |            |            |            |            |
|-----------|----|-----------------|------------|-------------|------------|------------|------------|------------|
|           | NA | ENSG00000227251 | 0          | NA          | NA         | NA         | NA         | TRIM60P9Y  |
|           | NA | ENSG00000227252 | 37.7715665 | 0.16107839  | 0.30195681 | 0.42255332 | 0.64862343 |            |
|           | NA | ENSG00000227253 | 2.43608647 | 0.01679791  | 0.37491926 | 0.84818804 | NA         |            |
|           | NA | ENSG00000227254 | 0.3411271  | 0.02362666  | 0.38535342 | 0.62409671 | NA         | VDAC1P12   |
|           | NA | ENSG00000227255 | 0          | NA          | NA         | NA         | NA         | CDRT15P2   |
|           | NA | ENSG00000227256 | 1.73986008 | -0.02587266 | 0.3778738  | 0.74010569 | NA         | MIS18A-AS1 |
|           | NA | ENSG00000227257 | 0          | NA          | NA         | NA         | NA         |            |
|           | NA | ENSG00000227258 | 17.8536731 | -0.41582675 | 0.48644025 | 0.08013497 | 0.21150429 | SMIM2-AS1  |
|           | NA | ENSG00000227259 | 0          | NA          | NA         | NA         | NA         | HMG2N2P22  |
| 101928015 | NA | ENSG00000227260 | 0          | NA          | NA         | NA         | NA         | LINC01985  |
|           | NA | ENSG00000227261 | 0          | NA          | NA         | NA         | NA         | YWHAZP7    |
|           | NA | ENSG00000227262 | 0.66337881 | 0.00169286  | 0.38130777 | 0.97272394 | NA         | HCG4B      |
|           | NA | ENSG00000227264 | 0          | NA          | NA         | NA         | NA         | ACTR3BP5   |
|           | NA | ENSG00000227265 | 0          | NA          | NA         | NA         | NA         | GXYLT1P7   |
|           | NA | ENSG00000227267 | 0          | NA          | NA         | NA         | NA         |            |
| 100144748 | NA | ENSG00000227268 | 62.1755146 | -0.1831896  | 0.25800139 | 0.3498333  | 0.58017995 | KLLN       |
|           | NA | ENSG00000227269 | 0          | NA          | NA         | NA         | NA         |            |
|           | NA | ENSG00000227270 | 0          | NA          | NA         | NA         | NA         |            |
|           | NA | ENSG00000227271 | 0          | NA          | NA         | NA         | NA         | RPL39P25   |
| 101928418 | NA | ENSG00000227274 | 0          | NA          | NA         | NA         | NA         | MYOCD-AS1  |
|           | NA | ENSG00000227275 | 0          | NA          | NA         | NA         | NA         | MTND6P10   |
|           | NA | ENSG00000227278 | 0          | NA          | NA         | NA         | NA         |            |
|           | NA | ENSG00000227279 | 0          | NA          | NA         | NA         | NA         |            |
|           | NA | ENSG00000227282 | 0          | NA          | NA         | NA         | NA         |            |
|           | NA | ENSG00000227283 | 0          | NA          | NA         | NA         | NA         | RPL35AP12  |
|           | NA | ENSG00000227284 | 0          | NA          | NA         | NA         | NA         | MARK2P10   |
|           | NA | ENSG00000227288 | 1.72928421 | 0.03738421  | 0.37784956 | 0.65625682 | NA         | ARID3BP1   |
|           | NA | ENSG00000227289 | 0          | NA          | NA         | NA         | NA         | HSFY3P     |
| 100505768 | NA | ENSG00000227290 | 0          | NA          | NA         | NA         | NA         | LINC01364  |
|           | NA | ENSG00000227291 | 0          | NA          | NA         | NA         | NA         |            |
|           | NA | ENSG00000227292 | 0          | NA          | NA         | NA         | NA         |            |
|           | NA | ENSG00000227293 | 0          | NA          | NA         | NA         | NA         |            |
|           | NA | ENSG00000227294 | 0          | NA          | NA         | NA         | NA         |            |
|           | NA | ENSG00000227295 | 0          | NA          | NA         | NA         | NA         | ELL2P1     |
|           | NA | ENSG00000227297 | 0          | NA          | NA         | NA         | NA         |            |
|           | NA | ENSG00000227298 | 0          | NA          | NA         | NA         | NA         | ARAF3P3    |
|           | NA | ENSG00000227300 | 0          | NA          | NA         | NA         | NA         | KRT16P2    |
|           | NA | ENSG00000227301 | 2.03229968 | 0.05667287  | 0.38127636 | 0.50245457 | NA         |            |

|           |                 |            |             |            |            |            |             |
|-----------|-----------------|------------|-------------|------------|------------|------------|-------------|
| NA        | ENSG00000227302 | 0          | NA          | NA         | NA         | NA         | SSXP9       |
| NA        | ENSG00000227303 | 0          | NA          | NA         | NA         | NA         |             |
| NA        | ENSG00000227304 | 3.14457047 | -0.0016909  | 0.37170736 | 0.98412387 | 0.99453916 |             |
| NA        | ENSG00000227305 | 0          | NA          | NA         | NA         | NA         |             |
| NA        | ENSG00000227306 | 0          | NA          | NA         | NA         | NA         | LINC02708   |
| NA        | ENSG00000227307 | 0          | NA          | NA         | NA         | NA         |             |
| NA        | ENSG00000227308 | 0          | NA          | NA         | NA         | NA         | LINC02832   |
| NA        | ENSG00000227309 | 0          | NA          | NA         | NA         | NA         |             |
| NA        | ENSG00000227311 | 0.14931947 | -0.01844332 | 0.38480212 | 0.84537521 | NA         |             |
| NA        | ENSG00000227312 | 0          | NA          | NA         | NA         | NA         |             |
| NA        | ENSG00000227313 | 0          | NA          | NA         | NA         | NA         | LINC02630   |
| NA        | ENSG00000227321 | 1.09863032 | -0.00069564 | 0.38050679 | 0.99007141 | NA         | MTND4P15    |
| NA        | ENSG00000227329 | 0.65428374 | -0.02346311 | 0.38339586 | 0.6351993  | NA         |             |
| NA        | ENSG00000227330 | 0          | NA          | NA         | NA         | NA         |             |
| NA        | ENSG00000227331 | 0          | NA          | NA         | NA         | NA         | RPL7AP22    |
| NA        | ENSG00000227335 | 0          | NA          | NA         | NA         | NA         | IGHJ1P      |
| NA        | ENSG00000227336 | 0          | NA          | NA         | NA         | NA         | LINC00434   |
| NA        | ENSG00000227337 | 0          | NA          | NA         | NA         | NA         | RPL23AP43   |
| NA        | ENSG00000227338 | 0          | NA          | NA         | NA         | NA         |             |
| NA        | ENSG00000227339 | 0          | NA          | NA         | NA         | NA         | THRAP3P1    |
| 266919    | ENSG00000227342 | 0          | NA          | NA         | NA         | NA         | LINC00307   |
| NA        | ENSG00000227343 | 0          | NA          | NA         | NA         | NA         | RPL15P1     |
| NA        | ENSG00000227344 | 1.17010803 | -0.02926742 | 0.38136097 | 0.63936828 | NA         | HAUS6P1     |
| 8505      | ENSG00000227345 | 1049.14618 | 0.1115029   | 0.08651283 | 0.18591594 | 0.38543075 | PARG        |
| NA        | ENSG00000227347 | 0          | NA          | NA         | NA         | NA         | HNRNPKP2    |
| NA        | ENSG00000227348 | 0          | NA          | NA         | NA         | NA         | MTND5P25    |
| NA        | ENSG00000227349 | 0          | NA          | NA         | NA         | NA         | CEACAMP7    |
| NA        | ENSG00000227350 | 0          | NA          | NA         | NA         | NA         | PPIAP88     |
| NA        | ENSG00000227351 | 0          | NA          | NA         | NA         | NA         | NANOCP6     |
| NA        | ENSG00000227352 | 0          | NA          | NA         | NA         | NA         | ARHGEF7-AS1 |
| NA        | ENSG00000227353 | 0          | NA          | NA         | NA         | NA         | RAB28P3     |
| 100505538 | ENSG00000227354 | 125.277344 | -0.11886677 | 0.20302065 | 0.49003572 | 0.70970937 | RBM26-AS1   |
| NA        | ENSG00000227355 | 0.173733   | 0.01914545  | 0.38484597 | 0.78225479 | NA         |             |
| 100505561 | ENSG00000227356 | 0.98373546 | -0.02241981 | 0.38113741 | 0.70880588 | NA         | LINC00866   |
| NA        | ENSG00000227358 | 0          | NA          | NA         | NA         | NA         |             |
| NA        | ENSG00000227359 | 0.662022   | -0.01945741 | 0.38293387 | 0.66898873 | NA         |             |
| NA        | ENSG00000227360 | 0          | NA          | NA         | NA         | NA         |             |
| NA        | ENSG00000227361 | 0          | NA          | NA         | NA         | NA         | RPS24P7     |

|           |                 |            |             |            |            |            |             |
|-----------|-----------------|------------|-------------|------------|------------|------------|-------------|
| NA        | ENSG00000227364 | 0          | NA          | NA         | NA         | NA         |             |
| NA        | ENSG00000227365 | 0          | NA          | NA         | NA         | NA         |             |
| NA        | ENSG00000227367 | 0          | NA          | NA         | NA         | NA         | SLC9B1P4    |
| NA        | ENSG00000227368 | 0          | NA          | NA         | NA         | NA         | CDK8P2      |
| NA        | ENSG00000227370 | 3.76504023 | 0.09938333  | 0.38356972 | 0.39012311 | 0.61935204 |             |
| NA        | ENSG00000227371 | 0          | NA          | NA         | NA         | NA         |             |
| 57212     | ENSG00000227372 | 2241.03353 | 0.28928618  | 0.07510918 | 8.40E-05   | 0.0006505  | TP73-AS1    |
| 102724601 | ENSG00000227373 | 6.41871018 | -0.26149461 | 0.50214305 | 0.02830819 | 0.09589116 | RABGAP1L-DT |
| NA        | ENSG00000227374 | 0          | NA          | NA         | NA         | NA         |             |
| 100507086 | ENSG00000227375 | 0.47769487 | 0.00972985  | 0.38332309 | 0.80907114 | NA         | DLG1-AS1    |
| NA        | ENSG00000227376 | 0.16735865 | 0.01897177  | 0.38482933 | 0.78225479 | NA         | FTH1P16     |
| NA        | ENSG00000227379 | 0          | NA          | NA         | NA         | NA         | PPIAP2      |
| NA        | ENSG00000227382 | 1.33151299 | -0.01464339 | 0.37927329 | 0.82617533 | NA         | EIF4A2P2    |
| NA        | ENSG00000227383 | 0          | NA          | NA         | NA         | NA         | RPL35AP2    |
| NA        | ENSG00000227386 | 0          | NA          | NA         | NA         | NA         |             |
| NA        | ENSG00000227388 | 54.5055401 | 0.22518211  | 0.30080764 | 0.27852919 | 0.502914   |             |
| NA        | ENSG00000227391 | 0          | NA          | NA         | NA         | NA         | SALL1P1     |
| 100128675 | ENSG00000227392 | 0.4759851  | -0.00795189 | 0.38324776 | 0.85629392 | NA         | HPN-AS1     |
| NA        | ENSG00000227393 | 0          | NA          | NA         | NA         | NA         |             |
| NA        | ENSG00000227394 | 1.52003192 | 0.00131081  | 0.37939754 | 0.98466034 | NA         | RPL11P1     |
| NA        | ENSG00000227395 | 0          | NA          | NA         | NA         | NA         | EIF2AP4     |
| NA        | ENSG00000227397 | 0          | NA          | NA         | NA         | NA         |             |
| NA        | ENSG00000227398 | 67.8463524 | 0.02980529  | 0.2400206  | 0.87537761 | 0.94499851 | KIF9-AS1    |
| NA        | ENSG00000227399 | 0          | NA          | NA         | NA         | NA         |             |
| NA        | ENSG00000227400 | 0          | NA          | NA         | NA         | NA         |             |
| NA        | ENSG00000227401 | 0          | NA          | NA         | NA         | NA         | RPL37P1     |
| 100996579 | ENSG00000227403 | 0.76942968 | 0.04443431  | 0.38771031 | 0.31693981 | NA         | LINC01806   |
| NA        | ENSG00000227404 | 0          | NA          | NA         | NA         | NA         | KRT8P20     |
| NA        | ENSG00000227406 | 0.16735865 | 0.01897177  | 0.38482933 | 0.78225479 | NA         | RNF6P1      |
| NA        | ENSG00000227407 | 0.15069912 | -0.01848503 | 0.38480575 | 0.84537521 | NA         |             |
| NA        | ENSG00000227408 | 0          | NA          | NA         | NA         | NA         | AMYP1       |
| 100861513 | ENSG00000227409 | 0.15069912 | -0.01848503 | 0.38480575 | 0.84537521 | NA         | ZMYM4-AS1   |
| NA        | ENSG00000227411 | 0          | NA          | NA         | NA         | NA         | ACNATP      |
| NA        | ENSG00000227412 | 0          | NA          | NA         | NA         | NA         | STK33P1     |
| NA        | ENSG00000227413 | 0          | NA          | NA         | NA         | NA         |             |
| NA        | ENSG00000227416 | 0.75059999 | -0.04247785 | 0.38745014 | 0.34991775 | NA         |             |
| NA        | ENSG00000227417 | 0          | NA          | NA         | NA         | NA         |             |
| 64002     | ENSG00000227418 | 0          | NA          | NA         | NA         | NA         | PCGEM1      |

|           |                 |            |             |            |            |            |             |
|-----------|-----------------|------------|-------------|------------|------------|------------|-------------|
| NA        | ENSG00000227421 | 0          | NA          | NA         | NA         | NA         | LINC01724   |
| NA        | ENSG00000227423 | 0          | NA          | NA         | NA         | NA         | OR10U1P     |
| NA        | ENSG00000227425 | 0          | NA          | NA         | NA         | NA         | MRPS21P2    |
| NA        | ENSG00000227426 | 0          | NA          | NA         | NA         | NA         | VN1R33P     |
| NA        | ENSG00000227427 | 0          | NA          | NA         | NA         | NA         | MDH1P1      |
| NA        | ENSG00000227430 | 1.63991532 | 0.03339204  | 0.37902394 | 0.66569217 | NA         | H3P9        |
| 102723483 | ENSG00000227431 | 0.32515712 | 0.00185323  | 0.38337342 | 0.96256807 | NA         | CSE1L-AS1   |
| NA        | ENSG00000227432 | 0.34746601 | 0.02370763  | 0.3853651  | 0.61987128 | NA         | ASIC4-AS1   |
| NA        | ENSG00000227433 | 0          | NA          | NA         | NA         | NA         |             |
| NA        | ENSG00000227434 | 0          | NA          | NA         | NA         | NA         | RNF19BPX    |
| NA        | ENSG00000227436 | 0.47528145 | -0.00846188 | 0.38280813 | 0.85684788 | NA         | FCF1P1      |
| NA        | ENSG00000227437 | 0          | NA          | NA         | NA         | NA         | RPS8P4      |
| NA        | ENSG00000227438 | 0          | NA          | NA         | NA         | NA         |             |
| NA        | ENSG00000227440 | 1.63296849 | 0.00740771  | 0.37795867 | 0.91953078 | NA         | ATP5MC1P4   |
| NA        | ENSG00000227443 | 0          | NA          | NA         | NA         | NA         | H3P30       |
| NA        | ENSG00000227444 | 0          | NA          | NA         | NA         | NA         |             |
| NA        | ENSG00000227445 | 0          | NA          | NA         | NA         | NA         | OR10R1P     |
| NA        | ENSG00000227447 | 0          | NA          | NA         | NA         | NA         | XGY1        |
| NA        | ENSG00000227449 | 6.74891379 | -0.05226423 | 0.36331484 | 0.68797383 | 0.84852672 | FGF7P6      |
| NA        | ENSG00000227453 | 0          | NA          | NA         | NA         | NA         | HNRNPA1P63  |
| NA        | ENSG00000227454 | 0.16735865 | 0.01897177  | 0.38482933 | 0.78225479 | NA         | MTND4P30    |
| NA        | ENSG00000227455 | 0          | NA          | NA         | NA         | NA         |             |
| 114036    | ENSG00000227456 | 2.61277133 | 0.07594126  | 0.38430417 | 0.39283466 | 0.62197758 | LINC00310   |
| NA        | ENSG00000227459 | 0          | NA          | NA         | NA         | NA         |             |
| NA        | ENSG00000227462 | 0          | NA          | NA         | NA         | NA         | PSME2P6     |
| 101927575 | ENSG00000227463 | 0.36292397 | 0.02389455  | 0.38539237 | 0.6099817  | NA         |             |
| NA        | ENSG00000227465 | 0          | NA          | NA         | NA         | NA         | GPN3P1      |
| 101927139 | ENSG00000227466 | 0          | NA          | NA         | NA         | NA         | PDE4B-AS1   |
| 101928555 | ENSG00000227467 | 1.71385582 | -0.10609427 | 0.40051158 | 0.13058563 | NA         | LINC01537   |
| NA        | ENSG00000227470 | 0          | NA          | NA         | NA         | NA         | RPL39P16    |
| 441282    | ENSG00000227471 | 0          | NA          | NA         | NA         | NA         | AKR1B15     |
| NA        | ENSG00000227473 | 2.27393665 | -0.06864584 | 0.38265852 | 0.44551809 | NA         | TSSK5P      |
| NA        | ENSG00000227474 | 0          | NA          | NA         | NA         | NA         | RPL6P24     |
| NA        | ENSG00000227475 | 0          | NA          | NA         | NA         | NA         |             |
| 100505826 | ENSG00000227477 | 3.21427272 | -0.01386241 | 0.36901319 | 0.89315385 | 0.95382562 | STK4-AS1    |
| NA        | ENSG00000227479 | 0          | NA          | NA         | NA         | NA         |             |
| 554201    | ENSG00000227480 | 0          | NA          | NA         | NA         | NA         | CCDC148-AS1 |
| NA        | ENSG00000227481 | 0          | NA          | NA         | NA         | NA         |             |



|           |                 |            |             |            |            |            |             |
|-----------|-----------------|------------|-------------|------------|------------|------------|-------------|
| NA        | ENSG00000227482 | 0          | NA          | NA         | NA         | NA         |             |
| NA        | ENSG00000227484 | 0.32328047 | 0.00158651  | 0.38337047 | 0.96589257 | NA         |             |
| NA        | ENSG00000227485 | 0          | NA          | NA         | NA         | NA         |             |
| NA        | ENSG00000227486 | 0.16735865 | 0.01897177  | 0.38482933 | 0.78225479 | NA         |             |
| NA        | ENSG00000227487 | 73.5094333 | -0.83106256 | 0.30382687 | 0.00087837 | 0.00528885 | NCAM1-AS1   |
| NA        | ENSG00000227489 | 0          | NA          | NA         | NA         | NA         |             |
| NA        | ENSG00000227491 | 0          | NA          | NA         | NA         | NA         | CCNJP1      |
| NA        | ENSG00000227492 | 1.75468368 | -0.04219062 | 0.38056147 | 0.57414105 | NA         |             |
| NA        | ENSG00000227493 | 0          | NA          | NA         | NA         | NA         |             |
| NA        | ENSG00000227494 | 0          | NA          | NA         | NA         | NA         | USP9YP14    |
| 102724009 | ENSG00000227495 | 2.42705677 | 0.14831847  | 0.41736309 | 0.10287627 | NA         | KIF1C-AS1   |
| NA        | ENSG00000227496 | 0.16735865 | 0.01897177  | 0.38482933 | 0.78225479 | NA         |             |
| NA        | ENSG00000227497 | 0          | NA          | NA         | NA         | NA         | PABPC1P6    |
| NA        | ENSG00000227498 | 0          | NA          | NA         | NA         | NA         |             |
| NA        | ENSG00000227499 | 0          | NA          | NA         | NA         | NA         |             |
| 113178    | ENSG00000227500 | 1314.11579 | 0.04336599  | 0.09031955 | 0.62396468 | 0.80826973 | SCAMP4      |
| 285758    | ENSG00000227502 | 0.97195101 | -0.01819344 | 0.38090842 | 0.75858666 | NA         | MROCKI      |
| NA        | ENSG00000227505 | 0          | NA          | NA         | NA         | NA         | SLIRPP1     |
| 4050      | ENSG00000227507 | 1.64921325 | 0.07658204  | 0.39036969 | 0.26383965 | NA         | LTB         |
| 401289    | ENSG00000227508 | 0          | NA          | NA         | NA         | NA         | LINC01624   |
| NA        | ENSG00000227509 | 0          | NA          | NA         | NA         | NA         | LINC01839   |
| 103456507 | ENSG00000227510 | 0          | NA          | NA         | NA         | NA         | LINC01442   |
| NA        | ENSG00000227511 | 0          | NA          | NA         | NA         | NA         |             |
| NA        | ENSG00000227512 | 0          | NA          | NA         | NA         | NA         |             |
| NA        | ENSG00000227513 | 0          | NA          | NA         | NA         | NA         | ILRUNP1     |
| NA        | ENSG00000227514 | 0          | NA          | NA         | NA         | NA         |             |
| NA        | ENSG00000227515 | 0          | NA          | NA         | NA         | NA         | C1DP4       |
| NA        | ENSG00000227516 | 0          | NA          | NA         | NA         | NA         |             |
| NA        | ENSG00000227517 | 0.46390976 | -0.02633997 | 0.38556306 | 0.64587079 | NA         | LINC01483   |
| NA        | ENSG00000227518 | 60.6712823 | -0.31729613 | 0.27128563 | 0.12377304 | 0.29154187 | MIR1302-9HG |
| NA        | ENSG00000227519 | 0          | NA          | NA         | NA         | NA         |             |
| NA        | ENSG00000227521 | 0          | NA          | NA         | NA         | NA         | TUBB4BP8    |
| NA        | ENSG00000227523 | 0.173733   | 0.01914545  | 0.38484597 | 0.78225479 | NA         | RPS20P15    |
| NA        | ENSG00000227525 | 0.33936858 | 0.00256593  | 0.38338348 | 0.96395965 | NA         | RPL7P6      |
| NA        | ENSG00000227527 | 0.16735865 | 0.01897177  | 0.38482933 | 0.78225479 | NA         |             |
| 100874195 | ENSG00000227528 | 0          | NA          | NA         | NA         | NA         | DIAPH3-AS1  |
| NA        | ENSG00000227531 | 0          | NA          | NA         | NA         | NA         |             |
| NA        | ENSG00000227532 | 0.14931947 | -0.01844332 | 0.38480212 | 0.84537521 | NA         |             |

|           |                 |            |             |            |            |            |            |
|-----------|-----------------|------------|-------------|------------|------------|------------|------------|
| 440584    | ENSG00000227533 | 12.0507464 | 0.07039954  | 0.3445424  | 0.6662383  | 0.83537685 | SLC2A1-AS1 |
| NA        | ENSG00000227534 | 0          | NA          | NA         | NA         | NA         | AP1M2P1    |
| NA        | ENSG00000227535 | 0          | NA          | NA         | NA         | NA         |            |
| NA        | ENSG00000227536 | 3.55000531 | 0.0332587   | 0.36741203 | 0.77378369 | 0.89600234 | SOCS5P4    |
| NA        | ENSG00000227537 | 0          | NA          | NA         | NA         | NA         |            |
| NA        | ENSG00000227538 | 0          | NA          | NA         | NA         | NA         | HNRNPF1    |
| 414245    | ENSG00000227540 | 20.1170593 | -0.09517518 | 0.33162077 | 0.59627649 | 0.78841223 |            |
| NA        | ENSG00000227541 | 0          | NA          | NA         | NA         | NA         | SFR1P1     |
| NA        | ENSG00000227542 | 28.4916826 | 0.16372546  | 0.3096429  | 0.41520025 | 0.64226462 |            |
| NA        | ENSG00000227543 | 43.724959  | -0.02404193 | 0.25636149 | 0.8985373  | 0.95556135 | SPAG5-AS1  |
| NA        | ENSG00000227544 | 1.5773937  | -0.02298706 | 0.37740796 | 0.77226358 | NA         |            |
| NA        | ENSG00000227545 | 0          | NA          | NA         | NA         | NA         |            |
| NA        | ENSG00000227547 | 0          | NA          | NA         | NA         | NA         | OR4A2P     |
| NA        | ENSG00000227549 | 0          | NA          | NA         | NA         | NA         |            |
| NA        | ENSG00000227550 | 0          | NA          | NA         | NA         | NA         | TRBV7-5    |
| 100287205 | ENSG00000227551 | 0          | NA          | NA         | NA         | NA         | USP17L12   |
| NA        | ENSG00000227554 | 0          | NA          | NA         | NA         | NA         |            |
| 286370    | ENSG00000227555 | 0          | NA          | NA         | NA         | NA         | MIR4290HG  |
| NA        | ENSG00000227556 | 0          | NA          | NA         | NA         | NA         |            |
| NA        | ENSG00000227557 | 0          | NA          | NA         | NA         | NA         | MTND3P9    |
| NA        | ENSG00000227560 | 0          | NA          | NA         | NA         | NA         | RPS15AP30  |
| NA        | ENSG00000227562 | 0          | NA          | NA         | NA         | NA         |            |
| NA        | ENSG00000227563 | 0          | NA          | NA         | NA         | NA         | RNF11P2    |
| 104355293 | ENSG00000227564 | 0          | NA          | NA         | NA         | NA         | LINC00376  |
| NA        | ENSG00000227568 | 1.56574237 | 0.06292444  | 0.38640776 | 0.35891544 | NA         | SNX18P26   |
| NA        | ENSG00000227573 | 0          | NA          | NA         | NA         | NA         |            |
| NA        | ENSG00000227574 | 0.16735865 | 0.01897177  | 0.38482933 | 0.78225479 | NA         |            |
| NA        | ENSG00000227578 | 0          | NA          | NA         | NA         | NA         | RPS3AP53   |
| NA        | ENSG00000227579 | 0          | NA          | NA         | NA         | NA         |            |
| NA        | ENSG00000227581 | 0          | NA          | NA         | NA         | NA         | STAU2P1    |
| NA        | ENSG00000227582 | 3.84890412 | 0.03138239  | 0.37223574 | 0.75942908 | 0.88850157 | ADGRF5P1   |
| NA        | ENSG00000227583 | 0.45117978 | -0.02737023 | 0.38571884 | 0.56072084 | NA         | RPS3AP37   |
| NA        | ENSG00000227584 | 0          | NA          | NA         | NA         | NA         | MTND4P5    |
| NA        | ENSG00000227585 | 0          | NA          | NA         | NA         | NA         |            |
| NA        | ENSG00000227586 | 0          | NA          | NA         | NA         | NA         | RPS26P39   |
| 100873976 | ENSG00000227588 | 0.29863895 | -0.02292439 | 0.3852726  | 0.68753245 | NA         | CNTN4-AS2  |
| NA        | ENSG00000227589 | 0.51410687 | 0.01523683  | 0.38310723 | 0.73888576 | NA         | TP73-AS3   |
| NA        | ENSG00000227590 | 0          | NA          | NA         | NA         | NA         | ATP5MC1P5  |

|           |                 |            |             |            |            |            |             |
|-----------|-----------------|------------|-------------|------------|------------|------------|-------------|
| 101930114 | ENSG00000227591 | 0.18922458 | 0.01954053  | 0.38488496 | 0.78225479 | NA         | HSD11B1-AS1 |
| NA        | ENSG00000227592 | 0          | NA          | NA         | NA         | NA         | PIGFP3      |
| NA        | ENSG00000227593 | 0          | NA          | NA         | NA         | NA         | PHBP16      |
| NA        | ENSG00000227597 | 0          | NA          | NA         | NA         | NA         | WASF1P1     |
| NA        | ENSG00000227598 | 3.079605   | -0.00322717 | 0.37040971 | 0.97256641 | 0.98981748 |             |
| 101927138 | ENSG00000227599 | 0          | NA          | NA         | NA         | NA         | PTPRT-AS1   |
| NA        | ENSG00000227602 | 0          | NA          | NA         | NA         | NA         |             |
| NA        | ENSG00000227604 | 0          | NA          | NA         | NA         | NA         | TOMM22P3    |
| NA        | ENSG00000227606 | 0          | NA          | NA         | NA         | NA         |             |
| NA        | ENSG00000227607 | 0          | NA          | NA         | NA         | NA         | SUMO2P2     |
| NA        | ENSG00000227609 | 0          | NA          | NA         | NA         | NA         | TMEM183AP1  |
| 100874122 | ENSG00000227610 | 0          | NA          | NA         | NA         | NA         | FRMPD3-AS1  |
| 106144607 | ENSG00000227611 | 0          | NA          | NA         | NA         | NA         | LINC01074   |
| NA        | ENSG00000227613 | 0          | NA          | NA         | NA         | NA         | QRSL1P2     |
| NA        | ENSG00000227615 | 0.15069912 | -0.01848503 | 0.38480575 | 0.84537521 | NA         |             |
| NA        | ENSG00000227616 | 0          | NA          | NA         | NA         | NA         |             |
| 100861402 | ENSG00000227617 | 2.79363897 | 0.12974266  | 0.4161071  | 0.01757764 | 0.06562671 | CERS6-AS1   |
| NA        | ENSG00000227619 | 0.54625309 | 0.03262162  | 0.38620539 | 0.45596831 | NA         |             |
| NA        | ENSG00000227620 | 0          | NA          | NA         | NA         | NA         | ALG1L8P     |
| NA        | ENSG00000227621 | 0          | NA          | NA         | NA         | NA         | PHBP11      |
| NA        | ENSG00000227623 | 0          | NA          | NA         | NA         | NA         |             |
| NA        | ENSG00000227624 | 0          | NA          | NA         | NA         | NA         | SNRPEP3     |
| NA        | ENSG00000227625 | 0          | NA          | NA         | NA         | NA         |             |
| NA        | ENSG00000227627 | 30.2830908 | 0.05650885  | 0.28513393 | 0.77108784 | 0.8951015  |             |
| NA        | ENSG00000227629 | 0          | NA          | NA         | NA         | NA         | SLC25A15P1  |
| 100506810 | ENSG00000227630 | 2.35864428 | -0.11390847 | 0.39918321 | 0.20133238 | NA         | LINC01132   |
| NA        | ENSG00000227632 | 4.85484437 | 0.03492117  | 0.37038237 | 0.74786273 | 0.88161596 |             |
| NA        | ENSG00000227633 | 0          | NA          | NA         | NA         | NA         | RBMV2YP     |
| 102724539 | ENSG00000227634 | 0          | NA          | NA         | NA         | NA         | LINC01714   |
| NA        | ENSG00000227635 | 0          | NA          | NA         | NA         | NA         | USP9YP21    |
| NA        | ENSG00000227638 | 3.02283971 | -0.01387905 | 0.37262627 | 0.88152144 | 0.94772508 | HNRNPA1P14  |
| 100507533 | ENSG00000227640 | 1.05176339 | -0.05811951 | 0.39016996 | 0.21563853 | NA         | SOX21-AS1   |
| NA        | ENSG00000227644 | 0          | NA          | NA         | NA         | NA         | HIGD1AP11   |
| NA        | ENSG00000227645 | 0          | NA          | NA         | NA         | NA         | RPL7P54     |
| 100874100 | ENSG00000227646 | 0.69162848 | 0.0403673   | 0.38715599 | 0.35650129 | NA         | STEAP2-AS1  |
| NA        | ENSG00000227649 | 0          | NA          | NA         | NA         | NA         | MTND6P32    |
| NA        | ENSG00000227653 | 0          | NA          | NA         | NA         | NA         | ISCA1P6     |
| NA        | ENSG00000227657 | 0          | NA          | NA         | NA         | NA         | SERPINA7P1  |

|           |    |                 |            |             |            |            |            |           |
|-----------|----|-----------------|------------|-------------|------------|------------|------------|-----------|
|           | NA | ENSG00000227658 | 0          | NA          | NA         | NA         | NA         |           |
| 100874063 |    | ENSG00000227659 | 0          | NA          | NA         | NA         | NA         | CLYBL-AS2 |
|           | NA | ENSG00000227660 | 0          | NA          | NA         | NA         | NA         | UST-AS1   |
|           | NA | ENSG00000227661 | 0          | NA          | NA         | NA         | NA         | MTCO3P18  |
|           | NA | ENSG00000227663 | 0          | NA          | NA         | NA         | NA         | RPL7P2    |
|           | NA | ENSG00000227666 | 2.52789208 | 0.0474839   | 0.37781482 | 0.60077149 | NA         | CYCSP24   |
|           | NA | ENSG00000227667 | 0          | NA          | NA         | NA         | NA         |           |
|           | NA | ENSG00000227671 | 1066.1598  | -0.00692864 | 0.08362589 | 0.93163325 | 0.9715756  | ZNF731P   |
|           | NA | ENSG00000227673 | 0          | NA          | NA         | NA         | NA         |           |
| 144766    |    | ENSG00000227674 | 0          | NA          | NA         | NA         | NA         | LINC00355 |
| 103724388 |    | ENSG00000227676 | 5.0854373  | -0.0921109  | 0.37892346 | 0.43658764 | 0.66171877 | LINC01068 |
|           | NA | ENSG00000227678 | 1.88282351 | 0.10106574  | 0.3985334  | 0.12198616 | NA         |           |
|           | NA | ENSG00000227679 | 0          | NA          | NA         | NA         | NA         |           |
|           | NA | ENSG00000227680 | 0          | NA          | NA         | NA         | NA         |           |
|           | NA | ENSG00000227681 | 0          | NA          | NA         | NA         | NA         |           |
|           | NA | ENSG00000227682 | 0          | NA          | NA         | NA         | NA         | ATP5F1AP2 |
|           | NA | ENSG00000227683 | 0          | NA          | NA         | NA         | NA         |           |
|           | NA | ENSG00000227684 | 0.83177186 | 0.0151542   | 0.38113818 | 0.78765297 | NA         | CROCCP4   |
|           | NA | ENSG00000227685 | 0          | NA          | NA         | NA         | NA         | LINC02088 |
|           | NA | ENSG00000227687 | 0          | NA          | NA         | NA         | NA         |           |
|           | NA | ENSG00000227688 | 0          | NA          | NA         | NA         | NA         | HNRNPA3P2 |
|           | NA | ENSG00000227689 | 0          | NA          | NA         | NA         | NA         | SRP68P2   |
|           | NA | ENSG00000227692 | 0.55296157 | 0.03294421  | 0.38623941 | 0.4513509  | NA         | MED28P3   |
|           | NA | ENSG00000227693 | 0          | NA          | NA         | NA         | NA         | GSTM3P1   |
|           | NA | ENSG00000227694 | 0.63651579 | 0.00356217  | 0.38197435 | 0.93867063 | NA         | RPL23AP74 |
|           | NA | ENSG00000227695 | 0          | NA          | NA         | NA         | NA         | DNMBP-AS1 |
|           | NA | ENSG00000227698 | 0.66439922 | -0.02264424 | 0.38260846 | 0.64568679 | NA         |           |
|           | NA | ENSG00000227700 | 0          | NA          | NA         | NA         | NA         |           |
|           | NA | ENSG00000227702 | 0          | NA          | NA         | NA         | NA         | LINC00111 |
|           | NA | ENSG00000227704 | 0.34044059 | -3.15E-05   | 0.38336211 | 0.96555155 | NA         |           |
|           | NA | ENSG00000227705 | 0          | NA          | NA         | NA         | NA         |           |
|           | NA | ENSG00000227706 | 0.15069912 | -0.01848503 | 0.38480575 | 0.84537521 | NA         |           |
|           | NA | ENSG00000227707 | 0          | NA          | NA         | NA         | NA         | SDAD1P3   |
|           | NA | ENSG00000227708 | 0          | NA          | NA         | NA         | NA         | LINC01850 |
|           | NA | ENSG00000227709 | 0          | NA          | NA         | NA         | NA         |           |
|           | NA | ENSG00000227710 | 0          | NA          | NA         | NA         | NA         |           |
|           | NA | ENSG00000227711 | 0.16735865 | 0.01897177  | 0.38482933 | 0.78225479 | NA         |           |
|           | NA | ENSG00000227712 | 0.72360443 | 0.02314158  | 0.38386295 | 0.59186448 | NA         |           |

|           |    |                 |            |             |            |            |            |           |
|-----------|----|-----------------|------------|-------------|------------|------------|------------|-----------|
|           | NA | ENSG00000227713 | 0          | NA          | NA         | NA         | NA         |           |
|           | NA | ENSG00000227714 | 0          | NA          | NA         | NA         | NA         | MTND6P18  |
|           | NA | ENSG00000227716 | 0          | NA          | NA         | NA         | NA         |           |
| 100132202 | NA | ENSG00000227717 | 0          | NA          | NA         | NA         | NA         |           |
|           | NA | ENSG00000227718 | 0          | NA          | NA         | NA         | NA         |           |
|           | NA | ENSG00000227719 | 25.0979279 | 0.0351328   | 0.30933982 | 0.85154421 | 0.93275912 |           |
|           | NA | ENSG00000227721 | 0          | NA          | NA         | NA         | NA         | RPSAP64   |
|           | NA | ENSG00000227722 | 0          | NA          | NA         | NA         | NA         |           |
|           | NA | ENSG00000227723 | 0          | NA          | NA         | NA         | NA         |           |
|           | NA | ENSG00000227725 | 5.08406169 | 0.17879983  | 0.41656473 | 0.18460211 | 0.38334791 | GCOM2     |
|           | NA | ENSG00000227726 | 0.14931947 | -0.01844332 | 0.38480212 | 0.84537521 | NA         |           |
|           | NA | ENSG00000227728 | 0          | NA          | NA         | NA         | NA         |           |
| 647286    | NA | ENSG00000227729 | 0          | NA          | NA         | NA         | NA         | RD3L      |
|           | NA | ENSG00000227730 | 0          | NA          | NA         | NA         | NA         | MTND6P5   |
|           | NA | ENSG00000227733 | 0.52119901 | 0.02576573  | 0.38568143 | 0.51723676 | NA         |           |
|           | NA | ENSG00000227734 | 0          | NA          | NA         | NA         | NA         |           |
|           | NA | ENSG00000227735 | 0          | NA          | NA         | NA         | NA         | CYCSP5    |
|           | NA | ENSG00000227736 | 0          | NA          | NA         | NA         | NA         | MTCO3P16  |
|           | NA | ENSG00000227737 | 0          | NA          | NA         | NA         | NA         | OR8B1P    |
|           | NA | ENSG00000227738 | 0          | NA          | NA         | NA         | NA         | PSMD14P1  |
|           | NA | ENSG00000227740 | 11.2592477 | -0.01443022 | 0.33661489 | 0.92765248 | 0.9697364  | LINC02803 |
| 729867    | NA | ENSG00000227741 | 25.3519519 | -0.31152147 | 0.38906078 | 0.15688126 | 0.34373541 |           |
|           | NA | ENSG00000227742 | 0          | NA          | NA         | NA         | NA         | CALR4P    |
|           | NA | ENSG00000227743 | 0          | NA          | NA         | NA         | NA         |           |
| 401039    | NA | ENSG00000227744 | 0.34746601 | 0.02370763  | 0.3853651  | 0.61987128 | NA         | LINC01940 |
|           | NA | ENSG00000227745 | 0.86973492 | 0.04898083  | 0.38594889 | 0.3838577  | NA         |           |
|           | NA | ENSG00000227747 | 11.6236781 | 0.07913357  | 0.34394375 | 0.63721376 | 0.81722218 |           |
|           | NA | ENSG00000227748 | 0          | NA          | NA         | NA         | NA         |           |
| 114515514 | NA | ENSG00000227751 | 0          | NA          | NA         | NA         | NA         | RCC2-AS1  |
|           | NA | ENSG00000227753 | 0          | NA          | NA         | NA         | NA         |           |
|           | NA | ENSG00000227755 | 2.10992381 | 0.00586271  | 0.38067609 | 0.74394992 | NA         |           |
|           | NA | ENSG00000227757 | 0          | NA          | NA         | NA         | NA         |           |
|           | NA | ENSG00000227758 | 0          | NA          | NA         | NA         | NA         |           |
|           | NA | ENSG00000227759 | 0          | NA          | NA         | NA         | NA         | VTI1BP4   |
|           | NA | ENSG00000227760 | 0          | NA          | NA         | NA         | NA         |           |
|           | NA | ENSG00000227762 | 0          | NA          | NA         | NA         | NA         | GUSBP8    |
|           | NA | ENSG00000227764 | 0.173124   | -0.01911262 | 0.38486262 | 0.84537521 | NA         | LINC01693 |
|           | NA | ENSG00000227765 | 0          | NA          | NA         | NA         | NA         | MYL12BP2  |

|           |                 |            |             |            |            |            |            |
|-----------|-----------------|------------|-------------|------------|------------|------------|------------|
| NA        | ENSG00000227766 | 15.4368095 | 0.52447857  | 0.60790218 | 0.0471633  | 0.1422151  |            |
| NA        | ENSG00000227769 | 1.03244262 | 0.04128775  | 0.3836877  | 0.48674891 | NA         |            |
| NA        | ENSG00000227770 | 0          | NA          | NA         | NA         | NA         | RPL7P12    |
| NA        | ENSG00000227773 | 0          | NA          | NA         | NA         | NA         | ASH1L-IT1  |
| NA        | ENSG00000227775 | 253.82497  | -0.21526015 | 0.20510952 | 0.21524961 | 0.42582958 |            |
| NA        | ENSG00000227776 | 0.16735865 | 0.01897177  | 0.38482933 | 0.78225479 | NA         | AKR1D1P1   |
| NA        | ENSG00000227777 | 0          | NA          | NA         | NA         | NA         |            |
| NA        | ENSG00000227779 | 0          | NA          | NA         | NA         | NA         | NDUFB3P5   |
| NA        | ENSG00000227782 | 14.94384   | 0.12412366  | 0.34409841 | 0.49143373 | 0.71071887 |            |
| NA        | ENSG00000227784 | 0          | NA          | NA         | NA         | NA         | ZNF965P    |
| NA        | ENSG00000227785 | 0          | NA          | NA         | NA         | NA         |            |
| NA        | ENSG00000227788 | 0.94574764 | -0.03633306 | 0.38427582 | 0.4623598  | NA         | MTCO3P43   |
| NA        | ENSG00000227789 | 0          | NA          | NA         | NA         | NA         | MTCYBP7    |
| NA        | ENSG00000227790 | 0          | NA          | NA         | NA         | NA         | SPECC1P1   |
| NA        | ENSG00000227791 | 0          | NA          | NA         | NA         | NA         | RPS10P9    |
| NA        | ENSG00000227795 | 0          | NA          | NA         | NA         | NA         | MTND4LP9   |
| NA        | ENSG00000227799 | 22.4660673 | 0.40730645  | 0.43956176 | 0.09022842 | 0.23110403 | CDPF1P1    |
| NA        | ENSG00000227800 | 0          | NA          | NA         | NA         | NA         | IGHD4-17   |
| 414061    | ENSG00000227802 | 0          | NA          | NA         | NA         | NA         | DNAJB3     |
| NA        | ENSG00000227803 | 0          | NA          | NA         | NA         | NA         |            |
| NA        | ENSG00000227805 | 0          | NA          | NA         | NA         | NA         | RPL21P90   |
| NA        | ENSG00000227806 | 0          | NA          | NA         | NA         | NA         | OR5W1P     |
| 101927358 | ENSG00000227809 | 0.14931947 | -0.01844332 | 0.38480212 | 0.84537521 | NA         |            |
| NA        | ENSG00000227811 | 126.365521 | 0.19916519  | 0.19739399 | 0.24131756 | 0.45933728 | INKA2-AS1  |
| NA        | ENSG00000227813 | 0          | NA          | NA         | NA         | NA         |            |
| NA        | ENSG00000227814 | 0          | NA          | NA         | NA         | NA         | MRPS17P9   |
| NA        | ENSG00000227815 | 0.92184471 | 0.01769915  | 0.38194317 | 0.73301935 | NA         |            |
| NA        | ENSG00000227817 | 0          | NA          | NA         | NA         | NA         | ARHGAP42P1 |
| NA        | ENSG00000227818 | 0          | NA          | NA         | NA         | NA         |            |
| NA        | ENSG00000227824 | 0          | NA          | NA         | NA         | NA         |            |
| 121456    | ENSG00000227825 | 7.31452963 | -0.04577211 | 0.36318793 | 0.71851964 | 0.86497305 | SLC9A7P1   |
| NA        | ENSG00000227827 | 12.3003811 | 0.03758553  | 0.33146078 | 0.82772606 | 0.92210075 | PKD1P2     |
| NA        | ENSG00000227830 | 0          | NA          | NA         | NA         | NA         | TRIM60P3Y  |
| NA        | ENSG00000227832 | 0          | NA          | NA         | NA         | NA         | ST13P21    |
| NA        | ENSG00000227834 | 0          | NA          | NA         | NA         | NA         |            |
| NA        | ENSG00000227835 | 0          | NA          | NA         | NA         | NA         | CARM1P1    |
| NA        | ENSG00000227836 | 0          | NA          | NA         | NA         | NA         |            |
| NA        | ENSG00000227837 | 0          | NA          | NA         | NA         | NA         | TRIM60P11Y |

|           |                 |            |             |            |            |            |            |
|-----------|-----------------|------------|-------------|------------|------------|------------|------------|
| NA        | ENSG00000227838 | 0          | NA          | NA         | NA         | NA         |            |
| NA        | ENSG00000227840 | 0          | NA          | NA         | NA         | NA         | KRTAP8-3P  |
| NA        | ENSG00000227841 | 0          | NA          | NA         | NA         | NA         | MTND5P31   |
| NA        | ENSG00000227842 | 0          | NA          | NA         | NA         | NA         |            |
| NA        | ENSG00000227845 | 0          | NA          | NA         | NA         | NA         |            |
| NA        | ENSG00000227846 | 0          | NA          | NA         | NA         | NA         | UGT1A11P   |
| NA        | ENSG00000227847 | 0          | NA          | NA         | NA         | NA         | PPIAP93    |
| NA        | ENSG00000227848 | 0.50657251 | 0.01494381  | 0.3831067  | 0.74510534 | NA         | SUCLA2-AS1 |
| NA        | ENSG00000227850 | 0          | NA          | NA         | NA         | NA         | SEPTIN2P1  |
| NA        | ENSG00000227851 | 0          | NA          | NA         | NA         | NA         |            |
| NA        | ENSG00000227852 | 0          | NA          | NA         | NA         | NA         | RPS29P17   |
| NA        | ENSG00000227854 | 0          | NA          | NA         | NA         | NA         |            |
| 442524    | ENSG00000227855 | 68.5144793 | 0.29148358  | 0.26337094 | 0.15065764 | 0.33423321 | DPY19L2P3  |
| 101929626 | ENSG00000227857 | 2.1598601  | -0.02078048 | 0.37512291 | 0.81023706 | NA         |            |
| NA        | ENSG00000227860 | 0          | NA          | NA         | NA         | NA         | MTND5P18   |
| NA        | ENSG00000227862 | 0          | NA          | NA         | NA         | NA         | HNRNPA1P31 |
| NA        | ENSG00000227863 | 0          | NA          | NA         | NA         | NA         |            |
| NA        | ENSG00000227864 | 0          | NA          | NA         | NA         | NA         | ARL5AP1    |
| 729059    | ENSG00000227868 | 0.15069912 | -0.01848503 | 0.38480575 | 0.84537521 | NA         | TEX46      |
| NA        | ENSG00000227871 | 0          | NA          | NA         | NA         | NA         | USP9YP12   |
| NA        | ENSG00000227873 | 0          | NA          | NA         | NA         | NA         |            |
| NA        | ENSG00000227874 | 0          | NA          | NA         | NA         | NA         | GRAMD4P1   |
| NA        | ENSG00000227875 | 0          | NA          | NA         | NA         | NA         | RPL23AP89  |
| 100507027 | ENSG00000227877 | 0          | NA          | NA         | NA         | NA         | MRLN       |
| NA        | ENSG00000227878 | 0          | NA          | NA         | NA         | NA         |            |
| NA        | ENSG00000227879 | 0.50207596 | 0.02562368  | 0.38565771 | 0.52549886 | NA         | PSPC1P1    |
| NA        | ENSG00000227880 | 0          | NA          | NA         | NA         | NA         |            |
| NA        | ENSG00000227881 | 0.16735865 | 0.01897177  | 0.38482933 | 0.78225479 | NA         | ASS1P5     |
| NA        | ENSG00000227882 | 0          | NA          | NA         | NA         | NA         | THAP12P6   |
| NA        | ENSG00000227883 | 0          | NA          | NA         | NA         | NA         | ATP6V0E1P4 |
| NA        | ENSG00000227885 | 13.2097918 | 2.52202187  | 0.86366983 | 0.00016501 | 0.00119609 |            |
| NA        | ENSG00000227887 | 0.173733   | 0.01914545  | 0.38484597 | 0.78225479 | NA         | RPS26P13   |
| NA        | ENSG00000227888 | 6.54961571 | -0.11617063 | 0.37401518 | 0.42335744 | 0.64930517 | FAM66A     |
| NA        | ENSG00000227890 | 0          | NA          | NA         | NA         | NA         | PSMA2P3    |
| NA        | ENSG00000227892 | 0          | NA          | NA         | NA         | NA         | OR5P4P     |
| NA        | ENSG00000227893 | 0          | NA          | NA         | NA         | NA         | LINC00352  |
| NA        | ENSG00000227896 | 34.2732426 | 0.03980594  | 0.28737689 | 0.83774206 | 0.92628758 |            |
| NA        | ENSG00000227902 | 0          | NA          | NA         | NA         | NA         |            |

|           |    |                 |            |             |            |            |            |             |
|-----------|----|-----------------|------------|-------------|------------|------------|------------|-------------|
|           | NA | ENSG00000227905 | 0          | NA          | NA         | NA         | NA         | MED6P1      |
|           | NA | ENSG00000227906 | 19.5414615 | -0.46111215 | 0.49633209 | 0.06652762 | 0.1847317  | SNAP25-AS1  |
|           | NA | ENSG00000227907 | 0          | NA          | NA         | NA         | NA         |             |
| 441072    | NA | ENSG00000227908 | 3.83719025 | 0.1690546   | 0.4222617  | 0.13100157 | 0.30341712 |             |
|           | NA | ENSG00000227910 | 10.4799498 | -0.11318339 | 0.35497896 | 0.49689202 | 0.71500229 |             |
|           | NA | ENSG00000227911 | 0          | NA          | NA         | NA         | NA         | LINC02344   |
|           | NA | ENSG00000227912 | 0          | NA          | NA         | NA         | NA         |             |
|           | NA | ENSG00000227913 | 0          | NA          | NA         | NA         | NA         | KRT8P44     |
|           | NA | ENSG00000227914 | 0          | NA          | NA         | NA         | NA         |             |
|           | NA | ENSG00000227915 | 0          | NA          | NA         | NA         | NA         | ELOCP16     |
|           | NA | ENSG00000227917 | 0          | NA          | NA         | NA         | NA         |             |
|           | NA | ENSG00000227919 | 0          | NA          | NA         | NA         | NA         |             |
|           | NA | ENSG00000227920 | 0.15069912 | -0.01848503 | 0.38480575 | 0.84537521 | NA         |             |
|           | NA | ENSG00000227922 | 0          | NA          | NA         | NA         | NA         | SPTLC1P5    |
|           | NA | ENSG00000227923 | 0          | NA          | NA         | NA         | NA         |             |
|           | NA | ENSG00000227924 | 0.16735865 | 0.01897177  | 0.38482933 | 0.78225479 | NA         | RBPJP6      |
|           | NA | ENSG00000227925 | 0          | NA          | NA         | NA         | NA         | LINC01655   |
| 140848    | NA | ENSG00000227927 | 0          | NA          | NA         | NA         | NA         | MACROD2-IT1 |
| 100288831 | NA | ENSG00000227929 | 0          | NA          | NA         | NA         | NA         | SRGAP3-AS3  |
|           | NA | ENSG00000227930 | 0          | NA          | NA         | NA         | NA         |             |
|           | NA | ENSG00000227932 | 0          | NA          | NA         | NA         | NA         | SELENOOLP   |
|           | NA | ENSG00000227933 | 0.173733   | 0.01914545  | 0.38484597 | 0.78225479 | NA         |             |
|           | NA | ENSG00000227934 | 0.34117771 | 0.02362704  | 0.38535348 | 0.62406989 | NA         |             |
|           | NA | ENSG00000227935 | 0          | NA          | NA         | NA         | NA         |             |
|           | NA | ENSG00000227937 | 0          | NA          | NA         | NA         | NA         | MTND2P30    |
|           | NA | ENSG00000227938 | 0          | NA          | NA         | NA         | NA         |             |
|           | NA | ENSG00000227939 | 0.14931947 | -0.01844332 | 0.38480212 | 0.84537521 | NA         | RPL3P2      |
|           | NA | ENSG00000227940 | 0          | NA          | NA         | NA         | NA         | LINC01696   |
|           | NA | ENSG00000227941 | 0          | NA          | NA         | NA         | NA         | UQCRBP2     |
|           | NA | ENSG00000227942 | 0          | NA          | NA         | NA         | NA         | FRMD8P1     |
|           | NA | ENSG00000227945 | 0          | NA          | NA         | NA         | NA         | PTPRK-AS1   |
|           | NA | ENSG00000227946 | 34.8452996 | 0.38087557  | 0.36106069 | 0.10122597 | 0.25154348 |             |
| 107984953 | NA | ENSG00000227947 | 0          | NA          | NA         | NA         | NA         | LINC01738   |
|           | NA | ENSG00000227948 | 0.18922458 | 0.01954053  | 0.38488496 | 0.78225479 | NA         |             |
|           | NA | ENSG00000227949 | 0          | NA          | NA         | NA         | NA         | CYCSP46     |
|           | NA | ENSG00000227950 | 0          | NA          | NA         | NA         | NA         |             |
|           | NA | ENSG00000227952 | 0          | NA          | NA         | NA         | NA         | RPL18AP17   |
|           | NA | ENSG00000227953 | 47.7440863 | 0.33882125  | 0.34547401 | 0.13079713 | 0.30308515 | LINC01341   |



|           |                 |            |             |            |            |            |             |
|-----------|-----------------|------------|-------------|------------|------------|------------|-------------|
| 100507308 | ENSG00000227954 | 1.45878091 | 0.09865129  | 0.40139646 | 0.07323134 | NA         | TARID       |
| NA        | ENSG00000227958 | 0          | NA          | NA         | NA         | NA         |             |
| NA        | ENSG00000227959 | 1.24177619 | -0.06958093 | 0.38958206 | 0.26112355 | NA         |             |
| NA        | ENSG00000227960 | 0.173124   | -0.01911262 | 0.38486262 | 0.84537521 | NA         |             |
| NA        | ENSG00000227962 | 0.94452777 | -0.0138327  | 0.38151935 | 0.7963309  | NA         |             |
| 440600    | ENSG00000227963 | 9.57655468 | -0.17777448 | 0.38889259 | 0.28709213 | 0.51288829 | RBM15-AS1   |
| 101927678 | ENSG00000227964 | 0          | NA          | NA         | NA         | NA         | LINC01429   |
| NA        | ENSG00000227965 | 0.173733   | 0.01914545  | 0.38484597 | 0.78225479 | NA         |             |
| NA        | ENSG00000227968 | 0          | NA          | NA         | NA         | NA         | BUB3P1      |
| NA        | ENSG00000227969 | 0          | NA          | NA         | NA         | NA         | NPM1P22     |
| NA        | ENSG00000227970 | 0          | NA          | NA         | NA         | NA         | NR1H5P      |
| NA        | ENSG00000227971 | 0          | NA          | NA         | NA         | NA         |             |
| NA        | ENSG00000227972 | 0.14931947 | -0.01844332 | 0.38480212 | 0.84537521 | NA         | THAP12P3    |
| NA        | ENSG00000227973 | 0.95742318 | 0.00607391  | 0.38011261 | 0.92008372 | NA         | PIN4P1      |
| NA        | ENSG00000227979 | 0.34624801 | -0.02356563 | 0.38536324 | 0.65270996 | NA         |             |
| NA        | ENSG00000227981 | 0          | NA          | NA         | NA         | NA         |             |
| NA        | ENSG00000227982 | 0          | NA          | NA         | NA         | NA         | RPL7P30     |
| NA        | ENSG00000227983 | 0          | NA          | NA         | NA         | NA         | BRK1P2      |
| NA        | ENSG00000227986 | 0          | NA          | NA         | NA         | NA         | TRIM60P18   |
| NA        | ENSG00000227987 | 0          | NA          | NA         | NA         | NA         |             |
| NA        | ENSG00000227988 | 0          | NA          | NA         | NA         | NA         | TDGF1P1     |
| NA        | ENSG00000227992 | 0          | NA          | NA         | NA         | NA         |             |
| NA        | ENSG00000227994 | 0          | NA          | NA         | NA         | NA         |             |
| NA        | ENSG00000227995 | 0          | NA          | NA         | NA         | NA         | RAB11AP1    |
| NA        | ENSG00000227999 | 2.35714872 | 0.10475688  | 0.39614021 | 0.22563143 | NA         | MTND5P1     |
| NA        | ENSG00000228000 | 0.69655457 | 0.01992686  | 0.38353592 | 0.62082826 | NA         | RPL7AP65    |
| NA        | ENSG00000228002 | 0.68108832 | 0.00313625  | 0.38128702 | 0.95085431 | NA         | DHX9P1      |
| NA        | ENSG00000228004 | 0          | NA          | NA         | NA         | NA         | MYCLP2      |
| NA        | ENSG00000228005 | 0          | NA          | NA         | NA         | NA         |             |
| NA        | ENSG00000228007 | 0          | NA          | NA         | NA         | NA         |             |
| NA        | ENSG00000228008 | 0.93934828 | -0.01898615 | 0.3810249  | 0.74808533 | NA         |             |
| NA        | ENSG00000228010 | 36.6270294 | -0.62149807 | 0.40885272 | 0.02205476 | 0.0787982  |             |
| 101928101 | ENSG00000228013 | 0          | NA          | NA         | NA         | NA         | IL6R-AS1    |
| NA        | ENSG00000228014 | 9.57757597 | 0.06325494  | 0.3477092  | 0.69176394 | 0.85092669 | ZNF680P1    |
| NA        | ENSG00000228015 | 0          | NA          | NA         | NA         | NA         |             |
| 91149     | ENSG00000228016 | 1.55481517 | -0.00472028 | 0.37710748 | 0.94919726 | NA         | RAPGEF4-AS1 |
| NA        | ENSG00000228019 | 0          | NA          | NA         | NA         | NA         |             |
| NA        | ENSG00000228020 | 0          | NA          | NA         | NA         | NA         | HNRNPA1P46  |

|           |                 |                 |             |             |            |            |            |            |
|-----------|-----------------|-----------------|-------------|-------------|------------|------------|------------|------------|
| 283038    | ENSG00000228021 | 1.31014303      | -0.01780879 | 0.37859097  | 0.80292127 | NA         |            |            |
| 105375013 | ENSG00000228022 | 0.66764634      | 0.00807535  | 0.38144636  | 0.87545366 | NA         | HCG20      |            |
|           | NA              | ENSG00000228024 | 0           | NA          | NA         | NA         | CYP1D1P    |            |
|           | NA              | ENSG00000228027 | 0           | NA          | NA         | NA         |            |            |
|           | NA              | ENSG00000228028 | 0           | NA          | NA         | NA         |            |            |
|           | NA              | ENSG00000228030 | 0           | NA          | NA         | NA         |            |            |
|           | NA              | ENSG00000228031 | 14.9290316  | -3.49859921 | 0.81825994 | 9.48E-07   | 1.08E-05   |            |
|           | NA              | ENSG00000228033 | 0           | NA          | NA         | NA         |            |            |
|           | NA              | ENSG00000228034 | 0           | NA          | NA         | NA         | HMG2N2P21  |            |
| 112840934 | ENSG00000228035 | 0.33947949      | 0.00261255  | 0.38338427  | 0.96351428 | NA         | NGF-AS1    |            |
|           | NA              | ENSG00000228036 | 0           | NA          | NA         | NA         | HSPD1P9    |            |
|           | NA              | ENSG00000228037 | 0.34048006  | -0.00023338 | 0.38336237 | 0.9674648  | NA         |            |
|           | NA              | ENSG00000228038 | 4.16719961  | 0.00831365  | 0.36364181 | 0.94646363 | 0.97814213 | VN1R51P    |
|           | NA              | ENSG00000228039 | 0           | NA          | NA         | NA         | NA         |            |
|           | NA              | ENSG00000228040 | 0           | NA          | NA         | NA         | NA         |            |
|           | NA              | ENSG00000228041 | 0           | NA          | NA         | NA         | EIF3JP1    |            |
|           | NA              | ENSG00000228042 | 0.69493202  | 0.03154416  | 0.38626309 | 0.41391645 | NA         | M6PRP1     |
|           | NA              | ENSG00000228043 | 14.4171449  | 0.20933974  | 0.37928736 | 0.27177688 | 0.49516265 |            |
| 101927787 | ENSG00000228044 | 0               | NA          | NA          | NA         | NA         |            |            |
|           | NA              | ENSG00000228045 | 0           | NA          | NA         | NA         | DNAJA1P6   |            |
|           | NA              | ENSG00000228046 | 0           | NA          | NA         | NA         | MTCO3P40   |            |
|           | NA              | ENSG00000228048 | 0           | NA          | NA         | NA         | NA         |            |
| 246721    | ENSG00000228049 | 93.5735339      | 0.0451819   | 0.22686479  | 0.80749933 | 0.91286534 | POLR2J2    |            |
|           | NA              | ENSG00000228050 | 0           | NA          | NA         | NA         | TOP3BP1    |            |
|           | NA              | ENSG00000228051 | 0           | NA          | NA         | NA         | WBP11P3    |            |
|           | NA              | ENSG00000228053 | 0           | NA          | NA         | NA         | NA         |            |
|           | NA              | ENSG00000228054 | 0.173124    | -0.01911262 | 0.38486262 | 0.84537521 | NA         | RANP5      |
|           | NA              | ENSG00000228055 | 0           | NA          | NA         | NA         | NA         | FAM245A    |
|           | NA              | ENSG00000228056 | 0           | NA          | NA         | NA         | NA         | CFL1P3     |
|           | NA              | ENSG00000228057 | 0.64896474  | -0.03788042 | 0.38680576 | 0.40886727 | NA         | SEC63P1    |
|           | NA              | ENSG00000228058 | 0           | NA          | NA         | NA         | NA         | LINC01736  |
|           | NA              | ENSG00000228060 | 0           | NA          | NA         | NA         | NA         | PABPC4-AS1 |
|           | NA              | ENSG00000228061 | 0.16735865  | 0.01897177  | 0.38482933 | 0.78225479 | NA         |            |
|           | NA              | ENSG00000228063 | 2.00289388  | -0.08884095 | 0.39257276 | 0.25022715 | NA         | LYPLAL1-DT |
|           | NA              | ENSG00000228064 | 0           | NA          | NA         | NA         | NA         |            |
|           | NA              | ENSG00000228065 | 331.859092  | 0.0243489   | 0.13564186 | 0.84729628 | 0.93059999 | LINC01515  |
| 101929565 | ENSG00000228067 | 0               | NA          | NA          | NA         | NA         | LINC01740  |            |
|           | NA              | ENSG00000228069 | 0.7878967   | -0.00726885 | 0.38085607 | 0.89767764 | NA         | MTCO3P29   |

|           |                 |            |             |            |            |            |            |
|-----------|-----------------|------------|-------------|------------|------------|------------|------------|
| NA        | ENSG00000228071 | 0          | NA          | NA         | NA         | NA         | RPL7P47    |
| NA        | ENSG00000228072 | 0          | NA          | NA         | NA         | NA         |            |
| NA        | ENSG00000228073 | 0          | NA          | NA         | NA         | NA         |            |
| NA        | ENSG00000228074 | 0          | NA          | NA         | NA         | NA         | UBBP5      |
| 284257    | ENSG00000228075 | 0          | NA          | NA         | NA         | NA         | BOD1L2     |
| NA        | ENSG00000228076 | 0          | NA          | NA         | NA         | NA         |            |
| NA        | ENSG00000228078 | 0          | NA          | NA         | NA         | NA         | HLA-U      |
| NA        | ENSG00000228079 | 0          | NA          | NA         | NA         | NA         |            |
| NA        | ENSG00000228081 | 0          | NA          | NA         | NA         | NA         |            |
| NA        | ENSG00000228082 | 0          | NA          | NA         | NA         | NA         | SIM1-AS1   |
| 3448      | ENSG00000228083 | 0          | NA          | NA         | NA         | NA         | IFNA14     |
| NA        | ENSG00000228084 | 1.21592056 | 0.0091802   | 0.38136182 | 0.86272976 | NA         |            |
| NA        | ENSG00000228085 | 0          | NA          | NA         | NA         | NA         |            |
| NA        | ENSG00000228086 | 0          | NA          | NA         | NA         | NA         |            |
| NA        | ENSG00000228089 | 0          | NA          | NA         | NA         | NA         | PNKDP1     |
| NA        | ENSG00000228092 | 0          | NA          | NA         | NA         | NA         | COX6CP15   |
| NA        | ENSG00000228095 | 0          | NA          | NA         | NA         | NA         |            |
| NA        | ENSG00000228097 | 0.173733   | 0.01914545  | 0.38484597 | 0.78225479 | NA         | MTATP6P11  |
| NA        | ENSG00000228098 | 0          | NA          | NA         | NA         | NA         |            |
| 105374582 | ENSG00000228100 | 0.15069912 | -0.01848503 | 0.38480575 | 0.84537521 | NA         | LINC01820  |
| 105376827 | ENSG00000228105 | 0          | NA          | NA         | NA         | NA         | LINC01757  |
| NA        | ENSG00000228107 | 4.26011766 | 0.07189576  | 0.37445533 | 0.53664371 | 0.74729267 |            |
| NA        | ENSG00000228108 | 0          | NA          | NA         | NA         | NA         | SPTBN1-AS1 |
| 100507057 | ENSG00000228109 | 51.4440808 | 0.13994576  | 0.27918937 | 0.4806204  | 0.70158112 | MELTF-AS1  |
| NA        | ENSG00000228110 | 0          | NA          | NA         | NA         | NA         | ST13P19    |
| NA        | ENSG00000228111 | 0          | NA          | NA         | NA         | NA         | TPT1P2     |
| NA        | ENSG00000228112 | 0          | NA          | NA         | NA         | NA         |            |
| NA        | ENSG00000228113 | 3.71302647 | -0.1921507  | 0.44470038 | 0.05718713 | 0.16507967 |            |
| NA        | ENSG00000228115 | 0          | NA          | NA         | NA         | NA         |            |
| NA        | ENSG00000228118 | 0          | NA          | NA         | NA         | NA         | MYL6P5     |
| NA        | ENSG00000228121 | 0          | NA          | NA         | NA         | NA         | PHBP3      |
| NA        | ENSG00000228122 | 0          | NA          | NA         | NA         | NA         | MTND1P17   |
| NA        | ENSG00000228123 | 0          | NA          | NA         | NA         | NA         |            |
| NA        | ENSG00000228124 | 1.42094012 | 0.08410399  | 0.39352049 | 0.17805192 | NA         |            |
| NA        | ENSG00000228125 | 0          | NA          | NA         | NA         | NA         | AKIRIN1P2  |
| 100874054 | ENSG00000228126 | 9.11954513 | 0.13408873  | 0.37980109 | 0.37044434 | 0.59947926 | FALEC      |
| NA        | ENSG00000228127 | 0.14931947 | -0.01844332 | 0.38480212 | 0.84537521 | NA         | LINC01649  |
| NA        | ENSG00000228131 | 0          | NA          | NA         | NA         | NA         | IGHD6-6    |

|           |                 |            |             |            |            |            |            |
|-----------|-----------------|------------|-------------|------------|------------|------------|------------|
| NA        | ENSG00000228132 | 0          | NA          | NA         | NA         | NA         |            |
| 105371485 | ENSG00000228133 | 0          | NA          | NA         | NA         | NA         |            |
| NA        | ENSG00000228134 | 0          | NA          | NA         | NA         | NA         | UBE2V1P14  |
| 101928537 | ENSG00000228135 | 1.10704055 | -0.0320409  | 0.38180203 | 0.6079242  | NA         | LINC01494  |
| NA        | ENSG00000228136 | 0          | NA          | NA         | NA         | NA         |            |
| NA        | ENSG00000228137 | 1.77846319 | 0.00266335  | 0.37747079 | 0.97269493 | NA         |            |
| 104797536 | ENSG00000228139 | 0          | NA          | NA         | NA         | NA         | LINC01402  |
| NA        | ENSG00000228140 | 0.50765869 | 0.01004759  | 0.38333061 | 0.9129282  | NA         |            |
| 338963    | ENSG00000228141 | 1.98557728 | -0.05728421 | 0.38320821 | 0.45548339 | NA         |            |
| NA        | ENSG00000228142 | 0          | NA          | NA         | NA         | NA         |            |
| NA        | ENSG00000228143 | 0          | NA          | NA         | NA         | NA         |            |
| NA        | ENSG00000228144 | 1.01266944 | 0.02177889  | 0.38277737 | 0.65650704 | NA         |            |
| 197350    | ENSG00000228146 | 1.14660209 | 0.04765297  | 0.38468874 | 0.43138536 | NA         | CASP16P    |
| NA        | ENSG00000228149 | 0.173124   | -0.01911262 | 0.38486262 | 0.84537521 | NA         | RPL3P1     |
| NA        | ENSG00000228150 | 0.173124   | -0.01911262 | 0.38486262 | 0.84537521 | NA         |            |
| 101928733 | ENSG00000228151 | 0          | NA          | NA         | NA         | NA         |            |
| NA        | ENSG00000228153 | 0          | NA          | NA         | NA         | NA         |            |
| NA        | ENSG00000228154 | 0          | NA          | NA         | NA         | NA         |            |
| NA        | ENSG00000228156 | 0          | NA          | NA         | NA         | NA         |            |
| NA        | ENSG00000228157 | 0.33471731 | 0.02354391  | 0.38534154 | 0.62842204 | NA         |            |
| NA        | ENSG00000228158 | 0.99050534 | 0.00407253  | 0.38001461 | 0.94652744 | NA         | TLE1P1     |
| 102724188 | ENSG00000228159 | 0          | NA          | NA         | NA         | NA         | LINC01674  |
| NA        | ENSG00000228160 | 0          | NA          | NA         | NA         | NA         |            |
| NA        | ENSG00000228161 | 0          | NA          | NA         | NA         | NA         |            |
| NA        | ENSG00000228162 | 0          | NA          | NA         | NA         | NA         |            |
| NA        | ENSG00000228165 | 0          | NA          | NA         | NA         | NA         |            |
| NA        | ENSG00000228166 | 0.173733   | 0.01914545  | 0.38484597 | 0.78225479 | NA         | MTND1P11   |
| NA        | ENSG00000228167 | 0          | NA          | NA         | NA         | NA         |            |
| NA        | ENSG00000228168 | 0          | NA          | NA         | NA         | NA         | HNRNPA1P21 |
| NA        | ENSG00000228169 | 0          | NA          | NA         | NA         | NA         | PPIAP19    |
| NA        | ENSG00000228170 | 0          | NA          | NA         | NA         | NA         |            |
| NA        | ENSG00000228171 | 0          | NA          | NA         | NA         | NA         |            |
| NA        | ENSG00000228172 | 44.064573  | -0.00436267 | 0.26820682 | 0.98020579 | 0.99338199 |            |
| NA        | ENSG00000228173 | 0          | NA          | NA         | NA         | NA         |            |
| NA        | ENSG00000228174 | 0          | NA          | NA         | NA         | NA         |            |
| NA        | ENSG00000228175 | 19.2352643 | 0.01877854  | 0.31107296 | 0.92034692 | 0.96646868 | GEMIN8P4   |
| NA        | ENSG00000228176 | 0          | NA          | NA         | NA         | NA         |            |
| NA        | ENSG00000228181 | 0          | NA          | NA         | NA         | NA         |            |

|           |                 |            |             |            |            |            |           |
|-----------|-----------------|------------|-------------|------------|------------|------------|-----------|
| NA        | ENSG00000228182 | 0          | NA          | NA         | NA         | NA         | MTND2P25  |
| NA        | ENSG00000228184 | 0          | NA          | NA         | NA         | NA         | SNX19P1   |
| NA        | ENSG00000228187 | 0          | NA          | NA         | NA         | NA         |           |
| NA        | ENSG00000228189 | 0          | NA          | NA         | NA         | NA         | LINC02843 |
| NA        | ENSG00000228190 | 0          | NA          | NA         | NA         | NA         | RPL23AP16 |
| NA        | ENSG00000228191 | 0          | NA          | NA         | NA         | NA         |           |
| NA        | ENSG00000228192 | 61.469434  | -0.11622305 | 0.30169817 | 0.54724534 | 0.75424436 |           |
| NA        | ENSG00000228194 | 0          | NA          | NA         | NA         | NA         |           |
| NA        | ENSG00000228195 | 0.30139824 | -0.02296476 | 0.38527817 | 0.68536535 | NA         | RPL5P27   |
| NA        | ENSG00000228196 | 0          | NA          | NA         | NA         | NA         | PTPN2P1   |
| 127062    | ENSG00000228198 | 0          | NA          | NA         | NA         | NA         | OR2M3     |
| NA        | ENSG00000228201 | 2.47237705 | 0.08589872  | 0.38910875 | 0.31831972 | NA         |           |
| 386597    | ENSG00000228203 | 210.578727 | 0.1436579   | 0.15428316 | 0.30900987 | 0.53674977 | GRASLND   |
| NA        | ENSG00000228204 | 0          | NA          | NA         | NA         | NA         |           |
| NA        | ENSG00000228205 | 1.31347659 | 0.00781587  | 0.37891655 | 0.90830324 | NA         |           |
| NA        | ENSG00000228206 | 2.94884648 | 0.0145358   | 0.37233177 | 0.88145824 | 0.94772508 |           |
| NA        | ENSG00000228207 | 0          | NA          | NA         | NA         | NA         |           |
| 440714    | ENSG00000228208 | 0          | NA          | NA         | NA         | NA         | LINC02869 |
| NA        | ENSG00000228209 | 0          | NA          | NA         | NA         | NA         | PNPP1     |
| NA        | ENSG00000228210 | 0          | NA          | NA         | NA         | NA         |           |
| NA        | ENSG00000228211 | 0          | NA          | NA         | NA         | NA         | HYAL6P    |
| NA        | ENSG00000228212 | 1.26651616 | -0.04499123 | 0.38220886 | 0.52228503 | NA         | OFD1P17   |
| 100874010 | ENSG00000228213 | 0          | NA          | NA         | NA         | NA         | NLGN1-AS1 |
| NA        | ENSG00000228215 | 0          | NA          | NA         | NA         | NA         | LINC02770 |
| NA        | ENSG00000228216 | 0          | NA          | NA         | NA         | NA         |           |
| NA        | ENSG00000228217 | 0.16735865 | 0.01897177  | 0.38482933 | 0.78225479 | NA         | PNRC2P1   |
| NA        | ENSG00000228218 | 0.93882636 | -0.03773673 | 0.38439216 | 0.45424606 | NA         | ATF4P3    |
| NA        | ENSG00000228219 | 0.16735865 | 0.01897177  | 0.38482933 | 0.78225479 | NA         | NPM1P30   |
| 100505566 | ENSG00000228221 | 57.1278465 | 0.32100434  | 0.28512684 | 0.12839642 | 0.29909417 | LINC00578 |
| NA        | ENSG00000228222 | 2.4406175  | 0.00270345  | 0.37367351 | 0.97766834 | NA         |           |
| 493812    | ENSG00000228223 | 3.33285136 | 0.05922511  | 0.37726137 | 0.55598251 | 0.7616304  | HCG11     |
| NA        | ENSG00000228224 | 0          | NA          | NA         | NA         | NA         | NACA4P    |
| NA        | ENSG00000228225 | 0          | NA          | NA         | NA         | NA         | CRLF3P3   |
| NA        | ENSG00000228226 | 0          | NA          | NA         | NA         | NA         |           |
| NA        | ENSG00000228229 | 0          | NA          | NA         | NA         | NA         |           |
| NA        | ENSG00000228231 | 0          | NA          | NA         | NA         | NA         | TINAG-AS1 |
| NA        | ENSG00000228232 | 0.32242018 | -0.02325365 | 0.38531861 | 0.66964797 | NA         | GAPDHP1   |
| NA        | ENSG00000228234 | 0          | NA          | NA         | NA         | NA         | GLRXP1    |

|           |                 |            |             |            |            |            |             |
|-----------|-----------------|------------|-------------|------------|------------|------------|-------------|
| NA        | ENSG00000228235 | 0          | NA          | NA         | NA         | NA         |             |
| NA        | ENSG00000228236 | 0          | NA          | NA         | NA         | NA         | TXNP5       |
| 100130197 | ENSG00000228237 | 0          | NA          | NA         | NA         | NA         | EFCAB14-AS1 |
| NA        | ENSG00000228238 | 0.173733   | 0.01914545  | 0.38484597 | 0.78225479 | NA         |             |
| NA        | ENSG00000228239 | 0          | NA          | NA         | NA         | NA         |             |
| 252949    | ENSG00000228240 | 0          | NA          | NA         | NA         | NA         | TTY17A      |
| 474152    | ENSG00000228240 | 0          | NA          | NA         | NA         | NA         | TTY17A      |
| NA        | ENSG00000228241 | 0          | NA          | NA         | NA         | NA         | MOB1AP1     |
| NA        | ENSG00000228242 | 40.3969029 | 0.04560435  | 0.27831857 | 0.81381406 | 0.91592004 | XPC-AS1     |
| NA        | ENSG00000228247 | 0.31690641 | 0.00130071  | 0.38336799 | 0.96539071 | NA         | UBBP2       |
| NA        | ENSG00000228248 | 0          | NA          | NA         | NA         | NA         | NUTF2P3     |
| NA        | ENSG00000228251 | 0.34119456 | 0.02362717  | 0.3853535  | 0.62406097 | NA         |             |
| NA        | ENSG00000228252 | 2.01048673 | 0.12442302  | 0.41048293 | 0.06398788 | NA         | COL6A4P2    |
| 4509      | ENSG00000228253 | 3955.07646 | -0.51111044 | 0.07855009 | 2.96E-11   | 5.99E-10   | MT-ATP8     |
| NA        | ENSG00000228255 | 0.15069912 | -0.01848503 | 0.38480575 | 0.84537521 | NA         |             |
| NA        | ENSG00000228257 | 0          | NA          | NA         | NA         | NA         |             |
| NA        | ENSG00000228259 | 0          | NA          | NA         | NA         | NA         |             |
| NA        | ENSG00000228261 | 0.33471731 | 0.02354391  | 0.38534154 | 0.62842204 | NA         | ITPRIP-AS1  |
| 104355287 | ENSG00000228262 | 0          | NA          | NA         | NA         | NA         | LINC01320   |
| 104355288 | ENSG00000228262 | 0          | NA          | NA         | NA         | NA         | LINC01320   |
| NA        | ENSG00000228264 | 0          | NA          | NA         | NA         | NA         | PSMD8P1     |
| NA        | ENSG00000228271 | 2.18889426 | -0.05924099 | 0.38495464 | 0.40439854 | NA         | LINC02048   |
| NA        | ENSG00000228272 | 0          | NA          | NA         | NA         | NA         |             |
| NA        | ENSG00000228274 | 119.831166 | 0.04930827  | 0.19174791 | 0.77045357 | 0.89479592 |             |
| NA        | ENSG00000228275 | 0.34624801 | -0.02356563 | 0.38536324 | 0.65270996 | NA         | ARMCX3-AS1  |
| NA        | ENSG00000228277 | 0          | NA          | NA         | NA         | NA         | UMLILO      |
| 5005      | ENSG00000228278 | 0          | NA          | NA         | NA         | NA         | ORM2        |
| NA        | ENSG00000228280 | 0          | NA          | NA         | NA         | NA         |             |
| NA        | ENSG00000228283 | 0          | NA          | NA         | NA         | NA         | KATNBL1P6   |
| NA        | ENSG00000228285 | 0.14931947 | -0.01844332 | 0.38480212 | 0.84537521 | NA         | LYPLA2P1    |
| NA        | ENSG00000228286 | 0.9477655  | -0.06641787 | 0.391613   | 0.20389865 | NA         |             |
| 100506696 | ENSG00000228288 | 47.1694089 | 0.38704715  | 0.32092939 | 0.08658936 | 0.22418543 | PCAT6       |
| NA        | ENSG00000228289 | 0          | NA          | NA         | NA         | NA         |             |
| 102724201 | ENSG00000228290 | 0          | NA          | NA         | NA         | NA         | TBX18-AS1   |
| NA        | ENSG00000228291 | 0          | NA          | NA         | NA         | NA         | ARL4AP3     |
| NA        | ENSG00000228292 | 0          | NA          | NA         | NA         | NA         |             |
| NA        | ENSG00000228293 | 0.51573058 | 0.03114225  | 0.38605544 | 0.47750784 | NA         |             |
| NA        | ENSG00000228294 | 0.173124   | -0.01911262 | 0.38486262 | 0.84537521 | NA         | BMS1P17     |

|           |                 |            |             |            |            |            |           |
|-----------|-----------------|------------|-------------|------------|------------|------------|-----------|
| NA        | ENSG00000228295 | 0          | NA          | NA         | NA         | NA         | LINC00392 |
| 55009     | ENSG00000228300 | 305.282976 | -0.01557915 | 0.15711228 | 0.91278759 | 0.96277011 | FAM174C   |
| NA        | ENSG00000228301 | 0          | NA          | NA         | NA         | NA         | RPL7P55   |
| NA        | ENSG00000228302 | 45.1152159 | 0.07345431  | 0.26360311 | 0.70550349 | 0.85803894 |           |
| NA        | ENSG00000228303 | 0          | NA          | NA         | NA         | NA         |           |
| NA        | ENSG00000228304 | 0          | NA          | NA         | NA         | NA         | OR4K6P    |
| NA        | ENSG00000228305 | 0.34048473 | -0.00024947 | 0.3833624  | 0.96761728 | NA         | PRELID1P6 |
| NA        | ENSG00000228307 | 0          | NA          | NA         | NA         | NA         | OR2S1P    |
| 101928684 | ENSG00000228308 | 0          | NA          | NA         | NA         | NA         | LINC01209 |
| NA        | ENSG00000228309 | 0          | NA          | NA         | NA         | NA         | LINC01350 |
| NA        | ENSG00000228312 | 0          | NA          | NA         | NA         | NA         | GAPDHP45  |
| 54055     | ENSG00000228314 | 60.7185195 | 0.20284324  | 0.27223273 | 0.31322133 | 0.54126787 | CYP4F29P  |
| 91316     | ENSG00000228315 | 820.557492 | 0.30965979  | 0.09470117 | 0.00071829 | 0.00442363 | GUSBP11   |
| NA        | ENSG00000228316 | 0          | NA          | NA         | NA         | NA         | MTATP6P19 |
| 105376199 | ENSG00000228317 | 0.173733   | 0.01914545  | 0.38484597 | 0.78225479 | NA         |           |
| NA        | ENSG00000228318 | 0          | NA          | NA         | NA         | NA         |           |
| NA        | ENSG00000228319 | 0          | NA          | NA         | NA         | NA         | SPATA2P1  |
| NA        | ENSG00000228322 | 0          | NA          | NA         | NA         | NA         |           |
| NA        | ENSG00000228323 | 0          | NA          | NA         | NA         | NA         | MYADM-AS1 |
| NA        | ENSG00000228325 | 0.62273748 | -0.0450634  | 0.38756703 | 0.37418761 | NA         | IGKV3D-7  |
| NA        | ENSG00000228327 | 1178.39179 | 0.11510778  | 0.08464022 | 0.16320866 | 0.35219272 |           |
| NA        | ENSG00000228328 | 0          | NA          | NA         | NA         | NA         | PGK1P1    |
| NA        | ENSG00000228329 | 0          | NA          | NA         | NA         | NA         | LINC01890 |
| NA        | ENSG00000228330 | 0.33471731 | 0.02354391  | 0.38534154 | 0.62842204 | NA         |           |
| NA        | ENSG00000228331 | 0          | NA          | NA         | NA         | NA         | RPL17P43  |
| NA        | ENSG00000228334 | 0          | NA          | NA         | NA         | NA         |           |
| NA        | ENSG00000228335 | 3.92321441 | 0.00578309  | 0.36600005 | 0.96122364 | 0.98419142 |           |
| NA        | ENSG00000228336 | 0          | NA          | NA         | NA         | NA         | OR9H1P    |
| NA        | ENSG00000228337 | 0          | NA          | NA         | NA         | NA         | PPIAP69   |
| NA        | ENSG00000228338 | 0          | NA          | NA         | NA         | NA         | LINC01784 |
| NA        | ENSG00000228339 | 0.4511443  | -0.0273685  | 0.38571869 | 0.56075007 | NA         | AMD1P1    |
| 284757    | ENSG00000228340 | 1.52272289 | -0.05756831 | 0.38332455 | 0.45647034 | NA         | MIR646HG  |
| NA        | ENSG00000228341 | 0          | NA          | NA         | NA         | NA         |           |
| NA        | ENSG00000228343 | 0          | NA          | NA         | NA         | NA         |           |
| NA        | ENSG00000228345 | 0          | NA          | NA         | NA         | NA         |           |
| NA        | ENSG00000228347 | 0          | NA          | NA         | NA         | NA         | FTLP17    |
| NA        | ENSG00000228348 | 0.37844916 | 0.02407552  | 0.3854191  | 0.60038877 | NA         | EFCAB14P1 |
| NA        | ENSG00000228349 | 0          | NA          | NA         | NA         | NA         | RPS26P4   |

|           |                 |            |             |            |            |            |               |
|-----------|-----------------|------------|-------------|------------|------------|------------|---------------|
| 102724368 | ENSG00000228350 | 1.37256031 | 0.03328203  | 0.38003918 | 0.64432715 | NA         | LINC02585     |
| NA        | ENSG00000228351 | 0          | NA          | NA         | NA         | NA         |               |
| NA        | ENSG00000228352 | 2.31184114 | 0.07173041  | 0.38627366 | 0.37287309 | NA         |               |
| NA        | ENSG00000228353 | 0          | NA          | NA         | NA         | NA         |               |
| NA        | ENSG00000228354 | 0          | NA          | NA         | NA         | NA         |               |
| NA        | ENSG00000228355 | 0          | NA          | NA         | NA         | NA         |               |
| 105377390 | ENSG00000228358 | 0          | NA          | NA         | NA         | NA         | LINC02263     |
| NA        | ENSG00000228360 | 0          | NA          | NA         | NA         | NA         |               |
| NA        | ENSG00000228361 | 0          | NA          | NA         | NA         | NA         |               |
| NA        | ENSG00000228363 | 18.092177  | 0.23237074  | 0.37684972 | 0.24592238 | 0.46516351 |               |
| NA        | ENSG00000228364 | 0          | NA          | NA         | NA         | NA         | SAR1AP1       |
| NA        | ENSG00000228365 | 0          | NA          | NA         | NA         | NA         |               |
| NA        | ENSG00000228366 | 0.69627009 | 0.02517373  | 0.38342284 | 0.57839116 | NA         |               |
| NA        | ENSG00000228367 | 0          | NA          | NA         | NA         | NA         |               |
| NA        | ENSG00000228368 | 0.16735865 | 0.01897177  | 0.38482933 | 0.78225479 | NA         |               |
| 104355143 | ENSG00000228369 | 0          | NA          | NA         | NA         | NA         | TXNDC12-AS1   |
| NA        | ENSG00000228372 | 0.34624801 | -0.02356563 | 0.38536324 | 0.65270996 | NA         | SMIM10L2B-AS1 |
| NA        | ENSG00000228373 | 0          | NA          | NA         | NA         | NA         |               |
| NA        | ENSG00000228374 | 0          | NA          | NA         | NA         | NA         | RPL9P13       |
| NA        | ENSG00000228375 | 0          | NA          | NA         | NA         | NA         | RPS20P25      |
| 340508    | ENSG00000228376 | 1.22392859 | 0.04739246  | 0.38688687 | 0.31289928 | NA         | GAS2LIP2      |
| NA        | ENSG00000228379 | 0          | NA          | NA         | NA         | NA         |               |
| NA        | ENSG00000228380 | 0          | NA          | NA         | NA         | NA         | MYL6BP1       |
| NA        | ENSG00000228382 | 0          | NA          | NA         | NA         | NA         | ITPKB-IT1     |
| 105379269 | ENSG00000228383 | 0          | NA          | NA         | NA         | NA         | FAM197Y7      |
| NA        | ENSG00000228384 | 0.32504045 | 0.00177941  | 0.38337254 | 0.96327428 | NA         |               |
| NA        | ENSG00000228386 | 0          | NA          | NA         | NA         | NA         |               |
| NA        | ENSG00000228391 | 0.31672804 | 0.00112829  | 0.38336664 | 0.96704269 | NA         |               |
| NA        | ENSG00000228392 | 0          | NA          | NA         | NA         | NA         |               |
| NA        | ENSG00000228393 | 18.5439652 | -0.24076453 | 0.38176336 | 0.23018397 | 0.44613689 | LINC01004     |
| NA        | ENSG00000228395 | 18.6620965 | 0.10737119  | 0.33264853 | 0.55663899 | 0.76210873 |               |
| 101928043 | ENSG00000228397 | 0          | NA          | NA         | NA         | NA         | LINC01635     |
| NA        | ENSG00000228398 | 0          | NA          | NA         | NA         | NA         | HMG2P25       |
| NA        | ENSG00000228399 | 0          | NA          | NA         | NA         | NA         |               |
| 107985820 | ENSG00000228400 | 3.45401439 | -0.07255172 | 0.37643468 | 0.51393872 | 0.72910576 |               |
| NA        | ENSG00000228401 | 0.34746601 | 0.02370763  | 0.3853651  | 0.61987128 | NA         |               |
| NA        | ENSG00000228403 | 0          | NA          | NA         | NA         | NA         |               |
| NA        | ENSG00000228404 | 0          | NA          | NA         | NA         | NA         |               |



|           |                 |            |             |            |            |            |           |
|-----------|-----------------|------------|-------------|------------|------------|------------|-----------|
| NA        | ENSG00000228407 | 0.52528295 | 0.01110016  | 0.38327613 | 0.76681029 | NA         |           |
| NA        | ENSG00000228408 | 0          | NA          | NA         | NA         | NA         |           |
| NA        | ENSG00000228409 | 185.819139 | 0.01808286  | 0.16628975 | 0.90518241 | 0.95851937 | CCT6P1    |
| NA        | ENSG00000228410 | 0          | NA          | NA         | NA         | NA         | ELOCP24   |
| NA        | ENSG00000228411 | 0          | NA          | NA         | NA         | NA         | CDY4P     |
| 100506885 | ENSG00000228412 | 14.3312686 | 2.84241376  | 0.82226298 | 4.63E-05   | 0.0003831  | LNC-LBCS  |
| NA        | ENSG00000228413 | 0          | NA          | NA         | NA         | NA         |           |
| 400957    | ENSG00000228414 | 0.31808562 | 0.00102649  | 0.38336588 | 0.96724137 | NA         | LINC01185 |
| NA        | ENSG00000228415 | 2.16915621 | 0.02456005  | 0.37414967 | 0.79117489 | NA         | PTMAP1    |
| NA        | ENSG00000228417 | 0.15069912 | -0.01848503 | 0.38480575 | 0.84537521 | NA         |           |
| NA        | ENSG00000228420 | 0          | NA          | NA         | NA         | NA         | LINC01768 |
| NA        | ENSG00000228421 | 0.44987034 | -0.02730634 | 0.38571361 | 0.56180181 | NA         |           |
| NA        | ENSG00000228422 | 0          | NA          | NA         | NA         | NA         | LINC00687 |
| NA        | ENSG00000228423 | 0          | NA          | NA         | NA         | NA         |           |
| NA        | ENSG00000228426 | 0          | NA          | NA         | NA         | NA         |           |
| NA        | ENSG00000228427 | 0          | NA          | NA         | NA         | NA         |           |
| NA        | ENSG00000228429 | 0          | NA          | NA         | NA         | NA         |           |
| NA        | ENSG00000228430 | 0.75207623 | -0.01133728 | 0.38207488 | 0.74797343 | NA         |           |
| NA        | ENSG00000228431 | 0          | NA          | NA         | NA         | NA         | ARL5AP3   |
| NA        | ENSG00000228432 | 0          | NA          | NA         | NA         | NA         | DHFRP2    |
| NA        | ENSG00000228433 | 0          | NA          | NA         | NA         | NA         | OR7E23P   |
| NA        | ENSG00000228434 | 71.475742  | 0.14305762  | 0.25484334 | 0.46222859 | 0.6851832  |           |
| NA        | ENSG00000228436 | 8.94305245 | 0.15620837  | 0.37793609 | 0.34264008 | 0.57284732 |           |
| NA        | ENSG00000228437 | 0          | NA          | NA         | NA         | NA         | LINC02474 |
| NA        | ENSG00000228438 | 0          | NA          | NA         | NA         | NA         |           |
| NA        | ENSG00000228440 | 0.8311761  | -0.05729678 | 0.38968825 | 0.26034594 | NA         | MTND5P6   |
| NA        | ENSG00000228444 | 7.36173219 | -0.10662852 | 0.36984941 | 0.46368295 | 0.68652759 |           |
| NA        | ENSG00000228445 | 0          | NA          | NA         | NA         | NA         | UGT1A2P   |
| NA        | ENSG00000228446 | 1.34776779 | 0.06524406  | 0.38639378 | 0.36488795 | NA         | ANKRD49P1 |
| NA        | ENSG00000228450 | 0          | NA          | NA         | NA         | NA         | NLRP7P1   |
| 157489    | ENSG00000228451 | 52.6627213 | 0.22855739  | 0.29983325 | 0.27206333 | 0.49547792 | SDAD1P1   |
| NA        | ENSG00000228452 | 0          | NA          | NA         | NA         | NA         |           |
| NA        | ENSG00000228453 | 0          | NA          | NA         | NA         | NA         | RPS15AP9  |
| NA        | ENSG00000228459 | 0          | NA          | NA         | NA         | NA         | LINC01546 |
| NA        | ENSG00000228460 | 0          | NA          | NA         | NA         | NA         | CYP2C59P  |
| NA        | ENSG00000228462 | 0          | NA          | NA         | NA         | NA         | RPS19P7   |
| NA        | ENSG00000228463 | 86.3951749 | -0.02736868 | 0.28918232 | 0.88309732 | 0.94857242 |           |
| NA        | ENSG00000228464 | 0          | NA          | NA         | NA         | NA         |           |

|           |                 |            |             |            |            |            |             |
|-----------|-----------------|------------|-------------|------------|------------|------------|-------------|
| NA        | ENSG00000228465 | 0          | NA          | NA         | NA         | NA         | TRAPPC2P10  |
| NA        | ENSG00000228466 | 0          | NA          | NA         | NA         | NA         | TUBB4AP1    |
| NA        | ENSG00000228467 | 0          | NA          | NA         | NA         | NA         |             |
| NA        | ENSG00000228470 | 0.64981277 | -0.02093757 | 0.38312499 | 0.66319671 | NA         |             |
| NA        | ENSG00000228471 | 0          | NA          | NA         | NA         | NA         |             |
| NA        | ENSG00000228473 | 0          | NA          | NA         | NA         | NA         | LIN28AP2    |
| 100128731 | ENSG00000228474 | 2436.59783 | 0.07522156  | 0.06671533 | 0.25229694 | 0.47222371 | OST4        |
| NA        | ENSG00000228476 | 0          | NA          | NA         | NA         | NA         | CSTP1       |
| NA        | ENSG00000228477 | 7.43053155 | 0.05594622  | 0.35354139 | 0.70359732 | 0.85751377 |             |
| NA        | ENSG00000228478 | 0          | NA          | NA         | NA         | NA         |             |
| NA        | ENSG00000228480 | 0          | NA          | NA         | NA         | NA         |             |
| 105374580 | ENSG00000228481 | 0          | NA          | NA         | NA         | NA         | PRKCE-AS1   |
| NA        | ENSG00000228482 | 0          | NA          | NA         | NA         | NA         | LINC01713   |
| 101927692 | ENSG00000228484 | 0          | NA          | NA         | NA         | NA         |             |
| NA        | ENSG00000228485 | 0.173124   | -0.01911262 | 0.38486262 | 0.84537521 | NA         | GRK5-IT1    |
| 728537    | ENSG00000228486 | 82.119562  | 0.08558454  | 0.23497541 | 0.64759573 | 0.82430661 | C2orf92     |
| NA        | ENSG00000228487 | 4.22478518 | -0.10092597 | 0.38355416 | 0.38699166 | 0.61602672 |             |
| NA        | ENSG00000228488 | 0          | NA          | NA         | NA         | NA         |             |
| NA        | ENSG00000228489 | 0          | NA          | NA         | NA         | NA         | RPL21P50    |
| NA        | ENSG00000228492 | 128.385632 | 0.093628    | 0.18292034 | 0.56187644 | 0.76508177 | RAB11FIP1P1 |
| 100507254 | ENSG00000228495 | 0          | NA          | NA         | NA         | NA         | LINC01013   |
| 100506405 | ENSG00000228496 | 0.18922458 | 0.01954053  | 0.38488496 | 0.78225479 | NA         |             |
| NA        | ENSG00000228499 | 0          | NA          | NA         | NA         | NA         | TMSB10P1    |
| NA        | ENSG00000228501 | 0          | NA          | NA         | NA         | NA         | RPL15P18    |
| NA        | ENSG00000228502 | 0.91822155 | -0.03903549 | 0.38470287 | 0.45567058 | NA         | EEF1A1P11   |
| NA        | ENSG00000228503 | 0          | NA          | NA         | NA         | NA         |             |
| 100996630 | ENSG00000228504 | 0.29863895 | -0.02292439 | 0.3852726  | 0.68753245 | NA         | LINC01760   |
| NA        | ENSG00000228505 | 0          | NA          | NA         | NA         | NA         |             |
| NA        | ENSG00000228506 | 83.2199233 | -0.07119736 | 0.21525676 | 0.68972566 | 0.84943947 |             |
| NA        | ENSG00000228507 | 1.2063873  | 0.03306178  | 0.38299751 | 0.55489059 | NA         | DAP3P2      |
| NA        | ENSG00000228509 | 5.62633946 | 0.12526914  | 0.38908254 | 0.31727706 | 0.54509671 |             |
| NA        | ENSG00000228510 | 1.72713878 | 0.09215504  | 0.39307977 | 0.24448405 | NA         |             |
| NA        | ENSG00000228513 | 0.15069912 | -0.01848503 | 0.38480575 | 0.84537521 | NA         |             |
| 653282    | ENSG00000228517 | 0          | NA          | NA         | NA         | NA         | CT47A7      |
| NA        | ENSG00000228518 | 0          | NA          | NA         | NA         | NA         | SURF6P1     |
| NA        | ENSG00000228519 | 0          | NA          | NA         | NA         | NA         | RANBP1P1    |
| NA        | ENSG00000228521 | 0          | NA          | NA         | NA         | NA         |             |
| NA        | ENSG00000228522 | 0          | NA          | NA         | NA         | NA         |             |

|           |                 |            |             |            |            |            |             |
|-----------|-----------------|------------|-------------|------------|------------|------------|-------------|
| NA        | ENSG00000228523 | 0          | NA          | NA         | NA         | NA         | DNAJB6P4    |
| NA        | ENSG00000228525 | 0          | NA          | NA         | NA         | NA         |             |
| 106614088 | ENSG00000228526 | 190.790482 | 0.51889091  | 0.18546181 | 0.00175813 | 0.00959329 | MIR34AHG    |
| NA        | ENSG00000228527 | 0          | NA          | NA         | NA         | NA         |             |
| NA        | ENSG00000228528 | 14.1190567 | 0.09313175  | 0.3449658  | 0.5859282  | 0.7817695  |             |
| NA        | ENSG00000228530 | 0          | NA          | NA         | NA         | NA         |             |
| NA        | ENSG00000228532 | 0.18922458 | 0.01954053  | 0.38488496 | 0.78225479 | NA         | SUMO2P21    |
| NA        | ENSG00000228536 | 2.01923105 | -0.05589379 | 0.38408066 | 0.42376086 | NA         | LYPLAL1-AS1 |
| NA        | ENSG00000228538 | 0          | NA          | NA         | NA         | NA         |             |
| NA        | ENSG00000228539 | 0          | NA          | NA         | NA         | NA         |             |
| NA        | ENSG00000228540 | 0.14931947 | -0.01844332 | 0.38480212 | 0.84537521 | NA         |             |
| NA        | ENSG00000228541 | 0          | NA          | NA         | NA         | NA         |             |
| NA        | ENSG00000228543 | 0          | NA          | NA         | NA         | NA         |             |
| 100131193 | ENSG00000228544 | 53.7253714 | 0.28850495  | 0.28646767 | 0.16942563 | 0.36105311 | CCDC183-AS1 |
| NA        | ENSG00000228546 | 0          | NA          | NA         | NA         | NA         | PMS2P12     |
| NA        | ENSG00000228547 | 0.18922458 | 0.01954053  | 0.38488496 | 0.78225479 | NA         | OR7E26P     |
| NA        | ENSG00000228548 | 0          | NA          | NA         | NA         | NA         | ITPKB-AS1   |
| 112267871 | ENSG00000228549 | 2.08853449 | -0.09549853 | 0.39572501 | 0.19913057 | NA         |             |
| NA        | ENSG00000228550 | 0          | NA          | NA         | NA         | NA         |             |
| NA        | ENSG00000228551 | 0          | NA          | NA         | NA         | NA         | SNRPGP9     |
| NA        | ENSG00000228553 | 0          | NA          | NA         | NA         | NA         |             |
| NA        | ENSG00000228554 | 2.81022655 | 0.03480171  | 0.37401288 | 0.72074678 | 0.8666434  |             |
| NA        | ENSG00000228557 | 0          | NA          | NA         | NA         | NA         | HSPA8P17    |
| NA        | ENSG00000228559 | 0          | NA          | NA         | NA         | NA         |             |
| NA        | ENSG00000228560 | 0          | NA          | NA         | NA         | NA         |             |
| NA        | ENSG00000228561 | 0.70622295 | 0.0041373   | 0.38184106 | 0.93034313 | NA         |             |
| NA        | ENSG00000228563 | 0          | NA          | NA         | NA         | NA         |             |
| 100506050 | ENSG00000228564 | 0          | NA          | NA         | NA         | NA         | LINC01005   |
| NA        | ENSG00000228566 | 0.49850263 | 0.01733174  | 0.38333864 | 0.71703795 | NA         |             |
| 317703    | ENSG00000228567 | 0          | NA          | NA         | NA         | NA         | VN1R4       |
| NA        | ENSG00000228568 | 0          | NA          | NA         | NA         | NA         | RPS15AP13   |
| 283008    | ENSG00000228570 | 73.6454237 | 0.07334438  | 0.22493389 | 0.68951143 | 0.84931439 | NUTM2E      |
| NA        | ENSG00000228571 | 0          | NA          | NA         | NA         | NA         | HSFY7P      |
| NA        | ENSG00000228572 | 0          | NA          | NA         | NA         | NA         |             |
| NA        | ENSG00000228573 | 0          | NA          | NA         | NA         | NA         |             |
| NA        | ENSG00000228577 | 0.78911446 | -0.03603243 | 0.38381739 | 0.51257466 | NA         |             |
| NA        | ENSG00000228578 | 0          | NA          | NA         | NA         | NA         | TUBB1P2     |
| NA        | ENSG00000228585 | 0          | NA          | NA         | NA         | NA         |             |

|           |                 |            |             |            |            |            |           |
|-----------|-----------------|------------|-------------|------------|------------|------------|-----------|
| NA        | ENSG00000228586 | 0          | NA          | NA         | NA         | NA         |           |
| NA        | ENSG00000228587 | 0          | NA          | NA         | NA         | NA         |           |
| NA        | ENSG00000228589 | 1.09445074 | -0.05983674 | 0.39052994 | 0.20360722 | NA         | SPCS2P4   |
| 106660609 | ENSG00000228590 | 0.33471731 | 0.02354391  | 0.38534154 | 0.62842204 | NA         |           |
| 266917    | ENSG00000228592 | 0          | NA          | NA         | NA         | NA         |           |
| NA        | ENSG00000228593 | 0          | NA          | NA         | NA         | NA         | CFTRP1    |
| 643988    | ENSG00000228594 | 332.336417 | 0.02195604  | 0.13157518 | 0.85953258 | 0.93751308 | FNDC10    |
| NA        | ENSG00000228595 | 0          | NA          | NA         | NA         | NA         | PAICSP2   |
| NA        | ENSG00000228596 | 0          | NA          | NA         | NA         | NA         |           |
| NA        | ENSG00000228597 | 0          | NA          | NA         | NA         | NA         | MTND4P1   |
| 100874041 | ENSG00000228598 | 0          | NA          | NA         | NA         | NA         | MACC1-AS1 |
| NA        | ENSG00000228599 | 0          | NA          | NA         | NA         | NA         | RPL7P52   |
| NA        | ENSG00000228600 | 0          | NA          | NA         | NA         | NA         | POLR2CP1  |
| NA        | ENSG00000228601 | 0          | NA          | NA         | NA         | NA         | RPL39P    |
| NA        | ENSG00000228604 | 0.173124   | -0.01911262 | 0.38486262 | 0.84537521 | NA         |           |
| 100287049 | ENSG00000228606 | 6.9130337  | 0.03893775  | 0.35553093 | 0.78555243 | 0.90248778 |           |
| 644672    | ENSG00000228607 | 0          | NA          | NA         | NA         | NA         | CLDN25    |
| NA        | ENSG00000228610 | 0          | NA          | NA         | NA         | NA         | PDCL2P1   |
| NA        | ENSG00000228611 | 0          | NA          | NA         | NA         | NA         | HNF4GP1   |
| NA        | ENSG00000228612 | 0.16735865 | 0.01897177  | 0.38482933 | 0.78225479 | NA         | HK2P1     |
| NA        | ENSG00000228613 | 0.173124   | -0.01911262 | 0.38486262 | 0.84537521 | NA         |           |
| NA        | ENSG00000228615 | 0          | NA          | NA         | NA         | NA         | CENPNP2   |
| NA        | ENSG00000228618 | 0          | NA          | NA         | NA         | NA         |           |
| NA        | ENSG00000228620 | 0          | NA          | NA         | NA         | NA         |           |
| NA        | ENSG00000228622 | 0          | NA          | NA         | NA         | NA         |           |
| 169834    | ENSG00000228623 | 218.237091 | -0.5012371  | 0.16423389 | 0.00082945 | 0.00501563 | ZNF883    |
| 101927768 | ENSG00000228624 | 11.957695  | -0.09856486 | 0.34996171 | 0.55003634 | 0.75651445 | HDAC2-AS2 |
| NA        | ENSG00000228625 | 0          | NA          | NA         | NA         | NA         |           |
| NA        | ENSG00000228626 | 0          | NA          | NA         | NA         | NA         |           |
| 105375283 | ENSG00000228627 | 0          | NA          | NA         | NA         | NA         |           |
| NA        | ENSG00000228629 | 0.51300477 | -0.00906117 | 0.38272934 | 0.83054964 | NA         |           |
| 100124700 | ENSG00000228630 | 1.58895025 | 0.0762482   | 0.39469449 | 0.10332466 | NA         | HOTAIR    |
| NA        | ENSG00000228634 | 0          | NA          | NA         | NA         | NA         |           |
| NA        | ENSG00000228636 | 0          | NA          | NA         | NA         | NA         | LINC02663 |
| NA        | ENSG00000228638 | 14.9607225 | 0.21151881  | 0.41647624 | 0.20142377 | 0.40682557 | FCF1P2    |
| NA        | ENSG00000228639 | 0          | NA          | NA         | NA         | NA         | ROCR      |
| NA        | ENSG00000228643 | 0.173733   | 0.01914545  | 0.38484597 | 0.78225479 | NA         |           |
| NA        | ENSG00000228645 | 0          | NA          | NA         | NA         | NA         | PHKG1P2   |

|           |    |                 |            |             |            |            |            |           |
|-----------|----|-----------------|------------|-------------|------------|------------|------------|-----------|
|           | NA | ENSG00000228646 | 0          | NA          | NA         | NA         | NA         | RPL31P13  |
|           | NA | ENSG00000228648 | 0          | NA          | NA         | NA         | NA         |           |
| 109729180 | NA | ENSG00000228649 | 0          | NA          | NA         | NA         | NA         | SNHG26    |
|           | NA | ENSG00000228650 | 0.15069912 | -0.01848503 | 0.38480575 | 0.84537521 | NA         |           |
|           | NA | ENSG00000228653 | 23.4977429 | 0.02429223  | 0.29949974 | 0.8993353  | 0.95557174 | HNRNPCP7  |
|           | NA | ENSG00000228655 | 0          | NA          | NA         | NA         | NA         |           |
|           | NA | ENSG00000228656 | 0          | NA          | NA         | NA         | NA         | MYO5BP3   |
|           | NA | ENSG00000228657 | 0          | NA          | NA         | NA         | NA         | RPL23AP58 |
|           | NA | ENSG00000228658 | 0          | NA          | NA         | NA         | NA         |           |
| 104266960 | NA | ENSG00000228659 | 0.34624801 | -0.02356563 | 0.38536324 | 0.65270996 | NA         | LINC01201 |
|           | NA | ENSG00000228660 | 0          | NA          | NA         | NA         | NA         | VN1R35P   |
| 105376527 | NA | ENSG00000228661 | 0          | NA          | NA         | NA         | NA         | STIM1-AS1 |
|           | NA | ENSG00000228663 | 1.61643293 | 0.00997137  | 0.37683161 | 0.89933368 | NA         | PSMD10P1  |
|           | NA | ENSG00000228664 | 0          | NA          | NA         | NA         | NA         |           |
|           | NA | ENSG00000228665 | 0.14931947 | -0.01844332 | 0.38480212 | 0.84537521 | NA         |           |
|           | NA | ENSG00000228666 | 0          | NA          | NA         | NA         | NA         | KRT18P1   |
|           | NA | ENSG00000228667 | 0          | NA          | NA         | NA         | NA         |           |
|           | NA | ENSG00000228668 | 0          | NA          | NA         | NA         | NA         | TRGV5P    |
|           | NA | ENSG00000228669 | 0          | NA          | NA         | NA         | NA         | LINC00448 |
|           | NA | ENSG00000228670 | 0          | NA          | NA         | NA         | NA         | NANOGP2   |
| 389333    | NA | ENSG00000228672 | 73.2568859 | 0.21015699  | 0.26508677 | 0.29335899 | 0.51951614 | PROB1     |
|           | NA | ENSG00000228674 | 0          | NA          | NA         | NA         | NA         | PPIAP59   |
|           | NA | ENSG00000228675 | 0          | NA          | NA         | NA         | NA         |           |
| 100874006 | NA | ENSG00000228677 | 0.14931947 | -0.01844332 | 0.38480212 | 0.84537521 | NA         | TTC3-AS1  |
|           | NA | ENSG00000228679 | 0          | NA          | NA         | NA         | NA         |           |
|           | NA | ENSG00000228680 | 0          | NA          | NA         | NA         | NA         |           |
|           | NA | ENSG00000228681 | 0          | NA          | NA         | NA         | NA         |           |
|           | NA | ENSG00000228683 | 0.173124   | -0.01911262 | 0.38486262 | 0.84537521 | NA         |           |
|           | NA | ENSG00000228685 | 0          | NA          | NA         | NA         | NA         |           |
|           | NA | ENSG00000228686 | 0.34734764 | 0.00111788  | 0.38336578 | 0.95788424 | NA         |           |
|           | NA | ENSG00000228687 | 0          | NA          | NA         | NA         | NA         |           |
|           | NA | ENSG00000228688 | 0          | NA          | NA         | NA         | NA         | COL11A2P1 |
|           | NA | ENSG00000228689 | 0          | NA          | NA         | NA         | NA         |           |
|           | NA | ENSG00000228692 | 0.173733   | 0.01914545  | 0.38484597 | 0.78225479 | NA         |           |
|           | NA | ENSG00000228694 | 0          | NA          | NA         | NA         | NA         | MTND4P18  |
| 51716     | NA | ENSG00000228695 | 0          | NA          | NA         | NA         | NA         | CES1P1    |
| 107987423 | NA | ENSG00000228695 | 0          | NA          | NA         | NA         | NA         | CES1P1    |
| 51326     | NA | ENSG00000228696 | 54.3512998 | 0.08622354  | 0.28720067 | 0.65761485 | 0.83025448 | ARL17B    |

|           |                 |            |             |            |            |            |            |
|-----------|-----------------|------------|-------------|------------|------------|------------|------------|
| 100506084 | ENSG00000228696 | 54.3512998 | 0.08622354  | 0.28720067 | 0.65761485 | 0.83025448 | ARL17B     |
| 100996709 | ENSG00000228696 | 54.3512998 | 0.08622354  | 0.28720067 | 0.65761485 | 0.83025448 | ARL17B     |
| 101928565 | ENSG00000228697 | 0          | NA          | NA         | NA         | NA         |            |
| NA        | ENSG00000228700 | 0.173733   | 0.01914545  | 0.38484597 | 0.78225479 | NA         |            |
| 100507633 | ENSG00000228701 | 1.52029031 | 0.0130576   | 0.37859897 | 0.85294274 | NA         | TNKS2-AS1  |
| NA        | ENSG00000228702 | 0.47271284 | -0.02840801 | 0.38580563 | 0.54345672 | NA         |            |
| NA        | ENSG00000228703 | 0.34746601 | 0.02370763  | 0.3853651  | 0.61987128 | NA         |            |
| NA        | ENSG00000228705 | 1.27788538 | 0.03682092  | 0.38184207 | 0.57139795 | NA         | LINC00659  |
| NA        | ENSG00000228707 | 0          | NA          | NA         | NA         | NA         |            |
| NA        | ENSG00000228708 | 0          | NA          | NA         | NA         | NA         |            |
| NA        | ENSG00000228709 | 166.646418 | -0.57472434 | 0.32972428 | 0.01811672 | 0.06720935 | LINC02575  |
| NA        | ENSG00000228711 | 0          | NA          | NA         | NA         | NA         |            |
| NA        | ENSG00000228714 | 0          | NA          | NA         | NA         | NA         |            |
| 1719      | ENSG00000228716 | 3105.67718 | -0.52284335 | 0.06942333 | 1.89E-14   | 4.94E-13   | DHFR       |
| NA        | ENSG00000228717 | 0          | NA          | NA         | NA         | NA         | NAB1P1     |
| NA        | ENSG00000228718 | 0          | NA          | NA         | NA         | NA         | LINC02521  |
| NA        | ENSG00000228719 | 0          | NA          | NA         | NA         | NA         |            |
| NA        | ENSG00000228721 | 0          | NA          | NA         | NA         | NA         |            |
| 101927416 | ENSG00000228723 | 0          | NA          | NA         | NA         | NA         | SRGAP3-AS2 |
| NA        | ENSG00000228725 | 0          | NA          | NA         | NA         | NA         | MTND2P12   |
| 401251    | ENSG00000228727 | 92.2567058 | 0.70532657  | 0.26933932 | 0.00167985 | 0.00925014 | SAPCD1     |
| NA        | ENSG00000228728 | 0          | NA          | NA         | NA         | NA         | PPIAP91    |
| NA        | ENSG00000228729 | 0          | NA          | NA         | NA         | NA         |            |
| NA        | ENSG00000228730 | 0          | NA          | NA         | NA         | NA         | LINC02013  |
| NA        | ENSG00000228734 | 0          | NA          | NA         | NA         | NA         |            |
| NA        | ENSG00000228735 | 0          | NA          | NA         | NA         | NA         |            |
| NA        | ENSG00000228737 | 0          | NA          | NA         | NA         | NA         |            |
| NA        | ENSG00000228739 | 0          | NA          | NA         | NA         | NA         |            |
| NA        | ENSG00000228740 | 0.14931947 | -0.01844332 | 0.38480212 | 0.84537521 | NA         | GABRG3-AS1 |
| 221178    | ENSG00000228741 | 0          | NA          | NA         | NA         | NA         |            |
| 111216280 | ENSG00000228742 | 0          | NA          | NA         | NA         | NA         | LINC02577  |
| NA        | ENSG00000228744 | 0          | NA          | NA         | NA         | NA         | RPS3AP30   |
| NA        | ENSG00000228748 | 22.3554707 | -0.09792742 | 0.33685213 | 0.57777616 | 0.77605301 |            |
| NA        | ENSG00000228750 | 0          | NA          | NA         | NA         | NA         | LINC01672  |
| NA        | ENSG00000228751 | 0          | NA          | NA         | NA         | NA         |            |
| NA        | ENSG00000228753 | 0.3468566  | 7.76E-05    | 0.38336202 | 0.96772087 | NA         | EIF4BP2    |
| NA        | ENSG00000228754 | 0          | NA          | NA         | NA         | NA         | RPL13AP19  |
| NA        | ENSG00000228755 | 0          | NA          | NA         | NA         | NA         | PABPC1P8   |

|           |                 |                 |             |             |            |            |            |              |
|-----------|-----------------|-----------------|-------------|-------------|------------|------------|------------|--------------|
|           | NA              | ENSG00000228757 | 0           | NA          | NA         | NA         | NA         |              |
|           | NA              | ENSG00000228759 | 0           | NA          | NA         | NA         | NA         | FAF2P1       |
| 106182118 | ENSG00000228763 | 0               | NA          | NA          | NA         | NA         | NA         | LIMS1-AS1    |
|           | NA              | ENSG00000228764 | 0           | NA          | NA         | NA         | NA         | ZNF885P      |
|           | NA              | ENSG00000228766 | 0.15069912  | -0.01848503 | 0.38480575 | 0.84537521 | NA         | RPL7L1P8     |
|           | NA              | ENSG00000228767 | 0           | NA          | NA         | NA         | NA         | KRT8P18      |
|           | NA              | ENSG00000228768 | 0           | NA          | NA         | NA         | NA         |              |
|           | NA              | ENSG00000228769 | 0           | NA          | NA         | NA         | NA         | ABCF2P2      |
|           | NA              | ENSG00000228770 | 0           | NA          | NA         | NA         | NA         |              |
|           | NA              | ENSG00000228771 | 0           | NA          | NA         | NA         | NA         |              |
|           | NA              | ENSG00000228772 | 0           | NA          | NA         | NA         | NA         |              |
| 285962    | ENSG00000228775 | 82.6739086      | 0.6950139   | 0.26163325  | 0.00153438 | 0.00854636 |            | WEE2-AS1     |
|           | NA              | ENSG00000228776 | 0           | NA          | NA         | NA         | NA         |              |
|           | NA              | ENSG00000228777 | 0           | NA          | NA         | NA         | NA         | LINC02534    |
|           | NA              | ENSG00000228778 | 0           | NA          | NA         | NA         | NA         |              |
|           | NA              | ENSG00000228779 | 1.22755351  | 0.08223047  | 0.39599748 | 0.11468409 | NA         |              |
|           | NA              | ENSG00000228780 | 0           | NA          | NA         | NA         | NA         |              |
|           | NA              | ENSG00000228781 | 0           | NA          | NA         | NA         | NA         |              |
|           | NA              | ENSG00000228782 | 36.425359   | -0.34811909 | 0.35123305 | 0.12366267 | 0.29135107 | MRPL45P2     |
|           | NA              | ENSG00000228783 | 0           | NA          | NA         | NA         | NA         | H3P29        |
| 400946    | ENSG00000228784 | 1.11711857      | 0.01078398  | 0.38077361  | 0.85220928 | NA         | NA         | LINC00954    |
|           | NA              | ENSG00000228786 | 0           | NA          | NA         | NA         | NA         | LINC00266-4P |
| 100874056 | ENSG00000228787 | 0               | NA          | NA          | NA         | NA         | NA         | NLGN4Y-AS1   |
| 285834    | ENSG00000228789 | 0               | NA          | NA          | NA         | NA         | NA         | HCG22        |
|           | NA              | ENSG00000228790 | 0           | NA          | NA         | NA         | NA         |              |
|           | NA              | ENSG00000228791 | 1.93803978  | 0.08957589  | 0.39229618 | 0.25172582 | NA         | THRB-AS1     |
|           | NA              | ENSG00000228792 | 1.11819722  | -0.04882824 | 0.38606033 | 0.36139395 | NA         |              |
| 100507336 | ENSG00000228793 | 0               | NA          | NA          | NA         | NA         | NA         |              |
| 643837    | ENSG00000228794 | 525.352531      | -0.21524018 | 0.11425456  | 0.04768767 | 0.14350424 |            | LINC01128    |
|           | NA              | ENSG00000228797 | 0.30139824  | -0.02296476 | 0.38527817 | 0.68536535 | NA         | FAM207BP     |
|           | NA              | ENSG00000228799 | 0           | NA          | NA         | NA         | NA         | LINC01939    |
|           | NA              | ENSG00000228800 | 0           | NA          | NA         | NA         | NA         |              |
| 102724330 | ENSG00000228801 | 192.059025      | 0.32044202  | 0.18267563  | 0.04690966 | 0.14176508 |            |              |
|           | NA              | ENSG00000228802 | 0           | NA          | NA         | NA         | NA         |              |
|           | NA              | ENSG00000228803 | 0           | NA          | NA         | NA         | NA         | MTCYBP42     |
| 100131635 | ENSG00000228804 | 0               | NA          | NA          | NA         | NA         | NA         |              |
|           | NA              | ENSG00000228806 | 0           | NA          | NA         | NA         | NA         |              |
|           | NA              | ENSG00000228807 | 0           | NA          | NA         | NA         | NA         | MRPS18CP6    |

|           |    |                 |            |             |            |            |            |            |
|-----------|----|-----------------|------------|-------------|------------|------------|------------|------------|
|           | NA | ENSG00000228808 | 0.80083873 | -0.0061784  | 0.38147257 | 0.9054842  | NA         | HMGB3P4    |
|           | NA | ENSG00000228809 | 1.68976362 | 0.0339509   | 0.3787211  | 0.66631994 | NA         |            |
|           | NA | ENSG00000228810 | 0.16735865 | 0.01897177  | 0.38482933 | 0.78225479 | NA         | PABPC1P11  |
| 101928158 |    | ENSG00000228812 | 7.2291413  | -0.0854829  | 0.36719358 | 0.53445259 | 0.74557301 | LAMA5-AS1  |
|           | NA | ENSG00000228814 | 0.18922458 | 0.01954053  | 0.38488496 | 0.78225479 | NA         |            |
|           | NA | ENSG00000228815 | 0          | NA          | NA         | NA         | NA         | MARK2P13   |
|           | NA | ENSG00000228816 | 1.32836959 | 0.00627279  | 0.37794528 | 0.93126661 | NA         | AK3P5      |
|           | NA | ENSG00000228817 | 1.71388548 | 0.09646163  | 0.39689465 | 0.13815003 | NA         | BACH1-IT2  |
|           | NA | ENSG00000228818 | 1.82481523 | -0.03538029 | 0.37702707 | 0.67997249 | NA         |            |
|           | NA | ENSG00000228819 | 0          | NA          | NA         | NA         | NA         | AGKP2      |
|           | NA | ENSG00000228820 | 14.3543789 | 0.04607838  | 0.32867682 | 0.79341606 | 0.90556117 | RPSAP1     |
|           | NA | ENSG00000228823 | 0          | NA          | NA         | NA         | NA         | PDE4DIPP10 |
| 642345    |    | ENSG00000228824 | 2.33133247 | -0.00048856 | 0.37234816 | 0.99434242 | NA         | MIR4500HG  |
|           | NA | ENSG00000228825 | 0          | NA          | NA         | NA         | NA         | LAMTOR3P1  |
|           | NA | ENSG00000228826 | 0          | NA          | NA         | NA         | NA         |            |
|           | NA | ENSG00000228827 | 0          | NA          | NA         | NA         | NA         |            |
|           | NA | ENSG00000228828 | 3.34185912 | 0.01007361  | 0.37136973 | 0.92044876 | 0.96648338 | TLK2P2     |
|           | NA | ENSG00000228829 | 0.16735865 | 0.01897177  | 0.38482933 | 0.78225479 | NA         |            |
|           | NA | ENSG00000228830 | 97.5442467 | -0.08249233 | 0.20885496 | 0.63726169 | 0.81722397 |            |
|           | NA | ENSG00000228833 | 0          | NA          | NA         | NA         | NA         |            |
|           | NA | ENSG00000228834 | 0          | NA          | NA         | NA         | NA         | ATP5MFP2   |
|           | NA | ENSG00000228835 | 4.27030005 | 0.22053437  | 0.45720201 | 0.07920347 | 0.2099675  |            |
| 441521    |    | ENSG00000228836 | 0          | NA          | NA         | NA         | NA         | CT45A5     |
|           | NA | ENSG00000228837 | 0          | NA          | NA         | NA         | NA         | CBX3P6     |
|           | NA | ENSG00000228838 | 0.82948423 | -0.00374312 | 0.38205315 | 0.93686735 | NA         |            |
| 101929760 |    | ENSG00000228839 | 1.98846246 | -0.09266286 | 0.39545328 | 0.1930334  | NA         | PIK3IP1-DT |
| 100874064 |    | ENSG00000228842 | 0          | NA          | NA         | NA         | NA         | PCDH9-AS2  |
|           | NA | ENSG00000228843 | 8.01428832 | -0.18881745 | 0.40514156 | 0.232489   | 0.4493504  |            |
|           | NA | ENSG00000228844 | 0          | NA          | NA         | NA         | NA         |            |
|           | NA | ENSG00000228847 | 0          | NA          | NA         | NA         | NA         | ATP5MC2P4  |
|           | NA | ENSG00000228848 | 1.68391658 | 0.05334764  | 0.38372865 | 0.45539935 | NA         | RPS20P13   |
|           | NA | ENSG00000228850 | 0          | NA          | NA         | NA         | NA         | CDY12P     |
|           | NA | ENSG00000228851 | 0          | NA          | NA         | NA         | NA         | MTCO3P4    |
|           | NA | ENSG00000228852 | 6.98754213 | -0.03142084 | 0.3583121  | 0.81131029 | 0.91456796 |            |
| 100852409 |    | ENSG00000228853 | 0          | NA          | NA         | NA         | NA         | NEGR1-IT1  |
|           | NA | ENSG00000228855 | 0          | NA          | NA         | NA         | NA         |            |
|           | NA | ENSG00000228857 | 0.15069912 | -0.01848503 | 0.38480575 | 0.84537521 | NA         |            |
|           | NA | ENSG00000228860 | 0          | NA          | NA         | NA         | NA         |            |



|           |                 |            |             |            |            |            |              |
|-----------|-----------------|------------|-------------|------------|------------|------------|--------------|
| NA        | ENSG00000228861 | 0          | NA          | NA         | NA         | NA         | RPL23AP12    |
| NA        | ENSG00000228862 | 0.34624801 | -0.02356563 | 0.38536324 | 0.65270996 | NA         |              |
| NA        | ENSG00000228863 | 0          | NA          | NA         | NA         | NA         |              |
| NA        | ENSG00000228868 | 0          | NA          | NA         | NA         | NA         | MYLKP1       |
| NA        | ENSG00000228869 | 0          | NA          | NA         | NA         | NA         | COX4I1P2     |
| NA        | ENSG00000228872 | 0.18922458 | 0.01954053  | 0.38488496 | 0.78225479 | NA         | CSP1         |
| NA        | ENSG00000228873 | 0          | NA          | NA         | NA         | NA         |              |
| NA        | ENSG00000228874 | 0          | NA          | NA         | NA         | NA         |              |
| NA        | ENSG00000228876 | 0          | NA          | NA         | NA         | NA         |              |
| NA        | ENSG00000228877 | 0          | NA          | NA         | NA         | NA         |              |
| NA        | ENSG00000228878 | 35.5503073 | 0.185193    | 0.34689153 | 0.33806318 | 0.56829936 | SEPTIN7-DT   |
| NA        | ENSG00000228879 | 0.15069912 | -0.01848503 | 0.38480575 | 0.84537521 | NA         | RPL35AP6     |
| NA        | ENSG00000228882 | 1.04929494 | 0.02987987  | 0.38181324 | 0.62055315 | NA         | CICP9        |
| NA        | ENSG00000228884 | 0          | NA          | NA         | NA         | NA         | RPL23AP26    |
| NA        | ENSG00000228886 | 0.16735865 | 0.01897177  | 0.38482933 | 0.78225479 | NA         |              |
| NA        | ENSG00000228887 | 1.52817822 | 0.03675943  | 0.38108991 | 0.59629606 | NA         | EEF1DP1      |
| 101929265 | ENSG00000228888 | 0          | NA          | NA         | NA         | NA         | LINC01428    |
| 100289373 | ENSG00000228889 | 35.0458571 | -0.16762717 | 0.31400574 | 0.40174181 | 0.6302829  | UBAC2-AS1    |
| 252953    | ENSG00000228890 | 0          | NA          | NA         | NA         | NA         | TTY21        |
| NA        | ENSG00000228897 | 0.15069912 | -0.01848503 | 0.38480575 | 0.84537521 | NA         |              |
| NA        | ENSG00000228898 | 0          | NA          | NA         | NA         | NA         | MTCO1P43     |
| NA        | ENSG00000228901 | 0          | NA          | NA         | NA         | NA         | HMG2P36      |
| NA        | ENSG00000228902 | 0          | NA          | NA         | NA         | NA         | ST6GALNAC2P1 |
| NA        | ENSG00000228903 | 90.2718567 | -0.0035221  | 0.23618211 | 0.9832565  | 0.99428951 | RASA4CP      |
| NA        | ENSG00000228906 | 2.9745969  | 0.03350634  | 0.37326025 | 0.73438406 | 0.87361673 |              |
| NA        | ENSG00000228909 | 0          | NA          | NA         | NA         | NA         | LINC01803    |
| NA        | ENSG00000228914 | 0          | NA          | NA         | NA         | NA         | OR1H1P       |
| NA        | ENSG00000228915 | 14.1678325 | -0.24714536 | 0.40712172 | 0.20002102 | 0.40494051 | OR7E128P     |
| NA        | ENSG00000228917 | 0          | NA          | NA         | NA         | NA         | NECTIN4-AS1  |
| NA        | ENSG00000228918 | 0          | NA          | NA         | NA         | NA         | LINC01344    |
| 389199    | ENSG00000228919 | 6.75773778 | -0.03919261 | 0.35914688 | 0.76835899 | 0.89324733 |              |
| NA        | ENSG00000228922 | 0          | NA          | NA         | NA         | NA         |              |
| NA        | ENSG00000228923 | 0.50893729 | 0.00998772  | 0.38324763 | 0.78572051 | NA         |              |
| NA        | ENSG00000228925 | 22.5822246 | 0.037679    | 0.30512156 | 0.84237642 | 0.92837824 |              |
| 728137    | ENSG00000228927 | 0          | NA          | NA         | NA         | NA         | TSPY3        |
| NA        | ENSG00000228928 | 0          | NA          | NA         | NA         | NA         | KPNA2P2      |
| NA        | ENSG00000228929 | 0.15069912 | -0.01848503 | 0.38480575 | 0.84537521 | NA         | RPS13P2      |
| NA        | ENSG00000228930 | 0          | NA          | NA         | NA         | NA         | MTCO1P3      |

|           |    |                 |            |             |            |            |            |           |
|-----------|----|-----------------|------------|-------------|------------|------------|------------|-----------|
|           | NA | ENSG00000228933 | 24.5096721 | -0.1645848  | 0.32790866 | 0.40302038 | 0.63099498 |           |
|           | NA | ENSG00000228935 | 0          | NA          | NA         | NA         | NA         |           |
|           | NA | ENSG00000228937 | 0          | NA          | NA         | NA         | NA         | MTA3P1    |
|           | NA | ENSG00000228938 | 0          | NA          | NA         | NA         | NA         | SNRPD2P1  |
|           | NA | ENSG00000228939 | 0          | NA          | NA         | NA         | NA         | AKT3-IT1  |
|           | NA | ENSG00000228940 | 0          | NA          | NA         | NA         | NA         |           |
|           | NA | ENSG00000228941 | 0.33471731 | 0.02354391  | 0.38534154 | 0.62842204 | NA         | UBE3AP2   |
|           | NA | ENSG00000228943 | 0          | NA          | NA         | NA         | NA         |           |
|           | NA | ENSG00000228944 | 0.66695591 | 0.00135672  | 0.3818841  | 0.975907   | NA         |           |
|           | NA | ENSG00000228945 | 0          | NA          | NA         | NA         | NA         | CLUHP2    |
|           | NA | ENSG00000228948 | 0          | NA          | NA         | NA         | NA         | SLC25A6P5 |
|           | NA | ENSG00000228949 | 0          | NA          | NA         | NA         | NA         | UGT1A12P  |
|           | NA | ENSG00000228950 | 0          | NA          | NA         | NA         | NA         |           |
|           | NA | ENSG00000228952 | 0          | NA          | NA         | NA         | NA         | LINC02041 |
|           | NA | ENSG00000228953 | 0          | NA          | NA         | NA         | NA         |           |
|           | NA | ENSG00000228955 | 0          | NA          | NA         | NA         | NA         |           |
|           | NA | ENSG00000228956 | 116.5942   | 1.48795153  | 0.26264804 | 1.16E-09   | 1.99E-08   | SATB1-AS1 |
|           | NA | ENSG00000228957 | 0          | NA          | NA         | NA         | NA         |           |
|           | NA | ENSG00000228958 | 0          | NA          | NA         | NA         | NA         | PIGPP3    |
|           | NA | ENSG00000228959 | 0          | NA          | NA         | NA         | NA         |           |
|           | NA | ENSG00000228960 | 0          | NA          | NA         | NA         | NA         | OR2A9P    |
| 102724502 | NA | ENSG00000228961 | 0          | NA          | NA         | NA         | NA         | LINC01690 |
|           | NA | ENSG00000228963 | 0          | NA          | NA         | NA         | NA         | OR7E93P   |
|           | NA | ENSG00000228965 | 0          | NA          | NA         | NA         | NA         | RPSAP60   |
|           | NA | ENSG00000228966 | 0          | NA          | NA         | NA         | NA         | HOMER2P1  |
|           | NA | ENSG00000228968 | 0          | NA          | NA         | NA         | NA         |           |
|           | NA | ENSG00000228970 | 0.76782197 | -0.02252996 | 0.38365958 | 0.60932458 | NA         | UBTFL6    |
| 100996635 | NA | ENSG00000228971 | 2.46804793 | 0.00483415  | 0.37184666 | 0.96121012 | NA         | LINC02607 |
|           | NA | ENSG00000228973 | 0.15069912 | -0.01848503 | 0.38480575 | 0.84537521 | NA         |           |
|           | NA | ENSG00000228974 | 0          | NA          | NA         | NA         | NA         |           |
|           | NA | ENSG00000228976 | 0          | NA          | NA         | NA         | NA         | SUMO2P8   |
|           | NA | ENSG00000228979 | 0.32407713 | -0.02327503 | 0.38532165 | 0.66846289 | NA         | PPIAP55   |
| 401082    | NA | ENSG00000228980 | 0          | NA          | NA         | NA         | NA         | LINC01205 |
|           | NA | ENSG00000228981 | 8.73773543 | 0.03921445  | 0.34918945 | 0.79685252 | 0.90662359 |           |
|           | NA | ENSG00000228982 | 0          | NA          | NA         | NA         | NA         |           |
|           | NA | ENSG00000228983 | 0.73956469 | 0.0157651   | 0.38175213 | 0.778212   | NA         | SLC47A1P1 |
|           | NA | ENSG00000228984 | 0          | NA          | NA         | NA         | NA         |           |
|           | NA | ENSG00000228985 | 0          | NA          | NA         | NA         | NA         | TRDD3     |

|           |                 |            |             |            |            |            |            |
|-----------|-----------------|------------|-------------|------------|------------|------------|------------|
| NA        | ENSG00000228986 | 0.35665013 | 0.02381684  | 0.38538102 | 0.61403266 | NA         | PHF10P1    |
| NA        | ENSG00000228988 | 0.14931947 | -0.01844332 | 0.38480212 | 0.84537521 | NA         |            |
| NA        | ENSG00000228992 | 0.16735865 | 0.01897177  | 0.38482933 | 0.78225479 | NA         | RPL5P32    |
| NA        | ENSG00000228995 | 0.99209013 | 0.00851166  | 0.38012909 | 0.88857531 | NA         | MTND1P9    |
| NA        | ENSG00000228997 | 0          | NA          | NA         | NA         | NA         |            |
| NA        | ENSG00000228998 | 69.6133389 | 0.00602691  | 0.24249819 | 0.97607373 | 0.99170422 |            |
| NA        | ENSG00000228999 | 0          | NA          | NA         | NA         | NA         |            |
| NA        | ENSG00000229000 | 0          | NA          | NA         | NA         | NA         | SEPTIN7P8  |
| NA        | ENSG00000229001 | 0.14931947 | -0.01844332 | 0.38480212 | 0.84537521 | NA         | ACTBP14    |
| NA        | ENSG00000229002 | 0          | NA          | NA         | NA         | NA         |            |
| 101927219 | ENSG00000229005 | 0          | NA          | NA         | NA         | NA         | HNF4A-AS1  |
| NA        | ENSG00000229007 | 0.94968445 | -0.01484627 | 0.38146341 | 0.78486341 | NA         | EXOSC3P1   |
| NA        | ENSG00000229009 | 0          | NA          | NA         | NA         | NA         | TMPRSS11GP |
| NA        | ENSG00000229010 | 0.34746601 | 0.02370763  | 0.3853651  | 0.61987128 | NA         |            |
| 102724076 | ENSG00000229011 | 0          | NA          | NA         | NA         | NA         | LINC01038  |
| NA        | ENSG00000229012 | 0          | NA          | NA         | NA         | NA         |            |
| NA        | ENSG00000229013 | 0          | NA          | NA         | NA         | NA         |            |
| NA        | ENSG00000229014 | 0          | NA          | NA         | NA         | NA         | RPL30P13   |
| 100506790 | ENSG00000229015 | 0          | NA          | NA         | NA         | NA         |            |
| NA        | ENSG00000229016 | 0.16735865 | 0.01897177  | 0.38482933 | 0.78225479 | NA         |            |
| NA        | ENSG00000229017 | 1.95850739 | -0.00924857 | 0.37558835 | 0.90989329 | NA         | LINC01277  |
| NA        | ENSG00000229018 | 61.6297978 | -0.07298365 | 0.24693738 | 0.69982177 | 0.8552838  | PMS2P7     |
| NA        | ENSG00000229019 | 0          | NA          | NA         | NA         | NA         |            |
| NA        | ENSG00000229020 | 3.9567925  | 0.10938725  | 0.38672571 | 0.35206521 | 0.5820803  | AKR7A2P1   |
| NA        | ENSG00000229021 | 0.18922458 | 0.01954053  | 0.38488496 | 0.78225479 | NA         |            |
| NA        | ENSG00000229022 | 0.18922458 | 0.01954053  | 0.38488496 | 0.78225479 | NA         |            |
| NA        | ENSG00000229023 | 0          | NA          | NA         | NA         | NA         | RAB1AP1    |
| NA        | ENSG00000229025 | 0.16735865 | 0.01897177  | 0.38482933 | 0.78225479 | NA         |            |
| 27437     | ENSG00000229027 | 0          | NA          | NA         | NA         | NA         | HSFY1P1    |
| NA        | ENSG00000229028 | 0          | NA          | NA         | NA         | NA         | KRT223P    |
| NA        | ENSG00000229029 | 5.62016497 | -0.01260052 | 0.3622379  | 0.91625375 | 0.96446211 | CDCA4P1    |
| NA        | ENSG00000229030 | 0          | NA          | NA         | NA         | NA         |            |
| NA        | ENSG00000229031 | 0          | NA          | NA         | NA         | NA         | MTCO1P25   |
| NA        | ENSG00000229032 | 0.173124   | -0.01911262 | 0.38486262 | 0.84537521 | NA         |            |
| NA        | ENSG00000229035 | 0          | NA          | NA         | NA         | NA         | SPRR2C     |
| NA        | ENSG00000229036 | 48.6606715 | -0.42422966 | 0.32210655 | 0.06393029 | 0.1796757  | VDAC1P8    |
| NA        | ENSG00000229037 | 0          | NA          | NA         | NA         | NA         | MRPL32P2   |
| 101927159 | ENSG00000229042 | 0          | NA          | NA         | NA         | NA         |            |

|           |    |                 |            |             |            |            |            |             |
|-----------|----|-----------------|------------|-------------|------------|------------|------------|-------------|
|           | NA | ENSG00000229043 | 112.611828 | 0.46335917  | 0.23590247 | 0.01818456 | 0.06735733 | ZFAND2A-DT  |
|           | NA | ENSG00000229044 | 0          | NA          | NA         | NA         | NA         |             |
|           | NA | ENSG00000229046 | 0          | NA          | NA         | NA         | NA         | HMGN1P2     |
|           | NA | ENSG00000229047 | 0          | NA          | NA         | NA         | NA         |             |
|           | NA | ENSG00000229048 | 0.53554981 | 0.03210677  | 0.38615226 | 0.46336891 | NA         | DUTP1       |
| 101927244 | NA | ENSG00000229051 | 0          | NA          | NA         | NA         | NA         | LINC01788   |
|           | NA | ENSG00000229052 | 0.64873643 | -0.03787059 | 0.3868046  | 0.40898811 | NA         |             |
|           | NA | ENSG00000229054 | 0          | NA          | NA         | NA         | NA         | RPS29P14    |
| 101927482 | NA | ENSG00000229056 | 1.1253752  | 0.07423473  | 0.39161665 | 0.22661821 | NA         | HECW2-AS1   |
|           | NA | ENSG00000229057 | 0.34258875 | 0.0032011   | 0.38339553 | 0.95711779 | NA         | RPS3AP54    |
|           | NA | ENSG00000229060 | 0          | NA          | NA         | NA         | NA         |             |
|           | NA | ENSG00000229063 | 0          | NA          | NA         | NA         | NA         | TRBV23OR9-2 |
|           | NA | ENSG00000229064 | 0          | NA          | NA         | NA         | NA         |             |
|           | NA | ENSG00000229065 | 1.67118051 | 0.00615527  | 0.37532112 | 0.94235465 | NA         |             |
|           | NA | ENSG00000229066 | 0          | NA          | NA         | NA         | NA         |             |
|           | NA | ENSG00000229067 | 0          | NA          | NA         | NA         | NA         |             |
|           | NA | ENSG00000229068 | 0          | NA          | NA         | NA         | NA         | TMPOP1      |
|           | NA | ENSG00000229072 | 0          | NA          | NA         | NA         | NA         | HMGN2P24    |
|           | NA | ENSG00000229079 | 0.88865675 | 0.01622642  | 0.38256405 | 0.72954168 | NA         |             |
|           | NA | ENSG00000229080 | 0          | NA          | NA         | NA         | NA         | MTCO3P30    |
|           | NA | ENSG00000229081 | 4.65135861 | 0.19694811  | 0.43338825 | 0.13041997 | 0.30256457 | LINC01165   |
|           | NA | ENSG00000229082 | 0.97122531 | 0.00437565  | 0.38090128 | 0.93687782 | NA         | OR5AW1P     |
|           | NA | ENSG00000229083 | 0          | NA          | NA         | NA         | NA         | PSMA6P2     |
|           | NA | ENSG00000229086 | 0          | NA          | NA         | NA         | NA         | LINC01548   |
|           | NA | ENSG00000229087 | 0          | NA          | NA         | NA         | NA         | RPS26P18    |
|           | NA | ENSG00000229088 | 0.35666312 | 0.02381693  | 0.38538104 | 0.61402611 | NA         | MTND1P10    |
|           | NA | ENSG00000229089 | 0          | NA          | NA         | NA         | NA         | ANKRD20A8P  |
|           | NA | ENSG00000229090 | 0          | NA          | NA         | NA         | NA         |             |
|           | NA | ENSG00000229091 | 0.14931947 | -0.01844332 | 0.38480212 | 0.84537521 | NA         | HSPA8P8     |
|           | NA | ENSG00000229092 | 2.88076224 | 0.06396365  | 0.37662812 | 0.54451312 | 0.75235966 | IGHV3-47    |
|           | NA | ENSG00000229093 | 0          | NA          | NA         | NA         | NA         | OR51AB1P    |
|           | NA | ENSG00000229097 | 13.4098655 | -0.00217064 | 0.3315631  | 0.98761728 | 0.99589897 | CALM2P2     |
|           | NA | ENSG00000229101 | 0          | NA          | NA         | NA         | NA         | ELOCP20     |
| 101928739 | NA | ENSG00000229102 | 0          | NA          | NA         | NA         | NA         |             |
|           | NA | ENSG00000229104 | 0          | NA          | NA         | NA         | NA         | YY1P2       |
| 100128505 | NA | ENSG00000229105 | 0          | NA          | NA         | NA         | NA         | ASTN2-AS1   |
|           | NA | ENSG00000229106 | 0          | NA          | NA         | NA         | NA         | BTBD6P1     |
|           | NA | ENSG00000229107 | 0          | NA          | NA         | NA         | NA         | ABHD17AP4   |

|           |                 |            |             |            |            |            |             |
|-----------|-----------------|------------|-------------|------------|------------|------------|-------------|
| NA        | ENSG00000229108 | 0          | NA          | NA         | NA         | NA         | LINC02587   |
| NA        | ENSG00000229109 | 4.22209293 | 0.057813    | 0.37063929 | 0.61945767 | 0.80561992 |             |
| NA        | ENSG00000229110 | 0          | NA          | NA         | NA         | NA         |             |
| 100873965 | ENSG00000229111 | 0          | NA          | NA         | NA         | NA         | MED4-AS1    |
| NA        | ENSG00000229112 | 0          | NA          | NA         | NA         | NA         |             |
| NA        | ENSG00000229115 | 0          | NA          | NA         | NA         | NA         |             |
| NA        | ENSG00000229116 | 0          | NA          | NA         | NA         | NA         |             |
| 6171      | ENSG00000229117 | 22179.1722 | -0.10091291 | 0.04924948 | 0.0405811  | 0.12671214 | RPL41       |
| NA        | ENSG00000229118 | 0          | NA          | NA         | NA         | NA         |             |
| NA        | ENSG00000229119 | 0.49839506 | -0.02962949 | 0.38591376 | 0.52358634 | NA         |             |
| NA        | ENSG00000229120 | 0          | NA          | NA         | NA         | NA         | CYCSP4      |
| NA        | ENSG00000229122 | 0.83540459 | 0.04763563  | 0.38826766 | 0.28123021 | NA         | AGBL5-IT1   |
| 100507347 | ENSG00000229124 | 8.84071612 | 1.50233286  | 1.35361831 | 0.00702453 | 0.03106701 | VIM-AS1     |
| NA        | ENSG00000229127 | 17.2276227 | -0.11033626 | 0.33648679 | 0.5407468  | 0.74929575 | KANSL1L-AS1 |
| NA        | ENSG00000229129 | 0          | NA          | NA         | NA         | NA         | ACTG1P2     |
| NA        | ENSG00000229131 | 0          | NA          | NA         | NA         | NA         |             |
| NA        | ENSG00000229132 | 1.5180838  | -0.00864795 | 0.37723958 | 0.9079976  | NA         | EIF4A1P10   |
| NA        | ENSG00000229133 | 0.173124   | -0.01911262 | 0.38486262 | 0.84537521 | NA         | RPS7P4      |
| NA        | ENSG00000229138 | 0          | NA          | NA         | NA         | NA         | CDY6P       |
| 137196    | ENSG00000229140 | 0.32546767 | 0.00274882  | 0.38338701 | 0.95475083 | NA         | CCDC26      |
| 728724    | ENSG00000229140 | 0.32546767 | 0.00274882  | 0.38338701 | 0.95475083 | NA         | CCDC26      |
| 106144608 | ENSG00000229140 | 0.32546767 | 0.00274882  | 0.38338701 | 0.95475083 | NA         | CCDC26      |
| NA        | ENSG00000229142 | 0          | NA          | NA         | NA         | NA         | HCG4P8      |
| NA        | ENSG00000229143 | 0          | NA          | NA         | NA         | NA         |             |
| NA        | ENSG00000229145 | 0          | NA          | NA         | NA         | NA         | ACTBP1      |
| NA        | ENSG00000229146 | 0.51937201 | -0.02557462 | 0.38567603 | 0.54680819 | NA         | SNX18P4     |
| NA        | ENSG00000229147 | 0          | NA          | NA         | NA         | NA         | SMPD4P2     |
| NA        | ENSG00000229150 | 0          | NA          | NA         | NA         | NA         | CRYGEP      |
| NA        | ENSG00000229151 | 0.83659833 | -0.00962113 | 0.3801652  | 0.87432639 | NA         |             |
| NA        | ENSG00000229152 | 118.008314 | -0.10079233 | 0.20497736 | 0.56031049 | 0.76415299 | ANKRD10-IT1 |
| 285965    | ENSG00000229153 | 0.45209736 | -0.02505403 | 0.38558831 | 0.57865948 | NA         | EPHA1-AS1   |
| 100873997 | ENSG00000229154 | 4.87162359 | -0.08844364 | 0.37423828 | 0.48584266 | 0.70600735 | KCNQ5-AS1   |
| NA        | ENSG00000229155 | 0          | NA          | NA         | NA         | NA         | LINC02038   |
| NA        | ENSG00000229156 | 0.87824652 | 0.0153439   | 0.38251325 | 0.74332429 | NA         |             |
| NA        | ENSG00000229159 | 0          | NA          | NA         | NA         | NA         | TSPY23P     |
| NA        | ENSG00000229160 | 0          | NA          | NA         | NA         | NA         |             |
| NA        | ENSG00000229161 | 0          | NA          | NA         | NA         | NA         | TCPIP1      |
| NA        | ENSG00000229162 | 0          | NA          | NA         | NA         | NA         | RUNX3-AS1   |

|           |                 |            |             |            |            |            |            |
|-----------|-----------------|------------|-------------|------------|------------|------------|------------|
| NA        | ENSG00000229163 | 0          | NA          | NA         | NA         | NA         | NAP1L1P2   |
| NA        | ENSG00000229165 | 0          | NA          | NA         | NA         | NA         | GDI2P1     |
| NA        | ENSG00000229167 | 0          | NA          | NA         | NA         | NA         |            |
| NA        | ENSG00000229168 | 0.32327482 | 0.00158244  | 0.38337043 | 0.96593158 | NA         | RPL19P20   |
| NA        | ENSG00000229169 | 0          | NA          | NA         | NA         | NA         |            |
| NA        | ENSG00000229172 | 0          | NA          | NA         | NA         | NA         |            |
| NA        | ENSG00000229173 | 0          | NA          | NA         | NA         | NA         | SRMP3      |
| 101927195 | ENSG00000229175 | 0          | NA          | NA         | NA         | NA         | LINC00382  |
| NA        | ENSG00000229177 | 0          | NA          | NA         | NA         | NA         |            |
| NA        | ENSG00000229178 | 6.8773066  | -0.24011731 | 0.44543495 | 0.13764476 | 0.31342501 |            |
| NA        | ENSG00000229180 | 519.975584 | 0.12147852  | 0.10827877 | 0.24220471 | 0.46045817 |            |
| NA        | ENSG00000229182 | 0          | NA          | NA         | NA         | NA         | MRPS16P1   |
| 643847    | ENSG00000229183 | 0.45209736 | -0.02505403 | 0.38558831 | 0.57865948 | NA         | PGA4       |
| NA        | ENSG00000229184 | 0          | NA          | NA         | NA         | NA         | ATP5PDP2   |
| NA        | ENSG00000229186 | 5.52283556 | 0.03114296  | 0.38670161 | 0.12593064 | 0.29508254 | ADAM1A     |
| NA        | ENSG00000229188 | 0          | NA          | NA         | NA         | NA         |            |
| NA        | ENSG00000229190 | 0          | NA          | NA         | NA         | NA         |            |
| NA        | ENSG00000229191 | 17.8009597 | -0.71675136 | 0.70536275 | 0.02410758 | 0.08469589 |            |
| NA        | ENSG00000229192 | 0          | NA          | NA         | NA         | NA         |            |
| NA        | ENSG00000229195 | 0          | NA          | NA         | NA         | NA         |            |
| 100128325 | ENSG00000229196 | 0.86216524 | -0.01202697 | 0.38097831 | 0.82023256 | NA         |            |
| NA        | ENSG00000229197 | 0          | NA          | NA         | NA         | NA         | RPS15AP28  |
| NA        | ENSG00000229201 | 0          | NA          | NA         | NA         | NA         | LINC02787  |
| NA        | ENSG00000229203 | 2.64194255 | 0.0412804   | 0.37332517 | 0.68665882 | 0.84769738 |            |
| NA        | ENSG00000229204 | 0.34163603 | 0.00285788  | 0.38338866 | 0.96040212 | NA         | PTGES3P3   |
| NA        | ENSG00000229205 | 86.2602363 | -0.39463717 | 0.2389076  | 0.0431434  | 0.13291451 | LINC00200  |
| NA        | ENSG00000229206 | 0          | NA          | NA         | NA         | NA         |            |
| NA        | ENSG00000229207 | 3.06864134 | -0.12487993 | 0.3998593  | 0.22237819 | 0.43535977 | SERPINH1P1 |
| NA        | ENSG00000229208 | 0          | NA          | NA         | NA         | NA         | RBMY2NP    |
| NA        | ENSG00000229209 | 0          | NA          | NA         | NA         | NA         |            |
| NA        | ENSG00000229211 | 0          | NA          | NA         | NA         | NA         | KCTD9P6    |
| NA        | ENSG00000229212 | 127.811662 | 0.47423302  | 0.21000648 | 0.00890472 | 0.03768041 |            |
| NA        | ENSG00000229213 | 0          | NA          | NA         | NA         | NA         |            |
| 401288    | ENSG00000229214 | 16.95434   | 0.07697135  | 0.32130789 | 0.67668411 | 0.84200981 | LINC00242  |
| NA        | ENSG00000229217 | 0          | NA          | NA         | NA         | NA         | CYCSP11    |
| NA        | ENSG00000229220 | 0          | NA          | NA         | NA         | NA         |            |
| NA        | ENSG00000229221 | 0.61740167 | -0.01519295 | 0.3833142  | 0.72382456 | NA         | HNRNPA1P66 |
| NA        | ENSG00000229222 | 5.93154084 | 0.03263783  | 0.35871846 | 0.8090847  | 0.91334153 | KRT18P4    |

|           |                 |            |             |            |            |            |            |
|-----------|-----------------|------------|-------------|------------|------------|------------|------------|
| NA        | ENSG00000229224 | 0          | NA          | NA         | NA         | NA         |            |
| NA        | ENSG00000229225 | 0          | NA          | NA         | NA         | NA         |            |
| NA        | ENSG00000229226 | 0          | NA          | NA         | NA         | NA         | BTF3L4P4   |
| NA        | ENSG00000229227 | 4.63853698 | 0.0141685   | 0.36482756 | 0.90656399 | 0.95939951 |            |
| 100287814 | ENSG00000229228 | 0.33471731 | 0.02354391  | 0.38534154 | 0.62842204 | NA         | LINC00582  |
| NA        | ENSG00000229229 | 0          | NA          | NA         | NA         | NA         |            |
| NA        | ENSG00000229230 | 0          | NA          | NA         | NA         | NA         | MT1P3      |
| NA        | ENSG00000229231 | 0          | NA          | NA         | NA         | NA         | FEM1AP1    |
| NA        | ENSG00000229232 | 0          | NA          | NA         | NA         | NA         | KRT18P53   |
| NA        | ENSG00000229233 | 0          | NA          | NA         | NA         | NA         |            |
| NA        | ENSG00000229234 | 0          | NA          | NA         | NA         | NA         | RBMY1KP    |
| NA        | ENSG00000229235 | 0          | NA          | NA         | NA         | NA         | RPL37P18   |
| 246119    | ENSG00000229236 | 0.544921   | 0.03255816  | 0.38619882 | 0.45687164 | NA         | TTY10      |
| NA        | ENSG00000229237 | 0          | NA          | NA         | NA         | NA         | HMG1P37    |
| NA        | ENSG00000229238 | 0          | NA          | NA         | NA         | NA         | PPP1R12BP1 |
| NA        | ENSG00000229239 | 0          | NA          | NA         | NA         | NA         |            |
| NA        | ENSG00000229240 | 0          | NA          | NA         | NA         | NA         | LINC00710  |
| NA        | ENSG00000229241 | 1.68280647 | -0.04023768 | 0.38096331 | 0.57961165 | NA         | PNPT1P1    |
| NA        | ENSG00000229242 | 0          | NA          | NA         | NA         | NA         |            |
| 100996624 | ENSG00000229243 | 0          | NA          | NA         | NA         | NA         | LINC01981  |
| NA        | ENSG00000229246 | 0.16735865 | 0.01897177  | 0.38482933 | 0.78225479 | NA         | LINC00377  |
| NA        | ENSG00000229247 | 0          | NA          | NA         | NA         | NA         |            |
| NA        | ENSG00000229248 | 0          | NA          | NA         | NA         | NA         | WBP2P1     |
| NA        | ENSG00000229249 | 0          | NA          | NA         | NA         | NA         | LINC00446  |
| NA        | ENSG00000229250 | 0          | NA          | NA         | NA         | NA         | USP9YP31   |
| NA        | ENSG00000229251 | 0.48501627 | 0.01104311  | 0.3833888  | 0.78999982 | NA         | HNRNPA1P8  |
| NA        | ENSG00000229254 | 0          | NA          | NA         | NA         | NA         | OR8C1P     |
| NA        | ENSG00000229255 | 0          | NA          | NA         | NA         | NA         |            |
| NA        | ENSG00000229256 | 0.173124   | -0.01911262 | 0.38486262 | 0.84537521 | NA         | ST13P13    |
| NA        | ENSG00000229257 | 0          | NA          | NA         | NA         | NA         |            |
| 102723727 | ENSG00000229258 | 0.16735865 | 0.01897177  | 0.38482933 | 0.78225479 | NA         | LPGAT1-AS1 |
| NA        | ENSG00000229259 | 0          | NA          | NA         | NA         | NA         | LRRC37A12P |
| 101928994 | ENSG00000229261 | 0          | NA          | NA         | NA         | NA         |            |
| NA        | ENSG00000229262 | 0          | NA          | NA         | NA         | NA         |            |
| NA        | ENSG00000229263 | 0.44960276 | -0.02729327 | 0.38571254 | 0.56202333 | NA         |            |
| NA        | ENSG00000229266 | 0          | NA          | NA         | NA         | NA         | POM121L8P  |
| NA        | ENSG00000229267 | 12.8022406 | -0.15844421 | 0.36879513 | 0.36221764 | 0.59197696 | SNHG31     |
| NA        | ENSG00000229268 | 0          | NA          | NA         | NA         | NA         | PES1P2     |

|           |                 |            |             |            |            |            |           |
|-----------|-----------------|------------|-------------|------------|------------|------------|-----------|
| NA        | ENSG00000229269 | 0          | NA          | NA         | NA         | NA         |           |
| NA        | ENSG00000229271 | 0          | NA          | NA         | NA         | NA         |           |
| NA        | ENSG00000229272 | 2.54458801 | 0.11832363  | 0.40483379 | 0.12755867 | NA         |           |
| NA        | ENSG00000229273 | 6.61058455 | 0.07331783  | 0.36706997 | 0.58130384 | 0.77852492 |           |
| 105375009 | ENSG00000229274 | 0          | NA          | NA         | NA         | NA         | LINC02829 |
| NA        | ENSG00000229275 | 0          | NA          | NA         | NA         | NA         |           |
| NA        | ENSG00000229276 | 0.173124   | -0.01911262 | 0.38486262 | 0.84537521 | NA         | REV3L-IT1 |
| NA        | ENSG00000229278 | 5.36392406 | -0.08792858 | 0.37937682 | 0.44481835 | 0.66962186 |           |
| NA        | ENSG00000229280 | 0          | NA          | NA         | NA         | NA         | EEF1DP6   |
| NA        | ENSG00000229281 | 0          | NA          | NA         | NA         | NA         | GPR53P    |
| NA        | ENSG00000229282 | 0          | NA          | NA         | NA         | NA         |           |
| NA        | ENSG00000229283 | 0          | NA          | NA         | NA         | NA         |           |
| NA        | ENSG00000229286 | 0          | NA          | NA         | NA         | NA         |           |
| NA        | ENSG00000229287 | 0          | NA          | NA         | NA         | NA         | FABP5P4   |
| NA        | ENSG00000229288 | 0          | NA          | NA         | NA         | NA         |           |
| NA        | ENSG00000229289 | 0          | NA          | NA         | NA         | NA         |           |
| NA        | ENSG00000229291 | 0.6798474  | 0.00379411  | 0.38244633 | 0.9289167  | NA         | LINC02768 |
| 729974    | ENSG00000229292 | 0          | NA          | NA         | NA         | NA         | RFPL4AL1  |
| NA        | ENSG00000229294 | 0          | NA          | NA         | NA         | NA         |           |
| NA        | ENSG00000229297 | 0          | NA          | NA         | NA         | NA         |           |
| NA        | ENSG00000229298 | 6.6042501  | 0.09626398  | 0.37163158 | 0.4839293  | 0.70415528 | TUBB8P1   |
| NA        | ENSG00000229299 | 6.59443931 | -0.14482044 | 0.39962269 | 0.24928266 | 0.46867491 |           |
| NA        | ENSG00000229301 | 0          | NA          | NA         | NA         | NA         |           |
| NA        | ENSG00000229303 | 0          | NA          | NA         | NA         | NA         | PPIAP25   |
| NA        | ENSG00000229305 | 0          | NA          | NA         | NA         | NA         |           |
| NA        | ENSG00000229306 | 0          | NA          | NA         | NA         | NA         |           |
| 100874180 | ENSG00000229307 | 0          | NA          | NA         | NA         | NA         | LINC00459 |
| NA        | ENSG00000229308 | 0          | NA          | NA         | NA         | NA         |           |
| NA        | ENSG00000229309 | 0          | NA          | NA         | NA         | NA         |           |
| NA        | ENSG00000229310 | 0          | NA          | NA         | NA         | NA         | RPP40P1   |
| NA        | ENSG00000229311 | 21.8597951 | -0.05958916 | 0.30710802 | 0.75018099 | 0.88246122 |           |
| NA        | ENSG00000229312 | 2.05712159 | -0.09743543 | 0.39501518 | 0.22154097 | NA         |           |
| NA        | ENSG00000229313 | 0          | NA          | NA         | NA         | NA         |           |
| 5004      | ENSG00000229314 | 0          | NA          | NA         | NA         | NA         | ORM1      |
| 728012    | ENSG00000229315 | 0          | NA          | NA         | NA         | NA         | MCHR2-AS1 |
| NA        | ENSG00000229316 | 0          | NA          | NA         | NA         | NA         | HMGB1P45  |
| NA        | ENSG00000229320 | 103.247467 | 0.04709753  | 0.2038065  | 0.78655344 | 0.90294962 | KRT8P12   |
| NA        | ENSG00000229321 | 2.90588927 | 0.01797522  | 0.37431343 | 0.8375236  | 0.92628758 |           |



|           |                 |            |             |            |            |            |            |
|-----------|-----------------|------------|-------------|------------|------------|------------|------------|
| NA        | ENSG00000229322 | 0          | NA          | NA         | NA         | NA         |            |
| NA        | ENSG00000229324 | 0          | NA          | NA         | NA         | NA         | NUTF2P7    |
| NA        | ENSG00000229325 | 10.4088959 | -0.22838766 | 0.41619144 | 0.1961153  | 0.39984868 | ACAP2-IT1  |
| NA        | ENSG00000229326 | 0.16735865 | 0.01897177  | 0.38482933 | 0.78225479 | NA         | RPL17P15   |
| NA        | ENSG00000229327 | 0          | NA          | NA         | NA         | NA         |            |
| NA        | ENSG00000229330 | 0          | NA          | NA         | NA         | NA         |            |
| NA        | ENSG00000229331 | 0          | NA          | NA         | NA         | NA         | GK-IT1     |
| NA        | ENSG00000229332 | 0          | NA          | NA         | NA         | NA         | PGBD4P8    |
| NA        | ENSG00000229334 | 10.1768397 | -0.00484957 | 0.34229534 | 0.97348212 | 0.99020176 |            |
| NA        | ENSG00000229335 | 0          | NA          | NA         | NA         | NA         | DANT1      |
| NA        | ENSG00000229336 | 0.173124   | -0.01911262 | 0.38486262 | 0.84537521 | NA         | SREK1IP1P1 |
| NA        | ENSG00000229337 | 10.8278628 | -0.14422685 | 0.3684244  | 0.38933338 | 0.61854375 |            |
| NA        | ENSG00000229338 | 0          | NA          | NA         | NA         | NA         | NME2P3     |
| NA        | ENSG00000229339 | 0          | NA          | NA         | NA         | NA         |            |
| NA        | ENSG00000229343 | 0          | NA          | NA         | NA         | NA         | CDY22P     |
| NA        | ENSG00000229344 | 1.82612496 | 0.0210964   | 0.377979   | 0.78201295 | NA         | MTCO2P12   |
| NA        | ENSG00000229345 | 0          | NA          | NA         | NA         | NA         |            |
| NA        | ENSG00000229347 | 0          | NA          | NA         | NA         | NA         |            |
| NA        | ENSG00000229348 | 0.81184682 | -0.03576796 | 0.38369041 | 0.50114691 | NA         | HYI-AS1    |
| NA        | ENSG00000229349 | 0          | NA          | NA         | NA         | NA         | ACTG1P9    |
| NA        | ENSG00000229351 | 0          | NA          | NA         | NA         | NA         | KRTAP9-11P |
| NA        | ENSG00000229352 | 0.31664933 | 0.00104351  | 0.38336605 | 0.96785479 | NA         |            |
| 100861510 | ENSG00000229356 | 0.81438481 | -0.01132717 | 0.38027742 | 0.85223318 | NA         | LRRC3-DT   |
| NA        | ENSG00000229357 | 0          | NA          | NA         | NA         | NA         | CYCSP51    |
| NA        | ENSG00000229358 | 26.5185515 | 0.21821146  | 0.33125427 | 0.29192831 | 0.5179626  | DPY19L1P1  |
| 5301      | ENSG00000229359 | 0          | NA          | NA         | NA         | NA         | PIN1P1     |
| NA        | ENSG00000229360 | 0          | NA          | NA         | NA         | NA         | PPP1R2P5   |
| NA        | ENSG00000229361 | 0          | NA          | NA         | NA         | NA         | UBTFL7     |
| NA        | ENSG00000229365 | 0          | NA          | NA         | NA         | NA         |            |
| NA        | ENSG00000229367 | 0          | NA          | NA         | NA         | NA         | HMG2P19    |
| NA        | ENSG00000229368 | 1.18777663 | 0.01474818  | 0.37985976 | 0.81766827 | NA         |            |
| NA        | ENSG00000229369 | 0.15069912 | -0.01848503 | 0.38480575 | 0.84537521 | NA         |            |
| NA        | ENSG00000229370 | 0          | NA          | NA         | NA         | NA         |            |
| 100873952 | ENSG00000229372 | 0.53184983 | 0.01319331  | 0.38342077 | 0.74955495 | NA         | SZT2-AS1   |
| 643365    | ENSG00000229373 | 0          | NA          | NA         | NA         | NA         | LINC00452  |
| NA        | ENSG00000229375 | 0          | NA          | NA         | NA         | NA         | USP24P1    |
| NA        | ENSG00000229376 | 14.2160917 | -0.05523034 | 0.33071107 | 0.7490256  | 0.88205755 | CICP3      |
| NA        | ENSG00000229379 | 0          | NA          | NA         | NA         | NA         |            |

|           |                 |            |             |            |            |            |             |
|-----------|-----------------|------------|-------------|------------|------------|------------|-------------|
| 101927000 | ENSG00000229380 | 1.53330137 | 0.02911164  | 0.38122719 | 0.6463085  | NA         | PRKAR1B-AS2 |
| NA        | ENSG00000229382 | 0          | NA          | NA         | NA         | NA         |             |
| NA        | ENSG00000229384 | 0          | NA          | NA         | NA         | NA         | HMGB1P16    |
| NA        | ENSG00000229385 | 0.82412577 | -0.02816922 | 0.38334241 | 0.5522259  | NA         | CTNNA2-AS1  |
| NA        | ENSG00000229386 | 0          | NA          | NA         | NA         | NA         | OR8B9P      |
| 105378616 | ENSG00000229388 | 2.01674199 | -0.02201602 | 0.3747092  | 0.80375305 | NA         | LINC01715   |
| NA        | ENSG00000229389 | 0          | NA          | NA         | NA         | NA         |             |
| NA        | ENSG00000229390 | 0.74264788 | 0.04267494  | 0.38748003 | 0.33066109 | NA         | MICD        |
| 3128      | ENSG00000229391 | 0          | NA          | NA         | NA         | NA         | HLA-DRB6    |
| NA        | ENSG00000229393 | 1.50010614 | -0.00674923 | 0.37602692 | 0.93252524 | NA         |             |
| NA        | ENSG00000229395 | 0          | NA          | NA         | NA         | NA         |             |
| NA        | ENSG00000229398 | 0          | NA          | NA         | NA         | NA         |             |
| NA        | ENSG00000229399 | 0.51779697 | 0.0312432   | 0.38606539 | 0.47601421 | NA         |             |
| NA        | ENSG00000229400 | 0          | NA          | NA         | NA         | NA         | CNIH3-AS1   |
| 106660610 | ENSG00000229401 | 0          | NA          | NA         | NA         | NA         | MIR5689HG   |
| NA        | ENSG00000229402 | 0          | NA          | NA         | NA         | NA         |             |
| NA        | ENSG00000229403 | 0          | NA          | NA         | NA         | NA         |             |
| 170425    | ENSG00000229404 | 0          | NA          | NA         | NA         | NA         | LINC00858   |
| NA        | ENSG00000229405 | 0          | NA          | NA         | NA         | NA         |             |
| NA        | ENSG00000229406 | 0          | NA          | NA         | NA         | NA         | OFD1P4Y     |
| NA        | ENSG00000229407 | 87.1966091 | 0.07894329  | 0.22286282 | 0.66569746 | 0.83494641 |             |
| NA        | ENSG00000229409 | 0          | NA          | NA         | NA         | NA         |             |
| NA        | ENSG00000229413 | 15.4650466 | 0.08461409  | 0.3286595  | 0.64089699 | 0.82008361 |             |
| 338653    | ENSG00000229414 | 0.14931947 | -0.01844332 | 0.38480212 | 0.84537521 | NA         | KCNQ1-AS1   |
| NA        | ENSG00000229415 | 0          | NA          | NA         | NA         | NA         | SFTA3       |
| NA        | ENSG00000229416 | 0          | NA          | NA         | NA         | NA         | USP9YP8     |
| NA        | ENSG00000229417 | 0.47400914 | -0.03509759 | 0.38628859 | 0.49540921 | NA         | NPM1P25     |
| NA        | ENSG00000229418 | 0          | NA          | NA         | NA         | NA         |             |
| NA        | ENSG00000229419 | 43.4644336 | -1.34106478 | 0.40250913 | 6.51E-05   | 0.00051978 | RALGAPA1P1  |
| NA        | ENSG00000229421 | 0          | NA          | NA         | NA         | NA         | H3P10       |
| NA        | ENSG00000229422 | 139.260293 | -0.1446021  | 0.20794745 | 0.40898561 | 0.6370813  |             |
| NA        | ENSG00000229423 | 0          | NA          | NA         | NA         | NA         | RPL27AP8    |
| NA        | ENSG00000229424 | 0.173733   | 0.01914545  | 0.38484597 | 0.78225479 | NA         |             |
| 101927745 | ENSG00000229425 | 1.16675197 | 0.07945061  | 0.39517244 | 0.12559605 | NA         |             |
| 105369302 | ENSG00000229425 | 1.16675197 | 0.07945061  | 0.39517244 | 0.12559605 | NA         |             |
| NA        | ENSG00000229427 | 1.5878747  | 0.0250744   | 0.37923973 | 0.7256704  | NA         | ANKRD26P4   |
| NA        | ENSG00000229431 | 3.60088444 | -0.08666534 | 0.37954966 | 0.44711687 | 0.67106427 | MED8-AS1    |
| 101928992 | ENSG00000229433 | 0          | NA          | NA         | NA         | NA         | LINC02069   |

|           |                 |            |             |            |            |           |             |
|-----------|-----------------|------------|-------------|------------|------------|-----------|-------------|
| NA        | ENSG00000229434 | 0          | NA          | NA         | NA         | NA        |             |
| NA        | ENSG00000229435 | 0          | NA          | NA         | NA         | NA        | PIP5K1P2    |
| NA        | ENSG00000229436 | 0          | NA          | NA         | NA         | NA        |             |
| NA        | ENSG00000229437 | 0          | NA          | NA         | NA         | NA        | LINC00366   |
| NA        | ENSG00000229440 | 0          | NA          | NA         | NA         | NA        |             |
| NA        | ENSG00000229442 | 0          | NA          | NA         | NA         | NA        | THEMIS3P    |
| NA        | ENSG00000229443 | 0          | NA          | NA         | NA         | NA        | LINC00433   |
| 101929592 | ENSG00000229444 | 0          | NA          | NA         | NA         | NA        | ST3GAL3-AS1 |
| NA        | ENSG00000229447 | 3.32742885 | -0.00293894 | 0.37070131 | 0.9745704  | 0.9909531 |             |
| 107986703 | ENSG00000229452 | 0          | NA          | NA         | NA         | NA        | CPVL-AS1    |
| 646424    | ENSG00000229453 | 0          | NA          | NA         | NA         | NA        | SPINK8      |
| NA        | ENSG00000229454 | 0          | NA          | NA         | NA         | NA        |             |
| NA        | ENSG00000229455 | 0          | NA          | NA         | NA         | NA        | RPS10P18    |
| NA        | ENSG00000229456 | 0          | NA          | NA         | NA         | NA        | RLIMP1      |
| NA        | ENSG00000229457 | 0          | NA          | NA         | NA         | NA        | LINC01789   |
| NA        | ENSG00000229458 | 0          | NA          | NA         | NA         | NA        |             |
| NA        | ENSG00000229459 | 0          | NA          | NA         | NA         | NA        |             |
| NA        | ENSG00000229462 | 0          | NA          | NA         | NA         | NA        | WDR4P2      |
| NA        | ENSG00000229463 | 0.173124   | -0.01911262 | 0.38486262 | 0.84537521 | NA        | LYST-AS1    |
| NA        | ENSG00000229466 | 0          | NA          | NA         | NA         | NA        | LINC02627   |
| NA        | ENSG00000229468 | 0          | NA          | NA         | NA         | NA        | RPL39P18    |
| NA        | ENSG00000229473 | 0.16735865 | 0.01897177  | 0.38482933 | 0.78225479 | NA        | RGS17P1     |
| 197135    | ENSG00000229474 | 1.50301348 | 0.03144185  | 0.38118518 | 0.56264479 | NA        | PATL2       |
| NA        | ENSG00000229478 | 0          | NA          | NA         | NA         | NA        | ROBO2P1     |
| NA        | ENSG00000229483 | 0          | NA          | NA         | NA         | NA        | LINC00362   |
| NA        | ENSG00000229484 | 0          | NA          | NA         | NA         | NA        | LINC02766   |
| NA        | ENSG00000229485 | 0          | NA          | NA         | NA         | NA        | KSR1P1      |
| NA        | ENSG00000229486 | 0          | NA          | NA         | NA         | NA        |             |
| NA        | ENSG00000229487 | 0          | NA          | NA         | NA         | NA        | ALG13-AS1   |
| NA        | ENSG00000229491 | 0          | NA          | NA         | NA         | NA        |             |
| NA        | ENSG00000229492 | 0          | NA          | NA         | NA         | NA        |             |
| 101927948 | ENSG00000229494 | 0          | NA          | NA         | NA         | NA        |             |
| NA        | ENSG00000229495 | 0.173733   | 0.01914545  | 0.38484597 | 0.78225479 | NA        |             |
| NA        | ENSG00000229497 | 0          | NA          | NA         | NA         | NA        |             |
| NA        | ENSG00000229498 | 0.16735865 | 0.01897177  | 0.38482933 | 0.78225479 | NA        |             |
| NA        | ENSG00000229500 | 0          | NA          | NA         | NA         | NA        | RPL17P1     |
| NA        | ENSG00000229502 | 0.18922458 | 0.01954053  | 0.38488496 | 0.78225479 | NA        |             |
| NA        | ENSG00000229503 | 0.16735865 | 0.01897177  | 0.38482933 | 0.78225479 | NA        | RPL21P37    |

|           |                 |            |             |            |            |            |              |
|-----------|-----------------|------------|-------------|------------|------------|------------|--------------|
| NA        | ENSG00000229505 | 0          | NA          | NA         | NA         | NA         |              |
| NA        | ENSG00000229508 | 0          | NA          | NA         | NA         | NA         | PHKG1P4      |
| NA        | ENSG00000229509 | 0          | NA          | NA         | NA         | NA         |              |
| NA        | ENSG00000229511 | 4.79843373 | 0.14246726  | 0.39707529 | 0.26815398 | 0.49088161 | GAS2L1P1     |
| NA        | ENSG00000229512 | 0          | NA          | NA         | NA         | NA         |              |
| NA        | ENSG00000229515 | 0          | NA          | NA         | NA         | NA         | FLT1P1       |
| NA        | ENSG00000229518 | 0          | NA          | NA         | NA         | NA         | UBE2V1P3     |
| NA        | ENSG00000229519 | 0.32563364 | 0.0021288   | 0.38337701 | 0.95993008 | NA         |              |
| NA        | ENSG00000229520 | 0          | NA          | NA         | NA         | NA         | LINC00404    |
| 100874213 | ENSG00000229521 | 0          | NA          | NA         | NA         | NA         | MYCBP2-AS2   |
| NA        | ENSG00000229522 | 0          | NA          | NA         | NA         | NA         | LINC01523    |
| NA        | ENSG00000229525 | 5.03098725 | 0.10609967  | 0.37785564 | 0.42544771 | 0.65125241 |              |
| NA        | ENSG00000229526 | 0          | NA          | NA         | NA         | NA         | KRT16P4      |
| NA        | ENSG00000229528 | 0          | NA          | NA         | NA         | NA         |              |
| NA        | ENSG00000229530 | 0.3168298  | 0.00122953  | 0.38336741 | 0.9660727  | NA         |              |
| 101928696 | ENSG00000229531 | 0          | NA          | NA         | NA         | NA         | RABGAP1L-AS1 |
| NA        | ENSG00000229532 | 0          | NA          | NA         | NA         | NA         |              |
| NA        | ENSG00000229533 | 0.34685661 | 7.85E-05    | 0.38336202 | 0.96771276 | NA         |              |
| NA        | ENSG00000229534 | 0          | NA          | NA         | NA         | NA         | HNRNPA1P53   |
| 105373615 | ENSG00000229536 | 6.33291109 | -0.03025025 | 0.35589395 | 0.82462341 | 0.92036233 | LINC02572    |
| 105378769 | ENSG00000229537 | 0          | NA          | NA         | NA         | NA         | LINC01739    |
| NA        | ENSG00000229539 | 2.1430838  | -0.0340858  | 0.37899723 | 0.65690338 | NA         | PANK2-AS1    |
| NA        | ENSG00000229541 | 0          | NA          | NA         | NA         | NA         | GAPDHP26     |
| NA        | ENSG00000229543 | 0.33471731 | 0.02354391  | 0.38534154 | 0.62842204 | NA         |              |
| 390010    | ENSG00000229544 | 0          | NA          | NA         | NA         | NA         | NKX1-2       |
| NA        | ENSG00000229546 | 0          | NA          | NA         | NA         | NA         | LINC00428    |
| 100131816 | ENSG00000229547 | 0          | NA          | NA         | NA         | NA         | UBE2DNL      |
| 728403    | ENSG00000229549 | 0          | NA          | NA         | NA         | NA         | TSPY8        |
| NA        | ENSG00000229550 | 0          | NA          | NA         | NA         | NA         |              |
| NA        | ENSG00000229551 | 0          | NA          | NA         | NA         | NA         | GAPDHP17     |
| NA        | ENSG00000229553 | 0          | NA          | NA         | NA         | NA         | USP9YP17     |
| NA        | ENSG00000229554 | 0          | NA          | NA         | NA         | NA         | RPL21P24     |
| NA        | ENSG00000229557 | 0          | NA          | NA         | NA         | NA         | LINC00379    |
| 100506680 | ENSG00000229558 | 4.81440426 | -0.06236179 | 0.36913465 | 0.61000025 | 0.79837997 | SACS-AS1     |
| NA        | ENSG00000229559 | 0          | NA          | NA         | NA         | NA         |              |
| NA        | ENSG00000229560 | 0          | NA          | NA         | NA         | NA         | LYARP1       |
| NA        | ENSG00000229562 | 0          | NA          | NA         | NA         | NA         | ZFYVE9P1     |
| 101927528 | ENSG00000229563 | 0          | NA          | NA         | NA         | NA         | LINC01204    |

|           |                 |            |             |            |            |            |            |
|-----------|-----------------|------------|-------------|------------|------------|------------|------------|
| NA        | ENSG00000229565 | 0          | NA          | NA         | NA         | NA         | LINC02264  |
| NA        | ENSG00000229567 | 0          | NA          | NA         | NA         | NA         |            |
| NA        | ENSG00000229568 | 0          | NA          | NA         | NA         | NA         | SMC4P1     |
| NA        | ENSG00000229569 | 0.18922458 | 0.01954053  | 0.38488496 | 0.78225479 | NA         |            |
| NA        | ENSG00000229570 | 0          | NA          | NA         | NA         | NA         | GAPDHP58   |
| 441873    | ENSG00000229571 | 0          | NA          | NA         | NA         | NA         | PRAMEF25   |
| 645359    | ENSG00000229571 | 0          | NA          | NA         | NA         | NA         | PRAMEF25   |
| NA        | ENSG00000229572 | 0          | NA          | NA         | NA         | NA         | EIF4BP4    |
| 100874143 | ENSG00000229578 | 0          | NA          | NA         | NA         | NA         | LINC00358  |
| NA        | ENSG00000229582 | 11.4652539 | -0.02544891 | 0.33616437 | 0.87536494 | 0.94499851 |            |
| NA        | ENSG00000229585 | 1.03704424 | 0.04938566  | 0.38641123 | 0.34997119 | NA         | RPL21P44   |
| NA        | ENSG00000229586 | 0.173733   | 0.01914545  | 0.38484597 | 0.78225479 | NA         | TNPO1P3    |
| NA        | ENSG00000229587 | 0.95797506 | -0.01154181 | 0.38117166 | 0.8336531  | NA         |            |
| NA        | ENSG00000229588 | 0          | NA          | NA         | NA         | NA         |            |
| 100128640 | ENSG00000229589 | 46.0685052 | 0.14047866  | 0.283968   | 0.4807811  | 0.70158112 | ACVR2B-AS1 |
| NA        | ENSG00000229590 | 0.65657418 | 0.02513028  | 0.3835478  | 0.59850434 | NA         | MSX2P1     |
| NA        | ENSG00000229591 | 3.37827316 | -0.0865271  | 0.38417625 | 0.39628867 | 0.62563597 |            |
| NA        | ENSG00000229593 | 0          | NA          | NA         | NA         | NA         | SUCLA2P3   |
| NA        | ENSG00000229594 | 0          | NA          | NA         | NA         | NA         |            |
| NA        | ENSG00000229595 | 0          | NA          | NA         | NA         | NA         |            |
| NA        | ENSG00000229596 | 0          | NA          | NA         | NA         | NA         | MYL12BP3   |
| NA        | ENSG00000229598 | 2.83807062 | 0.07153099  | 0.38222582 | 0.45007096 | 0.67346012 | PRDX3P1    |
| NA        | ENSG00000229599 | 0          | NA          | NA         | NA         | NA         | LINC00411  |
| NA        | ENSG00000229600 | 0          | NA          | NA         | NA         | NA         |            |
| NA        | ENSG00000229601 | 0.66501872 | 0.00154494  | 0.38130367 | 0.97499488 | NA         |            |
| NA        | ENSG00000229603 | 0          | NA          | NA         | NA         | NA         |            |
| NA        | ENSG00000229604 | 0          | NA          | NA         | NA         | NA         | MTATP8P2   |
| NA        | ENSG00000229605 | 0          | NA          | NA         | NA         | NA         | RPL21P93   |
| NA        | ENSG00000229606 | 0          | NA          | NA         | NA         | NA         | LINC01718  |
| NA        | ENSG00000229607 | 0          | NA          | NA         | NA         | NA         |            |
| NA        | ENSG00000229608 | 0          | NA          | NA         | NA         | NA         | GOLGA2P4   |
| NA        | ENSG00000229609 | 0          | NA          | NA         | NA         | NA         | LINC01079  |
| NA        | ENSG00000229611 | 0.173733   | 0.01914545  | 0.38484597 | 0.78225479 | NA         | LINC02851  |
| NA        | ENSG00000229612 | 0          | NA          | NA         | NA         | NA         | SUMO1P2    |
| NA        | ENSG00000229613 | 0          | NA          | NA         | NA         | NA         | LINC01501  |
| NA        | ENSG00000229616 | 0          | NA          | NA         | NA         | NA         |            |
| NA        | ENSG00000229618 | 1.03758883 | -0.04423306 | 0.38568653 | 0.39867919 | NA         |            |
| 401093    | ENSG00000229619 | 16.6693484 | -0.06786229 | 0.33882397 | 0.68501659 | 0.84671809 | MBNL1-AS1  |

|           |                 |            |             |            |            |            |            |
|-----------|-----------------|------------|-------------|------------|------------|------------|------------|
| 645949    | ENSG00000229621 | 0          | NA          | NA         | NA         | NA         | LINC01822  |
| NA        | ENSG00000229622 | 0          | NA          | NA         | NA         | NA         | MTND5P2    |
| NA        | ENSG00000229623 | 0          | NA          | NA         | NA         | NA         | METTL21AP1 |
| NA        | ENSG00000229625 | 0          | NA          | NA         | NA         | NA         |            |
| NA        | ENSG00000229626 | 0          | NA          | NA         | NA         | NA         | PIGCP2     |
| NA        | ENSG00000229627 | 0          | NA          | NA         | NA         | NA         | BSNDP4     |
| NA        | ENSG00000229628 | 0          | NA          | NA         | NA         | NA         |            |
| NA        | ENSG00000229629 | 0          | NA          | NA         | NA         | NA         |            |
| 104266963 | ENSG00000229630 | 0.48754068 | -0.00635939 | 0.38314155 | 0.86824528 | NA         | LINC01264  |
| NA        | ENSG00000229635 | 1.49417628 | -0.03226197 | 0.37945903 | 0.66267469 | NA         |            |
| NA        | ENSG00000229636 | 0          | NA          | NA         | NA         | NA         | KRT8P21    |
| 360205    | ENSG00000229637 | 0          | NA          | NA         | NA         | NA         | PRAC2      |
| NA        | ENSG00000229638 | 7.29007154 | -0.09139894 | 0.36186766 | 0.53998828 | 0.74887232 | RPL4P4     |
| 105378788 | ENSG00000229639 | 0          | NA          | NA         | NA         | NA         | LINC01758  |
| NA        | ENSG00000229641 | 0          | NA          | NA         | NA         | NA         | CYP2C56P   |
| NA        | ENSG00000229642 | 0          | NA          | NA         | NA         | NA         |            |
| 100873964 | ENSG00000229643 | 0          | NA          | NA         | NA         | NA         | LINC00280  |
| NA        | ENSG00000229644 | 12.9326194 | -0.0640426  | 0.33912064 | 0.70138561 | 0.85617981 | NAMPTP1    |
| NA        | ENSG00000229646 | 0          | NA          | NA         | NA         | NA         |            |
| 105373853 | ENSG00000229647 | 0          | NA          | NA         | NA         | NA         | MYOSLID    |
| NA        | ENSG00000229648 | 0          | NA          | NA         | NA         | NA         | RPSAP22    |
| 101927419 | ENSG00000229649 | 0          | NA          | NA         | NA         | NA         | LINC02681  |
| NA        | ENSG00000229652 | 0          | NA          | NA         | NA         | NA         |            |
| NA        | ENSG00000229654 | 0          | NA          | NA         | NA         | NA         | LINC02526  |
| NA        | ENSG00000229656 | 5.09310752 | 0.11400514  | 0.39189706 | 0.29867551 | 0.52551632 | ITGB1-DT   |
| NA        | ENSG00000229657 | 0.89688829 | 0.06453179  | 0.39124169 | 0.20216241 | NA         |            |
| NA        | ENSG00000229658 | 0          | NA          | NA         | NA         | NA         | PABPC1P9   |
| NA        | ENSG00000229659 | 3.29050727 | -0.10182339 | 0.39088771 | 0.30396333 | 0.53126299 | RPL26P6    |
| NA        | ENSG00000229660 | 0          | NA          | NA         | NA         | NA         |            |
| NA        | ENSG00000229661 | 0.37844916 | 0.02407552  | 0.3854191  | 0.60038877 | NA         | BUD31P2    |
| NA        | ENSG00000229662 | 0          | NA          | NA         | NA         | NA         |            |
| NA        | ENSG00000229663 | 0          | NA          | NA         | NA         | NA         | DPY19L4P1  |
| NA        | ENSG00000229664 | 0          | NA          | NA         | NA         | NA         |            |
| NA        | ENSG00000229666 | 22.214754  | -0.06011406 | 0.31287779 | 0.74440653 | 0.87963225 | MAST4-AS1  |
| NA        | ENSG00000229667 | 0          | NA          | NA         | NA         | NA         | UBE2V1P9   |
| NA        | ENSG00000229668 | 0          | NA          | NA         | NA         | NA         |            |
| NA        | ENSG00000229670 | 0          | NA          | NA         | NA         | NA         | PKP4P1     |
| NA        | ENSG00000229671 | 0.15069912 | -0.01848503 | 0.38480575 | 0.84537521 | NA         | LINC01150  |

|           |                 |            |             |            |            |            |            |
|-----------|-----------------|------------|-------------|------------|------------|------------|------------|
| NA        | ENSG00000229672 | 0.75689831 | 0.03380966  | 0.38651369 | 0.3822658  | NA         |            |
| NA        | ENSG00000229673 | 0          | NA          | NA         | NA         | NA         |            |
| NA        | ENSG00000229674 | 0          | NA          | NA         | NA         | NA         | H2AL1RP    |
| 57615     | ENSG00000229676 | 121.268247 | -0.49606718 | 0.22806334 | 0.00995405 | 0.04132895 | ZNF492     |
| NA        | ENSG00000229677 | 0.18922458 | 0.01954053  | 0.38488496 | 0.78225479 | NA         |            |
| NA        | ENSG00000229679 | 0          | NA          | NA         | NA         | NA         |            |
| NA        | ENSG00000229682 | 0          | NA          | NA         | NA         | NA         |            |
| 26793     | ENSG00000229686 | 0          | NA          | NA         | NA         | NA         | SNORD56    |
| NA        | ENSG00000229687 | 0          | NA          | NA         | NA         | NA         |            |
| 100506025 | ENSG00000229688 | 0.58857489 | -0.00662667 | 0.38283957 | 0.83252299 | NA         | CRPPA-AS1  |
| NA        | ENSG00000229689 | 38.3605328 | -0.12555313 | 0.2753537  | 0.52255331 | 0.73580254 |            |
| NA        | ENSG00000229690 | 0          | NA          | NA         | NA         | NA         | MTCO2P1    |
| NA        | ENSG00000229692 | 53.3395488 | -0.05878643 | 0.25319953 | 0.75701074 | 0.88697677 | SOS1-IT1   |
| NA        | ENSG00000229693 | 0          | NA          | NA         | NA         | NA         | SKP2P1     |
| 100129347 | ENSG00000229694 | 0          | NA          | NA         | NA         | NA         |            |
| NA        | ENSG00000229695 | 0          | NA          | NA         | NA         | NA         |            |
| NA        | ENSG00000229696 | 0          | NA          | NA         | NA         | NA         | KARS1P1    |
| NA        | ENSG00000229697 | 0          | NA          | NA         | NA         | NA         | FAM242E    |
| 101928009 | ENSG00000229699 | 0          | NA          | NA         | NA         | NA         |            |
| NA        | ENSG00000229700 | 0.18922458 | 0.01954053  | 0.38488496 | 0.78225479 | NA         |            |
| NA        | ENSG00000229701 | 0          | NA          | NA         | NA         | NA         | MTND2P20   |
| NA        | ENSG00000229703 | 0          | NA          | NA         | NA         | NA         | LYPD9P     |
| NA        | ENSG00000229704 | 0.18922458 | 0.01954053  | 0.38488496 | 0.78225479 | NA         | EIF2S2P2   |
| NA        | ENSG00000229707 | 0          | NA          | NA         | NA         | NA         | SKP1P3     |
| NA        | ENSG00000229708 | 0          | NA          | NA         | NA         | NA         | MARK2P12   |
| NA        | ENSG00000229709 | 0          | NA          | NA         | NA         | NA         | USP9YP36   |
| NA        | ENSG00000229711 | 0          | NA          | NA         | NA         | NA         |            |
| NA        | ENSG00000229713 | 0          | NA          | NA         | NA         | NA         | LCEP2      |
| NA        | ENSG00000229715 | 1.57483979 | 0.09894211  | 0.3981209  | 0.13639762 | NA         | EEF1DP3    |
| NA        | ENSG00000229716 | 0          | NA          | NA         | NA         | NA         | RPL23AP19  |
| NA        | ENSG00000229717 | 0          | NA          | NA         | NA         | NA         |            |
| NA        | ENSG00000229719 | 0.34109282 | 0.02362639  | 0.38535338 | 0.62411488 | NA         | MIR194-2HG |
| 101929460 | ENSG00000229720 | 0          | NA          | NA         | NA         | NA         |            |
| NA        | ENSG00000229721 | 0          | NA          | NA         | NA         | NA         |            |
| NA        | ENSG00000229722 | 0          | NA          | NA         | NA         | NA         |            |
| NA        | ENSG00000229723 | 0          | NA          | NA         | NA         | NA         | LINC01054  |
| NA        | ENSG00000229724 | 0          | NA          | NA         | NA         | NA         | OR2AQ1P    |
| NA        | ENSG00000229725 | 0          | NA          | NA         | NA         | NA         |            |

|           |                 |            |             |            |            |            |            |
|-----------|-----------------|------------|-------------|------------|------------|------------|------------|
| 100506274 | ENSG00000229727 | 30.0836167 | 1.42304673  | 0.57265746 | 0.00061688 | 0.00387428 |            |
| NA        | ENSG00000229728 | 1.47766368 | 0.04724851  | 0.38184145 | 0.52597645 | NA         |            |
| NA        | ENSG00000229730 | 0          | NA          | NA         | NA         | NA         |            |
| NA        | ENSG00000229731 | 0          | NA          | NA         | NA         | NA         |            |
| NA        | ENSG00000229732 | 0          | NA          | NA         | NA         | NA         |            |
| NA        | ENSG00000229733 | 0          | NA          | NA         | NA         | NA         |            |
| NA        | ENSG00000229735 | 0          | NA          | NA         | NA         | NA         | FTLP16     |
| NA        | ENSG00000229738 | 0          | NA          | NA         | NA         | NA         |            |
| 102724919 | ENSG00000229739 | 7.67626536 | 0.18569449  | 0.42356639 | 0.15294916 | 0.33769323 | PDC-AS1    |
| NA        | ENSG00000229740 | 0          | NA          | NA         | NA         | NA         |            |
| NA        | ENSG00000229742 | 0          | NA          | NA         | NA         | NA         |            |
| 102682016 | ENSG00000229743 | 1.71971968 | 0.11896329  | 0.40964923 | 0.04310599 | NA         | LINC01159  |
| NA        | ENSG00000229744 | 0          | NA          | NA         | NA         | NA         | SDHDP5     |
| NA        | ENSG00000229745 | 0          | NA          | NA         | NA         | NA         | BPY2DP     |
| NA        | ENSG00000229747 | 0.30139824 | -0.02296476 | 0.38527817 | 0.68536535 | NA         |            |
| NA        | ENSG00000229749 | 0          | NA          | NA         | NA         | NA         | COTL1P1    |
| NA        | ENSG00000229750 | 0.15069912 | -0.01848503 | 0.38480575 | 0.84537521 | NA         |            |
| NA        | ENSG00000229751 | 0          | NA          | NA         | NA         | NA         |            |
| NA        | ENSG00000229752 | 0          | NA          | NA         | NA         | NA         | RPL7P10    |
| NA        | ENSG00000229753 | 0          | NA          | NA         | NA         | NA         | RPS27AP15  |
| NA        | ENSG00000229754 | 0          | NA          | NA         | NA         | NA         | CXCR2P1    |
| NA        | ENSG00000229755 | 0          | NA          | NA         | NA         | NA         |            |
| NA        | ENSG00000229756 | 0          | NA          | NA         | NA         | NA         | RPL31P20   |
| NA        | ENSG00000229757 | 0          | NA          | NA         | NA         | NA         |            |
| NA        | ENSG00000229758 | 0.53050677 | 0.01398699  | 0.38295303 | 0.7375069  | NA         | DYNLT3P2   |
| NA        | ENSG00000229759 | 5.83243019 | -0.07703368 | 0.36731841 | 0.56328934 | 0.76608585 | MRPS18AP1  |
| NA        | ENSG00000229760 | 0          | NA          | NA         | NA         | NA         | MTCO1P52   |
| NA        | ENSG00000229761 | 0          | NA          | NA         | NA         | NA         | RPS20P1    |
| NA        | ENSG00000229762 | 0          | NA          | NA         | NA         | NA         |            |
| NA        | ENSG00000229765 | 0.51731722 | 0.03121979  | 0.38606308 | 0.47636011 | NA         |            |
| NA        | ENSG00000229766 | 8.25549537 | 0.09552812  | 0.35922489 | 0.53929471 | 0.74850934 |            |
| NA        | ENSG00000229769 | 0          | NA          | NA         | NA         | NA         | TRBV10-2   |
| NA        | ENSG00000229770 | 10.5535549 | -1.48008007 | 1.13682366 | 0.00565566 | 0.02583065 |            |
| NA        | ENSG00000229771 | 0          | NA          | NA         | NA         | NA         |            |
| NA        | ENSG00000229774 | 0          | NA          | NA         | NA         | NA         |            |
| NA        | ENSG00000229775 | 0          | NA          | NA         | NA         | NA         | LINC02624  |
| NA        | ENSG00000229779 | 0          | NA          | NA         | NA         | NA         |            |
| 100874097 | ENSG00000229780 | 0.78938028 | -0.00768238 | 0.38086643 | 0.89187081 | NA         | UBE2Q1-AS1 |



|           |                 |            |             |            |            |            |            |
|-----------|-----------------|------------|-------------|------------|------------|------------|------------|
| NA        | ENSG00000229781 | 0          | NA          | NA         | NA         | NA         | RRN3P4     |
| NA        | ENSG00000229782 | 0          | NA          | NA         | NA         | NA         |            |
| NA        | ENSG00000229785 | 0          | NA          | NA         | NA         | NA         | SLC25A38P1 |
| NA        | ENSG00000229786 | 0          | NA          | NA         | NA         | NA         | SNRFP2     |
| NA        | ENSG00000229788 | 0          | NA          | NA         | NA         | NA         | LINC00388  |
| NA        | ENSG00000229791 | 0          | NA          | NA         | NA         | NA         |            |
| 104326054 | ENSG00000229792 | 0          | NA          | NA         | NA         | NA         | LINC00399  |
| NA        | ENSG00000229794 | 0          | NA          | NA         | NA         | NA         | MTCYBP32   |
| NA        | ENSG00000229795 | 0          | NA          | NA         | NA         | NA         | RPS21P1    |
| NA        | ENSG00000229797 | 1.06914067 | -0.07417763 | 0.39354878 | 0.16285047 | NA         |            |
| NA        | ENSG00000229798 | 0.173733   | 0.01914545  | 0.38484597 | 0.78225479 | NA         | KRT18P26   |
| NA        | ENSG00000229800 | 0          | NA          | NA         | NA         | NA         | ATP8A2P2   |
| NA        | ENSG00000229805 | 0          | NA          | NA         | NA         | NA         | LINC01813  |
| NA        | ENSG00000229806 | 0.15069912 | -0.01848503 | 0.38480575 | 0.84537521 | NA         | RPS15P5    |
| 7503      | ENSG00000229807 | 32910.2147 | 0.23338505  | 0.04457785 | 1.34E-07   | 1.74E-06   | XIST       |
| NA        | ENSG00000229808 | 10.2601488 | -0.04243369 | 0.34078991 | 0.79101483 | 0.90490309 |            |
| 146542    | ENSG00000229809 | 201.291601 | 0.03948593  | 0.16844593 | 0.79547338 | 0.90598116 | ZNF688     |
| NA        | ENSG00000229814 | 0          | NA          | NA         | NA         | NA         | RPL35AP21  |
| NA        | ENSG00000229815 | 0.173124   | -0.01911262 | 0.38486262 | 0.84537521 | NA         | CCNB1IP1P1 |
| NA        | ENSG00000229816 | 17.0465619 | 0.13685832  | 0.33490959 | 0.46942484 | 0.69185312 | DDX50P1    |
| NA        | ENSG00000229817 | 0          | NA          | NA         | NA         | NA         |            |
| NA        | ENSG00000229820 | 0.16735865 | 0.01897177  | 0.38482933 | 0.78225479 | NA         |            |
| NA        | ENSG00000229821 | 0          | NA          | NA         | NA         | NA         |            |
| NA        | ENSG00000229822 | 0          | NA          | NA         | NA         | NA         | RPS15AP39  |
| NA        | ENSG00000229824 | 0          | NA          | NA         | NA         | NA         | RPL12P34   |
| NA        | ENSG00000229826 | 0          | NA          | NA         | NA         | NA         |            |
| NA        | ENSG00000229827 | 0          | NA          | NA         | NA         | NA         |            |
| NA        | ENSG00000229828 | 0.60055462 | -0.03512362 | 0.38649175 | 0.44191675 | NA         | PDE4DIPP1  |
| NA        | ENSG00000229829 | 0          | NA          | NA         | NA         | NA         | DUTP4      |
| NA        | ENSG00000229830 | 0          | NA          | NA         | NA         | NA         |            |
| NA        | ENSG00000229831 | 0          | NA          | NA         | NA         | NA         |            |
| NA        | ENSG00000229832 | 0.49261761 | 0.01443462  | 0.38310649 | 0.75385763 | NA         |            |
| 100131801 | ENSG00000229833 | 352.749439 | -0.09759213 | 0.12528669 | 0.40899721 | 0.6370813  | PET100     |
| NA        | ENSG00000229834 | 0          | NA          | NA         | NA         | NA         |            |
| NA        | ENSG00000229835 | 0          | NA          | NA         | NA         | NA         | KHSRPP1    |
| NA        | ENSG00000229836 | 0          | NA          | NA         | NA         | NA         |            |
| NA        | ENSG00000229839 | 0.33471731 | 0.02354391  | 0.38534154 | 0.62842204 | NA         |            |
| NA        | ENSG00000229840 | 0          | NA          | NA         | NA         | NA         | ISCA1P2    |

|           |                 |            |             |            |            |            |             |
|-----------|-----------------|------------|-------------|------------|------------|------------|-------------|
| NA        | ENSG00000229842 | 0          | NA          | NA         | NA         | NA         | MTATP6P13   |
| NA        | ENSG00000229846 | 0          | NA          | NA         | NA         | NA         |             |
| 196047    | ENSG00000229847 | 0.16735865 | 0.01897177  | 0.38482933 | 0.78225479 | NA         | EMX2OS      |
| NA        | ENSG00000229848 | 0.66678391 | 0.02552131  | 0.38356658 | 0.59190807 | NA         |             |
| NA        | ENSG00000229849 | 0          | NA          | NA         | NA         | NA         | PYHIN5P     |
| 100506356 | ENSG00000229851 | 0.50207596 | 0.02562368  | 0.38565771 | 0.52549886 | NA         | ARSD-AS1    |
| NA        | ENSG00000229852 | 314.517733 | -0.03737289 | 0.13559372 | 0.7673018  | 0.89280791 |             |
| NA        | ENSG00000229853 | 0          | NA          | NA         | NA         | NA         |             |
| NA        | ENSG00000229854 | 0.14931947 | -0.01844332 | 0.38480212 | 0.84537521 | NA         |             |
| NA        | ENSG00000229855 | 0          | NA          | NA         | NA         | NA         |             |
| NA        | ENSG00000229857 | 0          | NA          | NA         | NA         | NA         |             |
| NA        | ENSG00000229858 | 0          | NA          | NA         | NA         | NA         |             |
| 643834    | ENSG00000229859 | 0          | NA          | NA         | NA         | NA         | PGA3        |
| NA        | ENSG00000229862 | 0          | NA          | NA         | NA         | NA         |             |
| NA        | ENSG00000229863 | 0          | NA          | NA         | NA         | NA         |             |
| NA        | ENSG00000229865 | 0          | NA          | NA         | NA         | NA         | RPL31P54    |
| 100874111 | ENSG00000229867 | 5.28749238 | 0.04658047  | 0.36275981 | 0.7220446  | 0.86742752 | STEAP3-AS1  |
| 101927762 | ENSG00000229869 | 0.16735865 | 0.01897177  | 0.38482933 | 0.78225479 | NA         |             |
| NA        | ENSG00000229870 | 1.21501654 | 0.03885406  | 0.38353414 | 0.50396739 | NA         | RPL21P89    |
| NA        | ENSG00000229871 | 2.02211597 | 0.060521    | 0.38197473 | 0.47830162 | NA         | RPSAP20     |
| 101409261 | ENSG00000229873 | 0          | NA          | NA         | NA         | NA         | OGFR-AS1    |
| NA        | ENSG00000229875 | 0          | NA          | NA         | NA         | NA         | EIF1P1      |
| 101929244 | ENSG00000229876 | 0          | NA          | NA         | NA         | NA         | CASC20      |
| NA        | ENSG00000229877 | 0.14931947 | -0.01844332 | 0.38480212 | 0.84537521 | NA         | PAICSP5     |
| NA        | ENSG00000229878 | 0          | NA          | NA         | NA         | NA         |             |
| NA        | ENSG00000229880 | 0          | NA          | NA         | NA         | NA         | IMMTP1      |
| NA        | ENSG00000229881 | 0          | NA          | NA         | NA         | NA         |             |
| NA        | ENSG00000229882 | 0          | NA          | NA         | NA         | NA         |             |
| NA        | ENSG00000229885 | 0          | NA          | NA         | NA         | NA         |             |
| NA        | ENSG00000229886 | 0          | NA          | NA         | NA         | NA         |             |
| NA        | ENSG00000229887 | 0          | NA          | NA         | NA         | NA         | HNRNPA1P6   |
| NA        | ENSG00000229890 | 0          | NA          | NA         | NA         | NA         | ACTP1       |
| 102723775 | ENSG00000229891 | 42.1286501 | 0.11659409  | 0.29068388 | 0.55402498 | 0.76002561 | LINC01315   |
| NA        | ENSG00000229892 | 0          | NA          | NA         | NA         | NA         |             |
| NA        | ENSG00000229893 | 0.31684765 | 0.00124646  | 0.38336755 | 0.96591047 | NA         | TAX1BP1-AS1 |
| NA        | ENSG00000229894 | 0          | NA          | NA         | NA         | NA         | GK3P        |
| NA        | ENSG00000229896 | 0          | NA          | NA         | NA         | NA         |             |
| NA        | ENSG00000229897 | 0          | NA          | NA         | NA         | NA         | SEPTIN7P7   |

|           |    |                 |            |             |            |            |            |            |
|-----------|----|-----------------|------------|-------------|------------|------------|------------|------------|
|           | NA | ENSG00000229899 | 0          | NA          | NA         | NA         | NA         |            |
|           | NA | ENSG00000229900 | 0          | NA          | NA         | NA         | NA         | HSPD1P21   |
| 101929901 | NA | ENSG00000229901 | 0.173733   | 0.01914545  | 0.38484597 | 0.78225479 | NA         | FOXO6-AS1  |
|           | NA | ENSG00000229905 | 0.173733   | 0.01914545  | 0.38484597 | 0.78225479 | NA         |            |
|           | NA | ENSG00000229906 | 0          | NA          | NA         | NA         | NA         | SNRPGP11   |
|           | NA | ENSG00000229907 | 0          | NA          | NA         | NA         | NA         | DEFB108A   |
|           | NA | ENSG00000229909 | 0          | NA          | NA         | NA         | NA         | TRIM60P16  |
|           | NA | ENSG00000229910 | 0          | NA          | NA         | NA         | NA         | HNRNPA1P18 |
|           | NA | ENSG00000229911 | 0          | NA          | NA         | NA         | NA         |            |
|           | NA | ENSG00000229912 | 0          | NA          | NA         | NA         | NA         |            |
|           | NA | ENSG00000229913 | 0.18922458 | 0.01954053  | 0.38488496 | 0.78225479 | NA         |            |
|           | NA | ENSG00000229914 | 0.18922458 | 0.01954053  | 0.38488496 | 0.78225479 | NA         |            |
|           | NA | ENSG00000229915 | 1.00952802 | 0.02869884  | 0.38173716 | 0.63317452 | NA         |            |
|           | NA | ENSG00000229917 | 0.18922458 | 0.01954053  | 0.38488496 | 0.78225479 | NA         | RPL7P46    |
| 100874096 | NA | ENSG00000229918 | 0          | NA          | NA         | NA         | NA         | DOCK9-AS1  |
|           | NA | ENSG00000229919 | 0          | NA          | NA         | NA         | NA         | ELOCP3     |
|           | NA | ENSG00000229920 | 0.173733   | 0.01914545  | 0.38484597 | 0.78225479 | NA         | RPS4XP5    |
| 100505879 | NA | ENSG00000229921 | 34.3416862 | -0.01898279 | 0.29016415 | 0.91877321 | 0.96558446 | KIF25-AS1  |
|           | NA | ENSG00000229922 | 0          | NA          | NA         | NA         | NA         | LINC02865  |
|           | NA | ENSG00000229923 | 0          | NA          | NA         | NA         | NA         |            |
| 100287045 | NA | ENSG00000229924 | 0          | NA          | NA         | NA         | NA         | FAM90A26   |
|           | NA | ENSG00000229925 | 0          | NA          | NA         | NA         | NA         |            |
|           | NA | ENSG00000229926 | 0          | NA          | NA         | NA         | NA         | IL9RP1     |
|           | NA | ENSG00000229927 | 3.83284712 | -0.03335457 | 0.3869751  | 0.15597965 | 0.34213777 | RHEBP1     |
|           | NA | ENSG00000229928 | 0          | NA          | NA         | NA         | NA         | LINC00400  |
|           | NA | ENSG00000229930 | 0          | NA          | NA         | NA         | NA         |            |
|           | NA | ENSG00000229931 | 0.83396144 | 0.03957025  | 0.3852024  | 0.43888631 | NA         | ATXN1-AS1  |
|           | NA | ENSG00000229932 | 1.66254892 | 0.03850708  | 0.37804693 | 0.64745084 | NA         | YWHAZP3    |
|           | NA | ENSG00000229935 | 0          | NA          | NA         | NA         | NA         | MTCYBP9    |
| 221823    | NA | ENSG00000229937 | 0          | NA          | NA         | NA         | NA         | PRPS1L1    |
|           | NA | ENSG00000229938 | 0          | NA          | NA         | NA         | NA         | MYO16-AS2  |
|           | NA | ENSG00000229939 | 0.84954197 | 0.04951234  | 0.38855746 | 0.26950975 | NA         |            |
|           | NA | ENSG00000229940 | 0          | NA          | NA         | NA         | NA         | TSPY22P    |
|           | NA | ENSG00000229941 | 0          | NA          | NA         | NA         | NA         | PDE11A-AS1 |
|           | NA | ENSG00000229943 | 0          | NA          | NA         | NA         | NA         |            |
|           | NA | ENSG00000229944 | 0.5972779  | -0.02732172 | 0.38586499 | 0.50076333 | NA         | EIF4EP2    |
|           | NA | ENSG00000229946 | 0.89185175 | 0.0392838   | 0.38497961 | 0.43523502 | NA         | B3GNT2P1   |
|           | NA | ENSG00000229948 | 0          | NA          | NA         | NA         | NA         | B3GALNT1P1 |

|           |                 |            |             |            |            |            |            |
|-----------|-----------------|------------|-------------|------------|------------|------------|------------|
| NA        | ENSG00000229949 | 0          | NA          | NA         | NA         | NA         |            |
| NA        | ENSG00000229950 | 0          | NA          | NA         | NA         | NA         | TFAP2A-AS1 |
| 403150    | ENSG00000229951 | 0.173124   | -0.01911262 | 0.38486262 | 0.84537521 | NA         |            |
| NA        | ENSG00000229953 | 12.8988125 | -0.29102665 | 0.43591818 | 0.14897888 | 0.33152472 |            |
| NA        | ENSG00000229954 | 0.173124   | -0.01911262 | 0.38486262 | 0.84537521 | NA         | MTND2P2    |
| NA        | ENSG00000229955 | 0.29863895 | -0.02292439 | 0.3852726  | 0.68753245 | NA         |            |
| NA        | ENSG00000229956 | 12.8759324 | -0.01255297 | 0.33123433 | 0.93893799 | 0.97474024 | ZRANB2-AS2 |
| NA        | ENSG00000229957 | 0          | NA          | NA         | NA         | NA         |            |
| NA        | ENSG00000229960 | 0          | NA          | NA         | NA         | NA         |            |
| NA        | ENSG00000229961 | 0          | NA          | NA         | NA         | NA         |            |
| NA        | ENSG00000229962 | 0.173124   | -0.01911262 | 0.38486262 | 0.84537521 | NA         |            |
| NA        | ENSG00000229964 | 0          | NA          | NA         | NA         | NA         |            |
| NA        | ENSG00000229965 | 0          | NA          | NA         | NA         | NA         | RPS3AP7    |
| NA        | ENSG00000229967 | 0          | NA          | NA         | NA         | NA         | MAGEA4-AS1 |
| NA        | ENSG00000229968 | 0          | NA          | NA         | NA         | NA         |            |
| NA        | ENSG00000229969 | 0          | NA          | NA         | NA         | NA         |            |
| NA        | ENSG00000229970 | 17.9434596 | -0.12629983 | 0.32911234 | 0.50210866 | 0.71895859 |            |
| NA        | ENSG00000229971 | 0          | NA          | NA         | NA         | NA         |            |
| 401067    | ENSG00000229972 | 0          | NA          | NA         | NA         | NA         | IQCF3      |
| NA        | ENSG00000229975 | 0.30001882 | -0.02294461 | 0.38527539 | 0.68644691 | NA         | LIPT1P1    |
| NA        | ENSG00000229976 | 0.18922458 | 0.01954053  | 0.38488496 | 0.78225479 | NA         |            |
| NA        | ENSG00000229977 | 0          | NA          | NA         | NA         | NA         |            |
| NA        | ENSG00000229978 | 0          | NA          | NA         | NA         | NA         | PRAMEF36P  |
| NA        | ENSG00000229979 | 0          | NA          | NA         | NA         | NA         | HMG2P48    |
| 400604    | ENSG00000229980 | 74.3136753 | 0.19189548  | 0.27017294 | 0.33296918 | 0.56231772 | TOB1-AS1   |
| 103695365 | ENSG00000229981 | 0          | NA          | NA         | NA         | NA         | LINC01435  |
| NA        | ENSG00000229982 | 0          | NA          | NA         | NA         | NA         | GTF3AP6    |
| NA        | ENSG00000229983 | 0.47243751 | -0.00725703 | 0.38322329 | 0.86713603 | NA         |            |
| NA        | ENSG00000229985 | 0          | NA          | NA         | NA         | NA         |            |
| NA        | ENSG00000229986 | 0          | NA          | NA         | NA         | NA         |            |
| NA        | ENSG00000229988 | 0          | NA          | NA         | NA         | NA         | HBBP1      |
| NA        | ENSG00000229989 | 1.77938611 | -0.07652702 | 0.38709969 | 0.35267184 | NA         | MIR181A1HG |
| NA        | ENSG00000229990 | 0.97813649 | 0.02902255  | 0.38194814 | 0.62514064 | NA         |            |
| NA        | ENSG00000229991 | 0.16735865 | 0.01897177  | 0.38482933 | 0.78225479 | NA         | AKR1B1P1   |
| NA        | ENSG00000229992 | 1.00624467 | 0.00142246  | 0.38080718 | 0.97958223 | NA         | HMGB3P9    |
| NA        | ENSG00000229994 | 0.4640946  | -0.00760095 | 0.38326356 | 0.86775234 | NA         | RPL5P4     |
| NA        | ENSG00000229996 | 0          | NA          | NA         | NA         | NA         |            |
| NA        | ENSG00000229999 | 0          | NA          | NA         | NA         | NA         | SGSM3-AS1  |

|           |                 |            |             |            |            |            |            |
|-----------|-----------------|------------|-------------|------------|------------|------------|------------|
| NA        | ENSG00000230000 | 0          | NA          | NA         | NA         | NA         |            |
| NA        | ENSG00000230001 | 0          | NA          | NA         | NA         | NA         |            |
| NA        | ENSG00000230002 | 12.7062239 | 0.05307018  | 0.33990702 | 0.74971069 | 0.88222183 | ALMS1-IT1  |
| NA        | ENSG00000230003 | 0          | NA          | NA         | NA         | NA         |            |
| NA        | ENSG00000230005 | 0.47310743 | -0.03505191 | 0.38628401 | 0.49603829 | NA         | SNAP47-AS1 |
| 645784    | ENSG00000230006 | 0.51425947 | 0.01321833  | 0.3829421  | 0.75081981 | NA         | ANKRD36BP2 |
| NA        | ENSG00000230009 | 0          | NA          | NA         | NA         | NA         | MTCO2P3    |
| NA        | ENSG00000230010 | 11.225069  | 0.04539441  | 0.33682179 | 0.78721323 | 0.90331242 |            |
| NA        | ENSG00000230011 | 0          | NA          | NA         | NA         | NA         | CTSLP4     |
| NA        | ENSG00000230013 | 0          | NA          | NA         | NA         | NA         | CT70       |
| NA        | ENSG00000230014 | 0          | NA          | NA         | NA         | NA         | LINC00709  |
| NA        | ENSG00000230015 | 0.14931947 | -0.01844332 | 0.38480212 | 0.84537521 | NA         |            |
| NA        | ENSG00000230018 | 0          | NA          | NA         | NA         | NA         | PPIAP39    |
| NA        | ENSG00000230019 | 0          | NA          | NA         | NA         | NA         | YWHAQP9    |
| 100873920 | ENSG00000230020 | 0          | NA          | NA         | NA         | NA         | NHS-AS1    |
| 101928626 | ENSG00000230021 | 9.23795156 | -0.00533673 | 0.3501737  | 0.96764612 | 0.98765815 |            |
| NA        | ENSG00000230022 | 0.32570456 | 0.00216688  | 0.38337755 | 0.95956544 | NA         | FNTAP2     |
| 284632    | ENSG00000230023 | 0          | NA          | NA         | NA         | NA         | LINC02800  |
| NA        | ENSG00000230025 | 0          | NA          | NA         | NA         | NA         |            |
| NA        | ENSG00000230026 | 2.62752256 | 0.13028378  | 0.40643943 | 0.1589134  | 0.34631391 |            |
| NA        | ENSG00000230027 | 0          | NA          | NA         | NA         | NA         |            |
| NA        | ENSG00000230029 | 0          | NA          | NA         | NA         | NA         | CDY11P     |
| NA        | ENSG00000230030 | 0          | NA          | NA         | NA         | NA         |            |
| 100287399 | ENSG00000230031 | 0          | NA          | NA         | NA         | NA         | POTEB2     |
| NA        | ENSG00000230033 | 0          | NA          | NA         | NA         | NA         |            |
| NA        | ENSG00000230035 | 0          | NA          | NA         | NA         | NA         | IGSF21-AS1 |
| NA        | ENSG00000230037 | 0          | NA          | NA         | NA         | NA         | UBBP1      |
| NA        | ENSG00000230039 | 0          | NA          | NA         | NA         | NA         | CCNYL5     |
| 100874145 | ENSG00000230040 | 0          | NA          | NA         | NA         | NA         | LINC00364  |
| NA        | ENSG00000230042 | 8.80879174 | -0.03165562 | 0.35081738 | 0.82716749 | 0.92186288 | AK3P3      |
| NA        | ENSG00000230043 | 0          | NA          | NA         | NA         | NA         | TMSB4XP6   |
| NA        | ENSG00000230044 | 0          | NA          | NA         | NA         | NA         | CDK8P1     |
| NA        | ENSG00000230045 | 0          | NA          | NA         | NA         | NA         | FAM90A15P  |
| NA        | ENSG00000230046 | 0.16735865 | 0.01897177  | 0.38482933 | 0.78225479 | NA         | BIRC6-AS1  |
| NA        | ENSG00000230047 | 0          | NA          | NA         | NA         | NA         | HIGD2AP1   |
| NA        | ENSG00000230051 | 0          | NA          | NA         | NA         | NA         |            |
| NA        | ENSG00000230052 | 0          | NA          | NA         | NA         | NA         | MTND3P2    |
| NA        | ENSG00000230053 | 0          | NA          | NA         | NA         | NA         |            |

|           |                 |            |             |            |            |            |             |
|-----------|-----------------|------------|-------------|------------|------------|------------|-------------|
| 105376230 | ENSG00000230054 | 0          | NA          | NA         | NA         | NA         | TEX53       |
| NA        | ENSG00000230056 | 0          | NA          | NA         | NA         | NA         | DDX6P1      |
| NA        | ENSG00000230061 | 0          | NA          | NA         | NA         | NA         | TRPM2-AS    |
| 100287718 | ENSG00000230062 | 0          | NA          | NA         | NA         | NA         | ANKRD66     |
| NA        | ENSG00000230063 | 0          | NA          | NA         | NA         | NA         |             |
| NA        | ENSG00000230064 | 1.15012358 | 0.01316226  | 0.38166507 | 0.80197959 | NA         |             |
| NA        | ENSG00000230065 | 0          | NA          | NA         | NA         | NA         |             |
| 107987341 | ENSG00000230066 | 0          | NA          | NA         | NA         | NA         | FAM197Y3    |
| NA        | ENSG00000230067 | 0.88201751 | 0.01766619  | 0.38200769 | 0.73236539 | NA         | HSPD1P6     |
| NA        | ENSG00000230068 | 0.33471731 | 0.02354391  | 0.38534154 | 0.62842204 | NA         | CDC42-IT1   |
| NA        | ENSG00000230069 | 1.03081482 | 0.058584    | 0.39029598 | 0.20062929 | NA         | LRRC37A15P  |
| NA        | ENSG00000230071 | 0.9615814  | -0.01824378 | 0.38082111 | 0.76020573 | NA         | RPL4P6      |
| NA        | ENSG00000230073 | 0          | NA          | NA         | NA         | NA         |             |
| NA        | ENSG00000230074 | 56.1659723 | 0.31815855  | 0.28993226 | 0.13426324 | 0.3084867  |             |
| NA        | ENSG00000230076 | 2.62524661 | 0.01581675  | 0.3711321  | 0.87606892 | 0.94529871 | RPL10P6     |
| NA        | ENSG00000230077 | 0          | NA          | NA         | NA         | NA         | MTAPP2      |
| NA        | ENSG00000230079 | 0          | NA          | NA         | NA         | NA         | STK24P1     |
| NA        | ENSG00000230080 | 0          | NA          | NA         | NA         | NA         |             |
| NA        | ENSG00000230081 | 0          | NA          | NA         | NA         | NA         | HSPE1P28    |
| 100874032 | ENSG00000230082 | 4.21218683 | -0.05502123 | 0.36913089 | 0.64373965 | 0.8220245  | PRRT3-AS1   |
| NA        | ENSG00000230083 | 0          | NA          | NA         | NA         | NA         |             |
| NA        | ENSG00000230084 | 154.106216 | -0.00505523 | 0.17701492 | 0.97316291 | 0.99002934 |             |
| NA        | ENSG00000230086 | 0          | NA          | NA         | NA         | NA         | VN1R96P     |
| NA        | ENSG00000230087 | 0          | NA          | NA         | NA         | NA         |             |
| NA        | ENSG00000230088 | 0          | NA          | NA         | NA         | NA         | KRT16P5     |
| NA        | ENSG00000230090 | 8.21983168 | 0.07704615  | 0.37946319 | 0.44990024 | 0.67340229 |             |
| NA        | ENSG00000230091 | 14.7302801 | 0.05448842  | 0.34021121 | 0.74252404 | 0.87870936 | TMEM254-AS1 |
| NA        | ENSG00000230092 | 7.17297456 | -0.00760916 | 0.35171047 | 0.95516315 | 0.98160111 |             |
| NA        | ENSG00000230096 | 0          | NA          | NA         | NA         | NA         |             |
| NA        | ENSG00000230097 | 0          | NA          | NA         | NA         | NA         | ME2P1       |
| 101927489 | ENSG00000230098 | 0          | NA          | NA         | NA         | NA         | TCERG1L-AS1 |
| NA        | ENSG00000230099 | 0          | NA          | NA         | NA         | NA         | TRBV5-4     |
| NA        | ENSG00000230100 | 0          | NA          | NA         | NA         | NA         |             |
| NA        | ENSG00000230101 | 0.173733   | 0.01914545  | 0.38484597 | 0.78225479 | NA         | TUBB3P2     |
| 285389    | ENSG00000230102 | 2.08937691 | 0.02362238  | 0.37664383 | 0.76856224 | NA         | LINC02028   |
| NA        | ENSG00000230104 | 0          | NA          | NA         | NA         | NA         |             |
| NA        | ENSG00000230105 | 0          | NA          | NA         | NA         | NA         |             |
| NA        | ENSG00000230106 | 0          | NA          | NA         | NA         | NA         | SNRPCP15    |

|           |                 |            |             |            |            |            |            |
|-----------|-----------------|------------|-------------|------------|------------|------------|------------|
| NA        | ENSG00000230107 | 0          | NA          | NA         | NA         | NA         |            |
| 105376444 | ENSG00000230109 | 0          | NA          | NA         | NA         | NA         | LINC02643  |
| NA        | ENSG00000230111 | 0          | NA          | NA         | NA         | NA         | H3P11      |
| NA        | ENSG00000230112 | 0          | NA          | NA         | NA         | NA         |            |
| NA        | ENSG00000230113 | 0          | NA          | NA         | NA         | NA         |            |
| 101929721 | ENSG00000230114 | 0          | NA          | NA         | NA         | NA         | AGBL4-AS1  |
| 100874027 | ENSG00000230115 | 0          | NA          | NA         | NA         | NA         | TPRG1-AS2  |
| NA        | ENSG00000230116 | 0          | NA          | NA         | NA         | NA         | RPS3AP11   |
| NA        | ENSG00000230118 | 0          | NA          | NA         | NA         | NA         |            |
| NA        | ENSG00000230119 | 0          | NA          | NA         | NA         | NA         |            |
| NA        | ENSG00000230120 | 0          | NA          | NA         | NA         | NA         |            |
| NA        | ENSG00000230121 | 0          | NA          | NA         | NA         | NA         |            |
| NA        | ENSG00000230122 | 0          | NA          | NA         | NA         | NA         | ECEL1P3    |
| NA        | ENSG00000230123 | 0          | NA          | NA         | NA         | NA         | DLEC1P1    |
| 84320     | ENSG00000230124 | 1696.87416 | 0.08693295  | 0.09119993 | 0.32689555 | 0.55525384 | ACBD6      |
| 100527964 | ENSG00000230124 | 1696.87416 | 0.08693295  | 0.09119993 | 0.32689555 | 0.55525384 | ACBD6      |
| NA        | ENSG00000230125 | 0          | NA          | NA         | NA         | NA         | EEF1A1P39  |
| 100873987 | ENSG00000230126 | 0          | NA          | NA         | NA         | NA         | FGF12-AS2  |
| NA        | ENSG00000230130 | 0          | NA          | NA         | NA         | NA         | MTND2P39   |
| NA        | ENSG00000230131 | 1.5378153  | -0.00783743 | 0.37722565 | 0.91621573 | NA         | LINC02641  |
| NA        | ENSG00000230132 | 0          | NA          | NA         | NA         | NA         |            |
| 400839    | ENSG00000230133 | 0          | NA          | NA         | NA         | NA         | LINC01721  |
| NA        | ENSG00000230137 | 0.16735865 | 0.01897177  | 0.38482933 | 0.78225479 | NA         |            |
| NA        | ENSG00000230138 | 5.81751534 | -0.18353297 | 0.41223719 | 0.2069514  | 0.41417369 | LINC02812  |
| NA        | ENSG00000230140 | 0.29863895 | -0.02292439 | 0.3852726  | 0.68753245 | NA         | NPAS2-AS1  |
| NA        | ENSG00000230142 | 0          | NA          | NA         | NA         | NA         | LINC01075  |
| NA        | ENSG00000230146 | 0          | NA          | NA         | NA         | NA         | SEPHS1P4   |
| NA        | ENSG00000230147 | 0          | NA          | NA         | NA         | NA         |            |
| 100874362 | ENSG00000230148 | 0          | NA          | NA         | NA         | NA         | HOXB-AS1   |
| NA        | ENSG00000230149 | 2.7984785  | 0.08398332  | 0.38727609 | 0.35221401 | 0.58213871 |            |
| NA        | ENSG00000230153 | 0          | NA          | NA         | NA         | NA         |            |
| NA        | ENSG00000230154 | 0          | NA          | NA         | NA         | NA         | AIDAP1     |
| NA        | ENSG00000230155 | 0.33471731 | 0.02354391  | 0.38534154 | 0.62842204 | NA         | CEP250-AS1 |
| 100874173 | ENSG00000230156 | 0          | NA          | NA         | NA         | NA         | LINC00443  |
| NA        | ENSG00000230157 | 0          | NA          | NA         | NA         | NA         | ATP5MC1P1  |
| NA        | ENSG00000230158 | 0.14931947 | -0.01844332 | 0.38480212 | 0.84537521 | NA         | MTND1P28   |
| NA        | ENSG00000230159 | 0          | NA          | NA         | NA         | NA         |            |
| NA        | ENSG00000230160 | 0          | NA          | NA         | NA         | NA         |            |

|           |                 |            |             |            |            |            |            |
|-----------|-----------------|------------|-------------|------------|------------|------------|------------|
| NA        | ENSG00000230161 | 0          | NA          | NA         | NA         | NA         |            |
| NA        | ENSG00000230162 | 0.34624801 | -0.02356563 | 0.38536324 | 0.65270996 | NA         | CT45A11P   |
| NA        | ENSG00000230163 | 0.14931947 | -0.01844332 | 0.38480212 | 0.84537521 | NA         |            |
| NA        | ENSG00000230164 | 0          | NA          | NA         | NA         | NA         | MAS1LP1    |
| NA        | ENSG00000230165 | 0          | NA          | NA         | NA         | NA         | AURKAP2    |
| NA        | ENSG00000230166 | 0          | NA          | NA         | NA         | NA         | RPL35AP24  |
| NA        | ENSG00000230169 | 0          | NA          | NA         | NA         | NA         | RPL30P16   |
| NA        | ENSG00000230170 | 0          | NA          | NA         | NA         | NA         | HNRNPA1P28 |
| NA        | ENSG00000230171 | 0          | NA          | NA         | NA         | NA         | RPL22P18   |
| NA        | ENSG00000230172 | 0          | NA          | NA         | NA         | NA         |            |
| 101927431 | ENSG00000230173 | 0          | NA          | NA         | NA         | NA         | LINC01790  |
| 101929111 | ENSG00000230174 | 0          | NA          | NA         | NA         | NA         | LINC01149  |
| NA        | ENSG00000230175 | 0.44967623 | -0.02729686 | 0.38571283 | 0.56196249 | NA         |            |
| NA        | ENSG00000230176 | 1.18997396 | 0.06725017  | 0.39224887 | 0.15287506 | NA         | LINC01433  |
| NA        | ENSG00000230180 | 0          | NA          | NA         | NA         | NA         | RPL12P49   |
| NA        | ENSG00000230182 | 0          | NA          | NA         | NA         | NA         | RNF10P1    |
| NA        | ENSG00000230183 | 3.04777335 | 0.03581286  | 0.3760399  | 0.69290164 | 0.85163509 | CNOT6LP1   |
| NA        | ENSG00000230184 | 0          | NA          | NA         | NA         | NA         | SMYD3-IT1  |
| NA        | ENSG00000230185 | 9.54091291 | 0.07769497  | 0.35096851 | 0.62778118 | 0.81114806 | C9orf147   |
| NA        | ENSG00000230186 | 0          | NA          | NA         | NA         | NA         |            |
| NA        | ENSG00000230187 | 0          | NA          | NA         | NA         | NA         |            |
| NA        | ENSG00000230188 | 0.92079868 | -0.0650689  | 0.39130174 | 0.21254609 | NA         |            |
| NA        | ENSG00000230189 | 1.64902108 | 0.00933836  | 0.37800636 | 0.89842032 | NA         |            |
| 105375556 | ENSG00000230190 | 0.51054272 | -0.00970538 | 0.3832583  | 0.82602083 | NA         |            |
| NA        | ENSG00000230191 | 0          | NA          | NA         | NA         | NA         | IFITM3P4   |
| NA        | ENSG00000230192 | 0          | NA          | NA         | NA         | NA         |            |
| NA        | ENSG00000230194 | 0          | NA          | NA         | NA         | NA         |            |
| NA        | ENSG00000230196 | 0          | NA          | NA         | NA         | NA         | DDX43P3    |
| NA        | ENSG00000230197 | 0.8177595  | 0.01548285  | 0.38189268 | 0.76404105 | NA         |            |
| NA        | ENSG00000230198 | 0          | NA          | NA         | NA         | NA         | RPL37P4    |
| NA        | ENSG00000230199 | 0          | NA          | NA         | NA         | NA         |            |
| NA        | ENSG00000230201 | 0.33930666 | 0.00253954  | 0.38338303 | 0.96421169 | NA         | ATP6V0CP1  |
| NA        | ENSG00000230202 | 3.60734333 | -0.00114606 | 0.36918907 | 0.98924894 | 0.99604194 |            |
| NA        | ENSG00000230203 | 0          | NA          | NA         | NA         | NA         |            |
| NA        | ENSG00000230204 | 0.91607345 | 0.03225437  | 0.38465941 | 0.47272396 | NA         | FTH1P5     |
| NA        | ENSG00000230205 | 0          | NA          | NA         | NA         | NA         |            |
| NA        | ENSG00000230207 | 0.46918471 | -0.00816529 | 0.38327871 | 0.85831809 | NA         | RPL4P5     |
| NA        | ENSG00000230208 | 0          | NA          | NA         | NA         | NA         | IFNNP1     |



|           |                 |            |             |            |            |            |            |
|-----------|-----------------|------------|-------------|------------|------------|------------|------------|
| 100133286 | ENSG00000230212 | 2.9180655  | 0.08121918  | 0.38181557 | 0.43526284 | 0.66041715 |            |
| NA        | ENSG00000230213 | 0          | NA          | NA         | NA         | NA         | OR8V1P     |
| NA        | ENSG00000230214 | 0          | NA          | NA         | NA         | NA         | FTLP18     |
| 100874079 | ENSG00000230215 | 0          | NA          | NA         | NA         | NA         | LINC01840  |
| NA        | ENSG00000230216 | 0.64036044 | -0.02531234 | 0.38298268 | 0.6353029  | NA         | HSPB1P2    |
| 403315    | ENSG00000230219 | 0          | NA          | NA         | NA         | NA         | CIBAR1P2   |
| NA        | ENSG00000230221 | 0.47402054 | -0.00929218 | 0.38285224 | 0.84636685 | NA         |            |
| NA        | ENSG00000230223 | 0          | NA          | NA         | NA         | NA         | ATXN8OS    |
| NA        | ENSG00000230224 | 16.5713338 | 0.17009208  | 0.35746783 | 0.36419898 | 0.59387751 | PHBP9      |
| NA        | ENSG00000230225 | 0.53030373 | 0.03940047  | 0.3868093  | 0.41707373 | NA         | MTND5P14   |
| NA        | ENSG00000230226 | 0          | NA          | NA         | NA         | NA         |            |
| NA        | ENSG00000230227 | 0          | NA          | NA         | NA         | NA         | SIAH1P1    |
| NA        | ENSG00000230228 | 0          | NA          | NA         | NA         | NA         | H3P1       |
| NA        | ENSG00000230229 | 0          | NA          | NA         | NA         | NA         |            |
| NA        | ENSG00000230231 | 0          | NA          | NA         | NA         | NA         | FMO7P      |
| NA        | ENSG00000230233 | 0          | NA          | NA         | NA         | NA         |            |
| NA        | ENSG00000230234 | 0          | NA          | NA         | NA         | NA         |            |
| NA        | ENSG00000230237 | 0          | NA          | NA         | NA         | NA         | GNA13P1    |
| NA        | ENSG00000230239 | 0          | NA          | NA         | NA         | NA         | PDE4DIPP9  |
| NA        | ENSG00000230240 | 0.18922458 | 0.01954053  | 0.38488496 | 0.78225479 | NA         | RPL34P19   |
| NA        | ENSG00000230241 | 0          | NA          | NA         | NA         | NA         |            |
| NA        | ENSG00000230243 | 0          | NA          | NA         | NA         | NA         | FKBP1AP3   |
| NA        | ENSG00000230244 | 0          | NA          | NA         | NA         | NA         | RAD23BP2   |
| NA        | ENSG00000230245 | 0          | NA          | NA         | NA         | NA         |            |
| 441452    | ENSG00000230246 | 0          | NA          | NA         | NA         | NA         | SPATA31C1  |
| NA        | ENSG00000230247 | 0          | NA          | NA         | NA         | NA         | HNRNPH3P1  |
| NA        | ENSG00000230248 | 0          | NA          | NA         | NA         | NA         |            |
| NA        | ENSG00000230249 | 0          | NA          | NA         | NA         | NA         | RPS24P21   |
| 105378739 | ENSG00000230250 | 0          | NA          | NA         | NA         | NA         | LINC01753  |
| NA        | ENSG00000230251 | 1.80389958 | -0.00308126 | 0.37607561 | 0.96815699 | NA         | PHBP4      |
| NA        | ENSG00000230252 | 0          | NA          | NA         | NA         | NA         | MTND2P4    |
| NA        | ENSG00000230256 | 0          | NA          | NA         | NA         | NA         | FGFR1OP2P1 |
| 58160     | ENSG00000230257 | 0          | NA          | NA         | NA         | NA         | NFE4       |
| NA        | ENSG00000230258 | 0          | NA          | NA         | NA         | NA         |            |
| NA        | ENSG00000230260 | 0          | NA          | NA         | NA         | NA         |            |
| NA        | ENSG00000230261 | 0          | NA          | NA         | NA         | NA         | OR5J2P     |
| 158257    | ENSG00000230262 | 1.38986283 | 0.05106189  | 0.38467801 | 0.42447378 | NA         | LINC02603  |
| 101410543 | ENSG00000230266 | 0.31675535 | 0.0011563   | 0.38336685 | 0.96677434 | NA         | XXYLT1-AS2 |

|           |                 |            |             |            |            |            |              |
|-----------|-----------------|------------|-------------|------------|------------|------------|--------------|
| NA        | ENSG00000230267 | 280.681699 | 0.0111541   | 0.14714711 | 0.93576926 | 0.97325384 | HERC2P4      |
| NA        | ENSG00000230268 | 0.173733   | 0.01914545  | 0.38484597 | 0.78225479 | NA         | SSU72P8      |
| NA        | ENSG00000230269 | 0.61400271 | -0.03573714 | 0.38656146 | 0.43356928 | NA         | LINC02525    |
| NA        | ENSG00000230271 | 0.30001607 | -0.02294459 | 0.38527538 | 0.68644863 | NA         |              |
| NA        | ENSG00000230273 | 0          | NA          | NA         | NA         | NA         | BRI3P3       |
| NA        | ENSG00000230274 | 0          | NA          | NA         | NA         | NA         | PGAM1P3      |
| NA        | ENSG00000230275 | 0          | NA          | NA         | NA         | NA         | SERBP1P4     |
| NA        | ENSG00000230276 | 0          | NA          | NA         | NA         | NA         |              |
| NA        | ENSG00000230280 | 15.4932829 | 0.21074203  | 0.38003702 | 0.26969165 | 0.4928325  | HNRNPA1P59   |
| NA        | ENSG00000230282 | 0          | NA          | NA         | NA         | NA         | RPL7P61      |
| NA        | ENSG00000230283 | 0          | NA          | NA         | NA         | NA         | RPS12P24     |
| NA        | ENSG00000230284 | 0          | NA          | NA         | NA         | NA         |              |
| NA        | ENSG00000230285 | 0          | NA          | NA         | NA         | NA         |              |
| NA        | ENSG00000230286 | 0.6631837  | -0.0219684  | 0.3832051  | 0.65282718 | NA         |              |
| NA        | ENSG00000230287 | 0          | NA          | NA         | NA         | NA         |              |
| NA        | ENSG00000230289 | 0.65766424 | 0.02557295  | 0.38360097 | 0.59373954 | NA         |              |
| NA        | ENSG00000230290 | 0          | NA          | NA         | NA         | NA         | ARMC2-AS1    |
| NA        | ENSG00000230291 | 0.53097584 | 0.03943458  | 0.38681336 | 0.41666598 | NA         |              |
| 100862679 | ENSG00000230292 | 0          | NA          | NA         | NA         | NA         | NAALADL2-AS3 |
| NA        | ENSG00000230294 | 2.19804752 | -0.0536952  | 0.38062736 | 0.52290309 | NA         | LINC02370    |
| NA        | ENSG00000230295 | 0.983158   | -0.04616843 | 0.38481429 | 0.40413096 | NA         | GTF2IP23     |
| NA        | ENSG00000230298 | 0          | NA          | NA         | NA         | NA         |              |
| NA        | ENSG00000230299 | 0          | NA          | NA         | NA         | NA         | SNRPEP11     |
| NA        | ENSG00000230300 | 0          | NA          | NA         | NA         | NA         | STARD13-IT1  |
| 79295     | ENSG00000230301 | 0          | NA          | NA         | NA         | NA         | OR5H6        |
| NA        | ENSG00000230302 | 0          | NA          | NA         | NA         | NA         | MTND3P4      |
| NA        | ENSG00000230303 | 12.9002684 | 0.22886266  | 0.40642411 | 0.21137623 | 0.42054798 |              |
| NA        | ENSG00000230304 | 1.1336966  | -0.04838012 | 0.38590219 | 0.35738891 | NA         | CICP6        |
| NA        | ENSG00000230305 | 0          | NA          | NA         | NA         | NA         |              |
| NA        | ENSG00000230306 | 0          | NA          | NA         | NA         | NA         | BANF1P2      |
| NA        | ENSG00000230307 | 0          | NA          | NA         | NA         | NA         | OR6C5P       |
| NA        | ENSG00000230309 | 0          | NA          | NA         | NA         | NA         |              |
| NA        | ENSG00000230310 | 0.97908152 | -0.01456901 | 0.38130746 | 0.79136882 | NA         |              |
| NA        | ENSG00000230311 | 0          | NA          | NA         | NA         | NA         | TOMM20P4     |
| NA        | ENSG00000230312 | 0.31805662 | 0.00099283  | 0.38336566 | 0.96756354 | NA         | SLC25A53P1   |
| NA        | ENSG00000230313 | 0          | NA          | NA         | NA         | NA         | HCG24        |
| 100506409 | ENSG00000230314 | 5.76977773 | -0.16885947 | 0.40892259 | 0.21187028 | 0.42144641 | ELOVL2-AS1   |
| 154860    | ENSG00000230316 | 0          | NA          | NA         | NA         | NA         | FEZF1-AS1    |

|           |                 |            |             |            |            |            |             |
|-----------|-----------------|------------|-------------|------------|------------|------------|-------------|
| 101926971 | ENSG00000230317 | 1.68383795 | 0.02692495  | 0.37958572 | 0.70449487 | NA         | LINC01284   |
| NA        | ENSG00000230318 | 0          | NA          | NA         | NA         | NA         | XRCC6P3     |
| 100506679 | ENSG00000230319 | 6.87136345 | -0.03151451 | 0.35462328 | 0.8209286  | 0.91847813 | TTLL1-AS1   |
| NA        | ENSG00000230320 | 0.32262676 | -0.02325531 | 0.38531886 | 0.66952847 | NA         | BEND7P1     |
| NA        | ENSG00000230321 | 0          | NA          | NA         | NA         | NA         | MTCO2P27    |
| NA        | ENSG00000230322 | 0          | NA          | NA         | NA         | NA         |             |
| NA        | ENSG00000230323 | 0.18922458 | 0.01954053  | 0.38488496 | 0.78225479 | NA         | LINC00159   |
| 339568    | ENSG00000230324 | 0          | NA          | NA         | NA         | NA         | LINC01734   |
| NA        | ENSG00000230325 | 7.29941562 | -0.0951969  | 0.36941545 | 0.49581552 | 0.71458521 |             |
| NA        | ENSG00000230326 | 0          | NA          | NA         | NA         | NA         | HMGNI1P33   |
| NA        | ENSG00000230327 | 0.34624801 | -0.02356563 | 0.38536324 | 0.65270996 | NA         | MTCO1P42    |
| NA        | ENSG00000230328 | 0          | NA          | NA         | NA         | NA         |             |
| NA        | ENSG00000230330 | 0.16735865 | 0.01897177  | 0.38482933 | 0.78225479 | NA         | HMGNI2P3    |
| NA        | ENSG00000230331 | 0          | NA          | NA         | NA         | NA         |             |
| NA        | ENSG00000230333 | 10.7135601 | 1.90147925  | 1.00674068 | 0.00177135 | 0.00965219 |             |
| NA        | ENSG00000230335 | 0          | NA          | NA         | NA         | NA         | DNAJB5P1    |
| 105376736 | ENSG00000230337 | 1.81852429 | -0.04874458 | 0.38363253 | 0.47053311 | NA         | EXOSC10-AS1 |
| NA        | ENSG00000230338 | 0          | NA          | NA         | NA         | NA         | MTND4P19    |
| NA        | ENSG00000230339 | 0          | NA          | NA         | NA         | NA         |             |
| NA        | ENSG00000230342 | 0          | NA          | NA         | NA         | NA         | FANCD2P2    |
| NA        | ENSG00000230343 | 0          | NA          | NA         | NA         | NA         |             |
| NA        | ENSG00000230350 | 0.44958697 | -0.0272925  | 0.38571247 | 0.56203641 | NA         | RPL35AP3    |
| NA        | ENSG00000230352 | 0          | NA          | NA         | NA         | NA         |             |
| NA        | ENSG00000230353 | 0          | NA          | NA         | NA         | NA         | RPS21P2     |
| NA        | ENSG00000230355 | 0          | NA          | NA         | NA         | NA         |             |
| NA        | ENSG00000230356 | 0          | NA          | NA         | NA         | NA         | NCAPD2P1    |
| 442572    | ENSG00000230358 | 1.05090746 | -0.05883765 | 0.3903014  | 0.21312778 | NA         | SPDYE21     |
| 286016    | ENSG00000230359 | 47.8562005 | -0.19792907 | 0.27210296 | 0.3232276  | 0.55093089 | TPI1P2      |
| NA        | ENSG00000230360 | 0          | NA          | NA         | NA         | NA         | DDX10P2     |
| NA        | ENSG00000230361 | 0          | NA          | NA         | NA         | NA         | VN1R32P     |
| NA        | ENSG00000230362 | 0          | NA          | NA         | NA         | NA         | ACTG1P23    |
| NA        | ENSG00000230364 | 0          | NA          | NA         | NA         | NA         | RPL4P3      |
| NA        | ENSG00000230365 | 0          | NA          | NA         | NA         | NA         |             |
| 257203    | ENSG00000230366 | 9.98424406 | -0.11260962 | 0.36257688 | 0.47656939 | 0.69841458 | DSCR9       |
| 284593    | ENSG00000230368 | 1.60688963 | -0.0169733  | 0.37726071 | 0.82604138 | NA         | FAM41C      |
| NA        | ENSG00000230370 | 0.14931947 | -0.01844332 | 0.38480212 | 0.84537521 | NA         | RPL23AP52   |
| NA        | ENSG00000230371 | 5.85402986 | -0.03199383 | 0.35772444 | 0.81122304 | 0.91456796 | KARS1P2     |
| 642402    | ENSG00000230373 | 379.161803 | 0.60519687  | 0.12931277 | 8.40E-07   | 9.65E-06   | GOLGA6L5P   |

|           |                 |            |             |            |            |            |           |
|-----------|-----------------|------------|-------------|------------|------------|------------|-----------|
| NA        | ENSG00000230375 | 0          | NA          | NA         | NA         | NA         | GSTA11P   |
| NA        | ENSG00000230376 | 0          | NA          | NA         | NA         | NA         | MEMO1P4   |
| NA        | ENSG00000230377 | 0          | NA          | NA         | NA         | NA         | ELOCP7    |
| NA        | ENSG00000230379 | 0          | NA          | NA         | NA         | NA         |           |
| NA        | ENSG00000230381 | 0          | NA          | NA         | NA         | NA         |           |
| NA        | ENSG00000230383 | 1.61623504 | -0.06411529 | 0.38639415 | 0.36297803 | NA         |           |
| NA        | ENSG00000230384 | 0          | NA          | NA         | NA         | NA         | RPSAP25   |
| NA        | ENSG00000230385 | 0          | NA          | NA         | NA         | NA         |           |
| NA        | ENSG00000230386 | 0          | NA          | NA         | NA         | NA         |           |
| 100505664 | ENSG00000230387 | 0          | NA          | NA         | NA         | NA         |           |
| 103695431 | ENSG00000230390 | 0          | NA          | NA         | NA         | NA         | LINC01048 |
| NA        | ENSG00000230391 | 0          | NA          | NA         | NA         | NA         | RPSAP23   |
| 101928336 | ENSG00000230392 | 0.173733   | 0.01914545  | 0.38484597 | 0.78225479 | NA         |           |
| NA        | ENSG00000230393 | 11.2774449 | 0.11019212  | 0.35747545 | 0.50125927 | 0.71841948 |           |
| NA        | ENSG00000230395 | 0          | NA          | NA         | NA         | NA         | ANAPC1P3  |
| NA        | ENSG00000230397 | 0.55814128 | 0.03318919  | 0.38626524 | 0.44790581 | NA         | SPTLC1P1  |
| NA        | ENSG00000230398 | 0          | NA          | NA         | NA         | NA         | HINT2P1   |
| NA        | ENSG00000230399 | 0          | NA          | NA         | NA         | NA         | RBBP8P1   |
| NA        | ENSG00000230400 | 0          | NA          | NA         | NA         | NA         | LINC01747 |
| 105374293 | ENSG00000230401 | 0          | NA          | NA         | NA         | NA         | LINC01972 |
| NA        | ENSG00000230402 | 0          | NA          | NA         | NA         | NA         | LINC01349 |
| NA        | ENSG00000230403 | 0          | NA          | NA         | NA         | NA         | LINC01066 |
| NA        | ENSG00000230404 | 0          | NA          | NA         | NA         | NA         |           |
| NA        | ENSG00000230405 | 0          | NA          | NA         | NA         | NA         | RPS3AP52  |
| NA        | ENSG00000230406 | 0          | NA          | NA         | NA         | NA         | RPL23P5   |
| NA        | ENSG00000230407 | 0          | NA          | NA         | NA         | NA         |           |
| 101927795 | ENSG00000230408 | 0.32382659 | -0.02327302 | 0.38532134 | 0.6686071  | NA         | BZW1-AS1  |
| NA        | ENSG00000230409 | 0.29863895 | -0.02292439 | 0.3852726  | 0.68753245 | NA         | TCEA1P2   |
| NA        | ENSG00000230411 | 0          | NA          | NA         | NA         | NA         | OR3D1P    |
| NA        | ENSG00000230415 | 10.8649465 | 0.1476928   | 0.36556576 | 0.39181603 | 0.62114503 | LINC01786 |
| NA        | ENSG00000230416 | 0          | NA          | NA         | NA         | NA         | OR5M4P    |
| 414243    | ENSG00000230417 | 1.80828967 | -0.03351018 | 0.37750081 | 0.68003111 | NA         | LINC00595 |
| 100132987 | ENSG00000230417 | 1.80828967 | -0.03351018 | 0.37750081 | 0.68003111 | NA         | LINC00595 |
| 414243    | ENSG00000230417 | 1.80828967 | -0.03351018 | 0.37750081 | 0.68003111 | NA         | LINC00856 |
| 100132987 | ENSG00000230417 | 1.80828967 | -0.03351018 | 0.37750081 | 0.68003111 | NA         | LINC00856 |
| NA        | ENSG00000230418 | 0          | NA          | NA         | NA         | NA         | ARL2BPP7  |
| NA        | ENSG00000230423 | 6.13619005 | 0.01438673  | 0.37321665 | 0.87835547 | 0.9462221  |           |
| NA        | ENSG00000230424 | 6.7789052  | 0.15351546  | 0.39042649 | 0.302617   | 0.52987991 | EMC1-AS1  |

|           |                 |            |             |            |            |            |            |
|-----------|-----------------|------------|-------------|------------|------------|------------|------------|
| NA        | ENSG00000230425 | 0.16735865 | 0.01897177  | 0.38482933 | 0.78225479 | NA         | RSUIP1     |
| 104169671 | ENSG00000230426 | 99.5575707 | -0.00386481 | 0.2029871  | 0.98061592 | 0.99355086 | LINC01036  |
| 101928098 | ENSG00000230427 | 0.36264879 | 0.00118959  | 0.3833663  | 0.96457681 | NA         | ALG14-AS1  |
| NA        | ENSG00000230428 | 0          | NA          | NA         | NA         | NA         |            |
| NA        | ENSG00000230432 | 0.173733   | 0.01914545  | 0.38484597 | 0.78225479 | NA         |            |
| NA        | ENSG00000230433 | 0.30001567 | -0.02294458 | 0.38527538 | 0.68644887 | NA         |            |
| NA        | ENSG00000230434 | 0.15069912 | -0.01848503 | 0.38480575 | 0.84537521 | NA         | LINC01650  |
| NA        | ENSG00000230435 | 0.18922458 | 0.01954053  | 0.38488496 | 0.78225479 | NA         |            |
| NA        | ENSG00000230437 | 0          | NA          | NA         | NA         | NA         |            |
| NA        | ENSG00000230438 | 6.68268404 | 0.18436395  | 0.41042043 | 0.21558923 | 0.42640716 | SERPINB9P1 |
| NA        | ENSG00000230440 | 0          | NA          | NA         | NA         | NA         |            |
| 102724555 | ENSG00000230442 | 0          | NA          | NA         | NA         | NA         | ASB15-AS1  |
| NA        | ENSG00000230444 | 25.9103593 | -2.0935995  | 0.61540178 | 3.64E-05   | 0.00030858 | TFAMP1     |
| NA        | ENSG00000230445 | 28.6920977 | 0.09200452  | 0.30411052 | 0.63313512 | 0.81467026 | LRRC37A6P  |
| NA        | ENSG00000230447 | 0          | NA          | NA         | NA         | NA         | CTF2P      |
| 100499171 | ENSG00000230448 | 0          | NA          | NA         | NA         | NA         | LINC00276  |
| NA        | ENSG00000230449 | 0.32422381 | 0.00216432  | 0.38337757 | 0.96035969 | NA         | RPL7P4     |
| NA        | ENSG00000230450 | 0.29863895 | -0.02292439 | 0.3852726  | 0.68753245 | NA         | NEK2P4     |
| NA        | ENSG00000230451 | 0          | NA          | NA         | NA         | NA         | RPS29P6    |
| 106144568 | ENSG00000230452 | 0          | NA          | NA         | NA         | NA         | LINC01381  |
| 441459    | ENSG00000230453 | 273.853149 | -0.28569772 | 0.178257   | 0.07019486 | 0.19193303 | ANKRD18B   |
| NA        | ENSG00000230454 | 69.9103596 | 0.60275472  | 0.32507834 | 0.01350968 | 0.05308616 |            |
| NA        | ENSG00000230457 | 4.02607051 | 0.0660031   | 0.37185256 | 0.57967054 | 0.77720951 | PA2G4P4    |
| NA        | ENSG00000230458 | 0          | NA          | NA         | NA         | NA         | GPM6BP1    |
| NA        | ENSG00000230459 | 0          | NA          | NA         | NA         | NA         |            |
| NA        | ENSG00000230461 | 344.397932 | 0.42096555  | 0.13128314 | 0.000644   | 0.00402042 | PROX1-AS1  |
| NA        | ENSG00000230465 | 0          | NA          | NA         | NA         | NA         | VENTXP4    |
| NA        | ENSG00000230468 | 0          | NA          | NA         | NA         | NA         | CLUHP5     |
| NA        | ENSG00000230469 | 0          | NA          | NA         | NA         | NA         | RPL5P26    |
| NA        | ENSG00000230470 | 0          | NA          | NA         | NA         | NA         |            |
| NA        | ENSG00000230471 | 1.96919639 | -0.00496534 | 0.37714623 | 0.9461791  | NA         |            |
| NA        | ENSG00000230472 | 0          | NA          | NA         | NA         | NA         |            |
| NA        | ENSG00000230474 | 0          | NA          | NA         | NA         | NA         | ATP6V1G1P7 |
| NA        | ENSG00000230476 | 0          | NA          | NA         | NA         | NA         | OFD1P9Y    |
| NA        | ENSG00000230477 | 0          | NA          | NA         | NA         | NA         |            |
| NA        | ENSG00000230478 | 0          | NA          | NA         | NA         | NA         |            |
| NA        | ENSG00000230479 | 0          | NA          | NA         | NA         | NA         |            |
| NA        | ENSG00000230480 | 0          | NA          | NA         | NA         | NA         |            |

|           |                 |            |             |            |            |            |             |
|-----------|-----------------|------------|-------------|------------|------------|------------|-------------|
| NA        | ENSG00000230481 | 0          | NA          | NA         | NA         | NA         | IGKV1OR22-5 |
| NA        | ENSG00000230482 | 1.85373093 | -0.02873034 | 0.37786503 | 0.7158808  | NA         | ATP5MC2P3   |
| NA        | ENSG00000230483 | 0          | NA          | NA         | NA         | NA         |             |
| NA        | ENSG00000230484 | 0          | NA          | NA         | NA         | NA         | OR51A10P    |
| NA        | ENSG00000230485 | 0          | NA          | NA         | NA         | NA         |             |
| 114796    | ENSG00000230487 | 812.338403 | -0.15569279 | 0.11544395 | 0.15613372 | 0.34240003 | PSMG3-AS1   |
| 100873946 | ENSG00000230489 | 0          | NA          | NA         | NA         | NA         | VAV3-AS1    |
| NA        | ENSG00000230490 | 0.87313978 | -0.01132888 | 0.38162313 | 0.82696524 | NA         |             |
| NA        | ENSG00000230491 | 0.32302308 | -0.02325851 | 0.38531934 | 0.66929936 | NA         | SRD5A2P1    |
| NA        | ENSG00000230492 | 0          | NA          | NA         | NA         | NA         |             |
| NA        | ENSG00000230495 | 0          | NA          | NA         | NA         | NA         |             |
| NA        | ENSG00000230496 | 0          | NA          | NA         | NA         | NA         | MTCO2P7     |
| NA        | ENSG00000230497 | 0          | NA          | NA         | NA         | NA         | EEF1B2P8    |
| NA        | ENSG00000230498 | 5.35464543 | -0.2178856  | 0.45245579 | 0.0909801  | 0.23271133 |             |
| NA        | ENSG00000230499 | 0          | NA          | NA         | NA         | NA         |             |
| NA        | ENSG00000230500 | 0          | NA          | NA         | NA         | NA         | MKX-AS1     |
| NA        | ENSG00000230501 | 0          | NA          | NA         | NA         | NA         | ANKRD30BP3  |
| NA        | ENSG00000230502 | 0          | NA          | NA         | NA         | NA         |             |
| NA        | ENSG00000230506 | 3.0989335  | 0.04489573  | 0.37257275 | 0.67161519 | 0.83826144 |             |
| NA        | ENSG00000230507 | 0          | NA          | NA         | NA         | NA         | RPL7AP8     |
| NA        | ENSG00000230508 | 0          | NA          | NA         | NA         | NA         | RPL19P21    |
| 100506012 | ENSG00000230510 | 6.74051191 | -0.02861764 | 0.3585372  | 0.82592698 | 0.92110125 | PPP5D1      |
| 439931    | ENSG00000230513 | 109.294724 | -0.17379058 | 0.22331052 | 0.34172944 | 0.57180671 | THAP7-AS1   |
| NA        | ENSG00000230515 | 0.173124   | -0.01911262 | 0.38486262 | 0.84537521 | NA         |             |
| NA        | ENSG00000230516 | 0          | NA          | NA         | NA         | NA         |             |
| NA        | ENSG00000230519 | 0          | NA          | NA         | NA         | NA         | HMGB1P49    |
| NA        | ENSG00000230520 | 0          | NA          | NA         | NA         | NA         |             |
| NA        | ENSG00000230521 | 0.173124   | -0.01911262 | 0.38486262 | 0.84537521 | NA         |             |
| 125997    | ENSG00000230522 | 0          | NA          | NA         | NA         | NA         | MBD3L2      |
| 101928460 | ENSG00000230523 | 1.35421024 | 0.08145287  | 0.39292243 | 0.19451998 | NA         | LINC01756   |
| 344875    | ENSG00000230524 | 0.16735865 | 0.01897177  | 0.38482933 | 0.78225479 | NA         | COL6A4P1    |
| 101060019 | ENSG00000230525 | 0          | NA          | NA         | NA         | NA         | LINC01799   |
| NA        | ENSG00000230526 | 0          | NA          | NA         | NA         | NA         |             |
| NA        | ENSG00000230528 | 0          | NA          | NA         | NA         | NA         | NOS2P3      |
| NA        | ENSG00000230529 | 0          | NA          | NA         | NA         | NA         | CEACAMP9    |
| NA        | ENSG00000230530 | 236.313599 | -0.00319685 | 0.15422222 | 0.98078208 | 0.99355086 | LIMD1-AS1   |
| NA        | ENSG00000230531 | 0          | NA          | NA         | NA         | NA         | MTND5P7     |
| NA        | ENSG00000230532 | 0          | NA          | NA         | NA         | NA         |             |

|           |                 |            |             |            |            |            |            |
|-----------|-----------------|------------|-------------|------------|------------|------------|------------|
| NA        | ENSG00000230533 | 0          | NA          | NA         | NA         | NA         |            |
| NA        | ENSG00000230534 | 1.04259413 | -0.04443485 | 0.38527289 | 0.40256899 | NA         |            |
| NA        | ENSG00000230535 | 0          | NA          | NA         | NA         | NA         | BASP1P1    |
| NA        | ENSG00000230536 | 0.31665767 | 0.0010528   | 0.38336611 | 0.96776582 | NA         |            |
| NA        | ENSG00000230537 | 4.49396149 | 0.03447862  | 0.37053097 | 0.74931867 | 0.88205755 |            |
| NA        | ENSG00000230538 | 0          | NA          | NA         | NA         | NA         | PNPLA10P   |
| 100874264 | ENSG00000230539 | 0          | NA          | NA         | NA         | NA         | AOAH-IT1   |
| 100359394 | ENSG00000230542 | 0          | NA          | NA         | NA         | NA         | LINC00102  |
| NA        | ENSG00000230543 | 0          | NA          | NA         | NA         | NA         | SNX3P1X    |
| NA        | ENSG00000230546 | 0          | NA          | NA         | NA         | NA         |            |
| NA        | ENSG00000230547 | 0.18922458 | 0.01954053  | 0.38488496 | 0.78225479 | NA         | HMGB1P11   |
| NA        | ENSG00000230548 | 0          | NA          | NA         | NA         | NA         | MTND4P27   |
| 401447    | ENSG00000230549 | 0          | NA          | NA         | NA         | NA         | USP17L1    |
| 101929441 | ENSG00000230550 | 2.37907009 | -0.02255912 | 0.37412429 | 0.80461373 | NA         | ERLNC1     |
| NA        | ENSG00000230551 | 892.317587 | -0.30879414 | 0.11422448 | 0.00449238 | 0.02127687 |            |
| NA        | ENSG00000230552 | 2.41456163 | -0.05099291 | 0.37642017 | 0.59931866 | NA         |            |
| NA        | ENSG00000230555 | 7.9582851  | -0.01054068 | 0.35504606 | 0.9369553  | 0.97351594 |            |
| NA        | ENSG00000230556 | 0          | NA          | NA         | NA         | NA         |            |
| NA        | ENSG00000230558 | 0          | NA          | NA         | NA         | NA         | CEACAMP2   |
| NA        | ENSG00000230559 | 0          | NA          | NA         | NA         | NA         | RPL17P12   |
| 728586    | ENSG00000230561 | 2.89956884 | -0.07659492 | 0.38219304 | 0.43623274 | 0.6612819  | CCDC192    |
| NA        | ENSG00000230562 | 0          | NA          | NA         | NA         | NA         | FAM133DP   |
| NA        | ENSG00000230563 | 0          | NA          | NA         | NA         | NA         |            |
| NA        | ENSG00000230564 | 0          | NA          | NA         | NA         | NA         | CALM1P2    |
| 414208    | ENSG00000230565 | 26.2331722 | -0.01570815 | 0.29131969 | 0.93256728 | 0.97195497 | ZNF32-AS2  |
| NA        | ENSG00000230568 | 0.16735865 | 0.01897177  | 0.38482933 | 0.78225479 | NA         | SF3A3P1    |
| NA        | ENSG00000230569 | 0          | NA          | NA         | NA         | NA         |            |
| NA        | ENSG00000230570 | 0          | NA          | NA         | NA         | NA         |            |
| NA        | ENSG00000230571 | 0          | NA          | NA         | NA         | NA         |            |
| NA        | ENSG00000230572 | 0.30139824 | -0.02296476 | 0.38527817 | 0.68536535 | NA         |            |
| 105376365 | ENSG00000230573 | 0          | NA          | NA         | NA         | NA         | LINC02639  |
| NA        | ENSG00000230575 | 0          | NA          | NA         | NA         | NA         |            |
| NA        | ENSG00000230576 | 0          | NA          | NA         | NA         | NA         | OR6R1P     |
| NA        | ENSG00000230578 | 1.22928904 | 0.07088712  | 0.38998114 | 0.23443291 | NA         |            |
| NA        | ENSG00000230580 | 0          | NA          | NA         | NA         | NA         | RPL19P5    |
| NA        | ENSG00000230581 | 1.12704579 | -0.00706562 | 0.38053757 | 0.90285551 | NA         | ACTG1P14   |
| 729156    | ENSG00000230583 | 7.12308032 | 0.07800125  | 0.36123582 | 0.59283729 | 0.78702605 | GTF2IRD1P1 |
| NA        | ENSG00000230584 | 0          | NA          | NA         | NA         | NA         | CCT5P2     |

|           |    |                 |            |             |            |            |            |           |
|-----------|----|-----------------|------------|-------------|------------|------------|------------|-----------|
|           | NA | ENSG00000230585 | 0.18922458 | 0.01954053  | 0.38488496 | 0.78225479 | NA         | PHBP12    |
|           | NA | ENSG00000230587 | 0.49788184 | -0.01273938 | 0.38299404 | 0.78861686 | NA         | LINC02580 |
|           | NA | ENSG00000230589 | 0          | NA          | NA         | NA         | NA         | IMP3P1    |
| 100302692 |    | ENSG00000230590 | 1445.76302 | 0.00250183  | 0.08736207 | 0.97733652 | 0.99232877 | FTX       |
|           | NA | ENSG00000230592 | 0          | NA          | NA         | NA         | NA         | RPSAP8    |
|           | NA | ENSG00000230593 | 0.15069912 | -0.01848503 | 0.38480575 | 0.84537521 | NA         | PPIAP40   |
|           | NA | ENSG00000230595 | 0          | NA          | NA         | NA         | NA         | RSL24D1P2 |
|           | NA | ENSG00000230596 | 0.65301634 | -0.00826404 | 0.38222046 | 0.8067639  | NA         | GPAA1P2   |
|           | NA | ENSG00000230597 | 0          | NA          | NA         | NA         | NA         |           |
|           | NA | ENSG00000230598 | 0          | NA          | NA         | NA         | NA         |           |
|           | NA | ENSG00000230599 | 0          | NA          | NA         | NA         | NA         |           |
|           | NA | ENSG00000230600 | 0          | NA          | NA         | NA         | NA         |           |
| 100505478 |    | ENSG00000230601 | 0          | NA          | NA         | NA         | NA         | TEX48     |
|           | NA | ENSG00000230603 | 0          | NA          | NA         | NA         | NA         |           |
|           | NA | ENSG00000230604 | 0          | NA          | NA         | NA         | NA         | TSEN15P2  |
|           | NA | ENSG00000230605 | 0          | NA          | NA         | NA         | NA         | MTCYBP6   |
|           | NA | ENSG00000230606 | 193.153943 | 0.12482385  | 0.16954162 | 0.41234112 | 0.64005916 |           |
|           | NA | ENSG00000230607 | 0          | NA          | NA         | NA         | NA         |           |
|           | NA | ENSG00000230609 | 0          | NA          | NA         | NA         | NA         |           |
|           | NA | ENSG00000230611 | 0.32423144 | -0.02327627 | 0.38532184 | 0.6683741  | NA         | HMGB1P27  |
|           | NA | ENSG00000230612 | 3.28000629 | 0.09389289  | 0.3877651  | 0.34443124 | 0.57472798 |           |
|           | NA | ENSG00000230613 | 0.53213383 | -0.00857344 | 0.38313468 | 0.82524639 | NA         | HM13-AS1  |
|           | NA | ENSG00000230614 | 0          | NA          | NA         | NA         | NA         | DYNLL1P7  |
|           | NA | ENSG00000230615 | 8.47908958 | 0.12994293  | 0.39348524 | 0.28615509 | 0.51197736 |           |
|           | NA | ENSG00000230617 | 0          | NA          | NA         | NA         | NA         |           |
|           | NA | ENSG00000230618 | 0          | NA          | NA         | NA         | NA         | H3P12     |
|           | NA | ENSG00000230621 | 0          | NA          | NA         | NA         | NA         |           |
|           | NA | ENSG00000230622 | 0.67187887 | -0.03832028 | 0.38687474 | 0.39936632 | NA         | UQCRHP1   |
|           | NA | ENSG00000230623 | 0          | NA          | NA         | NA         | NA         |           |
|           | NA | ENSG00000230626 | 0.29863895 | -0.02292439 | 0.3852726  | 0.68753245 | NA         |           |
|           | NA | ENSG00000230627 | 0          | NA          | NA         | NA         | NA         |           |
|           | NA | ENSG00000230628 | 0          | NA          | NA         | NA         | NA         |           |
|           | NA | ENSG00000230629 | 0.34746601 | 0.02370763  | 0.3853651  | 0.61987128 | NA         | RPS23P8   |
|           | NA | ENSG00000230630 | 371.221122 | 0.10712967  | 0.12671299 | 0.37169925 | 0.60072607 | DNM3OS    |
|           | NA | ENSG00000230631 | 0          | NA          | NA         | NA         | NA         |           |
|           | NA | ENSG00000230634 | 0          | NA          | NA         | NA         | NA         |           |
|           | NA | ENSG00000230635 | 0.173124   | -0.01911262 | 0.38486262 | 0.84537521 | NA         | CYP4F60P  |
|           | NA | ENSG00000230636 | 0          | NA          | NA         | NA         | NA         | RPL36P1   |



|           |                 |            |             |            |            |            |           |
|-----------|-----------------|------------|-------------|------------|------------|------------|-----------|
| NA        | ENSG00000230637 | 0          | NA          | NA         | NA         | NA         |           |
| NA        | ENSG00000230638 | 0.96338116 | -0.04632374 | 0.38502244 | 0.4031322  | NA         |           |
| NA        | ENSG00000230639 | 0          | NA          | NA         | NA         | NA         | VN1R36P   |
| NA        | ENSG00000230641 | 0.36352239 | 0.02389875  | 0.38539303 | 0.60968573 | NA         | USP12-AS2 |
| NA        | ENSG00000230643 | 0          | NA          | NA         | NA         | NA         |           |
| NA        | ENSG00000230645 | 0          | NA          | NA         | NA         | NA         | LINC01818 |
| NA        | ENSG00000230646 | 0          | NA          | NA         | NA         | NA         | KLF2P2    |
| NA        | ENSG00000230647 | 0          | NA          | NA         | NA         | NA         |           |
| NA        | ENSG00000230648 | 1.19435702 | 0.01846971  | 0.37910681 | 0.78960606 | NA         |           |
| NA        | ENSG00000230649 | 0          | NA          | NA         | NA         | NA         |           |
| NA        | ENSG00000230650 | 0.30139824 | -0.02296476 | 0.38527817 | 0.68536535 | NA         |           |
| 729121    | ENSG00000230651 | 0          | NA          | NA         | NA         | NA         | RGPD4-AS1 |
| NA        | ENSG00000230654 | 0          | NA          | NA         | NA         | NA         | MTCO2P25  |
| NA        | ENSG00000230655 | 0          | NA          | NA         | NA         | NA         | OR7E55P   |
| 5545      | ENSG00000230657 | 0          | NA          | NA         | NA         | NA         | PRB4      |
| NA        | ENSG00000230658 | 28.809733  | -0.17068147 | 0.32932632 | 0.38703493 | 0.61602672 | KLHL7-DT  |
| NA        | ENSG00000230659 | 0          | NA          | NA         | NA         | NA         |           |
| NA        | ENSG00000230661 | 0          | NA          | NA         | NA         | NA         | YY1P1     |
| NA        | ENSG00000230662 | 0.82966066 | 0.01866099  | 0.38139382 | 0.74062685 | NA         | TNPO1P2   |
| NA        | ENSG00000230663 | 0          | NA          | NA         | NA         | NA         | FAM224B   |
| NA        | ENSG00000230665 | 0.16735865 | 0.01897177  | 0.38482933 | 0.78225479 | NA         | THAP12P1  |
| 388550    | ENSG00000230666 | 0          | NA          | NA         | NA         | NA         | CEACAM22P |
| 646817    | ENSG00000230667 | 0.15069912 | -0.01848503 | 0.38480575 | 0.84537521 | NA         | SETSIP    |
| NA        | ENSG00000230668 | 0          | NA          | NA         | NA         | NA         |           |
| NA        | ENSG00000230671 | 0          | NA          | NA         | NA         | NA         | NDUFS5P5  |
| NA        | ENSG00000230673 | 0          | NA          | NA         | NA         | NA         | PABPC1P3  |
| NA        | ENSG00000230676 | 0          | NA          | NA         | NA         | NA         |           |
| 100505975 | ENSG00000230679 | 0.63909775 | 0.00303949  | 0.38196015 | 0.94746594 | NA         | ENO1-AS1  |
| NA        | ENSG00000230680 | 0          | NA          | NA         | NA         | NA         |           |
| NA        | ENSG00000230681 | 0          | NA          | NA         | NA         | NA         | CEACAMP4  |
| NA        | ENSG00000230682 | 0          | NA          | NA         | NA         | NA         | GRPEL2P3  |
| NA        | ENSG00000230683 | 0.34624801 | -0.02356563 | 0.38536324 | 0.65270996 | NA         | DDTP1     |
| NA        | ENSG00000230684 | 0          | NA          | NA         | NA         | NA         |           |
| NA        | ENSG00000230686 | 0          | NA          | NA         | NA         | NA         |           |
| NA        | ENSG00000230687 | 0          | NA          | NA         | NA         | NA         |           |
| NA        | ENSG00000230690 | 0.29863895 | -0.02292439 | 0.3852726  | 0.68753245 | NA         |           |
| NA        | ENSG00000230691 | 0          | NA          | NA         | NA         | NA         | MRPL35P4  |
| NA        | ENSG00000230694 | 0          | NA          | NA         | NA         | NA         |           |

|           |                 |            |             |            |            |            |            |
|-----------|-----------------|------------|-------------|------------|------------|------------|------------|
| NA        | ENSG00000230695 | 0          | NA          | NA         | NA         | NA         |            |
| NA        | ENSG00000230696 | 0          | NA          | NA         | NA         | NA         |            |
| NA        | ENSG00000230697 | 0.67141507 | 0.02660647  | 0.38369582 | 0.58081486 | NA         | SAP18P3    |
| NA        | ENSG00000230698 | 0.30139824 | -0.02296476 | 0.38527817 | 0.68536535 | NA         |            |
| NA        | ENSG00000230699 | 521.623182 | 0.46437427  | 0.11238228 | 1.57E-05   | 0.00014359 |            |
| 26226     | ENSG00000230701 | 7.98275549 | 0.10354111  | 0.36458537 | 0.49630021 | 0.714811   | FBXW4P1    |
| NA        | ENSG00000230702 | 0.16735865 | 0.01897177  | 0.38482933 | 0.78225479 | NA         | RPL31P30   |
| NA        | ENSG00000230703 | 0          | NA          | NA         | NA         | NA         | MYOM3-AS1  |
| NA        | ENSG00000230704 | 0          | NA          | NA         | NA         | NA         |            |
| NA        | ENSG00000230706 | 0          | NA          | NA         | NA         | NA         | TMEM184CP1 |
| 389895    | ENSG00000230707 | 0          | NA          | NA         | NA         | NA         |            |
| 284191    | ENSG00000230709 | 0.34110111 | 0.02362646  | 0.38535339 | 0.62411049 | NA         |            |
| NA        | ENSG00000230710 | 0          | NA          | NA         | NA         | NA         | LINC00332  |
| NA        | ENSG00000230711 | 0          | NA          | NA         | NA         | NA         | CTAGE13P   |
| NA        | ENSG00000230712 | 0.18922458 | 0.01954053  | 0.38488496 | 0.78225479 | NA         | GGTLC4P    |
| NA        | ENSG00000230714 | 0          | NA          | NA         | NA         | NA         |            |
| NA        | ENSG00000230715 | 48.2641085 | -0.02070491 | 0.25937468 | 0.91245828 | 0.96260718 |            |
| NA        | ENSG00000230716 | 0.16735865 | 0.01897177  | 0.38482933 | 0.78225479 | NA         | KRT8P7     |
| NA        | ENSG00000230718 | 0.15069912 | -0.01848503 | 0.38480575 | 0.84537521 | NA         |            |
| 105376480 | ENSG00000230720 | 0          | NA          | NA         | NA         | NA         | LINC02644  |
| NA        | ENSG00000230721 | 0.173124   | -0.01911262 | 0.38486262 | 0.84537521 | NA         |            |
| NA        | ENSG00000230724 | 421.680482 | 0.43075136  | 0.127109   | 0.000329   | 0.00222319 | LINC01001  |
| 284798    | ENSG00000230725 | 0          | NA          | NA         | NA         | NA         |            |
| NA        | ENSG00000230727 | 0          | NA          | NA         | NA         | NA         | RBMY2WP    |
| NA        | ENSG00000230728 | 0.18922458 | 0.01954053  | 0.38488496 | 0.78225479 | NA         |            |
| NA        | ENSG00000230729 | 0          | NA          | NA         | NA         | NA         |            |
| NA        | ENSG00000230730 | 0          | NA          | NA         | NA         | NA         |            |
| NA        | ENSG00000230731 | 0.61633178 | -0.01507053 | 0.38330622 | 0.72556539 | NA         |            |
| NA        | ENSG00000230732 | 11.1441339 | 0.14233284  | 0.36979282 | 0.39206825 | 0.62139592 |            |
| NA        | ENSG00000230733 | 6.24199454 | 0.18720343  | 0.42188334 | 0.16970489 | 0.3614153  |            |
| NA        | ENSG00000230734 | 0.16735865 | 0.01897177  | 0.38482933 | 0.78225479 | NA         | RPL10P3    |
| NA        | ENSG00000230735 | 0          | NA          | NA         | NA         | NA         |            |
| 339666    | ENSG00000230736 | 8.44557231 | 0.25230299  | 0.4397596  | 0.15424276 | 0.3394719  |            |
| NA        | ENSG00000230737 | 0          | NA          | NA         | NA         | NA         |            |
| NA        | ENSG00000230739 | 0          | NA          | NA         | NA         | NA         |            |
| NA        | ENSG00000230741 | 0          | NA          | NA         | NA         | NA         |            |
| NA        | ENSG00000230746 | 0          | NA          | NA         | NA         | NA         |            |
| NA        | ENSG00000230747 | 17.9538331 | -0.20701021 | 0.36350821 | 0.29016924 | 0.51614542 |            |

|           |                 |            |             |            |            |            |              |
|-----------|-----------------|------------|-------------|------------|------------|------------|--------------|
| NA        | ENSG00000230748 | 0          | NA          | NA         | NA         | NA         | PRELID1P7    |
| 100873998 | ENSG00000230749 | 4.79241699 | 0.04155325  | 0.36602951 | 0.73215562 | 0.87206385 | MEIS1-AS2    |
| NA        | ENSG00000230750 | 0          | NA          | NA         | NA         | NA         | SDAD1P2      |
| NA        | ENSG00000230751 | 0          | NA          | NA         | NA         | NA         |              |
| 101929746 | ENSG00000230753 | 0          | NA          | NA         | NA         | NA         | ZNF341-AS1   |
| NA        | ENSG00000230755 | 0          | NA          | NA         | NA         | NA         | MTATP6P23    |
| NA        | ENSG00000230756 | 0          | NA          | NA         | NA         | NA         | RHOQP3       |
| NA        | ENSG00000230757 | 0          | NA          | NA         | NA         | NA         | NFU1P1       |
| NA        | ENSG00000230758 | 0          | NA          | NA         | NA         | NA         | SNAP23P1     |
| NA        | ENSG00000230759 | 0          | NA          | NA         | NA         | NA         |              |
| NA        | ENSG00000230764 | 0.15069912 | -0.01848503 | 0.38480575 | 0.84537521 | NA         | MTND1P4      |
| 101928476 | ENSG00000230768 | 0          | NA          | NA         | NA         | NA         | LINC01676    |
| NA        | ENSG00000230769 | 0.173733   | 0.01914545  | 0.38484597 | 0.78225479 | NA         |              |
| NA        | ENSG00000230772 | 5.06927773 | 0.071688    | 0.37465695 | 0.53818832 | 0.74807128 | VN1R108P     |
| NA        | ENSG00000230773 | 2.32489958 | 0.12086781  | 0.40024135 | 0.20925363 | NA         |              |
| NA        | ENSG00000230777 | 0.71837285 | 0.02271607  | 0.38382269 | 0.59743185 | NA         | RPS29P5      |
| 100131244 | ENSG00000230778 | 17.0079529 | -0.72990738 | 0.72288795 | 0.02336898 | 0.08251298 | ANKRD63      |
| NA        | ENSG00000230779 | 0          | NA          | NA         | NA         | NA         |              |
| NA        | ENSG00000230781 | 0          | NA          | NA         | NA         | NA         |              |
| 340512    | ENSG00000230782 | 0.83853687 | -0.01092323 | 0.38090175 | 0.84723999 | NA         |              |
| NA        | ENSG00000230783 | 0.36291544 | 0.0014125   | 0.38336816 | 0.96247768 | NA         | RPS3AP13     |
| NA        | ENSG00000230785 | 0          | NA          | NA         | NA         | NA         |              |
| NA        | ENSG00000230787 | 0          | NA          | NA         | NA         | NA         | PSAT1P3      |
| NA        | ENSG00000230788 | 0          | NA          | NA         | NA         | NA         | CTDSPL2P2    |
| 100874372 | ENSG00000230789 | 0.15069912 | -0.01848503 | 0.38480575 | 0.84537521 | NA         | ARHGAP26-IT1 |
| NA        | ENSG00000230790 | 0.16735865 | 0.01897177  | 0.38482933 | 0.78225479 | NA         |              |
| NA        | ENSG00000230793 | 0.87546981 | 0.01755851  | 0.3812237  | 0.75635971 | NA         | SMARCE1P5    |
| NA        | ENSG00000230794 | 0          | NA          | NA         | NA         | NA         |              |
| NA        | ENSG00000230795 | 0          | NA          | NA         | NA         | NA         | HLA-K        |
| NA        | ENSG00000230796 | 0          | NA          | NA         | NA         | NA         |              |
| 404281    | ENSG00000230797 | 88.3005384 | -0.06230031 | 0.20690588 | 0.71998241 | 0.86614425 | YY2          |
| 100996301 | ENSG00000230798 | 0.173733   | 0.01914545  | 0.38484597 | 0.78225479 | NA         | FOXD3-AS1    |
| NA        | ENSG00000230799 | 2.02626303 | 0.0138587   | 0.37440168 | 0.8765037  | NA         | RPS2P16      |
| NA        | ENSG00000230801 | 0.65632601 | 0.00381864  | 0.38193621 | 0.93475421 | NA         |              |
| NA        | ENSG00000230803 | 0          | NA          | NA         | NA         | NA         |              |
| NA        | ENSG00000230804 | 0          | NA          | NA         | NA         | NA         | CDRT15P14    |
| NA        | ENSG00000230805 | 33.4571436 | 2.09769765  | 0.46362984 | 3.86E-07   | 4.69E-06   |              |
| 100873165 | ENSG00000230806 | 0          | NA          | NA         | NA         | NA         | SRGAP2-AS1   |

|           |                 |            |             |            |            |            |            |
|-----------|-----------------|------------|-------------|------------|------------|------------|------------|
| NA        | ENSG00000230807 | 0          | NA          | NA         | NA         | NA         |            |
| NA        | ENSG00000230809 | 0          | NA          | NA         | NA         | NA         | RPS6P15    |
| NA        | ENSG00000230813 | 0          | NA          | NA         | NA         | NA         |            |
| NA        | ENSG00000230814 | 0          | NA          | NA         | NA         | NA         | USP9YP24   |
| NA        | ENSG00000230815 | 0          | NA          | NA         | NA         | NA         |            |
| 103283057 | ENSG00000230817 | 0          | NA          | NA         | NA         | NA         | LINC01362  |
| NA        | ENSG00000230818 | 0          | NA          | NA         | NA         | NA         | MTND2P16   |
| NA        | ENSG00000230819 | 0          | NA          | NA         | NA         | NA         | ZNF736P5Y  |
| NA        | ENSG00000230820 | 0          | NA          | NA         | NA         | NA         |            |
| NA        | ENSG00000230821 | 0          | NA          | NA         | NA         | NA         |            |
| NA        | ENSG00000230823 | 0.47065492 | -0.00687739 | 0.38321075 | 0.87305508 | NA         | CBX1P1     |
| 101927354 | ENSG00000230825 | 11.480404  | 0.04255144  | 0.34716222 | 0.78132154 | 0.90003181 |            |
| NA        | ENSG00000230826 | 0.173124   | -0.01911262 | 0.38486262 | 0.84537521 | NA         |            |
| NA        | ENSG00000230828 | 0.85582841 | 0.06103452  | 0.39050776 | 0.22096773 | NA         |            |
| NA        | ENSG00000230829 | 0          | NA          | NA         | NA         | NA         |            |
| NA        | ENSG00000230830 | 0          | NA          | NA         | NA         | NA         | ARPP21-AS1 |
| NA        | ENSG00000230831 | 0          | NA          | NA         | NA         | NA         |            |
| NA        | ENSG00000230832 | 0.90419472 | -0.03873466 | 0.3871499  | 0.33610152 | NA         | SSBL4P     |
| NA        | ENSG00000230833 | 0          | NA          | NA         | NA         | NA         | RPEP3      |
| NA        | ENSG00000230834 | 0          | NA          | NA         | NA         | NA         |            |
| NA        | ENSG00000230835 | 0.14931947 | -0.01844332 | 0.38480212 | 0.84537521 | NA         |            |
| NA        | ENSG00000230836 | 0.66000591 | 0.00430777  | 0.38193761 | 0.92669311 | NA         | LINC01293  |
| NA        | ENSG00000230837 | 0          | NA          | NA         | NA         | NA         | RPL31P2    |
| NA        | ENSG00000230838 | 0          | NA          | NA         | NA         | NA         | LINC01614  |
| NA        | ENSG00000230840 | 0          | NA          | NA         | NA         | NA         |            |
| NA        | ENSG00000230841 | 0.34122653 | 0.02362742  | 0.38535353 | 0.62404402 | NA         | RPL23AP15  |
| NA        | ENSG00000230843 | 0          | NA          | NA         | NA         | NA         |            |
| NA        | ENSG00000230844 | 61.3507169 | -0.18207687 | 0.26297895 | 0.35601589 | 0.58602466 | ZNF674-AS1 |
| NA        | ENSG00000230845 | 0          | NA          | NA         | NA         | NA         | GSTA10P    |
| NA        | ENSG00000230846 | 0          | NA          | NA         | NA         | NA         |            |
| NA        | ENSG00000230847 | 48.4511148 | 0.17992533  | 0.27600953 | 0.37075115 | 0.59992683 | OCLNP1     |
| NA        | ENSG00000230848 | 0          | NA          | NA         | NA         | NA         |            |
| NA        | ENSG00000230849 | 0          | NA          | NA         | NA         | NA         | GOT2P2     |
| NA        | ENSG00000230851 | 0          | NA          | NA         | NA         | NA         |            |
| NA        | ENSG00000230852 | 0.173733   | 0.01914545  | 0.38484597 | 0.78225479 | NA         | LINC02857  |
| NA        | ENSG00000230853 | 0          | NA          | NA         | NA         | NA         | RPL10P11   |
| NA        | ENSG00000230854 | 0          | NA          | NA         | NA         | NA         | USP9YP20   |
| NA        | ENSG00000230859 | 0          | NA          | NA         | NA         | NA         | YRDCP3     |

|           |                 |            |             |            |            |            |            |
|-----------|-----------------|------------|-------------|------------|------------|------------|------------|
| NA        | ENSG00000230860 | 0          | NA          | NA         | NA         | NA         | CCNB1IP1P2 |
| NA        | ENSG00000230863 | 0.14931947 | -0.01844332 | 0.38480212 | 0.84537521 | NA         |            |
| NA        | ENSG00000230864 | 0          | NA          | NA         | NA         | NA         |            |
| NA        | ENSG00000230865 | 0          | NA          | NA         | NA         | NA         | TSEN15P1   |
| NA        | ENSG00000230866 | 0.173124   | -0.01911262 | 0.38486262 | 0.84537521 | NA         | LINC02558  |
| NA        | ENSG00000230867 | 0          | NA          | NA         | NA         | NA         |            |
| NA        | ENSG00000230869 | 30.2333239 | -0.02260903 | 0.28679538 | 0.90428782 | 0.9581211  | AGAP10P    |
| NA        | ENSG00000230870 | 8.2252657  | 0.26243162  | 0.45323806 | 0.134352   | 0.30858343 | FBXW11P1   |
| NA        | ENSG00000230871 | 0          | NA          | NA         | NA         | NA         | RPS6P23    |
| 105371130 | ENSG00000230872 | 1.05405891 | -0.01647234 | 0.38157366 | 0.74956605 | NA         | MFSD13B    |
| 401236    | ENSG00000230873 | 0          | NA          | NA         | NA         | NA         | STMND1     |
| NA        | ENSG00000230876 | 1.04315021 | -0.0196945  | 0.38081861 | 0.74275788 | NA         | LINC00486  |
| NA        | ENSG00000230879 | 0          | NA          | NA         | NA         | NA         | RBMX2P4    |
| NA        | ENSG00000230881 | 0.15069912 | -0.01848503 | 0.38480575 | 0.84537521 | NA         |            |
| NA        | ENSG00000230882 | 3.31956533 | 0.09017548  | 0.38243276 | 0.4149715  | 0.64205213 |            |
| NA        | ENSG00000230886 | 0          | NA          | NA         | NA         | NA         | HMGB1P25   |
| NA        | ENSG00000230889 | 0          | NA          | NA         | NA         | NA         | SHC1P1     |
| 285326    | ENSG00000230891 | 0          | NA          | NA         | NA         | NA         | LINC00692  |
| NA        | ENSG00000230894 | 1.00846064 | 0.02868618  | 0.38185564 | 0.62944594 | NA         |            |
| NA        | ENSG00000230896 | 7.19183356 | -0.11658754 | 0.37360955 | 0.4253316  | 0.65112492 |            |
| NA        | ENSG00000230897 | 0          | NA          | NA         | NA         | NA         | RPS18P12   |
| NA        | ENSG00000230898 | 0          | NA          | NA         | NA         | NA         |            |
| NA        | ENSG00000230899 | 0          | NA          | NA         | NA         | NA         | MAGEA8-AS1 |
| NA        | ENSG00000230902 | 0          | NA          | NA         | NA         | NA         | FAM204CP   |
| NA        | ENSG00000230908 | 0          | NA          | NA         | NA         | NA         |            |
| NA        | ENSG00000230910 | 209.565642 | 0.28037861  | 0.17460472 | 0.07184635 | 0.19526459 |            |
| NA        | ENSG00000230911 | 0.91613845 | -0.0388117  | 0.38466772 | 0.45774437 | NA         | PPIHP1     |
| NA        | ENSG00000230912 | 0.83006896 | 0.0288881   | 0.38433259 | 0.51565379 | NA         |            |
| NA        | ENSG00000230913 | 0          | NA          | NA         | NA         | NA         | NPM1P51    |
| NA        | ENSG00000230914 | 0.18922458 | 0.01954053  | 0.38488496 | 0.78225479 | NA         | KIF19BP    |
| NA        | ENSG00000230916 | 0          | NA          | NA         | NA         | NA         | MTCO1P53   |
| 100131604 | ENSG00000230918 | 0.14931947 | -0.01844332 | 0.38480212 | 0.84537521 | NA         | DPP4-DT    |
| NA        | ENSG00000230920 | 0          | NA          | NA         | NA         | NA         |            |
| 100874270 | ENSG00000230921 | 0          | NA          | NA         | NA         | NA         | HAO2-IT1   |
| 101927551 | ENSG00000230922 | 3.99091607 | -0.2468167  | 0.48689455 | 0.04598379 | 0.13958359 |            |
| 150992    | ENSG00000230923 | 0          | NA          | NA         | NA         | NA         | LINC00309  |
| NA        | ENSG00000230926 | 0          | NA          | NA         | NA         | NA         |            |
| 105375396 | ENSG00000230927 | 0.33822593 | -0.0058943  | 0.38347936 | 0.96279235 | NA         | TMBIM7P    |

|           |                 |            |             |            |            |            |            |
|-----------|-----------------|------------|-------------|------------|------------|------------|------------|
| NA        | ENSG00000230928 | 0.89442094 | 0.06440653  | 0.39121342 | 0.20295148 | NA         |            |
| NA        | ENSG00000230929 | 1.17974076 | 0.01644918  | 0.38015769 | 0.79392029 | NA         |            |
| NA        | ENSG00000230931 | 0          | NA          | NA         | NA         | NA         | GXYLT1P1   |
| NA        | ENSG00000230932 | 0          | NA          | NA         | NA         | NA         |            |
| NA        | ENSG00000230934 | 0          | NA          | NA         | NA         | NA         |            |
| NA        | ENSG00000230935 | 0          | NA          | NA         | NA         | NA         | RPS3P1     |
| NA        | ENSG00000230936 | 0          | NA          | NA         | NA         | NA         |            |
| 642587    | ENSG00000230937 | 0          | NA          | NA         | NA         | NA         | MIR205HG   |
| NA        | ENSG00000230941 | 0          | NA          | NA         | NA         | NA         |            |
| NA        | ENSG00000230942 | 0          | NA          | NA         | NA         | NA         | HMG1P5     |
| 101927686 | ENSG00000230943 | 0          | NA          | NA         | NA         | NA         | LINC02541  |
| NA        | ENSG00000230944 | 0          | NA          | NA         | NA         | NA         |            |
| NA        | ENSG00000230945 | 0          | NA          | NA         | NA         | NA         | LINC01507  |
| NA        | ENSG00000230946 | 2.56056527 | 0.02666085  | 0.37431796 | 0.77393112 | NA         | HNRNPA1P68 |
| NA        | ENSG00000230947 | 0.14931947 | -0.01844332 | 0.38480212 | 0.84537521 | NA         |            |
| NA        | ENSG00000230948 | 0          | NA          | NA         | NA         | NA         | AURKBP1    |
| NA        | ENSG00000230950 | 0.47463924 | -0.03512944 | 0.38629179 | 0.49497116 | NA         | MTND2P21   |
| NA        | ENSG00000230951 | 0          | NA          | NA         | NA         | NA         | GPS2P2     |
| NA        | ENSG00000230952 | 0          | NA          | NA         | NA         | NA         |            |
| NA        | ENSG00000230953 | 0          | NA          | NA         | NA         | NA         |            |
| NA        | ENSG00000230955 | 0          | NA          | NA         | NA         | NA         |            |
| NA        | ENSG00000230956 | 0          | NA          | NA         | NA         | NA         | CAPZA1P1   |
| NA        | ENSG00000230958 | 0          | NA          | NA         | NA         | NA         |            |
| 154449    | ENSG00000230960 | 0.16735865 | 0.01897177  | 0.38482933 | 0.78225479 | NA         |            |
| 101929684 | ENSG00000230962 | 0          | NA          | NA         | NA         | NA         | LINC01520  |
| NA        | ENSG00000230965 | 17.9474189 | 0.23322284  | 0.36890956 | 0.25115353 | 0.47110579 | SNX18P13   |
| NA        | ENSG00000230967 | 0          | NA          | NA         | NA         | NA         |            |
| NA        | ENSG00000230968 | 0          | NA          | NA         | NA         | NA         |            |
| 105371562 | ENSG00000230969 | 0          | NA          | NA         | NA         | NA         | LINC02090  |
| 100874044 | ENSG00000230970 | 0          | NA          | NA         | NA         | NA         | HHATL-AS1  |
| NA        | ENSG00000230972 | 0          | NA          | NA         | NA         | NA         |            |
| NA        | ENSG00000230973 | 0          | NA          | NA         | NA         | NA         |            |
| NA        | ENSG00000230975 | 0          | NA          | NA         | NA         | NA         |            |
| NA        | ENSG00000230977 | 0          | NA          | NA         | NA         | NA         |            |
| 54064     | ENSG00000230978 | 0          | NA          | NA         | NA         | NA         | LINC00160  |
| NA        | ENSG00000230979 | 0.7092622  | 0.00430289  | 0.38183826 | 0.9276696  | NA         |            |
| NA        | ENSG00000230980 | 0          | NA          | NA         | NA         | NA         | RPL36AP39  |
| NA        | ENSG00000230982 | 25.4481235 | -0.04306619 | 0.29603044 | 0.81940074 | 0.91764002 | DSTNP1     |

|           |                 |            |             |            |            |            |            |
|-----------|-----------------|------------|-------------|------------|------------|------------|------------|
| NA        | ENSG00000230986 | 0          | NA          | NA         | NA         | NA         | DDX3P2     |
| NA        | ENSG00000230987 | 0          | NA          | NA         | NA         | NA         |            |
| NA        | ENSG00000230988 | 0          | NA          | NA         | NA         | NA         | RPL23AP11  |
| 3281      | ENSG00000230989 | 2849.59255 | -0.43591652 | 0.07608457 | 4.90E-09   | 7.69E-08   | HSBP1      |
| NA        | ENSG00000230990 | 0          | NA          | NA         | NA         | NA         |            |
| NA        | ENSG00000230991 | 0          | NA          | NA         | NA         | NA         |            |
| NA        | ENSG00000230992 | 9.974799   | 0.27372275  | 0.45383242 | 0.13527275 | 0.30983738 | FAM201B    |
| NA        | ENSG00000230993 | 1.00570418 | 0.00268338  | 0.3799712  | 0.96481212 | NA         | RPL12P15   |
| NA        | ENSG00000230994 | 0          | NA          | NA         | NA         | NA         | FGFR3P1    |
| NA        | ENSG00000230997 | 0          | NA          | NA         | NA         | NA         | RAB42P1    |
| NA        | ENSG00000230999 | 0.14931947 | -0.01844332 | 0.38480212 | 0.84537521 | NA         | MTND5P8    |
| NA        | ENSG00000231001 | 0          | NA          | NA         | NA         | NA         | CCNB1IP1P3 |
| NA        | ENSG00000231004 | 0          | NA          | NA         | NA         | NA         | CECR9      |
| NA        | ENSG00000231005 | 0          | NA          | NA         | NA         | NA         | RPL39P39   |
| NA        | ENSG00000231006 | 0.66410415 | 0.00233329  | 0.38131257 | 0.96293752 | NA         | RPL7P32    |
| NA        | ENSG00000231007 | 1.93194663 | 0.03706293  | 0.38000242 | 0.6199728  | NA         | CDC20P1    |
| NA        | ENSG00000231009 | 0          | NA          | NA         | NA         | NA         | CUBNP1     |
| NA        | ENSG00000231010 | 5.98502359 | -0.02557286 | 0.36139005 | 0.83857557 | 0.92674595 |            |
| NA        | ENSG00000231011 | 0          | NA          | NA         | NA         | NA         |            |
| 107105282 | ENSG00000231013 | 0.60003489 | -0.03562272 | 0.38653687 | 0.43872369 | NA         | SCTR-AS1   |
| NA        | ENSG00000231015 | 0          | NA          | NA         | NA         | NA         |            |
| NA        | ENSG00000231017 | 0          | NA          | NA         | NA         | NA         | RPS27P10   |
| NA        | ENSG00000231018 | 0          | NA          | NA         | NA         | NA         | EIF4A1P3   |
| 105370306 | ENSG00000231019 | 0          | NA          | NA         | NA         | NA         | LINC00373  |
| NA        | ENSG00000231020 | 0          | NA          | NA         | NA         | NA         |            |
| NA        | ENSG00000231022 | 0.51493613 | 0.03110336  | 0.38605162 | 0.47808476 | NA         | RPS3AP9    |
| 285735    | ENSG00000231023 | 0          | NA          | NA         | NA         | NA         | LINC00326  |
| NA        | ENSG00000231024 | 0          | NA          | NA         | NA         | NA         |            |
| NA        | ENSG00000231026 | 0          | NA          | NA         | NA         | NA         | XKRYP4     |
| 100131814 | ENSG00000231028 | 17.5878022 | -0.18148152 | 0.36626046 | 0.32798039 | 0.55648815 | LINC00271  |
| NA        | ENSG00000231029 | 0          | NA          | NA         | NA         | NA         |            |
| 101926966 | ENSG00000231031 | 0          | NA          | NA         | NA         | NA         | LINC01804  |
| NA        | ENSG00000231032 | 0          | NA          | NA         | NA         | NA         | CEP19P1    |
| NA        | ENSG00000231034 | 0          | NA          | NA         | NA         | NA         |            |
| NA        | ENSG00000231035 | 0          | NA          | NA         | NA         | NA         | RPL7L1P9   |
| NA        | ENSG00000231039 | 0          | NA          | NA         | NA         | NA         |            |
| NA        | ENSG00000231040 | 0          | NA          | NA         | NA         | NA         | LINC01911  |
| NA        | ENSG00000231043 | 0.14931947 | -0.01844332 | 0.38480212 | 0.84537521 | NA         |            |

|           |                 |            |             |            |            |            |            |
|-----------|-----------------|------------|-------------|------------|------------|------------|------------|
| NA        | ENSG00000231046 | 0          | NA          | NA         | NA         | NA         |            |
| NA        | ENSG00000231047 | 0          | NA          | NA         | NA         | NA         | GCNT1P3    |
| NA        | ENSG00000231049 | 0          | NA          | NA         | NA         | NA         | OR52B5P    |
| NA        | ENSG00000231050 | 0.85424706 | 0.04466753  | 0.38510302 | 0.41720146 | NA         |            |
| NA        | ENSG00000231052 | 0          | NA          | NA         | NA         | NA         |            |
| NA        | ENSG00000231053 | 0          | NA          | NA         | NA         | NA         | TRAPPC2LP1 |
| NA        | ENSG00000231054 | 0.173124   | -0.01911262 | 0.38486262 | 0.84537521 | NA         |            |
| NA        | ENSG00000231056 | 0.53230745 | 0.03194778  | 0.38613586 | 0.465701   | NA         | LINC02522  |
| NA        | ENSG00000231057 | 2.52973887 | 0.11990784  | 0.40312491 | 0.15331028 | NA         |            |
| NA        | ENSG00000231058 | 0          | NA          | NA         | NA         | NA         | MSANTD2P1  |
| NA        | ENSG00000231060 | 0          | NA          | NA         | NA         | NA         | FARSBP1    |
| 100874157 | ENSG00000231061 | 0          | NA          | NA         | NA         | NA         | LINC00395  |
| NA        | ENSG00000231062 | 0          | NA          | NA         | NA         | NA         |            |
| NA        | ENSG00000231063 | 0.49913562 | 0.01181549  | 0.38340466 | 0.77615718 | NA         | RPL6P6     |
| NA        | ENSG00000231064 | 36.8184295 | 0.2457492   | 0.31068096 | 0.24356438 | 0.46198062 | THBS3-AS1  |
| NA        | ENSG00000231066 | 9.35032133 | -0.10428596 | 0.36135373 | 0.50347612 | 0.7201331  | NPM1P9     |
| 100288323 | ENSG00000231068 | 0          | NA          | NA         | NA         | NA         | KRTAP21-3  |
| NA        | ENSG00000231069 | 0          | NA          | NA         | NA         | NA         |            |
| NA        | ENSG00000231070 | 0          | NA          | NA         | NA         | NA         | OR52Y1P    |
| NA        | ENSG00000231071 | 0          | NA          | NA         | NA         | NA         | IDI1P3     |
| NA        | ENSG00000231072 | 0          | NA          | NA         | NA         | NA         | GAPDHP64   |
| NA        | ENSG00000231073 | 0          | NA          | NA         | NA         | NA         |            |
| 414777    | ENSG00000231074 | 1865.08506 | -0.09343966 | 0.08343815 | 0.25055608 | 0.47053941 | HCG18      |
| NA        | ENSG00000231078 | 0          | NA          | NA         | NA         | NA         |            |
| NA        | ENSG00000231079 | 8.18303297 | 0.08945849  | 0.35858394 | 0.56006165 | 0.76415299 | KIF5C-AS1  |
| NA        | ENSG00000231080 | 0          | NA          | NA         | NA         | NA         |            |
| NA        | ENSG00000231081 | 0.14931947 | -0.01844332 | 0.38480212 | 0.84537521 | NA         |            |
| 105378386 | ENSG00000231082 | 0          | NA          | NA         | NA         | NA         | LINC02655  |
| NA        | ENSG00000231083 | 0          | NA          | NA         | NA         | NA         |            |
| NA        | ENSG00000231084 | 2.83291055 | 0.00680804  | 0.36913063 | 0.94987019 | 0.97933922 | RPL22P24   |
| NA        | ENSG00000231086 | 2.28174798 | -0.00807977 | 0.37429895 | 0.92521679 | NA         | TSSK1A     |
| NA        | ENSG00000231087 | 0.87492055 | 0.03870503  | 0.38481984 | 0.44387587 | NA         | FDPS7      |
| 109729135 | ENSG00000231090 | 0.15069912 | -0.01848503 | 0.38480575 | 0.84537521 | NA         | MIR4422HG  |
| NA        | ENSG00000231092 | 1.28286514 | -0.05914159 | 0.3879883  | 0.29090284 | NA         |            |
| NA        | ENSG00000231093 | 0          | NA          | NA         | NA         | NA         | TRMT1P1    |
| NA        | ENSG00000231095 | 0          | NA          | NA         | NA         | NA         | GYG1P3     |
| NA        | ENSG00000231096 | 0          | NA          | NA         | NA         | NA         | NDUFB4P3   |
| NA        | ENSG00000231098 | 0.14931947 | -0.01844332 | 0.38480212 | 0.84537521 | NA         |            |



|           |                 |            |            |            |            |            |             |
|-----------|-----------------|------------|------------|------------|------------|------------|-------------|
| NA        | ENSG00000231099 | 0          | NA         | NA         | NA         | NA         | BMS1P19     |
| NA        | ENSG00000231100 | 0          | NA         | NA         | NA         | NA         |             |
| NA        | ENSG00000231102 | 0          | NA         | NA         | NA         | NA         |             |
| NA        | ENSG00000231103 | 0          | NA         | NA         | NA         | NA         | PRAMEF30P   |
| NA        | ENSG00000231104 | 5.35870628 | 0.00998614 | 0.3577937  | 0.94174184 | 0.97592427 |             |
| 100506801 | ENSG00000231105 | 19.3685421 | 0.63385523 | 0.63959754 | 0.03182144 | 0.10506528 | ECE1-AS1    |
| NA        | ENSG00000231106 | 0          | NA         | NA         | NA         | NA         | LINC01436   |
| 101927873 | ENSG00000231107 | 0          | NA         | NA         | NA         | NA         | LINC01508   |
| NA        | ENSG00000231108 | 0          | NA         | NA         | NA         | NA         | PRELID3BP11 |
| 105373343 | ENSG00000231110 | 0          | NA         | NA         | NA         | NA         |             |
| NA        | ENSG00000231112 | 0          | NA         | NA         | NA         | NA         | MTHFD2P3    |
| NA        | ENSG00000231113 | 13.8279057 | 0.00091679 | 0.32852025 | 0.99773905 | 0.99926338 |             |
| NA        | ENSG00000231114 | 0.173733   | 0.01914545 | 0.38484597 | 0.78225479 | NA         |             |
| 101927377 | ENSG00000231119 | 1.17340639 | -0.0084782 | 0.37861366 | 0.90173358 | NA         |             |
| NA        | ENSG00000231120 | 0          | NA         | NA         | NA         | NA         | BTF3P10     |
| 643479    | ENSG00000231122 | 0          | NA         | NA         | NA         | NA         | FAM25E      |
| NA        | ENSG00000231123 | 0          | NA         | NA         | NA         | NA         | SPATA20P1   |
| NA        | ENSG00000231124 | 0          | NA         | NA         | NA         | NA         | UBE2V1P11   |
| NA        | ENSG00000231125 | 4.29442492 | 0.03653864 | 0.37037134 | 0.73812797 | 0.87628404 |             |
| NA        | ENSG00000231128 | 0          | NA         | NA         | NA         | NA         |             |
| NA        | ENSG00000231130 | 0          | NA         | NA         | NA         | NA         | HLA-T       |
| 101928687 | ENSG00000231131 | 0.38406468 | 0.02394353 | 0.3854026  | 0.61484686 | NA         | LNCAROD     |
| 105378305 | ENSG00000231131 | 0.38406468 | 0.02394353 | 0.3854026  | 0.61484686 | NA         | LNCAROD     |
| NA        | ENSG00000231132 | 0          | NA         | NA         | NA         | NA         |             |
| 768097    | ENSG00000231133 | 0          | NA         | NA         | NA         | NA         | HAR1B       |
| 100874334 | ENSG00000231134 | 0          | NA         | NA         | NA         | NA         | TCF7L1-IT1  |
| NA        | ENSG00000231136 | 0          | NA         | NA         | NA         | NA         |             |
| NA        | ENSG00000231137 | 0          | NA         | NA         | NA         | NA         | RBM22P5     |
| NA        | ENSG00000231138 | 0          | NA         | NA         | NA         | NA         |             |
| NA        | ENSG00000231139 | 0          | NA         | NA         | NA         | NA         |             |
| NA        | ENSG00000231140 | 0          | NA         | NA         | NA         | NA         |             |
| NA        | ENSG00000231143 | 0          | NA         | NA         | NA         | NA         |             |
| NA        | ENSG00000231144 | 0          | NA         | NA         | NA         | NA         | EEF1A1P40   |
| NA        | ENSG00000231147 | 0          | NA         | NA         | NA         | NA         | ARHGAP42P2  |
| NA        | ENSG00000231148 | 0          | NA         | NA         | NA         | NA         | HMGB1P7     |
| NA        | ENSG00000231149 | 0          | NA         | NA         | NA         | NA         |             |
| NA        | ENSG00000231150 | 0          | NA         | NA         | NA         | NA         | DNAH8-AS1   |
| NA        | ENSG00000231152 | 0          | NA         | NA         | NA         | NA         | MTND2P15    |

|           |                 |            |             |            |            |            |             |
|-----------|-----------------|------------|-------------|------------|------------|------------|-------------|
| NA        | ENSG00000231153 | 0          | NA          | NA         | NA         | NA         |             |
| NA        | ENSG00000231154 | 15.1931956 | -0.03544878 | 0.32224258 | 0.84013449 | 0.92740601 | MORF4L2-AS1 |
| NA        | ENSG00000231156 | 0.173733   | 0.01914545  | 0.38484597 | 0.78225479 | NA         |             |
| NA        | ENSG00000231158 | 0          | NA          | NA         | NA         | NA         | PTP4A1P1    |
| NA        | ENSG00000231159 | 0          | NA          | NA         | NA         | NA         | OFD1P8Y     |
| NA        | ENSG00000231160 | 82.7715735 | 1.31444202  | 0.28600516 | 3.65E-07   | 4.46E-06   | KLF3-AS1    |
| NA        | ENSG00000231162 | 3.39869451 | 0.10426249  | 0.38608357 | 0.36141696 | 0.59123619 | COX11P1     |
| 402779    | ENSG00000231163 | 0          | NA          | NA         | NA         | NA         | CSMD2-AS1   |
| NA        | ENSG00000231164 | 0          | NA          | NA         | NA         | NA         | RPL7P56     |
| NA        | ENSG00000231165 | 6.14941373 | -0.10666365 | 0.37251737 | 0.45118968 | 0.67453091 | TRBV26OR9-2 |
| 107987035 | ENSG00000231166 | 0          | NA          | NA         | NA         | NA         | TUBB4BP6    |
| NA        | ENSG00000231167 | 2.01810799 | 0.06436101  | 0.38204262 | 0.46705439 | NA         | YBX1P2      |
| NA        | ENSG00000231169 | 0.16735865 | 0.01897177  | 0.38482933 | 0.78225479 | NA         | EEF1B2P1    |
| NA        | ENSG00000231170 | 1.9972922  | 0.09004986  | 0.39335791 | 0.2233739  | NA         |             |
| 285501    | ENSG00000231171 | 0          | NA          | NA         | NA         | NA         | LINC01098   |
| 101927884 | ENSG00000231172 | 0          | NA          | NA         | NA         | NA         | EVA1A-AS    |
| NA        | ENSG00000231173 | 0          | NA          | NA         | NA         | NA         |             |
| 440704    | ENSG00000231175 | 0          | NA          | NA         | NA         | NA         | LINC01720   |
| 84657     | ENSG00000231177 | 13.3005631 | -0.25850239 | 0.41114353 | 0.18802123 | 0.38838712 | LINC00852   |
| NA        | ENSG00000231178 | 0.16735865 | 0.01897177  | 0.38482933 | 0.78225479 | NA         |             |
| NA        | ENSG00000231181 | 2.69889828 | -0.12256774 | 0.40123374 | 0.19908538 | 0.40354045 |             |
| NA        | ENSG00000231183 | 0          | NA          | NA         | NA         | NA         |             |
| NA        | ENSG00000231184 | 0          | NA          | NA         | NA         | NA         | CCNQP3      |
| 101926941 | ENSG00000231185 | 27.1859288 | 0.17995659  | 0.32260733 | 0.37165998 | 0.60071152 | SPRY4-AS1   |
| 102724593 | ENSG00000231187 | 77.7832654 | 0.20269074  | 0.30037968 | 0.32124458 | 0.54896575 |             |
| NA        | ENSG00000231188 | 0          | NA          | NA         | NA         | NA         |             |
| NA        | ENSG00000231189 | 0          | NA          | NA         | NA         | NA         |             |
| 26341     | ENSG00000231192 | 0          | NA          | NA         | NA         | NA         | OR5H1       |
| NA        | ENSG00000231193 | 1.11560239 | -0.00374439 | 0.37972022 | 0.95194011 | NA         |             |
| NA        | ENSG00000231194 | 0.173733   | 0.01914545  | 0.38484597 | 0.78225479 | NA         | FARP1-AS1   |
| NA        | ENSG00000231195 | 0          | NA          | NA         | NA         | NA         | IFNA11P     |
| NA        | ENSG00000231198 | 0          | NA          | NA         | NA         | NA         |             |
| NA        | ENSG00000231199 | 0          | NA          | NA         | NA         | NA         | MTND5P19    |
| NA        | ENSG00000231201 | 0          | NA          | NA         | NA         | NA         |             |
| NA        | ENSG00000231202 | 0          | NA          | NA         | NA         | NA         | TRGVB       |
| NA        | ENSG00000231203 | 0          | NA          | NA         | NA         | NA         | KRT8P10     |
| NA        | ENSG00000231204 | 0          | NA          | NA         | NA         | NA         |             |
| NA        | ENSG00000231205 | 345.865048 | 0.08469385  | 0.14754537 | 0.53461793 | 0.74572704 | ZNF826P     |

|           |                 |            |             |            |            |            |            |
|-----------|-----------------|------------|-------------|------------|------------|------------|------------|
| NA        | ENSG00000231206 | 0.63982339 | 0.00323688  | 0.38196162 | 0.94417483 | NA         | HNRNPA1P25 |
| NA        | ENSG00000231207 | 0          | NA          | NA         | NA         | NA         |            |
| NA        | ENSG00000231208 | 0          | NA          | NA         | NA         | NA         | ZBTB46-AS1 |
| NA        | ENSG00000231210 | 0          | NA          | NA         | NA         | NA         | COMETT     |
| NA        | ENSG00000231211 | 0          | NA          | NA         | NA         | NA         | RPL17P49   |
| NA        | ENSG00000231212 | 1.81253507 | 0.020944    | 0.37662587 | 0.79859357 | NA         |            |
| 389158    | ENSG00000231213 | 0          | NA          | NA         | NA         | NA         | PLSCR5     |
| 100093698 | ENSG00000231216 | 0          | NA          | NA         | NA         | NA         |            |
| NA        | ENSG00000231219 | 0          | NA          | NA         | NA         | NA         | PRAMEF32P  |
| 107178918 | ENSG00000231221 | 0          | NA          | NA         | NA         | NA         | LINC01593  |
| NA        | ENSG00000231222 | 0          | NA          | NA         | NA         | NA         | ARF4P4     |
| 104533120 | ENSG00000231226 | 0          | NA          | NA         | NA         | NA         | TRIM31-AS1 |
| NA        | ENSG00000231227 | 0          | NA          | NA         | NA         | NA         |            |
| NA        | ENSG00000231228 | 0          | NA          | NA         | NA         | NA         | ARPP19P1   |
| NA        | ENSG00000231231 | 0          | NA          | NA         | NA         | NA         | LINC01423  |
| NA        | ENSG00000231232 | 0          | NA          | NA         | NA         | NA         |            |
| NA        | ENSG00000231233 | 5.71762496 | -0.17763444 | 0.41309176 | 0.19807031 | 0.40234616 | CFAP58-DT  |
| NA        | ENSG00000231234 | 0.33471731 | 0.02354391  | 0.38534154 | 0.62842204 | NA         | SKP1P1     |
| NA        | ENSG00000231235 | 0          | NA          | NA         | NA         | NA         | CTNBNB1P1  |
| NA        | ENSG00000231236 | 3.58582249 | 0.0085793   | 0.36769144 | 0.93934318 | 0.97474024 |            |
| NA        | ENSG00000231237 | 0          | NA          | NA         | NA         | NA         | OR6K1P     |
| NA        | ENSG00000231238 | 0          | NA          | NA         | NA         | NA         | LINC00349  |
| NA        | ENSG00000231240 | 0          | NA          | NA         | NA         | NA         | KLF2P1     |
| NA        | ENSG00000231241 | 0          | NA          | NA         | NA         | NA         | RPS3AP3    |
| NA        | ENSG00000231243 | 0          | NA          | NA         | NA         | NA         |            |
| NA        | ENSG00000231244 | 0          | NA          | NA         | NA         | NA         | PSMC1P3    |
| NA        | ENSG00000231245 | 16.6719357 | -0.19397535 | 0.36824528 | 0.30530891 | 0.53274659 | C1DPI      |
| 105378909 | ENSG00000231246 | 0          | NA          | NA         | NA         | NA         | LINC02884  |
| NA        | ENSG00000231248 | 0          | NA          | NA         | NA         | NA         | FAM242D    |
| NA        | ENSG00000231249 | 14.0688355 | 0.00297992  | 0.3283525  | 0.98806831 | 0.99589897 | ITPR1-DT   |
| NA        | ENSG00000231251 | 0          | NA          | NA         | NA         | NA         |            |
| 101926964 | ENSG00000231252 | 24.7772626 | 0.36027077  | 0.40254774 | 0.11885797 | 0.28319227 |            |
| 105373006 | ENSG00000231253 | 0.34331046 | -0.0234271  | 0.38534484 | 0.65994669 | NA         | LINC01640  |
| NA        | ENSG00000231254 | 0          | NA          | NA         | NA         | NA         | PCED1CP    |
| NA        | ENSG00000231255 | 0.66904206 | 0.00165325  | 0.38188214 | 0.97098755 | NA         |            |
| 284067    | ENSG00000231256 | 1.33222935 | -0.04710497 | 0.3869078  | 0.32628384 | NA         | CFAP97D1   |
| NA        | ENSG00000231258 | 0          | NA          | NA         | NA         | NA         | ZSWIM5P2   |
| NA        | ENSG00000231259 | 3.64839308 | 0.03068396  | 0.38661299 | 0.16883843 | 0.36026614 | ANAPC1P2   |

|           |                 |            |             |            |            |            |              |
|-----------|-----------------|------------|-------------|------------|------------|------------|--------------|
| NA        | ENSG00000231261 | 0          | NA          | NA         | NA         | NA         | HMG2P10      |
| NA        | ENSG00000231264 | 0          | NA          | NA         | NA         | NA         | ARAF1        |
| NA        | ENSG00000231265 | 0          | NA          | NA         | NA         | NA         | TRERNA1      |
| NA        | ENSG00000231266 | 0          | NA          | NA         | NA         | NA         |              |
| NA        | ENSG00000231270 | 0          | NA          | NA         | NA         | NA         | COBLP1       |
| NA        | ENSG00000231271 | 0          | NA          | NA         | NA         | NA         |              |
| NA        | ENSG00000231272 | 0.14931947 | -0.01844332 | 0.38480212 | 0.84537521 | NA         |              |
| 100130827 | ENSG00000231274 | 0          | NA          | NA         | NA         | NA         | SBK3         |
| NA        | ENSG00000231276 | 0          | NA          | NA         | NA         | NA         | E2F4P1       |
| NA        | ENSG00000231278 | 0          | NA          | NA         | NA         | NA         | OR9S24P      |
| NA        | ENSG00000231280 | 0          | NA          | NA         | NA         | NA         | SALL4P6      |
| 149773    | ENSG00000231290 | 5.28871653 | 0.39369965  | 0.68470063 | 0.02040163 | 0.07399787 | APCDD1L-DT   |
| NA        | ENSG00000231291 | 0          | NA          | NA         | NA         | NA         |              |
| NA        | ENSG00000231292 | 0          | NA          | NA         | NA         | NA         | IGKV1OR2-108 |
| NA        | ENSG00000231293 | 0          | NA          | NA         | NA         | NA         | RPL36AP6     |
| NA        | ENSG00000231295 | 0          | NA          | NA         | NA         | NA         |              |
| NA        | ENSG00000231296 | 0.66486583 | -0.02232878 | 0.38257532 | 0.64873537 | NA         |              |
| NA        | ENSG00000231297 | 0          | NA          | NA         | NA         | NA         |              |
| 100216001 | ENSG00000231298 | 0          | NA          | NA         | NA         | NA         | MANCR        |
| NA        | ENSG00000231299 | 0          | NA          | NA         | NA         | NA         | SEPTIN14P24  |
| NA        | ENSG00000231300 | 0          | NA          | NA         | NA         | NA         | EZH2P1       |
| NA        | ENSG00000231301 | 0          | NA          | NA         | NA         | NA         | RPL13AP      |
| NA        | ENSG00000231302 | 0          | NA          | NA         | NA         | NA         | RPL36P2      |
| 100874028 | ENSG00000231304 | 7.4747832  | 0.04044298  | 0.35352928 | 0.7817766  | 0.90040914 | SGO1-AS1     |
| 101927829 | ENSG00000231304 | 7.4747832  | 0.04044298  | 0.35352928 | 0.7817766  | 0.90040914 | SGO1-AS1     |
| NA        | ENSG00000231305 | 85.000433  | -0.03771642 | 0.2296189  | 0.83625982 | 0.92539432 |              |
| NA        | ENSG00000231307 | 2.69425227 | 0.11589681  | 0.3978951  | 0.23047662 | 0.44641766 | RPS3P2       |
| NA        | ENSG00000231310 | 0          | NA          | NA         | NA         | NA         | TBL1XR1-AS1  |
| NA        | ENSG00000231311 | 0          | NA          | NA         | NA         | NA         | PRYP2        |
| NA        | ENSG00000231312 | 86.4530157 | -0.10007346 | 0.21634385 | 0.57773524 | 0.77605301 | MAP4K3-DT    |
| NA        | ENSG00000231313 | 0          | NA          | NA         | NA         | NA         | CLIC1P1      |
| NA        | ENSG00000231316 | 0          | NA          | NA         | NA         | NA         |              |
| NA        | ENSG00000231317 | 0          | NA          | NA         | NA         | NA         |              |
| 399670    | ENSG00000231322 | 0          | NA          | NA         | NA         | NA         | RPL13AP17    |
| NA        | ENSG00000231324 | 0          | NA          | NA         | NA         | NA         |              |
| 105376348 | ENSG00000231326 | 0          | NA          | NA         | NA         | NA         | LINC02662    |
| 100133985 | ENSG00000231327 | 29.8915953 | 0.00371649  | 0.28404818 | 0.98627052 | 0.99540871 | LINC01816    |
| NA        | ENSG00000231328 | 0          | NA          | NA         | NA         | NA         | TPT1P7       |

|           |                 |            |             |            |            |            |           |
|-----------|-----------------|------------|-------------|------------|------------|------------|-----------|
| NA        | ENSG00000231329 | 0.46701492 | -0.00652513 | 0.38320501 | 0.87914068 | NA         |           |
| NA        | ENSG00000231331 | 0          | NA          | NA         | NA         | NA         |           |
| NA        | ENSG00000231332 | 0          | NA          | NA         | NA         | NA         | OOEP-AS1  |
| NA        | ENSG00000231333 | 2.34767863 | 0.04317938  | 0.37529321 | 0.65549335 | NA         | RPL34P6   |
| NA        | ENSG00000231334 | 0          | NA          | NA         | NA         | NA         | EML6-AS1  |
| NA        | ENSG00000231336 | 0          | NA          | NA         | NA         | NA         |           |
| NA        | ENSG00000231340 | 28.6122962 | 0.04051144  | 0.29986965 | 0.83243087 | 0.92392457 | ACTG1P10  |
| NA        | ENSG00000231341 | 0          | NA          | NA         | NA         | NA         | VDAC1P6   |
| NA        | ENSG00000231344 | 0.32555893 | 0.00208796  | 0.38337645 | 0.96032119 | NA         |           |
| NA        | ENSG00000231345 | 241.159614 | -0.06940401 | 0.14278352 | 0.59953678 | 0.79057618 | BEND3P1   |
| NA        | ENSG00000231346 | 0.87574529 | -0.00734326 | 0.38070708 | 0.89710882 | NA         | LINC01160 |
| NA        | ENSG00000231349 | 0          | NA          | NA         | NA         | NA         |           |
| NA        | ENSG00000231351 | 0          | NA          | NA         | NA         | NA         | WBP1P1    |
| NA        | ENSG00000231353 | 0          | NA          | NA         | NA         | NA         |           |
| NA        | ENSG00000231355 | 0.14931947 | -0.01844332 | 0.38480212 | 0.84537521 | NA         |           |
| NA        | ENSG00000231356 | 0          | NA          | NA         | NA         | NA         | MTFR1P1   |
| NA        | ENSG00000231357 | 0.16735865 | 0.01897177  | 0.38482933 | 0.78225479 | NA         |           |
| NA        | ENSG00000231358 | 0          | NA          | NA         | NA         | NA         |           |
| NA        | ENSG00000231359 | 1.36312727 | 0.00789364  | 0.37795494 | 0.91344006 | NA         |           |
| NA        | ENSG00000231361 | 0          | NA          | NA         | NA         | NA         | RPS29P23  |
| NA        | ENSG00000231362 | 0          | NA          | NA         | NA         | NA         |           |
| NA        | ENSG00000231364 | 0          | NA          | NA         | NA         | NA         | LINC01712 |
| 101929147 | ENSG00000231365 | 167.548811 | 0.37123623  | 0.17931863 | 0.01997545 | 0.07288434 | WARS2-AS1 |
| NA        | ENSG00000231366 | 0          | NA          | NA         | NA         | NA         | RPS26P40  |
| 101929596 | ENSG00000231367 | 0          | NA          | NA         | NA         | NA         | LINC02613 |
| NA        | ENSG00000231368 | 0          | NA          | NA         | NA         | NA         | RPSAP40   |
| NA        | ENSG00000231369 | 0.50207596 | 0.02562368  | 0.38565771 | 0.52549886 | NA         |           |
| NA        | ENSG00000231371 | 0          | NA          | NA         | NA         | NA         | AKR1B1P8  |
| NA        | ENSG00000231373 | 0          | NA          | NA         | NA         | NA         | GNA14-AS1 |
| NA        | ENSG00000231375 | 0          | NA          | NA         | NA         | NA         | CDY17P    |
| NA        | ENSG00000231376 | 0          | NA          | NA         | NA         | NA         | HMG2P16   |
| NA        | ENSG00000231378 | 0          | NA          | NA         | NA         | NA         | NDUFA4P4  |
| NA        | ENSG00000231381 | 5.06193259 | -0.16966513 | 0.41039969 | 0.20581188 | 0.41287236 | RNF2P1    |
| NA        | ENSG00000231382 | 0          | NA          | NA         | NA         | NA         | NBPF21P   |
| 100873986 | ENSG00000231383 | 0          | NA          | NA         | NA         | NA         | FGF12-AS1 |
| NA        | ENSG00000231384 | 0          | NA          | NA         | NA         | NA         |           |
| NA        | ENSG00000231386 | 1.61569663 | 0.02570121  | 0.37856623 | 0.73092879 | NA         | MOB4P1    |
| NA        | ENSG00000231388 | 0          | NA          | NA         | NA         | NA         | FMN2P1    |

|           |                 |            |             |            |            |            |           |
|-----------|-----------------|------------|-------------|------------|------------|------------|-----------|
| 3113      | ENSG00000231389 | 1.96191012 | 0.03222328  | 0.3776023  | 0.6910703  | NA         | HLA-DPA1  |
| NA        | ENSG00000231390 | 0          | NA          | NA         | NA         | NA         | SNX18P8   |
| NA        | ENSG00000231392 | 0          | NA          | NA         | NA         | NA         |           |
| NA        | ENSG00000231393 | 0.173733   | 0.01914545  | 0.38484597 | 0.78225479 | NA         |           |
| NA        | ENSG00000231394 | 0          | NA          | NA         | NA         | NA         |           |
| NA        | ENSG00000231395 | 3.33092395 | -0.03620285 | 0.36995641 | 0.7383694  | 0.87630444 | ARL4AP4   |
| 100287144 | ENSG00000231396 | 0          | NA          | NA         | NA         | NA         | USP17L10  |
| NA        | ENSG00000231397 | 0          | NA          | NA         | NA         | NA         |           |
| NA        | ENSG00000231398 | 0          | NA          | NA         | NA         | NA         |           |
| NA        | ENSG00000231399 | 0          | NA          | NA         | NA         | NA         | SNRPEP8   |
| NA        | ENSG00000231401 | 0          | NA          | NA         | NA         | NA         |           |
| NA        | ENSG00000231402 | 0          | NA          | NA         | NA         | NA         | WASF5P    |
| NA        | ENSG00000231403 | 0          | NA          | NA         | NA         | NA         |           |
| NA        | ENSG00000231404 | 0          | NA          | NA         | NA         | NA         | RAC1P3    |
| NA        | ENSG00000231405 | 0.44956682 | -0.02729151 | 0.38571239 | 0.5620531  | NA         |           |
| NA        | ENSG00000231407 | 1.21230394 | -0.02044976 | 0.38119833 | 0.62535284 | NA         | GORAB-AS1 |
| NA        | ENSG00000231409 | 0          | NA          | NA         | NA         | NA         |           |
| NA        | ENSG00000231411 | 0          | NA          | NA         | NA         | NA         | DUX4L31   |
| NA        | ENSG00000231412 | 0          | NA          | NA         | NA         | NA         |           |
| NA        | ENSG00000231413 | 0          | NA          | NA         | NA         | NA         |           |
| NA        | ENSG00000231414 | 0.15069912 | -0.01848503 | 0.38480575 | 0.84537521 | NA         | RPL39P15  |
| NA        | ENSG00000231416 | 0          | NA          | NA         | NA         | NA         |           |
| NA        | ENSG00000231417 | 0          | NA          | NA         | NA         | NA         | IRX1P1    |
| 105375224 | ENSG00000231418 | 0          | NA          | NA         | NA         | NA         |           |
| 154822    | ENSG00000231419 | 0          | NA          | NA         | NA         | NA         | LINC00689 |
| 105373683 | ENSG00000231420 | 0          | NA          | NA         | NA         | NA         | LINC01817 |
| NA        | ENSG00000231421 | 0.34746601 | 0.02370763  | 0.3853651  | 0.61987128 | NA         |           |
| NA        | ENSG00000231422 | 0          | NA          | NA         | NA         | NA         | LINC01516 |
| NA        | ENSG00000231423 | 0          | NA          | NA         | NA         | NA         | RAB9AP5   |
| NA        | ENSG00000231424 | 0          | NA          | NA         | NA         | NA         |           |
| NA        | ENSG00000231426 | 0          | NA          | NA         | NA         | NA         | FILNC1    |
| 102723605 | ENSG00000231427 | 0          | NA          | NA         | NA         | NA         | LINC01445 |
| 104355146 | ENSG00000231428 | 0          | NA          | NA         | NA         | NA         | LINC00396 |
| 440910    | ENSG00000231431 | 0          | NA          | NA         | NA         | NA         | FAR2P4    |
| NA        | ENSG00000231434 | 0.15069912 | -0.01848503 | 0.38480575 | 0.84537521 | NA         | HSP90AA3P |
| NA        | ENSG00000231436 | 0          | NA          | NA         | NA         | NA         | RBM3AP    |
| 643355    | ENSG00000231437 | 0          | NA          | NA         | NA         | NA         | LINC01750 |
| 100132169 | ENSG00000231439 | 74.4207462 | -0.12626221 | 0.23537131 | 0.49943364 | 0.71682702 | WASIR2    |

|           |                 |            |             |            |            |            |           |
|-----------|-----------------|------------|-------------|------------|------------|------------|-----------|
| NA        | ENSG00000231440 | 0          | NA          | NA         | NA         | NA         |           |
| NA        | ENSG00000231441 | 4.96274002 | 0.02069375  | 0.36496223 | 0.86249816 | 0.93899493 | DST-AS1   |
| NA        | ENSG00000231442 | 0          | NA          | NA         | NA         | NA         | LARP1BP1  |
| NA        | ENSG00000231443 | 8.40570008 | 0.00829988  | 0.34586407 | 0.95845667 | 0.98288396 |           |
| NA        | ENSG00000231445 | 0          | NA          | NA         | NA         | NA         | TIMM8AP1  |
| NA        | ENSG00000231447 | 1.09769162 | -0.02379117 | 0.38172231 | 0.67771502 | NA         |           |
| NA        | ENSG00000231449 | 0          | NA          | NA         | NA         | NA         |           |
| 285084    | ENSG00000231453 | 0          | NA          | NA         | NA         | NA         | LINC01305 |
| NA        | ENSG00000231454 | 0          | NA          | NA         | NA         | NA         |           |
| NA        | ENSG00000231458 | 0          | NA          | NA         | NA         | NA         | RNASEH1P2 |
| NA        | ENSG00000231460 | 0.6418597  | -0.02125494 | 0.38318517 | 0.66470934 | NA         |           |
| NA        | ENSG00000231461 | 0          | NA          | NA         | NA         | NA         | HLA-DPA2  |
| NA        | ENSG00000231464 | 0.59803558 | -0.03500808 | 0.38647864 | 0.4435264  | NA         |           |
| NA        | ENSG00000231466 | 17.6463954 | -0.32776801 | 0.42908421 | 0.13387849 | 0.30803075 |           |
| NA        | ENSG00000231467 | 0          | NA          | NA         | NA         | NA         |           |
| NA        | ENSG00000231468 | 1.39387008 | 0.00610637  | 0.37787273 | 0.93319101 | NA         | PRDX3P2   |
| NA        | ENSG00000231470 | 0          | NA          | NA         | NA         | NA         | HMGB3P2   |
| NA        | ENSG00000231471 | 0          | NA          | NA         | NA         | NA         | HMG2P34   |
| 100862704 | ENSG00000231473 | 5.0851675  | 0.16607764  | 0.41113099 | 0.19731909 | 0.40124024 | RB1-DT    |
| NA        | ENSG00000231475 | 0          | NA          | NA         | NA         | NA         | IGHV4-31  |
| NA        | ENSG00000231476 | 0.51937201 | -0.02557462 | 0.38567603 | 0.54680819 | NA         |           |
| NA        | ENSG00000231477 | 0          | NA          | NA         | NA         | NA         |           |
| NA        | ENSG00000231478 | 0          | NA          | NA         | NA         | NA         | FCF1P9    |
| NA        | ENSG00000231480 | 0          | NA          | NA         | NA         | NA         | SNRPGP13  |
| NA        | ENSG00000231482 | 0.32327181 | 0.00158026  | 0.38337041 | 0.96595239 | NA         |           |
| NA        | ENSG00000231484 | 0          | NA          | NA         | NA         | NA         |           |
| NA        | ENSG00000231487 | 0          | NA          | NA         | NA         | NA         |           |
| NA        | ENSG00000231489 | 0          | NA          | NA         | NA         | NA         |           |
| NA        | ENSG00000231490 | 0          | NA          | NA         | NA         | NA         | RPL7L1P2  |
| NA        | ENSG00000231491 | 0          | NA          | NA         | NA         | NA         | JKAMPP1   |
| NA        | ENSG00000231492 | 0          | NA          | NA         | NA         | NA         |           |
| NA        | ENSG00000231494 | 0          | NA          | NA         | NA         | NA         | RPL21P35  |
| NA        | ENSG00000231495 | 0          | NA          | NA         | NA         | NA         |           |
| NA        | ENSG00000231496 | 0          | NA          | NA         | NA         | NA         |           |
| 6222      | ENSG00000231500 | 27975.7954 | -0.06304867 | 0.05518497 | 0.29143824 | 0.51742125 | RPS18     |
| NA        | ENSG00000231501 | 0          | NA          | NA         | NA         | NA         | MTND4LP1  |
| NA        | ENSG00000231503 | 1.13418331 | -0.04929945 | 0.38607369 | 0.35795275 | NA         | PTMAP4    |
| NA        | ENSG00000231504 | 0          | NA          | NA         | NA         | NA         | NMD3P2    |

|           |                 |            |             |            |            |            |             |
|-----------|-----------------|------------|-------------|------------|------------|------------|-------------|
| NA        | ENSG00000231505 | 0          | NA          | NA         | NA         | NA         |             |
| NA        | ENSG00000231507 | 0          | NA          | NA         | NA         | NA         | LINC01353   |
| NA        | ENSG00000231508 | 0          | NA          | NA         | NA         | NA         | RPL34P20    |
| NA        | ENSG00000231509 | 0          | NA          | NA         | NA         | NA         |             |
| NA        | ENSG00000231510 | 0          | NA          | NA         | NA         | NA         | LINC02782   |
| NA        | ENSG00000231512 | 0          | NA          | NA         | NA         | NA         | SEPTIN14P21 |
| NA        | ENSG00000231513 | 0          | NA          | NA         | NA         | NA         | E2F6P4      |
| NA        | ENSG00000231514 | 0          | NA          | NA         | NA         | NA         | CCNQP2      |
| NA        | ENSG00000231515 | 0.60015183 | -0.03510516 | 0.38648965 | 0.44217352 | NA         |             |
| NA        | ENSG00000231516 | 0          | NA          | NA         | NA         | NA         | CBX1P5      |
| NA        | ENSG00000231519 | 0.54962618 | 0.03278183  | 0.38622204 | 0.45369622 | NA         |             |
| 105376171 | ENSG00000231521 | 1.31824426 | -0.01949668 | 0.37870692 | 0.78484292 | NA         |             |
| NA        | ENSG00000231523 | 0          | NA          | NA         | NA         | NA         | SEPTIN14P1  |
| NA        | ENSG00000231525 | 0          | NA          | NA         | NA         | NA         |             |
| 105379444 | ENSG00000231527 | 209.722514 | -0.08691335 | 0.15323731 | 0.53250502 | 0.7437975  | FAM27C      |
| 286333    | ENSG00000231528 | 23.0662594 | -0.06070893 | 0.34530463 | 0.70306245 | 0.85721088 | FAM225A     |
| NA        | ENSG00000231529 | 0          | NA          | NA         | NA         | NA         | LINC02779   |
| NA        | ENSG00000231530 | 0.36328335 | 0.00167212  | 0.38337074 | 0.96003178 | NA         |             |
| NA        | ENSG00000231531 | 0          | NA          | NA         | NA         | NA         | HINT1P1     |
| 727982    | ENSG00000231532 | 0          | NA          | NA         | NA         | NA         | LINC01249   |
| NA        | ENSG00000231533 | 1.8880334  | 0.01098947  | 0.3762009  | 0.89180451 | NA         |             |
| NA        | ENSG00000231534 | 0.37844916 | 0.02407552  | 0.3854191  | 0.60038877 | NA         | FBXO36-IT1  |
| 100873962 | ENSG00000231535 | 0          | NA          | NA         | NA         | NA         | LINC00278   |
| NA        | ENSG00000231536 | 0.36290047 | 0.02389439  | 0.38539234 | 0.60999334 | NA         |             |
| NA        | ENSG00000231537 | 0          | NA          | NA         | NA         | NA         | MTCO3P10    |
| NA        | ENSG00000231538 | 0          | NA          | NA         | NA         | NA         | DPP10-AS3   |
| NA        | ENSG00000231539 | 0          | NA          | NA         | NA         | NA         |             |
| NA        | ENSG00000231540 | 0          | NA          | NA         | NA         | NA         | ELOCP9      |
| NA        | ENSG00000231541 | 0          | NA          | NA         | NA         | NA         | RPS6P2      |
| NA        | ENSG00000231542 | 0          | NA          | NA         | NA         | NA         | TAB3-AS1    |
| NA        | ENSG00000231544 | 0.78692798 | -0.00701102 | 0.38152501 | 0.89254818 | NA         | RSL24D1P11  |
| NA        | ENSG00000231546 | 0          | NA          | NA         | NA         | NA         | RPL3P5      |
| NA        | ENSG00000231547 | 0          | NA          | NA         | NA         | NA         |             |
| NA        | ENSG00000231548 | 0.80418457 | -0.03588998 | 0.38467623 | 0.48415269 | NA         | OR55B1P     |
| NA        | ENSG00000231549 | 0          | NA          | NA         | NA         | NA         | ATP5MDP1    |
| NA        | ENSG00000231550 | 6.88510668 | 0.03736672  | 0.36112907 | 0.7764662  | 0.89723881 | PTCHD3P2    |
| NA        | ENSG00000231551 | 0          | NA          | NA         | NA         | NA         | PDE4DIPP6   |
| NA        | ENSG00000231552 | 0          | NA          | NA         | NA         | NA         | IGBP1P3     |



|           |                 |            |             |            |            |            |             |
|-----------|-----------------|------------|-------------|------------|------------|------------|-------------|
| NA        | ENSG00000231553 | 0          | NA          | NA         | NA         | NA         | RNMTL1P1    |
| NA        | ENSG00000231556 | 2.52306958 | 0.07722074  | 0.38450436 | 0.40403316 | NA         | RSL24D1P3   |
| NA        | ENSG00000231557 | 0          | NA          | NA         | NA         | NA         |             |
| NA        | ENSG00000231559 | 0          | NA          | NA         | NA         | NA         |             |
| 400002    | ENSG00000231560 | 16.5457111 | 0.14641633  | 0.34953876 | 0.42604511 | 0.6519054  | CLEC12A-AS1 |
| NA        | ENSG00000231561 | 0          | NA          | NA         | NA         | NA         | CEACAMP5    |
| NA        | ENSG00000231562 | 1.81143888 | 0.05361344  | 0.3839297  | 0.44779282 | NA         |             |
| NA        | ENSG00000231563 | 0          | NA          | NA         | NA         | NA         |             |
| NA        | ENSG00000231564 | 0          | NA          | NA         | NA         | NA         | EIF4A1P11   |
| NA        | ENSG00000231565 | 0          | NA          | NA         | NA         | NA         | NEK2P2      |
| NA        | ENSG00000231566 | 0          | NA          | NA         | NA         | NA         | LINC02595   |
| NA        | ENSG00000231567 | 0          | NA          | NA         | NA         | NA         | MTND2P19    |
| NA        | ENSG00000231568 | 0          | NA          | NA         | NA         | NA         | S100A11P7   |
| NA        | ENSG00000231569 | 0          | NA          | NA         | NA         | NA         |             |
| NA        | ENSG00000231570 | 0          | NA          | NA         | NA         | NA         | PPIAP63     |
| 102724550 | ENSG00000231574 | 1.62929333 | 0.0492427   | 0.38442797 | 0.43297682 | NA         | LINC02015   |
| NA        | ENSG00000231575 | 0          | NA          | NA         | NA         | NA         |             |
| NA        | ENSG00000231576 | 0          | NA          | NA         | NA         | NA         | MTCO2P20    |
| NA        | ENSG00000231579 | 0.14931947 | -0.01844332 | 0.38480212 | 0.84537521 | NA         | RPL7P21     |
| NA        | ENSG00000231582 | 0          | NA          | NA         | NA         | NA         | MTND4LP21   |
| NA        | ENSG00000231583 | 0          | NA          | NA         | NA         | NA         |             |
| NA        | ENSG00000231584 | 88.3837106 | 0.65322385  | 0.25166666 | 0.00206295 | 0.01098762 | FAHD2CP     |
| NA        | ENSG00000231585 | 0          | NA          | NA         | NA         | NA         |             |
| NA        | ENSG00000231586 | 0          | NA          | NA         | NA         | NA         | RPS23P9     |
| NA        | ENSG00000231588 | 7.48747276 | -0.06143908 | 0.36506735 | 0.63704425 | 0.81722218 | SHQ1P1      |
| NA        | ENSG00000231589 | 0          | NA          | NA         | NA         | NA         |             |
| NA        | ENSG00000231590 | 0          | NA          | NA         | NA         | NA         |             |
| NA        | ENSG00000231593 | 0          | NA          | NA         | NA         | NA         |             |
| NA        | ENSG00000231597 | 0          | NA          | NA         | NA         | NA         |             |
| NA        | ENSG00000231600 | 0          | NA          | NA         | NA         | NA         |             |
| NA        | ENSG00000231601 | 0          | NA          | NA         | NA         | NA         |             |
| NA        | ENSG00000231603 | 0          | NA          | NA         | NA         | NA         |             |
| NA        | ENSG00000231604 | 0          | NA          | NA         | NA         | NA         |             |
| 101928484 | ENSG00000231605 | 0          | NA          | NA         | NA         | NA         | LINC01363   |
| NA        | ENSG00000231606 | 0          | NA          | NA         | NA         | NA         |             |
| 8847      | ENSG00000231607 | 144.366811 | -0.06394386 | 0.17455783 | 0.68010488 | 0.84377539 | DLEU2       |
| 100132215 | ENSG00000231609 | 23.0364822 | -0.02446965 | 0.29974754 | 0.89515153 | 0.95469109 |             |
| NA        | ENSG00000231610 | 0.33471731 | 0.02354391  | 0.38534154 | 0.62842204 | NA         | PIK3CDP1    |

|           |                 |            |             |            |            |            |             |
|-----------|-----------------|------------|-------------|------------|------------|------------|-------------|
| NA        | ENSG00000231612 | 0.84917145 | 0.01708357  | 0.3819496  | 0.74191198 | NA         |             |
| NA        | ENSG00000231613 | 0.34085608 | 0.00254334  | 0.38338306 | 0.96340686 | NA         |             |
| NA        | ENSG00000231615 | 0.173733   | 0.01914545  | 0.38484597 | 0.78225479 | NA         |             |
| NA        | ENSG00000231616 | 6.58628815 | 0.23398943  | 0.44780196 | 0.12938822 | 0.3008238  |             |
| NA        | ENSG00000231619 | 0          | NA          | NA         | NA         | NA         | ANAPC15P1   |
| NA        | ENSG00000231620 | 0          | NA          | NA         | NA         | NA         |             |
| 101927596 | ENSG00000231621 | 0          | NA          | NA         | NA         | NA         | ANKRD44-AS1 |
| NA        | ENSG00000231622 | 0          | NA          | NA         | NA         | NA         | RPS29P7     |
| NA        | ENSG00000231625 | 1.73136709 | 0.05809243  | 0.3840243  | 0.43565112 | NA         | SLC47A1P2   |
| NA        | ENSG00000231626 | 0          | NA          | NA         | NA         | NA         |             |
| NA        | ENSG00000231628 | 14.7382401 | 0.00527811  | 0.3300016  | 0.97728247 | 0.99232877 |             |
| NA        | ENSG00000231630 | 0          | NA          | NA         | NA         | NA         |             |
| NA        | ENSG00000231635 | 0          | NA          | NA         | NA         | NA         | ATP5F1BP1   |
| 100874031 | ENSG00000231636 | 0.48664021 | -0.00612659 | 0.38313466 | 0.87181189 | NA         | AGBL5-AS1   |
| 100506895 | ENSG00000231638 | 11.4764512 | 0.06302268  | 0.34025178 | 0.7067394  | 0.85864725 | LUARIS      |
| NA        | ENSG00000231643 | 0          | NA          | NA         | NA         | NA         | YWHAQP8     |
| NA        | ENSG00000231645 | 0          | NA          | NA         | NA         | NA         | KRT17P6     |
| 107985781 | ENSG00000231646 | 2.21682582 | 0.06349131  | 0.3832448  | 0.44007266 | NA         | FSIP2-AS1   |
| NA        | ENSG00000231648 | 0          | NA          | NA         | NA         | NA         | LINC01698   |
| NA        | ENSG00000231649 | 0.16735865 | 0.01897177  | 0.38482933 | 0.78225479 | NA         | SPATA31B1P  |
| NA        | ENSG00000231650 | 0          | NA          | NA         | NA         | NA         | RFESDP1     |
| 100873930 | ENSG00000231651 | 0.18922458 | 0.01954053  | 0.38488496 | 0.78225479 | NA         | DLG3-AS1    |
| 101928489 | ENSG00000231652 | 0          | NA          | NA         | NA         | NA         |             |
| NA        | ENSG00000231653 | 0          | NA          | NA         | NA         | NA         |             |
| NA        | ENSG00000231654 | 0.66516914 | 0.00209535  | 0.3813075  | 0.96658691 | NA         | RPS6KA2-AS1 |
| NA        | ENSG00000231655 | 0          | NA          | NA         | NA         | NA         | EMP2P1      |
| NA        | ENSG00000231660 | 0          | NA          | NA         | NA         | NA         | RPS8P6      |
| NA        | ENSG00000231662 | 0          | NA          | NA         | NA         | NA         |             |
| 101927765 | ENSG00000231663 | 7.26848933 | -0.05162959 | 0.3569551  | 0.71411883 | 0.86222722 | COA6-AS1    |
| NA        | ENSG00000231665 | 1.35285907 | 0.03287161  | 0.38000692 | 0.64831151 | NA         | OGFOD1P1    |
| 646268    | ENSG00000231666 | 0          | NA          | NA         | NA         | NA         | LINC01704   |
| NA        | ENSG00000231667 | 0          | NA          | NA         | NA         | NA         | OR7E111P    |
| NA        | ENSG00000231668 | 0          | NA          | NA         | NA         | NA         | PPP2R2DP1   |
| 104355286 | ENSG00000231671 | 0          | NA          | NA         | NA         | NA         | LINC01307   |
| NA        | ENSG00000231672 | 7.00586951 | -0.23957308 | 0.48139761 | 0.04031218 | 0.12621015 | DIRC3       |
| 144776    | ENSG00000231674 | 0          | NA          | NA         | NA         | NA         | LINC00410   |
| NA        | ENSG00000231675 | 0          | NA          | NA         | NA         | NA         |             |
| NA        | ENSG00000231678 | 0          | NA          | NA         | NA         | NA         |             |

|           |                 |            |             |            |            |            |             |
|-----------|-----------------|------------|-------------|------------|------------|------------|-------------|
| NA        | ENSG00000231680 | 0.173124   | -0.01911262 | 0.38486262 | 0.84537521 | NA         | LINC02723   |
| NA        | ENSG00000231681 | 0          | NA          | NA         | NA         | NA         |             |
| 105373934 | ENSG00000231682 | 0          | NA          | NA         | NA         | NA         | LINC01891   |
| 101927136 | ENSG00000231683 | 0          | NA          | NA         | NA         | NA         |             |
| NA        | ENSG00000231684 | 0          | NA          | NA         | NA         | NA         | EIF1P3      |
| NA        | ENSG00000231686 | 0.173124   | -0.01911262 | 0.38486262 | 0.84537521 | NA         | ANKRD11P2   |
| NA        | ENSG00000231688 | 0          | NA          | NA         | NA         | NA         | RPL21P43    |
| NA        | ENSG00000231689 | 0.14931947 | -0.01844332 | 0.38480212 | 0.84537521 | NA         | LINC01090   |
| 80069     | ENSG00000231690 | 15.7637563 | -0.0006645  | 0.32409656 | 0.99496629 | 0.99852582 | LINC00574   |
| NA        | ENSG00000231691 | 2.99775012 | -0.17264161 | 0.43216916 | 0.07367377 | 0.1987609  |             |
| NA        | ENSG00000231694 | 0          | NA          | NA         | NA         | NA         |             |
| NA        | ENSG00000231697 | 0          | NA          | NA         | NA         | NA         | NANOGP5     |
| NA        | ENSG00000231698 | 0          | NA          | NA         | NA         | NA         |             |
| NA        | ENSG00000231699 | 0          | NA          | NA         | NA         | NA         |             |
| NA        | ENSG00000231700 | 0          | NA          | NA         | NA         | NA         |             |
| NA        | ENSG00000231701 | 0.173124   | -0.01911262 | 0.38486262 | 0.84537521 | NA         | BMS1P13     |
| NA        | ENSG00000231702 | 0          | NA          | NA         | NA         | NA         |             |
| NA        | ENSG00000231703 | 0.14931947 | -0.01844332 | 0.38480212 | 0.84537521 | NA         |             |
| NA        | ENSG00000231704 | 1.22360854 | 0.02215856  | 0.3802718  | 0.73092831 | NA         |             |
| NA        | ENSG00000231705 | 0          | NA          | NA         | NA         | NA         |             |
| NA        | ENSG00000231706 | 0          | NA          | NA         | NA         | NA         | CYCSP43     |
| NA        | ENSG00000231707 | 0.14931947 | -0.01844332 | 0.38480212 | 0.84537521 | NA         | PABPC1P1    |
| NA        | ENSG00000231711 | 23.3366448 | 0.88180399  | 0.66672579 | 0.01156489 | 0.04675918 | LINC00899   |
| NA        | ENSG00000231712 | 0          | NA          | NA         | NA         | NA         | H3P5        |
| NA        | ENSG00000231713 | 0.83752457 | -0.0445745  | 0.38525205 | 0.43792619 | NA         |             |
| NA        | ENSG00000231714 | 0          | NA          | NA         | NA         | NA         |             |
| NA        | ENSG00000231715 | 0          | NA          | NA         | NA         | NA         | COX6CP2     |
| 400800    | ENSG00000231718 | 0          | NA          | NA         | NA         | NA         | LINC02789   |
| NA        | ENSG00000231720 | 0          | NA          | NA         | NA         | NA         |             |
| 378805    | ENSG00000231721 | 23.6360189 | -0.07355241 | 0.3223457  | 0.68114239 | 0.84419446 | LINC-PINT   |
| NA        | ENSG00000231722 | 0          | NA          | NA         | NA         | NA         | CHMP4AP1    |
| NA        | ENSG00000231723 | 0          | NA          | NA         | NA         | NA         | CAPZBP1     |
| NA        | ENSG00000231724 | 0          | NA          | NA         | NA         | NA         |             |
| NA        | ENSG00000231725 | 0.15069912 | -0.01848503 | 0.38480575 | 0.84537521 | NA         | VN1R110P    |
| NA        | ENSG00000231726 | 0          | NA          | NA         | NA         | NA         | HMG2P38     |
| NA        | ENSG00000231728 | 29.2247506 | -0.09264807 | 0.31802456 | 0.61673545 | 0.80362744 | TMSB15B-AS1 |
| 100874355 | ENSG00000231729 | 0          | NA          | NA         | NA         | NA         | ARHGEF9-IT1 |
| NA        | ENSG00000231731 | 16.3888362 | -0.00180556 | 0.33346477 | 0.98897584 | 0.99604194 |             |

|           |                 |            |             |            |            |            |              |
|-----------|-----------------|------------|-------------|------------|------------|------------|--------------|
| NA        | ENSG00000231735 | 0          | NA          | NA         | NA         | NA         | RPS2P18      |
| 144448    | ENSG00000231738 | 17.8179392 | 0.13005124  | 0.33900874 | 0.48078079 | 0.70158112 | TSPAN19      |
| NA        | ENSG00000231739 | 0          | NA          | NA         | NA         | NA         | GAPDHP59     |
| NA        | ENSG00000231740 | 0          | NA          | NA         | NA         | NA         |              |
| NA        | ENSG00000231741 | 0.34746601 | 0.02370763  | 0.3853651  | 0.61987128 | NA         |              |
| 101927541 | ENSG00000231742 | 0.30139824 | -0.02296476 | 0.38527817 | 0.68536535 | NA         | LINC01273    |
| NA        | ENSG00000231743 | 0          | NA          | NA         | NA         | NA         |              |
| NA        | ENSG00000231744 | 0          | NA          | NA         | NA         | NA         |              |
| NA        | ENSG00000231747 | 0          | NA          | NA         | NA         | NA         |              |
| NA        | ENSG00000231748 | 0          | NA          | NA         | NA         | NA         |              |
| 104355297 | ENSG00000231749 | 0          | NA          | NA         | NA         | NA         | ABCA9-AS1    |
| NA        | ENSG00000231750 | 0          | NA          | NA         | NA         | NA         | NANOGP10     |
| 647121    | ENSG00000231752 | 0.998969   | -0.03742572 | 0.38437394 | 0.45675554 | NA         | EMBP1        |
| NA        | ENSG00000231754 | 32.4094827 | 0.10641753  | 0.28961472 | 0.58840486 | 0.78317137 |              |
| NA        | ENSG00000231755 | 0          | NA          | NA         | NA         | NA         | CHODL-AS1    |
| NA        | ENSG00000231756 | 0          | NA          | NA         | NA         | NA         |              |
| NA        | ENSG00000231758 | 0.54869422 | 0.03273763  | 0.38621744 | 0.45432183 | NA         | ARHGAP15-AS1 |
| NA        | ENSG00000231760 | 2.26920811 | -0.01137724 | 0.37400599 | 0.89740979 | NA         |              |
| NA        | ENSG00000231762 | 0          | NA          | NA         | NA         | NA         |              |
| NA        | ENSG00000231763 | 0          | NA          | NA         | NA         | NA         | PQLC1P1      |
| NA        | ENSG00000231764 | 240.009355 | -0.63853258 | 0.16991873 | 4.29E-05   | 0.00035752 | DLX6-AS1     |
| NA        | ENSG00000231765 | 0.18922458 | 0.01954053  | 0.38488496 | 0.78225479 | NA         | PPP1R11P2    |
| NA        | ENSG00000231766 | 0          | NA          | NA         | NA         | NA         | MTCO2P5      |
| NA        | ENSG00000231767 | 0          | NA          | NA         | NA         | NA         | RPS27AP5     |
| 100506795 | ENSG00000231768 | 0.16735865 | 0.01897177  | 0.38482933 | 0.78225479 | NA         | LINC01354    |
| NA        | ENSG00000231769 | 0          | NA          | NA         | NA         | NA         |              |
| NA        | ENSG00000231770 | 76.2031145 | -0.13455702 | 0.2238894  | 0.46052205 | 0.68363319 | TMEM44-AS1   |
| NA        | ENSG00000231772 | 0          | NA          | NA         | NA         | NA         |              |
| NA        | ENSG00000231776 | 0          | NA          | NA         | NA         | NA         | LINC01611    |
| NA        | ENSG00000231777 | 0          | NA          | NA         | NA         | NA         | MTND4P21     |
| NA        | ENSG00000231780 | 0          | NA          | NA         | NA         | NA         |              |
| NA        | ENSG00000231781 | 0          | NA          | NA         | NA         | NA         |              |
| 439934    | ENSG00000231782 | 0          | NA          | NA         | NA         | NA         | LINC00575    |
| NA        | ENSG00000231784 | 19.9158247 | -0.20468153 | 0.3908269  | 0.24707803 | 0.46606087 | DBIL5P       |
| NA        | ENSG00000231787 | 0.64505835 | -0.03770471 | 0.38678426 | 0.41111405 | NA         | H2BP9        |
| NA        | ENSG00000231788 | 0          | NA          | NA         | NA         | NA         | RPL31P50     |
| 101929074 | ENSG00000231789 | 107.735646 | -0.16212949 | 0.20834579 | 0.35538033 | 0.58575606 | PIK3CD-AS2   |
| NA        | ENSG00000231791 | 0          | NA          | NA         | NA         | NA         |              |

|           |                 |            |             |            |            |            |             |
|-----------|-----------------|------------|-------------|------------|------------|------------|-------------|
| NA        | ENSG00000231793 | 9.11885274 | 0.17131716  | 0.38600319 | 0.30181674 | 0.52921292 | DOC2GP      |
| NA        | ENSG00000231794 | 1.05486053 | -0.03604913 | 0.38497715 | 0.44226309 | NA         |             |
| NA        | ENSG00000231795 | 0          | NA          | NA         | NA         | NA         | ITCH-IT1    |
| NA        | ENSG00000231799 | 0.56767373 | 0.02627943  | 0.38574813 | 0.49686938 | NA         | PA2G4P6     |
| NA        | ENSG00000231801 | 0          | NA          | NA         | NA         | NA         | ANP32BP2    |
| NA        | ENSG00000231802 | 0          | NA          | NA         | NA         | NA         | DNAJB6P3    |
| NA        | ENSG00000231804 | 0.32393147 | 0.00200272  | 0.38337536 | 0.96190814 | NA         |             |
| NA        | ENSG00000231806 | 2.04732578 | 0.08122576  | 0.39112865 | 0.24633913 | NA         | PCAT7       |
| NA        | ENSG00000231808 | 0          | NA          | NA         | NA         | NA         | LINC01388   |
| NA        | ENSG00000231809 | 0          | NA          | NA         | NA         | NA         | NANOCP9     |
| NA        | ENSG00000231810 | 0          | NA          | NA         | NA         | NA         | RPL36AP35   |
| 101927888 | ENSG00000231811 | 0          | NA          | NA         | NA         | NA         |             |
| NA        | ENSG00000231812 | 0          | NA          | NA         | NA         | NA         | SNRCP9      |
| 100885798 | ENSG00000231814 | 0          | NA          | NA         | NA         | NA         | LINC00210   |
| NA        | ENSG00000231815 | 0          | NA          | NA         | NA         | NA         |             |
| NA        | ENSG00000231817 | 0.18922458 | 0.01954053  | 0.38488496 | 0.78225479 | NA         | LINC01198   |
| NA        | ENSG00000231821 | 0          | NA          | NA         | NA         | NA         | NPM1P48     |
| NA        | ENSG00000231822 | 3.67386662 | 0.07081175  | 0.376221   | 0.52564871 | 0.73806584 | SMC3P1      |
| 642597    | ENSG00000231824 | 0          | NA          | NA         | NA         | NA         | AKAIN1      |
| 102723854 | ENSG00000231826 | 0          | NA          | NA         | NA         | NA         | LINC01819   |
| 343052    | ENSG00000231827 | 0.83625313 | 0.03593361  | 0.38452955 | 0.46984127 | NA         |             |
| NA        | ENSG00000231829 | 0          | NA          | NA         | NA         | NA         |             |
| NA        | ENSG00000231830 | 0          | NA          | NA         | NA         | NA         |             |
| NA        | ENSG00000231831 | 0.15069912 | -0.01848503 | 0.38480575 | 0.84537521 | NA         | MTHFD1P1    |
| NA        | ENSG00000231837 | 0          | NA          | NA         | NA         | NA         | RPS7P2      |
| NA        | ENSG00000231839 | 0          | NA          | NA         | NA         | NA         | DPY19L4P2   |
| NA        | ENSG00000231840 | 1.62736821 | 0.09486184  | 0.39664536 | 0.14307529 | NA         | TMEM139-AS1 |
| NA        | ENSG00000231841 | 0          | NA          | NA         | NA         | NA         | FAM192BP    |
| NA        | ENSG00000231845 | 1.04912931 | -0.0587523  | 0.39028338 | 0.21365192 | NA         | HMGB3P14    |
| NA        | ENSG00000231848 | 0          | NA          | NA         | NA         | NA         | KRTCAP2P1   |
| NA        | ENSG00000231849 | 0          | NA          | NA         | NA         | NA         | UBE2V2P4    |
| 101927492 | ENSG00000231851 | 0.59701084 | -0.0123038  | 0.38313531 | 0.76450493 | NA         | MRPS9-AS1   |
| 1589      | ENSG00000231852 | 0.30004201 | -0.02294482 | 0.38527542 | 0.68643244 | NA         | CYP21A2     |
| NA        | ENSG00000231855 | 0          | NA          | NA         | NA         | NA         |             |
| NA        | ENSG00000231856 | 42.7977817 | 0.14216662  | 0.27049807 | 0.47270931 | 0.69475907 |             |
| NA        | ENSG00000231857 | 0.18922458 | 0.01954053  | 0.38488496 | 0.78225479 | NA         | MORF4L1P5   |
| 105373805 | ENSG00000231858 | 0          | NA          | NA         | NA         | NA         |             |
| NA        | ENSG00000231859 | 0.54121272 | 0.01423046  | 0.38348109 | 0.73393352 | NA         |             |

|           |                 |            |             |            |            |            |              |
|-----------|-----------------|------------|-------------|------------|------------|------------|--------------|
| 402135    | ENSG00000231861 | 0.18922458 | 0.01954053  | 0.38488496 | 0.78225479 | NA         | OR5K2        |
| NA        | ENSG00000231863 | 0          | NA          | NA         | NA         | NA         |              |
| NA        | ENSG00000231864 | 0          | NA          | NA         | NA         | NA         |              |
| NA        | ENSG00000231866 | 0          | NA          | NA         | NA         | NA         |              |
| NA        | ENSG00000231867 | 0          | NA          | NA         | NA         | NA         |              |
| NA        | ENSG00000231868 | 0          | NA          | NA         | NA         | NA         |              |
| NA        | ENSG00000231870 | 0          | NA          | NA         | NA         | NA         | KRT17P3      |
| 100873949 | ENSG00000231871 | 13.8765156 | -0.0340928  | 0.32821188 | 0.84209719 | 0.92836346 | IPO9-AS1     |
| NA        | ENSG00000231873 | 0          | NA          | NA         | NA         | NA         |              |
| NA        | ENSG00000231875 | 0.14931947 | -0.01844332 | 0.38480212 | 0.84537521 | NA         |              |
| 102723536 | ENSG00000231876 | 0          | NA          | NA         | NA         | NA         |              |
| NA        | ENSG00000231877 | 0          | NA          | NA         | NA         | NA         |              |
| NA        | ENSG00000231878 | 0          | NA          | NA         | NA         | NA         | SNRFPF1      |
| NA        | ENSG00000231879 | 0          | NA          | NA         | NA         | NA         | TXNL1P1      |
| NA        | ENSG00000231880 | 3.74440688 | -0.03357247 | 0.38699891 | 0.15717655 | 0.34396456 |              |
| NA        | ENSG00000231881 | 35.6762759 | 0.24198084  | 0.37042313 | 0.23452413 | 0.45148057 |              |
| 104413892 | ENSG00000231882 | 0          | NA          | NA         | NA         | NA         | F10-AS1      |
| NA        | ENSG00000231883 | 0          | NA          | NA         | NA         | NA         |              |
| NA        | ENSG00000231884 | 0          | NA          | NA         | NA         | NA         | NDUFB1P1     |
| 5554      | ENSG00000231887 | 25.6453703 | -0.09649353 | 0.30637613 | 0.61367399 | 0.80132236 | PRH1         |
| NA        | ENSG00000231888 | 0.45001524 | -0.02731342 | 0.38571419 | 0.56168194 | NA         | MTND5P15     |
| NA        | ENSG00000231889 | 104.359477 | -0.44776495 | 0.23335609 | 0.02091667 | 0.0754933  | TRAF3IP2-AS1 |
| NA        | ENSG00000231890 | 8.50457332 | -0.08592377 | 0.35982642 | 0.56651241 | 0.76820492 | DARS1-AS1    |
| NA        | ENSG00000231892 | 0.68379976 | 0.02174772  | 0.3837937  | 0.61384185 | NA         |              |
| NA        | ENSG00000231894 | 0          | NA          | NA         | NA         | NA         | WDR95P       |
| NA        | ENSG00000231896 | 0.68688678 | -0.02086331 | 0.38301105 | 0.64889463 | NA         |              |
| NA        | ENSG00000231897 | 0          | NA          | NA         | NA         | NA         | MARK2P14     |
| NA        | ENSG00000231898 | 0          | NA          | NA         | NA         | NA         | MYO3B-AS1    |
| NA        | ENSG00000231900 | 0          | NA          | NA         | NA         | NA         | GOT2P1       |
| NA        | ENSG00000231901 | 0.72268823 | 0.0263657   | 0.38350237 | 0.56206821 | NA         |              |
| NA        | ENSG00000231902 | 0          | NA          | NA         | NA         | NA         |              |
| NA        | ENSG00000231903 | 1.38245673 | 0.04167261  | 0.38009144 | 0.59032575 | NA         |              |
| NA        | ENSG00000231905 | 0          | NA          | NA         | NA         | NA         | SETP10       |
| NA        | ENSG00000231906 | 0          | NA          | NA         | NA         | NA         |              |
| NA        | ENSG00000231907 | 0          | NA          | NA         | NA         | NA         | GAPDHP37     |
| 100507475 | ENSG00000231908 | 3.58507713 | -0.00811439 | 0.36993824 | 0.93504088 | 0.97306034 | IDH1-AS1     |
| NA        | ENSG00000231909 | 0          | NA          | NA         | NA         | NA         | MAP1LC3BP1   |
| NA        | ENSG00000231910 | 0          | NA          | NA         | NA         | NA         | GAMTP2       |

|           |                 |            |             |            |            |            |            |
|-----------|-----------------|------------|-------------|------------|------------|------------|------------|
| NA        | ENSG00000231911 | 0          | NA          | NA         | NA         | NA         | TPRKBP1    |
| NA        | ENSG00000231912 | 0          | NA          | NA         | NA         | NA         |            |
| NA        | ENSG00000231913 | 0          | NA          | NA         | NA         | NA         | RARRES2P3  |
| NA        | ENSG00000231914 | 0          | NA          | NA         | NA         | NA         | LINC00387  |
| NA        | ENSG00000231915 | 0          | NA          | NA         | NA         | NA         | SALL4P5    |
| NA        | ENSG00000231916 | 0          | NA          | NA         | NA         | NA         |            |
| 730100    | ENSG00000231918 | 0.14931947 | -0.01844332 | 0.38480212 | 0.84537521 | NA         |            |
| NA        | ENSG00000231920 | 3.96846876 | -0.01069373 | 0.36392366 | 0.92665254 | 0.96932621 | NEBL-AS1   |
| NA        | ENSG00000231922 | 0.15069912 | -0.01848503 | 0.38480575 | 0.84537521 | NA         |            |
| NA        | ENSG00000231923 | 0          | NA          | NA         | NA         | NA         |            |
| 5669      | ENSG00000231924 | 0          | NA          | NA         | NA         | NA         | PSG1       |
| 6892      | ENSG00000231925 | 645.803808 | 0.17344774  | 0.10081656 | 0.07410645 | 0.19971093 | TAPBP      |
| NA        | ENSG00000231926 | 0          | NA          | NA         | NA         | NA         | SEPHS1P7   |
| NA        | ENSG00000231927 | 0          | NA          | NA         | NA         | NA         |            |
| NA        | ENSG00000231929 | 0          | NA          | NA         | NA         | NA         | HMGB3P31   |
| NA        | ENSG00000231930 | 0          | NA          | NA         | NA         | NA         |            |
| NA        | ENSG00000231931 | 0          | NA          | NA         | NA         | NA         |            |
| NA        | ENSG00000231933 | 0.14931947 | -0.01844332 | 0.38480212 | 0.84537521 | NA         | MYO18B-AS1 |
| NA        | ENSG00000231934 | 0          | NA          | NA         | NA         | NA         | FAM242A    |
| NA        | ENSG00000231937 | 0          | NA          | NA         | NA         | NA         |            |
| NA        | ENSG00000231940 | 1.24360332 | 0.07365972  | 0.39084792 | 0.22842143 | NA         | RPS7P3     |
| NA        | ENSG00000231942 | 0.98407338 | 0.02510115  | 0.38220171 | 0.64887112 | NA         | HNRNPA1P36 |
| 103344932 | ENSG00000231943 | 0.16735865 | 0.01897177  | 0.38482933 | 0.78225479 | NA         | PGM5P4-AS1 |
| 101928259 | ENSG00000231944 | 0          | NA          | NA         | NA         | NA         | PHKA1-AS1  |
| NA        | ENSG00000231947 | 0          | NA          | NA         | NA         | NA         | MTND2P24   |
| 100874343 | ENSG00000231948 | 1.06937253 | -0.04696192 | 0.38571929 | 0.37940857 | NA         | HS1BP3-IT1 |
| NA        | ENSG00000231949 | 0          | NA          | NA         | NA         | NA         |            |
| NA        | ENSG00000231951 | 0.14931947 | -0.01844332 | 0.38480212 | 0.84537521 | NA         |            |
| NA        | ENSG00000231952 | 1.91522639 | -0.06701601 | 0.38400429 | 0.42255835 | NA         | DPY19L1P2  |
| NA        | ENSG00000231953 | 0          | NA          | NA         | NA         | NA         |            |
| NA        | ENSG00000231954 | 0          | NA          | NA         | NA         | NA         | MTND2P22   |
| NA        | ENSG00000231955 | 0          | NA          | NA         | NA         | NA         |            |
| NA        | ENSG00000231956 | 6.67180466 | -0.06211633 | 0.36190213 | 0.64837442 | 0.82455589 | HNRNPA1P9  |
| NA        | ENSG00000231957 | 0          | NA          | NA         | NA         | NA         | GNAI2P2    |
| NA        | ENSG00000231961 | 0          | NA          | NA         | NA         | NA         |            |
| 102724323 | ENSG00000231964 | 0          | NA          | NA         | NA         | NA         |            |
| NA        | ENSG00000231965 | 0.99462455 | 0.00359151  | 0.3800007  | 0.95284853 | NA         |            |
| NA        | ENSG00000231966 | 0.44795842 | -0.02501848 | 0.38558245 | 0.5807882  | NA         | LINC02818  |

|           |                 |            |             |            |            |            |            |
|-----------|-----------------|------------|-------------|------------|------------|------------|------------|
| NA        | ENSG00000231967 | 0.29863895 | -0.02292439 | 0.3852726  | 0.68753245 | NA         |            |
| NA        | ENSG00000231969 | 3.86419875 | 0.07398223  | 0.37813837 | 0.49622262 | 0.714811   | MMADHC-DT  |
| NA        | ENSG00000231970 | 1.57236593 | 0.03656241  | 0.38245236 | 0.55823086 | NA         |            |
| NA        | ENSG00000231971 | 0          | NA          | NA         | NA         | NA         | CT69       |
| NA        | ENSG00000231976 | 58.583377  | 0.26087072  | 0.29247268 | 0.20918153 | 0.41739531 | FAM238B    |
| NA        | ENSG00000231977 | 0          | NA          | NA         | NA         | NA         |            |
| NA        | ENSG00000231978 | 0          | NA          | NA         | NA         | NA         |            |
| NA        | ENSG00000231979 | 0.50284766 | 0.01227484  | 0.3834286  | 0.76909913 | NA         |            |
| NA        | ENSG00000231980 | 3.10638586 | -0.17243049 | 0.43272987 | 0.06915379 | 0.18974018 |            |
| NA        | ENSG00000231981 | 0          | NA          | NA         | NA         | NA         | RPL7L1P12  |
| NA        | ENSG00000231982 | 0.33471731 | 0.02354391  | 0.38534154 | 0.62842204 | NA         |            |
| NA        | ENSG00000231983 | 0          | NA          | NA         | NA         | NA         | LINC00415  |
| NA        | ENSG00000231984 | 0          | NA          | NA         | NA         | NA         |            |
| NA        | ENSG00000231985 | 0          | NA          | NA         | NA         | NA         |            |
| NA        | ENSG00000231986 | 0          | NA          | NA         | NA         | NA         |            |
| 101928241 | ENSG00000231987 | 0          | NA          | NA         | NA         | NA         | LINC01787  |
| NA        | ENSG00000231988 | 0          | NA          | NA         | NA         | NA         | OFD1P3Y    |
| 153743    | ENSG00000231989 | 0          | NA          | NA         | NA         | NA         | PPP1R2B    |
| NA        | ENSG00000231990 | 0          | NA          | NA         | NA         | NA         |            |
| NA        | ENSG00000231991 | 0.29863895 | -0.02292439 | 0.3852726  | 0.68753245 | NA         | ANXA2P2    |
| NA        | ENSG00000231992 | 0          | NA          | NA         | NA         | NA         |            |
| NA        | ENSG00000231993 | 3.40515035 | -0.200966   | 0.44576438 | 0.08144965 | 0.21429002 | EP300-AS1  |
| NA        | ENSG00000231995 | 5.34657764 | -0.1474602  | 0.40341136 | 0.22499277 | 0.43877008 |            |
| NA        | ENSG00000231996 | 0          | NA          | NA         | NA         | NA         |            |
| 400761    | ENSG00000231999 | 74.2838575 | 0.05121845  | 0.2342413  | 0.78307323 | 0.90117013 | LRRRC8C-DT |
| NA        | ENSG00000232000 | 594.998828 | 0.06395786  | 0.10293149 | 0.5195292  | 0.73305307 | CLCN3P1    |
| NA        | ENSG00000232001 | 0          | NA          | NA         | NA         | NA         |            |
| 105373979 | ENSG00000232002 | 0          | NA          | NA         | NA         | NA         | LINC01880  |
| NA        | ENSG00000232003 | 0          | NA          | NA         | NA         | NA         | ZNF736P12Y |
| NA        | ENSG00000232004 | 1.33741658 | 0.02435113  | 0.3802288  | 0.71267149 | NA         | CAP1P2     |
| NA        | ENSG00000232006 | 0          | NA          | NA         | NA         | NA         |            |
| NA        | ENSG00000232009 | 0          | NA          | NA         | NA         | NA         |            |
| 105372833 | ENSG00000232010 | 0          | NA          | NA         | NA         | NA         | DNMT3L-AS1 |
| NA        | ENSG00000232015 | 0          | NA          | NA         | NA         | NA         | HSPE1P25   |
| NA        | ENSG00000232019 | 0.66296726 | -0.0224054  | 0.38325419 | 0.6481761  | NA         |            |
| 641518    | ENSG00000232021 | 7.19102361 | -0.032838   | 0.35991869 | 0.79672859 | 0.90658744 | LEF1-AS1   |
| NA        | ENSG00000232022 | 0          | NA          | NA         | NA         | NA         | FAAHP1     |
| 101928765 | ENSG00000232023 | 0          | NA          | NA         | NA         | NA         | LINC01807  |



|           |                 |            |             |            |            |            |            |
|-----------|-----------------|------------|-------------|------------|------------|------------|------------|
| NA        | ENSG00000232024 | 89.7021732 | -0.34245898 | 0.24190305 | 0.07907626 | 0.20976104 | LSM12P1    |
| NA        | ENSG00000232027 | 1.12488466 | -0.01758128 | 0.38215624 | 0.72861029 | NA         |            |
| NA        | ENSG00000232028 | 0          | NA          | NA         | NA         | NA         |            |
| NA        | ENSG00000232029 | 0          | NA          | NA         | NA         | NA         | ELOCP15    |
| NA        | ENSG00000232030 | 0          | NA          | NA         | NA         | NA         | MAGEB6B    |
| NA        | ENSG00000232031 | 0          | NA          | NA         | NA         | NA         |            |
| NA        | ENSG00000232032 | 0          | NA          | NA         | NA         | NA         |            |
| NA        | ENSG00000232034 | 0          | NA          | NA         | NA         | NA         |            |
| NA        | ENSG00000232035 | 0          | NA          | NA         | NA         | NA         |            |
| NA        | ENSG00000232036 | 0.47288434 | -0.0077589  | 0.38324618 | 0.85987853 | NA         |            |
| NA        | ENSG00000232037 | 0          | NA          | NA         | NA         | NA         |            |
| NA        | ENSG00000232039 | 0          | NA          | NA         | NA         | NA         | DEFT1P2    |
| 114821    | ENSG00000232040 | 239.443899 | 0.23377999  | 0.15143146 | 0.09244432 | 0.23508014 | ZBED9      |
| NA        | ENSG00000232041 | 0          | NA          | NA         | NA         | NA         | PSMD10P3   |
| NA        | ENSG00000232042 | 0          | NA          | NA         | NA         | NA         |            |
| NA        | ENSG00000232043 | 2.97339434 | 0.01652975  | 0.37085086 | 0.87187589 | 0.94401928 |            |
| NA        | ENSG00000232044 | 227.274047 | -0.08046419 | 0.19397881 | 0.6295978  | 0.8124371  | SILC1      |
| NA        | ENSG00000232046 | 2.16177209 | 0.01779396  | 0.37378247 | 0.84526081 | NA         | LINC01798  |
| NA        | ENSG00000232048 | 0          | NA          | NA         | NA         | NA         | HNRNPCP9   |
| NA        | ENSG00000232050 | 0          | NA          | NA         | NA         | NA         |            |
| NA        | ENSG00000232053 | 0.16735865 | 0.01897177  | 0.38482933 | 0.78225479 | NA         |            |
| NA        | ENSG00000232054 | 0          | NA          | NA         | NA         | NA         | NPM1P34    |
| NA        | ENSG00000232056 | 0          | NA          | NA         | NA         | NA         |            |
| NA        | ENSG00000232057 | 10.5869709 | -0.46537204 | 0.64604413 | 0.04848756 | 0.14547001 |            |
| 101928475 | ENSG00000232058 | 0          | NA          | NA         | NA         | NA         |            |
| NA        | ENSG00000232059 | 0.48468105 | -0.00618423 | 0.38314176 | 0.87155942 | NA         |            |
| NA        | ENSG00000232060 | 0          | NA          | NA         | NA         | NA         | SLC4A1APP1 |
| NA        | ENSG00000232063 | 7.59211101 | 0.15345259  | 0.3888473  | 0.3097509  | 0.53756629 |            |
| NA        | ENSG00000232064 | 0          | NA          | NA         | NA         | NA         | USP9YP33   |
| 101929769 | ENSG00000232065 | 0.95434203 | -0.01579149 | 0.38076801 | 0.78919224 | NA         | LINC01063  |
| NA        | ENSG00000232068 | 0          | NA          | NA         | NA         | NA         |            |
| NA        | ENSG00000232069 | 0          | NA          | NA         | NA         | NA         | RPS29P28   |
| 643382    | ENSG00000232070 | 13.6368021 | -0.18250467 | 0.37300161 | 0.31371014 | 0.54159326 | TMEM253    |
| NA        | ENSG00000232072 | 0          | NA          | NA         | NA         | NA         |            |
| NA        | ENSG00000232073 | 0          | NA          | NA         | NA         | NA         |            |
| NA        | ENSG00000232075 | 4.35031346 | -0.06519075 | 0.37497837 | 0.5528659  | 0.75919187 | MRPL35P2   |
| 101929184 | ENSG00000232077 | 0.90223025 | 0.03897233  | 0.38477293 | 0.42794276 | NA         | LINC01031  |
| 284825    | ENSG00000232079 | 1.76080563 | -0.07190697 | 0.3881665  | 0.3145088  | NA         | LINC01697  |

|           |                 |            |             |            |            |            |             |
|-----------|-----------------|------------|-------------|------------|------------|------------|-------------|
| 102725019 | ENSG00000232080 | 0          | NA          | NA         | NA         | NA         |             |
| NA        | ENSG00000232081 | 0          | NA          | NA         | NA         | NA         | LARGE-IT1   |
| 100874353 | ENSG00000232082 | 0.83262084 | -0.00445993 | 0.38137177 | 0.93208685 | NA         | RPS6KA2-IT1 |
| NA        | ENSG00000232083 | 0          | NA          | NA         | NA         | NA         | RPL31P7     |
| 150577    | ENSG00000232084 | 0          | NA          | NA         | NA         | NA         | LINC01104   |
| NA        | ENSG00000232085 | 0          | NA          | NA         | NA         | NA         |             |
| NA        | ENSG00000232086 | 0          | NA          | NA         | NA         | NA         |             |
| NA        | ENSG00000232087 | 0          | NA          | NA         | NA         | NA         | HCFC2P1     |
| NA        | ENSG00000232089 | 0          | NA          | NA         | NA         | NA         |             |
| NA        | ENSG00000232090 | 0          | NA          | NA         | NA         | NA         | POLR2DP1    |
| NA        | ENSG00000232091 | 0          | NA          | NA         | NA         | NA         | PNLIPP1     |
| NA        | ENSG00000232093 | 24.241159  | 0.07854654  | 0.30527191 | 0.6813189  | 0.84428882 | DCST1-AS1   |
| NA        | ENSG00000232096 | 0          | NA          | NA         | NA         | NA         | YPEL5P1     |
| NA        | ENSG00000232097 | 1.01957349 | 0.03232174  | 0.38229942 | 0.58813604 | NA         |             |
| NA        | ENSG00000232098 | 240.771607 | 0.31585316  | 0.15586824 | 0.02644599 | 0.0909654  |             |
| 101929631 | ENSG00000232100 | 0          | NA          | NA         | NA         | NA         | LINC01653   |
| NA        | ENSG00000232101 | 0          | NA          | NA         | NA         | NA         |             |
| NA        | ENSG00000232102 | 0          | NA          | NA         | NA         | NA         | MTCO3P2     |
| 101929302 | ENSG00000232104 | 24.2625632 | 0.97716352  | 0.61181286 | 0.00697368 | 0.03087657 | RFX3-AS1    |
| NA        | ENSG00000232105 | 0          | NA          | NA         | NA         | NA         | RPL32P28    |
| NA        | ENSG00000232109 | 13.5783748 | -0.05906647 | 0.33271948 | 0.73073928 | 0.87121371 | VN1R54P     |
| NA        | ENSG00000232110 | 7.97537346 | -0.15989269 | 0.38398714 | 0.31932784 | 0.54696229 |             |
| NA        | ENSG00000232111 | 0          | NA          | NA         | NA         | NA         |             |
| 51372     | ENSG00000232112 | 1688.79911 | -0.21553588 | 0.08047166 | 0.00612864 | 0.0276095  | TMA7        |
| 730159    | ENSG00000232113 | 0          | NA          | NA         | NA         | NA         | TEX50       |
| NA        | ENSG00000232114 | 0          | NA          | NA         | NA         | NA         | NPLP1       |
| NA        | ENSG00000232115 | 0          | NA          | NA         | NA         | NA         |             |
| NA        | ENSG00000232117 | 3.66448558 | 0.0502922   | 0.38149442 | 0.47582858 | 0.6978444  | LINC00384   |
| NA        | ENSG00000232118 | 0.18922458 | 0.01954053  | 0.38488496 | 0.78225479 | NA         | BACH1-AS1   |
| 28985     | ENSG00000232119 | 909.373484 | -0.00359309 | 0.10790989 | 0.97107063 | 0.98911805 | MCTS1       |
| NA        | ENSG00000232120 | 0          | NA          | NA         | NA         | NA         |             |
| NA        | ENSG00000232121 | 0          | NA          | NA         | NA         | NA         |             |
| NA        | ENSG00000232124 | 0          | NA          | NA         | NA         | NA         |             |
| 391475    | ENSG00000232125 | 0          | NA          | NA         | NA         | NA         | DYTN        |
| NA        | ENSG00000232128 | 0          | NA          | NA         | NA         | NA         | MTCO3P45    |
| NA        | ENSG00000232130 | 0          | NA          | NA         | NA         | NA         |             |
| 104355145 | ENSG00000232131 | 0          | NA          | NA         | NA         | NA         | NCOA7-AS1   |
| 100874208 | ENSG00000232132 | 0          | NA          | NA         | NA         | NA         | NDFIP2-AS1  |

|           |                 |            |             |            |            |            |            |
|-----------|-----------------|------------|-------------|------------|------------|------------|------------|
| NA        | ENSG00000232133 | 10.0593166 | 0.03165306  | 0.38679464 | 0.07964566 | 0.21062825 | IMPDH1P10  |
| NA        | ENSG00000232134 | 0.99727722 | -0.0169565  | 0.38144348 | 0.75888027 | NA         | RPS15AP12  |
| NA        | ENSG00000232135 | 0          | NA          | NA         | NA         | NA         |            |
| NA        | ENSG00000232136 | 0          | NA          | NA         | NA         | NA         | DUXAP7     |
| NA        | ENSG00000232138 | 0          | NA          | NA         | NA         | NA         | IFNWP5     |
| 100506126 | ENSG00000232139 | 0.51937201 | -0.02557462 | 0.38567603 | 0.54680819 | NA         | LINC00867  |
| NA        | ENSG00000232140 | 0          | NA          | NA         | NA         | NA         |            |
| NA        | ENSG00000232142 | 0          | NA          | NA         | NA         | NA         | RPS25P9    |
| NA        | ENSG00000232144 | 0          | NA          | NA         | NA         | NA         | PSAT1P2    |
| NA        | ENSG00000232145 | 0          | NA          | NA         | NA         | NA         |            |
| NA        | ENSG00000232148 | 0          | NA          | NA         | NA         | NA         | FMO11P     |
| NA        | ENSG00000232149 | 11.6678421 | 0.16311976  | 0.37529322 | 0.34195325 | 0.57202996 | FERP1      |
| NA        | ENSG00000232150 | 0.36296006 | 0.0238948   | 0.38539241 | 0.60996383 | NA         | ST13P4     |
| NA        | ENSG00000232153 | 0          | NA          | NA         | NA         | NA         |            |
| NA        | ENSG00000232154 | 0          | NA          | NA         | NA         | NA         | MTCYBP15   |
| NA        | ENSG00000232155 | 0          | NA          | NA         | NA         | NA         |            |
| NA        | ENSG00000232158 | 0          | NA          | NA         | NA         | NA         | C11orf98P1 |
| 9366      | ENSG00000232159 | 0          | NA          | NA         | NA         | NA         | RAB9BP1    |
| 101928578 | ENSG00000232160 | 58.7808571 | 0.32097054  | 0.29588738 | 0.13429176 | 0.3085165  | RAP2C-AS1  |
| NA        | ENSG00000232161 | 0          | NA          | NA         | NA         | NA         |            |
| NA        | ENSG00000232162 | 0.18922458 | 0.01954053  | 0.38488496 | 0.78225479 | NA         | USP12-AS1  |
| NA        | ENSG00000232163 | 0.37844916 | 0.02407552  | 0.3854191  | 0.60038877 | NA         | RPLP1P13   |
| 729348    | ENSG00000232164 | 0.79728685 | -0.05676116 | 0.38955093 | 0.26934121 | NA         | LINC01873  |
| NA        | ENSG00000232165 | 0          | NA          | NA         | NA         | NA         |            |
| NA        | ENSG00000232166 | 0.99739748 | 0.00395675  | 0.38085074 | 0.94313713 | NA         |            |
| NA        | ENSG00000232167 | 0          | NA          | NA         | NA         | NA         |            |
| NA        | ENSG00000232168 | 0          | NA          | NA         | NA         | NA         | P2RY10BP   |
| 100507143 | ENSG00000232170 | 0          | NA          | NA         | NA         | NA         | LINC00708  |
| NA        | ENSG00000232172 | 0          | NA          | NA         | NA         | NA         |            |
| NA        | ENSG00000232173 | 0          | NA          | NA         | NA         | NA         | OR2H5P     |
| NA        | ENSG00000232174 | 0          | NA          | NA         | NA         | NA         |            |
| NA        | ENSG00000232175 | 0          | NA          | NA         | NA         | NA         |            |
| NA        | ENSG00000232176 | 2.3018978  | 0.03941866  | 0.37512298 | 0.68022546 | NA         |            |
| NA        | ENSG00000232177 | 0          | NA          | NA         | NA         | NA         | MTND4P24   |
| NA        | ENSG00000232179 | 0          | NA          | NA         | NA         | NA         | MTATP6P29  |
| NA        | ENSG00000232183 | 0          | NA          | NA         | NA         | NA         |            |
| NA        | ENSG00000232184 | 0          | NA          | NA         | NA         | NA         |            |
| NA        | ENSG00000232185 | 0          | NA          | NA         | NA         | NA         | CNOT7P2    |

|           |                 |            |             |            |            |            |            |
|-----------|-----------------|------------|-------------|------------|------------|------------|------------|
| NA        | ENSG00000232186 | 5.3779181  | -0.08949145 | 0.37903743 | 0.44476159 | 0.66960616 | TERF1P7    |
| NA        | ENSG00000232187 | 1.30125254 | -0.02090524 | 0.37794775 | 0.78210064 | NA         | FTH1P7     |
| NA        | ENSG00000232188 | 0          | NA          | NA         | NA         | NA         |            |
| 440390    | ENSG00000232190 | 0          | NA          | NA         | NA         | NA         | LINC02181  |
| 111216275 | ENSG00000232192 | 0          | NA          | NA         | NA         | NA         | KIF26B-AS1 |
| NA        | ENSG00000232193 | 0          | NA          | NA         | NA         | NA         |            |
| NA        | ENSG00000232194 | 0.173733   | 0.01914545  | 0.38484597 | 0.78225479 | NA         |            |
| NA        | ENSG00000232195 | 0          | NA          | NA         | NA         | NA         | TOMM22P2   |
| 100463285 | ENSG00000232196 | 5.02766101 | 0.00054287  | 0.36347284 | 0.99853262 | 0.99943937 | MTRNR2L4   |
| 102724511 | ENSG00000232197 | 0          | NA          | NA         | NA         | NA         |            |
| NA        | ENSG00000232198 | 0          | NA          | NA         | NA         | NA         | MTCO2P34   |
| NA        | ENSG00000232199 | 0          | NA          | NA         | NA         | NA         | RPL3P8     |
| NA        | ENSG00000232200 | 0          | NA          | NA         | NA         | NA         |            |
| NA        | ENSG00000232202 | 0.45121296 | -0.02737185 | 0.38571897 | 0.56069351 | NA         | CHORDC1P1  |
| NA        | ENSG00000232203 | 0          | NA          | NA         | NA         | NA         | SLC25A6P2  |
| NA        | ENSG00000232204 | 0          | NA          | NA         | NA         | NA         | TET1P1     |
| NA        | ENSG00000232205 | 0          | NA          | NA         | NA         | NA         | CDY18P     |
| NA        | ENSG00000232208 | 0          | NA          | NA         | NA         | NA         |            |
| NA        | ENSG00000232211 | 0          | NA          | NA         | NA         | NA         |            |
| 107985456 | ENSG00000232212 | 0          | NA          | NA         | NA         | NA         | LINC01701  |
| NA        | ENSG00000232215 | 0          | NA          | NA         | NA         | NA         | OR2L6P     |
| NA        | ENSG00000232216 | 0.60003233 | -0.03562261 | 0.38653686 | 0.43872518 | NA         | IGHV3-43   |
| NA        | ENSG00000232217 | 0          | NA          | NA         | NA         | NA         | FTLP8      |
| NA        | ENSG00000232218 | 0          | NA          | NA         | NA         | NA         |            |
| NA        | ENSG00000232220 | 8.79537162 | 0.26970967  | 0.45063796 | 0.13874804 | 0.31543588 |            |
| NA        | ENSG00000232223 | 0          | NA          | NA         | NA         | NA         | CNN2P10    |
| 105616982 | ENSG00000232225 | 0          | NA          | NA         | NA         | NA         | LINC01047  |
| NA        | ENSG00000232226 | 0          | NA          | NA         | NA         | NA         | ARSFP1     |
| 112268441 | ENSG00000232227 | 0          | NA          | NA         | NA         | NA         |            |
| NA        | ENSG00000232228 | 0          | NA          | NA         | NA         | NA         | RPL36AP16  |
| 643529    | ENSG00000232229 | 1.14402111 | 0.01810093  | 0.38014934 | 0.77679634 | NA         | LINC00865  |
| NA        | ENSG00000232230 | 0          | NA          | NA         | NA         | NA         | TPM4P1     |
| 102724699 | ENSG00000232233 | 0.87384541 | 0.02865468  | 0.38416981 | 0.50171311 | NA         | LINC02043  |
| NA        | ENSG00000232234 | 1.22808875 | 0.05777759  | 0.38827681 | 0.2705578  | NA         |            |
| NA        | ENSG00000232235 | 0          | NA          | NA         | NA         | NA         | CDY3P      |
| 647219    | ENSG00000232237 | 12.5869419 | -0.05243939 | 0.33703641 | 0.75262383 | 0.88425267 | ASCL5      |
| NA        | ENSG00000232238 | 0.173733   | 0.01914545  | 0.38484597 | 0.78225479 | NA         | RPS29P8    |
| NA        | ENSG00000232239 | 0          | NA          | NA         | NA         | NA         | RBPJP5     |

|           |                 |            |             |            |            |            |             |
|-----------|-----------------|------------|-------------|------------|------------|------------|-------------|
| NA        | ENSG00000232240 | 0          | NA          | NA         | NA         | NA         |             |
| NA        | ENSG00000232241 | 0          | NA          | NA         | NA         | NA         | DYNLT3P1    |
| NA        | ENSG00000232242 | 0          | NA          | NA         | NA         | NA         | ZYG11AP1    |
| NA        | ENSG00000232245 | 0          | NA          | NA         | NA         | NA         |             |
| NA        | ENSG00000232249 | 0          | NA          | NA         | NA         | NA         |             |
| NA        | ENSG00000232252 | 0          | NA          | NA         | NA         | NA         |             |
| NA        | ENSG00000232254 | 0          | NA          | NA         | NA         | NA         | CSF2RBP1    |
| 283953    | ENSG00000232258 | 0          | NA          | NA         | NA         | NA         | TMEM114     |
| NA        | ENSG00000232259 | 0          | NA          | NA         | NA         | NA         |             |
| NA        | ENSG00000232260 | 0          | NA          | NA         | NA         | NA         | BTF3L4P1    |
| NA        | ENSG00000232261 | 0          | NA          | NA         | NA         | NA         |             |
| 100131902 | ENSG00000232263 | 0          | NA          | NA         | NA         | NA         | KRTAP25-1   |
| 728369    | ENSG00000232264 | 0          | NA          | NA         | NA         | NA         | USP17L24    |
| NA        | ENSG00000232265 | 0.173124   | -0.01911262 | 0.38486262 | 0.84537521 | NA         | LINC02805   |
| NA        | ENSG00000232267 | 0          | NA          | NA         | NA         | NA         | ACTR3P2     |
| 390037    | ENSG00000232268 | 0.83407258 | -0.02949927 | 0.38357792 | 0.5370938  | NA         | OR52I1      |
| NA        | ENSG00000232271 | 0          | NA          | NA         | NA         | NA         |             |
| NA        | ENSG00000232273 | 1.5621462  | -0.02889059 | 0.38032883 | 0.66911198 | NA         | FTH1P1      |
| NA        | ENSG00000232277 | 0          | NA          | NA         | NA         | NA         | SLC30A6P1   |
| NA        | ENSG00000232281 | 0          | NA          | NA         | NA         | NA         | IFNWP15     |
| NA        | ENSG00000232282 | 0.14931947 | -0.01844332 | 0.38480212 | 0.84537521 | NA         | MTND1P32    |
| NA        | ENSG00000232283 | 0.34746601 | 0.02370763  | 0.3853651  | 0.61987128 | NA         | HSD17B3-AS1 |
| 100289178 | ENSG00000232284 | 6.92933769 | 0.05458332  | 0.36664821 | 0.65611807 | 0.82907086 | GNG12-AS1   |
| NA        | ENSG00000232285 | 0          | NA          | NA         | NA         | NA         | ELOBP3      |
| NA        | ENSG00000232286 | 0          | NA          | NA         | NA         | NA         |             |
| 100874090 | ENSG00000232287 | 0.31816881 | 0.00111761  | 0.3833665  | 0.96636909 | NA         | SLC6A1-AS1  |
| NA        | ENSG00000232290 | 0          | NA          | NA         | NA         | NA         |             |
| NA        | ENSG00000232292 | 0.34624801 | -0.02356563 | 0.38536324 | 0.65270996 | NA         | ALDH7A1P2   |
| NA        | ENSG00000232293 | 0          | NA          | NA         | NA         | NA         | PAICSP7     |
| NA        | ENSG00000232294 | 0          | NA          | NA         | NA         | NA         |             |
| NA        | ENSG00000232295 | 1.37848861 | 0.02926858  | 0.38096843 | 0.64915769 | NA         |             |
| NA        | ENSG00000232296 | 0          | NA          | NA         | NA         | NA         |             |
| NA        | ENSG00000232298 | 0          | NA          | NA         | NA         | NA         | GRHL3-AS1   |
| NA        | ENSG00000232299 | 0          | NA          | NA         | NA         | NA         |             |
| NA        | ENSG00000232300 | 121.882815 | -0.11286336 | 0.1899482  | 0.49357635 | 0.71244487 | FAM215B     |
| 101927721 | ENSG00000232301 | 0          | NA          | NA         | NA         | NA         | LNCPRESS1   |
| NA        | ENSG00000232303 | 16.688744  | 1.14683262  | 0.68472859 | 0.00539213 | 0.02481554 | DFFBP1      |
| NA        | ENSG00000232305 | 0          | NA          | NA         | NA         | NA         | CLCP1       |

|           |                 |            |             |            |            |            |            |
|-----------|-----------------|------------|-------------|------------|------------|------------|------------|
| NA        | ENSG00000232306 | 0          | NA          | NA         | NA         | NA         |            |
| 282706    | ENSG00000232307 | 0          | NA          | NA         | NA         | NA         | DAOA-AS1   |
| NA        | ENSG00000232309 | 0          | NA          | NA         | NA         | NA         |            |
| NA        | ENSG00000232310 | 0          | NA          | NA         | NA         | NA         |            |
| NA        | ENSG00000232314 | 0          | NA          | NA         | NA         | NA         | PSMC1P13   |
| NA        | ENSG00000232316 | 0          | NA          | NA         | NA         | NA         | LINC02518  |
| NA        | ENSG00000232320 | 0          | NA          | NA         | NA         | NA         | MXRA7P1    |
| NA        | ENSG00000232325 | 0          | NA          | NA         | NA         | NA         |            |
| NA        | ENSG00000232327 | 0          | NA          | NA         | NA         | NA         |            |
| NA        | ENSG00000232328 | 0          | NA          | NA         | NA         | NA         |            |
| NA        | ENSG00000232332 | 0.15069912 | -0.01848503 | 0.38480575 | 0.84537521 | NA         | ARL5AP5    |
| NA        | ENSG00000232333 | 0.3238915  | 0.00197962  | 0.38337506 | 0.96212942 | NA         | RPS27AP2   |
| NA        | ENSG00000232334 | 0          | NA          | NA         | NA         | NA         |            |
| NA        | ENSG00000232335 | 2.1310869  | -0.00393983 | 0.37481229 | 0.96186196 | NA         |            |
| NA        | ENSG00000232337 | 0          | NA          | NA         | NA         | NA         |            |
| NA        | ENSG00000232341 | 0          | NA          | NA         | NA         | NA         | RPL4P2     |
| NA        | ENSG00000232342 | 0          | NA          | NA         | NA         | NA         |            |
| NA        | ENSG00000232344 | 11.2256691 | 0.00976577  | 0.33678311 | 0.95437514 | 0.98112988 |            |
| NA        | ENSG00000232346 | 0.83903407 | -0.00772555 | 0.3800978  | 0.89896155 | NA         |            |
| NA        | ENSG00000232347 | 0.84746439 | 0.04456665  | 0.38509953 | 0.41803368 | NA         |            |
| NA        | ENSG00000232349 | 0          | NA          | NA         | NA         | NA         | YBX1P7     |
| NA        | ENSG00000232350 | 0          | NA          | NA         | NA         | NA         |            |
| 101928931 | ENSG00000232352 | 1.75665846 | 0.11369079  | 0.40384787 | 0.10240444 | NA         | SEMA3B-AS1 |
| NA        | ENSG00000232353 | 0          | NA          | NA         | NA         | NA         |            |
| NA        | ENSG00000232354 | 0.52119901 | 0.02576573  | 0.38568143 | 0.51723676 | NA         | VIPR1-AS1  |
| NA        | ENSG00000232355 | 0          | NA          | NA         | NA         | NA         |            |
| NA        | ENSG00000232358 | 0.3223451  | -0.02325304 | 0.38531851 | 0.6696914  | NA         |            |
| NA        | ENSG00000232359 | 0          | NA          | NA         | NA         | NA         |            |
| NA        | ENSG00000232360 | 0          | NA          | NA         | NA         | NA         |            |
| NA        | ENSG00000232361 | 0          | NA          | NA         | NA         | NA         |            |
| NA        | ENSG00000232362 | 0          | NA          | NA         | NA         | NA         | ATP5MGP2   |
| NA        | ENSG00000232363 | 0          | NA          | NA         | NA         | NA         |            |
| NA        | ENSG00000232366 | 0          | NA          | NA         | NA         | NA         | VDAC1P9    |
| NA        | ENSG00000232368 | 0          | NA          | NA         | NA         | NA         | FTLP2      |
| NA        | ENSG00000232369 | 0.173124   | -0.01911262 | 0.38486262 | 0.84537521 | NA         | PPIAP35    |
| NA        | ENSG00000232370 | 0.16735865 | 0.01897177  | 0.38482933 | 0.78225479 | NA         | BAG1P1     |
| NA        | ENSG00000232373 | 0.44795842 | -0.02501848 | 0.38558245 | 0.5807882  | NA         | MTCYBP3    |
| NA        | ENSG00000232374 | 0          | NA          | NA         | NA         | NA         | GPR79      |

|           |    |                 |            |             |            |            |            |            |
|-----------|----|-----------------|------------|-------------|------------|------------|------------|------------|
|           | NA | ENSG00000232375 | 0.16735865 | 0.01897177  | 0.38482933 | 0.78225479 | NA         |            |
| 101928386 |    | ENSG00000232377 | 0.91795471 | -0.03679866 | 0.38444071 | 0.4685817  | NA         |            |
|           | NA | ENSG00000232378 | 0          | NA          | NA         | NA         | NA         | RPL29P28   |
|           | NA | ENSG00000232379 | 0          | NA          | NA         | NA         | NA         | RPL22P23   |
|           | NA | ENSG00000232380 | 0          | NA          | NA         | NA         | NA         | ZDHHC20P4  |
|           | NA | ENSG00000232381 | 0          | NA          | NA         | NA         | NA         | OR52U1P    |
| 26339     |    | ENSG00000232382 | 0          | NA          | NA         | NA         | NA         | OR5K1      |
|           | NA | ENSG00000232383 | 0          | NA          | NA         | NA         | NA         |            |
|           | NA | ENSG00000232385 | 0.49185454 | -0.00751996 | 0.38271584 | 0.85644808 | NA         | RPS3AP25   |
|           | NA | ENSG00000232386 | 0.16735865 | 0.01897177  | 0.38482933 | 0.78225479 | NA         |            |
|           | NA | ENSG00000232387 | 0.16735865 | 0.01897177  | 0.38482933 | 0.78225479 | NA         | SKA2P1     |
| 388789    |    | ENSG00000232388 | 427.115236 | -0.03356489 | 0.12130604 | 0.76950047 | 0.89405696 | SMIM26     |
|           | NA | ENSG00000232389 | 0          | NA          | NA         | NA         | NA         |            |
|           | NA | ENSG00000232390 | 0          | NA          | NA         | NA         | NA         | NDUFA5P1   |
|           | NA | ENSG00000232391 | 0          | NA          | NA         | NA         | NA         | RANP2      |
|           | NA | ENSG00000232392 | 0          | NA          | NA         | NA         | NA         | GOT2P7     |
|           | NA | ENSG00000232393 | 0          | NA          | NA         | NA         | NA         | RPL5P6     |
|           | NA | ENSG00000232394 | 0          | NA          | NA         | NA         | NA         |            |
|           | NA | ENSG00000232395 | 0          | NA          | NA         | NA         | NA         |            |
|           | NA | ENSG00000232396 | 5.00211998 | -0.34213494 | 0.59799691 | 0.02857037 | 0.09663078 |            |
|           | NA | ENSG00000232398 | 0.51356778 | -0.0090342  | 0.38272703 | 0.83076456 | NA         | TMPRSS11CP |
| 100287238 |    | ENSG00000232399 | 0          | NA          | NA         | NA         | NA         | USP17L13   |
|           | NA | ENSG00000232400 | 0.173124   | -0.01911262 | 0.38486262 | 0.84537521 | NA         | RAD17P1    |
|           | NA | ENSG00000232401 | 0          | NA          | NA         | NA         | NA         | LINC00112  |
|           | NA | ENSG00000232403 | 0.51247763 | -0.00999142 | 0.38327083 | 0.8216073  | NA         | RPL27P5    |
|           | NA | ENSG00000232406 | 0.35662279 | 0.02381664  | 0.38538099 | 0.61404647 | NA         |            |
|           | NA | ENSG00000232407 | 0          | NA          | NA         | NA         | NA         | PPIAP70    |
|           | NA | ENSG00000232408 | 0          | NA          | NA         | NA         | NA         |            |
|           | NA | ENSG00000232409 | 0          | NA          | NA         | NA         | NA         |            |
|           | NA | ENSG00000232411 | 0.14931947 | -0.01844332 | 0.38480212 | 0.84537521 | NA         |            |
| 101928402 |    | ENSG00000232412 | 0.15069912 | -0.01848503 | 0.38480575 | 0.84537521 | NA         |            |
|           | NA | ENSG00000232413 | 0.173124   | -0.01911262 | 0.38486262 | 0.84537521 | NA         |            |
|           | NA | ENSG00000232415 | 0.29863895 | -0.02292439 | 0.3852726  | 0.68753245 | NA         | ELN-AS1    |
| 60467     |    | ENSG00000232416 | 0          | NA          | NA         | NA         | NA         | BPESC1     |
|           | NA | ENSG00000232418 | 0          | NA          | NA         | NA         | NA         |            |
| 252952    |    | ENSG00000232419 | 0          | NA          | NA         | NA         | NA         | TTY19      |
|           | NA | ENSG00000232420 | 0          | NA          | NA         | NA         | NA         | IL9RP2     |
|           | NA | ENSG00000232422 | 0.173733   | 0.01914545  | 0.38484597 | 0.78225479 | NA         | KNOP1P4    |

|           |                 |            |             |            |            |            |            |
|-----------|-----------------|------------|-------------|------------|------------|------------|------------|
| 440561    | ENSG00000232423 | 0          | NA          | NA         | NA         | NA         | PRAMEF6    |
| NA        | ENSG00000232424 | 0          | NA          | NA         | NA         | NA         | USP9YP29   |
| NA        | ENSG00000232429 | 0          | NA          | NA         | NA         | NA         | RPL21P131  |
| NA        | ENSG00000232430 | 0          | NA          | NA         | NA         | NA         | RPL31P15   |
| 100289656 | ENSG00000232431 | 0.173124   | -0.01911262 | 0.38486262 | 0.84537521 | NA         |            |
| NA        | ENSG00000232433 | 1.68602004 | -0.10262776 | 0.3992077  | 0.14018812 | NA         | GXYLT1P3   |
| 389813    | ENSG00000232434 | 206.110619 | -0.40410362 | 0.17580093 | 0.01014561 | 0.04187411 | AJM1       |
| NA        | ENSG00000232436 | 0          | NA          | NA         | NA         | NA         |            |
| NA        | ENSG00000232437 | 0          | NA          | NA         | NA         | NA         | RPS26P42   |
| NA        | ENSG00000232439 | 4.26011342 | 0.02421979  | 0.36691722 | 0.83388637 | 0.92431452 | RPL18AP7   |
| 100505771 | ENSG00000232442 | 30.6227481 | 0.17091038  | 0.30883068 | 0.3969975  | 0.62606586 | MHENCRC    |
| NA        | ENSG00000232444 | 0.18922458 | 0.01954053  | 0.38488496 | 0.78225479 | NA         |            |
| NA        | ENSG00000232445 | 54.6751465 | 0.02891374  | 0.25011066 | 0.87906721 | 0.94641763 | EMSLR      |
| NA        | ENSG00000232446 | 0          | NA          | NA         | NA         | NA         |            |
| NA        | ENSG00000232447 | 0          | NA          | NA         | NA         | NA         | MTND5P3    |
| NA        | ENSG00000232448 | 3.59777254 | -0.02518393 | 0.37058144 | 0.80606229 | 0.9121533  |            |
| NA        | ENSG00000232450 | 31.9927152 | 0.08727898  | 0.29086437 | 0.65459948 | 0.82810431 |            |
| NA        | ENSG00000232451 | 0          | NA          | NA         | NA         | NA         |            |
| 105378753 | ENSG00000232453 | 3.18910897 | -0.1542064  | 0.41253877 | 0.16764101 | 0.35871254 | LINC02777  |
| NA        | ENSG00000232454 | 1.1144242  | -0.00411017 | 0.37956004 | 0.94809898 | NA         |            |
| NA        | ENSG00000232455 | 0          | NA          | NA         | NA         | NA         | LARS2-AS1  |
| NA        | ENSG00000232456 | 0.68004673 | 0.03148293  | 0.38361896 | 0.54705895 | NA         |            |
| NA        | ENSG00000232457 | 13.6017566 | 0.06203598  | 0.34397741 | 0.70538147 | 0.85803894 | SLC16A6P1  |
| 101928744 | ENSG00000232458 | 0.63585554 | -0.02031424 | 0.38310293 | 0.67622475 | NA         | LINC01450  |
| NA        | ENSG00000232459 | 0          | NA          | NA         | NA         | NA         | OR4F14P    |
| NA        | ENSG00000232460 | 0          | NA          | NA         | NA         | NA         | BMPR1AP2   |
| NA        | ENSG00000232463 | 0          | NA          | NA         | NA         | NA         |            |
| NA        | ENSG00000232464 | 0          | NA          | NA         | NA         | NA         |            |
| NA        | ENSG00000232465 | 0          | NA          | NA         | NA         | NA         |            |
| NA        | ENSG00000232466 | 0          | NA          | NA         | NA         | NA         | H3P31      |
| NA        | ENSG00000232467 | 0.34746601 | 0.02370763  | 0.3853651  | 0.61987128 | NA         | TMA16P2    |
| NA        | ENSG00000232470 | 1.29661738 | -0.04204799 | 0.38245959 | 0.527335   | NA         |            |
| NA        | ENSG00000232471 | 0.15069912 | -0.01848503 | 0.38480575 | 0.84537521 | NA         |            |
| NA        | ENSG00000232472 | 0.70477617 | 0.00394118  | 0.3818401  | 0.93355436 | NA         | EEF1B2P3   |
| NA        | ENSG00000232474 | 0          | NA          | NA         | NA         | NA         | NCKAP5-IT1 |
| NA        | ENSG00000232475 | 0          | NA          | NA         | NA         | NA         | HSFY5P     |
| NA        | ENSG00000232479 | 4.34763759 | 0.24405123  | 0.47677273 | 0.06617705 | 0.1840258  | KRT8P52    |
| 728463    | ENSG00000232480 | 0          | NA          | NA         | NA         | NA         | TGFB2-AS1  |



|           |    |                 |            |             |            |            |            |             |
|-----------|----|-----------------|------------|-------------|------------|------------|------------|-------------|
|           | NA | ENSG00000232482 | 0          | NA          | NA         | NA         | NA         |             |
|           | NA | ENSG00000232485 | 12.4668015 | -0.04790721 | 0.34737253 | 0.75542992 | 0.88621127 | RPL37A-DT   |
|           | NA | ENSG00000232486 | 1.83423676 | 0.05122047  | 0.38107919 | 0.5276214  | NA         | DEPDC1P2    |
|           | NA | ENSG00000232487 | 0.34125913 | 0.02362767  | 0.38535357 | 0.62402675 | NA         | RASA3-IT1   |
|           | NA | ENSG00000232489 | 2.14654585 | 0.02010365  | 0.37710161 | 0.80153703 | NA         | MFAP1P1     |
| 100874206 |    | ENSG00000232490 | 0          | NA          | NA         | NA         | NA         | OSBPL10-AS1 |
|           | NA | ENSG00000232491 | 0.9884849  | 0.00570092  | 0.38004964 | 0.92521789 | NA         | SAPCD2P3    |
|           | NA | ENSG00000232492 | 18.1733789 | 0.07079252  | 0.32964534 | 0.69116693 | 0.85035049 | NPM1P13     |
|           | NA | ENSG00000232493 | 0.18922458 | 0.01954053  | 0.38488496 | 0.78225479 | NA         | RPL12P11    |
|           | NA | ENSG00000232494 | 0          | NA          | NA         | NA         | NA         |             |
|           | NA | ENSG00000232496 | 0          | NA          | NA         | NA         | NA         | RPL3P12     |
|           | NA | ENSG00000232497 | 0          | NA          | NA         | NA         | NA         | ADIPOR1P1   |
|           | NA | ENSG00000232499 | 1.17749368 | 0.04381049  | 0.38348706 | 0.48793526 | NA         |             |
|           | NA | ENSG00000232500 | 0          | NA          | NA         | NA         | NA         |             |
|           | NA | ENSG00000232502 | 0          | NA          | NA         | NA         | NA         |             |
|           | NA | ENSG00000232503 | 0.34624801 | -0.02356563 | 0.38536324 | 0.65270996 | NA         | CYCSP8      |
|           | NA | ENSG00000232504 | 0.3231249  | 0.00147037  | 0.38336931 | 0.96700363 | NA         | ST3GAL5-AS1 |
|           | NA | ENSG00000232508 | 0          | NA          | NA         | NA         | NA         | MRPL45P1    |
|           | NA | ENSG00000232511 | 0          | NA          | NA         | NA         | NA         | OR2AH1P     |
|           | NA | ENSG00000232512 | 0          | NA          | NA         | NA         | NA         |             |
|           | NA | ENSG00000232514 | 0          | NA          | NA         | NA         | NA         |             |
|           | NA | ENSG00000232515 | 0          | NA          | NA         | NA         | NA         |             |
|           | NA | ENSG00000232517 | 0          | NA          | NA         | NA         | NA         | CSPG4BP     |
|           | NA | ENSG00000232518 | 0.16735865 | 0.01897177  | 0.38482933 | 0.78225479 | NA         |             |
|           | NA | ENSG00000232519 | 0          | NA          | NA         | NA         | NA         |             |
| 151484    |    | ENSG00000232520 | 0.8733882  | -0.02093416 | 0.38224033 | 0.63334481 | NA         | GCSIR       |
|           | NA | ENSG00000232522 | 0          | NA          | NA         | NA         | NA         | ZNF886P     |
|           | NA | ENSG00000232524 | 0.173733   | 0.01914545  | 0.38484597 | 0.78225479 | NA         |             |
|           | NA | ENSG00000232525 | 0          | NA          | NA         | NA         | NA         | SS18L2P1    |
|           | NA | ENSG00000232526 | 0.48323512 | 0.01080161  | 0.38337725 | 0.79373772 | NA         | VDAC1P13    |
| 645166    |    | ENSG00000232527 | 17.4093809 | 0.33073701  | 0.49083995 | 0.09814085 | 0.2457547  | LINC02802   |
| 100996732 |    | ENSG00000232527 | 17.4093809 | 0.33073701  | 0.49083995 | 0.09814085 | 0.2457547  | LINC02802   |
| 107985200 |    | ENSG00000232527 | 17.4093809 | 0.33073701  | 0.49083995 | 0.09814085 | 0.2457547  | LINC02802   |
| 100289473 |    | ENSG00000232528 | 1.6317508  | 0.02141813  | 0.37916486 | 0.75760689 | NA         |             |
|           | NA | ENSG00000232529 | 0.14931947 | -0.01844332 | 0.38480212 | 0.84537521 | NA         |             |
| 110806283 |    | ENSG00000232530 | 0          | NA          | NA         | NA         | NA         | LIF-AS1     |
|           | NA | ENSG00000232531 | 0          | NA          | NA         | NA         | NA         | KMT5AP2     |
|           | NA | ENSG00000232533 | 5.05692473 | -0.07455249 | 0.37110211 | 0.55011987 | 0.75657689 |             |

|           |                 |            |             |            |            |            |              |
|-----------|-----------------|------------|-------------|------------|------------|------------|--------------|
| NA        | ENSG00000232535 | 0          | NA          | NA         | NA         | NA         | OR5H8        |
| NA        | ENSG00000232536 | 0.6702457  | -0.02149297 | 0.38313008 | 0.65317612 | NA         |              |
| NA        | ENSG00000232537 | 0.34624801 | -0.02356563 | 0.38536324 | 0.65270996 | NA         |              |
| NA        | ENSG00000232539 | 0          | NA          | NA         | NA         | NA         | LINC00945    |
| NA        | ENSG00000232540 | 0          | NA          | NA         | NA         | NA         | RPL36P19     |
| NA        | ENSG00000232542 | 0          | NA          | NA         | NA         | NA         | DPYD-IT1     |
| NA        | ENSG00000232543 | 0          | NA          | NA         | NA         | NA         | IGHD4-11     |
| NA        | ENSG00000232545 | 4.25036969 | 0.04421667  | 0.36896204 | 0.70322697 | 0.85731984 |              |
| NA        | ENSG00000232546 | 0          | NA          | NA         | NA         | NA         |              |
| 101928031 | ENSG00000232548 | 0          | NA          | NA         | NA         | NA         | LINC01809    |
| NA        | ENSG00000232549 | 0          | NA          | NA         | NA         | NA         | SRD5A1P1     |
| NA        | ENSG00000232551 | 0          | NA          | NA         | NA         | NA         | MTCO1P14     |
| NA        | ENSG00000232553 | 0.173733   | 0.01914545  | 0.38484597 | 0.78225479 | NA         | CLK2P1       |
| NA        | ENSG00000232554 | 0          | NA          | NA         | NA         | NA         | RSU1P2       |
| NA        | ENSG00000232555 | 0          | NA          | NA         | NA         | NA         |              |
| NA        | ENSG00000232556 | 0          | NA          | NA         | NA         | NA         | PRCPP1       |
| NA        | ENSG00000232557 | 0          | NA          | NA         | NA         | NA         |              |
| 100874295 | ENSG00000232558 | 0          | NA          | NA         | NA         | NA         | KCND3-IT1    |
| NA        | ENSG00000232560 | 0          | NA          | NA         | NA         | NA         | LINC01549    |
| NA        | ENSG00000232562 | 0          | NA          | NA         | NA         | NA         | TPMTP3       |
| NA        | ENSG00000232563 | 0.173124   | -0.01911262 | 0.38486262 | 0.84537521 | NA         | CRB3P1       |
| 101927257 | ENSG00000232564 | 0          | NA          | NA         | NA         | NA         | MRTFA-AS1    |
| NA        | ENSG00000232568 | 0          | NA          | NA         | NA         | NA         | RPL23AP35    |
| NA        | ENSG00000232573 | 0.32403744 | -0.02327471 | 0.3853216  | 0.66848573 | NA         | RPL3P4       |
| NA        | ENSG00000232576 | 0          | NA          | NA         | NA         | NA         |              |
| NA        | ENSG00000232578 | 0.18922458 | 0.01954053  | 0.38488496 | 0.78225479 | NA         |              |
| NA        | ENSG00000232579 | 0.61807637 | -0.0199719  | 0.38311657 | 0.68360919 | NA         | MTCO1P27     |
| NA        | ENSG00000232581 | 0          | NA          | NA         | NA         | NA         |              |
| NA        | ENSG00000232582 | 0          | NA          | NA         | NA         | NA         |              |
| NA        | ENSG00000232583 | 0          | NA          | NA         | NA         | NA         | GPR143P      |
| NA        | ENSG00000232585 | 0          | NA          | NA         | NA         | NA         | OFD1P12Y     |
| 103344928 | ENSG00000232586 | 32.1356539 | -0.30988013 | 0.38633776 | 0.15833974 | 0.34551918 | KIAA1614-AS1 |
| NA        | ENSG00000232587 | 0.67906087 | 0.00470197  | 0.38190603 | 0.92054641 | NA         | EEF1A1P3     |
| NA        | ENSG00000232590 | 0          | NA          | NA         | NA         | NA         |              |
| NA        | ENSG00000232591 | 0          | NA          | NA         | NA         | NA         | LINC02642    |
| NA        | ENSG00000232593 | 402.460546 | -0.48051444 | 0.14583145 | 0.00038755 | 0.0025724  | KANTR        |
| NA        | ENSG00000232594 | 0          | NA          | NA         | NA         | NA         |              |
| NA        | ENSG00000232595 | 0          | NA          | NA         | NA         | NA         | CST2P1       |

|           |                 |            |             |            |            |            |           |
|-----------|-----------------|------------|-------------|------------|------------|------------|-----------|
| NA        | ENSG00000232596 | 0          | NA          | NA         | NA         | NA         | LINC01646 |
| NA        | ENSG00000232597 | 0          | NA          | NA         | NA         | NA         |           |
| NA        | ENSG00000232598 | 0          | NA          | NA         | NA         | NA         |           |
| NA        | ENSG00000232599 | 0.29863895 | -0.02292439 | 0.3852726  | 0.68753245 | NA         |           |
| NA        | ENSG00000232600 | 0.82223465 | 0.03578062  | 0.38454189 | 0.47286227 | NA         | TONSL-AS1 |
| NA        | ENSG00000232601 | 0          | NA          | NA         | NA         | NA         | ANAPC15P2 |
| NA        | ENSG00000232603 | 0          | NA          | NA         | NA         | NA         |           |
| NA        | ENSG00000232604 | 0          | NA          | NA         | NA         | NA         |           |
| NA        | ENSG00000232605 | 0          | NA          | NA         | NA         | NA         | HMG2P11   |
| NA        | ENSG00000232606 | 0.45070772 | -0.02734721 | 0.38571695 | 0.56110996 | NA         | LINC01412 |
| NA        | ENSG00000232608 | 0          | NA          | NA         | NA         | NA         | TIMM9P2   |
| NA        | ENSG00000232610 | 0          | NA          | NA         | NA         | NA         | CCT6P4    |
| NA        | ENSG00000232611 | 68.253578  | 0.0624702   | 0.24141064 | 0.74171675 | 0.87812748 |           |
| NA        | ENSG00000232612 | 0          | NA          | NA         | NA         | NA         | RPL31P35  |
| NA        | ENSG00000232613 | 0.33471731 | 0.02354391  | 0.38534154 | 0.62842204 | NA         | LINC02576 |
| NA        | ENSG00000232614 | 0          | NA          | NA         | NA         | NA         | USP9YP9   |
| NA        | ENSG00000232615 | 2.15648285 | 0.02608389  | 0.37602855 | 0.76282845 | NA         |           |
| NA        | ENSG00000232617 | 0          | NA          | NA         | NA         | NA         |           |
| NA        | ENSG00000232618 | 3.09865634 | 0.01836921  | 0.37301601 | 0.84711889 | 0.93052693 |           |
| NA        | ENSG00000232620 | 0          | NA          | NA         | NA         | NA         | TSPY17P   |
| NA        | ENSG00000232621 | 0          | NA          | NA         | NA         | NA         | C4BPAP2   |
| NA        | ENSG00000232622 | 0          | NA          | NA         | NA         | NA         |           |
| NA        | ENSG00000232623 | 0.72682437 | 0.02340022  | 0.38388776 | 0.58849046 | NA         | MRAP-AS1  |
| 283080    | ENSG00000232624 | 0          | NA          | NA         | NA         | NA         | LINC01517 |
| NA        | ENSG00000232625 | 0          | NA          | NA         | NA         | NA         | RPL23AP31 |
| NA        | ENSG00000232626 | 0.65636108 | 0.00103208  | 0.38190465 | 0.98122397 | NA         |           |
| NA        | ENSG00000232627 | 1.09677155 | -0.02353927 | 0.38169806 | 0.68087098 | NA         |           |
| 101927143 | ENSG00000232628 | 2.64133561 | 0.08481192  | 0.38984133 | 0.28257    | 0.50762175 |           |
| 3120      | ENSG00000232629 | 0          | NA          | NA         | NA         | NA         | HLA-DQB2  |
| NA        | ENSG00000232630 | 53.4271307 | 0.16000742  | 0.2696368  | 0.42030935 | 0.64619198 | PRPS1P2   |
| NA        | ENSG00000232631 | 0          | NA          | NA         | NA         | NA         | MTND2P23  |
| NA        | ENSG00000232633 | 0.65125806 | -0.0116542  | 0.38239887 | 0.76053336 | NA         |           |
| NA        | ENSG00000232634 | 0          | NA          | NA         | NA         | NA         | NEFLP1    |
| NA        | ENSG00000232636 | 0          | NA          | NA         | NA         | NA         |           |
| NA        | ENSG00000232638 | 9.47796885 | -0.12665345 | 0.36658949 | 0.43060046 | 0.65606363 |           |
| NA        | ENSG00000232640 | 4.61293706 | -0.04383347 | 0.36507636 | 0.72207859 | 0.86742752 |           |
| NA        | ENSG00000232642 | 0.4678232  | -0.00940287 | 0.38287839 | 0.85011535 | NA         |           |
| NA        | ENSG00000232643 | 0.62524199 | -0.0362481  | 0.38662159 | 0.42658189 | NA         | LINC00385 |

|           |                 |            |             |            |            |            |            |
|-----------|-----------------|------------|-------------|------------|------------|------------|------------|
| NA        | ENSG00000232644 | 0          | NA          | NA         | NA         | NA         |            |
| NA        | ENSG00000232645 | 3.85552866 | 0.0388516   | 0.36910701 | 0.73177939 | 0.8719298  | LINC01431  |
| NA        | ENSG00000232646 | 0          | NA          | NA         | NA         | NA         |            |
| NA        | ENSG00000232647 | 0          | NA          | NA         | NA         | NA         | POLR3KP1   |
| NA        | ENSG00000232648 | 7.59331877 | -0.06358333 | 0.36731061 | 0.6130567  | 0.80076208 |            |
| 105378934 | ENSG00000232650 | 0          | NA          | NA         | NA         | NA         | LINC01780  |
| 643699    | ENSG00000232653 | 146.194198 | 0.11075401  | 0.1804521  | 0.48791041 | 0.70776647 | GOLGA8N    |
| NA        | ENSG00000232654 | 0.173124   | -0.01911262 | 0.38486262 | 0.84537521 | NA         | FAM136BP   |
| 101927526 | ENSG00000232655 | 0          | NA          | NA         | NA         | NA         | LINC01656  |
| 55853     | ENSG00000232656 | 81.4381291 | -0.30304795 | 0.25226382 | 0.12642392 | 0.29588894 | IDI2-AS1   |
| NA        | ENSG00000232658 | 0          | NA          | NA         | NA         | NA         | SLC44A3P1  |
| 111082987 | ENSG00000232661 | 0          | NA          | NA         | NA         | NA         | CFTR-AS1   |
| NA        | ENSG00000232662 | 0.15069912 | -0.01848503 | 0.38480575 | 0.84537521 | NA         | LDHBP1     |
| NA        | ENSG00000232663 | 0          | NA          | NA         | NA         | NA         |            |
| NA        | ENSG00000232664 | 0          | NA          | NA         | NA         | NA         | LARP1BP3   |
| NA        | ENSG00000232665 | 0          | NA          | NA         | NA         | NA         | PHBP10     |
| NA        | ENSG00000232667 | 0          | NA          | NA         | NA         | NA         |            |
| NA        | ENSG00000232668 | 0          | NA          | NA         | NA         | NA         |            |
| NA        | ENSG00000232671 | 22.617951  | 0.06239231  | 0.30409553 | 0.74331516 | 0.87897084 | ZNF687-AS1 |
| NA        | ENSG00000232672 | 0          | NA          | NA         | NA         | NA         | ACTG1P21   |
| NA        | ENSG00000232675 | 0          | NA          | NA         | NA         | NA         |            |
| NA        | ENSG00000232676 | 0          | NA          | NA         | NA         | NA         | ADH5P2     |
| 100506930 | ENSG00000232677 | 951.870801 | 0.23700623  | 0.08768405 | 0.0052616  | 0.02427112 | LINC00665  |
| NA        | ENSG00000232678 | 0          | NA          | NA         | NA         | NA         | SPTLC1P4   |
| NA        | ENSG00000232679 | 0.173733   | 0.01914545  | 0.38484597 | 0.78225479 | NA         | LINC01705  |
| NA        | ENSG00000232680 | 0          | NA          | NA         | NA         | NA         |            |
| NA        | ENSG00000232682 | 2.74558264 | 0.01500214  | 0.376284   | 0.85519961 | 0.93529355 |            |
| 100874205 | ENSG00000232684 | 0.15069912 | -0.01848503 | 0.38480575 | 0.84537521 | NA         | ATP11A-AS1 |
| 348021    | ENSG00000232685 | 0          | NA          | NA         | NA         | NA         | LINC00442  |
| NA        | ENSG00000232687 | 0          | NA          | NA         | NA         | NA         | RPL12P9    |
| 102724321 | ENSG00000232688 | 0          | NA          | NA         | NA         | NA         | LINC01628  |
| NA        | ENSG00000232690 | 0          | NA          | NA         | NA         | NA         | HSPE1P9    |
| NA        | ENSG00000232692 | 2.6694545  | 0.02665817  | 0.37499472 | 0.76302158 | 0.89079933 |            |
| NA        | ENSG00000232693 | 0          | NA          | NA         | NA         | NA         |            |
| NA        | ENSG00000232695 | 0          | NA          | NA         | NA         | NA         | ELOCP17    |
| NA        | ENSG00000232696 | 0          | NA          | NA         | NA         | NA         |            |
| NA        | ENSG00000232699 | 0          | NA          | NA         | NA         | NA         | BDH2P1     |
| NA        | ENSG00000232701 | 0          | NA          | NA         | NA         | NA         | RPL21P108  |

|           |    |                 |            |             |            |            |            |           |
|-----------|----|-----------------|------------|-------------|------------|------------|------------|-----------|
|           | NA | ENSG00000232702 | 0          | NA          | NA         | NA         | NA         |           |
|           | NA | ENSG00000232706 | 0.54676649 | 0.03264605  | 0.38620792 | 0.45562108 | NA         | NUTM2HP   |
|           | NA | ENSG00000232707 | 0          | NA          | NA         | NA         | NA         | AP1B1P2   |
|           | NA | ENSG00000232709 | 5.24748621 | 0.00086327  | 0.36109285 | 0.99657232 | 0.99873692 | MARK2P9   |
|           | NA | ENSG00000232710 | 0.70414283 | -0.01761645 | 0.38332214 | 0.66983381 | NA         |           |
| 101929591 | NA | ENSG00000232712 | 2.62292625 | 0.1343563   | 0.41134853 | 0.10895894 | 0.26521666 | KIZ-AS1   |
|           | NA | ENSG00000232713 | 3.02687454 | -0.03744482 | 0.37431477 | 0.6977042  | 0.85399787 | RPS12P3   |
|           | NA | ENSG00000232714 | 0          | NA          | NA         | NA         | NA         | MTND3P8   |
|           | NA | ENSG00000232715 | 0          | NA          | NA         | NA         | NA         | LINC01022 |
|           | NA | ENSG00000232716 | 0          | NA          | NA         | NA         | NA         |           |
|           | NA | ENSG00000232717 | 0          | NA          | NA         | NA         | NA         | TRIM51JP  |
|           | NA | ENSG00000232718 | 2.02647347 | -0.0176819  | 0.3757869  | 0.83143805 | NA         | GAPDHP48  |
|           | NA | ENSG00000232719 | 0          | NA          | NA         | NA         | NA         |           |
|           | NA | ENSG00000232721 | 0.31737711 | 0.00167413  | 0.38337161 | 0.96181076 | NA         |           |
|           | NA | ENSG00000232722 | 0          | NA          | NA         | NA         | NA         | MROH4P    |
|           | NA | ENSG00000232723 | 0          | NA          | NA         | NA         | NA         | RPS17P7   |
|           | NA | ENSG00000232724 | 0.53631729 | 0.03214424  | 0.38615613 | 0.46282211 | NA         | TRIM80P   |
|           | NA | ENSG00000232725 | 1.97193741 | -0.01341441 | 0.37980926 | 0.90190462 | NA         |           |
|           | NA | ENSG00000232727 | 0.4916187  | 0.01478813  | 0.38313829 | 0.75056867 | NA         | YWHAEP1   |
|           | NA | ENSG00000232728 | 0          | NA          | NA         | NA         | NA         | PHB2P1    |
| 101926943 | NA | ENSG00000232729 | 14.3939831 | -0.01648219 | 0.32617064 | 0.92234012 | 0.96745047 |           |
|           | NA | ENSG00000232730 | 0          | NA          | NA         | NA         | NA         | FAM8A4P   |
|           | NA | ENSG00000232732 | 1.94123438 | -0.00660176 | 0.37797777 | 0.92428477 | NA         |           |
|           | NA | ENSG00000232734 | 0          | NA          | NA         | NA         | NA         | ATP5MC1P7 |
|           | NA | ENSG00000232735 | 0          | NA          | NA         | NA         | NA         | ATG4AP1   |
|           | NA | ENSG00000232736 | 0          | NA          | NA         | NA         | NA         |           |
|           | NA | ENSG00000232738 | 0          | NA          | NA         | NA         | NA         |           |
|           | NA | ENSG00000232739 | 0.93856341 | -0.01477419 | 0.38147841 | 0.78568655 | NA         |           |
| 107985818 | NA | ENSG00000232740 | 0          | NA          | NA         | NA         | NA         | LINC01826 |
|           | NA | ENSG00000232742 | 0.31703244 | 0.00141019  | 0.38336896 | 0.9643414  | NA         | RHOQP2    |
|           | NA | ENSG00000232743 | 0          | NA          | NA         | NA         | NA         | ELF2P3    |
|           | NA | ENSG00000232744 | 0          | NA          | NA         | NA         | NA         | USP9YP16  |
| 105376955 | NA | ENSG00000232746 | 0          | NA          | NA         | NA         | NA         | LINC02022 |
|           | NA | ENSG00000232747 | 0          | NA          | NA         | NA         | NA         | IGKV1D-35 |
|           | NA | ENSG00000232748 | 27.3571439 | 0.0424759   | 0.30183698 | 0.82384698 | 0.91986742 |           |
|           | NA | ENSG00000232749 | 0          | NA          | NA         | NA         | NA         |           |
|           | NA | ENSG00000232750 | 0.51449982 | 0.01613668  | 0.38318273 | 0.7287339  | NA         |           |
|           | NA | ENSG00000232751 | 0          | NA          | NA         | NA         | NA         |           |

|           |                 |            |             |            |            |            |             |
|-----------|-----------------|------------|-------------|------------|------------|------------|-------------|
| NA        | ENSG00000232752 | 0          | NA          | NA         | NA         | NA         | MTCO3P21    |
| NA        | ENSG00000232754 | 0          | NA          | NA         | NA         | NA         |             |
| NA        | ENSG00000232756 | 0          | NA          | NA         | NA         | NA         | DDX3ILA1    |
| NA        | ENSG00000232757 | 0.68857185 | 0.02214889  | 0.38383025 | 0.60847524 | NA         | ETF1P1      |
| 100506178 | ENSG00000232759 | 0          | NA          | NA         | NA         | NA         |             |
| NA        | ENSG00000232760 | 0.16735865 | 0.01897177  | 0.38482933 | 0.78225479 | NA         |             |
| NA        | ENSG00000232762 | 0          | NA          | NA         | NA         | NA         |             |
| NA        | ENSG00000232764 | 0          | NA          | NA         | NA         | NA         | TRIM60P8Y   |
| NA        | ENSG00000232765 | 0          | NA          | NA         | NA         | NA         |             |
| NA        | ENSG00000232766 | 0          | NA          | NA         | NA         | NA         | KIAA1143P2  |
| 105378499 | ENSG00000232767 | 0.173124   | -0.01911262 | 0.38486262 | 0.84537521 | NA         |             |
| NA        | ENSG00000232768 | 0          | NA          | NA         | NA         | NA         |             |
| NA        | ENSG00000232771 | 0          | NA          | NA         | NA         | NA         | PPP1R26P5   |
| NA        | ENSG00000232772 | 0          | NA          | NA         | NA         | NA         | MTND4P22    |
| NA        | ENSG00000232773 | 0          | NA          | NA         | NA         | NA         | DEFB130D    |
| NA        | ENSG00000232774 | 4.60452644 | 0.09803389  | 0.38294178 | 0.38736904 | 0.61635625 |             |
| NA        | ENSG00000232775 | 48.7853883 | 0.04633326  | 0.25733033 | 0.81074628 | 0.91424385 | BMS1P22     |
| NA        | ENSG00000232777 | 0.173733   | 0.01914545  | 0.38484597 | 0.78225479 | NA         | MRPL51P2    |
| NA        | ENSG00000232778 | 0.7532944  | 0.02277787  | 0.38372836 | 0.57983222 | NA         | RPL23AP50   |
| NA        | ENSG00000232780 | 0          | NA          | NA         | NA         | NA         | GAPDHP74    |
| NA        | ENSG00000232783 | 0          | NA          | NA         | NA         | NA         | FRG2FP      |
| NA        | ENSG00000232786 | 0          | NA          | NA         | NA         | NA         | TIMM9P3     |
| NA        | ENSG00000232787 | 0          | NA          | NA         | NA         | NA         | OR7L1P      |
| 101929947 | ENSG00000232788 | 0          | NA          | NA         | NA         | NA         | ITGA6-AS1   |
| NA        | ENSG00000232789 | 0          | NA          | NA         | NA         | NA         |             |
| 104355138 | ENSG00000232790 | 0          | NA          | NA         | NA         | NA         | LINC01162   |
| NA        | ENSG00000232791 | 0.15069912 | -0.01848503 | 0.38480575 | 0.84537521 | NA         | OR11I1P     |
| NA        | ENSG00000232792 | 0          | NA          | NA         | NA         | NA         | FTH1P25     |
| NA        | ENSG00000232793 | 0          | NA          | NA         | NA         | NA         | DNAJC19P8   |
| NA        | ENSG00000232794 | 0          | NA          | NA         | NA         | NA         | HNRNPDP1    |
| NA        | ENSG00000232795 | 0          | NA          | NA         | NA         | NA         | SCAND3P1    |
| NA        | ENSG00000232797 | 0          | NA          | NA         | NA         | NA         | FAM207CP    |
| NA        | ENSG00000232798 | 0          | NA          | NA         | NA         | NA         |             |
| NA        | ENSG00000232799 | 0          | NA          | NA         | NA         | NA         | CRYGFP      |
| NA        | ENSG00000232800 | 0          | NA          | NA         | NA         | NA         | SLC7A15P    |
| NA        | ENSG00000232801 | 0          | NA          | NA         | NA         | NA         | SDCBPP3     |
| 100127888 | ENSG00000232803 | 11.3142429 | 0.00879002  | 0.34674632 | 0.95600473 | 0.98188817 | SLCO4A1-AS1 |
| NA        | ENSG00000232805 | 0          | NA          | NA         | NA         | NA         | NIP7P1      |

|           |                 |            |             |            |            |            |            |
|-----------|-----------------|------------|-------------|------------|------------|------------|------------|
| NA        | ENSG00000232806 | 0          | NA          | NA         | NA         | NA         |            |
| NA        | ENSG00000232807 | 23.6650118 | 0.18721043  | 0.33494541 | 0.35047067 | 0.58089708 |            |
| 252951    | ENSG00000232808 | 0          | NA          | NA         | NA         | NA         | TTY20      |
| NA        | ENSG00000232809 | 0          | NA          | NA         | NA         | NA         | VDAC1P10   |
| 7124      | ENSG00000232810 | 0          | NA          | NA         | NA         | NA         | TNF        |
| NA        | ENSG00000232811 | 10.4004886 | -0.17771749 | 0.38700689 | 0.29188517 | 0.5179626  |            |
| 105372893 | ENSG00000232812 | 0.99944232 | -0.05367288 | 0.38925418 | 0.2477979  | NA         | LINC01717  |
| NA        | ENSG00000232813 | 0          | NA          | NA         | NA         | NA         | S100A11P6  |
| 100874203 | ENSG00000232814 | 0.173124   | -0.01911262 | 0.38486262 | 0.84537521 | NA         | COL4A2-AS1 |
| NA        | ENSG00000232815 | 269.708239 | -0.08695549 | 0.14252935 | 0.50989539 | 0.72545712 | DUX4L50    |
| NA        | ENSG00000232818 | 124.287999 | -0.3240388  | 0.21086142 | 0.06949757 | 0.19044638 | RPS2P32    |
| NA        | ENSG00000232821 | 80.1861194 | -1.26246262 | 0.29589    | 1.73E-06   | 1.88E-05   |            |
| NA        | ENSG00000232823 | 0          | NA          | NA         | NA         | NA         | TXNP1      |
| NA        | ENSG00000232824 | 0          | NA          | NA         | NA         | NA         | PRR13P1    |
| 100129620 | ENSG00000232825 | 0.79086601 | -0.03612053 | 0.38478166 | 0.48544408 | NA         |            |
| NA        | ENSG00000232827 | 17.2567865 | 0.16594199  | 0.36470498 | 0.3594758  | 0.58949503 | LINC01189  |
| NA        | ENSG00000232828 | 1.19938415 | -0.03101429 | 0.38152969 | 0.62007241 | NA         |            |
| NA        | ENSG00000232829 | 0          | NA          | NA         | NA         | NA         | GSTO3P     |
| NA        | ENSG00000232830 | 0          | NA          | NA         | NA         | NA         |            |
| 100873947 | ENSG00000232832 | 0          | NA          | NA         | NA         | NA         | LMLN-AS1   |
| NA        | ENSG00000232834 | 0          | NA          | NA         | NA         | NA         |            |
| NA        | ENSG00000232835 | 0          | NA          | NA         | NA         | NA         |            |
| 101928435 | ENSG00000232837 | 0          | NA          | NA         | NA         | NA         | LINC01700  |
| 100303755 | ENSG00000232838 | 150.715083 | -0.19273091 | 0.18256815 | 0.22956963 | 0.44518243 | PET117     |
| NA        | ENSG00000232841 | 0          | NA          | NA         | NA         | NA         | BRWD1P3    |
| NA        | ENSG00000232842 | 0.54681185 | 0.03264821  | 0.38620815 | 0.45559043 | NA         | KAT7P1     |
| NA        | ENSG00000232843 | 0          | NA          | NA         | NA         | NA         | SNX18P2    |
| NA        | ENSG00000232845 | 0          | NA          | NA         | NA         | NA         | TRAPPC2P9  |
| NA        | ENSG00000232846 | 0          | NA          | NA         | NA         | NA         | SLC25A6P3  |
| NA        | ENSG00000232848 | 0.15069912 | -0.01848503 | 0.38480575 | 0.84537521 | NA         |            |
| NA        | ENSG00000232849 | 0          | NA          | NA         | NA         | NA         | LINC00363  |
| 389791    | ENSG00000232850 | 2.62380957 | -0.01591791 | 0.37082796 | 0.87332129 | 0.94441388 |            |
| NA        | ENSG00000232851 | 0          | NA          | NA         | NA         | NA         | ATP5MFP3   |
| NA        | ENSG00000232852 | 0.96283617 | -0.04718892 | 0.3850622  | 0.39949657 | NA         | CICP4      |
| NA        | ENSG00000232853 | 0          | NA          | NA         | NA         | NA         | LUZP4P1    |
| NA        | ENSG00000232855 | 3.49775799 | 0.16349366  | 0.43253763 | 0.02266787 | 0.08053912 |            |
| NA        | ENSG00000232857 | 0          | NA          | NA         | NA         | NA         | KATNBL1P2  |
| NA        | ENSG00000232858 | 0.173124   | -0.01911262 | 0.38486262 | 0.84537521 | NA         | RPL34P27   |

|           |                 |            |             |            |            |            |            |
|-----------|-----------------|------------|-------------|------------|------------|------------|------------|
| 201229    | ENSG00000232859 | 54.7636653 | 0.42990137  | 0.34999408 | 0.06889812 | 0.18927425 | LYRM9      |
| NA        | ENSG00000232860 | 41.3773235 | -0.23917464 | 0.31629872 | 0.25352762 | 0.47391189 | SMG7-AS1   |
| NA        | ENSG00000232862 | 2.06969931 | -0.08429022 | 0.38899397 | 0.31548269 | NA         |            |
| NA        | ENSG00000232864 | 0          | NA          | NA         | NA         | NA         | NUCKS1P1   |
| NA        | ENSG00000232867 | 0          | NA          | NA         | NA         | NA         |            |
| NA        | ENSG00000232869 | 0          | NA          | NA         | NA         | NA         | TRBV29-1   |
| 653677    | ENSG00000232871 | 7.8669285  | 3.67375778  | 1.57340069 | 0.00095104 | 0.00567478 | SEC1P      |
| NA        | ENSG00000232872 | 12.3159941 | 0.05007155  | 0.33321569 | 0.77131614 | 0.89515442 | CTAGE3P    |
| NA        | ENSG00000232873 | 0          | NA          | NA         | NA         | NA         | RPL23AP93  |
| NA        | ENSG00000232874 | 0          | NA          | NA         | NA         | NA         |            |
| NA        | ENSG00000232875 | 0          | NA          | NA         | NA         | NA         | HMG2P35    |
| NA        | ENSG00000232876 | 0.88454989 | 0.03624858  | 0.38442939 | 0.44981517 | NA         |            |
| 100873932 | ENSG00000232878 | 0.16735865 | 0.01897177  | 0.38482933 | 0.78225479 | NA         | DPYD-AS1   |
| NA        | ENSG00000232879 | 0.173124   | -0.01911262 | 0.38486262 | 0.84537521 | NA         | GLRX5P2    |
| NA        | ENSG00000232880 | 0          | NA          | NA         | NA         | NA         | NDUFB4P10  |
| NA        | ENSG00000232881 | 0          | NA          | NA         | NA         | NA         | RPS10P21   |
| NA        | ENSG00000232882 | 1.41604309 | -0.00332716 | 0.38071589 | 0.95195783 | NA         | PHKA1P1    |
| NA        | ENSG00000232883 | 0          | NA          | NA         | NA         | NA         |            |
| NA        | ENSG00000232884 | 0          | NA          | NA         | NA         | NA         |            |
| NA        | ENSG00000232885 | 0          | NA          | NA         | NA         | NA         | GPC5-AS2   |
| NA        | ENSG00000232886 | 0          | NA          | NA         | NA         | NA         |            |
| NA        | ENSG00000232887 | 0.33471731 | 0.02354391  | 0.38534154 | 0.62842204 | NA         |            |
| NA        | ENSG00000232888 | 7.87263634 | 0.06815549  | 0.35522958 | 0.65128381 | 0.82581139 | RPS11P5    |
| NA        | ENSG00000232889 | 0          | NA          | NA         | NA         | NA         |            |
| NA        | ENSG00000232891 | 0          | NA          | NA         | NA         | NA         |            |
| 101928404 | ENSG00000232892 | 8.89543568 | 0.04388918  | 0.35382773 | 0.76374099 | 0.89122581 | RGS5-AS1   |
| NA        | ENSG00000232893 | 0          | NA          | NA         | NA         | NA         | IQCA1-AS1  |
| NA        | ENSG00000232894 | 1.47406867 | 0.09932377  | 0.40164612 | 0.07167444 | NA         | MRPS31P2   |
| NA        | ENSG00000232895 | 0.18922458 | 0.01954053  | 0.38488496 | 0.78225479 | NA         |            |
| NA        | ENSG00000232896 | 0          | NA          | NA         | NA         | NA         |            |
| NA        | ENSG00000232897 | 0          | NA          | NA         | NA         | NA         |            |
| 101929413 | ENSG00000232900 | 0          | NA          | NA         | NA         | NA         |            |
| NA        | ENSG00000232901 | 3.50228779 | -0.04202132 | 0.37113414 | 0.69599571 | 0.8531799  | CYCSP10    |
| 101927590 | ENSG00000232903 | 0.173733   | 0.01914545  | 0.38484597 | 0.78225479 | NA         | LINC01166  |
| NA        | ENSG00000232905 | 0          | NA          | NA         | NA         | NA         |            |
| NA        | ENSG00000232906 | 25.8446322 | -0.85072258 | 0.52138226 | 0.00964135 | 0.04027888 |            |
| 101926987 | ENSG00000232907 | 1.10853759 | -0.03771242 | 0.38421261 | 0.44189853 | NA         | DLGAP4-AS1 |
| NA        | ENSG00000232908 | 0          | NA          | NA         | NA         | NA         | HSD17B7P1  |



|           |    |                 |            |             |            |            |            |           |
|-----------|----|-----------------|------------|-------------|------------|------------|------------|-----------|
|           | NA | ENSG00000232909 | 3.69312787 | 0.12857376  | 0.39973616 | 0.23364571 | 0.45053268 |           |
|           | NA | ENSG00000232910 | 0          | NA          | NA         | NA         | NA         | RAB9AP1   |
|           | NA | ENSG00000232912 | 0.30001562 | -0.02294458 | 0.38527538 | 0.68644891 | NA         | RERE-AS1  |
| 101927049 |    | ENSG00000232913 | 0          | NA          | NA         | NA         | NA         | PLCE1-AS2 |
|           | NA | ENSG00000232914 | 0          | NA          | NA         | NA         | NA         | TRAPPC2P4 |
|           | NA | ENSG00000232915 | 0.173733   | 0.01914545  | 0.38484597 | 0.78225479 | NA         | RNF14P1   |
|           | NA | ENSG00000232916 | 0          | NA          | NA         | NA         | NA         | HMG22P27  |
|           | NA | ENSG00000232917 | 0          | NA          | NA         | NA         | NA         | HSPE1P6   |
|           | NA | ENSG00000232918 | 0          | NA          | NA         | NA         | NA         |           |
|           | NA | ENSG00000232920 | 0          | NA          | NA         | NA         | NA         | LINC01400 |
|           | NA | ENSG00000232922 | 0          | NA          | NA         | NA         | NA         | MTND6P24  |
|           | NA | ENSG00000232924 | 0          | NA          | NA         | NA         | NA         | ELOCP4    |
|           | NA | ENSG00000232925 | 0          | NA          | NA         | NA         | NA         | MRPS16P2  |
|           | NA | ENSG00000232926 | 3.54759011 | 0.00624571  | 0.36668825 | 0.9571808  | 0.98264776 |           |
|           | NA | ENSG00000232927 | 0          | NA          | NA         | NA         | NA         | USP12PY   |
|           | NA | ENSG00000232928 | 1.5811709  | 0.0495438   | 0.38207346 | 0.50860535 | NA         | DDX3P1    |
|           | NA | ENSG00000232930 | 0          | NA          | NA         | NA         | NA         |           |
|           | NA | ENSG00000232931 | 761.573245 | -0.18768682 | 0.1030418  | 0.05800839 | 0.16698875 | LINC00342 |
|           | NA | ENSG00000232934 | 1.44761175 | 0.02742827  | 0.37990524 | 0.69519844 | NA         |           |
|           | NA | ENSG00000232935 | 0          | NA          | NA         | NA         | NA         |           |
|           | NA | ENSG00000232936 | 6.24224701 | -0.21429071 | 0.43255449 | 0.15328227 | 0.33809007 |           |
|           | NA | ENSG00000232937 | 0          | NA          | NA         | NA         | NA         |           |
| 388574    |    | ENSG00000232938 | 1.63755709 | -0.01832574 | 0.37856266 | 0.79808811 | NA         | RPL23AP87 |
| 107987013 |    | ENSG00000232939 | 0          | NA          | NA         | NA         | NA         |           |
| 414765    |    | ENSG00000232940 | 24.1751378 | -0.07906734 | 0.31084521 | 0.67345053 | 0.83953925 | HCG25     |
|           | NA | ENSG00000232943 | 0          | NA          | NA         | NA         | NA         | GGCTP2    |
|           | NA | ENSG00000232944 | 0          | NA          | NA         | NA         | NA         |           |
|           | NA | ENSG00000232946 | 0.81258357 | -0.0095408  | 0.38089005 | 0.8661131  | NA         | RPL35AP20 |
|           | NA | ENSG00000232947 | 0          | NA          | NA         | NA         | NA         | LINC02543 |
|           | NA | ENSG00000232949 | 0.14931947 | -0.01844332 | 0.38480212 | 0.84537521 | NA         |           |
|           | NA | ENSG00000232950 | 0          | NA          | NA         | NA         | NA         | ZNF519P1  |
|           | NA | ENSG00000232951 | 0          | NA          | NA         | NA         | NA         | IPO7P1    |
|           | NA | ENSG00000232952 | 0          | NA          | NA         | NA         | NA         |           |
|           | NA | ENSG00000232953 | 0.30139824 | -0.02296476 | 0.38527817 | 0.68536535 | NA         | HSPA8P18  |
| 106144531 |    | ENSG00000232954 | 0          | NA          | NA         | NA         | NA         | LINC00374 |
| 285958    |    | ENSG00000232956 | 993.90651  | -0.05132346 | 0.09321041 | 0.56945068 | 0.77018894 | SNHG15    |
|           | NA | ENSG00000232958 | 0          | NA          | NA         | NA         | NA         |           |
|           | NA | ENSG00000232959 | 0          | NA          | NA         | NA         | NA         |           |

|           |                 |            |             |            |            |            |             |
|-----------|-----------------|------------|-------------|------------|------------|------------|-------------|
| NA        | ENSG00000232963 | 0          | NA          | NA         | NA         | NA         | HMG2P20     |
| 101927553 | ENSG00000232964 | 0          | NA          | NA         | NA         | NA         | LINC01737   |
| NA        | ENSG00000232965 | 0          | NA          | NA         | NA         | NA         | RPS12P18    |
| NA        | ENSG00000232968 | 0          | NA          | NA         | NA         | NA         | EIF4EP4     |
| NA        | ENSG00000232969 | 0          | NA          | NA         | NA         | NA         |             |
| NA        | ENSG00000232970 | 0          | NA          | NA         | NA         | NA         | POLHP1      |
| NA        | ENSG00000232971 | 0          | NA          | NA         | NA         | NA         |             |
| 285154    | ENSG00000232973 | 11.2966426 | 0.18009038  | 0.37849251 | 0.30965009 | 0.53743835 | CYP1B1-AS1  |
| NA        | ENSG00000232975 | 0          | NA          | NA         | NA         | NA         | MTCO1P57    |
| NA        | ENSG00000232976 | 0          | NA          | NA         | NA         | NA         | TRIM60P10Y  |
| 100506697 | ENSG00000232977 | 8.63176547 | -0.15254278 | 0.37983124 | 0.34153596 | 0.57180671 | LINC00327   |
| NA        | ENSG00000232978 | 0          | NA          | NA         | NA         | NA         |             |
| NA        | ENSG00000232979 | 0          | NA          | NA         | NA         | NA         |             |
| NA        | ENSG00000232981 | 0          | NA          | NA         | NA         | NA         | MTCO1P51    |
| NA        | ENSG00000232982 | 0          | NA          | NA         | NA         | NA         | MTCO1P45    |
| NA        | ENSG00000232983 | 3.88530796 | -0.07848941 | 0.37624671 | 0.49851478 | 0.71624312 |             |
| NA        | ENSG00000232985 | 0          | NA          | NA         | NA         | NA         |             |
| NA        | ENSG00000232986 | 0          | NA          | NA         | NA         | NA         |             |
| NA        | ENSG00000232987 | 0.70516209 | 0.02761756  | 0.38373446 | 0.56439247 | NA         | LINC01219   |
| NA        | ENSG00000232989 | 0          | NA          | NA         | NA         | NA         |             |
| NA        | ENSG00000232990 | 0          | NA          | NA         | NA         | NA         | MTATP6P7    |
| 104326057 | ENSG00000232991 | 0          | NA          | NA         | NA         | NA         | GACAT1      |
| NA        | ENSG00000232992 | 0          | NA          | NA         | NA         | NA         | AHCYP4      |
| NA        | ENSG00000232993 | 0          | NA          | NA         | NA         | NA         |             |
| NA        | ENSG00000232994 | 0          | NA          | NA         | NA         | NA         | RPL7P14     |
| 8490      | ENSG00000232995 | 48.852467  | 0.13942859  | 0.26715561 | 0.47924449 | 0.70061045 |             |
| NA        | ENSG00000232998 | 0          | NA          | NA         | NA         | NA         | VPS13A-AS1  |
| NA        | ENSG00000232999 | 0          | NA          | NA         | NA         | NA         |             |
| NA        | ENSG00000233002 | 0.15069912 | -0.01848503 | 0.38480575 | 0.84537521 | NA         | TBC1D26-AS1 |
| NA        | ENSG00000233003 | 0          | NA          | NA         | NA         | NA         | CICP26      |
| NA        | ENSG00000233005 | 0.14931947 | -0.01844332 | 0.38480212 | 0.84537521 | NA         |             |
| 553103    | ENSG00000233006 | 110.355068 | -0.10404281 | 0.20519342 | 0.5473355  | 0.75427171 | MIR3936HG   |
| NA        | ENSG00000233007 | 0          | NA          | NA         | NA         | NA         | UBTFL11     |
| 101927560 | ENSG00000233008 | 0          | NA          | NA         | NA         | NA         | LINC01725   |
| 101927587 | ENSG00000233008 | 0          | NA          | NA         | NA         | NA         | LINC01725   |
| 100885778 | ENSG00000233009 | 0          | NA          | NA         | NA         | NA         | NALCN-AS1   |
| NA        | ENSG00000233010 | 0          | NA          | NA         | NA         | NA         | RPEP4       |
| NA        | ENSG00000233011 | 0          | NA          | NA         | NA         | NA         | SLC9A3P1    |

|           |                 |            |             |            |            |            |            |
|-----------|-----------------|------------|-------------|------------|------------|------------|------------|
| NA        | ENSG00000233012 | 2.52328427 | -0.00298107 | 0.37082127 | 0.97446425 | NA         | HDAC1P2    |
| NA        | ENSG00000233013 | 0          | NA          | NA         | NA         | NA         | FAM157B    |
| NA        | ENSG00000233014 | 0          | NA          | NA         | NA         | NA         | TBC1D3P7   |
| NA        | ENSG00000233015 | 0          | NA          | NA         | NA         | NA         | SLC25A6P1  |
| 84973     | ENSG00000233016 | 996.044046 | -0.16540438 | 0.09709873 | 0.07747544 | 0.20649016 | SNHG7      |
| NA        | ENSG00000233017 | 0.55417886 | 0.03300194  | 0.38624548 | 0.45053656 | NA         |            |
| NA        | ENSG00000233018 | 0          | NA          | NA         | NA         | NA         |            |
| NA        | ENSG00000233020 | 0.15069912 | -0.01848503 | 0.38480575 | 0.84537521 | NA         | CHORDC1P5  |
| NA        | ENSG00000233021 | 0          | NA          | NA         | NA         | NA         |            |
| NA        | ENSG00000233024 | 1209.12305 | 0.10657361  | 0.08673436 | 0.207294   | 0.41450442 | NPIPA9     |
| NA        | ENSG00000233025 | 16.6273377 | -0.11845887 | 0.33799666 | 0.5133411  | 0.72857053 | CRYZP1     |
| NA        | ENSG00000233026 | 0          | NA          | NA         | NA         | NA         | MTCO1P5    |
| NA        | ENSG00000233028 | 0.15069912 | -0.01848503 | 0.38480575 | 0.84537521 | NA         |            |
| NA        | ENSG00000233029 | 1.49401281 | -0.0782874  | 0.39514498 | 0.11281625 | NA         |            |
| NA        | ENSG00000233030 | 4.86712642 | 0.00099025  | 0.36630718 | 0.99523809 | 0.99852582 |            |
| NA        | ENSG00000233031 | 0          | NA          | NA         | NA         | NA         |            |
| NA        | ENSG00000233033 | 0          | NA          | NA         | NA         | NA         | CASK-AS1   |
| NA        | ENSG00000233036 | 0          | NA          | NA         | NA         | NA         | KRTAP8-2P  |
| NA        | ENSG00000233037 | 0          | NA          | NA         | NA         | NA         |            |
| NA        | ENSG00000233038 | 4.24467319 | -0.21189413 | 0.44773708 | 0.10017186 | 0.24951784 | PTPRN2-AS1 |
| NA        | ENSG00000233039 | 0          | NA          | NA         | NA         | NA         | MTND5P30   |
| NA        | ENSG00000233040 | 0          | NA          | NA         | NA         | NA         | FAM204BP   |
| 644844    | ENSG00000233041 | 0          | NA          | NA         | NA         | NA         | PHGR1      |
| NA        | ENSG00000233044 | 0          | NA          | NA         | NA         | NA         |            |
| NA        | ENSG00000233045 | 0          | NA          | NA         | NA         | NA         | RPL15P5    |
| NA        | ENSG00000233047 | 0          | NA          | NA         | NA         | NA         | LINC01677  |
| 101929486 | ENSG00000233048 | 0.47372291 | -0.0075172  | 0.38323222 | 0.86307752 | NA         | LINC01722  |
| 100133267 | ENSG00000233050 | 0          | NA          | NA         | NA         | NA         | DEFB130B   |
| NA        | ENSG00000233052 | 0          | NA          | NA         | NA         | NA         |            |
| NA        | ENSG00000233055 | 0          | NA          | NA         | NA         | NA         |            |
| 90625     | ENSG00000233056 | 6.74398885 | 0.00534639  | 0.35398045 | 0.9713934  | 0.98929444 | ERVH48-1   |
| NA        | ENSG00000233057 | 0.173733   | 0.01914545  | 0.38484597 | 0.78225479 | NA         | EEF1A1P14  |
| NA        | ENSG00000233058 | 22.0732156 | -0.01583297 | 0.31308518 | 0.92857499 | 0.97011965 | LINC00884  |
| NA        | ENSG00000233060 | 0.31840706 | 0.00134555  | 0.38336832 | 0.96418641 | NA         |            |
| NA        | ENSG00000233061 | 0.83924869 | -0.00746192 | 0.38008932 | 0.9024069  | NA         | TTL7-IT1   |
| NA        | ENSG00000233063 | 0          | NA          | NA         | NA         | NA         | SAR1AP4    |
| NA        | ENSG00000233064 | 0          | NA          | NA         | NA         | NA         |            |
| NA        | ENSG00000233067 | 0          | NA          | NA         | NA         | NA         | PTCHD1-AS  |

|           |                 |            |             |            |            |            |               |
|-----------|-----------------|------------|-------------|------------|------------|------------|---------------|
| NA        | ENSG00000233068 | 0          | NA          | NA         | NA         | NA         |               |
| NA        | ENSG00000233069 | 0          | NA          | NA         | NA         | NA         |               |
| 107987337 | ENSG00000233070 | 0          | NA          | NA         | NA         | NA         | ZFY-AS1       |
| NA        | ENSG00000233071 | 0          | NA          | NA         | NA         | NA         | RPSAP59       |
| NA        | ENSG00000233072 | 0.34044929 | -9.56E-05   | 0.38336216 | 0.96615866 | NA         | RPS15AP6      |
| NA        | ENSG00000233073 | 95.3172357 | 0.51558576  | 0.24978026 | 0.01208261 | 0.04850647 | GRM3-AS1      |
| 101927586 | ENSG00000233077 | 43.4739161 | 0.46260193  | 0.37851234 | 0.05926667 | 0.16956407 | LINC01271     |
| NA        | ENSG00000233078 | 0          | NA          | NA         | NA         | NA         |               |
| 105378738 | ENSG00000233079 | 0          | NA          | NA         | NA         | NA         | LINC01755     |
| 104310353 | ENSG00000233080 | 5.6599149  | -0.11340105 | 0.37931169 | 0.39819047 | 0.62727695 | LINC01399     |
| NA        | ENSG00000233081 | 0          | NA          | NA         | NA         | NA         |               |
| NA        | ENSG00000233082 | 0          | NA          | NA         | NA         | NA         |               |
| NA        | ENSG00000233083 | 0          | NA          | NA         | NA         | NA         | FTH1P6        |
| NA        | ENSG00000233084 | 0.5972779  | -0.02732172 | 0.38586499 | 0.50076333 | NA         | RPL23AP25     |
| NA        | ENSG00000233085 | 0          | NA          | NA         | NA         | NA         |               |
| 102723932 | ENSG00000233086 | 0.43647774 | 0.01554388  | 0.38405488 | 0.81169287 | NA         | LNCARSR       |
| 150786    | ENSG00000233087 | 0.92801236 | 0.05156086  | 0.38894934 | 0.2463468  | NA         | RAB6D         |
| NA        | ENSG00000233090 | 0          | NA          | NA         | NA         | NA         |               |
| 100128420 | ENSG00000233093 | 0          | NA          | NA         | NA         | NA         | LINC00892     |
| NA        | ENSG00000233096 | 0          | NA          | NA         | NA         | NA         |               |
| 339260    | ENSG00000233098 | 1022.39369 | 0.18576711  | 0.08260365 | 0.02117142 | 0.07623248 | CCDC144NL-AS1 |
| 440416    | ENSG00000233098 | 1022.39369 | 0.18576711  | 0.08260365 | 0.02117142 | 0.07623248 | CCDC144NL-AS1 |
| NA        | ENSG00000233099 | 0          | NA          | NA         | NA         | NA         |               |
| 404266    | ENSG00000233101 | 0          | NA          | NA         | NA         | NA         | HOXB-AS3      |
| NA        | ENSG00000233103 | 0          | NA          | NA         | NA         | NA         |               |
| NA        | ENSG00000233105 | 0          | NA          | NA         | NA         | NA         |               |
| NA        | ENSG00000233106 | 0          | NA          | NA         | NA         | NA         | RPL12P3       |
| NA        | ENSG00000233107 | 0          | NA          | NA         | NA         | NA         | SUCLA2P2      |
| NA        | ENSG00000233108 | 0.69648091 | 0.02502893  | 0.38340441 | 0.5797871  | NA         | GLCCII-DT     |
| NA        | ENSG00000233109 | 0          | NA          | NA         | NA         | NA         |               |
| NA        | ENSG00000233110 | 12.6325471 | 0.51585204  | 0.67471245 | 0.04304253 | 0.13276806 |               |
| NA        | ENSG00000233111 | 0.18922458 | 0.01954053  | 0.38488496 | 0.78225479 | NA         | RAB1C         |
| NA        | ENSG00000233114 | 0          | NA          | NA         | NA         | NA         |               |
| NA        | ENSG00000233115 | 0          | NA          | NA         | NA         | NA         | FAM90A11P     |
| NA        | ENSG00000233117 | 0.15069912 | -0.01848503 | 0.38480575 | 0.84537521 | NA         | LINC00702     |
| NA        | ENSG00000233118 | 0          | NA          | NA         | NA         | NA         | UBE2V1P8      |
| NA        | ENSG00000233120 | 0          | NA          | NA         | NA         | NA         | USP9YP15      |
| NA        | ENSG00000233121 | 1.50300465 | 0.01995267  | 0.37786284 | 0.79315996 | NA         | VN1R20P       |

|           |    |                 |            |             |            |            |            |            |
|-----------|----|-----------------|------------|-------------|------------|------------|------------|------------|
|           | NA | ENSG00000233122 | 10.3969894 | -0.07702681 | 0.34993196 | 0.62797282 | 0.81117654 | CTAGE7P    |
| 100506527 |    | ENSG00000233123 | 0          | NA          | NA         | NA         | NA         | LINC01007  |
|           | NA | ENSG00000233124 | 0          | NA          | NA         | NA         | NA         | LINC00456  |
|           | NA | ENSG00000233125 | 0          | NA          | NA         | NA         | NA         | ACTBP12    |
|           | NA | ENSG00000233126 | 0          | NA          | NA         | NA         | NA         | ZNF736P3Y  |
|           | NA | ENSG00000233128 | 0          | NA          | NA         | NA         | NA         | LINC01794  |
|           | NA | ENSG00000233129 | 0          | NA          | NA         | NA         | NA         |            |
|           | NA | ENSG00000233131 | 0.49146578 | 0.01456854  | 0.38312136 | 0.75331796 | NA         | RPS15AP14  |
|           | NA | ENSG00000233132 | 0          | NA          | NA         | NA         | NA         | FAM90A3P   |
|           | NA | ENSG00000233133 | 0          | NA          | NA         | NA         | NA         |            |
|           | NA | ENSG00000233134 | 0.37844916 | 0.02407552  | 0.3854191  | 0.60038877 | NA         | MTND3P17   |
|           | NA | ENSG00000233135 | 0          | NA          | NA         | NA         | NA         | RPS27P18   |
| 100287178 |    | ENSG00000233136 | 0          | NA          | NA         | NA         | NA         | USP17L11   |
|           | NA | ENSG00000233138 | 0          | NA          | NA         | NA         | NA         |            |
|           | NA | ENSG00000233139 | 0          | NA          | NA         | NA         | NA         |            |
|           | NA | ENSG00000233143 | 3.82178704 | 0.17420691  | 0.42547035 | 0.11387404 | 0.27408236 | DIRC3-AS1  |
|           | NA | ENSG00000233144 | 0          | NA          | NA         | NA         | NA         |            |
| 728660    |    | ENSG00000233145 | 0          | NA          | NA         | NA         | NA         |            |
|           | NA | ENSG00000233146 | 0          | NA          | NA         | NA         | NA         | BPIFB5P    |
|           | NA | ENSG00000233148 | 0          | NA          | NA         | NA         | NA         | SYF2P2     |
| 100505877 |    | ENSG00000233153 | 0.37844916 | 0.02407552  | 0.3854191  | 0.60038877 | NA         | UBE2E2-AS1 |
| 101929023 |    | ENSG00000233154 | 0.16735865 | 0.01897177  | 0.38482933 | 0.78225479 | NA         | LINC01762  |
|           | NA | ENSG00000233155 | 9.84019775 | -0.03948441 | 0.3437236  | 0.80117494 | 0.90897872 | HMGA1P8    |
|           | NA | ENSG00000233157 | 0.15069912 | -0.01848503 | 0.38480575 | 0.84537521 | NA         |            |
|           | NA | ENSG00000233158 | 0          | NA          | NA         | NA         | NA         | RPS24P6    |
|           | NA | ENSG00000233159 | 0          | NA          | NA         | NA         | NA         | RPL31P16   |
|           | NA | ENSG00000233162 | 0          | NA          | NA         | NA         | NA         | MORF4L1P6  |
|           | NA | ENSG00000233163 | 0          | NA          | NA         | NA         | NA         | RPS12P17   |
|           | NA | ENSG00000233167 | 0          | NA          | NA         | NA         | NA         | EEF1A1P26  |
|           | NA | ENSG00000233170 | 10.6892032 | 0.14625149  | 0.36682966 | 0.39139356 | 0.62087218 |            |
|           | NA | ENSG00000233173 | 0.87174124 | 0.01391941  | 0.38242086 | 0.76628248 | NA         | VN1R34P    |
|           | NA | ENSG00000233175 | 18.4090385 | 0.25011812  | 0.39081158 | 0.21135513 | 0.42054798 |            |
|           | NA | ENSG00000233176 | 0          | NA          | NA         | NA         | NA         | OR7E157P   |
|           | NA | ENSG00000233178 | 13.6844309 | 0.14317873  | 0.35375333 | 0.42377702 | 0.64959716 |            |
|           | NA | ENSG00000233179 | 0          | NA          | NA         | NA         | NA         |            |
|           | NA | ENSG00000233183 | 0          | NA          | NA         | NA         | NA         |            |
|           | NA | ENSG00000233184 | 289.992876 | 0.08591527  | 0.15916731 | 0.55389642 | 0.75992705 |            |
|           | NA | ENSG00000233186 | 0          | NA          | NA         | NA         | NA         | KLF4P1     |

|           |                 |            |             |            |            |            |            |
|-----------|-----------------|------------|-------------|------------|------------|------------|------------|
| NA        | ENSG00000233189 | 0.52119901 | 0.02576573  | 0.38568143 | 0.51723676 | NA         | RPL12P29   |
| NA        | ENSG00000233190 | 0          | NA          | NA         | NA         | NA         | RPS24P13   |
| NA        | ENSG00000233191 | 2.59707413 | 0.09829278  | 0.40190595 | 0.04304255 | 0.13276806 |            |
| NA        | ENSG00000233193 | 0          | NA          | NA         | NA         | NA         |            |
| NA        | ENSG00000233196 | 0          | NA          | NA         | NA         | NA         |            |
| NA        | ENSG00000233197 | 0          | NA          | NA         | NA         | NA         | TMEM256P1  |
| 643596    | ENSG00000233198 | 39.8928874 | 0.3696043   | 0.35771161 | 0.10893915 | 0.26521666 | RNF224     |
| NA        | ENSG00000233200 | 0          | NA          | NA         | NA         | NA         | LINC02634  |
| NA        | ENSG00000233203 | 0          | NA          | NA         | NA         | NA         | DHCR24-DT  |
| NA        | ENSG00000233204 | 0          | NA          | NA         | NA         | NA         | MAPRE1P3   |
| NA        | ENSG00000233205 | 0.173124   | -0.01911262 | 0.38486262 | 0.84537521 | NA         | WBP1P2     |
| NA        | ENSG00000233206 | 0          | NA          | NA         | NA         | NA         | RPS3AP1    |
| 400238    | ENSG00000233208 | 15.9902963 | -2.33798047 | 0.92788943 | 0.00029179 | 0.00199549 | LINC00642  |
| NA        | ENSG00000233211 | 0          | NA          | NA         | NA         | NA         | GRPEL2P1   |
| NA        | ENSG00000233213 | 0          | NA          | NA         | NA         | NA         | KCNJ6-AS1  |
| NA        | ENSG00000233214 | 0          | NA          | NA         | NA         | NA         |            |
| 101927843 | ENSG00000233215 | 0          | NA          | NA         | NA         | NA         | LINC01687  |
| NA        | ENSG00000233216 | 0          | NA          | NA         | NA         | NA         |            |
| NA        | ENSG00000233217 | 0          | NA          | NA         | NA         | NA         | MROH3P     |
| NA        | ENSG00000233219 | 0          | NA          | NA         | NA         | NA         |            |
| NA        | ENSG00000233220 | 2.11904881 | 0.05823672  | 0.38209996 | 0.48056298 | NA         | LINC00167  |
| NA        | ENSG00000233221 | 0.91035094 | -0.0478848  | 0.38825341 | 0.29250838 | NA         |            |
| NA        | ENSG00000233222 | 0          | NA          | NA         | NA         | NA         |            |
| 100996842 | ENSG00000233223 | 61.226523  | 0.01885977  | 0.25007071 | 0.92259028 | 0.96755425 |            |
| NA        | ENSG00000233225 | 0          | NA          | NA         | NA         | NA         | SSBL3P1    |
| NA        | ENSG00000233228 | 0          | NA          | NA         | NA         | NA         | LPCAT2BP   |
| NA        | ENSG00000233229 | 0          | NA          | NA         | NA         | NA         | CNOT7P1    |
| NA        | ENSG00000233230 | 6.59674346 | 0.00155279  | 0.3566663  | 0.99271635 | 0.99756121 |            |
| NA        | ENSG00000233231 | 14.2090389 | 0.16992292  | 0.3599018  | 0.36053159 | 0.59046856 | HNRNPA1P49 |
| NA        | ENSG00000233232 | 5.18661604 | 0.05025548  | 0.36700401 | 0.68273311 | 0.84521822 | NPIP7      |
| NA        | ENSG00000233234 | 0          | NA          | NA         | NA         | NA         |            |
| NA        | ENSG00000233235 | 0          | NA          | NA         | NA         | NA         |            |
| NA        | ENSG00000233236 | 0          | NA          | NA         | NA         | NA         | LINC02573  |
| 79940     | ENSG00000233237 | 55.5053771 | 0.59394154  | 0.35238787 | 0.01882958 | 0.06937398 | LINC00472  |
| 449492    | ENSG00000233238 | 0          | NA          | NA         | NA         | NA         | DEFA9P     |
| NA        | ENSG00000233242 | 1.05092183 | 0.00321701  | 0.38107755 | 0.98901193 | NA         |            |
| NA        | ENSG00000233243 | 0          | NA          | NA         | NA         | NA         | VKORC1P1   |
| 101929464 | ENSG00000233246 | 0.69493202 | 0.03154416  | 0.38626309 | 0.41391645 | NA         | PHC2-AS1   |

|           |    |                 |            |             |            |            |            |            |
|-----------|----|-----------------|------------|-------------|------------|------------|------------|------------|
|           | NA | ENSG00000233247 | 0          | NA          | NA         | NA         | NA         | UBE2E4P    |
|           | NA | ENSG00000233248 | 0.16735865 | 0.01897177  | 0.38482933 | 0.78225479 | NA         | MTND6P9    |
|           | NA | ENSG00000233250 | 0.51691858 | 0.03120033  | 0.38606116 | 0.47664792 | NA         |            |
| 100129434 | NA | ENSG00000233251 | 1.75907707 | 0.03251738  | 0.37848906 | 0.6789588  | NA         |            |
|           | NA | ENSG00000233252 | 0          | NA          | NA         | NA         | NA         | CRIP1P1    |
|           | NA | ENSG00000233254 | 0.173733   | 0.01914545  | 0.38484597 | 0.78225479 | NA         | RPL21P134  |
|           | NA | ENSG00000233256 | 0          | NA          | NA         | NA         | NA         |            |
|           | NA | ENSG00000233258 | 0          | NA          | NA         | NA         | NA         |            |
|           | NA | ENSG00000233259 | 0          | NA          | NA         | NA         | NA         | FABP3P2    |
|           | NA | ENSG00000233260 | 0          | NA          | NA         | NA         | NA         | RPSAP63    |
| 645528    | NA | ENSG00000233261 | 0.48778514 | -0.00693809 | 0.38316506 | 0.85998954 | NA         | FAM238A    |
|           | NA | ENSG00000233262 | 0          | NA          | NA         | NA         | NA         |            |
|           | NA | ENSG00000233263 | 0          | NA          | NA         | NA         | NA         | CAPZA1P4   |
|           | NA | ENSG00000233264 | 16.1471474 | 0.34691562  | 0.45258974 | 0.1168258  | 0.27969395 |            |
|           | NA | ENSG00000233266 | 1.47021077 | -0.05924001 | 0.38428931 | 0.42396495 | NA         | HMGB1P31   |
|           | NA | ENSG00000233268 | 0          | NA          | NA         | NA         | NA         |            |
|           | NA | ENSG00000233270 | 1.7680711  | -0.02179788 | 0.37766414 | 0.77694667 | NA         | SNRPEP4    |
|           | NA | ENSG00000233271 | 0          | NA          | NA         | NA         | NA         |            |
|           | NA | ENSG00000233272 | 0          | NA          | NA         | NA         | NA         | PNPT1P2    |
|           | NA | ENSG00000233273 | 0.77363104 | -0.04346419 | 0.38759344 | 0.33888286 | NA         | AMMECR1LP1 |
|           | NA | ENSG00000233275 | 0          | NA          | NA         | NA         | NA         |            |
| 2876      | NA | ENSG00000233276 | 2695.97    | -0.25236224 | 0.07203008 | 0.00035276 | 0.00236603 | GPX1       |
| 105372626 | NA | ENSG00000233277 | 0          | NA          | NA         | NA         | NA         | LINC01728  |
|           | NA | ENSG00000233278 | 0          | NA          | NA         | NA         | NA         | RPS26P2    |
|           | NA | ENSG00000233285 | 0          | NA          | NA         | NA         | NA         | MTCYBP10   |
|           | NA | ENSG00000233286 | 0.45082492 | -0.02735293 | 0.38571742 | 0.56101329 | NA         | MTND3P10   |
|           | NA | ENSG00000233287 | 0          | NA          | NA         | NA         | NA         |            |
| 101928401 | NA | ENSG00000233288 | 9.38647179 | -2.69112683 | 1.14665304 | 0.00081137 | 0.00493414 |            |
|           | NA | ENSG00000233290 | 0          | NA          | NA         | NA         | NA         |            |
|           | NA | ENSG00000233291 | 0          | NA          | NA         | NA         | NA         | RPL7AP61   |
|           | NA | ENSG00000233292 | 0          | NA          | NA         | NA         | NA         |            |
|           | NA | ENSG00000233293 | 0          | NA          | NA         | NA         | NA         |            |
|           | NA | ENSG00000233295 | 0          | NA          | NA         | NA         | NA         | FAM90A20P  |
|           | NA | ENSG00000233296 | 13.4076649 | 0.11360733  | 0.34762093 | 0.51506229 | 0.72955207 | TMEM18-DT  |
|           | NA | ENSG00000233297 | 56.1295856 | -0.15249119 | 0.25940426 | 0.43469538 | 0.660162   | RASA4DP    |
|           | NA | ENSG00000233299 | 0          | NA          | NA         | NA         | NA         | HIGD1AP4   |
|           | NA | ENSG00000233300 | 1.23357483 | 0.0374468   | 0.38344907 | 0.51314561 | NA         | EIF4A1P1   |
|           | NA | ENSG00000233301 | 0          | NA          | NA         | NA         | NA         | OR4C14P    |

|           |                 |                 |            |             |            |            |            |            |
|-----------|-----------------|-----------------|------------|-------------|------------|------------|------------|------------|
| 100874528 | ENSG00000233303 | 0               | NA         | NA          | NA         | NA         | XXYLT1-AS1 |            |
|           | NA              | ENSG00000233304 | 0          | NA          | NA         | NA         | LINC01346  |            |
|           | NA              | ENSG00000233306 | 0          | NA          | NA         | NA         | TRGV2      |            |
|           | NA              | ENSG00000233307 | 0          | NA          | NA         | NA         | SRSF3P6    |            |
| 106480738 | ENSG00000233308 | 0               | NA         | NA          | NA         | NA         | OSTN-AS1   |            |
|           | NA              | ENSG00000233309 | 0.44795842 | -0.02501848 | 0.38558245 | 0.5807882  | RPS6P12    |            |
|           | NA              | ENSG00000233311 | 0.83215765 | 0.03671094  | 0.38458281 | 0.4655258  | MTCO1P54   |            |
|           | NA              | ENSG00000233313 | 0          | NA          | NA         | NA         | HMGA1P5    |            |
| 259234    | ENSG00000233316 | 0               | NA         | NA          | NA         | NA         | DSCR10     |            |
|           | NA              | ENSG00000233318 | 0          | NA          | NA         | NA         | RPL31P45   |            |
|           | NA              | ENSG00000233319 | 0.173733   | 0.01914545  | 0.38484597 | 0.78225479 | PPIAP32    |            |
| 101927880 | ENSG00000233321 | 0               | NA         | NA          | NA         | NA         | LINC02669  |            |
|           | NA              | ENSG00000233324 | 0.32381664 | -0.02327294 | 0.38532133 | 0.66861283 | EEF1A1P34  |            |
|           | NA              | ENSG00000233325 | 2.525041   | 0.1010711   | 0.39654285 | 0.20588711 | MIPEPP3    |            |
|           | NA              | ENSG00000233327 | 3.79326445 | 0.11756802  | 0.39776934 | 0.22500236 | 0.43877008 | USP32P2    |
|           | NA              | ENSG00000233328 | 0          | NA          | NA         | NA         | PFN1P1     |            |
|           | NA              | ENSG00000233329 | 0          | NA          | NA         | NA         | RPS16P3    |            |
|           | NA              | ENSG00000233330 | 1.11688825 | -0.02410096 | 0.38187069 | 0.6694154  | NA         |            |
|           | NA              | ENSG00000233332 | 0.68429127 | -0.02111788 | 0.38304363 | 0.64672392 | NA         |            |
|           | NA              | ENSG00000233333 | 0          | NA          | NA         | NA         | RNFT1P2    |            |
|           | NA              | ENSG00000233334 | 0.48521267 | 0.01106942  | 0.38339007 | 0.78959266 | NA         | FAM53B-AS1 |
|           | NA              | ENSG00000233335 | 0          | NA          | NA         | NA         | NA         | RPL36AP14  |
|           | NA              | ENSG00000233336 | 0          | NA          | NA         | NA         | NA         |            |
|           | NA              | ENSG00000233337 | 3.82952082 | -0.11303893 | 0.39355277 | 0.28020246 | 0.50483262 | UBE2FP3    |
|           | NA              | ENSG00000233338 | 0          | NA          | NA         | NA         | NA         | TLR8-AS1   |
|           | NA              | ENSG00000233339 | 0          | NA          | NA         | NA         | NA         |            |
|           | NA              | ENSG00000233340 | 0          | NA          | NA         | NA         | NA         |            |
|           | NA              | ENSG00000233342 | 0          | NA          | NA         | NA         | NA         |            |
|           | NA              | ENSG00000233343 | 0.16735865 | 0.01897177  | 0.38482933 | 0.78225479 | NA         | ATP6V1G1P4 |
|           | NA              | ENSG00000233347 | 0.44961913 | -0.02729407 | 0.3857126  | 0.56200977 | NA         | ERP29P1    |
|           | NA              | ENSG00000233349 | 0          | NA          | NA         | NA         | NA         | LINC00333  |
|           | NA              | ENSG00000233351 | 0          | NA          | NA         | NA         | NA         |            |
|           | NA              | ENSG00000233352 | 0          | NA          | NA         | NA         | NA         |            |
|           | NA              | ENSG00000233353 | 0          | NA          | NA         | NA         | NA         | RPS7P9     |
| 140875    | ENSG00000233354 | 0               | NA         | NA          | NA         | NA         | NA         | LINC00028  |
| 100506915 | ENSG00000233355 | 6.56810669      | 0.07789331 | 0.37059569  | 0.5329173  | 0.74405906 | NA         | CHRM3-AS2  |
|           | NA              | ENSG00000233357 | 0          | NA          | NA         | NA         | NA         | RPL30P15   |
|           | NA              | ENSG00000233358 | 0.29863895 | -0.02292439 | 0.3852726  | 0.68753245 | NA         |            |



|           |                 |            |             |            |            |            |           |
|-----------|-----------------|------------|-------------|------------|------------|------------|-----------|
| NA        | ENSG00000233359 | 0          | NA          | NA         | NA         | NA         |           |
| 101927051 | ENSG00000233360 | 3.27244511 | 0.16298306  | 0.42005045 | 0.13074057 | 0.30298947 | PDXP-DT   |
| NA        | ENSG00000233363 | 0          | NA          | NA         | NA         | NA         |           |
| 101929297 | ENSG00000233365 | 0          | NA          | NA         | NA         | NA         |           |
| NA        | ENSG00000233366 | 0.51729149 | -0.00944461 | 0.38322376 | 0.82463624 | NA         | ZNF90P2   |
| NA        | ENSG00000233367 | 0          | NA          | NA         | NA         | NA         |           |
| 100093631 | ENSG00000233369 | 4373.70881 | 0.01123297  | 0.06286434 | 0.85694937 | 0.93609679 | GTF2IP4   |
| NA        | ENSG00000233370 | 0.14931947 | -0.01844332 | 0.38480212 | 0.84537521 | NA         | ACTR1AP1  |
| NA        | ENSG00000233372 | 0.35694074 | 0.02381893  | 0.38538135 | 0.61388594 | NA         |           |
| NA        | ENSG00000233376 | 0          | NA          | NA         | NA         | NA         |           |
| NA        | ENSG00000233377 | 0          | NA          | NA         | NA         | NA         | MTND4P20  |
| NA        | ENSG00000233378 | 0          | NA          | NA         | NA         | NA         | USP9YP34  |
| NA        | ENSG00000233379 | 0          | NA          | NA         | NA         | NA         |           |
| NA        | ENSG00000233380 | 0          | NA          | NA         | NA         | NA         | RPS2P48   |
| NA        | ENSG00000233381 | 8.54782891 | -0.02623157 | 0.34537779 | 0.86302931 | 0.93919706 | AK4P3     |
| 158801    | ENSG00000233382 | 2.92505036 | 0.10361977  | 0.39302994 | 0.25170937 | 0.47152431 | NKAPP1    |
| NA        | ENSG00000233383 | 0          | NA          | NA         | NA         | NA         |           |
| NA        | ENSG00000233384 | 0          | NA          | NA         | NA         | NA         | CNIH3-AS2 |
| NA        | ENSG00000233385 | 0          | NA          | NA         | NA         | NA         | MTCO3P8   |
| NA        | ENSG00000233387 | 0          | NA          | NA         | NA         | NA         | IATPR     |
| NA        | ENSG00000233388 | 0.48686418 | -0.00618552 | 0.38313638 | 0.87090924 | NA         |           |
| 200772    | ENSG00000233392 | 0          | NA          | NA         | NA         | NA         | UICLM     |
| 105369306 | ENSG00000233393 | 0          | NA          | NA         | NA         | NA         |           |
| NA        | ENSG00000233395 | 0          | NA          | NA         | NA         | NA         | LINC00841 |
| NA        | ENSG00000233396 | 181.561095 | -0.28866513 | 0.19180063 | 0.08339401 | 0.21803706 | LINC01719 |
| NA        | ENSG00000233397 | 0          | NA          | NA         | NA         | NA         |           |
| 101929406 | ENSG00000233399 | 0          | NA          | NA         | NA         | NA         | LINC01648 |
| NA        | ENSG00000233401 | 0          | NA          | NA         | NA         | NA         | PRKAR1AP1 |
| NA        | ENSG00000233402 | 0          | NA          | NA         | NA         | NA         | TARDBPP1  |
| NA        | ENSG00000233403 | 0          | NA          | NA         | NA         | NA         |           |
| NA        | ENSG00000233405 | 0          | NA          | NA         | NA         | NA         | LINC01046 |
| NA        | ENSG00000233406 | 0.68727598 | -0.01908066 | 0.38352342 | 0.66647457 | NA         |           |
| NA        | ENSG00000233407 | 0          | NA          | NA         | NA         | NA         |           |
| NA        | ENSG00000233408 | 0.14931947 | -0.01844332 | 0.38480212 | 0.84537521 | NA         |           |
| 101410540 | ENSG00000233409 | 0          | NA          | NA         | NA         | NA         | FANK1-AS1 |
| NA        | ENSG00000233410 | 0          | NA          | NA         | NA         | NA         | LINC01222 |
| NA        | ENSG00000233411 | 0          | NA          | NA         | NA         | NA         |           |
| 403274    | ENSG00000233412 | 0          | NA          | NA         | NA         | NA         | OR5H15    |

|           |                 |            |             |            |            |            |            |
|-----------|-----------------|------------|-------------|------------|------------|------------|------------|
| NA        | ENSG00000233415 | 0          | NA          | NA         | NA         | NA         |            |
| NA        | ENSG00000233416 | 0.34089647 | 0.00314922  | 0.38339449 | 0.95837938 | NA         | RPS25P3    |
| NA        | ENSG00000233417 | 0          | NA          | NA         | NA         | NA         |            |
| NA        | ENSG00000233419 | 0          | NA          | NA         | NA         | NA         | IFITM3P7   |
| NA        | ENSG00000233420 | 0.5100672  | -0.00963373 | 0.38325521 | 0.82712646 | NA         |            |
| 100132147 | ENSG00000233421 | 0.173124   | -0.01911262 | 0.38486262 | 0.84537521 | NA         | LINC01783  |
| NA        | ENSG00000233423 | 0          | NA          | NA         | NA         | NA         |            |
| NA        | ENSG00000233424 | 0          | NA          | NA         | NA         | NA         |            |
| NA        | ENSG00000233425 | 0          | NA          | NA         | NA         | NA         | KRT18P67   |
| NA        | ENSG00000233426 | 0.63305598 | 0.00167829  | 0.38251026 | 0.96698172 | NA         | EIF3FP3    |
| NA        | ENSG00000233427 | 1.59003024 | -0.01413807 | 0.37825368 | 0.84392425 | NA         |            |
| NA        | ENSG00000233428 | 0          | NA          | NA         | NA         | NA         | PPIAP65    |
| NA        | ENSG00000233429 | 0          | NA          | NA         | NA         | NA         | HOTAIRM1   |
| NA        | ENSG00000233430 | 0          | NA          | NA         | NA         | NA         | PDE4DIPP3  |
| NA        | ENSG00000233431 | 0.173733   | 0.01914545  | 0.38484597 | 0.78225479 | NA         | LINC02596  |
| NA        | ENSG00000233432 | 0          | NA          | NA         | NA         | NA         | MTIF2P1    |
| NA        | ENSG00000233433 | 0          | NA          | NA         | NA         | NA         | CBLL1P1    |
| NA        | ENSG00000233435 | 47.8083087 | -0.24561692 | 0.28432034 | 0.23320615 | 0.45004948 | AGGF1P2    |
| 643376    | ENSG00000233436 | 2.9178701  | 0.00738375  | 0.37377423 | 0.93659988 | 0.97351594 | BTBD18     |
| 100130849 | ENSG00000233437 | 0          | NA          | NA         | NA         | NA         |            |
| NA        | ENSG00000233440 | 0          | NA          | NA         | NA         | NA         | HMGA1P6    |
| NA        | ENSG00000233441 | 0          | NA          | NA         | NA         | NA         | CYP2AB1P   |
| NA        | ENSG00000233442 | 0          | NA          | NA         | NA         | NA         | PPP6R2P1   |
| NA        | ENSG00000233444 | 0          | NA          | NA         | NA         | NA         |            |
| NA        | ENSG00000233445 | 0          | NA          | NA         | NA         | NA         | RPL17P11   |
| NA        | ENSG00000233446 | 0          | NA          | NA         | NA         | NA         | PDK1P2     |
| NA        | ENSG00000233447 | 0          | NA          | NA         | NA         | NA         |            |
| NA        | ENSG00000233448 | 0          | NA          | NA         | NA         | NA         | PMS2P9     |
| NA        | ENSG00000233449 | 0          | NA          | NA         | NA         | NA         | MTATP6P14  |
| NA        | ENSG00000233451 | 0.31837034 | 0.00131295  | 0.38336804 | 0.96449865 | NA         |            |
| NA        | ENSG00000233452 | 6.48324199 | -0.11044845 | 0.37366149 | 0.43578212 | 0.66095232 | STXBP5-AS1 |
| NA        | ENSG00000233454 | 0          | NA          | NA         | NA         | NA         |            |
| NA        | ENSG00000233455 | 0.47404669 | -0.00926935 | 0.38285099 | 0.8466566  | NA         |            |
| NA        | ENSG00000233456 | 0          | NA          | NA         | NA         | NA         | LINC01077  |
| NA        | ENSG00000233457 | 0          | NA          | NA         | NA         | NA         |            |
| NA        | ENSG00000233459 | 0          | NA          | NA         | NA         | NA         |            |
| NA        | ENSG00000233460 | 0          | NA          | NA         | NA         | NA         | RPL35AP31  |
| NA        | ENSG00000233461 | 77.280366  | 0.6343874   | 0.30592269 | 0.00768133 | 0.0333547  |            |

|           |                 |            |             |            |            |            |              |
|-----------|-----------------|------------|-------------|------------|------------|------------|--------------|
| NA        | ENSG00000233464 | 0          | NA          | NA         | NA         | NA         | NANOGP11     |
| NA        | ENSG00000233467 | 0          | NA          | NA         | NA         | NA         | HAX1P1       |
| NA        | ENSG00000233469 | 1.03397171 | 0.00454571  | 0.37995458 | 0.94057805 | NA         | ST6GALNAC4P1 |
| NA        | ENSG00000233470 | 0          | NA          | NA         | NA         | NA         |              |
| NA        | ENSG00000233471 | 0          | NA          | NA         | NA         | NA         | KRT18P62     |
| NA        | ENSG00000233472 | 0          | NA          | NA         | NA         | NA         |              |
| NA        | ENSG00000233473 | 0          | NA          | NA         | NA         | NA         | RAD1P2       |
| NA        | ENSG00000233476 | 54.897546  | -0.23380582 | 0.26167195 | 0.24069911 | 0.45879844 | EEF1A1P6     |
| NA        | ENSG00000233477 | 0          | NA          | NA         | NA         | NA         | PPIAP38      |
| NA        | ENSG00000233478 | 0          | NA          | NA         | NA         | NA         |              |
| NA        | ENSG00000233479 | 0          | NA          | NA         | NA         | NA         |              |
| 105372746 | ENSG00000233480 | 0          | NA          | NA         | NA         | NA         | LINC01683    |
| NA        | ENSG00000233482 | 0          | NA          | NA         | NA         | NA         |              |
| NA        | ENSG00000233483 | 1.79156859 | 0.00984221  | 0.37601075 | 0.90493788 | NA         | EFCAB15P     |
| NA        | ENSG00000233484 | 0.14931947 | -0.01844332 | 0.38480212 | 0.84537521 | NA         |              |
| 101927417 | ENSG00000233485 | 0          | NA          | NA         | NA         | NA         | FHAD1-AS1    |
| NA        | ENSG00000233487 | 0          | NA          | NA         | NA         | NA         | RPSAP69      |
| NA        | ENSG00000233489 | 0          | NA          | NA         | NA         | NA         | PAXBP1P1     |
| 100128317 | ENSG00000233491 | 0          | NA          | NA         | NA         | NA         |              |
| NA        | ENSG00000233492 | 0          | NA          | NA         | NA         | NA         |              |
| 388564    | ENSG00000233493 | 23.5361826 | -0.12852465 | 0.31235531 | 0.50826963 | 0.7239622  | TMEM238      |
| NA        | ENSG00000233494 | 0          | NA          | NA         | NA         | NA         |              |
| 100874300 | ENSG00000233496 | 0          | NA          | NA         | NA         | NA         | SYNJ2-IT1    |
| NA        | ENSG00000233497 | 0.15069912 | -0.01848503 | 0.38480575 | 0.84537521 | NA         | HNRNPA1P60   |
| NA        | ENSG00000233499 | 0          | NA          | NA         | NA         | NA         | OR5B1P       |
| NA        | ENSG00000233502 | 0          | NA          | NA         | NA         | NA         |              |
| NA        | ENSG00000233503 | 0.18922458 | 0.01954053  | 0.38488496 | 0.78225479 | NA         | HNRNPLP1     |
| NA        | ENSG00000233508 | 0          | NA          | NA         | NA         | NA         |              |
| 100874094 | ENSG00000233509 | 3.01337809 | -0.04186302 | 0.37305725 | 0.68302065 | 0.84545523 | ZNF197-AS1   |
| NA        | ENSG00000233511 | 0          | NA          | NA         | NA         | NA         |              |
| NA        | ENSG00000233514 | 0          | NA          | NA         | NA         | NA         |              |
| 101929397 | ENSG00000233515 | 102.479096 | -0.02442412 | 0.20699461 | 0.8872285  | 0.95051641 | LINC01518    |
| NA        | ENSG00000233516 | 0          | NA          | NA         | NA         | NA         |              |
| NA        | ENSG00000233517 | 0.15069912 | -0.01848503 | 0.38480575 | 0.84537521 | NA         |              |
| NA        | ENSG00000233518 | 0          | NA          | NA         | NA         | NA         | RPL7P35      |
| NA        | ENSG00000233519 | 0          | NA          | NA         | NA         | NA         |              |
| NA        | ENSG00000233521 | 1.32681073 | -0.02994689 | 0.38196692 | 0.61347314 | NA         | LINC01638    |
| NA        | ENSG00000233522 | 0          | NA          | NA         | NA         | NA         | FAM224A      |

|           |                 |            |             |            |            |            |             |
|-----------|-----------------|------------|-------------|------------|------------|------------|-------------|
| NA        | ENSG00000233523 | 3.22100867 | 0.04581711  | 0.37407187 | 0.65350515 | 0.82739649 | PHBP5       |
| NA        | ENSG00000233524 | 0.48665483 | 0.01126078  | 0.3833994  | 0.786632   | NA         | RANP8       |
| NA        | ENSG00000233526 | 0          | NA          | NA         | NA         | NA         | RFC5P1      |
| 101927599 | ENSG00000233527 | 64.6833743 | 0.17657402  | 0.2526777  | 0.36605229 | 0.59523625 | ZNF529-AS1  |
| NA        | ENSG00000233528 | 0          | NA          | NA         | NA         | NA         | LINC00430   |
| NA        | ENSG00000233529 | 0          | NA          | NA         | NA         | NA         | HCG21       |
| 449493    | ENSG00000233531 | 0          | NA          | NA         | NA         | NA         | DEFA10P     |
| 728192    | ENSG00000233532 | 0          | NA          | NA         | NA         | NA         | LINC00460   |
| NA        | ENSG00000233533 | 0          | NA          | NA         | NA         | NA         | MKNK2P1     |
| NA        | ENSG00000233534 | 0          | NA          | NA         | NA         | NA         |             |
| NA        | ENSG00000233535 | 0          | NA          | NA         | NA         | NA         |             |
| NA        | ENSG00000233536 | 0          | NA          | NA         | NA         | NA         |             |
| NA        | ENSG00000233537 | 0          | NA          | NA         | NA         | NA         | TEDDM2P     |
| NA        | ENSG00000233538 | 1.58937619 | 0.04798005  | 0.38154425 | 0.52657647 | NA         |             |
| 730338    | ENSG00000233539 | 0          | NA          | NA         | NA         | NA         |             |
| 100874284 | ENSG00000233540 | 0          | NA          | NA         | NA         | NA         | DNM3-IT1    |
| NA        | ENSG00000233541 | 0          | NA          | NA         | NA         | NA         | RPL31P47    |
| NA        | ENSG00000233542 | 0.91755202 | -0.02489216 | 0.38245748 | 0.64530791 | NA         |             |
| NA        | ENSG00000233543 | 0          | NA          | NA         | NA         | NA         | CHTF8P1     |
| NA        | ENSG00000233544 | 0          | NA          | NA         | NA         | NA         | EIF3KP2     |
| NA        | ENSG00000233545 | 0          | NA          | NA         | NA         | NA         | CYCSP33     |
| NA        | ENSG00000233546 | 0          | NA          | NA         | NA         | NA         | PRYP5       |
| NA        | ENSG00000233547 | 0.34746601 | 0.02370763  | 0.3853651  | 0.61987128 | NA         |             |
| NA        | ENSG00000233548 | 0          | NA          | NA         | NA         | NA         | CYCSP44     |
| NA        | ENSG00000233549 | 0          | NA          | NA         | NA         | NA         | CYCSP35     |
| NA        | ENSG00000233550 | 0          | NA          | NA         | NA         | NA         | MTCYBP8     |
| NA        | ENSG00000233551 | 0          | NA          | NA         | NA         | NA         | LSM1P1      |
| NA        | ENSG00000233553 | 0          | NA          | NA         | NA         | NA         |             |
| NA        | ENSG00000233554 | 3.90793998 | -0.42765065 | 0.86382967 | 0.00290943 | 0.01473656 | B4GALT1-AS1 |
| NA        | ENSG00000233555 | 1.96272888 | -0.04447009 | 0.37741469 | 0.61914828 | NA         |             |
| NA        | ENSG00000233557 | 0.34694931 | 0.0005205   | 0.38336274 | 0.96353333 | NA         | NFU1P2      |
| NA        | ENSG00000233558 | 5.36698464 | -0.28126191 | 0.52504605 | 0.03223752 | 0.10619165 |             |
| NA        | ENSG00000233559 | 0.70347769 | 0.02994328  | 0.38331505 | 0.54425521 | NA         | LINC00513   |
| NA        | ENSG00000233560 | 13.5376338 | 0.09460078  | 0.33767206 | 0.59298613 | 0.78705143 | KRT8P39     |
| NA        | ENSG00000233562 | 1.00195039 | -0.06690344 | 0.39178834 | 0.19449531 | NA         | RPS3AP8     |
| NA        | ENSG00000233563 | 0          | NA          | NA         | NA         | NA         | OR52E7P     |
| NA        | ENSG00000233565 | 0          | NA          | NA         | NA         | NA         |             |
| 101928797 | ENSG00000233569 | 0.317369   | 0.00166839  | 0.38337155 | 0.96186582 | NA         |             |

|           |                 |            |             |            |            |            |            |
|-----------|-----------------|------------|-------------|------------|------------|------------|------------|
| NA        | ENSG00000233570 | 1.03624065 | 0.02192789  | 0.3818786  | 0.68896993 | NA         | LINC00690  |
| NA        | ENSG00000233571 | 0          | NA          | NA         | NA         | NA         |            |
| NA        | ENSG00000233574 | 0          | NA          | NA         | NA         | NA         |            |
| NA        | ENSG00000233575 | 0          | NA          | NA         | NA         | NA         |            |
| NA        | ENSG00000233576 | 0          | NA          | NA         | NA         | NA         | HTR3C2P    |
| NA        | ENSG00000233577 | 0.32370645 | 0.00186907  | 0.38337367 | 0.96318818 | NA         |            |
| NA        | ENSG00000233578 | 1.06040787 | 0.03489097  | 0.38259011 | 0.56053263 | NA         | EIF4EP1    |
| NA        | ENSG00000233579 | 1.40651918 | 0.04760218  | 0.38470814 | 0.42976436 | NA         | KRT8P15    |
| NA        | ENSG00000233581 | 0          | NA          | NA         | NA         | NA         |            |
| NA        | ENSG00000233583 | 0.34216313 | 0.00305249  | 0.38339246 | 0.95854065 | NA         |            |
| NA        | ENSG00000233585 | 1.63316972 | 0.08108328  | 0.3911685  | 0.25889376 | NA         |            |
| NA        | ENSG00000233586 | 2.18019467 | 0.05204979  | 0.37909311 | 0.56020808 | NA         |            |
| NA        | ENSG00000233587 | 0          | NA          | NA         | NA         | NA         | LINC01884  |
| NA        | ENSG00000233588 | 0.34111016 | 0.02362653  | 0.3853534  | 0.62410569 | NA         | CYP51A1P2  |
| NA        | ENSG00000233589 | 15.6889227 | -0.07216349 | 0.3326419  | 0.67899352 | 0.84320727 |            |
| NA        | ENSG00000233590 | 0.173124   | -0.01911262 | 0.38486262 | 0.84537521 | NA         | LINC02640  |
| 105378853 | ENSG00000233593 | 47.7180888 | 0.3460378   | 0.35614881 | 0.12667856 | 0.29641499 | LINC02609  |
| NA        | ENSG00000233594 | 0          | NA          | NA         | NA         | NA         | BTF3P5     |
| NA        | ENSG00000233595 | 0          | NA          | NA         | NA         | NA         | MTND2P29   |
| NA        | ENSG00000233597 | 0.8466944  | -0.04650604 | 0.38806154 | 0.30654823 | NA         |            |
| NA        | ENSG00000233601 | 0          | NA          | NA         | NA         | NA         | NCOR1P3    |
| 100874278 | ENSG00000233602 | 4.93030889 | 0.02124804  | 0.36476312 | 0.8600874  | 0.93769283 | ERI3-IT1   |
| NA        | ENSG00000233603 | 0          | NA          | NA         | NA         | NA         | JTBP1      |
| 101927926 | ENSG00000233605 | 0          | NA          | NA         | NA         | NA         | LINC01851  |
| NA        | ENSG00000233606 | 0          | NA          | NA         | NA         | NA         | OR6C66P    |
| 104355291 | ENSG00000233607 | 0          | NA          | NA         | NA         | NA         | LINC01392  |
| 117581    | ENSG00000233608 | 29.2506909 | 9.1201987   | 2.76496619 | 1.79E-11   | 3.72E-10   | TWIST2     |
| NA        | ENSG00000233609 | 0.47232813 | -0.02839081 | 0.38580426 | 0.54372498 | NA         | RPL10P19   |
| 100129597 | ENSG00000233610 | 0          | NA          | NA         | NA         | NA         | LINC00462  |
| NA        | ENSG00000233611 | 0          | NA          | NA         | NA         | NA         |            |
| NA        | ENSG00000233613 | 1.50180041 | 0.00163547  | 0.37850285 | 0.98203957 | NA         | DCUN1D2-AS |
| 727856    | ENSG00000233614 | 1.12932476 | -0.02373671 | 0.38166533 | 0.67894058 | NA         | DDX11L10   |
| 100287029 | ENSG00000233614 | 1.12932476 | -0.02373671 | 0.38166533 | 0.67894058 | NA         | DDX11L10   |
| NA        | ENSG00000233615 | 0.14931947 | -0.01844332 | 0.38480212 | 0.84537521 | NA         | HNRNPA1P42 |
| NA        | ENSG00000233616 | 0          | NA          | NA         | NA         | NA         |            |
| NA        | ENSG00000233619 | 0          | NA          | NA         | NA         | NA         |            |
| 102723833 | ENSG00000233620 | 0          | NA          | NA         | NA         | NA         | USH2A-AS2  |
| 728431    | ENSG00000233621 | 25.5063608 | 0.17565142  | 0.32108932 | 0.38237822 | 0.61160786 | LINC01137  |

|           |                 |            |             |            |            |            |              |
|-----------|-----------------|------------|-------------|------------|------------|------------|--------------|
| 171523    | ENSG00000233622 | 8.02248501 | 0.23682589  | 0.43718735 | 0.1558322  | 0.34200341 | CYP2T1P      |
| NA        | ENSG00000233623 | 0.30139824 | -0.02296476 | 0.38527817 | 0.68536535 | NA         | PGAM1P11     |
| NA        | ENSG00000233625 | 0          | NA          | NA         | NA         | NA         |              |
| NA        | ENSG00000233626 | 0.64817676 | -0.04640637 | 0.38776867 | 0.3594116  | NA         |              |
| NA        | ENSG00000233627 | 7.03996554 | 0.10235076  | 0.37003981 | 0.47578198 | 0.69782764 | C4A-AS1      |
| NA        | ENSG00000233632 | 0          | NA          | NA         | NA         | NA         |              |
| 105373352 | ENSG00000233633 | 0          | NA          | NA         | NA         | NA         |              |
| NA        | ENSG00000233634 | 0          | NA          | NA         | NA         | NA         | GOT2P5       |
| NA        | ENSG00000233635 | 0          | NA          | NA         | NA         | NA         |              |
| 100506421 | ENSG00000233639 | 21.3393047 | 6.23059877  | 1.34412931 | 1.25E-07   | 1.63E-06   | PANTR1       |
| NA        | ENSG00000233640 | 0          | NA          | NA         | NA         | NA         | KRTAP13-5P   |
| 100128811 | ENSG00000233642 | 0.96907804 | -0.01008806 | 0.3819565  | 0.83685936 | NA         | GPR158-AS1   |
| NA        | ENSG00000233643 | 0          | NA          | NA         | NA         | NA         | LINC02625    |
| NA        | ENSG00000233644 | 2.34212021 | 0.01578352  | 0.37240604 | 0.87057304 | NA         | ARHGEF7-IT1  |
| NA        | ENSG00000233645 | 0          | NA          | NA         | NA         | NA         |              |
| NA        | ENSG00000233646 | 0          | NA          | NA         | NA         | NA         | OR52T1P      |
| NA        | ENSG00000233647 | 1.04197063 | 0.05905178  | 0.39039349 | 0.19753142 | NA         | NENFP1       |
| NA        | ENSG00000233648 | 0          | NA          | NA         | NA         | NA         |              |
| NA        | ENSG00000233651 | 0.44795842 | -0.02501848 | 0.38558245 | 0.5807882  | NA         |              |
| NA        | ENSG00000233652 | 0          | NA          | NA         | NA         | NA         | CICP1        |
| NA        | ENSG00000233653 | 0.34746601 | 0.02370763  | 0.3853651  | 0.61987128 | NA         | CICP7        |
| 105376748 | ENSG00000233654 | 16.972294  | -0.19750761 | 0.37357298 | 0.29337998 | 0.51951614 |              |
| NA        | ENSG00000233656 | 0          | NA          | NA         | NA         | NA         |              |
| NA        | ENSG00000233659 | 0          | NA          | NA         | NA         | NA         | NDUFA5P4     |
| NA        | ENSG00000233661 | 0.35730472 | 0.02382155  | 0.38538176 | 0.61370228 | NA         | SPIN4-AS1    |
| NA        | ENSG00000233662 | 0          | NA          | NA         | NA         | NA         | CALM2P4      |
| NA        | ENSG00000233663 | 0          | NA          | NA         | NA         | NA         |              |
| NA        | ENSG00000233664 | 0          | NA          | NA         | NA         | NA         | NDUFS5P3     |
| NA        | ENSG00000233665 | 5.41817215 | 0.18210543  | 0.42389287 | 0.14869187 | 0.33120542 |              |
| NA        | ENSG00000233668 | 2.621567   | 0.16440305  | 0.42669074 | 0.08226317 | 0.21582931 |              |
| 644139    | ENSG00000233670 | 0          | NA          | NA         | NA         | NA         | PIRT         |
| NA        | ENSG00000233671 | 0          | NA          | NA         | NA         | NA         | CENPNP1      |
| NA        | ENSG00000233672 | 21.8675848 | 0.84893471  | 0.73703067 | 0.01490087 | 0.05734884 | RNASEH2B-AS1 |
| 100286979 | ENSG00000233673 | 1.39953711 | 0.10212228  | 0.40251042 | 0.07218107 | NA         | ANAPC1P1     |
| NA        | ENSG00000233674 | 0          | NA          | NA         | NA         | NA         |              |
| NA        | ENSG00000233676 | 0          | NA          | NA         | NA         | NA         | FDPSP6       |
| NA        | ENSG00000233677 | 0          | NA          | NA         | NA         | NA         | DDX39BP1     |
| NA        | ENSG00000233680 | 0.64662193 | 0.00286646  | 0.38249671 | 0.94520606 | NA         | HNRNPA1P27   |

|           |                 |            |             |            |            |            |             |
|-----------|-----------------|------------|-------------|------------|------------|------------|-------------|
| NA        | ENSG00000233681 | 0          | NA          | NA         | NA         | NA         | CEACAMP1    |
| NA        | ENSG00000233682 | 0          | NA          | NA         | NA         | NA         |             |
| NA        | ENSG00000233683 | 0          | NA          | NA         | NA         | NA         |             |
| NA        | ENSG00000233684 | 0          | NA          | NA         | NA         | NA         | LINC01865   |
| NA        | ENSG00000233685 | 0.83069902 | -0.00498456 | 0.3813862  | 0.9240416  | NA         | OR6L1P      |
| NA        | ENSG00000233686 | 0          | NA          | NA         | NA         | NA         | PIEZO1P1    |
| NA        | ENSG00000233688 | 0          | NA          | NA         | NA         | NA         | ZNF622P1    |
| NA        | ENSG00000233689 | 0          | NA          | NA         | NA         | NA         |             |
| NA        | ENSG00000233690 | 6.30155229 | 0.14657562  | 0.39363908 | 0.28987974 | 0.51587019 | EBAG9P1     |
| NA        | ENSG00000233691 | 0          | NA          | NA         | NA         | NA         |             |
| 100505795 | ENSG00000233693 | 0          | NA          | NA         | NA         | NA         | PBX1-AS1    |
| 339807    | ENSG00000233694 | 0          | NA          | NA         | NA         | NA         | LINC02579   |
| NA        | ENSG00000233695 | 38.2459717 | 0.46354989  | 0.39827204 | 0.06177732 | 0.17534507 | GAS6-AS1    |
| NA        | ENSG00000233699 | 0          | NA          | NA         | NA         | NA         | TTY18       |
| 389152    | ENSG00000233701 | 0          | NA          | NA         | NA         | NA         | PRR23C      |
| NA        | ENSG00000233702 | 0          | NA          | NA         | NA         | NA         | RPL37P13    |
| NA        | ENSG00000233703 | 0          | NA          | NA         | NA         | NA         |             |
| NA        | ENSG00000233705 | 0.72394659 | -0.00523857 | 0.38129788 | 0.93757745 | NA         | SLC26A4-AS1 |
| NA        | ENSG00000233706 | 0          | NA          | NA         | NA         | NA         |             |
| NA        | ENSG00000233707 | 0          | NA          | NA         | NA         | NA         | RPL22P11    |
| NA        | ENSG00000233708 | 0          | NA          | NA         | NA         | NA         |             |
| NA        | ENSG00000233709 | 0          | NA          | NA         | NA         | NA         | MTND4P28    |
| NA        | ENSG00000233710 | 0          | NA          | NA         | NA         | NA         |             |
| NA        | ENSG00000233711 | 0          | NA          | NA         | NA         | NA         | EIF4EBP2P1  |
| NA        | ENSG00000233712 | 0          | NA          | NA         | NA         | NA         |             |
| NA        | ENSG00000233713 | 0          | NA          | NA         | NA         | NA         |             |
| NA        | ENSG00000233714 | 0.5972779  | -0.02732172 | 0.38586499 | 0.50076333 | NA         |             |
| NA        | ENSG00000233716 | 0.173733   | 0.01914545  | 0.38484597 | 0.78225479 | NA         | MTFR2P1     |
| NA        | ENSG00000233717 | 0          | NA          | NA         | NA         | NA         | RPS29P29    |
| 10408     | ENSG00000233718 | 11.5894881 | 3.42688844  | 1.22602536 | 5.32E-05   | 0.00043099 | MYCNOS      |
| NA        | ENSG00000233719 | 0.15069912 | -0.01848503 | 0.38480575 | 0.84537521 | NA         | GOT2P3      |
| NA        | ENSG00000233720 | 0          | NA          | NA         | NA         | NA         |             |
| NA        | ENSG00000233721 | 7.61505472 | 0.01255514  | 0.35930329 | 0.92536633 | 0.96892907 |             |
| NA        | ENSG00000233723 | 11.1841263 | 0.02490445  | 0.34341453 | 0.87398044 | 0.94453492 | LINC01122   |
| NA        | ENSG00000233724 | 0          | NA          | NA         | NA         | NA         |             |
| 121838    | ENSG00000233725 | 0          | NA          | NA         | NA         | NA         | NRAD1       |
| NA        | ENSG00000233727 | 0          | NA          | NA         | NA         | NA         |             |
| NA        | ENSG00000233728 | 0          | NA          | NA         | NA         | NA         |             |

|           |                 |                 |             |             |            |            |              |            |
|-----------|-----------------|-----------------|-------------|-------------|------------|------------|--------------|------------|
| 101928185 | ENSG00000233729 | 0.14931947      | -0.01844332 | 0.38480212  | 0.84537521 | NA         | NCKAP5-AS1   |            |
|           | NA              | ENSG00000233730 | 0           | NA          | NA         | NA         | LINC01765    |            |
|           | NA              | ENSG00000233732 | 0           | NA          | NA         | NA         | IGHV3OR16-10 |            |
|           | NA              | ENSG00000233733 | 0           | NA          | NA         | NA         | H2AZP6       |            |
|           | NA              | ENSG00000233735 | 0           | NA          | NA         | NA         |              |            |
|           | NA              | ENSG00000233737 | 0           | NA          | NA         | NA         |              |            |
|           | NA              | ENSG00000233739 | 2.21558824  | 0.08199595  | 0.38573464 | 0.37701295 | NA           |            |
|           | NA              | ENSG00000233740 | 0           | NA          | NA         | NA         | CICP2        |            |
|           | NA              | ENSG00000233741 | 0           | NA          | NA         | NA         | RPL27P7      |            |
| 200261    | ENSG00000233746 | 0               | NA          | NA          | NA         | NA         | LINC00656    |            |
|           | NA              | ENSG00000233747 | 0           | NA          | NA         | NA         | RPL36AP13    |            |
|           | NA              | ENSG00000233750 | 30.6426731  | -0.05537143 | 0.28481765 | 0.77259893 | 0.89560987   | CICP27     |
|           | NA              | ENSG00000233751 | 0           | NA          | NA         | NA         | RRAS2P2      |            |
|           | NA              | ENSG00000233752 | 0           | NA          | NA         | NA         | RPL21P36     |            |
|           | NA              | ENSG00000233754 | 0.51566297  | 0.03113894  | 0.38605512 | 0.47755688 | NA           |            |
|           | NA              | ENSG00000233755 | 0           | NA          | NA         | NA         | NA           |            |
| 100874326 | ENSG00000233756 | 0               | NA          | NA          | NA         | NA         | DSCAM-IT1    |            |
|           | NA              | ENSG00000233757 | 70.6244628  | 0.07240554  | 0.229398   | 0.69571066 | 0.85316371   |            |
| 100506289 | ENSG00000233760 | 0               | NA          | NA          | NA         | NA         |              |            |
|           | NA              | ENSG00000233762 | 1.15636103  | -0.03416441 | 0.38201391 | 0.58588311 | NA           | RPS15P4    |
|           | NA              | ENSG00000233764 | 0           | NA          | NA         | NA         | NA           | MTCO1P20   |
|           | NA              | ENSG00000233765 | 0           | NA          | NA         | NA         | NA           | CDRT15P12  |
|           | NA              | ENSG00000233766 | 0           | NA          | NA         | NA         | NA           | CAVIN2-AS1 |
|           | NA              | ENSG00000233767 | 0           | NA          | NA         | NA         | NA           | PSMA6P3    |
|           | NA              | ENSG00000233771 | 1.1926835   | 0.05038055  | 0.38357515 | 0.46466331 | NA           | CICP5      |
|           | NA              | ENSG00000233774 | 0           | NA          | NA         | NA         | NA           | MED14P1    |
|           | NA              | ENSG00000233775 | 0.3181223   | 0.00106759  | 0.38336615 | 0.96684788 | NA           |            |
| 101929688 | ENSG00000233776 | 0.75084144      | 0.05359413  | 0.38901113  | 0.27532172 | NA         | LINC01251    |            |
|           | NA              | ENSG00000233778 | 0.14931947  | -0.01844332 | 0.38480212 | 0.84537521 | NA           |            |
| 101930748 | ENSG00000233780 | 0               | NA          | NA          | NA         | NA         | HNRNPA1P30   |            |
|           | NA              | ENSG00000233782 | 0           | NA          | NA         | NA         | NA           | ZNF90P3    |
|           | NA              | ENSG00000233783 | 0.44628539  | -0.02685501 | 0.38565255 | 0.57378986 | NA           |            |
|           | NA              | ENSG00000233785 | 0.14931947  | -0.01844332 | 0.38480212 | 0.84537521 | NA           |            |
|           | NA              | ENSG00000233786 | 0           | NA          | NA         | NA         | NA           | CDC27P1    |
|           | NA              | ENSG00000233787 | 0           | NA          | NA         | NA         | NA           |            |
| 730227    | ENSG00000233791 | 0.83053694      | -0.00596397 | 0.38210562  | 0.89915679 | NA         | LINC01136    |            |
|           | NA              | ENSG00000233792 | 0           | NA          | NA         | NA         | NA           | PUDPP2     |
|           | NA              | ENSG00000233797 | 2.28777472  | 0.04073007  | 0.37990584 | 0.59029412 | NA           | UFL1-AS1   |



|           |                 |            |             |            |            |            |           |
|-----------|-----------------|------------|-------------|------------|------------|------------|-----------|
| NA        | ENSG00000233799 | 0.3167925  | 0.00119339  | 0.38336713 | 0.96641904 | NA         |           |
| 729384    | ENSG00000233802 | 0          | NA          | NA         | NA         | NA         | TRIM49D2  |
| 728395    | ENSG00000233803 | 0          | NA          | NA         | NA         | NA         | TSPY4     |
| NA        | ENSG00000233805 | 0          | NA          | NA         | NA         | NA         |           |
| 101927289 | ENSG00000233806 | 58.6045463 | -0.0192053  | 0.24929956 | 0.91786576 | 0.9652015  | LINC01237 |
| NA        | ENSG00000233807 | 0          | NA          | NA         | NA         | NA         | AMZ2P3    |
| NA        | ENSG00000233810 | 0          | NA          | NA         | NA         | NA         | MOB1AP2   |
| NA        | ENSG00000233814 | 0          | NA          | NA         | NA         | NA         | H3P32     |
| 3447      | ENSG00000233816 | 0          | NA          | NA         | NA         | NA         | IFNA13    |
| NA        | ENSG00000233817 | 1.01062434 | 0.00552301  | 0.37924298 | 0.93248704 | NA         |           |
| NA        | ENSG00000233818 | 0          | NA          | NA         | NA         | NA         |           |
| NA        | ENSG00000233819 | 0          | NA          | NA         | NA         | NA         | LCEP1     |
| NA        | ENSG00000233820 | 9.19502112 | -0.03946953 | 0.34869244 | 0.79229481 | 0.9050068  |           |
| NA        | ENSG00000233821 | 0          | NA          | NA         | NA         | NA         | ENOX1-AS1 |
| 8341      | ENSG00000233822 | 27.4943643 | -0.46520777 | 0.49588878 | 0.06370714 | 0.17918196 | H2BC15    |
| NA        | ENSG00000233823 | 0          | NA          | NA         | NA         | NA         |           |
| NA        | ENSG00000233824 | 0          | NA          | NA         | NA         | NA         |           |
| NA        | ENSG00000233825 | 3.50192495 | 0.0126531   | 0.38352942 | 0.7384883  | 0.87634475 |           |
| NA        | ENSG00000233827 | 0          | NA          | NA         | NA         | NA         | CCNQP1    |
| NA        | ENSG00000233828 | 0.29863895 | -0.02292439 | 0.3852726  | 0.68753245 | NA         | MIR4280HG |
| NA        | ENSG00000233829 | 0          | NA          | NA         | NA         | NA         | RPL26P15  |
| NA        | ENSG00000233830 | 1.17275252 | 0.05018321  | 0.38356514 | 0.46600909 | NA         | EIF4HP1   |
| NA        | ENSG00000233832 | 0          | NA          | NA         | NA         | NA         |           |
| NA        | ENSG00000233833 | 0          | NA          | NA         | NA         | NA         | ETF1P3    |
| 100506098 | ENSG00000233834 | 0          | NA          | NA         | NA         | NA         |           |
| NA        | ENSG00000233835 | 0          | NA          | NA         | NA         | NA         |           |
| NA        | ENSG00000233836 | 162.241737 | -0.28308433 | 0.22212869 | 0.1239339  | 0.29179226 |           |
| NA        | ENSG00000233837 | 0.33471731 | 0.02354391  | 0.38534154 | 0.62842204 | NA         | EIF3LP2   |
| NA        | ENSG00000233838 | 0          | NA          | NA         | NA         | NA         | DPH3P1    |
| NA        | ENSG00000233839 | 0          | NA          | NA         | NA         | NA         |           |
| 100874087 | ENSG00000233840 | 0          | NA          | NA         | NA         | NA         | PCDH9-AS4 |
| NA        | ENSG00000233842 | 0          | NA          | NA         | NA         | NA         |           |
| NA        | ENSG00000233843 | 0          | NA          | NA         | NA         | NA         | CYCSP48   |
| NA        | ENSG00000233845 | 0.18922458 | 0.01954053  | 0.38488496 | 0.78225479 | NA         |           |
| NA        | ENSG00000233846 | 0          | NA          | NA         | NA         | NA         | SELENOTP1 |
| NA        | ENSG00000233847 | 0          | NA          | NA         | NA         | NA         | ERCC8-AS1 |
| NA        | ENSG00000233848 | 0          | NA          | NA         | NA         | NA         |           |
| NA        | ENSG00000233849 | 0          | NA          | NA         | NA         | NA         |           |

|           |                 |            |             |            |            |            |             |
|-----------|-----------------|------------|-------------|------------|------------|------------|-------------|
| NA        | ENSG00000233850 | 0          | NA          | NA         | NA         | NA         |             |
| NA        | ENSG00000233851 | 0          | NA          | NA         | NA         | NA         | LATS2-AS1   |
| NA        | ENSG00000233852 | 0          | NA          | NA         | NA         | NA         |             |
| NA        | ENSG00000233854 | 0          | NA          | NA         | NA         | NA         | POU6F2-AS2  |
| NA        | ENSG00000233858 | 1.78038964 | -0.00158464 | 0.3770641  | 0.98203369 | NA         | LINC02599   |
| NA        | ENSG00000233859 | 0          | NA          | NA         | NA         | NA         | ADH5P4      |
| NA        | ENSG00000233860 | 4.59036667 | 0.01486551  | 0.36427855 | 0.90167122 | 0.95678213 | SHROOM3-AS1 |
| NA        | ENSG00000233861 | 0          | NA          | NA         | NA         | NA         | MGAT2P1     |
| NA        | ENSG00000233862 | 0.88091182 | 0.0393184   | 0.38491409 | 0.43747209 | NA         |             |
| NA        | ENSG00000233866 | 0          | NA          | NA         | NA         | NA         |             |
| NA        | ENSG00000233867 | 0          | NA          | NA         | NA         | NA         | SLC9B1P3    |
| NA        | ENSG00000233868 | 0          | NA          | NA         | NA         | NA         | LLPHP3      |
| NA        | ENSG00000233869 | 0          | NA          | NA         | NA         | NA         | RPSAP27     |
| NA        | ENSG00000233870 | 0          | NA          | NA         | NA         | NA         |             |
| NA        | ENSG00000233871 | 21.6356672 | -0.03390661 | 0.30740299 | 0.85301981 | 0.93373137 | DLG5-AS1    |
| NA        | ENSG00000233872 | 0          | NA          | NA         | NA         | NA         | TOR1BP1     |
| NA        | ENSG00000233873 | 0          | NA          | NA         | NA         | NA         | RPL7P44     |
| NA        | ENSG00000233874 | 0.15069912 | -0.01848503 | 0.38480575 | 0.84537521 | NA         | MFN1P1      |
| NA        | ENSG00000233875 | 0          | NA          | NA         | NA         | NA         |             |
| NA        | ENSG00000233876 | 0.173733   | 0.01914545  | 0.38484597 | 0.78225479 | NA         | GAPDHP68    |
| NA        | ENSG00000233877 | 0          | NA          | NA         | NA         | NA         |             |
| NA        | ENSG00000233880 | 0          | NA          | NA         | NA         | NA         | NFYCP1      |
| NA        | ENSG00000233882 | 0          | NA          | NA         | NA         | NA         | LINC01680   |
| NA        | ENSG00000233884 | 0          | NA          | NA         | NA         | NA         |             |
| NA        | ENSG00000233885 | 88.6458247 | 0.04836794  | 0.21970783 | 0.7901088  | 0.9043359  | YEATS2-AS1  |
| NA        | ENSG00000233887 | 0.18922458 | 0.01954053  | 0.38488496 | 0.78225479 | NA         |             |
| NA        | ENSG00000233888 | 0.54262406 | 0.01438064  | 0.3834902  | 0.73167523 | NA         | MTCO2P17    |
| NA        | ENSG00000233891 | 0          | NA          | NA         | NA         | NA         |             |
| NA        | ENSG00000233892 | 3.16487219 | -0.04704926 | 0.37837739 | 0.59131299 | 0.78598752 | PAIP1P1     |
| 101409257 | ENSG00000233893 | 0          | NA          | NA         | NA         | NA         | EZR-AS1     |
| NA        | ENSG00000233894 | 0.18922458 | 0.01954053  | 0.38488496 | 0.78225479 | NA         |             |
| 727993    | ENSG00000233896 | 0          | NA          | NA         | NA         | NA         | PDYN-AS1    |
| NA        | ENSG00000233900 | 0          | NA          | NA         | NA         | NA         | RPL17P35    |
| 100506119 | ENSG00000233901 | 2.485986   | 0.08203241  | 0.38903648 | 0.31990714 | NA         | LINC01503   |
| NA        | ENSG00000233902 | 0          | NA          | NA         | NA         | NA         |             |
| NA        | ENSG00000233905 | 0          | NA          | NA         | NA         | NA         | LONRF2P2    |
| NA        | ENSG00000233906 | 0          | NA          | NA         | NA         | NA         |             |
| 440594    | ENSG00000233907 | 0          | NA          | NA         | NA         | NA         | LINC01761   |

|           |                 |            |             |            |            |            |              |
|-----------|-----------------|------------|-------------|------------|------------|------------|--------------|
| NA        | ENSG00000233908 | 0          | NA          | NA         | NA         | NA         |              |
| NA        | ENSG00000233909 | 0          | NA          | NA         | NA         | NA         | UBE2V1P4     |
| NA        | ENSG00000233910 | 0          | NA          | NA         | NA         | NA         | GTF2F2P2     |
| NA        | ENSG00000233912 | 0.51614295 | 0.03116242  | 0.38605743 | 0.47720898 | NA         |              |
| NA        | ENSG00000233913 | 3.48246327 | -0.02160072 | 0.36653558 | 0.84810657 | 0.93095493 | RPL10P9      |
| NA        | ENSG00000233915 | 0          | NA          | NA         | NA         | NA         | UBE2Q2P10    |
| NA        | ENSG00000233916 | 0          | NA          | NA         | NA         | NA         | ZDHHC20P1    |
| 100996331 | ENSG00000233917 | 0          | NA          | NA         | NA         | NA         | POTEB        |
| NA        | ENSG00000233918 | 0          | NA          | NA         | NA         | NA         |              |
| NA        | ENSG00000233919 | 0.16735865 | 0.01897177  | 0.38482933 | 0.78225479 | NA         |              |
| NA        | ENSG00000233920 | 0.18922458 | 0.01954053  | 0.38488496 | 0.78225479 | NA         |              |
| NA        | ENSG00000233921 | 0          | NA          | NA         | NA         | NA         | RPS15AP40    |
| 105372840 | ENSG00000233922 | 190.017664 | -0.28706276 | 0.1912961  | 0.08392048 | 0.21898015 | LINC01694    |
| NA        | ENSG00000233924 | 0.32305908 | 0.00141849  | 0.38336882 | 0.96749979 | NA         | RPSAP13      |
| 101927502 | ENSG00000233926 | 2.16998968 | -0.02094216 | 0.37756989 | 0.78512792 | NA         |              |
| 6234      | ENSG00000233927 | 5381.82893 | -0.02242204 | 0.06203833 | 0.71368992 | 0.86192204 | RPS28        |
| NA        | ENSG00000233928 | 0          | NA          | NA         | NA         | NA         |              |
| NA        | ENSG00000233929 | 0.35628104 | 0.02381418  | 0.38538061 | 0.61421911 | NA         | MT1XP1       |
| 338651    | ENSG00000233930 | 73.3309641 | -2.1102908  | 0.43421195 | 6.05E-08   | 8.21E-07   | KRTAP5-AS1   |
| 399697    | ENSG00000233932 | 5.3109176  | -0.173687   | 0.41226756 | 0.19959409 | 0.40424119 | CTXN2        |
| NA        | ENSG00000233933 | 0          | NA          | NA         | NA         | NA         |              |
| NA        | ENSG00000233934 | 0          | NA          | NA         | NA         | NA         | RPL21P38     |
| NA        | ENSG00000233936 | 0          | NA          | NA         | NA         | NA         |              |
| 101928649 | ENSG00000233937 | 92.9229809 | 0.09178566  | 0.23267513 | 0.62348848 | 0.80797652 |              |
| NA        | ENSG00000233939 | 0          | NA          | NA         | NA         | NA         | RPL27AP4     |
| NA        | ENSG00000233940 | 0          | NA          | NA         | NA         | NA         | RPL12P45     |
| NA        | ENSG00000233941 | 0          | NA          | NA         | NA         | NA         |              |
| NA        | ENSG00000233942 | 0          | NA          | NA         | NA         | NA         |              |
| NA        | ENSG00000233943 | 0          | NA          | NA         | NA         | NA         |              |
| NA        | ENSG00000233944 | 0          | NA          | NA         | NA         | NA         | LINC00265-3P |
| 105378397 | ENSG00000233945 | 0          | NA          | NA         | NA         | NA         | LINC02650    |
| NA        | ENSG00000233946 | 0          | NA          | NA         | NA         | NA         | RPS29P4      |
| NA        | ENSG00000233947 | 0          | NA          | NA         | NA         | NA         | ASS1P3       |
| NA        | ENSG00000233951 | 0          | NA          | NA         | NA         | NA         | RCC2P3       |
| NA        | ENSG00000233952 | 0          | NA          | NA         | NA         | NA         | FTLP15       |
| NA        | ENSG00000233953 | 0          | NA          | NA         | NA         | NA         |              |
| 440567    | ENSG00000233954 | 24.4137229 | 0.523568    | 0.47027823 | 0.04869567 | 0.14598401 | UQCRHL       |
| NA        | ENSG00000233955 | 1.34700709 | -0.04220738 | 0.38258956 | 0.52081653 | NA         | AHCYP3       |

|           |                 |            |             |            |            |            |              |
|-----------|-----------------|------------|-------------|------------|------------|------------|--------------|
| NA        | ENSG00000233956 | 1.39275208 | -0.0173219  | 0.37958616 | 0.79226811 | NA         | BTF3P6       |
| NA        | ENSG00000233960 | 0          | NA          | NA         | NA         | NA         |              |
| NA        | ENSG00000233962 | 0          | NA          | NA         | NA         | NA         |              |
| NA        | ENSG00000233963 | 0          | NA          | NA         | NA         | NA         | ATP8A2P3     |
| NA        | ENSG00000233966 | 6.38895784 | -0.16197613 | 0.39524419 | 0.27546323 | 0.49956038 | UBE2SP1      |
| NA        | ENSG00000233967 | 87.9779429 | 0.54473208  | 0.26911432 | 0.01185181 | 0.04778297 |              |
| 101928834 | ENSG00000233968 | 0          | NA          | NA         | NA         | NA         |              |
| NA        | ENSG00000233969 | 0          | NA          | NA         | NA         | NA         |              |
| NA        | ENSG00000233970 | 0          | NA          | NA         | NA         | NA         |              |
| NA        | ENSG00000233971 | 0          | NA          | NA         | NA         | NA         | RPS20P10     |
| 101927295 | ENSG00000233973 | 0          | NA          | NA         | NA         | NA         | LINC01360    |
| NA        | ENSG00000233974 | 5.18601469 | 0.03032598  | 0.36933387 | 0.7837921  | 0.9014745  |              |
| 111216282 | ENSG00000233975 | 0          | NA          | NA         | NA         | NA         | LINC02574    |
| NA        | ENSG00000233977 | 0          | NA          | NA         | NA         | NA         |              |
| NA        | ENSG00000233978 | 0          | NA          | NA         | NA         | NA         | LINC02590    |
| NA        | ENSG00000233979 | 0          | NA          | NA         | NA         | NA         | RPL22P21     |
| NA        | ENSG00000233980 | 0.15069912 | -0.01848503 | 0.38480575 | 0.84537521 | NA         | FDPS2        |
| NA        | ENSG00000233981 | 0          | NA          | NA         | NA         | NA         |              |
| NA        | ENSG00000233983 | 0          | NA          | NA         | NA         | NA         |              |
| NA        | ENSG00000233984 | 0          | NA          | NA         | NA         | NA         | RPSAP14      |
| NA        | ENSG00000233985 | 0.14931947 | -0.01844332 | 0.38480212 | 0.84537521 | NA         | LINC01681    |
| NA        | ENSG00000233987 | 0          | NA          | NA         | NA         | NA         |              |
| NA        | ENSG00000233990 | 0          | NA          | NA         | NA         | NA         |              |
| 101929526 | ENSG00000233993 | 0          | NA          | NA         | NA         | NA         | DTD1-AS1     |
| NA        | ENSG00000233994 | 0.32404638 | -0.02327478 | 0.38532161 | 0.66848059 | NA         | GDI2P2       |
| NA        | ENSG00000233995 | 0          | NA          | NA         | NA         | NA         |              |
| NA        | ENSG00000233996 | 0          | NA          | NA         | NA         | NA         | KDM3AP1      |
| 101927821 | ENSG00000233997 | 0          | NA          | NA         | NA         | NA         | LINC01425    |
| NA        | ENSG00000233998 | 0          | NA          | NA         | NA         | NA         | SETP5        |
| NA        | ENSG00000233999 | 0.6371185  | 0.00342325  | 0.38197071 | 0.94100611 | NA         | IGKV3OR2-268 |
| NA        | ENSG00000234001 | 0          | NA          | NA         | NA         | NA         |              |
| NA        | ENSG00000234003 | 1.26940767 | -0.03695523 | 0.38209013 | 0.56515483 | NA         | MTATP6P27    |
| NA        | ENSG00000234004 | 0.14931947 | -0.01844332 | 0.38480212 | 0.84537521 | NA         |              |
| NA        | ENSG00000234005 | 2.01073252 | 0.01405518  | 0.37704853 | 0.85786566 | NA         | GAPDHP22     |
| 106478957 | ENSG00000234006 | 1.57274851 | 0.05849908  | 0.38666861 | 0.35034436 | NA         | DDX39B-AS1   |
| NA        | ENSG00000234008 | 0          | NA          | NA         | NA         | NA         | PPP1R2P2     |
| NA        | ENSG00000234009 | 0.173124   | -0.01911262 | 0.38486262 | 0.84537521 | NA         | RPL5P34      |
| NA        | ENSG00000234015 | 0          | NA          | NA         | NA         | NA         | LINC02530    |

|           |                 |            |             |            |            |            |             |
|-----------|-----------------|------------|-------------|------------|------------|------------|-------------|
| NA        | ENSG00000234016 | 0          | NA          | NA         | NA         | NA         | GNG10P1     |
| NA        | ENSG00000234017 | 0          | NA          | NA         | NA         | NA         |             |
| NA        | ENSG00000234019 | 0          | NA          | NA         | NA         | NA         |             |
| NA        | ENSG00000234020 | 0          | NA          | NA         | NA         | NA         | CHIAP3      |
| NA        | ENSG00000234021 | 0          | NA          | NA         | NA         | NA         |             |
| NA        | ENSG00000234022 | 0          | NA          | NA         | NA         | NA         |             |
| NA        | ENSG00000234025 | 0.173124   | -0.01911262 | 0.38486262 | 0.84537521 | NA         | BPMS2P1     |
| NA        | ENSG00000234026 | 0          | NA          | NA         | NA         | NA         |             |
| NA        | ENSG00000234028 | 73.1965287 | 0.50711139  | 0.31199621 | 0.02895054 | 0.09755072 | EIF2AK3-DT  |
| NA        | ENSG00000234030 | 0          | NA          | NA         | NA         | NA         | TMEM97P1    |
| NA        | ENSG00000234031 | 0.98618302 | 0.02664004  | 0.38237325 | 0.62907931 | NA         | RPS3AP44    |
| NA        | ENSG00000234033 | 0          | NA          | NA         | NA         | NA         | RAC1P8      |
| NA        | ENSG00000234034 | 0          | NA          | NA         | NA         | NA         |             |
| NA        | ENSG00000234036 | 0.69350415 | 0.05065086  | 0.38849344 | 0.30147795 | NA         | TXNP6       |
| NA        | ENSG00000234039 | 0          | NA          | NA         | NA         | NA         | NDUFA5P7    |
| NA        | ENSG00000234040 | 0.173733   | 0.01914545  | 0.38484597 | 0.78225479 | NA         | RPL10P12    |
| NA        | ENSG00000234041 | 0          | NA          | NA         | NA         | NA         |             |
| NA        | ENSG00000234042 | 0.62285955 | -0.0193452  | 0.38303621 | 0.68616499 | NA         |             |
| NA        | ENSG00000234043 | 0.63278082 | -0.01446514 | 0.38320751 | 0.72200935 | NA         | NUDT9P1     |
| NA        | ENSG00000234044 | 0          | NA          | NA         | NA         | NA         |             |
| NA        | ENSG00000234048 | 0          | NA          | NA         | NA         | NA         | FAM96AP1    |
| NA        | ENSG00000234050 | 0          | NA          | NA         | NA         | NA         |             |
| NA        | ENSG00000234052 | 0          | NA          | NA         | NA         | NA         | LINC01673   |
| NA        | ENSG00000234055 | 0          | NA          | NA         | NA         | NA         |             |
| 101928922 | ENSG00000234056 | 0          | NA          | NA         | NA         | NA         | LINC00463   |
| NA        | ENSG00000234059 | 0          | NA          | NA         | NA         | NA         | CASKP1      |
| NA        | ENSG00000234060 | 0          | NA          | NA         | NA         | NA         | EDDM3CP     |
| NA        | ENSG00000234061 | 0          | NA          | NA         | NA         | NA         |             |
| NA        | ENSG00000234062 | 22.9061459 | 0.33403883  | 0.40097688 | 0.13729622 | 0.31285428 |             |
| NA        | ENSG00000234064 | 0          | NA          | NA         | NA         | NA         | PRAMEF29P   |
| NA        | ENSG00000234065 | 4.04832947 | -0.09494245 | 0.38490491 | 0.37924816 | 0.60821951 | MTND4P26    |
| NA        | ENSG00000234066 | 0          | NA          | NA         | NA         | NA         | TAS2R62P    |
| NA        | ENSG00000234067 | 0          | NA          | NA         | NA         | NA         | RPL5P10     |
| 203569    | ENSG00000234068 | 0.16735865 | 0.01897177  | 0.38482933 | 0.78225479 | NA         | PAGE2       |
| NA        | ENSG00000234069 | 0          | NA          | NA         | NA         | NA         | GAPDHP53    |
| 103752555 | ENSG00000234070 | 0          | NA          | NA         | NA         | NA         | SPATA17-AS1 |
| NA        | ENSG00000234071 | 0          | NA          | NA         | NA         | NA         |             |
| NA        | ENSG00000234072 | 527.314092 | 0.75004355  | 0.12131239 | 1.32E-10   | 2.51E-09   |             |

|           |                 |                 |             |             |            |            |            |             |
|-----------|-----------------|-----------------|-------------|-------------|------------|------------|------------|-------------|
|           | NA              | ENSG00000234073 | 0           | NA          | NA         | NA         | NA         |             |
|           | NA              | ENSG00000234075 | 0           | NA          | NA         | NA         | NA         | RPL35AP     |
| 100874043 | ENSG00000234076 | 0.15069912      | -0.01848503 | 0.38480575  | 0.84537521 | NA         | NA         | TPRG1-AS1   |
|           | NA              | ENSG00000234080 | 0.31666675  | 0.00106283  | 0.38336618 | 0.96766976 | NA         |             |
|           | NA              | ENSG00000234081 | 0           | NA          | NA         | NA         | NA         | ELOCP10     |
|           | NA              | ENSG00000234083 | 0           | NA          | NA         | NA         | NA         |             |
|           | NA              | ENSG00000234084 | 1.48966709  | -0.03355716 | 0.37942233 | 0.65439051 | NA         |             |
|           | NA              | ENSG00000234085 | 0           | NA          | NA         | NA         | NA         |             |
|           | NA              | ENSG00000234087 | 0           | NA          | NA         | NA         | NA         |             |
|           | NA              | ENSG00000234088 | 0           | NA          | NA         | NA         | NA         | RPS15AP7    |
| 105375297 | ENSG00000234089 | 0               | NA          | NA          | NA         | NA         | NA         |             |
|           | NA              | ENSG00000234091 | 0           | NA          | NA         | NA         | NA         |             |
|           | NA              | ENSG00000234093 | 0.34051105  | 0.00301255  | 0.3833917  | 0.9596884  | NA         | RPS15AP11   |
|           | NA              | ENSG00000234099 | 0           | NA          | NA         | NA         | NA         | MTND4P11    |
|           | NA              | ENSG00000234102 | 0           | NA          | NA         | NA         | NA         | KRT19P4     |
|           | NA              | ENSG00000234104 | 0           | NA          | NA         | NA         | NA         |             |
|           | NA              | ENSG00000234105 | 0           | NA          | NA         | NA         | NA         |             |
|           | NA              | ENSG00000234106 | 0           | NA          | NA         | NA         | NA         | SRP14P2     |
|           | NA              | ENSG00000234107 | 0           | NA          | NA         | NA         | NA         | TPT1P1      |
|           | NA              | ENSG00000234108 | 0           | NA          | NA         | NA         | NA         |             |
|           | NA              | ENSG00000234109 | 0.173733    | 0.01914545  | 0.38484597 | 0.78225479 | NA         | RPL7P36     |
|           | NA              | ENSG00000234110 | 0           | NA          | NA         | NA         | NA         | TSPY25P     |
| 340017    | ENSG00000234111 | 0               | NA          | NA          | NA         | NA         | NA         | LINC02433   |
|           | NA              | ENSG00000234112 | 0           | NA          | NA         | NA         | NA         |             |
|           | NA              | ENSG00000234115 | 0           | NA          | NA         | NA         | NA         |             |
|           | NA              | ENSG00000234116 | 0           | NA          | NA         | NA         | NA         |             |
|           | NA              | ENSG00000234117 | 0           | NA          | NA         | NA         | NA         |             |
| 644511    | ENSG00000234118 | 0.33931084      | 0.00254134  | 0.38338306  | 0.96419459 | NA         | NA         | RPL13AP6    |
|           | NA              | ENSG00000234119 | 0           | NA          | NA         | NA         | NA         | METAP2P1    |
|           | NA              | ENSG00000234120 | 0           | NA          | NA         | NA         | NA         |             |
|           | NA              | ENSG00000234121 | 0           | NA          | NA         | NA         | NA         | GPM6BP3     |
|           | NA              | ENSG00000234122 | 0           | NA          | NA         | NA         | NA         | TRBV22OR9-2 |
|           | NA              | ENSG00000234123 | 1.09564679  | -0.07817651 | 0.39456038 | 0.14982151 | NA         | RHBDF1P1    |
| 286828    | ENSG00000234124 | 0               | NA          | NA          | NA         | NA         | NA         | CSN1S2AP    |
|           | NA              | ENSG00000234125 | 0           | NA          | NA         | NA         | NA         | EEF1GP8     |
| 7726      | ENSG00000234127 | 820.199255      | -0.10398017 | 0.09415951  | 0.25386083 | 0.47439002 | NA         | TRIM26      |
|           | NA              | ENSG00000234129 | 13.2582495  | 0.08047011  | 0.34709208 | 0.62349398 | 0.80797652 |             |
|           | NA              | ENSG00000234130 | 0           | NA          | NA         | NA         | NA         | AP2B1P1     |

|           |                 |            |             |            |            |            |              |
|-----------|-----------------|------------|-------------|------------|------------|------------|--------------|
| NA        | ENSG00000234132 | 0          | NA          | NA         | NA         | NA         |              |
| NA        | ENSG00000234134 | 0.44967959 | -0.02729702 | 0.38571284 | 0.5619597  | NA         |              |
| NA        | ENSG00000234135 | 0          | NA          | NA         | NA         | NA         | RPL23AP83    |
| NA        | ENSG00000234136 | 0.16735865 | 0.01897177  | 0.38482933 | 0.78225479 | NA         |              |
| NA        | ENSG00000234139 | 0          | NA          | NA         | NA         | NA         |              |
| NA        | ENSG00000234141 | 2.01924721 | -0.01297498 | 0.37697574 | 0.86642023 | NA         |              |
| NA        | ENSG00000234142 | 0          | NA          | NA         | NA         | NA         | LINC01675    |
| NA        | ENSG00000234143 | 0          | NA          | NA         | NA         | NA         | UGT1A13P     |
| NA        | ENSG00000234144 | 0          | NA          | NA         | NA         | NA         | COX6CP13     |
| NA        | ENSG00000234145 | 0.54349856 | 0.01466941  | 0.38351415 | 0.72849025 | NA         | NAP1L4P3     |
| NA        | ENSG00000234146 | 0.79055967 | -0.00867841 | 0.38089819 | 0.87791309 | NA         | AKAP8P1      |
| NA        | ENSG00000234147 | 2.89758367 | 0.01961222  | 0.37482687 | 0.82154032 | 0.91847813 |              |
| NA        | ENSG00000234148 | 0          | NA          | NA         | NA         | NA         | LINC01961    |
| NA        | ENSG00000234149 | 0          | NA          | NA         | NA         | NA         |              |
| NA        | ENSG00000234152 | 0          | NA          | NA         | NA         | NA         | ELOBP1       |
| 101928820 | ENSG00000234155 | 0.34109772 | 0.02362643  | 0.38535338 | 0.62411229 | NA         | LINC02535    |
| NA        | ENSG00000234156 | 9.253926   | 0.33549527  | 0.58411531 | 0.02385259 | 0.08389209 |              |
| NA        | ENSG00000234158 | 0          | NA          | NA         | NA         | NA         | RPEP2        |
| NA        | ENSG00000234159 | 0          | NA          | NA         | NA         | NA         | RBPM5LP      |
| NA        | ENSG00000234160 | 13.6986914 | -0.00434141 | 0.32740035 | 0.97798559 | 0.99249544 |              |
| 102724167 | ENSG00000234161 | 0          | NA          | NA         | NA         | NA         | PABPC5-AS1   |
| NA        | ENSG00000234162 | 0          | NA          | NA         | NA         | NA         |              |
| NA        | ENSG00000234163 | 0          | NA          | NA         | NA         | NA         | MTND4LP11    |
| NA        | ENSG00000234166 | 0          | NA          | NA         | NA         | NA         | ARHGEF19-AS1 |
| NA        | ENSG00000234167 | 0          | NA          | NA         | NA         | NA         | ELOBP4       |
| NA        | ENSG00000234168 | 0          | NA          | NA         | NA         | NA         | LINC01039    |
| NA        | ENSG00000234169 | 0          | NA          | NA         | NA         | NA         | LINC01868    |
| NA        | ENSG00000234170 | 0          | NA          | NA         | NA         | NA         | LINC02645    |
| NA        | ENSG00000234171 | 522.08747  | 0.18658484  | 0.10967701 | 0.075439   | 0.2022854  | RNASEH1-AS1  |
| NA        | ENSG00000234172 | 0          | NA          | NA         | NA         | NA         |              |
| 105378311 | ENSG00000234173 | 0          | NA          | NA         | NA         | NA         |              |
| NA        | ENSG00000234174 | 0          | NA          | NA         | NA         | NA         |              |
| NA        | ENSG00000234175 | 0          | NA          | NA         | NA         | NA         |              |
| NA        | ENSG00000234176 | 0          | NA          | NA         | NA         | NA         | HSPA8P1      |
| 284998    | ENSG00000234177 | 0          | NA          | NA         | NA         | NA         | LINC01114    |
| NA        | ENSG00000234178 | 0          | NA          | NA         | NA         | NA         | DEFA11P      |
| NA        | ENSG00000234179 | 0          | NA          | NA         | NA         | NA         | MTCYBP1      |
| NA        | ENSG00000234181 | 0.16735865 | 0.01897177  | 0.38482933 | 0.78225479 | NA         |              |

|           |                 |            |             |            |            |            |           |
|-----------|-----------------|------------|-------------|------------|------------|------------|-----------|
| NA        | ENSG00000234182 | 0          | NA          | NA         | NA         | NA         |           |
| NA        | ENSG00000234183 | 0          | NA          | NA         | NA         | NA         | LINC01952 |
| 101927412 | ENSG00000234184 | 0          | NA          | NA         | NA         | NA         | LINC01781 |
| NA        | ENSG00000234185 | 0.18922458 | 0.01954053  | 0.38488496 | 0.78225479 | NA         |           |
| 162083    | ENSG00000234186 | 0          | NA          | NA         | NA         | NA         | C16orf82  |
| NA        | ENSG00000234187 | 0          | NA          | NA         | NA         | NA         | AIMP1P1   |
| NA        | ENSG00000234189 | 0          | NA          | NA         | NA         | NA         |           |
| NA        | ENSG00000234190 | 0          | NA          | NA         | NA         | NA         |           |
| NA        | ENSG00000234191 | 0          | NA          | NA         | NA         | NA         | LINC01283 |
| NA        | ENSG00000234192 | 0          | NA          | NA         | NA         | NA         | RPS26P38  |
| NA        | ENSG00000234193 | 0          | NA          | NA         | NA         | NA         | ACSL3-AS1 |
| NA        | ENSG00000234197 | 0.66344306 | 0.00170955  | 0.38189525 | 0.96998114 | NA         | ETV5-AS1  |
| 440900    | ENSG00000234199 | 0          | NA          | NA         | NA         | NA         | LINC01191 |
| NA        | ENSG00000234200 | 0          | NA          | NA         | NA         | NA         |           |
| NA        | ENSG00000234201 | 0          | NA          | NA         | NA         | NA         | BMI1P1    |
| NA        | ENSG00000234202 | 0          | NA          | NA         | NA         | NA         | H3P3      |
| NA        | ENSG00000234203 | 0.63707397 | 0.00272751  | 0.38196029 | 0.95265536 | NA         |           |
| NA        | ENSG00000234204 | 0          | NA          | NA         | NA         | NA         | PIGPP2    |
| NA        | ENSG00000234206 | 0.49194605 | -0.00748253 | 0.38271408 | 0.8569103  | NA         |           |
| NA        | ENSG00000234207 | 0          | NA          | NA         | NA         | NA         | LINC01830 |
| NA        | ENSG00000234208 | 0          | NA          | NA         | NA         | NA         |           |
| 101927914 | ENSG00000234210 | 1.03279485 | 0.00300725  | 0.37993148 | 0.96069333 | NA         |           |
| NA        | ENSG00000234211 | 0          | NA          | NA         | NA         | NA         |           |
| NA        | ENSG00000234213 | 0.68672349 | -0.01903006 | 0.38351936 | 0.66717074 | NA         | FHP1      |
| 100507468 | ENSG00000234215 | 19.1087626 | -0.02706409 | 0.31783246 | 0.87880255 | 0.94634404 | CT66      |
| NA        | ENSG00000234217 | 0          | NA          | NA         | NA         | NA         | RBPJP7    |
| NA        | ENSG00000234219 | 0.84327235 | 0.03653358  | 0.38461252 | 0.46310374 | NA         | CDCA4P4   |
| 105371260 | ENSG00000234222 | 5.11708968 | -0.01132531 | 0.36010257 | 0.92765961 | 0.9697364  | LIX1L-AS1 |
| NA        | ENSG00000234223 | 0          | NA          | NA         | NA         | NA         |           |
| 730130    | ENSG00000234224 | 3505.69171 | 0.55604501  | 0.06784902 | 8.78E-17   | 2.68E-15   | TMEM229A  |
| NA        | ENSG00000234225 | 0.51543945 | -0.00587213 | 0.38261017 | 0.87980804 | NA         |           |
| NA        | ENSG00000234226 | 0          | NA          | NA         | NA         | NA         | NDUFS5P2  |
| NA        | ENSG00000234227 | 0          | NA          | NA         | NA         | NA         | RPL7L1P1  |
| NA        | ENSG00000234228 | 0          | NA          | NA         | NA         | NA         | NCLP2     |
| 100873922 | ENSG00000234230 | 0          | NA          | NA         | NA         | NA         | ZFX-AS1   |
| NA        | ENSG00000234231 | 0.34746601 | 0.02370763  | 0.3853651  | 0.61987128 | NA         | ANAPC1P4  |
| NA        | ENSG00000234232 | 0.29863895 | -0.02292439 | 0.3852726  | 0.68753245 | NA         | PDE4DIPP7 |
| NA        | ENSG00000234233 | 10.7315365 | -0.07391596 | 0.34440362 | 0.65242403 | 0.8264121  | KCNH1-IT1 |



|           |                 |            |             |            |            |            |    |            |
|-----------|-----------------|------------|-------------|------------|------------|------------|----|------------|
| NA        | ENSG00000234234 | 0          | NA          | NA         | NA         | NA         | NA | MTCO2P8    |
| NA        | ENSG00000234235 | 0          | NA          | NA         | NA         | NA         | NA | BOK-AS1    |
| NA        | ENSG00000234238 | 0          | NA          | NA         | NA         | NA         | NA |            |
| NA        | ENSG00000234239 | 0          | NA          | NA         | NA         | NA         | NA | CFL1P8     |
| NA        | ENSG00000234241 | 0.18922458 | 0.01954053  | 0.38488496 | 0.78225479 | NA         | NA |            |
| NA        | ENSG00000234244 | 0          | NA          | NA         | NA         | NA         | NA |            |
| NA        | ENSG00000234247 | 0          | NA          | NA         | NA         | NA         | NA | DNAJB6P6   |
| NA        | ENSG00000234253 | 0.173733   | 0.01914545  | 0.38484597 | 0.78225479 | NA         | NA | RPL7P13    |
| NA        | ENSG00000234255 | 1.47994957 | -0.06992763 | 0.3882868  | 0.31679023 | NA         | NA |            |
| NA        | ENSG00000234256 | 0          | NA          | NA         | NA         | NA         | NA | PTCD2P2    |
| NA        | ENSG00000234257 | 0          | NA          | NA         | NA         | NA         | NA | SOD2P1     |
| NA        | ENSG00000234259 | 0          | NA          | NA         | NA         | NA         | NA |            |
| NA        | ENSG00000234261 | 0          | NA          | NA         | NA         | NA         | NA |            |
| NA        | ENSG00000234262 | 0          | NA          | NA         | NA         | NA         | NA |            |
| 101928461 | ENSG00000234263 | 0          | NA          | NA         | NA         | NA         | NA | MAP3K5-AS1 |
| 101927220 | ENSG00000234264 | 0.61336589 | -0.01781535 | 0.38292221 | 0.70870956 | NA         | NA | DEPDC1-AS1 |
| 100505515 | ENSG00000234265 | 0.16735865 | 0.01897177  | 0.38482933 | 0.78225479 | NA         | NA | LINC01723  |
| NA        | ENSG00000234267 | 2.48402755 | -0.03541238 | 0.37563516 | 0.69500819 | NA         | NA | TULP3P1    |
| NA        | ENSG00000234268 | 0          | NA          | NA         | NA         | NA         | NA |            |
| NA        | ENSG00000234269 | 0          | NA          | NA         | NA         | NA         | NA |            |
| NA        | ENSG00000234270 | 0          | NA          | NA         | NA         | NA         | NA | RPL36P20   |
| NA        | ENSG00000234271 | 0.68450242 | -0.01882668 | 0.38350315 | 0.66998887 | NA         | NA |            |
| NA        | ENSG00000234272 | 0          | NA          | NA         | NA         | NA         | NA | RPL30P2    |
| NA        | ENSG00000234273 | 0          | NA          | NA         | NA         | NA         | NA |            |
| NA        | ENSG00000234274 | 0          | NA          | NA         | NA         | NA         | NA | COX7BP2    |
| NA        | ENSG00000234275 | 0          | NA          | NA         | NA         | NA         | NA |            |
| NA        | ENSG00000234276 | 0          | NA          | NA         | NA         | NA         | NA | SDR42E1P3  |
| NA        | ENSG00000234277 | 0          | NA          | NA         | NA         | NA         | NA | LINC01641  |
| NA        | ENSG00000234279 | 0          | NA          | NA         | NA         | NA         | NA | LINC01937  |
| NA        | ENSG00000234281 | 1.02377281 | -0.03966352 | 0.3845465  | 0.42962604 | NA         | NA | LANCL1-AS1 |
| NA        | ENSG00000234282 | 0          | NA          | NA         | NA         | NA         | NA |            |
| NA        | ENSG00000234283 | 0          | NA          | NA         | NA         | NA         | NA | LINC01731  |
| 345462    | ENSG00000234284 | 77.6990942 | -0.13330475 | 0.2355182  | 0.47611911 | 0.69811174 | NA | ZNF879     |
| NA        | ENSG00000234285 | 0          | NA          | NA         | NA         | NA         | NA | GAPDHP49   |
| NA        | ENSG00000234286 | 0          | NA          | NA         | NA         | NA         | NA |            |
| NA        | ENSG00000234287 | 0.173733   | 0.01914545  | 0.38484597 | 0.78225479 | NA         | NA |            |
| NA        | ENSG00000234288 | 0          | NA          | NA         | NA         | NA         | NA | OR1AA1P    |
| 54145     | ENSG00000234289 | 0          | NA          | NA         | NA         | NA         | NA | H2BS1      |

|           |                 |            |             |            |            |            |            |
|-----------|-----------------|------------|-------------|------------|------------|------------|------------|
| NA        | ENSG00000234292 | 0.52816929 | 0.01299275  | 0.38341533 | 0.75380218 | NA         |            |
| 54147     | ENSG00000234293 | 0          | NA          | NA         | NA         | NA         | BACH1-IT3  |
| NA        | ENSG00000234296 | 7.77699495 | 0.10801359  | 0.36946407 | 0.46586039 | 0.68856963 |            |
| NA        | ENSG00000234297 | 0          | NA          | NA         | NA         | NA         | PSIP1P1    |
| NA        | ENSG00000234300 | 0          | NA          | NA         | NA         | NA         | LINC00229  |
| NA        | ENSG00000234303 | 0          | NA          | NA         | NA         | NA         | CLYBL-AS1  |
| NA        | ENSG00000234304 | 0          | NA          | NA         | NA         | NA         | SGO1P2     |
| NA        | ENSG00000234306 | 0          | NA          | NA         | NA         | NA         |            |
| 102725079 | ENSG00000234308 | 0          | NA          | NA         | NA         | NA         | LINC01878  |
| NA        | ENSG00000234309 | 0          | NA          | NA         | NA         | NA         | SLC25A18P1 |
| NA        | ENSG00000234311 | 0.173124   | -0.01911262 | 0.38486262 | 0.84537521 | NA         |            |
| NA        | ENSG00000234312 | 0          | NA          | NA         | NA         | NA         | SAPCD2P4   |
| NA        | ENSG00000234315 | 0          | NA          | NA         | NA         | NA         | OSTCP5     |
| NA        | ENSG00000234318 | 1.19826391 | 0.02229614  | 0.37940493 | 0.74748917 | NA         |            |
| NA        | ENSG00000234319 | 0          | NA          | NA         | NA         | NA         | RPS12P2    |
| NA        | ENSG00000234322 | 0          | NA          | NA         | NA         | NA         | ST13P18    |
| 100996590 | ENSG00000234323 | 2.55824472 | 0.08199952  | 0.38433822 | 0.39641402 | NA         | LINC01505  |
| NA        | ENSG00000234324 | 1.37023918 | -0.02141261 | 0.379046   | 0.76079453 | NA         | RPL9P2     |
| NA        | ENSG00000234325 | 0          | NA          | NA         | NA         | NA         | MRPS10P2   |
| 101928000 | ENSG00000234327 | 63.004501  | -0.26682148 | 0.2648259  | 0.18605083 | 0.3856298  | ZNF232-AS1 |
| NA        | ENSG00000234329 | 9.71840715 | 0.04202591  | 0.34711724 | 0.78761214 | 0.90351292 |            |
| NA        | ENSG00000234332 | 0          | NA          | NA         | NA         | NA         | BCAS2P2    |
| NA        | ENSG00000234333 | 0          | NA          | NA         | NA         | NA         | CYCSP53    |
| NA        | ENSG00000234335 | 0          | NA          | NA         | NA         | NA         | RPS4XP11   |
| NA        | ENSG00000234336 | 1.58941636 | -0.02455465 | 0.38098756 | 0.68376217 | NA         | JAZF1-AS1  |
| NA        | ENSG00000234337 | 0.16735865 | 0.01897177  | 0.38482933 | 0.78225479 | NA         |            |
| NA        | ENSG00000234338 | 150.741455 | -0.24093827 | 0.19158006 | 0.14771526 | 0.32969634 |            |
| NA        | ENSG00000234340 | 0          | NA          | NA         | NA         | NA         |            |
| NA        | ENSG00000234345 | 7.75106306 | -0.02633114 | 0.34967503 | 0.85691747 | 0.93609679 | ELF2P1     |
| NA        | ENSG00000234349 | 0          | NA          | NA         | NA         | NA         | GLUD1P9    |
| NA        | ENSG00000234350 | 3.56904346 | 0.03373199  | 0.37035314 | 0.75284817 | 0.8843065  |            |
| 349160    | ENSG00000234352 | 4.76848448 | -0.1563798  | 0.40922905 | 0.19649063 | 0.40007944 |            |
| NA        | ENSG00000234353 | 15.4885778 | 0.1963698   | 0.37951172 | 0.28684137 | 0.51269665 |            |
| NA        | ENSG00000234354 | 0.52986329 | -0.00815252 | 0.38311882 | 0.8315893  | NA         | RPS26P47   |
| NA        | ENSG00000234355 | 0          | NA          | NA         | NA         | NA         | FTH1P27    |
| NA        | ENSG00000234356 | 0          | NA          | NA         | NA         | NA         |            |
| NA        | ENSG00000234358 | 0          | NA          | NA         | NA         | NA         |            |
| NA        | ENSG00000234359 | 0          | NA          | NA         | NA         | NA         | ELK1P1     |

|           |                 |            |             |            |            |            |           |
|-----------|-----------------|------------|-------------|------------|------------|------------|-----------|
| NA        | ENSG00000234360 | 0          | NA          | NA         | NA         | NA         |           |
| NA        | ENSG00000234361 | 0          | NA          | NA         | NA         | NA         |           |
| NA        | ENSG00000234362 | 3.63831294 | 0.10612635  | 0.38915962 | 0.32841803 | 0.55685955 | LINC01914 |
| NA        | ENSG00000234363 | 0          | NA          | NA         | NA         | NA         | PPIAP27   |
| NA        | ENSG00000234367 | 2.90888081 | -0.05444133 | 0.37538431 | 0.59406582 | 0.78764139 | PFN1P3    |
| NA        | ENSG00000234369 | 0          | NA          | NA         | NA         | NA         | TATDN1P1  |
| NA        | ENSG00000234371 | 0          | NA          | NA         | NA         | NA         | RPSAP31   |
| NA        | ENSG00000234373 | 21.5581944 | -0.10478661 | 0.31382385 | 0.58176206 | 0.77877061 | SNX18P7   |
| NA        | ENSG00000234376 | 0          | NA          | NA         | NA         | NA         | UBTFL2    |
| 100874222 | ENSG00000234377 | 0.68219892 | 0.0406033   | 0.38717363 | 0.35756033 | NA         | OBI1-AS1  |
| NA        | ENSG00000234378 | 0.50747966 | 0.03073593  | 0.38601567 | 0.48357854 | NA         |           |
| NA        | ENSG00000234379 | 0          | NA          | NA         | NA         | NA         | HMGB1P48  |
| 100506385 | ENSG00000234380 | 0          | NA          | NA         | NA         | NA         | LINC01426 |
| NA        | ENSG00000234381 | 0.62450867 | -0.03621485 | 0.38661765 | 0.42703364 | NA         | MED15P7   |
| NA        | ENSG00000234382 | 0          | NA          | NA         | NA         | NA         |           |
| NA        | ENSG00000234383 | 4.44441    | 0.1810095   | 0.42233428 | 0.1570508  | 0.34380314 | CTBP2P8   |
| NA        | ENSG00000234384 | 0          | NA          | NA         | NA         | NA         | LINC01049 |
| NA        | ENSG00000234385 | 0          | NA          | NA         | NA         | NA         | RCC2P1    |
| NA        | ENSG00000234386 | 0          | NA          | NA         | NA         | NA         | OR7E162P  |
| NA        | ENSG00000234387 | 0          | NA          | NA         | NA         | NA         |           |
| NA        | ENSG00000234388 | 0          | NA          | NA         | NA         | NA         | TXNP3     |
| NA        | ENSG00000234389 | 0          | NA          | NA         | NA         | NA         |           |
| 158572    | ENSG00000234390 | 8.26799799 | 0.12009908  | 0.36797243 | 0.44279366 | 0.6677074  | USP27X-DT |
| NA        | ENSG00000234391 | 0          | NA          | NA         | NA         | NA         |           |
| NA        | ENSG00000234393 | 0          | NA          | NA         | NA         | NA         |           |
| 440896    | ENSG00000234394 | 0.30139824 | -0.02296476 | 0.38527817 | 0.68536535 | NA         |           |
| NA        | ENSG00000234396 | 0          | NA          | NA         | NA         | NA         |           |
| NA        | ENSG00000234397 | 0.36288921 | 0.00139215  | 0.38336798 | 0.96266936 | NA         | PPIAP34   |
| NA        | ENSG00000234398 | 0          | NA          | NA         | NA         | NA         |           |
| NA        | ENSG00000234399 | 0          | NA          | NA         | NA         | NA         | RBMV2XP   |
| NA        | ENSG00000234402 | 0          | NA          | NA         | NA         | NA         | ELK2BP    |
| NA        | ENSG00000234404 | 0          | NA          | NA         | NA         | NA         | SPRYD7P1  |
| NA        | ENSG00000234405 | 11.7329409 | -0.00660653 | 0.34767752 | 0.96211781 | 0.98470041 |           |
| NA        | ENSG00000234406 | 0          | NA          | NA         | NA         | NA         |           |
| 388849    | ENSG00000234409 | 200.264247 | 0.05362194  | 0.15941811 | 0.7127229  | 0.86169546 | CCDC188   |
| NA        | ENSG00000234413 | 0          | NA          | NA         | NA         | NA         | MPV17L2P1 |
| 5940      | ENSG00000234414 | 0          | NA          | NA         | NA         | NA         | RBMV1A1   |
| NA        | ENSG00000234415 | 0          | NA          | NA         | NA         | NA         | RPL5P7    |

|           |    |                 |            |             |            |            |            |              |
|-----------|----|-----------------|------------|-------------|------------|------------|------------|--------------|
|           | NA | ENSG00000234418 | 0          | NA          | NA         | NA         | NA         |              |
|           | NA | ENSG00000234419 | 1.03801834 | 0.02647704  | 0.38236001 | 0.62968741 | NA         | CICP13       |
| 100129482 | NA | ENSG00000234420 | 1485.99062 | -0.42120908 | 0.08797504 | 8.28E-07   | 9.53E-06   | ZNF37BP      |
|           | NA | ENSG00000234421 | 0          | NA          | NA         | NA         | NA         | SLC25A5P4    |
|           | NA | ENSG00000234422 | 0          | NA          | NA         | NA         | NA         | UBE2WP1      |
| 101927554 | NA | ENSG00000234423 | 124.176775 | 0.04110397  | 0.21118965 | 0.81693366 | 0.91671007 | LINC01250    |
|           | NA | ENSG00000234424 | 0          | NA          | NA         | NA         | NA         |              |
|           | NA | ENSG00000234425 | 0          | NA          | NA         | NA         | NA         |              |
|           | NA | ENSG00000234426 | 0          | NA          | NA         | NA         | NA         |              |
|           | NA | ENSG00000234427 | 0          | NA          | NA         | NA         | NA         |              |
|           | NA | ENSG00000234428 | 0          | NA          | NA         | NA         | NA         |              |
|           | NA | ENSG00000234429 | 0          | NA          | NA         | NA         | NA         | ANKRD11P1    |
|           | NA | ENSG00000234431 | 0          | NA          | NA         | NA         | NA         |              |
|           | NA | ENSG00000234432 | 57.3388862 | 0.0164492   | 0.24851906 | 0.93252938 | 0.97195497 |              |
| 100270679 | NA | ENSG00000234435 | 0          | NA          | NA         | NA         | NA         | LINC01432    |
|           | NA | ENSG00000234436 | 0          | NA          | NA         | NA         | NA         |              |
| 390594    | NA | ENSG00000234438 | 0.18922458 | 0.01954053  | 0.38488496 | 0.78225479 | NA         | KBTBD13      |
|           | NA | ENSG00000234439 | 0          | NA          | NA         | NA         | NA         | KRT18P2      |
|           | NA | ENSG00000234441 | 0          | NA          | NA         | NA         | NA         |              |
|           | NA | ENSG00000234442 | 6.35363866 | -0.40484404 | 0.74692919 | 0.01081375 | 0.04419191 |              |
| 728927    | NA | ENSG00000234444 | 1076.88633 | -0.01890222 | 0.10135764 | 0.84578638 | 0.93002282 | ZNF736       |
|           | NA | ENSG00000234445 | 0          | NA          | NA         | NA         | NA         | FGF14-AS1    |
|           | NA | ENSG00000234446 | 0          | NA          | NA         | NA         | NA         |              |
|           | NA | ENSG00000234448 | 0          | NA          | NA         | NA         | NA         |              |
|           | NA | ENSG00000234450 | 2.14591332 | 0.00139329  | 0.37256965 | 0.98949946 | NA         |              |
|           | NA | ENSG00000234451 | 0.16735865 | 0.01897177  | 0.38482933 | 0.78225479 | NA         |              |
|           | NA | ENSG00000234452 | 0          | NA          | NA         | NA         | NA         | SLC16A12-AS1 |
|           | NA | ENSG00000234455 | 0          | NA          | NA         | NA         | NA         |              |
| 100505881 | NA | ENSG00000234456 | 2784.31167 | 0.03017151  | 0.07514258 | 0.68305453 | 0.84545523 | MAGI2-AS3    |
|           | NA | ENSG00000234457 | 0          | NA          | NA         | NA         | NA         |              |
|           | NA | ENSG00000234458 | 0          | NA          | NA         | NA         | NA         | OR7E130P     |
|           | NA | ENSG00000234459 | 0          | NA          | NA         | NA         | NA         |              |
|           | NA | ENSG00000234460 | 0          | NA          | NA         | NA         | NA         |              |
|           | NA | ENSG00000234463 | 0          | NA          | NA         | NA         | NA         | COX6CP12     |
|           | NA | ENSG00000234464 | 0          | NA          | NA         | NA         | NA         |              |
| 390940    | NA | ENSG00000234465 | 47.0222238 | 0.15960044  | 0.27412502 | 0.42316681 | 0.64917034 | PINLYP       |
|           | NA | ENSG00000234466 | 0          | NA          | NA         | NA         | NA         | HDGFL3P1     |
|           | NA | ENSG00000234467 | 0          | NA          | NA         | NA         | NA         | SLC25A1P2    |

|           |                 |            |             |            |            |            |            |
|-----------|-----------------|------------|-------------|------------|------------|------------|------------|
| 100288814 | ENSG00000234469 | 0.47363189 | -0.00749912 | 0.38323159 | 0.86335971 | NA         | CLDN34     |
| NA        | ENSG00000234471 | 0.30139824 | -0.02296476 | 0.38527817 | 0.68536535 | NA         |            |
| NA        | ENSG00000234473 | 2.46370404 | 0.00508977  | 0.3755319  | 0.95284405 | NA         | ZNF101P2   |
| 101927704 | ENSG00000234474 | 0          | NA          | NA         | NA         | NA         | MIR3663HG  |
| NA        | ENSG00000234476 | 0.48937687 | -0.03587766 | 0.38636917 | 0.48458983 | NA         | LINC02765  |
| NA        | ENSG00000234477 | 0          | NA          | NA         | NA         | NA         |            |
| NA        | ENSG00000234478 | 4.17996505 | 0.08367502  | 0.37464841 | 0.49945586 | 0.71682702 | ACBD3-AS1  |
| 23782     | ENSG00000234479 | 0          | NA          | NA         | NA         | NA         | AP1B1P1    |
| NA        | ENSG00000234480 | 0          | NA          | NA         | NA         | NA         | MTCO2P18   |
| NA        | ENSG00000234481 | 0          | NA          | NA         | NA         | NA         |            |
| NA        | ENSG00000234484 | 0          | NA          | NA         | NA         | NA         |            |
| NA        | ENSG00000234485 | 0          | NA          | NA         | NA         | NA         | OR7E46P    |
| NA        | ENSG00000234488 | 0          | NA          | NA         | NA         | NA         | RPL27P6    |
| NA        | ENSG00000234489 | 0          | NA          | NA         | NA         | NA         | ALDH7A1P4  |
| NA        | ENSG00000234491 | 0          | NA          | NA         | NA         | NA         | HNRNPA1P51 |
| 285456    | ENSG00000234492 | 3.7734803  | -0.06333808 | 0.37224731 | 0.58288602 | 0.77951315 | RPL34-DT   |
| 101928941 | ENSG00000234493 | 0          | NA          | NA         | NA         | NA         | RHOXF1P1   |
| NA        | ENSG00000234494 | 70.2556102 | -0.46441162 | 0.32122427 | 0.04444955 | 0.13588274 | SP2-AS1    |
| NA        | ENSG00000234496 | 0          | NA          | NA         | NA         | NA         | MRPS21P1   |
| 101927320 | ENSG00000234497 | 0.14931947 | -0.01844332 | 0.38480212 | 0.84537521 | NA         | ERICH3-AS1 |
| 387841    | ENSG00000234498 | 2.21120427 | 0.02740346  | 0.37424155 | 0.76880666 | NA         | RPL13AP20  |
| NA        | ENSG00000234500 | 0.33907716 | 0.00243935  | 0.38338139 | 0.96516853 | NA         |            |
| NA        | ENSG00000234502 | 0.30139824 | -0.02296476 | 0.38527817 | 0.68536535 | NA         | FYTTD1P1   |
| NA        | ENSG00000234503 | 0          | NA          | NA         | NA         | NA         |            |
| NA        | ENSG00000234504 | 0          | NA          | NA         | NA         | NA         |            |
| 101927015 | ENSG00000234506 | 0          | NA          | NA         | NA         | NA         | LINC01506  |
| NA        | ENSG00000234509 | 2.15677659 | 0.02036746  | 0.3755346  | 0.81378215 | NA         |            |
| 133874    | ENSG00000234511 | 0          | NA          | NA         | NA         | NA         | C5orf58    |
| NA        | ENSG00000234512 | 0          | NA          | NA         | NA         | NA         | TLR12P     |
| NA        | ENSG00000234513 | 0          | NA          | NA         | NA         | NA         |            |
| NA        | ENSG00000234515 | 0.173733   | 0.01914545  | 0.38484597 | 0.78225479 | NA         | PPP1R2P1   |
| NA        | ENSG00000234518 | 0.31839735 | 0.001337    | 0.38336825 | 0.96426826 | NA         | PTGES3P1   |
| 102724357 | ENSG00000234519 | 0          | NA          | NA         | NA         | NA         |            |
| 101928036 | ENSG00000234520 | 0.173124   | -0.01911262 | 0.38486262 | 0.84537521 | NA         |            |
| NA        | ENSG00000234521 | 0.173733   | 0.01914545  | 0.38484597 | 0.78225479 | NA         |            |
| NA        | ENSG00000234522 | 0          | NA          | NA         | NA         | NA         |            |
| NA        | ENSG00000234523 | 0          | NA          | NA         | NA         | NA         | NDUFB1P2   |
| NA        | ENSG00000234524 | 0          | NA          | NA         | NA         | NA         | RPL12P43   |

|           |                 |            |             |            |            |            |           |
|-----------|-----------------|------------|-------------|------------|------------|------------|-----------|
| NA        | ENSG00000234527 | 0          | NA          | NA         | NA         | NA         | PCDH9-AS1 |
| NA        | ENSG00000234529 | 0          | NA          | NA         | NA         | NA         | GAPDHP19  |
| NA        | ENSG00000234534 | 0          | NA          | NA         | NA         | NA         | CSNK1G2P1 |
| NA        | ENSG00000234535 | 0          | NA          | NA         | NA         | NA         |           |
| NA        | ENSG00000234537 | 1.96643951 | -0.04359893 | 0.377975   | 0.61594544 | NA         |           |
| NA        | ENSG00000234538 | 0          | NA          | NA         | NA         | NA         | ZNF114P1  |
| NA        | ENSG00000234540 | 0          | NA          | NA         | NA         | NA         |           |
| NA        | ENSG00000234541 | 0          | NA          | NA         | NA         | NA         | CHEK2P5   |
| NA        | ENSG00000234542 | 0          | NA          | NA         | NA         | NA         |           |
| NA        | ENSG00000234544 | 0          | NA          | NA         | NA         | NA         | PTGES3P5  |
| 257415    | ENSG00000234545 | 880.40808  | 0.07978861  | 0.09083063 | 0.36610319 | 0.59527022 | FAM133B   |
| 102724571 | ENSG00000234546 | 10.4536309 | 0.08462136  | 0.35309911 | 0.59605584 | 0.78832911 | LNCTAM34A |
| NA        | ENSG00000234548 | 0          | NA          | NA         | NA         | NA         | LINC02020 |
| NA        | ENSG00000234551 | 0          | NA          | NA         | NA         | NA         | LINC01309 |
| NA        | ENSG00000234553 | 0          | NA          | NA         | NA         | NA         |           |
| NA        | ENSG00000234556 | 0          | NA          | NA         | NA         | NA         | LINC00701 |
| NA        | ENSG00000234557 | 0          | NA          | NA         | NA         | NA         | PPIAP90   |
| NA        | ENSG00000234558 | 0          | NA          | NA         | NA         | NA         | API5P1    |
| NA        | ENSG00000234559 | 0          | NA          | NA         | NA         | NA         | RPL22P7   |
| 219869    | ENSG00000234560 | 0          | NA          | NA         | NA         | NA         | OR10G8    |
| NA        | ENSG00000234562 | 0          | NA          | NA         | NA         | NA         | TPMTP2    |
| NA        | ENSG00000234564 | 0          | NA          | NA         | NA         | NA         | HSPA8P20  |
| NA        | ENSG00000234565 | 0          | NA          | NA         | NA         | NA         | COX6B1P1  |
| NA        | ENSG00000234566 | 0.173124   | -0.01911262 | 0.38486262 | 0.84537521 | NA         | RPL7AP71  |
| NA        | ENSG00000234567 | 0          | NA          | NA         | NA         | NA         |           |
| NA        | ENSG00000234568 | 0          | NA          | NA         | NA         | NA         | BIN2P1    |
| NA        | ENSG00000234569 | 0.173733   | 0.01914545  | 0.38484597 | 0.78225479 | NA         | RAD1P1    |
| NA        | ENSG00000234570 | 0          | NA          | NA         | NA         | NA         | ZFRP1     |
| NA        | ENSG00000234571 | 37.3882014 | -0.34723656 | 0.41553695 | 0.12293272 | 0.29025171 | H2BP2     |
| 101927438 | ENSG00000234572 | 0.173124   | -0.01911262 | 0.38486262 | 0.84537521 | NA         | LINC01800 |
| NA        | ENSG00000234573 | 0          | NA          | NA         | NA         | NA         |           |
| NA        | ENSG00000234575 | 0          | NA          | NA         | NA         | NA         | CTSLP8    |
| NA        | ENSG00000234576 | 0          | NA          | NA         | NA         | NA         | MTND1P26  |
| NA        | ENSG00000234577 | 0          | NA          | NA         | NA         | NA         | SYNE1-AS1 |
| NA        | ENSG00000234578 | 0.16735865 | 0.01897177  | 0.38482933 | 0.78225479 | NA         |           |
| NA        | ENSG00000234579 | 0          | NA          | NA         | NA         | NA         |           |
| NA        | ENSG00000234580 | 0          | NA          | NA         | NA         | NA         |           |
| NA        | ENSG00000234583 | 0          | NA          | NA         | NA         | NA         | TSPY19P   |

|           |                 |            |             |            |            |            |              |
|-----------|-----------------|------------|-------------|------------|------------|------------|--------------|
| NA        | ENSG00000234584 | 0.32332238 | 0.00161643  | 0.38337078 | 0.96560638 | NA         |              |
| 643180    | ENSG00000234585 | 234.709329 | -0.07585924 | 0.14859449 | 0.57874329 | 0.77656626 | CCT6P3       |
| NA        | ENSG00000234586 | 0.59774645 | -0.0349948  | 0.38647714 | 0.44371175 | NA         |              |
| NA        | ENSG00000234587 | 0          | NA          | NA         | NA         | NA         | MRPL50P1     |
| NA        | ENSG00000234588 | 0          | NA          | NA         | NA         | NA         | FABP5P14     |
| NA        | ENSG00000234589 | 0.14931947 | -0.01844332 | 0.38480212 | 0.84537521 | NA         |              |
| NA        | ENSG00000234590 | 0          | NA          | NA         | NA         | NA         | GNG5P5       |
| NA        | ENSG00000234592 | 0          | NA          | NA         | NA         | NA         | TJAP1P1      |
| NA        | ENSG00000234593 | 0          | NA          | NA         | NA         | NA         | KAZN-AS1     |
| NA        | ENSG00000234594 | 0          | NA          | NA         | NA         | NA         |              |
| NA        | ENSG00000234595 | 0          | NA          | NA         | NA         | NA         |              |
| NA        | ENSG00000234597 | 0          | NA          | NA         | NA         | NA         |              |
| 100873984 | ENSG00000234601 | 8.59090003 | 0.03792069  | 0.35309325 | 0.79498819 | 0.90585603 | CHRM3-AS1    |
| 345643    | ENSG00000234602 | 0          | NA          | NA         | NA         | NA         | MCIDAS       |
| NA        | ENSG00000234604 | 0          | NA          | NA         | NA         | NA         |              |
| NA        | ENSG00000234607 | 0          | NA          | NA         | NA         | NA         |              |
| 51275     | ENSG00000234608 | 421.006888 | 0.22239085  | 0.11862926 | 0.04819287 | 0.14471721 | MAPKAPK5-AS1 |
| NA        | ENSG00000234611 | 0          | NA          | NA         | NA         | NA         | OR2AT2P      |
| NA        | ENSG00000234612 | 0          | NA          | NA         | NA         | NA         | H2AZP5       |
| NA        | ENSG00000234613 | 0          | NA          | NA         | NA         | NA         |              |
| NA        | ENSG00000234614 | 0.53369569 | 0.01361989  | 0.38345093 | 0.7443217  | NA         | C2CD4D-AS1   |
| 8629      | ENSG00000234616 | 2008.40551 | -0.12524423 | 0.09125854 | 0.15699578 | 0.34378031 | JRK          |
| NA        | ENSG00000234617 | 19.5715278 | 0.13251109  | 0.32497807 | 0.4909351  | 0.71049328 | SNRK-AS1     |
| NA        | ENSG00000234618 | 5.1400277  | -0.04196514 | 0.36276138 | 0.74167181 | 0.87812748 | RPSAP9       |
| NA        | ENSG00000234619 | 0          | NA          | NA         | NA         | NA         | RPL7P11      |
| NA        | ENSG00000234620 | 0          | NA          | NA         | NA         | NA         | PUDPP1       |
| NA        | ENSG00000234622 | 0          | NA          | NA         | NA         | NA         |              |
| NA        | ENSG00000234624 | 0          | NA          | NA         | NA         | NA         |              |
| NA        | ENSG00000234625 | 0          | NA          | NA         | NA         | NA         | LINC00380    |
| NA        | ENSG00000234626 | 0          | NA          | NA         | NA         | NA         |              |
| NA        | ENSG00000234627 | 0          | NA          | NA         | NA         | NA         | NUS1P3       |
| NA        | ENSG00000234629 | 0          | NA          | NA         | NA         | NA         | WDR82P1      |
| NA        | ENSG00000234630 | 6.01960982 | -0.07772094 | 0.36537724 | 0.57181204 | 0.77185678 |              |
| NA        | ENSG00000234632 | 0.14931947 | -0.01844332 | 0.38480212 | 0.84537521 | NA         | NECAP1P2     |
| 105371541 | ENSG00000234634 | 0          | NA          | NA         | NA         | NA         | LINC02093    |
| NA        | ENSG00000234636 | 19.6113273 | 0.10558381  | 0.33674929 | 0.55823484 | 0.76291851 | MED14OS      |
| NA        | ENSG00000234637 | 0          | NA          | NA         | NA         | NA         | RPS19P6      |
| NA        | ENSG00000234638 | 0          | NA          | NA         | NA         | NA         |              |

|           |                 |            |             |            |            |            |            |
|-----------|-----------------|------------|-------------|------------|------------|------------|------------|
| NA        | ENSG00000234639 | 0          | NA          | NA         | NA         | NA         |            |
| NA        | ENSG00000234640 | 0          | NA          | NA         | NA         | NA         |            |
| NA        | ENSG00000234644 | 0          | NA          | NA         | NA         | NA         | OTX2P1     |
| NA        | ENSG00000234645 | 0          | NA          | NA         | NA         | NA         | YWHAEP5    |
| NA        | ENSG00000234646 | 0          | NA          | NA         | NA         | NA         |            |
| 101929420 | ENSG00000234647 | 0          | NA          | NA         | NA         | NA         |            |
| NA        | ENSG00000234648 | 0          | NA          | NA         | NA         | NA         |            |
| NA        | ENSG00000234650 | 0.34624801 | -0.02356563 | 0.38536324 | 0.65270996 | NA         | PCCA-AS1   |
| NA        | ENSG00000234652 | 0          | NA          | NA         | NA         | NA         | AGPAT5P1   |
| 101927907 | ENSG00000234653 | 0.37844916 | 0.02407552  | 0.3854191  | 0.60038877 | NA         | LRRTM4-AS1 |
| NA        | ENSG00000234655 | 0          | NA          | NA         | NA         | NA         | OR7E155P   |
| NA        | ENSG00000234658 | 0          | NA          | NA         | NA         | NA         |            |
| NA        | ENSG00000234660 | 0          | NA          | NA         | NA         | NA         | LINC00440  |
| 101927193 | ENSG00000234661 | 0          | NA          | NA         | NA         | NA         | CHL1-AS1   |
| NA        | ENSG00000234663 | 0.57750503 | 0.03340368  | 0.38622545 | 0.46959586 | NA         | LINC01934  |
| NA        | ENSG00000234664 | 1.89381324 | 0.04495484  | 0.38106078 | 0.55446158 | NA         | HMG2N2P5   |
| NA        | ENSG00000234665 | 6.11370803 | 0.38002308  | 0.62258066 | 0.03862493 | 0.12228832 | LERFS      |
| NA        | ENSG00000234667 | 0.173733   | 0.01914545  | 0.38484597 | 0.78225479 | NA         | ACTL11P    |
| NA        | ENSG00000234670 | 0          | NA          | NA         | NA         | NA         | OR6C64P    |
| NA        | ENSG00000234671 | 0          | NA          | NA         | NA         | NA         | MTCYBP5    |
| NA        | ENSG00000234675 | 0          | NA          | NA         | NA         | NA         |            |
| 101929602 | ENSG00000234676 | 0.34699665 | 0.00062565  | 0.3833631  | 0.96253916 | NA         | IFT74-AS1  |
| NA        | ENSG00000234677 | 0          | NA          | NA         | NA         | NA         |            |
| NA        | ENSG00000234678 | 80.2170177 | 0.06086381  | 0.23576981 | 0.74501721 | 0.87988222 | ELF3-AS1   |
| NA        | ENSG00000234680 | 0          | NA          | NA         | NA         | NA         | VN2R3P     |
| NA        | ENSG00000234682 | 1.11702913 | -0.05839178 | 0.38701996 | 0.32362245 | NA         | VDAC2P4    |
| NA        | ENSG00000234683 | 0.173733   | 0.01914545  | 0.38484597 | 0.78225479 | NA         |            |
| 100507495 | ENSG00000234684 | 92.3739942 | 0.27348886  | 0.23178116 | 0.14817075 | 0.33038933 | SDCBP2-AS1 |
| NA        | ENSG00000234685 | 0          | NA          | NA         | NA         | NA         | NUS1P2     |
| NA        | ENSG00000234686 | 0          | NA          | NA         | NA         | NA         |            |
| NA        | ENSG00000234688 | 1.44944611 | -0.09759358 | 0.40083254 | 0.08386404 | NA         |            |
| 101927043 | ENSG00000234690 | 89.105497  | 0.46444009  | 0.26614754 | 0.02772847 | 0.09424924 | EPCAM-DT   |
| NA        | ENSG00000234692 | 0          | NA          | NA         | NA         | NA         |            |
| 100506175 | ENSG00000234693 | 0          | NA          | NA         | NA         | NA         | RIPOR3-AS1 |
| NA        | ENSG00000234694 | 1.23429682 | 0.04264225  | 0.38319307 | 0.49969823 | NA         |            |
| 105375401 | ENSG00000234695 | 0.33471731 | 0.02354391  | 0.38534154 | 0.62842204 | NA         | TFPI2-DT   |
| 100128688 | ENSG00000234696 | 0          | NA          | NA         | NA         | NA         | GPR50-AS1  |
| NA        | ENSG00000234698 | 0          | NA          | NA         | NA         | NA         |            |



|           |                 |            |             |            |            |            |             |
|-----------|-----------------|------------|-------------|------------|------------|------------|-------------|
| NA        | ENSG00000234699 | 0.34056945 | 0.00241779  | 0.38338101 | 0.96460499 | NA         |             |
| NA        | ENSG00000234700 | 0          | NA          | NA         | NA         | NA         | MTCO1P8     |
| NA        | ENSG00000234701 | 0          | NA          | NA         | NA         | NA         | PRDX3P3     |
| NA        | ENSG00000234702 | 0          | NA          | NA         | NA         | NA         | VDAC1P3     |
| NA        | ENSG00000234703 | 0          | NA          | NA         | NA         | NA         |             |
| NA        | ENSG00000234705 | 0          | NA          | NA         | NA         | NA         | HMGA1P4     |
| NA        | ENSG00000234706 | 0          | NA          | NA         | NA         | NA         | PRUNEP1     |
| NA        | ENSG00000234707 | 0          | NA          | NA         | NA         | NA         | SEC61G-DT   |
| NA        | ENSG00000234709 | 2.02640208 | 0.01327047  | 0.37359779 | 0.88540736 | NA         | UPF3AP3     |
| NA        | ENSG00000234710 | 0          | NA          | NA         | NA         | NA         |             |
| NA        | ENSG00000234711 | 0          | NA          | NA         | NA         | NA         | TUBB8P11    |
| NA        | ENSG00000234712 | 0          | NA          | NA         | NA         | NA         |             |
| NA        | ENSG00000234713 | 0          | NA          | NA         | NA         | NA         |             |
| NA        | ENSG00000234714 | 0          | NA          | NA         | NA         | NA         |             |
| 101927870 | ENSG00000234715 | 4.41455863 | -0.07774073 | 0.37756604 | 0.49111009 | 0.71060078 |             |
| NA        | ENSG00000234716 | 0          | NA          | NA         | NA         | NA         |             |
| NA        | ENSG00000234717 | 0          | NA          | NA         | NA         | NA         | TMEM212-AS1 |
| NA        | ENSG00000234718 | 0.30139824 | -0.02296476 | 0.38527817 | 0.68536535 | NA         |             |
| 729978    | ENSG00000234719 | 37.0873662 | 0.04462125  | 0.29046743 | 0.81752632 | 0.91685309 | NPIP2       |
| NA        | ENSG00000234720 | 0          | NA          | NA         | NA         | NA         | ATP5F1AP8   |
| 400620    | ENSG00000234721 | 0          | NA          | NA         | NA         | NA         | LINC02092   |
| 103724390 | ENSG00000234722 | 2.97735322 | -0.14773633 | 0.41521883 | 0.11976716 | 0.28481128 | LINC01287   |
| NA        | ENSG00000234723 | 0          | NA          | NA         | NA         | NA         |             |
| NA        | ENSG00000234724 | 0          | NA          | NA         | NA         | NA         | HDAC1P1     |
| NA        | ENSG00000234726 | 0          | NA          | NA         | NA         | NA         |             |
| NA        | ENSG00000234730 | 0          | NA          | NA         | NA         | NA         |             |
| NA        | ENSG00000234731 | 0          | NA          | NA         | NA         | NA         | MTND4LP16   |
| NA        | ENSG00000234732 | 0          | NA          | NA         | NA         | NA         | RPEP5       |
| NA        | ENSG00000234735 | 0          | NA          | NA         | NA         | NA         |             |
| 100506733 | ENSG00000234736 | 0          | NA          | NA         | NA         | NA         | FAM170B-AS1 |
| NA        | ENSG00000234737 | 0          | NA          | NA         | NA         | NA         | KRT18P15    |
| NA        | ENSG00000234740 | 3.24923345 | 0.02245652  | 0.36885211 | 0.83771669 | 0.92628758 |             |
| 60674     | ENSG00000234741 | 6136.27702 | 0.0042841   | 0.07120181 | 0.95199451 | 0.98012235 | GAS5        |
| NA        | ENSG00000234742 | 2.70503131 | -0.01157489 | 0.37129925 | 0.90486246 | 0.95833402 |             |
| NA        | ENSG00000234743 | 0          | NA          | NA         | NA         | NA         | EIF5AP4     |
| NA        | ENSG00000234744 | 0          | NA          | NA         | NA         | NA         | USP9YP26    |
| 3106      | ENSG00000234745 | 1.43726589 | -0.04539262 | 0.38327929 | 0.48283272 | NA         | HLA-B       |
| NA        | ENSG00000234748 | 0          | NA          | NA         | NA         | NA         |             |

|           |                 |            |             |            |            |            |              |
|-----------|-----------------|------------|-------------|------------|------------|------------|--------------|
| NA        | ENSG00000234749 | 0          | NA          | NA         | NA         | NA         | FAM90A21P    |
| NA        | ENSG00000234750 | 5.87717216 | 0.19752984  | 0.42729293 | 0.1575978  | 0.34450642 |              |
| NA        | ENSG00000234751 | 0.6357265  | 0.00251627  | 0.38196061 | 0.95617274 | NA         |              |
| 105755953 | ENSG00000234752 | 0          | NA          | NA         | NA         | NA         | LINC02676    |
| 101060264 | ENSG00000234753 | 5.20710573 | 0.02712399  | 0.36778482 | 0.81183043 | 0.91473851 | FOXP4-AS1    |
| 400804    | ENSG00000234754 | 0.15069912 | -0.01848503 | 0.38480575 | 0.84537521 | NA         | LINC02817    |
| NA        | ENSG00000234756 | 0          | NA          | NA         | NA         | NA         | LINC02621    |
| NA        | ENSG00000234758 | 0          | NA          | NA         | NA         | NA         |              |
| NA        | ENSG00000234761 | 0          | NA          | NA         | NA         | NA         | MGAT4FP      |
| NA        | ENSG00000234763 | 0          | NA          | NA         | NA         | NA         |              |
| NA        | ENSG00000234764 | 0          | NA          | NA         | NA         | NA         | E2F6P1       |
| NA        | ENSG00000234765 | 0          | NA          | NA         | NA         | NA         | ELL2P3       |
| NA        | ENSG00000234766 | 1.46520372 | 0.02714695  | 0.38007737 | 0.71063111 | NA         | LINC01496    |
| NA        | ENSG00000234767 | 0          | NA          | NA         | NA         | NA         | LINC01052    |
| NA        | ENSG00000234768 | 0          | NA          | NA         | NA         | NA         |              |
| NA        | ENSG00000234769 | 93.345169  | 0.18325593  | 0.23551132 | 0.3325151  | 0.56173872 | WASH4P       |
| NA        | ENSG00000234770 | 0          | NA          | NA         | NA         | NA         | GULOP        |
| NA        | ENSG00000234771 | 481.832597 | -0.09232203 | 0.11711781 | 0.40679914 | 0.63510348 | SLC25A25-AS1 |
| NA        | ENSG00000234772 | 0.16735865 | 0.01897177  | 0.38482933 | 0.78225479 | NA         | LINC00412    |
| NA        | ENSG00000234773 | 24.1049564 | 0.33200311  | 0.38416864 | 0.14115679 | 0.31929662 |              |
| NA        | ENSG00000234775 | 0.16735865 | 0.01897177  | 0.38482933 | 0.78225479 | NA         |              |
| 143678    | ENSG00000234776 | 8.23918217 | 0.03465628  | 0.3484473  | 0.82066739 | 0.91843643 | C11orf94     |
| NA        | ENSG00000234777 | 0          | NA          | NA         | NA         | NA         | LINC02529    |
| 111216284 | ENSG00000234779 | 0          | NA          | NA         | NA         | NA         | BNC2-AS1     |
| NA        | ENSG00000234780 | 0          | NA          | NA         | NA         | NA         |              |
| 101927360 | ENSG00000234781 | 1.05097572 | 0.00663357  | 0.38083027 | 0.90545316 | NA         | LINC01103    |
| NA        | ENSG00000234782 | 4.45081702 | 3.12256177  | 2.03481124 | 0.00351044 | 0.01731586 | TPT1P9       |
| NA        | ENSG00000234784 | 0          | NA          | NA         | NA         | NA         |              |
| NA        | ENSG00000234785 | 0.16735865 | 0.01897177  | 0.38482933 | 0.78225479 | NA         | EEF1GP5      |
| 100507428 | ENSG00000234787 | 0          | NA          | NA         | NA         | NA         | LINC00458    |
| NA        | ENSG00000234788 | 0.49010279 | -0.00827049 | 0.38275245 | 0.84718048 | NA         | HSPA8P3      |
| NA        | ENSG00000234789 | 3.13194089 | 0.00501769  | 0.36784408 | 0.96486582 | 0.98622874 |              |
| NA        | ENSG00000234790 | 0          | NA          | NA         | NA         | NA         | NUTF2P4      |
| NA        | ENSG00000234791 | 0          | NA          | NA         | NA         | NA         |              |
| NA        | ENSG00000234792 | 0          | NA          | NA         | NA         | NA         |              |
| NA        | ENSG00000234793 | 0.50207596 | 0.02562368  | 0.38565771 | 0.52549886 | NA         |              |
| NA        | ENSG00000234795 | 0          | NA          | NA         | NA         | NA         | RFTN1P1      |
| NA        | ENSG00000234796 | 0          | NA          | NA         | NA         | NA         |              |

|           |                 |            |             |            |            |            |                |
|-----------|-----------------|------------|-------------|------------|------------|------------|----------------|
| NA        | ENSG00000234797 | 6.64093745 | -0.05505425 | 0.36630571 | 0.65871334 | 0.83073135 | RPS3AP6        |
| NA        | ENSG00000234800 | 0          | NA          | NA         | NA         | NA         | PCMTD1P3       |
| NA        | ENSG00000234801 | 0          | NA          | NA         | NA         | NA         | MORF4          |
| NA        | ENSG00000234803 | 0          | NA          | NA         | NA         | NA         | FAM197Y2       |
| NA        | ENSG00000234805 | 0          | NA          | NA         | NA         | NA         |                |
| NA        | ENSG00000234806 | 0.85832659 | 0.04591292  | 0.38534064 | 0.40765246 | NA         | RPL26P29       |
| NA        | ENSG00000234807 | 2.20837199 | 0.09283098  | 0.38968351 | 0.3147074  | NA         | LINC01135      |
| NA        | ENSG00000234810 | 1.00178474 | -0.02147519 | 0.38102036 | 0.72049909 | NA         |                |
| NA        | ENSG00000234811 | 0          | NA          | NA         | NA         | NA         |                |
| NA        | ENSG00000234812 | 0          | NA          | NA         | NA         | NA         |                |
| NA        | ENSG00000234813 | 0          | NA          | NA         | NA         | NA         |                |
| NA        | ENSG00000234814 | 2.52891062 | 0.10526876  | 0.39351344 | 0.2713954  | NA         | SVIL2P         |
| NA        | ENSG00000234816 | 0          | NA          | NA         | NA         | NA         | H2AC5P         |
| 100507506 | ENSG00000234817 | 1.60560228 | -0.06777645 | 0.38701032 | 0.34820265 | NA         | ECI2-DT        |
| NA        | ENSG00000234818 | 0          | NA          | NA         | NA         | NA         |                |
| NA        | ENSG00000234819 | 0          | NA          | NA         | NA         | NA         |                |
| NA        | ENSG00000234821 | 0          | NA          | NA         | NA         | NA         | MRPS33P4       |
| NA        | ENSG00000234825 | 0          | NA          | NA         | NA         | NA         | XRCC6P2        |
| NA        | ENSG00000234826 | 0          | NA          | NA         | NA         | NA         |                |
| 285423    | ENSG00000234828 | 0          | NA          | NA         | NA         | NA         | IQCM           |
| 3451      | ENSG00000234829 | 0          | NA          | NA         | NA         | NA         | IFNA17         |
| 100132932 | ENSG00000234830 | 0          | NA          | NA         | NA         | NA         | FAM197Y9       |
| NA        | ENSG00000234832 | 0.34113463 | 0.02362671  | 0.38535343 | 0.62409272 | NA         | NXT1-AS1       |
| NA        | ENSG00000234835 | 0.96082714 | -0.01801211 | 0.38080529 | 0.76312393 | NA         | PHBP13         |
| NA        | ENSG00000234837 | 0          | NA          | NA         | NA         | NA         |                |
| NA        | ENSG00000234838 | 0          | NA          | NA         | NA         | NA         | PPIAP78        |
| NA        | ENSG00000234839 | 0          | NA          | NA         | NA         | NA         | RPS26P30       |
| 441389    | ENSG00000234840 | 0          | NA          | NA         | NA         | NA         | LINC01239      |
| NA        | ENSG00000234841 | 6.91023983 | 0.34036744  | 0.55603265 | 0.05586166 | 0.16215001 |                |
| NA        | ENSG00000234842 | 0          | NA          | NA         | NA         | NA         | MTCO2P16       |
| NA        | ENSG00000234844 | 0          | NA          | NA         | NA         | NA         | CDC42P2        |
| NA        | ENSG00000234848 | 0.31822942 | 0.00117968  | 0.38336696 | 0.9657748  | NA         |                |
| NA        | ENSG00000234850 | 0          | NA          | NA         | NA         | NA         | MTND2P3        |
| NA        | ENSG00000234851 | 7799.33338 | -0.05592231 | 0.05805458 | 0.33002802 | 0.55861736 | RPL23AP42      |
| NA        | ENSG00000234853 | 0          | NA          | NA         | NA         | NA         | NDUFA5P3       |
| 101409253 | ENSG00000234854 | 0          | NA          | NA         | NA         | NA         | LINC00676      |
| 100505540 | ENSG00000234855 | 0.52072932 | 0.01043593  | 0.38324495 | 0.77673444 | NA         | SLIT1-AS1      |
| NA        | ENSG00000234857 | 1733.37174 | 0.1229628   | 0.08654922 | 0.1447008  | 0.32486861 | HNRNPUL2-BSCL2 |

|           |                 |                 |             |             |            |            |            |           |
|-----------|-----------------|-----------------|-------------|-------------|------------|------------|------------|-----------|
| 100505782 | ENSG00000234859 | 0               | NA          | NA          | NA         | NA         |            |           |
|           | NA              | ENSG00000234860 | 0.173733    | 0.01914545  | 0.38484597 | 0.78225479 | NA         |           |
|           | NA              | ENSG00000234861 | 0           | NA          | NA         | NA         | ATP5F1AP1  |           |
|           | NA              | ENSG00000234862 | 0           | NA          | NA         | NA         |            |           |
|           | NA              | ENSG00000234863 | 0           | NA          | NA         | NA         |            |           |
|           | NA              | ENSG00000234864 | 0           | NA          | NA         | NA         | LINC02632  |           |
|           | NA              | ENSG00000234865 | 0           | NA          | NA         | NA         | ADH5P5     |           |
|           | NA              | ENSG00000234869 | 0.70943029  | 0.04117672  | 0.38726725 | 0.34723773 | NA         |           |
|           | NA              | ENSG00000234872 | 0           | NA          | NA         | NA         |            |           |
|           | NA              | ENSG00000234877 | 0           | NA          | NA         | NA         |            |           |
|           | NA              | ENSG00000234878 | 0           | NA          | NA         | NA         | HSPE1P1    |           |
| 727699    | ENSG00000234880 | 12.3068598      | -0.56857757 | 0.71372077  | 0.03689801 | 0.11811172 | LINC00163  |           |
|           | NA              | ENSG00000234881 | 0           | NA          | NA         | NA         | PIGFP2     |           |
|           | NA              | ENSG00000234882 | 45.4541645  | -0.20572881 | 0.30702474 | 0.31631825 | 0.54434505 | EIF3EP1   |
| 114614    | ENSG00000234883 | 0.173733        | 0.01914545  | 0.38484597  | 0.78225479 | NA         | MIR155HG   |           |
|           | NA              | ENSG00000234884 | 8.66832007  | -0.05647438 | 0.3616296  | 0.67209903 | 0.83855284 |           |
|           | NA              | ENSG00000234886 | 0.6911769   | -0.01624055 | 0.38322337 | 0.68846529 | NA         | MTND5P26  |
|           | NA              | ENSG00000234888 | 0           | NA          | NA         | NA         | NA         | OFD1P15Y  |
|           | NA              | ENSG00000234889 | 0           | NA          | NA         | NA         | NA         | KPNB1P1   |
|           | NA              | ENSG00000234890 | 0           | NA          | NA         | NA         | NA         | HNRNPDLP2 |
|           | NA              | ENSG00000234891 | 0           | NA          | NA         | NA         | NA         |           |
|           | NA              | ENSG00000234892 | 0           | NA          | NA         | NA         | NA         |           |
|           | NA              | ENSG00000234894 | 0           | NA          | NA         | NA         | NA         |           |
|           | NA              | ENSG00000234895 | 0           | NA          | NA         | NA         | NA         | OR52X1P   |
|           | NA              | ENSG00000234896 | 0           | NA          | NA         | NA         | NA         | OR7E62P   |
|           | NA              | ENSG00000234898 | 0           | NA          | NA         | NA         | NA         | CHEK2P3   |
| 400618    | ENSG00000234899 | 5.68274422      | 0.20562195  | 0.44249345  | 0.10033504 | 0.24986158 | SOX9-AS1   |           |
|           | NA              | ENSG00000234900 | 0           | NA          | NA         | NA         | NA         |           |
|           | NA              | ENSG00000234901 | 0           | NA          | NA         | NA         | NA         | MTND6P13  |
|           | NA              | ENSG00000234902 | 0.33471731  | 0.02354391  | 0.38534154 | 0.62842204 | NA         |           |
|           | NA              | ENSG00000234903 | 0           | NA          | NA         | NA         | NA         |           |
| 344       | ENSG00000234906 | 0               | NA          | NA          | NA         | NA         | NA         | APOC2     |
|           | NA              | ENSG00000234907 | 0           | NA          | NA         | NA         | NA         |           |
|           | NA              | ENSG00000234910 | 0           | NA          | NA         | NA         | NA         | IL6RP1    |
|           | NA              | ENSG00000234911 | 12.9110252  | -0.05903588 | 0.33504598 | 0.72773672 | 0.86981806 | TEX21P    |
| 654434    | ENSG00000234912 | 494.606624      | -0.22948467 | 0.11874263  | 0.04140311 | 0.12877216 | SNHG20     |           |
|           | NA              | ENSG00000234913 | 0           | NA          | NA         | NA         | NA         |           |
|           | NA              | ENSG00000234915 | 0.173124    | -0.01911262 | 0.38486262 | 0.84537521 | NA         |           |

|           |                 |            |             |            |            |            |            |
|-----------|-----------------|------------|-------------|------------|------------|------------|------------|
| NA        | ENSG00000234917 | 2.79196441 | -0.02487574 | 0.37054203 | 0.80902389 | 0.91334153 |            |
| NA        | ENSG00000234918 | 0          | NA          | NA         | NA         | NA         |            |
| NA        | ENSG00000234919 | 0          | NA          | NA         | NA         | NA         | LINC01827  |
| NA        | ENSG00000234921 | 0          | NA          | NA         | NA         | NA         |            |
| NA        | ENSG00000234922 | 0          | NA          | NA         | NA         | NA         | TSEN15P3   |
| NA        | ENSG00000234925 | 1.68444515 | -0.03608322 | 0.38056662 | 0.61142119 | NA         | ATP5PDP4   |
| NA        | ENSG00000234927 | 0.36347431 | 0.02389841  | 0.38539298 | 0.6097095  | NA         | HMG1N1P18  |
| 101929374 | ENSG00000234928 | 1.38072594 | 0.03115623  | 0.38094479 | 0.63899866 | NA         | LINC01659  |
| NA        | ENSG00000234929 | 1.63861202 | 0.08755672  | 0.39806848 | 0.07807489 | NA         |            |
| NA        | ENSG00000234931 | 0          | NA          | NA         | NA         | NA         | MARK2P15   |
| NA        | ENSG00000234932 | 0          | NA          | NA         | NA         | NA         |            |
| NA        | ENSG00000234933 | 0          | NA          | NA         | NA         | NA         | CDC42P1    |
| NA        | ENSG00000234934 | 0          | NA          | NA         | NA         | NA         | MTND5P29   |
| NA        | ENSG00000234936 | 2.81031225 | 0.12136304  | 0.39979387 | 0.21582022 | 0.42665138 |            |
| NA        | ENSG00000234937 | 1.6906133  | -0.07787021 | 0.38897037 | 0.30885645 | NA         |            |
| NA        | ENSG00000234938 | 0          | NA          | NA         | NA         | NA         |            |
| NA        | ENSG00000234939 | 0          | NA          | NA         | NA         | NA         | MTND2P18   |
| NA        | ENSG00000234940 | 0          | NA          | NA         | NA         | NA         |            |
| NA        | ENSG00000234941 | 0          | NA          | NA         | NA         | NA         |            |
| 100507470 | ENSG00000234942 | 2.25601457 | -0.07516959 | 0.38863431 | 0.21142553 | NA         | GRID1-AS1  |
| NA        | ENSG00000234943 | 0          | NA          | NA         | NA         | NA         |            |
| 101929445 | ENSG00000234944 | 34.4672218 | 0.02564418  | 0.29165038 | 0.89497841 | 0.95469109 | LINC02623  |
| 100505624 | ENSG00000234945 | 6.62202731 | 0.0791612   | 0.3684951  | 0.5524787  | 0.75887409 | GTF3C2-AS1 |
| NA        | ENSG00000234946 | 0.16735865 | 0.01897177  | 0.38482933 | 0.78225479 | NA         | SDHCP3     |
| 101927700 | ENSG00000234948 | 0.173124   | -0.01911262 | 0.38486262 | 0.84537521 | NA         | LINC01524  |
| 105373958 | ENSG00000234949 | 0.87728738 | 0.04336945  | 0.38475722 | 0.41284557 | NA         |            |
| NA        | ENSG00000234950 | 0          | NA          | NA         | NA         | NA         | RBM2OP     |
| NA        | ENSG00000234952 | 0          | NA          | NA         | NA         | NA         | LINC02674  |
| 101927434 | ENSG00000234953 | 0          | NA          | NA         | NA         | NA         |            |
| 100507406 | ENSG00000234956 | 0          | NA          | NA         | NA         | NA         | LINC02539  |
| NA        | ENSG00000234958 | 0          | NA          | NA         | NA         | NA         | FABP5P13   |
| NA        | ENSG00000234961 | 1.69278353 | 0.0863213   | 0.39531667 | 0.14923634 | NA         |            |
| NA        | ENSG00000234962 | 0.15069912 | -0.01848503 | 0.38480575 | 0.84537521 | NA         | LINC00700  |
| NA        | ENSG00000234964 | 0          | NA          | NA         | NA         | NA         | FABP5P7    |
| 440829    | ENSG00000234965 | 0          | NA          | NA         | NA         | NA         | SHISA8     |
| NA        | ENSG00000234967 | 0.97001019 | -0.0675202  | 0.39187299 | 0.1971191  | NA         |            |
| NA        | ENSG00000234969 | 9.69598592 | 0.18106429  | 0.39051202 | 0.28086633 | 0.50556476 | AARSD1P1   |
| 102724264 | ENSG00000234973 | 0          | NA          | NA         | NA         | NA         | LINC02658  |

|           |                 |            |             |            |            |            |            |
|-----------|-----------------|------------|-------------|------------|------------|------------|------------|
| NA        | ENSG00000234975 | 0.85508201 | 0.02068562  | 0.38079809 | 0.73336268 | NA         | FTH1P2     |
| NA        | ENSG00000234977 | 0          | NA          | NA         | NA         | NA         |            |
| NA        | ENSG00000234979 | 0          | NA          | NA         | NA         | NA         |            |
| NA        | ENSG00000234981 | 0.34746601 | 0.02370763  | 0.3853651  | 0.61987128 | NA         |            |
| NA        | ENSG00000234982 | 0.173124   | -0.01911262 | 0.38486262 | 0.84537521 | NA         |            |
| NA        | ENSG00000234983 | 3.65719368 | 0.12107171  | 0.40594999 | 0.1227472  | 0.28995172 |            |
| NA        | ENSG00000234984 | 0          | NA          | NA         | NA         | NA         | FMO10P     |
| NA        | ENSG00000234985 | 0          | NA          | NA         | NA         | NA         |            |
| NA        | ENSG00000234986 | 0.45209736 | -0.02505403 | 0.38558831 | 0.57865948 | NA         |            |
| NA        | ENSG00000234988 | 0.34746601 | 0.02370763  | 0.3853651  | 0.61987128 | NA         | LINC01849  |
| NA        | ENSG00000234993 | 0          | NA          | NA         | NA         | NA         | CUBNP2     |
| NA        | ENSG00000234995 | 0.16735865 | 0.01897177  | 0.38482933 | 0.78225479 | NA         | RPS3AP28   |
| 148709    | ENSG00000234996 | 57.8257121 | -0.00647123 | 0.23947994 | 0.97169254 | 0.98938604 | ACTG1P25   |
| NA        | ENSG00000234997 | 3.97254555 | -0.00038031 | 0.36626292 | 0.99519224 | 0.99852582 |            |
| NA        | ENSG00000234998 | 0          | NA          | NA         | NA         | NA         |            |
| NA        | ENSG00000234999 | 0.16735865 | 0.01897177  | 0.38482933 | 0.78225479 | NA         | SNRPCP19   |
| NA        | ENSG00000235001 | 0.14931947 | -0.01844332 | 0.38480212 | 0.84537521 | NA         | EIF4A1P2   |
| NA        | ENSG00000235002 | 0.15069912 | -0.01848503 | 0.38480575 | 0.84537521 | NA         |            |
| NA        | ENSG00000235004 | 0          | NA          | NA         | NA         | NA         | USP9YP30   |
| NA        | ENSG00000235005 | 0          | NA          | NA         | NA         | NA         |            |
| NA        | ENSG00000235007 | 0          | NA          | NA         | NA         | NA         |            |
| NA        | ENSG00000235008 | 0.173733   | 0.01914545  | 0.38484597 | 0.78225479 | NA         |            |
| 100996902 | ENSG00000235009 | 0          | NA          | NA         | NA         | NA         | LINC01883  |
| NA        | ENSG00000235010 | 2.77019401 | 0.043997    | 0.37403202 | 0.6631789  | 0.83380582 |            |
| NA        | ENSG00000235011 | 0          | NA          | NA         | NA         | NA         |            |
| NA        | ENSG00000235012 | 0.15069912 | -0.01848503 | 0.38480575 | 0.84537521 | NA         | JCADP1     |
| NA        | ENSG00000235013 | 0          | NA          | NA         | NA         | NA         | COX20P2    |
| NA        | ENSG00000235014 | 0          | NA          | NA         | NA         | NA         | REREP2Y    |
| NA        | ENSG00000235015 | 0          | NA          | NA         | NA         | NA         | GEMIN2P1   |
| 100129060 | ENSG00000235016 | 49.3745573 | 0.2271839   | 0.27835468 | 0.26597291 | 0.48827746 | SEMA3F-AS1 |
| NA        | ENSG00000235018 | 0.3409998  | 0.00260408  | 0.38338409 | 0.96282695 | NA         |            |
| NA        | ENSG00000235020 | 0.51338134 | 0.02901278  | 0.38577108 | 0.57141025 | NA         |            |
| NA        | ENSG00000235021 | 0          | NA          | NA         | NA         | NA         |            |
| NA        | ENSG00000235023 | 13.8690561 | 0.08221209  | 0.33562443 | 0.64069129 | 0.82008361 |            |
| NA        | ENSG00000235024 | 2.11903792 | -0.07877901 | 0.39121378 | 0.24842676 | NA         |            |
| 389023    | ENSG00000235026 | 3.16839953 | 0.10839756  | 0.3963075  | 0.2303801  | 0.44631785 | DPP10-AS1  |
| NA        | ENSG00000235027 | 2.10994421 | -0.0033619  | 0.37509714 | 0.96686114 | NA         |            |
| NA        | ENSG00000235028 | 0          | NA          | NA         | NA         | NA         | HMG1P30    |

|           |                 |            |             |            |            |            |              |
|-----------|-----------------|------------|-------------|------------|------------|------------|--------------|
| 105375606 | ENSG00000235029 | 0          | NA          | NA         | NA         | NA         | MNX1-AS2     |
| NA        | ENSG00000235032 | 0          | NA          | NA         | NA         | NA         | BMP7-AS1     |
| 100505635 | ENSG00000235033 | 14.7677393 | 1.42371183  | 0.93413907 | 0.00387886 | 0.01877904 | DAAM2-AS1    |
| 342918    | ENSG00000235034 | 32.5150152 | 0.01054811  | 0.27987746 | 0.95795019 | 0.98268084 | C19orf81     |
| NA        | ENSG00000235035 | 0          | NA          | NA         | NA         | NA         |              |
| NA        | ENSG00000235036 | 4.57941627 | 0.17143736  | 0.41450561 | 0.18682763 | 0.38675502 |              |
| NA        | ENSG00000235038 | 0          | NA          | NA         | NA         | NA         |              |
| NA        | ENSG00000235039 | 0          | NA          | NA         | NA         | NA         | MTND6P12     |
| NA        | ENSG00000235040 | 0          | NA          | NA         | NA         | NA         | MTCO3P1      |
| NA        | ENSG00000235042 | 0.6811135  | 0.00430387  | 0.38245477 | 0.91962625 | NA         | SMARCAL1-AS1 |
| NA        | ENSG00000235043 | 0          | NA          | NA         | NA         | NA         | TECRP1       |
| NA        | ENSG00000235044 | 2.13928205 | 0.02206286  | 0.37609548 | 0.79474202 | NA         | PPIAP3       |
| NA        | ENSG00000235045 | 0.89802186 | 0.04004814  | 0.38510671 | 0.42829731 | NA         | RPL7P8       |
| NA        | ENSG00000235047 | 0          | NA          | NA         | NA         | NA         |              |
| 100271702 | ENSG00000235049 | 0.15069912 | -0.01848503 | 0.38480575 | 0.84537521 | NA         | LINC00940    |
| NA        | ENSG00000235050 | 0          | NA          | NA         | NA         | NA         | MLIP-AS1     |
| NA        | ENSG00000235051 | 0.69061353 | 0.04032093  | 0.3871497  | 0.35703835 | NA         |              |
| NA        | ENSG00000235052 | 0.63396199 | 0.00243652  | 0.3825166  | 0.95292108 | NA         |              |
| 284661    | ENSG00000235054 | 0          | NA          | NA         | NA         | NA         | LINC01777    |
| NA        | ENSG00000235055 | 0.14931947 | -0.01844332 | 0.38480212 | 0.84537521 | NA         |              |
| NA        | ENSG00000235056 | 0          | NA          | NA         | NA         | NA         |              |
| NA        | ENSG00000235058 | 0          | NA          | NA         | NA         | NA         | ZMYND10-AS1  |
| NA        | ENSG00000235060 | 0          | NA          | NA         | NA         | NA         | VDAC1P4      |
| NA        | ENSG00000235061 | 0          | NA          | NA         | NA         | NA         | UBE2V1P7     |
| NA        | ENSG00000235062 | 0          | NA          | NA         | NA         | NA         | BCRP5        |
| NA        | ENSG00000235064 | 0          | NA          | NA         | NA         | NA         | SLC25A5P2    |
| NA        | ENSG00000235065 | 0.14931947 | -0.01844332 | 0.38480212 | 0.84537521 | NA         | RPL24P2      |
| NA        | ENSG00000235066 | 0.37027566 | 0.02394581  | 0.38540043 | 0.60636585 | NA         |              |
| NA        | ENSG00000235069 | 0          | NA          | NA         | NA         | NA         |              |
| NA        | ENSG00000235070 | 0          | NA          | NA         | NA         | NA         |              |
| NA        | ENSG00000235071 | 0          | NA          | NA         | NA         | NA         |              |
| NA        | ENSG00000235072 | 7.17744129 | 0.05190531  | 0.3663413  | 0.67815446 | 0.84291038 | ARNILA       |
| NA        | ENSG00000235076 | 0.81529013 | 0.02797051  | 0.38423262 | 0.52762508 | NA         | GAPDHP52     |
| NA        | ENSG00000235077 | 0.15069912 | -0.01848503 | 0.38480575 | 0.84537521 | NA         |              |
| NA        | ENSG00000235078 | 14.1835185 | -0.01182327 | 0.32964351 | 0.9426419  | 0.97635163 |              |
| NA        | ENSG00000235079 | 1.13500299 | 0.00016547  | 0.37937117 | 0.99831242 | NA         | ZRANB2-AS1   |
| NA        | ENSG00000235080 | 0          | NA          | NA         | NA         | NA         | MTND5P23     |
| NA        | ENSG00000235081 | 0.51295475 | 0.01546653  | 0.38313024 | 0.73719805 | NA         |              |

|           |    |                 |            |             |            |            |            |           |
|-----------|----|-----------------|------------|-------------|------------|------------|------------|-----------|
|           | NA | ENSG00000235082 | 0          | NA          | NA         | NA         | NA         | SUMO1P3   |
|           | NA | ENSG00000235083 | 0.18922458 | 0.01954053  | 0.38488496 | 0.78225479 | NA         |           |
|           | NA | ENSG00000235084 | 1.03751962 | 0.03817649  | 0.38538177 | 0.40757108 | NA         | CHCHD2P6  |
|           | NA | ENSG00000235085 | 0          | NA          | NA         | NA         | NA         |           |
| 100874312 |    | ENSG00000235086 | 0          | NA          | NA         | NA         | NA         | FNDC1-IT1 |
|           | NA | ENSG00000235088 | 0.173733   | 0.01914545  | 0.38484597 | 0.78225479 | NA         |           |
|           | NA | ENSG00000235089 | 0.14931947 | -0.01844332 | 0.38480212 | 0.84537521 | NA         |           |
|           | NA | ENSG00000235090 | 0.34746601 | 0.02370763  | 0.3853651  | 0.61987128 | NA         | RPL7L1P3  |
|           | NA | ENSG00000235091 | 0          | NA          | NA         | NA         | NA         |           |
|           | NA | ENSG00000235092 | 127.56849  | -0.37188171 | 0.22387365 | 0.04613365 | 0.13991007 | ID2-AS1   |
|           | NA | ENSG00000235094 | 0          | NA          | NA         | NA         | NA         |           |
|           | NA | ENSG00000235095 | 0          | NA          | NA         | NA         | NA         |           |
|           | NA | ENSG00000235096 | 0.37844916 | 0.02407552  | 0.3854191  | 0.60038877 | NA         |           |
| 144817    |    | ENSG00000235097 | 0          | NA          | NA         | NA         | NA         | LINC00330 |
| 441869    |    | ENSG00000235098 | 32.8166268 | 0.90315659  | 0.48251235 | 0.00575724 | 0.02622752 | ANKRD65   |
|           | NA | ENSG00000235099 | 0          | NA          | NA         | NA         | NA         |           |
|           | NA | ENSG00000235100 | 5.59503475 | -0.09914658 | 0.38110483 | 0.40765911 | 0.63599565 |           |
|           | NA | ENSG00000235101 | 0          | NA          | NA         | NA         | NA         | SETP9     |
|           | NA | ENSG00000235102 | 0          | NA          | NA         | NA         | NA         | ADI1P1    |
|           | NA | ENSG00000235105 | 0          | NA          | NA         | NA         | NA         |           |
| 266655    |    | ENSG00000235106 | 679.064728 | -0.05097936 | 0.09726689 | 0.58705848 | 0.78237765 | BRD3OS    |
|           | NA | ENSG00000235108 | 0          | NA          | NA         | NA         | NA         | IFNA12P   |
| 64288     |    | ENSG00000235109 | 80.8516937 | -0.06675558 | 0.23672291 | 0.71957858 | 0.86581594 | ZSCAN31   |
|           | NA | ENSG00000235110 | 0          | NA          | NA         | NA         | NA         |           |
|           | NA | ENSG00000235111 | 2.15869266 | -0.13870779 | 0.41516088 | 0.07199129 | NA         |           |
|           | NA | ENSG00000235112 | 0          | NA          | NA         | NA         | NA         | HSPE1P27  |
|           | NA | ENSG00000235113 | 0          | NA          | NA         | NA         | NA         |           |
|           | NA | ENSG00000235115 | 0          | NA          | NA         | NA         | NA         | CHCHD2P8  |
| 200726    |    | ENSG00000235118 | 0          | NA          | NA         | NA         | NA         | FAM237A   |
|           | NA | ENSG00000235119 | 0.30139824 | -0.02296476 | 0.38527817 | 0.68536535 | NA         |           |
|           | NA | ENSG00000235120 | 0          | NA          | NA         | NA         | NA         | BSN-AS1   |
|           | NA | ENSG00000235121 | 3.60448573 | 0.05908055  | 0.37374131 | 0.59225165 | 0.78670814 |           |
|           | NA | ENSG00000235122 | 0          | NA          | NA         | NA         | NA         |           |
| 100506492 |    | ENSG00000235123 | 0          | NA          | NA         | NA         | NA         | DSCAM-AS1 |
|           | NA | ENSG00000235124 | 0          | NA          | NA         | NA         | NA         | KRT8P17   |
|           | NA | ENSG00000235126 | 0          | NA          | NA         | NA         | NA         |           |
|           | NA | ENSG00000235127 | 0.14931947 | -0.01844332 | 0.38480212 | 0.84537521 | NA         |           |
|           | NA | ENSG00000235128 | 0          | NA          | NA         | NA         | NA         |           |



|           |                 |            |             |            |            |            |           |
|-----------|-----------------|------------|-------------|------------|------------|------------|-----------|
| NA        | ENSG00000235129 | 0          | NA          | NA         | NA         | NA         | FABP7P2   |
| NA        | ENSG00000235131 | 0          | NA          | NA         | NA         | NA         | TP73-AS2  |
| NA        | ENSG00000235133 | 0          | NA          | NA         | NA         | NA         | RPL35AP22 |
| NA        | ENSG00000235136 | 0          | NA          | NA         | NA         | NA         | PSMA5P1   |
| NA        | ENSG00000235137 | 0.45209736 | -0.02505403 | 0.38558831 | 0.57865948 | NA         | HSP90AB6P |
| 100130548 | ENSG00000235138 | 19.6894146 | 0.04192375  | 0.3227687  | 0.8157532  | 0.9163678  |           |
| 101927378 | ENSG00000235139 | 0          | NA          | NA         | NA         | NA         |           |
| 105378318 | ENSG00000235140 | 0.41813098 | 0.01450755  | 0.38400752 | 0.81914816 | NA         |           |
| NA        | ENSG00000235141 | 0          | NA          | NA         | NA         | NA         | COX6CP17  |
| 100422737 | ENSG00000235142 | 1.16135039 | -0.0532717  | 0.38571722 | 0.34335967 | NA         | LINC02532 |
| NA        | ENSG00000235143 | 0          | NA          | NA         | NA         | NA         |           |
| NA        | ENSG00000235145 | 0          | NA          | NA         | NA         | NA         | RPSAP16   |
| NA        | ENSG00000235146 | 0          | NA          | NA         | NA         | NA         |           |
| NA        | ENSG00000235147 | 0          | NA          | NA         | NA         | NA         |           |
| NA        | ENSG00000235148 | 0          | NA          | NA         | NA         | NA         | HMGB3P23  |
| NA        | ENSG00000235149 | 0          | NA          | NA         | NA         | NA         |           |
| NA        | ENSG00000235150 | 0          | NA          | NA         | NA         | NA         | RCBTB2P1  |
| NA        | ENSG00000235151 | 3.37812808 | -0.05764409 | 0.374779   | 0.58487857 | 0.78083513 |           |
| NA        | ENSG00000235152 | 0          | NA          | NA         | NA         | NA         |           |
| NA        | ENSG00000235154 | 0          | NA          | NA         | NA         | NA         |           |
| 644444    | ENSG00000235156 | 0          | NA          | NA         | NA         | NA         | TMEM30CP  |
| NA        | ENSG00000235158 | 0          | NA          | NA         | NA         | NA         |           |
| NA        | ENSG00000235159 | 3.90305224 | 0.08404724  | 0.37681274 | 0.480325   | 0.70158112 |           |
| 107984780 | ENSG00000235160 | 0          | NA          | NA         | NA         | NA         | LINC02248 |
| 387882    | ENSG00000235162 | 468.104205 | -0.58593915 | 0.12567706 | 9.57E-07   | 1.09E-05   | C12orf75  |
| NA        | ENSG00000235163 | 0          | NA          | NA         | NA         | NA         |           |
| NA        | ENSG00000235165 | 0          | NA          | NA         | NA         | NA         | CDK5P1    |
| NA        | ENSG00000235166 | 2.13051303 | 0.03242913  | 0.37711669 | 0.70017351 | NA         | LINC01440 |
| NA        | ENSG00000235168 | 0          | NA          | NA         | NA         | NA         |           |
| 388588    | ENSG00000235169 | 35.9676143 | 0.15363707  | 0.2924449  | 0.44409546 | 0.66905081 | SMIM1     |
| NA        | ENSG00000235170 | 0          | NA          | NA         | NA         | NA         | MTND1P31  |
| 257358    | ENSG00000235172 | 0          | NA          | NA         | NA         | NA         | LINC01366 |
| 51236     | ENSG00000235173 | 582.513626 | -0.11371845 | 0.10692596 | 0.26570939 | 0.48802762 | HGH1      |
| NA        | ENSG00000235174 | 0          | NA          | NA         | NA         | NA         | RPL39P3   |
| NA        | ENSG00000235175 | 0          | NA          | NA         | NA         | NA         | RPL26P37  |
| 101101772 | ENSG00000235180 | 0          | NA          | NA         | NA         | NA         | LINC00601 |
| NA        | ENSG00000235181 | 0          | NA          | NA         | NA         | NA         |           |
| NA        | ENSG00000235182 | 0          | NA          | NA         | NA         | NA         |           |

|           |                 |            |             |            |            |            |            |
|-----------|-----------------|------------|-------------|------------|------------|------------|------------|
| NA        | ENSG00000235183 | 0          | NA          | NA         | NA         | NA         | SRP14P3    |
| 105378614 | ENSG00000235185 | 0          | NA          | NA         | NA         | NA         |            |
| NA        | ENSG00000235186 | 0          | NA          | NA         | NA         | NA         |            |
| NA        | ENSG00000235189 | 1.55110818 | 0.02665974  | 0.37987812 | 0.70052259 | NA         |            |
| NA        | ENSG00000235190 | 0          | NA          | NA         | NA         | NA         |            |
| 100874085 | ENSG00000235191 | 0          | NA          | NA         | NA         | NA         | NUCB1-AS1  |
| NA        | ENSG00000235192 | 0          | NA          | NA         | NA         | NA         |            |
| 90673     | ENSG00000235194 | 156.311509 | -0.22935688 | 0.17843066 | 0.14621827 | 0.32701731 | PPP1R3E    |
| NA        | ENSG00000235196 | 0.33948246 | 0.00261378  | 0.3833843  | 0.96350246 | NA         |            |
| NA        | ENSG00000235197 | 0.173733   | 0.01914545  | 0.38484597 | 0.78225479 | NA         | ZNF33CP    |
| NA        | ENSG00000235198 | 0          | NA          | NA         | NA         | NA         |            |
| NA        | ENSG00000235199 | 0          | NA          | NA         | NA         | NA         | CYP2C58P   |
| NA        | ENSG00000235200 | 0          | NA          | NA         | NA         | NA         | LINC01702  |
| NA        | ENSG00000235201 | 0          | NA          | NA         | NA         | NA         | LINC02578  |
| 104355292 | ENSG00000235202 | 0          | NA          | NA         | NA         | NA         | LINC01525  |
| NA        | ENSG00000235203 | 0          | NA          | NA         | NA         | NA         | TBC1D3P3   |
| NA        | ENSG00000235204 | 0          | NA          | NA         | NA         | NA         |            |
| NA        | ENSG00000235205 | 0          | NA          | NA         | NA         | NA         | TATDN2P3   |
| NA        | ENSG00000235207 | 0.16735865 | 0.01897177  | 0.38482933 | 0.78225479 | NA         | TUBBP6     |
| NA        | ENSG00000235208 | 0          | NA          | NA         | NA         | NA         |            |
| NA        | ENSG00000235209 | 0          | NA          | NA         | NA         | NA         |            |
| NA        | ENSG00000235211 | 0          | NA          | NA         | NA         | NA         | TMSB10P2   |
| NA        | ENSG00000235213 | 0          | NA          | NA         | NA         | NA         | OR6E1P     |
| 140846    | ENSG00000235214 | 0          | NA          | NA         | NA         | NA         | FAM83C-AS1 |
| NA        | ENSG00000235215 | 0          | NA          | NA         | NA         | NA         |            |
| NA        | ENSG00000235217 | 184.383505 | -0.07362788 | 0.18917622 | 0.65340676 | 0.82733998 | TSPY26P    |
| NA        | ENSG00000235218 | 0          | NA          | NA         | NA         | NA         | DNAJC17P1  |
| NA        | ENSG00000235219 | 0          | NA          | NA         | NA         | NA         |            |
| NA        | ENSG00000235221 | 0          | NA          | NA         | NA         | NA         | LINC00383  |
| NA        | ENSG00000235224 | 0          | NA          | NA         | NA         | NA         |            |
| NA        | ENSG00000235225 | 0.50623771 | 0.01245901  | 0.38343271 | 0.76506749 | NA         | RPL31P17   |
| NA        | ENSG00000235226 | 0          | NA          | NA         | NA         | NA         |            |
| NA        | ENSG00000235227 | 0          | NA          | NA         | NA         | NA         | VN1R38P    |
| NA        | ENSG00000235232 | 0          | NA          | NA         | NA         | NA         | MRPS18BP2  |
| NA        | ENSG00000235235 | 0          | NA          | NA         | NA         | NA         | IGKV1OR2-1 |
| NA        | ENSG00000235236 | 2.24738878 | 0.0348708   | 0.37472146 | 0.71178749 | NA         |            |
| NA        | ENSG00000235237 | 0.70524781 | 0.0279442   | 0.38378037 | 0.56190997 | NA         |            |
| NA        | ENSG00000235238 | 0          | NA          | NA         | NA         | NA         | SUMO2P1    |

|           |                 |            |             |            |            |            |            |
|-----------|-----------------|------------|-------------|------------|------------|------------|------------|
| NA        | ENSG00000235239 | 0          | NA          | NA         | NA         | NA         | ACTRT1P1   |
| NA        | ENSG00000235240 | 0          | NA          | NA         | NA         | NA         |            |
| NA        | ENSG00000235241 | 0          | NA          | NA         | NA         | NA         |            |
| NA        | ENSG00000235242 | 0          | NA          | NA         | NA         | NA         |            |
| NA        | ENSG00000235243 | 0          | NA          | NA         | NA         | NA         |            |
| 642776    | ENSG00000235244 | 10.0020356 | 0.31701834  | 0.48437952 | 0.10507    | 0.25840943 | DANT2      |
| NA        | ENSG00000235246 | 0          | NA          | NA         | NA         | NA         |            |
| NA        | ENSG00000235248 | 0          | NA          | NA         | NA         | NA         | OR13C1P    |
| NA        | ENSG00000235251 | 0.30002178 | -0.02294464 | 0.38527539 | 0.68644506 | NA         |            |
| NA        | ENSG00000235253 | 1.34753639 | 0.02616346  | 0.38127731 | 0.67083862 | NA         |            |
| NA        | ENSG00000235254 | 0.33920167 | 0.00249419  | 0.38338228 | 0.96464488 | NA         | TMEM185AP1 |
| NA        | ENSG00000235256 | 0          | NA          | NA         | NA         | NA         | FKBP4P7    |
| 101928153 | ENSG00000235257 | 93.3163432 | 0.01761056  | 0.21161864 | 0.92037078 | 0.96646868 | ITGA9-AS1  |
| NA        | ENSG00000235258 | 0.37844916 | 0.02407552  | 0.3854191  | 0.60038877 | NA         | NDUFB4P6   |
| NA        | ENSG00000235262 | 0.5972779  | -0.02732172 | 0.38586499 | 0.50076333 | NA         | KDM5C-IT1  |
| NA        | ENSG00000235263 | 0          | NA          | NA         | NA         | NA         |            |
| NA        | ENSG00000235264 | 0          | NA          | NA         | NA         | NA         | RPL5P28    |
| NA        | ENSG00000235266 | 0.173733   | 0.01914545  | 0.38484597 | 0.78225479 | NA         | RPL22P17   |
| NA        | ENSG00000235267 | 0.46611847 | -0.00759768 | 0.38325806 | 0.86724052 | NA         |            |
| 390245    | ENSG00000235268 | 0          | NA          | NA         | NA         | NA         | KDM4E      |
| 105370503 | ENSG00000235269 | 0          | NA          | NA         | NA         | NA         | LINC02331  |
| NA        | ENSG00000235271 | 0.70358714 | 0.03007482  | 0.38333253 | 0.54306061 | NA         |            |
| NA        | ENSG00000235272 | 7.87636477 | -0.03210035 | 0.35046981 | 0.82614031 | 0.92125524 | RAMACL     |
| NA        | ENSG00000235274 | 0          | NA          | NA         | NA         | NA         |            |
| NA        | ENSG00000235275 | 0          | NA          | NA         | NA         | NA         | KRT18P16   |
| NA        | ENSG00000235277 | 0          | NA          | NA         | NA         | NA         |            |
| NA        | ENSG00000235278 | 0          | NA          | NA         | NA         | NA         | ZNF652P1   |
| NA        | ENSG00000235279 | 0          | NA          | NA         | NA         | NA         |            |
| NA        | ENSG00000235280 | 42.1329053 | -0.0804256  | 0.2678193  | 0.67723617 | 0.84229976 | MCF2L-AS1  |
| NA        | ENSG00000235281 | 0.14931947 | -0.01844332 | 0.38480212 | 0.84537521 | NA         |            |
| NA        | ENSG00000235282 | 0          | NA          | NA         | NA         | NA         | DYNLL1P3   |
| 26786     | ENSG00000235284 | 0          | NA          | NA         | NA         | NA         | SNORD62A   |
| 100874377 | ENSG00000235285 | 0.29863895 | -0.02292439 | 0.3852726  | 0.68753245 | NA         | SMIM2-IT1  |
| NA        | ENSG00000235286 | 0.85322318 | 0.04461796  | 0.38509595 | 0.41768274 | NA         |            |
| NA        | ENSG00000235288 | 37.2595913 | 0.01953144  | 0.37390982 | 0.83790742 | 0.92628758 |            |
| NA        | ENSG00000235289 | 0          | NA          | NA         | NA         | NA         | BRD7P6     |
| NA        | ENSG00000235290 | 1.36545135 | 0.00682189  | 0.37774106 | 0.92614194 | NA         | HLA-W      |
| NA        | ENSG00000235292 | 0          | NA          | NA         | NA         | NA         |            |

|           |                 |                 |            |             |            |            |            |             |
|-----------|-----------------|-----------------|------------|-------------|------------|------------|------------|-------------|
|           | NA              | ENSG00000235293 | 0          | NA          | NA         | NA         | NA         |             |
|           | NA              | ENSG00000235294 | 0          | NA          | NA         | NA         | NA         | RPL7AP25    |
| 100192420 | ENSG00000235295 | 0               | NA         | NA          | NA         | NA         | NA         | LINC01634   |
|           | NA              | ENSG00000235296 | 0.85933088 | -0.0094171  | 0.38079954 | 0.86824019 | NA         |             |
|           | NA              | ENSG00000235297 | 0.16735865 | 0.01897177  | 0.38482933 | 0.78225479 | NA         | FAUP1       |
|           | NA              | ENSG00000235298 | 35.2972651 | 0.54116958  | 0.38780598 | 0.0353518  | 0.11417545 |             |
|           | NA              | ENSG00000235299 | 0          | NA          | NA         | NA         | NA         | MRPL53P1    |
| 105371807 | ENSG00000235300 | 0               | NA         | NA          | NA         | NA         | NA         |             |
|           | NA              | ENSG00000235301 | 0          | NA          | NA         | NA         | NA         | HLA-Z       |
|           | NA              | ENSG00000235303 | 0          | NA          | NA         | NA         | NA         |             |
| 286442    | ENSG00000235304 | 0               | NA         | NA          | NA         | NA         | NA         | LINC01281   |
|           | NA              | ENSG00000235306 | 0.14931947 | -0.01844332 | 0.38480212 | 0.84537521 | NA         | GAPDHP34    |
|           | NA              | ENSG00000235308 | 1.46430547 | -0.00355604 | 0.37599908 | 0.96407397 | NA         |             |
|           | NA              | ENSG00000235310 | 0          | NA          | NA         | NA         | NA         | GXYLT1P6    |
|           | NA              | ENSG00000235312 | 0          | NA          | NA         | NA         | NA         | KRTAP19-10P |
|           | NA              | ENSG00000235313 | 3.0745201  | -0.02026967 | 0.36903145 | 0.8482425  | 0.93095493 | HM13-IT1    |
|           | NA              | ENSG00000235314 | 78.8325638 | 0.07078727  | 0.22950824 | 0.70244876 | 0.85694048 | LINC00957   |
|           | NA              | ENSG00000235315 | 0          | NA          | NA         | NA         | NA         | RPL23AP69   |
|           | NA              | ENSG00000235316 | 127.091287 | 0.21658847  | 0.20504111 | 0.21422504 | 0.42438929 | DUSP8P5     |
|           | NA              | ENSG00000235318 | 0          | NA          | NA         | NA         | NA         | MTND4LP13   |
|           | NA              | ENSG00000235319 | 0.97246569 | -0.02034521 | 0.38097118 | 0.73412661 | NA         |             |
|           | NA              | ENSG00000235321 | 0          | NA          | NA         | NA         | NA         |             |
|           | NA              | ENSG00000235323 | 0          | NA          | NA         | NA         | NA         | COTL1P2     |
|           | NA              | ENSG00000235325 | 0          | NA          | NA         | NA         | NA         | SRSF3P5     |
|           | NA              | ENSG00000235328 | 0          | NA          | NA         | NA         | NA         |             |
|           | NA              | ENSG00000235329 | 0          | NA          | NA         | NA         | NA         |             |
|           | NA              | ENSG00000235330 | 0          | NA          | NA         | NA         | NA         | RPL12P25    |
|           | NA              | ENSG00000235332 | 0          | NA          | NA         | NA         | NA         | RPSAP76     |
|           | NA              | ENSG00000235333 | 0          | NA          | NA         | NA         | NA         | PVRIG2P     |
|           | NA              | ENSG00000235334 | 0          | NA          | NA         | NA         | NA         | BTG3P1      |
|           | NA              | ENSG00000235335 | 0          | NA          | NA         | NA         | NA         | B3GALT1-AS1 |
|           | NA              | ENSG00000235337 | 0          | NA          | NA         | NA         | NA         |             |
|           | NA              | ENSG00000235338 | 0          | NA          | NA         | NA         | NA         | DUSP5P2     |
|           | NA              | ENSG00000235339 | 0          | NA          | NA         | NA         | NA         | GEMIN2P2    |
|           | NA              | ENSG00000235343 | 0          | NA          | NA         | NA         | NA         | LINC01665   |
|           | NA              | ENSG00000235347 | 0          | NA          | NA         | NA         | NA         |             |
|           | NA              | ENSG00000235349 | 0          | NA          | NA         | NA         | NA         |             |
|           | NA              | ENSG00000235350 | 0          | NA          | NA         | NA         | NA         |             |

|           |                 |            |             |            |            |            |           |
|-----------|-----------------|------------|-------------|------------|------------|------------|-----------|
| NA        | ENSG00000235351 | 12.4779096 | 0.05578301  | 0.33925457 | 0.73878862 | 0.87654385 |           |
| NA        | ENSG00000235352 | 0          | NA          | NA         | NA         | NA         | SGCEP1    |
| NA        | ENSG00000235354 | 0.51937201 | -0.02557462 | 0.38567603 | 0.54680819 | NA         | RPS29P16  |
| NA        | ENSG00000235356 | 0          | NA          | NA         | NA         | NA         |           |
| NA        | ENSG00000235357 | 5.52253232 | -0.42530532 | 0.78841646 | 0.01028009 | 0.04237628 | LINC01621 |
| NA        | ENSG00000235358 | 0.18922458 | 0.01954053  | 0.38488496 | 0.78225479 | NA         |           |
| NA        | ENSG00000235361 | 0          | NA          | NA         | NA         | NA         |           |
| NA        | ENSG00000235363 | 0          | NA          | NA         | NA         | NA         | SNRPGP10  |
| NA        | ENSG00000235366 | 0          | NA          | NA         | NA         | NA         | LINC01055 |
| NA        | ENSG00000235368 | 0          | NA          | NA         | NA         | NA         | SAPCD2P2  |
| NA        | ENSG00000235369 | 1.54043068 | 0.03708843  | 0.38226769 | 0.56153152 | NA         | RPL36AP15 |
| NA        | ENSG00000235370 | 228.891668 | 0.2601755   | 0.22949638 | 0.16411385 | 0.35345406 | DNM1P51   |
| NA        | ENSG00000235371 | 0          | NA          | NA         | NA         | NA         |           |
| 728039    | ENSG00000235374 | 44.7848845 | -0.232028   | 0.29396808 | 0.26158317 | 0.4835377  | SSR4P1    |
| 729020    | ENSG00000235376 | 0.173124   | -0.01911262 | 0.38486262 | 0.84537521 | NA         | RPEL1     |
| NA        | ENSG00000235377 | 0          | NA          | NA         | NA         | NA         |           |
| NA        | ENSG00000235378 | 0          | NA          | NA         | NA         | NA         | MRPS10P1  |
| NA        | ENSG00000235379 | 0          | NA          | NA         | NA         | NA         | RPL7P31   |
| NA        | ENSG00000235381 | 137.954229 | 0.13440309  | 0.18903386 | 0.41564669 | 0.64249554 |           |
| NA        | ENSG00000235382 | 0          | NA          | NA         | NA         | NA         | MTND4P31  |
| 109729169 | ENSG00000235385 | 0          | NA          | NA         | NA         | NA         | LINC02154 |
| NA        | ENSG00000235386 | 0          | NA          | NA         | NA         | NA         |           |
| 158376    | ENSG00000235387 | 0          | NA          | NA         | NA         | NA         | SPAAR     |
| NA        | ENSG00000235389 | 0          | NA          | NA         | NA         | NA         |           |
| NA        | ENSG00000235390 | 0          | NA          | NA         | NA         | NA         |           |
| 100874018 | ENSG00000235397 | 2.29976206 | -0.03994559 | 0.37660313 | 0.65631736 | NA         | EPN2-AS1  |
| NA        | ENSG00000235399 | 0.33471731 | 0.02354391  | 0.38534154 | 0.62842204 | NA         |           |
| NA        | ENSG00000235400 | 0          | NA          | NA         | NA         | NA         |           |
| NA        | ENSG00000235403 | 0          | NA          | NA         | NA         | NA         |           |
| 440602    | ENSG00000235407 | 0          | NA          | NA         | NA         | NA         | CYMP-AS1  |
| NA        | ENSG00000235408 | 7.34335782 | 0.11227802  | 0.36887241 | 0.45798506 | 0.6814881  | SNORA71B  |
| NA        | ENSG00000235410 | 0.15069912 | -0.01848503 | 0.38480575 | 0.84537521 | NA         |           |
| NA        | ENSG00000235411 | 1.04683507 | 0.03640753  | 0.38500215 | 0.41223135 | NA         | DRG1P1    |
| NA        | ENSG00000235413 | 2.26693476 | -0.01329483 | 0.3736281  | 0.88272365 | NA         | KRT18P63  |
| NA        | ENSG00000235414 | 0          | NA          | NA         | NA         | NA         | RPSAP24   |
| 105372672 | ENSG00000235415 | 0          | NA          | NA         | NA         | NA         |           |
| NA        | ENSG00000235416 | 0          | NA          | NA         | NA         | NA         | TIPINP1   |
| NA        | ENSG00000235419 | 0          | NA          | NA         | NA         | NA         |           |

|           |                 |            |             |            |            |            |             |
|-----------|-----------------|------------|-------------|------------|------------|------------|-------------|
| NA        | ENSG00000235420 | 0          | NA          | NA         | NA         | NA         | RPL29P30    |
| NA        | ENSG00000235421 | 0.37844916 | 0.02407552  | 0.3854191  | 0.60038877 | NA         |             |
| NA        | ENSG00000235422 | 0          | NA          | NA         | NA         | NA         | KATNBL1P3   |
| NA        | ENSG00000235424 | 0          | NA          | NA         | NA         | NA         | SUMO2P10    |
| NA        | ENSG00000235425 | 0          | NA          | NA         | NA         | NA         | RPS7P13     |
| NA        | ENSG00000235426 | 0          | NA          | NA         | NA         | NA         |             |
| NA        | ENSG00000235427 | 0          | NA          | NA         | NA         | NA         |             |
| NA        | ENSG00000235429 | 0.15069912 | -0.01848503 | 0.38480575 | 0.84537521 | NA         |             |
| NA        | ENSG00000235430 | 0          | NA          | NA         | NA         | NA         | ZSWIM5P1    |
| NA        | ENSG00000235431 | 0          | NA          | NA         | NA         | NA         |             |
| NA        | ENSG00000235432 | 0          | NA          | NA         | NA         | NA         |             |
| NA        | ENSG00000235433 | 0.74659737 | -0.03303578 | 0.38644226 | 0.4112877  | NA         | MTATP6P17   |
| NA        | ENSG00000235434 | 0          | NA          | NA         | NA         | NA         |             |
| NA        | ENSG00000235435 | 0          | NA          | NA         | NA         | NA         |             |
| 442523    | ENSG00000235436 | 22.0356549 | -0.01645093 | 0.31885492 | 0.92468149 | 0.96862095 | DPY19L2P4   |
| 92249     | ENSG00000235437 | 340.856184 | -0.11396461 | 0.13469944 | 0.36496923 | 0.5944495  | LINC01278   |
| 105370105 | ENSG00000235438 | 0.50746864 | 0.01531133  | 0.38313421 | 0.74042389 | NA         | ESRRAP2     |
| NA        | ENSG00000235440 | 0.173733   | 0.01914545  | 0.38484597 | 0.78225479 | NA         | RPS2P15     |
| NA        | ENSG00000235444 | 0          | NA          | NA         | NA         | NA         | PSMB3P2     |
| NA        | ENSG00000235445 | 0          | NA          | NA         | NA         | NA         |             |
| NA        | ENSG00000235446 | 0          | NA          | NA         | NA         | NA         | LINC02791   |
| NA        | ENSG00000235447 | 0          | NA          | NA         | NA         | NA         | TRAPPC13P1  |
| NA        | ENSG00000235448 | 5.10348725 | 0.09866919  | 0.37832755 | 0.43621454 | 0.6612819  | LURAP1L-AS1 |
| NA        | ENSG00000235449 | 0.63498831 | 0.00101637  | 0.38194967 | 0.9813044  | NA         |             |
| NA        | ENSG00000235450 | 0          | NA          | NA         | NA         | NA         |             |
| NA        | ENSG00000235451 | 0          | NA          | NA         | NA         | NA         | PNPLA4P1    |
| 100129250 | ENSG00000235453 | 99.7880652 | 0.03336513  | 0.22471853 | 0.85637954 | 0.93595581 | SMIM27      |
| NA        | ENSG00000235454 | 7.73080337 | -0.05482395 | 0.36116692 | 0.68387534 | 0.84594343 | HAUS6P3     |
| 101928999 | ENSG00000235455 | 0          | NA          | NA         | NA         | NA         | IQCF5-AS1   |
| NA        | ENSG00000235459 | 0.66428818 | 0.00276318  | 0.38131679 | 0.95637491 | NA         | RPS26P31    |
| NA        | ENSG00000235461 | 0.14931947 | -0.01844332 | 0.38480212 | 0.84537521 | NA         |             |
| NA        | ENSG00000235462 | 0          | NA          | NA         | NA         | NA         | TAB3P1      |
| NA        | ENSG00000235463 | 0          | NA          | NA         | NA         | NA         |             |
| NA        | ENSG00000235464 | 0          | NA          | NA         | NA         | NA         |             |
| NA        | ENSG00000235467 | 0          | NA          | NA         | NA         | NA         | RPL10AP5    |
| NA        | ENSG00000235469 | 0          | NA          | NA         | NA         | NA         | MRPL50P4    |
| 102724341 | ENSG00000235470 | 0.34624801 | -0.02356563 | 0.38536324 | 0.65270996 | NA         | NEURL1-AS1  |
| NA        | ENSG00000235472 | 0          | NA          | NA         | NA         | NA         | EIF4A1P7    |

|           |                 |            |             |            |            |            |             |
|-----------|-----------------|------------|-------------|------------|------------|------------|-------------|
| 100996342 | ENSG00000235478 | 2.34553586 | 0.00548382  | 0.37412881 | 0.95204203 | NA         | LINC01664   |
| NA        | ENSG00000235479 | 0          | NA          | NA         | NA         | NA         | RAB9AP4     |
| 105373496 | ENSG00000235480 | 0.88612811 | 0.04001483  | 0.38502973 | 0.43122769 | NA         |             |
| NA        | ENSG00000235481 | 13.4632273 | 0.29925426  | 0.45244889 | 0.13115515 | 0.30359562 | UBE2R2-AS1  |
| NA        | ENSG00000235482 | 0.14931947 | -0.01844332 | 0.38480212 | 0.84537521 | NA         | RPL21P135   |
| NA        | ENSG00000235483 | 0          | NA          | NA         | NA         | NA         | GYG2-AS1    |
| NA        | ENSG00000235485 | 0          | NA          | NA         | NA         | NA         |             |
| NA        | ENSG00000235486 | 0          | NA          | NA         | NA         | NA         | ANAPC1P6    |
| NA        | ENSG00000235488 | 0.49525314 | -0.02948176 | 0.38590041 | 0.52595419 | NA         | JARID2-AS1  |
| NA        | ENSG00000235489 | 14.3756043 | -0.63872013 | 0.72483368 | 0.03070952 | 0.10216479 | DBF4P1      |
| NA        | ENSG00000235491 | 0          | NA          | NA         | NA         | NA         | LINC01889   |
| 104266961 | ENSG00000235492 | 0          | NA          | NA         | NA         | NA         | LINC01221   |
| NA        | ENSG00000235493 | 0          | NA          | NA         | NA         | NA         | LINC01967   |
| NA        | ENSG00000235494 | 0          | NA          | NA         | NA         | NA         |             |
| NA        | ENSG00000235495 | 0          | NA          | NA         | NA         | NA         |             |
| NA        | ENSG00000235497 | 0          | NA          | NA         | NA         | NA         |             |
| NA        | ENSG00000235499 | 0          | NA          | NA         | NA         | NA         |             |
| NA        | ENSG00000235500 | 0.173733   | 0.01914545  | 0.38484597 | 0.78225479 | NA         | SNX19P2     |
| NA        | ENSG00000235501 | 114.280099 | 0.33190751  | 0.20500356 | 0.05867948 | 0.16825136 | CNN3-DT     |
| NA        | ENSG00000235503 | 0          | NA          | NA         | NA         | NA         |             |
| 643733    | ENSG00000235505 | 0          | NA          | NA         | NA         | NA         | CASP4LP     |
| NA        | ENSG00000235508 | 1.28797738 | -0.05021093 | 0.38314437 | 0.47807505 | NA         | RPS2P7      |
| NA        | ENSG00000235510 | 0          | NA          | NA         | NA         | NA         |             |
| NA        | ENSG00000235511 | 0          | NA          | NA         | NA         | NA         | OFD1P18Y    |
| NA        | ENSG00000235512 | 0          | NA          | NA         | NA         | NA         | TAB3-AS2    |
| NA        | ENSG00000235513 | 2.93877683 | -0.04005289 | 0.37588515 | 0.66372655 | 0.83407238 | L3MBTL2-AS1 |
| NA        | ENSG00000235514 | 0.30001565 | -0.02294458 | 0.38527538 | 0.68644889 | NA         | LLPHP2      |
| NA        | ENSG00000235518 | 0.33471731 | 0.02354391  | 0.38534154 | 0.62842204 | NA         |             |
| NA        | ENSG00000235519 | 0          | NA          | NA         | NA         | NA         | LINC01815   |
| NA        | ENSG00000235521 | 0          | NA          | NA         | NA         | NA         | USP9YP27    |
| NA        | ENSG00000235522 | 0.14931947 | -0.01844332 | 0.38480212 | 0.84537521 | NA         |             |
| NA        | ENSG00000235523 | 0          | NA          | NA         | NA         | NA         |             |
| NA        | ENSG00000235524 | 0          | NA          | NA         | NA         | NA         | MTCO1P23    |
| NA        | ENSG00000235525 | 0          | NA          | NA         | NA         | NA         | FTLP1       |
| NA        | ENSG00000235526 | 2.68004081 | -0.16200829 | 0.42398486 | 0.09603496 | 0.24194713 |             |
| 101928846 | ENSG00000235527 | 3.57788975 | -0.04677451 | 0.37102532 | 0.67119539 | 0.83824921 | HIPK1-AS1   |
| 100506749 | ENSG00000235529 | 0.3390936  | 0.00244666  | 0.38338151 | 0.96509873 | NA         | AGAP1-IT1   |
| 107984969 | ENSG00000235530 | 7.02243491 | -0.15699654 | 0.39048669 | 0.29683863 | 0.52357548 |             |

|           |                 |            |             |            |            |            |           |
|-----------|-----------------|------------|-------------|------------|------------|------------|-----------|
| 100132891 | ENSG00000235531 | 1.23892514 | 0.03944131  | 0.38377265 | 0.49141834 | NA         | MSC-AS1   |
| 100507612 | ENSG00000235532 | 0.85896995 | 0.03031254  | 0.38448372 | 0.49860827 | NA         | LINC00402 |
| NA        | ENSG00000235533 | 0          | NA          | NA         | NA         | NA         |           |
| NA        | ENSG00000235534 | 0          | NA          | NA         | NA         | NA         | FECHP1    |
| NA        | ENSG00000235535 | 0          | NA          | NA         | NA         | NA         | TRDN-AS1  |
| NA        | ENSG00000235537 | 0          | NA          | NA         | NA         | NA         |           |
| NA        | ENSG00000235538 | 0          | NA          | NA         | NA         | NA         |           |
| NA        | ENSG00000235539 | 0          | NA          | NA         | NA         | NA         | MTND1P33  |
| NA        | ENSG00000235544 | 0          | NA          | NA         | NA         | NA         | RPS11P1   |
| NA        | ENSG00000235545 | 4.78435503 | -0.00064566 | 0.35953997 | 0.99411103 | 0.99823681 |           |
| NA        | ENSG00000235546 | 0          | NA          | NA         | NA         | NA         |           |
| NA        | ENSG00000235547 | 0          | NA          | NA         | NA         | NA         | NDUFB11P1 |
| NA        | ENSG00000235548 | 0          | NA          | NA         | NA         | NA         | HEBP2P1   |
| NA        | ENSG00000235549 | 0          | NA          | NA         | NA         | NA         | EIF1P2    |
| NA        | ENSG00000235550 | 0          | NA          | NA         | NA         | NA         | ANKRD26P2 |
| NA        | ENSG00000235552 | 5.61620519 | 0.23471354  | 0.45561339 | 0.11035579 | 0.2677814  | RPL6P27   |
| NA        | ENSG00000235554 | 1.25667083 | -0.0391352  | 0.38244113 | 0.54291356 | NA         | SRSF6P2   |
| NA        | ENSG00000235555 | 0          | NA          | NA         | NA         | NA         | SUMO1P4   |
| NA        | ENSG00000235558 | 0          | NA          | NA         | NA         | NA         | GUSBP17   |
| NA        | ENSG00000235559 | 0          | NA          | NA         | NA         | NA         | NOP56P1   |
| 107984875 | ENSG00000235560 | 47.0189777 | 0.11457818  | 0.26662738 | 0.55893994 | 0.7635226  |           |
| NA        | ENSG00000235563 | 0.15069912 | -0.01848503 | 0.38480575 | 0.84537521 | NA         |           |
| NA        | ENSG00000235564 | 0          | NA          | NA         | NA         | NA         |           |
| 150372    | ENSG00000235568 | 1.76414376 | -0.02956088 | 0.37783543 | 0.71117875 | NA         | NFAM1     |
| 387055    | ENSG00000235570 | 0          | NA          | NA         | NA         | NA         | LINC00533 |
| NA        | ENSG00000235571 | 0          | NA          | NA         | NA         | NA         | SNX18P14  |
| NA        | ENSG00000235572 | 0          | NA          | NA         | NA         | NA         |           |
| NA        | ENSG00000235573 | 0          | NA          | NA         | NA         | NA         |           |
| NA        | ENSG00000235574 | 0          | NA          | NA         | NA         | NA         |           |
| NA        | ENSG00000235575 | 0          | NA          | NA         | NA         | NA         |           |
| NA        | ENSG00000235576 | 0          | NA          | NA         | NA         | NA         | LINC01871 |
| NA        | ENSG00000235578 | 0          | NA          | NA         | NA         | NA         |           |
| NA        | ENSG00000235579 | 0          | NA          | NA         | NA         | NA         | RPL38P5   |
| NA        | ENSG00000235581 | 0          | NA          | NA         | NA         | NA         |           |
| NA        | ENSG00000235582 | 0          | NA          | NA         | NA         | NA         |           |
| NA        | ENSG00000235583 | 0          | NA          | NA         | NA         | NA         |           |
| NA        | ENSG00000235584 | 0          | NA          | NA         | NA         | NA         |           |
| NA        | ENSG00000235586 | 1.1700737  | -0.00252492 | 0.3803772  | 0.96500374 | NA         |           |



|           |                 |            |             |            |            |            |           |
|-----------|-----------------|------------|-------------|------------|------------|------------|-----------|
| NA        | ENSG00000235587 | 0.14931947 | -0.01844332 | 0.38480212 | 0.84537521 | NA         | GAPDHP65  |
| 149775    | ENSG00000235590 | 31.4451454 | -0.18483006 | 0.31729009 | 0.3607029  | 0.59064153 | GNAS-AS1  |
| NA        | ENSG00000235592 | 0          | NA          | NA         | NA         | NA         |           |
| 100873977 | ENSG00000235593 | 0          | NA          | NA         | NA         | NA         | RBMS3-AS1 |
| NA        | ENSG00000235594 | 0          | NA          | NA         | NA         | NA         |           |
| NA        | ENSG00000235595 | 0          | NA          | NA         | NA         | NA         | GAPDHP23  |
| NA        | ENSG00000235597 | 248.380884 | 0.20011353  | 0.14306325 | 0.13107535 | 0.30355257 | LINC01102 |
| NA        | ENSG00000235598 | 0          | NA          | NA         | NA         | NA         | RRM2P4    |
| 101928040 | ENSG00000235601 | 0          | NA          | NA         | NA         | NA         | BARX1-DT  |
| 642559    | ENSG00000235602 | 4.1375584  | 0.02630432  | 0.36620151 | 0.82312546 | 0.919424   | POU5F1P3  |
| NA        | ENSG00000235605 | 2.07679637 | -0.10265655 | 0.39702251 | 0.20218661 | NA         |           |
| NA        | ENSG00000235606 | 0          | NA          | NA         | NA         | NA         | AK4P6     |
| 54729     | ENSG00000235608 | 0          | NA          | NA         | NA         | NA         | NKX1-1    |
| NA        | ENSG00000235609 | 0          | NA          | NA         | NA         | NA         |           |
| NA        | ENSG00000235610 | 0          | NA          | NA         | NA         | NA         |           |
| NA        | ENSG00000235612 | 0          | NA          | NA         | NA         | NA         |           |
| NA        | ENSG00000235613 | 1.21532937 | 0.01686478  | 0.37996117 | 0.79232305 | NA         | NSRP1P1   |
| NA        | ENSG00000235615 | 0          | NA          | NA         | NA         | NA         |           |
| NA        | ENSG00000235616 | 0          | NA          | NA         | NA         | NA         | ST13P2    |
| NA        | ENSG00000235617 | 0          | NA          | NA         | NA         | NA         |           |
| 100421577 | ENSG00000235618 | 9.44780208 | 0.07435904  | 0.35085595 | 0.63976282 | 0.81937218 | FAM21EP   |
| NA        | ENSG00000235619 | 0          | NA          | NA         | NA         | NA         | RPL36AP33 |
| NA        | ENSG00000235620 | 0          | NA          | NA         | NA         | NA         |           |
| 284749    | ENSG00000235621 | 0.34624801 | -0.02356563 | 0.38536324 | 0.65270996 | NA         | LINC00494 |
| NA        | ENSG00000235623 | 0          | NA          | NA         | NA         | NA         | OR7E110P  |
| NA        | ENSG00000235625 | 0          | NA          | NA         | NA         | NA         |           |
| NA        | ENSG00000235626 | 0          | NA          | NA         | NA         | NA         | KRT18P66  |
| NA        | ENSG00000235627 | 0.44795842 | -0.02501848 | 0.38558245 | 0.5807882  | NA         | SNRFPF4   |
| NA        | ENSG00000235628 | 0          | NA          | NA         | NA         | NA         | TNR-IT1   |
| NA        | ENSG00000235629 | 0          | NA          | NA         | NA         | NA         |           |
| 378925    | ENSG00000235631 | 0          | NA          | NA         | NA         | NA         | RNF148    |
| NA        | ENSG00000235635 | 0.34624801 | -0.02356563 | 0.38536324 | 0.65270996 | NA         |           |
| NA        | ENSG00000235636 | 16.9633691 | -0.25662963 | 0.39375509 | 0.20481662 | 0.41169887 | NUS1P1    |
| NA        | ENSG00000235637 | 0          | NA          | NA         | NA         | NA         |           |
| NA        | ENSG00000235638 | 0.15069912 | -0.01848503 | 0.38480575 | 0.84537521 | NA         | MTND6P14  |
| NA        | ENSG00000235639 | 0          | NA          | NA         | NA         | NA         |           |
| NA        | ENSG00000235640 | 0          | NA          | NA         | NA         | NA         | ELOAP1    |
| NA        | ENSG00000235641 | 0.86880555 | 0.01919989  | 0.38302548 | 0.78717443 | NA         | LINC00484 |

|           |    |                 |            |             |            |            |            |            |
|-----------|----|-----------------|------------|-------------|------------|------------|------------|------------|
|           | NA | ENSG00000235642 | 0          | NA          | NA         | NA         | NA         | PTP4A1P5   |
| 101929181 |    | ENSG00000235643 | 0.16735865 | 0.01897177  | 0.38482933 | 0.78225479 | NA         | LINC01647  |
|           | NA | ENSG00000235644 | 0.14931947 | -0.01844332 | 0.38480212 | 0.84537521 | NA         | RPL10P5    |
|           | NA | ENSG00000235645 | 0          | NA          | NA         | NA         | NA         | LINC02651  |
|           | NA | ENSG00000235646 | 0          | NA          | NA         | NA         | NA         | MTND1P2    |
|           | NA | ENSG00000235647 | 0          | NA          | NA         | NA         | NA         | MTFR2P2    |
|           | NA | ENSG00000235649 | 0          | NA          | NA         | NA         | NA         | MXRA5Y     |
|           | NA | ENSG00000235651 | 7.7408086  | -0.08812184 | 0.36302222 | 0.5460355  | 0.75333225 | G3BP1P1    |
|           | NA | ENSG00000235652 | 70.8891252 | 0.28202622  | 0.24767981 | 0.15082027 | 0.33448181 | FBXO30-DT  |
|           | NA | ENSG00000235653 | 0          | NA          | NA         | NA         | NA         |            |
|           | NA | ENSG00000235655 | 1178.1529  | 0.17682063  | 0.10563056 | 0.08134986 | 0.21408425 | H3P6       |
|           | NA | ENSG00000235656 | 0          | NA          | NA         | NA         | NA         | RPL36P18   |
|           | NA | ENSG00000235659 | 0.15069912 | -0.01848503 | 0.38480575 | 0.84537521 | NA         |            |
|           | NA | ENSG00000235660 | 6.81309383 | 0.20621584  | 0.45694354 | 0.02751594 | 0.09368737 | LINC00345  |
| 100507261 |    | ENSG00000235661 | 0          | NA          | NA         | NA         | NA         | MIR670HG   |
|           | NA | ENSG00000235663 | 1.00415192 | 0.04322574  | 0.38779947 | 0.2717111  | NA         | SAPCD1-AS1 |
| 339788    |    | ENSG00000235665 | 0          | NA          | NA         | NA         | NA         | LINC00298  |
|           | NA | ENSG00000235669 | 0.18922458 | 0.01954053  | 0.38488496 | 0.78225479 | NA         | CHN2-AS1   |
|           | NA | ENSG00000235670 | 0.173733   | 0.01914545  | 0.38484597 | 0.78225479 | NA         | RPL21P40   |
|           | NA | ENSG00000235672 | 0.79002736 | -0.03650164 | 0.38389044 | 0.50850798 | NA         |            |
|           | NA | ENSG00000235673 | 0          | NA          | NA         | NA         | NA         |            |
|           | NA | ENSG00000235674 | 2.036568   | 0.03925032  | 0.38350549 | 0.50300955 | NA         | LDHAP2     |
|           | NA | ENSG00000235677 | 10.9058952 | 0.1620815   | 0.37197653 | 0.35150429 | 0.58163846 | NPM1P26    |
|           | NA | ENSG00000235678 | 0          | NA          | NA         | NA         | NA         | OR5AN2P    |
|           | NA | ENSG00000235679 | 0          | NA          | NA         | NA         | NA         |            |
|           | NA | ENSG00000235681 | 0.81639431 | -0.03769849 | 0.38401834 | 0.4948288  | NA         |            |
|           | NA | ENSG00000235683 | 0          | NA          | NA         | NA         | NA         |            |
|           | NA | ENSG00000235685 | 0          | NA          | NA         | NA         | NA         |            |
|           | NA | ENSG00000235686 | 0          | NA          | NA         | NA         | NA         | PPIAP20    |
|           | NA | ENSG00000235687 | 0          | NA          | NA         | NA         | NA         | LINC00993  |
|           | NA | ENSG00000235688 | 3.63650243 | 0.21185939  | 0.45815051 | 0.05539883 | 0.16108826 | SNTG2-AS1  |
|           | NA | ENSG00000235689 | 0          | NA          | NA         | NA         | NA         |            |
|           | NA | ENSG00000235690 | 0          | NA          | NA         | NA         | NA         | CUBNP3     |
|           | NA | ENSG00000235695 | 0          | NA          | NA         | NA         | NA         | HIGD2AP2   |
|           | NA | ENSG00000235698 | 0          | NA          | NA         | NA         | NA         | PA2G4P2    |
| 100133053 |    | ENSG00000235699 | 0          | NA          | NA         | NA         | NA         | CXorf51B   |
| 360155    |    | ENSG00000235700 | 1.07569288 | -0.07166113 | 0.39297402 | 0.16884262 | NA         | CYCSP52    |
|           | NA | ENSG00000235701 | 0.81542884 | -0.01004674 | 0.3809054  | 0.85909771 | NA         | PCBP2P1    |

|        |                 |            |             |            |            |            |             |
|--------|-----------------|------------|-------------|------------|------------|------------|-------------|
| NA     | ENSG00000235703 | 55.1668448 | 0.11474497  | 0.29833687 | 0.55656613 | 0.76208295 | LINC00894   |
| 729815 | ENSG00000235705 | 0          | NA          | NA         | NA         | NA         |             |
| 400242 | ENSG00000235706 | 139.687534 | 0.38401869  | 0.22100498 | 0.03848291 | 0.12200399 | DICER1-AS1  |
| NA     | ENSG00000235707 | 0          | NA          | NA         | NA         | NA         |             |
| 149373 | ENSG00000235710 | 0          | NA          | NA         | NA         | NA         | TRIM67-AS1  |
| 390616 | ENSG00000235711 | 0.32382918 | 0.00194308  | 0.38337459 | 0.96247945 | NA         | ANKRD34C    |
| NA     | ENSG00000235713 | 0          | NA          | NA         | NA         | NA         |             |
| NA     | ENSG00000235716 | 0          | NA          | NA         | NA         | NA         | KRT18P46    |
| NA     | ENSG00000235717 | 0          | NA          | NA         | NA         | NA         | DPP10-AS2   |
| 83552  | ENSG00000235718 | 1.31702676 | 0.05186319  | 0.38459478 | 0.42893964 | NA         | MFRP        |
| NA     | ENSG00000235720 | 0          | NA          | NA         | NA         | NA         | GABPAP      |
| NA     | ENSG00000235721 | 0.34624801 | -0.02356563 | 0.38536324 | 0.65270996 | NA         |             |
| NA     | ENSG00000235724 | 1.03659264 | 0.04844985  | 0.38620524 | 0.35659937 | NA         |             |
| NA     | ENSG00000235725 | 0.173733   | 0.01914545  | 0.38484597 | 0.78225479 | NA         |             |
| NA     | ENSG00000235726 | 0          | NA          | NA         | NA         | NA         |             |
| NA     | ENSG00000235728 | 0          | NA          | NA         | NA         | NA         |             |
| NA     | ENSG00000235729 | 0          | NA          | NA         | NA         | NA         |             |
| NA     | ENSG00000235730 | 0.16735865 | 0.01897177  | 0.38482933 | 0.78225479 | NA         | OR2AF1P     |
| NA     | ENSG00000235731 | 0.173733   | 0.01914545  | 0.38484597 | 0.78225479 | NA         | LINC02250   |
| NA     | ENSG00000235734 | 0          | NA          | NA         | NA         | NA         | HMGNI1P36   |
| NA     | ENSG00000235735 | 0          | NA          | NA         | NA         | NA         | RPL7AP72    |
| NA     | ENSG00000235736 | 0          | NA          | NA         | NA         | NA         |             |
| NA     | ENSG00000235737 | 0          | NA          | NA         | NA         | NA         | TRIM60P19   |
| NA     | ENSG00000235738 | 0          | NA          | NA         | NA         | NA         |             |
| NA     | ENSG00000235740 | 0          | NA          | NA         | NA         | NA         | PHACTR2-AS1 |
| NA     | ENSG00000235741 | 0          | NA          | NA         | NA         | NA         | LINC02784   |
| NA     | ENSG00000235742 | 0          | NA          | NA         | NA         | NA         |             |
| NA     | ENSG00000235743 | 0.173124   | -0.01911262 | 0.38486262 | 0.84537521 | NA         |             |
| NA     | ENSG00000235746 | 0.15069912 | -0.01848503 | 0.38480575 | 0.84537521 | NA         | CTBP2P2     |
| NA     | ENSG00000235748 | 1.95573115 | 0.10545842  | 0.39810504 | 0.1893179  | NA         | SEPTIN14P12 |
| NA     | ENSG00000235749 | 0.173124   | -0.01911262 | 0.38486262 | 0.84537521 | NA         |             |
| 9674   | ENSG00000235750 | 112.590485 | 0.44394868  | 0.21900167 | 0.01694342 | 0.06377749 | KIAA0040    |
| NA     | ENSG00000235756 | 0.16735865 | 0.01897177  | 0.38482933 | 0.78225479 | NA         |             |
| NA     | ENSG00000235759 | 0          | NA          | NA         | NA         | NA         | ARHGAP42P3  |
| 644093 | ENSG00000235760 | 7.05346024 | 0.11964444  | 0.37941809 | 0.38823913 | 0.6172996  | MSH2-OT1    |
| NA     | ENSG00000235761 | 0          | NA          | NA         | NA         | NA         | MTCO3P46    |
| NA     | ENSG00000235763 | 0          | NA          | NA         | NA         | NA         | SNRPGP5     |
| NA     | ENSG00000235768 | 0          | NA          | NA         | NA         | NA         | BRD7P5      |

|           |                 |            |             |            |            |            |            |
|-----------|-----------------|------------|-------------|------------|------------|------------|------------|
| 646324    | ENSG00000235770 | 1.36590371 | 0.04725804  | 0.38314502 | 0.45293516 | NA         | LINC00607  |
| NA        | ENSG00000235772 | 0          | NA          | NA         | NA         | NA         |            |
| NA        | ENSG00000235774 | 0          | NA          | NA         | NA         | NA         |            |
| NA        | ENSG00000235775 | 0          | NA          | NA         | NA         | NA         |            |
| NA        | ENSG00000235776 | 0.173733   | 0.01914545  | 0.38484597 | 0.78225479 | NA         |            |
| 100873933 | ENSG00000235777 | 0.66943461 | 0.03059546  | 0.38616409 | 0.42784935 | NA         | DPYD-AS2   |
| NA        | ENSG00000235778 | 0          | NA          | NA         | NA         | NA         |            |
| NA        | ENSG00000235779 | 0.51400187 | -0.01021091 | 0.38328066 | 0.8182209  | NA         |            |
| NA        | ENSG00000235781 | 0.14931947 | -0.01844332 | 0.38480212 | 0.84537521 | NA         | LINC02569  |
| NA        | ENSG00000235782 | 0          | NA          | NA         | NA         | NA         |            |
| NA        | ENSG00000235784 | 0.14931947 | -0.01844332 | 0.38480212 | 0.84537521 | NA         | HNRNPA1P29 |
| NA        | ENSG00000235785 | 0          | NA          | NA         | NA         | NA         |            |
| NA        | ENSG00000235786 | 0.14931947 | -0.01844332 | 0.38480212 | 0.84537521 | NA         | ZNRF3-IT1  |
| NA        | ENSG00000235787 | 0          | NA          | NA         | NA         | NA         | RPL35AP8   |
| NA        | ENSG00000235790 | 0.88758677 | 0.01396742  | 0.38098342 | 0.80439898 | NA         | PEF1-AS1   |
| NA        | ENSG00000235794 | 0          | NA          | NA         | NA         | NA         | MTND3P21   |
| NA        | ENSG00000235795 | 3.34087203 | -0.03781737 | 0.3744333  | 0.69334456 | 0.85183585 |            |
| NA        | ENSG00000235797 | 0          | NA          | NA         | NA         | NA         |            |
| NA        | ENSG00000235802 | 0.49581158 | -0.02950787 | 0.38590274 | 0.52553756 | NA         | HCFC1-AS1  |
| NA        | ENSG00000235803 | 0          | NA          | NA         | NA         | NA         | MTCO2P23   |
| NA        | ENSG00000235804 | 0          | NA          | NA         | NA         | NA         |            |
| NA        | ENSG00000235805 | 0          | NA          | NA         | NA         | NA         | SOCS5P3    |
| NA        | ENSG00000235806 | 4.13177355 | -0.00985463 | 0.36382297 | 0.93234824 | 0.97193091 |            |
| NA        | ENSG00000235808 | 0.55409406 | 0.03299792  | 0.38624506 | 0.4505932  | NA         | MYL6P2     |
| NA        | ENSG00000235810 | 0          | NA          | NA         | NA         | NA         |            |
| NA        | ENSG00000235811 | 0          | NA          | NA         | NA         | NA         |            |
| 145241    | ENSG00000235812 | 0.6896631  | 0.02703628  | 0.38369942 | 0.57269394 | NA         | ADAM21P1   |
| NA        | ENSG00000235813 | 0          | NA          | NA         | NA         | NA         |            |
| NA        | ENSG00000235815 | 0          | NA          | NA         | NA         | NA         |            |
| NA        | ENSG00000235816 | 0          | NA          | NA         | NA         | NA         | PRELID1P3  |
| NA        | ENSG00000235817 | 0          | NA          | NA         | NA         | NA         |            |
| NA        | ENSG00000235818 | 0          | NA          | NA         | NA         | NA         | VN1R17P    |
| NA        | ENSG00000235819 | 0          | NA          | NA         | NA         | NA         |            |
| NA        | ENSG00000235820 | 0          | NA          | NA         | NA         | NA         |            |
| NA        | ENSG00000235821 | 0          | NA          | NA         | NA         | NA         | IFITM4P    |
| 90271     | ENSG00000235823 | 915.859607 | -0.63885303 | 0.09285449 | 1.63E-12   | 3.65E-11   | OLMALINC   |
| 100507605 | ENSG00000235824 | 0          | NA          | NA         | NA         | NA         | LINC00837  |
| NA        | ENSG00000235827 | 0          | NA          | NA         | NA         | NA         | TUBB8P9    |

|           |                 |            |             |            |            |            |             |
|-----------|-----------------|------------|-------------|------------|------------|------------|-------------|
| NA        | ENSG00000235828 | 0          | NA          | NA         | NA         | NA         | RPL36AP26   |
| NA        | ENSG00000235829 | 0          | NA          | NA         | NA         | NA         | TBCAP2      |
| 101927440 | ENSG00000235830 | 0          | NA          | NA         | NA         | NA         | SRGAP3-AS4  |
| 100507582 | ENSG00000235831 | 0.53666613 | -0.00051391 | 0.38248169 | 0.92804096 | NA         | BHLHE40-AS1 |
| NA        | ENSG00000235832 | 0          | NA          | NA         | NA         | NA         | CNN2P3      |
| NA        | ENSG00000235833 | 0.87831924 | 0.0459353   | 0.38525243 | 0.39460997 | NA         |             |
| 101928389 | ENSG00000235834 | 0.31821793 | 0.00116815  | 0.38336688 | 0.96588514 | NA         |             |
| NA        | ENSG00000235836 | 0          | NA          | NA         | NA         | NA         | KIF3AP1     |
| NA        | ENSG00000235837 | 0.31812271 | 0.00106805  | 0.38336616 | 0.96684347 | NA         |             |
| NA        | ENSG00000235838 | 0          | NA          | NA         | NA         | NA         | HSP90AB7P   |
| NA        | ENSG00000235840 | 0          | NA          | NA         | NA         | NA         |             |
| NA        | ENSG00000235843 | 0          | NA          | NA         | NA         | NA         |             |
| NA        | ENSG00000235845 | 0          | NA          | NA         | NA         | NA         |             |
| NA        | ENSG00000235847 | 0.51424337 | 0.01265494  | 0.38290376 | 0.7576761  | NA         | LDHAP7      |
| NA        | ENSG00000235848 | 1.40479627 | 0.02643909  | 0.38129676 | 0.66863261 | NA         | RMDN2-AS1   |
| 100874102 | ENSG00000235849 | 0          | NA          | NA         | NA         | NA         | HS6ST2-AS1  |
| NA        | ENSG00000235852 | 109.523671 | -0.19435258 | 0.21808111 | 0.28134317 | 0.50619829 |             |
| NA        | ENSG00000235855 | 1.60710494 | 0.11606096  | 0.40820138 | 0.04935889 | NA         | OR7E145P    |
| NA        | ENSG00000235857 | 0          | NA          | NA         | NA         | NA         | CTBP2P1     |
| NA        | ENSG00000235858 | 0          | NA          | NA         | NA         | NA         |             |
| NA        | ENSG00000235859 | 58.471091  | 0.15681104  | 0.25079037 | 0.41833365 | 0.6444567  |             |
| NA        | ENSG00000235861 | 0          | NA          | NA         | NA         | NA         |             |
| NA        | ENSG00000235862 | 1.2424541  | 0.0581341   | 0.38778836 | 0.27573414 | NA         |             |
| 8705      | ENSG00000235863 | 14.9317458 | -0.10611037 | 0.33668141 | 0.55317141 | 0.75940498 | B3GALT4     |
| NA        | ENSG00000235864 | 0          | NA          | NA         | NA         | NA         | HSPA8P6     |
| 57000     | ENSG00000235865 | 14.8600529 | 0.25613969  | 0.39973193 | 0.20183902 | 0.4072911  | GSN-AS1     |
| NA        | ENSG00000235868 | 0          | NA          | NA         | NA         | NA         | GAPDHP31    |
| NA        | ENSG00000235869 | 0          | NA          | NA         | NA         | NA         |             |
| NA        | ENSG00000235871 | 0          | NA          | NA         | NA         | NA         |             |
| NA        | ENSG00000235872 | 3.02529392 | -0.00456842 | 0.37869542 | 0.94359222 | 0.97701605 |             |
| 100874238 | ENSG00000235875 | 17.0352607 | -0.12656628 | 0.33372646 | 0.49649951 | 0.714811   | ARHGEF7-AS2 |
| NA        | ENSG00000235876 | 0          | NA          | NA         | NA         | NA         | FEM1AP4     |
| NA        | ENSG00000235879 | 0          | NA          | NA         | NA         | NA         | FAR1P1      |
| NA        | ENSG00000235880 | 0          | NA          | NA         | NA         | NA         |             |
| NA        | ENSG00000235881 | 0          | NA          | NA         | NA         | NA         |             |
| NA        | ENSG00000235884 | 0          | NA          | NA         | NA         | NA         | LINC00941   |
| 101927661 | ENSG00000235885 | 28.629331  | 0.38625296  | 0.44333001 | 0.09808843 | 0.24568546 | LINC01828   |
| NA        | ENSG00000235886 | 0          | NA          | NA         | NA         | NA         |             |

|           |                 |            |             |            |            |            |             |
|-----------|-----------------|------------|-------------|------------|------------|------------|-------------|
| NA        | ENSG00000235887 | 0          | NA          | NA         | NA         | NA         | LINC02799   |
| NA        | ENSG00000235888 | 1.03212984 | -0.02250063 | 0.38180886 | 0.61943543 | NA         |             |
| NA        | ENSG00000235890 | 199.703938 | -0.07632901 | 0.23732492 | 0.6825005  | 0.8450858  | TSPEAR-AS1  |
| NA        | ENSG00000235892 | 0          | NA          | NA         | NA         | NA         | PKMP2       |
| NA        | ENSG00000235893 | 0          | NA          | NA         | NA         | NA         |             |
| NA        | ENSG00000235895 | 0          | NA          | NA         | NA         | NA         |             |
| 100874214 | ENSG00000235897 | 8.05748295 | 1.31676416  | 1.7123401  | 0.00842747 | 0.03605781 | TM4SF19-AS1 |
| 101927171 | ENSG00000235899 | 0          | NA          | NA         | NA         | NA         | LINC01564   |
| NA        | ENSG00000235901 | 0          | NA          | NA         | NA         | NA         |             |
| NA        | ENSG00000235902 | 0.51436124 | 0.01539355  | 0.38311934 | 0.736926   | NA         |             |
| 100509894 | ENSG00000235903 | 32.0572129 | 0.69004741  | 0.44961326 | 0.01721085 | 0.06459766 | CPB2-AS1    |
| NA        | ENSG00000235904 | 50.0756557 | -0.50678314 | 0.32816734 | 0.03296547 | 0.10807232 | RBMS3-AS3   |
| NA        | ENSG00000235907 | 0.55524214 | 0.01232093  | 0.38328494 | 0.7437204  | NA         |             |
| NA        | ENSG00000235908 | 1.52361759 | -0.02981331 | 0.37893417 | 0.68978198 | NA         | RHOA-IT1    |
| 104326055 | ENSG00000235910 | 1.60438984 | -0.03143782 | 0.38132154 | 0.6305994  | NA         | APOA1-AS    |
| NA        | ENSG00000235911 | 0          | NA          | NA         | NA         | NA         |             |
| NA        | ENSG00000235912 | 0          | NA          | NA         | NA         | NA         |             |
| 100379174 | ENSG00000235914 | 0          | NA          | NA         | NA         | NA         | MACROD2-AS1 |
| NA        | ENSG00000235916 | 0          | NA          | NA         | NA         | NA         | MRPS18CP7   |
| NA        | ENSG00000235917 | 0          | NA          | NA         | NA         | NA         | MTCO2P11    |
| 645676    | ENSG00000235919 | 35.3759935 | 0.07082771  | 0.29883825 | 0.71313361 | 0.86187687 | ASH1L-AS1   |
| NA        | ENSG00000235920 | 0.53038534 | 0.03940461  | 0.38680979 | 0.41702417 | NA         | THRAP3P3    |
| NA        | ENSG00000235922 | 0          | NA          | NA         | NA         | NA         |             |
| NA        | ENSG00000235924 | 0          | NA          | NA         | NA         | NA         | ZNRF2P3     |
| NA        | ENSG00000235926 | 0          | NA          | NA         | NA         | NA         | RPS29P15    |
| 374987    | ENSG00000235927 | 3.38315667 | 0.09168373  | 0.38834554 | 0.33693797 | 0.56718559 | NEXN-AS1    |
| NA        | ENSG00000235929 | 0          | NA          | NA         | NA         | NA         | TPT1P14     |
| NA        | ENSG00000235930 | 0          | NA          | NA         | NA         | NA         | HSPE1P12    |
| 283025    | ENSG00000235931 | 0          | NA          | NA         | NA         | NA         | LINC01553   |
| NA        | ENSG00000235932 | 0          | NA          | NA         | NA         | NA         |             |
| NA        | ENSG00000235933 | 0          | NA          | NA         | NA         | NA         | LINC01779   |
| NA        | ENSG00000235934 | 0          | NA          | NA         | NA         | NA         |             |
| NA        | ENSG00000235937 | 0          | NA          | NA         | NA         | NA         | RPL21P30    |
| NA        | ENSG00000235939 | 0          | NA          | NA         | NA         | NA         |             |
| NA        | ENSG00000235940 | 0          | NA          | NA         | NA         | NA         | MTND1P21    |
| 448835    | ENSG00000235942 | 0          | NA          | NA         | NA         | NA         | LCE6A       |
| NA        | ENSG00000235943 | 0          | NA          | NA         | NA         | NA         | TMEM212-IT1 |
| NA        | ENSG00000235944 | 237.184984 | 0.25269203  | 0.15546915 | 0.07503029 | 0.20148903 | ZNF815P     |

|           |                 |            |             |            |            |            |           |
|-----------|-----------------|------------|-------------|------------|------------|------------|-----------|
| NA        | ENSG00000235945 | 0.15069912 | -0.01848503 | 0.38480575 | 0.84537521 | NA         |           |
| NA        | ENSG00000235946 | 53.0315847 | 0.30669065  | 0.29062762 | 0.14817562 | 0.33038933 | H2BW3P    |
| 100126791 | ENSG00000235947 | 0.66512812 | 0.00193864  | 0.38130629 | 0.96898031 | NA         | EGOT      |
| NA        | ENSG00000235951 | 0          | NA          | NA         | NA         | NA         |           |
| 284900    | ENSG00000235954 | 547.300545 | 0.27082659  | 0.14025779 | 0.03759053 | 0.11981944 | TTC28-AS1 |
| NA        | ENSG00000235955 | 2.53617687 | -0.03775909 | 0.37818592 | 0.64619481 | NA         | CICP20    |
| NA        | ENSG00000235957 | 0          | NA          | NA         | NA         | NA         | COX7CP1   |
| 100134015 | ENSG00000235958 | 1.01114635 | -0.0233268  | 0.38128881 | 0.69514434 | NA         | UBOX5-AS1 |
| 84968     | ENSG00000235961 | 32.7153194 | -1.43907272 | 0.47350557 | 0.00015554 | 0.00113161 | PNMA6A    |
| NA        | ENSG00000235962 | 0          | NA          | NA         | NA         | NA         | RPL7AP53  |
| NA        | ENSG00000235963 | 0          | NA          | NA         | NA         | NA         | MCCD1P1   |
| NA        | ENSG00000235964 | 0          | NA          | NA         | NA         | NA         | FXVD6P2   |
| NA        | ENSG00000235965 | 0          | NA          | NA         | NA         | NA         |           |
| NA        | ENSG00000235967 | 0.14931947 | -0.01844332 | 0.38480212 | 0.84537521 | NA         | COX5BP3   |
| NA        | ENSG00000235968 | 0          | NA          | NA         | NA         | NA         | FBXL12P1  |
| NA        | ENSG00000235969 | 0          | NA          | NA         | NA         | NA         | CHEK2P4   |
| NA        | ENSG00000235972 | 0          | NA          | NA         | NA         | NA         |           |
| NA        | ENSG00000235974 | 0          | NA          | NA         | NA         | NA         | VN2R19P   |
| NA        | ENSG00000235975 | 0          | NA          | NA         | NA         | NA         | TPM2P1    |
| NA        | ENSG00000235976 | 0          | NA          | NA         | NA         | NA         | H2BP8     |
| NA        | ENSG00000235978 | 1.01671071 | 0.02795204  | 0.38284072 | 0.59409643 | NA         |           |
| NA        | ENSG00000235979 | 0.84931517 | -0.04862516 | 0.38602531 | 0.40262615 | NA         |           |
| NA        | ENSG00000235981 | 0          | NA          | NA         | NA         | NA         |           |
| 100873969 | ENSG00000235984 | 0          | NA          | NA         | NA         | NA         | GPC5-AS1  |
| NA        | ENSG00000235988 | 0          | NA          | NA         | NA         | NA         |           |
| 150291    | ENSG00000235989 | 1.27652951 | -0.01557112 | 0.37848939 | 0.82682673 | NA         | MORC2-AS1 |
| NA        | ENSG00000235990 | 8.93536483 | -0.03241167 | 0.35189565 | 0.82137238 | 0.91847813 | RPL23AP20 |
| NA        | ENSG00000235991 | 0          | NA          | NA         | NA         | NA         |           |
| NA        | ENSG00000235992 | 0          | NA          | NA         | NA         | NA         | GRAMD4P2  |
| NA        | ENSG00000235993 | 0          | NA          | NA         | NA         | NA         |           |
| NA        | ENSG00000235994 | 3.28276604 | 0.0653414   | 0.37690442 | 0.53709981 | 0.74759591 |           |
| NA        | ENSG00000235995 | 0          | NA          | NA         | NA         | NA         | UBE2V1P6  |
| NA        | ENSG00000235996 | 0          | NA          | NA         | NA         | NA         |           |
| NA        | ENSG00000235997 | 0.56767373 | 0.02627943  | 0.38574813 | 0.49686938 | NA         | LINC01936 |
| NA        | ENSG00000235998 | 0          | NA          | NA         | NA         | NA         | TAAR7P    |
| NA        | ENSG00000236003 | 0.36259403 | 0.00113845  | 0.38336592 | 0.9650582  | NA         |           |
| NA        | ENSG00000236004 | 0          | NA          | NA         | NA         | NA         |           |
| NA        | ENSG00000236005 | 0          | NA          | NA         | NA         | NA         |           |

|           |                 |            |             |            |            |            |            |
|-----------|-----------------|------------|-------------|------------|------------|------------|------------|
| NA        | ENSG00000236007 | 0          | NA          | NA         | NA         | NA         | MTCO1P46   |
| 101929567 | ENSG00000236008 | 1.61150017 | -0.11043928 | 0.40344773 | 0.11106428 | NA         | LINC01814  |
| NA        | ENSG00000236009 | 0          | NA          | NA         | NA         | NA         |            |
| NA        | ENSG00000236012 | 0          | NA          | NA         | NA         | NA         | HIGD1AP12  |
| 100507477 | ENSG00000236013 | 0          | NA          | NA         | NA         | NA         |            |
| NA        | ENSG00000236015 | 26.3233679 | -0.2604636  | 0.35035412 | 0.21996657 | 0.43209275 |            |
| NA        | ENSG00000236017 | 53.3219635 | 0.55458891  | 0.31274236 | 0.01883589 | 0.06937959 | ASMTL-AS1  |
| NA        | ENSG00000236018 | 0.15069912 | -0.01848503 | 0.38480575 | 0.84537521 | NA         |            |
| NA        | ENSG00000236021 | 7.00942352 | 0.12579434  | 0.39384229 | 0.27349813 | 0.49702826 |            |
| NA        | ENSG00000236024 | 0          | NA          | NA         | NA         | NA         | PRRX2-AS1  |
| NA        | ENSG00000236025 | 0          | NA          | NA         | NA         | NA         |            |
| NA        | ENSG00000236026 | 0          | NA          | NA         | NA         | NA         |            |
| 100169851 | ENSG00000236027 | 0          | NA          | NA         | NA         | NA         | PATE3      |
| NA        | ENSG00000236028 | 0          | NA          | NA         | NA         | NA         |            |
| NA        | ENSG00000236031 | 0.68952232 | -0.01969992 | 0.38288974 | 0.6607111  | NA         |            |
| 403273    | ENSG00000236032 | 0          | NA          | NA         | NA         | NA         | OR5H14     |
| NA        | ENSG00000236035 | 0          | NA          | NA         | NA         | NA         | NSA2P1     |
| 100507114 | ENSG00000236036 | 0          | NA          | NA         | NA         | NA         | LINC00445  |
| 101927630 | ENSG00000236039 | 0          | NA          | NA         | NA         | NA         | LINC02889  |
| NA        | ENSG00000236040 | 0          | NA          | NA         | NA         | NA         | CHIAP1     |
| NA        | ENSG00000236041 | 0          | NA          | NA         | NA         | NA         | COX6CP18   |
| NA        | ENSG00000236042 | 0          | NA          | NA         | NA         | NA         |            |
| NA        | ENSG00000236044 | 0.15069912 | -0.01848503 | 0.38480575 | 0.84537521 | NA         | FABP5P2    |
| NA        | ENSG00000236045 | 1.11656446 | -0.06151306 | 0.39087412 | 0.19495052 | NA         |            |
| NA        | ENSG00000236046 | 0          | NA          | NA         | NA         | NA         |            |
| NA        | ENSG00000236047 | 1.51936662 | -0.0017229  | 0.37729634 | 0.98063864 | NA         | RPL13AP12  |
| NA        | ENSG00000236048 | 0.15069912 | -0.01848503 | 0.38480575 | 0.84537521 | NA         | SSBL5P     |
| 101929260 | ENSG00000236049 | 0          | NA          | NA         | NA         | NA         | LINC01920  |
| 100874212 | ENSG00000236051 | 6.38622553 | 0.09165521  | 0.37806735 | 0.44453284 | 0.66940936 | MYCBP2-AS1 |
| 105373010 | ENSG00000236052 | 0          | NA          | NA         | NA         | NA         | LINC01643  |
| NA        | ENSG00000236053 | 0          | NA          | NA         | NA         | NA         | LINC01067  |
| NA        | ENSG00000236054 | 0          | NA          | NA         | NA         | NA         | SYN3-AS1   |
| NA        | ENSG00000236056 | 0.930874   | 0.05167899  | 0.38897079 | 0.24536113 | NA         | GAPDHP14   |
| NA        | ENSG00000236058 | 0.173124   | -0.01911262 | 0.38486262 | 0.84537521 | NA         | RPL17P36   |
| NA        | ENSG00000236060 | 0.173733   | 0.01914545  | 0.38484597 | 0.78225479 | NA         | HSPB1P1    |
| NA        | ENSG00000236062 | 0.34047749 | -0.00022416 | 0.38336235 | 0.96737738 | NA         | GSTM5P1    |
| 101928335 | ENSG00000236064 | 0          | NA          | NA         | NA         | NA         |            |
| NA        | ENSG00000236065 | 2.9505727  | -0.06355244 | 0.37687174 | 0.54053424 | 0.74921051 |            |



|           |                 |            |             |            |            |            |             |
|-----------|-----------------|------------|-------------|------------|------------|------------|-------------|
| NA        | ENSG00000236068 | 0          | NA          | NA         | NA         | NA         | NT5ELP      |
| NA        | ENSG00000236069 | 0          | NA          | NA         | NA         | NA         |             |
| NA        | ENSG00000236072 | 0          | NA          | NA         | NA         | NA         | SRSF2P1     |
| NA        | ENSG00000236073 | 0          | NA          | NA         | NA         | NA         |             |
| NA        | ENSG00000236075 | 0          | NA          | NA         | NA         | NA         |             |
| 104355137 | ENSG00000236076 | 0          | NA          | NA         | NA         | NA         | LINC01072   |
| NA        | ENSG00000236077 | 0          | NA          | NA         | NA         | NA         | SLC6A14P1   |
| 101929086 | ENSG00000236078 | 0.72732939 | 0.03152924  | 0.38453568 | 0.56920444 | NA         | LINC01447   |
| NA        | ENSG00000236079 | 0          | NA          | NA         | NA         | NA         |             |
| NA        | ENSG00000236080 | 0          | NA          | NA         | NA         | NA         | YAP1P2      |
| 101927125 | ENSG00000236081 | 1.16856149 | -0.06275576 | 0.39117129 | 0.18451425 | NA         | ELFN1-AS1   |
| NA        | ENSG00000236083 | 0          | NA          | NA         | NA         | NA         | OR13E1P     |
| NA        | ENSG00000236085 | 0.89399399 | 0.03882106  | 0.38488671 | 0.43813023 | NA         | ACTG1P4     |
| NA        | ENSG00000236086 | 0.173733   | 0.01914545  | 0.38484597 | 0.78225479 | NA         | HMG2P28     |
| 100874058 | ENSG00000236088 | 866.434876 | -0.04744318 | 0.10244848 | 0.63002618 | 0.81288414 | COX10-AS1   |
| NA        | ENSG00000236090 | 0.65757947 | 0.00120754  | 0.38190317 | 0.97830461 | NA         | LDHAP3      |
| 340581    | ENSG00000236091 | 0.16735865 | 0.01897177  | 0.38482933 | 0.78225479 | NA         | LINC02243   |
| 440132    | ENSG00000236094 | 0          | NA          | NA         | NA         | NA         | LINC00545   |
| NA        | ENSG00000236095 | 0.30139824 | -0.02296476 | 0.38527817 | 0.68536535 | NA         |             |
| NA        | ENSG00000236097 | 0          | NA          | NA         | NA         | NA         | BNIP3P2     |
| NA        | ENSG00000236098 | 0          | NA          | NA         | NA         | NA         |             |
| NA        | ENSG00000236099 | 0          | NA          | NA         | NA         | NA         |             |
| NA        | ENSG00000236101 | 0.15069912 | -0.01848503 | 0.38480575 | 0.84537521 | NA         | RAC1P7      |
| NA        | ENSG00000236102 | 0          | NA          | NA         | NA         | NA         |             |
| 9278      | ENSG00000236104 | 479.055664 | 0.18203965  | 0.11616277 | 0.09966992 | 0.24867343 | ZBTB22      |
| NA        | ENSG00000236105 | 0          | NA          | NA         | NA         | NA         | PRELID3BP10 |
| 112268411 | ENSG00000236106 | 0.15069912 | -0.01848503 | 0.38480575 | 0.84537521 | NA         |             |
| 101929680 | ENSG00000236107 | 6.11432246 | 0.08379557  | 0.36517592 | 0.55384886 | 0.75991434 | SCN1A-AS1   |
| 102724058 | ENSG00000236107 | 6.11432246 | 0.08379557  | 0.36517592 | 0.55384886 | 0.75991434 | SCN1A-AS1   |
| NA        | ENSG00000236108 | 0          | NA          | NA         | NA         | NA         |             |
| 105373525 | ENSG00000236109 | 0.69493202 | 0.03154416  | 0.38626309 | 0.41391645 | NA         |             |
| NA        | ENSG00000236110 | 0          | NA          | NA         | NA         | NA         | OR2AM1P     |
| NA        | ENSG00000236111 | 0          | NA          | NA         | NA         | NA         |             |
| NA        | ENSG00000236114 | 0.15069912 | -0.01848503 | 0.38480575 | 0.84537521 | NA         |             |
| NA        | ENSG00000236115 | 0          | NA          | NA         | NA         | NA         |             |
| NA        | ENSG00000236116 | 0          | NA          | NA         | NA         | NA         |             |
| 105373054 | ENSG00000236117 | 0          | NA          | NA         | NA         | NA         | LINC01639   |
| NA        | ENSG00000236118 | 0          | NA          | NA         | NA         | NA         |             |

|           |                 |            |             |            |            |            |             |
|-----------|-----------------|------------|-------------|------------|------------|------------|-------------|
| NA        | ENSG00000236119 | 0          | NA          | NA         | NA         | NA         |             |
| NA        | ENSG00000236120 | 0          | NA          | NA         | NA         | NA         |             |
| NA        | ENSG00000236121 | 0          | NA          | NA         | NA         | NA         | HAUS6P2     |
| NA        | ENSG00000236123 | 0          | NA          | NA         | NA         | NA         | CEACAMP11   |
| NA        | ENSG00000236124 | 0          | NA          | NA         | NA         | NA         | HMG22P23    |
| 392188    | ENSG00000236125 | 0          | NA          | NA         | NA         | NA         | USP17L4     |
| 645402    | ENSG00000236125 | 0          | NA          | NA         | NA         | NA         | USP17L4     |
| NA        | ENSG00000236129 | 0          | NA          | NA         | NA         | NA         |             |
| 101928337 | ENSG00000236130 | 0.173733   | 0.01914545  | 0.38484597 | 0.78225479 | NA         | PTCSC2      |
| NA        | ENSG00000236131 | 0          | NA          | NA         | NA         | NA         | MED13P1     |
| NA        | ENSG00000236132 | 0.67421842 | -0.03842345 | 0.38688781 | 0.39805044 | NA         |             |
| NA        | ENSG00000236133 | 0          | NA          | NA         | NA         | NA         | LINC01069   |
| NA        | ENSG00000236136 | 0          | NA          | NA         | NA         | NA         | ADORA2BP1   |
| 101929099 | ENSG00000236137 | 8.08553196 | 0.38463061  | 0.59725108 | 0.05041653 | 0.14987473 |             |
| NA        | ENSG00000236138 | 23.2565881 | -0.16060828 | 0.33026631 | 0.41049395 | 0.63818422 | DUX4L26     |
| NA        | ENSG00000236140 | 3.66076592 | 0.07026532  | 0.37532336 | 0.53562395 | 0.74647226 |             |
| NA        | ENSG00000236141 | 0          | NA          | NA         | NA         | NA         |             |
| 100506469 | ENSG00000236144 | 379.319344 | 0.28601782  | 0.12043563 | 0.01216187 | 0.04874577 | TMEM147-AS1 |
| NA        | ENSG00000236145 | 0          | NA          | NA         | NA         | NA         |             |
| NA        | ENSG00000236146 | 0          | NA          | NA         | NA         | NA         |             |
| NA        | ENSG00000236148 | 0.14931947 | -0.01844332 | 0.38480212 | 0.84537521 | NA         | RPL23AP37   |
| NA        | ENSG00000236151 | 0          | NA          | NA         | NA         | NA         |             |
| NA        | ENSG00000236152 | 0          | NA          | NA         | NA         | NA         | MRPS36P1    |
| NA        | ENSG00000236153 | 0.15069912 | -0.01848503 | 0.38480575 | 0.84537521 | NA         |             |
| NA        | ENSG00000236154 | 0.85997366 | -0.00652767 | 0.3807016  | 0.9084938  | NA         |             |
| 101928303 | ENSG00000236155 | 0.77388269 | -0.05444754 | 0.38914294 | 0.28425701 | NA         | ZPLD2P      |
| NA        | ENSG00000236156 | 2.61648252 | -0.06044819 | 0.3845778  | 0.41937912 | 0.64519864 | CHCHD4P3    |
| NA        | ENSG00000236158 | 0          | NA          | NA         | NA         | NA         | RFC3P1      |
| NA        | ENSG00000236159 | 0          | NA          | NA         | NA         | NA         |             |
| NA        | ENSG00000236160 | 0          | NA          | NA         | NA         | NA         |             |
| NA        | ENSG00000236162 | 0          | NA          | NA         | NA         | NA         |             |
| NA        | ENSG00000236164 | 0          | NA          | NA         | NA         | NA         |             |
| NA        | ENSG00000236165 | 0.32391856 | -0.02327376 | 0.38532145 | 0.66855415 | NA         | PRADC1P1    |
| NA        | ENSG00000236166 | 0          | NA          | NA         | NA         | NA         |             |
| NA        | ENSG00000236167 | 0          | NA          | NA         | NA         | NA         | GAPDHP57    |
| NA        | ENSG00000236168 | 0          | NA          | NA         | NA         | NA         |             |
| NA        | ENSG00000236170 | 0          | NA          | NA         | NA         | NA         | IGHD1-1     |
| NA        | ENSG00000236171 | 0          | NA          | NA         | NA         | NA         | RPL12P26    |

|           |                 |            |             |            |            |            |              |
|-----------|-----------------|------------|-------------|------------|------------|------------|--------------|
| 102800315 | ENSG00000236172 | 0          | NA          | NA         | NA         | NA         | MIR7515HG    |
| NA        | ENSG00000236173 | 1.13077909 | -0.03322704 | 0.38104979 | 0.61942526 | NA         |              |
| NA        | ENSG00000236175 | 0          | NA          | NA         | NA         | NA         | SSU72P6      |
| NA        | ENSG00000236176 | 0          | NA          | NA         | NA         | NA         | LINC00353    |
| NA        | ENSG00000236179 | 0          | NA          | NA         | NA         | NA         | PRAMEF35P    |
| NA        | ENSG00000236180 | 0.50364861 | 0.01237182  | 0.38343376 | 0.76761002 | NA         |              |
| NA        | ENSG00000236182 | 0          | NA          | NA         | NA         | NA         |              |
| NA        | ENSG00000236184 | 6.19172639 | -0.15119137 | 0.40098985 | 0.24477214 | 0.46347387 | TCEA1P4      |
| NA        | ENSG00000236185 | 0          | NA          | NA         | NA         | NA         | HNRNPDLP3    |
| NA        | ENSG00000236187 | 0          | NA          | NA         | NA         | NA         | GJA6P        |
| 100873944 | ENSG00000236188 | 0          | NA          | NA         | NA         | NA         | PRKX-AS1     |
| NA        | ENSG00000236189 | 0          | NA          | NA         | NA         | NA         | RPL18AP15    |
| NA        | ENSG00000236190 | 0          | NA          | NA         | NA         | NA         |              |
| NA        | ENSG00000236191 | 0          | NA          | NA         | NA         | NA         | RPS15AP25    |
| NA        | ENSG00000236193 | 0          | NA          | NA         | NA         | NA         | LINC01953    |
| NA        | ENSG00000236194 | 1.75858693 | 0.05619323  | 0.38412522 | 0.43658257 | NA         |              |
| NA        | ENSG00000236195 | 0          | NA          | NA         | NA         | NA         | RNMTL1P2     |
| NA        | ENSG00000236197 | 0          | NA          | NA         | NA         | NA         | PPP1R9A-AS1  |
| NA        | ENSG00000236199 | 0          | NA          | NA         | NA         | NA         |              |
| NA        | ENSG00000236200 | 39.5069893 | -0.32348159 | 0.34662424 | 0.14361649 | 0.32301905 | KDM4A-AS1    |
| 100873937 | ENSG00000236202 | 0          | NA          | NA         | NA         | NA         | GRM7-AS1     |
| 400945    | ENSG00000236204 | 9.33140141 | 0.22413537  | 0.4303325  | 0.1580224  | 0.34501645 | LINC01376    |
| NA        | ENSG00000236205 | 0          | NA          | NA         | NA         | NA         |              |
| NA        | ENSG00000236206 | 0.37844916 | 0.02407552  | 0.3854191  | 0.60038877 | NA         |              |
| NA        | ENSG00000236208 | 5.23270215 | 0.16208898  | 0.40384393 | 0.23612149 | 0.45297334 | C10orf71-AS1 |
| NA        | ENSG00000236209 | 7.08942891 | 0.23066249  | 0.44241529 | 0.14087351 | 0.31892169 |              |
| NA        | ENSG00000236211 | 0          | NA          | NA         | NA         | NA         | MTCO1P7      |
| NA        | ENSG00000236212 | 0          | NA          | NA         | NA         | NA         |              |
| NA        | ENSG00000236213 | 0.32326809 | 0.00157757  | 0.38337038 | 0.96597813 | NA         |              |
| NA        | ENSG00000236216 | 0          | NA          | NA         | NA         | NA         | PPP1R11P1    |
| NA        | ENSG00000236217 | 0          | NA          | NA         | NA         | NA         | C1DP2        |
| NA        | ENSG00000236226 | 0.18922458 | 0.01954053  | 0.38488496 | 0.78225479 | NA         |              |
| NA        | ENSG00000236229 | 0          | NA          | NA         | NA         | NA         | VEZF1P1      |
| NA        | ENSG00000236230 | 0          | NA          | NA         | NA         | NA         |              |
| NA        | ENSG00000236231 | 0          | NA          | NA         | NA         | NA         |              |
| NA        | ENSG00000236232 | 0.173124   | -0.01911262 | 0.38486262 | 0.84537521 | NA         | MTCYBP24     |
| NA        | ENSG00000236234 | 0.34686777 | 0.00022108  | 0.38336211 | 0.96636416 | NA         |              |
| NA        | ENSG00000236235 | 0          | NA          | NA         | NA         | NA         |              |

|           |                 |            |             |            |            |            |             |
|-----------|-----------------|------------|-------------|------------|------------|------------|-------------|
| NA        | ENSG00000236238 | 0          | NA          | NA         | NA         | NA         |             |
| NA        | ENSG00000236240 | 0          | NA          | NA         | NA         | NA         | GPC5-IT1    |
| NA        | ENSG00000236241 | 0          | NA          | NA         | NA         | NA         |             |
| 100885782 | ENSG00000236242 | 0          | NA          | NA         | NA         | NA         | MYO16-AS1   |
| NA        | ENSG00000236243 | 0          | NA          | NA         | NA         | NA         | RPL6P29     |
| NA        | ENSG00000236244 | 0.29863895 | -0.02292439 | 0.3852726  | 0.68753245 | NA         | SLC35F3-AS1 |
| NA        | ENSG00000236246 | 0          | NA          | NA         | NA         | NA         |             |
| NA        | ENSG00000236248 | 0          | NA          | NA         | NA         | NA         |             |
| 101928381 | ENSG00000236252 | 0          | NA          | NA         | NA         | NA         |             |
| 163742    | ENSG00000236253 | 0          | NA          | NA         | NA         | NA         | SLC25A3P1   |
| NA        | ENSG00000236254 | 0.34177751 | 0.00291137  | 0.38338968 | 0.95989063 | NA         | MTND4P14    |
| NA        | ENSG00000236255 | 216.127855 | 0.22165838  | 0.15518358 | 0.11783268 | 0.28162877 |             |
| 10824     | ENSG00000236256 | 0          | NA          | NA         | NA         | NA         | DIAPH2-AS1  |
| NA        | ENSG00000236257 | 0          | NA          | NA         | NA         | NA         | EI24P2      |
| NA        | ENSG00000236258 | 0          | NA          | NA         | NA         | NA         | TIMM8BP1    |
| NA        | ENSG00000236259 | 0          | NA          | NA         | NA         | NA         | PPIAP64     |
| NA        | ENSG00000236261 | 0          | NA          | NA         | NA         | NA         |             |
| NA        | ENSG00000236262 | 0.14931947 | -0.01844332 | 0.38480212 | 0.84537521 | NA         | SHANK2-AS2  |
| NA        | ENSG00000236263 | 0          | NA          | NA         | NA         | NA         |             |
| NA        | ENSG00000236264 | 0.85387321 | 0.01131973  | 0.3815698  | 0.82708434 | NA         | RPL26P30    |
| NA        | ENSG00000236266 | 1.09256048 | 0.04922007  | 0.38619653 | 0.33708792 | NA         |             |
| NA        | ENSG00000236267 | 0          | NA          | NA         | NA         | NA         |             |
| 101927498 | ENSG00000236268 | 0          | NA          | NA         | NA         | NA         | LINC01361   |
| 105373051 | ENSG00000236272 | 0          | NA          | NA         | NA         | NA         | SCUBE1-AS2  |
| NA        | ENSG00000236274 | 0          | NA          | NA         | NA         | NA         |             |
| NA        | ENSG00000236276 | 0          | NA          | NA         | NA         | NA         | NDP-AS1     |
| NA        | ENSG00000236277 | 0          | NA          | NA         | NA         | NA         | NIPA2P5     |
| NA        | ENSG00000236278 | 0          | NA          | NA         | NA         | NA         | PEBP1P3     |
| 154790    | ENSG00000236279 | 18.6983195 | 0.1702693   | 0.35744354 | 0.36241256 | 0.59208376 | CLEC2L      |
| NA        | ENSG00000236281 | 0          | NA          | NA         | NA         | NA         | NDUFB9P2    |
| NA        | ENSG00000236283 | 7.43239171 | -0.12145623 | 0.39053147 | 0.28808823 | 0.51381431 |             |
| NA        | ENSG00000236284 | 0          | NA          | NA         | NA         | NA         | VN1R31P     |
| NA        | ENSG00000236285 | 0          | NA          | NA         | NA         | NA         | NPM1P8      |
| 58486     | ENSG00000236287 | 1071.13372 | -0.30574542 | 0.08902998 | 0.00040065 | 0.0026514  | ZBED5       |
| NA        | ENSG00000236289 | 0.16735865 | 0.01897177  | 0.38482933 | 0.78225479 | NA         | GACAT3      |
| NA        | ENSG00000236290 | 2.11114257 | 0.08423434  | 0.38929542 | 0.30891224 | NA         | EEF1GP7     |
| NA        | ENSG00000236292 | 0          | NA          | NA         | NA         | NA         | USH2A-AS1   |
| NA        | ENSG00000236295 | 0.16735865 | 0.01897177  | 0.38482933 | 0.78225479 | NA         |             |

|           |                 |            |             |            |            |            |             |
|-----------|-----------------|------------|-------------|------------|------------|------------|-------------|
| 441046    | ENSG00000236296 | 28.5111998 | -0.21899817 | 0.39276056 | 0.23300214 | 0.44988944 | GUSBP5      |
| NA        | ENSG00000236297 | 1.14763392 | 0.01779607  | 0.37917552 | 0.79558371 | NA         |             |
| NA        | ENSG00000236299 | 0.16735865 | 0.01897177  | 0.38482933 | 0.78225479 | NA         |             |
| NA        | ENSG00000236300 | 0          | NA          | NA         | NA         | NA         | MTND4LP12   |
| 283303    | ENSG00000236301 | 0          | NA          | NA         | NA         | NA         | MRGPRG-AS1  |
| NA        | ENSG00000236303 | 0.173733   | 0.01914545  | 0.38484597 | 0.78225479 | NA         | LINC02646   |
| 107984360 | ENSG00000236304 | 2.06399007 | -0.0629579  | 0.38502045 | 0.40347255 | NA         |             |
| 105375430 | ENSG00000236305 | 0.98518464 | 0.0257287   | 0.38227006 | 0.6407684  | NA         | SLC12A9-AS1 |
| 101929582 | ENSG00000236306 | 0          | NA          | NA         | NA         | NA         | LINC01241   |
| NA        | ENSG00000236307 | 0.32265491 | -0.02325554 | 0.38531889 | 0.6695122  | NA         | EEF1E1P1    |
| NA        | ENSG00000236308 | 6.1482564  | -0.10629299 | 0.38446002 | 0.37366758 | 0.60267984 |             |
| 100038246 | ENSG00000236311 | 1.41637037 | 0.01873721  | 0.37986046 | 0.76983729 | NA         | TLX1NB      |
| NA        | ENSG00000236312 | 0          | NA          | NA         | NA         | NA         | RPL34P34    |
| NA        | ENSG00000236313 | 0          | NA          | NA         | NA         | NA         | VN1R53P     |
| NA        | ENSG00000236316 | 0          | NA          | NA         | NA         | NA         | OR7E109P    |
| NA        | ENSG00000236317 | 0.14931947 | -0.01844332 | 0.38480212 | 0.84537521 | NA         |             |
| NA        | ENSG00000236318 | 0          | NA          | NA         | NA         | NA         | LINC02888   |
| NA        | ENSG00000236319 | 0          | NA          | NA         | NA         | NA         |             |
| 342618    | ENSG00000236320 | 0          | NA          | NA         | NA         | NA         | SLFN14      |
| NA        | ENSG00000236323 | 0          | NA          | NA         | NA         | NA         | BMP6P1      |
| NA        | ENSG00000236324 | 0          | NA          | NA         | NA         | NA         | SNX9-AS1    |
| NA        | ENSG00000236325 | 0          | NA          | NA         | NA         | NA         | RPL32P5     |
| NA        | ENSG00000236326 | 0          | NA          | NA         | NA         | NA         |             |
| NA        | ENSG00000236327 | 0          | NA          | NA         | NA         | NA         |             |
| NA        | ENSG00000236330 | 0.30139824 | -0.02296476 | 0.38527817 | 0.68536535 | NA         | RPL5P9      |
| NA        | ENSG00000236332 | 0.31778202 | 0.00193945  | 0.38337474 | 0.95926502 | NA         |             |
| NA        | ENSG00000236333 | 3.70697365 | 0.31565996  | 0.60364391 | 0.00137985 | 0.00780393 | TRHDE-AS1   |
| 644591    | ENSG00000236334 | 0          | NA          | NA         | NA         | NA         | PPIAL4G     |
| NA        | ENSG00000236335 | 0          | NA          | NA         | NA         | NA         |             |
| NA        | ENSG00000236336 | 0          | NA          | NA         | NA         | NA         | CDYL-AS1    |
| NA        | ENSG00000236337 | 0.85254182 | -0.00968268 | 0.38157277 | 0.85173525 | NA         | FMR1-IT1    |
| NA        | ENSG00000236339 | 0          | NA          | NA         | NA         | NA         | POM121L13P  |
| 101928333 | ENSG00000236340 | 0          | NA          | NA         | NA         | NA         | GRM8-AS1    |
| NA        | ENSG00000236341 | 0          | NA          | NA         | NA         | NA         |             |
| NA        | ENSG00000236343 | 0          | NA          | NA         | NA         | NA         | EI24P4      |
| 112935969 | ENSG00000236345 | 1.14953757 | 0.01851325  | 0.38017217 | 0.77196547 | NA         | SCAT8       |
| NA        | ENSG00000236347 | 0          | NA          | NA         | NA         | NA         |             |
| NA        | ENSG00000236348 | 0          | NA          | NA         | NA         | NA         | PSMC1P10    |

|           |                 |            |             |            |            |            |             |
|-----------|-----------------|------------|-------------|------------|------------|------------|-------------|
| NA        | ENSG00000236349 | 0          | NA          | NA         | NA         | NA         | SUCLG2P2    |
| NA        | ENSG00000236352 | 0          | NA          | NA         | NA         | NA         |             |
| NA        | ENSG00000236354 | 0          | NA          | NA         | NA         | NA         | LINC00437   |
| NA        | ENSG00000236355 | 0          | NA          | NA         | NA         | NA         |             |
| NA        | ENSG00000236356 | 0          | NA          | NA         | NA         | NA         |             |
| NA        | ENSG00000236357 | 0          | NA          | NA         | NA         | NA         | EI24P1      |
| NA        | ENSG00000236358 | 1.76004901 | -0.0785762  | 0.38889413 | 0.30878222 | NA         |             |
| NA        | ENSG00000236359 | 0          | NA          | NA         | NA         | NA         | OR51B8P     |
| NA        | ENSG00000236360 | 0          | NA          | NA         | NA         | NA         | RRAS2P1     |
| 2574      | ENSG00000236362 | 0          | NA          | NA         | NA         | NA         | GAGE12F     |
| 2576      | ENSG00000236362 | 0          | NA          | NA         | NA         | NA         | GAGE12F     |
| 2578      | ENSG00000236362 | 0          | NA          | NA         | NA         | NA         | GAGE12F     |
| 2579      | ENSG00000236362 | 0          | NA          | NA         | NA         | NA         | GAGE12F     |
| 26748     | ENSG00000236362 | 0          | NA          | NA         | NA         | NA         | GAGE12F     |
| 729408    | ENSG00000236362 | 0          | NA          | NA         | NA         | NA         | GAGE12F     |
| 100008586 | ENSG00000236362 | 0          | NA          | NA         | NA         | NA         | GAGE12F     |
| NA        | ENSG00000236364 | 44.3099344 | -0.56296687 | 0.3657408  | 0.02628357 | 0.09050816 |             |
| NA        | ENSG00000236365 | 0          | NA          | NA         | NA         | NA         | EIF3MP1     |
| 153910    | ENSG00000236366 | 0.14931947 | -0.01844332 | 0.38480212 | 0.84537521 | NA         |             |
| 728096    | ENSG00000236371 | 0          | NA          | NA         | NA         | NA         | CT47A1      |
| NA        | ENSG00000236372 | 0          | NA          | NA         | NA         | NA         |             |
| 101926942 | ENSG00000236373 | 0          | NA          | NA         | NA         | NA         | LINC02653   |
| NA        | ENSG00000236375 | 0          | NA          | NA         | NA         | NA         | POU5F1P5    |
| NA        | ENSG00000236376 | 0          | NA          | NA         | NA         | NA         |             |
| NA        | ENSG00000236377 | 0.15069912 | -0.01848503 | 0.38480575 | 0.84537521 | NA         |             |
| NA        | ENSG00000236378 | 0          | NA          | NA         | NA         | NA         |             |
| NA        | ENSG00000236379 | 0          | NA          | NA         | NA         | NA         | ZNF736P4Y   |
| NA        | ENSG00000236380 | 0          | NA          | NA         | NA         | NA         | VENTXP7     |
| NA        | ENSG00000236382 | 0          | NA          | NA         | NA         | NA         | KRTAP10-13P |
| 100874261 | ENSG00000236383 | 1.17351796 | 0.069763    | 0.39012221 | 0.24577232 | NA         | CCDC200     |
| 150135    | ENSG00000236384 | 0          | NA          | NA         | NA         | NA         | LINC00479   |
| NA        | ENSG00000236385 | 0          | NA          | NA         | NA         | NA         |             |
| NA        | ENSG00000236386 | 0          | NA          | NA         | NA         | NA         |             |
| NA        | ENSG00000236387 | 0          | NA          | NA         | NA         | NA         |             |
| NA        | ENSG00000236388 | 0          | NA          | NA         | NA         | NA         | ITCH-AS1    |
| NA        | ENSG00000236389 | 0          | NA          | NA         | NA         | NA         |             |
| NA        | ENSG00000236390 | 0          | NA          | NA         | NA         | NA         |             |
| NA        | ENSG00000236391 | 0.173124   | -0.01911262 | 0.38486262 | 0.84537521 | NA         |             |

|           |                 |            |             |            |            |            |            |
|-----------|-----------------|------------|-------------|------------|------------|------------|------------|
| 101927476 | ENSG00000236393 | 0          | NA          | NA         | NA         | NA         |            |
| NA        | ENSG00000236394 | 0.68098139 | -0.00025533 | 0.38240795 | 0.99691449 | NA         |            |
| NA        | ENSG00000236395 | 0          | NA          | NA         | NA         | NA         |            |
| 646000    | ENSG00000236396 | 0          | NA          | NA         | NA         | NA         | SLC35G4    |
| NA        | ENSG00000236397 | 22.5564441 | 0.03763642  | 0.30541593 | 0.84246656 | 0.92837906 | DDX11L2    |
| 259285    | ENSG00000236398 | 0          | NA          | NA         | NA         | NA         | TAS2R39    |
| NA        | ENSG00000236400 | 0          | NA          | NA         | NA         | NA         | KRTAP21-4P |
| NA        | ENSG00000236401 | 0          | NA          | NA         | NA         | NA         | SLC4A1APP2 |
| NA        | ENSG00000236403 | 0          | NA          | NA         | NA         | NA         |            |
| 401491    | ENSG00000236404 | 16.6658542 | 0.8787972   | 0.95469971 | 0.01588061 | 0.06038154 | VLDLR-AS1  |
| NA        | ENSG00000236405 | 0          | NA          | NA         | NA         | NA         | UBQLN1P1   |
| NA        | ENSG00000236407 | 0          | NA          | NA         | NA         | NA         | HMGB1P18   |
| NA        | ENSG00000236408 | 0          | NA          | NA         | NA         | NA         |            |
| NA        | ENSG00000236409 | 0.39047689 | 0.01034119  | 0.38371495 | 0.86425745 | NA         | NRADDP     |
| NA        | ENSG00000236411 | 1.61741893 | -0.0166913  | 0.37858654 | 0.81406213 | NA         | NDUFAF4P3  |
| NA        | ENSG00000236412 | 0          | NA          | NA         | NA         | NA         |            |
| NA        | ENSG00000236413 | 0          | NA          | NA         | NA         | NA         |            |
| NA        | ENSG00000236414 | 0          | NA          | NA         | NA         | NA         |            |
| NA        | ENSG00000236417 | 0          | NA          | NA         | NA         | NA         | CTSLP1     |
| NA        | ENSG00000236420 | 0          | NA          | NA         | NA         | NA         | CHCHD3P1   |
| 100133612 | ENSG00000236423 | 8.15443095 | -0.07171031 | 0.36077105 | 0.60719073 | 0.79658855 | LINC01134  |
| 100289087 | ENSG00000236424 | 0          | NA          | NA         | NA         | NA         | TSPY10     |
| NA        | ENSG00000236425 | 0          | NA          | NA         | NA         | NA         |            |
| NA        | ENSG00000236426 | 0          | NA          | NA         | NA         | NA         |            |
| NA        | ENSG00000236427 | 0          | NA          | NA         | NA         | NA         |            |
| NA        | ENSG00000236430 | 1.66028597 | 0.04790402  | 0.38301915 | 0.49128879 | NA         | KRT8P29    |
| NA        | ENSG00000236431 | 1.03302181 | 0.00364623  | 0.38078943 | 0.94787889 | NA         |            |
| NA        | ENSG00000236432 | 27.2182792 | -0.11040596 | 0.30491411 | 0.56766923 | 0.76899226 | MFF-DT     |
| NA        | ENSG00000236433 | 0          | NA          | NA         | NA         | NA         | RPL37P21   |
| NA        | ENSG00000236434 | 0          | NA          | NA         | NA         | NA         |            |
| NA        | ENSG00000236435 | 0          | NA          | NA         | NA         | NA         | TSPY12P    |
| 101928271 | ENSG00000236436 | 0          | NA          | NA         | NA         | NA         | LINC02850  |
| NA        | ENSG00000236437 | 36.7841333 | -1.07236937 | 0.43695636 | 0.00121019 | 0.00697364 | LINC02151  |
| NA        | ENSG00000236438 | 65.034873  | 0.04904135  | 0.28219078 | 0.80003715 | 0.90845064 | FAM157A    |
| NA        | ENSG00000236439 | 0.83694727 | -0.0104414  | 0.38019938 | 0.86366237 | NA         |            |
| NA        | ENSG00000236440 | 0          | NA          | NA         | NA         | NA         | COPRSP1    |
| NA        | ENSG00000236442 | 0          | NA          | NA         | NA         | NA         | ANKRD54P1  |
| 171222    | ENSG00000236444 | 0.15069912 | -0.01848503 | 0.38480575 | 0.84537521 | NA         | UBE2L5     |

|           |                 |            |             |            |            |            |            |
|-----------|-----------------|------------|-------------|------------|------------|------------|------------|
| NA        | ENSG00000236445 | 1.1615761  | -0.0576062  | 0.38855911 | 0.29840992 | NA         | LINC00608  |
| 643311    | ENSG00000236446 | 0.33822236 | 0.00202501  | 0.38337529 | 0.96912108 | NA         | CT47B1     |
| NA        | ENSG00000236447 | 0          | NA          | NA         | NA         | NA         | ATG10-IT1  |
| NA        | ENSG00000236449 | 0.63051347 | -0.00517754 | 0.38203308 | 0.91507611 | NA         |            |
| NA        | ENSG00000236450 | 0          | NA          | NA         | NA         | NA         |            |
| NA        | ENSG00000236451 | 0          | NA          | NA         | NA         | NA         |            |
| NA        | ENSG00000236452 | 0          | NA          | NA         | NA         | NA         |            |
| NA        | ENSG00000236453 | 0          | NA          | NA         | NA         | NA         |            |
| NA        | ENSG00000236456 | 1.37897988 | 0.08621612  | 0.39453745 | 0.17683099 | NA         |            |
| NA        | ENSG00000236457 | 0          | NA          | NA         | NA         | NA         |            |
| NA        | ENSG00000236459 | 0.31815592 | 0.00110397  | 0.38336641 | 0.96649962 | NA         | HNRNPA1P22 |
| NA        | ENSG00000236460 | 0          | NA          | NA         | NA         | NA         | SNX2P2     |
| 101928748 | ENSG00000236461 | 0          | NA          | NA         | NA         | NA         |            |
| NA        | ENSG00000236463 | 0          | NA          | NA         | NA         | NA         | LINC00427  |
| NA        | ENSG00000236464 | 0          | NA          | NA         | NA         | NA         | LINC02559  |
| NA        | ENSG00000236466 | 0          | NA          | NA         | NA         | NA         |            |
| 101929328 | ENSG00000236467 | 14.0074327 | -3.99455811 | 0.90115673 | 6.47E-07   | 7.57E-06   | KCNMA1-AS1 |
| NA        | ENSG00000236468 | 0          | NA          | NA         | NA         | NA         |            |
| NA        | ENSG00000236469 | 0          | NA          | NA         | NA         | NA         |            |
| NA        | ENSG00000236471 | 0          | NA          | NA         | NA         | NA         |            |
| NA        | ENSG00000236472 | 0          | NA          | NA         | NA         | NA         |            |
| NA        | ENSG00000236473 | 0          | NA          | NA         | NA         | NA         | KRT43P     |
| NA        | ENSG00000236474 | 4.89286256 | 0.06521683  | 0.36849261 | 0.60572148 | 0.79555768 | GCNT1P1    |
| NA        | ENSG00000236475 | 0.62304535 | -0.04508052 | 0.3875696  | 0.37399372 | NA         | TRIM26BP   |
| NA        | ENSG00000236476 | 0          | NA          | NA         | NA         | NA         |            |
| NA        | ENSG00000236477 | 0          | NA          | NA         | NA         | NA         | RPS24P1    |
| NA        | ENSG00000236478 | 1.28532856 | -0.07167099 | 0.39001874 | 0.25018961 | NA         |            |
| NA        | ENSG00000236480 | 0.30139824 | -0.02296476 | 0.38527817 | 0.68536535 | NA         | PKMP1      |
| NA        | ENSG00000236481 | 0          | NA          | NA         | NA         | NA         | LINC02195  |
| NA        | ENSG00000236483 | 2.36062789 | 0.06813166  | 0.38332384 | 0.43772527 | NA         | MTND2P40   |
| NA        | ENSG00000236484 | 0.14931947 | -0.01844332 | 0.38480212 | 0.84537521 | NA         | RRM2P2     |
| NA        | ENSG00000236485 | 0          | NA          | NA         | NA         | NA         | LINC01945  |
| NA        | ENSG00000236487 | 0          | NA          | NA         | NA         | NA         |            |
| NA        | ENSG00000236489 | 0          | NA          | NA         | NA         | NA         |            |
| NA        | ENSG00000236491 | 0          | NA          | NA         | NA         | NA         |            |
| NA        | ENSG00000236493 | 0.18922458 | 0.01954053  | 0.38488496 | 0.78225479 | NA         | EIF2S2P3   |
| NA        | ENSG00000236494 | 0.47498102 | -0.00863808 | 0.38281725 | 0.85462825 | NA         |            |
| NA        | ENSG00000236495 | 0          | NA          | NA         | NA         | NA         |            |



|           |                 |            |             |            |            |            |             |
|-----------|-----------------|------------|-------------|------------|------------|------------|-------------|
| NA        | ENSG00000236496 | 0          | NA          | NA         | NA         | NA         | GPS2P1      |
| 101927683 | ENSG00000236497 | 0          | NA          | NA         | NA         | NA         | LINC01744   |
| NA        | ENSG00000236498 | 2.07351919 | 0.08935148  | 0.39491515 | 0.191915   | NA         |             |
| 150197    | ENSG00000236499 | 5.43795158 | 0.09543402  | 0.38027133 | 0.41887034 | 0.64468844 | LINC00896   |
| NA        | ENSG00000236500 | 0          | NA          | NA         | NA         | NA         | CD24P1      |
| NA        | ENSG00000236501 | 0.16735865 | 0.01897177  | 0.38482933 | 0.78225479 | NA         |             |
| 100506108 | ENSG00000236502 | 94.7241359 | -0.10677697 | 0.21046962 | 0.544529   | 0.75235966 | SIX3-AS1    |
| NA        | ENSG00000236503 | 0          | NA          | NA         | NA         | NA         |             |
| NA        | ENSG00000236504 | 0          | NA          | NA         | NA         | NA         |             |
| NA        | ENSG00000236505 | 0          | NA          | NA         | NA         | NA         |             |
| NA        | ENSG00000236507 | 0.14931947 | -0.01844332 | 0.38480212 | 0.84537521 | NA         |             |
| NA        | ENSG00000236508 | 0          | NA          | NA         | NA         | NA         | ATP13A5-AS1 |
| NA        | ENSG00000236509 | 0          | NA          | NA         | NA         | NA         | RPL21P133   |
| NA        | ENSG00000236510 | 0          | NA          | NA         | NA         | NA         |             |
| NA        | ENSG00000236511 | 0          | NA          | NA         | NA         | NA         | LINC01231   |
| NA        | ENSG00000236512 | 0          | NA          | NA         | NA         | NA         |             |
| 101928201 | ENSG00000236513 | 0          | NA          | NA         | NA         | NA         |             |
| NA        | ENSG00000236514 | 14.0097855 | -0.00358917 | 0.32512027 | 0.98172523 | 0.99389849 |             |
| NA        | ENSG00000236516 | 0          | NA          | NA         | NA         | NA         | KLF2P4      |
| NA        | ENSG00000236519 | 7.57088748 | -0.11401038 | 0.36682939 | 0.45832092 | 0.68173128 | LINC01424   |
| 100873972 | ENSG00000236520 | 0.15069912 | -0.01848503 | 0.38480575 | 0.84537521 | NA         | GPC6-AS1    |
| NA        | ENSG00000236521 | 0          | NA          | NA         | NA         | NA         | NPAP1P4     |
| NA        | ENSG00000236523 | 0          | NA          | NA         | NA         | NA         | NPM1P40     |
| NA        | ENSG00000236525 | 0          | NA          | NA         | NA         | NA         |             |
| NA        | ENSG00000236526 | 10.1830716 | 0.09632149  | 0.35460809 | 0.55171482 | 0.75813977 |             |
| NA        | ENSG00000236527 | 1.37707743 | -0.01930921 | 0.37862618 | 0.78667188 | NA         | ARF4P2      |
| NA        | ENSG00000236528 | 0.64902765 | 0.00252842  | 0.38248679 | 0.95150468 | NA         |             |
| NA        | ENSG00000236529 | 36.6319246 | 0.36484856  | 0.35460233 | 0.11236711 | 0.27144325 |             |
| NA        | ENSG00000236530 | 0.34110811 | 0.02362651  | 0.38535339 | 0.62410678 | NA         | KPNA2P1     |
| NA        | ENSG00000236531 | 0          | NA          | NA         | NA         | NA         |             |
| 101927973 | ENSG00000236532 | 14.5155368 | 0.17721767  | 0.38501243 | 0.29405872 | 0.52025369 | LINC01695   |
| NA        | ENSG00000236533 | 0          | NA          | NA         | NA         | NA         | RPS12P4     |
| NA        | ENSG00000236534 | 1.37240581 | 0.01027906  | 0.37908614 | 0.87831597 | NA         | H3P36       |
| NA        | ENSG00000236535 | 0          | NA          | NA         | NA         | NA         | RC3H1-IT1   |
| NA        | ENSG00000236536 | 5.87608862 | 0.12102854  | 0.3784201  | 0.39609474 | 0.62549509 |             |
| NA        | ENSG00000236538 | 0          | NA          | NA         | NA         | NA         | ZNF863P     |
| NA        | ENSG00000236539 | 0.64755518 | -0.02418326 | 0.38282881 | 0.64168373 | NA         | HNRNPA1P54  |
| NA        | ENSG00000236540 | 6.09682342 | -0.01793982 | 0.35821148 | 0.88978852 | 0.95202525 |             |

|           |                 |            |             |            |            |            |            |
|-----------|-----------------|------------|-------------|------------|------------|------------|------------|
| NA        | ENSG00000236541 | 0          | NA          | NA         | NA         | NA         | VN2R9P     |
| NA        | ENSG00000236542 | 1.07527906 | 0.04901689  | 0.38640953 | 0.34551368 | NA         | MED28P7    |
| 102723971 | ENSG00000236543 | 0          | NA          | NA         | NA         | NA         |            |
| NA        | ENSG00000236544 | 0          | NA          | NA         | NA         | NA         |            |
| NA        | ENSG00000236545 | 0.49614694 | -0.02952354 | 0.38590415 | 0.52528768 | NA         |            |
| 105378668 | ENSG00000236546 | 0.60054584 | -0.03512322 | 0.3864917  | 0.44192234 | NA         | MYCL-AS1   |
| NA        | ENSG00000236548 | 0          | NA          | NA         | NA         | NA         | RNF217-AS1 |
| NA        | ENSG00000236549 | 0          | NA          | NA         | NA         | NA         | RPS27AP7   |
| NA        | ENSG00000236550 | 0          | NA          | NA         | NA         | NA         |            |
| 728658    | ENSG00000236552 | 2.58378772 | 0.12669131  | 0.40424473 | 0.17258447 | 0.36535167 | RPL13AP5   |
| NA        | ENSG00000236554 | 2.52742842 | 0.02934948  | 0.3750571  | 0.7478017  | NA         | ASNSP3     |
| NA        | ENSG00000236555 | 0          | NA          | NA         | NA         | NA         |            |
| NA        | ENSG00000236556 | 0.18922458 | 0.01954053  | 0.38488496 | 0.78225479 | NA         |            |
| NA        | ENSG00000236559 | 0          | NA          | NA         | NA         | NA         | BCL2L1-AS1 |
| NA        | ENSG00000236562 | 0.53093216 | 0.01411712  | 0.3829617  | 0.73585816 | NA         | IFITM3P1   |
| NA        | ENSG00000236564 | 0          | NA          | NA         | NA         | NA         | YWHAQP5    |
| NA        | ENSG00000236565 | 0.33471731 | 0.02354391  | 0.38534154 | 0.62842204 | NA         | HNRNPA3P5  |
| NA        | ENSG00000236567 | 0.5056021  | 0.01438473  | 0.3830653  | 0.7521643  | NA         | TCF3P1     |
| NA        | ENSG00000236569 | 0          | NA          | NA         | NA         | NA         | HNRNPA1P73 |
| NA        | ENSG00000236570 | 3.3745256  | 0.10039863  | 0.38454704 | 0.37993065 | 0.60887109 | RAD23BP1   |
| NA        | ENSG00000236571 | 0          | NA          | NA         | NA         | NA         |            |
| NA        | ENSG00000236572 | 0          | NA          | NA         | NA         | NA         |            |
| NA        | ENSG00000236574 | 0          | NA          | NA         | NA         | NA         |            |
| NA        | ENSG00000236576 | 1.41961579 | -0.0194963  | 0.37956074 | 0.77140627 | NA         |            |
| NA        | ENSG00000236577 | 0          | NA          | NA         | NA         | NA         | SNRPGP14   |
| NA        | ENSG00000236580 | 0          | NA          | NA         | NA         | NA         |            |
| NA        | ENSG00000236581 | 0          | NA          | NA         | NA         | NA         | STARD13-AS |
| NA        | ENSG00000236582 | 0          | NA          | NA         | NA         | NA         | PRPF38AP2  |
| NA        | ENSG00000236583 | 0          | NA          | NA         | NA         | NA         |            |
| NA        | ENSG00000236590 | 0          | NA          | NA         | NA         | NA         | MTATP6P4   |
| NA        | ENSG00000236591 | 0          | NA          | NA         | NA         | NA         | UST-AS2    |
| NA        | ENSG00000236592 | 0          | NA          | NA         | NA         | NA         | S100A11P2  |
| NA        | ENSG00000236594 | 0          | NA          | NA         | NA         | NA         | RPS27AP14  |
| NA        | ENSG00000236595 | 0.15069912 | -0.01848503 | 0.38480575 | 0.84537521 | NA         | MED15P5    |
| NA        | ENSG00000236596 | 0          | NA          | NA         | NA         | NA         | CRLF3P1    |
| NA        | ENSG00000236597 | 0          | NA          | NA         | NA         | NA         | IGHD7-27   |
| NA        | ENSG00000236601 | 0          | NA          | NA         | NA         | NA         |            |
| NA        | ENSG00000236603 | 0.70660575 | 0.00392233  | 0.38183615 | 0.93389603 | NA         | RANP1      |

|           |                 |            |            |            |            |            |             |
|-----------|-----------------|------------|------------|------------|------------|------------|-------------|
| NA        | ENSG00000236604 | 0          | NA         | NA         | NA         | NA         | LYPLA2P3    |
| NA        | ENSG00000236605 | 1.37506926 | 0.03340134 | 0.38101558 | 0.62094128 | NA         |             |
| NA        | ENSG00000236606 | 0          | NA         | NA         | NA         | NA         |             |
| NA        | ENSG00000236607 | 0          | NA         | NA         | NA         | NA         | EEF1DP8     |
| NA        | ENSG00000236608 | 0          | NA         | NA         | NA         | NA         | EIF4A1P6    |
| 54753     | ENSG00000236609 | 1773.24526 | 0.21146232 | 0.06927181 | 0.00189156 | 0.01019518 | ZNF853      |
| NA        | ENSG00000236610 | 0          | NA         | NA         | NA         | NA         | SOCS5P1     |
| 102724679 | ENSG00000236611 | 0.56002111 | 0.01291858 | 0.38331719 | 0.73494227 | NA         | LINC02556   |
| NA        | ENSG00000236612 | 0          | NA         | NA         | NA         | NA         | KRTAP19-11P |
| NA        | ENSG00000236615 | 0          | NA         | NA         | NA         | NA         |             |
| NA        | ENSG00000236616 | 0          | NA         | NA         | NA         | NA         | BAK1P2      |
| 101928530 | ENSG00000236617 | 2.97849505 | 0.01811097 | 0.37027807 | 0.86235964 | 0.93898333 |             |
| 100306951 | ENSG00000236618 | 149.561206 | 0.06835065 | 0.1914174  | 0.68169985 | 0.84446335 | PITPNA-AS1  |
| NA        | ENSG00000236620 | 0          | NA         | NA         | NA         | NA         | XKRYP3      |
| NA        | ENSG00000236626 | 0          | NA         | NA         | NA         | NA         | MTND5P17    |
| NA        | ENSG00000236627 | 1.03771797 | 0.07424282 | 0.39363572 | 0.15253254 | NA         |             |
| NA        | ENSG00000236634 | 0          | NA         | NA         | NA         | NA         |             |
| 105377860 | ENSG00000236635 | 0          | NA         | NA         | NA         | NA         | LINC02540   |
| NA        | ENSG00000236636 | 0          | NA         | NA         | NA         | NA         |             |
| 3441      | ENSG00000236637 | 0          | NA         | NA         | NA         | NA         | IFNA4       |
| NA        | ENSG00000236638 | 0          | NA         | NA         | NA         | NA         |             |
| NA        | ENSG00000236641 | 0.84266712 | 0.02724262 | 0.38405744 | 0.53161382 | NA         |             |
| NA        | ENSG00000236643 | 0.16735865 | 0.01897177 | 0.38482933 | 0.78225479 | NA         |             |
| NA        | ENSG00000236646 | 0          | NA         | NA         | NA         | NA         | LAMTOR5P1   |
| NA        | ENSG00000236647 | 0          | NA         | NA         | NA         | NA         |             |
| NA        | ENSG00000236648 | 0.16735865 | 0.01897177 | 0.38482933 | 0.78225479 | NA         | LINC02810   |
| 104326193 | ENSG00000236651 | 0          | NA         | NA         | NA         | NA         | DLX2-DT     |
| NA        | ENSG00000236653 | 0          | NA         | NA         | NA         | NA         | LINC01923   |
| NA        | ENSG00000236654 | 0          | NA         | NA         | NA         | NA         |             |
| NA        | ENSG00000236655 | 0          | NA         | NA         | NA         | NA         | SLC6A14P3   |
| NA        | ENSG00000236656 | 0          | NA         | NA         | NA         | NA         |             |
| NA        | ENSG00000236658 | 0          | NA         | NA         | NA         | NA         |             |
| NA        | ENSG00000236662 | 0.35747915 | 0.0238228  | 0.38538196 | 0.61361431 | NA         |             |
| 106481742 | ENSG00000236663 | 0          | NA         | NA         | NA         | NA         | FRGCA       |
| 106780825 | ENSG00000236663 | 0          | NA         | NA         | NA         | NA         | FRGCA       |
| NA        | ENSG00000236664 | 0          | NA         | NA         | NA         | NA         |             |
| NA        | ENSG00000236665 | 0          | NA         | NA         | NA         | NA         |             |
| NA        | ENSG00000236666 | 0          | NA         | NA         | NA         | NA         | POTEH-AS1   |

|           |                 |            |             |            |            |            |            |
|-----------|-----------------|------------|-------------|------------|------------|------------|------------|
| NA        | ENSG00000236667 | 0          | NA          | NA         | NA         | NA         | RPL27AP3   |
| 100505588 | ENSG00000236668 | 0          | NA          | NA         | NA         | NA         |            |
| NA        | ENSG00000236670 | 8.54469226 | -0.43525349 | 0.64340511 | 0.04742485 | 0.14279997 | KRT18P5    |
| NA        | ENSG00000236671 | 72.5140269 | 0.58482105  | 0.33309411 | 0.01732995 | 0.06491745 | PRKG1-AS1  |
| NA        | ENSG00000236673 | 0          | NA          | NA         | NA         | NA         |            |
| NA        | ENSG00000236674 | 0          | NA          | NA         | NA         | NA         |            |
| NA        | ENSG00000236675 | 0.44795842 | -0.02501848 | 0.38558245 | 0.5807882  | NA         | MTX1P1     |
| NA        | ENSG00000236676 | 0.47268444 | -0.02840662 | 0.38580551 | 0.5434799  | NA         |            |
| NA        | ENSG00000236677 | 0          | NA          | NA         | NA         | NA         | SETD4-AS1  |
| NA        | ENSG00000236678 | 2.17019185 | -0.11639295 | 0.40374628 | 0.10573416 | NA         | LINC00347  |
| NA        | ENSG00000236679 | 1.98428526 | -0.10006532 | 0.40241297 | 0.05644301 | NA         | RPL23AP24  |
| NA        | ENSG00000236680 | 0.49034623 | 0.01379242  | 0.3830648  | 0.76317406 | NA         |            |
| NA        | ENSG00000236681 | 0          | NA          | NA         | NA         | NA         | DSTNP5     |
| 100506922 | ENSG00000236682 | 9.27078511 | 0.20317173  | 0.40349681 | 0.23295662 | 0.44988944 | MAP3K2-DT  |
| NA        | ENSG00000236683 | 0          | NA          | NA         | NA         | NA         | HMGA1P1    |
| NA        | ENSG00000236686 | 0          | NA          | NA         | NA         | NA         | BZW1P1     |
| NA        | ENSG00000236687 | 0          | NA          | NA         | NA         | NA         |            |
| NA        | ENSG00000236689 | 0          | NA          | NA         | NA         | NA         | MTCO2P21   |
| NA        | ENSG00000236690 | 0          | NA          | NA         | NA         | NA         |            |
| NA        | ENSG00000236691 | 0          | NA          | NA         | NA         | NA         | NDUFA4P2   |
| NA        | ENSG00000236692 | 0          | NA          | NA         | NA         | NA         | MTCO1P10   |
| NA        | ENSG00000236695 | 0.18922458 | 0.01954053  | 0.38488496 | 0.78225479 | NA         | HNRNPA1P47 |
| NA        | ENSG00000236698 | 0.56767373 | 0.02627943  | 0.38574813 | 0.49686938 | NA         | EIF1AXP1   |
| 54848     | ENSG00000236699 | 1.17418645 | 0.04369797  | 0.38425709 | 0.44977565 | NA         | ARHGEF38   |
| NA        | ENSG00000236700 | 0          | NA          | NA         | NA         | NA         | LINC01010  |
| NA        | ENSG00000236701 | 0.18922458 | 0.01954053  | 0.38488496 | 0.78225479 | NA         |            |
| NA        | ENSG00000236703 | 0.53542851 | 0.03210085  | 0.38615165 | 0.4634555  | NA         | MYB-AS1    |
| NA        | ENSG00000236704 | 0          | NA          | NA         | NA         | NA         | CNOT4P1    |
| NA        | ENSG00000236708 | 1.6253395  | 0.08126733  | 0.39375878 | 0.16697592 | NA         | SDK1-AS1   |
| 100506897 | ENSG00000236709 | 0          | NA          | NA         | NA         | NA         | DAPK1-IT1  |
| NA        | ENSG00000236710 | 0.52881841 | 0.01306787  | 0.38341952 | 0.75266559 | NA         |            |
| NA        | ENSG00000236711 | 2.99321954 | -0.03665556 | 0.3726461  | 0.7166377  | 0.86363918 | SMAD9-IT1  |
| NA        | ENSG00000236712 | 0          | NA          | NA         | NA         | NA         |            |
| NA        | ENSG00000236713 | 0          | NA          | NA         | NA         | NA         |            |
| NA        | ENSG00000236714 | 22.0792897 | 2.03541851  | 0.73311187 | 0.00021514 | 0.00151896 | LINC01844  |
| NA        | ENSG00000236716 | 0          | NA          | NA         | NA         | NA         |            |
| NA        | ENSG00000236717 | 0          | NA          | NA         | NA         | NA         |            |
| NA        | ENSG00000236718 | 0          | NA          | NA         | NA         | NA         | RBMY2QP    |

|           |                 |            |             |            |            |            |            |
|-----------|-----------------|------------|-------------|------------|------------|------------|------------|
| 148756    | ENSG00000236719 | 0.173733   | 0.01914545  | 0.38484597 | 0.78225479 | NA         | OVAAL      |
| 101928778 | ENSG00000236720 | 0          | NA          | NA         | NA         | NA         | LINC01741  |
| NA        | ENSG00000236722 | 0          | NA          | NA         | NA         | NA         |            |
| NA        | ENSG00000236723 | 3.15742445 | 0.0346675   | 0.37089707 | 0.74555891 | 0.88008306 |            |
| NA        | ENSG00000236724 | 0          | NA          | NA         | NA         | NA         |            |
| NA        | ENSG00000236731 | 0          | NA          | NA         | NA         | NA         |            |
| NA        | ENSG00000236732 | 1.31717786 | -0.013579   | 0.3794373  | 0.83549103 | NA         |            |
| NA        | ENSG00000236733 | 0          | NA          | NA         | NA         | NA         |            |
| NA        | ENSG00000236735 | 0          | NA          | NA         | NA         | NA         | RPL31P63   |
| NA        | ENSG00000236736 | 0          | NA          | NA         | NA         | NA         | UQCRC2P1   |
| NA        | ENSG00000236737 | 0          | NA          | NA         | NA         | NA         | GAGE12B    |
| NA        | ENSG00000236739 | 0.173124   | -0.01911262 | 0.38486262 | 0.84537521 | NA         | CLIC4P1    |
| 101927189 | ENSG00000236740 | 0          | NA          | NA         | NA         | NA         |            |
| NA        | ENSG00000236741 | 0          | NA          | NA         | NA         | NA         |            |
| NA        | ENSG00000236744 | 0.173124   | -0.01911262 | 0.38486262 | 0.84537521 | NA         |            |
| NA        | ENSG00000236745 | 0.173124   | -0.01911262 | 0.38486262 | 0.84537521 | NA         | YRDCP2     |
| 101927449 | ENSG00000236747 | 0          | NA          | NA         | NA         | NA         | LINC01282  |
| NA        | ENSG00000236748 | 0          | NA          | NA         | NA         | NA         |            |
| NA        | ENSG00000236750 | 0          | NA          | NA         | NA         | NA         |            |
| NA        | ENSG00000236751 | 0          | NA          | NA         | NA         | NA         | LINC01186  |
| 100506881 | ENSG00000236753 | 90.978271  | -0.68159378 | 0.26048571 | 0.00177367 | 0.00965687 | MKLN1-AS   |
| NA        | ENSG00000236754 | 0          | NA          | NA         | NA         | NA         |            |
| 414245    | ENSG00000236756 | 0.68484732 | 0.00067763  | 0.38184383 | 0.98734816 | NA         | DNAJC9-AS1 |
| NA        | ENSG00000236758 | 0          | NA          | NA         | NA         | NA         | MTUS2-AS2  |
| NA        | ENSG00000236760 | 0.84409266 | -0.00894851 | 0.38148788 | 0.86395398 | NA         |            |
| 643854    | ENSG00000236761 | 0          | NA          | NA         | NA         | NA         | CTAGE9     |
| NA        | ENSG00000236762 | 0          | NA          | NA         | NA         | NA         | RPL19P16   |
| NA        | ENSG00000236763 | 0          | NA          | NA         | NA         | NA         | TRMT112P4  |
| NA        | ENSG00000236764 | 0          | NA          | NA         | NA         | NA         | COX7A2P2   |
| NA        | ENSG00000236768 | 0          | NA          | NA         | NA         | NA         |            |
| NA        | ENSG00000236769 | 0          | NA          | NA         | NA         | NA         | LINC02659  |
| NA        | ENSG00000236770 | 0          | NA          | NA         | NA         | NA         |            |
| NA        | ENSG00000236772 | 1.49258355 | -0.03445593 | 0.37953485 | 0.64585194 | NA         |            |
| NA        | ENSG00000236773 | 0          | NA          | NA         | NA         | NA         |            |
| NA        | ENSG00000236775 | 0.44795842 | -0.02501848 | 0.38558245 | 0.5807882  | NA         |            |
| NA        | ENSG00000236776 | 0.34746601 | 0.02370763  | 0.3853651  | 0.61987128 | NA         | RPL21P23   |
| NA        | ENSG00000236777 | 0          | NA          | NA         | NA         | NA         |            |
| NA        | ENSG00000236778 | 46.7014304 | 0.09925978  | 0.26837496 | 0.61194075 | 0.79995417 | INTS6-AS1  |

|           |                 |            |             |            |            |            |             |
|-----------|-----------------|------------|-------------|------------|------------|------------|-------------|
| NA        | ENSG00000236779 | 0.83720167 | 0.01542537  | 0.3818493  | 0.76572383 | NA         |             |
| 644838    | ENSG00000236780 | 11.6690872 | -0.10165531 | 0.34781752 | 0.54721428 | 0.75424436 | LINC01829   |
| NA        | ENSG00000236782 | 16.839517  | 0.1539021   | 0.34858262 | 0.40919001 | 0.63717543 | ZNF593OS    |
| NA        | ENSG00000236783 | 0          | NA          | NA         | NA         | NA         | RPS15AP27   |
| NA        | ENSG00000236785 | 0          | NA          | NA         | NA         | NA         | SDR42E1P5   |
| NA        | ENSG00000236786 | 0          | NA          | NA         | NA         | NA         | TSPY15P     |
| 339789    | ENSG00000236790 | 0          | NA          | NA         | NA         | NA         | LINC00299   |
| NA        | ENSG00000236791 | 0          | NA          | NA         | NA         | NA         | OR2AI1P     |
| NA        | ENSG00000236792 | 0          | NA          | NA         | NA         | NA         |             |
| NA        | ENSG00000236794 | 0.173124   | -0.01911262 | 0.38486262 | 0.84537521 | NA         | BCRP8       |
| 101928700 | ENSG00000236795 | 0          | NA          | NA         | NA         | NA         | CNTNAP2-AS1 |
| NA        | ENSG00000236796 | 0          | NA          | NA         | NA         | NA         |             |
| NA        | ENSG00000236797 | 0          | NA          | NA         | NA         | NA         | SPA17P1     |
| 102724589 | ENSG00000236799 | 0          | NA          | NA         | NA         | NA         | LINC02626   |
| NA        | ENSG00000236800 | 0          | NA          | NA         | NA         | NA         |             |
| NA        | ENSG00000236801 | 0.7885004  | -0.00731121 | 0.38085635 | 0.89708387 | NA         | RPL24P8     |
| NA        | ENSG00000236803 | 0          | NA          | NA         | NA         | NA         | SDAD1P4     |
| NA        | ENSG00000236804 | 0          | NA          | NA         | NA         | NA         | RPS3AP12    |
| NA        | ENSG00000236806 | 1.94935157 | 0.04662183  | 0.38154286 | 0.53696862 | NA         | RPL7AP15    |
| NA        | ENSG00000236807 | 0          | NA          | NA         | NA         | NA         |             |
| NA        | ENSG00000236809 | 1.25772604 | -0.06815297 | 0.38900003 | 0.26141144 | NA         | SNX25P1     |
| 100506963 | ENSG00000236810 | 62.6766314 | -0.0080858  | 0.23708481 | 0.9639655  | 0.9857573  | ELOA-AS1    |
| NA        | ENSG00000236811 | 1.72559093 | 0.09552004  | 0.39430463 | 0.23124233 | NA         | GAPDHP2     |
| NA        | ENSG00000236813 | 0          | NA          | NA         | NA         | NA         | BTF3P8      |
| NA        | ENSG00000236814 | 2.52407313 | -0.03868659 | 0.37817644 | 0.64197957 | NA         |             |
| NA        | ENSG00000236816 | 34.0153712 | -0.24895077 | 0.32450718 | 0.23825387 | 0.45582998 | ANKRD20A7P  |
| NA        | ENSG00000236817 | 0          | NA          | NA         | NA         | NA         |             |
| NA        | ENSG00000236818 | 0          | NA          | NA         | NA         | NA         | ARL5AP2     |
| 101060544 | ENSG00000236819 | 6.71769957 | -0.65051479 | 2.00151147 | 0.00820872 | 0.03531244 | LINC01563   |
| NA        | ENSG00000236822 | 0          | NA          | NA         | NA         | NA         | NMBR-AS1    |
| NA        | ENSG00000236823 | 0          | NA          | NA         | NA         | NA         |             |
| 618       | ENSG00000236824 | 22.5086587 | -0.85782458 | 0.65946696 | 0.01365922 | 0.05353595 | BCYRN1      |
| NA        | ENSG00000236825 | 0          | NA          | NA         | NA         | NA         | RAB28P2     |
| NA        | ENSG00000236827 | 0          | NA          | NA         | NA         | NA         | LINC00529   |
| NA        | ENSG00000236828 | 0          | NA          | NA         | NA         | NA         | DMD-AS3     |
| 100134368 | ENSG00000236829 | 31.1297914 | -0.33249402 | 0.3664035  | 0.13924897 | 0.31613004 |             |
| 100506428 | ENSG00000236830 | 26.2513649 | -1.12566224 | 0.56303849 | 0.00310315 | 0.01559038 | CBR3-AS1    |
| NA        | ENSG00000236831 | 0          | NA          | NA         | NA         | NA         | YME1L1P1    |

|           |    |                 |            |             |            |            |            |             |
|-----------|----|-----------------|------------|-------------|------------|------------|------------|-------------|
|           | NA | ENSG00000236832 | 0          | NA          | NA         | NA         | NA         | CBY1P1      |
|           | NA | ENSG00000236833 | 2.40978438 | 0.09919635  | 0.39056983 | 0.30575732 | NA         |             |
| 100287114 |    | ENSG00000236834 | 0          | NA          | NA         | NA         | NA         | LINC00421   |
| 100874088 |    | ENSG00000236836 | 0          | NA          | NA         | NA         | NA         | PCYT1B-AS1  |
|           | NA | ENSG00000236837 | 0          | NA          | NA         | NA         | NA         |             |
|           | NA | ENSG00000236838 | 0          | NA          | NA         | NA         | NA         |             |
|           | NA | ENSG00000236839 | 0          | NA          | NA         | NA         | NA         |             |
|           | NA | ENSG00000236841 | 0          | NA          | NA         | NA         | NA         |             |
|           | NA | ENSG00000236842 | 0          | NA          | NA         | NA         | NA         |             |
|           | NA | ENSG00000236844 | 0.83345088 | -0.00949054 | 0.38153075 | 0.85560283 | NA         |             |
|           | NA | ENSG00000236846 | 0          | NA          | NA         | NA         | NA         |             |
|           | NA | ENSG00000236847 | 0          | NA          | NA         | NA         | NA         |             |
|           | NA | ENSG00000236848 | 0          | NA          | NA         | NA         | NA         | RPL23AP95   |
| 101927258 |    | ENSG00000236849 | 0          | NA          | NA         | NA         | NA         | LINC01474   |
|           | NA | ENSG00000236852 | 0          | NA          | NA         | NA         | NA         | SSBL2P      |
|           | NA | ENSG00000236853 | 0          | NA          | NA         | NA         | NA         | OR2R1P      |
| 285045    |    | ENSG00000236854 | 0.83471985 | -0.02384409 | 0.383624   | 0.5872929  | NA         |             |
|           | NA | ENSG00000236856 | 0          | NA          | NA         | NA         | NA         |             |
|           | NA | ENSG00000236857 | 0          | NA          | NA         | NA         | NA         | RAP1BP1     |
|           | NA | ENSG00000236858 | 0          | NA          | NA         | NA         | NA         |             |
| 254128    |    | ENSG00000236859 | 133.081876 | -0.04881585 | 0.17944793 | 0.75731902 | 0.88697677 | NIFK-AS1    |
|           | NA | ENSG00000236860 | 0          | NA          | NA         | NA         | NA         | RPL39P29    |
|           | NA | ENSG00000236861 | 2.3530149  | 0.10884969  | 0.39740482 | 0.21679705 | NA         | BET1-AS1    |
|           | NA | ENSG00000236862 | 0          | NA          | NA         | NA         | NA         | RPS20P24    |
|           | NA | ENSG00000236863 | 0          | NA          | NA         | NA         | NA         | RPL23AP23   |
|           | NA | ENSG00000236864 | 0          | NA          | NA         | NA         | NA         |             |
|           | NA | ENSG00000236866 | 0          | NA          | NA         | NA         | NA         |             |
|           | NA | ENSG00000236867 | 1.48560151 | -0.0060024  | 0.37719918 | 0.93579578 | NA         |             |
| 112840933 |    | ENSG00000236869 | 3.13824999 | 0.11768777  | 0.39660441 | 0.24929064 | 0.46867491 | ZKSCAN7-AS1 |
|           | NA | ENSG00000236870 | 0          | NA          | NA         | NA         | NA         | POMPP1      |
| 751580    |    | ENSG00000236871 | 4.03140228 | 0.37865969  | 0.71400629 | 0.00474458 | 0.02223252 | LINC00106   |
|           | NA | ENSG00000236872 | 0          | NA          | NA         | NA         | NA         | PPIAP36     |
|           | NA | ENSG00000236874 | 0          | NA          | NA         | NA         | NA         |             |
|           | NA | ENSG00000236875 | 0          | NA          | NA         | NA         | NA         | DDX11L5     |
|           | NA | ENSG00000236876 | 0          | NA          | NA         | NA         | NA         | TMSB4XP1    |
|           | NA | ENSG00000236877 | 0          | NA          | NA         | NA         | NA         | SETD6P1     |
|           | NA | ENSG00000236878 | 1.96274602 | 0.01485186  | 0.37587352 | 0.85933686 | NA         | MTATP6P26   |
|           | NA | ENSG00000236880 | 0          | NA          | NA         | NA         | NA         | RPS26P57    |

|           |                 |            |             |            |            |            |           |
|-----------|-----------------|------------|-------------|------------|------------|------------|-----------|
| 202299    | ENSG00000236882 | 4.0757104  | 0.11390839  | 0.3915795  | 0.30350191 | 0.53085409 | LINC01554 |
| NA        | ENSG00000236883 | 0          | NA          | NA         | NA         | NA         |           |
| NA        | ENSG00000236885 | 0.30139824 | -0.02296476 | 0.38527817 | 0.68536535 | NA         |           |
| NA        | ENSG00000236886 | 0.173733   | 0.01914545  | 0.38484597 | 0.78225479 | NA         |           |
| NA        | ENSG00000236887 | 0          | NA          | NA         | NA         | NA         |           |
| NA        | ENSG00000236888 | 0          | NA          | NA         | NA         | NA         | RPS20P5   |
| NA        | ENSG00000236889 | 0          | NA          | NA         | NA         | NA         |           |
| NA        | ENSG00000236890 | 0.32454776 | -0.0232788  | 0.38532222 | 0.66819217 | NA         |           |
| NA        | ENSG00000236892 | 0          | NA          | NA         | NA         | NA         |           |
| NA        | ENSG00000236893 | 0          | NA          | NA         | NA         | NA         | ASS1P7    |
| NA        | ENSG00000236894 | 0          | NA          | NA         | NA         | NA         |           |
| NA        | ENSG00000236896 | 0          | NA          | NA         | NA         | NA         |           |
| NA        | ENSG00000236897 | 0          | NA          | NA         | NA         | NA         |           |
| NA        | ENSG00000236900 | 0          | NA          | NA         | NA         | NA         | TIMM9P1   |
| 81571     | ENSG00000236901 | 499.643843 | 0.05541215  | 0.10821489 | 0.59426416 | 0.7877158  | MIR600HG  |
| NA        | ENSG00000236905 | 1.32396091 | -0.01708708 | 0.37835015 | 0.81283613 | NA         |           |
| NA        | ENSG00000236907 | 0          | NA          | NA         | NA         | NA         |           |
| NA        | ENSG00000236908 | 18.8233161 | -1.4882234  | 0.63559959 | 0.0010652  | 0.00623227 | LINC02827 |
| NA        | ENSG00000236909 | 0          | NA          | NA         | NA         | NA         | OR2P1P    |
| NA        | ENSG00000236911 | 0          | NA          | NA         | NA         | NA         |           |
| NA        | ENSG00000236913 | 0          | NA          | NA         | NA         | NA         | RPS13P3   |
| 107984773 | ENSG00000236914 | 16.1418313 | 0.04866962  | 0.32718187 | 0.78337287 | 0.90135811 | LINC01852 |
| NA        | ENSG00000236915 | 0          | NA          | NA         | NA         | NA         | CLCA4-AS1 |
| NA        | ENSG00000236917 | 0          | NA          | NA         | NA         | NA         | DNAJA1P2  |
| NA        | ENSG00000236919 | 0          | NA          | NA         | NA         | NA         | PHKG1P3   |
| NA        | ENSG00000236920 | 0          | NA          | NA         | NA         | NA         |           |
| NA        | ENSG00000236921 | 0          | NA          | NA         | NA         | NA         |           |
| NA        | ENSG00000236922 | 0          | NA          | NA         | NA         | NA         | LINC01378 |
| NA        | ENSG00000236924 | 12.7623014 | 0.06619092  | 0.33688808 | 0.69978717 | 0.8552838  |           |
| NA        | ENSG00000236928 | 0.81677452 | -0.04638458 | 0.38801514 | 0.31350074 | NA         |           |
| NA        | ENSG00000236929 | 0.14931947 | -0.01844332 | 0.38480212 | 0.84537521 | NA         | RPL35AP37 |
| NA        | ENSG00000236930 | 0          | NA          | NA         | NA         | NA         | SDHDP4    |
| NA        | ENSG00000236932 | 0          | NA          | NA         | NA         | NA         | CEACAMP8  |
| NA        | ENSG00000236935 | 0.173733   | 0.01914545  | 0.38484597 | 0.78225479 | NA         |           |
| NA        | ENSG00000236936 | 0          | NA          | NA         | NA         | NA         |           |
| NA        | ENSG00000236937 | 0.79700489 | -0.04552442 | 0.38788016 | 0.32237218 | NA         | PTGES3P4  |
| NA        | ENSG00000236938 | 0          | NA          | NA         | NA         | NA         |           |
| 157556    | ENSG00000236939 | 0.173124   | -0.01911262 | 0.38486262 | 0.84537521 | NA         | BAALC-AS2 |



|           |                 |            |             |            |            |            |             |
|-----------|-----------------|------------|-------------|------------|------------|------------|-------------|
| NA        | ENSG00000236940 | 0          | NA          | NA         | NA         | NA         |             |
| NA        | ENSG00000236941 | 0          | NA          | NA         | NA         | NA         |             |
| NA        | ENSG00000236942 | 0          | NA          | NA         | NA         | NA         |             |
| NA        | ENSG00000236944 | 0          | NA          | NA         | NA         | NA         | MIX23P2     |
| NA        | ENSG00000236946 | 0          | NA          | NA         | NA         | NA         | HNRNPA1P70  |
| NA        | ENSG00000236948 | 0.31686865 | 0.00126611  | 0.38336771 | 0.96572226 | NA         |             |
| 105372894 | ENSG00000236950 | 0          | NA          | NA         | NA         | NA         | LINC01774   |
| 102725532 | ENSG00000236951 | 0          | NA          | NA         | NA         | NA         |             |
| NA        | ENSG00000236953 | 0.63736017 | 0.00336193  | 0.38196915 | 0.94203703 | NA         | ZDHHC20-IT1 |
| NA        | ENSG00000236956 | 0          | NA          | NA         | NA         | NA         | NF1P8       |
| 105371458 | ENSG00000236957 | 0          | NA          | NA         | NA         | NA         |             |
| NA        | ENSG00000236958 | 0          | NA          | NA         | NA         | NA         |             |
| NA        | ENSG00000236959 | 0          | NA          | NA         | NA         | NA         | SULT1D1P    |
| NA        | ENSG00000236960 | 0          | NA          | NA         | NA         | NA         |             |
| NA        | ENSG00000236961 | 0          | NA          | NA         | NA         | NA         |             |
| NA        | ENSG00000236963 | 0          | NA          | NA         | NA         | NA         | LINC01141   |
| NA        | ENSG00000236965 | 0          | NA          | NA         | NA         | NA         | OR52N3P     |
| NA        | ENSG00000236966 | 0          | NA          | NA         | NA         | NA         |             |
| NA        | ENSG00000236968 | 0          | NA          | NA         | NA         | NA         |             |
| NA        | ENSG00000236969 | 0          | NA          | NA         | NA         | NA         | GGT8P       |
| NA        | ENSG00000236972 | 0          | NA          | NA         | NA         | NA         | FABP5P1     |
| NA        | ENSG00000236973 | 0          | NA          | NA         | NA         | NA         | GAPDHP51    |
| NA        | ENSG00000236975 | 0          | NA          | NA         | NA         | NA         | LINC02814   |
| NA        | ENSG00000236976 | 0          | NA          | NA         | NA         | NA         |             |
| 101927547 | ENSG00000236977 | 0.32259838 | -0.02325509 | 0.38531882 | 0.66954488 | NA         | ANKRD44-IT1 |
| NA        | ENSG00000236978 | 0          | NA          | NA         | NA         | NA         |             |
| 646498    | ENSG00000236980 | 0          | NA          | NA         | NA         | NA         | C3orf84     |
| 219870    | ENSG00000236981 | 0          | NA          | NA         | NA         | NA         | OR10G9      |
| NA        | ENSG00000236982 | 0          | NA          | NA         | NA         | NA         | BLOC1S2P1   |
| NA        | ENSG00000236985 | 0          | NA          | NA         | NA         | NA         |             |
| NA        | ENSG00000236986 | 0          | NA          | NA         | NA         | NA         |             |
| NA        | ENSG00000236987 | 0          | NA          | NA         | NA         | NA         | NDUFA5P8    |
| NA        | ENSG00000236988 | 0          | NA          | NA         | NA         | NA         | CTDSPL2P1   |
| NA        | ENSG00000236989 | 0.16735865 | 0.01897177  | 0.38482933 | 0.78225479 | NA         |             |
| 101927964 | ENSG00000236990 | 0          | NA          | NA         | NA         | NA         |             |
| NA        | ENSG00000236991 | 23.5458467 | 0.0387609   | 0.30126947 | 0.8390155  | 0.92674595 | EDRF1-AS1   |
| NA        | ENSG00000236992 | 0.33471731 | 0.02354391  | 0.38534154 | 0.62842204 | NA         | RPL12P12    |
| NA        | ENSG00000236993 | 0          | NA          | NA         | NA         | NA         | GAPDHP21    |

|           |                 |            |             |            |            |            |            |
|-----------|-----------------|------------|-------------|------------|------------|------------|------------|
| NA        | ENSG00000236994 | 0          | NA          | NA         | NA         | NA         | YBX1P9     |
| 100874282 | ENSG00000236996 | 0          | NA          | NA         | NA         | NA         | MLIP-IT1   |
| NA        | ENSG00000236998 | 0.85493431 | 0.03530681  | 0.38425449 | 0.4629839  | NA         |            |
| NA        | ENSG00000236999 | 0          | NA          | NA         | NA         | NA         | ATP2B2-IT1 |
| NA        | ENSG00000237000 | 0          | NA          | NA         | NA         | NA         | PTMAP6     |
| NA        | ENSG00000237001 | 0          | NA          | NA         | NA         | NA         | WASF3-AS1  |
| NA        | ENSG00000237002 | 0          | NA          | NA         | NA         | NA         |            |
| NA        | ENSG00000237003 | 0.34746601 | 0.02370763  | 0.3853651  | 0.61987128 | NA         |            |
| NA        | ENSG00000237004 | 54.4849348 | -0.14804868 | 0.27662021 | 0.4542739  | 0.67744995 | ZNRF2P1    |
| NA        | ENSG00000237005 | 0          | NA          | NA         | NA         | NA         | HIGD1AP15  |
| NA        | ENSG00000237007 | 0.83679327 | 0.03708827  | 0.38692416 | 0.33987194 | NA         | KRT18P52   |
| NA        | ENSG00000237008 | 0          | NA          | NA         | NA         | NA         | LAPTM4BP1  |
| 84850     | ENSG00000237009 | 0          | NA          | NA         | NA         | NA         | GLIS3-AS1  |
| NA        | ENSG00000237011 | 0          | NA          | NA         | NA         | NA         |            |
| 101927701 | ENSG00000237013 | 0.173124   | -0.01911262 | 0.38486262 | 0.84537521 | NA         | LINC01812  |
| NA        | ENSG00000237014 | 0          | NA          | NA         | NA         | NA         | LRRFIP2P1  |
| NA        | ENSG00000237015 | 1.39853577 | 0.10206572  | 0.40248838 | 0.07230916 | NA         |            |
| NA        | ENSG00000237016 | 0          | NA          | NA         | NA         | NA         |            |
| NA        | ENSG00000237017 | 24.5941931 | 0.3843348   | 0.4244236  | 0.10256703 | 0.25414386 |            |
| NA        | ENSG00000237019 | 0          | NA          | NA         | NA         | NA         |            |
| NA        | ENSG00000237020 | 0          | NA          | NA         | NA         | NA         | IGHD1-20   |
| NA        | ENSG00000237023 | 0          | NA          | NA         | NA         | NA         | USP9YP3    |
| NA        | ENSG00000237024 | 0          | NA          | NA         | NA         | NA         | RPL21P33   |
| NA        | ENSG00000237025 | 0.68031235 | 0.02162885  | 0.38378949 | 0.6165315  | NA         | PARD6BP1   |
| NA        | ENSG00000237026 | 0          | NA          | NA         | NA         | NA         |            |
| NA        | ENSG00000237027 | 0          | NA          | NA         | NA         | NA         |            |
| NA        | ENSG00000237031 | 0.173124   | -0.01911262 | 0.38486262 | 0.84537521 | NA         |            |
| NA        | ENSG00000237032 | 0          | NA          | NA         | NA         | NA         | RPSAP7     |
| NA        | ENSG00000237033 | 0          | NA          | NA         | NA         | NA         | CASP3P1    |
| NA        | ENSG00000237035 | 0          | NA          | NA         | NA         | NA         |            |
| 220930    | ENSG00000237036 | 163.164705 | 0.07558967  | 0.20177065 | 0.66049506 | 0.83169726 | ZEB1-AS1   |
| NA        | ENSG00000237037 | 77.5132661 | 0.66402745  | 0.30414234 | 0.00554431 | 0.02540982 | NDUFA6-DT  |
| 392188    | ENSG00000237038 | 0          | NA          | NA         | NA         | NA         | USP17L8    |
| NA        | ENSG00000237039 | 0.18922458 | 0.01954053  | 0.38488496 | 0.78225479 | NA         | RPS28P4    |
| NA        | ENSG00000237040 | 0          | NA          | NA         | NA         | NA         | DPH3P2     |
| NA        | ENSG00000237041 | 0          | NA          | NA         | NA         | NA         | RPL27P8    |
| NA        | ENSG00000237042 | 0          | NA          | NA         | NA         | NA         | MICG       |
| 83867     | ENSG00000237048 | 0          | NA          | NA         | NA         | NA         | TTY12      |

|           |                 |            |             |            |            |            |           |
|-----------|-----------------|------------|-------------|------------|------------|------------|-----------|
| NA        | ENSG00000237049 | 0          | NA          | NA         | NA         | NA         | RPL34P1   |
| NA        | ENSG00000237053 | 0.82114744 | -0.04658164 | 0.3880459  | 0.31157711 | NA         | FUCA1P1   |
| NA        | ENSG00000237054 | 6.58202164 | -0.02760747 | 0.3646924  | 0.81176061 | 0.91472316 | PRMT5-AS1 |
| NA        | ENSG00000237055 | 0          | NA          | NA         | NA         | NA         | MTCO1P48  |
| NA        | ENSG00000237057 | 0          | NA          | NA         | NA         | NA         | LINC02087 |
| NA        | ENSG00000237058 | 0          | NA          | NA         | NA         | NA         | MMEL1-AS1 |
| NA        | ENSG00000237061 | 0.173124   | -0.01911262 | 0.38486262 | 0.84537521 | NA         |           |
| NA        | ENSG00000237062 | 0          | NA          | NA         | NA         | NA         |           |
| NA        | ENSG00000237063 | 0          | NA          | NA         | NA         | NA         |           |
| 442720    | ENSG00000237064 | 0          | NA          | NA         | NA         | NA         | EIF3IP1   |
| NA        | ENSG00000237065 | 0          | NA          | NA         | NA         | NA         | NANOGP4   |
| NA        | ENSG00000237068 | 0          | NA          | NA         | NA         | NA         | RPL5P2    |
| 105375166 | ENSG00000237070 | 0          | NA          | NA         | NA         | NA         |           |
| NA        | ENSG00000237072 | 0          | NA          | NA         | NA         | NA         |           |
| NA        | ENSG00000237073 | 0          | NA          | NA         | NA         | NA         |           |
| NA        | ENSG00000237074 | 0          | NA          | NA         | NA         | NA         |           |
| NA        | ENSG00000237076 | 0          | NA          | NA         | NA         | NA         |           |
| NA        | ENSG00000237077 | 0          | NA          | NA         | NA         | NA         | RPL38P2   |
| NA        | ENSG00000237080 | 24.0368167 | 1.26865214  | 0.7678877  | 0.00404728 | 0.01949455 | EHMT2-AS1 |
| NA        | ENSG00000237082 | 0.30001859 | -0.02294461 | 0.38527539 | 0.68644705 | NA         | COX5BP6   |
| NA        | ENSG00000237083 | 0          | NA          | NA         | NA         | NA         |           |
| NA        | ENSG00000237085 | 0          | NA          | NA         | NA         | NA         |           |
| NA        | ENSG00000237087 | 0          | NA          | NA         | NA         | NA         |           |
| NA        | ENSG00000237088 | 0          | NA          | NA         | NA         | NA         |           |
| NA        | ENSG00000237089 | 0          | NA          | NA         | NA         | NA         | PCNPP4    |
| NA        | ENSG00000237090 | 0          | NA          | NA         | NA         | NA         | MKRN8P    |
| NA        | ENSG00000237092 | 0          | NA          | NA         | NA         | NA         | LINC01065 |
| NA        | ENSG00000237094 | 372.821597 | 0.11289576  | 0.12299338 | 0.33253236 | 0.56173872 |           |
| NA        | ENSG00000237099 | 0          | NA          | NA         | NA         | NA         | GYG1P2    |
| 101927164 | ENSG00000237101 | 3.3877217  | -0.07278442 | 0.37703304 | 0.50832669 | 0.72399149 |           |
| NA        | ENSG00000237106 | 0          | NA          | NA         | NA         | NA         | FABP5P15  |
| NA        | ENSG00000237107 | 0          | NA          | NA         | NA         | NA         |           |
| NA        | ENSG00000237109 | 0          | NA          | NA         | NA         | NA         | RPL21P111 |
| 134860    | ENSG00000237110 | 0          | NA          | NA         | NA         | NA         | TAAR9     |
| NA        | ENSG00000237111 | 0          | NA          | NA         | NA         | NA         | IGHJ3P    |
| NA        | ENSG00000237115 | 0          | NA          | NA         | NA         | NA         |           |
| NA        | ENSG00000237118 | 1.76490183 | -0.01695278 | 0.37865312 | 0.80908317 | NA         | CYP2F2P   |
| 100144597 | ENSG00000237119 | 0          | NA          | NA         | NA         | NA         | LINC01056 |

|           |                 |            |             |            |            |            |             |
|-----------|-----------------|------------|-------------|------------|------------|------------|-------------|
| NA        | ENSG00000237121 | 0          | NA          | NA         | NA         | NA         | PIEZO1P2    |
| NA        | ENSG00000237124 | 0.15069912 | -0.01848503 | 0.38480575 | 0.84537521 | NA         | MTND2P11    |
| 79804     | ENSG00000237125 | 5596.44009 | 1.45517606  | 0.06450093 | 9.44E-114  | 3.34E-111  | HAND2-AS1   |
| NA        | ENSG00000237126 | 14.3304519 | 0.05498489  | 0.33008255 | 0.75445384 | 0.88559722 |             |
| NA        | ENSG00000237127 | 0          | NA          | NA         | NA         | NA         |             |
| 105376468 | ENSG00000237128 | 0.173733   | 0.01914545  | 0.38484597 | 0.78225479 | NA         | LINC02652   |
| NA        | ENSG00000237129 | 0          | NA          | NA         | NA         | NA         | MTCYBP34    |
| NA        | ENSG00000237130 | 0          | NA          | NA         | NA         | NA         | MRPS6P2     |
| NA        | ENSG00000237131 | 0          | NA          | NA         | NA         | NA         |             |
| NA        | ENSG00000237133 | 0.35748636 | 0.02382285  | 0.38538196 | 0.61361067 | NA         | RASGRP3-AS1 |
| NA        | ENSG00000237135 | 1.22398382 | -0.06584574 | 0.38854939 | 0.27821191 | NA         | DDX10P1     |
| 646603    | ENSG00000237136 | 0          | NA          | NA         | NA         | NA         | C4orf51     |
| NA        | ENSG00000237137 | 0          | NA          | NA         | NA         | NA         |             |
| NA        | ENSG00000237138 | 0          | NA          | NA         | NA         | NA         | HUNK-AS1    |
| NA        | ENSG00000237139 | 0          | NA          | NA         | NA         | NA         | RPS26P41    |
| NA        | ENSG00000237140 | 0          | NA          | NA         | NA         | NA         | HSPE1P16    |
| NA        | ENSG00000237141 | 0          | NA          | NA         | NA         | NA         | DNAJC19P1   |
| NA        | ENSG00000237148 | 0          | NA          | NA         | NA         | NA         | HIGD1AP2    |
| 100131213 | ENSG00000237149 | 101.127673 | -0.2882608  | 0.2159477  | 0.11095935 | 0.26886095 | ZNF503-AS2  |
| NA        | ENSG00000237153 | 0          | NA          | NA         | NA         | NA         |             |
| NA        | ENSG00000237154 | 0.31831986 | 0.00126679  | 0.38336765 | 0.96494072 | NA         | MCFD2P1     |
| NA        | ENSG00000237158 | 0.8765328  | 0.03864217  | 0.38480223 | 0.44351801 | NA         |             |
| 415056    | ENSG00000237159 | 70.2866944 | -1.12582761 | 0.3046208  | 2.13E-05   | 0.00019042 | CNTFR-AS1   |
| 105376023 | ENSG00000237159 | 70.2866944 | -1.12582761 | 0.3046208  | 2.13E-05   | 0.00019042 | CNTFR-AS1   |
| NA        | ENSG00000237160 | 0          | NA          | NA         | NA         | NA         |             |
| NA        | ENSG00000237161 | 0          | NA          | NA         | NA         | NA         |             |
| NA        | ENSG00000237162 | 0          | NA          | NA         | NA         | NA         | RPS20P9     |
| NA        | ENSG00000237163 | 0          | NA          | NA         | NA         | NA         |             |
| NA        | ENSG00000237164 | 0          | NA          | NA         | NA         | NA         | SLC25A15P2  |
| NA        | ENSG00000237166 | 0          | NA          | NA         | NA         | NA         | LINC01792   |
| NA        | ENSG00000237167 | 0          | NA          | NA         | NA         | NA         |             |
| NA        | ENSG00000237169 | 0          | NA          | NA         | NA         | NA         | RPL12P27    |
| NA        | ENSG00000237170 | 0          | NA          | NA         | NA         | NA         | RPS7P15     |
| NA        | ENSG00000237171 | 0          | NA          | NA         | NA         | NA         |             |
| 84752     | ENSG00000237172 | 267.394971 | -0.11501013 | 0.14959401 | 0.40252399 | 0.63061911 | B3GNT9      |
| NA        | ENSG00000237173 | 0          | NA          | NA         | NA         | NA         |             |
| NA        | ENSG00000237174 | 0          | NA          | NA         | NA         | NA         |             |
| NA        | ENSG00000237175 | 0          | NA          | NA         | NA         | NA         | NME1P1      |

|           |                 |            |             |            |            |            |             |
|-----------|-----------------|------------|-------------|------------|------------|------------|-------------|
| NA        | ENSG00000237176 | 0          | NA          | NA         | NA         | NA         |             |
| NA        | ENSG00000237178 | 0.51937201 | -0.02557462 | 0.38567603 | 0.54680819 | NA         | H3P7        |
| NA        | ENSG00000237179 | 1.49610223 | -0.03808594 | 0.38169643 | 0.5678436  | NA         | LINC01797   |
| NA        | ENSG00000237180 | 0.14931947 | -0.01844332 | 0.38480212 | 0.84537521 | NA         | CYP46A4P    |
| NA        | ENSG00000237181 | 0          | NA          | NA         | NA         | NA         | PRKAR1B-AS1 |
| NA        | ENSG00000237182 | 0          | NA          | NA         | NA         | NA         |             |
| NA        | ENSG00000237183 | 0          | NA          | NA         | NA         | NA         | KRTAP9-10P  |
| NA        | ENSG00000237185 | 0          | NA          | NA         | NA         | NA         | VN1R66P     |
| NA        | ENSG00000237186 | 0          | NA          | NA         | NA         | NA         |             |
| 441094    | ENSG00000237187 | 277.918744 | 0.47189153  | 0.17850235 | 0.00318597 | 0.0159178  | NR2F1-AS1   |
| NA        | ENSG00000237188 | 3.52233949 | 0.07821805  | 0.38749575 | 0.33868629 | 0.56895057 |             |
| 91368     | ENSG00000237190 | 871.393274 | -0.01578526 | 0.09590549 | 0.86425132 | 0.93988845 | CDKN2AIPNL  |
| NA        | ENSG00000237193 | 0          | NA          | NA         | NA         | NA         |             |
| NA        | ENSG00000237194 | 4.95417136 | -0.2249655  | 0.45586885 | 0.09335006 | 0.23674616 | SNAI1P1     |
| NA        | ENSG00000237195 | 0          | NA          | NA         | NA         | NA         | DLGAP5P1    |
| NA        | ENSG00000237197 | 0          | NA          | NA         | NA         | NA         | IGHD1-7     |
| NA        | ENSG00000237200 | 0.49061106 | 0.01410553  | 0.38308766 | 0.75923273 | NA         | ZBTB40-IT1  |
| NA        | ENSG00000237202 | 0          | NA          | NA         | NA         | NA         |             |
| NA        | ENSG00000237205 | 0          | NA          | NA         | NA         | NA         | RPL7P34     |
| NA        | ENSG00000237206 | 1.14068039 | -0.07755621 | 0.39447066 | 0.1465147  | NA         | IMPDH1P4    |
| NA        | ENSG00000237207 | 0          | NA          | NA         | NA         | NA         | RBM17P3     |
| 101928495 | ENSG00000237208 | 0.173124   | -0.01911262 | 0.38486262 | 0.84537521 | NA         |             |
| NA        | ENSG00000237210 | 0.14931947 | -0.01844332 | 0.38480212 | 0.84537521 | NA         |             |
| NA        | ENSG00000237211 | 0          | NA          | NA         | NA         | NA         | SETP4       |
| NA        | ENSG00000237212 | 0          | NA          | NA         | NA         | NA         |             |
| NA        | ENSG00000237213 | 0          | NA          | NA         | NA         | NA         | RPL23AP22   |
| NA        | ENSG00000237214 | 0.47324067 | -0.03505867 | 0.38628469 | 0.49594513 | NA         |             |
| NA        | ENSG00000237215 | 0          | NA          | NA         | NA         | NA         | DEFB131D    |
| NA        | ENSG00000237217 | 0          | NA          | NA         | NA         | NA         |             |
| NA        | ENSG00000237220 | 0          | NA          | NA         | NA         | NA         |             |
| NA        | ENSG00000237221 | 0          | NA          | NA         | NA         | NA         | PPEF1-AS1   |
| 100507391 | ENSG00000237222 | 2.76550218 | 0.02258448  | 0.37313875 | 0.81443905 | 0.91592004 | LINC01968   |
| 151234    | ENSG00000237223 | 0          | NA          | NA         | NA         | NA         | SULT1C2P1   |
| NA        | ENSG00000237224 | 0.18922458 | 0.01954053  | 0.38488496 | 0.78225479 | NA         |             |
| NA        | ENSG00000237225 | 0.16735865 | 0.01897177  | 0.38482933 | 0.78225479 | NA         | OR13K1P     |
| NA        | ENSG00000237226 | 0          | NA          | NA         | NA         | NA         | RPS3AP39    |
| NA        | ENSG00000237227 | 0          | NA          | NA         | NA         | NA         |             |
| NA        | ENSG00000237230 | 0          | NA          | NA         | NA         | NA         | KRTAP2-5P   |

|           |                 |            |             |            |            |            |             |
|-----------|-----------------|------------|-------------|------------|------------|------------|-------------|
| 150142    | ENSG00000237232 | 14.072032  | 0.22127027  | 0.40329221 | 0.22045722 | 0.43280124 | ZNF295-AS1  |
| NA        | ENSG00000237233 | 1.78882876 | -0.11712416 | 0.40870442 | 0.04834973 | NA         | TMEM26-AS1  |
| NA        | ENSG00000237234 | 0          | NA          | NA         | NA         | NA         |             |
| NA        | ENSG00000237235 | 0          | NA          | NA         | NA         | NA         | TRDD2       |
| NA        | ENSG00000237236 | 0          | NA          | NA         | NA         | NA         |             |
| NA        | ENSG00000237238 | 6.20772143 | 0.10552086  | 0.37124803 | 0.46332941 | 0.68620899 | BMS1P10     |
| NA        | ENSG00000237242 | 0          | NA          | NA         | NA         | NA         | BTF3P15     |
| 100130880 | ENSG00000237243 | 0          | NA          | NA         | NA         | NA         | CREB3L2-AS1 |
| 284428    | ENSG00000237247 | 0          | NA          | NA         | NA         | NA         | MBD3L5      |
| 100499405 | ENSG00000237248 | 12.5638021 | 0.33235997  | 0.49930736 | 0.09555074 | 0.24100263 | LINC00987   |
| NA        | ENSG00000237249 | 0          | NA          | NA         | NA         | NA         |             |
| 100130331 | ENSG00000237250 | 1.11209431 | -0.0557319  | 0.38659094 | 0.33018413 | NA         |             |
| NA        | ENSG00000237251 | 0          | NA          | NA         | NA         | NA         |             |
| NA        | ENSG00000237252 | 0          | NA          | NA         | NA         | NA         | MMADHCP1    |
| NA        | ENSG00000237254 | 0          | NA          | NA         | NA         | NA         | TRBV30      |
| NA        | ENSG00000237256 | 0          | NA          | NA         | NA         | NA         | PGAM3P      |
| NA        | ENSG00000237257 | 0          | NA          | NA         | NA         | NA         | MTND2P8     |
| NA        | ENSG00000237259 | 0          | NA          | NA         | NA         | NA         | ZNF133-AS1  |
| NA        | ENSG00000237260 | 0.52502332 | 0.01106341  | 0.38327436 | 0.7673591  | NA         | PPIAP67     |
| NA        | ENSG00000237261 | 0          | NA          | NA         | NA         | NA         |             |
| NA        | ENSG00000237262 | 0          | NA          | NA         | NA         | NA         |             |
| NA        | ENSG00000237263 | 0          | NA          | NA         | NA         | NA         | MAPK6P3     |
| NA        | ENSG00000237264 | 0.37844916 | 0.02407552  | 0.3854191  | 0.60038877 | NA         | FTH1P11     |
| NA        | ENSG00000237265 | 0          | NA          | NA         | NA         | NA         |             |
| 105373400 | ENSG00000237266 | 0          | NA          | NA         | NA         | NA         | LINC01810   |
| 101929624 | ENSG00000237267 | 0          | NA          | NA         | NA         | NA         | LINC01519   |
| NA        | ENSG00000237268 | 6.31566107 | -0.23075984 | 0.44212819 | 0.14067289 | 0.318644   |             |
| NA        | ENSG00000237269 | 0          | NA          | NA         | NA         | NA         | RBMV2TP     |
| NA        | ENSG00000237271 | 0.62197869 | -0.04502076 | 0.38756061 | 0.37467211 | NA         |             |
| NA        | ENSG00000237272 | 0          | NA          | NA         | NA         | NA         | OR51R1P     |
| NA        | ENSG00000237273 | 0.15069912 | -0.01848503 | 0.38480575 | 0.84537521 | NA         | RSL24D1P8   |
| NA        | ENSG00000237274 | 0          | NA          | NA         | NA         | NA         | GTF3AP1     |
| NA        | ENSG00000237275 | 0          | NA          | NA         | NA         | NA         | S100A11P10  |
| NA        | ENSG00000237276 | 2.71973212 | -0.00814129 | 0.37401204 | 0.92307781 | 0.96791204 | ANO7L1      |
| NA        | ENSG00000237278 | 0          | NA          | NA         | NA         | NA         | RLIMP2      |
| NA        | ENSG00000237279 | 0          | NA          | NA         | NA         | NA         | H3P2        |
| NA        | ENSG00000237280 | 0          | NA          | NA         | NA         | NA         |             |
| NA        | ENSG00000237281 | 0          | NA          | NA         | NA         | NA         | CATIP-AS2   |

|           |                 |            |             |            |            |            |            |
|-----------|-----------------|------------|-------------|------------|------------|------------|------------|
| 440757    | ENSG00000237282 | 0.173124   | -0.01911262 | 0.38486262 | 0.84537521 | NA         | LINC00851  |
| NA        | ENSG00000237283 | 2.49215145 | 0.18870136  | 0.45186229 | 0.0094342  | NA         |            |
| NA        | ENSG00000237285 | 0          | NA          | NA         | NA         | NA         | HNRNPA1P2  |
| NA        | ENSG00000237286 | 0          | NA          | NA         | NA         | NA         | CARD11-AS1 |
| 1159      | ENSG00000237289 | 674.393836 | -1.12847384 | 0.13184491 | 1.29E-18   | 4.49E-17   | CKMT1B     |
| 339442    | ENSG00000237290 | 0          | NA          | NA         | NA         | NA         | LINC01343  |
| 101928973 | ENSG00000237292 | 0.54720683 | 0.03266699  | 0.3862101  | 0.45532368 | NA         | LINC01732  |
| NA        | ENSG00000237293 | 0          | NA          | NA         | NA         | NA         |            |
| NA        | ENSG00000237294 | 0          | NA          | NA         | NA         | NA         | EIF4BP9    |
| NA        | ENSG00000237296 | 474.794379 | 0.18018353  | 0.11683142 | 0.10490264 | 0.25815782 | SMG1P1     |
| NA        | ENSG00000237297 | 0          | NA          | NA         | NA         | NA         |            |
| 100506866 | ENSG00000237298 | 455.076671 | 0.18526102  | 0.12517786 | 0.11757717 | 0.28111968 | TTN-AS1    |
| 101927055 | ENSG00000237298 | 455.076671 | 0.18526102  | 0.12517786 | 0.11757717 | 0.28111968 | TTN-AS1    |
| NA        | ENSG00000237299 | 0.173733   | 0.01914545  | 0.38484597 | 0.78225479 | NA         |            |
| NA        | ENSG00000237300 | 0          | NA          | NA         | NA         | NA         | MTCO1P19   |
| NA        | ENSG00000237301 | 4.11533655 | -0.10183983 | 0.38202234 | 0.39886125 | 0.62769948 |            |
| NA        | ENSG00000237302 | 0          | NA          | NA         | NA         | NA         | OFD1P11Y   |
| NA        | ENSG00000237303 | 0          | NA          | NA         | NA         | NA         | HIGD1AP8   |
| NA        | ENSG00000237306 | 0.16735865 | 0.01897177  | 0.38482933 | 0.78225479 | NA         | HSPE1P22   |
| NA        | ENSG00000237307 | 0.88051493 | 0.05089011  | 0.38879816 | 0.25754067 | NA         | SRRM1P3    |
| NA        | ENSG00000237308 | 0          | NA          | NA         | NA         | NA         |            |
| NA        | ENSG00000237309 | 0          | NA          | NA         | NA         | NA         | MTND2P6    |
| 100289098 | ENSG00000237310 | 71.0339624 | 0.35521605  | 0.27796482 | 0.09188164 | 0.23409935 |            |
| NA        | ENSG00000237311 | 0          | NA          | NA         | NA         | NA         |            |
| NA        | ENSG00000237312 | 0          | NA          | NA         | NA         | NA         |            |
| NA        | ENSG00000237314 | 0          | NA          | NA         | NA         | NA         | RPL12P39   |
| NA        | ENSG00000237316 | 0          | NA          | NA         | NA         | NA         |            |
| NA        | ENSG00000237317 | 0          | NA          | NA         | NA         | NA         |            |
| NA        | ENSG00000237319 | 0          | NA          | NA         | NA         | NA         |            |
| 105374461 | ENSG00000237320 | 0          | NA          | NA         | NA         | NA         |            |
| NA        | ENSG00000237321 | 0          | NA          | NA         | NA         | NA         |            |
| NA        | ENSG00000237322 | 0          | NA          | NA         | NA         | NA         | RPL7L1P10  |
| NA        | ENSG00000237323 | 0          | NA          | NA         | NA         | NA         |            |
| NA        | ENSG00000237324 | 0          | NA          | NA         | NA         | NA         |            |
| NA        | ENSG00000237325 | 0.3000203  | -0.02294463 | 0.38527539 | 0.68644599 | NA         |            |
| NA        | ENSG00000237326 | 0          | NA          | NA         | NA         | NA         |            |
| NA        | ENSG00000237327 | 0          | NA          | NA         | NA         | NA         | UPP2-IT1   |
| 100861516 | ENSG00000237328 | 0          | NA          | NA         | NA         | NA         | RAI1-AS1   |

|           |                 |            |             |            |            |            |            |
|-----------|-----------------|------------|-------------|------------|------------|------------|------------|
| NA        | ENSG00000237329 | 0.33471731 | 0.02354391  | 0.38534154 | 0.62842204 | NA         |            |
| 401934    | ENSG00000237330 | 0.32281916 | 0.00121169  | 0.38336705 | 0.96947709 | NA         | RNF223     |
| NA        | ENSG00000237331 | 0          | NA          | NA         | NA         | NA         | XIAP-AS1   |
| NA        | ENSG00000237336 | 0          | NA          | NA         | NA         | NA         |            |
| NA        | ENSG00000237337 | 1.37102097 | 0.03302814  | 0.37981585 | 0.65051369 | NA         | ELAVL4-AS1 |
| NA        | ENSG00000237338 | 0          | NA          | NA         | NA         | NA         | FTCD-AS1   |
| 100130954 | ENSG00000237339 | 0          | NA          | NA         | NA         | NA         | LINC01502  |
| NA        | ENSG00000237341 | 0          | NA          | NA         | NA         | NA         | SYP-AS1    |
| NA        | ENSG00000237342 | 0          | NA          | NA         | NA         | NA         |            |
| NA        | ENSG00000237343 | 0.16735865 | 0.01897177  | 0.38482933 | 0.78225479 | NA         |            |
| NA        | ENSG00000237345 | 0          | NA          | NA         | NA         | NA         |            |
| NA        | ENSG00000237346 | 0          | NA          | NA         | NA         | NA         |            |
| NA        | ENSG00000237347 | 0          | NA          | NA         | NA         | NA         |            |
| NA        | ENSG00000237349 | 0.15069912 | -0.01848503 | 0.38480575 | 0.84537521 | NA         |            |
| NA        | ENSG00000237350 | 0.18922458 | 0.01954053  | 0.38488496 | 0.78225479 | NA         | CDC42P6    |
| NA        | ENSG00000237351 | 0.78311926 | -0.00626871 | 0.38220092 | 0.89309921 | NA         | ITPK1P1    |
| NA        | ENSG00000237352 | 0          | NA          | NA         | NA         | NA         | LINC01358  |
| 399968    | ENSG00000237353 | 0          | NA          | NA         | NA         | NA         | PATE4      |
| NA        | ENSG00000237354 | 0          | NA          | NA         | NA         | NA         | OR52S1P    |
| NA        | ENSG00000237356 | 27.5114873 | 1.04957677  | 0.56625391 | 0.0045491  | 0.02148745 |            |
| NA        | ENSG00000237357 | 23.5113709 | -0.18371767 | 0.32616392 | 0.36017938 | 0.59016007 |            |
| NA        | ENSG00000237358 | 0          | NA          | NA         | NA         | NA         |            |
| NA        | ENSG00000237359 | 0          | NA          | NA         | NA         | NA         |            |
| NA        | ENSG00000237360 | 0          | NA          | NA         | NA         | NA         | CHCHD4P2   |
| NA        | ENSG00000237361 | 25.6379919 | -1.82628563 | 0.52518671 | 2.90E-05   | 0.00025076 | TUSC8      |
| NA        | ENSG00000237363 | 0          | NA          | NA         | NA         | NA         |            |
| NA        | ENSG00000237365 | 0          | NA          | NA         | NA         | NA         |            |
| NA        | ENSG00000237370 | 1.48328713 | 0.01937655  | 0.37783833 | 0.79899545 | NA         |            |
| NA        | ENSG00000237371 | 0          | NA          | NA         | NA         | NA         |            |
| 100129066 | ENSG00000237372 | 0.82261857 | 0.03320795  | 0.38403391 | 0.49725723 | NA         |            |
| NA        | ENSG00000237373 | 0          | NA          | NA         | NA         | NA         | BRWD1-IT1  |
| NA        | ENSG00000237377 | 0          | NA          | NA         | NA         | NA         |            |
| 112267897 | ENSG00000237378 | 0          | NA          | NA         | NA         | NA         |            |
| NA        | ENSG00000237379 | 0          | NA          | NA         | NA         | NA         | CBX1P3     |
| NA        | ENSG00000237380 | 172.232211 | -0.10000981 | 0.16155023 | 0.4938905  | 0.71263909 | HOXD-AS2   |
| NA        | ENSG00000237381 | 0          | NA          | NA         | NA         | NA         | NT5DC1P1   |
| NA        | ENSG00000237382 | 0.16735865 | 0.01897177  | 0.38482933 | 0.78225479 | NA         | RPL21P121  |
| NA        | ENSG00000237383 | 0          | NA          | NA         | NA         | NA         | CNN2P11    |



|           |                 |            |             |            |            |            |            |
|-----------|-----------------|------------|-------------|------------|------------|------------|------------|
| NA        | ENSG00000237385 | 0          | NA          | NA         | NA         | NA         |            |
| NA        | ENSG00000237387 | 0          | NA          | NA         | NA         | NA         |            |
| 403253    | ENSG00000237388 | 0          | NA          | NA         | NA         | NA         | OR4A47     |
| NA        | ENSG00000237389 | 0          | NA          | NA         | NA         | NA         |            |
| NA        | ENSG00000237390 | 1.03637069 | -0.02045871 | 0.38188025 | 0.70579704 | NA         |            |
| 101929685 | ENSG00000237396 | 0          | NA          | NA         | NA         | NA         | LNCNEF     |
| NA        | ENSG00000237398 | 0          | NA          | NA         | NA         | NA         | HLA-DPA3   |
| 100507034 | ENSG00000237399 | 32.3655192 | -0.49303146 | 0.43532427 | 0.05465513 | 0.15939406 | PITRM1-AS1 |
| NA        | ENSG00000237400 | 0          | NA          | NA         | NA         | NA         |            |
| 100505964 | ENSG00000237401 | 0          | NA          | NA         | NA         | NA         | LINC01304  |
| NA        | ENSG00000237402 | 0          | NA          | NA         | NA         | NA         | CAMTA1-IT1 |
| NA        | ENSG00000237406 | 0.173733   | 0.01914545  | 0.38484597 | 0.78225479 | NA         | NDUFA9P1   |
| NA        | ENSG00000237407 | 0          | NA          | NA         | NA         | NA         |            |
| NA        | ENSG00000237408 | 0          | NA          | NA         | NA         | NA         | ART2BP     |
| NA        | ENSG00000237409 | 0.14931947 | -0.01844332 | 0.38480212 | 0.84537521 | NA         |            |
| NA        | ENSG00000237410 | 2.83590339 | -0.11003511 | 0.3943485  | 0.26599309 | 0.48827746 | NRXN2-AS1  |
| 646960    | ENSG00000237412 | 1.72150766 | 0.12156823  | 0.41077235 | 0.04135405 | NA         | PRSS56     |
| 149047    | ENSG00000237413 | 0.30139824 | -0.02296476 | 0.38527817 | 0.68536535 | NA         |            |
| NA        | ENSG00000237414 | 0          | NA          | NA         | NA         | NA         |            |
| NA        | ENSG00000237415 | 0          | NA          | NA         | NA         | NA         | NRBF2P3    |
| NA        | ENSG00000237417 | 0          | NA          | NA         | NA         | NA         | XRCC6P1    |
| NA        | ENSG00000237418 | 0          | NA          | NA         | NA         | NA         |            |
| NA        | ENSG00000237419 | 0          | NA          | NA         | NA         | NA         |            |
| NA        | ENSG00000237422 | 0.95988367 | -0.02713729 | 0.3831115  | 0.59359478 | NA         |            |
| NA        | ENSG00000237423 | 2.90210776 | -0.17721295 | 0.44307052 | 0.01126629 | 0.04576934 | LINC01522  |
| 84793     | ENSG00000237424 | 0          | NA          | NA         | NA         | NA         | FOX D2-AS1 |
| NA        | ENSG00000237425 | 0          | NA          | NA         | NA         | NA         | RPSAP2     |
| NA        | ENSG00000237426 | 0          | NA          | NA         | NA         | NA         | ZIK1P1     |
| NA        | ENSG00000237427 | 0          | NA          | NA         | NA         | NA         | TOMM22P1   |
| NA        | ENSG00000237428 | 0          | NA          | NA         | NA         | NA         | ASH2LP2    |
| NA        | ENSG00000237429 | 0          | NA          | NA         | NA         | NA         |            |
| NA        | ENSG00000237432 | 0          | NA          | NA         | NA         | NA         | RPS7P12    |
| NA        | ENSG00000237433 | 0          | NA          | NA         | NA         | NA         | RPSAP11    |
| NA        | ENSG00000237434 | 0          | NA          | NA         | NA         | NA         |            |
| 102723661 | ENSG00000237435 | 7.26696976 | -0.59388524 | 1.11782089 | 0.01822668 | 0.06742818 | LINC02790  |
| NA        | ENSG00000237436 | 0.83860934 | -0.03079028 | 0.38376674 | 0.53182622 | NA         | CAMTA1-DT  |
| NA        | ENSG00000237437 | 2.24993543 | 0.02790798  | 0.38125485 | 0.65918292 | NA         | ASS1P12    |
| NA        | ENSG00000237438 | 0          | NA          | NA         | NA         | NA         | CECR7      |

|           |                 |            |             |            |            |            |            |
|-----------|-----------------|------------|-------------|------------|------------|------------|------------|
| NA        | ENSG00000237439 | 0          | NA          | NA         | NA         | NA         |            |
| 100129842 | ENSG00000237440 | 485.656257 | 0.08555384  | 0.12737731 | 0.47694997 | 0.69881747 | ZNF737     |
| 5863      | ENSG00000237441 | 1281.64749 | -0.0630434  | 0.08400152 | 0.44095294 | 0.66589331 | RGL2       |
| NA        | ENSG00000237442 | 0          | NA          | NA         | NA         | NA         | HNRNPA1P57 |
| NA        | ENSG00000237443 | 0          | NA          | NA         | NA         | NA         | OR13D2P    |
| NA        | ENSG00000237444 | 0          | NA          | NA         | NA         | NA         |            |
| NA        | ENSG00000237445 | 0          | NA          | NA         | NA         | NA         |            |
| NA        | ENSG00000237446 | 0          | NA          | NA         | NA         | NA         | RHEBP3     |
| NA        | ENSG00000237447 | 0          | NA          | NA         | NA         | NA         | CDC27P2    |
| NA        | ENSG00000237449 | 0          | NA          | NA         | NA         | NA         | TAAR4P     |
| NA        | ENSG00000237450 | 0          | NA          | NA         | NA         | NA         | RPL23AP71  |
| NA        | ENSG00000237451 | 6.97653724 | 0.0902122   | 0.36559067 | 0.53128843 | 0.74272565 | CDK2AP2P2  |
| 388553    | ENSG00000237452 | 0.65574953 | 0.00093835  | 0.38190547 | 0.98278404 | NA         | MEIOSIN    |
| NA        | ENSG00000237453 | 0          | NA          | NA         | NA         | NA         |            |
| NA        | ENSG00000237456 | 0          | NA          | NA         | NA         | NA         | ID2B       |
| NA        | ENSG00000237457 | 0.33798622 | 0.00062349  | 0.3833631  | 0.98167448 | NA         | LINC01351  |
| NA        | ENSG00000237458 | 0          | NA          | NA         | NA         | NA         | TUBB4BP3   |
| NA        | ENSG00000237460 | 0          | NA          | NA         | NA         | NA         | LINC01661  |
| 101928438 | ENSG00000237461 | 8.0840395  | 0.29470892  | 0.49680231 | 0.08799112 | 0.22663167 |            |
| 400794    | ENSG00000237463 | 0          | NA          | NA         | NA         | NA         | LRRC52-AS1 |
| NA        | ENSG00000237464 | 0          | NA          | NA         | NA         | NA         |            |
| NA        | ENSG00000237466 | 0          | NA          | NA         | NA         | NA         | MTCO3P41   |
| NA        | ENSG00000237467 | 0          | NA          | NA         | NA         | NA         | USP9YP35   |
| 101928661 | ENSG00000237468 | 0.14931947 | -0.01844332 | 0.38480212 | 0.84537521 | NA         |            |
| NA        | ENSG00000237469 | 0          | NA          | NA         | NA         | NA         | TUBB8P10   |
| NA        | ENSG00000237470 | 0.18922458 | 0.01954053  | 0.38488496 | 0.78225479 | NA         | DCLRE1CP1  |
| NA        | ENSG00000237471 | 0          | NA          | NA         | NA         | NA         |            |
| NA        | ENSG00000237472 | 0          | NA          | NA         | NA         | NA         |            |
| NA        | ENSG00000237473 | 0          | NA          | NA         | NA         | NA         |            |
| NA        | ENSG00000237475 | 0          | NA          | NA         | NA         | NA         | RPL7P53    |
| 101928891 | ENSG00000237476 | 0.62292661 | -0.016505   | 0.38342396 | 0.70972604 | NA         | LINC01637  |
| NA        | ENSG00000237477 | 0          | NA          | NA         | NA         | NA         |            |
| NA        | ENSG00000237478 | 0          | NA          | NA         | NA         | NA         |            |
| 105373876 | ENSG00000237479 | 0          | NA          | NA         | NA         | NA         |            |
| NA        | ENSG00000237480 | 0          | NA          | NA         | NA         | NA         |            |
| NA        | ENSG00000237481 | 0.51272494 | 0.01531487  | 0.38311841 | 0.73909381 | NA         |            |
| NA        | ENSG00000237483 | 0          | NA          | NA         | NA         | NA         | RPS27AP8   |
| 105372751 | ENSG00000237484 | 0          | NA          | NA         | NA         | NA         | LINC01684  |

|           |                 |            |             |            |            |            |           |
|-----------|-----------------|------------|-------------|------------|------------|------------|-----------|
| NA        | ENSG00000237487 | 8.89934819 | -0.14791761 | 0.38161287 | 0.34064001 | 0.57088546 | VN1R48P   |
| 387723    | ENSG00000237489 | 11.2131566 | 0.12425946  | 0.35738775 | 0.46358922 | 0.68649127 | C10orf143 |
| NA        | ENSG00000237490 | 0.18922458 | 0.01954053  | 0.38488496 | 0.78225479 | NA         | RPS27AP17 |
| 105378580 | ENSG00000237491 | 45.6934001 | 0.02663299  | 0.26221385 | 0.89136733 | 0.95284094 | LINC01409 |
| NA        | ENSG00000237492 | 0          | NA          | NA         | NA         | NA         | OR2L9P    |
| NA        | ENSG00000237493 | 2.51034181 | -0.02814628 | 0.37267538 | 0.77255803 | NA         |           |
| NA        | ENSG00000237494 | 0          | NA          | NA         | NA         | NA         |           |
| NA        | ENSG00000237498 | 0          | NA          | NA         | NA         | NA         |           |
| 100130476 | ENSG00000237499 | 0.18922458 | 0.01954053  | 0.38488496 | 0.78225479 | NA         | WAKMAR2   |
| NA        | ENSG00000237500 | 0          | NA          | NA         | NA         | NA         |           |
| NA        | ENSG00000237501 | 0          | NA          | NA         | NA         | NA         |           |
| NA        | ENSG00000237503 | 0          | NA          | NA         | NA         | NA         |           |
| 101927891 | ENSG00000237505 | 0.14931947 | -0.01844332 | 0.38480212 | 0.84537521 | NA         | PKN2-AS1  |
| NA        | ENSG00000237506 | 1.83350798 | 0.02219528  | 0.37520984 | 0.80087255 | NA         | RPSAP15   |
| NA        | ENSG00000237510 | 0.16735865 | 0.01897177  | 0.38482933 | 0.78225479 | NA         | GPAT2P1   |
| 728978    | ENSG00000237512 | 0.88530959 | 0.01910433  | 0.38137081 | 0.73407154 | NA         | UNC5B-AS1 |
| NA        | ENSG00000237513 | 3.78409605 | -0.04668374 | 0.37430306 | 0.63471201 | 0.81607019 |           |
| NA        | ENSG00000237514 | 0          | NA          | NA         | NA         | NA         | PTP4A1P7  |
| 729993    | ENSG00000237515 | 1.10756612 | -0.02812101 | 0.38131575 | 0.65132478 | NA         | SHISA9    |
| NA        | ENSG00000237517 | 0          | NA          | NA         | NA         | NA         | DGCR5     |
| NA        | ENSG00000237520 | 0          | NA          | NA         | NA         | NA         |           |
| 26648     | ENSG00000237521 | 0          | NA          | NA         | NA         | NA         | OR7E24    |
| NA        | ENSG00000237522 | 16.4169147 | 0.28255892  | 0.41454076 | 0.17039558 | 0.36230289 | NONOP2    |
| 439990    | ENSG00000237523 | 0          | NA          | NA         | NA         | NA         | LINC00857 |
| 101929926 | ENSG00000237524 | 0          | NA          | NA         | NA         | NA         | TEX51     |
| NA        | ENSG00000237525 | 0          | NA          | NA         | NA         | NA         |           |
| NA        | ENSG00000237527 | 0          | NA          | NA         | NA         | NA         |           |
| NA        | ENSG00000237528 | 0          | NA          | NA         | NA         | NA         | UQCR10P1  |
| NA        | ENSG00000237529 | 6.2597319  | -0.00788187 | 0.35690631 | 0.95066201 | 0.97972521 |           |
| NA        | ENSG00000237530 | 0          | NA          | NA         | NA         | NA         |           |
| NA        | ENSG00000237531 | 0          | NA          | NA         | NA         | NA         |           |
| NA        | ENSG00000237532 | 0          | NA          | NA         | NA         | NA         |           |
| NA        | ENSG00000237539 | 0          | NA          | NA         | NA         | NA         |           |
| NA        | ENSG00000237540 | 0          | NA          | NA         | NA         | NA         | RPL36AP36 |
| 3117      | ENSG00000237541 | 0          | NA          | NA         | NA         | NA         | HLA-DQA2  |
| 3118      | ENSG00000237541 | 0          | NA          | NA         | NA         | NA         | HLA-DQA2  |
| NA        | ENSG00000237542 | 0.32226603 | -0.0232524  | 0.38531842 | 0.66973715 | NA         | MTCO3P17  |
| NA        | ENSG00000237546 | 0          | NA          | NA         | NA         | NA         | XKRYP6    |

|           |                 |            |             |            |            |            |             |
|-----------|-----------------|------------|-------------|------------|------------|------------|-------------|
| NA        | ENSG00000237547 | 0          | NA          | NA         | NA         | NA         | IGHJ2P      |
| NA        | ENSG00000237548 | 0.173124   | -0.01911262 | 0.38486262 | 0.84537521 | NA         | TLL11-IT1   |
| NA        | ENSG00000237549 | 0          | NA          | NA         | NA         | NA         | RPS6P3      |
| NA        | ENSG00000237550 | 3613.09121 | -0.19471038 | 0.06522407 | 0.00240428 | 0.0125397  |             |
| NA        | ENSG00000237551 | 0          | NA          | NA         | NA         | NA         |             |
| 110806286 | ENSG00000237552 | 0          | NA          | NA         | NA         | NA         | LINC02567   |
| NA        | ENSG00000237553 | 0          | NA          | NA         | NA         | NA         |             |
| NA        | ENSG00000237555 | 0.173124   | -0.01911262 | 0.38486262 | 0.84537521 | NA         |             |
| NA        | ENSG00000237556 | 0          | NA          | NA         | NA         | NA         | KCND3-AS1   |
| NA        | ENSG00000237557 | 0          | NA          | NA         | NA         | NA         | YWHABP1     |
| NA        | ENSG00000237558 | 0          | NA          | NA         | NA         | NA         | CDY7P       |
| 102723487 | ENSG00000237560 | 0          | NA          | NA         | NA         | NA         | LINC01497   |
| 100101115 | ENSG00000237563 | 0          | NA          | NA         | NA         | NA         | TTY21B      |
| NA        | ENSG00000237566 | 0          | NA          | NA         | NA         | NA         |             |
| NA        | ENSG00000237567 | 0          | NA          | NA         | NA         | NA         | LINC02836   |
| NA        | ENSG00000237568 | 0          | NA          | NA         | NA         | NA         |             |
| NA        | ENSG00000237569 | 0          | NA          | NA         | NA         | NA         | TUBA1       |
| NA        | ENSG00000237571 | 0          | NA          | NA         | NA         | NA         | LINC02862   |
| NA        | ENSG00000237572 | 0          | NA          | NA         | NA         | NA         |             |
| 101927924 | ENSG00000237574 | 0          | NA          | NA         | NA         | NA         | LINC01856   |
| 23615     | ENSG00000237575 | 4.32458399 | -0.01236162 | 0.36465684 | 0.91422722 | 0.96378282 | PYY2        |
| NA        | ENSG00000237576 | 0          | NA          | NA         | NA         | NA         | LINC01888   |
| 101927396 | ENSG00000237579 | 0          | NA          | NA         | NA         | NA         | LINC01514   |
| NA        | ENSG00000237580 | 0          | NA          | NA         | NA         | NA         | GCSHP3      |
| NA        | ENSG00000237581 | 0          | NA          | NA         | NA         | NA         |             |
| NA        | ENSG00000237583 | 0          | NA          | NA         | NA         | NA         | RPL34P8     |
| NA        | ENSG00000237584 | 0          | NA          | NA         | NA         | NA         | RAC1P4      |
| NA        | ENSG00000237585 | 0          | NA          | NA         | NA         | NA         | LINC00407   |
| NA        | ENSG00000237586 | 0          | NA          | NA         | NA         | NA         |             |
| NA        | ENSG00000237588 | 7.96303441 | 0.02596784  | 0.34759109 | 0.86532003 | 0.94029737 |             |
| NA        | ENSG00000237589 | 0          | NA          | NA         | NA         | NA         | HMG1P32     |
| NA        | ENSG00000237590 | 0          | NA          | NA         | NA         | NA         |             |
| NA        | ENSG00000237592 | 0.15069912 | -0.01848503 | 0.38480575 | 0.84537521 | NA         | IGKV1OR10-1 |
| NA        | ENSG00000237593 | 0.18922458 | 0.01954053  | 0.38488496 | 0.78225479 | NA         |             |
| NA        | ENSG00000237594 | 46.877177  | -0.25302971 | 0.28174453 | 0.21887563 | 0.43080282 |             |
| 101927512 | ENSG00000237595 | 0          | NA          | NA         | NA         | NA         | LINC01275   |
| 644135    | ENSG00000237596 | 0.173733   | 0.01914545  | 0.38484597 | 0.78225479 | NA         |             |
| NA        | ENSG00000237601 | 0          | NA          | NA         | NA         | NA         |             |

|           |                 |            |             |            |            |            |           |
|-----------|-----------------|------------|-------------|------------|------------|------------|-----------|
| NA        | ENSG00000237603 | 0          | NA          | NA         | NA         | NA         | HMGB3P12  |
| NA        | ENSG00000237604 | 0.44795842 | -0.02501848 | 0.38558245 | 0.5807882  | NA         |           |
| NA        | ENSG00000237605 | 2.43597107 | 0.03734777  | 0.37855188 | 0.64861096 | NA         | DYRK3-AS1 |
| NA        | ENSG00000237606 | 0          | NA          | NA         | NA         | NA         |           |
| NA        | ENSG00000237609 | 0          | NA          | NA         | NA         | NA         |           |
| NA        | ENSG00000237610 | 0          | NA          | NA         | NA         | NA         | OR4C50P   |
| NA        | ENSG00000237611 | 0          | NA          | NA         | NA         | NA         |           |
| NA        | ENSG00000237612 | 0          | NA          | NA         | NA         | NA         |           |
| 645520    | ENSG00000237613 | 0          | NA          | NA         | NA         | NA         | FAM138A   |
| NA        | ENSG00000237614 | 0          | NA          | NA         | NA         | NA         |           |
| NA        | ENSG00000237617 | 0          | NA          | NA         | NA         | NA         |           |
| NA        | ENSG00000237618 | 0          | NA          | NA         | NA         | NA         | BTBD7P2   |
| NA        | ENSG00000237619 | 0          | NA          | NA         | NA         | NA         | OR3B1P    |
| NA        | ENSG00000237620 | 0          | NA          | NA         | NA         | NA         | GCNT1P5   |
| NA        | ENSG00000237621 | 0          | NA          | NA         | NA         | NA         | OR9A1P    |
| NA        | ENSG00000237622 | 0          | NA          | NA         | NA         | NA         | ELOCP18   |
| NA        | ENSG00000237623 | 0          | NA          | NA         | NA         | NA         | NICN2P    |
| NA        | ENSG00000237624 | 22.2068932 | -1.34438482 | 0.64607524 | 0.00206605 | 0.01099527 | OXCT2P1   |
| NA        | ENSG00000237626 | 0          | NA          | NA         | NA         | NA         |           |
| NA        | ENSG00000237628 | 0          | NA          | NA         | NA         | NA         | MTCO2P19  |
| NA        | ENSG00000237629 | 0          | NA          | NA         | NA         | NA         | UQCRHP2   |
| NA        | ENSG00000237630 | 0          | NA          | NA         | NA         | NA         | NIFKP9    |
| NA        | ENSG00000237631 | 0.16735865 | 0.01897177  | 0.38482933 | 0.78225479 | NA         | PARK7P2   |
| NA        | ENSG00000237632 | 0          | NA          | NA         | NA         | NA         | S100A11P1 |
| NA        | ENSG00000237633 | 0.56767373 | 0.02627943  | 0.38574813 | 0.49686938 | NA         |           |
| NA        | ENSG00000237635 | 0          | NA          | NA         | NA         | NA         | DUX4L29   |
| 100101938 | ENSG00000237636 | 7.17000325 | 1.61183567  | 1.55453142 | 0.00724678 | 0.03180197 | ANKRD26P3 |
| NA        | ENSG00000237637 | 0.5972779  | -0.02732172 | 0.38586499 | 0.50076333 | NA         | FRY-AS1   |
| 400958    | ENSG00000237638 | 30.508856  | 0.12699301  | 0.30165625 | 0.51938666 | 0.73290408 | LINC02245 |
| NA        | ENSG00000237639 | 0          | NA          | NA         | NA         | NA         |           |
| NA        | ENSG00000237640 | 0.33471731 | 0.02354391  | 0.38534154 | 0.62842204 | NA         |           |
| NA        | ENSG00000237641 | 8.74510601 | 0.07630461  | 0.35903641 | 0.60732201 | 0.79664586 | RPL28P2   |
| NA        | ENSG00000237642 | 0          | NA          | NA         | NA         | NA         | HMGB3P5   |
| NA        | ENSG00000237643 | 0          | NA          | NA         | NA         | NA         |           |
| NA        | ENSG00000237645 | 0          | NA          | NA         | NA         | NA         |           |
| NA        | ENSG00000237646 | 0          | NA          | NA         | NA         | NA         | HLCS-IT1  |
| 3833      | ENSG00000237649 | 1964.39348 | -0.03671146 | 0.07329895 | 0.60923663 | 0.79799662 | KIFC1     |
| NA        | ENSG00000237650 | 0          | NA          | NA         | NA         | NA         | OR11Q1P   |

|           |                 |            |             |            |            |            |            |
|-----------|-----------------|------------|-------------|------------|------------|------------|------------|
| 339804    | ENSG00000237651 | 194.407218 | -0.20058156 | 0.17891664 | 0.20425548 | 0.41088053 | C2orf74    |
| NA        | ENSG00000237653 | 0          | NA          | NA         | NA         | NA         |            |
| 101929653 | ENSG00000237654 | 0          | NA          | NA         | NA         | NA         |            |
| NA        | ENSG00000237655 | 0          | NA          | NA         | NA         | NA         |            |
| NA        | ENSG00000237659 | 0          | NA          | NA         | NA         | NA         | RNASEH2CP1 |
| NA        | ENSG00000237661 | 0          | NA          | NA         | NA         | NA         | TNIP2P1    |
| NA        | ENSG00000237662 | 0          | NA          | NA         | NA         | NA         | SOCS2P1    |
| NA        | ENSG00000237663 | 0          | NA          | NA         | NA         | NA         | DNAJC19P7  |
| 388830    | ENSG00000237664 | 0          | NA          | NA         | NA         | NA         | LINC00316  |
| 105376946 | ENSG00000237665 | 0.29863895 | -0.02292439 | 0.3852726  | 0.68753245 | NA         | GRM7-AS2   |
| NA        | ENSG00000237666 | 0          | NA          | NA         | NA         | NA         |            |
| 339822    | ENSG00000237667 | 0          | NA          | NA         | NA         | NA         | LINC01115  |
| NA        | ENSG00000237668 | 0.14931947 | -0.01844332 | 0.38480212 | 0.84537521 | NA         | RPS15AP38  |
| NA        | ENSG00000237669 | 22.7008141 | 0.1684224   | 0.3333168  | 0.3928428  | 0.62197758 |            |
| NA        | ENSG00000237670 | 0          | NA          | NA         | NA         | NA         | LINC01866  |
| 729422    | ENSG00000237671 | 0          | NA          | NA         | NA         | NA         | GAGE12C    |
| NA        | ENSG00000237672 | 0.14931947 | -0.01844332 | 0.38480212 | 0.84537521 | NA         | KRR1P1     |
| NA        | ENSG00000237674 | 0          | NA          | NA         | NA         | NA         | GSTA7P     |
| 100169752 | ENSG00000237675 | 0          | NA          | NA         | NA         | NA         | TEX36-AS1  |
| NA        | ENSG00000237676 | 0          | NA          | NA         | NA         | NA         | RPL30P4    |
| NA        | ENSG00000237679 | 1.55693834 | 0.04851317  | 0.38167416 | 0.52263096 | NA         | VDAC1P11   |
| NA        | ENSG00000237682 | 0.66131946 | 0.00452253  | 0.38193943 | 0.92314864 | NA         | PRKCIP1    |
| NA        | ENSG00000237684 | 0          | NA          | NA         | NA         | NA         | RPSAP35    |
| NA        | ENSG00000237685 | 0          | NA          | NA         | NA         | NA         |            |
| 101929705 | ENSG00000237686 | 7.1385121  | -0.2825581  | 0.50183762 | 0.06407637 | 0.17991439 | SCIRT      |
| NA        | ENSG00000237687 | 0          | NA          | NA         | NA         | NA         | LINC00686  |
| NA        | ENSG00000237689 | 0          | NA          | NA         | NA         | NA         |            |
| NA        | ENSG00000237691 | 0          | NA          | NA         | NA         | NA         | IFNWP2     |
| 345611    | ENSG00000237693 | 1.35026602 | -0.07355658 | 0.39380602 | 0.13393704 | NA         | IRGM       |
| NA        | ENSG00000237699 | 0          | NA          | NA         | NA         | NA         |            |
| 645382    | ENSG00000237700 | 0          | NA          | NA         | NA         | NA         | PRAMEF33   |
| NA        | ENSG00000237701 | 0          | NA          | NA         | NA         | NA         | ATP5PFP1   |
| NA        | ENSG00000237702 | 0          | NA          | NA         | NA         | NA         | TRBV3-1    |
| NA        | ENSG00000237704 | 0          | NA          | NA         | NA         | NA         |            |
| NA        | ENSG00000237705 | 0.16735865 | 0.01897177  | 0.38482933 | 0.78225479 | NA         |            |
| NA        | ENSG00000237706 | 0          | NA          | NA         | NA         | NA         | TRIM51EP   |
| 101928596 | ENSG00000237707 | 2.01399246 | -0.11385943 | 0.40439749 | 0.10134642 | NA         |            |
| NA        | ENSG00000237708 | 0.173124   | -0.01911262 | 0.38486262 | 0.84537521 | NA         | SPIN2P1    |

|           |    |                 |            |             |            |            |            |            |
|-----------|----|-----------------|------------|-------------|------------|------------|------------|------------|
|           | NA | ENSG00000237709 | 0.30139824 | -0.02296476 | 0.38527817 | 0.68536535 | NA         | EEF1A1P28  |
|           | NA | ENSG00000237711 | 0          | NA          | NA         | NA         | NA         | MTCO3P11   |
|           | NA | ENSG00000237713 | 0          | NA          | NA         | NA         | NA         |            |
| 100861518 | NA | ENSG00000237714 | 0          | NA          | NA         | NA         | NA         | P4HA2-AS1  |
|           | NA | ENSG00000237716 | 0          | NA          | NA         | NA         | NA         |            |
|           | NA | ENSG00000237718 | 3.18229719 | 0.01346148  | 0.3836199  | 0.71866586 | 0.86508498 |            |
|           | NA | ENSG00000237719 | 13.6512868 | 0.27300216  | 0.42546975 | 0.16748309 | 0.35846798 |            |
|           | NA | ENSG00000237720 | 25.3256957 | 0.31746741  | 0.37679807 | 0.15382293 | 0.33890581 |            |
|           | NA | ENSG00000237722 | 0          | NA          | NA         | NA         | NA         | MTND1P29   |
| 102725193 | NA | ENSG00000237728 | 0          | NA          | NA         | NA         | NA         | CAMTA1-AS2 |
|           | NA | ENSG00000237729 | 0          | NA          | NA         | NA         | NA         |            |
|           | NA | ENSG00000237730 | 0          | NA          | NA         | NA         | NA         | RPS5P8     |
|           | NA | ENSG00000237731 | 0.64348969 | -0.01985273 | 0.38303134 | 0.67631781 | NA         | RNGTTP1    |
| 440934    | NA | ENSG00000237732 | 7.40788323 | -0.25537801 | 0.47681422 | 0.08239031 | 0.21607715 | CT75       |
|           | NA | ENSG00000237734 | 0          | NA          | NA         | NA         | NA         |            |
|           | NA | ENSG00000237735 | 0          | NA          | NA         | NA         | NA         |            |
| 100189589 | NA | ENSG00000237737 | 1.76307258 | -0.02635398 | 0.37891865 | 0.71992205 | NA         | DCTN1-AS1  |
| 100874342 | NA | ENSG00000237738 | 0          | NA          | NA         | NA         | NA         | RNF216-IT1 |
|           | NA | ENSG00000237740 | 0.18922458 | 0.01954053  | 0.38488496 | 0.78225479 | NA         | NPAP1P3    |
|           | NA | ENSG00000237741 | 0          | NA          | NA         | NA         | NA         |            |
|           | NA | ENSG00000237742 | 0          | NA          | NA         | NA         | NA         |            |
|           | NA | ENSG00000237743 | 0          | NA          | NA         | NA         | NA         | FBP2P1     |
|           | NA | ENSG00000237745 | 0          | NA          | NA         | NA         | NA         | RPL22P8    |
|           | NA | ENSG00000237746 | 0          | NA          | NA         | NA         | NA         | ZNF101P1   |
|           | NA | ENSG00000237747 | 0          | NA          | NA         | NA         | NA         |            |
|           | NA | ENSG00000237748 | 0          | NA          | NA         | NA         | NA         | UQCRBP1    |
|           | NA | ENSG00000237749 | 0.15069912 | -0.01848503 | 0.38480575 | 0.84537521 | NA         |            |
| 101929570 | NA | ENSG00000237750 | 0          | NA          | NA         | NA         | NA         | KCNH7-AS1  |
| 104355141 | NA | ENSG00000237751 | 0          | NA          | NA         | NA         | NA         | LINC01143  |
|           | NA | ENSG00000237752 | 0          | NA          | NA         | NA         | NA         | NCKAP1P1   |
|           | NA | ENSG00000237753 | 17.4483223 | -0.1801552  | 0.35902772 | 0.33970009 | 0.57009388 |            |
|           | NA | ENSG00000237754 | 0          | NA          | NA         | NA         | NA         |            |
|           | NA | ENSG00000237756 | 0.173733   | 0.01914545  | 0.38484597 | 0.78225479 | NA         |            |
|           | NA | ENSG00000237757 | 0          | NA          | NA         | NA         | NA         | EEF1A1P30  |
|           | NA | ENSG00000237758 | 0.16735865 | 0.01897177  | 0.38482933 | 0.78225479 | NA         | BANF1P3    |
|           | NA | ENSG00000237759 | 0          | NA          | NA         | NA         | NA         |            |
|           | NA | ENSG00000237760 | 0          | NA          | NA         | NA         | NA         |            |
|           | NA | ENSG00000237761 | 0          | NA          | NA         | NA         | NA         |            |

|           |                 |            |             |            |            |            |              |
|-----------|-----------------|------------|-------------|------------|------------|------------|--------------|
| 276       | ENSG00000237763 | 0          | NA          | NA         | NA         | NA         | AMY1A        |
| 285550    | ENSG00000237765 | 411.591594 | -0.16293333 | 0.11900564 | 0.14877781 | 0.33135964 | FAM200B      |
| NA        | ENSG00000237766 | 7.43276838 | 0.0101512   | 0.35388162 | 0.9442539  | 0.97728379 | GGTA2P       |
| NA        | ENSG00000237767 | 0          | NA          | NA         | NA         | NA         | LINC01370    |
| NA        | ENSG00000237768 | 0          | NA          | NA         | NA         | NA         |              |
| NA        | ENSG00000237770 | 0          | NA          | NA         | NA         | NA         | SPATA31D2P   |
| NA        | ENSG00000237772 | 0.75973167 | -0.03136978 | 0.38404921 | 0.53113745 | NA         | LINC02631    |
| NA        | ENSG00000237773 | 0          | NA          | NA         | NA         | NA         |              |
| NA        | ENSG00000237774 | 0          | NA          | NA         | NA         | NA         |              |
| NA        | ENSG00000237775 | 0          | NA          | NA         | NA         | NA         | DDR1-DT      |
| NA        | ENSG00000237781 | 0.67432729 | 0.02619312  | 0.38363193 | 0.58379114 | NA         | ADAMTSL4-AS2 |
| NA        | ENSG00000237782 | 0          | NA          | NA         | NA         | NA         | PLLPP1       |
| NA        | ENSG00000237783 | 0          | NA          | NA         | NA         | NA         |              |
| NA        | ENSG00000237784 | 0          | NA          | NA         | NA         | NA         | RPS20P12     |
| NA        | ENSG00000237786 | 0          | NA          | NA         | NA         | NA         | GFOD1-AS1    |
| 152118    | ENSG00000237787 | 0          | NA          | NA         | NA         | NA         | LINC02877    |
| NA        | ENSG00000237788 | 0.69371396 | 0.00036893  | 0.38238358 | 0.99174024 | NA         |              |
| 106144585 | ENSG00000237790 | 0          | NA          | NA         | NA         | NA         | LINC01318    |
| NA        | ENSG00000237793 | 0          | NA          | NA         | NA         | NA         | RPL18AP16    |
| NA        | ENSG00000237797 | 0          | NA          | NA         | NA         | NA         | MACORIS      |
| NA        | ENSG00000237798 | 0          | NA          | NA         | NA         | NA         |              |
| NA        | ENSG00000237799 | 0          | NA          | NA         | NA         | NA         | CICP11       |
| NA        | ENSG00000237801 | 0          | NA          | NA         | NA         | NA         | AMD1P2       |
| 105379270 | ENSG00000237802 | 0          | NA          | NA         | NA         | NA         | FAM197Y6     |
| NA        | ENSG00000237803 | 0          | NA          | NA         | NA         | NA         | LINC00211    |
| NA        | ENSG00000237804 | 0          | NA          | NA         | NA         | NA         | HNRNPA1P39   |
| NA        | ENSG00000237806 | 0          | NA          | NA         | NA         | NA         | FAUP2        |
| 100507516 | ENSG00000237807 | 4.92665307 | 0.08664412  | 0.3806905  | 0.42876368 | 0.65462623 |              |
| NA        | ENSG00000237810 | 0          | NA          | NA         | NA         | NA         |              |
| NA        | ENSG00000237813 | 0          | NA          | NA         | NA         | NA         |              |
| NA        | ENSG00000237816 | 0          | NA          | NA         | NA         | NA         | RPL21P109    |
| NA        | ENSG00000237818 | 0.15069912 | -0.01848503 | 0.38480575 | 0.84537521 | NA         | RPS3AP29     |
| 101927497 | ENSG00000237819 | 44.0989991 | 0.68247031  | 0.36405569 | 0.01012902 | 0.04183108 | CDK6-AS1     |
| NA        | ENSG00000237821 | 0.34624801 | -0.02356563 | 0.38536324 | 0.65270996 | NA         | ST13P7       |
| NA        | ENSG00000237823 | 0          | NA          | NA         | NA         | NA         | CDY19P       |
| NA        | ENSG00000237824 | 0          | NA          | NA         | NA         | NA         | RPL23AP33    |
| NA        | ENSG00000237827 | 0          | NA          | NA         | NA         | NA         | RPS15AP29    |
| NA        | ENSG00000237828 | 0          | NA          | NA         | NA         | NA         | PA2G4P1      |



|           |                 |            |             |            |            |            |            |
|-----------|-----------------|------------|-------------|------------|------------|------------|------------|
| NA        | ENSG00000237832 | 0          | NA          | NA         | NA         | NA         |            |
| NA        | ENSG00000237833 | 0          | NA          | NA         | NA         | NA         | ETS2P1     |
| NA        | ENSG00000237835 | 0          | NA          | NA         | NA         | NA         |            |
| NA        | ENSG00000237836 | 1.70655094 | 0.02463286  | 0.37901939 | 0.7338335  | NA         | PHKA2-AS1  |
| NA        | ENSG00000237837 | 0          | NA          | NA         | NA         | NA         |            |
| NA        | ENSG00000237838 | 1.16398191 | 0.01642012  | 0.38085306 | 0.78078055 | NA         |            |
| NA        | ENSG00000237840 | 14.0565407 | -0.06761147 | 0.3331844  | 0.69538047 | 0.85294273 | FAM21FP    |
| NA        | ENSG00000237841 | 0          | NA          | NA         | NA         | NA         | KRTAP19-9P |
| NA        | ENSG00000237842 | 0          | NA          | NA         | NA         | NA         | SMU1P1     |
| NA        | ENSG00000237843 | 0          | NA          | NA         | NA         | NA         |            |
| NA        | ENSG00000237844 | 0          | NA          | NA         | NA         | NA         |            |
| NA        | ENSG00000237845 | 0          | NA          | NA         | NA         | NA         |            |
| NA        | ENSG00000237846 | 6.85767687 | 0.0503567   | 0.36931983 | 0.66904808 | 0.83720681 |            |
| NA        | ENSG00000237848 | 0.15069912 | -0.01848503 | 0.38480575 | 0.84537521 | NA         |            |
| NA        | ENSG00000237849 | 0          | NA          | NA         | NA         | NA         | NFYAP1     |
| 645202    | ENSG00000237850 | 0          | NA          | NA         | NA         | NA         |            |
| NA        | ENSG00000237851 | 0          | NA          | NA         | NA         | NA         |            |
| NA        | ENSG00000237852 | 0          | NA          | NA         | NA         | NA         |            |
| 645030    | ENSG00000237853 | 0.29863895 | -0.02292439 | 0.3852726  | 0.68753245 | NA         | NFIA-AS1   |
| NA        | ENSG00000237854 | 46.9031388 | -0.0473319  | 0.28293787 | 0.80305604 | 0.9104022  | LINC00674  |
| NA        | ENSG00000237856 | 0          | NA          | NA         | NA         | NA         |            |
| NA        | ENSG00000237859 | 0          | NA          | NA         | NA         | NA         | EEF1A1P31  |
| NA        | ENSG00000237860 | 0          | NA          | NA         | NA         | NA         | SLC6A14P2  |
| NA        | ENSG00000237861 | 0.14931947 | -0.01844332 | 0.38480212 | 0.84537521 | NA         |            |
| 100506271 | ENSG00000237862 | 0          | NA          | NA         | NA         | NA         |            |
| NA        | ENSG00000237863 | 0          | NA          | NA         | NA         | NA         |            |
| NA        | ENSG00000237864 | 0          | NA          | NA         | NA         | NA         | LINC00322  |
| NA        | ENSG00000237868 | 0          | NA          | NA         | NA         | NA         |            |
| 102724434 | ENSG00000237870 | 0          | NA          | NA         | NA         | NA         |            |
| 645682    | ENSG00000237872 | 0.72602119 | 0.04264172  | 0.38745951 | 0.33481525 | NA         | POU5F1P4   |
| NA        | ENSG00000237873 | 0          | NA          | NA         | NA         | NA         | DLGAP5P2   |
| NA        | ENSG00000237874 | 0          | NA          | NA         | NA         | NA         |            |
| NA        | ENSG00000237875 | 0          | NA          | NA         | NA         | NA         |            |
| NA        | ENSG00000237876 | 0          | NA          | NA         | NA         | NA         | AKR1B1P4   |
| NA        | ENSG00000237877 | 4.47648803 | -0.0903163  | 0.37764585 | 0.45803281 | 0.6814881  | LINC01473  |
| 100874158 | ENSG00000237879 | 0.15069912 | -0.01848503 | 0.38480575 | 0.84537521 | NA         | LINC00398  |
| NA        | ENSG00000237880 | 1.03897615 | 0.074307    | 0.3936529  | 0.15222474 | NA         | LINC01885  |
| NA        | ENSG00000237882 | 0          | NA          | NA         | NA         | NA         | PPIAP13    |

|           |                 |                 |             |             |            |            |            |           |
|-----------|-----------------|-----------------|-------------|-------------|------------|------------|------------|-----------|
| 100874048 | ENSG00000237883 | 20.0578882      | 0.19349468  | 0.35861243  | 0.31958532 | 0.54727882 | DGUOK-AS1  |           |
|           | NA              | ENSG00000237885 | 0           | NA          | NA         | NA         |            |           |
|           | NA              | ENSG00000237886 | 1.16828715  | 0.04088295  | 0.38336185 | 0.49869047 | NALT1      |           |
|           | NA              | ENSG00000237887 | 0           | NA          | NA         | NA         | RPL23AP32  |           |
|           | NA              | ENSG00000237888 | 0           | NA          | NA         | NA         |            |           |
|           | NA              | ENSG00000237891 | 0           | NA          | NA         | NA         | UBE2V1P16  |           |
|           | NA              | ENSG00000237892 | 4.0313211   | -0.08242118 | 0.37779391 | 0.4735423  | 0.69551963 | KLF7-IT1  |
|           | NA              | ENSG00000237896 | 0           | NA          | NA         | NA         | NA         |           |
|           | NA              | ENSG00000237897 | 0           | NA          | NA         | NA         | NA         |           |
|           | NA              | ENSG00000237899 | 0           | NA          | NA         | NA         | NA         |           |
|           | NA              | ENSG00000237901 | 0           | NA          | NA         | NA         | NA         |           |
|           | NA              | ENSG00000237902 | 0           | NA          | NA         | NA         | NA         |           |
|           | NA              | ENSG00000237903 | 0           | NA          | NA         | NA         | NA         |           |
|           | NA              | ENSG00000237904 | 0           | NA          | NA         | NA         | NA         |           |
|           | NA              | ENSG00000237906 | 0           | NA          | NA         | NA         | NA         |           |
|           | NA              | ENSG00000237910 | 0           | NA          | NA         | NA         | NA         |           |
|           | NA              | ENSG00000237911 | 0           | NA          | NA         | NA         | NA         |           |
|           | NA              | ENSG00000237913 | 0           | NA          | NA         | NA         | NA         |           |
|           | NA              | ENSG00000237914 | 0           | NA          | NA         | NA         | NA         |           |
| 101929010 | ENSG00000237914 | 0               | NA          | NA          | NA         | NA         | SIRPG-AS1  |           |
|           | NA              | ENSG00000237916 | 2.9552743   | -0.00824522 | 0.36847221 | 0.93705816 | 0.97351594 | RPL37P12  |
|           | NA              | ENSG00000237917 | 0           | NA          | NA         | NA         | NA         | PARP4P1   |
|           | NA              | ENSG00000237919 | 0           | NA          | NA         | NA         | NA         | LRRC7-AS1 |
|           | NA              | ENSG00000237920 | 0           | NA          | NA         | NA         | NA         |           |
|           | NA              | ENSG00000237921 | 0           | NA          | NA         | NA         | NA         |           |
|           | NA              | ENSG00000237922 | 0           | NA          | NA         | NA         | NA         |           |
| 105375014 | ENSG00000237923 | 0               | NA          | NA          | NA         | NA         | NA         | LINC02570 |
|           | NA              | ENSG00000237924 | 0           | NA          | NA         | NA         | NA         | RPL21P112 |
|           | NA              | ENSG00000237926 | 0           | NA          | NA         | NA         | NA         |           |
|           | NA              | ENSG00000237927 | 0.35659405  | 0.02381643  | 0.38538096 | 0.61406099 | NA         |           |
| 100996570 | ENSG00000237928 | 3.75385365      | -0.22336708 | 0.47033224  | 0.03660777 | 0.11748596 | NFIA-AS2   |           |
|           | NA              | ENSG00000237929 | 0           | NA          | NA         | NA         | NA         | RPL31P3   |
|           | NA              | ENSG00000237930 | 0           | NA          | NA         | NA         | NA         | RPL31P14  |
|           | NA              | ENSG00000237931 | 0           | NA          | NA         | NA         | NA         | CLIC4P3   |
|           | NA              | ENSG00000237934 | 0           | NA          | NA         | NA         | NA         |           |
|           | NA              | ENSG00000237936 | 0           | NA          | NA         | NA         | NA         |           |
| 101929011 | ENSG00000237937 | 0.29863895      | -0.02292439 | 0.3852726   | 0.68753245 | NA         | NA         | LINC02702 |
|           | NA              | ENSG00000237938 | 2.48071256  | 0.0940915   | 0.39022428 | 0.30753474 | NA         |           |
|           | NA              | ENSG00000237939 | 0           | NA          | NA         | NA         | NA         | IDI1P1    |

|           |                 |            |             |            |            |            |            |
|-----------|-----------------|------------|-------------|------------|------------|------------|------------|
| 102723927 | ENSG00000237940 | 90.9690085 | 0.03525568  | 0.22132183 | 0.84672343 | 0.93052693 | LINC01238  |
| 55539     | ENSG00000237941 | 0          | NA          | NA         | NA         | NA         | KCNQ1DN    |
| 439949    | ENSG00000237943 | 77.2087396 | 0.10961795  | 0.23033003 | 0.55562893 | 0.7613563  | PRKCQ-AS1  |
| 100506334 | ENSG00000237945 | 4.33197227 | 0.14066434  | 0.41730047 | 0.03722817 | 0.11895745 | LINC00649  |
| NA        | ENSG00000237947 | 0          | NA          | NA         | NA         | NA         |            |
| NA        | ENSG00000237948 | 0          | NA          | NA         | NA         | NA         | MTATP6P20  |
| NA        | ENSG00000237949 | 0.18922458 | 0.01954053  | 0.38488496 | 0.78225479 | NA         | LINC00844  |
| NA        | ENSG00000237950 | 50.4819606 | -0.49948206 | 0.32654668 | 0.03466696 | 0.11251309 |            |
| NA        | ENSG00000237951 | 0          | NA          | NA         | NA         | NA         | PPIL1P1    |
| NA        | ENSG00000237952 | 0          | NA          | NA         | NA         | NA         | RPL7AP73   |
| NA        | ENSG00000237953 | 0          | NA          | NA         | NA         | NA         | RPS13P5    |
| NA        | ENSG00000237954 | 8.39931346 | -0.39883629 | 0.64616861 | 0.03761108 | 0.11985285 |            |
| NA        | ENSG00000237955 | 0          | NA          | NA         | NA         | NA         |            |
| NA        | ENSG00000237956 | 0          | NA          | NA         | NA         | NA         | TRIAP1P1   |
| NA        | ENSG00000237959 | 0          | NA          | NA         | NA         | NA         | RPL36AP10  |
| NA        | ENSG00000237961 | 1.75394504 | -0.01777849 | 0.37718979 | 0.81883007 | NA         |            |
| NA        | ENSG00000237963 | 0.66090991 | -0.0193222  | 0.38292388 | 0.67068895 | NA         | PRXL2CP1   |
| NA        | ENSG00000237964 | 0          | NA          | NA         | NA         | NA         | RAD52P1    |
| NA        | ENSG00000237968 | 0          | NA          | NA         | NA         | NA         |            |
| NA        | ENSG00000237970 | 0          | NA          | NA         | NA         | NA         | TMEM161BP1 |
| NA        | ENSG00000237971 | 0          | NA          | NA         | NA         | NA         |            |
| NA        | ENSG00000237972 | 4.43378896 | 0.10070033  | 0.37874473 | 0.42830575 | 0.65428642 | TUBG1P     |
| NA        | ENSG00000237973 | 478.318118 | -0.23985527 | 0.10915235 | 0.02148762 | 0.07714699 | MTCO1P12   |
| NA        | ENSG00000237974 | 0          | NA          | NA         | NA         | NA         |            |
| 339400    | ENSG00000237975 | 0          | NA          | NA         | NA         | NA         | FLG-AS1    |
| NA        | ENSG00000237976 | 20.7767579 | 0.03690198  | 0.31359629 | 0.84241902 | 0.92837824 | RFX5-AS1   |
| NA        | ENSG00000237977 | 4.65822712 | 0.16635273  | 0.4134227  | 0.1857207  | 0.38510648 | EIF4HP2    |
| NA        | ENSG00000237978 | 5.73929867 | 0.09332088  | 0.38186078 | 0.40204517 | 0.63031025 | KCNMB2-AS1 |
| NA        | ENSG00000237979 | 0.16735865 | 0.01897177  | 0.38482933 | 0.78225479 | NA         | DNAJB12P1  |
| NA        | ENSG00000237980 | 0          | NA          | NA         | NA         | NA         | LINC02773  |
| NA        | ENSG00000237982 | 0          | NA          | NA         | NA         | NA         |            |
| 11191     | ENSG00000237984 | 75.3384935 | -0.6699667  | 0.36522286 | 0.01111457 | 0.045252   | PTENP1     |
| NA        | ENSG00000237986 | 0          | NA          | NA         | NA         | NA         | CELF2-AS2  |
| 105378137 | ENSG00000237987 | 0          | NA          | NA         | NA         | NA         |            |
| NA        | ENSG00000237988 | 0.173124   | -0.01911262 | 0.38486262 | 0.84537521 | NA         | OR2I1P     |
| 101928399 | ENSG00000237989 | 32.8043309 | -0.90964041 | 0.48629738 | 0.00567298 | 0.02589185 | LINC01679  |
| NA        | ENSG00000237990 | 12.6275624 | -0.11702423 | 0.36175041 | 0.46774829 | 0.69058833 | CNTN4-AS1  |
| NA        | ENSG00000237991 | 0          | NA          | NA         | NA         | NA         | RPL35P1    |

|           |                 |            |             |            |            |            |            |
|-----------|-----------------|------------|-------------|------------|------------|------------|------------|
| NA        | ENSG00000237992 | 0          | NA          | NA         | NA         | NA         | LINC01808  |
| NA        | ENSG00000237993 | 0          | NA          | NA         | NA         | NA         |            |
| NA        | ENSG00000237994 | 0          | NA          | NA         | NA         | NA         |            |
| NA        | ENSG00000237997 | 0          | NA          | NA         | NA         | NA         | RCC2P2     |
| NA        | ENSG00000237999 | 0          | NA          | NA         | NA         | NA         | ACTG1P19   |
| NA        | ENSG00000238000 | 0          | NA          | NA         | NA         | NA         | PSME2P1    |
| NA        | ENSG00000238001 | 0.173733   | 0.01914545  | 0.38484597 | 0.78225479 | NA         | SNRPCP1    |
| NA        | ENSG00000238002 | 0          | NA          | NA         | NA         | NA         | NPAP1P6    |
| NA        | ENSG00000238003 | 0          | NA          | NA         | NA         | NA         | RPL10P4    |
| NA        | ENSG00000238004 | 0          | NA          | NA         | NA         | NA         |            |
| 101927851 | ENSG00000238005 | 0.30139824 | -0.02296476 | 0.38527817 | 0.68536535 | NA         |            |
| NA        | ENSG00000238007 | 0          | NA          | NA         | NA         | NA         |            |
| NA        | ENSG00000238008 | 0.173124   | -0.01911262 | 0.38486262 | 0.84537521 | NA         | COX6CP10   |
| NA        | ENSG00000238009 | 10.6069535 | 0.34198207  | 0.54428504 | 0.06618442 | 0.1840258  |            |
| NA        | ENSG00000238010 | 0          | NA          | NA         | NA         | NA         |            |
| NA        | ENSG00000238012 | 0.173733   | 0.01914545  | 0.38484597 | 0.78225479 | NA         |            |
| NA        | ENSG00000238013 | 0          | NA          | NA         | NA         | NA         |            |
| NA        | ENSG00000238015 | 0          | NA          | NA         | NA         | NA         |            |
| NA        | ENSG00000238018 | 6.19678207 | -0.07000526 | 0.36776652 | 0.58707909 | 0.78237765 |            |
| NA        | ENSG00000238019 | 0          | NA          | NA         | NA         | NA         |            |
| 106478970 | ENSG00000238020 | 0          | NA          | NA         | NA         | NA         | HTR3E-AS1  |
| NA        | ENSG00000238021 | 1.19863605 | 0.06761007  | 0.39233703 | 0.15102074 | NA         | ODAD2P1    |
| NA        | ENSG00000238022 | 0          | NA          | NA         | NA         | NA         | LMX1A-AS1  |
| NA        | ENSG00000238024 | 0          | NA          | NA         | NA         | NA         | DDX39BP2   |
| NA        | ENSG00000238025 | 0          | NA          | NA         | NA         | NA         | ZDHHC4P1   |
| NA        | ENSG00000238026 | 0          | NA          | NA         | NA         | NA         |            |
| NA        | ENSG00000238029 | 0          | NA          | NA         | NA         | NA         | RALBP1P2   |
| NA        | ENSG00000238031 | 0          | NA          | NA         | NA         | NA         |            |
| NA        | ENSG00000238032 | 0          | NA          | NA         | NA         | NA         | S100A11P5  |
| NA        | ENSG00000238034 | 0          | NA          | NA         | NA         | NA         |            |
| NA        | ENSG00000238035 | 505.578544 | 0.17281442  | 0.11973211 | 0.12827367 | 0.29899782 |            |
| NA        | ENSG00000238037 | 0          | NA          | NA         | NA         | NA         | OOSP1P1    |
| NA        | ENSG00000238038 | 0.16735865 | 0.01897177  | 0.38482933 | 0.78225479 | NA         | ATP6V0E1P3 |
| NA        | ENSG00000238039 | 7.04616764 | -0.00574367 | 0.35207719 | 0.96582619 | 0.98666349 |            |
| NA        | ENSG00000238040 | 0          | NA          | NA         | NA         | NA         | SALL4P2    |
| NA        | ENSG00000238041 | 0          | NA          | NA         | NA         | NA         | TMEM230P2  |
| 105372950 | ENSG00000238042 | 0          | NA          | NA         | NA         | NA         | LINC02257  |
| NA        | ENSG00000238043 | 0          | NA          | NA         | NA         | NA         |            |

|           |    |                 |            |             |            |            |            |            |
|-----------|----|-----------------|------------|-------------|------------|------------|------------|------------|
|           | NA | ENSG00000238045 | 56.4451236 | -0.05437205 | 0.25523122 | 0.77513722 | 0.89624817 |            |
|           | NA | ENSG00000238046 | 0          | NA          | NA         | NA         | NA         | MTND5P22   |
|           | NA | ENSG00000238047 | 0          | NA          | NA         | NA         | NA         | MTND1P30   |
|           | NA | ENSG00000238048 | 0          | NA          | NA         | NA         | NA         | ART2P      |
|           | NA | ENSG00000238049 | 0          | NA          | NA         | NA         | NA         |            |
|           | NA | ENSG00000238051 | 0          | NA          | NA         | NA         | NA         | ISCUP1     |
|           | NA | ENSG00000238054 | 0          | NA          | NA         | NA         | NA         |            |
|           | NA | ENSG00000238055 | 0.34746601 | 0.02370763  | 0.3853651  | 0.61987128 | NA         |            |
| 100303491 | NA | ENSG00000238057 | 8.98240511 | 0.20544335  | 0.40947918 | 0.21637468 | 0.42727915 | ZEB2-AS1   |
|           | NA | ENSG00000238058 | 10.6562572 | 0.02090308  | 0.34253145 | 0.89639592 | 0.95469109 |            |
|           | NA | ENSG00000238059 | 0          | NA          | NA         | NA         | NA         | HSPE1P21   |
|           | NA | ENSG00000238061 | 4.98011318 | 0.0969045   | 0.37835614 | 0.44034519 | 0.66517856 |            |
| 348761    | NA | ENSG00000238062 | 13.6820025 | -0.25037835 | 0.41400508 | 0.18914239 | 0.38991947 | SPATA3-AS1 |
|           | NA | ENSG00000238063 | 0          | NA          | NA         | NA         | NA         | LINC01685  |
|           | NA | ENSG00000238065 | 0          | NA          | NA         | NA         | NA         | LRRC57P1   |
|           | NA | ENSG00000238066 | 0          | NA          | NA         | NA         | NA         |            |
|           | NA | ENSG00000238067 | 0          | NA          | NA         | NA         | NA         | XKRYP1     |
|           | NA | ENSG00000238069 | 0          | NA          | NA         | NA         | NA         | RPLP0P7    |
|           | NA | ENSG00000238072 | 0          | NA          | NA         | NA         | NA         | CDC26P1    |
|           | NA | ENSG00000238073 | 0          | NA          | NA         | NA         | NA         | RBMY2HP    |
|           | NA | ENSG00000238074 | 0          | NA          | NA         | NA         | NA         | TSPY9P     |
|           | NA | ENSG00000238075 | 0          | NA          | NA         | NA         | NA         | RPSAP32    |
|           | NA | ENSG00000238076 | 0.15069912 | -0.01848503 | 0.38480575 | 0.84537521 | NA         | MRPL48P1   |
|           | NA | ENSG00000238077 | 0          | NA          | NA         | NA         | NA         | NMNAT1P3   |
| 101929730 | NA | ENSG00000238078 | 0.34746601 | 0.02370763  | 0.3853651  | 0.61987128 | NA         | LINC01352  |
|           | NA | ENSG00000238079 | 0          | NA          | NA         | NA         | NA         |            |
|           | NA | ENSG00000238081 | 0          | NA          | NA         | NA         | NA         |            |
|           | NA | ENSG00000238082 | 6.32004295 | 0.06046418  | 0.36408801 | 0.65010432 | 0.82529572 | NUDCP2     |
| 474170    | NA | ENSG00000238083 | 445.43794  | 0.03197381  | 0.11110531 | 0.76439363 | 0.89148768 | LRRC37A2   |
|           | NA | ENSG00000238084 | 0.82529838 | 0.02854168  | 0.38429183 | 0.51977948 | NA         |            |
|           | NA | ENSG00000238085 | 0          | NA          | NA         | NA         | NA         |            |
|           | NA | ENSG00000238086 | 0.15069912 | -0.01848503 | 0.38480575 | 0.84537521 | NA         | PPP1R26P1  |
|           | NA | ENSG00000238087 | 0          | NA          | NA         | NA         | NA         | FMO8P      |
|           | NA | ENSG00000238088 | 0          | NA          | NA         | NA         | NA         | OFD1P7Y    |
|           | NA | ENSG00000238090 | 0.45051049 | -0.02733759 | 0.38571616 | 0.56127273 | NA         |            |
|           | NA | ENSG00000238092 | 0          | NA          | NA         | NA         | NA         | CEACAMP6   |
|           | NA | ENSG00000238094 | 0          | NA          | NA         | NA         | NA         |            |
| 101929337 | NA | ENSG00000238097 | 4.05274497 | -0.28625137 | 0.53459033 | 0.02685375 | 0.09209652 | LINC02037  |

|           |                 |            |             |            |            |            |             |
|-----------|-----------------|------------|-------------|------------|------------|------------|-------------|
| 650655    | ENSG00000238098 | 15.8911292 | -0.03714526 | 0.32873935 | 0.82694858 | 0.92172246 | ABCA17P     |
| 645434    | ENSG00000238099 | 0          | NA          | NA         | NA         | NA         | LINC01625   |
| NA        | ENSG00000238102 | 0          | NA          | NA         | NA         | NA         |             |
| NA        | ENSG00000238103 | 2.23949732 | -0.00396052 | 0.37708706 | 0.95647093 | NA         | RPL9P7      |
| 55592     | ENSG00000238105 | 380.206995 | 0.46947211  | 0.1396028  | 0.00032103 | 0.00217305 | GOLGA2P5    |
| NA        | ENSG00000238107 | 0          | NA          | NA         | NA         | NA         | LINC02806   |
| NA        | ENSG00000238108 | 0          | NA          | NA         | NA         | NA         |             |
| NA        | ENSG00000238109 | 5.54578555 | 0.06128024  | 0.36214188 | 0.65482706 | 0.82814932 | RNF14P3     |
| NA        | ENSG00000238110 | 0          | NA          | NA         | NA         | NA         |             |
| NA        | ENSG00000238111 | 0          | NA          | NA         | NA         | NA         | RPS13P4     |
| 103352539 | ENSG00000238113 | 238.528268 | 0.03084898  | 0.18746849 | 0.85172904 | 0.93275912 | LINC01410   |
| NA        | ENSG00000238116 | 0          | NA          | NA         | NA         | NA         | RAD21P1     |
| NA        | ENSG00000238117 | 0          | NA          | NA         | NA         | NA         |             |
| NA        | ENSG00000238118 | 1.56359704 | 0.06153354  | 0.39132085 | 0.13522809 | NA         | SLC25A24P2  |
| 100506737 | ENSG00000238120 | 1.02124956 | 0.00578372  | 0.38000092 | 0.92433301 | NA         | LINC01589   |
| 100188949 | ENSG00000238121 | 0          | NA          | NA         | NA         | NA         | LINC00426   |
| NA        | ENSG00000238122 | 300.033694 | 0.77983928  | 0.15187138 | 5.48E-08   | 7.49E-07   |             |
| NA        | ENSG00000238123 | 5.04023831 | -0.00854941 | 0.36126005 | 0.94356534 | 0.97701605 | MID1IP1-AS1 |
| NA        | ENSG00000238124 | 0          | NA          | NA         | NA         | NA         |             |
| NA        | ENSG00000238125 | 0          | NA          | NA         | NA         | NA         | SLC9A3P2    |
| NA        | ENSG00000238129 | 0          | NA          | NA         | NA         | NA         |             |
| NA        | ENSG00000238131 | 0          | NA          | NA         | NA         | NA         | LINC02854   |
| NA        | ENSG00000238132 | 1.19010872 | 0.02167677  | 0.37936208 | 0.75432897 | NA         | CASC4P1     |
| 339751    | ENSG00000238133 | 0.52403109 | 0.03154624  | 0.38609537 | 0.47157163 | NA         | MAP3K20-AS1 |
| NA        | ENSG00000238135 | 0          | NA          | NA         | NA         | NA         | USP9YP10    |
| NA        | ENSG00000238137 | 0.92330664 | -0.05034868 | 0.38871855 | 0.27048466 | NA         | ARPC3P2     |
| NA        | ENSG00000238138 | 0          | NA          | NA         | NA         | NA         |             |
| NA        | ENSG00000238139 | 0          | NA          | NA         | NA         | NA         |             |
| NA        | ENSG00000238140 | 0          | NA          | NA         | NA         | NA         |             |
| 100874093 | ENSG00000238141 | 0          | NA          | NA         | NA         | NA         | BRWD1-AS1   |
| NA        | ENSG00000238142 | 1.11835527 | -0.05201927 | 0.38709701 | 0.33150125 | NA         |             |
| NA        | ENSG00000238143 | 0          | NA          | NA         | NA         | NA         |             |
| NA        | ENSG00000238145 | 0          | NA          | NA         | NA         | NA         | TUBAP8      |
| NA        | ENSG00000238149 | 0          | NA          | NA         | NA         | NA         |             |
| NA        | ENSG00000238150 | 0          | NA          | NA         | NA         | NA         |             |
| NA        | ENSG00000238151 | 0.16735865 | 0.01897177  | 0.38482933 | 0.78225479 | NA         | MLLT10P1    |
| NA        | ENSG00000238152 | 0          | NA          | NA         | NA         | NA         | OR7E140P    |
| NA        | ENSG00000238153 | 0.45209736 | -0.02505403 | 0.38558831 | 0.57865948 | NA         |             |

|           |                 |            |             |            |            |            |              |
|-----------|-----------------|------------|-------------|------------|------------|------------|--------------|
| NA        | ENSG00000238154 | 0          | NA          | NA         | NA         | NA         | USP9YP4      |
| NA        | ENSG00000238156 | 0          | NA          | NA         | NA         | NA         |              |
| 26240     | ENSG00000238158 | 0          | NA          | NA         | NA         | NA         |              |
| NA        | ENSG00000238160 | 0          | NA          | NA         | NA         | NA         | LINC02863    |
| NA        | ENSG00000238161 | 0          | NA          | NA         | NA         | NA         | OR7E117P     |
| NA        | ENSG00000238162 | 0          | NA          | NA         | NA         | NA         |              |
| NA        | ENSG00000238164 | 4.69224709 | 0.03238578  | 0.37034502 | 0.75002784 | 0.8824202  | TNFRSF14-AS1 |
| NA        | ENSG00000238165 | 0          | NA          | NA         | NA         | NA         |              |
| NA        | ENSG00000238166 | 1.20109635 | -0.00656162 | 0.38041663 | 0.91013849 | NA         |              |
| NA        | ENSG00000238168 | 0          | NA          | NA         | NA         | NA         | IFITM3P5     |
| 102723318 | ENSG00000238169 | 0          | NA          | NA         | NA         | NA         | LINC01053    |
| NA        | ENSG00000238171 | 0          | NA          | NA         | NA         | NA         |              |
| NA        | ENSG00000238172 | 0.32452278 | 0.00140749  | 0.38336867 | 0.96683047 | NA         | RPS2P35      |
| NA        | ENSG00000238173 | 0          | NA          | NA         | NA         | NA         | RPL39P6      |
| NA        | ENSG00000238176 | 0          | NA          | NA         | NA         | NA         |              |
| NA        | ENSG00000238178 | 0          | NA          | NA         | NA         | NA         |              |
| NA        | ENSG00000238180 | 0.85170743 | 0.01744849  | 0.38197278 | 0.73675683 | NA         | RPL21P34     |
| NA        | ENSG00000238181 | 1.13132547 | 0.01692853  | 0.37995056 | 0.79309925 | NA         | AHCYP2       |
| NA        | ENSG00000238183 | 0          | NA          | NA         | NA         | NA         | RPS27P5      |
| 101927682 | ENSG00000238184 | 3.97427722 | 0.07463303  | 0.37826266 | 0.49182963 | 0.71106639 | CD81-AS1     |
| NA        | ENSG00000238185 | 0          | NA          | NA         | NA         | NA         |              |
| NA        | ENSG00000238186 | 3.2598074  | 0.01430643  | 0.3701821  | 0.89130729 | 0.9528281  |              |
| NA        | ENSG00000238188 | 0          | NA          | NA         | NA         | NA         | SPRING1P2    |
| NA        | ENSG00000238189 | 0          | NA          | NA         | NA         | NA         | ENOX1-AS2    |
| NA        | ENSG00000238190 | 0          | NA          | NA         | NA         | NA         | HMGB1P15     |
| NA        | ENSG00000238191 | 0          | NA          | NA         | NA         | NA         | CLUHP1       |
| NA        | ENSG00000238192 | 0          | NA          | NA         | NA         | NA         |              |
| NA        | ENSG00000238193 | 0          | NA          | NA         | NA         | NA         | HADHBP1      |
| NA        | ENSG00000238194 | 0.31799011 | 0.0009111   | 0.38336516 | 0.96834584 | NA         | PHACTR3-AS1  |
| NA        | ENSG00000238195 | 0          | NA          | NA         | NA         | NA         |              |
| 100506215 | ENSG00000238197 | 347.07138  | 0.02972027  | 0.12336673 | 0.80085844 | 0.90877553 | PAXBP1-AS1   |
| 100996251 | ENSG00000238198 | 8.73582618 | -0.04578779 | 0.3460441  | 0.76790532 | 0.89309112 | LRIG2-DT     |
| NA        | ENSG00000238199 | 0          | NA          | NA         | NA         | NA         | UBE2V2P3     |
| NA        | ENSG00000238200 | 0          | NA          | NA         | NA         | NA         | MGAT2P2      |
| NA        | ENSG00000238201 | 0          | NA          | NA         | NA         | NA         |              |
| 347411    | ENSG00000238205 | 0.4958766  | -0.02951091 | 0.38590302 | 0.52548909 | NA         | MPC1L        |
| NA        | ENSG00000238207 | 0.83477817 | -0.03033755 | 0.38361363 | 0.53081057 | NA         |              |
| 101928677 | ENSG00000238210 | 0.14931947 | -0.01844332 | 0.38480212 | 0.84537521 | NA         | ETDA         |

|           |                 |            |             |            |            |            |             |
|-----------|-----------------|------------|-------------|------------|------------|------------|-------------|
| NA        | ENSG00000238211 | 0          | NA          | NA         | NA         | NA         | POLR2LP1    |
| 107984977 | ENSG00000238212 | 0          | NA          | NA         | NA         | NA         | LINC02096   |
| NA        | ENSG00000238213 | 0.18922458 | 0.01954053  | 0.38488496 | 0.78225479 | NA         | TARDBPP2    |
| NA        | ENSG00000238215 | 0.16735865 | 0.01897177  | 0.38482933 | 0.78225479 | NA         |             |
| 101927641 | ENSG00000238217 | 0          | NA          | NA         | NA         | NA         | LINC01877   |
| NA        | ENSG00000238220 | 0.29863895 | -0.02292439 | 0.3852726  | 0.68753245 | NA         |             |
| NA        | ENSG00000238221 | 0.173124   | -0.01911262 | 0.38486262 | 0.84537521 | NA         |             |
| NA        | ENSG00000238222 | 0.31797473 | 0.00089116  | 0.38336504 | 0.96853666 | NA         | MKRN4P      |
| NA        | ENSG00000238223 | 0          | NA          | NA         | NA         | NA         |             |
| NA        | ENSG00000238224 | 0          | NA          | NA         | NA         | NA         |             |
| NA        | ENSG00000238225 | 0          | NA          | NA         | NA         | NA         | CRIP1P2     |
| 90120     | ENSG00000238227 | 1137.26384 | 0.27220474  | 0.07851704 | 0.00038927 | 0.0025821  | TMEM250     |
| NA        | ENSG00000238228 | 24.7758593 | 0.31237764  | 0.3822464  | 0.15863274 | 0.34585424 | OR7E7P      |
| 101927248 | ENSG00000238230 | 0          | NA          | NA         | NA         | NA         | LINC00391   |
| NA        | ENSG00000238231 | 0.5159476  | 0.01616321  | 0.38317988 | 0.72725623 | NA         |             |
| NA        | ENSG00000238232 | 0          | NA          | NA         | NA         | NA         |             |
| NA        | ENSG00000238235 | 0          | NA          | NA         | NA         | NA         | TSPY11P     |
| NA        | ENSG00000238236 | 0          | NA          | NA         | NA         | NA         | MTCYBP14    |
| NA        | ENSG00000238241 | 0.37844916 | 0.02407552  | 0.3854191  | 0.60038877 | NA         | CCR12P      |
| NA        | ENSG00000238242 | 0          | NA          | NA         | NA         | NA         | LINC02778   |
| 343171    | ENSG00000238243 | 0          | NA          | NA         | NA         | NA         | OR2W3       |
| NA        | ENSG00000238244 | 0          | NA          | NA         | NA         | NA         | GABARAPL3   |
| NA        | ENSG00000238245 | 0          | NA          | NA         | NA         | NA         | MYO5BP2     |
| NA        | ENSG00000238246 | 0          | NA          | NA         | NA         | NA         |             |
| NA        | ENSG00000238247 | 0          | NA          | NA         | NA         | NA         | RDXP3       |
| NA        | ENSG00000238249 | 0          | NA          | NA         | NA         | NA         | HMG2P17     |
| NA        | ENSG00000238250 | 0          | NA          | NA         | NA         | NA         | ST6GAL2-IT1 |
| NA        | ENSG00000238251 | 0.30139824 | -0.02296476 | 0.38527817 | 0.68536535 | NA         | NSA2P7      |
| NA        | ENSG00000238254 | 0          | NA          | NA         | NA         | NA         |             |
| NA        | ENSG00000238256 | 0          | NA          | NA         | NA         | NA         | MTND5P20    |
| NA        | ENSG00000238257 | 0          | NA          | NA         | NA         | NA         |             |
| NA        | ENSG00000238258 | 0          | NA          | NA         | NA         | NA         |             |
| NA        | ENSG00000238259 | 0          | NA          | NA         | NA         | NA         | PHF5GP      |
| NA        | ENSG00000238260 | 1.30088365 | 0.00678938  | 0.38009651 | 0.91172845 | NA         |             |
| NA        | ENSG00000238262 | 0          | NA          | NA         | NA         | NA         | NTM-IT      |
| NA        | ENSG00000238263 | 0          | NA          | NA         | NA         | NA         | RPL21P88    |
| 378828    | ENSG00000238265 | 0          | NA          | NA         | NA         | NA         | LINC00317   |
| 100507127 | ENSG00000238266 | 0          | NA          | NA         | NA         | NA         | LINC00707   |



|           |    |                 |            |             |            |            |            |           |
|-----------|----|-----------------|------------|-------------|------------|------------|------------|-----------|
|           | NA | ENSG00000238267 | 0          | NA          | NA         | NA         | NA         |           |
| 389860    | NA | ENSG00000238269 | 0.71382643 | 0.04207633  | 0.38737816 | 0.34103579 | NA         | PAGE2B    |
|           | NA | ENSG00000238270 | 0          | NA          | NA         | NA         | NA         |           |
|           | NA | ENSG00000238271 | 0          | NA          | NA         | NA         | NA         | IFNWP19   |
|           | NA | ENSG00000238272 | 0.5362551  | 0.01409624  | 0.3829448  | 0.73472721 | NA         |           |
|           | NA | ENSG00000238273 | 1.12549489 | -0.00420257 | 0.38046707 | 0.94196743 | NA         |           |
|           | NA | ENSG00000238275 | 0.32242132 | -0.02325366 | 0.38531861 | 0.66964731 | NA         | HOMER2P2  |
| 101927760 | NA | ENSG00000238276 | 0          | NA          | NA         | NA         | NA         |           |
|           | NA | ENSG00000238277 | 0          | NA          | NA         | NA         | NA         |           |
|           | NA | ENSG00000238278 | 0.173124   | -0.01911262 | 0.38486262 | 0.84537521 | NA         | ALG1L6P   |
|           | NA | ENSG00000238279 | 0.32342885 | 0.00169013  | 0.38337158 | 0.9649011  | NA         |           |
|           | NA | ENSG00000238280 | 0          | NA          | NA         | NA         | NA         |           |
|           | NA | ENSG00000238282 | 0          | NA          | NA         | NA         | NA         |           |
|           | NA | ENSG00000238283 | 2.42735823 | 0.09568946  | 0.39427019 | 0.23367914 | NA         | TBC1D3P1  |
| 101928795 | NA | ENSG00000238284 | 0          | NA          | NA         | NA         | NA         | LINC01448 |
|           | NA | ENSG00000238285 | 0          | NA          | NA         | NA         | NA         | MRPL50P2  |
|           | NA | ENSG00000238286 | 13.8528339 | -0.18280653 | 0.36849217 | 0.32263142 | 0.55024563 | SLC35E1P1 |
|           | NA | ENSG00000238287 | 7.25103966 | -0.08081278 | 0.36232217 | 0.57339833 | 0.7729263  |           |
|           | NA | ENSG00000238288 | 0          | NA          | NA         | NA         | NA         | MTND3P23  |
|           | NA | ENSG00000238290 | 0.85269472 | 0.0186067   | 0.38063616 | 0.75907407 | NA         |           |
|           | NA | ENSG00000238291 | 0          | NA          | NA         | NA         | NA         |           |
|           | NA | ENSG00000238295 | 0          | NA          | NA         | NA         | NA         |           |
|           | NA | ENSG00000238297 | 0.32364473 | 0.00020608  | 0.38336246 | 0.97830245 | NA         |           |
| 101340252 | NA | ENSG00000238300 | 0          | NA          | NA         | NA         | NA         | SNORD121B |
|           | NA | ENSG00000238302 | 0          | NA          | NA         | NA         | NA         | RNU7-120P |
|           | NA | ENSG00000238304 | 0          | NA          | NA         | NA         | NA         | RNU7-50P  |
| 109617020 | NA | ENSG00000238311 | 0          | NA          | NA         | NA         | NA         | SNORD13E  |
|           | NA | ENSG00000238316 | 0          | NA          | NA         | NA         | NA         |           |
| 692058    | NA | ENSG00000238317 | 0          | NA          | NA         | NA         | NA         | SNORD11   |
|           | NA | ENSG00000238324 | 0          | NA          | NA         | NA         | NA         | RN7SKP198 |
|           | NA | ENSG00000238326 | 0          | NA          | NA         | NA         | NA         |           |
|           | NA | ENSG00000238344 | 0          | NA          | NA         | NA         | NA         | SNORD126  |
|           | NA | ENSG00000238357 | 0          | NA          | NA         | NA         | NA         | RNU7-148P |
|           | NA | ENSG00000238358 | 1.3120235  | 0.00696695  | 0.37997588 | 0.91023544 | NA         |           |
| 654322    | NA | ENSG00000238363 | 0          | NA          | NA         | NA         | NA         | SNORA13   |
|           | NA | ENSG00000238364 | 0          | NA          | NA         | NA         | NA         | RNU7-140P |
|           | NA | ENSG00000238365 | 0          | NA          | NA         | NA         | NA         | RNU7-57P  |
|           | NA | ENSG00000238366 | 0          | NA          | NA         | NA         | NA         |           |

|           |                 |                 |            |            |            |            |            |
|-----------|-----------------|-----------------|------------|------------|------------|------------|------------|
| 100302164 | ENSG00000238367 | 0               | NA         | NA         | NA         | NA         | MIR2113    |
|           | NA              | ENSG00000238370 | 0          | NA         | NA         | NA         | RNU7-103P  |
|           | NA              | ENSG00000238371 | 0          | NA         | NA         | NA         |            |
|           | NA              | ENSG00000238372 | 0          | NA         | NA         | NA         |            |
|           | NA              | ENSG00000238374 | 0          | NA         | NA         | NA         | RNU7-180P  |
|           | NA              | ENSG00000238379 | 0          | NA         | NA         | NA         | RNA5SP103  |
|           | NA              | ENSG00000238380 | 0          | NA         | NA         | NA         | RNU7-165P  |
|           | NA              | ENSG00000238382 | 0          | NA         | NA         | NA         | RNU6-1211P |
|           | NA              | ENSG00000238386 | 0          | NA         | NA         | NA         | RNU7-48P   |
|           | NA              | ENSG00000238387 | 0          | NA         | NA         | NA         |            |
|           | NA              | ENSG00000238390 | 0.69279532 | 0.04042056 | 0.38716323 | 0.35588535 | NA         |
|           | NA              | ENSG00000238391 | 0          | NA         | NA         | NA         | RNA5SP233  |
| 100302225 | ENSG00000238399 | 0               | NA         | NA         | NA         | NA         | MIR2053    |
|           | NA              | ENSG00000238405 | 0.52119901 | 0.02576573 | 0.38568143 | 0.51723676 | RNA5SP311  |
|           | NA              | ENSG00000238406 | 0          | NA         | NA         | NA         | RNU7-171P  |
|           | NA              | ENSG00000238410 | 0          | NA         | NA         | NA         |            |
|           | NA              | ENSG00000238417 | 0          | NA         | NA         | NA         | RNU7-63P   |
|           | NA              | ENSG00000238419 | 0          | NA         | NA         | NA         | RNU7-186P  |
|           | NA              | ENSG00000238420 | 0          | NA         | NA         | NA         | RNU6-437P  |
| 26808     | ENSG00000238423 | 0               | NA         | NA         | NA         | NA         | SNORD42B   |
|           | NA              | ENSG00000238426 | 0          | NA         | NA         | NA         |            |
|           | NA              | ENSG00000238427 | 0          | NA         | NA         | NA         | RNU7-136P  |
|           | NA              | ENSG00000238431 | 0          | NA         | NA         | NA         | RNU7-157P  |
|           | NA              | ENSG00000238440 | 0          | NA         | NA         | NA         |            |
|           | NA              | ENSG00000238441 | 0          | NA         | NA         | NA         | RNU7-130P  |
|           | NA              | ENSG00000238443 | 0          | NA         | NA         | NA         |            |
|           | NA              | ENSG00000238444 | 0          | NA         | NA         | NA         | RNU6-893P  |
|           | NA              | ENSG00000238446 | 0          | NA         | NA         | NA         | RNU7-38P   |
|           | NA              | ENSG00000238447 | 0          | NA         | NA         | NA         | RNU7-134P  |
|           | NA              | ENSG00000238452 | 0          | NA         | NA         | NA         | RNU7-144P  |
|           | NA              | ENSG00000238456 | 0          | NA         | NA         | NA         | RNU6-1014P |
|           | NA              | ENSG00000238457 | 0          | NA         | NA         | NA         | RNU7-169P  |
|           | NA              | ENSG00000238468 | 0          | NA         | NA         | NA         | RNU7-14P   |
|           | NA              | ENSG00000238478 | 0          | NA         | NA         | NA         | RNU6-498P  |
|           | NA              | ENSG00000238482 | 0          | NA         | NA         | NA         | RNU6-1208P |
|           | NA              | ENSG00000238485 | 0          | NA         | NA         | NA         |            |
|           | NA              | ENSG00000238489 | 0          | NA         | NA         | NA         | RNU6-749P  |
|           | NA              | ENSG00000238490 | 0          | NA         | NA         | NA         |            |

|           |                 |   |    |    |    |    |             |
|-----------|-----------------|---|----|----|----|----|-------------|
| NA        | ENSG00000238493 | 0 | NA | NA | NA | NA | RNU6-221P   |
| NA        | ENSG00000238498 | 0 | NA | NA | NA | NA | SNORD13P1   |
| NA        | ENSG00000238500 | 0 | NA | NA | NA | NA | RNU7-87P    |
| NA        | ENSG00000238503 | 0 | NA | NA | NA | NA |             |
| NA        | ENSG00000238509 | 0 | NA | NA | NA | NA | RNU6-104P   |
| NA        | ENSG00000238516 | 0 | NA | NA | NA | NA |             |
| 100302179 | ENSG00000238517 | 0 | NA | NA | NA | NA | MIR1270     |
| NA        | ENSG00000238519 | 0 | NA | NA | NA | NA |             |
| NA        | ENSG00000238523 | 0 | NA | NA | NA | NA | RNU7-107P   |
| NA        | ENSG00000238529 | 0 | NA | NA | NA | NA | RNU6-599P   |
| NA        | ENSG00000238531 | 0 | NA | NA | NA | NA | SNORD105B   |
| NA        | ENSG00000238540 | 0 | NA | NA | NA | NA | RNU7-93P    |
| NA        | ENSG00000238542 | 0 | NA | NA | NA | NA | RNU7-104P   |
| NA        | ENSG00000238554 | 0 | NA | NA | NA | NA | RNU1-88P    |
| NA        | ENSG00000238558 | 0 | NA | NA | NA | NA | RNU7-21P    |
| NA        | ENSG00000238561 | 0 | NA | NA | NA | NA | RNU6ATAC28P |
| NA        | ENSG00000238562 | 0 | NA | NA | NA | NA | RNU7-159P   |
| NA        | ENSG00000238570 | 0 | NA | NA | NA | NA |             |
| NA        | ENSG00000238575 | 0 | NA | NA | NA | NA |             |
| 26773     | ENSG00000238578 | 0 | NA | NA | NA | NA | SNORD4A     |
| NA        | ENSG00000238584 | 0 | NA | NA | NA | NA | RNU7-167P   |
| NA        | ENSG00000238585 | 0 | NA | NA | NA | NA |             |
| NA        | ENSG00000238590 | 0 | NA | NA | NA | NA | RNU7-54P    |
| NA        | ENSG00000238594 | 0 | NA | NA | NA | NA |             |
| 26772     | ENSG00000238597 | 0 | NA | NA | NA | NA | SNORD4B     |
| NA        | ENSG00000238606 | 0 | NA | NA | NA | NA | RNU7-7P     |
| NA        | ENSG00000238609 | 0 | NA | NA | NA | NA | RNU7-94P    |
| NA        | ENSG00000238610 | 0 | NA | NA | NA | NA | RNU7-26P    |
| NA        | ENSG00000238616 | 0 | NA | NA | NA | NA | RNU6-300P   |
| NA        | ENSG00000238619 | 0 | NA | NA | NA | NA | RNU6-775P   |
| 692223    | ENSG00000238622 | 0 | NA | NA | NA | NA | SNORD97     |
| NA        | ENSG00000238627 | 0 | NA | NA | NA | NA | RNA5SP489   |
| NA        | ENSG00000238628 | 0 | NA | NA | NA | NA |             |
| NA        | ENSG00000238632 | 0 | NA | NA | NA | NA | RNU7-126P   |
| NA        | ENSG00000238645 | 0 | NA | NA | NA | NA |             |
| 26809     | ENSG00000238649 | 0 | NA | NA | NA | NA | SNORD42A    |
| 26795     | ENSG00000238650 | 0 | NA | NA | NA | NA | SNORD54     |
| NA        | ENSG00000238653 | 0 | NA | NA | NA | NA | RNU7-62P    |

|           |    |                 |            |            |            |            |    |            |
|-----------|----|-----------------|------------|------------|------------|------------|----|------------|
|           | NA | ENSG00000238658 | 0          | NA         | NA         | NA         | NA | RNU6-625P  |
|           | NA | ENSG00000238669 | 0          | NA         | NA         | NA         | NA | RNU6-333P  |
|           | NA | ENSG00000238680 | 0          | NA         | NA         | NA         | NA | RNU6-1037P |
|           | NA | ENSG00000238685 | 0          | NA         | NA         | NA         | NA |            |
|           | NA | ENSG00000238694 | 0          | NA         | NA         | NA         | NA |            |
|           | NA | ENSG00000238697 | 0          | NA         | NA         | NA         | NA | RNU6-261P  |
|           | NA | ENSG00000238698 | 0          | NA         | NA         | NA         | NA | RNU7-147P  |
|           | NA | ENSG00000238704 | 0          | NA         | NA         | NA         | NA | RNU7-97P   |
| 100302190 | NA | ENSG00000238705 | 0          | NA         | NA         | NA         | NA | MIR1976    |
|           | NA | ENSG00000238707 | 0          | NA         | NA         | NA         | NA |            |
|           | NA | ENSG00000238709 | 0          | NA         | NA         | NA         | NA | RNU7-56P   |
|           | NA | ENSG00000238711 | 0          | NA         | NA         | NA         | NA | RNY4P25    |
|           | NA | ENSG00000238713 | 0          | NA         | NA         | NA         | NA |            |
|           | NA | ENSG00000238719 | 0          | NA         | NA         | NA         | NA | RNU7-96P   |
|           | NA | ENSG00000238721 | 0          | NA         | NA         | NA         | NA | RNU7-194P  |
|           | NA | ENSG00000238723 | 0          | NA         | NA         | NA         | NA |            |
|           | NA | ENSG00000238724 | 0          | NA         | NA         | NA         | NA |            |
| 100302243 | NA | ENSG00000238728 | 0          | NA         | NA         | NA         | NA | MIR1972-1  |
|           | NA | ENSG00000238730 | 0          | NA         | NA         | NA         | NA | RNU7-164P  |
|           | NA | ENSG00000238731 | 0          | NA         | NA         | NA         | NA | RNU7-90P   |
|           | NA | ENSG00000238735 | 0          | NA         | NA         | NA         | NA | RNU7-113P  |
| 677767    | NA | ENSG00000238741 | 0.56023453 | 0.01294463 | 0.38331863 | 0.73456001 | NA | SCARNA7    |
|           | NA | ENSG00000238745 | 0          | NA         | NA         | NA         | NA |            |
|           | NA | ENSG00000238750 | 0          | NA         | NA         | NA         | NA | RNU7-27P   |
| 107397392 | NA | ENSG00000238754 | 0          | NA         | NA         | NA         | NA | SCARNA18B  |
|           | NA | ENSG00000238755 | 0          | NA         | NA         | NA         | NA | LINC02006  |
|           | NA | ENSG00000238759 | 0          | NA         | NA         | NA         | NA | RNU7-155P  |
|           | NA | ENSG00000238761 | 0          | NA         | NA         | NA         | NA |            |
|           | NA | ENSG00000238764 | 0          | NA         | NA         | NA         | NA |            |
|           | NA | ENSG00000238765 | 0          | NA         | NA         | NA         | NA | RNA5SP57   |
|           | NA | ENSG00000238777 | 0          | NA         | NA         | NA         | NA | RNU7-141P  |
|           | NA | ENSG00000238778 | 0          | NA         | NA         | NA         | NA | RNU7-80P   |
|           | NA | ENSG00000238782 | 0          | NA         | NA         | NA         | NA | RNU7-9P    |
|           | NA | ENSG00000238783 | 0          | NA         | NA         | NA         | NA |            |
|           | NA | ENSG00000238785 | 0          | NA         | NA         | NA         | NA | RNU7-92P   |
|           | NA | ENSG00000238788 | 0          | NA         | NA         | NA         | NA | RNU7-182P  |
|           | NA | ENSG00000238789 | 0          | NA         | NA         | NA         | NA | RNU7-152P  |
| 101340251 | NA | ENSG00000238793 | 0          | NA         | NA         | NA         | NA | SNORD124   |

|           |                 |   |    |    |    |    |           |
|-----------|-----------------|---|----|----|----|----|-----------|
| 677777    | ENSG00000238795 | 0 | NA | NA | NA | NA | SCARNA12  |
| NA        | ENSG00000238797 | 0 | NA | NA | NA | NA |           |
| NA        | ENSG00000238804 | 0 | NA | NA | NA | NA |           |
| NA        | ENSG00000238808 | 0 | NA | NA | NA | NA | RNU7-102P |
| NA        | ENSG00000238812 | 0 | NA | NA | NA | NA | RNU7-127P |
| NA        | ENSG00000238813 | 0 | NA | NA | NA | NA |           |
| NA        | ENSG00000238819 | 0 | NA | NA | NA | NA |           |
| NA        | ENSG00000238825 | 0 | NA | NA | NA | NA | RNVU1-2   |
| NA        | ENSG00000238829 | 0 | NA | NA | NA | NA | RNU7-45P  |
| NA        | ENSG00000238830 | 0 | NA | NA | NA | NA | RNU7-46P  |
| NA        | ENSG00000238832 | 0 | NA | NA | NA | NA |           |
| NA        | ENSG00000238833 | 0 | NA | NA | NA | NA | RNU1-131P |
| 677765    | ENSG00000238835 | 0 | NA | NA | NA | NA | SCARNA18  |
| NA        | ENSG00000238837 | 0 | NA | NA | NA | NA | LINC02031 |
| NA        | ENSG00000238840 | 0 | NA | NA | NA | NA |           |
| NA        | ENSG00000238842 | 0 | NA | NA | NA | NA | RNU7-106P |
| NA        | ENSG00000238845 | 0 | NA | NA | NA | NA |           |
| NA        | ENSG00000238854 | 0 | NA | NA | NA | NA |           |
| NA        | ENSG00000238862 | 0 | NA | NA | NA | NA | SNORD19B  |
| NA        | ENSG00000238875 | 0 | NA | NA | NA | NA | RN7SKP210 |
| NA        | ENSG00000238880 | 0 | NA | NA | NA | NA | RNU7-59P  |
| NA        | ENSG00000238882 | 0 | NA | NA | NA | NA | RNU6-329P |
| NA        | ENSG00000238884 | 0 | NA | NA | NA | NA | RNU7-85P  |
| 100113379 | ENSG00000238886 | 0 | NA | NA | NA | NA | SNORD121A |
| NA        | ENSG00000238898 | 0 | NA | NA | NA | NA | RNU1-80P  |
| NA        | ENSG00000238901 | 0 | NA | NA | NA | NA |           |
| NA        | ENSG00000238902 | 0 | NA | NA | NA | NA |           |
| NA        | ENSG00000238904 | 0 | NA | NA | NA | NA | RNU7-34P  |
| NA        | ENSG00000238906 | 0 | NA | NA | NA | NA |           |
| NA        | ENSG00000238908 | 0 | NA | NA | NA | NA | RNA5SP484 |
| NA        | ENSG00000238912 | 0 | NA | NA | NA | NA |           |
| NA        | ENSG00000238913 | 0 | NA | NA | NA | NA | RNU7-196P |
| NA        | ENSG00000238917 | 0 | NA | NA | NA | NA | SNORD10   |
| 100147744 | ENSG00000238923 | 0 | NA | NA | NA | NA | RNU7-1    |
| NA        | ENSG00000238924 | 0 | NA | NA | NA | NA | RNU7-82P  |
| NA        | ENSG00000238926 | 0 | NA | NA | NA | NA |           |
| NA        | ENSG00000238933 | 0 | NA | NA | NA | NA |           |
| NA        | ENSG00000238934 | 0 | NA | NA | NA | NA |           |

|           |                 |                 |            |            |            |    |           |
|-----------|-----------------|-----------------|------------|------------|------------|----|-----------|
| 109616980 | ENSG00000238936 | 0               | NA         | NA         | NA         | NA | SNORD65B  |
|           | NA              | ENSG00000238941 | 0          | NA         | NA         | NA | RNU6-953P |
|           | NA              | ENSG00000238942 | 0          | NA         | NA         | NA | SNORD2    |
|           | NA              | ENSG00000238943 | 0          | NA         | NA         | NA |           |
|           | NA              | ENSG00000238949 | 0          | NA         | NA         | NA | RNU7-66P  |
|           | NA              | ENSG00000238950 | 0          | NA         | NA         | NA | RNU7-173P |
|           | NA              | ENSG00000238959 | 0          | NA         | NA         | NA | RNU7-19P  |
| 677828    | ENSG00000238961 | 0               | NA         | NA         | NA         | NA | SNORA47   |
|           | NA              | ENSG00000238962 | 0          | NA         | NA         | NA | RNU7-176P |
|           | NA              | ENSG00000238963 | 0          | NA         | NA         | NA |           |
|           | NA              | ENSG00000238964 | 0          | NA         | NA         | NA | RNU7-125P |
|           | NA              | ENSG00000238965 | 0          | NA         | NA         | NA | RNA5SP351 |
|           | NA              | ENSG00000238966 | 0          | NA         | NA         | NA |           |
|           | NA              | ENSG00000238987 | 0          | NA         | NA         | NA | RNU7-133P |
|           | NA              | ENSG00000238998 | 0          | NA         | NA         | NA | RNU7-187P |
|           | NA              | ENSG00000239001 | 0          | NA         | NA         | NA | RNU6-420P |
| 692148    | ENSG00000239002 | 1.61217309      | 0.00945679 | 0.37776892 | 0.89889179 | NA | SCARNA10  |
|           | NA              | ENSG00000239003 | 0          | NA         | NA         | NA | RNU7-88P  |
|           | NA              | ENSG00000239005 | 0          | NA         | NA         | NA |           |
|           | NA              | ENSG00000239007 | 0          | NA         | NA         | NA | RNU7-95P  |
|           | NA              | ENSG00000239008 | 0          | NA         | NA         | NA |           |
|           | NA              | ENSG00000239010 | 0          | NA         | NA         | NA | RNU7-74P  |
| 338427    | ENSG00000239014 | 0               | NA         | NA         | NA         | NA | SNORD108  |
|           | NA              | ENSG00000239021 | 0          | NA         | NA         | NA | RNA5SP246 |
|           | NA              | ENSG00000239023 | 0          | NA         | NA         | NA | RNU1-98P  |
|           | NA              | ENSG00000239030 | 0          | NA         | NA         | NA | RNU6-956P |
|           | NA              | ENSG00000239035 | 0          | NA         | NA         | NA | SNORD13D  |
| 692084    | ENSG00000239039 | 0               | NA         | NA         | NA         | NA | SNORD13   |
|           | NA              | ENSG00000239040 | 0          | NA         | NA         | NA |           |
|           | NA              | ENSG00000239041 | 0          | NA         | NA         | NA |           |
|           | NA              | ENSG00000239043 | 0          | NA         | NA         | NA | SNORD127  |
|           | NA              | ENSG00000239053 | 0          | NA         | NA         | NA | RNU7-138P |
| 100422911 | ENSG00000239057 | 0               | NA         | NA         | NA         | NA | MIR500B   |
|           | NA              | ENSG00000239075 | 0          | NA         | NA         | NA | RNU6-274P |
|           | NA              | ENSG00000239078 | 0          | NA         | NA         | NA | RNU7-55P  |
|           | NA              | ENSG00000239079 | 0          | NA         | NA         | NA |           |
|           | NA              | ENSG00000239080 | 0          | NA         | NA         | NA |           |
|           | NA              | ENSG00000239081 | 0          | NA         | NA         | NA | RNU7-24P  |

|           |                 |   |    |    |    |    |            |
|-----------|-----------------|---|----|----|----|----|------------|
| NA        | ENSG00000239082 | 0 | NA | NA | NA | NA | RNU7-170P  |
| NA        | ENSG00000239093 | 0 | NA | NA | NA | NA |            |
| NA        | ENSG00000239096 | 0 | NA | NA | NA | NA |            |
| NA        | ENSG00000239099 | 0 | NA | NA | NA | NA | RNU7-23P   |
| NA        | ENSG00000239102 | 0 | NA | NA | NA | NA | RNU7-185P  |
| NA        | ENSG00000239105 | 0 | NA | NA | NA | NA | RNU7-73P   |
| NA        | ENSG00000239106 | 0 | NA | NA | NA | NA |            |
| NA        | ENSG00000239108 | 0 | NA | NA | NA | NA | RNU6-1132P |
| NA        | ENSG00000239112 | 0 | NA | NA | NA | NA | SNORD123   |
| NA        | ENSG00000239115 | 0 | NA | NA | NA | NA | RNU7-67P   |
| NA        | ENSG00000239119 | 0 | NA | NA | NA | NA | RNU7-119P  |
| NA        | ENSG00000239122 | 0 | NA | NA | NA | NA | RNU2-11P   |
| 100113380 | ENSG00000239127 | 0 | NA | NA | NA | NA | SNORD125   |
| NA        | ENSG00000239128 | 0 | NA | NA | NA | NA | SNORD13P3  |
| NA        | ENSG00000239129 | 0 | NA | NA | NA | NA |            |
| NA        | ENSG00000239137 | 0 | NA | NA | NA | NA |            |
| NA        | ENSG00000239142 | 0 | NA | NA | NA | NA |            |
| NA        | ENSG00000239143 | 0 | NA | NA | NA | NA |            |
| NA        | ENSG00000239148 | 0 | NA | NA | NA | NA |            |
| 677882    | ENSG00000239149 | 0 | NA | NA | NA | NA | SNORA59A   |
| 677885    | ENSG00000239149 | 0 | NA | NA | NA | NA | SNORA59A   |
| NA        | ENSG00000239151 | 0 | NA | NA | NA | NA | RNU7-195P  |
| NA        | ENSG00000239152 | 0 | NA | NA | NA | NA | RNA5SP310  |
| NA        | ENSG00000239153 | 0 | NA | NA | NA | NA |            |
| NA        | ENSG00000239168 | 0 | NA | NA | NA | NA | RNU7-197P  |
| NA        | ENSG00000239175 | 0 | NA | NA | NA | NA | RNU6-1218P |
| NA        | ENSG00000239180 | 0 | NA | NA | NA | NA |            |
| NA        | ENSG00000239182 | 0 | NA | NA | NA | NA |            |
| 100124534 | ENSG00000239183 | 0 | NA | NA | NA | NA | SNORA84    |
| NA        | ENSG00000239184 | 0 | NA | NA | NA | NA | RNA5SP269  |
| NA        | ENSG00000239185 | 0 | NA | NA | NA | NA | RNU7-190P  |
| NA        | ENSG00000239189 | 0 | NA | NA | NA | NA | RNU6-634P  |
| NA        | ENSG00000239190 | 0 | NA | NA | NA | NA | RNU6-717P  |
| NA        | ENSG00000239194 | 0 | NA | NA | NA | NA | RNU1-123P  |
| 692072    | ENSG00000239195 | 0 | NA | NA | NA | NA | SNORD5     |
| NA        | ENSG00000239197 | 0 | NA | NA | NA | NA |            |
| NA        | ENSG00000239198 | 0 | NA | NA | NA | NA | RPL5P22    |
| NA        | ENSG00000239199 | 0 | NA | NA | NA | NA | RPL21P6    |

|           |    |                 |            |             |            |            |            |           |
|-----------|----|-----------------|------------|-------------|------------|------------|------------|-----------|
|           | NA | ENSG00000239200 | 0          | NA          | NA         | NA         | NA         | RPL22P20  |
|           | NA | ENSG00000239201 | 0          | NA          | NA         | NA         | NA         | RPL21P106 |
|           | NA | ENSG00000239202 | 0          | NA          | NA         | NA         | NA         | RN7SL499P |
|           | NA | ENSG00000239203 | 0          | NA          | NA         | NA         | NA         |           |
| 101928405 | NA | ENSG00000239205 | 0          | NA          | NA         | NA         | NA         | LINC02023 |
|           | NA | ENSG00000239207 | 0          | NA          | NA         | NA         | NA         | GAPDHP39  |
|           | NA | ENSG00000239210 | 0          | NA          | NA         | NA         | NA         | RPS26P55  |
|           | NA | ENSG00000239211 | 0          | NA          | NA         | NA         | NA         | RN7SL563P |
|           | NA | ENSG00000239212 | 0          | NA          | NA         | NA         | NA         | RPL6P7    |
|           | NA | ENSG00000239213 | 53.9780506 | 0.21185472  | 0.26824152 | 0.29117884 | 0.51728046 | NCK1-DT   |
|           | NA | ENSG00000239215 | 0          | NA          | NA         | NA         | NA         | RPL27P12  |
|           | NA | ENSG00000239216 | 0          | NA          | NA         | NA         | NA         |           |
|           | NA | ENSG00000239218 | 13.457439  | -0.06893055 | 0.3556311  | 0.63364444 | 0.81500848 | RPS20P22  |
| 100128164 | NA | ENSG00000239219 | 7.3902429  | 0.05139009  | 0.35520709 | 0.72402095 | 0.86795018 |           |
|           | NA | ENSG00000239221 | 0          | NA          | NA         | NA         | NA         | RN7SL442P |
|           | NA | ENSG00000239223 | 0          | NA          | NA         | NA         | NA         | RPL34P31  |
|           | NA | ENSG00000239224 | 0          | NA          | NA         | NA         | NA         | RN7SL546P |
|           | NA | ENSG00000239226 | 0          | NA          | NA         | NA         | NA         | MRPS17P3  |
|           | NA | ENSG00000239227 | 0          | NA          | NA         | NA         | NA         |           |
|           | NA | ENSG00000239228 | 0          | NA          | NA         | NA         | NA         | RN7SL578P |
|           | NA | ENSG00000239238 | 0          | NA          | NA         | NA         | NA         | MEMO1P3   |
|           | NA | ENSG00000239246 | 0.53095919 | 0.03943374  | 0.38681326 | 0.416676   | NA         |           |
|           | NA | ENSG00000239247 | 0.15069912 | -0.01848503 | 0.38480575 | 0.84537521 | NA         | RN7SL589P |
|           | NA | ENSG00000239249 | 0          | NA          | NA         | NA         | NA         | RN7SL757P |
|           | NA | ENSG00000239250 | 0          | NA          | NA         | NA         | NA         | RN7SL271P |
|           | NA | ENSG00000239253 | 0          | NA          | NA         | NA         | NA         | RPS4XP23  |
|           | NA | ENSG00000239254 | 6.09665971 | 0.21109173  | 0.4325708  | 0.15307569 | 0.33785979 |           |
|           | NA | ENSG00000239255 | 0          | NA          | NA         | NA         | NA         |           |
|           | NA | ENSG00000239256 | 0          | NA          | NA         | NA         | NA         | RPL35AP35 |
|           | NA | ENSG00000239257 | 0.34045952 | -0.00015022 | 0.38336223 | 0.96667657 | NA         | RPL23AP1  |
|           | NA | ENSG00000239261 | 0          | NA          | NA         | NA         | NA         | RPL31P41  |
|           | NA | ENSG00000239263 | 0          | NA          | NA         | NA         | NA         | RBM43P1   |
| 81567     | NA | ENSG00000239264 | 2538.04464 | -0.08277948 | 0.06110332 | 0.16781228 | 0.35875832 | TXNDC5    |
|           | NA | ENSG00000239265 | 0.51555354 | 0.0158725   | 0.38315621 | 0.73086514 | NA         | CLRN1-AS1 |
|           | NA | ENSG00000239268 | 136.79713  | 0.37098896  | 0.20589435 | 0.03564618 | 0.11493909 |           |
|           | NA | ENSG00000239269 | 0.30001544 | -0.02294458 | 0.38527538 | 0.68644902 | NA         | RPSAP4    |
|           | NA | ENSG00000239272 | 1.40304329 | 0.0704382   | 0.39079272 | 0.21571302 | NA         | RPL21P10  |
|           | NA | ENSG00000239279 | 0          | NA          | NA         | NA         | NA         | RN7SL184P |



|           |                 |            |             |            |            |            |              |
|-----------|-----------------|------------|-------------|------------|------------|------------|--------------|
| NA        | ENSG00000239280 | 2.07702161 | -0.04519967 | 0.37882783 | 0.59407485 | NA         |              |
| NA        | ENSG00000239281 | 0          | NA          | NA         | NA         | NA         | RPS29P2      |
| 652968    | ENSG00000239282 | 105.329442 | 0.41282126  | 0.252259   | 0.04134209 | 0.1286227  | CASTOR1      |
| NA        | ENSG00000239288 | 0          | NA          | NA         | NA         | NA         |              |
| NA        | ENSG00000239291 | 4.13392399 | -0.04449797 | 0.3690271  | 0.69695006 | 0.85375952 |              |
| NA        | ENSG00000239293 | 0          | NA          | NA         | NA         | NA         | OR9PIP       |
| NA        | ENSG00000239300 | 0.49682398 | -0.01008772 | 0.38283183 | 0.8297923  | NA         |              |
| NA        | ENSG00000239304 | 0          | NA          | NA         | NA         | NA         | DNM1P48      |
| 7844      | ENSG00000239305 | 442.605831 | -0.21872414 | 0.12034779 | 0.05468578 | 0.15944542 | RNF103       |
| 10432     | ENSG00000239306 | 1885.92551 | -0.11177867 | 0.09262181 | 0.21274197 | 0.42262948 | RBM14        |
| NA        | ENSG00000239311 | 0          | NA          | NA         | NA         | NA         |              |
| 100506506 | ENSG00000239314 | 0          | NA          | NA         | NA         | NA         | MORC1-AS1    |
| NA        | ENSG00000239315 | 0          | NA          | NA         | NA         | NA         | RPL19P13     |
| NA        | ENSG00000239316 | 0          | NA          | NA         | NA         | NA         | RN7SL11P     |
| NA        | ENSG00000239317 | 0.31689549 | 0.0012908   | 0.38336791 | 0.96548565 | NA         | RPL35AP17    |
| NA        | ENSG00000239319 | 0          | NA          | NA         | NA         | NA         | RN7SL854P    |
| NA        | ENSG00000239320 | 0          | NA          | NA         | NA         | NA         | RPS29P26     |
| NA        | ENSG00000239322 | 2.15511864 | -0.03809474 | 0.37582313 | 0.6772807  | NA         | ATP6V1B1-AS1 |
| NA        | ENSG00000239323 | 0          | NA          | NA         | NA         | NA         |              |
| NA        | ENSG00000239327 | 0          | NA          | NA         | NA         | NA         |              |
| 100134259 | ENSG00000239332 | 5.03219289 | 0.04103122  | 0.36236909 | 0.7510988  | 0.88312198 | LINC01119    |
| NA        | ENSG00000239333 | 0          | NA          | NA         | NA         | NA         | RN7SL658P    |
| 103625681 | ENSG00000239335 | 18.6282023 | -0.00346132 | 0.30973256 | 0.9831392  | 0.99428951 | LLPH-DT      |
| NA        | ENSG00000239344 | 0.173733   | 0.01914545  | 0.38484597 | 0.78225479 | NA         |              |
| NA        | ENSG00000239345 | 0.18922458 | 0.01954053  | 0.38488496 | 0.78225479 | NA         | HNRNPA1P26   |
| NA        | ENSG00000239350 | 0          | NA          | NA         | NA         | NA         |              |
| NA        | ENSG00000239351 | 1.38763216 | 0.06395256  | 0.3860153  | 0.37283881 | NA         | NPM1P29      |
| NA        | ENSG00000239354 | 0          | NA          | NA         | NA         | NA         | RPS17P15     |
| NA        | ENSG00000239356 | 0          | NA          | NA         | NA         | NA         | RN7SL309P    |
| NA        | ENSG00000239365 | 0.49219313 | -0.00738626 | 0.38270957 | 0.85809656 | NA         | RPS26P49     |
| NA        | ENSG00000239367 | 0.14931947 | -0.01844332 | 0.38480212 | 0.84537521 | NA         | RN7SL477P    |
| NA        | ENSG00000239374 | 0.35711207 | 0.02382016  | 0.38538154 | 0.61379948 | NA         |              |
| NA        | ENSG00000239377 | 1.39907393 | -0.02445558 | 0.38002689 | 0.71621961 | NA         | ZNF775-AS1   |
| NA        | ENSG00000239381 | 0          | NA          | NA         | NA         | NA         |              |
| 84964     | ENSG00000239382 | 217.518431 | 0.01336145  | 0.17527372 | 0.93318608 | 0.97202552 | ALKBH6       |
| NA        | ENSG00000239383 | 0          | NA          | NA         | NA         | NA         |              |
| 142686    | ENSG00000239388 | 35.5841845 | 0.17785231  | 0.29712806 | 0.38037388 | 0.60938451 | ASB14        |
| 56136     | ENSG00000239389 | 2.51734984 | 0.039748    | 0.37717638 | 0.65321964 | NA         | PCDHA13      |

|           |                 |            |             |            |            |            |             |
|-----------|-----------------|------------|-------------|------------|------------|------------|-------------|
| NA        | ENSG00000239390 | 0          | NA          | NA         | NA         | NA         | RN7SL87P    |
| NA        | ENSG00000239392 | 0          | NA          | NA         | NA         | NA         |             |
| NA        | ENSG00000239393 | 0          | NA          | NA         | NA         | NA         |             |
| NA        | ENSG00000239395 | 0          | NA          | NA         | NA         | NA         |             |
| NA        | ENSG00000239396 | 0.34624801 | -0.02356563 | 0.38536324 | 0.65270996 | NA         | RN7SL414P   |
| NA        | ENSG00000239397 | 0.29863895 | -0.02292439 | 0.3852726  | 0.68753245 | NA         |             |
| NA        | ENSG00000239398 | 0          | NA          | NA         | NA         | NA         | RN7SL342P   |
| NA        | ENSG00000239402 | 0          | NA          | NA         | NA         | NA         | CYP4F62P    |
| NA        | ENSG00000239405 | 7.81606316 | 0.16106206  | 0.39222012 | 0.2910188  | 0.51708875 | TMED10P2    |
| NA        | ENSG00000239407 | 63.1436241 | 0.10313789  | 0.25454044 | 0.59330948 | 0.78711401 |             |
| NA        | ENSG00000239408 | 0          | NA          | NA         | NA         | NA         |             |
| NA        | ENSG00000239412 | 0          | NA          | NA         | NA         | NA         | RPL21P71    |
| NA        | ENSG00000239413 | 0          | NA          | NA         | NA         | NA         | RPS27P23    |
| NA        | ENSG00000239415 | 80.9389625 | 0.40359985  | 0.25403286 | 0.04696192 | 0.14179583 |             |
| NA        | ENSG00000239419 | 2.38433716 | -0.12334763 | 0.40509199 | 0.14904091 | NA         | RN7SL535P   |
| NA        | ENSG00000239426 | 0          | NA          | NA         | NA         | NA         | OR8F1P      |
| NA        | ENSG00000239428 | 0          | NA          | NA         | NA         | NA         | GM2AP2      |
| NA        | ENSG00000239432 | 0          | NA          | NA         | NA         | NA         |             |
| NA        | ENSG00000239435 | 0          | NA          | NA         | NA         | NA         | KCNMB3P1    |
| NA        | ENSG00000239437 | 0          | NA          | NA         | NA         | NA         | RN7SL752P   |
| NA        | ENSG00000239438 | 0          | NA          | NA         | NA         | NA         | RPS26P48    |
| NA        | ENSG00000239439 | 0          | NA          | NA         | NA         | NA         | RFKP2       |
| 105377180 | ENSG00000239440 | 0          | NA          | NA         | NA         | NA         | LINC02008   |
| NA        | ENSG00000239443 | 0          | NA          | NA         | NA         | NA         | PABPC1P10   |
| NA        | ENSG00000239445 | 129.104433 | -0.46785598 | 0.22915734 | 0.0147981  | 0.05704184 | ST3GAL6-AS1 |
| NA        | ENSG00000239446 | 0          | NA          | NA         | NA         | NA         |             |
| NA        | ENSG00000239453 | 0          | NA          | NA         | NA         | NA         | SIDT1-AS1   |
| 101927346 | ENSG00000239454 | 0          | NA          | NA         | NA         | NA         | LINC02047   |
| NA        | ENSG00000239455 | 0          | NA          | NA         | NA         | NA         |             |
| NA        | ENSG00000239462 | 0.34701395 | 0.00065949  | 0.38336324 | 0.96221916 | NA         |             |
| NA        | ENSG00000239464 | 0          | NA          | NA         | NA         | NA         | RN7SL691P   |
| NA        | ENSG00000239465 | 0.14931947 | -0.01844332 | 0.38480212 | 0.84537521 | NA         |             |
| NA        | ENSG00000239466 | 0          | NA          | NA         | NA         | NA         | RN7SL552P   |
| 285141    | ENSG00000239467 | 16.7966681 | 0.0314276   | 0.3233853  | 0.86074579 | 0.93799827 |             |
| NA        | ENSG00000239468 | 0          | NA          | NA         | NA         | NA         | RN7SL569P   |
| NA        | ENSG00000239470 | 0.16735865 | 0.01897177  | 0.38482933 | 0.78225479 | NA         |             |
| NA        | ENSG00000239471 | 0          | NA          | NA         | NA         | NA         | RN7SL584P   |
| NA        | ENSG00000239472 | 0.86048849 | -0.00650012 | 0.38070038 | 0.90887641 | NA         | RN7SL221P   |

|           |                 |            |             |            |            |            |           |
|-----------|-----------------|------------|-------------|------------|------------|------------|-----------|
| NA        | ENSG00000239473 | 0          | NA          | NA         | NA         | NA         | RPL7P38   |
| 10324     | ENSG00000239474 | 3.97752872 | 0.02817452  | 0.36678135 | 0.80850437 | 0.91317199 | KLHL41    |
| NA        | ENSG00000239480 | 0.82135821 | 0.02841696  | 0.38428426 | 0.52226522 | NA         |           |
| NA        | ENSG00000239481 | 0          | NA          | NA         | NA         | NA         | RPS3AP41  |
| 105374042 | ENSG00000239482 | 2.13373635 | 0.0359012   | 0.37912043 | 0.64733772 | NA         |           |
| NA        | ENSG00000239483 | 0.7644063  | -0.02907357 | 0.38363724 | 0.56378993 | NA         | RPS15AP16 |
| NA        | ENSG00000239486 | 0.14931947 | -0.01844332 | 0.38480212 | 0.84537521 | NA         |           |
| NA        | ENSG00000239490 | 0          | NA          | NA         | NA         | NA         | RPS4XP18  |
| NA        | ENSG00000239494 | 2.78903515 | 0.00750213  | 0.37041766 | 0.94256936 | 0.97632745 | RN7SL333P |
| NA        | ENSG00000239498 | 0          | NA          | NA         | NA         | NA         |           |
| NA        | ENSG00000239503 | 0          | NA          | NA         | NA         | NA         | MARK2P8   |
| NA        | ENSG00000239504 | 0          | NA          | NA         | NA         | NA         | RN7SL583P |
| NA        | ENSG00000239508 | 0          | NA          | NA         | NA         | NA         | PLCH1-AS1 |
| NA        | ENSG00000239510 | 0          | NA          | NA         | NA         | NA         | RPL9P5    |
| NA        | ENSG00000239511 | 5.67731794 | 0.14896605  | 0.39807973 | 0.26400008 | 0.48609939 | POM121L7P |
| 100507274 | ENSG00000239513 | 2.542954   | -0.14740018 | 0.42170595 | 0.04766689 | NA         | LINC01210 |
| NA        | ENSG00000239516 | 0.15069912 | -0.01848503 | 0.38480575 | 0.84537521 | NA         | FLYWCH1P1 |
| NA        | ENSG00000239517 | 0          | NA          | NA         | NA         | NA         |           |
| NA        | ENSG00000239519 | 0.67506566 | 0.02756517  | 0.38381363 | 0.56968972 | NA         | CADM2-AS1 |
| 352954    | ENSG00000239521 | 803.206752 | 0.44576384  | 0.11315585 | 3.73E-05   | 0.00031576 | CASTOR3   |
| 100506826 | ENSG00000239523 | 35.9019045 | 0.26015172  | 0.32320082 | 0.22250278 | 0.43547944 | MYLK-AS1  |
| NA        | ENSG00000239524 | 0.98194191 | -0.02136283 | 0.38104456 | 0.72173326 | NA         | RPL32P34  |
| NA        | ENSG00000239525 | 0          | NA          | NA         | NA         | NA         | RPL30P5   |
| NA        | ENSG00000239527 | 0          | NA          | NA         | NA         | NA         | RPS23P7   |
| NA        | ENSG00000239528 | 0.3420718  | 0.00301965  | 0.3833918  | 0.95885486 | NA         | RPS14P8   |
| NA        | ENSG00000239532 | 0          | NA          | NA         | NA         | NA         |           |
| 84559     | ENSG00000239533 | 0          | NA          | NA         | NA         | NA         | GOLGA2P2Y |
| 401634    | ENSG00000239533 | 0          | NA          | NA         | NA         | NA         | GOLGA2P2Y |
| NA        | ENSG00000239539 | 0          | NA          | NA         | NA         | NA         | HMG1P20   |
| NA        | ENSG00000239542 | 0          | NA          | NA         | NA         | NA         | RN7SL399P |
| NA        | ENSG00000239544 | 0          | NA          | NA         | NA         | NA         |           |
| NA        | ENSG00000239545 | 0          | NA          | NA         | NA         | NA         | RN7SL822P |
| NA        | ENSG00000239547 | 0          | NA          | NA         | NA         | NA         | RN7SL843P |
| NA        | ENSG00000239552 | 0          | NA          | NA         | NA         | NA         | HOXB-AS2  |
| NA        | ENSG00000239553 | 0.18922458 | 0.01954053  | 0.38488496 | 0.78225479 | NA         | RN7SL12P  |
| NA        | ENSG00000239555 | 0          | NA          | NA         | NA         | NA         | RN7SL841P |
| NA        | ENSG00000239556 | 6.08389828 | -0.05623051 | 0.36991216 | 0.63237653 | 0.81401092 |           |
| NA        | ENSG00000239557 | 2.4621807  | 0.0981666   | 0.3909646  | 0.29722499 | NA         | PPP2R5CP  |

|           |                 |            |             |            |            |            |            |
|-----------|-----------------|------------|-------------|------------|------------|------------|------------|
| NA        | ENSG00000239559 | 0          | NA          | NA         | NA         | NA         | RPL37P2    |
| NA        | ENSG00000239560 | 0          | NA          | NA         | NA         | NA         | RN7SL479P  |
| NA        | ENSG00000239568 | 0          | NA          | NA         | NA         | NA         |            |
| NA        | ENSG00000239569 | 17.6487347 | 0.08963708  | 0.32366974 | 0.62800764 | 0.81117654 | KMT2E-AS1  |
| NA        | ENSG00000239570 | 0          | NA          | NA         | NA         | NA         | SETP11     |
| NA        | ENSG00000239571 | 0          | NA          | NA         | NA         | NA         | IGKV2D-30  |
| NA        | ENSG00000239572 | 0.16735865 | 0.01897177  | 0.38482933 | 0.78225479 | NA         |            |
| NA        | ENSG00000239576 | 0          | NA          | NA         | NA         | NA         | COX6CP14   |
| NA        | ENSG00000239577 | 0          | NA          | NA         | NA         | NA         | RN7SL388P  |
| NA        | ENSG00000239579 | 0          | NA          | NA         | NA         | NA         | RN7SL325P  |
| NA        | ENSG00000239580 | 0          | NA          | NA         | NA         | NA         | RN7SL675P  |
| NA        | ENSG00000239586 | 0          | NA          | NA         | NA         | NA         | MTND1P16   |
| 255025    | ENSG00000239589 | 0          | NA          | NA         | NA         | NA         | LINC00879  |
| 26219     | ENSG00000239590 | 0.18922458 | 0.01954053  | 0.38488496 | 0.78225479 | NA         | OR1J4      |
| NA        | ENSG00000239593 | 0.173124   | -0.01911262 | 0.38486262 | 0.84537521 | NA         |            |
| NA        | ENSG00000239595 | 0          | NA          | NA         | NA         | NA         | RN7SL79P   |
| NA        | ENSG00000239600 | 0          | NA          | NA         | NA         | NA         |            |
| NA        | ENSG00000239602 | 0          | NA          | NA         | NA         | NA         | RPL35AP16  |
| 285051    | ENSG00000239605 | 3.76155596 | -0.10137664 | 0.38579827 | 0.35999508 | 0.58993165 | STPG4      |
| NA        | ENSG00000239607 | 0          | NA          | NA         | NA         | NA         | RN7SL573P  |
| 100874089 | ENSG00000239608 | 1.17782538 | -0.03003026 | 0.38129944 | 0.63451626 | NA         | RUVBL1-AS1 |
| NA        | ENSG00000239614 | 0.34201251 | 0.00299815  | 0.38339137 | 0.95906061 | NA         | HMG1P7     |
| NA        | ENSG00000239615 | 0          | NA          | NA         | NA         | NA         |            |
| NA        | ENSG00000239617 | 1.72725617 | 0.10707147  | 0.40142256 | 0.1121512  | NA         | RPL32P27   |
| 100419008 | ENSG00000239620 | 0.63602631 | 0.00174719  | 0.38250476 | 0.96575037 | NA         | PRR20G     |
| NA        | ENSG00000239622 | 0          | NA          | NA         | NA         | NA         |            |
| NA        | ENSG00000239625 | 0          | NA          | NA         | NA         | NA         | RN7SL241P  |
| NA        | ENSG00000239626 | 23.8591925 | 0.0440627   | 0.30138673 | 0.81662064 | 0.9166503  | RPSAP41    |
| NA        | ENSG00000239627 | 0          | NA          | NA         | NA         | NA         | RPL12P20   |
| NA        | ENSG00000239628 | 0          | NA          | NA         | NA         | NA         |            |
| NA        | ENSG00000239632 | 0          | NA          | NA         | NA         | NA         | MTND4LP3   |
| NA        | ENSG00000239636 | 4.29877089 | 0.15148685  | 0.41032254 | 0.17276679 | 0.36566523 | TFAP2E-AS1 |
| NA        | ENSG00000239640 | 0          | NA          | NA         | NA         | NA         | RN7SL62P   |
| NA        | ENSG00000239641 | 0          | NA          | NA         | NA         | NA         | PLS1-AS1   |
| 728637    | ENSG00000239642 | 0          | NA          | NA         | NA         | NA         | MEIKIN     |
| NA        | ENSG00000239648 | 0          | NA          | NA         | NA         | NA         | MTND1P3    |
| 151325    | ENSG00000239649 | 0          | NA          | NA         | NA         | NA         | MYADML     |
| NA        | ENSG00000239650 | 5.61158226 | 0.29581056  | 0.53117541 | 0.04236242 | 0.13122678 | GUSBP4     |

|           |                 |            |             |            |            |            |            |
|-----------|-----------------|------------|-------------|------------|------------|------------|------------|
| 100507062 | ENSG00000239653 | 31.546738  | -0.16887495 | 0.30541437 | 0.40000515 | 0.62850258 | PSMD6-AS2  |
| NA        | ENSG00000239659 | 0          | NA          | NA         | NA         | NA         | RPL9P31    |
| NA        | ENSG00000239661 | 0          | NA          | NA         | NA         | NA         |            |
| NA        | ENSG00000239665 | 409.26862  | -0.3410066  | 0.19425967 | 0.04305984 | 0.13277051 |            |
| NA        | ENSG00000239670 | 0.173124   | -0.01911262 | 0.38486262 | 0.84537521 | NA         |            |
| NA        | ENSG00000239671 | 0          | NA          | NA         | NA         | NA         |            |
| 4830      | ENSG00000239672 | 3288.6129  | -0.22409917 | 0.06984724 | 0.00108009 | 0.00630636 | NME1       |
| NA        | ENSG00000239674 | 0          | NA          | NA         | NA         | NA         |            |
| NA        | ENSG00000239677 | 0          | NA          | NA         | NA         | NA         | PDZRN3-AS1 |
| NA        | ENSG00000239679 | 0          | NA          | NA         | NA         | NA         | RN7SL193P  |
| NA        | ENSG00000239683 | 0          | NA          | NA         | NA         | NA         |            |
| NA        | ENSG00000239684 | 0.18922458 | 0.01954053  | 0.38488496 | 0.78225479 | NA         | PTGER4P3   |
| NA        | ENSG00000239686 | 0          | NA          | NA         | NA         | NA         |            |
| NA        | ENSG00000239689 | 0          | NA          | NA         | NA         | NA         | RPL17P46   |
| NA        | ENSG00000239690 | 0          | NA          | NA         | NA         | NA         | RN7SL668P  |
| NA        | ENSG00000239694 | 0          | NA          | NA         | NA         | NA         | RPSAP38    |
| NA        | ENSG00000239696 | 0          | NA          | NA         | NA         | NA         |            |
| 8742      | ENSG00000239697 | 220.015382 | 0.16674822  | 0.18406345 | 0.30233511 | 0.52984087 | TNFSF12    |
| NA        | ENSG00000239699 | 0          | NA          | NA         | NA         | NA         | HNRNPA3P8  |
| NA        | ENSG00000239701 | 0.45209736 | -0.02505403 | 0.38558831 | 0.57865948 | NA         |            |
| NA        | ENSG00000239702 | 0.18922458 | 0.01954053  | 0.38488496 | 0.78225479 | NA         | RN7SL507P  |
| NA        | ENSG00000239703 | 0          | NA          | NA         | NA         | NA         | RN7SL568P  |
| 284040    | ENSG00000239704 | 13.1188106 | 0.24334576  | 0.41682359 | 0.19439749 | 0.39740816 | CDRT4      |
| NA        | ENSG00000239705 | 0.95750421 | 0.00515097  | 0.38009023 | 0.93218517 | NA         |            |
| NA        | ENSG00000239706 | 0.32394902 | -0.023274   | 0.38532149 | 0.66853662 | NA         |            |
| NA        | ENSG00000239708 | 0          | NA          | NA         | NA         | NA         | RN7SL782P  |
| NA        | ENSG00000239710 | 0          | NA          | NA         | NA         | NA         | RN7SL692P  |
| 60489     | ENSG00000239713 | 3.61423779 | 0.01841063  | 0.3701493  | 0.86110974 | 0.93812292 | APOBEC3G   |
| 105375115 | ENSG00000239715 | 0          | NA          | NA         | NA         | NA         |            |
| NA        | ENSG00000239716 | 0          | NA          | NA         | NA         | NA         |            |
| 100873945 | ENSG00000239718 | 0          | NA          | NA         | NA         | NA         | HLTF-AS1   |
| NA        | ENSG00000239719 | 0.15069912 | -0.01848503 | 0.38480575 | 0.84537521 | NA         |            |
| NA        | ENSG00000239722 | 0          | NA          | NA         | NA         | NA         | IMP3P2     |
| NA        | ENSG00000239726 | 0          | NA          | NA         | NA         | NA         | RN7SL688P  |
| NA        | ENSG00000239731 | 0          | NA          | NA         | NA         | NA         | RN7SL825P  |
| 54106     | ENSG00000239732 | 0          | NA          | NA         | NA         | NA         | TLR9       |
| NA        | ENSG00000239736 | 0          | NA          | NA         | NA         | NA         | CEACAMP3   |
| NA        | ENSG00000239739 | 0          | NA          | NA         | NA         | NA         |            |

|           |                 |            |             |            |            |            |             |
|-----------|-----------------|------------|-------------|------------|------------|------------|-------------|
| NA        | ENSG00000239742 | 0          | NA          | NA         | NA         | NA         | RN7SL672P   |
| NA        | ENSG00000239744 | 0          | NA          | NA         | NA         | NA         | RN7SL63P    |
| NA        | ENSG00000239745 | 0          | NA          | NA         | NA         | NA         | RN7SL790P   |
| NA        | ENSG00000239748 | 0          | NA          | NA         | NA         | NA         | RN7SL795P   |
| NA        | ENSG00000239763 | 19.9280697 | -0.02308262 | 0.31528714 | 0.89628065 | 0.95469109 |             |
| NA        | ENSG00000239767 | 0          | NA          | NA         | NA         | NA         |             |
| NA        | ENSG00000239774 | 0.50207596 | 0.02562368  | 0.38565771 | 0.52549886 | NA         |             |
| NA        | ENSG00000239775 | 6.6495477  | -0.11146588 | 0.38452895 | 0.36784327 | 0.59716966 |             |
| 23559     | ENSG00000239779 | 1710.69197 | 0.25687071  | 0.08001168 | 0.00100903 | 0.00595277 | WBP1        |
| NA        | ENSG00000239780 | 0          | NA          | NA         | NA         | NA         | RPLP0P11    |
| NA        | ENSG00000239783 | 0          | NA          | NA         | NA         | NA         |             |
| 51373     | ENSG00000239789 | 335.738451 | -0.2107316  | 0.13180279 | 0.08778659 | 0.22632101 | MRPS17      |
| NA        | ENSG00000239791 | 11.0718144 | -0.28531594 | 0.4433393  | 0.14495195 | 0.32532202 |             |
| NA        | ENSG00000239792 | 0          | NA          | NA         | NA         | NA         | CDRT15P5    |
| NA        | ENSG00000239793 | 0          | NA          | NA         | NA         | NA         |             |
| NA        | ENSG00000239794 | 0          | NA          | NA         | NA         | NA         | RN7SL653P   |
| NA        | ENSG00000239797 | 1.51379295 | 0.02253919  | 0.37806552 | 0.7670556  | NA         | RPL21P39    |
| 100873993 | ENSG00000239799 | 0.30139824 | -0.02296476 | 0.38527817 | 0.68536535 | NA         | ITIH4-AS1   |
| NA        | ENSG00000239801 | 0          | NA          | NA         | NA         | NA         | DENND6A-AS1 |
| NA        | ENSG00000239804 | 0.48582451 | 0.011151    | 0.38339403 | 0.78833041 | NA         |             |
| NA        | ENSG00000239805 | 0          | NA          | NA         | NA         | NA         |             |
| NA        | ENSG00000239808 | 0          | NA          | NA         | NA         | NA         | RN7SL255P   |
| NA        | ENSG00000239809 | 0          | NA          | NA         | NA         | NA         |             |
| 440560    | ENSG00000239810 | 0          | NA          | NA         | NA         | NA         | PRAMEF11    |
| NA        | ENSG00000239819 | 0          | NA          | NA         | NA         | NA         | IGKV1D-8    |
| NA        | ENSG00000239820 | 0          | NA          | NA         | NA         | NA         | RN7SL213P   |
| NA        | ENSG00000239821 | 0          | NA          | NA         | NA         | NA         | RN7SL513P   |
| NA        | ENSG00000239822 | 0          | NA          | NA         | NA         | NA         | RN7SL754P   |
| NA        | ENSG00000239823 | 0          | NA          | NA         | NA         | NA         |             |
| NA        | ENSG00000239825 | 0          | NA          | NA         | NA         | NA         | RN7SL549P   |
| 283507    | ENSG00000239827 | 24.6336555 | 0.14201876  | 0.31121142 | 0.47261698 | 0.69470213 | SUGT1P3     |
| NA        | ENSG00000239828 | 3.71907199 | -0.06120918 | 0.37491357 | 0.56353711 | 0.76627833 |             |
| NA        | ENSG00000239829 | 0          | NA          | NA         | NA         | NA         | KRT8P25     |
| NA        | ENSG00000239830 | 1.86932454 | -0.02567282 | 0.37845236 | 0.73156509 | NA         | RPS4XP22    |
| NA        | ENSG00000239831 | 0          | NA          | NA         | NA         | NA         | RNF7P1      |
| NA        | ENSG00000239835 | 0          | NA          | NA         | NA         | NA         |             |
| 1668      | ENSG00000239839 | 0          | NA          | NA         | NA         | NA         | DEFA3       |
| NA        | ENSG00000239840 | 0          | NA          | NA         | NA         | NA         | RPL23AP72   |

|           |                 |            |             |            |            |            |            |
|-----------|-----------------|------------|-------------|------------|------------|------------|------------|
| NA        | ENSG00000239855 | 0          | NA          | NA         | NA         | NA         | IGKV1-6    |
| NA        | ENSG00000239856 | 0          | NA          | NA         | NA         | NA         | RN7SL225P  |
| 51608     | ENSG00000239857 | 1541.69952 | 0.10285021  | 0.08379578 | 0.20844388 | 0.41617456 | GET4       |
| NA        | ENSG00000239861 | 0.173124   | -0.01911262 | 0.38486262 | 0.84537521 | NA         |            |
| NA        | ENSG00000239862 | 0          | NA          | NA         | NA         | NA         | IGKV1-37   |
| NA        | ENSG00000239868 | 0          | NA          | NA         | NA         | NA         | RN7SL34P   |
| NA        | ENSG00000239870 | 0          | NA          | NA         | NA         | NA         |            |
| NA        | ENSG00000239872 | 0          | NA          | NA         | NA         | NA         | RPL35AP19  |
| NA        | ENSG00000239873 | 0          | NA          | NA         | NA         | NA         | GAPDHP27   |
| 100506765 | ENSG00000239877 | 0          | NA          | NA         | NA         | NA         | IGSF11-AS1 |
| NA        | ENSG00000239880 | 0          | NA          | NA         | NA         | NA         | RALBP1P1   |
| NA        | ENSG00000239881 | 0.68233276 | 0.0047435   | 0.38246291 | 0.91162625 | NA         | RPS27P25   |
| NA        | ENSG00000239883 | 206.98301  | -0.00059295 | 0.1619633  | 0.99562505 | 0.99852582 | PARGP1     |
| NA        | ENSG00000239884 | 3.63650027 | 0.02818664  | 0.36837509 | 0.80059473 | 0.90868418 | RN7SL608P  |
| 83899     | ENSG00000239886 | 0          | NA          | NA         | NA         | NA         | KRTAP9-2   |
| 400793    | ENSG00000239887 | 368.119693 | -1.25712765 | 0.13915941 | 1.66E-20   | 6.38E-19   | C1orf226   |
| NA        | ENSG00000239888 | 0          | NA          | NA         | NA         | NA         | RN7SL792P  |
| NA        | ENSG00000239893 | 0          | NA          | NA         | NA         | NA         | ZNF736P9Y  |
| NA        | ENSG00000239899 | 5.64045553 | 0.05747984  | 0.36427169 | 0.66167115 | 0.83254412 | RN7SL674P  |
| 158       | ENSG00000239900 | 1098.39997 | -0.03903469 | 0.08980887 | 0.6490855  | 0.82497477 | ADSL       |
| NA        | ENSG00000239906 | 0          | NA          | NA         | NA         | NA         |            |
| NA        | ENSG00000239908 | 0.83242365 | 0.01506393  | 0.38113148 | 0.78889662 | NA         | RN7SL75P   |
| NA        | ENSG00000239910 | 0          | NA          | NA         | NA         | NA         | RN7SL530P  |
| NA        | ENSG00000239911 | 109.508303 | 0.23440236  | 0.21850096 | 0.19722119 | 0.40121304 | PRKAG2-AS1 |
| NA        | ENSG00000239912 | 0          | NA          | NA         | NA         | NA         | RPL39P36   |
| NA        | ENSG00000239917 | 0          | NA          | NA         | NA         | NA         | RPS10P16   |
| NA        | ENSG00000239919 | 0          | NA          | NA         | NA         | NA         | SNRPGP3    |
| NA        | ENSG00000239920 | 0.173124   | -0.01911262 | 0.38486262 | 0.84537521 | NA         |            |
| 101927149 | ENSG00000239921 | 0.59677744 | 0.02820697  | 0.3843295  | 0.56193963 | NA         | LINC01471  |
| NA        | ENSG00000239922 | 0          | NA          | NA         | NA         | NA         |            |
| NA        | ENSG00000239923 | 0          | NA          | NA         | NA         | NA         | RN7SL864P  |
| NA        | ENSG00000239924 | 0          | NA          | NA         | NA         | NA         | RPL29P22   |
| NA        | ENSG00000239926 | 0.173124   | -0.01911262 | 0.38486262 | 0.84537521 | NA         | PRDX3P4    |
| 101930094 | ENSG00000239930 | 0          | NA          | NA         | NA         | NA         |            |
| NA        | ENSG00000239932 | 0          | NA          | NA         | NA         | NA         | RN7SL606P  |
| NA        | ENSG00000239939 | 0          | NA          | NA         | NA         | NA         | RPSAP34    |
| NA        | ENSG00000239941 | 0.85347894 | 0.01943221  | 0.38069839 | 0.74883163 | NA         |            |
| NA        | ENSG00000239942 | 0          | NA          | NA         | NA         | NA         | RN7SL394P  |

|           |                 |            |             |            |            |            |            |
|-----------|-----------------|------------|-------------|------------|------------|------------|------------|
| NA        | ENSG00000239944 | 0          | NA          | NA         | NA         | NA         | TRBV8-2    |
| NA        | ENSG00000239945 | 8.34357457 | 0.05409071  | 0.3675038  | 0.66153828 | 0.83248253 |            |
| NA        | ENSG00000239946 | 0          | NA          | NA         | NA         | NA         | ZBTB20-AS3 |
| NA        | ENSG00000239948 | 0.62355113 | -0.01560401 | 0.38333556 | 0.71745485 | NA         | RN7SL368P  |
| NA        | ENSG00000239951 | 0          | NA          | NA         | NA         | NA         | IGKV3-20   |
| NA        | ENSG00000239953 | 0          | NA          | NA         | NA         | NA         | RN7SL273P  |
| NA        | ENSG00000239958 | 0          | NA          | NA         | NA         | NA         | RN7SL51P   |
| NA        | ENSG00000239959 | 3.27301596 | 0.0366699   | 0.37312988 | 0.71691928 | 0.8637162  | ENPP7P2    |
| 23547     | ENSG00000239961 | 0          | NA          | NA         | NA         | NA         | LILRA4     |
| NA        | ENSG00000239964 | 0          | NA          | NA         | NA         | NA         | RN7SL748P  |
| NA        | ENSG00000239967 | 0          | NA          | NA         | NA         | NA         | OR2A41P    |
| NA        | ENSG00000239969 | 13.7319665 | -0.00526505 | 0.33648677 | 0.97222198 | 0.98958828 |            |
| NA        | ENSG00000239975 | 0          | NA          | NA         | NA         | NA         | IGKV1D-33  |
| NA        | ENSG00000239978 | 0          | NA          | NA         | NA         | NA         | OR7E53P    |
| NA        | ENSG00000239981 | 0          | NA          | NA         | NA         | NA         | OR2A15P    |
| NA        | ENSG00000239983 | 0          | NA          | NA         | NA         | NA         |            |
| NA        | ENSG00000239984 | 0          | NA          | NA         | NA         | NA         | RN7SL420P  |
| NA        | ENSG00000239985 | 0          | NA          | NA         | NA         | NA         |            |
| NA        | ENSG00000239986 | 0          | NA          | NA         | NA         | NA         |            |
| NA        | ENSG00000239988 | 0          | NA          | NA         | NA         | NA         | RPL31P60   |
| NA        | ENSG00000239989 | 0          | NA          | NA         | NA         | NA         |            |
| NA        | ENSG00000239991 | 0          | NA          | NA         | NA         | NA         |            |
| NA        | ENSG00000239992 | 0          | NA          | NA         | NA         | NA         | TRBVA      |
| NA        | ENSG00000239994 | 0          | NA          | NA         | NA         | NA         |            |
| NA        | ENSG00000239995 | 0          | NA          | NA         | NA         | NA         | TPT1P11    |
| NA        | ENSG00000239997 | 0          | NA          | NA         | NA         | NA         | FCF1P3     |
| 11027     | ENSG00000239998 | 0.173733   | 0.01914545  | 0.38484597 | 0.78225479 | NA         | LILRA2     |
| NA        | ENSG00000240002 | 0          | NA          | NA         | NA         | NA         | YBX1P3     |
| NA        | ENSG00000240003 | 1.24253479 | -0.03295744 | 0.38268711 | 0.57033357 | NA         | RPL7P24    |
| NA        | ENSG00000240005 | 0.35796543 | 0.0238263   | 0.3853825  | 0.61336921 | NA         | STIM2-AS1  |
| 105374119 | ENSG00000240006 | 0          | NA          | NA         | NA         | NA         | LINC02004  |
| 100885796 | ENSG00000240012 | 0          | NA          | NA         | NA         | NA         | SLC9A9-AS1 |
| NA        | ENSG00000240014 | 0          | NA          | NA         | NA         | NA         | RN7SL254P  |
| NA        | ENSG00000240015 | 0          | NA          | NA         | NA         | NA         |            |
| 84066     | ENSG00000240021 | 0.88437313 | 0.0638908   | 0.39109748 | 0.20623483 | NA         | TEX35      |
| NA        | ENSG00000240023 | 0.173733   | 0.01914545  | 0.38484597 | 0.78225479 | NA         |            |
| 100505687 | ENSG00000240024 | 210.388763 | -0.16573133 | 0.16440657 | 0.26348707 | 0.48542909 | LINC00888  |
| NA        | ENSG00000240027 | 0          | NA          | NA         | NA         | NA         |            |



|           |    |                 |            |             |            |            |            |           |
|-----------|----|-----------------|------------|-------------|------------|------------|------------|-----------|
|           | NA | ENSG00000240031 | 0.55209779 | 0.00467012  | 0.38285316 | 0.85467697 | NA         | OR9A3P    |
| 109729161 |    | ENSG00000240032 | 0          | NA          | NA         | NA         | NA         | LNC SRLR  |
|           | NA | ENSG00000240033 | 0          | NA          | NA         | NA         | NA         |           |
|           | NA | ENSG00000240034 | 0          | NA          | NA         | NA         | NA         | MTND6P6   |
|           | NA | ENSG00000240036 | 0.64820628 | -0.02351395 | 0.38275403 | 0.64824047 | NA         |           |
| 280       |    | ENSG00000240038 | 22.9826656 | 0.65449508  | 0.60929105 | 0.02855439 | 0.09659318 | AMY2B     |
|           | NA | ENSG00000240040 | 0          | NA          | NA         | NA         | NA         |           |
|           | NA | ENSG00000240041 | 0          | NA          | NA         | NA         | NA         | IGHJ4     |
|           | NA | ENSG00000240043 | 0          | NA          | NA         | NA         | NA         | RPS27P26  |
| 100507537 |    | ENSG00000240045 | 0          | NA          | NA         | NA         | NA         | STRIT1    |
|           | NA | ENSG00000240047 | 0          | NA          | NA         | NA         | NA         | RPS3AP32  |
|           | NA | ENSG00000240048 | 0          | NA          | NA         | NA         | NA         | DDX50P2   |
|           | NA | ENSG00000240051 | 2.45142943 | -0.09243398 | 0.39105979 | 0.28555491 | NA         | RPL23AP10 |
|           | NA | ENSG00000240052 | 0          | NA          | NA         | NA         | NA         |           |
| 58496     |    | ENSG00000240053 | 519.450579 | 0.21246224  | 0.10897122 | 0.04158997 | 0.1293128  | LY6G5B    |
|           | NA | ENSG00000240056 | 0          | NA          | NA         | NA         | NA         |           |
| 107986114 |    | ENSG00000240057 | 21.7554551 | 0.11379868  | 0.32542765 | 0.54401042 | 0.75203224 |           |
|           | NA | ENSG00000240058 | 0          | NA          | NA         | NA         | NA         | ARGFXP1   |
|           | NA | ENSG00000240063 | 0          | NA          | NA         | NA         | NA         |           |
| 5698      |    | ENSG00000240065 | 0          | NA          | NA         | NA         | NA         | PSMB9     |
|           | NA | ENSG00000240068 | 0          | NA          | NA         | NA         | NA         | RPL21P42  |
|           | NA | ENSG00000240069 | 0.54781602 | 0.03269594  | 0.3862131  | 0.45491284 | NA         | GPAA1P1   |
|           | NA | ENSG00000240074 | 0          | NA          | NA         | NA         | NA         | RPL9P30   |
|           | NA | ENSG00000240083 | 0          | NA          | NA         | NA         | NA         | RPS3AP22  |
|           | NA | ENSG00000240084 | 0          | NA          | NA         | NA         | NA         | MTND4LP10 |
|           | NA | ENSG00000240086 | 13.9630867 | 0.03713471  | 0.3252291  | 0.83474489 | 0.92454439 |           |
|           | NA | ENSG00000240087 | 0.63904687 | -0.01868888 | 0.38291988 | 0.68218641 | NA         | RPSAP12   |
|           | NA | ENSG00000240089 | 0          | NA          | NA         | NA         | NA         | BMS1P3    |
|           | NA | ENSG00000240093 | 0          | NA          | NA         | NA         | NA         |           |
|           | NA | ENSG00000240095 | 0          | NA          | NA         | NA         | NA         |           |
|           | NA | ENSG00000240096 | 4.24289735 | 0.01980888  | 0.36474074 | 0.86928742 | 0.94304726 |           |
|           | NA | ENSG00000240097 | 0.16735865 | 0.01897177  | 0.38482933 | 0.78225479 | NA         |           |
|           | NA | ENSG00000240098 | 0          | NA          | NA         | NA         | NA         | RN7SL351P |
|           | NA | ENSG00000240100 | 0          | NA          | NA         | NA         | NA         |           |
|           | NA | ENSG00000240103 | 0          | NA          | NA         | NA         | NA         |           |
|           | NA | ENSG00000240106 | 0          | NA          | NA         | NA         | NA         | RN7SL146P |
|           | NA | ENSG00000240107 | 0.173733   | 0.01914545  | 0.38484597 | 0.78225479 | NA         |           |
| 149934    |    | ENSG00000240108 | 0          | NA          | NA         | NA         | NA         | NCOR1P1   |

|           |                 |            |             |            |            |            |             |
|-----------|-----------------|------------|-------------|------------|------------|------------|-------------|
| NA        | ENSG00000240116 | 0          | NA          | NA         | NA         | NA         | RN7SL303P   |
| NA        | ENSG00000240121 | 0          | NA          | NA         | NA         | NA         | RPS27P20    |
| NA        | ENSG00000240122 | 0          | NA          | NA         | NA         | NA         | FABP5P11    |
| NA        | ENSG00000240125 | 0          | NA          | NA         | NA         | NA         | RPL23AP75   |
| NA        | ENSG00000240128 | 0          | NA          | NA         | NA         | NA         | KRT18P43    |
| NA        | ENSG00000240131 | 0          | NA          | NA         | NA         | NA         |             |
| NA        | ENSG00000240132 | 4.16733601 | 0.04197683  | 0.36898308 | 0.71371158 | 0.86192204 | ETF1P2      |
| NA        | ENSG00000240135 | 0          | NA          | NA         | NA         | NA         | PSMD12P1    |
| 101928085 | ENSG00000240137 | 32.5950063 | -0.01939064 | 0.29442735 | 0.91599873 | 0.96435405 | ERICH6-AS1  |
| NA        | ENSG00000240138 | 0          | NA          | NA         | NA         | NA         | EEF1GP4     |
| NA        | ENSG00000240143 | 0          | NA          | NA         | NA         | NA         |             |
| NA        | ENSG00000240151 | 0          | NA          | NA         | NA         | NA         | RN7SL826P   |
| NA        | ENSG00000240152 | 0          | NA          | NA         | NA         | NA         | LINC02271   |
| NA        | ENSG00000240156 | 0          | NA          | NA         | NA         | NA         | COX6CP6     |
| NA        | ENSG00000240159 | 0          | NA          | NA         | NA         | NA         |             |
| NA        | ENSG00000240160 | 0          | NA          | NA         | NA         | NA         | RN7SL263P   |
| NA        | ENSG00000240163 | 0          | NA          | NA         | NA         | NA         |             |
| NA        | ENSG00000240167 | 0.14931947 | -0.01844332 | 0.38480212 | 0.84537521 | NA         | RPS7P7      |
| NA        | ENSG00000240173 | 0.14931947 | -0.01844332 | 0.38480212 | 0.84537521 | NA         | RN7SL771P   |
| NA        | ENSG00000240174 | 0          | NA          | NA         | NA         | NA         |             |
| 100873983 | ENSG00000240175 | 0          | NA          | NA         | NA         | NA         | MAGI1-AS1   |
| NA        | ENSG00000240179 | 0          | NA          | NA         | NA         | NA         | RPL26P3     |
| NA        | ENSG00000240180 | 2.03518655 | -0.10300012 | 0.40354463 | 0.05177341 | NA         | RPL12P28    |
| NA        | ENSG00000240183 | 0          | NA          | NA         | NA         | NA         | RN7SL297P   |
| 5098      | ENSG00000240184 | 2714.30601 | -0.31330994 | 0.07588773 | 2.45E-05   | 0.00021539 | PCDHGC3     |
| NA        | ENSG00000240186 | 0          | NA          | NA         | NA         | NA         | RN7SL633P   |
| NA        | ENSG00000240189 | 0          | NA          | NA         | NA         | NA         | RN7SL621P   |
| 643160    | ENSG00000240194 | 0          | NA          | NA         | NA         | NA         | CYMP        |
| NA        | ENSG00000240197 | 0          | NA          | NA         | NA         | NA         |             |
| 100874200 | ENSG00000240198 | 0          | NA          | NA         | NA         | NA         | ARHGEF3-AS1 |
| NA        | ENSG00000240199 | 0          | NA          | NA         | NA         | NA         | RN7SL520P   |
| NA        | ENSG00000240201 | 0          | NA          | NA         | NA         | NA         |             |
| NA        | ENSG00000240202 | 0          | NA          | NA         | NA         | NA         | RN7SL223P   |
| NA        | ENSG00000240203 | 0          | NA          | NA         | NA         | NA         | RN7SL567P   |
| 100287482 | ENSG00000240204 | 85.5225187 | -0.16647767 | 0.2682527  | 0.39734917 | 0.626413   | SMKR1       |
| NA        | ENSG00000240205 | 0          | NA          | NA         | NA         | NA         | RN7SL865P   |
| NA        | ENSG00000240207 | 42.4562598 | -0.07431207 | 0.26392389 | 0.69928661 | 0.85493261 |             |
| NA        | ENSG00000240210 | 0.18922458 | 0.01954053  | 0.38488496 | 0.78225479 | NA         |             |

|           |                 |            |             |            |            |            |             |
|-----------|-----------------|------------|-------------|------------|------------|------------|-------------|
| NA        | ENSG00000240211 | 0.52119901 | 0.02576573  | 0.38568143 | 0.51723676 | NA         | PPP1R35-AS1 |
| NA        | ENSG00000240215 | 0          | NA          | NA         | NA         | NA         | TRBV25OR9-2 |
| NA        | ENSG00000240216 | 0          | NA          | NA         | NA         | NA         | CPHL1P      |
| NA        | ENSG00000240219 | 3.24502172 | -0.03031244 | 0.37051879 | 0.77248577 | 0.89553101 |             |
| 147947    | ENSG00000240225 | 445.681829 | -0.12502215 | 0.13145952 | 0.30989767 | 0.53772694 | ZNF542P     |
| 90639     | ENSG00000240230 | 499.060085 | 0.18686182  | 0.11812436 | 0.0958396  | 0.24163904 | COX19       |
| NA        | ENSG00000240231 | 0          | NA          | NA         | NA         | NA         | RPS27P29    |
| NA        | ENSG00000240233 | 0          | NA          | NA         | NA         | NA         | RN7SL587P   |
| NA        | ENSG00000240235 | 0          | NA          | NA         | NA         | NA         | RN7SL794P   |
| NA        | ENSG00000240236 | 0          | NA          | NA         | NA         | NA         | HNRNPA1P23  |
| NA        | ENSG00000240237 | 0          | NA          | NA         | NA         | NA         |             |
| NA        | ENSG00000240238 | 0          | NA          | NA         | NA         | NA         |             |
| NA        | ENSG00000240240 | 28.6513378 | -0.4547253  | 0.45778537 | 0.06755412 | 0.18665906 |             |
| NA        | ENSG00000240241 | 0          | NA          | NA         | NA         | NA         |             |
| NA        | ENSG00000240244 | 0.18922458 | 0.01954053  | 0.38488496 | 0.78225479 | NA         | GAPDHP33    |
| NA        | ENSG00000240246 | 0          | NA          | NA         | NA         | NA         | RPL32P8     |
| 728358    | ENSG00000240247 | 0          | NA          | NA         | NA         | NA         | DEFA1B      |
| NA        | ENSG00000240250 | 0          | NA          | NA         | NA         | NA         | RN7SL541P   |
| NA        | ENSG00000240253 | 0.34624801 | -0.02356563 | 0.38536324 | 0.65270996 | NA         | FAR2P3      |
| 100874201 | ENSG00000240254 | 0          | NA          | NA         | NA         | NA         | B4GALT4-AS1 |
| NA        | ENSG00000240255 | 0          | NA          | NA         | NA         | NA         | PSMC1P6     |
| NA        | ENSG00000240265 | 0          | NA          | NA         | NA         | NA         |             |
| NA        | ENSG00000240268 | 0          | NA          | NA         | NA         | NA         | MOXD2P      |
| NA        | ENSG00000240270 | 0.46535932 | -0.00784021 | 0.38327212 | 0.86398724 | NA         | RPL12P37    |
| NA        | ENSG00000240271 | 0          | NA          | NA         | NA         | NA         |             |
| 146771    | ENSG00000240280 | 0.16735865 | 0.01897177  | 0.38482933 | 0.78225479 | NA         | TCAM1P      |
| NA        | ENSG00000240281 | 0          | NA          | NA         | NA         | NA         |             |
| NA        | ENSG00000240286 | 0          | NA          | NA         | NA         | NA         | MEAF6P1     |
| 100126793 | ENSG00000240288 | 14.3611361 | 0.03438618  | 0.33235949 | 0.84123061 | 0.92789889 | GHRLOS      |
| NA        | ENSG00000240291 | 52.6102538 | -0.40652856 | 0.32405858 | 0.07429827 | 0.20010202 |             |
| NA        | ENSG00000240294 | 0          | NA          | NA         | NA         | NA         | RN7SKP241   |
| NA        | ENSG00000240296 | 0          | NA          | NA         | NA         | NA         |             |
| NA        | ENSG00000240298 | 0          | NA          | NA         | NA         | NA         | RPL36AP40   |
| NA        | ENSG00000240299 | 0.76242405 | -0.02290679 | 0.38372379 | 0.60919217 | NA         | RN7SL187P   |
| NA        | ENSG00000240302 | 0.16735865 | 0.01897177  | 0.38482933 | 0.78225479 | NA         | RN7SL717P   |
| 84129     | ENSG00000240303 | 470.339891 | -0.00465016 | 0.17853878 | 0.97506515 | 0.99122005 | ACAD11      |
| NA        | ENSG00000240305 | 1.03393406 | -0.04062566 | 0.38484077 | 0.41832135 | NA         |             |
| NA        | ENSG00000240306 | 0.14931947 | -0.01844332 | 0.38480212 | 0.84537521 | NA         | RN7SL100P   |

|           |                 |            |             |            |            |            |    |           |
|-----------|-----------------|------------|-------------|------------|------------|------------|----|-----------|
| NA        | ENSG00000240309 | 0          | NA          | NA         | NA         | NA         | NA | MTCO1P6   |
| NA        | ENSG00000240311 | 0.173733   | 0.01914545  | 0.38484597 | 0.78225479 | NA         | NA |           |
| NA        | ENSG00000240317 | 0          | NA          | NA         | NA         | NA         | NA | RN7SL764P |
| NA        | ENSG00000240320 | 0          | NA          | NA         | NA         | NA         | NA | RPS29P27  |
| NA        | ENSG00000240322 | 1.97907613 | -0.01139389 | 0.37566269 | 0.88937613 | NA         | NA | RN7SL481P |
| NA        | ENSG00000240327 | 0          | NA          | NA         | NA         | NA         | NA | RN7SL93P  |
| NA        | ENSG00000240328 | 0          | NA          | NA         | NA         | NA         | NA |           |
| 100506281 | ENSG00000240338 | 0.59739863 | 0.02154077  | 0.38409908 | 0.6299314  | NA         | NA |           |
| NA        | ENSG00000240342 | 3298.91613 | -0.38043798 | 0.06454655 | 2.14E-09   | 3.52E-08   | NA | RPS2P5    |
| 53938     | ENSG00000240344 | 291.127386 | 0.14074264  | 0.15164343 | 0.31333943 | 0.54126787 | NA | PPIL3     |
| NA        | ENSG00000240347 | 0          | NA          | NA         | NA         | NA         | NA | RN7SL35P  |
| NA        | ENSG00000240350 | 0          | NA          | NA         | NA         | NA         | NA | SOCAR     |
| NA        | ENSG00000240354 | 0          | NA          | NA         | NA         | NA         | NA |           |
| NA        | ENSG00000240355 | 0          | NA          | NA         | NA         | NA         | NA |           |
| NA        | ENSG00000240356 | 79.2401006 | 0.07971026  | 0.22148477 | 0.66132379 | 0.8324506  | NA | RPL23AP7  |
| NA        | ENSG00000240359 | 0          | NA          | NA         | NA         | NA         | NA | UBL5P3    |
| NA        | ENSG00000240361 | 0          | NA          | NA         | NA         | NA         | NA | OR4G11P   |
| NA        | ENSG00000240364 | 0          | NA          | NA         | NA         | NA         | NA | RPL31P59  |
| NA        | ENSG00000240366 | 0          | NA          | NA         | NA         | NA         | NA | RPL36AP45 |
| NA        | ENSG00000240370 | 36.3510145 | 0.06171933  | 0.27885562 | 0.75156208 | 0.88345726 | NA | RPL13P5   |
| NA        | ENSG00000240371 | 0          | NA          | NA         | NA         | NA         | NA | RPS4XP13  |
| NA        | ENSG00000240373 | 0.31855312 | 0.00146822  | 0.38336944 | 0.96301138 | NA         | NA | SEC62-AS1 |
| NA        | ENSG00000240374 | 0          | NA          | NA         | NA         | NA         | NA | RN7SL503P |
| NA        | ENSG00000240375 | 0          | NA          | NA         | NA         | NA         | NA | VPS26AP1  |
| NA        | ENSG00000240376 | 0          | NA          | NA         | NA         | NA         | NA |           |
| NA        | ENSG00000240382 | 0          | NA          | NA         | NA         | NA         | NA | IGKV1-17  |
| NA        | ENSG00000240385 | 0          | NA          | NA         | NA         | NA         | NA | RPS29P20  |
| 353137    | ENSG00000240386 | 0          | NA          | NA         | NA         | NA         | NA | LCE1F     |
| NA        | ENSG00000240388 | 0          | NA          | NA         | NA         | NA         | NA |           |
| NA        | ENSG00000240392 | 0          | NA          | NA         | NA         | NA         | NA | RPL9P3    |
| NA        | ENSG00000240393 | 0          | NA          | NA         | NA         | NA         | NA |           |
| NA        | ENSG00000240395 | 1.85615202 | 0.04581932  | 0.37979461 | 0.57570009 | NA         | NA | RPL5P23   |
| NA        | ENSG00000240399 | 17.0152332 | -0.0735007  | 0.33506619 | 0.67008106 | 0.83758072 | NA |           |
| NA        | ENSG00000240401 | 2.74257315 | 0.08687932  | 0.38925121 | 0.30327764 | 0.53060216 | NA |           |
| 3812      | ENSG00000240403 | 0          | NA          | NA         | NA         | NA         | NA | KIR3DL2   |
| NA        | ENSG00000240404 | 0          | NA          | NA         | NA         | NA         | NA |           |
| 101927152 | ENSG00000240405 | 0          | NA          | NA         | NA         | NA         | NA | SAMMSON   |
| NA        | ENSG00000240409 | 0.56058375 | 0.03330415  | 0.38627742 | 0.44629885 | NA         | NA | MTATP8P1  |

|        |                 |            |             |            |            |            |            |
|--------|-----------------|------------|-------------|------------|------------|------------|------------|
| NA     | ENSG00000240411 | 0.45209736 | -0.02505403 | 0.38558831 | 0.57865948 | NA         | RPL5P16    |
| NA     | ENSG00000240412 | 0          | NA          | NA         | NA         | NA         | RPL5P15    |
| NA     | ENSG00000240416 | 0          | NA          | NA         | NA         | NA         | CYCSP20    |
| NA     | ENSG00000240418 | 0.173733   | 0.01914545  | 0.38484597 | 0.78225479 | NA         |            |
| NA     | ENSG00000240419 | 0          | NA          | NA         | NA         | NA         |            |
| 285205 | ENSG00000240423 | 0          | NA          | NA         | NA         | NA         | LINC00636  |
| NA     | ENSG00000240424 | 0          | NA          | NA         | NA         | NA         |            |
| NA     | ENSG00000240426 | 0          | NA          | NA         | NA         | NA         |            |
| NA     | ENSG00000240427 | 0          | NA          | NA         | NA         | NA         | RPS26P34   |
| NA     | ENSG00000240429 | 45.7790029 | 0.06205352  | 0.25886348 | 0.74845879 | 0.88197086 | LRRFIP1P1  |
| 337960 | ENSG00000240432 | 0          | NA          | NA         | NA         | NA         | KRTAP13-3  |
| NA     | ENSG00000240435 | 0.84464121 | -0.04642205 | 0.38804808 | 0.30740735 | NA         | RPS12P27   |
| NA     | ENSG00000240436 | 0          | NA          | NA         | NA         | NA         | RPL35AP14  |
| NA     | ENSG00000240438 | 0          | NA          | NA         | NA         | NA         | OFD1P5Y    |
| NA     | ENSG00000240439 | 0          | NA          | NA         | NA         | NA         | RN7SL91P   |
| NA     | ENSG00000240440 | 0          | NA          | NA         | NA         | NA         |            |
| NA     | ENSG00000240441 | 1.74214004 | -0.05364309 | 0.38184256 | 0.50009962 | NA         |            |
| NA     | ENSG00000240443 | 0          | NA          | NA         | NA         | NA         | RPS10P20   |
| 2310   | ENSG00000240445 | 889.157601 | -0.09242628 | 0.13161108 | 0.45329254 | 0.67649496 | FOXO3B     |
| NA     | ENSG00000240449 | 3.69803007 | 0.09502166  | 0.38184454 | 0.4129068  | 0.64038252 | REPIN1-AS1 |
| NA     | ENSG00000240452 | 0          | NA          | NA         | NA         | NA         | MTCO1P29   |
| NA     | ENSG00000240454 | 0          | NA          | NA         | NA         | NA         | RPL39P26   |
| NA     | ENSG00000240457 | 0.37844916 | 0.02407552  | 0.3854191  | 0.60038877 | NA         | RN7SL472P  |
| NA     | ENSG00000240458 | 0          | NA          | NA         | NA         | NA         |            |
| NA     | ENSG00000240459 | 0          | NA          | NA         | NA         | NA         |            |
| NA     | ENSG00000240463 | 2.16497719 | -0.04583982 | 0.38102981 | 0.54896084 | NA         | RPS19P3    |
| NA     | ENSG00000240470 | 0          | NA          | NA         | NA         | NA         | RN7SL346P  |
| NA     | ENSG00000240471 | 0          | NA          | NA         | NA         | NA         | PHBP8      |
| NA     | ENSG00000240474 | 0          | NA          | NA         | NA         | NA         | RN7SL116P  |
| NA     | ENSG00000240476 | 0.50882641 | 0.01558652  | 0.38315182 | 0.73590994 | NA         | LINC00973  |
| NA     | ENSG00000240477 | 0          | NA          | NA         | NA         | NA         |            |
| NA     | ENSG00000240478 | 0          | NA          | NA         | NA         | NA         |            |
| 118432 | ENSG00000240480 | 0.173124   | -0.01911262 | 0.38486262 | 0.84537521 | NA         | RPL29P2    |
| NA     | ENSG00000240481 | 0          | NA          | NA         | NA         | NA         | RN7SL38P   |
| NA     | ENSG00000240484 | 0.14931947 | -0.01844332 | 0.38480212 | 0.84537521 | NA         |            |
| NA     | ENSG00000240486 | 0          | NA          | NA         | NA         | NA         | RPL23AP54  |
| NA     | ENSG00000240487 | 0          | NA          | NA         | NA         | NA         | FAM214BP1  |
| NA     | ENSG00000240489 | 0.16735865 | 0.01897177  | 0.38482933 | 0.78225479 | NA         | SETP14     |

|           |                 |            |             |            |            |            |            |
|-----------|-----------------|------------|-------------|------------|------------|------------|------------|
| NA        | ENSG00000240490 | 0.35723081 | 0.02382102  | 0.38538168 | 0.61373957 | NA         | RN7SL277P  |
| NA        | ENSG00000240494 | 0          | NA          | NA         | NA         | NA         | RPS12P28   |
| NA        | ENSG00000240497 | 0.50511069 | -0.02994002 | 0.38594172 | 0.51869073 | NA         |            |
| 100048912 | ENSG00000240498 | 27.5363887 | -0.50333986 | 0.4773021  | 0.05263015 | 0.15480832 | CDKN2B-AS1 |
| NA        | ENSG00000240499 | 0          | NA          | NA         | NA         | NA         |            |
| NA        | ENSG00000240502 | 0          | NA          | NA         | NA         | NA         | RN7SL837P  |
| 23495     | ENSG00000240505 | 0          | NA          | NA         | NA         | NA         | TNFRSF13B  |
| NA        | ENSG00000240509 | 0          | NA          | NA         | NA         | NA         | RPL34P18   |
| NA        | ENSG00000240511 | 0          | NA          | NA         | NA         | NA         | MED28P2    |
| NA        | ENSG00000240513 | 0          | NA          | NA         | NA         | NA         |            |
| NA        | ENSG00000240518 | 0          | NA          | NA         | NA         | NA         |            |
| NA        | ENSG00000240519 | 0          | NA          | NA         | NA         | NA         |            |
| NA        | ENSG00000240520 | 0.38228034 | -0.00934365 | 0.38365699 | 0.94118365 | NA         | UOX        |
| NA        | ENSG00000240521 | 0.14931947 | -0.01844332 | 0.38480212 | 0.84537521 | NA         |            |
| NA        | ENSG00000240522 | 18.2297726 | 0.77478047  | 0.61027992 | 0.01806601 | 0.067119   | RPL7AP10   |
| NA        | ENSG00000240527 | 0          | NA          | NA         | NA         | NA         |            |
| NA        | ENSG00000240531 | 0.173733   | 0.01914545  | 0.38484597 | 0.78225479 | NA         | RPL21P123  |
| NA        | ENSG00000240533 | 0          | NA          | NA         | NA         | NA         | RN7SL69P   |
| NA        | ENSG00000240534 | 0          | NA          | NA         | NA         | NA         | RPL34P17   |
| NA        | ENSG00000240535 | 0          | NA          | NA         | NA         | NA         |            |
| NA        | ENSG00000240540 | 0          | NA          | NA         | NA         | NA         | RPL3P9     |
| 100874091 | ENSG00000240541 | 0          | NA          | NA         | NA         | NA         | TM4SF1-AS1 |
| 728318    | ENSG00000240542 | 0          | NA          | NA         | NA         | NA         | KRTAP9-1   |
| NA        | ENSG00000240545 | 0          | NA          | NA         | NA         | NA         | RN7SL492P  |
| 100874039 | ENSG00000240549 | 0.173124   | -0.01911262 | 0.38486262 | 0.84537521 | NA         | THOC7-AS1  |
| NA        | ENSG00000240553 | 0.30001558 | -0.02294458 | 0.38527538 | 0.68644893 | NA         |            |
| NA        | ENSG00000240554 | 0          | NA          | NA         | NA         | NA         | RPL7AP58   |
| NA        | ENSG00000240562 | 0          | NA          | NA         | NA         | NA         |            |
| 54596     | ENSG00000240563 | 0.16735865 | 0.01897177  | 0.38482933 | 0.78225479 | NA         | L1TD1      |
| NA        | ENSG00000240566 | 0          | NA          | NA         | NA         | NA         |            |
| 101243545 | ENSG00000240567 | 0.14931947 | -0.01844332 | 0.38480212 | 0.84537521 | NA         | LINC02067  |
| NA        | ENSG00000240568 | 0          | NA          | NA         | NA         | NA         |            |
| NA        | ENSG00000240571 | 0          | NA          | NA         | NA         | NA         |            |
| NA        | ENSG00000240572 | 0          | NA          | NA         | NA         | NA         |            |
| NA        | ENSG00000240573 | 0          | NA          | NA         | NA         | NA         |            |
| NA        | ENSG00000240577 | 0          | NA          | NA         | NA         | NA         | RN7SL445P  |
| NA        | ENSG00000240578 | 0          | NA          | NA         | NA         | NA         | TRBV22-1   |
| NA        | ENSG00000240579 | 0.173733   | 0.01914545  | 0.38484597 | 0.78225479 | NA         |            |

|           |                 |            |             |            |            |            |            |
|-----------|-----------------|------------|-------------|------------|------------|------------|------------|
| 358       | ENSG00000240583 | 595.92097  | -0.34517069 | 0.12587303 | 0.00357853 | 0.01760428 | AQP1       |
| NA        | ENSG00000240584 | 0          | NA          | NA         | NA         | NA         | RN7SL547P  |
| NA        | ENSG00000240589 | 0.47433129 | -0.0090593  | 0.38283958 | 0.84931289 | NA         | RN7SL258P  |
| NA        | ENSG00000240590 | 0          | NA          | NA         | NA         | NA         | RPSAP48    |
| NA        | ENSG00000240591 | 15.3738858 | -0.03429769 | 0.34065337 | 0.82916296 | 0.92261925 |            |
| 100874083 | ENSG00000240596 | 0          | NA          | NA         | NA         | NA         | KCNAB1-AS2 |
| NA        | ENSG00000240601 | 0          | NA          | NA         | NA         | NA         | RPL9P15    |
| 201651    | ENSG00000240602 | 0          | NA          | NA         | NA         | NA         | AADACP1    |
| NA        | ENSG00000240606 | 0          | NA          | NA         | NA         | NA         | RN7SL564P  |
| NA        | ENSG00000240611 | 0          | NA          | NA         | NA         | NA         |            |
| NA        | ENSG00000240613 | 0          | NA          | NA         | NA         | NA         | RN7SL98P   |
| NA        | ENSG00000240616 | 5.14649673 | -0.03556874 | 0.36161429 | 0.78041837 | 0.89962817 | RPS6P25    |
| NA        | ENSG00000240621 | 0          | NA          | NA         | NA         | NA         | OR2AO1P    |
| NA        | ENSG00000240622 | 0.82818046 | -0.00273368 | 0.38203913 | 0.95404963 | NA         | RPL7P15    |
| NA        | ENSG00000240624 | 0.51774953 | -0.00951607 | 0.38322678 | 0.82354165 | NA         |            |
| NA        | ENSG00000240625 | 0.34624801 | -0.02356563 | 0.38536324 | 0.65270996 | NA         | RN7SL403P  |
| NA        | ENSG00000240626 | 0          | NA          | NA         | NA         | NA         | RN7SL150P  |
| NA        | ENSG00000240627 | 0          | NA          | NA         | NA         | NA         |            |
| NA        | ENSG00000240631 | 0          | NA          | NA         | NA         | NA         | RPL30P12   |
| 347127    | ENSG00000240632 | 0.70958227 | 0.02528094  | 0.38340037 | 0.57493582 | NA         | SPATA31D5P |
| NA        | ENSG00000240634 | 0.78876843 | -0.00673108 | 0.38157757 | 0.89592403 | NA         |            |
| NA        | ENSG00000240637 | 0          | NA          | NA         | NA         | NA         | RN7SL808P  |
| NA        | ENSG00000240639 | 0          | NA          | NA         | NA         | NA         | RN7SL666P  |
| NA        | ENSG00000240641 | 0          | NA          | NA         | NA         | NA         | RN7SL580P  |
| NA        | ENSG00000240647 | 0          | NA          | NA         | NA         | NA         | RN7SL305P  |
| NA        | ENSG00000240651 | 0          | NA          | NA         | NA         | NA         | SEPTIN7P4  |
| NA        | ENSG00000240652 | 0          | NA          | NA         | NA         | NA         |            |
| 338872    | ENSG00000240654 | 0          | NA          | NA         | NA         | NA         | C1QTNF9    |
| NA        | ENSG00000240661 | 2.05580746 | 0.02685912  | 0.37675095 | 0.74904265 | NA         |            |
| NA        | ENSG00000240663 | 0          | NA          | NA         | NA         | NA         | RN7SL310P  |
| NA        | ENSG00000240665 | 0          | NA          | NA         | NA         | NA         | LSP1P2     |
| NA        | ENSG00000240666 | 0.32706137 | 0.00279785  | 0.38338784 | 0.95351401 | NA         | MME-AS1    |
| NA        | ENSG00000240667 | 0          | NA          | NA         | NA         | NA         | NBPF18P    |
| NA        | ENSG00000240668 | 0.33471731 | 0.02354391  | 0.38534154 | 0.62842204 | NA         | KRT8P36    |
| NA        | ENSG00000240669 | 0          | NA          | NA         | NA         | NA         |            |
| NA        | ENSG00000240671 | 0          | NA          | NA         | NA         | NA         | IGKV1-8    |
| NA        | ENSG00000240673 | 0.15069912 | -0.01848503 | 0.38480575 | 0.84537521 | NA         |            |
| NA        | ENSG00000240674 | 0          | NA          | NA         | NA         | NA         |            |

|           |                 |            |             |            |            |            |              |
|-----------|-----------------|------------|-------------|------------|------------|------------|--------------|
| NA        | ENSG00000240677 | 0          | NA          | NA         | NA         | NA         | MYL6P4       |
| NA        | ENSG00000240680 | 0          | NA          | NA         | NA         | NA         | H4P1         |
| 57461     | ENSG00000240682 | 667.01109  | -0.12182645 | 0.11849398 | 0.2784946  | 0.50289732 | ISY1         |
| NA        | ENSG00000240687 | 0          | NA          | NA         | NA         | NA         |              |
| NA        | ENSG00000240692 | 0          | NA          | NA         | NA         | NA         | RN7SL538P    |
| 10687     | ENSG00000240694 | 2987.49581 | -0.79939036 | 0.07337119 | 2.30E-28   | 1.25E-26   | PNMA2        |
| NA        | ENSG00000240695 | 0.15069912 | -0.01848503 | 0.38480575 | 0.84537521 | NA         |              |
| NA        | ENSG00000240698 | 0          | NA          | NA         | NA         | NA         | RPS2P39      |
| NA        | ENSG00000240704 | 0          | NA          | NA         | NA         | NA         | KLF7P1       |
| 399829    | ENSG00000240707 | 8.26667996 | -0.01621454 | 0.34792639 | 0.91197154 | 0.96252342 | LINC01168    |
| NA        | ENSG00000240708 | 0          | NA          | NA         | NA         | NA         | LINC02030    |
| NA        | ENSG00000240710 | 0.85035186 | 0.01903259  | 0.3813838  | 0.73633285 | NA         |              |
| NA        | ENSG00000240713 | 0          | NA          | NA         | NA         | NA         | RN7SL860P    |
| NA        | ENSG00000240718 | 0.18922458 | 0.01954053  | 0.38488496 | 0.78225479 | NA         | RN7SL851P    |
| 401387    | ENSG00000240720 | 2.86145333 | 0.08177381  | 0.38417586 | 0.40471809 | 0.63309996 | LRRD1        |
| NA        | ENSG00000240721 | 0          | NA          | NA         | NA         | NA         | RPS4XP15     |
| NA        | ENSG00000240723 | 0          | NA          | NA         | NA         | NA         | RN7SL382P    |
| NA        | ENSG00000240724 | 0          | NA          | NA         | NA         | NA         | RPS12P15     |
| NA        | ENSG00000240729 | 0.95980662 | -0.02082412 | 0.38103516 | 0.72803664 | NA         |              |
| NA        | ENSG00000240731 | 12.6364944 | -0.08210877 | 0.33793067 | 0.63344528 | 0.8149108  |              |
| NA        | ENSG00000240733 | 0.16735865 | 0.01897177  | 0.38482933 | 0.78225479 | NA         | RN7SL502P    |
| NA        | ENSG00000240738 | 0          | NA          | NA         | NA         | NA         |              |
| NA        | ENSG00000240739 | 0          | NA          | NA         | NA         | NA         |              |
| 100506243 | ENSG00000240747 | 0          | NA          | NA         | NA         | NA         | KRBOX1       |
| NA        | ENSG00000240750 | 0.30001628 | -0.02294459 | 0.38527538 | 0.68644849 | NA         | RN7SL559P    |
| NA        | ENSG00000240751 | 9.75766364 | -0.00090179 | 0.34042344 | 0.99344942 | 0.99792601 |              |
| NA        | ENSG00000240752 | 0          | NA          | NA         | NA         | NA         |              |
| NA        | ENSG00000240755 | 1.91235071 | 0.01826862  | 0.38073897 | 0.76380589 | NA         | ERLEC1P1     |
| NA        | ENSG00000240758 | 49.1929954 | -0.04786153 | 0.25439138 | 0.80085414 | 0.90877553 |              |
| NA        | ENSG00000240759 | 0.15069912 | -0.01848503 | 0.38480575 | 0.84537521 | NA         | RPS27P21     |
| NA        | ENSG00000240760 | 0          | NA          | NA         | NA         | NA         | RPL31P56     |
| NA        | ENSG00000240761 | 0          | NA          | NA         | NA         | NA         |              |
| 56097     | ENSG00000240764 | 27.082383  | -0.14263388 | 0.3065315  | 0.47011991 | 0.6923895  | PCDHGC5      |
| NA        | ENSG00000240766 | 0          | NA          | NA         | NA         | NA         | PLCXD2-AS1   |
| NA        | ENSG00000240767 | 0          | NA          | NA         | NA         | NA         | RN7SL288P    |
| 246312    | ENSG00000240770 | 0          | NA          | NA         | NA         | NA         | C21orf91-OT1 |
| 115557    | ENSG00000240771 | 1625.5833  | 0.47061152  | 0.07543019 | 1.94E-10   | 3.62E-09   | ARHGEF25     |
| NA        | ENSG00000240772 | 0          | NA          | NA         | NA         | NA         | RN7SL776P    |



|           |                 |            |             |            |            |           |             |
|-----------|-----------------|------------|-------------|------------|------------|-----------|-------------|
| NA        | ENSG00000240774 | 0          | NA          | NA         | NA         | NA        |             |
| NA        | ENSG00000240775 | 0          | NA          | NA         | NA         | NA        |             |
| NA        | ENSG00000240776 | 0          | NA          | NA         | NA         | NA        |             |
| NA        | ENSG00000240777 | 0          | NA          | NA         | NA         | NA        |             |
| NA        | ENSG00000240785 | 0          | NA          | NA         | NA         | NA        | RPL36AP21   |
| NA        | ENSG00000240787 | 0          | NA          | NA         | NA         | NA        |             |
| NA        | ENSG00000240790 | 0          | NA          | NA         | NA         | NA        |             |
| NA        | ENSG00000240791 | 0.18922458 | 0.01954053  | 0.38488496 | 0.78225479 | NA        | MTND4LP7    |
| NA        | ENSG00000240792 | 0          | NA          | NA         | NA         | NA        |             |
| NA        | ENSG00000240793 | 2.19342132 | 0.05594921  | 0.37912751 | 0.54292624 | NA        | UBA52P8     |
| NA        | ENSG00000240796 | 0          | NA          | NA         | NA         | NA        | MTND2P14    |
| NA        | ENSG00000240801 | 0          | NA          | NA         | NA         | NA        |             |
| NA        | ENSG00000240803 | 0          | NA          | NA         | NA         | NA        | RN7SL231P   |
| NA        | ENSG00000240804 | 0          | NA          | NA         | NA         | NA        | NPM1P28     |
| NA        | ENSG00000240808 | 0.55709367 | 0.03313977  | 0.38626002 | 0.44859844 | NA        |             |
| NA        | ENSG00000240809 | 1.61709744 | -0.01627541 | 0.37756482 | 0.82949555 | NA        | CAP1P1      |
| NA        | ENSG00000240813 | 0          | NA          | NA         | NA         | NA        |             |
| NA        | ENSG00000240821 | 0          | NA          | NA         | NA         | NA        | RPL9P25     |
| NA        | ENSG00000240823 | 1.60196674 | -0.03755024 | 0.38098737 | 0.59434397 | NA        | RN7SL23P    |
| NA        | ENSG00000240824 | 0          | NA          | NA         | NA         | NA        | MTND3P7     |
| NA        | ENSG00000240827 | 0          | NA          | NA         | NA         | NA        |             |
| NA        | ENSG00000240828 | 1.0032499  | 0.00837496  | 0.38010658 | 0.89045082 | NA        | RPL21P4     |
| NA        | ENSG00000240837 | 0          | NA          | NA         | NA         | NA        | RN7SL77P    |
| NA        | ENSG00000240842 | 0          | NA          | NA         | NA         | NA        |             |
| NA        | ENSG00000240846 | 0          | NA          | NA         | NA         | NA        | RPS15P9     |
| NA        | ENSG00000240847 | 0          | NA          | NA         | NA         | NA        | RN7SL497P   |
| 387521    | ENSG00000240849 | 668.726073 | -0.54850088 | 0.09867582 | 9.34E-09   | 1.42E-07  | PEDS1       |
| NA        | ENSG00000240853 | 0          | NA          | NA         | NA         | NA        | RN7SL328P   |
| NA        | ENSG00000240854 | 0          | NA          | NA         | NA         | NA        | PSMC2P1     |
| 57665     | ENSG00000240857 | 381.527521 | -0.65280448 | 0.13730577 | 5.03E-07   | 6.00E-06  | RDH14       |
| 100507642 | ENSG00000240859 | 27.864498  | 0.075346    | 0.31230317 | 0.68879347 | 0.8489088 |             |
| NA        | ENSG00000240861 | 0          | NA          | NA         | NA         | NA        |             |
| NA        | ENSG00000240863 | 0          | NA          | NA         | NA         | NA        | RN7SL645P   |
| NA        | ENSG00000240864 | 0          | NA          | NA         | NA         | NA        | IGKV1-16    |
| NA        | ENSG00000240868 | 0          | NA          | NA         | NA         | NA        | C1QTNF9-AS1 |
| NA        | ENSG00000240869 | 0.173733   | 0.01914545  | 0.38484597 | 0.78225479 | NA        | RN7SL128P   |
| NA        | ENSG00000240870 | 0          | NA          | NA         | NA         | NA        | RPL19P14    |
| 100132476 | ENSG00000240871 | 0          | NA          | NA         | NA         | NA        | KRTAP4-7    |

|           |                 |            |             |            |            |            |            |
|-----------|-----------------|------------|-------------|------------|------------|------------|------------|
| NA        | ENSG00000240873 | 0          | NA          | NA         | NA         | NA         | RPS29P22   |
| NA        | ENSG00000240874 | 0.15069912 | -0.01848503 | 0.38480575 | 0.84537521 | NA         |            |
| 730091    | ENSG00000240875 | 21.3725421 | 0.31459108  | 0.44814899 | 0.12386867 | 0.29169785 | LINC00886  |
| NA        | ENSG00000240877 | 1.25117491 | 0.07400793  | 0.39093894 | 0.22654534 | NA         | RN7SL521P  |
| NA        | ENSG00000240881 | 0          | NA          | NA         | NA         | NA         |            |
| NA        | ENSG00000240882 | 3.41097574 | -0.00059772 | 0.3695803  | 0.99342369 | 0.99792601 |            |
| NA        | ENSG00000240888 | 0          | NA          | NA         | NA         | NA         |            |
| 100134713 | ENSG00000240889 | 21.0038352 | -0.08868403 | 0.31367119 | 0.63685586 | 0.81722218 | NDUFB2-AS1 |
| NA        | ENSG00000240890 | 0          | NA          | NA         | NA         | NA         |            |
| 257068    | ENSG00000240891 | 449.476406 | 0.40070109  | 0.13192102 | 0.00121265 | 0.00698575 | PLCXD2     |
| 101929694 | ENSG00000240893 | 0          | NA          | NA         | NA         | NA         | LINC02042  |
| NA        | ENSG00000240895 | 0          | NA          | NA         | NA         | NA         |            |
| NA        | ENSG00000240898 | 3.32253796 | 0.15066226  | 0.41408128 | 0.14255449 | 0.32128606 |            |
| NA        | ENSG00000240902 | 0          | NA          | NA         | NA         | NA         | APOOP2     |
| NA        | ENSG00000240905 | 0.173733   | 0.01914545  | 0.38484597 | 0.78225479 | NA         | RN7SL798P  |
| NA        | ENSG00000240912 | 0          | NA          | NA         | NA         | NA         | H2BP3      |
| NA        | ENSG00000240914 | 0          | NA          | NA         | NA         | NA         | RPL15P2    |
| NA        | ENSG00000240915 | 0.16735865 | 0.01897177  | 0.38482933 | 0.78225479 | NA         |            |
| NA        | ENSG00000240919 | 0.173733   | 0.01914545  | 0.38484597 | 0.78225479 | NA         |            |
| 101926903 | ENSG00000240922 | 0          | NA          | NA         | NA         | NA         | LSAMP-AS1  |
| NA        | ENSG00000240925 | 0          | NA          | NA         | NA         | NA         | RPS20P31   |
| NA        | ENSG00000240927 | 0.44795842 | -0.02501848 | 0.38558245 | 0.5807882  | NA         | RN7SL209P  |
| NA        | ENSG00000240934 | 0          | NA          | NA         | NA         | NA         |            |
| NA        | ENSG00000240935 | 0          | NA          | NA         | NA         | NA         | PLGLA      |
| NA        | ENSG00000240936 | 0          | NA          | NA         | NA         | NA         | RN7SL554P  |
| NA        | ENSG00000240940 | 0          | NA          | NA         | NA         | NA         | RN7SL591P  |
| NA        | ENSG00000240950 | 0          | NA          | NA         | NA         | NA         |            |
| NA        | ENSG00000240951 | 0          | NA          | NA         | NA         | NA         | MTCO2P6    |
| NA        | ENSG00000240954 | 0          | NA          | NA         | NA         | NA         | RPL4P1     |
| NA        | ENSG00000240959 | 0          | NA          | NA         | NA         | NA         | ST13P14    |
| NA        | ENSG00000240960 | 0          | NA          | NA         | NA         | NA         |            |
| NA        | ENSG00000240961 | 0          | NA          | NA         | NA         | NA         | RN7SL415P  |
| NA        | ENSG00000240963 | 0          | NA          | NA         | NA         | NA         |            |
| NA        | ENSG00000240964 | 0          | NA          | NA         | NA         | NA         | RN7SL751P  |
| NA        | ENSG00000240966 | 0          | NA          | NA         | NA         | NA         | RN7SL681P  |
| NA        | ENSG00000240970 | 10.4403505 | -0.12214384 | 0.35637092 | 0.46957737 | 0.69200141 | RPL23AP64  |
| 4282      | ENSG00000240972 | 8678.1487  | -0.10043146 | 0.05706763 | 0.07492653 | 0.20131938 | MIF        |
| 100506489 | ENSG00000240973 | 0          | NA          | NA         | NA         | NA         |            |

|        |                 |            |             |            |            |            |           |
|--------|-----------------|------------|-------------|------------|------------|------------|-----------|
| NA     | ENSG00000240974 | 0          | NA          | NA         | NA         | NA         | RPS27AP10 |
| NA     | ENSG00000240975 | 0          | NA          | NA         | NA         | NA         |           |
| NA     | ENSG00000240977 | 0          | NA          | NA         | NA         | NA         | RN7SL283P |
| NA     | ENSG00000240980 | 0          | NA          | NA         | NA         | NA         |           |
| NA     | ENSG00000240983 | 0          | NA          | NA         | NA         | NA         |           |
| 221883 | ENSG00000240990 | 0          | NA          | NA         | NA         | NA         | HOXA11-AS |
| NA     | ENSG00000240991 | 0.69621354 | 0.02520989  | 0.38342747 | 0.5780435  | NA         | RPL23AP67 |
| NA     | ENSG00000240992 | 0          | NA          | NA         | NA         | NA         | RPS23P4   |
| NA     | ENSG00000240993 | 0          | NA          | NA         | NA         | NA         | RN7SL459P |
| NA     | ENSG00000240995 | 0          | NA          | NA         | NA         | NA         |           |
| NA     | ENSG00000240996 | 3.06584229 | 0.02154025  | 0.37007056 | 0.83882015 | 0.92674595 |           |
| NA     | ENSG00000240997 | 0          | NA          | NA         | NA         | NA         | RN7SL183P |
| NA     | ENSG00000241002 | 0          | NA          | NA         | NA         | NA         | RPL32P13  |
| NA     | ENSG00000241003 | 0          | NA          | NA         | NA         | NA         |           |
| NA     | ENSG00000241007 | 0          | NA          | NA         | NA         | NA         | SEPTIN7P6 |
| NA     | ENSG00000241008 | 0          | NA          | NA         | NA         | NA         |           |
| NA     | ENSG00000241011 | 0          | NA          | NA         | NA         | NA         |           |
| 653160 | ENSG00000241014 | 4.03565972 | -0.0300929  | 0.38660146 | 0.17014868 | 0.3620107  | GPR199P   |
| 147804 | ENSG00000241015 | 201.255322 | 0.2005033   | 0.20957881 | 0.2564756  | 0.47758495 | TPM3P9    |
| NA     | ENSG00000241018 | 0          | NA          | NA         | NA         | NA         | RCC2P5    |
| NA     | ENSG00000241020 | 6.20784094 | 0.03578566  | 0.38532622 | 0.41551531 | 0.64244323 | RPL32P24  |
| NA     | ENSG00000241022 | 0          | NA          | NA         | NA         | NA         | NIPA2P2   |
| NA     | ENSG00000241026 | 0          | NA          | NA         | NA         | NA         |           |
| NA     | ENSG00000241030 | 0.34693517 | 0.00048404  | 0.38336263 | 0.96387805 | NA         | RPL29P24  |
| NA     | ENSG00000241032 | 0          | NA          | NA         | NA         | NA         | RN7SL709P |
| NA     | ENSG00000241035 | 0          | NA          | NA         | NA         | NA         |           |
| NA     | ENSG00000241037 | 0          | NA          | NA         | NA         | NA         | RN7SL335P |
| NA     | ENSG00000241042 | 0          | NA          | NA         | NA         | NA         |           |
| NA     | ENSG00000241045 | 0          | NA          | NA         | NA         | NA         | RPL7P43   |
| NA     | ENSG00000241048 | 0          | NA          | NA         | NA         | NA         |           |
| NA     | ENSG00000241052 | 0          | NA          | NA         | NA         | NA         | RPL23AP70 |
| NA     | ENSG00000241054 | 0          | NA          | NA         | NA         | NA         |           |
| NA     | ENSG00000241057 | 3.1310412  | -0.04421937 | 0.37451211 | 0.65492252 | 0.82814932 |           |
| 221078 | ENSG00000241058 | 390.555306 | -0.16328012 | 0.13656802 | 0.19934052 | 0.40389255 | NSUN6     |
| NA     | ENSG00000241059 | 0          | NA          | NA         | NA         | NA         |           |
| NA     | ENSG00000241061 | 0.173733   | 0.01914545  | 0.38484597 | 0.78225479 | NA         | RPL5P1    |
| NA     | ENSG00000241064 | 0          | NA          | NA         | NA         | NA         | RN7SL110P |
| NA     | ENSG00000241067 | 0          | NA          | NA         | NA         | NA         | RPL17P40  |

|           |                 |            |             |            |            |            |              |
|-----------|-----------------|------------|-------------|------------|------------|------------|--------------|
| NA        | ENSG00000241069 | 0          | NA          | NA         | NA         | NA         |              |
| NA        | ENSG00000241073 | 0          | NA          | NA         | NA         | NA         |              |
| NA        | ENSG00000241074 | 0          | NA          | NA         | NA         | NA         | RN7SL813P    |
| NA        | ENSG00000241081 | 0.33471731 | 0.02354391  | 0.38534154 | 0.62842204 | NA         | RPL22P2      |
| NA        | ENSG00000241082 | 0          | NA          | NA         | NA         | NA         | RN7SL259P    |
| NA        | ENSG00000241088 | 0          | NA          | NA         | NA         | NA         | RPL17P44     |
| NA        | ENSG00000241095 | 0          | NA          | NA         | NA         | NA         | CYP51A1P1    |
| NA        | ENSG00000241097 | 0          | NA          | NA         | NA         | NA         |              |
| 401103    | ENSG00000241098 | 0          | NA          | NA         | NA         | NA         | LINC01994    |
| NA        | ENSG00000241101 | 0          | NA          | NA         | NA         | NA         | PRICKLE2-AS2 |
| NA        | ENSG00000241102 | 0          | NA          | NA         | NA         | NA         |              |
| NA        | ENSG00000241103 | 0          | NA          | NA         | NA         | NA         | RPL35AP11    |
| 284344    | ENSG00000241104 | 0          | NA          | NA         | NA         | NA         | CEACAMP10    |
| NA        | ENSG00000241105 | 0          | NA          | NA         | NA         | NA         |              |
| 3112      | ENSG00000241106 | 0          | NA          | NA         | NA         | NA         | HLA-DOB      |
| 100652759 | ENSG00000241111 | 0          | NA          | NA         | NA         | NA         |              |
| NA        | ENSG00000241112 | 0.97762028 | 0.00397347  | 0.38003463 | 0.9477462  | NA         | RPL29P14     |
| NA        | ENSG00000241114 | 0          | NA          | NA         | NA         | NA         |              |
| 54600     | ENSG00000241119 | 0          | NA          | NA         | NA         | NA         | UGT1A9       |
| NA        | ENSG00000241120 | 0.79806966 | -0.00515016 | 0.38214039 | 0.91249788 | NA         | HMG1P8       |
| 386680    | ENSG00000241123 | 0          | NA          | NA         | NA         | NA         | KRTAP10-5    |
| 57002     | ENSG00000241127 | 408.172401 | 0.02854011  | 0.11738329 | 0.7994751  | 0.90803676 | YAE1         |
| 388761    | ENSG00000241128 | 0          | NA          | NA         | NA         | NA         | OR14A2       |
| NA        | ENSG00000241129 | 0.3240178  | 0.00205173  | 0.38337601 | 0.96143858 | NA         | RPL22P19     |
| NA        | ENSG00000241130 | 0          | NA          | NA         | NA         | NA         | RPL32P30     |
| 100507461 | ENSG00000241131 | 0.14931947 | -0.01844332 | 0.38480212 | 0.84537521 | NA         | LINC02032    |
| NA        | ENSG00000241134 | 0          | NA          | NA         | NA         | NA         | BET1P1       |
| NA        | ENSG00000241135 | 0          | NA          | NA         | NA         | NA         | LINC00881    |
| NA        | ENSG00000241136 | 0          | NA          | NA         | NA         | NA         | PAICSP6      |
| NA        | ENSG00000241143 | 0          | NA          | NA         | NA         | NA         | RPL32P9      |
| NA        | ENSG00000241144 | 0          | NA          | NA         | NA         | NA         | RN7SL728P    |
| NA        | ENSG00000241146 | 0          | NA          | NA         | NA         | NA         | RPL7P41      |
| NA        | ENSG00000241149 | 13.418112  | -2.05038818 | 0.79221181 | 0.00049999 | 0.00322383 | ZNF722P      |
| NA        | ENSG00000241151 | 0          | NA          | NA         | NA         | NA         | LINC02066    |
| NA        | ENSG00000241152 | 0          | NA          | NA         | NA         | NA         | RN7SL720P    |
| 100874246 | ENSG00000241155 | 9.80844762 | -0.06644107 | 0.35021133 | 0.66829959 | 0.83695644 | ARHGAP31-AS1 |
| NA        | ENSG00000241156 | 0          | NA          | NA         | NA         | NA         | RN7SL582P    |
| NA        | ENSG00000241157 | 0          | NA          | NA         | NA         | NA         | RPL32P32     |

|           |                 |            |             |            |            |            |                 |
|-----------|-----------------|------------|-------------|------------|------------|------------|-----------------|
| 101929335 | ENSG00000241158 | 44.1260223 | -0.25418157 | 0.3134733  | 0.2269627  | 0.4416379  | ADAMTS9-AS1     |
| NA        | ENSG00000241159 | 0.173733   | 0.01914545  | 0.38484597 | 0.78225479 | NA         | RN7SL160P       |
| NA        | ENSG00000241162 | 0          | NA          | NA         | NA         | NA         | RN7SL617P       |
| 285286    | ENSG00000241163 | 11.9988555 | -0.07617628 | 0.34238327 | 0.64711002 | 0.82430661 | LINC00877       |
| NA        | ENSG00000241168 | 0          | NA          | NA         | NA         | NA         |                 |
| NA        | ENSG00000241169 | 0          | NA          | NA         | NA         | NA         |                 |
| NA        | ENSG00000241170 | 2.23377843 | -0.00966124 | 0.37333866 | 0.91493175 | NA         |                 |
| NA        | ENSG00000241172 | 0          | NA          | NA         | NA         | NA         | RN7SL70P        |
| NA        | ENSG00000241174 | 0          | NA          | NA         | NA         | NA         | RN7SL570P       |
| NA        | ENSG00000241175 | 0          | NA          | NA         | NA         | NA         | RN7SL494P       |
| NA        | ENSG00000241179 | 0          | NA          | NA         | NA         | NA         |                 |
| NA        | ENSG00000241180 | 7.25130206 | 0.14901129  | 0.38558786 | 0.32728488 | 0.55565052 |                 |
| NA        | ENSG00000241183 | 0          | NA          | NA         | NA         | NA         |                 |
| NA        | ENSG00000241185 | 0.16735865 | 0.01897177  | 0.38482933 | 0.78225479 | NA         |                 |
| 6997      | ENSG00000241186 | 0          | NA          | NA         | NA         | NA         | TDGF1           |
| NA        | ENSG00000241187 | 0          | NA          | NA         | NA         | NA         |                 |
| NA        | ENSG00000241188 | 0          | NA          | NA         | NA         | NA         | RN7SL165P       |
| NA        | ENSG00000241198 | 0          | NA          | NA         | NA         | NA         | RN7SL191P       |
| NA        | ENSG00000241200 | 0          | NA          | NA         | NA         | NA         | ZNF736P7Y       |
| NA        | ENSG00000241202 | 0          | NA          | NA         | NA         | NA         | ZIC4-AS1        |
| NA        | ENSG00000241203 | 0          | NA          | NA         | NA         | NA         | HMG2P26         |
| NA        | ENSG00000241204 | 0          | NA          | NA         | NA         | NA         |                 |
| NA        | ENSG00000241207 | 0          | NA          | NA         | NA         | NA         |                 |
| NA        | ENSG00000241211 | 0          | NA          | NA         | NA         | NA         | IQCJ-SCHIP1-AS1 |
| 105374057 | ENSG00000241213 | 0.79587527 | -0.02353192 | 0.38280024 | 0.65827106 | NA         | LINC02024       |
| NA        | ENSG00000241216 | 0          | NA          | NA         | NA         | NA         | SNAPC5P1        |
| NA        | ENSG00000241217 | 0.99605683 | 0.03078181  | 0.38213753 | 0.60505401 | NA         | RN7SL809P       |
| NA        | ENSG00000241218 | 4.42410497 | 0.18411436  | 0.42924711 | 0.12480209 | 0.29313051 | CSP2            |
| NA        | ENSG00000241219 | 0          | NA          | NA         | NA         | NA         |                 |
| NA        | ENSG00000241220 | 0          | NA          | NA         | NA         | NA         |                 |
| NA        | ENSG00000241221 | 0          | NA          | NA         | NA         | NA         | MTND4LP17       |
| NA        | ENSG00000241223 | 0          | NA          | NA         | NA         | NA         | RN7SL39P        |
| 401081    | ENSG00000241224 | 0          | NA          | NA         | NA         | NA         | C3orf85         |
| NA        | ENSG00000241225 | 0          | NA          | NA         | NA         | NA         | NMTR5-TGA3-1    |
| NA        | ENSG00000241226 | 0          | NA          | NA         | NA         | NA         | RN7SL836P       |
| NA        | ENSG00000241227 | 0          | NA          | NA         | NA         | NA         | RN7SL553P       |
| NA        | ENSG00000241228 | 0          | NA          | NA         | NA         | NA         | RPL12P31        |
| NA        | ENSG00000241229 | 0.46676019 | -0.0077203  | 0.38326241 | 0.86531354 | NA         | RN7SL443P       |

|           |                 |            |             |            |            |            |            |
|-----------|-----------------|------------|-------------|------------|------------|------------|------------|
| NA        | ENSG00000241230 | 0          | NA          | NA         | NA         | NA         | RN7SL801P  |
| NA        | ENSG00000241231 | 0          | NA          | NA         | NA         | NA         |            |
| 57830     | ENSG00000241233 | 0.69790075 | 0.02708321  | 0.38368267 | 0.5709056  | NA         | KRTAP5-8   |
| NA        | ENSG00000241241 | 0          | NA          | NA         | NA         | NA         | KRTAP4-16  |
| NA        | ENSG00000241243 | 0.34624801 | -0.02356563 | 0.38536324 | 0.65270996 | NA         | RN7SL629P  |
| NA        | ENSG00000241244 | 0          | NA          | NA         | NA         | NA         | IGKV1D-16  |
| NA        | ENSG00000241246 | 0          | NA          | NA         | NA         | NA         | RN7SL302P  |
| NA        | ENSG00000241248 | 0          | NA          | NA         | NA         | NA         | RN7SL727P  |
| NA        | ENSG00000241250 | 0          | NA          | NA         | NA         | NA         | RPL17P20   |
| NA        | ENSG00000241251 | 0          | NA          | NA         | NA         | NA         |            |
| NA        | ENSG00000241255 | 1.3451087  | 0.03368124  | 0.3810935  | 0.61787513 | NA         |            |
| NA        | ENSG00000241257 | 0          | NA          | NA         | NA         | NA         |            |
| 27297     | ENSG00000241258 | 1178.61237 | 0.05622105  | 0.08492794 | 0.49781367 | 0.71568059 | CRCP       |
| NA        | ENSG00000241261 | 0          | NA          | NA         | NA         | NA         | RPL17P19   |
| NA        | ENSG00000241269 | 0.18922458 | 0.01954053  | 0.38488496 | 0.78225479 | NA         |            |
| NA        | ENSG00000241278 | 1.53552592 | 0.04847236  | 0.38144855 | 0.52828901 | NA         | ENPP7P4    |
| NA        | ENSG00000241280 | 0          | NA          | NA         | NA         | NA         |            |
| NA        | ENSG00000241281 | 0.173733   | 0.01914545  | 0.38484597 | 0.78225479 | NA         |            |
| NA        | ENSG00000241282 | 0          | NA          | NA         | NA         | NA         | RPL34P33   |
| NA        | ENSG00000241286 | 0          | NA          | NA         | NA         | NA         | RPL29P25   |
| 101927056 | ENSG00000241288 | 17.0059282 | 0.14220549  | 0.34203571 | 0.4459119  | 0.67028199 | LINC02614  |
| NA        | ENSG00000241291 | 0          | NA          | NA         | NA         | NA         | RN7SL791P  |
| NA        | ENSG00000241293 | 0          | NA          | NA         | NA         | NA         | PPATP1     |
| NA        | ENSG00000241294 | 0          | NA          | NA         | NA         | NA         | IGKV2-24   |
| NA        | ENSG00000241295 | 0          | NA          | NA         | NA         | NA         | ZBTB20-AS2 |
| NA        | ENSG00000241305 | 0          | NA          | NA         | NA         | NA         | ACTG1P13   |
| NA        | ENSG00000241307 | 0.15069912 | -0.01848503 | 0.38480575 | 0.84537521 | NA         |            |
| 100128025 | ENSG00000241313 | 2.00739266 | 0.07007752  | 0.38485843 | 0.40303359 | NA         | WWTR1-AS1  |
| 101927111 | ENSG00000241316 | 43.5599814 | -0.35844865 | 0.33136567 | 0.11067758 | 0.26834208 | SUCLG2-AS1 |
| NA        | ENSG00000241317 | 0          | NA          | NA         | NA         | NA         |            |
| NA        | ENSG00000241318 | 0.16735865 | 0.01897177  | 0.38482933 | 0.78225479 | NA         | WDR82P2    |
| NA        | ENSG00000241319 | 0          | NA          | NA         | NA         | NA         | SETP6      |
| 374286    | ENSG00000241322 | 14.65291   | -0.06181595 | 0.33627164 | 0.71095619 | 0.86118643 | CDRT1      |
| NA        | ENSG00000241324 | 0          | NA          | NA         | NA         | NA         |            |
| NA        | ENSG00000241326 | 0          | NA          | NA         | NA         | NA         |            |
| 101927494 | ENSG00000241328 | 0          | NA          | NA         | NA         | NA         | LINC02070  |
| NA        | ENSG00000241333 | 0.34624801 | -0.02356563 | 0.38536324 | 0.65270996 | NA         | RN7SL385P  |
| NA        | ENSG00000241334 | 0          | NA          | NA         | NA         | NA         | RPL35AP33  |

|           |                 |            |             |            |            |            |            |
|-----------|-----------------|------------|-------------|------------|------------|------------|------------|
| 101928190 | ENSG00000241336 | 0          | NA          | NA         | NA         | NA         | LINC01487  |
| 6173      | ENSG00000241343 | 5968.97125 | 0.35457267  | 0.07305782 | 7.36E-07   | 8.52E-06   | RPL36A     |
| NA        | ENSG00000241344 | 0          | NA          | NA         | NA         | NA         | RPL21P47   |
| 105375483 | ENSG00000241345 | 45.5519538 | -0.24118075 | 0.31719593 | 0.25067308 | 0.47063996 |            |
| NA        | ENSG00000241346 | 0.16735865 | 0.01897177  | 0.38482933 | 0.78225479 | NA         | SNRPCP11   |
| NA        | ENSG00000241347 | 0          | NA          | NA         | NA         | NA         | RN7SL466P  |
| NA        | ENSG00000241350 | 0.16735865 | 0.01897177  | 0.38482933 | 0.78225479 | NA         | PMS2P11    |
| NA        | ENSG00000241351 | 0          | NA          | NA         | NA         | NA         | IGKV3-11   |
| NA        | ENSG00000241352 | 0.63740076 | -0.02080764 | 0.38315    | 0.67049884 | NA         |            |
| NA        | ENSG00000241353 | 0          | NA          | NA         | NA         | NA         | PPP1R2P4   |
| NA        | ENSG00000241354 | 0          | NA          | NA         | NA         | NA         |            |
| NA        | ENSG00000241356 | 0          | NA          | NA         | NA         | NA         | OR5G3      |
| NA        | ENSG00000241357 | 0.173124   | -0.01911262 | 0.38486262 | 0.84537521 | NA         |            |
| NA        | ENSG00000241358 | 0          | NA          | NA         | NA         | NA         |            |
| 100874016 | ENSG00000241359 | 0          | NA          | NA         | NA         | NA         | SYNPR-AS1  |
| 57026     | ENSG00000241360 | 1384.4088  | -0.26739646 | 0.07617169 | 0.00033026 | 0.00223097 | PDXP       |
| NA        | ENSG00000241361 | 19.288769  | 0.66903042  | 0.58351095 | 0.02724335 | 0.09307784 | SLC25A24P1 |
| NA        | ENSG00000241362 | 2.25967379 | -0.01148323 | 0.37458519 | 0.89396792 | NA         | RPL36AP43  |
| NA        | ENSG00000241367 | 0          | NA          | NA         | NA         | NA         | RPL7AP23   |
| 647107    | ENSG00000241369 | 0.73968404 | 0.041007    | 0.38719459 | 0.34990325 | NA         | LINC01192  |
| 79897     | ENSG00000241370 | 307.480574 | 0.1048255   | 0.13129716 | 0.39557017 | 0.62504875 | RPP21      |
| 202658    | ENSG00000241370 | 307.480574 | 0.1048255   | 0.13129716 | 0.39557017 | 0.62504875 | RPP21      |
| NA        | ENSG00000241383 | 0          | NA          | NA         | NA         | NA         | LINC01997  |
| NA        | ENSG00000241385 | 0          | NA          | NA         | NA         | NA         |            |
| 283460    | ENSG00000241388 | 0          | NA          | NA         | NA         | NA         | HNF1A-AS1  |
| NA        | ENSG00000241391 | 0          | NA          | NA         | NA         | NA         | RN7SL234P  |
| NA        | ENSG00000241392 | 0          | NA          | NA         | NA         | NA         | RN7SL205P  |
| NA        | ENSG00000241395 | 0          | NA          | NA         | NA         | NA         | RN7SL344P  |
| NA        | ENSG00000241397 | 0          | NA          | NA         | NA         | NA         | LINC00903  |
| 9936      | ENSG00000241399 | 169.357043 | 0.54576972  | 0.1870199  | 0.0011145  | 0.00648789 | CD302      |
| NA        | ENSG00000241400 | 0.29863895 | -0.02292439 | 0.3852726  | 0.68753245 | NA         |            |
| 80864     | ENSG00000241404 | 235.63586  | 1.00338732  | 0.16889122 | 3.67E-10   | 6.68E-09   | EGFL8      |
| NA        | ENSG00000241406 | 0          | NA          | NA         | NA         | NA         | RN7SL515P  |
| NA        | ENSG00000241409 | 0          | NA          | NA         | NA         | NA         |            |
| NA        | ENSG00000241411 | 0          | NA          | NA         | NA         | NA         |            |
| NA        | ENSG00000241413 | 0          | NA          | NA         | NA         | NA         | RN7SL441P  |
| NA        | ENSG00000241416 | 0.14931947 | -0.01844332 | 0.38480212 | 0.84537521 | NA         | KRT8P13    |
| NA        | ENSG00000241418 | 0          | NA          | NA         | NA         | NA         | MCRIP2P1   |

|           |                 |            |             |            |            |            |            |
|-----------|-----------------|------------|-------------|------------|------------|------------|------------|
| NA        | ENSG00000241420 | 0          | NA          | NA         | NA         | NA         | RN7SL505P  |
| NA        | ENSG00000241423 | 0          | NA          | NA         | NA         | NA         | RPL21P103  |
| NA        | ENSG00000241429 | 0.18922458 | 0.01954053  | 0.38488496 | 0.78225479 | NA         | EEF1A1P25  |
| NA        | ENSG00000241431 | 0          | NA          | NA         | NA         | NA         | RPL37P6    |
| NA        | ENSG00000241434 | 0          | NA          | NA         | NA         | NA         |            |
| NA        | ENSG00000241438 | 0.15069912 | -0.01848503 | 0.38480575 | 0.84537521 | NA         | TDGF1P6    |
| NA        | ENSG00000241439 | 0.51937201 | -0.02557462 | 0.38567603 | 0.54680819 | NA         |            |
| NA        | ENSG00000241449 | 0          | NA          | NA         | NA         | NA         |            |
| NA        | ENSG00000241451 | 0          | NA          | NA         | NA         | NA         | RPS27P22   |
| NA        | ENSG00000241456 | 0.14931947 | -0.01844332 | 0.38480212 | 0.84537521 | NA         |            |
| NA        | ENSG00000241457 | 0          | NA          | NA         | NA         | NA         | PLSCR5-AS1 |
| NA        | ENSG00000241458 | 0          | NA          | NA         | NA         | NA         | RPL7P19    |
| NA        | ENSG00000241461 | 0          | NA          | NA         | NA         | NA         | RN7SL182P  |
| NA        | ENSG00000241462 | 0          | NA          | NA         | NA         | NA         |            |
| NA        | ENSG00000241464 | 0          | NA          | NA         | NA         | NA         | RPL39P38   |
| 9551      | ENSG00000241468 | 2293.71079 | -0.06756815 | 0.08295542 | 0.4035027  | 0.6315473  | ATP5MF     |
| 151658    | ENSG00000241469 | 0.14931947 | -0.01844332 | 0.38480212 | 0.84537521 | NA         | LINC00635  |
| 100506994 | ENSG00000241472 | 77.2172379 | 0.10055693  | 0.22698135 | 0.58593649 | 0.7817695  | PTPRG-AS1  |
| NA        | ENSG00000241473 | 0          | NA          | NA         | NA         | NA         |            |
| NA        | ENSG00000241475 | 0          | NA          | NA         | NA         | NA         |            |
| 6757      | ENSG00000241476 | 0.6603194  | -0.03662483 | 0.38662896 | 0.42216809 | NA         | SSX2       |
| NA        | ENSG00000241478 | 0.47383319 | -0.00944496 | 0.38286066 | 0.84443184 | NA         | HSPA8P9    |
| 105374205 | ENSG00000241479 | 0          | NA          | NA         | NA         | NA         | MECOM-AS1  |
| 23779     | ENSG00000241484 | 54.8687854 | 0.44908566  | 0.29823387 | 0.04444945 | 0.13588274 | ARHGAP8    |
| NA        | ENSG00000241487 | 0          | NA          | NA         | NA         | NA         | RN7SL586P  |
| NA        | ENSG00000241489 | 273.285135 | 0.48162713  | 0.16560573 | 0.00141372 | 0.00797179 |            |
| NA        | ENSG00000241490 | 0.15069912 | -0.01848503 | 0.38480575 | 0.84537521 | NA         |            |
| NA        | ENSG00000241493 | 0          | NA          | NA         | NA         | NA         |            |
| NA        | ENSG00000241494 | 0.173733   | 0.01914545  | 0.38484597 | 0.78225479 | NA         |            |
| NA        | ENSG00000241499 | 0.6388937  | 0.00346183  | 0.38196731 | 0.94039531 | NA         |            |
| NA        | ENSG00000241505 | 0          | NA          | NA         | NA         | NA         |            |
| NA        | ENSG00000241506 | 15.6739911 | -0.00194038 | 0.38288218 | 0.94894976 | 0.97900074 | PSMC1P1    |
| NA        | ENSG00000241511 | 1.39615646 | 0.03785823  | 0.38064455 | 0.60037941 | NA         | RPS15AP24  |
| NA        | ENSG00000241520 | 2.49457314 | -0.02502211 | 0.37487    | 0.7786657  | NA         |            |
| NA        | ENSG00000241524 | 0          | NA          | NA         | NA         | NA         | RN7SL632P  |
| 105371430 | ENSG00000241525 | 0.49744687 | 0.01159955  | 0.3833937  | 0.77945948 | NA         |            |
| NA        | ENSG00000241526 | 0          | NA          | NA         | NA         | NA         |            |
| NA        | ENSG00000241527 | 0.34685788 | 0.00011739  | 0.38336203 | 0.9673446  | NA         | CA15P1     |



|           |                 |            |             |            |            |            |              |
|-----------|-----------------|------------|-------------|------------|------------|------------|--------------|
| NA        | ENSG00000241529 | 0.51536296 | 0.01573501  | 0.38314518 | 0.7325741  | NA         | RN7SL767P    |
| NA        | ENSG00000241532 | 9.32099962 | -0.1173394  | 0.37682746 | 0.40763951 | 0.63599565 | AGGF1P3      |
| NA        | ENSG00000241535 | 0.49894205 | -0.01036516 | 0.38284216 | 0.82570019 | NA         | CBX5P1       |
| NA        | ENSG00000241537 | 1.63203204 | -0.00608007 | 0.37797204 | 0.93142573 | NA         |              |
| NA        | ENSG00000241539 | 0          | NA          | NA         | NA         | NA         |              |
| NA        | ENSG00000241542 | 0          | NA          | NA         | NA         | NA         | RN7SL369P    |
| 105374177 | ENSG00000241544 | 0.34495978 | 0.02365591  | 0.38535793 | 0.62207308 | NA         | LINC02029    |
| NA        | ENSG00000241546 | 0          | NA          | NA         | NA         | NA         |              |
| NA        | ENSG00000241547 | 21.7885161 | 0.07541631  | 0.3130631  | 0.68874533 | 0.8489088  | ACTG1P20     |
| 387036    | ENSG00000241549 | 182.352758 | 0.43541317  | 0.18107268 | 0.00701474 | 0.03103065 | GUSBP2       |
| NA        | ENSG00000241550 | 0          | NA          | NA         | NA         | NA         | RN7SL41P     |
| NA        | ENSG00000241552 | 0          | NA          | NA         | NA         | NA         | RN7SL58P     |
| 10093     | ENSG00000241553 | 1961.52333 | -0.1087302  | 0.06540421 | 0.09181381 | 0.23401671 | ARPC4        |
| NA        | ENSG00000241556 | 0          | NA          | NA         | NA         | NA         |              |
| 100131117 | ENSG00000241560 | 1.00420373 | -0.02270392 | 0.38034616 | 0.72424647 | NA         | ZBTB20-AS1   |
| NA        | ENSG00000241562 | 0          | NA          | NA         | NA         | NA         | RPL7P5       |
| 1325      | ENSG00000241563 | 5.24725467 | 0.16724012  | 0.41487553 | 0.17906042 | 0.3751778  | CORT         |
| NA        | ENSG00000241566 | 0          | NA          | NA         | NA         | NA         | IGKV2D-24    |
| NA        | ENSG00000241568 | 0          | NA          | NA         | NA         | NA         | RN7SL338P    |
| 101927832 | ENSG00000241570 | 2.31069407 | 0.14062802  | 0.41757423 | 0.05569558 | NA         | PAQR9-AS1    |
| NA        | ENSG00000241571 | 0          | NA          | NA         | NA         | NA         | ATP5F1AP7    |
| NA        | ENSG00000241572 | 0          | NA          | NA         | NA         | NA         | PRICKLE2-AS1 |
| NA        | ENSG00000241573 | 0          | NA          | NA         | NA         | NA         |              |
| NA        | ENSG00000241577 | 0          | NA          | NA         | NA         | NA         |              |
| NA        | ENSG00000241582 | 0          | NA          | NA         | NA         | NA         | RPL23AP8     |
| NA        | ENSG00000241587 | 0.173733   | 0.01914545  | 0.38484597 | 0.78225479 | NA         | RN7SL482P    |
| NA        | ENSG00000241588 | 0          | NA          | NA         | NA         | NA         | RN7SL484P    |
| NA        | ENSG00000241590 | 0          | NA          | NA         | NA         | NA         | RPL17P37     |
| NA        | ENSG00000241592 | 0.14931947 | -0.01844332 | 0.38480212 | 0.84537521 | NA         |              |
| NA        | ENSG00000241593 | 2.4071213  | 0.06985688  | 0.38151237 | 0.46271869 | NA         |              |
| 85280     | ENSG00000241595 | 0          | NA          | NA         | NA         | NA         | KRTAP9-4     |
| NA        | ENSG00000241596 | 0          | NA          | NA         | NA         | NA         |              |
| NA        | ENSG00000241597 | 1.28317895 | 0.00663291  | 0.37876532 | 0.9231745  | NA         |              |
| 387267    | ENSG00000241598 | 0.15069912 | -0.01848503 | 0.38480575 | 0.84537521 | NA         | KRTAP5-4     |
| NA        | ENSG00000241599 | 0          | NA          | NA         | NA         | NA         |              |
| NA        | ENSG00000241604 | 0          | NA          | NA         | NA         | NA         | RN7SL340P    |
| NA        | ENSG00000241607 | 0.50207596 | 0.02562368  | 0.38565771 | 0.52549886 | NA         |              |
| NA        | ENSG00000241612 | 0          | NA          | NA         | NA         | NA         |              |

|           |                 |            |             |            |            |            |             |
|-----------|-----------------|------------|-------------|------------|------------|------------|-------------|
| NA        | ENSG00000241613 | 0          | NA          | NA         | NA         | NA         | RN7SL618P   |
| NA        | ENSG00000241621 | 0          | NA          | NA         | NA         | NA         | GOLGA2P6    |
| NA        | ENSG00000241622 | 9.06093759 | 0.34451764  | 0.5245484  | 0.07926143 | 0.21000892 | RARRES2P1   |
| NA        | ENSG00000241625 | 0          | NA          | NA         | NA         | NA         | RN7SL18P    |
| NA        | ENSG00000241627 | 1.21061239 | 0.04825415  | 0.38313739 | 0.48209855 | NA         | UBQLN4P1    |
| NA        | ENSG00000241631 | 0          | NA          | NA         | NA         | NA         | RN7SL316P   |
| NA        | ENSG00000241634 | 49.0725066 | -0.12143217 | 0.26548435 | 0.53270184 | 0.74395247 |             |
| 54658     | ENSG00000241635 | 0          | NA          | NA         | NA         | NA         | UGT1A1      |
| NA        | ENSG00000241636 | 0          | NA          | NA         | NA         | NA         | LINC01323   |
| NA        | ENSG00000241640 | 0          | NA          | NA         | NA         | NA         |             |
| NA        | ENSG00000241641 | 0.173124   | -0.01911262 | 0.38486262 | 0.84537521 | NA         | RPS23P6     |
| 11185     | ENSG00000241644 | 1.18836417 | 0.05531488  | 0.3875502  | 0.29796258 | NA         | INMT        |
| 100874037 | ENSG00000241648 | 0          | NA          | NA         | NA         | NA         | CADM2-AS2   |
| NA        | ENSG00000241651 | 0          | NA          | NA         | NA         | NA         |             |
| NA        | ENSG00000241652 | 0          | NA          | NA         | NA         | NA         | RN7SL253P   |
| NA        | ENSG00000241654 | 0          | NA          | NA         | NA         | NA         | RPL19P18    |
| NA        | ENSG00000241656 | 0          | NA          | NA         | NA         | NA         | UBA52P7     |
| NA        | ENSG00000241657 | 0          | NA          | NA         | NA         | NA         | TRBV11-2    |
| NA        | ENSG00000241661 | 0          | NA          | NA         | NA         | NA         | PPP1R2P6    |
| NA        | ENSG00000241665 | 0          | NA          | NA         | NA         | NA         | RN7SL418P   |
| NA        | ENSG00000241666 | 0          | NA          | NA         | NA         | NA         |             |
| NA        | ENSG00000241667 | 0          | NA          | NA         | NA         | NA         |             |
| NA        | ENSG00000241668 | 0          | NA          | NA         | NA         | NA         | RPL19P11    |
| 104310350 | ENSG00000241669 | 0          | NA          | NA         | NA         | NA         | LINC01327   |
| NA        | ENSG00000241671 | 0          | NA          | NA         | NA         | NA         |             |
| NA        | ENSG00000241673 | 0          | NA          | NA         | NA         | NA         | RPS27P12    |
| NA        | ENSG00000241678 | 0          | NA          | NA         | NA         | NA         |             |
| NA        | ENSG00000241679 | 0          | NA          | NA         | NA         | NA         |             |
| NA        | ENSG00000241680 | 0.68943743 | 0.0050863   | 0.3813053  | 0.92130341 | NA         | RPL31P49    |
| NA        | ENSG00000241684 | 71.7159526 | -0.47721847 | 0.28446873 | 0.02974252 | 0.0997008  | ADAMTS9-AS2 |
| 10552     | ENSG00000241685 | 3209.61943 | 0.10011564  | 0.06325061 | 0.10858784 | 0.26446884 | ARPC1A      |
| NA        | ENSG00000241690 | 0          | NA          | NA         | NA         | NA         |             |
| NA        | ENSG00000241693 | 0.173733   | 0.01914545  | 0.38484597 | 0.78225479 | NA         | RN7SL704P   |
| NA        | ENSG00000241695 | 1.00314123 | 0.05552724  | 0.38971597 | 0.21593007 | NA         | GM2AP1      |
| 100505609 | ENSG00000241696 | 0          | NA          | NA         | NA         | NA         | LINC02053   |
| 8577      | ENSG00000241697 | 1049.5139  | -0.1085075  | 0.10830434 | 0.29536075 | 0.52197116 | TMEFF1      |
| NA        | ENSG00000241709 | 0          | NA          | NA         | NA         | NA         | RN7SL265P   |
| NA        | ENSG00000241717 | 0          | NA          | NA         | NA         | NA         | VWFP1       |

|           |                 |            |             |            |            |            |           |
|-----------|-----------------|------------|-------------|------------|------------|------------|-----------|
| NA        | ENSG00000241720 | 0          | NA          | NA         | NA         | NA         |           |
| NA        | ENSG00000241721 | 0          | NA          | NA         | NA         | NA         | SUMO1P1   |
| NA        | ENSG00000241722 | 0          | NA          | NA         | NA         | NA         |           |
| NA        | ENSG00000241723 | 0          | NA          | NA         | NA         | NA         |           |
| NA        | ENSG00000241728 | 1.38710288 | 0.0404936   | 0.38363774 | 0.49032735 | NA         |           |
| 220832    | ENSG00000241735 | 0.76738632 | -0.0263316  | 0.38326145 | 0.58646811 | NA         | FABP5P3   |
| NA        | ENSG00000241738 | 0.8529536  | 0.03850269  | 0.38494047 | 0.44586214 | NA         | ZNF90P1   |
| NA        | ENSG00000241739 | 0          | NA          | NA         | NA         | NA         |           |
| NA        | ENSG00000241741 | 0.84049591 | 0.01551186  | 0.38114475 | 0.78302402 | NA         | RPL7AP30  |
| NA        | ENSG00000241743 | 6.21119424 | -0.04964394 | 0.3609078  | 0.71007907 | 0.86085968 | XACT      |
| NA        | ENSG00000241744 | 0          | NA          | NA         | NA         | NA         |           |
| NA        | ENSG00000241745 | 0          | NA          | NA         | NA         | NA         | RN7SL788P |
| NA        | ENSG00000241746 | 0          | NA          | NA         | NA         | NA         |           |
| 204010    | ENSG00000241749 | 0.15069912 | -0.01848503 | 0.38480575 | 0.84537521 | NA         | RPSAP52   |
| NA        | ENSG00000241754 | 1.50613994 | 0.03209568  | 0.38125302 | 0.61685351 | NA         |           |
| NA        | ENSG00000241755 | 0          | NA          | NA         | NA         | NA         | IGKV1-9   |
| NA        | ENSG00000241756 | 0          | NA          | NA         | NA         | NA         | RN7SL83P  |
| NA        | ENSG00000241757 | 0          | NA          | NA         | NA         | NA         | RN7SL714P |
| 101927974 | ENSG00000241764 | 49.416397  | -0.22171562 | 0.27640992 | 0.2737331  | 0.49724086 |           |
| NA        | ENSG00000241765 | 0          | NA          | NA         | NA         | NA         | RPS26P45  |
| 104355289 | ENSG00000241767 | 0          | NA          | NA         | NA         | NA         | LINC01324 |
| 100131434 | ENSG00000241769 | 31.1109727 | 0.30921446  | 0.34929712 | 0.16295491 | 0.35195933 | LINC00893 |
| NA        | ENSG00000241770 | 0.34207143 | 0.00301952  | 0.3833918  | 0.95885612 | NA         |           |
| NA        | ENSG00000241772 | 0.16735865 | 0.01897177  | 0.38482933 | 0.78225479 | NA         |           |
| NA        | ENSG00000241776 | 0          | NA          | NA         | NA         | NA         |           |
| NA        | ENSG00000241777 | 0          | NA          | NA         | NA         | NA         |           |
| NA        | ENSG00000241782 | 1.36473271 | 0.03394452  | 0.38110293 | 0.61514873 | NA         |           |
| NA        | ENSG00000241785 | 0          | NA          | NA         | NA         | NA         | RN7SL390P |
| NA        | ENSG00000241787 | 0.16735865 | 0.01897177  | 0.38482933 | 0.78225479 | NA         | MTND4P16  |
| NA        | ENSG00000241788 | 0          | NA          | NA         | NA         | NA         | COX6B1P2  |
| NA        | ENSG00000241789 | 0          | NA          | NA         | NA         | NA         | RN7SL504P |
| NA        | ENSG00000241790 | 39.3526524 | 0.03147559  | 0.38320968 | 0.57186656 | 0.77187786 | ENO1P4    |
| NA        | ENSG00000241791 | 0          | NA          | NA         | NA         | NA         | RN7SL817P |
| NA        | ENSG00000241792 | 0          | NA          | NA         | NA         | NA         |           |
| 6700      | ENSG00000241794 | 0          | NA          | NA         | NA         | NA         | SPRR2A    |
| NA        | ENSG00000241804 | 0          | NA          | NA         | NA         | NA         |           |
| NA        | ENSG00000241807 | 0          | NA          | NA         | NA         | NA         | RN7SL319P |
| NA        | ENSG00000241808 | 0          | NA          | NA         | NA         | NA         | RPS15AP34 |

|           |                 |            |             |            |            |            |           |
|-----------|-----------------|------------|-------------|------------|------------|------------|-----------|
| NA        | ENSG00000241809 | 0          | NA          | NA         | NA         | NA         |           |
| NA        | ENSG00000241810 | 0          | NA          | NA         | NA         | NA         | HMG2P13   |
| NA        | ENSG00000241815 | 0          | NA          | NA         | NA         | NA         |           |
| 105370757 | ENSG00000241818 | 0.173733   | 0.01914545  | 0.38484597 | 0.78225479 | NA         | SCG5-AS1  |
| NA        | ENSG00000241821 | 0          | NA          | NA         | NA         | NA         | RN7SL170P |
| NA        | ENSG00000241825 | 0          | NA          | NA         | NA         | NA         | RPL7P42   |
| NA        | ENSG00000241828 | 0          | NA          | NA         | NA         | NA         |           |
| NA        | ENSG00000241829 | 0          | NA          | NA         | NA         | NA         | RPL21P54  |
| 27442     | ENSG00000241832 | 0          | NA          | NA         | NA         | NA         | CECR3     |
| NA        | ENSG00000241834 | 0          | NA          | NA         | NA         | NA         | RN7SL149P |
| 539       | ENSG00000241837 | 1461.36674 | -0.10283616 | 0.07754301 | 0.17526184 | 0.36920736 | ATP5PO    |
| NA        | ENSG00000241838 | 0          | NA          | NA         | NA         | NA         |           |
| 80301     | ENSG00000241839 | 403.514092 | 0.12085982  | 0.12496801 | 0.30631046 | 0.53402457 | PLEKHO2   |
| NA        | ENSG00000241846 | 0          | NA          | NA         | NA         | NA         |           |
| 541565    | ENSG00000241852 | 160.850456 | 0.02167445  | 0.179792   | 0.89277146 | 0.95357124 | C8orf58   |
| NA        | ENSG00000241853 | 0          | NA          | NA         | NA         | NA         |           |
| NA        | ENSG00000241859 | 0          | NA          | NA         | NA         | NA         | ANOS2P    |
| NA        | ENSG00000241860 | 189.612154 | 0.01758195  | 0.20851781 | 0.92103731 | 0.96674322 |           |
| NA        | ENSG00000241861 | 0          | NA          | NA         | NA         | NA         | GAPDHP50  |
| NA        | ENSG00000241866 | 0          | NA          | NA         | NA         | NA         | RN7SL401P |
| NA        | ENSG00000241868 | 0.51417971 | -0.00935211 | 0.38274063 | 0.82650914 | NA         | RN7SL434P |
| NA        | ENSG00000241869 | 0          | NA          | NA         | NA         | NA         | RN7SL363P |
| NA        | ENSG00000241870 | 0          | NA          | NA         | NA         | NA         |           |
| NA        | ENSG00000241874 | 0          | NA          | NA         | NA         | NA         | TOMM22P6  |
| NA        | ENSG00000241877 | 0          | NA          | NA         | NA         | NA         |           |
| 23761     | ENSG00000241878 | 443.970061 | -0.07557137 | 0.12566514 | 0.52354828 | 0.73634542 | PISD      |
| NA        | ENSG00000241879 | 0          | NA          | NA         | NA         | NA         | KLF3P2    |
| NA        | ENSG00000241881 | 0          | NA          | NA         | NA         | NA         |           |
| NA        | ENSG00000241882 | 0          | NA          | NA         | NA         | NA         |           |
| NA        | ENSG00000241884 | 0          | NA          | NA         | NA         | NA         |           |
| NA        | ENSG00000241886 | 1.29334887 | -0.01976089 | 0.37786901 | 0.79367021 | NA         |           |
| NA        | ENSG00000241888 | 0          | NA          | NA         | NA         | NA         | RPSAP37   |
| NA        | ENSG00000241889 | 5.28586465 | 0.09350031  | 0.37805663 | 0.44635152 | 0.67062583 |           |
| NA        | ENSG00000241890 | 0.34048242 | -0.00024161 | 0.38336238 | 0.96754283 | NA         | RPL13P4   |
| NA        | ENSG00000241891 | 0          | NA          | NA         | NA         | NA         | RPL9P6    |
| NA        | ENSG00000241899 | 0          | NA          | NA         | NA         | NA         | TPT1P3    |
| NA        | ENSG00000241905 | 0          | NA          | NA         | NA         | NA         | NDUFS6P1  |
| NA        | ENSG00000241907 | 1.24627156 | -0.06242585 | 0.3878603  | 0.28439144 | NA         | RPS20P4   |

|           |                 |            |             |            |            |            |            |
|-----------|-----------------|------------|-------------|------------|------------|------------|------------|
| NA        | ENSG00000241911 | 0          | NA          | NA         | NA         | NA         | TRBV8      |
| NA        | ENSG00000241912 | 0          | NA          | NA         | NA         | NA         |            |
| NA        | ENSG00000241913 | 0          | NA          | NA         | NA         | NA         | RPS29P21   |
| NA        | ENSG00000241917 | 0          | NA          | NA         | NA         | NA         |            |
| NA        | ENSG00000241921 | 0          | NA          | NA         | NA         | NA         |            |
| NA        | ENSG00000241923 | 1.9531381  | -0.0150834  | 0.37741504 | 0.84208913 | NA         | RPL14P3    |
| NA        | ENSG00000241926 | 0          | NA          | NA         | NA         | NA         | MTCO1P55   |
| NA        | ENSG00000241929 | 0          | NA          | NA         | NA         | NA         |            |
| NA        | ENSG00000241932 | 0          | NA          | NA         | NA         | NA         | RPL35AP34  |
| 101929159 | ENSG00000241933 | 0.15069912 | -0.01848503 | 0.38480575 | 0.84537521 | NA         | DENND6A-DT |
| 112817    | ENSG00000241935 | 16.7408681 | -0.0089397  | 0.31924469 | 0.95751189 | 0.98264776 | HOGA1      |
| NA        | ENSG00000241939 | 0.16735865 | 0.01897177  | 0.38482933 | 0.78225479 | NA         | RN7SL517P  |
| NA        | ENSG00000241941 | 0          | NA          | NA         | NA         | NA         | RPL32P26   |
| NA        | ENSG00000241942 | 0          | NA          | NA         | NA         | NA         | RPS20P20   |
| NA        | ENSG00000241943 | 0          | NA          | NA         | NA         | NA         | RN7SL188P  |
| 5822      | ENSG00000241945 | 69.3301664 | -0.02574575 | 0.23276104 | 0.88809989 | 0.95127807 | PWP2       |
| NA        | ENSG00000241946 | 0          | NA          | NA         | NA         | NA         |            |
| NA        | ENSG00000241947 | 0.6575592  | 0.00481875  | 0.38136496 | 0.92495239 | NA         | HNRNPA1P24 |
| NA        | ENSG00000241950 | 0          | NA          | NA         | NA         | NA         | RPL29P23   |
| NA        | ENSG00000241954 | 0          | NA          | NA         | NA         | NA         |            |
| 102546299 | ENSG00000241956 | 1.14699098 | -0.00297196 | 0.37936052 | 0.96298833 | NA         |            |
| NA        | ENSG00000241959 | 0          | NA          | NA         | NA         | NA         | RN7SL76P   |
| NA        | ENSG00000241961 | 0          | NA          | NA         | NA         | NA         |            |
| NA        | ENSG00000241962 | 14.4480971 | 0.12145347  | 0.34008012 | 0.50527084 | 0.72150391 |            |
| NA        | ENSG00000241963 | 0          | NA          | NA         | NA         | NA         | RN7SL655P  |
| NA        | ENSG00000241964 | 0          | NA          | NA         | NA         | NA         | RN7SL135P  |
| NA        | ENSG00000241965 | 0.173124   | -0.01911262 | 0.38486262 | 0.84537521 | NA         | RPS2P25    |
| 5297      | ENSG00000241973 | 2929.86068 | -0.37490244 | 0.07807224 | 8.90E-07   | 1.02E-05   | PI4KA      |
| NA        | ENSG00000241975 | 12.3703208 | -0.07793067 | 0.34143073 | 0.64262111 | 0.82136499 | ELOCP19    |
| NA        | ENSG00000241981 | 0.34746601 | 0.02370763  | 0.3853651  | 0.61987128 | NA         |            |
| NA        | ENSG00000241983 | 0.14931947 | -0.01844332 | 0.38480212 | 0.84537521 | NA         | RN7SL566P  |
| NA        | ENSG00000241984 | 1.2633404  | -0.04873219 | 0.38289169 | 0.49040897 | NA         | RPL7AP2    |
| NA        | ENSG00000241985 | 0          | NA          | NA         | NA         | NA         | WWTR1-IT1  |
| NA        | ENSG00000241990 | 21.9708179 | -0.06844377 | 0.31051136 | 0.7127058  | 0.86169546 | PRR34-AS1  |
| NA        | ENSG00000241991 | 0          | NA          | NA         | NA         | NA         |            |
| NA        | ENSG00000241992 | 0          | NA          | NA         | NA         | NA         | RN7SL831P  |
| NA        | ENSG00000241993 | 0          | NA          | NA         | NA         | NA         | RPL38P1    |
| NA        | ENSG00000241997 | 0          | NA          | NA         | NA         | NA         | RN7SL323P  |

|        |                 |            |             |            |            |            |            |
|--------|-----------------|------------|-------------|------------|------------|------------|------------|
| NA     | ENSG00000242001 | 0          | NA          | NA         | NA         | NA         |            |
| NA     | ENSG00000242009 | 0          | NA          | NA         | NA         | NA         |            |
| NA     | ENSG00000242012 | 0          | NA          | NA         | NA         | NA         |            |
| NA     | ENSG00000242014 | 0          | NA          | NA         | NA         | NA         | RN7SL26P   |
| NA     | ENSG00000242017 | 0          | NA          | NA         | NA         | NA         | ALG1L15P   |
| 115653 | ENSG00000242019 | 0          | NA          | NA         | NA         | NA         | KIR3DL3    |
| NA     | ENSG00000242020 | 0.50008578 | 0.01193469  | 0.38341079 | 0.77432503 | NA         | RN7SL68P   |
| NA     | ENSG00000242021 | 2.30278872 | -0.03562053 | 0.37636799 | 0.68643496 | NA         |            |
| 25764  | ENSG00000242028 | 1027.0986  | 0.03064774  | 0.10403009 | 0.76062147 | 0.88925928 | HYPK       |
| NA     | ENSG00000242029 | 0          | NA          | NA         | NA         | NA         |            |
| NA     | ENSG00000242034 | 0          | NA          | NA         | NA         | NA         |            |
| NA     | ENSG00000242036 | 0          | NA          | NA         | NA         | NA         |            |
| NA     | ENSG00000242041 | 0          | NA          | NA         | NA         | NA         | RPL35AP28  |
| 255654 | ENSG00000242042 | 0          | NA          | NA         | NA         | NA         | LINC01743  |
| NA     | ENSG00000242048 | 0          | NA          | NA         | NA         | NA         |            |
| 285224 | ENSG00000242049 | 0.65792608 | 0.00098454  | 0.38190106 | 0.9820315  | NA         | DNAJB8-AS1 |
| NA     | ENSG00000242052 | 7.22777448 | 0.18294698  | 0.41065425 | 0.21332563 | 0.42332271 | RPL10P7    |
| NA     | ENSG00000242058 | 0          | NA          | NA         | NA         | NA         | RPS4XP19   |
| NA     | ENSG00000242060 | 0.14931947 | -0.01844332 | 0.38480212 | 0.84537521 | NA         | RPS3AP49   |
| NA     | ENSG00000242061 | 0          | NA          | NA         | NA         | NA         |            |
| NA     | ENSG00000242062 | 0.30139824 | -0.02296476 | 0.38527817 | 0.68536535 | NA         | MARK2P6    |
| NA     | ENSG00000242065 | 0          | NA          | NA         | NA         | NA         | RN7SL291P  |
| NA     | ENSG00000242066 | 0          | NA          | NA         | NA         | NA         | RN7SL214P  |
| NA     | ENSG00000242067 | 0.15069912 | -0.01848503 | 0.38480575 | 0.84537521 | NA         | RPL9P28    |
| NA     | ENSG00000242068 | 0          | NA          | NA         | NA         | NA         |            |
| NA     | ENSG00000242070 | 0          | NA          | NA         | NA         | NA         | NPM1P17    |
| NA     | ENSG00000242071 | 3.31593073 | -0.0018408  | 0.37211594 | 0.98248463 | 0.99428951 | RPL7AP6    |
| NA     | ENSG00000242072 | 0          | NA          | NA         | NA         | NA         |            |
| NA     | ENSG00000242073 | 33.0576776 | 0.07112269  | 0.29743335 | 0.71245201 | 0.86169546 |            |
| NA     | ENSG00000242076 | 0          | NA          | NA         | NA         | NA         | IGKV1-33   |
| NA     | ENSG00000242078 | 0          | NA          | NA         | NA         | NA         |            |
| NA     | ENSG00000242079 | 0          | NA          | NA         | NA         | NA         | RN7SL318P  |
| NA     | ENSG00000242080 | 0          | NA          | NA         | NA         | NA         |            |
| NA     | ENSG00000242082 | 173.484326 | -0.11244141 | 0.18129782 | 0.481102   | 0.70194614 | SLC5A4-AS1 |
| NA     | ENSG00000242083 | 1.6599654  | 0.01003858  | 0.37544292 | 0.90552273 | NA         | RPL7AP31   |
| NA     | ENSG00000242085 | 3.5481133  | 0.01308371  | 0.37000224 | 0.90082653 | 0.95635693 | RPS20P33   |
| NA     | ENSG00000242086 | 716.39175  | 0.31163307  | 0.11244743 | 0.00365091 | 0.0178761  | MUC20-OT1  |
| NA     | ENSG00000242087 | 0          | NA          | NA         | NA         | NA         | RPL36AP41  |

|           |                 |            |             |            |            |            |           |
|-----------|-----------------|------------|-------------|------------|------------|------------|-----------|
| NA        | ENSG00000242088 | 0.16735865 | 0.01897177  | 0.38482933 | 0.78225479 | NA         |           |
| NA        | ENSG00000242094 | 0.76940599 | -0.0542165  | 0.38909984 | 0.28629215 | NA         | FOXP1-IT1 |
| NA        | ENSG00000242097 | 0          | NA          | NA         | NA         | NA         |           |
| NA        | ENSG00000242100 | 0          | NA          | NA         | NA         | NA         | RPL9P32   |
| NA        | ENSG00000242101 | 0          | NA          | NA         | NA         | NA         | RN7SL416P |
| NA        | ENSG00000242102 | 0          | NA          | NA         | NA         | NA         | RN7SL152P |
| NA        | ENSG00000242103 | 0.16735865 | 0.01897177  | 0.38482933 | 0.78225479 | NA         |           |
| NA        | ENSG00000242104 | 0.173733   | 0.01914545  | 0.38484597 | 0.78225479 | NA         | LINC02618 |
| NA        | ENSG00000242107 | 0          | NA          | NA         | NA         | NA         | LINC01100 |
| NA        | ENSG00000242109 | 0          | NA          | NA         | NA         | NA         | NPM1P23   |
| 23600     | ENSG00000242110 | 168.064063 | -0.07441972 | 0.18128654 | 0.64079637 | 0.82008361 | AMACR     |
| NA        | ENSG00000242111 | 0          | NA          | NA         | NA         | NA         | TOPORSLP  |
| NA        | ENSG00000242113 | 0.29863895 | -0.02292439 | 0.3852726  | 0.68753245 | NA         | RN7SL124P |
| 51537     | ENSG00000242114 | 403.548204 | -0.48136631 | 0.16232994 | 0.0011629  | 0.00673635 | MTFP1     |
| NA        | ENSG00000242118 | 0          | NA          | NA         | NA         | NA         | RN7SL201P |
| NA        | ENSG00000242119 | 0          | NA          | NA         | NA         | NA         |           |
| 107986096 | ENSG00000242120 | 0          | NA          | NA         | NA         | NA         | MDFIC2    |
| NA        | ENSG00000242121 | 0          | NA          | NA         | NA         | NA         | RN7SL267P |
| NA        | ENSG00000242123 | 0          | NA          | NA         | NA         | NA         |           |
| 8420      | ENSG00000242125 | 1293.56936 | -0.15888571 | 0.07697434 | 0.03484776 | 0.11295863 | SNHG3     |
| NA        | ENSG00000242134 | 0          | NA          | NA         | NA         | NA         | RPL5P13   |
| NA        | ENSG00000242135 | 0          | NA          | NA         | NA         | NA         | RPL17P2   |
| NA        | ENSG00000242136 | 0          | NA          | NA         | NA         | NA         |           |
| NA        | ENSG00000242137 | 0          | NA          | NA         | NA         | NA         | RPL11P5   |
| NA        | ENSG00000242140 | 0          | NA          | NA         | NA         | NA         |           |
| NA        | ENSG00000242142 | 0.51364107 | -0.0101594  | 0.38327833 | 0.81901564 | NA         | SERBP1P3  |
| NA        | ENSG00000242145 | 0          | NA          | NA         | NA         | NA         |           |
| 102723629 | ENSG00000242147 | 1.59544542 | -0.11234143 | 0.40643017 | 0.05970918 | NA         | LASTR     |
| 105376382 | ENSG00000242147 | 1.59544542 | -0.11234143 | 0.40643017 | 0.05970918 | NA         | LASTR     |
| NA        | ENSG00000242151 | 0          | NA          | NA         | NA         | NA         | DYNLL1P5  |
| NA        | ENSG00000242152 | 0          | NA          | NA         | NA         | NA         |           |
| 83864     | ENSG00000242153 | 0          | NA          | NA         | NA         | NA         | OFD1P6Y   |
| NA        | ENSG00000242154 | 0.51734507 | 0.00991169  | 0.38322157 | 0.78457391 | NA         |           |
| NA        | ENSG00000242156 | 0          | NA          | NA         | NA         | NA         |           |
| NA        | ENSG00000242158 | 0          | NA          | NA         | NA         | NA         | RN7SL361P |
| NA        | ENSG00000242159 | 0          | NA          | NA         | NA         | NA         | ABCF2P1   |
| NA        | ENSG00000242162 | 0          | NA          | NA         | NA         | NA         |           |
| NA        | ENSG00000242163 | 0          | NA          | NA         | NA         | NA         |           |

|           |                 |            |             |            |            |            |             |
|-----------|-----------------|------------|-------------|------------|------------|------------|-------------|
| NA        | ENSG00000242165 | 0          | NA          | NA         | NA         | NA         | RN7SL222P   |
| NA        | ENSG00000242169 | 0          | NA          | NA         | NA         | NA         |             |
| NA        | ENSG00000242170 | 0          | NA          | NA         | NA         | NA         | RN7SL329P   |
| 398       | ENSG00000242173 | 185.697933 | -0.02246625 | 0.17197397 | 0.882669   | 0.94829441 | ARHGDIG     |
| NA        | ENSG00000242175 | 0          | NA          | NA         | NA         | NA         | RN7SL127P   |
| NA        | ENSG00000242176 | 0          | NA          | NA         | NA         | NA         | RPL39P31    |
| NA        | ENSG00000242178 | 0          | NA          | NA         | NA         | NA         | MTND4P17    |
| NA        | ENSG00000242182 | 0          | NA          | NA         | NA         | NA         | RN7SL745P   |
| NA        | ENSG00000242186 | 0          | NA          | NA         | NA         | NA         |             |
| NA        | ENSG00000242190 | 0          | NA          | NA         | NA         | NA         |             |
| 730102    | ENSG00000242193 | 2.99720586 | -0.10597615 | 0.39372992 | 0.26061292 | 0.48260891 | CRYZL2P     |
| NA        | ENSG00000242195 | 0          | NA          | NA         | NA         | NA         | SRRM1P2     |
| NA        | ENSG00000242197 | 0          | NA          | NA         | NA         | NA         |             |
| NA        | ENSG00000242198 | 4.72428596 | -0.04850816 | 0.36515491 | 0.69751404 | 0.85389371 |             |
| NA        | ENSG00000242199 | 1.10489182 | -0.05354139 | 0.38610101 | 0.3436452  | NA         |             |
| NA        | ENSG00000242201 | 0          | NA          | NA         | NA         | NA         | RN7SL215P   |
| NA        | ENSG00000242206 | 0          | NA          | NA         | NA         | NA         | RPS26P35    |
| 100874351 | ENSG00000242207 | 0          | NA          | NA         | NA         | NA         | HOXB-AS4    |
| NA        | ENSG00000242208 | 0          | NA          | NA         | NA         | NA         | RPL5P29     |
| NA        | ENSG00000242209 | 0          | NA          | NA         | NA         | NA         | RPL32P12    |
| NA        | ENSG00000242214 | 0          | NA          | NA         | NA         | NA         | MTND3P6     |
| NA        | ENSG00000242216 | 0          | NA          | NA         | NA         | NA         | RN7SL97P    |
| 140290    | ENSG00000242220 | 0.18922458 | 0.01954053  | 0.38488496 | 0.78225479 | NA         | TCP10L      |
| 5670      | ENSG00000242221 | 0          | NA          | NA         | NA         | NA         | PSG2        |
| NA        | ENSG00000242222 | 0          | NA          | NA         | NA         | NA         |             |
| NA        | ENSG00000242229 | 1.08419756 | 0.02527005  | 0.38305376 | 0.60934212 | NA         | RPS3AP14    |
| NA        | ENSG00000242236 | 0.31682749 | 0.00122732  | 0.38336739 | 0.96609392 | NA         | RN7SL594P   |
| NA        | ENSG00000242241 | 0.15069912 | -0.01848503 | 0.38480575 | 0.84537521 | NA         | RN7SL306P   |
| NA        | ENSG00000242242 | 1.40202533 | 0.09689839  | 0.40060629 | 0.08046257 | NA         | NECTIN3-AS1 |
| NA        | ENSG00000242244 | 0          | NA          | NA         | NA         | NA         | ATP5MC1P3   |
| NA        | ENSG00000242246 | 0          | NA          | NA         | NA         | NA         |             |
| 26286     | ENSG00000242247 | 197.562885 | -0.07033064 | 0.15600117 | 0.6208211  | 0.80662021 | ARFGAP3     |
| NA        | ENSG00000242248 | 0          | NA          | NA         | NA         | NA         | RPL7AP57    |
| NA        | ENSG00000242251 | 0          | NA          | NA         | NA         | NA         | RN7SL20P    |
| 632       | ENSG00000242252 | 13.5044383 | 1.15719148  | 0.98032011 | 0.00884807 | 0.03748274 | BGLAP       |
| NA        | ENSG00000242255 | 0          | NA          | NA         | NA         | NA         | RPL39P34    |
| NA        | ENSG00000242256 | 0          | NA          | NA         | NA         | NA         | RN7SL57P    |
| 285972    | ENSG00000242258 | 0.37844916 | 0.02407552  | 0.3854191  | 0.60038877 | NA         | LINC00996   |



|           |                 |            |             |            |            |            |            |
|-----------|-----------------|------------|-------------|------------|------------|------------|------------|
| 128977    | ENSG00000242259 | 591.580265 | -0.10030517 | 0.10686055 | 0.3274834  | 0.55589242 | C22orf39   |
| NA        | ENSG00000242261 | 49.5600965 | -0.12439527 | 0.27039182 | 0.52499002 | 0.73755856 |            |
| NA        | ENSG00000242262 | 0.15069912 | -0.01848503 | 0.38480575 | 0.84537521 | NA         |            |
| 23089     | ENSG00000242265 | 4010.52529 | 9.13E-05    | 0.09007363 | 0.99941484 | 0.99966662 | PEG10      |
| NA        | ENSG00000242266 | 0          | NA          | NA         | NA         | NA         | RN7SL456P  |
| NA        | ENSG00000242267 | 3.45325107 | 0.17653403  | 0.42837176 | 0.10991837 | 0.26699075 | SKINT1L    |
| 100507661 | ENSG00000242268 | 3.16709043 | 0.14873624  | 0.41374348 | 0.14239258 | 0.32117652 | LINC02082  |
| NA        | ENSG00000242272 | 0          | NA          | NA         | NA         | NA         | AK2P2      |
| NA        | ENSG00000242276 | 0.30139824 | -0.02296476 | 0.38527817 | 0.68536535 | NA         | RPL5P3     |
| NA        | ENSG00000242278 | 0          | NA          | NA         | NA         | NA         | RPS3AP48   |
| NA        | ENSG00000242279 | 0          | NA          | NA         | NA         | NA         |            |
| NA        | ENSG00000242280 | 0          | NA          | NA         | NA         | NA         | SLC16A1P1  |
| NA        | ENSG00000242281 | 0          | NA          | NA         | NA         | NA         | RN7SL159P  |
| NA        | ENSG00000242282 | 4.48145147 | 0.07171523  | 0.37682453 | 0.51001067 | 0.72545712 |            |
| NA        | ENSG00000242285 | 0          | NA          | NA         | NA         | NA         | RPL6P8     |
| 113939925 | ENSG00000242288 | 76.118069  | -0.09183084 | 0.23807885 | 0.62401762 | 0.80828554 |            |
| 101929754 | ENSG00000242290 | 0.14931947 | -0.01844332 | 0.38480212 | 0.84537521 | NA         | ZBTB20-AS5 |
| NA        | ENSG00000242291 | 0          | NA          | NA         | NA         | NA         | RPL36AP51  |
| NA        | ENSG00000242292 | 0          | NA          | NA         | NA         | NA         |            |
| NA        | ENSG00000242293 | 0          | NA          | NA         | NA         | NA         | RPS29P1    |
| 101735302 | ENSG00000242294 | 443.791657 | 0.09943614  | 0.12158304 | 0.3889547  | 0.61818964 | STAG3L5P   |
| NA        | ENSG00000242295 | 0          | NA          | NA         | NA         | NA         |            |
| NA        | ENSG00000242296 | 0          | NA          | NA         | NA         | NA         | DEFB109A   |
| NA        | ENSG00000242299 | 21.1867808 | 0.08407798  | 0.31639206 | 0.65427166 | 0.82790673 |            |
| NA        | ENSG00000242307 | 1.11325765 | -0.01591351 | 0.38203978 | 0.7532428  | NA         | RPS26P52   |
| NA        | ENSG00000242308 | 0          | NA          | NA         | NA         | NA         |            |
| NA        | ENSG00000242314 | 0          | NA          | NA         | NA         | NA         | RPL12P32   |
| NA        | ENSG00000242315 | 0          | NA          | NA         | NA         | NA         | RN7SL685P  |
| NA        | ENSG00000242317 | 0          | NA          | NA         | NA         | NA         |            |
| NA        | ENSG00000242318 | 0          | NA          | NA         | NA         | NA         |            |
| NA        | ENSG00000242320 | 0          | NA          | NA         | NA         | NA         | RPL21P126  |
| NA        | ENSG00000242321 | 0          | NA          | NA         | NA         | NA         | RPL23AP40  |
| NA        | ENSG00000242324 | 0          | NA          | NA         | NA         | NA         |            |
| NA        | ENSG00000242325 | 0.51571978 | 0.01608583  | 0.38317381 | 0.72824004 | NA         | RPS12P31   |
| NA        | ENSG00000242326 | 0          | NA          | NA         | NA         | NA         | MCUR1P2    |
| NA        | ENSG00000242327 | 0          | NA          | NA         | NA         | NA         |            |
| NA        | ENSG00000242329 | 0          | NA          | NA         | NA         | NA         |            |
| NA        | ENSG00000242330 | 0          | NA          | NA         | NA         | NA         | RN7SL683P  |

|           |                 |            |             |            |            |            |              |
|-----------|-----------------|------------|-------------|------------|------------|------------|--------------|
| NA        | ENSG00000242337 | 1.3686884  | 0.03337544  | 0.38228096 | 0.51942969 | NA         | INHCAP       |
| NA        | ENSG00000242338 | 40.2696854 | 0.27668571  | 0.31804207 | 0.19732364 | 0.40124024 | BMS1P4       |
| 105377192 | ENSG00000242339 | 0          | NA          | NA         | NA         | NA         | LINC02025    |
| NA        | ENSG00000242341 | 0          | NA          | NA         | NA         | NA         | RN7SL646P    |
| NA        | ENSG00000242348 | 0          | NA          | NA         | NA         | NA         | RN7SL561P    |
| NA        | ENSG00000242352 | 0          | NA          | NA         | NA         | NA         | FAM91A3P     |
| NA        | ENSG00000242353 | 0.84978026 | -0.0083017  | 0.38145238 | 0.87381542 | NA         | RPL12P30     |
| NA        | ENSG00000242358 | 0          | NA          | NA         | NA         | NA         | RPS21P4      |
| NA        | ENSG00000242360 | 0          | NA          | NA         | NA         | NA         | RN7SL272P    |
| NA        | ENSG00000242364 | 0          | NA          | NA         | NA         | NA         |              |
| NA        | ENSG00000242365 | 0          | NA          | NA         | NA         | NA         | NDUFA5P5     |
| 54576     | ENSG00000242366 | 0          | NA          | NA         | NA         | NA         | UGT1A8       |
| 100874084 | ENSG00000242370 | 0          | NA          | NA         | NA         | NA         | KCNAB1-AS1   |
| NA        | ENSG00000242371 | 0          | NA          | NA         | NA         | NA         | IGKV1-39     |
| 3692      | ENSG00000242372 | 2140.56678 | -0.14038547 | 0.06943425 | 0.03958174 | 0.12445351 | EIF6         |
| NA        | ENSG00000242375 | 0.50207596 | 0.02562368  | 0.38565771 | 0.52549886 | NA         |              |
| NA        | ENSG00000242381 | 0          | NA          | NA         | NA         | NA         | RN7SL741P    |
| 100506724 | ENSG00000242385 | 0          | NA          | NA         | NA         | NA         | LINC00901    |
| NA        | ENSG00000242387 | 0          | NA          | NA         | NA         | NA         | H2AC3P       |
| 378950    | ENSG00000242389 | 0          | NA          | NA         | NA         | NA         | RBMY1E       |
| NA        | ENSG00000242390 | 0          | NA          | NA         | NA         | NA         | RPL6P9       |
| NA        | ENSG00000242391 | 0          | NA          | NA         | NA         | NA         |              |
| NA        | ENSG00000242393 | 0          | NA          | NA         | NA         | NA         |              |
| NA        | ENSG00000242396 | 1.56694607 | 0.04979949  | 0.38190689 | 0.51196157 | NA         |              |
| NA        | ENSG00000242398 | 0.34746601 | 0.02370763  | 0.3853651  | 0.61987128 | NA         | RN7SL800P    |
| NA        | ENSG00000242399 | 0          | NA          | NA         | NA         | NA         | RPS20P23     |
| NA        | ENSG00000242405 | 0.16735865 | 0.01897177  | 0.38482933 | 0.78225479 | NA         |              |
| NA        | ENSG00000242407 | 0          | NA          | NA         | NA         | NA         |              |
| NA        | ENSG00000242411 | 0          | NA          | NA         | NA         | NA         |              |
| 100169989 | ENSG00000242412 | 0.82501847 | 0.01204345  | 0.38173195 | 0.81369884 | NA         | DBIL5P2      |
| NA        | ENSG00000242417 | 0          | NA          | NA         | NA         | NA         | RPL18P1      |
| 56098     | ENSG00000242419 | 738.913298 | -0.43466509 | 0.34258814 | 0.06285139 | 0.17750484 | PCDHGC4      |
| NA        | ENSG00000242423 | 0          | NA          | NA         | NA         | NA         | RPL12P36     |
| 101929238 | ENSG00000242428 | 0          | NA          | NA         | NA         | NA         | CFAP20DC-AS1 |
| NA        | ENSG00000242430 | 0          | NA          | NA         | NA         | NA         | RN7SL274P    |
| NA        | ENSG00000242431 | 0          | NA          | NA         | NA         | NA         |              |
| NA        | ENSG00000242435 | 0.36277024 | 0.00129585  | 0.38336715 | 0.96357625 | NA         | UPK3BP1      |
| NA        | ENSG00000242436 | 0          | NA          | NA         | NA         | NA         | RN7SL789P    |

|           |                 |            |             |            |            |            |           |
|-----------|-----------------|------------|-------------|------------|------------|------------|-----------|
| NA        | ENSG00000242439 | 0          | NA          | NA         | NA         | NA         |           |
| NA        | ENSG00000242440 | 0          | NA          | NA         | NA         | NA         | LINC02046 |
| 11036     | ENSG00000242441 | 0          | NA          | NA         | NA         | NA         | GTF2A1L   |
| NA        | ENSG00000242444 | 0          | NA          | NA         | NA         | NA         |           |
| NA        | ENSG00000242445 | 0.9802801  | -0.01958956 | 0.38100454 | 0.74095049 | NA         | RPL7AP11  |
| NA        | ENSG00000242456 | 0          | NA          | NA         | NA         | NA         | MTCO3P38  |
| NA        | ENSG00000242457 | 3.82026812 | -0.08052042 | 0.38056523 | 0.4483513  | 0.67234398 | RBBP4P2   |
| NA        | ENSG00000242461 | 0          | NA          | NA         | NA         | NA         | RPS15AP32 |
| NA        | ENSG00000242472 | 0          | NA          | NA         | NA         | NA         | IGHJ5     |
| NA        | ENSG00000242473 | 0          | NA          | NA         | NA         | NA         | KIR2DP1   |
| NA        | ENSG00000242474 | 163.372124 | -0.12803934 | 0.24104544 | 0.49686012 | 0.71500229 |           |
| NA        | ENSG00000242477 | 0.18922458 | 0.01954053  | 0.38488496 | 0.78225479 | NA         |           |
| NA        | ENSG00000242479 | 2.36754255 | -0.02151843 | 0.38043601 | 0.73365844 | NA         |           |
| NA        | ENSG00000242482 | 0          | NA          | NA         | NA         | NA         | RN7SL392P |
| NA        | ENSG00000242483 | 0          | NA          | NA         | NA         | NA         | RN7SL293P |
| 55052     | ENSG00000242485 | 1391.88075 | -0.24350551 | 0.07595263 | 0.00104623 | 0.00614119 | MRPL20    |
| NA        | ENSG00000242488 | 0          | NA          | NA         | NA         | NA         |           |
| NA        | ENSG00000242493 | 0          | NA          | NA         | NA         | NA         | RN7SL37P  |
| 348110    | ENSG00000242498 | 833.337628 | -0.14372493 | 0.10676431 | 0.1597601  | 0.34735289 | ARPIN     |
| NA        | ENSG00000242507 | 0.173124   | -0.01911262 | 0.38486262 | 0.84537521 | NA         |           |
| NA        | ENSG00000242509 | 0          | NA          | NA         | NA         | NA         | RN7SL156P |
| NA        | ENSG00000242510 | 0          | NA          | NA         | NA         | NA         | NDUFB4P1  |
| 100996490 | ENSG00000242512 | 0          | NA          | NA         | NA         | NA         | LINC01206 |
| 54575     | ENSG00000242515 | 0          | NA          | NA         | NA         | NA         | UGT1A10   |
| 401074    | ENSG00000242516 | 62.6273678 | -0.0724327  | 0.24595707 | 0.70144191 | 0.85619586 | LINC00960 |
| NA        | ENSG00000242520 | 0          | NA          | NA         | NA         | NA         | MAGEA5    |
| 100874019 | ENSG00000242522 | 0          | NA          | NA         | NA         | NA         | KLHL6-AS1 |
| NA        | ENSG00000242524 | 0          | NA          | NA         | NA         | NA         | OR2U2P    |
| NA        | ENSG00000242525 | 0          | NA          | NA         | NA         | NA         | OR7E100P  |
| NA        | ENSG00000242527 | 0          | NA          | NA         | NA         | NA         |           |
| NA        | ENSG00000242529 | 0          | NA          | NA         | NA         | NA         | AHCYP8    |
| NA        | ENSG00000242531 | 0          | NA          | NA         | NA         | NA         |           |
| NA        | ENSG00000242534 | 0          | NA          | NA         | NA         | NA         | IGKV2D-28 |
| NA        | ENSG00000242536 | 0          | NA          | NA         | NA         | NA         |           |
| NA        | ENSG00000242537 | 0          | NA          | NA         | NA         | NA         | MRE11P1   |
| NA        | ENSG00000242539 | 54.5793716 | -0.08526043 | 0.27028989 | 0.66006593 | 0.83146071 |           |
| NA        | ENSG00000242540 | 1.17519289 | 0.0199729   | 0.37924207 | 0.77294808 | NA         |           |
| NA        | ENSG00000242545 | 0          | NA          | NA         | NA         | NA         |           |

|           |                 |            |             |            |            |            |           |
|-----------|-----------------|------------|-------------|------------|------------|------------|-----------|
| NA        | ENSG00000242547 | 0          | NA          | NA         | NA         | NA         | RN7SL169P |
| 5273      | ENSG00000242550 | 0          | NA          | NA         | NA         | NA         | SERPINB10 |
| NA        | ENSG00000242551 | 2.09399365 | -0.07264954 | 0.3866669  | 0.36065588 | NA         | POU5F1P6  |
| NA        | ENSG00000242552 | 0          | NA          | NA         | NA         | NA         | MRPL42P4  |
| NA        | ENSG00000242553 | 10.804377  | -0.05311942 | 0.34335239 | 0.73979631 | 0.87711    |           |
| NA        | ENSG00000242559 | 0          | NA          | NA         | NA         | NA         | RN7SL144P |
| NA        | ENSG00000242560 | 0          | NA          | NA         | NA         | NA         | RN7SL797P |
| NA        | ENSG00000242561 | 0          | NA          | NA         | NA         | NA         | ATP5MGP5  |
| NA        | ENSG00000242562 | 0          | NA          | NA         | NA         | NA         | DCAF13P1  |
| NA        | ENSG00000242565 | 0          | NA          | NA         | NA         | NA         | RN7SL372P |
| NA        | ENSG00000242568 | 0          | NA          | NA         | NA         | NA         |           |
| NA        | ENSG00000242571 | 2.72592397 | 0.14264912  | 0.41201208 | 0.13680017 | 0.31200314 | RPL21P11  |
| NA        | ENSG00000242573 | 0          | NA          | NA         | NA         | NA         | ACTR3P3   |
| 3109      | ENSG00000242574 | 1.08377469 | 0.06119922  | 0.39083076 | 0.18583336 | NA         | HLA-DMB   |
| NA        | ENSG00000242575 | 0.85720752 | 0.04857842  | 0.38842543 | 0.27250728 | NA         | TUBAP13   |
| NA        | ENSG00000242578 | 0          | NA          | NA         | NA         | NA         |           |
| NA        | ENSG00000242580 | 0          | NA          | NA         | NA         | NA         | IGKV1D-43 |
| NA        | ENSG00000242583 | 0          | NA          | NA         | NA         | NA         | KMT5AP3   |
| NA        | ENSG00000242586 | 0          | NA          | NA         | NA         | NA         |           |
| NA        | ENSG00000242588 | 345.591995 | 0.07636218  | 0.12728618 | 0.52543358 | 0.73801083 |           |
| NA        | ENSG00000242590 | 0          | NA          | NA         | NA         | NA         |           |
| NA        | ENSG00000242593 | 328.451126 | 0.56201568  | 0.15843724 | 0.00012163 | 0.00090576 |           |
| NA        | ENSG00000242595 | 0          | NA          | NA         | NA         | NA         | RPL26P26  |
| NA        | ENSG00000242598 | 0.173733   | 0.01914545  | 0.38484597 | 0.78225479 | NA         | MED28P8   |
| 100130935 | ENSG00000242599 | 15.9320914 | -0.15017052 | 0.35344464 | 0.40840198 | 0.63650394 | CSAG4     |
| 8512      | ENSG00000242600 | 12.4312186 | -0.12383206 | 0.34917442 | 0.48070112 | 0.70158112 | MBL1P     |
| NA        | ENSG00000242602 | 0.34624801 | -0.02356563 | 0.38536324 | 0.65270996 | NA         | RPL35AP13 |
| NA        | ENSG00000242607 | 0.86687229 | 0.03575058  | 0.38438986 | 0.45615021 | NA         | RPS3AP34  |
| NA        | ENSG00000242608 | 0          | NA          | NA         | NA         | NA         | RPS23P5   |
| NA        | ENSG00000242609 | 0          | NA          | NA         | NA         | NA         | CCDC137P  |
| NA        | ENSG00000242610 | 0.33471731 | 0.02354391  | 0.38534154 | 0.62842204 | NA         | OR5BH1P   |
| NA        | ENSG00000242611 | 0          | NA          | NA         | NA         | NA         |           |
| 26063     | ENSG00000242612 | 419.678691 | 0.62478349  | 0.15613404 | 1.66E-05   | 0.00015138 | DECR2     |
| NA        | ENSG00000242613 | 0          | NA          | NA         | NA         | NA         |           |
| NA        | ENSG00000242614 | 0          | NA          | NA         | NA         | NA         | RN7SL164P |
| NA        | ENSG00000242615 | 34.4862524 | -0.01553634 | 0.29548884 | 0.93242199 | 0.97195497 |           |
| 2790      | ENSG00000242616 | 442.821056 | -0.49336734 | 0.1246357  | 2.98E-05   | 0.00025655 | GNG10     |
| NA        | ENSG00000242618 | 0          | NA          | NA         | NA         | NA         |           |

|           |                 |            |             |            |            |            |           |
|-----------|-----------------|------------|-------------|------------|------------|------------|-----------|
| NA        | ENSG00000242622 | 65.5425152 | 0.10600452  | 0.23998903 | 0.57560283 | 0.7744446  |           |
| NA        | ENSG00000242628 | 27.9056195 | 0.63665017  | 1.03299062 | 0.01409026 | 0.05487356 |           |
| NA        | ENSG00000242634 | 0          | NA          | NA         | NA         | NA         | RPS24P16  |
| NA        | ENSG00000242635 | 0          | NA          | NA         | NA         | NA         | RPS14P7   |
| NA        | ENSG00000242636 | 0.36307598 | 0.02389562  | 0.38539254 | 0.60990648 | NA         | RPL21P129 |
| NA        | ENSG00000242638 | 0          | NA          | NA         | NA         | NA         | RN7SL294P |
| NA        | ENSG00000242640 | 0          | NA          | NA         | NA         | NA         | RPS29P11  |
| 440970    | ENSG00000242641 | 0          | NA          | NA         | NA         | NA         | LINC00971 |
| NA        | ENSG00000242650 | 0          | NA          | NA         | NA         | NA         | RN7SL292P |
| NA        | ENSG00000242651 | 0          | NA          | NA         | NA         | NA         | RN7SL862P |
| NA        | ENSG00000242653 | 0          | NA          | NA         | NA         | NA         | RN7SL132P |
| NA        | ENSG00000242654 | 0          | NA          | NA         | NA         | NA         | RPL32P14  |
| NA        | ENSG00000242657 | 0          | NA          | NA         | NA         | NA         | RN7SL581P |
| NA        | ENSG00000242659 | 0.48464252 | -0.00617416 | 0.38314147 | 0.87171398 | NA         |           |
| NA        | ENSG00000242660 | 0          | NA          | NA         | NA         | NA         |           |
| NA        | ENSG00000242661 | 0          | NA          | NA         | NA         | NA         | RPS3AP43  |
| NA        | ENSG00000242667 | 0.30001543 | -0.02294458 | 0.38527538 | 0.68644903 | NA         |           |
| NA        | ENSG00000242668 | 0          | NA          | NA         | NA         | NA         | RN7SL317P |
| NA        | ENSG00000242670 | 0          | NA          | NA         | NA         | NA         | RPL22P13  |
| NA        | ENSG00000242671 | 0          | NA          | NA         | NA         | NA         | LINC02010 |
| NA        | ENSG00000242673 | 0          | NA          | NA         | NA         | NA         | RN7SL167P |
| NA        | ENSG00000242675 | 0          | NA          | NA         | NA         | NA         | RPS16P9   |
| NA        | ENSG00000242683 | 0          | NA          | NA         | NA         | NA         | RPL12P21  |
| 101928521 | ENSG00000242686 | 108.357123 | 1.10044807  | 0.23748837 | 3.92E-07   | 4.75E-06   | PDE6B-AS1 |
| NA        | ENSG00000242688 | 0          | NA          | NA         | NA         | NA         | RN7SL304P |
| 1270      | ENSG00000242689 | 64.4214321 | -0.18071041 | 0.2583751  | 0.35661526 | 0.58670273 | CNTF      |
| NA        | ENSG00000242692 | 0.15069912 | -0.01848503 | 0.38480575 | 0.84537521 | NA         | RPS27AP1  |
| NA        | ENSG00000242696 | 0          | NA          | NA         | NA         | NA         | RN7SL40P  |
| NA        | ENSG00000242697 | 0          | NA          | NA         | NA         | NA         | RPL5P12   |
| NA        | ENSG00000242699 | 0          | NA          | NA         | NA         | NA         | RN7SL516P |
| NA        | ENSG00000242703 | 0          | NA          | NA         | NA         | NA         | CCT4P1    |
| NA        | ENSG00000242705 | 0          | NA          | NA         | NA         | NA         | ICE2P2    |
| NA        | ENSG00000242706 | 0.173124   | -0.01911262 | 0.38486262 | 0.84537521 | NA         | RPS27AP9  |
| NA        | ENSG00000242707 | 0          | NA          | NA         | NA         | NA         | RN7SL362P |
| NA        | ENSG00000242709 | 0          | NA          | NA         | NA         | NA         | RPL30P9   |
| 728591    | ENSG00000242715 | 59.6081371 | -0.47114542 | 0.3010552  | 0.03672624 | 0.11778994 | CCDC169   |
| NA        | ENSG00000242719 | 0.173733   | 0.01914545  | 0.38484597 | 0.78225479 | NA         | RN7SL806P |
| NA        | ENSG00000242727 | 0          | NA          | NA         | NA         | NA         |           |

|           |                 |            |             |            |            |            |               |
|-----------|-----------------|------------|-------------|------------|------------|------------|---------------|
| NA        | ENSG00000242728 | 0          | NA          | NA         | NA         | NA         | UQCRHP4       |
| NA        | ENSG00000242729 | 0          | NA          | NA         | NA         | NA         |               |
| NA        | ENSG00000242731 | 0          | NA          | NA         | NA         | NA         | FAM86LP       |
| 340526    | ENSG00000242732 | 2064.92186 | -0.1415998  | 0.06507365 | 0.02741385 | 0.09343597 | RTL5          |
| NA        | ENSG00000242735 | 5.98144816 | -0.05848095 | 0.37017717 | 0.61918915 | 0.8053437  | RPSAP26       |
| NA        | ENSG00000242736 | 0          | NA          | NA         | NA         | NA         | TRBV1         |
| NA        | ENSG00000242737 | 0          | NA          | NA         | NA         | NA         |               |
| NA        | ENSG00000242741 | 0.51549759 | 0.02199626  | 0.38378485 | 0.65799367 | NA         | LINC02005     |
| NA        | ENSG00000242747 | 0          | NA          | NA         | NA         | NA         |               |
| NA        | ENSG00000242748 | 8.99296193 | 0.03938667  | 0.34972708 | 0.79516809 | 0.90585603 | RPL23AP81     |
| NA        | ENSG00000242752 | 0          | NA          | NA         | NA         | NA         | NMTRQ-TTG12-1 |
| NA        | ENSG00000242753 | 0          | NA          | NA         | NA         | NA         |               |
| NA        | ENSG00000242756 | 0          | NA          | NA         | NA         | NA         | RHOT1P3       |
| NA        | ENSG00000242757 | 0          | NA          | NA         | NA         | NA         |               |
| NA        | ENSG00000242759 | 14.4686798 | 0.23615724  | 0.40540446 | 0.20935132 | 0.41760809 | LINC00882     |
| NA        | ENSG00000242764 | 0          | NA          | NA         | NA         | NA         | RN7SL824P     |
| NA        | ENSG00000242766 | 0          | NA          | NA         | NA         | NA         | IGKV1D-17     |
| 100874131 | ENSG00000242767 | 0.32345582 | 0.0017083   | 0.38337178 | 0.96472715 | NA         | ZBTB20-AS4    |
| NA        | ENSG00000242768 | 0          | NA          | NA         | NA         | NA         |               |
| NA        | ENSG00000242769 | 0          | NA          | NA         | NA         | NA         | RN7SL432P     |
| NA        | ENSG00000242770 | 0          | NA          | NA         | NA         | NA         | CD200R1L-AS1  |
| NA        | ENSG00000242771 | 0          | NA          | NA         | NA         | NA         | TRBV5-2       |
| NA        | ENSG00000242775 | 0          | NA          | NA         | NA         | NA         |               |
| 79986     | ENSG00000242779 | 80.1111502 | -0.04138312 | 0.24535871 | 0.82534469 | 0.92066374 | ZNF702P       |
| 105377175 | ENSG00000242781 | 0          | NA          | NA         | NA         | NA         | LINC02050     |
| NA        | ENSG00000242790 | 0          | NA          | NA         | NA         | NA         |               |
| NA        | ENSG00000242791 | 1.13446026 | 0.0074876   | 0.37961944 | 0.89816692 | NA         |               |
| NA        | ENSG00000242793 | 0          | NA          | NA         | NA         | NA         |               |
| NA        | ENSG00000242794 | 0          | NA          | NA         | NA         | NA         | RN7SL299P     |
| NA        | ENSG00000242795 | 0          | NA          | NA         | NA         | NA         |               |
| NA        | ENSG00000242797 | 24.9275862 | 0.04234     | 0.30846222 | 0.82217928 | 0.91878095 | GLYCTK-AS1    |
| NA        | ENSG00000242798 | 19.0608075 | 0.24054222  | 0.36601013 | 0.2434095  | 0.46186348 |               |
| 9907      | ENSG00000242802 | 763.344252 | 0.10517152  | 0.10692272 | 0.30591267 | 0.53356548 | AP5Z1         |
| NA        | ENSG00000242807 | 0          | NA          | NA         | NA         | NA         | RPL26P31      |
| 347689    | ENSG00000242808 | 3.92786276 | 0.01711599  | 0.3695876  | 0.87116757 | 0.94384401 | SOX2-OT       |
| NA        | ENSG00000242810 | 0          | NA          | NA         | NA         | NA         | MRPL42P6      |
| NA        | ENSG00000242811 | 0          | NA          | NA         | NA         | NA         | RN7SL229P     |
| NA        | ENSG00000242814 | 0          | NA          | NA         | NA         | NA         |               |

|           |                 |            |             |            |            |            |              |
|-----------|-----------------|------------|-------------|------------|------------|------------|--------------|
| NA        | ENSG00000242816 | 0          | NA          | NA         | NA         | NA         |              |
| NA        | ENSG00000242818 | 0          | NA          | NA         | NA         | NA         | RN7SL846P    |
| NA        | ENSG00000242828 | 0          | NA          | NA         | NA         | NA         |              |
| NA        | ENSG00000242829 | 2.44692913 | 0.12005961  | 0.40134219 | 0.19002277 | NA         | RPS26P21     |
| NA        | ENSG00000242834 | 0          | NA          | NA         | NA         | NA         | RPL7AP56     |
| NA        | ENSG00000242836 | 0          | NA          | NA         | NA         | NA         | MTCO3P35     |
| NA        | ENSG00000242837 | 0          | NA          | NA         | NA         | NA         | RPL21P13     |
| NA        | ENSG00000242841 | 0          | NA          | NA         | NA         | NA         | KRT8P35      |
| NA        | ENSG00000242849 | 0          | NA          | NA         | NA         | NA         | ALDOAP1      |
| NA        | ENSG00000242850 | 0          | NA          | NA         | NA         | NA         | RPL23AP68    |
| 163051    | ENSG00000242852 | 110.217896 | 0.03434138  | 0.20387694 | 0.84500263 | 0.92965052 | ZNF709       |
| NA        | ENSG00000242853 | 0          | NA          | NA         | NA         | NA         | RN7SL749P    |
| NA        | ENSG00000242854 | 0          | NA          | NA         | NA         | NA         | DNM1P24      |
| NA        | ENSG00000242855 | 0          | NA          | NA         | NA         | NA         | RN7SL496P    |
| NA        | ENSG00000242856 | 0          | NA          | NA         | NA         | NA         | VN1R105P     |
| NA        | ENSG00000242858 | 0          | NA          | NA         | NA         | NA         |              |
| NA        | ENSG00000242860 | 0          | NA          | NA         | NA         | NA         | RN7SL180P    |
| NA        | ENSG00000242861 | 0.87348916 | 0.03613127  | 0.38443722 | 0.45214812 | NA         |              |
| NA        | ENSG00000242863 | 0          | NA          | NA         | NA         | NA         | RN7SL677P    |
| NA        | ENSG00000242865 | 0          | NA          | NA         | NA         | NA         | RN7SL244P    |
| 161497    | ENSG00000242866 | 15.857019  | -0.01886873 | 0.33459921 | 0.90472957 | 0.95824443 | STRC         |
| 378948    | ENSG00000242875 | 0          | NA          | NA         | NA         | NA         | RBMY1B       |
| NA        | ENSG00000242876 | 1.09321432 | -0.05978501 | 0.39051881 | 0.20395169 | NA         | RN7SL812P    |
| NA        | ENSG00000242880 | 2.71936094 | -0.04536529 | 0.38000913 | 0.56531488 | 0.76733419 |              |
| NA        | ENSG00000242882 | 0.85342255 | 0.0114008   | 0.38157474 | 0.82585778 | NA         | RPL5P11      |
| NA        | ENSG00000242887 | 0          | NA          | NA         | NA         | NA         | IGHJ3        |
| NA        | ENSG00000242888 | 0.6172547  | -0.01996111 | 0.38311777 | 0.68390028 | NA         |              |
| NA        | ENSG00000242889 | 2.14447571 | -0.01383208 | 0.37758929 | 0.8521262  | NA         | RN7SL449P    |
| NA        | ENSG00000242893 | 0          | NA          | NA         | NA         | NA         | RN7SL413P    |
| NA        | ENSG00000242894 | 0          | NA          | NA         | NA         | NA         | RN7SL634P    |
| NA        | ENSG00000242899 | 0.31916953 | 0.00190159  | 0.3833742  | 0.95885748 | NA         | RPL7P16      |
| 110806300 | ENSG00000242902 | 0          | NA          | NA         | NA         | NA         | FLNC-AS1     |
| NA        | ENSG00000242908 | 0          | NA          | NA         | NA         | NA         | AADAACL2-AS1 |
| NA        | ENSG00000242911 | 0          | NA          | NA         | NA         | NA         |              |
| NA        | ENSG00000242912 | 0          | NA          | NA         | NA         | NA         | RN7SL384P    |
| NA        | ENSG00000242915 | 0          | NA          | NA         | NA         | NA         | SNRPGP7      |
| NA        | ENSG00000242922 | 0          | NA          | NA         | NA         | NA         | RPL21P104    |
| 100874036 | ENSG00000242925 | 0          | NA          | NA         | NA         | NA         | PLCH1-AS2    |

|           |                 |            |             |            |            |            |           |
|-----------|-----------------|------------|-------------|------------|------------|------------|-----------|
| NA        | ENSG00000242928 | 0          | NA          | NA         | NA         | NA         | RN7SL868P |
| NA        | ENSG00000242931 | 0.173733   | 0.01914545  | 0.38484597 | 0.78225479 | NA         | RPL7P49   |
| NA        | ENSG00000242936 | 0          | NA          | NA         | NA         | NA         | RPL30P6   |
| NA        | ENSG00000242941 | 0.46775827 | -0.00945959 | 0.38288155 | 0.84939236 | NA         | RPL12P7   |
| NA        | ENSG00000242943 | 0          | NA          | NA         | NA         | NA         | NKAIN1P1  |
| NA        | ENSG00000242945 | 0          | NA          | NA         | NA         | NA         | RPL29P32  |
| NA        | ENSG00000242948 | 0          | NA          | NA         | NA         | NA         | EPS15P1   |
| 30816     | ENSG00000242950 | 18.688428  | 0.05792333  | 0.32721543 | 0.74448313 | 0.87966141 | ERVW-1    |
| NA        | ENSG00000242951 | 0          | NA          | NA         | NA         | NA         |           |
| NA        | ENSG00000242952 | 0          | NA          | NA         | NA         | NA         | RPSAP3    |
| NA        | ENSG00000242953 | 0          | NA          | NA         | NA         | NA         |           |
| NA        | ENSG00000242958 | 0.34746601 | 0.02370763  | 0.3853651  | 0.61987128 | NA         |           |
| NA        | ENSG00000242960 | 0.173124   | -0.01911262 | 0.38486262 | 0.84537521 | NA         | FTH1P23   |
| NA        | ENSG00000242963 | 0          | NA          | NA         | NA         | NA         |           |
| NA        | ENSG00000242968 | 0          | NA          | NA         | NA         | NA         |           |
| NA        | ENSG00000242970 | 0.173733   | 0.01914545  | 0.38484597 | 0.78225479 | NA         |           |
| NA        | ENSG00000242971 | 0.14931947 | -0.01844332 | 0.38480212 | 0.84537521 | NA         | RN7SL233P |
| 101926934 | ENSG00000242973 | 0.18922458 | 0.01954053  | 0.38488496 | 0.78225479 | NA         |           |
| NA        | ENSG00000242976 | 0          | NA          | NA         | NA         | NA         | RN7SL177P |
| NA        | ENSG00000242978 | 0          | NA          | NA         | NA         | NA         | PPIAP83   |
| NA        | ENSG00000242979 | 0.31847737 | 0.00140591  | 0.38336886 | 0.96360826 | NA         | RPS15AP18 |
| NA        | ENSG00000242983 | 0          | NA          | NA         | NA         | NA         | CABYRP1   |
| NA        | ENSG00000242985 | 0          | NA          | NA         | NA         | NA         | RN7SL50P  |
| NA        | ENSG00000242986 | 0          | NA          | NA         | NA         | NA         | RPL21P99  |
| NA        | ENSG00000242989 | 0          | NA          | NA         | NA         | NA         | RN7SL332P |
| NA        | ENSG00000242990 | 0          | NA          | NA         | NA         | NA         | RPL13AP23 |
| NA        | ENSG00000242991 | 0          | NA          | NA         | NA         | NA         | RPL7P40   |
| NA        | ENSG00000242992 | 0          | NA          | NA         | NA         | NA         | FTH1P4    |
| NA        | ENSG00000242993 | 0          | NA          | NA         | NA         | NA         | RPL32P25  |
| NA        | ENSG00000242995 | 0.29863895 | -0.02292439 | 0.3852726  | 0.68753245 | NA         |           |
| NA        | ENSG00000242998 | 0          | NA          | NA         | NA         | NA         | RN7SL379P |
| NA        | ENSG00000242999 | 0.80579235 | -0.00649344 | 0.38080095 | 0.90865917 | NA         | RN7SL239P |
| NA        | ENSG00000243004 | 3.12787538 | 0.00578089  | 0.37091748 | 0.95555169 | 0.9817278  |           |
| NA        | ENSG00000243005 | 0          | NA          | NA         | NA         | NA         | RN7SL16P  |
| NA        | ENSG00000243007 | 0          | NA          | NA         | NA         | NA         | RPL12P35  |
| NA        | ENSG00000243008 | 16.5840895 | 3.07927368  | 0.77544387 | 4.14E-06   | 4.22E-05   |           |
| NA        | ENSG00000243011 | 0          | NA          | NA         | NA         | NA         | RN7SL266P |
| NA        | ENSG00000243014 | 0.16735865 | 0.01897177  | 0.38482933 | 0.78225479 | NA         | PTMAP8    |



|           |                 |            |             |            |            |            |              |
|-----------|-----------------|------------|-------------|------------|------------|------------|--------------|
| NA        | ENSG00000243015 | 0          | NA          | NA         | NA         | NA         | RN7SL737P    |
| NA        | ENSG00000243016 | 0          | NA          | NA         | NA         | NA         |              |
| NA        | ENSG00000243018 | 0          | NA          | NA         | NA         | NA         |              |
| NA        | ENSG00000243020 | 0          | NA          | NA         | NA         | NA         | RPL7P39      |
| NA        | ENSG00000243022 | 0.68668015 | 0.00036592  | 0.38183963 | 0.99253125 | NA         | MARK3P3      |
| NA        | ENSG00000243023 | 0          | NA          | NA         | NA         | NA         | UBA52P3      |
| NA        | ENSG00000243024 | 4.48929147 | 0.04362666  | 0.37013829 | 0.69360465 | 0.85183585 |              |
| NA        | ENSG00000243025 | 0          | NA          | NA         | NA         | NA         | MTAPP1       |
| NA        | ENSG00000243027 | 0          | NA          | NA         | NA         | NA         | RN7SL354P    |
| NA        | ENSG00000243029 | 0          | NA          | NA         | NA         | NA         | RN7SL635P    |
| NA        | ENSG00000243033 | 0          | NA          | NA         | NA         | NA         | GAPDHP47     |
| NA        | ENSG00000243035 | 0          | NA          | NA         | NA         | NA         | RN7SL810P    |
| NA        | ENSG00000243038 | 0          | NA          | NA         | NA         | NA         |              |
| 159162    | ENSG00000243040 | 0          | NA          | NA         | NA         | NA         | RBMY2FP      |
| NA        | ENSG00000243044 | 0          | NA          | NA         | NA         | NA         |              |
| NA        | ENSG00000243048 | 0          | NA          | NA         | NA         | NA         | FTHL18       |
| NA        | ENSG00000243049 | 0          | NA          | NA         | NA         | NA         | RN7SL33P     |
| NA        | ENSG00000243050 | 0          | NA          | NA         | NA         | NA         | RPL30P10     |
| NA        | ENSG00000243051 | 0          | NA          | NA         | NA         | NA         | RN7SL269P    |
| NA        | ENSG00000243053 | 0          | NA          | NA         | NA         | NA         | RPL31P58     |
| NA        | ENSG00000243055 | 3.27247813 | 0.01753983  | 0.36908795 | 0.87120037 | 0.94384401 | GK-AS1       |
| 8637      | ENSG00000243056 | 3.35833394 | 0.0670773   | 0.3799615  | 0.4919289  | 0.7110834  | EIF4EBP3     |
| NA        | ENSG00000243058 | 0          | NA          | NA         | NA         | NA         | RPL39P33     |
| NA        | ENSG00000243059 | 0          | NA          | NA         | NA         | NA         | RN7SL400P    |
| 148753    | ENSG00000243062 | 1.02108245 | 0.02425248  | 0.38121443 | 0.68888302 | NA         |              |
| NA        | ENSG00000243063 | 0          | NA          | NA         | NA         | NA         | IGKV3-7      |
| 150000    | ENSG00000243064 | 0          | NA          | NA         | NA         | NA         | ABCC13       |
| NA        | ENSG00000243066 | 0          | NA          | NA         | NA         | NA         | RN7SL842P    |
| 100507524 | ENSG00000243069 | 8.06775798 | -0.39797817 | 0.61047174 | 0.04868369 | 0.14597015 | ARHGEF26-AS1 |
| NA        | ENSG00000243071 | 2.17946302 | 0.02856721  | 0.3740002  | 0.7626299  | NA         |              |
| NA        | ENSG00000243072 | 0          | NA          | NA         | NA         | NA         |              |
| 400735    | ENSG00000243073 | 0          | NA          | NA         | NA         | NA         | PRAMEF4      |
| NA        | ENSG00000243075 | 0          | NA          | NA         | NA         | NA         | RN7SL519P    |
| NA        | ENSG00000243081 | 0          | NA          | NA         | NA         | NA         |              |
| 201617    | ENSG00000243083 | 7.04671994 | 0.06533761  | 0.37120948 | 0.57684503 | 0.77537977 | LINC00870    |
| NA        | ENSG00000243085 | 0          | NA          | NA         | NA         | NA         |              |
| NA        | ENSG00000243089 | 0          | NA          | NA         | NA         | NA         |              |
| NA        | ENSG00000243094 | 1.47651302 | 0.04843909  | 0.38206454 | 0.51582734 | NA         | RPL32P2      |

|           |                 |            |             |            |            |            |             |
|-----------|-----------------|------------|-------------|------------|------------|------------|-------------|
| NA        | ENSG00000243095 | 0          | NA          | NA         | NA         | NA         | RPL3P10     |
| NA        | ENSG00000243099 | 0          | NA          | NA         | NA         | NA         |             |
| NA        | ENSG00000243101 | 0          | NA          | NA         | NA         | NA         | RPS3P7      |
| NA        | ENSG00000243103 | 0.14931947 | -0.01844332 | 0.38480212 | 0.84537521 | NA         | RN7SL452P   |
| NA        | ENSG00000243104 | 0          | NA          | NA         | NA         | NA         | MTND4LP14   |
| NA        | ENSG00000243107 | 36.8858246 | -0.1943492  | 0.31206478 | 0.34066093 | 0.57088546 |             |
| NA        | ENSG00000243115 | 0          | NA          | NA         | NA         | NA         | RN7SL849P   |
| NA        | ENSG00000243116 | 0          | NA          | NA         | NA         | NA         |             |
| NA        | ENSG00000243122 | 0          | NA          | NA         | NA         | NA         |             |
| NA        | ENSG00000243124 | 0          | NA          | NA         | NA         | NA         | RN7SL643P   |
| NA        | ENSG00000243125 | 0          | NA          | NA         | NA         | NA         | RN7SL807P   |
| NA        | ENSG00000243129 | 0          | NA          | NA         | NA         | NA         |             |
| 5680      | ENSG00000243130 | 0          | NA          | NA         | NA         | NA         | PSG11       |
| NA        | ENSG00000243136 | 0          | NA          | NA         | NA         | NA         | RN7SL22P    |
| 5672      | ENSG00000243137 | 0          | NA          | NA         | NA         | NA         | PSG4        |
| NA        | ENSG00000243141 | 0.18922458 | 0.01954053  | 0.38488496 | 0.78225479 | NA         | RPL23AP66   |
| NA        | ENSG00000243144 | 0.5661881  | 0.00637436  | 0.38255159 | 0.97543542 | NA         |             |
| 9553      | ENSG00000243147 | 648.794467 | -0.17085486 | 0.10660204 | 0.09445856 | 0.23891609 | MRPL33      |
| NA        | ENSG00000243149 | 0          | NA          | NA         | NA         | NA         | LINC02040   |
| 100996447 | ENSG00000243150 | 0          | NA          | NA         | NA         | NA         |             |
| NA        | ENSG00000243154 | 0          | NA          | NA         | NA         | NA         | SYPL1P1     |
| NA        | ENSG00000243155 | 47.2937655 | 0.24278364  | 0.28227583 | 0.23836442 | 0.45590958 |             |
| 57553     | ENSG00000243156 | 1715.74145 | -0.13449922 | 0.08373441 | 0.09894523 | 0.24742544 | MICAL3      |
| NA        | ENSG00000243160 | 0          | NA          | NA         | NA         | NA         |             |
| NA        | ENSG00000243164 | 0          | NA          | NA         | NA         | NA         |             |
| NA        | ENSG00000243165 | 0          | NA          | NA         | NA         | NA         |             |
| NA        | ENSG00000243167 | 0          | NA          | NA         | NA         | NA         | RPS10P28    |
| NA        | ENSG00000243171 | 0          | NA          | NA         | NA         | NA         |             |
| NA        | ENSG00000243173 | 0.32320803 | 0.00153348  | 0.38336993 | 0.96639996 | NA         | RN7SL861P   |
| NA        | ENSG00000243175 | 2.22401523 | 0.11172761  | 0.39846754 | 0.20887694 | NA         | RPSAP36     |
| NA        | ENSG00000243176 | 26.2054362 | 0.13875124  | 0.31541698 | 0.47845002 | 0.70013633 |             |
| NA        | ENSG00000243179 | 0.30139824 | -0.02296476 | 0.38527817 | 0.68536535 | NA         |             |
| NA        | ENSG00000243181 | 0          | NA          | NA         | NA         | NA         |             |
| NA        | ENSG00000243187 | 0          | NA          | NA         | NA         | NA         | CCDC39-AS1  |
| NA        | ENSG00000243188 | 0          | NA          | NA         | NA         | NA         | HNRNPA1P17  |
| NA        | ENSG00000243193 | 0.29863895 | -0.02292439 | 0.3852726  | 0.68753245 | NA         | PRKAR2B-AS1 |
| NA        | ENSG00000243195 | 0          | NA          | NA         | NA         | NA         | TUBBP11     |
| 285194    | ENSG00000243197 | 0.59158236 | -0.03381752 | 0.38626285 | 0.48698277 | NA         | TUSC7       |

|           |                 |            |             |            |            |            |             |
|-----------|-----------------|------------|-------------|------------|------------|------------|-------------|
| NA        | ENSG00000243199 | 7.72954873 | 0.03352507  | 0.34919966 | 0.82453373 | 0.92032344 |             |
| 692312    | ENSG00000243207 | 388.310391 | -0.08176608 | 0.15458423 | 0.56237258 | 0.76552124 | PPAN-P2RY11 |
| 101929054 | ENSG00000243224 | 31.9843492 | 0.28712778  | 0.34534331 | 0.18754146 | 0.38786275 |             |
| NA        | ENSG00000243225 | 0.30139824 | -0.02296476 | 0.38527817 | 0.68536535 | NA         |             |
| NA        | ENSG00000243227 | 0          | NA          | NA         | NA         | NA         | RN7SL55P    |
| NA        | ENSG00000243230 | 8.84922161 | 0.47285282  | 0.70018966 | 0.04049684 | 0.12654862 |             |
| 56134     | ENSG00000243232 | 600.451056 | -0.18154913 | 0.10900773 | 0.0815261  | 0.21429626 | PCDHAC2     |
| NA        | ENSG00000243234 | 0          | NA          | NA         | NA         | NA         |             |
| NA        | ENSG00000243236 | 0          | NA          | NA         | NA         | NA         | GSTA9P      |
| NA        | ENSG00000243238 | 0          | NA          | NA         | NA         | NA         | IGKV2-30    |
| NA        | ENSG00000243243 | 2.04976984 | 0.0162946   | 0.37716305 | 0.8351772  | NA         |             |
| 11037     | ENSG00000243244 | 168.575944 | 0.08725344  | 0.17693997 | 0.57946256 | 0.77706744 | STON1       |
| NA        | ENSG00000243250 | 0.4698562  | -0.02827018 | 0.38579374 | 0.54574443 | NA         | RPS6P16     |
| NA        | ENSG00000243254 | 0          | NA          | NA         | NA         | NA         | RN7SL350P   |
| NA        | ENSG00000243256 | 0          | NA          | NA         | NA         | NA         | RPL30P14    |
| NA        | ENSG00000243257 | 0          | NA          | NA         | NA         | NA         | MTCO2P29    |
| NA        | ENSG00000243260 | 0.33471731 | 0.02354391  | 0.38534154 | 0.62842204 | NA         | RN7SL558P   |
| NA        | ENSG00000243264 | 0          | NA          | NA         | NA         | NA         | IGKV2D-29   |
| NA        | ENSG00000243265 | 0.35719942 | 0.02382079  | 0.38538164 | 0.6137554  | NA         | RPL23AP55   |
| NA        | ENSG00000243267 | 0          | NA          | NA         | NA         | NA         | RN7SL614P   |
| NA        | ENSG00000243273 | 0          | NA          | NA         | NA         | NA         |             |
| NA        | ENSG00000243274 | 0          | NA          | NA         | NA         | NA         | RN7SL571P   |
| NA        | ENSG00000243276 | 0          | NA          | NA         | NA         | NA         |             |
| 11230     | ENSG00000243279 | 841.542004 | 0.01227225  | 0.08952101 | 0.88870016 | 0.95146564 | PRAF2       |
| NA        | ENSG00000243280 | 0.15069912 | -0.01848503 | 0.38480575 | 0.84537521 | NA         |             |
| 391123    | ENSG00000243284 | 0.48250734 | 0.0104392   | 0.38335466 | 0.79810238 | NA         | VSIG8       |
| NA        | ENSG00000243287 | 0          | NA          | NA         | NA         | NA         | RPS17P14    |
| NA        | ENSG00000243289 | 2.48776173 | 0.17971595  | 0.44082596 | 0.03450979 | NA         | AGAP13P     |
| NA        | ENSG00000243290 | 0          | NA          | NA         | NA         | NA         | IGKV1-12    |
| NA        | ENSG00000243295 | 0          | NA          | NA         | NA         | NA         |             |
| NA        | ENSG00000243296 | 0          | NA          | NA         | NA         | NA         |             |
| NA        | ENSG00000243297 | 0.173733   | 0.01914545  | 0.38484597 | 0.78225479 | NA         | RPL31P61    |
| NA        | ENSG00000243302 | 274.701734 | 0.10181855  | 0.13901067 | 0.4324384  | 0.65788827 |             |
| NA        | ENSG00000243303 | 0          | NA          | NA         | NA         | NA         |             |
| NA        | ENSG00000243304 | 1.18940872 | 0.05088149  | 0.38367896 | 0.46032606 | NA         |             |
| NA        | ENSG00000243305 | 0          | NA          | NA         | NA         | NA         |             |
| NA        | ENSG00000243307 | 2.12257864 | -0.02942412 | 0.37530875 | 0.74200841 | NA         | POM121L6P   |
| NA        | ENSG00000243312 | 0.48575961 | 0.01089219  | 0.38337587 | 0.79110161 | NA         |             |

|           |                 |            |             |            |            |            |           |
|-----------|-----------------|------------|-------------|------------|------------|------------|-----------|
| NA        | ENSG00000243313 | 0          | NA          | NA         | NA         | NA         | RN7SL285P |
| NA        | ENSG00000243314 | 0          | NA          | NA         | NA         | NA         |           |
| NA        | ENSG00000243316 | 0          | NA          | NA         | NA         | NA         | GUCY2GP   |
| 647087    | ENSG00000243317 | 905.838191 | -0.0728246  | 0.09405621 | 0.4203925  | 0.6462065  | STMP1     |
| 283480    | ENSG00000243319 | 3.47618784 | 0.00367352  | 0.36757375 | 0.97501005 | 0.99122005 | FGF14-IT1 |
| 107986046 | ENSG00000243321 | 0          | NA          | NA         | NA         | NA         | LINC01998 |
| 148713    | ENSG00000243323 | 20.1439373 | 0.82174759  | 0.79406234 | 0.01744719 | 0.06525018 | PTPRVP    |
| NA        | ENSG00000243328 | 0          | NA          | NA         | NA         | NA         |           |
| NA        | ENSG00000243333 | 0          | NA          | NA         | NA         | NA         | RN7SL174P |
| 154881    | ENSG00000243335 | 855.960877 | 0.19200708  | 0.09578583 | 0.03816479 | 0.12118909 | KCTD7     |
| NA        | ENSG00000243338 | 0          | NA          | NA         | NA         | NA         | RN7SL307P |
| NA        | ENSG00000243339 | 0.34045199 | -0.00011143 | 0.38336218 | 0.96630893 | NA         | RN7SL738P |
| NA        | ENSG00000243345 | 0          | NA          | NA         | NA         | NA         |           |
| NA        | ENSG00000243346 | 0          | NA          | NA         | NA         | NA         | RN7SL601P |
| NA        | ENSG00000243347 | 0          | NA          | NA         | NA         | NA         | LINC02045 |
| NA        | ENSG00000243349 | 0          | NA          | NA         | NA         | NA         |           |
| NA        | ENSG00000243352 | 0          | NA          | NA         | NA         | NA         | RN7SL8P   |
| NA        | ENSG00000243353 | 0          | NA          | NA         | NA         | NA         | RPS29P19  |
| NA        | ENSG00000243355 | 0.34105512 | 0.0236261   | 0.38535333 | 0.62413487 | NA         |           |
| NA        | ENSG00000243359 | 0.7880586  | -0.0068543  | 0.38151778 | 0.8949678  | NA         | RN7SL815P |
| 1945      | ENSG00000243364 | 171.918453 | 1.94530213  | 0.20229938 | 5.09E-23   | 2.21E-21   | EFNA4     |
| NA        | ENSG00000243365 | 0          | NA          | NA         | NA         | NA         | RN7SL278P |
| NA        | ENSG00000243366 | 0          | NA          | NA         | NA         | NA         | RN7SL60P  |
| NA        | ENSG00000243368 | 5.97978557 | -0.03690868 | 0.35833263 | 0.78373014 | 0.9014745  | MCCC1-AS1 |
| NA        | ENSG00000243370 | 0.72955384 | 0.02697334  | 0.38356341 | 0.55504355 | NA         | RN7SL775P |
| NA        | ENSG00000243373 | 0          | NA          | NA         | NA         | NA         | RN7SL173P |
| NA        | ENSG00000243374 | 0          | NA          | NA         | NA         | NA         | RN7SL72P  |
| NA        | ENSG00000243378 | 0          | NA          | NA         | NA         | NA         |           |
| NA        | ENSG00000243383 | 0          | NA          | NA         | NA         | NA         | RN7SL89P  |
| NA        | ENSG00000243384 | 0          | NA          | NA         | NA         | NA         |           |
| NA        | ENSG00000243385 | 0          | NA          | NA         | NA         | NA         |           |
| NA        | ENSG00000243388 | 0          | NA          | NA         | NA         | NA         | RPL3P3    |
| NA        | ENSG00000243389 | 3.85475305 | 0.02007097  | 0.36842239 | 0.85622574 | 0.93595144 |           |
| NA        | ENSG00000243396 | 0          | NA          | NA         | NA         | NA         | RPL32P7   |
| NA        | ENSG00000243398 | 0          | NA          | NA         | NA         | NA         | RN7SL141P |
| NA        | ENSG00000243402 | 0.31667257 | 0.00106922  | 0.38336622 | 0.96760856 | NA         |           |
| NA        | ENSG00000243403 | 0.15069912 | -0.01848503 | 0.38480575 | 0.84537521 | NA         |           |
| NA        | ENSG00000243404 | 0.33471731 | 0.02354391  | 0.38534154 | 0.62842204 | NA         | RPL35AP32 |

|           |                 |            |             |            |            |            |             |
|-----------|-----------------|------------|-------------|------------|------------|------------|-------------|
| 100887750 | ENSG00000243406 | 347.527316 | 0.18358923  | 0.14756959 | 0.17722865 | 0.37216515 | MRPS31P5    |
| NA        | ENSG00000243410 | 0          | NA          | NA         | NA         | NA         | PSMD6-AS1   |
| 353376    | ENSG00000243414 | 0.68272719 | 0.00487731  | 0.38246555 | 0.90919376 | NA         | TICAM2      |
| NA        | ENSG00000243415 | 0          | NA          | NA         | NA         | NA         |             |
| NA        | ENSG00000243417 | 0          | NA          | NA         | NA         | NA         | RPS3AP18    |
| NA        | ENSG00000243420 | 0          | NA          | NA         | NA         | NA         | RN7SL734P   |
| NA        | ENSG00000243422 | 32.183161  | 1.03630361  | 0.44624216 | 0.0017309  | 0.00947339 | RPL23AP49   |
| NA        | ENSG00000243423 | 0          | NA          | NA         | NA         | NA         |             |
| NA        | ENSG00000243424 | 0          | NA          | NA         | NA         | NA         | RN7SL107P   |
| NA        | ENSG00000243426 | 0          | NA          | NA         | NA         | NA         | RN7SL454P   |
| NA        | ENSG00000243429 | 0.79443515 | -0.00515605 | 0.38214716 | 0.9123378  | NA         | OR7E29P     |
| NA        | ENSG00000243431 | 11.1456551 | -0.05487152 | 0.34241902 | 0.73389446 | 0.87327664 | RPL5P30     |
| NA        | ENSG00000243433 | 4.00779841 | 0.06555573  | 0.37272416 | 0.57496119 | 0.77384371 |             |
| NA        | ENSG00000243437 | 0          | NA          | NA         | NA         | NA         | RN7SL370P   |
| NA        | ENSG00000243438 | 0          | NA          | NA         | NA         | NA         | LARP1BP2    |
| NA        | ENSG00000243439 | 0          | NA          | NA         | NA         | NA         | RN7SL352P   |
| NA        | ENSG00000243445 | 0.66763811 | -0.02111416 | 0.3830967  | 0.65774771 | NA         |             |
| NA        | ENSG00000243446 | 0          | NA          | NA         | NA         | NA         | RN7SL284P   |
| 401115    | ENSG00000243449 | 810.518195 | 0.24556569  | 0.11357483 | 0.02325891 | 0.08224146 | C4orf48     |
| NA        | ENSG00000243455 | 0          | NA          | NA         | NA         | NA         | RPS18P13    |
| NA        | ENSG00000243466 | 0          | NA          | NA         | NA         | NA         | IGKV1-5     |
| 27160     | ENSG00000243468 | 0          | NA          | NA         | NA         | NA         | INGX        |
| NA        | ENSG00000243469 | 0          | NA          | NA         | NA         | NA         | RPL7P51     |
| 24142     | ENSG00000243477 | 125.813953 | 0.01082543  | 0.19166131 | 0.94656648 | 0.97814213 | NAA80       |
| NA        | ENSG00000243478 | 0          | NA          | NA         | NA         | NA         | AOX2P       |
| 645249    | ENSG00000243479 | 0          | NA          | NA         | NA         | NA         | MNX1-AS1    |
| 279       | ENSG00000243480 | 0          | NA          | NA         | NA         | NA         | AMY2A       |
| NA        | ENSG00000243483 | 0          | NA          | NA         | NA         | NA         |             |
| NA        | ENSG00000243485 | 0          | NA          | NA         | NA         | NA         | MIR1302-2HG |
| NA        | ENSG00000243486 | 0          | NA          | NA         | NA         | NA         |             |
| NA        | ENSG00000243488 | 0          | NA          | NA         | NA         | NA         | RN7SL337P   |
| 386678    | ENSG00000243489 | 0          | NA          | NA         | NA         | NA         | KRTAP10-11  |
| NA        | ENSG00000243491 | 0          | NA          | NA         | NA         | NA         |             |
| NA        | ENSG00000243494 | 0          | NA          | NA         | NA         | NA         |             |
| NA        | ENSG00000243495 | 0          | NA          | NA         | NA         | NA         | GMFBP1      |
| NA        | ENSG00000243498 | 0          | NA          | NA         | NA         | NA         | UBA52P5     |
| NA        | ENSG00000243499 | 0          | NA          | NA         | NA         | NA         | RPS6P21     |
| NA        | ENSG00000243501 | 0.45209736 | -0.02505403 | 0.38558831 | 0.57865948 | NA         |             |

|           |                 |            |             |            |            |            |              |
|-----------|-----------------|------------|-------------|------------|------------|------------|--------------|
| NA        | ENSG00000243503 | 0          | NA          | NA         | NA         | NA         |              |
| NA        | ENSG00000243504 | 0.32539995 | 0.00199832  | 0.38337525 | 0.96117945 | NA         | RPS23P1      |
| NA        | ENSG00000243505 | 0          | NA          | NA         | NA         | NA         | RN7SL240P    |
| NA        | ENSG00000243507 | 0          | NA          | NA         | NA         | NA         |              |
| NA        | ENSG00000243508 | 0.173124   | -0.01911262 | 0.38486262 | 0.84537521 | NA         | DNAJB6P7     |
| 8771      | ENSG00000243509 | 0          | NA          | NA         | NA         | NA         | TNFRSF6B     |
| NA        | ENSG00000243510 | 0          | NA          | NA         | NA         | NA         | RN7SL111P    |
| NA        | ENSG00000243514 | 0          | NA          | NA         | NA         | NA         | RPL32P33     |
| NA        | ENSG00000243516 | 0          | NA          | NA         | NA         | NA         | RPL12P40     |
| NA        | ENSG00000243517 | 1.53488294 | 0.02262108  | 0.37825653 | 0.76351586 | NA         |              |
| NA        | ENSG00000243518 | 0          | NA          | NA         | NA         | NA         |              |
| NA        | ENSG00000243519 | 0.16735865 | 0.01897177  | 0.38482933 | 0.78225479 | NA         | IGLVIVOR22-2 |
| NA        | ENSG00000243521 | 0          | NA          | NA         | NA         | NA         | RPL5P33      |
| NA        | ENSG00000243531 | 0          | NA          | NA         | NA         | NA         |              |
| NA        | ENSG00000243532 | 0          | NA          | NA         | NA         | NA         | RN7SL19P     |
| NA        | ENSG00000243537 | 0          | NA          | NA         | NA         | NA         | RPL32P20     |
| NA        | ENSG00000243538 | 0          | NA          | NA         | NA         | NA         | RPS26P28     |
| NA        | ENSG00000243539 | 0          | NA          | NA         | NA         | NA         | RN7SL649P    |
| NA        | ENSG00000243541 | 0          | NA          | NA         | NA         | NA         | RN7SL104P    |
| 140870    | ENSG00000243543 | 0          | NA          | NA         | NA         | NA         | WFDC6        |
| NA        | ENSG00000243544 | 0          | NA          | NA         | NA         | NA         | RN7SL172P    |
| NA        | ENSG00000243546 | 0          | NA          | NA         | NA         | NA         | RN7SL108P    |
| NA        | ENSG00000243547 | 0.30001729 | -0.0229446  | 0.38527539 | 0.68644787 | NA         | HNRNPKP4     |
| NA        | ENSG00000243548 | 0          | NA          | NA         | NA         | NA         | RN7SL101P    |
| NA        | ENSG00000243549 | 0          | NA          | NA         | NA         | NA         | RN7SL705P    |
| NA        | ENSG00000243550 | 0          | NA          | NA         | NA         | NA         | LINC01214    |
| NA        | ENSG00000243554 | 8.86884943 | 0.1646898   | 0.38769663 | 0.30418542 | 0.53153416 |              |
| NA        | ENSG00000243560 | 0          | NA          | NA         | NA         | NA         | RN7SL364P    |
| NA        | ENSG00000243562 | 0.34746601 | 0.02370763  | 0.3853651  | 0.61987128 | NA         | RN7SL838P    |
| 105375355 | ENSG00000243566 | 2.29091206 | 0.05289829  | 0.38009139 | 0.53670876 | NA         | UPK3B        |
| NA        | ENSG00000243568 | 0.32265033 | -0.0232555  | 0.38531889 | 0.66951484 | NA         |              |
| 105377096 | ENSG00000243572 | 0          | NA          | NA         | NA         | NA         | LINC02017    |
| NA        | ENSG00000243574 | 1.14894321 | -0.00767628 | 0.38042588 | 0.89577363 | NA         |              |
| NA        | ENSG00000243581 | 0          | NA          | NA         | NA         | NA         | RPS29P25     |
| NA        | ENSG00000243584 | 0          | NA          | NA         | NA         | NA         |              |
| NA        | ENSG00000243591 | 0          | NA          | NA         | NA         | NA         | RN7SL282P    |
| NA        | ENSG00000243592 | 0          | NA          | NA         | NA         | NA         | RPL17P22     |
| 101926983 | ENSG00000243593 | 0          | NA          | NA         | NA         | NA         | LINC02049    |

|        |                 |            |             |            |            |            |           |
|--------|-----------------|------------|-------------|------------|------------|------------|-----------|
| NA     | ENSG00000243596 | 0          | NA          | NA         | NA         | NA         |           |
| NA     | ENSG00000243601 | 0          | NA          | NA         | NA         | NA         | RPL12P24  |
| NA     | ENSG00000243607 | 0.14931947 | -0.01844332 | 0.38480212 | 0.84537521 | NA         | RPL35AP26 |
| NA     | ENSG00000243609 | 0          | NA          | NA         | NA         | NA         | RPS2P44   |
| NA     | ENSG00000243613 | 0          | NA          | NA         | NA         | NA         |           |
| NA     | ENSG00000243620 | 1.11313104 | 0.05581711  | 0.38544037 | 0.38618816 | NA         |           |
| NA     | ENSG00000243621 | 0          | NA          | NA         | NA         | NA         |           |
| 388820 | ENSG00000243627 | 0.33471731 | 0.02354391  | 0.38534154 | 0.62842204 | NA         | SMIM34A   |
| 339894 | ENSG00000243629 | 0          | NA          | NA         | NA         | NA         | LINC00880 |
| NA     | ENSG00000243633 | 0          | NA          | NA         | NA         | NA         | RN7SL542P |
| NA     | ENSG00000243635 | 0          | NA          | NA         | NA         | NA         |           |
| NA     | ENSG00000243636 | 0          | NA          | NA         | NA         | NA         |           |
| NA     | ENSG00000243641 | 0          | NA          | NA         | NA         | NA         | OR13C7    |
| NA     | ENSG00000243642 | 0          | NA          | NA         | NA         | NA         | RN7SL526P |
| NA     | ENSG00000243643 | 0          | NA          | NA         | NA         | NA         | TSPY20P   |
| 3588   | ENSG00000243646 | 229.049321 | 0.51073848  | 0.18067586 | 0.00164206 | 0.00906721 | IL10RB    |
| NA     | ENSG00000243648 | 0.52119901 | 0.02576573  | 0.38568143 | 0.51723676 | NA         |           |
| 629    | ENSG00000243649 | 0.96625492 | 0.0492309   | 0.38473651 | 0.42325958 | NA         | CFB       |
| NA     | ENSG00000243650 | 0          | NA          | NA         | NA         | NA         | RN7SL834P |
| NA     | ENSG00000243655 | 0          | NA          | NA         | NA         | NA         |           |
| NA     | ENSG00000243658 | 0          | NA          | NA         | NA         | NA         | MTND5P16  |
| NA     | ENSG00000243659 | 0          | NA          | NA         | NA         | NA         |           |
| 642819 | ENSG00000243660 | 23.1667664 | 0.27216705  | 0.41436803 | 0.17292086 | 0.36578929 | ZNF487    |
| NA     | ENSG00000243661 | 0          | NA          | NA         | NA         | NA         | WBP1LP1   |
| NA     | ENSG00000243663 | 0.173733   | 0.01914545  | 0.38484597 | 0.78225479 | NA         | RPS4XP14  |
| NA     | ENSG00000243664 | 0          | NA          | NA         | NA         | NA         | RPS29P12  |
| 116143 | ENSG00000243667 | 193.103902 | -0.07649056 | 0.17078313 | 0.61577647 | 0.80301072 | WDR92     |
| NA     | ENSG00000243669 | 0          | NA          | NA         | NA         | NA         | RPL34P23  |
| NA     | ENSG00000243671 | 0          | NA          | NA         | NA         | NA         | RN7SL761P |
| NA     | ENSG00000243672 | 0          | NA          | NA         | NA         | NA         | RPS3AP40  |
| NA     | ENSG00000243674 | 0          | NA          | NA         | NA         | NA         | OR7E66P   |
| NA     | ENSG00000243675 | 0.34119172 | 0.02362715  | 0.38535349 | 0.62406247 | NA         | RPL35AP9  |
| 4831   | ENSG00000243678 | 5598.64935 | -0.44610419 | 0.05793971 | 6.46E-15   | 1.75E-13   | NME2      |
| NA     | ENSG00000243679 | 158.410145 | 0.15989547  | 0.17372952 | 0.30260083 | 0.52987991 |           |
| NA     | ENSG00000243680 | 0.173124   | -0.01911262 | 0.38486262 | 0.84537521 | NA         | RPL37P23  |
| NA     | ENSG00000243686 | 1.69813557 | -0.02836889 | 0.38221367 | 0.62103985 | NA         | RPLP1P11  |
| NA     | ENSG00000243687 | 0          | NA          | NA         | NA         | NA         | RPL35AP10 |
| 728290 | ENSG00000243694 | 0          | NA          | NA         | NA         | NA         | LINC02027 |

|           |                 |            |             |            |            |            |              |
|-----------|-----------------|------------|-------------|------------|------------|------------|--------------|
| NA        | ENSG00000243695 | 1.87673572 | 0.07213576  | 0.38726828 | 0.34701092 | NA         |              |
| NA        | ENSG00000243696 | 48.9513052 | 0.4382116   | 0.39719571 | 0.07210198 | 0.19559917 |              |
| NA        | ENSG00000243697 | 0          | NA          | NA         | NA         | NA         |              |
| NA        | ENSG00000243700 | 0          | NA          | NA         | NA         | NA         | RN7SL598P    |
| 344595    | ENSG00000243701 | 198.637671 | 0.78900372  | 0.21291733 | 3.57E-05   | 0.00030326 | DUBR         |
| NA        | ENSG00000243702 | 0          | NA          | NA         | NA         | NA         | RN7SL638P    |
| NA        | ENSG00000243704 | 0.173124   | -0.01911262 | 0.38486262 | 0.84537521 | NA         | RN7SL105P    |
| NA        | ENSG00000243705 | 0          | NA          | NA         | NA         | NA         |              |
| 100137049 | ENSG00000243708 | 70.5795603 | 0.61000504  | 0.3480518  | 0.01614937 | 0.0612509  | PLA2G4B      |
| 10637     | ENSG00000243709 | 4.46783152 | 0.20973012  | 0.44456648 | 0.10406923 | 0.25680766 | LEFTY1       |
| 149465    | ENSG00000243710 | 9.63928418 | 0.18975264  | 0.42440393 | 0.13619041 | 0.31128106 | CFAP57       |
| NA        | ENSG00000243711 | 0.50744923 | 0.01538016  | 0.38313985 | 0.73958504 | NA         | RPL21P116    |
| 100874237 | ENSG00000243715 | 0          | NA          | NA         | NA         | NA         | CACNA2D3-AS1 |
| 100132247 | ENSG00000243716 | 2137.24685 | -0.05601981 | 0.1058664  | 0.58080479 | 0.77801412 | NPIP5        |
| NA        | ENSG00000243720 | 0          | NA          | NA         | NA         | NA         | RPL21P127    |
| NA        | ENSG00000243721 | 0          | NA          | NA         | NA         | NA         | RPL23AP63    |
| NA        | ENSG00000243723 | 0          | NA          | NA         | NA         | NA         | RN7SL393P    |
| 7268      | ENSG00000243725 | 459.504979 | 0.03528527  | 0.13224061 | 0.77717436 | 0.89777292 | TTC4         |
| 81696     | ENSG00000243729 | 0          | NA          | NA         | NA         | NA         | OR5V1        |
| NA        | ENSG00000243730 | 0          | NA          | NA         | NA         | NA         | RPL29P3      |
| NA        | ENSG00000243733 | 0          | NA          | NA         | NA         | NA         |              |
| NA        | ENSG00000243738 | 0.50991537 | 0.03085646  | 0.38602743 | 0.48176741 | NA         | RN7SL181P    |
| 113157    | ENSG00000243742 | 1.30784894 | 0.01792319  | 0.3795019  | 0.7920719  | NA         | RPLP0P2      |
| NA        | ENSG00000243744 | 0          | NA          | NA         | NA         | NA         |              |
| NA        | ENSG00000243746 | 0.94711862 | -0.04801754 | 0.38529456 | 0.40180573 | NA         | EEF1A1P10    |
| 100506144 | ENSG00000243749 | 50.372124  | 0.18773588  | 0.27632724 | 0.35084038 | 0.58113897 | TMEM35B      |
| 3139      | ENSG00000243753 | 60.7083063 | 0.13080528  | 0.2509703  | 0.49716687 | 0.7150265  | HLA-L        |
| NA        | ENSG00000243758 | 0          | NA          | NA         | NA         | NA         | RPL35AP15    |
| NA        | ENSG00000243759 | 0.173124   | -0.01911262 | 0.38486262 | 0.84537521 | NA         | ST13P15      |
| NA        | ENSG00000243761 | 0          | NA          | NA         | NA         | NA         | RPL32P4      |
| NA        | ENSG00000243762 | 0          | NA          | NA         | NA         | NA         |              |
| NA        | ENSG00000243766 | 0          | NA          | NA         | NA         | NA         | HOTTIP       |
| NA        | ENSG00000243770 | 0          | NA          | NA         | NA         | NA         | RN7SL65P     |
| NA        | ENSG00000243771 | 0          | NA          | NA         | NA         | NA         |              |
| 3804      | ENSG00000243772 | 0          | NA          | NA         | NA         | NA         | KIR2DL3      |
| 202459    | ENSG00000243775 | 0.34746601 | 0.02370763  | 0.3853651  | 0.61987128 | NA         | OSTCP1       |
| NA        | ENSG00000243777 | 0          | NA          | NA         | NA         | NA         |              |
| NA        | ENSG00000243779 | 0          | NA          | NA         | NA         | NA         |              |



|           |                 |            |             |            |            |            |            |
|-----------|-----------------|------------|-------------|------------|------------|------------|------------|
| NA        | ENSG00000243780 | 0          | NA          | NA         | NA         | NA         |            |
| NA        | ENSG00000243781 | 1.24682889 | -0.03379682 | 0.38254793 | 0.56980055 | NA         |            |
| NA        | ENSG00000243782 | 0          | NA          | NA         | NA         | NA         | RN7SL78P   |
| 100137047 | ENSG00000243789 | 77.5627378 | 0.15301065  | 0.23832018 | 0.41902137 | 0.64480922 | JMJD7      |
| NA        | ENSG00000243792 | 0          | NA          | NA         | NA         | NA         | OR7E89P    |
| NA        | ENSG00000243794 | 0          | NA          | NA         | NA         | NA         | SNRPCP10   |
| 101929717 | ENSG00000243795 | 9.28153768 | 0.02579908  | 0.35026749 | 0.86325429 | 0.93939037 | LINC02044  |
| NA        | ENSG00000243797 | 0          | NA          | NA         | NA         | NA         |            |
| NA        | ENSG00000243799 | 0          | NA          | NA         | NA         | NA         | PEX5L-AS1  |
| NA        | ENSG00000243801 | 0          | NA          | NA         | NA         | NA         | RN7SL461P  |
| NA        | ENSG00000243802 | 0          | NA          | NA         | NA         | NA         |            |
| NA        | ENSG00000243806 | 0          | NA          | NA         | NA         | NA         | RPL7P18    |
| NA        | ENSG00000243810 | 0          | NA          | NA         | NA         | NA         | CFAP61-AS1 |
| 140564    | ENSG00000243811 | 6.22429115 | 0.11675203  | 0.38477624 | 0.36313459 | 0.5928728  | APOBEC3D   |
| NA        | ENSG00000243813 | 0          | NA          | NA         | NA         | NA         |            |
| NA        | ENSG00000243817 | 0          | NA          | NA         | NA         | NA         | RN7SL189P  |
| 100507389 | ENSG00000243818 | 0          | NA          | NA         | NA         | NA         |            |
| NA        | ENSG00000243819 | 20.1270704 | 0.21900914  | 0.356211   | 0.27954418 | 0.50405857 | RN7SL832P  |
| NA        | ENSG00000243822 | 0          | NA          | NA         | NA         | NA         |            |
| NA        | ENSG00000243824 | 0.14931947 | -0.01844332 | 0.38480212 | 0.84537521 | NA         | RPL12P6    |
| NA        | ENSG00000243828 | 0          | NA          | NA         | NA         | NA         |            |
| NA        | ENSG00000243829 | 0.33471731 | 0.02354391  | 0.38534154 | 0.62842204 | NA         |            |
| NA        | ENSG00000243830 | 0          | NA          | NA         | NA         | NA         |            |
| NA        | ENSG00000243831 | 0          | NA          | NA         | NA         | NA         |            |
| 100507210 | ENSG00000243832 | 0          | NA          | NA         | NA         | NA         | LINC02000  |
| 100131176 | ENSG00000243836 | 11.4983334 | 0.03706561  | 0.33799446 | 0.82328081 | 0.91945578 | WDR86-AS1  |
| NA        | ENSG00000243838 | 0.32469337 | 0.00153968  | 0.38336994 | 0.96556693 | NA         | PSMC1P7    |
| NA        | ENSG00000243844 | 0          | NA          | NA         | NA         | NA         | RPL17P33   |
| NA        | ENSG00000243845 | 0          | NA          | NA         | NA         | NA         | RN7SL30P   |
| NA        | ENSG00000243847 | 0.29863895 | -0.02292439 | 0.3852726  | 0.68753245 | NA         | RN7SL610P  |
| 100874029 | ENSG00000243849 | 0.52119901 | 0.02576573  | 0.38568143 | 0.51723676 | NA         | CFAP44-AS1 |
| NA        | ENSG00000243853 | 0          | NA          | NA         | NA         | NA         | ALDH7A1P3  |
| NA        | ENSG00000243854 | 0.173733   | 0.01914545  | 0.38484597 | 0.78225479 | NA         | RN7SL67P   |
| NA        | ENSG00000243855 | 0          | NA          | NA         | NA         | NA         | RPL12P5    |
| NA        | ENSG00000243856 | 0          | NA          | NA         | NA         | NA         | RN7SL551P  |
| NA        | ENSG00000243859 | 0          | NA          | NA         | NA         | NA         | RPL5P17    |
| NA        | ENSG00000243861 | 0          | NA          | NA         | NA         | NA         |            |
| NA        | ENSG00000243864 | 0          | NA          | NA         | NA         | NA         | RPS3AP50   |

|        |                 |            |             |            |            |            |            |
|--------|-----------------|------------|-------------|------------|------------|------------|------------|
| NA     | ENSG00000243870 | 0          | NA          | NA         | NA         | NA         | RN7SL236P  |
| NA     | ENSG00000243871 | 1.41772883 | 0.0895862   | 0.39530971 | 0.16897084 | NA         | RN7SL487P  |
| NA     | ENSG00000243872 | 0          | NA          | NA         | NA         | NA         | RN7SL464P  |
| NA     | ENSG00000243873 | 0          | NA          | NA         | NA         | NA         | HMGB1P36   |
| NA     | ENSG00000243877 | 0          | NA          | NA         | NA         | NA         | HMGB1P38   |
| NA     | ENSG00000243883 | 0.32478482 | 0.00160621  | 0.38337063 | 0.9649308  | NA         | RN7SL419P  |
| NA     | ENSG00000243885 | 0          | NA          | NA         | NA         | NA         |            |
| NA     | ENSG00000243886 | 0          | NA          | NA         | NA         | NA         |            |
| NA     | ENSG00000243888 | 0          | NA          | NA         | NA         | NA         |            |
| NA     | ENSG00000243889 | 0          | NA          | NA         | NA         | NA         | TRBV8-1    |
| NA     | ENSG00000243894 | 0.44795842 | -0.02501848 | 0.38558245 | 0.5807882  | NA         | RPS3AP16   |
| 401427 | ENSG00000243896 | 0          | NA          | NA         | NA         | NA         | OR2A7      |
| NA     | ENSG00000243900 | 0.18922458 | 0.01954053  | 0.38488496 | 0.78225479 | NA         | RN7SL320P  |
| 114794 | ENSG00000243902 | 4.33438386 | 0.03314046  | 0.36857453 | 0.76655321 | 0.8924999  |            |
| NA     | ENSG00000243903 | 0          | NA          | NA         | NA         | NA         |            |
| NA     | ENSG00000243904 | 0          | NA          | NA         | NA         | NA         | RPSAP5     |
| NA     | ENSG00000243905 | 0          | NA          | NA         | NA         | NA         | RN7SL679P  |
| 80086  | ENSG00000243910 | 0          | NA          | NA         | NA         | NA         | TUBA4B     |
| NA     | ENSG00000243911 | 0          | NA          | NA         | NA         | NA         | RN7SL430P  |
| NA     | ENSG00000243914 | 0.44965365 | -0.02729575 | 0.38571274 | 0.56198119 | NA         | RPL5P14    |
| NA     | ENSG00000243915 | 0.4870118  | -0.00622397 | 0.38313752 | 0.87032008 | NA         | THAP12P2   |
| NA     | ENSG00000243916 | 0          | NA          | NA         | NA         | NA         |            |
| NA     | ENSG00000243918 | 0          | NA          | NA         | NA         | NA         | EIF4BP8    |
| NA     | ENSG00000243920 | 0          | NA          | NA         | NA         | NA         | RPS26P24   |
| NA     | ENSG00000243925 | 0          | NA          | NA         | NA         | NA         | RPS24P18   |
| NA     | ENSG00000243926 | 10.3367487 | 0.04218595  | 0.34140544 | 0.7951328  | 0.90585603 | TIPARP-AS1 |
| 64968  | ENSG00000243927 | 407.649983 | 0.01069268  | 0.12092812 | 0.92672276 | 0.96932621 | MRPS6      |
| NA     | ENSG00000243929 | 0          | NA          | NA         | NA         | NA         |            |
| NA     | ENSG00000243930 | 0          | NA          | NA         | NA         | NA         | RPS12P21   |
| NA     | ENSG00000243939 | 0          | NA          | NA         | NA         | NA         |            |
| 84450  | ENSG00000243943 | 2573.41737 | 0.0149822   | 0.06840153 | 0.82451743 | 0.92032344 | ZNF512     |
| NA     | ENSG00000243944 | 0.18922458 | 0.01954053  | 0.38488496 | 0.78225479 | NA         |            |
| NA     | ENSG00000243945 | 0          | NA          | NA         | NA         | NA         |            |
| NA     | ENSG00000243951 | 0          | NA          | NA         | NA         | NA         | RN7SL308P  |
| NA     | ENSG00000243953 | 0          | NA          | NA         | NA         | NA         |            |
| NA     | ENSG00000243954 | 0          | NA          | NA         | NA         | NA         | RN7SL743P  |
| 2938   | ENSG00000243955 | 0          | NA          | NA         | NA         | NA         | GSTA1      |
| NA     | ENSG00000243957 | 0          | NA          | NA         | NA         | NA         | RN7SL647P  |

|        |                 |            |             |            |            |            |           |
|--------|-----------------|------------|-------------|------------|------------|------------|-----------|
| NA     | ENSG00000243959 | 0          | NA          | NA         | NA         | NA         | RN7SL684P |
| NA     | ENSG00000243960 | 1.87595524 | -0.00719402 | 0.38014101 | 0.90339726 | NA         |           |
| NA     | ENSG00000243961 | 0          | NA          | NA         | NA         | NA         | PARAL1    |
| NA     | ENSG00000243964 | 0.34045044 | -0.00010249 | 0.38336217 | 0.96622416 | NA         | RPL23AP65 |
| NA     | ENSG00000243967 | 4.35533021 | 0.10869922  | 0.39047266 | 0.31460973 | 0.5422726  | NBPF5P    |
| NA     | ENSG00000243968 | 0          | NA          | NA         | NA         | NA         | RN7SL402P |
| NA     | ENSG00000243969 | 0          | NA          | NA         | NA         | NA         |           |
| 728448 | ENSG00000243970 | 283.057116 | 0.49391829  | 0.15626141 | 0.00059638 | 0.00376582 | PPIEL     |
| NA     | ENSG00000243974 | 0          | NA          | NA         | NA         | NA         | VTI1BP1   |
| NA     | ENSG00000243976 | 0          | NA          | NA         | NA         | NA         | RN7SL523P |
| NA     | ENSG00000243977 | 0          | NA          | NA         | NA         | NA         | H3P13     |
| 57529  | ENSG00000243978 | 7.42303136 | 0.06196938  | 0.35783521 | 0.66843902 | 0.83697256 | RTL9      |
| NA     | ENSG00000243979 | 0          | NA          | NA         | NA         | NA         |           |
| NA     | ENSG00000243980 | 0          | NA          | NA         | NA         | NA         | RN7SL702P |
| NA     | ENSG00000243981 | 0          | NA          | NA         | NA         | NA         |           |
| NA     | ENSG00000243986 | 0          | NA          | NA         | NA         | NA         | ENO1P3    |
| NA     | ENSG00000243988 | 0          | NA          | NA         | NA         | NA         | RPS24P17  |
| 95     | ENSG00000243989 | 485.239884 | 0.1426951   | 0.12998821 | 0.24333655 | 0.4618134  | ACY1      |
| NA     | ENSG00000243991 | 0          | NA          | NA         | NA         | NA         | RN7SL447P |
| NA     | ENSG00000243995 | 0          | NA          | NA         | NA         | NA         |           |
| NA     | ENSG00000244000 | 0          | NA          | NA         | NA         | NA         |           |
| NA     | ENSG00000244002 | 0          | NA          | NA         | NA         | NA         | RPSAP39   |
| NA     | ENSG00000244003 | 0          | NA          | NA         | NA         | NA         | RN7SL143P |
| NA     | ENSG00000244004 | 0          | NA          | NA         | NA         | NA         | RPS3AP19  |
| 9054   | ENSG00000244005 | 514.981195 | -0.0421557  | 0.1125445  | 0.69435672 | 0.85208349 | NFS1      |
| NA     | ENSG00000244006 | 0          | NA          | NA         | NA         | NA         | RN7SL799P |
| NA     | ENSG00000244009 | 0          | NA          | NA         | NA         | NA         | B3GAT3P1  |
| NA     | ENSG00000244018 | 0          | NA          | NA         | NA         | NA         | RPL35P6   |
| NA     | ENSG00000244019 | 0          | NA          | NA         | NA         | NA         | RPS2P24   |
| 645745 | ENSG00000244020 | 0          | NA          | NA         | NA         | NA         | MT1HL1    |
| NA     | ENSG00000244021 | 0.15069912 | -0.01848503 | 0.38480575 | 0.84537521 | NA         |           |
| NA     | ENSG00000244024 | 0.86015647 | -0.0055746  | 0.38134912 | 0.91529998 | NA         | LARP7P4   |
| 337970 | ENSG00000244025 | 0          | NA          | NA         | NA         | NA         | KRTAP19-3 |
| 692099 | ENSG00000244026 | 139.484466 | 0.17491797  | 0.1783772  | 0.26862013 | 0.49155354 | FAM86DP   |
| NA     | ENSG00000244031 | 0          | NA          | NA         | NA         | NA         | RPS3AP17  |
| NA     | ENSG00000244033 | 0          | NA          | NA         | NA         | NA         | RN7SL228P |
| NA     | ENSG00000244034 | 0          | NA          | NA         | NA         | NA         | RN7SL424P |
| NA     | ENSG00000244036 | 0          | NA          | NA         | NA         | NA         |           |

|           |                 |            |             |            |            |            |           |
|-----------|-----------------|------------|-------------|------------|------------|------------|-----------|
| 1650      | ENSG00000244038 | 4014.45042 | 0.23987733  | 0.05942474 | 4.29E-05   | 0.00035752 | DDOST     |
| NA        | ENSG00000244039 | 0          | NA          | NA         | NA         | NA         |           |
| 101928376 | ENSG00000244040 | 2.49524973 | 0.06902039  | 0.38320409 | 0.43464746 | NA         | IL12A-AS1 |
| 401232    | ENSG00000244041 | 24.9860343 | 0.22986974  | 0.36357493 | 0.25815005 | 0.47950675 | LINC01011 |
| NA        | ENSG00000244043 | 0          | NA          | NA         | NA         | NA         | RPS27P27  |
| NA        | ENSG00000244044 | 0          | NA          | NA         | NA         | NA         | RN7SL735P |
| 147007    | ENSG00000244045 | 638.368971 | -0.16093088 | 0.11330629 | 0.13492237 | 0.3094278  | TMEM199   |
| NA        | ENSG00000244048 | 0          | NA          | NA         | NA         | NA         | RPS18P6   |
| NA        | ENSG00000244050 | 1.11825895 | -0.03159961 | 0.38158592 | 0.61692063 | NA         | DEFB109F  |
| NA        | ENSG00000244052 | 0.16735865 | 0.01897177  | 0.38482933 | 0.78225479 | NA         | RPL5P24   |
| NA        | ENSG00000244053 | 0.15069912 | -0.01848503 | 0.38480575 | 0.84537521 | NA         | RPL13AP2  |
| NA        | ENSG00000244055 | 97.8285608 | 0.09242951  | 0.23902903 | 0.62385738 | 0.80823628 |           |
| NA        | ENSG00000244056 | 3.9014458  | 0.1480982   | 0.40369792 | 0.227082   | 0.44177223 | RN7SL417P |
| 353144    | ENSG00000244057 | 0          | NA          | NA         | NA         | NA         | LCE3C     |
| NA        | ENSG00000244060 | 0.86999347 | 0.06313478  | 0.39092875 | 0.21115239 | NA         | RPS2P41   |
| NA        | ENSG00000244061 | 0.86073985 | 0.06128953  | 0.39056271 | 0.21919084 | NA         |           |
| NA        | ENSG00000244062 | 0.14931947 | -0.01844332 | 0.38480212 | 0.84537521 | NA         |           |
| NA        | ENSG00000244063 | 0          | NA          | NA         | NA         | NA         |           |
| NA        | ENSG00000244065 | 1.33736181 | 0.0320921   | 0.37992628 | 0.65591662 | NA         | MARK2P17  |
| NA        | ENSG00000244066 | 0          | NA          | NA         | NA         | NA         | RN7SL148P |
| 2939      | ENSG00000244067 | 0          | NA          | NA         | NA         | NA         | GSTA2     |
| NA        | ENSG00000244071 | 0          | NA          | NA         | NA         | NA         | RPL9P33   |
| NA        | ENSG00000244073 | 0.83391594 | -0.00835717 | 0.38080499 | 0.88276076 | NA         | RPS4XP6   |
| NA        | ENSG00000244076 | 0          | NA          | NA         | NA         | NA         |           |
| NA        | ENSG00000244080 | 0          | NA          | NA         | NA         | NA         | RN7SL833P |
| NA        | ENSG00000244081 | 0          | NA          | NA         | NA         | NA         |           |
| NA        | ENSG00000244083 | 0          | NA          | NA         | NA         | NA         |           |
| NA        | ENSG00000244086 | 0.34700522 | 0.00064267  | 0.38336317 | 0.96237818 | NA         |           |
| NA        | ENSG00000244088 | 0          | NA          | NA         | NA         | NA         | RPL23AP44 |
| NA        | ENSG00000244089 | 0          | NA          | NA         | NA         | NA         | HMGB1P30  |
| NA        | ENSG00000244091 | 0          | NA          | NA         | NA         | NA         | RN7SL483P |
| 6705      | ENSG00000244094 | 0          | NA          | NA         | NA         | NA         | SPRR2F    |
| NA        | ENSG00000244097 | 2.25061203 | -0.07751829 | 0.39551187 | 0.07541765 | NA         | RPS4XP17  |
| NA        | ENSG00000244099 | 0.16735865 | 0.01897177  | 0.38482933 | 0.78225479 | NA         | RPS23P3   |
| NA        | ENSG00000244101 | 0          | NA          | NA         | NA         | NA         | HMG1P10   |
| NA        | ENSG00000244104 | 0          | NA          | NA         | NA         | NA         | RN7SL659P |
| NA        | ENSG00000244107 | 0          | NA          | NA         | NA         | NA         | RN7SL250P |
| NA        | ENSG00000244112 | 1.01961496 | 0.03413444  | 0.38158532 | 0.59795254 | NA         | RN7SL508P |

|           |                 |            |             |            |            |            |               |
|-----------|-----------------|------------|-------------|------------|------------|------------|---------------|
| NA        | ENSG00000244113 | 0.33950691 | 0.00262394  | 0.38338447 | 0.96340536 | NA         |               |
| 552891    | ENSG00000244115 | 51.040007  | -0.40347545 | 0.34799734 | 0.08266269 | 0.2165339  | DNAJC25-GNG10 |
| NA        | ENSG00000244116 | 0          | NA          | NA         | NA         | NA         | IGKV2-28      |
| NA        | ENSG00000244119 | 12.656357  | 0.19425495  | 0.38334721 | 0.28367016 | 0.50881632 | PDCL3P4       |
| 54577     | ENSG00000244122 | 0          | NA          | NA         | NA         | NA         | UGT1A7        |
| NA        | ENSG00000244124 | 4.23751446 | -0.05385703 | 0.37289491 | 0.62014174 | 0.80605425 | ATP1B3-AS1    |
| NA        | ENSG00000244125 | 0          | NA          | NA         | NA         | NA         |               |
| NA        | ENSG00000244128 | 1.65661819 | 0.04147368  | 0.37983134 | 0.59958731 | NA         | LINC01322     |
| NA        | ENSG00000244130 | 0          | NA          | NA         | NA         | NA         | UBE2Q2P9      |
| NA        | ENSG00000244131 | 0          | NA          | NA         | NA         | NA         | RPSAP51       |
| NA        | ENSG00000244134 | 0          | NA          | NA         | NA         | NA         | RPS12P20      |
| NA        | ENSG00000244137 | 0          | NA          | NA         | NA         | NA         |               |
| NA        | ENSG00000244139 | 0.15069912 | -0.01848503 | 0.38480575 | 0.84537521 | NA         | RN7SL397P     |
| NA        | ENSG00000244142 | 0          | NA          | NA         | NA         | NA         | ATP6V0CP2     |
| NA        | ENSG00000244144 | 0          | NA          | NA         | NA         | NA         |               |
| NA        | ENSG00000244146 | 0          | NA          | NA         | NA         | NA         |               |
| NA        | ENSG00000244151 | 51.415139  | 0.26082421  | 0.2998469  | 0.21573719 | 0.42652973 |               |
| NA        | ENSG00000244153 | 0.45209736 | -0.02505403 | 0.38558831 | 0.57865948 | NA         | WWP1P1        |
| NA        | ENSG00000244155 | 0          | NA          | NA         | NA         | NA         | CYP4F34P      |
| NA        | ENSG00000244157 | 0          | NA          | NA         | NA         | NA         | EIF4E2P2      |
| NA        | ENSG00000244158 | 0          | NA          | NA         | NA         | NA         | CALHM6-AS1    |
| NA        | ENSG00000244159 | 0          | NA          | NA         | NA         | NA         | RPS27AP13     |
| 105377105 | ENSG00000244161 | 22.1409259 | -0.0490756  | 0.3127282  | 0.78665753 | 0.90294962 | FLNB-AS1      |
| 5032      | ENSG00000244165 | 325.141297 | 0.3397299   | 0.14180025 | 0.00981625 | 0.04086329 | P2RY11        |
| NA        | ENSG00000244167 | 0.15069912 | -0.01848503 | 0.38480575 | 0.84537521 | NA         |               |
| NA        | ENSG00000244169 | 0          | NA          | NA         | NA         | NA         | RN7SL120P     |
| NA        | ENSG00000244171 | 0.173733   | 0.01914545  | 0.38484597 | 0.78225479 | NA         | PBX2P1        |
| NA        | ENSG00000244176 | 0          | NA          | NA         | NA         | NA         |               |
| NA        | ENSG00000244183 | 0          | NA          | NA         | NA         | NA         | PPIAP71       |
| 101559451 | ENSG00000244184 | 2.62992372 | 0.02551972  | 0.37326413 | 0.7899256  | 0.9043268  |               |
| 85014     | ENSG00000244187 | 293.634543 | 0.18592631  | 0.16219621 | 0.20588499 | 0.41297728 | TMEM141       |
| NA        | ENSG00000244192 | 0.16735865 | 0.01897177  | 0.38482933 | 0.78225479 | NA         |               |
| NA        | ENSG00000244193 | 0          | NA          | NA         | NA         | NA         |               |
| NA        | ENSG00000244194 | 0          | NA          | NA         | NA         | NA         | RN7SL218P     |
| NA        | ENSG00000244196 | 0.34624801 | -0.02356563 | 0.38536324 | 0.65270996 | NA         | PPIAP15       |
| NA        | ENSG00000244197 | 0          | NA          | NA         | NA         | NA         | RN7SL766P     |
| NA        | ENSG00000244198 | 5.30785912 | -0.02934511 | 0.36983624 | 0.77428022 | 0.89604057 | ARHGEF35-AS1  |
| NA        | ENSG00000244199 | 0          | NA          | NA         | NA         | NA         | EIF4EP3       |

|           |                 |            |             |            |            |            |           |
|-----------|-----------------|------------|-------------|------------|------------|------------|-----------|
| 104502416 | ENSG00000244203 | 0          | NA          | NA         | NA         | NA         | FOXP1-AS1 |
| NA        | ENSG00000244213 | 0          | NA          | NA         | NA         | NA         | ZFAND6P1  |
| 101927123 | ENSG00000244215 | 0.34746601 | 0.02370763  | 0.3853651  | 0.61987128 | NA         | LINC02016 |
| NA        | ENSG00000244217 | 0.37844916 | 0.02407552  | 0.3854191  | 0.60038877 | NA         | RPS4XP10  |
| NA        | ENSG00000244218 | 4.65008447 | 0.01667523  | 0.36433369 | 0.89052074 | 0.95232275 | RN7SL81P  |
| 100289187 | ENSG00000244219 | 9.61728012 | 0.04132095  | 0.34757347 | 0.78956987 | 0.9043268  | TMEM225B  |
| NA        | ENSG00000244222 | 0          | NA          | NA         | NA         | NA         | OR7E121P  |
| NA        | ENSG00000244226 | 0.16735865 | 0.01897177  | 0.38482933 | 0.78225479 | NA         | ILF2P1    |
| 646168    | ENSG00000244227 | 0          | NA          | NA         | NA         | NA         | LRRC77P   |
| NA        | ENSG00000244229 | 0.18922458 | 0.01954053  | 0.38488496 | 0.78225479 | NA         | RPL26P35  |
| NA        | ENSG00000244230 | 0          | NA          | NA         | NA         | NA         | RN7SL151P |
| NA        | ENSG00000244231 | 0          | NA          | NA         | NA         | NA         | CSPG4P2Y  |
| NA        | ENSG00000244232 | 0          | NA          | NA         | NA         | NA         | RN7SL698P |
| 64396     | ENSG00000244234 | 5.71256797 | 0.09629     | 0.37134539 | 0.48614316 | 0.70618541 | GMCL2     |
| NA        | ENSG00000244235 | 0          | NA          | NA         | NA         | NA         |           |
| NA        | ENSG00000244236 | 0          | NA          | NA         | NA         | NA         | RN7SL604P |
| NA        | ENSG00000244237 | 0          | NA          | NA         | NA         | NA         |           |
| NA        | ENSG00000244239 | 96.955739  | 0.05634601  | 0.22628031 | 0.76006131 | 0.88886628 |           |
| 402778    | ENSG00000244242 | 425.585219 | -1.68905513 | 0.19848784 | 1.11E-18   | 3.90E-17   | IFITM10   |
| NA        | ENSG00000244244 | 0          | NA          | NA         | NA         | NA         | RPS3AP42  |
| NA        | ENSG00000244245 | 0          | NA          | NA         | NA         | NA         |           |
| NA        | ENSG00000244246 | 0          | NA          | NA         | NA         | NA         | ZNF736P8Y |
| 105374244 | ENSG00000244247 | 0          | NA          | NA         | NA         | NA         | LINC01995 |
| NA        | ENSG00000244249 | 0          | NA          | NA         | NA         | NA         |           |
| NA        | ENSG00000244251 | 0          | NA          | NA         | NA         | NA         |           |
| NA        | ENSG00000244253 | 0          | NA          | NA         | NA         | NA         | RPS29P24  |
| NA        | ENSG00000244255 | 0          | NA          | NA         | NA         | NA         |           |
| NA        | ENSG00000244256 | 0.9780628  | 0.0025567   | 0.38086233 | 0.96310973 | NA         | RN7SL130P |
| NA        | ENSG00000244257 | 1114.49997 | 0.57583898  | 0.08255437 | 1.01E-12   | 2.30E-11   | PKD1P1    |
| NA        | ENSG00000244259 | 0.18922458 | 0.01954053  | 0.38488496 | 0.78225479 | NA         |           |
| NA        | ENSG00000244260 | 0          | NA          | NA         | NA         | NA         |           |
| NA        | ENSG00000244264 | 0          | NA          | NA         | NA         | NA         | RN7SL597P |
| NA        | ENSG00000244265 | 1.7659065  | 0.023798    | 0.38031951 | 0.70640024 | NA         | SIAH2-AS1 |
| NA        | ENSG00000244266 | 0.34624801 | -0.02356563 | 0.38536324 | 0.65270996 | NA         |           |
| NA        | ENSG00000244267 | 0          | NA          | NA         | NA         | NA         | RPL34P22  |
| NA        | ENSG00000244268 | 0          | NA          | NA         | NA         | NA         |           |
| NA        | ENSG00000244270 | 27.1816161 | -0.2105122  | 0.35097882 | 0.29397312 | 0.52021105 | RPL32P29  |
| NA        | ENSG00000244273 | 0          | NA          | NA         | NA         | NA         | PGBD4P1   |

|           |                 |            |             |            |            |            |           |
|-----------|-----------------|------------|-------------|------------|------------|------------|-----------|
| 55861     | ENSG00000244274 | 327.172192 | -0.57356721 | 0.15059798 | 4.28E-05   | 0.00035707 | DBNDD2    |
| NA        | ENSG00000244278 | 0          | NA          | NA         | NA         | NA         |           |
| 347694    | ENSG00000244280 | 0          | NA          | NA         | NA         | NA         | ECEL1P2   |
| NA        | ENSG00000244281 | 0.15069912 | -0.01848503 | 0.38480575 | 0.84537521 | NA         |           |
| NA        | ENSG00000244283 | 0          | NA          | NA         | NA         | NA         | RPL23AP73 |
| NA        | ENSG00000244286 | 0          | NA          | NA         | NA         | NA         | ITGB5-AS1 |
| NA        | ENSG00000244289 | 0          | NA          | NA         | NA         | NA         | RPS3AP35  |
| NA        | ENSG00000244292 | 0          | NA          | NA         | NA         | NA         | OR9N1P    |
| NA        | ENSG00000244294 | 0          | NA          | NA         | NA         | NA         | RN7SL740P |
| NA        | ENSG00000244295 | 0          | NA          | NA         | NA         | NA         | RPS20P21  |
| NA        | ENSG00000244296 | 0          | NA          | NA         | NA         | NA         | RN7SL168P |
| NA        | ENSG00000244297 | 0          | NA          | NA         | NA         | NA         | RN7SL465P |
| NA        | ENSG00000244300 | 410.84658  | 0.27603629  | 0.11887629 | 0.01434051 | 0.05559119 | GATA2-AS1 |
| NA        | ENSG00000244301 | 0          | NA          | NA         | NA         | NA         | AOX3P     |
| 101928790 | ENSG00000244302 | 0          | NA          | NA         | NA         | NA         | PEX5L-AS2 |
| 503639    | ENSG00000244306 | 5219.38353 | -0.0951555  | 0.05673008 | 0.08964178 | 0.22992799 |           |
| NA        | ENSG00000244307 | 0.69530437 | 0.05074945  | 0.38851047 | 0.30056088 | NA         | RN7SL395P |
| NA        | ENSG00000244308 | 0.34167368 | 0.00287221  | 0.38338893 | 0.9602651  | NA         | RN7SL762P |
| NA        | ENSG00000244310 | 0          | NA          | NA         | NA         | NA         |           |
| NA        | ENSG00000244313 | 0.82656754 | 0.01855444  | 0.38139192 | 0.74199384 | NA         |           |
| NA        | ENSG00000244314 | 0.173733   | 0.01914545  | 0.38484597 | 0.78225479 | NA         | RN7SL36P  |
| NA        | ENSG00000244318 | 0          | NA          | NA         | NA         | NA         | RN7SL252P |
| NA        | ENSG00000244321 | 0          | NA          | NA         | NA         | NA         | LINC01326 |
| NA        | ENSG00000244326 | 0          | NA          | NA         | NA         | NA         | RN7SL814P |
| NA        | ENSG00000244327 | 0.64034418 | 0.00420173  | 0.38253478 | 0.92034789 | NA         |           |
| NA        | ENSG00000244328 | 0.14931947 | -0.01844332 | 0.38480212 | 0.84537521 | NA         | RN7SL845P |
| NA        | ENSG00000244329 | 0          | NA          | NA         | NA         | NA         | UBA52P9   |
| NA        | ENSG00000244331 | 0          | NA          | NA         | NA         | NA         |           |
| NA        | ENSG00000244332 | 0.52119901 | 0.02576573  | 0.38568143 | 0.51723676 | NA         |           |
| NA        | ENSG00000244335 | 0          | NA          | NA         | NA         | NA         | RN7SL687P |
| NA        | ENSG00000244337 | 0          | NA          | NA         | NA         | NA         |           |
| 285401    | ENSG00000244342 | 0          | NA          | NA         | NA         | NA         | LINC00698 |
| NA        | ENSG00000244345 | 0          | NA          | NA         | NA         | NA         |           |
| NA        | ENSG00000244346 | 0          | NA          | NA         | NA         | NA         |           |
| NA        | ENSG00000244349 | 1.82307988 | 0.0264308   | 0.37736311 | 0.74435491 | NA         |           |
| 58530     | ENSG00000244355 | 0.37844916 | 0.02407552  | 0.3854191  | 0.60038877 | NA         | LY6G6D    |
| 110599563 | ENSG00000244355 | 0.37844916 | 0.02407552  | 0.3854191  | 0.60038877 | NA         | LY6G6D    |
| NA        | ENSG00000244356 | 0          | NA          | NA         | NA         | NA         | RN7SL398P |

|           |                 |            |             |            |            |            |           |
|-----------|-----------------|------------|-------------|------------|------------|------------|-----------|
| NA        | ENSG00000244357 | 1.41119415 | 0.08661989  | 0.39450159 | 0.17539852 | NA         | RN7SL145P |
| NA        | ENSG00000244358 | 0          | NA          | NA         | NA         | NA         |           |
| NA        | ENSG00000244361 | 0.14931947 | -0.01844332 | 0.38480212 | 0.84537521 | NA         | RPL30P7   |
| 337974    | ENSG00000244362 | 0          | NA          | NA         | NA         | NA         | KRTAP19-7 |
| NA        | ENSG00000244363 | 1.17271546 | -0.00555332 | 0.37853482 | 0.93536182 | NA         | RPL7P23   |
| NA        | ENSG00000244371 | 11.7058472 | 0.03356939  | 0.33372324 | 0.84335693 | 0.92899903 | PFN1P8    |
| NA        | ENSG00000244372 | 0          | NA          | NA         | NA         | NA         | RN7SL423P |
| NA        | ENSG00000244376 | 0          | NA          | NA         | NA         | NA         | RN7SL636P |
| NA        | ENSG00000244378 | 0.16735865 | 0.01897177  | 0.38482933 | 0.78225479 | NA         | RPS2P45   |
| NA        | ENSG00000244380 | 1.10094607 | 0.03869429  | 0.38392095 | 0.48933579 | NA         |           |
| NA        | ENSG00000244381 | 0          | NA          | NA         | NA         | NA         | SDHDP3    |
| 105377108 | ENSG00000244383 | 0.52632639 | -0.01541361 | 0.38365989 | 0.7449668  | NA         | FAM3D-AS1 |
| NA        | ENSG00000244384 | 0          | NA          | NA         | NA         | NA         | RN7SL359P |
| NA        | ENSG00000244389 | 0          | NA          | NA         | NA         | NA         | RN7SL242P |
| NA        | ENSG00000244390 | 0          | NA          | NA         | NA         | NA         | RPS6P22   |
| NA        | ENSG00000244391 | 0          | NA          | NA         | NA         | NA         | RN7SL330P |
| NA        | ENSG00000244392 | 0          | NA          | NA         | NA         | NA         | RN7SL869P |
| 378949    | ENSG00000244395 | 0          | NA          | NA         | NA         | NA         | RBMY1D    |
| NA        | ENSG00000244398 | 2452.53712 | -0.02464319 | 0.06654987 | 0.70636091 | 0.85848115 |           |
| NA        | ENSG00000244399 | 0          | NA          | NA         | NA         | NA         | RN7SL251P |
| NA        | ENSG00000244400 | 0          | NA          | NA         | NA         | NA         | RPS4XP12  |
| NA        | ENSG00000244402 | 0          | NA          | NA         | NA         | NA         | RN7SL314P |
| NA        | ENSG00000244404 | 0          | NA          | NA         | NA         | NA         | RN7SL216P |
| 2119      | ENSG00000244405 | 1401.98772 | -0.11620783 | 0.08975332 | 0.182201   | 0.37987261 | ETV5      |
| 440050    | ENSG00000244411 | 0.69543536 | 0.02700673  | 0.38368059 | 0.5728567  | NA         | KRTAP5-7  |
| NA        | ENSG00000244413 | 0          | NA          | NA         | NA         | NA         | RPL23AP56 |
| 3078      | ENSG00000244414 | 3.5918132  | 0.05527011  | 0.37419359 | 0.60699131 | 0.79648767 | CFHR1     |
| NA        | ENSG00000244422 | 0          | NA          | NA         | NA         | NA         | RPL38P3   |
| NA        | ENSG00000244425 | 5.61328972 | -0.01876467 | 0.36021821 | 0.88172388 | 0.94774091 | RN7SL268P |
| NA        | ENSG00000244427 | 0          | NA          | NA         | NA         | NA         | RPS3AP31  |
| NA        | ENSG00000244429 | 0          | NA          | NA         | NA         | NA         |           |
| NA        | ENSG00000244432 | 0          | NA          | NA         | NA         | NA         | RPL39P28  |
| NA        | ENSG00000244436 | 0          | NA          | NA         | NA         | NA         |           |
| NA        | ENSG00000244437 | 0          | NA          | NA         | NA         | NA         | IGKV3-15  |
| NA        | ENSG00000244441 | 0          | NA          | NA         | NA         | NA         |           |
| NA        | ENSG00000244451 | 0          | NA          | NA         | NA         | NA         | RPL34P21  |
| NA        | ENSG00000244456 | 0          | NA          | NA         | NA         | NA         | SPECC1P2  |
| NA        | ENSG00000244457 | 1.05489384 | -0.04391844 | 0.38790839 | 0.27834512 | NA         | ENO1P1    |



|           |                 |            |             |            |            |            |            |
|-----------|-----------------|------------|-------------|------------|------------|------------|------------|
| NA        | ENSG00000244459 | 1.1075309  | -0.03251724 | 0.38172399 | 0.60696638 | NA         |            |
| NA        | ENSG00000244461 | 0          | NA          | NA         | NA         | NA         | LINC02077  |
| 10137     | ENSG00000244462 | 2879.81528 | -0.23640836 | 0.07246534 | 0.00087366 | 0.00526214 | RBM12      |
| NA        | ENSG00000244464 | 0          | NA          | NA         | NA         | NA         |            |
| NA        | ENSG00000244468 | 0          | NA          | NA         | NA         | NA         |            |
| NA        | ENSG00000244470 | 0          | NA          | NA         | NA         | NA         |            |
| NA        | ENSG00000244471 | 0          | NA          | NA         | NA         | NA         |            |
| 54657     | ENSG00000244474 | 0          | NA          | NA         | NA         | NA         | UGT1A4     |
| 405754    | ENSG00000244476 | 0.49096599 | -0.00716235 | 0.38316699 | 0.85593295 | NA         | ERVFRD-1   |
| NA        | ENSG00000244479 | 0.15069912 | -0.01848503 | 0.38480575 | 0.84537521 | NA         | OR2A1-AS1  |
| NA        | ENSG00000244480 | 24.4575885 | 0.29289038  | 0.38353771 | 0.17686469 | 0.37163689 |            |
| 79168     | ENSG00000244482 | 1.19069685 | 0.02723214  | 0.37991351 | 0.69397395 | NA         | LILRA6     |
| NA        | ENSG00000244485 | 0          | NA          | NA         | NA         | NA         | RPL18P13   |
| 91179     | ENSG00000244486 | 1862.66751 | 0.10581459  | 0.06947863 | 0.11942815 | 0.28424358 | SCARF2     |
| NA        | ENSG00000244490 | 1.40169299 | -0.05549041 | 0.38376206 | 0.44657975 | NA         | RWDD4P1    |
| NA        | ENSG00000244491 | 0          | NA          | NA         | NA         | NA         |            |
| NA        | ENSG00000244493 | 0          | NA          | NA         | NA         | NA         | SLC9A9-AS2 |
| NA        | ENSG00000244501 | 0          | NA          | NA         | NA         | NA         | RN7SL623P  |
| 100874101 | ENSG00000244502 | 0.63626049 | 0.00196772  | 0.38250642 | 0.96166309 | NA         | HDAC11-AS1 |
| NA        | ENSG00000244503 | 0          | NA          | NA         | NA         | NA         |            |
| 27350     | ENSG00000244509 | 47.6903747 | 1.88038743  | 0.37901254 | 4.59E-08   | 6.32E-07   | APOBEC3C   |
| NA        | ENSG00000244510 | 0          | NA          | NA         | NA         | NA         |            |
| NA        | ENSG00000244512 | 0          | NA          | NA         | NA         | NA         | RN7SL28P   |
| NA        | ENSG00000244513 | 28.9638115 | 0.14123484  | 0.30657335 | 0.47650893 | 0.69841458 |            |
| NA        | ENSG00000244514 | 0          | NA          | NA         | NA         | NA         | RN7SL125P  |
| NA        | ENSG00000244515 | 8.65975322 | 0.02855002  | 0.34864514 | 0.85101717 | 0.93262156 | KRT18P34   |
| NA        | ENSG00000244521 | 0          | NA          | NA         | NA         | NA         | RN7SL700P  |
| NA        | ENSG00000244527 | 0.173124   | -0.01911262 | 0.38486262 | 0.84537521 | NA         |            |
| NA        | ENSG00000244528 | 0          | NA          | NA         | NA         | NA         | SEPTIN14P2 |
| NA        | ENSG00000244532 | 0          | NA          | NA         | NA         | NA         | RN7SL380P  |
| NA        | ENSG00000244534 | 0          | NA          | NA         | NA         | NA         | RN7SL211P  |
| NA        | ENSG00000244535 | 0          | NA          | NA         | NA         | NA         |            |
| 85291     | ENSG00000244537 | 0          | NA          | NA         | NA         | NA         | KRTAP4-2   |
| NA        | ENSG00000244538 | 0.173124   | -0.01911262 | 0.38486262 | 0.84537521 | NA         |            |
| NA        | ENSG00000244540 | 0          | NA          | NA         | NA         | NA         | RPL35AP29  |
| 101927992 | ENSG00000244541 | 0          | NA          | NA         | NA         | NA         | LINC01213  |
| NA        | ENSG00000244544 | 0          | NA          | NA         | NA         | NA         | RN7SL446P  |
| NA        | ENSG00000244545 | 0          | NA          | NA         | NA         | NA         |            |

|           |                 |            |             |            |            |            |             |
|-----------|-----------------|------------|-------------|------------|------------|------------|-------------|
| NA        | ENSG00000244550 | 0          | NA          | NA         | NA         | NA         |             |
| NA        | ENSG00000244551 | 0          | NA          | NA         | NA         | NA         | RPL34P29    |
| NA        | ENSG00000244556 | 4.62289268 | -0.05158187 | 0.36554363 | 0.68033805 | 0.84380894 | ODCP        |
| NA        | ENSG00000244558 | 13.3112183 | -0.10537413 | 0.34770346 | 0.53478852 | 0.74572704 | KCNK15-AS1  |
| NA        | ENSG00000244559 | 0          | NA          | NA         | NA         | NA         |             |
| NA        | ENSG00000244560 | 108.150004 | 0.600672    | 0.2334066  | 0.00256994 | 0.0132884  |             |
| NA        | ENSG00000244561 | 0          | NA          | NA         | NA         | NA         |             |
| NA        | ENSG00000244563 | 38.7987481 | -0.01522885 | 0.28172773 | 0.93505017 | 0.97306034 | RPS26P19    |
| 101929316 | ENSG00000244564 | 0          | NA          | NA         | NA         | NA         | PRICKLE2-DT |
| NA        | ENSG00000244565 | 0          | NA          | NA         | NA         | NA         | POLR2DP2    |
| NA        | ENSG00000244568 | 0          | NA          | NA         | NA         | NA         | RN7SL654P   |
| NA        | ENSG00000244571 | 0          | NA          | NA         | NA         | NA         | RPS6P4      |
| NA        | ENSG00000244573 | 0.30139824 | -0.02296476 | 0.38527817 | 0.68536535 | NA         | RPL30P11    |
| NA        | ENSG00000244575 | 0          | NA          | NA         | NA         | NA         | IGKV1-27    |
| 103344930 | ENSG00000244578 | 0          | NA          | NA         | NA         | NA         | LINC01391   |
| NA        | ENSG00000244582 | 0          | NA          | NA         | NA         | NA         | RPL21P120   |
| NA        | ENSG00000244585 | 0.14931947 | -0.01844332 | 0.38480212 | 0.84537521 | NA         | RPL12P33    |
| NA        | ENSG00000244586 | 4.55192178 | 0.12055207  | 0.39254724 | 0.29852912 | 0.5253702  | WNT5A-AS1   |
| 642636    | ENSG00000244588 | 3.1502876  | -0.15695269 | 0.41954586 | 0.11184601 | 0.27044787 | RAD21L1     |
| NA        | ENSG00000244593 | 0          | NA          | NA         | NA         | NA         |             |
| NA        | ENSG00000244604 | 0          | NA          | NA         | NA         | NA         |             |
| 152206    | ENSG00000244607 | 9.93556797 | 0.19209377  | 0.40691566 | 0.2269279  | 0.4416135  | CCDC13      |
| NA        | ENSG00000244610 | 0          | NA          | NA         | NA         | NA         | RN7SL756P   |
| NA        | ENSG00000244615 | 0          | NA          | NA         | NA         | NA         | PSPC1P2     |
| 151516    | ENSG00000244617 | 1.13534747 | 0.04747751  | 0.38849004 | 0.23182692 | NA         | ASPRV1      |
| NA        | ENSG00000244618 | 0          | NA          | NA         | NA         | NA         | RN7SL334P   |
| NA        | ENSG00000244619 | 0          | NA          | NA         | NA         | NA         |             |
| NA        | ENSG00000244620 | 0.14931947 | -0.01844332 | 0.38480212 | 0.84537521 | NA         |             |
| NA        | ENSG00000244621 | 0          | NA          | NA         | NA         | NA         | RPS17P11    |
| 81392     | ENSG00000244623 | 0          | NA          | NA         | NA         | NA         | OR2AE1      |
| 337975    | ENSG00000244624 | 0          | NA          | NA         | NA         | NA         | KRTAP20-1   |
| NA        | ENSG00000244625 | 108.534772 | -0.11512495 | 0.21805914 | 0.52164596 | 0.73494218 | MIATNB      |
| NA        | ENSG00000244627 | 35.5814383 | 0.44042567  | 0.368222   | 0.0675685  | 0.18665906 | TPTEP2      |
| NA        | ENSG00000244630 | 0.15069912 | -0.01848503 | 0.38480575 | 0.84537521 | NA         |             |
| NA        | ENSG00000244632 | 0          | NA          | NA         | NA         | NA         | RN7SL863P   |
| NA        | ENSG00000244640 | 0          | NA          | NA         | NA         | NA         |             |
| NA        | ENSG00000244641 | 0          | NA          | NA         | NA         | NA         | RPS26P43    |
| NA        | ENSG00000244642 | 0          | NA          | NA         | NA         | NA         | RN7SL396P   |

|           |                 |            |             |            |            |            |           |
|-----------|-----------------|------------|-------------|------------|------------|------------|-----------|
| NA        | ENSG00000244646 | 0          | NA          | NA         | NA         | NA         | XKRY2     |
| NA        | ENSG00000244649 | 0          | NA          | NA         | NA         | NA         | LINC02086 |
| NA        | ENSG00000244650 | 0          | NA          | NA         | NA         | NA         |           |
| NA        | ENSG00000244652 | 0          | NA          | NA         | NA         | NA         |           |
| NA        | ENSG00000244653 | 0          | NA          | NA         | NA         | NA         | UBFD1P1   |
| NA        | ENSG00000244657 | 0          | NA          | NA         | NA         | NA         |           |
| NA        | ENSG00000244661 | 0          | NA          | NA         | NA         | NA         | TRBV12-1  |
| NA        | ENSG00000244662 | 0          | NA          | NA         | NA         | NA         |           |
| NA        | ENSG00000244668 | 0          | NA          | NA         | NA         | NA         | SNRPCP3   |
| NA        | ENSG00000244669 | 0          | NA          | NA         | NA         | NA         |           |
| NA        | ENSG00000244671 | 1.19476853 | 0.04557854  | 0.38362286 | 0.47697606 | NA         | RN7SL280P |
| NA        | ENSG00000244674 | 0          | NA          | NA         | NA         | NA         | RPS3AP15  |
| NA        | ENSG00000244675 | 0.16735865 | 0.01897177  | 0.38482933 | 0.78225479 | NA         |           |
| NA        | ENSG00000244676 | 0.55995227 | 0.01291017  | 0.38331673 | 0.73506574 | NA         |           |
| NA        | ENSG00000244677 | 0          | NA          | NA         | NA         | NA         | RN7SL706P |
| 100287639 | ENSG00000244681 | 0          | NA          | NA         | NA         | NA         | MTHFD2P1  |
| NA        | ENSG00000244682 | 0          | NA          | NA         | NA         | NA         | FCGR2C    |
| 7335      | ENSG00000244687 | 2230.39146 | -0.03252975 | 0.06896248 | 0.63150855 | 0.81371846 | UBE2V1    |
| NA        | ENSG00000244691 | 0          | NA          | NA         | NA         | NA         | RPL10AP1  |
| NA        | ENSG00000244692 | 0.67042847 | 0.00158107  | 0.38187863 | 0.97220454 | NA         | RN7SL724P |
| 100142659 | ENSG00000244693 | 0          | NA          | NA         | NA         | NA         | CTAGE8    |
| 442213    | ENSG00000244694 | 45.3802399 | 0.04573071  | 0.2840249  | 0.81406675 | 0.91592004 | PTCHD4    |
| NA        | ENSG00000244699 | 0          | NA          | NA         | NA         | NA         |           |
| NA        | ENSG00000244701 | 12.0129603 | -0.04782641 | 0.33742733 | 0.77175183 | 0.89531784 |           |
| NA        | ENSG00000244703 | 0          | NA          | NA         | NA         | NA         | CD46P1    |
| NA        | ENSG00000244705 | 0.15069912 | -0.01848503 | 0.38480575 | 0.84537521 | NA         |           |
| NA        | ENSG00000244706 | 0.33471731 | 0.02354391  | 0.38534154 | 0.62842204 | NA         |           |
| NA        | ENSG00000244708 | 0          | NA          | NA         | NA         | NA         | RPL23P10  |
| NA        | ENSG00000244710 | 0          | NA          | NA         | NA         | NA         | RN7SL47P  |
| NA        | ENSG00000244712 | 0.33471731 | 0.02354391  | 0.38534154 | 0.62842204 | NA         |           |
| NA        | ENSG00000244716 | 0.93962135 | -0.04818406 | 0.38535915 | 0.40420632 | NA         |           |
| NA        | ENSG00000244717 | 0          | NA          | NA         | NA         | NA         | RPS27P14  |
| NA        | ENSG00000244720 | 0          | NA          | NA         | NA         | NA         | NT5C3AP2  |
| NA        | ENSG00000244722 | 0.15069912 | -0.01848503 | 0.38480575 | 0.84537521 | NA         | RPSAP29   |
| NA        | ENSG00000244723 | 0          | NA          | NA         | NA         | NA         | ASLP1     |
| NA        | ENSG00000244730 | 0          | NA          | NA         | NA         | NA         |           |
| 720       | ENSG00000244731 | 62.5641624 | -0.01160202 | 0.30847334 | 0.94686328 | 0.97815729 | C4A       |
| 110384692 | ENSG00000244731 | 62.5641624 | -0.01160202 | 0.30847334 | 0.94686328 | 0.97815729 | C4A       |

|           |                 |            |             |            |            |            |             |
|-----------|-----------------|------------|-------------|------------|------------|------------|-------------|
| NA        | ENSG00000244732 | 0          | NA          | NA         | NA         | NA         | RN7SL870P   |
| NA        | ENSG00000244733 | 9.45966362 | -0.00824302 | 0.34320479 | 0.9557751  | 0.9818048  |             |
| 3043      | ENSG00000244734 | 0          | NA          | NA         | NA         | NA         | HBB         |
| NA        | ENSG00000244738 | 0          | NA          | NA         | NA         | NA         |             |
| NA        | ENSG00000244740 | 0          | NA          | NA         | NA         | NA         |             |
| NA        | ENSG00000244743 | 0          | NA          | NA         | NA         | NA         | RPL35AP27   |
| NA        | ENSG00000244748 | 0          | NA          | NA         | NA         | NA         | RN7SL153P   |
| 1415      | ENSG00000244752 | 1.94465742 | 0.01483517  | 0.37562901 | 0.86114225 | NA         | CRYBB2      |
| NA        | ENSG00000244753 | 0.16735865 | 0.01897177  | 0.38482933 | 0.78225479 | NA         | RPL15P21    |
| 10443     | ENSG00000244754 | 2417.42227 | 0.00359726  | 0.08718014 | 0.96749892 | 0.98759962 | N4BP2L2     |
| NA        | ENSG00000244756 | 0          | NA          | NA         | NA         | NA         |             |
| NA        | ENSG00000244757 | 25.0100561 | -0.02498174 | 0.30449768 | 0.89171305 | 0.95300511 |             |
| 101927657 | ENSG00000244791 | 0          | NA          | NA         | NA         | NA         |             |
| NA        | ENSG00000244879 | 3561.05491 | 0.18315503  | 0.115666   | 0.0966075  | 0.24301925 | GABPB1-AS1  |
| NA        | ENSG00000244921 | 1.9913909  | 0.00944067  | 0.37377055 | 0.91769563 | NA         | MTCYBP18    |
| 100507300 | ENSG00000244926 | 3.33948687 | 0.19213768  | 0.43738472 | 0.09821951 | 0.24588959 | ALKBH3-AS1  |
| NA        | ENSG00000244932 | 0          | NA          | NA         | NA         | NA         |             |
| 101928445 | ENSG00000244945 | 3.06612881 | 0.06678256  | 0.37758872 | 0.5235698  | 0.73634542 | RUFY1-AS1   |
| NA        | ENSG00000244952 | 0.72070543 | 0.05210875  | 0.38874801 | 0.28822071 | NA         |             |
| NA        | ENSG00000244953 | 76.4956589 | 2.31047218  | 0.32133365 | 4.07E-14   | 1.04E-12   |             |
| 100506495 | ENSG00000244968 | 7.64274257 | 3.14243008  | 1.27131795 | 0.00084502 | 0.00510353 | LIFR-AS1    |
| NA        | ENSG00000244998 | 0.14931947 | -0.01844332 | 0.38480212 | 0.84537521 | NA         |             |
| 101929538 | ENSG00000245008 | 0          | NA          | NA         | NA         | NA         |             |
| 643770    | ENSG00000245017 | 6.64373695 | -0.01746169 | 0.36877537 | 0.86524774 | 0.94028794 | LINC02453   |
| NA        | ENSG00000245025 | 47.1006098 | 0.29054596  | 0.31159354 | 0.1763076  | 0.37081334 |             |
| NA        | ENSG00000245059 | 1.21502893 | 0.05683121  | 0.38787381 | 0.28724792 | NA         |             |
| 729678    | ENSG00000245060 | 133.454343 | 0.18901939  | 0.19784853 | 0.26684955 | 0.48926117 | LINC00847   |
| 255130    | ENSG00000245067 | 3.59460083 | -0.05384904 | 0.37102609 | 0.63659054 | 0.81722218 | IGFBP7-AS1  |
| 105375650 | ENSG00000245080 | 2.5906612  | -0.06562391 | 0.38394139 | 0.40821716 | 0.63640649 | MIR3150BHG  |
| 144571    | ENSG00000245105 | 2.14796589 | 0.11670891  | 0.40385827 | 0.14115947 | NA         | A2M-AS1     |
| NA        | ENSG00000245112 | 315.13501  | 0.25465364  | 0.1362245  | 0.04486346 | 0.13674773 | SMARCA5-AS1 |
| NA        | ENSG00000245146 | 15.6737608 | 0.20205754  | 0.39392188 | 0.25155611 | 0.47149344 | MALINC1     |
| 100506020 | ENSG00000245148 | 8.08851084 | -0.22261894 | 0.42769498 | 0.17166227 | 0.36420774 | ARAP1-AS2   |
| 101927612 | ENSG00000245149 | 45.1144014 | -0.24408518 | 0.29644445 | 0.24074574 | 0.45879844 | RNF139-AS1  |
| NA        | ENSG00000245156 | 15.2889991 | 0.0790242   | 0.33080978 | 0.65892154 | 0.83082321 |             |
| 100130231 | ENSG00000245164 | 0.173733   | 0.01914545  | 0.38484597 | 0.78225479 | NA         | LINC00861   |
| NA        | ENSG00000245205 | 1.84870765 | 0.01624574  | 0.37652131 | 0.84115419 | NA         | EEF1A1P4    |
| 101930370 | ENSG00000245213 | 38.832897  | -0.07970374 | 0.2745128  | 0.68028221 | 0.84380894 |             |

|           |                 |            |             |            |            |            |            |
|-----------|-----------------|------------|-------------|------------|------------|------------|------------|
| NA        | ENSG00000245248 | 27.9924945 | 0.1714968   | 0.35717594 | 0.3579679  | 0.58831039 | USP2-AS1   |
| NA        | ENSG00000245261 | 1.90833579 | 0.00765286  | 0.38012088 | 0.90117747 | NA         |            |
| 386627    | ENSG00000245275 | 25.7797483 | 0.06751594  | 0.31354791 | 0.7175219  | 0.86412738 | SAP30L-AS1 |
| 101929066 | ENSG00000245281 | 46.4548694 | -0.09745787 | 0.30456712 | 0.60770863 | 0.79694224 |            |
| 101929595 | ENSG00000245293 | 7.2671504  | -0.09874055 | 0.37089093 | 0.47868362 | 0.7003511  | CYP2U1-AS1 |
| 107986298 | ENSG00000245293 | 7.2671504  | -0.09874055 | 0.37089093 | 0.47868362 | 0.7003511  | CYP2U1-AS1 |
| 101928646 | ENSG00000245311 | 0          | NA          | NA         | NA         | NA         | ARNTL2-AS1 |
| 100996419 | ENSG00000245317 | 14.1668065 | 0.05633684  | 0.33000697 | 0.74868668 | 0.88205755 |            |
| NA        | ENSG00000245322 | 8.26233797 | -0.03665335 | 0.35115056 | 0.80242838 | 0.90988049 | H2AZ1-DT   |
| NA        | ENSG00000245330 | 0.18922458 | 0.01954053  | 0.38488496 | 0.78225479 | NA         |            |
| 101929468 | ENSG00000245384 | 1.7875822  | -0.03385696 | 0.38113168 | 0.61338987 | NA         | CXXC4-AS1  |
| NA        | ENSG00000245385 | 0.14931947 | -0.01844332 | 0.38480212 | 0.84537521 | NA         |            |
| 101928075 | ENSG00000245466 | 0          | NA          | NA         | NA         | NA         |            |
| NA        | ENSG00000245468 | 5.48488893 | -0.04058037 | 0.36092247 | 0.75651839 | 0.88693352 | LINC02447  |
| 101929765 | ENSG00000245479 | 1.41952905 | 0.07083981  | 0.39307336 | 0.13152313 | NA         | LINC01585  |
| NA        | ENSG00000245482 | 1.04239802 | 0.04448868  | 0.38799694 | 0.25925947 | NA         |            |
| 100507283 | ENSG00000245498 | 74.809166  | 0.21004124  | 0.25900974 | 0.28912369 | 0.51505917 |            |
| 440028    | ENSG00000245522 | 2.85876218 | -0.06745709 | 0.38150878 | 0.46502964 | 0.68775162 | LINC02709  |
| 645323    | ENSG00000245526 | 125.516059 | 0.18319532  | 0.18771678 | 0.26438807 | 0.48663691 | LINC00461  |
| 283131    | ENSG00000245532 | 3238.98483 | 1.00321752  | 0.06835005 | 1.18E-49   | 1.16E-47   | NEAT1      |
| 101928784 | ENSG00000245534 | 9.83685274 | -0.01553585 | 0.34218884 | 0.91906515 | 0.96566562 | RORA-AS1   |
| 101929295 | ENSG00000245552 | 20.4770789 | -0.2248307  | 0.37559108 | 0.25187332 | 0.47174235 |            |
| 728769    | ENSG00000245556 | 154.694064 | 0.26665702  | 0.18182416 | 0.09666308 | 0.24306007 | SCAMP1-AS1 |
| 101927204 | ENSG00000245571 | 22.7154394 | 3.1584176   | 0.60670283 | 1.54E-08   | 2.27E-07   | FAM111A-DT |
| 497258    | ENSG00000245573 | 45.6482718 | 0.31905628  | 0.36679364 | 0.15243112 | 0.33692441 | BDNF-AS    |
| 100506068 | ENSG00000245598 | 6.97935607 | 0.1110651   | 0.37663272 | 0.41738451 | 0.64367732 | DACT3-AS1  |
| 100506660 | ENSG00000245614 | 42.4816606 | -0.04512192 | 0.26086733 | 0.81452446 | 0.91592004 | DDX11-AS1  |
| 101928100 | ENSG00000245648 | 0          | NA          | NA         | NA         | NA         | KLRK1-AS1  |
| 283387    | ENSG00000245651 | 1.53323733 | -0.00622342 | 0.37906937 | 0.92173077 | NA         |            |
| NA        | ENSG00000245662 | 0.14931947 | -0.01844332 | 0.38480212 | 0.84537521 | NA         | LINC02211  |
| NA        | ENSG00000245667 | 1.01746756 | -0.05405837 | 0.38939962 | 0.238611   | NA         |            |
| 92285     | ENSG00000245680 | 363.066505 | -0.4413492  | 0.16774751 | 0.0036072  | 0.01771458 | ZNF585B    |
| 728339    | ENSG00000245685 | 36.1706594 | -0.01863528 | 0.27770889 | 0.9209555  | 0.96670947 | FRG1-DT    |
| NA        | ENSG00000245688 | 1.80998408 | -0.11998133 | 0.40993623 | 0.04564478 | NA         |            |
| 101927480 | ENSG00000245694 | 1455.06627 | -0.13091558 | 0.08399179 | 0.10946546 | 0.26615132 | CRNDE      |
| 101056700 | ENSG00000245711 | 6.94181378 | 0.16288749  | 0.3982399  | 0.26466239 | 0.48691598 | NADK2-AS1  |
| 101929076 | ENSG00000245719 | 0.47217617 | -0.02838342 | 0.38580362 | 0.54384832 | NA         |            |
| 729506    | ENSG00000245729 | 0.52119901 | 0.02576573  | 0.38568143 | 0.51723676 | NA         | LINC02226  |

|           |                 |            |             |            |            |            |             |
|-----------|-----------------|------------|-------------|------------|------------|------------|-------------|
| 100129931 | ENSG00000245748 | 7.2280357  | -0.1357422  | 0.38556593 | 0.33625093 | 0.56617316 |             |
| 145837    | ENSG00000245750 | 2.13492586 | -0.03051145 | 0.37589798 | 0.72777758 | NA         | DRAIC       |
| NA        | ENSG00000245768 | 0.66339244 | -0.02205172 | 0.38321373 | 0.65189262 | NA         |             |
| 101927740 | ENSG00000245812 | 2.98720707 | -0.04727744 | 0.37848851 | 0.56527403 | 0.76733419 | LINC02202   |
| 101928989 | ENSG00000245832 | 0          | NA          | NA         | NA         | NA         | MIR4300HG   |
| 1050      | ENSG00000245848 | 18.5326185 | 0.00463312  | 0.31093125 | 0.98172391 | 0.99389849 | CEBPA       |
| 100505648 | ENSG00000245849 | 252.94472  | 0.0573656   | 0.13854463 | 0.65795191 | 0.83031782 | RAD51-AS1   |
| 100652791 | ENSG00000245857 | 31.5221451 | 0.28835551  | 0.36602295 | 0.18327078 | 0.38146163 |             |
| 109729137 | ENSG00000245864 | 0.49477276 | -0.01003866 | 0.38283985 | 0.83457535 | NA         | MEF2C-AS2   |
| NA        | ENSG00000245869 | 0          | NA          | NA         | NA         | NA         |             |
| 101927074 | ENSG00000245870 | 926.4255   | 0.17707319  | 0.0943659  | 0.05266038 | 0.15487427 | LINC00682   |
| 400512    | ENSG00000245888 | 6.83501854 | -0.10054711 | 0.37255504 | 0.46482876 | 0.68755165 | NSMCE1-DT   |
| NA        | ENSG00000245904 | 12.2738095 | 0.25125917  | 0.46820491 | 0.0904023  | 0.23145976 |             |
| 641638    | ENSG00000245910 | 1291.51836 | 0.1321919   | 0.09145311 | 0.13652167 | 0.31158286 | SNHG6       |
| 101928809 | ENSG00000245928 | 0.31690049 | 0.00129534  | 0.38336795 | 0.96544212 | NA         | SDAD1-AS1   |
| 644873    | ENSG00000245937 | 319.985764 | -0.31014492 | 0.14651255 | 0.02163202 | 0.07750287 | LINC01184   |
| 100996286 | ENSG00000245954 | 0          | NA          | NA         | NA         | NA         | LINC02273   |
| 645513    | ENSG00000245958 | 284.678187 | 0.29753171  | 0.14593871 | 0.02706004 | 0.09264388 | SEPTIN7P14  |
| NA        | ENSG00000245970 | 96.0333308 | -0.16028991 | 0.21453723 | 0.36931306 | 0.59872292 |             |
| 101928725 | ENSG00000245975 | 5.45657227 | -0.34715626 | 0.59625013 | 0.03343163 | 0.10939858 |             |
| NA        | ENSG00000246016 | 0          | NA          | NA         | NA         | NA         | LINC01513   |
| 100862662 | ENSG00000246022 | 1.01980042 | -0.02258427 | 0.38109311 | 0.70700324 | NA         | ALDH1L1-AS2 |
| NA        | ENSG00000246067 | 146.719781 | -0.149492   | 0.1923266  | 0.36845174 | 0.59786396 | RAB30-DT    |
| 152195    | ENSG00000246082 | 1.30380489 | -0.02762727 | 0.37929071 | 0.7029915  | NA         | NUDT16L2P   |
| 101929241 | ENSG00000246084 | 0          | NA          | NA         | NA         | NA         | LINC02325   |
| 100287015 | ENSG00000246089 | 109.591209 | 0.0080591   | 0.20458053 | 0.96428546 | 0.98585095 |             |
| 100507053 | ENSG00000246090 | 75.513118  | 0.24741074  | 0.27299968 | 0.22437868 | 0.43811368 |             |
| NA        | ENSG00000246095 | 0.16735865 | 0.01897177  | 0.38482933 | 0.78225479 | NA         | LINC01096   |
| NA        | ENSG00000246100 | 16.7093513 | 0.0404997   | 0.33264507 | 0.81309796 | 0.91549081 | LINC00900   |
| NA        | ENSG00000246115 | 0          | NA          | NA         | NA         | NA         | SUPT4H1P2   |
| 286059    | ENSG00000246130 | 6.19679253 | 0.04573877  | 0.35836846 | 0.74192379 | 0.87832019 |             |
| 100505676 | ENSG00000246145 | 0.68145953 | 0.03285411  | 0.38381681 | 0.53437202 | NA         | RRS1-AS1    |
| 100289388 | ENSG00000246174 | 91.112317  | 0.22527606  | 0.21695627 | 0.21308229 | 0.42300907 | KCTD21-AS1  |
| NA        | ENSG00000246203 | 3.04647329 | 0.01608424  | 0.37056451 | 0.87606568 | 0.94529871 |             |
| 101928580 | ENSG00000246211 | 0          | NA          | NA         | NA         | NA         | P4HA3-AS1   |
| 101929524 | ENSG00000246214 | 1.5635625  | 0.05740626  | 0.38641805 | 0.35881447 | NA         |             |
| 388011    | ENSG00000246223 | 0          | NA          | NA         | NA         | NA         | LINC01550   |
| NA        | ENSG00000246225 | 4.23477957 | 3.10472816  | 1.80861453 | 0.00302531 | 0.01523403 |             |

|           |                 |            |             |            |            |            |             |
|-----------|-----------------|------------|-------------|------------|------------|------------|-------------|
| 727677    | ENSG00000246228 | 0          | NA          | NA         | NA         | NA         | CASC8       |
| NA        | ENSG00000246250 | 22.0020167 | 0.38852801  | 0.4465181  | 0.09751886 | 0.24456759 |             |
| NA        | ENSG00000246263 | 23.1311689 | 0.23935784  | 0.34980993 | 0.25162656 | 0.47149344 | UBR5-AS1    |
| 283104    | ENSG00000246273 | 119.422294 | 0.03206257  | 0.19034189 | 0.84755563 | 0.93065124 | SBF2-AS1    |
| NA        | ENSG00000246283 | 7.03343639 | -0.03043608 | 0.3866849  | 0.11458097 | 0.27548308 |             |
| 101928053 | ENSG00000246308 | 9.36621145 | -0.07659106 | 0.3563425  | 0.61104035 | 0.7991984  |             |
| NA        | ENSG00000246316 | 0          | NA          | NA         | NA         | NA         |             |
| NA        | ENSG00000246323 | 1.26906345 | -0.01424487 | 0.3793289  | 0.83039239 | NA         |             |
| 645485    | ENSG00000246331 | 1.41656147 | 0.10296478  | 0.40283349 | 0.0703514  | NA         |             |
| NA        | ENSG00000246334 | 9.83352084 | 0.01924753  | 0.34148126 | 0.90532253 | 0.95855092 | PRR7-AS1    |
| 101929402 | ENSG00000246339 | 44.5826638 | 0.15963899  | 0.29885278 | 0.42515328 | 0.6509524  | EXTL3-AS1   |
| NA        | ENSG00000246350 | 19.3581169 | 0.04921245  | 0.31814592 | 0.78860663 | 0.90411045 |             |
| NA        | ENSG00000246363 | 4.9725723  | 0.01208097  | 0.35960826 | 0.92721997 | 0.96953959 | LINC02458   |
| 286190    | ENSG00000246366 | 2.09514494 | -0.03769611 | 0.3789766  | 0.58705331 | NA         | LACTB2-AS1  |
| 105369192 | ENSG00000246375 | 0.32252989 | -0.02325453 | 0.38531874 | 0.6695845  | NA         | PPM1K-DT    |
| 283856    | ENSG00000246379 | 36.5102737 | -1.48591643 | 0.44406926 | 5.25E-05   | 0.00042643 |             |
| 101928597 | ENSG00000246394 | 0.173124   | -0.01911262 | 0.38486262 | 0.84537521 | NA         | ZNF84-DT    |
| 100505658 | ENSG00000246422 | 0.173733   | 0.01914545  | 0.38484597 | 0.78225479 | NA         | DIAPH1-AS1  |
| 100507632 | ENSG00000246430 | 0          | NA          | NA         | NA         | NA         | LINC00968   |
| NA        | ENSG00000246451 | 107.829844 | 0.00042155  | 0.21000209 | 0.99951546 | 0.99966662 |             |
| NA        | ENSG00000246465 | 284.570701 | -0.03397324 | 0.13850256 | 0.79158436 | 0.90499209 |             |
| 101929290 | ENSG00000246477 | 26.7843321 | -0.01208541 | 0.29604966 | 0.94732083 | 0.97843954 |             |
| 100506368 | ENSG00000246523 | 3.47426598 | -0.07145107 | 0.37629283 | 0.5184946  | 0.73226139 | FZD4-DT     |
| 339988    | ENSG00000246526 | 2.78550196 | 0.02397293  | 0.37130308 | 0.8150194  | 0.91599551 | LINC02481   |
| 101929759 | ENSG00000246528 | 2.29998052 | 0.01241407  | 0.37512884 | 0.88498765 | NA         |             |
| 101929210 | ENSG00000246541 | 0.173733   | 0.01914545  | 0.38484597 | 0.78225479 | NA         |             |
| 283575    | ENSG00000246548 | 1.00670343 | 0.04712127  | 0.38598825 | 0.36759892 | NA         | LINC02288   |
| 105377348 | ENSG00000246560 | 22.1261403 | 0.02933646  | 0.30963735 | 0.87562145 | 0.94509825 | UBE2D3-AS1  |
| NA        | ENSG00000246575 | 0.49776469 | -0.01056224 | 0.3828557  | 0.82345144 | NA         |             |
| 389641    | ENSG00000246582 | 7.24977374 | -0.07234041 | 0.36425028 | 0.59562402 | 0.78816266 |             |
| NA        | ENSG00000246596 | 187.280409 | 0.30870607  | 0.20841509 | 0.08134819 | 0.21408425 |             |
| 100652846 | ENSG00000246627 | 1.97354862 | 0.01573418  | 0.37512807 | 0.85421153 | NA         | CACNA1C-AS1 |
| 284080    | ENSG00000246640 | 1.17012128 | 0.05711269  | 0.38774583 | 0.29443997 | NA         | PICART1     |
| 642924    | ENSG00000246662 | 2.2178423  | -0.05960986 | 0.38166321 | 0.48571352 | NA         | LINC00535   |
| NA        | ENSG00000246695 | 399.955128 | -0.01718323 | 0.12039461 | 0.87961637 | 0.94660386 | RASSF8-AS1  |
| 55766     | ENSG00000246705 | 35.7944484 | 0.48317938  | 0.37893038 | 0.05138411 | 0.15218103 | H2AJ        |
| 85001     | ENSG00000246731 | 12.0989558 | 0.06927405  | 0.33818833 | 0.68499593 | 0.84671809 |             |
| 101928388 | ENSG00000246740 | 0          | NA          | NA         | NA         | NA         | PLA2G4E-AS1 |

|           |                 |            |             |            |            |            |            |
|-----------|-----------------|------------|-------------|------------|------------|------------|------------|
| 503569    | ENSG00000246763 | 27.2376914 | -0.08665662 | 0.29832482 | 0.65192832 | 0.82607871 | RGMB-AS1   |
| 645078    | ENSG00000246774 | 0          | NA          | NA         | NA         | NA         | COL25A1-DT |
| 106699570 | ENSG00000246777 | 6.43973878 | 0.02673134  | 0.36188653 | 0.83479834 | 0.92454439 |            |
| NA        | ENSG00000246790 | 0.173124   | -0.01911262 | 0.38486262 | 0.84537521 | NA         |            |
| NA        | ENSG00000246792 | 11.0427896 | -0.16113991 | 0.38188424 | 0.31810881 | 0.54567516 |            |
| NA        | ENSG00000246820 | 5.86576605 | -0.11795917 | 0.38113818 | 0.38322158 | 0.61246304 | RIC3-DT    |
| NA        | ENSG00000246851 | 3.4681399  | -0.03982578 | 0.37074318 | 0.71258383 | 0.86169546 |            |
| 100505678 | ENSG00000246859 | 882.726298 | 0.38461322  | 0.11029806 | 0.00026485 | 0.00183216 | STARD4-AS1 |
| NA        | ENSG00000246863 | 6.34742154 | -0.26736205 | 0.4867409  | 0.07604745 | 0.20347693 | GPR176-DT  |
| 101927282 | ENSG00000246876 | 0.16735865 | 0.01897177  | 0.38482933 | 0.78225479 | NA         | LINC02466  |
| NA        | ENSG00000246877 | 10.9286818 | 0.08690141  | 0.35140546 | 0.59211991 | 0.78663848 | DNM1P35    |
| NA        | ENSG00000246889 | 52.6937587 | 0.14129927  | 0.30554395 | 0.47340697 | 0.69547532 |            |
| NA        | ENSG00000246898 | 8.7367248  | -0.2636752  | 0.49446764 | 0.05689143 | 0.16436959 | LINC00920  |
| 390595    | ENSG00000246922 | 123.433385 | 0.22953222  | 0.19830833 | 0.17856623 | 0.37437958 | UBAP1L     |
| NA        | ENSG00000246982 | 10.5542236 | 0.0336527   | 0.34034801 | 0.83655962 | 0.92562282 |            |
| 144481    | ENSG00000246985 | 97.9414855 | 0.00360763  | 0.2102154  | 0.98509626 | 0.99475332 | SOCS2-AS1  |
| NA        | ENSG00000247011 | 0.69354441 | 0.01963913  | 0.38351215 | 0.62461035 | NA         |            |
| NA        | ENSG00000247033 | 0.33471731 | 0.02354391  | 0.38534154 | 0.62842204 | NA         |            |
| NA        | ENSG00000247049 | 0.30001662 | -0.02294459 | 0.38527539 | 0.68644828 | NA         |            |
| 192111    | ENSG00000247077 | 1260.15226 | -0.16874616 | 0.08420239 | 0.03960774 | 0.12447954 | PGAM5      |
| 105369147 | ENSG00000247081 | 62.7962486 | 0.18985034  | 0.27994586 | 0.3466894  | 0.57745009 | BAALC-AS1  |
| NA        | ENSG00000247092 | 237.732978 | 0.28433132  | 0.15777563 | 0.04775888 | 0.14367493 | SNHG10     |
| NA        | ENSG00000247095 | 44.0054403 | 0.20640661  | 0.29198566 | 0.31070447 | 0.53846756 | MIR210HG   |
| NA        | ENSG00000247121 | 36.508458  | 0.1509804   | 0.29282956 | 0.45013484 | 0.67350492 |            |
| NA        | ENSG00000247130 | 0          | NA          | NA         | NA         | NA         |            |
| 101928002 | ENSG00000247131 | 0          | NA          | NA         | NA         | NA         |            |
| NA        | ENSG00000247134 | 4.18388238 | -0.07287389 | 0.37923737 | 0.48220186 | 0.70272402 |            |
| NA        | ENSG00000247137 | 103.085997 | -0.254364   | 0.21351984 | 0.15546994 | 0.34143497 |            |
| 338739    | ENSG00000247151 | 1.26255225 | 0.03475241  | 0.38163956 | 0.5942197  | NA         | CSTF3-DT   |
| 338817    | ENSG00000247157 | 22.7879624 | 0.69519282  | 0.72836819 | 0.02424959 | 0.08501712 | LINC01252  |
| 439933    | ENSG00000247193 | 0          | NA          | NA         | NA         | NA         |            |
| 102546294 | ENSG00000247199 | 54.0084293 | 0.18253057  | 0.27613905 | 0.36271428 | 0.59247911 |            |
| 102723562 | ENSG00000247213 | 0.48897518 | -0.00720212 | 0.38317376 | 0.85593404 | NA         | LINC01498  |
| 400541    | ENSG00000247228 | 1.34661596 | 0.06237236  | 0.38869501 | 0.25582213 | NA         |            |
| 440288    | ENSG00000247240 | 112.717135 | -0.06483415 | 0.19524368 | 0.6986855  | 0.85472333 | UBL7-AS1   |
| 729013    | ENSG00000247271 | 58.4204157 | -0.17324591 | 0.2595935  | 0.37688097 | 0.60570261 | ZBED5-AS1  |
| NA        | ENSG00000247287 | 0.66943461 | 0.03059546  | 0.38616409 | 0.42784935 | NA         |            |
| NA        | ENSG00000247311 | 0          | NA          | NA         | NA         | NA         |            |



|           |                 |            |             |            |            |            |              |
|-----------|-----------------|------------|-------------|------------|------------|------------|--------------|
| 85364     | ENSG00000247315 | 1285.20385 | -0.15848492 | 0.07861968 | 0.0391495  | 0.12352513 | ZCCHC3       |
| NA        | ENSG00000247317 | 3.17284252 | -0.07763322 | 0.38239384 | 0.4319131  | 0.65749681 | LY6E-DT      |
| NA        | ENSG00000247324 | 6.03664322 | -0.04492208 | 0.35913959 | 0.73930715 | 0.87688337 |              |
| NA        | ENSG00000247345 | 0          | NA          | NA         | NA         | NA         |              |
| 100507250 | ENSG00000247363 | 5.8091439  | -0.07854925 | 0.36616322 | 0.56510399 | 0.76729149 |              |
| NA        | ENSG00000247372 | 0.173733   | 0.01914545  | 0.38484597 | 0.78225479 | NA         |              |
| NA        | ENSG00000247373 | 59.9954274 | 0.05703384  | 0.24090249 | 0.76335802 | 0.89095066 | TMED2-DT     |
| NA        | ENSG00000247381 | 0          | NA          | NA         | NA         | NA         | PLUT         |
| 100289274 | ENSG00000247400 | 51.8439537 | 0.1998634   | 0.30019238 | 0.32672495 | 0.55507989 | DNAJC3-DT    |
| NA        | ENSG00000247402 | 0          | NA          | NA         | NA         | NA         |              |
| 101928847 | ENSG00000247416 | 79.8191392 | -0.20530276 | 0.23200249 | 0.27232641 | 0.49568018 |              |
| 100852407 | ENSG00000247473 | 2.33459438 | 0.06417303  | 0.38051432 | 0.49379338 | NA         | CARS1-AS1    |
| 100506314 | ENSG00000247498 | 54.4985729 | 0.52502026  | 0.32217358 | 0.02692264 | 0.09226899 | GPRC5D-AS1   |
| 100505738 | ENSG00000247516 | 102.098524 | 0.32451718  | 0.25286229 | 0.10420758 | 0.25698924 | MIR4458HG    |
| 729082    | ENSG00000247556 | 2839.43506 | 0.1055983   | 0.07925145 | 0.1733623  | 0.36633379 | OIP5-AS1     |
| NA        | ENSG00000247570 | 0          | NA          | NA         | NA         | NA         | SDCBPP2      |
| 100131067 | ENSG00000247572 | 244.683067 | 0.30561175  | 0.1513592  | 0.02764206 | 0.09400385 | CKMT2-AS1    |
| 100506540 | ENSG00000247595 | 9.70798362 | -0.08614021 | 0.36166244 | 0.55233728 | 0.75883745 | SPTY2D1OS    |
| 11344     | ENSG00000247596 | 1233.34283 | 0.13672706  | 0.07858698 | 0.07543161 | 0.2022854  | TWF2         |
| 441009    | ENSG00000247624 | 0.46938384 | -0.00831371 | 0.38282047 | 0.86395743 | NA         | CPEB2-DT     |
| 92935     | ENSG00000247626 | 285.149637 | -0.09440624 | 0.13497601 | 0.45404433 | 0.67734106 | MARS2        |
| NA        | ENSG00000247627 | 140.420469 | -0.04003107 | 0.17663481 | 0.79919847 | 0.90801909 | MTND4P12     |
| 100507401 | ENSG00000247675 | 6.06892276 | 6.02332657  | 2.67251053 | 4.90E-05   | 0.00040213 | LRP4-AS1     |
| NA        | ENSG00000247679 | 173.46333  | 0.09770239  | 0.17295357 | 0.52790272 | 0.73966031 |              |
| NA        | ENSG00000247699 | 0          | NA          | NA         | NA         | NA         | FABP6-AS1    |
| 100507266 | ENSG00000247708 | 197.933821 | -0.19609694 | 0.16284878 | 0.18249483 | 0.3803144  | STX18-AS1    |
| NA        | ENSG00000247728 | 12.4506766 | 0.013225    | 0.33663814 | 0.93767604 | 0.97366414 |              |
| NA        | ENSG00000247735 | 28.8000875 | 0.19098862  | 0.32430325 | 0.3467029  | 0.57745009 |              |
| 158880    | ENSG00000247746 | 46.9949379 | -0.0571386  | 0.25870603 | 0.76473609 | 0.8916054  | USP51        |
| NA        | ENSG00000247763 | 0          | NA          | NA         | NA         | NA         | TUBAP14      |
| NA        | ENSG00000247765 | 0          | NA          | NA         | NA         | NA         |              |
| 100233209 | ENSG00000247774 | 0          | NA          | NA         | NA         | NA         | PCED1B-AS1   |
| 644248    | ENSG00000247775 | 0.90753711 | 0.01254962  | 0.38099096 | 0.84689909 | NA         | SNCA-AS1     |
| 257396    | ENSG00000247796 | 43.637071  | -0.41050572 | 0.33723382 | 0.07602858 | 0.20345386 |              |
| NA        | ENSG00000247809 | 0          | NA          | NA         | NA         | NA         | NR2F2-AS1    |
| 101928721 | ENSG00000247810 | 0          | NA          | NA         | NA         | NA         |              |
| 100505894 | ENSG00000247828 | 544.931841 | 0.18225603  | 0.13539449 | 0.1496607  | 0.33254209 | TMEM161B-AS1 |
| NA        | ENSG00000247853 | 12.5124    | 0.07486928  | 0.34501598 | 0.65075808 | 0.8254613  |              |

|           |                 |            |             |            |            |            |              |
|-----------|-----------------|------------|-------------|------------|------------|------------|--------------|
| 283214    | ENSG00000247867 | 0          | NA          | NA         | NA         | NA         |              |
| NA        | ENSG00000247872 | 0          | NA          | NA         | NA         | NA         | SPCS2P3      |
| NA        | ENSG00000247877 | 5.2332964  | 0.06172895  | 0.36695924 | 0.62691881 | 0.81066736 |              |
| NA        | ENSG00000247903 | 39.2325987 | -0.29293213 | 0.31850014 | 0.17538261 | 0.36938334 |              |
| NA        | ENSG00000247911 | 0          | NA          | NA         | NA         | NA         | HMGNI1P12    |
| NA        | ENSG00000247925 | 0          | NA          | NA         | NA         | NA         |              |
| NA        | ENSG00000247934 | 24.4717432 | -0.09061125 | 0.30870858 | 0.6294824  | 0.8124371  |              |
| 100533182 | ENSG00000247950 | 29.5574902 | -0.17853238 | 0.33016414 | 0.36806574 | 0.59748194 | SEC24B-AS1   |
| NA        | ENSG00000247970 | 3.24161276 | -0.05687029 | 0.3751506  | 0.5860513  | 0.7817695  |              |
| 283663    | ENSG00000247982 | 83.1234385 | 0.60762327  | 0.3140297  | 0.01121519 | 0.04558686 | LINC00926    |
| NA        | ENSG00000247993 | 0          | NA          | NA         | NA         | NA         | FOXD1-AS1    |
| 100506668 | ENSG00000248008 | 193.027916 | -0.15385416 | 0.16151035 | 0.29208008 | 0.5181392  | NRAV         |
| NA        | ENSG00000248015 | 141.763792 | -0.09691911 | 0.19556937 | 0.56361356 | 0.76627833 |              |
| 285512    | ENSG00000248019 | 43.5714941 | -0.37094393 | 0.36601081 | 0.10812223 | 0.26372572 | FAM13A-AS1   |
| 100128386 | ENSG00000248027 | 0          | NA          | NA         | NA         | NA         | ARHGAP42-AS1 |
| NA        | ENSG00000248029 | 0          | NA          | NA         | NA         | NA         |              |
| NA        | ENSG00000248049 | 280.562036 | -0.26523777 | 0.14532977 | 0.04787944 | 0.14395032 | UBA6-AS1     |
| NA        | ENSG00000248050 | 1.16530299 | -0.00933206 | 0.37865454 | 0.89197594 | NA         |              |
| NA        | ENSG00000248079 | 11.8592875 | 0.01998977  | 0.34912909 | 0.89251697 | 0.95350475 | DPH6-DT      |
| NA        | ENSG00000248092 | 330.53503  | -0.35214328 | 0.15740628 | 0.01406667 | 0.05479733 | NNT-AS1      |
| 593       | ENSG00000248098 | 693.325875 | 0.07339778  | 0.10181633 | 0.45518695 | 0.67860754 | BCKDHA       |
| 3640      | ENSG00000248099 | 0.91150283 | 0.0321059   | 0.38464706 | 0.47532545 | NA         | INSL3        |
| NA        | ENSG00000248100 | 0.15069912 | -0.01848503 | 0.38480575 | 0.84537521 | NA         |              |
| NA        | ENSG00000248101 | 26.9513019 | 0.08632525  | 0.31271817 | 0.64956865 | 0.82525848 |              |
| NA        | ENSG00000248103 | 134.715354 | 0.18692347  | 0.1940471  | 0.26595673 | 0.48827746 |              |
| NA        | ENSG00000248104 | 0          | NA          | NA         | NA         | NA         | TARS2P1      |
| NA        | ENSG00000248105 | 0          | NA          | NA         | NA         | NA         |              |
| NA        | ENSG00000248106 | 0          | NA          | NA         | NA         | NA         |              |
| 102546228 | ENSG00000248107 | 0          | NA          | NA         | NA         | NA         | LINC02039    |
| 105378220 | ENSG00000248109 | 0.5059888  | -0.00899448 | 0.38322858 | 0.83699076 | NA         | MARCOL       |
| NA        | ENSG00000248112 | 1.00724464 | 0.05569532  | 0.38974936 | 0.21468543 | NA         |              |
| NA        | ENSG00000248113 | 0          | NA          | NA         | NA         | NA         |              |
| NA        | ENSG00000248114 | 0          | NA          | NA         | NA         | NA         |              |
| NA        | ENSG00000248115 | 2.05907386 | 0.04813299  | 0.38188844 | 0.51398417 | NA         |              |
| NA        | ENSG00000248117 | 0          | NA          | NA         | NA         | NA         | MICOS10P4    |
| 285577    | ENSG00000248118 | 0          | NA          | NA         | NA         | NA         | LINC01019    |
| NA        | ENSG00000248120 | 0          | NA          | NA         | NA         | NA         |              |
| NA        | ENSG00000248121 | 0.15069912 | -0.01848503 | 0.38480575 | 0.84537521 | NA         | SMURF2P1     |

|           |     |                 |            |             |            |            |            |              |
|-----------|-----|-----------------|------------|-------------|------------|------------|------------|--------------|
|           | NA  | ENSG00000248122 | 0          | NA          | NA         | NA         | NA         | APOOP4       |
|           | NA  | ENSG00000248124 | 273.586811 | 0.24023656  | 0.15824127 | 0.09520081 | 0.24027275 | RRN3P1       |
|           | NA  | ENSG00000248125 | 0.5972779  | -0.02732172 | 0.38586499 | 0.50076333 | NA         |              |
|           | NA  | ENSG00000248126 | 0          | NA          | NA         | NA         | NA         |              |
|           | NA  | ENSG00000248127 | 27.0324111 | 0.09801719  | 0.31368285 | 0.60719801 | 0.79658855 |              |
|           | NA  | ENSG00000248128 | 0          | NA          | NA         | NA         | NA         |              |
|           | NA  | ENSG00000248131 | 27.8860146 | -0.75995016 | 0.56717176 | 0.01739054 | 0.06511196 | LINC01194    |
| 101928569 | NA  | ENSG00000248132 | 0          | NA          | NA         | NA         | NA         | LINC02101    |
|           | NA  | ENSG00000248133 | 0          | NA          | NA         | NA         | NA         | MTND4LP22    |
|           | NA  | ENSG00000248134 | 0          | NA          | NA         | NA         | NA         |              |
|           | NA  | ENSG00000248136 | 0          | NA          | NA         | NA         | NA         | MTND6P8      |
|           | NA  | ENSG00000248137 | 0          | NA          | NA         | NA         | NA         |              |
|           | NA  | ENSG00000248138 | 0          | NA          | NA         | NA         | NA         |              |
|           | NA  | ENSG00000248139 | 0          | NA          | NA         | NA         | NA         | CUL4AP1      |
| 105374436 | NA  | ENSG00000248143 | 0          | NA          | NA         | NA         | NA         | LINC02383    |
|           | 126 | ENSG00000248144 | 0          | NA          | NA         | NA         | NA         | ADH1C        |
|           | NA  | ENSG00000248145 | 0          | NA          | NA         | NA         | NA         |              |
|           | NA  | ENSG00000248148 | 0          | NA          | NA         | NA         | NA         |              |
| 101929505 | NA  | ENSG00000248150 | 0.14931947 | -0.01844332 | 0.38480212 | 0.84537521 | NA         | LINC02150    |
|           | NA  | ENSG00000248152 | 1.03625245 | 0.04636748  | 0.38592506 | 0.36784203 | NA         | ANK2-AS1     |
|           | NA  | ENSG00000248155 | 0          | NA          | NA         | NA         | NA         |              |
|           | NA  | ENSG00000248156 | 0          | NA          | NA         | NA         | NA         | BTG4P1       |
|           | NA  | ENSG00000248159 | 0.63341902 | 0.00201941  | 0.38251281 | 0.96065369 | NA         | HSPA8P11     |
|           | NA  | ENSG00000248160 | 0          | NA          | NA         | NA         | NA         |              |
|           | NA  | ENSG00000248161 | 8.03273907 | -0.05966198 | 0.3532837  | 0.6885907  | 0.84881264 |              |
|           | NA  | ENSG00000248162 | 0          | NA          | NA         | NA         | NA         | CHORDC1P3    |
|           | NA  | ENSG00000248165 | 0          | NA          | NA         | NA         | NA         |              |
| 202658    | NA  | ENSG00000248167 | 0.8173843  | -0.04641056 | 0.38801922 | 0.31323916 | NA         | TRIM39-RPP21 |
|           | NA  | ENSG00000248170 | 0          | NA          | NA         | NA         | NA         |              |
|           | NA  | ENSG00000248172 | 0          | NA          | NA         | NA         | NA         |              |
| 101928509 | NA  | ENSG00000248174 | 115.549073 | 1.27086448  | 0.23665208 | 7.33E-09   | 1.12E-07   | LINC02268    |
|           | NA  | ENSG00000248176 | 0          | NA          | NA         | NA         | NA         |              |
|           | NA  | ENSG00000248180 | 0.32306198 | 0.00142081  | 0.38336884 | 0.96747763 | NA         | GAPDHP60     |
|           | NA  | ENSG00000248184 | 0          | NA          | NA         | NA         | NA         | LINC02283    |
|           | NA  | ENSG00000248185 | 0          | NA          | NA         | NA         | NA         |              |
|           | NA  | ENSG00000248187 | 0.14931947 | -0.01844332 | 0.38480212 | 0.84537521 | NA         |              |
|           | NA  | ENSG00000248188 | 0          | NA          | NA         | NA         | NA         |              |
|           | NA  | ENSG00000248191 | 0          | NA          | NA         | NA         | NA         | PES1P1       |

|           |                 |            |             |            |            |            |            |
|-----------|-----------------|------------|-------------|------------|------------|------------|------------|
| NA        | ENSG00000248192 | 0          | NA          | NA         | NA         | NA         | ATG10-AS1  |
| NA        | ENSG00000248195 | 0.34746601 | 0.02370763  | 0.3853651  | 0.61987128 | NA         |            |
| NA        | ENSG00000248196 | 1.82112262 | -0.00414855 | 0.37607936 | 0.95754771 | NA         |            |
| 728081    | ENSG00000248197 | 0          | NA          | NA         | NA         | NA         | LINC00290  |
| NA        | ENSG00000248199 | 0          | NA          | NA         | NA         | NA         |            |
| NA        | ENSG00000248200 | 0          | NA          | NA         | NA         | NA         |            |
| 109729164 | ENSG00000248202 | 0.95121414 | 0.01529591  | 0.38149253 | 0.77718296 | NA         | LINC02234  |
| NA        | ENSG00000248203 | 0          | NA          | NA         | NA         | NA         |            |
| NA        | ENSG00000248205 | 0          | NA          | NA         | NA         | NA         | H3P17      |
| NA        | ENSG00000248206 | 4.21045106 | -0.07735491 | 0.37254317 | 0.53107849 | 0.74258913 |            |
| NA        | ENSG00000248208 | 0          | NA          | NA         | NA         | NA         | WDR45P1    |
| NA        | ENSG00000248209 | 0          | NA          | NA         | NA         | NA         |            |
| 101927849 | ENSG00000248210 | 0          | NA          | NA         | NA         | NA         | LINC02355  |
| 100874024 | ENSG00000248211 | 0          | NA          | NA         | NA         | NA         | TRPC7-AS1  |
| NA        | ENSG00000248213 | 95.0264234 | -0.06402754 | 0.20701349 | 0.71256151 | 0.86169546 | CICP16     |
| NA        | ENSG00000248215 | 0          | NA          | NA         | NA         | NA         | LINC02505  |
| NA        | ENSG00000248216 | 0          | NA          | NA         | NA         | NA         | KCTD9P5    |
| 104472519 | ENSG00000248221 | 0.173124   | -0.01911262 | 0.38486262 | 0.84537521 | NA         | STX18-IT1  |
| NA        | ENSG00000248222 | 0.14931947 | -0.01844332 | 0.38480212 | 0.84537521 | NA         | SLIT3-AS1  |
| NA        | ENSG00000248223 | 0.37844916 | 0.02407552  | 0.3854191  | 0.60038877 | NA         |            |
| 105374410 | ENSG00000248227 | 0          | NA          | NA         | NA         | NA         | LINC02513  |
| 100505893 | ENSG00000248228 | 0          | NA          | NA         | NA         | NA         | SLIT2-IT1  |
| NA        | ENSG00000248229 | 0          | NA          | NA         | NA         | NA         |            |
| NA        | ENSG00000248231 | 0          | NA          | NA         | NA         | NA         | KRT8P4     |
| NA        | ENSG00000248234 | 0          | NA          | NA         | NA         | NA         |            |
| NA        | ENSG00000248235 | 6.16847818 | 0.09375894  | 0.38029173 | 0.42932447 | 0.65501365 |            |
| NA        | ENSG00000248236 | 0          | NA          | NA         | NA         | NA         |            |
| NA        | ENSG00000248237 | 0          | NA          | NA         | NA         | NA         |            |
| NA        | ENSG00000248238 | 0          | NA          | NA         | NA         | NA         | LINC02438  |
| NA        | ENSG00000248240 | 0.47286787 | -0.03503977 | 0.38628279 | 0.4962058  | NA         |            |
| NA        | ENSG00000248242 | 0          | NA          | NA         | NA         | NA         |            |
| NA        | ENSG00000248243 | 0.71360058 | 0.04206647  | 0.38737682 | 0.34113922 | NA         | LINC02014  |
| NA        | ENSG00000248245 | 0.47320054 | -0.03505663 | 0.38628448 | 0.49597322 | NA         |            |
| NA        | ENSG00000248249 | 0          | NA          | NA         | NA         | NA         |            |
| NA        | ENSG00000248254 | 0.78171723 | -0.00433438 | 0.3821505  | 0.92624363 | NA         |            |
| 100861517 | ENSG00000248256 | 0          | NA          | NA         | NA         | NA         | OCIAD1-AS1 |
| NA        | ENSG00000248257 | 0          | NA          | NA         | NA         | NA         | PSG10P     |
| NA        | ENSG00000248259 | 0          | NA          | NA         | NA         | NA         | MTND4LP31  |

|           |                 |            |             |            |            |            |            |
|-----------|-----------------|------------|-------------|------------|------------|------------|------------|
| NA        | ENSG00000248261 | 0          | NA          | NA         | NA         | NA         |            |
| NA        | ENSG00000248262 | 0          | NA          | NA         | NA         | NA         |            |
| 440101    | ENSG00000248265 | 19.9665087 | 0.14494388  | 0.33383115 | 0.44869093 | 0.67234398 |            |
| NA        | ENSG00000248266 | 0          | NA          | NA         | NA         | NA         |            |
| NA        | ENSG00000248268 | 0.63636175 | 0.00205514  | 0.38250713 | 0.96004327 | NA         |            |
| NA        | ENSG00000248271 | 0          | NA          | NA         | NA         | NA         | PGAM1P1    |
| 100507602 | ENSG00000248275 | 96.6139032 | -0.12541153 | 0.2160498  | 0.48344125 | 0.70370318 | TRIM52-AS1 |
| 105371814 | ENSG00000248278 | 1.68855075 | -0.05174348 | 0.38491004 | 0.41302848 | NA         | SUMO2P17   |
| 340113    | ENSG00000248279 | 0          | NA          | NA         | NA         | NA         | LINC02120  |
| NA        | ENSG00000248281 | 0          | NA          | NA         | NA         | NA         |            |
| NA        | ENSG00000248282 | 0          | NA          | NA         | NA         | NA         | MTCYBP44   |
| NA        | ENSG00000248283 | 0.173733   | 0.01914545  | 0.38484597 | 0.78225479 | NA         | CCNL2P1    |
| NA        | ENSG00000248285 | 0          | NA          | NA         | NA         | NA         |            |
| NA        | ENSG00000248286 | 0          | NA          | NA         | NA         | NA         |            |
| NA        | ENSG00000248287 | 0          | NA          | NA         | NA         | NA         | SCGB1D5P   |
| NA        | ENSG00000248288 | 0          | NA          | NA         | NA         | NA         |            |
| NA        | ENSG00000248290 | 0.34685679 | 3.37E-05    | 0.38336202 | 0.96813594 | NA         | TNXA       |
| NA        | ENSG00000248293 | 0          | NA          | NA         | NA         | NA         |            |
| NA        | ENSG00000248295 | 0          | NA          | NA         | NA         | NA         | DDX43P1    |
| NA        | ENSG00000248296 | 0.15069912 | -0.01848503 | 0.38480575 | 0.84537521 | NA         |            |
| 105374484 | ENSG00000248300 | 0          | NA          | NA         | NA         | NA         | LINC02360  |
| NA        | ENSG00000248302 | 1.14022993 | -0.0275741  | 0.38120818 | 0.65822137 | NA         | BNIP3P41   |
| NA        | ENSG00000248305 | 0          | NA          | NA         | NA         | NA         |            |
| 641365    | ENSG00000248307 | 0          | NA          | NA         | NA         | NA         | LINC00616  |
| NA        | ENSG00000248308 | 0.173733   | 0.01914545  | 0.38484597 | 0.78225479 | NA         |            |
| 101929423 | ENSG00000248309 | 16.5263358 | 0.20947896  | 0.36382517 | 0.28894744 | 0.51490664 | MEF2C-AS1  |
| NA        | ENSG00000248311 | 0          | NA          | NA         | NA         | NA         |            |
| NA        | ENSG00000248313 | 0          | NA          | NA         | NA         | NA         | CYP4F27P   |
| NA        | ENSG00000248315 | 0          | NA          | NA         | NA         | NA         | MTND4LP2   |
| NA        | ENSG00000248317 | 0          | NA          | NA         | NA         | NA         |            |
| 101927543 | ENSG00000248318 | 0          | NA          | NA         | NA         | NA         |            |
| 100506085 | ENSG00000248319 | 0.30002057 | -0.02294463 | 0.38527539 | 0.68644581 | NA         | LINC02275  |
| NA        | ENSG00000248320 | 0          | NA          | NA         | NA         | NA         | THAP12P9   |
| NA        | ENSG00000248322 | 0          | NA          | NA         | NA         | NA         |            |
| NA        | ENSG00000248323 | 13.298052  | 0.36408528  | 0.51718304 | 0.08516375 | 0.2214571  | LUCAT1     |
| NA        | ENSG00000248327 | 0          | NA          | NA         | NA         | NA         | NOL8P1     |
| NA        | ENSG00000248328 | 0          | NA          | NA         | NA         | NA         | MTCO3P28   |
| 100506013 | ENSG00000248329 | 0          | NA          | NA         | NA         | NA         | APELA      |

|           |                 |            |             |            |            |            |           |
|-----------|-----------------|------------|-------------|------------|------------|------------|-----------|
| 100507528 | ENSG00000248330 | 0          | NA          | NA         | NA         | NA         | LINC00613 |
| 101927917 | ENSG00000248332 | 0.48057488 | 0.01891726  | 0.38429156 | 0.76610598 | NA         | TUB-AS1   |
| 984       | ENSG00000248333 | 1147.77846 | 0.153206    | 0.09034183 | 0.08078509 | 0.21305012 | CDK11B    |
| NA        | ENSG00000248334 | 129.819325 | 0.76185482  | 0.22404619 | 0.00012133 | 0.00090393 | WHAMMP2   |
| NA        | ENSG00000248335 | 0          | NA          | NA         | NA         | NA         |           |
| NA        | ENSG00000248336 | 0          | NA          | NA         | NA         | NA         | HMGNI1P11 |
| NA        | ENSG00000248337 | 0          | NA          | NA         | NA         | NA         |           |
| NA        | ENSG00000248338 | 0          | NA          | NA         | NA         | NA         | LINC02472 |
| 101928288 | ENSG00000248339 | 0          | NA          | NA         | NA         | NA         | LINC02504 |
| NA        | ENSG00000248340 | 0          | NA          | NA         | NA         | NA         | PIMREGP4  |
| NA        | ENSG00000248343 | 0          | NA          | NA         | NA         | NA         |           |
| NA        | ENSG00000248346 | 0          | NA          | NA         | NA         | NA         |           |
| NA        | ENSG00000248347 | 0          | NA          | NA         | NA         | NA         |           |
| NA        | ENSG00000248349 | 0          | NA          | NA         | NA         | NA         |           |
| NA        | ENSG00000248350 | 0          | NA          | NA         | NA         | NA         |           |
| NA        | ENSG00000248351 | 0          | NA          | NA         | NA         | NA         | HSPD1P18  |
| NA        | ENSG00000248355 | 0          | NA          | NA         | NA         | NA         | ARL2BPP6  |
| NA        | ENSG00000248356 | 0.173733   | 0.01914545  | 0.38484597 | 0.78225479 | NA         |           |
| NA        | ENSG00000248358 | 0          | NA          | NA         | NA         | NA         |           |
| NA        | ENSG00000248359 | 1.09245189 | -0.07529559 | 0.39384814 | 0.15728085 | NA         |           |
| 201853    | ENSG00000248360 | 1.9077009  | 0.05811375  | 0.38422928 | 0.42903185 | NA         | LINC00504 |
| NA        | ENSG00000248362 | 0          | NA          | NA         | NA         | NA         |           |
| NA        | ENSG00000248363 | 0          | NA          | NA         | NA         | NA         |           |
| NA        | ENSG00000248364 | 0          | NA          | NA         | NA         | NA         | OR7E86P   |
| NA        | ENSG00000248365 | 0          | NA          | NA         | NA         | NA         | POU5F1P7  |
| NA        | ENSG00000248366 | 0          | NA          | NA         | NA         | NA         | TRAJ51    |
| NA        | ENSG00000248367 | 0.61770092 | -0.01494322 | 0.38329171 | 0.72684829 | NA         |           |
| NA        | ENSG00000248369 | 0.15069912 | -0.01848503 | 0.38480575 | 0.84537521 | NA         |           |
| NA        | ENSG00000248370 | 0          | NA          | NA         | NA         | NA         | LINC02434 |
| 102477328 | ENSG00000248371 | 0.18922458 | 0.01954053  | 0.38488496 | 0.78225479 | NA         | LINC02056 |
| NA        | ENSG00000248373 | 0          | NA          | NA         | NA         | NA         |           |
| NA        | ENSG00000248374 | 0          | NA          | NA         | NA         | NA         |           |
| NA        | ENSG00000248375 | 0          | NA          | NA         | NA         | NA         |           |
| NA        | ENSG00000248376 | 0          | NA          | NA         | NA         | NA         |           |
| NA        | ENSG00000248377 | 0          | NA          | NA         | NA         | NA         | HMGNI1P9  |
| NA        | ENSG00000248378 | 0          | NA          | NA         | NA         | NA         |           |
| 56135     | ENSG00000248383 | 93.0621022 | -0.38314496 | 0.26742538 | 0.06530678 | 0.18235113 | PCDHAC1   |
| 441864    | ENSG00000248385 | 0          | NA          | NA         | NA         | NA         | TARM1     |

|        |                 |            |             |            |            |            |              |
|--------|-----------------|------------|-------------|------------|------------|------------|--------------|
| NA     | ENSG00000248387 | 0          | NA          | NA         | NA         | NA         |              |
| NA     | ENSG00000248388 | 0          | NA          | NA         | NA         | NA         |              |
| NA     | ENSG00000248391 | 0          | NA          | NA         | NA         | NA         | LINC02064    |
| NA     | ENSG00000248393 | 0          | NA          | NA         | NA         | NA         |              |
| NA     | ENSG00000248394 | 0.37844916 | 0.02407552  | 0.3854191  | 0.60038877 | NA         | FOSL1P1      |
| NA     | ENSG00000248396 | 0          | NA          | NA         | NA         | NA         | TOMM22P4     |
| NA     | ENSG00000248397 | 0          | NA          | NA         | NA         | NA         | LINC00498    |
| NA     | ENSG00000248399 | 0          | NA          | NA         | NA         | NA         |              |
| NA     | ENSG00000248400 | 0.36296133 | 0.02389481  | 0.38539241 | 0.6099632  | NA         | ST13P12      |
| NA     | ENSG00000248401 | 0          | NA          | NA         | NA         | NA         |              |
| NA     | ENSG00000248403 | 0          | NA          | NA         | NA         | NA         | NACAP6       |
| 553158 | ENSG00000248405 | 4.19871851 | -0.07880577 | 0.37874607 | 0.47263555 | 0.69470213 | PRR5-ARHGAP8 |
| NA     | ENSG00000248406 | 2.26010093 | -0.10609346 | 0.40185673 | 0.09764247 | NA         |              |
| NA     | ENSG00000248408 | 0          | NA          | NA         | NA         | NA         | LINC02469    |
| NA     | ENSG00000248409 | 6.56354283 | -0.06233771 | 0.36097989 | 0.65164568 | 0.82602754 |              |
| NA     | ENSG00000248415 | 0          | NA          | NA         | NA         | NA         | GAPDHP61     |
| NA     | ENSG00000248416 | 0.16735865 | 0.01897177  | 0.38482933 | 0.78225479 | NA         |              |
| NA     | ENSG00000248417 | 0          | NA          | NA         | NA         | NA         |              |
| NA     | ENSG00000248418 | 0          | NA          | NA         | NA         | NA         | UBL5P1       |
| NA     | ENSG00000248419 | 0          | NA          | NA         | NA         | NA         |              |
| NA     | ENSG00000248420 | 0          | NA          | NA         | NA         | NA         | MTATP6P9     |
| NA     | ENSG00000248422 | 0          | NA          | NA         | NA         | NA         |              |
| NA     | ENSG00000248423 | 0.14931947 | -0.01844332 | 0.38480212 | 0.84537521 | NA         |              |
| NA     | ENSG00000248424 | 0          | NA          | NA         | NA         | NA         | OR51K1P      |
| NA     | ENSG00000248425 | 0          | NA          | NA         | NA         | NA         |              |
| NA     | ENSG00000248426 | 0          | NA          | NA         | NA         | NA         |              |
| NA     | ENSG00000248428 | 0          | NA          | NA         | NA         | NA         |              |
| 285505 | ENSG00000248429 | 0          | NA          | NA         | NA         | NA         | FAM198B-AS1  |
| NA     | ENSG00000248430 | 0          | NA          | NA         | NA         | NA         | HMGB3P16     |
| NA     | ENSG00000248431 | 0.48210744 | -0.02886135 | 0.38584542 | 0.53596518 | NA         |              |
| NA     | ENSG00000248434 | 0          | NA          | NA         | NA         | NA         |              |
| NA     | ENSG00000248439 | 1.93818725 | -0.08749341 | 0.39206102 | 0.25429941 | NA         | RPL23AP94    |
| NA     | ENSG00000248440 | 0          | NA          | NA         | NA         | NA         |              |
| 400456 | ENSG00000248441 | 0          | NA          | NA         | NA         | NA         | LINC01197    |
| NA     | ENSG00000248442 | 0          | NA          | NA         | NA         | NA         | OR10J7P      |
| NA     | ENSG00000248443 | 0          | NA          | NA         | NA         | NA         |              |
| NA     | ENSG00000248444 | 0          | NA          | NA         | NA         | NA         | HNRNPA1P65   |
| NA     | ENSG00000248445 | 15.952655  | -0.09606775 | 0.3314454  | 0.59331099 | 0.78711401 | SEMA6A-AS1   |

|           |                 |            |             |            |            |            |           |
|-----------|-----------------|------------|-------------|------------|------------|------------|-----------|
| NA        | ENSG00000248447 | 0          | NA          | NA         | NA         | NA         |           |
| NA        | ENSG00000248448 | 0          | NA          | NA         | NA         | NA         | COX5BP1   |
| 56120     | ENSG00000248449 | 4.66495325 | -0.05967272 | 0.37416986 | 0.58209106 | 0.77905333 | PCDHGB8P  |
| NA        | ENSG00000248452 | 0          | NA          | NA         | NA         | NA         |           |
| 101929544 | ENSG00000248455 | 0          | NA          | NA         | NA         | NA         | LINC02217 |
| NA        | ENSG00000248456 | 0          | NA          | NA         | NA         | NA         | LINC02485 |
| NA        | ENSG00000248457 | 0          | NA          | NA         | NA         | NA         | LINC02220 |
| NA        | ENSG00000248458 | 7.06588339 | -0.10585982 | 0.36834639 | 0.47200361 | 0.69433911 |           |
| NA        | ENSG00000248459 | 0          | NA          | NA         | NA         | NA         |           |
| 101929745 | ENSG00000248461 | 0          | NA          | NA         | NA         | NA         | LINC02119 |
| NA        | ENSG00000248462 | 0          | NA          | NA         | NA         | NA         | NENFP3    |
| 101927075 | ENSG00000248464 | 0          | NA          | NA         | NA         | NA         | FGF10-AS1 |
| NA        | ENSG00000248466 | 0          | NA          | NA         | NA         | NA         |           |
| NA        | ENSG00000248468 | 5.78087513 | -0.00103032 | 0.35735068 | 0.99178294 | 0.9973124  |           |
| 100996385 | ENSG00000248469 | 0          | NA          | NA         | NA         | NA         |           |
| NA        | ENSG00000248471 | 0          | NA          | NA         | NA         | NA         |           |
| 727856    | ENSG00000248472 | 1.27352761 | -0.04114059 | 0.38274431 | 0.52362844 | NA         | DDX11L9   |
| 100287596 | ENSG00000248472 | 1.27352761 | -0.04114059 | 0.38274431 | 0.52362844 | NA         | DDX11L9   |
| 100288486 | ENSG00000248472 | 1.27352761 | -0.04114059 | 0.38274431 | 0.52362844 | NA         | DDX11L9   |
| NA        | ENSG00000248473 | 2.3190051  | 0.03814041  | 0.38168957 | 0.55912499 | NA         | LINC01962 |
| NA        | ENSG00000248474 | 0          | NA          | NA         | NA         | NA         | LINC02122 |
| NA        | ENSG00000248475 | 0.49839687 | -0.01005991 | 0.38282607 | 0.82971604 | NA         |           |
| NA        | ENSG00000248476 | 1.87476172 | 0.0481223   | 0.37976407 | 0.56482349 | NA         | BACH1-IT1 |
| NA        | ENSG00000248477 | 110.078321 | -0.00179267 | 0.20469916 | 0.99037601 | 0.99675646 | NAIPP3    |
| NA        | ENSG00000248479 | 0          | NA          | NA         | NA         | NA         |           |
| NA        | ENSG00000248480 | 0          | NA          | NA         | NA         | NA         |           |
| NA        | ENSG00000248482 | 0          | NA          | NA         | NA         | NA         |           |
| 134187    | ENSG00000248483 | 2.45950607 | -0.06796738 | 0.3821991  | 0.45222854 | NA         | POU5F2    |
| NA        | ENSG00000248484 | 0          | NA          | NA         | NA         | NA         |           |
| 654790    | ENSG00000248485 | 9.71531057 | -0.05692911 | 0.35222829 | 0.70412636 | 0.85774517 | PCP4L1    |
| 25864     | ENSG00000248487 | 377.847244 | -0.07833242 | 0.12601526 | 0.50947419 | 0.7251053  | ABHD14A   |
| NA        | ENSG00000248488 | 0          | NA          | NA         | NA         | NA         | PGAM4P2   |
| NA        | ENSG00000248489 | 11.0542323 | -0.03086781 | 0.34045941 | 0.84586851 | 0.93006158 | LINC02062 |
| NA        | ENSG00000248490 | 0          | NA          | NA         | NA         | NA         |           |
| NA        | ENSG00000248491 | 0          | NA          | NA         | NA         | NA         |           |
| 594840    | ENSG00000248492 | 0          | NA          | NA         | NA         | NA         | ZFAT-AS1  |
| NA        | ENSG00000248493 | 0          | NA          | NA         | NA         | NA         |           |
| NA        | ENSG00000248494 | 0.16735865 | 0.01897177  | 0.38482933 | 0.78225479 | NA         | LNX1-AS2  |



|           |                 |            |             |            |            |            |           |
|-----------|-----------------|------------|-------------|------------|------------|------------|-----------|
| 389652    | ENSG00000248498 | 11.0631466 | 0.02787168  | 0.35657723 | 0.84129991 | 0.92791806 | ASNSP1    |
| NA        | ENSG00000248503 | 14.2137289 | 0.25328579  | 0.40961375 | 0.19459253 | 0.39768396 |           |
| NA        | ENSG00000248505 | 0          | NA          | NA         | NA         | NA         | LINC02380 |
| NA        | ENSG00000248506 | 0          | NA          | NA         | NA         | NA         | TUBAP10   |
| NA        | ENSG00000248507 | 0          | NA          | NA         | NA         | NA         | OR5H4P    |
| 100131089 | ENSG00000248508 | 140.229682 | 0.0129242   | 0.19104    | 0.93926239 | 0.97474024 | SRP14-AS1 |
| NA        | ENSG00000248510 | 1.44976498 | 0.08766479  | 0.39472303 | 0.16541053 | NA         | LINC02267 |
| NA        | ENSG00000248511 | 0          | NA          | NA         | NA         | NA         |           |
| NA        | ENSG00000248514 | 1.76247548 | 0.00949893  | 0.37791566 | 0.89684445 | NA         |           |
| NA        | ENSG00000248515 | 0          | NA          | NA         | NA         | NA         |           |
| NA        | ENSG00000248516 | 0          | NA          | NA         | NA         | NA         |           |
| NA        | ENSG00000248517 | 0          | NA          | NA         | NA         | NA         | LINC02437 |
| NA        | ENSG00000248518 | 0          | NA          | NA         | NA         | NA         |           |
| NA        | ENSG00000248521 | 0          | NA          | NA         | NA         | NA         |           |
| 100133234 | ENSG00000248522 | 0          | NA          | NA         | NA         | NA         | SBF1P1    |
| NA        | ENSG00000248525 | 0          | NA          | NA         | NA         | NA         |           |
| NA        | ENSG00000248527 | 5821.46592 | -0.02251423 | 0.07683384 | 0.76424718 | 0.89148768 | MTATP6P1  |
| NA        | ENSG00000248528 | 0          | NA          | NA         | NA         | NA         | LINC02058 |
| 101928651 | ENSG00000248529 | 0          | NA          | NA         | NA         | NA         |           |
| NA        | ENSG00000248530 | 0          | NA          | NA         | NA         | NA         | BCL2L12P1 |
| NA        | ENSG00000248531 | 0          | NA          | NA         | NA         | NA         | NDUFA5P12 |
| NA        | ENSG00000248532 | 0          | NA          | NA         | NA         | NA         |           |
| NA        | ENSG00000248533 | 0          | NA          | NA         | NA         | NA         |           |
| NA        | ENSG00000248537 | 0          | NA          | NA         | NA         | NA         |           |
| 157273    | ENSG00000248538 | 104.175446 | -1.37098663 | 0.25519506 | 6.43E-09   | 9.94E-08   |           |
| NA        | ENSG00000248539 | 0          | NA          | NA         | NA         | NA         | LINC02117 |
| 283731    | ENSG00000248540 | 980.804525 | -0.99281584 | 0.0915766  | 3.05E-28   | 1.65E-26   |           |
| NA        | ENSG00000248542 | 0          | NA          | NA         | NA         | NA         |           |
| NA        | ENSG00000248543 | 0          | NA          | NA         | NA         | NA         | NPM1P41   |
| NA        | ENSG00000248544 | 20.0423376 | 0.29564253  | 0.40272749 | 0.16666428 | 0.35740949 |           |
| NA        | ENSG00000248545 | 0          | NA          | NA         | NA         | NA         |           |
| 23520     | ENSG00000248546 | 0          | NA          | NA         | NA         | NA         | ANP32C    |
| NA        | ENSG00000248547 | 0          | NA          | NA         | NA         | NA         |           |
| NA        | ENSG00000248548 | 0          | NA          | NA         | NA         | NA         | MTND4P8   |
| NA        | ENSG00000248550 | 0          | NA          | NA         | NA         | NA         | OTX2-AS1  |
| NA        | ENSG00000248551 | 0          | NA          | NA         | NA         | NA         |           |
| NA        | ENSG00000248552 | 0          | NA          | NA         | NA         | NA         |           |
| NA        | ENSG00000248553 | 0          | NA          | NA         | NA         | NA         | OR52H2P   |

|           |                 |            |             |            |            |            |                |
|-----------|-----------------|------------|-------------|------------|------------|------------|----------------|
| NA        | ENSG00000248554 | 0.60062881 | -0.03512702 | 0.38649214 | 0.44186948 | NA         | C5orf34-AS1    |
| NA        | ENSG00000248555 | 0          | NA          | NA         | NA         | NA         | LINC01339      |
| NA        | ENSG00000248557 | 2.93410687 | -0.0691493  | 0.37744569 | 0.51504031 | 0.72955207 |                |
| NA        | ENSG00000248559 | 1.79576537 | 0.01543964  | 0.37667477 | 0.84776333 | NA         |                |
| NA        | ENSG00000248560 | 0          | NA          | NA         | NA         | NA         |                |
| NA        | ENSG00000248564 | 0.97286767 | 0.02331411  | 0.38224796 | 0.66400528 | NA         |                |
| NA        | ENSG00000248565 | 0          | NA          | NA         | NA         | NA         | TECRP2         |
| NA        | ENSG00000248567 | 0          | NA          | NA         | NA         | NA         |                |
| NA        | ENSG00000248568 | 0          | NA          | NA         | NA         | NA         | KRT8P48        |
| NA        | ENSG00000248569 | 0          | NA          | NA         | NA         | NA         |                |
| NA        | ENSG00000248571 | 0          | NA          | NA         | NA         | NA         |                |
| 100506475 | ENSG00000248572 | 0          | NA          | NA         | NA         | NA         | EGFLAM-AS2     |
| NA        | ENSG00000248573 | 0          | NA          | NA         | NA         | NA         | PRYP6          |
| NA        | ENSG00000248574 | 0          | NA          | NA         | NA         | NA         | ADAM20P2       |
| NA        | ENSG00000248576 | 0.33471731 | 0.02354391  | 0.38534154 | 0.62842204 | NA         |                |
| NA        | ENSG00000248577 | 0          | NA          | NA         | NA         | NA         |                |
| NA        | ENSG00000248578 | 0.173124   | -0.01911262 | 0.38486262 | 0.84537521 | NA         | NPM1P21        |
| NA        | ENSG00000248583 | 13.4668491 | 0.43056827  | 0.654419   | 0.04421853 | 0.13540604 |                |
| NA        | ENSG00000248585 | 0          | NA          | NA         | NA         | NA         |                |
| NA        | ENSG00000248586 | 0          | NA          | NA         | NA         | NA         |                |
| NA        | ENSG00000248587 | 0.14931947 | -0.01844332 | 0.38480212 | 0.84537521 | NA         | GDNF-AS1       |
| NA        | ENSG00000248588 | 0          | NA          | NA         | NA         | NA         |                |
| NA        | ENSG00000248590 | 0          | NA          | NA         | NA         | NA         | GLDCP1         |
| NA        | ENSG00000248591 | 0          | NA          | NA         | NA         | NA         |                |
| 100526772 | ENSG00000248592 | 154.269828 | 0.09530824  | 0.18603254 | 0.55972046 | 0.76413192 | STIMATE-MUSTN1 |
| 171220    | ENSG00000248593 | 30.3674669 | -0.17611013 | 0.34508391 | 0.3614919  | 0.59131002 | DSTNP2         |
| NA        | ENSG00000248596 | 4.2155139  | -0.06807207 | 0.37542969 | 0.53931969 | 0.74850934 |                |
| NA        | ENSG00000248597 | 0          | NA          | NA         | NA         | NA         |                |
| 441374    | ENSG00000248599 | 0.51894312 | -0.03057635 | 0.38600037 | 0.50874356 | NA         |                |
| NA        | ENSG00000248600 | 0          | NA          | NA         | NA         | NA         |                |
| NA        | ENSG00000248601 | 0          | NA          | NA         | NA         | NA         |                |
| NA        | ENSG00000248605 | 0          | NA          | NA         | NA         | NA         |                |
| NA        | ENSG00000248607 | 0          | NA          | NA         | NA         | NA         |                |
| NA        | ENSG00000248608 | 0          | NA          | NA         | NA         | NA         |                |
| NA        | ENSG00000248610 | 0.173733   | 0.01914545  | 0.38484597 | 0.78225479 | NA         | HSPA8P4        |
| NA        | ENSG00000248611 | 0          | NA          | NA         | NA         | NA         |                |
| NA        | ENSG00000248613 | 0          | NA          | NA         | NA         | NA         |                |
| NA        | ENSG00000248616 | 0.14931947 | -0.01844332 | 0.38480212 | 0.84537521 | NA         | ANKRD49P3      |

|           |                 |            |             |            |            |            |            |
|-----------|-----------------|------------|-------------|------------|------------|------------|------------|
| NA        | ENSG00000248618 | 0          | NA          | NA         | NA         | NA         | ENPP7P3    |
| NA        | ENSG00000248621 | 0          | NA          | NA         | NA         | NA         |            |
| NA        | ENSG00000248624 | 0          | NA          | NA         | NA         | NA         |            |
| NA        | ENSG00000248625 | 0          | NA          | NA         | NA         | NA         |            |
| NA        | ENSG00000248626 | 0.14931947 | -0.01844332 | 0.38480212 | 0.84537521 | NA         | GAPDHP40   |
| NA        | ENSG00000248627 | 0          | NA          | NA         | NA         | NA         |            |
| NA        | ENSG00000248629 | 0          | NA          | NA         | NA         | NA         |            |
| NA        | ENSG00000248633 | 0          | NA          | NA         | NA         | NA         | WRBP1      |
| NA        | ENSG00000248634 | 0          | NA          | NA         | NA         | NA         |            |
| NA        | ENSG00000248635 | 0          | NA          | NA         | NA         | NA         |            |
| NA        | ENSG00000248636 | 0.90008354 | 0.05176537  | 0.38895511 | 0.25020729 | NA         |            |
| NA        | ENSG00000248637 | 0          | NA          | NA         | NA         | NA         |            |
| NA        | ENSG00000248639 | 0          | NA          | NA         | NA         | NA         |            |
| NA        | ENSG00000248640 | 0          | NA          | NA         | NA         | NA         | HNRNPA1P56 |
| NA        | ENSG00000248641 | 1.22324644 | 0.0335042   | 0.38285929 | 0.5569705  | NA         | HMGA1P2    |
| NA        | ENSG00000248642 | 0          | NA          | NA         | NA         | NA         | OR10J2P    |
| 100526737 | ENSG00000248643 | 358.168452 | -0.05470295 | 0.13174463 | 0.65755043 | 0.83025448 | RBM14-RBM4 |
| NA        | ENSG00000248645 | 0          | NA          | NA         | NA         | NA         |            |
| NA        | ENSG00000248646 | 0          | NA          | NA         | NA         | NA         |            |
| NA        | ENSG00000248647 | 0          | NA          | NA         | NA         | NA         |            |
| NA        | ENSG00000248648 | 0          | NA          | NA         | NA         | NA         |            |
| NA        | ENSG00000248651 | 0          | NA          | NA         | NA         | NA         | GCSHP1     |
| NA        | ENSG00000248652 | 0          | NA          | NA         | NA         | NA         |            |
| NA        | ENSG00000248654 | 0          | NA          | NA         | NA         | NA         | MTCO3P44   |
| NA        | ENSG00000248656 | 0          | NA          | NA         | NA         | NA         |            |
| NA        | ENSG00000248659 | 0          | NA          | NA         | NA         | NA         |            |
| NA        | ENSG00000248660 | 0          | NA          | NA         | NA         | NA         | SRIP1      |
| NA        | ENSG00000248663 | 0          | NA          | NA         | NA         | NA         | LINC00992  |
| NA        | ENSG00000248664 | 1.78557264 | 0.00113519  | 0.37435429 | 0.99075009 | NA         |            |
| NA        | ENSG00000248667 | 0          | NA          | NA         | NA         | NA         |            |
| 100874002 | ENSG00000248668 | 43.9834648 | -0.22411827 | 0.30475195 | 0.2783643  | 0.50275355 | OXCT1-AS1  |
| NA        | ENSG00000248669 | 0          | NA          | NA         | NA         | NA         |            |
| 285407    | ENSG00000248671 | 54.9492586 | 0.49945185  | 0.31887704 | 0.03288071 | 0.10786266 |            |
| 100526664 | ENSG00000248672 | 0          | NA          | NA         | NA         | NA         | LY75-CD302 |
| 104310351 | ENSG00000248673 | 0          | NA          | NA         | NA         | NA         | LINC01331  |
| NA        | ENSG00000248674 | 0          | NA          | NA         | NA         | NA         | RBBP4P6    |
| NA        | ENSG00000248676 | 0          | NA          | NA         | NA         | NA         |            |
| 100505625 | ENSG00000248677 | 3.05724009 | -0.0072467  | 0.37596449 | 0.89572535 | 0.95469109 | LINC02102  |

|           |                 |            |             |            |            |            |              |
|-----------|-----------------|------------|-------------|------------|------------|------------|--------------|
| NA        | ENSG00000248682 | 0          | NA          | NA         | NA         | NA         | ARHGAP22-IT1 |
| NA        | ENSG00000248684 | 0          | NA          | NA         | NA         | NA         | BIN2P2       |
| NA        | ENSG00000248685 | 0.173124   | -0.01911262 | 0.38486262 | 0.84537521 | NA         | LINC02484    |
| NA        | ENSG00000248687 | 0          | NA          | NA         | NA         | NA         |              |
| NA        | ENSG00000248690 | 0          | NA          | NA         | NA         | NA         | HAS2-AS1     |
| NA        | ENSG00000248692 | 0          | NA          | NA         | NA         | NA         | ADGRL3-AS1   |
| NA        | ENSG00000248693 | 0          | NA          | NA         | NA         | NA         | LINC02100    |
| NA        | ENSG00000248694 | 0          | NA          | NA         | NA         | NA         |              |
| NA        | ENSG00000248696 | 0          | NA          | NA         | NA         | NA         |              |
| NA        | ENSG00000248697 | 0.15069912 | -0.01848503 | 0.38480575 | 0.84537521 | NA         | TOX4P1       |
| 152742    | ENSG00000248698 | 0.45209736 | -0.02505403 | 0.38558831 | 0.57865948 | NA         | LINC01085    |
| NA        | ENSG00000248699 | 0          | NA          | NA         | NA         | NA         |              |
| NA        | ENSG00000248701 | 0          | NA          | NA         | NA         | NA         |              |
| NA        | ENSG00000248702 | 0          | NA          | NA         | NA         | NA         |              |
| 107161159 | ENSG00000248703 | 0          | NA          | NA         | NA         | NA         | LINC02415    |
| NA        | ENSG00000248704 | 0          | NA          | NA         | NA         | NA         | MTND4P2      |
| NA        | ENSG00000248705 | 0          | NA          | NA         | NA         | NA         |              |
| NA        | ENSG00000248708 | 0          | NA          | NA         | NA         | NA         | LINC02144    |
| NA        | ENSG00000248709 | 0          | NA          | NA         | NA         | NA         |              |
| NA        | ENSG00000248710 | 3.58517262 | 0.03445342  | 0.37598848 | 0.70373726 | 0.85757322 |              |
| NA        | ENSG00000248711 | 0          | NA          | NA         | NA         | NA         | THUMPD3P1    |
| 283152    | ENSG00000248712 | 3.27532407 | 0.1286892   | 0.40247851 | 0.19592548 | 0.39958487 | CCDC153      |
| 285556    | ENSG00000248713 | 0          | NA          | NA         | NA         | NA         | C4orf54      |
| NA        | ENSG00000248714 | 12.0824352 | 2.26987159  | 0.78775538 | 0.00016201 | 0.00117565 |              |
| NA        | ENSG00000248715 | 0          | NA          | NA         | NA         | NA         |              |
| NA        | ENSG00000248716 | 0          | NA          | NA         | NA         | NA         |              |
| NA        | ENSG00000248717 | 0          | NA          | NA         | NA         | NA         | LINC02222    |
| NA        | ENSG00000248719 | 21.2549906 | 1.69248149  | 0.61221067 | 0.00031942 | 0.00216588 |              |
| NA        | ENSG00000248720 | 0          | NA          | NA         | NA         | NA         | RFPL4AP5     |
| NA        | ENSG00000248722 | 0          | NA          | NA         | NA         | NA         | AK3P4        |
| 348808    | ENSG00000248724 | 0.16735865 | 0.01897177  | 0.38482933 | 0.78225479 | NA         | NPHP3-AS1    |
| NA        | ENSG00000248725 | 0          | NA          | NA         | NA         | NA         |              |
| 102467147 | ENSG00000248727 | 157.772632 | -0.55870761 | 0.21118433 | 0.00236996 | 0.01238998 | LINC01948    |
| NA        | ENSG00000248729 | 0.18922458 | 0.01954053  | 0.38488496 | 0.78225479 | NA         | MTCO1P30     |
| 100852408 | ENSG00000248730 | 0          | NA          | NA         | NA         | NA         | EGFLAM-AS4   |
| NA        | ENSG00000248733 | 0          | NA          | NA         | NA         | NA         |              |
| NA        | ENSG00000248734 | 2.56724871 | 0.00068413  | 0.37322375 | 0.99574693 | 0.99852582 |              |
| NA        | ENSG00000248735 | 0.84010937 | 0.01874551  | 0.38137987 | 0.73985823 | NA         | R3HDM2P1     |

|           |                 |            |             |            |            |            |           |
|-----------|-----------------|------------|-------------|------------|------------|------------|-----------|
| NA        | ENSG00000248736 | 0.15069912 | -0.01848503 | 0.38480575 | 0.84537521 | NA         |           |
| 101929237 | ENSG00000248738 | 0.70683294 | 0.0359026   | 0.38639988 | 0.50393839 | NA         |           |
| NA        | ENSG00000248739 | 0          | NA          | NA         | NA         | NA         |           |
| NA        | ENSG00000248740 | 0          | NA          | NA         | NA         | NA         | LINC02428 |
| NA        | ENSG00000248744 | 0          | NA          | NA         | NA         | NA         |           |
| NA        | ENSG00000248745 | 0          | NA          | NA         | NA         | NA         | NMNAT1P4  |
| 89        | ENSG00000248746 | 1.73470525 | 0.03016427  | 0.37822577 | 0.70098404 | NA         | ACTN3     |
| NA        | ENSG00000248747 | 0          | NA          | NA         | NA         | NA         |           |
| NA        | ENSG00000248748 | 0          | NA          | NA         | NA         | NA         | MTND5P9   |
| NA        | ENSG00000248749 | 0          | NA          | NA         | NA         | NA         |           |
| NA        | ENSG00000248750 | 0          | NA          | NA         | NA         | NA         |           |
| NA        | ENSG00000248751 | 8.56557883 | 0.16234641  | 0.38794339 | 0.3047277  | 0.53198909 |           |
| NA        | ENSG00000248752 | 0.89301899 | 0.06433558  | 0.39119747 | 0.20339845 | NA         |           |
| NA        | ENSG00000248753 | 0          | NA          | NA         | NA         | NA         |           |
| NA        | ENSG00000248755 | 0          | NA          | NA         | NA         | NA         |           |
| 102467212 | ENSG00000248757 | 0          | NA          | NA         | NA         | NA         | LINC02115 |
| NA        | ENSG00000248758 | 0          | NA          | NA         | NA         | NA         |           |
| NA        | ENSG00000248761 | 0          | NA          | NA         | NA         | NA         |           |
| NA        | ENSG00000248762 | 0          | NA          | NA         | NA         | NA         |           |
| NA        | ENSG00000248763 | 0          | NA          | NA         | NA         | NA         |           |
| NA        | ENSG00000248764 | 0          | NA          | NA         | NA         | NA         |           |
| NA        | ENSG00000248765 | 0          | NA          | NA         | NA         | NA         | MTCYBP37  |
| NA        | ENSG00000248766 | 0          | NA          | NA         | NA         | NA         |           |
| 116033993 | ENSG00000248767 | 0          | NA          | NA         | NA         | NA         | FOXL3     |
| NA        | ENSG00000248769 | 1.46471823 | -0.0236638  | 0.38072951 | 0.70666385 | NA         |           |
| NA        | ENSG00000248770 | 0          | NA          | NA         | NA         | NA         |           |
| 100505989 | ENSG00000248771 | 0          | NA          | NA         | NA         | NA         | SMIM31    |
| NA        | ENSG00000248772 | 0          | NA          | NA         | NA         | NA         |           |
| NA        | ENSG00000248773 | 0          | NA          | NA         | NA         | NA         |           |
| NA        | ENSG00000248774 | 0.93567972 | -0.01407949 | 0.38225024 | 0.7724176  | NA         |           |
| NA        | ENSG00000248775 | 0          | NA          | NA         | NA         | NA         |           |
| NA        | ENSG00000248777 | 0          | NA          | NA         | NA         | NA         |           |
| NA        | ENSG00000248778 | 0.173124   | -0.01911262 | 0.38486262 | 0.84537521 | NA         |           |
| NA        | ENSG00000248779 | 0          | NA          | NA         | NA         | NA         |           |
| NA        | ENSG00000248780 | 1.5370993  | 0.07516568  | 0.3894593  | 0.29117702 | NA         | ARL4AP2   |
| NA        | ENSG00000248781 | 0          | NA          | NA         | NA         | NA         | PSMC1P4   |
| NA        | ENSG00000248783 | 3.85261436 | 0.00625939  | 0.36655504 | 0.9573928  | 0.98264776 |           |
| NA        | ENSG00000248785 | 0.15069912 | -0.01848503 | 0.38480575 | 0.84537521 | NA         | HIGD1AP14 |

|           |    |                 |            |             |            |            |            |              |
|-----------|----|-----------------|------------|-------------|------------|------------|------------|--------------|
|           | NA | ENSG00000248787 | 0.36238946 | 0.00092298  | 0.38336451 | 0.96708633 | NA         |              |
| 105378960 | NA | ENSG00000248789 | 0.18922458 | 0.01954053  | 0.38488496 | 0.78225479 | NA         | LINC02118    |
|           | NA | ENSG00000248790 | 0          | NA          | NA         | NA         | NA         |              |
|           | NA | ENSG00000248791 | 4.32110298 | -0.12897618 | 0.39324543 | 0.2913955  | 0.51742125 |              |
|           | NA | ENSG00000248792 | 0          | NA          | NA         | NA         | NA         | LINC00266-2P |
|           | NA | ENSG00000248794 | 1.92336437 | -0.00195534 | 0.3759991  | 0.97918359 | NA         |              |
|           | NA | ENSG00000248795 | 0          | NA          | NA         | NA         | NA         |              |
|           | NA | ENSG00000248796 | 0          | NA          | NA         | NA         | NA         | MED15P8      |
|           | NA | ENSG00000248799 | 0          | NA          | NA         | NA         | NA         |              |
|           | NA | ENSG00000248801 | 0          | NA          | NA         | NA         | NA         | C8orf34-AS1  |
|           | NA | ENSG00000248802 | 0          | NA          | NA         | NA         | NA         |              |
|           | NA | ENSG00000248803 | 0          | NA          | NA         | NA         | NA         |              |
|           | NA | ENSG00000248807 | 0          | NA          | NA         | NA         | NA         | KRTAP9-12P   |
| 100505545 | NA | ENSG00000248809 | 0          | NA          | NA         | NA         | NA         | LINC01095    |
| 100507639 | NA | ENSG00000248810 | 0          | NA          | NA         | NA         | NA         | LINC02432    |
|           | NA | ENSG00000248813 | 0          | NA          | NA         | NA         | NA         |              |
|           | NA | ENSG00000248816 | 0          | NA          | NA         | NA         | NA         |              |
|           | NA | ENSG00000248817 | 0          | NA          | NA         | NA         | NA         | PMPCAP1      |
|           | NA | ENSG00000248820 | 0          | NA          | NA         | NA         | NA         | DYNLL1P6     |
|           | NA | ENSG00000248821 | 0          | NA          | NA         | NA         | NA         |              |
|           | NA | ENSG00000248822 | 0          | NA          | NA         | NA         | NA         | APOBEC3AP1   |
|           | NA | ENSG00000248824 | 0          | NA          | NA         | NA         | NA         |              |
|           | NA | ENSG00000248826 | 0          | NA          | NA         | NA         | NA         | PCBP2P3      |
|           | NA | ENSG00000248827 | 0.46900914 | -0.00697274 | 0.38321924 | 0.87215679 | NA         |              |
|           | NA | ENSG00000248830 | 2.06719697 | 0.06685459  | 0.38361564 | 0.43220277 | NA         | ZNF807P      |
|           | NA | ENSG00000248831 | 0          | NA          | NA         | NA         | NA         |              |
|           | NA | ENSG00000248834 | 0          | NA          | NA         | NA         | NA         | MARK2P5      |
|           | NA | ENSG00000248837 | 0.91076083 | -0.06445893 | 0.39115812 | 0.21666812 | NA         |              |
|           | NA | ENSG00000248838 | 0          | NA          | NA         | NA         | NA         | PGAM1P13     |
|           | NA | ENSG00000248839 | 0          | NA          | NA         | NA         | NA         |              |
|           | NA | ENSG00000248840 | 1.50849692 | 0.04936896  | 0.38220772 | 0.50820655 | NA         |              |
|           | NA | ENSG00000248842 | 0          | NA          | NA         | NA         | NA         |              |
|           | NA | ENSG00000248843 | 0.34746601 | 0.02370763  | 0.3853651  | 0.61987128 | NA         |              |
| 101928443 | NA | ENSG00000248844 | 0          | NA          | NA         | NA         | NA         | LINC02753    |
|           | NA | ENSG00000248846 | 0          | NA          | NA         | NA         | NA         | LINC02065    |
|           | NA | ENSG00000248847 | 0          | NA          | NA         | NA         | NA         |              |
| 10895     | NA | ENSG00000248848 | 0          | NA          | NA         | NA         | NA         | PPBPP2       |
|           | NA | ENSG00000248850 | 0.33471731 | 0.02354391  | 0.38534154 | 0.62842204 | NA         |              |

|           |                 |            |             |            |            |            |                 |
|-----------|-----------------|------------|-------------|------------|------------|------------|-----------------|
| NA        | ENSG00000248851 | 0          | NA          | NA         | NA         | NA         |                 |
| NA        | ENSG00000248853 | 0.29863895 | -0.02292439 | 0.3852726  | 0.68753245 | NA         |                 |
| NA        | ENSG00000248854 | 0          | NA          | NA         | NA         | NA         | HNRNPH1P3       |
| 441369    | ENSG00000248858 | 11.7413369 | 0.06918776  | 0.34077367 | 0.68140672 | 0.84429601 |                 |
| 102577424 | ENSG00000248859 | 0          | NA          | NA         | NA         | NA         | LINC01574       |
| NA        | ENSG00000248863 | 1.34558798 | -0.01960949 | 0.37868597 | 0.78372612 | NA         |                 |
| NA        | ENSG00000248866 | 39.794508  | 0.17100764  | 0.28163206 | 0.39533261 | 0.62492223 | USP46-DT        |
| NA        | ENSG00000248867 | 0          | NA          | NA         | NA         | NA         |                 |
| 105377441 | ENSG00000248869 | 0          | NA          | NA         | NA         | NA         | LINC02511       |
| NA        | ENSG00000248870 | 0.15069912 | -0.01848503 | 0.38480575 | 0.84537521 | NA         |                 |
| 407977    | ENSG00000248871 | 15.171083  | 0.17049792  | 0.4040293  | 0.24052479 | 0.45858273 | TNFSF12-TNFSF13 |
| 100506122 | ENSG00000248872 | 0          | NA          | NA         | NA         | NA         | LINC02431       |
| NA        | ENSG00000248873 | 0.44938071 | -0.02728241 | 0.38571165 | 0.56220732 | NA         | SERBP1P6        |
| 439936    | ENSG00000248874 | 0          | NA          | NA         | NA         | NA         | C5orf17         |
| NA        | ENSG00000248876 | 0          | NA          | NA         | NA         | NA         |                 |
| NA        | ENSG00000248877 | 0          | NA          | NA         | NA         | NA         | PGBD4P4         |
| NA        | ENSG00000248878 | 0          | NA          | NA         | NA         | NA         |                 |
| NA        | ENSG00000248880 | 0          | NA          | NA         | NA         | NA         | ICE2P1          |
| NA        | ENSG00000248881 | 0          | NA          | NA         | NA         | NA         |                 |
| NA        | ENSG00000248883 | 0          | NA          | NA         | NA         | NA         | B4GALNT2P1      |
| NA        | ENSG00000248884 | 0          | NA          | NA         | NA         | NA         |                 |
| NA        | ENSG00000248885 | 0          | NA          | NA         | NA         | NA         | SEPTIN7P10      |
| NA        | ENSG00000248886 | 0          | NA          | NA         | NA         | NA         | UGT2A3P7        |
| 646576    | ENSG00000248890 | 0.83612448 | 0.02948033  | 0.38441029 | 0.50960419 | NA         | HHIP-AS1        |
| NA        | ENSG00000248891 | 0          | NA          | NA         | NA         | NA         |                 |
| 100124412 | ENSG00000248893 | 0          | NA          | NA         | NA         | NA         | FAM138E         |
| NA        | ENSG00000248895 | 0          | NA          | NA         | NA         | NA         |                 |
| 102723313 | ENSG00000248896 | 7.26841703 | -0.00099124 | 0.35357869 | 0.99234524 | 0.99756121 |                 |
| NA        | ENSG00000248898 | 1.67228381 | 0.02976462  | 0.37992018 | 0.67496975 | NA         |                 |
| 105379098 | ENSG00000248901 | 0          | NA          | NA         | NA         | NA         | LINC01846       |
| NA        | ENSG00000248903 | 0          | NA          | NA         | NA         | NA         |                 |
| 342184    | ENSG00000248905 | 191.092981 | -0.3692063  | 0.25942896 | 0.06931765 | 0.19008462 | FMN1            |
| NA        | ENSG00000248907 | 0          | NA          | NA         | NA         | NA         | MTND2P33        |
| 340107    | ENSG00000248908 | 0          | NA          | NA         | NA         | NA         | LINC02239       |
| NA        | ENSG00000248909 | 0.76421431 | -0.02902927 | 0.38363156 | 0.56424374 | NA         | HMGB1P21        |
| NA        | ENSG00000248911 | 0          | NA          | NA         | NA         | NA         |                 |
| NA        | ENSG00000248912 | 0          | NA          | NA         | NA         | NA         |                 |
| NA        | ENSG00000248913 | 0          | NA          | NA         | NA         | NA         | PHBP14          |

|           |                 |            |             |            |            |            |              |
|-----------|-----------------|------------|-------------|------------|------------|------------|--------------|
| NA        | ENSG00000248915 | 0          | NA          | NA         | NA         | NA         | ACTR6P1      |
| NA        | ENSG00000248916 | 0          | NA          | NA         | NA         | NA         | NUP210P3     |
| NA        | ENSG00000248918 | 2.83675409 | -0.11058348 | 0.39341614 | 0.27728635 | 0.50167437 |              |
| 100526740 | ENSG00000248919 | 190.979986 | -0.24018116 | 0.18963168 | 0.14560388 | 0.32613386 | ATP5MF-PTCD1 |
| 100287404 | ENSG00000248920 | 0          | NA          | NA         | NA         | NA         | USP17L19     |
| NA        | ENSG00000248921 | 0          | NA          | NA         | NA         | NA         |              |
| NA        | ENSG00000248923 | 2.00426366 | -0.01535706 | 0.37409206 | 0.86279158 | NA         | MTND5P11     |
| NA        | ENSG00000248924 | 0          | NA          | NA         | NA         | NA         |              |
| NA        | ENSG00000248925 | 2.25321111 | -0.00200588 | 0.37467864 | 0.97974329 | NA         |              |
| NA        | ENSG00000248926 | 0.3256545  | 0.00214007  | 0.38337717 | 0.95982218 | NA         |              |
| NA        | ENSG00000248927 | 3.76674613 | 0.02872806  | 0.36960124 | 0.79127628 | 0.90493295 |              |
| NA        | ENSG00000248928 | 0          | NA          | NA         | NA         | NA         |              |
| NA        | ENSG00000248929 | 0          | NA          | NA         | NA         | NA         | HIGD1AP3     |
| NA        | ENSG00000248930 | 0          | NA          | NA         | NA         | NA         | CHP1P1       |
| NA        | ENSG00000248931 | 0          | NA          | NA         | NA         | NA         | MTCYBP40     |
| 100507291 | ENSG00000248932 | 184.81723  | 0.03549047  | 0.19692733 | 0.83514374 | 0.92475394 |              |
| 100287513 | ENSG00000248933 | 0          | NA          | NA         | NA         | NA         | USP17L22     |
| NA        | ENSG00000248935 | 0          | NA          | NA         | NA         | NA         |              |
| NA        | ENSG00000248936 | 2.10104606 | 0.12457911  | 0.40536615 | 0.14914491 | NA         |              |
| NA        | ENSG00000248939 | 0          | NA          | NA         | NA         | NA         |              |
| NA        | ENSG00000248942 | 0          | NA          | NA         | NA         | NA         | LINC01335    |
| NA        | ENSG00000248943 | 0          | NA          | NA         | NA         | NA         |              |
| NA        | ENSG00000248944 | 0          | NA          | NA         | NA         | NA         | FAM90A6P     |
| NA        | ENSG00000248946 | 0          | NA          | NA         | NA         | NA         | MTND3P22     |
| NA        | ENSG00000248949 | 0.47326976 | -0.00742667 | 0.38322908 | 0.86449    | NA         |              |
| NA        | ENSG00000248950 | 0          | NA          | NA         | NA         | NA         | LDHBP3       |
| NA        | ENSG00000248951 | 0          | NA          | NA         | NA         | NA         | MTCO2P32     |
| NA        | ENSG00000248954 | 0          | NA          | NA         | NA         | NA         |              |
| NA        | ENSG00000248955 | 0          | NA          | NA         | NA         | NA         |              |
| NA        | ENSG00000248956 | 0.18922458 | 0.01954053  | 0.38488496 | 0.78225479 | NA         | HMGB1P44     |
| NA        | ENSG00000248958 | 0          | NA          | NA         | NA         | NA         | ZSWIM5P3     |
| NA        | ENSG00000248962 | 0          | NA          | NA         | NA         | NA         |              |
| 101929470 | ENSG00000248964 | 0.15069912 | -0.01848503 | 0.38480575 | 0.84537521 | NA         |              |
| NA        | ENSG00000248965 | 0          | NA          | NA         | NA         | NA         |              |
| NA        | ENSG00000248966 | 0.18922458 | 0.01954053  | 0.38488496 | 0.78225479 | NA         | BCLAF1P1     |
| NA        | ENSG00000248967 | 0          | NA          | NA         | NA         | NA         |              |
| NA        | ENSG00000248968 | 0.74981427 | -0.04344279 | 0.38756701 | 0.34464352 | NA         |              |
| NA        | ENSG00000248969 | 0          | NA          | NA         | NA         | NA         |              |



|           |                 |            |             |            |            |            |           |
|-----------|-----------------|------------|-------------|------------|------------|------------|-----------|
| NA        | ENSG00000248971 | 11.1787781 | -0.04396279 | 0.34221066 | 0.78214973 | 0.90073431 | KRT8P46   |
| NA        | ENSG00000248973 | 0.15069912 | -0.01848503 | 0.38480575 | 0.84537521 | NA         |           |
| NA        | ENSG00000248975 | 0.35670009 | 0.0238172   | 0.38538108 | 0.61400743 | NA         |           |
| NA        | ENSG00000248977 | 0          | NA          | NA         | NA         | NA         |           |
| NA        | ENSG00000248978 | 0          | NA          | NA         | NA         | NA         |           |
| NA        | ENSG00000248979 | 0          | NA          | NA         | NA         | NA         | LAMTOR3P2 |
| NA        | ENSG00000248980 | 0          | NA          | NA         | NA         | NA         | SPCS3-AS1 |
| NA        | ENSG00000248984 | 0          | NA          | NA         | NA         | NA         |           |
| NA        | ENSG00000248987 | 0          | NA          | NA         | NA         | NA         | PRDX4P1   |
| NA        | ENSG00000248988 | 0.47407388 | -0.0284743  | 0.38581144 | 0.5423502  | NA         | PSME2P3   |
| NA        | ENSG00000248990 | 0          | NA          | NA         | NA         | NA         | LINC02758 |
| NA        | ENSG00000248991 | 0          | NA          | NA         | NA         | NA         |           |
| NA        | ENSG00000248993 | 0.173124   | -0.01911262 | 0.38486262 | 0.84537521 | NA         |           |
| 105374618 | ENSG00000248994 | 0          | NA          | NA         | NA         | NA         |           |
| 109729131 | ENSG00000248995 | 0          | NA          | NA         | NA         | NA         | LINC02231 |
| NA        | ENSG00000248996 | 0          | NA          | NA         | NA         | NA         |           |
| NA        | ENSG00000248998 | 0          | NA          | NA         | NA         | NA         | EFL1P2    |
| NA        | ENSG00000249000 | 0          | NA          | NA         | NA         | NA         |           |
| NA        | ENSG00000249001 | 0          | NA          | NA         | NA         | NA         |           |
| NA        | ENSG00000249002 | 0.18922458 | 0.01954053  | 0.38488496 | 0.78225479 | NA         |           |
| NA        | ENSG00000249003 | 0          | NA          | NA         | NA         | NA         | CLUHP4    |
| NA        | ENSG00000249004 | 0.33471731 | 0.02354391  | 0.38534154 | 0.62842204 | NA         | PRMT5P1   |
| NA        | ENSG00000249005 | 0          | NA          | NA         | NA         | NA         | FAM90A4P  |
| NA        | ENSG00000249006 | 0.15069912 | -0.01848503 | 0.38480575 | 0.84537521 | NA         |           |
| NA        | ENSG00000249007 | 0          | NA          | NA         | NA         | NA         |           |
| NA        | ENSG00000249008 | 0          | NA          | NA         | NA         | NA         |           |
| NA        | ENSG00000249012 | 0          | NA          | NA         | NA         | NA         |           |
| NA        | ENSG00000249013 | 0          | NA          | NA         | NA         | NA         | FTH1P21   |
| NA        | ENSG00000249014 | 0.36324351 | 0.00164598  | 0.38337046 | 0.96027808 | NA         | HMG2P4    |
| NA        | ENSG00000249016 | 0          | NA          | NA         | NA         | NA         |           |
| NA        | ENSG00000249017 | 0          | NA          | NA         | NA         | NA         |           |
| NA        | ENSG00000249018 | 0          | NA          | NA         | NA         | NA         | GAPDHP56  |
| NA        | ENSG00000249019 | 0          | NA          | NA         | NA         | NA         |           |
| NA        | ENSG00000249020 | 0          | NA          | NA         | NA         | NA         | SNORA58   |
| NA        | ENSG00000249021 | 0          | NA          | NA         | NA         | NA         |           |
| NA        | ENSG00000249022 | 0.30139824 | -0.02296476 | 0.38527817 | 0.68536535 | NA         |           |
| NA        | ENSG00000249023 | 0          | NA          | NA         | NA         | NA         |           |
| NA        | ENSG00000249025 | 0          | NA          | NA         | NA         | NA         | ZNF519P4  |

|           |    |                 |            |             |            |            |            |             |
|-----------|----|-----------------|------------|-------------|------------|------------|------------|-------------|
|           | NA | ENSG00000249026 | 0.173733   | 0.01914545  | 0.38484597 | 0.78225479 | NA         | CTNNA1P1    |
|           | NA | ENSG00000249028 | 0          | NA          | NA         | NA         | NA         |             |
|           | NA | ENSG00000249031 | 0          | NA          | NA         | NA         | NA         | SUMO2P6     |
| 101927096 |    | ENSG00000249035 | 0.48942322 | -0.00559511 | 0.38311451 | 0.88937625 | NA         | CLMAT3      |
|           | NA | ENSG00000249036 | 0          | NA          | NA         | NA         | NA         |             |
|           | NA | ENSG00000249038 | 0          | NA          | NA         | NA         | NA         | AARS1P1     |
|           | NA | ENSG00000249041 | 0          | NA          | NA         | NA         | NA         |             |
|           | NA | ENSG00000249042 | 163.170432 | 0.29146463  | 0.18122872 | 0.0688298  | 0.18913894 |             |
|           | NA | ENSG00000249045 | 0          | NA          | NA         | NA         | NA         | MTND3P24    |
|           | NA | ENSG00000249047 | 0          | NA          | NA         | NA         | NA         | COX6B1P5    |
|           | NA | ENSG00000249048 | 0          | NA          | NA         | NA         | NA         | TRAV31      |
|           | NA | ENSG00000249049 | 0          | NA          | NA         | NA         | NA         |             |
|           | NA | ENSG00000249050 | 0.15069912 | -0.01848503 | 0.38480575 | 0.84537521 | NA         |             |
|           | NA | ENSG00000249051 | 0          | NA          | NA         | NA         | NA         |             |
|           | NA | ENSG00000249052 | 0          | NA          | NA         | NA         | NA         |             |
|           | NA | ENSG00000249053 | 0.34624801 | -0.02356563 | 0.38536324 | 0.65270996 | NA         |             |
| 677784    |    | ENSG00000249054 | 0          | NA          | NA         | NA         | NA         | FAM138D     |
|           | NA | ENSG00000249055 | 0.29863895 | -0.02292439 | 0.3852726  | 0.68753245 | NA         | TBCAP3      |
|           | NA | ENSG00000249056 | 0          | NA          | NA         | NA         | NA         |             |
|           | NA | ENSG00000249057 | 0          | NA          | NA         | NA         | NA         | MAST4-IT1   |
|           | NA | ENSG00000249061 | 0          | NA          | NA         | NA         | NA         |             |
|           | NA | ENSG00000249064 | 0          | NA          | NA         | NA         | NA         | KRT18P25    |
|           | NA | ENSG00000249065 | 0          | NA          | NA         | NA         | NA         | PCNAP1      |
|           | NA | ENSG00000249066 | 0          | NA          | NA         | NA         | NA         | LINC02496   |
|           | NA | ENSG00000249068 | 0          | NA          | NA         | NA         | NA         |             |
|           | NA | ENSG00000249069 | 0.31681308 | 0.00121345  | 0.38336728 | 0.96622676 | NA         | LINC01033   |
|           | NA | ENSG00000249071 | 0          | NA          | NA         | NA         | NA         | EGFLAM-AS3  |
|           | NA | ENSG00000249072 | 0          | NA          | NA         | NA         | NA         |             |
| 105664404 |    | ENSG00000249073 | 1.43090226 | -0.0561726  | 0.38473649 | 0.4185575  | NA         | WSPAR       |
|           | NA | ENSG00000249074 | 0          | NA          | NA         | NA         | NA         | NDUFB2P1    |
|           | NA | ENSG00000249077 | 0          | NA          | NA         | NA         | NA         |             |
|           | NA | ENSG00000249079 | 0          | NA          | NA         | NA         | NA         |             |
|           | NA | ENSG00000249081 | 0          | NA          | NA         | NA         | NA         | OR5M14P     |
| 101927953 |    | ENSG00000249082 | 0          | NA          | NA         | NA         | NA         | C5orf66-AS1 |
|           | NA | ENSG00000249084 | 3.28752696 | 0.02634437  | 0.37077418 | 0.80055797 | 0.90868418 |             |
|           | NA | ENSG00000249085 | 1.71453585 | -0.04146158 | 0.38046063 | 0.5811695  | NA         |             |
|           | NA | ENSG00000249086 | 0          | NA          | NA         | NA         | NA         |             |
|           | NA | ENSG00000249087 | 47.4794286 | 1.08766873  | 0.37138028 | 0.0003097  | 0.00210787 | ZNF436-AS1  |

|           |                 |            |             |            |            |            |             |
|-----------|-----------------|------------|-------------|------------|------------|------------|-------------|
| NA        | ENSG00000249089 | 0          | NA          | NA         | NA         | NA         | AIG1P1      |
| NA        | ENSG00000249091 | 0          | NA          | NA         | NA         | NA         |             |
| NA        | ENSG00000249092 | 0          | NA          | NA         | NA         | NA         | PPIAP77     |
| NA        | ENSG00000249094 | 0          | NA          | NA         | NA         | NA         |             |
| NA        | ENSG00000249096 | 3.27551903 | 0.07966879  | 0.38364654 | 0.40778096 | 0.63603571 | LINC02362   |
| NA        | ENSG00000249098 | 0.173124   | -0.01911262 | 0.38486262 | 0.84537521 | NA         |             |
| NA        | ENSG00000249099 | 0          | NA          | NA         | NA         | NA         |             |
| NA        | ENSG00000249100 | 0          | NA          | NA         | NA         | NA         |             |
| NA        | ENSG00000249101 | 0          | NA          | NA         | NA         | NA         |             |
| NA        | ENSG00000249102 | 0          | NA          | NA         | NA         | NA         |             |
| 100287327 | ENSG00000249104 | 0          | NA          | NA         | NA         | NA         | USP17L17    |
| NA        | ENSG00000249105 | 0          | NA          | NA         | NA         | NA         |             |
| 101928590 | ENSG00000249106 | 0          | NA          | NA         | NA         | NA         |             |
| NA        | ENSG00000249109 | 0          | NA          | NA         | NA         | NA         |             |
| NA        | ENSG00000249111 | 0          | NA          | NA         | NA         | NA         |             |
| NA        | ENSG00000249112 | 0.14931947 | -0.01844332 | 0.38480212 | 0.84537521 | NA         |             |
| NA        | ENSG00000249114 | 0          | NA          | NA         | NA         | NA         |             |
| 23354     | ENSG00000249115 | 597.038008 | 0.26577749  | 0.10446474 | 0.00802441 | 0.03460211 | HAUS5       |
| NA        | ENSG00000249116 | 0          | NA          | NA         | NA         | NA         | IRX4-AS1    |
| NA        | ENSG00000249119 | 0          | NA          | NA         | NA         | NA         | MTND6P4     |
| NA        | ENSG00000249122 | 6.3326703  | -0.01012767 | 0.35917916 | 0.93542631 | 0.97325384 |             |
| NA        | ENSG00000249125 | 0          | NA          | NA         | NA         | NA         |             |
| NA        | ENSG00000249127 | 0          | NA          | NA         | NA         | NA         | MTND3P3     |
| 102467225 | ENSG00000249128 | 0          | NA          | NA         | NA         | NA         | LINC02215   |
| NA        | ENSG00000249129 | 0.35669568 | 0.02381717  | 0.38538108 | 0.61400966 | NA         | SUDS3P1     |
| NA        | ENSG00000249131 | 2.35896606 | 0.01160899  | 0.37485997 | 0.894438   | NA         | PSD2-AS1    |
| NA        | ENSG00000249135 | 0          | NA          | NA         | NA         | NA         |             |
| 643036    | ENSG00000249138 | 0.16735865 | 0.01897177  | 0.38482933 | 0.78225479 | NA         |             |
| 100526773 | ENSG00000249139 | 0          | NA          | NA         | NA         | NA         | EPPIN-WFDC6 |
| NA        | ENSG00000249140 | 0.83387356 | 0.01594917  | 0.38189335 | 0.75789975 | NA         | PRDX2P3     |
| NA        | ENSG00000249141 | 1.70581107 | 0.09296418  | 0.39987022 | 0.06733456 | NA         |             |
| NA        | ENSG00000249142 | 0          | NA          | NA         | NA         | NA         |             |
| 105374374 | ENSG00000249145 | 0          | NA          | NA         | NA         | NA         | LINC02517   |
| NA        | ENSG00000249148 | 0          | NA          | NA         | NA         | NA         |             |
| NA        | ENSG00000249149 | 0          | NA          | NA         | NA         | NA         |             |
| NA        | ENSG00000249150 | 0          | NA          | NA         | NA         | NA         |             |
| NA        | ENSG00000249152 | 0          | NA          | NA         | NA         | NA         | LNCPRESS2   |
| NA        | ENSG00000249153 | 0          | NA          | NA         | NA         | NA         |             |

|           |                 |            |             |            |            |            |              |
|-----------|-----------------|------------|-------------|------------|------------|------------|--------------|
| NA        | ENSG00000249156 | 0          | NA          | NA         | NA         | NA         | TAF11L12     |
| NA        | ENSG00000249157 | 0          | NA          | NA         | NA         | NA         |              |
| 56138     | ENSG00000249158 | 137.535632 | 0.14553073  | 0.18595462 | 0.37188532 | 0.60097783 | PCDHA11      |
| NA        | ENSG00000249159 | 4.53672499 | -0.04039207 | 0.36896404 | 0.72035481 | 0.86653971 |              |
| 389273    | ENSG00000249160 | 0          | NA          | NA         | NA         | NA         | LINC02213    |
| NA        | ENSG00000249162 | 0          | NA          | NA         | NA         | NA         | ADAM20P3     |
| NA        | ENSG00000249163 | 0          | NA          | NA         | NA         | NA         |              |
| NA        | ENSG00000249166 | 0          | NA          | NA         | NA         | NA         |              |
| 105379132 | ENSG00000249167 | 17.4943123 | -0.0914329  | 0.3468018  | 0.58070459 | 0.77801412 | SEMA6A-AS2   |
| NA        | ENSG00000249169 | 0          | NA          | NA         | NA         | NA         |              |
| NA        | ENSG00000249170 | 0          | NA          | NA         | NA         | NA         |              |
| NA        | ENSG00000249171 | 0          | NA          | NA         | NA         | NA         |              |
| 100506229 | ENSG00000249173 | 0          | NA          | NA         | NA         | NA         | LINC01093    |
| NA        | ENSG00000249174 | 0          | NA          | NA         | NA         | NA         |              |
| NA        | ENSG00000249175 | 0          | NA          | NA         | NA         | NA         |              |
| NA        | ENSG00000249176 | 0          | NA          | NA         | NA         | NA         |              |
| NA        | ENSG00000249177 | 0          | NA          | NA         | NA         | NA         | MTND4P29     |
| NA        | ENSG00000249180 | 0          | NA          | NA         | NA         | NA         |              |
| NA        | ENSG00000249183 | 0          | NA          | NA         | NA         | NA         | SUMO2P4      |
| 105377488 | ENSG00000249184 | 0          | NA          | NA         | NA         | NA         |              |
| NA        | ENSG00000249186 | 0          | NA          | NA         | NA         | NA         |              |
| NA        | ENSG00000249188 | 0          | NA          | NA         | NA         | NA         | ENPP7P1      |
| NA        | ENSG00000249189 | 0          | NA          | NA         | NA         | NA         |              |
| NA        | ENSG00000249191 | 0          | NA          | NA         | NA         | NA         | UBE2V1P12    |
| NA        | ENSG00000249192 | 0          | NA          | NA         | NA         | NA         | MTND3P25     |
| NA        | ENSG00000249193 | 0          | NA          | NA         | NA         | NA         | HSPD1P5      |
| 283352    | ENSG00000249196 | 0          | NA          | NA         | NA         | NA         | TMEM132D-AS1 |
| NA        | ENSG00000249197 | 0          | NA          | NA         | NA         | NA         | OR10J9P      |
| NA        | ENSG00000249198 | 0          | NA          | NA         | NA         | NA         |              |
| NA        | ENSG00000249199 | 0.29863895 | -0.02292439 | 0.3852726  | 0.68753245 | NA         |              |
| NA        | ENSG00000249200 | 0          | NA          | NA         | NA         | NA         |              |
| 101928857 | ENSG00000249201 | 0          | NA          | NA         | NA         | NA         |              |
| NA        | ENSG00000249203 | 0          | NA          | NA         | NA         | NA         | LINC02224    |
| NA        | ENSG00000249206 | 0          | NA          | NA         | NA         | NA         | GCNT1P2      |
| NA        | ENSG00000249207 | 3.2259996  | 0.04037688  | 0.37010608 | 0.71678849 | 0.86371598 |              |
| NA        | ENSG00000249209 | 3.65267858 | 0.0444384   | 0.36867775 | 0.70309439 | 0.85721088 |              |
| NA        | ENSG00000249210 | 0          | NA          | NA         | NA         | NA         | GAPDHP38     |
| NA        | ENSG00000249212 | 2.01099787 | 0.05725962  | 0.38246955 | 0.47802542 | NA         | ATP1B1P1     |

|           |                 |            |             |            |            |            |             |
|-----------|-----------------|------------|-------------|------------|------------|------------|-------------|
| NA        | ENSG00000249213 | 0          | NA          | NA         | NA         | NA         |             |
| NA        | ENSG00000249215 | 0          | NA          | NA         | NA         | NA         | NCOA4P4     |
| NA        | ENSG00000249216 | 0.34038852 | 0.0029678   | 0.38339082 | 0.96011681 | NA         |             |
| NA        | ENSG00000249219 | 0          | NA          | NA         | NA         | NA         |             |
| 267020    | ENSG00000249222 | 0          | NA          | NA         | NA         | NA         | ATP5MGL     |
| NA        | ENSG00000249225 | 0          | NA          | NA         | NA         | NA         |             |
| NA        | ENSG00000249226 | 0          | NA          | NA         | NA         | NA         | SUCLG2P4    |
| NA        | ENSG00000249228 | 0          | NA          | NA         | NA         | NA         |             |
| NA        | ENSG00000249229 | 0          | NA          | NA         | NA         | NA         | NAMPTP2     |
| NA        | ENSG00000249230 | 16.8415499 | 8.12580985  | 2.69831136 | 6.23E-09   | 9.64E-08   | CDH12P2     |
| 643714    | ENSG00000249231 | 0          | NA          | NA         | NA         | NA         | CASC16      |
| NA        | ENSG00000249234 | 0          | NA          | NA         | NA         | NA         |             |
| NA        | ENSG00000249235 | 0          | NA          | NA         | NA         | NA         |             |
| NA        | ENSG00000249236 | 0          | NA          | NA         | NA         | NA         |             |
| NA        | ENSG00000249237 | 0.55354215 | 0.01210119  | 0.38327343 | 0.7469516  | NA         |             |
| NA        | ENSG00000249238 | 0          | NA          | NA         | NA         | NA         | BCL9P1      |
| NA        | ENSG00000249239 | 0          | NA          | NA         | NA         | NA         |             |
| NA        | ENSG00000249240 | 19.3677081 | 0.63875418  | 0.58625514 | 0.03105384 | 0.10304537 |             |
| 101060498 | ENSG00000249241 | 0          | NA          | NA         | NA         | NA         | LINC02265   |
| 441027    | ENSG00000249242 | 151.985656 | 0.68700272  | 0.24638157 | 0.0010807  | 0.00630808 | TMEM150C    |
| NA        | ENSG00000249244 | 7.3434136  | -0.08909301 | 0.36912562 | 0.51464335 | 0.72937777 |             |
| NA        | ENSG00000249245 | 0.18922458 | 0.01954053  | 0.38488496 | 0.78225479 | NA         | NCOA4P3     |
| NA        | ENSG00000249247 | 0          | NA          | NA         | NA         | NA         | MTCYBP17    |
| NA        | ENSG00000249249 | 13.5565767 | 0.10000435  | 0.36244077 | 0.51076049 | 0.72599857 |             |
| 101929095 | ENSG00000249252 | 0          | NA          | NA         | NA         | NA         | C1QTNF7-AS1 |
| NA        | ENSG00000249253 | 0          | NA          | NA         | NA         | NA         |             |
| NA        | ENSG00000249255 | 0          | NA          | NA         | NA         | NA         | PGAM1P9     |
| NA        | ENSG00000249256 | 0          | NA          | NA         | NA         | NA         | ATP5MGP3    |
| NA        | ENSG00000249257 | 0          | NA          | NA         | NA         | NA         |             |
| NA        | ENSG00000249258 | 5.23277739 | 0.0568544   | 0.36713797 | 0.65018688 | 0.82529572 |             |
| NA        | ENSG00000249259 | 0          | NA          | NA         | NA         | NA         |             |
| NA        | ENSG00000249261 | 0          | NA          | NA         | NA         | NA         |             |
| NA        | ENSG00000249262 | 0          | NA          | NA         | NA         | NA         |             |
| NA        | ENSG00000249263 | 0          | NA          | NA         | NA         | NA         | PARP4P3     |
| NA        | ENSG00000249264 | 2.67679609 | -0.04230314 | 0.37362704 | 0.6739719  | 0.84006388 | EEF1A1P9    |
| NA        | ENSG00000249266 | 0          | NA          | NA         | NA         | NA         | MTHFD2P6    |
| 400084    | ENSG00000249267 | 0          | NA          | NA         | NA         | NA         | LINC00939   |
| NA        | ENSG00000249269 | 0          | NA          | NA         | NA         | NA         |             |

|           |                 |            |             |            |            |            |              |
|-----------|-----------------|------------|-------------|------------|------------|------------|--------------|
| NA        | ENSG00000249270 | 0          | NA          | NA         | NA         | NA         | KATNBL1P4    |
| NA        | ENSG00000249271 | 0.14931947 | -0.01844332 | 0.38480212 | 0.84537521 | NA         | HNRNPA1P44   |
| NA        | ENSG00000249272 | 0          | NA          | NA         | NA         | NA         | UNC93B8      |
| NA        | ENSG00000249274 | 31.2669805 | 0.21680675  | 0.3227596  | 0.29577365 | 0.52251089 | PDLIM1P4     |
| NA        | ENSG00000249275 | 0          | NA          | NA         | NA         | NA         |              |
| NA        | ENSG00000249276 | 0          | NA          | NA         | NA         | NA         |              |
| NA        | ENSG00000249277 | 0          | NA          | NA         | NA         | NA         | SLIRPP2      |
| NA        | ENSG00000249278 | 0          | NA          | NA         | NA         | NA         |              |
| 105378992 | ENSG00000249279 | 0.173124   | -0.01911262 | 0.38486262 | 0.84537521 | NA         | LINC02057    |
| NA        | ENSG00000249282 | 0          | NA          | NA         | NA         | NA         |              |
| NA        | ENSG00000249283 | 0          | NA          | NA         | NA         | NA         | ACTR3BP4     |
| NA        | ENSG00000249284 | 0          | NA          | NA         | NA         | NA         |              |
| NA        | ENSG00000249285 | 0          | NA          | NA         | NA         | NA         |              |
| NA        | ENSG00000249286 | 4.1470703  | -0.059593   | 0.37440084 | 0.58136889 | 0.77855949 | AMD1P3       |
| NA        | ENSG00000249287 | 0          | NA          | NA         | NA         | NA         |              |
| NA        | ENSG00000249288 | 0          | NA          | NA         | NA         | NA         | SLC25A15P5   |
| NA        | ENSG00000249289 | 0          | NA          | NA         | NA         | NA         |              |
| NA        | ENSG00000249290 | 0          | NA          | NA         | NA         | NA         |              |
| NA        | ENSG00000249293 | 0.16735865 | 0.01897177  | 0.38482933 | 0.78225479 | NA         |              |
| 101928924 | ENSG00000249295 | 0          | NA          | NA         | NA         | NA         |              |
| 105377536 | ENSG00000249297 | 0          | NA          | NA         | NA         | NA         | LINC02174    |
| NA        | ENSG00000249301 | 0          | NA          | NA         | NA         | NA         |              |
| NA        | ENSG00000249302 | 0          | NA          | NA         | NA         | NA         | FTH1P24      |
| NA        | ENSG00000249304 | 0.36310146 | 0.0238958   | 0.38539257 | 0.60989388 | NA         |              |
| NA        | ENSG00000249305 | 0          | NA          | NA         | NA         | NA         |              |
| NA        | ENSG00000249306 | 0.61721451 | -0.01994286 | 0.38311603 | 0.68411121 | NA         | LINC01411    |
| NA        | ENSG00000249307 | 13.6227638 | 0.00313859  | 0.33605726 | 0.98699554 | 0.99565021 | LINC01088    |
| NA        | ENSG00000249309 | 0          | NA          | NA         | NA         | NA         |              |
| 100874530 | ENSG00000249310 | 0          | NA          | NA         | NA         | NA         | APOBEC3B-AS1 |
| NA        | ENSG00000249311 | 0.173124   | -0.01911262 | 0.38486262 | 0.84537521 | NA         | TERF1P3      |
| NA        | ENSG00000249312 | 0          | NA          | NA         | NA         | NA         | ARL2BPP4     |
| NA        | ENSG00000249316 | 0          | NA          | NA         | NA         | NA         |              |
| 105377480 | ENSG00000249317 | 0          | NA          | NA         | NA         | NA         |              |
| NA        | ENSG00000249318 | 0          | NA          | NA         | NA         | NA         |              |
| NA        | ENSG00000249319 | 12.1210058 | 0.25363323  | 0.42813239 | 0.17123495 | 0.36358107 |              |
| NA        | ENSG00000249320 | 0          | NA          | NA         | NA         | NA         |              |
| NA        | ENSG00000249321 | 0          | NA          | NA         | NA         | NA         | OR5H5P       |
| 101929081 | ENSG00000249326 | 0          | NA          | NA         | NA         | NA         |              |

|           |                 |            |             |            |            |            |            |
|-----------|-----------------|------------|-------------|------------|------------|------------|------------|
| 101927040 | ENSG00000249328 | 8.68909939 | -0.11056714 | 0.37829432 | 0.40898482 | 0.6370813  |            |
| NA        | ENSG00000249330 | 0          | NA          | NA         | NA         | NA         |            |
| NA        | ENSG00000249332 | 0          | NA          | NA         | NA         | NA         | LINC02149  |
| NA        | ENSG00000249333 | 0          | NA          | NA         | NA         | NA         |            |
| NA        | ENSG00000249334 | 0          | NA          | NA         | NA         | NA         |            |
| NA        | ENSG00000249335 | 2.6435221  | -0.16858476 | 0.437609   | 0.01302334 | 0.05150152 |            |
| NA        | ENSG00000249337 | 0          | NA          | NA         | NA         | NA         | SNX18P25   |
| NA        | ENSG00000249338 | 2.19619116 | 0.052563    | 0.38018324 | 0.53979801 | NA         | HMGB1P47   |
| 100506444 | ENSG00000249341 | 0          | NA          | NA         | NA         | NA         |            |
| NA        | ENSG00000249343 | 0          | NA          | NA         | NA         | NA         | LINC01333  |
| 101927592 | ENSG00000249345 | 0          | NA          | NA         | NA         | NA         | LINC02405  |
| 100507584 | ENSG00000249346 | 0          | NA          | NA         | NA         | NA         | LINC01016  |
| NA        | ENSG00000249347 | 0          | NA          | NA         | NA         | NA         |            |
| 100885776 | ENSG00000249348 | 56.4910198 | 0.02726573  | 0.24162163 | 0.88620404 | 0.95015905 | UGDH-AS1   |
| NA        | ENSG00000249349 | 0          | NA          | NA         | NA         | NA         |            |
| NA        | ENSG00000249351 | 0          | NA          | NA         | NA         | NA         |            |
| NA        | ENSG00000249352 | 0          | NA          | NA         | NA         | NA         | LINC02198  |
| NA        | ENSG00000249353 | 3.8485641  | -0.06719731 | 0.37357395 | 0.55751978 | 0.76263048 | NPM1P27    |
| NA        | ENSG00000249359 | 2.32510931 | -0.1173489  | 0.40292738 | 0.15145694 | NA         |            |
| NA        | ENSG00000249360 | 0          | NA          | NA         | NA         | NA         | TOMM40P3   |
| NA        | ENSG00000249362 | 0          | NA          | NA         | NA         | NA         | LINC02488  |
| NA        | ENSG00000249363 | 1.60756218 | -0.05775416 | 0.38523279 | 0.39843498 | NA         |            |
| 101928858 | ENSG00000249364 | 0.36182967 | -0.0235619  | 0.3853657  | 0.6614861  | NA         |            |
| NA        | ENSG00000249367 | 0          | NA          | NA         | NA         | NA         | FABP5P12   |
| NA        | ENSG00000249368 | 0          | NA          | NA         | NA         | NA         |            |
| NA        | ENSG00000249372 | 0          | NA          | NA         | NA         | NA         | ATP6V1G1P6 |
| NA        | ENSG00000249373 | 0          | NA          | NA         | NA         | NA         |            |
| 100270680 | ENSG00000249375 | 0.4995947  | -0.01434195 | 0.38310739 | 0.77531267 | NA         | CASC11     |
| 401164    | ENSG00000249378 | 1.74598803 | 0.08161699  | 0.38938229 | 0.30449698 | NA         | LINC01060  |
| NA        | ENSG00000249379 | 2.49237928 | 0.13996059  | 0.41314368 | 0.09463398 | NA         |            |
| NA        | ENSG00000249380 | 0          | NA          | NA         | NA         | NA         |            |
| NA        | ENSG00000249381 | 0          | NA          | NA         | NA         | NA         | LINC00500  |
| 105377245 | ENSG00000249382 | 0          | NA          | NA         | NA         | NA         | LINC02619  |
| 101927274 | ENSG00000249383 | 0          | NA          | NA         | NA         | NA         | LINC02071  |
| NA        | ENSG00000249386 | 0          | NA          | NA         | NA         | NA         | MTCO2P9    |
| NA        | ENSG00000249387 | 0          | NA          | NA         | NA         | NA         | KRTAP5-14P |
| NA        | ENSG00000249388 | 1.48557358 | 0.0077816   | 0.37876907 | 0.90798394 | NA         |            |
| NA        | ENSG00000249392 | 0          | NA          | NA         | NA         | NA         |            |

|           |                 |                 |             |             |            |            |              |
|-----------|-----------------|-----------------|-------------|-------------|------------|------------|--------------|
| 101805492 | ENSG00000249395 | 85.7293712      | -0.90427233 | 0.26936144  | 0.00010277 | 0.00077939 | CASC9        |
| 101929412 | ENSG00000249396 | 0               | NA          | NA          | NA         | NA         | LINC02212    |
|           | NA              | ENSG00000249400 | 0           | NA          | NA         | NA         | HMGB3P17     |
|           | NA              | ENSG00000249403 | 0           | NA          | NA         | NA         |              |
|           | NA              | ENSG00000249404 | 0           | NA          | NA         | NA         |              |
|           | NA              | ENSG00000249405 | 0           | NA          | NA         | NA         |              |
|           | NA              | ENSG00000249406 | 0.99658843  | 0.00444697  | 0.37926504 | 0.94541322 | NA           |
|           | NA              | ENSG00000249407 | 0           | NA          | NA         | NA         | IL20RB-AS1   |
|           | NA              | ENSG00000249409 | 0           | NA          | NA         | NA         |              |
|           | NA              | ENSG00000249410 | 0.173124    | -0.01911262 | 0.38486262 | 0.84537521 | NA           |
|           | NA              | ENSG00000249411 | 0           | NA          | NA         | NA         | AK4P2        |
|           | NA              | ENSG00000249412 | 1.31921721  | 0.00266375  | 0.37900767 | 0.96869818 | NA           |
|           | NA              | ENSG00000249413 | 26.1859743  | 0.14974575  | 0.31605885 | 0.4494053  | 0.672975     |
|           | NA              | ENSG00000249416 | 0           | NA          | NA         | NA         | NA           |
|           | NA              | ENSG00000249417 | 0.34126536  | 0.02362771  | 0.38535358 | 0.62402345 | NA           |
|           | NA              | ENSG00000249418 | 0           | NA          | NA         | NA         | NA           |
| 101928052 | ENSG00000249419 | 0               | NA          | NA          | NA         | NA         |              |
| 103689846 | ENSG00000249421 | 15.5617872      | 2.59137046  | 0.74748827  | 2.39E-05   | 0.000211   | ADAMTS19-AS1 |
|           | NA              | ENSG00000249425 | 0           | NA          | NA         | NA         | LINC02477    |
|           | NA              | ENSG00000249426 | 0           | NA          | NA         | NA         |              |
|           | NA              | ENSG00000249429 | 0           | NA          | NA         | NA         |              |
|           | NA              | ENSG00000249433 | 0           | NA          | NA         | NA         |              |
|           | NA              | ENSG00000249435 | 0           | NA          | NA         | NA         |              |
| 100996645 | ENSG00000249436 | 0               | NA          | NA          | NA         | NA         |              |
| 4671      | ENSG00000249437 | 874.500489      | 0.28320541  | 0.09120739  | 0.00135896 | 0.00769895 | NAIP         |
|           | NA              | ENSG00000249438 | 0           | NA          | NA         | NA         | KRT18P45     |
|           | NA              | ENSG00000249439 | 0           | NA          | NA         | NA         | HMGN1P14     |
|           | NA              | ENSG00000249441 | 0           | NA          | NA         | NA         |              |
|           | NA              | ENSG00000249443 | 0           | NA          | NA         | NA         |              |
|           | NA              | ENSG00000249444 | 0           | NA          | NA         | NA         |              |
|           | NA              | ENSG00000249446 | 0           | NA          | NA         | NA         | TRAJ60       |
|           | NA              | ENSG00000249448 | 0           | NA          | NA         | NA         | MTCO1P24     |
|           | NA              | ENSG00000249449 | 0           | NA          | NA         | NA         | MRPL57P6     |
|           | NA              | ENSG00000249451 | 0           | NA          | NA         | NA         |              |
|           | NA              | ENSG00000249452 | 0           | NA          | NA         | NA         |              |
|           | NA              | ENSG00000249453 | 0           | NA          | NA         | NA         |              |
|           | NA              | ENSG00000249454 | 0           | NA          | NA         | NA         | GZMAP1       |
|           | NA              | ENSG00000249456 | 58.7654749  | 0.00204498  | 0.23749034 | 0.99273036 | 0.99756121   |



|           |                 |            |             |            |            |            |             |
|-----------|-----------------|------------|-------------|------------|------------|------------|-------------|
| NA        | ENSG00000249458 | 0          | NA          | NA         | NA         | NA         |             |
| 729288    | ENSG00000249459 | 185.620315 | -0.37577411 | 0.23335382 | 0.04971595 | 0.14834779 | ZNF286B     |
| NA        | ENSG00000249460 | 0          | NA          | NA         | NA         | NA         | LINC02500   |
| NA        | ENSG00000249462 | 0          | NA          | NA         | NA         | NA         | MLLT10P2    |
| NA        | ENSG00000249463 | 0          | NA          | NA         | NA         | NA         |             |
| 285419    | ENSG00000249464 | 0.7230177  | -0.01067975 | 0.3826687  | 0.75562046 | NA         | LINC01091   |
| NA        | ENSG00000249465 | 0.18922458 | 0.01954053  | 0.38488496 | 0.78225479 | NA         | RBMXP4      |
| NA        | ENSG00000249467 | 0          | NA          | NA         | NA         | NA         | H2AL1QP     |
| 388569    | ENSG00000249471 | 216.030446 | -0.1681942  | 0.15239462 | 0.22739567 | 0.44217683 | ZNF324B     |
| NA        | ENSG00000249472 | 0          | NA          | NA         | NA         | NA         |             |
| NA        | ENSG00000249474 | 0.68264648 | 0.04062327  | 0.38717624 | 0.35734191 | NA         |             |
| 285638    | ENSG00000249476 | 10.213815  | -0.15506757 | 0.37381819 | 0.35570356 | 0.58599659 |             |
| NA        | ENSG00000249478 | 1.00432939 | -0.06927805 | 0.39219378 | 0.19145377 | NA         |             |
| NA        | ENSG00000249479 | 0          | NA          | NA         | NA         | NA         |             |
| 221409    | ENSG00000249481 | 2.17839375 | 0.00016247  | 0.37255856 | 0.99999936 | NA         | SPATS1      |
| NA        | ENSG00000249482 | 0          | NA          | NA         | NA         | NA         | USP17L14P   |
| NA        | ENSG00000249483 | 0.32249212 | -0.02325423 | 0.38531869 | 0.66960634 | NA         |             |
| 101927134 | ENSG00000249484 | 0          | NA          | NA         | NA         | NA         | LINC01470   |
| NA        | ENSG00000249485 | 0.15069912 | -0.01848503 | 0.38480575 | 0.84537521 | NA         | RBBP4P1     |
| NA        | ENSG00000249486 | 0          | NA          | NA         | NA         | NA         |             |
| 101929743 | ENSG00000249487 | 0.61096439 | 0.02050672  | 0.38393351 | 0.64108133 | NA         | LINC01586   |
| NA        | ENSG00000249488 | 0          | NA          | NA         | NA         | NA         | NACAP5      |
| NA        | ENSG00000249489 | 0.37844916 | 0.02407552  | 0.3854191  | 0.60038877 | NA         | GAPDHP70    |
| NA        | ENSG00000249490 | 0          | NA          | NA         | NA         | NA         | LINC02146   |
| NA        | ENSG00000249491 | 0          | NA          | NA         | NA         | NA         | EGFLAM-AS1  |
| NA        | ENSG00000249492 | 49.9296735 | 0.13802017  | 0.2624066  | 0.48216361 | 0.70272402 |             |
| NA        | ENSG00000249493 | 1.24289026 | 0.01795497  | 0.38000303 | 0.77951015 | NA         | ANKRD20A18P |
| NA        | ENSG00000249494 | 8.71052884 | 0.51760035  | 0.9369692  | 0.01620952 | 0.06143205 |             |
| NA        | ENSG00000249495 | 0          | NA          | NA         | NA         | NA         |             |
| 101927207 | ENSG00000249497 | 0          | NA          | NA         | NA         | NA         | LINC02075   |
| 101928151 | ENSG00000249500 | 0          | NA          | NA         | NA         | NA         | LINC01179   |
| NA        | ENSG00000249501 | 0          | NA          | NA         | NA         | NA         | USP9YP2     |
| NA        | ENSG00000249502 | 1.58005329 | -0.05940231 | 0.38581258 | 0.38150177 | NA         |             |
| NA        | ENSG00000249503 | 0          | NA          | NA         | NA         | NA         | HMGN1P16    |
| NA        | ENSG00000249504 | 34.8613067 | -0.25130849 | 0.33657945 | 0.23459788 | 0.45153942 | PCDHA14     |
| NA        | ENSG00000249505 | 0          | NA          | NA         | NA         | NA         |             |
| NA        | ENSG00000249506 | 0.35668472 | 0.02381709  | 0.38538106 | 0.6140152  | NA         | ZEB2P1      |
| NA        | ENSG00000249509 | 42.7417739 | -0.4690993  | 0.34195362 | 0.04901073 | 0.14679543 | NEUROG2-AS1 |

|           |                 |            |             |            |            |            |             |
|-----------|-----------------|------------|-------------|------------|------------|------------|-------------|
| NA        | ENSG00000249510 | 0          | NA          | NA         | NA         | NA         |             |
| NA        | ENSG00000249513 | 0          | NA          | NA         | NA         | NA         |             |
| NA        | ENSG00000249514 | 0          | NA          | NA         | NA         | NA         | TMEM251P1   |
| NA        | ENSG00000249515 | 0          | NA          | NA         | NA         | NA         | LINC02113   |
| NA        | ENSG00000249516 | 0          | NA          | NA         | NA         | NA         | PRELID3BP6  |
| NA        | ENSG00000249518 | 0          | NA          | NA         | NA         | NA         |             |
| NA        | ENSG00000249519 | 0          | NA          | NA         | NA         | NA         | LINC01438   |
| NA        | ENSG00000249520 | 0          | NA          | NA         | NA         | NA         |             |
| 101929153 | ENSG00000249521 | 0          | NA          | NA         | NA         | NA         | LINC02114   |
| NA        | ENSG00000249522 | 0          | NA          | NA         | NA         | NA         |             |
| NA        | ENSG00000249525 | 0          | NA          | NA         | NA         | NA         |             |
| NA        | ENSG00000249526 | 2.19726189 | 0.08007626  | 0.38951803 | 0.29961276 | NA         |             |
| NA        | ENSG00000249531 | 0          | NA          | NA         | NA         | NA         |             |
| 109864269 | ENSG00000249532 | 2.83135499 | 0.09118431  | 0.38866347 | 0.32922489 | 0.55775099 | MIR302CHG   |
| 101928776 | ENSG00000249534 | 0          | NA          | NA         | NA         | NA         | LINC01258   |
| NA        | ENSG00000249539 | 0          | NA          | NA         | NA         | NA         | MRPS36P2    |
| NA        | ENSG00000249540 | 0.15069912 | -0.01848503 | 0.38480575 | 0.84537521 | NA         |             |
| NA        | ENSG00000249541 | 0          | NA          | NA         | NA         | NA         |             |
| NA        | ENSG00000249542 | 0          | NA          | NA         | NA         | NA         | EEF1A1P21   |
| NA        | ENSG00000249545 | 0          | NA          | NA         | NA         | NA         | MCTP1-AS1   |
| NA        | ENSG00000249547 | 0          | NA          | NA         | NA         | NA         |             |
| 100506465 | ENSG00000249550 | 168.549425 | -1.88942577 | 0.27215703 | 2.17E-13   | 5.17E-12   | LINC01234   |
| NA        | ENSG00000249551 | 0          | NA          | NA         | NA         | NA         | LINC02216   |
| 100874361 | ENSG00000249553 | 0          | NA          | NA         | NA         | NA         | PPP2R2B-IT1 |
| NA        | ENSG00000249555 | 0          | NA          | NA         | NA         | NA         | TMEM248P1   |
| NA        | ENSG00000249557 | 0          | NA          | NA         | NA         | NA         | HSPD1P15    |
| NA        | ENSG00000249558 | 0          | NA          | NA         | NA         | NA         | RCC2P4      |
| NA        | ENSG00000249562 | 0          | NA          | NA         | NA         | NA         |             |
| NA        | ENSG00000249563 | 0          | NA          | NA         | NA         | NA         |             |
| NA        | ENSG00000249564 | 0          | NA          | NA         | NA         | NA         |             |
| NA        | ENSG00000249565 | 1.1528354  | -0.0037526  | 0.37949753 | 0.95260585 | NA         | SERBP1P5    |
| NA        | ENSG00000249568 | 2.49191468 | -0.06301129 | 0.38350131 | 0.44023786 | NA         |             |
| NA        | ENSG00000249572 | 13.8709595 | 0.05556927  | 0.33179241 | 0.75005717 | 0.8824202  |             |
| 442497    | ENSG00000249574 | 0          | NA          | NA         | NA         | NA         |             |
| NA        | ENSG00000249577 | 0          | NA          | NA         | NA         | NA         |             |
| NA        | ENSG00000249579 | 0          | NA          | NA         | NA         | NA         |             |
| NA        | ENSG00000249580 | 0          | NA          | NA         | NA         | NA         | MTATP6P22   |
| 645104    | ENSG00000249581 | 0          | NA          | NA         | NA         | NA         | CLRN2       |

|           |    |                 |            |             |            |            |            |            |
|-----------|----|-----------------|------------|-------------|------------|------------|------------|------------|
|           | NA | ENSG00000249582 | 0          | NA          | NA         | NA         | NA         | RPL7L1P4   |
| 101928539 | NA | ENSG00000249584 | 0          | NA          | NA         | NA         | NA         | LINC02225  |
|           | NA | ENSG00000249588 | 0          | NA          | NA         | NA         | NA         |            |
|           | NA | ENSG00000249590 | 2.6692885  | -0.05643535 | 0.3788844  | 0.54060243 | 0.74925268 |            |
| 100129917 | NA | ENSG00000249592 | 113.849501 | 0.42438759  | 0.22629842 | 0.02513452 | 0.08753183 |            |
|           | NA | ENSG00000249593 | 0.81255168 | -0.04620407 | 0.38798681 | 0.31532531 | NA         |            |
|           | NA | ENSG00000249599 | 22.3740227 | -0.18497232 | 0.33952617 | 0.35023679 | 0.58060645 | BMPR1B-DT  |
|           | NA | ENSG00000249600 | 0          | NA          | NA         | NA         | NA         |            |
|           | NA | ENSG00000249601 | 0          | NA          | NA         | NA         | NA         | LINC01187  |
|           | NA | ENSG00000249602 | 0.63901753 | -0.02099246 | 0.38316493 | 0.66814441 | NA         |            |
|           | NA | ENSG00000249604 | 5.87110435 | -0.07531344 | 0.36893132 | 0.56124586 | 0.76472206 |            |
|           | NA | ENSG00000249605 | 0          | NA          | NA         | NA         | NA         |            |
|           | NA | ENSG00000249606 | 0          | NA          | NA         | NA         | NA         | TRAPPC2P7  |
|           | NA | ENSG00000249607 | 0          | NA          | NA         | NA         | NA         |            |
|           | NA | ENSG00000249609 | 0.61640815 | -0.01932283 | 0.3830562  | 0.69117496 | NA         |            |
|           | NA | ENSG00000249610 | 0          | NA          | NA         | NA         | NA         | ZNF474-AS1 |
| 105377355 | NA | ENSG00000249613 | 0          | NA          | NA         | NA         | NA         | LINC02173  |
|           | NA | ENSG00000249614 | 0.70164984 | -0.0173601  | 0.38330318 | 0.67329148 | NA         | LINC02503  |
|           | NA | ENSG00000249616 | 0          | NA          | NA         | NA         | NA         | CCNB3P1    |
|           | NA | ENSG00000249617 | 0          | NA          | NA         | NA         | NA         |            |
| 107986313 | NA | ENSG00000249618 | 0          | NA          | NA         | NA         | NA         | LINC02465  |
|           | NA | ENSG00000249619 | 0          | NA          | NA         | NA         | NA         | HMGN1P13   |
|           | NA | ENSG00000249620 | 0          | NA          | NA         | NA         | NA         | H3P18      |
|           | NA | ENSG00000249621 | 0          | NA          | NA         | NA         | NA         |            |
|           | NA | ENSG00000249623 | 0          | NA          | NA         | NA         | NA         | PALLD-AS1  |
|           | NA | ENSG00000249624 | 11.7141944 | -0.00976102 | 0.37964322 | 0.87224275 | 0.94414841 |            |
|           | NA | ENSG00000249626 | 49.9414452 | 0.4776444   | 0.32823026 | 0.0425676  | 0.13174296 |            |
|           | NA | ENSG00000249627 | 0          | NA          | NA         | NA         | NA         |            |
| 100292680 | NA | ENSG00000249628 | 6.19596897 | -0.06040546 | 0.36726778 | 0.63052795 | 0.81314944 | LINC00942  |
|           | NA | ENSG00000249631 | 0          | NA          | NA         | NA         | NA         |            |
|           | NA | ENSG00000249633 | 0          | NA          | NA         | NA         | NA         | OR52V1P    |
|           | NA | ENSG00000249634 | 0          | NA          | NA         | NA         | NA         | USP9YP5    |
| 101929577 | NA | ENSG00000249635 | 3.22704086 | 0.12518193  | 0.40060669 | 0.21796358 | 0.42977514 |            |
|           | NA | ENSG00000249637 | 12.6401979 | 0.15945017  | 0.36514019 | 0.3697996  | 0.59912004 |            |
|           | NA | ENSG00000249638 | 0          | NA          | NA         | NA         | NA         |            |
|           | NA | ENSG00000249639 | 0          | NA          | NA         | NA         | NA         |            |
| 100874366 | NA | ENSG00000249641 | 0          | NA          | NA         | NA         | NA         | HOXC13-AS  |
|           | NA | ENSG00000249642 | 0          | NA          | NA         | NA         | NA         |            |

|           |        |                 |            |             |            |            |            |             |
|-----------|--------|-----------------|------------|-------------|------------|------------|------------|-------------|
|           | NA     | ENSG00000249646 | 0          | NA          | NA         | NA         | NA         | OR7E94P     |
| 340073    |        | ENSG00000249647 | 0          | NA          | NA         | NA         | NA         | C5orf66-AS2 |
|           | NA     | ENSG00000249649 | 0          | NA          | NA         | NA         | NA         | MRPS33P2    |
|           | NA     | ENSG00000249650 | 0.29863895 | -0.02292439 | 0.3852726  | 0.68753245 | NA         |             |
|           | NA     | ENSG00000249654 | 0          | NA          | NA         | NA         | NA         | VN1R104P    |
|           | NA     | ENSG00000249655 | 3.30192502 | -0.03666083 | 0.36991642 | 0.73619127 | 0.87477001 |             |
|           | NA     | ENSG00000249658 | 0          | NA          | NA         | NA         | NA         |             |
|           | NA     | ENSG00000249661 | 9.12827826 | 0.14215252  | 0.37604241 | 0.37248112 | 0.60143185 | TNRC18P1    |
| 102723526 |        | ENSG00000249662 | 0          | NA          | NA         | NA         | NA         | LINC02218   |
|           | NA     | ENSG00000249664 | 1.36871279 | 0.04537574  | 0.3809278  | 0.55383144 | NA         |             |
| 106144599 |        | ENSG00000249667 | 0          | NA          | NA         | NA         | NA         | LINC01259   |
|           | NA     | ENSG00000249668 | 0          | NA          | NA         | NA         | NA         | KRT18P56    |
|           | NA     | ENSG00000249669 | 11.3661612 | 0.05323138  | 0.340624   | 0.74766557 | 0.88148829 | CARMN       |
|           | NA     | ENSG00000249673 | 475.27921  | -0.09290181 | 0.10908412 | 0.37356867 | 0.6025693  | NOP14-AS1   |
|           | NA     | ENSG00000249675 | 0          | NA          | NA         | NA         | NA         |             |
|           | NA     | ENSG00000249678 | 0          | NA          | NA         | NA         | NA         |             |
|           | NA     | ENSG00000249679 | 22.1772102 | 0.29166097  | 0.44614927 | 0.1345484  | 0.30894131 |             |
|           | NA     | ENSG00000249680 | 0          | NA          | NA         | NA         | NA         | TUBA3GP     |
|           | NA     | ENSG00000249681 | 0          | NA          | NA         | NA         | NA         | KRT19P3     |
|           | NA     | ENSG00000249684 | 6.00379222 | -0.02123192 | 0.37632499 | 0.77499401 | 0.89613481 |             |
|           | NA     | ENSG00000249685 | 6.79834167 | 0.20187437  | 0.41812068 | 0.19462018 | 0.39769949 |             |
|           | NA     | ENSG00000249686 | 0          | NA          | NA         | NA         | NA         |             |
|           | NA     | ENSG00000249688 | 0          | NA          | NA         | NA         | NA         |             |
|           | NA     | ENSG00000249689 | 0          | NA          | NA         | NA         | NA         |             |
|           | NA     | ENSG00000249690 | 0.66107166 | 0.00179971  | 0.38189979 | 0.96846299 | NA         |             |
|           | NA     | ENSG00000249691 | 0          | NA          | NA         | NA         | NA         |             |
|           | NA     | ENSG00000249692 | 0          | NA          | NA         | NA         | NA         |             |
| 100506564 |        | ENSG00000249693 | 5.39991799 | 0.18504087  | 0.41647229 | 0.19129445 | 0.39296769 | THEGL       |
|           | 574538 | ENSG00000249695 | 6.97791761 | -4.22440138 | 1.55795907 | 0.0003206  | 0.0021709  |             |
|           | NA     | ENSG00000249697 | 0          | NA          | NA         | NA         | NA         |             |
|           | NA     | ENSG00000249698 | 0          | NA          | NA         | NA         | NA         | MTCO3P9     |
| 101929199 |        | ENSG00000249699 | 0          | NA          | NA         | NA         | NA         | LINC02261   |
| 100506462 |        | ENSG00000249700 | 4.02072898 | 0.13524716  | 0.40557821 | 0.16735936 | 0.35828164 | SRD5A3-AS1  |
|           | NA     | ENSG00000249706 | 0.173124   | -0.01911262 | 0.38486262 | 0.84537521 | NA         |             |
|           | NA     | ENSG00000249708 | 0          | NA          | NA         | NA         | NA         |             |
| 163050    |        | ENSG00000249709 | 93.5741227 | -0.25041107 | 0.22320229 | 0.17377513 | 0.36689354 | ZNF564      |
| 101929353 |        | ENSG00000249710 | 0          | NA          | NA         | NA         | NA         |             |
| 101929109 |        | ENSG00000249713 | 0.34110708 | 0.0236265   | 0.38535339 | 0.62410733 | NA         |             |

|           |                 |            |             |            |            |            |           |
|-----------|-----------------|------------|-------------|------------|------------|------------|-----------|
| 90342     | ENSG00000249715 | 2.38776594 | 0.04934887  | 0.37787216 | 0.58740049 | NA         | FER1L5    |
| 100507388 | ENSG00000249717 | 0          | NA          | NA         | NA         | NA         | PARM1-AS1 |
| NA        | ENSG00000249721 | 0          | NA          | NA         | NA         | NA         |           |
| NA        | ENSG00000249722 | 1.77242996 | -0.07079941 | 0.38756109 | 0.33132732 | NA         |           |
| NA        | ENSG00000249725 | 0          | NA          | NA         | NA         | NA         |           |
| NA        | ENSG00000249726 | 0          | NA          | NA         | NA         | NA         | TUBB1P1   |
| NA        | ENSG00000249727 | 0          | NA          | NA         | NA         | NA         |           |
| NA        | ENSG00000249729 | 0          | NA          | NA         | NA         | NA         |           |
| NA        | ENSG00000249730 | 0          | NA          | NA         | NA         | NA         | OR10J4    |
| NA        | ENSG00000249731 | 3.87077524 | 0.05515803  | 0.37181855 | 0.62655988 | 0.81036167 |           |
| NA        | ENSG00000249735 | 0          | NA          | NA         | NA         | NA         |           |
| 105379006 | ENSG00000249736 | 0          | NA          | NA         | NA         | NA         | LINC02242 |
| NA        | ENSG00000249737 | 0          | NA          | NA         | NA         | NA         |           |
| 285626    | ENSG00000249738 | 4.16133667 | 0.04313411  | 0.37132514 | 0.68353468 | 0.84579696 |           |
| 101926904 | ENSG00000249740 | 0          | NA          | NA         | NA         | NA         | OSMR-AS1  |
| NA        | ENSG00000249741 | 0.173733   | 0.01914545  | 0.38484597 | 0.78225479 | NA         |           |
| NA        | ENSG00000249742 | 0          | NA          | NA         | NA         | NA         |           |
| NA        | ENSG00000249743 | 0          | NA          | NA         | NA         | NA         |           |
| NA        | ENSG00000249744 | 0          | NA          | NA         | NA         | NA         |           |
| NA        | ENSG00000249745 | 0.15069912 | -0.01848503 | 0.38480575 | 0.84537521 | NA         | HMGB1P28  |
| NA        | ENSG00000249746 | 0          | NA          | NA         | NA         | NA         |           |
| NA        | ENSG00000249747 | 0          | NA          | NA         | NA         | NA         | LINC02374 |
| 100506406 | ENSG00000249748 | 0          | NA          | NA         | NA         | NA         |           |
| 641700    | ENSG00000249751 | 0          | NA          | NA         | NA         | NA         | ECSCR     |
| NA        | ENSG00000249752 | 0          | NA          | NA         | NA         | NA         |           |
| NA        | ENSG00000249753 | 0.48521756 | -0.00632249 | 0.38314586 | 0.86943869 | NA         |           |
| NA        | ENSG00000249754 | 0          | NA          | NA         | NA         | NA         | NDUFB4P9  |
| NA        | ENSG00000249755 | 1.03547804 | 0.05510059  | 0.38665514 | 0.32245847 | NA         |           |
| NA        | ENSG00000249761 | 0          | NA          | NA         | NA         | NA         |           |
| NA        | ENSG00000249763 | 0          | NA          | NA         | NA         | NA         |           |
| NA        | ENSG00000249764 | 0          | NA          | NA         | NA         | NA         |           |
| NA        | ENSG00000249766 | 0          | NA          | NA         | NA         | NA         |           |
| NA        | ENSG00000249767 | 0          | NA          | NA         | NA         | NA         | ENPP7P10  |
| NA        | ENSG00000249768 | 0          | NA          | NA         | NA         | NA         | HSPE1P10  |
| NA        | ENSG00000249770 | 0          | NA          | NA         | NA         | NA         | MTND6P17  |
| NA        | ENSG00000249771 | 5.3547902  | -0.04008489 | 0.36464749 | 0.74290236 | 0.87875221 |           |
| NA        | ENSG00000249772 | 1.19163159 | 0.05800969  | 0.38798418 | 0.28620948 | NA         |           |
| NA        | ENSG00000249773 | 76.1573984 | -0.0579288  | 0.22797543 | 0.75150459 | 0.88344203 |           |

|           |                 |            |             |            |            |            |           |
|-----------|-----------------|------------|-------------|------------|------------|------------|-----------|
| NA        | ENSG00000249774 | 0          | NA          | NA         | NA         | NA         |           |
| NA        | ENSG00000249776 | 1.09392565 | -0.07536399 | 0.39386651 | 0.15695122 | NA         |           |
| NA        | ENSG00000249777 | 0.31696818 | 0.00135544  | 0.38336847 | 0.96486615 | NA         | SAP18P1   |
| NA        | ENSG00000249778 | 0          | NA          | NA         | NA         | NA         | TRMT112P2 |
| NA        | ENSG00000249779 | 0.18922458 | 0.01954053  | 0.38488496 | 0.78225479 | NA         |           |
| NA        | ENSG00000249780 | 0          | NA          | NA         | NA         | NA         |           |
| 285692    | ENSG00000249781 | 0          | NA          | NA         | NA         | NA         | LINC02112 |
| 105374647 | ENSG00000249782 | 0          | NA          | NA         | NA         | NA         |           |
| 677770    | ENSG00000249784 | 0          | NA          | NA         | NA         | NA         | SCARNA22  |
| NA        | ENSG00000249785 | 0          | NA          | NA         | NA         | NA         | LINC02103 |
| NA        | ENSG00000249786 | 2.34895132 | 0.06177133  | 0.38038578 | 0.49942774 | NA         | EAF1-AS1  |
| NA        | ENSG00000249787 | 0.173124   | -0.01911262 | 0.38486262 | 0.84537521 | NA         |           |
| NA        | ENSG00000249790 | 0.8729833  | -0.02530802 | 0.38277775 | 0.57775925 | NA         |           |
| NA        | ENSG00000249791 | 0.72653655 | 0.05241024  | 0.38880124 | 0.28555583 | NA         |           |
| NA        | ENSG00000249792 | 0          | NA          | NA         | NA         | NA         |           |
| NA        | ENSG00000249795 | 0          | NA          | NA         | NA         | NA         |           |
| NA        | ENSG00000249797 | 0          | NA          | NA         | NA         | NA         | LINC02147 |
| NA        | ENSG00000249798 | 0          | NA          | NA         | NA         | NA         | HSD3BP3   |
| NA        | ENSG00000249799 | 0          | NA          | NA         | NA         | NA         | SNRPCP13  |
| NA        | ENSG00000249803 | 0          | NA          | NA         | NA         | NA         |           |
| NA        | ENSG00000249806 | 0          | NA          | NA         | NA         | NA         |           |
| NA        | ENSG00000249807 | 0          | NA          | NA         | NA         | NA         |           |
| 102467074 | ENSG00000249808 | 0          | NA          | NA         | NA         | NA         |           |
| 100287478 | ENSG00000249811 | 0          | NA          | NA         | NA         | NA         | USP17L21  |
| NA        | ENSG00000249815 | 0.48345803 | 0.0294879   | 0.38589305 | 0.50327208 | NA         |           |
| 157381    | ENSG00000249816 | 0          | NA          | NA         | NA         | NA         | LINC00964 |
| 102724700 | ENSG00000249818 | 0          | NA          | NA         | NA         | NA         |           |
| NA        | ENSG00000249819 | 0          | NA          | NA         | NA         | NA         |           |
| NA        | ENSG00000249820 | 0          | NA          | NA         | NA         | NA         |           |
| 101929215 | ENSG00000249825 | 2.71451894 | 0.00045935  | 0.37328962 | 0.99771807 | 0.99926338 | THBS4-AS1 |
| NA        | ENSG00000249828 | 0          | NA          | NA         | NA         | NA         |           |
| NA        | ENSG00000249829 | 0          | NA          | NA         | NA         | NA         |           |
| 105374624 | ENSG00000249830 | 0          | NA          | NA         | NA         | NA         | LINC02162 |
| NA        | ENSG00000249831 | 0          | NA          | NA         | NA         | NA         |           |
| 100506907 | ENSG00000249833 | 0          | NA          | NA         | NA         | NA         | CCDC37-DT |
| NA        | ENSG00000249834 | 0.14931947 | -0.01844332 | 0.38480212 | 0.84537521 | NA         | PGBD4P3   |
| 105379054 | ENSG00000249835 | 0          | NA          | NA         | NA         | NA         | VCAN-AS1  |
| NA        | ENSG00000249837 | 0          | NA          | NA         | NA         | NA         |           |

|           |    |                 |            |             |            |            |            |              |
|-----------|----|-----------------|------------|-------------|------------|------------|------------|--------------|
|           | NA | ENSG00000249838 | 0          | NA          | NA         | NA         | NA         | SUMO2P7      |
|           | NA | ENSG00000249839 | 119.792054 | -0.36327414 | 0.22496229 | 0.05226217 | 0.15402903 |              |
|           | NA | ENSG00000249840 | 0          | NA          | NA         | NA         | NA         | GAPDHP76     |
|           | NA | ENSG00000249842 | 0          | NA          | NA         | NA         | NA         |              |
|           | NA | ENSG00000249843 | 0          | NA          | NA         | NA         | NA         |              |
|           | NA | ENSG00000249844 | 0          | NA          | NA         | NA         | NA         | OR7E43P      |
| 105374104 | NA | ENSG00000249846 | 7.17808187 | 0.09342988  | 0.36466945 | 0.52595838 | 0.73808697 | LINC02021    |
|           | NA | ENSG00000249847 | 0          | NA          | NA         | NA         | NA         |              |
|           | NA | ENSG00000249848 | 0          | NA          | NA         | NA         | NA         |              |
|           | NA | ENSG00000249849 | 0.15069912 | -0.01848503 | 0.38480575 | 0.84537521 | NA         |              |
|           | NA | ENSG00000249850 | 0.50741669 | 0.01462997  | 0.38307837 | 0.74789476 | NA         | KRT18P31     |
|           | NA | ENSG00000249851 | 0.29863895 | -0.02292439 | 0.3852726  | 0.68753245 | NA         | RPS27AP18    |
|           | NA | ENSG00000249852 | 0          | NA          | NA         | NA         | NA         |              |
| 222537    | NA | ENSG00000249853 | 18.0709171 | -0.02173045 | 0.31619501 | 0.90237622 | 0.95713489 | HS3ST5       |
|           | NA | ENSG00000249854 | 0          | NA          | NA         | NA         | NA         | CDH18-AS1    |
|           | NA | ENSG00000249855 | 31.3239007 | -0.01146595 | 0.27967952 | 0.95073838 | 0.97972521 | EEF1A1P19    |
|           | NA | ENSG00000249856 | 0          | NA          | NA         | NA         | NA         |              |
|           | NA | ENSG00000249857 | 0          | NA          | NA         | NA         | NA         |              |
|           | NA | ENSG00000249858 | 0          | NA          | NA         | NA         | NA         | SNX5P1       |
|           | NA | ENSG00000249859 | 142.622134 | -0.31270452 | 0.20138451 | 0.07003862 | 0.19166431 | PVT1         |
| 100463289 | NA | ENSG00000249860 | 0.16735865 | 0.01897177  | 0.38482933 | 0.78225479 | NA         | MTRNR2L5     |
| 148003    | NA | ENSG00000249861 | 0          | NA          | NA         | NA         | NA         | LGALS16      |
|           | NA | ENSG00000249863 | 4.18910642 | 0.0202319   | 0.37005709 | 0.84816834 | 0.93095493 |              |
|           | NA | ENSG00000249865 | 0          | NA          | NA         | NA         | NA         |              |
|           | NA | ENSG00000249866 | 0          | NA          | NA         | NA         | NA         | OR7E83P      |
|           | NA | ENSG00000249867 | 0          | NA          | NA         | NA         | NA         | LINC02742    |
|           | NA | ENSG00000249868 | 0          | NA          | NA         | NA         | NA         |              |
|           | NA | ENSG00000249869 | 0          | NA          | NA         | NA         | NA         |              |
|           | NA | ENSG00000249870 | 0          | NA          | NA         | NA         | NA         |              |
|           | NA | ENSG00000249873 | 0          | NA          | NA         | NA         | NA         | LINC02372    |
|           | NA | ENSG00000249875 | 0          | NA          | NA         | NA         | NA         |              |
|           | NA | ENSG00000249876 | 0.34047251 | -0.00020551 | 0.38336232 | 0.96720061 | NA         |              |
|           | NA | ENSG00000249877 | 0          | NA          | NA         | NA         | NA         |              |
|           | NA | ENSG00000249878 | 0          | NA          | NA         | NA         | NA         |              |
|           | NA | ENSG00000249881 | 0          | NA          | NA         | NA         | NA         |              |
|           | NA | ENSG00000249882 | 0          | NA          | NA         | NA         | NA         | LINC02501    |
|           | NA | ENSG00000249883 | 0          | NA          | NA         | NA         | NA         |              |
| 100526767 | NA | ENSG00000249884 | 3.47956449 | 0.16109019  | 0.422943   | 0.09855618 | 0.24663907 | RNF103-CHMP3 |

|           |                 |                 |            |             |            |            |              |           |
|-----------|-----------------|-----------------|------------|-------------|------------|------------|--------------|-----------|
| 100874374 | ENSG00000249885 | 0               | NA         | NA          | NA         | NA         | ARHGEF38-IT1 |           |
|           | NA              | ENSG00000249887 | 0          | NA          | NA         | NA         |              |           |
|           | NA              | ENSG00000249888 | 0          | NA          | NA         | NA         |              |           |
|           | NA              | ENSG00000249889 | 0.82475436 | 0.01257346  | 0.38241678 | 0.7862013  | ALG1L11P     |           |
|           | NA              | ENSG00000249890 | 0          | NA          | NA         | NA         |              |           |
|           | NA              | ENSG00000249891 | 0          | NA          | NA         | NA         | KRT19P6      |           |
|           | NA              | ENSG00000249892 | 0          | NA          | NA         | NA         |              |           |
|           | NA              | ENSG00000249893 | 0          | NA          | NA         | NA         | MTND6P16     |           |
|           | NA              | ENSG00000249894 | 1.66815011 | -0.01270857 | 0.3768705  | 0.8694137  | NA           |           |
|           | NA              | ENSG00000249896 | 133.611905 | -1.00610836 | 0.23687918 | 2.57E-06   | 2.72E-05     | LINC02495 |
|           | NA              | ENSG00000249898 | 45.6866622 | 0.36783046  | 0.32969892 | 0.10291344 | 0.25477628   | MCPH1-AS1 |
|           | NA              | ENSG00000249899 | 5.71678517 | -0.09573639 | 0.37254812 | 0.47735237 | 0.6991489    |           |
|           | NA              | ENSG00000249901 | 0          | NA          | NA         | NA         | NA           |           |
|           | NA              | ENSG00000249904 | 0          | NA          | NA         | NA         | NA           |           |
| 100288866 | ENSG00000249906 | 0.86001996      | 0.01644737 | 0.38117166  | 0.77087608 | NA         |              |           |
|           | NA              | ENSG00000249908 | 0          | NA          | NA         | NA         | BRD9P2       |           |
|           | NA              | ENSG00000249909 | 0          | NA          | NA         | NA         | CYCTP        |           |
|           | NA              | ENSG00000249910 | 0          | NA          | NA         | NA         | TRIM51CP     |           |
|           | NA              | ENSG00000249912 | 0          | NA          | NA         | NA         | TRBV26       |           |
| 10016     | ENSG00000249915 | 1726.38577      | 0.17867387 | 0.06942177  | 0.00882709 | 0.03742084 | PDCD6        |           |
|           | NA              | ENSG00000249916 | 0          | NA          | NA         | NA         |              |           |
| 100859921 | ENSG00000249917 | 2.01818452      | 0.03205565 | 0.37891713  | 0.67747971 | NA         | LINC00536    |           |
|           | NA              | ENSG00000249919 | 0          | NA          | NA         | NA         | FABP5P6      |           |
|           | NA              | ENSG00000249920 | 0          | NA          | NA         | NA         | HNRNPA1P55   |           |
|           | NA              | ENSG00000249921 | 0          | NA          | NA         | NA         |              |           |
| 284865    | ENSG00000249923 | 0.3410973       | 0.02362643 | 0.38535338  | 0.62411251 | NA         | LINC02891    |           |
|           | NA              | ENSG00000249924 | 0          | NA          | NA         | NA         |              |           |
|           | NA              | ENSG00000249926 | 0          | NA          | NA         | NA         |              |           |
|           | NA              | ENSG00000249927 | 0          | NA          | NA         | NA         |              |           |
|           | NA              | ENSG00000249928 | 0          | NA          | NA         | NA         | UQCRBP3      |           |
|           | NA              | ENSG00000249930 | 0          | NA          | NA         | NA         |              |           |
| 653125    | ENSG00000249931 | 23.556231       | 0.06572021 | 0.30414107  | 0.72985681 | 0.87081915 | GOLGA8K      |           |
|           | NA              | ENSG00000249934 | 0.31670123 | 0.00110012  | 0.38336644 | 0.96731252 | NA           | NCOA4P2   |
|           | NA              | ENSG00000249936 | 1.73124003 | -0.06407614 | 0.39190352 | 0.1291005  | NA           | RAC1P2    |
|           | NA              | ENSG00000249937 | 0          | NA          | NA         | NA         | NA           | LINC02223 |
|           | NA              | ENSG00000249941 | 0          | NA          | NA         | NA         | NA           |           |
|           | NA              | ENSG00000249942 | 0          | NA          | NA         | NA         | NA           |           |
|           | NA              | ENSG00000249943 | 0          | NA          | NA         | NA         | NA           |           |



|           |                 |            |             |            |            |            |           |
|-----------|-----------------|------------|-------------|------------|------------|------------|-----------|
| NA        | ENSG00000249944 | 0          | NA          | NA         | NA         | NA         |           |
| NA        | ENSG00000249945 | 0          | NA          | NA         | NA         | NA         |           |
| NA        | ENSG00000249947 | 3.50231903 | 0.0106093   | 0.36674418 | 0.9262602  | 0.96932621 | XBP1P1    |
| 57733     | ENSG00000249948 | 0          | NA          | NA         | NA         | NA         | GBA3      |
| NA        | ENSG00000249950 | 0          | NA          | NA         | NA         | NA         |           |
| NA        | ENSG00000249951 | 0          | NA          | NA         | NA         | NA         |           |
| NA        | ENSG00000249955 | 1.51105052 | -0.00086134 | 0.37730155 | 0.9898613  | NA         |           |
| NA        | ENSG00000249956 | 0          | NA          | NA         | NA         | NA         | UGT2B24P  |
| NA        | ENSG00000249958 | 0          | NA          | NA         | NA         | NA         | CCT7P2    |
| NA        | ENSG00000249959 | 0          | NA          | NA         | NA         | NA         |           |
| NA        | ENSG00000249960 | 0          | NA          | NA         | NA         | NA         |           |
| 283847    | ENSG00000249961 | 0.33691811 | 0.00550581  | 0.3834622  | 0.92727297 | NA         | TERB1     |
| NA        | ENSG00000249963 | 0          | NA          | NA         | NA         | NA         | EEF1A1P20 |
| NA        | ENSG00000249965 | 0.51422201 | 0.01617113  | 0.38318627 | 0.72836781 | NA         | CDC42P4   |
| NA        | ENSG00000249966 | 0          | NA          | NA         | NA         | NA         |           |
| NA        | ENSG00000249967 | 2.64914409 | 0.08998728  | 0.39956664 | 0.04253877 | 0.13168499 |           |
| NA        | ENSG00000249970 | 0          | NA          | NA         | NA         | NA         |           |
| NA        | ENSG00000249971 | 0          | NA          | NA         | NA         | NA         |           |
| NA        | ENSG00000249973 | 0          | NA          | NA         | NA         | NA         | CHCHD2P7  |
| NA        | ENSG00000249975 | 0          | NA          | NA         | NA         | NA         | OR5H3P    |
| NA        | ENSG00000249976 | 0          | NA          | NA         | NA         | NA         |           |
| NA        | ENSG00000249977 | 0          | NA          | NA         | NA         | NA         |           |
| NA        | ENSG00000249978 | 0          | NA          | NA         | NA         | NA         | TRGV7     |
| 107987420 | ENSG00000249981 | 0          | NA          | NA         | NA         | NA         |           |
| 107987434 | ENSG00000249981 | 0          | NA          | NA         | NA         | NA         |           |
| NA        | ENSG00000249982 | 0          | NA          | NA         | NA         | NA         |           |
| NA        | ENSG00000249984 | 0.29863895 | -0.02292439 | 0.3852726  | 0.68753245 | NA         |           |
| NA        | ENSG00000249985 | 0          | NA          | NA         | NA         | NA         |           |
| NA        | ENSG00000249986 | 0.16735865 | 0.01897177  | 0.38482933 | 0.78225479 | NA         | YWHAQP6   |
| NA        | ENSG00000249987 | 0          | NA          | NA         | NA         | NA         | RPS4XP20  |
| NA        | ENSG00000249988 | 0          | NA          | NA         | NA         | NA         |           |
| NA        | ENSG00000249990 | 0          | NA          | NA         | NA         | NA         | MTCO2P24  |
| 25907     | ENSG00000249992 | 20.0196227 | -1.45426249 | 0.60556306 | 0.00095252 | 0.00567859 | TMEM158   |
| 85003     | ENSG00000249993 | 0          | NA          | NA         | NA         | NA         | BFSP2-AS1 |
| NA        | ENSG00000249994 | 0          | NA          | NA         | NA         | NA         |           |
| NA        | ENSG00000249995 | 0          | NA          | NA         | NA         | NA         | ECM1P2    |
| NA        | ENSG00000249996 | 0.69522582 | 0.04053192  | 0.38717839 | 0.35460406 | NA         | PPIC-AS1  |
| NA        | ENSG00000249997 | 0          | NA          | NA         | NA         | NA         | MTCO3P7   |

|           |                 |            |             |            |            |            |             |
|-----------|-----------------|------------|-------------|------------|------------|------------|-------------|
| NA        | ENSG00000249998 | 0          | NA          | NA         | NA         | NA         |             |
| NA        | ENSG00000250001 | 0          | NA          | NA         | NA         | NA         |             |
| NA        | ENSG00000250006 | 0          | NA          | NA         | NA         | NA         |             |
| NA        | ENSG00000250007 | 0.173733   | 0.01914545  | 0.38484597 | 0.78225479 | NA         |             |
| NA        | ENSG00000250011 | 0          | NA          | NA         | NA         | NA         | HMGB1P3     |
| NA        | ENSG00000250012 | 7.17427445 | -0.02586762 | 0.35908493 | 0.84079964 | 0.92773074 |             |
| NA        | ENSG00000250013 | 0          | NA          | NA         | NA         | NA         | ZP3P1       |
| NA        | ENSG00000250015 | 0.44795842 | -0.02501848 | 0.38558245 | 0.5807882  | NA         |             |
| NA        | ENSG00000250016 | 0          | NA          | NA         | NA         | NA         | SNX18P23    |
| NA        | ENSG00000250017 | 0          | NA          | NA         | NA         | NA         |             |
| NA        | ENSG00000250020 | 0          | NA          | NA         | NA         | NA         |             |
| 100526783 | ENSG00000250021 | 387.765408 | 0.21949168  | 0.12916248 | 0.07046242 | 0.19245241 | ARPIN-AP3S2 |
| NA        | ENSG00000250024 | 0          | NA          | NA         | NA         | NA         |             |
| NA        | ENSG00000250025 | 0          | NA          | NA         | NA         | NA         |             |
| NA        | ENSG00000250026 | 0          | NA          | NA         | NA         | NA         | TMPRSS11BNL |
| NA        | ENSG00000250027 | 2.3109729  | -0.02453629 | 0.37778102 | 0.75135744 | NA         |             |
| NA        | ENSG00000250030 | 0          | NA          | NA         | NA         | NA         |             |
| NA        | ENSG00000250031 | 4.15077974 | 0.00170127  | 0.36514192 | 0.99025664 | 0.99673744 |             |
| NA        | ENSG00000250032 | 0          | NA          | NA         | NA         | NA         |             |
| 641364    | ENSG00000250033 | 4.90673886 | 0.30993363  | 0.59223983 | 0.00335334 | 0.01662423 | SLC7A11-AS1 |
| NA        | ENSG00000250034 | 0          | NA          | NA         | NA         | NA         |             |
| NA        | ENSG00000250036 | 0          | NA          | NA         | NA         | NA         | IGKV1D-37   |
| NA        | ENSG00000250037 | 0.15069912 | -0.01848503 | 0.38480575 | 0.84537521 | NA         |             |
| NA        | ENSG00000250038 | 3.87852723 | -0.02214122 | 0.36619342 | 0.84563249 | 0.92995669 |             |
| NA        | ENSG00000250039 | 1.95702864 | -0.01503765 | 0.3756595  | 0.85635581 | NA         |             |
| NA        | ENSG00000250040 | 0          | NA          | NA         | NA         | NA         | RAF1P1      |
| NA        | ENSG00000250041 | 0          | NA          | NA         | NA         | NA         |             |
| 105377602 | ENSG00000250042 | 0          | NA          | NA         | NA         | NA         | LINC02514   |
| NA        | ENSG00000250043 | 0.34624801 | -0.02356563 | 0.38536324 | 0.65270996 | NA         |             |
| NA        | ENSG00000250045 | 0          | NA          | NA         | NA         | NA         | CBX3P3      |
| NA        | ENSG00000250046 | 5.14377745 | 0.06805624  | 0.36853285 | 0.59325589 | 0.78711401 |             |
| NA        | ENSG00000250048 | 0          | NA          | NA         | NA         | NA         | LINC00603   |
| NA        | ENSG00000250049 | 0          | NA          | NA         | NA         | NA         |             |
| NA        | ENSG00000250050 | 0.16735865 | 0.01897177  | 0.38482933 | 0.78225479 | NA         | MTND4P9     |
| NA        | ENSG00000250053 | 0          | NA          | NA         | NA         | NA         | RARRES2P4   |
| NA        | ENSG00000250056 | 5.99310342 | 0.02007166  | 0.35968874 | 0.87734404 | 0.94576863 | LINC01018   |
| NA        | ENSG00000250057 | 0.15069912 | -0.01848503 | 0.38480575 | 0.84537521 | NA         |             |
| NA        | ENSG00000250060 | 0          | NA          | NA         | NA         | NA         |             |

|           |                 |            |             |            |            |            |              |
|-----------|-----------------|------------|-------------|------------|------------|------------|--------------|
| 101929064 | ENSG00000250062 | 0          | NA          | NA         | NA         | NA         | MAPK10-AS1   |
| NA        | ENSG00000250064 | 0          | NA          | NA         | NA         | NA         |              |
| NA        | ENSG00000250066 | 0          | NA          | NA         | NA         | NA         |              |
| 374887    | ENSG00000250067 | 360.93373  | 0.62210946  | 0.15972069 | 2.62E-05   | 0.00022914 | YJEFN3       |
| NA        | ENSG00000250068 | 0          | NA          | NA         | NA         | NA         |              |
| NA        | ENSG00000250069 | 0.14931947 | -0.01844332 | 0.38480212 | 0.84537521 | NA         |              |
| NA        | ENSG00000250071 | 0.34746601 | 0.02370763  | 0.3853651  | 0.61987128 | NA         |              |
| NA        | ENSG00000250072 | 0          | NA          | NA         | NA         | NA         | SH3TC2-DT    |
| 101929340 | ENSG00000250073 | 10.058428  | 0.04055569  | 0.34280072 | 0.80137491 | 0.90902045 |              |
| NA        | ENSG00000250074 | 0          | NA          | NA         | NA         | NA         |              |
| 101927237 | ENSG00000250075 | 0.31891762 | 0.00254055  | 0.38338357 | 0.95348926 | NA         |              |
| NA        | ENSG00000250076 | 0          | NA          | NA         | NA         | NA         | MAPRE1P2     |
| NA        | ENSG00000250078 | 0          | NA          | NA         | NA         | NA         |              |
| NA        | ENSG00000250079 | 0          | NA          | NA         | NA         | NA         |              |
| NA        | ENSG00000250080 | 0.18922458 | 0.01954053  | 0.38488496 | 0.78225479 | NA         |              |
| NA        | ENSG00000250081 | 2.23006252 | 0.09602866  | 0.3939225  | 0.24304498 | NA         |              |
| NA        | ENSG00000250082 | 0          | NA          | NA         | NA         | NA         |              |
| NA        | ENSG00000250084 | 0          | NA          | NA         | NA         | NA         |              |
| NA        | ENSG00000250088 | 0          | NA          | NA         | NA         | NA         |              |
| NA        | ENSG00000250090 | 1.10969345 | -0.04828331 | 0.38617069 | 0.36184404 | NA         |              |
| NA        | ENSG00000250091 | 191.038143 | 1.49744115  | 0.19485423 | 1.32E-15   | 3.77E-14   | DNAH10OS     |
| 105374516 | ENSG00000250092 | 0          | NA          | NA         | NA         | NA         |              |
| 100873948 | ENSG00000250095 | 0          | NA          | NA         | NA         | NA         | NREP-AS1     |
| NA        | ENSG00000250098 | 0          | NA          | NA         | NA         | NA         |              |
| NA        | ENSG00000250099 | 0          | NA          | NA         | NA         | NA         |              |
| NA        | ENSG00000250100 | 0          | NA          | NA         | NA         | NA         |              |
| NA        | ENSG00000250101 | 0.32489873 | 0.00168553  | 0.38337148 | 0.96417233 | NA         |              |
| NA        | ENSG00000250102 | 0          | NA          | NA         | NA         | NA         | LINC02377    |
| 110231149 | ENSG00000250103 | 0          | NA          | NA         | NA         | NA         | PANCR        |
| NA        | ENSG00000250105 | 0.14931947 | -0.01844332 | 0.38480212 | 0.84537521 | NA         |              |
| NA        | ENSG00000250106 | 0          | NA          | NA         | NA         | NA         | ANKRD33B-AS1 |
| 253962    | ENSG00000250107 | 2.47791353 | -0.13708318 | 0.41066018 | 0.13032113 | NA         | CACNA1G-AS1  |
| 101929141 | ENSG00000250111 | 0.69493202 | 0.03154416  | 0.38626309 | 0.41391645 | NA         |              |
| NA        | ENSG00000250114 | 0          | NA          | NA         | NA         | NA         |              |
| NA        | ENSG00000250115 | 0          | NA          | NA         | NA         | NA         | AK3P2        |
| 100506142 | ENSG00000250116 | 2.77318404 | 0.00468873  | 0.37189654 | 0.96292652 | 0.9853756  | RHOQ-AS1     |
| NA        | ENSG00000250118 | 0          | NA          | NA         | NA         | NA         |              |
| 56139     | ENSG00000250120 | 135.154835 | -0.44432794 | 0.22789079 | 0.01987323 | 0.0726123  | PCDHA10      |

|           |                 |            |             |            |            |            |             |
|-----------|-----------------|------------|-------------|------------|------------|------------|-------------|
| NA        | ENSG00000250122 | 0          | NA          | NA         | NA         | NA         |             |
| NA        | ENSG00000250124 | 0          | NA          | NA         | NA         | NA         |             |
| 401134    | ENSG00000250125 | 0          | NA          | NA         | NA         | NA         | LINC02232   |
| NA        | ENSG00000250126 | 0          | NA          | NA         | NA         | NA         |             |
| 101928600 | ENSG00000250127 | 0          | NA          | NA         | NA         | NA         | LINC02108   |
| NA        | ENSG00000250129 | 0.52119901 | 0.02576573  | 0.38568143 | 0.51723676 | NA         |             |
| NA        | ENSG00000250130 | 0.32451092 | 0.00139785  | 0.38336859 | 0.96692253 | NA         | GAPDHP43    |
| NA        | ENSG00000250131 | 1.84975716 | -0.00498187 | 0.3762404  | 0.94880383 | NA         |             |
| NA        | ENSG00000250132 | 87.1846774 | -0.19128961 | 0.24560809 | 0.31818564 | 0.54575975 |             |
| 100874364 | ENSG00000250133 | 1.02149248 | 0.02109085  | 0.38182359 | 0.69975445 | NA         | HOXC-AS2    |
| NA        | ENSG00000250135 | 1.83483388 | -0.09080779 | 0.3991671  | 0.0723944  | NA         |             |
| NA        | ENSG00000250137 | 0          | NA          | NA         | NA         | NA         |             |
| NA        | ENSG00000250138 | 53.012037  | 0.16380309  | 0.26119028 | 0.40594146 | 0.63416367 |             |
| NA        | ENSG00000250140 | 0          | NA          | NA         | NA         | NA         |             |
| NA        | ENSG00000250141 | 0          | NA          | NA         | NA         | NA         | LINC02276   |
| NA        | ENSG00000250144 | 0          | NA          | NA         | NA         | NA         |             |
| NA        | ENSG00000250145 | 0          | NA          | NA         | NA         | NA         |             |
| NA        | ENSG00000250147 | 0.49976788 | 0.01189493  | 0.38340874 | 0.77493601 | NA         | MORF4L2P1   |
| NA        | ENSG00000250148 | 0.62027509 | -0.0162275  | 0.38340448 | 0.71368239 | NA         | KRT8P31     |
| NA        | ENSG00000250149 | 0          | NA          | NA         | NA         | NA         |             |
| NA        | ENSG00000250150 | 0          | NA          | NA         | NA         | NA         |             |
| 100526693 | ENSG00000250151 | 114.955593 | 0.02852945  | 0.19607429 | 0.86705824 | 0.94161889 | ARPC4-TTLL3 |
| NA        | ENSG00000250155 | 1.21043089 | -0.06271027 | 0.39122716 | 0.17847261 | NA         |             |
| 102546226 | ENSG00000250156 | 0          | NA          | NA         | NA         | NA         | LINC02060   |
| NA        | ENSG00000250158 | 0          | NA          | NA         | NA         | NA         |             |
| NA        | ENSG00000250159 | 43.0967782 | -0.51495509 | 0.36027312 | 0.03728124 | 0.11908867 |             |
| NA        | ENSG00000250161 | 0          | NA          | NA         | NA         | NA         | TRMT112P5   |
| NA        | ENSG00000250162 | 0          | NA          | NA         | NA         | NA         | CSNK1A1P3   |
| NA        | ENSG00000250164 | 0          | NA          | NA         | NA         | NA         |             |
| NA        | ENSG00000250166 | 0.53469843 | 0.01235789  | 0.38333992 | 0.74805528 | NA         |             |
| NA        | ENSG00000250167 | 0          | NA          | NA         | NA         | NA         |             |
| NA        | ENSG00000250169 | 0          | NA          | NA         | NA         | NA         | MTND5P13    |
| NA        | ENSG00000250170 | 0.15069912 | -0.01848503 | 0.38480575 | 0.84537521 | NA         | RASA2-IT1   |
| NA        | ENSG00000250173 | 0          | NA          | NA         | NA         | NA         |             |
| 100873940 | ENSG00000250174 | 0.90075246 | 0.0377903   | 0.3845588  | 0.43709354 | NA         | MYLK-AS2    |
| NA        | ENSG00000250180 | 0          | NA          | NA         | NA         | NA         |             |
| NA        | ENSG00000250182 | 5.16888708 | 0.07951608  | 0.37084873 | 0.53855862 | 0.74830191 | EEF1A1P13   |
| NA        | ENSG00000250183 | 0          | NA          | NA         | NA         | NA         |             |

|           |                 |            |             |            |            |            |             |
|-----------|-----------------|------------|-------------|------------|------------|------------|-------------|
| NA        | ENSG00000250185 | 0          | NA          | NA         | NA         | NA         | RCC2P8      |
| NA        | ENSG00000250186 | 0.15069912 | -0.01848503 | 0.38480575 | 0.84537521 | NA         |             |
| NA        | ENSG00000250189 | 0          | NA          | NA         | NA         | NA         |             |
| NA        | ENSG00000250190 | 0          | NA          | NA         | NA         | NA         | LINC02364   |
| NA        | ENSG00000250191 | 0          | NA          | NA         | NA         | NA         |             |
| NA        | ENSG00000250192 | 0          | NA          | NA         | NA         | NA         |             |
| NA        | ENSG00000250193 | 0          | NA          | NA         | NA         | NA         |             |
| NA        | ENSG00000250194 | 0          | NA          | NA         | NA         | NA         |             |
| 105377448 | ENSG00000250195 | 0          | NA          | NA         | NA         | NA         |             |
| NA        | ENSG00000250197 | 0.34025547 | 0.00291845  | 0.38338986 | 0.96058914 | NA         | HMGNI1P15   |
| NA        | ENSG00000250198 | 0          | NA          | NA         | NA         | NA         | LINC02199   |
| NA        | ENSG00000250200 | 0          | NA          | NA         | NA         | NA         |             |
| NA        | ENSG00000250202 | 0          | NA          | NA         | NA         | NA         |             |
| 100101121 | ENSG00000250204 | 0          | NA          | NA         | NA         | NA         | TTY23B      |
| NA        | ENSG00000250205 | 0          | NA          | NA         | NA         | NA         | YWAEP4      |
| NA        | ENSG00000250207 | 0          | NA          | NA         | NA         | NA         |             |
| 440119    | ENSG00000250208 | 0          | NA          | NA         | NA         | NA         | FZD10-AS1   |
| NA        | ENSG00000250213 | 0          | NA          | NA         | NA         | NA         |             |
| NA        | ENSG00000250214 | 0.53330581 | 0.03199687  | 0.38614092 | 0.46497895 | NA         |             |
| NA        | ENSG00000250215 | 0.49776449 | -0.00969062 | 0.38280843 | 0.83465729 | NA         | CIR1P2      |
| 100874204 | ENSG00000250218 | 0.173124   | -0.01911262 | 0.38486262 | 0.84537521 | NA         | ALDH1L1-AS1 |
| NA        | ENSG00000250219 | 0          | NA          | NA         | NA         | NA         | LTV1P1      |
| NA        | ENSG00000250220 | 3.26813429 | -0.03502379 | 0.37532412 | 0.70104514 | 0.85586952 |             |
| NA        | ENSG00000250221 | 0          | NA          | NA         | NA         | NA         | KRT8P32     |
| NA        | ENSG00000250222 | 5.6196985  | 0.07799824  | 0.36656285 | 0.56736454 | 0.76893998 |             |
| 100874275 | ENSG00000250223 | 0          | NA          | NA         | NA         | NA         | LINC01216   |
| NA        | ENSG00000250227 | 0          | NA          | NA         | NA         | NA         | TRIM60P14   |
| NA        | ENSG00000250229 | 0          | NA          | NA         | NA         | NA         |             |
| 101927495 | ENSG00000250230 | 0          | NA          | NA         | NA         | NA         |             |
| NA        | ENSG00000250231 | 0          | NA          | NA         | NA         | NA         | USP17L16P   |
| NA        | ENSG00000250234 | 0          | NA          | NA         | NA         | NA         |             |
| NA        | ENSG00000250237 | 0          | NA          | NA         | NA         | NA         |             |
| NA        | ENSG00000250238 | 0          | NA          | NA         | NA         | NA         |             |
| NA        | ENSG00000250240 | 8.21944579 | -0.19856453 | 0.41772997 | 0.19074577 | 0.39211202 |             |
| NA        | ENSG00000250241 | 21.7395407 | 0.25920099  | 0.36501777 | 0.21977906 | 0.43189545 |             |
| NA        | ENSG00000250242 | 0          | NA          | NA         | NA         | NA         |             |
| NA        | ENSG00000250243 | 0          | NA          | NA         | NA         | NA         |             |
| NA        | ENSG00000250244 | 0.14931947 | -0.01844332 | 0.38480212 | 0.84537521 | NA         |             |

|           |                 |            |             |            |            |            |           |
|-----------|-----------------|------------|-------------|------------|------------|------------|-----------|
| NA        | ENSG00000250247 | 0          | NA          | NA         | NA         | NA         | SEPHS2P1  |
| NA        | ENSG00000250249 | 0          | NA          | NA         | NA         | NA         |           |
| 101929472 | ENSG00000250250 | 0          | NA          | NA         | NA         | NA         |           |
| NA        | ENSG00000250251 | 1014.09043 | 0.09388848  | 0.11375055 | 0.38792728 | 0.61690263 | PKD1P6    |
| 107986319 | ENSG00000250252 | 0          | NA          | NA         | NA         | NA         | LINC02430 |
| NA        | ENSG00000250253 | 0          | NA          | NA         | NA         | NA         |           |
| 10744     | ENSG00000250254 | 0          | NA          | NA         | NA         | NA         | PTTG2     |
| NA        | ENSG00000250256 | 0          | NA          | NA         | NA         | NA         |           |
| NA        | ENSG00000250257 | 0          | NA          | NA         | NA         | NA         | LDHAL6DP  |
| NA        | ENSG00000250258 | 0          | NA          | NA         | NA         | NA         |           |
| NA        | ENSG00000250259 | 0          | NA          | NA         | NA         | NA         |           |
| NA        | ENSG00000250260 | 0.18922458 | 0.01954053  | 0.38488496 | 0.78225479 | NA         |           |
| NA        | ENSG00000250261 | 0          | NA          | NA         | NA         | NA         | CCDC74BP1 |
| 105377556 | ENSG00000250263 | 0          | NA          | NA         | NA         | NA         | LINC02509 |
| NA        | ENSG00000250264 | 186.682272 | -0.79795581 | 0.29262408 | 0.00094215 | 0.0056302  |           |
| 101928223 | ENSG00000250266 | 0          | NA          | NA         | NA         | NA         | LINC01612 |
| NA        | ENSG00000250267 | 0.14931947 | -0.01844332 | 0.38480212 | 0.84537521 | NA         |           |
| NA        | ENSG00000250268 | 0          | NA          | NA         | NA         | NA         | ALG1L14P  |
| NA        | ENSG00000250271 | 0          | NA          | NA         | NA         | NA         |           |
| NA        | ENSG00000250272 | 0          | NA          | NA         | NA         | NA         | TRMT112P1 |
| NA        | ENSG00000250273 | 0          | NA          | NA         | NA         | NA         | PSMC1P5   |
| 100128059 | ENSG00000250274 | 0          | NA          | NA         | NA         | NA         |           |
| NA        | ENSG00000250277 | 0          | NA          | NA         | NA         | NA         |           |
| NA        | ENSG00000250280 | 0          | NA          | NA         | NA         | NA         |           |
| NA        | ENSG00000250282 | 2.03152252 | 0.08687474  | 0.39325645 | 0.22011326 | NA         |           |
| NA        | ENSG00000250284 | 0          | NA          | NA         | NA         | NA         |           |
| 105371824 | ENSG00000250286 | 6.64983854 | 0.21433219  | 0.43529279 | 0.1441122  | 0.32391367 |           |
| NA        | ENSG00000250289 | 0          | NA          | NA         | NA         | NA         | VWA8P1    |
| NA        | ENSG00000250290 | 0          | NA          | NA         | NA         | NA         | NCAPGP1   |
| NA        | ENSG00000250292 | 0          | NA          | NA         | NA         | NA         |           |
| NA        | ENSG00000250293 | 0          | NA          | NA         | NA         | NA         | CRYZP2    |
| 101926926 | ENSG00000250295 | 0.64960028 | 0.00502767  | 0.3819765  | 0.9144766  | NA         | RDH10-AS1 |
| 100507096 | ENSG00000250298 | 0          | NA          | NA         | NA         | NA         | GIMD1     |
| NA        | ENSG00000250299 | 17.0126742 | 0.1330071   | 0.35206242 | 0.45370353 | 0.67695556 | MRPS31P4  |
| NA        | ENSG00000250300 | 0          | NA          | NA         | NA         | NA         |           |
| 152578    | ENSG00000250302 | 8.72757497 | -0.37393538 | 0.68427892 | 0.01075354 | 0.04398973 | LINC01618 |
| 107986281 | ENSG00000250302 | 8.72757497 | -0.37393538 | 0.68427892 | 0.01075354 | 0.04398973 | LINC01618 |
| 283140    | ENSG00000250303 | 10.0847003 | 0.09654988  | 0.35721217 | 0.54392072 | 0.75196063 | LINC02762 |

|           |                 |            |             |            |            |            |            |
|-----------|-----------------|------------|-------------|------------|------------|------------|------------|
| NA        | ENSG00000250304 | 0          | NA          | NA         | NA         | NA         | ZBED1P1    |
| 57604     | ENSG00000250305 | 1.81865749 | 0.01985777  | 0.37900783 | 0.76745443 | NA         | TRMT9B     |
| NA        | ENSG00000250306 | 0          | NA          | NA         | NA         | NA         |            |
| NA        | ENSG00000250307 | 0          | NA          | NA         | NA         | NA         | TUBB8P3    |
| NA        | ENSG00000250308 | 0          | NA          | NA         | NA         | NA         | SALL4P1    |
| NA        | ENSG00000250309 | 4.77455157 | 0.08491523  | 0.37241259 | 0.51120093 | 0.72640667 |            |
| NA        | ENSG00000250310 | 0          | NA          | NA         | NA         | NA         |            |
| 255403    | ENSG00000250312 | 11.9407667 | -2.27929088 | 0.95074917 | 0.00069938 | 0.00432533 | ZNF718     |
| NA        | ENSG00000250313 | 0          | NA          | NA         | NA         | NA         | LINC02229  |
| NA        | ENSG00000250315 | 0          | NA          | NA         | NA         | NA         |            |
| NA        | ENSG00000250316 | 0          | NA          | NA         | NA         | NA         |            |
| 389203    | ENSG00000250317 | 288.056461 | 0.07100555  | 0.14677615 | 0.60291941 | 0.79296792 | SMIM20     |
| NA        | ENSG00000250318 | 18.0164674 | 0.23909856  | 0.37993357 | 0.23546826 | 0.45228872 |            |
| NA        | ENSG00000250319 | 0          | NA          | NA         | NA         | NA         |            |
| NA        | ENSG00000250320 | 8.92303761 | -0.17000011 | 0.40295352 | 0.23560203 | 0.45240308 | EDIL3-DT   |
| NA        | ENSG00000250321 | 0          | NA          | NA         | NA         | NA         |            |
| NA        | ENSG00000250322 | 0          | NA          | NA         | NA         | NA         |            |
| NA        | ENSG00000250324 | 0          | NA          | NA         | NA         | NA         | MRPL22P1   |
| NA        | ENSG00000250325 | 0          | NA          | NA         | NA         | NA         | IGBP1P4    |
| 105377623 | ENSG00000250326 | 43.6373954 | 0.75466565  | 0.40986903 | 0.00857043 | 0.03655146 |            |
| NA        | ENSG00000250327 | 7.74623049 | -0.09677557 | 0.36169193 | 0.52409919 | 0.73698546 | RPSAP70    |
| 153163    | ENSG00000250328 | 0          | NA          | NA         | NA         | NA         |            |
| NA        | ENSG00000250329 | 0          | NA          | NA         | NA         | NA         | KDEL3P1    |
| NA        | ENSG00000250330 | 0          | NA          | NA         | NA         | NA         |            |
| 102546227 | ENSG00000250331 | 0.50722456 | -0.0300376  | 0.3859506  | 0.51715697 | NA         | LINC01340  |
| NA        | ENSG00000250332 | 0          | NA          | NA         | NA         | NA         |            |
| NA        | ENSG00000250333 | 0.30002138 | -0.02294464 | 0.38527539 | 0.68644531 | NA         |            |
| 100506035 | ENSG00000250334 | 0.45590073 | 0.00213458  | 0.38310763 | 0.9162374  | NA         | LINC00989  |
| 643401    | ENSG00000250337 | 20.8836625 | 0.53425269  | 0.50207763 | 0.04716241 | 0.1422151  | PURPL      |
| NA        | ENSG00000250338 | 0          | NA          | NA         | NA         | NA         |            |
| NA        | ENSG00000250339 | 0          | NA          | NA         | NA         | NA         | CXCL1P1    |
| 105377671 | ENSG00000250340 | 0          | NA          | NA         | NA         | NA         | LINC02494  |
| NA        | ENSG00000250341 | 0          | NA          | NA         | NA         | NA         | LINC02510  |
| NA        | ENSG00000250342 | 0          | NA          | NA         | NA         | NA         | SNRPCP16   |
| NA        | ENSG00000250343 | 2.00399587 | 0.01854406  | 0.37922257 | 0.78883882 | NA         | STK32A-AS1 |
| NA        | ENSG00000250344 | 0          | NA          | NA         | NA         | NA         |            |
| NA        | ENSG00000250345 | 0.34225149 | 0.00308392  | 0.3833931  | 0.95823979 | NA         |            |
| NA        | ENSG00000250346 | 0          | NA          | NA         | NA         | NA         | EEF1GP2    |

|           |                 |            |             |            |            |            |           |
|-----------|-----------------|------------|-------------|------------|------------|------------|-----------|
| NA        | ENSG00000250347 | 0          | NA          | NA         | NA         | NA         |           |
| NA        | ENSG00000250348 | 0.30001561 | -0.02294458 | 0.38527538 | 0.68644891 | NA         |           |
| NA        | ENSG00000250349 | 0.33471731 | 0.02354391  | 0.38534154 | 0.62842204 | NA         |           |
| NA        | ENSG00000250350 | 0          | NA          | NA         | NA         | NA         |           |
| NA        | ENSG00000250351 | 0          | NA          | NA         | NA         | NA         | H3P20     |
| NA        | ENSG00000250354 | 0          | NA          | NA         | NA         | NA         |           |
| NA        | ENSG00000250356 | 0          | NA          | NA         | NA         | NA         | HSPE1P23  |
| NA        | ENSG00000250357 | 0          | NA          | NA         | NA         | NA         |           |
| NA        | ENSG00000250358 | 0          | NA          | NA         | NA         | NA         | LINC02200 |
| NA        | ENSG00000250359 | 0          | NA          | NA         | NA         | NA         | PTP4A1P4  |
| NA        | ENSG00000250360 | 17.2933433 | -0.28235445 | 0.40662517 | 0.17369306 | 0.36679833 |           |
| 2994      | ENSG00000250361 | 0.18922458 | 0.01954053  | 0.38488496 | 0.78225479 | NA         | GYPB      |
| NA        | ENSG00000250362 | 0          | NA          | NA         | NA         | NA         |           |
| NA        | ENSG00000250363 | 0          | NA          | NA         | NA         | NA         | KRT18P21  |
| 101927124 | ENSG00000250365 | 22.2113753 | -0.40417878 | 0.45368852 | 0.08909842 | 0.22877088 |           |
| NA        | ENSG00000250366 | 292.428207 | -4.91004383 | 0.26194594 | 1.46E-79   | 2.95E-77   | TUNAR     |
| NA        | ENSG00000250371 | 2.30184034 | 0.059688    | 0.38636799 | 0.36094195 | NA         |           |
| NA        | ENSG00000250372 | 0          | NA          | NA         | NA         | NA         | MARK2P4   |
| NA        | ENSG00000250374 | 0.15069912 | -0.01848503 | 0.38480575 | 0.84537521 | NA         | TRIM75P   |
| NA        | ENSG00000250375 | 0          | NA          | NA         | NA         | NA         |           |
| NA        | ENSG00000250376 | 0          | NA          | NA         | NA         | NA         |           |
| NA        | ENSG00000250377 | 0.90498843 | 0.00390299  | 0.38124803 | 0.94003627 | NA         |           |
| NA        | ENSG00000250378 | 0          | NA          | NA         | NA         | NA         |           |
| NA        | ENSG00000250379 | 0          | NA          | NA         | NA         | NA         |           |
| NA        | ENSG00000250381 | 0          | NA          | NA         | NA         | NA         | UNC93B4   |
| NA        | ENSG00000250383 | 0          | NA          | NA         | NA         | NA         |           |
| NA        | ENSG00000250384 | 0          | NA          | NA         | NA         | NA         | UBE2CP3   |
| NA        | ENSG00000250385 | 0          | NA          | NA         | NA         | NA         |           |
| NA        | ENSG00000250386 | 0          | NA          | NA         | NA         | NA         | H3P21     |
| NA        | ENSG00000250387 | 0.4289117  | 0.01375351  | 0.38390612 | 0.84431391 | NA         | LINC02197 |
| NA        | ENSG00000250389 | 0          | NA          | NA         | NA         | NA         | MTND6P2   |
| NA        | ENSG00000250390 | 0          | NA          | NA         | NA         | NA         |           |
| NA        | ENSG00000250391 | 0          | NA          | NA         | NA         | NA         | CRLF3P2   |
| 100996694 | ENSG00000250392 | 0          | NA          | NA         | NA         | NA         | LINC02502 |
| NA        | ENSG00000250393 | 0          | NA          | NA         | NA         | NA         |           |
| NA        | ENSG00000250397 | 55.1334355 | 0.05937924  | 0.25094671 | 0.75724464 | 0.88697677 |           |
| NA        | ENSG00000250398 | 0          | NA          | NA         | NA         | NA         |           |
| NA        | ENSG00000250402 | 0          | NA          | NA         | NA         | NA         |           |



|           |                 |            |             |            |            |            |            |
|-----------|-----------------|------------|-------------|------------|------------|------------|------------|
| NA        | ENSG00000250403 | 0          | NA          | NA         | NA         | NA         |            |
| NA        | ENSG00000250405 | 0          | NA          | NA         | NA         | NA         |            |
| NA        | ENSG00000250406 | 0          | NA          | NA         | NA         | NA         |            |
| NA        | ENSG00000250407 | 0          | NA          | NA         | NA         | NA         |            |
| NA        | ENSG00000250409 | 0          | NA          | NA         | NA         | NA         |            |
| NA        | ENSG00000250410 | 2.07838483 | -0.09448015 | 0.3947902  | 0.2171025  | NA         |            |
| NA        | ENSG00000250412 | 1.80631725 | 0.06816885  | 0.38884736 | 0.29010629 | NA         | KLHL2P1    |
| NA        | ENSG00000250413 | 0          | NA          | NA         | NA         | NA         | SLC2A9-AS1 |
| NA        | ENSG00000250415 | 0          | NA          | NA         | NA         | NA         |            |
| NA        | ENSG00000250416 | 0          | NA          | NA         | NA         | NA         | SEC63P2    |
| 101929034 | ENSG00000250417 | 0          | NA          | NA         | NA         | NA         | LINC02116  |
| NA        | ENSG00000250418 | 0          | NA          | NA         | NA         | NA         |            |
| 729522    | ENSG00000250420 | 3.87652299 | 0.02274021  | 0.36943915 | 0.8329825  | 0.9239848  | AACSP1     |
| NA        | ENSG00000250421 | 0          | NA          | NA         | NA         | NA         |            |
| NA        | ENSG00000250422 | 0          | NA          | NA         | NA         | NA         |            |
| 57481     | ENSG00000250423 | 0          | NA          | NA         | NA         | NA         | KIAA1210   |
| NA        | ENSG00000250424 | 1.5912519  | 0.08383863  | 0.39692031 | 0.08599443 | NA         |            |
| NA        | ENSG00000250425 | 0          | NA          | NA         | NA         | NA         | OR7E35P    |
| 100130017 | ENSG00000250426 | 0          | NA          | NA         | NA         | NA         | FTLP10     |
| 100505811 | ENSG00000250427 | 0          | NA          | NA         | NA         | NA         | LINC02148  |
| NA        | ENSG00000250428 | 0          | NA          | NA         | NA         | NA         | MRS2P1     |
| NA        | ENSG00000250430 | 0          | NA          | NA         | NA         | NA         |            |
| NA        | ENSG00000250431 | 0          | NA          | NA         | NA         | NA         |            |
| NA        | ENSG00000250432 | 7.0183568  | -0.16118379 | 0.39633487 | 0.27130392 | 0.49473993 | FAM242C    |
| 101927808 | ENSG00000250433 | 0          | NA          | NA         | NA         | NA         | CLSTN2-AS1 |
| 728040    | ENSG00000250436 | 0          | NA          | NA         | NA         | NA         | LINC02499  |
| NA        | ENSG00000250437 | 0          | NA          | NA         | NA         | NA         | LINC02161  |
| NA        | ENSG00000250438 | 0          | NA          | NA         | NA         | NA         |            |
| NA        | ENSG00000250441 | 0.16735865 | 0.01897177  | 0.38482933 | 0.78225479 | NA         |            |
| NA        | ENSG00000250442 | 0          | NA          | NA         | NA         | NA         | EIF3KP3    |
| NA        | ENSG00000250444 | 0.29863895 | -0.02292439 | 0.3852726  | 0.68753245 | NA         | CCT5P1     |
| NA        | ENSG00000250446 | 0          | NA          | NA         | NA         | NA         | LINC01332  |
| 105378966 | ENSG00000250447 | 0.30139824 | -0.02296476 | 0.38527817 | 0.68536535 | NA         | LINC02105  |
| NA        | ENSG00000250448 | 28.9533978 | -0.72255355 | 0.51992709 | 0.01830253 | 0.06767091 |            |
| 100874363 | ENSG00000250451 | 6.24529219 | -0.09735209 | 0.38552805 | 0.36406188 | 0.59381904 | HOXC-AS1   |
| NA        | ENSG00000250453 | 0.15069912 | -0.01848503 | 0.38480575 | 0.84537521 | NA         |            |
| NA        | ENSG00000250455 | 0          | NA          | NA         | NA         | NA         |            |
| 339978    | ENSG00000250456 | 0          | NA          | NA         | NA         | NA         | LINC02260  |

|           |                 |            |             |            |            |            |            |
|-----------|-----------------|------------|-------------|------------|------------|------------|------------|
| NA        | ENSG00000250458 | 0          | NA          | NA         | NA         | NA         |            |
| NA        | ENSG00000250461 | 0          | NA          | NA         | NA         | NA         |            |
| NA        | ENSG00000250462 | 490.288932 | 0.09301542  | 0.12354196 | 0.42696987 | 0.65286501 | LRRC37BP1  |
| NA        | ENSG00000250464 | 0          | NA          | NA         | NA         | NA         | LRRC34P2   |
| NA        | ENSG00000250467 | 83.2859562 | -0.06012257 | 0.22314668 | 0.73973472 | 0.8770894  | PHOX2B-AS1 |
| NA        | ENSG00000250470 | 0.3000207  | -0.02294463 | 0.38527539 | 0.68644573 | NA         |            |
| NA        | ENSG00000250471 | 0.14931947 | -0.01844332 | 0.38480212 | 0.84537521 | NA         | GMPS1      |
| NA        | ENSG00000250472 | 0.34113318 | 0.00136329  | 0.38336773 | 0.95233284 | NA         | TRIM36-IT1 |
| NA        | ENSG00000250473 | 0.18922458 | 0.01954053  | 0.38488496 | 0.78225479 | NA         | DUTP7      |
| NA        | ENSG00000250474 | 11.1157852 | 0.32639316  | 0.48588629 | 0.10532531 | 0.25877695 | WBP1LP2    |
| NA        | ENSG00000250475 | 0          | NA          | NA         | NA         | NA         |            |
| NA        | ENSG00000250476 | 0          | NA          | NA         | NA         | NA         | ENPP7P9    |
| 400916    | ENSG00000250479 | 314.117323 | -0.26018251 | 0.14023367 | 0.04546701 | 0.13826877 | CHCHD10    |
| NA        | ENSG00000250480 | 0          | NA          | NA         | NA         | NA         |            |
| NA        | ENSG00000250481 | 0          | NA          | NA         | NA         | NA         |            |
| NA        | ENSG00000250482 | 0          | NA          | NA         | NA         | NA         | DUX4L51    |
| NA        | ENSG00000250483 | 1.33799559 | 0.05639784  | 0.38536441 | 0.39823472 | NA         | PPM1AP1    |
| NA        | ENSG00000250484 | 0          | NA          | NA         | NA         | NA         | PPIAP76    |
| NA        | ENSG00000250485 | 0          | NA          | NA         | NA         | NA         | EXOC7P1    |
| 152756    | ENSG00000250486 | 0.64927623 | -0.0228036  | 0.38267633 | 0.65516003 | NA         | FAM218A    |
| NA        | ENSG00000250488 | 0          | NA          | NA         | NA         | NA         | LINC02233  |
| 401172    | ENSG00000250490 | 4.56166598 | 0.03723201  | 0.36988271 | 0.72944202 | 0.87060877 | LINC02145  |
| NA        | ENSG00000250492 | 0          | NA          | NA         | NA         | NA         | INTS6P1    |
| 101929227 | ENSG00000250493 | 0.52795596 | 0.01273932  | 0.38339561 | 0.75641212 | NA         |            |
| NA        | ENSG00000250494 | 0          | NA          | NA         | NA         | NA         |            |
| NA        | ENSG00000250496 | 0.18922458 | 0.01954053  | 0.38488496 | 0.78225479 | NA         | ABT1P1     |
| NA        | ENSG00000250497 | 0          | NA          | NA         | NA         | NA         |            |
| NA        | ENSG00000250500 | 0          | NA          | NA         | NA         | NA         |            |
| NA        | ENSG00000250501 | 0          | NA          | NA         | NA         | NA         |            |
| NA        | ENSG00000250503 | 0          | NA          | NA         | NA         | NA         |            |
| NA        | ENSG00000250504 | 0          | NA          | NA         | NA         | NA         | KRT18P51   |
| NA        | ENSG00000250505 | 0          | NA          | NA         | NA         | NA         |            |
| 1018      | ENSG00000250506 | 252.422856 | 0.48471684  | 0.16422236 | 0.00122367 | 0.00704108 | CDK3       |
| NA        | ENSG00000250507 | 0          | NA          | NA         | NA         | NA         |            |
| 105369364 | ENSG00000250508 | 2.5152227  | 0.02518055  | 0.3742788  | 0.78569078 | NA         | LINC02701  |
| NA        | ENSG00000250509 | 0          | NA          | NA         | NA         | NA         |            |
| 27239     | ENSG00000250510 | 395.003236 | -0.00741062 | 0.12697096 | 0.95426787 | 0.98112988 | GPR162     |
| NA        | ENSG00000250511 | 0          | NA          | NA         | NA         | NA         |            |

|           |                 |            |             |            |            |            |           |
|-----------|-----------------|------------|-------------|------------|------------|------------|-----------|
| 101928203 | ENSG00000250514 | 0          | NA          | NA         | NA         | NA         | LINC02125 |
| NA        | ENSG00000250515 | 0          | NA          | NA         | NA         | NA         |           |
| NA        | ENSG00000250516 | 0.16735865 | 0.01897177  | 0.38482933 | 0.78225479 | NA         |           |
| NA        | ENSG00000250517 | 0          | NA          | NA         | NA         | NA         | LDHAL6CP  |
| NA        | ENSG00000250519 | 11.4079621 | -0.44968227 | 0.6905382  | 0.03387746 | 0.11058388 |           |
| NA        | ENSG00000250522 | 0          | NA          | NA         | NA         | NA         |           |
| NA        | ENSG00000250523 | 0          | NA          | NA         | NA         | NA         |           |
| NA        | ENSG00000250524 | 0          | NA          | NA         | NA         | NA         |           |
| NA        | ENSG00000250526 | 0          | NA          | NA         | NA         | NA         | CCT6P2    |
| 105374631 | ENSG00000250529 | 0          | NA          | NA         | NA         | NA         | LINC02121 |
| NA        | ENSG00000250532 | 0          | NA          | NA         | NA         | NA         |           |
| NA        | ENSG00000250535 | 0          | NA          | NA         | NA         | NA         | STK19B    |
| NA        | ENSG00000250536 | 0.86671444 | -0.00851491 | 0.38213738 | 0.8570168  | NA         | ABHD17AP3 |
| NA        | ENSG00000250538 | 3.11536975 | -0.04286614 | 0.3738302  | 0.67153077 | 0.83826144 |           |
| NA        | ENSG00000250539 | 23.3100902 | 0.0271783   | 0.30315326 | 0.88672297 | 0.95023138 | KRT8P33   |
| NA        | ENSG00000250540 | 0          | NA          | NA         | NA         | NA         |           |
| NA        | ENSG00000250541 | 0          | NA          | NA         | NA         | NA         |           |
| NA        | ENSG00000250543 | 0.33471731 | 0.02354391  | 0.38534154 | 0.62842204 | NA         |           |
| NA        | ENSG00000250544 | 0          | NA          | NA         | NA         | NA         | LINC02059 |
| 101928978 | ENSG00000250546 | 0          | NA          | NA         | NA         | NA         |           |
| NA        | ENSG00000250547 | 0          | NA          | NA         | NA         | NA         |           |
| 101927780 | ENSG00000250548 | 0          | NA          | NA         | NA         | NA         | LINC01303 |
| NA        | ENSG00000250550 | 0          | NA          | NA         | NA         | NA         | PPBPP1    |
| NA        | ENSG00000250551 | 0          | NA          | NA         | NA         | NA         | MIR583HG  |
| NA        | ENSG00000250555 | 0          | NA          | NA         | NA         | NA         |           |
| NA        | ENSG00000250556 | 0          | NA          | NA         | NA         | NA         | CCDC34P1  |
| NA        | ENSG00000250560 | 0          | NA          | NA         | NA         | NA         |           |
| NA        | ENSG00000250561 | 0          | NA          | NA         | NA         | NA         | OR7E59P   |
| NA        | ENSG00000250562 | 0          | NA          | NA         | NA         | NA         | RPL38P4   |
| NA        | ENSG00000250563 | 0          | NA          | NA         | NA         | NA         | KNOP1P5   |
| 102546229 | ENSG00000250564 | 0          | NA          | NA         | NA         | NA         |           |
| 90423     | ENSG00000250565 | 400.071341 | 0.19868143  | 0.13469571 | 0.11457492 | 0.27548308 | ATP6V1E2  |
| NA        | ENSG00000250566 | 0          | NA          | NA         | NA         | NA         | UGT2B29P  |
| NA        | ENSG00000250567 | 0          | NA          | NA         | NA         | NA         |           |
| NA        | ENSG00000250568 | 0          | NA          | NA         | NA         | NA         |           |
| NA        | ENSG00000250569 | 3.63871415 | -0.00411041 | 0.36581546 | 0.96941658 | 0.98853525 | NTAN1P2   |
| 2738      | ENSG00000250571 | 372.694368 | 0.22725314  | 0.13489368 | 0.07126928 | 0.19409505 | GLI4      |
| NA        | ENSG00000250572 | 0          | NA          | NA         | NA         | NA         |           |

|           |                 |            |             |            |            |            |            |
|-----------|-----------------|------------|-------------|------------|------------|------------|------------|
| NA        | ENSG00000250573 | 0          | NA          | NA         | NA         | NA         |            |
| NA        | ENSG00000250574 | 0          | NA          | NA         | NA         | NA         |            |
| NA        | ENSG00000250575 | 279.863482 | 0.18169994  | 0.14514785 | 0.1758594  | 0.37013108 |            |
| NA        | ENSG00000250576 | 0          | NA          | NA         | NA         | NA         |            |
| NA        | ENSG00000250577 | 0          | NA          | NA         | NA         | NA         |            |
| 101929176 | ENSG00000250579 | 2.40052506 | -0.07940448 | 0.38658434 | 0.35600017 | NA         |            |
| NA        | ENSG00000250580 | 0          | NA          | NA         | NA         | NA         | SNRPCP8    |
| 101927659 | ENSG00000250582 | 0.29863895 | -0.02292439 | 0.3852726  | 0.68753245 | NA         | SMAD1-AS2  |
| NA        | ENSG00000250583 | 0          | NA          | NA         | NA         | NA         |            |
| 100506791 | ENSG00000250584 | 0.34624801 | -0.02356563 | 0.38536324 | 0.65270996 | NA         | LINC01511  |
| 106144578 | ENSG00000250585 | 0          | NA          | NA         | NA         | NA         | LINC00604  |
| NA        | ENSG00000250587 | 0          | NA          | NA         | NA         | NA         | HPRT1P2    |
| NA        | ENSG00000250590 | 0.37844916 | 0.02407552  | 0.3854191  | 0.60038877 | NA         | LINC02492  |
| NA        | ENSG00000250591 | 0          | NA          | NA         | NA         | NA         | PRSS3P1    |
| NA        | ENSG00000250592 | 4.68891684 | -0.0585639  | 0.36845068 | 0.63179958 | 0.81371846 |            |
| NA        | ENSG00000250594 | 0          | NA          | NA         | NA         | NA         | RNF14P2    |
| NA        | ENSG00000250596 | 0.173124   | -0.01911262 | 0.38486262 | 0.84537521 | NA         |            |
| NA        | ENSG00000250597 | 0          | NA          | NA         | NA         | NA         |            |
| NA        | ENSG00000250600 | 0          | NA          | NA         | NA         | NA         | ROPN1L-AS1 |
| NA        | ENSG00000250602 | 0          | NA          | NA         | NA         | NA         |            |
| NA        | ENSG00000250603 | 0          | NA          | NA         | NA         | NA         |            |
| NA        | ENSG00000250604 | 0          | NA          | NA         | NA         | NA         |            |
| 339874    | ENSG00000250608 | 16.1068408 | 0.61135106  | 0.62031067 | 0.03484979 | 0.11295863 |            |
| NA        | ENSG00000250609 | 0          | NA          | NA         | NA         | NA         |            |
| NA        | ENSG00000250611 | 0          | NA          | NA         | NA         | NA         |            |
| NA        | ENSG00000250612 | 0          | NA          | NA         | NA         | NA         |            |
| NA        | ENSG00000250613 | 0          | NA          | NA         | NA         | NA         |            |
| NA        | ENSG00000250614 | 0          | NA          | NA         | NA         | NA         |            |
| NA        | ENSG00000250615 | 7.98210638 | 0.05890456  | 0.37425591 | 0.59089561 | 0.78559063 |            |
| NA        | ENSG00000250616 | 12.4167349 | 0.09690149  | 0.3464599  | 0.56986813 | 0.77039833 |            |
| NA        | ENSG00000250618 | 0          | NA          | NA         | NA         | NA         |            |
| NA        | ENSG00000250619 | 0          | NA          | NA         | NA         | NA         |            |
| NA        | ENSG00000250620 | 0          | NA          | NA         | NA         | NA         | LINC02515  |
| NA        | ENSG00000250622 | 0          | NA          | NA         | NA         | NA         |            |
| NA        | ENSG00000250623 | 0          | NA          | NA         | NA         | NA         |            |
| NA        | ENSG00000250624 | 0          | NA          | NA         | NA         | NA         | MTCYBP43   |
| NA        | ENSG00000250625 | 0          | NA          | NA         | NA         | NA         |            |
| NA        | ENSG00000250626 | 0          | NA          | NA         | NA         | NA         |            |

|           |                 |            |             |            |            |            |               |
|-----------|-----------------|------------|-------------|------------|------------|------------|---------------|
| NA        | ENSG00000250627 | 0          | NA          | NA         | NA         | NA         | TTC39CP1      |
| NA        | ENSG00000250629 | 0          | NA          | NA         | NA         | NA         |               |
| NA        | ENSG00000250630 | 0          | NA          | NA         | NA         | NA         | MTCO1P35      |
| 100133461 | ENSG00000250632 | 0          | NA          | NA         | NA         | NA         | LINC02171     |
| 101929071 | ENSG00000250634 | 0.14931947 | -0.01844332 | 0.38480212 | 0.84537521 | NA         | LINC01182     |
| 111082989 | ENSG00000250635 | 0.62294831 | -0.04507565 | 0.3875689  | 0.37404731 | NA         | CXXC5-AS1     |
| NA        | ENSG00000250636 | 0          | NA          | NA         | NA         | NA         |               |
| NA        | ENSG00000250637 | 0          | NA          | NA         | NA         | NA         |               |
| NA        | ENSG00000250640 | 0          | NA          | NA         | NA         | NA         | OR7E41P       |
| 110599563 | ENSG00000250641 | 0          | NA          | NA         | NA         | NA         | LY6G6F-LY6G6D |
| NA        | ENSG00000250642 | 0          | NA          | NA         | NA         | NA         |               |
| NA        | ENSG00000250643 | 0          | NA          | NA         | NA         | NA         |               |
| NA        | ENSG00000250644 | 525.341211 | -1.00791116 | 0.13955319 | 6.67E-14   | 1.67E-12   |               |
| NA        | ENSG00000250645 | 0.4879698  | 0.01118965  | 0.38339023 | 0.78650698 | NA         |               |
| NA        | ENSG00000250646 | 0          | NA          | NA         | NA         | NA         |               |
| NA        | ENSG00000250650 | 0          | NA          | NA         | NA         | NA         |               |
| NA        | ENSG00000250651 | 2.18805286 | -0.02978452 | 0.37442476 | 0.7470685  | NA         | PABPC1P7      |
| 100240735 | ENSG00000250654 | 0.16735865 | 0.01897177  | 0.38482933 | 0.78225479 | NA         |               |
| NA        | ENSG00000250655 | 0          | NA          | NA         | NA         | NA         |               |
| NA        | ENSG00000250656 | 4.39556029 | 0.21920293  | 0.45160421 | 0.09793583 | 0.24536517 | ST3GAL1P1     |
| NA        | ENSG00000250657 | 0          | NA          | NA         | NA         | NA         |               |
| NA        | ENSG00000250658 | 0          | NA          | NA         | NA         | NA         |               |
| NA        | ENSG00000250659 | 0          | NA          | NA         | NA         | NA         |               |
| NA        | ENSG00000250662 | 0.16735865 | 0.01897177  | 0.38482933 | 0.78225479 | NA         | HNRNPKP5      |
| NA        | ENSG00000250665 | 0          | NA          | NA         | NA         | NA         |               |
| 105377617 | ENSG00000250666 | 0          | NA          | NA         | NA         | NA         | LINC01596     |
| NA        | ENSG00000250667 | 0          | NA          | NA         | NA         | NA         |               |
| 101929261 | ENSG00000250668 | 0          | NA          | NA         | NA         | NA         | LINC02123     |
| NA        | ENSG00000250669 | 0          | NA          | NA         | NA         | NA         |               |
| NA        | ENSG00000250670 | 0          | NA          | NA         | NA         | NA         |               |
| NA        | ENSG00000250672 | 0          | NA          | NA         | NA         | NA         |               |
| 345051    | ENSG00000250673 | 2.44590195 | -0.05223954 | 0.38107719 | 0.50285773 | NA         | REELD1        |
| NA        | ENSG00000250674 | 0          | NA          | NA         | NA         | NA         |               |
| NA        | ENSG00000250677 | 0          | NA          | NA         | NA         | NA         |               |
| NA        | ENSG00000250678 | 0.68090388 | 7.62E-06    | 0.38240776 | 0.99826867 | NA         |               |
| NA        | ENSG00000250681 | 0          | NA          | NA         | NA         | NA         |               |
| NA        | ENSG00000250682 | 0          | NA          | NA         | NA         | NA         | LINC00491     |
| NA        | ENSG00000250684 | 0          | NA          | NA         | NA         | NA         | ADI1P2        |

|           |                 |            |             |            |            |            |                |
|-----------|-----------------|------------|-------------|------------|------------|------------|----------------|
| 654780    | ENSG00000250685 | 0          | NA          | NA         | NA         | NA         |                |
| NA        | ENSG00000250686 | 0          | NA          | NA         | NA         | NA         | KHDRBS2-OT1    |
| NA        | ENSG00000250687 | 3.22660534 | -0.0603945  | 0.37524292 | 0.57072693 | 0.77107405 | NAIPP1         |
| NA        | ENSG00000250688 | 0          | NA          | NA         | NA         | NA         | TRAJ55         |
| NA        | ENSG00000250692 | 0.64409194 | -0.0201099  | 0.38305518 | 0.67337056 | NA         |                |
| NA        | ENSG00000250693 | 0          | NA          | NA         | NA         | NA         | RPF2P2         |
| NA        | ENSG00000250694 | 0          | NA          | NA         | NA         | NA         |                |
| NA        | ENSG00000250696 | 0          | NA          | NA         | NA         | NA         |                |
| NA        | ENSG00000250697 | 0          | NA          | NA         | NA         | NA         |                |
| NA        | ENSG00000250698 | 0.16735865 | 0.01897177  | 0.38482933 | 0.78225479 | NA         |                |
| NA        | ENSG00000250699 | 0.50869256 | 0.01525623  | 0.38312517 | 0.73997264 | NA         |                |
| NA        | ENSG00000250703 | 0          | NA          | NA         | NA         | NA         |                |
| NA        | ENSG00000250704 | 0          | NA          | NA         | NA         | NA         |                |
| NA        | ENSG00000250705 | 0          | NA          | NA         | NA         | NA         | H3P23          |
| NA        | ENSG00000250706 | 0          | NA          | NA         | NA         | NA         |                |
| 101928478 | ENSG00000250708 | 2.45178137 | 0.12727199  | 0.40852999 | 0.11563998 | NA         | LINC02269      |
| 100526761 | ENSG00000250709 | 30.4699489 | 1.15189385  | 0.55233786 | 0.00248503 | 0.01290655 | CCDC169-SOHLH2 |
| NA        | ENSG00000250710 | 0          | NA          | NA         | NA         | NA         | OR7E99P        |
| NA        | ENSG00000250711 | 0          | NA          | NA         | NA         | NA         | PRELID3BP7     |
| NA        | ENSG00000250712 | 0          | NA          | NA         | NA         | NA         |                |
| NA        | ENSG00000250714 | 0.16735865 | 0.01897177  | 0.38482933 | 0.78225479 | NA         |                |
| NA        | ENSG00000250715 | 0          | NA          | NA         | NA         | NA         | H3P22          |
| NA        | ENSG00000250716 | 0          | NA          | NA         | NA         | NA         | LINC01017      |
| 110117498 | ENSG00000250719 | 0          | NA          | NA         | NA         | NA         | P3R3URF        |
| NA        | ENSG00000250721 | 0          | NA          | NA         | NA         | NA         | HMGB1P22       |
| 6414      | ENSG00000250722 | 72.5275718 | -0.15599028 | 0.26542061 | 0.42716501 | 0.65297433 | SELENOP        |
| NA        | ENSG00000250723 | 0          | NA          | NA         | NA         | NA         |                |
| NA        | ENSG00000250725 | 0          | NA          | NA         | NA         | NA         |                |
| NA        | ENSG00000250726 | 2.23540014 | 0.08995507  | 0.38772508 | 0.3442507  | NA         |                |
| NA        | ENSG00000250727 | 0          | NA          | NA         | NA         | NA         |                |
| NA        | ENSG00000250728 | 0          | NA          | NA         | NA         | NA         |                |
| NA        | ENSG00000250730 | 0          | NA          | NA         | NA         | NA         | HMGB3P3        |
| NA        | ENSG00000250731 | 0.84575293 | 0.0159271   | 0.38116317 | 0.77750999 | NA         | TPM3P6         |
| NA        | ENSG00000250732 | 0          | NA          | NA         | NA         | NA         | RPEP1          |
| NA        | ENSG00000250733 | 0.173733   | 0.01914545  | 0.38484597 | 0.78225479 | NA         | C8orf17        |
| NA        | ENSG00000250734 | 0          | NA          | NA         | NA         | NA         |                |
| NA        | ENSG00000250735 | 0          | NA          | NA         | NA         | NA         |                |
| 101928971 | ENSG00000250739 | 0          | NA          | NA         | NA         | NA         | LINC01262      |

|           |                 |            |             |            |            |            |              |
|-----------|-----------------|------------|-------------|------------|------------|------------|--------------|
| NA        | ENSG00000250740 | 0          | NA          | NA         | NA         | NA         |              |
| 100526794 | ENSG00000250741 | 0          | NA          | NA         | NA         | NA         | NT5C1B-RDH14 |
| 400043    | ENSG00000250742 | 524.291408 | 0.09487363  | 0.11002666 | 0.36838324 | 0.59780607 | LINC02381    |
| 100287441 | ENSG00000250745 | 0          | NA          | NA         | NA         | NA         | USP17L20     |
| NA        | ENSG00000250746 | 0          | NA          | NA         | NA         | NA         |              |
| NA        | ENSG00000250747 | 0          | NA          | NA         | NA         | NA         |              |
| 105369187 | ENSG00000250748 | 0          | NA          | NA         | NA         | NA         |              |
| NA        | ENSG00000250749 | 0          | NA          | NA         | NA         | NA         |              |
| NA        | ENSG00000250750 | 0          | NA          | NA         | NA         | NA         | OR5BM1P      |
| NA        | ENSG00000250751 | 0.86932426 | 0.04330541  | 0.38476541 | 0.41427759 | NA         |              |
| NA        | ENSG00000250752 | 0          | NA          | NA         | NA         | NA         | RPL23AP96    |
| NA        | ENSG00000250753 | 0.834131   | 0.04758001  | 0.38825843 | 0.28175463 | NA         |              |
| 101928877 | ENSG00000250754 | 0          | NA          | NA         | NA         | NA         | LINC02436    |
| NA        | ENSG00000250756 | 0          | NA          | NA         | NA         | NA         |              |
| NA        | ENSG00000250761 | 0          | NA          | NA         | NA         | NA         |              |
| NA        | ENSG00000250762 | 0          | NA          | NA         | NA         | NA         |              |
| NA        | ENSG00000250764 | 1.60441024 | -0.06842875 | 0.38718473 | 0.34403812 | NA         |              |
| NA        | ENSG00000250765 | 3.59553126 | 0.01679156  | 0.37482275 | 0.85044739 | 0.93230613 | SEPTIN14P5   |
| NA        | ENSG00000250767 | 0          | NA          | NA         | NA         | NA         |              |
| NA        | ENSG00000250768 | 0          | NA          | NA         | NA         | NA         | DPP3P1       |
| NA        | ENSG00000250769 | 1.11135828 | -0.02853881 | 0.3813622  | 0.64705225 | NA         |              |
| NA        | ENSG00000250770 | 15.8892574 | -0.16730975 | 0.3659321  | 0.35191618 | 0.58202876 |              |
| 100419170 | ENSG00000250771 | 0.33226763 | -0.02333258 | 0.38533061 | 0.66400368 | NA         |              |
| 101927007 | ENSG00000250772 | 0          | NA          | NA         | NA         | NA         | LINC01365    |
| NA        | ENSG00000250775 | 0          | NA          | NA         | NA         | NA         |              |
| NA        | ENSG00000250777 | 0          | NA          | NA         | NA         | NA         |              |
| NA        | ENSG00000250778 | 0          | NA          | NA         | NA         | NA         |              |
| 105374428 | ENSG00000250781 | 0.15069912 | -0.01848503 | 0.38480575 | 0.84537521 | NA         |              |
| NA        | ENSG00000250782 | 0.14931947 | -0.01844332 | 0.38480212 | 0.84537521 | NA         | TAF11L14     |
| NA        | ENSG00000250786 | 0.7112367  | 0.04795863  | 0.38799676 | 0.32074611 | NA         | SNHG18       |
| NA        | ENSG00000250787 | 0          | NA          | NA         | NA         | NA         | HMG1P17      |
| NA        | ENSG00000250788 | 0          | NA          | NA         | NA         | NA         | TUBB8P4      |
| NA        | ENSG00000250790 | 5.72418707 | -0.07440981 | 0.37502725 | 0.52104914 | 0.73457437 |              |
| NA        | ENSG00000250791 | 0          | NA          | NA         | NA         | NA         |              |
| NA        | ENSG00000250794 | 0          | NA          | NA         | NA         | NA         | ALG1L12P     |
| NA        | ENSG00000250796 | 4.48072715 | 0.01977515  | 0.36663728 | 0.86395003 | 0.93973512 |              |
| 58510     | ENSG00000250799 | 0          | NA          | NA         | NA         | NA         | PRODH2       |
| NA        | ENSG00000250801 | 0          | NA          | NA         | NA         | NA         | THOC3-AS1    |

|           |    |                 |            |             |            |            |            |            |
|-----------|----|-----------------|------------|-------------|------------|------------|------------|------------|
|           | NA | ENSG00000250802 | 201.455795 | 0.08213253  | 0.16476125 | 0.58246275 | 0.7792354  | ZBED3-AS1  |
| 100505841 | NA | ENSG00000250803 | 0.14931947 | -0.01844332 | 0.38480212 | 0.84537521 | NA         |            |
|           | NA | ENSG00000250804 | 0          | NA          | NA         | NA         | NA         | OR7E111FP  |
|           | NA | ENSG00000250806 | 0          | NA          | NA         | NA         | NA         |            |
|           | NA | ENSG00000250808 | 0          | NA          | NA         | NA         | NA         | MTCO2P30   |
|           | NA | ENSG00000250812 | 0          | NA          | NA         | NA         | NA         |            |
|           | NA | ENSG00000250813 | 0          | NA          | NA         | NA         | NA         | SERF1AP1   |
|           | NA | ENSG00000250814 | 0          | NA          | NA         | NA         | NA         | LINC02221  |
|           | NA | ENSG00000250815 | 0          | NA          | NA         | NA         | NA         |            |
|           | NA | ENSG00000250816 | 0          | NA          | NA         | NA         | NA         | DCAF13P2   |
| 101929123 | NA | ENSG00000250819 | 0          | NA          | NA         | NA         | NA         | LINC02493  |
|           | NA | ENSG00000250820 | 0.173124   | -0.01911262 | 0.38486262 | 0.84537521 | NA         |            |
| 644145    | NA | ENSG00000250821 | 2.52571507 | 0.12724508  | 0.40433012 | 0.17463868 | NA         | EXOC1L     |
| 401177    | NA | ENSG00000250822 | 0          | NA          | NA         | NA         | NA         | LINC02111  |
|           | NA | ENSG00000250825 | 0          | NA          | NA         | NA         | NA         | PGAM1P12   |
|           | NA | ENSG00000250826 | 0          | NA          | NA         | NA         | NA         | HNRNPA3P13 |
|           | NA | ENSG00000250827 | 0          | NA          | NA         | NA         | NA         | MFSD4BP1   |
|           | NA | ENSG00000250828 | 0          | NA          | NA         | NA         | NA         |            |
|           | NA | ENSG00000250829 | 0          | NA          | NA         | NA         | NA         |            |
|           | NA | ENSG00000250830 | 0          | NA          | NA         | NA         | NA         | MRPS35P2   |
|           | NA | ENSG00000250831 | 0          | NA          | NA         | NA         | NA         |            |
|           | NA | ENSG00000250833 | 0          | NA          | NA         | NA         | NA         | DNM1P17    |
|           | NA | ENSG00000250834 | 0          | NA          | NA         | NA         | NA         | KRT18P54   |
|           | NA | ENSG00000250835 | 0          | NA          | NA         | NA         | NA         | LSM3P4     |
|           | NA | ENSG00000250838 | 0          | NA          | NA         | NA         | NA         |            |
|           | NA | ENSG00000250839 | 0          | NA          | NA         | NA         | NA         |            |
|           | NA | ENSG00000250842 | 0          | NA          | NA         | NA         | NA         |            |
| 100287364 | NA | ENSG00000250844 | 0          | NA          | NA         | NA         | NA         | USP17L18   |
| 100144602 | NA | ENSG00000250846 | 0          | NA          | NA         | NA         | NA         | EPHA5-AS1  |
|           | NA | ENSG00000250847 | 0          | NA          | NA         | NA         | NA         |            |
|           | NA | ENSG00000250848 | 5.46725222 | -0.00633559 | 0.36006591 | 0.95778439 | 0.98264776 |            |
|           | NA | ENSG00000250850 | 0          | NA          | NA         | NA         | NA         |            |
|           | NA | ENSG00000250853 | 0.35629283 | 0.02381426  | 0.38538062 | 0.61421315 | NA         | RNF138P1   |
|           | NA | ENSG00000250855 | 0          | NA          | NA         | NA         | NA         |            |
|           | NA | ENSG00000250857 | 0          | NA          | NA         | NA         | NA         | TRIM60P15  |
|           | NA | ENSG00000250858 | 0          | NA          | NA         | NA         | NA         | IGBP1P5    |
|           | NA | ENSG00000250859 | 0.30139824 | -0.02296476 | 0.38527817 | 0.68536535 | NA         | HNRNPKP1   |
|           | NA | ENSG00000250860 | 0          | NA          | NA         | NA         | NA         |            |



|           |    |                 |            |             |            |            |            |           |
|-----------|----|-----------------|------------|-------------|------------|------------|------------|-----------|
|           | NA | ENSG00000250862 | 0          | NA          | NA         | NA         | NA         | HMGB1P29  |
| 105374438 | NA | ENSG00000250863 | 0          | NA          | NA         | NA         | NA         |           |
|           | NA | ENSG00000250865 | 0          | NA          | NA         | NA         | NA         |           |
|           | NA | ENSG00000250866 | 0          | NA          | NA         | NA         | NA         |           |
|           | NA | ENSG00000250868 | 0          | NA          | NA         | NA         | NA         | XKRY      |
|           | NA | ENSG00000250869 | 0.35655934 | 0.02381618  | 0.38538092 | 0.61407852 | NA         |           |
|           | NA | ENSG00000250874 | 17.5974026 | -0.00227881 | 0.32270349 | 0.98770781 | 0.99589897 |           |
|           | NA | ENSG00000250877 | 0          | NA          | NA         | NA         | NA         |           |
| 121952    | NA | ENSG00000250878 | 0          | NA          | NA         | NA         | NA         | METTL21EP |
|           | NA | ENSG00000250882 | 0          | NA          | NA         | NA         | NA         |           |
|           | NA | ENSG00000250884 | 0          | NA          | NA         | NA         | NA         | OR7E85P   |
|           | NA | ENSG00000250885 | 0          | NA          | NA         | NA         | NA         | LINC02061 |
|           | NA | ENSG00000250886 | 0          | NA          | NA         | NA         | NA         |           |
|           | NA | ENSG00000250887 | 0          | NA          | NA         | NA         | NA         |           |
| 105616916 | NA | ENSG00000250888 | 0          | NA          | NA         | NA         | NA         | LINC01455 |
|           | NA | ENSG00000250890 | 0          | NA          | NA         | NA         | NA         |           |
|           | NA | ENSG00000250891 | 0.173124   | -0.01911262 | 0.38486262 | 0.84537521 | NA         | LINC02208 |
|           | NA | ENSG00000250892 | 0          | NA          | NA         | NA         | NA         |           |
|           | NA | ENSG00000250893 | 0          | NA          | NA         | NA         | NA         |           |
|           | NA | ENSG00000250894 | 0          | NA          | NA         | NA         | NA         | PRAMEF31P |
|           | NA | ENSG00000250895 | 0          | NA          | NA         | NA         | NA         | TUBAP15   |
|           | NA | ENSG00000250896 | 0          | NA          | NA         | NA         | NA         | RNPS1P1   |
|           | NA | ENSG00000250897 | 0          | NA          | NA         | NA         | NA         | HMGB3P15  |
|           | NA | ENSG00000250899 | 113.765673 | -0.20467377 | 0.22883424 | 0.27069193 | 0.49398241 |           |
|           | NA | ENSG00000250900 | 1.02622827 | 0.00657074  | 0.38001294 | 0.91411503 | NA         | TRIM7-AS1 |
|           | NA | ENSG00000250902 | 0          | NA          | NA         | NA         | NA         | SMAD1-AS1 |
|           | NA | ENSG00000250903 | 59.6663342 | 0.63531577  | 0.33305607 | 0.01114968 | 0.04534843 | GMDS-DT   |
|           | NA | ENSG00000250905 | 0          | NA          | NA         | NA         | NA         |           |
|           | NA | ENSG00000250906 | 0.37844916 | 0.02407552  | 0.3854191  | 0.60038877 | NA         |           |
|           | NA | ENSG00000250908 | 0          | NA          | NA         | NA         | NA         |           |
|           | NA | ENSG00000250909 | 2.36531515 | -0.0482755  | 0.37682881 | 0.60831621 | NA         |           |
| 102724776 | NA | ENSG00000250910 | 0.8499984  | 0.03694597  | 0.38457735 | 0.46092206 | NA         |           |
|           | NA | ENSG00000250913 | 0          | NA          | NA         | NA         | NA         | USP17L23  |
|           | NA | ENSG00000250914 | 0.4612408  | -0.00702734 | 0.383244   | 0.87677362 | NA         |           |
| 101928532 | NA | ENSG00000250915 | 0          | NA          | NA         | NA         | NA         |           |
|           | NA | ENSG00000250917 | 1.39739831 | 0.05733394  | 0.38576355 | 0.38291152 | NA         |           |
|           | NA | ENSG00000250919 | 0          | NA          | NA         | NA         | NA         | UGT2B26P  |
|           | NA | ENSG00000250920 | 0          | NA          | NA         | NA         | NA         |           |

|           |    |                 |            |             |            |            |            |            |
|-----------|----|-----------------|------------|-------------|------------|------------|------------|------------|
|           | NA | ENSG00000250921 | 0          | NA          | NA         | NA         | NA         | LINC02063  |
|           | NA | ENSG00000250922 | 0          | NA          | NA         | NA         | NA         | ATP5F1EP1  |
|           | NA | ENSG00000250923 | 0          | NA          | NA         | NA         | NA         |            |
|           | NA | ENSG00000250927 | 0          | NA          | NA         | NA         | NA         | MESTP3     |
|           | NA | ENSG00000250928 | 0          | NA          | NA         | NA         | NA         |            |
|           | NA | ENSG00000250929 | 0          | NA          | NA         | NA         | NA         | LINC01181  |
| 100873939 | NA | ENSG00000250930 | 0          | NA          | NA         | NA         | NA         | LNK1-AS1   |
|           | NA | ENSG00000250933 | 0          | NA          | NA         | NA         | NA         | GAPDHP66   |
|           | NA | ENSG00000250934 | 0.173733   | 0.01914545  | 0.38484597 | 0.78225479 | NA         |            |
|           | NA | ENSG00000250938 | 2.48900043 | 0.05378724  | 0.37803748 | 0.56863873 | NA         |            |
|           | NA | ENSG00000250939 | 0          | NA          | NA         | NA         | NA         |            |
|           | NA | ENSG00000250940 | 0          | NA          | NA         | NA         | NA         |            |
|           | NA | ENSG00000250942 | 0          | NA          | NA         | NA         | NA         | ENPP7P11   |
|           | NA | ENSG00000250945 | 0          | NA          | NA         | NA         | NA         |            |
|           | NA | ENSG00000250946 | 0          | NA          | NA         | NA         | NA         |            |
| 106478968 | NA | ENSG00000250947 | 0          | NA          | NA         | NA         | NA         | TRPC7-AS2  |
|           | NA | ENSG00000250948 | 0.83372029 | -0.03064851 | 0.38366061 | 0.52817084 | NA         |            |
|           | NA | ENSG00000250949 | 0          | NA          | NA         | NA         | NA         |            |
|           | NA | ENSG00000250950 | 1.05728859 | -0.04480396 | 0.38535188 | 0.3948114  | NA         |            |
|           | NA | ENSG00000250951 | 0          | NA          | NA         | NA         | NA         | USP9YP1    |
| 101928622 | NA | ENSG00000250954 | 0          | NA          | NA         | NA         | NA         |            |
|           | NA | ENSG00000250955 | 0          | NA          | NA         | NA         | NA         |            |
|           | NA | ENSG00000250956 | 0          | NA          | NA         | NA         | NA         |            |
|           | NA | ENSG00000250957 | 1.06479362 | 0.0521746   | 0.38698204 | 0.32846755 | NA         |            |
| 100861468 | NA | ENSG00000250958 | 0          | NA          | NA         | NA         | NA         | LINC00492  |
| 2749      | NA | ENSG00000250959 | 53.3031924 | 0.2095872   | 0.2717143  | 0.29802751 | 0.52474847 | GLUD1P3    |
|           | NA | ENSG00000250961 | 0          | NA          | NA         | NA         | NA         |            |
|           | NA | ENSG00000250962 | 0.5366059  | 0.01465715  | 0.38298587 | 0.72795631 | NA         |            |
|           | NA | ENSG00000250966 | 2.02500122 | 0.01464065  | 0.37399269 | 0.87192967 | NA         | H3P14      |
| 100506107 | NA | ENSG00000250968 | 0          | NA          | NA         | NA         | NA         | LINC02382  |
|           | NA | ENSG00000250969 | 0          | NA          | NA         | NA         | NA         |            |
|           | NA | ENSG00000250971 | 0          | NA          | NA         | NA         | NA         |            |
|           | NA | ENSG00000250972 | 0          | NA          | NA         | NA         | NA         | CKS1BP5    |
|           | NA | ENSG00000250973 | 0          | NA          | NA         | NA         | NA         | KRTAP13-6P |
|           | NA | ENSG00000250974 | 0          | NA          | NA         | NA         | NA         | LINC02196  |
|           | NA | ENSG00000250976 | 0          | NA          | NA         | NA         | NA         |            |
|           | NA | ENSG00000250977 | 0          | NA          | NA         | NA         | NA         |            |
|           | NA | ENSG00000250978 | 0          | NA          | NA         | NA         | NA         |            |

|           |    |                 |            |             |            |            |            |              |
|-----------|----|-----------------|------------|-------------|------------|------------|------------|--------------|
|           | NA | ENSG00000250979 | 630.905089 | 0.09933558  | 0.10141287 | 0.31011869 | 0.53778389 |              |
|           | NA | ENSG00000250980 | 0          | NA          | NA         | NA         | NA         | NSA2P6       |
|           | NA | ENSG00000250981 | 0.32473357 | 0.00156926  | 0.38337024 | 0.96528412 | NA         | MARCHF11-AS1 |
|           | NA | ENSG00000250982 | 0.87045417 | 0.06316002  | 0.39093441 | 0.21098458 | NA         | GAPDHP35     |
|           | NA | ENSG00000250983 | 0          | NA          | NA         | NA         | NA         |              |
|           | NA | ENSG00000250984 | 0          | NA          | NA         | NA         | NA         |              |
|           | NA | ENSG00000250986 | 40.3765519 | -1.29790649 | 0.41031686 | 0.00011823 | 0.00088384 | LINC02600    |
| 100505616 | NA | ENSG00000250988 | 82.5003091 | 0.16810398  | 0.2186802  | 0.3534701  | 0.58377148 | SNHG21       |
|           | NA | ENSG00000250990 | 0.67597091 | 0.01894948  | 0.38348267 | 0.63567666 | NA         |              |
|           | NA | ENSG00000250992 | 0          | NA          | NA         | NA         | NA         |              |
|           | NA | ENSG00000250993 | 0          | NA          | NA         | NA         | NA         |              |
|           | NA | ENSG00000250994 | 0          | NA          | NA         | NA         | NA         |              |
|           | NA | ENSG00000250995 | 0.85630477 | 0.04981597  | 0.38860994 | 0.26682509 | NA         | TMEM30BP1    |
|           | NA | ENSG00000250997 | 0          | NA          | NA         | NA         | NA         |              |
|           | NA | ENSG00000250999 | 12.9443647 | 0.04362498  | 0.33400002 | 0.79841897 | 0.90769144 |              |
|           | NA | ENSG00000251000 | 0          | NA          | NA         | NA         | NA         | GGCTP1       |
|           | NA | ENSG00000251001 | 0          | NA          | NA         | NA         | NA         |              |
| 105370401 | NA | ENSG00000251002 | 3.90004111 | 0.22681489  | 0.48724989 | 0.0028745  | 0.01460438 |              |
|           | NA | ENSG00000251003 | 0          | NA          | NA         | NA         | NA         | ZFPM2-AS1    |
|           | NA | ENSG00000251005 | 0          | NA          | NA         | NA         | NA         | H3P15        |
|           | NA | ENSG00000251008 | 0.18922458 | 0.01954053  | 0.38488496 | 0.78225479 | NA         | ORAOV1P1     |
|           | NA | ENSG00000251009 | 0          | NA          | NA         | NA         | NA         |              |
|           | NA | ENSG00000251010 | 0.15069912 | -0.01848503 | 0.38480575 | 0.84537521 | NA         |              |
|           | NA | ENSG00000251011 | 75.2450456 | 2.99083447  | 0.51791085 | 2.15E-10   | 3.99E-09   | TMEM108-AS1  |
|           | NA | ENSG00000251012 | 0          | NA          | NA         | NA         | NA         |              |
|           | NA | ENSG00000251013 | 3.94753678 | 0.02937447  | 0.37033106 | 0.78379155 | 0.9014745  | GAPDHP62     |
|           | NA | ENSG00000251014 | 0          | NA          | NA         | NA         | NA         |              |
| 100874259 | NA | ENSG00000251015 | 1.13073372 | -0.03515047 | 0.38130823 | 0.59992662 | NA         | SLC25A30-AS1 |
|           | NA | ENSG00000251017 | 0          | NA          | NA         | NA         | NA         |              |
|           | NA | ENSG00000251018 | 0          | NA          | NA         | NA         | NA         | HMMR-AS1     |
|           | NA | ENSG00000251019 | 0          | NA          | NA         | NA         | NA         | HIGD1AP13    |
|           | NA | ENSG00000251022 | 840.016743 | -0.00132275 | 0.10389511 | 0.98800949 | 0.99589897 | THAP9-AS1    |
|           | NA | ENSG00000251023 | 2.64115638 | -0.08410063 | 0.3863924  | 0.36479527 | 0.59432668 |              |
|           | NA | ENSG00000251025 | 0          | NA          | NA         | NA         | NA         | NDUFB5P1     |
|           | NA | ENSG00000251026 | 0          | NA          | NA         | NA         | NA         | LINC02163    |
| 102467213 | NA | ENSG00000251027 | 0.16735865 | 0.01897177  | 0.38482933 | 0.78225479 | NA         | LINC01950    |
|           | NA | ENSG00000251031 | 0          | NA          | NA         | NA         | NA         |              |
|           | NA | ENSG00000251032 | 0.18922458 | 0.01954053  | 0.38488496 | 0.78225479 | NA         | CUL1P1       |

|           |                 |            |             |            |            |            |              |
|-----------|-----------------|------------|-------------|------------|------------|------------|--------------|
| NA        | ENSG00000251033 | 0          | NA          | NA         | NA         | NA         |              |
| NA        | ENSG00000251034 | 14.0111247 | -0.07567792 | 0.34119594 | 0.65136615 | 0.82586301 |              |
| NA        | ENSG00000251035 | 0          | NA          | NA         | NA         | NA         | WBP1LP4      |
| NA        | ENSG00000251038 | 0          | NA          | NA         | NA         | NA         |              |
| NA        | ENSG00000251039 | 0          | NA          | NA         | NA         | NA         | IGKV2D-40    |
| 105377652 | ENSG00000251040 | 0          | NA          | NA         | NA         | NA         | LINC02480    |
| NA        | ENSG00000251044 | 0          | NA          | NA         | NA         | NA         |              |
| 340074    | ENSG00000251045 | 0          | NA          | NA         | NA         | NA         | SLC25A48-AS1 |
| NA        | ENSG00000251046 | 0          | NA          | NA         | NA         | NA         | ZNF969P      |
| NA        | ENSG00000251048 | 0          | NA          | NA         | NA         | NA         |              |
| NA        | ENSG00000251049 | 0          | NA          | NA         | NA         | NA         |              |
| NA        | ENSG00000251050 | 3.46326764 | -0.01601697 | 0.37068837 | 0.87257557 | 0.94430258 | RBX1P2       |
| NA        | ENSG00000251051 | 0.14931947 | -0.01844332 | 0.38480212 | 0.84537521 | NA         | ELL2P2       |
| NA        | ENSG00000251054 | 0.173733   | 0.01914545  | 0.38484597 | 0.78225479 | NA         |              |
| NA        | ENSG00000251055 | 0          | NA          | NA         | NA         | NA         |              |
| NA        | ENSG00000251056 | 19.4923546 | 0.0818538   | 0.31747953 | 0.6613683  | 0.8324506  | ANKRD20A17P  |
| NA        | ENSG00000251058 | 0          | NA          | NA         | NA         | NA         |              |
| 101928942 | ENSG00000251059 | 0          | NA          | NA         | NA         | NA         | PRKG2-AS1    |
| NA        | ENSG00000251061 | 0          | NA          | NA         | NA         | NA         | LINC02512    |
| NA        | ENSG00000251062 | 0          | NA          | NA         | NA         | NA         |              |
| NA        | ENSG00000251066 | 0          | NA          | NA         | NA         | NA         |              |
| 102723557 | ENSG00000251072 | 0.15069912 | -0.01848503 | 0.38480575 | 0.84537521 | NA         | LMNB1-DT     |
| NA        | ENSG00000251073 | 0          | NA          | NA         | NA         | NA         | NUDT19P5     |
| NA        | ENSG00000251074 | 0          | NA          | NA         | NA         | NA         |              |
| NA        | ENSG00000251075 | 0          | NA          | NA         | NA         | NA         | HTT-AS       |
| 101927023 | ENSG00000251076 | 0          | NA          | NA         | NA         | NA         |              |
| NA        | ENSG00000251078 | 0          | NA          | NA         | NA         | NA         | SLC25A5P9    |
| NA        | ENSG00000251079 | 79.4937114 | 0.03802864  | 0.2265136  | 0.83702199 | 0.92594176 | BMS1P2       |
| NA        | ENSG00000251080 | 0          | NA          | NA         | NA         | NA         |              |
| NA        | ENSG00000251081 | 0          | NA          | NA         | NA         | NA         |              |
| NA        | ENSG00000251087 | 0          | NA          | NA         | NA         | NA         | ALG1L3P      |
| NA        | ENSG00000251088 | 0          | NA          | NA         | NA         | NA         |              |
| NA        | ENSG00000251090 | 0          | NA          | NA         | NA         | NA         | OR5AC4P      |
| NA        | ENSG00000251093 | 0          | NA          | NA         | NA         | NA         |              |
| NA        | ENSG00000251095 | 1.3116715  | -0.0561957  | 0.38463978 | 0.42118911 | NA         |              |
| NA        | ENSG00000251099 | 0          | NA          | NA         | NA         | NA         |              |
| NA        | ENSG00000251101 | 0          | NA          | NA         | NA         | NA         |              |
| NA        | ENSG00000251102 | 0          | NA          | NA         | NA         | NA         | CTBP2P4      |

|           |                 |            |             |            |            |            |            |
|-----------|-----------------|------------|-------------|------------|------------|------------|------------|
| NA        | ENSG00000251105 | 0          | NA          | NA         | NA         | NA         |            |
| NA        | ENSG00000251106 | 0          | NA          | NA         | NA         | NA         | ABITRAMP1  |
| NA        | ENSG00000251107 | 0          | NA          | NA         | NA         | NA         | PDCD5P2    |
| NA        | ENSG00000251108 | 0          | NA          | NA         | NA         | NA         | YBX1P5     |
| NA        | ENSG00000251111 | 0.18922458 | 0.01954053  | 0.38488496 | 0.78225479 | NA         | FCF1P8     |
| NA        | ENSG00000251112 | 0.16735865 | 0.01897177  | 0.38482933 | 0.78225479 | NA         |            |
| NA        | ENSG00000251113 | 0          | NA          | NA         | NA         | NA         |            |
| NA        | ENSG00000251118 | 0          | NA          | NA         | NA         | NA         | H3P24      |
| NA        | ENSG00000251122 | 0          | NA          | NA         | NA         | NA         | NIFKP2     |
| NA        | ENSG00000251123 | 0          | NA          | NA         | NA         | NA         |            |
| NA        | ENSG00000251125 | 0.46134908 | -0.00705008 | 0.38324475 | 0.87641625 | NA         |            |
| NA        | ENSG00000251126 | 0          | NA          | NA         | NA         | NA         |            |
| NA        | ENSG00000251127 | 0          | NA          | NA         | NA         | NA         |            |
| 101928734 | ENSG00000251128 | 0.30139824 | -0.02296476 | 0.38527817 | 0.68536535 | NA         | WWC2-AS1   |
| NA        | ENSG00000251129 | 0          | NA          | NA         | NA         | NA         | LINC02506  |
| NA        | ENSG00000251131 | 0          | NA          | NA         | NA         | NA         |            |
| NA        | ENSG00000251132 | 0          | NA          | NA         | NA         | NA         |            |
| NA        | ENSG00000251135 | 0          | NA          | NA         | NA         | NA         |            |
| 101929709 | ENSG00000251136 | 271.833474 | 0.18474851  | 0.18623468 | 0.25710113 | 0.47814578 |            |
| NA        | ENSG00000251137 | 0          | NA          | NA         | NA         | NA         | RPL7L1P7   |
| 100507377 | ENSG00000251138 | 0.15069912 | -0.01848503 | 0.38480575 | 0.84537521 | NA         | LINC02882  |
| NA        | ENSG00000251139 | 0.18922458 | 0.01954053  | 0.38488496 | 0.78225479 | NA         |            |
| NA        | ENSG00000251141 | 33.6453009 | 0.11248529  | 0.30994721 | 0.55993846 | 0.76415299 | MRPS30-DT  |
| NA        | ENSG00000251142 | 0          | NA          | NA         | NA         | NA         |            |
| 100128494 | ENSG00000251143 | 80.1208026 | 0.73523317  | 0.32792286 | 0.00398012 | 0.0192177  |            |
| NA        | ENSG00000251144 | 0          | NA          | NA         | NA         | NA         |            |
| NA        | ENSG00000251147 | 0          | NA          | NA         | NA         | NA         |            |
| NA        | ENSG00000251148 | 0.16735865 | 0.01897177  | 0.38482933 | 0.78225479 | NA         |            |
| NA        | ENSG00000251149 | 0          | NA          | NA         | NA         | NA         | MTND5P5    |
| 100874365 | ENSG00000251151 | 0.16735865 | 0.01897177  | 0.38482933 | 0.78225479 | NA         | HOXC-AS3   |
| NA        | ENSG00000251152 | 0          | NA          | NA         | NA         | NA         |            |
| 102723899 | ENSG00000251154 | 0          | NA          | NA         | NA         | NA         | PTTG1IP2   |
| NA        | ENSG00000251155 | 0.4659976  | -0.00795794 | 0.38327642 | 0.86213412 | NA         | SEPTIN14P4 |
| NA        | ENSG00000251158 | 14.0928145 | -0.14656554 | 0.35530595 | 0.41311827 | 0.6403849  |            |
| NA        | ENSG00000251159 | 0          | NA          | NA         | NA         | NA         |            |
| NA        | ENSG00000251161 | 3.40403011 | 0.09873416  | 0.38646596 | 0.35709182 | 0.58712453 |            |
| NA        | ENSG00000251162 | 0          | NA          | NA         | NA         | NA         |            |
| NA        | ENSG00000251163 | 0          | NA          | NA         | NA         | NA         | PRELID3BP4 |

|           |                 |            |             |            |            |            |              |
|-----------|-----------------|------------|-------------|------------|------------|------------|--------------|
| 285441    | ENSG00000251165 | 0          | NA          | NA         | NA         | NA         | F11-AS1      |
| NA        | ENSG00000251166 | 0          | NA          | NA         | NA         | NA         | OR7E163P     |
| NA        | ENSG00000251168 | 0          | NA          | NA         | NA         | NA         |              |
| 101927934 | ENSG00000251169 | 0          | NA          | NA         | NA         | NA         | LINC01843    |
| NA        | ENSG00000251170 | 0          | NA          | NA         | NA         | NA         |              |
| NA        | ENSG00000251171 | 0          | NA          | NA         | NA         | NA         |              |
| NA        | ENSG00000251172 | 0          | NA          | NA         | NA         | NA         |              |
| 101410542 | ENSG00000251173 | 0          | NA          | NA         | NA         | NA         | UCHL1-AS1    |
| NA        | ENSG00000251174 | 0          | NA          | NA         | NA         | NA         | TSEN2P1      |
| 101929529 | ENSG00000251175 | 0          | NA          | NA         | NA         | NA         | GSTCD-AS1    |
| NA        | ENSG00000251176 | 0          | NA          | NA         | NA         | NA         |              |
| NA        | ENSG00000251177 | 0          | NA          | NA         | NA         | NA         |              |
| NA        | ENSG00000251178 | 0          | NA          | NA         | NA         | NA         | OR7E21P      |
| 103752589 | ENSG00000251179 | 0          | NA          | NA         | NA         | NA         | TMEM92-AS1   |
| NA        | ENSG00000251182 | 0          | NA          | NA         | NA         | NA         | LINC02497    |
| 105378238 | ENSG00000251183 | 0          | NA          | NA         | NA         | NA         | LINC01861    |
| NA        | ENSG00000251184 | 0          | NA          | NA         | NA         | NA         |              |
| NA        | ENSG00000251185 | 0          | NA          | NA         | NA         | NA         |              |
| NA        | ENSG00000251186 | 0          | NA          | NA         | NA         | NA         |              |
| NA        | ENSG00000251187 | 0          | NA          | NA         | NA         | NA         |              |
| NA        | ENSG00000251188 | 10.8219718 | -0.06532858 | 0.34378446 | 0.68748877 | 0.84817465 |              |
| NA        | ENSG00000251189 | 0          | NA          | NA         | NA         | NA         |              |
| 619351    | ENSG00000251191 | 16.9626131 | -0.91428623 | 0.68171752 | 0.01219562 | 0.04886129 | LINC00589    |
| 641339    | ENSG00000251192 | 97.7424594 | -0.01866864 | 0.23315995 | 0.91819314 | 0.9653411  | ZNF674       |
| NA        | ENSG00000251193 | 0          | NA          | NA         | NA         | NA         |              |
| NA        | ENSG00000251194 | 0          | NA          | NA         | NA         | NA         |              |
| NA        | ENSG00000251195 | 0          | NA          | NA         | NA         | NA         |              |
| NA        | ENSG00000251196 | 0.97964021 | -0.01431527 | 0.38129055 | 0.79491897 | NA         |              |
| NA        | ENSG00000251199 | 0          | NA          | NA         | NA         | NA         |              |
| NA        | ENSG00000251200 | 0          | NA          | NA         | NA         | NA         |              |
| 100302736 | ENSG00000251201 | 169.565232 | 0.37353724  | 0.1750368  | 0.01703281 | 0.06405061 | TMED7-TICAM2 |
| NA        | ENSG00000251203 | 0.48770252 | -0.00640012 | 0.38314278 | 0.86762113 | NA         | DNAJB6P2     |
| NA        | ENSG00000251204 | 0          | NA          | NA         | NA         | NA         |              |
| NA        | ENSG00000251205 | 0          | NA          | NA         | NA         | NA         |              |
| NA        | ENSG00000251206 | 0          | NA          | NA         | NA         | NA         |              |
| 91948     | ENSG00000251209 | 0          | NA          | NA         | NA         | NA         | LINC00923    |
| 101929019 | ENSG00000251210 | 0.15069912 | -0.01848503 | 0.38480575 | 0.84537521 | NA         | LINC02270    |
| NA        | ENSG00000251211 | 0.64119169 | 0.00328692  | 0.38137258 | 0.94814494 | NA         |              |

|           |                 |            |             |            |            |            |            |
|-----------|-----------------|------------|-------------|------------|------------|------------|------------|
| NA        | ENSG00000251212 | 0          | NA          | NA         | NA         | NA         | MTND5P4    |
| NA        | ENSG00000251213 | 0          | NA          | NA         | NA         | NA         |            |
| NA        | ENSG00000251214 | 0          | NA          | NA         | NA         | NA         |            |
| NA        | ENSG00000251215 | 0          | NA          | NA         | NA         | NA         | GOLGA5P1   |
| NA        | ENSG00000251216 | 48.2871667 | 0.91121265  | 0.40964348 | 0.0026433  | 0.0136049  |            |
| 101927845 | ENSG00000251218 | 0          | NA          | NA         | NA         | NA         |            |
| 100874276 | ENSG00000251219 | 0          | NA          | NA         | NA         | NA         | LINC01217  |
| NA        | ENSG00000251220 | 0          | NA          | NA         | NA         | NA         | RFPL4AP3   |
| 103689917 | ENSG00000251221 | 0.66585085 | 0.00285844  | 0.38131469 | 0.95493584 | NA         | LINC01337  |
| NA        | ENSG00000251223 | 0.30139824 | -0.02296476 | 0.38527817 | 0.68536535 | NA         | MTCO1P9    |
| NA        | ENSG00000251224 | 0          | NA          | NA         | NA         | NA         | CNOT10-AS1 |
| 729305    | ENSG00000251226 | 0.16735865 | 0.01897177  | 0.38482933 | 0.78225479 | NA         | LINC02714  |
| NA        | ENSG00000251228 | 0          | NA          | NA         | NA         | NA         |            |
| NA        | ENSG00000251229 | 1.43260349 | -0.03077132 | 0.37913329 | 0.68101767 | NA         |            |
| NA        | ENSG00000251230 | 0          | NA          | NA         | NA         | NA         | MIR3945HG  |
| NA        | ENSG00000251234 | 0          | NA          | NA         | NA         | NA         | PSMA2P2    |
| NA        | ENSG00000251235 | 0.15069912 | -0.01848503 | 0.38480575 | 0.84537521 | NA         | SNRPCP2    |
| NA        | ENSG00000251236 | 0          | NA          | NA         | NA         | NA         |            |
| NA        | ENSG00000251237 | 0.18922458 | 0.01954053  | 0.38488496 | 0.78225479 | NA         | B3GNTL1P1  |
| 101927253 | ENSG00000251239 | 0          | NA          | NA         | NA         | NA         |            |
| NA        | ENSG00000251243 | 0          | NA          | NA         | NA         | NA         |            |
| NA        | ENSG00000251244 | 0.72614955 | 0.00286878  | 0.38234362 | 0.94669384 | NA         |            |
| NA        | ENSG00000251246 | 1.34915777 | 0.07372127  | 0.39394933 | 0.12150327 | NA         |            |
| 25850     | ENSG00000251247 | 105.564472 | 0.09504343  | 0.21200128 | 0.59281871 | 0.78702605 | ZNF345     |
| NA        | ENSG00000251248 | 0          | NA          | NA         | NA         | NA         |            |
| 100505685 | ENSG00000251249 | 0          | NA          | NA         | NA         | NA         |            |
| NA        | ENSG00000251250 | 1.87606613 | -0.05995291 | 0.38473711 | 0.41412911 | NA         |            |
| NA        | ENSG00000251252 | 0          | NA          | NA         | NA         | NA         | MTND2P31   |
| NA        | ENSG00000251253 | 0          | NA          | NA         | NA         | NA         | MTHFD2P4   |
| NA        | ENSG00000251254 | 0.173733   | 0.01914545  | 0.38484597 | 0.78225479 | NA         | GTF2F2P1   |
| NA        | ENSG00000251256 | 0          | NA          | NA         | NA         | NA         | LINC02358  |
| NA        | ENSG00000251257 | 0          | NA          | NA         | NA         | NA         |            |
| 442247    | ENSG00000251258 | 0          | NA          | NA         | NA         | NA         | RFPL4B     |
| NA        | ENSG00000251259 | 2.33238482 | 0.06693513  | 0.38078459 | 0.48194265 | NA         |            |
| NA        | ENSG00000251260 | 0          | NA          | NA         | NA         | NA         | WDFY3-AS1  |
| NA        | ENSG00000251261 | 0          | NA          | NA         | NA         | NA         | OR7H2P     |
| NA        | ENSG00000251264 | 0          | NA          | NA         | NA         | NA         |            |
| 105377247 | ENSG00000251266 | 0          | NA          | NA         | NA         | NA         | LINC02429  |

|           |                 |            |             |            |            |            |            |
|-----------|-----------------|------------|-------------|------------|------------|------------|------------|
| NA        | ENSG00000251270 | 0          | NA          | NA         | NA         | NA         |            |
| NA        | ENSG00000251271 | 0          | NA          | NA         | NA         | NA         | ALG1L7P    |
| NA        | ENSG00000251273 | 0          | NA          | NA         | NA         | NA         | LINC02228  |
| NA        | ENSG00000251276 | 0          | NA          | NA         | NA         | NA         | MAGI2-AS1  |
| NA        | ENSG00000251278 | 0          | NA          | NA         | NA         | NA         |            |
| NA        | ENSG00000251279 | 0.6960864  | 0.0247804   | 0.38337517 | 0.58232717 | NA         | SMIM15-AS1 |
| NA        | ENSG00000251281 | 0          | NA          | NA         | NA         | NA         |            |
| NA        | ENSG00000251283 | 0          | NA          | NA         | NA         | NA         | LINC02272  |
| NA        | ENSG00000251284 | 0          | NA          | NA         | NA         | NA         |            |
| NA        | ENSG00000251285 | 0          | NA          | NA         | NA         | NA         |            |
| NA        | ENSG00000251286 | 0          | NA          | NA         | NA         | NA         |            |
| 644974    | ENSG00000251287 | 0.30001594 | -0.02294459 | 0.38527538 | 0.68644871 | NA         | ALG1L2     |
| NA        | ENSG00000251288 | 0.78845231 | -0.00764899 | 0.38086686 | 0.89233728 | NA         |            |
| NA        | ENSG00000251291 | 0          | NA          | NA         | NA         | NA         | LINC02462  |
| NA        | ENSG00000251292 | 0          | NA          | NA         | NA         | NA         | ERVH-1     |
| NA        | ENSG00000251293 | 0          | NA          | NA         | NA         | NA         |            |
| NA        | ENSG00000251294 | 0          | NA          | NA         | NA         | NA         |            |
| NA        | ENSG00000251296 | 0          | NA          | NA         | NA         | NA         |            |
| NA        | ENSG00000251297 | 0.16735865 | 0.01897177  | 0.38482933 | 0.78225479 | NA         | TUBB7P     |
| NA        | ENSG00000251298 | 0.72168372 | 0.05215949  | 0.38875695 | 0.28777056 | NA         |            |
| NA        | ENSG00000251299 | 0          | NA          | NA         | NA         | NA         | SLC25A15P3 |
| NA        | ENSG00000251300 | 0          | NA          | NA         | NA         | NA         |            |
| NA        | ENSG00000251301 | 1.05238425 | -0.00123768 | 0.38083357 | 0.98188738 | NA         | LINC02384  |
| NA        | ENSG00000251303 | 0.31838587 | 0.00132684  | 0.38336816 | 0.96436563 | NA         | CAB39P1    |
| NA        | ENSG00000251306 | 0          | NA          | NA         | NA         | NA         | NDUFB4P2   |
| NA        | ENSG00000251307 | 0          | NA          | NA         | NA         | NA         |            |
| NA        | ENSG00000251308 | 0          | NA          | NA         | NA         | NA         | MRPS33P3   |
| NA        | ENSG00000251309 | 0          | NA          | NA         | NA         | NA         |            |
| NA        | ENSG00000251310 | 0          | NA          | NA         | NA         | NA         |            |
| NA        | ENSG00000251311 | 0          | NA          | NA         | NA         | NA         | LINC02214  |
| NA        | ENSG00000251312 | 0          | NA          | NA         | NA         | NA         |            |
| NA        | ENSG00000251313 | 0.37844916 | 0.02407552  | 0.3854191  | 0.60038877 | NA         |            |
| 101929710 | ENSG00000251314 | 0          | NA          | NA         | NA         | NA         |            |
| NA        | ENSG00000251320 | 0          | NA          | NA         | NA         | NA         |            |
| 118425    | ENSG00000251321 | 0          | NA          | NA         | NA         | NA         | PCAT4      |
| 85358     | ENSG00000251322 | 309.756011 | 0.28442953  | 0.17791447 | 0.07137869 | 0.19425517 | SHANK3     |
| 101928865 | ENSG00000251323 | 13.4772985 | 0.06745371  | 0.33776265 | 0.69327838 | 0.85183585 | LINC02728  |
| NA        | ENSG00000251324 | 0          | NA          | NA         | NA         | NA         | LINC01386  |



|           |                 |                 |             |             |            |            |            |                |
|-----------|-----------------|-----------------|-------------|-------------|------------|------------|------------|----------------|
|           | NA              | ENSG00000251325 | 0           | NA          | NA         | NA         | NA         |                |
|           | NA              | ENSG00000251326 | 0           | NA          | NA         | NA         | NA         | LINC02479      |
| 101927363 | ENSG00000251329 | 0               | NA          | NA          | NA         | NA         | NA         | LINC02353      |
|           | NA              | ENSG00000251330 | 1.30950169  | 0.0295217   | 0.3808333  | 0.65547677 | NA         |                |
|           | NA              | ENSG00000251332 | 1.36727872  | 0.02017818  | 0.3806607  | 0.74322285 | NA         | PSME2P4        |
|           | NA              | ENSG00000251333 | 0           | NA          | NA         | NA         | NA         | RTN3P1         |
|           | NA              | ENSG00000251334 | 0           | NA          | NA         | NA         | NA         |                |
| 105377573 | ENSG00000251336 | 0               | NA          | NA          | NA         | NA         | NA         | TEMN3-AS1      |
|           | NA              | ENSG00000251338 | 0           | NA          | NA         | NA         | NA         |                |
|           | NA              | ENSG00000251339 | 0           | NA          | NA         | NA         | NA         |                |
|           | NA              | ENSG00000251340 | 0           | NA          | NA         | NA         | NA         | MTCYBP35       |
|           | NA              | ENSG00000251342 | 1.60569107  | -0.09466542 | 0.39631587 | 0.15751884 | NA         |                |
|           | NA              | ENSG00000251345 | 0           | NA          | NA         | NA         | NA         | CDRT15P11      |
|           | NA              | ENSG00000251347 | 0           | NA          | NA         | NA         | NA         | IRF5P1         |
|           | NA              | ENSG00000251348 | 32.3205778  | 0.16076466  | 0.29803428 | 0.42442957 | 0.65014536 | HSPD1P11       |
| 100526694 | ENSG00000251349 | 499.237056      | -0.64632149 | 0.15917202  | 1.24E-05   | 0.00011573 | 0.00011573 | MSANTD3-TMEFF1 |
| 100506827 | ENSG00000251350 | 0               | NA          | NA          | NA         | NA         | NA         | LINC02475      |
|           | NA              | ENSG00000251352 | 0           | NA          | NA         | NA         | NA         |                |
|           | NA              | ENSG00000251353 | 0           | NA          | NA         | NA         | NA         | MTND3P5        |
|           | NA              | ENSG00000251354 | 0           | NA          | NA         | NA         | NA         |                |
|           | NA              | ENSG00000251356 | 0.15069912  | -0.01848503 | 0.38480575 | 0.84537521 | NA         | RAB5CP2        |
|           | NA              | ENSG00000251357 | 0.173733    | 0.01914545  | 0.38484597 | 0.78225479 | NA         |                |
| 152641    | ENSG00000251359 | 5.76473552      | 0.16797708  | 0.4062626   | 0.22708053 | 0.44177223 | 0.44177223 | WWC2-AS2       |
|           | NA              | ENSG00000251360 | 0           | NA          | NA         | NA         | NA         | KHDC1P1        |
|           | NA              | ENSG00000251361 | 0.56767373  | 0.02627943  | 0.38574813 | 0.49686938 | NA         |                |
|           | NA              | ENSG00000251363 | 7.81933245  | -0.07876797 | 0.36024654 | 0.58904506 | 0.78360292 | LINC02315      |
| 100506258 | ENSG00000251364 | 2.32352705      | 0.1287387   | 0.40912226  | 0.10143077 | NA         | NA         |                |
| 109729133 | ENSG00000251365 | 69.2448475      | -0.04027763 | 0.23273988  | 0.82663038 | 0.92144622 | 0.92144622 | LINC02236      |
|           | NA              | ENSG00000251366 | 0           | NA          | NA         | NA         | NA         | DBIP2          |
|           | NA              | ENSG00000251367 | 0           | NA          | NA         | NA         | NA         |                |
|           | NA              | ENSG00000251368 | 0           | NA          | NA         | NA         | NA         |                |
| 162972    | ENSG00000251369 | 412.376353      | 0.07875504  | 0.11702595  | 0.48230867 | 0.70272483 | 0.70272483 | ZNF550         |
| 101929338 | ENSG00000251370 | 0               | NA          | NA          | NA         | NA         | NA         | SEMA5A-AS1     |
|           | NA              | ENSG00000251371 | 0           | NA          | NA         | NA         | NA         |                |
| 100874047 | ENSG00000251372 | 0               | NA          | NA          | NA         | NA         | NA         | LINC00499      |
|           | NA              | ENSG00000251373 | 0           | NA          | NA         | NA         | NA         |                |
|           | NA              | ENSG00000251374 | 0           | NA          | NA         | NA         | NA         |                |
|           | NA              | ENSG00000251376 | 0           | NA          | NA         | NA         | NA         |                |

|           |                 |            |             |            |            |            |           |
|-----------|-----------------|------------|-------------|------------|------------|------------|-----------|
| NA        | ENSG00000251377 | 0.52119901 | 0.02576573  | 0.38568143 | 0.51723676 | NA         |           |
| NA        | ENSG00000251378 | 0          | NA          | NA         | NA         | NA         |           |
| NA        | ENSG00000251379 | 0.31942293 | 0.00205357  | 0.38337616 | 0.95739945 | NA         |           |
| 140947    | ENSG00000251380 | 0          | NA          | NA         | NA         | NA         | DCANP1    |
| 100506305 | ENSG00000251381 | 0.51341399 | -0.01984356 | 0.38358098 | 0.70422394 | NA         | LINC00958 |
| 441025    | ENSG00000251383 | 0          | NA          | NA         | NA         | NA         | LINC02483 |
| NA        | ENSG00000251385 | 0          | NA          | NA         | NA         | NA         | MTCYBP16  |
| NA        | ENSG00000251387 | 1.63361132 | 0.04169177  | 0.38284627 | 0.52065314 | NA         |           |
| NA        | ENSG00000251388 | 0.173733   | 0.01914545  | 0.38484597 | 0.78225479 | NA         |           |
| NA        | ENSG00000251389 | 0          | NA          | NA         | NA         | NA         | YTHDF1P1  |
| NA        | ENSG00000251391 | 0          | NA          | NA         | NA         | NA         |           |
| NA        | ENSG00000251393 | 35.9931341 | -0.54720291 | 0.39329192 | 0.03434064 | 0.11170355 |           |
| NA        | ENSG00000251395 | 0          | NA          | NA         | NA         | NA         | FTH1P9    |
| NA        | ENSG00000251396 | 9.52876923 | 0.36782266  | 0.56232231 | 0.0623463  | 0.17642997 | LINC01301 |
| 104355285 | ENSG00000251398 | 0          | NA          | NA         | NA         | NA         | LINC01256 |
| NA        | ENSG00000251399 | 0          | NA          | NA         | NA         | NA         |           |
| NA        | ENSG00000251400 | 0          | NA          | NA         | NA         | NA         | ALDH7A1P1 |
| NA        | ENSG00000251401 | 0          | NA          | NA         | NA         | NA         |           |
| NA        | ENSG00000251402 | 3.04654826 | 0.01685192  | 0.37024628 | 0.87151865 | 0.94401928 | FAM90A25P |
| NA        | ENSG00000251405 | 7.85500398 | 0.23106742  | 0.44754902 | 0.12752726 | 0.29797913 |           |
| NA        | ENSG00000251407 | 0          | NA          | NA         | NA         | NA         | MTND1P22  |
| NA        | ENSG00000251408 | 0.96430113 | -0.02420846 | 0.38054746 | 0.7069161  | NA         |           |
| NA        | ENSG00000251409 | 0          | NA          | NA         | NA         | NA         |           |
| NA        | ENSG00000251410 | 0.173124   | -0.01911262 | 0.38486262 | 0.84537521 | NA         |           |
| NA        | ENSG00000251411 | 0.33471731 | 0.02354391  | 0.38534154 | 0.62842204 | NA         |           |
| NA        | ENSG00000251412 | 0          | NA          | NA         | NA         | NA         |           |
| NA        | ENSG00000251413 | 0          | NA          | NA         | NA         | NA         |           |
| NA        | ENSG00000251414 | 3.03617256 | 0.08716109  | 0.38409789 | 0.39787874 | 0.62704855 |           |
| NA        | ENSG00000251416 | 0          | NA          | NA         | NA         | NA         |           |
| NA        | ENSG00000251417 | 11.6401539 | 0.10290649  | 0.35074936 | 0.54086013 | 0.74940045 |           |
| NA        | ENSG00000251418 | 0          | NA          | NA         | NA         | NA         | ASS1P8    |
| NA        | ENSG00000251419 | 0          | NA          | NA         | NA         | NA         |           |
| NA        | ENSG00000251421 | 0.34624801 | -0.02356563 | 0.38536324 | 0.65270996 | NA         |           |
| NA        | ENSG00000251423 | 0          | NA          | NA         | NA         | NA         |           |
| NA        | ENSG00000251424 | 0          | NA          | NA         | NA         | NA         |           |
| NA        | ENSG00000251426 | 0          | NA          | NA         | NA         | NA         |           |
| NA        | ENSG00000251427 | 0          | NA          | NA         | NA         | NA         |           |
| NA        | ENSG00000251429 | 0.14931947 | -0.01844332 | 0.38480212 | 0.84537521 | NA         | AIDAP2    |

|           |    |                 |            |             |            |            |            |             |
|-----------|----|-----------------|------------|-------------|------------|------------|------------|-------------|
|           | NA | ENSG00000251430 | 0          | NA          | NA         | NA         | NA         | MTCO3P27    |
|           | NA | ENSG00000251431 | 0          | NA          | NA         | NA         | NA         |             |
| 100507487 |    | ENSG00000251432 | 27.7675571 | 0.194938    | 0.33290951 | 0.33528316 | 0.5651672  | LINC02615   |
|           | NA | ENSG00000251433 | 0          | NA          | NA         | NA         | NA         | CCNHP1      |
|           | NA | ENSG00000251434 | 0          | NA          | NA         | NA         | NA         |             |
|           | NA | ENSG00000251435 | 0          | NA          | NA         | NA         | NA         | C1GALT1P2   |
|           | NA | ENSG00000251436 | 0          | NA          | NA         | NA         | NA         | NUP58P1     |
|           | NA | ENSG00000251437 | 0          | NA          | NA         | NA         | NA         | NDUFS5P4    |
|           | NA | ENSG00000251438 | 0          | NA          | NA         | NA         | NA         |             |
|           | NA | ENSG00000251439 | 0          | NA          | NA         | NA         | NA         | KRTAP4-17P  |
|           | NA | ENSG00000251440 | 0          | NA          | NA         | NA         | NA         | STMN1P2     |
|           | NA | ENSG00000251441 | 0.66943461 | 0.03059546  | 0.38616409 | 0.42784935 | NA         | RTEL1P1     |
|           | NA | ENSG00000251442 | 0          | NA          | NA         | NA         | NA         | LINC01094   |
| 105374716 |    | ENSG00000251443 | 0          | NA          | NA         | NA         | NA         | LINC02160   |
|           | NA | ENSG00000251445 | 0          | NA          | NA         | NA         | NA         |             |
|           | NA | ENSG00000251446 | 0          | NA          | NA         | NA         | NA         |             |
|           | NA | ENSG00000251447 | 0          | NA          | NA         | NA         | NA         |             |
|           | NA | ENSG00000251448 | 1.81425946 | 0.1255976   | 0.41269805 | 0.03653846 | NA         |             |
|           | NA | ENSG00000251449 | 0          | NA          | NA         | NA         | NA         | MTND1P19    |
| 102524628 |    | ENSG00000251450 | 1.6402536  | -0.06536699 | 0.3912101  | 0.17172872 | NA         | RASGRF2-AS1 |
|           | NA | ENSG00000251451 | 0          | NA          | NA         | NA         | NA         | GTF2IP9     |
|           | NA | ENSG00000251452 | 0          | NA          | NA         | NA         | NA         |             |
|           | NA | ENSG00000251453 | 0.18922458 | 0.01954053  | 0.38488496 | 0.78225479 | NA         | HAUS1P1     |
|           | NA | ENSG00000251454 | 0          | NA          | NA         | NA         | NA         |             |
|           | NA | ENSG00000251455 | 7.86690141 | 0.05149807  | 0.35513091 | 0.72480928 | 0.86844186 |             |
|           | NA | ENSG00000251456 | 0          | NA          | NA         | NA         | NA         |             |
|           | NA | ENSG00000251458 | 0          | NA          | NA         | NA         | NA         |             |
|           | NA | ENSG00000251459 | 0          | NA          | NA         | NA         | NA         |             |
|           | NA | ENSG00000251460 | 0.48558052 | 0.01086774  | 0.3833747  | 0.79147945 | NA         |             |
|           | NA | ENSG00000251461 | 0          | NA          | NA         | NA         | NA         |             |
|           | NA | ENSG00000251463 | 0          | NA          | NA         | NA         | NA         | FKBP4P1     |
|           | NA | ENSG00000251464 | 0          | NA          | NA         | NA         | NA         | RPL7L1P13   |
|           | NA | ENSG00000251467 | 0          | NA          | NA         | NA         | NA         |             |
|           | NA | ENSG00000251468 | 0          | NA          | NA         | NA         | NA         |             |
|           | NA | ENSG00000251470 | 0          | NA          | NA         | NA         | NA         | ASNSP4      |
|           | NA | ENSG00000251471 | 0          | NA          | NA         | NA         | NA         |             |
|           | NA | ENSG00000251473 | 0          | NA          | NA         | NA         | NA         |             |
|           | NA | ENSG00000251474 | 354.051129 | 0.08367965  | 0.14862545 | 0.54158146 | 0.74998089 | RPL32P3     |

|           |                 |            |             |            |            |            |             |
|-----------|-----------------|------------|-------------|------------|------------|------------|-------------|
| NA        | ENSG00000251476 | 0.29863895 | -0.02292439 | 0.3852726  | 0.68753245 | NA         | MTCO1P31    |
| NA        | ENSG00000251477 | 0          | NA          | NA         | NA         | NA         |             |
| NA        | ENSG00000251478 | 0.64779657 | 0.00348149  | 0.38250471 | 0.93386819 | NA         |             |
| NA        | ENSG00000251482 | 0          | NA          | NA         | NA         | NA         | AKIRIN2P1   |
| NA        | ENSG00000251483 | 0          | NA          | NA         | NA         | NA         | LYPLA1P2    |
| NA        | ENSG00000251484 | 1.17923696 | 0.01478882  | 0.37974199 | 0.81909083 | NA         |             |
| NA        | ENSG00000251485 | 62.4292324 | 0.16380468  | 0.24795077 | 0.39625473 | 0.62563597 | NRBF2P6     |
| NA        | ENSG00000251487 | 0          | NA          | NA         | NA         | NA         |             |
| NA        | ENSG00000251488 | 0          | NA          | NA         | NA         | NA         |             |
| NA        | ENSG00000251489 | 0          | NA          | NA         | NA         | NA         |             |
| NA        | ENSG00000251490 | 0.16735865 | 0.01897177  | 0.38482933 | 0.78225479 | NA         |             |
| NA        | ENSG00000251491 | 0          | NA          | NA         | NA         | NA         | OR7E28P     |
| NA        | ENSG00000251492 | 0          | NA          | NA         | NA         | NA         |             |
| 2297      | ENSG00000251493 | 1.08522309 | -0.02893226 | 0.38162704 | 0.63631102 | NA         | FOXD1       |
| NA        | ENSG00000251495 | 0.16735865 | 0.01897177  | 0.38482933 | 0.78225479 | NA         | PPIAP11     |
| 100507091 | ENSG00000251497 | 0          | NA          | NA         | NA         | NA         | PITPNM2-AS1 |
| NA        | ENSG00000251498 | 0          | NA          | NA         | NA         | NA         |             |
| NA        | ENSG00000251501 | 0          | NA          | NA         | NA         | NA         |             |
| 100526739 | ENSG00000251503 | 26.4931986 | -0.13752099 | 0.35506744 | 0.43076846 | 0.65615711 | CENPS-CORT  |
| 101928656 | ENSG00000251504 | 0          | NA          | NA         | NA         | NA         | LINC01099   |
| NA        | ENSG00000251506 | 0          | NA          | NA         | NA         | NA         |             |
| NA        | ENSG00000251508 | 0          | NA          | NA         | NA         | NA         |             |
| NA        | ENSG00000251510 | 0          | NA          | NA         | NA         | NA         |             |
| NA        | ENSG00000251511 | 0.53024662 | 0.03939758  | 0.38680895 | 0.41710829 | NA         |             |
| NA        | ENSG00000251513 | 0.53268114 | 0.01350679  | 0.3834444  | 0.74602997 | NA         | LIX1-AS1    |
| NA        | ENSG00000251515 | 0          | NA          | NA         | NA         | NA         | CCDC11P1    |
| NA        | ENSG00000251516 | 0          | NA          | NA         | NA         | NA         |             |
| NA        | ENSG00000251517 | 2.33637501 | -0.07699606 | 0.38798085 | 0.3303874  | NA         |             |
| 105374729 | ENSG00000251518 | 0          | NA          | NA         | NA         | NA         | LINC02110   |
| NA        | ENSG00000251520 | 1.97289226 | -0.00896717 | 0.37733649 | 0.90370453 | NA         |             |
| NA        | ENSG00000251521 | 6.39738263 | 0.20849916  | 0.42763497 | 0.16531934 | 0.35535597 | IMPA1P1     |
| NA        | ENSG00000251523 | 0          | NA          | NA         | NA         | NA         |             |
| NA        | ENSG00000251525 | 0          | NA          | NA         | NA         | NA         | TCP11X3P    |
| NA        | ENSG00000251526 | 0          | NA          | NA         | NA         | NA         | LINC02435   |
| NA        | ENSG00000251527 | 0          | NA          | NA         | NA         | NA         |             |
| NA        | ENSG00000251529 | 0          | NA          | NA         | NA         | NA         |             |
| NA        | ENSG00000251532 | 0          | NA          | NA         | NA         | NA         |             |
| 100131366 | ENSG00000251533 | 0          | NA          | NA         | NA         | NA         | LINC00605   |

|           |                 |            |             |            |            |            |             |
|-----------|-----------------|------------|-------------|------------|------------|------------|-------------|
| NA        | ENSG00000251535 | 4.38684712 | 0.01264429  | 0.36393716 | 0.91771988 | 0.9652015  |             |
| NA        | ENSG00000251536 | 0          | NA          | NA         | NA         | NA         |             |
| NA        | ENSG00000251537 | 4.16442792 | 0.12503984  | 0.39864576 | 0.24025449 | 0.45820056 |             |
| 101927379 | ENSG00000251538 | 0          | NA          | NA         | NA         | NA         | LINC02201   |
| NA        | ENSG00000251539 | 1.16961767 | -0.00801957 | 0.3794509  | 0.90057486 | NA         | SNX18P24    |
| 101927059 | ENSG00000251542 | 0          | NA          | NA         | NA         | NA         | LINC01957   |
| NA        | ENSG00000251543 | 0          | NA          | NA         | NA         | NA         | LINC02230   |
| NA        | ENSG00000251544 | 0          | NA          | NA         | NA         | NA         | MTND5P12    |
| NA        | ENSG00000251545 | 0          | NA          | NA         | NA         | NA         |             |
| NA        | ENSG00000251546 | 0          | NA          | NA         | NA         | NA         | IGKV1D-39   |
| NA        | ENSG00000251548 | 0          | NA          | NA         | NA         | NA         |             |
| NA        | ENSG00000251549 | 0          | NA          | NA         | NA         | NA         |             |
| NA        | ENSG00000251550 | 0          | NA          | NA         | NA         | NA         |             |
| NA        | ENSG00000251552 | 0          | NA          | NA         | NA         | NA         | COQ10BP2    |
| NA        | ENSG00000251553 | 0          | NA          | NA         | NA         | NA         | DDX18P4     |
| NA        | ENSG00000251555 | 5.73217941 | -0.04011313 | 0.36069523 | 0.75919154 | 0.88842516 |             |
| NA        | ENSG00000251556 | 0          | NA          | NA         | NA         | NA         |             |
| 399881    | ENSG00000251557 | 0.14931947 | -0.01844332 | 0.38480212 | 0.84537521 | NA         | HNRNPKP3    |
| 378938    | ENSG00000251562 | 4041.81836 | 0.63688832  | 0.10695805 | 8.80E-10   | 1.53E-08   | MALAT1      |
| NA        | ENSG00000251563 | 0          | NA          | NA         | NA         | NA         | IARS2P1     |
| NA        | ENSG00000251566 | 0          | NA          | NA         | NA         | NA         | HMGB1P35    |
| NA        | ENSG00000251567 | 0.69004527 | 0.02728095  | 0.38373139 | 0.5701726  | NA         |             |
| NA        | ENSG00000251568 | 0          | NA          | NA         | NA         | NA         | ALG3P1      |
| NA        | ENSG00000251569 | 5.65311797 | -0.01417742 | 0.36604591 | 0.89893423 | 0.95556135 |             |
| NA        | ENSG00000251571 | 0          | NA          | NA         | NA         | NA         | DDX3P3      |
| NA        | ENSG00000251572 | 0          | NA          | NA         | NA         | NA         |             |
| 100287592 | ENSG00000251573 | 31.366521  | -0.02205595 | 0.28390512 | 0.9067713  | 0.95943377 | LINC02106   |
| 105379109 | ENSG00000251574 | 0.18922458 | 0.01954053  | 0.38488496 | 0.78225479 | NA         |             |
| 100506526 | ENSG00000251575 | 0          | NA          | NA         | NA         | NA         | C5orf64-AS1 |
| 101927565 | ENSG00000251576 | 0.18922458 | 0.01954053  | 0.38488496 | 0.78225479 | NA         | LINC01267   |
| NA        | ENSG00000251577 | 0          | NA          | NA         | NA         | NA         |             |
| NA        | ENSG00000251578 | 0          | NA          | NA         | NA         | NA         | TRBV21-1    |
| NA        | ENSG00000251579 | 0          | NA          | NA         | NA         | NA         |             |
| NA        | ENSG00000251580 | 20.9556644 | 0.00383757  | 0.30707713 | 0.98534074 | 0.99476696 | LINC02482   |
| NA        | ENSG00000251583 | 1.97698779 | -0.06967549 | 0.38488956 | 0.40032666 | NA         | MFFP2       |
| NA        | ENSG00000251584 | 0          | NA          | NA         | NA         | NA         |             |
| NA        | ENSG00000251585 | 0          | NA          | NA         | NA         | NA         |             |
| NA        | ENSG00000251586 | 0.16735865 | 0.01897177  | 0.38482933 | 0.78225479 | NA         | TET2-AS1    |

|           |                 |            |             |            |            |            |             |
|-----------|-----------------|------------|-------------|------------|------------|------------|-------------|
| NA        | ENSG00000251587 | 0          | NA          | NA         | NA         | NA         | LDHAP1      |
| NA        | ENSG00000251588 | 0          | NA          | NA         | NA         | NA         |             |
| NA        | ENSG00000251590 | 0          | NA          | NA         | NA         | NA         | NIFKP7      |
| NA        | ENSG00000251591 | 0          | NA          | NA         | NA         | NA         |             |
| NA        | ENSG00000251593 | 0          | NA          | NA         | NA         | NA         | MSNP1       |
| 79963     | ENSG00000251595 | 100.861464 | -0.04471326 | 0.20121713 | 0.79315552 | 0.9054599  | ABCA11P     |
| NA        | ENSG00000251596 | 3.05151503 | 0.03734061  | 0.37264619 | 0.71557154 | 0.86274919 | HADHAP1     |
| NA        | ENSG00000251597 | 0          | NA          | NA         | NA         | NA         | RPL37P25    |
| NA        | ENSG00000251598 | 0          | NA          | NA         | NA         | NA         |             |
| 105379030 | ENSG00000251599 | 0          | NA          | NA         | NA         | NA         |             |
| 101927636 | ENSG00000251600 | 23.040882  | 0.112716    | 0.33967768 | 0.52865739 | 0.74035171 |             |
| NA        | ENSG00000251601 | 0          | NA          | NA         | NA         | NA         |             |
| 100507437 | ENSG00000251602 | 87.4318902 | -0.05829483 | 0.21525369 | 0.7448041  | 0.87988222 |             |
| NA        | ENSG00000251604 | 0          | NA          | NA         | NA         | NA         | LINC01385   |
| NA        | ENSG00000251605 | 0          | NA          | NA         | NA         | NA         |             |
| 26530     | ENSG00000251608 | 0          | NA          | NA         | NA         | NA         | OR12D1      |
| NA        | ENSG00000251609 | 0.173124   | -0.01911262 | 0.38486262 | 0.84537521 | NA         | SETP12      |
| NA        | ENSG00000251610 | 0          | NA          | NA         | NA         | NA         |             |
| NA        | ENSG00000251611 | 0.5340022  | 0.03203103  | 0.38614445 | 0.46447744 | NA         | FAM160A1-DT |
| NA        | ENSG00000251613 | 1.23277136 | -0.02310696 | 0.38221595 | 0.54605853 | NA         |             |
| NA        | ENSG00000251614 | 0.49595885 | 0.01220596  | 0.38344192 | 0.77082667 | NA         | HSPA8P19    |
| NA        | ENSG00000251615 | 8.2489496  | 0.04439219  | 0.3526155  | 0.76445967 | 0.89148768 |             |
| NA        | ENSG00000251616 | 0.37844916 | 0.02407552  | 0.3854191  | 0.60038877 | NA         |             |
| NA        | ENSG00000251618 | 0          | NA          | NA         | NA         | NA         |             |
| 105377610 | ENSG00000251619 | 0          | NA          | NA         | NA         | NA         | LINC02508   |
| 101410545 | ENSG00000251620 | 0          | NA          | NA         | NA         | NA         | STPG2-AS1   |
| NA        | ENSG00000251621 | 0          | NA          | NA         | NA         | NA         |             |
| 202134    | ENSG00000251623 | 0          | NA          | NA         | NA         | NA         |             |
| NA        | ENSG00000251624 | 0          | NA          | NA         | NA         | NA         | UNC93B7     |
| NA        | ENSG00000251627 | 0          | NA          | NA         | NA         | NA         |             |
| 105374676 | ENSG00000251629 | 11.7656376 | -0.0173193  | 0.33564596 | 0.91424773 | 0.96378282 | LINC02241   |
| NA        | ENSG00000251630 | 0          | NA          | NA         | NA         | NA         |             |
| 105377443 | ENSG00000251632 | 0          | NA          | NA         | NA         | NA         | LINC02172   |
| NA        | ENSG00000251633 | 0          | NA          | NA         | NA         | NA         | GYG1P1      |
| NA        | ENSG00000251634 | 170.954824 | 0.22876528  | 0.20253567 | 0.18661684 | 0.38635899 | NAIPP4      |
| NA        | ENSG00000251635 | 0          | NA          | NA         | NA         | NA         | LINC02278   |
| NA        | ENSG00000251636 | 0          | NA          | NA         | NA         | NA         | LINC01218   |
| NA        | ENSG00000251637 | 0          | NA          | NA         | NA         | NA         | LINC02754   |

|           |                 |            |             |            |            |            |            |
|-----------|-----------------|------------|-------------|------------|------------|------------|------------|
| NA        | ENSG00000251638 | 0          | NA          | NA         | NA         | NA         |            |
| NA        | ENSG00000251639 | 1.56498073 | 0.04812736  | 0.38135638 | 0.53059242 | NA         |            |
| NA        | ENSG00000251642 | 0          | NA          | NA         | NA         | NA         |            |
| NA        | ENSG00000251643 | 0          | NA          | NA         | NA         | NA         |            |
| NA        | ENSG00000251644 | 0          | NA          | NA         | NA         | NA         | HPRT1P1    |
| NA        | ENSG00000251647 | 0          | NA          | NA         | NA         | NA         |            |
| NA        | ENSG00000251648 | 0          | NA          | NA         | NA         | NA         |            |
| 101927109 | ENSG00000251649 | 0          | NA          | NA         | NA         | NA         | LINC02379  |
| 105374344 | ENSG00000251652 | 0          | NA          | NA         | NA         | NA         |            |
| NA        | ENSG00000251654 | 0          | NA          | NA         | NA         | NA         |            |
| 5542      | ENSG00000251655 | 0          | NA          | NA         | NA         | NA         | PRB1       |
| 653247    | ENSG00000251655 | 0          | NA          | NA         | NA         | NA         | PRB1       |
| NA        | ENSG00000251656 | 0          | NA          | NA         | NA         | NA         | PRELID3BP5 |
| NA        | ENSG00000251660 | 3.42257333 | 0.12022638  | 0.39564643 | 0.26485639 | 0.48706137 |            |
| NA        | ENSG00000251661 | 11.4123639 | 0.30654598  | 0.46996785 | 0.11747974 | 0.2809883  |            |
| NA        | ENSG00000251663 | 0          | NA          | NA         | NA         | NA         | SUMO2P5    |
| 56137     | ENSG00000251664 | 146.4646   | -0.2936558  | 0.18439368 | 0.07000613 | 0.19161995 | PCDHA12    |
| NA        | ENSG00000251665 | 0          | NA          | NA         | NA         | NA         |            |
| NA        | ENSG00000251666 | 2.86011901 | -0.08162878 | 0.38359821 | 0.410202   | 0.63808185 | ZNF346-IT1 |
| NA        | ENSG00000251667 | 6.00123572 | -0.07270059 | 0.363968   | 0.59617389 | 0.78832911 | BRCC3P1    |
| NA        | ENSG00000251668 | 0          | NA          | NA         | NA         | NA         |            |
| 348926    | ENSG00000251669 | 59.9799145 | 0.11424348  | 0.26816736 | 0.5581187  | 0.76291851 | FAM86EP    |
| NA        | ENSG00000251670 | 0          | NA          | NA         | NA         | NA         |            |
| NA        | ENSG00000251675 | 0.674422   | 0.00223266  | 0.38187608 | 0.96141271 | NA         |            |
| 101927305 | ENSG00000251676 | 0.57331226 | 0.04150036  | 0.38706409 | 0.39290298 | NA         | SNHG27     |
| NA        | ENSG00000251678 | 0          | NA          | NA         | NA         | NA         |            |
| NA        | ENSG00000251679 | 0          | NA          | NA         | NA         | NA         |            |
| NA        | ENSG00000251680 | 1.53071183 | 0.03877228  | 0.38131288 | 0.57918427 | NA         |            |
| NA        | ENSG00000251682 | 0          | NA          | NA         | NA         | NA         |            |
| 101929773 | ENSG00000251685 | 0          | NA          | NA         | NA         | NA         | UGT2B27P   |
| NA        | ENSG00000251686 | 0          | NA          | NA         | NA         | NA         | OR10J8P    |
| NA        | ENSG00000251687 | 0.36249534 | 0.00104003  | 0.38336524 | 0.96598469 | NA         |            |
| NA        | ENSG00000251688 | 0          | NA          | NA         | NA         | NA         | LINC02507  |
| NA        | ENSG00000251689 | 0.6482659  | -0.03785032 | 0.3868022  | 0.40923732 | NA         |            |
| NA        | ENSG00000251691 | 0          | NA          | NA         | NA         | NA         |            |
| 390667    | ENSG00000251692 | 0.30139824 | -0.02296476 | 0.38527817 | 0.68536535 | NA         | PTX4       |
| 391627    | ENSG00000251694 | 0.48907741 | -0.00879391 | 0.38277935 | 0.84069218 | NA         | USP17L9P   |
| NA        | ENSG00000251697 | 0          | NA          | NA         | NA         | NA         | RN7SKP24   |

|        |                 |   |    |    |    |    |             |
|--------|-----------------|---|----|----|----|----|-------------|
| NA     | ENSG00000251698 | 0 | NA | NA | NA | NA | RNA5SP445   |
| NA     | ENSG00000251702 | 0 | NA | NA | NA | NA | RNU6-857P   |
| NA     | ENSG00000251703 | 0 | NA | NA | NA | NA | RNU6-998P   |
| NA     | ENSG00000251704 | 0 | NA | NA | NA | NA |             |
| NA     | ENSG00000251705 | 0 | NA | NA | NA | NA | RNA5-8SP6   |
| NA     | ENSG00000251706 | 0 | NA | NA | NA | NA | RNU7-61P    |
| NA     | ENSG00000251707 | 0 | NA | NA | NA | NA | RNU7-37P    |
| NA     | ENSG00000251711 | 0 | NA | NA | NA | NA | RNU6-632P   |
| NA     | ENSG00000251712 | 0 | NA | NA | NA | NA | RNU7-20P    |
| NA     | ENSG00000251714 | 0 | NA | NA | NA | NA | RN7SKP67    |
| NA     | ENSG00000251715 | 0 | NA | NA | NA | NA |             |
| NA     | ENSG00000251717 | 0 | NA | NA | NA | NA | RNA5SP419   |
| NA     | ENSG00000251718 | 0 | NA | NA | NA | NA | RNU2-13P    |
| NA     | ENSG00000251719 | 0 | NA | NA | NA | NA | RNU6-408P   |
| NA     | ENSG00000251720 | 0 | NA | NA | NA | NA | RNU7-123P   |
| NA     | ENSG00000251722 | 0 | NA | NA | NA | NA | RNU5E-3P    |
| NA     | ENSG00000251724 | 0 | NA | NA | NA | NA | RNU7-175P   |
| NA     | ENSG00000251726 | 0 | NA | NA | NA | NA | RNU7-41P    |
| NA     | ENSG00000251727 | 0 | NA | NA | NA | NA | RNU6-488P   |
| NA     | ENSG00000251728 | 0 | NA | NA | NA | NA |             |
| NA     | ENSG00000251729 | 0 | NA | NA | NA | NA | RNA5SP401   |
| NA     | ENSG00000251730 | 0 | NA | NA | NA | NA |             |
| NA     | ENSG00000251732 | 0 | NA | NA | NA | NA | RN7SKP122   |
| 677776 | ENSG00000251733 | 0 | NA | NA | NA | NA | SCARNA8     |
| NA     | ENSG00000251735 | 0 | NA | NA | NA | NA |             |
| NA     | ENSG00000251739 | 0 | NA | NA | NA | NA | RNU6-1053P  |
| NA     | ENSG00000251741 | 0 | NA | NA | NA | NA | RNU4ATAC13P |
| NA     | ENSG00000251742 | 0 | NA | NA | NA | NA | RN7SKP13    |
| NA     | ENSG00000251744 | 0 | NA | NA | NA | NA |             |
| NA     | ENSG00000251745 | 0 | NA | NA | NA | NA | RNU7-124P   |
| NA     | ENSG00000251746 | 0 | NA | NA | NA | NA | RNA5SP112   |
| NA     | ENSG00000251747 | 0 | NA | NA | NA | NA | RNU7-60P    |
| NA     | ENSG00000251748 | 0 | NA | NA | NA | NA | RNU4ATAC11P |
| NA     | ENSG00000251750 | 0 | NA | NA | NA | NA | RNU5F-8P    |
| NA     | ENSG00000251751 | 0 | NA | NA | NA | NA | RN7SKP46    |
| NA     | ENSG00000251752 | 0 | NA | NA | NA | NA | RNU4-29P    |
| NA     | ENSG00000251753 | 0 | NA | NA | NA | NA | RNU6-75P    |
| NA     | ENSG00000251754 | 0 | NA | NA | NA | NA | RNU6-999P   |



|        |                 |            |            |            |            |    |            |
|--------|-----------------|------------|------------|------------|------------|----|------------|
| NA     | ENSG00000251756 | 0          | NA         | NA         | NA         | NA | RNA5SP385  |
| NA     | ENSG00000251759 | 0          | NA         | NA         | NA         | NA | RN7SKP298  |
| NA     | ENSG00000251760 | 0          | NA         | NA         | NA         | NA | RNA5SP418  |
| NA     | ENSG00000251761 | 0          | NA         | NA         | NA         | NA | RNU6-138P  |
| NA     | ENSG00000251763 | 0          | NA         | NA         | NA         | NA | RNU6-470P  |
| NA     | ENSG00000251764 | 0          | NA         | NA         | NA         | NA | RNA5SP446  |
| NA     | ENSG00000251766 | 0          | NA         | NA         | NA         | NA | RNA5SP518  |
| NA     | ENSG00000251767 | 0          | NA         | NA         | NA         | NA | RNU7-8P    |
| NA     | ENSG00000251768 | 0          | NA         | NA         | NA         | NA | RNA5SP217  |
| NA     | ENSG00000251770 | 0          | NA         | NA         | NA         | NA | RNA5SP486  |
| NA     | ENSG00000251773 | 0          | NA         | NA         | NA         | NA | RNU6-1129P |
| NA     | ENSG00000251774 | 0          | NA         | NA         | NA         | NA | RNU6-377P  |
| NA     | ENSG00000251775 | 0          | NA         | NA         | NA         | NA |            |
| NA     | ENSG00000251776 | 0          | NA         | NA         | NA         | NA | RN7SKP242  |
| NA     | ENSG00000251778 | 0          | NA         | NA         | NA         | NA |            |
| NA     | ENSG00000251779 | 0          | NA         | NA         | NA         | NA |            |
| NA     | ENSG00000251781 | 0          | NA         | NA         | NA         | NA | RNA5SP356  |
| NA     | ENSG00000251783 | 0          | NA         | NA         | NA         | NA | RNU6-1170P |
| NA     | ENSG00000251785 | 0          | NA         | NA         | NA         | NA | RNA5SP20   |
| NA     | ENSG00000251787 | 0          | NA         | NA         | NA         | NA | RNU7-47P   |
| NA     | ENSG00000251788 | 0          | NA         | NA         | NA         | NA | RNU5A-7P   |
| NA     | ENSG00000251789 | 0          | NA         | NA         | NA         | NA | RNU4-57P   |
| 677772 | ENSG00000251791 | 0.35689104 | 0.02381857 | 0.38538129 | 0.61391103 | NA | SCARNA6    |
| NA     | ENSG00000251792 | 0          | NA         | NA         | NA         | NA |            |
| NA     | ENSG00000251794 | 0          | NA         | NA         | NA         | NA | RNU6-237P  |
| NA     | ENSG00000251798 | 0          | NA         | NA         | NA         | NA | RNU6-863P  |
| NA     | ENSG00000251799 | 0          | NA         | NA         | NA         | NA |            |
| NA     | ENSG00000251802 | 0          | NA         | NA         | NA         | NA |            |
| NA     | ENSG00000251803 | 0          | NA         | NA         | NA         | NA |            |
| NA     | ENSG00000251804 | 0          | NA         | NA         | NA         | NA | RNU6-1294P |
| NA     | ENSG00000251805 | 0          | NA         | NA         | NA         | NA |            |
| NA     | ENSG00000251807 | 0          | NA         | NA         | NA         | NA | RNU6-202P  |
| NA     | ENSG00000251809 | 0          | NA         | NA         | NA         | NA | RN7SKP14   |
| NA     | ENSG00000251810 | 0          | NA         | NA         | NA         | NA | RN7SKP132  |
| NA     | ENSG00000251811 | 0          | NA         | NA         | NA         | NA |            |
| NA     | ENSG00000251812 | 0          | NA         | NA         | NA         | NA |            |
| NA     | ENSG00000251813 | 0          | NA         | NA         | NA         | NA | RNU6-983P  |
| NA     | ENSG00000251814 | 0          | NA         | NA         | NA         | NA | RN7SKP18   |

|           |                 |            |            |            |            |            |             |
|-----------|-----------------|------------|------------|------------|------------|------------|-------------|
| NA        | ENSG00000251815 | 0          | NA         | NA         | NA         | NA         | SNORD116-26 |
| NA        | ENSG00000251816 | 0          | NA         | NA         | NA         | NA         | RNA5SP157   |
| NA        | ENSG00000251818 | 0          | NA         | NA         | NA         | NA         |             |
| NA        | ENSG00000251819 | 0          | NA         | NA         | NA         | NA         | RNU6-322P   |
| NA        | ENSG00000251821 | 0          | NA         | NA         | NA         | NA         | RNU6-583P   |
| NA        | ENSG00000251822 | 0          | NA         | NA         | NA         | NA         |             |
| NA        | ENSG00000251823 | 0          | NA         | NA         | NA         | NA         | RNA5SP162   |
| NA        | ENSG00000251825 | 0          | NA         | NA         | NA         | NA         | RN7SKP19    |
| NA        | ENSG00000251828 | 0          | NA         | NA         | NA         | NA         |             |
| NA        | ENSG00000251829 | 0          | NA         | NA         | NA         | NA         | RNA5SP436   |
| NA        | ENSG00000251830 | 0          | NA         | NA         | NA         | NA         |             |
| NA        | ENSG00000251831 | 0          | NA         | NA         | NA         | NA         | RNU6-1114P  |
| NA        | ENSG00000251834 | 0          | NA         | NA         | NA         | NA         | RNU6-319P   |
| NA        | ENSG00000251835 | 0          | NA         | NA         | NA         | NA         | RNU6ATAC32P |
| NA        | ENSG00000251837 | 0          | NA         | NA         | NA         | NA         |             |
| NA        | ENSG00000251838 | 0          | NA         | NA         | NA         | NA         |             |
| NA        | ENSG00000251839 | 0          | NA         | NA         | NA         | NA         | RNU7-12P    |
| NA        | ENSG00000251840 | 0          | NA         | NA         | NA         | NA         | RN7SKP155   |
| NA        | ENSG00000251841 | 0          | NA         | NA         | NA         | NA         | RNU6-1334P  |
| NA        | ENSG00000251842 | 0          | NA         | NA         | NA         | NA         | RNU6-732P   |
| NA        | ENSG00000251843 | 0          | NA         | NA         | NA         | NA         | RNU6-803P   |
| NA        | ENSG00000251844 | 0          | NA         | NA         | NA         | NA         |             |
| NA        | ENSG00000251850 | 0          | NA         | NA         | NA         | NA         | RNA5SP96    |
| NA        | ENSG00000251851 | 0          | NA         | NA         | NA         | NA         | RNU6-772P   |
| NA        | ENSG00000251852 | 0          | NA         | NA         | NA         | NA         |             |
| NA        | ENSG00000251854 | 0          | NA         | NA         | NA         | NA         | RNU6-507P   |
| 100313923 | ENSG00000251856 | 0          | NA         | NA         | NA         | NA         | MIR449C     |
| NA        | ENSG00000251857 | 0          | NA         | NA         | NA         | NA         | RNA5SP362   |
| NA        | ENSG00000251858 | 0          | NA         | NA         | NA         | NA         |             |
| NA        | ENSG00000251859 | 0          | NA         | NA         | NA         | NA         | RNU6-1288P  |
| NA        | ENSG00000251861 | 0          | NA         | NA         | NA         | NA         |             |
| 100616437 | ENSG00000251862 | 0          | NA         | NA         | NA         | NA         | MIR1343     |
| NA        | ENSG00000251864 | 0          | NA         | NA         | NA         | NA         |             |
| NA        | ENSG00000251865 | 0          | NA         | NA         | NA         | NA         | RNU6-518P   |
| 107397391 | ENSG00000251866 | 0          | NA         | NA         | NA         | NA         | SCARNA21B   |
| NA        | ENSG00000251867 | 36.2438702 | 0.04559145 | 0.28956479 | 0.81411929 | 0.91592004 |             |
| NA        | ENSG00000251868 | 0          | NA         | NA         | NA         | NA         | RNU7-71P    |
| 677773    | ENSG00000251869 | 0          | NA         | NA         | NA         | NA         | SCARNA23    |

|        |                 |   |    |    |    |    |             |
|--------|-----------------|---|----|----|----|----|-------------|
| NA     | ENSG00000251870 | 0 | NA | NA | NA | NA | RNU2-69P    |
| NA     | ENSG00000251873 | 0 | NA | NA | NA | NA | RNA5SP182   |
| NA     | ENSG00000251874 | 0 | NA | NA | NA | NA | RNU6-615P   |
| NA     | ENSG00000251875 | 0 | NA | NA | NA | NA | RNU5F-2P    |
| NA     | ENSG00000251877 | 0 | NA | NA | NA | NA | RNU2-45P    |
| NA     | ENSG00000251878 | 0 | NA | NA | NA | NA |             |
| NA     | ENSG00000251880 | 0 | NA | NA | NA | NA | RNU7-75P    |
| NA     | ENSG00000251882 | 0 | NA | NA | NA | NA | RNU6-475P   |
| NA     | ENSG00000251883 | 0 | NA | NA | NA | NA | RNU6ATAC17P |
| NA     | ENSG00000251884 | 0 | NA | NA | NA | NA | RNA5SP288   |
| NA     | ENSG00000251886 | 0 | NA | NA | NA | NA | RNU6-120P   |
| NA     | ENSG00000251887 | 0 | NA | NA | NA | NA | RNU6-760P   |
| NA     | ENSG00000251888 | 0 | NA | NA | NA | NA | RN7SKP190   |
| NA     | ENSG00000251889 | 0 | NA | NA | NA | NA | RNU4-49P    |
| NA     | ENSG00000251890 | 0 | NA | NA | NA | NA | RNA5SP497   |
| NA     | ENSG00000251891 | 0 | NA | NA | NA | NA | RNU7-79P    |
| NA     | ENSG00000251892 | 0 | NA | NA | NA | NA | RNU7-84P    |
| NA     | ENSG00000251893 | 0 | NA | NA | NA | NA |             |
| NA     | ENSG00000251895 | 0 | NA | NA | NA | NA | RNU6-976P   |
| NA     | ENSG00000251896 | 0 | NA | NA | NA | NA | SNORD116-27 |
| NA     | ENSG00000251897 | 0 | NA | NA | NA | NA | RNU6-916P   |
| 677780 | ENSG00000251898 | 0 | NA | NA | NA | NA | SCARNA11    |
| NA     | ENSG00000251900 | 0 | NA | NA | NA | NA | VTRNA2-2P   |
| NA     | ENSG00000251904 | 0 | NA | NA | NA | NA | RNA5SP272   |
| NA     | ENSG00000251905 | 0 | NA | NA | NA | NA | RNU7-2P     |
| NA     | ENSG00000251906 | 0 | NA | NA | NA | NA | RNU6-351P   |
| NA     | ENSG00000251907 | 0 | NA | NA | NA | NA | RNU6-240P   |
| NA     | ENSG00000251908 | 0 | NA | NA | NA | NA | RNU6-491P   |
| NA     | ENSG00000251913 | 0 | NA | NA | NA | NA | RNU6-513P   |
| NA     | ENSG00000251914 | 0 | NA | NA | NA | NA | RNU7-200P   |
| NA     | ENSG00000251915 | 0 | NA | NA | NA | NA | RNA5SP406   |
| NA     | ENSG00000251916 | 0 | NA | NA | NA | NA | RNU1-61P    |
| NA     | ENSG00000251917 | 0 | NA | NA | NA | NA | RNU1-86P    |
| NA     | ENSG00000251919 | 0 | NA | NA | NA | NA | RNU7-105P   |
| NA     | ENSG00000251920 | 0 | NA | NA | NA | NA | RNA5SP216   |
| NA     | ENSG00000251922 | 0 | NA | NA | NA | NA |             |
| NA     | ENSG00000251923 | 0 | NA | NA | NA | NA | RNU6-276P   |
| NA     | ENSG00000251924 | 0 | NA | NA | NA | NA | RNA5SP408   |

|    |                 |   |    |    |    |    |             |
|----|-----------------|---|----|----|----|----|-------------|
| NA | ENSG00000251925 | 0 | NA | NA | NA | NA |             |
| NA | ENSG00000251929 | 0 | NA | NA | NA | NA | RNU6-189P   |
| NA | ENSG00000251931 | 0 | NA | NA | NA | NA | RNU6-871P   |
| NA | ENSG00000251934 | 0 | NA | NA | NA | NA | RNU6-1143P  |
| NA | ENSG00000251935 | 0 | NA | NA | NA | NA | RN7SKP179   |
| NA | ENSG00000251936 | 0 | NA | NA | NA | NA | RNA5SP249   |
| NA | ENSG00000251937 | 0 | NA | NA | NA | NA | RNU7-129P   |
| NA | ENSG00000251939 | 0 | NA | NA | NA | NA | RNU6-1278P  |
| NA | ENSG00000251940 | 0 | NA | NA | NA | NA |             |
| NA | ENSG00000251941 | 0 | NA | NA | NA | NA | RNA5SP116   |
| NA | ENSG00000251942 | 0 | NA | NA | NA | NA |             |
| NA | ENSG00000251943 | 0 | NA | NA | NA | NA | RNU6-693P   |
| NA | ENSG00000251946 | 0 | NA | NA | NA | NA | RNU6-1023P  |
| NA | ENSG00000251947 | 0 | NA | NA | NA | NA | RN7SKP164   |
| NA | ENSG00000251951 | 0 | NA | NA | NA | NA | RN7SKP34    |
| NA | ENSG00000251952 | 0 | NA | NA | NA | NA | RNU6-1219P  |
| NA | ENSG00000251954 | 0 | NA | NA | NA | NA | RNU6-496P   |
| NA | ENSG00000251955 | 0 | NA | NA | NA | NA | RNU6-27P    |
| NA | ENSG00000251957 | 0 | NA | NA | NA | NA | RNU6-1095P  |
| NA | ENSG00000251958 | 0 | NA | NA | NA | NA | RNU6-1102P  |
| NA | ENSG00000251960 | 0 | NA | NA | NA | NA | RNU6-559P   |
| NA | ENSG00000251961 | 0 | NA | NA | NA | NA | RNU6ATAC13P |
| NA | ENSG00000251965 | 0 | NA | NA | NA | NA | RNA5SP208   |
| NA | ENSG00000251967 | 0 | NA | NA | NA | NA |             |
| NA | ENSG00000251971 | 0 | NA | NA | NA | NA | RNU6-1333P  |
| NA | ENSG00000251972 | 0 | NA | NA | NA | NA | RNU6-123P   |
| NA | ENSG00000251973 | 0 | NA | NA | NA | NA | RNU6-473P   |
| NA | ENSG00000251974 | 0 | NA | NA | NA | NA |             |
| NA | ENSG00000251975 | 0 | NA | NA | NA | NA | RNU6-718P   |
| NA | ENSG00000251976 | 0 | NA | NA | NA | NA | RN7SKP141   |
| NA | ENSG00000251977 | 0 | NA | NA | NA | NA | RNU6-991P   |
| NA | ENSG00000251978 | 0 | NA | NA | NA | NA | RNA5SP236   |
| NA | ENSG00000251980 | 0 | NA | NA | NA | NA | RNU6-436P   |
| NA | ENSG00000251981 | 0 | NA | NA | NA | NA | RNU7-52P    |
| NA | ENSG00000251982 | 0 | NA | NA | NA | NA | RN7SKP43    |
| NA | ENSG00000251983 | 0 | NA | NA | NA | NA | RN7SKP157   |
| NA | ENSG00000251985 | 0 | NA | NA | NA | NA | RNU6-1161P  |
| NA | ENSG00000251986 | 0 | NA | NA | NA | NA |             |

|        |                 |   |    |    |    |    |             |
|--------|-----------------|---|----|----|----|----|-------------|
| NA     | ENSG00000251987 | 0 | NA | NA | NA | NA |             |
| NA     | ENSG00000251988 | 0 | NA | NA | NA | NA | RNU4ATAC18P |
| NA     | ENSG00000251990 | 0 | NA | NA | NA | NA | RNA5SP180   |
| NA     | ENSG00000251991 | 0 | NA | NA | NA | NA | RNU7-49P    |
| NA     | ENSG00000251992 | 0 | NA | NA | NA | NA | SCARNA17    |
| NA     | ENSG00000251993 | 0 | NA | NA | NA | NA | RNA5SP227   |
| NA     | ENSG00000251994 | 0 | NA | NA | NA | NA | RNU2-27P    |
| NA     | ENSG00000251996 | 0 | NA | NA | NA | NA |             |
| NA     | ENSG00000251997 | 0 | NA | NA | NA | NA | RNA5SP458   |
| NA     | ENSG00000251998 | 0 | NA | NA | NA | NA | RNU6-168P   |
| NA     | ENSG00000251999 | 0 | NA | NA | NA | NA |             |
| NA     | ENSG00000252001 | 0 | NA | NA | NA | NA | RNA5SP303   |
| NA     | ENSG00000252002 | 0 | NA | NA | NA | NA | RNA5SP154   |
| NA     | ENSG00000252003 | 0 | NA | NA | NA | NA | RNU7-154P   |
| NA     | ENSG00000252005 | 0 | NA | NA | NA | NA | RNU4ATAC8P  |
| NA     | ENSG00000252008 | 0 | NA | NA | NA | NA | RNU6-927P   |
| 677775 | ENSG00000252010 | 0 | NA | NA | NA | NA | SCARNA5     |
| NA     | ENSG00000252011 | 0 | NA | NA | NA | NA |             |
| NA     | ENSG00000252012 | 0 | NA | NA | NA | NA | RNA5SP521   |
| NA     | ENSG00000252013 | 0 | NA | NA | NA | NA | RNU4ATAC14P |
| NA     | ENSG00000252014 | 0 | NA | NA | NA | NA |             |
| NA     | ENSG00000252015 | 0 | NA | NA | NA | NA | RNU6-904P   |
| NA     | ENSG00000252016 | 0 | NA | NA | NA | NA |             |
| NA     | ENSG00000252017 | 0 | NA | NA | NA | NA | RNU6-1194P  |
| NA     | ENSG00000252018 | 0 | NA | NA | NA | NA | RNU2-30P    |
| NA     | ENSG00000252019 | 0 | NA | NA | NA | NA | RNU6ATAC9P  |
| NA     | ENSG00000252020 | 0 | NA | NA | NA | NA |             |
| NA     | ENSG00000252021 | 0 | NA | NA | NA | NA |             |
| NA     | ENSG00000252022 | 0 | NA | NA | NA | NA |             |
| NA     | ENSG00000252023 | 0 | NA | NA | NA | NA | RNU6-581P   |
| NA     | ENSG00000252025 | 0 | NA | NA | NA | NA | RNU6-982P   |
| NA     | ENSG00000252026 | 0 | NA | NA | NA | NA | RNU6-1262P  |
| NA     | ENSG00000252027 | 0 | NA | NA | NA | NA | RNU6ATAC14P |
| NA     | ENSG00000252028 | 0 | NA | NA | NA | NA | RN7SKP52    |
| NA     | ENSG00000252029 | 0 | NA | NA | NA | NA | RNA5SP253   |
| NA     | ENSG00000252030 | 0 | NA | NA | NA | NA | RNU6-1196P  |
| NA     | ENSG00000252031 | 0 | NA | NA | NA | NA | RNU6-561P   |
| NA     | ENSG00000252032 | 0 | NA | NA | NA | NA | RNU6-1281P  |

|    |                 |            |             |            |            |    |            |
|----|-----------------|------------|-------------|------------|------------|----|------------|
| NA | ENSG00000252033 | 0          | NA          | NA         | NA         | NA | RNU6-311P  |
| NA | ENSG00000252034 | 0          | NA          | NA         | NA         | NA | RNY4P37    |
| NA | ENSG00000252035 | 0          | NA          | NA         | NA         | NA | RNU6-397P  |
| NA | ENSG00000252036 | 0          | NA          | NA         | NA         | NA | RN7SKP288  |
| NA | ENSG00000252037 | 0          | NA          | NA         | NA         | NA | RNU6-162P  |
| NA | ENSG00000252039 | 0          | NA          | NA         | NA         | NA | RNU6-287P  |
| NA | ENSG00000252040 | 0          | NA          | NA         | NA         | NA |            |
| NA | ENSG00000252041 | 0          | NA          | NA         | NA         | NA | RNA5SP228  |
| NA | ENSG00000252042 | 0          | NA          | NA         | NA         | NA |            |
| NA | ENSG00000252045 | 0          | NA          | NA         | NA         | NA |            |
| NA | ENSG00000252046 | 0          | NA          | NA         | NA         | NA | RNU6-150P  |
| NA | ENSG00000252047 | 0          | NA          | NA         | NA         | NA |            |
| NA | ENSG00000252049 | 0          | NA          | NA         | NA         | NA |            |
| NA | ENSG00000252050 | 0          | NA          | NA         | NA         | NA |            |
| NA | ENSG00000252051 | 0.15069912 | -0.01848503 | 0.38480575 | 0.84537521 | NA | RN7SKP276  |
| NA | ENSG00000252053 | 0          | NA          | NA         | NA         | NA | RNU6-1101P |
| NA | ENSG00000252057 | 0          | NA          | NA         | NA         | NA | RNU7-174P  |
| NA | ENSG00000252060 | 0          | NA          | NA         | NA         | NA | RNA5SP464  |
| NA | ENSG00000252061 | 0          | NA          | NA         | NA         | NA | RNU6-415P  |
| NA | ENSG00000252062 | 0          | NA          | NA         | NA         | NA | RNU6-469P  |
| NA | ENSG00000252063 | 0          | NA          | NA         | NA         | NA | RNU6-1041P |
| NA | ENSG00000252064 | 0          | NA          | NA         | NA         | NA |            |
| NA | ENSG00000252065 | 0          | NA          | NA         | NA         | NA | RNU6-864P  |
| NA | ENSG00000252066 | 0          | NA          | NA         | NA         | NA | RNU2-53P   |
| NA | ENSG00000252067 | 0          | NA          | NA         | NA         | NA | RNU4-71P   |
| NA | ENSG00000252068 | 0          | NA          | NA         | NA         | NA | RNU6-390P  |
| NA | ENSG00000252069 | 0          | NA          | NA         | NA         | NA |            |
| NA | ENSG00000252070 | 0          | NA          | NA         | NA         | NA | RNA5SP341  |
| NA | ENSG00000252072 | 0          | NA          | NA         | NA         | NA | RNA5SP320  |
| NA | ENSG00000252073 | 0          | NA          | NA         | NA         | NA | RNU6-947P  |
| NA | ENSG00000252074 | 0          | NA          | NA         | NA         | NA | RNU6-416P  |
| NA | ENSG00000252076 | 0          | NA          | NA         | NA         | NA | RN7SKP196  |
| NA | ENSG00000252079 | 0          | NA          | NA         | NA         | NA | RNU6-327P  |
| NA | ENSG00000252080 | 0          | NA          | NA         | NA         | NA | RNU7-99P   |
| NA | ENSG00000252081 | 0          | NA          | NA         | NA         | NA | RNU6-277P  |
| NA | ENSG00000252082 | 0          | NA          | NA         | NA         | NA | RNU6-547P  |
| NA | ENSG00000252083 | 0          | NA          | NA         | NA         | NA |            |
| NA | ENSG00000252084 | 0          | NA          | NA         | NA         | NA | RN7SKP12   |

|    |                 |   |    |    |    |    |             |
|----|-----------------|---|----|----|----|----|-------------|
| NA | ENSG00000252086 | 0 | NA | NA | NA | NA | RNA5SP76    |
| NA | ENSG00000252087 | 0 | NA | NA | NA | NA | RN7SKP248   |
| NA | ENSG00000252089 | 0 | NA | NA | NA | NA | RNU4ATAC7P  |
| NA | ENSG00000252091 | 0 | NA | NA | NA | NA | RNU6-1146P  |
| NA | ENSG00000252094 | 0 | NA | NA | NA | NA | RNA5SP410   |
| NA | ENSG00000252096 | 0 | NA | NA | NA | NA |             |
| NA | ENSG00000252097 | 0 | NA | NA | NA | NA | RNU6-346P   |
| NA | ENSG00000252098 | 0 | NA | NA | NA | NA |             |
| NA | ENSG00000252101 | 0 | NA | NA | NA | NA | RNU6-758P   |
| NA | ENSG00000252103 | 0 | NA | NA | NA | NA | RNU6-917P   |
| NA | ENSG00000252104 | 0 | NA | NA | NA | NA | RNU6-191P   |
| NA | ENSG00000252106 | 0 | NA | NA | NA | NA | RNY3P15     |
| NA | ENSG00000252107 | 0 | NA | NA | NA | NA | RNA5SP220   |
| NA | ENSG00000252108 | 0 | NA | NA | NA | NA | RNU6-1232P  |
| NA | ENSG00000252112 | 0 | NA | NA | NA | NA |             |
| NA | ENSG00000252113 | 0 | NA | NA | NA | NA | RNU6-523P   |
| NA | ENSG00000252115 | 0 | NA | NA | NA | NA |             |
| NA | ENSG00000252116 | 0 | NA | NA | NA | NA | RNU4ATAC4P  |
| NA | ENSG00000252117 | 0 | NA | NA | NA | NA | RNU6-1108P  |
| NA | ENSG00000252118 | 0 | NA | NA | NA | NA | RNU6ATAC39P |
| NA | ENSG00000252119 | 0 | NA | NA | NA | NA |             |
| NA | ENSG00000252121 | 0 | NA | NA | NA | NA | RNU6-970P   |
| NA | ENSG00000252122 | 0 | NA | NA | NA | NA |             |
| NA | ENSG00000252125 | 0 | NA | NA | NA | NA | RNU6-1299P  |
| NA | ENSG00000252126 | 0 | NA | NA | NA | NA | RNU6-313P   |
| NA | ENSG00000252128 | 0 | NA | NA | NA | NA |             |
| NA | ENSG00000252129 | 0 | NA | NA | NA | NA |             |
| NA | ENSG00000252130 | 0 | NA | NA | NA | NA | RNU6-1045P  |
| NA | ENSG00000252132 | 0 | NA | NA | NA | NA | RNU6-795P   |
| NA | ENSG00000252135 | 0 | NA | NA | NA | NA | RNU1-155P   |
| NA | ENSG00000252136 | 0 | NA | NA | NA | NA |             |
| NA | ENSG00000252137 | 0 | NA | NA | NA | NA | RNU6-1338P  |
| NA | ENSG00000252138 | 0 | NA | NA | NA | NA |             |
| NA | ENSG00000252139 | 0 | NA | NA | NA | NA |             |
| NA | ENSG00000252141 | 0 | NA | NA | NA | NA | RNU6-65P    |
| NA | ENSG00000252145 | 0 | NA | NA | NA | NA | RNU6-1225P  |
| NA | ENSG00000252147 | 0 | NA | NA | NA | NA | RNY3P16     |
| NA | ENSG00000252148 | 0 | NA | NA | NA | NA | RNU6-1206P  |

|           |                 |   |    |    |    |    |            |
|-----------|-----------------|---|----|----|----|----|------------|
| NA        | ENSG00000252151 | 0 | NA | NA | NA | NA | RNU6-1265P |
| 100313780 | ENSG00000252153 | 0 | NA | NA | NA | NA | MIR2278    |
| NA        | ENSG00000252155 | 0 | NA | NA | NA | NA | RNU6-941P  |
| NA        | ENSG00000252156 | 0 | NA | NA | NA | NA | RNU6-155P  |
| NA        | ENSG00000252157 | 0 | NA | NA | NA | NA | RNU6-479P  |
| NA        | ENSG00000252158 | 0 | NA | NA | NA | NA |            |
| NA        | ENSG00000252161 | 0 | NA | NA | NA | NA | RNA5SP318  |
| NA        | ENSG00000252162 | 0 | NA | NA | NA | NA | RNU6-830P  |
| NA        | ENSG00000252163 | 0 | NA | NA | NA | NA | RN7SKP31   |
| NA        | ENSG00000252164 | 0 | NA | NA | NA | NA | RNA5SP282  |
| NA        | ENSG00000252167 | 0 | NA | NA | NA | NA | RNA5SP287  |
| NA        | ENSG00000252169 | 0 | NA | NA | NA | NA | RNA5SP200  |
| NA        | ENSG00000252170 | 0 | NA | NA | NA | NA |            |
| NA        | ENSG00000252171 | 0 | NA | NA | NA | NA |            |
| NA        | ENSG00000252172 | 0 | NA | NA | NA | NA | RNU6-720P  |
| NA        | ENSG00000252173 | 0 | NA | NA | NA | NA | RNU6-109P  |
| NA        | ENSG00000252174 | 0 | NA | NA | NA | NA | RNU7-18P   |
| NA        | ENSG00000252178 | 0 | NA | NA | NA | NA | RNU7-69P   |
| NA        | ENSG00000252179 | 0 | NA | NA | NA | NA | RNA5SP255  |
| NA        | ENSG00000252182 | 0 | NA | NA | NA | NA | RNA5SP413  |
| NA        | ENSG00000252183 | 0 | NA | NA | NA | NA | RNU6-948P  |
| NA        | ENSG00000252184 | 0 | NA | NA | NA | NA | RNU2-10P   |
| NA        | ENSG00000252185 | 0 | NA | NA | NA | NA | RNU6-752P  |
| NA        | ENSG00000252186 | 0 | NA | NA | NA | NA | RNU6-781P  |
| NA        | ENSG00000252188 | 0 | NA | NA | NA | NA |            |
| NA        | ENSG00000252190 | 0 | NA | NA | NA | NA |            |
| NA        | ENSG00000252191 | 0 | NA | NA | NA | NA | RNU6-751P  |
| NA        | ENSG00000252192 | 0 | NA | NA | NA | NA |            |
| NA        | ENSG00000252193 | 0 | NA | NA | NA | NA |            |
| NA        | ENSG00000252198 | 0 | NA | NA | NA | NA |            |
| NA        | ENSG00000252199 | 0 | NA | NA | NA | NA |            |
| NA        | ENSG00000252200 | 0 | NA | NA | NA | NA |            |
| NA        | ENSG00000252202 | 0 | NA | NA | NA | NA |            |
| NA        | ENSG00000252204 | 0 | NA | NA | NA | NA |            |
| NA        | ENSG00000252205 | 0 | NA | NA | NA | NA | RNU6-764P  |
| NA        | ENSG00000252206 | 0 | NA | NA | NA | NA | RNU7-40P   |
| NA        | ENSG00000252207 | 0 | NA | NA | NA | NA | RNA5SP365  |
| NA        | ENSG00000252209 | 0 | NA | NA | NA | NA | RNU1-48P   |



|           |                 |   |    |    |    |    |             |
|-----------|-----------------|---|----|----|----|----|-------------|
| NA        | ENSG00000252210 | 0 | NA | NA | NA | NA |             |
| NA        | ENSG00000252211 | 0 | NA | NA | NA | NA | RNA5SP473   |
| NA        | ENSG00000252212 | 0 | NA | NA | NA | NA | RNU2-58P    |
| 109616975 | ENSG00000252213 | 0 | NA | NA | NA | NA | SNORA74D    |
| NA        | ENSG00000252214 | 0 | NA | NA | NA | NA | RNU6-542P   |
| NA        | ENSG00000252217 | 0 | NA | NA | NA | NA |             |
| NA        | ENSG00000252218 | 0 | NA | NA | NA | NA |             |
| 102466721 | ENSG00000252219 | 0 | NA | NA | NA | NA | MIR892C     |
| NA        | ENSG00000252220 | 0 | NA | NA | NA | NA | RNU6-977P   |
| NA        | ENSG00000252222 | 0 | NA | NA | NA | NA | RNU7-13P    |
| NA        | ENSG00000252223 | 0 | NA | NA | NA | NA | RNU6-1049P  |
| NA        | ENSG00000252224 | 0 | NA | NA | NA | NA | RNU4ATAC15P |
| NA        | ENSG00000252225 | 0 | NA | NA | NA | NA |             |
| NA        | ENSG00000252228 | 0 | NA | NA | NA | NA |             |
| NA        | ENSG00000252230 | 0 | NA | NA | NA | NA |             |
| NA        | ENSG00000252231 | 0 | NA | NA | NA | NA | RNA5SP67    |
| NA        | ENSG00000252233 | 0 | NA | NA | NA | NA | RN7SKP253   |
| NA        | ENSG00000252236 | 0 | NA | NA | NA | NA |             |
| NA        | ENSG00000252237 | 0 | NA | NA | NA | NA | RNU4-54P    |
| NA        | ENSG00000252238 | 0 | NA | NA | NA | NA |             |
| NA        | ENSG00000252242 | 0 | NA | NA | NA | NA | RNU7-115P   |
| NA        | ENSG00000252243 | 0 | NA | NA | NA | NA | RNU6-412P   |
| NA        | ENSG00000252244 | 0 | NA | NA | NA | NA | RNU7-3P     |
| NA        | ENSG00000252246 | 0 | NA | NA | NA | NA | RNA5SP92    |
| NA        | ENSG00000252247 | 0 | NA | NA | NA | NA | RNU6-70P    |
| NA        | ENSG00000252249 | 0 | NA | NA | NA | NA |             |
| NA        | ENSG00000252250 | 0 | NA | NA | NA | NA |             |
| NA        | ENSG00000252252 | 0 | NA | NA | NA | NA | RNU6-687P   |
| NA        | ENSG00000252254 | 0 | NA | NA | NA | NA |             |
| NA        | ENSG00000252255 | 0 | NA | NA | NA | NA | RNU2-35P    |
| NA        | ENSG00000252257 | 0 | NA | NA | NA | NA | RN7SKP265   |
| NA        | ENSG00000252258 | 0 | NA | NA | NA | NA |             |
| NA        | ENSG00000252259 | 0 | NA | NA | NA | NA | RNA5SP49    |
| NA        | ENSG00000252260 | 0 | NA | NA | NA | NA | RNA5SP461   |
| NA        | ENSG00000252261 | 0 | NA | NA | NA | NA | RNA5SP262   |
| NA        | ENSG00000252262 | 0 | NA | NA | NA | NA | RNA5SP61    |
| NA        | ENSG00000252263 | 0 | NA | NA | NA | NA | RNU6-659P   |
| NA        | ENSG00000252264 | 0 | NA | NA | NA | NA | RNU7-153P   |

|           |                 |            |            |            |            |    |             |
|-----------|-----------------|------------|------------|------------|------------|----|-------------|
| NA        | ENSG00000252266 | 0          | NA         | NA         | NA         | NA |             |
| NA        | ENSG00000252267 | 0          | NA         | NA         | NA         | NA | RNA5SP495   |
| NA        | ENSG00000252268 | 0          | NA         | NA         | NA         | NA | RNA5SP417   |
| NA        | ENSG00000252269 | 0          | NA         | NA         | NA         | NA | RNU4ATAC12P |
| NA        | ENSG00000252271 | 0          | NA         | NA         | NA         | NA | RNU6-1110P  |
| NA        | ENSG00000252272 | 0          | NA         | NA         | NA         | NA | RNA5SP470   |
| NA        | ENSG00000252273 | 0          | NA         | NA         | NA         | NA | RNU6-426P   |
| NA        | ENSG00000252274 | 0          | NA         | NA         | NA         | NA |             |
| NA        | ENSG00000252275 | 0          | NA         | NA         | NA         | NA | RNU7-192P   |
| 100873856 | ENSG00000252277 | 0          | NA         | NA         | NA         | NA | SNORD116-30 |
| NA        | ENSG00000252279 | 0          | NA         | NA         | NA         | NA | RNU6-406P   |
| NA        | ENSG00000252282 | 0          | NA         | NA         | NA         | NA | RNU6-1089P  |
| NA        | ENSG00000252283 | 0          | NA         | NA         | NA         | NA |             |
| NA        | ENSG00000252284 | 0          | NA         | NA         | NA         | NA | SNORA108    |
| NA        | ENSG00000252287 | 0          | NA         | NA         | NA         | NA | RNA5SP24    |
| NA        | ENSG00000252288 | 0          | NA         | NA         | NA         | NA | RNU6-966P   |
| NA        | ENSG00000252289 | 0          | NA         | NA         | NA         | NA | RNA5SP519   |
| NA        | ENSG00000252290 | 0          | NA         | NA         | NA         | NA |             |
| NA        | ENSG00000252291 | 0          | NA         | NA         | NA         | NA |             |
| NA        | ENSG00000252292 | 0          | NA         | NA         | NA         | NA | RN7SKP238   |
| NA        | ENSG00000252294 | 0          | NA         | NA         | NA         | NA | RNU6-589P   |
| NA        | ENSG00000252296 | 0          | NA         | NA         | NA         | NA |             |
| NA        | ENSG00000252297 | 0          | NA         | NA         | NA         | NA | RNU6-875P   |
| NA        | ENSG00000252301 | 0          | NA         | NA         | NA         | NA | RNA5SP134   |
| NA        | ENSG00000252302 | 0          | NA         | NA         | NA         | NA | RNA5SP147   |
| NA        | ENSG00000252305 | 0          | NA         | NA         | NA         | NA |             |
| NA        | ENSG00000252307 | 0          | NA         | NA         | NA         | NA | RNA5SP153   |
| NA        | ENSG00000252311 | 0.16735865 | 0.01897177 | 0.38482933 | 0.78225479 | NA | RNU1-103P   |
| NA        | ENSG00000252312 | 0          | NA         | NA         | NA         | NA | RN7SKP21    |
| NA        | ENSG00000252313 | 0          | NA         | NA         | NA         | NA | RNA5SP281   |
| NA        | ENSG00000252315 | 0          | NA         | NA         | NA         | NA | RNA5SP520   |
| 6086      | ENSG00000252316 | 0          | NA         | NA         | NA         | NA | RNY4        |
| NA        | ENSG00000252317 | 0          | NA         | NA         | NA         | NA |             |
| NA        | ENSG00000252319 | 0          | NA         | NA         | NA         | NA |             |
| NA        | ENSG00000252320 | 0          | NA         | NA         | NA         | NA | RNU6-320P   |
| NA        | ENSG00000252321 | 0          | NA         | NA         | NA         | NA | RN7SKP83    |
| NA        | ENSG00000252322 | 0          | NA         | NA         | NA         | NA | RN7SKP244   |
| NA        | ENSG00000252325 | 0          | NA         | NA         | NA         | NA | RNU6-1038P  |

|    |                 |            |            |            |           |    |             |
|----|-----------------|------------|------------|------------|-----------|----|-------------|
| NA | ENSG00000252326 | 0          | NA         | NA         | NA        | NA | SNORD116-25 |
| NA | ENSG00000252328 | 0          | NA         | NA         | NA        | NA |             |
| NA | ENSG00000252329 | 0          | NA         | NA         | NA        | NA |             |
| NA | ENSG00000252332 | 0          | NA         | NA         | NA        | NA | RNU6-911P   |
| NA | ENSG00000252333 | 0          | NA         | NA         | NA        | NA | RNU6-964P   |
| NA | ENSG00000252334 | 0          | NA         | NA         | NA        | NA | RNU6-1337P  |
| NA | ENSG00000252335 | 0          | NA         | NA         | NA        | NA | RNU6-62P    |
| NA | ENSG00000252336 | 0          | NA         | NA         | NA        | NA | RNA5SP148   |
| NA | ENSG00000252337 | 0          | NA         | NA         | NA        | NA |             |
| NA | ENSG00000252338 | 0          | NA         | NA         | NA        | NA | RNU6-503P   |
| NA | ENSG00000252339 | 0          | NA         | NA         | NA        | NA | RNU6-1061P  |
| NA | ENSG00000252341 | 0          | NA         | NA         | NA        | NA |             |
| NA | ENSG00000252342 | 0          | NA         | NA         | NA        | NA | RNA5SP164   |
| NA | ENSG00000252343 | 0          | NA         | NA         | NA        | NA | RNU2-34P    |
| NA | ENSG00000252346 | 0          | NA         | NA         | NA        | NA | RNA5SP121   |
| NA | ENSG00000252347 | 0          | NA         | NA         | NA        | NA | RNU6-1046P  |
| NA | ENSG00000252348 | 0          | NA         | NA         | NA        | NA | RNU6-1256P  |
| NA | ENSG00000252349 | 0          | NA         | NA         | NA        | NA |             |
| NA | ENSG00000252350 | 0          | NA         | NA         | NA        | NA | RPPH1-3P    |
| NA | ENSG00000252351 | 0          | NA         | NA         | NA        | NA | RNU6ATAC12P |
| NA | ENSG00000252352 | 0          | NA         | NA         | NA        | NA |             |
| NA | ENSG00000252353 | 0          | NA         | NA         | NA        | NA | RNU7-25P    |
| NA | ENSG00000252355 | 1.89946901 | 0.00028034 | 0.37600385 | 0.9985376 | NA | RN7SKP287   |
| NA | ENSG00000252357 | 0          | NA         | NA         | NA        | NA |             |
| NA | ENSG00000252358 | 0          | NA         | NA         | NA        | NA | RN7SKP135   |
| NA | ENSG00000252361 | 0          | NA         | NA         | NA        | NA | RNU6-118P   |
| NA | ENSG00000252362 | 0          | NA         | NA         | NA        | NA | RNU6-506P   |
| NA | ENSG00000252363 | 0          | NA         | NA         | NA        | NA | RNU7-43P    |
| NA | ENSG00000252364 | 0          | NA         | NA         | NA        | NA | RNA5SP360   |
| NA | ENSG00000252366 | 0          | NA         | NA         | NA        | NA | RNA5SP367   |
| NA | ENSG00000252367 | 0          | NA         | NA         | NA        | NA |             |
| NA | ENSG00000252368 | 0          | NA         | NA         | NA        | NA | RNA5SP43    |
| NA | ENSG00000252369 | 0          | NA         | NA         | NA        | NA | RNU7-51P    |
| NA | ENSG00000252370 | 0          | NA         | NA         | NA        | NA | RNA5SP438   |
| NA | ENSG00000252371 | 0          | NA         | NA         | NA        | NA | RNU6-725P   |
| NA | ENSG00000252373 | 0          | NA         | NA         | NA        | NA | RNU6-358P   |
| NA | ENSG00000252374 | 0          | NA         | NA         | NA        | NA |             |
| NA | ENSG00000252376 | 0          | NA         | NA         | NA        | NA | RNA5SP395   |

|    |                 |   |    |    |    |    |            |
|----|-----------------|---|----|----|----|----|------------|
| NA | ENSG00000252377 | 0 | NA | NA | NA | NA | RNU6-504P  |
| NA | ENSG00000252383 | 0 | NA | NA | NA | NA | RNU6-314P  |
| NA | ENSG00000252385 | 0 | NA | NA | NA | NA | RNU6-68P   |
| NA | ENSG00000252386 | 0 | NA | NA | NA | NA | RNU6-1018P |
| NA | ENSG00000252390 | 0 | NA | NA | NA | NA | RNU5F-4P   |
| NA | ENSG00000252391 | 0 | NA | NA | NA | NA | RNU6-638P  |
| NA | ENSG00000252393 | 0 | NA | NA | NA | NA | RNU6-1004P |
| NA | ENSG00000252395 | 0 | NA | NA | NA | NA | RNU6-1007P |
| NA | ENSG00000252396 | 0 | NA | NA | NA | NA | RN7SKP195  |
| NA | ENSG00000252397 | 0 | NA | NA | NA | NA | RNU5A-4P   |
| NA | ENSG00000252398 | 0 | NA | NA | NA | NA |            |
| NA | ENSG00000252400 | 0 | NA | NA | NA | NA | RNU6-1291P |
| NA | ENSG00000252401 | 0 | NA | NA | NA | NA | RNU4ATAC6P |
| NA | ENSG00000252404 | 0 | NA | NA | NA | NA |            |
| NA | ENSG00000252407 | 0 | NA | NA | NA | NA | RNU7-183P  |
| NA | ENSG00000252408 | 0 | NA | NA | NA | NA |            |
| NA | ENSG00000252409 | 0 | NA | NA | NA | NA |            |
| NA | ENSG00000252410 | 0 | NA | NA | NA | NA | RNU5B-3P   |
| NA | ENSG00000252411 | 0 | NA | NA | NA | NA | RNU6-1087P |
| NA | ENSG00000252412 | 0 | NA | NA | NA | NA |            |
| NA | ENSG00000252413 | 0 | NA | NA | NA | NA | RNU7-121P  |
| NA | ENSG00000252414 | 0 | NA | NA | NA | NA | RNU6-100P  |
| NA | ENSG00000252415 | 0 | NA | NA | NA | NA | RNU6-1012P |
| NA | ENSG00000252416 | 0 | NA | NA | NA | NA | RNU6-885P  |
| NA | ENSG00000252417 | 0 | NA | NA | NA | NA | RNU7-179P  |
| NA | ENSG00000252420 | 0 | NA | NA | NA | NA |            |
| NA | ENSG00000252421 | 0 | NA | NA | NA | NA | RNU6-1069P |
| NA | ENSG00000252422 | 0 | NA | NA | NA | NA | RNA5SP476  |
| NA | ENSG00000252423 | 0 | NA | NA | NA | NA | RNU6-229P  |
| NA | ENSG00000252424 | 0 | NA | NA | NA | NA | RNA5SP384  |
| NA | ENSG00000252425 | 0 | NA | NA | NA | NA |            |
| NA | ENSG00000252427 | 0 | NA | NA | NA | NA |            |
| NA | ENSG00000252428 | 0 | NA | NA | NA | NA | RNA5SP285  |
| NA | ENSG00000252429 | 0 | NA | NA | NA | NA | RNU7-29P   |
| NA | ENSG00000252431 | 0 | NA | NA | NA | NA | RNU6-1247P |
| NA | ENSG00000252433 | 0 | NA | NA | NA | NA |            |
| NA | ENSG00000252436 | 0 | NA | NA | NA | NA |            |
| NA | ENSG00000252437 | 0 | NA | NA | NA | NA | RNA5SP459  |

|           |                 |            |             |            |            |    |            |
|-----------|-----------------|------------|-------------|------------|------------|----|------------|
| NA        | ENSG00000252438 | 0          | NA          | NA         | NA         | NA |            |
| NA        | ENSG00000252441 | 0          | NA          | NA         | NA         | NA |            |
| NA        | ENSG00000252443 | 0          | NA          | NA         | NA         | NA |            |
| NA        | ENSG00000252444 | 0          | NA          | NA         | NA         | NA | RNU6-344P  |
| NA        | ENSG00000252446 | 0          | NA          | NA         | NA         | NA | RNU6-405P  |
| NA        | ENSG00000252448 | 0          | NA          | NA         | NA         | NA |            |
| NA        | ENSG00000252449 | 0          | NA          | NA         | NA         | NA | RNU6-139P  |
| NA        | ENSG00000252450 | 0          | NA          | NA         | NA         | NA |            |
| NA        | ENSG00000252451 | 0          | NA          | NA         | NA         | NA | RNA5SP168  |
| NA        | ENSG00000252452 | 0          | NA          | NA         | NA         | NA | RNU6-107P  |
| 100313839 | ENSG00000252454 | 0          | NA          | NA         | NA         | NA | MIR2114    |
| NA        | ENSG00000252456 | 0          | NA          | NA         | NA         | NA | RNA5SP434  |
| NA        | ENSG00000252457 | 0          | NA          | NA         | NA         | NA | RNU7-65P   |
| NA        | ENSG00000252458 | 0          | NA          | NA         | NA         | NA |            |
| NA        | ENSG00000252459 | 0          | NA          | NA         | NA         | NA |            |
| NA        | ENSG00000252460 | 0          | NA          | NA         | NA         | NA | RNU6-635P  |
| NA        | ENSG00000252461 | 0          | NA          | NA         | NA         | NA |            |
| NA        | ENSG00000252462 | 0          | NA          | NA         | NA         | NA | RNU6-113P  |
| NA        | ENSG00000252464 | 0.34106672 | 0.0026319   | 0.38338457 | 0.96256134 | NA | RN7SKP70   |
| 100313840 | ENSG00000252466 | 0          | NA          | NA         | NA         | NA | MIR2115    |
| NA        | ENSG00000252467 | 0          | NA          | NA         | NA         | NA | RNU6-347P  |
| NA        | ENSG00000252468 | 0          | NA          | NA         | NA         | NA | RNU2-57P   |
| NA        | ENSG00000252469 | 0          | NA          | NA         | NA         | NA | RNU7-160P  |
| NA        | ENSG00000252470 | 0          | NA          | NA         | NA         | NA | RNU6-551P  |
| NA        | ENSG00000252472 | 0          | NA          | NA         | NA         | NA | RNU6-521P  |
| NA        | ENSG00000252473 | 0          | NA          | NA         | NA         | NA |            |
| NA        | ENSG00000252474 | 0          | NA          | NA         | NA         | NA | RNU6-539P  |
| NA        | ENSG00000252475 | 0          | NA          | NA         | NA         | NA | RNU6-1332P |
| NA        | ENSG00000252479 | 0          | NA          | NA         | NA         | NA | RNA5SP309  |
| NA        | ENSG00000252480 | 0          | NA          | NA         | NA         | NA | RNU6-719P  |
| 677768    | ENSG00000252481 | 0.45209736 | -0.02505403 | 0.38558831 | 0.57865948 | NA | SCARNA13   |
| NA        | ENSG00000252482 | 0          | NA          | NA         | NA         | NA | RNU7-22P   |
| NA        | ENSG00000252483 | 0          | NA          | NA         | NA         | NA | RNU6-1178P |
| NA        | ENSG00000252484 | 0          | NA          | NA         | NA         | NA | RN7SKP49   |
| NA        | ENSG00000252485 | 0          | NA          | NA         | NA         | NA |            |
| NA        | ENSG00000252486 | 0          | NA          | NA         | NA         | NA |            |
| NA        | ENSG00000252487 | 0          | NA          | NA         | NA         | NA | RNY4P20    |
| NA        | ENSG00000252489 | 0          | NA          | NA         | NA         | NA | RNU6-197P  |

|       |                 |   |    |    |    |    |            |
|-------|-----------------|---|----|----|----|----|------------|
| NA    | ENSG00000252490 | 0 | NA | NA | NA | NA | RN7SKP66   |
| NA    | ENSG00000252491 | 0 | NA | NA | NA | NA | RNU1-142P  |
| NA    | ENSG00000252494 | 0 | NA | NA | NA | NA | RNU6-126P  |
| NA    | ENSG00000252496 | 0 | NA | NA | NA | NA | RNA5SP33   |
| NA    | ENSG00000252497 | 0 | NA | NA | NA | NA | RPPH1-2P   |
| NA    | ENSG00000252498 | 0 | NA | NA | NA | NA | RNU6-1016P |
| NA    | ENSG00000252499 | 0 | NA | NA | NA | NA | RNU6-63P   |
| NA    | ENSG00000252501 | 0 | NA | NA | NA | NA | RNU4-77P   |
| NA    | ENSG00000252503 | 0 | NA | NA | NA | NA | RNU6-531P  |
| NA    | ENSG00000252505 | 0 | NA | NA | NA | NA |            |
| NA    | ENSG00000252506 | 0 | NA | NA | NA | NA | RNU6-180P  |
| NA    | ENSG00000252507 | 0 | NA | NA | NA | NA | RNU7-81P   |
| NA    | ENSG00000252508 | 0 | NA | NA | NA | NA | RNU4ATAC3P |
| NA    | ENSG00000252509 | 0 | NA | NA | NA | NA | RNA5SP271  |
| NA    | ENSG00000252510 | 0 | NA | NA | NA | NA | RNA5SP55   |
| NA    | ENSG00000252512 | 0 | NA | NA | NA | NA | RNA5SP206  |
| NA    | ENSG00000252513 | 0 | NA | NA | NA | NA | RNU1-128P  |
| NA    | ENSG00000252514 | 0 | NA | NA | NA | NA | RNU7-53P   |
| NA    | ENSG00000252516 | 0 | NA | NA | NA | NA | RNA5SP82   |
| NA    | ENSG00000252517 | 0 | NA | NA | NA | NA |            |
| NA    | ENSG00000252519 | 0 | NA | NA | NA | NA | RNU6-783P  |
| NA    | ENSG00000252521 | 0 | NA | NA | NA | NA | RNU5D-2P   |
| NA    | ENSG00000252523 | 0 | NA | NA | NA | NA | RNU6-267P  |
| NA    | ENSG00000252524 | 0 | NA | NA | NA | NA |            |
| NA    | ENSG00000252526 | 0 | NA | NA | NA | NA |            |
| NA    | ENSG00000252530 | 0 | NA | NA | NA | NA | RNU6-965P  |
| NA    | ENSG00000252532 | 0 | NA | NA | NA | NA | RNU7-193P  |
| NA    | ENSG00000252533 | 0 | NA | NA | NA | NA | RNU6-572P  |
| NA    | ENSG00000252534 | 0 | NA | NA | NA | NA |            |
| NA    | ENSG00000252537 | 0 | NA | NA | NA | NA |            |
| NA    | ENSG00000252539 | 0 | NA | NA | NA | NA | RNA5SP462  |
| NA    | ENSG00000252540 | 0 | NA | NA | NA | NA | RNU6-919P  |
| 26813 | ENSG00000252542 | 0 | NA | NA | NA | NA | SNORD36C   |
| NA    | ENSG00000252544 | 0 | NA | NA | NA | NA | RNU6-1282P |
| NA    | ENSG00000252545 | 0 | NA | NA | NA | NA | RNU6-362P  |
| NA    | ENSG00000252546 | 0 | NA | NA | NA | NA | RNA5SP466  |
| NA    | ENSG00000252548 | 0 | NA | NA | NA | NA | RNU7-149P  |
| NA    | ENSG00000252549 | 0 | NA | NA | NA | NA | RNU6-759P  |

|           |                 |   |    |    |    |    |             |
|-----------|-----------------|---|----|----|----|----|-------------|
| NA        | ENSG00000252550 | 0 | NA | NA | NA | NA |             |
| NA        | ENSG00000252552 | 0 | NA | NA | NA | NA | RNU6-307P   |
| NA        | ENSG00000252553 | 0 | NA | NA | NA | NA | RNA5SP73    |
| NA        | ENSG00000252554 | 0 | NA | NA | NA | NA | RNU6-861P   |
| NA        | ENSG00000252555 | 0 | NA | NA | NA | NA | RNU6-567P   |
| NA        | ENSG00000252556 | 0 | NA | NA | NA | NA | RNU6-256P   |
| NA        | ENSG00000252558 | 0 | NA | NA | NA | NA | RNU6-914P   |
| NA        | ENSG00000252560 | 0 | NA | NA | NA | NA | RNU4-18P    |
| NA        | ENSG00000252561 | 0 | NA | NA | NA | NA | RNU1-125P   |
| NA        | ENSG00000252562 | 0 | NA | NA | NA | NA | RNU6-922P   |
| NA        | ENSG00000252563 | 0 | NA | NA | NA | NA | RNA5SP45    |
| NA        | ENSG00000252568 | 0 | NA | NA | NA | NA | RNU7-28P    |
| NA        | ENSG00000252569 | 0 | NA | NA | NA | NA | RNU6-1153P  |
| NA        | ENSG00000252574 | 0 | NA | NA | NA | NA | RNU5B-6P    |
| 677681    | ENSG00000252577 | 0 | NA | NA | NA | NA | SCARNA20    |
| NA        | ENSG00000252578 | 0 | NA | NA | NA | NA | RNU6-135P   |
| NA        | ENSG00000252580 | 0 | NA | NA | NA | NA |             |
| NA        | ENSG00000252581 | 0 | NA | NA | NA | NA | RNU6-1098P  |
| NA        | ENSG00000252582 | 0 | NA | NA | NA | NA |             |
| 100422847 | ENSG00000252583 | 0 | NA | NA | NA | NA | MIR514B     |
| NA        | ENSG00000252585 | 0 | NA | NA | NA | NA |             |
| NA        | ENSG00000252587 | 0 | NA | NA | NA | NA | RNA5SP422   |
| NA        | ENSG00000252590 | 0 | NA | NA | NA | NA | RNU7-143P   |
| NA        | ENSG00000252591 | 0 | NA | NA | NA | NA | RNA5SP468   |
| NA        | ENSG00000252593 | 0 | NA | NA | NA | NA | RNU6-1224P  |
| NA        | ENSG00000252594 | 0 | NA | NA | NA | NA | RNU6-656P   |
| NA        | ENSG00000252595 | 0 | NA | NA | NA | NA | RN7SKP82    |
| NA        | ENSG00000252597 | 0 | NA | NA | NA | NA | RNU7-137P   |
| NA        | ENSG00000252598 | 0 | NA | NA | NA | NA | RNA5SP460   |
| NA        | ENSG00000252599 | 0 | NA | NA | NA | NA | RNU6-566P   |
| NA        | ENSG00000252601 | 0 | NA | NA | NA | NA |             |
| NA        | ENSG00000252603 | 0 | NA | NA | NA | NA | RNU6ATAC22P |
| NA        | ENSG00000252604 | 0 | NA | NA | NA | NA | RNU2-44P    |
| NA        | ENSG00000252606 | 0 | NA | NA | NA | NA | RNU6-1150P  |
| NA        | ENSG00000252607 | 0 | NA | NA | NA | NA |             |
| NA        | ENSG00000252608 | 0 | NA | NA | NA | NA | RNU6-1191P  |
| NA        | ENSG00000252611 | 0 | NA | NA | NA | NA | RNU6-1121P  |
| NA        | ENSG00000252612 | 0 | NA | NA | NA | NA |             |

|    |                 |   |    |    |    |    |             |
|----|-----------------|---|----|----|----|----|-------------|
| NA | ENSG00000252614 | 0 | NA | NA | NA | NA | RNU6-807P   |
| NA | ENSG00000252615 | 0 | NA | NA | NA | NA |             |
| NA | ENSG00000252618 | 0 | NA | NA | NA | NA | RNA5SP441   |
| NA | ENSG00000252619 | 0 | NA | NA | NA | NA | RNU6-1149P  |
| NA | ENSG00000252620 | 0 | NA | NA | NA | NA | RNU6ATAC24P |
| NA | ENSG00000252621 | 0 | NA | NA | NA | NA |             |
| NA | ENSG00000252622 | 0 | NA | NA | NA | NA | RNU6-881P   |
| NA | ENSG00000252623 | 0 | NA | NA | NA | NA | RNA5SP481   |
| NA | ENSG00000252624 | 0 | NA | NA | NA | NA | RNA5SP409   |
| NA | ENSG00000252626 | 0 | NA | NA | NA | NA | RNU6-1308P  |
| NA | ENSG00000252627 | 0 | NA | NA | NA | NA | RNU6-122P   |
| NA | ENSG00000252628 | 0 | NA | NA | NA | NA | RNU6-453P   |
| NA | ENSG00000252633 | 0 | NA | NA | NA | NA | RN7SKP282   |
| NA | ENSG00000252634 | 0 | NA | NA | NA | NA | RN7SKP219   |
| NA | ENSG00000252635 | 0 | NA | NA | NA | NA | RNU2-56P    |
| NA | ENSG00000252636 | 0 | NA | NA | NA | NA | RNU6-826P   |
| NA | ENSG00000252637 | 0 | NA | NA | NA | NA | RNA5SP268   |
| NA | ENSG00000252639 | 0 | NA | NA | NA | NA | RNU2-24P    |
| NA | ENSG00000252640 | 0 | NA | NA | NA | NA |             |
| NA | ENSG00000252641 | 0 | NA | NA | NA | NA | RNU6-678P   |
| NA | ENSG00000252642 | 0 | NA | NA | NA | NA | RNA5SP137   |
| NA | ENSG00000252643 | 0 | NA | NA | NA | NA | RNU6-1136P  |
| NA | ENSG00000252644 | 0 | NA | NA | NA | NA | RNU7-30P    |
| NA | ENSG00000252645 | 0 | NA | NA | NA | NA | RNU7-111P   |
| NA | ENSG00000252647 | 0 | NA | NA | NA | NA | RNA5SP416   |
| NA | ENSG00000252649 | 0 | NA | NA | NA | NA | RNA5SP480   |
| NA | ENSG00000252650 | 0 | NA | NA | NA | NA | RNA5SP75    |
| NA | ENSG00000252651 | 0 | NA | NA | NA | NA | RNU6-557P   |
| NA | ENSG00000252652 | 0 | NA | NA | NA | NA |             |
| NA | ENSG00000252653 | 0 | NA | NA | NA | NA | RNA5SP444   |
| NA | ENSG00000252654 | 0 | NA | NA | NA | NA | RNU7-6P     |
| NA | ENSG00000252655 | 0 | NA | NA | NA | NA |             |
| NA | ENSG00000252657 | 0 | NA | NA | NA | NA |             |
| NA | ENSG00000252658 | 0 | NA | NA | NA | NA | RNU6-786P   |
| NA | ENSG00000252659 | 0 | NA | NA | NA | NA | RNU6-1088P  |
| NA | ENSG00000252660 | 0 | NA | NA | NA | NA |             |
| NA | ENSG00000252661 | 0 | NA | NA | NA | NA | RNU6-782P   |
| NA | ENSG00000252671 | 0 | NA | NA | NA | NA |             |



|           |                 |            |            |            |            |            |             |
|-----------|-----------------|------------|------------|------------|------------|------------|-------------|
| NA        | ENSG00000252673 | 0          | NA         | NA         | NA         | NA         | RNA5SP421   |
| NA        | ENSG00000252674 | 0          | NA         | NA         | NA         | NA         | RNA5SP102   |
| NA        | ENSG00000252677 | 0          | NA         | NA         | NA         | NA         |             |
| NA        | ENSG00000252680 | 0          | NA         | NA         | NA         | NA         | RNA5SP449   |
| NA        | ENSG00000252681 | 0          | NA         | NA         | NA         | NA         | RNU1-97P    |
| NA        | ENSG00000252682 | 0          | NA         | NA         | NA         | NA         |             |
| NA        | ENSG00000252684 | 0          | NA         | NA         | NA         | NA         | RNU6ATAC36P |
| NA        | ENSG00000252685 | 0          | NA         | NA         | NA         | NA         | RNU6-928P   |
| NA        | ENSG00000252686 | 0          | NA         | NA         | NA         | NA         | RNU6-1234P  |
| NA        | ENSG00000252688 | 0          | NA         | NA         | NA         | NA         | RNU6-579P   |
| NA        | ENSG00000252689 | 0          | NA         | NA         | NA         | NA         |             |
| NA        | ENSG00000252690 | 86.6760883 | -0.4807093 | 0.26175724 | 0.02193951 | 0.07847309 |             |
| NA        | ENSG00000252691 | 0          | NA         | NA         | NA         | NA         |             |
| NA        | ENSG00000252692 | 0          | NA         | NA         | NA         | NA         |             |
| NA        | ENSG00000252693 | 0          | NA         | NA         | NA         | NA         |             |
| 100313842 | ENSG00000252695 | 0          | NA         | NA         | NA         | NA         | MIR2276     |
| NA        | ENSG00000252696 | 0          | NA         | NA         | NA         | NA         | RNA5SP34    |
| NA        | ENSG00000252697 | 0          | NA         | NA         | NA         | NA         | RN7SKP209   |
| 109617002 | ENSG00000252699 | 0          | NA         | NA         | NA         | NA         | SNORA21B    |
| NA        | ENSG00000252700 | 0          | NA         | NA         | NA         | NA         | RNU7-110P   |
| NA        | ENSG00000252704 | 0          | NA         | NA         | NA         | NA         | RN7SKP277   |
| NA        | ENSG00000252705 | 0          | NA         | NA         | NA         | NA         | RNU6-175P   |
| NA        | ENSG00000252707 | 0          | NA         | NA         | NA         | NA         | RNU11-2P    |
| NA        | ENSG00000252710 | 0          | NA         | NA         | NA         | NA         | RNU6-295P   |
| NA        | ENSG00000252711 | 0          | NA         | NA         | NA         | NA         | RN7SKP116   |
| 692149    | ENSG00000252712 | 0          | NA         | NA         | NA         | NA         | SCARNA14    |
| NA        | ENSG00000252713 | 0          | NA         | NA         | NA         | NA         | RNU6-1198P  |
| NA        | ENSG00000252714 | 0          | NA         | NA         | NA         | NA         | RNA5SP392   |
| NA        | ENSG00000252716 | 0          | NA         | NA         | NA         | NA         | RN7SKP260   |
| NA        | ENSG00000252717 | 0          | NA         | NA         | NA         | NA         | RNU6-352P   |
| NA        | ENSG00000252718 | 0          | NA         | NA         | NA         | NA         | RNU6-612P   |
| NA        | ENSG00000252719 | 0          | NA         | NA         | NA         | NA         |             |
| NA        | ENSG00000252720 | 0          | NA         | NA         | NA         | NA         | RNU6-1258P  |
| NA        | ENSG00000252721 | 0          | NA         | NA         | NA         | NA         | RNU6-798P   |
| NA        | ENSG00000252722 | 0          | NA         | NA         | NA         | NA         |             |
| NA        | ENSG00000252723 | 0          | NA         | NA         | NA         | NA         | RNU6-677P   |
| NA        | ENSG00000252724 | 0          | NA         | NA         | NA         | NA         |             |
| NA        | ENSG00000252725 | 0          | NA         | NA         | NA         | NA         | RNU6-765P   |

|    |                 |            |            |            |            |    |             |
|----|-----------------|------------|------------|------------|------------|----|-------------|
| NA | ENSG00000252726 | 0          | NA         | NA         | NA         | NA | RNA5SP94    |
| NA | ENSG00000252727 | 0          | NA         | NA         | NA         | NA |             |
| NA | ENSG00000252729 | 0          | NA         | NA         | NA         | NA | RNU6-971P   |
| NA | ENSG00000252734 | 0          | NA         | NA         | NA         | NA | RNU6-980P   |
| NA | ENSG00000252735 | 0          | NA         | NA         | NA         | NA | RNU6-528P   |
| NA | ENSG00000252739 | 0          | NA         | NA         | NA         | NA | RNU7-151P   |
| NA | ENSG00000252742 | 0          | NA         | NA         | NA         | NA |             |
| NA | ENSG00000252743 | 0.16735865 | 0.01897177 | 0.38482933 | 0.78225479 | NA | RNU6-850P   |
| NA | ENSG00000252744 | 0          | NA         | NA         | NA         | NA |             |
| NA | ENSG00000252745 | 0          | NA         | NA         | NA         | NA | RNA5SP143   |
| NA | ENSG00000252746 | 0          | NA         | NA         | NA         | NA | RNU6-273P   |
| NA | ENSG00000252747 | 0          | NA         | NA         | NA         | NA | RNA5SP364   |
| NA | ENSG00000252749 | 0          | NA         | NA         | NA         | NA | RNU7-116P   |
| NA | ENSG00000252750 | 0          | NA         | NA         | NA         | NA | RNU7-70P    |
| NA | ENSG00000252751 | 0          | NA         | NA         | NA         | NA | RNU6-143P   |
| NA | ENSG00000252752 | 0          | NA         | NA         | NA         | NA | RNU6-210P   |
| NA | ENSG00000252755 | 0          | NA         | NA         | NA         | NA | RNU6-703P   |
| NA | ENSG00000252756 | 0          | NA         | NA         | NA         | NA | RNU6-577P   |
| NA | ENSG00000252757 | 0          | NA         | NA         | NA         | NA | RN7SKP96    |
| NA | ENSG00000252758 | 0          | NA         | NA         | NA         | NA | RNU6-445P   |
| NA | ENSG00000252759 | 0          | NA         | NA         | NA         | NA |             |
| NA | ENSG00000252760 | 0          | NA         | NA         | NA         | NA | RNA5SP54    |
| NA | ENSG00000252761 | 0          | NA         | NA         | NA         | NA |             |
| NA | ENSG00000252762 | 0          | NA         | NA         | NA         | NA |             |
| NA | ENSG00000252763 | 0          | NA         | NA         | NA         | NA | RNU2-31P    |
| NA | ENSG00000252764 | 0          | NA         | NA         | NA         | NA | RNU6-1092P  |
| NA | ENSG00000252765 | 0          | NA         | NA         | NA         | NA |             |
| NA | ENSG00000252766 | 0          | NA         | NA         | NA         | NA | RNU6-255P   |
| NA | ENSG00000252767 | 0          | NA         | NA         | NA         | NA | RNU6-250P   |
| NA | ENSG00000252768 | 0          | NA         | NA         | NA         | NA | RNU6-856P   |
| NA | ENSG00000252769 | 0          | NA         | NA         | NA         | NA | RNU6-943P   |
| NA | ENSG00000252770 | 0          | NA         | NA         | NA         | NA | RNU7-4P     |
| NA | ENSG00000252772 | 0          | NA         | NA         | NA         | NA | RNU6-714P   |
| NA | ENSG00000252774 | 0          | NA         | NA         | NA         | NA |             |
| NA | ENSG00000252776 | 0          | NA         | NA         | NA         | NA | RNU4ATAC10P |
| NA | ENSG00000252777 | 0          | NA         | NA         | NA         | NA |             |
| NA | ENSG00000252778 | 0          | NA         | NA         | NA         | NA |             |
| NA | ENSG00000252779 | 0          | NA         | NA         | NA         | NA | RNU6-182P   |

|        |                 |   |    |    |    |    |            |
|--------|-----------------|---|----|----|----|----|------------|
| NA     | ENSG00000252780 | 0 | NA | NA | NA | NA | RNA5SP471  |
| NA     | ENSG00000252782 | 0 | NA | NA | NA | NA | RNU6-341P  |
| NA     | ENSG00000252783 | 0 | NA | NA | NA | NA | RNU6-835P  |
| NA     | ENSG00000252784 | 0 | NA | NA | NA | NA |            |
| NA     | ENSG00000252787 | 0 | NA | NA | NA | NA |            |
| NA     | ENSG00000252794 | 0 | NA | NA | NA | NA | RN7SKP60   |
| NA     | ENSG00000252795 | 0 | NA | NA | NA | NA | RNU6-56P   |
| NA     | ENSG00000252796 | 0 | NA | NA | NA | NA | RNU7-11P   |
| NA     | ENSG00000252797 | 0 | NA | NA | NA | NA | RN7SKP272  |
| NA     | ENSG00000252798 | 0 | NA | NA | NA | NA |            |
| NA     | ENSG00000252800 | 0 | NA | NA | NA | NA |            |
| NA     | ENSG00000252802 | 0 | NA | NA | NA | NA |            |
| NA     | ENSG00000252804 | 0 | NA | NA | NA | NA | RNU6-958P  |
| NA     | ENSG00000252806 | 0 | NA | NA | NA | NA | RNA5SP420  |
| NA     | ENSG00000252807 | 0 | NA | NA | NA | NA | RNU6-1006P |
| NA     | ENSG00000252810 | 0 | NA | NA | NA | NA | RNU6-345P  |
| NA     | ENSG00000252812 | 0 | NA | NA | NA | NA | RN7SKP2    |
| NA     | ENSG00000252814 | 0 | NA | NA | NA | NA | RN7SKP233  |
| NA     | ENSG00000252815 | 0 | NA | NA | NA | NA | RNU6-410P  |
| NA     | ENSG00000252816 | 0 | NA | NA | NA | NA | RNA5SP337  |
| NA     | ENSG00000252820 | 0 | NA | NA | NA | NA |            |
| NA     | ENSG00000252821 | 0 | NA | NA | NA | NA | RNU6-388P  |
| NA     | ENSG00000252822 | 0 | NA | NA | NA | NA |            |
| NA     | ENSG00000252823 | 0 | NA | NA | NA | NA | RNU6-148P  |
| NA     | ENSG00000252824 | 0 | NA | NA | NA | NA |            |
| NA     | ENSG00000252826 | 0 | NA | NA | NA | NA | RNVU1-23   |
| NA     | ENSG00000252827 | 0 | NA | NA | NA | NA | RN7SKP11   |
| NA     | ENSG00000252828 | 0 | NA | NA | NA | NA | RNA5SP135  |
| NA     | ENSG00000252830 | 0 | NA | NA | NA | NA | RNA5SP533  |
| NA     | ENSG00000252832 | 0 | NA | NA | NA | NA | RNU6-1212P |
| NA     | ENSG00000252833 | 0 | NA | NA | NA | NA | RNA5SP186  |
| 677763 | ENSG00000252835 | 0 | NA | NA | NA | NA | SCARNA21   |
| NA     | ENSG00000252837 | 0 | NA | NA | NA | NA | RN7SKP99   |
| NA     | ENSG00000252839 | 0 | NA | NA | NA | NA | RNU6-419P  |
| NA     | ENSG00000252840 | 0 | NA | NA | NA | NA |            |
| NA     | ENSG00000252845 | 0 | NA | NA | NA | NA | RNA5SP101  |
| NA     | ENSG00000252847 | 0 | NA | NA | NA | NA | RNU2-46P   |
| NA     | ENSG00000252848 | 0 | NA | NA | NA | NA | RNA5SP230  |

|        |                 |            |             |            |            |    |            |
|--------|-----------------|------------|-------------|------------|------------|----|------------|
| NA     | ENSG00000252850 | 0          | NA          | NA         | NA         | NA | RNU1-117P  |
| NA     | ENSG00000252852 | 0          | NA          | NA         | NA         | NA |            |
| NA     | ENSG00000252854 | 0.33471731 | 0.02354391  | 0.38534154 | 0.62842204 | NA | RN7SKP5    |
| NA     | ENSG00000252856 | 0          | NA          | NA         | NA         | NA | RNA5SP503  |
| NA     | ENSG00000252857 | 0          | NA          | NA         | NA         | NA | RNU6-389P  |
| NA     | ENSG00000252858 | 0          | NA          | NA         | NA         | NA | RNU6-1271P |
| NA     | ENSG00000252859 | 0          | NA          | NA         | NA         | NA | RNU6-375P  |
| NA     | ENSG00000252860 | 0          | NA          | NA         | NA         | NA | RNU6-570P  |
| NA     | ENSG00000252861 | 0          | NA          | NA         | NA         | NA | RNU6-448P  |
| NA     | ENSG00000252863 | 0          | NA          | NA         | NA         | NA | RNU6-1183P |
| NA     | ENSG00000252864 | 0          | NA          | NA         | NA         | NA | RNA5SP278  |
| NA     | ENSG00000252866 | 0          | NA          | NA         | NA         | NA | RNA5SP243  |
| NA     | ENSG00000252867 | 0          | NA          | NA         | NA         | NA | RNU6-909P  |
| NA     | ENSG00000252868 | 0          | NA          | NA         | NA         | NA |            |
| NA     | ENSG00000252870 | 0          | NA          | NA         | NA         | NA |            |
| NA     | ENSG00000252872 | 0          | NA          | NA         | NA         | NA | RNU7-188P  |
| NA     | ENSG00000252874 | 0.15069912 | -0.01848503 | 0.38480575 | 0.84537521 | NA |            |
| NA     | ENSG00000252877 | 0          | NA          | NA         | NA         | NA | RNA5SP312  |
| NA     | ENSG00000252879 | 0          | NA          | NA         | NA         | NA | RN7SKP98   |
| NA     | ENSG00000252881 | 0          | NA          | NA         | NA         | NA | RNU6-334P  |
| NA     | ENSG00000252882 | 0          | NA          | NA         | NA         | NA | RNU6-1137P |
| NA     | ENSG00000252884 | 0          | NA          | NA         | NA         | NA | RNU6-1213P |
| NA     | ENSG00000252886 | 0          | NA          | NA         | NA         | NA | RN7SKP197  |
| NA     | ENSG00000252887 | 0          | NA          | NA         | NA         | NA | RNU6-430P  |
| NA     | ENSG00000252888 | 0          | NA          | NA         | NA         | NA |            |
| NA     | ENSG00000252889 | 0          | NA          | NA         | NA         | NA | RNU6-1236P |
| NA     | ENSG00000252890 | 0          | NA          | NA         | NA         | NA | RNU6-699P  |
| NA     | ENSG00000252891 | 0          | NA          | NA         | NA         | NA |            |
| NA     | ENSG00000252892 | 0          | NA          | NA         | NA         | NA | RNU6-548P  |
| NA     | ENSG00000252894 | 0          | NA          | NA         | NA         | NA |            |
| NA     | ENSG00000252897 | 0          | NA          | NA         | NA         | NA | RNU6-685P  |
| NA     | ENSG00000252898 | 0          | NA          | NA         | NA         | NA | RNU6-1096P |
| NA     | ENSG00000252900 | 0          | NA          | NA         | NA         | NA | RNU6-303P  |
| NA     | ENSG00000252903 | 0          | NA          | NA         | NA         | NA | RNU6-894P  |
| NA     | ENSG00000252904 | 0          | NA          | NA         | NA         | NA |            |
| NA     | ENSG00000252905 | 0          | NA          | NA         | NA         | NA | RNA5SP330  |
| 677679 | ENSG00000252906 | 0          | NA          | NA         | NA         | NA | SCARNA3    |
| NA     | ENSG00000252908 | 0          | NA          | NA         | NA         | NA | RNU6-1003P |

|        |                 |   |    |    |    |    |            |
|--------|-----------------|---|----|----|----|----|------------|
| NA     | ENSG00000252909 | 0 | NA | NA | NA | NA | RNU6-201P  |
| NA     | ENSG00000252913 | 0 | NA | NA | NA | NA | RNU6-158P  |
| NA     | ENSG00000252914 | 0 | NA | NA | NA | NA | RNU6-789P  |
| NA     | ENSG00000252915 | 0 | NA | NA | NA | NA |            |
| NA     | ENSG00000252916 | 0 | NA | NA | NA | NA | RNU6-762P  |
| NA     | ENSG00000252917 | 0 | NA | NA | NA | NA |            |
| NA     | ENSG00000252919 | 0 | NA | NA | NA | NA |            |
| NA     | ENSG00000252920 | 0 | NA | NA | NA | NA |            |
| NA     | ENSG00000252922 | 0 | NA | NA | NA | NA | RNU6-365P  |
| NA     | ENSG00000252923 | 0 | NA | NA | NA | NA |            |
| NA     | ENSG00000252927 | 0 | NA | NA | NA | NA | RNA5SP404  |
| NA     | ENSG00000252928 | 0 | NA | NA | NA | NA | RNU6-64P   |
| NA     | ENSG00000252929 | 0 | NA | NA | NA | NA | RNU6-218P  |
| NA     | ENSG00000252930 | 0 | NA | NA | NA | NA | RNU6-1015P |
| NA     | ENSG00000252931 | 0 | NA | NA | NA | NA | RNU6-231P  |
| NA     | ENSG00000252933 | 0 | NA | NA | NA | NA | RNU6-1223P |
| NA     | ENSG00000252934 | 0 | NA | NA | NA | NA | RNU7-172P  |
| NA     | ENSG00000252935 | 0 | NA | NA | NA | NA | RNU6-1220P |
| NA     | ENSG00000252936 | 0 | NA | NA | NA | NA | RNA5SP423  |
| NA     | ENSG00000252937 | 0 | NA | NA | NA | NA | RNU6-1270P |
| NA     | ENSG00000252941 | 0 | NA | NA | NA | NA | RNA5SP340  |
| NA     | ENSG00000252942 | 0 | NA | NA | NA | NA | RNA5SP290  |
| NA     | ENSG00000252943 | 0 | NA | NA | NA | NA | RNU6-264P  |
| NA     | ENSG00000252944 | 0 | NA | NA | NA | NA | RNU6-897P  |
| NA     | ENSG00000252945 | 0 | NA | NA | NA | NA |            |
| 677774 | ENSG00000252947 | 0 | NA | NA | NA | NA | SCARNA1    |
| NA     | ENSG00000252948 | 0 | NA | NA | NA | NA | RNU6-1314P |
| NA     | ENSG00000252950 | 0 | NA | NA | NA | NA | RNA5SP490  |
| NA     | ENSG00000252951 | 0 | NA | NA | NA | NA | RNA5SP165  |
| NA     | ENSG00000252952 | 0 | NA | NA | NA | NA | RNU6-58P   |
| NA     | ENSG00000252953 | 0 | NA | NA | NA | NA | RNU6-232P  |
| NA     | ENSG00000252955 | 0 | NA | NA | NA | NA | RNU4ATAC9P |
| NA     | ENSG00000252956 | 0 | NA | NA | NA | NA | RNA5SP40   |
| NA     | ENSG00000252957 | 0 | NA | NA | NA | NA | RNA5SP402  |
| NA     | ENSG00000252959 | 0 | NA | NA | NA | NA | RNA5SP170  |
| NA     | ENSG00000252960 | 0 | NA | NA | NA | NA | RN7SKP258  |
| NA     | ENSG00000252962 | 0 | NA | NA | NA | NA | RNU6-993P  |
| NA     | ENSG00000252963 | 0 | NA | NA | NA | NA | RN7SKP147  |

|           |                 |   |    |    |    |    |            |
|-----------|-----------------|---|----|----|----|----|------------|
| NA        | ENSG00000252964 | 0 | NA | NA | NA | NA | RNA5SP400  |
| NA        | ENSG00000252965 | 0 | NA | NA | NA | NA |            |
| NA        | ENSG00000252969 | 0 | NA | NA | NA | NA |            |
| NA        | ENSG00000252970 | 0 | NA | NA | NA | NA | RNA5SP159  |
| NA        | ENSG00000252971 | 0 | NA | NA | NA | NA | RNU6-1057P |
| NA        | ENSG00000252973 | 0 | NA | NA | NA | NA | RNU6-1028P |
| NA        | ENSG00000252975 | 0 | NA | NA | NA | NA |            |
| NA        | ENSG00000252977 | 0 | NA | NA | NA | NA | RNA5SP70   |
| NA        | ENSG00000252978 | 0 | NA | NA | NA | NA | RN7SKP183  |
| NA        | ENSG00000252979 | 0 | NA | NA | NA | NA | RNU6-165P  |
| NA        | ENSG00000252980 | 0 | NA | NA | NA | NA | RNU6-367P  |
| NA        | ENSG00000252982 | 0 | NA | NA | NA | NA | RN7SKP234  |
| NA        | ENSG00000252983 | 0 | NA | NA | NA | NA | RNU7-35P   |
| NA        | ENSG00000252984 | 0 | NA | NA | NA | NA | RNU6-844P  |
| NA        | ENSG00000252985 | 0 | NA | NA | NA | NA |            |
| NA        | ENSG00000252987 | 0 | NA | NA | NA | NA | RNA5SP66   |
| NA        | ENSG00000252988 | 0 | NA | NA | NA | NA | RNU6-111P  |
| NA        | ENSG00000252989 | 0 | NA | NA | NA | NA |            |
| NA        | ENSG00000252990 | 0 | NA | NA | NA | NA | RNU1-54P   |
| NA        | ENSG00000252991 | 0 | NA | NA | NA | NA | RNU6-1073P |
| NA        | ENSG00000252992 | 0 | NA | NA | NA | NA |            |
| NA        | ENSG00000252993 | 0 | NA | NA | NA | NA |            |
| NA        | ENSG00000252994 | 0 | NA | NA | NA | NA | RNU6-1231P |
| NA        | ENSG00000252995 | 0 | NA | NA | NA | NA | RNU6-667P  |
| NA        | ENSG00000252996 | 0 | NA | NA | NA | NA | RNU6-1315P |
| NA        | ENSG00000252998 | 0 | NA | NA | NA | NA | RNU6-889P  |
| NA        | ENSG00000252999 | 0 | NA | NA | NA | NA | RNA5SP380  |
| NA        | ENSG00000253000 | 0 | NA | NA | NA | NA | RNU1-45P   |
| NA        | ENSG00000253001 | 0 | NA | NA | NA | NA | RN7SKP105  |
| NA        | ENSG00000253003 | 0 | NA | NA | NA | NA | RNU6-1261P |
| NA        | ENSG00000253005 | 0 | NA | NA | NA | NA | RNU6-176P  |
| NA        | ENSG00000253006 | 0 | NA | NA | NA | NA | RN7SKP283  |
| 109616998 | ENSG00000253007 | 0 | NA | NA | NA | NA | SNORA50B   |
| 100423036 | ENSG00000253008 | 0 | NA | NA | NA | NA | MIR2355    |
| NA        | ENSG00000253010 | 0 | NA | NA | NA | NA | RN7SKP256  |
| NA        | ENSG00000253013 | 0 | NA | NA | NA | NA |            |
| NA        | ENSG00000253015 | 0 | NA | NA | NA | NA | RN7SKP64   |
| NA        | ENSG00000253016 | 0 | NA | NA | NA | NA |            |

|           |                 |            |            |            |            |    |            |
|-----------|-----------------|------------|------------|------------|------------|----|------------|
| NA        | ENSG00000253019 | 0          | NA         | NA         | NA         | NA | RN7SKP35   |
| NA        | ENSG00000253020 | 0          | NA         | NA         | NA         | NA | RN7SKP40   |
| NA        | ENSG00000253021 | 0          | NA         | NA         | NA         | NA | RNU6-902P  |
| NA        | ENSG00000253022 | 0          | NA         | NA         | NA         | NA | RNU6-731P  |
| NA        | ENSG00000253023 | 0          | NA         | NA         | NA         | NA | RNU7-156P  |
| NA        | ENSG00000253024 | 0          | NA         | NA         | NA         | NA | RNU6-1238P |
| NA        | ENSG00000253025 | 0          | NA         | NA         | NA         | NA | RNU2-12P   |
| NA        | ENSG00000253026 | 0          | NA         | NA         | NA         | NA | RNU6-464P  |
| NA        | ENSG00000253027 | 0          | NA         | NA         | NA         | NA |            |
| NA        | ENSG00000253028 | 0          | NA         | NA         | NA         | NA |            |
| 100313886 | ENSG00000253030 | 0          | NA         | NA         | NA         | NA | MIR2116    |
| NA        | ENSG00000253031 | 0          | NA         | NA         | NA         | NA | RNA5SP291  |
| NA        | ENSG00000253032 | 0          | NA         | NA         | NA         | NA | RNU6-299P  |
| NA        | ENSG00000253035 | 0          | NA         | NA         | NA         | NA | RNU4ATAC5P |
| NA        | ENSG00000253038 | 0          | NA         | NA         | NA         | NA | RNU6-706P  |
| NA        | ENSG00000253039 | 0          | NA         | NA         | NA         | NA | RNA5SP47   |
| NA        | ENSG00000253040 | 0          | NA         | NA         | NA         | NA | RNA5SP454  |
| NA        | ENSG00000253041 | 0          | NA         | NA         | NA         | NA |            |
| NA        | ENSG00000253042 | 0          | NA         | NA         | NA         | NA |            |
| NA        | ENSG00000253043 | 0          | NA         | NA         | NA         | NA | RNU7-181P  |
| NA        | ENSG00000253047 | 0          | NA         | NA         | NA         | NA |            |
| NA        | ENSG00000253048 | 0          | NA         | NA         | NA         | NA | RNU4-60P   |
| NA        | ENSG00000253049 | 0          | NA         | NA         | NA         | NA |            |
| 109616966 | ENSG00000253051 | 0          | NA         | NA         | NA         | NA |            |
| NA        | ENSG00000253053 | 0          | NA         | NA         | NA         | NA | RN7SKP289  |
| NA        | ENSG00000253054 | 0          | NA         | NA         | NA         | NA | RNU7-77P   |
| NA        | ENSG00000253055 | 0          | NA         | NA         | NA         | NA | RNA5SP415  |
| NA        | ENSG00000253056 | 0          | NA         | NA         | NA         | NA | RNU7-128P  |
| NA        | ENSG00000253057 | 0.85788267 | 0.01727728 | 0.38194762 | 0.73946937 | NA | RN7SKP57   |
| NA        | ENSG00000253058 | 0          | NA         | NA         | NA         | NA | RNA5SP437  |
| NA        | ENSG00000253059 | 0          | NA         | NA         | NA         | NA |            |
| NA        | ENSG00000253060 | 0          | NA         | NA         | NA         | NA |            |
| NA        | ENSG00000253063 | 0          | NA         | NA         | NA         | NA | RNU6-494P  |
| NA        | ENSG00000253064 | 0          | NA         | NA         | NA         | NA | RNU6-711P  |
| NA        | ENSG00000253065 | 0          | NA         | NA         | NA         | NA |            |
| NA        | ENSG00000253066 | 0          | NA         | NA         | NA         | NA | RNU6-709P  |
| NA        | ENSG00000253067 | 0          | NA         | NA         | NA         | NA |            |
| NA        | ENSG00000253070 | 0          | NA         | NA         | NA         | NA | RNU6-794P  |

|           |                 |            |             |            |            |            |             |
|-----------|-----------------|------------|-------------|------------|------------|------------|-------------|
| NA        | ENSG00000253072 | 0          | NA          | NA         | NA         | NA         |             |
| NA        | ENSG00000253073 | 0          | NA          | NA         | NA         | NA         | RN7SKP295   |
| NA        | ENSG00000253074 | 0          | NA          | NA         | NA         | NA         | RNU6-586P   |
| NA        | ENSG00000253075 | 0          | NA          | NA         | NA         | NA         | RN7SKP92    |
| NA        | ENSG00000253077 | 0          | NA          | NA         | NA         | NA         | RNA5SP169   |
| NA        | ENSG00000253078 | 0          | NA          | NA         | NA         | NA         | RNU6-1116P  |
| NA        | ENSG00000253079 | 0          | NA          | NA         | NA         | NA         | NRON        |
| NA        | ENSG00000253080 | 0          | NA          | NA         | NA         | NA         | RNA5SP373   |
| NA        | ENSG00000253081 | 0          | NA          | NA         | NA         | NA         | RNU4ATAC17P |
| NA        | ENSG00000253083 | 0          | NA          | NA         | NA         | NA         | RNA5SP106   |
| NA        | ENSG00000253084 | 0          | NA          | NA         | NA         | NA         | RNU6-840P   |
| NA        | ENSG00000253085 | 0          | NA          | NA         | NA         | NA         |             |
| NA        | ENSG00000253086 | 0          | NA          | NA         | NA         | NA         | RNU6-537P   |
| NA        | ENSG00000253087 | 0          | NA          | NA         | NA         | NA         | RNU6-1174P  |
| NA        | ENSG00000253088 | 0          | NA          | NA         | NA         | NA         |             |
| NA        | ENSG00000253089 | 0          | NA          | NA         | NA         | NA         | RNU1-104P   |
| NA        | ENSG00000253090 | 0          | NA          | NA         | NA         | NA         |             |
| NA        | ENSG00000253092 | 0          | NA          | NA         | NA         | NA         |             |
| NA        | ENSG00000253093 | 0          | NA          | NA         | NA         | NA         | RNA5SP179   |
| NA        | ENSG00000253094 | 0          | NA          | NA         | NA         | NA         |             |
| NA        | ENSG00000253096 | 0          | NA          | NA         | NA         | NA         |             |
| NA        | ENSG00000253097 | 0          | NA          | NA         | NA         | NA         | RNU2-19P    |
| NA        | ENSG00000253098 | 0          | NA          | NA         | NA         | NA         | RNU7-161P   |
| NA        | ENSG00000253099 | 0          | NA          | NA         | NA         | NA         | RNU2-60P    |
| NA        | ENSG00000253100 | 0          | NA          | NA         | NA         | NA         |             |
| NA        | ENSG00000253102 | 12.9104157 | -0.15198416 | 0.36316755 | 0.38564688 | 0.61480386 |             |
| 101927487 | ENSG00000253103 | 0          | NA          | NA         | NA         | NA         | LINC01609   |
| NA        | ENSG00000253104 | 0          | NA          | NA         | NA         | NA         |             |
| NA        | ENSG00000253105 | 0          | NA          | NA         | NA         | NA         |             |
| NA        | ENSG00000253106 | 36.9449337 | -0.47141056 | 0.37441323 | 0.05494042 | 0.16005939 |             |
| NA        | ENSG00000253107 | 0          | NA          | NA         | NA         | NA         |             |
| NA        | ENSG00000253108 | 0          | NA          | NA         | NA         | NA         |             |
| NA        | ENSG00000253109 | 0          | NA          | NA         | NA         | NA         | RPL12P22    |
| NA        | ENSG00000253110 | 0          | NA          | NA         | NA         | NA         |             |
| NA        | ENSG00000253111 | 0          | NA          | NA         | NA         | NA         |             |
| NA        | ENSG00000253112 | 0          | NA          | NA         | NA         | NA         |             |
| NA        | ENSG00000253114 | 0          | NA          | NA         | NA         | NA         |             |
| NA        | ENSG00000253115 | 0          | NA          | NA         | NA         | NA         |             |



|           |    |                 |            |             |            |            |            |             |
|-----------|----|-----------------|------------|-------------|------------|------------|------------|-------------|
|           | NA | ENSG00000253116 | 0          | NA          | NA         | NA         | NA         |             |
| 729330    | NA | ENSG00000253117 | 0.14931947 | -0.01844332 | 0.38480212 | 0.84537521 | NA         | OC90        |
|           | NA | ENSG00000253118 | 0          | NA          | NA         | NA         | NA         |             |
|           | NA | ENSG00000253119 | 0          | NA          | NA         | NA         | NA         | HNRNPA3P7   |
|           | NA | ENSG00000253120 | 0          | NA          | NA         | NA         | NA         | IGLV2-34    |
|           | NA | ENSG00000253121 | 0.34624801 | -0.02356563 | 0.38536324 | 0.65270996 | NA         |             |
|           | NA | ENSG00000253122 | 0          | NA          | NA         | NA         | NA         |             |
| 100507403 | NA | ENSG00000253123 | 0          | NA          | NA         | NA         | NA         |             |
|           | NA | ENSG00000253124 | 0          | NA          | NA         | NA         | NA         | TRAPPC2P2   |
|           | NA | ENSG00000253125 | 0          | NA          | NA         | NA         | NA         |             |
|           | NA | ENSG00000253126 | 0          | NA          | NA         | NA         | NA         | IGLVI-56    |
|           | NA | ENSG00000253127 | 0          | NA          | NA         | NA         | NA         | IGKV2D-36   |
|           | NA | ENSG00000253130 | 0          | NA          | NA         | NA         | NA         |             |
|           | NA | ENSG00000253131 | 0          | NA          | NA         | NA         | NA         | IGHV7-56    |
|           | NA | ENSG00000253132 | 0          | NA          | NA         | NA         | NA         | IGHV3-62    |
|           | NA | ENSG00000253133 | 2.48773746 | 0.00236773  | 0.37140374 | 0.98219475 | NA         |             |
|           | NA | ENSG00000253134 | 0          | NA          | NA         | NA         | NA         |             |
|           | NA | ENSG00000253135 | 0          | NA          | NA         | NA         | NA         |             |
|           | NA | ENSG00000253137 | 0          | NA          | NA         | NA         | NA         | PSMC2P2     |
| 100505659 | NA | ENSG00000253138 | 0          | NA          | NA         | NA         | NA         | LINC00967   |
|           | NA | ENSG00000253139 | 0          | NA          | NA         | NA         | NA         |             |
|           | NA | ENSG00000253140 | 0          | NA          | NA         | NA         | NA         |             |
|           | NA | ENSG00000253141 | 0          | NA          | NA         | NA         | NA         |             |
|           | NA | ENSG00000253142 | 0          | NA          | NA         | NA         | NA         |             |
|           | NA | ENSG00000253143 | 0          | NA          | NA         | NA         | NA         |             |
|           | NA | ENSG00000253144 | 2.08479605 | 0.07640289  | 0.39520228 | 0.07476764 | NA         |             |
|           | NA | ENSG00000253146 | 0          | NA          | NA         | NA         | NA         | CIR1P1      |
| 102467222 | NA | ENSG00000253147 | 0          | NA          | NA         | NA         | NA         |             |
| 431704    | NA | ENSG00000253148 | 0          | NA          | NA         | NA         | NA         | RGS21       |
|           | NA | ENSG00000253149 | 0          | NA          | NA         | NA         | NA         | IGHVII-28-1 |
|           | NA | ENSG00000253152 | 0          | NA          | NA         | NA         | NA         | IGLV3-17    |
|           | NA | ENSG00000253153 | 0          | NA          | NA         | NA         | NA         |             |
|           | NA | ENSG00000253154 | 0          | NA          | NA         | NA         | NA         |             |
|           | NA | ENSG00000253155 | 0          | NA          | NA         | NA         | NA         |             |
|           | NA | ENSG00000253156 | 0          | NA          | NA         | NA         | NA         | H2AZP7      |
|           | NA | ENSG00000253158 | 0          | NA          | NA         | NA         | NA         | IGKV3-31    |
| 26025     | NA | ENSG00000253159 | 7.09805574 | 0.05427954  | 0.35810968 | 0.7023931  | 0.85693514 | PCDHGA12    |
|           | NA | ENSG00000253160 | 0          | NA          | NA         | NA         | NA         |             |

|           |                 |            |             |            |            |            |             |
|-----------|-----------------|------------|-------------|------------|------------|------------|-------------|
| NA        | ENSG00000253161 | 0.16735865 | 0.01897177  | 0.38482933 | 0.78225479 | NA         | LINC01605   |
| NA        | ENSG00000253162 | 0          | NA          | NA         | NA         | NA         |             |
| NA        | ENSG00000253163 | 0          | NA          | NA         | NA         | NA         |             |
| NA        | ENSG00000253164 | 0          | NA          | NA         | NA         | NA         |             |
| 101927798 | ENSG00000253165 | 0          | NA          | NA         | NA         | NA         |             |
| NA        | ENSG00000253166 | 0          | NA          | NA         | NA         | NA         |             |
| 106479020 | ENSG00000253167 | 3.10768961 | 0.04641923  | 0.37476634 | 0.64446789 | 0.822478   | WASHC5-AS1  |
| NA        | ENSG00000253168 | 0          | NA          | NA         | NA         | NA         |             |
| NA        | ENSG00000253169 | 0          | NA          | NA         | NA         | NA         | IGHVII-65-1 |
| NA        | ENSG00000253170 | 0          | NA          | NA         | NA         | NA         |             |
| NA        | ENSG00000253171 | 0          | NA          | NA         | NA         | NA         |             |
| NA        | ENSG00000253172 | 0.30139824 | -0.02296476 | 0.38527817 | 0.68536535 | NA         |             |
| NA        | ENSG00000253173 | 0          | NA          | NA         | NA         | NA         | H2AZP2      |
| NA        | ENSG00000253174 | 7.1440965  | 0.134475    | 0.39476453 | 0.28767042 | 0.51339221 |             |
| NA        | ENSG00000253175 | 0          | NA          | NA         | NA         | NA         |             |
| NA        | ENSG00000253176 | 0          | NA          | NA         | NA         | NA         |             |
| 101926956 | ENSG00000253177 | 0          | NA          | NA         | NA         | NA         |             |
| NA        | ENSG00000253178 | 0          | NA          | NA         | NA         | NA         |             |
| NA        | ENSG00000253179 | 0          | NA          | NA         | NA         | NA         | CALCP       |
| NA        | ENSG00000253180 | 2.18010096 | -0.02456484 | 0.37409722 | 0.78826583 | NA         |             |
| NA        | ENSG00000253181 | 0          | NA          | NA         | NA         | NA         |             |
| NA        | ENSG00000253182 | 0          | NA          | NA         | NA         | NA         |             |
| NA        | ENSG00000253183 | 0          | NA          | NA         | NA         | NA         |             |
| NA        | ENSG00000253184 | 0          | NA          | NA         | NA         | NA         |             |
| NA        | ENSG00000253186 | 0          | NA          | NA         | NA         | NA         |             |
| 100874323 | ENSG00000253187 | 0          | NA          | NA         | NA         | NA         | HOXA10-AS   |
| NA        | ENSG00000253188 | 0          | NA          | NA         | NA         | NA         | TRBV6-7     |
| NA        | ENSG00000253189 | 0          | NA          | NA         | NA         | NA         |             |
| NA        | ENSG00000253190 | 0.56767373 | 0.02627943  | 0.38574813 | 0.49686938 | NA         |             |
| NA        | ENSG00000253191 | 0          | NA          | NA         | NA         | NA         | IGKV1D-32   |
| NA        | ENSG00000253194 | 7.99427655 | 0.94767538  | 1.39810972 | 0.01426536 | 0.05539728 |             |
| NA        | ENSG00000253195 | 0          | NA          | NA         | NA         | NA         |             |
| NA        | ENSG00000253196 | 0          | NA          | NA         | NA         | NA         |             |
| NA        | ENSG00000253197 | 0          | NA          | NA         | NA         | NA         |             |
| NA        | ENSG00000253198 | 0          | NA          | NA         | NA         | NA         |             |
| 286114    | ENSG00000253199 | 0          | NA          | NA         | NA         | NA         | LINC02153   |
| NA        | ENSG00000253200 | 185.008906 | 0.00169343  | 0.17393225 | 0.99253469 | 0.99756121 |             |
| NA        | ENSG00000253202 | 0          | NA          | NA         | NA         | NA         | IGKV3-25    |

|        |                 |            |             |            |            |            |            |
|--------|-----------------|------------|-------------|------------|------------|------------|------------|
| NA     | ENSG00000253203 | 152.108811 | 0.3878248   | 0.18641437 | 0.01836818 | 0.06786306 | GUSBP3     |
| NA     | ENSG00000253204 | 0          | NA          | NA         | NA         | NA         |            |
| NA     | ENSG00000253205 | 0          | NA          | NA         | NA         | NA         |            |
| NA     | ENSG00000253206 | 0          | NA          | NA         | NA         | NA         |            |
| NA     | ENSG00000253207 | 0          | NA          | NA         | NA         | NA         |            |
| NA     | ENSG00000253208 | 0.33471731 | 0.02354391  | 0.38534154 | 0.62842204 | NA         | PSME2P5    |
| NA     | ENSG00000253209 | 0          | NA          | NA         | NA         | NA         | IGHV3-65   |
| NA     | ENSG00000253210 | 28.7262309 | -0.04365855 | 0.31816504 | 0.80696124 | 0.91256903 |            |
| NA     | ENSG00000253213 | 2.39071448 | -0.0412509  | 0.37696855 | 0.64421949 | NA         | USP12P1    |
| NA     | ENSG00000253214 | 0          | NA          | NA         | NA         | NA         |            |
| NA     | ENSG00000253215 | 0          | NA          | NA         | NA         | NA         |            |
| NA     | ENSG00000253216 | 0          | NA          | NA         | NA         | NA         |            |
| NA     | ENSG00000253217 | 0          | NA          | NA         | NA         | NA         |            |
| NA     | ENSG00000253218 | 0.78405649 | -0.00772644 | 0.38155506 | 0.88154213 | NA         | KLF3P1     |
| NA     | ENSG00000253219 | 0          | NA          | NA         | NA         | NA         | KRT18P41   |
| NA     | ENSG00000253220 | 0          | NA          | NA         | NA         | NA         |            |
| NA     | ENSG00000253223 | 0.18922458 | 0.01954053  | 0.38488496 | 0.78225479 | NA         |            |
| NA     | ENSG00000253224 | 0          | NA          | NA         | NA         | NA         | PGAM5P1    |
| NA     | ENSG00000253225 | 0          | NA          | NA         | NA         | NA         |            |
| NA     | ENSG00000253226 | 0          | NA          | NA         | NA         | NA         | HAUS1P3    |
| NA     | ENSG00000253227 | 0.33471731 | 0.02354391  | 0.38534154 | 0.62842204 | NA         |            |
| NA     | ENSG00000253228 | 0          | NA          | NA         | NA         | NA         | NRBF2P4    |
| NA     | ENSG00000253229 | 0          | NA          | NA         | NA         | NA         | HIGD1AP6   |
| 157627 | ENSG00000253230 | 330.476497 | -2.04721096 | 0.15111403 | 5.87E-43   | 4.80E-41   | MIR124-1HG |
| NA     | ENSG00000253231 | 0          | NA          | NA         | NA         | NA         | COX6CP8    |
| NA     | ENSG00000253232 | 0          | NA          | NA         | NA         | NA         |            |
| NA     | ENSG00000253233 | 0          | NA          | NA         | NA         | NA         |            |
| NA     | ENSG00000253234 | 0          | NA          | NA         | NA         | NA         | IGLV2-5    |
| NA     | ENSG00000253235 | 0          | NA          | NA         | NA         | NA         |            |
| NA     | ENSG00000253236 | 0          | NA          | NA         | NA         | NA         | LINC02143  |
| NA     | ENSG00000253237 | 0          | NA          | NA         | NA         | NA         |            |
| NA     | ENSG00000253238 | 0          | NA          | NA         | NA         | NA         |            |
| NA     | ENSG00000253239 | 0          | NA          | NA         | NA         | NA         | IGLVI-70   |
| NA     | ENSG00000253240 | 0.18922458 | 0.01954053  | 0.38488496 | 0.78225479 | NA         | IGHV3-36   |
| NA     | ENSG00000253241 | 0          | NA          | NA         | NA         | NA         | IGHV3-50   |
| NA     | ENSG00000253242 | 0          | NA          | NA         | NA         | NA         | IGLVIV-64  |
| NA     | ENSG00000253244 | 0          | NA          | NA         | NA         | NA         |            |
| NA     | ENSG00000253245 | 11.4968247 | -0.18434689 | 0.37611366 | 0.30738234 | 0.53486671 | MTND1P36   |

|           |                 |            |             |            |            |            |             |
|-----------|-----------------|------------|-------------|------------|------------|------------|-------------|
| NA        | ENSG00000253247 | 0          | NA          | NA         | NA         | NA         | IGHV3-76    |
| 100127983 | ENSG00000253250 | 166.811318 | -0.0456536  | 0.16849355 | 0.76196789 | 0.89001685 | C8orf88     |
| 112441434 | ENSG00000253251 | 60.0966942 | -0.15579643 | 0.2469335  | 0.41656883 | 0.64309452 | SHLD3       |
| NA        | ENSG00000253252 | 1.48727861 | -0.03292329 | 0.37934381 | 0.66038106 | NA         |             |
| NA        | ENSG00000253256 | 0.15069912 | -0.01848503 | 0.38480575 | 0.84537521 | NA         |             |
| NA        | ENSG00000253257 | 0          | NA          | NA         | NA         | NA         | MTND4P7     |
| NA        | ENSG00000253258 | 0          | NA          | NA         | NA         | NA         |             |
| NA        | ENSG00000253259 | 0          | NA          | NA         | NA         | NA         |             |
| NA        | ENSG00000253260 | 0          | NA          | NA         | NA         | NA         |             |
| NA        | ENSG00000253261 | 0          | NA          | NA         | NA         | NA         |             |
| NA        | ENSG00000253262 | 0          | NA          | NA         | NA         | NA         |             |
| NA        | ENSG00000253263 | 2.60531852 | -0.09457314 | 0.38924054 | 0.32186642 | 0.54956623 |             |
| NA        | ENSG00000253265 | 0          | NA          | NA         | NA         | NA         | IGKV2-14    |
| NA        | ENSG00000253266 | 0          | NA          | NA         | NA         | NA         |             |
| 100507435 | ENSG00000253267 | 0          | NA          | NA         | NA         | NA         | DLGAP2-AS1  |
| NA        | ENSG00000253269 | 0          | NA          | NA         | NA         | NA         |             |
| NA        | ENSG00000253270 | 0          | NA          | NA         | NA         | NA         |             |
| NA        | ENSG00000253271 | 0          | NA          | NA         | NA         | NA         |             |
| NA        | ENSG00000253273 | 0          | NA          | NA         | NA         | NA         |             |
| NA        | ENSG00000253274 | 0          | NA          | NA         | NA         | NA         | IGHV1-67    |
| NA        | ENSG00000253275 | 0          | NA          | NA         | NA         | NA         |             |
| 168455    | ENSG00000253276 | 867.516161 | 0.22942567  | 0.11984353 | 0.04359748 | 0.13393838 | CCDC71L     |
| NA        | ENSG00000253278 | 0          | NA          | NA         | NA         | NA         | IGKV2-10    |
| 286135    | ENSG00000253279 | 0          | NA          | NA         | NA         | NA         | LINC02209   |
| NA        | ENSG00000253280 | 0          | NA          | NA         | NA         | NA         |             |
| 101929528 | ENSG00000253281 | 0          | NA          | NA         | NA         | NA         |             |
| NA        | ENSG00000253282 | 0          | NA          | NA         | NA         | NA         |             |
| NA        | ENSG00000253283 | 0          | NA          | NA         | NA         | NA         |             |
| NA        | ENSG00000253284 | 0          | NA          | NA         | NA         | NA         |             |
| NA        | ENSG00000253286 | 0          | NA          | NA         | NA         | NA         |             |
| NA        | ENSG00000253287 | 0          | NA          | NA         | NA         | NA         |             |
| NA        | ENSG00000253288 | 0          | NA          | NA         | NA         | NA         |             |
| NA        | ENSG00000253290 | 0          | NA          | NA         | NA         | NA         |             |
| NA        | ENSG00000253291 | 0          | NA          | NA         | NA         | NA         | TRBV7-7     |
| NA        | ENSG00000253292 | 0          | NA          | NA         | NA         | NA         | MIOXP1      |
| 3206      | ENSG00000253293 | 0          | NA          | NA         | NA         | NA         | HOXA10      |
| NA        | ENSG00000253294 | 0          | NA          | NA         | NA         | NA         | IGHVII-40-1 |
| 101928093 | ENSG00000253295 | 0.18922458 | 0.01954053  | 0.38488496 | 0.78225479 | NA         |             |

|           |                 |            |             |            |            |            |              |
|-----------|-----------------|------------|-------------|------------|------------|------------|--------------|
| NA        | ENSG00000253297 | 0          | NA          | NA         | NA         | NA         |              |
| 285627    | ENSG00000253298 | 0          | NA          | NA         | NA         | NA         | LINC01845    |
| NA        | ENSG00000253299 | 0          | NA          | NA         | NA         | NA         | UFM1P3       |
| NA        | ENSG00000253300 | 0.44795842 | -0.02501848 | 0.38558245 | 0.5807882  | NA         |              |
| NA        | ENSG00000253301 | 0          | NA          | NA         | NA         | NA         | LINC01606    |
| 100128126 | ENSG00000253302 | 1.90643876 | 0.03167825  | 0.38108696 | 0.61233919 | NA         | STAU2-AS1    |
| NA        | ENSG00000253303 | 0          | NA          | NA         | NA         | NA         | IGHVIII-82   |
| 399474    | ENSG00000253304 | 9.92816429 | 0.2896403   | 0.47261313 | 0.11447302 | 0.27535702 | TMEM200B     |
| 56100     | ENSG00000253305 | 20.7770811 | -0.21865884 | 0.35387537 | 0.28004857 | 0.5047371  | PCDHGB6      |
| NA        | ENSG00000253307 | 0          | NA          | NA         | NA         | NA         |              |
| NA        | ENSG00000253308 | 0          | NA          | NA         | NA         | NA         |              |
| 647174    | ENSG00000253309 | 3.42124882 | 0.03038903  | 0.36959685 | 0.78003673 | 0.89936692 | SERPINE3     |
| NA        | ENSG00000253310 | 0          | NA          | NA         | NA         | NA         | IGHVIII-76-1 |
| 101927766 | ENSG00000253311 | 0          | NA          | NA         | NA         | NA         | LINC01847    |
| NA        | ENSG00000253312 | 0          | NA          | NA         | NA         | NA         |              |
| 149466    | ENSG00000253313 | 0          | NA          | NA         | NA         | NA         | C1orf210     |
| 497634    | ENSG00000253314 | 0          | NA          | NA         | NA         | NA         | LINC00293    |
| 105377682 | ENSG00000253315 | 0.14931947 | -0.01844332 | 0.38480212 | 0.84537521 | NA         | LINC01932    |
| NA        | ENSG00000253317 | 174.531683 | -0.24880083 | 0.18286921 | 0.12164815 | 0.28819117 |              |
| NA        | ENSG00000253318 | 0          | NA          | NA         | NA         | NA         | TMCC1P1      |
| NA        | ENSG00000253319 | 0          | NA          | NA         | NA         | NA         |              |
| NA        | ENSG00000253320 | 121.024775 | 0.32307112  | 0.20777623 | 0.06812172 | 0.18781025 | MAILR        |
| NA        | ENSG00000253321 | 0          | NA          | NA         | NA         | NA         |              |
| NA        | ENSG00000253322 | 0          | NA          | NA         | NA         | NA         |              |
| NA        | ENSG00000253325 | 0.34697551 | 0.00058132  | 0.38336294 | 0.96295829 | NA         | IGHV7-34-1   |
| NA        | ENSG00000253326 | 1.33530394 | 0.00588779  | 0.3788363  | 0.93108931 | NA         |              |
| 644660    | ENSG00000253327 | 6.74669724 | -0.03740278 | 0.35511778 | 0.78940867 | 0.90431711 | RAD21-AS1    |
| NA        | ENSG00000253328 | 0          | NA          | NA         | NA         | NA         | SUMO2P19     |
| NA        | ENSG00000253329 | 0          | NA          | NA         | NA         | NA         | IGLV3-30     |
| NA        | ENSG00000253330 | 1.37201368 | 0.00648724  | 0.3777242  | 0.92980679 | NA         |              |
| NA        | ENSG00000253331 | 0          | NA          | NA         | NA         | NA         |              |
| NA        | ENSG00000253332 | 0          | NA          | NA         | NA         | NA         |              |
| NA        | ENSG00000253333 | 0          | NA          | NA         | NA         | NA         |              |
| NA        | ENSG00000253334 | 0.53837157 | 0.01392364  | 0.38346276 | 0.73855103 | NA         |              |
| NA        | ENSG00000253335 | 0          | NA          | NA         | NA         | NA         |              |
| NA        | ENSG00000253336 | 1.19538736 | 0.02116347  | 0.37946773 | 0.75727105 | NA         |              |
| NA        | ENSG00000253338 | 0          | NA          | NA         | NA         | NA         | IGLV3-29     |
| NA        | ENSG00000253339 | 0          | NA          | NA         | NA         | NA         |              |

|           |                 |            |             |            |            |            |              |
|-----------|-----------------|------------|-------------|------------|------------|------------|--------------|
| NA        | ENSG00000253340 | 0          | NA          | NA         | NA         | NA         |              |
| NA        | ENSG00000253341 | 0.37844916 | 0.02407552  | 0.3854191  | 0.60038877 | NA         | PCBP2P2      |
| NA        | ENSG00000253342 | 0          | NA          | NA         | NA         | NA         |              |
| NA        | ENSG00000253343 | 0          | NA          | NA         | NA         | NA         |              |
| NA        | ENSG00000253344 | 0          | NA          | NA         | NA         | NA         |              |
| NA        | ENSG00000253345 | 0          | NA          | NA         | NA         | NA         | IGHVII-22-1  |
| NA        | ENSG00000253346 | 0          | NA          | NA         | NA         | NA         |              |
| NA        | ENSG00000253347 | 0.64905449 | 0.00254624  | 0.38248698 | 0.95117592 | NA         |              |
| NA        | ENSG00000253348 | 0          | NA          | NA         | NA         | NA         |              |
| NA        | ENSG00000253349 | 0          | NA          | NA         | NA         | NA         | COX6B1P6     |
| 619344    | ENSG00000253351 | 0          | NA          | NA         | NA         | NA         | LINC01298    |
| NA        | ENSG00000253352 | 6815.80491 | -0.12478195 | 0.06029532 | 0.03578084 | 0.11531705 | TUG1         |
| NA        | ENSG00000253354 | 0          | NA          | NA         | NA         | NA         |              |
| NA        | ENSG00000253355 | 0.18922458 | 0.01954053  | 0.38488496 | 0.78225479 | NA         |              |
| NA        | ENSG00000253356 | 0          | NA          | NA         | NA         | NA         |              |
| NA        | ENSG00000253357 | 0          | NA          | NA         | NA         | NA         |              |
| NA        | ENSG00000253358 | 0          | NA          | NA         | NA         | NA         |              |
| NA        | ENSG00000253359 | 0.173124   | -0.01911262 | 0.38486262 | 0.84537521 | NA         | IGHV3-37     |
| NA        | ENSG00000253361 | 0          | NA          | NA         | NA         | NA         |              |
| NA        | ENSG00000253362 | 0          | NA          | NA         | NA         | NA         |              |
| NA        | ENSG00000253363 | 0          | NA          | NA         | NA         | NA         |              |
| NA        | ENSG00000253364 | 0          | NA          | NA         | NA         | NA         | COPDA1       |
| NA        | ENSG00000253365 | 0          | NA          | NA         | NA         | NA         | IGKV1D-22    |
| NA        | ENSG00000253366 | 16.7421859 | 2.14441352  | 0.8864739  | 0.00066535 | 0.00413424 | GUSBP16      |
| NA        | ENSG00000253367 | 0          | NA          | NA         | NA         | NA         | IGHVIII-25-1 |
| 388610    | ENSG00000253368 | 38.7522685 | -0.81412833 | 0.42938451 | 0.00668568 | 0.0297404  | TRNP1        |
| NA        | ENSG00000253369 | 0.88133119 | 0.06366609  | 0.39104236 | 0.20783348 | NA         |              |
| NA        | ENSG00000253370 | 0          | NA          | NA         | NA         | NA         |              |
| NA        | ENSG00000253372 | 0          | NA          | NA         | NA         | NA         |              |
| NA        | ENSG00000253373 | 0          | NA          | NA         | NA         | NA         |              |
| NA        | ENSG00000253374 | 0          | NA          | NA         | NA         | NA         |              |
| NA        | ENSG00000253376 | 0          | NA          | NA         | NA         | NA         |              |
| NA        | ENSG00000253377 | 0          | NA          | NA         | NA         | NA         |              |
| 100507464 | ENSG00000253380 | 0          | NA          | NA         | NA         | NA         |              |
| NA        | ENSG00000253381 | 0          | NA          | NA         | NA         | NA         |              |
| NA        | ENSG00000253382 | 0          | NA          | NA         | NA         | NA         | POU5F1P2     |
| NA        | ENSG00000253383 | 0          | NA          | NA         | NA         | NA         |              |
| NA        | ENSG00000253384 | 3.41895176 | -0.01649084 | 0.36926912 | 0.87442231 | 0.94470892 |              |

|           |                 |            |             |            |            |            |              |
|-----------|-----------------|------------|-------------|------------|------------|------------|--------------|
| NA        | ENSG00000253385 | 0.33471731 | 0.02354391  | 0.38534154 | 0.62842204 | NA         |              |
| NA        | ENSG00000253386 | 0          | NA          | NA         | NA         | NA         | IGHVII-49-1  |
| NA        | ENSG00000253387 | 0          | NA          | NA         | NA         | NA         | IGHVIII-5-1  |
| NA        | ENSG00000253388 | 0          | NA          | NA         | NA         | NA         |              |
| NA        | ENSG00000253389 | 0.18922458 | 0.01954053  | 0.38488496 | 0.78225479 | NA         |              |
| NA        | ENSG00000253390 | 5.82550909 | 0.10651257  | 0.37633642 | 0.43404935 | 0.65928182 |              |
| NA        | ENSG00000253391 | 0          | NA          | NA         | NA         | NA         |              |
| NA        | ENSG00000253392 | 3.52179444 | 0.02338135  | 0.3676941  | 0.83732731 | 0.92616234 |              |
| NA        | ENSG00000253393 | 0          | NA          | NA         | NA         | NA         | RANP9        |
| NA        | ENSG00000253394 | 0          | NA          | NA         | NA         | NA         | LINC00534    |
| NA        | ENSG00000253395 | 1.66229209 | 0.03974651  | 0.37822624 | 0.63705588 | NA         |              |
| 105379391 | ENSG00000253396 | 0          | NA          | NA         | NA         | NA         |              |
| NA        | ENSG00000253397 | 0          | NA          | NA         | NA         | NA         |              |
| NA        | ENSG00000253398 | 0          | NA          | NA         | NA         | NA         |              |
| NA        | ENSG00000253399 | 0.44965745 | -0.02729594 | 0.38571276 | 0.56197804 | NA         |              |
| NA        | ENSG00000253400 | 0          | NA          | NA         | NA         | NA         |              |
| NA        | ENSG00000253401 | 0          | NA          | NA         | NA         | NA         | VTA1P2       |
| NA        | ENSG00000253403 | 0          | NA          | NA         | NA         | NA         |              |
| 105379194 | ENSG00000253404 | 0.89453006 | 0.0135747   | 0.38162355 | 0.79469792 | NA         |              |
| 101410536 | ENSG00000253405 | 0          | NA          | NA         | NA         | NA         | EVX1-AS      |
| NA        | ENSG00000253406 | 0.33820008 | 0.00201313  | 0.38337513 | 0.9692343  | NA         |              |
| NA        | ENSG00000253407 | 0          | NA          | NA         | NA         | NA         |              |
| NA        | ENSG00000253408 | 0.16735865 | 0.01897177  | 0.38482933 | 0.78225479 | NA         | IKBKB-DT     |
| NA        | ENSG00000253409 | 0          | NA          | NA         | NA         | NA         | TRBV7-4      |
| NA        | ENSG00000253410 | 0          | NA          | NA         | NA         | NA         |              |
| NA        | ENSG00000253412 | 0          | NA          | NA         | NA         | NA         | IGHVIII-13-1 |
| NA        | ENSG00000253413 | 0          | NA          | NA         | NA         | NA         |              |
| 100507420 | ENSG00000253414 | 6.26104362 | -0.41556925 | 0.70170362 | 0.02719862 | 0.09298992 |              |
| NA        | ENSG00000253415 | 0          | NA          | NA         | NA         | NA         |              |
| NA        | ENSG00000253416 | 0          | NA          | NA         | NA         | NA         |              |
| 285629    | ENSG00000253417 | 0          | NA          | NA         | NA         | NA         | LINC02159    |
| NA        | ENSG00000253418 | 0          | NA          | NA         | NA         | NA         | SNX18P27     |
| NA        | ENSG00000253420 | 0          | NA          | NA         | NA         | NA         |              |
| NA        | ENSG00000253421 | 0          | NA          | NA         | NA         | NA         | ZNHIT1P1     |
| NA        | ENSG00000253422 | 0          | NA          | NA         | NA         | NA         |              |
| NA        | ENSG00000253423 | 0          | NA          | NA         | NA         | NA         |              |
| NA        | ENSG00000253424 | 0          | NA          | NA         | NA         | NA         |              |
| NA        | ENSG00000253425 | 0.33471731 | 0.02354391  | 0.38534154 | 0.62842204 | NA         | HSPA8P13     |

|           |                 |            |             |            |            |            |              |
|-----------|-----------------|------------|-------------|------------|------------|------------|--------------|
| NA        | ENSG00000253427 | 0          | NA          | NA         | NA         | NA         |              |
| 105377736 | ENSG00000253428 | 0          | NA          | NA         | NA         | NA         | LINC01942    |
| NA        | ENSG00000253429 | 0          | NA          | NA         | NA         | NA         |              |
| NA        | ENSG00000253430 | 0          | NA          | NA         | NA         | NA         |              |
| NA        | ENSG00000253431 | 0          | NA          | NA         | NA         | NA         | SRPK2P       |
| NA        | ENSG00000253432 | 0          | NA          | NA         | NA         | NA         |              |
| 552853    | ENSG00000253433 | 0.51751422 | -0.00947943 | 0.38322522 | 0.82410288 | NA         |              |
| 105375706 | ENSG00000253434 | 0          | NA          | NA         | NA         | NA         | LINC02237    |
| NA        | ENSG00000253435 | 0          | NA          | NA         | NA         | NA         | IGKV2-4      |
| NA        | ENSG00000253437 | 0          | NA          | NA         | NA         | NA         | RNU6-988P    |
| 100750225 | ENSG00000253438 | 0.16735865 | 0.01897177  | 0.38482933 | 0.78225479 | NA         | PCAT1        |
| NA        | ENSG00000253439 | 0          | NA          | NA         | NA         | NA         | CDC42P5      |
| NA        | ENSG00000253440 | 0.66016068 | 0.0016471   | 0.38190052 | 0.97099756 | NA         | IGHV3-33-2   |
| NA        | ENSG00000253441 | 0          | NA          | NA         | NA         | NA         | IGHV3-25     |
| NA        | ENSG00000253444 | 0          | NA          | NA         | NA         | NA         |              |
| NA        | ENSG00000253445 | 0          | NA          | NA         | NA         | NA         |              |
| NA        | ENSG00000253447 | 1.89153372 | -0.13235206 | 0.41301021 | 0.07845795 | NA         |              |
| NA        | ENSG00000253448 | 0          | NA          | NA         | NA         | NA         | IGLV3-6      |
| NA        | ENSG00000253449 | 0          | NA          | NA         | NA         | NA         |              |
| NA        | ENSG00000253451 | 0          | NA          | NA         | NA         | NA         | IGLV2-28     |
| NA        | ENSG00000253452 | 0.30139824 | -0.02296476 | 0.38527817 | 0.68536535 | NA         |              |
| NA        | ENSG00000253454 | 0          | NA          | NA         | NA         | NA         | NDUFA5P2     |
| NA        | ENSG00000253455 | 0          | NA          | NA         | NA         | NA         |              |
| NA        | ENSG00000253456 | 0          | NA          | NA         | NA         | NA         |              |
| 100507341 | ENSG00000253457 | 53.4754457 | -0.41437545 | 0.30555136 | 0.06347089 | 0.17887414 | SMIM18       |
| NA        | ENSG00000253458 | 0          | NA          | NA         | NA         | NA         | IGHVII-15-1  |
| NA        | ENSG00000253460 | 0          | NA          | NA         | NA         | NA         | IGKV2OR22-3  |
| NA        | ENSG00000253461 | 0          | NA          | NA         | NA         | NA         | IGKV1-35     |
| NA        | ENSG00000253462 | 0          | NA          | NA         | NA         | NA         | IGHVIII-26-1 |
| NA        | ENSG00000253463 | 1.01461516 | 0.02765406  | 0.38244201 | 0.61743813 | NA         | HMGB1P19     |
| NA        | ENSG00000253465 | 0.51177099 | -0.00988796 | 0.38326626 | 0.82320372 | NA         | IGHVIV-44-1  |
| NA        | ENSG00000253467 | 0          | NA          | NA         | NA         | NA         | IGHV7-40     |
| NA        | ENSG00000253468 | 0          | NA          | NA         | NA         | NA         |              |
| 101927908 | ENSG00000253469 | 0          | NA          | NA         | NA         | NA         |              |
| NA        | ENSG00000253470 | 0          | NA          | NA         | NA         | NA         |              |
| NA        | ENSG00000253471 | 0          | NA          | NA         | NA         | NA         |              |
| NA        | ENSG00000253472 | 0          | NA          | NA         | NA         | NA         |              |
| NA        | ENSG00000253474 | 0          | NA          | NA         | NA         | NA         |              |



|           |                 |            |             |            |            |            |             |
|-----------|-----------------|------------|-------------|------------|------------|------------|-------------|
| NA        | ENSG00000253475 | 0          | NA          | NA         | NA         | NA         |             |
| NA        | ENSG00000253476 | 4.57802477 | -0.04047823 | 0.36804305 | 0.72488857 | 0.86844186 |             |
| NA        | ENSG00000253477 | 22.7758259 | -2.27747144 | 0.6311288  | 1.48E-05   | 0.00013614 |             |
| NA        | ENSG00000253479 | 0          | NA          | NA         | NA         | NA         | LINC01603   |
| NA        | ENSG00000253480 | 0.14931947 | -0.01844332 | 0.38480212 | 0.84537521 | NA         |             |
| NA        | ENSG00000253481 | 0          | NA          | NA         | NA         | NA         | IGKV1OR22-1 |
| NA        | ENSG00000253482 | 0          | NA          | NA         | NA         | NA         | IGHVII-26-2 |
| NA        | ENSG00000253483 | 1.89436623 | -0.07655527 | 0.38910625 | 0.29825366 | NA         |             |
| NA        | ENSG00000253484 | 0          | NA          | NA         | NA         | NA         |             |
| 56110     | ENSG00000253485 | 33.0794488 | -0.3151153  | 0.34892374 | 0.15549001 | 0.34144125 | PCDHGA5     |
| NA        | ENSG00000253487 | 0          | NA          | NA         | NA         | NA         | IGKV2-36    |
| NA        | ENSG00000253488 | 0          | NA          | NA         | NA         | NA         | SINHC AFP3  |
| NA        | ENSG00000253489 | 0          | NA          | NA         | NA         | NA         |             |
| 101929450 | ENSG00000253490 | 0.14931947 | -0.01844332 | 0.38480212 | 0.84537521 | NA         | LINC02099   |
| NA        | ENSG00000253491 | 0          | NA          | NA         | NA         | NA         | IGHVII-30-1 |
| NA        | ENSG00000253492 | 15.1615719 | -7.77701294 | 2.72315356 | 2.86E-08   | 4.06E-07   | CDH12P3     |
| NA        | ENSG00000253493 | 0          | NA          | NA         | NA         | NA         |             |
| NA        | ENSG00000253495 | 0          | NA          | NA         | NA         | NA         | CYCSP23     |
| NA        | ENSG00000253496 | 0          | NA          | NA         | NA         | NA         |             |
| NA        | ENSG00000253497 | 0          | NA          | NA         | NA         | NA         | IGKV1-13    |
| NA        | ENSG00000253499 | 0          | NA          | NA         | NA         | NA         |             |
| NA        | ENSG00000253500 | 0          | NA          | NA         | NA         | NA         |             |
| NA        | ENSG00000253501 | 0          | NA          | NA         | NA         | NA         | IGKV3D-34   |
| NA        | ENSG00000253502 | 0          | NA          | NA         | NA         | NA         | ATP6V1G1P2  |
| NA        | ENSG00000253503 | 0          | NA          | NA         | NA         | NA         |             |
| NA        | ENSG00000253504 | 0          | NA          | NA         | NA         | NA         | MTCYBP19    |
| NA        | ENSG00000253505 | 0          | NA          | NA         | NA         | NA         |             |
| 342538    | ENSG00000253506 | 0          | NA          | NA         | NA         | NA         | NACA2       |
| NA        | ENSG00000253507 | 0          | NA          | NA         | NA         | NA         |             |
| NA        | ENSG00000253508 | 0          | NA          | NA         | NA         | NA         |             |
| NA        | ENSG00000253509 | 0          | NA          | NA         | NA         | NA         |             |
| NA        | ENSG00000253510 | 0          | NA          | NA         | NA         | NA         |             |
| NA        | ENSG00000253512 | 0          | NA          | NA         | NA         | NA         |             |
| 105375744 | ENSG00000253513 | 0          | NA          | NA         | NA         | NA         |             |
| NA        | ENSG00000253515 | 0          | NA          | NA         | NA         | NA         |             |
| NA        | ENSG00000253516 | 0.85650513 | 0.06107041  | 0.39051552 | 0.22071596 | NA         | HMGB1P41    |
| NA        | ENSG00000253517 | 0          | NA          | NA         | NA         | NA         | XRCC6P4     |
| NA        | ENSG00000253519 | 0.15069912 | -0.01848503 | 0.38480575 | 0.84537521 | NA         |             |

|           |                 |            |             |            |            |            |             |
|-----------|-----------------|------------|-------------|------------|------------|------------|-------------|
| NA        | ENSG00000253520 | 0          | NA          | NA         | NA         | NA         |             |
| 93668     | ENSG00000253521 | 0.15069912 | -0.01848503 | 0.38480575 | 0.84537521 | NA         | HPYR1       |
| 107075116 | ENSG00000253522 | 0          | NA          | NA         | NA         | NA         | MIR3142HG   |
| NA        | ENSG00000253523 | 0          | NA          | NA         | NA         | NA         |             |
| NA        | ENSG00000253524 | 0          | NA          | NA         | NA         | NA         |             |
| NA        | ENSG00000253525 | 0          | NA          | NA         | NA         | NA         | CPP         |
| NA        | ENSG00000253526 | 0          | NA          | NA         | NA         | NA         |             |
| NA        | ENSG00000253527 | 0          | NA          | NA         | NA         | NA         |             |
| NA        | ENSG00000253528 | 0.49003462 | -0.01098095 | 0.3829048  | 0.82363979 | NA         |             |
| NA        | ENSG00000253530 | 0          | NA          | NA         | NA         | NA         |             |
| NA        | ENSG00000253532 | 0          | NA          | NA         | NA         | NA         |             |
| NA        | ENSG00000253534 | 0          | NA          | NA         | NA         | NA         | TRBV6-8     |
| NA        | ENSG00000253535 | 0.5767571  | 0.01689671  | 0.38362124 | 0.68105006 | NA         |             |
| NA        | ENSG00000253536 | 0          | NA          | NA         | NA         | NA         |             |
| 56108     | ENSG00000253537 | 553.339665 | 0.53922857  | 0.11133634 | 4.51E-07   | 5.42E-06   | PCDHGA7     |
| NA        | ENSG00000253538 | 0          | NA          | NA         | NA         | NA         |             |
| NA        | ENSG00000253539 | 0          | NA          | NA         | NA         | NA         |             |
| NA        | ENSG00000253540 | 5.72765786 | 0.30322216  | 0.52513618 | 0.05609467 | 0.16266792 | FAM86HP     |
| NA        | ENSG00000253541 | 0          | NA          | NA         | NA         | NA         | SEPTIN10P1  |
| 442388    | ENSG00000253542 | 0          | NA          | NA         | NA         | NA         | SDR16C6P    |
| NA        | ENSG00000253543 | 0          | NA          | NA         | NA         | NA         |             |
| NA        | ENSG00000253544 | 0          | NA          | NA         | NA         | NA         | C1GALT1P3   |
| NA        | ENSG00000253545 | 0          | NA          | NA         | NA         | NA         | IGHV3-52    |
| NA        | ENSG00000253546 | 0          | NA          | NA         | NA         | NA         | IGLVVI-22-1 |
| NA        | ENSG00000253547 | 0          | NA          | NA         | NA         | NA         | TUBAP7      |
| 152138    | ENSG00000253548 | 0          | NA          | NA         | NA         | NA         | PYDC2       |
| NA        | ENSG00000253549 | 0          | NA          | NA         | NA         | NA         | CA3-AS1     |
| NA        | ENSG00000253550 | 0          | NA          | NA         | NA         | NA         |             |
| 101929341 | ENSG00000253551 | 0          | NA          | NA         | NA         | NA         |             |
| NA        | ENSG00000253552 | 0          | NA          | NA         | NA         | NA         | HOXA-AS2    |
| NA        | ENSG00000253553 | 33.6099281 | 0.7766953   | 0.48588608 | 0.01211269 | 0.04859773 |             |
| 102724623 | ENSG00000253554 | 5.02922718 | 0.22195517  | 0.45758703 | 0.08150696 | 0.21429626 | LINC01414   |
| NA        | ENSG00000253555 | 0          | NA          | NA         | NA         | NA         | TARDBPP4    |
| NA        | ENSG00000253556 | 0          | NA          | NA         | NA         | NA         | MTCO1P4     |
| NA        | ENSG00000253557 | 0          | NA          | NA         | NA         | NA         |             |
| NA        | ENSG00000253558 | 0.93889663 | -0.01922087 | 0.38104426 | 0.74508998 | NA         |             |
| NA        | ENSG00000253559 | 7.37033267 | -0.03704824 | 0.35376939 | 0.79438206 | 0.90579008 | OSGEPL1-AS1 |
| NA        | ENSG00000253560 | 0          | NA          | NA         | NA         | NA         |             |

|           |                 |            |             |            |            |           |            |
|-----------|-----------------|------------|-------------|------------|------------|-----------|------------|
| NA        | ENSG00000253561 | 0          | NA          | NA         | NA         | NA        |            |
| NA        | ENSG00000253562 | 0.15069912 | -0.01848503 | 0.38480575 | 0.84537521 | NA        |            |
| 100506237 | ENSG00000253563 | 0          | NA          | NA         | NA         | NA        | NKX2-1-AS1 |
| NA        | ENSG00000253564 | 0          | NA          | NA         | NA         | NA        |            |
| NA        | ENSG00000253567 | 0.49080764 | -0.01116502 | 0.38291327 | 0.82104242 | NA        |            |
| NA        | ENSG00000253568 | 0          | NA          | NA         | NA         | NA        |            |
| NA        | ENSG00000253569 | 0          | NA          | NA         | NA         | NA        | VENTXP5    |
| NA        | ENSG00000253570 | 0          | NA          | NA         | NA         | NA        | RNF5P1     |
| NA        | ENSG00000253571 | 0          | NA          | NA         | NA         | NA        |            |
| NA        | ENSG00000253572 | 0          | NA          | NA         | NA         | NA        |            |
| NA        | ENSG00000253573 | 0          | NA          | NA         | NA         | NA        |            |
| NA        | ENSG00000253574 | 0          | NA          | NA         | NA         | NA        |            |
| NA        | ENSG00000253576 | 0.14931947 | -0.01844332 | 0.38480212 | 0.84537521 | NA        |            |
| NA        | ENSG00000253577 | 0          | NA          | NA         | NA         | NA        |            |
| NA        | ENSG00000253578 | 0          | NA          | NA         | NA         | NA        | IGKV1-22   |
| NA        | ENSG00000253579 | 0          | NA          | NA         | NA         | NA        | SUMO2P16   |
| NA        | ENSG00000253580 | 0          | NA          | NA         | NA         | NA        | TRMT10BP1  |
| NA        | ENSG00000253581 | 0          | NA          | NA         | NA         | NA        |            |
| NA        | ENSG00000253582 | 0          | NA          | NA         | NA         | NA        |            |
| NA        | ENSG00000253583 | 0          | NA          | NA         | NA         | NA        |            |
| NA        | ENSG00000253584 | 0          | NA          | NA         | NA         | NA        |            |
| NA        | ENSG00000253585 | 0          | NA          | NA         | NA         | NA        |            |
| NA        | ENSG00000253586 | 0          | NA          | NA         | NA         | NA        |            |
| NA        | ENSG00000253587 | 0          | NA          | NA         | NA         | NA        | IGHV3-30-2 |
| NA        | ENSG00000253590 | 0          | NA          | NA         | NA         | NA        | IGLV3-13   |
| 105377716 | ENSG00000253591 | 0.60279648 | -0.02752712 | 0.38588313 | 0.49730371 | NA        | KCNIP1-AS1 |
| NA        | ENSG00000253592 | 0          | NA          | NA         | NA         | NA        | IGKV2-38   |
| 101927822 | ENSG00000253593 | 0          | NA          | NA         | NA         | NA        |            |
| 731779    | ENSG00000253595 | 0          | NA          | NA         | NA         | NA        | LINC01300  |
| NA        | ENSG00000253596 | 2.1161803  | -0.00228327 | 0.37426824 | 0.97782753 | NA        |            |
| 347051    | ENSG00000253598 | 4.70581784 | -0.04995668 | 0.36545588 | 0.68909583 | 0.8490152 | SLC10A5    |
| NA        | ENSG00000253600 | 0          | NA          | NA         | NA         | NA        |            |
| NA        | ENSG00000253602 | 0          | NA          | NA         | NA         | NA        | RN7SL260P  |
| 105375847 | ENSG00000253603 | 0.173124   | -0.01911262 | 0.38486262 | 0.84537521 | NA        | CERNA3     |
| NA        | ENSG00000253604 | 0          | NA          | NA         | NA         | NA        |            |
| NA        | ENSG00000253605 | 0.18922458 | 0.01954053  | 0.38488496 | 0.78225479 | NA        | HNRNPA1P38 |
| NA        | ENSG00000253606 | 0          | NA          | NA         | NA         | NA        | AFG3L2P1   |
| NA        | ENSG00000253607 | 0          | NA          | NA         | NA         | NA        |            |

|           |                 |            |             |            |            |            |              |
|-----------|-----------------|------------|-------------|------------|------------|------------|--------------|
| 101929268 | ENSG00000253608 | 0.173124   | -0.01911262 | 0.38486262 | 0.84537521 | NA         |              |
| NA        | ENSG00000253610 | 0          | NA          | NA         | NA         | NA         |              |
| NA        | ENSG00000253611 | 0          | NA          | NA         | NA         | NA         | VN1R46P      |
| NA        | ENSG00000253612 | 0          | NA          | NA         | NA         | NA         | WBP1LP3      |
| NA        | ENSG00000253613 | 0          | NA          | NA         | NA         | NA         |              |
| 286177    | ENSG00000253614 | 0          | NA          | NA         | NA         | NA         |              |
| NA        | ENSG00000253615 | 0          | NA          | NA         | NA         | NA         |              |
| NA        | ENSG00000253616 | 0          | NA          | NA         | NA         | NA         |              |
| NA        | ENSG00000253617 | 0          | NA          | NA         | NA         | NA         |              |
| 106144529 | ENSG00000253618 | 0.70324131 | 0.00256706  | 0.38182157 | 0.95623055 | NA         | GRPEL2-AS1   |
| NA        | ENSG00000253619 | 0          | NA          | NA         | NA         | NA         |              |
| NA        | ENSG00000253620 | 0          | NA          | NA         | NA         | NA         |              |
| NA        | ENSG00000253621 | 0          | NA          | NA         | NA         | NA         | RPSAP74      |
| NA        | ENSG00000253622 | 0          | NA          | NA         | NA         | NA         |              |
| NA        | ENSG00000253623 | 0          | NA          | NA         | NA         | NA         |              |
| NA        | ENSG00000253625 | 0          | NA          | NA         | NA         | NA         | IGKV2-23     |
| 143244    | ENSG00000253626 | 3.07678207 | 0.06865517  | 0.37877675 | 0.50392829 | 0.72045005 | EIF5AL1      |
| NA        | ENSG00000253627 | 0          | NA          | NA         | NA         | NA         |              |
| NA        | ENSG00000253628 | 0          | NA          | NA         | NA         | NA         |              |
| NA        | ENSG00000253629 | 0          | NA          | NA         | NA         | NA         |              |
| NA        | ENSG00000253630 | 0          | NA          | NA         | NA         | NA         |              |
| NA        | ENSG00000253631 | 0          | NA          | NA         | NA         | NA         | IGLV7-35     |
| NA        | ENSG00000253632 | 0.16735865 | 0.01897177  | 0.38482933 | 0.78225479 | NA         |              |
| 107986898 | ENSG00000253633 | 12.0868379 | 0.28448033  | 0.4558083  | 0.13266691 | 0.30598688 |              |
| NA        | ENSG00000253634 | 0          | NA          | NA         | NA         | NA         |              |
| NA        | ENSG00000253635 | 0          | NA          | NA         | NA         | NA         | IGHVIII-67-3 |
| NA        | ENSG00000253636 | 31.2325031 | 0.1752252   | 0.30410264 | 0.3870033  | 0.61602672 |              |
| NA        | ENSG00000253637 | 0          | NA          | NA         | NA         | NA         | IGLVV-58     |
| NA        | ENSG00000253638 | 0          | NA          | NA         | NA         | NA         |              |
| NA        | ENSG00000253639 | 0          | NA          | NA         | NA         | NA         | SUMO2P18     |
| 101929191 | ENSG00000253641 | 13.3330869 | 0.21709985  | 0.38760327 | 0.25070937 | 0.47063996 |              |
| NA        | ENSG00000253642 | 0          | NA          | NA         | NA         | NA         |              |
| 101929315 | ENSG00000253643 | 0          | NA          | NA         | NA         | NA         |              |
| NA        | ENSG00000253644 | 0          | NA          | NA         | NA         | NA         | LINC02845    |
| NA        | ENSG00000253645 | 1.49319474 | -0.05783425 | 0.39048926 | 0.16515854 | NA         |              |
| NA        | ENSG00000253646 | 0          | NA          | NA         | NA         | NA         |              |
| 101928033 | ENSG00000253647 | 0          | NA          | NA         | NA         | NA         | KCNIP1-OT1   |
| NA        | ENSG00000253648 | 0          | NA          | NA         | NA         | NA         |              |

|           |    |                 |            |             |            |            |            |             |
|-----------|----|-----------------|------------|-------------|------------|------------|------------|-------------|
|           | NA | ENSG00000253649 | 3.02673624 | 0.00414237  | 0.36846902 | 0.97083766 | 0.98911805 | PRSS51      |
|           | NA | ENSG00000253650 | 0          | NA          | NA         | NA         | NA         | SMARCE1P4   |
|           | NA | ENSG00000253651 | 0          | NA          | NA         | NA         | NA         | SOD1P3      |
|           | NA | ENSG00000253652 | 0          | NA          | NA         | NA         | NA         |             |
|           | NA | ENSG00000253653 | 1.27358974 | -0.01261536 | 0.38026834 | 0.8357067  | NA         |             |
|           | NA | ENSG00000253654 | 0          | NA          | NA         | NA         | NA         | IDI1P2      |
|           | NA | ENSG00000253655 | 0          | NA          | NA         | NA         | NA         | JCHAINP1    |
|           | NA | ENSG00000253656 | 0          | NA          | NA         | NA         | NA         |             |
|           | NA | ENSG00000253657 | 0          | NA          | NA         | NA         | NA         |             |
| 100505718 | NA | ENSG00000253658 | 0          | NA          | NA         | NA         | NA         | LINC01592   |
|           | NA | ENSG00000253659 | 10.3912469 | -4.35854031 | 1.23629588 | 6.84E-05   | 0.00054447 |             |
|           | NA | ENSG00000253660 | 0          | NA          | NA         | NA         | NA         |             |
|           | NA | ENSG00000253661 | 31.5128912 | 0.38132046  | 0.40963549 | 0.10443692 | 0.25733091 | ZFH4-AS1    |
|           | NA | ENSG00000253663 | 0          | NA          | NA         | NA         | NA         | NPM1P52     |
|           | NA | ENSG00000253664 | 0.35697015 | 0.02381914  | 0.38538138 | 0.6138711  | NA         |             |
|           | NA | ENSG00000253665 | 0          | NA          | NA         | NA         | NA         | LINC02866   |
|           | NA | ENSG00000253666 | 0.14931947 | -0.01844332 | 0.38480212 | 0.84537521 | NA         |             |
|           | NA | ENSG00000253667 | 5.80951935 | 0.06143584  | 0.36134065 | 0.65796355 | 0.83031782 |             |
|           | NA | ENSG00000253668 | 0          | NA          | NA         | NA         | NA         |             |
|           | NA | ENSG00000253669 | 15.2288522 | 0.15908851  | 0.35465839 | 0.38954396 | 0.61876783 | GASAL1      |
|           | NA | ENSG00000253670 | 0          | NA          | NA         | NA         | NA         |             |
| 101930275 | NA | ENSG00000253671 | 0.90867904 | 0.06093877  | 0.39043602 | 0.21925615 | NA         |             |
|           | NA | ENSG00000253672 | 0          | NA          | NA         | NA         | NA         |             |
|           | NA | ENSG00000253673 | 0          | NA          | NA         | NA         | NA         |             |
|           | NA | ENSG00000253674 | 0          | NA          | NA         | NA         | NA         | IGHVII-78-1 |
|           | NA | ENSG00000253675 | 0          | NA          | NA         | NA         | NA         |             |
|           | NA | ENSG00000253676 | 0          | NA          | NA         | NA         | NA         | TAGLN2P1    |
|           | NA | ENSG00000253677 | 0          | NA          | NA         | NA         | NA         | UBE2HP1     |
|           | NA | ENSG00000253678 | 0.173124   | -0.01911262 | 0.38486262 | 0.84537521 | NA         |             |
| 105375679 | NA | ENSG00000253679 | 0          | NA          | NA         | NA         | NA         | LINC02844   |
|           | NA | ENSG00000253680 | 0          | NA          | NA         | NA         | NA         |             |
|           | NA | ENSG00000253681 | 0          | NA          | NA         | NA         | NA         |             |
|           | NA | ENSG00000253682 | 0          | NA          | NA         | NA         | NA         |             |
|           | NA | ENSG00000253683 | 0          | NA          | NA         | NA         | NA         |             |
|           | NA | ENSG00000253684 | 0          | NA          | NA         | NA         | NA         | BUD31P1     |
|           | NA | ENSG00000253685 | 0          | NA          | NA         | NA         | NA         | MTND5P41    |
| 101928136 | NA | ENSG00000253686 | 13.9810545 | -0.3106422  | 0.44241674 | 0.13534732 | 0.30992327 | LINC01484   |
|           | NA | ENSG00000253687 | 0          | NA          | NA         | NA         | NA         |             |

|           |    |                 |            |             |            |            |            |             |
|-----------|----|-----------------|------------|-------------|------------|------------|------------|-------------|
|           | NA | ENSG00000253688 | 3.92303485 | 0.01231675  | 0.365252   | 0.91678846 | 0.96473338 |             |
|           | NA | ENSG00000253690 | 0          | NA          | NA         | NA         | NA         |             |
|           | NA | ENSG00000253691 | 0          | NA          | NA         | NA         | NA         | IGKV2OR22-4 |
|           | NA | ENSG00000253692 | 0          | NA          | NA         | NA         | NA         | IGHEP1      |
|           | NA | ENSG00000253693 | 0          | NA          | NA         | NA         | NA         |             |
|           | NA | ENSG00000253695 | 1.01649132 | 0.00575305  | 0.38163643 | 0.9089078  | NA         |             |
| 104266957 | NA | ENSG00000253696 | 2.01153102 | -0.12490317 | 0.40855736 | 0.09007206 | NA         | KBTBD11-OT1 |
|           | NA | ENSG00000253697 | 0          | NA          | NA         | NA         | NA         |             |
|           | NA | ENSG00000253698 | 0          | NA          | NA         | NA         | NA         |             |
|           | NA | ENSG00000253699 | 0          | NA          | NA         | NA         | NA         |             |
|           | NA | ENSG00000253702 | 0.15069912 | -0.01848503 | 0.38480575 | 0.84537521 | NA         | LINC02847   |
|           | NA | ENSG00000253703 | 0          | NA          | NA         | NA         | NA         | IGHV1-68    |
| 101926977 | NA | ENSG00000253704 | 11.297908  | 0.1924596   | 0.39922487 | 0.2416327  | 0.45963497 |             |
|           | NA | ENSG00000253706 | 4.37746028 | -0.07909    | 0.3752152  | 0.49955924 | 0.71690059 |             |
|           | NA | ENSG00000253707 | 0          | NA          | NA         | NA         | NA         |             |
|           | NA | ENSG00000253708 | 0.18922458 | 0.01954053  | 0.38488496 | 0.78225479 | NA         |             |
|           | NA | ENSG00000253709 | 0          | NA          | NA         | NA         | NA         | IGHV1-14    |
| 440138    | NA | ENSG00000253710 | 1040.65841 | -0.03453743 | 0.09077393 | 0.69404016 | 0.85201936 | ALG11       |
|           | NA | ENSG00000253711 | 0.40845553 | -0.01222004 | 0.38384283 | 0.8852752  | NA         |             |
|           | NA | ENSG00000253712 | 0          | NA          | NA         | NA         | NA         | LINC02886   |
|           | NA | ENSG00000253713 | 0          | NA          | NA         | NA         | NA         |             |
|           | NA | ENSG00000253714 | 0          | NA          | NA         | NA         | NA         | IGHVII-53-1 |
|           | NA | ENSG00000253715 | 0          | NA          | NA         | NA         | NA         |             |
| 100507316 | NA | ENSG00000253716 | 93.8468722 | 0.15484698  | 0.2123723  | 0.38452196 | 0.61356176 | MINCR       |
|           | NA | ENSG00000253717 | 0          | NA          | NA         | NA         | NA         |             |
| 552889    | NA | ENSG00000253719 | 4029.65497 | 0.03534761  | 0.054897   | 0.51560709 | 0.72995895 | ATXN7L3B    |
|           | NA | ENSG00000253720 | 0.173733   | 0.01914545  | 0.38484597 | 0.78225479 | NA         |             |
|           | NA | ENSG00000253721 | 0          | NA          | NA         | NA         | NA         | SUMO2P20    |
|           | NA | ENSG00000253722 | 0          | NA          | NA         | NA         | NA         |             |
|           | NA | ENSG00000253723 | 0          | NA          | NA         | NA         | NA         |             |
|           | NA | ENSG00000253725 | 0          | NA          | NA         | NA         | NA         |             |
| 101926908 | NA | ENSG00000253726 | 0          | NA          | NA         | NA         | NA         |             |
|           | NA | ENSG00000253728 | 0          | NA          | NA         | NA         | NA         |             |
| 5591      | NA | ENSG00000253729 | 11639.8647 | -0.0724753  | 0.06924298 | 0.2871037  | 0.51288829 | PRKDC       |
|           | NA | ENSG00000253730 | 3.02681216 | -0.00913331 | 0.36930345 | 0.92861365 | 0.97011965 |             |
| 56109     | NA | ENSG00000253731 | 103.241493 | 0.01628026  | 0.2086497  | 0.92742663 | 0.96965347 | PCDHGA6     |
|           | NA | ENSG00000253732 | 0          | NA          | NA         | NA         | NA         | IGKV2-19    |
| 100874051 | NA | ENSG00000253733 | 0          | NA          | NA         | NA         | NA         | LZTS1-AS1   |

|           |                 |            |             |            |            |            |             |
|-----------|-----------------|------------|-------------|------------|------------|------------|-------------|
| 286184    | ENSG00000253734 | 0.95433375 | 0.04692705  | 0.38622948 | 0.36095504 | NA         | LINC01289   |
| NA        | ENSG00000253735 | 0          | NA          | NA         | NA         | NA         |             |
| NA        | ENSG00000253736 | 1.48372249 | -0.07389889 | 0.39392695 | 0.12591138 | NA         |             |
| NA        | ENSG00000253737 | 0.55760761 | 0.01262028  | 0.38330092 | 0.73932164 | NA         |             |
| NA        | ENSG00000253738 | 449.424318 | -0.19414876 | 0.11933778 | 0.08596985 | 0.2230472  | OTUD6B-AS1  |
| NA        | ENSG00000253739 | 0          | NA          | NA         | NA         | NA         | RNU6-323P   |
| NA        | ENSG00000253740 | 0          | NA          | NA         | NA         | NA         |             |
| 100288181 | ENSG00000253741 | 14.5160379 | 0.08742748  | 0.33828575 | 0.61724076 | 0.80396906 | LNCOC1      |
| NA        | ENSG00000253742 | 0          | NA          | NA         | NA         | NA         | IGHV3-60    |
| NA        | ENSG00000253743 | 0          | NA          | NA         | NA         | NA         | MARK2P11    |
| NA        | ENSG00000253744 | 0.59987325 | -0.03509239 | 0.3864882  | 0.44235124 | NA         |             |
| NA        | ENSG00000253745 | 0          | NA          | NA         | NA         | NA         |             |
| NA        | ENSG00000253746 | 0.30139824 | -0.02296476 | 0.38527817 | 0.68536535 | NA         |             |
| NA        | ENSG00000253747 | 0          | NA          | NA         | NA         | NA         | IGHVII-62-1 |
| NA        | ENSG00000253748 | 0          | NA          | NA         | NA         | NA         | CYP4F44P    |
| NA        | ENSG00000253749 | 0          | NA          | NA         | NA         | NA         |             |
| NA        | ENSG00000253750 | 0          | NA          | NA         | NA         | NA         |             |
| NA        | ENSG00000253752 | 0          | NA          | NA         | NA         | NA         | IGLVI-63    |
| NA        | ENSG00000253754 | 0          | NA          | NA         | NA         | NA         |             |
| NA        | ENSG00000253755 | 0          | NA          | NA         | NA         | NA         | IGHGP       |
| NA        | ENSG00000253756 | 0          | NA          | NA         | NA         | NA         | CARS1P2     |
| NA        | ENSG00000253759 | 0          | NA          | NA         | NA         | NA         | IGHV3-57    |
| NA        | ENSG00000253760 | 0.16735865 | 0.01897177  | 0.38482933 | 0.78225479 | NA         |             |
| NA        | ENSG00000253762 | 0.52119901 | 0.02576573  | 0.38568143 | 0.51723676 | NA         |             |
| NA        | ENSG00000253763 | 0          | NA          | NA         | NA         | NA         | IGHV3-6     |
| 101928058 | ENSG00000253764 | 25.6458799 | 0.93390211  | 0.62602698 | 0.00913647 | 0.0384857  |             |
| NA        | ENSG00000253765 | 0          | NA          | NA         | NA         | NA         | IGKV2D-19   |
| NA        | ENSG00000253766 | 0.173733   | 0.01914545  | 0.38484597 | 0.78225479 | NA         |             |
| 9708      | ENSG00000253767 | 20.7964429 | -0.03993599 | 0.30777367 | 0.82842295 | 0.92220943 | PCDHGA8     |
| NA        | ENSG00000253768 | 0          | NA          | NA         | NA         | NA         |             |
| NA        | ENSG00000253770 | 0          | NA          | NA         | NA         | NA         | HMGB1P23    |
| NA        | ENSG00000253771 | 1.74555105 | 0.06054798  | 0.3876539  | 0.24150487 | NA         | TPTE2P1     |
| NA        | ENSG00000253772 | 0.68229388 | 0.04060754  | 0.38717419 | 0.35751397 | NA         |             |
| NA        | ENSG00000253773 | 1.01528111 | 0.01624633  | 0.38139988 | 0.76892132 | NA         | C8orf37-AS1 |
| NA        | ENSG00000253774 | 0          | NA          | NA         | NA         | NA         |             |
| NA        | ENSG00000253775 | 0          | NA          | NA         | NA         | NA         |             |
| NA        | ENSG00000253776 | 0          | NA          | NA         | NA         | NA         |             |
| NA        | ENSG00000253777 | 0          | NA          | NA         | NA         | NA         |             |

|           |    |                 |            |             |            |            |            |             |
|-----------|----|-----------------|------------|-------------|------------|------------|------------|-------------|
|           | NA | ENSG00000253778 | 0.14931947 | -0.01844332 | 0.38480212 | 0.84537521 | NA         |             |
|           | NA | ENSG00000253779 | 0          | NA          | NA         | NA         | NA         | IGLVVI-25-1 |
|           | NA | ENSG00000253780 | 0          | NA          | NA         | NA         | NA         | IGHVIII-2-1 |
|           | NA | ENSG00000253781 | 0.16735865 | 0.01897177  | 0.38482933 | 0.78225479 | NA         | ZNF317P1    |
| 105375814 | NA | ENSG00000253782 | 0          | NA          | NA         | NA         | NA         |             |
|           | NA | ENSG00000253783 | 0          | NA          | NA         | NA         | NA         |             |
|           | NA | ENSG00000253784 | 0          | NA          | NA         | NA         | NA         |             |
|           | NA | ENSG00000253785 | 0.50915237 | 0.01002148  | 0.38324912 | 0.78521272 | NA         |             |
|           | NA | ENSG00000253786 | 0          | NA          | NA         | NA         | NA         | IGLV3-15    |
| 102467655 | NA | ENSG00000253787 | 0          | NA          | NA         | NA         | NA         | LINC02219   |
|           | NA | ENSG00000253789 | 0          | NA          | NA         | NA         | NA         | NARS1P2     |
|           | NA | ENSG00000253790 | 0          | NA          | NA         | NA         | NA         |             |
|           | NA | ENSG00000253792 | 0          | NA          | NA         | NA         | NA         |             |
|           | NA | ENSG00000253793 | 1.81594359 | -0.00088225 | 0.37434222 | 0.99078271 | NA         |             |
|           | NA | ENSG00000253794 | 0          | NA          | NA         | NA         | NA         | IGLV10-67   |
|           | NA | ENSG00000253795 | 0          | NA          | NA         | NA         | NA         | MTND1P5     |
|           | NA | ENSG00000253796 | 3.05360545 | -0.02413788 | 0.36913067 | 0.8213698  | 0.91847813 |             |
| 9724      | NA | ENSG00000253797 | 0          | NA          | NA         | NA         | NA         | UTP14C      |
|           | NA | ENSG00000253798 | 0.173733   | 0.01914545  | 0.38484597 | 0.78225479 | NA         |             |
| 101937451 | NA | ENSG00000253799 | 0          | NA          | NA         | NA         | NA         | LINC01030   |
|           | NA | ENSG00000253800 | 0          | NA          | NA         | NA         | NA         |             |
|           | NA | ENSG00000253801 | 0          | NA          | NA         | NA         | NA         |             |
| 112543493 | NA | ENSG00000253802 | 0          | NA          | NA         | NA         | NA         | SIRLNT      |
|           | NA | ENSG00000253803 | 0          | NA          | NA         | NA         | NA         |             |
|           | NA | ENSG00000253805 | 0          | NA          | NA         | NA         | NA         |             |
|           | NA | ENSG00000253806 | 0          | NA          | NA         | NA         | NA         |             |
|           | NA | ENSG00000253807 | 0.77123127 | -0.0554079  | 0.38929192 | 0.28063913 | NA         | LINC01170   |
|           | NA | ENSG00000253808 | 0          | NA          | NA         | NA         | NA         | IGHVII-46-1 |
|           | NA | ENSG00000253809 | 0          | NA          | NA         | NA         | NA         |             |
|           | NA | ENSG00000253810 | 0          | NA          | NA         | NA         | NA         | PSAT1P1     |
|           | NA | ENSG00000253811 | 0          | NA          | NA         | NA         | NA         |             |
|           | NA | ENSG00000253813 | 0          | NA          | NA         | NA         | NA         | COX6B1P4    |
|           | NA | ENSG00000253814 | 0          | NA          | NA         | NA         | NA         | MRPS36P3    |
|           | NA | ENSG00000253816 | 326.277559 | 0.45017707  | 0.14113163 | 0.00062642 | 0.00393169 | GUSBP14     |
|           | NA | ENSG00000253817 | 0          | NA          | NA         | NA         | NA         |             |
|           | NA | ENSG00000253818 | 0          | NA          | NA         | NA         | NA         | IGLV1-41    |
|           | NA | ENSG00000253819 | 0          | NA          | NA         | NA         | NA         | LINC01151   |
|           | NA | ENSG00000253820 | 0          | NA          | NA         | NA         | NA         | IGHVII-67-1 |



|           |                 |            |             |            |            |            |              |
|-----------|-----------------|------------|-------------|------------|------------|------------|--------------|
| NA        | ENSG00000253821 | 0          | NA          | NA         | NA         | NA         |              |
| NA        | ENSG00000253822 | 0          | NA          | NA         | NA         | NA         | IGLV3-24     |
| NA        | ENSG00000253823 | 0          | NA          | NA         | NA         | NA         | IGLV1-62     |
| NA        | ENSG00000253824 | 0          | NA          | NA         | NA         | NA         |              |
| NA        | ENSG00000253825 | 0          | NA          | NA         | NA         | NA         |              |
| NA        | ENSG00000253826 | 0          | NA          | NA         | NA         | NA         | WBP1LP10     |
| NA        | ENSG00000253828 | 0          | NA          | NA         | NA         | NA         | MTND2P38     |
| NA        | ENSG00000253829 | 0.73304346 | 0.02759625  | 0.38363607 | 0.54843736 | NA         |              |
| 440695    | ENSG00000253831 | 0          | NA          | NA         | NA         | NA         | ETV3L        |
| NA        | ENSG00000253832 | 0.47051628 | -0.00729002 | 0.38322981 | 0.8672032  | NA         |              |
| NA        | ENSG00000253833 | 0.31848082 | 0.00140881  | 0.38336888 | 0.96358049 | NA         | DSTNP3       |
| NA        | ENSG00000253834 | 0          | NA          | NA         | NA         | NA         |              |
| NA        | ENSG00000253836 | 0          | NA          | NA         | NA         | NA         |              |
| 100507156 | ENSG00000253837 | 13.2180467 | -0.08104135 | 0.33747337 | 0.63839136 | 0.81803815 |              |
| NA        | ENSG00000253838 | 0          | NA          | NA         | NA         | NA         |              |
| NA        | ENSG00000253840 | 0          | NA          | NA         | NA         | NA         |              |
| NA        | ENSG00000253841 | 0          | NA          | NA         | NA         | NA         |              |
| NA        | ENSG00000253842 | 0          | NA          | NA         | NA         | NA         |              |
| NA        | ENSG00000253843 | 0          | NA          | NA         | NA         | NA         |              |
| NA        | ENSG00000253844 | 0.36303898 | 0.02389536  | 0.3853925  | 0.60992479 | NA         |              |
| NA        | ENSG00000253845 | 0          | NA          | NA         | NA         | NA         |              |
| 56106     | ENSG00000253846 | 36.511762  | 0.11316249  | 0.28093713 | 0.56604074 | 0.76788022 | PCDHGA10     |
| NA        | ENSG00000253848 | 0.15069912 | -0.01848503 | 0.38480575 | 0.84537521 | NA         |              |
| NA        | ENSG00000253849 | 0          | NA          | NA         | NA         | NA         |              |
| NA        | ENSG00000253851 | 0.173733   | 0.01914545  | 0.38484597 | 0.78225479 | NA         |              |
| NA        | ENSG00000253852 | 0          | NA          | NA         | NA         | NA         |              |
| NA        | ENSG00000253853 | 0          | NA          | NA         | NA         | NA         |              |
| NA        | ENSG00000253854 | 38.4580021 | -0.05821068 | 0.27082873 | 0.76197927 | 0.89001685 |              |
| NA        | ENSG00000253855 | 0          | NA          | NA         | NA         | NA         |              |
| NA        | ENSG00000253857 | 0          | NA          | NA         | NA         | NA         |              |
| NA        | ENSG00000253858 | 0          | NA          | NA         | NA         | NA         |              |
| NA        | ENSG00000253859 | 0          | NA          | NA         | NA         | NA         |              |
| NA        | ENSG00000253860 | 0          | NA          | NA         | NA         | NA         | IGKV3-34     |
| NA        | ENSG00000253861 | 85.4671967 | 0.07152665  | 0.38514817 | 0.40622639 | 0.63450886 | SLC2A3P1     |
| NA        | ENSG00000253862 | 0          | NA          | NA         | NA         | NA         | IGHVIII-47-1 |
| NA        | ENSG00000253865 | 1.49799775 | 0.04931064  | 0.38188245 | 0.51642843 | NA         |              |
| NA        | ENSG00000253866 | 0          | NA          | NA         | NA         | NA         | TMEM97P2     |
| 157376    | ENSG00000253868 | 0.37844916 | 0.02407552  | 0.3854191  | 0.60038877 | NA         | FER1L6-AS2   |

|           |                 |            |             |            |            |            |             |
|-----------|-----------------|------------|-------------|------------|------------|------------|-------------|
| NA        | ENSG00000253869 | 0.14931947 | -0.01844332 | 0.38480212 | 0.84537521 | NA         | PIGFP1      |
| NA        | ENSG00000253870 | 0          | NA          | NA         | NA         | NA         | IGKV1-32    |
| 101929488 | ENSG00000253871 | 0          | NA          | NA         | NA         | NA         |             |
| NA        | ENSG00000253872 | 0          | NA          | NA         | NA         | NA         |             |
| 56105     | ENSG00000253873 | 9.80733017 | 0.06196533  | 0.35309525 | 0.68507254 | 0.84671809 | PCDHGA11    |
| NA        | ENSG00000253874 | 0          | NA          | NA         | NA         | NA         | IGLVIV-66-1 |
| NA        | ENSG00000253875 | 3.55805123 | 0.14603113  | 0.40533221 | 0.21145197 | 0.42065649 |             |
| 101927459 | ENSG00000253877 | 4.19016983 | 0.01188357  | 0.36595181 | 0.91807475 | 0.9653411  | LINC01608   |
| NA        | ENSG00000253878 | 19.623317  | 0.01513497  | 0.30746352 | 0.93669035 | 0.97351594 |             |
| NA        | ENSG00000253879 | 0          | NA          | NA         | NA         | NA         |             |
| NA        | ENSG00000253880 | 0          | NA          | NA         | NA         | NA         |             |
| NA        | ENSG00000253881 | 0          | NA          | NA         | NA         | NA         |             |
| 154761    | ENSG00000253882 | 7.57296133 | 0.17036131  | 0.41072125 | 0.19857745 | 0.40288134 |             |
| NA        | ENSG00000253883 | 0          | NA          | NA         | NA         | NA         | IGHV3-19    |
| NA        | ENSG00000253884 | 0          | NA          | NA         | NA         | NA         |             |
| NA        | ENSG00000253885 | 0          | NA          | NA         | NA         | NA         | ARF1P3      |
| NA        | ENSG00000253886 | 2.15959488 | -0.06516951 | 0.38515109 | 0.3964039  | NA         |             |
| NA        | ENSG00000253887 | 0.34044482 | -6.59E-05   | 0.38336214 | 0.9658778  | NA         |             |
| NA        | ENSG00000253888 | 0          | NA          | NA         | NA         | NA         |             |
| NA        | ENSG00000253889 | 0          | NA          | NA         | NA         | NA         | IGLVI-38    |
| NA        | ENSG00000253891 | 0          | NA          | NA         | NA         | NA         |             |
| NA        | ENSG00000253892 | 0          | NA          | NA         | NA         | NA         |             |
| NA        | ENSG00000253893 | 6.87717378 | 0.21410946  | 0.4328288  | 0.15338159 | 0.33827155 | FAM85B      |
| 102724612 | ENSG00000253894 | 0          | NA          | NA         | NA         | NA         |             |
| NA        | ENSG00000253895 | 0          | NA          | NA         | NA         | NA         | IGHVII-44-2 |
| NA        | ENSG00000253896 | 0          | NA          | NA         | NA         | NA         |             |
| NA        | ENSG00000253897 | 0          | NA          | NA         | NA         | NA         |             |
| 103352670 | ENSG00000253898 | 0.68318671 | 0.00503933  | 0.3813173  | 0.92191908 | NA         | LINC01419   |
| NA        | ENSG00000253899 | 0.30139824 | -0.02296476 | 0.38527817 | 0.68536535 | NA         |             |
| NA        | ENSG00000253900 | 0          | NA          | NA         | NA         | NA         | CDH12P4     |
| NA        | ENSG00000253901 | 0          | NA          | NA         | NA         | NA         |             |
| NA        | ENSG00000253903 | 0          | NA          | NA         | NA         | NA         |             |
| NA        | ENSG00000253906 | 0          | NA          | NA         | NA         | NA         | IGKV2D-10   |
| NA        | ENSG00000253907 | 0          | NA          | NA         | NA         | NA         |             |
| NA        | ENSG00000253908 | 1.5211943  | 0.00257717  | 0.37711118 | 0.97368801 | NA         |             |
| 56103     | ENSG00000253910 | 108.9444   | 0.20827073  | 0.21186032 | 0.24284037 | 0.4611137  | PCDHGB2     |
| NA        | ENSG00000253911 | 0          | NA          | NA         | NA         | NA         |             |
| NA        | ENSG00000253912 | 0          | NA          | NA         | NA         | NA         |             |

|        |                 |            |             |            |            |            |               |
|--------|-----------------|------------|-------------|------------|------------|------------|---------------|
| NA     | ENSG00000253913 | 0          | NA          | NA         | NA         | NA         | IGLV3-26      |
| NA     | ENSG00000253915 | 0.173124   | -0.01911262 | 0.38486262 | 0.84537521 | NA         | MAPRE1P1      |
| NA     | ENSG00000253916 | 0          | NA          | NA         | NA         | NA         | MTCO1P49      |
| NA     | ENSG00000253917 | 1.3427241  | 0.00360832  | 0.37985998 | 0.95399026 | NA         |               |
| NA     | ENSG00000253919 | 2.9583727  | -0.02990717 | 0.37113088 | 0.77112272 | 0.8951015  | THAP12P7      |
| NA     | ENSG00000253920 | 0          | NA          | NA         | NA         | NA         | IGLV3-31      |
| NA     | ENSG00000253921 | 0          | NA          | NA         | NA         | NA         |               |
| NA     | ENSG00000253923 | 0.46567683 | -0.00789902 | 0.38327426 | 0.86306163 | NA         |               |
| NA     | ENSG00000253924 | 0          | NA          | NA         | NA         | NA         |               |
| NA     | ENSG00000253925 | 0.14931947 | -0.01844332 | 0.38480212 | 0.84537521 | NA         |               |
| NA     | ENSG00000253926 | 0          | NA          | NA         | NA         | NA         |               |
| NA     | ENSG00000253927 | 0          | NA          | NA         | NA         | NA         |               |
| NA     | ENSG00000253930 | 4.66681109 | 0.10845     | 0.38532067 | 0.36370421 | 0.59354103 | TNFRSF10A-AS1 |
| NA     | ENSG00000253931 | 0.173733   | 0.01914545  | 0.38484597 | 0.78225479 | NA         |               |
| NA     | ENSG00000253932 | 0          | NA          | NA         | NA         | NA         |               |
| NA     | ENSG00000253934 | 0          | NA          | NA         | NA         | NA         | MRPL49P2      |
| NA     | ENSG00000253935 | 0          | NA          | NA         | NA         | NA         | IGLVIV-53     |
| NA     | ENSG00000253936 | 0          | NA          | NA         | NA         | NA         | IGHV3-63      |
| NA     | ENSG00000253937 | 0          | NA          | NA         | NA         | NA         | NATP          |
| NA     | ENSG00000253939 | 0          | NA          | NA         | NA         | NA         |               |
| NA     | ENSG00000253940 | 0          | NA          | NA         | NA         | NA         |               |
| NA     | ENSG00000253941 | 0          | NA          | NA         | NA         | NA         | IGHVII-51-2   |
| NA     | ENSG00000253942 | 0.15069912 | -0.01848503 | 0.38480575 | 0.84537521 | NA         |               |
| NA     | ENSG00000253943 | 0          | NA          | NA         | NA         | NA         | KRT18P37      |
| NA     | ENSG00000253944 | 0.16735865 | 0.01897177  | 0.38482933 | 0.78225479 | NA         |               |
| NA     | ENSG00000253945 | 0          | NA          | NA         | NA         | NA         |               |
| NA     | ENSG00000253946 | 0          | NA          | NA         | NA         | NA         |               |
| NA     | ENSG00000253947 | 0          | NA          | NA         | NA         | NA         |               |
| NA     | ENSG00000253948 | 24.9366827 | 0.2504626   | 0.34658381 | 0.23621488 | 0.4530211  | VPS13B-DT     |
| NA     | ENSG00000253949 | 0          | NA          | NA         | NA         | NA         |               |
| NA     | ENSG00000253951 | 0          | NA          | NA         | NA         | NA         | CCT3P1        |
| NA     | ENSG00000253952 | 0.173733   | 0.01914545  | 0.38484597 | 0.78225479 | NA         | HIGD1AP18     |
| 8641   | ENSG00000253953 | 47.2667021 | -0.36443818 | 0.31921836 | 0.10219892 | 0.25341857 | PCDHGB4       |
| NA     | ENSG00000253954 | 0          | NA          | NA         | NA         | NA         | HMGNI1P38     |
| 285593 | ENSG00000253955 | 4.73354619 | 0.06048814  | 0.36816247 | 0.62754911 | 0.81099169 |               |
| NA     | ENSG00000253956 | 0          | NA          | NA         | NA         | NA         |               |
| NA     | ENSG00000253957 | 0          | NA          | NA         | NA         | NA         | IGHV3-22      |
| 137075 | ENSG00000253958 | 21.582494  | 0.11983467  | 0.32768981 | 0.52562701 | 0.73806584 | CLDN23        |

|           |                 |            |             |            |            |            |              |
|-----------|-----------------|------------|-------------|------------|------------|------------|--------------|
| NA        | ENSG00000253959 | 0          | NA          | NA         | NA         | NA         | LINC01863    |
| NA        | ENSG00000253960 | 0          | NA          | NA         | NA         | NA         |              |
| NA        | ENSG00000253961 | 0.37844916 | 0.02407552  | 0.3854191  | 0.60038877 | NA         |              |
| NA        | ENSG00000253963 | 0          | NA          | NA         | NA         | NA         | IGLV3-2      |
| NA        | ENSG00000253964 | 0          | NA          | NA         | NA         | NA         | RPL31P40     |
| NA        | ENSG00000253965 | 0.5328344  | 0.01352393  | 0.38344538 | 0.74577103 | NA         |              |
| NA        | ENSG00000253966 | 1.46713727 | 0.03514816  | 0.38212879 | 0.57873853 | NA         |              |
| 101926892 | ENSG00000253967 | 0          | NA          | NA         | NA         | NA         |              |
| NA        | ENSG00000253968 | 0          | NA          | NA         | NA         | NA         |              |
| NA        | ENSG00000253970 | 0          | NA          | NA         | NA         | NA         | MTND2P7      |
| NA        | ENSG00000253971 | 0          | NA          | NA         | NA         | NA         | CDC42P3      |
| 105375726 | ENSG00000253972 | 0          | NA          | NA         | NA         | NA         | MAL2-AS1     |
| NA        | ENSG00000253973 | 23.2918651 | 0.59904238  | 0.64274798 | 0.03212423 | 0.10588625 |              |
| 100856811 | ENSG00000253974 | 0          | NA          | NA         | NA         | NA         | NRG1-IT1     |
| NA        | ENSG00000253975 | 0          | NA          | NA         | NA         | NA         |              |
| NA        | ENSG00000253976 | 0          | NA          | NA         | NA         | NA         |              |
| NA        | ENSG00000253977 | 0          | NA          | NA         | NA         | NA         | MTCO2P4      |
| 101927862 | ENSG00000253978 | 10.0181073 | 0.48836472  | 0.67297991 | 0.04483173 | 0.13667203 |              |
| NA        | ENSG00000253979 | 0          | NA          | NA         | NA         | NA         |              |
| NA        | ENSG00000253980 | 0          | NA          | NA         | NA         | NA         |              |
| NA        | ENSG00000253981 | 1.48203136 | -0.03055339 | 0.37907679 | 0.68279189 | NA         | ALG1L13P     |
| NA        | ENSG00000253982 | 170.084219 | 0.10831576  | 0.16733945 | 0.47281181 | 0.69485824 |              |
| NA        | ENSG00000253983 | 0          | NA          | NA         | NA         | NA         |              |
| NA        | ENSG00000253985 | 0          | NA          | NA         | NA         | NA         |              |
| NA        | ENSG00000253986 | 0          | NA          | NA         | NA         | NA         |              |
| NA        | ENSG00000253988 | 0          | NA          | NA         | NA         | NA         |              |
| NA        | ENSG00000253989 | 5.9436942  | -0.1329786  | 0.38860063 | 0.32254201 | 0.55014042 | IGHVIII-38-1 |
| NA        | ENSG00000253991 | 0          | NA          | NA         | NA         | NA         |              |
| NA        | ENSG00000253992 | 0          | NA          | NA         | NA         | NA         |              |
| NA        | ENSG00000253993 | 0          | NA          | NA         | NA         | NA         |              |
| NA        | ENSG00000253994 | 0          | NA          | NA         | NA         | NA         | NDUFB9P3     |
| NA        | ENSG00000253995 | 0          | NA          | NA         | NA         | NA         | RPL10P18     |
| NA        | ENSG00000253997 | 0          | NA          | NA         | NA         | NA         |              |
| NA        | ENSG00000253998 | 0          | NA          | NA         | NA         | NA         | IGKV2-29     |
| NA        | ENSG00000253999 | 0          | NA          | NA         | NA         | NA         | IGKV3D-31    |
| NA        | ENSG00000254000 | 0          | NA          | NA         | NA         | NA         |              |
| NA        | ENSG00000254001 | 0          | NA          | NA         | NA         | NA         |              |
| NA        | ENSG00000254002 | 0          | NA          | NA         | NA         | NA         |              |

|           |                 |            |             |            |            |            |              |
|-----------|-----------------|------------|-------------|------------|------------|------------|--------------|
| 102723885 | ENSG00000254003 | 1.98629095 | 0.05877129  | 0.38228504 | 0.47805356 | NA         | SRI-AS1      |
| 339324    | ENSG00000254004 | 882.508121 | 0.07142417  | 0.12433062 | 0.54458857 | 0.75235966 | ZNF260       |
| NA        | ENSG00000254006 | 0          | NA          | NA         | NA         | NA         |              |
| NA        | ENSG00000254007 | 0          | NA          | NA         | NA         | NA         |              |
| 619434    | ENSG00000254008 | 0.3386657  | 0.00224902  | 0.38337845 | 0.96698496 | NA         | LINC00051    |
| NA        | ENSG00000254009 | 0          | NA          | NA         | NA         | NA         | IGKV2D-38    |
| NA        | ENSG00000254011 | 0          | NA          | NA         | NA         | NA         |              |
| NA        | ENSG00000254012 | 0          | NA          | NA         | NA         | NA         | RPL10P8      |
| NA        | ENSG00000254013 | 0          | NA          | NA         | NA         | NA         | MAP2K1P1     |
| NA        | ENSG00000254014 | 0          | NA          | NA         | NA         | NA         |              |
| NA        | ENSG00000254015 | 0          | NA          | NA         | NA         | NA         | MTND4LP26    |
| NA        | ENSG00000254016 | 0          | NA          | NA         | NA         | NA         | ALG1L10P     |
| NA        | ENSG00000254017 | 0.68663394 | 0.02655722  | 0.38364434 | 0.5780238  | NA         | IGHEP2       |
| 105375787 | ENSG00000254019 | 0          | NA          | NA         | NA         | NA         |              |
| NA        | ENSG00000254020 | 0          | NA          | NA         | NA         | NA         |              |
| NA        | ENSG00000254021 | 0          | NA          | NA         | NA         | NA         |              |
| NA        | ENSG00000254023 | 0          | NA          | NA         | NA         | NA         | PKMP4        |
| NA        | ENSG00000254024 | 0          | NA          | NA         | NA         | NA         |              |
| NA        | ENSG00000254025 | 0          | NA          | NA         | NA         | NA         | BRIX1P1      |
| NA        | ENSG00000254026 | 0          | NA          | NA         | NA         | NA         |              |
| NA        | ENSG00000254027 | 16.653708  | -0.14449978 | 0.33947383 | 0.44172369 | 0.66660059 |              |
| NA        | ENSG00000254028 | 0.69581776 | 0.01985679  | 0.3835301  | 0.62174862 | NA         |              |
| NA        | ENSG00000254029 | 0          | NA          | NA         | NA         | NA         | IGLC4        |
| NA        | ENSG00000254030 | 0          | NA          | NA         | NA         | NA         | IGLC5        |
| NA        | ENSG00000254031 | 0          | NA          | NA         | NA         | NA         |              |
| NA        | ENSG00000254033 | 0          | NA          | NA         | NA         | NA         |              |
| NA        | ENSG00000254034 | 6.03657849 | -0.1364341  | 0.38922296 | 0.31339277 | 0.54126787 | INTS9-AS1    |
| NA        | ENSG00000254035 | 4.17774042 | 0.11568778  | 0.38988727 | 0.31991401 | 0.54754089 |              |
| NA        | ENSG00000254036 | 0          | NA          | NA         | NA         | NA         | IGHVIII-67-2 |
| NA        | ENSG00000254037 | 0          | NA          | NA         | NA         | NA         |              |
| NA        | ENSG00000254038 | 0.14931947 | -0.01844332 | 0.38480212 | 0.84537521 | NA         |              |
| NA        | ENSG00000254039 | 0          | NA          | NA         | NA         | NA         |              |
| NA        | ENSG00000254040 | 0          | NA          | NA         | NA         | NA         |              |
| NA        | ENSG00000254041 | 0          | NA          | NA         | NA         | NA         |              |
| NA        | ENSG00000254042 | 31.2987385 | 0.16864222  | 0.31131417 | 0.40252825 | 0.63061911 | SLIT3-AS2    |
| NA        | ENSG00000254043 | 0.18922458 | 0.01954053  | 0.38488496 | 0.78225479 | NA         |              |
| NA        | ENSG00000254044 | 0.3717644  | 0.02395611  | 0.38540205 | 0.6056392  | NA         |              |
| NA        | ENSG00000254045 | 0          | NA          | NA         | NA         | NA         | IGHVIII-22-2 |

|           |                 |            |             |            |            |            |              |
|-----------|-----------------|------------|-------------|------------|------------|------------|--------------|
| NA        | ENSG00000254046 | 0          | NA          | NA         | NA         | NA         | IGHV1-17     |
| NA        | ENSG00000254047 | 0          | NA          | NA         | NA         | NA         |              |
| NA        | ENSG00000254048 | 0          | NA          | NA         | NA         | NA         |              |
| 100874286 | ENSG00000254049 | 0          | NA          | NA         | NA         | NA         | NRG1-IT3     |
| NA        | ENSG00000254050 | 0          | NA          | NA         | NA         | NA         |              |
| NA        | ENSG00000254051 | 0          | NA          | NA         | NA         | NA         |              |
| NA        | ENSG00000254052 | 0          | NA          | NA         | NA         | NA         | IGHVIII-67-4 |
| NA        | ENSG00000254053 | 0          | NA          | NA         | NA         | NA         | IGHVIII-5-2  |
| NA        | ENSG00000254054 | 0          | NA          | NA         | NA         | NA         |              |
| 105375851 | ENSG00000254055 | 0          | NA          | NA         | NA         | NA         |              |
| NA        | ENSG00000254056 | 0          | NA          | NA         | NA         | NA         | IGHV3-71     |
| NA        | ENSG00000254057 | 0.16735865 | 0.01897177  | 0.38482933 | 0.78225479 | NA         |              |
| NA        | ENSG00000254060 | 0.15069912 | -0.01848503 | 0.38480575 | 0.84537521 | NA         |              |
| NA        | ENSG00000254061 | 0          | NA          | NA         | NA         | NA         |              |
| NA        | ENSG00000254063 | 0          | NA          | NA         | NA         | NA         | DUXAP2       |
| 100507071 | ENSG00000254064 | 14.0631995 | -0.14054675 | 0.35019824 | 0.4361424  | 0.6612819  |              |
| NA        | ENSG00000254065 | 0          | NA          | NA         | NA         | NA         |              |
| NA        | ENSG00000254066 | 0          | NA          | NA         | NA         | NA         | LINC01938    |
| NA        | ENSG00000254067 | 0          | NA          | NA         | NA         | NA         |              |
| NA        | ENSG00000254069 | 0          | NA          | NA         | NA         | NA         |              |
| NA        | ENSG00000254070 | 0          | NA          | NA         | NA         | NA         |              |
| NA        | ENSG00000254073 | 0          | NA          | NA         | NA         | NA         | IGLVVII-41-1 |
| NA        | ENSG00000254075 | 0          | NA          | NA         | NA         | NA         | IGLVV-66     |
| NA        | ENSG00000254076 | 0          | NA          | NA         | NA         | NA         |              |
| NA        | ENSG00000254077 | 0          | NA          | NA         | NA         | NA         | IGLV3-7      |
| NA        | ENSG00000254079 | 0          | NA          | NA         | NA         | NA         | SRSF3P2      |
| NA        | ENSG00000254080 | 0          | NA          | NA         | NA         | NA         |              |
| NA        | ENSG00000254081 | 0          | NA          | NA         | NA         | NA         | LINC01299    |
| 286094    | ENSG00000254083 | 0          | NA          | NA         | NA         | NA         | LINC01591    |
| NA        | ENSG00000254084 | 0          | NA          | NA         | NA         | NA         |              |
| NA        | ENSG00000254086 | 0          | NA          | NA         | NA         | NA         |              |
| 4067      | ENSG00000254087 | 2292.75261 | -0.11764794 | 0.087187   | 0.16520336 | 0.35517682 | LYN          |
| NA        | ENSG00000254088 | 0.51424321 | 0.01252107  | 0.38289489 | 0.75930758 | NA         | SLC2A3P4     |
| NA        | ENSG00000254089 | 0          | NA          | NA         | NA         | NA         |              |
| NA        | ENSG00000254090 | 0          | NA          | NA         | NA         | NA         | MTND2P32     |
| NA        | ENSG00000254091 | 0.47340295 | -0.03506689 | 0.38628551 | 0.49583185 | NA         |              |
| NA        | ENSG00000254092 | 0.30139824 | -0.02296476 | 0.38527817 | 0.68536535 | NA         |              |
| 54984     | ENSG00000254093 | 189.99721  | -0.01234145 | 0.17462832 | 0.93591289 | 0.97325384 | PINX1        |

|           |                 |            |             |            |            |            |             |
|-----------|-----------------|------------|-------------|------------|------------|------------|-------------|
| NA        | ENSG00000254094 | 1.17955945 | -0.02963552 | 0.38124998 | 0.63887636 | NA         |             |
| NA        | ENSG00000254095 | 0          | NA          | NA         | NA         | NA         |             |
| NA        | ENSG00000254097 | 0          | NA          | NA         | NA         | NA         | IGKV3D-25   |
| NA        | ENSG00000254098 | 0          | NA          | NA         | NA         | NA         | IGKV2-26    |
| NA        | ENSG00000254099 | 0          | NA          | NA         | NA         | NA         |             |
| 107986980 | ENSG00000254101 | 0.18922458 | 0.01954053  | 0.38488496 | 0.78225479 | NA         | LINC02055   |
| 401463    | ENSG00000254102 | 0.36554114 | -0.0028033  | 0.38338865 | 0.99777826 | NA         |             |
| NA        | ENSG00000254103 | 0          | NA          | NA         | NA         | NA         | PPIAP85     |
| NA        | ENSG00000254104 | 0          | NA          | NA         | NA         | NA         |             |
| NA        | ENSG00000254105 | 0          | NA          | NA         | NA         | NA         | VENTXP6     |
| NA        | ENSG00000254106 | 0          | NA          | NA         | NA         | NA         | LINC01848   |
| 100128750 | ENSG00000254109 | 2.71944646 | 0.03187487  | 0.37406106 | 0.74049669 | 0.87742184 | RBPMS-AS1   |
| NA        | ENSG00000254111 | 0          | NA          | NA         | NA         | NA         |             |
| NA        | ENSG00000254112 | 0          | NA          | NA         | NA         | NA         |             |
| NA        | ENSG00000254113 | 0          | NA          | NA         | NA         | NA         |             |
| NA        | ENSG00000254114 | 0          | NA          | NA         | NA         | NA         | HMGNI1P28   |
| NA        | ENSG00000254115 | 0          | NA          | NA         | NA         | NA         |             |
| NA        | ENSG00000254118 | 0          | NA          | NA         | NA         | NA         | MTCYBP20    |
| NA        | ENSG00000254119 | 0          | NA          | NA         | NA         | NA         | LINC02842   |
| 111082988 | ENSG00000254120 | 0          | NA          | NA         | NA         | NA         | LINC02155   |
| 56099     | ENSG00000254122 | 540.26456  | 1.13166753  | 0.13503039 | 6.05E-18   | 1.99E-16   | PCDHGB7     |
| 105375929 | ENSG00000254123 | 0          | NA          | NA         | NA         | NA         | LINC02839   |
| NA        | ENSG00000254124 | 0          | NA          | NA         | NA         | NA         | EEF1A1P37   |
| 927       | ENSG00000254126 | 0          | NA          | NA         | NA         | NA         | CD8B2       |
| NA        | ENSG00000254127 | 0.173124   | -0.01911262 | 0.38486262 | 0.84537521 | NA         | IGLCOR22-1  |
| NA        | ENSG00000254129 | 0          | NA          | NA         | NA         | NA         |             |
| 102557615 | ENSG00000254130 | 0          | NA          | NA         | NA         | NA         | LINC01947   |
| NA        | ENSG00000254131 | 0.60098368 | -0.03514327 | 0.38649398 | 0.4416435  | NA         |             |
| NA        | ENSG00000254132 | 0          | NA          | NA         | NA         | NA         | MTND6P3     |
| NA        | ENSG00000254134 | 0          | NA          | NA         | NA         | NA         | IGHVII-74-1 |
| NA        | ENSG00000254135 | 0          | NA          | NA         | NA         | NA         |             |
| NA        | ENSG00000254136 | 0          | NA          | NA         | NA         | NA         |             |
| NA        | ENSG00000254138 | 0          | NA          | NA         | NA         | NA         |             |
| 286178    | ENSG00000254139 | 0          | NA          | NA         | NA         | NA         |             |
| NA        | ENSG00000254141 | 0          | NA          | NA         | NA         | NA         |             |
| NA        | ENSG00000254143 | 0          | NA          | NA         | NA         | NA         |             |
| NA        | ENSG00000254145 | 0          | NA          | NA         | NA         | NA         |             |
| NA        | ENSG00000254146 | 0          | NA          | NA         | NA         | NA         | HMGB1P46    |

|           |                 |            |             |            |            |            |                |
|-----------|-----------------|------------|-------------|------------|------------|------------|----------------|
| NA        | ENSG00000254150 | 0          | NA          | NA         | NA         | NA         |                |
| NA        | ENSG00000254151 | 0          | NA          | NA         | NA         | NA         | NIPA2P4        |
| NA        | ENSG00000254152 | 0          | NA          | NA         | NA         | NA         | PPIAP84        |
| NA        | ENSG00000254153 | 0          | NA          | NA         | NA         | NA         |                |
| NA        | ENSG00000254154 | 47.8329877 | 0.99346346  | 0.36960277 | 0.00073195 | 0.00450016 | CRYZL2P-SEC16B |
| NA        | ENSG00000254156 | 0          | NA          | NA         | NA         | NA         | MTND6P20       |
| NA        | ENSG00000254157 | 0          | NA          | NA         | NA         | NA         | IGKV2-18       |
| NA        | ENSG00000254158 | 0          | NA          | NA         | NA         | NA         |                |
| NA        | ENSG00000254160 | 0          | NA          | NA         | NA         | NA         |                |
| NA        | ENSG00000254161 | 0          | NA          | NA         | NA         | NA         | IGLVIV-65      |
| NA        | ENSG00000254162 | 21.3168304 | 0.1707494   | 0.33577106 | 0.38578437 | 0.61497363 |                |
| NA        | ENSG00000254163 | 0          | NA          | NA         | NA         | NA         |                |
| NA        | ENSG00000254164 | 0          | NA          | NA         | NA         | NA         |                |
| NA        | ENSG00000254165 | 5.62775179 | 0.02430704  | 0.36083083 | 0.85112341 | 0.93268646 |                |
| 103164619 | ENSG00000254166 | 0.81646814 | -0.042482   | 0.38736571 | 0.34991926 | NA         | CASC19         |
| NA        | ENSG00000254167 | 0          | NA          | NA         | NA         | NA         | IGHV8-51-1     |
| NA        | ENSG00000254170 | 0.49277141 | 0.01547619  | 0.38319142 | 0.74183179 | NA         |                |
| NA        | ENSG00000254171 | 0          | NA          | NA         | NA         | NA         |                |
| NA        | ENSG00000254172 | 0          | NA          | NA         | NA         | NA         | RNU5A-3P       |
| NA        | ENSG00000254174 | 0          | NA          | NA         | NA         | NA         | IGHV1-12       |
| NA        | ENSG00000254175 | 0          | NA          | NA         | NA         | NA         | IGLVI-42       |
| NA        | ENSG00000254176 | 0          | NA          | NA         | NA         | NA         | IGHV3-75       |
| NA        | ENSG00000254177 | 0          | NA          | NA         | NA         | NA         |                |
| NA        | ENSG00000254178 | 0          | NA          | NA         | NA         | NA         |                |
| NA        | ENSG00000254180 | 2.79038099 | 0.00931337  | 0.36926088 | 0.93075255 | 0.97111825 |                |
| NA        | ENSG00000254181 | 0          | NA          | NA         | NA         | NA         | SLC25A51P3     |
| NA        | ENSG00000254182 | 0.15069912 | -0.01848503 | 0.38480575 | 0.84537521 | NA         |                |
| NA        | ENSG00000254183 | 0          | NA          | NA         | NA         | NA         |                |
| NA        | ENSG00000254185 | 0          | NA          | NA         | NA         | NA         | MAPK6P5        |
| NA        | ENSG00000254186 | 1.84846281 | 0.0626664   | 0.38604797 | 0.36172154 | NA         |                |
| NA        | ENSG00000254187 | 0          | NA          | NA         | NA         | NA         |                |
| NA        | ENSG00000254189 | 0          | NA          | NA         | NA         | NA         |                |
| NA        | ENSG00000254190 | 0          | NA          | NA         | NA         | NA         |                |
| NA        | ENSG00000254192 | 29.1777068 | -0.01776317 | 0.29358158 | 0.92365207 | 0.96829936 |                |
| NA        | ENSG00000254193 | 0          | NA          | NA         | NA         | NA         |                |
| NA        | ENSG00000254194 | 0          | NA          | NA         | NA         | NA         |                |
| NA        | ENSG00000254195 | 0          | NA          | NA         | NA         | NA         | TPM3P3         |
| NA        | ENSG00000254197 | 0          | NA          | NA         | NA         | NA         |                |



|           |                 |            |             |            |            |            |              |
|-----------|-----------------|------------|-------------|------------|------------|------------|--------------|
| NA        | ENSG00000254198 | 2.23979211 | -0.07809589 | 0.39568363 | 0.07433587 | NA         |              |
| NA        | ENSG00000254200 | 0          | NA          | NA         | NA         | NA         | RPL7AP33     |
| NA        | ENSG00000254201 | 0          | NA          | NA         | NA         | NA         |              |
| NA        | ENSG00000254202 | 2.3001726  | 0.0242949   | 0.37834556 | 0.74136244 | NA         |              |
| NA        | ENSG00000254203 | 0.16735865 | 0.01897177  | 0.38482933 | 0.78225479 | NA         | IGHVII-33-1  |
| NA        | ENSG00000254204 | 0          | NA          | NA         | NA         | NA         |              |
| NA        | ENSG00000254205 | 0          | NA          | NA         | NA         | NA         |              |
| 728888    | ENSG00000254206 | 179.049318 | -0.05907273 | 0.18536044 | 0.71449077 | 0.86242659 | NPIP11       |
| NA        | ENSG00000254207 | 0          | NA          | NA         | NA         | NA         |              |
| NA        | ENSG00000254208 | 0.48969654 | -0.0111174  | 0.38291377 | 0.82196968 | NA         |              |
| NA        | ENSG00000254209 | 0          | NA          | NA         | NA         | NA         | LINC02855    |
| NA        | ENSG00000254211 | 0.173124   | -0.01911262 | 0.38486262 | 0.84537521 | NA         | LINC01485    |
| NA        | ENSG00000254212 | 0          | NA          | NA         | NA         | NA         |              |
| NA        | ENSG00000254213 | 0          | NA          | NA         | NA         | NA         | PRXL2AP2     |
| NA        | ENSG00000254215 | 0          | NA          | NA         | NA         | NA         | IGHVIII-11-1 |
| NA        | ENSG00000254216 | 0          | NA          | NA         | NA         | NA         |              |
| NA        | ENSG00000254219 | 0          | NA          | NA         | NA         | NA         |              |
| NA        | ENSG00000254220 | 0          | NA          | NA         | NA         | NA         | IGKV2D-18    |
| 56104     | ENSG00000254221 | 43.4736875 | 0.49498469  | 0.38995372 | 0.04780296 | 0.14378575 | PCDHGB1      |
| NA        | ENSG00000254222 | 0          | NA          | NA         | NA         | NA         |              |
| NA        | ENSG00000254224 | 1.50372732 | -0.02836867 | 0.37997833 | 0.68201018 | NA         |              |
| NA        | ENSG00000254225 | 0          | NA          | NA         | NA         | NA         | BTF3P1       |
| 101927115 | ENSG00000254226 | 0.31853758 | 0.00145565  | 0.38336932 | 0.96313179 | NA         | LINC01933    |
| NA        | ENSG00000254227 | 0          | NA          | NA         | NA         | NA         |              |
| NA        | ENSG00000254228 | 0          | NA          | NA         | NA         | NA         | IGHV3-42     |
| NA        | ENSG00000254229 | 0.62604453 | -0.03628445 | 0.38662591 | 0.42608846 | NA         | FAM90A12P    |
| NA        | ENSG00000254230 | 0          | NA          | NA         | NA         | NA         |              |
| 105375624 | ENSG00000254231 | 1.11894377 | 0.07098008  | 0.39082115 | 0.23926301 | NA         |              |
| NA        | ENSG00000254233 | 0          | NA          | NA         | NA         | NA         | LINC02365    |
| NA        | ENSG00000254236 | 0          | NA          | NA         | NA         | NA         |              |
| NA        | ENSG00000254237 | 0          | NA          | NA         | NA         | NA         |              |
| NA        | ENSG00000254238 | 2.82951283 | -0.0497978  | 0.37451166 | 0.62643038 | 0.81032538 |              |
| NA        | ENSG00000254239 | 0          | NA          | NA         | NA         | NA         |              |
| NA        | ENSG00000254240 | 0          | NA          | NA         | NA         | NA         | IGLVI-20     |
| NA        | ENSG00000254241 | 0          | NA          | NA         | NA         | NA         | MTCO1P47     |
| 105379301 | ENSG00000254242 | 0          | NA          | NA         | NA         | NA         |              |
| NA        | ENSG00000254244 | 0          | NA          | NA         | NA         | NA         | PAICSP4      |
| 56112     | ENSG00000254245 | 18.510492  | 0.01947501  | 0.31316059 | 0.91696084 | 0.96477469 | PCDHGA3      |

|           |                 |            |             |            |            |            |             |
|-----------|-----------------|------------|-------------|------------|------------|------------|-------------|
| NA        | ENSG00000254246 | 0          | NA          | NA         | NA         | NA         |             |
| NA        | ENSG00000254247 | 0          | NA          | NA         | NA         | NA         |             |
| NA        | ENSG00000254248 | 0.173124   | -0.01911262 | 0.38486262 | 0.84537521 | NA         |             |
| NA        | ENSG00000254249 | 0          | NA          | NA         | NA         | NA         |             |
| NA        | ENSG00000254251 | 0.44968403 | -0.02729724 | 0.38571286 | 0.56195603 | NA         |             |
| NA        | ENSG00000254252 | 0          | NA          | NA         | NA         | NA         | RPL7P20     |
| NA        | ENSG00000254253 | 0          | NA          | NA         | NA         | NA         | NACAP10     |
| 101929415 | ENSG00000254254 | 0          | NA          | NA         | NA         | NA         |             |
| NA        | ENSG00000254255 | 0          | NA          | NA         | NA         | NA         |             |
| NA        | ENSG00000254256 | 0          | NA          | NA         | NA         | NA         | RPSAP71     |
| NA        | ENSG00000254258 | 0.61891849 | -0.01608374 | 0.38339451 | 0.71573379 | NA         |             |
| NA        | ENSG00000254260 | 0          | NA          | NA         | NA         | NA         |             |
| NA        | ENSG00000254261 | 0          | NA          | NA         | NA         | NA         |             |
| NA        | ENSG00000254263 | 0.69034125 | 0.00615669  | 0.38192107 | 0.89677036 | NA         |             |
| NA        | ENSG00000254264 | 0          | NA          | NA         | NA         | NA         | IGKV3OR22-2 |
| NA        | ENSG00000254265 | 0          | NA          | NA         | NA         | NA         |             |
| 101927003 | ENSG00000254266 | 1.04034149 | 0.03620111  | 0.38198878 | 0.55163502 | NA         | PKIA-AS1    |
| NA        | ENSG00000254268 | 0          | NA          | NA         | NA         | NA         | RFPL4AP7    |
| NA        | ENSG00000254270 | 0.53127872 | 0.03944988  | 0.38681518 | 0.41648411 | NA         | ERHP1       |
| NA        | ENSG00000254271 | 0          | NA          | NA         | NA         | NA         | ANK3-DT     |
| NA        | ENSG00000254272 | 0          | NA          | NA         | NA         | NA         | BTF3P3      |
| NA        | ENSG00000254273 | 0.47128911 | -0.02834021 | 0.38579985 | 0.54457036 | NA         |             |
| NA        | ENSG00000254274 | 0.76578535 | -0.028872   | 0.38368256 | 0.5640109  | NA         | TDGF1P5     |
| NA        | ENSG00000254275 | 0.48408189 | 0.01091708  | 0.38338274 | 0.79195034 | NA         | LINC00824   |
| NA        | ENSG00000254277 | 0          | NA          | NA         | NA         | NA         |             |
| 101927513 | ENSG00000254278 | 0          | NA          | NA         | NA         | NA         |             |
| NA        | ENSG00000254279 | 0          | NA          | NA         | NA         | NA         | IGHVII-1-1  |
| NA        | ENSG00000254283 | 0          | NA          | NA         | NA         | NA         |             |
| NA        | ENSG00000254285 | 1.68434982 | 0.04624162  | 0.38267861 | 0.50594182 | NA         | KRT8P3      |
| NA        | ENSG00000254287 | 0          | NA          | NA         | NA         | NA         |             |
| NA        | ENSG00000254288 | 0          | NA          | NA         | NA         | NA         |             |
| NA        | ENSG00000254289 | 0          | NA          | NA         | NA         | NA         | IGHV3-32    |
| NA        | ENSG00000254290 | 0          | NA          | NA         | NA         | NA         |             |
| NA        | ENSG00000254291 | 0          | NA          | NA         | NA         | NA         |             |
| NA        | ENSG00000254292 | 0          | NA          | NA         | NA         | NA         | IGKV2D-14   |
| NA        | ENSG00000254293 | 202.063839 | 0.01443823  | 0.17998959 | 0.92876816 | 0.97013584 |             |
| NA        | ENSG00000254294 | 1.58872578 | -0.10626908 | 0.40411855 | 0.06589989 | NA         | IMPDH1P6    |
| NA        | ENSG00000254295 | 0          | NA          | NA         | NA         | NA         |             |

|           |    |                 |            |             |            |            |            |             |
|-----------|----|-----------------|------------|-------------|------------|------------|------------|-------------|
|           | NA | ENSG00000254297 | 0          | NA          | NA         | NA         | NA         |             |
|           | NA | ENSG00000254298 | 0          | NA          | NA         | NA         | NA         |             |
|           | NA | ENSG00000254299 | 0          | NA          | NA         | NA         | NA         | LINC01944   |
| 101926978 | NA | ENSG00000254300 | 0          | NA          | NA         | NA         | NA         | LINC01111   |
|           | NA | ENSG00000254302 | 0          | NA          | NA         | NA         | NA         |             |
|           | NA | ENSG00000254303 | 0          | NA          | NA         | NA         | NA         |             |
|           | NA | ENSG00000254305 | 1.00913424 | 0.00522019  | 0.38000637 | 0.93162377 | NA         | MRPL9P1     |
|           | NA | ENSG00000254306 | 0          | NA          | NA         | NA         | NA         |             |
|           | NA | ENSG00000254307 | 9.17013103 | 0.13050767  | 0.37599047 | 0.39191721 | 0.62123244 |             |
|           | NA | ENSG00000254308 | 0          | NA          | NA         | NA         | NA         | IGLVIV-59   |
|           | NA | ENSG00000254309 | 0          | NA          | NA         | NA         | NA         |             |
|           | NA | ENSG00000254310 | 0          | NA          | NA         | NA         | NA         |             |
|           | NA | ENSG00000254311 | 0          | NA          | NA         | NA         | NA         | SNRPCP17    |
|           | NA | ENSG00000254312 | 0          | NA          | NA         | NA         | NA         | MRPL57P7    |
|           | NA | ENSG00000254313 | 0          | NA          | NA         | NA         | NA         |             |
|           | NA | ENSG00000254314 | 0          | NA          | NA         | NA         | NA         |             |
|           | NA | ENSG00000254315 | 0.16735865 | 0.01897177  | 0.38482933 | 0.78225479 | NA         |             |
|           | NA | ENSG00000254316 | 0          | NA          | NA         | NA         | NA         |             |
|           | NA | ENSG00000254317 | 4.94579911 | 0.054858    | 0.36650455 | 0.66355919 | 0.83404953 |             |
| 101927815 | NA | ENSG00000254319 | 0          | NA          | NA         | NA         | NA         |             |
|           | NA | ENSG00000254320 | 0          | NA          | NA         | NA         | NA         |             |
|           | NA | ENSG00000254321 | 0          | NA          | NA         | NA         | NA         |             |
| 442893    | NA | ENSG00000254324 | 0          | NA          | NA         | NA         | NA         | MIR151A     |
|           | NA | ENSG00000254325 | 0          | NA          | NA         | NA         | NA         |             |
|           | NA | ENSG00000254326 | 0          | NA          | NA         | NA         | NA         | IGHV7-27    |
|           | NA | ENSG00000254328 | 0          | NA          | NA         | NA         | NA         |             |
|           | NA | ENSG00000254329 | 0          | NA          | NA         | NA         | NA         | IGHVII-60-1 |
|           | NA | ENSG00000254330 | 0          | NA          | NA         | NA         | NA         |             |
|           | NA | ENSG00000254331 | 0.173733   | 0.01914545  | 0.38484597 | 0.78225479 | NA         | CKS1BP7     |
|           | NA | ENSG00000254332 | 0.16735865 | 0.01897177  | 0.38482933 | 0.78225479 | NA         |             |
| 102546298 | NA | ENSG00000254333 | 0.35749303 | 0.0238229   | 0.38538197 | 0.61360731 | NA         | NDST1-AS1   |
| 101929172 | NA | ENSG00000254334 | 0          | NA          | NA         | NA         | NA         |             |
|           | NA | ENSG00000254336 | 0          | NA          | NA         | NA         | NA         |             |
|           | NA | ENSG00000254337 | 0          | NA          | NA         | NA         | NA         |             |
| 104326051 | NA | ENSG00000254338 | 1.46035985 | -0.00418161 | 0.37738556 | 0.95445022 | NA         | MAFA-AS1    |
|           | NA | ENSG00000254339 | 0          | NA          | NA         | NA         | NA         |             |
|           | NA | ENSG00000254340 | 3.02147251 | -0.02754074 | 0.37463259 | 0.76124422 | 0.88962039 |             |
|           | NA | ENSG00000254341 | 0          | NA          | NA         | NA         | NA         | SNORD87     |

|           |                 |            |             |            |            |            |            |
|-----------|-----------------|------------|-------------|------------|------------|------------|------------|
| NA        | ENSG00000254342 | 0          | NA          | NA         | NA         | NA         |            |
| NA        | ENSG00000254343 | 0          | NA          | NA         | NA         | NA         |            |
| NA        | ENSG00000254344 | 0          | NA          | NA         | NA         | NA         | LINC01288  |
| NA        | ENSG00000254345 | 0          | NA          | NA         | NA         | NA         | IGKV2D-23  |
| NA        | ENSG00000254346 | 0          | NA          | NA         | NA         | NA         | MTND1P6    |
| NA        | ENSG00000254347 | 0          | NA          | NA         | NA         | NA         |            |
| NA        | ENSG00000254348 | 0          | NA          | NA         | NA         | NA         |            |
| 441355    | ENSG00000254349 | 0.95487208 | -0.06829504 | 0.39200954 | 0.1970412  | NA         | MIR2052HG  |
| NA        | ENSG00000254350 | 0          | NA          | NA         | NA         | NA         |            |
| NA        | ENSG00000254351 | 0          | NA          | NA         | NA         | NA         | ARL2BPP5   |
| NA        | ENSG00000254352 | 2.42371795 | 0.07977143  | 0.38808659 | 0.33463034 | NA         |            |
| NA        | ENSG00000254355 | 0          | NA          | NA         | NA         | NA         | IGLVI-68   |
| 105375843 | ENSG00000254357 | 0          | NA          | NA         | NA         | NA         |            |
| NA        | ENSG00000254358 | 0          | NA          | NA         | NA         | NA         | CYCSP22    |
| NA        | ENSG00000254361 | 0          | NA          | NA         | NA         | NA         |            |
| NA        | ENSG00000254362 | 0.173733   | 0.01914545  | 0.38484597 | 0.78225479 | NA         |            |
| 101929719 | ENSG00000254363 | 10.204291  | 0.04973896  | 0.35484519 | 0.7336515  | 0.87316412 |            |
| NA        | ENSG00000254364 | 0          | NA          | NA         | NA         | NA         |            |
| NA        | ENSG00000254365 | 0          | NA          | NA         | NA         | NA         |            |
| NA        | ENSG00000254366 | 0          | NA          | NA         | NA         | NA         |            |
| NA        | ENSG00000254367 | 0          | NA          | NA         | NA         | NA         |            |
| 100133311 | ENSG00000254369 | 0          | NA          | NA         | NA         | NA         | HOXA-AS3   |
| NA        | ENSG00000254370 | 2.2049686  | 0.02189903  | 0.37494824 | 0.80556353 | NA         |            |
| NA        | ENSG00000254372 | 0          | NA          | NA         | NA         | NA         |            |
| NA        | ENSG00000254373 | 0.34624801 | -0.02356563 | 0.38536324 | 0.65270996 | NA         |            |
| NA        | ENSG00000254376 | 0          | NA          | NA         | NA         | NA         | SOX5P1     |
| 100130155 | ENSG00000254377 | 1.43430502 | -0.01269091 | 0.37878402 | 0.85295605 | NA         | MIR124-2HG |
| NA        | ENSG00000254380 | 0          | NA          | NA         | NA         | NA         |            |
| NA        | ENSG00000254381 | 0          | NA          | NA         | NA         | NA         | TUBB8P5    |
| NA        | ENSG00000254383 | 0          | NA          | NA         | NA         | NA         |            |
| NA        | ENSG00000254384 | 0          | NA          | NA         | NA         | NA         | MTND6P19   |
| NA        | ENSG00000254387 | 0.173733   | 0.01914545  | 0.38484597 | 0.78225479 | NA         | MYL12AP1   |
| NA        | ENSG00000254388 | 1.34889045 | -0.01782136 | 0.37837375 | 0.80487595 | NA         | DUTP2      |
| 78998     | ENSG00000254389 | 14.6564423 | 0.31028274  | 0.4296389  | 0.14463229 | 0.32482506 | RHPN1-AS1  |
| NA        | ENSG00000254391 | 0          | NA          | NA         | NA         | NA         |            |
| NA        | ENSG00000254392 | 0          | NA          | NA         | NA         | NA         |            |
| 101927141 | ENSG00000254394 | 0          | NA          | NA         | NA         | NA         |            |
| NA        | ENSG00000254395 | 0          | NA          | NA         | NA         | NA         | IGHV4-55   |

|           |                 |            |             |            |            |            |            |
|-----------|-----------------|------------|-------------|------------|------------|------------|------------|
| NA        | ENSG00000254396 | 0.91135968 | 0.01091296  | 0.38216939 | 0.81726606 | NA         |            |
| NA        | ENSG00000254397 | 0.49940904 | -0.00955939 | 0.38279715 | 0.83588569 | NA         |            |
| NA        | ENSG00000254398 | 0.14931947 | -0.01844332 | 0.38480212 | 0.84537521 | NA         |            |
| NA        | ENSG00000254399 | 0          | NA          | NA         | NA         | NA         | GLYATL1P4  |
| NA        | ENSG00000254400 | 1.19914705 | -0.06597333 | 0.39189673 | 0.16967186 | NA         |            |
| NA        | ENSG00000254401 | 0          | NA          | NA         | NA         | NA         | LINC02752  |
| 441381    | ENSG00000254402 | 351.534376 | -0.47489558 | 0.12731155 | 7.88E-05   | 0.00061502 | LRRC24     |
| NA        | ENSG00000254403 | 0          | NA          | NA         | NA         | NA         | OR10Y1P    |
| NA        | ENSG00000254404 | 0          | NA          | NA         | NA         | NA         |            |
| NA        | ENSG00000254406 | 0          | NA          | NA         | NA         | NA         |            |
| NA        | ENSG00000254407 | 0          | NA          | NA         | NA         | NA         | PHBP17     |
| NA        | ENSG00000254408 | 0          | NA          | NA         | NA         | NA         | OR4A1P     |
| NA        | ENSG00000254409 | 0          | NA          | NA         | NA         | NA         |            |
| NA        | ENSG00000254411 | 0          | NA          | NA         | NA         | NA         |            |
| NA        | ENSG00000254412 | 0          | NA          | NA         | NA         | NA         |            |
| NA        | ENSG00000254413 | 426.628056 | -0.07044947 | 0.14317783 | 0.59534918 | 0.78816266 | CHKB-CPT1B |
| 100049587 | ENSG00000254415 | 0.29863895 | -0.02292439 | 0.3852726  | 0.68753245 | NA         | SIGLEC14   |
| NA        | ENSG00000254416 | 0          | NA          | NA         | NA         | NA         | LINC02732  |
| NA        | ENSG00000254417 | 0          | NA          | NA         | NA         | NA         | LINC02584  |
| NA        | ENSG00000254418 | 0          | NA          | NA         | NA         | NA         | SPON1-AS1  |
| NA        | ENSG00000254419 | 0.46806545 | -0.00796327 | 0.38327121 | 0.86149441 | NA         |            |
| NA        | ENSG00000254420 | 0.18922458 | 0.01954053  | 0.38488496 | 0.78225479 | NA         |            |
| NA        | ENSG00000254422 | 0          | NA          | NA         | NA         | NA         |            |
| NA        | ENSG00000254423 | 0.48922185 | -0.00871517 | 0.38277523 | 0.84166946 | NA         |            |
| NA        | ENSG00000254424 | 0          | NA          | NA         | NA         | NA         |            |
| NA        | ENSG00000254425 | 0          | NA          | NA         | NA         | NA         |            |
| 101928812 | ENSG00000254427 | 19.1826754 | -0.27088526 | 0.42175631 | 0.16476046 | 0.35442346 | LINC02696  |
| NA        | ENSG00000254428 | 9.62700828 | -0.11857947 | 0.36427608 | 0.45638636 | 0.67988477 |            |
| NA        | ENSG00000254429 | 0          | NA          | NA         | NA         | NA         |            |
| NA        | ENSG00000254430 | 0          | NA          | NA         | NA         | NA         | OR6M3P     |
| NA        | ENSG00000254431 | 0          | NA          | NA         | NA         | NA         |            |
| NA        | ENSG00000254432 | 0          | NA          | NA         | NA         | NA         |            |
| NA        | ENSG00000254433 | 2.00724854 | -0.08626811 | 0.38968783 | 0.30829756 | NA         |            |
| NA        | ENSG00000254434 | 0          | NA          | NA         | NA         | NA         |            |
| NA        | ENSG00000254436 | 0          | NA          | NA         | NA         | NA         |            |
| NA        | ENSG00000254437 | 0          | NA          | NA         | NA         | NA         |            |
| 101928132 | ENSG00000254438 | 0          | NA          | NA         | NA         | NA         | LINC02683  |
| 59351     | ENSG00000254440 | 0          | NA          | NA         | NA         | NA         | PBOV1      |

|           |                 |            |             |            |            |            |                |
|-----------|-----------------|------------|-------------|------------|------------|------------|----------------|
| NA        | ENSG00000254441 | 0          | NA          | NA         | NA         | NA         | EIF2S2P6       |
| NA        | ENSG00000254442 | 0          | NA          | NA         | NA         | NA         |                |
| NA        | ENSG00000254443 | 0.173124   | -0.01911262 | 0.38486262 | 0.84537521 | NA         |                |
| NA        | ENSG00000254444 | 0          | NA          | NA         | NA         | NA         |                |
| NA        | ENSG00000254445 | 0          | NA          | NA         | NA         | NA         | HSPB2-C11orf52 |
| NA        | ENSG00000254447 | 0.16735865 | 0.01897177  | 0.38482933 | 0.78225479 | NA         | OR7E11P        |
| NA        | ENSG00000254449 | 0.16735865 | 0.01897177  | 0.38482933 | 0.78225479 | NA         | SF3A3P2        |
| NA        | ENSG00000254450 | 0          | NA          | NA         | NA         | NA         | ALG9-IT1       |
| 100130268 | ENSG00000254451 | 0.18922458 | 0.01954053  | 0.38488496 | 0.78225479 | NA         | CAPS2-AS1      |
| NA        | ENSG00000254452 | 1.10874973 | 0.0618313   | 0.39099658 | 0.17971349 | NA         |                |
| 100874014 | ENSG00000254453 | 0.48980945 | -0.00841188 | 0.3827596  | 0.84543003 | NA         | NAV2-AS2       |
| NA        | ENSG00000254454 | 5.2117428  | -0.09970323 | 0.37625339 | 0.44576429 | 0.67028199 | RCC2P6         |
| NA        | ENSG00000254455 | 0          | NA          | NA         | NA         | NA         | HIGD1AP10      |
| NA        | ENSG00000254456 | 0          | NA          | NA         | NA         | NA         | LINC02699      |
| NA        | ENSG00000254457 | 0          | NA          | NA         | NA         | NA         | OR5D2P         |
| NA        | ENSG00000254458 | 0.49806322 | -0.02961401 | 0.38591237 | 0.52383254 | NA         |                |
| NA        | ENSG00000254459 | 1.52923912 | 0.01803428  | 0.37869851 | 0.80057173 | NA         |                |
| NA        | ENSG00000254460 | 0          | NA          | NA         | NA         | NA         |                |
| NA        | ENSG00000254461 | 4.43738725 | 0.21330934  | 0.44789612 | 0.09987977 | 0.24900912 |                |
| NA        | ENSG00000254463 | 5.31037454 | 0.14133094  | 0.3959773  | 0.27685749 | 0.50121841 | PPIAP41        |
| NA        | ENSG00000254464 | 0          | NA          | NA         | NA         | NA         | OR4A3P         |
| NA        | ENSG00000254465 | 0          | NA          | NA         | NA         | NA         | THAP12P4       |
| 390197    | ENSG00000254466 | 0          | NA          | NA         | NA         | NA         | OR4D10         |
| NA        | ENSG00000254467 | 0.94745663 | -0.06639996 | 0.39160862 | 0.20401747 | NA         |                |
| NA        | ENSG00000254468 | 0          | NA          | NA         | NA         | NA         |                |
| 100133315 | ENSG00000254469 | 115.433795 | 0.05513646  | 0.20742718 | 0.75328219 | 0.88464062 |                |
| 91056     | ENSG00000254470 | 604.410159 | 0.10452457  | 0.10243119 | 0.28963635 | 0.51556744 | AP5B1          |
| NA        | ENSG00000254471 | 0          | NA          | NA         | NA         | NA         |                |
| NA        | ENSG00000254472 | 0          | NA          | NA         | NA         | NA         | OR4A49P        |
| NA        | ENSG00000254473 | 20.3107741 | -0.4690943  | 0.55385347 | 0.05959245 | 0.17026415 |                |
| NA        | ENSG00000254475 | 0          | NA          | NA         | NA         | NA         | OR2AT1P        |
| NA        | ENSG00000254477 | 1.75434373 | -0.07150686 | 0.38649079 | 0.36044009 | NA         |                |
| NA        | ENSG00000254478 | 0          | NA          | NA         | NA         | NA         |                |
| NA        | ENSG00000254479 | 0.51547615 | 0.0311298   | 0.38605422 | 0.47769244 | NA         | SLC25A1P1      |
| 100506082 | ENSG00000254480 | 0.47143337 | -0.02834724 | 0.38580046 | 0.5444527  | NA         | LINC02749      |
| NA        | ENSG00000254481 | 1.18007096 | -0.03514102 | 0.38124144 | 0.60034284 | NA         | PTP4A2P2       |
| NA        | ENSG00000254482 | 0          | NA          | NA         | NA         | NA         |                |
| NA        | ENSG00000254483 | 0          | NA          | NA         | NA         | NA         | SUGT1P4        |

|           |                 |            |             |            |            |            |            |
|-----------|-----------------|------------|-------------|------------|------------|------------|------------|
| NA        | ENSG00000254484 | 0          | NA          | NA         | NA         | NA         |            |
| NA        | ENSG00000254485 | 10.5567062 | -0.25956139 | 0.43659868 | 0.15483709 | 0.34030142 |            |
| 105376554 | ENSG00000254486 | 0          | NA          | NA         | NA         | NA         | LINC02547  |
| NA        | ENSG00000254487 | 0.173124   | -0.01911262 | 0.38486262 | 0.84537521 | NA         |            |
| NA        | ENSG00000254488 | 0          | NA          | NA         | NA         | NA         |            |
| 105376609 | ENSG00000254489 | 4.95731942 | 0.01731476  | 0.36026189 | 0.89422125 | 0.95429776 | MPPED2-AS1 |
| NA        | ENSG00000254490 | 0          | NA          | NA         | NA         | NA         | OR5M7P     |
| NA        | ENSG00000254491 | 0          | NA          | NA         | NA         | NA         |            |
| NA        | ENSG00000254492 | 0          | NA          | NA         | NA         | NA         |            |
| NA        | ENSG00000254495 | 0          | NA          | NA         | NA         | NA         |            |
| NA        | ENSG00000254496 | 0          | NA          | NA         | NA         | NA         | CBX3P8     |
| NA        | ENSG00000254497 | 0          | NA          | NA         | NA         | NA         |            |
| NA        | ENSG00000254498 | 0.61858893 | -0.01604863 | 0.38339209 | 0.71623501 | NA         |            |
| NA        | ENSG00000254499 | 0.15069912 | -0.01848503 | 0.38480575 | 0.84537521 | NA         |            |
| NA        | ENSG00000254500 | 0.32265491 | -0.02325554 | 0.38531889 | 0.6695122  | NA         | RANP3      |
| NA        | ENSG00000254501 | 3.60868388 | 0.06191182  | 0.38048211 | 0.50319763 | 0.72004858 |            |
| NA        | ENSG00000254502 | 0          | NA          | NA         | NA         | NA         | FNTAP1     |
| NA        | ENSG00000254503 | 0.94585864 | -0.06632016 | 0.39158994 | 0.20452346 | NA         |            |
| 29082     | ENSG00000254505 | 354.477129 | -0.03480313 | 0.14810153 | 0.79850635 | 0.90769144 | CHMP4A     |
| NA        | ENSG00000254506 | 0          | NA          | NA         | NA         | NA         |            |
| NA        | ENSG00000254507 | 1.56712839 | -0.03181654 | 0.37922511 | 0.67093458 | NA         | DEFB131E   |
| 101928440 | ENSG00000254508 | 0          | NA          | NA         | NA         | NA         | FBXO3-DT   |
| NA        | ENSG00000254509 | 0          | NA          | NA         | NA         | NA         |            |
| NA        | ENSG00000254510 | 2.18097233 | -0.08011894 | 0.38611341 | 0.36803769 | NA         |            |
| NA        | ENSG00000254511 | 0          | NA          | NA         | NA         | NA         |            |
| NA        | ENSG00000254512 | 0          | NA          | NA         | NA         | NA         | PHBP2      |
| NA        | ENSG00000254514 | 0          | NA          | NA         | NA         | NA         |            |
| NA        | ENSG00000254515 | 0          | NA          | NA         | NA         | NA         |            |
| 105376633 | ENSG00000254516 | 0          | NA          | NA         | NA         | NA         | LINC02760  |
| NA        | ENSG00000254517 | 0          | NA          | NA         | NA         | NA         |            |
| NA        | ENSG00000254518 | 9.64276114 | 0.14652558  | 0.38402496 | 0.33658215 | 0.56663469 | LINC02750  |
| 100507384 | ENSG00000254519 | 0          | NA          | NA         | NA         | NA         |            |
| 89858     | ENSG00000254521 | 0          | NA          | NA         | NA         | NA         | SIGLEC12   |
| NA        | ENSG00000254522 | 0          | NA          | NA         | NA         | NA         |            |
| NA        | ENSG00000254524 | 0          | NA          | NA         | NA         | NA         | OR8I4P     |
| NA        | ENSG00000254526 | 0          | NA          | NA         | NA         | NA         |            |
| NA        | ENSG00000254527 | 3.49829167 | -0.20166228 | 0.44754518 | 0.07494335 | 0.20133732 | ENPP7P12   |
| NA        | ENSG00000254528 | 8.4094095  | -0.03179864 | 0.34649959 | 0.83387559 | 0.92431452 |            |

|           |                 |            |             |            |            |            |           |
|-----------|-----------------|------------|-------------|------------|------------|------------|-----------|
| NA        | ENSG00000254529 | 0          | NA          | NA         | NA         | NA         | MRGPRX7P  |
| NA        | ENSG00000254530 | 0          | NA          | NA         | NA         | NA         | LINC02755 |
| 90024     | ENSG00000254531 | 40.8173794 | 0.02207929  | 0.27471031 | 0.91062761 | 0.96177013 |           |
| NA        | ENSG00000254532 | 1.48316773 | -0.06807839 | 0.3885947  | 0.30356293 | NA         |           |
| NA        | ENSG00000254533 | 9.73754758 | -0.16033486 | 0.38389789 | 0.31884277 | 0.54655612 |           |
| NA        | ENSG00000254534 | 0          | NA          | NA         | NA         | NA         |           |
| 132430    | ENSG00000254535 | 55.0026055 | 0.10625959  | 0.2632963  | 0.58643527 | 0.78212395 | PABPC4L   |
| NA        | ENSG00000254536 | 99.4141601 | -0.01426616 | 0.21570093 | 0.93428829 | 0.9726246  |           |
| NA        | ENSG00000254537 | 0.16735865 | 0.01897177  | 0.38482933 | 0.78225479 | NA         |           |
| NA        | ENSG00000254538 | 0.30139824 | -0.02296476 | 0.38527817 | 0.68536535 | NA         |           |
| NA        | ENSG00000254539 | 0.6626146  | 0.02641502  | 0.38369622 | 0.58422706 | NA         |           |
| NA        | ENSG00000254540 | 0          | NA          | NA         | NA         | NA         |           |
| NA        | ENSG00000254541 | 0          | NA          | NA         | NA         | NA         | MRGPRX6P  |
| NA        | ENSG00000254542 | 0          | NA          | NA         | NA         | NA         | NAV2-AS3  |
| NA        | ENSG00000254543 | 0          | NA          | NA         | NA         | NA         | HSPD1P2   |
| NA        | ENSG00000254544 | 0          | NA          | NA         | NA         | NA         | PCNAP4    |
| NA        | ENSG00000254545 | 0          | NA          | NA         | NA         | NA         |           |
| NA        | ENSG00000254546 | 0          | NA          | NA         | NA         | NA         | MRGPRX13P |
| NA        | ENSG00000254547 | 37.6852338 | -4.21075485 | 0.577619   | 4.94E-14   | 1.24E-12   |           |
| NA        | ENSG00000254548 | 0.16735865 | 0.01897177  | 0.38482933 | 0.78225479 | NA         |           |
| 4975      | ENSG00000254550 | 0.44795842 | -0.02501848 | 0.38558245 | 0.5807882  | NA         | OMP       |
| NA        | ENSG00000254551 | 0.68095272 | -0.00017374 | 0.38240786 | 0.99840911 | NA         |           |
| NA        | ENSG00000254552 | 0          | NA          | NA         | NA         | NA         | XIRP2-AS1 |
| NA        | ENSG00000254553 | 60.1761784 | 0.323235    | 0.29118104 | 0.12999652 | 0.30172333 |           |
| NA        | ENSG00000254554 | 0.82077072 | 0.01477754  | 0.38183729 | 0.77462479 | NA         |           |
| NA        | ENSG00000254555 | 0          | NA          | NA         | NA         | NA         |           |
| NA        | ENSG00000254556 | 3.67556886 | -0.05489551 | 0.37798044 | 0.56048637 | 0.7641659  |           |
| NA        | ENSG00000254557 | 0          | NA          | NA         | NA         | NA         |           |
| NA        | ENSG00000254558 | 0          | NA          | NA         | NA         | NA         |           |
| NA        | ENSG00000254559 | 0          | NA          | NA         | NA         | NA         |           |
| 103695435 | ENSG00000254560 | 0          | NA          | NA         | NA         | NA         | BBOX1-AS1 |
| NA        | ENSG00000254561 | 3.92190938 | -0.02538587 | 0.37029349 | 0.80265036 | 0.91008018 |           |
| 101928536 | ENSG00000254562 | 0          | NA          | NA         | NA         | NA         | LINC01493 |
| NA        | ENSG00000254563 | 0.8250044  | 0.02868249  | 0.38431533 | 0.51908962 | NA         |           |
| NA        | ENSG00000254564 | 0          | NA          | NA         | NA         | NA         |           |
| NA        | ENSG00000254565 | 18.3281885 | -1.183455   | 0.69471196 | 0.00488945 | 0.02280362 | MTND2P26  |
| NA        | ENSG00000254566 | 0          | NA          | NA         | NA         | NA         |           |
| NA        | ENSG00000254567 | 0          | NA          | NA         | NA         | NA         | UBTFL9    |



|           |                 |            |             |            |            |            |           |
|-----------|-----------------|------------|-------------|------------|------------|------------|-----------|
| NA        | ENSG00000254568 | 0.173733   | 0.01914545  | 0.38484597 | 0.78225479 | NA         |           |
| NA        | ENSG00000254569 | 0          | NA          | NA         | NA         | NA         |           |
| NA        | ENSG00000254571 | 0          | NA          | NA         | NA         | NA         |           |
| NA        | ENSG00000254572 | 0          | NA          | NA         | NA         | NA         | GLULP3    |
| NA        | ENSG00000254573 | 0          | NA          | NA         | NA         | NA         |           |
| NA        | ENSG00000254574 | 0          | NA          | NA         | NA         | NA         |           |
| NA        | ENSG00000254575 | 0          | NA          | NA         | NA         | NA         |           |
| NA        | ENSG00000254576 | 0          | NA          | NA         | NA         | NA         | OR4C1P    |
| NA        | ENSG00000254577 | 0          | NA          | NA         | NA         | NA         |           |
| NA        | ENSG00000254578 | 0          | NA          | NA         | NA         | NA         |           |
| NA        | ENSG00000254579 | 0          | NA          | NA         | NA         | NA         |           |
| 105369473 | ENSG00000254580 | 0          | NA          | NA         | NA         | NA         | LINC02719 |
| NA        | ENSG00000254581 | 0          | NA          | NA         | NA         | NA         |           |
| NA        | ENSG00000254582 | 0          | NA          | NA         | NA         | NA         | PSMA2P1   |
| NA        | ENSG00000254583 | 0          | NA          | NA         | NA         | NA         |           |
| 100506675 | ENSG00000254584 | 0          | NA          | NA         | NA         | NA         |           |
| 54551     | ENSG00000254585 | 0          | NA          | NA         | NA         | NA         | MAGEL2    |
| NA        | ENSG00000254586 | 0          | NA          | NA         | NA         | NA         |           |
| NA        | ENSG00000254587 | 0          | NA          | NA         | NA         | NA         |           |
| 101929517 | ENSG00000254588 | 0          | NA          | NA         | NA         | NA         | ETS1-AS1  |
| NA        | ENSG00000254589 | 0          | NA          | NA         | NA         | NA         | EIF4A2P3  |
| NA        | ENSG00000254590 | 0          | NA          | NA         | NA         | NA         |           |
| NA        | ENSG00000254591 | 0          | NA          | NA         | NA         | NA         |           |
| NA        | ENSG00000254592 | 0          | NA          | NA         | NA         | NA         |           |
| NA        | ENSG00000254593 | 8.19084288 | -0.37846505 | 0.58870382 | 0.05368948 | 0.15715539 | OR7E126P  |
| NA        | ENSG00000254594 | 0          | NA          | NA         | NA         | NA         | LINC02686 |
| NA        | ENSG00000254595 | 20.7043961 | 0.17765725  | 0.33390618 | 0.3713302  | 0.60057374 |           |
| NA        | ENSG00000254596 | 0.16735865 | 0.01897177  | 0.38482933 | 0.78225479 | NA         |           |
| 283106    | ENSG00000254598 | 0.47272793 | -0.02840875 | 0.38580569 | 0.5434444  | NA         | CSNK2A3   |
| NA        | ENSG00000254599 | 0          | NA          | NA         | NA         | NA         |           |
| NA        | ENSG00000254601 | 0          | NA          | NA         | NA         | NA         | CYCSP26   |
| NA        | ENSG00000254602 | 18.3711544 | 0.37585431  | 0.49523996 | 0.09147141 | 0.23347687 |           |
| NA        | ENSG00000254603 | 0          | NA          | NA         | NA         | NA         | OR5M6P    |
| NA        | ENSG00000254604 | 3.78721385 | 0.08882573  | 0.38206047 | 0.42148313 | 0.64748163 |           |
| NA        | ENSG00000254605 | 0          | NA          | NA         | NA         | NA         |           |
| NA        | ENSG00000254606 | 0.16735865 | 0.01897177  | 0.38482933 | 0.78225479 | NA         |           |
| 101929427 | ENSG00000254607 | 0.55197306 | 0.0328929   | 0.38623362 | 0.4521279  | NA         |           |
| NA        | ENSG00000254609 | 0          | NA          | NA         | NA         | NA         |           |

|        |                 |            |             |            |            |            |          |
|--------|-----------------|------------|-------------|------------|------------|------------|----------|
| NA     | ENSG00000254610 | 1.29207336 | 0.06251975  | 0.39094887 | 0.17431029 | NA         |          |
| NA     | ENSG00000254612 | 0.82700047 | 0.03612158  | 0.38458739 | 0.46930861 | NA         | DNAJB6P1 |
| NA     | ENSG00000254613 | 0          | NA          | NA         | NA         | NA         | OR6M2P   |
| 728975 | ENSG00000254614 | 33.2651314 | -0.10357789 | 0.28508195 | 0.59509133 | 0.78790447 |          |
| NA     | ENSG00000254616 | 0.15069912 | -0.01848503 | 0.38480575 | 0.84537521 | NA         |          |
| NA     | ENSG00000254617 | 0          | NA          | NA         | NA         | NA         |          |
| NA     | ENSG00000254618 | 0          | NA          | NA         | NA         | NA         | TMED10P1 |
| NA     | ENSG00000254619 | 0          | NA          | NA         | NA         | NA         |          |
| NA     | ENSG00000254620 | 0.173733   | 0.01914545  | 0.38484597 | 0.78225479 | NA         |          |
| NA     | ENSG00000254621 | 0          | NA          | NA         | NA         | NA         | SETP16   |
| NA     | ENSG00000254622 | 0          | NA          | NA         | NA         | NA         | NAV2-AS4 |
| NA     | ENSG00000254623 | 0          | NA          | NA         | NA         | NA         | DEFB108E |
| NA     | ENSG00000254624 | 0          | NA          | NA         | NA         | NA         | OR4R3P   |
| NA     | ENSG00000254625 | 0          | NA          | NA         | NA         | NA         |          |
| NA     | ENSG00000254626 | 0          | NA          | NA         | NA         | NA         |          |
| NA     | ENSG00000254627 | 0          | NA          | NA         | NA         | NA         |          |
| NA     | ENSG00000254629 | 0.14931947 | -0.01844332 | 0.38480212 | 0.84537521 | NA         |          |
| NA     | ENSG00000254630 | 0          | NA          | NA         | NA         | NA         |          |
| NA     | ENSG00000254631 | 0          | NA          | NA         | NA         | NA         |          |
| NA     | ENSG00000254632 | 0.74173168 | 0.04263421  | 0.38747414 | 0.33110172 | NA         |          |
| NA     | ENSG00000254633 | 0          | NA          | NA         | NA         | NA         |          |
| NA     | ENSG00000254634 | 30.3594834 | -0.16552312 | 0.34252467 | 0.38877571 | 0.61800417 | SMG1P6   |
| NA     | ENSG00000254635 | 735.355554 | 0.07992397  | 0.10905181 | 0.44456339 | 0.66940936 | WAC-AS1  |
| 387715 | ENSG00000254636 | 0.49752497 | -0.02958889 | 0.38591011 | 0.52423236 | NA         | ARMS2    |
| NA     | ENSG00000254637 | 0          | NA          | NA         | NA         | NA         | OR4A18P  |
| NA     | ENSG00000254638 | 0          | NA          | NA         | NA         | NA         |          |
| NA     | ENSG00000254639 | 0.36304759 | 0.02389542  | 0.38539251 | 0.60992053 | NA         |          |
| NA     | ENSG00000254641 | 0.72598242 | 0.00276452  | 0.38234243 | 0.94857789 | NA         |          |
| NA     | ENSG00000254642 | 0          | NA          | NA         | NA         | NA         | COX6CP5  |
| NA     | ENSG00000254644 | 0          | NA          | NA         | NA         | NA         |          |
| NA     | ENSG00000254645 | 0          | NA          | NA         | NA         | NA         |          |
| NA     | ENSG00000254646 | 0          | NA          | NA         | NA         | NA         | OR8B10P  |
| 3630   | ENSG00000254647 | 0          | NA          | NA         | NA         | NA         | INS      |
| NA     | ENSG00000254648 | 6.24797954 | -0.04626685 | 0.36126716 | 0.72535284 | 0.86860214 |          |
| NA     | ENSG00000254649 | 0          | NA          | NA         | NA         | NA         |          |
| NA     | ENSG00000254650 | 0          | NA          | NA         | NA         | NA         | MTCYBP41 |
| NA     | ENSG00000254651 | 0          | NA          | NA         | NA         | NA         |          |
| NA     | ENSG00000254653 | 0.34624801 | -0.02356563 | 0.38536324 | 0.65270996 | NA         |          |

|           |                 |            |             |            |            |            |            |
|-----------|-----------------|------------|-------------|------------|------------|------------|------------|
| 221122    | ENSG00000254654 | 0          | NA          | NA         | NA         | NA         | LINC02685  |
| NA        | ENSG00000254655 | 0          | NA          | NA         | NA         | NA         |            |
| 388015    | ENSG00000254656 | 26370.8726 | 0.78140687  | 0.06477731 | 3.40E-34   | 2.23E-32   | RTL1       |
| NA        | ENSG00000254658 | 0          | NA          | NA         | NA         | NA         | OR8J2      |
| NA        | ENSG00000254659 | 0          | NA          | NA         | NA         | NA         | LINC02715  |
| NA        | ENSG00000254660 | 0          | NA          | NA         | NA         | NA         |            |
| 105376570 | ENSG00000254661 | 0          | NA          | NA         | NA         | NA         | LINC02682  |
| NA        | ENSG00000254662 | 0.32358561 | 0.00179331  | 0.38337276 | 0.96391352 | NA         |            |
| NA        | ENSG00000254663 | 0          | NA          | NA         | NA         | NA         | OR4A11P    |
| NA        | ENSG00000254664 | 1.17970396 | -0.00651308 | 0.37939108 | 0.91910419 | NA         |            |
| NA        | ENSG00000254665 | 0          | NA          | NA         | NA         | NA         |            |
| NA        | ENSG00000254668 | 0          | NA          | NA         | NA         | NA         |            |
| NA        | ENSG00000254669 | 0          | NA          | NA         | NA         | NA         |            |
| 105376557 | ENSG00000254670 | 0.91629058 | 0.05246727  | 0.38908352 | 0.24440345 | NA         | RASSF10-DT |
| NA        | ENSG00000254672 | 0          | NA          | NA         | NA         | NA         |            |
| NA        | ENSG00000254673 | 0          | NA          | NA         | NA         | NA         |            |
| NA        | ENSG00000254674 | 0          | NA          | NA         | NA         | NA         | OR4A42P    |
| NA        | ENSG00000254675 | 0          | NA          | NA         | NA         | NA         |            |
| NA        | ENSG00000254676 | 4.88896511 | 0.05389267  | 0.36394456 | 0.68016733 | 0.84377664 |            |
| NA        | ENSG00000254677 | 0          | NA          | NA         | NA         | NA         | OSBPL9P2   |
| NA        | ENSG00000254678 | 0          | NA          | NA         | NA         | NA         |            |
| NA        | ENSG00000254680 | 0          | NA          | NA         | NA         | NA         |            |
| NA        | ENSG00000254681 | 447.852231 | -0.01522993 | 0.3105593  | 0.9302563  | 0.97097459 | PKD1P5     |
| NA        | ENSG00000254682 | 66.1995867 | 0.00631002  | 0.22713608 | 0.97395272 | 0.99052809 |            |
| NA        | ENSG00000254683 | 0          | NA          | NA         | NA         | NA         | SNRPCP6    |
| NA        | ENSG00000254684 | 0          | NA          | NA         | NA         | NA         |            |
| 8790      | ENSG00000254685 | 230.594272 | -0.3762665  | 0.15794548 | 0.0089955  | 0.03800482 | FPGT       |
| NA        | ENSG00000254686 | 0          | NA          | NA         | NA         | NA         |            |
| NA        | ENSG00000254687 | 0          | NA          | NA         | NA         | NA         |            |
| NA        | ENSG00000254688 | 0          | NA          | NA         | NA         | NA         |            |
| 109729147 | ENSG00000254689 | 0.78025319 | -0.00525618 | 0.38217604 | 0.91039555 | NA         | LINC02235  |
| NA        | ENSG00000254691 | 0.45009187 | -0.02731716 | 0.38571449 | 0.56161858 | NA         |            |
| NA        | ENSG00000254692 | 25.6052623 | -0.03252172 | 0.33074767 | 0.84639702 | 0.930418   |            |
| NA        | ENSG00000254693 | 0          | NA          | NA         | NA         | NA         |            |
| NA        | ENSG00000254694 | 1.63403787 | -0.01171819 | 0.37717009 | 0.87732194 | NA         |            |
| NA        | ENSG00000254695 | 0.34115471 | 0.02362687  | 0.38535345 | 0.62408208 | NA         |            |
| NA        | ENSG00000254697 | 0          | NA          | NA         | NA         | NA         | COPS8P3    |
| NA        | ENSG00000254698 | 0          | NA          | NA         | NA         | NA         |            |

|           |    |                 |            |             |            |            |            |            |
|-----------|----|-----------------|------------|-------------|------------|------------|------------|------------|
|           | NA | ENSG00000254699 | 0          | NA          | NA         | NA         | NA         | LINC02695  |
|           | NA | ENSG00000254700 | 0.173124   | -0.01911262 | 0.38486262 | 0.84537521 | NA         | DEFB131C   |
|           | NA | ENSG00000254701 | 276.808849 | 0.54033759  | 0.15666607 | 0.00018788 | 0.00134469 |            |
|           | NA | ENSG00000254702 | 0          | NA          | NA         | NA         | NA         |            |
| 100507392 |    | ENSG00000254703 | 0.16735865 | 0.01897177  | 0.38482933 | 0.78225479 | NA         | SENCR      |
|           | NA | ENSG00000254704 | 0          | NA          | NA         | NA         | NA         |            |
|           | NA | ENSG00000254705 | 0          | NA          | NA         | NA         | NA         |            |
|           | NA | ENSG00000254706 | 9.26107712 | 0.14213187  | 0.38408536 | 0.3410706  | 0.57133069 |            |
|           | NA | ENSG00000254707 | 0          | NA          | NA         | NA         | NA         |            |
|           | NA | ENSG00000254708 | 0          | NA          | NA         | NA         | NA         | MMADHCP2   |
| 100423062 |    | ENSG00000254709 | 0          | NA          | NA         | NA         | NA         | IGLL5      |
|           | NA | ENSG00000254710 | 0          | NA          | NA         | NA         | NA         |            |
|           | NA | ENSG00000254712 | 0          | NA          | NA         | NA         | NA         |            |
|           | NA | ENSG00000254713 | 0          | NA          | NA         | NA         | NA         | HNRNPA1P72 |
|           | NA | ENSG00000254715 | 0          | NA          | NA         | NA         | NA         | OR7E154P   |
|           | NA | ENSG00000254717 | 8.89178571 | -0.15887336 | 0.39292952 | 0.28367023 | 0.50881632 | GLYATL1P2  |
| 101927702 |    | ENSG00000254718 | 5.89244077 | -0.00473767 | 0.37417566 | 0.94916208 | 0.97907226 |            |
|           | NA | ENSG00000254719 | 0          | NA          | NA         | NA         | NA         |            |
|           | NA | ENSG00000254720 | 0          | NA          | NA         | NA         | NA         | MRGPRX10P  |
|           | NA | ENSG00000254721 | 1.8949336  | 0.09939527  | 0.40226574 | 0.05307787 | NA         |            |
|           | NA | ENSG00000254722 | 0          | NA          | NA         | NA         | NA         | FAM8A2P    |
|           | NA | ENSG00000254723 | 0          | NA          | NA         | NA         | NA         | OR4A12P    |
|           | NA | ENSG00000254724 | 0          | NA          | NA         | NA         | NA         | OR7E10P    |
|           | NA | ENSG00000254725 | 0          | NA          | NA         | NA         | NA         |            |
| 92312     |    | ENSG00000254726 | 9491.04831 | 0.12467586  | 0.05017117 | 0.01133582 | 0.04600178 | MEX3A      |
|           | NA | ENSG00000254727 | 0.173124   | -0.01911262 | 0.38486262 | 0.84537521 | NA         | PTP4A1P6   |
|           | NA | ENSG00000254728 | 0          | NA          | NA         | NA         | NA         |            |
|           | NA | ENSG00000254730 | 0          | NA          | NA         | NA         | NA         |            |
|           | NA | ENSG00000254731 | 0.64248474 | 0.00445939  | 0.38139023 | 0.93022378 | NA         |            |
|           | NA | ENSG00000254732 | 7.44394107 | 0.21453277  | 0.45225752 | 0.0825789  | 0.21637154 |            |
|           | NA | ENSG00000254733 | 0          | NA          | NA         | NA         | NA         |            |
|           | NA | ENSG00000254734 | 0          | NA          | NA         | NA         | NA         |            |
|           | NA | ENSG00000254735 | 0          | NA          | NA         | NA         | NA         | HMGB1P42   |
|           | NA | ENSG00000254736 | 0          | NA          | NA         | NA         | NA         | BRD9P1     |
| 390264    |    | ENSG00000254737 | 0          | NA          | NA         | NA         | NA         | OR10G4     |
|           | NA | ENSG00000254738 | 0          | NA          | NA         | NA         | NA         | MRGPRX11P  |
|           | NA | ENSG00000254739 | 2.79138375 | -0.01588778 | 0.37380103 | 0.8595946  | 0.93751308 |            |
|           | NA | ENSG00000254740 | 0          | NA          | NA         | NA         | NA         |            |

|           |                 |            |             |            |            |            |           |
|-----------|-----------------|------------|-------------|------------|------------|------------|-----------|
| NA        | ENSG00000254741 | 0          | NA          | NA         | NA         | NA         |           |
| NA        | ENSG00000254743 | 0.18922458 | 0.01954053  | 0.38488496 | 0.78225479 | NA         | OR10V3P   |
| NA        | ENSG00000254744 | 0.44795842 | -0.02501848 | 0.38558245 | 0.5807882  | NA         |           |
| 105376654 | ENSG00000254746 | 0          | NA          | NA         | NA         | NA         |           |
| NA        | ENSG00000254747 | 0          | NA          | NA         | NA         | NA         | MTND4LP18 |
| NA        | ENSG00000254748 | 0          | NA          | NA         | NA         | NA         | HNRNPCP8  |
| NA        | ENSG00000254749 | 0          | NA          | NA         | NA         | NA         | OR5BD1P   |
| NA        | ENSG00000254750 | 0          | NA          | NA         | NA         | NA         | CASP1P2   |
| NA        | ENSG00000254751 | 0          | NA          | NA         | NA         | NA         | TRIM64DP  |
| NA        | ENSG00000254752 | 0          | NA          | NA         | NA         | NA         | OR5M2P    |
| NA        | ENSG00000254753 | 0          | NA          | NA         | NA         | NA         |           |
| NA        | ENSG00000254754 | 0          | NA          | NA         | NA         | NA         |           |
| NA        | ENSG00000254755 | 0          | NA          | NA         | NA         | NA         |           |
| NA        | ENSG00000254756 | 0.31798647 | 0.00090641  | 0.38336513 | 0.96839064 | NA         |           |
| NA        | ENSG00000254757 | 0          | NA          | NA         | NA         | NA         |           |
| NA        | ENSG00000254758 | 0.18922458 | 0.01954053  | 0.38488496 | 0.78225479 | NA         |           |
| NA        | ENSG00000254759 | 0.75721748 | -0.02727976 | 0.38341321 | 0.58221616 | NA         | NAP1L1P1  |
| NA        | ENSG00000254760 | 1.86777615 | 0.04330695  | 0.38113736 | 0.5612328  | NA         |           |
| NA        | ENSG00000254762 | 0          | NA          | NA         | NA         | NA         |           |
| NA        | ENSG00000254764 | 0          | NA          | NA         | NA         | NA         | TRIM53CP  |
| NA        | ENSG00000254765 | 0          | NA          | NA         | NA         | NA         |           |
| NA        | ENSG00000254767 | 0          | NA          | NA         | NA         | NA         | OR2AL1P   |
| NA        | ENSG00000254768 | 0          | NA          | NA         | NA         | NA         |           |
| NA        | ENSG00000254769 | 0          | NA          | NA         | NA         | NA         | OR4A4P    |
| NA        | ENSG00000254770 | 0          | NA          | NA         | NA         | NA         | OR4D7P    |
| NA        | ENSG00000254771 | 0.50207596 | 0.02562368  | 0.38565771 | 0.52549886 | NA         |           |
| 1937      | ENSG00000254772 | 27427.9124 | -0.07064591 | 0.0486098  | 0.14308329 | 0.32222162 | EEF1G     |
| 105375861 | ENSG00000254775 | 0          | NA          | NA         | NA         | NA         |           |
| NA        | ENSG00000254776 | 0          | NA          | NA         | NA         | NA         | PRR23D3P  |
| NA        | ENSG00000254777 | 0.29863895 | -0.02292439 | 0.3852726  | 0.68753245 | NA         |           |
| NA        | ENSG00000254779 | 1.86930904 | 0.00605553  | 0.38010567 | 0.92192217 | NA         | EGLN1P1   |
| NA        | ENSG00000254780 | 0          | NA          | NA         | NA         | NA         |           |
| NA        | ENSG00000254781 | 0          | NA          | NA         | NA         | NA         | GVINP2    |
| NA        | ENSG00000254783 | 4.037816   | -0.12281469 | 0.39076842 | 0.31080854 | 0.53855384 |           |
| NA        | ENSG00000254784 | 0          | NA          | NA         | NA         | NA         | LRRRC6P1  |
| NA        | ENSG00000254785 | 0          | NA          | NA         | NA         | NA         |           |
| NA        | ENSG00000254786 | 0          | NA          | NA         | NA         | NA         |           |
| NA        | ENSG00000254787 | 0          | NA          | NA         | NA         | NA         |           |

|           |                 |            |             |            |            |            |             |
|-----------|-----------------|------------|-------------|------------|------------|------------|-------------|
| 100529251 | ENSG00000254788 | 22.3771253 | 0.0626037   | 0.30933614 | 0.73985742 | 0.87713004 | CKLF-CMTM1  |
| NA        | ENSG00000254789 | 0          | NA          | NA         | NA         | NA         |             |
| NA        | ENSG00000254790 | 0          | NA          | NA         | NA         | NA         |             |
| NA        | ENSG00000254791 | 0.86068546 | 0.03561709  | 0.38438358 | 0.45805563 | NA         | FAR1-IT1    |
| NA        | ENSG00000254792 | 0          | NA          | NA         | NA         | NA         |             |
| NA        | ENSG00000254793 | 1.00232478 | -0.02020458 | 0.38179253 | 0.71217552 | NA         | FDPSF4      |
| NA        | ENSG00000254794 | 0          | NA          | NA         | NA         | NA         |             |
| NA        | ENSG00000254795 | 0          | NA          | NA         | NA         | NA         | OR5AP1P     |
| NA        | ENSG00000254796 | 0          | NA          | NA         | NA         | NA         |             |
| NA        | ENSG00000254798 | 0          | NA          | NA         | NA         | NA         | TFAMP2      |
| NA        | ENSG00000254799 | 0          | NA          | NA         | NA         | NA         | SLC25A47P1  |
| NA        | ENSG00000254800 | 0          | NA          | NA         | NA         | NA         |             |
| NA        | ENSG00000254801 | 0          | NA          | NA         | NA         | NA         |             |
| NA        | ENSG00000254802 | 0.33867208 | 0.00225209  | 0.38337849 | 0.96695566 | NA         |             |
| NA        | ENSG00000254803 | 0          | NA          | NA         | NA         | NA         |             |
| NA        | ENSG00000254804 | 0          | NA          | NA         | NA         | NA         |             |
| NA        | ENSG00000254805 | 0          | NA          | NA         | NA         | NA         | SNRPCP14    |
| NA        | ENSG00000254806 | 23.0277399 | 0.01725004  | 0.31861357 | 0.92479087 | 0.96868438 | SYS1-DBNDD2 |
| NA        | ENSG00000254807 | 0          | NA          | NA         | NA         | NA         | OR10AK1P    |
| NA        | ENSG00000254810 | 0          | NA          | NA         | NA         | NA         |             |
| 101928535 | ENSG00000254811 | 0          | NA          | NA         | NA         | NA         |             |
| NA        | ENSG00000254812 | 6.63164304 | 0.06341205  | 0.36104356 | 0.64999753 | 0.82529572 |             |
| 340357    | ENSG00000254813 | 0          | NA          | NA         | NA         | NA         |             |
| NA        | ENSG00000254814 | 0.49813515 | 0.01168758  | 0.38339815 | 0.77810629 | NA         |             |
| 692247    | ENSG00000254815 | 30.5876064 | 0.70365649  | 0.45060832 | 0.01592477 | 0.06050314 | LMNTD2-AS1  |
| NA        | ENSG00000254816 | 0          | NA          | NA         | NA         | NA         |             |
| NA        | ENSG00000254817 | 0          | NA          | NA         | NA         | NA         |             |
| NA        | ENSG00000254818 | 0          | NA          | NA         | NA         | NA         |             |
| NA        | ENSG00000254819 | 0          | NA          | NA         | NA         | NA         | ANO3-AS1    |
| NA        | ENSG00000254820 | 0          | NA          | NA         | NA         | NA         |             |
| NA        | ENSG00000254821 | 0.72515442 | 0.0021678   | 0.38233646 | 0.95936751 | NA         |             |
| NA        | ENSG00000254822 | 0          | NA          | NA         | NA         | NA         |             |
| NA        | ENSG00000254823 | 0          | NA          | NA         | NA         | NA         | LINC02727   |
| NA        | ENSG00000254824 | 0          | NA          | NA         | NA         | NA         |             |
| NA        | ENSG00000254825 | 0          | NA          | NA         | NA         | NA         | OR9G2P      |
| NA        | ENSG00000254826 | 0          | NA          | NA         | NA         | NA         |             |
| NA        | ENSG00000254827 | 0.5115969  | -0.00991576 | 0.38277612 | 0.82004188 | NA         | SLC22A18AS  |
| NA        | ENSG00000254828 | 0          | NA          | NA         | NA         | NA         |             |

|           |                 |            |             |            |            |            |                |
|-----------|-----------------|------------|-------------|------------|------------|------------|----------------|
| NA        | ENSG00000254829 | 0.29863895 | -0.02292439 | 0.3852726  | 0.68753245 | NA         |                |
| NA        | ENSG00000254830 | 0          | NA          | NA         | NA         | NA         |                |
| NA        | ENSG00000254831 | 0          | NA          | NA         | NA         | NA         | KRT18P58       |
| NA        | ENSG00000254832 | 0          | NA          | NA         | NA         | NA         | OR4A40P        |
| NA        | ENSG00000254833 | 0.82436745 | -0.00896068 | 0.38084454 | 0.87429502 | NA         |                |
| 390167    | ENSG00000254834 | 0          | NA          | NA         | NA         | NA         | OR5M10         |
| NA        | ENSG00000254835 | 8.93881063 | -0.10838912 | 0.38807705 | 0.33902569 | 0.56925099 | RNF185-AS1     |
| NA        | ENSG00000254836 | 0          | NA          | NA         | NA         | NA         |                |
| NA        | ENSG00000254837 | 61.0256438 | -0.17827554 | 0.2715507  | 0.36838594 | 0.59780607 |                |
| 387751    | ENSG00000254838 | 0.34050812 | 0.0023901   | 0.38338057 | 0.96486913 | NA         | GVINP1         |
| 101929269 | ENSG00000254839 | 0          | NA          | NA         | NA         | NA         |                |
| NA        | ENSG00000254840 | 6.86714812 | 0.08382053  | 0.37193337 | 0.50327309 | 0.72006071 |                |
| NA        | ENSG00000254841 | 0          | NA          | NA         | NA         | NA         | OR4V1P         |
| NA        | ENSG00000254842 | 0          | NA          | NA         | NA         | NA         | LINC02551      |
| NA        | ENSG00000254843 | 0          | NA          | NA         | NA         | NA         | XIAPP2         |
| NA        | ENSG00000254844 | 0          | NA          | NA         | NA         | NA         |                |
| NA        | ENSG00000254846 | 0          | NA          | NA         | NA         | NA         |                |
| NA        | ENSG00000254847 | 0.18922458 | 0.01954053  | 0.38488496 | 0.78225479 | NA         |                |
| NA        | ENSG00000254848 | 0          | NA          | NA         | NA         | NA         | OR5BN1P        |
| NA        | ENSG00000254850 | 0          | NA          | NA         | NA         | NA         |                |
| NA        | ENSG00000254851 | 0          | NA          | NA         | NA         | NA         |                |
| 642799    | ENSG00000254852 | 6.49471556 | -0.00520841 | 0.37061483 | 0.95543287 | 0.9817074  | NPIPA2         |
| NA        | ENSG00000254853 | 0          | NA          | NA         | NA         | NA         |                |
| 102724301 | ENSG00000254854 | 27.8850523 | -0.04955259 | 0.28907418 | 0.79475683 | 0.90579008 |                |
| NA        | ENSG00000254855 | 2.27934238 | 0.03626941  | 0.37674145 | 0.68166091 | NA         |                |
| NA        | ENSG00000254856 | 0          | NA          | NA         | NA         | NA         | NDUFA3P2       |
| NA        | ENSG00000254857 | 0          | NA          | NA         | NA         | NA         | MRGPRX12P      |
| 84769     | ENSG00000254858 | 272.275845 | 0.11542563  | 0.17344342 | 0.45611006 | 0.67958359 | MPV17L2        |
| NA        | ENSG00000254859 | 0          | NA          | NA         | NA         | NA         |                |
| 493900    | ENSG00000254860 | 157.102994 | 0.38687507  | 0.18928508 | 0.02003792 | 0.07301236 | TMEM9B-AS1     |
| NA        | ENSG00000254861 | 0          | NA          | NA         | NA         | NA         |                |
| 105376671 | ENSG00000254862 | 0          | NA          | NA         | NA         | NA         | LGR4-AS1       |
| NA        | ENSG00000254863 | 0          | NA          | NA         | NA         | NA         | LINC02744      |
| NA        | ENSG00000254864 | 0          | NA          | NA         | NA         | NA         |                |
| NA        | ENSG00000254865 | 0          | NA          | NA         | NA         | NA         |                |
| NA        | ENSG00000254866 | 0.31689042 | 0.00128616  | 0.38336787 | 0.96553006 | NA         | DEFB109D       |
| NA        | ENSG00000254867 | 0.72772419 | 0.02659371  | 0.38351833 | 0.55898135 | NA         |                |
| NA        | ENSG00000254870 | 114.774812 | 0.0320442   | 0.20503238 | 0.85404937 | 0.9344992  | TP6V1G2-DDX39B |

|           |                 |                 |             |             |            |            |            |                 |
|-----------|-----------------|-----------------|-------------|-------------|------------|------------|------------|-----------------|
|           | NA              | ENSG00000254871 | 0           | NA          | NA         | NA         | NA         | FBLIM1P2        |
| 101927503 | ENSG00000254872 | 0.173733        | 0.01914545  | 0.38484597  | 0.78225479 | NA         | NA         | LINC02688       |
|           | NA              | ENSG00000254873 | 5.24618204  | 0.0515987   | 0.36307115 | 0.69869497 | 0.85472333 |                 |
|           | NA              | ENSG00000254874 | 0           | NA          | NA         | NA         | NA         |                 |
| 100499484 | ENSG00000254876 | 52.2379437      | 0.10125496  | 0.25956163  | 0.60252774 | 0.79259054 | 0.79259054 | STRA6LP         |
| 100499484 | ENSG00000254876 | 52.2379437      | 0.10125496  | 0.25956163  | 0.60252774 | 0.79259054 | 0.79259054 | 3UGT1P4-STRA6LP |
|           | NA              | ENSG00000254877 | 0           | NA          | NA         | NA         | NA         |                 |
|           | NA              | ENSG00000254878 | 0           | NA          | NA         | NA         | NA         |                 |
|           | NA              | ENSG00000254879 | 0           | NA          | NA         | NA         | NA         | PTPRJ-AS1       |
| 103695364 | ENSG00000254880 | 0               | NA          | NA          | NA         | NA         | NA         | PKNOX2-AS1      |
|           | NA              | ENSG00000254883 | 0           | NA          | NA         | NA         | NA         |                 |
|           | NA              | ENSG00000254884 | 0           | NA          | NA         | NA         | NA         | PRR13P2         |
|           | NA              | ENSG00000254885 | 0           | NA          | NA         | NA         | NA         |                 |
| 100505622 | ENSG00000254887 | 0               | NA          | NA          | NA         | NA         | NA         |                 |
|           | NA              | ENSG00000254888 | 0           | NA          | NA         | NA         | NA         |                 |
|           | NA              | ENSG00000254889 | 0           | NA          | NA         | NA         | NA         |                 |
|           | NA              | ENSG00000254890 | 0           | NA          | NA         | NA         | NA         |                 |
|           | NA              | ENSG00000254891 | 0           | NA          | NA         | NA         | NA         | OR4A9P          |
|           | NA              | ENSG00000254892 | 0           | NA          | NA         | NA         | NA         |                 |
|           | NA              | ENSG00000254893 | 0           | NA          | NA         | NA         | NA         | RAP1BL          |
|           | NA              | ENSG00000254894 | 1.72951978  | 0.03746236  | 0.38355866 | 0.5116907  | NA         | NAV2-AS1        |
|           | NA              | ENSG00000254895 | 9.59677989  | -0.10497339 | 0.36019256 | 0.50584706 | 0.72177288 | MTCO3P15        |
|           | NA              | ENSG00000254896 | 0           | NA          | NA         | NA         | NA         | OPCML-IT1       |
|           | NA              | ENSG00000254897 | 0           | NA          | NA         | NA         | NA         |                 |
|           | NA              | ENSG00000254898 | 0.15069912  | -0.01848503 | 0.38480575 | 0.84537521 | NA         |                 |
|           | NA              | ENSG00000254900 | 0.67395238  | -0.0384118  | 0.38688634 | 0.39819787 | NA         |                 |
| 729991    | ENSG00000254901 | 294.656789      | -0.07268935 | 0.15472034  | 0.6063703  | 0.79607018 | 0.79607018 | BORCS8          |
|           | NA              | ENSG00000254902 | 0           | NA          | NA         | NA         | NA         | ANO1-AS1        |
|           | NA              | ENSG00000254903 | 0           | NA          | NA         | NA         | NA         | OR8L1P          |
|           | NA              | ENSG00000254905 | 1.27625983  | -0.03043512 | 0.38209675 | 0.6066525  | NA         |                 |
|           | NA              | ENSG00000254906 | 0.15069912  | -0.01848503 | 0.38480575 | 0.84537521 | NA         |                 |
|           | NA              | ENSG00000254907 | 3.9427906   | -7.05E-05   | 0.36657303 | 0.99751521 | 0.99926338 |                 |
|           | NA              | ENSG00000254909 | 2.1003265   | -0.02608655 | 0.37612862 | 0.75888555 | NA         |                 |
|           | NA              | ENSG00000254910 | 2.15922884  | 0.04282971  | 0.37977917 | 0.59354508 | NA         |                 |
| 619383    | ENSG00000254911 | 3.21314255      | 0.00174084  | 0.37098161  | 0.98795323 | 0.99589897 | 0.99589897 | SCARNA9         |
| 100158262 | ENSG00000254911 | 3.21314255      | 0.00174084  | 0.37098161  | 0.98795323 | 0.99589897 | 0.99589897 | SCARNA9         |
|           | NA              | ENSG00000254912 | 0.34746601  | 0.02370763  | 0.3853651  | 0.61987128 | NA         |                 |
|           | NA              | ENSG00000254913 | 0           | NA          | NA         | NA         | NA         |                 |



|           |                 |            |             |            |            |            |           |
|-----------|-----------------|------------|-------------|------------|------------|------------|-----------|
| NA        | ENSG00000254914 | 0          | NA          | NA         | NA         | NA         |           |
| NA        | ENSG00000254915 | 0          | NA          | NA         | NA         | NA         |           |
| NA        | ENSG00000254916 | 0          | NA          | NA         | NA         | NA         |           |
| NA        | ENSG00000254917 | 0          | NA          | NA         | NA         | NA         | OR7E15P   |
| NA        | ENSG00000254919 | 0          | NA          | NA         | NA         | NA         |           |
| NA        | ENSG00000254920 | 0          | NA          | NA         | NA         | NA         |           |
| NA        | ENSG00000254921 | 0.173733   | 0.01914545  | 0.38484597 | 0.78225479 | NA         |           |
| NA        | ENSG00000254923 | 2.23961498 | 0.02310137  | 0.37573047 | 0.78889915 | NA         |           |
| NA        | ENSG00000254924 | 0.76968879 | -0.02084319 | 0.38344748 | 0.62019023 | NA         |           |
| NA        | ENSG00000254925 | 0          | NA          | NA         | NA         | NA         | OR4C9P    |
| NA        | ENSG00000254926 | 0          | NA          | NA         | NA         | NA         |           |
| NA        | ENSG00000254927 | 0          | NA          | NA         | NA         | NA         |           |
| NA        | ENSG00000254928 | 0          | NA          | NA         | NA         | NA         |           |
| NA        | ENSG00000254929 | 120.39438  | 0.1412912   | 0.1965244  | 0.40412741 | 0.63222582 |           |
| 105376561 | ENSG00000254930 | 0          | NA          | NA         | NA         | NA         | LINC02545 |
| NA        | ENSG00000254931 | 12.7244815 | -0.1450817  | 0.37548348 | 0.36640187 | 0.59565824 | MTATP6P15 |
| NA        | ENSG00000254932 | 0          | NA          | NA         | NA         | NA         |           |
| NA        | ENSG00000254933 | 0.14931947 | -0.01844332 | 0.38480212 | 0.84537521 | NA         |           |
| NA        | ENSG00000254934 | 0          | NA          | NA         | NA         | NA         | LINC00678 |
| NA        | ENSG00000254935 | 0          | NA          | NA         | NA         | NA         |           |
| NA        | ENSG00000254936 | 12.1278528 | 0.07602682  | 0.34072169 | 0.65458404 | 0.82810431 |           |
| NA        | ENSG00000254937 | 0          | NA          | NA         | NA         | NA         |           |
| NA        | ENSG00000254938 | 0          | NA          | NA         | NA         | NA         |           |
| NA        | ENSG00000254939 | 0.14931947 | -0.01844332 | 0.38480212 | 0.84537521 | NA         |           |
| NA        | ENSG00000254940 | 0          | NA          | NA         | NA         | NA         | OR4A19P   |
| NA        | ENSG00000254941 | 0          | NA          | NA         | NA         | NA         |           |
| NA        | ENSG00000254942 | 0          | NA          | NA         | NA         | NA         |           |
| NA        | ENSG00000254943 | 0          | NA          | NA         | NA         | NA         |           |
| NA        | ENSG00000254944 | 0          | NA          | NA         | NA         | NA         | ATP5PBP5  |
| 105376569 | ENSG00000254946 | 0          | NA          | NA         | NA         | NA         | LINC02751 |
| NA        | ENSG00000254947 | 0          | NA          | NA         | NA         | NA         | OR8K4P    |
| NA        | ENSG00000254948 | 0          | NA          | NA         | NA         | NA         | OR7E158P  |
| NA        | ENSG00000254949 | 0          | NA          | NA         | NA         | NA         | GNG5P3    |
| 283299    | ENSG00000254951 | 0          | NA          | NA         | NA         | NA         |           |
| NA        | ENSG00000254952 | 0          | NA          | NA         | NA         | NA         | LINC02705 |
| NA        | ENSG00000254953 | 0          | NA          | NA         | NA         | NA         |           |
| NA        | ENSG00000254954 | 0          | NA          | NA         | NA         | NA         | SLC2A13P1 |
| NA        | ENSG00000254957 | 0          | NA          | NA         | NA         | NA         |           |

|           |    |                 |            |             |            |            |            |                 |
|-----------|----|-----------------|------------|-------------|------------|------------|------------|-----------------|
|           | NA | ENSG00000254959 | 0          | NA          | NA         | NA         | NA         | INMT-MINDY4     |
| 100874251 | NA | ENSG00000254960 | 0          | NA          | NA         | NA         | NA         | KIRREL3-AS2     |
|           | NA | ENSG00000254961 | 0          | NA          | NA         | NA         | NA         | TUBB4BP4        |
|           | NA | ENSG00000254963 | 0          | NA          | NA         | NA         | NA         |                 |
|           | NA | ENSG00000254964 | 0          | NA          | NA         | NA         | NA         |                 |
|           | NA | ENSG00000254965 | 0          | NA          | NA         | NA         | NA         | C1DP5           |
|           | NA | ENSG00000254966 | 13.0748755 | 0.25696301  | 0.40900531 | 0.19235368 | 0.39461244 |                 |
| 101928823 | NA | ENSG00000254968 | 0          | NA          | NA         | NA         | NA         | LINC02763       |
|           | NA | ENSG00000254971 | 0          | NA          | NA         | NA         | NA         |                 |
|           | NA | ENSG00000254972 | 0          | NA          | NA         | NA         | NA         |                 |
|           | NA | ENSG00000254973 | 0          | NA          | NA         | NA         | NA         |                 |
|           | NA | ENSG00000254974 | 1.76277803 | -0.01413179 | 0.3784796  | 0.84007925 | NA         |                 |
|           | NA | ENSG00000254975 | 0          | NA          | NA         | NA         | NA         |                 |
|           | NA | ENSG00000254976 | 0          | NA          | NA         | NA         | NA         | OR8B7P          |
|           | NA | ENSG00000254978 | 0.16735865 | 0.01897177  | 0.38482933 | 0.78225479 | NA         | ALG1L9P         |
|           | NA | ENSG00000254979 | 2.30372108 | -0.04109002 | 0.3815402  | 0.54327196 | NA         |                 |
|           | NA | ENSG00000254980 | 0          | NA          | NA         | NA         | NA         |                 |
|           | NA | ENSG00000254983 | 0          | NA          | NA         | NA         | NA         |                 |
|           | NA | ENSG00000254984 | 0.29863895 | -0.02292439 | 0.3852726  | 0.68753245 | NA         | FTLP6           |
|           | NA | ENSG00000254985 | 0.54904078 | 0.01149871  | 0.38324285 | 0.75582038 | NA         | RSF1-IT2        |
| 10072     | NA | ENSG00000254986 | 1097.45681 | 0.11588333  | 0.11720492 | 0.2991154  | 0.52612826 | DPP3            |
|           | NA | ENSG00000254987 | 0.52119901 | 0.02576573  | 0.38568143 | 0.51723676 | NA         |                 |
|           | NA | ENSG00000254988 | 0.18922458 | 0.01954053  | 0.38488496 | 0.78225479 | NA         |                 |
|           | NA | ENSG00000254989 | 0          | NA          | NA         | NA         | NA         |                 |
|           | NA | ENSG00000254990 | 1.2366329  | 0.06912121  | 0.39270598 | 0.14374538 | NA         |                 |
|           | NA | ENSG00000254991 | 0          | NA          | NA         | NA         | NA         |                 |
|           | NA | ENSG00000254992 | 0          | NA          | NA         | NA         | NA         |                 |
|           | NA | ENSG00000254993 | 0          | NA          | NA         | NA         | NA         | TRIM77BP        |
|           | NA | ENSG00000254995 | 110.818884 | 0.71391521  | 0.24680956 | 0.00072245 | 0.00444583 | STX16-NPEPL1    |
| 404734    | NA | ENSG00000254996 | 701.796308 | 0.00772001  | 0.09977716 | 0.93697303 | 0.97351594 | ANKHD1-EIF4EBP3 |
| 3846      | NA | ENSG00000254997 | 0.53046836 | 0.03940882  | 0.38681029 | 0.4169741  | NA         | KRTAP5-9        |
| 55845     | NA | ENSG00000254999 | 1458.78619 | -0.11088336 | 0.07122264 | 0.1126853  | 0.27181476 | BRK1            |
|           | NA | ENSG00000255000 | 0.46713262 | -0.0281362  | 0.38578206 | 0.54800585 | NA         |                 |
|           | NA | ENSG00000255001 | 0          | NA          | NA         | NA         | NA         |                 |
| 100128233 | NA | ENSG00000255002 | 0          | NA          | NA         | NA         | NA         | LINC02324       |
|           | NA | ENSG00000255003 | 0          | NA          | NA         | NA         | NA         | CYCSP28         |
|           | NA | ENSG00000255004 | 0.15069912 | -0.01848503 | 0.38480575 | 0.84537521 | NA         | SLC1A2-AS1      |
|           | NA | ENSG00000255005 | 0          | NA          | NA         | NA         | NA         |                 |

|           |                 |            |             |            |            |            |                     |
|-----------|-----------------|------------|-------------|------------|------------|------------|---------------------|
| NA        | ENSG00000255006 | 0          | NA          | NA         | NA         | NA         | ELOCP22             |
| NA        | ENSG00000255007 | 0          | NA          | NA         | NA         | NA         | LINC02489           |
| NA        | ENSG00000255008 | 0.34049677 | -0.00028787 | 0.38336248 | 0.96798138 | NA         | LINC02739           |
| 642623    | ENSG00000255009 | 0          | NA          | NA         | NA         | NA         | UBTFL1              |
| NA        | ENSG00000255010 | 0          | NA          | NA         | NA         | NA         | COX5BP4             |
| NA        | ENSG00000255011 | 0          | NA          | NA         | NA         | NA         |                     |
| 390168    | ENSG00000255012 | 0          | NA          | NA         | NA         | NA         | OR5M1               |
| NA        | ENSG00000255014 | 0          | NA          | NA         | NA         | NA         | ARL6IP1P3           |
| NA        | ENSG00000255015 | 0          | NA          | NA         | NA         | NA         |                     |
| NA        | ENSG00000255016 | 0          | NA          | NA         | NA         | NA         |                     |
| NA        | ENSG00000255018 | 0          | NA          | NA         | NA         | NA         |                     |
| NA        | ENSG00000255019 | 0          | NA          | NA         | NA         | NA         | OR5D15P             |
| 100129129 | ENSG00000255020 | 4.93258472 | 0.1826872   | 0.42213346 | 0.16085997 | 0.3488699  |                     |
| NA        | ENSG00000255021 | 0          | NA          | NA         | NA         | NA         |                     |
| NA        | ENSG00000255022 | 0          | NA          | NA         | NA         | NA         |                     |
| NA        | ENSG00000255025 | 0          | NA          | NA         | NA         | NA         |                     |
| NA        | ENSG00000255026 | 0.16735865 | 0.01897177  | 0.38482933 | 0.78225479 | NA         |                     |
| NA        | ENSG00000255027 | 0.52487431 | 0.0315777   | 0.38609771 | 0.4712151  | NA         |                     |
| NA        | ENSG00000255028 | 0          | NA          | NA         | NA         | NA         |                     |
| NA        | ENSG00000255029 | 0          | NA          | NA         | NA         | NA         |                     |
| NA        | ENSG00000255030 | 0          | NA          | NA         | NA         | NA         | OR8B5P              |
| NA        | ENSG00000255031 | 0.32509971 | 0.00419608  | 0.38342026 | 0.93673669 | NA         |                     |
| NA        | ENSG00000255032 | 0          | NA          | NA         | NA         | NA         | TSPAN18-AS1         |
| NA        | ENSG00000255033 | 0          | NA          | NA         | NA         | NA         | SERPINA15P          |
| NA        | ENSG00000255035 | 0.14931947 | -0.01844332 | 0.38480212 | 0.84537521 | NA         | SDHCP4              |
| 57653     | ENSG00000255036 | 141.916307 | 0.79431007  | 0.20486132 | 1.85E-05   | 0.00016736 | 1P4-STRA6LP-CCDC180 |
| NA        | ENSG00000255037 | 0          | NA          | NA         | NA         | NA         |                     |
| NA        | ENSG00000255038 | 0          | NA          | NA         | NA         | NA         |                     |
| NA        | ENSG00000255039 | 0          | NA          | NA         | NA         | NA         | LINC02553           |
| NA        | ENSG00000255040 | 0          | NA          | NA         | NA         | NA         | MORF4L1P3           |
| NA        | ENSG00000255041 | 0          | NA          | NA         | NA         | NA         |                     |
| 441601    | ENSG00000255042 | 183.119161 | -0.04822844 | 0.16774578 | 0.7480982  | 0.88173637 | SEPTIN7P11          |
| 100874012 | ENSG00000255043 | 0          | NA          | NA         | NA         | NA         | NAV2-AS5            |
| NA        | ENSG00000255045 | 0.37844916 | 0.02407552  | 0.3854191  | 0.60038877 | NA         |                     |
| NA        | ENSG00000255046 | 5.55381074 | 0.06227351  | 0.36377376 | 0.64356048 | 0.8219015  |                     |
| NA        | ENSG00000255047 | 0          | NA          | NA         | NA         | NA         | HNRNPRP2            |
| NA        | ENSG00000255048 | 0          | NA          | NA         | NA         | NA         | OR8X1P              |
| NA        | ENSG00000255050 | 0          | NA          | NA         | NA         | NA         |                     |

|           |    |                 |            |             |            |            |            |            |
|-----------|----|-----------------|------------|-------------|------------|------------|------------|------------|
|           | NA | ENSG00000255051 | 0          | NA          | NA         | NA         | NA         | BCAS2P1    |
| 112268389 | NA | ENSG00000255052 | 108.414704 | 0.66758904  | 0.22812372 | 0.0007563  | 0.00463118 | FAM66D     |
|           | NA | ENSG00000255053 | 0          | NA          | NA         | NA         | NA         | OR4A44P    |
|           | NA | ENSG00000255054 | 0.34687707 | 0.00027729  | 0.38336218 | 0.96583272 | NA         |            |
|           | NA | ENSG00000255055 | 0          | NA          | NA         | NA         | NA         | MTND1P35   |
|           | NA | ENSG00000255057 | 0          | NA          | NA         | NA         | NA         |            |
|           | NA | ENSG00000255058 | 0          | NA          | NA         | NA         | NA         | PDCL2P2    |
|           | NA | ENSG00000255059 | 0          | NA          | NA         | NA         | NA         | PPIAP43    |
|           | NA | ENSG00000255060 | 0          | NA          | NA         | NA         | NA         |            |
|           | NA | ENSG00000255062 | 4.97216232 | -0.05249026 | 0.36367142 | 0.68460291 | 0.846474   |            |
|           | NA | ENSG00000255063 | 0          | NA          | NA         | NA         | NA         | RBMXP3     |
|           | NA | ENSG00000255065 | 0          | NA          | NA         | NA         | NA         |            |
|           | NA | ENSG00000255067 | 0          | NA          | NA         | NA         | NA         |            |
|           | NA | ENSG00000255070 | 0          | NA          | NA         | NA         | NA         | OSBPL9P3   |
| 100528017 | NA | ENSG00000255071 | 0          | NA          | NA         | NA         | NA         | SAA2-SAA4  |
|           | NA | ENSG00000255073 | 23.1060046 | -0.00205801 | 0.38079663 | 0.96071621 | 0.98407795 | ZFP91-CNTF |
|           | NA | ENSG00000255074 | 0          | NA          | NA         | NA         | NA         |            |
|           | NA | ENSG00000255075 | 0          | NA          | NA         | NA         | NA         | CENPUP1    |
|           | NA | ENSG00000255076 | 0          | NA          | NA         | NA         | NA         |            |
|           | NA | ENSG00000255077 | 0          | NA          | NA         | NA         | NA         | OR4X7P     |
|           | NA | ENSG00000255078 | 0          | NA          | NA         | NA         | NA         | OR4A6P     |
|           | NA | ENSG00000255079 | 3.7808182  | -0.09889884 | 0.38892163 | 0.32841149 | 0.55685955 | LINC02704  |
|           | NA | ENSG00000255081 | 0          | NA          | NA         | NA         | NA         |            |
| 100873989 | NA | ENSG00000255082 | 0.77095274 | -0.05539295 | 0.38928908 | 0.28076697 | NA         | GRM5-AS1   |
|           | NA | ENSG00000255083 | 0          | NA          | NA         | NA         | NA         | OR5AK1P    |
| 101928896 | NA | ENSG00000255084 | 0          | NA          | NA         | NA         | NA         |            |
|           | NA | ENSG00000255085 | 61.0857696 | -0.0448305  | 0.23930082 | 0.80953636 | 0.91359357 |            |
|           | NA | ENSG00000255086 | 0          | NA          | NA         | NA         | NA         |            |
| 101929473 | NA | ENSG00000255087 | 0.34746601 | 0.02370763  | 0.3853651  | 0.61987128 | NA         |            |
|           | NA | ENSG00000255088 | 0          | NA          | NA         | NA         | NA         |            |
|           | NA | ENSG00000255089 | 0          | NA          | NA         | NA         | NA         |            |
|           | NA | ENSG00000255091 | 0          | NA          | NA         | NA         | NA         |            |
|           | NA | ENSG00000255092 | 0          | NA          | NA         | NA         | NA         |            |
|           | NA | ENSG00000255093 | 0.173733   | 0.01914545  | 0.38484597 | 0.78225479 | NA         |            |
|           | NA | ENSG00000255094 | 1.18420012 | -0.02883548 | 0.38115074 | 0.64774756 | NA         |            |
| 653166    | NA | ENSG00000255095 | 0          | NA          | NA         | NA         | NA         | OR1D4      |
|           | NA | ENSG00000255096 | 0          | NA          | NA         | NA         | NA         | OR5B10P    |
|           | NA | ENSG00000255097 | 0          | NA          | NA         | NA         | NA         |            |

|           |                 |            |             |            |            |            |            |
|-----------|-----------------|------------|-------------|------------|------------|------------|------------|
| NA        | ENSG00000255099 | 0          | NA          | NA         | NA         | NA         |            |
| 101928837 | ENSG00000255100 | 1.90819174 | -0.02341799 | 0.37706702 | 0.76940707 | NA         |            |
| NA        | ENSG00000255101 | 0          | NA          | NA         | NA         | NA         |            |
| NA        | ENSG00000255102 | 0          | NA          | NA         | NA         | NA         |            |
| NA        | ENSG00000255104 | 11.7326516 | -0.1654731  | 0.370294   | 0.34723601 | 0.57794986 |            |
| NA        | ENSG00000255105 | 0          | NA          | NA         | NA         | NA         | PTMAP15    |
| NA        | ENSG00000255106 | 0          | NA          | NA         | NA         | NA         |            |
| NA        | ENSG00000255107 | 0          | NA          | NA         | NA         | NA         |            |
| NA        | ENSG00000255108 | 1.59842581 | -0.04250081 | 0.38164674 | 0.55078759 | NA         |            |
| NA        | ENSG00000255109 | 0          | NA          | NA         | NA         | NA         | LINC02740  |
| NA        | ENSG00000255110 | 0          | NA          | NA         | NA         | NA         |            |
| NA        | ENSG00000255111 | 0          | NA          | NA         | NA         | NA         |            |
| 57132     | ENSG00000255112 | 1048.72306 | 0.50672471  | 0.08583698 | 1.42E-09   | 2.40E-08   | CHMP1B     |
| NA        | ENSG00000255113 | 0          | NA          | NA         | NA         | NA         | OR4A48P    |
| NA        | ENSG00000255114 | 0.32329567 | 0.00159742  | 0.38337058 | 0.96578818 | NA         |            |
| NA        | ENSG00000255115 | 0.16735865 | 0.01897177  | 0.38482933 | 0.78225479 | NA         |            |
| NA        | ENSG00000255116 | 0          | NA          | NA         | NA         | NA         | SLC5A4P1   |
| 105376606 | ENSG00000255117 | 0          | NA          | NA         | NA         | NA         | LINC02546  |
| NA        | ENSG00000255118 | 0          | NA          | NA         | NA         | NA         |            |
| NA        | ENSG00000255119 | 0          | NA          | NA         | NA         | NA         |            |
| 101927828 | ENSG00000255120 | 0          | NA          | NA         | NA         | NA         | OVOL1-AS1  |
| NA        | ENSG00000255121 | 42.8408892 | 0.22160748  | 0.30530616 | 0.28638709 | 0.51225386 | CENATAC-DT |
| NA        | ENSG00000255122 | 0          | NA          | NA         | NA         | NA         |            |
| NA        | ENSG00000255123 | 0          | NA          | NA         | NA         | NA         | MTND5P21   |
| NA        | ENSG00000255126 | 0          | NA          | NA         | NA         | NA         |            |
| NA        | ENSG00000255127 | 0          | NA          | NA         | NA         | NA         |            |
| NA        | ENSG00000255128 | 0          | NA          | NA         | NA         | NA         | HSPD1P3    |
| NA        | ENSG00000255129 | 12.5714408 | -0.05768748 | 0.34653886 | 0.71080347 | 0.86115906 |            |
| NA        | ENSG00000255130 | 0          | NA          | NA         | NA         | NA         |            |
| NA        | ENSG00000255131 | 0          | NA          | NA         | NA         | NA         | OR9L1P     |
| NA        | ENSG00000255132 | 0          | NA          | NA         | NA         | NA         |            |
| NA        | ENSG00000255133 | 0.18922458 | 0.01954053  | 0.38488496 | 0.78225479 | NA         | LINC02721  |
| NA        | ENSG00000255134 | 0          | NA          | NA         | NA         | NA         | OR8K2P     |
| NA        | ENSG00000255135 | 112.819111 | -0.04077258 | 0.19728122 | 0.81029574 | 0.9140475  |            |
| NA        | ENSG00000255136 | 6.39074278 | -0.13041416 | 0.40604372 | 0.14937075 | 0.33213215 |            |
| NA        | ENSG00000255138 | 0          | NA          | NA         | NA         | NA         | GLTPP1     |
| NA        | ENSG00000255139 | 3.82754281 | 0.14875701  | 0.40510144 | 0.21603457 | 0.42681994 |            |
| NA        | ENSG00000255140 | 0          | NA          | NA         | NA         | NA         | OR5BN2P    |

|           |                 |            |             |            |            |            |             |
|-----------|-----------------|------------|-------------|------------|------------|------------|-------------|
| NA        | ENSG00000255141 | 0          | NA          | NA         | NA         | NA         | HNRNPA1P76  |
| NA        | ENSG00000255142 | 0.77324326 | -0.02929627 | 0.38363823 | 0.55708665 | NA         |             |
| NA        | ENSG00000255143 | 0          | NA          | NA         | NA         | NA         |             |
| NA        | ENSG00000255144 | 0          | NA          | NA         | NA         | NA         |             |
| NA        | ENSG00000255145 | 21.1405872 | 0.41587346  | 0.46151424 | 0.08486099 | 0.22086345 | STX17-AS1   |
| NA        | ENSG00000255146 | 0          | NA          | NA         | NA         | NA         |             |
| NA        | ENSG00000255147 | 0          | NA          | NA         | NA         | NA         |             |
| NA        | ENSG00000255148 | 0.14931947 | -0.01844332 | 0.38480212 | 0.84537521 | NA         |             |
| NA        | ENSG00000255149 | 0          | NA          | NA         | NA         | NA         |             |
| 493861    | ENSG00000255150 | 11.9122176 | 1.65011144  | 0.81607279 | 0.00198106 | 0.01061414 | EID3        |
| 100287520 | ENSG00000255151 | 0          | NA          | NA         | NA         | NA         | GLYATL1B    |
| NA        | ENSG00000255152 | 275.842274 | -0.05044017 | 0.17002079 | 0.73968172 | 0.8770894  | MSH5-SAPCD1 |
| 255512    | ENSG00000255153 | 7.52005209 | -0.14130376 | 0.377733   | 0.36483391 | 0.59432668 | TOLLIP-AS1  |
| 109703458 | ENSG00000255154 | 147.883289 | 0.07559537  | 0.17200745 | 0.62436037 | 0.80857113 | HTD2        |
| NA        | ENSG00000255155 | 0          | NA          | NA         | NA         | NA         |             |
| NA        | ENSG00000255156 | 0          | NA          | NA         | NA         | NA         | RNY1P9      |
| NA        | ENSG00000255157 | 0          | NA          | NA         | NA         | NA         | DEFB130C    |
| NA        | ENSG00000255158 | 0.68098728 | 0.02398609  | 0.38332048 | 0.59301239 | NA         |             |
| NA        | ENSG00000255159 | 0.34713168 | -0.00073071 | 0.38336405 | 0.97536682 | NA         |             |
| NA        | ENSG00000255160 | 0.8763205  | 0.01174451  | 0.38022444 | 0.84524216 | NA         |             |
| NA        | ENSG00000255161 | 0          | NA          | NA         | NA         | NA         |             |
| NA        | ENSG00000255162 | 0          | NA          | NA         | NA         | NA         |             |
| NA        | ENSG00000255163 | 0          | NA          | NA         | NA         | NA         | HSPE1P18    |
| NA        | ENSG00000255164 | 0          | NA          | NA         | NA         | NA         |             |
| NA        | ENSG00000255165 | 0.34022711 | 0.00290782  | 0.38338966 | 0.96069084 | NA         |             |
| NA        | ENSG00000255166 | 0          | NA          | NA         | NA         | NA         |             |
| NA        | ENSG00000255167 | 0.173124   | -0.01911262 | 0.38486262 | 0.84537521 | NA         |             |
| NA        | ENSG00000255169 | 0          | NA          | NA         | NA         | NA         | LINC02722   |
| NA        | ENSG00000255170 | 0          | NA          | NA         | NA         | NA         |             |
| 102723644 | ENSG00000255171 | 0          | NA          | NA         | NA         | NA         | LINC01499   |
| NA        | ENSG00000255172 | 0          | NA          | NA         | NA         | NA         | OR5AM1P     |
| NA        | ENSG00000255173 | 0          | NA          | NA         | NA         | NA         |             |
| NA        | ENSG00000255174 | 0          | NA          | NA         | NA         | NA         |             |
| 103312105 | ENSG00000255175 | 0          | NA          | NA         | NA         | NA         | LINC02759   |
| NA        | ENSG00000255176 | 6.05706651 | 0.04374659  | 0.36014357 | 0.7459036  | 0.8802926  |             |
| 112577518 | ENSG00000255177 | 0          | NA          | NA         | NA         | NA         | MUC5B-AS1   |
| 101928944 | ENSG00000255178 | 0          | NA          | NA         | NA         | NA         | LINC02720   |
| NA        | ENSG00000255179 | 0          | NA          | NA         | NA         | NA         |             |

|           |                 |            |             |            |            |            |           |
|-----------|-----------------|------------|-------------|------------|------------|------------|-----------|
| 100130274 | ENSG00000255181 | 0          | NA          | NA         | NA         | NA         | CCDC166   |
| NA        | ENSG00000255182 | 213.368973 | 0.50471273  | 0.17974815 | 0.00177981 | 0.00968232 |           |
| 105369423 | ENSG00000255183 | 0          | NA          | NA         | NA         | NA         | LINC02711 |
| NA        | ENSG00000255184 | 0          | NA          | NA         | NA         | NA         |           |
| NA        | ENSG00000255185 | 10.7753549 | 0.46423806  | 0.69247011 | 0.03844478 | 0.12194154 | PDXDC2P   |
| NA        | ENSG00000255186 | 0          | NA          | NA         | NA         | NA         |           |
| NA        | ENSG00000255187 | 0          | NA          | NA         | NA         | NA         | LINC02748 |
| NA        | ENSG00000255188 | 0          | NA          | NA         | NA         | NA         |           |
| NA        | ENSG00000255189 | 0          | NA          | NA         | NA         | NA         | GLYATL1P1 |
| NA        | ENSG00000255190 | 0          | NA          | NA         | NA         | NA         | TRIM51DP  |
| NA        | ENSG00000255191 | 0          | NA          | NA         | NA         | NA         |           |
| 388112    | ENSG00000255192 | 4.69200264 | -0.00082634 | 0.36164633 | 0.99270309 | 0.99756121 | NANOGP8   |
| NA        | ENSG00000255193 | 0          | NA          | NA         | NA         | NA         | LINC02726 |
| NA        | ENSG00000255196 | 0          | NA          | NA         | NA         | NA         | OR4A17P   |
| NA        | ENSG00000255197 | 3.01589468 | -0.08935477 | 0.38585785 | 0.35817497 | 0.58850446 |           |
| NA        | ENSG00000255198 | 14.508161  | -0.04263926 | 0.33203064 | 0.80137459 | 0.90902045 | SNHG9     |
| NA        | ENSG00000255199 | 0.68114393 | 0.00534832  | 0.38248141 | 0.90054478 | NA         | GTF2IP11  |
| NA        | ENSG00000255200 | 4.17851045 | 0.00116609  | 0.36738582 | 0.99361045 | 0.99798514 | PGAM1P8   |
| NA        | ENSG00000255201 | 0          | NA          | NA         | NA         | NA         |           |
| NA        | ENSG00000255202 | 0.5221374  | 0.01064597  | 0.38325462 | 0.77359506 | NA         |           |
| NA        | ENSG00000255203 | 0          | NA          | NA         | NA         | NA         | OR7E2P    |
| NA        | ENSG00000255204 | 0          | NA          | NA         | NA         | NA         |           |
| NA        | ENSG00000255205 | 0          | NA          | NA         | NA         | NA         | MED28P5   |
| NA        | ENSG00000255206 | 0          | NA          | NA         | NA         | NA         |           |
| NA        | ENSG00000255207 | 0          | NA          | NA         | NA         | NA         |           |
| NA        | ENSG00000255209 | 0          | NA          | NA         | NA         | NA         |           |
| NA        | ENSG00000255210 | 0          | NA          | NA         | NA         | NA         |           |
| NA        | ENSG00000255211 | 0          | NA          | NA         | NA         | NA         |           |
| NA        | ENSG00000255213 | 0          | NA          | NA         | NA         | NA         | NPM1P35   |
| NA        | ENSG00000255214 | 0          | NA          | NA         | NA         | NA         |           |
| NA        | ENSG00000255215 | 0          | NA          | NA         | NA         | NA         | OR4R1P    |
| NA        | ENSG00000255216 | 3.05017703 | -0.14225393 | 0.41439836 | 0.10318572 | 0.25514879 |           |
| NA        | ENSG00000255217 | 0          | NA          | NA         | NA         | NA         | OR5J7P    |
| NA        | ENSG00000255218 | 0          | NA          | NA         | NA         | NA         | OR5BC1P   |
| NA        | ENSG00000255219 | 0          | NA          | NA         | NA         | NA         |           |
| NA        | ENSG00000255220 | 0          | NA          | NA         | NA         | NA         | DDX18P5   |
| 440068    | ENSG00000255221 | 0          | NA          | NA         | NA         | NA         | CARD17    |
| NA        | ENSG00000255222 | 0.36273979 | 0.00127004  | 0.38336694 | 0.96381929 | NA         | SETP17    |

|           |                 |            |             |            |            |            |             |
|-----------|-----------------|------------|-------------|------------|------------|------------|-------------|
| 219487    | ENSG00000255223 | 0          | NA          | NA         | NA         | NA         | OR5M11      |
| NA        | ENSG00000255224 | 69.3660232 | -0.17822198 | 0.23906198 | 0.3470514  | 0.5778365  |             |
| NA        | ENSG00000255225 | 0          | NA          | NA         | NA         | NA         | OR8B6P      |
| NA        | ENSG00000255226 | 0          | NA          | NA         | NA         | NA         | LINC02690   |
| NA        | ENSG00000255227 | 0          | NA          | NA         | NA         | NA         |             |
| NA        | ENSG00000255229 | 0          | NA          | NA         | NA         | NA         |             |
| NA        | ENSG00000255230 | 0          | NA          | NA         | NA         | NA         |             |
| NA        | ENSG00000255231 | 0.173124   | -0.01911262 | 0.38486262 | 0.84537521 | NA         | MRPS36P4    |
| NA        | ENSG00000255232 | 0          | NA          | NA         | NA         | NA         |             |
| NA        | ENSG00000255233 | 0          | NA          | NA         | NA         | NA         |             |
| NA        | ENSG00000255234 | 1.79694902 | 0.04316035  | 0.38009515 | 0.58520137 | NA         |             |
| NA        | ENSG00000255235 | 0          | NA          | NA         | NA         | NA         |             |
| NA        | ENSG00000255236 | 7.12968684 | 0.21590614  | 0.42371781 | 0.18166241 | 0.37914815 |             |
| NA        | ENSG00000255237 | 0.63337965 | 0.00198549  | 0.38251254 | 0.96128281 | NA         |             |
| NA        | ENSG00000255238 | 0          | NA          | NA         | NA         | NA         | RFPL4AP1    |
| NA        | ENSG00000255239 | 0          | NA          | NA         | NA         | NA         | TREHP1      |
| 283194    | ENSG00000255240 | 0.54286655 | -0.03082041 | 0.38594551 | 0.55027088 | NA         |             |
| NA        | ENSG00000255241 | 0          | NA          | NA         | NA         | NA         |             |
| NA        | ENSG00000255244 | 0          | NA          | NA         | NA         | NA         |             |
| 100533181 | ENSG00000255245 | 2.50705539 | -0.03143199 | 0.37768257 | 0.69708089 | NA         | FXYD6-FXYD2 |
| NA        | ENSG00000255246 | 0          | NA          | NA         | NA         | NA         |             |
| NA        | ENSG00000255247 | 0.3167846  | 0.0011856   | 0.38336707 | 0.96649368 | NA         | NECTIN1-AS1 |
| 399959    | ENSG00000255248 | 8.46564336 | 0.03660678  | 0.35432055 | 0.79932416 | 0.90803676 | MIR100HG    |
| NA        | ENSG00000255250 | 0.69940711 | -0.00338966 | 0.3812772  | 0.94947376 | NA         |             |
| 100131608 | ENSG00000255251 | 0          | NA          | NA         | NA         | NA         | PRR23D1     |
| 100133251 | ENSG00000255251 | 0          | NA          | NA         | NA         | NA         | PRR23D1     |
| NA        | ENSG00000255252 | 0          | NA          | NA         | NA         | NA         |             |
| NA        | ENSG00000255253 | 0          | NA          | NA         | NA         | NA         |             |
| NA        | ENSG00000255254 | 0          | NA          | NA         | NA         | NA         | HIGD1AP5    |
| NA        | ENSG00000255255 | 0          | NA          | NA         | NA         | NA         | PPP1R1AP1   |
| NA        | ENSG00000255256 | 0          | NA          | NA         | NA         | NA         |             |
| 646522    | ENSG00000255258 | 0          | NA          | NA         | NA         | NA         | LINC02743   |
| NA        | ENSG00000255259 | 0          | NA          | NA         | NA         | NA         | ZNF123P     |
| NA        | ENSG00000255260 | 0.15069912 | -0.01848503 | 0.38480575 | 0.84537521 | NA         |             |
| NA        | ENSG00000255261 | 0          | NA          | NA         | NA         | NA         | OR7E4P      |
| NA        | ENSG00000255262 | 0          | NA          | NA         | NA         | NA         | ELOBP2      |
| NA        | ENSG00000255265 | 0          | NA          | NA         | NA         | NA         | TMA16P1     |
| NA        | ENSG00000255266 | 0          | NA          | NA         | NA         | NA         |             |



|           |                 |            |             |            |            |            |           |
|-----------|-----------------|------------|-------------|------------|------------|------------|-----------|
| 399886    | ENSG00000255267 | 0          | NA          | NA         | NA         | NA         | LINC02687 |
| NA        | ENSG00000255268 | 0          | NA          | NA         | NA         | NA         |           |
| NA        | ENSG00000255269 | 0          | NA          | NA         | NA         | NA         | LINC02710 |
| NA        | ENSG00000255270 | 0          | NA          | NA         | NA         | NA         | NAV2-IT1  |
| NA        | ENSG00000255271 | 0          | NA          | NA         | NA         | NA         |           |
| NA        | ENSG00000255272 | 0          | NA          | NA         | NA         | NA         |           |
| NA        | ENSG00000255273 | 0          | NA          | NA         | NA         | NA         |           |
| NA        | ENSG00000255274 | 0          | NA          | NA         | NA         | NA         | SMIM35    |
| NA        | ENSG00000255276 | 0.18922458 | 0.01954053  | 0.38488496 | 0.78225479 | NA         | RRM1-AS1  |
| 730013    | ENSG00000255277 | 8.35352077 | -0.08071567 | 0.36237377 | 0.57440926 | 0.77352065 | ABCC6P2   |
| NA        | ENSG00000255279 | 0          | NA          | NA         | NA         | NA         |           |
| NA        | ENSG00000255280 | 0          | NA          | NA         | NA         | NA         |           |
| NA        | ENSG00000255281 | 0          | NA          | NA         | NA         | NA         |           |
| 100288077 | ENSG00000255282 | 0          | NA          | NA         | NA         | NA         | WTAPP1    |
| NA        | ENSG00000255283 | 0          | NA          | NA         | NA         | NA         |           |
| 171391    | ENSG00000255284 | 46.0342442 | 0.24088853  | 0.29757565 | 0.24711203 | 0.46606087 |           |
| NA        | ENSG00000255285 | 0          | NA          | NA         | NA         | NA         |           |
| NA        | ENSG00000255286 | 0          | NA          | NA         | NA         | NA         |           |
| NA        | ENSG00000255287 | 0          | NA          | NA         | NA         | NA         | SNRPGP16  |
| NA        | ENSG00000255288 | 0          | NA          | NA         | NA         | NA         |           |
| NA        | ENSG00000255289 | 0          | NA          | NA         | NA         | NA         |           |
| NA        | ENSG00000255291 | 0.173124   | -0.01911262 | 0.38486262 | 0.84537521 | NA         | HMGB1P40  |
| NA        | ENSG00000255292 | 2.2477921  | 0.02716619  | 0.37806626 | 0.72882748 | NA         |           |
| NA        | ENSG00000255293 | 0          | NA          | NA         | NA         | NA         | WIZP1     |
| NA        | ENSG00000255294 | 0          | NA          | NA         | NA         | NA         | OR4A50P   |
| NA        | ENSG00000255295 | 0          | NA          | NA         | NA         | NA         | H3P34     |
| NA        | ENSG00000255296 | 0          | NA          | NA         | NA         | NA         |           |
| NA        | ENSG00000255297 | 0          | NA          | NA         | NA         | NA         | OR4A41P   |
| 219865    | ENSG00000255298 | 0          | NA          | NA         | NA         | NA         | OR8G5     |
| NA        | ENSG00000255299 | 0          | NA          | NA         | NA         | NA         |           |
| NA        | ENSG00000255300 | 0          | NA          | NA         | NA         | NA         | LINC02745 |
| NA        | ENSG00000255301 | 0          | NA          | NA         | NA         | NA         |           |
| 23741     | ENSG00000255302 | 2347.19734 | -0.17084499 | 0.0766481  | 0.02270947 | 0.08064878 | EID1      |
| NA        | ENSG00000255303 | 0          | NA          | NA         | NA         | NA         | OR5BA1P   |
| NA        | ENSG00000255304 | 0          | NA          | NA         | NA         | NA         | OR4A46P   |
| NA        | ENSG00000255305 | 0          | NA          | NA         | NA         | NA         |           |
| NA        | ENSG00000255306 | 1.64942575 | -0.01487804 | 0.37676573 | 0.84961897 | NA         |           |
| 255725    | ENSG00000255307 | 0          | NA          | NA         | NA         | NA         | OR52B2    |

|           |                 |            |             |            |            |            |           |
|-----------|-----------------|------------|-------------|------------|------------|------------|-----------|
| NA        | ENSG00000255308 | 1.02163578 | 0.03152174  | 0.38206849 | 0.60153786 | NA         | CSRP3-AS1 |
| NA        | ENSG00000255309 | 0          | NA          | NA         | NA         | NA         |           |
| NA        | ENSG00000255310 | 206.239373 | -0.30521252 | 0.18196978 | 0.05730218 | 0.16533181 |           |
| NA        | ENSG00000255311 | 0          | NA          | NA         | NA         | NA         | DLG2-AS2  |
| NA        | ENSG00000255312 | 0          | NA          | NA         | NA         | NA         | OR4C7P    |
| NA        | ENSG00000255313 | 0          | NA          | NA         | NA         | NA         |           |
| 101928894 | ENSG00000255314 | 0.16735865 | 0.01897177  | 0.38482933 | 0.78225479 | NA         |           |
| NA        | ENSG00000255315 | 0          | NA          | NA         | NA         | NA         | OR8A3P    |
| NA        | ENSG00000255316 | 0          | NA          | NA         | NA         | NA         | MTND6P25  |
| NA        | ENSG00000255317 | 0          | NA          | NA         | NA         | NA         |           |
| NA        | ENSG00000255319 | 0.37844916 | 0.02407552  | 0.3854191  | 0.60038877 | NA         | ENPP7P8   |
| NA        | ENSG00000255320 | 2.43529586 | 0.13001996  | 0.40887159 | 0.12226372 | NA         |           |
| NA        | ENSG00000255321 | 0          | NA          | NA         | NA         | NA         |           |
| 102723378 | ENSG00000255323 | 0          | NA          | NA         | NA         | NA         | LINC01495 |
| NA        | ENSG00000255325 | 0          | NA          | NA         | NA         | NA         |           |
| 105369391 | ENSG00000255326 | 13.4071405 | -0.67149786 | 0.87047994 | 0.02582152 | 0.08929734 |           |
| NA        | ENSG00000255327 | 0          | NA          | NA         | NA         | NA         | LINC02697 |
| NA        | ENSG00000255328 | 0.173733   | 0.01914545  | 0.38484597 | 0.78225479 | NA         |           |
| NA        | ENSG00000255329 | 0.16735865 | 0.01897177  | 0.38482933 | 0.78225479 | NA         | H2AZP4    |
| NA        | ENSG00000255330 | 3513.43535 | -0.54657267 | 0.06739797 | 1.80E-16   | 5.41E-15   |           |
| NA        | ENSG00000255331 | 0          | NA          | NA         | NA         | NA         |           |
| NA        | ENSG00000255332 | 0          | NA          | NA         | NA         | NA         | LINC02756 |
| NA        | ENSG00000255333 | 0          | NA          | NA         | NA         | NA         |           |
| NA        | ENSG00000255334 | 0          | NA          | NA         | NA         | NA         |           |
| 102723330 | ENSG00000255335 | 0          | NA          | NA         | NA         | NA         | LINC02729 |
| NA        | ENSG00000255336 | 0          | NA          | NA         | NA         | NA         |           |
| 101928424 | ENSG00000255337 | 2.34766322 | 0.138215    | 0.41277072 | 0.11200338 | NA         |           |
| NA        | ENSG00000255338 | 0          | NA          | NA         | NA         | NA         |           |
| NA        | ENSG00000255339 | 45.4591538 | -0.11868581 | 0.27144254 | 0.54485118 | 0.75256526 |           |
| NA        | ENSG00000255340 | 0          | NA          | NA         | NA         | NA         |           |
| NA        | ENSG00000255341 | 0          | NA          | NA         | NA         | NA         | OR8Q1P    |
| NA        | ENSG00000255342 | 0.15069912 | -0.01848503 | 0.38480575 | 0.84537521 | NA         |           |
| NA        | ENSG00000255343 | 0          | NA          | NA         | NA         | NA         |           |
| NA        | ENSG00000255344 | 0          | NA          | NA         | NA         | NA         | LINC02706 |
| NA        | ENSG00000255345 | 4.3558774  | -0.00977185 | 0.36470763 | 0.93103697 | 0.97122738 |           |
| 79400     | ENSG00000255346 | 1.72347992 | 0.01891012  | 0.38009834 | 0.81526086 | NA         | NOX5      |
| NA        | ENSG00000255347 | 0          | NA          | NA         | NA         | NA         |           |
| NA        | ENSG00000255348 | 0.15069912 | -0.01848503 | 0.38480575 | 0.84537521 | NA         |           |

|           |    |                 |            |             |            |            |            |           |
|-----------|----|-----------------|------------|-------------|------------|------------|------------|-----------|
|           | NA | ENSG00000255349 | 0          | NA          | NA         | NA         | NA         | OR4A7P    |
|           | NA | ENSG00000255350 | 29.3624903 | -0.89220794 | 0.52366292 | 0.00780993 | 0.03383165 | MTCO1P15  |
|           | NA | ENSG00000255351 | 0.36299265 | 0.02389503  | 0.38539245 | 0.6099477  | NA         |           |
|           | NA | ENSG00000255352 | 0          | NA          | NA         | NA         | NA         | PPP1R10P1 |
|           | NA | ENSG00000255353 | 0          | NA          | NA         | NA         | NA         | ASS1P13   |
|           | NA | ENSG00000255355 | 0          | NA          | NA         | NA         | NA         |           |
|           | NA | ENSG00000255356 | 0          | NA          | NA         | NA         | NA         |           |
|           | NA | ENSG00000255357 | 0          | NA          | NA         | NA         | NA         |           |
|           | NA | ENSG00000255358 | 0          | NA          | NA         | NA         | NA         | NDUFAF2P2 |
| 100500938 | NA | ENSG00000255359 | 0          | NA          | NA         | NA         | NA         | CCDC179   |
|           | NA | ENSG00000255360 | 0          | NA          | NA         | NA         | NA         |           |
|           | NA | ENSG00000255361 | 0          | NA          | NA         | NA         | NA         |           |
|           | NA | ENSG00000255362 | 0.34746601 | 0.02370763  | 0.3853651  | 0.61987128 | NA         | LINC02761 |
|           | NA | ENSG00000255363 | 1.36005098 | -0.08337533 | 0.39628134 | 0.11491599 | NA         | LINC02757 |
|           | NA | ENSG00000255364 | 0          | NA          | NA         | NA         | NA         | SMILR     |
|           | NA | ENSG00000255365 | 0          | NA          | NA         | NA         | NA         |           |
|           | NA | ENSG00000255366 | 1.47780258 | -0.08372191 | 0.39297376 | 0.19259204 | NA         |           |
| 101927708 | NA | ENSG00000255367 | 0.45053391 | -0.02733874 | 0.38571626 | 0.56125339 | NA         |           |
|           | NA | ENSG00000255368 | 0          | NA          | NA         | NA         | NA         |           |
|           | NA | ENSG00000255369 | 0          | NA          | NA         | NA         | NA         |           |
|           | NA | ENSG00000255370 | 0          | NA          | NA         | NA         | NA         | CYCSP25   |
|           | NA | ENSG00000255371 | 0          | NA          | NA         | NA         | NA         | OPCML-IT2 |
|           | NA | ENSG00000255372 | 0.32339798 | 0.00166908  | 0.38337135 | 0.96510249 | NA         |           |
| 259289    | NA | ENSG00000255374 | 0          | NA          | NA         | NA         | NA         | TAS2R43   |
| 259291    | NA | ENSG00000255374 | 0          | NA          | NA         | NA         | NA         | TAS2R43   |
|           | NA | ENSG00000255375 | 0          | NA          | NA         | NA         | NA         |           |
|           | NA | ENSG00000255376 | 0          | NA          | NA         | NA         | NA         |           |
|           | NA | ENSG00000255377 | 0          | NA          | NA         | NA         | NA         | DUXAP5    |
| 100133251 | NA | ENSG00000255378 | 0.48968692 | -0.01119441 | 0.38291851 | 0.8209875  | NA         | PRR23D2   |
|           | NA | ENSG00000255379 | 0          | NA          | NA         | NA         | NA         | CYCSP29   |
|           | NA | ENSG00000255380 | 0          | NA          | NA         | NA         | NA         |           |
|           | NA | ENSG00000255381 | 0.68979381 | 0.02762169  | 0.38377994 | 0.56756409 | NA         |           |
| 105369413 | NA | ENSG00000255382 | 0.66652023 | -0.02197203 | 0.38253658 | 0.65198108 | NA         | LINC02734 |
|           | NA | ENSG00000255384 | 2.43324391 | -0.08072918 | 0.3850059  | 0.3892948  | NA         |           |
|           | NA | ENSG00000255385 | 0          | NA          | NA         | NA         | NA         | UBTFL10   |
|           | NA | ENSG00000255386 | 0          | NA          | NA         | NA         | NA         | OR5BR1P   |
|           | NA | ENSG00000255387 | 0          | NA          | NA         | NA         | NA         | RDXP1     |
|           | NA | ENSG00000255388 | 1.15833755 | 0.03354767  | 0.38263635 | 0.53949905 | NA         | LINC02741 |

|           |                 |            |             |            |            |            |           |
|-----------|-----------------|------------|-------------|------------|------------|------------|-----------|
| NA        | ENSG00000255389 | 115.249437 | -0.14144009 | 0.20004039 | 0.40738451 | 0.63571722 |           |
| NA        | ENSG00000255390 | 0.30139824 | -0.02296476 | 0.38527817 | 0.68536535 | NA         | DCHS1-AS1 |
| NA        | ENSG00000255391 | 0          | NA          | NA         | NA         | NA         |           |
| 107987155 | ENSG00000255393 | 0          | NA          | NA         | NA         | NA         | OOSP4B    |
| NA        | ENSG00000255395 | 0.14931947 | -0.01844332 | 0.38480212 | 0.84537521 | NA         |           |
| NA        | ENSG00000255396 | 0          | NA          | NA         | NA         | NA         |           |
| NA        | ENSG00000255397 | 0.85366502 | 0.04475961  | 0.38512259 | 0.41659229 | NA         | NASPP1    |
| 8843      | ENSG00000255398 | 0.37844916 | 0.02407552  | 0.3854191  | 0.60038877 | NA         | HCAR3     |
| 255480    | ENSG00000255399 | 0          | NA          | NA         | NA         | NA         | TBX5-AS1  |
| NA        | ENSG00000255400 | 0          | NA          | NA         | NA         | NA         |           |
| NA        | ENSG00000255401 | 0          | NA          | NA         | NA         | NA         |           |
| NA        | ENSG00000255402 | 0          | NA          | NA         | NA         | NA         |           |
| NA        | ENSG00000255403 | 0.33471731 | 0.02354391  | 0.38534154 | 0.62842204 | NA         | HSPD1P13  |
| NA        | ENSG00000255404 | 0          | NA          | NA         | NA         | NA         |           |
| NA        | ENSG00000255406 | 0.82850511 | -0.04683647 | 0.38808053 | 0.30945523 | NA         | LINC02730 |
| 56145     | ENSG00000255408 | 164.225931 | 0.15633682  | 0.1721223  | 0.31001534 | 0.53774299 | PCDHA3    |
| NA        | ENSG00000255409 | 0.173124   | -0.01911262 | 0.38486262 | 0.84537521 | NA         | RSF1-IT1  |
| NA        | ENSG00000255410 | 3.92732574 | -0.06779183 | 0.38022197 | 0.47730468 | 0.69913066 |           |
| NA        | ENSG00000255411 | 0          | NA          | NA         | NA         | NA         | LINC02548 |
| NA        | ENSG00000255413 | 0          | NA          | NA         | NA         | NA         |           |
| NA        | ENSG00000255415 | 0          | NA          | NA         | NA         | NA         |           |
| NA        | ENSG00000255416 | 0          | NA          | NA         | NA         | NA         | OR10AF1P  |
| NA        | ENSG00000255417 | 9.15128191 | -0.35038932 | 0.55128195 | 0.06366954 | 0.17916619 | MTCO2P15  |
| NA        | ENSG00000255418 | 0.32662539 | -0.02328749 | 0.38532375 | 0.6672247  | NA         | LINC02718 |
| 103581031 | ENSG00000255420 | 0          | NA          | NA         | NA         | NA         | CASC23    |
| NA        | ENSG00000255421 | 0          | NA          | NA         | NA         | NA         |           |
| 105369519 | ENSG00000255422 | 0          | NA          | NA         | NA         | NA         |           |
| 55096     | ENSG00000255423 | 71.7960815 | 0.4428407   | 0.27106106 | 0.03709754 | 0.11861648 | EBLN2     |
| NA        | ENSG00000255424 | 0          | NA          | NA         | NA         | NA         | MRGPRX9P  |
| NA        | ENSG00000255425 | 0          | NA          | NA         | NA         | NA         | OR8G3P    |
| NA        | ENSG00000255426 | 0          | NA          | NA         | NA         | NA         |           |
| NA        | ENSG00000255427 | 0          | NA          | NA         | NA         | NA         | LINC02707 |
| 100132078 | ENSG00000255428 | 0          | NA          | NA         | NA         | NA         |           |
| NA        | ENSG00000255429 | 0          | NA          | NA         | NA         | NA         |           |
| NA        | ENSG00000255430 | 0          | NA          | NA         | NA         | NA         | CASP1P1   |
| NA        | ENSG00000255431 | 0          | NA          | NA         | NA         | NA         | OR5B19P   |
| NA        | ENSG00000255432 | 1.31127549 | 0.00551581  | 0.37900706 | 0.93477663 | NA         |           |
| 101927120 | ENSG00000255433 | 24.1665783 | -3.9614279  | 0.70600003 | 2.46E-09   | 4.01E-08   | LINC02735 |

|           |                 |            |             |            |            |            |              |
|-----------|-----------------|------------|-------------|------------|------------|------------|--------------|
| NA        | ENSG00000255434 | 6.99764447 | -0.40369363 | 0.64813467 | 0.03856825 | 0.12219644 |              |
| NA        | ENSG00000255435 | 18.9692652 | -0.01482525 | 0.33074987 | 0.92718985 | 0.96953959 |              |
| NA        | ENSG00000255437 | 0          | NA          | NA         | NA         | NA         |              |
| NA        | ENSG00000255438 | 3.15431141 | -0.17568945 | 0.42900104 | 0.10394781 | 0.25666764 |              |
| NA        | ENSG00000255439 | 90.3622321 | 0.18352878  | 0.22764782 | 0.3215093  | 0.54918161 |              |
| NA        | ENSG00000255440 | 0          | NA          | NA         | NA         | NA         |              |
| NA        | ENSG00000255441 | 8.82541032 | 0.3784964   | 0.59671775 | 0.04936561 | 0.14763547 | SIGLEC10-AS1 |
| NA        | ENSG00000255442 | 0          | NA          | NA         | NA         | NA         |              |
| NA        | ENSG00000255443 | 0          | NA          | NA         | NA         | NA         | CD44-AS1     |
| NA        | ENSG00000255444 | 0          | NA          | NA         | NA         | NA         | CYCSP27      |
| NA        | ENSG00000255445 | 12.8626167 | 0.07674944  | 0.33761684 | 0.65689123 | 0.82968692 |              |
| NA        | ENSG00000255446 | 0          | NA          | NA         | NA         | NA         |              |
| NA        | ENSG00000255447 | 0          | NA          | NA         | NA         | NA         |              |
| NA        | ENSG00000255448 | 0          | NA          | NA         | NA         | NA         |              |
| NA        | ENSG00000255449 | 3.42051994 | 0.08511609  | 0.38195871 | 0.42653555 | 0.65231368 |              |
| NA        | ENSG00000255450 | 0          | NA          | NA         | NA         | NA         |              |
| NA        | ENSG00000255451 | 0          | NA          | NA         | NA         | NA         |              |
| NA        | ENSG00000255452 | 0          | NA          | NA         | NA         | NA         |              |
| NA        | ENSG00000255454 | 0          | NA          | NA         | NA         | NA         |              |
| NA        | ENSG00000255455 | 0          | NA          | NA         | NA         | NA         |              |
| NA        | ENSG00000255456 | 0          | NA          | NA         | NA         | NA         |              |
| NA        | ENSG00000255457 | 0          | NA          | NA         | NA         | NA         |              |
| NA        | ENSG00000255458 | 38.2094006 | 0.10514338  | 0.27721675 | 0.59262576 | 0.78702605 |              |
| NA        | ENSG00000255459 | 0          | NA          | NA         | NA         | NA         |              |
| NA        | ENSG00000255460 | 0          | NA          | NA         | NA         | NA         | ZDHHC20P3    |
| NA        | ENSG00000255461 | 0          | NA          | NA         | NA         | NA         | OR8I1P       |
| NA        | ENSG00000255462 | 0          | NA          | NA         | NA         | NA         |              |
| NA        | ENSG00000255463 | 0          | NA          | NA         | NA         | NA         |              |
| NA        | ENSG00000255464 | 0          | NA          | NA         | NA         | NA         | SEPTIN14P8   |
| NA        | ENSG00000255466 | 0          | NA          | NA         | NA         | NA         | OR5AL2P      |
| NA        | ENSG00000255467 | 0.30139824 | -0.02296476 | 0.38527817 | 0.68536535 | NA         |              |
| 102724064 | ENSG00000255468 | 82.0094628 | -0.31284381 | 0.25811928 | 0.1188911  | 0.28323721 |              |
| NA        | ENSG00000255469 | 0          | NA          | NA         | NA         | NA         | BOLA3P1      |
| NA        | ENSG00000255470 | 0          | NA          | NA         | NA         | NA         |              |
| NA        | ENSG00000255471 | 0.49258168 | 0.01178666  | 0.38342011 | 0.77729199 | NA         |              |
| NA        | ENSG00000255472 | 0          | NA          | NA         | NA         | NA         |              |
| 101929549 | ENSG00000255474 | 7.18405713 | 0.09837557  | 0.37307744 | 0.47140378 | 0.69371391 | GAU1         |
| NA        | ENSG00000255475 | 0          | NA          | NA         | NA         | NA         |              |

|           |                 |                 |            |             |            |            |            |
|-----------|-----------------|-----------------|------------|-------------|------------|------------|------------|
| 101928008 | ENSG00000255476 | 0               | NA         | NA          | NA         | NA         |            |
|           | NA              | ENSG00000255477 | 0          | NA          | NA         | NA         |            |
|           | NA              | ENSG00000255478 | 0          | NA          | NA         | NA         |            |
|           | NA              | ENSG00000255479 | 0          | NA          | NA         | NA         |            |
|           | NA              | ENSG00000255480 | 0.18922458 | 0.01954053  | 0.38488496 | 0.78225479 |            |
|           | NA              | ENSG00000255481 | 0          | NA          | NA         | NA         | OR56A7P    |
| 102723838 | ENSG00000255482 | 0               | NA         | NA          | NA         | NA         |            |
|           | NA              | ENSG00000255483 | 0          | NA          | NA         | NA         |            |
| 387810    | ENSG00000255484 | 0               | NA         | NA          | NA         | NA         | LINC02764  |
|           | NA              | ENSG00000255485 | 0          | NA          | NA         | NA         | OR5G4P     |
|           | NA              | ENSG00000255486 | 0          | NA          | NA         | NA         |            |
|           | NA              | ENSG00000255487 | 0.85408931 | -0.00913037 | 0.38218655 | 0.84642652 |            |
|           | NA              | ENSG00000255489 | 0          | NA          | NA         | NA         |            |
|           | NA              | ENSG00000255490 | 0          | NA          | NA         | NA         | EIF4A2P5   |
| 105375743 | ENSG00000255491 | 0               | NA         | NA          | NA         | NA         |            |
|           | NA              | ENSG00000255492 | 0          | NA          | NA         | NA         | H3P33      |
|           | NA              | ENSG00000255493 | 0          | NA          | NA         | NA         | OR4A10P    |
| 101409254 | ENSG00000255494 | 0               | NA         | NA          | NA         | NA         | LINC00681  |
|           | NA              | ENSG00000255495 | 42.0843743 | 0.45488948  | 0.36208824 | 0.05995433 | 0.17112559 |
|           | NA              | ENSG00000255496 | 0          | NA          | NA         | NA         |            |
|           | NA              | ENSG00000255497 | 0          | NA          | NA         | NA         |            |
|           | NA              | ENSG00000255498 | 2.53841613 | 0.04904616  | 0.38468251 | 0.43376528 |            |
|           | NA              | ENSG00000255499 | 0          | NA          | NA         | NA         |            |
|           | NA              | ENSG00000255500 | 0.48871349 | 0.01152856  | 0.38341271 | 0.78249039 |            |
| 59082     | ENSG00000255501 | 0               | NA         | NA          | NA         | NA         | CARD18     |
| 105369454 | ENSG00000255502 | 0               | NA         | NA          | NA         | NA         | LINC02713  |
|           | NA              | ENSG00000255503 | 0          | NA          | NA         | NA         |            |
|           | NA              | ENSG00000255504 | 0          | NA          | NA         | NA         |            |
|           | NA              | ENSG00000255505 | 0          | NA          | NA         | NA         |            |
|           | NA              | ENSG00000255506 | 0          | NA          | NA         | NA         |            |
| 100506113 | ENSG00000255507 | 3.02012631      | 0.0701612  | 0.38463511  | 0.40827529 | 0.63640649 | UVRAG-DT   |
|           | NA              | ENSG00000255508 | 224.690353 | 0.27229183  | 0.16515032 | 0.06756951 | 0.18665906 |
|           | NA              | ENSG00000255510 | 0          | NA          | NA         | NA         | OR8A2P     |
|           | NA              | ENSG00000255511 | 0          | NA          | NA         | NA         |            |
|           | NA              | ENSG00000255512 | 0          | NA          | NA         | NA         | LINC02684  |
|           | NA              | ENSG00000255513 | 4.35023257 | 0.1025126   | 0.38621537 | 0.36231735 | 0.59197696 |
|           | NA              | ENSG00000255514 | 0          | NA          | NA         | NA         | OR4B2P     |
|           | NA              | ENSG00000255515 | 0          | NA          | NA         | NA         |            |

|           |                 |            |             |            |            |            |            |
|-----------|-----------------|------------|-------------|------------|------------|------------|------------|
| NA        | ENSG00000255516 | 0          | NA          | NA         | NA         | NA         |            |
| 101928069 | ENSG00000255517 | 43.4884541 | 0.08849001  | 0.27068975 | 0.65062164 | 0.82544657 |            |
| NA        | ENSG00000255519 | 0          | NA          | NA         | NA         | NA         |            |
| NA        | ENSG00000255520 | 0          | NA          | NA         | NA         | NA         |            |
| 100507144 | ENSG00000255521 | 0          | NA          | NA         | NA         | NA         |            |
| NA        | ENSG00000255522 | 0          | NA          | NA         | NA         | NA         | SNRPCP5    |
| NA        | ENSG00000255523 | 0          | NA          | NA         | NA         | NA         |            |
| 728734    | ENSG00000255524 | 1.7153588  | 0.07787132  | 0.39229993 | 0.17074099 | NA         | NPIP8      |
| NA        | ENSG00000255525 | 0          | NA          | NA         | NA         | NA         |            |
| 100528064 | ENSG00000255526 | 5.19697197 | -0.01634    | 0.36107418 | 0.89489891 | 0.95469109 | NEDD8-MDP1 |
| NA        | ENSG00000255527 | 0          | NA          | NA         | NA         | NA         |            |
| NA        | ENSG00000255528 | 0          | NA          | NA         | NA         | NA         |            |
| 81488     | ENSG00000255529 | 1026.63201 | -0.30455382 | 0.10022033 | 0.00158429 | 0.0087898  | POLR2M     |
| NA        | ENSG00000255530 | 0          | NA          | NA         | NA         | NA         |            |
| NA        | ENSG00000255531 | 0          | NA          | NA         | NA         | NA         | NDUFS5P6   |
| NA        | ENSG00000255532 | 0          | NA          | NA         | NA         | NA         |            |
| NA        | ENSG00000255533 | 0          | NA          | NA         | NA         | NA         |            |
| NA        | ENSG00000255534 | 0          | NA          | NA         | NA         | NA         | OR4A43P    |
| NA        | ENSG00000255535 | 0          | NA          | NA         | NA         | NA         |            |
| NA        | ENSG00000255536 | 0          | NA          | NA         | NA         | NA         | MRGPRX5P   |
| 403312    | ENSG00000255537 | 1.82546307 | -0.10752407 | 0.40133844 | 0.12113435 | NA         |            |
| 81343     | ENSG00000255538 | 0.30139824 | -0.02296476 | 0.38527817 | 0.68536535 | NA         | OR10V2P    |
| NA        | ENSG00000255539 | 0          | NA          | NA         | NA         | NA         |            |
| NA        | ENSG00000255540 | 0          | NA          | NA         | NA         | NA         |            |
| NA        | ENSG00000255541 | 0          | NA          | NA         | NA         | NA         | CKS1BP4    |
| NA        | ENSG00000255542 | 0.14931947 | -0.01844332 | 0.38480212 | 0.84537521 | NA         |            |
| NA        | ENSG00000255543 | 0          | NA          | NA         | NA         | NA         |            |
| NA        | ENSG00000255544 | 0          | NA          | NA         | NA         | NA         | DEFB108D   |
| NA        | ENSG00000255545 | 61.369337  | -0.67636579 | 0.37652179 | 0.01149676 | 0.04653421 | B3GAT1-DT  |
| NA        | ENSG00000255547 | 0          | NA          | NA         | NA         | NA         | RPA2P3     |
| NA        | ENSG00000255548 | 0.29863895 | -0.02292439 | 0.3852726  | 0.68753245 | NA         |            |
| NA        | ENSG00000255549 | 0          | NA          | NA         | NA         | NA         | ENPP7P6    |
| NA        | ENSG00000255550 | 0          | NA          | NA         | NA         | NA         |            |
| NA        | ENSG00000255551 | 0          | NA          | NA         | NA         | NA         |            |
| NA        | ENSG00000255552 | 0          | NA          | NA         | NA         | NA         | LY6G6E     |
| NA        | ENSG00000255553 | 0          | NA          | NA         | NA         | NA         | LINC02733  |
| NA        | ENSG00000255554 | 0          | NA          | NA         | NA         | NA         | OR7E1P     |
| NA        | ENSG00000255555 | 0          | NA          | NA         | NA         | NA         |            |

|           |                 |            |             |            |            |            |             |
|-----------|-----------------|------------|-------------|------------|------------|------------|-------------|
| NA        | ENSG00000255556 | 0.173733   | 0.01914545  | 0.38484597 | 0.78225479 | NA         |             |
| NA        | ENSG00000255557 | 0.5037328  | 0.01215445  | 0.38341653 | 0.76973558 | NA         |             |
| NA        | ENSG00000255558 | 0          | NA          | NA         | NA         | NA         |             |
| 286103    | ENSG00000255559 | 10.2382277 | 0.18669391  | 0.39117314 | 0.27532837 | 0.4994071  | ZNF252P-AS1 |
| NA        | ENSG00000255560 | 0          | NA          | NA         | NA         | NA         | OR4R2P      |
| 91893     | ENSG00000255561 | 90.6939304 | 0.20159623  | 0.22533508 | 0.27520243 | 0.49926995 | FDXACB1     |
| NA        | ENSG00000255562 | 0          | NA          | NA         | NA         | NA         | UNC93B6     |
| NA        | ENSG00000255563 | 0          | NA          | NA         | NA         | NA         |             |
| NA        | ENSG00000255565 | 0          | NA          | NA         | NA         | NA         |             |
| NA        | ENSG00000255566 | 3.0055489  | 0.01857793  | 0.37267284 | 0.8477207  | 0.93071088 |             |
| 103091865 | ENSG00000255568 | 5.57296559 | -0.18302855 | 0.4235547  | 0.15368401 | 0.33878786 | BRWD1-AS2   |
| NA        | ENSG00000255569 | 0          | NA          | NA         | NA         | NA         | TRAV1-1     |
| 254559    | ENSG00000255571 | 544.41846  | -1.80909668 | 0.11288233 | 6.11E-59   | 7.72E-57   | MIR9-3HG    |
| NA        | ENSG00000255572 | 0          | NA          | NA         | NA         | NA         |             |
| NA        | ENSG00000255575 | 0          | NA          | NA         | NA         | NA         |             |
| NA        | ENSG00000255580 | 0.34443086 | 0.00377758  | 0.38340882 | 0.95158641 | NA         |             |
| NA        | ENSG00000255581 | 0          | NA          | NA         | NA         | NA         |             |
| 26534     | ENSG00000255582 | 0          | NA          | NA         | NA         | NA         | OR10G2      |
| NA        | ENSG00000255583 | 0.49102231 | -0.0078578  | 0.38273203 | 0.85228226 | NA         |             |
| 651337    | ENSG00000255585 | 17.1238216 | -0.01626171 | 0.33123224 | 0.92095643 | 0.96670947 |             |
| 401258    | ENSG00000255587 | 0.32287454 | 0.00126228  | 0.38336746 | 0.96899347 | NA         | RAB44       |
| 101927531 | ENSG00000255595 | 0          | NA          | NA         | NA         | NA         |             |
| NA        | ENSG00000255599 | 0.173124   | -0.01911262 | 0.38486262 | 0.84537521 | NA         |             |
| NA        | ENSG00000255605 | 0          | NA          | NA         | NA         | NA         |             |
| NA        | ENSG00000255606 | 0          | NA          | NA         | NA         | NA         |             |
| NA        | ENSG00000255608 | 0          | NA          | NA         | NA         | NA         |             |
| NA        | ENSG00000255618 | 13.1994443 | -1.4051618  | 0.89980439 | 0.00475806 | 0.02227463 | LINC02440   |
| NA        | ENSG00000255621 | 0.36237392 | 0.00090454  | 0.3833644  | 0.96725988 | NA         |             |
| NA        | ENSG00000255622 | 21.7335746 | 0.41310027  | 0.45578472 | 0.08666117 | 0.22434207 | PCDHB17P    |
| NA        | ENSG00000255624 | 22.6303674 | 0.06889208  | 0.31645561 | 0.71115333 | 0.86120368 | C10orf88B   |
| NA        | ENSG00000255627 | 0          | NA          | NA         | NA         | NA         |             |
| NA        | ENSG00000255628 | 0          | NA          | NA         | NA         | NA         |             |
| NA        | ENSG00000255629 | 0          | NA          | NA         | NA         | NA         |             |
| NA        | ENSG00000255633 | 0          | NA          | NA         | NA         | NA         | MTRNR2L9    |
| NA        | ENSG00000255639 | 45.3406583 | 0.23381499  | 0.3177578  | 0.26465373 | 0.48691598 |             |
| NA        | ENSG00000255641 | 0          | NA          | NA         | NA         | NA         |             |
| NA        | ENSG00000255642 | 0.173733   | 0.01914545  | 0.38484597 | 0.78225479 | NA         | PABPC1P4    |
| NA        | ENSG00000255644 | 0.34044905 | -9.41E-05   | 0.38336216 | 0.96614477 | NA         |             |



|           |                 |            |             |            |            |            |             |
|-----------|-----------------|------------|-------------|------------|------------|------------|-------------|
| 731157    | ENSG00000255647 | 0.47369839 | -0.03508186 | 0.38628702 | 0.49562572 | NA         |             |
| NA        | ENSG00000255648 | 0          | NA          | NA         | NA         | NA         |             |
| NA        | ENSG00000255649 | 0          | NA          | NA         | NA         | NA         |             |
| 84983     | ENSG00000255650 | 17.4552317 | -1.56805799 | 0.68823971 | 0.0011798  | 0.00682424 | FAM222A-AS1 |
| NA        | ENSG00000255652 | 0.18922458 | 0.01954053  | 0.38488496 | 0.78225479 | NA         |             |
| NA        | ENSG00000255653 | 0          | NA          | NA         | NA         | NA         |             |
| NA        | ENSG00000255655 | 1.07084424 | 0.07589668  | 0.39408253 | 0.14479988 | NA         |             |
| 100873980 | ENSG00000255660 | 0          | NA          | NA         | NA         | NA         | RERG-AS1    |
| NA        | ENSG00000255663 | 31.3358553 | 0.22894591  | 0.35756889 | 0.26470501 | 0.48694922 |             |
| NA        | ENSG00000255664 | 0          | NA          | NA         | NA         | NA         | ARL6IP1P1   |
| NA        | ENSG00000255666 | 0.38992376 | -0.02377457 | 0.38539848 | 0.65899201 | NA         | LINC02700   |
| NA        | ENSG00000255669 | 0.15069912 | -0.01848503 | 0.38480575 | 0.84537521 | NA         |             |
| NA        | ENSG00000255670 | 0.97083568 | 0.00669677  | 0.38010606 | 0.91202052 | NA         |             |
| NA        | ENSG00000255671 | 0          | NA          | NA         | NA         | NA         |             |
| NA        | ENSG00000255672 | 1.23499332 | -0.03439369 | 0.38270631 | 0.5611183  | NA         |             |
| NA        | ENSG00000255679 | 0          | NA          | NA         | NA         | NA         | JRKL-AS1    |
| NA        | ENSG00000255680 | 0.46980664 | -0.00714265 | 0.38322485 | 0.86950433 | NA         |             |
| NA        | ENSG00000255686 | 0          | NA          | NA         | NA         | NA         |             |
| NA        | ENSG00000255689 | 1.94819613 | -0.04246745 | 0.37759668 | 0.62842894 | NA         |             |
| 9865      | ENSG00000255690 | 720.511357 | 1.23748654  | 0.12002047 | 6.54E-26   | 3.19E-24   | TRIL        |
| NA        | ENSG00000255692 | 0          | NA          | NA         | NA         | NA         |             |
| NA        | ENSG00000255693 | 0          | NA          | NA         | NA         | NA         | LINC02389   |
| NA        | ENSG00000255700 | 0          | NA          | NA         | NA         | NA         | APOOP3      |
| NA        | ENSG00000255703 | 0          | NA          | NA         | NA         | NA         |             |
| NA        | ENSG00000255704 | 0          | NA          | NA         | NA         | NA         |             |
| NA        | ENSG00000255710 | 10.9265081 | -0.00686657 | 0.34044174 | 0.96350528 | 0.98545957 |             |
| 124538    | ENSG00000255713 | 0          | NA          | NA         | NA         | NA         | OR4D2       |
| NA        | ENSG00000255714 | 0          | NA          | NA         | NA         | NA         | LINC02460   |
| 23642     | ENSG00000255717 | 2216.93394 | -0.18770781 | 0.06544122 | 0.00356342 | 0.01754736 | SNHG1       |
| NA        | ENSG00000255723 | 1.08495246 | 0.03262021  | 0.38223269 | 0.58607742 | NA         |             |
| NA        | ENSG00000255725 | 0          | NA          | NA         | NA         | NA         | TDGP1       |
| NA        | ENSG00000255726 | 0          | NA          | NA         | NA         | NA         |             |
| NA        | ENSG00000255727 | 0          | NA          | NA         | NA         | NA         | LINC01489   |
| NA        | ENSG00000255730 | 0.18922458 | 0.01954053  | 0.38488496 | 0.78225479 | NA         |             |
| 100885789 | ENSG00000255733 | 0.18922458 | 0.01954053  | 0.38488496 | 0.78225479 | NA         | IFNG-AS1    |
| NA        | ENSG00000255734 | 0          | NA          | NA         | NA         | NA         | HNRNPABP1   |
| 100130776 | ENSG00000255737 | 396.879793 | -0.18916155 | 0.1204248  | 0.09646746 | 0.2427593  | AGAP2-AS1   |
| NA        | ENSG00000255741 | 1.81639949 | -0.06209308 | 0.38251652 | 0.4607723  | NA         |             |

|           |                 |            |             |            |            |            |             |
|-----------|-----------------|------------|-------------|------------|------------|------------|-------------|
| NA        | ENSG00000255745 | 0          | NA          | NA         | NA         | NA         |             |
| 102723544 | ENSG00000255746 | 0          | NA          | NA         | NA         | NA         |             |
| NA        | ENSG00000255749 | 0          | NA          | NA         | NA         | NA         | GNAI2P1     |
| NA        | ENSG00000255750 | 1.53779348 | -0.00593244 | 0.37714645 | 0.93645894 | NA         |             |
| NA        | ENSG00000255753 | 0          | NA          | NA         | NA         | NA         |             |
| NA        | ENSG00000255757 | 0          | NA          | NA         | NA         | NA         |             |
| NA        | ENSG00000255760 | 0          | NA          | NA         | NA         | NA         | LINC02422   |
| NA        | ENSG00000255763 | 0          | NA          | NA         | NA         | NA         | MRPS18CP4   |
| NA        | ENSG00000255769 | 477.809846 | 0.32215629  | 0.11671602 | 0.00368148 | 0.01800358 | GOLGA2P10   |
| 101927922 | ENSG00000255772 | 0          | NA          | NA         | NA         | NA         | LINC01479   |
| 105379407 | ENSG00000255774 | 0          | NA          | NA         | NA         | NA         | LINC02747   |
| NA        | ENSG00000255775 | 0          | NA          | NA         | NA         | NA         |             |
| NA        | ENSG00000255776 | 0.61472985 | -0.01907725 | 0.38303684 | 0.69427157 | NA         | VDAC2P2     |
| NA        | ENSG00000255780 | 0.18922458 | 0.01954053  | 0.38488496 | 0.78225479 | NA         |             |
| NA        | ENSG00000255786 | 0          | NA          | NA         | NA         | NA         |             |
| NA        | ENSG00000255790 | 0          | NA          | NA         | NA         | NA         |             |
| 196475    | ENSG00000255794 | 0          | NA          | NA         | NA         | NA         | RMST        |
| NA        | ENSG00000255801 | 0          | NA          | NA         | NA         | NA         |             |
| 79549     | ENSG00000255804 | 0          | NA          | NA         | NA         | NA         | OR6J1       |
| NA        | ENSG00000255807 | 0          | NA          | NA         | NA         | NA         | PTP4A1P2    |
| NA        | ENSG00000255808 | 0          | NA          | NA         | NA         | NA         | PDE2A-AS1   |
| NA        | ENSG00000255811 | 0.34746601 | 0.02370763  | 0.3853651  | 0.61987128 | NA         |             |
| 105370016 | ENSG00000255814 | 0          | NA          | NA         | NA         | NA         | LINC02439   |
| NA        | ENSG00000255815 | 0.46918847 | -0.00816596 | 0.38327874 | 0.85830756 | NA         | KRT8P11     |
| NA        | ENSG00000255817 | 0.14931947 | -0.01844332 | 0.38480212 | 0.84537521 | NA         |             |
| NA        | ENSG00000255819 | 0          | NA          | NA         | NA         | NA         | KLRC4-KLRK1 |
| 100463486 | ENSG00000255823 | 7.60152121 | 0.07313685  | 0.36331736 | 0.60149942 | 0.79200883 | MTRNR2L8    |
| NA        | ENSG00000255825 | 0          | NA          | NA         | NA         | NA         |             |
| NA        | ENSG00000255829 | 0          | NA          | NA         | NA         | NA         |             |
| NA        | ENSG00000255830 | 0          | NA          | NA         | NA         | NA         |             |
| 497189    | ENSG00000255833 | 0          | NA          | NA         | NA         | NA         | TIFAB       |
| NA        | ENSG00000255835 | 5.07477707 | 0.0314809   | 0.36753749 | 0.78469505 | 0.9020424  |             |
| NA        | ENSG00000255836 | 0.82713705 | -0.00788277 | 0.3808023  | 0.88933526 | NA         |             |
| 259295    | ENSG00000255837 | 30.6970668 | 0.01995277  | 0.28677895 | 0.91881396 | 0.96558446 | TAS2R20     |
| NA        | ENSG00000255838 | 0          | NA          | NA         | NA         | NA         |             |
| NA        | ENSG00000255839 | 0.173733   | 0.01914545  | 0.38484597 | 0.78225479 | NA         |             |
| NA        | ENSG00000255843 | 1.1158506  | -0.00529313 | 0.3795805  | 0.93331137 | NA         |             |
| NA        | ENSG00000255845 | 0          | NA          | NA         | NA         | NA         |             |

|           |    |                 |            |             |            |            |            |             |
|-----------|----|-----------------|------------|-------------|------------|------------|------------|-------------|
|           | NA | ENSG00000255847 | 2.87999632 | -0.00063269 | 0.37248944 | 0.9927343  | 0.99756121 |             |
| 104169670 | NA | ENSG00000255850 | 0          | NA          | NA         | NA         | NA         | RXYLT1-AS1  |
|           | NA | ENSG00000255851 | 0          | NA          | NA         | NA         | NA         |             |
|           | NA | ENSG00000255853 | 0          | NA          | NA         | NA         | NA         |             |
|           | NA | ENSG00000255855 | 0          | NA          | NA         | NA         | NA         | KDM4F       |
|           | NA | ENSG00000255856 | 0.8267995  | 0.01898809  | 0.38142581 | 0.736237   | NA         |             |
|           | NA | ENSG00000255857 | 116.077011 | -0.07044935 | 0.20434359 | 0.68273524 | 0.84521822 | PXN-AS1     |
|           | NA | ENSG00000255858 | 0          | NA          | NA         | NA         | NA         |             |
|           | NA | ENSG00000255860 | 0          | NA          | NA         | NA         | NA         |             |
|           | NA | ENSG00000255866 | 0          | NA          | NA         | NA         | NA         |             |
| 100874249 | NA | ENSG00000255867 | 13.3073234 | 0.08207359  | 0.33805533 | 0.63673893 | 0.81722218 | DENND5B-AS1 |
|           | NA | ENSG00000255870 | 0          | NA          | NA         | NA         | NA         |             |
|           | NA | ENSG00000255871 | 0          | NA          | NA         | NA         | NA         |             |
|           | NA | ENSG00000255872 | 6.08965165 | -0.15685829 | 0.40861038 | 0.2004186  | 0.40562125 |             |
| 283487    | NA | ENSG00000255874 | 1.23452424 | 0.0895951   | 0.39811902 | 0.10099154 | NA         | PRECSIT     |
|           | NA | ENSG00000255875 | 1.15690018 | 0.01553324  | 0.37982016 | 0.80996804 | NA         | PABPN1P2    |
|           | NA | ENSG00000255882 | 0          | NA          | NA         | NA         | NA         |             |
|           | NA | ENSG00000255883 | 0          | NA          | NA         | NA         | NA         | FUNDC2P1    |
|           | NA | ENSG00000255885 | 0          | NA          | NA         | NA         | NA         |             |
|           | NA | ENSG00000255886 | 0          | NA          | NA         | NA         | NA         |             |
|           | NA | ENSG00000255892 | 0          | NA          | NA         | NA         | NA         | NDFIP1P1    |
|           | NA | ENSG00000255893 | 12.7631776 | -0.01976069 | 0.33716842 | 0.90181426 | 0.95684234 |             |
|           | NA | ENSG00000255899 | 0          | NA          | NA         | NA         | NA         |             |
|           | NA | ENSG00000255900 | 0          | NA          | NA         | NA         | NA         |             |
|           | NA | ENSG00000255903 | 0          | NA          | NA         | NA         | NA         | RPL12P46    |
|           | NA | ENSG00000255909 | 0          | NA          | NA         | NA         | NA         | PDCD5P1     |
|           | NA | ENSG00000255910 | 1.36752284 | 0.08215243  | 0.39306146 | 0.18566663 | NA         |             |
| 101928416 | NA | ENSG00000255916 | 0          | NA          | NA         | NA         | NA         |             |
|           | NA | ENSG00000255919 | 0          | NA          | NA         | NA         | NA         |             |
| 103752584 | NA | ENSG00000255920 | 0          | NA          | NA         | NA         | NA         | CCND2-AS1   |
|           | NA | ENSG00000255921 | 0.32365234 | 0.00183552  | 0.38337326 | 0.96350939 | NA         |             |
|           | NA | ENSG00000255923 | 0          | NA          | NA         | NA         | NA         |             |
|           | NA | ENSG00000255928 | 0          | NA          | NA         | NA         | NA         |             |
| 105369438 | NA | ENSG00000255929 | 0.30139824 | -0.02296476 | 0.38527817 | 0.68536535 | NA         |             |
|           | NA | ENSG00000255931 | 1.23649499 | 0.06916114  | 0.3927228  | 0.14329518 | NA         |             |
|           | NA | ENSG00000255933 | 5.38224802 | 0.0496825   | 0.36246569 | 0.70719254 | 0.8589348  |             |
|           | NA | ENSG00000255944 | 0          | NA          | NA         | NA         | NA         |             |
|           | NA | ENSG00000255945 | 0          | NA          | NA         | NA         | NA         |             |

|           |                 |            |             |            |            |            |               |
|-----------|-----------------|------------|-------------|------------|------------|------------|---------------|
| NA        | ENSG00000255946 | 0          | NA          | NA         | NA         | NA         |               |
| NA        | ENSG00000255947 | 0          | NA          | NA         | NA         | NA         |               |
| NA        | ENSG00000255949 | 0          | NA          | NA         | NA         | NA         | RPS6KB2-AS1   |
| NA        | ENSG00000255951 | 0.14931947 | -0.01844332 | 0.38480212 | 0.84537521 | NA         |               |
| NA        | ENSG00000255958 | 0          | NA          | NA         | NA         | NA         | GABARAPL1-AS1 |
| NA        | ENSG00000255959 | 0.32496766 | 0.00173181  | 0.38337199 | 0.96372963 | NA         |               |
| NA        | ENSG00000255960 | 0          | NA          | NA         | NA         | NA         |               |
| NA        | ENSG00000255964 | 0          | NA          | NA         | NA         | NA         | HSPD1P12      |
| NA        | ENSG00000255965 | 0          | NA          | NA         | NA         | NA         |               |
| NA        | ENSG00000255966 | 3.15281872 | -0.04149246 | 0.37524871 | 0.66273443 | 0.83353574 |               |
| NA        | ENSG00000255967 | 0          | NA          | NA         | NA         | NA         | HADHAP2       |
| NA        | ENSG00000255968 | 0.89592365 | -0.00659798 | 0.38201651 | 0.88959367 | NA         |               |
| 101927901 | ENSG00000255970 | 2.49674022 | 0.02310499  | 0.37524914 | 0.79398958 | NA         | LINC02421     |
| NA        | ENSG00000255972 | 0          | NA          | NA         | NA         | NA         |               |
| NA        | ENSG00000255973 | 0          | NA          | NA         | NA         | NA         |               |
| 1548      | ENSG00000255974 | 0.96836516 | 0.00124006  | 0.38046106 | 0.98225686 | NA         | CYP2A6        |
| NA        | ENSG00000255976 | 0          | NA          | NA         | NA         | NA         | RAB11AP2      |
| NA        | ENSG00000255977 | 0          | NA          | NA         | NA         | NA         |               |
| 102724265 | ENSG00000255980 | 0          | NA          | NA         | NA         | NA         |               |
| NA        | ENSG00000255982 | 0.18922458 | 0.01954053  | 0.38488496 | 0.78225479 | NA         | NXPE2P1       |
| NA        | ENSG00000255983 | 36.3477096 | 0.27059965  | 0.31739508 | 0.20641793 | 0.41337759 |               |
| 4498      | ENSG00000255986 | 0          | NA          | NA         | NA         | NA         | MT1JP         |
| NA        | ENSG00000255987 | 0          | NA          | NA         | NA         | NA         | TOMM20P2      |
| NA        | ENSG00000255988 | 0          | NA          | NA         | NA         | NA         | TUBB4BP1      |
| NA        | ENSG00000255991 | 0.37844916 | 0.02407552  | 0.3854191  | 0.60038877 | NA         |               |
| NA        | ENSG00000255992 | 2.03579158 | 0.00811392  | 0.37527786 | 0.92436591 | NA         |               |
| NA        | ENSG00000255993 | 0          | NA          | NA         | NA         | NA         | PSMC1P9       |
| NA        | ENSG00000255995 | 0          | NA          | NA         | NA         | NA         |               |
| NA        | ENSG00000255996 | 0          | NA          | NA         | NA         | NA         |               |
| NA        | ENSG00000255998 | 0          | NA          | NA         | NA         | NA         | LINC02824     |
| NA        | ENSG00000256001 | 2.79232138 | -0.0222829  | 0.37475983 | 0.79668305 | 0.90658744 |               |
| NA        | ENSG00000256004 | 0          | NA          | NA         | NA         | NA         |               |
| NA        | ENSG00000256006 | 0.16735865 | 0.01897177  | 0.38482933 | 0.78225479 | NA         |               |
| NA        | ENSG00000256007 | 0          | NA          | NA         | NA         | NA         | ARAP1-AS1     |
| NA        | ENSG00000256008 | 0.97318397 | -0.0109701  | 0.38032829 | 0.85522985 | NA         |               |
| NA        | ENSG00000256011 | 0          | NA          | NA         | NA         | NA         |               |
| NA        | ENSG00000256013 | 0.33471731 | 0.02354391  | 0.38534154 | 0.62842204 | NA         |               |
| NA        | ENSG00000256019 | 0          | NA          | NA         | NA         | NA         | TAS2R63P      |

|           |                 |            |             |            |            |            |             |
|-----------|-----------------|------------|-------------|------------|------------|------------|-------------|
| NA        | ENSG00000256020 | 0          | NA          | NA         | NA         | NA         |             |
| NA        | ENSG00000256021 | 0          | NA          | NA         | NA         | NA         | ELOCP31     |
| 101927637 | ENSG00000256022 | 0          | NA          | NA         | NA         | NA         | LINC02411   |
| 100874234 | ENSG00000256025 | 0.81848586 | -0.04645744 | 0.3880266  | 0.31276777 | NA         | CACNA1C-AS4 |
| NA        | ENSG00000256028 | 202.650175 | 0.3574259   | 0.16452955 | 0.01640754 | 0.06205214 |             |
| NA        | ENSG00000256029 | 9.88758119 | 2.89429885  | 1.11990866 | 0.00050516 | 0.0032561  |             |
| NA        | ENSG00000256030 | 0.44951096 | -0.02728878 | 0.38571217 | 0.56209938 | NA         | CBX3P4      |
| NA        | ENSG00000256034 | 0          | NA          | NA         | NA         | NA         |             |
| NA        | ENSG00000256035 | 0          | NA          | NA         | NA         | NA         |             |
| NA        | ENSG00000256037 | 0          | NA          | NA         | NA         | NA         | MRPL40P1    |
| NA        | ENSG00000256039 | 0          | NA          | NA         | NA         | NA         | LINC02446   |
| 493913    | ENSG00000256040 | 7.35231265 | -0.07143522 | 0.3789095  | 0.4914492  | 0.71071887 | PAPPA-AS1   |
| NA        | ENSG00000256041 | 0          | NA          | NA         | NA         | NA         |             |
| 1519      | ENSG00000256043 | 88.9934955 | 0.48489858  | 0.27402525 | 0.02464562 | 0.08617715 | CTSO        |
| NA        | ENSG00000256044 | 0          | NA          | NA         | NA         | NA         |             |
| 100463488 | ENSG00000256045 | 0          | NA          | NA         | NA         | NA         | MTRNR2L10   |
| 84334     | ENSG00000256053 | 211.24638  | -0.09013393 | 0.16253089 | 0.53931133 | 0.74850934 | COA8        |
| NA        | ENSG00000256056 | 0.16735865 | 0.01897177  | 0.38482933 | 0.78225479 | NA         |             |
| 10597     | ENSG00000256060 | 95.634252  | 0.3015335   | 0.22741965 | 0.10780606 | 0.26339391 | TRAPPC2B    |
| 161582    | ENSG00000256061 | 89.8045048 | 0.32784233  | 0.27571637 | 0.11554626 | 0.27736694 | DNAAF4      |
| NA        | ENSG00000256064 | 7.68027824 | 0.0934757   | 0.3614805  | 0.53860161 | 0.74830924 |             |
| 3         | ENSG00000256069 | 0.16735865 | 0.01897177  | 0.38482933 | 0.78225479 | NA         | A2MP1       |
| NA        | ENSG00000256070 | 0          | NA          | NA         | NA         | NA         |             |
| NA        | ENSG00000256071 | 0          | NA          | NA         | NA         | NA         |             |
| NA        | ENSG00000256072 | 0          | NA          | NA         | NA         | NA         |             |
| 84996     | ENSG00000256073 | 84.9076106 | -0.04611339 | 0.2111632  | 0.79280335 | 0.90517456 | URB1-AS1    |
| NA        | ENSG00000256075 | 0          | NA          | NA         | NA         | NA         |             |
| NA        | ENSG00000256077 | 0          | NA          | NA         | NA         | NA         | LINC02442   |
| NA        | ENSG00000256079 | 0.64812824 | 0.00795132  | 0.38147533 | 0.87715842 | NA         | FAM133GP    |
| NA        | ENSG00000256081 | 0          | NA          | NA         | NA         | NA         |             |
| NA        | ENSG00000256083 | 0          | NA          | NA         | NA         | NA         |             |
| NA        | ENSG00000256084 | 0          | NA          | NA         | NA         | NA         |             |
| NA        | ENSG00000256085 | 0          | NA          | NA         | NA         | NA         |             |
| 9668      | ENSG00000256087 | 203.563867 | 0.26631657  | 0.19786858 | 0.11808442 | 0.28192478 | ZNF432      |
| NA        | ENSG00000256091 | 0.15069912 | -0.01848503 | 0.38480575 | 0.84537521 | NA         | MTRF1LP1    |
| NA        | ENSG00000256092 | 23.5489176 | 0.10406237  | 0.31105008 | 0.58926858 | 0.78379517 | SBNO1-AS1   |
| NA        | ENSG00000256093 | 0          | NA          | NA         | NA         | NA         |             |
| NA        | ENSG00000256098 | 0          | NA          | NA         | NA         | NA         |             |

|           |                 |            |             |            |            |            |            |
|-----------|-----------------|------------|-------------|------------|------------|------------|------------|
| NA        | ENSG00000256100 | 1.46591025 | 0.09895417  | 0.40150826 | 0.0725266  | NA         |            |
| NA        | ENSG00000256101 | 0          | NA          | NA         | NA         | NA         |            |
| NA        | ENSG00000256103 | 0          | NA          | NA         | NA         | NA         | ATP5MFP5   |
| NA        | ENSG00000256108 | 0.45041965 | -0.02733316 | 0.3857158  | 0.56134773 | NA         |            |
| 101929584 | ENSG00000256115 | 0.96345495 | -0.06719658 | 0.39179663 | 0.19902965 | NA         | LINC02443  |
| NA        | ENSG00000256116 | 24.3421486 | -0.00316484 | 0.32191896 | 0.98449666 | 0.99457273 |            |
| 101928471 | ENSG00000256120 | 0          | NA          | NA         | NA         | NA         | SOX5-AS1   |
| 102606463 | ENSG00000256124 | 0          | NA          | NA         | NA         | NA         | LINC01152  |
| NA        | ENSG00000256125 | 0          | NA          | NA         | NA         | NA         | FAM32EP    |
| NA        | ENSG00000256128 | 0          | NA          | NA         | NA         | NA         | LINC00944  |
| NA        | ENSG00000256134 | 0.67937029 | 0.00297019  | 0.38128813 | 0.95336802 | NA         | EGLN3P1    |
| NA        | ENSG00000256136 | 0          | NA          | NA         | NA         | NA         |            |
| NA        | ENSG00000256137 | 0          | NA          | NA         | NA         | NA         |            |
| NA        | ENSG00000256138 | 0          | NA          | NA         | NA         | NA         | ZKSCAN7P1  |
| NA        | ENSG00000256139 | 11.2165598 | 0.12636021  | 0.35918295 | 0.45460421 | 0.67789159 |            |
| NA        | ENSG00000256146 | 2.52918902 | -0.08647742 | 0.38656064 | 0.36235682 | NA         |            |
| NA        | ENSG00000256148 | 0          | NA          | NA         | NA         | NA         |            |
| NA        | ENSG00000256149 | 0          | NA          | NA         | NA         | NA         |            |
| 283440    | ENSG00000256150 | 0          | NA          | NA         | NA         | NA         | ITFG2-AS1  |
| NA        | ENSG00000256151 | 0          | NA          | NA         | NA         | NA         | ADGRD1-AS1 |
| NA        | ENSG00000256152 | 0.173733   | 0.01914545  | 0.38484597 | 0.78225479 | NA         |            |
| NA        | ENSG00000256155 | 0          | NA          | NA         | NA         | NA         | LINC02598  |
| NA        | ENSG00000256157 | 0          | NA          | NA         | NA         | NA         |            |
| NA        | ENSG00000256159 | 0          | NA          | NA         | NA         | NA         |            |
| 100507203 | ENSG00000256162 | 0          | NA          | NA         | NA         | NA         | SMLR1      |
| 105375015 | ENSG00000256166 | 0          | NA          | NA         | NA         | NA         | LINC02571  |
| NA        | ENSG00000256167 | 1.12768496 | -0.00035385 | 0.37939151 | 0.99525143 | NA         | ATF4P4     |
| NA        | ENSG00000256171 | 0          | NA          | NA         | NA         | NA         | GCSHP4     |
| 102724433 | ENSG00000256172 | 0          | NA          | NA         | NA         | NA         | LINC02420  |
| NA        | ENSG00000256176 | 0.15069912 | -0.01848503 | 0.38480575 | 0.84537521 | NA         |            |
| NA        | ENSG00000256181 | 0          | NA          | NA         | NA         | NA         |            |
| NA        | ENSG00000256185 | 0          | NA          | NA         | NA         | NA         |            |
| 259293    | ENSG00000256188 | 0.33471731 | 0.02354391  | 0.38534154 | 0.62842204 | NA         | TAS2R30    |
| NA        | ENSG00000256189 | 0.65543135 | 0.00355896  | 0.38193365 | 0.939062   | NA         |            |
| NA        | ENSG00000256192 | 0          | NA          | NA         | NA         | NA         | OOEPP2     |
| 100862680 | ENSG00000256193 | 0          | NA          | NA         | NA         | NA         | LINC00507  |
| 101928940 | ENSG00000256195 | 0          | NA          | NA         | NA         | NA         |            |
| NA        | ENSG00000256196 | 6.1811939  | 0.00847665  | 0.35663263 | 0.95140736 | 0.98008882 |            |

|           |                 |            |             |            |            |            |             |
|-----------|-----------------|------------|-------------|------------|------------|------------|-------------|
| NA        | ENSG00000256197 | 0          | NA          | NA         | NA         | NA         | TSPAN9-IT1  |
| NA        | ENSG00000256199 | 0          | NA          | NA         | NA         | NA         |             |
| NA        | ENSG00000256204 | 0          | NA          | NA         | NA         | NA         |             |
| NA        | ENSG00000256206 | 8.4821527  | -0.006308   | 0.34640963 | 0.96472265 | 0.98622874 |             |
| NA        | ENSG00000256209 | 0          | NA          | NA         | NA         | NA         |             |
| NA        | ENSG00000256210 | 0          | NA          | NA         | NA         | NA         |             |
| NA        | ENSG00000256211 | 0          | NA          | NA         | NA         | NA         | SKP1P2      |
| NA        | ENSG00000256218 | 0.85146313 | -0.00581404 | 0.3813699  | 0.911543   | NA         |             |
| NA        | ENSG00000256220 | 0          | NA          | NA         | NA         | NA         |             |
| NA        | ENSG00000256221 | 0          | NA          | NA         | NA         | NA         |             |
| 100462983 | ENSG00000256222 | 1.22473244 | 0.04170343  | 0.38325313 | 0.50153843 | NA         | MTRNR2L3    |
| 7556      | ENSG00000256223 | 206.23651  | -0.27136055 | 0.2028571  | 0.11675392 | 0.2795556  | ZNF10       |
| NA        | ENSG00000256226 | 0          | NA          | NA         | NA         | NA         |             |
| 90649     | ENSG00000256229 | 310.341859 | -0.00035886 | 0.13976394 | 0.99711768 | 0.99913206 | ZNF486      |
| 101929027 | ENSG00000256232 | 0          | NA          | NA         | NA         | NA         | LINC02387   |
| NA        | ENSG00000256234 | 0.50956064 | 0.01593384  | 0.38317915 | 0.7315268  | NA         |             |
| 85027     | ENSG00000256235 | 55.8944856 | 0.26558637  | 0.29610081 | 0.20739075 | 0.41455862 | SMIM3       |
| NA        | ENSG00000256237 | 0          | NA          | NA         | NA         | NA         |             |
| NA        | ENSG00000256238 | 0.82897918 | -0.00874392 | 0.38082873 | 0.8773202  | NA         | SUPT16HP1   |
| NA        | ENSG00000256243 | 0          | NA          | NA         | NA         | NA         | RPL7AP3     |
| NA        | ENSG00000256249 | 0          | NA          | NA         | NA         | NA         |             |
| NA        | ENSG00000256250 | 0.49704718 | -0.01009779 | 0.38283197 | 0.82961345 | NA         |             |
| NA        | ENSG00000256254 | 0          | NA          | NA         | NA         | NA         |             |
| NA        | ENSG00000256256 | 0          | NA          | NA         | NA         | NA         |             |
| NA        | ENSG00000256258 | 0.173733   | 0.01914545  | 0.38484597 | 0.78225479 | NA         |             |
| 105369810 | ENSG00000256259 | 0          | NA          | NA         | NA         | NA         | LINC02425   |
| NA        | ENSG00000256262 | 0.16735865 | 0.01897177  | 0.38482933 | 0.78225479 | NA         | USP30-AS1   |
| NA        | ENSG00000256263 | 0          | NA          | NA         | NA         | NA         | DDX11L8     |
| 105369807 | ENSG00000256268 | 0          | NA          | NA         | NA         | NA         | LINC02454   |
| 3145      | ENSG00000256269 | 796.423669 | 0.14684733  | 0.10038898 | 0.12939669 | 0.3008238  | HMBS        |
| 100874235 | ENSG00000256271 | 0.48646477 | -0.00663023 | 0.38315527 | 0.86471614 | NA         | CACNA1C-AS2 |
| NA        | ENSG00000256273 | 0          | NA          | NA         | NA         | NA         |             |
| NA        | ENSG00000256274 | 0.15069912 | -0.01848503 | 0.38480575 | 0.84537521 | NA         | TAS2R64P    |
| NA        | ENSG00000256278 | 5.67391695 | 0.13568869  | 0.38934293 | 0.31824087 | 0.54576013 |             |
| NA        | ENSG00000256280 | 0          | NA          | NA         | NA         | NA         | ATP5MGP1    |
| NA        | ENSG00000256281 | 0          | NA          | NA         | NA         | NA         |             |
| NA        | ENSG00000256282 | 6.09296834 | 0.14311102  | 0.38809679 | 0.32145896 | 0.54914291 |             |
| NA        | ENSG00000256283 | 0          | NA          | NA         | NA         | NA         | METTL8P1    |

|           |                 |            |             |            |            |            |            |
|-----------|-----------------|------------|-------------|------------|------------|------------|------------|
| NA        | ENSG00000256285 | 0          | NA          | NA         | NA         | NA         | OSBPL9P5   |
| NA        | ENSG00000256286 | 0          | NA          | NA         | NA         | NA         |            |
| NA        | ENSG00000256287 | 0          | NA          | NA         | NA         | NA         | LINC02398  |
| 113523642 | ENSG00000256288 | 0          | NA          | NA         | NA         | NA         | LINC02617  |
| NA        | ENSG00000256292 | 0          | NA          | NA         | NA         | NA         | LINC02376  |
| NA        | ENSG00000256293 | 0          | NA          | NA         | NA         | NA         | ATP6V1E1P3 |
| 7768      | ENSG00000256294 | 218.674518 | -0.03753272 | 0.16399452 | 0.79917972 | 0.90801909 | ZNF225     |
| NA        | ENSG00000256298 | 0          | NA          | NA         | NA         | NA         |            |
| NA        | ENSG00000256299 | 0          | NA          | NA         | NA         | NA         |            |
| NA        | ENSG00000256306 | 0          | NA          | NA         | NA         | NA         |            |
| NA        | ENSG00000256310 | 0          | NA          | NA         | NA         | NA         | NDUFA5P6   |
| NA        | ENSG00000256311 | 0          | NA          | NA         | NA         | NA         |            |
| NA        | ENSG00000256312 | 0          | NA          | NA         | NA         | NA         |            |
| NA        | ENSG00000256314 | 0          | NA          | NA         | NA         | NA         |            |
| 105369507 | ENSG00000256315 | 0          | NA          | NA         | NA         | NA         |            |
| 101928441 | ENSG00000256321 | 0          | NA          | NA         | NA         | NA         |            |
| NA        | ENSG00000256325 | 0.15069912 | -0.01848503 | 0.38480575 | 0.84537521 | NA         |            |
| NA        | ENSG00000256331 | 0          | NA          | NA         | NA         | NA         | NIFKP3     |
| NA        | ENSG00000256338 | 1.13654547 | -0.06113685 | 0.38768028 | 0.30916813 | NA         | RPL41P2    |
| NA        | ENSG00000256339 | 0          | NA          | NA         | NA         | NA         |            |
| NA        | ENSG00000256340 | 14.0208432 | 0.20838245  | 0.38203883 | 0.2679483  | 0.49058288 | ABCC6P1    |
| NA        | ENSG00000256341 | 0.30139824 | -0.02296476 | 0.38527817 | 0.68536535 | NA         |            |
| NA        | ENSG00000256343 | 0.15069912 | -0.01848503 | 0.38480575 | 0.84537521 | NA         |            |
| NA        | ENSG00000256346 | 0          | NA          | NA         | NA         | NA         |            |
| NA        | ENSG00000256347 | 0          | NA          | NA         | NA         | NA         | OR8R1P     |
| NA        | ENSG00000256349 | 5.455232   | 0.03073608  | 0.38461278 | 0.48165576 | 0.70240082 |            |
| NA        | ENSG00000256350 | 0          | NA          | NA         | NA         | NA         |            |
| NA        | ENSG00000256351 | 0          | NA          | NA         | NA         | NA         |            |
| NA        | ENSG00000256353 | 0          | NA          | NA         | NA         | NA         |            |
| NA        | ENSG00000256355 | 0          | NA          | NA         | NA         | NA         | NTAN1P3    |
| NA        | ENSG00000256356 | 0          | NA          | NA         | NA         | NA         | HSPA8P5    |
| NA        | ENSG00000256357 | 0          | NA          | NA         | NA         | NA         |            |
| NA        | ENSG00000256358 | 0          | NA          | NA         | NA         | NA         | RPL31P57   |
| NA        | ENSG00000256361 | 0.30139824 | -0.02296476 | 0.38527817 | 0.68536535 | NA         |            |
| 101927616 | ENSG00000256362 | 0          | NA          | NA         | NA         | NA         | LINC02375  |
| NA        | ENSG00000256364 | 0.34624801 | -0.02356563 | 0.38536324 | 0.65270996 | NA         |            |
| NA        | ENSG00000256371 | 0          | NA          | NA         | NA         | NA         | LRRC34P1   |
| NA        | ENSG00000256372 | 0          | NA          | NA         | NA         | NA         |            |



|           |                 |            |             |            |            |            |           |
|-----------|-----------------|------------|-------------|------------|------------|------------|-----------|
| 645142    | ENSG00000256374 | 0          | NA          | NA         | NA         | NA         | PPIAL4D   |
| NA        | ENSG00000256377 | 0.46355696 | -0.00749666 | 0.38325991 | 0.86939315 | NA         |           |
| NA        | ENSG00000256378 | 0          | NA          | NA         | NA         | NA         |           |
| NA        | ENSG00000256379 | 0          | NA          | NA         | NA         | NA         | TRAV8-5   |
| NA        | ENSG00000256381 | 0          | NA          | NA         | NA         | NA         |           |
| NA        | ENSG00000256385 | 0          | NA          | NA         | NA         | NA         | UBE2NP1   |
| NA        | ENSG00000256389 | 0.34746601 | 0.02370763  | 0.3853651  | 0.61987128 | NA         |           |
| 51802     | ENSG00000256394 | 0          | NA          | NA         | NA         | NA         | ASIC5     |
| NA        | ENSG00000256399 | 0          | NA          | NA         | NA         | NA         |           |
| NA        | ENSG00000256400 | 0          | NA          | NA         | NA         | NA         |           |
| NA        | ENSG00000256403 | 0          | NA          | NA         | NA         | NA         |           |
| NA        | ENSG00000256407 | 9.48585958 | 0.28902572  | 0.48280433 | 0.10146971 | 0.25202292 |           |
| NA        | ENSG00000256417 | 42.8841804 | 0.05102619  | 0.26222432 | 0.79259992 | 0.90514695 |           |
| NA        | ENSG00000256420 | 0          | NA          | NA         | NA         | NA         | OSBPL9P4  |
| NA        | ENSG00000256422 | 0          | NA          | NA         | NA         | NA         | LINC02552 |
| NA        | ENSG00000256424 | 0          | NA          | NA         | NA         | NA         | LINC02414 |
| NA        | ENSG00000256427 | 2.88401374 | 0.07922258  | 0.38173194 | 0.44033666 | 0.66517856 |           |
| NA        | ENSG00000256433 | 0          | NA          | NA         | NA         | NA         |           |
| 259290    | ENSG00000256436 | 3.47876204 | 0.09685722  | 0.3891769  | 0.32434671 | 0.55220346 | TAS2R31   |
| NA        | ENSG00000256440 | 0          | NA          | NA         | NA         | NA         |           |
| NA        | ENSG00000256441 | 0          | NA          | NA         | NA         | NA         | DNAJB6P5  |
| 105369728 | ENSG00000256442 | 1.05017032 | 0.01389752  | 0.38030107 | 0.81960103 | NA         |           |
| NA        | ENSG00000256443 | 4.07072538 | -0.17958497 | 0.42596793 | 0.13273245 | 0.30603274 |           |
| NA        | ENSG00000256448 | 0          | NA          | NA         | NA         | NA         |           |
| NA        | ENSG00000256450 | 0          | NA          | NA         | NA         | NA         |           |
| NA        | ENSG00000256452 | 0          | NA          | NA         | NA         | NA         |           |
| 373863    | ENSG00000256453 | 53.4139792 | -0.00645339 | 0.2683162  | 0.97147244 | 0.98930349 | DND1      |
| NA        | ENSG00000256458 | 0.53879228 | 0.01396946  | 0.38346548 | 0.73786109 | NA         |           |
| NA        | ENSG00000256462 | 0          | NA          | NA         | NA         | NA         |           |
| 27164     | ENSG00000256463 | 0          | NA          | NA         | NA         | NA         | SALL3     |
| NA        | ENSG00000256464 | 2.07702051 | -0.13243084 | 0.41178491 | 0.08162581 | NA         | YWHABP2   |
| NA        | ENSG00000256465 | 0          | NA          | NA         | NA         | NA         |           |
| NA        | ENSG00000256469 | 0          | NA          | NA         | NA         | NA         |           |
| NA        | ENSG00000256473 | 0          | NA          | NA         | NA         | NA         |           |
| NA        | ENSG00000256474 | 0          | NA          | NA         | NA         | NA         | TRAV11    |
| NA        | ENSG00000256480 | 0          | NA          | NA         | NA         | NA         |           |
| NA        | ENSG00000256481 | 2.50341007 | 0.00172101  | 0.37547726 | 0.98530164 | NA         |           |
| NA        | ENSG00000256482 | 0.49698308 | -0.00996015 | 0.38282449 | 0.83138653 | NA         |           |

|           |                 |            |             |            |            |            |             |
|-----------|-----------------|------------|-------------|------------|------------|------------|-------------|
| NA        | ENSG00000256484 | 0.15069912 | -0.01848503 | 0.38480575 | 0.84537521 | NA         |             |
| NA        | ENSG00000256494 | 0          | NA          | NA         | NA         | NA         | LINC02825   |
| NA        | ENSG00000256496 | 0          | NA          | NA         | NA         | NA         |             |
| NA        | ENSG00000256499 | 0          | NA          | NA         | NA         | NA         | LINC02468   |
| NA        | ENSG00000256500 | 237.829595 | -0.99318637 | 0.23979522 | 4.11E-06   | 4.20E-05   |             |
| NA        | ENSG00000256502 | 0          | NA          | NA         | NA         | NA         |             |
| NA        | ENSG00000256504 | 0          | NA          | NA         | NA         | NA         |             |
| 101928200 | ENSG00000256508 | 0.15069912 | -0.01848503 | 0.38480575 | 0.84537521 | NA         | MRGPRF-AS1  |
| NA        | ENSG00000256512 | 0          | NA          | NA         | NA         | NA         |             |
| NA        | ENSG00000256513 | 0          | NA          | NA         | NA         | NA         |             |
| NA        | ENSG00000256514 | 23.7927964 | -0.13135879 | 0.36900945 | 0.41100323 | 0.63865537 |             |
| NA        | ENSG00000256518 | 0          | NA          | NA         | NA         | NA         | FOLR1P1     |
| 11232     | ENSG00000256525 | 701.643339 | 0.14151714  | 0.09416645 | 0.12084181 | 0.28678247 | POLG2       |
| NA        | ENSG00000256533 | 0.47319461 | -0.03505633 | 0.38628445 | 0.49597737 | NA         |             |
| 100129361 | ENSG00000256537 | 582.68628  | -0.06033056 | 0.1075186  | 0.55581845 | 0.7615108  | SMIM10L1    |
| NA        | ENSG00000256538 | 2.15684096 | 0.04798341  | 0.38175608 | 0.52172202 | NA         |             |
| NA        | ENSG00000256540 | 3.74288053 | -0.15038523 | 0.41540964 | 0.13224337 | 0.30529538 |             |
| NA        | ENSG00000256542 | 0          | NA          | NA         | NA         | NA         |             |
| 100506691 | ENSG00000256546 | 10.772515  | -0.1006557  | 0.35206046 | 0.54113106 | 0.74967112 |             |
| NA        | ENSG00000256551 | 0          | NA          | NA         | NA         | NA         | LINC02369   |
| NA        | ENSG00000256552 | 0          | NA          | NA         | NA         | NA         |             |
| NA        | ENSG00000256553 | 0          | NA          | NA         | NA         | NA         | TRAV1-2     |
| NA        | ENSG00000256557 | 0          | NA          | NA         | NA         | NA         |             |
| NA        | ENSG00000256560 | 0          | NA          | NA         | NA         | NA         | LINC01486   |
| NA        | ENSG00000256563 | 0          | NA          | NA         | NA         | NA         | NANOGNBP2   |
| NA        | ENSG00000256564 | 0.68409195 | -0.0207224  | 0.38300355 | 0.65094445 | NA         |             |
| NA        | ENSG00000256566 | 12.0432755 | -0.0099707  | 0.3582661  | 0.93651135 | 0.97351594 |             |
| NA        | ENSG00000256568 | 0          | NA          | NA         | NA         | NA         |             |
| NA        | ENSG00000256569 | 19.2513287 | 0.00148561  | 0.37996921 | 0.98912383 | 0.99604194 |             |
| NA        | ENSG00000256571 | 0          | NA          | NA         | NA         | NA         |             |
| 79290     | ENSG00000256574 | 0          | NA          | NA         | NA         | NA         | OR13A1      |
| 100996246 | ENSG00000256576 | 0          | NA          | NA         | NA         | NA         | LINC02361   |
| 101929384 | ENSG00000256577 | 0.173733   | 0.01914545  | 0.38484597 | 0.78225479 | NA         | SLC6A12-AS1 |
| NA        | ENSG00000256581 | 0          | NA          | NA         | NA         | NA         | NLRP9P1     |
| NA        | ENSG00000256582 | 0          | NA          | NA         | NA         | NA         | LINC02390   |
| NA        | ENSG00000256588 | 1.44039958 | 0.10277173  | 0.40280055 | 0.06938311 | NA         |             |
| NA        | ENSG00000256589 | 0          | NA          | NA         | NA         | NA         | ENPP7P5     |
| NA        | ENSG00000256590 | 0          | NA          | NA         | NA         | NA         | TRDV3       |

|           |                 |            |             |            |            |            |            |
|-----------|-----------------|------------|-------------|------------|------------|------------|------------|
| NA        | ENSG00000256591 | 147.731737 | -0.00434294 | 0.17826035 | 0.97688886 | 0.99214102 |            |
| 374443    | ENSG00000256594 | 86.7516187 | -0.28379112 | 0.24353018 | 0.14337258 | 0.32261677 |            |
| NA        | ENSG00000256596 | 2.40248237 | 0.02293196  | 0.37747637 | 0.77214383 | NA         |            |
| 400087    | ENSG00000256597 | 0          | NA          | NA         | NA         | NA         | LINC02393  |
| NA        | ENSG00000256603 | 0.31723241 | 0.00156863  | 0.38337049 | 0.96282246 | NA         |            |
| NA        | ENSG00000256609 | 0          | NA          | NA         | NA         | NA         |            |
| 1556      | ENSG00000256612 | 1.14881861 | 0.06381112  | 0.39018199 | 0.23005785 | NA         | CYP2B7P    |
| NA        | ENSG00000256614 | 0          | NA          | NA         | NA         | NA         | AK6P1      |
| NA        | ENSG00000256615 | 0          | NA          | NA         | NA         | NA         |            |
| NA        | ENSG00000256616 | 49.0472273 | 0.5927227   | 0.34084383 | 0.01736392 | 0.06502457 |            |
| 100462977 | ENSG00000256618 | 0          | NA          | NA         | NA         | NA         | MTRNR2L1   |
| NA        | ENSG00000256625 | 0          | NA          | NA         | NA         | NA         |            |
| NA        | ENSG00000256626 | 0          | NA          | NA         | NA         | NA         |            |
| NA        | ENSG00000256627 | 0          | NA          | NA         | NA         | NA         |            |
| 100009676 | ENSG00000256628 | 108.116193 | -0.11925875 | 0.19557093 | 0.47823257 | 0.69986975 | ZBTB11-AS1 |
| NA        | ENSG00000256630 | 0          | NA          | NA         | NA         | NA         |            |
| NA        | ENSG00000256632 | 0.66687463 | 0.02592558  | 0.38361953 | 0.58853713 | NA         |            |
| NA        | ENSG00000256633 | 0.18922458 | 0.01954053  | 0.38488496 | 0.78225479 | NA         | PDE2A-AS2  |
| NA        | ENSG00000256637 | 0.52119901 | 0.02576573  | 0.38568143 | 0.51723676 | NA         | LINC01965  |
| NA        | ENSG00000256640 | 0          | NA          | NA         | NA         | NA         |            |
| 649159    | ENSG00000256642 | 0          | NA          | NA         | NA         | NA         | LINC00273  |
| 105370070 | ENSG00000256643 | 0          | NA          | NA         | NA         | NA         | LINC02441  |
| NA        | ENSG00000256646 | 133.183293 | -0.37791087 | 0.24712197 | 0.05680529 | 0.16421638 |            |
| NA        | ENSG00000256650 | 0          | NA          | NA         | NA         | NA         | RERG-IT1   |
| NA        | ENSG00000256651 | 10.0476336 | 0.14107103  | 0.3670918  | 0.40085154 | 0.62929088 |            |
| NA        | ENSG00000256654 | 0          | NA          | NA         | NA         | NA         |            |
| NA        | ENSG00000256657 | 0          | NA          | NA         | NA         | NA         |            |
| NA        | ENSG00000256658 | 0          | NA          | NA         | NA         | NA         |            |
| 101927694 | ENSG00000256659 | 0          | NA          | NA         | NA         | NA         | LINC02368  |
| 387837    | ENSG00000256660 | 0          | NA          | NA         | NA         | NA         | CLEC12B    |
| NA        | ENSG00000256661 | 0          | NA          | NA         | NA         | NA         | A2ML1-AS1  |
| NA        | ENSG00000256663 | 104.380703 | -0.71081893 | 0.25355628 | 0.00095166 | 0.00567675 |            |
| NA        | ENSG00000256664 | 55.4706984 | -0.04952945 | 0.25933203 | 0.79505532 | 0.90585603 |            |
| NA        | ENSG00000256667 | 96.3204338 | 0.35652136  | 0.23211687 | 0.06209936 | 0.17590681 | KLRA1P     |
| NA        | ENSG00000256670 | 0          | NA          | NA         | NA         | NA         |            |
| 100288695 | ENSG00000256671 | 2.42541013 | 0.11817953  | 0.41028465 | 0.02719726 | NA         | LIMS4      |
| NA        | ENSG00000256672 | 0          | NA          | NA         | NA         | NA         | LINC02455  |
| NA        | ENSG00000256673 | 0          | NA          | NA         | NA         | NA         |            |

|           |                 |            |             |            |            |            |              |
|-----------|-----------------|------------|-------------|------------|------------|------------|--------------|
| NA        | ENSG00000256674 | 0.18922458 | 0.01954053  | 0.38488496 | 0.78225479 | NA         |              |
| NA        | ENSG00000256678 | 0.173124   | -0.01911262 | 0.38486262 | 0.84537521 | NA         |              |
| NA        | ENSG00000256681 | 0.15069912 | -0.01848503 | 0.38480575 | 0.84537521 | NA         | MIX23P5      |
| NA        | ENSG00000256682 | 1.20035166 | 0.04114442  | 0.38319448 | 0.50645837 | NA         |              |
| 59348     | ENSG00000256683 | 82.087658  | -0.07596303 | 0.2285693  | 0.6784824  | 0.84291038 | ZNF350       |
| 105369443 | ENSG00000256684 | 0          | NA          | NA         | NA         | NA         | LINC02737    |
| NA        | ENSG00000256686 | 0          | NA          | NA         | NA         | NA         |              |
| 105369332 | ENSG00000256690 | 7.41387307 | 0.06612943  | 0.36110461 | 0.63950093 | 0.81914252 |              |
| NA        | ENSG00000256691 | 0          | NA          | NA         | NA         | NA         |              |
| NA        | ENSG00000256694 | 1.731172   | -0.07793451 | 0.3894879  | 0.29601385 | NA         |              |
| NA        | ENSG00000256695 | 0          | NA          | NA         | NA         | NA         |              |
| 101927735 | ENSG00000256699 | 0          | NA          | NA         | NA         | NA         | TMEM132D-AS2 |
| NA        | ENSG00000256704 | 0.14931947 | -0.01844332 | 0.38480212 | 0.84537521 | NA         | ENTR1P1      |
| NA        | ENSG00000256705 | 0.16735865 | 0.01897177  | 0.38482933 | 0.78225479 | NA         |              |
| NA        | ENSG00000256706 | 0          | NA          | NA         | NA         | NA         |              |
| NA        | ENSG00000256708 | 0          | NA          | NA         | NA         | NA         |              |
| NA        | ENSG00000256709 | 0          | NA          | NA         | NA         | NA         | CSGALNACT2P2 |
| NA        | ENSG00000256712 | 0.65758703 | 0.02031301  | 0.38369372 | 0.63484073 | NA         |              |
| 5222      | ENSG00000256713 | 1.13143215 | -0.0320822  | 0.38163237 | 0.61187548 | NA         | PGA5         |
| NA        | ENSG00000256714 | 0          | NA          | NA         | NA         | NA         |              |
| NA        | ENSG00000256717 | 0          | NA          | NA         | NA         | NA         | LINC02698    |
| NA        | ENSG00000256720 | 2.74074864 | 0.07268425  | 0.37971532 | 0.48019018 | 0.70144111 | BTG1P1       |
| NA        | ENSG00000256721 | 0          | NA          | NA         | NA         | NA         | CACNA1C-IT3  |
| NA        | ENSG00000256723 | 0.52409736 | 0.03154951  | 0.38609571 | 0.47152305 | NA         |              |
| 100996671 | ENSG00000256732 | 0          | NA          | NA         | NA         | NA         |              |
| NA        | ENSG00000256733 | 0          | NA          | NA         | NA         | NA         |              |
| NA        | ENSG00000256734 | 0          | NA          | NA         | NA         | NA         |              |
| NA        | ENSG00000256737 | 0          | NA          | NA         | NA         | NA         | RBBP4P5      |
| NA        | ENSG00000256739 | 0.83138508 | 0.02108215  | 0.38087387 | 0.72843971 | NA         |              |
| NA        | ENSG00000256742 | 4.19183543 | 0.08925245  | 0.37683271 | 0.46817695 | 0.69110148 | KDM2B-DT     |
| NA        | ENSG00000256745 | 0          | NA          | NA         | NA         | NA         | ARPC3P3      |
| 101928943 | ENSG00000256746 | 0          | NA          | NA         | NA         | NA         | MADD-AS1     |
| NA        | ENSG00000256747 | 0          | NA          | NA         | NA         | NA         |              |
| NA        | ENSG00000256748 | 0          | NA          | NA         | NA         | NA         |              |
| NA        | ENSG00000256750 | 0          | NA          | NA         | NA         | NA         | LINC02423    |
| NA        | ENSG00000256751 | 4.42355337 | 0.21115467  | 0.45749305 | 0.05931858 | 0.16962822 | PLBD1-AS1    |
| NA        | ENSG00000256752 | 0          | NA          | NA         | NA         | NA         | HPRT1P3      |
| NA        | ENSG00000256756 | 0          | NA          | NA         | NA         | NA         | TIMM17BP1    |

|           |                 |            |             |            |            |            |             |
|-----------|-----------------|------------|-------------|------------|------------|------------|-------------|
| NA        | ENSG00000256757 | 0.47367873 | -0.02845508 | 0.38580975 | 0.54267058 | NA         |             |
| 246744    | ENSG00000256762 | 0.4733184  | -0.03506261 | 0.38628508 | 0.49589089 | NA         | STH         |
| NA        | ENSG00000256769 | 0          | NA          | NA         | NA         | NA         | CACNA1C-AS3 |
| 56242     | ENSG00000256771 | 398.136597 | -0.05714496 | 0.12656222 | 0.63166026 | 0.81371846 | ZNF253      |
| NA        | ENSG00000256774 | 0          | NA          | NA         | NA         | NA         |             |
| NA        | ENSG00000256777 | 0          | NA          | NA         | NA         | NA         | PDCL3P7     |
| NA        | ENSG00000256779 | 0          | NA          | NA         | NA         | NA         |             |
| NA        | ENSG00000256783 | 0.14931947 | -0.01844332 | 0.38480212 | 0.84537521 | NA         |             |
| NA        | ENSG00000256789 | 0          | NA          | NA         | NA         | NA         |             |
| 100431172 | ENSG00000256797 | 0          | NA          | NA         | NA         | NA         | KLRF2       |
| NA        | ENSG00000256799 | 0          | NA          | NA         | NA         | NA         |             |
| 100130111 | ENSG00000256802 | 0.51566203 | 0.0311389   | 0.38605511 | 0.47755756 | NA         |             |
| NA        | ENSG00000256803 | 0          | NA          | NA         | NA         | NA         |             |
| NA        | ENSG00000256804 | 0          | NA          | NA         | NA         | NA         |             |
| 388327    | ENSG00000256806 | 131.060364 | 0.10497606  | 0.18774233 | 0.52287692 | 0.73594481 | C17orf100   |
| NA        | ENSG00000256810 | 0          | NA          | NA         | NA         | NA         |             |
| NA        | ENSG00000256811 | 0.18922458 | 0.01954053  | 0.38488496 | 0.78225479 | NA         |             |
| 84290     | ENSG00000256812 | 2.36367657 | 0.06674274  | 0.38000515 | 0.49277449 | NA         | CAPNS2      |
| NA        | ENSG00000256813 | 0          | NA          | NA         | NA         | NA         |             |
| NA        | ENSG00000256814 | 0          | NA          | NA         | NA         | NA         |             |
| NA        | ENSG00000256817 | 0          | NA          | NA         | NA         | NA         | TPT1P12     |
| NA        | ENSG00000256824 | 0.48654729 | 0.01099911  | 0.38338099 | 0.78944986 | NA         |             |
| NA        | ENSG00000256825 | 0          | NA          | NA         | NA         | NA         |             |
| NA        | ENSG00000256826 | 0.94580704 | -0.04827941 | 0.38535233 | 0.40015495 | NA         | ATP5MFP4    |
| NA        | ENSG00000256827 | 2.93466506 | 0.11209287  | 0.39474022 | 0.26562276 | 0.48795885 |             |
| NA        | ENSG00000256835 | 0          | NA          | NA         | NA         | NA         |             |
| NA        | ENSG00000256837 | 0          | NA          | NA         | NA         | NA         | CACNA1C-IT1 |
| NA        | ENSG00000256843 | 0          | NA          | NA         | NA         | NA         |             |
| NA        | ENSG00000256844 | 0          | NA          | NA         | NA         | NA         | MEF2BNBP1   |
| NA        | ENSG00000256847 | 0          | NA          | NA         | NA         | NA         | CCND2P1     |
| NA        | ENSG00000256849 | 3.21472939 | -0.05102096 | 0.37591319 | 0.60527815 | 0.7952267  | TCP1P3      |
| NA        | ENSG00000256851 | 0          | NA          | NA         | NA         | NA         |             |
| NA        | ENSG00000256852 | 0          | NA          | NA         | NA         | NA         | KNOP1P1     |
| NA        | ENSG00000256861 | 26.4258891 | 0.02061819  | 0.38445907 | NA         | NA         |             |
| 105369609 | ENSG00000256862 | 0.60819063 | -0.00547299 | 0.38209576 | 0.91215116 | NA         | PARP11-AS1  |
| NA        | ENSG00000256863 | 0.16735865 | 0.01897177  | 0.38482933 | 0.78225479 | NA         |             |
| 160728    | ENSG00000256870 | 0          | NA          | NA         | NA         | NA         | SLC5A8      |
| NA        | ENSG00000256875 | 0.173733   | 0.01914545  | 0.38484597 | 0.78225479 | NA         |             |

|           |                 |            |             |            |            |            |              |
|-----------|-----------------|------------|-------------|------------|------------|------------|--------------|
| NA        | ENSG00000256879 | 2.96601907 | 0.11800671  | 0.40567038 | 0.1103476  | 0.2677814  |              |
| 105370024 | ENSG00000256884 | 0          | NA          | NA         | NA         | NA         |              |
| 101928162 | ENSG00000256888 | 0          | NA          | NA         | NA         | NA         | LINC02366    |
| 100288485 | ENSG00000256892 | 0          | NA          | NA         | NA         | NA         | MTRNR2L7     |
| NA        | ENSG00000256894 | 0          | NA          | NA         | NA         | NA         |              |
| NA        | ENSG00000256896 | 0          | NA          | NA         | NA         | NA         | PSMC1P8      |
| NA        | ENSG00000256897 | 8.09406785 | -0.02253191 | 0.35253262 | 0.8727672  | 0.94439555 |              |
| NA        | ENSG00000256898 | 1.68213667 | 0.00922617  | 0.37822739 | 0.8979844  | NA         | ARPC3P4      |
| NA        | ENSG00000256902 | 2.89647571 | 0.03054033  | 0.37176339 | 0.76593806 | 0.89234011 | IQSEC3P1     |
| NA        | ENSG00000256904 | 0          | NA          | NA         | NA         | NA         | A2ML1-AS2    |
| NA        | ENSG00000256906 | 0          | NA          | NA         | NA         | NA         | LINC02419    |
| NA        | ENSG00000256912 | 0          | NA          | NA         | NA         | NA         | GCNAP1       |
| NA        | ENSG00000256913 | 0          | NA          | NA         | NA         | NA         |              |
| NA        | ENSG00000256915 | 0          | NA          | NA         | NA         | NA         |              |
| NA        | ENSG00000256916 | 0          | NA          | NA         | NA         | NA         |              |
| NA        | ENSG00000256917 | 0          | NA          | NA         | NA         | NA         |              |
| NA        | ENSG00000256923 | 0          | NA          | NA         | NA         | NA         |              |
| NA        | ENSG00000256925 | 0          | NA          | NA         | NA         | NA         | ADGRA1-AS1   |
| NA        | ENSG00000256928 | 0          | NA          | NA         | NA         | NA         |              |
| NA        | ENSG00000256937 | 5.71834525 | 0.05017613  | 0.36409567 | 0.69781777 | 0.85403149 | KRT17P8      |
| NA        | ENSG00000256940 | 8.83223299 | 0.03524666  | 0.34704648 | 0.82029904 | 0.91817957 | PPP1R14B-AS1 |
| NA        | ENSG00000256943 | 0          | NA          | NA         | NA         | NA         |              |
| NA        | ENSG00000256944 | 0          | NA          | NA         | NA         | NA         |              |
| NA        | ENSG00000256947 | 0          | NA          | NA         | NA         | NA         |              |
| NA        | ENSG00000256948 | 0          | NA          | NA         | NA         | NA         |              |
| NA        | ENSG00000256950 | 0.97130183 | 0.00455456  | 0.38090459 | 0.93430764 | NA         |              |
| NA        | ENSG00000256951 | 0          | NA          | NA         | NA         | NA         |              |
| NA        | ENSG00000256955 | 0.4919264  | 0.013898    | 0.38306729 | 0.76064497 | NA         |              |
| NA        | ENSG00000256963 | 0          | NA          | NA         | NA         | NA         |              |
| NA        | ENSG00000256966 | 28.7870951 | -0.48689067 | 0.51879762 | 0.05852543 | 0.16798965 |              |
| NA        | ENSG00000256967 | 14.8394508 | 0.11942453  | 0.34916527 | 0.49588936 | 0.71459926 |              |
| NA        | ENSG00000256968 | 0          | NA          | NA         | NA         | NA         | SNRPEP2      |
| NA        | ENSG00000256969 | 0          | NA          | NA         | NA         | NA         |              |
| NA        | ENSG00000256971 | 0          | NA          | NA         | NA         | NA         | LINC00508    |
| NA        | ENSG00000256972 | 0          | NA          | NA         | NA         | NA         |              |
| NA        | ENSG00000256973 | 20.729611  | -0.22450135 | 0.35482543 | 0.27019549 | 0.49338964 |              |
| NA        | ENSG00000256975 | 0.18922458 | 0.01954053  | 0.38488496 | 0.78225479 | NA         |              |
| 96626     | ENSG00000256977 | 14.6414792 | -0.07845421 | 0.36257015 | 0.58158879 | 0.77868762 | LIMS3        |

|           |                 |            |             |            |            |            |                 |
|-----------|-----------------|------------|-------------|------------|------------|------------|-----------------|
| 100129128 | ENSG00000256980 | 1.36622895 | 0.03984765  | 0.38355509 | 0.49655537 | NA         | KHDC1L          |
| NA        | ENSG00000256981 | 1.22372644 | -0.00626915 | 0.37945854 | 0.92127623 | NA         |                 |
| NA        | ENSG00000256982 | 20.8685753 | -0.16432838 | 0.34225574 | 0.3913658  | 0.62087218 |                 |
| NA        | ENSG00000256984 | 0.52321694 | 0.031506    | 0.3860913  | 0.47216971 | NA         |                 |
| NA        | ENSG00000256986 | 0          | NA          | NA         | NA         | NA         |                 |
| NA        | ENSG00000256987 | 0          | NA          | NA         | NA         | NA         |                 |
| NA        | ENSG00000256988 | 0.173124   | -0.01911262 | 0.38486262 | 0.84537521 | NA         |                 |
| NA        | ENSG00000256994 | 0          | NA          | NA         | NA         | NA         | LINC02378       |
| NA        | ENSG00000256995 | 0          | NA          | NA         | NA         | NA         |                 |
| NA        | ENSG00000257000 | 0          | NA          | NA         | NA         | NA         |                 |
| NA        | ENSG00000257002 | 0.36304439 | 0.0238954   | 0.3853925  | 0.60992211 | NA         |                 |
| NA        | ENSG00000257004 | 0          | NA          | NA         | NA         | NA         |                 |
| NA        | ENSG00000257005 | 0          | NA          | NA         | NA         | NA         |                 |
| 350383    | ENSG00000257008 | 0          | NA          | NA         | NA         | NA         | GPR142          |
| NA        | ENSG00000257009 | 0.15069912 | -0.01848503 | 0.38480575 | 0.84537521 | NA         |                 |
| NA        | ENSG00000257012 | 0          | NA          | NA         | NA         | NA         |                 |
| NA        | ENSG00000257016 | 0          | NA          | NA         | NA         | NA         | SLC25A39P2      |
| 3240      | ENSG00000257017 | 0          | NA          | NA         | NA         | NA         | HP              |
| NA        | ENSG00000257021 | 0          | NA          | NA         | NA         | NA         | HSPE1P20        |
| NA        | ENSG00000257022 | 0.173124   | -0.01911262 | 0.38486262 | 0.84537521 | NA         |                 |
| NA        | ENSG00000257023 | 0          | NA          | NA         | NA         | NA         |                 |
| NA        | ENSG00000257025 | 0          | NA          | NA         | NA         | NA         |                 |
| NA        | ENSG00000257027 | 54.9390941 | -0.4582499  | 0.35419385 | 0.05629144 | 0.16308734 |                 |
| NA        | ENSG00000257035 | 0          | NA          | NA         | NA         | NA         |                 |
| NA        | ENSG00000257037 | 0          | NA          | NA         | NA         | NA         | RARS1P1         |
| NA        | ENSG00000257038 | 6.7314273  | 0.04402316  | 0.36211856 | 0.7374902  | 0.8759911  |                 |
| NA        | ENSG00000257042 | 0.30139824 | -0.02296476 | 0.38527817 | 0.68536535 | NA         |                 |
| NA        | ENSG00000257043 | 0.32504203 | 0.00178043  | 0.38337255 | 0.96326453 | NA         | SRSF3P1         |
| NA        | ENSG00000257045 | 0          | NA          | NA         | NA         | NA         |                 |
| 338821    | ENSG00000257046 | 0          | NA          | NA         | NA         | NA         | SLCO1B3-SLCO1B7 |
| 115072896 | ENSG00000257046 | 0          | NA          | NA         | NA         | NA         | SLCO1B3-SLCO1B7 |
| NA        | ENSG00000257048 | 0.15069912 | -0.01848503 | 0.38480575 | 0.84537521 | NA         | LINC02417       |
| NA        | ENSG00000257052 | 1.06834968 | 0.05037949  | 0.38655705 | 0.34088079 | NA         |                 |
| 105370424 | ENSG00000257056 | 0          | NA          | NA         | NA         | NA         | LINC02282       |
| 643037    | ENSG00000257057 | 0          | NA          | NA         | NA         | NA         | C11orf97        |
| NA        | ENSG00000257058 | 0          | NA          | NA         | NA         | NA         |                 |
| NA        | ENSG00000257060 | 0.34857006 | -0.00510383 | 0.38344901 | 0.9635507  | NA         |                 |
| NA        | ENSG00000257062 | 0          | NA          | NA         | NA         | NA         |                 |

|           |    |                 |            |             |            |            |            |            |
|-----------|----|-----------------|------------|-------------|------------|------------|------------|------------|
|           | NA | ENSG00000257065 | 0          | NA          | NA         | NA         | NA         |            |
|           | NA | ENSG00000257067 | 2.15777754 | 0.05421925  | 0.38138433 | 0.50122365 | NA         | LINC02703  |
| 106780802 | NA | ENSG00000257069 | 14.3250106 | -0.93833815 | 0.85981942 | 0.01386378 | 0.05410254 |            |
|           | NA | ENSG00000257070 | 0          | NA          | NA         | NA         | NA         |            |
|           | NA | ENSG00000257074 | 0.14931947 | -0.01844332 | 0.38480212 | 0.84537521 | NA         | RPL29P33   |
|           | NA | ENSG00000257075 | 0          | NA          | NA         | NA         | NA         | RPEP6      |
|           | NA | ENSG00000257078 | 0          | NA          | NA         | NA         | NA         |            |
|           | NA | ENSG00000257083 | 0          | NA          | NA         | NA         | NA         |            |
| 105369635 | NA | ENSG00000257084 | 0          | NA          | NA         | NA         | NA         | MIR200CHG  |
|           | NA | ENSG00000257086 | 20.5695728 | 0.20026542  | 0.34402557 | 0.31928497 | 0.5469361  |            |
|           | NA | ENSG00000257087 | 0          | NA          | NA         | NA         | NA         |            |
| 57189     | NA | ENSG00000257093 | 2148.26578 | 0.15676131  | 0.07684059 | 0.03722725 | 0.11895745 | DENND11    |
|           | NA | ENSG00000257094 | 0          | NA          | NA         | NA         | NA         |            |
|           | NA | ENSG00000257095 | 0          | NA          | NA         | NA         | NA         |            |
|           | NA | ENSG00000257096 | 0          | NA          | NA         | NA         | NA         |            |
|           | NA | ENSG00000257097 | 0          | NA          | NA         | NA         | NA         | CLIP1-AS1  |
|           | NA | ENSG00000257101 | 0          | NA          | NA         | NA         | NA         | LRRC37A13P |
| 26065     | NA | ENSG00000257103 | 2719.9723  | 0.11486048  | 0.08772634 | 0.17872683 | 0.3746401  | LSM14A     |
|           | NA | ENSG00000257105 | 0.18922458 | 0.01954053  | 0.38488496 | 0.78225479 | NA         |            |
| 283948    | NA | ENSG00000257108 | 15.1418069 | 0.17417378  | 0.37252076 | 0.33119427 | 0.5601308  | NHLRC4     |
|           | NA | ENSG00000257109 | 0          | NA          | NA         | NA         | NA         | OR4F28P    |
|           | NA | ENSG00000257113 | 0          | NA          | NA         | NA         | NA         |            |
| 105369739 | NA | ENSG00000257114 | 0          | NA          | NA         | NA         | NA         | LINC02450  |
| 440153    | NA | ENSG00000257115 | 0.71037271 | 0.04122859  | 0.38727429 | 0.34669872 | NA         | OR11H12    |
|           | NA | ENSG00000257119 | 0          | NA          | NA         | NA         | NA         | EEF1B2P4   |
|           | NA | ENSG00000257120 | 0          | NA          | NA         | NA         | NA         |            |
|           | NA | ENSG00000257121 | 0.173733   | 0.01914545  | 0.38484597 | 0.78225479 | NA         |            |
|           | NA | ENSG00000257122 | 114.038595 | -0.28323527 | 0.23536127 | 0.13620115 | 0.31128106 | RRN3P3     |
|           | NA | ENSG00000257124 | 0          | NA          | NA         | NA         | NA         |            |
|           | NA | ENSG00000257125 | 0          | NA          | NA         | NA         | NA         | KRT127P    |
|           | NA | ENSG00000257126 | 0          | NA          | NA         | NA         | NA         | FOXG1-AS1  |
| 574028    | NA | ENSG00000257127 | 0          | NA          | NA         | NA         | NA         | CLLU1      |
|           | NA | ENSG00000257128 | 0          | NA          | NA         | NA         | NA         |            |
|           | NA | ENSG00000257129 | 0          | NA          | NA         | NA         | NA         |            |
|           | NA | ENSG00000257135 | 9.5541728  | 0.15082857  | 0.37835437 | 0.34747998 | 0.57819389 | ODC1-DT    |
|           | NA | ENSG00000257137 | 0.72538937 | -0.00572068 | 0.38204915 | 0.82058379 | NA         | LINC02874  |
| 5726      | NA | ENSG00000257138 | 0          | NA          | NA         | NA         | NA         | TAS2R38    |
|           | NA | ENSG00000257139 | 0          | NA          | NA         | NA         | NA         | LINC02821  |



|           |                 |            |             |            |            |            |            |
|-----------|-----------------|------------|-------------|------------|------------|------------|------------|
| NA        | ENSG00000257142 | 0          | NA          | NA         | NA         | NA         |            |
| NA        | ENSG00000257146 | 0          | NA          | NA         | NA         | NA         |            |
| 100132594 | ENSG00000257150 | 0          | NA          | NA         | NA         | NA         | PGAM1P5    |
| NA        | ENSG00000257155 | 0          | NA          | NA         | NA         | NA         |            |
| NA        | ENSG00000257157 | 0          | NA          | NA         | NA         | NA         |            |
| NA        | ENSG00000257159 | 0.59954673 | -0.03507742 | 0.3864865  | 0.44255968 | NA         |            |
| NA        | ENSG00000257162 | 5.82444462 | -0.0844024  | 0.37492327 | 0.49292934 | 0.71202899 | MED15P6    |
| 105369738 | ENSG00000257164 | 0          | NA          | NA         | NA         | NA         | LINC02451  |
| NA        | ENSG00000257165 | 0          | NA          | NA         | NA         | NA         |            |
| 100128191 | ENSG00000257167 | 134.227201 | -0.04555907 | 0.18270448 | 0.7757451  | 0.89689877 | TMPO-AS1   |
| NA        | ENSG00000257169 | 0          | NA          | NA         | NA         | NA         |            |
| NA        | ENSG00000257171 | 0          | NA          | NA         | NA         | NA         |            |
| NA        | ENSG00000257173 | 0          | NA          | NA         | NA         | NA         | AK6P2      |
| NA        | ENSG00000257175 | 0          | NA          | NA         | NA         | NA         |            |
| 100506606 | ENSG00000257176 | 28.2615221 | -0.04330939 | 0.30392425 | 0.81529652 | 0.91609463 |            |
| NA        | ENSG00000257178 | 0          | NA          | NA         | NA         | NA         |            |
| NA        | ENSG00000257179 | 0          | NA          | NA         | NA         | NA         | HMG2P6     |
| NA        | ENSG00000257180 | 0          | NA          | NA         | NA         | NA         |            |
| NA        | ENSG00000257181 | 10.5727645 | 0.00881843  | 0.37986549 | 0.89438441 | 0.95442054 |            |
| NA        | ENSG00000257183 | 0          | NA          | NA         | NA         | NA         |            |
| NA        | ENSG00000257184 | 0          | NA          | NA         | NA         | NA         |            |
| NA        | ENSG00000257185 | 1.6699932  | -0.01408749 | 0.37570962 | 0.86451416 | NA         | LINC02293  |
| NA        | ENSG00000257191 | 0          | NA          | NA         | NA         | NA         |            |
| NA        | ENSG00000257193 | 0          | NA          | NA         | NA         | NA         | LINC02385  |
| NA        | ENSG00000257194 | 0          | NA          | NA         | NA         | NA         |            |
| NA        | ENSG00000257195 | 1.55828295 | 0.03706771  | 0.38139885 | 0.58594604 | NA         | HNRNPA1P50 |
| NA        | ENSG00000257198 | 0.32288254 | 0.00126944  | 0.38336752 | 0.96892507 | NA         | FAM205BP   |
| NA        | ENSG00000257199 | 0          | NA          | NA         | NA         | NA         |            |
| NA        | ENSG00000257202 | 0          | NA          | NA         | NA         | NA         |            |
| NA        | ENSG00000257207 | 0.56767373 | 0.02627943  | 0.38574813 | 0.49686938 | NA         |            |
| NA        | ENSG00000257210 | 0          | NA          | NA         | NA         | NA         | NACAP8     |
| 283459    | ENSG00000257218 | 1065.71124 | -0.10445296 | 0.08965933 | 0.23028464 | 0.44622006 | GATC       |
| 105369848 | ENSG00000257219 | 0          | NA          | NA         | NA         | NA         | LNCOG      |
| NA        | ENSG00000257220 | 0          | NA          | NA         | NA         | NA         | PRXL2AP1   |
| NA        | ENSG00000257221 | 0.63459128 | -0.00864486 | 0.38252799 | 0.97746902 | NA         |            |
| NA        | ENSG00000257222 | 0.51864038 | 0.03128432  | 0.38606944 | 0.4754074  | NA         |            |
| NA        | ENSG00000257224 | 0          | NA          | NA         | NA         | NA         |            |
| NA        | ENSG00000257225 | 26.1610105 | 0.12488564  | 0.32985668 | 0.50868257 | 0.72435534 |            |

|           |                 |            |             |            |            |            |             |
|-----------|-----------------|------------|-------------|------------|------------|------------|-------------|
| NA        | ENSG00000257226 | 0          | NA          | NA         | NA         | NA         |             |
| NA        | ENSG00000257228 | 0          | NA          | NA         | NA         | NA         |             |
| NA        | ENSG00000257230 | 0          | NA          | NA         | NA         | NA         | LINC02448   |
| NA        | ENSG00000257231 | 0.14931947 | -0.01844332 | 0.38480212 | 0.84537521 | NA         | DYNLL1P4    |
| NA        | ENSG00000257235 | 0          | NA          | NA         | NA         | NA         |             |
| NA        | ENSG00000257237 | 0          | NA          | NA         | NA         | NA         |             |
| NA        | ENSG00000257239 | 0.18922458 | 0.01954053  | 0.38488496 | 0.78225479 | NA         |             |
| NA        | ENSG00000257241 | 0          | NA          | NA         | NA         | NA         |             |
| 256021    | ENSG00000257242 | 73.072151  | -0.0739344  | 0.26408804 | 0.70083701 | 0.85575596 | LINC01619   |
| NA        | ENSG00000257243 | 6.62359649 | -0.17035384 | 0.40212986 | 0.24525572 | 0.46421231 | PARK7P1     |
| NA        | ENSG00000257246 | 0.85961946 | -0.00959787 | 0.38080599 | 0.86573989 | NA         | PHBP19      |
| NA        | ENSG00000257252 | 2.27770243 | 0.09759332  | 0.40151036 | 0.05005377 | NA         |             |
| NA        | ENSG00000257253 | 0          | NA          | NA         | NA         | NA         |             |
| NA        | ENSG00000257254 | 0          | NA          | NA         | NA         | NA         |             |
| NA        | ENSG00000257256 | 0          | NA          | NA         | NA         | NA         |             |
| NA        | ENSG00000257258 | 0          | NA          | NA         | NA         | NA         |             |
| 101927653 | ENSG00000257259 | 0          | NA          | NA         | NA         | NA         | LINC02388   |
| NA        | ENSG00000257261 | 6.62293628 | -0.09120645 | 0.37287301 | 0.47461528 | 0.69683765 |             |
| NA        | ENSG00000257262 | 0          | NA          | NA         | NA         | NA         |             |
| NA        | ENSG00000257264 | 0          | NA          | NA         | NA         | NA         |             |
| NA        | ENSG00000257265 | 0.173733   | 0.01914545  | 0.38484597 | 0.78225479 | NA         |             |
| 10778     | ENSG00000257267 | 474.535837 | -0.36316444 | 0.15626472 | 0.0109132  | 0.04456018 | ZNF271P     |
| NA        | ENSG00000257268 | 0          | NA          | NA         | NA         | NA         |             |
| NA        | ENSG00000257270 | 1.92923395 | -0.00367721 | 0.37640515 | 0.96124912 | NA         |             |
| NA        | ENSG00000257271 | 0          | NA          | NA         | NA         | NA         | KIRREL3-AS1 |
| NA        | ENSG00000257272 | 0.49309842 | -0.00988986 | 0.38283484 | 0.83686171 | NA         |             |
| NA        | ENSG00000257275 | 0          | NA          | NA         | NA         | NA         |             |
| NA        | ENSG00000257277 | 2.50759145 | -0.06983607 | 0.38415915 | 0.4068197  | NA         |             |
| 100506551 | ENSG00000257279 | 7.73832232 | -0.06844397 | 0.35388344 | 0.65072776 | 0.8254613  |             |
| NA        | ENSG00000257281 | 0.37844916 | 0.02407552  | 0.3854191  | 0.60038877 | NA         |             |
| 105369911 | ENSG00000257283 | 0.97843835 | 0.00513932  | 0.38090486 | 0.92599336 | NA         |             |
| NA        | ENSG00000257284 | 0          | NA          | NA         | NA         | NA         |             |
| 101926933 | ENSG00000257285 | 27.3744464 | -0.06606564 | 0.31571899 | 0.71758787 | 0.86415438 |             |
| NA        | ENSG00000257286 | 0          | NA          | NA         | NA         | NA         |             |
| NA        | ENSG00000257287 | 0          | NA          | NA         | NA         | NA         | H3P35       |
| NA        | ENSG00000257288 | 0          | NA          | NA         | NA         | NA         |             |
| NA        | ENSG00000257289 | 0          | NA          | NA         | NA         | NA         |             |
| NA        | ENSG00000257292 | 0          | NA          | NA         | NA         | NA         |             |

|           |                 |            |             |            |            |            |            |
|-----------|-----------------|------------|-------------|------------|------------|------------|------------|
| NA        | ENSG00000257294 | 0          | NA          | NA         | NA         | NA         |            |
| NA        | ENSG00000257296 | 0          | NA          | NA         | NA         | NA         |            |
| NA        | ENSG00000257298 | 12.7148352 | 0.00686523  | 0.33221206 | 0.96947968 | 0.98853525 |            |
| NA        | ENSG00000257300 | 0          | NA          | NA         | NA         | NA         | HAUS8P1    |
| NA        | ENSG00000257302 | 0.99649392 | 0.00392424  | 0.38010767 | 0.94796903 | NA         | FAHD2P1    |
| NA        | ENSG00000257303 | 51.8316933 | 0.31141158  | 0.29194984 | 0.14335237 | 0.32260788 |            |
| NA        | ENSG00000257307 | 0.14931947 | -0.01844332 | 0.38480212 | 0.84537521 | NA         |            |
| NA        | ENSG00000257308 | 0          | NA          | NA         | NA         | NA         |            |
| NA        | ENSG00000257310 | 2.31300212 | -0.00435875 | 0.37187682 | 0.96240189 | NA         |            |
| 100381270 | ENSG00000257315 | 2689.18048 | -0.05774667 | 0.17853773 | 0.71328211 | 0.86190557 | ZBED6      |
| NA        | ENSG00000257316 | 0          | NA          | NA         | NA         | NA         | ASS1P14    |
| NA        | ENSG00000257319 | 0          | NA          | NA         | NA         | NA         |            |
| NA        | ENSG00000257322 | 1.2305834  | -0.06736655 | 0.39114492 | 0.20365523 | NA         |            |
| NA        | ENSG00000257323 | 0          | NA          | NA         | NA         | NA         |            |
| NA        | ENSG00000257325 | 0          | NA          | NA         | NA         | NA         |            |
| NA        | ENSG00000257327 | 0.47019855 | -0.02828694 | 0.38579521 | 0.54546301 | NA         |            |
| NA        | ENSG00000257329 | 0          | NA          | NA         | NA         | NA         |            |
| NA        | ENSG00000257331 | 0          | NA          | NA         | NA         | NA         | RACGAP1P1  |
| NA        | ENSG00000257332 | 0          | NA          | NA         | NA         | NA         | HNRNPA1P69 |
| 8972      | ENSG00000257335 | 1.2525286  | 0.06028491  | 0.38844417 | 0.27051008 | NA         | MGAM       |
| NA        | ENSG00000257336 | 0          | NA          | NA         | NA         | NA         | PRELID2P1  |
| 283335    | ENSG00000257337 | 135.781187 | 0.33082339  | 0.20117149 | 0.05599242 | 0.16248203 |            |
| NA        | ENSG00000257341 | 0.173733   | 0.01914545  | 0.38484597 | 0.78225479 | NA         |            |
| NA        | ENSG00000257342 | 0.173124   | -0.01911262 | 0.38486262 | 0.84537521 | NA         |            |
| NA        | ENSG00000257343 | 0          | NA          | NA         | NA         | NA         |            |
| NA        | ENSG00000257345 | 0          | NA          | NA         | NA         | NA         | LINC02413  |
| NA        | ENSG00000257346 | 0.18922458 | 0.01954053  | 0.38488496 | 0.78225479 | NA         |            |
| NA        | ENSG00000257350 | 0.16735865 | 0.01897177  | 0.38482933 | 0.78225479 | NA         |            |
| NA        | ENSG00000257354 | 77.6434949 | -0.09623454 | 0.22040599 | 0.59384514 | 0.78750669 |            |
| NA        | ENSG00000257355 | 0.6497544  | 0.00297196  | 0.38249178 | 0.94332726 | NA         |            |
| NA        | ENSG00000257356 | 0          | NA          | NA         | NA         | NA         | BNIP3P6    |
| NA        | ENSG00000257359 | 0          | NA          | NA         | NA         | NA         |            |
| NA        | ENSG00000257360 | 0          | NA          | NA         | NA         | NA         |            |
| NA        | ENSG00000257364 | 0          | NA          | NA         | NA         | NA         | VENTXP3    |
| 2342      | ENSG00000257365 | 448.914249 | -0.19203887 | 0.13823917 | 0.13503333 | 0.30949318 | FNTB       |
| 100529261 | ENSG00000257365 | 448.914249 | -0.19203887 | 0.13823917 | 0.13503333 | 0.30949318 | FNTB       |
| NA        | ENSG00000257366 | 4.14897888 | 0.00406379  | 0.38296722 | 0.92380158 | 0.96836389 |            |
| NA        | ENSG00000257368 | 0.173124   | -0.01911262 | 0.38486262 | 0.84537521 | NA         |            |

|        |                 |            |             |            |            |            |         |
|--------|-----------------|------------|-------------|------------|------------|------------|---------|
| NA     | ENSG00000257373 | 0          | NA          | NA         | NA         | NA         |         |
| NA     | ENSG00000257376 | 0          | NA          | NA         | NA         | NA         |         |
| NA     | ENSG00000257378 | 0          | NA          | NA         | NA         | NA         |         |
| NA     | ENSG00000257379 | 158.27738  | 0.26230263  | 0.18083269 | 0.10085633 | 0.25087634 |         |
| NA     | ENSG00000257384 | 0.36360417 | 0.02389932  | 0.38539312 | 0.6096453  | NA         |         |
| NA     | ENSG00000257386 | 17.6555343 | -0.05500323 | 0.3860858  | 0.3732318  | 0.60227075 |         |
| NA     | ENSG00000257389 | 0          | NA          | NA         | NA         | NA         |         |
| NA     | ENSG00000257390 | 16.0563622 | -0.02854144 | 0.3308238  | 0.86461397 | 0.94007513 |         |
| NA     | ENSG00000257391 | 0          | NA          | NA         | NA         | NA         |         |
| NA     | ENSG00000257392 | 0          | NA          | NA         | NA         | NA         |         |
| NA     | ENSG00000257395 | 0.30139824 | -0.02296476 | 0.38527817 | 0.68536535 | NA         |         |
| NA     | ENSG00000257398 | 4.09748674 | -0.01515746 | 0.36519013 | 0.8937955  | 0.95410001 |         |
| NA     | ENSG00000257400 | 0          | NA          | NA         | NA         | NA         |         |
| NA     | ENSG00000257402 | 0          | NA          | NA         | NA         | NA         | KRT126P |
| NA     | ENSG00000257403 | 0          | NA          | NA         | NA         | NA         |         |
| NA     | ENSG00000257404 | 0          | NA          | NA         | NA         | NA         |         |
| NA     | ENSG00000257405 | 0          | NA          | NA         | NA         | NA         |         |
| NA     | ENSG00000257407 | 0          | NA          | NA         | NA         | NA         |         |
| NA     | ENSG00000257408 | 0          | NA          | NA         | NA         | NA         |         |
| NA     | ENSG00000257410 | 0          | NA          | NA         | NA         | NA         |         |
| NA     | ENSG00000257411 | 0          | NA          | NA         | NA         | NA         |         |
| NA     | ENSG00000257414 | 0          | NA          | NA         | NA         | NA         | OR6C73P |
| NA     | ENSG00000257415 | 0          | NA          | NA         | NA         | NA         |         |
| NA     | ENSG00000257426 | 0          | NA          | NA         | NA         | NA         |         |
| NA     | ENSG00000257429 | 0          | NA          | NA         | NA         | NA         |         |
| NA     | ENSG00000257431 | 0.29863895 | -0.02292439 | 0.3852726  | 0.68753245 | NA         |         |
| NA     | ENSG00000257432 | 0.34624801 | -0.02356563 | 0.38536324 | 0.65270996 | NA         |         |
| NA     | ENSG00000257433 | 6.45570844 | -0.10459282 | 0.37598914 | 0.43252105 | 0.65791748 |         |
| NA     | ENSG00000257434 | 0          | NA          | NA         | NA         | NA         |         |
| NA     | ENSG00000257435 | 0          | NA          | NA         | NA         | NA         |         |
| NA     | ENSG00000257438 | 0          | NA          | NA         | NA         | NA         |         |
| NA     | ENSG00000257443 | 0          | NA          | NA         | NA         | NA         |         |
| NA     | ENSG00000257444 | 0          | NA          | NA         | NA         | NA         | SETP7   |
| 729747 | ENSG00000257446 | 14.5652546 | -0.01277711 | 0.32585815 | 0.93940951 | 0.97474024 | ZNF878  |
| NA     | ENSG00000257449 | 0          | NA          | NA         | NA         | NA         |         |
| NA     | ENSG00000257452 | 0          | NA          | NA         | NA         | NA         |         |
| NA     | ENSG00000257453 | 0.86562001 | -0.0370931  | 0.38692692 | 0.35638876 | NA         |         |
| NA     | ENSG00000257454 | 0.18922458 | 0.01954053  | 0.38488496 | 0.78225479 | NA         |         |

|           |                 |            |             |            |            |            |            |
|-----------|-----------------|------------|-------------|------------|------------|------------|------------|
| NA        | ENSG00000257456 | 0          | NA          | NA         | NA         | NA         |            |
| NA        | ENSG00000257458 | 0          | NA          | NA         | NA         | NA         |            |
| NA        | ENSG00000257464 | 0          | NA          | NA         | NA         | NA         |            |
| NA        | ENSG00000257465 | 0          | NA          | NA         | NA         | NA         | ELOCP32    |
| 102724663 | ENSG00000257467 | 0          | NA          | NA         | NA         | NA         | PPFIA2-AS1 |
| NA        | ENSG00000257470 | 0          | NA          | NA         | NA         | NA         |            |
| NA        | ENSG00000257472 | 0          | NA          | NA         | NA         | NA         |            |
| NA        | ENSG00000257474 | 0          | NA          | NA         | NA         | NA         |            |
| NA        | ENSG00000257475 | 0.34746601 | 0.02370763  | 0.3853651  | 0.61987128 | NA         |            |
| 105369996 | ENSG00000257476 | 0          | NA          | NA         | NA         | NA         | LINC02459  |
| NA        | ENSG00000257477 | 0          | NA          | NA         | NA         | NA         | LINC01154  |
| NA        | ENSG00000257480 | 0          | NA          | NA         | NA         | NA         | MRPL2P1    |
| NA        | ENSG00000257488 | 0          | NA          | NA         | NA         | NA         | LINC02354  |
| NA        | ENSG00000257489 | 33.4478289 | 0.42603731  | 0.38190628 | 0.07757424 | 0.2066702  |            |
| NA        | ENSG00000257493 | 0          | NA          | NA         | NA         | NA         |            |
| NA        | ENSG00000257494 | 0          | NA          | NA         | NA         | NA         |            |
| 100127967 | ENSG00000257495 | 0          | NA          | NA         | NA         | NA         | KRT73-AS1  |
| NA        | ENSG00000257496 | 0.32403417 | 0.0020609   | 0.38337614 | 0.96135073 | NA         |            |
| NA        | ENSG00000257497 | 3.63114929 | 0.04798342  | 0.36988115 | 0.67678586 | 0.84203356 |            |
| NA        | ENSG00000257500 | 0          | NA          | NA         | NA         | NA         |            |
| 643711    | ENSG00000257501 | 0          | NA          | NA         | NA         | NA         | PAFAH1B2P2 |
| NA        | ENSG00000257503 | 0          | NA          | NA         | NA         | NA         | CYB5AP5    |
| NA        | ENSG00000257504 | 0          | NA          | NA         | NA         | NA         | LINC02297  |
| NA        | ENSG00000257506 | 0          | NA          | NA         | NA         | NA         |            |
| NA        | ENSG00000257507 | 0.66053605 | 0.02599335  | 0.38364572 | 0.58813063 | NA         | LINC02373  |
| NA        | ENSG00000257509 | 2.68900832 | -0.01317174 | 0.37167417 | 0.89103067 | 0.95273684 |            |
| NA        | ENSG00000257510 | 0          | NA          | NA         | NA         | NA         | LINC02402  |
| NA        | ENSG00000257511 | 13.8400132 | 0.01819008  | 0.32682142 | 0.91818561 | 0.9653411  |            |
| NA        | ENSG00000257512 | 0.16735865 | 0.01897177  | 0.38482933 | 0.78225479 | NA         |            |
| NA        | ENSG00000257513 | 0          | NA          | NA         | NA         | NA         | NPIP1P     |
| NA        | ENSG00000257514 | 0          | NA          | NA         | NA         | NA         |            |
| NA        | ENSG00000257515 | 0          | NA          | NA         | NA         | NA         |            |
| NA        | ENSG00000257517 | 0          | NA          | NA         | NA         | NA         |            |
| NA        | ENSG00000257519 | 0          | NA          | NA         | NA         | NA         |            |
| 253970    | ENSG00000257520 | 0          | NA          | NA         | NA         | NA         |            |
| NA        | ENSG00000257522 | 0          | NA          | NA         | NA         | NA         |            |
| 105370425 | ENSG00000257523 | 0          | NA          | NA         | NA         | NA         | LINC02326  |
| 30815     | ENSG00000257524 | 176.103272 | 0.05694651  | 0.19125073 | 0.73233453 | 0.87210781 |            |

|           |                 |            |             |            |            |            |                |
|-----------|-----------------|------------|-------------|------------|------------|------------|----------------|
| NA        | ENSG00000257526 | 0.15069912 | -0.01848503 | 0.38480575 | 0.84537521 | NA         |                |
| NA        | ENSG00000257527 | 0.52119901 | 0.02576573  | 0.38568143 | 0.51723676 | NA         |                |
| NA        | ENSG00000257528 | 0          | NA          | NA         | NA         | NA         | KRT8P19        |
| 100529097 | ENSG00000257529 | 1967.36762 | -0.70408759 | 0.11438312 | 1.72E-10   | 3.23E-09   | RPL36A-HNRNPH2 |
| NA        | ENSG00000257530 | 0          | NA          | NA         | NA         | NA         |                |
| NA        | ENSG00000257531 | 0.55285912 | 0.03293476  | 0.386238   | 0.45153838 | NA         |                |
| NA        | ENSG00000257534 | 4.71778098 | 0.09401345  | 0.37809801 | 0.44754802 | 0.67145741 |                |
| NA        | ENSG00000257539 | 0.65677707 | 0.00371355  | 0.38193337 | 0.93651251 | NA         | HSPA8P14       |
| 105369785 | ENSG00000257541 | 0          | NA          | NA         | NA         | NA         | LINC02403      |
| 26628     | ENSG00000257542 | 0.36297927 | 0.02389494  | 0.38539243 | 0.60995431 | NA         | OR7E47P        |
| NA        | ENSG00000257543 | 0          | NA          | NA         | NA         | NA         |                |
| 100287944 | ENSG00000257545 | 2.25979605 | 0.03763958  | 0.37878022 | 0.63400754 | NA         |                |
| NA        | ENSG00000257548 | 0          | NA          | NA         | NA         | NA         |                |
| 100652999 | ENSG00000257550 | 2.65385598 | 0.09653806  | 0.39131999 | 0.28950588 | 0.51546747 |                |
| 100873924 | ENSG00000257551 | 0.32476569 | 0.00159251  | 0.38337048 | 0.96506177 | NA         | HLX-AS1        |
| NA        | ENSG00000257553 | 0.15069912 | -0.01848503 | 0.38480575 | 0.84537521 | NA         |                |
| NA        | ENSG00000257556 | 26.9555551 | 0.00681197  | 0.31128618 | 0.97313084 | 0.99002934 | LINC02298      |
| NA        | ENSG00000257557 | 19.3797226 | 0.12372412  | 0.3262688  | 0.51536254 | 0.72968723 | PPP1R12A-AS1   |
| NA        | ENSG00000257558 | 0          | NA          | NA         | NA         | NA         |                |
| NA        | ENSG00000257564 | 0          | NA          | NA         | NA         | NA         |                |
| NA        | ENSG00000257568 | 0          | NA          | NA         | NA         | NA         |                |
| NA        | ENSG00000257569 | 0          | NA          | NA         | NA         | NA         | GSTP1P1        |
| NA        | ENSG00000257570 | 0          | NA          | NA         | NA         | NA         |                |
| NA        | ENSG00000257572 | 0          | NA          | NA         | NA         | NA         | SSBL3P         |
| NA        | ENSG00000257576 | 0.81202142 | -0.00604501 | 0.38077535 | 0.91503961 | NA         | HSPD1P4        |
| NA        | ENSG00000257579 | 0.14931947 | -0.01844332 | 0.38480212 | 0.84537521 | NA         |                |
| NA        | ENSG00000257580 | 0          | NA          | NA         | NA         | NA         |                |
| 101927324 | ENSG00000257582 | 0          | NA          | NA         | NA         | NA         | LINC01475      |
| 101101773 | ENSG00000257585 | 0          | NA          | NA         | NA         | NA         | LINC00609      |
| NA        | ENSG00000257586 | 0          | NA          | NA         | NA         | NA         |                |
| NA        | ENSG00000257587 | 0          | NA          | NA         | NA         | NA         |                |
| 101927318 | ENSG00000257588 | 1.3335031  | 0.07958237  | 0.3925599  | 0.20044808 | NA         |                |
| 90589     | ENSG00000257591 | 70.774319  | -0.14747387 | 0.26229852 | 0.45093438 | 0.67429441 | ZNF625         |
| 8693      | ENSG00000257594 | 76.38788   | 0.37469437  | 0.29010878 | 0.0830517  | 0.21740938 | GALNT4         |
| 105369984 | ENSG00000257595 | 1.47719452 | 0.02077592  | 0.37922311 | 0.76675366 | NA         | LINC02356      |
| 112935960 | ENSG00000257596 | 5.49633159 | 0.05188327  | 0.36595385 | 0.68066827 | 0.84396798 | SCAT2          |
| 101055625 | ENSG00000257599 | 0.16735865 | 0.01897177  | 0.38482933 | 0.78225479 | NA         | OVCH1-AS1      |
| NA        | ENSG00000257603 | 0          | NA          | NA         | NA         | NA         |                |

|           |                 |            |             |            |            |            |           |
|-----------|-----------------|------------|-------------|------------|------------|------------|-----------|
| NA        | ENSG00000257604 | 0          | NA          | NA         | NA         | NA         |           |
| NA        | ENSG00000257605 | 0.63895644 | -0.0183147  | 0.38288562 | 0.68630683 | NA         | MYG1-AS1  |
| NA        | ENSG00000257607 | 0          | NA          | NA         | NA         | NA         |           |
| NA        | ENSG00000257609 | 0          | NA          | NA         | NA         | NA         |           |
| NA        | ENSG00000257611 | 0          | NA          | NA         | NA         | NA         |           |
| 101927081 | ENSG00000257612 | 0.38033412 | 0.01155874  | 0.38380794 | 0.85659386 | NA         | MIR4307HG |
| NA        | ENSG00000257614 | 0          | NA          | NA         | NA         | NA         |           |
| NA        | ENSG00000257616 | 0.15069912 | -0.01848503 | 0.38480575 | 0.84537521 | NA         |           |
| 379025    | ENSG00000257621 | 902.198554 | -0.10442754 | 0.08517861 | 0.20868246 | 0.4165387  | PSMA3-AS1 |
| NA        | ENSG00000257622 | 2.17948077 | 0.03487031  | 0.38049835 | 0.62620037 | NA         |           |
| NA        | ENSG00000257624 | 0.34624801 | -0.02356563 | 0.38536324 | 0.65270996 | NA         |           |
| NA        | ENSG00000257629 | 0          | NA          | NA         | NA         | NA         |           |
| NA        | ENSG00000257634 | 0          | NA          | NA         | NA         | NA         |           |
| NA        | ENSG00000257635 | 2.99283773 | -0.16912509 | 0.42943886 | 0.07877048 | 0.20918301 |           |
| NA        | ENSG00000257636 | 0          | NA          | NA         | NA         | NA         | G2E3-AS1  |
| NA        | ENSG00000257639 | 0          | NA          | NA         | NA         | NA         |           |
| 105369954 | ENSG00000257642 | 0          | NA          | NA         | NA         | NA         |           |
| NA        | ENSG00000257643 | 0          | NA          | NA         | NA         | NA         |           |
| NA        | ENSG00000257644 | 0          | NA          | NA         | NA         | NA         |           |
| NA        | ENSG00000257645 | 0          | NA          | NA         | NA         | NA         |           |
| NA        | ENSG00000257647 | 0          | NA          | NA         | NA         | NA         |           |
| NA        | ENSG00000257648 | 0          | NA          | NA         | NA         | NA         | CYCSP30   |
| NA        | ENSG00000257649 | 0          | NA          | NA         | NA         | NA         | METTL7AP1 |
| NA        | ENSG00000257653 | 0          | NA          | NA         | NA         | NA         |           |
| NA        | ENSG00000257654 | 0          | NA          | NA         | NA         | NA         |           |
| NA        | ENSG00000257657 | 0.18922458 | 0.01954053  | 0.38488496 | 0.78225479 | NA         |           |
| NA        | ENSG00000257658 | 0          | NA          | NA         | NA         | NA         |           |
| 100506125 | ENSG00000257660 | 2.20833247 | -0.0077292  | 0.37304752 | 0.93217607 | NA         | ADCY6-DT  |
| NA        | ENSG00000257662 | 0          | NA          | NA         | NA         | NA         | EIF4A1P12 |
| NA        | ENSG00000257663 | 0.64930469 | 0.00270646  | 0.38248869 | 0.94822116 | NA         |           |
| NA        | ENSG00000257664 | 0          | NA          | NA         | NA         | NA         | RSL24D1P5 |
| NA        | ENSG00000257666 | 0.30139824 | -0.02296476 | 0.38527817 | 0.68536535 | NA         | CBX3P5    |
| NA        | ENSG00000257668 | 0          | NA          | NA         | NA         | NA         |           |
| 109729127 | ENSG00000257671 | 0          | NA          | NA         | NA         | NA         | KRT7-AS   |
| NA        | ENSG00000257672 | 0.37844916 | 0.02407552  | 0.3854191  | 0.60038877 | NA         |           |
| NA        | ENSG00000257674 | 0.96503148 | -0.02471571 | 0.38059532 | 0.70115278 | NA         |           |
| NA        | ENSG00000257675 | 0.14931947 | -0.01844332 | 0.38480212 | 0.84537521 | NA         | BTBD10P1  |
| NA        | ENSG00000257677 | 0          | NA          | NA         | NA         | NA         | LINC02464 |

|           |                 |            |             |            |            |            |           |
|-----------|-----------------|------------|-------------|------------|------------|------------|-----------|
| NA        | ENSG00000257680 | 0          | NA          | NA         | NA         | NA         |           |
| NA        | ENSG00000257681 | 2.71274279 | -0.03582909 | 0.37385886 | 0.7118602  | 0.86154673 |           |
| NA        | ENSG00000257682 | 0          | NA          | NA         | NA         | NA         |           |
| NA        | ENSG00000257683 | 0          | NA          | NA         | NA         | NA         | LINC02463 |
| NA        | ENSG00000257687 | 0          | NA          | NA         | NA         | NA         |           |
| NA        | ENSG00000257691 | 0          | NA          | NA         | NA         | NA         |           |
| NA        | ENSG00000257696 | 0.173733   | 0.01914545  | 0.38484597 | 0.78225479 | NA         |           |
| NA        | ENSG00000257698 | 106.928982 | -0.07101843 | 0.20832426 | 0.68407216 | 0.84597592 | GIHCG     |
| NA        | ENSG00000257700 | 0          | NA          | NA         | NA         | NA         |           |
| NA        | ENSG00000257702 | 54.8882957 | 1.05691211  | 0.35562583 | 0.00028641 | 0.00196215 | LBX2-AS1  |
| NA        | ENSG00000257703 | 0          | NA          | NA         | NA         | NA         |           |
| 255783    | ENSG00000257704 | 85.1235464 | 0.17908175  | 0.21897456 | 0.32364339 | 0.55140274 | INAFM1    |
| 100505978 | ENSG00000257711 | 3.03345729 | 0.01949005  | 0.37332372 | 0.8325665  | 0.92392457 |           |
| NA        | ENSG00000257715 | 0          | NA          | NA         | NA         | NA         |           |
| NA        | ENSG00000257718 | 0          | NA          | NA         | NA         | NA         | CPNE8-AS1 |
| NA        | ENSG00000257720 | 0          | NA          | NA         | NA         | NA         | ILF2P2    |
| NA        | ENSG00000257721 | 0          | NA          | NA         | NA         | NA         |           |
| NA        | ENSG00000257723 | 0          | NA          | NA         | NA         | NA         | CHCHD3P2  |
| 105369891 | ENSG00000257725 | 0          | NA          | NA         | NA         | NA         | LINC02399 |
| NA        | ENSG00000257726 | 0          | NA          | NA         | NA         | NA         |           |
| 10330     | ENSG00000257727 | 744.386029 | -0.02554777 | 0.11319037 | 0.81219451 | 0.91499949 | CNPY2     |
| NA        | ENSG00000257729 | 0          | NA          | NA         | NA         | NA         |           |
| NA        | ENSG00000257730 | 0          | NA          | NA         | NA         | NA         | LSM6P2    |
| NA        | ENSG00000257731 | 0          | NA          | NA         | NA         | NA         |           |
| NA        | ENSG00000257732 | 0          | NA          | NA         | NA         | NA         |           |
| NA        | ENSG00000257735 | 0          | NA          | NA         | NA         | NA         |           |
| NA        | ENSG00000257737 | 0          | NA          | NA         | NA         | NA         |           |
| NA        | ENSG00000257738 | 0          | NA          | NA         | NA         | NA         |           |
| NA        | ENSG00000257740 | 1.18876856 | -0.0058103  | 0.37852154 | 0.9323953  | NA         |           |
| 101928420 | ENSG00000257741 | 0          | NA          | NA         | NA         | NA         | LINC01490 |
| 93432     | ENSG00000257743 | 0.15069912 | -0.01848503 | 0.38480575 | 0.84537521 | NA         | MGAM2     |
| NA        | ENSG00000257746 | 0          | NA          | NA         | NA         | NA         |           |
| 101928449 | ENSG00000257747 | 0          | NA          | NA         | NA         | NA         | LINC02426 |
| NA        | ENSG00000257748 | 0          | NA          | NA         | NA         | NA         | LINC02281 |
| NA        | ENSG00000257750 | 0          | NA          | NA         | NA         | NA         | LINC02445 |
| NA        | ENSG00000257751 | 0          | NA          | NA         | NA         | NA         |           |
| NA        | ENSG00000257752 | 5.24388612 | 0.04647384  | 0.36256999 | 0.72268647 | 0.86754018 |           |
| NA        | ENSG00000257754 | 0          | NA          | NA         | NA         | NA         |           |



|           |                 |            |             |            |            |            |           |
|-----------|-----------------|------------|-------------|------------|------------|------------|-----------|
| NA        | ENSG00000257756 | 0          | NA          | NA         | NA         | NA         | LINC02386 |
| NA        | ENSG00000257757 | 0          | NA          | NA         | NA         | NA         | OR6C7P    |
| NA        | ENSG00000257758 | 0.33471731 | 0.02354391  | 0.38534154 | 0.62842204 | NA         | KRT18P20  |
| NA        | ENSG00000257759 | 0          | NA          | NA         | NA         | NA         |           |
| NA        | ENSG00000257761 | 0.96612184 | -0.00937563 | 0.38192732 | 0.84820033 | NA         |           |
| 101929084 | ENSG00000257762 | 0          | NA          | NA         | NA         | NA         | LINC02401 |
| NA        | ENSG00000257763 | 0.34624801 | -0.02356563 | 0.38536324 | 0.65270996 | NA         | OR5BK1P   |
| NA        | ENSG00000257764 | 0.34686924 | 0.00023121  | 0.38336212 | 0.96626839 | NA         |           |
| NA        | ENSG00000257766 | 0          | NA          | NA         | NA         | NA         |           |
| NA        | ENSG00000257767 | 105.728924 | -0.20218843 | 0.25050471 | 0.29814377 | 0.52487422 |           |
| NA        | ENSG00000257769 | 0.14931947 | -0.01844332 | 0.38480212 | 0.84537521 | NA         |           |
| 101927292 | ENSG00000257771 | 2.08231953 | 0.10515226  | 0.40257956 | 0.08753049 | NA         | LINC02395 |
| NA        | ENSG00000257773 | 0          | NA          | NA         | NA         | NA         | ST13P3    |
| NA        | ENSG00000257777 | 0          | NA          | NA         | NA         | NA         |           |
| NA        | ENSG00000257779 | 0          | NA          | NA         | NA         | NA         |           |
| 644076    | ENSG00000257780 | 0          | NA          | NA         | NA         | NA         | GLYCAM1   |
| NA        | ENSG00000257781 | 0          | NA          | NA         | NA         | NA         |           |
| 101927038 | ENSG00000257784 | 0          | NA          | NA         | NA         | NA         | LINC02400 |
| NA        | ENSG00000257786 | 0          | NA          | NA         | NA         | NA         | AKIRIN1P1 |
| NA        | ENSG00000257787 | 0          | NA          | NA         | NA         | NA         |           |
| NA        | ENSG00000257790 | 0.95743137 | -0.01822246 | 0.38169911 | 0.73799209 | NA         | EIF4A1P4  |
| NA        | ENSG00000257792 | 0          | NA          | NA         | NA         | NA         | OR5BJ1P   |
| NA        | ENSG00000257797 | 0          | NA          | NA         | NA         | NA         |           |
| NA        | ENSG00000257800 | 79.5257829 | -0.06717991 | 0.21791054 | 0.70730388 | 0.85900354 | FNBP1P1   |
| NA        | ENSG00000257802 | 0.65150102 | -0.04657721 | 0.38779463 | 0.35757921 | NA         | MRS2P2    |
| NA        | ENSG00000257803 | 3.33626583 | -0.00176703 | 0.37166629 | 0.98335524 | 0.99428951 | PIGAP1    |
| NA        | ENSG00000257807 | 0          | NA          | NA         | NA         | NA         |           |
| NA        | ENSG00000257808 | 0.14931947 | -0.01844332 | 0.38480212 | 0.84537521 | NA         |           |
| NA        | ENSG00000257809 | 0.93254924 | -0.03557258 | 0.38418074 | 0.47020278 | NA         |           |
| NA        | ENSG00000257813 | 0          | NA          | NA         | NA         | NA         |           |
| 101928062 | ENSG00000257815 | 64.3187176 | -0.29441612 | 0.26207698 | 0.14467786 | 0.32485387 | PRANCR    |
| NA        | ENSG00000257817 | 0.49433257 | 0.00467589  | 0.38304963 | 0.86285712 | NA         |           |
| NA        | ENSG00000257818 | 0.51123866 | 0.01034289  | 0.3832635  | 0.78037986 | NA         | C1GALT1P1 |
| NA        | ENSG00000257820 | 0          | NA          | NA         | NA         | NA         | MRPS6P4   |
| NA        | ENSG00000257823 | 0.14931947 | -0.01844332 | 0.38480212 | 0.84537521 | NA         |           |
| NA        | ENSG00000257824 | 0          | NA          | NA         | NA         | NA         |           |
| NA        | ENSG00000257825 | 0          | NA          | NA         | NA         | NA         |           |
| NA        | ENSG00000257826 | 0          | NA          | NA         | NA         | NA         |           |

|           |                 |            |             |            |            |            |            |
|-----------|-----------------|------------|-------------|------------|------------|------------|------------|
| NA        | ENSG00000257829 | 0          | NA          | NA         | NA         | NA         |            |
| NA        | ENSG00000257830 | 0          | NA          | NA         | NA         | NA         |            |
| NA        | ENSG00000257831 | 0.68981252 | 0.02465428  | 0.38337634 | 0.58468503 | NA         |            |
| NA        | ENSG00000257835 | 0          | NA          | NA         | NA         | NA         |            |
| NA        | ENSG00000257837 | 0          | NA          | NA         | NA         | NA         |            |
| 653786    | ENSG00000257838 | 0.68589721 | -0.01098736 | 0.38275128 | 0.8097363  | NA         | OTOAP1     |
| NA        | ENSG00000257839 | 1.55029938 | -0.0256118  | 0.37998349 | 0.70437611 | NA         |            |
| 102725045 | ENSG00000257842 | 1.12322678 | -0.02843616 | 0.38150985 | 0.6429299  | NA         | LINC02588  |
| NA        | ENSG00000257844 | 0          | NA          | NA         | NA         | NA         | KRT90P     |
| 101927062 | ENSG00000257845 | 0          | NA          | NA         | NA         | NA         | LINC02294  |
| NA        | ENSG00000257846 | 0.62590022 | -0.01586243 | 0.38335305 | 0.71379187 | NA         |            |
| NA        | ENSG00000257847 | 0          | NA          | NA         | NA         | NA         | LSM3P2     |
| NA        | ENSG00000257848 | 0          | NA          | NA         | NA         | NA         |            |
| NA        | ENSG00000257849 | 0          | NA          | NA         | NA         | NA         |            |
| NA        | ENSG00000257851 | 0.32268716 | -0.0232558  | 0.38531893 | 0.66949354 | NA         | HNRNPA3P10 |
| NA        | ENSG00000257852 | 0          | NA          | NA         | NA         | NA         |            |
| NA        | ENSG00000257853 | 1.67874907 | 0.08693393  | 0.39791535 | 0.07706209 | NA         | MED15P1    |
| NA        | ENSG00000257855 | 0          | NA          | NA         | NA         | NA         |            |
| NA        | ENSG00000257858 | 0          | NA          | NA         | NA         | NA         | MTND1P24   |
| 101929110 | ENSG00000257859 | 0          | NA          | NA         | NA         | NA         | CASC18     |
| 101929058 | ENSG00000257860 | 0          | NA          | NA         | NA         | NA         |            |
| NA        | ENSG00000257863 | 0          | NA          | NA         | NA         | NA         |            |
| NA        | ENSG00000257864 | 1.14110027 | -0.06039064 | 0.38746524 | 0.31058519 | NA         |            |
| NA        | ENSG00000257865 | 0          | NA          | NA         | NA         | NA         |            |
| NA        | ENSG00000257869 | 0          | NA          | NA         | NA         | NA         |            |
| NA        | ENSG00000257870 | 0          | NA          | NA         | NA         | NA         |            |
| NA        | ENSG00000257872 | 0          | NA          | NA         | NA         | NA         |            |
| NA        | ENSG00000257875 | 0.50422328 | 0.01221466  | 0.3834197  | 0.7688125  | NA         |            |
| NA        | ENSG00000257878 | 0          | NA          | NA         | NA         | NA         |            |
| NA        | ENSG00000257879 | 0          | NA          | NA         | NA         | NA         |            |
| NA        | ENSG00000257880 | 0          | NA          | NA         | NA         | NA         |            |
| NA        | ENSG00000257883 | 0.52282468 | 0.03148658  | 0.38608934 | 0.47245876 | NA         |            |
| NA        | ENSG00000257884 | 1.55301913 | 0.10830636  | 0.40506179 | 0.05791309 | NA         |            |
| NA        | ENSG00000257885 | 0.30139824 | -0.02296476 | 0.38527817 | 0.68536535 | NA         | PHBP18     |
| NA        | ENSG00000257890 | 0          | NA          | NA         | NA         | NA         |            |
| NA        | ENSG00000257891 | 12.1102928 | 0.03415977  | 0.33686512 | 0.83790165 | 0.92628758 |            |
| 105369900 | ENSG00000257893 | 0          | NA          | NA         | NA         | NA         | LINC02404  |
| NA        | ENSG00000257894 | 0          | NA          | NA         | NA         | NA         |            |

|           |                 |            |             |            |            |            |               |
|-----------|-----------------|------------|-------------|------------|------------|------------|---------------|
| NA        | ENSG00000257896 | 3.37352303 | 0.08833763  | 0.38690002 | 0.35756869 | 0.58770299 |               |
| NA        | ENSG00000257897 | 0          | NA          | NA         | NA         | NA         |               |
| NA        | ENSG00000257900 | 2.9815783  | -0.01010784 | 0.37172377 | 0.91531542 | 0.96406776 |               |
| NA        | ENSG00000257904 | 0          | NA          | NA         | NA         | NA         |               |
| NA        | ENSG00000257905 | 0          | NA          | NA         | NA         | NA         |               |
| NA        | ENSG00000257906 | 0          | NA          | NA         | NA         | NA         | LINC02156     |
| NA        | ENSG00000257907 | 0.31807464 | 0.00101387  | 0.38336579 | 0.96736215 | NA         | EEF1A1P17     |
| NA        | ENSG00000257910 | 0.173124   | -0.01911262 | 0.38486262 | 0.84537521 | NA         |               |
| NA        | ENSG00000257912 | 0          | NA          | NA         | NA         | NA         | LINC02258     |
| 105369758 | ENSG00000257913 | 141.300515 | -0.11609711 | 0.18533873 | 0.47329502 | 0.69536236 | DDN-AS1       |
| NA        | ENSG00000257915 | 0          | NA          | NA         | NA         | NA         | GLULP5        |
| NA        | ENSG00000257918 | 0.81488378 | -0.03782757 | 0.38404363 | 0.49398141 | NA         |               |
| NA        | ENSG00000257920 | 0          | NA          | NA         | NA         | NA         | LINC02409     |
| NA        | ENSG00000257921 | 16.8545024 | 0.01765463  | 0.36413017 | 0.87376907 | 0.94441388 |               |
| 1523      | ENSG00000257923 | 4645.09389 | 0.00069187  | 0.0538647  | 0.99066347 | 0.99679705 | CUX1          |
| NA        | ENSG00000257924 | 0          | NA          | NA         | NA         | NA         | LINC02416     |
| NA        | ENSG00000257925 | 0          | NA          | NA         | NA         | NA         |               |
| NA        | ENSG00000257927 | 0          | NA          | NA         | NA         | NA         | MRPS36P5      |
| NA        | ENSG00000257932 | 0          | NA          | NA         | NA         | NA         |               |
| NA        | ENSG00000257935 | 0          | NA          | NA         | NA         | NA         | LHX5-AS1      |
| NA        | ENSG00000257940 | 0.18922458 | 0.01954053  | 0.38488496 | 0.78225479 | NA         |               |
| NA        | ENSG00000257941 | 3.45868175 | 0.03117068  | 0.37363676 | 0.74752844 | 0.88138554 |               |
| NA        | ENSG00000257943 | 0          | NA          | NA         | NA         | NA         |               |
| NA        | ENSG00000257947 | 0          | NA          | NA         | NA         | NA         |               |
| NA        | ENSG00000257948 | 0          | NA          | NA         | NA         | NA         |               |
| 100134934 | ENSG00000257949 | 382.10343  | 0.37409203  | 0.12454078 | 0.00147496 | 0.00826176 | TEN1          |
| NA        | ENSG00000257950 | 70.1205395 | -0.26651937 | 0.30171315 | 0.20612809 | 0.41317248 | P2RX5-TAX1BP3 |
| NA        | ENSG00000257951 | 0.62337401 | -0.04509847 | 0.38757227 | 0.37379167 | NA         |               |
| NA        | ENSG00000257953 | 0.14931947 | -0.01844332 | 0.38480212 | 0.84537521 | NA         |               |
| NA        | ENSG00000257954 | 0.48543365 | -0.005796   | 0.38312526 | 0.87687391 | NA         |               |
| NA        | ENSG00000257955 | 0          | NA          | NA         | NA         | NA         |               |
| NA        | ENSG00000257956 | 0          | NA          | NA         | NA         | NA         | NOP56P3       |
| NA        | ENSG00000257957 | 0.81202203 | -0.00916527 | 0.38087636 | 0.87132789 | NA         | QRSL1P3       |
| NA        | ENSG00000257958 | 0          | NA          | NA         | NA         | NA         |               |
| NA        | ENSG00000257959 | 0          | NA          | NA         | NA         | NA         |               |
| NA        | ENSG00000257962 | 0          | NA          | NA         | NA         | NA         |               |
| NA        | ENSG00000257964 | 5.84954828 | 0.10446055  | 0.3785733  | 0.42426856 | 0.65002811 |               |
| NA        | ENSG00000257966 | 0.14931947 | -0.01844332 | 0.38480212 | 0.84537521 | NA         | OLA1P3        |

|           |                 |            |             |            |            |            |           |
|-----------|-----------------|------------|-------------|------------|------------|------------|-----------|
| NA        | ENSG00000257976 | 0          | NA          | NA         | NA         | NA         |           |
| NA        | ENSG00000257979 | 0          | NA          | NA         | NA         | NA         | SNRPGP18  |
| NA        | ENSG00000257985 | 0          | NA          | NA         | NA         | NA         |           |
| NA        | ENSG00000257986 | 0          | NA          | NA         | NA         | NA         | LINC02306 |
| 255411    | ENSG00000257987 | 0          | NA          | NA         | NA         | NA         | TEX49     |
| NA        | ENSG00000257989 | 0          | NA          | NA         | NA         | NA         |           |
| NA        | ENSG00000257991 | 0          | NA          | NA         | NA         | NA         |           |
| NA        | ENSG00000257994 | 0          | NA          | NA         | NA         | NA         |           |
| NA        | ENSG00000257995 | 0          | NA          | NA         | NA         | NA         |           |
| NA        | ENSG00000257997 | 0          | NA          | NA         | NA         | NA         |           |
| NA        | ENSG00000257998 | 0          | NA          | NA         | NA         | NA         |           |
| NA        | ENSG00000258001 | 0.33471731 | 0.02354391  | 0.38534154 | 0.62842204 | NA         |           |
| NA        | ENSG00000258007 | 0          | NA          | NA         | NA         | NA         |           |
| NA        | ENSG00000258010 | 0.83839648 | 0.01507255  | 0.38112019 | 0.78894528 | NA         |           |
| NA        | ENSG00000258011 | 0.30139824 | -0.02296476 | 0.38527817 | 0.68536535 | NA         | HMGA1P3   |
| NA        | ENSG00000258012 | 0.37844916 | 0.02407552  | 0.3854191  | 0.60038877 | NA         |           |
| NA        | ENSG00000258013 | 0          | NA          | NA         | NA         | NA         | RPL3P13   |
| NA        | ENSG00000258016 | 0          | NA          | NA         | NA         | NA         | HIGD1AP1  |
| NA        | ENSG00000258017 | 71.1445154 | -0.0700632  | 0.26570407 | 0.7155563  | 0.86274919 |           |
| NA        | ENSG00000258018 | 0          | NA          | NA         | NA         | NA         | LINC02457 |
| NA        | ENSG00000258021 | 0          | NA          | NA         | NA         | NA         |           |
| NA        | ENSG00000258024 | 0          | NA          | NA         | NA         | NA         | OR5BT1P   |
| NA        | ENSG00000258026 | 0          | NA          | NA         | NA         | NA         |           |
| NA        | ENSG00000258027 | 13.0652512 | -0.03349737 | 0.33840563 | 0.8352025  | 0.92475394 | NF1P4     |
| NA        | ENSG00000258028 | 0          | NA          | NA         | NA         | NA         |           |
| NA        | ENSG00000258033 | 0          | NA          | NA         | NA         | NA         | SNX5P2    |
| NA        | ENSG00000258034 | 0.173124   | -0.01911262 | 0.38486262 | 0.84537521 | NA         |           |
| NA        | ENSG00000258035 | 0.63982575 | -0.01892123 | 0.38293964 | 0.67947749 | NA         |           |
| NA        | ENSG00000258036 | 0          | NA          | NA         | NA         | NA         | KRT125P   |
| NA        | ENSG00000258038 | 0          | NA          | NA         | NA         | NA         | LINC02327 |
| 101928937 | ENSG00000258039 | 0          | NA          | NA         | NA         | NA         |           |
| NA        | ENSG00000258044 | 0.30139824 | -0.02296476 | 0.38527817 | 0.68536535 | NA         |           |
| NA        | ENSG00000258045 | 0.173124   | -0.01911262 | 0.38486262 | 0.84537521 | NA         |           |
| NA        | ENSG00000258048 | 0          | NA          | NA         | NA         | NA         |           |
| NA        | ENSG00000258050 | 0          | NA          | NA         | NA         | NA         |           |
| NA        | ENSG00000258051 | 0          | NA          | NA         | NA         | NA         |           |
| NA        | ENSG00000258052 | 0          | NA          | NA         | NA         | NA         |           |
| NA        | ENSG00000258053 | 8.83824862 | 0.19096369  | 0.39683132 | 0.25704972 | 0.47809754 |           |

|           |                 |            |             |            |            |            |             |
|-----------|-----------------|------------|-------------|------------|------------|------------|-------------|
| 105369779 | ENSG00000258056 | 75.8642502 | -0.11486531 | 0.22819811 | 0.53238257 | 0.74373118 |             |
| 100286844 | ENSG00000258057 | 57.1805538 | -0.05634031 | 0.2607378  | 0.76822518 | 0.89324733 | BCDIN3D-AS1 |
|           | NA              | 0          | NA          | NA         | NA         | NA         |             |
|           | NA              | 0          | NA          | NA         | NA         | NA         |             |
|           | NA              | 0          | NA          | NA         | NA         | NA         |             |
|           | NA              | 0          | NA          | NA         | NA         | NA         |             |
|           | NA              | 0          | NA          | NA         | NA         | NA         | ARL2BPP2    |
|           | NA              | 8.08600244 | -0.13798594 | 0.37768969 | 0.3695688  | 0.59894175 |             |
|           | NA              | 0          | NA          | NA         | NA         | NA         |             |
|           | NA              | 0          | NA          | NA         | NA         | NA         | VTI1BP3     |
|           | NA              | 0          | NA          | NA         | NA         | NA         |             |
|           | NA              | 0.173124   | -0.01911262 | 0.38486262 | 0.84537521 | NA         |             |
|           | NA              | 0          | NA          | NA         | NA         | NA         | ARHGAP42P4  |
|           | NA              | 8.34691666 | 1.04599576  | 2.46741552 | 0.00902864 | 0.03811757 |             |
|           | NA              | 0          | NA          | NA         | NA         | NA         |             |
| 130075    | ENSG00000258083 | 0          | NA          | NA         | NA         | NA         | OR9A4       |
|           | NA              | 0          | NA          | NA         | NA         | NA         |             |
|           | NA              | 0          | NA          | NA         | NA         | NA         |             |
|           | NA              | 0.61269302 | -0.0154094  | 0.38334849 | 0.72538272 | NA         |             |
|           | NA              | 0.35658473 | 0.02381637  | 0.38538095 | 0.61406569 | NA         |             |
|           | NA              | 0          | NA          | NA         | NA         | NA         |             |
|           | NA              | 0          | NA          | NA         | NA         | NA         |             |
|           | NA              | 0.15069912 | -0.01848503 | 0.38480575 | 0.84537521 | NA         |             |
| 105370414 | ENSG00000258098 | 0          | NA          | NA         | NA         | NA         | LINC02286   |
| 102723619 | ENSG00000258099 | 5.23020737 | 0.11407996  | 0.38016892 | 0.39662999 | 0.6258107  | ATXN2-AS    |
|           | NA              | 0          | NA          | NA         | NA         | NA         | LINC02823   |
|           | NA              | 1.0493197  | 0.0041202   | 0.37992275 | 0.94622322 | NA         |             |
| 643246    | ENSG00000258102 | 1.8396817  | 0.06198932  | 0.38555815 | 0.38874668 | NA         | MAP1LC3B2   |
|           | NA              | 0.173733   | 0.01914545  | 0.38484597 | 0.78225479 | NA         | HIGD1AP9    |
|           | NA              | 0          | NA          | NA         | NA         | NA         |             |
|           | NA              | 0.173124   | -0.01911262 | 0.38486262 | 0.84537521 | NA         |             |
|           | NA              | 0          | NA          | NA         | NA         | NA         |             |
|           | NA              | 0          | NA          | NA         | NA         | NA         | CCNG2P1     |
|           | NA              | 0          | NA          | NA         | NA         | NA         |             |
|           | NA              | 0          | NA          | NA         | NA         | NA         | PPIAP45     |
|           | NA              | 0          | NA          | NA         | NA         | NA         |             |
|           | NA              | 0          | NA          | NA         | NA         | NA         | PPIAP44     |

|           |                 |            |             |            |            |            |           |
|-----------|-----------------|------------|-------------|------------|------------|------------|-----------|
| NA        | ENSG00000258119 | 0          | NA          | NA         | NA         | NA         |           |
| NA        | ENSG00000258120 | 0          | NA          | NA         | NA         | NA         | KRT128P   |
| NA        | ENSG00000258121 | 0          | NA          | NA         | NA         | NA         |           |
| NA        | ENSG00000258122 | 0          | NA          | NA         | NA         | NA         |           |
| 101928137 | ENSG00000258123 | 0          | NA          | NA         | NA         | NA         | LINC02444 |
| NA        | ENSG00000258125 | 0          | NA          | NA         | NA         | NA         |           |
| NA        | ENSG00000258128 | 0          | NA          | NA         | NA         | NA         | MKRN9P    |
| NA        | ENSG00000258130 | 12.6763754 | 0.04478041  | 0.3405499  | 0.78813441 | 0.90384894 |           |
| NA        | ENSG00000258131 | 0          | NA          | NA         | NA         | NA         |           |
| NA        | ENSG00000258133 | 0          | NA          | NA         | NA         | NA         |           |
| NA        | ENSG00000258134 | 0.50771564 | 0.0147973   | 0.38309077 | 0.74578404 | NA         |           |
| 283332    | ENSG00000258135 | 1.25293733 | 0.04073749  | 0.38261832 | 0.53175389 | NA         | LINC02396 |
| 101929162 | ENSG00000258136 | 6.1620427  | 0.08376848  | 0.36714373 | 0.54356671 | 0.75152359 |           |
| 102724050 | ENSG00000258137 | 0          | NA          | NA         | NA         | NA         |           |
| NA        | ENSG00000258140 | 0          | NA          | NA         | NA         | NA         |           |
| NA        | ENSG00000258142 | 0.16735865 | 0.01897177  | 0.38482933 | 0.78225479 | NA         |           |
| NA        | ENSG00000258144 | 0          | NA          | NA         | NA         | NA         | LINC02406 |
| NA        | ENSG00000258148 | 0          | NA          | NA         | NA         | NA         |           |
| NA        | ENSG00000258150 | 2.3512397  | 0.02055127  | 0.38064882 | 0.73722917 | NA         |           |
| NA        | ENSG00000258153 | 0.173124   | -0.01911262 | 0.38486262 | 0.84537521 | NA         | HSPE1P4   |
| NA        | ENSG00000258154 | 0          | NA          | NA         | NA         | NA         |           |
| NA        | ENSG00000258159 | 0          | NA          | NA         | NA         | NA         | IMMP1LP2  |
| NA        | ENSG00000258162 | 0          | NA          | NA         | NA         | NA         |           |
| NA        | ENSG00000258167 | 0          | NA          | NA         | NA         | NA         |           |
| NA        | ENSG00000258168 | 2.41090215 | -0.08741257 | 0.39102862 | 0.26170632 | NA         |           |
| 283432    | ENSG00000258169 | 0.73390991 | 0.04228368  | 0.38742348 | 0.33493889 | NA         | LINC00485 |
| NA        | ENSG00000258170 | 0          | NA          | NA         | NA         | NA         |           |
| NA        | ENSG00000258171 | 0.51937201 | -0.02557462 | 0.38567603 | 0.54680819 | NA         | LINC02412 |
| NA        | ENSG00000258172 | 1.07986558 | -0.04603501 | 0.38576236 | 0.38293628 | NA         |           |
| NA        | ENSG00000258173 | 0          | NA          | NA         | NA         | NA         |           |
| NA        | ENSG00000258175 | 0          | NA          | NA         | NA         | NA         | LINC02300 |
| NA        | ENSG00000258177 | 0.15069912 | -0.01848503 | 0.38480575 | 0.84537521 | NA         |           |
| NA        | ENSG00000258178 | 0          | NA          | NA         | NA         | NA         |           |
| NA        | ENSG00000258179 | 0          | NA          | NA         | NA         | NA         |           |
| NA        | ENSG00000258181 | 0          | NA          | NA         | NA         | NA         |           |
| NA        | ENSG00000258183 | 0          | NA          | NA         | NA         | NA         | LINC02392 |
| NA        | ENSG00000258184 | 0          | NA          | NA         | NA         | NA         |           |
| NA        | ENSG00000258185 | 0          | NA          | NA         | NA         | NA         |           |

|           |                 |            |             |            |            |            |            |
|-----------|-----------------|------------|-------------|------------|------------|------------|------------|
| NA        | ENSG00000258186 | 6.70649715 | -0.02062007 | 0.38341426 | 0.63224591 | 0.8139484  | SLC7A5P2   |
| NA        | ENSG00000258193 | 0          | NA          | NA         | NA         | NA         |            |
| NA        | ENSG00000258196 | 0          | NA          | NA         | NA         | NA         |            |
| NA        | ENSG00000258197 | 0          | NA          | NA         | NA         | NA         | NKX2-2-AS1 |
| NA        | ENSG00000258199 | 2.30986511 | 0.10693454  | 0.3970938  | 0.21635767 | NA         |            |
| NA        | ENSG00000258202 | 0          | NA          | NA         | NA         | NA         |            |
| NA        | ENSG00000258203 | 0          | NA          | NA         | NA         | NA         |            |
| NA        | ENSG00000258204 | 0          | NA          | NA         | NA         | NA         |            |
| NA        | ENSG00000258205 | 0          | NA          | NA         | NA         | NA         |            |
| NA        | ENSG00000258206 | 0          | NA          | NA         | NA         | NA         |            |
| NA        | ENSG00000258210 | 29.8977432 | 0.22125262  | 0.33593131 | 0.28540566 | 0.51091295 |            |
| NA        | ENSG00000258212 | 0.15069912 | -0.01848503 | 0.38480575 | 0.84537521 | NA         | ZNF75BP    |
| NA        | ENSG00000258214 | 0          | NA          | NA         | NA         | NA         |            |
| NA        | ENSG00000258215 | 0          | NA          | NA         | NA         | NA         |            |
| NA        | ENSG00000258216 | 0          | NA          | NA         | NA         | NA         |            |
| 105369860 | ENSG00000258220 | 0          | NA          | NA         | NA         | NA         | LINC02424  |
| 136541    | ENSG00000258223 | 0          | NA          | NA         | NA         | NA         | PRSS58     |
| NA        | ENSG00000258224 | 0          | NA          | NA         | NA         | NA         |            |
| NA        | ENSG00000258225 | 0.173124   | -0.01911262 | 0.38486262 | 0.84537521 | NA         |            |
| 23601     | ENSG00000258227 | 0          | NA          | NA         | NA         | NA         | CLEC5A     |
| NA        | ENSG00000258230 | 2.22764559 | 0.01087879  | 0.37561076 | 0.89391305 | NA         |            |
| 100506869 | ENSG00000258231 | 0          | NA          | NA         | NA         | NA         |            |
| NA        | ENSG00000258232 | 0          | NA          | NA         | NA         | NA         |            |
| NA        | ENSG00000258233 | 0          | NA          | NA         | NA         | NA         | ARHGAP42P5 |
| NA        | ENSG00000258234 | 0          | NA          | NA         | NA         | NA         |            |
| NA        | ENSG00000258235 | 0          | NA          | NA         | NA         | NA         |            |
| NA        | ENSG00000258239 | 0          | NA          | NA         | NA         | NA         | MTND2P17   |
| 105369980 | ENSG00000258240 | 111.935443 | -0.24121137 | 0.20249703 | 0.16265846 | 0.35150242 |            |
| NA        | ENSG00000258244 | 0          | NA          | NA         | NA         | NA         | OSTF1P1    |
| NA        | ENSG00000258245 | 0.14931947 | -0.01844332 | 0.38480212 | 0.84537521 | NA         | RPL10P13   |
| NA        | ENSG00000258249 | 0          | NA          | NA         | NA         | NA         |            |
| NA        | ENSG00000258251 | 0          | NA          | NA         | NA         | NA         | YPEL5P3    |
| NA        | ENSG00000258253 | 0          | NA          | NA         | NA         | NA         |            |
| NA        | ENSG00000258254 | 0          | NA          | NA         | NA         | NA         |            |
| NA        | ENSG00000258256 | 0          | NA          | NA         | NA         | NA         |            |
| NA        | ENSG00000258260 | 0.5972779  | -0.02732172 | 0.38586499 | 0.50076333 | NA         |            |
| NA        | ENSG00000258262 | 0          | NA          | NA         | NA         | NA         |            |
| NA        | ENSG00000258265 | 0          | NA          | NA         | NA         | NA         |            |

|           |                 |            |             |            |            |            |           |
|-----------|-----------------|------------|-------------|------------|------------|------------|-----------|
| NA        | ENSG00000258271 | 0          | NA          | NA         | NA         | NA         |           |
| NA        | ENSG00000258272 | 0          | NA          | NA         | NA         | NA         |           |
| NA        | ENSG00000258273 | 0          | NA          | NA         | NA         | NA         |           |
| 101928731 | ENSG00000258274 | 0.34624801 | -0.02356563 | 0.38536324 | 0.65270996 | NA         |           |
| NA        | ENSG00000258275 | 0          | NA          | NA         | NA         | NA         | OR7K1P    |
| NA        | ENSG00000258278 | 0          | NA          | NA         | NA         | NA         | CLUHP8    |
| 283404    | ENSG00000258279 | 0.59935816 | -0.03506877 | 0.38648552 | 0.44268014 | NA         | LINC00592 |
| NA        | ENSG00000258282 | 0          | NA          | NA         | NA         | NA         | BTF3P2    |
| NA        | ENSG00000258283 | 0          | NA          | NA         | NA         | NA         |           |
| NA        | ENSG00000258284 | 0.31842879 | 0.00136449  | 0.38336849 | 0.96400503 | NA         | POLR2KP1  |
| NA        | ENSG00000258285 | 0          | NA          | NA         | NA         | NA         | TESC-AS1  |
| NA        | ENSG00000258288 | 0          | NA          | NA         | NA         | NA         | NENFP2    |
| 91612     | ENSG00000258289 | 538.105359 | -0.28092529 | 0.15148838 | 0.04270633 | 0.1320389  | CHURC1    |
| NA        | ENSG00000258290 | 0          | NA          | NA         | NA         | NA         | BRWD1P2   |
| 105369920 | ENSG00000258292 | 0          | NA          | NA         | NA         | NA         | LINC02410 |
| NA        | ENSG00000258294 | 0          | NA          | NA         | NA         | NA         |           |
| NA        | ENSG00000258300 | 0.53713907 | 0.01399743  | 0.38347309 | 0.73862382 | NA         | NUTF2P2   |
| 100506603 | ENSG00000258301 | 85.339     | 0.42369231  | 0.28432544 | 0.05037962 | 0.14978744 | VASH1-AS1 |
| NA        | ENSG00000258302 | 4.25345303 | 0.04537848  | 0.36866638 | 0.69767259 | 0.85399787 |           |
| NA        | ENSG00000258303 | 0.87750813 | 0.01908042  | 0.38133857 | 0.73610901 | NA         |           |
| NA        | ENSG00000258304 | 0          | NA          | NA         | NA         | NA         |           |
| NA        | ENSG00000258308 | 0          | NA          | NA         | NA         | NA         |           |
| NA        | ENSG00000258311 | 140.715714 | 0.39987177  | 0.21287022 | 0.02736654 | 0.09336911 |           |
| NA        | ENSG00000258312 | 0          | NA          | NA         | NA         | NA         |           |
| NA        | ENSG00000258313 | 0          | NA          | NA         | NA         | NA         |           |
| NA        | ENSG00000258314 | 5.92978499 | -0.17086029 | 0.41502767 | 0.1775594  | 0.37266248 |           |
| 124944    | ENSG00000258315 | 1044.96158 | 0.36723703  | 0.08685515 | 1.37E-05   | 0.00012703 | C17orf49  |
| NA        | ENSG00000258316 | 0.37844916 | 0.02407552  | 0.3854191  | 0.60038877 | NA         | KLF17P1   |
| NA        | ENSG00000258317 | 7.96716592 | 0.15321143  | 0.39242005 | 0.29252003 | 0.51859507 |           |
| NA        | ENSG00000258320 | 0          | NA          | NA         | NA         | NA         |           |
| NA        | ENSG00000258323 | 0          | NA          | NA         | NA         | NA         |           |
| NA        | ENSG00000258324 | 0          | NA          | NA         | NA         | NA         |           |
| NA        | ENSG00000258325 | 11.7208839 | -0.04051301 | 0.34327868 | 0.79707914 | 0.90675443 | ITFG2-AS1 |
| 105369740 | ENSG00000258331 | 0          | NA          | NA         | NA         | NA         | LINC02461 |
| NA        | ENSG00000258332 | 0          | NA          | NA         | NA         | NA         | LINC02394 |
| 101927267 | ENSG00000258334 | 2.05731581 | -0.10232607 | 0.39699907 | 0.20192737 | NA         |           |
| NA        | ENSG00000258336 | 0          | NA          | NA         | NA         | NA         | DUX4L52   |
| NA        | ENSG00000258337 | 0          | NA          | NA         | NA         | NA         |           |



|           |                 |            |             |            |            |            |            |
|-----------|-----------------|------------|-------------|------------|------------|------------|------------|
| NA        | ENSG00000258338 | 0          | NA          | NA         | NA         | NA         |            |
| NA        | ENSG00000258342 | 0          | NA          | NA         | NA         | NA         |            |
| 105369921 | ENSG00000258343 | 0.31792923 | -0.00211466 | 0.38337802 | 0.99813022 | NA         |            |
| NA        | ENSG00000258344 | 0.173733   | 0.01914545  | 0.38484597 | 0.78225479 | NA         |            |
| NA        | ENSG00000258345 | 0.14931947 | -0.01844332 | 0.38480212 | 0.84537521 | NA         |            |
| NA        | ENSG00000258346 | 0          | NA          | NA         | NA         | NA         |            |
| NA        | ENSG00000258350 | 0          | NA          | NA         | NA         | NA         | SYF2P1     |
| NA        | ENSG00000258352 | 0          | NA          | NA         | NA         | NA         | IFITM3P6   |
| NA        | ENSG00000258354 | 9.71434936 | 0.03944667  | 0.3701791  | 0.72266653 | 0.86754018 |            |
| NA        | ENSG00000258355 | 0          | NA          | NA         | NA         | NA         |            |
| NA        | ENSG00000258357 | 0          | NA          | NA         | NA         | NA         | NSA2P2     |
| NA        | ENSG00000258358 | 0          | NA          | NA         | NA         | NA         |            |
| NA        | ENSG00000258359 | 3.83547474 | -0.00685995 | 0.37035721 | 0.94375145 | 0.97708788 | PCNPP1     |
| NA        | ENSG00000258360 | 0          | NA          | NA         | NA         | NA         | NF1P12     |
| NA        | ENSG00000258364 | 0          | NA          | NA         | NA         | NA         |            |
| NA        | ENSG00000258365 | 15.2765017 | -0.05839621 | 0.33305538 | 0.73202411 | 0.87198139 |            |
| 51750     | ENSG00000258366 | 707.06562  | 0.23686987  | 0.10776444 | 0.02161543 | 0.07746569 | RTEL1      |
| NA        | ENSG00000258367 | 0          | NA          | NA         | NA         | NA         |            |
| NA        | ENSG00000258368 | 0          | NA          | NA         | NA         | NA         | ZNF970P    |
| NA        | ENSG00000258369 | 0          | NA          | NA         | NA         | NA         | ADI1P3     |
| NA        | ENSG00000258373 | 0          | NA          | NA         | NA         | NA         | SLC25A3P2  |
| NA        | ENSG00000258375 | 0          | NA          | NA         | NA         | NA         |            |
| NA        | ENSG00000258376 | 0          | NA          | NA         | NA         | NA         |            |
| NA        | ENSG00000258377 | 16.3417957 | -0.10688492 | 0.37621584 | 0.4299394  | 0.65564932 |            |
| NA        | ENSG00000258378 | 0          | NA          | NA         | NA         | NA         |            |
| NA        | ENSG00000258379 | 0          | NA          | NA         | NA         | NA         |            |
| NA        | ENSG00000258380 | 0          | NA          | NA         | NA         | NA         |            |
| NA        | ENSG00000258381 | 0          | NA          | NA         | NA         | NA         |            |
| NA        | ENSG00000258383 | 0          | NA          | NA         | NA         | NA         |            |
| NA        | ENSG00000258384 | 10.510303  | -0.02048417 | 0.34337776 | 0.89360151 | 0.95394425 | RCCD1-AS1  |
| NA        | ENSG00000258385 | 0.14931947 | -0.01844332 | 0.38480212 | 0.84537521 | NA         |            |
| NA        | ENSG00000258386 | 0          | NA          | NA         | NA         | NA         |            |
| NA        | ENSG00000258387 | 0          | NA          | NA         | NA         | NA         |            |
| NA        | ENSG00000258388 | 204.464596 | 1.20935351  | 0.22998674 | 1.34E-08   | 2.00E-07   | PPT2-EGFL8 |
| 100506999 | ENSG00000258390 | 0          | NA          | NA         | NA         | NA         | LINC02318  |
| NA        | ENSG00000258392 | 0          | NA          | NA         | NA         | NA         | RPA2P1     |
| NA        | ENSG00000258393 | 0.61763886 | -0.01999622 | 0.38312027 | 0.68343048 | NA         |            |
| NA        | ENSG00000258394 | 0          | NA          | NA         | NA         | NA         |            |

|           |                 |            |             |            |            |            |           |
|-----------|-----------------|------------|-------------|------------|------------|------------|-----------|
| NA        | ENSG00000258397 | 0          | NA          | NA         | NA         | NA         | BCAR1P1   |
| NA        | ENSG00000258399 | 0.18922458 | 0.01954053  | 0.38488496 | 0.78225479 | NA         |           |
| NA        | ENSG00000258400 | 0          | NA          | NA         | NA         | NA         |           |
| NA        | ENSG00000258401 | 0          | NA          | NA         | NA         | NA         | ATP5MC2P2 |
| NA        | ENSG00000258402 | 0          | NA          | NA         | NA         | NA         |           |
| NA        | ENSG00000258404 | 0          | NA          | NA         | NA         | NA         | LINC02320 |
| 147660    | ENSG00000258405 | 79.9677665 | -0.22639899 | 0.22721952 | 0.22241969 | 0.43535977 | ZNF578    |
| NA        | ENSG00000258406 | 0          | NA          | NA         | NA         | NA         | TUBBP3    |
| NA        | ENSG00000258407 | 0          | NA          | NA         | NA         | NA         |           |
| NA        | ENSG00000258408 | 0          | NA          | NA         | NA         | NA         | NT5CP2    |
| NA        | ENSG00000258410 | 19.3039745 | 0.04903101  | 0.31236545 | 0.79271579 | 0.90515734 |           |
| NA        | ENSG00000258411 | 0          | NA          | NA         | NA         | NA         |           |
| NA        | ENSG00000258412 | 0          | NA          | NA         | NA         | NA         |           |
| NA        | ENSG00000258413 | 0          | NA          | NA         | NA         | NA         |           |
| NA        | ENSG00000258414 | 0          | NA          | NA         | NA         | NA         |           |
| NA        | ENSG00000258415 | 0          | NA          | NA         | NA         | NA         | LONRF2P4  |
| NA        | ENSG00000258416 | 0          | NA          | NA         | NA         | NA         |           |
| NA        | ENSG00000258417 | 0          | NA          | NA         | NA         | NA         |           |
| 105370586 | ENSG00000258419 | 0          | NA          | NA         | NA         | NA         |           |
| NA        | ENSG00000258420 | 0          | NA          | NA         | NA         | NA         | LONRF2P3  |
| NA        | ENSG00000258421 | 0          | NA          | NA         | NA         | NA         | FXNP1     |
| NA        | ENSG00000258422 | 2.38537092 | -0.05052141 | 0.37611874 | 0.60540118 | NA         |           |
| NA        | ENSG00000258423 | 0          | NA          | NA         | NA         | NA         | OR7E105P  |
| NA        | ENSG00000258424 | 3.11920952 | 0.03116404  | 0.36996489 | 0.77384073 | 0.89600234 |           |
| NA        | ENSG00000258425 | 0.46751774 | -0.00969729 | 0.38289489 | 0.84635666 | NA         |           |
| NA        | ENSG00000258426 | 0          | NA          | NA         | NA         | NA         |           |
| NA        | ENSG00000258427 | 0.173733   | 0.01914545  | 0.38484597 | 0.78225479 | NA         | RBM8B     |
| NA        | ENSG00000258428 | 0.34624801 | -0.02356563 | 0.38536324 | 0.65270996 | NA         |           |
| 64146     | ENSG00000258429 | 498.352264 | -0.12177264 | 0.11095534 | 0.25068547 | 0.47063996 | PDF       |
| NA        | ENSG00000258430 | 29.0083268 | 0.01191477  | 0.38336109 | 0.77189129 | 0.89538192 |           |
| NA        | ENSG00000258431 | 0          | NA          | NA         | NA         | NA         |           |
| NA        | ENSG00000258433 | 0          | NA          | NA         | NA         | NA         |           |
| NA        | ENSG00000258435 | 0.14931947 | -0.01844332 | 0.38480212 | 0.84537521 | NA         |           |
| 493901    | ENSG00000258436 | 0          | NA          | NA         | NA         | NA         | RNASE12   |
| NA        | ENSG00000258437 | 0          | NA          | NA         | NA         | NA         |           |
| NA        | ENSG00000258438 | 0          | NA          | NA         | NA         | NA         | OR11K2P   |
| NA        | ENSG00000258439 | 1.50912783 | 0.02119261  | 0.37698955 | 0.79179824 | NA         |           |
| NA        | ENSG00000258440 | 0          | NA          | NA         | NA         | NA         |           |

|           |                 |            |             |            |            |            |           |
|-----------|-----------------|------------|-------------|------------|------------|------------|-----------|
| 283624    | ENSG00000258441 | 1923.7645  | -0.3203389  | 0.07241486 | 6.39E-06   | 6.30E-05   | LINC00641 |
| NA        | ENSG00000258443 | 1.24502402 | 0.07448185  | 0.39109992 | 0.22479629 | NA         |           |
| NA        | ENSG00000258444 | 0          | NA          | NA         | NA         | NA         |           |
| NA        | ENSG00000258445 | 0.15069912 | -0.01848503 | 0.38480575 | 0.84537521 | NA         | MAD2L1P1  |
| NA        | ENSG00000258446 | 0.15069912 | -0.01848503 | 0.38480575 | 0.84537521 | NA         |           |
| NA        | ENSG00000258448 | 0.48403678 | 0.01091096  | 0.38338245 | 0.79204509 | NA         |           |
| NA        | ENSG00000258449 | 0          | NA          | NA         | NA         | NA         |           |
| NA        | ENSG00000258450 | 1.15752743 | -0.0052061  | 0.37951916 | 0.93445705 | NA         |           |
| NA        | ENSG00000258451 | 0          | NA          | NA         | NA         | NA         | EGILA     |
| NA        | ENSG00000258452 | 0          | NA          | NA         | NA         | NA         | HMG2P2    |
| 79334     | ENSG00000258453 | 0          | NA          | NA         | NA         | NA         | OR11H2    |
| NA        | ENSG00000258454 | 1.68741709 | 0.06511262  | 0.38374068 | 0.43120214 | NA         |           |
| NA        | ENSG00000258455 | 0          | NA          | NA         | NA         | NA         |           |
| NA        | ENSG00000258456 | 0          | NA          | NA         | NA         | NA         | PTCD2P1   |
| NA        | ENSG00000258457 | 4.46577951 | 0.25072753  | 0.48805422 | 0.051192   | 0.15179828 |           |
| NA        | ENSG00000258458 | 2.08172957 | -0.11764516 | 0.40882318 | 0.0443041  | NA         |           |
| NA        | ENSG00000258459 | 0.173733   | 0.01914545  | 0.38484597 | 0.78225479 | NA         |           |
| NA        | ENSG00000258460 | 0          | NA          | NA         | NA         | NA         |           |
| NA        | ENSG00000258461 | 6.34155771 | 0.00789888  | 0.35803012 | 0.95438342 | 0.98112988 |           |
| NA        | ENSG00000258462 | 0          | NA          | NA         | NA         | NA         |           |
| NA        | ENSG00000258463 | 0          | NA          | NA         | NA         | NA         |           |
| NA        | ENSG00000258464 | 0          | NA          | NA         | NA         | NA         |           |
| NA        | ENSG00000258465 | 28.0862041 | -0.03120025 | 0.37705143 | 0.70513313 | 0.85803894 |           |
| NA        | ENSG00000258466 | 0.50207596 | 0.02562368  | 0.38565771 | 0.52549886 | NA         |           |
| NA        | ENSG00000258467 | 0          | NA          | NA         | NA         | NA         | PHKBP2    |
| NA        | ENSG00000258468 | 0          | NA          | NA         | NA         | NA         | OR11G1P   |
| NA        | ENSG00000258469 | 1.30252613 | -0.01896535 | 0.37960262 | 0.77618262 | NA         | CHMP4BP1  |
| 101929718 | ENSG00000258471 | 1.34258671 | 0.00809431  | 0.37690483 | 0.91698698 | NA         |           |
| NA        | ENSG00000258472 | 37.9772071 | 0.02179507  | 0.27955079 | 0.91124775 | 0.96222021 |           |
| NA        | ENSG00000258473 | 0          | NA          | NA         | NA         | NA         |           |
| NA        | ENSG00000258474 | 0.173733   | 0.01914545  | 0.38484597 | 0.78225479 | NA         | LINC02313 |
| NA        | ENSG00000258476 | 0.15069912 | -0.01848503 | 0.38480575 | 0.84537521 | NA         | LINC02207 |
| NA        | ENSG00000258477 | 0.32406722 | -0.02327495 | 0.38532164 | 0.66846859 | NA         | PPIAP6    |
| NA        | ENSG00000258478 | 0          | NA          | NA         | NA         | NA         |           |
| NA        | ENSG00000258479 | 0.32404224 | -0.02327475 | 0.3853216  | 0.66848297 | NA         | LINC00640 |
| NA        | ENSG00000258481 | 0          | NA          | NA         | NA         | NA         |           |
| NA        | ENSG00000258482 | 0          | NA          | NA         | NA         | NA         | TRAV15    |
| 105371008 | ENSG00000258483 | 0          | NA          | NA         | NA         | NA         | LINC02251 |

|           |                 |            |             |            |            |            |           |
|-----------|-----------------|------------|-------------|------------|------------|------------|-----------|
| 246777    | ENSG00000258484 | 0.15069912 | -0.01848503 | 0.38480575 | 0.84537521 | NA         | SPESP1    |
| NA        | ENSG00000258485 | 0.16735865 | 0.01897177  | 0.38482933 | 0.78225479 | NA         | SRMP2     |
| NA        | ENSG00000258487 | 0          | NA          | NA         | NA         | NA         | LINC02277 |
| NA        | ENSG00000258488 | 0          | NA          | NA         | NA         | NA         |           |
| NA        | ENSG00000258489 | 0          | NA          | NA         | NA         | NA         |           |
| NA        | ENSG00000258490 | 0          | NA          | NA         | NA         | NA         |           |
| NA        | ENSG00000258491 | 0          | NA          | NA         | NA         | NA         | ZFP64P1   |
| NA        | ENSG00000258493 | 0          | NA          | NA         | NA         | NA         |           |
| NA        | ENSG00000258494 | 0          | NA          | NA         | NA         | NA         | OR11J5P   |
| NA        | ENSG00000258496 | 0          | NA          | NA         | NA         | NA         |           |
| NA        | ENSG00000258497 | 0          | NA          | NA         | NA         | NA         |           |
| 64150     | ENSG00000258498 | 61.7626204 | 2.97487729  | 0.4255891  | 2.01E-13   | 4.81E-12   | DIO3OS    |
| 101929002 | ENSG00000258499 | 2.18395667 | 0.04338227  | 0.37807532 | 0.61831828 | NA         | LINC02287 |
| NA        | ENSG00000258500 | 0.15069912 | -0.01848503 | 0.38480575 | 0.84537521 | NA         |           |
| NA        | ENSG00000258501 | 0          | NA          | NA         | NA         | NA         | EIF3LP1   |
| NA        | ENSG00000258502 | 0          | NA          | NA         | NA         | NA         | LINC02290 |
| NA        | ENSG00000258503 | 0          | NA          | NA         | NA         | NA         |           |
| NA        | ENSG00000258504 | 0          | NA          | NA         | NA         | NA         |           |
| NA        | ENSG00000258505 | 0          | NA          | NA         | NA         | NA         |           |
| NA        | ENSG00000258506 | 0          | NA          | NA         | NA         | NA         |           |
| NA        | ENSG00000258507 | 0.16735865 | 0.01897177  | 0.38482933 | 0.78225479 | NA         |           |
| NA        | ENSG00000258509 | 0          | NA          | NA         | NA         | NA         |           |
| NA        | ENSG00000258510 | 0.99927239 | -0.02009313 | 0.38090808 | 0.7375543  | NA         |           |
| NA        | ENSG00000258511 | 0          | NA          | NA         | NA         | NA         | LINC02295 |
| 145200    | ENSG00000258512 | 0          | NA          | NA         | NA         | NA         | LINC00239 |
| NA        | ENSG00000258513 | 0          | NA          | NA         | NA         | NA         |           |
| NA        | ENSG00000258515 | 2.30670225 | 0.03132635  | 0.37625755 | 0.72096649 | NA         |           |
| NA        | ENSG00000258516 | 0          | NA          | NA         | NA         | NA         |           |
| NA        | ENSG00000258517 | 0          | NA          | NA         | NA         | NA         |           |
| NA        | ENSG00000258519 | 0          | NA          | NA         | NA         | NA         |           |
| NA        | ENSG00000258520 | 0.29863895 | -0.02292439 | 0.3852726  | 0.68753245 | NA         |           |
| NA        | ENSG00000258521 | 1.20948391 | 0.04162335  | 0.3830551  | 0.50912522 | NA         |           |
| NA        | ENSG00000258524 | 2.5978699  | -0.01116979 | 0.37094484 | 0.90964504 | 0.96107209 | NT5CP1    |
| 100506071 | ENSG00000258525 | 71.4454608 | -0.19502605 | 0.25028186 | 0.31452557 | 0.54224777 |           |
| NA        | ENSG00000258526 | 4.02601873 | 0.12615954  | 0.39143409 | 0.30722527 | 0.53477359 |           |
| NA        | ENSG00000258527 | 0          | NA          | NA         | NA         | NA         | ASB9P1    |
| NA        | ENSG00000258529 | 2.02672461 | 0.00061583  | 0.38024291 | 0.99383555 | NA         |           |
| NA        | ENSG00000258531 | 0          | NA          | NA         | NA         | NA         | BANF1P1   |

|           |                 |            |             |            |            |            |                |
|-----------|-----------------|------------|-------------|------------|------------|------------|----------------|
| 102724338 | ENSG00000258532 | 0          | NA          | NA         | NA         | NA         | LINC02305      |
| NA        | ENSG00000258534 | 0          | NA          | NA         | NA         | NA         |                |
| NA        | ENSG00000258535 | 0          | NA          | NA         | NA         | NA         |                |
| NA        | ENSG00000258536 | 0          | NA          | NA         | NA         | NA         | FKBP1BP1       |
| 100874185 | ENSG00000258537 | 0          | NA          | NA         | NA         | NA         | FRMD6-AS2      |
| NA        | ENSG00000258538 | 0          | NA          | NA         | NA         | NA         |                |
| NA        | ENSG00000258539 | 28.0770881 | 0.10557467  | 0.29988178 | 0.58893634 | 0.78351083 |                |
| NA        | ENSG00000258540 | 0          | NA          | NA         | NA         | NA         |                |
| NA        | ENSG00000258541 | 0          | NA          | NA         | NA         | NA         | OR4K4P         |
| NA        | ENSG00000258542 | 0          | NA          | NA         | NA         | NA         |                |
| NA        | ENSG00000258544 | 0          | NA          | NA         | NA         | NA         | GLRXP2         |
| 101928969 | ENSG00000258545 | 0.45462773 | 0.01718682  | 0.38417264 | 0.78680624 | NA         | RHOXF1-AS1     |
| NA        | ENSG00000258546 | 0          | NA          | NA         | NA         | NA         | CENPUP2        |
| 100505967 | ENSG00000258548 | 8.61158097 | 0.23362354  | 0.44296937 | 0.13456654 | 0.30894131 | LINC00645      |
| NA        | ENSG00000258549 | 0          | NA          | NA         | NA         | NA         |                |
| NA        | ENSG00000258550 | 0          | NA          | NA         | NA         | NA         | OR7E106P       |
| 101926928 | ENSG00000258551 | 0.16735865 | 0.01897177  | 0.38482933 | 0.78225479 | NA         |                |
| NA        | ENSG00000258552 | 0.15069912 | -0.01848503 | 0.38480575 | 0.84537521 | NA         | FAM204DP       |
| NA        | ENSG00000258553 | 0          | NA          | NA         | NA         | NA         |                |
| NA        | ENSG00000258554 | 0          | NA          | NA         | NA         | NA         |                |
| NA        | ENSG00000258555 | 51.4632879 | -0.15857978 | 0.32453801 | 0.41902849 | 0.64480922 | PECC1L-ADORA2A |
| NA        | ENSG00000258556 | 0          | NA          | NA         | NA         | NA         | LINC02322      |
| NA        | ENSG00000258557 | 0          | NA          | NA         | NA         | NA         |                |
| NA        | ENSG00000258558 | 0.173124   | -0.01911262 | 0.38486262 | 0.84537521 | NA         |                |
| NA        | ENSG00000258559 | 74.1824312 | 0.18188071  | 0.2293705  | 0.3290876  | 0.55761363 |                |
| NA        | ENSG00000258560 | 0.14931947 | -0.01844332 | 0.38480212 | 0.84537521 | NA         |                |
| NA        | ENSG00000258561 | 6.95247043 | -0.03565042 | 0.36119097 | 0.77717993 | 0.89777292 |                |
| NA        | ENSG00000258562 | 0          | NA          | NA         | NA         | NA         |                |
| NA        | ENSG00000258563 | 0          | NA          | NA         | NA         | NA         | PSMA3P1        |
| NA        | ENSG00000258564 | 0          | NA          | NA         | NA         | NA         | OR4N1P         |
| NA        | ENSG00000258565 | 0.46828208 | -0.0090313  | 0.38285807 | 0.85484808 | NA         | BLZF2P         |
| NA        | ENSG00000258566 | 0          | NA          | NA         | NA         | NA         |                |
| NA        | ENSG00000258567 | 0          | NA          | NA         | NA         | NA         | DUX4L16        |
| NA        | ENSG00000258568 | 11.6416246 | 0.21067076  | 0.39245345 | 0.25092981 | 0.47084257 | RHOQP1         |
| NA        | ENSG00000258569 | 0          | NA          | NA         | NA         | NA         |                |
| NA        | ENSG00000258570 | 0          | NA          | NA         | NA         | NA         | H3P40          |
| NA        | ENSG00000258571 | 0.81666589 | 0.01578923  | 0.38191708 | 0.75945952 | NA         | PTTG4P         |
| NA        | ENSG00000258572 | 1.06626086 | 0.00211607  | 0.38071978 | 0.96995545 | NA         |                |

|           |                 |            |             |            |            |            |              |
|-----------|-----------------|------------|-------------|------------|------------|------------|--------------|
| 254028    | ENSG00000258573 | 0          | NA          | NA         | NA         | NA         |              |
| NA        | ENSG00000258576 | 0.86868413 | 0.03890076  | 0.3848729  | 0.44296267 | NA         |              |
| NA        | ENSG00000258577 | 0          | NA          | NA         | NA         | NA         | SNRPGP1      |
| NA        | ENSG00000258578 | 0          | NA          | NA         | NA         | NA         |              |
| NA        | ENSG00000258580 | 0.18922458 | 0.01954053  | 0.38488496 | 0.78225479 | NA         |              |
| NA        | ENSG00000258581 | 0          | NA          | NA         | NA         | NA         |              |
| NA        | ENSG00000258583 | 0.14931947 | -0.01844332 | 0.38480212 | 0.84537521 | NA         | LINC01500    |
| 283592    | ENSG00000258584 | 0          | NA          | NA         | NA         | NA         | FAM181A-AS1  |
| NA        | ENSG00000258585 | 0          | NA          | NA         | NA         | NA         | ZNF519P3     |
| 100506498 | ENSG00000258586 | 0.18922458 | 0.01954053  | 0.38488496 | 0.78225479 | NA         | LINC02274    |
| NA        | ENSG00000258587 | 0          | NA          | NA         | NA         | NA         |              |
| 445372    | ENSG00000258588 | 0          | NA          | NA         | NA         | NA         | TRIM6-TRIM34 |
| NA        | ENSG00000258590 | 0          | NA          | NA         | NA         | NA         | NBEAP1       |
| NA        | ENSG00000258591 | 0.49292324 | 0.01462381  | 0.38312053 | 0.75145573 | NA         | PPIAP4       |
| NA        | ENSG00000258592 | 0          | NA          | NA         | NA         | NA         |              |
| NA        | ENSG00000258593 | 0.34746601 | 0.02370763  | 0.3853651  | 0.61987128 | NA         |              |
| NA        | ENSG00000258594 | 0          | NA          | NA         | NA         | NA         |              |
| NA        | ENSG00000258595 | 0          | NA          | NA         | NA         | NA         | CYB5AP3      |
| 390502    | ENSG00000258597 | 0          | NA          | NA         | NA         | NA         | SERPINA2     |
| NA        | ENSG00000258598 | 0          | NA          | NA         | NA         | NA         |              |
| NA        | ENSG00000258599 | 0.87280488 | -0.00936222 | 0.38152437 | 0.85686481 | NA         |              |
| NA        | ENSG00000258600 | 0          | NA          | NA         | NA         | NA         |              |
| NA        | ENSG00000258601 | 0          | NA          | NA         | NA         | NA         |              |
| 105370578 | ENSG00000258602 | 0          | NA          | NA         | NA         | NA         | LINC01629    |
| NA        | ENSG00000258603 | 0.66943461 | 0.03059546  | 0.38616409 | 0.42784935 | NA         |              |
| NA        | ENSG00000258604 | 0          | NA          | NA         | NA         | NA         |              |
| NA        | ENSG00000258605 | 0          | NA          | NA         | NA         | NA         | DYNLL1P2     |
| NA        | ENSG00000258608 | 0          | NA          | NA         | NA         | NA         | DNAJC19P9    |
| 100885779 | ENSG00000258609 | 0          | NA          | NA         | NA         | NA         | LINC-ROR     |
| NA        | ENSG00000258610 | 0.74659737 | -0.03303578 | 0.38644226 | 0.4112877  | NA         |              |
| NA        | ENSG00000258611 | 2.84087334 | 0.09294665  | 0.38805043 | 0.34059105 | 0.57088546 | YBX2P2       |
| NA        | ENSG00000258613 | 0          | NA          | NA         | NA         | NA         | RPL21P7      |
| NA        | ENSG00000258615 | 0          | NA          | NA         | NA         | NA         |              |
| NA        | ENSG00000258616 | 0          | NA          | NA         | NA         | NA         | LINC02303    |
| NA        | ENSG00000258618 | 0          | NA          | NA         | NA         | NA         | RPL21P9      |
| NA        | ENSG00000258619 | 0          | NA          | NA         | NA         | NA         |              |
| NA        | ENSG00000258620 | 0.86321978 | -0.02219966 | 0.38294061 | 0.73898577 | NA         |              |
| NA        | ENSG00000258622 | 0          | NA          | NA         | NA         | NA         |              |

|           |                 |            |             |            |            |            |               |
|-----------|-----------------|------------|-------------|------------|------------|------------|---------------|
| NA        | ENSG00000258623 | 0.86860088 | 0.0435735   | 0.38481798 | 0.41244625 | NA         |               |
| NA        | ENSG00000258624 | 0          | NA          | NA         | NA         | NA         | SERPINE4P     |
| NA        | ENSG00000258625 | 0          | NA          | NA         | NA         | NA         | OR11H5P       |
| NA        | ENSG00000258626 | 0.33471731 | 0.02354391  | 0.38534154 | 0.62842204 | NA         | COX7A2P1      |
| NA        | ENSG00000258627 | 0          | NA          | NA         | NA         | NA         |               |
| NA        | ENSG00000258628 | 0          | NA          | NA         | NA         | NA         | RHPN2P1       |
| NA        | ENSG00000258629 | 0          | NA          | NA         | NA         | NA         | NCOA4P1       |
| 101929080 | ENSG00000258630 | 0          | NA          | NA         | NA         | NA         | LINC02292     |
| NA        | ENSG00000258631 | 0          | NA          | NA         | NA         | NA         |               |
| NA        | ENSG00000258632 | 0          | NA          | NA         | NA         | NA         |               |
| NA        | ENSG00000258633 | 0          | NA          | NA         | NA         | NA         |               |
| NA        | ENSG00000258634 | 682.65217  | -0.43232527 | 0.10317551 | 1.32E-05   | 0.00012321 |               |
| NA        | ENSG00000258636 | 0.86236687 | -0.00361619 | 0.38130519 | 0.94514815 | NA         |               |
| NA        | ENSG00000258637 | 0          | NA          | NA         | NA         | NA         |               |
| NA        | ENSG00000258638 | 0          | NA          | NA         | NA         | NA         |               |
| NA        | ENSG00000258639 | 0          | NA          | NA         | NA         | NA         |               |
| NA        | ENSG00000258640 | 0.16735865 | 0.01897177  | 0.38482933 | 0.78225479 | NA         | RPL21P5       |
| NA        | ENSG00000258641 | 0          | NA          | NA         | NA         | NA         | OR4T1P        |
| NA        | ENSG00000258642 | 0          | NA          | NA         | NA         | NA         |               |
| 100529063 | ENSG00000258643 | 103.75967  | 1.51064333  | 0.38740194 | 6.45E-06   | 6.34E-05   | BCL2L2-PABPN1 |
| 100529257 | ENSG00000258644 | 8.9982285  | 0.19387112  | 0.40615186 | 0.23106508 | 0.44716458 | SYNJ2BP-COX16 |
| NA        | ENSG00000258645 | 0          | NA          | NA         | NA         | NA         | HSPE1P2       |
| NA        | ENSG00000258646 | 0.98424876 | 0.00495848  | 0.37927337 | 0.93926378 | NA         |               |
| NA        | ENSG00000258647 | 0          | NA          | NA         | NA         | NA         | LINC00930     |
| NA        | ENSG00000258648 | 0.51937201 | -0.02557462 | 0.38567603 | 0.54680819 | NA         | UBE2CP1       |
| NA        | ENSG00000258649 | 0          | NA          | NA         | NA         | NA         |               |
| NA        | ENSG00000258650 | 0          | NA          | NA         | NA         | NA         | HSBP1P1       |
| 105370458 | ENSG00000258651 | 0          | NA          | NA         | NA         | NA         | SEC23A-AS1    |
| NA        | ENSG00000258653 | 33.4586321 | 0.08495692  | 0.2808037  | 0.66429551 | 0.8344174  |               |
| NA        | ENSG00000258654 | 5.02676918 | 0.1105596   | 0.3793556  | 0.40981644 | 0.63780658 |               |
| NA        | ENSG00000258655 | 22.7323283 | 0.05385255  | 0.30691029 | 0.77582524 | 0.89693915 | ARHGAP5-AS1   |
| NA        | ENSG00000258656 | 0          | NA          | NA         | NA         | NA         |               |
| NA        | ENSG00000258657 | 0          | NA          | NA         | NA         | NA         |               |
| NA        | ENSG00000258658 | 0.35734097 | 0.02382181  | 0.3853818  | 0.613684   | NA         |               |
| 53840     | ENSG00000258659 | 0          | NA          | NA         | NA         | NA         | TRIM34        |
| NA        | ENSG00000258660 | 0.90419472 | -0.03873466 | 0.3871499  | 0.33610152 | NA         |               |
| NA        | ENSG00000258661 | 0          | NA          | NA         | NA         | NA         |               |
| NA        | ENSG00000258662 | 0          | NA          | NA         | NA         | NA         |               |

|           |                 |            |             |            |            |            |           |
|-----------|-----------------|------------|-------------|------------|------------|------------|-----------|
| NA        | ENSG00000258663 | 0          | NA          | NA         | NA         | NA         |           |
| NA        | ENSG00000258665 | 0          | NA          | NA         | NA         | NA         |           |
| NA        | ENSG00000258666 | 0          | NA          | NA         | NA         | NA         |           |
| 105370526 | ENSG00000258667 | 2.50719796 | -0.0223608  | 0.37657797 | 0.78446103 | NA         | HIF1A-AS3 |
| NA        | ENSG00000258668 | 0          | NA          | NA         | NA         | NA         | COX6CP11  |
| NA        | ENSG00000258670 | 2.23918387 | 0.09181314  | 0.38853853 | 0.33208468 | NA         |           |
| NA        | ENSG00000258671 | 0          | NA          | NA         | NA         | NA         |           |
| NA        | ENSG00000258672 | 0          | NA          | NA         | NA         | NA         |           |
| 104355139 | ENSG00000258673 | 0.15069912 | -0.01848503 | 0.38480575 | 0.84537521 | NA         | LINC01397 |
| NA        | ENSG00000258674 | 49.4580277 | 0.46683416  | 0.31511757 | 0.04293573 | 0.13257414 |           |
| NA        | ENSG00000258675 | 0          | NA          | NA         | NA         | NA         | LINC02308 |
| NA        | ENSG00000258676 | 4.04987178 | -0.02535768 | 0.3694109  | 0.80968203 | 0.91359357 |           |
| NA        | ENSG00000258677 | 38.6434922 | -0.15912733 | 0.27999736 | 0.42427891 | 0.65002811 |           |
| 101930294 | ENSG00000258678 | 1.20681322 | -2.91E-05   | 0.38009187 | 0.93723406 | NA         | LINC02317 |
| NA        | ENSG00000258679 | 0          | NA          | NA         | NA         | NA         |           |
| NA        | ENSG00000258680 | 0          | NA          | NA         | NA         | NA         |           |
| NA        | ENSG00000258681 | 0          | NA          | NA         | NA         | NA         |           |
| NA        | ENSG00000258682 | 3.82858969 | -0.06372296 | 0.3729592  | 0.57715447 | 0.77558553 |           |
| NA        | ENSG00000258683 | 0          | NA          | NA         | NA         | NA         |           |
| NA        | ENSG00000258684 | 1.03122105 | 0.03450369  | 0.38161638 | 0.59427489 | NA         | BMS1P16   |
| NA        | ENSG00000258685 | 0          | NA          | NA         | NA         | NA         | AKR1B1P5  |
| NA        | ENSG00000258687 | 0          | NA          | NA         | NA         | NA         |           |
| 103695436 | ENSG00000258689 | 0          | NA          | NA         | NA         | NA         | LINC01269 |
| NA        | ENSG00000258690 | 0          | NA          | NA         | NA         | NA         |           |
| NA        | ENSG00000258691 | 0          | NA          | NA         | NA         | NA         |           |
| NA        | ENSG00000258692 | 1.3813298  | -0.04269722 | 0.38312239 | 0.50166587 | NA         | SALL4P7   |
| NA        | ENSG00000258693 | 0          | NA          | NA         | NA         | NA         |           |
| NA        | ENSG00000258694 | 0          | NA          | NA         | NA         | NA         | LINC02319 |
| NA        | ENSG00000258695 | 2.47625236 | 0.09549624  | 0.38981375 | 0.31254906 | NA         |           |
| NA        | ENSG00000258696 | 0          | NA          | NA         | NA         | NA         |           |
| NA        | ENSG00000258698 | 0.37844916 | 0.02407552  | 0.3854191  | 0.60038877 | NA         |           |
| NA        | ENSG00000258699 | 0          | NA          | NA         | NA         | NA         |           |
| 100506412 | ENSG00000258700 | 0          | NA          | NA         | NA         | NA         | LINC00871 |
| 196872    | ENSG00000258701 | 77.9231131 | 0.07580104  | 0.22292086 | 0.67838727 | 0.84291038 | LINC00638 |
| NA        | ENSG00000258702 | 19.2180328 | 0.05869849  | 0.32742496 | 0.74041693 | 0.87742184 |           |
| NA        | ENSG00000258703 | 0          | NA          | NA         | NA         | NA         |           |
| NA        | ENSG00000258704 | 10.7547498 | 0.19089734  | 0.38789807 | 0.27831124 | 0.50270347 | SRP54-AS1 |
| NA        | ENSG00000258705 | 0          | NA          | NA         | NA         | NA         |           |



|           |                 |            |             |            |            |            |              |
|-----------|-----------------|------------|-------------|------------|------------|------------|--------------|
| NA        | ENSG00000258706 | 0          | NA          | NA         | NA         | NA         | SLC20A1P3    |
| NA        | ENSG00000258707 | 0          | NA          | NA         | NA         | NA         |              |
| 100129794 | ENSG00000258708 | 0          | NA          | NA         | NA         | NA         | SLC25A21-AS1 |
| 348120    | ENSG00000258710 | 0          | NA          | NA         | NA         | NA         | LINC01193    |
| NA        | ENSG00000258711 | 0.64673492 | -0.02044296 | 0.38308207 | 0.66919855 | NA         |              |
| NA        | ENSG00000258712 | 0          | NA          | NA         | NA         | NA         | CXADRP2      |
| 128653    | ENSG00000258713 | 0          | NA          | NA         | NA         | NA         | C20orf141    |
| 105370622 | ENSG00000258716 | 0          | NA          | NA         | NA         | NA         |              |
| NA        | ENSG00000258717 | 1.10450617 | -0.00572687 | 0.38053281 | 0.92099568 | NA         |              |
| NA        | ENSG00000258718 | 0          | NA          | NA         | NA         | NA         | LINC02311    |
| NA        | ENSG00000258719 | 0          | NA          | NA         | NA         | NA         |              |
| NA        | ENSG00000258721 | 0          | NA          | NA         | NA         | NA         | OR11H3P      |
| NA        | ENSG00000258722 | 0          | NA          | NA         | NA         | NA         | CKAP2P1      |
| NA        | ENSG00000258723 | 0          | NA          | NA         | NA         | NA         |              |
| 54984     | ENSG00000258724 | 4.62890369 | -0.03020446 | 0.38662721 | 0.1548243  | 0.34030142 | PINX1        |
| 100507118 | ENSG00000258725 | 39.1453072 | -0.343459   | 0.35876327 | 0.12804855 | 0.29872367 | PRC1-AS1     |
| NA        | ENSG00000258726 | 0          | NA          | NA         | NA         | NA         | DUXAP6       |
| 102724814 | ENSG00000258727 | 175.507784 | 0.8584065   | 0.18818439 | 8.17E-07   | 9.41E-06   |              |
| NA        | ENSG00000258728 | 0.29863895 | -0.02292439 | 0.3852726  | 0.68753245 | NA         |              |
| NA        | ENSG00000258729 | 0.16735865 | 0.01897177  | 0.38482933 | 0.78225479 | NA         |              |
| 319085    | ENSG00000258730 | 1.95610123 | -0.03428023 | 0.37941605 | 0.64965455 | NA         | ITPK1-AS1    |
| 101927620 | ENSG00000258731 | 0.82967321 | 0.03615821  | 0.38458456 | 0.46795668 | NA         |              |
| NA        | ENSG00000258732 | 27.1020261 | -0.02789102 | 0.30491151 | 0.87978567 | 0.94668335 |              |
| NA        | ENSG00000258733 | 0.3236641  | 0.00028064  | 0.38336257 | 0.97759073 | NA         | LINC02328    |
| NA        | ENSG00000258734 | 0          | NA          | NA         | NA         | NA         |              |
| 145216    | ENSG00000258735 | 0.85475092 | 0.01112511  | 0.38155846 | 0.83002369 | NA         | LINC00637    |
| NA        | ENSG00000258736 | 0          | NA          | NA         | NA         | NA         |              |
| NA        | ENSG00000258737 | 0          | NA          | NA         | NA         | NA         | SUB1P2       |
| 112268124 | ENSG00000258738 | 94.7504971 | -0.0033504  | 0.21239747 | 0.98489182 | 0.99473578 |              |
| NA        | ENSG00000258739 | 1.85290297 | -0.08227691 | 0.39073267 | 0.27234588 | NA         | ENO1P2       |
| NA        | ENSG00000258740 | 0          | NA          | NA         | NA         | NA         |              |
| NA        | ENSG00000258741 | 8.50495866 | 0.04370428  | 0.36790044 | 0.70274375 | 0.85699455 | H2AZ2P1      |
| NA        | ENSG00000258742 | 1.69096777 | -0.0395492  | 0.38121202 | 0.57557387 | NA         | LINC02833    |
| 101928599 | ENSG00000258743 | 0.91694949 | 0.06411138  | 0.39118496 | 0.20048665 | NA         | LINC02301    |
| NA        | ENSG00000258744 | 24.8465939 | -0.05520327 | 0.30131758 | 0.76958206 | 0.89405696 |              |
| NA        | ENSG00000258745 | 0          | NA          | NA         | NA         | NA         |              |
| NA        | ENSG00000258746 | 0          | NA          | NA         | NA         | NA         |              |
| 105370473 | ENSG00000258747 | 0          | NA          | NA         | NA         | NA         |              |

|           |                 |            |             |            |            |            |           |
|-----------|-----------------|------------|-------------|------------|------------|------------|-----------|
| NA        | ENSG00000258748 | 7.23965216 | 0.0673949   | 0.35731807 | 0.64740902 | 0.82430661 |           |
| NA        | ENSG00000258749 | 6.42769711 | 0.01821091  | 0.37033898 | 0.86218508 | 0.9388505  |           |
| NA        | ENSG00000258750 | 0          | NA          | NA         | NA         | NA         |           |
| NA        | ENSG00000258751 | 0          | NA          | NA         | NA         | NA         |           |
| NA        | ENSG00000258752 | 1.17588367 | -0.00803917 | 0.37859767 | 0.90676936 | NA         |           |
| NA        | ENSG00000258753 | 0          | NA          | NA         | NA         | NA         |           |
| 105369203 | ENSG00000258754 | 0.15069912 | -0.01848503 | 0.38480575 | 0.84537521 | NA         | LINC01579 |
| NA        | ENSG00000258757 | 0          | NA          | NA         | NA         | NA         |           |
| NA        | ENSG00000258758 | 0          | NA          | NA         | NA         | NA         |           |
| NA        | ENSG00000258759 | 0.173733   | 0.01914545  | 0.38484597 | 0.78225479 | NA         |           |
| NA        | ENSG00000258760 | 0          | NA          | NA         | NA         | NA         |           |
| NA        | ENSG00000258761 | 0          | NA          | NA         | NA         | NA         |           |
| NA        | ENSG00000258762 | 0          | NA          | NA         | NA         | NA         | MTND4P33  |
| NA        | ENSG00000258763 | 0          | NA          | NA         | NA         | NA         |           |
| NA        | ENSG00000258764 | 0          | NA          | NA         | NA         | NA         |           |
| NA        | ENSG00000258765 | 0          | NA          | NA         | NA         | NA         |           |
| 100628307 | ENSG00000258766 | 0.14931947 | -0.01844332 | 0.38480212 | 0.84537521 | NA         | DIO2-AS1  |
| NA        | ENSG00000258767 | 0          | NA          | NA         | NA         | NA         |           |
| NA        | ENSG00000258768 | 28.0344018 | 0.1503646   | 0.30319559 | 0.45182615 | 0.67506821 |           |
| NA        | ENSG00000258769 | 0          | NA          | NA         | NA         | NA         | RAP1AP    |
| 105370611 | ENSG00000258770 | 0          | NA          | NA         | NA         | NA         | LINC02330 |
| NA        | ENSG00000258771 | 0.15069912 | -0.01848503 | 0.38480575 | 0.84537521 | NA         | BCAR1P2   |
| NA        | ENSG00000258772 | 0          | NA          | NA         | NA         | NA         |           |
| NA        | ENSG00000258773 | 0          | NA          | NA         | NA         | NA         |           |
| NA        | ENSG00000258774 | 0          | NA          | NA         | NA         | NA         | NANOGP7   |
| NA        | ENSG00000258776 | 0          | NA          | NA         | NA         | NA         |           |
| 100750246 | ENSG00000258777 | 1.93206176 | 0.07616094  | 0.38674283 | 0.3569527  | NA         | HIF1A-AS1 |
| NA        | ENSG00000258778 | 0          | NA          | NA         | NA         | NA         | EIF2S2P1  |
| 100506172 | ENSG00000258779 | 0          | NA          | NA         | NA         | NA         | LINC01568 |
| NA        | ENSG00000258780 | 0          | NA          | NA         | NA         | NA         | BMS1P15   |
| NA        | ENSG00000258781 | 0          | NA          | NA         | NA         | NA         | CDRT15P13 |
| NA        | ENSG00000258782 | 0          | NA          | NA         | NA         | NA         |           |
| NA        | ENSG00000258783 | 4.99883918 | 0.01337344  | 0.36307903 | 0.91437924 | 0.96378282 | KRT18P6   |
| NA        | ENSG00000258784 | 0          | NA          | NA         | NA         | NA         |           |
| 101927129 | ENSG00000258785 | 0          | NA          | NA         | NA         | NA         | LINC01580 |
| NA        | ENSG00000258787 | 0          | NA          | NA         | NA         | NA         | SEPHS1P2  |
| NA        | ENSG00000258788 | 0.15069912 | -0.01848503 | 0.38480575 | 0.84537521 | NA         | CKS1BP1   |
| NA        | ENSG00000258789 | 8.10490151 | -0.00983277 | 0.35014142 | 0.94410437 | 0.97725417 |           |

|           |                 |            |             |            |            |            |           |
|-----------|-----------------|------------|-------------|------------|------------|------------|-----------|
| NA        | ENSG00000258790 | 269.078634 | -0.08045737 | 0.15534788 | 0.57023001 | 0.7706786  |           |
| 645687    | ENSG00000258791 | 0          | NA          | NA         | NA         | NA         | LINC00520 |
| 105370616 | ENSG00000258792 | 0          | NA          | NA         | NA         | NA         |           |
| NA        | ENSG00000258793 | 0          | NA          | NA         | NA         | NA         |           |
| NA        | ENSG00000258794 | 0.88178948 | -0.00935353 | 0.38150782 | 0.85715288 | NA         | DUX4L27   |
| NA        | ENSG00000258795 | 0          | NA          | NA         | NA         | NA         |           |
| NA        | ENSG00000258796 | 0          | NA          | NA         | NA         | NA         |           |
| NA        | ENSG00000258797 | 0          | NA          | NA         | NA         | NA         |           |
| NA        | ENSG00000258798 | 0.35712931 | 0.02382029  | 0.38538156 | 0.61379078 | NA         |           |
| NA        | ENSG00000258799 | 0          | NA          | NA         | NA         | NA         | ZNF519P2  |
| NA        | ENSG00000258800 | 0          | NA          | NA         | NA         | NA         |           |
| NA        | ENSG00000258802 | 0          | NA          | NA         | NA         | NA         |           |
| 101927690 | ENSG00000258803 | 0          | NA          | NA         | NA         | NA         |           |
| 283585    | ENSG00000258804 | 0          | NA          | NA         | NA         | NA         | LINC01148 |
| NA        | ENSG00000258805 | 0          | NA          | NA         | NA         | NA         | ADIPOR1P2 |
| NA        | ENSG00000258806 | 0.68224988 | 0.04060558  | 0.38717393 | 0.35753545 | NA         | OR11H7    |
| NA        | ENSG00000258807 | 0          | NA          | NA         | NA         | NA         |           |
| 105370496 | ENSG00000258808 | 0          | NA          | NA         | NA         | NA         | LINC02310 |
| NA        | ENSG00000258810 | 0          | NA          | NA         | NA         | NA         |           |
| NA        | ENSG00000258811 | 6.41438538 | -0.01142294 | 0.36003997 | 0.92661193 | 0.96932621 |           |
| NA        | ENSG00000258812 | 0          | NA          | NA         | NA         | NA         | TRAV33    |
| NA        | ENSG00000258813 | 5.2408025  | 0.03385934  | 0.3637518  | 0.78633009 | 0.90287569 |           |
| NA        | ENSG00000258814 | 0          | NA          | NA         | NA         | NA         | LINC02329 |
| NA        | ENSG00000258815 | 16.6067506 | -0.08754124 | 0.33277217 | 0.62200319 | 0.80695268 | LINC02820 |
| NA        | ENSG00000258816 | 0          | NA          | NA         | NA         | NA         |           |
| 283092    | ENSG00000258817 | 0          | NA          | NA         | NA         | NA         | OR4C13    |
| 6038      | ENSG00000258818 | 10.5392665 | 0.4579795   | 0.70430718 | 0.03482616 | 0.11291894 | RNASE4    |
| 102724190 | ENSG00000258819 | 0.49772307 | -0.01060787 | 0.38285843 | 0.82287947 | NA         | LINC02289 |
| NA        | ENSG00000258820 | 0          | NA          | NA         | NA         | NA         |           |
| NA        | ENSG00000258822 | 0          | NA          | NA         | NA         | NA         | OR4K16P   |
| NA        | ENSG00000258823 | 0          | NA          | NA         | NA         | NA         |           |
| NA        | ENSG00000258824 | 9.16762208 | -0.0390993  | 0.3508193  | 0.79009312 | 0.9043359  |           |
| NA        | ENSG00000258826 | 0          | NA          | NA         | NA         | NA         | LINC01147 |
| NA        | ENSG00000258827 | 0          | NA          | NA         | NA         | NA         |           |
| NA        | ENSG00000258828 | 0          | NA          | NA         | NA         | NA         | KRT8P2    |
| NA        | ENSG00000258829 | 0          | NA          | NA         | NA         | NA         |           |
| NA        | ENSG00000258830 | 14.6082609 | 0.00666711  | 0.37931878 | 0.92587662 | 0.9691565  |           |
| NA        | ENSG00000258831 | 0          | NA          | NA         | NA         | NA         |           |

|           |                 |            |             |            |            |            |            |
|-----------|-----------------|------------|-------------|------------|------------|------------|------------|
| NA        | ENSG00000258834 | 0.74659737 | -0.03303578 | 0.38644226 | 0.4112877  | NA         | DUX4L4     |
| NA        | ENSG00000258835 | 0          | NA          | NA         | NA         | NA         | TRAV28     |
| NA        | ENSG00000258836 | 0          | NA          | NA         | NA         | NA         |            |
| NA        | ENSG00000258837 | 0          | NA          | NA         | NA         | NA         |            |
| 4157      | ENSG00000258839 | 115.47315  | -0.16366179 | 0.20044697 | 0.33852399 | 0.56881111 | MC1R       |
| NA        | ENSG00000258841 | 0          | NA          | NA         | NA         | NA         | EEF1A1P2   |
| NA        | ENSG00000258842 | 0          | NA          | NA         | NA         | NA         |            |
| NA        | ENSG00000258843 | 0          | NA          | NA         | NA         | NA         |            |
| NA        | ENSG00000258844 | 0          | NA          | NA         | NA         | NA         |            |
| NA        | ENSG00000258845 | 0          | NA          | NA         | NA         | NA         |            |
| NA        | ENSG00000258846 | 0.15069912 | -0.01848503 | 0.38480575 | 0.84537521 | NA         | EEF1A1P33  |
| NA        | ENSG00000258847 | 0.32266016 | -0.02325558 | 0.3853189  | 0.66950916 | NA         |            |
| NA        | ENSG00000258848 | 0          | NA          | NA         | NA         | NA         | GRAMD4P6   |
| NA        | ENSG00000258849 | 0          | NA          | NA         | NA         | NA         | OR7E159P   |
| NA        | ENSG00000258850 | 0          | NA          | NA         | NA         | NA         |            |
| NA        | ENSG00000258851 | 0.14931947 | -0.01844332 | 0.38480212 | 0.84537521 | NA         |            |
| NA        | ENSG00000258853 | 0          | NA          | NA         | NA         | NA         |            |
| NA        | ENSG00000258854 | 0          | NA          | NA         | NA         | NA         |            |
| NA        | ENSG00000258855 | 0          | NA          | NA         | NA         | NA         | OR11J2P    |
| NA        | ENSG00000258856 | 0          | NA          | NA         | NA         | NA         |            |
| NA        | ENSG00000258857 | 0.77230379 | -0.05436653 | 0.38912783 | 0.28496849 | NA         |            |
| NA        | ENSG00000258858 | 0.32383431 | -0.02327308 | 0.38532135 | 0.66860265 | NA         |            |
| NA        | ENSG00000258859 | 0          | NA          | NA         | NA         | NA         | LINC02296  |
| NA        | ENSG00000258860 | 0          | NA          | NA         | NA         | NA         |            |
| 378881    | ENSG00000258861 | 0          | NA          | NA         | NA         | NA         | MIR381HG   |
| NA        | ENSG00000258863 | 0          | NA          | NA         | NA         | NA         | SETP1      |
| NA        | ENSG00000258864 | 1.36874898 | -0.02948648 | 0.38303433 | 0.57782938 | NA         |            |
| NA        | ENSG00000258866 | 0          | NA          | NA         | NA         | NA         |            |
| 283587    | ENSG00000258867 | 0          | NA          | NA         | NA         | NA         | LINC01146  |
| NA        | ENSG00000258868 | 0          | NA          | NA         | NA         | NA         |            |
| 100132612 | ENSG00000258869 | 0          | NA          | NA         | NA         | NA         | LINC02312  |
| NA        | ENSG00000258870 | 0.16735865 | 0.01897177  | 0.38482933 | 0.78225479 | NA         | EIF4EBP1P1 |
| NA        | ENSG00000258871 | 0          | NA          | NA         | NA         | NA         |            |
| NA        | ENSG00000258872 | 0.173733   | 0.01914545  | 0.38484597 | 0.78225479 | NA         | FDPSP3     |
| 503835    | ENSG00000258873 | 0          | NA          | NA         | NA         | NA         | DUXA       |
| NA        | ENSG00000258874 | 0          | NA          | NA         | NA         | NA         |            |
| NA        | ENSG00000258875 | 27.2391971 | -0.78684915 | 0.56613663 | 0.01487637 | 0.05727678 |            |
| NA        | ENSG00000258876 | 0.82351411 | 0.03571403  | 0.38452688 | 0.47329114 | NA         | TGFB3-AS1  |

|        |                 |            |             |            |            |            |            |
|--------|-----------------|------------|-------------|------------|------------|------------|------------|
| NA     | ENSG00000258877 | 0          | NA          | NA         | NA         | NA         | ATP5F1AP4  |
| NA     | ENSG00000258878 | 0          | NA          | NA         | NA         | NA         |            |
| NA     | ENSG00000258881 | 7.81850486 | -0.05108662 | 0.35754886 | 0.71484105 | 0.86267923 |            |
| NA     | ENSG00000258883 | 0          | NA          | NA         | NA         | NA         | NBEAP4     |
| NA     | ENSG00000258884 | 2.86990593 | -0.21392853 | 0.46883248 | 0.02125123 | 0.07649208 | LINC02321  |
| NA     | ENSG00000258885 | 0.34624801 | -0.02356563 | 0.38536324 | 0.65270996 | NA         |            |
| NA     | ENSG00000258886 | 0          | NA          | NA         | NA         | NA         | HIGD1AP17  |
| NA     | ENSG00000258887 | 0          | NA          | NA         | NA         | NA         |            |
| NA     | ENSG00000258888 | 0          | NA          | NA         | NA         | NA         |            |
| 90799  | ENSG00000258890 | 1268.42975 | 0.13044969  | 0.08299179 | 0.10725156 | 0.2623762  | CEP95      |
| NA     | ENSG00000258891 | 1.04250742 | 0.00627259  | 0.3800873  | 0.91726778 | NA         |            |
| NA     | ENSG00000258892 | 0.173733   | 0.01914545  | 0.38484597 | 0.78225479 | NA         |            |
| NA     | ENSG00000258893 | 0          | NA          | NA         | NA         | NA         | SETP2      |
| NA     | ENSG00000258894 | 0          | NA          | NA         | NA         | NA         | ARHGAP16P  |
| NA     | ENSG00000258895 | 0          | NA          | NA         | NA         | NA         |            |
| NA     | ENSG00000258896 | 1.32466473 | 0.05995039  | 0.38840957 | 0.25608572 | NA         | SCOCP1     |
| NA     | ENSG00000258897 | 0          | NA          | NA         | NA         | NA         | EGLN3-AS1  |
| NA     | ENSG00000258899 | 0          | NA          | NA         | NA         | NA         | OR4U1P     |
| NA     | ENSG00000258900 | 4.58902613 | 0.03716364  | 0.37411171 | 0.70489931 | 0.85803894 | HNRNPCP1   |
| NA     | ENSG00000258901 | 0.68455617 | 0.00545616  | 0.38247749 | 0.8986916  | NA         |            |
| NA     | ENSG00000258902 | 0          | NA          | NA         | NA         | NA         |            |
| NA     | ENSG00000258903 | 2.50089017 | -0.10834786 | 0.39639996 | 0.23191998 | NA         |            |
| NA     | ENSG00000258904 | 2.59887045 | -0.13680393 | 0.41181083 | 0.11794242 | 0.28178922 |            |
| NA     | ENSG00000258905 | 0          | NA          | NA         | NA         | NA         | TRAV32     |
| NA     | ENSG00000258906 | 0          | NA          | NA         | NA         | NA         |            |
| NA     | ENSG00000258907 | 0          | NA          | NA         | NA         | NA         | PSMB3P1    |
| NA     | ENSG00000258908 | 0          | NA          | NA         | NA         | NA         |            |
| NA     | ENSG00000258909 | 0          | NA          | NA         | NA         | NA         |            |
| NA     | ENSG00000258910 | 0          | NA          | NA         | NA         | NA         | LINC01956  |
| NA     | ENSG00000258912 | 0          | NA          | NA         | NA         | NA         | LINC02316  |
| 145195 | ENSG00000258913 | 65.2377528 | -0.11916947 | 0.27170581 | 0.54020202 | 0.748907   | LINC02691  |
| NA     | ENSG00000258915 | 0          | NA          | NA         | NA         | NA         | BHLHB9P1   |
| NA     | ENSG00000258916 | 0          | NA          | NA         | NA         | NA         | SPATA31E2P |
| NA     | ENSG00000258917 | 1.12423015 | 0.01637637  | 0.38005603 | 0.79733401 | NA         | ZMYND19P1  |
| NA     | ENSG00000258918 | 0          | NA          | NA         | NA         | NA         |            |
| NA     | ENSG00000258919 | 0          | NA          | NA         | NA         | NA         |            |
| 400236 | ENSG00000258920 | 30.2018055 | -0.50670496 | 0.45843258 | 0.05211753 | 0.15377926 | FOXN3-AS1  |
| NA     | ENSG00000258921 | 0          | NA          | NA         | NA         | NA         |            |

|           |    |                 |            |             |            |            |            |           |
|-----------|----|-----------------|------------|-------------|------------|------------|------------|-----------|
|           | NA | ENSG00000258922 | 0          | NA          | NA         | NA         | NA         |           |
|           | NA | ENSG00000258923 | 0          | NA          | NA         | NA         | NA         | MTND5P35  |
|           | NA | ENSG00000258924 | 45.4822522 | 0.04668042  | 0.30302489 | 0.80613387 | 0.9121533  |           |
|           | NA | ENSG00000258925 | 0          | NA          | NA         | NA         | NA         | NPM1P5    |
|           | NA | ENSG00000258926 | 4.71796431 | 0.08348104  | 0.37408703 | 0.50588248 | 0.72177288 |           |
|           | NA | ENSG00000258927 | 0          | NA          | NA         | NA         | NA         |           |
| 102723604 | NA | ENSG00000258928 | 0          | NA          | NA         | NA         | NA         |           |
|           | NA | ENSG00000258930 | 0.18922458 | 0.01954053  | 0.38488496 | 0.78225479 | NA         |           |
|           | NA | ENSG00000258931 | 0          | NA          | NA         | NA         | NA         |           |
| 728755    | NA | ENSG00000258932 | 0.31754355 | 0.0017879   | 0.38337289 | 0.96071939 | NA         |           |
|           | NA | ENSG00000258933 | 0.6147749  | -0.01590162 | 0.38338788 | 0.71884406 | NA         | LINC02279 |
|           | NA | ENSG00000258934 | 0          | NA          | NA         | NA         | NA         | YWHAQP1   |
|           | NA | ENSG00000258935 | 0.15069912 | -0.01848503 | 0.38480575 | 0.84537521 | NA         |           |
|           | NA | ENSG00000258938 | 24.6089275 | 0.34131274  | 0.42666487 | 0.12730345 | 0.29752625 |           |
| 100288846 | NA | ENSG00000258940 | 3.52182174 | 0.03654097  | 0.36847907 | 0.7487929  | 0.88205755 |           |
|           | NA | ENSG00000258942 | 0.30001613 | -0.02294459 | 0.38527538 | 0.68644859 | NA         |           |
|           | NA | ENSG00000258943 | 0          | NA          | NA         | NA         | NA         |           |
|           | NA | ENSG00000258944 | 5.24126699 | 0.08472451  | 0.37168353 | 0.51629861 | 0.73041674 |           |
|           | NA | ENSG00000258945 | 0          | NA          | NA         | NA         | NA         |           |
| 10381     | NA | ENSG00000258947 | 10971.2906 | -0.43461469 | 0.056673   | 8.48E-15   | 2.27E-13   | TUBB3     |
|           | NA | ENSG00000258948 | 0          | NA          | NA         | NA         | NA         | KRT8P1    |
|           | NA | ENSG00000258949 | 0.15069912 | -0.01848503 | 0.38480575 | 0.84537521 | NA         |           |
|           | NA | ENSG00000258951 | 9.46562    | 0.54739592  | 0.80198447 | 0.03201528 | 0.10559986 | KRT18P7   |
|           | NA | ENSG00000258952 | 0          | NA          | NA         | NA         | NA         | SALRNA1   |
|           | NA | ENSG00000258954 | 0          | NA          | NA         | NA         | NA         |           |
|           | NA | ENSG00000258955 | 0          | NA          | NA         | NA         | NA         | LINC00519 |
|           | NA | ENSG00000258956 | 0          | NA          | NA         | NA         | NA         | COX4I1P1  |
|           | NA | ENSG00000258957 | 7.06127315 | -0.06523247 | 0.35946812 | 0.64339089 | 0.82181194 |           |
|           | NA | ENSG00000258958 | 0          | NA          | NA         | NA         | NA         |           |
|           | NA | ENSG00000258959 | 0.30139824 | -0.02296476 | 0.38527817 | 0.68536535 | NA         |           |
|           | NA | ENSG00000258960 | 0          | NA          | NA         | NA         | NA         | FTH1P13   |
|           | NA | ENSG00000258962 | 0          | NA          | NA         | NA         | NA         |           |
|           | NA | ENSG00000258963 | 0          | NA          | NA         | NA         | NA         | EDDM3DP   |
|           | NA | ENSG00000258964 | 4.15291596 | -0.01559317 | 0.38391961 | 0.65403758 | 0.82779603 |           |
|           | NA | ENSG00000258965 | 0          | NA          | NA         | NA         | NA         |           |
|           | NA | ENSG00000258966 | 0          | NA          | NA         | NA         | NA         | GTF3AP2   |
|           | NA | ENSG00000258967 | 0.30139824 | -0.02296476 | 0.38527817 | 0.68536535 | NA         | HMGN1P3   |
|           | NA | ENSG00000258968 | 0          | NA          | NA         | NA         | NA         |           |

|           |                 |            |             |            |            |            |            |
|-----------|-----------------|------------|-------------|------------|------------|------------|------------|
| NA        | ENSG00000258969 | 0          | NA          | NA         | NA         | NA         | LINC02307  |
| NA        | ENSG00000258970 | 0          | NA          | NA         | NA         | NA         |            |
| NA        | ENSG00000258971 | 0          | NA          | NA         | NA         | NA         |            |
| NA        | ENSG00000258972 | 0          | NA          | NA         | NA         | NA         | NDUFB8P1   |
| NA        | ENSG00000258973 | 0          | NA          | NA         | NA         | NA         |            |
| NA        | ENSG00000258975 | 0          | NA          | NA         | NA         | NA         |            |
| NA        | ENSG00000258976 | 0          | NA          | NA         | NA         | NA         |            |
| 101928559 | ENSG00000258977 | 0          | NA          | NA         | NA         | NA         | LINC01467  |
| NA        | ENSG00000258978 | 0          | NA          | NA         | NA         | NA         | HIF1AP1    |
| 105370646 | ENSG00000258979 | 0          | NA          | NA         | NA         | NA         | LINC02299  |
| NA        | ENSG00000258980 | 0          | NA          | NA         | NA         | NA         | EIF1AXP2   |
| NA        | ENSG00000258981 | 0          | NA          | NA         | NA         | NA         | COX5AP2    |
| NA        | ENSG00000258982 | 4.54553719 | -0.0950378  | 0.38250283 | 0.40249313 | 0.63061911 |            |
| NA        | ENSG00000258983 | 0.173733   | 0.01914545  | 0.38484597 | 0.78225479 | NA         |            |
| NA        | ENSG00000258984 | 6.49842676 | 0.12365733  | 0.3939047  | 0.2757257  | 0.49980793 | UBE2F-SCLY |
| NA        | ENSG00000258985 | 0.15069912 | -0.01848503 | 0.38480575 | 0.84537521 | NA         |            |
| 388021    | ENSG00000258986 | 767.718848 | -1.30624765 | 0.14243524 | 3.95E-21   | 1.55E-19   | TMEM179    |
| NA        | ENSG00000258987 | 0          | NA          | NA         | NA         | NA         |            |
| NA        | ENSG00000258988 | 0          | NA          | NA         | NA         | NA         | SF3B4P1    |
| NA        | ENSG00000258989 | 1.47486424 | -0.02521121 | 0.38081885 | 0.69032531 | NA         |            |
| NA        | ENSG00000258990 | 0          | NA          | NA         | NA         | NA         | MPPE1P1    |
| NA        | ENSG00000258991 | 0          | NA          | NA         | NA         | NA         | DUX4L19    |
| 7258      | ENSG00000258992 | 0          | NA          | NA         | NA         | NA         | TSPY1      |
| NA        | ENSG00000258993 | 0          | NA          | NA         | NA         | NA         |            |
| NA        | ENSG00000258994 | 0          | NA          | NA         | NA         | NA         | LINC02309  |
| NA        | ENSG00000258995 | 0          | NA          | NA         | NA         | NA         | PARP1P2    |
| NA        | ENSG00000258996 | 0          | NA          | NA         | NA         | NA         | PPIAP5     |
| NA        | ENSG00000258997 | 0          | NA          | NA         | NA         | NA         | NF1P2      |
| NA        | ENSG00000258998 | 0.34624801 | -0.02356563 | 0.38536324 | 0.65270996 | NA         | LINC02302  |
| NA        | ENSG00000259000 | 0.16735865 | 0.01897177  | 0.38482933 | 0.78225479 | NA         | DOCK11P1   |
| NA        | ENSG00000259001 | 0          | NA          | NA         | NA         | NA         |            |
| NA        | ENSG00000259002 | 0.29863895 | -0.02292439 | 0.3852726  | 0.68753245 | NA         |            |
| NA        | ENSG00000259003 | 0          | NA          | NA         | NA         | NA         |            |
| 101929422 | ENSG00000259004 | 0          | NA          | NA         | NA         | NA         | LINC02285  |
| NA        | ENSG00000259005 | 0.3234017  | 0.00167163  | 0.38337138 | 0.96507814 | NA         |            |
| NA        | ENSG00000259006 | 0.29863895 | -0.02292439 | 0.3852726  | 0.68753245 | NA         |            |
| NA        | ENSG00000259007 | 0          | NA          | NA         | NA         | NA         |            |
| NA        | ENSG00000259008 | 0.18922458 | 0.01954053  | 0.38488496 | 0.78225479 | NA         |            |

|           |                 |            |             |            |            |            |                |
|-----------|-----------------|------------|-------------|------------|------------|------------|----------------|
| NA        | ENSG00000259009 | 0          | NA          | NA         | NA         | NA         | TPRX2P         |
| NA        | ENSG00000259010 | 0          | NA          | NA         | NA         | NA         | NUP50P1        |
| NA        | ENSG00000259011 | 0          | NA          | NA         | NA         | NA         |                |
| NA        | ENSG00000259012 | 0          | NA          | NA         | NA         | NA         | MTCYBP27       |
| NA        | ENSG00000259013 | 0          | NA          | NA         | NA         | NA         |                |
| NA        | ENSG00000259015 | 0          | NA          | NA         | NA         | NA         |                |
| NA        | ENSG00000259016 | 0          | NA          | NA         | NA         | NA         |                |
| NA        | ENSG00000259017 | 74.0045994 | 1.47832135  | 0.29057349 | 2.87E-08   | 4.07E-07   |                |
| NA        | ENSG00000259018 | 0          | NA          | NA         | NA         | NA         |                |
| NA        | ENSG00000259019 | 0          | NA          | NA         | NA         | NA         | EIF4BP1        |
| NA        | ENSG00000259020 | 0          | NA          | NA         | NA         | NA         |                |
| NA        | ENSG00000259021 | 0          | NA          | NA         | NA         | NA         | TPRX1P1        |
| NA        | ENSG00000259022 | 4.12319174 | 0.16308813  | 0.41298919 | 0.18329822 | 0.38147873 | DNAJC8P1       |
| 338002    | ENSG00000259023 | 0          | NA          | NA         | NA         | NA         | LINC00524      |
| 100533496 | ENSG00000259024 | 209.840315 | 0.39615245  | 0.18763911 | 0.01660618 | 0.06268392 | TVP23C-CDRT4   |
| NA        | ENSG00000259025 | 0          | NA          | NA         | NA         | NA         |                |
| NA        | ENSG00000259026 | 1.0000508  | 0.02039736  | 0.38265745 | 0.6766433  | NA         |                |
| NA        | ENSG00000259028 | 0          | NA          | NA         | NA         | NA         |                |
| NA        | ENSG00000259029 | 0          | NA          | NA         | NA         | NA         | DUX4L18        |
| 100526835 | ENSG00000259030 | 58.2312941 | -0.22483591 | 0.36330779 | 0.25608161 | 0.47719162 | FPGT-TNNI3K    |
| NA        | ENSG00000259031 | 33.8398107 | 0.76494214  | 0.48929852 | 0.01307323 | 0.05164121 |                |
| NA        | ENSG00000259032 | 0          | NA          | NA         | NA         | NA         | ENSAP2         |
| NA        | ENSG00000259033 | 9.64417358 | -0.15474714 | 0.3802026  | 0.33760965 | 0.56788262 |                |
| NA        | ENSG00000259035 | 0          | NA          | NA         | NA         | NA         |                |
| NA        | ENSG00000259036 | 0          | NA          | NA         | NA         | NA         |                |
| NA        | ENSG00000259037 | 0          | NA          | NA         | NA         | NA         |                |
| NA        | ENSG00000259038 | 0          | NA          | NA         | NA         | NA         |                |
| NA        | ENSG00000259039 | 2.36084483 | 0.01483529  | 0.37374756 | 0.87309942 | NA         |                |
| NA        | ENSG00000259040 | 32.6343088 | 0.06171816  | 0.39016902 | 0.198242   | 0.40248048 | BLOC1S5-TXNDC5 |
| NA        | ENSG00000259041 | 0          | NA          | NA         | NA         | NA         |                |
| NA        | ENSG00000259042 | 0          | NA          | NA         | NA         | NA         |                |
| NA        | ENSG00000259043 | 0          | NA          | NA         | NA         | NA         | BRD7P1         |
| NA        | ENSG00000259044 | 0          | NA          | NA         | NA         | NA         |                |
| NA        | ENSG00000259045 | 0.32238133 | -0.02325333 | 0.38531856 | 0.66967044 | NA         | MTCO1P2        |
| NA        | ENSG00000259046 | 0          | NA          | NA         | NA         | NA         | RRAGAP1        |
| NA        | ENSG00000259047 | 0          | NA          | NA         | NA         | NA         |                |
| NA        | ENSG00000259048 | 0          | NA          | NA         | NA         | NA         |                |
| NA        | ENSG00000259049 | 2.4674534  | -0.04285169 | 0.37607514 | 0.64345845 | NA         |                |



|           |    |                 |            |             |            |            |            |              |
|-----------|----|-----------------|------------|-------------|------------|------------|------------|--------------|
|           | NA | ENSG00000259050 | 0          | NA          | NA         | NA         | NA         | CHORDC2P     |
|           | NA | ENSG00000259051 | 0          | NA          | NA         | NA         | NA         | HNRNPUP1     |
|           | NA | ENSG00000259052 | 1.50628457 | 0.03678927  | 0.38393374 | 0.49188604 | NA         |              |
|           | NA | ENSG00000259053 | 0          | NA          | NA         | NA         | NA         |              |
| 105370400 | NA | ENSG00000259054 | 0          | NA          | NA         | NA         | NA         | LINC02332    |
|           | NA | ENSG00000259055 | 0          | NA          | NA         | NA         | NA         |              |
|           | NA | ENSG00000259056 | 0          | NA          | NA         | NA         | NA         | DUXAP1       |
|           | NA | ENSG00000259057 | 0          | NA          | NA         | NA         | NA         | THRAP3P2     |
|           | NA | ENSG00000259058 | 0.15069912 | -0.01848503 | 0.38480575 | 0.84537521 | NA         |              |
|           | NA | ENSG00000259059 | 0          | NA          | NA         | NA         | NA         | PEBP1P1      |
|           | NA | ENSG00000259060 | 0          | NA          | NA         | NA         | NA         |              |
|           | NA | ENSG00000259061 | 0          | NA          | NA         | NA         | NA         |              |
| 161159    | NA | ENSG00000259062 | 0          | NA          | NA         | NA         | NA         | ACTN1-AS1    |
|           | NA | ENSG00000259064 | 0          | NA          | NA         | NA         | NA         |              |
|           | NA | ENSG00000259065 | 20.3837604 | 0.25790973  | 0.38452896 | 0.20990849 | 0.41838301 |              |
|           | NA | ENSG00000259066 | 4.55432553 | -0.01868442 | 0.37008787 | 0.8552886  | 0.93533932 |              |
|           | NA | ENSG00000259067 | 0          | NA          | NA         | NA         | NA         |              |
|           | NA | ENSG00000259068 | 0          | NA          | NA         | NA         | NA         | TRAV37       |
|           | NA | ENSG00000259069 | 0          | NA          | NA         | NA         | NA         |              |
| 283547    | NA | ENSG00000259070 | 21.8916419 | -0.90934    | 1.05444882 | 0.01303448 | 0.05152502 | LINC00639    |
|           | NA | ENSG00000259071 | 0.61632235 | -0.01943123 | 0.38306715 | 0.68998605 | NA         |              |
|           | NA | ENSG00000259072 | 0          | NA          | NA         | NA         | NA         |              |
| 29018     | NA | ENSG00000259073 | 0          | NA          | NA         | NA         | NA         | FOXN3-AS2    |
|           | NA | ENSG00000259074 | 0          | NA          | NA         | NA         | NA         | PSMB7P1      |
| 100528030 | NA | ENSG00000259075 | 63.1144644 | 0.16228378  | 0.26433    | 0.41206266 | 0.63994702 | POC1B-GALNT4 |
|           | NA | ENSG00000259076 | 0          | NA          | NA         | NA         | NA         |              |
|           | NA | ENSG00000259077 | 0          | NA          | NA         | NA         | NA         |              |
|           | NA | ENSG00000259078 | 0          | NA          | NA         | NA         | NA         | PTBP1P       |
|           | NA | ENSG00000259079 | 0          | NA          | NA         | NA         | NA         |              |
|           | NA | ENSG00000259080 | 27.1836865 | 0.02998232  | 0.29781414 | 0.87588691 | 0.94529871 |              |
|           | NA | ENSG00000259081 | 13.586616  | 0.50725637  | 0.62867406 | 0.04805334 | 0.14438563 |              |
| 100507277 | NA | ENSG00000259082 | 0          | NA          | NA         | NA         | NA         | LINC02314    |
|           | NA | ENSG00000259083 | 0          | NA          | NA         | NA         | NA         |              |
|           | NA | ENSG00000259084 | 0.16735865 | 0.01897177  | 0.38482933 | 0.78225479 | NA         |              |
|           | NA | ENSG00000259086 | 0.18922458 | 0.01954053  | 0.38488496 | 0.78225479 | NA         | KIAA1143P1   |
|           | NA | ENSG00000259087 | 0          | NA          | NA         | NA         | NA         |              |
|           | NA | ENSG00000259088 | 5.68396243 | -0.03743071 | 0.3593336  | 0.77743489 | 0.89796287 |              |
|           | NA | ENSG00000259089 | 0          | NA          | NA         | NA         | NA         | GRAMD4P5     |

|           |                 |            |             |            |            |            |               |
|-----------|-----------------|------------|-------------|------------|------------|------------|---------------|
| NA        | ENSG00000259090 | 0.18922458 | 0.01954053  | 0.38488496 | 0.78225479 | NA         | SEPTIN7P1     |
| 400208    | ENSG00000259091 | 0          | NA          | NA         | NA         | NA         | LINC00517     |
| NA        | ENSG00000259092 | 0          | NA          | NA         | NA         | NA         | TRAV30        |
| NA        | ENSG00000259093 | 0          | NA          | NA         | NA         | NA         |               |
| NA        | ENSG00000259094 | 0          | NA          | NA         | NA         | NA         |               |
| NA        | ENSG00000259095 | 0          | NA          | NA         | NA         | NA         | GTF2IP22      |
| NA        | ENSG00000259096 | 0.32455599 | -0.02327887 | 0.38532223 | 0.66818744 | NA         | SHLD2P2       |
| NA        | ENSG00000259097 | 0          | NA          | NA         | NA         | NA         |               |
| NA        | ENSG00000259098 | 21.4522842 | 0.27724344  | 0.38217219 | 0.19268657 | 0.39513195 |               |
| NA        | ENSG00000259099 | 0          | NA          | NA         | NA         | NA         |               |
| NA        | ENSG00000259100 | 0.31689813 | 0.00129319  | 0.38336793 | 0.96546269 | NA         | COILP1        |
| NA        | ENSG00000259102 | 0          | NA          | NA         | NA         | NA         | SMARCE1P3     |
| NA        | ENSG00000259103 | 0          | NA          | NA         | NA         | NA         |               |
| NA        | ENSG00000259104 | 0          | NA          | NA         | NA         | NA         | PTCSC3        |
| NA        | ENSG00000259105 | 2.4385904  | -0.02310844 | 0.37262078 | 0.81030816 | NA         | RPS3AP4       |
| NA        | ENSG00000259106 | 0          | NA          | NA         | NA         | NA         |               |
| NA        | ENSG00000259107 | 0          | NA          | NA         | NA         | NA         | LINC00911     |
| NA        | ENSG00000259108 | 0          | NA          | NA         | NA         | NA         | LINC01595     |
| NA        | ENSG00000259109 | 0          | NA          | NA         | NA         | NA         |               |
| 105370648 | ENSG00000259110 | 0          | NA          | NA         | NA         | NA         | LINC02304     |
| NA        | ENSG00000259111 | 0          | NA          | NA         | NA         | NA         |               |
| 100532726 | ENSG00000259112 | 24.3697927 | 0.10751991  | 0.35091477 | 0.52724437 | 0.73906416 | NDUFC2-KCTD14 |
| NA        | ENSG00000259113 | 0.82627662 | 0.01836178  | 0.38137748 | 0.74448218 | NA         |               |
| NA        | ENSG00000259115 | 0.173733   | 0.01914545  | 0.38484597 | 0.78225479 | NA         |               |
| 102723809 | ENSG00000259116 | 8.18502174 | -0.03038088 | 0.35213674 | 0.83161519 | 0.92378968 |               |
| NA        | ENSG00000259117 | 0          | NA          | NA         | NA         | NA         |               |
| NA        | ENSG00000259118 | 2.32899014 | -0.03211347 | 0.37707794 | 0.69669271 | NA         |               |
| NA        | ENSG00000259119 | 0          | NA          | NA         | NA         | NA         |               |
| 100130933 | ENSG00000259120 | 2.3015441  | 0.0082626   | 0.37281921 | 0.93082609 | NA         | SMIM6         |
| NA        | ENSG00000259121 | 0          | NA          | NA         | NA         | NA         |               |
| NA        | ENSG00000259122 | 0          | NA          | NA         | NA         | NA         | TVP23BP1      |
| NA        | ENSG00000259123 | 0          | NA          | NA         | NA         | NA         |               |
| NA        | ENSG00000259124 | 0.15069912 | -0.01848503 | 0.38480575 | 0.84537521 | NA         |               |
| 105751187 | ENSG00000259125 | 0          | NA          | NA         | NA         | NA         | LRP1-AS       |
| NA        | ENSG00000259126 | 0          | NA          | NA         | NA         | NA         |               |
| 100506433 | ENSG00000259129 | 0.173733   | 0.01914545  | 0.38484597 | 0.78225479 | NA         | LINC00648     |
| NA        | ENSG00000259130 | 0          | NA          | NA         | NA         | NA         |               |
| NA        | ENSG00000259132 | 51.7321885 | 0.2224406   | 0.30812059 | 0.28535809 | 0.5108739  |               |

|           |                 |            |             |            |            |            |           |
|-----------|-----------------|------------|-------------|------------|------------|------------|-----------|
| NA        | ENSG00000259133 | 0          | NA          | NA         | NA         | NA         |           |
| 145820    | ENSG00000259134 | 0          | NA          | NA         | NA         | NA         | LINC00924 |
| NA        | ENSG00000259135 | 0.173733   | 0.01914545  | 0.38484597 | 0.78225479 | NA         |           |
| NA        | ENSG00000259136 | 0          | NA          | NA         | NA         | NA         |           |
| NA        | ENSG00000259137 | 0          | NA          | NA         | NA         | NA         |           |
| NA        | ENSG00000259138 | 2.99991442 | -0.08970654 | 0.38627967 | 0.36570963 | 0.59492284 |           |
| NA        | ENSG00000259140 | 0.173733   | 0.01914545  | 0.38484597 | 0.78225479 | NA         |           |
| 101954204 | ENSG00000259142 | 0          | NA          | NA         | NA         | NA         | LINC00644 |
| NA        | ENSG00000259143 | 0.51937201 | -0.02557462 | 0.38567603 | 0.54680819 | NA         |           |
| NA        | ENSG00000259144 | 0          | NA          | NA         | NA         | NA         | RANBP20P  |
| NA        | ENSG00000259146 | 3.50510278 | 0.0168987   | 0.36789702 | 0.87935947 | 0.94652699 |           |
| NA        | ENSG00000259148 | 0          | NA          | NA         | NA         | NA         | YWHAZP1   |
| NA        | ENSG00000259149 | 0          | NA          | NA         | NA         | NA         |           |
| 503519    | ENSG00000259150 | 0          | NA          | NA         | NA         | NA         | LINC00929 |
| NA        | ENSG00000259151 | 1.75394251 | -0.02844818 | 0.37789152 | 0.71908435 | NA         | CAP2P1    |
| NA        | ENSG00000259152 | 0          | NA          | NA         | NA         | NA         |           |
| 100506411 | ENSG00000259153 | 45.3320656 | -0.07773942 | 0.26948774 | 0.68609197 | 0.8472712  |           |
| NA        | ENSG00000259154 | 0          | NA          | NA         | NA         | NA         | DUX4L17   |
| NA        | ENSG00000259155 | 3.47715969 | 0.03301879  | 0.37041285 | 0.75945055 | 0.88850157 | STK16P1   |
| 646096    | ENSG00000259156 | 0          | NA          | NA         | NA         | NA         | CHEK2P2   |
| NA        | ENSG00000259157 | 0          | NA          | NA         | NA         | NA         |           |
| 317760    | ENSG00000259158 | 5.52831426 | 0.00934239  | 0.3603764  | 0.94277804 | 0.97644165 | ADAM20P1  |
| NA        | ENSG00000259160 | 0          | NA          | NA         | NA         | NA         |           |
| NA        | ENSG00000259161 | 0.32525837 | 0.00191504  | 0.38337418 | 0.96197662 | NA         | NPM1P20   |
| NA        | ENSG00000259162 | 0          | NA          | NA         | NA         | NA         |           |
| 101928909 | ENSG00000259163 | 0          | NA          | NA         | NA         | NA         |           |
| NA        | ENSG00000259164 | 0.18922458 | 0.01954053  | 0.38488496 | 0.78225479 | NA         |           |
| NA        | ENSG00000259165 | 2.04196425 | 0.0401484   | 0.37867419 | 0.62784219 | NA         | DDX18P1   |
| NA        | ENSG00000259166 | 0.14931947 | -0.01844332 | 0.38480212 | 0.84537521 | NA         |           |
| NA        | ENSG00000259167 | 0          | NA          | NA         | NA         | NA         | NMNAT1P1  |
| NA        | ENSG00000259168 | 0.34746601 | 0.02370763  | 0.3853651  | 0.61987128 | NA         |           |
| NA        | ENSG00000259169 | 0          | NA          | NA         | NA         | NA         | GNRHR2P1  |
| 104613533 | ENSG00000259170 | 0.97445651 | -0.01955811 | 0.38090282 | 0.74397429 | NA         |           |
| NA        | ENSG00000259171 | 0.45209736 | -0.02505403 | 0.38558831 | 0.57865948 | NA         |           |
| NA        | ENSG00000259172 | 16.5255811 | -0.03976215 | 0.32661607 | 0.81850065 | 0.9171248  |           |
| NA        | ENSG00000259173 | 0          | NA          | NA         | NA         | NA         |           |
| 101929586 | ENSG00000259175 | 0.85427561 | 0.01877758  | 0.38064621 | 0.75695953 | NA         |           |
| NA        | ENSG00000259177 | 0          | NA          | NA         | NA         | NA         |           |

|           |                 |            |             |            |            |            |           |
|-----------|-----------------|------------|-------------|------------|------------|------------|-----------|
| NA        | ENSG00000259178 | 0          | NA          | NA         | NA         | NA         |           |
| NA        | ENSG00000259179 | 0          | NA          | NA         | NA         | NA         | UBE2CP4   |
| NA        | ENSG00000259180 | 0          | NA          | NA         | NA         | NA         |           |
| NA        | ENSG00000259181 | 0          | NA          | NA         | NA         | NA         |           |
| NA        | ENSG00000259182 | 0.57153858 | 0.00687201  | 0.38256035 | 0.9701829  | NA         |           |
| NA        | ENSG00000259183 | 0          | NA          | NA         | NA         | NA         | MED28P6   |
| NA        | ENSG00000259185 | 0          | NA          | NA         | NA         | NA         |           |
| NA        | ENSG00000259186 | 0.18922458 | 0.01954053  | 0.38488496 | 0.78225479 | NA         | MRPS15P1  |
| NA        | ENSG00000259187 | 0          | NA          | NA         | NA         | NA         |           |
| NA        | ENSG00000259188 | 0          | NA          | NA         | NA         | NA         |           |
| NA        | ENSG00000259191 | 3.77934423 | -0.04618344 | 0.36778726 | 0.69547404 | 0.85296328 |           |
| NA        | ENSG00000259192 | 0.31809633 | 0.00103866  | 0.38336596 | 0.96712482 | NA         |           |
| NA        | ENSG00000259194 | 0          | NA          | NA         | NA         | NA         |           |
| NA        | ENSG00000259195 | 0          | NA          | NA         | NA         | NA         |           |
| NA        | ENSG00000259196 | 0          | NA          | NA         | NA         | NA         | HMBX1-IT1 |
| NA        | ENSG00000259198 | 0.173124   | -0.01911262 | 0.38486262 | 0.84537521 | NA         |           |
| NA        | ENSG00000259199 | 0          | NA          | NA         | NA         | NA         |           |
| 105370802 | ENSG00000259200 | 0.15069912 | -0.01848503 | 0.38480575 | 0.84537521 | NA         |           |
| NA        | ENSG00000259201 | 0          | NA          | NA         | NA         | NA         |           |
| NA        | ENSG00000259202 | 0          | NA          | NA         | NA         | NA         |           |
| NA        | ENSG00000259203 | 0.15069912 | -0.01848503 | 0.38480575 | 0.84537521 | NA         |           |
| NA        | ENSG00000259204 | 0          | NA          | NA         | NA         | NA         |           |
| NA        | ENSG00000259205 | 16.3579673 | -0.1784832  | 0.3706838  | 0.32605989 | 0.55423476 | PRKXP1    |
| 3690      | ENSG00000259207 | 36.4044463 | 0.00350484  | 0.27669895 | 0.98714538 | 0.99567688 | ITGB3     |
| NA        | ENSG00000259208 | 0          | NA          | NA         | NA         | NA         |           |
| NA        | ENSG00000259209 | 13.6630511 | 0.07413232  | 0.33728619 | 0.66728747 | 0.83616392 |           |
| NA        | ENSG00000259211 | 1.00518373 | -0.02005754 | 0.38177455 | 0.71425771 | NA         |           |
| NA        | ENSG00000259212 | 5.81635872 | 0.01425626  | 0.35869042 | 0.91496973 | 0.96403708 |           |
| NA        | ENSG00000259213 | 0          | NA          | NA         | NA         | NA         |           |
| NA        | ENSG00000259214 | 0          | NA          | NA         | NA         | NA         |           |
| NA        | ENSG00000259215 | 0          | NA          | NA         | NA         | NA         |           |
| NA        | ENSG00000259216 | 1.72361552 | 0.01025508  | 0.37541986 | 0.90328502 | NA         |           |
| NA        | ENSG00000259217 | 0          | NA          | NA         | NA         | NA         |           |
| 283761    | ENSG00000259218 | 20.8945122 | -0.20611072 | 0.35055702 | 0.30240308 | 0.52987991 | LINC00928 |
| 105371022 | ENSG00000259219 | 5.86822392 | -0.09659145 | 0.37048988 | 0.48677231 | 0.70661128 |           |
| NA        | ENSG00000259221 | 0          | NA          | NA         | NA         | NA         |           |
| NA        | ENSG00000259222 | 0.30001545 | -0.02294458 | 0.38527538 | 0.68644901 | NA         |           |
| NA        | ENSG00000259223 | 0          | NA          | NA         | NA         | NA         |           |

|           |                 |                 |             |             |            |            |            |              |
|-----------|-----------------|-----------------|-------------|-------------|------------|------------|------------|--------------|
| 643664    | ENSG00000259224 | 4.66707599      | -0.11620294 | 0.38555617  | 0.35574943 | 0.58599659 | SLC35G6    |              |
| 101928227 | ENSG00000259225 | 0               | NA          | NA          | NA         | NA         | LINC02345  |              |
|           | NA              | ENSG00000259227 | 0           | NA          | NA         | NA         |            |              |
|           | NA              | ENSG00000259228 | 0.173733    | 0.01914545  | 0.38484597 | 0.78225479 | HNRNPA1P62 |              |
|           | NA              | ENSG00000259229 | 0           | NA          | NA         | NA         |            |              |
| 105370681 | ENSG00000259230 | 0               | NA          | NA          | NA         | NA         | LINC02323  |              |
|           | NA              | ENSG00000259231 | 0           | NA          | NA         | NA         |            |              |
|           | NA              | ENSG00000259232 | 0.51390845  | 0.01575539  | 0.38315196 | 0.73349077 | NA         |              |
|           | NA              | ENSG00000259234 | 3.3818439   | -0.25205879 | 0.50582711 | 0.0141644  | 0.05506989 | ANKRD34C-AS1 |
|           | NA              | ENSG00000259235 | 3.07654453  | 0.00042793  | 0.37595623 | 0.99731345 | 0.99926338 |              |
|           | NA              | ENSG00000259236 | 0.15069912  | -0.01848503 | 0.38480575 | 0.84537521 | NA         | GOLGA8VP     |
| 105370822 | ENSG00000259237 | 0               | NA          | NA          | NA         | NA         | LINC02490  |              |
|           | NA              | ENSG00000259238 | 1.0138906   | -0.0179796  | 0.38158402 | 0.74280303 | NA         |              |
|           | NA              | ENSG00000259239 | 0           | NA          | NA         | NA         | NA         |              |
| 109729174 | ENSG00000259240 | 0               | NA          | NA          | NA         | NA         | MIR4713HG  |              |
|           | NA              | ENSG00000259241 | 0.71379544  | 0.00484762  | 0.38184183 | 0.91877018 | NA         |              |
|           | NA              | ENSG00000259242 | 0.32455584  | 0.00143403  | 0.38336892 | 0.96657684 | NA         |              |
|           | NA              | ENSG00000259244 | 31.7482708  | 0.22916755  | 0.31995704 | 0.27322902 | 0.49676945 |              |
|           | NA              | ENSG00000259245 | 0           | NA          | NA         | NA         | NA         | LINC02853    |
|           | NA              | ENSG00000259246 | 0           | NA          | NA         | NA         | NA         | HMG2P47      |
|           | NA              | ENSG00000259247 | 0           | NA          | NA         | NA         | NA         | TTY25P       |
|           | NA              | ENSG00000259248 | 22.2805443  | 0.04379765  | 0.30662091 | 0.81667506 | 0.9166503  | USP3-AS1     |
|           | NA              | ENSG00000259250 | 9.0295743   | -0.15387948 | 0.38671043 | 0.31445637 | 0.54217557 |              |
|           | NA              | ENSG00000259251 | 2.64021139  | 0.01089179  | 0.37079347 | 0.91544516 | 0.96408684 |              |
|           | NA              | ENSG00000259252 | 0           | NA          | NA         | NA         | NA         |              |
|           | NA              | ENSG00000259254 | 0.49403218  | -0.02942462 | 0.3858953  | 0.52686735 | NA         |              |
|           | NA              | ENSG00000259255 | 0           | NA          | NA         | NA         | NA         |              |
|           | NA              | ENSG00000259256 | 0           | NA          | NA         | NA         | NA         | LINC01895    |
|           | NA              | ENSG00000259257 | 0.14931947  | -0.01844332 | 0.38480212 | 0.84537521 | NA         |              |
|           | NA              | ENSG00000259258 | 0.30001813  | -0.02294461 | 0.38527539 | 0.68644734 | NA         |              |
|           | NA              | ENSG00000259259 | 0           | NA          | NA         | NA         | NA         | NPM1P42      |
|           | NA              | ENSG00000259261 | 0           | NA          | NA         | NA         | NA         | IGHV4OR15-8  |
|           | NA              | ENSG00000259262 | 0           | NA          | NA         | NA         | NA         | NDUFA3P4     |
|           | NA              | ENSG00000259265 | 0           | NA          | NA         | NA         | NA         |              |
|           | NA              | ENSG00000259266 | 0           | NA          | NA         | NA         | NA         |              |
| 105378349 | ENSG00000259267 | 0.5151146       | 0.0311121   | 0.38605248  | 0.47795503 | NA         | LINC02622  |              |
|           | NA              | ENSG00000259268 | 0           | NA          | NA         | NA         | NA         |              |
|           | NA              | ENSG00000259269 | 0           | NA          | NA         | NA         | NA         |              |

|           |                 |            |             |            |            |            |              |
|-----------|-----------------|------------|-------------|------------|------------|------------|--------------|
| NA        | ENSG00000259270 | 0          | NA          | NA         | NA         | NA         |              |
| NA        | ENSG00000259271 | 0          | NA          | NA         | NA         | NA         | ANKRD62P1    |
| NA        | ENSG00000259273 | 0          | NA          | NA         | NA         | NA         |              |
| NA        | ENSG00000259274 | 0.7720548  | -0.04339659 | 0.38758345 | 0.33963463 | NA         |              |
| NA        | ENSG00000259275 | 0          | NA          | NA         | NA         | NA         |              |
| NA        | ENSG00000259276 | 0          | NA          | NA         | NA         | NA         |              |
| NA        | ENSG00000259277 | 0          | NA          | NA         | NA         | NA         |              |
| NA        | ENSG00000259278 | 0          | NA          | NA         | NA         | NA         |              |
| NA        | ENSG00000259280 | 0          | NA          | NA         | NA         | NA         |              |
| 101929478 | ENSG00000259281 | 0          | NA          | NA         | NA         | NA         | LINGO1-AS2   |
| 100652749 | ENSG00000259282 | 0          | NA          | NA         | NA         | NA         | SPATA8-AS1   |
| NA        | ENSG00000259283 | 0.18922458 | 0.01954053  | 0.38488496 | 0.78225479 | NA         |              |
| 100506530 | ENSG00000259284 | 0          | NA          | NA         | NA         | NA         | LINC02349    |
| NA        | ENSG00000259285 | 0          | NA          | NA         | NA         | NA         |              |
| NA        | ENSG00000259286 | 1.34485067 | -0.01731117 | 0.37942687 | 0.7955003  | NA         |              |
| NA        | ENSG00000259287 | 8.20311928 | -0.11507462 | 0.36939898 | 0.44579662 | 0.67028199 |              |
| NA        | ENSG00000259288 | 0          | NA          | NA         | NA         | NA         | BUB1B-PAK6   |
| 102723481 | ENSG00000259289 | 0          | NA          | NA         | NA         | NA         | LINC02206    |
| NA        | ENSG00000259290 | 0          | NA          | NA         | NA         | NA         |              |
| 109729181 | ENSG00000259291 | 165.627205 | 0.36427303  | 0.17960451 | 0.02249414 | 0.08003652 | ZNF710-AS1   |
| 101928694 | ENSG00000259293 | 0          | NA          | NA         | NA         | NA         | LIPC-AS1     |
| NA        | ENSG00000259294 | 0.16735865 | 0.01897177  | 0.38482933 | 0.78225479 | NA         |              |
| 440300    | ENSG00000259295 | 385.618374 | 0.41853471  | 0.13374968 | 0.00084435 | 0.00510105 | CSPG4P12     |
| NA        | ENSG00000259296 | 0          | NA          | NA         | NA         | NA         |              |
| NA        | ENSG00000259299 | 0          | NA          | NA         | NA         | NA         |              |
| NA        | ENSG00000259300 | 0          | NA          | NA         | NA         | NA         | TUBBP8       |
| NA        | ENSG00000259301 | 0          | NA          | NA         | NA         | NA         |              |
| NA        | ENSG00000259302 | 0          | NA          | NA         | NA         | NA         |              |
| NA        | ENSG00000259303 | 0          | NA          | NA         | NA         | NA         | IGHV2OR16-5  |
| NA        | ENSG00000259304 | 0          | NA          | NA         | NA         | NA         |              |
| 100533106 | ENSG00000259305 | 42.3356896 | 0.33602356  | 0.36462206 | 0.13657886 | 0.31167755 | ZHX1-C8orf76 |
| NA        | ENSG00000259306 | 0          | NA          | NA         | NA         | NA         |              |
| NA        | ENSG00000259307 | 0          | NA          | NA         | NA         | NA         | PLCB2-AS1    |
| NA        | ENSG00000259308 | 0.91749169 | 0.05251892  | 0.38909298 | 0.2439869  | NA         | FABP5P8      |
| NA        | ENSG00000259309 | 0          | NA          | NA         | NA         | NA         |              |
| NA        | ENSG00000259312 | 0          | NA          | NA         | NA         | NA         |              |
| NA        | ENSG00000259314 | 1.20184277 | 0.02633988  | 0.37893328 | 0.71974378 | NA         |              |
| 283693    | ENSG00000259315 | 10.4191354 | 0.73723766  | 0.92815941 | 0.02196617 | 0.07855243 | ACTG1P17     |

|           |                 |            |             |            |            |            |             |
|-----------|-----------------|------------|-------------|------------|------------|------------|-------------|
| NA        | ENSG00000259316 | 210.305884 | -0.08051284 | 0.1965017  | 0.63158872 | 0.81371846 |             |
| NA        | ENSG00000259317 | 0          | NA          | NA         | NA         | NA         |             |
| NA        | ENSG00000259318 | 2.30317827 | -0.05313851 | 0.38028024 | 0.53075926 | NA         | HMGN1P1     |
| NA        | ENSG00000259319 | 7.58961699 | -0.02962606 | 0.35609813 | 0.82466135 | 0.92036233 |             |
| NA        | ENSG00000259320 | 0          | NA          | NA         | NA         | NA         |             |
| NA        | ENSG00000259321 | 7.05284836 | -0.0733491  | 0.36338483 | 0.5967389  | 0.78891849 |             |
| NA        | ENSG00000259322 | 2.76174552 | 0.00626008  | 0.3721301  | 0.94957552 | 0.97920861 |             |
| NA        | ENSG00000259324 | 0          | NA          | NA         | NA         | NA         | OR11K1BP    |
| NA        | ENSG00000259326 | 4.74634764 | 0.00461822  | 0.36450205 | 0.97096258 | 0.98911805 |             |
| NA        | ENSG00000259327 | 1.70429337 | 0.00886185  | 0.38044571 | 0.88187745 | NA         |             |
| 100505573 | ENSG00000259330 | 373.306073 | -0.39095718 | 0.12321218 | 0.00078569 | 0.00479928 | INAFM2      |
| NA        | ENSG00000259331 | 0          | NA          | NA         | NA         | NA         |             |
| 100528021 | ENSG00000259332 | 118.700628 | -0.11938758 | 0.19463663 | 0.47615162 | 0.69811174 | ST20-MTHFS  |
| NA        | ENSG00000259333 | 0          | NA          | NA         | NA         | NA         |             |
| NA        | ENSG00000259334 | 0          | NA          | NA         | NA         | NA         | LINC00596   |
| NA        | ENSG00000259335 | 0          | NA          | NA         | NA         | NA         | HNRNPMP1    |
| NA        | ENSG00000259336 | 2.5480123  | 0.02528533  | 0.3745576  | 0.78232216 | NA         |             |
| NA        | ENSG00000259337 | 0          | NA          | NA         | NA         | NA         | IGHV1OR15-2 |
| NA        | ENSG00000259338 | 0          | NA          | NA         | NA         | NA         | H3P39       |
| NA        | ENSG00000259339 | 0          | NA          | NA         | NA         | NA         | TGIF1P1     |
| NA        | ENSG00000259340 | 0          | NA          | NA         | NA         | NA         |             |
| NA        | ENSG00000259341 | 1.19052966 | -0.05051225 | 0.38649428 | 0.34057352 | NA         |             |
| NA        | ENSG00000259342 | 0          | NA          | NA         | NA         | NA         |             |
| NA        | ENSG00000259343 | 55.7838678 | -0.09584127 | 0.24535429 | 0.61288509 | 0.80067344 | TMC3-AS1    |
| NA        | ENSG00000259345 | 0.173733   | 0.01914545  | 0.38484597 | 0.78225479 | NA         |             |
| NA        | ENSG00000259346 | 0.18922458 | 0.01954053  | 0.38488496 | 0.78225479 | NA         |             |
| NA        | ENSG00000259347 | 1.19192456 | 0.0198159   | 0.37920672 | 0.77480251 | NA         |             |
| NA        | ENSG00000259349 | 10.3574365 | 0.12659218  | 0.37313819 | 0.40910963 | 0.63710637 |             |
| NA        | ENSG00000259350 | 0          | NA          | NA         | NA         | NA         |             |
| 101928988 | ENSG00000259351 | 0          | NA          | NA         | NA         | NA         |             |
| NA        | ENSG00000259352 | 0.18922458 | 0.01954053  | 0.38488496 | 0.78225479 | NA         |             |
| NA        | ENSG00000259353 | 0          | NA          | NA         | NA         | NA         |             |
| NA        | ENSG00000259354 | 0.34048032 | 0.00237745  | 0.38338037 | 0.96498985 | NA         |             |
| NA        | ENSG00000259356 | 0.29863895 | -0.02292439 | 0.3852726  | 0.68753245 | NA         |             |
| NA        | ENSG00000259357 | 17.892096  | -0.00305895 | 0.32345495 | 0.98406174 | 0.99453916 |             |
| NA        | ENSG00000259358 | 0          | NA          | NA         | NA         | NA         | DEPDC1P1    |
| NA        | ENSG00000259359 | 0          | NA          | NA         | NA         | NA         |             |
| NA        | ENSG00000259360 | 0          | NA          | NA         | NA         | NA         |             |





|           |    |                 |            |             |            |            |            |            |
|-----------|----|-----------------|------------|-------------|------------|------------|------------|------------|
|           | NA | ENSG00000259408 | 10.244325  | 0.0858168   | 0.35717651 | 0.5799835  | 0.77743886 |            |
|           | NA | ENSG00000259409 | 0          | NA          | NA         | NA         | NA         | BMF-AS1    |
|           | NA | ENSG00000259410 | 0          | NA          | NA         | NA         | NA         |            |
|           | NA | ENSG00000259411 | 1.19134464 | -0.00688498 | 0.379385   | 0.91454197 | NA         | HNRNPA1P45 |
|           | NA | ENSG00000259413 | 0          | NA          | NA         | NA         | NA         |            |
|           | NA | ENSG00000259414 | 4.25557521 | -0.06532613 | 0.37686091 | 0.53536962 | 0.74627695 |            |
|           | NA | ENSG00000259415 | 0.16735865 | 0.01897177  | 0.38482933 | 0.78225479 | NA         |            |
|           | NA | ENSG00000259416 | 1.51950635 | -0.00253545 | 0.37730237 | 0.97195521 | NA         | LINC02883  |
| 100996492 | NA | ENSG00000259417 | 2.17823927 | 0.01464669  | 0.3755729  | 0.86305446 | NA         | CTXND1     |
|           | NA | ENSG00000259418 | 0          | NA          | NA         | NA         | NA         |            |
|           | NA | ENSG00000259419 | 0.173733   | 0.01914545  | 0.38484597 | 0.78225479 | NA         | HNRNPCP3   |
|           | NA | ENSG00000259420 | 0.85667571 | 0.01934199  | 0.38069014 | 0.74980137 | NA         |            |
|           | NA | ENSG00000259421 | 0          | NA          | NA         | NA         | NA         |            |
| 101929439 | NA | ENSG00000259422 | 3.05842346 | 0.07732369  | 0.38361895 | 0.41760248 | 0.64376444 |            |
|           | NA | ENSG00000259423 | 0          | NA          | NA         | NA         | NA         |            |
|           | NA | ENSG00000259424 | 0.81939041 | 0.01567644  | 0.38190343 | 0.76122655 | NA         | IRAIN      |
|           | NA | ENSG00000259425 | 7.81712631 | -0.19606908 | 0.40709635 | 0.2251898  | 0.43900616 |            |
| 145694    | NA | ENSG00000259426 | 19.4316433 | 0.14542598  | 0.35271878 | 0.4169001  | 0.64333033 |            |
|           | NA | ENSG00000259427 | 0          | NA          | NA         | NA         | NA         | DPPA5P2    |
|           | NA | ENSG00000259428 | 0          | NA          | NA         | NA         | NA         | HMGB3P26   |
| 100134869 | NA | ENSG00000259429 | 140.724202 | 0.33379456  | 0.19474624 | 0.04861493 | 0.14580805 | UBE2Q2P2   |
|           | NA | ENSG00000259430 | 0.34746601 | 0.02370763  | 0.3853651  | 0.61987128 | NA         | CERS3-AS1  |
| 79178     | NA | ENSG00000259431 | 299.868265 | 0.09509082  | 0.15126484 | 0.49452851 | 0.71345591 | THTPA      |
|           | NA | ENSG00000259432 | 0          | NA          | NA         | NA         | NA         |            |
|           | NA | ENSG00000259433 | 0.63787944 | -0.02026046 | 0.38309187 | 0.67639666 | NA         |            |
|           | NA | ENSG00000259434 | 2.20611048 | 0.00893579  | 0.3766585  | 0.91127835 | NA         |            |
| 390539    | NA | ENSG00000259435 | 0          | NA          | NA         | NA         | NA         | OR4N3P     |
|           | NA | ENSG00000259436 | 0.173124   | -0.01911262 | 0.38486262 | 0.84537521 | NA         |            |
|           | NA | ENSG00000259437 | 0          | NA          | NA         | NA         | NA         |            |
| 112543478 | NA | ENSG00000259438 | 2.28306237 | 0.08095965  | 0.38616344 | 0.37011204 | NA         | MAPK6-DT   |
| 107985879 | NA | ENSG00000259439 | 340.11896  | 0.78043638  | 0.13526952 | 1.52E-09   | 2.55E-08   | LINC01833  |
|           | NA | ENSG00000259440 | 0          | NA          | NA         | NA         | NA         | NPM1P43    |
|           | NA | ENSG00000259441 | 0          | NA          | NA         | NA         | NA         | MRPL15P1   |
|           | NA | ENSG00000259442 | 0          | NA          | NA         | NA         | NA         |            |
|           | NA | ENSG00000259443 | 0          | NA          | NA         | NA         | NA         |            |
|           | NA | ENSG00000259444 | 0          | NA          | NA         | NA         | NA         |            |
| 101928134 | NA | ENSG00000259446 | 0          | NA          | NA         | NA         | NA         | RYR3-DT    |
|           | NA | ENSG00000259447 | 0          | NA          | NA         | NA         | NA         |            |

|           |                 |            |             |            |            |            |             |
|-----------|-----------------|------------|-------------|------------|------------|------------|-------------|
| NA        | ENSG00000259448 | 26.7809943 | 0.44682463  | 0.45369529 | 0.07171776 | 0.19502198 | LINC02352   |
| NA        | ENSG00000259449 | 0          | NA          | NA         | NA         | NA         | NIFKP8      |
| NA        | ENSG00000259452 | 0          | NA          | NA         | NA         | NA         |             |
| NA        | ENSG00000259453 | 0.33471731 | 0.02354391  | 0.38534154 | 0.62842204 | NA         |             |
| NA        | ENSG00000259454 | 0          | NA          | NA         | NA         | NA         | WBP1LP5     |
| 101927631 | ENSG00000259456 | 15.4925859 | -0.51360056 | 0.59162001 | 0.04990116 | 0.14876619 | ADNP-AS1    |
| NA        | ENSG00000259457 | 0          | NA          | NA         | NA         | NA         |             |
| 197003    | ENSG00000259458 | 0          | NA          | NA         | NA         | NA         |             |
| NA        | ENSG00000259459 | 0          | NA          | NA         | NA         | NA         | LINC02568   |
| NA        | ENSG00000259460 | 15.6218362 | -0.0672118  | 0.3889277  | 0.28746297 | 0.513189   |             |
| NA        | ENSG00000259461 | 0          | NA          | NA         | NA         | NA         | ANP32BP3    |
| 283692    | ENSG00000259462 | 12.8903208 | -1.1892371  | 0.83943444 | 0.00728704 | 0.03196437 | CPEB1-AS1   |
| NA        | ENSG00000259463 | 0          | NA          | NA         | NA         | NA         |             |
| NA        | ENSG00000259464 | 0          | NA          | NA         | NA         | NA         | SNRPCP18    |
| NA        | ENSG00000259465 | 0.56767373 | 0.02627943  | 0.38574813 | 0.49686938 | NA         | AHCYP7      |
| NA        | ENSG00000259466 | 0.3175635  | 0.00180106  | 0.38337305 | 0.9605931  | NA         | NPM1P47     |
| NA        | ENSG00000259467 | 0.14931947 | -0.01844332 | 0.38480212 | 0.84537521 | NA         | NDUFAF4P1   |
| NA        | ENSG00000259468 | 0          | NA          | NA         | NA         | NA         |             |
| NA        | ENSG00000259469 | 1.4780603  | -0.0534014  | 0.38436074 | 0.43133422 | NA         |             |
| NA        | ENSG00000259470 | 0          | NA          | NA         | NA         | NA         | KRT8P9      |
| 102723165 | ENSG00000259471 | 0          | NA          | NA         | NA         | NA         | LINC01169   |
| 105370880 | ENSG00000259473 | 0          | NA          | NA         | NA         | NA         | LINC02205   |
| NA        | ENSG00000259474 | 0          | NA          | NA         | NA         | NA         |             |
| NA        | ENSG00000259475 | 1.20641207 | 0.04789463  | 0.38325004 | 0.48001765 | NA         |             |
| NA        | ENSG00000259476 | 0          | NA          | NA         | NA         | NA         |             |
| NA        | ENSG00000259477 | 0.173733   | 0.01914545  | 0.38484597 | 0.78225479 | NA         |             |
| NA        | ENSG00000259478 | 0          | NA          | NA         | NA         | NA         |             |
| 653381    | ENSG00000259479 | 42.7104374 | -0.32639136 | 0.31309601 | 0.13468236 | 0.30909174 | SORD2P      |
| NA        | ENSG00000259481 | 0          | NA          | NA         | NA         | NA         |             |
| 100996876 | ENSG00000259482 | 0.70459944 | 0.00996352  | 0.3820632  | 0.83855036 | NA         | RORA-AS2    |
| NA        | ENSG00000259483 | 0          | NA          | NA         | NA         | NA         |             |
| NA        | ENSG00000259485 | 0          | NA          | NA         | NA         | NA         | LINC02253   |
| NA        | ENSG00000259488 | 98.2503118 | -0.01194143 | 0.22989545 | 0.94665188 | 0.97814213 |             |
| NA        | ENSG00000259489 | 0          | NA          | NA         | NA         | NA         | KRT18P47    |
| NA        | ENSG00000259490 | 0          | NA          | NA         | NA         | NA         | IGHV3OR15-7 |
| NA        | ENSG00000259493 | 0          | NA          | NA         | NA         | NA         | TFDP1P3     |
| 26589     | ENSG00000259494 | 279.762868 | -0.12612165 | 0.14985421 | 0.35932977 | 0.58949503 | MRPL46      |
| NA        | ENSG00000259495 | 344.792279 | 0.1866699   | 0.14475307 | 0.16315419 | 0.35215179 |             |

|           |                 |            |             |            |            |            |           |
|-----------|-----------------|------------|-------------|------------|------------|------------|-----------|
| NA        | ENSG00000259496 | 0          | NA          | NA         | NA         | NA         | GEMIN8P1  |
| NA        | ENSG00000259498 | 36.9396692 | 0.10554125  | 0.2946621  | 0.5892312  | 0.78379517 | TPM1-AS   |
| NA        | ENSG00000259499 | 0.14931947 | -0.01844332 | 0.38480212 | 0.84537521 | NA         |           |
| NA        | ENSG00000259500 | 0          | NA          | NA         | NA         | NA         | KRT8P24   |
| NA        | ENSG00000259502 | 0.94881852 | -0.01364621 | 0.38149884 | 0.79914458 | NA         |           |
| NA        | ENSG00000259503 | 0          | NA          | NA         | NA         | NA         |           |
| NA        | ENSG00000259504 | 0          | NA          | NA         | NA         | NA         |           |
| NA        | ENSG00000259505 | 0          | NA          | NA         | NA         | NA         |           |
| NA        | ENSG00000259507 | 0          | NA          | NA         | NA         | NA         |           |
| NA        | ENSG00000259508 | 0          | NA          | NA         | NA         | NA         |           |
| NA        | ENSG00000259509 | 0          | NA          | NA         | NA         | NA         |           |
| NA        | ENSG00000259511 | 46.4760093 | 0.20252282  | 0.27674298 | 0.31669477 | 0.54452953 | UBE2Q2L   |
| NA        | ENSG00000259512 | 0          | NA          | NA         | NA         | NA         | HNRNPA1P5 |
| NA        | ENSG00000259513 | 0.18922458 | 0.01954053  | 0.38488496 | 0.78225479 | NA         | CYCSP38   |
| NA        | ENSG00000259514 | 1.79035436 | -0.03438693 | 0.37662507 | 0.69239484 | NA         |           |
| NA        | ENSG00000259515 | 14.1265474 | 0.16029869  | 0.35948558 | 0.38003526 | 0.60898955 |           |
| NA        | ENSG00000259516 | 0.15069912 | -0.01848503 | 0.38480575 | 0.84537521 | NA         | ANP32AP1  |
| NA        | ENSG00000259517 | 0          | NA          | NA         | NA         | NA         | LINC02169 |
| 101929690 | ENSG00000259518 | 0          | NA          | NA         | NA         | NA         | LINC01583 |
| NA        | ENSG00000259519 | 0          | NA          | NA         | NA         | NA         |           |
| NA        | ENSG00000259520 | 10.7521876 | 0.18906047  | 0.39131088 | 0.26916453 | 0.49223194 |           |
| NA        | ENSG00000259521 | 0          | NA          | NA         | NA         | NA         | INO80-AS1 |
| NA        | ENSG00000259522 | 66.7210998 | 0.07556531  | 0.38802902 | 0.34171379 | 0.57180671 |           |
| NA        | ENSG00000259523 | 5.70910948 | -0.0276487  | 0.36067301 | 0.82836911 | 0.92220943 |           |
| NA        | ENSG00000259525 | 0          | NA          | NA         | NA         | NA         | GCSHP2    |
| 145978    | ENSG00000259527 | 0          | NA          | NA         | NA         | NA         | LINC00052 |
| NA        | ENSG00000259528 | 0.173733   | 0.01914545  | 0.38484597 | 0.78225479 | NA         |           |
| NA        | ENSG00000259529 | 255.497353 | 0.329885    | 0.17939855 | 0.03827148 | 0.12145011 |           |
| 101928850 | ENSG00000259530 | 0          | NA          | NA         | NA         | NA         |           |
| NA        | ENSG00000259531 | 2.66553794 | 0.04728097  | 0.37561674 | 0.63032    | 0.81299888 |           |
| NA        | ENSG00000259532 | 0          | NA          | NA         | NA         | NA         |           |
| NA        | ENSG00000259533 | 0          | NA          | NA         | NA         | NA         |           |
| NA        | ENSG00000259534 | 0          | NA          | NA         | NA         | NA         |           |
| NA        | ENSG00000259535 | 0          | NA          | NA         | NA         | NA         | RPL21P12  |
| NA        | ENSG00000259536 | 1.69377721 | -0.01905809 | 0.37755939 | 0.80263393 | NA         |           |
| NA        | ENSG00000259538 | 0          | NA          | NA         | NA         | NA         | UBE2Q2P11 |
| NA        | ENSG00000259539 | 14.88071   | 1.06737108  | 1.27162805 | 0.01126701 | 0.04576934 |           |
| 102723335 | ENSG00000259540 | 1.43681574 | -0.03023802 | 0.37935688 | 0.68086997 | NA         |           |

|           |                 |            |             |            |            |            |            |
|-----------|-----------------|------------|-------------|------------|------------|------------|------------|
| 649133    | ENSG00000259541 | 0          | NA          | NA         | NA         | NA         |            |
| NA        | ENSG00000259542 | 0          | NA          | NA         | NA         | NA         |            |
| NA        | ENSG00000259543 | 0          | NA          | NA         | NA         | NA         |            |
| NA        | ENSG00000259544 | 0          | NA          | NA         | NA         | NA         |            |
| NA        | ENSG00000259545 | 0          | NA          | NA         | NA         | NA         |            |
| NA        | ENSG00000259546 | 0.16735865 | 0.01897177  | 0.38482933 | 0.78225479 | NA         |            |
| NA        | ENSG00000259547 | 0          | NA          | NA         | NA         | NA         | CYCSP2     |
| NA        | ENSG00000259548 | 2.39980771 | 0.01820007  | 0.37632512 | 0.8266434  | NA         |            |
| NA        | ENSG00000259550 | 0          | NA          | NA         | NA         | NA         | HNRNPA1P74 |
| NA        | ENSG00000259553 | 0.99401703 | 0.02303823  | 0.38232281 | 0.65904873 | NA         |            |
| NA        | ENSG00000259554 | 0          | NA          | NA         | NA         | NA         |            |
| NA        | ENSG00000259555 | 21.1783673 | 0.05064375  | 0.31150052 | 0.78639018 | 0.90289242 |            |
| NA        | ENSG00000259556 | 2.82838973 | 0.07696091  | 0.38215771 | 0.44013517 | 0.66517856 |            |
| NA        | ENSG00000259557 | 0.173733   | 0.01914545  | 0.38484597 | 0.78225479 | NA         | HMGNI1P26  |
| NA        | ENSG00000259558 | 0          | NA          | NA         | NA         | NA         | MESTP2     |
| NA        | ENSG00000259560 | 0.14931947 | -0.01844332 | 0.38480212 | 0.84537521 | NA         |            |
| NA        | ENSG00000259561 | 0.14931947 | -0.01844332 | 0.38480212 | 0.84537521 | NA         |            |
| NA        | ENSG00000259562 | 13.8881617 | -0.03688716 | 0.32854918 | 0.8294629  | 0.92261925 |            |
| NA        | ENSG00000259563 | 0.14931947 | -0.01844332 | 0.38480212 | 0.84537521 | NA         |            |
| NA        | ENSG00000259564 | 0          | NA          | NA         | NA         | NA         |            |
| NA        | ENSG00000259565 | 0          | NA          | NA         | NA         | NA         | KRT8P23    |
| NA        | ENSG00000259569 | 0          | NA          | NA         | NA         | NA         |            |
| NA        | ENSG00000259570 | 0.34035016 | 0.00295366  | 0.38339054 | 0.96025221 | NA         |            |
| 414899    | ENSG00000259571 | 0          | NA          | NA         | NA         | NA         | BLID       |
| NA        | ENSG00000259572 | 0          | NA          | NA         | NA         | NA         | LINC01491  |
| NA        | ENSG00000259573 | 0          | NA          | NA         | NA         | NA         | NMNAT1P5   |
| NA        | ENSG00000259575 | 0          | NA          | NA         | NA         | NA         |            |
| NA        | ENSG00000259577 | 7.75460585 | 0.22602448  | 0.42935928 | 0.17020543 | 0.3620926  | CERNA1     |
| NA        | ENSG00000259579 | 0.32484451 | 0.00164823  | 0.38337107 | 0.96452898 | NA         |            |
| NA        | ENSG00000259580 | 0          | NA          | NA         | NA         | NA         |            |
| NA        | ENSG00000259581 | 1.87129371 | 0.04826856  | 0.38049822 | 0.5512317  | NA         | TYRO3P     |
| 101927310 | ENSG00000259582 | 0          | NA          | NA         | NA         | NA         |            |
| 101927751 | ENSG00000259583 | 285.512005 | 0.47743257  | 0.14920858 | 0.00055128 | 0.00350892 |            |
| NA        | ENSG00000259584 | 1.00897048 | -0.02071842 | 0.38094221 | 0.72995082 | NA         |            |
| NA        | ENSG00000259585 | 0          | NA          | NA         | NA         | NA         | RBM17P4    |
| NA        | ENSG00000259586 | 0          | NA          | NA         | NA         | NA         |            |
| NA        | ENSG00000259587 | 0.30001543 | -0.02294458 | 0.38527538 | 0.68644903 | NA         |            |
| NA        | ENSG00000259588 | 0          | NA          | NA         | NA         | NA         |            |

|           |                 |            |             |            |            |            |           |
|-----------|-----------------|------------|-------------|------------|------------|------------|-----------|
| NA        | ENSG00000259589 | 0.66344027 | -0.0231947  | 0.38266766 | 0.64041163 | NA         |           |
| NA        | ENSG00000259590 | 0          | NA          | NA         | NA         | NA         | LINC02244 |
| NA        | ENSG00000259591 | 0          | NA          | NA         | NA         | NA         |           |
| NA        | ENSG00000259592 | 1.6795707  | 0.03286133  | 0.3796832  | 0.65671608 | NA         | PRELID1P4 |
| NA        | ENSG00000259593 | 0          | NA          | NA         | NA         | NA         | MTND5P40  |
| NA        | ENSG00000259594 | 0.34686493 | 0.00019951  | 0.38336209 | 0.9665681  | NA         |           |
| NA        | ENSG00000259595 | 0          | NA          | NA         | NA         | NA         |           |
| NA        | ENSG00000259598 | 0.16735865 | 0.01897177  | 0.38482933 | 0.78225479 | NA         |           |
| NA        | ENSG00000259600 | 0          | NA          | NA         | NA         | NA         |           |
| NA        | ENSG00000259601 | 0.31858289 | 0.00149201  | 0.38336967 | 0.96278349 | NA         |           |
| NA        | ENSG00000259602 | 0          | NA          | NA         | NA         | NA         |           |
| NA        | ENSG00000259603 | 0          | NA          | NA         | NA         | NA         |           |
| NA        | ENSG00000259604 | 0.14931947 | -0.01844332 | 0.38480212 | 0.84537521 | NA         |           |
| NA        | ENSG00000259605 | 52.7138745 | 1.66207962  | 0.37525536 | 6.66E-07   | 7.77E-06   |           |
| NA        | ENSG00000259607 | 0          | NA          | NA         | NA         | NA         |           |
| NA        | ENSG00000259608 | 0          | NA          | NA         | NA         | NA         |           |
| NA        | ENSG00000259609 | 1.04691422 | 0.03532231  | 0.38170517 | 0.58598783 | NA         |           |
| 101927332 | ENSG00000259611 | 0          | NA          | NA         | NA         | NA         | LINC01582 |
| NA        | ENSG00000259612 | 0.98865041 | 0.0287829   | 0.38190059 | 0.6283256  | NA         | EEF1A1P22 |
| NA        | ENSG00000259614 | 0          | NA          | NA         | NA         | NA         | TUBAP12   |
| NA        | ENSG00000259615 | 0          | NA          | NA         | NA         | NA         |           |
| NA        | ENSG00000259616 | 0          | NA          | NA         | NA         | NA         |           |
| NA        | ENSG00000259617 | 0.173733   | 0.01914545  | 0.38484597 | 0.78225479 | NA         |           |
| NA        | ENSG00000259619 | 0          | NA          | NA         | NA         | NA         |           |
| 102724452 | ENSG00000259620 | 0          | NA          | NA         | NA         | NA         |           |
| NA        | ENSG00000259621 | 0          | NA          | NA         | NA         | NA         |           |
| NA        | ENSG00000259622 | 0          | NA          | NA         | NA         | NA         |           |
| NA        | ENSG00000259623 | 49.9868343 | 0.15616055  | 0.30476542 | 0.43539178 | 0.66055517 |           |
| NA        | ENSG00000259624 | 0          | NA          | NA         | NA         | NA         |           |
| NA        | ENSG00000259626 | 0          | NA          | NA         | NA         | NA         | MTND3P12  |
| NA        | ENSG00000259627 | 0.34746601 | 0.02370763  | 0.3853651  | 0.61987128 | NA         |           |
| NA        | ENSG00000259628 | 0.8393363  | 0.03754907  | 0.38470825 | 0.45682999 | NA         |           |
| NA        | ENSG00000259630 | 0.35730472 | 0.02382155  | 0.38538176 | 0.61370228 | NA         | FABP5P9   |
| NA        | ENSG00000259631 | 0          | NA          | NA         | NA         | NA         |           |
| NA        | ENSG00000259632 | 0          | NA          | NA         | NA         | NA         |           |
| NA        | ENSG00000259633 | 0          | NA          | NA         | NA         | NA         | UBE2Q2P8  |
| NA        | ENSG00000259635 | 5.33263441 | -0.0342174  | 0.36627924 | 0.76959197 | 0.89405696 |           |
| 105370954 | ENSG00000259636 | 0          | NA          | NA         | NA         | NA         |           |

|           |                 |            |             |            |            |            |              |
|-----------|-----------------|------------|-------------|------------|------------|------------|--------------|
| NA        | ENSG00000259637 | 0          | NA          | NA         | NA         | NA         | DNM1P38      |
| NA        | ENSG00000259639 | 0          | NA          | NA         | NA         | NA         |              |
| NA        | ENSG00000259642 | 133.930029 | 0.48269895  | 0.26415599 | 0.0219059  | 0.07839341 | ST20-AS1     |
| NA        | ENSG00000259644 | 2.27058801 | 0.12390132  | 0.40642733 | 0.13268029 | NA         |              |
| NA        | ENSG00000259645 | 0.34624801 | -0.02356563 | 0.38536324 | 0.65270996 | NA         |              |
| NA        | ENSG00000259646 | 0          | NA          | NA         | NA         | NA         |              |
| NA        | ENSG00000259647 | 0          | NA          | NA         | NA         | NA         |              |
| NA        | ENSG00000259648 | 3.70958581 | 0.06194324  | 0.37567906 | 0.56249371 | 0.76552855 |              |
| NA        | ENSG00000259649 | 0.45033321 | -0.02732894 | 0.38571546 | 0.56141913 | NA         |              |
| NA        | ENSG00000259650 | 0          | NA          | NA         | NA         | NA         |              |
| NA        | ENSG00000259651 | 0          | NA          | NA         | NA         | NA         | MTCO3P23     |
| NA        | ENSG00000259652 | 0          | NA          | NA         | NA         | NA         |              |
| NA        | ENSG00000259654 | 0.31693789 | 0.00132888  | 0.38336823 | 0.96512072 | NA         |              |
| NA        | ENSG00000259655 | 0          | NA          | NA         | NA         | NA         |              |
| NA        | ENSG00000259656 | 1.35973882 | -0.09092541 | 0.39858426 | 0.09921066 | NA         |              |
| NA        | ENSG00000259657 | 3.11599402 | -0.07625432 | 0.3790702  | 0.47621872 | 0.69815853 | PIGHP1       |
| 100128108 | ENSG00000259658 | 8.70178598 | 0.02739106  | 0.35615948 | 0.84471881 | 0.92965052 |              |
| NA        | ENSG00000259659 | 5.48750995 | 0.05279932  | 0.36352375 | 0.68789018 | 0.8484763  |              |
| NA        | ENSG00000259660 | 196.150227 | -0.18695274 | 0.16777571 | 0.2140034  | 0.42415859 | DNM1P47      |
| NA        | ENSG00000259661 | 0          | NA          | NA         | NA         | NA         |              |
| 642366    | ENSG00000259663 | 1595.94666 | 0.04310833  | 0.20624952 | 0.80632129 | 0.9122093  |              |
| 101927286 | ENSG00000259664 | 0.16735865 | 0.01897177  | 0.38482933 | 0.78225479 | NA         | LINC02254    |
| NA        | ENSG00000259665 | 0.14931947 | -0.01844332 | 0.38480212 | 0.84537521 | NA         |              |
| 253044    | ENSG00000259666 | 2.73270776 | -0.00947964 | 0.37571235 | 0.90377474 | 0.95800026 | LINGO1-AS1   |
| NA        | ENSG00000259668 | 18.4980316 | -0.28413809 | 0.42178005 | 0.15608872 | 0.34233917 |              |
| NA        | ENSG00000259669 | 0          | NA          | NA         | NA         | NA         |              |
| NA        | ENSG00000259670 | 0          | NA          | NA         | NA         | NA         |              |
| NA        | ENSG00000259671 | 0          | NA          | NA         | NA         | NA         | MTCYBP23     |
| NA        | ENSG00000259672 | 0.34624801 | -0.02356563 | 0.38536324 | 0.65270996 | NA         |              |
| 100506686 | ENSG00000259673 | 67.7533353 | 0.01755519  | 0.2382635  | 0.92663337 | 0.96932621 | IQCH-AS1     |
| NA        | ENSG00000259674 | 0          | NA          | NA         | NA         | NA         |              |
| NA        | ENSG00000259675 | 0          | NA          | NA         | NA         | NA         |              |
| NA        | ENSG00000259676 | 0          | NA          | NA         | NA         | NA         |              |
| NA        | ENSG00000259677 | 0.8415306  | -0.03549438 | 0.38357684 | 0.49896565 | NA         |              |
| NA        | ENSG00000259678 | 0          | NA          | NA         | NA         | NA         |              |
| NA        | ENSG00000259680 | 0          | NA          | NA         | NA         | NA         | IGHV3OR16-17 |
| NA        | ENSG00000259681 | 0          | NA          | NA         | NA         | NA         |              |
| NA        | ENSG00000259682 | 0          | NA          | NA         | NA         | NA         |              |

|           |    |                 |            |             |            |            |            |            |
|-----------|----|-----------------|------------|-------------|------------|------------|------------|------------|
|           | NA | ENSG00000259683 | 13.916865  | -0.03322536 | 0.32654027 | 0.84718286 | 0.93052693 |            |
|           | NA | ENSG00000259684 | 0          | NA          | NA         | NA         | NA         |            |
|           | NA | ENSG00000259685 | 0          | NA          | NA         | NA         | NA         | IDH2-DT    |
|           | NA | ENSG00000259686 | 0          | NA          | NA         | NA         | NA         | HNRNPA1P71 |
|           | NA | ENSG00000259687 | 0.55937828 | -0.00775793 | 0.38296194 | 0.83643459 | NA         | LINC01220  |
|           | NA | ENSG00000259688 | 0          | NA          | NA         | NA         | NA         |            |
|           | NA | ENSG00000259690 | 0          | NA          | NA         | NA         | NA         |            |
|           | NA | ENSG00000259691 | 0          | NA          | NA         | NA         | NA         | FKBP1AP2   |
|           | NA | ENSG00000259692 | 1.8562066  | 0.1158414   | 0.40483893 | 0.09969117 | NA         |            |
|           | NA | ENSG00000259694 | 1.58588897 | 0.01973953  | 0.37797825 | 0.79274012 | NA         |            |
|           | NA | ENSG00000259695 | 0          | NA          | NA         | NA         | NA         |            |
|           | NA | ENSG00000259696 | 0          | NA          | NA         | NA         | NA         |            |
| 107984784 | NA | ENSG00000259697 | 0          | NA          | NA         | NA         | NA         |            |
|           | NA | ENSG00000259698 | 0          | NA          | NA         | NA         | NA         | FAM30C     |
|           | NA | ENSG00000259699 | 0          | NA          | NA         | NA         | NA         | HMGB1P8    |
|           | NA | ENSG00000259700 | 0.34746601 | 0.02370763  | 0.3853651  | 0.61987128 | NA         |            |
|           | NA | ENSG00000259701 | 0          | NA          | NA         | NA         | NA         |            |
|           | NA | ENSG00000259702 | 0          | NA          | NA         | NA         | NA         |            |
| 105370969 | NA | ENSG00000259704 | 0          | NA          | NA         | NA         | NA         |            |
|           | NA | ENSG00000259705 | 10.5698625 | -0.13153088 | 0.36457593 | 0.42526002 | 0.65106558 |            |
|           | NA | ENSG00000259706 | 3.65860947 | 0.05202765  | 0.37192557 | 0.64135796 | 0.82041028 | HSP90B2P   |
|           | NA | ENSG00000259707 | 13.2297384 | -1.71656672 | 0.96875683 | 0.00287421 | 0.01460438 |            |
|           | NA | ENSG00000259708 | 0          | NA          | NA         | NA         | NA         |            |
|           | NA | ENSG00000259709 | 1.48598359 | -0.00541937 | 0.37834069 | 0.93732199 | NA         |            |
|           | NA | ENSG00000259710 | 0          | NA          | NA         | NA         | NA         | NUTF2P6    |
|           | NA | ENSG00000259711 | 0.173124   | -0.01911262 | 0.38486262 | 0.84537521 | NA         |            |
|           | NA | ENSG00000259712 | 1.83348671 | 0.04225183  | 0.38103876 | 0.569232   | NA         |            |
|           | NA | ENSG00000259713 | 0.18922458 | 0.01954053  | 0.38488496 | 0.78225479 | NA         |            |
|           | NA | ENSG00000259715 | 0          | NA          | NA         | NA         | NA         |            |
| 105370683 | NA | ENSG00000259717 | 0.49086116 | 0.01417782  | 0.38309259 | 0.75828417 | NA         | LINC00677  |
|           | NA | ENSG00000259719 | 0          | NA          | NA         | NA         | NA         | LINC02284  |
|           | NA | ENSG00000259720 | 0.16735865 | 0.01897177  | 0.38482933 | 0.78225479 | NA         |            |
| 100131315 | NA | ENSG00000259721 | 0          | NA          | NA         | NA         | NA         |            |
|           | NA | ENSG00000259722 | 0          | NA          | NA         | NA         | NA         |            |
|           | NA | ENSG00000259723 | 0          | NA          | NA         | NA         | NA         |            |
| 101927112 | NA | ENSG00000259724 | 0          | NA          | NA         | NA         | NA         | LINC01581  |
|           | NA | ENSG00000259725 | 0          | NA          | NA         | NA         | NA         |            |
|           | NA | ENSG00000259726 | 210.421329 | 0.37564768  | 0.15860283 | 0.00941549 | 0.03948351 | CSPG4P11   |

|           |    |                 |            |             |            |            |            |           |
|-----------|----|-----------------|------------|-------------|------------|------------|------------|-----------|
|           | NA | ENSG00000259727 | 0          | NA          | NA         | NA         | NA         |           |
| 100506874 | NA | ENSG00000259728 | 2.37107276 | 0.10089801  | 0.39603536 | 0.194699   | NA         | LINC00933 |
|           | NA | ENSG00000259730 | 0          | NA          | NA         | NA         | NA         |           |
|           | NA | ENSG00000259731 | 0          | NA          | NA         | NA         | NA         |           |
|           | NA | ENSG00000259732 | 1.12808037 | -0.00234425 | 0.3786959  | 0.97217658 | NA         |           |
|           | NA | ENSG00000259734 | 0          | NA          | NA         | NA         | NA         |           |
|           | NA | ENSG00000259735 | 0          | NA          | NA         | NA         | NA         |           |
| 101926895 | NA | ENSG00000259736 | 6.9372206  | 0.04622612  | 0.35583375 | 0.74745104 | 0.88138554 | CRTC3-AS1 |
|           | NA | ENSG00000259737 | 0          | NA          | NA         | NA         | NA         |           |
|           | NA | ENSG00000259738 | 0.16735865 | 0.01897177  | 0.38482933 | 0.78225479 | NA         | ZNF444P1  |
|           | NA | ENSG00000259740 | 0          | NA          | NA         | NA         | NA         |           |
|           | NA | ENSG00000259742 | 0          | NA          | NA         | NA         | NA         |           |
|           | NA | ENSG00000259743 | 0          | NA          | NA         | NA         | NA         |           |
|           | NA | ENSG00000259744 | 0.5142946  | 0.01323736  | 0.38294335 | 0.75058107 | NA         |           |
|           | NA | ENSG00000259746 | 0.35730472 | 0.02382155  | 0.38538176 | 0.61370228 | NA         | HSPE1P3   |
|           | NA | ENSG00000259749 | 0          | NA          | NA         | NA         | NA         | NCAPGP2   |
|           | NA | ENSG00000259750 | 0          | NA          | NA         | NA         | NA         | NSA2P4    |
|           | NA | ENSG00000259751 | 2.16683602 | -0.0019896  | 0.37456367 | 0.98015531 | NA         | TUBAP11   |
|           | NA | ENSG00000259753 | 0          | NA          | NA         | NA         | NA         |           |
|           | NA | ENSG00000259754 | 0.16735865 | 0.01897177  | 0.38482933 | 0.78225479 | NA         |           |
|           | NA | ENSG00000259755 | 0.33471731 | 0.02354391  | 0.38534154 | 0.62842204 | NA         |           |
|           | NA | ENSG00000259756 | 0          | NA          | NA         | NA         | NA         |           |
|           | NA | ENSG00000259757 | 0          | NA          | NA         | NA         | NA         |           |
|           | NA | ENSG00000259759 | 0          | NA          | NA         | NA         | NA         |           |
|           | NA | ENSG00000259760 | 0          | NA          | NA         | NA         | NA         |           |
|           | NA | ENSG00000259762 | 0.51350909 | 0.01568358  | 0.38314687 | 0.73444325 | NA         |           |
|           | NA | ENSG00000259763 | 0          | NA          | NA         | NA         | NA         | LINC02157 |
| 105371027 | NA | ENSG00000259764 | 0          | NA          | NA         | NA         | NA         | PCSK6-AS1 |
|           | NA | ENSG00000259767 | 0.30001544 | -0.02294458 | 0.38527538 | 0.68644902 | NA         |           |
|           | NA | ENSG00000259768 | 351.165163 | -0.2076814  | 0.14358372 | 0.11753113 | 0.28107735 |           |
|           | NA | ENSG00000259769 | 0          | NA          | NA         | NA         | NA         |           |
|           | NA | ENSG00000259770 | 0          | NA          | NA         | NA         | NA         |           |
|           | NA | ENSG00000259771 | 0.34746601 | 0.02370763  | 0.3853651  | 0.61987128 | NA         |           |
|           | NA | ENSG00000259772 | 3.02795681 | 0.06786603  | 0.38309065 | 0.44128281 | 0.6661181  |           |
|           | NA | ENSG00000259773 | 0          | NA          | NA         | NA         | NA         |           |
| 103171574 | NA | ENSG00000259774 | 5.62233815 | -0.01681099 | 0.35950579 | 0.89544716 | 0.95469109 |           |
|           | NA | ENSG00000259775 | 3.66965749 | -0.0417441  | 0.37011715 | 0.70527658 | 0.85803894 |           |
|           | NA | ENSG00000259776 | 0          | NA          | NA         | NA         | NA         |           |



|           |                 |                 |             |             |            |            |            |
|-----------|-----------------|-----------------|-------------|-------------|------------|------------|------------|
| 101927606 | ENSG00000259779 | 0               | NA          | NA          | NA         | NA         | LINC01922  |
|           | NA              | ENSG00000259780 | 4.48189079  | -0.04418467 | 0.37556008 | 0.64373262 | 0.8220245  |
|           | NA              | ENSG00000259781 | 1909.67663  | -0.29456674 | 0.07690952 | 8.89E-05   | 0.00068552 |
|           | NA              | ENSG00000259782 | 0.45032473  | -0.02732853 | 0.38571542 | 0.56142613 | NA         |
| 102723640 | ENSG00000259783 | 1.16313893      | 0.01966389  | 0.38024316  | 0.75840804 | NA         | LINC02259  |
|           | NA              | ENSG00000259784 | 0           | NA          | NA         | NA         | NA         |
|           | NA              | ENSG00000259786 | 0           | NA          | NA         | NA         | NA         |
|           | NA              | ENSG00000259788 | 0           | NA          | NA         | NA         | NA         |
|           | NA              | ENSG00000259789 | 0.30139824  | -0.02296476 | 0.38527817 | 0.68536535 | NA         |
|           | NA              | ENSG00000259790 | 0           | NA          | NA         | NA         | NA         |
|           | NA              | ENSG00000259791 | 0           | NA          | NA         | NA         | NA         |
|           | NA              | ENSG00000259792 | 0           | NA          | NA         | NA         | NA         |
|           | NA              | ENSG00000259793 | 1.86733963  | -0.07230919 | 0.38836867 | 0.31021564 | NA         |
|           | NA              | ENSG00000259797 | 0.30001591  | -0.02294459 | 0.38527538 | 0.68644873 | NA         |
|           | NA              | ENSG00000259798 | 0           | NA          | NA         | NA         | NA         |
|           | NA              | ENSG00000259800 | 0           | NA          | NA         | NA         | NA         |
|           | NA              | ENSG00000259802 | 54.0847279  | -0.08822628 | 0.26699598 | 0.64819769 | 0.82448382 |
| 146429    | ENSG00000259803 | 3.52055262      | 0.22230904  | 0.46839746  | 0.04506626 | 0.1373026  | SLC22A31   |
| 107984813 | ENSG00000259804 | 2.74781652      | -0.05417323 | 0.37583011  | 0.59145416 | 0.78612249 |            |
|           | NA              | ENSG00000259805 | 0           | NA          | NA         | NA         | NA         |
|           | NA              | ENSG00000259807 | 4.3864409   | -0.04099643 | 0.36687981 | 0.72886673 | 0.87045369 |
|           | NA              | ENSG00000259810 | 1.09079872  | -0.00273729 | 0.38053336 | 0.96183786 | NA         |
|           | NA              | ENSG00000259813 | 0           | NA          | NA         | NA         | NA         |
|           | NA              | ENSG00000259814 | 0           | NA          | NA         | NA         | NA         |
|           | NA              | ENSG00000259815 | 0           | NA          | NA         | NA         | NA         |
|           | NA              | ENSG00000259817 | 0           | NA          | NA         | NA         | NA         |
|           | NA              | ENSG00000259818 | 1.27587167  | 0.00608152  | 0.37906374 | 0.92771816 | NA         |
|           | NA              | ENSG00000259819 | 0           | NA          | NA         | NA         | NA         |
|           | NA              | ENSG00000259820 | 70.5164862  | -0.69005058 | 0.30040727 | 0.00395932 | 0.0191359  |
|           | NA              | ENSG00000259821 | 0           | NA          | NA         | NA         | NA         |
|           | NA              | ENSG00000259822 | 0           | NA          | NA         | NA         | NA         |
| 646627    | ENSG00000259823 | 0               | NA          | NA          | NA         | NA         | LYPD8      |
|           | NA              | ENSG00000259826 | 22.159064   | 0.07695981  | 0.31824974 | 0.67899195 | 0.84320727 |
|           | NA              | ENSG00000259827 | 0           | NA          | NA         | NA         | NA         |
|           | NA              | ENSG00000259828 | 0           | NA          | NA         | NA         | NA         |
| 283486    | ENSG00000259831 | 0.36294038      | 0.02389467  | 0.38539239  | 0.60997357 | NA         | LINC00567  |
|           | NA              | ENSG00000259832 | 0           | NA          | NA         | NA         | NA         |
|           | NA              | ENSG00000259833 | 0           | NA          | NA         | NA         | NA         |

|           |                 |            |             |            |            |            |              |
|-----------|-----------------|------------|-------------|------------|------------|------------|--------------|
| NA        | ENSG00000259834 | 54.5791142 | -4.67896315 | 0.5445298  | 2.13E-18   | 7.38E-17   |              |
| NA        | ENSG00000259836 | 2.80603238 | -0.04614201 | 0.37456248 | 0.64499478 | 0.82283284 | AGGF1P6      |
| 388456    | ENSG00000259837 | 0          | NA          | NA         | NA         | NA         | LINC01904    |
| NA        | ENSG00000259838 | 0          | NA          | NA         | NA         | NA         | ELOCP2       |
| NA        | ENSG00000259840 | 0.34125555 | 0.02362764  | 0.38535357 | 0.62402865 | NA         |              |
| 283914    | ENSG00000259841 | 0          | NA          | NA         | NA         | NA         | LINC01566    |
| NA        | ENSG00000259842 | 0          | NA          | NA         | NA         | NA         | IGHV3OR16-16 |
| NA        | ENSG00000259843 | 0.51429194 | 0.01284237  | 0.38291625 | 0.7553835  | NA         |              |
| NA        | ENSG00000259844 | 0          | NA          | NA         | NA         | NA         | GNPATP       |
| NA        | ENSG00000259845 | 6.03652505 | 0.28119939  | 0.49447139 | 0.07945664 | 0.21038565 | HERC2P10     |
| NA        | ENSG00000259846 | 0          | NA          | NA         | NA         | NA         |              |
| 101927650 | ENSG00000259847 | 0          | NA          | NA         | NA         | NA         | LINC02126    |
| 442028    | ENSG00000259848 | 0.18922458 | 0.01954053  | 0.38488496 | 0.78225479 | NA         |              |
| 139538    | ENSG00000259849 | 0          | NA          | NA         | NA         | NA         | VENTXP1      |
| NA        | ENSG00000259852 | 0          | NA          | NA         | NA         | NA         | IGHV1OR16-2  |
| NA        | ENSG00000259854 | 0          | NA          | NA         | NA         | NA         |              |
| NA        | ENSG00000259855 | 0          | NA          | NA         | NA         | NA         |              |
| NA        | ENSG00000259856 | 2.77972806 | 0.09366769  | 0.4008849  | 0.03675572 | 0.1178464  | RAB43P1      |
| NA        | ENSG00000259861 | 0          | NA          | NA         | NA         | NA         |              |
| NA        | ENSG00000259862 | 0          | NA          | NA         | NA         | NA         |              |
| NA        | ENSG00000259863 | 6.67471849 | 0.0720453   | 0.3646384  | 0.59875063 | 0.79005929 | SH3RF3-AS1   |
| NA        | ENSG00000259864 | 0          | NA          | NA         | NA         | NA         |              |
| NA        | ENSG00000259865 | 133.03399  | -0.08293723 | 0.19309059 | 0.61840927 | 0.80469863 |              |
| NA        | ENSG00000259866 | 0.173733   | 0.01914545  | 0.38484597 | 0.78225479 | NA         |              |
| NA        | ENSG00000259867 | 0.41272299 | 0.02468819  | 0.38545968 | 0.60904042 | NA         |              |
| NA        | ENSG00000259868 | 1.93185262 | 0.13114622  | 0.41552142 | 0.03068933 | NA         |              |
| NA        | ENSG00000259869 | 0          | NA          | NA         | NA         | NA         |              |
| NA        | ENSG00000259870 | 0          | NA          | NA         | NA         | NA         |              |
| NA        | ENSG00000259871 | 0.16735865 | 0.01897177  | 0.38482933 | 0.78225479 | NA         |              |
| NA        | ENSG00000259873 | 0          | NA          | NA         | NA         | NA         |              |
| NA        | ENSG00000259874 | 0          | NA          | NA         | NA         | NA         |              |
| NA        | ENSG00000259876 | 0          | NA          | NA         | NA         | NA         |              |
| NA        | ENSG00000259877 | 149.186154 | 0.56998767  | 0.20388231 | 0.00148785 | 0.00832223 |              |
| NA        | ENSG00000259878 | 0          | NA          | NA         | NA         | NA         |              |
| 101927793 | ENSG00000259881 | 0          | NA          | NA         | NA         | NA         |              |
| NA        | ENSG00000259882 | 0          | NA          | NA         | NA         | NA         |              |
| 101928363 | ENSG00000259883 | 0.34746601 | 0.02370763  | 0.3853651  | 0.61987128 | NA         | EHD4-AS1     |
| 115409980 | ENSG00000259884 | 0.83847291 | 0.04776942  | 0.38828988 | 0.27997252 | NA         | NR4A1AS      |

|           |                 |            |             |            |            |            |           |
|-----------|-----------------|------------|-------------|------------|------------|------------|-----------|
| 105369971 | ENSG00000259887 | 1.85246854 | -0.00497739 | 0.3771516  | 0.9460923  | NA         | FIGNL2-DT |
| NA        | ENSG00000259889 | 0          | NA          | NA         | NA         | NA         |           |
| NA        | ENSG00000259890 | 0          | NA          | NA         | NA         | NA         | DNM1P50   |
| NA        | ENSG00000259891 | 132.330209 | 0.3205909   | 0.20120921 | 0.06395827 | 0.17968452 |           |
| NA        | ENSG00000259892 | 0.173733   | 0.01914545  | 0.38484597 | 0.78225479 | NA         |           |
| 729652    | ENSG00000259895 | 19.485543  | 0.03732793  | 0.31452911 | 0.84021665 | 0.92744511 |           |
| NA        | ENSG00000259897 | 5.34393592 | 0.2844547   | 0.50826351 | 0.06187047 | 0.17550903 | FRG2JP    |
| NA        | ENSG00000259899 | 0.33471731 | 0.02354391  | 0.38534154 | 0.62842204 | NA         |           |
| NA        | ENSG00000259900 | 0          | NA          | NA         | NA         | NA         |           |
| NA        | ENSG00000259904 | 2.58207596 | 0.10134231  | 0.39249879 | 0.27909158 | 0.50354712 | ACTG1P15  |
| 791114    | ENSG00000259905 | 0          | NA          | NA         | NA         | NA         | PWRN1     |
| 101928840 | ENSG00000259905 | 0          | NA          | NA         | NA         | NA         | PWRN1     |
| NA        | ENSG00000259906 | 0          | NA          | NA         | NA         | NA         |           |
| NA        | ENSG00000259907 | 0          | NA          | NA         | NA         | NA         |           |
| NA        | ENSG00000259909 | 0          | NA          | NA         | NA         | NA         |           |
| NA        | ENSG00000259910 | 0          | NA          | NA         | NA         | NA         |           |
| NA        | ENSG00000259912 | 0          | NA          | NA         | NA         | NA         |           |
| NA        | ENSG00000259914 | 0          | NA          | NA         | NA         | NA         |           |
| NA        | ENSG00000259915 | 0.67721118 | -0.03855433 | 0.38690435 | 0.39639755 | NA         |           |
| 100509620 | ENSG00000259916 | 0          | NA          | NA         | NA         | NA         |           |
| NA        | ENSG00000259917 | 37.8518286 | 0.46589179  | 0.38004262 | 0.05868338 | 0.16825136 | HNRNPLP2  |
| NA        | ENSG00000259918 | 0          | NA          | NA         | NA         | NA         | NDUFA5P11 |
| NA        | ENSG00000259920 | 0.33960528 | 0.00266446  | 0.38338518 | 0.9630182  | NA         |           |
| NA        | ENSG00000259921 | 0.64625181 | 0.00264207  | 0.38249418 | 0.9493469  | NA         |           |
| NA        | ENSG00000259922 | 0          | NA          | NA         | NA         | NA         |           |
| NA        | ENSG00000259923 | 0          | NA          | NA         | NA         | NA         |           |
| NA        | ENSG00000259924 | 0.18922458 | 0.01954053  | 0.38488496 | 0.78225479 | NA         |           |
| NA        | ENSG00000259925 | 0          | NA          | NA         | NA         | NA         |           |
| NA        | ENSG00000259926 | 0.32630925 | 0.00246798  | 0.38338213 | 0.95667965 | NA         |           |
| NA        | ENSG00000259928 | 0.14931947 | -0.01844332 | 0.38480212 | 0.84537521 | NA         |           |
| 107984893 | ENSG00000259929 | 1.68841681 | -0.07683334 | 0.39228852 | 0.18812154 | NA         |           |
| NA        | ENSG00000259931 | 0          | NA          | NA         | NA         | NA         |           |
| NA        | ENSG00000259932 | 1.67290343 | -0.02074464 | 0.37612401 | 0.80244244 | NA         |           |
| 105371049 | ENSG00000259933 | 1.72250647 | 0.00995613  | 0.37492388 | 0.90898704 | NA         |           |
| NA        | ENSG00000259934 | 0          | NA          | NA         | NA         | NA         |           |
| NA        | ENSG00000259935 | 0          | NA          | NA         | NA         | NA         |           |
| NA        | ENSG00000259937 | 0          | NA          | NA         | NA         | NA         |           |
| NA        | ENSG00000259940 | 6.6674208  | -0.06685209 | 0.36123731 | 0.63122943 | 0.81364292 |           |

|           |    |                 |            |             |            |            |            |           |
|-----------|----|-----------------|------------|-------------|------------|------------|------------|-----------|
|           | NA | ENSG00000259941 | 0.7534956  | -0.03327829 | 0.38646938 | 0.40782637 | NA         |           |
|           | NA | ENSG00000259943 | 120.536756 | 0.23493402  | 0.20964361 | 0.18477164 | 0.38350847 |           |
| 94150     | NA | ENSG00000259944 | 0          | NA          | NA         | NA         | NA         | CDRT7     |
|           | NA | ENSG00000259945 | 0          | NA          | NA         | NA         | NA         |           |
|           | NA | ENSG00000259946 | 57.2854887 | -0.50149813 | 0.32603057 | 0.03397427 | 0.11082695 |           |
| 105371048 | NA | ENSG00000259947 | 0          | NA          | NA         | NA         | NA         | LINC02124 |
|           | NA | ENSG00000259948 | 31.7549612 | -0.08540785 | 0.38550121 | 0.37885873 | 0.60779147 |           |
|           | NA | ENSG00000259950 | 0          | NA          | NA         | NA         | NA         |           |
|           | NA | ENSG00000259952 | 9.55503197 | 0.02514582  | 0.38466748 | 0.50302398 | 0.71990159 |           |
|           | NA | ENSG00000259953 | 149.040698 | -0.13279842 | 0.18200355 | 0.40650597 | 0.63480853 |           |
| 283888    | NA | ENSG00000259954 | 1.59689537 | 0.08006104  | 0.39334304 | 0.17289899 | NA         | IL21R-AS1 |
|           | NA | ENSG00000259955 | 0          | NA          | NA         | NA         | NA         |           |
| 29890     | NA | ENSG00000259956 | 3583.18554 | 0.08962167  | 0.06291382 | 0.14895217 | 0.33152468 | RBM15B    |
|           | NA | ENSG00000259959 | 141.192257 | -0.03120169 | 0.17928298 | 0.84295693 | 0.92866152 |           |
|           | NA | ENSG00000259961 | 0          | NA          | NA         | NA         | NA         |           |
|           | NA | ENSG00000259962 | 0          | NA          | NA         | NA         | NA         |           |
|           | NA | ENSG00000259963 | 0          | NA          | NA         | NA         | NA         |           |
| 101929196 | NA | ENSG00000259964 | 0          | NA          | NA         | NA         | NA         | THSD4-AS1 |
|           | NA | ENSG00000259966 | 0          | NA          | NA         | NA         | NA         | FAM153DP  |
|           | NA | ENSG00000259967 | 0          | NA          | NA         | NA         | NA         |           |
|           | NA | ENSG00000259968 | 0          | NA          | NA         | NA         | NA         |           |
|           | NA | ENSG00000259969 | 1.98327109 | -0.12043454 | 0.40609412 | 0.09745952 | NA         |           |
|           | NA | ENSG00000259970 | 0          | NA          | NA         | NA         | NA         |           |
|           | NA | ENSG00000259972 | 177.565361 | 0.54663672  | 0.18653274 | 0.00106848 | 0.00624777 |           |
| 140828    | NA | ENSG00000259974 | 0          | NA          | NA         | NA         | NA         | LINC00261 |
|           | NA | ENSG00000259976 | 198.789227 | -0.14502161 | 0.16359703 | 0.32594417 | 0.55408554 |           |
|           | NA | ENSG00000259977 | 0.14931947 | -0.01844332 | 0.38480212 | 0.84537521 | NA         |           |
|           | NA | ENSG00000259978 | 0          | NA          | NA         | NA         | NA         | MRPS21P8  |
|           | NA | ENSG00000259979 | 0          | NA          | NA         | NA         | NA         | VN1R68P   |
|           | NA | ENSG00000259981 | 0          | NA          | NA         | NA         | NA         |           |
|           | NA | ENSG00000259982 | 4.37154343 | 0.06976337  | 0.37253383 | 0.56069185 | 0.76433463 | CDC37P1   |
|           | NA | ENSG00000259983 | 0          | NA          | NA         | NA         | NA         |           |
|           | NA | ENSG00000259984 | 0          | NA          | NA         | NA         | NA         |           |
|           | NA | ENSG00000259985 | 19.5781046 | -0.00329594 | 0.31575666 | 0.98294025 | 0.99428951 |           |
|           | NA | ENSG00000259986 | 0          | NA          | NA         | NA         | NA         |           |
|           | NA | ENSG00000259987 | 0          | NA          | NA         | NA         | NA         | DUX4L46   |
|           | NA | ENSG00000259989 | 0          | NA          | NA         | NA         | NA         |           |
|           | NA | ENSG00000259990 | 0          | NA          | NA         | NA         | NA         |           |

|           |                 |            |             |            |            |            |             |
|-----------|-----------------|------------|-------------|------------|------------|------------|-------------|
| NA        | ENSG00000259992 | 0          | NA          | NA         | NA         | NA         |             |
| NA        | ENSG00000259993 | 5.90934511 | -0.00579548 | 0.36224836 | 0.95992253 | 0.98360159 |             |
| NA        | ENSG00000259994 | 51.5338501 | -0.34355443 | 0.29243547 | 0.10923125 | 0.26571211 |             |
| NA        | ENSG00000259995 | 0          | NA          | NA         | NA         | NA         |             |
| NA        | ENSG00000259996 | 0          | NA          | NA         | NA         | NA         | RARRES2P8   |
| NA        | ENSG00000259997 | 0          | NA          | NA         | NA         | NA         | IGHV1OR16-4 |
| NA        | ENSG00000259998 | 0          | NA          | NA         | NA         | NA         |             |
| NA        | ENSG00000259999 | 0          | NA          | NA         | NA         | NA         |             |
| NA        | ENSG00000260000 | 22.2785102 | -0.00016118 | 0.30536071 | 0.9979035  | 0.99926338 |             |
| 100507588 | ENSG00000260001 | 63.4415522 | -0.93616032 | 0.39642475 | 0.00172656 | 0.00945647 | TGFBR3L     |
| NA        | ENSG00000260003 | 0          | NA          | NA         | NA         | NA         |             |
| NA        | ENSG00000260004 | 0          | NA          | NA         | NA         | NA         |             |
| NA        | ENSG00000260005 | 59.9506633 | 0.31325381  | 0.26858339 | 0.12746686 | 0.29787309 |             |
| NA        | ENSG00000260007 | 227.037539 | -0.05456901 | 0.1593644  | 0.70555855 | 0.85805331 |             |
| NA        | ENSG00000260008 | 0          | NA          | NA         | NA         | NA         |             |
| 105447648 | ENSG00000260009 | 0          | NA          | NA         | NA         | NA         | LINC02130   |
| NA        | ENSG00000260010 | 0          | NA          | NA         | NA         | NA         | ZNF720P1    |
| NA        | ENSG00000260011 | 0.34095288 | 0.00316874  | 0.38339489 | 0.95819239 | NA         |             |
| NA        | ENSG00000260012 | 0          | NA          | NA         | NA         | NA         |             |
| NA        | ENSG00000260014 | 0          | NA          | NA         | NA         | NA         | LSM3P5      |
| NA        | ENSG00000260015 | 0          | NA          | NA         | NA         | NA         |             |
| NA        | ENSG00000260017 | 0.82364505 | -0.04669023 | 0.3880633  | 0.31047364 | NA         |             |
| NA        | ENSG00000260018 | 13.3699532 | 0.07296034  | 0.33464782 | 0.67633715 | 0.84170926 |             |
| 105371708 | ENSG00000260019 | 0          | NA          | NA         | NA         | NA         | LINC01992   |
| NA        | ENSG00000260021 | 0          | NA          | NA         | NA         | NA         |             |
| NA        | ENSG00000260022 | 0.51937201 | -0.02557462 | 0.38567603 | 0.54680819 | NA         |             |
| NA        | ENSG00000260024 | 0          | NA          | NA         | NA         | NA         | MRPS21P7    |
| NA        | ENSG00000260025 | 0          | NA          | NA         | NA         | NA         | CRIM1-DT    |
| NA        | ENSG00000260026 | 0          | NA          | NA         | NA         | NA         | LINC02189   |
| 3217      | ENSG00000260027 | 0.18922458 | 0.01954053  | 0.38488496 | 0.78225479 | NA         | HOXB7       |
| NA        | ENSG00000260029 | 0          | NA          | NA         | NA         | NA         |             |
| NA        | ENSG00000260030 | 0          | NA          | NA         | NA         | NA         |             |
| NA        | ENSG00000260031 | 0          | NA          | NA         | NA         | NA         | RPL10P14    |
| 647979    | ENSG00000260032 | 7852.98735 | -0.21696874 | 0.05097652 | 1.72E-05   | 0.00015645 | NORAD       |
| NA        | ENSG00000260033 | 0          | NA          | NA         | NA         | NA         |             |
| 100506655 | ENSG00000260034 | 6.79774943 | 0.03672287  | 0.35363196 | 0.800317   | 0.90857687 | LCMT1-AS2   |
| NA        | ENSG00000260035 | 0.14931947 | -0.01844332 | 0.38480212 | 0.84537521 | NA         |             |
| NA        | ENSG00000260036 | 0.15069912 | -0.01848503 | 0.38480575 | 0.84537521 | NA         |             |

|           |                 |            |             |            |            |            |             |
|-----------|-----------------|------------|-------------|------------|------------|------------|-------------|
| NA        | ENSG00000260037 | 1.17876613 | -0.03011353 | 0.38130838 | 0.63360345 | NA         |             |
| NA        | ENSG00000260038 | 0.29863895 | -0.02292439 | 0.3852726  | 0.68753245 | NA         |             |
| NA        | ENSG00000260041 | 0          | NA          | NA         | NA         | NA         |             |
| NA        | ENSG00000260042 | 0          | NA          | NA         | NA         | NA         |             |
| NA        | ENSG00000260046 | 0          | NA          | NA         | NA         | NA         |             |
| NA        | ENSG00000260047 | 0.18922458 | 0.01954053  | 0.38488496 | 0.78225479 | NA         | BCAP31P2    |
| NA        | ENSG00000260048 | 0          | NA          | NA         | NA         | NA         | IGHV1OR16-3 |
| NA        | ENSG00000260051 | 16.8666652 | 0.22060215  | 0.38506133 | 0.25053511 | 0.47053941 |             |
| NA        | ENSG00000260052 | 2.01123786 | 0.03805667  | 0.37625775 | 0.67478612 | NA         |             |
| NA        | ENSG00000260053 | 5.15517586 | 0.12962084  | 0.40817854 | 0.13214842 | 0.30511168 | ABCB10P4    |
| NA        | ENSG00000260057 | 0.32417457 | -0.02327581 | 0.38532177 | 0.66840682 | NA         | LINC01571   |
| NA        | ENSG00000260058 | 0          | NA          | NA         | NA         | NA         |             |
| NA        | ENSG00000260059 | 0.34111827 | 0.02362659  | 0.38535341 | 0.62410139 | NA         |             |
| NA        | ENSG00000260060 | 1.5037683  | 0.04895913  | 0.38181018 | 0.51935072 | NA         |             |
| NA        | ENSG00000260062 | 0          | NA          | NA         | NA         | NA         | GOLGA2P11   |
| 101928728 | ENSG00000260063 | 15.7135042 | 0.09774725  | 0.33397873 | 0.58809065 | 0.78291072 |             |
| NA        | ENSG00000260064 | 0          | NA          | NA         | NA         | NA         |             |
| NA        | ENSG00000260066 | 0          | NA          | NA         | NA         | NA         |             |
| NA        | ENSG00000260067 | 0          | NA          | NA         | NA         | NA         | MTND4LP25   |
| NA        | ENSG00000260068 | 0          | NA          | NA         | NA         | NA         |             |
| NA        | ENSG00000260070 | 0.34624801 | -0.02356563 | 0.38536324 | 0.65270996 | NA         |             |
| 101927026 | ENSG00000260071 | 0.38023728 | 0.00622535  | 0.38348864 | 0.9165921  | NA         |             |
| NA        | ENSG00000260072 | 0          | NA          | NA         | NA         | NA         |             |
| NA        | ENSG00000260073 | 0.37844916 | 0.02407552  | 0.3854191  | 0.60038877 | NA         |             |
| NA        | ENSG00000260075 | 0.74659737 | -0.03303578 | 0.38644226 | 0.4112877  | NA         | NSFPI       |
| NA        | ENSG00000260077 | 23.0842749 | 0.05547417  | 0.30940603 | 0.76815114 | 0.89321994 |             |
| NA        | ENSG00000260078 | 0          | NA          | NA         | NA         | NA         |             |
| 105373383 | ENSG00000260081 | 10.252459  | -0.0081446  | 0.34026365 | 0.95744672 | 0.98264776 |             |
| NA        | ENSG00000260082 | 0.173733   | 0.01914545  | 0.38484597 | 0.78225479 | NA         |             |
| 101928736 | ENSG00000260083 | 56.7261168 | 0.21498227  | 0.27560648 | 0.28868912 | 0.51460846 | MIR762HG    |
| NA        | ENSG00000260084 | 0.16735865 | 0.01897177  | 0.38482933 | 0.78225479 | NA         |             |
| NA        | ENSG00000260086 | 22.2502614 | 0.03178777  | 0.31476844 | 0.86301239 | 0.93919706 |             |
| NA        | ENSG00000260087 | 0          | NA          | NA         | NA         | NA         | PCMTD1P2    |
| 101929224 | ENSG00000260088 | 3.43040902 | 0.06957469  | 0.3754188  | 0.53570301 | 0.74647757 | DDX59-AS1   |
| NA        | ENSG00000260089 | 0.80841831 | -0.03279863 | 0.38325538 | 0.52636106 | NA         | ADAM3B      |
| NA        | ENSG00000260090 | 0          | NA          | NA         | NA         | NA         |             |
| NA        | ENSG00000260091 | 1.06459485 | -0.04567962 | 0.3857225  | 0.38687432 | NA         |             |
| NA        | ENSG00000260092 | 10.4749135 | 0.21676868  | 0.40482359 | 0.22392745 | 0.43757713 |             |

|           |                 |            |             |            |            |            |           |
|-----------|-----------------|------------|-------------|------------|------------|------------|-----------|
| NA        | ENSG00000260093 | 2.22643994 | -0.03638369 | 0.37548933 | 0.69259177 | NA         |           |
| 100861546 | ENSG00000260094 | 0          | NA          | NA         | NA         | NA         | LINC00564 |
| NA        | ENSG00000260095 | 4.39353213 | -0.08507779 | 0.37656346 | 0.47791973 | 0.69957877 |           |
| NA        | ENSG00000260096 | 0          | NA          | NA         | NA         | NA         | DNM1P33   |
| 729597    | ENSG00000260097 | 54.116504  | -0.11705633 | 0.25194273 | 0.54198361 | 0.75025664 | SPDYE6    |
| NA        | ENSG00000260100 | 0.8879987  | 0.03714625  | 0.38447941 | 0.44380688 | NA         |           |
| 101927402 | ENSG00000260101 | 5.48938733 | -0.02441409 | 0.35855928 | 0.8518479  | 0.93275912 |           |
| NA        | ENSG00000260102 | 0          | NA          | NA         | NA         | NA         | LINC01070 |
| NA        | ENSG00000260103 | 14.4309636 | -0.12157581 | 0.34456079 | 0.49510857 | 0.71392913 |           |
| NA        | ENSG00000260104 | 0          | NA          | NA         | NA         | NA         |           |
| 90586     | ENSG00000260105 | 0.30139824 | -0.02296476 | 0.38527817 | 0.68536535 | NA         | AOC4P     |
| NA        | ENSG00000260107 | 0.37844916 | 0.02407552  | 0.3854191  | 0.60038877 | NA         |           |
| NA        | ENSG00000260108 | 0          | NA          | NA         | NA         | NA         |           |
| NA        | ENSG00000260109 | 0          | NA          | NA         | NA         | NA         |           |
| NA        | ENSG00000260111 | 0.50207596 | 0.02562368  | 0.38565771 | 0.52549886 | NA         |           |
| NA        | ENSG00000260112 | 0.16735865 | 0.01897177  | 0.38482933 | 0.78225479 | NA         |           |
| NA        | ENSG00000260113 | 0          | NA          | NA         | NA         | NA         |           |
| NA        | ENSG00000260115 | 0          | NA          | NA         | NA         | NA         |           |
| NA        | ENSG00000260118 | 4.27039297 | 0.21455065  | 0.45488063 | 0.07526957 | 0.20202221 |           |
| NA        | ENSG00000260120 | 0          | NA          | NA         | NA         | NA         |           |
| NA        | ENSG00000260121 | 8.42738045 | 0.17041148  | 0.3956259  | 0.2718216  | 0.49517404 |           |
| NA        | ENSG00000260122 | 7.56814733 | 0.00745683  | 0.38308282 | 0.85771117 | 0.93653665 |           |
| NA        | ENSG00000260123 | 2.4479155  | -0.03992809 | 0.37648238 | 0.6559414  | NA         | CARMAL    |
| 727915    | ENSG00000260125 | 0          | NA          | NA         | NA         | NA         | AGBL1-AS1 |
| NA        | ENSG00000260126 | 0          | NA          | NA         | NA         | NA         |           |
| 89838     | ENSG00000260128 | 29.2826227 | -0.09008914 | 0.30632106 | 0.63716498 | 0.81722218 | ULK4P2    |
| 100288380 | ENSG00000260128 | 29.2826227 | -0.09008914 | 0.30632106 | 0.63716498 | 0.81722218 | ULK4P2    |
| NA        | ENSG00000260131 | 0          | NA          | NA         | NA         | NA         | LINC00556 |
| NA        | ENSG00000260132 | 1.05349116 | 0.00573945  | 0.37995224 | 0.92509431 | NA         |           |
| NA        | ENSG00000260133 | 0          | NA          | NA         | NA         | NA         | CA5AP1    |
| NA        | ENSG00000260134 | 0          | NA          | NA         | NA         | NA         | C1QL1P1   |
| NA        | ENSG00000260135 | 0.16735865 | 0.01897177  | 0.38482933 | 0.78225479 | NA         | MMP2-AS1  |
| NA        | ENSG00000260136 | 25.8086597 | 0.04967572  | 0.29499129 | 0.7963377  | 0.90654923 |           |
| NA        | ENSG00000260137 | 0.18922458 | 0.01954053  | 0.38488496 | 0.78225479 | NA         |           |
| NA        | ENSG00000260139 | 0          | NA          | NA         | NA         | NA         | CSPG4P13  |
| NA        | ENSG00000260141 | 10.1353323 | -0.05427747 | 0.35001574 | 0.72072487 | 0.8666434  |           |
| NA        | ENSG00000260142 | 0          | NA          | NA         | NA         | NA         |           |
| NA        | ENSG00000260144 | 2.22878265 | -0.09568681 | 0.39165037 | 0.28393713 | NA         |           |

|           |                 |            |             |            |            |            |            |
|-----------|-----------------|------------|-------------|------------|------------|------------|------------|
| NA        | ENSG00000260145 | 0          | NA          | NA         | NA         | NA         |            |
| NA        | ENSG00000260146 | 0          | NA          | NA         | NA         | NA         |            |
| NA        | ENSG00000260147 | 0          | NA          | NA         | NA         | NA         | MTND5P34   |
| NA        | ENSG00000260148 | 0          | NA          | NA         | NA         | NA         |            |
| NA        | ENSG00000260151 | 0          | NA          | NA         | NA         | NA         | LINC02673  |
| NA        | ENSG00000260152 | 0          | NA          | NA         | NA         | NA         |            |
| NA        | ENSG00000260153 | 3.37852731 | -0.02789006 | 0.36999729 | 0.79064952 | 0.90466583 | RARRES2P10 |
| NA        | ENSG00000260156 | 0.15069912 | -0.01848503 | 0.38480575 | 0.84537521 | NA         |            |
| NA        | ENSG00000260157 | 0          | NA          | NA         | NA         | NA         |            |
| NA        | ENSG00000260158 | 0.34687928 | 0.00028859  | 0.3833622  | 0.96572589 | NA         |            |
| NA        | ENSG00000260159 | 5.88674466 | -0.40972567 | 0.70651374 | 0.02305569 | 0.08165386 |            |
| NA        | ENSG00000260160 | 0.96297362 | -0.02046704 | 0.38099908 | 0.73252803 | NA         |            |
| NA        | ENSG00000260161 | 0          | NA          | NA         | NA         | NA         | MTCYBP28   |
| NA        | ENSG00000260162 | 0.44795842 | -0.02501848 | 0.38558245 | 0.5807882  | NA         |            |
| NA        | ENSG00000260163 | 2.79551523 | 0.05772631  | 0.38187341 | 0.49120749 | 0.71060078 |            |
| NA        | ENSG00000260165 | 0          | NA          | NA         | NA         | NA         |            |
| NA        | ENSG00000260166 | 1.72724383 | -0.01735863 | 0.37853549 | 0.80692351 | NA         |            |
| NA        | ENSG00000260167 | 1.29686054 | -0.01850796 | 0.37957548 | 0.78137463 | NA         |            |
| NA        | ENSG00000260170 | 0.29863895 | -0.02292439 | 0.3852726  | 0.68753245 | NA         |            |
| NA        | ENSG00000260171 | 0          | NA          | NA         | NA         | NA         |            |
| 101928611 | ENSG00000260172 | 0          | NA          | NA         | NA         | NA         | LINC01413  |
| NA        | ENSG00000260173 | 0          | NA          | NA         | NA         | NA         |            |
| NA        | ENSG00000260174 | 0          | NA          | NA         | NA         | NA         | SYNGR2P1   |
| NA        | ENSG00000260177 | 0          | NA          | NA         | NA         | NA         |            |
| NA        | ENSG00000260179 | 1.6446136  | -0.02146672 | 0.37619281 | 0.7960231  | NA         |            |
| NA        | ENSG00000260182 | 0          | NA          | NA         | NA         | NA         |            |
| NA        | ENSG00000260183 | 0.4947044  | 0.01124217  | 0.38337595 | 0.78495592 | NA         |            |
| NA        | ENSG00000260184 | 0          | NA          | NA         | NA         | NA         |            |
| NA        | ENSG00000260185 | 0          | NA          | NA         | NA         | NA         |            |
| NA        | ENSG00000260186 | 0.78964455 | -0.00083437 | 0.3807751  | 0.98878036 | NA         | LINC02137  |
| NA        | ENSG00000260187 | 0          | NA          | NA         | NA         | NA         | PPIAP48    |
| NA        | ENSG00000260188 | 0          | NA          | NA         | NA         | NA         |            |
| NA        | ENSG00000260190 | 2.37319471 | -0.04554737 | 0.37815926 | 0.60406433 | NA         |            |
| 101927460 | ENSG00000260192 | 0          | NA          | NA         | NA         | NA         | LINC02240  |
| NA        | ENSG00000260193 | 4.77027119 | 0.0225445   | 0.36400932 | 0.85435979 | 0.93466646 | LINC02846  |
| NA        | ENSG00000260194 | 0.62261305 | -0.01852715 | 0.3829585  | 0.69529064 | NA         |            |
| NA        | ENSG00000260196 | 111.504293 | -0.50052627 | 0.27333508 | 0.02037525 | 0.07391569 |            |
| NA        | ENSG00000260197 | 0          | NA          | NA         | NA         | NA         |            |



|           |                 |            |             |            |            |            |            |
|-----------|-----------------|------------|-------------|------------|------------|------------|------------|
| NA        | ENSG00000260198 | 0.83757447 | -0.03260171 | 0.38404981 | 0.51854461 | NA         |            |
| NA        | ENSG00000260201 | 0          | NA          | NA         | NA         | NA         |            |
| NA        | ENSG00000260202 | 0          | NA          | NA         | NA         | NA         |            |
| NA        | ENSG00000260205 | 0.15069912 | -0.01848503 | 0.38480575 | 0.84537521 | NA         |            |
| NA        | ENSG00000260206 | 0          | NA          | NA         | NA         | NA         |            |
| NA        | ENSG00000260207 | 0          | NA          | NA         | NA         | NA         | DUX4L47    |
| NA        | ENSG00000260209 | 0.71017356 | 0.02547028  | 0.38342218 | 0.5729672  | NA         |            |
| NA        | ENSG00000260211 | 2.17610783 | 0.000137    | 0.37468863 | 0.9998012  | NA         |            |
| NA        | ENSG00000260212 | 0          | NA          | NA         | NA         | NA         |            |
| NA        | ENSG00000260213 | 4.70165618 | -0.14014942 | 0.41771457 | 0.04981509 | 0.14857274 | CENPN-AS1  |
| NA        | ENSG00000260217 | 0          | NA          | NA         | NA         | NA         |            |
| NA        | ENSG00000260218 | 0          | NA          | NA         | NA         | NA         |            |
| 101928707 | ENSG00000260219 | 26.956332  | 0.35444283  | 0.37625699 | 0.12252853 | 0.28964209 | CD2BP2-DT  |
| 399693    | ENSG00000260220 | 0.45209736 | -0.02505403 | 0.38558831 | 0.57865948 | NA         | CCDC187    |
| NA        | ENSG00000260223 | 0          | NA          | NA         | NA         | NA         |            |
| NA        | ENSG00000260224 | 0          | NA          | NA         | NA         | NA         | UBL5P4     |
| 102724163 | ENSG00000260228 | 0          | NA          | NA         | NA         | NA         |            |
| NA        | ENSG00000260229 | 0          | NA          | NA         | NA         | NA         | PPIAP51    |
| 23732     | ENSG00000260230 | 745.928221 | -0.16405253 | 0.09589365 | 0.07662188 | 0.20468266 | FRRS1L     |
| 100134229 | ENSG00000260231 | 71.9435427 | -0.23191508 | 0.25717851 | 0.2405528  | 0.45859206 | KDM7A-DT   |
| NA        | ENSG00000260232 | 0          | NA          | NA         | NA         | NA         | PWRN4      |
| NA        | ENSG00000260233 | 36.5829956 | 0.07324418  | 0.2906981  | 0.70534256 | 0.85803894 | ZNRD2-AS1  |
| NA        | ENSG00000260234 | 0          | NA          | NA         | NA         | NA         |            |
| NA        | ENSG00000260235 | 0.173124   | -0.01911262 | 0.38486262 | 0.84537521 | NA         |            |
| NA        | ENSG00000260236 | 41.9597521 | 0.12634314  | 0.27217212 | 0.52205448 | 0.73541329 |            |
| NA        | ENSG00000260237 | 0          | NA          | NA         | NA         | NA         |            |
| 100527963 | ENSG00000260238 | 93.308661  | 0.5524551   | 0.25755949 | 0.00881794 | 0.03739802 | PMF1-BGLAP |
| NA        | ENSG00000260239 | 0          | NA          | NA         | NA         | NA         | LINC02533  |
| NA        | ENSG00000260240 | 0          | NA          | NA         | NA         | NA         | APOOP5     |
| NA        | ENSG00000260242 | 0          | NA          | NA         | NA         | NA         |            |
| NA        | ENSG00000260244 | 6.08776223 | 0.0040795   | 0.38294838 | 0.925699   | 0.96912396 |            |
| NA        | ENSG00000260246 | 0          | NA          | NA         | NA         | NA         |            |
| NA        | ENSG00000260247 | 0          | NA          | NA         | NA         | NA         | SUB1P4     |
| NA        | ENSG00000260249 | 7.19954081 | -0.10737114 | 0.37046738 | 0.45947361 | 0.68258752 |            |
| NA        | ENSG00000260251 | 0          | NA          | NA         | NA         | NA         |            |
| NA        | ENSG00000260252 | 0.70592898 | 0.05132177  | 0.38860963 | 0.29531019 | NA         |            |
| NA        | ENSG00000260253 | 9.78532066 | -0.09268407 | 0.35804309 | 0.54907782 | 0.75561517 |            |
| NA        | ENSG00000260254 | 5.44431225 | -0.03087643 | 0.36498831 | 0.79518087 | 0.90585603 |            |

|           |                 |            |             |             |            |            |               |
|-----------|-----------------|------------|-------------|-------------|------------|------------|---------------|
| NA        | ENSG00000260255 | 0          | NA          | NA          | NA         | NA         |               |
| NA        | ENSG00000260256 | 0          | NA          | NA          | NA         | NA         |               |
| NA        | ENSG00000260257 | 40.005115  | -0.01253492 | 0.2686568   | 0.94639458 | 0.97814213 |               |
| NA        | ENSG00000260258 | 0          | NA          | NA          | NA         | NA         |               |
| NA        | ENSG00000260259 | 2.1296391  | 0.08495789  | 0.38951858  | 0.30500216 | NA         | LINC02166     |
| 100507303 | ENSG00000260260 | 150.455927 | -0.48748176 | 0.20162418  | 0.00563599 | 0.02574672 | SNHG19        |
| NA        | ENSG00000260261 | 107.6835   | 0.13757451  | 0.20032839  | 0.42320409 | 0.64917034 |               |
| NA        | ENSG00000260262 | 0.777227   | -0.04361809 | 0.38761627  | 0.33717706 | NA         |               |
| 105371142 | ENSG00000260264 | 0          | NA          | NA          | NA         | NA         | LINC02194     |
| NA        | ENSG00000260265 | 0          | NA          | NA          | NA         | NA         | LINC02562     |
| 729739    | ENSG00000260266 | 0          | NA          | NA          | NA         | NA         | PPIAP46       |
| NA        | ENSG00000260267 | 292.251146 | 0.23785374  | 0.13666291  | 0.06181162 | 0.17539718 |               |
| 100505619 | ENSG00000260268 | 0          | NA          | NA          | NA         | NA         | LINC00919     |
| NA        | ENSG00000260269 | 2.99345424 | 0.00035051  | 0.37588878  | 0.99876425 | 0.99957022 |               |
| NA        | ENSG00000260271 | 2.25714028 | 0.07136493  | 0.38394018  | 0.42036119 | NA         |               |
| NA        | ENSG00000260272 | 5.39790957 | 0.13838209  | 0.4043042   | 0.20458838 | 0.41133293 |               |
| NA        | ENSG00000260273 | 8.22711807 | -0.17285482 | 0.40048983  | 0.250942   | 0.47084257 |               |
| NA        | ENSG00000260274 | 19.859034  | -0.02145063 | 0.3104735   | 0.90532835 | 0.95855092 |               |
| NA        | ENSG00000260275 | 0          | NA          | NA          | NA         | NA         |               |
| NA        | ENSG00000260277 | 2.71646037 | -0.06029859 | 0.38015278  | 0.51037036 | 0.72572757 |               |
| NA        | ENSG00000260278 | 0.173733   | 0.01914545  | 0.38484597  | 0.78225479 | NA         |               |
| 105371414 | ENSG00000260279 | 59.0125551 | 0.28394753  | 0.27395026  | 0.16791701 | 0.35887898 |               |
| 100526831 | ENSG00000260280 | 548.578321 | 0.48251618  | 0.14020666  | 0.00023277 | 0.00162667 | SLX1B-SULT1A4 |
| NA        | ENSG00000260281 | 0.9681669  | 0.02312433  | 0.38211401  | 0.67087525 | NA         | ITFG1-AS1     |
| NA        | ENSG00000260282 | 0.15069912 | -0.01848503 | 0.38480575  | 0.84537521 | NA         | EIF4EBP2P2    |
| NA        | ENSG00000260284 | 0          | NA          | NA          | NA         | NA         | TPSP2         |
| NA        | ENSG00000260285 | 54.6729257 | -0.00887559 | 0.2598408   | 0.96515056 | 0.98622874 |               |
| 101928603 | ENSG00000260286 | 0          | NA          | NA          | NA         | NA         | ARMH2         |
| 101060321 | ENSG00000260287 | 0          | NA          | NA          | NA         | NA         | TBC1D3G       |
| NA        | ENSG00000260288 | 0.73157539 | -0.04919633 | 0.388136    | 0.33132659 | NA         |               |
| NA        | ENSG00000260289 | 0          | NA          | NA          | NA         | NA         |               |
| NA        | ENSG00000260290 | 0.48968642 | -0.01119464 | 0.38291853  | 0.82098459 | NA         |               |
| NA        | ENSG00000260291 | 0.81078327 | -0.02869029 | 0.38352265  | 0.54820495 | NA         | FRG2GP        |
| NA        | ENSG00000260293 | 485.055093 | -0.15475284 | 0.111173428 | 0.1467252  | 0.32789232 |               |
| NA        | ENSG00000260296 | 34.6466758 | 0.01605441  | 0.27310623  | 0.93523088 | 0.97319735 |               |
| NA        | ENSG00000260298 | 1.20136647 | -0.04923028 | 0.38615901  | 0.34252428 | NA         | ACTG1P16      |
| NA        | ENSG00000260302 | 0          | NA          | NA          | NA         | NA         | LINC01882     |
| NA        | ENSG00000260303 | 0          | NA          | NA          | NA         | NA         |               |

|           |                 |            |             |            |            |            |           |
|-----------|-----------------|------------|-------------|------------|------------|------------|-----------|
| NA        | ENSG00000260304 | 0.66028614 | 0.00134854  | 0.38189823 | 0.97597824 | NA         |           |
| 283738    | ENSG00000260305 | 0          | NA          | NA         | NA         | NA         | NTRK3-AS1 |
| NA        | ENSG00000260306 | 40.2295401 | 0.11974566  | 0.2862738  | 0.54458504 | 0.75235966 |           |
| NA        | ENSG00000260307 | 0          | NA          | NA         | NA         | NA         | PABPC1P13 |
| NA        | ENSG00000260308 | 0          | NA          | NA         | NA         | NA         |           |
| NA        | ENSG00000260310 | 0          | NA          | NA         | NA         | NA         |           |
| NA        | ENSG00000260311 | 0          | NA          | NA         | NA         | NA         |           |
| NA        | ENSG00000260312 | 0          | NA          | NA         | NA         | NA         |           |
| 4360      | ENSG00000260314 | 0.30139824 | -0.02296476 | 0.38527817 | 0.68536535 | NA         | MRC1      |
| NA        | ENSG00000260316 | 2.37933027 | -0.06258488 | 0.38196596 | 0.46887329 | NA         |           |
| NA        | ENSG00000260317 | 19.579962  | -0.06998699 | 0.31141313 | 0.70712737 | 0.85890823 |           |
| NA        | ENSG00000260318 | 0.173733   | 0.01914545  | 0.38484597 | 0.78225479 | NA         | COX6CP1   |
| NA        | ENSG00000260322 | 0          | NA          | NA         | NA         | NA         |           |
| 94086     | ENSG00000260325 | 0.97899161 | -0.02232432 | 0.38035173 | 0.72834967 | NA         | HSPB9     |
| NA        | ENSG00000260326 | 0          | NA          | NA         | NA         | NA         | PHBP21    |
| NA        | ENSG00000260327 | 0          | NA          | NA         | NA         | NA         | ACTR3BP3  |
| NA        | ENSG00000260328 | 0          | NA          | NA         | NA         | NA         |           |
| NA        | ENSG00000260329 | 29.7530857 | -0.17820854 | 0.31062959 | 0.37734017 | 0.6061395  |           |
| NA        | ENSG00000260331 | 4.70822082 | 0.04391376  | 0.36581359 | 0.72148119 | 0.86709971 |           |
| NA        | ENSG00000260332 | 0          | NA          | NA         | NA         | NA         |           |
| NA        | ENSG00000260335 | 0          | NA          | NA         | NA         | NA         |           |
| NA        | ENSG00000260337 | 3.79254133 | -0.03838082 | 0.37406554 | 0.69076824 | 0.85017629 |           |
| NA        | ENSG00000260338 | 0          | NA          | NA         | NA         | NA         | LINC01570 |
| 80072     | ENSG00000260339 | 8.30711751 | 0.00130794  | 0.34928615 | 0.99515471 | 0.99852582 | HEXA-AS1  |
| NA        | ENSG00000260340 | 0          | NA          | NA         | NA         | NA         | LINC02176 |
| NA        | ENSG00000260341 | 0          | NA          | NA         | NA         | NA         | C2orf69P2 |
| NA        | ENSG00000260342 | 5.5645154  | -0.16888668 | 0.41504835 | 0.17735669 | 0.3723552  |           |
| 101928752 | ENSG00000260343 | 0          | NA          | NA         | NA         | NA         | LINC01043 |
| NA        | ENSG00000260344 | 0          | NA          | NA         | NA         | NA         |           |
| NA        | ENSG00000260345 | 0.173124   | -0.01911262 | 0.38486262 | 0.84537521 | NA         |           |
| NA        | ENSG00000260347 | 0          | NA          | NA         | NA         | NA         | MOCS1P1   |
| NA        | ENSG00000260348 | 0          | NA          | NA         | NA         | NA         |           |
| NA        | ENSG00000260349 | 0          | NA          | NA         | NA         | NA         |           |
| NA        | ENSG00000260350 | 3.55845478 | 0.05851193  | 0.37326871 | 0.59918713 | 0.79043404 |           |
| NA        | ENSG00000260351 | 1.24343726 | 0.08753617  | 0.3975205  | 0.10381142 | NA         |           |
| NA        | ENSG00000260352 | 0          | NA          | NA         | NA         | NA         |           |
| NA        | ENSG00000260357 | 0.62576701 | -0.03627188 | 0.38662441 | 0.42625897 | NA         | DNM1P34   |
| NA        | ENSG00000260360 | 1.63767859 | 0.02752748  | 0.37969504 | 0.69805727 | NA         |           |

|           |                 |            |             |            |            |            |           |
|-----------|-----------------|------------|-------------|------------|------------|------------|-----------|
| NA        | ENSG00000260361 | 0          | NA          | NA         | NA         | NA         |           |
| NA        | ENSG00000260362 | 0          | NA          | NA         | NA         | NA         |           |
| NA        | ENSG00000260364 | 0.14931947 | -0.01844332 | 0.38480212 | 0.84537521 | NA         |           |
| NA        | ENSG00000260366 | 0.32424978 | -0.02327641 | 0.38532186 | 0.66836355 | NA         |           |
| NA        | ENSG00000260367 | 13.4810427 | 0.00870291  | 0.3327716  | 0.96072791 | 0.98407795 |           |
| NA        | ENSG00000260368 | 6.26868137 | 0.07570628  | 0.36534509 | 0.5829454  | 0.77951315 |           |
| NA        | ENSG00000260369 | 1.75722313 | -0.10837089 | 0.40120626 | 0.12332267 | NA         |           |
| NA        | ENSG00000260370 | 0          | NA          | NA         | NA         | NA         |           |
| NA        | ENSG00000260371 | 0          | NA          | NA         | NA         | NA         |           |
| NA        | ENSG00000260372 | 5.33237772 | 0.01981624  | 0.36080021 | 0.87750241 | 0.94578953 | AQP4-AS1  |
| NA        | ENSG00000260375 | 0          | NA          | NA         | NA         | NA         |           |
| NA        | ENSG00000260377 | 0          | NA          | NA         | NA         | NA         |           |
| NA        | ENSG00000260378 | 0.18922458 | 0.01954053  | 0.38488496 | 0.78225479 | NA         |           |
| NA        | ENSG00000260379 | 0          | NA          | NA         | NA         | NA         |           |
| NA        | ENSG00000260381 | 0.47611967 | -0.00801743 | 0.38278569 | 0.86243532 | NA         |           |
| NA        | ENSG00000260382 | 1.2939193  | -0.04436399 | 0.38285969 | 0.50589868 | NA         |           |
| NA        | ENSG00000260385 | 0          | NA          | NA         | NA         | NA         |           |
| 149086    | ENSG00000260386 | 0          | NA          | NA         | NA         | NA         | LDC1P     |
| NA        | ENSG00000260387 | 0          | NA          | NA         | NA         | NA         |           |
| 100861549 | ENSG00000260388 | 8.46602052 | 0.08088895  | 0.35639008 | 0.59909687 | 0.7904031  | LINC00562 |
| 441818    | ENSG00000260389 | 0          | NA          | NA         | NA         | NA         | WBP11P1   |
| NA        | ENSG00000260390 | 1.1899529  | 0.02321688  | 0.38038054 | 0.72014015 | NA         |           |
| NA        | ENSG00000260391 | 10.2106752 | -0.03056069 | 0.38671859 | 0.08612377 | 0.22335889 |           |
| NA        | ENSG00000260392 | 0.18922458 | 0.01954053  | 0.38488496 | 0.78225479 | NA         |           |
| NA        | ENSG00000260393 | 0          | NA          | NA         | NA         | NA         |           |
| 105371184 | ENSG00000260394 | 2.43336819 | -0.00502982 | 0.37436197 | 0.95200603 | NA         | LINC02867 |
| NA        | ENSG00000260395 | 0          | NA          | NA         | NA         | NA         |           |
| NA        | ENSG00000260398 | 23.8254947 | -0.01179987 | 0.30458618 | 0.94755578 | 0.97852939 |           |
| NA        | ENSG00000260399 | 0          | NA          | NA         | NA         | NA         |           |
| NA        | ENSG00000260400 | 92.9483164 | -0.41547646 | 0.24513619 | 0.03680739 | 0.11795487 |           |
| NA        | ENSG00000260401 | 2.74400343 | 0.06429929  | 0.38558554 | 0.38765707 | 0.61657178 |           |
| NA        | ENSG00000260402 | 0          | NA          | NA         | NA         | NA         |           |
| NA        | ENSG00000260403 | 0          | NA          | NA         | NA         | NA         |           |
| NA        | ENSG00000260404 | 692.757526 | 0.10732431  | 0.09556313 | 0.24632248 | 0.46560957 |           |
| NA        | ENSG00000260405 | 0          | NA          | NA         | NA         | NA         |           |
| NA        | ENSG00000260406 | 0          | NA          | NA         | NA         | NA         |           |
| NA        | ENSG00000260409 | 0          | NA          | NA         | NA         | NA         |           |
| NA        | ENSG00000260410 | 0.18922458 | 0.01954053  | 0.38488496 | 0.78225479 | NA         |           |

|           |                 |            |             |            |            |            |            |
|-----------|-----------------|------------|-------------|------------|------------|------------|------------|
| NA        | ENSG00000260412 | 103.394208 | -0.7413253  | 0.24595248 | 0.00046514 | 0.00303163 |            |
| NA        | ENSG00000260413 | 2.56061163 | -0.0217851  | 0.37628353 | 0.79110983 | 0.90490742 |            |
| NA        | ENSG00000260414 | 0          | NA          | NA         | NA         | NA         |            |
| NA        | ENSG00000260416 | 0          | NA          | NA         | NA         | NA         |            |
| NA        | ENSG00000260417 | 3.81179801 | -0.01656302 | 0.37361126 | 0.85457044 | 0.93481157 |            |
| NA        | ENSG00000260418 | 5.62470056 | -0.10629834 | 0.37775059 | 0.42131004 | 0.64728348 |            |
| 101928880 | ENSG00000260420 | 7.76241367 | -0.29597375 | 0.4869449  | 0.09882939 | 0.24719806 | LINC02182  |
| NA        | ENSG00000260422 | 0          | NA          | NA         | NA         | NA         |            |
| 101930452 | ENSG00000260423 | 6.13591146 | 0.09097995  | 0.36846245 | 0.51537838 | 0.72968723 | LINC02367  |
| NA        | ENSG00000260425 | 1.81372917 | 0.05231494  | 0.38445535 | 0.43555596 | NA         |            |
| NA        | ENSG00000260426 | 0          | NA          | NA         | NA         | NA         |            |
| NA        | ENSG00000260427 | 0          | NA          | NA         | NA         | NA         | AGGF1P9    |
| 642658    | ENSG00000260428 | 90.8498235 | 0.21899719  | 0.22970924 | 0.24096652 | 0.45889574 | SCX        |
| NA        | ENSG00000260430 | 3.32756468 | -0.05165825 | 0.37535919 | 0.60685228 | 0.79639829 |            |
| NA        | ENSG00000260431 | 0          | NA          | NA         | NA         | NA         |            |
| 101928167 | ENSG00000260433 | 0.95497728 | 0.05136421  | 0.38888028 | 0.24761627 | NA         | LINC01917  |
| NA        | ENSG00000260436 | 0.173733   | 0.01914545  | 0.38484597 | 0.78225479 | NA         |            |
| NA        | ENSG00000260438 | 0          | NA          | NA         | NA         | NA         |            |
| 101929387 | ENSG00000260439 | 1.1546832  | 0.01921218  | 0.37924864 | 0.78023305 | NA         | LMF1-AS1   |
| NA        | ENSG00000260440 | 0.46965363 | -0.00824832 | 0.38328184 | 0.8570124  | NA         | LINC01544  |
| NA        | ENSG00000260441 | 0.32324826 | 0.00156314  | 0.38337023 | 0.96611616 | NA         |            |
| 100289092 | ENSG00000260442 | 56.6724682 | 0.20464153  | 0.27036981 | 0.30871568 | 0.53633268 | ATP2A1-AS1 |
| NA        | ENSG00000260443 | 0          | NA          | NA         | NA         | NA         |            |
| NA        | ENSG00000260444 | 0          | NA          | NA         | NA         | NA         |            |
| NA        | ENSG00000260445 | 0          | NA          | NA         | NA         | NA         |            |
| NA        | ENSG00000260447 | 0.79402504 | -0.04539524 | 0.38786027 | 0.32371416 | NA         |            |
| NA        | ENSG00000260448 | 11.8590327 | 0.10662296  | 0.35800087 | 0.50771536 | 0.72359301 | LCMT1-AS1  |
| NA        | ENSG00000260450 | 0          | NA          | NA         | NA         | NA         | LINC02134  |
| NA        | ENSG00000260451 | 0          | NA          | NA         | NA         | NA         | GEMIN8P2   |
| NA        | ENSG00000260452 | 0.31841146 | 0.00134941  | 0.38336835 | 0.96414943 | NA         | TPRKBP2    |
| NA        | ENSG00000260454 | 0.173733   | 0.01914545  | 0.38484597 | 0.78225479 | NA         |            |
| NA        | ENSG00000260455 | 50.8731407 | -1.33709114 | 0.35264558 | 1.20E-05   | 0.00011243 | NBAT1      |
| 100506581 | ENSG00000260456 | 57.9349702 | -0.16154227 | 0.2619022  | 0.41001302 | 0.63791235 | C16orf95   |
| NA        | ENSG00000260457 | 0          | NA          | NA         | NA         | NA         |            |
| 100134444 | ENSG00000260458 | 0          | NA          | NA         | NA         | NA         | KCNJ18     |
| NA        | ENSG00000260459 | 0          | NA          | NA         | NA         | NA         | FTLP14     |
| NA        | ENSG00000260460 | 0.37844916 | 0.02407552  | 0.3854191  | 0.60038877 | NA         |            |
| NA        | ENSG00000260461 | 4.06119161 | -0.097832   | 0.39080237 | 0.30069736 | 0.52795005 |            |

|           |                 |            |             |            |            |            |            |
|-----------|-----------------|------------|-------------|------------|------------|------------|------------|
| NA        | ENSG00000260464 | 16.6976796 | 0.02719308  | 0.32716026 | 0.87721271 | 0.94574195 |            |
| NA        | ENSG00000260465 | 3.57772252 | -0.15374291 | 0.4194896  | 0.10403172 | 0.25677486 |            |
| NA        | ENSG00000260466 | 0.31680549 | 0.00120609  | 0.38336723 | 0.9662973  | NA         |            |
| NA        | ENSG00000260467 | 0          | NA          | NA         | NA         | NA         |            |
| 106144584 | ENSG00000260468 | 0          | NA          | NA         | NA         | NA         | LINC01290  |
| NA        | ENSG00000260469 | 0.34624801 | -0.02356563 | 0.38536324 | 0.65270996 | NA         | INSYN1-AS1 |
| NA        | ENSG00000260470 | 25.0560715 | 0.2828526   | 0.37217633 | 0.18982955 | 0.39101103 |            |
| NA        | ENSG00000260471 | 0          | NA          | NA         | NA         | NA         | PPIAP49    |
| NA        | ENSG00000260472 | 0          | NA          | NA         | NA         | NA         |            |
| NA        | ENSG00000260473 | 6.61450592 | -0.01755157 | 0.35825655 | 0.89185191 | 0.95310218 |            |
| NA        | ENSG00000260475 | 2.69938312 | 0.06950283  | 0.37928883 | 0.49509154 | 0.71392913 |            |
| NA        | ENSG00000260476 | 0          | NA          | NA         | NA         | NA         |            |
| 101929701 | ENSG00000260477 | 0          | NA          | NA         | NA         | NA         | LINC01584  |
| NA        | ENSG00000260478 | 0          | NA          | NA         | NA         | NA         |            |
| NA        | ENSG00000260479 | 0          | NA          | NA         | NA         | NA         |            |
| NA        | ENSG00000260480 | 0          | NA          | NA         | NA         | NA         | C2orf69P4  |
| NA        | ENSG00000260482 | 6.79065493 | 0.05085189  | 0.37055943 | 0.65779484 | 0.83028388 |            |
| NA        | ENSG00000260483 | 0          | NA          | NA         | NA         | NA         |            |
| NA        | ENSG00000260484 | 0          | NA          | NA         | NA         | NA         |            |
| NA        | ENSG00000260487 | 0          | NA          | NA         | NA         | NA         |            |
| NA        | ENSG00000260488 | 0.16735865 | 0.01897177  | 0.38482933 | 0.78225479 | NA         |            |
| NA        | ENSG00000260490 | 0.87528329 | 0.01443224  | 0.38245083 | 0.75805047 | NA         | MYL12BP1   |
| NA        | ENSG00000260492 | 0          | NA          | NA         | NA         | NA         | CISTR      |
| 102723322 | ENSG00000260493 | 1.79544747 | -0.00046925 | 0.37502326 | 0.99440618 | NA         |            |
| NA        | ENSG00000260494 | 1.35056085 | 0.05152707  | 0.38447526 | 0.43148781 | NA         |            |
| NA        | ENSG00000260495 | 2.78357091 | -0.01946453 | 0.37246974 | 0.83841504 | 0.92669384 |            |
| NA        | ENSG00000260496 | 0          | NA          | NA         | NA         | NA         |            |
| NA        | ENSG00000260497 | 0          | NA          | NA         | NA         | NA         |            |
| NA        | ENSG00000260498 | 1.68436377 | -0.01544748 | 0.37814507 | 0.83078399 | NA         |            |
| NA        | ENSG00000260500 | 2.61005472 | 0.05382209  | 0.38437692 | 0.43303776 | 0.65845104 |            |
| NA        | ENSG00000260504 | 0          | NA          | NA         | NA         | NA         |            |
| NA        | ENSG00000260505 | 0          | NA          | NA         | NA         | NA         |            |
| NA        | ENSG00000260507 | 0          | NA          | NA         | NA         | NA         |            |
| NA        | ENSG00000260509 | 0.29863895 | -0.02292439 | 0.3852726  | 0.68753245 | NA         |            |
| NA        | ENSG00000260510 | 0.16735865 | 0.01897177  | 0.38482933 | 0.78225479 | NA         |            |
| NA        | ENSG00000260511 | 0          | NA          | NA         | NA         | NA         |            |
| NA        | ENSG00000260514 | 0          | NA          | NA         | NA         | NA         |            |
| NA        | ENSG00000260515 | 0          | NA          | NA         | NA         | NA         |            |

|           |                 |            |             |            |            |            |           |
|-----------|-----------------|------------|-------------|------------|------------|------------|-----------|
| NA        | ENSG00000260516 | 0          | NA          | NA         | NA         | NA         |           |
| NA        | ENSG00000260517 | 0.31668285 | 0.0010804   | 0.3833663  | 0.96750146 | NA         |           |
| NA        | ENSG00000260518 | 137.714764 | 0.08383367  | 0.18627215 | 0.60790038 | 0.79695264 | BMS1P8    |
| NA        | ENSG00000260519 | 0          | NA          | NA         | NA         | NA         |           |
| NA        | ENSG00000260520 | 0          | NA          | NA         | NA         | NA         |           |
| NA        | ENSG00000260522 | 0          | NA          | NA         | NA         | NA         |           |
| NA        | ENSG00000260524 | 0          | NA          | NA         | NA         | NA         | CYP3A52P  |
| NA        | ENSG00000260525 | 0          | NA          | NA         | NA         | NA         |           |
| NA        | ENSG00000260526 | 14.0519032 | 0.01107783  | 0.3278387  | 0.95056502 | 0.97972521 |           |
| NA        | ENSG00000260528 | 58.6365564 | -0.1531778  | 0.25702591 | 0.4302271  | 0.65583601 | FAM157C   |
| NA        | ENSG00000260530 | 0          | NA          | NA         | NA         | NA         |           |
| NA        | ENSG00000260532 | 0          | NA          | NA         | NA         | NA         |           |
| NA        | ENSG00000260534 | 0          | NA          | NA         | NA         | NA         |           |
| NA        | ENSG00000260536 | 0          | NA          | NA         | NA         | NA         |           |
| NA        | ENSG00000260537 | 38.4084541 | 0.03751127  | 0.37617712 | 0.68590683 | 0.8472443  |           |
| NA        | ENSG00000260540 | 0          | NA          | NA         | NA         | NA         | ABHD17AP8 |
| NA        | ENSG00000260541 | 0          | NA          | NA         | NA         | NA         |           |
| NA        | ENSG00000260542 | 0          | NA          | NA         | NA         | NA         |           |
| NA        | ENSG00000260545 | 0.173733   | 0.01914545  | 0.38484597 | 0.78225479 | NA         |           |
| 4500      | ENSG00000260549 | 0          | NA          | NA         | NA         | NA         | MT1L      |
| NA        | ENSG00000260550 | 0          | NA          | NA         | NA         | NA         |           |
| 791115    | ENSG00000260551 | 0          | NA          | NA         | NA         | NA         | PWRN2     |
| 101927809 | ENSG00000260552 | 4.75655784 | 0.23702998  | 0.46691224 | 0.07959036 | 0.21058343 | COSMOC    |
| NA        | ENSG00000260555 | 0          | NA          | NA         | NA         | NA         |           |
| NA        | ENSG00000260558 | 0.37844916 | 0.02407552  | 0.3854191  | 0.60038877 | NA         |           |
| NA        | ENSG00000260563 | 84.8522226 | 0.11161845  | 0.22818571 | 0.54734122 | 0.75427171 |           |
| NA        | ENSG00000260564 | 0          | NA          | NA         | NA         | NA         |           |
| NA        | ENSG00000260565 | 447.837318 | -0.0032752  | 0.12745434 | 0.97738721 | 0.99232877 | ERVK13-1  |
| NA        | ENSG00000260566 | 0          | NA          | NA         | NA         | NA         |           |
| NA        | ENSG00000260568 | 0          | NA          | NA         | NA         | NA         |           |
| NA        | ENSG00000260569 | 0          | NA          | NA         | NA         | NA         |           |
| NA        | ENSG00000260570 | 0          | NA          | NA         | NA         | NA         |           |
| NA        | ENSG00000260571 | 0.67097437 | -0.03828061 | 0.38686976 | 0.39986992 | NA         | BNIP3P5   |
| NA        | ENSG00000260572 | 31.6664891 | -0.03427366 | 0.28806915 | 0.85708776 | 0.93609679 |           |
| NA        | ENSG00000260573 | 0          | NA          | NA         | NA         | NA         |           |
| NA        | ENSG00000260574 | 0          | NA          | NA         | NA         | NA         |           |
| NA        | ENSG00000260575 | 0          | NA          | NA         | NA         | NA         |           |
| NA        | ENSG00000260576 | 0.16735865 | 0.01897177  | 0.38482933 | 0.78225479 | NA         | EIF5A2P1  |

|           |                 |            |             |            |            |            |           |
|-----------|-----------------|------------|-------------|------------|------------|------------|-----------|
| NA        | ENSG00000260577 | 5.85961173 | -0.11713508 | 0.39048878 | 0.31267662 | 0.54056328 |           |
| NA        | ENSG00000260578 | 10.4343213 | 0.22241539  | 0.4119768  | 0.2067116  | 0.41386868 |           |
| NA        | ENSG00000260579 | 0          | NA          | NA         | NA         | NA         |           |
| NA        | ENSG00000260580 | 0          | NA          | NA         | NA         | NA         |           |
| 105378231 | ENSG00000260581 | 0          | NA          | NA         | NA         | NA         |           |
| NA        | ENSG00000260582 | 0          | NA          | NA         | NA         | NA         | TPST2P1   |
| NA        | ENSG00000260583 | 2.07038021 | 0.03548656  | 0.37837384 | 0.66176834 | NA         |           |
| NA        | ENSG00000260584 | 0          | NA          | NA         | NA         | NA         |           |
| NA        | ENSG00000260585 | 2.8374643  | -0.06562607 | 0.38001631 | 0.49366585 | 0.7125217  |           |
| NA        | ENSG00000260586 | 0          | NA          | NA         | NA         | NA         |           |
| NA        | ENSG00000260588 | 12.5270847 | 0.10647966  | 0.34635735 | 0.53910123 | 0.74843996 |           |
| 102723166 | ENSG00000260589 | 11.7816419 | -0.25872483 | 0.42546862 | 0.17229839 | 0.36486286 | STAM-AS1  |
| NA        | ENSG00000260590 | 0          | NA          | NA         | NA         | NA         |           |
| NA        | ENSG00000260592 | 0          | NA          | NA         | NA         | NA         |           |
| NA        | ENSG00000260593 | 0          | NA          | NA         | NA         | NA         |           |
| NA        | ENSG00000260594 | 0          | NA          | NA         | NA         | NA         |           |
| NA        | ENSG00000260595 | 0          | NA          | NA         | NA         | NA         | OR4C49P   |
| 100288687 | ENSG00000260596 | 1.62707571 | 0.08800524  | 0.39819527 | 0.0779728  | NA         | DUX4      |
| NA        | ENSG00000260597 | 30.6850048 | -0.48506399 | 0.40732669 | 0.05480072 | 0.15972474 |           |
| NA        | ENSG00000260598 | 0          | NA          | NA         | NA         | NA         | FRG2IP    |
| 101929124 | ENSG00000260599 | 0          | NA          | NA         | NA         | NA         |           |
| NA        | ENSG00000260600 | 0          | NA          | NA         | NA         | NA         |           |
| NA        | ENSG00000260601 | 0.173124   | -0.01911262 | 0.38486262 | 0.84537521 | NA         |           |
| NA        | ENSG00000260602 | 0          | NA          | NA         | NA         | NA         | HMG2P40   |
| NA        | ENSG00000260604 | 1.82853872 | 0.04685242  | 0.38045355 | 0.55925697 | NA         |           |
| NA        | ENSG00000260605 | 0          | NA          | NA         | NA         | NA         |           |
| NA        | ENSG00000260608 | 0.30139824 | -0.02296476 | 0.38527817 | 0.68536535 | NA         |           |
| NA        | ENSG00000260610 | 0          | NA          | NA         | NA         | NA         |           |
| NA        | ENSG00000260611 | 2.52294103 | 0.06749247  | 0.38343073 | 0.4360166  | NA         |           |
| NA        | ENSG00000260612 | 0          | NA          | NA         | NA         | NA         |           |
| NA        | ENSG00000260613 | 0          | NA          | NA         | NA         | NA         |           |
| NA        | ENSG00000260615 | 0.30139824 | -0.02296476 | 0.38527817 | 0.68536535 | NA         | RPL23AP97 |
| NA        | ENSG00000260616 | 0          | NA          | NA         | NA         | NA         |           |
| NA        | ENSG00000260617 | 2.53619773 | 0.00399734  | 0.37368379 | 0.9661312  | NA         |           |
| NA        | ENSG00000260618 | 6.94154681 | -0.09349767 | 0.36938616 | 0.50148505 | 0.71844678 |           |
| NA        | ENSG00000260619 | 4.72137097 | 0.18345661  | 0.42240993 | 0.16177918 | 0.35021265 |           |
| NA        | ENSG00000260620 | 0          | NA          | NA         | NA         | NA         |           |
| NA        | ENSG00000260621 | 0          | NA          | NA         | NA         | NA         |           |



|           |                 |            |             |            |            |            |           |
|-----------|-----------------|------------|-------------|------------|------------|------------|-----------|
| NA        | ENSG00000260622 | 0          | NA          | NA         | NA         | NA         |           |
| NA        | ENSG00000260624 | 0          | NA          | NA         | NA         | NA         |           |
| NA        | ENSG00000260625 | 3.59543003 | -0.12303382 | 0.39372561 | 0.28313321 | 0.50822065 |           |
| NA        | ENSG00000260626 | 0          | NA          | NA         | NA         | NA         |           |
| NA        | ENSG00000260628 | 0.18922458 | 0.01954053  | 0.38488496 | 0.78225479 | NA         |           |
| 103344929 | ENSG00000260629 | 0          | NA          | NA         | NA         | NA         | BGLT3     |
| 197187    | ENSG00000260630 | 65.5102675 | -0.24477878 | 0.33304984 | 0.24075612 | 0.45879844 | SNAI3-AS1 |
| NA        | ENSG00000260631 | 0          | NA          | NA         | NA         | NA         | RBM22P12  |
| NA        | ENSG00000260633 | 2.81769407 | 0.11171283  | 0.39615772 | 0.24156055 | 0.45960686 |           |
| NA        | ENSG00000260634 | 1.89911509 | -0.00273134 | 0.37601673 | 0.9715006  | NA         |           |
| NA        | ENSG00000260635 | 0          | NA          | NA         | NA         | NA         |           |
| NA        | ENSG00000260639 | 0.94022977 | -0.01335411 | 0.38149774 | 0.80312432 | NA         |           |
| NA        | ENSG00000260640 | 0.15069912 | -0.01848503 | 0.38480575 | 0.84537521 | NA         |           |
| NA        | ENSG00000260641 | 10.3440398 | -0.0129993  | 0.34012053 | 0.93308011 | 0.97202552 |           |
| NA        | ENSG00000260643 | 47.0014876 | 0.67735955  | 0.40333456 | 0.01427224 | 0.05540302 |           |
| NA        | ENSG00000260644 | 513.770917 | -0.01547565 | 0.10807368 | 0.88048944 | 0.94708108 | HERC2P5   |
| NA        | ENSG00000260645 | 32.3736258 | 0.57855028  | 0.41429877 | 0.03051652 | 0.10173884 |           |
| NA        | ENSG00000260646 | 0.97635588 | 0.00590397  | 0.38018074 | 0.92163883 | NA         |           |
| NA        | ENSG00000260647 | 2.13591501 | 0.04774336  | 0.37882438 | 0.58499414 | NA         |           |
| NA        | ENSG00000260648 | 0.89343526 | 0.06435647  | 0.39120215 | 0.2032673  | NA         |           |
| NA        | ENSG00000260649 | 0          | NA          | NA         | NA         | NA         |           |
| NA        | ENSG00000260650 | 0          | NA          | NA         | NA         | NA         |           |
| NA        | ENSG00000260651 | 9.64736517 | 0.05017485  | 0.34897365 | 0.74594149 | 0.8802926  |           |
| NA        | ENSG00000260653 | 1.35636546 | -0.09423766 | 0.39946962 | 0.09723236 | NA         |           |
| NA        | ENSG00000260657 | 0.173733   | 0.01914545  | 0.38484597 | 0.78225479 | NA         |           |
| NA        | ENSG00000260658 | 3.65195889 | 0.03936135  | 0.36867015 | 0.73142122 | 0.87166875 |           |
| NA        | ENSG00000260659 | 0          | NA          | NA         | NA         | NA         |           |
| NA        | ENSG00000260660 | 0.79043193 | -0.03684714 | 0.38394561 | 0.50556357 | NA         |           |
| NA        | ENSG00000260661 | 0.173124   | -0.01911262 | 0.38486262 | 0.84537521 | NA         |           |
| NA        | ENSG00000260662 | 0          | NA          | NA         | NA         | NA         |           |
| NA        | ENSG00000260664 | 0.52201175 | 0.01062741  | 0.38325376 | 0.77387249 | NA         |           |
| NA        | ENSG00000260668 | 0          | NA          | NA         | NA         | NA         |           |
| NA        | ENSG00000260669 | 48.8479429 | 0.30568238  | 0.30497605 | 0.15590491 | 0.34204948 |           |
| NA        | ENSG00000260670 | 0          | NA          | NA         | NA         | NA         |           |
| NA        | ENSG00000260671 | 0          | NA          | NA         | NA         | NA         |           |
| NA        | ENSG00000260672 | 5.5200211  | 0.07422916  | 0.36931814 | 0.56612915 | 0.76789354 |           |
| NA        | ENSG00000260673 | 0          | NA          | NA         | NA         | NA         |           |
| NA        | ENSG00000260674 | 0          | NA          | NA         | NA         | NA         |           |

|           |    |                 |            |             |            |            |            |            |
|-----------|----|-----------------|------------|-------------|------------|------------|------------|------------|
|           | NA | ENSG00000260675 | 0          | NA          | NA         | NA         | NA         | TCERG1P2   |
| 100505776 | NA | ENSG00000260676 | 0.173124   | -0.01911262 | 0.38486262 | 0.84537521 | NA         | LINC01541  |
|           | NA | ENSG00000260677 | 0          | NA          | NA         | NA         | NA         |            |
|           | NA | ENSG00000260678 | 0.32252442 | -0.02325449 | 0.38531873 | 0.66958766 | NA         |            |
|           | NA | ENSG00000260679 | 0          | NA          | NA         | NA         | NA         |            |
|           | NA | ENSG00000260680 | 0          | NA          | NA         | NA         | NA         | AGGF1P5    |
|           | NA | ENSG00000260681 | 0          | NA          | NA         | NA         | NA         |            |
|           | NA | ENSG00000260682 | 0          | NA          | NA         | NA         | NA         | RN7SKP176  |
|           | NA | ENSG00000260683 | 0          | NA          | NA         | NA         | NA         |            |
|           | NA | ENSG00000260685 | 0.51059499 | 0.01705496  | 0.38327651 | 0.71853422 | NA         |            |
|           | NA | ENSG00000260686 | 0          | NA          | NA         | NA         | NA         |            |
|           | NA | ENSG00000260688 | 0          | NA          | NA         | NA         | NA         |            |
|           | NA | ENSG00000260689 | 4.16281329 | 0.23080587  | 0.4654837  | 0.07356156 | 0.19856617 | HNRNPA3P11 |
|           | NA | ENSG00000260690 | 0          | NA          | NA         | NA         | NA         | CYCSP39    |
| 84210     | NA | ENSG00000260691 | 6.12677261 | -0.00529779 | 0.36632038 | 0.95922852 | 0.9831126  | ANKRD20A1  |
|           | NA | ENSG00000260693 | 17.2787586 | 0.10806199  | 0.33979713 | 0.54638653 | 0.75358156 |            |
|           | NA | ENSG00000260694 | 0          | NA          | NA         | NA         | NA         |            |
|           | NA | ENSG00000260695 | 0          | NA          | NA         | NA         | NA         |            |
|           | NA | ENSG00000260698 | 14.668995  | 0.13196802  | 0.34505964 | 0.46846605 | 0.69118513 |            |
|           | NA | ENSG00000260701 | 0          | NA          | NA         | NA         | NA         |            |
|           | NA | ENSG00000260702 | 0          | NA          | NA         | NA         | NA         |            |
| 100132234 | NA | ENSG00000260704 | 0.173124   | -0.01911262 | 0.38486262 | 0.84537521 | NA         | LINC00543  |
|           | NA | ENSG00000260706 | 0          | NA          | NA         | NA         | NA         |            |
|           | NA | ENSG00000260708 | 68.1395775 | 0.39201868  | 0.28512321 | 0.06884604 | 0.18915738 |            |
|           | NA | ENSG00000260710 | 0          | NA          | NA         | NA         | NA         |            |
|           | NA | ENSG00000260711 | 0          | NA          | NA         | NA         | NA         |            |
|           | NA | ENSG00000260714 | 1.33891398 | -0.01769355 | 0.37946355 | 0.79112492 | NA         |            |
|           | NA | ENSG00000260715 | 0          | NA          | NA         | NA         | NA         |            |
|           | NA | ENSG00000260719 | 0          | NA          | NA         | NA         | NA         |            |
| 101929620 | NA | ENSG00000260720 | 0          | NA          | NA         | NA         | NA         | LINC01243  |
|           | NA | ENSG00000260721 | 3.23347134 | -0.0535644  | 0.37449534 | 0.6074536  | 0.79671313 |            |
|           | NA | ENSG00000260722 | 0          | NA          | NA         | NA         | NA         | VN1R67P    |
|           | NA | ENSG00000260723 | 0          | NA          | NA         | NA         | NA         |            |
|           | NA | ENSG00000260724 | 0          | NA          | NA         | NA         | NA         | VN1R69P    |
|           | NA | ENSG00000260725 | 0          | NA          | NA         | NA         | NA         |            |
|           | NA | ENSG00000260726 | 0          | NA          | NA         | NA         | NA         | KLF8P1     |
|           | NA | ENSG00000260727 | 0          | NA          | NA         | NA         | NA         | SLC7A5P1   |
|           | NA | ENSG00000260729 | 36.5344879 | -0.65724485 | 0.45688501 | 0.02157615 | 0.07736687 |            |

|           |                 |            |             |            |            |            |            |
|-----------|-----------------|------------|-------------|------------|------------|------------|------------|
| NA        | ENSG00000260731 | 0          | NA          | NA         | NA         | NA         | KRT8P22    |
| NA        | ENSG00000260733 | 0.16735865 | 0.01897177  | 0.38482933 | 0.78225479 | NA         |            |
| 102723796 | ENSG00000260734 | 0          | NA          | NA         | NA         | NA         | TLE7       |
| 100505915 | ENSG00000260735 | 42.2449113 | -0.17249952 | 0.28259388 | 0.38959613 | 0.61876783 |            |
| 101928276 | ENSG00000260737 | 0          | NA          | NA         | NA         | NA         | LINC01227  |
| 100861542 | ENSG00000260738 | 0          | NA          | NA         | NA         | NA         | LINC00554  |
| NA        | ENSG00000260739 | 0          | NA          | NA         | NA         | NA         |            |
| NA        | ENSG00000260740 | 0.472271   | -0.02838803 | 0.38580402 | 0.54377134 | NA         |            |
| NA        | ENSG00000260741 | 0          | NA          | NA         | NA         | NA         |            |
| NA        | ENSG00000260742 | 4.79586387 | 0.01780364  | 0.3664949  | 0.87778686 | 0.94578953 |            |
| NA        | ENSG00000260743 | 4.23537183 | -0.12540784 | 0.39694113 | 0.25431557 | 0.47479259 |            |
| NA        | ENSG00000260744 | 0          | NA          | NA         | NA         | NA         |            |
| NA        | ENSG00000260746 | 0.173733   | 0.01914545  | 0.38484597 | 0.78225479 | NA         | KIF18BP1   |
| NA        | ENSG00000260747 | 0          | NA          | NA         | NA         | NA         |            |
| NA        | ENSG00000260750 | 0          | NA          | NA         | NA         | NA         |            |
| NA        | ENSG00000260751 | 25.5734852 | 0.223757    | 0.33729822 | 0.28006007 | 0.5047371  |            |
| NA        | ENSG00000260755 | 0          | NA          | NA         | NA         | NA         |            |
| NA        | ENSG00000260756 | 0          | NA          | NA         | NA         | NA         |            |
| NA        | ENSG00000260757 | 0.63785197 | -0.01507651 | 0.38324651 | 0.71346495 | NA         |            |
| NA        | ENSG00000260759 | 0          | NA          | NA         | NA         | NA         |            |
| NA        | ENSG00000260761 | 0          | NA          | NA         | NA         | NA         |            |
| NA        | ENSG00000260762 | 0          | NA          | NA         | NA         | NA         | ACSM5P1    |
| NA        | ENSG00000260763 | 0          | NA          | NA         | NA         | NA         |            |
| NA        | ENSG00000260764 | 0          | NA          | NA         | NA         | NA         |            |
| NA        | ENSG00000260765 | 2.94515865 | 0.17133363  | 0.43217572 | 0.066819   | 0.185353   | CES1P2     |
| NA        | ENSG00000260771 | 0          | NA          | NA         | NA         | NA         |            |
| NA        | ENSG00000260772 | 45.3104619 | -0.35700397 | 0.39831529 | 0.11981143 | 0.2848824  |            |
| NA        | ENSG00000260773 | 3.67408088 | -0.08710914 | 0.38020406 | 0.4402794  | 0.66517856 |            |
| NA        | ENSG00000260774 | 36.5071609 | -0.05560212 | 0.27498509 | 0.77207762 | 0.89539725 |            |
| NA        | ENSG00000260776 | 0.67043989 | 0.0207786   | 0.38371408 | 0.6280111  | NA         |            |
| NA        | ENSG00000260777 | 2.79224551 | -0.02180456 | 0.37076557 | 0.82931754 | 0.92261925 |            |
| 106660606 | ENSG00000260778 | 9.94714249 | 0.16885598  | 0.38022725 | 0.32082675 | 0.54867706 |            |
| 101927410 | ENSG00000260779 | 0          | NA          | NA         | NA         | NA         |            |
| NA        | ENSG00000260780 | 0          | NA          | NA         | NA         | NA         |            |
| NA        | ENSG00000260781 | 0          | NA          | NA         | NA         | NA         | ARHGAP23P1 |
| NA        | ENSG00000260782 | 1.36659187 | -0.09385635 | 0.39950437 | 0.094182   | NA         |            |
| NA        | ENSG00000260784 | 0          | NA          | NA         | NA         | NA         |            |
| 101928165 | ENSG00000260785 | 0          | NA          | NA         | NA         | NA         | CASC17     |

|           |                 |            |             |            |            |            |           |
|-----------|-----------------|------------|-------------|------------|------------|------------|-----------|
| NA        | ENSG00000260786 | 0          | NA          | NA         | NA         | NA         |           |
| NA        | ENSG00000260788 | 0          | NA          | NA         | NA         | NA         |           |
| 440346    | ENSG00000260790 | 0.78896133 | 0.0019748   | 0.38127541 | 0.95953469 | NA         | CDR2-DT   |
| 101929634 | ENSG00000260792 | 0.15069912 | -0.01848503 | 0.38480575 | 0.84537521 | NA         | LINC02280 |
| NA        | ENSG00000260793 | 37.2706889 | 0.391824    | 0.37095771 | 0.09568305 | 0.24127501 |           |
| NA        | ENSG00000260795 | 0          | NA          | NA         | NA         | NA         |           |
| NA        | ENSG00000260796 | 0          | NA          | NA         | NA         | NA         |           |
| NA        | ENSG00000260797 | 0          | NA          | NA         | NA         | NA         |           |
| NA        | ENSG00000260798 | 0          | NA          | NA         | NA         | NA         |           |
| NA        | ENSG00000260799 | 0.33471731 | 0.02354391  | 0.38534154 | 0.62842204 | NA         | KRT8P50   |
| 401613    | ENSG00000260802 | 37.3283726 | 3.81087203  | 0.51893327 | 2.11E-14   | 5.47E-13   | SERTM2    |
| NA        | ENSG00000260803 | 0.44920417 | -0.02727378 | 0.38571094 | 0.56235371 | NA         |           |
| 150967    | ENSG00000260804 | 489.786965 | -0.42780152 | 0.12127973 | 0.00019923 | 0.00141778 | LINC01963 |
| NA        | ENSG00000260805 | 58.7480502 | 0.01251879  | 0.24133124 | 0.94844106 | 0.97876335 |           |
| NA        | ENSG00000260806 | 18.869844  | 0.22500312  | 0.36307098 | 0.26668175 | 0.48908911 | PAPOLA-DT |
| 115804232 | ENSG00000260807 | 0          | NA          | NA         | NA         | NA         | CEROX1    |
| NA        | ENSG00000260808 | 2.97157157 | 0.04275018  | 0.37213552 | 0.68831616 | 0.8486324  |           |
| NA        | ENSG00000260809 | 0          | NA          | NA         | NA         | NA         | VPS35P1   |
| NA        | ENSG00000260810 | 3.32075108 | -0.05115874 | 0.37458971 | 0.6171499  | 0.80395958 |           |
| 403257    | ENSG00000260811 | 0          | NA          | NA         | NA         | NA         | OR4C45    |
| NA        | ENSG00000260812 | 0          | NA          | NA         | NA         | NA         | RARRES2P7 |
| NA        | ENSG00000260814 | 0.173124   | -0.01911262 | 0.38486262 | 0.84537521 | NA         |           |
| NA        | ENSG00000260815 | 0          | NA          | NA         | NA         | NA         | PPIAP47   |
| NA        | ENSG00000260816 | 0.14931947 | -0.01844332 | 0.38480212 | 0.84537521 | NA         |           |
| NA        | ENSG00000260817 | 0          | NA          | NA         | NA         | NA         |           |
| NA        | ENSG00000260818 | 0          | NA          | NA         | NA         | NA         | UNGP1     |
| NA        | ENSG00000260823 | 0          | NA          | NA         | NA         | NA         |           |
| NA        | ENSG00000260827 | 0          | NA          | NA         | NA         | NA         |           |
| NA        | ENSG00000260828 | 0          | NA          | NA         | NA         | NA         | HMGB3P32  |
| NA        | ENSG00000260830 | 1.1339297  | 0.01762047  | 0.37999561 | 0.78486336 | NA         |           |
| 101928417 | ENSG00000260832 | 0          | NA          | NA         | NA         | NA         |           |
| NA        | ENSG00000260834 | 0          | NA          | NA         | NA         | NA         |           |
| NA        | ENSG00000260835 | 0          | NA          | NA         | NA         | NA         |           |
| NA        | ENSG00000260836 | 5.76536173 | 0.12831742  | 0.38585523 | 0.34437784 | 0.57468722 |           |
| NA        | ENSG00000260838 | 0          | NA          | NA         | NA         | NA         |           |
| 100996478 | ENSG00000260840 | 0          | NA          | NA         | NA         | NA         | LINC01964 |
| NA        | ENSG00000260844 | 0.33904551 | 0.00242522  | 0.38338116 | 0.96530345 | NA         |           |
| NA        | ENSG00000260845 | 0          | NA          | NA         | NA         | NA         |           |

|           |                 |            |             |            |            |            |            |
|-----------|-----------------|------------|-------------|------------|------------|------------|------------|
| NA        | ENSG00000260846 | 0          | NA          | NA         | NA         | NA         | FRG2HP     |
| NA        | ENSG00000260847 | 0          | NA          | NA         | NA         | NA         |            |
| NA        | ENSG00000260848 | 0          | NA          | NA         | NA         | NA         |            |
| NA        | ENSG00000260850 | 0          | NA          | NA         | NA         | NA         |            |
| NA        | ENSG00000260851 | 0          | NA          | NA         | NA         | NA         |            |
| 283932    | ENSG00000260852 | 274.714606 | 0.35025376  | 0.15388856 | 0.01296713 | 0.05135086 | FBXL19-AS1 |
| NA        | ENSG00000260853 | 140.119077 | -0.05294224 | 0.1877051  | 0.74558649 | 0.88008306 |            |
| NA        | ENSG00000260854 | 0          | NA          | NA         | NA         | NA         | LINC02184  |
| NA        | ENSG00000260855 | 40.9181432 | 0.31735865  | 0.31404387 | 0.14589533 | 0.32651588 |            |
| NA        | ENSG00000260857 | 7.03271889 | -0.01518069 | 0.35056187 | 0.91489338 | 0.9640318  |            |
| NA        | ENSG00000260858 | 0          | NA          | NA         | NA         | NA         |            |
| NA        | ENSG00000260859 | 0          | NA          | NA         | NA         | NA         |            |
| NA        | ENSG00000260860 | 0          | NA          | NA         | NA         | NA         |            |
| NA        | ENSG00000260861 | 0          | NA          | NA         | NA         | NA         |            |
| 101928446 | ENSG00000260862 | 0          | NA          | NA         | NA         | NA         |            |
| NA        | ENSG00000260863 | 0          | NA          | NA         | NA         | NA         | CYP2C60P   |
| NA        | ENSG00000260864 | 0          | NA          | NA         | NA         | NA         | ABHD17AP7  |
| NA        | ENSG00000260865 | 0          | NA          | NA         | NA         | NA         |            |
| NA        | ENSG00000260866 | 0          | NA          | NA         | NA         | NA         |            |
| NA        | ENSG00000260867 | 0          | NA          | NA         | NA         | NA         |            |
| 100128905 | ENSG00000260868 | 1.70133718 | 0.06124056  | 0.38352508 | 0.44253994 | NA         | LINC01960  |
| NA        | ENSG00000260870 | 0          | NA          | NA         | NA         | NA         | NDUFB10P1  |
| NA        | ENSG00000260871 | 1.6537658  | 0.02096565  | 0.38026408 | 0.74398191 | NA         |            |
| 105371050 | ENSG00000260874 | 12.5201956 | 0.04553731  | 0.34245908 | 0.7790758  | 0.89891619 |            |
| 101928248 | ENSG00000260876 | 2.58191509 | -0.01426531 | 0.37487837 | 0.86370289 | 0.93962084 | LINC01229  |
| NA        | ENSG00000260877 | 0          | NA          | NA         | NA         | NA         |            |
| NA        | ENSG00000260878 | 0          | NA          | NA         | NA         | NA         |            |
| NA        | ENSG00000260879 | 39.8660215 | -0.06111344 | 0.29151277 | 0.74890927 | 0.88205755 |            |
| 283902    | ENSG00000260880 | 0.9378279  | -0.01101457 | 0.38080412 | 0.84519532 | NA         | HCCAT5     |
| NA        | ENSG00000260882 | 0          | NA          | NA         | NA         | NA         |            |
| NA        | ENSG00000260883 | 0          | NA          | NA         | NA         | NA         | VN1R65P    |
| NA        | ENSG00000260884 | 24.1706052 | 0.01520549  | 0.30565638 | 0.93685554 | 0.97351594 |            |
| 100132529 | ENSG00000260886 | 1.19711974 | 0.03962878  | 0.38202991 | 0.5324653  | NA         | TAT-AS1    |
| 283854    | ENSG00000260887 | 0          | NA          | NA         | NA         | NA         | CASC22     |
| NA        | ENSG00000260889 | 0          | NA          | NA         | NA         | NA         | CKBP1      |
| NA        | ENSG00000260891 | 0.16735865 | 0.01897177  | 0.38482933 | 0.78225479 | NA         |            |
| NA        | ENSG00000260892 | 1.00415192 | 0.04322574  | 0.38779947 | 0.2717111  | NA         |            |
| NA        | ENSG00000260894 | 0.15069912 | -0.01848503 | 0.38480575 | 0.84537521 | NA         |            |

|           |                 |            |             |            |            |            |           |
|-----------|-----------------|------------|-------------|------------|------------|------------|-----------|
| NA        | ENSG00000260895 | 0.53612843 | 0.03213502  | 0.38615518 | 0.46295649 | NA         |           |
| 100996425 | ENSG00000260896 | 0.57187502 | -0.01409516 | 0.38350286 | 0.89115711 | NA         | ARLNC1    |
| NA        | ENSG00000260897 | 0          | NA          | NA         | NA         | NA         | DNMIP30   |
| 100287559 | ENSG00000260898 | 9.19320035 | 0.04187363  | 0.3517463  | 0.77849769 | 0.89861498 | ADPGK-AS1 |
| NA        | ENSG00000260899 | 18.5774562 | 0.24013861  | 0.42960782 | 0.17191581 | 0.36451957 |           |
| NA        | ENSG00000260900 | 0          | NA          | NA         | NA         | NA         |           |
| 152274    | ENSG00000260902 | 0          | NA          | NA         | NA         | NA         | LINC02011 |
| 343702    | ENSG00000260903 | 920.182591 | -2.11381518 | 0.09592725 | 9.58E-109  | 3.17E-106  | XKR7      |
| NA        | ENSG00000260905 | 0          | NA          | NA         | NA         | NA         | LINC02890 |
| NA        | ENSG00000260907 | 0.16735865 | 0.01897177  | 0.38482933 | 0.78225479 | NA         |           |
| NA        | ENSG00000260908 | 0.30139824 | -0.02296476 | 0.38527817 | 0.68536535 | NA         |           |
| NA        | ENSG00000260909 | 0          | NA          | NA         | NA         | NA         |           |
| NA        | ENSG00000260910 | 0.84660176 | 0.01543683  | 0.38112855 | 0.78418667 | NA         | LINC00565 |
| NA        | ENSG00000260911 | 0.173124   | -0.01911262 | 0.38486262 | 0.84537521 | NA         |           |
| NA        | ENSG00000260912 | 33.5050984 | 0.19539389  | 0.30116433 | 0.34004935 | 0.57043876 |           |
| 101927350 | ENSG00000260913 | 0          | NA          | NA         | NA         | NA         | LINC01254 |
| NA        | ENSG00000260914 | 186.697421 | -0.15662557 | 0.22047501 | 0.38722622 | 0.61623231 |           |
| 9236      | ENSG00000260916 | 682.053959 | 0.65628838  | 0.12071557 | 1.39E-08   | 2.05E-07   | CCPG1     |
| 103344931 | ENSG00000260917 | 304.697818 | -0.05703906 | 0.13235801 | 0.64618981 | 0.82370422 |           |
| NA        | ENSG00000260918 | 6.33305719 | 1.12716665  | 2.37339606 | 0.01112986 | 0.04529569 |           |
| NA        | ENSG00000260919 | 0.47443056 | -0.00899004 | 0.38283586 | 0.85018793 | NA         |           |
| NA        | ENSG00000260920 | 189.888803 | 0.18274967  | 0.18162387 | 0.25504652 | 0.47579905 |           |
| NA        | ENSG00000260921 | 0          | NA          | NA         | NA         | NA         |           |
| NA        | ENSG00000260922 | 0.60003087 | -0.03562254 | 0.38653685 | 0.43872604 | NA         |           |
| NA        | ENSG00000260923 | 46.3389354 | 0.15194094  | 0.28891405 | 0.44675021 | 0.67086922 | LINC02193 |
| NA        | ENSG00000260924 | 26.3896983 | 0.02887676  | 0.29247299 | 0.88141923 | 0.94772508 | LINC01311 |
| 105370791 | ENSG00000260926 | 0.41574043 | -0.01398773 | 0.38398283 | 0.86439004 | NA         |           |
| 101927556 | ENSG00000260927 | 199.49956  | 0.11700329  | 0.22966526 | 0.52927585 | 0.7410086  |           |
| NA        | ENSG00000260928 | 0          | NA          | NA         | NA         | NA         | SPCS2P1   |
| 101927273 | ENSG00000260930 | 0.15069912 | -0.01848503 | 0.38480575 | 0.84537521 | NA         | LINC01416 |
| NA        | ENSG00000260932 | 0.173733   | 0.01914545  | 0.38484597 | 0.78225479 | NA         |           |
| NA        | ENSG00000260933 | 0          | NA          | NA         | NA         | NA         |           |
| NA        | ENSG00000260934 | 0          | NA          | NA         | NA         | NA         |           |
| 105370829 | ENSG00000260937 | 0          | NA          | NA         | NA         | NA         |           |
| NA        | ENSG00000260939 | 0          | NA          | NA         | NA         | NA         |           |
| 644242    | ENSG00000260941 | 3.18258199 | -0.0191816  | 0.37119527 | 0.84716096 | 0.93052693 | LINC00622 |
| NA        | ENSG00000260942 | 69.9506068 | -0.39514857 | 0.27295699 | 0.06061962 | 0.17270151 | CAPN10-DT |
| NA        | ENSG00000260943 | 0          | NA          | NA         | NA         | NA         | LINC02555 |

|           |                 |            |             |            |            |            |           |
|-----------|-----------------|------------|-------------|------------|------------|------------|-----------|
| 103752587 | ENSG00000260944 | 0          | NA          | NA         | NA         | NA         | FOXC2-AS1 |
| NA        | ENSG00000260945 | 0          | NA          | NA         | NA         | NA         |           |
| NA        | ENSG00000260947 | 202.500441 | -0.11112133 | 0.16217351 | 0.44876614 | 0.67234598 |           |
| NA        | ENSG00000260948 | 18.3068872 | 0.2373868   | 0.36734996 | 0.2466826  | 0.4658021  |           |
| NA        | ENSG00000260949 | 13.0603514 | 0.21007952  | 0.38942872 | 0.25639815 | 0.47756244 |           |
| NA        | ENSG00000260951 | 0          | NA          | NA         | NA         | NA         |           |
| NA        | ENSG00000260953 | 2.38176112 | -0.05055614 | 0.37683816 | 0.59667845 | NA         |           |
| NA        | ENSG00000260954 | 0.86799414 | 0.04372684  | 0.38484878 | 0.41142435 | NA         |           |
| NA        | ENSG00000260955 | 1.5681622  | 0.02082389  | 0.37787293 | 0.78420999 | NA         |           |
| NA        | ENSG00000260957 | 0          | NA          | NA         | NA         | NA         |           |
| 105371200 | ENSG00000260958 | 9.87564547 | 1.13510745  | 1.33211439 | 0.01094676 | 0.04467526 |           |
| NA        | ENSG00000260959 | 0          | NA          | NA         | NA         | NA         |           |
| 100861544 | ENSG00000260962 | 0.15069912 | -0.01848503 | 0.38480575 | 0.84537521 | NA         | LINC00557 |
| 105371264 | ENSG00000260963 | 0          | NA          | NA         | NA         | NA         |           |
| NA        | ENSG00000260965 | 0          | NA          | NA         | NA         | NA         | RPL23AP91 |
| NA        | ENSG00000260966 | 0          | NA          | NA         | NA         | NA         |           |
| NA        | ENSG00000260967 | 0.52054256 | 0.03137322  | 0.38607787 | 0.47415245 | NA         | RARRES2P5 |
| NA        | ENSG00000260969 | 0          | NA          | NA         | NA         | NA         | WWOX-AS1  |
| NA        | ENSG00000260970 | 0          | NA          | NA         | NA         | NA         |           |
| NA        | ENSG00000260971 | 15.7806411 | -0.207647   | 0.40582823 | 0.21937304 | 0.43139669 |           |
| NA        | ENSG00000260972 | 0          | NA          | NA         | NA         | NA         |           |
| NA        | ENSG00000260973 | 0          | NA          | NA         | NA         | NA         |           |
| NA        | ENSG00000260974 | 0          | NA          | NA         | NA         | NA         |           |
| NA        | ENSG00000260975 | 0          | NA          | NA         | NA         | NA         |           |
| NA        | ENSG00000260976 | 0          | NA          | NA         | NA         | NA         | LINC01633 |
| NA        | ENSG00000260978 | 4.00431813 | 0.04957865  | 0.36798009 | 0.68039518 | 0.84380894 |           |
| NA        | ENSG00000260979 | 0.55454578 | 0.03301932  | 0.38624731 | 0.45029168 | NA         | USP7-AS1  |
| NA        | ENSG00000260981 | 0          | NA          | NA         | NA         | NA         |           |
| NA        | ENSG00000260983 | 0          | NA          | NA         | NA         | NA         |           |
| NA        | ENSG00000260984 | 1.38447571 | 0.03484852  | 0.38023165 | 0.62917586 | NA         | FGFR3P5   |
| NA        | ENSG00000260986 | 0.51937201 | -0.02557462 | 0.38567603 | 0.54680819 | NA         |           |
| NA        | ENSG00000260988 | 1.63718601 | -0.01447297 | 0.37708522 | 0.85097867 | NA         |           |
| 105371046 | ENSG00000260989 | 0.85528758 | -0.00518191 | 0.38134752 | 0.92121163 | NA         |           |
| NA        | ENSG00000260990 | 0          | NA          | NA         | NA         | NA         |           |
| NA        | ENSG00000260991 | 0          | NA          | NA         | NA         | NA         |           |
| NA        | ENSG00000260992 | 4.62435486 | 0.04325384  | 0.36569343 | 0.72602833 | 0.86899144 | DOCK9-DT  |
| NA        | ENSG00000260994 | 0          | NA          | NA         | NA         | NA         | AGGF1P7   |
| 101927450 | ENSG00000260995 | 0.173733   | 0.01914545  | 0.38484597 | 0.78225479 | NA         |           |

|           |                 |            |             |            |            |            |             |
|-----------|-----------------|------------|-------------|------------|------------|------------|-------------|
| NA        | ENSG00000260996 | 18.4990551 | -0.7643772  | 0.65687381 | 0.0198997  | 0.07266889 |             |
| NA        | ENSG00000260997 | 1.16318538 | 0.04207087  | 0.38320419 | 0.50446739 | NA         |             |
| NA        | ENSG00000260999 | 0          | NA          | NA         | NA         | NA         |             |
| NA        | ENSG00000261000 | 0          | NA          | NA         | NA         | NA         |             |
| NA        | ENSG00000261002 | 0          | NA          | NA         | NA         | NA         | VPS39-DT    |
| NA        | ENSG00000261003 | 2.64648113 | 0.07913236  | 0.38714796 | 0.34954609 | 0.58004303 |             |
| NA        | ENSG00000261007 | 0          | NA          | NA         | NA         | NA         | NPM1P3      |
| 101927957 | ENSG00000261008 | 71.0976606 | -0.12408605 | 0.25344979 | 0.51891031 | 0.73244028 | LINC01572   |
| NA        | ENSG00000261009 | 0          | NA          | NA         | NA         | NA         |             |
| NA        | ENSG00000261010 | 7.72132893 | 0.34845792  | 0.5461653  | 0.0678509  | 0.18727905 | RARRES2P6   |
| NA        | ENSG00000261011 | 0.14931947 | -0.01844332 | 0.38480212 | 0.84537521 | NA         | AGAP11      |
| NA        | ENSG00000261012 | 0          | NA          | NA         | NA         | NA         |             |
| 101927629 | ENSG00000261014 | 0          | NA          | NA         | NA         | NA         | LINC02165   |
| NA        | ENSG00000261017 | 0          | NA          | NA         | NA         | NA         |             |
| NA        | ENSG00000261018 | 3.02410255 | 0.06215991  | 0.37708309 | 0.54625333 | 0.75345287 |             |
| NA        | ENSG00000261019 | 17.1578305 | 0.06556191  | 0.3210408  | 0.72040877 | 0.86655208 |             |
| NA        | ENSG00000261020 | 0.81045904 | -0.00594402 | 0.38077573 | 0.91645287 | NA         |             |
| 100288079 | ENSG00000261024 | 0.173733   | 0.01914545  | 0.38484597 | 0.78225479 | NA         |             |
| NA        | ENSG00000261025 | 0          | NA          | NA         | NA         | NA         |             |
| NA        | ENSG00000261026 | 0.55195815 | 0.03289656  | 0.38623441 | 0.4520244  | NA         |             |
| NA        | ENSG00000261028 | 0          | NA          | NA         | NA         | NA         |             |
| NA        | ENSG00000261029 | 0          | NA          | NA         | NA         | NA         | MPHOSPH6-DT |
| NA        | ENSG00000261030 | 0          | NA          | NA         | NA         | NA         |             |
| NA        | ENSG00000261033 | 7.13384677 | 0.26728551  | 0.47133094 | 0.10546079 | 0.25898528 | SPECC1-DT   |
| NA        | ENSG00000261035 | 0          | NA          | NA         | NA         | NA         |             |
| NA        | ENSG00000261036 | 0          | NA          | NA         | NA         | NA         |             |
| NA        | ENSG00000261037 | 0.68898111 | 0.02235485  | 0.38385576 | 0.60680167 | NA         |             |
| NA        | ENSG00000261038 | 0          | NA          | NA         | NA         | NA         |             |
| NA        | ENSG00000261039 | 0          | NA          | NA         | NA         | NA         | LINC02544   |
| NA        | ENSG00000261040 | 0.65054372 | -0.0107426  | 0.38290306 | 0.76385027 | NA         | WFDC21P     |
| NA        | ENSG00000261041 | 0          | NA          | NA         | NA         | NA         |             |
| NA        | ENSG00000261043 | 0          | NA          | NA         | NA         | NA         |             |
| NA        | ENSG00000261044 | 0.495763   | -0.0295056  | 0.38590254 | 0.52557378 | NA         |             |
| NA        | ENSG00000261045 | 0          | NA          | NA         | NA         | NA         | LINC02129   |
| NA        | ENSG00000261046 | 21.7533921 | 0.30220047  | 0.37997779 | 0.16840212 | 0.35960585 | C2orf69P1   |
| NA        | ENSG00000261047 | 0          | NA          | NA         | NA         | NA         |             |
| NA        | ENSG00000261048 | 0          | NA          | NA         | NA         | NA         |             |
| NA        | ENSG00000261049 | 0          | NA          | NA         | NA         | NA         |             |



|           |                 |            |             |            |            |            |           |
|-----------|-----------------|------------|-------------|------------|------------|------------|-----------|
| NA        | ENSG00000261051 | 0          | NA          | NA         | NA         | NA         |           |
| 6818      | ENSG00000261052 | 85.121557  | 0.41519516  | 0.30735064 | 0.06400191 | 0.17978167 | SULT1A3   |
| NA        | ENSG00000261053 | 0          | NA          | NA         | NA         | NA         | NAMPTP3   |
| NA        | ENSG00000261054 | 0.69249601 | -0.03077728 | 0.38619256 | 0.44510896 | NA         |           |
| NA        | ENSG00000261055 | 0          | NA          | NA         | NA         | NA         |           |
| NA        | ENSG00000261056 | 7.99077539 | 0.05929099  | 0.35084331 | 0.70090533 | 0.85575596 |           |
| NA        | ENSG00000261057 | 0          | NA          | NA         | NA         | NA         | LINC00555 |
| NA        | ENSG00000261058 | 0          | NA          | NA         | NA         | NA         |           |
| NA        | ENSG00000261060 | 0          | NA          | NA         | NA         | NA         |           |
| NA        | ENSG00000261061 | 0          | NA          | NA         | NA         | NA         |           |
| NA        | ENSG00000261063 | 0          | NA          | NA         | NA         | NA         |           |
| NA        | ENSG00000261064 | 26.080089  | 0.49257681  | 0.44319866 | 0.05621795 | 0.16294581 | LINC02256 |
| NA        | ENSG00000261065 | 0          | NA          | NA         | NA         | NA         |           |
| NA        | ENSG00000261066 | 0          | NA          | NA         | NA         | NA         |           |
| NA        | ENSG00000261067 | 57.5237345 | 0.46499419  | 0.29450085 | 0.03731704 | 0.11917383 |           |
| NA        | ENSG00000261068 | 0.173733   | 0.01914545  | 0.38484597 | 0.78225479 | NA         |           |
| NA        | ENSG00000261069 | 27.0683535 | -0.90001742 | 0.60835393 | 0.01039882 | 0.04275023 |           |
| 338694    | ENSG00000261070 | 0.18922458 | 0.01954053  | 0.38488496 | 0.78225479 | NA         |           |
| NA        | ENSG00000261071 | 0          | NA          | NA         | NA         | NA         |           |
| NA        | ENSG00000261072 | 0.66404977 | -0.02226877 | 0.38323609 | 0.64943926 | NA         |           |
| 104266959 | ENSG00000261075 | 0          | NA          | NA         | NA         | NA         | LINC01195 |
| NA        | ENSG00000261076 | 0          | NA          | NA         | NA         | NA         |           |
| NA        | ENSG00000261077 | 0          | NA          | NA         | NA         | NA         |           |
| NA        | ENSG00000261078 | 0          | NA          | NA         | NA         | NA         |           |
| NA        | ENSG00000261079 | 6.57748463 | 0.04209372  | 0.3585218  | 0.76026413 | 0.88889389 |           |
| NA        | ENSG00000261080 | 0          | NA          | NA         | NA         | NA         | RUNX2-AS1 |
| NA        | ENSG00000261081 | 0.16735865 | 0.01897177  | 0.38482933 | 0.78225479 | NA         |           |
| NA        | ENSG00000261082 | 0          | NA          | NA         | NA         | NA         | LINC01228 |
| 101927087 | ENSG00000261083 | 0.14931947 | -0.01844332 | 0.38480212 | 0.84537521 | NA         | LINC02516 |
| NA        | ENSG00000261084 | 0          | NA          | NA         | NA         | NA         | PPP1R1AP2 |
| NA        | ENSG00000261087 | 22.295637  | 0.04539462  | 0.30349267 | 0.81141854 | 0.9146069  | ZNNT1     |
| NA        | ENSG00000261089 | 4.39810829 | 0.03912912  | 0.36771659 | 0.73752799 | 0.8759911  | CDC37P2   |
| 112268176 | ENSG00000261090 | 0          | NA          | NA         | NA         | NA         |           |
| 105371248 | ENSG00000261092 | 0.15069912 | -0.01848503 | 0.38480575 | 0.84537521 | NA         | LINC02178 |
| NA        | ENSG00000261093 | 0.60279648 | -0.02752712 | 0.38588313 | 0.49730371 | NA         |           |
| NA        | ENSG00000261094 | 32.7682142 | -0.1514333  | 0.29202787 | 0.4474351  | 0.67133875 |           |
| 101928708 | ENSG00000261095 | 0          | NA          | NA         | NA         | NA         |           |
| NA        | ENSG00000261096 | 5.16841124 | 0.03475456  | 0.3598425  | 0.79448287 | 0.90579008 |           |

|           |                 |            |             |            |            |            |           |
|-----------|-----------------|------------|-------------|------------|------------|------------|-----------|
| 100861554 | ENSG00000261097 | 0          | NA          | NA         | NA         | NA         | LINC00563 |
| NA        | ENSG00000261098 | 55.7146459 | -0.38466756 | 0.31376088 | 0.08525383 | 0.22149194 |           |
| NA        | ENSG00000261101 | 8.47754317 | -0.04806162 | 0.35068385 | 0.747534   | 0.88138554 |           |
| NA        | ENSG00000261102 | 0          | NA          | NA         | NA         | NA         | ATP5MFP6  |
| NA        | ENSG00000261103 | 0          | NA          | NA         | NA         | NA         |           |
| NA        | ENSG00000261104 | 0          | NA          | NA         | NA         | NA         |           |
| 101927155 | ENSG00000261105 | 20.1238817 | 0.30830727  | 0.3979257  | 0.15792349 | 0.34494256 | LMO7-AS1  |
| NA        | ENSG00000261108 | 0          | NA          | NA         | NA         | NA         |           |
| NA        | ENSG00000261111 | 0          | NA          | NA         | NA         | NA         |           |
| NA        | ENSG00000261113 | 3.54016281 | -0.01578668 | 0.36887217 | 0.88010849 | 0.94683492 |           |
| NA        | ENSG00000261114 | 27.0368807 | 1.60001013  | 0.54497772 | 0.00019942 | 0.00141863 |           |
| 100507421 | ENSG00000261115 | 1362.59464 | -1.14314304 | 0.07870615 | 9.56E-49   | 8.99E-47   | TMEM178B  |
| NA        | ENSG00000261116 | 0          | NA          | NA         | NA         | NA         |           |
| NA        | ENSG00000261117 | 0          | NA          | NA         | NA         | NA         |           |
| NA        | ENSG00000261118 | 3.39979845 | -0.04615021 | 0.3712368  | 0.67344769 | 0.83953925 |           |
| NA        | ENSG00000261120 | 0.7010181  | 0.00149289  | 0.38181681 | 0.97395823 | NA         |           |
| 107986266 | ENSG00000261121 | 0          | NA          | NA         | NA         | NA         | LINC02473 |
| 400533    | ENSG00000261122 | 0.34624801 | -0.02356563 | 0.38536324 | 0.65270996 | NA         | LINC02167 |
| NA        | ENSG00000261123 | 4.9660863  | -0.01299831 | 0.36264776 | 0.91261643 | 0.96264321 |           |
| NA        | ENSG00000261124 | 2.18022909 | 0.02521053  | 0.37478399 | 0.78100618 | NA         |           |
| NA        | ENSG00000261126 | 32.3219663 | 0.27861212  | 0.3378824  | 0.19833333 | 0.40259191 | RBFADN    |
| NA        | ENSG00000261127 | 34.7861921 | 0.05007278  | 0.28208117 | 0.7969738  | 0.90670108 |           |
| NA        | ENSG00000261129 | 0          | NA          | NA         | NA         | NA         |           |
| 255027    | ENSG00000261130 | 15.2215489 | -0.07700485 | 0.32944455 | 0.66456963 | 0.83444869 |           |
| NA        | ENSG00000261131 | 0          | NA          | NA         | NA         | NA         |           |
| NA        | ENSG00000261135 | 34.7335159 | 0.04722778  | 0.28159531 | 0.80850019 | 0.91317199 |           |
| NA        | ENSG00000261136 | 15.6406456 | -0.44041742 | 0.53409062 | 0.06904725 | 0.18952649 |           |
| NA        | ENSG00000261140 | 20.8055585 | 0.13429852  | 0.3245464  | 0.48649877 | 0.7063832  |           |
| NA        | ENSG00000261141 | 1.3442494  | 0.06386273  | 0.38635529 | 0.36572383 | NA         |           |
| NA        | ENSG00000261143 | 55.3441506 | -0.0918237  | 0.33351845 | 0.5973977  | 0.78921427 | ADAMTS7P3 |
| NA        | ENSG00000261144 | 0          | NA          | NA         | NA         | NA         |           |
| NA        | ENSG00000261145 | 0          | NA          | NA         | NA         | NA         |           |
| NA        | ENSG00000261146 | 0.97764185 | -0.01845771 | 0.38081167 | 0.75780858 | NA         |           |
| NA        | ENSG00000261147 | 6.39769539 | 0.05196335  | 0.36169603 | 0.70014073 | 0.85541355 |           |
| 83481     | ENSG00000261150 | 11.9537508 | 0.0619078   | 0.34342807 | 0.70620528 | 0.85836628 | EPPK1     |
| NA        | ENSG00000261151 | 0          | NA          | NA         | NA         | NA         |           |
| NA        | ENSG00000261153 | 0          | NA          | NA         | NA         | NA         |           |
| NA        | ENSG00000261154 | 0          | NA          | NA         | NA         | NA         | LINC02131 |

|           |                 |            |             |            |            |            |            |
|-----------|-----------------|------------|-------------|------------|------------|------------|------------|
| 101927239 | ENSG00000261156 | 0          | NA          | NA         | NA         | NA         | LINC01989  |
| NA        | ENSG00000261158 | 5.45622828 | -0.21768886 | 0.44026137 | 0.13339811 | 0.30710356 |            |
| NA        | ENSG00000261159 | 25.2670297 | -0.35841733 | 0.40348895 | 0.11884155 | 0.28318716 |            |
| NA        | ENSG00000261161 | 0          | NA          | NA         | NA         | NA         |            |
| NA        | ENSG00000261166 | 1.93330938 | 0.01422887  | 0.376896   | 0.85780573 | NA         |            |
| NA        | ENSG00000261167 | 42.0319292 | -0.28818277 | 0.32235979 | 0.18203976 | 0.37980817 |            |
| NA        | ENSG00000261168 | 12.3268727 | 0.04161631  | 0.33911272 | 0.80171085 | 0.90927476 |            |
| 107984827 | ENSG00000261170 | 10.4996127 | -0.06649649 | 0.35154379 | 0.66498621 | 0.83454529 |            |
| NA        | ENSG00000261172 | 0.18922458 | 0.01954053  | 0.38488496 | 0.78225479 | NA         |            |
| NA        | ENSG00000261173 | 0.97105169 | -0.0675702  | 0.39188489 | 0.19680879 | NA         | DNAJA2-DT  |
| NA        | ENSG00000261174 | 0.29863895 | -0.02292439 | 0.3852726  | 0.68753245 | NA         | HMGB1P33   |
| NA        | ENSG00000261175 | 0          | NA          | NA         | NA         | NA         | LINC02188  |
| NA        | ENSG00000261177 | 0          | NA          | NA         | NA         | NA         |            |
| NA        | ENSG00000261178 | 0          | NA          | NA         | NA         | NA         |            |
| NA        | ENSG00000261181 | 0          | NA          | NA         | NA         | NA         |            |
| NA        | ENSG00000261182 | 0          | NA          | NA         | NA         | NA         |            |
| NA        | ENSG00000261183 | 2.00269742 | 0.02288537  | 0.37971044 | 0.73613809 | NA         | SPINT1-AS1 |
| 101928618 | ENSG00000261184 | 0          | NA          | NA         | NA         | NA         |            |
| 102723927 | ENSG00000261186 | 2.96372977 | -0.02080479 | 0.37321185 | 0.82331772 | 0.91945578 | LINC01238  |
| NA        | ENSG00000261187 | 5.42974902 | -0.02174108 | 0.35789981 | 0.86863433 | 0.94267349 |            |
| NA        | ENSG00000261188 | 101.763771 | 0.04900824  | 0.20095226 | 0.77616933 | 0.89709598 | TFIP11-DT  |
| NA        | ENSG00000261189 | 0          | NA          | NA         | NA         | NA         |            |
| NA        | ENSG00000261190 | 0          | NA          | NA         | NA         | NA         | C16orf97   |
| NA        | ENSG00000261191 | 0          | NA          | NA         | NA         | NA         |            |
| 376412    | ENSG00000261192 | 0          | NA          | NA         | NA         | NA         | RNF126P1   |
| NA        | ENSG00000261193 | 19.0810272 | -0.46273301 | 0.5143794  | 0.06504115 | 0.18187757 |            |
| NA        | ENSG00000261194 | 0          | NA          | NA         | NA         | NA         | LINC01898  |
| NA        | ENSG00000261195 | 0.173124   | -0.01911262 | 0.38486262 | 0.84537521 | NA         |            |
| NA        | ENSG00000261196 | 0          | NA          | NA         | NA         | NA         | CYP4A43P   |
| NA        | ENSG00000261197 | 0          | NA          | NA         | NA         | NA         |            |
| NA        | ENSG00000261198 | 0          | NA          | NA         | NA         | NA         |            |
| NA        | ENSG00000261199 | 0          | NA          | NA         | NA         | NA         | UBE2FP2    |
| NA        | ENSG00000261200 | 0.64043005 | -0.02515088 | 0.38296366 | 0.63689777 | NA         |            |
| 114841040 | ENSG00000261202 | 0.34050778 | -0.00031986 | 0.38336256 | 0.96828459 | NA         | TNRC6B-DT  |
| NA        | ENSG00000261203 | 0          | NA          | NA         | NA         | NA         |            |
| NA        | ENSG00000261204 | 1.80409064 | 0.01997907  | 0.37826465 | 0.78881816 | NA         |            |
| NA        | ENSG00000261205 | 0          | NA          | NA         | NA         | NA         | NIFKP4     |
| 100861545 | ENSG00000261206 | 0          | NA          | NA         | NA         | NA         | LINC00561  |

|           |    |                 |            |             |            |            |            |            |
|-----------|----|-----------------|------------|-------------|------------|------------|------------|------------|
|           | NA | ENSG00000261207 | 5.44540591 | 0.13168048  | 0.38796224 | 0.32989524 | 0.55861736 |            |
|           | NA | ENSG00000261208 | 0          | NA          | NA         | NA         | NA         |            |
|           | NA | ENSG00000261209 | 0          | NA          | NA         | NA         | NA         | SULT1C2P2  |
| 728276    |    | ENSG00000261210 | 0          | NA          | NA         | NA         | NA         | CLEC19A    |
|           | NA | ENSG00000261211 | 14.2785019 | 0.09441079  | 0.34122704 | 0.58767259 | 0.78270018 |            |
|           | NA | ENSG00000261213 | 0          | NA          | NA         | NA         | NA         |            |
|           | NA | ENSG00000261215 | 19.3769598 | 0.04461299  | 0.31741957 | 0.80779876 | 0.91309978 |            |
|           | NA | ENSG00000261216 | 0.62219329 | -0.03610973 | 0.38660519 | 0.42846553 | NA         |            |
|           | NA | ENSG00000261217 | 0          | NA          | NA         | NA         | NA         | BCAP31P1   |
|           | NA | ENSG00000261218 | 0          | NA          | NA         | NA         | NA         |            |
|           | NA | ENSG00000261219 | 0          | NA          | NA         | NA         | NA         |            |
|           | NA | ENSG00000261220 | 2.95673313 | -0.07489761 | 0.38457972 | 0.40360248 | 0.63160382 | ST3GAL1-DT |
| 100507290 |    | ENSG00000261221 | 745.425285 | 0.147872    | 0.09978452 | 0.12455278 | 0.29271822 | ZNF865     |
|           | NA | ENSG00000261222 | 0.30139824 | -0.02296476 | 0.38527817 | 0.68536535 | NA         |            |
|           | NA | ENSG00000261226 | 0.173733   | 0.01914545  | 0.38484597 | 0.78225479 | NA         |            |
|           | NA | ENSG00000261227 | 0.70870098 | 0.00146477  | 0.38180067 | 0.97449993 | NA         |            |
|           | NA | ENSG00000261229 | 0          | NA          | NA         | NA         | NA         |            |
| 101927132 |    | ENSG00000261231 | 0.50207596 | 0.02562368  | 0.38565771 | 0.52549886 | NA         | LINC02133  |
|           | NA | ENSG00000261232 | 0          | NA          | NA         | NA         | NA         |            |
|           | NA | ENSG00000261233 | 0          | NA          | NA         | NA         | NA         | ABCD1P3    |
|           | NA | ENSG00000261234 | 0          | NA          | NA         | NA         | NA         |            |
|           | NA | ENSG00000261235 | 0          | NA          | NA         | NA         | NA         |            |
| 23246     |    | ENSG00000261236 | 1725.61412 | -0.4076797  | 0.0718498  | 7.34E-09   | 1.12E-07   | BOP1       |
|           | NA | ENSG00000261238 | 0          | NA          | NA         | NA         | NA         |            |
|           | NA | ENSG00000261239 | 0.15069912 | -0.01848503 | 0.38480575 | 0.84537521 | NA         | ANKRD26P1  |
|           | NA | ENSG00000261240 | 1.35496915 | 0.0679195   | 0.39014242 | 0.22975993 | NA         |            |
| 112267895 |    | ENSG00000261241 | 0          | NA          | NA         | NA         | NA         | LINC02128  |
|           | NA | ENSG00000261242 | 0.91240262 | -0.0368317  | 0.38446803 | 0.47192994 | NA         |            |
|           | NA | ENSG00000261243 | 0.31671352 | 0.00111312  | 0.38336653 | 0.96718801 | NA         |            |
|           | NA | ENSG00000261244 | 0          | NA          | NA         | NA         | NA         |            |
|           | NA | ENSG00000261245 | 0          | NA          | NA         | NA         | NA         |            |
| 653075    |    | ENSG00000261247 | 25.4306684 | 0.23388304  | 0.34555151 | 0.26161508 | 0.48355163 | GOLGA8T    |
| 653125    |    | ENSG00000261247 | 25.4306684 | 0.23388304  | 0.34555151 | 0.26161508 | 0.48355163 | GOLGA8T    |
|           | NA | ENSG00000261248 | 0          | NA          | NA         | NA         | NA         |            |
| 101929288 |    | ENSG00000261249 | 0          | NA          | NA         | NA         | NA         | LINC01751  |
|           | NA | ENSG00000261250 | 0          | NA          | NA         | NA         | NA         |            |
|           | NA | ENSG00000261251 | 7.73164329 | 0.01258843  | 0.34963897 | 0.93380554 | 0.97237716 | EFCAB6-DT  |
|           | NA | ENSG00000261253 | 0.85512851 | 0.02491856  | 0.38369339 | 0.54096949 | NA         |            |

|           |                 |            |             |            |            |            |            |
|-----------|-----------------|------------|-------------|------------|------------|------------|------------|
| NA        | ENSG00000261257 | 0          | NA          | NA         | NA         | NA         |            |
| NA        | ENSG00000261259 | 0          | NA          | NA         | NA         | NA         |            |
| 102723786 | ENSG00000261260 | 0          | NA          | NA         | NA         | NA         |            |
| NA        | ENSG00000261261 | 0          | NA          | NA         | NA         | NA         |            |
| NA        | ENSG00000261263 | 0          | NA          | NA         | NA         | NA         |            |
| NA        | ENSG00000261265 | 0.5972779  | -0.02732172 | 0.38586499 | 0.50076333 | NA         |            |
| NA        | ENSG00000261266 | 1.56988802 | -0.01212652 | 0.37947966 | 0.85198869 | NA         |            |
| NA        | ENSG00000261267 | 0          | NA          | NA         | NA         | NA         |            |
| NA        | ENSG00000261268 | 0          | NA          | NA         | NA         | NA         |            |
| NA        | ENSG00000261269 | 0          | NA          | NA         | NA         | NA         |            |
| NA        | ENSG00000261270 | 20.4659921 | 1.06232578  | 0.61142786 | 0.00545971 | 0.02509744 |            |
| 100507679 | ENSG00000261272 | 0          | NA          | NA         | NA         | NA         | MUC22      |
| NA        | ENSG00000261273 | 2.69711926 | -0.04237329 | 0.37559826 | 0.65489382 | 0.82814932 |            |
| NA        | ENSG00000261274 | 0.173124   | -0.01911262 | 0.38486262 | 0.84537521 | NA         | TP53TG3GP  |
| NA        | ENSG00000261275 | 0.15069912 | -0.01848503 | 0.38480575 | 0.84537521 | NA         |            |
| NA        | ENSG00000261276 | 0          | NA          | NA         | NA         | NA         |            |
| NA        | ENSG00000261278 | 0          | NA          | NA         | NA         | NA         |            |
| 89838     | ENSG00000261279 | 39.8116338 | 0.91378049  | 0.64847323 | 0.01094889 | 0.04467526 | ULK4P1     |
| NA        | ENSG00000261281 | 0          | NA          | NA         | NA         | NA         |            |
| NA        | ENSG00000261282 | 0          | NA          | NA         | NA         | NA         | SOD1P2     |
| NA        | ENSG00000261284 | 0          | NA          | NA         | NA         | NA         | RBM22P13   |
| NA        | ENSG00000261285 | 0          | NA          | NA         | NA         | NA         |            |
| 105371374 | ENSG00000261286 | 3.46222185 | 0.12625802  | 0.40187083 | 0.20484032 | 0.41169887 | ATP2C2-AS1 |
| NA        | ENSG00000261288 | 2.00338384 | -0.03733551 | 0.38315542 | 0.52708243 | NA         |            |
| NA        | ENSG00000261289 | 0          | NA          | NA         | NA         | NA         |            |
| NA        | ENSG00000261290 | 0          | NA          | NA         | NA         | NA         | CYP4A44P   |
| NA        | ENSG00000261291 | 0          | NA          | NA         | NA         | NA         |            |
| NA        | ENSG00000261292 | 12.7609311 | -5.31635518 | 1.41411577 | 7.66E-06   | 7.44E-05   |            |
| NA        | ENSG00000261293 | 0          | NA          | NA         | NA         | NA         |            |
| NA        | ENSG00000261294 | 0          | NA          | NA         | NA         | NA         |            |
| NA        | ENSG00000261296 | 0          | NA          | NA         | NA         | NA         |            |
| NA        | ENSG00000261298 | 0          | NA          | NA         | NA         | NA         |            |
| NA        | ENSG00000261299 | 0          | NA          | NA         | NA         | NA         | C2orf69P3  |
| 105371286 | ENSG00000261302 | 0.62081023 | -0.00994658 | 0.38237221 | 0.78765842 | NA         | NUP93-DT   |
| NA        | ENSG00000261303 | 8.70707208 | 0.27172119  | 0.48582309 | 0.07924277 | 0.20999175 |            |
| NA        | ENSG00000261304 | 0          | NA          | NA         | NA         | NA         | LINC02252  |
| NA        | ENSG00000261305 | 2.97846948 | 0.11714985  | 0.39536613 | 0.26234085 | 0.48430654 |            |
| NA        | ENSG00000261307 | 0          | NA          | NA         | NA         | NA         |            |

|           |                 |            |             |            |            |            |            |
|-----------|-----------------|------------|-------------|------------|------------|------------|------------|
| 401720    | ENSG00000261308 | 213.613186 | -0.26016028 | 0.15956035 | 0.07229262 | 0.19588883 | FIGNL2     |
| NA        | ENSG00000261310 | 0          | NA          | NA         | NA         | NA         |            |
| NA        | ENSG00000261312 | 0.94080326 | -0.01220327 | 0.38211885 | 0.802381   | NA         |            |
| NA        | ENSG00000261313 | 0          | NA          | NA         | NA         | NA         |            |
| NA        | ENSG00000261314 | 0.32392773 | -0.02327383 | 0.38532146 | 0.66854888 | NA         |            |
| NA        | ENSG00000261315 | 0.18922458 | 0.01954053  | 0.38488496 | 0.78225479 | NA         | LARP4P     |
| 107985280 | ENSG00000261316 | 0          | NA          | NA         | NA         | NA         | LINC01834  |
| NA        | ENSG00000261318 | 0.54874555 | 0.03274007  | 0.38621769 | 0.45428733 | NA         | DIS3L-AS1  |
| NA        | ENSG00000261319 | 0          | NA          | NA         | NA         | NA         | LINC02152  |
| NA        | ENSG00000261320 | 1.29497252 | -0.04210146 | 0.38264343 | 0.52175189 | NA         |            |
| NA        | ENSG00000261324 | 57.2443267 | 0.00398608  | 0.23892871 | 0.98449406 | 0.99457273 |            |
| 100507534 | ENSG00000261325 | 0.30139824 | -0.02296476 | 0.38527817 | 0.68536535 | NA         | LINC02192  |
| NA        | ENSG00000261326 | 161.537618 | -0.13685369 | 0.23150325 | 0.45919867 | 0.68252693 | LINC01355  |
| NA        | ENSG00000261327 | 3.81894878 | -0.04142627 | 0.36970342 | 0.70975912 | 0.860757   |            |
| NA        | ENSG00000261329 | 4.2328376  | -0.02360883 | 0.36819897 | 0.82784484 | 0.92210075 |            |
| NA        | ENSG00000261330 | 0.18922458 | 0.01954053  | 0.38488496 | 0.78225479 | NA         | PPIAP50    |
| NA        | ENSG00000261332 | 0          | NA          | NA         | NA         | NA         |            |
| NA        | ENSG00000261333 | 0          | NA          | NA         | NA         | NA         | CD24P2     |
| NA        | ENSG00000261334 | 0          | NA          | NA         | NA         | NA         |            |
| 105274304 | ENSG00000261335 | 15.5085646 | -0.07443754 | 0.32802086 | 0.67546958 | 0.84111426 |            |
| NA        | ENSG00000261336 | 0          | NA          | NA         | NA         | NA         | EIF4BP5    |
| NA        | ENSG00000261338 | 11.3006217 | -0.19169672 | 0.38356452 | 0.28463137 | 0.50987892 |            |
| 106456574 | ENSG00000261340 | 0          | NA          | NA         | NA         | NA         | LINC01616  |
| 105372440 | ENSG00000261341 | 0.95706674 | 0.01506193  | 0.38139987 | 0.7844682  | NA         |            |
| NA        | ENSG00000261342 | 34.4117902 | 0.00796543  | 0.27417959 | 0.96884661 | 0.98832416 |            |
| NA        | ENSG00000261346 | 0          | NA          | NA         | NA         | NA         |            |
| NA        | ENSG00000261347 | 0          | NA          | NA         | NA         | NA         |            |
| NA        | ENSG00000261348 | 0          | NA          | NA         | NA         | NA         | LINC02136  |
| NA        | ENSG00000261349 | 2.25806745 | 0.0733417   | 0.38482817 | 0.39892164 | NA         |            |
| NA        | ENSG00000261350 | 2.05084922 | -6.34E-06   | 0.37717487 | 0.99830404 | NA         |            |
| NA        | ENSG00000261351 | 29.3667381 | 0.51322025  | 0.41804067 | 0.04732338 | 0.14258101 |            |
| NA        | ENSG00000261356 | 0          | NA          | NA         | NA         | NA         |            |
| NA        | ENSG00000261357 | 0.49178678 | 0.01489879  | 0.38314671 | 0.7491654  | NA         |            |
| 100652740 | ENSG00000261359 | 0          | NA          | NA         | NA         | NA         | PYCARD-AS1 |
| 728178    | ENSG00000261360 | 10.8364585 | -0.17889718 | 0.40026304 | 0.24791996 | 0.466983   | OTULIN-DT  |
| NA        | ENSG00000261362 | 0          | NA          | NA         | NA         | NA         |            |
| NA        | ENSG00000261363 | 0          | NA          | NA         | NA         | NA         |            |
| NA        | ENSG00000261364 | 0          | NA          | NA         | NA         | NA         |            |

|           |                 |            |             |            |            |            |            |
|-----------|-----------------|------------|-------------|------------|------------|------------|------------|
| NA        | ENSG00000261365 | 0          | NA          | NA         | NA         | NA         |            |
| 101927288 | ENSG00000261366 | 16.9333289 | -0.01933163 | 0.32059778 | 0.91146514 | 0.96229611 | MANEA-DT   |
| NA        | ENSG00000261367 | 0.29863895 | -0.02292439 | 0.3852726  | 0.68753245 | NA         |            |
| NA        | ENSG00000261368 | 0          | NA          | NA         | NA         | NA         |            |
| NA        | ENSG00000261369 | 0          | NA          | NA         | NA         | NA         |            |
| 5175      | ENSG00000261371 | 0          | NA          | NA         | NA         | NA         | PECAM1     |
| 100128881 | ENSG00000261373 | 388.802174 | 0.11144869  | 0.13101725 | 0.3653943  | 0.5947154  | VPS9D1-AS1 |
| NA        | ENSG00000261375 | 0          | NA          | NA         | NA         | NA         |            |
| NA        | ENSG00000261376 | 0          | NA          | NA         | NA         | NA         |            |
| NA        | ENSG00000261377 | 231.306929 | 0.00433218  | 0.15074256 | 0.97616371 | 0.99170916 | PDCD6IPP2  |
| NA        | ENSG00000261379 | 0.18922458 | 0.01954053  | 0.38488496 | 0.78225479 | NA         |            |
| NA        | ENSG00000261382 | 0          | NA          | NA         | NA         | NA         |            |
| NA        | ENSG00000261384 | 0          | NA          | NA         | NA         | NA         |            |
| NA        | ENSG00000261385 | 0          | NA          | NA         | NA         | NA         |            |
| NA        | ENSG00000261386 | 3.05133995 | 0.09364603  | 0.38558724 | 0.37686631 | 0.60570261 |            |
| 102467146 | ENSG00000261390 | 4.3603493  | 0.20849298  | 0.44586465 | 0.08819955 | 0.22696227 | MAFTRR     |
| NA        | ENSG00000261391 | 0          | NA          | NA         | NA         | NA         |            |
| NA        | ENSG00000261392 | 0          | NA          | NA         | NA         | NA         |            |
| NA        | ENSG00000261393 | 0          | NA          | NA         | NA         | NA         |            |
| 101927227 | ENSG00000261394 | 0          | NA          | NA         | NA         | NA         |            |
| NA        | ENSG00000261395 | 0          | NA          | NA         | NA         | NA         | HSPE1P5    |
| NA        | ENSG00000261396 | 0.4503438  | -0.02732946 | 0.3857155  | 0.56141038 | NA         |            |
| 104355218 | ENSG00000261397 | 0          | NA          | NA         | NA         | NA         | LINC01177  |
| 112268173 | ENSG00000261398 | 0          | NA          | NA         | NA         | NA         |            |
| NA        | ENSG00000261399 | 0.15069912 | -0.01848503 | 0.38480575 | 0.84537521 | NA         |            |
| NA        | ENSG00000261400 | 0.81839637 | -0.04645364 | 0.388026   | 0.31280601 | NA         |            |
| NA        | ENSG00000261401 | 2.36451145 | -0.02093317 | 0.37866398 | 0.7700679  | NA         | HERC2P1    |
| NA        | ENSG00000261402 | 0.34034035 | 0.00231272  | 0.38337937 | 0.96560714 | NA         |            |
| NA        | ENSG00000261403 | 0.37844916 | 0.02407552  | 0.3854191  | 0.60038877 | NA         |            |
| 101928035 | ENSG00000261404 | 0.65771928 | 0.00785724  | 0.38247208 | 0.86438943 | NA         | PSMD7-DT   |
| NA        | ENSG00000261405 | 0          | NA          | NA         | NA         | NA         |            |
| NA        | ENSG00000261407 | 0          | NA          | NA         | NA         | NA         |            |
| 100529145 | ENSG00000261408 | 264.720221 | 0.19713976  | 0.18081798 | 0.21700311 | 0.42826437 | TEN1-CDK3  |
| NA        | ENSG00000261410 | 0          | NA          | NA         | NA         | NA         |            |
| NA        | ENSG00000261411 | 0          | NA          | NA         | NA         | NA         |            |
| NA        | ENSG00000261416 | 1.29252599 | 0.00370974  | 0.37905382 | 0.9559107  | NA         | CORO1A-AS1 |
| NA        | ENSG00000261418 | 1.05150037 | 0.07242877  | 0.39322591 | 0.15560357 | NA         | HERC2P6    |
| NA        | ENSG00000261419 | 0          | NA          | NA         | NA         | NA         |            |

|           |                 |            |             |            |            |            |             |
|-----------|-----------------|------------|-------------|------------|------------|------------|-------------|
| NA        | ENSG00000261420 | 23.7707711 | -0.03751587 | 0.30806079 | 0.84140015 | 0.92792546 | MPC1-DT     |
| NA        | ENSG00000261421 | 0          | NA          | NA         | NA         | NA         |             |
| 105370888 | ENSG00000261423 | 104.372329 | 0.04217916  | 0.19784139 | 0.80449175 | 0.91118482 | TMEM202-AS1 |
| NA        | ENSG00000261424 | 0          | NA          | NA         | NA         | NA         | ATP5BPB7    |
| NA        | ENSG00000261426 | 0.18922458 | 0.01954053  | 0.38488496 | 0.78225479 | NA         |             |
| NA        | ENSG00000261427 | 0.48602639 | -0.02869496 | 0.38579971 | 0.54698822 | NA         |             |
| NA        | ENSG00000261429 | 0          | NA          | NA         | NA         | NA         | DPPA2P4     |
| NA        | ENSG00000261430 | 0          | NA          | NA         | NA         | NA         |             |
| NA        | ENSG00000261431 | 0.36401633 | 0.02390221  | 0.38539357 | 0.60944162 | NA         | DHX35-DT    |
| 106146149 | ENSG00000261432 | 0.173733   | 0.01914545  | 0.38484597 | 0.78225479 | NA         | LINC01613   |
| NA        | ENSG00000261433 | 0.82423768 | 0.02846419  | 0.38428278 | 0.52070448 | NA         |             |
| NA        | ENSG00000261434 | 0          | NA          | NA         | NA         | NA         |             |
| NA        | ENSG00000261435 | 0          | NA          | NA         | NA         | NA         |             |
| NA        | ENSG00000261436 | 0          | NA          | NA         | NA         | NA         |             |
| 100288748 | ENSG00000261437 | 0          | NA          | NA         | NA         | NA         | LINC02894   |
| NA        | ENSG00000261438 | 0.33471731 | 0.02354391  | 0.38534154 | 0.62842204 | NA         |             |
| 26077     | ENSG00000261439 | 0.65860578 | 0.00328586  | 0.38192233 | 0.94366818 | NA         | GNAO1-AS1   |
| NA        | ENSG00000261440 | 0          | NA          | NA         | NA         | NA         | DUX4L45     |
| NA        | ENSG00000261441 | 4.81169617 | -0.06914277 | 0.37017649 | 0.57710781 | 0.77557535 | POLG-DT     |
| NA        | ENSG00000261442 | 0.32435284 | 0.00126272  | 0.38336742 | 0.96821385 | NA         |             |
| NA        | ENSG00000261444 | 0          | NA          | NA         | NA         | NA         |             |
| NA        | ENSG00000261445 | 0          | NA          | NA         | NA         | NA         |             |
| 100874187 | ENSG00000261446 | 0          | NA          | NA         | NA         | NA         | LINC00559   |
| NA        | ENSG00000261447 | 2.05240871 | -0.10642168 | 0.39750971 | 0.2049307  | NA         |             |
| 102723692 | ENSG00000261448 | 0.32249822 | -0.02325428 | 0.3853187  | 0.66960282 | NA         |             |
| NA        | ENSG00000261449 | 0.30139824 | -0.02296476 | 0.38527817 | 0.68536535 | NA         |             |
| NA        | ENSG00000261451 | 3.56957894 | 0.00648124  | 0.36851905 | 0.95341486 | 0.98074558 |             |
| NA        | ENSG00000261453 | 1.50083972 | -0.08056732 | 0.39579073 | 0.10708504 | NA         | LINC01735   |
| NA        | ENSG00000261455 | 191.139037 | -0.08864071 | 0.16062121 | 0.5423352  | 0.75039615 | LINC01003   |
| 347688    | ENSG00000261456 | 11.7726613 | 0.36898308  | 0.51532598 | 0.08645875 | 0.22396418 | TUBB8       |
| NA        | ENSG00000261457 | 0          | NA          | NA         | NA         | NA         |             |
| NA        | ENSG00000261458 | 0          | NA          | NA         | NA         | NA         |             |
| NA        | ENSG00000261459 | 21.0369245 | -0.00843598 | 0.38309273 | 0.81830515 | 0.9171248  |             |
| NA        | ENSG00000261460 | 0.87826296 | 0.06218111  | 0.39075623 | 0.2130973  | NA         |             |
| NA        | ENSG00000261461 | 0          | NA          | NA         | NA         | NA         | UBE2MPI     |
| NA        | ENSG00000261462 | 21.5316057 | -0.34609155 | 0.4382655  | 0.11986715 | 0.28498075 |             |
| NA        | ENSG00000261465 | 0.84284586 | -0.02199733 | 0.38243157 | 0.67218326 | NA         | COQ7-DT     |
| NA        | ENSG00000261466 | 0.34686856 | 0.00022665  | 0.38336212 | 0.96631152 | NA         |             |



|           |                 |            |             |            |            |            |            |
|-----------|-----------------|------------|-------------|------------|------------|------------|------------|
| NA        | ENSG00000261467 | 0.84281226 | 0.04795819  | 0.38832137 | 0.27820709 | NA         |            |
| NA        | ENSG00000261468 | 0.86141565 | 0.04723685  | 0.38560384 | 0.39775965 | NA         |            |
| NA        | ENSG00000261469 | 0.60049103 | -0.0351207  | 0.38649142 | 0.44195727 | NA         |            |
| NA        | ENSG00000261470 | 0          | NA          | NA         | NA         | NA         |            |
| NA        | ENSG00000261471 | 0          | NA          | NA         | NA         | NA         |            |
| NA        | ENSG00000261472 | 0          | NA          | NA         | NA         | NA         |            |
| NA        | ENSG00000261474 | 4.61326862 | -0.01964513 | 0.36280078 | 0.87132525 | 0.94387622 |            |
| NA        | ENSG00000261475 | 0          | NA          | NA         | NA         | NA         | LINC02190  |
| NA        | ENSG00000261476 | 5.27393437 | 0.0138952   | 0.35867461 | 0.91753259 | 0.96510692 |            |
| NA        | ENSG00000261478 | 26.467832  | -0.01294901 | 0.29303426 | 0.94389791 | 0.97714242 |            |
| 653720    | ENSG00000261480 | 0.16735865 | 0.01897177  | 0.38482933 | 0.78225479 | NA         | GOLGA8M    |
| NA        | ENSG00000261481 | 0.16735865 | 0.01897177  | 0.38482933 | 0.78225479 | NA         | CARHSP1-DT |
| NA        | ENSG00000261482 | 0          | NA          | NA         | NA         | NA         |            |
| NA        | ENSG00000261485 | 12.9806096 | 0.27108193  | 0.42083617 | 0.17229443 | 0.36486286 | PAN3-AS1   |
| NA        | ENSG00000261486 | 0          | NA          | NA         | NA         | NA         | RARRES2P9  |
| NA        | ENSG00000261487 | 17.4564412 | -0.21769027 | 0.36658755 | 0.27217759 | 0.49553485 |            |
| 112806053 | ENSG00000261488 | 4.10913011 | 0.20890412  | 0.45450874 | 0.06347147 | 0.17887414 | TBILA      |
| NA        | ENSG00000261489 | 0          | NA          | NA         | NA         | NA         |            |
| NA        | ENSG00000261490 | 14.7079228 | -0.04145964 | 0.32458111 | 0.81271259 | 0.91516078 |            |
| NA        | ENSG00000261491 | 0          | NA          | NA         | NA         | NA         | DNM1P31    |
| NA        | ENSG00000261497 | 0          | NA          | NA         | NA         | NA         |            |
| 100861547 | ENSG00000261498 | 0          | NA          | NA         | NA         | NA         | LINC00566  |
| NA        | ENSG00000261499 | 9.92248265 | 0.16285696  | 0.40299363 | 0.24324235 | 0.46167877 |            |
| NA        | ENSG00000261501 | 0          | NA          | NA         | NA         | NA         | BBS7-DT    |
| NA        | ENSG00000261502 | 2.98232394 | 0.09731995  | 0.39406812 | 0.24082293 | 0.45879844 |            |
| 284648    | ENSG00000261504 | 6.2493909  | -0.08775754 | 0.36971284 | 0.51576713 | 0.73002247 | LINC01686  |
| NA        | ENSG00000261505 | 45.7348692 | 0.04472534  | 0.28533622 | 0.81804504 | 0.9171248  |            |
| 729355    | ENSG00000261509 | 6.05202485 | 0.17087282  | 0.41703679 | 0.16784311 | 0.35875968 | TP53TG3B   |
| 102723655 | ENSG00000261509 | 6.05202485 | 0.17087282  | 0.41703679 | 0.16784311 | 0.35875968 | TP53TG3B   |
| 102723713 | ENSG00000261509 | 6.05202485 | 0.17087282  | 0.41703679 | 0.16784311 | 0.35875968 | TP53TG3B   |
| 102724101 | ENSG00000261509 | 6.05202485 | 0.17087282  | 0.41703679 | 0.16784311 | 0.35875968 | TP53TG3B   |
| 102724127 | ENSG00000261509 | 6.05202485 | 0.17087282  | 0.41703679 | 0.16784311 | 0.35875968 | TP53TG3B   |
| NA        | ENSG00000261511 | 0          | NA          | NA         | NA         | NA         | CYP3A137P  |
| NA        | ENSG00000261512 | 27.9875116 | 1.62825555  | 0.51236936 | 9.12E-05   | 0.00070141 |            |
| NA        | ENSG00000261513 | 0.33969177 | 0.00269959  | 0.3833858  | 0.96268242 | NA         |            |
| NA        | ENSG00000261514 | 8.28454564 | 0.01947348  | 0.35072672 | 0.89559985 | 0.95469109 | LINC01976  |
| NA        | ENSG00000261515 | 0          | NA          | NA         | NA         | NA         | VN1R70P    |
| 100861552 | ENSG00000261517 | 0          | NA          | NA         | NA         | NA         | LINC00558  |

|           |    |                 |            |             |            |            |            |            |
|-----------|----|-----------------|------------|-------------|------------|------------|------------|------------|
|           | NA | ENSG00000261519 | 5.45243264 | -0.07791278 | 0.37747651 | 0.48840776 | 0.70812701 |            |
|           | NA | ENSG00000261520 | 0          | NA          | NA         | NA         | NA         | DLGAP1-AS5 |
| 100133920 | NA | ENSG00000261522 | 0          | NA          | NA         | NA         | NA         |            |
|           | NA | ENSG00000261523 | 0.34746601 | 0.02370763  | 0.3853651  | 0.61987128 | NA         |            |
|           | NA | ENSG00000261524 | 6.55766969 | -0.05933379 | 0.37523367 | 0.57422421 | 0.77352065 | ABCB10P3   |
|           | NA | ENSG00000261526 | 119.714429 | -0.42413571 | 0.21466263 | 0.02022195 | 0.07354783 |            |
|           | NA | ENSG00000261527 | 0.16735865 | 0.01897177  | 0.38482933 | 0.78225479 | NA         |            |
|           | NA | ENSG00000261528 | 2.53369646 | -0.0184488  | 0.37372692 | 0.83874651 | NA         | CCNYL7     |
|           | NA | ENSG00000261529 | 1.39106244 | 0.0361533   | 0.38021006 | 0.6204903  | NA         |            |
|           | NA | ENSG00000261532 | 0          | NA          | NA         | NA         | NA         |            |
|           | NA | ENSG00000261534 | 21.6389276 | 0.01174356  | 0.38028103 | 0.85548339 | 0.93550076 |            |
|           | NA | ENSG00000261535 | 0.51937201 | -0.02557462 | 0.38567603 | 0.54680819 | NA         |            |
|           | NA | ENSG00000261536 | 0          | NA          | NA         | NA         | NA         | ABHD17AP9  |
|           | NA | ENSG00000261537 | 0          | NA          | NA         | NA         | NA         |            |
|           | NA | ENSG00000261538 | 0          | NA          | NA         | NA         | NA         |            |
|           | NA | ENSG00000261540 | 0          | NA          | NA         | NA         | NA         |            |
|           | NA | ENSG00000261541 | 0          | NA          | NA         | NA         | NA         |            |
|           | NA | ENSG00000261542 | 5.94860523 | -0.073665   | 0.36379985 | 0.59394038 | 0.78752771 |            |
|           | NA | ENSG00000261543 | 0          | NA          | NA         | NA         | NA         |            |
|           | NA | ENSG00000261544 | 0          | NA          | NA         | NA         | NA         |            |
|           | NA | ENSG00000261546 | 3.64130042 | -0.05715874 | 0.3725318  | 0.60797795 | 0.79695264 |            |
|           | NA | ENSG00000261548 | 0          | NA          | NA         | NA         | NA         | HLA-P      |
|           | NA | ENSG00000261549 | 0          | NA          | NA         | NA         | NA         |            |
|           | NA | ENSG00000261552 | 0          | NA          | NA         | NA         | NA         |            |
|           | NA | ENSG00000261553 | 54.0337234 | 0.18157945  | 0.31706737 | 0.36475041 | 0.59432668 |            |
|           | NA | ENSG00000261554 | 0          | NA          | NA         | NA         | NA         |            |
|           | NA | ENSG00000261555 | 0.82392722 | 0.01909183  | 0.38143941 | 0.73471998 | NA         |            |
| 100506060 | NA | ENSG00000261556 | 325.568884 | -0.28097466 | 0.13351497 | 0.02423203 | 0.08501563 | SMG1P7     |
| 107984138 | NA | ENSG00000261556 | 325.568884 | -0.28097466 | 0.13351497 | 0.02423203 | 0.08501563 | SMG1P7     |
|           | NA | ENSG00000261557 | 0.14931947 | -0.01844332 | 0.38480212 | 0.84537521 | NA         | EEF1A1P38  |
| 101929164 | NA | ENSG00000261558 | 0.14931947 | -0.01844332 | 0.38480212 | 0.84537521 | NA         | LINC01859  |
|           | NA | ENSG00000261559 | 74.1170033 | 0.76879084  | 0.29565654 | 0.00149073 | 0.00833596 | FSCN1P1    |
|           | NA | ENSG00000261560 | 12.5064503 | 0.04281713  | 0.33856493 | 0.79653684 | 0.90658744 |            |
|           | NA | ENSG00000261561 | 0          | NA          | NA         | NA         | NA         |            |
|           | NA | ENSG00000261564 | 0          | NA          | NA         | NA         | NA         |            |
|           | NA | ENSG00000261566 | 0          | NA          | NA         | NA         | NA         |            |
|           | NA | ENSG00000261569 | 0          | NA          | NA         | NA         | NA         |            |
|           | NA | ENSG00000261570 | 2.87632314 | 0.06201224  | 0.37898023 | 0.52575765 | 0.73808697 | AGK-DT     |

|           |                 |            |             |            |            |            |           |
|-----------|-----------------|------------|-------------|------------|------------|------------|-----------|
| NA        | ENSG00000261572 | 1.43355308 | -0.06269703 | 0.38513188 | 0.40037913 | NA         |           |
| NA        | ENSG00000261573 | 0          | NA          | NA         | NA         | NA         |           |
| NA        | ENSG00000261575 | 2.98613826 | 0.04267151  | 0.37429381 | 0.66982959 | 0.83753108 |           |
| NA        | ENSG00000261578 | 132.708434 | 0.11514537  | 0.18679661 | 0.48168331 | 0.70240082 |           |
| NA        | ENSG00000261580 | 0          | NA          | NA         | NA         | NA         | ENPP7P13  |
| NA        | ENSG00000261581 | 1.19789296 | 0.06757947  | 0.39232954 | 0.15117685 | NA         | HERC2P11  |
| NA        | ENSG00000261582 | 2.33423213 | 0.01485388  | 0.37177176 | 0.88064859 | NA         |           |
| NA        | ENSG00000261583 | 0          | NA          | NA         | NA         | NA         |           |
| NA        | ENSG00000261584 | 98.4515146 | 0.07970698  | 0.20775264 | 0.64997827 | 0.82529572 |           |
| NA        | ENSG00000261586 | 0          | NA          | NA         | NA         | NA         |           |
| 340393    | ENSG00000261587 | 39.4430758 | -0.08859629 | 0.27727843 | 0.64758728 | 0.82430661 | TMEM249   |
| NA        | ENSG00000261588 | 0          | NA          | NA         | NA         | NA         |           |
| NA        | ENSG00000261590 | 0          | NA          | NA         | NA         | NA         |           |
| NA        | ENSG00000261592 | 0          | NA          | NA         | NA         | NA         |           |
| NA        | ENSG00000261593 | 0          | NA          | NA         | NA         | NA         | CYP4A27P  |
| 100507050 | ENSG00000261594 | 7.388668   | -0.13524044 | 0.38390424 | 0.34643161 | 0.57719207 | TPBGL     |
| NA        | ENSG00000261595 | 0.34110352 | 0.02362648  | 0.38535339 | 0.62410921 | NA         | PPM1J-DT  |
| NA        | ENSG00000261596 | 1.29592257 | -0.05668125 | 0.38729207 | 0.29670746 | NA         |           |
| NA        | ENSG00000261599 | 115.516684 | 0.32228551  | 0.22513783 | 0.08430467 | 0.21975376 | HERC2P8   |
| NA        | ENSG00000261600 | 5.53863875 | -0.10697859 | 0.37606229 | 0.43203743 | 0.65763562 |           |
| NA        | ENSG00000261602 | 0.15069912 | -0.01848503 | 0.38480575 | 0.84537521 | NA         |           |
| 100287362 | ENSG00000261603 | 2.61028064 | 0.05507879  | 0.37724571 | 0.57135574 | 0.77166993 | PRSS46P   |
| NA        | ENSG00000261604 | 0.52119901 | 0.02576573  | 0.38568143 | 0.51723676 | NA         |           |
| NA        | ENSG00000261606 | 0.34624801 | -0.02356563 | 0.38536324 | 0.65270996 | NA         |           |
| NA        | ENSG00000261607 | 0          | NA          | NA         | NA         | NA         |           |
| NA        | ENSG00000261608 | 0          | NA          | NA         | NA         | NA         | SLC25A1P4 |
| 8139      | ENSG00000261609 | 244.19693  | -0.21143027 | 0.16812512 | 0.16062651 | 0.34855682 | GAN       |
| NA        | ENSG00000261610 | 1.05997397 | 0.04611428  | 0.38577903 | 0.35751801 | NA         |           |
| NA        | ENSG00000261611 | 21.8275025 | 0.34579639  | 0.46995118 | 0.11013104 | 0.26735784 |           |
| NA        | ENSG00000261612 | 0          | NA          | NA         | NA         | NA         | SUB1P3    |
| NA        | ENSG00000261613 | 243.496168 | 0.28240195  | 0.15786647 | 0.04953587 | 0.14798849 |           |
| NA        | ENSG00000261614 | 0          | NA          | NA         | NA         | NA         | YBX3P1    |
| 101929144 | ENSG00000261615 | 2.06120887 | 0.03547001  | 0.37993034 | 0.6279614  | NA         | LINC01858 |
| NA        | ENSG00000261616 | 4.61105357 | -0.0695002  | 0.3707836  | 0.570613   | 0.77097262 |           |
| 101927009 | ENSG00000261617 | 0.54535647 | 0.03257892  | 0.38620097 | 0.45657595 | NA         | LINC02177 |
| NA        | ENSG00000261618 | 10.6515181 | -0.07830014 | 0.34946356 | 0.62480744 | 0.80878056 | LINC02605 |
| NA        | ENSG00000261620 | 0          | NA          | NA         | NA         | NA         | HMG2P41   |
| 101927228 | ENSG00000261623 | 0.30139824 | -0.02296476 | 0.38527817 | 0.68536535 | NA         | LINC02179 |

|           |                 |            |             |            |            |            |            |
|-----------|-----------------|------------|-------------|------------|------------|------------|------------|
| NA        | ENSG00000261624 | 0          | NA          | NA         | NA         | NA         | NDUFB10P2  |
| NA        | ENSG00000261625 | 0          | NA          | NA         | NA         | NA         |            |
| NA        | ENSG00000261627 | 0          | NA          | NA         | NA         | NA         |            |
| NA        | ENSG00000261628 | 0.173733   | 0.01914545  | 0.38484597 | 0.78225479 | NA         |            |
| NA        | ENSG00000261629 | 0.173124   | -0.01911262 | 0.38486262 | 0.84537521 | NA         |            |
| NA        | ENSG00000261630 | 0          | NA          | NA         | NA         | NA         |            |
| NA        | ENSG00000261632 | 0          | NA          | NA         | NA         | NA         |            |
| NA        | ENSG00000261633 | 0          | NA          | NA         | NA         | NA         |            |
| NA        | ENSG00000261634 | 1.31330749 | -0.02774834 | 0.37928877 | 0.7018868  | NA         | PAQR5-DT   |
| NA        | ENSG00000261635 | 0          | NA          | NA         | NA         | NA         |            |
| NA        | ENSG00000261636 | 0.16735865 | 0.01897177  | 0.38482933 | 0.78225479 | NA         | LINC02191  |
| NA        | ENSG00000261637 | 0          | NA          | NA         | NA         | NA         | LINC02127  |
| NA        | ENSG00000261638 | 0          | NA          | NA         | NA         | NA         |            |
| NA        | ENSG00000261641 | 0          | NA          | NA         | NA         | NA         |            |
| NA        | ENSG00000261642 | 0          | NA          | NA         | NA         | NA         |            |
| NA        | ENSG00000261644 | 0          | NA          | NA         | NA         | NA         | CYLD-AS1   |
| 101929222 | ENSG00000261645 | 0          | NA          | NA         | NA         | NA         | DISC1FP1   |
| NA        | ENSG00000261646 | 4.89379779 | 0.08640843  | 0.37652039 | 0.47792796 | 0.69957877 |            |
| NA        | ENSG00000261647 | 0          | NA          | NA         | NA         | NA         | IMPDH1P11  |
| NA        | ENSG00000261648 | 0          | NA          | NA         | NA         | NA         |            |
| 728310    | ENSG00000261649 | 11.3169744 | -0.05333546 | 0.34854304 | 0.72865911 | 0.87030261 | GOLGA6L7   |
| NA        | ENSG00000261650 | 0          | NA          | NA         | NA         | NA         |            |
| NA        | ENSG00000261651 | 0          | NA          | NA         | NA         | NA         |            |
| 145788    | ENSG00000261652 | 18.7978748 | 0.10196314  | 0.32211739 | 0.5871841  | 0.78237765 | C15orf65   |
| NA        | ENSG00000261653 | 0          | NA          | NA         | NA         | NA         |            |
| NA        | ENSG00000261654 | 5.79890887 | 0.08844622  | 0.37100947 | 0.50904307 | 0.72475167 |            |
| NA        | ENSG00000261655 | 0.60003387 | -0.03562268 | 0.38653687 | 0.43872429 | NA         |            |
| 101927726 | ENSG00000261656 | 0.82758009 | 0.01639784  | 0.38193871 | 0.7510404  | NA         | BEAN1-AS1  |
| NA        | ENSG00000261659 | 95.7683664 | 0.00896559  | 0.2169282  | 0.96159514 | 0.98439922 |            |
| NA        | ENSG00000261663 | 9.21356666 | 0.1058485   | 0.36424336 | 0.49213526 | 0.71115547 |            |
| NA        | ENSG00000261664 | 0.173733   | 0.01914545  | 0.38484597 | 0.78225479 | NA         | TTC39A-AS1 |
| NA        | ENSG00000261665 | 0          | NA          | NA         | NA         | NA         | TUBAP4     |
| 100861553 | ENSG00000261666 | 0          | NA          | NA         | NA         | NA         | LINC00560  |
| 101928108 | ENSG00000261667 | 0          | NA          | NA         | NA         | NA         | LY6L       |
| NA        | ENSG00000261668 | 2.10384635 | -0.02120355 | 0.37517131 | 0.80701365 | NA         |            |
| NA        | ENSG00000261669 | 2.23343035 | 0.01633887  | 0.37565321 | 0.84716251 | NA         |            |
| NA        | ENSG00000261670 | 1.56289721 | -0.06038492 | 0.38553848 | 0.38909691 | NA         |            |
| NA        | ENSG00000261671 | 0.173124   | -0.01911262 | 0.38486262 | 0.84537521 | NA         |            |

|           |                 |            |             |            |            |            |             |
|-----------|-----------------|------------|-------------|------------|------------|------------|-------------|
| NA        | ENSG00000261673 | 0          | NA          | NA         | NA         | NA         |             |
| NA        | ENSG00000261675 | 1.21613103 | 0.05045324  | 0.38902488 | 0.20730064 | NA         |             |
| 83482     | ENSG00000261678 | 423.825237 | -2.4826108  | 0.13811881 | 2.14E-73   | 3.69E-71   | SCRT1       |
| NA        | ENSG00000261679 | 0          | NA          | NA         | NA         | NA         | ATP5PDP1    |
| NA        | ENSG00000261680 | 0          | NA          | NA         | NA         | NA         |             |
| 100505583 | ENSG00000261683 | 0          | NA          | NA         | NA         | NA         | LINC00838   |
| NA        | ENSG00000261684 | 6.39713083 | 0.02453258  | 0.35643938 | 0.85970757 | 0.93751308 |             |
| NA        | ENSG00000261687 | 0.4759547  | -0.00794622 | 0.38324755 | 0.85638236 | NA         |             |
| NA        | ENSG00000261689 | 0          | NA          | NA         | NA         | NA         | AGGF1P4     |
| NA        | ENSG00000261691 | 0          | NA          | NA         | NA         | NA         |             |
| NA        | ENSG00000261692 | 0          | NA          | NA         | NA         | NA         |             |
| NA        | ENSG00000261693 | 5.56723719 | -0.12639237 | 0.38336092 | 0.35882563 | 0.58913444 |             |
| NA        | ENSG00000261696 | 0          | NA          | NA         | NA         | NA         |             |
| 101928682 | ENSG00000261697 | 0          | NA          | NA         | NA         | NA         |             |
| 3250      | ENSG00000261701 | 0          | NA          | NA         | NA         | NA         | HPR         |
| NA        | ENSG00000261702 | 0          | NA          | NA         | NA         | NA         |             |
| 105371252 | ENSG00000261703 | 0          | NA          | NA         | NA         | NA         | LINC02168   |
| NA        | ENSG00000261704 | 0          | NA          | NA         | NA         | NA         | IGHV1OR16-1 |
| 727701    | ENSG00000261706 | 0          | NA          | NA         | NA         | NA         | LINC00165   |
| NA        | ENSG00000261707 | 1.55589328 | 0.01920267  | 0.37796363 | 0.79823108 | NA         |             |
| NA        | ENSG00000261708 | 0.35705091 | 0.02381972  | 0.38538147 | 0.61383034 | NA         | DNM1P32     |
| NA        | ENSG00000261709 | 0          | NA          | NA         | NA         | NA         |             |
| NA        | ENSG00000261710 | 0.173124   | -0.01911262 | 0.38486262 | 0.84537521 | NA         |             |
| NA        | ENSG00000261711 | 0          | NA          | NA         | NA         | NA         | FRG2DP      |
| 146336    | ENSG00000261713 | 0          | NA          | NA         | NA         | NA         | SSTR5-AS1   |
| NA        | ENSG00000261714 | 0          | NA          | NA         | NA         | NA         |             |
| 101927900 | ENSG00000261715 | 0.15069912 | -0.01848503 | 0.38480575 | 0.84537521 | NA         | LINC01477   |
| NA        | ENSG00000261716 | 366.658234 | -0.5053531  | 0.5251007  | 0.05208424 | 0.15372677 | H2BC20P     |
| NA        | ENSG00000261717 | 16.9081968 | -0.10292491 | 0.33188391 | 0.57029815 | 0.7706786  |             |
| NA        | ENSG00000261719 | 0.173733   | 0.01914545  | 0.38484597 | 0.78225479 | NA         |             |
| NA        | ENSG00000261720 | 0          | NA          | NA         | NA         | NA         |             |
| NA        | ENSG00000261722 | 0          | NA          | NA         | NA         | NA         |             |
| NA        | ENSG00000261723 | 0.173124   | -0.01911262 | 0.38486262 | 0.84537521 | NA         |             |
| NA        | ENSG00000261725 | 0          | NA          | NA         | NA         | NA         |             |
| NA        | ENSG00000261727 | 0          | NA          | NA         | NA         | NA         |             |
| NA        | ENSG00000261728 | 5.35263199 | -0.06448936 | 0.36618248 | 0.61831544 | 0.80468208 |             |
| 105371653 | ENSG00000261729 | 0          | NA          | NA         | NA         | NA         |             |
| NA        | ENSG00000261730 | 0          | NA          | NA         | NA         | NA         | FOXF2-DT    |

|           |                 |            |             |            |            |            |              |
|-----------|-----------------|------------|-------------|------------|------------|------------|--------------|
| NA        | ENSG00000261731 | 0          | NA          | NA         | NA         | NA         |              |
| NA        | ENSG00000261732 | 64.8208739 | 0.72828088  | 0.31394659 | 0.00338842 | 0.01678388 |              |
| NA        | ENSG00000261734 | 0          | NA          | NA         | NA         | NA         |              |
| NA        | ENSG00000261736 | 0          | NA          | NA         | NA         | NA         |              |
| 105378828 | ENSG00000261737 | 2.01928976 | 0.0125369   | 0.3754511  | 0.8827186  | NA         |              |
| 645355    | ENSG00000261738 | 0          | NA          | NA         | NA         | NA         | MIR3976HG    |
| 653061    | ENSG00000261739 | 0.88064611 | 0.05089604  | 0.38879922 | 0.25748913 | NA         | GOLGA8S      |
| 107282092 | ENSG00000261740 | 1307.34101 | -0.17873135 | 0.07381766 | 0.01346929 | 0.05295894 | BOLA2-SMG1P6 |
| 102724018 | ENSG00000261741 | 0          | NA          | NA         | NA         | NA         | FRG2KP       |
| 283867    | ENSG00000261742 | 0          | NA          | NA         | NA         | NA         | LINC00922    |
| NA        | ENSG00000261743 | 0          | NA          | NA         | NA         | NA         |              |
| 100128882 | ENSG00000261744 | 1.51811663 | -0.02779421 | 0.37989724 | 0.68791652 | NA         | ZFPM1-AS1    |
| NA        | ENSG00000261745 | 0          | NA          | NA         | NA         | NA         |              |
| NA        | ENSG00000261747 | 0          | NA          | NA         | NA         | NA         |              |
| NA        | ENSG00000261748 | 0          | NA          | NA         | NA         | NA         |              |
| 102467079 | ENSG00000261749 | 0          | NA          | NA         | NA         | NA         | LINC02180    |
| NA        | ENSG00000261751 | 0          | NA          | NA         | NA         | NA         |              |
| NA        | ENSG00000261752 | 0.31934339 | 0.00200711  | 0.38337555 | 0.95784529 | NA         | AGGF1P8      |
| NA        | ENSG00000261754 | 94.0315955 | 0.22202308  | 0.22778396 | 0.23220492 | 0.44897628 |              |
| NA        | ENSG00000261757 | 6.31865019 | 0.21997501  | 0.43631503 | 0.14811295 | 0.33032384 |              |
| NA        | ENSG00000261758 | 3.9413103  | 0.0468155   | 0.36946206 | 0.68597386 | 0.84726805 | STAG1-DT     |
| NA        | ENSG00000261759 | 0          | NA          | NA         | NA         | NA         |              |
| 100507334 | ENSG00000261760 | 0          | NA          | NA         | NA         | NA         |              |
| 100508631 | ENSG00000261761 | 2.41136499 | 0.07161323  | 0.38338454 | 0.42604682 | NA         | LINC02616    |
| NA        | ENSG00000261762 | 469.168023 | 0.58254875  | 0.13011961 | 2.33E-06   | 2.48E-05   |              |
| NA        | ENSG00000261763 | 0.15069912 | -0.01848503 | 0.38480575 | 0.84537521 | NA         |              |
| NA        | ENSG00000261764 | 0          | NA          | NA         | NA         | NA         | KRT18P18     |
| NA        | ENSG00000261765 | 0          | NA          | NA         | NA         | NA         |              |
| NA        | ENSG00000261766 | 2.69553989 | 0.04505746  | 0.3787873  | 0.59849598 | 0.78996686 |              |
| NA        | ENSG00000261770 | 15.0588238 | -0.04266963 | 0.32410433 | 0.80790138 | 0.9131433  |              |
| 100533483 | ENSG00000261771 | 6.97974533 | -0.0013     | 0.38289651 | 0.96506918 | 0.98622874 | DNAAF4-CCPG1 |
| NA        | ENSG00000261773 | 1.29101929 | 0.08502782  | 0.39685969 | 0.10463156 | NA         |              |
| NA        | ENSG00000261774 | 0.30139824 | -0.02296476 | 0.38527817 | 0.68536535 | NA         |              |
| NA        | ENSG00000261775 | 0          | NA          | NA         | NA         | NA         |              |
| NA        | ENSG00000261776 | 0          | NA          | NA         | NA         | NA         |              |
| 100506083 | ENSG00000261777 | 13.2168565 | 0.04564735  | 0.33387219 | 0.78999034 | 0.9043268  | DDX19A-DT    |
| NA        | ENSG00000261778 | 0          | NA          | NA         | NA         | NA         |              |
| NA        | ENSG00000261779 | 0          | NA          | NA         | NA         | NA         |              |

|           |                 |                 |             |             |            |            |            |
|-----------|-----------------|-----------------|-------------|-------------|------------|------------|------------|
| 100505817 | ENSG00000261780 | 0               | NA          | NA          | NA         | NA         | LINC02582  |
| 101927876 | ENSG00000261781 | 0               | NA          | NA          | NA         | NA         | LINC01654  |
|           | NA              | ENSG00000261782 | 0           | NA          | NA         | NA         |            |
|           | NA              | ENSG00000261783 | 2.51981008  | 0.00223947  | 0.37341859 | 0.98196916 | NA         |
|           | NA              | ENSG00000261786 | 364.963078  | 0.04994071  | 0.12564843 | 0.67716888 | 0.84229976 |
| 100129654 | ENSG00000261787 | 0               | NA          | NA          | NA         | NA         | TCF24      |
|           | NA              | ENSG00000261789 | 0           | NA          | NA         | NA         |            |
|           | NA              | ENSG00000261790 | 43.4914509  | 0.17511516  | 0.2775027  | 0.38188352 | 0.61096436 |
|           | NA              | ENSG00000261792 | 0.34691387  | 0.00042224  | 0.38336247 | 0.96446229 | NA         |
|           | NA              | ENSG00000261793 | 0           | NA          | NA         | NA         | DNM1P28    |
| 728498    | ENSG00000261794 | 223.731662      | 0.69340626  | 0.15910863  | 3.00E-06   | 3.13E-05   | GOLGA8H    |
|           | NA              | ENSG00000261795 | 4.33224612  | -0.10708645 | 0.38569662 | 0.36140636 | 0.59123619 |
| 100534599 | ENSG00000261796 | 226.380938      | 1.0528428   | 0.23943013  | 1.24E-06   | 1.39E-05   | ISY1-RAB43 |
|           | NA              | ENSG00000261797 | 0.16735865  | 0.01897177  | 0.38482933 | 0.78225479 | NA         |
| 101929536 | ENSG00000261798 | 7.16401593      | 0.02675466  | 0.35508853  | 0.84956297 | 0.93154246 |            |
|           | NA              | ENSG00000261799 | 186.298803  | -0.12138356 | 0.15762019 | 0.39720244 | 0.62623144 |
|           | NA              | ENSG00000261800 | 45.7952472  | 0.66847155  | 0.34945486 | 0.0098309  | 0.04091568 |
| 100287616 | ENSG00000261801 | 0.72356816      | -0.00830019 | 0.38194451  | 0.86472976 | NA         | LOXL1-AS1  |
|           | NA              | ENSG00000261802 | 0           | NA          | NA         | NA         |            |
|           | NA              | ENSG00000261803 | 0           | NA          | NA         | NA         | LINC02140  |
|           | NA              | ENSG00000261804 | 0.4713972   | -0.02834368 | 0.38579999 | 0.54453479 | NA         |
| 101927580 | ENSG00000261807 | 0               | NA          | NA          | NA         | NA         | LINC02141  |
|           | NA              | ENSG00000261809 | 0           | NA          | NA         | NA         | CYP3A54P   |
|           | NA              | ENSG00000261810 | 0           | NA          | NA         | NA         |            |
|           | NA              | ENSG00000261811 | 0           | NA          | NA         | NA         | LINC02164  |
|           | NA              | ENSG00000261812 | 0.93703964  | 0.06646581  | 0.39168003 | 0.19052081 | NA         |
|           | NA              | ENSG00000261813 | 0.15069912  | -0.01848503 | 0.38480575 | 0.84537521 | TUBB8P7    |
|           | NA              | ENSG00000261815 | 0           | NA          | NA         | NA         |            |
|           | NA              | ENSG00000261816 | 0.32366414  | 0.00184289  | 0.38337335 | 0.96343884 | NA         |
|           | NA              | ENSG00000261817 | 0           | NA          | NA         | NA         | NA         |
|           | NA              | ENSG00000261818 | 0           | NA          | NA         | NA         | NA         |
|           | NA              | ENSG00000261819 | 16.7146059  | 0.36591221  | 0.45363063 | 0.10807847 | 0.26368383 |
|           | NA              | ENSG00000261820 | 0           | NA          | NA         | NA         | NA         |
|           | NA              | ENSG00000261821 | 0           | NA          | NA         | NA         | DNM1P49    |
|           | NA              | ENSG00000261822 | 5.11973169  | -0.11805679 | 0.39832756 | 0.22820964 | 0.44340764 |
|           | NA              | ENSG00000261823 | 3.19104054  | -0.0247675  | 0.37529043 | 0.77646717 | 0.89723881 |
| 148189    | ENSG00000261824 | 549.331281      | 0.37230886  | 0.11489261  | 0.00066988 | 0.00415973 | LINC00662  |
|           | NA              | ENSG00000261826 | 0           | NA          | NA         | NA         | NA         |

|           |                 |            |             |            |            |            |              |
|-----------|-----------------|------------|-------------|------------|------------|------------|--------------|
| NA        | ENSG00000261829 | 4.97755834 | 0.06500871  | 0.36842998 | 0.6075683  | 0.79681089 |              |
| NA        | ENSG00000261831 | 0          | NA          | NA         | NA         | NA         |              |
| NA        | ENSG00000261832 | 20.3938275 | 0.39380934  | 0.4681423  | 0.09162998 | 0.23375837 |              |
| NA        | ENSG00000261834 | 0          | NA          | NA         | NA         | NA         | IGHV3OR16-15 |
| NA        | ENSG00000261835 | 0          | NA          | NA         | NA         | NA         |              |
| NA        | ENSG00000261837 | 0.173733   | 0.01914545  | 0.38484597 | 0.78225479 | NA         |              |
| NA        | ENSG00000261838 | 0          | NA          | NA         | NA         | NA         |              |
| NA        | ENSG00000261839 | 12.8902112 | 0.04650224  | 0.33135915 | 0.78886254 | 0.90411045 |              |
| NA        | ENSG00000261840 | 42.6769852 | 0.34286495  | 0.33520487 | 0.12575388 | 0.29484247 |              |
| NA        | ENSG00000261842 | 1.00354867 | 0.00740604  | 0.38007234 | 0.903087   | NA         |              |
| NA        | ENSG00000261845 | 0.69493202 | 0.03154416  | 0.38626309 | 0.41391645 | NA         |              |
| 100288728 | ENSG00000261848 | 0          | NA          | NA         | NA         | NA         |              |
| 101927348 | ENSG00000261856 | 0          | NA          | NA         | NA         | NA         | LINC02186    |
| 8190      | ENSG00000261857 | 0.53166351 | 0.03191353  | 0.38613214 | 0.46622593 | NA         | MIA          |
| 400568    | ENSG00000261863 | 0          | NA          | NA         | NA         | NA         | LINC01996    |
| NA        | ENSG00000261864 | 0.15069912 | -0.01848503 | 0.38480575 | 0.84537521 | NA         |              |
| NA        | ENSG00000261868 | 1.79586571 | 0.11122804  | 0.40335537 | 0.10488251 | NA         | MFSD1P1      |
| NA        | ENSG00000261872 | 0.15069912 | -0.01848503 | 0.38480575 | 0.84537521 | NA         |              |
| NA        | ENSG00000261873 | 1.99642478 | -0.07518867 | 0.39393132 | 0.09678786 | NA         | SMIM36       |
| 100130950 | ENSG00000261879 | 73.9995484 | 0.14823759  | 0.23688328 | 0.43214761 | 0.65772984 | ZNF594-DT    |
| NA        | ENSG00000261882 | 0          | NA          | NA         | NA         | NA         |              |
| NA        | ENSG00000261884 | 119.408931 | -0.51245138 | 0.24660322 | 0.01151901 | 0.04659269 |              |
| NA        | ENSG00000261886 | 0.35740512 | 0.02382227  | 0.38538187 | 0.61365164 | NA         | GOSR2-DT     |
| NA        | ENSG00000261888 | 9.80838222 | 0.15882526  | 0.37723741 | 0.34392628 | 0.57422346 |              |
| NA        | ENSG00000261889 | 4.99298382 | -0.12383966 | 0.38849256 | 0.32783682 | 0.55637794 |              |
| NA        | ENSG00000261898 | 0          | NA          | NA         | NA         | NA         |              |
| NA        | ENSG00000261904 | 1.32910255 | -0.04659015 | 0.38241823 | 0.50815796 | NA         | MTND5P33     |
| NA        | ENSG00000261914 | 0          | NA          | NA         | NA         | NA         | RPL23AP84    |
| NA        | ENSG00000261915 | 2.78080333 | 0.02683454  | 0.37345565 | 0.78055517 | 0.89965693 |              |
| NA        | ENSG00000261916 | 0.44994317 | -0.0273099  | 0.3857139  | 0.56174156 | NA         |              |
| 400627    | ENSG00000261924 | 13.7278494 | 0.00740704  | 0.32985762 | 0.96734757 | 0.98759962 |              |
| 56107     | ENSG00000261934 | 48.78687   | -0.70013914 | 0.42520455 | 0.01347905 | 0.05298679 | PCDHGA9      |
| NA        | ENSG00000261938 | 0          | NA          | NA         | NA         | NA         |              |
| NA        | ENSG00000261939 | 0          | NA          | NA         | NA         | NA         | LARP7P2      |
| 100507003 | ENSG00000261949 | 0          | NA          | NA         | NA         | NA         | GFY          |
| NA        | ENSG00000261959 | 0          | NA          | NA         | NA         | NA         |              |
| NA        | ENSG00000261963 | 68.3336495 | -1.51305408 | 0.30500744 | 5.49E-08   | 7.49E-07   | CCDC92B      |
| NA        | ENSG00000261965 | 0          | NA          | NA         | NA         | NA         | ISCA1P3      |



|           |    |                 |            |             |            |            |            |            |
|-----------|----|-----------------|------------|-------------|------------|------------|------------|------------|
|           | NA | ENSG00000261970 | 0.80781151 | 0.01159789  | 0.38238897 | 0.80167851 | NA         |            |
|           | NA | ENSG00000261971 | 102.944487 | 0.11118821  | 0.20758649 | 0.52607297 | 0.73808697 | MMP25-AS1  |
|           | NA | ENSG00000261976 | 0          | NA          | NA         | NA         | NA         |            |
|           | NA | ENSG00000261978 | 0          | NA          | NA         | NA         | NA         |            |
|           | NA | ENSG00000261987 | 0          | NA          | NA         | NA         | NA         | KYNUPI     |
|           | NA | ENSG00000261996 | 10.7940751 | 0.03545908  | 0.33898093 | 0.82988148 | 0.92286579 |            |
|           | NA | ENSG00000261997 | 9.63963283 | 0.08271306  | 0.35098088 | 0.60796339 | 0.79695264 |            |
|           | NA | ENSG00000262000 | 0          | NA          | NA         | NA         | NA         |            |
|           | NA | ENSG00000262001 | 36.3546302 | 0.96648357  | 0.44140707 | 0.00272123 | 0.01395429 | DLGAP1-AS2 |
| 101927727 | NA | ENSG00000262003 | 0          | NA          | NA         | NA         | NA         |            |
|           | NA | ENSG00000262006 | 0          | NA          | NA         | NA         | NA         |            |
|           | NA | ENSG00000262008 | 0          | NA          | NA         | NA         | NA         |            |
|           | NA | ENSG00000262011 | 0          | NA          | NA         | NA         | NA         |            |
|           | NA | ENSG00000262020 | 0          | NA          | NA         | NA         | NA         |            |
|           | NA | ENSG00000262031 | 0          | NA          | NA         | NA         | NA         | LINC01974  |
|           | NA | ENSG00000262038 | 0          | NA          | NA         | NA         | NA         |            |
|           | NA | ENSG00000262039 | 0.48409288 | -0.00602808 | 0.38313723 | 0.87395397 | NA         |            |
|           | NA | ENSG00000262048 | 0          | NA          | NA         | NA         | NA         |            |
|           | NA | ENSG00000262049 | 202.87402  | 0.17921312  | 0.15873327 | 0.21474255 | 0.42507156 |            |
| 105371592 | NA | ENSG00000262050 | 9.80012523 | 0.18515133  | 0.3927856  | 0.27234927 | 0.49568018 |            |
|           | NA | ENSG00000262052 | 0.173733   | 0.01914545  | 0.38484597 | 0.78225479 | NA         |            |
|           | NA | ENSG00000262061 | 0.42836696 | -0.02611429 | 0.38560675 | 0.58427667 | NA         | RPH3AL-AS1 |
|           | NA | ENSG00000262067 | 0          | NA          | NA         | NA         | NA         |            |
|           | NA | ENSG00000262074 | 0.4739371  | -0.00935642 | 0.38285577 | 0.8455542  | NA         | SNORD3B-2  |
| 26102     | NA | ENSG00000262075 | 18.3643641 | -0.07245567 | 0.32566102 | 0.68552814 | 0.8470175  |            |
|           | NA | ENSG00000262079 | 0          | NA          | NA         | NA         | NA         |            |
|           | NA | ENSG00000262081 | 0          | NA          | NA         | NA         | NA         | IL9RP4     |
|           | NA | ENSG00000262085 | 0          | NA          | NA         | NA         | NA         | OR1P1      |
|           | NA | ENSG00000262089 | 1.93226135 | -0.0348427  | 0.37727764 | 0.68010742 | NA         |            |
|           | NA | ENSG00000262090 | 0          | NA          | NA         | NA         | NA         |            |
|           | NA | ENSG00000262094 | 5.64498888 | -0.00930356 | 0.36925654 | 0.92353474 | 0.96825748 |            |
|           | NA | ENSG00000262095 | 0          | NA          | NA         | NA         | NA         | MTATP6P25  |
|           | NA | ENSG00000262096 | 21.0673849 | 0.34285743  | 0.40291037 | 0.13072057 | 0.30297852 | PCDHB19P   |
|           | NA | ENSG00000262097 | 0.16735865 | 0.01897177  | 0.38482933 | 0.78225479 | NA         | LINC02185  |
|           | NA | ENSG00000262098 | 0          | NA          | NA         | NA         | NA         |            |
| 105371506 | NA | ENSG00000262099 | 0          | NA          | NA         | NA         | NA         | DHX33-DT   |
|           | NA | ENSG00000262106 | 0          | NA          | NA         | NA         | NA         | OR1D3P     |
|           | NA | ENSG00000262107 | 0          | NA          | NA         | NA         | NA         | MTND6P33   |

|           |                 |            |             |            |            |            |           |
|-----------|-----------------|------------|-------------|------------|------------|------------|-----------|
| NA        | ENSG00000262112 | 0          | NA          | NA         | NA         | NA         |           |
| NA        | ENSG00000262115 | 0.66085162 | -0.01969883 | 0.38296015 | 0.66663116 | NA         |           |
| NA        | ENSG00000262116 | 0          | NA          | NA         | NA         | NA         |           |
| 400500    | ENSG00000262117 | 0          | NA          | NA         | NA         | NA         | BCAR4     |
| NA        | ENSG00000262118 | 9.35021543 | 0.09489748  | 0.35549767 | 0.55367459 | 0.75980255 | MTCO1P28  |
| NA        | ENSG00000262119 | 2.57427776 | -0.10264309 | 0.3939762  | 0.25593143 | 0.47704618 |           |
| NA        | ENSG00000262120 | 0          | NA          | NA         | NA         | NA         |           |
| NA        | ENSG00000262133 | 0.34746601 | 0.02370763  | 0.3853651  | 0.61987128 | NA         |           |
| NA        | ENSG00000262135 | 0          | NA          | NA         | NA         | NA         | GARS1P1   |
| NA        | ENSG00000262136 | 0.4674844  | -0.00973412 | 0.38289698 | 0.8458856  | NA         | NQO1-DT   |
| NA        | ENSG00000262140 | 0.15069912 | -0.01848503 | 0.38480575 | 0.84537521 | NA         |           |
| NA        | ENSG00000262141 | 0          | NA          | NA         | NA         | NA         |           |
| NA        | ENSG00000262147 | 0.14931947 | -0.01844332 | 0.38480212 | 0.84537521 | NA         |           |
| NA        | ENSG00000262151 | 0          | NA          | NA         | NA         | NA         |           |
| NA        | ENSG00000262152 | 12.5400713 | -1.56343663 | 0.925854   | 0.00331292 | 0.01645002 | LINC00514 |
| NA        | ENSG00000262154 | 0          | NA          | NA         | NA         | NA         | EIF1P4    |
| 283887    | ENSG00000262155 | 28.0165573 | 0.19713382  | 0.33959781 | 0.3261976  | 0.55442134 | LINC02175 |
| NA        | ENSG00000262158 | 0.89803134 | 0.04011176  | 0.38511873 | 0.42777261 | NA         | MTCO3P24  |
| NA        | ENSG00000262160 | 14.2476521 | -0.00950247 | 0.38292215 | 0.8080131  | 0.9131433  |           |
| NA        | ENSG00000262165 | 1.61172576 | 0.02020761  | 0.38042642 | 0.7477311  | NA         | C17orf114 |
| NA        | ENSG00000262171 | 0.96308024 | -0.03828629 | 0.38457356 | 0.4444773  | NA         |           |
| NA        | ENSG00000262172 | 1.48075345 | 0.01552681  | 0.38015451 | 0.80550073 | NA         |           |
| 101929726 | ENSG00000262179 | 1.53210021 | 0.04458593  | 0.38236355 | 0.52157198 | NA         | MYMX      |
| NA        | ENSG00000262181 | 0          | NA          | NA         | NA         | NA         |           |
| 102724927 | ENSG00000262185 | 0.90245465 | -0.03969054 | 0.38417031 | 0.46743471 | NA         | LINC02861 |
| NA        | ENSG00000262187 | 0          | NA          | NA         | NA         | NA         |           |
| 101928738 | ENSG00000262188 | 2.37579385 | -0.04702356 | 0.37667477 | 0.61386863 | NA         | LINC01978 |
| NA        | ENSG00000262198 | 0          | NA          | NA         | NA         | NA         |           |
| NA        | ENSG00000262202 | 3.01449394 | -0.07482442 | 0.38365913 | 0.41651682 | 0.64309452 |           |
| 56102     | ENSG00000262209 | 41.1512349 | -0.28947191 | 0.31702835 | 0.17688813 | 0.37164677 | PCDHGB3   |
| NA        | ENSG00000262211 | 0          | NA          | NA         | NA         | NA         |           |
| NA        | ENSG00000262213 | 0          | NA          | NA         | NA         | NA         |           |
| NA        | ENSG00000262223 | 14.1159311 | 0.27529483  | 0.4802308  | 0.08902822 | 0.22865817 |           |
| NA        | ENSG00000262227 | 13.3282836 | 0.08123341  | 0.33883332 | 0.6388     | 0.81845605 |           |
| NA        | ENSG00000262228 | 3.25730078 | 0.05905548  | 0.37384448 | 0.59099987 | 0.78567659 |           |
| NA        | ENSG00000262231 | 0          | NA          | NA         | NA         | NA         |           |
| NA        | ENSG00000262235 | 0          | NA          | NA         | NA         | NA         | TMF1P1    |
| 79585     | ENSG00000262246 | 659.75684  | 0.05158047  | 0.09619178 | 0.58032776 | 0.77774473 | CORO7     |

|      |                 |            |             |            |            |            |            |
|------|-----------------|------------|-------------|------------|------------|------------|------------|
| NA   | ENSG00000262248 | 0.30139824 | -0.02296476 | 0.38527817 | 0.68536535 | NA         |            |
| NA   | ENSG00000262259 | 0          | NA          | NA         | NA         | NA         | MTND4LP24  |
| NA   | ENSG00000262262 | 0          | NA          | NA         | NA         | NA         |            |
| NA   | ENSG00000262265 | 2.46242323 | -0.04143726 | 0.37657971 | 0.63985922 | NA         |            |
| NA   | ENSG00000262267 | 0.33972904 | -0.02339159 | 0.3853396  | 0.66077303 | NA         |            |
| NA   | ENSG00000262271 | 0          | NA          | NA         | NA         | NA         |            |
| NA   | ENSG00000262292 | 0.18922458 | 0.01954053  | 0.38488496 | 0.78225479 | NA         | GRAPLDR    |
| NA   | ENSG00000262294 | 0.33939107 | 0.00257545  | 0.38338364 | 0.96386874 | NA         |            |
| NA   | ENSG00000262296 | 0          | NA          | NA         | NA         | NA         |            |
| NA   | ENSG00000262298 | 0          | NA          | NA         | NA         | NA         |            |
| NA   | ENSG00000262302 | 0          | NA          | NA         | NA         | NA         |            |
| NA   | ENSG00000262304 | 12.5520238 | 0.28779637  | 0.51277245 | 0.05767589 | 0.16624869 |            |
| NA   | ENSG00000262312 | 2.91081086 | 0.01215324  | 0.37248011 | 0.90025537 | 0.95585286 |            |
| NA   | ENSG00000262313 | 0          | NA          | NA         | NA         | NA         |            |
| NA   | ENSG00000262316 | 0          | NA          | NA         | NA         | NA         |            |
| NA   | ENSG00000262319 | 0.46701969 | -0.00814258 | 0.38328327 | 0.85922741 | NA         |            |
| NA   | ENSG00000262322 | 1.40675547 | -0.05535541 | 0.38372891 | 0.44758843 | NA         | MTND4P34   |
| NA   | ENSG00000262332 | 0.35702336 | 0.02381952  | 0.38538144 | 0.61384424 | NA         |            |
| NA   | ENSG00000262333 | 36.9789213 | -0.07028413 | 0.27793508 | 0.71553003 | 0.86274919 | HNRNPA1P16 |
| NA   | ENSG00000262339 | 0          | NA          | NA         | NA         | NA         |            |
| NA   | ENSG00000262343 | 0          | NA          | NA         | NA         | NA         |            |
| NA   | ENSG00000262352 | 0          | NA          | NA         | NA         | NA         | LINC02564  |
| NA   | ENSG00000262358 | 0.173733   | 0.01914545  | 0.38484597 | 0.78225479 | NA         |            |
| NA   | ENSG00000262362 | 0.6888907  | 0.02707736  | 0.38370722 | 0.57240855 | NA         |            |
| NA   | ENSG00000262366 | 0          | NA          | NA         | NA         | NA         | NDUFA3P6   |
| NA   | ENSG00000262370 | 0          | NA          | NA         | NA         | NA         |            |
| NA   | ENSG00000262372 | 0          | NA          | NA         | NA         | NA         |            |
| NA   | ENSG00000262380 | 0.15069912 | -0.01848503 | 0.38480575 | 0.84537521 | NA         |            |
| NA   | ENSG00000262381 | 0.546015   | 0.01492847  | 0.38353032 | 0.72459511 | NA         | MTATP6P24  |
| NA   | ENSG00000262384 | 0          | NA          | NA         | NA         | NA         |            |
| NA   | ENSG00000262400 | 0          | NA          | NA         | NA         | NA         |            |
| NA   | ENSG00000262402 | 0          | NA          | NA         | NA         | NA         | MCUR1P1    |
| 4321 | ENSG00000262406 | 0          | NA          | NA         | NA         | NA         | MMP12      |
| NA   | ENSG00000262408 | 0          | NA          | NA         | NA         | NA         |            |
| NA   | ENSG00000262410 | 12.8505794 | 0.0465031   | 0.3322909  | 0.78770018 | 0.90351292 |            |
| NA   | ENSG00000262412 | 6.57842428 | -0.06641981 | 0.36156151 | 0.63215377 | 0.8138826  |            |
| NA   | ENSG00000262413 | 0.50450392 | -0.02991331 | 0.38593942 | 0.51909313 | NA         |            |
| NA   | ENSG00000262420 | 3.58555303 | -0.08164839 | 0.38069747 | 0.44647976 | 0.6707435  |            |

|           |                 |            |             |            |            |            |                |
|-----------|-----------------|------------|-------------|------------|------------|------------|----------------|
| NA        | ENSG00000262429 | 0          | NA          | NA         | NA         | NA         |                |
| NA        | ENSG00000262434 | 1.17602236 | -0.00518697 | 0.3785233  | 0.93958319 | NA         |                |
| NA        | ENSG00000262445 | 0          | NA          | NA         | NA         | NA         |                |
| 100129781 | ENSG00000262454 | 13.5970722 | 0.18596553  | 0.37797825 | 0.30267195 | 0.5299163  | MIR193BHG      |
| NA        | ENSG00000262456 | 0          | NA          | NA         | NA         | NA         |                |
| NA        | ENSG00000262468 | 31.9768214 | -0.35195337 | 0.37028522 | 0.12281032 | 0.2900532  | LINC01569      |
| NA        | ENSG00000262470 | 0          | NA          | NA         | NA         | NA         | TVP23CP2       |
| NA        | ENSG00000262471 | 0          | NA          | NA         | NA         | NA         |                |
| NA        | ENSG00000262480 | 0.34746601 | 0.02370763  | 0.3853651  | 0.61987128 | NA         | SAMD11P1       |
| NA        | ENSG00000262481 | 8.52081893 | 0.03780417  | 0.36461576 | 0.76084956 | 0.88944647 | TMEM256-PLSCR3 |
| NA        | ENSG00000262482 | 0.51320449 | -0.0100967  | 0.38327552 | 0.81998293 | NA         |                |
| 643669    | ENSG00000262484 | 6.74742855 | 0.02639749  | 0.35797301 | 0.84616657 | 0.93023466 | CCER2          |
| NA        | ENSG00000262488 | 0.18922458 | 0.01954053  | 0.38488496 | 0.78225479 | NA         |                |
| NA        | ENSG00000262492 | 0.29863895 | -0.02292439 | 0.3852726  | 0.68753245 | NA         |                |
| NA        | ENSG00000262495 | 0          | NA          | NA         | NA         | NA         |                |
| NA        | ENSG00000262497 | 0          | NA          | NA         | NA         | NA         | FAM187B2P      |
| NA        | ENSG00000262500 | 0.15069912 | -0.01848503 | 0.38480575 | 0.84537521 | NA         | MAPK8IP1P1     |
| NA        | ENSG00000262503 | 0          | NA          | NA         | NA         | NA         |                |
| NA        | ENSG00000262514 | 0          | NA          | NA         | NA         | NA         |                |
| NA        | ENSG00000262516 | 0          | NA          | NA         | NA         | NA         |                |
| NA        | ENSG00000262518 | 0          | NA          | NA         | NA         | NA         |                |
| NA        | ENSG00000262519 | 0.173733   | 0.01914545  | 0.38484597 | 0.78225479 | NA         | TXNP4          |
| NA        | ENSG00000262521 | 0.16735865 | 0.01897177  | 0.38482933 | 0.78225479 | NA         |                |
| NA        | ENSG00000262526 | 8.13775248 | -0.0304971  | 0.38670033 | 0.10266293 | 0.25431797 |                |
| NA        | ENSG00000262528 | 95.1450444 | 0.43616291  | 0.24489954 | 0.02912957 | 0.09808735 |                |
| NA        | ENSG00000262529 | 0          | NA          | NA         | NA         | NA         |                |
| NA        | ENSG00000262533 | 0.16735865 | 0.01897177  | 0.38482933 | 0.78225479 | NA         |                |
| NA        | ENSG00000262539 | 51.0989748 | 0.0209126   | 0.26665572 | 0.91520354 | 0.96403708 |                |
| 110806279 | ENSG00000262543 | 0          | NA          | NA         | NA         | NA         | SMIM28         |
| NA        | ENSG00000262558 | 0          | NA          | NA         | NA         | NA         |                |
| NA        | ENSG00000262560 | 0          | NA          | NA         | NA         | NA         |                |
| NA        | ENSG00000262561 | 0          | NA          | NA         | NA         | NA         |                |
| NA        | ENSG00000262566 | 0          | NA          | NA         | NA         | NA         |                |
| 56111     | ENSG00000262576 | 67.6345165 | 0.25450154  | 0.29717719 | 0.22531985 | 0.43913024 | PCDHGA4        |
| NA        | ENSG00000262580 | 108.589538 | 0.27563029  | 0.2400025  | 0.15249034 | 0.33701774 |                |
| NA        | ENSG00000262583 | 0.35360233 | 0.00553767  | 0.38346179 | 0.9123925  | NA         | TMEM231P1      |
| 101928766 | ENSG00000262585 | 5.30677908 | 0.11989314  | 0.38591829 | 0.35082691 | 0.58113897 | LINC01979      |
| 554206    | ENSG00000262587 | 8.84205848 | 0.10740191  | 0.36142331 | 0.49762759 | 0.71553478 |                |

|           |                 |            |             |            |            |            |            |
|-----------|-----------------|------------|-------------|------------|------------|------------|------------|
| NA        | ENSG00000262609 | 0          | NA          | NA         | NA         | NA         | BTF3P14    |
| NA        | ENSG00000262619 | 0          | NA          | NA         | NA         | NA         | LINC00621  |
| NA        | ENSG00000262623 | 0          | NA          | NA         | NA         | NA         |            |
| NA        | ENSG00000262624 | 0          | NA          | NA         | NA         | NA         |            |
| 8386      | ENSG00000262628 | 0          | NA          | NA         | NA         | NA         | OR1D5      |
| 653166    | ENSG00000262628 | 0          | NA          | NA         | NA         | NA         | OR1D5      |
| NA        | ENSG00000262633 | 191.901714 | -0.01017986 | 0.15777369 | 0.94247907 | 0.97629193 |            |
| NA        | ENSG00000262636 | 0.34746601 | 0.02370763  | 0.3853651  | 0.61987128 | NA         |            |
| NA        | ENSG00000262648 | 0.89591684 | -0.03845544 | 0.3871124  | 0.33943682 | NA         | PHBP15     |
| NA        | ENSG00000262651 | 0          | NA          | NA         | NA         | NA         |            |
| NA        | ENSG00000262652 | 5.62356396 | 0.11874978  | 0.38046664 | 0.38765379 | 0.61657178 |            |
| 10418     | ENSG00000262655 | 7.62463516 | -0.00682623 | 0.35241686 | 0.95909785 | 0.9831126  | SPON1      |
| NA        | ENSG00000262660 | 0.86866502 | 0.03820342  | 0.3870704  | 0.32648034 | NA         |            |
| NA        | ENSG00000262662 | 0.36307829 | 0.02389563  | 0.38539254 | 0.60990534 | NA         |            |
| NA        | ENSG00000262663 | 8.94570833 | 0.04361804  | 0.34647196 | 0.78069112 | 0.89973348 |            |
| 124641    | ENSG00000262664 | 540.074222 | -0.26064749 | 0.13697615 | 0.04072771 | 0.12702999 | OVCA2      |
| 4992      | ENSG00000262668 | 6.50801779 | -0.19806795 | 0.41674586 | 0.19386039 | 0.39671894 |            |
| NA        | ENSG00000262678 | 4.51835009 | 0.00049716  | 0.37220008 | 0.99850585 | 0.99943937 | CAMTA2-AS1 |
| NA        | ENSG00000262681 | 1.86341335 | 0.0635831   | 0.38541214 | 0.39372148 | NA         |            |
| 101926896 | ENSG00000262686 | 1.3784766  | -0.03891007 | 0.38225111 | 0.54610214 | NA         | GLIS2-AS1  |
| NA        | ENSG00000262691 | 77.071668  | -0.25851656 | 0.24689481 | 0.1842812  | 0.38289533 |            |
| NA        | ENSG00000262692 | 0.53823321 | 0.01390854  | 0.38346187 | 0.73877841 | NA         |            |
| NA        | ENSG00000262693 | 0.87972407 | 0.01363979  | 0.38165303 | 0.79332181 | NA         | ZFP3-DT    |
| NA        | ENSG00000262700 | 1.6870375  | 0.00907338  | 0.37641621 | 0.91009599 | NA         |            |
| NA        | ENSG00000262703 | 14.911211  | 0.17911411  | 0.36221066 | 0.3401857  | 0.57056767 |            |
| NA        | ENSG00000262708 | 0.18922458 | 0.01954053  | 0.38488496 | 0.78225479 | NA         |            |
| NA        | ENSG00000262712 | 31.6781744 | -0.01340149 | 0.29356903 | 0.94195874 | 0.97594973 |            |
| NA        | ENSG00000262714 | 0.14931947 | -0.01844332 | 0.38480212 | 0.84537521 | NA         |            |
| NA        | ENSG00000262721 | 0          | NA          | NA         | NA         | NA         |            |
| NA        | ENSG00000262728 | 14.837262  | 0.48760589  | 0.55949938 | 0.05650509 | 0.16353915 |            |
| NA        | ENSG00000262730 | 0          | NA          | NA         | NA         | NA         |            |
| NA        | ENSG00000262732 | 5.61211981 | -0.00701314 | 0.35609972 | 0.95677418 | 0.98237333 |            |
| NA        | ENSG00000262759 | 0          | NA          | NA         | NA         | NA         | MRPS21P9   |
| NA        | ENSG00000262766 | 12.1793813 | -0.07785526 | 0.34417552 | 0.63735964 | 0.81729675 |            |
| NA        | ENSG00000262768 | 0          | NA          | NA         | NA         | NA         |            |
| NA        | ENSG00000262769 | 0.31810067 | 0.00104355  | 0.38336599 | 0.96707801 | NA         |            |
| NA        | ENSG00000262772 | 35.8801483 | 0.29257405  | 0.32062203 | 0.1770391  | 0.37184583 | LINC01977  |
| NA        | ENSG00000262777 | 2.84064444 | 0.00531426  | 0.37193252 | 0.95764647 | 0.98264776 |            |

|           |                 |            |             |            |            |            |           |
|-----------|-----------------|------------|-------------|------------|------------|------------|-----------|
| NA        | ENSG00000262786 | 0          | NA          | NA         | NA         | NA         |           |
| NA        | ENSG00000262791 | 0          | NA          | NA         | NA         | NA         |           |
| NA        | ENSG00000262801 | 0          | NA          | NA         | NA         | NA         |           |
| NA        | ENSG00000262803 | 0.16735865 | 0.01897177  | 0.38482933 | 0.78225479 | NA         |           |
| NA        | ENSG00000262810 | 0.18922458 | 0.01954053  | 0.38488496 | 0.78225479 | NA         |           |
| 6182      | ENSG00000262814 | 2159.42379 | -0.01630596 | 0.07097144 | 0.81430094 | 0.91592004 | MRPL12    |
| NA        | ENSG00000262815 | 0          | NA          | NA         | NA         | NA         |           |
| NA        | ENSG00000262818 | 0          | NA          | NA         | NA         | NA         |           |
| NA        | ENSG00000262823 | 0          | NA          | NA         | NA         | NA         |           |
| NA        | ENSG00000262831 | 0          | NA          | NA         | NA         | NA         |           |
| 101928855 | ENSG00000262833 | 0.52669475 | 0.01282056  | 0.38340583 | 0.75640835 | NA         |           |
| NA        | ENSG00000262837 | 0          | NA          | NA         | NA         | NA         |           |
| NA        | ENSG00000262848 | 9.63976302 | 0.15533678  | 0.38031929 | 0.33962246 | 0.57006003 |           |
| NA        | ENSG00000262855 | 0          | NA          | NA         | NA         | NA         |           |
| NA        | ENSG00000262869 | 0          | NA          | NA         | NA         | NA         |           |
| NA        | ENSG00000262870 | 0          | NA          | NA         | NA         | NA         | CYCSP40   |
| NA        | ENSG00000262873 | 0.66724168 | -0.01130706 | 0.38285335 | 0.75869653 | NA         |           |
| 147646    | ENSG00000262874 | 0.42436545 | -0.02599122 | 0.38560417 | 0.58530677 | NA         | C19orf84  |
| NA        | ENSG00000262877 | 70.2389154 | 0.06126215  | 0.23246346 | 0.74281296 | 0.87875221 |           |
| NA        | ENSG00000262879 | 1967.15597 | -0.27180452 | 0.09038096 | 0.00190906 | 0.01026723 |           |
| NA        | ENSG00000262880 | 38.5781692 | 0.82611197  | 0.41115805 | 0.00529921 | 0.02443892 |           |
| NA        | ENSG00000262881 | 0.15069912 | -0.01848503 | 0.38480575 | 0.84537521 | NA         |           |
| 101927911 | ENSG00000262884 | 11.4684712 | 0.90392339  | 0.94232457 | 0.01566078 | 0.05969449 |           |
| NA        | ENSG00000262885 | 0          | NA          | NA         | NA         | NA         |           |
| NA        | ENSG00000262898 | 1.13534747 | 0.04747751  | 0.38849004 | 0.23182692 | NA         |           |
| NA        | ENSG00000262899 | 0          | NA          | NA         | NA         | NA         |           |
| NA        | ENSG00000262902 | 0.36299531 | 0.02389505  | 0.38539245 | 0.60994638 | NA         | MTCO1P40  |
| NA        | ENSG00000262903 | 9.94130719 | 0.08225139  | 0.35532199 | 0.59686293 | 0.78900843 |           |
| NA        | ENSG00000262904 | 11.2995741 | 0.11583726  | 0.35948919 | 0.48045376 | 0.70158112 | TMPOP2    |
| NA        | ENSG00000262905 | 0          | NA          | NA         | NA         | NA         |           |
| 92002     | ENSG00000262919 | 273.581148 | 0.1816951   | 0.14580031 | 0.17718129 | 0.3721051  | CCNQ      |
| NA        | ENSG00000262920 | 0          | NA          | NA         | NA         | NA         |           |
| NA        | ENSG00000262921 | 0.51287039 | 0.01539528  | 0.38312461 | 0.73808384 | NA         |           |
| 245       | ENSG00000262943 | 0.15069912 | -0.01848503 | 0.38480575 | 0.84537521 | NA         | ALOX12P2  |
| NA        | ENSG00000262950 | 0.84360821 | -0.04638002 | 0.38804138 | 0.30783537 | NA         |           |
| NA        | ENSG00000262953 | 0          | NA          | NA         | NA         | NA         | EIF4A1P9  |
| NA        | ENSG00000262959 | 0.16735865 | 0.01897177  | 0.38482933 | 0.78225479 | NA         | RPL23AP86 |
| NA        | ENSG00000262961 | 0          | NA          | NA         | NA         | NA         |           |

|           |                 |            |             |            |            |            |            |
|-----------|-----------------|------------|-------------|------------|------------|------------|------------|
| NA        | ENSG00000262962 | 0          | NA          | NA         | NA         | NA         | KARS1P3    |
| 101928266 | ENSG00000262966 | 0.51422634 | 0.0125014   | 0.38289362 | 0.75955108 | NA         |            |
| NA        | ENSG00000262967 | 0.34746601 | 0.02370763  | 0.3853651  | 0.61987128 | NA         |            |
| NA        | ENSG00000262974 | 0          | NA          | NA         | NA         | NA         |            |
| NA        | ENSG00000262979 | 0.34746601 | 0.02370763  | 0.3853651  | 0.61987128 | NA         |            |
| NA        | ENSG00000262980 | 0          | NA          | NA         | NA         | NA         | OR52L2P    |
| NA        | ENSG00000262983 | 0          | NA          | NA         | NA         | NA         |            |
| NA        | ENSG00000262990 | 0          | NA          | NA         | NA         | NA         |            |
| NA        | ENSG00000262995 | 0          | NA          | NA         | NA         | NA         |            |
| 101927131 | ENSG00000262999 | 0.173124   | -0.01911262 | 0.38486262 | 0.84537521 | NA         |            |
| 2969      | ENSG00000263001 | 12079.1009 | 0.13528866  | 0.05514287 | 0.01359284 | 0.053339   | GTF2I      |
| 10780     | ENSG00000263002 | 421.824409 | -0.08192375 | 0.12607311 | 0.49027167 | 0.70981553 | ZNF234     |
| NA        | ENSG00000263004 | 11.3006453 | 0.00872252  | 0.34131459 | 0.95803911 | 0.98270581 | AKAP1-DT   |
| 727758    | ENSG00000263006 | 22.7756759 | 0.02113047  | 0.32001454 | 0.90724523 | 0.95963244 | ROCK1P1    |
| NA        | ENSG00000263011 | 0          | NA          | NA         | NA         | NA         |            |
| NA        | ENSG00000263015 | 0          | NA          | NA         | NA         | NA         |            |
| NA        | ENSG00000263017 | 0          | NA          | NA         | NA         | NA         |            |
| NA        | ENSG00000263020 | 18.3378959 | -0.25885685 | 0.43458808 | 0.15970684 | 0.34728011 |            |
| NA        | ENSG00000263029 | 0          | NA          | NA         | NA         | NA         |            |
| NA        | ENSG00000263033 | 1.39019202 | 0.05150282  | 0.38423163 | 0.43751697 | NA         |            |
| NA        | ENSG00000263041 | 0          | NA          | NA         | NA         | NA         |            |
| NA        | ENSG00000263045 | 0          | NA          | NA         | NA         | NA         |            |
| NA        | ENSG00000263050 | 2.06504882 | 0.04417365  | 0.37681477 | 0.63079414 | NA         |            |
| NA        | ENSG00000263051 | 0          | NA          | NA         | NA         | NA         |            |
| 101929552 | ENSG00000263063 | 0.69535648 | 0.0198128   | 0.38352646 | 0.62232658 | NA         |            |
| NA        | ENSG00000263065 | 0          | NA          | NA         | NA         | NA         |            |
| 100294362 | ENSG00000263069 | 233.908479 | 0.70101983  | 0.17203721 | 1.00E-05   | 9.49E-05   | RNF213-AS1 |
| NA        | ENSG00000263070 | 0          | NA          | NA         | NA         | NA         |            |
| NA        | ENSG00000263072 | 291.662819 | 0.06574926  | 0.17406044 | 0.67298361 | 0.83933156 | ZNF213-AS1 |
| 105371083 | ENSG00000263080 | 2.02622289 | -0.02459016 | 0.37686031 | 0.76193667 | NA         |            |
| NA        | ENSG00000263081 | 0          | NA          | NA         | NA         | NA         |            |
| NA        | ENSG00000263089 | 6.01439708 | 0.02236661  | 0.35558687 | 0.87299468 | 0.94439555 |            |
| NA        | ENSG00000263096 | 1.4636808  | -0.00653038 | 0.3772284  | 0.93029944 | NA         |            |
| NA        | ENSG00000263098 | 0          | NA          | NA         | NA         | NA         |            |
| NA        | ENSG00000263105 | 0.64546665 | -0.02008992 | 0.38304959 | 0.67330662 | NA         |            |
| NA        | ENSG00000263107 | 0          | NA          | NA         | NA         | NA         |            |
| NA        | ENSG00000263110 | 0          | NA          | NA         | NA         | NA         |            |
| NA        | ENSG00000263120 | 1.69876072 | 0.08525168  | 0.39138252 | 0.26350148 | NA         |            |

|           |    |                 |            |             |            |            |            |            |
|-----------|----|-----------------|------------|-------------|------------|------------|------------|------------|
|           | NA | ENSG00000263125 | 0          | NA          | NA         | NA         | NA         | ARL2BPP8   |
|           | NA | ENSG00000263126 | 33.7489715 | -0.13160997 | 0.29933395 | 0.50352232 | 0.72014726 |            |
|           | NA | ENSG00000263142 | 15.9221357 | -0.24861755 | 0.39826269 | 0.20544441 | 0.41239126 | LRRC37A17P |
|           | NA | ENSG00000263146 | 0          | NA          | NA         | NA         | NA         | LINC01896  |
|           | NA | ENSG00000263154 | 0.99318846 | -0.04894107 | 0.38551428 | 0.38836819 | NA         |            |
| 100820829 | NA | ENSG00000263155 | 123.494395 | -0.17386115 | 0.19618592 | 0.30275889 | 0.52998404 | MYZAP      |
|           | NA | ENSG00000263159 | 0          | NA          | NA         | NA         | NA         |            |
|           | NA | ENSG00000263164 | 4.70148433 | 0.0372108   | 0.36605971 | 0.75823046 | 0.88767331 |            |
|           | NA | ENSG00000263165 | 3.33133793 | 0.00051095  | 0.38292527 | 0.99521568 | 0.99852582 |            |
|           | NA | ENSG00000263167 | 0          | NA          | NA         | NA         | NA         |            |
|           | NA | ENSG00000263171 | 0          | NA          | NA         | NA         | NA         |            |
|           | NA | ENSG00000263176 | 0          | NA          | NA         | NA         | NA         |            |
|           | NA | ENSG00000263177 | 7.47568202 | 0.01195601  | 0.3513086  | 0.93589606 | 0.97325384 | MTND1P8    |
|           | NA | ENSG00000263179 | 0          | NA          | NA         | NA         | NA         | HNRNPCP4   |
|           | NA | ENSG00000263189 | 0          | NA          | NA         | NA         | NA         |            |
|           | NA | ENSG00000263196 | 0          | NA          | NA         | NA         | NA         | MTND3P13   |
|           | NA | ENSG00000263199 | 0          | NA          | NA         | NA         | NA         |            |
| 100131303 | NA | ENSG00000263201 | 0          | NA          | NA         | NA         | NA         | DPEP2NB    |
|           | NA | ENSG00000263206 | 0          | NA          | NA         | NA         | NA         | KYNUP3     |
|           | NA | ENSG00000263207 | 0.18922458 | 0.01954053  | 0.38488496 | 0.78225479 | NA         |            |
|           | NA | ENSG00000263212 | 2.14288444 | 0.04886698  | 0.38292814 | 0.49220607 | NA         |            |
|           | NA | ENSG00000263218 | 0          | NA          | NA         | NA         | NA         |            |
|           | NA | ENSG00000263219 | 0          | NA          | NA         | NA         | NA         | RYKPI      |
|           | NA | ENSG00000263220 | 1.04908614 | 0.05956012  | 0.38759892 | 0.30704141 | NA         |            |
|           | NA | ENSG00000263232 | 1.15461595 | 0.03499167  | 0.3830227  | 0.54455037 | NA         | ATP5F1AP3  |
|           | NA | ENSG00000263234 | 0          | NA          | NA         | NA         | NA         |            |
|           | NA | ENSG00000263235 | 27.7324745 | 0.05044276  | 0.30043162 | 0.79190764 | 0.90499209 |            |
|           | NA | ENSG00000263237 | 0          | NA          | NA         | NA         | NA         |            |
|           | NA | ENSG00000263241 | 2.05215619 | -0.04779294 | 0.37928995 | 0.57430914 | NA         | MTCYBP33   |
|           | NA | ENSG00000263244 | 19.6793561 | 0.03210956  | 0.38687039 | NA         | NA         |            |
|           | NA | ENSG00000263252 | 0          | NA          | NA         | NA         | NA         |            |
|           | NA | ENSG00000263253 | 0          | NA          | NA         | NA         | NA         |            |
|           | NA | ENSG00000263257 | 0.55201807 | 0.01190069  | 0.3832631  | 0.7499015  | NA         |            |
|           | NA | ENSG00000263266 | 1.28154813 | -0.0709379  | 0.38953836 | 0.25022283 | NA         | RPS7P1     |
|           | NA | ENSG00000263271 | 0.173124   | -0.01911262 | 0.38486262 | 0.84537521 | NA         |            |
|           | NA | ENSG00000263272 | 198.452867 | 0.11956656  | 0.17326165 | 0.43954267 | 0.66481822 |            |
|           | NA | ENSG00000263276 | 13.3310249 | -0.020352   | 0.3576871  | 0.87599661 | 0.94529871 |            |
|           | NA | ENSG00000263278 | 0          | NA          | NA         | NA         | NA         |            |



|           |                 |            |             |            |            |            |            |
|-----------|-----------------|------------|-------------|------------|------------|------------|------------|
| NA        | ENSG00000263279 | 0.18922458 | 0.01954053  | 0.38488496 | 0.78225479 | NA         |            |
| NA        | ENSG00000263280 | 0.96250857 | -0.01776595 | 0.38249572 | 0.71577671 | NA         |            |
| 102724508 | ENSG00000263293 | 1.48333527 | 0.03984373  | 0.38091902 | 0.58344476 | NA         | EFCAB13-DT |
| NA        | ENSG00000263300 | 0.173124   | -0.01911262 | 0.38486262 | 0.84537521 | NA         |            |
| NA        | ENSG00000263301 | 1.83990528 | 0.04763927  | 0.38040227 | 0.55612964 | NA         |            |
| NA        | ENSG00000263305 | 0          | NA          | NA         | NA         | NA         |            |
| NA        | ENSG00000263307 | 3.36967275 | -0.1010971  | 0.38567071 | 0.36616917 | 0.59532871 | RSL1D1-DT  |
| NA        | ENSG00000263311 | 0.173733   | 0.01914545  | 0.38484597 | 0.78225479 | NA         |            |
| NA        | ENSG00000263312 | 0          | NA          | NA         | NA         | NA         | LINC01975  |
| NA        | ENSG00000263316 | 0          | NA          | NA         | NA         | NA         |            |
| 105371830 | ENSG00000263317 | 0.65783765 | 0.0203355   | 0.38369563 | 0.63453443 | NA         | LINC01982  |
| NA        | ENSG00000263321 | 3.30677456 | -0.02195669 | 0.36985455 | 0.83239732 | 0.92392457 |            |
| NA        | ENSG00000263325 | 0          | NA          | NA         | NA         | NA         |            |
| NA        | ENSG00000263326 | 1.89435473 | 0.07815121  | 0.38734716 | 0.34658261 | NA         |            |
| NA        | ENSG00000263327 | 52.0613981 | 0.19202649  | 0.28089479 | 0.34283315 | 0.57307353 | TAPT1-AS1  |
| NA        | ENSG00000263331 | 0.173124   | -0.01911262 | 0.38486262 | 0.84537521 | NA         |            |
| NA        | ENSG00000263335 | 0          | NA          | NA         | NA         | NA         |            |
| NA        | ENSG00000263338 | 0.96976274 | 0.00510312  | 0.38091965 | 0.92639636 | NA         |            |
| NA        | ENSG00000263342 | 0          | NA          | NA         | NA         | NA         |            |
| NA        | ENSG00000263343 | 0          | NA          | NA         | NA         | NA         |            |
| NA        | ENSG00000263345 | 16.5965842 | 0.08003375  | 0.33320661 | 0.65180433 | 0.82604906 |            |
| 653505    | ENSG00000263353 | 0.14931947 | -0.01844332 | 0.38480212 | 0.84537521 | NA         | PPIAL4A    |
| 100847002 | ENSG00000263354 | 0          | NA          | NA         | NA         | NA         | MIR5011    |
| NA        | ENSG00000263355 | 0          | NA          | NA         | NA         | NA         | AKR1B10P2  |
| NA        | ENSG00000263360 | 0          | NA          | NA         | NA         | NA         | RN7SL134P  |
| 100616306 | ENSG00000263361 | 0          | NA          | NA         | NA         | NA         | MIR378H    |
| 100847053 | ENSG00000263363 | 0          | NA          | NA         | NA         | NA         | MIR5702    |
| NA        | ENSG00000263366 | 0          | NA          | NA         | NA         | NA         | ABHD17AP5  |
| NA        | ENSG00000263368 | 0          | NA          | NA         | NA         | NA         |            |
| NA        | ENSG00000263369 | 0          | NA          | NA         | NA         | NA         |            |
| NA        | ENSG00000263370 | 0          | NA          | NA         | NA         | NA         |            |
| 100847068 | ENSG00000263372 | 0          | NA          | NA         | NA         | NA         | MIR548AO   |
| NA        | ENSG00000263375 | 0          | NA          | NA         | NA         | NA         |            |
| 100847089 | ENSG00000263381 | 0          | NA          | NA         | NA         | NA         | MIR5584    |
| 105372035 | ENSG00000263382 | 0.34109488 | 0.02362641  | 0.38535338 | 0.62411379 | NA         |            |
| NA        | ENSG00000263388 | 0          | NA          | NA         | NA         | NA         |            |
| 100616311 | ENSG00000263389 | 0          | NA          | NA         | NA         | NA         | MIR3973    |
| 100423010 | ENSG00000263390 | 0          | NA          | NA         | NA         | NA         | MIR3119-2  |

|           |                 |            |             |            |            |            |             |
|-----------|-----------------|------------|-------------|------------|------------|------------|-------------|
| NA        | ENSG00000263393 | 0.44981803 | -0.02730379 | 0.3857134  | 0.5618451  | NA         |             |
| NA        | ENSG00000263394 | 0          | NA          | NA         | NA         | NA         |             |
| NA        | ENSG00000263396 | 0          | NA          | NA         | NA         | NA         |             |
| 100422881 | ENSG00000263399 | 0          | NA          | NA         | NA         | NA         | MIR3170     |
| 101101775 | ENSG00000263400 | 5.16971688 | 0.35213087  | 0.6087418  | 0.02770483 | 0.09418504 | TMEM220-AS1 |
| 100616242 | ENSG00000263403 | 0          | NA          | NA         | NA         | NA         | MIR4673     |
| NA        | ENSG00000263405 | 0          | NA          | NA         | NA         | NA         | PA2G4P3     |
| 100616350 | ENSG00000263407 | 0          | NA          | NA         | NA         | NA         | MIR4660     |
| 100616337 | ENSG00000263409 | 0          | NA          | NA         | NA         | NA         | MIR4747     |
| NA        | ENSG00000263410 | 0          | NA          | NA         | NA         | NA         | RN7SL460P   |
| 116435298 | ENSG00000263412 | 41.0045651 | 0.23160243  | 0.29424657 | 0.26597663 | 0.48827746 | NFE2L1-DT   |
| 100616276 | ENSG00000263413 | 0          | NA          | NA         | NA         | NA         | MIR4538     |
| 100422854 | ENSG00000263414 | 0          | NA          | NA         | NA         | NA         | MIR3187     |
| NA        | ENSG00000263417 | 0          | NA          | NA         | NA         | NA         | GTSCR1      |
| NA        | ENSG00000263424 | 0          | NA          | NA         | NA         | NA         |             |
| NA        | ENSG00000263426 | 0          | NA          | NA         | NA         | NA         | RN7SL471P   |
| NA        | ENSG00000263427 | 0          | NA          | NA         | NA         | NA         |             |
| 100289255 | ENSG00000263429 | 0          | NA          | NA         | NA         | NA         | TMEM238L    |
| NA        | ENSG00000263432 | 1.26826552 | -0.03600244 | 0.38218918 | 0.56751916 | NA         | RN7SL689P   |
| NA        | ENSG00000263433 | 0.31828087 | 0.00122997  | 0.38336736 | 0.96529321 | NA         |             |
| NA        | ENSG00000263435 | 0          | NA          | NA         | NA         | NA         |             |
| 100422900 | ENSG00000263436 | 0          | NA          | NA         | NA         | NA         | MIR3158-1   |
| 102724651 | ENSG00000263438 | 0.38381379 | 0.02403859  | 0.38541506 | 0.60121688 | NA         | LINC01919   |
| 100616224 | ENSG00000263439 | 0          | NA          | NA         | NA         | NA         | MIR4753     |
| NA        | ENSG00000263443 | 0          | NA          | NA         | NA         | NA         |             |
| 100616299 | ENSG00000263445 | 0          | NA          | NA         | NA         | NA         | MIR4450     |
| NA        | ENSG00000263450 | 0          | NA          | NA         | NA         | NA         |             |
| NA        | ENSG00000263453 | 0          | NA          | NA         | NA         | NA         |             |
| 100847057 | ENSG00000263456 | 0          | NA          | NA         | NA         | NA         | MIR5189     |
| 100616111 | ENSG00000263458 | 0          | NA          | NA         | NA         | NA         | MIR4455     |
| NA        | ENSG00000263460 | 0          | NA          | NA         | NA         | NA         | BOD1P1      |
| 653598    | ENSG00000263464 | 0          | NA          | NA         | NA         | NA         | PPIAL4C     |
| 10929     | ENSG00000263465 | 961.502805 | 0.00016501  | 0.11284345 | 0.9998748  | 0.9998748  | SRSF8       |
| NA        | ENSG00000263466 | 0.173124   | -0.01911262 | 0.38486262 | 0.84537521 | NA         |             |
| 100423002 | ENSG00000263468 | 0          | NA          | NA         | NA         | NA         | MIR3130-2   |
| 100422988 | ENSG00000263476 | 0          | NA          | NA         | NA         | NA         | MIR3156-1   |
| NA        | ENSG00000263477 | 0          | NA          | NA         | NA         | NA         |             |
| NA        | ENSG00000263479 | 0.30139824 | -0.02296476 | 0.38527817 | 0.68536535 | NA         | RN7SL509P   |

|           |                 |            |             |            |            |            |            |
|-----------|-----------------|------------|-------------|------------|------------|------------|------------|
| NA        | ENSG00000263482 | 0          | NA          | NA         | NA         | NA         | ANTXRLP1   |
| NA        | ENSG00000263483 | 0          | NA          | NA         | NA         | NA         | MTATP6P3   |
| NA        | ENSG00000263485 | 0          | NA          | NA         | NA         | NA         |            |
| NA        | ENSG00000263489 | 0          | NA          | NA         | NA         | NA         |            |
| NA        | ENSG00000263490 | 0          | NA          | NA         | NA         | NA         | RN7SL155P  |
| NA        | ENSG00000263494 | 0          | NA          | NA         | NA         | NA         |            |
| 101927539 | ENSG00000263499 | 1.00566042 | 0.03030528  | 0.38194003 | 0.61492957 | NA         |            |
| NA        | ENSG00000263501 | 0          | NA          | NA         | NA         | NA         |            |
| NA        | ENSG00000263503 | 0          | NA          | NA         | NA         | NA         | MAPK8IP1P2 |
| NA        | ENSG00000263505 | 0          | NA          | NA         | NA         | NA         | SLC25A3P3  |
| NA        | ENSG00000263508 | 0          | NA          | NA         | NA         | NA         |            |
| 100616454 | ENSG00000263510 | 0          | NA          | NA         | NA         | NA         | MIR4497    |
| 100847086 | ENSG00000263511 | 0          | NA          | NA         | NA         | NA         | MIR5699    |
| 100422905 | ENSG00000263512 | 0          | NA          | NA         | NA         | NA         | MIR4311    |
| 554282    | ENSG00000263513 | 354.836369 | -0.40976394 | 0.14810745 | 0.00272966 | 0.01398669 | FAM72C     |
| 100500879 | ENSG00000263514 | 0          | NA          | NA         | NA         | NA         | MIR3668    |
| 100616144 | ENSG00000263515 | 0          | NA          | NA         | NA         | NA         | MIR548AN   |
| 105827617 | ENSG00000263520 | 0          | NA          | NA         | NA         | NA         | LINC02563  |
| 100616321 | ENSG00000263526 | 0          | NA          | NA         | NA         | NA         | MIR378G    |
| 100616130 | ENSG00000263527 | 0          | NA          | NA         | NA         | NA         | MIR4526    |
| 9641      | ENSG00000263528 | 2.1754555  | -0.08720928 | 0.39427743 | 0.2040381  | NA         | IKBKE      |
| NA        | ENSG00000263529 | 0          | NA          | NA         | NA         | NA         | RN7SL122P  |
| NA        | ENSG00000263531 | 1.2300564  | 0.01796777  | 0.37988472 | 0.78148753 | NA         |            |
| 100616389 | ENSG00000263533 | 0          | NA          | NA         | NA         | NA         | MIR4463    |
| NA        | ENSG00000263535 | 11.0812789 | 0.34839746  | 0.50848362 | 0.09015394 | 0.23094308 | AK4P1      |
| NA        | ENSG00000263537 | 0          | NA          | NA         | NA         | NA         | RN7SL387P  |
| 100847020 | ENSG00000263540 | 0          | NA          | NA         | NA         | NA         | MIR5582    |
| 339298    | ENSG00000263547 | 0          | NA          | NA         | NA         | NA         |            |
| NA        | ENSG00000263551 | 0          | NA          | NA         | NA         | NA         |            |
| NA        | ENSG00000263556 | 0          | NA          | NA         | NA         | NA         | RN7SL383P  |
| NA        | ENSG00000263558 | 0          | NA          | NA         | NA         | NA         | RN7SL716P  |
| 100616205 | ENSG00000263561 | 0          | NA          | NA         | NA         | NA         | MIR4704    |
| 23666     | ENSG00000263563 | 19.5394001 | -0.06376847 | 0.31187464 | 0.73053563 | 0.87107559 | UBBP4      |
| NA        | ENSG00000263567 | 0          | NA          | NA         | NA         | NA         |            |
| NA        | ENSG00000263571 | 0          | NA          | NA         | NA         | NA         |            |
| 102466866 | ENSG00000263572 | 0          | NA          | NA         | NA         | NA         | MIR7853    |
| 100422868 | ENSG00000263573 | 0          | NA          | NA         | NA         | NA         | MIR4270    |
| 100134391 | ENSG00000263574 | 0          | NA          | NA         | NA         | NA         |            |

|           |                 |            |             |            |            |            |            |
|-----------|-----------------|------------|-------------|------------|------------|------------|------------|
| 100616288 | ENSG00000263575 | 0          | NA          | NA         | NA         | NA         | MIR4665    |
| 100616302 | ENSG00000263581 | 0          | NA          | NA         | NA         | NA         | MIR548X2   |
| 100616277 | ENSG00000263583 | 0          | NA          | NA         | NA         | NA         | MIR4522    |
| 100616151 | ENSG00000263584 | 0          | NA          | NA         | NA         | NA         | MIR4480    |
| NA        | ENSG00000263585 | 0          | NA          | NA         | NA         | NA         |            |
| 102723641 | ENSG00000263586 | 0.32236732 | -0.02325322 | 0.38531854 | 0.66967855 | NA         | HID1-AS1   |
| NA        | ENSG00000263588 | 0          | NA          | NA         | NA         | NA         |            |
| 103091866 | ENSG00000263590 | 0.37844916 | 0.02407552  | 0.3854191  | 0.60038877 | NA         | LINC02591  |
| 100616152 | ENSG00000263593 | 0          | NA          | NA         | NA         | NA         | MIR4804    |
| NA        | ENSG00000263594 | 0          | NA          | NA         | NA         | NA         |            |
| NA        | ENSG00000263595 | 0          | NA          | NA         | NA         | NA         | RN7SL823P  |
| 100500865 | ENSG00000263597 | 0          | NA          | NA         | NA         | NA         | MIR3936    |
| 100500915 | ENSG00000263600 | 0          | NA          | NA         | NA         | NA         | MIR3915    |
| 100422978 | ENSG00000263602 | 0          | NA          | NA         | NA         | NA         | MIR3185    |
| NA        | ENSG00000263603 | 6.26212919 | 0.02090047  | 0.35825842 | 0.87668086 | 0.94566867 |            |
| NA        | ENSG00000263604 | 0          | NA          | NA         | NA         | NA         |            |
| NA        | ENSG00000263606 | 0.173124   | -0.01911262 | 0.38486262 | 0.84537521 | NA         | CHORDC1P4  |
| NA        | ENSG00000263608 | 0          | NA          | NA         | NA         | NA         | RN7SL353P  |
| NA        | ENSG00000263609 | 0.15069912 | -0.01848503 | 0.38480575 | 0.84537521 | NA         | LINC02002  |
| 105372041 | ENSG00000263611 | 0          | NA          | NA         | NA         | NA         |            |
| NA        | ENSG00000263612 | 2.26688936 | 0.09926275  | 0.39408251 | 0.24653939 | NA         |            |
| NA        | ENSG00000263613 | 0          | NA          | NA         | NA         | NA         |            |
| 100422861 | ENSG00000263615 | 0          | NA          | NA         | NA         | NA         | MIR4306    |
| NA        | ENSG00000263616 | 0          | NA          | NA         | NA         | NA         | RN7SL178P  |
| NA        | ENSG00000263618 | 0          | NA          | NA         | NA         | NA         |            |
| NA        | ENSG00000263620 | 95.3581067 | -0.19678138 | 0.21611494 | 0.27321085 | 0.49676945 |            |
| NA        | ENSG00000263622 | 0          | NA          | NA         | NA         | NA         |            |
| NA        | ENSG00000263624 | 8.40936773 | -0.14329139 | 0.37511752 | 0.37035033 | 0.59943356 |            |
| 101927323 | ENSG00000263627 | 0          | NA          | NA         | NA         | NA         | PPP4R1-AS1 |
| 100422989 | ENSG00000263628 | 0          | NA          | NA         | NA         | NA         | MIR3155A   |
| 100847088 | ENSG00000263629 | 0          | NA          | NA         | NA         | NA         | MIR5586    |
| 100616201 | ENSG00000263631 | 0          | NA          | NA         | NA         | NA         | MIR378D1   |
| 100500803 | ENSG00000263634 | 0          | NA          | NA         | NA         | NA         | MIR3919    |
| NA        | ENSG00000263635 | 0          | NA          | NA         | NA         | NA         |            |
| NA        | ENSG00000263637 | 0          | NA          | NA         | NA         | NA         |            |
| 4477      | ENSG00000263639 | 0          | NA          | NA         | NA         | NA         | MSMB       |
| 100616317 | ENSG00000263641 | 0          | NA          | NA         | NA         | NA         | MIR4777    |
| 100616274 | ENSG00000263642 | 0          | NA          | NA         | NA         | NA         | MIR4802    |

|           |                 |            |             |            |            |            |                 |
|-----------|-----------------|------------|-------------|------------|------------|------------|-----------------|
| 100616404 | ENSG00000263643 | 0          | NA          | NA         | NA         | NA         | MIR4515         |
| NA        | ENSG00000263644 | 0          | NA          | NA         | NA         | NA         |                 |
| NA        | ENSG00000263647 | 19.0981196 | 0.11362924  | 0.33225409 | 0.53970819 | 0.74869322 | BPTFP1          |
| NA        | ENSG00000263648 | 0.14931947 | -0.01844332 | 0.38480212 | 0.84537521 | NA         |                 |
| 100616218 | ENSG00000263649 | 0          | NA          | NA         | NA         | NA         | MIR3135B        |
| 100847063 | ENSG00000263652 | 0          | NA          | NA         | NA         | NA         | MIR548AX        |
| NA        | ENSG00000263655 | 0          | NA          | NA         | NA         | NA         |                 |
| NA        | ENSG00000263657 | 0.173124   | -0.01911262 | 0.38486262 | 0.84537521 | NA         |                 |
| 100379141 | ENSG00000263666 | 0          | NA          | NA         | NA         | NA         | SNORA70D        |
| 285766    | ENSG00000263667 | 0          | NA          | NA         | NA         | NA         |                 |
| NA        | ENSG00000263669 | 0          | NA          | NA         | NA         | NA         | RN7SL470P       |
| 100616235 | ENSG00000263670 | 0          | NA          | NA         | NA         | NA         | MIR4457         |
| NA        | ENSG00000263672 | 0          | NA          | NA         | NA         | NA         | RN7SL750P       |
| NA        | ENSG00000263674 | 0          | NA          | NA         | NA         | NA         |                 |
| 100847010 | ENSG00000263675 | 0          | NA          | NA         | NA         | NA         | MIR5581         |
| 100616438 | ENSG00000263676 | 0          | NA          | NA         | NA         | NA         | MIR4632         |
| NA        | ENSG00000263677 | 11.2360741 | 0.09721299  | 0.35550998 | 0.54541979 | 0.75298369 |                 |
| NA        | ENSG00000263680 | 0          | NA          | NA         | NA         | NA         |                 |
| 100423023 | ENSG00000263681 | 0          | NA          | NA         | NA         | NA         | MIR3197         |
| NA        | ENSG00000263682 | 0          | NA          | NA         | NA         | NA         |                 |
| NA        | ENSG00000263683 | 0          | NA          | NA         | NA         | NA         |                 |
| NA        | ENSG00000263684 | 0          | NA          | NA         | NA         | NA         |                 |
| NA        | ENSG00000263688 | 0          | NA          | NA         | NA         | NA         |                 |
| 693131    | ENSG00000263690 | 0          | NA          | NA         | NA         | NA         | MIR548D2        |
| 100423000 | ENSG00000263693 | 0          | NA          | NA         | NA         | NA         | MIR3161         |
| 100500811 | ENSG00000263697 | 0          | NA          | NA         | NA         | NA         | MIR3621         |
| NA        | ENSG00000263698 | 0          | NA          | NA         | NA         | NA         |                 |
| 100846998 | ENSG00000263705 | 0          | NA          | NA         | NA         | NA         | MIR5689         |
| NA        | ENSG00000263707 | 0          | NA          | NA         | NA         | NA         |                 |
| NA        | ENSG00000263708 | 0          | NA          | NA         | NA         | NA         |                 |
| NA        | ENSG00000263709 | 0          | NA          | NA         | NA         | NA         |                 |
| 400655    | ENSG00000263711 | 0.40419807 | 0.02433354  | 0.38544165 | 0.60425546 | NA         | LINC02864       |
| 100616269 | ENSG00000263712 | 0          | NA          | NA         | NA         | NA         | MIR4639         |
| 1394      | ENSG00000263715 | 9.20472593 | 0.03158899  | 0.38678324 | 0.08543358 | 0.22180088 | LINC02210-CRHR1 |
| 104909134 | ENSG00000263715 | 9.20472593 | 0.03158899  | 0.38678324 | 0.08543358 | 0.22180088 | LINC02210-CRHR1 |
| NA        | ENSG00000263716 | 0          | NA          | NA         | NA         | NA         | SLC25A51P2      |
| NA        | ENSG00000263717 | 0.53895417 | 0.01398706  | 0.38346652 | 0.73759617 | NA         |                 |
| 105371907 | ENSG00000263718 | 0          | NA          | NA         | NA         | NA         | SEPTIN9-DT      |

|           |                 |            |             |            |            |            |            |
|-----------|-----------------|------------|-------------|------------|------------|------------|------------|
| NA        | ENSG00000263720 | 0          | NA          | NA         | NA         | NA         |            |
| NA        | ENSG00000263723 | 0          | NA          | NA         | NA         | NA         |            |
| 201477    | ENSG00000263724 | 0          | NA          | NA         | NA         | NA         | DLGAP1-AS3 |
| NA        | ENSG00000263725 | 0          | NA          | NA         | NA         | NA         | FTLP13     |
| NA        | ENSG00000263727 | 0.36251155 | 0.00105682  | 0.38336535 | 0.96582665 | NA         |            |
| NA        | ENSG00000263729 | 0          | NA          | NA         | NA         | NA         |            |
| 100500822 | ENSG00000263730 | 0          | NA          | NA         | NA         | NA         | MIR3937    |
| NA        | ENSG00000263731 | 47.6217192 | -0.0380146  | 0.26307776 | 0.8416458  | 0.92800104 |            |
| NA        | ENSG00000263733 | 0          | NA          | NA         | NA         | NA         |            |
| 100616174 | ENSG00000263734 | 0          | NA          | NA         | NA         | NA         | MIR4643    |
| 100616255 | ENSG00000263735 | 0          | NA          | NA         | NA         | NA         | MIR4662B   |
| NA        | ENSG00000263740 | 0.173733   | 0.01914545  | 0.38484597 | 0.78225479 | NA         | RN7SL4P    |
| 100847092 | ENSG00000263741 | 0          | NA          | NA         | NA         | NA         | MIR548AS   |
| 100422953 | ENSG00000263742 | 0          | NA          | NA         | NA         | NA         | MIR3165    |
| 100500844 | ENSG00000263744 | 0          | NA          | NA         | NA         | NA         | MIR3664    |
| NA        | ENSG00000263745 | 0          | NA          | NA         | NA         | NA         |            |
| 100422966 | ENSG00000263746 | 0          | NA          | NA         | NA         | NA         | MIR4277    |
| NA        | ENSG00000263748 | 0          | NA          | NA         | NA         | NA         | EXOGP1     |
| NA        | ENSG00000263749 | 0          | NA          | NA         | NA         | NA         | OOSP1P2    |
| 100847083 | ENSG00000263750 | 0          | NA          | NA         | NA         | NA         | MIR548AV   |
| 100422942 | ENSG00000263752 | 0          | NA          | NA         | NA         | NA         | MIR3133    |
| 339290    | ENSG00000263753 | 467.764094 | 0.09524925  | 0.11701274 | 0.39307057 | 0.62215525 | LINC00667  |
| NA        | ENSG00000263755 | 0.15069912 | -0.01848503 | 0.38480575 | 0.84537521 | NA         | RN7SL498P  |
| NA        | ENSG00000263756 | 0.31816529 | 0.0011139   | 0.38336648 | 0.96640459 | NA         |            |
| 2658      | ENSG00000263761 | 0          | NA          | NA         | NA         | NA         | GDF2       |
| 100422982 | ENSG00000263762 | 0          | NA          | NA         | NA         | NA         | MIR4286    |
| 100500839 | ENSG00000263763 | 0          | NA          | NA         | NA         | NA         | MIR3686    |
| 26807     | ENSG00000263764 | 0          | NA          | NA         | NA         | NA         | SNORD43    |
| NA        | ENSG00000263765 | 0          | NA          | NA         | NA         | NA         |            |
| NA        | ENSG00000263766 | 6.26678711 | 0.06307746  | 0.37039375 | 0.59725042 | 0.78921427 | KPNB1-DT   |
| NA        | ENSG00000263772 | 0          | NA          | NA         | NA         | NA         |            |
| 619568    | ENSG00000263776 | 0          | NA          | NA         | NA         | NA         | SNORA4     |
| NA        | ENSG00000263781 | 0          | NA          | NA         | NA         | NA         |            |
| 100847069 | ENSG00000263783 | 0          | NA          | NA         | NA         | NA         | MIR5590    |
| 100422853 | ENSG00000263785 | 0          | NA          | NA         | NA         | NA         | MIR3182    |
| NA        | ENSG00000263786 | 74.0948856 | -0.09261029 | 0.22350022 | 0.61098821 | 0.79918289 |            |
| NA        | ENSG00000263787 | 0          | NA          | NA         | NA         | NA         | SKAP1-AS1  |
| NA        | ENSG00000263788 | 0          | NA          | NA         | NA         | NA         |            |

|           |                 |            |             |            |            |            |            |
|-----------|-----------------|------------|-------------|------------|------------|------------|------------|
| 100616229 | ENSG00000263790 | 0          | NA          | NA         | NA         | NA         | MIR4473    |
| 100422866 | ENSG00000263793 | 0          | NA          | NA         | NA         | NA         | MIR3115    |
| NA        | ENSG00000263794 | 0          | NA          | NA         | NA         | NA         | RN7SL457P  |
| 100847014 | ENSG00000263795 | 0          | NA          | NA         | NA         | NA         | MIR5100    |
| NA        | ENSG00000263797 | 0          | NA          | NA         | NA         | NA         |            |
| NA        | ENSG00000263798 | 0          | NA          | NA         | NA         | NA         |            |
| 100847071 | ENSG00000263800 | 0          | NA          | NA         | NA         | NA         | MIR5684    |
| NA        | ENSG00000263809 | 0          | NA          | NA         | NA         | NA         |            |
| 100500876 | ENSG00000263811 | 0          | NA          | NA         | NA         | NA         | MIR3675    |
| 100500878 | ENSG00000263813 | 0          | NA          | NA         | NA         | NA         | MIR3679    |
| NA        | ENSG00000263815 | 0.47339775 | -0.00745236 | 0.38322997 | 0.86408909 | NA         | RN7SL426P  |
| 100846992 | ENSG00000263816 | 0          | NA          | NA         | NA         | NA         | MIR548AW   |
| 100131347 | ENSG00000263818 | 19.4522222 | -0.23273304 | 0.37061624 | 0.24871438 | 0.46802661 | RDM1P5     |
| NA        | ENSG00000263821 | 0          | NA          | NA         | NA         | NA         |            |
| NA        | ENSG00000263823 | 10.1978342 | -0.06361957 | 0.3473858  | 0.68695114 | 0.84777704 |            |
| NA        | ENSG00000263826 | 92.0297792 | -0.01820656 | 0.22224704 | 0.91848135 | 0.96558446 |            |
| 100616207 | ENSG00000263828 | 0          | NA          | NA         | NA         | NA         | MIR4439    |
| NA        | ENSG00000263829 | 0.18922458 | 0.01954053  | 0.38488496 | 0.78225479 | NA         | SINHCAFP1  |
| 100616498 | ENSG00000263831 | 0          | NA          | NA         | NA         | NA         | MIR378E    |
| 100616479 | ENSG00000263834 | 0          | NA          | NA         | NA         | NA         | MIR4635    |
| 100616486 | ENSG00000263838 | 0          | NA          | NA         | NA         | NA         | MIR4698    |
| NA        | ENSG00000263841 | 0          | NA          | NA         | NA         | NA         | RN7SL44P   |
| 100287042 | ENSG00000263843 | 134.075245 | 0.02169812  | 0.18449996 | 0.89400316 | 0.95417323 | MIF4GD-DT  |
| NA        | ENSG00000263846 | 0.49009361 | -0.00696843 | 0.38316061 | 0.85890792 | NA         | CIAPIN1P   |
| NA        | ENSG00000263847 | 2.07641846 | 0.11840655  | 0.40338583 | 0.15476137 | NA         |            |
| 100616420 | ENSG00000263849 | 0          | NA          | NA         | NA         | NA         | MIR4744    |
| 100616204 | ENSG00000263857 | 0          | NA          | NA         | NA         | NA         | MIR4729    |
| 100616147 | ENSG00000263858 | 0          | NA          | NA         | NA         | NA         | MIR4769    |
| NA        | ENSG00000263859 | 1.5069912  | -0.05820786 | 0.39056928 | 0.16274765 | NA         |            |
| NA        | ENSG00000263860 | 0          | NA          | NA         | NA         | NA         |            |
| 100500898 | ENSG00000263861 | 0          | NA          | NA         | NA         | NA         | MIR3927    |
| NA        | ENSG00000263862 | 0          | NA          | NA         | NA         | NA         | LINC01543  |
| NA        | ENSG00000263863 | 0          | NA          | NA         | NA         | NA         |            |
| NA        | ENSG00000263870 | 0          | NA          | NA         | NA         | NA         |            |
| 100616232 | ENSG00000263872 | 0          | NA          | NA         | NA         | NA         | MIR4528    |
| NA        | ENSG00000263873 | 224.391673 | -0.85452553 | 0.17528716 | 1.76E-07   | 2.25E-06   | THY1-AS1   |
| NA        | ENSG00000263874 | 64.6587292 | -0.91043053 | 0.32946108 | 0.00067978 | 0.00421332 | LINC00672  |
| NA        | ENSG00000263878 | 0          | NA          | NA         | NA         | NA         | DLGAP1-AS4 |

|           |                 |            |             |            |            |            |           |
|-----------|-----------------|------------|-------------|------------|------------|------------|-----------|
| NA        | ENSG00000263882 | 0          | NA          | NA         | NA         | NA         | RN7SL774P |
| NA        | ENSG00000263883 | 0          | NA          | NA         | NA         | NA         | EEF1DP7   |
| NA        | ENSG00000263884 | 5.8415994  | -0.01374922 | 0.35814429 | 0.91511631 | 0.96403708 | THOC1-DT  |
| 100500823 | ENSG00000263885 | 0          | NA          | NA         | NA         | NA         | MIR3920   |
| NA        | ENSG00000263887 | 0          | NA          | NA         | NA         | NA         |           |
| 100422924 | ENSG00000263890 | 0          | NA          | NA         | NA         | NA         | MIR4303   |
| 100616214 | ENSG00000263892 | 0          | NA          | NA         | NA         | NA         | MIR4667   |
| NA        | ENSG00000263893 | 0          | NA          | NA         | NA         | NA         |           |
| 100500885 | ENSG00000263894 | 0          | NA          | NA         | NA         | NA         | MIR3925   |
| NA        | ENSG00000263895 | 0          | NA          | NA         | NA         | NA         |           |
| 100616236 | ENSG00000263897 | 0          | NA          | NA         | NA         | NA         | MIR4669   |
| NA        | ENSG00000263904 | 0.30139824 | -0.02296476 | 0.38527817 | 0.68536535 | NA         |           |
| NA        | ENSG00000263905 | 0          | NA          | NA         | NA         | NA         | RN7SL555P |
| 100422902 | ENSG00000263908 | 0          | NA          | NA         | NA         | NA         | MIR3116-1 |
| 100846995 | ENSG00000263909 | 0          | NA          | NA         | NA         | NA         | MIR5000   |
| NA        | ENSG00000263914 | 0          | NA          | NA         | NA         | NA         | MTND2P13  |
| NA        | ENSG00000263916 | 1.00531038 | 0.00154339  | 0.38080915 | 0.9778418  | NA         |           |
| NA        | ENSG00000263917 | 2.72487085 | 0.08479069  | 0.38950713 | 0.30802208 | 0.53554973 |           |
| 100500910 | ENSG00000263918 | 0          | NA          | NA         | NA         | NA         | MIR3670-1 |
| NA        | ENSG00000263923 | 0          | NA          | NA         | NA         | NA         |           |
| NA        | ENSG00000263924 | 0          | NA          | NA         | NA         | NA         |           |
| 100616413 | ENSG00000263926 | 0          | NA          | NA         | NA         | NA         | MIR4462   |
| 100616127 | ENSG00000263932 | 0          | NA          | NA         | NA         | NA         | MIR4448   |
| NA        | ENSG00000263934 | 6.32735563 | -0.02805839 | 0.35801145 | 0.83259178 | 0.92392457 | SNORD3A   |
| NA        | ENSG00000263935 | 0          | NA          | NA         | NA         | NA         | TOMM20P3  |
| NA        | ENSG00000263938 | 0.31974041 | 0.00222945  | 0.38337863 | 0.95571128 | NA         |           |
| NA        | ENSG00000263940 | 0          | NA          | NA         | NA         | NA         | RN7SL275P |
| NA        | ENSG00000263941 | 0          | NA          | NA         | NA         | NA         | RN7SL32P  |
| NA        | ENSG00000263944 | 0          | NA          | NA         | NA         | NA         | RN7SL435P |
| 100500919 | ENSG00000263945 | 0          | NA          | NA         | NA         | NA         | MIR548Y   |
| NA        | ENSG00000263946 | 0          | NA          | NA         | NA         | NA         |           |
| NA        | ENSG00000263952 | 0          | NA          | NA         | NA         | NA         |           |
| NA        | ENSG00000263955 | 0          | NA          | NA         | NA         | NA         | RN7SL850P |
| 200030    | ENSG00000263956 | 936.887151 | 0.10075085  | 0.08389338 | 0.2185655  | 0.43050004 | NBPF11    |
| 100505797 | ENSG00000263958 | 0          | NA          | NA         | NA         | NA         | NETO1-DT  |
| 440712    | ENSG00000263961 | 0.94762657 | -0.01267043 | 0.38213624 | 0.7951659  | NA         | RHEX      |
| NA        | ENSG00000263963 | 0          | NA          | NA         | NA         | NA         |           |
| 100422963 | ENSG00000263967 | 0          | NA          | NA         | NA         | NA         | MIR4290   |



|           |                 |            |             |            |            |            |           |
|-----------|-----------------|------------|-------------|------------|------------|------------|-----------|
| NA        | ENSG00000263968 | 9.46849029 | 0.0461697   | 0.34783579 | 0.76663223 | 0.8924999  | RN7SL381P |
| NA        | ENSG00000263969 | 0.34746601 | 0.02370763  | 0.3853651  | 0.61987128 | NA         | RN7SL678P |
| NA        | ENSG00000263970 | 0          | NA          | NA         | NA         | NA         |           |
| 100616251 | ENSG00000263972 | 0          | NA          | NA         | NA         | NA         | MIR1587   |
| 100616148 | ENSG00000263973 | 0          | NA          | NA         | NA         | NA         | MIR4760   |
| NA        | ENSG00000263974 | 0          | NA          | NA         | NA         | NA         | RN7SL121P |
| NA        | ENSG00000263976 | 0          | NA          | NA         | NA         | NA         | YWHAEP3   |
| 100616304 | ENSG00000263978 | 0          | NA          | NA         | NA         | NA         | MIR4499   |
| 100616429 | ENSG00000263979 | 0          | NA          | NA         | NA         | NA         | MIR4672   |
| 100847027 | ENSG00000263981 | 0          | NA          | NA         | NA         | NA         | MIR5705   |
| NA        | ENSG00000263982 | 0          | NA          | NA         | NA         | NA         |           |
| NA        | ENSG00000263986 | 0.16735865 | 0.01897177  | 0.38482933 | 0.78225479 | NA         |           |
| 100847024 | ENSG00000263987 | 0          | NA          | NA         | NA         | NA         | MIR5698   |
| NA        | ENSG00000263988 | 0          | NA          | NA         | NA         | NA         | RN7SL147P |
| NA        | ENSG00000263989 | 0          | NA          | NA         | NA         | NA         | RN7SL615P |
| NA        | ENSG00000263990 | 2.10940985 | -0.05644157 | 0.37911342 | 0.53859301 | NA         |           |
| NA        | ENSG00000263993 | 0          | NA          | NA         | NA         | NA         | RN7SL786P |
| NA        | ENSG00000263999 | 0          | NA          | NA         | NA         | NA         | RN7SL42P  |
| NA        | ENSG00000264000 | 0          | NA          | NA         | NA         | NA         |           |
| NA        | ENSG00000264002 | 0          | NA          | NA         | NA         | NA         | RN7SL52P  |
| 100616241 | ENSG00000264004 | 0          | NA          | NA         | NA         | NA         | MIR4717   |
| 100422983 | ENSG00000264005 | 0          | NA          | NA         | NA         | NA         | MIR4314   |
| 340811    | ENSG00000264006 | 0          | NA          | NA         | NA         | NA         | AKR1C8P   |
| NA        | ENSG00000264007 | 7.25433068 | 0.02152131  | 0.35046174 | 0.88469938 | 0.94960159 |           |
| 100616469 | ENSG00000264010 | 0          | NA          | NA         | NA         | NA         | MIR4429   |
| NA        | ENSG00000264012 | 0          | NA          | NA         | NA         | NA         |           |
| 100500875 | ENSG00000264013 | 0          | NA          | NA         | NA         | NA         | MIR3938   |
| 100422914 | ENSG00000264014 | 0          | NA          | NA         | NA         | NA         | MIR4253   |
| NA        | ENSG00000264015 | 0          | NA          | NA         | NA         | NA         |           |
| NA        | ENSG00000264016 | 0          | NA          | NA         | NA         | NA         |           |
| NA        | ENSG00000264017 | 1.47490899 | -0.06044494 | 0.3845583  | 0.41520923 | NA         | RN7SL336P |
| NA        | ENSG00000264019 | 0          | NA          | NA         | NA         | NA         |           |
| NA        | ENSG00000264023 | 0          | NA          | NA         | NA         | NA         |           |
| 100616135 | ENSG00000264024 | 0          | NA          | NA         | NA         | NA         | MIR4507   |
| 146795    | ENSG00000264026 | 0          | NA          | NA         | NA         | NA         | LINC02003 |
| NA        | ENSG00000264028 | 0          | NA          | NA         | NA         | NA         | RN7SL744P |
| NA        | ENSG00000264029 | 0          | NA          | NA         | NA         | NA         |           |
| NA        | ENSG00000264030 | 0          | NA          | NA         | NA         | NA         | RN7SL66P  |

|           |                 |            |             |            |            |            |            |
|-----------|-----------------|------------|-------------|------------|------------|------------|------------|
| NA        | ENSG00000264031 | 0          | NA          | NA         | NA         | NA         | ABHD15-AS1 |
| 100616330 | ENSG00000264032 | 0          | NA          | NA         | NA         | NA         | MIR4491    |
| NA        | ENSG00000264036 | 0          | NA          | NA         | NA         | NA         | RN7SL198P  |
| 100616309 | ENSG00000264037 | 0          | NA          | NA         | NA         | NA         | MIR4472-2  |
| NA        | ENSG00000264040 | 0          | NA          | NA         | NA         | NA         |            |
| NA        | ENSG00000264041 | 0          | NA          | NA         | NA         | NA         | RN7SL670P  |
| NA        | ENSG00000264044 | 3.52892714 | -0.04087974 | 0.37614877 | 0.64789797 | 0.8244161  |            |
| NA        | ENSG00000264047 | 0          | NA          | NA         | NA         | NA         | RN7SL455P  |
| 100616210 | ENSG00000264049 | 0          | NA          | NA         | NA         | NA         | MIR4737    |
| NA        | ENSG00000264050 | 0          | NA          | NA         | NA         | NA         |            |
| NA        | ENSG00000264054 | 0          | NA          | NA         | NA         | NA         | RPL31P9    |
| 100847075 | ENSG00000264056 | 0.18922458 | 0.01954053  | 0.38488496 | 0.78225479 | NA         | MIR5685    |
| NA        | ENSG00000264057 | 2.3257804  | 0.09287773  | 0.39036307 | 0.29938722 | NA         |            |
| NA        | ENSG00000264058 | 17.3548837 | -0.01758533 | 0.38376561 | 0.63919616 | 0.81891074 |            |
| 100422851 | ENSG00000264060 | 0          | NA          | NA         | NA         | NA         | MIR4316    |
| NA        | ENSG00000264061 | 0          | NA          | NA         | NA         | NA         | FGF7P1     |
| NA        | ENSG00000264066 | 0          | NA          | NA         | NA         | NA         |            |
| NA        | ENSG00000264067 | 0.53041563 | 0.01325101  | 0.38342981 | 0.74989576 | NA         |            |
| 100500829 | ENSG00000264069 | 0          | NA          | NA         | NA         | NA         | MIR3943    |
| NA        | ENSG00000264070 | 96.9055415 | 0.0686739   | 0.22068081 | 0.70598737 | 0.85825065 | DND1P1     |
| NA        | ENSG00000264071 | 0          | NA          | NA         | NA         | NA         | RN7SL531P  |
| NA        | ENSG00000264072 | 0          | NA          | NA         | NA         | NA         |            |
| 100423034 | ENSG00000264073 | 0          | NA          | NA         | NA         | NA         | MIR3199-1  |
| 100616187 | ENSG00000264075 | 0          | NA          | NA         | NA         | NA         | MIR4783    |
| NA        | ENSG00000264078 | 0          | NA          | NA         | NA         | NA         |            |
| NA        | ENSG00000264080 | 0          | NA          | NA         | NA         | NA         |            |
| NA        | ENSG00000264083 | 0          | NA          | NA         | NA         | NA         |            |
| 100847077 | ENSG00000264084 | 0          | NA          | NA         | NA         | NA         | MIR5688    |
| 100500884 | ENSG00000264089 | 0          | NA          | NA         | NA         | NA         | MIR3681    |
| 100847047 | ENSG00000264090 | 0          | NA          | NA         | NA         | NA         | MIR4666B   |
| NA        | ENSG00000264092 | 0          | NA          | NA         | NA         | NA         | RN7SL474P  |
| NA        | ENSG00000264093 | 0          | NA          | NA         | NA         | NA         |            |
| 100616377 | ENSG00000264099 | 0          | NA          | NA         | NA         | NA         | MIR4803    |
| 100616421 | ENSG00000264101 | 0          | NA          | NA         | NA         | NA         | MIR4689    |
| 100616368 | ENSG00000264102 | 0          | NA          | NA         | NA         | NA         | MIR4688    |
| NA        | ENSG00000264104 | 0          | NA          | NA         | NA         | NA         |            |
| 100500881 | ENSG00000264105 | 0          | NA          | NA         | NA         | NA         | MIR3688-1  |
| NA        | ENSG00000264107 | 5.02582898 | 0.0204318   | 0.36385111 | 0.86750737 | 0.94194356 | MIR4733HG  |

|           |                 |            |             |            |            |            |           |
|-----------|-----------------|------------|-------------|------------|------------|------------|-----------|
| NA        | ENSG00000264108 | 0          | NA          | NA         | NA         | NA         |           |
| 100422823 | ENSG00000264110 | 0          | NA          | NA         | NA         | NA         | MIR4300   |
| NA        | ENSG00000264112 | 588.602995 | -0.66800476 | 0.12701616 | 3.61E-08   | 5.04E-07   |           |
| NA        | ENSG00000264113 | 0          | NA          | NA         | NA         | NA         | RN7SL784P |
| 100500852 | ENSG00000264115 | 0          | NA          | NA         | NA         | NA         | MIR3180-4 |
| NA        | ENSG00000264116 | 0.15069912 | -0.01848503 | 0.38480575 | 0.84537521 | NA         |           |
| 100616161 | ENSG00000264119 | 0          | NA          | NA         | NA         | NA         | MIR4795   |
| NA        | ENSG00000264125 | 0          | NA          | NA         | NA         | NA         |           |
| NA        | ENSG00000264127 | 0          | NA          | NA         | NA         | NA         | SCML2P1   |
| NA        | ENSG00000264128 | 0          | NA          | NA         | NA         | NA         | RN7SL713P |
| NA        | ENSG00000264131 | 0          | NA          | NA         | NA         | NA         |           |
| 100616344 | ENSG00000264136 | 0          | NA          | NA         | NA         | NA         | MIR3689D2 |
| NA        | ENSG00000264138 | 0          | NA          | NA         | NA         | NA         |           |
| 100500882 | ENSG00000264139 | 0          | NA          | NA         | NA         | NA         | MIR3667   |
| 100500901 | ENSG00000264141 | 0          | NA          | NA         | NA         | NA         | MIR3928   |
| NA        | ENSG00000264145 | 0          | NA          | NA         | NA         | NA         |           |
| NA        | ENSG00000264148 | 0          | NA          | NA         | NA         | NA         |           |
| NA        | ENSG00000264149 | 0          | NA          | NA         | NA         | NA         |           |
| NA        | ENSG00000264150 | 0          | NA          | NA         | NA         | NA         |           |
| NA        | ENSG00000264151 | 0          | NA          | NA         | NA         | NA         |           |
| 100422928 | ENSG00000264157 | 0          | NA          | NA         | NA         | NA         | MIR3127   |
| 100616351 | ENSG00000264158 | 0          | NA          | NA         | NA         | NA         | MIR4670   |
| 100616253 | ENSG00000264160 | 0          | NA          | NA         | NA         | NA         | MIR4762   |
| 100500906 | ENSG00000264163 | 0          | NA          | NA         | NA         | NA         | MIR3689B  |
| NA        | ENSG00000264164 | 0.55153652 | 0.03287226  | 0.38623147 | 0.45241886 | NA         |           |
| NA        | ENSG00000264167 | 0          | NA          | NA         | NA         | NA         |           |
| NA        | ENSG00000264168 | 0          | NA          | NA         | NA         | NA         | MTND1P15  |
| NA        | ENSG00000264169 | 0.3248319  | 0.00163944  | 0.38337098 | 0.96461302 | NA         | RN7SL665P |
| 100422940 | ENSG00000264171 | 0          | NA          | NA         | NA         | NA         | MIR4305   |
| NA        | ENSG00000264172 | 0.14931947 | -0.01844332 | 0.38480212 | 0.84537521 | NA         | PDLIM1P3  |
| NA        | ENSG00000264174 | 0          | NA          | NA         | NA         | NA         |           |
| 100422943 | ENSG00000264175 | 0          | NA          | NA         | NA         | NA         | MIR3189   |
| NA        | ENSG00000264176 | 6.2652346  | 0.20249207  | 0.42140657 | 0.18259072 | 0.38040533 | MAGOH2P   |
| NA        | ENSG00000264177 | 0          | NA          | NA         | NA         | NA         |           |
| NA        | ENSG00000264179 | 0          | NA          | NA         | NA         | NA         |           |
| NA        | ENSG00000264186 | 0          | NA          | NA         | NA         | NA         | SNRPCP4   |
| NA        | ENSG00000264187 | 2.00830384 | 0.07454075  | 0.39466602 | 0.08076756 | NA         |           |
| NA        | ENSG00000264188 | 0.15069912 | -0.01848503 | 0.38480575 | 0.84537521 | NA         |           |

|           |                 |            |             |            |            |            |            |
|-----------|-----------------|------------|-------------|------------|------------|------------|------------|
| NA        | ENSG00000264189 | 0          | NA          | NA         | NA         | NA         | AIDAP3     |
| NA        | ENSG00000264192 | 0          | NA          | NA         | NA         | NA         | RN7SL117P  |
| NA        | ENSG00000264193 | 0          | NA          | NA         | NA         | NA         |            |
| NA        | ENSG00000264196 | 0          | NA          | NA         | NA         | NA         |            |
| 100616457 | ENSG00000264200 | 0          | NA          | NA         | NA         | NA         | MIR4693    |
| 100616262 | ENSG00000264201 | 0          | NA          | NA         | NA         | NA         | MIR4701    |
| NA        | ENSG00000264204 | 302.305953 | 0.27334999  | 0.13353968 | 0.02873942 | 0.0970608  | AGAP7P     |
| NA        | ENSG00000264207 | 85.3435784 | -0.28433    | 0.23451874 | 0.13474689 | 0.30920405 |            |
| 100616332 | ENSG00000264210 | 0          | NA          | NA         | NA         | NA         | MIR4716    |
| 100616376 | ENSG00000264211 | 0          | NA          | NA         | NA         | NA         | MIR4492    |
| NA        | ENSG00000264212 | 0.34746601 | 0.02370763  | 0.3853651  | 0.61987128 | NA         |            |
| NA        | ENSG00000264215 | 0          | NA          | NA         | NA         | NA         |            |
| NA        | ENSG00000264217 | 0          | NA          | NA         | NA         | NA         | RPL35AP23  |
| 100422878 | ENSG00000264226 | 0          | NA          | NA         | NA         | NA         | MIR3168    |
| 100151683 | ENSG00000264229 | 0          | NA          | NA         | NA         | NA         | RNU4ATAC   |
| 728113    | ENSG00000264230 | 0          | NA          | NA         | NA         | NA         | ANXA8L1    |
| 107985128 | ENSG00000264232 | 0.18922458 | 0.01954053  | 0.38488496 | 0.78225479 | NA         | LINC01916  |
| 100616381 | ENSG00000264233 | 0          | NA          | NA         | NA         | NA         | MIR4456    |
| 104968399 | ENSG00000264235 | 3.11903575 | 0.1234713   | 0.40112739 | 0.19647583 | 0.40007944 | MYL12-AS1  |
| NA        | ENSG00000264236 | 0          | NA          | NA         | NA         | NA         |            |
| NA        | ENSG00000264240 | 0          | NA          | NA         | NA         | NA         | CPDP1      |
| NA        | ENSG00000264243 | 0.18922458 | 0.01954053  | 0.38488496 | 0.78225479 | NA         |            |
| NA        | ENSG00000264245 | 0          | NA          | NA         | NA         | NA         |            |
| NA        | ENSG00000264246 | 0          | NA          | NA         | NA         | NA         |            |
| NA        | ENSG00000264247 | 397.470761 | -0.09740516 | 0.12225171 | 0.39973624 | 0.62831531 | ZNF407-AS1 |
| 100500831 | ENSG00000264249 | 0          | NA          | NA         | NA         | NA         | MIR3912    |
| NA        | ENSG00000264250 | 0          | NA          | NA         | NA         | NA         | RN7SL835P  |
| NA        | ENSG00000264251 | 0          | NA          | NA         | NA         | NA         | RN7SL819P  |
| NA        | ENSG00000264254 | 0          | NA          | NA         | NA         | NA         |            |
| NA        | ENSG00000264257 | 0          | NA          | NA         | NA         | NA         | KIR3DP1    |
| NA        | ENSG00000264260 | 0          | NA          | NA         | NA         | NA         | LINC01893  |
| NA        | ENSG00000264262 | 0          | NA          | NA         | NA         | NA         |            |
| 105376854 | ENSG00000264265 | 0          | NA          | NA         | NA         | NA         | LINC01925  |
| 100422925 | ENSG00000264266 | 0          | NA          | NA         | NA         | NA         | MIR4322    |
| 100616467 | ENSG00000264268 | 0          | NA          | NA         | NA         | NA         | MIR4767    |
| 100129878 | ENSG00000264269 | 0          | NA          | NA         | NA         | NA         |            |
| NA        | ENSG00000264270 | 0          | NA          | NA         | NA         | NA         |            |
| NA        | ENSG00000264271 | 0          | NA          | NA         | NA         | NA         | RN7SL488P  |

|           |                 |            |            |            |            |            |            |
|-----------|-----------------|------------|------------|------------|------------|------------|------------|
| NA        | ENSG00000264272 | 0          | NA         | NA         | NA         | NA         |            |
| NA        | ENSG00000264273 | 0.31696972 | 0.00135678 | 0.38336848 | 0.96485331 | NA         |            |
| 100616246 | ENSG00000264274 | 0          | NA         | NA         | NA         | NA         | MIR4799    |
| NA        | ENSG00000264275 | 0.34746601 | 0.02370763 | 0.3853651  | 0.61987128 | NA         | RN7SL753P  |
| 100131655 | ENSG00000264278 | 21.8504059 | 0.22176952 | 0.35465263 | 0.27612664 | 0.50026048 | ZNF236-DT  |
| 100616417 | ENSG00000264279 | 0          | NA         | NA         | NA         | NA         | MIR4786    |
| NA        | ENSG00000264281 | 0          | NA         | NA         | NA         | NA         |            |
| NA        | ENSG00000264289 | 0          | NA         | NA         | NA         | NA         |            |
| NA        | ENSG00000264290 | 3.64202115 | 0.12673768 | 0.39968645 | 0.23197602 | 0.44862113 |            |
| 100616360 | ENSG00000264292 | 0          | NA         | NA         | NA         | NA         | MIR2467    |
| NA        | ENSG00000264293 | 0          | NA         | NA         | NA         | NA         | RN7SL657P  |
| 26811     | ENSG00000264294 | 0          | NA         | NA         | NA         | NA         | SNORD55    |
| 100500843 | ENSG00000264295 | 0          | NA         | NA         | NA         | NA         | MIR3922    |
| NA        | ENSG00000264296 | 0          | NA         | NA         | NA         | NA         |            |
| 102465833 | ENSG00000264297 | 0          | NA         | NA         | NA         | NA         | MIR4433B   |
| NA        | ENSG00000264300 | 0          | NA         | NA         | NA         | NA         |            |
| 101927642 | ENSG00000264301 | 0          | NA         | NA         | NA         | NA         | LINC01444  |
| NA        | ENSG00000264304 | 9.47046823 | 0.01046916 | 0.34482717 | 0.94772963 | 0.97860705 |            |
| 100616426 | ENSG00000264309 | 0          | NA         | NA         | NA         | NA         | MIR4694    |
| NA        | ENSG00000264311 | 0          | NA         | NA         | NA         | NA         | MIX23P1    |
| NA        | ENSG00000264313 | 0          | NA         | NA         | NA         | NA         | RN7SL644P  |
| 100847030 | ENSG00000264314 | 0          | NA         | NA         | NA         | NA         | MIR548AT   |
| NA        | ENSG00000264315 | 0          | NA         | NA         | NA         | NA         | HNRNPA1P11 |
| NA        | ENSG00000264316 | 0          | NA         | NA         | NA         | NA         | MTCO3P13   |
| NA        | ENSG00000264317 | 0          | NA         | NA         | NA         | NA         | RN7SL154P  |
| 100616435 | ENSG00000264319 | 0          | NA         | NA         | NA         | NA         | MIR4801    |
| NA        | ENSG00000264322 | 0          | NA         | NA         | NA         | NA         | RN7SL448P  |
| NA        | ENSG00000264324 | 16.143699  | -0.0940258 | 0.36158902 | 0.53147825 | 0.74283399 |            |
| 100847036 | ENSG00000264330 | 0          | NA         | NA         | NA         | NA         | MIR5186    |
| NA        | ENSG00000264334 | 0          | NA         | NA         | NA         | NA         |            |
| NA        | ENSG00000264339 | 0          | NA         | NA         | NA         | NA         |            |
| NA        | ENSG00000264340 | 0          | NA         | NA         | NA         | NA         |            |
| NA        | ENSG00000264341 | 0          | NA         | NA         | NA         | NA         |            |
| 100500825 | ENSG00000264342 | 0          | NA         | NA         | NA         | NA         | MIR3660    |
| 388677    | ENSG00000264343 | 7.22562371 | 0.20454699 | 0.45357376 | 0.04946836 | 0.14780908 | NOTCH2NLA  |
| 105372030 | ENSG00000264345 | 1.26815405 | 0.05970746 | 0.38825467 | 0.2724082  | NA         | LINC01894  |
| 109617010 | ENSG00000264346 | 0          | NA         | NA         | NA         | NA         | SNORA77B   |
| 100423020 | ENSG00000264349 | 0          | NA         | NA         | NA         | NA         | MIR4258    |

|           |                 |            |             |            |            |            |           |
|-----------|-----------------|------------|-------------|------------|------------|------------|-----------|
| NA        | ENSG00000264350 | 0          | NA          | NA         | NA         | NA         | SNRPGP2   |
| NA        | ENSG00000264352 | 0          | NA          | NA         | NA         | NA         | RN7SL602P |
| 100422990 | ENSG00000264354 | 0          | NA          | NA         | NA         | NA         | MIR3134   |
| 100616116 | ENSG00000264357 | 0          | NA          | NA         | NA         | NA         | MIR4648   |
| 100422947 | ENSG00000264358 | 0          | NA          | NA         | NA         | NA         | MIR3122   |
| NA        | ENSG00000264359 | 0.16735865 | 0.01897177  | 0.38482933 | 0.78225479 | NA         | NEK4P2    |
| 140735    | ENSG00000264364 | 3813.89959 | -0.14102914 | 0.06096551 | 0.01900998 | 0.06992175 | DYNLL2    |
| NA        | ENSG00000264365 | 0.98064951 | -0.02440786 | 0.38053749 | 0.70460941 | NA         |           |
| 100422986 | ENSG00000264370 | 0          | NA          | NA         | NA         | NA         | MIR3125   |
| 100616365 | ENSG00000264371 | 0          | NA          | NA         | NA         | NA         | MIR4425   |
| NA        | ENSG00000264373 | 0          | NA          | NA         | NA         | NA         |           |
| 100616380 | ENSG00000264377 | 0          | NA          | NA         | NA         | NA         | MIR4671   |
| NA        | ENSG00000264379 | 0          | NA          | NA         | NA         | NA         |           |
| NA        | ENSG00000264384 | 0          | NA          | NA         | NA         | NA         | RN7SL431P |
| 100616183 | ENSG00000264386 | 0          | NA          | NA         | NA         | NA         | MIR4513   |
| 100846996 | ENSG00000264387 | 0          | NA          | NA         | NA         | NA         | MIR5007   |
| NA        | ENSG00000264388 | 0          | NA          | NA         | NA         | NA         |           |
| 100616180 | ENSG00000264390 | 0          | NA          | NA         | NA         | NA         | MIR4465   |
| NA        | ENSG00000264391 | 0.18922458 | 0.01954053  | 0.38488496 | 0.78225479 | NA         | RN7SL208P |
| 100422904 | ENSG00000264395 | 0          | NA          | NA         | NA         | NA         | MIR3193   |
| 100500916 | ENSG00000264397 | 0          | NA          | NA         | NA         | NA         | MIR3180-5 |
| 100616220 | ENSG00000264399 | 0          | NA          | NA         | NA         | NA         | MIR4736   |
| NA        | ENSG00000264400 | 0          | NA          | NA         | NA         | NA         | RN7SL491P |
| 100616215 | ENSG00000264402 | 0          | NA          | NA         | NA         | NA         | MIR548AL  |
| NA        | ENSG00000264404 | 0          | NA          | NA         | NA         | NA         | LINC02675 |
| 100500903 | ENSG00000264405 | 0          | NA          | NA         | NA         | NA         | MIR3913-1 |
| 100847084 | ENSG00000264406 | 0          | NA          | NA         | NA         | NA         | MIR548AP  |
| 100616484 | ENSG00000264408 | 0          | NA          | NA         | NA         | NA         | MIR4470   |
| 100616384 | ENSG00000264419 | 0          | NA          | NA         | NA         | NA         | MIR548AC  |
| NA        | ENSG00000264421 | 0          | NA          | NA         | NA         | NA         |           |
| NA        | ENSG00000264422 | 0          | NA          | NA         | NA         | NA         |           |
| NA        | ENSG00000264423 | 0          | NA          | NA         | NA         | NA         | RN7SL718P |
| 4622      | ENSG00000264424 | 0          | NA          | NA         | NA         | NA         | MYH4      |
| 100616117 | ENSG00000264425 | 0          | NA          | NA         | NA         | NA         | MIR4653   |
| 100422917 | ENSG00000264426 | 0          | NA          | NA         | NA         | NA         | MIR4283-1 |
| 100422835 | ENSG00000264429 | 0          | NA          | NA         | NA         | NA         | MIR3183   |
| NA        | ENSG00000264431 | 0          | NA          | NA         | NA         | NA         |           |
| NA        | ENSG00000264434 | 0          | NA          | NA         | NA         | NA         |           |

|           |                 |            |            |            |            |            |            |
|-----------|-----------------|------------|------------|------------|------------|------------|------------|
| NA        | ENSG00000264435 | 0.16735865 | 0.01897177 | 0.38482933 | 0.78225479 | NA         |            |
| NA        | ENSG00000264438 | 0          | NA         | NA         | NA         | NA         | RN7SL560P  |
| NA        | ENSG00000264443 | 0          | NA         | NA         | NA         | NA         | NCMAP-DT   |
| NA        | ENSG00000264444 | 0          | NA         | NA         | NA         | NA         | SDHCP1     |
| 114515521 | ENSG00000264448 | 0.99137342 | 0.04527728 | 0.38580686 | 0.37954878 | NA         | MIR378D2HG |
| NA        | ENSG00000264449 | 10.2947515 | 3.04073965 | 1.00232688 | 0.00014964 | 0.00109357 |            |
| NA        | ENSG00000264451 | 0          | NA         | NA         | NA         | NA         |            |
| NA        | ENSG00000264452 | 0          | NA         | NA         | NA         | NA         |            |
| NA        | ENSG00000264456 | 0.3411089  | 0.02362652 | 0.3853534  | 0.62410636 | NA         |            |
| NA        | ENSG00000264458 | 0          | NA         | NA         | NA         | NA         |            |
| 101928144 | ENSG00000264464 | 0          | NA         | NA         | NA         | NA         | LINC02837  |
| 100616401 | ENSG00000264468 | 0          | NA         | NA         | NA         | NA         | MIR4520-1  |
| 100616338 | ENSG00000264470 | 0          | NA         | NA         | NA         | NA         | MIR4794    |
| NA        | ENSG00000264472 | 0.18922458 | 0.01954053 | 0.38488496 | 0.78225479 | NA         |            |
| 100616465 | ENSG00000264474 | 0          | NA         | NA         | NA         | NA         | MIR4656    |
| NA        | ENSG00000264475 | 0          | NA         | NA         | NA         | NA         |            |
| 100847043 | ENSG00000264477 | 0          | NA         | NA         | NA         | NA         | MIR5682    |
| 100616432 | ENSG00000264480 | 0          | NA         | NA         | NA         | NA         | MIR4714    |
| 100616239 | ENSG00000264482 | 0          | NA         | NA         | NA         | NA         | MIR4705    |
| 100847072 | ENSG00000264483 | 0          | NA         | NA         | NA         | NA         | MIR5008    |
| NA        | ENSG00000264484 | 0          | NA         | NA         | NA         | NA         | RN7SL697P  |
| NA        | ENSG00000264486 | 0          | NA         | NA         | NA         | NA         |            |
| NA        | ENSG00000264488 | 0          | NA         | NA         | NA         | NA         |            |
| NA        | ENSG00000264490 | 0          | NA         | NA         | NA         | NA         |            |
| NA        | ENSG00000264491 | 39.4086414 | 0.06823491 | 0.27860163 | 0.72666489 | 0.86949107 |            |
| 100423021 | ENSG00000264493 | 0          | NA         | NA         | NA         | NA         | MIR4298    |
| NA        | ENSG00000264497 | 0          | NA         | NA         | NA         | NA         |            |
| 100422879 | ENSG00000264500 | 0          | NA         | NA         | NA         | NA         | MIR3124    |
| NA        | ENSG00000264501 | 1.59145465 | 0.0044622  | 0.38042689 | 0.94053079 | NA         | RN7SL731P  |
| NA        | ENSG00000264503 | 0          | NA         | NA         | NA         | NA         |            |
| 100500841 | ENSG00000264511 | 0          | NA         | NA         | NA         | NA         | MIR3678    |
| 100847038 | ENSG00000264512 | 0          | NA         | NA         | NA         | NA         | MIR5692A2  |
| NA        | ENSG00000264513 | 0          | NA         | NA         | NA         | NA         |            |
| NA        | ENSG00000264514 | 0          | NA         | NA         | NA         | NA         |            |
| 284395    | ENSG00000264515 | 0          | NA         | NA         | NA         | NA         | VSTM2B-DT  |
| NA        | ENSG00000264519 | 0          | NA         | NA         | NA         | NA         | RN7SL596P  |
| NA        | ENSG00000264520 | 1.71190653 | 0.02597481 | 0.37914872 | 0.71996942 | NA         |            |
| 56957     | ENSG00000264522 | 816.250818 | 0.22335952 | 0.12492993 | 0.05797487 | 0.16694071 | OTUD7B     |

|           |                 |            |             |            |            |            |           |
|-----------|-----------------|------------|-------------|------------|------------|------------|-----------|
| 100616464 | ENSG00000264525 | 0          | NA          | NA         | NA         | NA         | MIR4778   |
| NA        | ENSG00000264529 | 0          | NA          | NA         | NA         | NA         | DNAJB6P8  |
| NA        | ENSG00000264530 | 0          | NA          | NA         | NA         | NA         | RN7SL25P  |
| 100422933 | ENSG00000264534 | 0          | NA          | NA         | NA         | NA         | MIR378B   |
| 100847085 | ENSG00000264536 | 0          | NA          | NA         | NA         | NA         | MIR5706   |
| NA        | ENSG00000264538 | 244.11303  | -0.03453062 | 0.14335461 | 0.79405353 | 0.90579008 | SUZ12P1   |
| 100847035 | ENSG00000264539 | 0          | NA          | NA         | NA         | NA         | MIR548AR  |
| NA        | ENSG00000264540 | 0          | NA          | NA         | NA         | NA         | RN7SL405P |
| NA        | ENSG00000264545 | 25.3441418 | 0.04620383  | 0.30014283 | 0.80916351 | 0.91334153 |           |
| NA        | ENSG00000264546 | 1.32329776 | -0.01905333 | 0.3795836  | 0.7753457  | NA         |           |
| NA        | ENSG00000264548 | 13.0255198 | 0.5970751   | 0.74121208 | 0.03369579 | 0.11004519 |           |
| 619570    | ENSG00000264549 | 0          | NA          | NA         | NA         | NA         | SNORD95   |
| 100422997 | ENSG00000264553 | 0          | NA          | NA         | NA         | NA         | MIR4257   |
| NA        | ENSG00000264554 | 0.6366565  | 0.00228925  | 0.38250921 | 0.95570647 | NA         | RN7SL793P |
| NA        | ENSG00000264558 | 0          | NA          | NA         | NA         | NA         |           |
| 100422880 | ENSG00000264559 | 0          | NA          | NA         | NA         | NA         | MIR3162   |
| 100616175 | ENSG00000264563 | 0          | NA          | NA         | NA         | NA         | MIR4633   |
| NA        | ENSG00000264564 | 0          | NA          | NA         | NA         | NA         |           |
| 100500809 | ENSG00000264566 | 0          | NA          | NA         | NA         | NA         | MIR23C    |
| 113523640 | ENSG00000264569 | 2.10859591 | -0.0209939  | 0.37647237 | 0.79692106 | NA         | DCXR-DT   |
| NA        | ENSG00000264570 | 0          | NA          | NA         | NA         | NA         | SNX19P3   |
| 100616290 | ENSG00000264571 | 0          | NA          | NA         | NA         | NA         | MIR4529   |
| 100423041 | ENSG00000264572 | 0          | NA          | NA         | NA         | NA         | MIR4296   |
| NA        | ENSG00000264573 | 1.56187122 | 0.11388474  | 0.40724906 | 0.05270798 | NA         | RN7SL15P  |
| NA        | ENSG00000264574 | 0          | NA          | NA         | NA         | NA         |           |
| NA        | ENSG00000264575 | 45.0471303 | 0.14318926  | 0.28695022 | 0.47327198 | 0.69536236 | LINC00526 |
| NA        | ENSG00000264577 | 48.8418887 | 0.1257477   | 0.25698621 | 0.51819116 | 0.73205017 |           |
| NA        | ENSG00000264578 | 0          | NA          | NA         | NA         | NA         |           |
| 100847013 | ENSG00000264580 | 0          | NA          | NA         | NA         | NA         | MIR5692B  |
| NA        | ENSG00000264582 | 0          | NA          | NA         | NA         | NA         | RN7SL326P |
| 100616222 | ENSG00000264583 | 0          | NA          | NA         | NA         | NA         | MIR4487   |
| 100616436 | ENSG00000264585 | 0          | NA          | NA         | NA         | NA         | MIR4449   |
| NA        | ENSG00000264587 | 0          | NA          | NA         | NA         | NA         |           |
| NA        | ENSG00000264589 | 20.8142218 | -0.67763614 | 0.56081067 | 0.02517787 | 0.08766423 | MAPT-AS1  |
| NA        | ENSG00000264592 | 0          | NA          | NA         | NA         | NA         | RN7SL131P |
| NA        | ENSG00000264595 | 0          | NA          | NA         | NA         | NA         |           |
| NA        | ENSG00000264596 | 0          | NA          | NA         | NA         | NA         |           |
| NA        | ENSG00000264598 | 0          | NA          | NA         | NA         | NA         |           |



|           |                 |            |             |            |            |            |             |
|-----------|-----------------|------------|-------------|------------|------------|------------|-------------|
| 100423016 | ENSG00000264603 | 0          | NA          | NA         | NA         | NA         | MIR3159     |
| 100422981 | ENSG00000264607 | 0          | NA          | NA         | NA         | NA         | MIR3173     |
| 100616482 | ENSG00000264610 | 0          | NA          | NA         | NA         | NA         | MIR4685     |
| NA        | ENSG00000264613 | 0          | NA          | NA         | NA         | NA         | RN7SL290P   |
| 100847054 | ENSG00000264614 | 0          | NA          | NA         | NA         | NA         | MIR5588     |
| NA        | ENSG00000264615 | 0          | NA          | NA         | NA         | NA         | RN7SL592P   |
| 100616434 | ENSG00000264616 | 0          | NA          | NA         | NA         | NA         | MIR4755     |
| NA        | ENSG00000264617 | 0          | NA          | NA         | NA         | NA         |             |
| NA        | ENSG00000264618 | 0          | NA          | NA         | NA         | NA         | RN7SL732P   |
| 100847065 | ENSG00000264621 | 0          | NA          | NA         | NA         | NA         | MIR5591     |
| NA        | ENSG00000264622 | 0          | NA          | NA         | NA         | NA         |             |
| 100616166 | ENSG00000264623 | 0          | NA          | NA         | NA         | NA         | MIR4796     |
| NA        | ENSG00000264630 | 0.16735865 | 0.01897177  | 0.38482933 | 0.78225479 | NA         | PRKCA-AS1   |
| 100422952 | ENSG00000264633 | 0          | NA          | NA         | NA         | NA         | MIR4271     |
| NA        | ENSG00000264634 | 0          | NA          | NA         | NA         | NA         |             |
| NA        | ENSG00000264635 | 3.51800324 | 0.05049978  | 0.37215414 | 0.6464302  | 0.82381649 |             |
| 100422869 | ENSG00000264638 | 0          | NA          | NA         | NA         | NA         | MIR3152     |
| NA        | ENSG00000264643 | 0          | NA          | NA         | NA         | NA         |             |
| NA        | ENSG00000264644 | 0          | NA          | NA         | NA         | NA         | KRT18P8     |
| NA        | ENSG00000264647 | 0.16735865 | 0.01897177  | 0.38482933 | 0.78225479 | NA         |             |
| 100847051 | ENSG00000264653 | 0          | NA          | NA         | NA         | NA         | MIR5194     |
| NA        | ENSG00000264655 | 3.19614673 | 0.08755629  | 0.38148105 | 0.42879382 | 0.65462623 | PPIAP54     |
| 100422830 | ENSG00000264657 | 0          | NA          | NA         | NA         | NA         | MIR3171     |
| 100616471 | ENSG00000264658 | 0          | NA          | NA         | NA         | NA         | MIR4798     |
| NA        | ENSG00000264659 | 0.173124   | -0.01911262 | 0.38486262 | 0.84537521 | NA         |             |
| NA        | ENSG00000264660 | 8.07345845 | 0.08426766  | 0.36122807 | 0.5703177  | 0.7706786  |             |
| 100422912 | ENSG00000264661 | 0          | NA          | NA         | NA         | NA         | MIR3200     |
| NA        | ENSG00000264662 | 0          | NA          | NA         | NA         | NA         |             |
| NA        | ENSG00000264663 | 0          | NA          | NA         | NA         | NA         | KRT8P34     |
| NA        | ENSG00000264666 | 0.173733   | 0.01914545  | 0.38484597 | 0.78225479 | NA         |             |
| NA        | ENSG00000264668 | 4.71284225 | 0.01756204  | 0.37286721 | 0.8555545  | 0.93552696 |             |
| 101927688 | ENSG00000264672 | 6.41023908 | 0.02412579  | 0.35627022 | 0.86174673 | 0.93867658 | SEPTIN4-AS1 |
| NA        | ENSG00000264673 | 0.33471731 | 0.02354391  | 0.38534154 | 0.62842204 | NA         |             |
| 100422858 | ENSG00000264675 | 0          | NA          | NA         | NA         | NA         | MIR4285     |
| NA        | ENSG00000264676 | 0          | NA          | NA         | NA         | NA         | RN7SL204P   |
| 100422896 | ENSG00000264678 | 0          | NA          | NA         | NA         | NA         | MIR3140     |
| 100616392 | ENSG00000264684 | 0          | NA          | NA         | NA         | NA         | MIR4773-1   |
| NA        | ENSG00000264685 | 0          | NA          | NA         | NA         | NA         | PRPF19P1    |

|           |                 |            |             |            |            |            |             |
|-----------|-----------------|------------|-------------|------------|------------|------------|-------------|
| NA        | ENSG00000264689 | 0          | NA          | NA         | NA         | NA         |             |
| NA        | ENSG00000264693 | 0          | NA          | NA         | NA         | NA         |             |
| NA        | ENSG00000264695 | 0          | NA          | NA         | NA         | NA         |             |
| NA        | ENSG00000264697 | 0          | NA          | NA         | NA         | NA         | MTL3P       |
| 100422898 | ENSG00000264698 | 0          | NA          | NA         | NA         | NA         | MIR4255     |
| NA        | ENSG00000264699 | 0          | NA          | NA         | NA         | NA         | LINC01912   |
| NA        | ENSG00000264701 | 0.173733   | 0.01914545  | 0.38484597 | 0.78225479 | NA         |             |
| 100616171 | ENSG00000264703 | 0          | NA          | NA         | NA         | NA         | MIR4752     |
| NA        | ENSG00000264705 | 0.173733   | 0.01914545  | 0.38484597 | 0.78225479 | NA         |             |
| NA        | ENSG00000264706 | 0          | NA          | NA         | NA         | NA         | RN7SL217P   |
| 101927150 | ENSG00000264707 | 0.15069912 | -0.01848503 | 0.38480575 | 0.84537521 | NA         | L3MBTL4-AS1 |
| 100616261 | ENSG00000264712 | 0          | NA          | NA         | NA         | NA         | MIR4504     |
| NA        | ENSG00000264714 | 0          | NA          | NA         | NA         | NA         | KIAA0895LP1 |
| 100996758 | ENSG00000264717 | 0          | NA          | NA         | NA         | NA         | NPY4R2      |
| 100422871 | ENSG00000264720 | 0          | NA          | NA         | NA         | NA         | MIR3117     |
| 100422908 | ENSG00000264725 | 0          | NA          | NA         | NA         | NA         | MIR3129     |
| NA        | ENSG00000264727 | 0          | NA          | NA         | NA         | NA         |             |
| NA        | ENSG00000264729 | 0          | NA          | NA         | NA         | NA         |             |
| 100616342 | ENSG00000264732 | 0          | NA          | NA         | NA         | NA         | MIR4638     |
| 100616195 | ENSG00000264733 | 0          | NA          | NA         | NA         | NA         | MIR4718     |
| NA        | ENSG00000264734 | 34.7953855 | 0.3038023   | 0.34095821 | 0.16767784 | 0.35871254 |             |
| NA        | ENSG00000264735 | 2.51671632 | -0.01909365 | 0.37437995 | 0.82935918 | NA         |             |
| NA        | ENSG00000264736 | 0          | NA          | NA         | NA         | NA         | BDP1P       |
| 100616379 | ENSG00000264737 | 0          | NA          | NA         | NA         | NA         | MIR4511     |
| NA        | ENSG00000264739 | 0.30001658 | -0.02294459 | 0.38527539 | 0.68644831 | NA         |             |
| 100616158 | ENSG00000264741 | 0          | NA          | NA         | NA         | NA         | MIR4505     |
| NA        | ENSG00000264743 | 0          | NA          | NA         | NA         | NA         | DPRXP4      |
| 100616333 | ENSG00000264744 | 0          | NA          | NA         | NA         | NA         | MIR3689C    |
| NA        | ENSG00000264745 | 0.66943461 | 0.03059546  | 0.38616409 | 0.42784935 | NA         | TTC39C-AS1  |
| 100500834 | ENSG00000264747 | 0          | NA          | NA         | NA         | NA         | MIR3924     |
| NA        | ENSG00000264750 | 0          | NA          | NA         | NA         | NA         |             |
| NA        | ENSG00000264754 | 0          | NA          | NA         | NA         | NA         |             |
| 100422957 | ENSG00000264755 | 0          | NA          | NA         | NA         | NA         | MIR3131     |
| 100423025 | ENSG00000264757 | 0          | NA          | NA         | NA         | NA         | MIR3198-1   |
| 100422950 | ENSG00000264760 | 0          | NA          | NA         | NA         | NA         | MIR3141     |
| 100422909 | ENSG00000264763 | 0          | NA          | NA         | NA         | NA         | MIR4295     |
| 100616157 | ENSG00000264764 | 0          | NA          | NA         | NA         | NA         | MIR4772     |
| NA        | ENSG00000264765 | 0          | NA          | NA         | NA         | NA         |             |

|           |                 |            |             |            |            |            |           |
|-----------|-----------------|------------|-------------|------------|------------|------------|-----------|
| NA        | ENSG00000264767 | 0          | NA          | NA         | NA         | NA         | RN7SL237P |
| NA        | ENSG00000264769 | 1.95838051 | 0.04854816  | 0.38169383 | 0.52534148 | NA         |           |
| NA        | ENSG00000264772 | 192.415976 | 0.21494307  | 0.17598575 | 0.16991031 | 0.3617363  |           |
| 100616164 | ENSG00000264773 | 0          | NA          | NA         | NA         | NA         | MIR4420   |
| NA        | ENSG00000264775 | 0          | NA          | NA         | NA         | NA         | PPIAP14   |
| 100616422 | ENSG00000264781 | 0          | NA          | NA         | NA         | NA         | MIR4537   |
| NA        | ENSG00000264785 | 0          | NA          | NA         | NA         | NA         |           |
| 100422876 | ENSG00000264788 | 0          | NA          | NA         | NA         | NA         | MIR3148   |
| NA        | ENSG00000264790 | 0          | NA          | NA         | NA         | NA         |           |
| NA        | ENSG00000264791 | 0          | NA          | NA         | NA         | NA         |           |
| 100616271 | ENSG00000264792 | 0          | NA          | NA         | NA         | NA         | MIR4637   |
| 100616370 | ENSG00000264793 | 0          | NA          | NA         | NA         | NA         | MIR4771-1 |
| 100846993 | ENSG00000264796 | 0          | NA          | NA         | NA         | NA         | MIR5009   |
| 100422895 | ENSG00000264800 | 0          | NA          | NA         | NA         | NA         | MIR4294   |
| NA        | ENSG00000264801 | 4.68474424 | -0.02692665 | 0.36494149 | 0.81932461 | 0.91761737 | ERVFRD-3  |
| 100847050 | ENSG00000264802 | 0          | NA          | NA         | NA         | NA         | MIR5191   |
| 100422867 | ENSG00000264803 | 0          | NA          | NA         | NA         | NA         | MIR378C   |
| NA        | ENSG00000264808 | 0.16735865 | 0.01897177  | 0.38482933 | 0.78225479 | NA         |           |
| NA        | ENSG00000264809 | 0          | NA          | NA         | NA         | NA         |           |
| 100616493 | ENSG00000264810 | 0          | NA          | NA         | NA         | NA         | MIR4441   |
| NA        | ENSG00000264812 | 3.7414339  | -0.12135977 | 0.39395516 | 0.2820924  | 0.50694866 |           |
| NA        | ENSG00000264813 | 1.01419946 | -0.05393314 | 0.38937579 | 0.23962431 | NA         |           |
| 100422821 | ENSG00000264814 | 0          | NA          | NA         | NA         | NA         | MIR1273C  |
| 100422893 | ENSG00000264823 | 0          | NA          | NA         | NA         | NA         | MIR3154   |
| 100847006 | ENSG00000264824 | 0          | NA          | NA         | NA         | NA         | MIR5571   |
| NA        | ENSG00000264825 | 0          | NA          | NA         | NA         | NA         |           |
| NA        | ENSG00000264829 | 0.63693105 | -0.01718161 | 0.38279086 | 0.69925092 | NA         |           |
| NA        | ENSG00000264833 | 0          | NA          | NA         | NA         | NA         | RN7SL468P |
| NA        | ENSG00000264834 | 0          | NA          | NA         | NA         | NA         |           |
| NA        | ENSG00000264837 | 3.41908284 | 0.10456877  | 0.38622944 | 0.35956268 | 0.58949503 | VN1R71P   |
| NA        | ENSG00000264840 | 0          | NA          | NA         | NA         | NA         | RN7SL404P |
| NA        | ENSG00000264843 | 0          | NA          | NA         | NA         | NA         |           |
| 105372179 | ENSG00000264845 | 0          | NA          | NA         | NA         | NA         |           |
| 100423013 | ENSG00000264850 | 0          | NA          | NA         | NA         | NA         | MIR4310   |
| NA        | ENSG00000264853 | 0.48996017 | 0.01145102  | 0.38340314 | 0.78247147 | NA         |           |
| 100847007 | ENSG00000264857 | 0          | NA          | NA         | NA         | NA         | MIR5696   |
| NA        | ENSG00000264859 | 0.16735865 | 0.01897177  | 0.38482933 | 0.78225479 | NA         | DSG2-AS1  |
| NA        | ENSG00000264860 | 2.30962327 | -0.06125115 | 0.38108233 | 0.48877635 | NA         |           |

|           |                 |            |             |            |            |            |            |
|-----------|-----------------|------------|-------------|------------|------------|------------|------------|
| NA        | ENSG00000264862 | 0          | NA          | NA         | NA         | NA         | RN7SL45P   |
| 100500908 | ENSG00000264864 | 0          | NA          | NA         | NA         | NA         | MIR3613    |
| NA        | ENSG00000264869 | 0          | NA          | NA         | NA         | NA         |            |
| NA        | ENSG00000264874 | 0          | NA          | NA         | NA         | NA         |            |
| NA        | ENSG00000264876 | 0          | NA          | NA         | NA         | NA         |            |
| NA        | ENSG00000264879 | 0          | NA          | NA         | NA         | NA         | RN7SL690P  |
| NA        | ENSG00000264880 | 0          | NA          | NA         | NA         | NA         |            |
| NA        | ENSG00000264881 | 0          | NA          | NA         | NA         | NA         |            |
| NA        | ENSG00000264892 | 0          | NA          | NA         | NA         | NA         | NOS2P4     |
| NA        | ENSG00000264895 | 0.78714674 | -0.00586495 | 0.380819   | 0.91746412 | NA         |            |
| 100500859 | ENSG00000264897 | 0          | NA          | NA         | NA         | NA         | MIR3921    |
| 100500814 | ENSG00000264901 | 0          | NA          | NA         | NA         | NA         | MIR3616    |
| 100616478 | ENSG00000264906 | 0          | NA          | NA         | NA         | NA         | MIR4494    |
| NA        | ENSG00000264907 | 0          | NA          | NA         | NA         | NA         | PRELID3BP3 |
| NA        | ENSG00000264910 | 0          | NA          | NA         | NA         | NA         | RN7SL525P  |
| NA        | ENSG00000264911 | 0.173733   | 0.01914545  | 0.38484597 | 0.78225479 | NA         |            |
| NA        | ENSG00000264914 | 0          | NA          | NA         | NA         | NA         |            |
| NA        | ENSG00000264916 | 0          | NA          | NA         | NA         | NA         | RN7SL230P  |
| 102724532 | ENSG00000264920 | 54.3970046 | 0.11304609  | 0.25598503 | 0.56018123 | 0.76415299 | SP2-DT     |
| 100616278 | ENSG00000264922 | 0          | NA          | NA         | NA         | NA         | MIR4540    |
| NA        | ENSG00000264924 | 2.48346994 | -0.11286517 | 0.39726424 | 0.22955395 | NA         |            |
| 100616492 | ENSG00000264926 | 0          | NA          | NA         | NA         | NA         | MIR378F    |
| NA        | ENSG00000264930 | 0          | NA          | NA         | NA         | NA         |            |
| 100423011 | ENSG00000264931 | 0          | NA          | NA         | NA         | NA         | MIR3138    |
| NA        | ENSG00000264932 | 1.3341002  | 0.0304521   | 0.38068775 | 0.65151414 | NA         |            |
| NA        | ENSG00000264933 | 0          | NA          | NA         | NA         | NA         | RN7SL190P  |
| 100422863 | ENSG00000264934 | 0          | NA          | NA         | NA         | NA         | MIR4265    |
| NA        | ENSG00000264937 | 1.05234559 | 0.02732851  | 0.38243694 | 0.61937029 | NA         |            |
| NA        | ENSG00000264940 | 0          | NA          | NA         | NA         | NA         | SNORD3C    |
| 100616441 | ENSG00000264941 | 0          | NA          | NA         | NA         | NA         | MIR4474    |
| NA        | ENSG00000264943 | 9.90821843 | -0.07523544 | 0.35330805 | 0.62499445 | 0.80891708 | SH3GLIP2   |
| 100422972 | ENSG00000264947 | 0          | NA          | NA         | NA         | NA         | MIR3181    |
| 400612    | ENSG00000264954 | 0.63581861 | 0.00152195  | 0.38250328 | 0.96992631 | NA         | PRR29-AS1  |
| NA        | ENSG00000264956 | 19.9538234 | -0.53012008 | 0.52508899 | 0.04831174 | 0.14503024 |            |
| NA        | ENSG00000264958 | 0          | NA          | NA         | NA         | NA         | ALOX12P1   |
| 100616359 | ENSG00000264961 | 0          | NA          | NA         | NA         | NA         | MIR4730    |
| NA        | ENSG00000264963 | 0          | NA          | NA         | NA         | NA         | RN7SL440P  |
| NA        | ENSG00000264964 | 1.65801976 | 0.01314046  | 0.37788879 | 0.85957031 | NA         | TWSG1-DT   |

|           |                 |            |             |            |            |            |             |
|-----------|-----------------|------------|-------------|------------|------------|------------|-------------|
| 100847059 | ENSG00000264966 | 0          | NA          | NA         | NA         | NA         | MIR5094     |
| NA        | ENSG00000264968 | 0.52840919 | -0.03096427 | 0.38603379 | 0.5030887  | NA         |             |
| NA        | ENSG00000264970 | 0          | NA          | NA         | NA         | NA         |             |
| NA        | ENSG00000264971 | 0          | NA          | NA         | NA         | NA         | PRR13P4     |
| 100616395 | ENSG00000264974 | 0          | NA          | NA         | NA         | NA         | MIR4789     |
| 100616431 | ENSG00000264975 | 0          | NA          | NA         | NA         | NA         | MIR4431     |
| NA        | ENSG00000264978 | 0          | NA          | NA         | NA         | NA         | RN7SL630P   |
| 100616123 | ENSG00000264979 | 0          | NA          | NA         | NA         | NA         | MIR4436B1   |
| NA        | ENSG00000264982 | 10.9008729 | 0.00864762  | 0.37954804 | 0.89946702 | 0.95557174 |             |
| 100847015 | ENSG00000264984 | 0          | NA          | NA         | NA         | NA         | MIR5691     |
| 101928251 | ENSG00000264985 | 0.8161332  | -0.00631362 | 0.38151348 | 0.90270029 | NA         |             |
| 100847039 | ENSG00000264986 | 0          | NA          | NA         | NA         | NA         | MIR5092     |
| NA        | ENSG00000264990 | 0          | NA          | NA         | NA         | NA         |             |
| 692209    | ENSG00000264994 | 0          | NA          | NA         | NA         | NA         | SNORD92     |
| NA        | ENSG00000264997 | 0          | NA          | NA         | NA         | NA         |             |
| 100847067 | ENSG00000264999 | 0          | NA          | NA         | NA         | NA         | MIR5089     |
| 101927877 | ENSG00000265000 | 0          | NA          | NA         | NA         | NA         | MARCHF10-DT |
| 100616447 | ENSG00000265003 | 0          | NA          | NA         | NA         | NA         | MIR4780     |
| 100422923 | ENSG00000265005 | 0          | NA          | NA         | NA         | NA         | MIR548W     |
| 100422891 | ENSG00000265007 | 0          | NA          | NA         | NA         | NA         | MIR4327     |
| NA        | ENSG00000265008 | 0.83820844 | -0.00827659 | 0.38011597 | 0.89178584 | NA         |             |
| NA        | ENSG00000265010 | 0.50207596 | 0.02562368  | 0.38565771 | 0.52549886 | NA         |             |
| 100422827 | ENSG00000265014 | 0          | NA          | NA         | NA         | NA         | MIR3160-1   |
| NA        | ENSG00000265015 | 0          | NA          | NA         | NA         | NA         |             |
| 414224    | ENSG00000265018 | 120.383116 | -0.08755003 | 0.19174482 | 0.59739319 | 0.78921427 | AGAP12P     |
| NA        | ENSG00000265019 | 0          | NA          | NA         | NA         | NA         | NCOR1P2     |
| NA        | ENSG00000265028 | 0          | NA          | NA         | NA         | NA         |             |
| NA        | ENSG00000265031 | 0          | NA          | NA         | NA         | NA         |             |
| NA        | ENSG00000265033 | 1.33491668 | 0.00490661  | 0.37773228 | 0.94699099 | NA         | RN7SL262P   |
| NA        | ENSG00000265038 | 0          | NA          | NA         | NA         | NA         | PMM2P1      |
| NA        | ENSG00000265041 | 0          | NA          | NA         | NA         | NA         |             |
| NA        | ENSG00000265043 | 0.14931947 | -0.01844332 | 0.38480212 | 0.84537521 | NA         |             |
| NA        | ENSG00000265046 | 0          | NA          | NA         | NA         | NA         |             |
| NA        | ENSG00000265052 | 0.16735865 | 0.01897177  | 0.38482933 | 0.78225479 | NA         | RN7SL622P   |
| NA        | ENSG00000265055 | 4.47785777 | 0.13501806  | 0.39610549 | 0.27201817 | 0.49544115 |             |
| 100422862 | ENSG00000265056 | 0          | NA          | NA         | NA         | NA         | MIR548S     |
| 100616219 | ENSG00000265057 | 0          | NA          | NA         | NA         | NA         | MIR4765     |
| 23614     | ENSG00000265060 | 0          | NA          | NA         | NA         | NA         | PPY2P       |

|           |                 |            |             |            |            |            |             |
|-----------|-----------------|------------|-------------|------------|------------|------------|-------------|
| NA        | ENSG00000265061 | 0          | NA          | NA         | NA         | NA         |             |
| 100616410 | ENSG00000265064 | 0          | NA          | NA         | NA         | NA         | MIR4692     |
| 101927188 | ENSG00000265069 | 0          | NA          | NA         | NA         | NA         |             |
| NA        | ENSG00000265073 | 0          | NA          | NA         | NA         | NA         |             |
| 100500871 | ENSG00000265075 | 0          | NA          | NA         | NA         | NA         | MIR3622B    |
| NA        | ENSG00000265078 | 0          | NA          | NA         | NA         | NA         | RN7SL664P   |
| 100500900 | ENSG00000265083 | 0          | NA          | NA         | NA         | NA         | MIR3691     |
| 100616160 | ENSG00000265089 | 0          | NA          | NA         | NA         | NA         | MIR4655     |
| NA        | ENSG00000265091 | 0.173733   | 0.01914545  | 0.38484597 | 0.78225479 | NA         |             |
| 100616327 | ENSG00000265092 | 0          | NA          | NA         | NA         | NA         | MIR4484     |
| NA        | ENSG00000265093 | 0.173124   | -0.01911262 | 0.38486262 | 0.84537521 | NA         | RN7SL246P   |
| NA        | ENSG00000265094 | 0          | NA          | NA         | NA         | NA         |             |
| NA        | ENSG00000265095 | 2.21906273 | -0.15468813 | 0.42817414 | 0.02075289 | NA         | FTLP12      |
| NA        | ENSG00000265096 | 45.0384029 | -0.21916177 | 0.31618723 | 0.28797159 | 0.51369864 | C1QTNF1-AS1 |
| NA        | ENSG00000265097 | 0          | NA          | NA         | NA         | NA         | RBM22P1     |
| 100616293 | ENSG00000265098 | 0          | NA          | NA         | NA         | NA         | MIR4510     |
| NA        | ENSG00000265099 | 1.75472034 | 0.034626    | 0.38047576 | 0.6266103  | NA         |             |
| NA        | ENSG00000265100 | 6.45427325 | 0.01229033  | 0.35283446 | 0.93281274 | 0.97195551 |             |
| NA        | ENSG00000265101 | 0          | NA          | NA         | NA         | NA         |             |
| 100500904 | ENSG00000265102 | 0          | NA          | NA         | NA         | NA         | MIR3942     |
| 2702      | ENSG00000265107 | 0.14931947 | -0.01844332 | 0.38480212 | 0.84537521 | NA         | GJA5        |
| 100616125 | ENSG00000265110 | 0          | NA          | NA         | NA         | NA         | MIR4731     |
| 100422936 | ENSG00000265112 | 0          | NA          | NA         | NA         | NA         | MIR3153     |
| NA        | ENSG00000265113 | 0          | NA          | NA         | NA         | NA         |             |
| NA        | ENSG00000265115 | 0          | NA          | NA         | NA         | NA         |             |
| NA        | ENSG00000265118 | 0          | NA          | NA         | NA         | NA         |             |
| NA        | ENSG00000265121 | 0          | NA          | NA         | NA         | NA         |             |
| NA        | ENSG00000265123 | 0          | NA          | NA         | NA         | NA         | RN7SL200P   |
| NA        | ENSG00000265125 | 0.90839259 | -0.0644145  | 0.39115204 | 0.21688926 | NA         |             |
| NA        | ENSG00000265126 | 1.03964425 | 0.0595157   | 0.38761454 | 0.30856214 | NA         |             |
| NA        | ENSG00000265128 | 0          | NA          | NA         | NA         | NA         |             |
| 100422899 | ENSG00000265134 | 0          | NA          | NA         | NA         | NA         | MIR3190     |
| 100847019 | ENSG00000265135 | 0          | NA          | NA         | NA         | NA         | MIR5687     |
| NA        | ENSG00000265136 | 0.73690411 | 0.02419484  | 0.38396554 | 0.57817081 | NA         |             |
| 100422875 | ENSG00000265137 | 0          | NA          | NA         | NA         | NA         | MIR3192     |
| NA        | ENSG00000265139 | 0.15069912 | -0.01848503 | 0.38480575 | 0.84537521 | NA         |             |
| 100422855 | ENSG00000265140 | 0          | NA          | NA         | NA         | NA         | MIR4301     |
| NA        | ENSG00000265141 | 0          | NA          | NA         | NA         | NA         | RN7SL451P   |

|           |                 |            |             |            |            |            |             |
|-----------|-----------------|------------|-------------|------------|------------|------------|-------------|
| 102723167 | ENSG00000265142 | 9.44779985 | 0.1696829   | 0.39076834 | 0.28649115 | 0.51225526 | MIR133A1HG  |
| 100616428 | ENSG00000265144 | 0          | NA          | NA         | NA         | NA         | MIR548AM    |
| 26796     | ENSG00000265145 | 0          | NA          | NA         | NA         | NA         | SNORD53     |
| 100506779 | ENSG00000265148 | 56.3334308 | -0.1071752  | 0.24685706 | 0.57333514 | 0.7729263  | TSPOAP1-AS1 |
| 100616247 | ENSG00000265154 | 0          | NA          | NA         | NA         | NA         | MIR151B     |
| NA        | ENSG00000265158 | 15.086674  | 0.64974479  | 0.70676615 | 0.02983935 | 0.09995148 | LRRC37A7P   |
| 100847029 | ENSG00000265160 | 0          | NA          | NA         | NA         | NA         | MIR5003     |
| NA        | ENSG00000265163 | 0          | NA          | NA         | NA         | NA         | CDRT8       |
| 100616110 | ENSG00000265164 | 0          | NA          | NA         | NA         | NA         | MIR2681     |
| 100423019 | ENSG00000265165 | 0          | NA          | NA         | NA         | NA         | MIR4307     |
| NA        | ENSG00000265168 | 0          | NA          | NA         | NA         | NA         |             |
| NA        | ENSG00000265170 | 0          | NA          | NA         | NA         | NA         | RN7SL667P   |
| 100422996 | ENSG00000265172 | 0          | NA          | NA         | NA         | NA         | MIR4262     |
| NA        | ENSG00000265174 | 0          | NA          | NA         | NA         | NA         |             |
| 100422987 | ENSG00000265176 | 0          | NA          | NA         | NA         | NA         | MIR3202-1   |
| 100616132 | ENSG00000265178 | 0          | NA          | NA         | NA         | NA         | MIR4728     |
| NA        | ENSG00000265179 | 0          | NA          | NA         | NA         | NA         |             |
| 100616334 | ENSG00000265180 | 0          | NA          | NA         | NA         | NA         | MIR4790     |
| 100616301 | ENSG00000265181 | 0          | NA          | NA         | NA         | NA         | MIR4674     |
| NA        | ENSG00000265182 | 0          | NA          | NA         | NA         | NA         | SRP72P1     |
| NA        | ENSG00000265185 | 9.86964159 | -0.08347004 | 0.3506193  | 0.60237784 | 0.79259054 | SNORD3B-1   |
| NA        | ENSG00000265188 | 0          | NA          | NA         | NA         | NA         |             |
| 653145    | ENSG00000265190 | 0.51541447 | 0.01780411  | 0.38334237 | 0.7081393  | NA         | ANXA8       |
| 100500877 | ENSG00000265193 | 0          | NA          | NA         | NA         | NA         | MIR3923     |
| NA        | ENSG00000265194 | 34.8945767 | 0.13297601  | 0.28732374 | 0.50364587 | 0.72027205 |             |
| 100422971 | ENSG00000265195 | 0          | NA          | NA         | NA         | NA         | MIR4312     |
| 100616343 | ENSG00000265201 | 0          | NA          | NA         | NA         | NA         | MIR4677     |
| 5949      | ENSG00000265203 | 6.00674271 | -0.01260313 | 0.36088187 | 0.91816925 | 0.9653411  | RBP3        |
| NA        | ENSG00000265204 | 0.33471731 | 0.02354391  | 0.38534154 | 0.62842204 | NA         |             |
| NA        | ENSG00000265205 | 1.45799596 | -0.00050064 | 0.37854439 | 0.99325959 | NA         |             |
| NA        | ENSG00000265206 | 1.24776146 | -0.0880894  | 0.39752711 | 0.11338828 | NA         |             |
| 100616118 | ENSG00000265210 | 0          | NA          | NA         | NA         | NA         | MIR4486     |
| 100500867 | ENSG00000265213 | 0          | NA          | NA         | NA         | NA         | MIR3684     |
| 100423043 | ENSG00000265215 | 0          | NA          | NA         | NA         | NA         | MIR4269     |
| NA        | ENSG00000265217 | 0          | NA          | NA         | NA         | NA         |             |
| NA        | ENSG00000265218 | 7.76456883 | 0.08483307  | 0.35952103 | 0.57329458 | 0.7729263  |             |
| NA        | ENSG00000265222 | 0          | NA          | NA         | NA         | NA         |             |
| 100616347 | ENSG00000265226 | 0          | NA          | NA         | NA         | NA         | MIR548AI    |

|           |                 |            |             |            |            |            |           |
|-----------|-----------------|------------|-------------|------------|------------|------------|-----------|
| 100616133 | ENSG00000265227 | 0          | NA          | NA         | NA         | NA         | MIR4699   |
| NA        | ENSG00000265233 | 0          | NA          | NA         | NA         | NA         |           |
| 692199    | ENSG00000265236 | 0          | NA          | NA         | NA         | NA         | SNORD84   |
| 100422938 | ENSG00000265237 | 0          | NA          | NA         | NA         | NA         | MIR3142   |
| NA        | ENSG00000265240 | 0          | NA          | NA         | NA         | NA         |           |
| 9939      | ENSG00000265241 | 3929.43606 | 0.20457243  | 0.06528722 | 0.00147769 | 0.0082724  | RBM8A     |
| NA        | ENSG00000265243 | 0          | NA          | NA         | NA         | NA         | IGLJCOR18 |
| NA        | ENSG00000265246 | 0          | NA          | NA         | NA         | NA         |           |
| 100616268 | ENSG00000265247 | 0          | NA          | NA         | NA         | NA         | MIR4472-1 |
| 100422903 | ENSG00000265251 | 0          | NA          | NA         | NA         | NA         | MIR4288   |
| 100423039 | ENSG00000265252 | 0          | NA          | NA         | NA         | NA         | MIR3132   |
| 100616476 | ENSG00000265253 | 0          | NA          | NA         | NA         | NA         | MIR4446   |
| NA        | ENSG00000265254 | 3.92497912 | 0.00881929  | 0.37017947 | 0.9331444  | 0.97202552 |           |
| NA        | ENSG00000265257 | 0          | NA          | NA         | NA         | NA         |           |
| 100616126 | ENSG00000265258 | 0          | NA          | NA         | NA         | NA         | MIR4686   |
| NA        | ENSG00000265260 | 0.173733   | 0.01914545  | 0.38484597 | 0.78225479 | NA         | RN7SL74P  |
| NA        | ENSG00000265261 | 0          | NA          | NA         | NA         | NA         |           |
| NA        | ENSG00000265262 | 0.49821938 | -0.02962129 | 0.38591302 | 0.52371665 | NA         | TRMT112P3 |
| NA        | ENSG00000265265 | 0.56767373 | 0.02627943  | 0.38574813 | 0.49686938 | NA         |           |
| NA        | ENSG00000265272 | 0          | NA          | NA         | NA         | NA         | RN7SL693P |
| NA        | ENSG00000265273 | 0.16735865 | 0.01897177  | 0.38482933 | 0.78225479 | NA         | PGDP1     |
| NA        | ENSG00000265279 | 0.16735865 | 0.01897177  | 0.38482933 | 0.78225479 | NA         | CLUHP6    |
| 100500891 | ENSG00000265281 | 0          | NA          | NA         | NA         | NA         | MIR3935   |
| NA        | ENSG00000265282 | 65.2502396 | -0.16002975 | 0.25150239 | 0.40736985 | 0.63571722 |           |
| 100616373 | ENSG00000265284 | 0          | NA          | NA         | NA         | NA         | MIR4770   |
| NA        | ENSG00000265287 | 0.5972779  | -0.02732172 | 0.38586499 | 0.50076333 | NA         |           |
| NA        | ENSG00000265289 | 0.16735865 | 0.01897177  | 0.38482933 | 0.78225479 | NA         |           |
| 100616300 | ENSG00000265291 | 0          | NA          | NA         | NA         | NA         | MIR4710   |
| NA        | ENSG00000265293 | 1.67849129 | -0.00881956 | 0.37944232 | 0.89001089 | NA         | ARGFXP2   |
| NA        | ENSG00000265296 | 0          | NA          | NA         | NA         | NA         | FEM1AP2   |
| NA        | ENSG00000265298 | 72.5653699 | 0.20880042  | 0.24070122 | 0.27587382 | 0.4999394  |           |
| 100616475 | ENSG00000265301 | 0          | NA          | NA         | NA         | NA         | MIR548AD  |
| NA        | ENSG00000265303 | 0          | NA          | NA         | NA         | NA         |           |
| 100500824 | ENSG00000265304 | 0          | NA          | NA         | NA         | NA         | MIR3650   |
| 100422838 | ENSG00000265306 | 0          | NA          | NA         | NA         | NA         | MIR3195   |
| NA        | ENSG00000265313 | 0.94548647 | 0.02817683  | 0.38153805 | 0.62512465 | NA         | LINC01476 |
| NA        | ENSG00000265316 | 0          | NA          | NA         | NA         | NA         |           |
| NA        | ENSG00000265319 | 0          | NA          | NA         | NA         | NA         | RN7SL847P |



|           |                 |            |             |            |            |            |           |
|-----------|-----------------|------------|-------------|------------|------------|------------|-----------|
| 100422965 | ENSG00000265321 | 0          | NA          | NA         | NA         | NA         | MIR4263   |
| 100422949 | ENSG00000265322 | 0          | NA          | NA         | NA         | NA         | MIR3118-2 |
| NA        | ENSG00000265327 | 0          | NA          | NA         | NA         | NA         | RN7SL411P |
| 100616336 | ENSG00000265328 | 0          | NA          | NA         | NA         | NA         | MIR548AB  |
| 100847008 | ENSG00000265331 | 0          | NA          | NA         | NA         | NA         | MIR4524B  |
| 100422926 | ENSG00000265333 | 0          | NA          | NA         | NA         | NA         | MIR3137   |
| NA        | ENSG00000265334 | 0.32463529 | -0.0232795  | 0.38532233 | 0.66814185 | NA         |           |
| NA        | ENSG00000265337 | 0.173733   | 0.01914545  | 0.38484597 | 0.78225479 | NA         |           |
| NA        | ENSG00000265340 | 0          | NA          | NA         | NA         | NA         | OR4K7P    |
| NA        | ENSG00000265342 | 0          | NA          | NA         | NA         | NA         |           |
| 100847004 | ENSG00000265345 | 0          | NA          | NA         | NA         | NA         | MIR5188   |
| 100422927 | ENSG00000265347 | 0          | NA          | NA         | NA         | NA         | MIR4291   |
| NA        | ENSG00000265349 | 0          | NA          | NA         | NA         | NA         |           |
| 102724913 | ENSG00000265352 | 0          | NA          | NA         | NA         | NA         | LINC01899 |
| 100287932 | ENSG00000265354 | 1057.10063 | -0.15988455 | 0.09202379 | 0.07291647 | 0.19718174 | TIMM23    |
| 100422859 | ENSG00000265355 | 0          | NA          | NA         | NA         | NA         | MIR3136   |
| NA        | ENSG00000265356 | 0          | NA          | NA         | NA         | NA         |           |
| 100616319 | ENSG00000265357 | 0          | NA          | NA         | NA         | NA         | MIR4493   |
| NA        | ENSG00000265359 | 0          | NA          | NA         | NA         | NA         |           |
| 414212    | ENSG00000265366 | 5.85097928 | 0.04550994  | 0.35892979 | 0.74162288 | 0.87812748 | GLUD1P2   |
| 100616456 | ENSG00000265368 | 0          | NA          | NA         | NA         | NA         | MIR4476   |
| 728606    | ENSG00000265369 | 6.64274816 | 0.08983827  | 0.36825694 | 0.51995341 | 0.73349514 | PCAT18    |
| 100616322 | ENSG00000265370 | 0          | NA          | NA         | NA         | NA         | MIR4682   |
| 100616383 | ENSG00000265372 | 0          | NA          | NA         | NA         | NA         | MIR4675   |
| 100422956 | ENSG00000265373 | 0          | NA          | NA         | NA         | NA         | MIR3180-2 |
| NA        | ENSG00000265374 | 0          | NA          | NA         | NA         | NA         | LINC01908 |
| 100616192 | ENSG00000265375 | 0          | NA          | NA         | NA         | NA         | MIR4679-2 |
| 100423038 | ENSG00000265376 | 0          | NA          | NA         | NA         | NA         | MIR466    |
| NA        | ENSG00000265378 | 0          | NA          | NA         | NA         | NA         |           |
| NA        | ENSG00000265380 | 0          | NA          | NA         | NA         | NA         |           |
| NA        | ENSG00000265386 | 0.94471403 | -0.04640957 | 0.38510845 | 0.41091377 | NA         | RN7SL219P |
| NA        | ENSG00000265388 | 0          | NA          | NA         | NA         | NA         | RN7SL391P |
| 100847049 | ENSG00000265390 | 0          | NA          | NA         | NA         | NA         | MIR4999   |
| 100422975 | ENSG00000265392 | 0          | NA          | NA         | NA         | NA         | MIR4252   |
| NA        | ENSG00000265393 | 2.18096173 | 0.10723187  | 0.39932354 | 0.17177619 | NA         |           |
| NA        | ENSG00000265394 | 0          | NA          | NA         | NA         | NA         |           |
| 100500911 | ENSG00000265395 | 0          | NA          | NA         | NA         | NA         | MIR3944   |
| 100422824 | ENSG00000265396 | 0          | NA          | NA         | NA         | NA         | MIR3128   |

|           |                 |            |             |            |            |            |            |
|-----------|-----------------|------------|-------------|------------|------------|------------|------------|
| NA        | ENSG00000265399 | 11.4196059 | 0.06741998  | 0.34944157 | 0.67019123 | 0.83758072 |            |
| NA        | ENSG00000265400 | 0          | NA          | NA         | NA         | NA         |            |
| NA        | ENSG00000265401 | 15.47796   | -0.10970107 | 0.34373389 | 0.53060967 | 0.74235215 |            |
| NA        | ENSG00000265402 | 0          | NA          | NA         | NA         | NA         | RSL24D1P9  |
| 100422979 | ENSG00000265407 | 0          | NA          | NA         | NA         | NA         | MIR4324    |
| NA        | ENSG00000265408 | 0          | NA          | NA         | NA         | NA         |            |
| NA        | ENSG00000265411 | 0.93740107 | -0.01319234 | 0.38218708 | 0.78656931 | NA         | RN7SL656P  |
| NA        | ENSG00000265413 | 6.48696328 | -0.17366962 | 0.40044452 | 0.25193558 | 0.47181441 |            |
| NA        | ENSG00000265415 | 0.52119901 | 0.02576573  | 0.38568143 | 0.51723676 | NA         |            |
| NA        | ENSG00000265417 | 1.1318482  | -0.05815251 | 0.38689775 | 0.31832615 | NA         |            |
| 100422929 | ENSG00000265418 | 0          | NA          | NA         | NA         | NA         | MIR4261    |
| 100616159 | ENSG00000265420 | 0          | NA          | NA         | NA         | NA         | MIR4779    |
| NA        | ENSG00000265421 | 0          | NA          | NA         | NA         | NA         |            |
| 100616391 | ENSG00000265422 | 0          | NA          | NA         | NA         | NA         | MIR4684    |
| 100616206 | ENSG00000265423 | 0          | NA          | NA         | NA         | NA         | MIR4652    |
| NA        | ENSG00000265425 | 0          | NA          | NA         | NA         | NA         |            |
| NA        | ENSG00000265428 | 0          | NA          | NA         | NA         | NA         |            |
| 100616208 | ENSG00000265429 | 0          | NA          | NA         | NA         | NA         | MIR4782    |
| 100422984 | ENSG00000265432 | 0          | NA          | NA         | NA         | NA         | MIR4308    |
| 100616485 | ENSG00000265433 | 0          | NA          | NA         | NA         | NA         | MIR4447    |
| 100423032 | ENSG00000265435 | 0          | NA          | NA         | NA         | NA         | MIR3121    |
| NA        | ENSG00000265437 | 0          | NA          | NA         | NA         | NA         |            |
| NA        | ENSG00000265439 | 0          | NA          | NA         | NA         | NA         | RN7SL811P  |
| 100500866 | ENSG00000265442 | 0          | NA          | NA         | NA         | NA         | MIR3941    |
| NA        | ENSG00000265443 | 0.9675488  | -0.0541588  | 0.38936753 | 0.24613069 | NA         |            |
| 100616266 | ENSG00000265444 | 0          | NA          | NA         | NA         | NA         | MIR4733    |
| NA        | ENSG00000265445 | 0.18922458 | 0.01954053  | 0.38488496 | 0.78225479 | NA         |            |
| 100616227 | ENSG00000265450 | 0          | NA          | NA         | NA         | NA         | MIR4502    |
| NA        | ENSG00000265451 | 1.99522301 | -0.04663653 | 0.37824869 | 0.59545135 | NA         | CLASP1-AS1 |
| 100500850 | ENSG00000265452 | 0          | NA          | NA         | NA         | NA         | MIR3682    |
| NA        | ENSG00000265453 | 0          | NA          | NA         | NA         | NA         |            |
| 100500869 | ENSG00000265456 | 0          | NA          | NA         | NA         | NA         | MIR3672    |
| NA        | ENSG00000265458 | 18.5541256 | -0.48587055 | 0.57441393 | 0.05269072 | 0.1548976  | NARF-AS2   |
| NA        | ENSG00000265460 | 0          | NA          | NA         | NA         | NA         |            |
| 100500917 | ENSG00000265462 | 0          | NA          | NA         | NA         | NA         | MIR3680-1  |
| 100616249 | ENSG00000265465 | 0          | NA          | NA         | NA         | NA         | MIR4768    |
| NA        | ENSG00000265469 | 0          | NA          | NA         | NA         | NA         | POLR3KP2   |
| 100847078 | ENSG00000265470 | 0          | NA          | NA         | NA         | NA         | MIR548AQ   |

|           |                 |            |             |            |            |            |                     |
|-----------|-----------------|------------|-------------|------------|------------|------------|---------------------|
| NA        | ENSG00000265472 | 0          | NA          | NA         | NA         | NA         | FAM32DP             |
| NA        | ENSG00000265474 | 4.87424751 | -0.00395587 | 0.38205648 | 0.92668806 | 0.96932621 |                     |
| NA        | ENSG00000265477 | 0          | NA          | NA         | NA         | NA         |                     |
| NA        | ENSG00000265478 | 2.19994038 | -0.05467511 | 0.37944441 | 0.54086343 | NA         |                     |
| 441263    | ENSG00000265479 | 294.462876 | 0.46212636  | 0.15746711 | 0.00137727 | 0.00779381 | 2P1-UPK3BP1-PMS2P11 |
| 284085    | ENSG00000265480 | 1.83743985 | -0.0750431  | 0.38755204 | 0.33621961 | NA         | KRT18P55            |
| 100616407 | ENSG00000265483 | 0          | NA          | NA         | NA         | NA         | MIR4443             |
| NA        | ENSG00000265484 | 0          | NA          | NA         | NA         | NA         |                     |
| 729950    | ENSG00000265485 | 0.31685993 | 0.00125799  | 0.38336764 | 0.96580001 | NA         | LINC01915           |
| NA        | ENSG00000265486 | 0          | NA          | NA         | NA         | NA         | RN7SL518P           |
| NA        | ENSG00000265487 | 0.33471731 | 0.02354391  | 0.38534154 | 0.62842204 | NA         |                     |
| 100128006 | ENSG00000265489 | 0          | NA          | NA         | NA         | NA         | ARHGAP44-AS1        |
| NA        | ENSG00000265490 | 1.15245264 | 0.01693462  | 0.38101332 | 0.77142385 | NA         |                     |
| 27246     | ENSG00000265491 | 891.605857 | -0.14774866 | 0.09060672 | 0.09274139 | 0.23565436 | RNF115              |
| NA        | ENSG00000265494 | 0          | NA          | NA         | NA         | NA         |                     |
| NA        | ENSG00000265496 | 1.75968879 | -0.0299657  | 0.37654604 | 0.72500368 | NA         |                     |
| 100422907 | ENSG00000265499 | 0          | NA          | NA         | NA         | NA         | MIR3156-2           |
| 100616494 | ENSG00000265503 | 0          | NA          | NA         | NA         | NA         | MIR1269B            |
| 100616499 | ENSG00000265507 | 0          | NA          | NA         | NA         | NA         | MIR4435-1           |
| 100616399 | ENSG00000265510 | 0          | NA          | NA         | NA         | NA         | MIR4436A            |
| NA        | ENSG00000265511 | 10.3431281 | 0.07034062  | 0.35575773 | 0.64142325 | 0.82042546 |                     |
| 105371969 | ENSG00000265514 | 0          | NA          | NA         | NA         | NA         | LINC01892           |
| NA        | ENSG00000265519 | 1.75354942 | 0.07480695  | 0.38579928 | 0.37789113 | NA         |                     |
| 100422850 | ENSG00000265520 | 0          | NA          | NA         | NA         | NA         | MIR548V             |
| 100847055 | ENSG00000265521 | 0          | NA          | NA         | NA         | NA         | MIR5697             |
| 100422931 | ENSG00000265526 | 0          | NA          | NA         | NA         | NA         | MIR4304             |
| 100847048 | ENSG00000265527 | 0          | NA          | NA         | NA         | NA         | MIR5690             |
| NA        | ENSG00000265531 | 0.15069912 | -0.01848503 | 0.38480575 | 0.84537521 | NA         | FCGR1CP             |
| 643542    | ENSG00000265533 | 0.32413808 | -0.02327552 | 0.38532172 | 0.66842782 | NA         | DSEL-AS1            |
| NA        | ENSG00000265535 | 0          | NA          | NA         | NA         | NA         | RN7SL475P           |
| 100422870 | ENSG00000265537 | 0          | NA          | NA         | NA         | NA         | MIR3180-1           |
| 100616189 | ENSG00000265538 | 0          | NA          | NA         | NA         | NA         | MIR4421             |
| 100422846 | ENSG00000265539 | 0          | NA          | NA         | NA         | NA         | MIR3164             |
| NA        | ENSG00000265541 | 0          | NA          | NA         | NA         | NA         | H3P41               |
| NA        | ENSG00000265542 | 0.63747948 | -0.01818272 | 0.38355465 | 0.68634922 | NA         |                     |
| 100506677 | ENSG00000265544 | 0          | NA          | NA         | NA         | NA         |                     |
| NA        | ENSG00000265545 | 0          | NA          | NA         | NA         | NA         | ELOCP27             |
| NA        | ENSG00000265547 | 0          | NA          | NA         | NA         | NA         |                     |

|           |                 |            |             |            |            |            |                |
|-----------|-----------------|------------|-------------|------------|------------|------------|----------------|
| NA        | ENSG00000265552 | 0          | NA          | NA         | NA         | NA         |                |
| NA        | ENSG00000265554 | 0          | NA          | NA         | NA         | NA         |                |
| 101927430 | ENSG00000265555 | 0          | NA          | NA         | NA         | NA         | LINC01903      |
| 100500851 | ENSG00000265558 | 0          | NA          | NA         | NA         | NA         | MIR3918        |
| NA        | ENSG00000265559 | 1.72829899 | 0.10596211  | 0.40101904 | 0.11378953 | NA         | RN7SL652P      |
| 100616121 | ENSG00000265561 | 0          | NA          | NA         | NA         | NA         | MIR1268B       |
| NA        | ENSG00000265564 | 0          | NA          | NA         | NA         | NA         | PIGPP4         |
| 100422934 | ENSG00000265565 | 0          | NA          | NA         | NA         | NA         | MIR3143        |
| NA        | ENSG00000265566 | 0          | NA          | NA         | NA         | NA         | RN7SL605P      |
| NA        | ENSG00000265574 | 0.83034025 | -0.01012228 | 0.38019718 | 0.8678055  | NA         | WDR45BP1       |
| NA        | ENSG00000265579 | 0          | NA          | NA         | NA         | NA         |                |
| 100616491 | ENSG00000265584 | 0          | NA          | NA         | NA         | NA         | MIR3978        |
| 100847056 | ENSG00000265588 | 0          | NA          | NA         | NA         | NA         | MIR5708        |
| 110091775 | ENSG00000265590 | 143.259119 | 0.14518193  | 0.21474967 | 0.41837507 | 0.6444567  | CFAP298-TCP10L |
| NA        | ENSG00000265593 | 0          | NA          | NA         | NA         | NA         | NPM1P45        |
| 100616225 | ENSG00000265595 | 0          | NA          | NA         | NA         | NA         | MIR4756        |
| 100500801 | ENSG00000265596 | 0          | NA          | NA         | NA         | NA         | MIR3659        |
| 100847032 | ENSG00000265598 | 0          | NA          | NA         | NA         | NA         | MIR5707        |
| 100616451 | ENSG00000265599 | 0          | NA          | NA         | NA         | NA         | MIR4471        |
| 100616120 | ENSG00000265606 | 0          | NA          | NA         | NA         | NA         | MIR4695        |
| 100616374 | ENSG00000265612 | 0          | NA          | NA         | NA         | NA         | MIR4539        |
| NA        | ENSG00000265614 | 0          | NA          | NA         | NA         | NA         |                |
| 100616440 | ENSG00000265617 | 0          | NA          | NA         | NA         | NA         | MIR548AG2      |
| NA        | ENSG00000265618 | 0          | NA          | NA         | NA         | NA         |                |
| 100423017 | ENSG00000265623 | 0          | NA          | NA         | NA         | NA         | MIR3139        |
| NA        | ENSG00000265625 | 7.41524468 | 0.04151214  | 0.35200225 | 0.77964876 | 0.89925062 |                |
| NA        | ENSG00000265626 | 0          | NA          | NA         | NA         | NA         |                |
| NA        | ENSG00000265630 | 0.16735865 | 0.01897177  | 0.38482933 | 0.78225479 | NA         |                |
| NA        | ENSG00000265631 | 0          | NA          | NA         | NA         | NA         | BNIP3P3        |
| 100500817 | ENSG00000265635 | 0          | NA          | NA         | NA         | NA         | MIR3612        |
| NA        | ENSG00000265639 | 0.63748239 | -0.02082864 | 0.38315199 | 0.67025234 | NA         |                |
| 100500864 | ENSG00000265641 | 0          | NA          | NA         | NA         | NA         | MIR3929        |
| NA        | ENSG00000265643 | 0          | NA          | NA         | NA         | NA         |                |
| NA        | ENSG00000265644 | 0          | NA          | NA         | NA         | NA         |                |
| NA        | ENSG00000265646 | 193.012262 | 0.05751359  | 0.16788289 | 0.7050578  | 0.85803894 | TUFMP1         |
| NA        | ENSG00000265648 | 0          | NA          | NA         | NA         | NA         | RN7SL279P      |
| 100616488 | ENSG00000265653 | 0          | NA          | NA         | NA         | NA         | MIR548AK       |
| NA        | ENSG00000265656 | 0.52439725 | 0.01097425  | 0.38327009 | 0.76869054 | NA         |                |

|           |                 |            |             |            |            |            |            |
|-----------|-----------------|------------|-------------|------------|------------|------------|------------|
| 100422992 | ENSG00000265657 | 0          | NA          | NA         | NA         | NA         | MIR3151    |
| 100500894 | ENSG00000265658 | 0          | NA          | NA         | NA         | NA         | MIR3690    |
| 100616318 | ENSG00000265660 | 0          | NA          | NA         | NA         | NA         | MIR4664    |
| NA        | ENSG00000265664 | 0.173733   | 0.01914545  | 0.38484597 | 0.78225479 | NA         |            |
| 101929693 | ENSG00000265666 | 115.825339 | 0.11454495  | 0.19502188 | 0.49685582 | 0.71500229 | RARA-AS1   |
| 100616191 | ENSG00000265669 | 0          | NA          | NA         | NA         | NA         | MIR548AJ1  |
| NA        | ENSG00000265670 | 0          | NA          | NA         | NA         | NA         |            |
| NA        | ENSG00000265671 | 0          | NA          | NA         | NA         | NA         |            |
| 100616275 | ENSG00000265673 | 0          | NA          | NA         | NA         | NA         | MIR4508    |
| NA        | ENSG00000265675 | 0          | NA          | NA         | NA         | NA         | RN7SL708P  |
| NA        | ENSG00000265678 | 25.0968858 | 0.2022817   | 0.33047749 | 0.32191867 | 0.54956623 |            |
| 6139      | ENSG00000265681 | 13009.1811 | -0.19181736 | 0.06149829 | 0.00169969 | 0.00934124 | RPL17      |
| 100422994 | ENSG00000265682 | 0          | NA          | NA         | NA         | NA         | MIR4267    |
| NA        | ENSG00000265683 | 8.08298726 | -0.09189582 | 0.3615205  | 0.53983361 | 0.7487625  | SYPL1P2    |
| NA        | ENSG00000265684 | 0          | NA          | NA         | NA         | NA         | RN7SL378P  |
| 92659     | ENSG00000265688 | 197.815474 | 0.00963642  | 0.1633037  | 0.94921648 | 0.97907226 | MAFG-DT    |
| NA        | ENSG00000265689 | 0          | NA          | NA         | NA         | NA         |            |
| NA        | ENSG00000265690 | 391.252506 | 0.49330357  | 0.128364   | 4.80E-05   | 0.00039517 |            |
| 100616325 | ENSG00000265691 | 0          | NA          | NA         | NA         | NA         | MIR4460    |
| 101929511 | ENSG00000265692 | 8.73294918 | 0.35806469  | 0.55769843 | 0.06351061 | 0.17891043 | LINC01970  |
| NA        | ENSG00000265693 | 0          | NA          | NA         | NA         | NA         |            |
| 100616356 | ENSG00000265694 | 0          | NA          | NA         | NA         | NA         | MIR4774    |
| NA        | ENSG00000265697 | 0          | NA          | NA         | NA         | NA         |            |
| NA        | ENSG00000265698 | 0          | NA          | NA         | NA         | NA         | LARP7P3    |
| 100616339 | ENSG00000265699 | 0          | NA          | NA         | NA         | NA         | MIR548AE2  |
| 105371855 | ENSG00000265702 | 0.18922458 | 0.01954053  | 0.38488496 | 0.78225479 | NA         |            |
| 109617012 | ENSG00000265706 | 0          | NA          | NA         | NA         | NA         | SNORD53B   |
| NA        | ENSG00000265712 | 0          | NA          | NA         | NA         | NA         |            |
| NA        | ENSG00000265713 | 0.36294697 | 0.02389471  | 0.3853924  | 0.60997031 | NA         |            |
| NA        | ENSG00000265717 | 0          | NA          | NA         | NA         | NA         |            |
| 100616398 | ENSG00000265719 | 0          | NA          | NA         | NA         | NA         | MIR4681    |
| 100422948 | ENSG00000265724 | 0          | NA          | NA         | NA         | NA         | MIR4284    |
| 100422951 | ENSG00000265725 | 0          | NA          | NA         | NA         | NA         | MIR3144    |
| NA        | ENSG00000265727 | 0.18922458 | 0.01954053  | 0.38488496 | 0.78225479 | NA         | RN7SL648P  |
| NA        | ENSG00000265728 | 0          | NA          | NA         | NA         | NA         |            |
| 109616974 | ENSG00000265733 | 0          | NA          | NA         | NA         | NA         | SNORA74C-1 |
| 100616375 | ENSG00000265734 | 0          | NA          | NA         | NA         | NA         | MIR4438    |
| NA        | ENSG00000265735 | 0          | NA          | NA         | NA         | NA         | RN7SL5P    |

|           |                 |            |             |            |            |            |            |
|-----------|-----------------|------------|-------------|------------|------------|------------|------------|
| NA        | ENSG00000265737 | 0          | NA          | NA         | NA         | NA         |            |
| NA        | ENSG00000265739 | 0          | NA          | NA         | NA         | NA         |            |
| NA        | ENSG00000265740 | 0          | NA          | NA         | NA         | NA         | RN7SL339P  |
| NA        | ENSG00000265743 | 0          | NA          | NA         | NA         | NA         |            |
| 100616390 | ENSG00000265744 | 0          | NA          | NA         | NA         | NA         | MIR4427    |
| NA        | ENSG00000265745 | 0          | NA          | NA         | NA         | NA         | RN7SL375P  |
| NA        | ENSG00000265746 | 0.48787706 | 0.01117732  | 0.38338963 | 0.78669732 | NA         | KYNUP2     |
| NA        | ENSG00000265749 | 9.21546995 | 0.48125739  | 0.81232895 | 0.02424201 | 0.08501712 |            |
| NA        | ENSG00000265750 | 0.9496642  | -0.01442231 | 0.38154735 | 0.78800895 | NA         |            |
| NA        | ENSG00000265751 | 0          | NA          | NA         | NA         | NA         |            |
| NA        | ENSG00000265752 | 0.70442492 | 0.05124568  | 0.38859665 | 0.29599299 | NA         |            |
| NA        | ENSG00000265753 | 0.34046374 | -0.00016945 | 0.38336226 | 0.96685887 | NA         | RN7SL444P  |
| NA        | ENSG00000265758 | 0          | NA          | NA         | NA         | NA         | LINC01900  |
| 118738    | ENSG00000265763 | 90.6226393 | 0.87382927  | 0.25803888 | 0.00010028 | 0.00076256 | ZNF488     |
| NA        | ENSG00000265766 | 0          | NA          | NA         | NA         | NA         | CXADRP3    |
| 100616140 | ENSG00000265768 | 0          | NA          | NA         | NA         | NA         | MIR4506    |
| NA        | ENSG00000265775 | 0          | NA          | NA         | NA         | NA         |            |
| NA        | ENSG00000265777 | 0          | NA          | NA         | NA         | NA         | RN7SL624P  |
| 101927989 | ENSG00000265778 | 11.8424135 | 0.1469862   | 0.36460627 | 0.39674353 | 0.6258107  | ZNF516-AS1 |
| NA        | ENSG00000265781 | 0          | NA          | NA         | NA         | NA         |            |
| NA        | ENSG00000265784 | 0          | NA          | NA         | NA         | NA         |            |
| 105372009 | ENSG00000265786 | 0          | NA          | NA         | NA         | NA         | LINC01906  |
| 284233    | ENSG00000265787 | 5.02409994 | -0.05590141 | 0.36492133 | 0.66239569 | 0.83329723 | CYP4F35P   |
| NA        | ENSG00000265788 | 0          | NA          | NA         | NA         | NA         | NOS2P1     |
| 100422930 | ENSG00000265789 | 0          | NA          | NA         | NA         | NA         | MIR4330    |
| NA        | ENSG00000265790 | 27.8676453 | -0.18995965 | 0.33604082 | 0.34155325 | 0.57180671 | RNASEH1P1  |
| NA        | ENSG00000265791 | 0.82710998 | 0.01914661  | 0.38143897 | 0.73410543 | NA         |            |
| NA        | ENSG00000265794 | 0.74659737 | -0.03303578 | 0.38644226 | 0.4112877  | NA         |            |
| NA        | ENSG00000265798 | 0          | NA          | NA         | NA         | NA         |            |
| NA        | ENSG00000265799 | 0          | NA          | NA         | NA         | NA         |            |
| NA        | ENSG00000265800 | 17.0547762 | -0.06661282 | 0.32633184 | 0.70747805 | 0.85903201 |            |
| NA        | ENSG00000265801 | 0          | NA          | NA         | NA         | NA         |            |
| NA        | ENSG00000265802 | 0.82838705 | 0.01875839  | 0.38140496 | 0.73929943 | NA         | RN7SL49P   |
| 100422860 | ENSG00000265806 | 0          | NA          | NA         | NA         | NA         | MIR4292    |
| 9554      | ENSG00000265808 | 1377.81162 | -0.05362741 | 0.07612208 | 0.47223039 | 0.69446676 | SEC22B     |
| 100500835 | ENSG00000265810 | 0          | NA          | NA         | NA         | NA         | MIR3907    |
| NA        | ENSG00000265813 | 0          | NA          | NA         | NA         | NA         | RN7SL300P  |
| NA        | ENSG00000265814 | 0          | NA          | NA         | NA         | NA         | RN7SL376P  |

|           |                 |            |             |            |            |            |                |
|-----------|-----------------|------------|-------------|------------|------------|------------|----------------|
| NA        | ENSG00000265815 | 0          | NA          | NA         | NA         | NA         |                |
| 100861412 | ENSG00000265817 | 132.72826  | 0.56066733  | 0.22039301 | 0.00314122 | 0.01574579 | FSBP           |
| NA        | ENSG00000265818 | 0          | NA          | NA         | NA         | NA         | EEF1E1-BLOC1S5 |
| 100423012 | ENSG00000265820 | 0          | NA          | NA         | NA         | NA         | MIR3177        |
| 100616272 | ENSG00000265822 | 0          | NA          | NA         | NA         | NA         | MIR4422        |
| 100500857 | ENSG00000265828 | 0          | NA          | NA         | NA         | NA         | MIR3939        |
| 100616450 | ENSG00000265829 | 0          | NA          | NA         | NA         | NA         | MIR548AG1      |
| 100422856 | ENSG00000265831 | 0          | NA          | NA         | NA         | NA         | MIR3123        |
| NA        | ENSG00000265833 | 0          | NA          | NA         | NA         | NA         |                |
| NA        | ENSG00000265836 | 0          | NA          | NA         | NA         | NA         | CCND3P2        |
| NA        | ENSG00000265840 | 0          | NA          | NA         | NA         | NA         |                |
| 100422920 | ENSG00000265841 | 0          | NA          | NA         | NA         | NA         | MIR548X        |
| NA        | ENSG00000265843 | 0          | NA          | NA         | NA         | NA         | LINC01029      |
| NA        | ENSG00000265844 | 0          | NA          | NA         | NA         | NA         |                |
| 101927018 | ENSG00000265845 | 0.40269637 | -0.02377963 | 0.38540121 | 0.6699083  | NA         |                |
| 100423042 | ENSG00000265846 | 0          | NA          | NA         | NA         | NA         | MIR4276        |
| 100422828 | ENSG00000265847 | 0          | NA          | NA         | NA         | NA         | MIR4287        |
| 100616131 | ENSG00000265848 | 0          | NA          | NA         | NA         | NA         | MIR3689D1      |
| 100616216 | ENSG00000265850 | 0          | NA          | NA         | NA         | NA         | MIR4797        |
| NA        | ENSG00000265853 | 0          | NA          | NA         | NA         | NA         |                |
| 100616181 | ENSG00000265855 | 0          | NA          | NA         | NA         | NA         | MIR4514        |
| 100847040 | ENSG00000265859 | 0          | NA          | NA         | NA         | NA         | MIR5704        |
| 100616287 | ENSG00000265861 | 0          | NA          | NA         | NA         | NA         | MIR4495        |
| NA        | ENSG00000265863 | 0          | NA          | NA         | NA         | NA         | GPR160P2       |
| 100616258 | ENSG00000265867 | 0          | NA          | NA         | NA         | NA         | MIR4516        |
| 100422841 | ENSG00000265871 | 0          | NA          | NA         | NA         | NA         | MIR3174        |
| 100500846 | ENSG00000265872 | 0          | NA          | NA         | NA         | NA         | MIR3689A       |
| 100423015 | ENSG00000265873 | 0          | NA          | NA         | NA         | NA         | MIR4289        |
| 100616284 | ENSG00000265874 | 0          | NA          | NA         | NA         | NA         | MIR4489        |
| 100500836 | ENSG00000265878 | 0          | NA          | NA         | NA         | NA         | MIR3914-1      |
| 100616425 | ENSG00000265879 | 0          | NA          | NA         | NA         | NA         | MIR4748        |
| NA        | ENSG00000265881 | 0          | NA          | NA         | NA         | NA         | PDLIM1P2       |
| NA        | ENSG00000265882 | 0          | NA          | NA         | NA         | NA         | RN7SL73P       |
| NA        | ENSG00000265883 | 0          | NA          | NA         | NA         | NA         |                |
| NA        | ENSG00000265885 | 0          | NA          | NA         | NA         | NA         | RN7SL783P      |
| 101927698 | ENSG00000265888 | 0          | NA          | NA         | NA         | NA         | DSCAS          |
| NA        | ENSG00000265889 | 0          | NA          | NA         | NA         | NA         |                |
| NA        | ENSG00000265892 | 0          | NA          | NA         | NA         | NA         | RN7SL311P      |

|           |                 |            |             |            |            |            |           |
|-----------|-----------------|------------|-------------|------------|------------|------------|-----------|
| NA        | ENSG00000265894 | 0          | NA          | NA         | NA         | NA         | RN7SL357P |
| NA        | ENSG00000265897 | 0          | NA          | NA         | NA         | NA         |           |
| 100616402 | ENSG00000265902 | 0          | NA          | NA         | NA         | NA         | MIR4696   |
| NA        | ENSG00000265905 | 0          | NA          | NA         | NA         | NA         | RN7SL96P  |
| NA        | ENSG00000265907 | 1.49741855 | 0.01963734  | 0.38028567 | 0.80759673 | NA         |           |
| NA        | ENSG00000265908 | 1.3295243  | 0.01054126  | 0.37899783 | 0.87646421 | NA         |           |
| NA        | ENSG00000265912 | 1.44879697 | -0.02835453 | 0.37884896 | 0.70447593 | NA         |           |
| NA        | ENSG00000265916 | 0.30139824 | -0.02296476 | 0.38527817 | 0.68536535 | NA         |           |
| 100500802 | ENSG00000265917 | 0          | NA          | NA         | NA         | NA         | MIR3685   |
| NA        | ENSG00000265918 | 0          | NA          | NA         | NA         | NA         | RN7SL543P |
| 100422887 | ENSG00000265919 | 0          | NA          | NA         | NA         | NA         | MIR4280   |
| 100847082 | ENSG00000265924 | 0          | NA          | NA         | NA         | NA         | MIR5692C1 |
| NA        | ENSG00000265927 | 0          | NA          | NA         | NA         | NA         |           |
| 100847062 | ENSG00000265929 | 0          | NA          | NA         | NA         | NA         | MIR5195   |
| 100422967 | ENSG00000265932 | 0          | NA          | NA         | NA         | NA         | MIR3146   |
| 400643    | ENSG00000265933 | 0          | NA          | NA         | NA         | NA         | LINC00668 |
| NA        | ENSG00000265934 | 0          | NA          | NA         | NA         | NA         | ARL2BPP1  |
| NA        | ENSG00000265935 | 0          | NA          | NA         | NA         | NA         |           |
| NA        | ENSG00000265936 | 0          | NA          | NA         | NA         | NA         |           |
| NA        | ENSG00000265939 | 3.04337621 | 0.12447873  | 0.3983372  | 0.24172294 | 0.45967442 | UBE2CP2   |
| NA        | ENSG00000265942 | 0.18922458 | 0.01954053  | 0.38488496 | 0.78225479 | NA         | RN7SL577P |
| NA        | ENSG00000265943 | 3.30941308 | -0.0517433  | 0.37652938 | 0.59474445 | 0.78785671 |           |
| 100130480 | ENSG00000265944 | 0          | NA          | NA         | NA         | NA         | LINC01387 |
| NA        | ENSG00000265946 | 0          | NA          | NA         | NA         | NA         |           |
| NA        | ENSG00000265948 | 0          | NA          | NA         | NA         | NA         |           |
| 100616313 | ENSG00000265954 | 0          | NA          | NA         | NA         | NA         | MIR4749   |
| 100616129 | ENSG00000265956 | 0          | NA          | NA         | NA         | NA         | MIR4445   |
| 100422829 | ENSG00000265957 | 0          | NA          | NA         | NA         | NA         | MIR4319   |
| NA        | ENSG00000265961 | 0          | NA          | NA         | NA         | NA         |           |
| 100287082 | ENSG00000265962 | 0.36248992 | 0.00103435  | 0.3833652  | 0.96603808 | NA         | GACAT2    |
| NA        | ENSG00000265964 | 0          | NA          | NA         | NA         | NA         |           |
| 100423027 | ENSG00000265965 | 0          | NA          | NA         | NA         | NA         | MIR4266   |
| NA        | ENSG00000265967 | 0          | NA          | NA         | NA         | NA         |           |
| NA        | ENSG00000265971 | 20.0070849 | -0.11828264 | 0.33396191 | 0.51931195 | 0.73285078 |           |
| 10628     | ENSG00000265972 | 2476.89232 | 0.18768769  | 0.08799847 | 0.02810456 | 0.09534788 | TXNIP     |
| NA        | ENSG00000265973 | 0          | NA          | NA         | NA         | NA         |           |
| NA        | ENSG00000265975 | 0          | NA          | NA         | NA         | NA         |           |
| 100616449 | ENSG00000265976 | 0          | NA          | NA         | NA         | NA         | MIR4725   |



|           |                 |            |             |            |            |            |              |
|-----------|-----------------|------------|-------------|------------|------------|------------|--------------|
| NA        | ENSG00000265980 | 0          | NA          | NA         | NA         | NA         |              |
| 100422864 | ENSG00000265981 | 0          | NA          | NA         | NA         | NA         | MIR544B      |
| NA        | ENSG00000265982 | 0          | NA          | NA         | NA         | NA         |              |
| NA        | ENSG00000265984 | 0          | NA          | NA         | NA         | NA         | GREB1L-DT    |
| 100616363 | ENSG00000265986 | 0          | NA          | NA         | NA         | NA         | MIR4735      |
| NA        | ENSG00000265987 | 0          | NA          | NA         | NA         | NA         |              |
| 100616231 | ENSG00000265991 | 0          | NA          | NA         | NA         | NA         | MIR4519      |
| 790952    | ENSG00000265992 | 0          | NA          | NA         | NA         | NA         | ESRG         |
| 100847064 | ENSG00000265993 | 0          | NA          | NA         | NA         | NA         | MIR5694      |
| NA        | ENSG00000265994 | 0          | NA          | NA         | NA         | NA         |              |
| NA        | ENSG00000265995 | 0          | NA          | NA         | NA         | NA         |              |
| 100500854 | ENSG00000265996 | 0          | NA          | NA         | NA         | NA         | MIR3671      |
| NA        | ENSG00000266002 | 0          | NA          | NA         | NA         | NA         |              |
| NA        | ENSG00000266003 | 0          | NA          | NA         | NA         | NA         |              |
| 100616470 | ENSG00000266006 | 0          | NA          | NA         | NA         | NA         | MIR4488      |
| NA        | ENSG00000266009 | 0          | NA          | NA         | NA         | NA         |              |
| 100128893 | ENSG00000266010 | 0          | NA          | NA         | NA         | NA         | GATA6-AS1    |
| 100616295 | ENSG00000266012 | 0          | NA          | NA         | NA         | NA         | MIR4764      |
| 105371766 | ENSG00000266013 | 0          | NA          | NA         | NA         | NA         | LINC02079    |
| NA        | ENSG00000266014 | 0          | NA          | NA         | NA         | NA         |              |
| 100422954 | ENSG00000266015 | 0          | NA          | NA         | NA         | NA         | MIR4309      |
| 100500856 | ENSG00000266016 | 0          | NA          | NA         | NA         | NA         | MIR548Z      |
| 100616194 | ENSG00000266017 | 0          | NA          | NA         | NA         | NA         | MIR4477B     |
| 100500819 | ENSG00000266019 | 0          | NA          | NA         | NA         | NA         | MIR3609      |
| 23380     | ENSG00000266028 | 1484.54157 | -0.62778874 | 0.07882265 | 4.66E-16   | 1.36E-14   | SRGAP2       |
| NA        | ENSG00000266036 | 1.34662713 | 0.0554058   | 0.3851292  | 0.40614999 | NA         | SLC9A3R1-AS1 |
| 100616348 | ENSG00000266038 | 0          | NA          | NA         | NA         | NA         | MIR4659A     |
| 100616292 | ENSG00000266041 | 0          | NA          | NA         | NA         | NA         | MIR4690      |
| NA        | ENSG00000266042 | 0          | NA          | NA         | NA         | NA         |              |
| 100500816 | ENSG00000266043 | 0          | NA          | NA         | NA         | NA         | MIR3649      |
| NA        | ENSG00000266048 | 0          | NA          | NA         | NA         | NA         |              |
| NA        | ENSG00000266049 | 0          | NA          | NA         | NA         | NA         |              |
| NA        | ENSG00000266050 | 0          | NA          | NA         | NA         | NA         |              |
| 100616182 | ENSG00000266052 | 0          | NA          | NA         | NA         | NA         | MIR4500      |
| 101927275 | ENSG00000266053 | 10.5053323 | 0.01368606  | 0.34185615 | 0.93278445 | 0.97195551 | NDUFV2-AS1   |
| NA        | ENSG00000266059 | 0          | NA          | NA         | NA         | NA         | RN7SL140P    |
| NA        | ENSG00000266065 | 0          | NA          | NA         | NA         | NA         |              |
| NA        | ENSG00000266066 | 16.6934395 | 0.10822105  | 0.32737676 | 0.56175025 | 0.76504152 | POLRMTP1     |

|           |                 |            |             |            |            |            |           |
|-----------|-----------------|------------|-------------|------------|------------|------------|-----------|
| 100500897 | ENSG00000266071 | 0          | NA          | NA         | NA         | NA         | MIR3617   |
| 100847003 | ENSG00000266072 | 0          | NA          | NA         | NA         | NA         | MIR5693   |
| 57597     | ENSG00000266074 | 2122.34232 | -0.51988122 | 0.07062408 | 6.86E-14   | 1.71E-12   | BAHCC1    |
| NA        | ENSG00000266075 | 1.81132485 | -0.00356988 | 0.37436366 | 0.96622418 | NA         | RN7SL574P |
| NA        | ENSG00000266076 | 0.51937201 | -0.02557462 | 0.38567603 | 0.54680819 | NA         |           |
| 100616473 | ENSG00000266078 | 0          | NA          | NA         | NA         | NA         | MIR4432   |
| NA        | ENSG00000266079 | 1.72269957 | 0.08870728  | 0.39252163 | 0.24680919 | NA         | SNORA59B  |
| NA        | ENSG00000266086 | 340.767945 | 0.30839261  | 0.13737836 | 0.01591817 | 0.06048964 |           |
| NA        | ENSG00000266088 | 0.173124   | -0.01911262 | 0.38486262 | 0.84537521 | NA         |           |
| 83593     | ENSG00000266094 | 39.5485661 | -0.54056881 | 0.49598642 | 0.04327868 | 0.13324783 | RASSF5    |
| 100847087 | ENSG00000266097 | 0          | NA          | NA         | NA         | NA         | MIR5192   |
| 100847031 | ENSG00000266099 | 0          | NA          | NA         | NA         | NA         | MIR5700   |
| 101927557 | ENSG00000266100 | 0          | NA          | NA         | NA         | NA         |           |
| NA        | ENSG00000266101 | 0          | NA          | NA         | NA         | NA         |           |
| NA        | ENSG00000266102 | 0          | NA          | NA         | NA         | NA         |           |
| 100422945 | ENSG00000266104 | 0          | NA          | NA         | NA         | NA         | MIR4326   |
| NA        | ENSG00000266105 | 0          | NA          | NA         | NA         | NA         |           |
| NA        | ENSG00000266106 | 0          | NA          | NA         | NA         | NA         |           |
| 100616196 | ENSG00000266107 | 0          | NA          | NA         | NA         | NA         | MIR4525   |
| 100616397 | ENSG00000266109 | 0          | NA          | NA         | NA         | NA         | MIR4440   |
| 100616481 | ENSG00000266110 | 0          | NA          | NA         | NA         | NA         | MIR4423   |
| NA        | ENSG00000266111 | 0.60279648 | -0.02752712 | 0.38588313 | 0.49730371 | NA         |           |
| NA        | ENSG00000266114 | 0          | NA          | NA         | NA         | NA         |           |
| NA        | ENSG00000266117 | 0          | NA          | NA         | NA         | NA         | FBXO36P1  |
| NA        | ENSG00000266120 | 0.30139824 | -0.02296476 | 0.38527817 | 0.68536535 | NA         |           |
| 100847028 | ENSG00000266124 | 0          | NA          | NA         | NA         | NA         | MIR5587   |
| NA        | ENSG00000266126 | 0.14931947 | -0.01844332 | 0.38480212 | 0.84537521 | NA         |           |
| NA        | ENSG00000266127 | 0          | NA          | NA         | NA         | NA         | ZNF415P1  |
| NA        | ENSG00000266128 | 0          | NA          | NA         | NA         | NA         | RN7SL366P |
| NA        | ENSG00000266129 | 0          | NA          | NA         | NA         | NA         | SRP68P1   |
| 100616243 | ENSG00000266133 | 0          | NA          | NA         | NA         | NA         | MIR4759   |
| 100616341 | ENSG00000266139 | 0          | NA          | NA         | NA         | NA         | MIR4435-2 |
| 100616362 | ENSG00000266140 | 0          | NA          | NA         | NA         | NA         | MIR4533   |
| 100616386 | ENSG00000266144 | 0          | NA          | NA         | NA         | NA         | MIR4654   |
| NA        | ENSG00000266145 | 0.36334279 | 0.00171037  | 0.38337116 | 0.95967127 | NA         | RHOT1P1   |
| 100847080 | ENSG00000266146 | 0          | NA          | NA         | NA         | NA         | MIR5190   |
| 100847025 | ENSG00000266148 | 0          | NA          | NA         | NA         | NA         | MIR5583-1 |
| 100192426 | ENSG00000266149 | 1.39403746 | -0.04123731 | 0.38337128 | 0.50084244 | NA         |           |

|           |                 |            |             |            |            |            |           |
|-----------|-----------------|------------|-------------|------------|------------|------------|-----------|
| 100616409 | ENSG00000266150 | 0          | NA          | NA         | NA         | NA         | MIR4711   |
| 100500813 | ENSG00000266151 | 0          | NA          | NA         | NA         | NA         | MIR3646   |
| NA        | ENSG00000266153 | 0          | NA          | NA         | NA         | NA         |           |
| NA        | ENSG00000266155 | 0.18922458 | 0.01954053  | 0.38488496 | 0.78225479 | NA         |           |
| NA        | ENSG00000266158 | 0          | NA          | NA         | NA         | NA         | RN7SL785P |
| NA        | ENSG00000266160 | 0          | NA          | NA         | NA         | NA         | RN7SL612P |
| NA        | ENSG00000266162 | 0          | NA          | NA         | NA         | NA         | YWHAEP2   |
| NA        | ENSG00000266166 | 0          | NA          | NA         | NA         | NA         | RN7SL557P |
| 100422939 | ENSG00000266168 | 0          | NA          | NA         | NA         | NA         | MIR3147   |
| NA        | ENSG00000266171 | 1.88716132 | 0.0590295   | 0.38074774 | 0.50449764 | NA         |           |
| 92335     | ENSG00000266173 | 1651.38692 | -0.02290702 | 0.08217634 | 0.77462643 | 0.89613481 | STRADA    |
| 100616308 | ENSG00000266174 | 0          | NA          | NA         | NA         | NA         | MIR4666A  |
| NA        | ENSG00000266179 | 0          | NA          | NA         | NA         | NA         |           |
| 100423005 | ENSG00000266180 | 0          | NA          | NA         | NA         | NA         | MIR4282   |
| NA        | ENSG00000266181 | 0          | NA          | NA         | NA         | NA         | EIF4A3P1  |
| NA        | ENSG00000266184 | 0.16735865 | 0.01897177  | 0.38482933 | 0.78225479 | NA         |           |
| NA        | ENSG00000266185 | 0          | NA          | NA         | NA         | NA         | RN7SL804P |
| NA        | ENSG00000266187 | 0          | NA          | NA         | NA         | NA         | RN7SL480P |
| NA        | ENSG00000266188 | 0          | NA          | NA         | NA         | NA         |           |
| 100422944 | ENSG00000266189 | 0          | NA          | NA         | NA         | NA         | MIR3186   |
| NA        | ENSG00000266190 | 0          | NA          | NA         | NA         | NA         |           |
| 100422991 | ENSG00000266192 | 0          | NA          | NA         | NA         | NA         | MIR1260B  |
| 100616245 | ENSG00000266194 | 0          | NA          | NA         | NA         | NA         | MIR4661   |
| NA        | ENSG00000266195 | 0          | NA          | NA         | NA         | NA         | RN7SL163P |
| NA        | ENSG00000266196 | 0          | NA          | NA         | NA         | NA         |           |
| 5408      | ENSG00000266200 | 0          | NA          | NA         | NA         | NA         | PNLIPRP2  |
| NA        | ENSG00000266201 | 0          | NA          | NA         | NA         | NA         | SS18L2P2  |
| NA        | ENSG00000266202 | 0.33471731 | 0.02354391  | 0.38534154 | 0.62842204 | NA         |           |
| 100847018 | ENSG00000266203 | 0          | NA          | NA         | NA         | NA         | MIR5585   |
| 100847093 | ENSG00000266204 | 0          | NA          | NA         | NA         | NA         | MIR5589   |
| 100500870 | ENSG00000266206 | 0          | NA          | NA         | NA         | NA         | MIR3926-1 |
| NA        | ENSG00000266208 | 108.306012 | 0.2215831   | 0.21564777 | 0.21892684 | 0.43081814 |           |
| NA        | ENSG00000266210 | 0          | NA          | NA         | NA         | NA         | RN7SL371P |
| 100423018 | ENSG00000266211 | 0          | NA          | NA         | NA         | NA         | MIR3156-3 |
| NA        | ENSG00000266213 | 0          | NA          | NA         | NA         | NA         |           |
| 100422918 | ENSG00000266215 | 0          | NA          | NA         | NA         | NA         | MIR3167   |
| NA        | ENSG00000266217 | 0          | NA          | NA         | NA         | NA         | CTSLP2    |
| NA        | ENSG00000266222 | 0          | NA          | NA         | NA         | NA         |           |

|           |                 |            |             |            |            |            |           |
|-----------|-----------------|------------|-------------|------------|------------|------------|-----------|
| 100422980 | ENSG00000266226 | 0          | NA          | NA         | NA         | NA         | MIR4323   |
| NA        | ENSG00000266227 | 0          | NA          | NA         | NA         | NA         | NPM1P2    |
| 100500890 | ENSG00000266228 | 0          | NA          | NA         | NA         | NA         | MIR3611   |
| 100422974 | ENSG00000266232 | 0          | NA          | NA         | NA         | NA         | MIR3178   |
| 100423037 | ENSG00000266235 | 0          | NA          | NA         | NA         | NA         | MIR3176   |
| NA        | ENSG00000266236 | 14.4136228 | 0.11153694  | 0.34079357 | 0.53404604 | 0.74532031 | NARF-IT1  |
| NA        | ENSG00000266237 | 0          | NA          | NA         | NA         | NA         |           |
| 100847023 | ENSG00000266240 | 0          | NA          | NA         | NA         | NA         | MIR5091   |
| NA        | ENSG00000266242 | 0          | NA          | NA         | NA         | NA         | GRAMD4P7  |
| 100422874 | ENSG00000266243 | 0          | NA          | NA         | NA         | NA         | MIR4279   |
| 100616430 | ENSG00000266245 | 0          | NA          | NA         | NA         | NA         | MIR4644   |
| NA        | ENSG00000266248 | 0          | NA          | NA         | NA         | NA         |           |
| NA        | ENSG00000266251 | 0          | NA          | NA         | NA         | NA         | COX6CP3   |
| 100616289 | ENSG00000266255 | 0          | NA          | NA         | NA         | NA         | MIR4475   |
| 284276    | ENSG00000266256 | 0          | NA          | NA         | NA         | NA         | LINC00683 |
| 400660    | ENSG00000266256 | 0          | NA          | NA         | NA         | NA         | LINC00683 |
| 101927481 | ENSG00000266258 | 1.88966594 | 0.02247882  | 0.37573313 | 0.79081764 | NA         | LINC01909 |
| NA        | ENSG00000266261 | 4.26164784 | 0.1055187   | 0.38613619 | 0.36099321 | 0.59083527 |           |
| 100616141 | ENSG00000266262 | 0          | NA          | NA         | NA         | NA         | MIR4428   |
| 136259    | ENSG00000266265 | 2.06530926 | 0.13677544  | 0.41855081 | 0.02553523 | NA         | KLF14     |
| NA        | ENSG00000266268 | 0          | NA          | NA         | NA         | NA         |           |
| NA        | ENSG00000266270 | 0          | NA          | NA         | NA         | NA         |           |
| NA        | ENSG00000266273 | 0          | NA          | NA         | NA         | NA         |           |
| NA        | ENSG00000266274 | 0          | NA          | NA         | NA         | NA         | RN7SL138P |
| 100616366 | ENSG00000266276 | 0          | NA          | NA         | NA         | NA         | MIR4743   |
| 101060542 | ENSG00000266278 | 0          | NA          | NA         | NA         | NA         | LINC01910 |
| NA        | ENSG00000266279 | 0          | NA          | NA         | NA         | NA         |           |
| NA        | ENSG00000266282 | 0          | NA          | NA         | NA         | NA         | UBL5P2    |
| NA        | ENSG00000266283 | 0          | NA          | NA         | NA         | NA         |           |
| 100500886 | ENSG00000266287 | 0          | NA          | NA         | NA         | NA         | MIR3683   |
| NA        | ENSG00000266288 | 0          | NA          | NA         | NA         | NA         |           |
| NA        | ENSG00000266289 | 1.10858595 | -0.05735758 | 0.38661793 | 0.33281449 | NA         |           |
| 101927666 | ENSG00000266290 | 0          | NA          | NA         | NA         | NA         | DYNLL2-DT |
| NA        | ENSG00000266296 | 0          | NA          | NA         | NA         | NA         | ARIH2P1   |
| 100126313 | ENSG00000266297 | 0          | NA          | NA         | NA         | NA         | MIR744    |
| 100423008 | ENSG00000266299 | 0          | NA          | NA         | NA         | NA         | MIR3118-1 |
| NA        | ENSG00000266302 | 0.45209736 | -0.02505403 | 0.38558831 | 0.57865948 | NA         |           |
| NA        | ENSG00000266304 | 0          | NA          | NA         | NA         | NA         | LIVAR     |

|           |                 |            |             |            |            |            |           |
|-----------|-----------------|------------|-------------|------------|------------|------------|-----------|
| 100616405 | ENSG00000266305 | 0          | NA          | NA         | NA         | NA         | MIR4518   |
| NA        | ENSG00000266306 | 0.70914614 | 0.00138095  | 0.38179928 | 0.97588822 | NA         |           |
| 100847022 | ENSG00000266307 | 0          | NA          | NA         | NA         | NA         | MIR5093   |
| NA        | ENSG00000266308 | 0.15069912 | -0.01848503 | 0.38480575 | 0.84537521 | NA         | RN7SL510P |
| NA        | ENSG00000266311 | 0          | NA          | NA         | NA         | NA         |           |
| NA        | ENSG00000266312 | 0          | NA          | NA         | NA         | NA         | LINC01927 |
| NA        | ENSG00000266313 | 3.59825851 | 0.03400387  | 0.36975105 | 0.75649078 | 0.88693352 |           |
| 100616114 | ENSG00000266315 | 0          | NA          | NA         | NA         | NA         | MIR4668   |
| NA        | ENSG00000266317 | 0          | NA          | NA         | NA         | NA         | RN7SL703P |
| 100847066 | ENSG00000266318 | 0          | NA          | NA         | NA         | NA         | MIR5692A1 |
| 100500826 | ENSG00000266320 | 0          | NA          | NA         | NA         | NA         | MIR3909   |
| 100422843 | ENSG00000266321 | 0          | NA          | NA         | NA         | NA         | MIR4293   |
| 100616260 | ENSG00000266324 | 0          | NA          | NA         | NA         | NA         | MIR4663   |
| 100500861 | ENSG00000266325 | 0          | NA          | NA         | NA         | NA         | MIR3665   |
| 100616280 | ENSG00000266327 | 0          | NA          | NA         | NA         | NA         | MIR4503   |
| 100847061 | ENSG00000266328 | 0          | NA          | NA         | NA         | NA         | MIR4536-2 |
| 100422962 | ENSG00000266329 | 0          | NA          | NA         | NA         | NA         | MIR4281   |
| NA        | ENSG00000266335 | 0          | NA          | NA         | NA         | NA         |           |
| 284565    | ENSG00000266338 | 3674.0171  | 0.20321757  | 0.05939433 | 0.00052923 | 0.00338814 | NBPF15    |
| NA        | ENSG00000266340 | 13.2220935 | 0.49182485  | 0.61650182 | 0.0512399  | 0.15188997 |           |
| NA        | ENSG00000266341 | 0          | NA          | NA         | NA         | NA         |           |
| 100616267 | ENSG00000266354 | 0          | NA          | NA         | NA         | NA         | MIR4776-1 |
| NA        | ENSG00000266356 | 0          | NA          | NA         | NA         | NA         |           |
| NA        | ENSG00000266357 | 0.173733   | 0.01914545  | 0.38484597 | 0.78225479 | NA         | LINC02074 |
| NA        | ENSG00000266364 | 0          | NA          | NA         | NA         | NA         |           |
| NA        | ENSG00000266365 | 0          | NA          | NA         | NA         | NA         |           |
| NA        | ENSG00000266368 | 0.48661599 | -0.00612017 | 0.38313447 | 0.87191015 | NA         |           |
| NA        | ENSG00000266369 | 2.98951805 | -0.0034595  | 0.37156635 | 0.96971778 | 0.98858357 |           |
| 100500889 | ENSG00000266370 | 0          | NA          | NA         | NA         | NA         | MIR3657   |
| NA        | ENSG00000266371 | 0.34624801 | -0.02356563 | 0.38536324 | 0.65270996 | NA         |           |
| NA        | ENSG00000266373 | 0          | NA          | NA         | NA         | NA         |           |
| NA        | ENSG00000266378 | 0          | NA          | NA         | NA         | NA         |           |
| NA        | ENSG00000266379 | 0          | NA          | NA         | NA         | NA         |           |
| 100847021 | ENSG00000266383 | 0          | NA          | NA         | NA         | NA         | MIR5002   |
| NA        | ENSG00000266385 | 0.173733   | 0.01914545  | 0.38484597 | 0.78225479 | NA         |           |
| NA        | ENSG00000266389 | 0          | NA          | NA         | NA         | NA         | PIK3R5-DT |
| 100616294 | ENSG00000266392 | 0          | NA          | NA         | NA         | NA         | MIR4740   |
| 100422955 | ENSG00000266396 | 0          | NA          | NA         | NA         | NA         | MIR4273   |

|           |                 |            |             |            |            |            |              |
|-----------|-----------------|------------|-------------|------------|------------|------------|--------------|
| NA        | ENSG00000266397 | 0          | NA          | NA         | NA         | NA         |              |
| 105371967 | ENSG00000266401 | 0          | NA          | NA         | NA         | NA         |              |
| NA        | ENSG00000266402 | 7.54906747 | -0.21011321 | 0.4283854  | 0.16298309 | 0.35195933 | SNHG25       |
| 645158    | ENSG00000266405 | 12.9130855 | 0.07757887  | 0.34945247 | 0.62710367 | 0.81074787 | CBX3P2       |
| 100422892 | ENSG00000266407 | 0          | NA          | NA         | NA         | NA         | MIR3157      |
| 8031      | ENSG00000266412 | 1569.18184 | -0.67513058 | 0.07394415 | 1.75E-20   | 6.72E-19   | NCOA4        |
| 100616326 | ENSG00000266415 | 0          | NA          | NA         | NA         | NA         | MIR4636      |
| NA        | ENSG00000266416 | 0          | NA          | NA         | NA         | NA         |              |
| 100616328 | ENSG00000266417 | 0          | NA          | NA         | NA         | NA         | MIR4424      |
| NA        | ENSG00000266420 | 0          | NA          | NA         | NA         | NA         | RN7SL118P    |
| 100616349 | ENSG00000266421 | 0          | NA          | NA         | NA         | NA         | MIR4451      |
| 100423029 | ENSG00000266423 | 0          | NA          | NA         | NA         | NA         | MIR3163      |
| 100616172 | ENSG00000266426 | 0          | NA          | NA         | NA         | NA         | MIR4719      |
| 100847076 | ENSG00000266431 | 0          | NA          | NA         | NA         | NA         | MIR5580      |
| 440419    | ENSG00000266433 | 0          | NA          | NA         | NA         | NA         | TBC1D3P5     |
| 100422888 | ENSG00000266436 | 0          | NA          | NA         | NA         | NA         | MIR4264      |
| 100616371 | ENSG00000266437 | 0          | NA          | NA         | NA         | NA         | MIR4746      |
| NA        | ENSG00000266439 | 0          | NA          | NA         | NA         | NA         | RN7SL493P    |
| NA        | ENSG00000266441 | 1.53172135 | 0.07852923  | 0.38963288 | 0.29301142 | NA         | ARHGAP28-AS1 |
| NA        | ENSG00000266445 | 1.57162846 | 0.09514478  | 0.39732687 | 0.14468076 | NA         | NARF-AS1     |
| NA        | ENSG00000266446 | 0.32494042 | 0.00171366  | 0.38337179 | 0.96390323 | NA         |              |
| NA        | ENSG00000266448 | 0          | NA          | NA         | NA         | NA         |              |
| 100500855 | ENSG00000266449 | 0          | NA          | NA         | NA         | NA         | MIR3713      |
| NA        | ENSG00000266450 | 0          | NA          | NA         | NA         | NA         |              |
| NA        | ENSG00000266456 | 7.04132253 | -0.03475504 | 0.35249951 | 0.80882997 | 0.91334153 |              |
| 100422852 | ENSG00000266458 | 0          | NA          | NA         | NA         | NA         | MIR4259      |
| NA        | ENSG00000266460 | 0          | NA          | NA         | NA         | NA         |              |
| 100616495 | ENSG00000266461 | 0          | NA          | NA         | NA         | NA         | MIR2392      |
| 100423014 | ENSG00000266463 | 0          | NA          | NA         | NA         | NA         | MIR3196      |
| NA        | ENSG00000266466 | 0.34746601 | 0.02370763  | 0.3853651  | 0.61987128 | NA         |              |
| NA        | ENSG00000266467 | 0          | NA          | NA         | NA         | NA         | RN7SL220P    |
| NA        | ENSG00000266469 | 4.8457244  | -0.08575171 | 0.38104221 | 0.43385562 | 0.65913894 |              |
| NA        | ENSG00000266470 | 0          | NA          | NA         | NA         | NA         |              |
| 54460     | ENSG00000266472 | 2054.53346 | 0.20330718  | 0.07330932 | 0.00468901 | 0.02201893 | MRPS21       |
| NA        | ENSG00000266473 | 2.39022402 | -0.08433776 | 0.38524734 | 0.38341503 | NA         | HELZ-AS1     |
| NA        | ENSG00000266477 | 0          | NA          | NA         | NA         | NA         | RN7SL616P    |
| 100846991 | ENSG00000266478 | 0          | NA          | NA         | NA         | NA         | MIR5197      |
| NA        | ENSG00000266479 | 0          | NA          | NA         | NA         | NA         |              |

|           |                 |            |             |            |            |           |            |
|-----------|-----------------|------------|-------------|------------|------------|-----------|------------|
| NA        | ENSG00000266489 | 0          | NA          | NA         | NA         | NA        |            |
| NA        | ENSG00000266490 | 14.7133458 | -0.22653085 | 0.40026004 | 0.22278054 | 0.4358511 |            |
| 100616178 | ENSG00000266494 | 0          | NA          | NA         | NA         | NA        | MIR4641    |
| NA        | ENSG00000266495 | 0.16735865 | 0.01897177  | 0.38482933 | 0.78225479 | NA        |            |
| NA        | ENSG00000266498 | 0.34624801 | -0.02356563 | 0.38536324 | 0.65270996 | NA        |            |
| NA        | ENSG00000266501 | 0.32394738 | 0.00201184  | 0.38337548 | 0.96182076 | NA        | ATG12P1    |
| 100847058 | ENSG00000266502 | 0          | NA          | NA         | NA         | NA        | MIR5681A   |
| NA        | ENSG00000266503 | 0          | NA          | NA         | NA         | NA        | RN7SL162P  |
| NA        | ENSG00000266504 | 0          | NA          | NA         | NA         | NA        | RDM1P1     |
| NA        | ENSG00000266505 | 0          | NA          | NA         | NA         | NA        |            |
| 100616480 | ENSG00000266507 | 0          | NA          | NA         | NA         | NA        | MIR4479    |
| 100422916 | ENSG00000266508 | 0          | NA          | NA         | NA         | NA        | MIR3201    |
| 100500873 | ENSG00000266509 | 0          | NA          | NA         | NA         | NA        | MIR3934    |
| NA        | ENSG00000266513 | 0          | NA          | NA         | NA         | NA        |            |
| 100616212 | ENSG00000266514 | 0          | NA          | NA         | NA         | NA        | MIR3689F   |
| 100616463 | ENSG00000266515 | 0          | NA          | NA         | NA         | NA        | MIR4452    |
| 100616474 | ENSG00000266517 | 0          | NA          | NA         | NA         | NA        | MIR4715    |
| 100422959 | ENSG00000266518 | 0          | NA          | NA         | NA         | NA        | MIR4268    |
| NA        | ENSG00000266520 | 0          | NA          | NA         | NA         | NA        | RAC1P1     |
| NA        | ENSG00000266521 | 0          | NA          | NA         | NA         | NA        |            |
| NA        | ENSG00000266522 | 1.21752107 | 0.01843521  | 0.37907074 | 0.78990257 | NA        |            |
| 2662      | ENSG00000266524 | 186.574173 | -1.5913894  | 0.23742136 | 1.58E-12   | 3.54E-11  | GDF10      |
| 100616310 | ENSG00000266525 | 0          | NA          | NA         | NA         | NA        | MIR4650-1  |
| NA        | ENSG00000266527 | 0.15069912 | -0.01848503 | 0.38480575 | 0.84537521 | NA        |            |
| NA        | ENSG00000266529 | 0          | NA          | NA         | NA         | NA        | MTCYBP13   |
| 100422857 | ENSG00000266530 | 0          | NA          | NA         | NA         | NA        | MIR4318    |
| 100616490 | ENSG00000266531 | 0          | NA          | NA         | NA         | NA        | MIR4706    |
| 100500828 | ENSG00000266533 | 0          | NA          | NA         | NA         | NA        | MIR3619    |
| NA        | ENSG00000266535 | 0          | NA          | NA         | NA         | NA        |            |
| NA        | ENSG00000266537 | 0          | NA          | NA         | NA         | NA        | SPDYE22P   |
| NA        | ENSG00000266538 | 0.78290473 | -0.02638956 | 0.3832887  | 0.57443825 | NA        |            |
| NA        | ENSG00000266541 | 0.33939834 | 0.0018213   | 0.38337268 | 0.97028913 | NA        |            |
| 100847060 | ENSG00000266545 | 0          | NA          | NA         | NA         | NA        | MIR5701-1  |
| NA        | ENSG00000266549 | 0          | NA          | NA         | NA         | NA        | ATP6V1E1P2 |
| NA        | ENSG00000266553 | 0          | NA          | NA         | NA         | NA        | RN7SL356P  |
| 400644    | ENSG00000266554 | 0          | NA          | NA         | NA         | NA        | LINC01443  |
| 100423001 | ENSG00000266555 | 0          | NA          | NA         | NA         | NA        | MIR3145    |
| 100616163 | ENSG00000266559 | 0          | NA          | NA         | NA         | NA        | MIR4530    |

|           |                 |            |             |            |            |            |           |
|-----------|-----------------|------------|-------------|------------|------------|------------|-----------|
| 100533997 | ENSG00000266560 | 0.29863895 | -0.02292439 | 0.3852726  | 0.68753245 | NA         |           |
| NA        | ENSG00000266561 | 0          | NA          | NA         | NA         | NA         |           |
| NA        | ENSG00000266563 | 0          | NA          | NA         | NA         | NA         | EIF1P5    |
| 100616433 | ENSG00000266564 | 0          | NA          | NA         | NA         | NA         | MIR4418   |
| NA        | ENSG00000266569 | 0          | NA          | NA         | NA         | NA         | RN7SL377P |
| 100847000 | ENSG00000266570 | 0          | NA          | NA         | NA         | NA         | MIR5579   |
| NA        | ENSG00000266573 | 0.54517984 | 0.01459914  | 0.38349207 | 0.71670485 | NA         |           |
| NA        | ENSG00000266575 | 0          | NA          | NA         | NA         | NA         | BOLA2P1   |
| NA        | ENSG00000266578 | 3.95365874 | 0.11245354  | 0.38768381 | 0.34202003 | 0.57202996 |           |
| NA        | ENSG00000266579 | 0          | NA          | NA         | NA         | NA         |           |
| 100423028 | ENSG00000266580 | 0          | NA          | NA         | NA         | NA         | MIR4254   |
| 100423040 | ENSG00000266581 | 0          | NA          | NA         | NA         | NA         | MIR3166   |
| 100616264 | ENSG00000266582 | 0          | NA          | NA         | NA         | NA         | MIR4527   |
| 100616312 | ENSG00000266583 | 0          | NA          | NA         | NA         | NA         | MIR4478   |
| NA        | ENSG00000266586 | 0          | NA          | NA         | NA         | NA         |           |
| NA        | ENSG00000266588 | 0          | NA          | NA         | NA         | NA         |           |
| 100616149 | ENSG00000266589 | 0          | NA          | NA         | NA         | NA         | MIR4512   |
| 100616369 | ENSG00000266593 | 0          | NA          | NA         | NA         | NA         | MIR4713   |
| 100616283 | ENSG00000266594 | 0          | NA          | NA         | NA         | NA         | MIR4766   |
| NA        | ENSG00000266598 | 0          | NA          | NA         | NA         | NA         |           |
| NA        | ENSG00000266599 | 0.173733   | 0.01914545  | 0.38484597 | 0.78225479 | NA         |           |
| NA        | ENSG00000266601 | 1.22229222 | 0.04612793  | 0.38384336 | 0.4670253  | NA         |           |
| NA        | ENSG00000266602 | 0          | NA          | NA         | NA         | NA         |           |
| NA        | ENSG00000266604 | 0          | NA          | NA         | NA         | NA         | LINC01887 |
| NA        | ENSG00000266605 | 0          | NA          | NA         | NA         | NA         | LONRF2P1  |
| NA        | ENSG00000266610 | 0          | NA          | NA         | NA         | NA         | RN7SL176P |
| 100616423 | ENSG00000266611 | 0          | NA          | NA         | NA         | NA         | MIR4703   |
| NA        | ENSG00000266613 | 0          | NA          | NA         | NA         | NA         | COP1P1    |
| NA        | ENSG00000266614 | 0          | NA          | NA         | NA         | NA         |           |
| 100500899 | ENSG00000266617 | 0          | NA          | NA         | NA         | NA         | MIR3692   |
| 100616468 | ENSG00000266618 | 0          | NA          | NA         | NA         | NA         | MIR4742   |
| 100616352 | ENSG00000266619 | 0          | NA          | NA         | NA         | NA         | MIR4642   |
| NA        | ENSG00000266627 | 0          | NA          | NA         | NA         | NA         | RN7SL202P |
| 100616188 | ENSG00000266634 | 0          | NA          | NA         | NA         | NA         | MIR3972   |
| 100616168 | ENSG00000266640 | 0          | NA          | NA         | NA         | NA         | MIR4754   |
| NA        | ENSG00000266642 | 1.73943868 | -0.01172474 | 0.37633403 | 0.88197406 | NA         |           |
| 100500812 | ENSG00000266643 | 0          | NA          | NA         | NA         | NA         | MIR3677   |
| NA        | ENSG00000266644 | 1.52563483 | 0.014434    | 0.37865035 | 0.83786354 | NA         |           |



|           |                 |            |             |            |            |            |           |
|-----------|-----------------|------------|-------------|------------|------------|------------|-----------|
| 100423026 | ENSG00000266645 | 0          | NA          | NA         | NA         | NA         | MIR4299   |
| NA        | ENSG00000266647 | 0          | NA          | NA         | NA         | NA         |           |
| NA        | ENSG00000266648 | 0.34113261 | 0.0236267   | 0.38535342 | 0.6240938  | NA         | SETP3     |
| 100423030 | ENSG00000266649 | 0          | NA          | NA         | NA         | NA         | MIR3126   |
| NA        | ENSG00000266651 | 0.34045131 | -0.00010757 | 0.38336218 | 0.96627228 | NA         |           |
| NA        | ENSG00000266654 | 0.14931947 | -0.01844332 | 0.38480212 | 0.84537521 | NA         |           |
| 100500909 | ENSG00000266655 | 0          | NA          | NA         | NA         | NA         | MIR3908   |
| 100422973 | ENSG00000266663 | 0          | NA          | NA         | NA         | NA         | MIR3169   |
| NA        | ENSG00000266664 | 0          | NA          | NA         | NA         | NA         |           |
| 100616170 | ENSG00000266665 | 0          | NA          | NA         | NA         | NA         | MIR4739   |
| 100422883 | ENSG00000266666 | 0          | NA          | NA         | NA         | NA         | MIR4325   |
| NA        | ENSG00000266667 | 0          | NA          | NA         | NA         | NA         |           |
| 100847017 | ENSG00000266668 | 0          | NA          | NA         | NA         | NA         | MIR5692C2 |
| NA        | ENSG00000266673 | 0          | NA          | NA         | NA         | NA         |           |
| 100422873 | ENSG00000266676 | 0          | NA          | NA         | NA         | NA         | MIR4297   |
| NA        | ENSG00000266677 | 0.15069912 | -0.01848503 | 0.38480575 | 0.84537521 | NA         |           |
| NA        | ENSG00000266680 | 5.85811074 | 0.15294719  | 0.39653599 | 0.27278059 | 0.49638425 |           |
| 100422826 | ENSG00000266690 | 0          | NA          | NA         | NA         | NA         | MIR4274   |
| NA        | ENSG00000266691 | 0.15069912 | -0.01848503 | 0.38480575 | 0.84537521 | NA         |           |
| NA        | ENSG00000266692 | 0          | NA          | NA         | NA         | NA         |           |
| NA        | ENSG00000266693 | 0          | NA          | NA         | NA         | NA         | OR4K8P    |
| NA        | ENSG00000266696 | 0          | NA          | NA         | NA         | NA         |           |
| 100500818 | ENSG00000266698 | 0          | NA          | NA         | NA         | NA         | MIR3945   |
| 100616186 | ENSG00000266703 | 0          | NA          | NA         | NA         | NA         | MIR4490   |
| 100616179 | ENSG00000266704 | 0          | NA          | NA         | NA         | NA         | MIR4498   |
| 100616213 | ENSG00000266705 | 0          | NA          | NA         | NA         | NA         | MIR4437   |
| NA        | ENSG00000266707 | 0          | NA          | NA         | NA         | NA         | PSMD7P1   |
| NA        | ENSG00000266708 | 3.84051816 | 0.2955572   | 0.5538528  | 0.01900602 | 0.06992015 |           |
| NA        | ENSG00000266709 | 0          | NA          | NA         | NA         | NA         |           |
| NA        | ENSG00000266710 | 0          | NA          | NA         | NA         | NA         | RN7SL48P  |
| NA        | ENSG00000266711 | 0          | NA          | NA         | NA         | NA         |           |
| 100422921 | ENSG00000266712 | 0          | NA          | NA         | NA         | NA         | MIR3149   |
| 80022     | ENSG00000266714 | 196.049266 | 1.64478468  | 0.23451125 | 1.43E-13   | 3.48E-12   | MYO15B    |
| NA        | ENSG00000266717 | 0.37844916 | 0.02407552  | 0.3854191  | 0.60038877 | NA         |           |
| NA        | ENSG00000266718 | 1.45754523 | -0.03640255 | 0.3827622  | 0.54415233 | NA         |           |
| 100616286 | ENSG00000266719 | 0          | NA          | NA         | NA         | NA         | MIR4676   |
| NA        | ENSG00000266720 | 0          | NA          | NA         | NA         | NA         | RN7SL14P  |
| 100847016 | ENSG00000266721 | 0          | NA          | NA         | NA         | NA         | MIR5695   |

|           |                 |            |             |            |            |            |           |
|-----------|-----------------|------------|-------------|------------|------------|------------|-----------|
| NA        | ENSG00000266728 | 0          | NA          | NA         | NA         | NA         |           |
| 101927718 | ENSG00000266729 | 0          | NA          | NA         | NA         | NA         | DSG1-AS1  |
| 26083     | ENSG00000266733 | 0.16735865 | 0.01897177  | 0.38482933 | 0.78225479 | NA         | TBC1D29P  |
| NA        | ENSG00000266736 | 6.78969476 | -0.05686247 | 0.35593194 | 0.69352034 | 0.85183585 | GTF2IP6   |
| 100616307 | ENSG00000266738 | 0          | NA          | NA         | NA         | NA         | MIR4757   |
| 100616176 | ENSG00000266740 | 0          | NA          | NA         | NA         | NA         | MIR4708   |
| NA        | ENSG00000266743 | 0.16735865 | 0.01897177  | 0.38482933 | 0.78225479 | NA         |           |
| NA        | ENSG00000266744 | 0          | NA          | NA         | NA         | NA         |           |
| 100422901 | ENSG00000266745 | 0          | NA          | NA         | NA         | NA         | MIR3135A  |
| 100616285 | ENSG00000266750 | 0          | NA          | NA         | NA         | NA         | MIR4645   |
| 100500905 | ENSG00000266751 | 0          | NA          | NA         | NA         | NA         | MIR3661   |
| NA        | ENSG00000266754 | 0          | NA          | NA         | NA         | NA         | RN7SL524P |
| 100847001 | ENSG00000266756 | 0          | NA          | NA         | NA         | NA         | MIR5680   |
| 100616109 | ENSG00000266760 | 0          | NA          | NA         | NA         | NA         | MIR4464   |
| 100422889 | ENSG00000266761 | 0          | NA          | NA         | NA         | NA         | MIR3194   |
| NA        | ENSG00000266765 | 0          | NA          | NA         | NA         | NA         |           |
| NA        | ENSG00000266767 | 0          | NA          | NA         | NA         | NA         |           |
| NA        | ENSG00000266770 | 0          | NA          | NA         | NA         | NA         | RN7SL619P |
| NA        | ENSG00000266771 | 0          | NA          | NA         | NA         | NA         |           |
| NA        | ENSG00000266774 | 0          | NA          | NA         | NA         | NA         |           |
| NA        | ENSG00000266775 | 0.52119901 | 0.02576573  | 0.38568143 | 0.51723676 | NA         |           |
| 100616230 | ENSG00000266776 | 0          | NA          | NA         | NA         | NA         | MIR4646   |
| NA        | ENSG00000266777 | 44.5750868 | 0.27478705  | 0.31032801 | 0.19812516 | 0.40237519 | SH3GL1P1  |
| 100500893 | ENSG00000266782 | 0          | NA          | NA         | NA         | NA         | MIR3663   |
| NA        | ENSG00000266783 | 4.18866198 | -0.03274998 | 0.36449867 | 0.78654104 | 0.90294962 |           |
| NA        | ENSG00000266786 | 0          | NA          | NA         | NA         | NA         | LGALS9DP  |
| NA        | ENSG00000266794 | 0          | NA          | NA         | NA         | NA         | RN7SL7P   |
| NA        | ENSG00000266801 | 0          | NA          | NA         | NA         | NA         |           |
| NA        | ENSG00000266802 | 0          | NA          | NA         | NA         | NA         |           |
| NA        | ENSG00000266803 | 0.47908437 | -0.00677604 | 0.38272732 | 0.87795337 | NA         |           |
| NA        | ENSG00000266805 | 0          | NA          | NA         | NA         | NA         |           |
| NA        | ENSG00000266806 | 0          | NA          | NA         | NA         | NA         |           |
| 100616455 | ENSG00000266807 | 0          | NA          | NA         | NA         | NA         | MIR548H5  |
| 100616305 | ENSG00000266808 | 0          | NA          | NA         | NA         | NA         | MIR548AE1 |
| NA        | ENSG00000266809 | 0          | NA          | NA         | NA         | NA         | PPIAP57   |
| NA        | ENSG00000266818 | 0          | NA          | NA         | NA         | NA         |           |
| NA        | ENSG00000266820 | 38.2699797 | 0.25795432  | 0.33219824 | 0.2267159  | 0.44128749 | KPNA2P3   |
| NA        | ENSG00000266821 | 0.61722212 | -0.01616031 | 0.38340606 | 0.71513237 | NA         |           |

|           |                 |            |             |            |            |            |              |
|-----------|-----------------|------------|-------------|------------|------------|------------|--------------|
| NA        | ENSG00000266824 | 0.173733   | 0.01914545  | 0.38484597 | 0.78225479 | NA         |              |
| NA        | ENSG00000266826 | 0          | NA          | NA         | NA         | NA         | IGBP1P2      |
| 100616460 | ENSG00000266827 | 0          | NA          | NA         | NA         | NA         | MIR3689E     |
| NA        | ENSG00000266828 | 0          | NA          | NA         | NA         | NA         | RN7SL712P    |
| NA        | ENSG00000266830 | 0          | NA          | NA         | NA         | NA         |              |
| NA        | ENSG00000266835 | 0          | NA          | NA         | NA         | NA         | GAPLINC      |
| NA        | ENSG00000266839 | 1.03393377 | 0.00427409  | 0.37995108 | 0.9441142  | NA         |              |
| NA        | ENSG00000266840 | 0          | NA          | NA         | NA         | NA         |              |
| NA        | ENSG00000266844 | 0          | NA          | NA         | NA         | NA         |              |
| NA        | ENSG00000266846 | 0.78677596 | -0.00629194 | 0.38219487 | 0.89278077 | NA         |              |
| 101927571 | ENSG00000266850 | 0.73070606 | 0.01314252  | 0.38202877 | 0.79200301 | NA         |              |
| 100616323 | ENSG00000266852 | 0          | NA          | NA         | NA         | NA         | MIR4482      |
| NA        | ENSG00000266853 | 1.03955927 | 0.02787145  | 0.38252478 | 0.61189782 | NA         | ITM2BP1      |
| 100500821 | ENSG00000266855 | 0          | NA          | NA         | NA         | NA         | MIR3910-1    |
| NA        | ENSG00000266858 | 0          | NA          | NA         | NA         | NA         | RPSAP67      |
| NA        | ENSG00000266863 | 0          | NA          | NA         | NA         | NA         | RN7SL123P    |
| NA        | ENSG00000266865 | 0.14931947 | -0.01844332 | 0.38480212 | 0.84537521 | NA         |              |
| NA        | ENSG00000266869 | 0          | NA          | NA         | NA         | NA         |              |
| NA        | ENSG00000266872 | 0          | NA          | NA         | NA         | NA         |              |
| NA        | ENSG00000266875 | 0          | NA          | NA         | NA         | NA         | RN7SL408P    |
| NA        | ENSG00000266876 | 0.87408028 | 0.04663374  | 0.38544169 | 0.40010713 | NA         |              |
| NA        | ENSG00000266877 | 0          | NA          | NA         | NA         | NA         |              |
| NA        | ENSG00000266885 | 7.7426215  | 0.09635001  | 0.38289587 | 0.37527416 | 0.60449338 |              |
| 100616415 | ENSG00000266887 | 0          | NA          | NA         | NA         | NA         | MIR4535      |
| 100616202 | ENSG00000266890 | 0          | NA          | NA         | NA         | NA         | MIR4634      |
| NA        | ENSG00000266891 | 0          | NA          | NA         | NA         | NA         |              |
| NA        | ENSG00000266893 | 0          | NA          | NA         | NA         | NA         |              |
| NA        | ENSG00000266896 | 12.4301414 | 0.22716795  | 0.39805682 | 0.22833922 | 0.44354125 |              |
| NA        | ENSG00000266897 | 0.70674343 | 0.02844879  | 0.38384694 | 0.55669516 | NA         |              |
| NA        | ENSG00000266899 | 0          | NA          | NA         | NA         | NA         | AKR1B1P7     |
| NA        | ENSG00000266900 | 0.83525524 | 0.01874306  | 0.38211254 | 0.71724837 | NA         |              |
| NA        | ENSG00000266901 | 0          | NA          | NA         | NA         | NA         |              |
| NA        | ENSG00000266903 | 1.63813306 | -0.04125728 | 0.37986853 | 0.59787716 | NA         | CEACAM16-AS1 |
| NA        | ENSG00000266904 | 61.8398606 | 0.32163062  | 0.27538803 | 0.12248698 | 0.28962737 | LINC00663    |
| NA        | ENSG00000266905 | 0          | NA          | NA         | NA         | NA         |              |
| NA        | ENSG00000266906 | 0          | NA          | NA         | NA         | NA         |              |
| NA        | ENSG00000266907 | 3.23370399 | 0.0518365   | 0.37300147 | 0.63200967 | 0.81380269 |              |
| NA        | ENSG00000266908 | 0.86412303 | -0.0483697  | 0.38833292 | 0.29422122 | NA         |              |

|           |    |                 |            |             |            |            |            |             |
|-----------|----|-----------------|------------|-------------|------------|------------|------------|-------------|
|           | NA | ENSG00000266909 | 0          | NA          | NA         | NA         | NA         | SLC25A6P4   |
|           | NA | ENSG00000266910 | 5.91763172 | -0.01714909 | 0.35560838 | 0.89859094 | 0.95556135 |             |
| 105372288 | NA | ENSG00000266913 | 0          | NA          | NA         | NA         | NA         | LINC01841   |
|           | NA | ENSG00000266915 | 0          | NA          | NA         | NA         | NA         | MRPS5P4     |
| 101927720 | NA | ENSG00000266916 | 57.2212795 | -0.04805013 | 0.2440688  | 0.79781325 | 0.90734393 | ZNF793-AS1  |
|           | NA | ENSG00000266918 | 16.9934618 | -0.05375309 | 0.32856236 | 0.75693248 | 0.88697677 |             |
|           | NA | ENSG00000266919 | 0          | NA          | NA         | NA         | NA         |             |
|           | NA | ENSG00000266920 | 0          | NA          | NA         | NA         | NA         | ACTBP9      |
| 101928063 | NA | ENSG00000266921 | 22.1687662 | -0.05316844 | 0.33991199 | 0.73889543 | 0.87661815 | ZNF230-DT   |
|           | NA | ENSG00000266922 | 0.173733   | 0.01914545  | 0.38484597 | 0.78225479 | NA         |             |
|           | NA | ENSG00000266923 | 0          | NA          | NA         | NA         | NA         |             |
|           | NA | ENSG00000266924 | 0          | NA          | NA         | NA         | NA         |             |
|           | NA | ENSG00000266925 | 0          | NA          | NA         | NA         | NA         |             |
|           | NA | ENSG00000266928 | 0          | NA          | NA         | NA         | NA         |             |
|           | NA | ENSG00000266929 | 2.77131953 | -0.01812313 | 0.37553836 | 0.82947376 | 0.92261925 |             |
|           | NA | ENSG00000266931 | 0          | NA          | NA         | NA         | NA         |             |
|           | NA | ENSG00000266932 | 0.51560297 | 0.03113601  | 0.38605483 | 0.47760041 | NA         |             |
|           | NA | ENSG00000266933 | 9.81950517 | 0.08729092  | 0.36155669 | 0.5578424  | 0.76280883 | MADCAM1-AS1 |
|           | NA | ENSG00000266934 | 9.1727991  | 0.5152378   | 0.75331317 | 0.03584762 | 0.11549476 |             |
|           | NA | ENSG00000266936 | 1.35698394 | -0.01906256 | 0.37975543 | 0.77209199 | NA         |             |
|           | NA | ENSG00000266938 | 0          | NA          | NA         | NA         | NA         |             |
|           | NA | ENSG00000266941 | 0          | NA          | NA         | NA         | NA         |             |
|           | NA | ENSG00000266943 | 0          | NA          | NA         | NA         | NA         | RPSAP66     |
|           | NA | ENSG00000266944 | 0          | NA          | NA         | NA         | NA         |             |
|           | NA | ENSG00000266946 | 0          | NA          | NA         | NA         | NA         | MRPL37P1    |
|           | NA | ENSG00000266947 | 0          | NA          | NA         | NA         | NA         |             |
|           | NA | ENSG00000266950 | 0          | NA          | NA         | NA         | NA         |             |
|           | NA | ENSG00000266951 | 0          | NA          | NA         | NA         | NA         |             |
| 400654    | NA | ENSG00000266952 | 0          | NA          | NA         | NA         | NA         | LINC01538   |
|           | NA | ENSG00000266953 | 0          | NA          | NA         | NA         | NA         |             |
|           | NA | ENSG00000266954 | 0.47338401 | -0.03506593 | 0.38628542 | 0.49584507 | NA         |             |
|           | NA | ENSG00000266955 | 0          | NA          | NA         | NA         | NA         |             |
|           | NA | ENSG00000266957 | 0.15069912 | -0.01848503 | 0.38480575 | 0.84537521 | NA         |             |
|           | NA | ENSG00000266959 | 0          | NA          | NA         | NA         | NA         |             |
|           | NA | ENSG00000266961 | 0          | NA          | NA         | NA         | NA         |             |
| 108783654 | NA | ENSG00000266962 | 617.946106 | -0.19068162 | 0.09775567 | 0.04313384 | 0.13291451 | HSD17B1-AS1 |
|           | NA | ENSG00000266963 | 0.18922458 | 0.01954053  | 0.38488496 | 0.78225479 | NA         |             |
| 5348      | NA | ENSG00000266964 | 1.42042719 | 0.08110572  | 0.39243898 | 0.18876161 | NA         | FXVD1       |

|           |                 |            |             |            |            |            |           |
|-----------|-----------------|------------|-------------|------------|------------|------------|-----------|
| NA        | ENSG00000266965 | 0          | NA          | NA         | NA         | NA         |           |
| 80755     | ENSG00000266967 | 488.094321 | 0.15244865  | 0.13261258 | 0.22004339 | 0.43220085 | AARSD1    |
| NA        | ENSG00000266968 | 2.2408267  | 0.11009352  | 0.39715613 | 0.22381546 | NA         |           |
| NA        | ENSG00000266969 | 2.95462842 | -0.02114017 | 0.37592697 | 0.80017346 | 0.90848606 | CEP192-DT |
| 101928674 | ENSG00000266970 | 0.69682712 | -0.04884095 | 0.38814738 | 0.33415495 | NA         | SOCS3-DT  |
| NA        | ENSG00000266971 | 0          | NA          | NA         | NA         | NA         | OR4F8P    |
| NA        | ENSG00000266973 | 0          | NA          | NA         | NA         | NA         |           |
| 106144598 | ENSG00000266975 | 0          | NA          | NA         | NA         | NA         | FARSA-AS1 |
| 102724908 | ENSG00000266976 | 0          | NA          | NA         | NA         | NA         |           |
| NA        | ENSG00000266977 | 0          | NA          | NA         | NA         | NA         |           |
| NA        | ENSG00000266978 | 0          | NA          | NA         | NA         | NA         |           |
| 101927017 | ENSG00000266979 | 0          | NA          | NA         | NA         | NA         | LINC01180 |
| NA        | ENSG00000266980 | 8.37608886 | 0.03058217  | 0.3469711  | 0.84267779 | 0.92845712 |           |
| NA        | ENSG00000266981 | 0          | NA          | NA         | NA         | NA         |           |
| 100128568 | ENSG00000266983 | 0.53627504 | 0.01406945  | 0.38294281 | 0.73504371 | NA         | RANBP3-DT |
| NA        | ENSG00000266984 | 0          | NA          | NA         | NA         | NA         | POLR3GP2  |
| NA        | ENSG00000266985 | 0          | NA          | NA         | NA         | NA         |           |
| NA        | ENSG00000266987 | 0          | NA          | NA         | NA         | NA         |           |
| 112268408 | ENSG00000266988 | 0          | NA          | NA         | NA         | NA         |           |
| NA        | ENSG00000266989 | 0          | NA          | NA         | NA         | NA         | FTLP5     |
| NA        | ENSG00000266990 | 0          | NA          | NA         | NA         | NA         |           |
| NA        | ENSG00000266992 | 0          | NA          | NA         | NA         | NA         | DHX40P1   |
| NA        | ENSG00000266993 | 33.2659778 | 0.14226438  | 0.29322005 | 0.47515226 | 0.69740127 |           |
| NA        | ENSG00000266994 | 0          | NA          | NA         | NA         | NA         |           |
| NA        | ENSG00000266995 | 0          | NA          | NA         | NA         | NA         |           |
| NA        | ENSG00000266997 | 0          | NA          | NA         | NA         | NA         |           |
| NA        | ENSG00000266998 | 32.3377994 | 0.20225326  | 0.31559661 | 0.32514682 | 0.55306181 |           |
| NA        | ENSG00000267000 | 0          | NA          | NA         | NA         | NA         |           |
| NA        | ENSG00000267001 | 93.8540261 | -0.28367752 | 0.22733622 | 0.12841511 | 0.29910257 |           |
| NA        | ENSG00000267002 | 470.972136 | 0.09836893  | 0.12317651 | 0.39981995 | 0.62831531 |           |
| NA        | ENSG00000267004 | 0          | NA          | NA         | NA         | NA         |           |
| NA        | ENSG00000267005 | 0.30139824 | -0.02296476 | 0.38527817 | 0.68536535 | NA         |           |
| NA        | ENSG00000267006 | 1.42665797 | 0.01499158  | 0.37820839 | 0.83600211 | NA         |           |
| NA        | ENSG00000267007 | 0          | NA          | NA         | NA         | NA         |           |
| NA        | ENSG00000267009 | 0.34746601 | 0.02370763  | 0.3853651  | 0.61987128 | NA         |           |
| NA        | ENSG00000267011 | 2.95765748 | -0.01436857 | 0.37099286 | 0.88389533 | 0.94897201 |           |
| 101927229 | ENSG00000267013 | 0          | NA          | NA         | NA         | NA         | LINC01929 |
| NA        | ENSG00000267014 | 0          | NA          | NA         | NA         | NA         | LINC01532 |

|           |                 |            |             |            |            |            |            |
|-----------|-----------------|------------|-------------|------------|------------|------------|------------|
| NA        | ENSG00000267015 | 0          | NA          | NA         | NA         | NA         |            |
| NA        | ENSG00000267016 | 0.450608   | -0.02734235 | 0.38571655 | 0.56119224 | NA         |            |
| NA        | ENSG00000267019 | 0.18922458 | 0.01954053  | 0.38488496 | 0.78225479 | NA         | NTF6A      |
| NA        | ENSG00000267022 | 79.8841758 | -0.00372569 | 0.37501608 | 0.95614336 | 0.98192889 |            |
| NA        | ENSG00000267023 | 166.634318 | -0.18852098 | 0.19139992 | 0.25601112 | 0.47710508 | LRRC37A16P |
| NA        | ENSG00000267024 | 0          | NA          | NA         | NA         | NA         |            |
| 102724684 | ENSG00000267026 | 0          | NA          | NA         | NA         | NA         |            |
| NA        | ENSG00000267027 | 0          | NA          | NA         | NA         | NA         |            |
| 105372127 | ENSG00000267028 | 0          | NA          | NA         | NA         | NA         | TCF4-AS1   |
| NA        | ENSG00000267030 | 3.42218041 | 0.07311907  | 0.38696171 | 0.35425602 | 0.58481438 |            |
| NA        | ENSG00000267032 | 0          | NA          | NA         | NA         | NA         |            |
| NA        | ENSG00000267033 | 3.17977883 | 0.08579419  | 0.38133307 | 0.43400544 | 0.6592656  |            |
| NA        | ENSG00000267035 | 0          | NA          | NA         | NA         | NA         |            |
| NA        | ENSG00000267036 | 0.99252283 | 0.00422754  | 0.37924692 | 0.94822561 | NA         |            |
| NA        | ENSG00000267038 | 0          | NA          | NA         | NA         | NA         |            |
| 105372069 | ENSG00000267039 | 0          | NA          | NA         | NA         | NA         |            |
| 100505549 | ENSG00000267040 | 61.8330779 | -0.06341178 | 0.23810794 | 0.73396613 | 0.87327664 |            |
| 342892    | ENSG00000267041 | 289.678657 | -0.03873175 | 0.18420341 | 0.8089452  | 0.91334153 | ZNF850     |
| NA        | ENSG00000267042 | 0.64629029 | 0.00266631  | 0.38249444 | 0.9488994  | NA         |            |
| NA        | ENSG00000267044 | 0          | NA          | NA         | NA         | NA         |            |
| NA        | ENSG00000267046 | 0          | NA          | NA         | NA         | NA         | E2F3P1     |
| NA        | ENSG00000267047 | 0          | NA          | NA         | NA         | NA         |            |
| NA        | ENSG00000267048 | 14.1571654 | 0.01203701  | 0.3269344  | 0.94642042 | 0.97814213 |            |
| NA        | ENSG00000267049 | 4.83289058 | 0.00304158  | 0.36664614 | 0.98077268 | 0.99355086 |            |
| NA        | ENSG00000267051 | 0          | NA          | NA         | NA         | NA         |            |
| NA        | ENSG00000267052 | 1.15791521 | 0.01907309  | 0.37935069 | 0.78031606 | NA         |            |
| NA        | ENSG00000267053 | 21.9999803 | 0.35518112  | 0.42035156 | 0.11938428 | 0.28417325 |            |
| NA        | ENSG00000267054 | 0          | NA          | NA         | NA         | NA         |            |
| NA        | ENSG00000267055 | 0          | NA          | NA         | NA         | NA         |            |
| NA        | ENSG00000267056 | 0          | NA          | NA         | NA         | NA         |            |
| 102724698 | ENSG00000267057 | 0          | NA          | NA         | NA         | NA         | LINC01905  |
| 100505715 | ENSG00000267058 | 55.5599838 | 0.29791866  | 0.32696156 | 0.17050896 | 0.36238863 |            |
| NA        | ENSG00000267059 | 253.572676 | 0.08179876  | 0.16207004 | 0.57870809 | 0.77656626 |            |
| 100885848 | ENSG00000267060 | 42.8960744 | 0.32655993  | 0.33369707 | 0.14188353 | 0.32042906 | PTGES3L    |
| NA        | ENSG00000267061 | 0          | NA          | NA         | NA         | NA         |            |
| NA        | ENSG00000267062 | 0.3416871  | 0.0028773   | 0.38338903 | 0.96021644 | NA         |            |
| NA        | ENSG00000267063 | 0          | NA          | NA         | NA         | NA         |            |
| 100133957 | ENSG00000267064 | 3.9876428  | -0.02801691 | 0.36709873 | 0.80361246 | 0.91070264 | UXT-AS1    |

|           |                 |            |             |            |            |            |                 |
|-----------|-----------------|------------|-------------|------------|------------|------------|-----------------|
| 101928514 | ENSG00000267065 | 0.15069912 | -0.01848503 | 0.38480575 | 0.84537521 | NA         | LINC02080       |
| NA        | ENSG00000267066 | 0          | NA          | NA         | NA         | NA         |                 |
| NA        | ENSG00000267069 | 0          | NA          | NA         | NA         | NA         |                 |
| NA        | ENSG00000267070 | 0          | NA          | NA         | NA         | NA         |                 |
| NA        | ENSG00000267072 | 0          | NA          | NA         | NA         | NA         |                 |
| NA        | ENSG00000267073 | 0          | NA          | NA         | NA         | NA         |                 |
| NA        | ENSG00000267074 | 0          | NA          | NA         | NA         | NA         |                 |
| NA        | ENSG00000267075 | 0          | NA          | NA         | NA         | NA         |                 |
| NA        | ENSG00000267076 | 0          | NA          | NA         | NA         | NA         | MIX23P3         |
| NA        | ENSG00000267077 | 0.34114859 | 0.02362682  | 0.38535344 | 0.62408532 | NA         |                 |
| NA        | ENSG00000267078 | 0.52929514 | 0.01289716  | 0.38340427 | 0.75402699 | NA         |                 |
| NA        | ENSG00000267079 | 0          | NA          | NA         | NA         | NA         |                 |
| 339201    | ENSG00000267080 | 252.824253 | 0.48547932  | 0.17140656 | 0.00174718 | 0.00954158 | ASB16-AS1       |
| NA        | ENSG00000267081 | 0          | NA          | NA         | NA         | NA         |                 |
| 105372273 | ENSG00000267082 | 2.65729722 | 0.0627481   | 0.37858833 | 0.52574472 | 0.73808697 |                 |
| NA        | ENSG00000267083 | 0.14931947 | -0.01844332 | 0.38480212 | 0.84537521 | NA         | KRT18P61        |
| NA        | ENSG00000267084 | 0          | NA          | NA         | NA         | NA         |                 |
| NA        | ENSG00000267085 | 0          | NA          | NA         | NA         | NA         |                 |
| NA        | ENSG00000267088 | 1.18863041 | -0.00587441 | 0.37852309 | 0.93165673 | NA         |                 |
| NA        | ENSG00000267089 | 0          | NA          | NA         | NA         | NA         |                 |
| NA        | ENSG00000267090 | 0          | NA          | NA         | NA         | NA         |                 |
| NA        | ENSG00000267091 | 2.58608223 | 0.09953124  | 0.39252217 | 0.27674291 | 0.50116619 | CTBP2P7         |
| NA        | ENSG00000267092 | 0.34133385 | 0.0027402   | 0.38338649 | 0.96152679 | NA         |                 |
| NA        | ENSG00000267095 | 0          | NA          | NA         | NA         | NA         |                 |
| NA        | ENSG00000267096 | 5.05143056 | -0.00794708 | 0.36169497 | 0.94694275 | 0.97815729 |                 |
| NA        | ENSG00000267097 | 0          | NA          | NA         | NA         | NA         | SLC14A2-AS1     |
| NA        | ENSG00000267098 | 0.67507128 | 0.02200455  | 0.3838492  | 0.61301654 | NA         |                 |
| NA        | ENSG00000267099 | 0          | NA          | NA         | NA         | NA         | NTF6G           |
| 147727    | ENSG00000267100 | 318.294894 | 0.15103316  | 0.13608703 | 0.2350204  | 0.45186105 | ILF3-DT         |
| NA        | ENSG00000267101 | 0.37844916 | 0.02407552  | 0.3854191  | 0.60038877 | NA         |                 |
| NA        | ENSG00000267102 | 0          | NA          | NA         | NA         | NA         |                 |
| 653645    | ENSG00000267104 | 2.44983829 | 0.00860071  | 0.37470214 | 0.9221135  | NA         | BC1D3P1-DHX40P1 |
| NA        | ENSG00000267105 | 0          | NA          | NA         | NA         | NA         |                 |
| NA        | ENSG00000267106 | 124.260297 | 0.29714895  | 0.22675296 | 0.11187089 | 0.27047506 | ZNF561-AS1      |
| 100505495 | ENSG00000267107 | 0          | NA          | NA         | NA         | NA         | PCAT19          |
| NA        | ENSG00000267108 | 1.51151046 | 0.04398669  | 0.3809206  | 0.56086262 | NA         |                 |
| NA        | ENSG00000267109 | 0          | NA          | NA         | NA         | NA         |                 |
| NA        | ENSG00000267110 | 0.18922458 | 0.01954053  | 0.38488496 | 0.78225479 | NA         |                 |

|           |                 |            |             |            |            |            |            |
|-----------|-----------------|------------|-------------|------------|------------|------------|------------|
| NA        | ENSG00000267112 | 0          | NA          | NA         | NA         | NA         |            |
| NA        | ENSG00000267113 | 0          | NA          | NA         | NA         | NA         |            |
| NA        | ENSG00000267114 | 0          | NA          | NA         | NA         | NA         |            |
| NA        | ENSG00000267115 | 0.32414418 | 0.00212149  | 0.38337697 | 0.96077014 | NA         |            |
| NA        | ENSG00000267116 | 0          | NA          | NA         | NA         | NA         | PMM2P2     |
| NA        | ENSG00000267117 | 0          | NA          | NA         | NA         | NA         |            |
| NA        | ENSG00000267119 | 0.14931947 | -0.01844332 | 0.38480212 | 0.84537521 | NA         | RPL10P15   |
| NA        | ENSG00000267120 | 12.0340427 | 0.1230021   | 0.36733396 | 0.43756669 | 0.66277119 |            |
| 339192    | ENSG00000267121 | 16.9456645 | 0.38411205  | 0.50796249 | 0.08368618 | 0.21852248 | FMNL1-DT   |
| NA        | ENSG00000267122 | 2.30531559 | 0.15773882  | 0.4264025  | 0.04817153 | NA         |            |
| 101928710 | ENSG00000267123 | 0.30139824 | -0.02296476 | 0.38527817 | 0.68536535 | NA         | SCAT1      |
| NA        | ENSG00000267124 | 0          | NA          | NA         | NA         | NA         |            |
| NA        | ENSG00000267125 | 64.4394901 | -0.03508359 | 0.24132966 | 0.85068377 | 0.93241069 |            |
| NA        | ENSG00000267127 | 7.07695408 | -0.1314226  | 0.39573485 | 0.26425149 | 0.48643065 |            |
| NA        | ENSG00000267128 | 73.047906  | 0.01073408  | 0.24231713 | 0.95624351 | 0.98198091 | RNF157-AS1 |
| NA        | ENSG00000267129 | 0          | NA          | NA         | NA         | NA         | OR1AC1P    |
| NA        | ENSG00000267130 | 0.16735865 | 0.01897177  | 0.38482933 | 0.78225479 | NA         |            |
| 101927855 | ENSG00000267131 | 7.83114165 | 0.45601439  | 0.7253991  | 0.0335904  | 0.10977326 |            |
| NA        | ENSG00000267132 | 0          | NA          | NA         | NA         | NA         | HMGB3P27   |
| NA        | ENSG00000267133 | 0          | NA          | NA         | NA         | NA         |            |
| 284294    | ENSG00000267134 | 0          | NA          | NA         | NA         | NA         | LINC01924  |
| NA        | ENSG00000267135 | 0          | NA          | NA         | NA         | NA         |            |
| NA        | ENSG00000267136 | 9.85153943 | -0.69526444 | 1.04238933 | 0.02190218 | 0.07839341 |            |
| NA        | ENSG00000267137 | 0          | NA          | NA         | NA         | NA         |            |
| NA        | ENSG00000267138 | 0.16735865 | 0.01897177  | 0.38482933 | 0.78225479 | NA         |            |
| NA        | ENSG00000267139 | 0          | NA          | NA         | NA         | NA         |            |
| NA        | ENSG00000267140 | 0.64198332 | 0.00401511  | 0.38138288 | 0.93701059 | NA         |            |
| NA        | ENSG00000267141 | 1.17679255 | -0.00431019 | 0.37947512 | 0.94564666 | NA         |            |
| NA        | ENSG00000267142 | 0          | NA          | NA         | NA         | NA         |            |
| NA        | ENSG00000267143 | 1.39062366 | 0.01658997  | 0.3815004  | 0.76226735 | NA         |            |
| NA        | ENSG00000267144 | 1.82177793 | -0.05412303 | 0.38088152 | 0.51265426 | NA         | ZNF222-DT  |
| NA        | ENSG00000267145 | 0          | NA          | NA         | NA         | NA         |            |
| NA        | ENSG00000267146 | 0          | NA          | NA         | NA         | NA         |            |
| 101928845 | ENSG00000267147 | 0          | NA          | NA         | NA         | NA         | LINC01842  |
| NA        | ENSG00000267148 | 0          | NA          | NA         | NA         | NA         |            |
| NA        | ENSG00000267149 | 0.18922458 | 0.01954053  | 0.38488496 | 0.78225479 | NA         |            |
| NA        | ENSG00000267150 | 7.7260664  | -0.0701488  | 0.35373564 | 0.64437736 | 0.82246828 |            |
| 106660605 | ENSG00000267151 | 0          | NA          | NA         | NA         | NA         | MIR2117HG  |



|           |                 |            |             |            |            |            |            |
|-----------|-----------------|------------|-------------|------------|------------|------------|------------|
| NA        | ENSG00000267152 | 8.00522429 | 0.09984183  | 0.38044178 | 0.41723298 | 0.64356838 |            |
| NA        | ENSG00000267153 | 0          | NA          | NA         | NA         | NA         | CTBP2P3    |
| NA        | ENSG00000267154 | 0          | NA          | NA         | NA         | NA         | OR1M4P     |
| NA        | ENSG00000267156 | 0          | NA          | NA         | NA         | NA         | TPMTP1     |
| NA        | ENSG00000267157 | 0.681861   | 0.00457837  | 0.38245976 | 0.91462971 | NA         |            |
| NA        | ENSG00000267159 | 0          | NA          | NA         | NA         | NA         |            |
| NA        | ENSG00000267160 | 25.9931642 | 0.13608765  | 0.32784667 | 0.47899298 | 0.70041426 |            |
| NA        | ENSG00000267162 | 0          | NA          | NA         | NA         | NA         | SDHDP1     |
| NA        | ENSG00000267165 | 7.05289562 | -0.03043761 | 0.38668527 | 0.11433174 | 0.27505053 | CHMP1B-AS1 |
| NA        | ENSG00000267166 | 0          | NA          | NA         | NA         | NA         |            |
| NA        | ENSG00000267168 | 0.34010615 | 0.00286207  | 0.38338878 | 0.96112863 | NA         |            |
| 100507373 | ENSG00000267169 | 134.313796 | -0.04670846 | 0.18708786 | 0.77379645 | 0.89600234 | ADGRL1-AS1 |
| NA        | ENSG00000267170 | 0          | NA          | NA         | NA         | NA         | CALM2P1    |
| NA        | ENSG00000267172 | 0.173124   | -0.01911262 | 0.38486262 | 0.84537521 | NA         |            |
| NA        | ENSG00000267173 | 0          | NA          | NA         | NA         | NA         |            |
| NA        | ENSG00000267174 | 0          | NA          | NA         | NA         | NA         |            |
| NA        | ENSG00000267175 | 0          | NA          | NA         | NA         | NA         |            |
| NA        | ENSG00000267177 | 0          | NA          | NA         | NA         | NA         |            |
| NA        | ENSG00000267178 | 0.173124   | -0.01911262 | 0.38486262 | 0.84537521 | NA         | PHF5CP     |
| NA        | ENSG00000267179 | 2.91619169 | -0.05204416 | 0.37477746 | 0.61639762 | 0.80326549 |            |
| NA        | ENSG00000267180 | 0          | NA          | NA         | NA         | NA         |            |
| NA        | ENSG00000267182 | 0          | NA          | NA         | NA         | NA         | SNRPCP20   |
| NA        | ENSG00000267184 | 0          | NA          | NA         | NA         | NA         |            |
| NA        | ENSG00000267185 | 0.50894729 | 0.00998929  | 0.3832477  | 0.78569685 | NA         | PTP4A2P1   |
| NA        | ENSG00000267187 | 0          | NA          | NA         | NA         | NA         |            |
| NA        | ENSG00000267188 | 0          | NA          | NA         | NA         | NA         |            |
| NA        | ENSG00000267189 | 0          | NA          | NA         | NA         | NA         | ATP5MGP7   |
| NA        | ENSG00000267190 | 0          | NA          | NA         | NA         | NA         | TYMSP2     |
| NA        | ENSG00000267191 | 15.8658765 | 0.02520675  | 0.31945557 | 0.88994712 | 0.9521436  | ZNF45-AS1  |
| NA        | ENSG00000267192 | 0.69265567 | 0.02498508  | 0.38340894 | 0.58087527 | NA         |            |
| NA        | ENSG00000267193 | 0          | NA          | NA         | NA         | NA         |            |
| 406994    | ENSG00000267195 | 0          | NA          | NA         | NA         | NA         | MIR212     |
| NA        | ENSG00000267196 | 0          | NA          | NA         | NA         | NA         |            |
| NA        | ENSG00000267197 | 1.97932638 | 0.01350781  | 0.37732474 | 0.8611124  | NA         |            |
| NA        | ENSG00000267198 | 6.13646346 | 0.25031092  | 0.47008156 | 0.09117598 | 0.23298963 |            |
| NA        | ENSG00000267199 | 25.6939092 | -0.36218971 | 0.46579623 | 0.09932298 | 0.24808862 |            |
| 406921    | ENSG00000267200 | 0          | NA          | NA         | NA         | NA         | MIR132     |
| 101928602 | ENSG00000267201 | 9.78911785 | 0.12254122  | 0.36498149 | 0.44718829 | 0.67112071 | LINC01775  |

|           |                 |            |             |            |            |            |            |
|-----------|-----------------|------------|-------------|------------|------------|------------|------------|
| 105372068 | ENSG00000267202 | 0          | NA          | NA         | NA         | NA         |            |
| NA        | ENSG00000267203 | 0.51374668 | 0.01451405  | 0.38305128 | 0.74777915 | NA         | SNRPGP4    |
| 101927411 | ENSG00000267204 | 0          | NA          | NA         | NA         | NA         | LINC01782  |
| NA        | ENSG00000267205 | 0.18922458 | 0.01954053  | 0.38488496 | 0.78225479 | NA         |            |
| 158062    | ENSG00000267206 | 0          | NA          | NA         | NA         | NA         | LCN6       |
| NA        | ENSG00000267207 | 0          | NA          | NA         | NA         | NA         |            |
| NA        | ENSG00000267209 | 0          | NA          | NA         | NA         | NA         | LINC01897  |
| NA        | ENSG00000267211 | 0          | NA          | NA         | NA         | NA         |            |
| NA        | ENSG00000267212 | 0.55305266 | 0.03294389  | 0.38623895 | 0.45140979 | NA         |            |
| 400684    | ENSG00000267213 | 12.1609286 | -0.01463726 | 0.33266065 | 0.92840553 | 0.9700635  | DPY19L3-DT |
| NA        | ENSG00000267214 | 0          | NA          | NA         | NA         | NA         |            |
| NA        | ENSG00000267215 | 0          | NA          | NA         | NA         | NA         |            |
| 108903150 | ENSG00000267216 | 96.616671  | 0.63940052  | 0.29334393 | 0.00611333 | 0.02755302 |            |
| NA        | ENSG00000267218 | 0          | NA          | NA         | NA         | NA         |            |
| NA        | ENSG00000267219 | 0.95728261 | 0.00488865  | 0.38008509 | 0.93562436 | NA         |            |
| NA        | ENSG00000267220 | 0          | NA          | NA         | NA         | NA         |            |
| 110806298 | ENSG00000267221 | 113.154781 | -0.02341764 | 0.19855644 | 0.89012942 | 0.95223594 | C17orf113  |
| NA        | ENSG00000267222 | 0.31818366 | 0.00217111  | 0.38337786 | 0.95704065 | NA         |            |
| NA        | ENSG00000267223 | 0          | NA          | NA         | NA         | NA         |            |
| NA        | ENSG00000267224 | 0.173733   | 0.01914545  | 0.38484597 | 0.78225479 | NA         |            |
| NA        | ENSG00000267225 | 0.67471005 | -0.02148657 | 0.38311829 | 0.65238861 | NA         | WDR7-OT1   |
| 101927322 | ENSG00000267226 | 4.95392937 | -0.00818972 | 0.36905623 | 0.93553791 | 0.97325384 | MALT1-AS1  |
| NA        | ENSG00000267227 | 0          | NA          | NA         | NA         | NA         |            |
| NA        | ENSG00000267228 | 0.60279648 | -0.02752712 | 0.38588313 | 0.49730371 | NA         |            |
| NA        | ENSG00000267231 | 0.50222787 | 0.0121993   | 0.38342461 | 0.77025939 | NA         |            |
| NA        | ENSG00000267232 | 0          | NA          | NA         | NA         | NA         |            |
| NA        | ENSG00000267233 | 0          | NA          | NA         | NA         | NA         | HNRNPA3P16 |
| NA        | ENSG00000267234 | 0          | NA          | NA         | NA         | NA         |            |
| NA        | ENSG00000267235 | 0          | NA          | NA         | NA         | NA         | ZNF861P    |
| NA        | ENSG00000267238 | 0          | NA          | NA         | NA         | NA         |            |
| NA        | ENSG00000267239 | 0          | NA          | NA         | NA         | NA         |            |
| NA        | ENSG00000267240 | 0          | NA          | NA         | NA         | NA         |            |
| NA        | ENSG00000267241 | 0          | NA          | NA         | NA         | NA         | CYP4F10P   |
| NA        | ENSG00000267243 | 0          | NA          | NA         | NA         | NA         |            |
| NA        | ENSG00000267244 | 55.0490259 | 0.14266681  | 0.26274406 | 0.46756972 | 0.69041597 |            |
| NA        | ENSG00000267245 | 0          | NA          | NA         | NA         | NA         |            |
| NA        | ENSG00000267246 | 3.79179913 | -0.06095086 | 0.37481445 | 0.57147856 | 0.77166993 |            |
| NA        | ENSG00000267247 | 0          | NA          | NA         | NA         | NA         |            |

|           |                 |            |             |            |            |            |             |
|-----------|-----------------|------------|-------------|------------|------------|------------|-------------|
| NA        | ENSG00000267248 | 52.0855762 | 0.36665049  | 0.32620387 | 0.10301507 | 0.25491514 |             |
| NA        | ENSG00000267249 | 8.63849464 | 0.08240533  | 0.35626508 | 0.59324742 | 0.78711401 |             |
| NA        | ENSG00000267250 | 0          | NA          | NA         | NA         | NA         |             |
| NA        | ENSG00000267251 | 7.56764913 | -0.0714471  | 0.35872273 | 0.62142869 | 0.80672374 |             |
| 101927433 | ENSG00000267252 | 0          | NA          | NA         | NA         | NA         | LINC01255   |
| NA        | ENSG00000267253 | 2.9621078  | 0.03884662  | 0.37207352 | 0.71161388 | 0.86140448 | WHSC1L2P    |
| 284408    | ENSG00000267254 | 124.910089 | 0.09682828  | 0.19239398 | 0.56208923 | 0.76518802 | ZNF790-AS1  |
| NA        | ENSG00000267255 | 2.64256852 | -0.05734396 | 0.38036023 | 0.51670294 | 0.73078033 |             |
| NA        | ENSG00000267257 | 0          | NA          | NA         | NA         | NA         |             |
| NA        | ENSG00000267258 | 0          | NA          | NA         | NA         | NA         | PPIAP58     |
| NA        | ENSG00000267259 | 0          | NA          | NA         | NA         | NA         | ERVE-1      |
| 728485    | ENSG00000267260 | 60.6358439 | 0.07159149  | 0.23766633 | 0.70388513 | 0.85759525 |             |
| NA        | ENSG00000267261 | 0.33471731 | 0.02354391  | 0.38534154 | 0.62842204 | NA         |             |
| NA        | ENSG00000267262 | 0          | NA          | NA         | NA         | NA         |             |
| NA        | ENSG00000267263 | 1.02884576 | 0.03382025  | 0.38152724 | 0.60146749 | NA         |             |
| NA        | ENSG00000267264 | 3.44791918 | -0.02449673 | 0.37043962 | 0.81233876 | 0.91499949 |             |
| NA        | ENSG00000267265 | 10.514251  | 0.14723281  | 0.36944965 | 0.3831214  | 0.61240159 | GP6-AS1     |
| NA        | ENSG00000267269 | 0          | NA          | NA         | NA         | NA         |             |
| 100130522 | ENSG00000267270 | 39.6420725 | 0.09737339  | 0.28413569 | 0.61952335 | 0.80561992 | PARD6G-AS1  |
| NA        | ENSG00000267271 | 0          | NA          | NA         | NA         | NA         |             |
| 339524    | ENSG00000267272 | 1.96270013 | 0.06991892  | 0.38772765 | 0.32371776 | NA         | LINC01140   |
| NA        | ENSG00000267273 | 0          | NA          | NA         | NA         | NA         |             |
| NA        | ENSG00000267274 | 1.3917668  | 0.0370297   | 0.38052871 | 0.60822963 | NA         |             |
| NA        | ENSG00000267275 | 0          | NA          | NA         | NA         | NA         | KLF2-DT     |
| NA        | ENSG00000267277 | 10.1689087 | -0.15968558 | 0.37628331 | 0.34201865 | 0.57202996 |             |
| NA        | ENSG00000267278 | 64.1134956 | 0.79659472  | 0.34872126 | 0.00306236 | 0.01540108 | MAP3K14-AS1 |
| NA        | ENSG00000267279 | 0          | NA          | NA         | NA         | NA         |             |
| 103689912 | ENSG00000267280 | 192.335144 | 0.34789031  | 0.1672994  | 0.02113695 | 0.0761775  | TBX2-AS1    |
| 114108587 | ENSG00000267281 | 0.94612289 | 0.04084733  | 0.38743659 | 0.29648824 | NA         | ATF7-NPFF   |
| NA        | ENSG00000267282 | 0.18922458 | 0.01954053  | 0.38488496 | 0.78225479 | NA         |             |
| NA        | ENSG00000267283 | 4.23049089 | 0.01598118  | 0.37198699 | 0.872202   | 0.94414841 |             |
| NA        | ENSG00000267284 | 1.07879399 | 0.01220855  | 0.38120228 | 0.80279983 | NA         |             |
| NA        | ENSG00000267285 | 0          | NA          | NA         | NA         | NA         |             |
| NA        | ENSG00000267286 | 0          | NA          | NA         | NA         | NA         |             |
| NA        | ENSG00000267287 | 0.34186639 | 0.00190967  | 0.38337345 | 0.94714888 | NA         |             |
| 105371795 | ENSG00000267288 | 3.15316618 | 0.09123843  | 0.39327504 | 0.24275103 | 0.461055   |             |
| NA        | ENSG00000267289 | 0.65487154 | 0.00370978  | 0.38193755 | 0.93653739 | NA         | PIN1-DT     |
| 105372397 | ENSG00000267291 | 0.50676775 | 0.03070061  | 0.38601223 | 0.4841112  | NA         | MAP4K1-AS1  |

|           |                 |            |             |            |            |            |            |
|-----------|-----------------|------------|-------------|------------|------------|------------|------------|
| NA        | ENSG00000267292 | 0.16735865 | 0.01897177  | 0.38482933 | 0.78225479 | NA         |            |
| NA        | ENSG00000267293 | 3.59125728 | -0.04853806 | 0.37496308 | 0.62761928 | 0.81099169 |            |
| NA        | ENSG00000267295 | 0          | NA          | NA         | NA         | NA         |            |
| 80054     | ENSG00000267296 | 12.8820089 | 0.03828906  | 0.33093798 | 0.82519115 | 0.92064289 | CEBPA-DT   |
| NA        | ENSG00000267298 | 0.15069912 | -0.01848503 | 0.38480575 | 0.84537521 | NA         |            |
| NA        | ENSG00000267299 | 0          | NA          | NA         | NA         | NA         |            |
| NA        | ENSG00000267301 | 0          | NA          | NA         | NA         | NA         | RPL23AP77  |
| 101927755 | ENSG00000267302 | 20.2378176 | -0.55084512 | 0.57298097 | 0.04379436 | 0.13435598 | RNFT1-DT   |
| NA        | ENSG00000267303 | 0          | NA          | NA         | NA         | NA         |            |
| NA        | ENSG00000267304 | 0          | NA          | NA         | NA         | NA         |            |
| NA        | ENSG00000267305 | 0          | NA          | NA         | NA         | NA         |            |
| NA        | ENSG00000267308 | 0          | NA          | NA         | NA         | NA         | LINC01764  |
| 728752    | ENSG00000267309 | 14.4901797 | 0.04448061  | 0.3292055  | 0.79962535 | 0.90810343 | ZNF566-AS1 |
| NA        | ENSG00000267310 | 0          | NA          | NA         | NA         | NA         | OR4G1P     |
| NA        | ENSG00000267311 | 0.68163839 | 0.01950434  | 0.38352739 | 0.62831014 | NA         |            |
| NA        | ENSG00000267312 | 0          | NA          | NA         | NA         | NA         |            |
| 641516    | ENSG00000267313 | 0.29863895 | -0.02292439 | 0.3852726  | 0.68753245 | NA         |            |
| NA        | ENSG00000267314 | 1.98826531 | 0.02584078  | 0.37788791 | 0.74203075 | NA         |            |
| NA        | ENSG00000267315 | 0          | NA          | NA         | NA         | NA         | UFM1P2     |
| NA        | ENSG00000267316 | 0          | NA          | NA         | NA         | NA         |            |
| NA        | ENSG00000267317 | 44.3431936 | 1.07950591  | 0.41061578 | 0.00074915 | 0.00459304 |            |
| NA        | ENSG00000267318 | 0.56767373 | 0.02627943  | 0.38574813 | 0.49686938 | NA         |            |
| NA        | ENSG00000267319 | 0          | NA          | NA         | NA         | NA         | SELENOKP1  |
| NA        | ENSG00000267320 | 0          | NA          | NA         | NA         | NA         |            |
| NA        | ENSG00000267321 | 83.3291644 | 0.14781888  | 0.22122925 | 0.41760644 | 0.64376444 | SNHG30     |
| 677769    | ENSG00000267322 | 9.75007474 | -0.17279536 | 0.38774417 | 0.29413057 | 0.52028802 | SNHG22     |
| 103091864 | ENSG00000267322 | 9.75007474 | -0.17279536 | 0.38774417 | 0.29413057 | 0.52028802 | SNHG22     |
| NA        | ENSG00000267323 | 1.65694908 | 0.05047814  | 0.38316411 | 0.47913953 | NA         | SLC25A1P5  |
| NA        | ENSG00000267324 | 0          | NA          | NA         | NA         | NA         |            |
| NA        | ENSG00000267325 | 52.4826693 | -0.18516854 | 0.28165108 | 0.35667731 | 0.58672398 | LINC01415  |
| 107985164 | ENSG00000267327 | 4.21682478 | -0.05234685 | 0.37472192 | 0.58773525 | 0.78270018 |            |
| NA        | ENSG00000267328 | 0          | NA          | NA         | NA         | NA         |            |
| NA        | ENSG00000267332 | 0          | NA          | NA         | NA         | NA         | BOLA3P2    |
| NA        | ENSG00000267333 | 0          | NA          | NA         | NA         | NA         | ASNSP6     |
| NA        | ENSG00000267334 | 0.15069912 | -0.01848503 | 0.38480575 | 0.84537521 | NA         | KIF18B-DT  |
| NA        | ENSG00000267335 | 0          | NA          | NA         | NA         | NA         |            |
| NA        | ENSG00000267336 | 0          | NA          | NA         | NA         | NA         | EIF4A2P1   |
| 101927921 | ENSG00000267337 | 0          | NA          | NA         | NA         | NA         | LINC01478  |

|           |                 |            |             |            |            |            |            |
|-----------|-----------------|------------|-------------|------------|------------|------------|------------|
| NA        | ENSG00000267338 | 0          | NA          | NA         | NA         | NA         |            |
| 148145    | ENSG00000267339 | 0          | NA          | NA         | NA         | NA         | LINC00906  |
| NA        | ENSG00000267340 | 0.6450451  | 0.00211172  | 0.38193603 | 0.96307063 | NA         |            |
| NA        | ENSG00000267341 | 0          | NA          | NA         | NA         | NA         |            |
| NA        | ENSG00000267342 | 11.7755989 | 0.08592195  | 0.34761149 | 0.60394823 | 0.7941631  |            |
| NA        | ENSG00000267343 | 13.3003836 | -0.18585715 | 0.40811362 | 0.22270903 | 0.43579714 | ZNF833P    |
| NA        | ENSG00000267344 | 0.173733   | 0.01914545  | 0.38484597 | 0.78225479 | NA         |            |
| NA        | ENSG00000267345 | 2.90194432 | 0.05808419  | 0.37532092 | 0.58119988 | 0.77843824 |            |
| NA        | ENSG00000267346 | 0          | NA          | NA         | NA         | NA         | EIF5AP3    |
| NA        | ENSG00000267348 | 31.2730103 | 0.17330119  | 0.31107921 | 0.3897216  | 0.61887921 | GEMIN7-AS1 |
| NA        | ENSG00000267349 | 0          | NA          | NA         | NA         | NA         |            |
| NA        | ENSG00000267352 | 0          | NA          | NA         | NA         | NA         | SH3GL1P3   |
| NA        | ENSG00000267353 | 6.40241097 | 0.02179702  | 0.35493657 | 0.87746186 | 0.94578953 |            |
| NA        | ENSG00000267354 | 0          | NA          | NA         | NA         | NA         |            |
| NA        | ENSG00000267355 | 0          | NA          | NA         | NA         | NA         | RPL9P29    |
| NA        | ENSG00000267356 | 0.49678548 | 0.01151436  | 0.38338942 | 0.78076946 | NA         |            |
| NA        | ENSG00000267359 | 0          | NA          | NA         | NA         | NA         |            |
| NA        | ENSG00000267360 | 1.99126225 | -0.02894079 | 0.37766472 | 0.71284523 | NA         |            |
| NA        | ENSG00000267361 | 0          | NA          | NA         | NA         | NA         | SEC24AP1   |
| NA        | ENSG00000267363 | 0          | NA          | NA         | NA         | NA         |            |
| NA        | ENSG00000267364 | 0          | NA          | NA         | NA         | NA         |            |
| 400617    | ENSG00000267365 | 4.09610554 | 0.27297111  | 0.51859336 | 0.02992481 | 0.10010254 | KCNJ2-AS1  |
| NA        | ENSG00000267366 | 0.49683742 | -0.01007664 | 0.38283119 | 0.82993074 | NA         |            |
| 100134938 | ENSG00000267368 | 619.890367 | 0.29745927  | 0.10915266 | 0.00437934 | 0.02084601 | UPK3BL1    |
| NA        | ENSG00000267369 | 0          | NA          | NA         | NA         | NA         | TAF5LP1    |
| NA        | ENSG00000267370 | 6.54989977 | 0.01439094  | 0.35892854 | 0.91446112 | 0.96381793 |            |
| NA        | ENSG00000267371 | 0          | NA          | NA         | NA         | NA         |            |
| NA        | ENSG00000267372 | 12.5910748 | 0.26619481  | 0.43315805 | 0.16175375 | 0.35019582 |            |
| NA        | ENSG00000267373 | 0          | NA          | NA         | NA         | NA         |            |
| 647946    | ENSG00000267374 | 0          | NA          | NA         | NA         | NA         | MIR924HG   |
| NA        | ENSG00000267375 | 0          | NA          | NA         | NA         | NA         |            |
| NA        | ENSG00000267376 | 0          | NA          | NA         | NA         | NA         | ATP5MGP6   |
| NA        | ENSG00000267378 | 0          | NA          | NA         | NA         | NA         |            |
| NA        | ENSG00000267379 | 0          | NA          | NA         | NA         | NA         |            |
| NA        | ENSG00000267382 | 0          | NA          | NA         | NA         | NA         |            |
| NA        | ENSG00000267383 | 100.129504 | -0.03921944 | 0.20759324 | 0.82107583 | 0.91847813 |            |
| NA        | ENSG00000267384 | 0          | NA          | NA         | NA         | NA         | SMCO4P1    |
| NA        | ENSG00000267385 | 68.7378407 | 0.69983117  | 0.29104851 | 0.00298946 | 0.0150803  |            |

|           |                 |            |             |            |            |            |             |
|-----------|-----------------|------------|-------------|------------|------------|------------|-------------|
| NA        | ENSG00000267387 | 2.12646039 | -0.01697335 | 0.37719441 | 0.8256285  | NA         |             |
| NA        | ENSG00000267388 | 0.72250548 | 0.02621022  | 0.38348308 | 0.56361255 | NA         |             |
| NA        | ENSG00000267389 | 0          | NA          | NA         | NA         | NA         |             |
| NA        | ENSG00000267390 | 30.8444887 | 0.07724904  | 0.29669942 | 0.68974142 | 0.84943947 | KDSR-DT     |
| 112441433 | ENSG00000267391 | 0          | NA          | NA         | NA         | NA         | MIR122HG    |
| NA        | ENSG00000267392 | 0          | NA          | NA         | NA         | NA         | CYP4F9P     |
| NA        | ENSG00000267393 | 0          | NA          | NA         | NA         | NA         |             |
| NA        | ENSG00000267394 | 0.86897338 | 0.04907744  | 0.38851096 | 0.26791962 | NA         | ATXN7L3-AS1 |
| 109729182 | ENSG00000267395 | 4.14832537 | 0.05848485  | 0.37080002 | 0.61501658 | 0.80239693 | DM1-AS      |
| NA        | ENSG00000267396 | 1.51379662 | 0.05967809  | 0.39089786 | 0.14517442 | NA         |             |
| NA        | ENSG00000267397 | 16.2095727 | -0.2753769  | 0.40974023 | 0.1774163  | 0.37244095 |             |
| NA        | ENSG00000267398 | 0.68092595 | 0.00528148  | 0.38247995 | 0.90175833 | NA         |             |
| NA        | ENSG00000267399 | 0          | NA          | NA         | NA         | NA         |             |
| NA        | ENSG00000267400 | 0          | NA          | NA         | NA         | NA         |             |
| NA        | ENSG00000267401 | 0          | NA          | NA         | NA         | NA         |             |
| NA        | ENSG00000267402 | 0          | NA          | NA         | NA         | NA         | TCF4-AS2    |
| NA        | ENSG00000267404 | 0          | NA          | NA         | NA         | NA         |             |
| NA        | ENSG00000267405 | 0.30139824 | -0.02296476 | 0.38527817 | 0.68536535 | NA         |             |
| NA        | ENSG00000267406 | 0          | NA          | NA         | NA         | NA         |             |
| 105372360 | ENSG00000267407 | 0          | NA          | NA         | NA         | NA         | LINC02841   |
| NA        | ENSG00000267408 | 0          | NA          | NA         | NA         | NA         |             |
| NA        | ENSG00000267409 | 0          | NA          | NA         | NA         | NA         |             |
| NA        | ENSG00000267412 | 0.15069912 | -0.01848503 | 0.38480575 | 0.84537521 | NA         |             |
| NA        | ENSG00000267413 | 1.15414712 | -0.03445336 | 0.3820578  | 0.58276066 | NA         | LINC01901   |
| 101927943 | ENSG00000267414 | 21.7552684 | 0.33629781  | 0.41277313 | 0.13423309 | 0.30845623 | SETBP1-DT   |
| NA        | ENSG00000267415 | 0          | NA          | NA         | NA         | NA         |             |
| 105371849 | ENSG00000267416 | 1.98743125 | 0.05946464  | 0.3822235  | 0.4773911  | NA         | HEATR6-DT   |
| NA        | ENSG00000267417 | 0.173124   | -0.01911262 | 0.38486262 | 0.84537521 | NA         |             |
| NA        | ENSG00000267418 | 0          | NA          | NA         | NA         | NA         | ELOCP29     |
| NA        | ENSG00000267419 | 13.7989125 | 0.02776367  | 0.33494518 | 0.86949367 | 0.94307645 | ZNF56       |
| NA        | ENSG00000267420 | 0          | NA          | NA         | NA         | NA         |             |
| 101928982 | ENSG00000267421 | 1.84047324 | 0.05654989  | 0.38217482 | 0.48293024 | NA         | ZFP28-DT    |
| NA        | ENSG00000267422 | 3.5552953  | 0.08686132  | 0.38477453 | 0.38907116 | 0.61827567 |             |
| NA        | ENSG00000267423 | 0          | NA          | NA         | NA         | NA         |             |
| NA        | ENSG00000267424 | 16.1315322 | 0.02114341  | 0.32836191 | 0.90412007 | 0.95807825 |             |
| 105371994 | ENSG00000267425 | 0          | NA          | NA         | NA         | NA         | LINC01928   |
| NA        | ENSG00000267426 | 32.7568877 | 0.50244207  | 0.43749911 | 0.05206258 | 0.15368569 |             |
| NA        | ENSG00000267428 | 0          | NA          | NA         | NA         | NA         |             |

|           |                 |            |             |            |            |            |            |
|-----------|-----------------|------------|-------------|------------|------------|------------|------------|
| NA        | ENSG00000267429 | 0.70451653 | 0.05125054  | 0.38859749 | 0.2959488  | NA         |            |
| NA        | ENSG00000267430 | 0          | NA          | NA         | NA         | NA         |            |
| NA        | ENSG00000267432 | 0.173733   | 0.01914545  | 0.38484597 | 0.78225479 | NA         | DNAH17-AS1 |
| NA        | ENSG00000267433 | 0          | NA          | NA         | NA         | NA         |            |
| NA        | ENSG00000267436 | 0          | NA          | NA         | NA         | NA         |            |
| NA        | ENSG00000267437 | 0          | NA          | NA         | NA         | NA         |            |
| NA        | ENSG00000267439 | 8.03290355 | 0.18814077  | 0.40559549 | 0.233549   | 0.45043378 |            |
| NA        | ENSG00000267440 | 0          | NA          | NA         | NA         | NA         | LINC02594  |
| NA        | ENSG00000267441 | 0          | NA          | NA         | NA         | NA         |            |
| NA        | ENSG00000267443 | 0.16735865 | 0.01897177  | 0.38482933 | 0.78225479 | NA         |            |
| NA        | ENSG00000267444 | 0          | NA          | NA         | NA         | NA         | SMUG1P1    |
| NA        | ENSG00000267446 | 0          | NA          | NA         | NA         | NA         |            |
| NA        | ENSG00000267448 | 0.16735865 | 0.01897177  | 0.38482933 | 0.78225479 | NA         |            |
| NA        | ENSG00000267449 | 0          | NA          | NA         | NA         | NA         |            |
| NA        | ENSG00000267450 | 0          | NA          | NA         | NA         | NA         | OR1AB1P    |
| 440446    | ENSG00000267452 | 0          | NA          | NA         | NA         | NA         | LINC02073  |
| 105371828 | ENSG00000267452 | 0          | NA          | NA         | NA         | NA         | LINC02073  |
| NA        | ENSG00000267453 | 0          | NA          | NA         | NA         | NA         | CLEC4O     |
| 386758    | ENSG00000267454 | 32.1489009 | -0.08801533 | 0.29873679 | 0.64575796 | 0.82359463 | ZNF582-DT  |
| NA        | ENSG00000267455 | 0          | NA          | NA         | NA         | NA         |            |
| NA        | ENSG00000267456 | 0.18922458 | 0.01954053  | 0.38488496 | 0.78225479 | NA         |            |
| NA        | ENSG00000267457 | 0.64508116 | 0.00174044  | 0.38248617 | 0.96600266 | NA         |            |
| NA        | ENSG00000267458 | 0          | NA          | NA         | NA         | NA         |            |
| NA        | ENSG00000267461 | 0          | NA          | NA         | NA         | NA         |            |
| NA        | ENSG00000267462 | 0.173733   | 0.01914545  | 0.38484597 | 0.78225479 | NA         |            |
| NA        | ENSG00000267463 | 0          | NA          | NA         | NA         | NA         | UBE2V2P2   |
| 100507527 | ENSG00000267465 | 0.58393576 | -0.01068524 | 0.38305877 | 0.78832881 | NA         |            |
| NA        | ENSG00000267466 | 0          | NA          | NA         | NA         | NA         |            |
| 346       | ENSG00000267467 | 0          | NA          | NA         | NA         | NA         | APOC4      |
| NA        | ENSG00000267469 | 0          | NA          | NA         | NA         | NA         |            |
| 100507433 | ENSG00000267470 | 147.5705   | -0.35274695 | 0.21283586 | 0.04981826 | 0.14857274 | ZNF571-AS1 |
| NA        | ENSG00000267471 | 0          | NA          | NA         | NA         | NA         |            |
| NA        | ENSG00000267472 | 0.16735865 | 0.01897177  | 0.38482933 | 0.78225479 | NA         | ARHGAP27P2 |
| NA        | ENSG00000267474 | 0.68628865 | 0.00381243  | 0.38128634 | 0.94062631 | NA         |            |
| NA        | ENSG00000267475 | 6.53300748 | -0.09146564 | 0.365336   | 0.52619485 | 0.73815356 | NUDT19-DT  |
| NA        | ENSG00000267476 | 0          | NA          | NA         | NA         | NA         |            |
| NA        | ENSG00000267477 | 0.173124   | -0.01911262 | 0.38486262 | 0.84537521 | NA         |            |
| NA        | ENSG00000267478 | 0.173124   | -0.01911262 | 0.38486262 | 0.84537521 | NA         |            |

|           |                 |            |             |            |            |            |            |
|-----------|-----------------|------------|-------------|------------|------------|------------|------------|
| NA        | ENSG00000267480 | 0          | NA          | NA         | NA         | NA         |            |
| NA        | ENSG00000267481 | 22.4690167 | -0.10237925 | 0.31627715 | 0.58790523 | 0.78282146 |            |
| NA        | ENSG00000267482 | 0          | NA          | NA         | NA         | NA         |            |
| NA        | ENSG00000267484 | 0          | NA          | NA         | NA         | NA         |            |
| NA        | ENSG00000267486 | 0          | NA          | NA         | NA         | NA         | GLUD1P4    |
| NA        | ENSG00000267487 | 0          | NA          | NA         | NA         | NA         |            |
| NA        | ENSG00000267489 | 0          | NA          | NA         | NA         | NA         | LINC01837  |
| NA        | ENSG00000267490 | 0          | NA          | NA         | NA         | NA         |            |
| NA        | ENSG00000267491 | 1.4635931  | 0.02025014  | 0.37812837 | 0.78766206 | NA         |            |
| NA        | ENSG00000267492 | 0          | NA          | NA         | NA         | NA         |            |
| 148046    | ENSG00000267493 | 40.9904539 | 0.05125773  | 0.26738662 | 0.79220067 | 0.90499209 | CIRBP-AS1  |
| 23591     | ENSG00000267496 | 0          | NA          | NA         | NA         | NA         | FAM215A    |
| NA        | ENSG00000267497 | 0          | NA          | NA         | NA         | NA         | NFE2L3P1   |
| 105372352 | ENSG00000267498 | 1.64624673 | 0.04160724  | 0.37930886 | 0.60302586 | NA         | UQCRFS1-DT |
| NA        | ENSG00000267500 | 51.0551774 | -0.42759986 | 0.34459614 | 0.06827878 | 0.18809373 | ZNF887P    |
| NA        | ENSG00000267501 | 0.33471731 | 0.02354391  | 0.38534154 | 0.62842204 | NA         |            |
| NA        | ENSG00000267503 | 0.34693639 | 0.0004873   | 0.38336264 | 0.96384722 | NA         |            |
| NA        | ENSG00000267504 | 0.15069912 | -0.01848503 | 0.38480575 | 0.84537521 | NA         |            |
| NA        | ENSG00000267505 | 0.15069912 | -0.01848503 | 0.38480575 | 0.84537521 | NA         |            |
| NA        | ENSG00000267506 | 0          | NA          | NA         | NA         | NA         |            |
| NA        | ENSG00000267507 | 0.98347738 | -0.04709711 | 0.38499649 | 0.39784321 | NA         |            |
| 26974     | ENSG00000267508 | 125.226948 | -0.38183564 | 0.23329694 | 0.04655557 | 0.14095263 | ZNF285     |
| NA        | ENSG00000267509 | 0          | NA          | NA         | NA         | NA         |            |
| NA        | ENSG00000267510 | 0          | NA          | NA         | NA         | NA         |            |
| NA        | ENSG00000267511 | 0          | NA          | NA         | NA         | NA         | ADAD1P2    |
| NA        | ENSG00000267512 | 0          | NA          | NA         | NA         | NA         |            |
| NA        | ENSG00000267513 | 0          | NA          | NA         | NA         | NA         | HMG1P31    |
| NA        | ENSG00000267515 | 0.97059251 | -0.01650777 | 0.38154416 | 0.762044   | NA         |            |
| NA        | ENSG00000267517 | 0          | NA          | NA         | NA         | NA         | LINC01855  |
| NA        | ENSG00000267518 | 0          | NA          | NA         | NA         | NA         |            |
| NA        | ENSG00000267519 | 115.311876 | 0.155217    | 0.19799306 | 0.361882   | 0.59157216 | MIR23AHG   |
| NA        | ENSG00000267520 | 45.0600865 | -0.01579479 | 0.37366386 | 0.85630756 | 0.93595581 |            |
| NA        | ENSG00000267521 | 4.35616662 | 0.02209642  | 0.36371812 | 0.85711362 | 0.93609679 |            |
| 101928886 | ENSG00000267522 | 1.1153451  | -0.00648004 | 0.37948226 | 0.91940017 | NA         | LINC01864  |
| NA        | ENSG00000267523 | 39.5195595 | -0.00656213 | 0.27576823 | 0.97096214 | 0.98911805 |            |
| NA        | ENSG00000267524 | 0          | NA          | NA         | NA         | NA         | RPSAP57    |
| NA        | ENSG00000267526 | 2.29268416 | 0.13519899  | 0.41123198 | 0.116427   | NA         |            |
| NA        | ENSG00000267529 | 1.18739926 | -0.07595195 | 0.39391815 | 0.15323777 | NA         |            |



|           |                 |            |             |            |            |            |             |
|-----------|-----------------|------------|-------------|------------|------------|------------|-------------|
| 107985343 | ENSG00000267530 | 0.56443281 | 0.02664994  | 0.38423507 | 0.59002607 | NA         | LINC01836   |
| 100506755 | ENSG00000267532 | 33.0392266 | 0.21372037  | 0.33283214 | 0.29912937 | 0.52612826 | MIR497HG    |
| NA        | ENSG00000267533 | 0.32366676 | -0.02327173 | 0.38532115 | 0.66869913 | NA         |             |
| 9294      | ENSG00000267534 | 310.636004 | -0.26974345 | 0.13126027 | 0.02813463 | 0.09543357 | S1PR2       |
| 283994    | ENSG00000267535 | 0          | NA          | NA         | NA         | NA         | LINC00868   |
| NA        | ENSG00000267537 | 0          | NA          | NA         | NA         | NA         |             |
| NA        | ENSG00000267541 | 0          | NA          | NA         | NA         | NA         | MTCO2P2     |
| NA        | ENSG00000267543 | 23.5138123 | -0.46328417 | 0.47772402 | 0.06624311 | 0.18414786 |             |
| 117751740 | ENSG00000267544 | 3.29884098 | -0.11744659 | 0.39376988 | 0.28117783 | 0.50594669 | HIKESHIP2   |
| NA        | ENSG00000267546 | 43.8543078 | -0.58641497 | 0.36651115 | 0.02227587 | 0.07940231 |             |
| NA        | ENSG00000267547 | 0          | NA          | NA         | NA         | NA         |             |
| NA        | ENSG00000267549 | 3.51550285 | -0.05007966 | 0.37325539 | 0.63659743 | 0.81722218 | ZSCAN5A-AS1 |
| NA        | ENSG00000267550 | 0.16735865 | 0.01897177  | 0.38482933 | 0.78225479 | NA         |             |
| 100996351 | ENSG00000267551 | 0          | NA          | NA         | NA         | NA         | GNA15-DT    |
| NA        | ENSG00000267552 | 0.52142703 | 0.01578456  | 0.38312211 | 0.7184063  | NA         |             |
| NA        | ENSG00000267554 | 0          | NA          | NA         | NA         | NA         |             |
| NA        | ENSG00000267555 | 0          | NA          | NA         | NA         | NA         |             |
| NA        | ENSG00000267557 | 0          | NA          | NA         | NA         | NA         |             |
| NA        | ENSG00000267558 | 0          | NA          | NA         | NA         | NA         |             |
| NA        | ENSG00000267559 | 0          | NA          | NA         | NA         | NA         |             |
| NA        | ENSG00000267560 | 1.54502174 | -0.0642699  | 0.38596422 | 0.37690121 | NA         |             |
| NA        | ENSG00000267561 | 3.52564368 | 0.05745233  | 0.37301973 | 0.60629287 | 0.79607018 |             |
| NA        | ENSG00000267563 | 0          | NA          | NA         | NA         | NA         |             |
| NA        | ENSG00000267564 | 0          | NA          | NA         | NA         | NA         |             |
| NA        | ENSG00000267565 | 12.9302817 | -0.09821005 | 0.34992437 | 0.55360311 | 0.75978734 |             |
| NA        | ENSG00000267567 | 0          | NA          | NA         | NA         | NA         |             |
| 105371899 | ENSG00000267568 | 6.43254026 | 0.00798178  | 0.36179794 | 0.94986452 | 0.97933922 |             |
| NA        | ENSG00000267570 | 0          | NA          | NA         | NA         | NA         | STK25P1     |
| NA        | ENSG00000267571 | 11.5379396 | 0.11379086  | 0.35283106 | 0.50289491 | 0.7197688  |             |
| NA        | ENSG00000267573 | 0          | NA          | NA         | NA         | NA         | KRT8P5      |
| NA        | ENSG00000267574 | 0          | NA          | NA         | NA         | NA         |             |
| 101927151 | ENSG00000267575 | 162.220541 | -0.2432156  | 0.18252807 | 0.12983351 | 0.30148605 |             |
| NA        | ENSG00000267576 | 0          | NA          | NA         | NA         | NA         |             |
| NA        | ENSG00000267577 | 1.59881528 | -0.04366551 | 0.38052704 | 0.57083689 | NA         | DNAAF3-AS1  |
| NA        | ENSG00000267579 | 0          | NA          | NA         | NA         | NA         |             |
| NA        | ENSG00000267580 | 0          | NA          | NA         | NA         | NA         |             |
| NA        | ENSG00000267581 | 1.06136183 | 0.0030735   | 0.38073773 | 0.95626409 | NA         |             |
| NA        | ENSG00000267582 | 1.56684671 | 0.02026327  | 0.37882927 | 0.77666406 | NA         |             |

|           |                 |            |             |            |            |            |           |
|-----------|-----------------|------------|-------------|------------|------------|------------|-----------|
| NA        | ENSG00000267583 | 0.41390197 | 0.01248493  | 0.38383973 | 0.85952023 | NA         |           |
| NA        | ENSG00000267585 | 0          | NA          | NA         | NA         | NA         |           |
| 284260    | ENSG00000267586 | 6.44263006 | -0.03975053 | 0.36168039 | 0.75474593 | 0.88583526 | LINC00907 |
| NA        | ENSG00000267587 | 0          | NA          | NA         | NA         | NA         |           |
| NA        | ENSG00000267589 | 0          | NA          | NA         | NA         | NA         |           |
| NA        | ENSG00000267590 | 2.50432293 | -0.00294629 | 0.37059534 | 0.97503648 | NA         | NDUFA3P1  |
| NA        | ENSG00000267591 | 0          | NA          | NA         | NA         | NA         |           |
| NA        | ENSG00000267592 | 0.16735865 | 0.01897177  | 0.38482933 | 0.78225479 | NA         |           |
| 105372147 | ENSG00000267593 | 0          | NA          | NA         | NA         | NA         | LINC01926 |
| NA        | ENSG00000267594 | 0          | NA          | NA         | NA         | NA         | CYP4F24P  |
| NA        | ENSG00000267595 | 0          | NA          | NA         | NA         | NA         | BRCA1P1   |
| NA        | ENSG00000267597 | 0          | NA          | NA         | NA         | NA         | RPIAP1    |
| NA        | ENSG00000267598 | 1.335018   | 0.05238792  | 0.38632984 | 0.29987665 | NA         |           |
| NA        | ENSG00000267599 | 0          | NA          | NA         | NA         | NA         |           |
| NA        | ENSG00000267601 | 39.2666173 | 0.03811676  | 0.37749776 | 0.66525604 | 0.83470042 |           |
| 101928141 | ENSG00000267603 | 0          | NA          | NA         | NA         | NA         | LINC01028 |
| NA        | ENSG00000267604 | 0          | NA          | NA         | NA         | NA         |           |
| NA        | ENSG00000267605 | 21.3511489 | -0.22400746 | 0.35220223 | 0.27157935 | 0.49500544 |           |
| NA        | ENSG00000267606 | 0          | NA          | NA         | NA         | NA         |           |
| NA        | ENSG00000267607 | 0          | NA          | NA         | NA         | NA         |           |
| NA        | ENSG00000267609 | 0          | NA          | NA         | NA         | NA         | SNX33P1   |
| NA        | ENSG00000267610 | 0.89919673 | 0.03750749  | 0.38451354 | 0.43953745 | NA         |           |
| NA        | ENSG00000267611 | 0          | NA          | NA         | NA         | NA         |           |
| NA        | ENSG00000267612 | 0          | NA          | NA         | NA         | NA         |           |
| NA        | ENSG00000267614 | 0          | NA          | NA         | NA         | NA         |           |
| NA        | ENSG00000267615 | 0          | NA          | NA         | NA         | NA         |           |
| NA        | ENSG00000267617 | 0          | NA          | NA         | NA         | NA         |           |
| NA        | ENSG00000267618 | 0          | NA          | NA         | NA         | NA         |           |
| NA        | ENSG00000267620 | 0.14931947 | -0.01844332 | 0.38480212 | 0.84537521 | NA         |           |
| NA        | ENSG00000267623 | 0.173733   | 0.01914545  | 0.38484597 | 0.78225479 | NA         |           |
| NA        | ENSG00000267624 | 0.34624801 | -0.02356563 | 0.38536324 | 0.65270996 | NA         |           |
| NA        | ENSG00000267625 | 0          | NA          | NA         | NA         | NA         |           |
| NA        | ENSG00000267626 | 0          | NA          | NA         | NA         | NA         | HAUS5-DT  |
| NA        | ENSG00000267627 | 1.05219157 | -0.00806852 | 0.3800382  | 0.89444821 | NA         |           |
| NA        | ENSG00000267628 | 0          | NA          | NA         | NA         | NA         |           |
| NA        | ENSG00000267629 | 82.9503033 | 0.00077499  | 0.29787871 | 0.99946123 | 0.99966662 |           |
| NA        | ENSG00000267630 | 0          | NA          | NA         | NA         | NA         |           |
| 114335    | ENSG00000267631 | 0.51395691 | -0.01020451 | 0.38328037 | 0.81831971 | NA         | CGB1      |

|           |    |                 |            |             |            |            |            |           |
|-----------|----|-----------------|------------|-------------|------------|------------|------------|-----------|
|           | NA | ENSG00000267632 | 65.1336707 | -0.43945825 | 0.27568002 | 0.03997446 | 0.12529119 |           |
|           | NA | ENSG00000267633 | 1.30115332 | -0.01459416 | 0.38156978 | 0.78343839 | NA         |           |
|           | NA | ENSG00000267634 | 0.15069912 | -0.01848503 | 0.38480575 | 0.84537521 | NA         | RPL7L1P5  |
|           | NA | ENSG00000267636 | 0          | NA          | NA         | NA         | NA         |           |
|           | NA | ENSG00000267637 | 0.173733   | 0.01914545  | 0.38484597 | 0.78225479 | NA         |           |
| 105371789 | NA | ENSG00000267638 | 0          | NA          | NA         | NA         | NA         |           |
|           | NA | ENSG00000267640 | 86.5325083 | -0.04255206 | 0.29385759 | 0.81971188 | 0.91783304 |           |
|           | NA | ENSG00000267641 | 1.31726549 | -0.01985355 | 0.3787294  | 0.78104924 | NA         | BNIP3P16  |
|           | NA | ENSG00000267642 | 0          | NA          | NA         | NA         | NA         | ASXL3-DT  |
|           | NA | ENSG00000267643 | 0          | NA          | NA         | NA         | NA         |           |
|           | NA | ENSG00000267644 | 0.67895517 | -0.03862952 | 0.38691379 | 0.39545919 | NA         |           |
|           | NA | ENSG00000267645 | 169.028047 | 0.17644169  | 0.22675901 | 0.34032751 | 0.57056767 |           |
|           | NA | ENSG00000267646 | 0.74060991 | 0.0425843   | 0.38746693 | 0.33164242 | NA         |           |
|           | NA | ENSG00000267647 | 0          | NA          | NA         | NA         | NA         | MAP1LC3P  |
|           | NA | ENSG00000267648 | 0          | NA          | NA         | NA         | NA         |           |
|           | NA | ENSG00000267649 | 8.79781848 | -0.06461838 | 0.3529186  | 0.66935908 | 0.83727912 |           |
|           | NA | ENSG00000267650 | 0          | NA          | NA         | NA         | NA         |           |
|           | NA | ENSG00000267651 | 24.7725469 | -1.56909664 | 0.53178522 | 0.00019609 | 0.00139693 |           |
|           | NA | ENSG00000267652 | 0          | NA          | NA         | NA         | NA         | NPM1P1    |
|           | NA | ENSG00000267653 | 0          | NA          | NA         | NA         | NA         |           |
|           | NA | ENSG00000267655 | 3.60934055 | -0.05308034 | 0.37131799 | 0.63684218 | 0.81722218 |           |
|           | NA | ENSG00000267656 | 0          | NA          | NA         | NA         | NA         |           |
|           | NA | ENSG00000267658 | 0          | NA          | NA         | NA         | NA         | RAB5C-AS1 |
| 101928104 | NA | ENSG00000267659 | 0          | NA          | NA         | NA         | NA         | LINC01482 |
|           | NA | ENSG00000267661 | 0          | NA          | NA         | NA         | NA         |           |
|           | NA | ENSG00000267662 | 1.17160832 | 0.02275688  | 0.37948039 | 0.74264829 | NA         | TSHZ3-AS1 |
|           | NA | ENSG00000267663 | 0          | NA          | NA         | NA         | NA         | PPIAP56   |
|           | NA | ENSG00000267664 | 0          | NA          | NA         | NA         | NA         | RPL17P45  |
| 400622    | NA | ENSG00000267665 | 6.00962741 | 0.00536198  | 0.37309808 | 0.95070675 | 0.97972521 |           |
|           | NA | ENSG00000267666 | 12.9950382 | 0.22525831  | 0.38816524 | 0.24244944 | 0.46065857 |           |
|           | NA | ENSG00000267669 | 0          | NA          | NA         | NA         | NA         |           |
|           | NA | ENSG00000267670 | 0          | NA          | NA         | NA         | NA         |           |
|           | NA | ENSG00000267672 | 0.14931947 | -0.01844332 | 0.38480212 | 0.84537521 | NA         |           |
| 112812    | NA | ENSG00000267673 | 151.40129  | 0.05488489  | 0.19089715 | 0.74168244 | 0.87812748 | FDX2      |
|           | NA | ENSG00000267674 | 0          | NA          | NA         | NA         | NA         |           |
|           | NA | ENSG00000267675 | 0          | NA          | NA         | NA         | NA         |           |
|           | NA | ENSG00000267676 | 0.3630396  | 0.02389536  | 0.3853925  | 0.60992448 | NA         | THA1P     |
|           | NA | ENSG00000267677 | 0          | NA          | NA         | NA         | NA         |           |

|           |                 |            |             |            |            |            |             |
|-----------|-----------------|------------|-------------|------------|------------|------------|-------------|
| NA        | ENSG00000267678 | 0          | NA          | NA         | NA         | NA         |             |
| NA        | ENSG00000267679 | 0          | NA          | NA         | NA         | NA         | EIF5AP2     |
| 7767      | ENSG00000267680 | 633.691655 | 0.08636949  | 0.1018687  | 0.37954138 | 0.60845927 | ZNF224      |
| NA        | ENSG00000267681 | 2.3009585  | 0.00467114  | 0.37662088 | 0.95381789 | NA         |             |
| NA        | ENSG00000267682 | 4.89146582 | -0.01312444 | 0.36026661 | 0.91619578 | 0.96446211 |             |
| NA        | ENSG00000267683 | 0          | NA          | NA         | NA         | NA         |             |
| NA        | ENSG00000267685 | 0          | NA          | NA         | NA         | NA         | NTF6B       |
| NA        | ENSG00000267686 | 0          | NA          | NA         | NA         | NA         |             |
| NA        | ENSG00000267687 | 0          | NA          | NA         | NA         | NA         |             |
| NA        | ENSG00000267688 | 0          | NA          | NA         | NA         | NA         |             |
| NA        | ENSG00000267689 | 0          | NA          | NA         | NA         | NA         |             |
| 100288122 | ENSG00000267690 | 0          | NA          | NA         | NA         | NA         | LDLRAD4-AS1 |
| NA        | ENSG00000267691 | 0.64601691 | 0.00248872  | 0.38249258 | 0.95217779 | NA         | SHC1P2      |
| NA        | ENSG00000267692 | 0          | NA          | NA         | NA         | NA         | TAF9P3      |
| NA        | ENSG00000267693 | 0.18922458 | 0.01954053  | 0.38488496 | 0.78225479 | NA         |             |
| NA        | ENSG00000267694 | 0          | NA          | NA         | NA         | NA         |             |
| NA        | ENSG00000267695 | 0          | NA          | NA         | NA         | NA         |             |
| NA        | ENSG00000267696 | 0          | NA          | NA         | NA         | NA         | ERVK-28     |
| NA        | ENSG00000267698 | 6.19828549 | 0.1839616   | 0.41089275 | 0.21259264 | 0.42241743 |             |
| NA        | ENSG00000267699 | 11.1577937 | -0.08852305 | 0.35714805 | 0.56616667 | 0.76789354 |             |
| NA        | ENSG00000267703 | 0          | NA          | NA         | NA         | NA         |             |
| NA        | ENSG00000267704 | 0          | NA          | NA         | NA         | NA         | FRG2LP      |
| NA        | ENSG00000267705 | 0.14931947 | -0.01844332 | 0.38480212 | 0.84537521 | NA         |             |
| NA        | ENSG00000267706 | 2.64978753 | 0.08802514  | 0.38577562 | 0.37534262 | 0.60449338 |             |
| NA        | ENSG00000267707 | 19.5313061 | -0.70530903 | 0.71155876 | 0.02502016 | 0.08721718 |             |
| NA        | ENSG00000267708 | 0          | NA          | NA         | NA         | NA         | RDM1P3      |
| 101928844 | ENSG00000267709 | 0.66429489 | 0.00377731  | 0.38191829 | 0.93559445 | NA         |             |
| 100506374 | ENSG00000267710 | 0.84908354 | -0.03000395 | 0.38361382 | 0.53022327 | NA         | EDDM13      |
| NA        | ENSG00000267711 | 0          | NA          | NA         | NA         | NA         |             |
| 100505474 | ENSG00000267712 | 0          | NA          | NA         | NA         | NA         | LINC01539   |
| NA        | ENSG00000267713 | 0          | NA          | NA         | NA         | NA         |             |
| NA        | ENSG00000267714 | 0.60599969 | -0.02248041 | 0.38362945 | 0.68169876 | NA         |             |
| NA        | ENSG00000267716 | 0          | NA          | NA         | NA         | NA         |             |
| NA        | ENSG00000267717 | 0.173124   | -0.01911262 | 0.38486262 | 0.84537521 | NA         | SRSF10P1    |
| 100652929 | ENSG00000267719 | 0          | NA          | NA         | NA         | NA         | LINC02078   |
| NA        | ENSG00000267722 | 0          | NA          | NA         | NA         | NA         |             |
| NA        | ENSG00000267723 | 5.3929694  | 0.12946627  | 0.38503013 | 0.34885342 | 0.57957225 |             |
| NA        | ENSG00000267724 | 19.5979581 | 0.21684236  | 0.37553976 | 0.26691684 | 0.48933932 |             |

|           |    |                 |            |             |            |            |            |             |
|-----------|----|-----------------|------------|-------------|------------|------------|------------|-------------|
|           | NA | ENSG00000267725 | 0          | NA          | NA         | NA         | NA         |             |
| 105372138 | NA | ENSG00000267726 | 0          | NA          | NA         | NA         | NA         | LINC02565   |
|           | NA | ENSG00000267727 | 0          | NA          | NA         | NA         | NA         |             |
|           | NA | ENSG00000267729 | 0          | NA          | NA         | NA         | NA         |             |
|           | NA | ENSG00000267731 | 7.76652183 | 0.17353324  | 0.40483052 | 0.23663947 | 0.45348469 |             |
|           | NA | ENSG00000267732 | 0          | NA          | NA         | NA         | NA         |             |
|           | NA | ENSG00000267733 | 0          | NA          | NA         | NA         | NA         |             |
|           | NA | ENSG00000267734 | 0          | NA          | NA         | NA         | NA         |             |
|           | NA | ENSG00000267735 | 0          | NA          | NA         | NA         | NA         |             |
|           | NA | ENSG00000267736 | 0.14931947 | -0.01844332 | 0.38480212 | 0.84537521 | NA         | HMGB2P1     |
|           | NA | ENSG00000267737 | 0          | NA          | NA         | NA         | NA         |             |
|           | NA | ENSG00000267740 | 16.1063793 | -0.01736653 | 0.33375448 | 0.914907   | 0.9640318  |             |
|           | NA | ENSG00000267741 | 0.68717922 | 0.00460442  | 0.3812993  | 0.9285939  | NA         | UBE2L4      |
|           | NA | ENSG00000267742 | 0.45209736 | -0.02505403 | 0.38558831 | 0.57865948 | NA         | SINHCAP2    |
| 105372143 | NA | ENSG00000267743 | 0          | NA          | NA         | NA         | NA         |             |
|           | NA | ENSG00000267744 | 0          | NA          | NA         | NA         | NA         |             |
|           | NA | ENSG00000267745 | 0          | NA          | NA         | NA         | NA         |             |
|           | NA | ENSG00000267746 | 0.55637391 | 0.01246505  | 0.38329259 | 0.74160212 | NA         |             |
|           | NA | ENSG00000267748 | 0          | NA          | NA         | NA         | NA         |             |
|           | NA | ENSG00000267749 | 0          | NA          | NA         | NA         | NA         |             |
|           | NA | ENSG00000267750 | 13.2128812 | -0.22149803 | 0.40900461 | 0.2043412  | 0.41096092 | RUNDC3A-AS1 |
|           | NA | ENSG00000267751 | 58.1416973 | 0.25289885  | 0.26189656 | 0.20762375 | 0.41489321 | BSG-AS1     |
|           | NA | ENSG00000267752 | 0          | NA          | NA         | NA         | NA         | RPS10P27    |
|           | NA | ENSG00000267755 | 0          | NA          | NA         | NA         | NA         |             |
|           | NA | ENSG00000267756 | 0          | NA          | NA         | NA         | NA         |             |
| 100287177 | NA | ENSG00000267757 | 0.71638048 | 0.0421877   | 0.38739337 | 0.33986919 | NA         | EML2-AS1    |
|           | NA | ENSG00000267758 | 0.35707095 | 0.02381987  | 0.3853815  | 0.61382023 | NA         |             |
|           | NA | ENSG00000267760 | 0.16735865 | 0.01897177  | 0.38482933 | 0.78225479 | NA         |             |
| 110175910 | NA | ENSG00000267761 | 0.173124   | -0.01911262 | 0.38486262 | 0.84537521 | NA         | MIR4527HG   |
|           | NA | ENSG00000267762 | 0          | NA          | NA         | NA         | NA         |             |
|           | NA | ENSG00000267764 | 2.15607388 | -0.0714627  | 0.38682872 | 0.35681875 | NA         |             |
|           | NA | ENSG00000267765 | 3.35384851 | 0.04414808  | 0.36989063 | 0.69656396 | 0.85360278 |             |
|           | NA | ENSG00000267766 | 0          | NA          | NA         | NA         | NA         |             |
| 400685    | NA | ENSG00000267767 | 66.8484037 | 0.15666829  | 0.23461236 | 0.40509601 | 0.63349136 | LINC01801   |
|           | NA | ENSG00000267768 | 0          | NA          | NA         | NA         | NA         |             |
|           | NA | ENSG00000267769 | 9.254131   | 0.21994518  | 0.42126232 | 0.18789466 | 0.38827518 |             |
|           | NA | ENSG00000267770 | 0          | NA          | NA         | NA         | NA         |             |
|           | NA | ENSG00000267771 | 0          | NA          | NA         | NA         | NA         |             |

|           |                 |            |             |            |            |            |              |
|-----------|-----------------|------------|-------------|------------|------------|------------|--------------|
| 388406    | ENSG00000267772 | 0          | NA          | NA         | NA         | NA         | LINC01999    |
| NA        | ENSG00000267773 | 0          | NA          | NA         | NA         | NA         |              |
| NA        | ENSG00000267774 | 0          | NA          | NA         | NA         | NA         |              |
| NA        | ENSG00000267775 | 0          | NA          | NA         | NA         | NA         | OR7E16P      |
| 107985312 | ENSG00000267777 | 0          | NA          | NA         | NA         | NA         | LINC01791    |
| NA        | ENSG00000267778 | 3.59659166 | -0.01095989 | 0.36743138 | 0.91898553 | 0.96566247 | CBARP-DT     |
| 100996665 | ENSG00000267779 | 0          | NA          | NA         | NA         | NA         | LINC01533    |
| NA        | ENSG00000267780 | 0          | NA          | NA         | NA         | NA         |              |
| NA        | ENSG00000267781 | 1.25976506 | -0.03167871 | 0.38248205 | 0.58548688 | NA         | SLC25A36P1   |
| NA        | ENSG00000267782 | 0          | NA          | NA         | NA         | NA         |              |
| NA        | ENSG00000267783 | 0          | NA          | NA         | NA         | NA         |              |
| NA        | ENSG00000267784 | 11.215533  | 0.10508808  | 0.34846603 | 0.53901001 | 0.74843996 |              |
| NA        | ENSG00000267786 | 1.02525634 | -0.01580959 | 0.38131468 | 0.77509071 | NA         |              |
| NA        | ENSG00000267787 | 126.680224 | 0.05925368  | 0.193809   | 0.72497538 | 0.86844186 |              |
| NA        | ENSG00000267788 | 0.15069912 | -0.01848503 | 0.38480575 | 0.84537521 | NA         |              |
| NA        | ENSG00000267789 | 0          | NA          | NA         | NA         | NA         |              |
| 100132174 | ENSG00000267790 | 0.66943461 | 0.03059546  | 0.38616409 | 0.42784935 | NA         | LINC01987    |
| NA        | ENSG00000267791 | 0          | NA          | NA         | NA         | NA         |              |
| NA        | ENSG00000267792 | 0          | NA          | NA         | NA         | NA         | WBP1LP11     |
| NA        | ENSG00000267793 | 0          | NA          | NA         | NA         | NA         |              |
| NA        | ENSG00000267794 | 0          | NA          | NA         | NA         | NA         |              |
| 440335    | ENSG00000267795 | 2.84142849 | -0.13382089 | 0.40404748 | 0.19816846 | 0.40242193 | SMIM22       |
| 55957     | ENSG00000267796 | 175.807295 | 0.06791168  | 0.17287795 | 0.66089173 | 0.83209112 | LIN37        |
| NA        | ENSG00000267797 | 0          | NA          | NA         | NA         | NA         | NRBF2P1      |
| NA        | ENSG00000267799 | 0          | NA          | NA         | NA         | NA         | MAN1A2P1     |
| NA        | ENSG00000267800 | 0.16735865 | 0.01897177  | 0.38482933 | 0.78225479 | NA         |              |
| NA        | ENSG00000267801 | 5.66920734 | -0.05363257 | 0.36879805 | 0.65102856 | 0.82569882 |              |
| NA        | ENSG00000267808 | 0.29863895 | -0.02292439 | 0.3852726  | 0.68753245 | NA         |              |
| NA        | ENSG00000267809 | 4.82313757 | -0.09604907 | 0.38407576 | 0.38775891 | 0.61668431 | NDUFV2P1     |
| NA        | ENSG00000267811 | 18.7870631 | 0.16663273  | 0.3448465  | 0.38633749 | 0.61550918 |              |
| NA        | ENSG00000267815 | 0          | NA          | NA         | NA         | NA         |              |
| NA        | ENSG00000267827 | 2.64508754 | -0.11037662 | 0.4008429  | 0.15947179 | 0.34700764 |              |
| NA        | ENSG00000267834 | 2.68198562 | -0.04454594 | 0.37521677 | 0.64706303 | 0.82430661 |              |
| NA        | ENSG00000267838 | 5.22602128 | 0.16985787  | 0.4089105  | 0.21569122 | 0.42648134 |              |
| NA        | ENSG00000267852 | 0.51963092 | 0.03132774  | 0.38607327 | 0.47483523 | NA         | ARHGEF18-AS1 |
| 4701      | ENSG00000267855 | 465.967512 | 0.41609429  | 0.16391037 | 0.00520232 | 0.02401442 | NDUFA7       |
| NA        | ENSG00000267857 | 0.14931947 | -0.01844332 | 0.38480212 | 0.84537521 | NA         |              |
| 100131691 | ENSG00000267858 | 114.004684 | 0.27820757  | 0.22320923 | 0.13204452 | 0.30496778 | MZF1-AS1     |

|           |    |                 |            |             |            |            |            |             |
|-----------|----|-----------------|------------|-------------|------------|------------|------------|-------------|
|           | NA | ENSG00000267868 | 40.161049  | -0.09416428 | 0.27901374 | 0.62846702 | 0.81161138 |             |
| 105372476 | NA | ENSG00000267871 | 4.06671138 | -0.0294593  | 0.36967535 | 0.78091955 | 0.89983992 | ZNF460-AS1  |
|           | NA | ENSG00000267872 | 0          | NA          | NA         | NA         | NA         |             |
|           | NA | ENSG00000267879 | 0          | NA          | NA         | NA         | NA         |             |
|           | NA | ENSG00000267881 | 0          | NA          | NA         | NA         | NA         |             |
| 100131496 | NA | ENSG00000267882 | 0.65577026 | 0.00345362  | 0.38193104 | 0.9408253  | NA         |             |
|           | NA | ENSG00000267886 | 49.2564929 | -0.04615337 | 0.24918732 | 0.8069095  | 0.91256903 |             |
|           | NA | ENSG00000267890 | 6.40298576 | -0.11886399 | 0.37855024 | 0.39546886 | 0.62498088 |             |
|           | NA | ENSG00000267892 | 1.57583042 | 0.06905048  | 0.38800851 | 0.31916718 | NA         |             |
|           | NA | ENSG00000267895 | 0          | NA          | NA         | NA         | NA         |             |
|           | NA | ENSG00000267898 | 3.16114767 | 0.02507579  | 0.37104116 | 0.80858471 | 0.91320776 |             |
|           | NA | ENSG00000267904 | 13.9232989 | -0.03838999 | 0.3393946  | 0.81155896 | 0.9146404  |             |
|           | NA | ENSG00000267905 | 0          | NA          | NA         | NA         | NA         | VSIG10L-AS1 |
|           | NA | ENSG00000267908 | 0          | NA          | NA         | NA         | NA         | ZSCAN5DP    |
| 56936     | NA | ENSG00000267909 | 37.3156615 | -0.21891202 | 0.30860945 | 0.29017571 | 0.51614542 | CCDC177     |
|           | NA | ENSG00000267919 | 0.97426105 | 0.02444214  | 0.38224231 | 0.6535802  | NA         |             |
|           | NA | ENSG00000267920 | 6.61523637 | -0.15038492 | 0.38895285 | 0.30880511 | 0.53644106 | SNX6P1      |
|           | NA | ENSG00000267922 | 0          | NA          | NA         | NA         | NA         |             |
|           | NA | ENSG00000267924 | 10.5903051 | 0.0462817   | 0.3433552  | 0.77423893 | 0.89604057 |             |
|           | NA | ENSG00000267927 | 0.87894753 | 0.05081892  | 0.38878532 | 0.25816192 | NA         |             |
|           | NA | ENSG00000267934 | 13.7510391 | -0.17357508 | 0.36779058 | 0.33794943 | 0.56821327 |             |
|           | NA | ENSG00000267938 | 0          | NA          | NA         | NA         | NA         | EIF1P6      |
|           | NA | ENSG00000267939 | 0.16735865 | 0.01897177  | 0.38482933 | 0.78225479 | NA         |             |
|           | NA | ENSG00000267940 | 4.30589102 | 0.05185207  | 0.36923059 | 0.66158517 | 0.83248873 |             |
|           | NA | ENSG00000267943 | 0.32439411 | 0.00129929  | 0.38336772 | 0.96786438 | NA         |             |
|           | NA | ENSG00000267952 | 16.2349888 | 0.06980615  | 0.33511667 | 0.68601381 | 0.84726805 |             |
| 100422833 | NA | ENSG00000267959 | 0          | NA          | NA         | NA         | NA         | MIR3188     |
|           | NA | ENSG00000267961 | 0          | NA          | NA         | NA         | NA         | OR10B1P     |
|           | NA | ENSG00000267968 | 0          | NA          | NA         | NA         | NA         |             |
| 728269    | NA | ENSG00000267978 | 2.79532534 | -0.11150659 | 0.40285597 | 0.12805669 | 0.29872367 | MAGEA9B     |
|           | NA | ENSG00000267980 | 15.519529  | 0.06827679  | 0.32662428 | 0.70446061 | 0.85803293 |             |
|           | NA | ENSG00000267984 | 0          | NA          | NA         | NA         | NA         |             |
|           | NA | ENSG00000267986 | 0          | NA          | NA         | NA         | NA         |             |
|           | NA | ENSG00000267990 | 0          | NA          | NA         | NA         | NA         |             |
|           | NA | ENSG00000267992 | 0.16735865 | 0.01897177  | 0.38482933 | 0.78225479 | NA         |             |
| 100505812 | NA | ENSG00000268001 | 7.0565244  | -0.09173594 | 0.36999029 | 0.50198252 | 0.71887781 | CARD8-AS1   |
| 100506033 | NA | ENSG00000268006 | 61.1612575 | 0.7689529   | 0.318416   | 0.00241692 | 0.01259895 | PTOV1-AS1   |
| 6759      | NA | ENSG00000268009 | 0.47176814 | -0.02836356 | 0.38580188 | 0.54418001 | NA         | SSX4        |

|           |                 |            |             |            |            |            |            |
|-----------|-----------------|------------|-------------|------------|------------|------------|------------|
| NA        | ENSG00000268015 | 0          | NA          | NA         | NA         | NA         |            |
| NA        | ENSG00000268020 | 0          | NA          | NA         | NA         | NA         | OR4G4P     |
| NA        | ENSG00000268027 | 0          | NA          | NA         | NA         | NA         |            |
| NA        | ENSG00000268030 | 86.504959  | -0.10974388 | 0.21499633 | 0.53827464 | 0.74807128 |            |
| NA        | ENSG00000268034 | 0.14931947 | -0.01844332 | 0.38480212 | 0.84537521 | NA         |            |
| 374890    | ENSG00000268038 | 0          | NA          | NA         | NA         | NA         | LINC01785  |
| 390937    | ENSG00000268041 | 0.99519755 | 0.02615045  | 0.38158721 | 0.65950453 | NA         | ERFL       |
| 149013    | ENSG00000268043 | 1181.16931 | 0.00284464  | 0.0836213  | 0.97296204 | 0.98995885 | NBPF12     |
| NA        | ENSG00000268047 | 1.1999935  | 0.0436477   | 0.3836318  | 0.48250574 | NA         |            |
| NA        | ENSG00000268049 | 41.332718  | 0.32332872  | 0.32368369 | 0.14228873 | 0.32112483 |            |
| NA        | ENSG00000268051 | 0          | NA          | NA         | NA         | NA         |            |
| NA        | ENSG00000268053 | 0          | NA          | NA         | NA         | NA         |            |
| NA        | ENSG00000268055 | 0          | NA          | NA         | NA         | NA         |            |
| NA        | ENSG00000268056 | 0          | NA          | NA         | NA         | NA         |            |
| NA        | ENSG00000268058 | 0.86048599 | 0.01092928  | 0.38153849 | 0.83311211 | NA         | BNIP3P40   |
| 100505681 | ENSG00000268061 | 48.3033482 | -0.28934446 | 0.33661009 | 0.17932797 | 0.37565905 | NAPA-AS1   |
| NA        | ENSG00000268062 | 0          | NA          | NA         | NA         | NA         | SRP14P4    |
| 100126270 | ENSG00000268066 | 0.55356866 | -0.01177914 | 0.38327848 | 0.77699285 | NA         | FMR1-AS1   |
| NA        | ENSG00000268067 | 0          | NA          | NA         | NA         | NA         | OR5AH1P    |
| NA        | ENSG00000268069 | 9.91349284 | 0.03636727  | 0.34694942 | 0.81467872 | 0.91594007 |            |
| NA        | ENSG00000268070 | 1.30794256 | -0.01972836 | 0.37855994 | 0.78496076 | NA         |            |
| NA        | ENSG00000268074 | 0          | NA          | NA         | NA         | NA         | RPL22P5    |
| NA        | ENSG00000268078 | 0          | NA          | NA         | NA         | NA         |            |
| NA        | ENSG00000268079 | 0          | NA          | NA         | NA         | NA         | BNIP3P30   |
| NA        | ENSG00000268080 | 0          | NA          | NA         | NA         | NA         |            |
| NA        | ENSG00000268081 | 0          | NA          | NA         | NA         | NA         |            |
| NA        | ENSG00000268083 | 0          | NA          | NA         | NA         | NA         |            |
| NA        | ENSG00000268087 | 11.292771  | -0.05486431 | 0.34100565 | 0.73588423 | 0.8746147  |            |
| NA        | ENSG00000268088 | 0          | NA          | NA         | NA         | NA         |            |
| 55879     | ENSG00000268089 | 52.1484403 | 0.97535947  | 0.35224201 | 0.00059948 | 0.00377934 | GABRQ      |
| NA        | ENSG00000268093 | 4.60055709 | -0.02590934 | 0.3660864  | 0.82081853 | 0.91847813 |            |
| 101928571 | ENSG00000268095 | 0.32510871 | 0.00182295  | 0.38337305 | 0.96285773 | NA         | ZNF649-AS1 |
| NA        | ENSG00000268100 | 0          | NA          | NA         | NA         | NA         | ZNF725P    |
| NA        | ENSG00000268101 | 0          | NA          | NA         | NA         | NA         | CYP2G2P    |
| 11254     | ENSG00000268104 | 0          | NA          | NA         | NA         | NA         | SLC6A14    |
| NA        | ENSG00000268105 | 6.6647635  | -0.04431741 | 0.35490762 | 0.7555914  | 0.88629101 |            |
| NA        | ENSG00000268107 | 20.5127184 | 0.44339014  | 0.50474723 | 0.07210748 | 0.19559917 |            |
| NA        | ENSG00000268108 | 0.14931947 | -0.01844332 | 0.38480212 | 0.84537521 | NA         |            |



|           |                 |            |             |            |            |            |            |
|-----------|-----------------|------------|-------------|------------|------------|------------|------------|
| NA        | ENSG00000268112 | 0          | NA          | NA         | NA         | NA         |            |
| NA        | ENSG00000268116 | 0          | NA          | NA         | NA         | NA         |            |
| NA        | ENSG00000268117 | 0          | NA          | NA         | NA         | NA         | VN1R84P    |
| NA        | ENSG00000268119 | 316.161795 | -1.01171355 | 0.17754606 | 1.49E-09   | 2.52E-08   |            |
| NA        | ENSG00000268120 | 21.6344005 | 0.03775749  | 0.3277739  | 0.83036809 | 0.92309648 |            |
| NA        | ENSG00000268129 | 7.09119311 | -0.04800095 | 0.36009974 | 0.72118281 | 0.86691933 |            |
| NA        | ENSG00000268133 | 0.30139824 | -0.02296476 | 0.38527817 | 0.68536535 | NA         |            |
| NA        | ENSG00000268140 | 0          | NA          | NA         | NA         | NA         | PCGF7P     |
| NA        | ENSG00000268144 | 0.94429076 | -0.01449786 | 0.38070436 | 0.80594218 | NA         | NIFKP6     |
| NA        | ENSG00000268148 | 0          | NA          | NA         | NA         | NA         | VN1R91P    |
| NA        | ENSG00000268149 | 0          | NA          | NA         | NA         | NA         |            |
| 100129935 | ENSG00000268153 | 0          | NA          | NA         | NA         | NA         |            |
| NA        | ENSG00000268154 | 1.009295   | 0.00182764  | 0.3799576  | 0.976047   | NA         |            |
| NA        | ENSG00000268157 | 0          | NA          | NA         | NA         | NA         |            |
| NA        | ENSG00000268163 | 0.67354557 | 0.02105046  | 0.38373776 | 0.62433893 | NA         |            |
| NA        | ENSG00000268170 | 0          | NA          | NA         | NA         | NA         |            |
| NA        | ENSG00000268173 | 194.854313 | -0.52890094 | 0.23991524 | 0.008234   | 0.03540516 |            |
| NA        | ENSG00000268174 | 0.66829672 | 0.02646987  | 0.38368542 | 0.58193928 | NA         | BNIP3P22   |
| NA        | ENSG00000268181 | 0          | NA          | NA         | NA         | NA         |            |
| 147670    | ENSG00000268182 | 12.0652717 | 0.15129902  | 0.37559459 | 0.35663482 | 0.58670273 | SMIM17     |
| NA        | ENSG00000268184 | 0.16735865 | 0.01897177  | 0.38482933 | 0.78225479 | NA         |            |
| NA        | ENSG00000268186 | 0.66400622 | 0.00252907  | 0.38131444 | 0.95994997 | NA         | ZNF114-AS1 |
| NA        | ENSG00000268189 | 8.29865448 | 0.00555301  | 0.35026878 | 0.97170371 | 0.98938604 |            |
| NA        | ENSG00000268191 | 0.45209736 | -0.02505403 | 0.38558831 | 0.57865948 | NA         |            |
| NA        | ENSG00000268193 | 1.40803277 | 0.07738622  | 0.39493316 | 0.10965007 | NA         |            |
| NA        | ENSG00000268199 | 0.32250268 | -0.02325431 | 0.38531871 | 0.66960024 | NA         |            |
| NA        | ENSG00000268201 | 2.33647335 | -0.04113744 | 0.3757147  | 0.65935312 | NA         |            |
| NA        | ENSG00000268203 | 0          | NA          | NA         | NA         | NA         |            |
| NA        | ENSG00000268204 | 0.15069912 | -0.01848503 | 0.38480575 | 0.84537521 | NA         |            |
| NA        | ENSG00000268205 | 182.096035 | 0.17193192  | 0.1748627  | 0.26990012 | 0.49307719 |            |
| NA        | ENSG00000268209 | 0          | NA          | NA         | NA         | NA         |            |
| NA        | ENSG00000268218 | 76.6346124 | 0.22532416  | 0.24330848 | 0.24277973 | 0.46106536 |            |
| 2652      | ENSG00000268221 | 0          | NA          | NA         | NA         | NA         | OPN1MW     |
| NA        | ENSG00000268222 | 0          | NA          | NA         | NA         | NA         | EEF1A1P7   |
| 644100    | ENSG00000268223 | 0          | NA          | NA         | NA         | NA         | ARL14EPL   |
| NA        | ENSG00000268230 | 56.6557054 | 0.16094486  | 0.26525569 | 0.41561261 | 0.64249293 |            |
| NA        | ENSG00000268231 | 6.54883081 | -0.11477802 | 0.37497699 | 0.42184281 | 0.64783923 |            |
| NA        | ENSG00000268234 | 0          | NA          | NA         | NA         | NA         | FKBP4P6    |

|           |                 |            |             |            |            |            |             |
|-----------|-----------------|------------|-------------|------------|------------|------------|-------------|
| 100996631 | ENSG00000268235 | 0          | NA          | NA         | NA         | NA         | TCP11X1     |
| NA        | ENSG00000268238 | 0          | NA          | NA         | NA         | NA         | IGFL1P2     |
| NA        | ENSG00000268240 | 0          | NA          | NA         | NA         | NA         |             |
| NA        | ENSG00000268243 | 0          | NA          | NA         | NA         | NA         | RPS29P30    |
| 100271873 | ENSG00000268257 | 0          | NA          | NA         | NA         | NA         | AIRN        |
| NA        | ENSG00000268266 | 1.62773676 | -0.04117545 | 0.38139963 | 0.56368673 | NA         |             |
| NA        | ENSG00000268267 | 0          | NA          | NA         | NA         | NA         | SIGLEC29P   |
| NA        | ENSG00000268272 | 0          | NA          | NA         | NA         | NA         | VN1R78P     |
| NA        | ENSG00000268278 | 0.15069912 | -0.01848503 | 0.38480575 | 0.84537521 | NA         |             |
| NA        | ENSG00000268279 | 0          | NA          | NA         | NA         | NA         |             |
| NA        | ENSG00000268282 | 0          | NA          | NA         | NA         | NA         |             |
| NA        | ENSG00000268287 | 0.54940948 | 0.03277155  | 0.38622097 | 0.45384154 | NA         |             |
| NA        | ENSG00000268288 | 2.48247778 | 0.0518309   | 0.37690581 | 0.59223924 | NA         |             |
| NA        | ENSG00000268289 | 0          | NA          | NA         | NA         | NA         |             |
| NA        | ENSG00000268292 | 0          | NA          | NA         | NA         | NA         |             |
| NA        | ENSG00000268293 | 0          | NA          | NA         | NA         | NA         |             |
| NA        | ENSG00000268295 | 0          | NA          | NA         | NA         | NA         | POLR3GP1    |
| NA        | ENSG00000268296 | 0          | NA          | NA         | NA         | NA         |             |
| NA        | ENSG00000268297 | 0          | NA          | NA         | NA         | NA         | CLEC4GP1    |
| 110806301 | ENSG00000268307 | 3.40496481 | 0.04482002  | 0.37094104 | 0.68514175 | 0.84671809 | LINC02560   |
| NA        | ENSG00000268309 | 0          | NA          | NA         | NA         | NA         |             |
| NA        | ENSG00000268316 | 0          | NA          | NA         | NA         | NA         |             |
| NA        | ENSG00000268318 | 0          | NA          | NA         | NA         | NA         | LINC01872   |
| 653486    | ENSG00000268320 | 0          | NA          | NA         | NA         | NA         | SCGB1C2     |
| NA        | ENSG00000268322 | 0.37844916 | 0.02407552  | 0.3854191  | 0.60038877 | NA         | BNIP3P25    |
| 83598     | ENSG00000268324 | 2.28089473 | 0.03953943  | 0.38242085 | 0.53272082 | NA         | LRRC2-AS1   |
| NA        | ENSG00000268326 | 0          | NA          | NA         | NA         | NA         |             |
| NA        | ENSG00000268333 | 7.08201878 | -0.12072293 | 0.37392856 | 0.41451969 | 0.6417034  |             |
| NA        | ENSG00000268335 | 0          | NA          | NA         | NA         | NA         | BNIP3P23    |
| NA        | ENSG00000268336 | 0          | NA          | NA         | NA         | NA         | SIGLEC20P   |
| 29057     | ENSG00000268350 | 455.300704 | 0.31723889  | 0.16506403 | 0.03363078 | 0.10986903 | FAM156A     |
| NA        | ENSG00000268355 | 0          | NA          | NA         | NA         | NA         |             |
| NA        | ENSG00000268357 | 0          | NA          | NA         | NA         | NA         | VN1R81P     |
| NA        | ENSG00000268361 | 0          | NA          | NA         | NA         | NA         |             |
| NA        | ENSG00000268362 | 156.836564 | -0.08399629 | 0.17427934 | 0.58771376 | 0.78270018 |             |
| NA        | ENSG00000268364 | 16.8840696 | -0.19233593 | 0.36397572 | 0.311102   | 0.53866926 | SMC5-DT     |
| NA        | ENSG00000268366 | 2.38307758 | 0.0636742   | 0.38170217 | 0.47587671 | NA         | SERTAD3-AS1 |
| NA        | ENSG00000268375 | 0.33471731 | 0.02354391  | 0.38534154 | 0.62842204 | NA         |             |

|           |                 |            |             |            |            |            |           |
|-----------|-----------------|------------|-------------|------------|------------|------------|-----------|
| NA        | ENSG00000268379 | 10.949295  | 0.21173435  | 0.40074765 | 0.23448431 | 0.45144772 |           |
| 400550    | ENSG00000268388 | 0          | NA          | NA         | NA         | NA         | FENDRR    |
| NA        | ENSG00000268390 | 0          | NA          | NA         | NA         | NA         |           |
| NA        | ENSG00000268391 | 0          | NA          | NA         | NA         | NA         | MTCO3P42  |
| NA        | ENSG00000268392 | 0.97982589 | 0.02968988  | 0.38202733 | 0.61731377 | NA         |           |
| NA        | ENSG00000268400 | 0.5290942  | 0.0203755   | 0.3835372  | 0.66248626 | NA         |           |
| NA        | ENSG00000268401 | 4.94439146 | -0.17521212 | 0.41561273 | 0.18408457 | 0.3826737  |           |
| 644656    | ENSG00000268403 | 27.0172288 | -0.56641079 | 0.46674321 | 0.03801957 | 0.12084399 |           |
| NA        | ENSG00000268407 | 0.15069912 | -0.01848503 | 0.38480575 | 0.84537521 | NA         |           |
| NA        | ENSG00000268412 | 0          | NA          | NA         | NA         | NA         | TRMT112P6 |
| NA        | ENSG00000268416 | 0          | NA          | NA         | NA         | NA         |           |
| NA        | ENSG00000268433 | 0          | NA          | NA         | NA         | NA         | MTDHP3    |
| NA        | ENSG00000268434 | 0.33471731 | 0.02354391  | 0.38534154 | 0.62842204 | NA         |           |
| NA        | ENSG00000268438 | 0.79709933 | -0.04552868 | 0.38788084 | 0.32232656 | NA         | BNIP3P27  |
| NA        | ENSG00000268442 | 12.3781199 | -0.00201763 | 0.33759572 | 0.98784144 | 0.99589897 |           |
| 727837    | ENSG00000268447 | 0.44795842 | -0.02501848 | 0.38558245 | 0.5807882  | NA         | SSX2B     |
| NA        | ENSG00000268455 | 0          | NA          | NA         | NA         | NA         |           |
| NA        | ENSG00000268458 | 0          | NA          | NA         | NA         | NA         |           |
| 93429     | ENSG00000268460 | 0          | NA          | NA         | NA         | NA         |           |
| NA        | ENSG00000268461 | 0          | NA          | NA         | NA         | NA         |           |
| NA        | ENSG00000268465 | 0          | NA          | NA         | NA         | NA         |           |
| NA        | ENSG00000268469 | 0.14931947 | -0.01844332 | 0.38480212 | 0.84537521 | NA         | BNIP3P38  |
| 54553     | ENSG00000268471 | 147.360015 | -0.4877118  | 0.19353922 | 0.00425698 | 0.02033792 | MIR4453HG |
| 100132686 | ENSG00000268472 | 0.34624801 | -0.02356563 | 0.38536324 | 0.65270996 | NA         |           |
| NA        | ENSG00000268473 | 0          | NA          | NA         | NA         | NA         |           |
| NA        | ENSG00000268475 | 0.173124   | -0.01911262 | 0.38486262 | 0.84537521 | NA         |           |
| 105372267 | ENSG00000268480 | 0          | NA          | NA         | NA         | NA         | NFILZ     |
| NA        | ENSG00000268483 | 0          | NA          | NA         | NA         | NA         | RPL7AP69  |
| NA        | ENSG00000268486 | 0          | NA          | NA         | NA         | NA         |           |
| NA        | ENSG00000268496 | 1.55980028 | 0.02223049  | 0.37799613 | 0.77009896 | NA         |           |
| NA        | ENSG00000268499 | 1.05089231 | -0.05808396 | 0.39016262 | 0.21589476 | NA         |           |
| 8778      | ENSG00000268500 | 0.14931947 | -0.01844332 | 0.38480212 | 0.84537521 | NA         | SIGLEC5   |
| NA        | ENSG00000268505 | 0          | NA          | NA         | NA         | NA         |           |
| NA        | ENSG00000268509 | 12.1269138 | 1.15052375  | 1.00437336 | 0.00955085 | 0.03994286 |           |
| NA        | ENSG00000268510 | 0          | NA          | NA         | NA         | NA         | IFNL3P1   |
| 105372482 | ENSG00000268516 | 94.2925402 | 0.0784867   | 0.21853172 | 0.66449966 | 0.83444869 | ZNF8-DT   |
| NA        | ENSG00000268518 | 0.18922458 | 0.01954053  | 0.38488496 | 0.78225479 | NA         |           |
| NA        | ENSG00000268520 | 1.6115118  | 0.00925369  | 0.377762   | 0.90107468 | NA         |           |

|           |                 |            |             |            |            |            |           |
|-----------|-----------------|------------|-------------|------------|------------|------------|-----------|
| NA        | ENSG00000268521 | 10.0351853 | -0.01881117 | 0.33997052 | 0.90454061 | 0.95823316 | VN1R83P   |
| NA        | ENSG00000268529 | 0          | NA          | NA         | NA         | NA         | CYP2T3P   |
| NA        | ENSG00000268530 | 0.83919932 | 0.04139905  | 0.38452512 | 0.44340779 | NA         |           |
| NA        | ENSG00000268531 | 0          | NA          | NA         | NA         | NA         |           |
| 146513    | ENSG00000268532 | 0          | NA          | NA         | NA         | NA         | LINC02135 |
| NA        | ENSG00000268533 | 0          | NA          | NA         | NA         | NA         |           |
| NA        | ENSG00000268535 | 0          | NA          | NA         | NA         | NA         | MTDHP4    |
| NA        | ENSG00000268536 | 1.87230976 | 0.00186666  | 0.37602453 | 0.98273619 | NA         |           |
| NA        | ENSG00000268541 | 0          | NA          | NA         | NA         | NA         | VN1R88P   |
| NA        | ENSG00000268543 | 5.94080366 | 0.02414836  | 0.35926827 | 0.85573901 | 0.93566075 |           |
| NA        | ENSG00000268545 | 0          | NA          | NA         | NA         | NA         | VN1R107P  |
| NA        | ENSG00000268555 | 0          | NA          | NA         | NA         | NA         |           |
| NA        | ENSG00000268560 | 0          | NA          | NA         | NA         | NA         |           |
| NA        | ENSG00000268564 | 0          | NA          | NA         | NA         | NA         | ILVBL-AS1 |
| NA        | ENSG00000268565 | 0          | NA          | NA         | NA         | NA         |           |
| NA        | ENSG00000268566 | 0          | NA          | NA         | NA         | NA         |           |
| NA        | ENSG00000268573 | 35.5031955 | -0.02239496 | 0.27083641 | 0.90590072 | 0.95895045 |           |
| NA        | ENSG00000268575 | 423.200804 | 0.25188235  | 0.13653207 | 0.04787871 | 0.14395032 |           |
| NA        | ENSG00000268580 | 0          | NA          | NA         | NA         | NA         | LINC01966 |
| NA        | ENSG00000268581 | 0          | NA          | NA         | NA         | NA         | SIGLEC18P |
| NA        | ENSG00000268582 | 0          | NA          | NA         | NA         | NA         |           |
| NA        | ENSG00000268583 | 12.5692336 | 0.24028671  | 0.40780353 | 0.20543549 | 0.41239126 |           |
| NA        | ENSG00000268584 | 18.1958095 | 0.08539718  | 0.3211553  | 0.64603411 | 0.82370422 |           |
| NA        | ENSG00000268589 | 0          | NA          | NA         | NA         | NA         |           |
| 100652739 | ENSG00000268592 | 6.72495936 | 0.12046349  | 0.386235   | 0.34843955 | 0.57911259 |           |
| NA        | ENSG00000268593 | 0          | NA          | NA         | NA         | NA         |           |
| NA        | ENSG00000268595 | 0          | NA          | NA         | NA         | NA         |           |
| NA        | ENSG00000268597 | 0          | NA          | NA         | NA         | NA         |           |
| NA        | ENSG00000268598 | 0.4831575  | -0.00576863 | 0.38312991 | 0.87793102 | NA         | VN1R80P   |
| NA        | ENSG00000268601 | 0          | NA          | NA         | NA         | NA         |           |
| NA        | ENSG00000268603 | 9.0021573  | 0.02704     | 0.34790136 | 0.85996917 | 0.93761545 |           |
| NA        | ENSG00000268605 | 0          | NA          | NA         | NA         | NA         |           |
| 4101      | ENSG00000268606 | 824.353205 | -0.22920686 | 0.10334811 | 0.02087016 | 0.07536656 | MAGEA2    |
| NA        | ENSG00000268614 | 0          | NA          | NA         | NA         | NA         |           |
| NA        | ENSG00000268615 | 0          | NA          | NA         | NA         | NA         |           |
| NA        | ENSG00000268618 | 0          | NA          | NA         | NA         | NA         |           |
| NA        | ENSG00000268620 | 0          | NA          | NA         | NA         | NA         |           |
| 645553    | ENSG00000268621 | 0          | NA          | NA         | NA         | NA         | IGFL2-AS1 |

|           |                 |            |             |            |            |            |           |
|-----------|-----------------|------------|-------------|------------|------------|------------|-----------|
| NA        | ENSG00000268623 | 0          | NA          | NA         | NA         | NA         |           |
| NA        | ENSG00000268628 | 0.35666224 | 0.02381692  | 0.38538104 | 0.61402655 | NA         |           |
| 56157     | ENSG00000268629 | 0.173124   | -0.01911262 | 0.38486262 | 0.84537521 | NA         | TEX13A    |
| NA        | ENSG00000268635 | 30.0356337 | 0.24452489  | 0.32870086 | 0.24703496 | 0.46606087 |           |
| NA        | ENSG00000268636 | 0          | NA          | NA         | NA         | NA         |           |
| NA        | ENSG00000268643 | 3.67245056 | 0.25735448  | 0.50701467 | 0.0256422  | 0.08884759 |           |
| NA        | ENSG00000268649 | 17.8643252 | 0.1410136   | 0.33518724 | 0.45769937 | 0.68122697 |           |
| 102725254 | ENSG00000268650 | 1.06003917 | -0.00132398 | 0.3801134  | 0.95172595 | NA         |           |
| 246100    | ENSG00000268651 | 0          | NA          | NA         | NA         | NA         | CTAG1A    |
| NA        | ENSG00000268652 | 0          | NA          | NA         | NA         | NA         |           |
| 100073347 | ENSG00000268654 | 17.5498543 | -0.03575536 | 0.31547716 | 0.84258267 | 0.928413   | MIMT1     |
| 101059948 | ENSG00000268655 | 9.5312256  | 1.63717177  | 1.11743586 | 0.00411247 | 0.01974622 |           |
| 400680    | ENSG00000268658 | 0.71010969 | -0.03996203 | 0.38708633 | 0.37895312 | NA         | LINC00664 |
| NA        | ENSG00000268659 | 0          | NA          | NA         | NA         | NA         |           |
| NA        | ENSG00000268660 | 1.15981671 | 0.01758056  | 0.37923829 | 0.79715227 | NA         | LETM1P2   |
| NA        | ENSG00000268663 | 0          | NA          | NA         | NA         | NA         | WBP1LP6   |
| NA        | ENSG00000268669 | 0          | NA          | NA         | NA         | NA         |           |
| NA        | ENSG00000268670 | 11.9290059 | 0.11228353  | 0.35244515 | 0.50797902 | 0.7237561  |           |
| NA        | ENSG00000268673 | 0          | NA          | NA         | NA         | NA         |           |
| NA        | ENSG00000268677 | 0          | NA          | NA         | NA         | NA         |           |
| NA        | ENSG00000268678 | 5.15358268 | 0.0201258   | 0.36196996 | 0.87356673 | 0.94441388 |           |
| NA        | ENSG00000268681 | 0          | NA          | NA         | NA         | NA         | COX6CP7   |
| NA        | ENSG00000268683 | 0.14931947 | -0.01844332 | 0.38480212 | 0.84537521 | NA         |           |
| NA        | ENSG00000268685 | 0          | NA          | NA         | NA         | NA         |           |
| 101928295 | ENSG00000268686 | 4.48078597 | 0.30291006  | 0.54703628 | 0.0330267  | 0.1082163  |           |
| 646864    | ENSG00000268696 | 0.32447073 | -0.02327818 | 0.38532213 | 0.66823646 | NA         | ZNF723    |
| NA        | ENSG00000268705 | 0.76912811 | -0.05419828 | 0.38909625 | 0.28645859 | NA         | BNIP3P26  |
| NA        | ENSG00000268707 | 0          | NA          | NA         | NA         | NA         |           |
| NA        | ENSG00000268711 | 0          | NA          | NA         | NA         | NA         |           |
| NA        | ENSG00000268713 | 0.94612289 | 0.04084733  | 0.38743659 | 0.29648824 | NA         |           |
| NA        | ENSG00000268717 | 0          | NA          | NA         | NA         | NA         | BNIP3P33  |
| NA        | ENSG00000268723 | 0          | NA          | NA         | NA         | NA         |           |
| NA        | ENSG00000268729 | 0          | NA          | NA         | NA         | NA         |           |
| NA        | ENSG00000268731 | 0          | NA          | NA         | NA         | NA         |           |
| NA        | ENSG00000268734 | 0          | NA          | NA         | NA         | NA         |           |
| NA        | ENSG00000268736 | 4.00579595 | 0.11516568  | 0.39356057 | 0.28276936 | 0.50782063 | MTCO3P39  |
| 100130086 | ENSG00000268738 | 7.66053322 | 0.14652135  | 0.40630962 | 0.20592791 | 0.4130216  | HSFX2     |
| NA        | ENSG00000268739 | 0          | NA          | NA         | NA         | NA         |           |

|           |                 |            |             |            |            |            |           |
|-----------|-----------------|------------|-------------|------------|------------|------------|-----------|
| NA        | ENSG00000268742 | 0.30139824 | -0.02296476 | 0.38527817 | 0.68536535 | NA         |           |
| NA        | ENSG00000268743 | 1.05014376 | -0.05880732 | 0.3902951  | 0.21335228 | NA         |           |
| NA        | ENSG00000268744 | 3.78833328 | -0.01528971 | 0.37261429 | 0.87030814 | 0.94334099 |           |
| NA        | ENSG00000268745 | 0          | NA          | NA         | NA         | NA         |           |
| NA        | ENSG00000268746 | 0.34746601 | 0.02370763  | 0.3853651  | 0.61987128 | NA         |           |
| NA        | ENSG00000268747 | 0.65262815 | 0.0045024   | 0.38195899 | 0.92326816 | NA         |           |
| NA        | ENSG00000268750 | 58.5775747 | 0.25727132  | 0.28406921 | 0.21472296 | 0.42507156 |           |
| NA        | ENSG00000268751 | 2.57608434 | 0.07945885  | 0.38367296 | 0.40943667 | 0.63746555 | SCGB1B2P  |
| NA        | ENSG00000268754 | 0          | NA          | NA         | NA         | NA         | LINC01081 |
| NA        | ENSG00000268756 | 0.15069912 | -0.01848503 | 0.38480575 | 0.84537521 | NA         |           |
| 326342    | ENSG00000268758 | 0          | NA          | NA         | NA         | NA         | ADGRE4P   |
| NA        | ENSG00000268764 | 0          | NA          | NA         | NA         | NA         |           |
| NA        | ENSG00000268777 | 0          | NA          | NA         | NA         | NA         |           |
| NA        | ENSG00000268785 | 0          | NA          | NA         | NA         | NA         | RPL7P50   |
| NA        | ENSG00000268789 | 0          | NA          | NA         | NA         | NA         | VN1R87P   |
| NA        | ENSG00000268790 | 29.32479   | -0.29806345 | 0.47532451 | 0.11164756 | 0.2700997  |           |
| NA        | ENSG00000268794 | 0          | NA          | NA         | NA         | NA         | VN1R90P   |
| NA        | ENSG00000268797 | 0          | NA          | NA         | NA         | NA         |           |
| NA        | ENSG00000268798 | 27.3559112 | -0.13747677 | 0.30572687 | 0.48460527 | 0.70472539 |           |
| 340096    | ENSG00000268799 | 0.173733   | 0.01914545  | 0.38484597 | 0.78225479 | NA         | H3Y2      |
| NA        | ENSG00000268803 | 0          | NA          | NA         | NA         | NA         |           |
| NA        | ENSG00000268804 | 0          | NA          | NA         | NA         | NA         | LINC02132 |
| NA        | ENSG00000268810 | 0          | NA          | NA         | NA         | NA         |           |
| 91370     | ENSG00000268812 | 4.88963371 | 0.06315404  | 0.36633515 | 0.62654582 | 0.81036167 | LIF-AS2   |
| NA        | ENSG00000268818 | 0          | NA          | NA         | NA         | NA         |           |
| NA        | ENSG00000268823 | 0          | NA          | NA         | NA         | NA         |           |
| NA        | ENSG00000268830 | 0          | NA          | NA         | NA         | NA         | BNIP3P32  |
| NA        | ENSG00000268833 | 0          | NA          | NA         | NA         | NA         |           |
| NA        | ENSG00000268834 | 0          | NA          | NA         | NA         | NA         | OR7A1P    |
| NA        | ENSG00000268836 | 6.19943277 | 0.07599505  | 0.36708758 | 0.57232713 | 0.7723153  |           |
| NA        | ENSG00000268839 | 0          | NA          | NA         | NA         | NA         |           |
| NA        | ENSG00000268842 | 0          | NA          | NA         | NA         | NA         |           |
| NA        | ENSG00000268845 | 0          | NA          | NA         | NA         | NA         |           |
| NA        | ENSG00000268847 | 0.173733   | 0.01914545  | 0.38484597 | 0.78225479 | NA         | SIGLEC31P |
| NA        | ENSG00000268849 | 0          | NA          | NA         | NA         | NA         | SIGLEC22P |
| NA        | ENSG00000268854 | 0.79436418 | -0.00475161 | 0.38151644 | 0.92663463 | NA         |           |
| 112268269 | ENSG00000268858 | 213.500583 | 0.31114272  | 0.154874   | 0.02796385 | 0.09493544 |           |
| 284379    | ENSG00000268864 | 0          | NA          | NA         | NA         | NA         |           |

|           |                 |            |             |            |            |            |           |
|-----------|-----------------|------------|-------------|------------|------------|------------|-----------|
| NA        | ENSG00000268866 | 0          | NA          | NA         | NA         | NA         |           |
| NA        | ENSG00000268869 | 3.31013815 | -0.00827566 | 0.37093089 | 0.93213289 | 0.97175748 | ESPNP     |
| NA        | ENSG00000268870 | 8.18599361 | 0.02192681  | 0.34854737 | 0.88535213 | 0.95004523 |           |
| NA        | ENSG00000268873 | 0          | NA          | NA         | NA         | NA         |           |
| NA        | ENSG00000268879 | 0          | NA          | NA         | NA         | NA         | IGFL1P1   |
| NA        | ENSG00000268883 | 11.478688  | -0.46037625 | 0.64937077 | 0.04725653 | 0.14240119 | PNMA6B    |
| NA        | ENSG00000268884 | 0.173733   | 0.01914545  | 0.38484597 | 0.78225479 | NA         |           |
| NA        | ENSG00000268886 | 0          | NA          | NA         | NA         | NA         |           |
| NA        | ENSG00000268889 | 2.09303037 | 0.11281368  | 0.40152919 | 0.16094046 | NA         |           |
| NA        | ENSG00000268892 | 0.173733   | 0.01914545  | 0.38484597 | 0.78225479 | NA         |           |
| NA        | ENSG00000268894 | 0.15069912 | -0.01848503 | 0.38480575 | 0.84537521 | NA         | PLCE1-AS1 |
| 503538    | ENSG00000268895 | 194.623053 | 0.2329326   | 0.16865966 | 0.12396337 | 0.29179342 | A1BG-AS1  |
| NA        | ENSG00000268896 | 3.04103128 | -0.09241603 | 0.38585355 | 0.36850263 | 0.59789763 |           |
| 102723547 | ENSG00000268902 | 17.2905384 | -0.25642264 | 0.46172919 | 0.10954602 | 0.26628191 | CSAG2     |
| NA        | ENSG00000268903 | 26.7675292 | -0.00101278 | 0.32025153 | 0.99314268 | 0.99778445 |           |
| NA        | ENSG00000268906 | 0          | NA          | NA         | NA         | NA         |           |
| NA        | ENSG00000268908 | 0          | NA          | NA         | NA         | NA         | VN1R92P   |
| NA        | ENSG00000268912 | 97.102856  | -0.13546722 | 0.21023107 | 0.44161859 | 0.66649268 |           |
| 389903    | ENSG00000268916 | 444.128777 | 0.04221066  | 0.11727464 | 0.70701284 | 0.85886619 | CSAG3     |
| NA        | ENSG00000268922 | 0          | NA          | NA         | NA         | NA         |           |
| NA        | ENSG00000268926 | 0.63935496 | -0.01494799 | 0.38323192 | 0.71470105 | NA         |           |
| NA        | ENSG00000268931 | 0.15069912 | -0.01848503 | 0.38480575 | 0.84537521 | NA         |           |
| NA        | ENSG00000268938 | 0.67229061 | 0.02643726  | 0.38366957 | 0.58161294 | NA         |           |
| 541466    | ENSG00000268940 | 0          | NA          | NA         | NA         | NA         | CT45A1    |
| 79160     | ENSG00000268941 | 0.15069912 | -0.01848503 | 0.38480575 | 0.84537521 | NA         | LINC01711 |
| NA        | ENSG00000268942 | 0          | NA          | NA         | NA         | NA         | CKS1BP3   |
| NA        | ENSG00000268945 | 2.38270397 | 0.11875888  | 0.40782309 | 0.06970543 | NA         |           |
| NA        | ENSG00000268947 | 4.89061704 | -0.01028014 | 0.36226548 | 0.93073707 | 0.97111825 |           |
| NA        | ENSG00000268949 | 1.59716096 | -0.05833799 | 0.38501751 | 0.40342427 | NA         | MRPS17P1  |
| NA        | ENSG00000268951 | 0.18922458 | 0.01954053  | 0.38488496 | 0.78225479 | NA         | CDRT15P7  |
| NA        | ENSG00000268955 | 0.32580439 | 0.00221937  | 0.3833783  | 0.95906255 | NA         |           |
| NA        | ENSG00000268957 | 0          | NA          | NA         | NA         | NA         |           |
| 100271846 | ENSG00000268964 | 0.14931947 | -0.01844332 | 0.38480212 | 0.84537521 | NA         | ERVV-2    |
| NA        | ENSG00000268967 | 0          | NA          | NA         | NA         | NA         |           |
| NA        | ENSG00000268970 | 7.0326313  | 0.26469631  | 0.47896365 | 0.09010154 | 0.23086121 |           |
| NA        | ENSG00000268975 | 0.92183469 | -0.0502854  | 0.38870752 | 0.27103757 | NA         | MIA-RAB4B |
| NA        | ENSG00000268981 | 0.14931947 | -0.01844332 | 0.38480212 | 0.84537521 | NA         |           |
| NA        | ENSG00000268983 | 0          | NA          | NA         | NA         | NA         |           |

|           |                 |            |             |            |            |            |            |
|-----------|-----------------|------------|-------------|------------|------------|------------|------------|
| NA        | ENSG00000268985 | 0          | NA          | NA         | NA         | NA         |            |
| NA        | ENSG00000268987 | 0.15069912 | -0.01848503 | 0.38480575 | 0.84537521 | NA         |            |
| 494119    | ENSG00000268988 | 0          | NA          | NA         | NA         | NA         | SPANXN2    |
| NA        | ENSG00000268992 | 0.49772858 | -0.01060053 | 0.38285799 | 0.82297184 | NA         | CDC42EP3P1 |
| NA        | ENSG00000268993 | 0.30139824 | -0.02296476 | 0.38527817 | 0.68536535 | NA         | RPL22P6    |
| 100132304 | ENSG00000268994 | 0          | NA          | NA         | NA         | NA         | FAM236B    |
| NA        | ENSG00000268995 | 0.74659737 | -0.03303578 | 0.38644226 | 0.4112877  | NA         | VN1R82P    |
| 100289341 | ENSG00000268996 | 33.233224  | 0.12374164  | 0.2900194  | 0.53192183 | 0.74319219 | MAN1B1-DT  |
| NA        | ENSG00000268997 | 0          | NA          | NA         | NA         | NA         | DNAJC19P3  |
| NA        | ENSG00000269001 | 93.3091795 | -0.44804825 | 0.28416843 | 0.03906307 | 0.12329166 |            |
| NA        | ENSG00000269009 | 0          | NA          | NA         | NA         | NA         | SLC6A21P   |
| NA        | ENSG00000269012 | 0.51937201 | -0.02557462 | 0.38567603 | 0.54680819 | NA         | KRT18P40   |
| NA        | ENSG00000269014 | 0          | NA          | NA         | NA         | NA         |            |
| NA        | ENSG00000269019 | 1.75784403 | 0.12990307  | 0.41459743 | 0.03554243 | NA         | HOMER3-AS1 |
| NA        | ENSG00000269021 | 0          | NA          | NA         | NA         | NA         | SIGLEC24P  |
| NA        | ENSG00000269025 | 0          | NA          | NA         | NA         | NA         |            |
| NA        | ENSG00000269026 | 7.5975132  | 0.18718832  | 0.41426151 | 0.19790489 | 0.4020513  |            |
| 100462981 | ENSG00000269028 | 0.36268051 | 0.00121823  | 0.38336652 | 0.96430717 | NA         | MTRNR2L12  |
| NA        | ENSG00000269032 | 0          | NA          | NA         | NA         | NA         |            |
| NA        | ENSG00000269035 | 0          | NA          | NA         | NA         | NA         |            |
| 100652911 | ENSG00000269037 | 0          | NA          | NA         | NA         | NA         | LINC01838  |
| NA        | ENSG00000269038 | 4.21149128 | -0.04887919 | 0.37102391 | 0.65882214 | 0.83075068 | SF1-DT     |
| NA        | ENSG00000269040 | 1.87940863 | -0.05158942 | 0.38263963 | 0.48743844 | NA         | BNIP3P24   |
| NA        | ENSG00000269043 | 0.42454348 | -0.02597822 | 0.38560117 | 0.58586612 | NA         |            |
| NA        | ENSG00000269044 | 95.521102  | -0.07431071 | 0.20611807 | 0.66837603 | 0.83697256 |            |
| NA        | ENSG00000269050 | 0.173124   | -0.01911262 | 0.38486262 | 0.84537521 | NA         |            |
| NA        | ENSG00000269053 | 0.61493321 | -0.01565636 | 0.38336499 | 0.72185183 | NA         |            |
| NA        | ENSG00000269054 | 26.264787  | 0.72218604  | 0.48367506 | 0.01658078 | 0.0626357  | ZNF497-AS1 |
| NA        | ENSG00000269055 | 0          | NA          | NA         | NA         | NA         | BNIP3P18   |
| 125972    | ENSG00000269058 | 0.30139824 | -0.02296476 | 0.38527817 | 0.68536535 | NA         | CALR3      |
| NA        | ENSG00000269066 | 0          | NA          | NA         | NA         | NA         |            |
| 388523    | ENSG00000269067 | 4.65935934 | -0.21668234 | 0.46440418 | 0.04468797 | 0.13639738 | ZNF728     |
| NA        | ENSG00000269068 | 8.67250651 | 0.09844715  | 0.37471485 | 0.46221793 | 0.6851832  |            |
| NA        | ENSG00000269069 | 119.045469 | 0.10567041  | 0.20336403 | 0.54046321 | 0.7491644  |            |
| 101928517 | ENSG00000269072 | 0          | NA          | NA         | NA         | NA         |            |
| NA        | ENSG00000269082 | 0          | NA          | NA         | NA         | NA         |            |
| NA        | ENSG00000269085 | 0          | NA          | NA         | NA         | NA         |            |
| NA        | ENSG00000269086 | 35.9332752 | -0.45773292 | 0.38610976 | 0.06172321 | 0.17524162 |            |



|           |                 |            |             |            |            |            |            |
|-----------|-----------------|------------|-------------|------------|------------|------------|------------|
| NA        | ENSG00000269091 | 15.3917947 | 1.18920104  | 0.77745499 | 0.00614809 | 0.02766569 |            |
| NA        | ENSG00000269095 | 0.63890519 | -0.0210218  | 0.38316839 | 0.66784759 | NA         |            |
| 441519    | ENSG00000269096 | 0          | NA          | NA         | NA         | NA         | CT45A3     |
| NA        | ENSG00000269097 | 0          | NA          | NA         | NA         | NA         | TPRG1LP1   |
| NA        | ENSG00000269099 | 0          | NA          | NA         | NA         | NA         | LSP1P1     |
| NA        | ENSG00000269102 | 0          | NA          | NA         | NA         | NA         |            |
| NA        | ENSG00000269103 | 0          | NA          | NA         | NA         | NA         |            |
| NA        | ENSG00000269106 | 1.55819657 | 0.01684566  | 0.38118111 | 0.76880772 | NA         |            |
| NA        | ENSG00000269107 | 0          | NA          | NA         | NA         | NA         |            |
| NA        | ENSG00000269110 | 0          | NA          | NA         | NA         | NA         |            |
| 388630    | ENSG00000269113 | 3.20008708 | 0.14340475  | 0.41364511 | 0.11999657 | 0.28519048 | TRABD2B    |
| NA        | ENSG00000269118 | 0          | NA          | NA         | NA         | NA         | FAM90A28P  |
| NA        | ENSG00000269119 | 0          | NA          | NA         | NA         | NA         | HNRNPA1P52 |
| NA        | ENSG00000269124 | 0.34121272 | 0.02362731  | 0.38535352 | 0.62405134 | NA         |            |
| NA        | ENSG00000269125 | 0.64567547 | 0.00157296  | 0.3819301  | 0.97208762 | NA         |            |
| NA        | ENSG00000269130 | 0          | NA          | NA         | NA         | NA         |            |
| 641367    | ENSG00000269136 | 1.11906587 | -0.02538469 | 0.38200631 | 0.65316121 | NA         | BRI3BPP1   |
| NA        | ENSG00000269138 | 0          | NA          | NA         | NA         | NA         | ZNF209P    |
| NA        | ENSG00000269139 | 4.20244961 | -0.01010668 | 0.36332517 | 0.93126775 | 0.97136597 |            |
| NA        | ENSG00000269145 | 0          | NA          | NA         | NA         | NA         | MAST3-AS1  |
| NA        | ENSG00000269148 | 8.45314338 | 0.15654705  | 0.38314192 | 0.3280088  | 0.55648815 |            |
| NA        | ENSG00000269151 | 0          | NA          | NA         | NA         | NA         |            |
| NA        | ENSG00000269153 | 0.31810842 | 0.00105222  | 0.38336605 | 0.966995   | NA         | LYPLA2P2   |
| NA        | ENSG00000269154 | 0          | NA          | NA         | NA         | NA         | BNIP3P13   |
| 441179    | ENSG00000269155 | 0.67708016 | 0.00443451  | 0.38190422 | 0.92493652 | NA         |            |
| NA        | ENSG00000269161 | 0          | NA          | NA         | NA         | NA         |            |
| NA        | ENSG00000269172 | 0          | NA          | NA         | NA         | NA         |            |
| NA        | ENSG00000269176 | 51.2593374 | -0.11436362 | 0.25357095 | 0.55184914 | 0.75827183 |            |
| NA        | ENSG00000269177 | 0          | NA          | NA         | NA         | NA         |            |
| NA        | ENSG00000269179 | 0          | NA          | NA         | NA         | NA         |            |
| NA        | ENSG00000269181 | 0          | NA          | NA         | NA         | NA         |            |
| 100506542 | ENSG00000269186 | 0          | NA          | NA         | NA         | NA         | LINC01082  |
| NA        | ENSG00000269188 | 0          | NA          | NA         | NA         | NA         |            |
| NA        | ENSG00000269189 | 0          | NA          | NA         | NA         | NA         |            |
| 115290    | ENSG00000269190 | 711.756955 | 0.20939415  | 0.10101069 | 0.0312983  | 0.10370043 | FBXO17     |
| NA        | ENSG00000269191 | 0.69234742 | 0.02488767  | 0.38339789 | 0.58190081 | NA         |            |
| NA        | ENSG00000269194 | 10.9254846 | 0.08486376  | 0.34552738 | 0.61308347 | 0.80076208 |            |
| 375196    | ENSG00000269210 | 2.36798608 | 0.0885842   | 0.3922683  | 0.25580509 | NA         |            |

|           |                 |            |             |            |            |            |             |
|-----------|-----------------|------------|-------------|------------|------------|------------|-------------|
| 200298    | ENSG00000269220 | 2.65384213 | 0.00961389  | 0.37051779 | 0.92579159 | 0.9691565  | LINC00528   |
| 286527    | ENSG00000269226 | 218.370554 | 0.1730639   | 0.15128382 | 0.21290128 | 0.42281896 |             |
| NA        | ENSG00000269228 | 0          | NA          | NA         | NA         | NA         | RPS27AP19   |
| 101669766 | ENSG00000269235 | 9.18412422 | -0.44509483 | 0.67943608 | 0.03785866 | 0.12050631 | ZNF350-AS1  |
| NA        | ENSG00000269236 | 0          | NA          | NA         | NA         | NA         |             |
| NA        | ENSG00000269237 | 0.14931947 | -0.01844332 | 0.38480212 | 0.84537521 | NA         |             |
| NA        | ENSG00000269242 | 0          | NA          | NA         | NA         | NA         |             |
| NA        | ENSG00000269243 | 56.1453108 | -0.1251566  | 0.29900953 | 0.52247593 | 0.73579802 |             |
| NA        | ENSG00000269244 | 0          | NA          | NA         | NA         | NA         | RPL23AP78   |
| NA        | ENSG00000269246 | 0.14931947 | -0.01844332 | 0.38480212 | 0.84537521 | NA         |             |
| NA        | ENSG00000269253 | 0          | NA          | NA         | NA         | NA         | SIGLEC21P   |
| NA        | ENSG00000269256 | 0          | NA          | NA         | NA         | NA         |             |
| NA        | ENSG00000269266 | 0          | NA          | NA         | NA         | NA         | DNAJC19P2   |
| NA        | ENSG00000269271 | 0          | NA          | NA         | NA         | NA         |             |
| NA        | ENSG00000269274 | 0.34338231 | 0.00346128  | 0.38340125 | 0.95462385 | NA         |             |
| NA        | ENSG00000269275 | 6.27688106 | 0.00929655  | 0.35476337 | 0.94838002 | 0.97876335 |             |
| NA        | ENSG00000269281 | 0          | NA          | NA         | NA         | NA         | S100A11P8   |
| NA        | ENSG00000269288 | 0.14931947 | -0.01844332 | 0.38480212 | 0.84537521 | NA         |             |
| 100505851 | ENSG00000269289 | 1.87713398 | 0.05374946  | 0.38155386 | 0.5081447  | NA         |             |
| NA        | ENSG00000269292 | 0          | NA          | NA         | NA         | NA         |             |
| 100129195 | ENSG00000269293 | 51.0169728 | 0.17164996  | 0.26047819 | 0.3837626  | 0.61293849 | ZSCAN16-AS1 |
| NA        | ENSG00000269296 | 0.63930624 | 0.00376659  | 0.38252761 | 0.92837376 | NA         |             |
| NA        | ENSG00000269300 | 1.62550097 | -0.00992829 | 0.37821763 | 0.88813277 | NA         |             |
| NA        | ENSG00000269303 | 0.45040812 | -0.0273326  | 0.38571575 | 0.56135725 | NA         | GRAMD1A-AS1 |
| NA        | ENSG00000269304 | 0          | NA          | NA         | NA         | NA         | FKBP1AP1    |
| NA        | ENSG00000269307 | 11.3383567 | 0.02549396  | 0.35855497 | 0.8505584  | 0.9323763  |             |
| 79917     | ENSG00000269313 | 19.590503  | 0.20120967  | 0.36625124 | 0.29439367 | 0.52061418 | MAGIX       |
| NA        | ENSG00000269316 | 0          | NA          | NA         | NA         | NA         | RAD54L2P1   |
| NA        | ENSG00000269318 | 13.9670873 | 0.140077    | 0.34923565 | 0.44130324 | 0.6661181  |             |
| NA        | ENSG00000269320 | 0          | NA          | NA         | NA         | NA         | VN1R93P     |
| NA        | ENSG00000269321 | 0          | NA          | NA         | NA         | NA         |             |
| 440518    | ENSG00000269332 | 0          | NA          | NA         | NA         | NA         | GOLGA2P9    |
| 8517      | ENSG00000269335 | 350.811623 | 0.14500541  | 0.12999924 | 0.23542672 | 0.45225273 | IKBKG       |
| 100293516 | ENSG00000269343 | 242.63889  | -0.57804945 | 0.1534068  | 4.96E-05   | 0.0004054  | ZNF587B     |
| NA        | ENSG00000269345 | 0          | NA          | NA         | NA         | NA         | VN1R85P     |
| NA        | ENSG00000269349 | 0.51937201 | -0.02557462 | 0.38567603 | 0.54680819 | NA         |             |
| NA        | ENSG00000269350 | 0          | NA          | NA         | NA         | NA         |             |
| NA        | ENSG00000269352 | 91.8848829 | 0.48107565  | 0.24140329 | 0.0158895  | 0.06039228 | PTOV1-AS2   |

|           |                 |            |             |            |            |            |             |
|-----------|-----------------|------------|-------------|------------|------------|------------|-------------|
| NA        | ENSG00000269353 | 0          | NA          | NA         | NA         | NA         |             |
| NA        | ENSG00000269354 | 0          | NA          | NA         | NA         | NA         |             |
| NA        | ENSG00000269356 | 0.4971252  | -0.02957022 | 0.38590843 | 0.52452971 | NA         |             |
| 100128139 | ENSG00000269364 | 0          | NA          | NA         | NA         | NA         | LINC01233   |
| NA        | ENSG00000269365 | 0          | NA          | NA         | NA         | NA         |             |
| NA        | ENSG00000269371 | 0.79943108 | -0.00567429 | 0.38215247 | 0.9035681  | NA         |             |
| NA        | ENSG00000269373 | 0          | NA          | NA         | NA         | NA         |             |
| NA        | ENSG00000269374 | 3.16964953 | -0.02214346 | 0.37086778 | 0.82658479 | 0.92144622 |             |
| NA        | ENSG00000269376 | 0          | NA          | NA         | NA         | NA         |             |
| NA        | ENSG00000269378 | 111.188923 | 0.05973741  | 0.22491041 | 0.74521244 | 0.87993124 | ITGB1P1     |
| NA        | ENSG00000269383 | 0          | NA          | NA         | NA         | NA         | CYCSP7      |
| NA        | ENSG00000269385 | 0          | NA          | NA         | NA         | NA         |             |
| 100507567 | ENSG00000269386 | 43.6561592 | 0.11883887  | 0.27191802 | 0.54590505 | 0.75333225 | RAB11B-AS1  |
| NA        | ENSG00000269387 | 0          | NA          | NA         | NA         | NA         |             |
| NA        | ENSG00000269388 | 39.312097  | -0.06292817 | 0.27982291 | 0.74421361 | 0.87961385 |             |
| NA        | ENSG00000269391 | 0.31542582 | -0.02307905 | 0.38529542 | 0.676986   | NA         |             |
| NA        | ENSG00000269392 | 2.36960251 | 0.094904    | 0.39000201 | 0.31127983 | NA         |             |
| NA        | ENSG00000269397 | 45.5972359 | 0.02959327  | 0.25550996 | 0.87847411 | 0.9462643  |             |
| NA        | ENSG00000269399 | 11.8793886 | -0.22062888 | 0.40024744 | 0.22767633 | 0.44257273 |             |
| NA        | ENSG00000269400 | 0          | NA          | NA         | NA         | NA         |             |
| NA        | ENSG00000269403 | 7.65543892 | -0.06228662 | 0.35515776 | 0.67262393 | 0.83906698 |             |
| 6689      | ENSG00000269404 | 1.52663598 | 0.00408871  | 0.38014189 | 0.85886399 | NA         | SPIB        |
| 56001     | ENSG00000269405 | 0          | NA          | NA         | NA         | NA         | NXF2        |
| 104472717 | ENSG00000269416 | 438.106107 | 0.11851359  | 0.13744889 | 0.35588913 | 0.58600518 | LINC01224   |
| NA        | ENSG00000269419 | 0          | NA          | NA         | NA         | NA         |             |
| 106144526 | ENSG00000269420 | 0.14931947 | -0.01844332 | 0.38480212 | 0.84537521 | NA         | PLA2G4C-AS1 |
| NA        | ENSG00000269421 | 5.08872241 | 0.04056134  | 0.36308585 | 0.75210885 | 0.88399524 |             |
| NA        | ENSG00000269425 | 5.41017656 | -0.00602467 | 0.35910355 | 0.96088066 | 0.98409417 |             |
| NA        | ENSG00000269427 | 6.51073656 | 0.06229352  | 0.37706051 | 0.5475933  | 0.75435339 |             |
| NA        | ENSG00000269431 | 0          | NA          | NA         | NA         | NA         | BNIP3P8     |
| 101060233 | ENSG00000269433 | 0          | NA          | NA         | NA         | NA         | OPN1MW3     |
| 728343    | ENSG00000269437 | 0          | NA          | NA         | NA         | NA         | NXF2B       |
| 100507551 | ENSG00000269439 | 26.7272661 | -0.00685387 | 0.29314494 | 0.96940389 | 0.98853525 | PGLS-DT     |
| NA        | ENSG00000269444 | 1.25801617 | 0.06207196  | 0.38884562 | 0.26112373 | NA         |             |
| NA        | ENSG00000269445 | 0          | NA          | NA         | NA         | NA         |             |
| NA        | ENSG00000269446 | 0          | NA          | NA         | NA         | NA         |             |
| NA        | ENSG00000269458 | 0          | NA          | NA         | NA         | NA         |             |
| NA        | ENSG00000269460 | 0          | NA          | NA         | NA         | NA         |             |

|        |                 |            |             |            |            |            |           |
|--------|-----------------|------------|-------------|------------|------------|------------|-----------|
| NA     | ENSG00000269463 | 0.34044875 | -9.22E-05   | 0.38336216 | 0.96612702 | NA         |           |
| 391769 | ENSG00000269466 | 0          | NA          | NA         | NA         | NA         | H3Y1      |
| NA     | ENSG00000269469 | 0.46860252 | -0.0080609  | 0.38327481 | 0.85995946 | NA         |           |
| NA     | ENSG00000269471 | 0.173733   | 0.01914545  | 0.38484597 | 0.78225479 | NA         |           |
| NA     | ENSG00000269473 | 11.5098322 | -0.09900909 | 0.3490376  | 0.55325383 | 0.75941303 | ZNF132-DT |
| NA     | ENSG00000269475 | 0          | NA          | NA         | NA         | NA         |           |
| NA     | ENSG00000269476 | 2.61857479 | -0.05194962 | 0.38043609 | 0.5349984  | 0.74596727 |           |
| NA     | ENSG00000269480 | 0          | NA          | NA         | NA         | NA         |           |
| NA     | ENSG00000269481 | 16.2428049 | -0.02253153 | 0.32483077 | 0.89553631 | 0.95469109 |           |
| NA     | ENSG00000269482 | 3.24544971 | 0.04963557  | 0.3787699  | 0.57583141 | 0.7744963  |           |
| NA     | ENSG00000269483 | 0          | NA          | NA         | NA         | NA         |           |
| NA     | ENSG00000269486 | 26.3447766 | -0.13451488 | 0.31556517 | 0.48817053 | 0.70793826 | ERVK9-11  |
| NA     | ENSG00000269487 | 0.33471731 | 0.02354391  | 0.38534154 | 0.62842204 | NA         |           |
| NA     | ENSG00000269489 | 1.15650921 | -0.00863018 | 0.37961705 | 0.89186675 | NA         |           |
| NA     | ENSG00000269495 | 0          | NA          | NA         | NA         | NA         |           |
| 63947  | ENSG00000269502 | 0.30139824 | -0.02296476 | 0.38527817 | 0.68536535 | NA         | DMRTC1    |
| NA     | ENSG00000269504 | 0          | NA          | NA         | NA         | NA         |           |
| NA     | ENSG00000269505 | 0          | NA          | NA         | NA         | NA         | ZNF92P2   |
| NA     | ENSG00000269506 | 0.49439866 | 0.01628241  | 0.38325613 | 0.73156926 | NA         |           |
| NA     | ENSG00000269509 | 0          | NA          | NA         | NA         | NA         | BNIP3P34  |
| NA     | ENSG00000269514 | 11.699784  | 0.16448097  | 0.36813766 | 0.35597812 | 0.58601111 |           |
| NA     | ENSG00000269516 | 0          | NA          | NA         | NA         | NA         | CYP4F23P  |
| NA     | ENSG00000269519 | 0          | NA          | NA         | NA         | NA         |           |
| NA     | ENSG00000269524 | 0          | NA          | NA         | NA         | NA         |           |
| 147664 | ENSG00000269526 | 0.98942658 | 0.00330748  | 0.38000443 | 0.95655404 | NA         | ERVV-1    |
| NA     | ENSG00000269533 | 2.36925665 | -0.04377482 | 0.37786961 | 0.61779166 | NA         |           |
| NA     | ENSG00000269534 | 1.04828521 | 0.00603464  | 0.38081688 | 0.91395108 | NA         |           |
| NA     | ENSG00000269535 | 0.47047398 | -0.00728133 | 0.38322951 | 0.86733887 | NA         |           |
| NA     | ENSG00000269540 | 0.173124   | -0.01911262 | 0.38486262 | 0.84537521 | NA         |           |
| NA     | ENSG00000269543 | 0.49973239 | 0.00840206  | 0.38318293 | 0.80956682 | NA         |           |
| NA     | ENSG00000269546 | 0          | NA          | NA         | NA         | NA         | CLIC4P2   |
| NA     | ENSG00000269547 | 0          | NA          | NA         | NA         | NA         |           |
| NA     | ENSG00000269552 | 0          | NA          | NA         | NA         | NA         | OR7A8P    |
| NA     | ENSG00000269553 | 0          | NA          | NA         | NA         | NA         |           |
| 84548  | ENSG00000269556 | 277.855498 | 0.34582662  | 0.14825135 | 0.01137494 | 0.04615107 | TMEM185A  |
| NA     | ENSG00000269559 | 5.98426436 | 0.09384465  | 0.37662767 | 0.45834746 | 0.68173128 |           |
| NA     | ENSG00000269560 | 0.15069912 | -0.01848503 | 0.38480575 | 0.84537521 | NA         |           |
| NA     | ENSG00000269564 | 0          | NA          | NA         | NA         | NA         |           |

|           |    |                 |            |             |            |            |            |              |
|-----------|----|-----------------|------------|-------------|------------|------------|------------|--------------|
|           | NA | ENSG00000269565 | 0          | NA          | NA         | NA         | NA         | GPR32P1      |
|           | NA | ENSG00000269570 | 9.6856646  | 0.05831114  | 0.34720525 | 0.71302721 | 0.86187687 |              |
|           | NA | ENSG00000269575 | 0          | NA          | NA         | NA         | NA         | MTDHP5       |
|           | NA | ENSG00000269576 | 0          | NA          | NA         | NA         | NA         | HNRNPMP2     |
|           | NA | ENSG00000269578 | 0          | NA          | NA         | NA         | NA         |              |
|           | NA | ENSG00000269580 | 0          | NA          | NA         | NA         | NA         | SIGLEC27P    |
|           | NA | ENSG00000269583 | 0          | NA          | NA         | NA         | NA         |              |
|           | NA | ENSG00000269584 | 2.93661955 | 0.18457665  | 0.4411774  | 0.05819687 | 0.1673371  | TDGF1P7      |
| 102723631 | NA | ENSG00000269586 | 0          | NA          | NA         | NA         | NA         | CT45A10      |
|           | NA | ENSG00000269588 | 0          | NA          | NA         | NA         | NA         |              |
|           | NA | ENSG00000269590 | 0          | NA          | NA         | NA         | NA         |              |
|           | NA | ENSG00000269599 | 0          | NA          | NA         | NA         | NA         |              |
|           | NA | ENSG00000269600 | 7.78729083 | -0.02507665 | 0.35313904 | 0.8578468  | 0.93653665 |              |
|           | NA | ENSG00000269604 | 971.34239  | -0.17489971 | 0.08491079 | 0.03431723 | 0.11167029 |              |
|           | NA | ENSG00000269608 | 0          | NA          | NA         | NA         | NA         | OSTCP3       |
| 100505761 | NA | ENSG00000269609 | 207.294899 | -0.47004493 | 0.17284053 | 0.0025742  | 0.01330348 | C10orf95-AS1 |
|           | NA | ENSG00000269615 | 0.31809391 | 0.00103592  | 0.38336594 | 0.9671511  | NA         | MTDHP2       |
|           | NA | ENSG00000269621 | 0.32268904 | -0.02325582 | 0.38531894 | 0.66949245 | NA         |              |
|           | NA | ENSG00000269622 | 4.86018313 | 0.01613978  | 0.36507421 | 0.89044429 | 0.95232275 | TP53TG3HP    |
|           | NA | ENSG00000269635 | 0          | NA          | NA         | NA         | NA         |              |
|           | NA | ENSG00000269637 | 0          | NA          | NA         | NA         | NA         | RPL12P41     |
|           | NA | ENSG00000269646 | 0.31693913 | 0.00132998  | 0.38336824 | 0.9651102  | NA         |              |
|           | NA | ENSG00000269651 | 0          | NA          | NA         | NA         | NA         |              |
|           | NA | ENSG00000269652 | 0          | NA          | NA         | NA         | NA         |              |
|           | NA | ENSG00000269653 | 3.43280895 | 0.00244624  | 0.36647335 | 0.98441743 | 0.99457273 |              |
| 106144593 | NA | ENSG00000269656 | 1.61553327 | -0.03171218 | 0.38049064 | 0.64435404 | NA         | NOP53-AS1    |
|           | NA | ENSG00000269662 | 0.53589682 | 0.01314342  | 0.38287819 | 0.74623147 | NA         | BNIP3P39     |
|           | NA | ENSG00000269667 | 0          | NA          | NA         | NA         | NA         |              |
|           | NA | ENSG00000269678 | 0          | NA          | NA         | NA         | NA         | OR7A18P      |
|           | NA | ENSG00000269680 | 1.8956745  | 0.07927509  | 0.38783785 | 0.3379926  | NA         |              |
|           | NA | ENSG00000269681 | 0          | NA          | NA         | NA         | NA         |              |
|           | NA | ENSG00000269688 | 7.03166522 | 0.07775582  | 0.36121409 | 0.59287174 | 0.78702605 |              |
|           | NA | ENSG00000269692 | 0          | NA          | NA         | NA         | NA         | FKBP4P2      |
|           | NA | ENSG00000269693 | 0          | NA          | NA         | NA         | NA         |              |
|           | NA | ENSG00000269694 | 2.27385815 | -0.03599119 | 0.37714502 | 0.67467159 | NA         |              |
|           | NA | ENSG00000269696 | 13.1497308 | 0.1323687   | 0.35068596 | 0.45853188 | 0.68190334 | ZNF470-DT    |
| 23619     | NA | ENSG00000269699 | 3.7869072  | -0.04541879 | 0.37096897 | 0.6787677  | 0.84319072 | ZIM2         |
|           | NA | ENSG00000269706 | 0          | NA          | NA         | NA         | NA         |              |

|           |    |                 |            |             |            |            |            |           |
|-----------|----|-----------------|------------|-------------|------------|------------|------------|-----------|
|           | NA | ENSG00000269707 | 16.6380096 | 5.22374711  | 1.1022003  | 8.34E-07   | 9.58E-06   |           |
|           | NA | ENSG00000269711 | 0          | NA          | NA         | NA         | NA         |           |
| 400818    |    | ENSG00000269713 | 2875.20863 | -0.00914161 | 0.06268458 | 0.8823913  | 0.94823075 | NBPF9     |
| 110806280 |    | ENSG00000269720 | 0.33471731 | 0.02354391  | 0.38534154 | 0.62842204 | NA         | CCDC194   |
|           | NA | ENSG00000269729 | 0          | NA          | NA         | NA         | NA         |           |
|           | NA | ENSG00000269732 | 0.14931947 | -0.01844332 | 0.38480212 | 0.84537521 | NA         | WBP1LP7   |
|           | NA | ENSG00000269736 | 0          | NA          | NA         | NA         | NA         |           |
|           | NA | ENSG00000269737 | 105.363257 | 0.05509458  | 0.2106016  | 0.75378974 | 0.88507951 |           |
|           | NA | ENSG00000269741 | 0          | NA          | NA         | NA         | NA         |           |
|           | NA | ENSG00000269742 | 0.173733   | 0.01914545  | 0.38484597 | 0.78225479 | NA         | BNIP3P29  |
| 401612    |    | ENSG00000269743 | 247.210402 | -0.07119971 | 0.16796125 | 0.63617563 | 0.81722218 | SLC25A53  |
|           | NA | ENSG00000269745 | 0          | NA          | NA         | NA         | NA         |           |
|           | NA | ENSG00000269749 | 1.00415192 | 0.04322574  | 0.38779947 | 0.2717111  | NA         |           |
|           | NA | ENSG00000269752 | 0.173124   | -0.01911262 | 0.38486262 | 0.84537521 | NA         |           |
|           | NA | ENSG00000269755 | 2.27069493 | 0.08073637  | 0.39650783 | 0.06234901 | NA         |           |
|           | NA | ENSG00000269758 | 0          | NA          | NA         | NA         | NA         |           |
|           | NA | ENSG00000269761 | 0          | NA          | NA         | NA         | NA         |           |
|           | NA | ENSG00000269763 | 0          | NA          | NA         | NA         | NA         | EXOSC3P2  |
|           | NA | ENSG00000269765 | 0          | NA          | NA         | NA         | NA         |           |
|           | NA | ENSG00000269776 | 0          | NA          | NA         | NA         | NA         | DPPA5P1   |
|           | NA | ENSG00000269779 | 0          | NA          | NA         | NA         | NA         |           |
| 100302127 |    | ENSG00000269782 | 0          | NA          | NA         | NA         | NA         | MIR1470   |
|           | NA | ENSG00000269786 | 0          | NA          | NA         | NA         | NA         |           |
|           | NA | ENSG00000269787 | 0          | NA          | NA         | NA         | NA         | OR7A3P    |
| 548313    |    | ENSG00000269791 | 0          | NA          | NA         | NA         | NA         | SSX4B     |
|           | NA | ENSG00000269792 | 0          | NA          | NA         | NA         | NA         |           |
|           | NA | ENSG00000269793 | 1.91106304 | 0.07165186  | 0.39386151 | 0.09054586 | NA         | ZIM2-AS1  |
|           | NA | ENSG00000269794 | 7.32250549 | 0.00022652  | 0.35069008 | 0.99927906 | 0.99963176 |           |
|           | NA | ENSG00000269796 | 0          | NA          | NA         | NA         | NA         |           |
|           | NA | ENSG00000269799 | 0          | NA          | NA         | NA         | NA         |           |
|           | NA | ENSG00000269800 | 0          | NA          | NA         | NA         | NA         | PLEKHA3P1 |
|           | NA | ENSG00000269802 | 0          | NA          | NA         | NA         | NA         |           |
|           | NA | ENSG00000269806 | 0          | NA          | NA         | NA         | NA         | BICRA-AS1 |
|           | NA | ENSG00000269807 | 0          | NA          | NA         | NA         | NA         |           |
|           | NA | ENSG00000269811 | 0.36308394 | 0.00153685  | 0.38336934 | 0.96130636 | NA         | SCGB2B3P  |
|           | NA | ENSG00000269813 | 0          | NA          | NA         | NA         | NA         |           |
|           | NA | ENSG00000269815 | 9.33988429 | 0.67067281  | 0.95568813 | 0.02439168 | 0.0854247  |           |
| 10984     |    | ENSG00000269821 | 457.594037 | -0.34455845 | 0.15881128 | 0.01690739 | 0.06368762 | KCNQ1OT1  |

|           |                 |            |             |            |            |            |                |
|-----------|-----------------|------------|-------------|------------|------------|------------|----------------|
| NA        | ENSG00000269825 | 276.589806 | -0.26590385 | 0.17642427 | 0.08946837 | 0.22960193 |                |
| NA        | ENSG00000269826 | 0          | NA          | NA         | NA         | NA         |                |
| NA        | ENSG00000269833 | 0.173124   | -0.01911262 | 0.38486262 | 0.84537521 | NA         |                |
| NA        | ENSG00000269834 | 162.142441 | 0.16780463  | 0.16958304 | 0.27014487 | 0.49334261 | ZNF528-AS1     |
| NA        | ENSG00000269836 | 0          | NA          | NA         | NA         | NA         |                |
| NA        | ENSG00000269837 | 225.215219 | 0.11600288  | 0.15808195 | 0.42132152 | 0.64728348 | IPO5P1         |
| NA        | ENSG00000269839 | 0          | NA          | NA         | NA         | NA         |                |
| NA        | ENSG00000269842 | 0          | NA          | NA         | NA         | NA         |                |
| NA        | ENSG00000269843 | 2.42423248 | 0.09942466  | 0.39076889 | 0.3020128  | NA         |                |
| 641367    | ENSG00000269845 | 12.6217954 | 0.05276357  | 0.33798719 | 0.75420951 | 0.88536281 | CCNYL6         |
| NA        | ENSG00000269846 | 1.5092328  | 0.02306287  | 0.37690996 | 0.77670455 | NA         |                |
| NA        | ENSG00000269848 | 0          | NA          | NA         | NA         | NA         |                |
| 646862    | ENSG00000269855 | 6.52434695 | 0.10332793  | 0.38184455 | 0.40072776 | 0.62923932 | RNF225         |
| 112398    | ENSG00000269858 | 1251.76762 | -0.14970417 | 0.09205757 | 0.09333943 | 0.23674616 | EGLN2          |
| NA        | ENSG00000269859 | 0.36284259 | 0.00135523  | 0.38336765 | 0.96301713 | NA         | ZNF628-DT      |
| NA        | ENSG00000269867 | 27.3644883 | -0.03663678 | 0.30157247 | 0.8441302  | 0.92948958 |                |
| NA        | ENSG00000269873 | 0.15069912 | -0.01848503 | 0.38480575 | 0.84537521 | NA         |                |
| NA        | ENSG00000269877 | 0          | NA          | NA         | NA         | NA         |                |
| NA        | ENSG00000269883 | 5.76780029 | -0.11566955 | 0.38434018 | 0.36377361 | 0.59354103 |                |
| NA        | ENSG00000269885 | 0          | NA          | NA         | NA         | NA         | VN1R79P        |
| NA        | ENSG00000269886 | 0.89834752 | -0.05084323 | 0.38876994 | 0.27270535 | NA         |                |
| NA        | ENSG00000269887 | 4.86393448 | -0.18790185 | 0.42659313 | 0.14522554 | 0.32572196 |                |
| NA        | ENSG00000269888 | 0.99958807 | 0.04664537  | 0.38590469 | 0.37159486 | NA         |                |
| NA        | ENSG00000269889 | 1.36229233 | 0.03067233  | 0.38068039 | 0.64897129 | NA         |                |
| NA        | ENSG00000269891 | 15.0161808 | -2.02982959 | 0.86577809 | 0.00080302 | 0.00488709 | ARHGAP19-SLIT1 |
| NA        | ENSG00000269892 | 4.59285598 | 0.1436423   | 0.40348789 | 0.22297676 | 0.43606299 |                |
| 100093630 | ENSG00000269893 | 750.504572 | -0.08828587 | 0.12079405 | 0.44017257 | 0.66517856 | SNHG8          |
| NA        | ENSG00000269895 | 0          | NA          | NA         | NA         | NA         |                |
| 100129534 | ENSG00000269896 | 46.0595551 | 0.23657512  | 0.29517203 | 0.25573253 | 0.47680983 |                |
| 100532731 | ENSG00000269897 | 10.8406016 | 0.01649201  | 0.34698791 | 0.91553446 | 0.96412971 | COMMD3-BMI1    |
| NA        | ENSG00000269898 | 0          | NA          | NA         | NA         | NA         |                |
| 6023      | ENSG00000269900 | 0          | NA          | NA         | NA         | NA         | RMRP           |
| NA        | ENSG00000269901 | 0.16735865 | 0.01897177  | 0.38482933 | 0.78225479 | NA         |                |
| NA        | ENSG00000269902 | 0          | NA          | NA         | NA         | NA         |                |
| NA        | ENSG00000269903 | 0.8434054  | 0.0163406   | 0.38119526 | 0.77188461 | NA         |                |
| 139201    | ENSG00000269904 | 0          | NA          | NA         | NA         | NA         | MAP2K4P1       |
| NA        | ENSG00000269906 | 4.25001211 | -0.01437335 | 0.36356508 | 0.90320075 | 0.95764766 |                |
| NA        | ENSG00000269907 | 3.22315803 | 0.0388349   | 0.37393603 | 0.69677112 | 0.85365037 | PTMAP11        |

|           |                 |            |             |            |            |            |             |
|-----------|-----------------|------------|-------------|------------|------------|------------|-------------|
| NA        | ENSG00000269910 | 21.9386785 | 0.01937746  | 0.31987982 | 0.91542079 | 0.96408684 |             |
| NA        | ENSG00000269911 | 14.3052751 | -0.23778454 | 0.39298439 | 0.22320732 | 0.43637055 | FAM226B     |
| NA        | ENSG00000269915 | 0.173733   | 0.01914545  | 0.38484597 | 0.78225479 | NA         |             |
| NA        | ENSG00000269918 | 103.888729 | -0.41230157 | 0.22443947 | 0.02838713 | 0.09609291 |             |
| NA        | ENSG00000269919 | 0          | NA          | NA         | NA         | NA         |             |
| NA        | ENSG00000269921 | 2.293087   | -0.09515147 | 0.39131518 | 0.28633755 | NA         |             |
| NA        | ENSG00000269924 | 0.30139824 | -0.02296476 | 0.38527817 | 0.68536535 | NA         |             |
| NA        | ENSG00000269925 | 3.68798191 | 0.03576009  | 0.37065585 | 0.74036682 | 0.87741937 |             |
| NA        | ENSG00000269927 | 0          | NA          | NA         | NA         | NA         |             |
| 112903833 | ENSG00000269929 | 110.961623 | -0.30072361 | 0.25748896 | 0.1325296  | 0.30570716 | MIRLET7A1HG |
| NA        | ENSG00000269930 | 0          | NA          | NA         | NA         | NA         |             |
| NA        | ENSG00000269931 | 0          | NA          | NA         | NA         | NA         |             |
| NA        | ENSG00000269933 | 0.32550011 | 0.00276241  | 0.38338726 | 0.95462016 | NA         |             |
| NA        | ENSG00000269934 | 15.4223957 | -0.08688083 | 0.33419582 | 0.62185875 | 0.80695268 |             |
| NA        | ENSG00000269935 | 3.31270651 | -0.18498951 | 0.43591385 | 0.08909067 | 0.22877088 |             |
| NA        | ENSG00000269937 | 466.01489  | 0.24657709  | 0.1136882  | 0.02283321 | 0.08099604 |             |
| NA        | ENSG00000269938 | 6.86987691 | -0.13559709 | 0.38460704 | 0.34289854 | 0.57311341 |             |
| NA        | ENSG00000269939 | 0.15069912 | -0.01848503 | 0.38480575 | 0.84537521 | NA         | PCF11-AS1   |
| NA        | ENSG00000269940 | 22.7734367 | 0.4102172   | 0.42494545 | 0.08903147 | 0.22865817 |             |
| NA        | ENSG00000269944 | 0          | NA          | NA         | NA         | NA         |             |
| NA        | ENSG00000269945 | 0          | NA          | NA         | NA         | NA         |             |
| NA        | ENSG00000269947 | 6.74070315 | 0.13256788  | 0.37885171 | 0.37589622 | 0.60500552 |             |
| NA        | ENSG00000269949 | 0.68486848 | 0.02183811  | 0.38380188 | 0.61263119 | NA         |             |
| NA        | ENSG00000269950 | 0.14931947 | -0.01844332 | 0.38480212 | 0.84537521 | NA         |             |
| NA        | ENSG00000269951 | 32.0814107 | 0.12007136  | 0.29519417 | 0.54257362 | 0.75067368 |             |
| NA        | ENSG00000269952 | 1.54774335 | -0.02949073 | 0.37917168 | 0.68767807 | NA         |             |
| NA        | ENSG00000269954 | 70.561751  | -0.86490576 | 0.42349008 | 0.00436977 | 0.0208191  |             |
| 100996928 | ENSG00000269955 | 758.679497 | -0.37177566 | 0.10444006 | 0.00020871 | 0.0014794  | FMC1-LUC7L2 |
| 100507423 | ENSG00000269956 | 3.47932387 | -0.04080983 | 0.3723645  | 0.69362058 | 0.85183585 | MKNK1-AS1   |
| NA        | ENSG00000269957 | 0          | NA          | NA         | NA         | NA         |             |
| NA        | ENSG00000269958 | 75.9998516 | 0.0774368   | 0.22501239 | 0.673341   | 0.83953925 |             |
| 102238594 | ENSG00000269959 | 12.2082012 | -0.0353345  | 0.3383714  | 0.82727846 | 0.92189669 | SPACA6P-AS  |
| NA        | ENSG00000269961 | 1.6207454  | -0.03774643 | 0.38056759 | 0.60244371 | NA         | ERBIN-DT    |
| 101928601 | ENSG00000269964 | 0          | NA          | NA         | NA         | NA         | MEI4        |
| NA        | ENSG00000269966 | 0          | NA          | NA         | NA         | NA         |             |
| NA        | ENSG00000269967 | 0.30139824 | -0.02296476 | 0.38527817 | 0.68536535 | NA         |             |
| NA        | ENSG00000269968 | 2.16849621 | -0.00422967 | 0.37606904 | 0.95639173 | NA         |             |
| NA        | ENSG00000269970 | 0          | NA          | NA         | NA         | NA         |             |



|           |                 |            |             |            |            |            |               |
|-----------|-----------------|------------|-------------|------------|------------|------------|---------------|
| NA        | ENSG00000269971 | 0          | NA          | NA         | NA         | NA         |               |
| NA        | ENSG00000269972 | 0          | NA          | NA         | NA         | NA         |               |
| NA        | ENSG00000269973 | 87.925717  | -0.19080112 | 0.22556794 | 0.30052854 | 0.52770034 |               |
| NA        | ENSG00000269976 | 0.80338862 | -0.00551616 | 0.3814501  | 0.91566916 | NA         |               |
| NA        | ENSG00000269978 | 2.76163405 | 0.04615608  | 0.37651188 | 0.62645014 | 0.81032538 |               |
| NA        | ENSG00000269980 | 1.90612079 | 0.07647058  | 0.39091682 | 0.24910467 | NA         |               |
| NA        | ENSG00000269981 | 1.34999786 | -0.07354612 | 0.39380321 | 0.13398426 | NA         |               |
| NA        | ENSG00000269982 | 51.4285398 | 0.18527872  | 0.27358647 | 0.35608408 | 0.58608828 |               |
| NA        | ENSG00000269983 | 67.2075501 | 0.15473678  | 0.23374646 | 0.40989766 | 0.63781075 |               |
| NA        | ENSG00000269984 | 66.4841862 | -0.36049796 | 0.29835667 | 0.09683307 | 0.24333986 |               |
| 101927972 | ENSG00000269985 | 0          | NA          | NA         | NA         | NA         |               |
| NA        | ENSG00000269986 | 0.3404501  | -0.00010048 | 0.38336217 | 0.96620516 | NA         |               |
| NA        | ENSG00000269987 | 2.053698   | 0.10611595  | 0.4049185  | 0.04254481 | NA         |               |
| NA        | ENSG00000269989 | 0          | NA          | NA         | NA         | NA         |               |
| NA        | ENSG00000269993 | 0          | NA          | NA         | NA         | NA         |               |
| 440173    | ENSG00000269994 | 0.34624801 | -0.02356563 | 0.38536324 | 0.65270996 | NA         | LINC02893     |
| NA        | ENSG00000269997 | 6.452301   | 0.02637335  | 0.35513061 | 0.85183241 | 0.93275912 |               |
| NA        | ENSG00000270000 | 0.15069912 | -0.01848503 | 0.38480575 | 0.84537521 | NA         |               |
| NA        | ENSG00000270001 | 1.87035521 | 0.10401752  | 0.39767903 | 0.19477231 | NA         |               |
| NA        | ENSG00000270002 | 0.30001729 | -0.0229446  | 0.38527539 | 0.68644786 | NA         |               |
| 101928659 | ENSG00000270006 | 5.6568296  | -0.12471834 | 0.38338774 | 0.36088252 | 0.59075159 | C16orf95-DT   |
| NA        | ENSG00000270008 | 0          | NA          | NA         | NA         | NA         |               |
| 7730      | ENSG00000270011 | 34.2502714 | -0.22816125 | 0.35617389 | 0.26295004 | 0.48497991 | ZNF559-ZNF177 |
| 100529215 | ENSG00000270011 | 34.2502714 | -0.22816125 | 0.35617389 | 0.26295004 | 0.48497991 | ZNF559-ZNF177 |
| NA        | ENSG00000270012 | 47.0926845 | -0.21565376 | 0.28337774 | 0.29000022 | 0.51597205 |               |
| NA        | ENSG00000270016 | 2.22462718 | -0.01203883 | 0.37492032 | 0.88761052 | NA         |               |
| NA        | ENSG00000270017 | 0          | NA          | NA         | NA         | NA         |               |
| NA        | ENSG00000270019 | 7.80511942 | -0.01359575 | 0.35516051 | 0.91893579 | 0.96566134 |               |
| NA        | ENSG00000270020 | 0.34109299 | 0.02362639  | 0.38535338 | 0.62411479 | NA         |               |
| NA        | ENSG00000270021 | 11.697085  | 0.04777817  | 0.34228266 | 0.76944414 | 0.89405696 |               |
| NA        | ENSG00000270022 | 1.58496909 | 0.07997733  | 0.39333218 | 0.17319007 | NA         |               |
| NA        | ENSG00000270025 | 20.1780569 | 0.07331732  | 0.32319895 | 0.68892267 | 0.84898907 | BMS1P7        |
| NA        | ENSG00000270031 | 0.47335017 | -0.03506422 | 0.38628524 | 0.4958687  | NA         |               |
| NA        | ENSG00000270035 | 6.2047953  | 0.14322899  | 0.38889843 | 0.31758753 | 0.5454761  |               |
| NA        | ENSG00000270036 | 3.08787339 | -0.02109995 | 0.36909401 | 0.84215828 | 0.92836346 |               |
| NA        | ENSG00000270038 | 0          | NA          | NA         | NA         | NA         |               |
| NA        | ENSG00000270039 | 3.24044907 | 0.07489928  | 0.38072529 | 0.46258615 | 0.68551757 |               |
| NA        | ENSG00000270048 | 1.57714651 | 0.02094707  | 0.37787799 | 0.78294921 | NA         |               |

|           |                 |            |             |            |            |            |             |
|-----------|-----------------|------------|-------------|------------|------------|------------|-------------|
| 101927837 | ENSG00000270049 | 76.7144395 | -0.00875845 | 0.24383967 | 0.96128795 | 0.98420647 | ATP6V0D1-DT |
| NA        | ENSG00000270050 | 0          | NA          | NA         | NA         | NA         |             |
| NA        | ENSG00000270052 | 0.69492844 | 0.0405183   | 0.38717653 | 0.35476053 | NA         |             |
| NA        | ENSG00000270055 | 119.630507 | 0.0799535   | 0.19061073 | 0.63055968 | 0.81314944 |             |
| NA        | ENSG00000270059 | 2.76917867 | -0.04336812 | 0.37354438 | 0.66893069 | 0.83720078 |             |
| NA        | ENSG00000270060 | 1.72691886 | 0.08775591  | 0.39219683 | 0.25127316 | NA         |             |
| NA        | ENSG00000270061 | 4.71172915 | 0.01981827  | 0.36380417 | 0.87176861 | 0.94401928 |             |
| NA        | ENSG00000270062 | 2.09893758 | -0.05742598 | 0.37931939 | 0.53211441 | NA         |             |
| NA        | ENSG00000270066 | 0.14931947 | -0.01844332 | 0.38480212 | 0.84537521 | NA         |             |
| NA        | ENSG00000270068 | 0.173733   | 0.01914545  | 0.38484597 | 0.78225479 | NA         |             |
| NA        | ENSG00000270069 | 0          | NA          | NA         | NA         | NA         | MIR222HG    |
| NA        | ENSG00000270071 | 0          | NA          | NA         | NA         | NA         |             |
| NA        | ENSG00000270072 | 0.173733   | 0.01914545  | 0.38484597 | 0.78225479 | NA         |             |
| NA        | ENSG00000270073 | 0          | NA          | NA         | NA         | NA         | TSPY6P      |
| NA        | ENSG00000270074 | 10.0807658 | 0.04497615  | 0.3607994  | 0.73809771 | 0.87628404 |             |
| NA        | ENSG00000270075 | 0          | NA          | NA         | NA         | NA         |             |
| NA        | ENSG00000270076 | 1.67747239 | 0.02205634  | 0.37615405 | 0.79329735 | NA         |             |
| NA        | ENSG00000270077 | 0          | NA          | NA         | NA         | NA         |             |
| NA        | ENSG00000270082 | 0          | NA          | NA         | NA         | NA         |             |
| NA        | ENSG00000270083 | 1.92261861 | -0.04232474 | 0.37726163 | 0.63420292 | NA         |             |
| NA        | ENSG00000270084 | 20.0222401 | 0.21669751  | 0.35913052 | 0.28168164 | 0.50648575 | GAS5-AS1    |
| NA        | ENSG00000270087 | 0          | NA          | NA         | NA         | NA         |             |
| NA        | ENSG00000270090 | 0.15069912 | -0.01848503 | 0.38480575 | 0.84537521 | NA         |             |
| NA        | ENSG00000270091 | 11.9431277 | -0.00769849 | 0.33877061 | 0.95957386 | 0.98341575 |             |
| NA        | ENSG00000270094 | 0          | NA          | NA         | NA         | NA         |             |
| NA        | ENSG00000270095 | 0.68447597 | 0.00541377  | 0.3819123  | 0.90889052 | NA         |             |
| NA        | ENSG00000270096 | 10.4891507 | -0.26306441 | 0.46530983 | 0.11167094 | 0.27012332 |             |
| NA        | ENSG00000270098 | 0          | NA          | NA         | NA         | NA         | LDHAL6EP    |
| NA        | ENSG00000270099 | 0          | NA          | NA         | NA         | NA         |             |
| NA        | ENSG00000270100 | 9.98160824 | -0.01856284 | 0.34003627 | 0.90575976 | 0.95887485 |             |
| NA        | ENSG00000270103 | 0          | NA          | NA         | NA         | NA         |             |
| NA        | ENSG00000270104 | 0.16735865 | 0.01897177  | 0.38482933 | 0.78225479 | NA         |             |
| NA        | ENSG00000270106 | 7.53750774 | -0.05700406 | 0.36985828 | 0.62815792 | 0.81131783 | TSNAX-DISC1 |
| NA        | ENSG00000270108 | 10.2283654 | 0.05500158  | 0.34297457 | 0.73580623 | 0.87457438 |             |
| NA        | ENSG00000270110 | 26.5174137 | 0.02370059  | 0.29883811 | 0.90203847 | 0.95687554 |             |
| NA        | ENSG00000270111 | 0          | NA          | NA         | NA         | NA         | CELF2-DT    |
| NA        | ENSG00000270112 | 3.05422057 | 0.03347406  | 0.37478656 | 0.71727409 | 0.86393382 | ST8SIA5-DT  |
| NA        | ENSG00000270114 | 0          | NA          | NA         | NA         | NA         |             |

|           |                 |            |             |            |            |            |              |
|-----------|-----------------|------------|-------------|------------|------------|------------|--------------|
| NA        | ENSG00000270115 | 6.62805588 | 0.12067379  | 0.37867521 | 0.39572801 | 0.6251488  |              |
| NA        | ENSG00000270116 | 2.38434738 | 0.01054513  | 0.37331078 | 0.90994251 | NA         |              |
| NA        | ENSG00000270117 | 0          | NA          | NA         | NA         | NA         |              |
| NA        | ENSG00000270118 | 0.173124   | -0.01911262 | 0.38486262 | 0.84537521 | NA         |              |
| NA        | ENSG00000270120 | 0          | NA          | NA         | NA         | NA         |              |
| NA        | ENSG00000270123 | 0          | NA          | NA         | NA         | NA         | VTRNA2-1     |
| NA        | ENSG00000270124 | 0.98907446 | 0.03609153  | 0.38510497 | 0.43080124 | NA         |              |
| NA        | ENSG00000270127 | 32.1645111 | -0.41588397 | 0.37645205 | 0.08157857 | 0.21430178 |              |
| NA        | ENSG00000270130 | 7.10680902 | -0.09255827 | 0.36932595 | 0.50393663 | 0.72045005 |              |
| NA        | ENSG00000270131 | 0          | NA          | NA         | NA         | NA         |              |
| NA        | ENSG00000270133 | 1.21842529 | 0.02392755  | 0.37952657 | 0.73000727 | NA         |              |
| NA        | ENSG00000270135 | 0.89591684 | -0.03845544 | 0.3871124  | 0.33943682 | NA         |              |
| NA        | ENSG00000270136 | 0          | NA          | NA         | NA         | NA         | MICOS10-NBL1 |
| NA        | ENSG00000270137 | 0.47637517 | -0.00789311 | 0.38277956 | 0.86399521 | NA         |              |
| NA        | ENSG00000270139 | 0          | NA          | NA         | NA         | NA         |              |
| NA        | ENSG00000270140 | 0.46846875 | -0.00685483 | 0.38321541 | 0.87399715 | NA         |              |
| NA        | ENSG00000270141 | 2.3835173  | -0.0007507  | 0.37936134 | 0.9885062  | NA         | TERC         |
| NA        | ENSG00000270147 | 2.75431825 | 0.02746676  | 0.3738056  | 0.771951   | 0.89538192 |              |
| NA        | ENSG00000270149 | 101.495275 | -0.10271564 | 0.20464797 | 0.55237923 | 0.75884254 |              |
| NA        | ENSG00000270154 | 0.49091588 | 0.01180852  | 0.38342692 | 0.77816255 | NA         |              |
| NA        | ENSG00000270157 | 70.6081984 | 0.27420901  | 0.24659251 | 0.16085932 | 0.3488699  |              |
| 101928557 | ENSG00000270159 | 0.5160545  | -0.0092487  | 0.38321558 | 0.82763739 | NA         |              |
| 101927931 | ENSG00000270164 | 0          | NA          | NA         | NA         | NA         | LINC01480    |
| NA        | ENSG00000270165 | 3.24362055 | 0.09518333  | 0.38861991 | 0.3341887  | 0.56389725 |              |
| NA        | ENSG00000270166 | 0          | NA          | NA         | NA         | NA         |              |
| 152217    | ENSG00000270170 | 619.253612 | -0.03442624 | 0.09884447 | 0.71776156 | 0.86431108 | NCBP2AS2     |
| NA        | ENSG00000270171 | 6.74185498 | 0.05318597  | 0.35550957 | 0.71498332 | 0.86271551 |              |
| 101927950 | ENSG00000270174 | 0          | NA          | NA         | NA         | NA         |              |
| NA        | ENSG00000270175 | 11.5737136 | 0.26010782  | 0.42524128 | 0.1724491  | 0.36510405 |              |
| NA        | ENSG00000270177 | 10.5596969 | 0.02139922  | 0.34038248 | 0.89565628 | 0.95469109 | PPP2CA-DT    |
| NA        | ENSG00000270179 | 4.72865421 | -0.10964783 | 0.38161394 | 0.39171574 | 0.62114503 |              |
| 100533467 | ENSG00000270181 | 39.9861059 | -0.11189346 | 0.39695444 | 0.23512814 | 0.45198549 | BIVM-ERCC5   |
| NA        | ENSG00000270182 | 0          | NA          | NA         | NA         | NA         |              |
| NA        | ENSG00000270184 | 7.6133974  | 0.24755105  | 0.45059977 | 0.13205535 | 0.30496778 |              |
| NA        | ENSG00000270188 | 0.14931947 | -0.01844332 | 0.38480212 | 0.84537521 | NA         | MTRNR2L11    |
| NA        | ENSG00000270190 | 0          | NA          | NA         | NA         | NA         |              |
| NA        | ENSG00000270191 | 0          | NA          | NA         | NA         | NA         | BNIP3P31     |
| NA        | ENSG00000270192 | 0          | NA          | NA         | NA         | NA         | MRPS35P3     |

|        |                 |            |             |            |            |            |            |
|--------|-----------------|------------|-------------|------------|------------|------------|------------|
| NA     | ENSG00000270193 | 0          | NA          | NA         | NA         | NA         |            |
| 152048 | ENSG00000270194 | 20.2176386 | 0.3010335   | 0.39609627 | 0.16482781 | 0.35449146 | GOLGA4-AS1 |
| NA     | ENSG00000270196 | 0          | NA          | NA         | NA         | NA         | GTF3C6P3   |
| NA     | ENSG00000270200 | 0          | NA          | NA         | NA         | NA         |            |
| NA     | ENSG00000270202 | 0          | NA          | NA         | NA         | NA         |            |
| NA     | ENSG00000270204 | 0          | NA          | NA         | NA         | NA         |            |
| NA     | ENSG00000270207 | 4.47984631 | 0.11373542  | 0.38452811 | 0.36690469 | 0.59618256 |            |
| NA     | ENSG00000270209 | 0          | NA          | NA         | NA         | NA         |            |
| NA     | ENSG00000270210 | 0          | NA          | NA         | NA         | NA         |            |
| NA     | ENSG00000270212 | 0          | NA          | NA         | NA         | NA         |            |
| NA     | ENSG00000270218 | 0          | NA          | NA         | NA         | NA         |            |
| NA     | ENSG00000270222 | 0          | NA          | NA         | NA         | NA         | DUXAP11    |
| NA     | ENSG00000270225 | 0.173124   | -0.01911262 | 0.38486262 | 0.84537521 | NA         | MTCO2P22   |
| NA     | ENSG00000270226 | 0          | NA          | NA         | NA         | NA         |            |
| NA     | ENSG00000270228 | 7.62076382 | 0.03016782  | 0.35504805 | 0.83133722 | 0.92375976 |            |
| NA     | ENSG00000270230 | 0          | NA          | NA         | NA         | NA         | MTND6P22   |
| 728841 | ENSG00000270231 | 968.438643 | 0.2477688   | 0.08806054 | 0.0037819  | 0.01839941 | NBPF8      |
| NA     | ENSG00000270232 | 0          | NA          | NA         | NA         | NA         | MTCYBP22   |
| NA     | ENSG00000270234 | 0          | NA          | NA         | NA         | NA         |            |
| NA     | ENSG00000270236 | 0          | NA          | NA         | NA         | NA         |            |
| NA     | ENSG00000270240 | 0.16735865 | 0.01897177  | 0.38482933 | 0.78225479 | NA         |            |
| NA     | ENSG00000270241 | 0          | NA          | NA         | NA         | NA         |            |
| NA     | ENSG00000270242 | 0          | NA          | NA         | NA         | NA         | ACTR3BP1   |
| NA     | ENSG00000270243 | 0          | NA          | NA         | NA         | NA         |            |
| NA     | ENSG00000270244 | 0          | NA          | NA         | NA         | NA         |            |
| NA     | ENSG00000270248 | 0.36316552 | 0.00159358  | 0.38336991 | 0.96077186 | NA         |            |
| NA     | ENSG00000270249 | 10.8968708 | 0.09162971  | 0.3606999  | 0.54739386 | 0.75429185 |            |
| NA     | ENSG00000270252 | 0          | NA          | NA         | NA         | NA         | IGKV3OR2-5 |
| NA     | ENSG00000270255 | 0          | NA          | NA         | NA         | NA         |            |
| NA     | ENSG00000270257 | 0.3479061  | -0.00148364 | 0.38336983 | 0.9825001  | NA         |            |
| NA     | ENSG00000270258 | 0          | NA          | NA         | NA         | NA         | DUXAP4     |
| NA     | ENSG00000270259 | 0          | NA          | NA         | NA         | NA         |            |
| NA     | ENSG00000270264 | 0.83991999 | -0.03160319 | 0.38388419 | 0.52421854 | NA         | NDUFB8P2   |
| NA     | ENSG00000270265 | 0          | NA          | NA         | NA         | NA         |            |
| NA     | ENSG00000270268 | 0          | NA          | NA         | NA         | NA         | CORO1CP1   |
| NA     | ENSG00000270269 | 0          | NA          | NA         | NA         | NA         | IMMP1LP1   |
| NA     | ENSG00000270270 | 1.11530063 | -0.0013226  | 0.37855888 | 0.98437126 | NA         | BNIP3P10   |
| NA     | ENSG00000270273 | 0          | NA          | NA         | NA         | NA         |            |

|           |                 |            |             |            |            |            |              |
|-----------|-----------------|------------|-------------|------------|------------|------------|--------------|
| NA        | ENSG00000270275 | 0          | NA          | NA         | NA         | NA         | TRMT112P7    |
| 554313    | ENSG00000270276 | 60.7436842 | -0.03174884 | 0.37857331 | 0.677535   | 0.84255476 | H4C15        |
| NA        | ENSG00000270277 | 32.8069044 | 0.00518783  | 0.28426191 | 0.97979158 | 0.99328572 |              |
| NA        | ENSG00000270279 | 0          | NA          | NA         | NA         | NA         |              |
| NA        | ENSG00000270280 | 0          | NA          | NA         | NA         | NA         | SMIM15P1     |
| NA        | ENSG00000270281 | 0.68151806 | 0.00336183  | 0.38128977 | 0.94741712 | NA         |              |
| NA        | ENSG00000270282 | 0          | NA          | NA         | NA         | NA         |              |
| NA        | ENSG00000270285 | 0          | NA          | NA         | NA         | NA         |              |
| NA        | ENSG00000270287 | 0          | NA          | NA         | NA         | NA         |              |
| NA        | ENSG00000270289 | 0          | NA          | NA         | NA         | NA         |              |
| NA        | ENSG00000270292 | 1.74694685 | -0.02545687 | 0.37597114 | 0.76589513 | NA         |              |
| NA        | ENSG00000270293 | 0          | NA          | NA         | NA         | NA         |              |
| NA        | ENSG00000270294 | 0          | NA          | NA         | NA         | NA         | XIAPP1       |
| NA        | ENSG00000270296 | 0.55520737 | 0.03305063  | 0.38625061 | 0.4498508  | NA         | STX8P1       |
| NA        | ENSG00000270299 | 2.64410169 | -0.13102581 | 0.40947232 | 0.12166324 | 0.28819117 |              |
| NA        | ENSG00000270300 | 6.67527765 | 0.00714018  | 0.35164622 | 0.9622792  | 0.98476398 | PHACTR2P1    |
| NA        | ENSG00000270301 | 0          | NA          | NA         | NA         | NA         |              |
| NA        | ENSG00000270302 | 0          | NA          | NA         | NA         | NA         |              |
| NA        | ENSG00000270304 | 0          | NA          | NA         | NA         | NA         |              |
| NA        | ENSG00000270306 | 0          | NA          | NA         | NA         | NA         |              |
| NA        | ENSG00000270307 | 0          | NA          | NA         | NA         | NA         | MTATP6P2     |
| NA        | ENSG00000270308 | 0          | NA          | NA         | NA         | NA         | TEX101P1     |
| NA        | ENSG00000270313 | 0          | NA          | NA         | NA         | NA         | COX6CP16     |
| NA        | ENSG00000270314 | 0          | NA          | NA         | NA         | NA         |              |
| NA        | ENSG00000270316 | 0          | NA          | NA         | NA         | NA         | BORCS7-ASMT  |
| NA        | ENSG00000270317 | 0          | NA          | NA         | NA         | NA         |              |
| NA        | ENSG00000270318 | 0          | NA          | NA         | NA         | NA         | IGHV3OR16-11 |
| NA        | ENSG00000270321 | 0          | NA          | NA         | NA         | NA         |              |
| NA        | ENSG00000270322 | 0          | NA          | NA         | NA         | NA         |              |
| NA        | ENSG00000270323 | 0          | NA          | NA         | NA         | NA         |              |
| NA        | ENSG00000270324 | 0          | NA          | NA         | NA         | NA         |              |
| NA        | ENSG00000270325 | 0          | NA          | NA         | NA         | NA         | BNIP3P9      |
| NA        | ENSG00000270326 | 0          | NA          | NA         | NA         | NA         | SMIM15P2     |
| NA        | ENSG00000270328 | 0          | NA          | NA         | NA         | NA         |              |
| NA        | ENSG00000270330 | 0          | NA          | NA         | NA         | NA         |              |
| 101928550 | ENSG00000270332 | 1.24644129 | -0.08553511 | 0.39678224 | 0.11858426 | NA         | SMC2-DT      |
| NA        | ENSG00000270333 | 0          | NA          | NA         | NA         | NA         |              |
| NA        | ENSG00000270335 | 0          | NA          | NA         | NA         | NA         |              |

|           |                 |            |             |            |            |            |            |
|-----------|-----------------|------------|-------------|------------|------------|------------|------------|
| NA        | ENSG00000270336 | 0          | NA          | NA         | NA         | NA         |            |
| 105371242 | ENSG00000270339 | 0          | NA          | NA         | NA         | NA         | PPIAL4H    |
| NA        | ENSG00000270342 | 0          | NA          | NA         | NA         | NA         |            |
| NA        | ENSG00000270343 | 0.49782191 | -0.01051652 | 0.38285295 | 0.82402112 | NA         | UNGP3      |
| NA        | ENSG00000270344 | 31.5697967 | -0.05550254 | 0.28945563 | 0.77073585 | 0.89494676 | POC1B-AS1  |
| NA        | ENSG00000270347 | 0          | NA          | NA         | NA         | NA         |            |
| NA        | ENSG00000270350 | 0          | NA          | NA         | NA         | NA         | MTND4LP5   |
| NA        | ENSG00000270352 | 0          | NA          | NA         | NA         | NA         |            |
| NA        | ENSG00000270354 | 0          | NA          | NA         | NA         | NA         |            |
| NA        | ENSG00000270359 | 0          | NA          | NA         | NA         | NA         |            |
| NA        | ENSG00000270361 | 1.06205868 | -0.04521505 | 0.38563131 | 0.39047697 | NA         |            |
| 100288198 | ENSG00000270362 | 30.7488315 | 0.12425091  | 0.29430944 | 0.53000916 | 0.7416689  | HMGN3-AS1  |
| NA        | ENSG00000270367 | 0          | NA          | NA         | NA         | NA         |            |
| NA        | ENSG00000270369 | 0.18922458 | 0.01954053  | 0.38488496 | 0.78225479 | NA         |            |
| NA        | ENSG00000270371 | 0          | NA          | NA         | NA         | NA         | ATP6V1G1P1 |
| NA        | ENSG00000270372 | 0          | NA          | NA         | NA         | NA         |            |
| NA        | ENSG00000270377 | 0          | NA          | NA         | NA         | NA         |            |
| NA        | ENSG00000270378 | 0          | NA          | NA         | NA         | NA         |            |
| 256957    | ENSG00000270379 | 0          | NA          | NA         | NA         | NA         | HEATR9     |
| NA        | ENSG00000270380 | 0          | NA          | NA         | NA         | NA         |            |
| NA        | ENSG00000270381 | 0          | NA          | NA         | NA         | NA         |            |
| NA        | ENSG00000270382 | 0          | NA          | NA         | NA         | NA         |            |
| NA        | ENSG00000270384 | 0          | NA          | NA         | NA         | NA         | RNU1-154P  |
| NA        | ENSG00000270385 | 0          | NA          | NA         | NA         | NA         |            |
| NA        | ENSG00000270387 | 0.37844916 | 0.02407552  | 0.3854191  | 0.60038877 | NA         |            |
| NA        | ENSG00000270388 | 0          | NA          | NA         | NA         | NA         | MTCO3P22   |
| NA        | ENSG00000270390 | 0          | NA          | NA         | NA         | NA         | SFXN4P1    |
| 767846    | ENSG00000270392 | 68.0566841 | 0.18750514  | 0.27180354 | 0.34752833 | 0.57819389 | PFN1P2     |
| NA        | ENSG00000270393 | 2.63826694 | 0.13520159  | 0.41854392 | 0.01815986 | 0.06731907 |            |
| NA        | ENSG00000270394 | 0          | NA          | NA         | NA         | NA         | MTRNR2L13  |
| NA        | ENSG00000270395 | 0          | NA          | NA         | NA         | NA         | MREGP1     |
| NA        | ENSG00000270397 | 0          | NA          | NA         | NA         | NA         |            |
| NA        | ENSG00000270400 | 0          | NA          | NA         | NA         | NA         |            |
| NA        | ENSG00000270401 | 0          | NA          | NA         | NA         | NA         |            |
| NA        | ENSG00000270402 | 0.3192764  | 0.00270276  | 0.38338637 | 0.95192815 | NA         |            |
| NA        | ENSG00000270403 | 0          | NA          | NA         | NA         | NA         |            |
| NA        | ENSG00000270405 | 0          | NA          | NA         | NA         | NA         |            |
| NA        | ENSG00000270409 | 1.5134386  | 0.05820444  | 0.38535481 | 0.39383317 | NA         |            |

|           |                 |            |             |            |            |            |              |
|-----------|-----------------|------------|-------------|------------|------------|------------|--------------|
| NA        | ENSG00000270411 | 0          | NA          | NA         | NA         | NA         |              |
| NA        | ENSG00000270412 | 0          | NA          | NA         | NA         | NA         |              |
| NA        | ENSG00000270413 | 0          | NA          | NA         | NA         | NA         |              |
| NA        | ENSG00000270415 | 0          | NA          | NA         | NA         | NA         | DPPA3P3      |
| NA        | ENSG00000270416 | 0          | NA          | NA         | NA         | NA         | REXO1L4P     |
| 100526820 | ENSG00000270419 | 14.3836636 | 0.1073091   | 0.34206994 | 0.54404988 | 0.75203439 | CAHM         |
| NA        | ENSG00000270421 | 0          | NA          | NA         | NA         | NA         |              |
| NA        | ENSG00000270422 | 0          | NA          | NA         | NA         | NA         |              |
| NA        | ENSG00000270423 | 0          | NA          | NA         | NA         | NA         |              |
| NA        | ENSG00000270424 | 1.44421219 | -0.05496823 | 0.38445218 | 0.42772213 | NA         |              |
| NA        | ENSG00000270425 | 0          | NA          | NA         | NA         | NA         |              |
| NA        | ENSG00000270426 | 0.62215462 | -0.04503069 | 0.3875621  | 0.37455912 | NA         |              |
| NA        | ENSG00000270427 | 3.24885051 | -0.00708042 | 0.36758673 | 0.94673706 | 0.97814213 | NRBF2P5      |
| NA        | ENSG00000270429 | 0.34050526 | -0.00031276 | 0.38336254 | 0.9682173  | NA         | KNOP1P2      |
| NA        | ENSG00000270430 | 0          | NA          | NA         | NA         | NA         |              |
| NA        | ENSG00000270431 | 0          | NA          | NA         | NA         | NA         | PHF5FP       |
| NA        | ENSG00000270432 | 0          | NA          | NA         | NA         | NA         | OR7E108P     |
| NA        | ENSG00000270433 | 3.73958438 | -0.01783694 | 0.36787974 | 0.86932416 | 0.94304726 | H3P37        |
| NA        | ENSG00000270434 | 0          | NA          | NA         | NA         | NA         |              |
| NA        | ENSG00000270435 | 0          | NA          | NA         | NA         | NA         |              |
| NA        | ENSG00000270437 | 0          | NA          | NA         | NA         | NA         |              |
| NA        | ENSG00000270440 | 0          | NA          | NA         | NA         | NA         |              |
| NA        | ENSG00000270441 | 5.03460115 | 0.089406    | 0.37460658 | 0.48400569 | 0.70421479 | LAMB2P1      |
| NA        | ENSG00000270442 | 0          | NA          | NA         | NA         | NA         |              |
| NA        | ENSG00000270443 | 0          | NA          | NA         | NA         | NA         |              |
| NA        | ENSG00000270444 | 0          | NA          | NA         | NA         | NA         | AZU1P1       |
| NA        | ENSG00000270445 | 0          | NA          | NA         | NA         | NA         | COPS5P2      |
| NA        | ENSG00000270446 | 0          | NA          | NA         | NA         | NA         | RPL34P36     |
| NA        | ENSG00000270447 | 0          | NA          | NA         | NA         | NA         |              |
| NA        | ENSG00000270449 | 0          | NA          | NA         | NA         | NA         |              |
| NA        | ENSG00000270453 | 0          | NA          | NA         | NA         | NA         |              |
| NA        | ENSG00000270455 | 0          | NA          | NA         | NA         | NA         | PABPC1P5     |
| NA        | ENSG00000270456 | 0          | NA          | NA         | NA         | NA         |              |
| NA        | ENSG00000270457 | 0.47323796 | -0.02843361 | 0.38580787 | 0.54302879 | NA         |              |
| NA        | ENSG00000270458 | 0          | NA          | NA         | NA         | NA         |              |
| NA        | ENSG00000270460 | 0          | NA          | NA         | NA         | NA         |              |
| NA        | ENSG00000270462 | 1.78724364 | 0.04736697  | 0.38057632 | 0.55507162 | NA         |              |
| NA        | ENSG00000270467 | 0          | NA          | NA         | NA         | NA         | IGHV3OR16-12 |

|    |                 |            |             |            |            |            |             |
|----|-----------------|------------|-------------|------------|------------|------------|-------------|
| NA | ENSG00000270469 | 0.71161522 | 0.02587463  | 0.38346887 | 0.56874302 | NA         |             |
| NA | ENSG00000270470 | 0          | NA          | NA         | NA         | NA         |             |
| NA | ENSG00000270472 | 0          | NA          | NA         | NA         | NA         | IGHV3OR16-9 |
| NA | ENSG00000270474 | 0          | NA          | NA         | NA         | NA         | IGHV3-29    |
| NA | ENSG00000270475 | 0          | NA          | NA         | NA         | NA         |             |
| NA | ENSG00000270477 | 0          | NA          | NA         | NA         | NA         |             |
| NA | ENSG00000270479 | 1.13245948 | -0.00668836 | 0.37861692 | 0.92232007 | NA         | BNIP3P37    |
| NA | ENSG00000270480 | 0.323172   | 0.00150644  | 0.38336966 | 0.96665865 | NA         |             |
| NA | ENSG00000270482 | 0.69493202 | 0.03154416  | 0.38626309 | 0.41391645 | NA         |             |
| NA | ENSG00000270484 | 0          | NA          | NA         | NA         | NA         |             |
| NA | ENSG00000270487 | 0          | NA          | NA         | NA         | NA         |             |
| NA | ENSG00000270488 | 0          | NA          | NA         | NA         | NA         |             |
| NA | ENSG00000270490 | 0          | NA          | NA         | NA         | NA         |             |
| NA | ENSG00000270491 | 0          | NA          | NA         | NA         | NA         |             |
| NA | ENSG00000270492 | 1.01100047 | 0.00646151  | 0.38003461 | 0.91541882 | NA         |             |
| NA | ENSG00000270493 | 0          | NA          | NA         | NA         | NA         |             |
| NA | ENSG00000270494 | 0          | NA          | NA         | NA         | NA         |             |
| NA | ENSG00000270495 | 0          | NA          | NA         | NA         | NA         |             |
| NA | ENSG00000270496 | 0          | NA          | NA         | NA         | NA         | BNIP3P7     |
| NA | ENSG00000270497 | 27.023879  | 0.24115888  | 0.33979723 | 0.25165731 | 0.47149344 |             |
| NA | ENSG00000270499 | 0.15069912 | -0.01848503 | 0.38480575 | 0.84537521 | NA         | MKI67P1     |
| NA | ENSG00000270500 | 0          | NA          | NA         | NA         | NA         | COX6CP4     |
| NA | ENSG00000270503 | 0.18922458 | 0.01954053  | 0.38488496 | 0.78225479 | NA         | YTHDF2P1    |
| NA | ENSG00000270504 | 2.93195269 | 0.22408915  | 0.4769432  | 0.01920979 | 0.07049338 |             |
| NA | ENSG00000270506 | 0          | NA          | NA         | NA         | NA         |             |
| NA | ENSG00000270507 | 0          | NA          | NA         | NA         | NA         |             |
| NA | ENSG00000270509 | 0          | NA          | NA         | NA         | NA         |             |
| NA | ENSG00000270510 | 0.56767373 | 0.02627943  | 0.38574813 | 0.49686938 | NA         |             |
| NA | ENSG00000270512 | 0.50768284 | 0.01546992  | 0.38314667 | 0.73844049 | NA         |             |
| NA | ENSG00000270513 | 0          | NA          | NA         | NA         | NA         |             |
| NA | ENSG00000270516 | 0          | NA          | NA         | NA         | NA         |             |
| NA | ENSG00000270518 | 0          | NA          | NA         | NA         | NA         |             |
| NA | ENSG00000270521 | 0          | NA          | NA         | NA         | NA         |             |
| NA | ENSG00000270522 | 0          | NA          | NA         | NA         | NA         |             |
| NA | ENSG00000270524 | 0          | NA          | NA         | NA         | NA         | QTRT1P1     |
| NA | ENSG00000270526 | 0          | NA          | NA         | NA         | NA         | SNRPGP19    |
| NA | ENSG00000270528 | 0.65409771 | -0.01743032 | 0.38276999 | 0.69280094 | NA         | FAM133EP    |
| NA | ENSG00000270531 | 0          | NA          | NA         | NA         | NA         |             |



|           |                 |            |             |            |            |            |           |
|-----------|-----------------|------------|-------------|------------|------------|------------|-----------|
| NA        | ENSG00000270532 | 0.173124   | -0.01911262 | 0.38486262 | 0.84537521 | NA         | PEBP1P2   |
| NA        | ENSG00000270533 | 44.8392867 | 0.00232745  | 0.25932208 | 0.99169214 | 0.99727164 |           |
| NA        | ENSG00000270538 | 0          | NA          | NA         | NA         | NA         |           |
| NA        | ENSG00000270540 | 0          | NA          | NA         | NA         | NA         |           |
| NA        | ENSG00000270541 | 0          | NA          | NA         | NA         | NA         |           |
| NA        | ENSG00000270542 | 0          | NA          | NA         | NA         | NA         |           |
| 401492    | ENSG00000270547 | 9.31277796 | -2.94161817 | 1.071378   | 0.00040131 | 0.00265399 | LINC01235 |
| NA        | ENSG00000270549 | 0          | NA          | NA         | NA         | NA         |           |
| NA        | ENSG00000270550 | 0          | NA          | NA         | NA         | NA         | IGHV3-30  |
| NA        | ENSG00000270552 | 0          | NA          | NA         | NA         | NA         | DUXAP3    |
| NA        | ENSG00000270553 | 0          | NA          | NA         | NA         | NA         |           |
| NA        | ENSG00000270554 | 0          | NA          | NA         | NA         | NA         |           |
| NA        | ENSG00000270555 | 0          | NA          | NA         | NA         | NA         |           |
| NA        | ENSG00000270557 | 1.91639372 | 0.07829635  | 0.39098307 | 0.25138557 | NA         |           |
| NA        | ENSG00000270558 | 4.78497777 | -9.15E-05   | 0.36057935 | 0.99745937 | 0.99926338 |           |
| NA        | ENSG00000270560 | 0          | NA          | NA         | NA         | NA         | APOOP1    |
| NA        | ENSG00000270562 | 4.58540656 | -0.00412517 | 0.36356062 | 0.97062581 | 0.9889696  |           |
| NA        | ENSG00000270569 | 0          | NA          | NA         | NA         | NA         |           |
| NA        | ENSG00000270570 | 0          | NA          | NA         | NA         | NA         |           |
| NA        | ENSG00000270571 | 2.45252398 | -0.08240179 | 0.38469824 | 0.39205427 | NA         |           |
| NA        | ENSG00000270574 | 35.0766315 | -0.12584653 | 0.29747993 | 0.52061688 | 0.7341489  |           |
| NA        | ENSG00000270575 | 0          | NA          | NA         | NA         | NA         |           |
| NA        | ENSG00000270576 | 0          | NA          | NA         | NA         | NA         |           |
| NA        | ENSG00000270577 | 0          | NA          | NA         | NA         | NA         |           |
| NA        | ENSG00000270578 | 0          | NA          | NA         | NA         | NA         |           |
| 105369154 | ENSG00000270580 | 365.613187 | 0.75632175  | 0.12905715 | 9.43E-10   | 1.63E-08   |           |
| NA        | ENSG00000270583 | 0          | NA          | NA         | NA         | NA         |           |
| NA        | ENSG00000270584 | 0          | NA          | NA         | NA         | NA         |           |
| NA        | ENSG00000270585 | 2.5006584  | 0.04150728  | 0.37420653 | 0.6769418  | NA         | SNX2P1    |
| NA        | ENSG00000270587 | 5.0855012  | -0.0048347  | 0.35916821 | 0.96831019 | 0.98809325 |           |
| NA        | ENSG00000270588 | 0          | NA          | NA         | NA         | NA         |           |
| NA        | ENSG00000270589 | 42.083647  | 0.04183033  | 0.26475761 | 0.82964575 | 0.92275881 |           |
| NA        | ENSG00000270591 | 0.52119901 | 0.02576573  | 0.38568143 | 0.51723676 | NA         |           |
| NA        | ENSG00000270593 | 0          | NA          | NA         | NA         | NA         |           |
| NA        | ENSG00000270598 | 0          | NA          | NA         | NA         | NA         |           |
| 343068    | ENSG00000270601 | 0          | NA          | NA         | NA         | NA         | PRAMEF5   |
| 414778    | ENSG00000270604 | 9.90277472 | -0.03776358 | 0.35103154 | 0.79448773 | 0.90579008 | HCG17     |
| NA        | ENSG00000270605 | 67.8600454 | 0.18078791  | 0.24093103 | 0.3441878  | 0.57451506 |           |

|           |    |                 |            |             |            |            |            |              |
|-----------|----|-----------------|------------|-------------|------------|------------|------------|--------------|
|           | NA | ENSG00000270606 | 0.72544631 | 0.02664169  | 0.38353077 | 0.55892847 | NA         | PPIAP52      |
|           | NA | ENSG00000270607 | 163.732679 | 0.16697547  | 0.18170704 | 0.29759409 | 0.52431106 | NAV2-AS6     |
|           | NA | ENSG00000270610 | 0.15069912 | -0.01848503 | 0.38480575 | 0.84537521 | NA         |              |
|           | NA | ENSG00000270611 | 0          | NA          | NA         | NA         | NA         |              |
|           | NA | ENSG00000270612 | 0          | NA          | NA         | NA         | NA         |              |
|           | NA | ENSG00000270614 | 1.12850179 | -0.01915463 | 0.38138666 | 0.73404883 | NA         |              |
|           | NA | ENSG00000270615 | 0.16735865 | 0.01897177  | 0.38482933 | 0.78225479 | NA         | SGO1P1       |
| 100534592 | NA | ENSG00000270617 | 2.25970361 | -0.03310142 | 0.38075721 | 0.62740428 | NA         | URGCP-MRPS24 |
|           | NA | ENSG00000270618 | 0          | NA          | NA         | NA         | NA         |              |
|           | NA | ENSG00000270619 | 0          | NA          | NA         | NA         | NA         |              |
|           | NA | ENSG00000270620 | 0          | NA          | NA         | NA         | NA         |              |
|           | NA | ENSG00000270623 | 0          | NA          | NA         | NA         | NA         | SPCS2P2      |
|           | NA | ENSG00000270624 | 0.34688835 | 0.00033016  | 0.38336227 | 0.9653329  | NA         |              |
|           | NA | ENSG00000270625 | 0          | NA          | NA         | NA         | NA         | NUDT19P6     |
|           | NA | ENSG00000270627 | 0.18922458 | 0.01954053  | 0.38488496 | 0.78225479 | NA         |              |
| 25832     | NA | ENSG00000270629 | 41.3896799 | 0.155022    | 0.31408278 | 0.43478097 | 0.66019092 | NBPF14       |
|           | NA | ENSG00000270631 | 0          | NA          | NA         | NA         | NA         |              |
|           | NA | ENSG00000270632 | 0          | NA          | NA         | NA         | NA         |              |
|           | NA | ENSG00000270634 | 0          | NA          | NA         | NA         | NA         |              |
|           | NA | ENSG00000270638 | 10.1063263 | 0.03457995  | 0.3420288  | 0.83016045 | 0.92296908 |              |
|           | NA | ENSG00000270639 | 0.34110552 | 0.02362649  | 0.38535339 | 0.62410815 | NA         | ECM1P1       |
|           | NA | ENSG00000270640 | 0          | NA          | NA         | NA         | NA         |              |
| 9383      | NA | ENSG00000270641 | 56.2354472 | 0.10937673  | 0.25736859 | 0.57392341 | 0.77331018 | TSIX         |
| 8148      | NA | ENSG00000270647 | 4132.80094 | -0.22452775 | 0.05741849 | 7.38E-05   | 0.00058189 | TAF15        |
|           | NA | ENSG00000270648 | 0          | NA          | NA         | NA         | NA         | CYP2C61P     |
|           | NA | ENSG00000270652 | 0          | NA          | NA         | NA         | NA         | DPRXP5       |
|           | NA | ENSG00000270654 | 0          | NA          | NA         | NA         | NA         | NUTF2P8      |
|           | NA | ENSG00000270655 | 0          | NA          | NA         | NA         | NA         |              |
|           | NA | ENSG00000270659 | 2.39654999 | 0.04227894  | 0.37918005 | 0.60733889 | NA         |              |
|           | NA | ENSG00000270661 | 0          | NA          | NA         | NA         | NA         |              |
|           | NA | ENSG00000270664 | 0          | NA          | NA         | NA         | NA         |              |
|           | NA | ENSG00000270665 | 0          | NA          | NA         | NA         | NA         | HNRNPA1P67   |
|           | NA | ENSG00000270666 | 0          | NA          | NA         | NA         | NA         |              |
|           | NA | ENSG00000270669 | 0          | NA          | NA         | NA         | NA         |              |
|           | NA | ENSG00000270670 | 0          | NA          | NA         | NA         | NA         | MARK2P16     |
| 100463482 | NA | ENSG00000270672 | 0          | NA          | NA         | NA         | NA         | MTRNR2L6     |
| 101410533 | NA | ENSG00000270673 | 5.85168794 | 0.04178074  | 0.35738309 | 0.76474038 | 0.8916054  | YTHDF3-DT    |
|           | NA | ENSG00000270677 | 0          | NA          | NA         | NA         | NA         |              |

|    |                 |            |             |            |            |            |             |
|----|-----------------|------------|-------------|------------|------------|------------|-------------|
| NA | ENSG00000270678 | 0          | NA          | NA         | NA         | NA         |             |
| NA | ENSG00000270679 | 0.656759   | 0.00421731  | 0.38135437 | 0.93411229 | NA         |             |
| NA | ENSG00000270680 | 0          | NA          | NA         | NA         | NA         |             |
| NA | ENSG00000270681 | 5.5091805  | -0.0481063  | 0.36198302 | 0.71350668 | 0.86190773 |             |
| NA | ENSG00000270682 | 0          | NA          | NA         | NA         | NA         |             |
| NA | ENSG00000270683 | 0          | NA          | NA         | NA         | NA         | FAM71BP1    |
| NA | ENSG00000270685 | 0          | NA          | NA         | NA         | NA         | IGHV1OR15-6 |
| NA | ENSG00000270688 | 0          | NA          | NA         | NA         | NA         |             |
| NA | ENSG00000270689 | 0          | NA          | NA         | NA         | NA         | BUD13P1     |
| NA | ENSG00000270690 | 0.15069912 | -0.01848503 | 0.38480575 | 0.84537521 | NA         |             |
| NA | ENSG00000270691 | 0          | NA          | NA         | NA         | NA         |             |
| NA | ENSG00000270694 | 0          | NA          | NA         | NA         | NA         |             |
| NA | ENSG00000270695 | 0          | NA          | NA         | NA         | NA         |             |
| NA | ENSG00000270696 | 0          | NA          | NA         | NA         | NA         |             |
| NA | ENSG00000270697 | 0.31696589 | 0.00135345  | 0.38336845 | 0.96488519 | NA         |             |
| NA | ENSG00000270698 | 0          | NA          | NA         | NA         | NA         |             |
| NA | ENSG00000270699 | 0          | NA          | NA         | NA         | NA         |             |
| NA | ENSG00000270701 | 0          | NA          | NA         | NA         | NA         |             |
| NA | ENSG00000270702 | 0          | NA          | NA         | NA         | NA         |             |
| NA | ENSG00000270705 | 0          | NA          | NA         | NA         | NA         |             |
| NA | ENSG00000270706 | 4.14666493 | 0.01651363  | 0.36990841 | 0.87596544 | 0.94529871 | PRMT1P1     |
| NA | ENSG00000270708 | 0          | NA          | NA         | NA         | NA         |             |
| NA | ENSG00000270709 | 0          | NA          | NA         | NA         | NA         | UFM1P1      |
| NA | ENSG00000270710 | 0          | NA          | NA         | NA         | NA         |             |
| NA | ENSG00000270711 | 2.31390062 | -0.05730653 | 0.38100596 | 0.50314625 | NA         |             |
| NA | ENSG00000270712 | 0          | NA          | NA         | NA         | NA         |             |
| NA | ENSG00000270713 | 0          | NA          | NA         | NA         | NA         |             |
| NA | ENSG00000270714 | 0          | NA          | NA         | NA         | NA         | MICOS10P2   |
| NA | ENSG00000270716 | 0.16735865 | 0.01897177  | 0.38482933 | 0.78225479 | NA         | BNIP3P15    |
| NA | ENSG00000270718 | 0          | NA          | NA         | NA         | NA         |             |
| NA | ENSG00000270719 | 0          | NA          | NA         | NA         | NA         |             |
| NA | ENSG00000270720 | 2.25728826 | 0.07090574  | 0.3847625  | 0.40226528 | NA         |             |
| NA | ENSG00000270722 | 0          | NA          | NA         | NA         | NA         | RNVU1-31    |
| NA | ENSG00000270723 | 0          | NA          | NA         | NA         | NA         | RPL23AP92   |
| NA | ENSG00000270725 | 0          | NA          | NA         | NA         | NA         |             |
| NA | ENSG00000270726 | 2.60504816 | -0.10084684 | 0.38997774 | 0.31434996 | 0.5421676  |             |
| NA | ENSG00000270727 | 0          | NA          | NA         | NA         | NA         |             |
| NA | ENSG00000270728 | 7.97128532 | -0.2024215  | 0.41002742 | 0.21615203 | 0.42696697 |             |

|           |                 |            |             |            |            |            |            |
|-----------|-----------------|------------|-------------|------------|------------|------------|------------|
| NA        | ENSG00000270729 | 0          | NA          | NA         | NA         | NA         | CAPZA1P5   |
| NA        | ENSG00000270733 | 0.52554028 | 0.01113646  | 0.38327788 | 0.76626822 | NA         |            |
| NA        | ENSG00000270734 | 0          | NA          | NA         | NA         | NA         |            |
| NA        | ENSG00000270739 | 0.34746601 | 0.02370763  | 0.3853651  | 0.61987128 | NA         |            |
| NA        | ENSG00000270741 | 0          | NA          | NA         | NA         | NA         | PRELID3BP8 |
| NA        | ENSG00000270745 | 0          | NA          | NA         | NA         | NA         |            |
| NA        | ENSG00000270747 | 0          | NA          | NA         | NA         | NA         | S100A11P9  |
| NA        | ENSG00000270748 | 0          | NA          | NA         | NA         | NA         | IGKV2OR2-1 |
| NA        | ENSG00000270749 | 0.30001588 | -0.02294459 | 0.38527538 | 0.68644874 | NA         |            |
| 102191832 | ENSG00000270751 | 0          | NA          | NA         | NA         | NA         | FBXW7-AS1  |
| NA        | ENSG00000270753 | 0          | NA          | NA         | NA         | NA         |            |
| NA        | ENSG00000270754 | 0          | NA          | NA         | NA         | NA         | NEK4P3     |
| NA        | ENSG00000270755 | 0.15069912 | -0.01848503 | 0.38480575 | 0.84537521 | NA         |            |
| 100529241 | ENSG00000270757 | 23.4244679 | 0.14236857  | 0.3730198  | 0.38306337 | 0.61240159 | HSPE1-MOB4 |
| NA        | ENSG00000270759 | 0          | NA          | NA         | NA         | NA         | OOEPP1     |
| NA        | ENSG00000270760 | 0          | NA          | NA         | NA         | NA         |            |
| NA        | ENSG00000270761 | 0.989769   | 0.03135181  | 0.38210412 | 0.60247231 | NA         | CD2AP-DT   |
| NA        | ENSG00000270762 | 0          | NA          | NA         | NA         | NA         | FXVD6P1    |
| NA        | ENSG00000270763 | 0          | NA          | NA         | NA         | NA         | DDX43P2    |
| NA        | ENSG00000270764 | 0          | NA          | NA         | NA         | NA         |            |
| 246176    | ENSG00000270765 | 10.4929274 | -0.01516486 | 0.33688486 | 0.92408012 | 0.96852    | GAS2L2     |
| NA        | ENSG00000270766 | 0          | NA          | NA         | NA         | NA         |            |
| NA        | ENSG00000270767 | 0          | NA          | NA         | NA         | NA         |            |
| NA        | ENSG00000270772 | 0          | NA          | NA         | NA         | NA         | PDHA1P1    |
| NA        | ENSG00000270773 | 2.04073506 | 0.08892493  | 0.39026006 | 0.29816362 | NA         |            |
| NA        | ENSG00000270775 | 0.70479482 | 0.05126518  | 0.38860002 | 0.29581605 | NA         |            |
| NA        | ENSG00000270776 | 0          | NA          | NA         | NA         | NA         |            |
| NA        | ENSG00000270777 | 0          | NA          | NA         | NA         | NA         |            |
| NA        | ENSG00000270778 | 0          | NA          | NA         | NA         | NA         | BUB1P1     |
| NA        | ENSG00000270779 | 0          | NA          | NA         | NA         | NA         |            |
| NA        | ENSG00000270780 | 0          | NA          | NA         | NA         | NA         |            |
| NA        | ENSG00000270781 | 0.34045066 | -0.00010379 | 0.38336217 | 0.96623653 | NA         |            |
| NA        | ENSG00000270782 | 0          | NA          | NA         | NA         | NA         |            |
| NA        | ENSG00000270788 | 0          | NA          | NA         | NA         | NA         | PDLIM1P1   |
| NA        | ENSG00000270789 | 0          | NA          | NA         | NA         | NA         |            |
| NA        | ENSG00000270790 | 0          | NA          | NA         | NA         | NA         |            |
| NA        | ENSG00000270791 | 0.14931947 | -0.01844332 | 0.38480212 | 0.84537521 | NA         | DPRXP6     |
| NA        | ENSG00000270792 | 0.34746601 | 0.02370763  | 0.3853651  | 0.61987128 | NA         |            |

|           |                 |            |             |            |            |            |             |
|-----------|-----------------|------------|-------------|------------|------------|------------|-------------|
| NA        | ENSG00000270793 | 0          | NA          | NA         | NA         | NA         | LLPHP1      |
| NA        | ENSG00000270794 | 0          | NA          | NA         | NA         | NA         |             |
| NA        | ENSG00000270797 | 0.173124   | -0.01911262 | 0.38486262 | 0.84537521 | NA         |             |
| NA        | ENSG00000270798 | 0          | NA          | NA         | NA         | NA         |             |
| NA        | ENSG00000270799 | 0.65856056 | 0.00107792  | 0.38190025 | 0.98047806 | NA         |             |
| 100529239 | ENSG00000270800 | 254.291471 | 0.01497672  | 0.19569396 | 0.93074121 | 0.97111825 | RPS10-NUDT3 |
| NA        | ENSG00000270802 | 0.46406178 | -0.00759463 | 0.38326334 | 0.86785181 | NA         |             |
| NA        | ENSG00000270804 | 59.1708149 | 0.33654217  | 0.30981737 | 0.12370447 | 0.29141494 |             |
| 146853    | ENSG00000270806 | 3.90198726 | 0.07399485  | 0.38081911 | 0.46380964 | 0.68661269 | C17orf50    |
| NA        | ENSG00000270807 | 0          | NA          | NA         | NA         | NA         |             |
| NA        | ENSG00000270808 | 3.66950962 | -0.05007049 | 0.37138636 | 0.65041729 | 0.82534564 |             |
| NA        | ENSG00000270809 | 0          | NA          | NA         | NA         | NA         | CHCHD2P11   |
| NA        | ENSG00000270811 | 0          | NA          | NA         | NA         | NA         |             |
| NA        | ENSG00000270812 | 0          | NA          | NA         | NA         | NA         |             |
| NA        | ENSG00000270813 | 3.4629224  | -0.0112833  | 0.36730772 | 0.91687987 | 0.96477469 | NANOGNBP3   |
| NA        | ENSG00000270814 | 0          | NA          | NA         | NA         | NA         | DMAC1P1     |
| NA        | ENSG00000270815 | 0          | NA          | NA         | NA         | NA         |             |
| 338005    | ENSG00000270816 | 673.724269 | -0.17757646 | 0.09410533 | 0.05104084 | 0.15143566 | LINC00221   |
| NA        | ENSG00000270818 | 0          | NA          | NA         | NA         | NA         |             |
| NA        | ENSG00000270820 | 33.0014154 | -0.05970946 | 0.31513516 | 0.74116765 | 0.87779167 | USP34-DT    |
| NA        | ENSG00000270822 | 0          | NA          | NA         | NA         | NA         |             |
| NA        | ENSG00000270823 | 3.20183668 | -0.02594591 | 0.36975693 | 0.80607763 | 0.9121533  |             |
| NA        | ENSG00000270826 | 0          | NA          | NA         | NA         | NA         | USP37P1     |
| NA        | ENSG00000270828 | 0.173733   | 0.01914545  | 0.38484597 | 0.78225479 | NA         |             |
| NA        | ENSG00000270829 | 0          | NA          | NA         | NA         | NA         |             |
| NA        | ENSG00000270830 | 0          | NA          | NA         | NA         | NA         |             |
| NA        | ENSG00000270831 | 0          | NA          | NA         | NA         | NA         | NF1P1       |
| NA        | ENSG00000270832 | 0          | NA          | NA         | NA         | NA         |             |
| NA        | ENSG00000270835 | 0          | NA          | NA         | NA         | NA         |             |
| NA        | ENSG00000270837 | 0.173124   | -0.01911262 | 0.38486262 | 0.84537521 | NA         | HNRNPDLP4   |
| NA        | ENSG00000270838 | 0          | NA          | NA         | NA         | NA         |             |
| NA        | ENSG00000270839 | 0.45209736 | -0.02505403 | 0.38558831 | 0.57865948 | NA         |             |
| NA        | ENSG00000270842 | 0          | NA          | NA         | NA         | NA         |             |
| NA        | ENSG00000270846 | 0          | NA          | NA         | NA         | NA         | MYG1P1      |
| NA        | ENSG00000270849 | 0          | NA          | NA         | NA         | NA         | CHCHD2P3    |
| NA        | ENSG00000270850 | 0          | NA          | NA         | NA         | NA         |             |
| NA        | ENSG00000270852 | 0          | NA          | NA         | NA         | NA         |             |
| NA        | ENSG00000270855 | 0          | NA          | NA         | NA         | NA         | ATP7BP1     |

|       |                 |            |             |            |            |            |             |
|-------|-----------------|------------|-------------|------------|------------|------------|-------------|
| NA    | ENSG00000270856 | 0          | NA          | NA         | NA         | NA         |             |
| NA    | ENSG00000270857 | 0          | NA          | NA         | NA         | NA         |             |
| NA    | ENSG00000270858 | 0          | NA          | NA         | NA         | NA         | VDAC1P5     |
| NA    | ENSG00000270859 | 0          | NA          | NA         | NA         | NA         |             |
| NA    | ENSG00000270861 | 0          | NA          | NA         | NA         | NA         |             |
| NA    | ENSG00000270863 | 0.14931947 | -0.01844332 | 0.38480212 | 0.84537521 | NA         | DDX55P1     |
| NA    | ENSG00000270864 | 0          | NA          | NA         | NA         | NA         | IGHV3OR16-6 |
| NA    | ENSG00000270865 | 0          | NA          | NA         | NA         | NA         | RPL12P48    |
| NA    | ENSG00000270866 | 0.51548833 | 0.0311304   | 0.38605428 | 0.4776836  | NA         |             |
| NA    | ENSG00000270868 | 0          | NA          | NA         | NA         | NA         |             |
| NA    | ENSG00000270870 | 0          | NA          | NA         | NA         | NA         |             |
| NA    | ENSG00000270871 | 14.9440578 | 0.03173974  | 0.32173438 | 0.86025082 | 0.93781946 |             |
| NA    | ENSG00000270872 | 106.656624 | -0.38234788 | 0.22666336 | 0.04257077 | 0.13174296 | SRGAP2D     |
| NA    | ENSG00000270874 | 0          | NA          | NA         | NA         | NA         | RPAP2P1     |
| NA    | ENSG00000270876 | 0.83847507 | 0.02091255  | 0.3815675  | 0.71107346 | NA         | ZNF30-AS1   |
| NA    | ENSG00000270878 | 12.12254   | -0.01358013 | 0.33300758 | 0.93277704 | 0.97195551 | GCATP1      |
| NA    | ENSG00000270880 | 0          | NA          | NA         | NA         | NA         |             |
| 8370  | ENSG00000270882 | 143.95522  | -0.77394268 | 0.22732476 | 0.00011853 | 0.00088507 | H4C14       |
| NA    | ENSG00000270883 | 0          | NA          | NA         | NA         | NA         |             |
| 91608 | ENSG00000270885 | 1088.51414 | -0.63984736 | 0.08356659 | 5.26E-15   | 1.43E-13   | RASL10B     |
| NA    | ENSG00000270889 | 0          | NA          | NA         | NA         | NA         | PPP1R14BP4  |
| NA    | ENSG00000270890 | 15.2738196 | -0.08838759 | 0.33242131 | 0.61861491 | 0.80491342 |             |
| NA    | ENSG00000270891 | 0          | NA          | NA         | NA         | NA         |             |
| NA    | ENSG00000270892 | 0          | NA          | NA         | NA         | NA         |             |
| NA    | ENSG00000270893 | 0          | NA          | NA         | NA         | NA         |             |
| NA    | ENSG00000270894 | 0.97510595 | -0.0380402  | 0.38435938 | 0.44751188 | NA         |             |
| NA    | ENSG00000270896 | 0          | NA          | NA         | NA         | NA         |             |
| NA    | ENSG00000270897 | 0          | NA          | NA         | NA         | NA         |             |
| NA    | ENSG00000270900 | 0.15069912 | -0.01848503 | 0.38480575 | 0.84537521 | NA         | NUDT19P4    |
| NA    | ENSG00000270902 | 0          | NA          | NA         | NA         | NA         |             |
| NA    | ENSG00000270903 | 6.08122921 | -0.03059757 | 0.36307002 | 0.8035232  | 0.91070264 | HNRNPA3P9   |
| NA    | ENSG00000270904 | 0          | NA          | NA         | NA         | NA         | ATP6V1G1P5  |
| NA    | ENSG00000270906 | 0          | NA          | NA         | NA         | NA         | MTND4P35    |
| NA    | ENSG00000270909 | 0          | NA          | NA         | NA         | NA         |             |
| NA    | ENSG00000270911 | 2.88257407 | -0.01991824 | 0.37046331 | 0.84468126 | 0.92965052 |             |
| NA    | ENSG00000270912 | 0          | NA          | NA         | NA         | NA         | RPS28P1     |
| NA    | ENSG00000270914 | 0          | NA          | NA         | NA         | NA         |             |
| NA    | ENSG00000270915 | 0          | NA          | NA         | NA         | NA         | H3P8        |

|           |                 |            |             |            |            |            |              |
|-----------|-----------------|------------|-------------|------------|------------|------------|--------------|
| NA        | ENSG00000270916 | 0          | NA          | NA         | NA         | NA         | RPL12P50     |
| NA        | ENSG00000270917 | 2.0525859  | 0.00060664  | 0.37678138 | 0.99534371 | NA         |              |
| NA        | ENSG00000270919 | 1.83507796 | 0.06406152  | 0.38555722 | 0.39025566 | NA         |              |
| NA        | ENSG00000270920 | 0          | NA          | NA         | NA         | NA         | MCRIP2P2     |
| NA        | ENSG00000270921 | 0.173124   | -0.01911262 | 0.38486262 | 0.84537521 | NA         | CICP23       |
| NA        | ENSG00000270923 | 8.99440246 | -0.12777727 | 0.37364368 | 0.40276909 | 0.6308968  | TAS2R6P      |
| NA        | ENSG00000270924 | 0          | NA          | NA         | NA         | NA         |              |
| NA        | ENSG00000270926 | 0          | NA          | NA         | NA         | NA         |              |
| NA        | ENSG00000270927 | 0          | NA          | NA         | NA         | NA         |              |
| NA        | ENSG00000270929 | 0          | NA          | NA         | NA         | NA         | SRD5A3P1     |
| NA        | ENSG00000270930 | 0          | NA          | NA         | NA         | NA         | GRAMD4P8     |
| NA        | ENSG00000270933 | 0.31816369 | 0.0011122   | 0.38336647 | 0.9664208  | NA         |              |
| NA        | ENSG00000270934 | 0.16735865 | 0.01897177  | 0.38482933 | 0.78225479 | NA         |              |
| NA        | ENSG00000270935 | 0          | NA          | NA         | NA         | NA         |              |
| NA        | ENSG00000270936 | 0          | NA          | NA         | NA         | NA         | BPNT2P1      |
| NA        | ENSG00000270937 | 0          | NA          | NA         | NA         | NA         |              |
| NA        | ENSG00000270938 | 5.17613939 | 0.19949835  | 0.42925433 | 0.14860135 | 0.33104097 | RAP2CP1      |
| NA        | ENSG00000270941 | 0.47410898 | -0.00759338 | 0.38323489 | 0.86188907 | NA         |              |
| NA        | ENSG00000270945 | 0          | NA          | NA         | NA         | NA         | HSPE1P7      |
| 102723680 | ENSG00000270946 | 0          | NA          | NA         | NA         | NA         | CT45A9       |
| NA        | ENSG00000270947 | 0          | NA          | NA         | NA         | NA         |              |
| NA        | ENSG00000270948 | 5.68795444 | -0.02407364 | 0.35692235 | 0.85698572 | 0.93609679 | MTDHP1       |
| NA        | ENSG00000270951 | 1.56967082 | -0.00229465 | 0.37821055 | 0.97278085 | NA         |              |
| NA        | ENSG00000270953 | 6.98492565 | 0.01288723  | 0.35805068 | 0.92438985 | 0.96852    |              |
| NA        | ENSG00000270954 | 0          | NA          | NA         | NA         | NA         | RPSAP75      |
| NA        | ENSG00000270955 | 0          | NA          | NA         | NA         | NA         |              |
| NA        | ENSG00000270956 | 12.3520658 | -0.08439389 | 0.34395782 | 0.61426728 | 0.80178045 |              |
| NA        | ENSG00000270957 | 0          | NA          | NA         | NA         | NA         |              |
| 339929    | ENSG00000270959 | 0          | NA          | NA         | NA         | NA         | LPP-AS2      |
| NA        | ENSG00000270960 | 0          | NA          | NA         | NA         | NA         |              |
| NA        | ENSG00000270961 | 0          | NA          | NA         | NA         | NA         | IGHD5OR15-5A |
| NA        | ENSG00000270962 | 0.72606999 | 0.00281966  | 0.38234305 | 0.94758139 | NA         |              |
| NA        | ENSG00000270964 | 25.9503253 | 0.07574989  | 0.30648019 | 0.69090081 | 0.85028671 | MAP2K5-DT    |
| NA        | ENSG00000270965 | 0          | NA          | NA         | NA         | NA         | NTAN1P1      |
| NA        | ENSG00000270966 | 0          | NA          | NA         | NA         | NA         |              |
| NA        | ENSG00000270969 | 0          | NA          | NA         | NA         | NA         |              |
| NA        | ENSG00000270971 | 0          | NA          | NA         | NA         | NA         | REXO1L8P     |
| NA        | ENSG00000270972 | 0          | NA          | NA         | NA         | NA         |              |

|    |                 |            |             |            |            |            |              |
|----|-----------------|------------|-------------|------------|------------|------------|--------------|
| NA | ENSG00000270973 | 0          | NA          | NA         | NA         | NA         | SMARCE1P7    |
| NA | ENSG00000270975 | 0          | NA          | NA         | NA         | NA         | MAGOH3P      |
| NA | ENSG00000270976 | 0          | NA          | NA         | NA         | NA         |              |
| NA | ENSG00000270977 | 21.8737189 | 0.37747312  | 0.47538499 | 0.09376982 | 0.23753778 |              |
| NA | ENSG00000270978 | 0          | NA          | NA         | NA         | NA         |              |
| NA | ENSG00000270980 | 0          | NA          | NA         | NA         | NA         |              |
| NA | ENSG00000270981 | 0          | NA          | NA         | NA         | NA         |              |
| NA | ENSG00000270982 | 0          | NA          | NA         | NA         | NA         |              |
| NA | ENSG00000270983 | 0          | NA          | NA         | NA         | NA         |              |
| NA | ENSG00000270986 | 0.14931947 | -0.01844332 | 0.38480212 | 0.84537521 | NA         | HMGB1P51     |
| NA | ENSG00000270987 | 0.49822796 | 0.0116994   | 0.38339875 | 0.7779246  | NA         |              |
| NA | ENSG00000270988 | 0.95776914 | 0.00564752  | 0.38010126 | 0.92567521 | NA         |              |
| NA | ENSG00000270989 | 0.173124   | -0.01911262 | 0.38486262 | 0.84537521 | NA         |              |
| NA | ENSG00000270990 | 0          | NA          | NA         | NA         | NA         |              |
| NA | ENSG00000270992 | 0          | NA          | NA         | NA         | NA         |              |
| NA | ENSG00000270993 | 0          | NA          | NA         | NA         | NA         |              |
| NA | ENSG00000270994 | 0          | NA          | NA         | NA         | NA         |              |
| NA | ENSG00000270995 | 0          | NA          | NA         | NA         | NA         |              |
| NA | ENSG00000270996 | 4.3770267  | 0.02642081  | 0.3656755  | 0.82441018 | 0.92028909 |              |
| NA | ENSG00000270997 | 0          | NA          | NA         | NA         | NA         |              |
| NA | ENSG00000270999 | 0          | NA          | NA         | NA         | NA         | IGKV1OR2-118 |
| NA | ENSG00000271002 | 0          | NA          | NA         | NA         | NA         |              |
| NA | ENSG00000271003 | 0          | NA          | NA         | NA         | NA         |              |
| NA | ENSG00000271005 | 0          | NA          | NA         | NA         | NA         | CTHRC1P1     |
| NA | ENSG00000271009 | 21.592087  | -0.00034803 | 0.31015693 | 0.99656102 | 0.99873692 |              |
| NA | ENSG00000271010 | 0          | NA          | NA         | NA         | NA         |              |
| NA | ENSG00000271011 | 7.21999174 | 0.02176286  | 0.35449635 | 0.87778855 | 0.94578953 |              |
| NA | ENSG00000271013 | 17.371592  | 0.17476813  | 0.35377951 | 0.35943626 | 0.58949503 | LRR37A9P     |
| NA | ENSG00000271014 | 0          | NA          | NA         | NA         | NA         |              |
| NA | ENSG00000271015 | 0          | NA          | NA         | NA         | NA         | IGKV2OR2-7D  |
| NA | ENSG00000271018 | 0          | NA          | NA         | NA         | NA         |              |
| NA | ENSG00000271021 | 0          | NA          | NA         | NA         | NA         |              |
| NA | ENSG00000271022 | 0          | NA          | NA         | NA         | NA         |              |
| NA | ENSG00000271024 | 0          | NA          | NA         | NA         | NA         | HSPE1P19     |
| NA | ENSG00000271025 | 0          | NA          | NA         | NA         | NA         |              |
| NA | ENSG00000271026 | 0          | NA          | NA         | NA         | NA         | KATNBL1P1    |
| NA | ENSG00000271027 | 0          | NA          | NA         | NA         | NA         |              |
| NA | ENSG00000271028 | 0          | NA          | NA         | NA         | NA         |              |



|           |                 |            |             |            |            |            |             |
|-----------|-----------------|------------|-------------|------------|------------|------------|-------------|
| NA        | ENSG00000271029 | 0          | NA          | NA         | NA         | NA         |             |
| NA        | ENSG00000271032 | 3.7196256  | -0.07195735 | 0.37394287 | 0.53886135 | 0.74840807 |             |
| NA        | ENSG00000271034 | 0          | NA          | NA         | NA         | NA         |             |
| NA        | ENSG00000271035 | 0          | NA          | NA         | NA         | NA         |             |
| NA        | ENSG00000271036 | 0          | NA          | NA         | NA         | NA         | CLPTM1LP1   |
| NA        | ENSG00000271040 | 1.61070043 | -0.09235767 | 0.39590539 | 0.16272007 | NA         | TMEM242-DT  |
| NA        | ENSG00000271042 | 0          | NA          | NA         | NA         | NA         |             |
| NA        | ENSG00000271043 | 0          | NA          | NA         | NA         | NA         | MTRNR2L2    |
| NA        | ENSG00000271044 | 0          | NA          | NA         | NA         | NA         |             |
| NA        | ENSG00000271045 | 0          | NA          | NA         | NA         | NA         | NDUFB9P1    |
| NA        | ENSG00000271046 | 0          | NA          | NA         | NA         | NA         |             |
| NA        | ENSG00000271047 | 0          | NA          | NA         | NA         | NA         |             |
| NA        | ENSG00000271048 | 0          | NA          | NA         | NA         | NA         |             |
| NA        | ENSG00000271049 | 1.66756923 | 0.00730006  | 0.37509097 | 0.93231206 | NA         |             |
| NA        | ENSG00000271052 | 0          | NA          | NA         | NA         | NA         |             |
| NA        | ENSG00000271053 | 0          | NA          | NA         | NA         | NA         |             |
| NA        | ENSG00000271056 | 0          | NA          | NA         | NA         | NA         | MRPS22P1    |
| NA        | ENSG00000271057 | 0          | NA          | NA         | NA         | NA         |             |
| NA        | ENSG00000271063 | 0          | NA          | NA         | NA         | NA         | SNRPGP17    |
| NA        | ENSG00000271064 | 0          | NA          | NA         | NA         | NA         |             |
| NA        | ENSG00000271065 | 0          | NA          | NA         | NA         | NA         | SLC4A8-AS1  |
| NA        | ENSG00000271070 | 0          | NA          | NA         | NA         | NA         | GMCL1P2     |
| NA        | ENSG00000271071 | 0.31800595 | 0.00093119  | 0.38336528 | 0.96815356 | NA         |             |
| NA        | ENSG00000271072 | 0.44998284 | -0.02731184 | 0.38571406 | 0.56170874 | NA         | PHBP20      |
| NA        | ENSG00000271074 | 0          | NA          | NA         | NA         | NA         |             |
| NA        | ENSG00000271075 | 9.05361891 | 0.23207459  | 0.42347018 | 0.18309934 | 0.3812648  |             |
| NA        | ENSG00000271077 | 0          | NA          | NA         | NA         | NA         | PER3P1      |
| NA        | ENSG00000271078 | 2.26373727 | -0.05226422 | 0.37979534 | 0.54327379 | NA         |             |
| 441294    | ENSG00000271079 | 0.18922458 | 0.01954053  | 0.38488496 | 0.78225479 | NA         | CTAGE15     |
| NA        | ENSG00000271081 | 0          | NA          | NA         | NA         | NA         | HIKESHIP3   |
| 100996569 | ENSG00000271086 | 7.06582447 | 0.65996413  | 1.24517276 | 0.01830911 | 0.06768265 | NAMA        |
| NA        | ENSG00000271088 | 0          | NA          | NA         | NA         | NA         |             |
| 100527978 | ENSG00000271092 | 35.8266608 | -0.27351971 | 0.3501657  | 0.20218214 | 0.40773466 | TLCD4-RWDD3 |
| NA        | ENSG00000271093 | 0          | NA          | NA         | NA         | NA         | IGLCOR22-2  |
| NA        | ENSG00000271094 | 0          | NA          | NA         | NA         | NA         |             |
| NA        | ENSG00000271095 | 0          | NA          | NA         | NA         | NA         | BNIP3P28    |
| NA        | ENSG00000271096 | 0          | NA          | NA         | NA         | NA         | SUMO2P14    |
| NA        | ENSG00000271097 | 0.34624801 | -0.02356563 | 0.38536324 | 0.65270996 | NA         | DBF4P3      |

|           |                 |            |             |            |            |            |                |
|-----------|-----------------|------------|-------------|------------|------------|------------|----------------|
| NA        | ENSG00000271098 | 0          | NA          | NA         | NA         | NA         | IMMP1LP3       |
| NA        | ENSG00000271099 | 0.44795842 | -0.02501848 | 0.38558245 | 0.5807882  | NA         |                |
| NA        | ENSG00000271100 | 0          | NA          | NA         | NA         | NA         |                |
| NA        | ENSG00000271101 | 0          | NA          | NA         | NA         | NA         |                |
| NA        | ENSG00000271105 | 2.0192806  | 0.03867219  | 0.37667064 | 0.66590595 | NA         | SCML2P2        |
| NA        | ENSG00000271108 | 0          | NA          | NA         | NA         | NA         | KATNBL1P5      |
| NA        | ENSG00000271109 | 41.2865979 | 0.13118737  | 0.28067401 | 0.50869168 | 0.72435534 |                |
| NA        | ENSG00000271111 | 0          | NA          | NA         | NA         | NA         |                |
| NA        | ENSG00000271113 | 0          | NA          | NA         | NA         | NA         |                |
| NA        | ENSG00000271114 | 0          | NA          | NA         | NA         | NA         |                |
| NA        | ENSG00000271115 | 0          | NA          | NA         | NA         | NA         | EIF2S2P7       |
| NA        | ENSG00000271117 | 0          | NA          | NA         | NA         | NA         |                |
| NA        | ENSG00000271118 | 0          | NA          | NA         | NA         | NA         |                |
| NA        | ENSG00000271119 | 16.6968073 | -0.0304516  | 0.3252307  | 0.85984472 | 0.93754016 |                |
| NA        | ENSG00000271121 | 58.2687485 | 0.02868097  | 0.24724451 | 0.88120026 | 0.94760765 | NUDT4P2        |
| 101930085 | ENSG00000271122 | 804.535362 | -0.00040982 | 0.12982982 | 0.99622375 | 0.99863982 | HERPUD2-AS1    |
| NA        | ENSG00000271123 | 0          | NA          | NA         | NA         | NA         | ELOCP5         |
| NA        | ENSG00000271127 | 45.6847633 | 0.2072517   | 0.29581839 | 0.31296008 | 0.54091192 |                |
| NA        | ENSG00000271128 | 0.14931947 | -0.01844332 | 0.38480212 | 0.84537521 | NA         |                |
| NA        | ENSG00000271129 | 0          | NA          | NA         | NA         | NA         |                |
| NA        | ENSG00000271130 | 0          | NA          | NA         | NA         | NA         | IGHV3OR16-8    |
| NA        | ENSG00000271131 | 0.173733   | 0.01914545  | 0.38484597 | 0.78225479 | NA         | PPIAP75        |
| NA        | ENSG00000271133 | 16.773232  | 0.31624076  | 0.43974314 | 0.13595738 | 0.310903   | ITGB8-AS1      |
| NA        | ENSG00000271134 | 0          | NA          | NA         | NA         | NA         | IFITM3P9       |
| NA        | ENSG00000271136 | 0          | NA          | NA         | NA         | NA         |                |
| NA        | ENSG00000271137 | 0.16735865 | 0.01897177  | 0.38482933 | 0.78225479 | NA         |                |
| NA        | ENSG00000271138 | 2.48827618 | 0.10148144  | 0.39220197 | 0.2831767  | NA         | IGLVIVOR22-1   |
| NA        | ENSG00000271140 | 0          | NA          | NA         | NA         | NA         | PRR20FP        |
| NA        | ENSG00000271141 | 17.0205704 | 0.17149972  | 0.36617806 | 0.34762375 | 0.57830414 |                |
| NA        | ENSG00000271142 | 0          | NA          | NA         | NA         | NA         | YWHAQP7        |
| NA        | ENSG00000271143 | 0          | NA          | NA         | NA         | NA         |                |
| NA        | ENSG00000271146 | 0          | NA          | NA         | NA         | NA         |                |
| NA        | ENSG00000271147 | 142.304416 | -0.53017434 | 0.21275341 | 0.00396333 | 0.01915061 | ARMCX5-GPRASP2 |
| NA        | ENSG00000271148 | 0          | NA          | NA         | NA         | NA         |                |
| NA        | ENSG00000271149 | 0          | NA          | NA         | NA         | NA         |                |
| NA        | ENSG00000271150 | 0.16735865 | 0.01897177  | 0.38482933 | 0.78225479 | NA         |                |
| NA        | ENSG00000271151 | 3.22759487 | 0.06765772  | 0.37546858 | 0.54272078 | 0.75077257 |                |
| NA        | ENSG00000271153 | 1.17151057 | 0.04905867  | 0.3887731  | 0.21859307 | NA         | RPL23AP88      |

|    |                 |            |             |            |            |            |              |
|----|-----------------|------------|-------------|------------|------------|------------|--------------|
| NA | ENSG00000271154 | 0          | NA          | NA         | NA         | NA         |              |
| NA | ENSG00000271155 | 55.8190319 | -0.02712723 | 0.2482316  | 0.8848338  | 0.94964311 |              |
| NA | ENSG00000271156 | 0          | NA          | NA         | NA         | NA         |              |
| NA | ENSG00000271157 | 0          | NA          | NA         | NA         | NA         |              |
| NA | ENSG00000271158 | 0          | NA          | NA         | NA         | NA         | WDR4P1       |
| NA | ENSG00000271159 | 0          | NA          | NA         | NA         | NA         | HINT1P2      |
| NA | ENSG00000271161 | 7.97116359 | -0.05611328 | 0.35174777 | 0.70904646 | 0.86034382 | BOLA2P2      |
| NA | ENSG00000271162 | 0          | NA          | NA         | NA         | NA         |              |
| NA | ENSG00000271163 | 0          | NA          | NA         | NA         | NA         |              |
| NA | ENSG00000271164 | 0          | NA          | NA         | NA         | NA         | CFAP97P1     |
| NA | ENSG00000271166 | 0.30139824 | -0.02296476 | 0.38527817 | 0.68536535 | NA         |              |
| NA | ENSG00000271167 | 0          | NA          | NA         | NA         | NA         | LINC01109    |
| NA | ENSG00000271171 | 0.54473777 | -0.01058432 | 0.38322007 | 0.79496066 | NA         | LINC00904    |
| NA | ENSG00000271172 | 0.16735865 | 0.01897177  | 0.38482933 | 0.78225479 | NA         |              |
| NA | ENSG00000271173 | 0          | NA          | NA         | NA         | NA         | SPRING1P1    |
| NA | ENSG00000271174 | 0          | NA          | NA         | NA         | NA         |              |
| NA | ENSG00000271175 | 0          | NA          | NA         | NA         | NA         |              |
| NA | ENSG00000271177 | 0          | NA          | NA         | NA         | NA         |              |
| NA | ENSG00000271178 | 0          | NA          | NA         | NA         | NA         | IGHV3OR16-13 |
| NA | ENSG00000271179 | 0          | NA          | NA         | NA         | NA         |              |
| NA | ENSG00000271180 | 0          | NA          | NA         | NA         | NA         | COX5AP1      |
| NA | ENSG00000271181 | 0          | NA          | NA         | NA         | NA         |              |
| NA | ENSG00000271182 | 0          | NA          | NA         | NA         | NA         |              |
| NA | ENSG00000271184 | 0          | NA          | NA         | NA         | NA         |              |
| NA | ENSG00000271185 | 0.48241159 | 0.01068812  | 0.3833719  | 0.79549464 | NA         |              |
| NA | ENSG00000271187 | 0          | NA          | NA         | NA         | NA         |              |
| NA | ENSG00000271190 | 0          | NA          | NA         | NA         | NA         | RPP40P2      |
| NA | ENSG00000271192 | 0.15069912 | -0.01848503 | 0.38480575 | 0.84537521 | NA         |              |
| NA | ENSG00000271194 | 0          | NA          | NA         | NA         | NA         | RNF138P2     |
| NA | ENSG00000271195 | 0          | NA          | NA         | NA         | NA         |              |
| NA | ENSG00000271196 | 0          | NA          | NA         | NA         | NA         |              |
| NA | ENSG00000271198 | 0          | NA          | NA         | NA         | NA         | VDAC3P1      |
| NA | ENSG00000271199 | 0.173733   | 0.01914545  | 0.38484597 | 0.78225479 | NA         |              |
| NA | ENSG00000271200 | 0.18922458 | 0.01954053  | 0.38488496 | 0.78225479 | NA         | PATJ-DT      |
| NA | ENSG00000271201 | 0          | NA          | NA         | NA         | NA         |              |
| NA | ENSG00000271202 | 0          | NA          | NA         | NA         | NA         | PRR13P7      |
| NA | ENSG00000271204 | 0.32580332 | 0.00221882  | 0.3833783  | 0.95906787 | NA         |              |
| NA | ENSG00000271205 | 0          | NA          | NA         | NA         | NA         |              |

|    |                 |            |             |            |            |            |            |
|----|-----------------|------------|-------------|------------|------------|------------|------------|
| NA | ENSG00000271207 | 0          | NA          | NA         | NA         | NA         | MTCO1P22   |
| NA | ENSG00000271208 | 0          | NA          | NA         | NA         | NA         |            |
| NA | ENSG00000271209 | 0          | NA          | NA         | NA         | NA         | BRDTP1     |
| NA | ENSG00000271214 | 0          | NA          | NA         | NA         | NA         |            |
| NA | ENSG00000271215 | 0          | NA          | NA         | NA         | NA         | RPL21P136  |
| NA | ENSG00000271216 | 0          | NA          | NA         | NA         | NA         | LINC01050  |
| NA | ENSG00000271218 | 0          | NA          | NA         | NA         | NA         |            |
| NA | ENSG00000271219 | 0          | NA          | NA         | NA         | NA         |            |
| NA | ENSG00000271220 | 0          | NA          | NA         | NA         | NA         |            |
| NA | ENSG00000271222 | 0          | NA          | NA         | NA         | NA         |            |
| NA | ENSG00000271225 | 0.16735865 | 0.01897177  | 0.38482933 | 0.78225479 | NA         | BNIP3P4    |
| NA | ENSG00000271227 | 0          | NA          | NA         | NA         | NA         | SREK1IP1P2 |
| NA | ENSG00000271228 | 0.33471731 | 0.02354391  | 0.38534154 | 0.62842204 | NA         |            |
| NA | ENSG00000271230 | 0          | NA          | NA         | NA         | NA         |            |
| NA | ENSG00000271231 | 0          | NA          | NA         | NA         | NA         | KRT18P9    |
| NA | ENSG00000271232 | 0          | NA          | NA         | NA         | NA         | CARS1P1    |
| NA | ENSG00000271234 | 0.3630641  | 0.02389553  | 0.38539252 | 0.60991236 | NA         |            |
| NA | ENSG00000271235 | 0          | NA          | NA         | NA         | NA         |            |
| NA | ENSG00000271236 | 0.32265123 | -0.02325551 | 0.38531889 | 0.66951432 | NA         | SUMO2P15   |
| NA | ENSG00000271237 | 0          | NA          | NA         | NA         | NA         | HMGB1P50   |
| NA | ENSG00000271238 | 0          | NA          | NA         | NA         | NA         |            |
| NA | ENSG00000271239 | 0          | NA          | NA         | NA         | NA         |            |
| NA | ENSG00000271240 | 0          | NA          | NA         | NA         | NA         |            |
| NA | ENSG00000271242 | 0          | NA          | NA         | NA         | NA         | PRELID3BP2 |
| NA | ENSG00000271243 | 0          | NA          | NA         | NA         | NA         |            |
| NA | ENSG00000271245 | 0          | NA          | NA         | NA         | NA         |            |
| NA | ENSG00000271248 | 0          | NA          | NA         | NA         | NA         |            |
| NA | ENSG00000271249 | 0          | NA          | NA         | NA         | NA         | DIMT1P1    |
| NA | ENSG00000271250 | 0          | NA          | NA         | NA         | NA         |            |
| NA | ENSG00000271251 | 0          | NA          | NA         | NA         | NA         |            |
| NA | ENSG00000271252 | 0          | NA          | NA         | NA         | NA         |            |
| NA | ENSG00000271253 | 0          | NA          | NA         | NA         | NA         |            |
| NA | ENSG00000271257 | 0          | NA          | NA         | NA         | NA         |            |
| NA | ENSG00000271259 | 6.92567295 | 0.0595365   | 0.35629005 | 0.68395994 | 0.84597592 |            |
| NA | ENSG00000271264 | 0          | NA          | NA         | NA         | NA         | MZT1P1     |
| NA | ENSG00000271265 | 2.97796283 | -0.15220297 | 0.41545208 | 0.13642193 | 0.31149858 |            |
| NA | ENSG00000271266 | 0          | NA          | NA         | NA         | NA         | LAPTM4BP2  |
| NA | ENSG00000271267 | 0.8131428  | -0.00616388 | 0.38151558 | 0.9049547  | NA         |            |

|           |                 |            |             |            |            |            |              |
|-----------|-----------------|------------|-------------|------------|------------|------------|--------------|
| NA        | ENSG00000271268 | 0          | NA          | NA         | NA         | NA         |              |
| NA        | ENSG00000271269 | 0          | NA          | NA         | NA         | NA         |              |
| 100507032 | ENSG00000271270 | 141.019433 | -0.25531292 | 0.21842119 | 0.15948863 | 0.34700764 | TMCC1-DT     |
| 574537    | ENSG00000271271 | 0          | NA          | NA         | NA         | NA         | UGT2A2       |
| NA        | ENSG00000271272 | 0          | NA          | NA         | NA         | NA         |              |
| NA        | ENSG00000271275 | 1.09898787 | -0.02777851 | 0.38129365 | 0.65506186 | NA         |              |
| NA        | ENSG00000271277 | 0          | NA          | NA         | NA         | NA         |              |
| NA        | ENSG00000271278 | 0          | NA          | NA         | NA         | NA         | ELOCP33      |
| NA        | ENSG00000271283 | 0.16735865 | 0.01897177  | 0.38482933 | 0.78225479 | NA         |              |
| NA        | ENSG00000271284 | 0          | NA          | NA         | NA         | NA         | SMIM12P1     |
| NA        | ENSG00000271286 | 0          | NA          | NA         | NA         | NA         | CYTH1P1      |
| NA        | ENSG00000271287 | 0          | NA          | NA         | NA         | NA         | BCRP9        |
| NA        | ENSG00000271288 | 0          | NA          | NA         | NA         | NA         | IGHV1OR15-3  |
| NA        | ENSG00000271290 | 0          | NA          | NA         | NA         | NA         | COPS8P1      |
| NA        | ENSG00000271291 | 0          | NA          | NA         | NA         | NA         |              |
| NA        | ENSG00000271296 | 0          | NA          | NA         | NA         | NA         | H3P19        |
| NA        | ENSG00000271298 | 0          | NA          | NA         | NA         | NA         |              |
| NA        | ENSG00000271299 | 0          | NA          | NA         | NA         | NA         |              |
| NA        | ENSG00000271302 | 0          | NA          | NA         | NA         | NA         |              |
| 140809    | ENSG00000271303 | 1009.85472 | -0.09603707 | 0.09067913 | 0.2733397  | 0.49679916 | SRXN1        |
| NA        | ENSG00000271304 | 0          | NA          | NA         | NA         | NA         | DPRXP2       |
| NA        | ENSG00000271306 | 0          | NA          | NA         | NA         | NA         | RAC1P9       |
| NA        | ENSG00000271307 | 0          | NA          | NA         | NA         | NA         |              |
| NA        | ENSG00000271309 | 0          | NA          | NA         | NA         | NA         |              |
| NA        | ENSG00000271313 | 0          | NA          | NA         | NA         | NA         |              |
| NA        | ENSG00000271314 | 1.9623352  | -0.01522496 | 0.37594398 | 0.85263445 | NA         |              |
| NA        | ENSG00000271315 | 0          | NA          | NA         | NA         | NA         |              |
| NA        | ENSG00000271317 | 0          | NA          | NA         | NA         | NA         | IGHD4OR15-4A |
| NA        | ENSG00000271318 | 0          | NA          | NA         | NA         | NA         | MOB4P2       |
| NA        | ENSG00000271320 | 0.31860545 | 0.00150979  | 0.38336984 | 0.96261315 | NA         |              |
| 340307    | ENSG00000271321 | 0          | NA          | NA         | NA         | NA         | CTAGE6       |
| NA        | ENSG00000271322 | 0          | NA          | NA         | NA         | NA         |              |
| NA        | ENSG00000271327 | 61.6844464 | -0.11722881 | 0.24848908 | 0.53963172 | 0.74869184 |              |
| NA        | ENSG00000271328 | 0          | NA          | NA         | NA         | NA         | B3GNTL1P2    |
| NA        | ENSG00000271329 | 0          | NA          | NA         | NA         | NA         |              |
| NA        | ENSG00000271330 | 0          | NA          | NA         | NA         | NA         |              |
| NA        | ENSG00000271332 | 0.173733   | 0.01914545  | 0.38484597 | 0.78225479 | NA         | ATP5MGP8     |
| NA        | ENSG00000271333 | 0          | NA          | NA         | NA         | NA         |              |

|           |                 |                 |            |             |            |            |            |              |
|-----------|-----------------|-----------------|------------|-------------|------------|------------|------------|--------------|
| 101926940 | ENSG00000271334 | 0               | NA         | NA          | NA         | NA         | LINC02104  |              |
|           | NA              | ENSG00000271335 | 18.1733469 | -0.18973462 | 0.37284218 | 0.30205698 | 0.52954055 | CCNY-AS1     |
|           | NA              | ENSG00000271336 | 0          | NA          | NA         | NA         | NA         | IGHD1OR15-1A |
|           | NA              | ENSG00000271337 | 0          | NA          | NA         | NA         | NA         | NDE1P2       |
|           | NA              | ENSG00000271338 | 0          | NA          | NA         | NA         | NA         |              |
|           | NA              | ENSG00000271339 | 0          | NA          | NA         | NA         | NA         |              |
|           | NA              | ENSG00000271340 | 0          | NA          | NA         | NA         | NA         |              |
|           | NA              | ENSG00000271343 | 0          | NA          | NA         | NA         | NA         |              |
|           | NA              | ENSG00000271344 | 1.04648558 | 0.00500998  | 0.379945   | 0.93458209 | NA         |              |
|           | NA              | ENSG00000271346 | 0          | NA          | NA         | NA         | NA         |              |
|           | NA              | ENSG00000271349 | 0          | NA          | NA         | NA         | NA         |              |
|           | NA              | ENSG00000271350 | 0.18922458 | 0.01954053  | 0.38488496 | 0.78225479 | NA         |              |
|           | NA              | ENSG00000271351 | 0          | NA          | NA         | NA         | NA         | IGKV1OR2-9   |
|           | NA              | ENSG00000271353 | 0          | NA          | NA         | NA         | NA         |              |
|           | NA              | ENSG00000271355 | 0          | NA          | NA         | NA         | NA         |              |
|           | NA              | ENSG00000271356 | 0          | NA          | NA         | NA         | NA         | USP21P2      |
|           | NA              | ENSG00000271357 | 0          | NA          | NA         | NA         | NA         |              |
|           | NA              | ENSG00000271358 | 0          | NA          | NA         | NA         | NA         |              |
| 107984208 | ENSG00000271360 | 5.75593955      | 0.0106574  | 0.35835891  | 0.93723239 | 0.97354401 | USP6NL-AS1 |              |
|           | NA              | ENSG00000271361 | 2.39000022 | 0.06100402  | 0.38098472 | 0.49520822 | NA         | HTATSFP2     |
|           | NA              | ENSG00000271362 | 0          | NA          | NA         | NA         | NA         |              |
|           | NA              | ENSG00000271364 | 0          | NA          | NA         | NA         | NA         |              |
|           | NA              | ENSG00000271365 | 0          | NA          | NA         | NA         | NA         |              |
|           | NA              | ENSG00000271366 | 0          | NA          | NA         | NA         | NA         |              |
|           | NA              | ENSG00000271367 | 0.95775506 | -0.02061218 | 0.38102161 | 0.73058704 | NA         |              |
|           | NA              | ENSG00000271368 | 0          | NA          | NA         | NA         | NA         |              |
|           | NA              | ENSG00000271369 | 0          | NA          | NA         | NA         | NA         |              |
|           | NA              | ENSG00000271370 | 0          | NA          | NA         | NA         | NA         |              |
|           | NA              | ENSG00000271373 | 0          | NA          | NA         | NA         | NA         | NANOGP3      |
|           | NA              | ENSG00000271375 | 0          | NA          | NA         | NA         | NA         |              |
|           | NA              | ENSG00000271377 | 0          | NA          | NA         | NA         | NA         | IFITM3P8     |
|           | NA              | ENSG00000271378 | 0.18922458 | 0.01954053  | 0.38488496 | 0.78225479 | NA         | RBISP2       |
|           | NA              | ENSG00000271379 | 0          | NA          | NA         | NA         | NA         |              |
|           | NA              | ENSG00000271380 | 42.4278711 | 0.13799014  | 0.26929951 | 0.48468941 | 0.70479609 |              |
|           | NA              | ENSG00000271381 | 0          | NA          | NA         | NA         | NA         | REXO1L9P     |
|           | NA              | ENSG00000271382 | 0.84818246 | 0.02056927  | 0.38151751 | 0.71596621 | NA         |              |
| 101060226 | ENSG00000271383 | 682.533039      | 0.12512308 | 0.10460521  | 0.21341173 | 0.42345121 | NBPF19     |              |
|           | NA              | ENSG00000271384 | 0          | NA          | NA         | NA         | NA         |              |

|           |                 |            |             |            |            |            |            |
|-----------|-----------------|------------|-------------|------------|------------|------------|------------|
| NA        | ENSG00000271385 | 0          | NA          | NA         | NA         | NA         |            |
| NA        | ENSG00000271386 | 0          | NA          | NA         | NA         | NA         | SRGNP1     |
| NA        | ENSG00000271387 | 8.10664344 | -0.12761434 | 0.37521681 | 0.39600433 | 0.62543591 | C1orf21-DT |
| NA        | ENSG00000271389 | 0          | NA          | NA         | NA         | NA         | OSBPL9P1   |
| NA        | ENSG00000271390 | 0.18922458 | 0.01954053  | 0.38488496 | 0.78225479 | NA         |            |
| NA        | ENSG00000271392 | 1.64176447 | -0.06347806 | 0.3862091  | 0.36736644 | NA         |            |
| NA        | ENSG00000271394 | 0          | NA          | NA         | NA         | NA         |            |
| NA        | ENSG00000271395 | 0          | NA          | NA         | NA         | NA         | LINC02336  |
| NA        | ENSG00000271396 | 4.85744902 | 0.06608575  | 0.36938254 | 0.59690932 | 0.78900843 |            |
| NA        | ENSG00000271397 | 0          | NA          | NA         | NA         | NA         |            |
| NA        | ENSG00000271398 | 0.53469271 | 0.03206486  | 0.38614794 | 0.46398183 | NA         |            |
| NA        | ENSG00000271399 | 0          | NA          | NA         | NA         | NA         |            |
| NA        | ENSG00000271400 | 0          | NA          | NA         | NA         | NA         | CCDC121P1  |
| NA        | ENSG00000271401 | 1.89404884 | 0.06282881  | 0.38536668 | 0.39403687 | NA         |            |
| NA        | ENSG00000271402 | 0          | NA          | NA         | NA         | NA         | IGKV2OR2-2 |
| NA        | ENSG00000271404 | 0          | NA          | NA         | NA         | NA         | MZT1P2     |
| NA        | ENSG00000271408 | 0          | NA          | NA         | NA         | NA         | NAPGP1     |
| NA        | ENSG00000271409 | 0          | NA          | NA         | NA         | NA         |            |
| NA        | ENSG00000271410 | 0.78953329 | -0.02814495 | 0.38350087 | 0.55668294 | NA         |            |
| NA        | ENSG00000271412 | 0          | NA          | NA         | NA         | NA         | PRR13P3    |
| NA        | ENSG00000271413 | 0          | NA          | NA         | NA         | NA         |            |
| NA        | ENSG00000271414 | 0.45209736 | -0.02505403 | 0.38558831 | 0.57865948 | NA         |            |
| NA        | ENSG00000271415 | 0          | NA          | NA         | NA         | NA         | RPL23AP90  |
| NA        | ENSG00000271418 | 0          | NA          | NA         | NA         | NA         |            |
| NA        | ENSG00000271419 | 0          | NA          | NA         | NA         | NA         |            |
| NA        | ENSG00000271420 | 0.50793439 | 0.00982864  | 0.38324069 | 0.78811329 | NA         |            |
| NA        | ENSG00000271421 | 0          | NA          | NA         | NA         | NA         |            |
| NA        | ENSG00000271423 | 0          | NA          | NA         | NA         | NA         | CYCSP1     |
| NA        | ENSG00000271424 | 0.18922458 | 0.01954053  | 0.38488496 | 0.78225479 | NA         | GLRX5P3    |
| 100132406 | ENSG00000271425 | 157.34648  | 0.07948665  | 0.19699024 | 0.64010157 | 0.81965584 | NBPF10     |
| NA        | ENSG00000271426 | 0          | NA          | NA         | NA         | NA         |            |
| NA        | ENSG00000271427 | 0.15069912 | -0.01848503 | 0.38480575 | 0.84537521 | NA         |            |
| NA        | ENSG00000271428 | 0.82579833 | 0.03616293  | 0.38459793 | 0.46909007 | NA         | MPHOSPH6P1 |
| NA        | ENSG00000271429 | 0          | NA          | NA         | NA         | NA         | RPL17P51   |
| NA        | ENSG00000271433 | 0          | NA          | NA         | NA         | NA         | PPATP2     |
| NA        | ENSG00000271434 | 0          | NA          | NA         | NA         | NA         |            |
| NA        | ENSG00000271435 | 0          | NA          | NA         | NA         | NA         | TEKT4P3    |
| NA        | ENSG00000271437 | 0          | NA          | NA         | NA         | NA         |            |

|        |                 |            |             |            |            |            |           |
|--------|-----------------|------------|-------------|------------|------------|------------|-----------|
| NA     | ENSG00000271439 | 0          | NA          | NA         | NA         | NA         |           |
| NA     | ENSG00000271440 | 0.14931947 | -0.01844332 | 0.38480212 | 0.84537521 | NA         |           |
| NA     | ENSG00000271443 | 0          | NA          | NA         | NA         | NA         |           |
| 79148  | ENSG00000271447 | 52.4900483 | 0.47059864  | 0.38385883 | 0.05687222 | 0.16435994 | MMP28     |
| 728911 | ENSG00000271449 | 0          | NA          | NA         | NA         | NA         | CT45A2    |
| NA     | ENSG00000271452 | 4.59080108 | 0.02509097  | 0.36493834 | 0.83521501 | 0.92475394 |           |
| NA     | ENSG00000271454 | 0.34043409 | 6.94E-05    | 0.38336209 | 0.96459554 | NA         |           |
| NA     | ENSG00000271455 | 0          | NA          | NA         | NA         | NA         |           |
| NA     | ENSG00000271456 | 0          | NA          | NA         | NA         | NA         |           |
| NA     | ENSG00000271457 | 0          | NA          | NA         | NA         | NA         |           |
| NA     | ENSG00000271459 | 0          | NA          | NA         | NA         | NA         |           |
| NA     | ENSG00000271461 | 0          | NA          | NA         | NA         | NA         | CKAP2LP1  |
| NA     | ENSG00000271462 | 0          | NA          | NA         | NA         | NA         |           |
| NA     | ENSG00000271464 | 0          | NA          | NA         | NA         | NA         | DPRXP7    |
| NA     | ENSG00000271465 | 0          | NA          | NA         | NA         | NA         | SQSTM1P1  |
| NA     | ENSG00000271466 | 0          | NA          | NA         | NA         | NA         | CICP24    |
| NA     | ENSG00000271468 | 0          | NA          | NA         | NA         | NA         |           |
| NA     | ENSG00000271474 | 418.260452 | 0.00238585  | 0.11620147 | 0.98414155 | 0.99453916 | UNC5C-AS1 |
| NA     | ENSG00000271475 | 0          | NA          | NA         | NA         | NA         |           |
| NA     | ENSG00000271477 | 0          | NA          | NA         | NA         | NA         |           |
| NA     | ENSG00000271480 | 0          | NA          | NA         | NA         | NA         | MTND3P19  |
| NA     | ENSG00000271482 | 0          | NA          | NA         | NA         | NA         |           |
| NA     | ENSG00000271483 | 0          | NA          | NA         | NA         | NA         |           |
| NA     | ENSG00000271484 | 0.173733   | 0.01914545  | 0.38484597 | 0.78225479 | NA         | ABI1P1    |
| NA     | ENSG00000271486 | 0          | NA          | NA         | NA         | NA         | NIPA2P3   |
| NA     | ENSG00000271488 | 0          | NA          | NA         | NA         | NA         | RBM11P1   |
| NA     | ENSG00000271490 | 0          | NA          | NA         | NA         | NA         |           |
| NA     | ENSG00000271491 | 0          | NA          | NA         | NA         | NA         |           |
| NA     | ENSG00000271492 | 0          | NA          | NA         | NA         | NA         | MEMO1P5   |
| NA     | ENSG00000271494 | 0          | NA          | NA         | NA         | NA         |           |
| NA     | ENSG00000271495 | 0          | NA          | NA         | NA         | NA         |           |
| NA     | ENSG00000271496 | 0          | NA          | NA         | NA         | NA         | SNRPGP20  |
| NA     | ENSG00000271498 | 0          | NA          | NA         | NA         | NA         |           |
| NA     | ENSG00000271499 | 0.37844916 | 0.02407552  | 0.3854191  | 0.60038877 | NA         |           |
| NA     | ENSG00000271500 | 0          | NA          | NA         | NA         | NA         |           |
| NA     | ENSG00000271502 | 0          | NA          | NA         | NA         | NA         |           |
| 6352   | ENSG00000271503 | 0          | NA          | NA         | NA         | NA         | CCL5      |
| NA     | ENSG00000271507 | 0          | NA          | NA         | NA         | NA         |           |



|           |                 |            |             |            |            |            |            |
|-----------|-----------------|------------|-------------|------------|------------|------------|------------|
| NA        | ENSG00000271508 | 0          | NA          | NA         | NA         | NA         |            |
| NA        | ENSG00000271509 | 0          | NA          | NA         | NA         | NA         |            |
| NA        | ENSG00000271511 | 0.173124   | -0.01911262 | 0.38486262 | 0.84537521 | NA         |            |
| NA        | ENSG00000271519 | 0          | NA          | NA         | NA         | NA         |            |
| NA        | ENSG00000271522 | 0          | NA          | NA         | NA         | NA         |            |
| NA        | ENSG00000271523 | 0          | NA          | NA         | NA         | NA         |            |
| NA        | ENSG00000271524 | 19.0125249 | -0.19910049 | 0.36443955 | 0.3013851  | 0.52872103 | BNIP3P17   |
| NA        | ENSG00000271525 | 0          | NA          | NA         | NA         | NA         | ARF4P1     |
| NA        | ENSG00000271526 | 0          | NA          | NA         | NA         | NA         |            |
| NA        | ENSG00000271527 | 0          | NA          | NA         | NA         | NA         |            |
| NA        | ENSG00000271530 | 0.34624801 | -0.02356563 | 0.38536324 | 0.65270996 | NA         | WBP1LP12   |
| NA        | ENSG00000271532 | 0          | NA          | NA         | NA         | NA         | BBIP1P1    |
| NA        | ENSG00000271533 | 218.0994   | -0.09593381 | 0.15632051 | 0.50021595 | 0.71738359 |            |
| NA        | ENSG00000271536 | 0          | NA          | NA         | NA         | NA         |            |
| NA        | ENSG00000271537 | 1.26358761 | 0.04740069  | 0.38424151 | 0.44826515 | NA         |            |
| NA        | ENSG00000271538 | 0.44795842 | -0.02501848 | 0.38558245 | 0.5807882  | NA         | LINC02427  |
| NA        | ENSG00000271543 | 0          | NA          | NA         | NA         | NA         |            |
| NA        | ENSG00000271544 | 0          | NA          | NA         | NA         | NA         |            |
| NA        | ENSG00000271546 | 0          | NA          | NA         | NA         | NA         |            |
| NA        | ENSG00000271547 | 4.35817298 | 0.18579352  | 0.43159808 | 0.11707664 | 0.28015927 |            |
| NA        | ENSG00000271550 | 11.3778467 | -0.08293817 | 0.34316702 | 0.62129065 | 0.80672374 | BNIP3P11   |
| 115308161 | ENSG00000271551 | 14.2527769 | -0.13515018 | 0.34892836 | 0.45128177 | 0.67456655 |            |
| NA        | ENSG00000271553 | 14.5574161 | -0.0973825  | 0.33465794 | 0.58527585 | 0.78126037 |            |
| NA        | ENSG00000271554 | 0.33471731 | 0.02354391  | 0.38534154 | 0.62842204 | NA         |            |
| NA        | ENSG00000271555 | 0.29863895 | -0.02292439 | 0.3852726  | 0.68753245 | NA         |            |
| NA        | ENSG00000271557 | 1.65895367 | -0.03547631 | 0.38050552 | 0.61743995 | NA         | YPEL5P2    |
| NA        | ENSG00000271558 | 0          | NA          | NA         | NA         | NA         |            |
| NA        | ENSG00000271559 | 0          | NA          | NA         | NA         | NA         |            |
| NA        | ENSG00000271560 | 0          | NA          | NA         | NA         | NA         |            |
| NA        | ENSG00000271563 | 0          | NA          | NA         | NA         | NA         | HIRAP1     |
| 103191607 | ENSG00000271564 | 0          | NA          | NA         | NA         | NA         | LINC02333  |
| NA        | ENSG00000271565 | 0          | NA          | NA         | NA         | NA         |            |
| 730262    | ENSG00000271567 | 0          | NA          | NA         | NA         | NA         | PPIAL4E    |
| NA        | ENSG00000271568 | 0          | NA          | NA         | NA         | NA         |            |
| NA        | ENSG00000271569 | 0          | NA          | NA         | NA         | NA         | IGKV1OR2-6 |
| NA        | ENSG00000271573 | 0          | NA          | NA         | NA         | NA         |            |
| NA        | ENSG00000271576 | 29.3669255 | 0.23875449  | 0.33487938 | 0.25644812 | 0.47758495 | PRKACB-DT  |
| NA        | ENSG00000271578 | 0          | NA          | NA         | NA         | NA         |            |

|           |                 |            |             |            |            |            |             |
|-----------|-----------------|------------|-------------|------------|------------|------------|-------------|
| NA        | ENSG00000271579 | 0          | NA          | NA         | NA         | NA         |             |
| NA        | ENSG00000271580 | 6.73810601 | -0.04583204 | 0.35682724 | 0.74251321 | 0.87870936 |             |
| NA        | ENSG00000271581 | 0          | NA          | NA         | NA         | NA         |             |
| NA        | ENSG00000271582 | 0          | NA          | NA         | NA         | NA         |             |
| NA        | ENSG00000271583 | 0          | NA          | NA         | NA         | NA         |             |
| 105369490 | ENSG00000271584 | 0          | NA          | NA         | NA         | NA         | LINC02550   |
| NA        | ENSG00000271585 | 0.16735865 | 0.01897177  | 0.38482933 | 0.78225479 | NA         | SELENOTP2   |
| NA        | ENSG00000271586 | 0          | NA          | NA         | NA         | NA         |             |
| NA        | ENSG00000271587 | 0          | NA          | NA         | NA         | NA         |             |
| NA        | ENSG00000271588 | 0          | NA          | NA         | NA         | NA         | LARP7P1     |
| NA        | ENSG00000271589 | 0          | NA          | NA         | NA         | NA         |             |
| NA        | ENSG00000271590 | 0          | NA          | NA         | NA         | NA         |             |
| NA        | ENSG00000271595 | 0          | NA          | NA         | NA         | NA         | ELOCP35     |
| NA        | ENSG00000271596 | 0          | NA          | NA         | NA         | NA         |             |
| NA        | ENSG00000271597 | 0          | NA          | NA         | NA         | NA         |             |
| NA        | ENSG00000271598 | 0          | NA          | NA         | NA         | NA         |             |
| NA        | ENSG00000271600 | 0          | NA          | NA         | NA         | NA         |             |
| 128077    | ENSG00000271601 | 1734.04345 | -0.04035763 | 0.07717097 | 0.59279255 | 0.78702605 | LIX1L       |
| NA        | ENSG00000271602 | 0          | NA          | NA         | NA         | NA         | KRT8P49     |
| 284021    | ENSG00000271605 | 0          | NA          | NA         | NA         | NA         | MILR1       |
| NA        | ENSG00000271606 | 0          | NA          | NA         | NA         | NA         |             |
| NA        | ENSG00000271607 | 0          | NA          | NA         | NA         | NA         |             |
| NA        | ENSG00000271608 | 0          | NA          | NA         | NA         | NA         |             |
| NA        | ENSG00000271609 | 0          | NA          | NA         | NA         | NA         |             |
| NA        | ENSG00000271611 | 0          | NA          | NA         | NA         | NA         |             |
| NA        | ENSG00000271612 | 0          | NA          | NA         | NA         | NA         | HSPE1P14    |
| NA        | ENSG00000271614 | 33.2804622 | 0.54337925  | 0.41332447 | 0.038431   | 0.12191735 | ATP2B1-AS1  |
| NA        | ENSG00000271615 | 0          | NA          | NA         | NA         | NA         | ACTG1P22    |
| NA        | ENSG00000271616 | 0          | NA          | NA         | NA         | NA         |             |
| NA        | ENSG00000271618 | 0          | NA          | NA         | NA         | NA         |             |
| NA        | ENSG00000271620 | 0          | NA          | NA         | NA         | NA         | IGHV3OR16-7 |
| NA        | ENSG00000271621 | 0          | NA          | NA         | NA         | NA         |             |
| NA        | ENSG00000271623 | 0.54919481 | 0.03276138  | 0.38621991 | 0.45398559 | NA         |             |
| NA        | ENSG00000271624 | 0          | NA          | NA         | NA         | NA         |             |
| NA        | ENSG00000271625 | 0          | NA          | NA         | NA         | NA         | PSMA6P4     |
| NA        | ENSG00000271626 | 0          | NA          | NA         | NA         | NA         | H3P42       |
| NA        | ENSG00000271627 | 0          | NA          | NA         | NA         | NA         | NKAIN1P2    |
| NA        | ENSG00000271629 | 0.18922458 | 0.01954053  | 0.38488496 | 0.78225479 | NA         |             |

|    |                 |            |             |            |            |            |            |
|----|-----------------|------------|-------------|------------|------------|------------|------------|
| NA | ENSG00000271631 | 0.18922458 | 0.01954053  | 0.38488496 | 0.78225479 | NA         |            |
| NA | ENSG00000271632 | 0          | NA          | NA         | NA         | NA         |            |
| NA | ENSG00000271635 | 0.16735865 | 0.01897177  | 0.38482933 | 0.78225479 | NA         | DBF4P2     |
| NA | ENSG00000271638 | 0.67243483 | 0.03948371  | 0.38703737 | 0.3668709  | NA         | BNIP3P19   |
| NA | ENSG00000271639 | 1.62185474 | -0.01763419 | 0.37719653 | 0.82038449 | NA         | PPFIA1P1   |
| NA | ENSG00000271642 | 0          | NA          | NA         | NA         | NA         | MARK3P1    |
| NA | ENSG00000271643 | 25.6851092 | -0.18328772 | 0.32759186 | 0.36056082 | 0.59046856 | PDCD6IP-DT |
| NA | ENSG00000271644 | 0          | NA          | NA         | NA         | NA         |            |
| NA | ENSG00000271646 | 30.2721167 | 0.83699318  | 0.47343257 | 0.00807711 | 0.03481275 | IRF2-DT    |
| NA | ENSG00000271647 | 0          | NA          | NA         | NA         | NA         | KRT8P47    |
| NA | ENSG00000271650 | 0          | NA          | NA         | NA         | NA         |            |
| NA | ENSG00000271652 | 0          | NA          | NA         | NA         | NA         |            |
| NA | ENSG00000271653 | 1.71107918 | 0.05996294  | 0.38667714 | 0.34790702 | NA         |            |
| NA | ENSG00000271654 | 0          | NA          | NA         | NA         | NA         |            |
| NA | ENSG00000271655 | 0          | NA          | NA         | NA         | NA         | BNIP3P35   |
| NA | ENSG00000271656 | 0          | NA          | NA         | NA         | NA         |            |
| NA | ENSG00000271657 | 0          | NA          | NA         | NA         | NA         |            |
| NA | ENSG00000271659 | 8.14475432 | -0.12093818 | 0.36629034 | 0.44409014 | 0.66905081 |            |
| NA | ENSG00000271660 | 0          | NA          | NA         | NA         | NA         |            |
| NA | ENSG00000271661 | 0          | NA          | NA         | NA         | NA         | BNIP3P36   |
| NA | ENSG00000271662 | 4.76310855 | 0.13502223  | 0.39788349 | 0.25951679 | 0.48119749 |            |
| NA | ENSG00000271664 | 6.12207865 | 0.08309833  | 0.36866324 | 0.5401037  | 0.748907   |            |
| NA | ENSG00000271666 | 0.14931947 | -0.01844332 | 0.38480212 | 0.84537521 | NA         |            |
| NA | ENSG00000271667 | 0          | NA          | NA         | NA         | NA         |            |
| NA | ENSG00000271670 | 0.34746601 | 0.02370763  | 0.3853651  | 0.61987128 | NA         |            |
| NA | ENSG00000271671 | 0          | NA          | NA         | NA         | NA         |            |
| NA | ENSG00000271672 | 0          | NA          | NA         | NA         | NA         | DUXAP8     |
| NA | ENSG00000271676 | 0          | NA          | NA         | NA         | NA         |            |
| NA | ENSG00000271677 | 0          | NA          | NA         | NA         | NA         |            |
| NA | ENSG00000271679 | 0          | NA          | NA         | NA         | NA         | LSM1P2     |
| NA | ENSG00000271680 | 0.173124   | -0.01911262 | 0.38486262 | 0.84537521 | NA         |            |
| NA | ENSG00000271681 | 0          | NA          | NA         | NA         | NA         |            |
| NA | ENSG00000271682 | 0          | NA          | NA         | NA         | NA         |            |
| NA | ENSG00000271686 | 0          | NA          | NA         | NA         | NA         | TNPO3P1    |
| NA | ENSG00000271687 | 0.16735865 | 0.01897177  | 0.38482933 | 0.78225479 | NA         | MTND5P10   |
| NA | ENSG00000271691 | 0          | NA          | NA         | NA         | NA         |            |
| NA | ENSG00000271693 | 0          | NA          | NA         | NA         | NA         |            |
| NA | ENSG00000271696 | 0          | NA          | NA         | NA         | NA         |            |

|    |                 |            |             |            |            |            |            |
|----|-----------------|------------|-------------|------------|------------|------------|------------|
| NA | ENSG00000271697 | 0          | NA          | NA         | NA         | NA         |            |
| NA | ENSG00000271698 | 38.4171042 | 0.12930865  | 0.29068107 | 0.51487573 | 0.72954824 |            |
| NA | ENSG00000271699 | 14.964147  | -0.36226932 | 0.56699653 | 0.05578498 | 0.16202225 | SNX29P2    |
| NA | ENSG00000271701 | 0          | NA          | NA         | NA         | NA         |            |
| NA | ENSG00000271702 | 0          | NA          | NA         | NA         | NA         |            |
| NA | ENSG00000271704 | 0          | NA          | NA         | NA         | NA         | BNIP3P20   |
| NA | ENSG00000271705 | 0          | NA          | NA         | NA         | NA         | RPL17P3    |
| NA | ENSG00000271707 | 0          | NA          | NA         | NA         | NA         | ATP1B3P1   |
| NA | ENSG00000271709 | 0          | NA          | NA         | NA         | NA         |            |
| NA | ENSG00000271710 | 0          | NA          | NA         | NA         | NA         | NDUFA8P1   |
| NA | ENSG00000271711 | 0.64286601 | 0.00479783  | 0.38139638 | 0.9250586  | NA         |            |
| NA | ENSG00000271712 | 0          | NA          | NA         | NA         | NA         |            |
| NA | ENSG00000271714 | 9.05053042 | 0.11695922  | 0.36680421 | 0.45340794 | 0.67661629 |            |
| NA | ENSG00000271715 | 0.173733   | 0.01914545  | 0.38484597 | 0.78225479 | NA         |            |
| NA | ENSG00000271716 | 0.16735865 | 0.01897177  | 0.38482933 | 0.78225479 | NA         |            |
| NA | ENSG00000271717 | 0.14931947 | -0.01844332 | 0.38480212 | 0.84537521 | NA         |            |
| NA | ENSG00000271723 | 24.9653335 | 0.5715664   | 0.68851151 | 0.03853607 | 0.1221335  | MROH7-TTC4 |
| NA | ENSG00000271724 | 0          | NA          | NA         | NA         | NA         |            |
| NA | ENSG00000271725 | 0          | NA          | NA         | NA         | NA         |            |
| NA | ENSG00000271727 | 0.16735865 | 0.01897177  | 0.38482933 | 0.78225479 | NA         |            |
| NA | ENSG00000271730 | 4.60751679 | 0.05940118  | 0.37043523 | 0.61880583 | 0.80500345 |            |
| NA | ENSG00000271732 | 0.16735865 | 0.01897177  | 0.38482933 | 0.78225479 | NA         |            |
| NA | ENSG00000271734 | 0.97344133 | 0.00673497  | 0.38010431 | 0.91152392 | NA         |            |
| NA | ENSG00000271736 | 0          | NA          | NA         | NA         | NA         | LINC02772  |
| NA | ENSG00000271737 | 3.30897136 | -0.02893096 | 0.36914083 | 0.78886045 | 0.90411045 |            |
| NA | ENSG00000271739 | 0          | NA          | NA         | NA         | NA         | RNU1-29P   |
| NA | ENSG00000271741 | 70.2693393 | -0.3258295  | 0.33786172 | 0.14254366 | 0.32128606 |            |
| NA | ENSG00000271742 | 0          | NA          | NA         | NA         | NA         |            |
| NA | ENSG00000271743 | 1.03914978 | 0.00535172  | 0.38081351 | 0.92358337 | NA         |            |
| NA | ENSG00000271746 | 5.36290501 | -0.06343665 | 0.36553801 | 0.62685112 | 0.81066736 |            |
| NA | ENSG00000271749 | 0.69368311 | 0.02718964  | 0.38370989 | 0.57129696 | NA         |            |
| NA | ENSG00000271751 | 1.33182472 | -0.01643738 | 0.37938441 | 0.80545407 | NA         |            |
| NA | ENSG00000271752 | 0.84852459 | -0.0079465  | 0.38144152 | 0.8791714  | NA         |            |
| NA | ENSG00000271754 | 10.849858  | 0.28012091  | 0.45661263 | 0.13202743 | 0.30496778 |            |
| NA | ENSG00000271755 | 5.6401215  | 0.14307871  | 0.40005102 | 0.25056639 | 0.47053941 |            |
| NA | ENSG00000271758 | 0          | NA          | NA         | NA         | NA         |            |
| NA | ENSG00000271761 | 0.34624801 | -0.02356563 | 0.38536324 | 0.65270996 | NA         |            |
| NA | ENSG00000271763 | 0          | NA          | NA         | NA         | NA         |            |

|           |                 |            |             |            |            |            |             |
|-----------|-----------------|------------|-------------|------------|------------|------------|-------------|
| NA        | ENSG00000271765 | 0          | NA          | NA         | NA         | NA         | RN7SKP299   |
| NA        | ENSG00000271766 | 0          | NA          | NA         | NA         | NA         |             |
| NA        | ENSG00000271771 | 0.32409447 | -0.02327517 | 0.38532167 | 0.66845291 | NA         |             |
| NA        | ENSG00000271774 | 1.20559296 | -0.04889181 | 0.38873944 | 0.2316198  | NA         |             |
| 780529    | ENSG00000271776 | 0.69742816 | 0.05086913  | 0.38853141 | 0.29944258 | NA         |             |
| NA        | ENSG00000271778 | 3.30422344 | -0.0096953  | 0.3683511  | 0.92627221 | 0.96932621 |             |
| NA        | ENSG00000271779 | 0.173733   | 0.01914545  | 0.38484597 | 0.78225479 | NA         |             |
| NA        | ENSG00000271780 | 15.6182038 | 0.07493748  | 0.33408812 | 0.66996177 | 0.83755775 |             |
| NA        | ENSG00000271781 | 7.97479913 | 0.01704664  | 0.35163413 | 0.90769062 | 0.95968995 |             |
| NA        | ENSG00000271784 | 0.47344433 | -0.03506899 | 0.38628572 | 0.49580294 | NA         | TP53RK-DT   |
| NA        | ENSG00000271787 | 0          | NA          | NA         | NA         | NA         |             |
| NA        | ENSG00000271788 | 0.36246752 | 0.00101058  | 0.38336505 | 0.96626189 | NA         |             |
| NA        | ENSG00000271789 | 7.81858426 | 0.24148466  | 0.44926454 | 0.13226821 | 0.3053172  |             |
| NA        | ENSG00000271792 | 0          | NA          | NA         | NA         | NA         |             |
| NA        | ENSG00000271793 | 42.1836787 | -0.02997999 | 0.38019264 | 0.66019386 | 0.83152908 |             |
| NA        | ENSG00000271795 | 14.2691011 | 0.12197958  | 0.35231578 | 0.48253143 | 0.70294615 |             |
| NA        | ENSG00000271797 | 2.53403485 | -0.09443154 | 0.38816015 | 0.33781825 | NA         |             |
| 677831    | ENSG00000271798 | 0          | NA          | NA         | NA         | NA         | SNORA51     |
| NA        | ENSG00000271803 | 0          | NA          | NA         | NA         | NA         |             |
| NA        | ENSG00000271806 | 3.19944306 | -0.10822749 | 0.392268   | 0.29131781 | 0.51742125 |             |
| NA        | ENSG00000271810 | 0.14931947 | -0.01844332 | 0.38480212 | 0.84537521 | NA         |             |
| NA        | ENSG00000271811 | 0          | NA          | NA         | NA         | NA         |             |
| NA        | ENSG00000271814 | 0          | NA          | NA         | NA         | NA         | RN7SKP290   |
| 729096    | ENSG00000271816 | 52.7333174 | 0.06624662  | 0.2646809  | 0.73225262 | 0.87210781 |             |
| NA        | ENSG00000271817 | 0          | NA          | NA         | NA         | NA         |             |
| NA        | ENSG00000271818 | 0          | NA          | NA         | NA         | NA         | RN7SKP4     |
| NA        | ENSG00000271819 | 0          | NA          | NA         | NA         | NA         | RNU6-94P    |
| 285804    | ENSG00000271820 | 0          | NA          | NA         | NA         | NA         |             |
| NA        | ENSG00000271821 | 0.18922458 | 0.01954053  | 0.38488496 | 0.78225479 | NA         |             |
| 389332    | ENSG00000271824 | 0.173733   | 0.01914545  | 0.38484597 | 0.78225479 | NA         | SMIM32      |
| NA        | ENSG00000271825 | 0.34624801 | -0.02356563 | 0.38536324 | 0.65270996 | NA         |             |
| 101927352 | ENSG00000271826 | 4.18620089 | 0.11283856  | 0.38977065 | 0.31760786 | 0.5454761  | PLS3-AS1    |
| NA        | ENSG00000271828 | 41.0714912 | 0.08776999  | 0.27044677 | 0.6535348  | 0.82739649 |             |
| NA        | ENSG00000271830 | 1.99209486 | -0.13987398 | 0.41965054 | 0.02970265 | NA         |             |
| NA        | ENSG00000271833 | 14.3492098 | -0.05572259 | 0.33216419 | 0.7453325  | 0.87994031 |             |
| NA        | ENSG00000271841 | 0          | NA          | NA         | NA         | NA         | RNU7-10P    |
| NA        | ENSG00000271843 | 2.28470058 | 0.09627747  | 0.39007188 | 0.31045071 | NA         |             |
| NA        | ENSG00000271848 | 40.1492969 | 0.83255742  | 0.43039437 | 0.00582797 | 0.02649562 | SYNPO2L-AS1 |

|           |                 |            |             |            |            |            |           |
|-----------|-----------------|------------|-------------|------------|------------|------------|-----------|
| NA        | ENSG00000271849 | 0.80867165 | -0.0092341  | 0.38156637 | 0.85901082 | NA         | MAN2A1-DT |
| NA        | ENSG00000271850 | 0          | NA          | NA         | NA         | NA         | LINC02343 |
| NA        | ENSG00000271851 | 15.2103903 | -0.11470558 | 0.34912447 | 0.50607282 | 0.72177288 |           |
| NA        | ENSG00000271852 | 0          | NA          | NA         | NA         | NA         | SNORD11B  |
| NA        | ENSG00000271853 | 9.3274656  | 0.15111938  | 0.37827437 | 0.35096051 | 0.5811749  |           |
| NA        | ENSG00000271855 | 15.2274531 | -0.0193732  | 0.32796325 | 0.90839391 | 0.96022884 |           |
| 101929623 | ENSG00000271856 | 0          | NA          | NA         | NA         | NA         | LINC01215 |
| NA        | ENSG00000271857 | 0          | NA          | NA         | NA         | NA         |           |
| 11068     | ENSG00000271858 | 72.3207029 | 1.50114097  | 0.32935606 | 3.66E-07   | 4.47E-06   |           |
| 101927314 | ENSG00000271860 | 3.90623697 | -0.03732451 | 0.36945073 | 0.73452847 | 0.87368375 |           |
| NA        | ENSG00000271862 | 26.6242928 | 0.09799464  | 0.30186837 | 0.61420994 | 0.80178045 |           |
| NA        | ENSG00000271868 | 1.98213904 | -0.04281308 | 0.37715895 | 0.6316175  | NA         |           |
| NA        | ENSG00000271869 | 3.74249691 | -0.03397095 | 0.36799658 | 0.76340112 | 0.89095066 | DCTN6-DT  |
| NA        | ENSG00000271870 | 22.3523225 | -0.20097121 | 0.34906748 | 0.31219808 | 0.53995191 |           |
| NA        | ENSG00000271871 | 3.65305773 | 0.04220885  | 0.36836114 | 0.71713183 | 0.86381491 |           |
| NA        | ENSG00000271874 | 0          | NA          | NA         | NA         | NA         |           |
| NA        | ENSG00000271880 | 1.41234422 | -0.01494542 | 0.38039383 | 0.80456819 | NA         |           |
| NA        | ENSG00000271882 | 0.33471731 | 0.02354391  | 0.38534154 | 0.62842204 | NA         |           |
| 407054    | ENSG00000271886 | 0          | NA          | NA         | NA         | NA         | MIR98     |
| NA        | ENSG00000271888 | 10.553425  | 0.12335771  | 0.35572634 | 0.47067563 | 0.69300219 | JARID2-DT |
| 105374758 | ENSG00000271889 | 1.21202453 | -0.00376969 | 0.37931045 | 0.95280842 | NA         |           |
| NA        | ENSG00000271890 | 0          | NA          | NA         | NA         | NA         | OR10AE1P  |
| NA        | ENSG00000271892 | 0          | NA          | NA         | NA         | NA         |           |
| NA        | ENSG00000271893 | 0          | NA          | NA         | NA         | NA         |           |
| NA        | ENSG00000271894 | 0          | NA          | NA         | NA         | NA         |           |
| NA        | ENSG00000271897 | 0          | NA          | NA         | NA         | NA         |           |
| 100616291 | ENSG00000271898 | 0          | NA          | NA         | NA         | NA         | MIR4791   |
| 100616154 | ENSG00000271899 | 0          | NA          | NA         | NA         | NA         | MIR4466   |
| NA        | ENSG00000271900 | 0          | NA          | NA         | NA         | NA         |           |
| NA        | ENSG00000271901 | 0          | NA          | NA         | NA         | NA         |           |
| NA        | ENSG00000271904 | 0.16735865 | 0.01897177  | 0.38482933 | 0.78225479 | NA         |           |
| 109617004 | ENSG00000271907 | 0          | NA          | NA         | NA         | NA         | SNORA35B  |
| NA        | ENSG00000271911 | 0.54552894 | 0.03258714  | 0.38620182 | 0.45645895 | NA         |           |
| 105378083 | ENSG00000271913 | 51.8058977 | 0.72576688  | 0.37001375 | 0.00733717 | 0.03212745 | TAGAP-AS1 |
| NA        | ENSG00000271914 | 0          | NA          | NA         | NA         | NA         |           |
| NA        | ENSG00000271916 | 0.4676222  | -0.0095933  | 0.38288902 | 0.84768452 | NA         |           |
| NA        | ENSG00000271917 | 1.05055521 | -0.05605189 | 0.38979878 | 0.22376419 | NA         |           |
| NA        | ENSG00000271918 | 25.7000162 | -0.13176351 | 0.31178069 | 0.49861656 | 0.71628068 |           |

|           |                 |            |             |            |            |            |            |
|-----------|-----------------|------------|-------------|------------|------------|------------|------------|
| NA        | ENSG00000271919 | 0.56767373 | 0.02627943  | 0.38574813 | 0.49686938 | NA         |            |
| NA        | ENSG00000271922 | 0          | NA          | NA         | NA         | NA         |            |
| NA        | ENSG00000271923 | 0          | NA          | NA         | NA         | NA         | RNU6-86P   |
| NA        | ENSG00000271924 | 0          | NA          | NA         | NA         | NA         | RNA5SP108  |
| NA        | ENSG00000271926 | 0          | NA          | NA         | NA         | NA         |            |
| NA        | ENSG00000271930 | 0.173733   | 0.01914545  | 0.38484597 | 0.78225479 | NA         |            |
| NA        | ENSG00000271931 | 0.32252204 | -0.02325447 | 0.38531873 | 0.66958904 | NA         | PNRC1-DT   |
| NA        | ENSG00000271932 | 0          | NA          | NA         | NA         | NA         | RNU6-85P   |
| NA        | ENSG00000271933 | 17.2464228 | 0.11485372  | 0.33037951 | 0.53788824 | 0.74784181 |            |
| NA        | ENSG00000271934 | 0          | NA          | NA         | NA         | NA         | OR2AS2P    |
| NA        | ENSG00000271936 | 63.8593167 | 0.10305227  | 0.25147256 | 0.59222268 | 0.78670814 |            |
| NA        | ENSG00000271937 | 2.26042571 | -0.01598747 | 0.37423291 | 0.85702358 | NA         |            |
| NA        | ENSG00000271938 | 0          | NA          | NA         | NA         | NA         |            |
| NA        | ENSG00000271943 | 8.0522942  | -0.03272326 | 0.34852165 | 0.82620436 | 0.92125524 |            |
| NA        | ENSG00000271945 | 0          | NA          | NA         | NA         | NA         |            |
| NA        | ENSG00000271947 | 4.74529824 | -0.04547188 | 0.36483815 | 0.71497702 | 0.86271551 |            |
| NA        | ENSG00000271949 | 0          | NA          | NA         | NA         | NA         |            |
| 101929733 | ENSG00000271952 | 0          | NA          | NA         | NA         | NA         | LINC01954  |
| NA        | ENSG00000271955 | 0          | NA          | NA         | NA         | NA         |            |
| NA        | ENSG00000271958 | 0.173733   | 0.01914545  | 0.38484597 | 0.78225479 | NA         |            |
| NA        | ENSG00000271959 | 4.85096443 | 0.10539363  | 0.38019201 | 0.41082356 | 0.63847247 |            |
| NA        | ENSG00000271963 | 0.37844916 | 0.02407552  | 0.3854191  | 0.60038877 | NA         |            |
| NA        | ENSG00000271964 | 7.12326022 | -0.02672615 | 0.35302651 | 0.8495461  | 0.93154246 |            |
| NA        | ENSG00000271966 | 10.4194491 | -0.09964616 | 0.35482521 | 0.53678752 | 0.74734999 | ARFGEF1-DT |
| NA        | ENSG00000271967 | 1.97530084 | -0.04517899 | 0.37945598 | 0.58398217 | NA         |            |
| 8755      | ENSG00000271968 | 0          | NA          | NA         | NA         | NA         | ADAM6      |
| NA        | ENSG00000271969 | 0          | NA          | NA         | NA         | NA         |            |
| NA        | ENSG00000271971 | 25.84049   | 0.01128831  | 0.29271891 | 0.95441102 | 0.98112988 |            |
| NA        | ENSG00000271973 | 0          | NA          | NA         | NA         | NA         |            |
| NA        | ENSG00000271974 | 0          | NA          | NA         | NA         | NA         | RDM1P4     |
| NA        | ENSG00000271976 | 121.454147 | -0.19455042 | 0.19463694 | 0.24667039 | 0.4658021  |            |
| NA        | ENSG00000271977 | 0.18922458 | 0.01954053  | 0.38488496 | 0.78225479 | NA         |            |
| NA        | ENSG00000271978 | 11.6750257 | 0.39402448  | 0.53268981 | 0.07794761 | 0.20738642 |            |
| NA        | ENSG00000271980 | 2.71440213 | 0.01896443  | 0.37482984 | 0.83106288 | 0.92369221 |            |
| NA        | ENSG00000271981 | 0.173124   | -0.01911262 | 0.38486262 | 0.84537521 | NA         |            |
| 26790     | ENSG00000271982 | 0          | NA          | NA         | NA         | NA         | SNORD58B   |
| NA        | ENSG00000271983 | 0          | NA          | NA         | NA         | NA         |            |
| NA        | ENSG00000271984 | 0          | NA          | NA         | NA         | NA         |            |

|        |                 |            |             |            |            |            |           |
|--------|-----------------|------------|-------------|------------|------------|------------|-----------|
| NA     | ENSG00000271985 | 0          | NA          | NA         | NA         | NA         |           |
| NA     | ENSG00000271986 | 0.14931947 | -0.01844332 | 0.38480212 | 0.84537521 | NA         | RN7SL827P |
| NA     | ENSG00000271989 | 2.93968336 | 0.03768788  | 0.37526477 | 0.68824953 | 0.8486324  |           |
| NA     | ENSG00000271991 | 2.89357845 | -0.0244662  | 0.37149751 | 0.80585236 | 0.91210433 | TTC32-DT  |
| NA     | ENSG00000271992 | 1.17830584 | -0.00844522 | 0.38051115 | 0.8845071  | NA         |           |
| NA     | ENSG00000271993 | 4.50911994 | 0.0601871   | 0.36709603 | 0.63553476 | 0.81659281 |           |
| NA     | ENSG00000271996 | 1.16543548 | -0.05995767 | 0.38755844 | 0.30969002 | NA         |           |
| NA     | ENSG00000271998 | 0.86285982 | 0.03513688  | 0.38429772 | 0.46175518 | NA         |           |
| NA     | ENSG00000272002 | 2.58315232 | 0.04986484  | 0.37685188 | 0.60057011 | 0.79134695 |           |
| NA     | ENSG00000272004 | 2.23034386 | -0.12848333 | 0.41035667 | 0.07752905 | NA         |           |
| NA     | ENSG00000272006 | 0          | NA          | NA         | NA         | NA         |           |
| NA     | ENSG00000272008 | 107.510334 | 0.01001399  | 0.19136024 | 0.95315147 | 0.98058207 |           |
| NA     | ENSG00000272009 | 2.56952501 | -0.05969424 | 0.37968535 | 0.51880487 | 0.73239566 |           |
| NA     | ENSG00000272010 | 2.82873716 | -0.02652852 | 0.37415094 | 0.77326914 | 0.89572433 |           |
| NA     | ENSG00000272015 | 0          | NA          | NA         | NA         | NA         |           |
| NA     | ENSG00000272020 | 0          | NA          | NA         | NA         | NA         | RNU1-30P  |
| NA     | ENSG00000272021 | 1.21850812 | 0.06619129  | 0.3889315  | 0.25242686 | NA         |           |
| NA     | ENSG00000272023 | 0.62277997 | -0.01893267 | 0.38299645 | 0.69075141 | NA         | AFF4-DT   |
| NA     | ENSG00000272024 | 1.30108012 | 0.0069147   | 0.3779948  | 0.9241263  | NA         |           |
| NA     | ENSG00000272025 | 0          | NA          | NA         | NA         | NA         |           |
| NA     | ENSG00000272027 | 0          | NA          | NA         | NA         | NA         |           |
| NA     | ENSG00000272028 | 0          | NA          | NA         | NA         | NA         | RNU6-87P  |
| NA     | ENSG00000272030 | 6.64523049 | 0.0507998   | 0.3572734  | 0.7207425  | 0.8666434  |           |
| 284615 | ENSG00000272031 | 135.270645 | -0.64537186 | 0.21201374 | 0.00054405 | 0.00347173 | ANKRD34A  |
| NA     | ENSG00000272033 | 2.38561776 | 0.04896089  | 0.37624315 | 0.61321264 | NA         |           |
| 26822  | ENSG00000272034 | 0          | NA          | NA         | NA         | NA         | SNORD14A  |
| 406931 | ENSG00000272036 | 0          | NA          | NA         | NA         | NA         | MIR139    |
| NA     | ENSG00000272037 | 18.749261  | 0.36228005  | 0.44079947 | 0.11210759 | 0.2709813  |           |
| NA     | ENSG00000272040 | 17.078922  | -0.02042581 | 0.32656667 | 0.90418635 | 0.95807825 |           |
| NA     | ENSG00000272043 | 0.18922458 | 0.01954053  | 0.38488496 | 0.78225479 | NA         |           |
| NA     | ENSG00000272046 | 0          | NA          | NA         | NA         | NA         |           |
| 404672 | ENSG00000272047 | 324.732826 | -0.57570495 | 0.16380675 | 0.00012975 | 0.00096018 | GTF2H5    |
| NA     | ENSG00000272049 | 3.03106475 | 0.15535603  | 0.414809   | 0.14986136 | 0.33287611 |           |
| NA     | ENSG00000272050 | 0          | NA          | NA         | NA         | NA         |           |
| NA     | ENSG00000272051 | 0          | NA          | NA         | NA         | NA         |           |
| NA     | ENSG00000272054 | 94.2754805 | -0.08259302 | 0.21972237 | 0.64603216 | 0.82370422 |           |
| NA     | ENSG00000272056 | 10.7982855 | 0.09468287  | 0.35164711 | 0.56501891 | 0.76722846 |           |
| NA     | ENSG00000272057 | 0.35765493 | 0.02382406  | 0.38538215 | 0.61352569 | NA         | ANKH-DT   |



|           |                 |            |             |            |            |            |            |
|-----------|-----------------|------------|-------------|------------|------------|------------|------------|
| NA        | ENSG00000272068 | 19.4495654 | 0.08807568  | 0.32180515 | 0.63542782 | 0.8165276  | BCAN-AS1   |
| NA        | ENSG00000272070 | 18.1253249 | 0.06824757  | 0.34136852 | 0.67841669 | 0.84291038 |            |
| NA        | ENSG00000272071 | 5.31318314 | -0.07605661 | 0.36830754 | 0.5624716  | 0.76552855 |            |
| NA        | ENSG00000272072 | 22.0327595 | 0.04165388  | 0.30570024 | 0.82578243 | 0.92099182 |            |
| NA        | ENSG00000272075 | 0          | NA          | NA         | NA         | NA         | RN7SL828P  |
| NA        | ENSG00000272076 | 2.52378059 | 0.01750429  | 0.37420671 | 0.84724085 | NA         |            |
| NA        | ENSG00000272077 | 99.9794596 | 0.10330867  | 0.21354242 | 0.56270321 | 0.7656036  |            |
| NA        | ENSG00000272078 | 11.7155834 | 0.06744444  | 0.3452908  | 0.68007972 | 0.84377539 |            |
| NA        | ENSG00000272079 | 19.7768698 | -0.63853637 | 0.60114907 | 0.03091374 | 0.10263197 |            |
| 574504    | ENSG00000272080 | 0          | NA          | NA         | NA         | NA         | MIR502     |
| NA        | ENSG00000272081 | 0.49236993 | 0.01424218  | 0.38309227 | 0.75628987 | NA         | FCHO2-DT   |
| NA        | ENSG00000272084 | 7.67073399 | 0.06901255  | 0.3557407  | 0.64633244 | 0.82374482 |            |
| NA        | ENSG00000272085 | 0          | NA          | NA         | NA         | NA         |            |
| NA        | ENSG00000272086 | 7.41296291 | 0.00389843  | 0.35303652 | 0.98031381 | 0.99338199 | GOLPH3-DT  |
| NA        | ENSG00000272087 | 0.90419472 | -0.03873466 | 0.3871499  | 0.33610152 | NA         |            |
| NA        | ENSG00000272088 | 0          | NA          | NA         | NA         | NA         |            |
| NA        | ENSG00000272092 | 22.8175481 | -0.07615472 | 0.31112693 | 0.68404901 | 0.84597592 |            |
| NA        | ENSG00000272094 | 0.33471731 | 0.02354391  | 0.38534154 | 0.62842204 | NA         |            |
| NA        | ENSG00000272096 | 0          | NA          | NA         | NA         | NA         | RN7SL715P  |
| NA        | ENSG00000272097 | 16.103912  | 0.01109268  | 0.32189106 | 0.95177823 | 0.98012235 | TMEM14B-DT |
| NA        | ENSG00000272100 | 0.80965794 | 0.01737517  | 0.38133441 | 0.75723271 | NA         |            |
| NA        | ENSG00000272103 | 9.93076802 | -0.13310657 | 0.3664895  | 0.41613359 | 0.64294763 |            |
| NA        | ENSG00000272104 | 0          | NA          | NA         | NA         | NA         |            |
| NA        | ENSG00000272106 | 175.542366 | 0.34023995  | 0.1785932  | 0.03212208 | 0.10588625 |            |
| NA        | ENSG00000272108 | 46.0403589 | -0.44730559 | 0.34581805 | 0.05926306 | 0.16956407 |            |
| NA        | ENSG00000272109 | 0.93996471 | -0.00135435 | 0.38087354 | 0.94457143 | NA         |            |
| NA        | ENSG00000272112 | 0.50207596 | 0.02562368  | 0.38565771 | 0.52549886 | NA         |            |
| NA        | ENSG00000272113 | 0          | NA          | NA         | NA         | NA         |            |
| NA        | ENSG00000272114 | 0          | NA          | NA         | NA         | NA         |            |
| NA        | ENSG00000272115 | 16.609155  | -0.0450602  | 0.32645522 | 0.79565816 | 0.90608758 |            |
| NA        | ENSG00000272121 | 31.2395709 | -0.27479291 | 0.33406071 | 0.20125577 | 0.40656904 |            |
| NA        | ENSG00000272123 | 0.97312817 | 0.00697542  | 0.38011199 | 0.90837196 | NA         |            |
| NA        | ENSG00000272128 | 0.31697286 | 0.0013595   | 0.3833685  | 0.96482725 | NA         |            |
| NA        | ENSG00000272129 | 5.06413849 | 0.04661221  | 0.36496928 | 0.71134051 | 0.86130838 |            |
| NA        | ENSG00000272130 | 0.34746601 | 0.02370763  | 0.3853651  | 0.61987128 | NA         |            |
| NA        | ENSG00000272134 | 0          | NA          | NA         | NA         | NA         |            |
| NA        | ENSG00000272137 | 1.98241613 | -0.11468941 | 0.4041232  | 0.10217957 | NA         |            |
| 101927067 | ENSG00000272138 | 14.0749973 | 0.43015295  | 0.63262087 | 0.04593634 | 0.1394609  | LINC01607  |

|           |                 |            |             |            |            |            |           |
|-----------|-----------------|------------|-------------|------------|------------|------------|-----------|
| NA        | ENSG00000272139 | 0          | NA          | NA         | NA         | NA         |           |
| NA        | ENSG00000272140 | 23.5115905 | -0.08813365 | 0.31468176 | 0.6368813  | 0.81722218 |           |
| NA        | ENSG00000272141 | 0          | NA          | NA         | NA         | NA         |           |
| 100129461 | ENSG00000272142 | 48.2868707 | 0.53557082  | 0.40149958 | 0.03855231 | 0.12216544 |           |
| 283481    | ENSG00000272143 | 68.6590071 | 0.10565357  | 0.23551159 | 0.57394115 | 0.77331018 | FGF14-AS2 |
| NA        | ENSG00000272144 | 0          | NA          | NA         | NA         | NA         |           |
| NA        | ENSG00000272145 | 72.9832992 | -0.14090516 | 0.25664793 | 0.46735233 | 0.69026057 | NFYC-AS1  |
| 106144532 | ENSG00000272146 | 9.09867836 | -0.02434936 | 0.34707569 | 0.86937358 | 0.94304931 | ARF4-AS1  |
| NA        | ENSG00000272148 | 8.39548891 | -0.02991229 | 0.34756832 | 0.84176092 | 0.92806539 |           |
| NA        | ENSG00000272149 | 0          | NA          | NA         | NA         | NA         |           |
| 101929780 | ENSG00000272150 | 79.678475  | -0.22253911 | 0.23103823 | 0.23381832 | 0.45077791 | NBPF25P   |
| NA        | ENSG00000272153 | 27.8372684 | -0.1085458  | 0.30193302 | 0.57523288 | 0.77410434 |           |
| NA        | ENSG00000272154 | 17.453176  | -0.10891483 | 0.32945211 | 0.55422507 | 0.76016768 |           |
| NA        | ENSG00000272155 | 0          | NA          | NA         | NA         | NA         |           |
| NA        | ENSG00000272156 | 3.10294247 | 0.07457672  | 0.37899374 | 0.48343704 | 0.70370318 |           |
| NA        | ENSG00000272157 | 5.31737061 | -0.12164693 | 0.3846924  | 0.35515409 | 0.58555051 |           |
| NA        | ENSG00000272158 | 0          | NA          | NA         | NA         | NA         |           |
| NA        | ENSG00000272159 | 1.98034827 | 0.05929905  | 0.38576021 | 0.38615801 | NA         |           |
| NA        | ENSG00000272160 | 0          | NA          | NA         | NA         | NA         | RNU4-5P   |
| NA        | ENSG00000272161 | 0.52314496 | 0.01079363  | 0.38326152 | 0.77138874 | NA         |           |
| NA        | ENSG00000272162 | 3.09957508 | 0.00219872  | 0.37699661 | 0.9795267  | 0.99317507 |           |
| NA        | ENSG00000272163 | 244.004535 | -0.79210011 | 0.16362566 | 2.34E-07   | 2.94E-06   |           |
| NA        | ENSG00000272164 | 0          | NA          | NA         | NA         | NA         |           |
| NA        | ENSG00000272166 | 0          | NA          | NA         | NA         | NA         |           |
| NA        | ENSG00000272167 | 17.2127561 | -0.08952859 | 0.33223862 | 0.61509984 | 0.80244482 |           |
| NA        | ENSG00000272168 | 1153.4132  | -0.04905056 | 0.08103874 | 0.53569758 | 0.74647757 | CASC15    |
| NA        | ENSG00000272170 | 1.67119598 | 0.05626374  | 0.38388943 | 0.44520303 | NA         | KLC4-AS1  |
| NA        | ENSG00000272172 | 0.79588531 | -0.0229464  | 0.38363383 | 0.59311559 | NA         |           |
| NA        | ENSG00000272173 | 62.6908758 | 0.34636236  | 0.29845233 | 0.11046724 | 0.26795865 |           |
| NA        | ENSG00000272175 | 0.34746601 | 0.02370763  | 0.3853651  | 0.61987128 | NA         |           |
| NA        | ENSG00000272180 | 0          | NA          | NA         | NA         | NA         |           |
| NA        | ENSG00000272181 | 1.54225739 | -0.0857317  | 0.39362666 | 0.18197637 | NA         |           |
| NA        | ENSG00000272182 | 0.16735865 | 0.01897177  | 0.38482933 | 0.78225479 | NA         |           |
| NA        | ENSG00000272183 | 8.02387077 | 1.37588784  | 1.44844912 | 0.00875676 | 0.03719422 |           |
| NA        | ENSG00000272186 | 1.2009455  | 0.03972895  | 0.38275177 | 0.52759782 | NA         | VPS11-DT  |
| NA        | ENSG00000272189 | 8.03711796 | -0.24824089 | 0.44896891 | 0.13516705 | 0.30966679 |           |
| NA        | ENSG00000272192 | 2.18194921 | -0.02692726 | 0.37448956 | 0.76737066 | NA         | PDE7A-DT  |
| NA        | ENSG00000272195 | 24.9784724 | 0.16150888  | 0.31939633 | 0.41746978 | 0.64370875 |           |

|           |                 |            |             |            |            |            |            |
|-----------|-----------------|------------|-------------|------------|------------|------------|------------|
| 723790    | ENSG00000272196 | 126.768825 | -0.20670425 | 0.41730363 | 0.19480615 | 0.39799752 | H2AC19     |
| NA        | ENSG00000272197 | 0          | NA          | NA         | NA         | NA         | RN7SL803P  |
| NA        | ENSG00000272202 | 2.1048134  | -0.03035008 | 0.37508327 | 0.73781569 | NA         |            |
| NA        | ENSG00000272203 | 0          | NA          | NA         | NA         | NA         |            |
| NA        | ENSG00000272205 | 2.37151195 | -0.10561494 | 0.39504995 | 0.24705109 | NA         | POU2F1-DT  |
| NA        | ENSG00000272209 | 1.07595467 | 0.00962874  | 0.38015273 | 0.87354555 | NA         |            |
| NA        | ENSG00000272211 | 0.63816215 | -0.01728511 | 0.38279658 | 0.69782836 | NA         |            |
| NA        | ENSG00000272215 | 0          | NA          | NA         | NA         | NA         |            |
| NA        | ENSG00000272217 | 7.90584939 | 0.1601419   | 0.38848685 | 0.30554276 | 0.53306089 |            |
| NA        | ENSG00000272218 | 0          | NA          | NA         | NA         | NA         |            |
| NA        | ENSG00000272219 | 0.75689831 | 0.03380966  | 0.38651369 | 0.3822658  | NA         |            |
| NA        | ENSG00000272220 | 0          | NA          | NA         | NA         | NA         |            |
| NA        | ENSG00000272221 | 0          | NA          | NA         | NA         | NA         |            |
| NA        | ENSG00000272223 | 4.07978787 | 0.07411885  | 0.37522822 | 0.52331477 | 0.73621666 |            |
| NA        | ENSG00000272226 | 0.29863895 | -0.02292439 | 0.3852726  | 0.68753245 | NA         |            |
| 100500896 | ENSG00000272230 | 0          | NA          | NA         | NA         | NA         | MIR3666    |
| NA        | ENSG00000272232 | 0.18922458 | 0.01954053  | 0.38488496 | 0.78225479 | NA         | RN7SL726P  |
| NA        | ENSG00000272234 | 0          | NA          | NA         | NA         | NA         |            |
| NA        | ENSG00000272235 | 0          | NA          | NA         | NA         | NA         |            |
| NA        | ENSG00000272236 | 0          | NA          | NA         | NA         | NA         |            |
| NA        | ENSG00000272237 | 0          | NA          | NA         | NA         | NA         |            |
| NA        | ENSG00000272239 | 0          | NA          | NA         | NA         | NA         |            |
| NA        | ENSG00000272240 | 16.8968505 | -0.10513113 | 0.33407172 | 0.56012461 | 0.76415299 |            |
| NA        | ENSG00000272243 | 0          | NA          | NA         | NA         | NA         |            |
| NA        | ENSG00000272247 | 2.2240559  | -0.00298924 | 0.37309025 | 0.97251949 | NA         |            |
| NA        | ENSG00000272248 | 2.22573272 | 0.08016637  | 0.38662333 | 0.36377112 | NA         |            |
| NA        | ENSG00000272249 | 0          | NA          | NA         | NA         | NA         |            |
| NA        | ENSG00000272253 | 0          | NA          | NA         | NA         | NA         | RNA5SP386  |
| NA        | ENSG00000272254 | 0.14931947 | -0.01844332 | 0.38480212 | 0.84537521 | NA         |            |
| NA        | ENSG00000272255 | 0.32258598 | -0.02325499 | 0.38531881 | 0.66955206 | NA         |            |
| NA        | ENSG00000272256 | 11.6265412 | 1.81317113  | 0.84191268 | 0.00141435 | 0.00797179 |            |
| 63930     | ENSG00000272259 | 0.34746601 | 0.02370763  | 0.3853651  | 0.61987128 | NA         | LINC01749  |
| NA        | ENSG00000272262 | 0          | NA          | NA         | NA         | NA         | RNU6-89P   |
| NA        | ENSG00000272263 | 5.68069192 | 0.15387029  | 0.39514964 | 0.28016262 | 0.50481908 |            |
| NA        | ENSG00000272264 | 1.18869466 | 0.01726835  | 0.3809844  | 0.76782878 | NA         |            |
| NA        | ENSG00000272265 | 0.45035775 | -0.02733014 | 0.38571555 | 0.56139885 | NA         |            |
| NA        | ENSG00000272267 | 19.9588922 | -0.16239314 | 0.35871046 | 0.37329064 | 0.60231672 |            |
| NA        | ENSG00000272269 | 9.15574011 | -0.13288966 | 0.37277687 | 0.39610485 | 0.62549509 | NUP153-AS1 |

|           |                 |            |             |            |            |            |             |
|-----------|-----------------|------------|-------------|------------|------------|------------|-------------|
| NA        | ENSG00000272273 | 10.9364501 | -0.25801626 | 0.42651318 | 0.17147615 | 0.36389846 | IER3-AS1    |
| NA        | ENSG00000272274 | 2.31792731 | 0.16260997  | 0.43097383 | 0.03875774 | NA         | LINC00551   |
| NA        | ENSG00000272275 | 1.35314042 | 0.09385517  | 0.39966945 | 0.08533235 | NA         |             |
| NA        | ENSG00000272277 | 20.702074  | 0.04680691  | 0.30724353 | 0.80358239 | 0.91070264 |             |
| NA        | ENSG00000272279 | 0          | NA          | NA         | NA         | NA         |             |
| NA        | ENSG00000272281 | 0          | NA          | NA         | NA         | NA         | TPTE2P2     |
| NA        | ENSG00000272282 | 0.34746601 | 0.02370763  | 0.3853651  | 0.61987128 | NA         | LINC02084   |
| 101929243 | ENSG00000272288 | 13.0570436 | 0.2514005   | 0.40559167 | 0.19923111 | 0.40371211 | ILRUN-AS1   |
| NA        | ENSG00000272293 | 7.6165581  | -0.18330187 | 0.41920502 | 0.17439869 | 0.36797512 |             |
| 619571    | ENSG00000272296 | 0          | NA          | NA         | NA         | NA         | SNORD96A    |
| NA        | ENSG00000272297 | 0          | NA          | NA         | NA         | NA         |             |
| NA        | ENSG00000272298 | 0          | NA          | NA         | NA         | NA         |             |
| NA        | ENSG00000272304 | 0.3164349  | 0.00076867  | 0.38336445 | 0.97048705 | NA         |             |
| NA        | ENSG00000272305 | 3.5543504  | 0.19328569  | 0.44436445 | 0.06598046 | 0.18367509 |             |
| NA        | ENSG00000272311 | 0          | NA          | NA         | NA         | NA         | IFNL4P1     |
| NA        | ENSG00000272312 | 1.26357232 | -0.05426896 | 0.38686776 | 0.31128814 | NA         |             |
| NA        | ENSG00000272316 | 52.8772884 | 0.61413139  | 0.32317438 | 0.01203158 | 0.04836033 |             |
| NA        | ENSG00000272319 | 0          | NA          | NA         | NA         | NA         |             |
| NA        | ENSG00000272320 | 0.6974579  | 0.02756717  | 0.38375057 | 0.56691309 | NA         |             |
| NA        | ENSG00000272321 | 0.30001614 | -0.02294459 | 0.38527538 | 0.68644858 | NA         |             |
| NA        | ENSG00000272323 | 7.17486269 | 0.01420349  | 0.35406564 | 0.92121157 | 0.96682383 | TTC23L-AS1  |
| NA        | ENSG00000272324 | 0          | NA          | NA         | NA         | NA         | DAP-DT      |
| 11165     | ENSG00000272325 | 4946.51474 | -0.29764451 | 0.05822563 | 2.20E-07   | 2.78E-06   | NUDT3       |
| NA        | ENSG00000272328 | 1.976231   | 0.07335955  | 0.38659375 | 0.35935996 | NA         |             |
| NA        | ENSG00000272329 | 0          | NA          | NA         | NA         | NA         |             |
| NA        | ENSG00000272330 | 0          | NA          | NA         | NA         | NA         |             |
| 9757      | ENSG00000272333 | 1773.74708 | 0.14429314  | 0.0828675  | 0.07433848 | 0.20011698 | KMT2B       |
| NA        | ENSG00000272334 | 1.01502561 | -0.02316411 | 0.38037083 | 0.71895602 | NA         |             |
| NA        | ENSG00000272335 | 127.976357 | -0.01454379 | 0.19442894 | 0.92982226 | 0.97064482 |             |
| NA        | ENSG00000272337 | 0          | NA          | NA         | NA         | NA         | RNU6-90P    |
| NA        | ENSG00000272338 | 6.64040592 | 0.16999806  | 0.40266802 | 0.24397376 | 0.46235928 |             |
| NA        | ENSG00000272341 | 1.38890162 | 0.06670381  | 0.38670876 | 0.35414149 | NA         |             |
| 339822    | ENSG00000272342 | 1.83065956 | 0.04709184  | 0.38049586 | 0.55726704 | NA         |             |
| NA        | ENSG00000272343 | 0.18922458 | 0.01954053  | 0.38488496 | 0.78225479 | NA         |             |
| 767599    | ENSG00000272344 | 0          | NA          | NA         | NA         | NA         | SNORD114-21 |
| NA        | ENSG00000272345 | 7.39669057 | -0.16552332 | 0.3970783  | 0.26621834 | 0.48851016 |             |
| NA        | ENSG00000272346 | 0          | NA          | NA         | NA         | NA         |             |
| NA        | ENSG00000272347 | 0          | NA          | NA         | NA         | NA         |             |

|           |                 |            |             |            |            |            |              |
|-----------|-----------------|------------|-------------|------------|------------|------------|--------------|
| NA        | ENSG00000272354 | 0.33471731 | 0.02354391  | 0.38534154 | 0.62842204 | NA         |              |
| NA        | ENSG00000272356 | 26.2440765 | 0.04493608  | 0.29701218 | 0.81491806 | 0.91598064 |              |
| NA        | ENSG00000272359 | 0          | NA          | NA         | NA         | NA         | RNU4-89P     |
| NA        | ENSG00000272360 | 0.53046641 | 0.01389216  | 0.38294623 | 0.73865383 | NA         |              |
| NA        | ENSG00000272361 | 0.64930308 | -0.03789498 | 0.38680748 | 0.40868827 | NA         |              |
| NA        | ENSG00000272362 | 0          | NA          | NA         | NA         | NA         |              |
| NA        | ENSG00000272366 | 0          | NA          | NA         | NA         | NA         |              |
| NA        | ENSG00000272368 | 11.0837356 | 0.17267604  | 0.37572314 | 0.32691129 | 0.55525384 |              |
| NA        | ENSG00000272369 | 0          | NA          | NA         | NA         | NA         |              |
| NA        | ENSG00000272370 | 1.34606169 | 0.03334403  | 0.37988383 | 0.64764822 | NA         |              |
| NA        | ENSG00000272371 | 0.50906448 | 0.0100077   | 0.38324851 | 0.78541999 | NA         |              |
| NA        | ENSG00000272372 | 64.1229814 | -1.36355706 | 0.32418018 | 2.11E-06   | 2.26E-05   |              |
| NA        | ENSG00000272374 | 28.5781531 | -0.04283254 | 0.29158947 | 0.82122234 | 0.91847813 |              |
| NA        | ENSG00000272375 | 5.62591174 | -0.02605782 | 0.36210043 | 0.83311307 | 0.92402523 |              |
| NA        | ENSG00000272379 | 25.0606541 | -0.38053812 | 0.41014639 | 0.10456764 | 0.25755703 |              |
| 100616244 | ENSG00000272380 | 0          | NA          | NA         | NA         | NA         | MIR3976      |
| NA        | ENSG00000272381 | 0          | NA          | NA         | NA         | NA         | LINC02664    |
| NA        | ENSG00000272382 | 0.173733   | 0.01914545  | 0.38484597 | 0.78225479 | NA         |              |
| NA        | ENSG00000272383 | 0          | NA          | NA         | NA         | NA         |              |
| NA        | ENSG00000272384 | 0.173733   | 0.01914545  | 0.38484597 | 0.78225479 | NA         |              |
| NA        | ENSG00000272386 | 8.29539939 | -0.39381683 | 0.6009386  | 0.05273502 | 0.15500188 |              |
| NA        | ENSG00000272387 | 0          | NA          | NA         | NA         | NA         |              |
| 100101267 | ENSG00000272391 | 4534.21736 | -0.00539868 | 0.0571345  | 0.92355366 | 0.96825748 | POM121C      |
| NA        | ENSG00000272393 | 0          | NA          | NA         | NA         | NA         | RNU6-92P     |
| 101180976 | ENSG00000272395 | 0          | NA          | NA         | NA         | NA         | IFNL4        |
| NA        | ENSG00000272396 | 0          | NA          | NA         | NA         | NA         |              |
| NA        | ENSG00000272397 | 0          | NA          | NA         | NA         | NA         |              |
| 100133941 | ENSG00000272398 | 8829.42907 | 0.19652306  | 0.06587661 | 0.00244277 | 0.01270702 | CD24         |
| NA        | ENSG00000272400 | 0          | NA          | NA         | NA         | NA         |              |
| NA        | ENSG00000272402 | 1.4376579  | -0.02889121 | 0.37920266 | 0.69410965 | NA         |              |
| NA        | ENSG00000272405 | 42.85177   | -0.33605994 | 0.32469138 | 0.12910014 | 0.30048648 |              |
| NA        | ENSG00000272406 | 0          | NA          | NA         | NA         | NA         |              |
| NA        | ENSG00000272407 | 1.35498778 | -0.0175003  | 0.38064401 | 0.77164326 | NA         |              |
| NA        | ENSG00000272410 | 145.475118 | 0.10437354  | 0.22357353 | 0.56873584 | 0.76943192 |              |
| NA        | ENSG00000272411 | 0          | NA          | NA         | NA         | NA         |              |
| NA        | ENSG00000272412 | 0          | NA          | NA         | NA         | NA         | RN7SL778P    |
| 100631383 | ENSG00000272414 | 39.6492813 | -0.03682847 | 0.28671641 | 0.84516665 | 0.92965052 | FAM47E-STBD1 |
| NA        | ENSG00000272416 | 2.5547601  | -0.05103903 | 0.37723027 | 0.588622   | NA         |              |

|           |                 |            |             |            |            |            |             |
|-----------|-----------------|------------|-------------|------------|------------|------------|-------------|
| NA        | ENSG00000272417 | 0.33471731 | 0.02354391  | 0.38534154 | 0.62842204 | NA         |             |
| NA        | ENSG00000272418 | 0          | NA          | NA         | NA         | NA         |             |
| NA        | ENSG00000272419 | 241.865064 | -1.09696909 | 0.16833141 | 8.27E-12   | 1.77E-10   | LINC01145   |
| NA        | ENSG00000272420 | 3.85701647 | 0.02475512  | 0.3674949  | 0.82752128 | 0.92199822 |             |
| NA        | ENSG00000272425 | 33.2150377 | -0.1586354  | 0.30631181 | 0.42684379 | 0.65273477 |             |
| NA        | ENSG00000272426 | 1.40878227 | -0.02414605 | 0.37971431 | 0.72488904 | NA         |             |
| NA        | ENSG00000272428 | 0          | NA          | NA         | NA         | NA         |             |
| NA        | ENSG00000272430 | 0.65642921 | 0.02020883  | 0.3836849  | 0.63626025 | NA         | LINC02637   |
| NA        | ENSG00000272431 | 0.14931947 | -0.01844332 | 0.38480212 | 0.84537521 | NA         | ZNF454-DT   |
| NA        | ENSG00000272432 | 2.20535367 | 0.0039517   | 0.37358001 | 0.96642095 | NA         |             |
| NA        | ENSG00000272434 | 10.9358707 | 0.17269443  | 0.38254335 | 0.31101844 | 0.53866926 |             |
| NA        | ENSG00000272435 | 0          | NA          | NA         | NA         | NA         | RNA5SP357   |
| NA        | ENSG00000272436 | 0          | NA          | NA         | NA         | NA         | CUX2P1      |
| NA        | ENSG00000272438 | 26.2084062 | 0.81487805  | 0.54111343 | 0.01240286 | 0.04956148 |             |
| NA        | ENSG00000272439 | 0          | NA          | NA         | NA         | NA         | RNU6-91P    |
| NA        | ENSG00000272442 | 17.0828123 | 0.27671174  | 0.3979301  | 0.18532812 | 0.38437996 |             |
| NA        | ENSG00000272443 | 0          | NA          | NA         | NA         | NA         | OR13Z2P     |
| NA        | ENSG00000272444 | 2.68411107 | -0.03343633 | 0.37423021 | 0.72312758 | 0.86764418 |             |
| NA        | ENSG00000272445 | 0          | NA          | NA         | NA         | NA         | RNU6-84P    |
| NA        | ENSG00000272446 | 0          | NA          | NA         | NA         | NA         |             |
| 642361    | ENSG00000272447 | 64.2456867 | -0.14480585 | 0.24061185 | 0.44450821 | 0.66940936 |             |
| NA        | ENSG00000272449 | 16.6276352 | -0.20607747 | 0.37659798 | 0.2762647  | 0.50042786 |             |
| NA        | ENSG00000272455 | 53.551604  | -0.38815165 | 0.31081203 | 0.08147783 | 0.21429626 | MRPL20-DT   |
| NA        | ENSG00000272456 | 0          | NA          | NA         | NA         | NA         |             |
| NA        | ENSG00000272457 | 0.96338235 | -0.04903672 | 0.38547802 | 0.39588292 | NA         |             |
| 574451    | ENSG00000272458 | 0          | NA          | NA         | NA         | NA         | MIR432      |
| NA        | ENSG00000272459 | 0.69249601 | -0.03077728 | 0.38619256 | 0.44510896 | NA         | FAM193B-DT  |
| 100033814 | ENSG00000272460 | 0          | NA          | NA         | NA         | NA         | SNORD115-40 |
| NA        | ENSG00000272461 | 0          | NA          | NA         | NA         | NA         |             |
| NA        | ENSG00000272462 | 85.9418732 | -0.19830681 | 0.24106133 | 0.29768515 | 0.5243318  |             |
| NA        | ENSG00000272463 | 0.15069912 | -0.01848503 | 0.38480575 | 0.84537521 | NA         |             |
| NA        | ENSG00000272465 | 0.71502571 | 0.02675648  | 0.38357279 | 0.55953927 | NA         |             |
| NA        | ENSG00000272468 | 2.18635763 | 0.04425446  | 0.37844903 | 0.6077856  | NA         |             |
| NA        | ENSG00000272469 | 0          | NA          | NA         | NA         | NA         | RN7SL760P   |
| NA        | ENSG00000272472 | 0          | NA          | NA         | NA         | NA         |             |
| NA        | ENSG00000272473 | 0.15069912 | -0.01848503 | 0.38480575 | 0.84537521 | NA         |             |
| 767565    | ENSG00000272474 | 0          | NA          | NA         | NA         | NA         | SNORD113-5  |
| NA        | ENSG00000272476 | 17.2645161 | -0.02866778 | 0.31608841 | 0.87235351 | 0.94419841 |             |

|           |                 |            |             |            |            |            |           |
|-----------|-----------------|------------|-------------|------------|------------|------------|-----------|
| NA        | ENSG00000272477 | 0          | NA          | NA         | NA         | NA         |           |
| NA        | ENSG00000272478 | 0          | NA          | NA         | NA         | NA         |           |
| NA        | ENSG00000272479 | 0.31987131 | 0.00229805  | 0.38337965 | 0.95505254 | NA         |           |
| NA        | ENSG00000272480 | 0          | NA          | NA         | NA         | NA         | OR13Z3P   |
| NA        | ENSG00000272482 | 0.16735865 | 0.01897177  | 0.38482933 | 0.78225479 | NA         |           |
| NA        | ENSG00000272483 | 0.4700059  | -0.00718439 | 0.38322624 | 0.86885276 | NA         |           |
| NA        | ENSG00000272485 | 0.4648018  | -0.00773575 | 0.38326836 | 0.86563119 | NA         |           |
| NA        | ENSG00000272489 | 1.75300077 | 0.03348773  | 0.38032084 | 0.63774379 | NA         |           |
| NA        | ENSG00000272491 | 5.60621713 | 0.16508734  | 0.40247021 | 0.24428309 | 0.46285708 |           |
| NA        | ENSG00000272494 | 0          | NA          | NA         | NA         | NA         | OR1X1P    |
| NA        | ENSG00000272498 | 3.4092109  | 0.04523516  | 0.37013449 | 0.6884915  | 0.8487431  |           |
| NA        | ENSG00000272501 | 33.3693379 | -0.1139697  | 0.29094994 | 0.55961453 | 0.76413192 |           |
| NA        | ENSG00000272502 | 0.53656189 | 0.03215616  | 0.38615737 | 0.46264823 | NA         |           |
| NA        | ENSG00000272505 | 35.2709727 | 0.48712894  | 0.38855449 | 0.05175342 | 0.15302351 |           |
| NA        | ENSG00000272506 | 0.14931947 | -0.01844332 | 0.38480212 | 0.84537521 | NA         |           |
| NA        | ENSG00000272507 | 0          | NA          | NA         | NA         | NA         | RNU6-88P  |
| NA        | ENSG00000272508 | 1.63990569 | -0.00937577 | 0.37806324 | 0.89510003 | NA         |           |
| NA        | ENSG00000272509 | 4.08158061 | 0.00777988  | 0.36771545 | 0.94533827 | 0.97766426 |           |
| NA        | ENSG00000272510 | 0          | NA          | NA         | NA         | NA         |           |
| NA        | ENSG00000272512 | 5.57686547 | -0.11972926 | 0.38363593 | 0.36479654 | 0.59432668 |           |
| 154313    | ENSG00000272514 | 8.43935731 | -0.07936711 | 0.35448684 | 0.60593209 | 0.79576969 | CFAP206   |
| NA        | ENSG00000272515 | 0          | NA          | NA         | NA         | NA         |           |
| NA        | ENSG00000272516 | 0.98649095 | 0.00491873  | 0.38088651 | 0.9292456  | NA         |           |
| NA        | ENSG00000272518 | 4.53850763 | -0.0318825  | 0.36591088 | 0.78512375 | 0.90222156 |           |
| NA        | ENSG00000272519 | 0          | NA          | NA         | NA         | NA         |           |
| 100652853 | ENSG00000272523 | 9.25306039 | 0.04453826  | 0.34755437 | 0.77490169 | 0.89613481 | LINC01023 |
| NA        | ENSG00000272525 | 9.5152402  | 0.02869611  | 0.34678903 | 0.85306526 | 0.93373137 | BTF3-DT   |
| NA        | ENSG00000272529 | 2.4826451  | 0.0456704   | 0.37777312 | 0.61144107 | NA         |           |
| 677811    | ENSG00000272533 | 0          | NA          | NA         | NA         | NA         | SNORA28   |
| NA        | ENSG00000272536 | 0          | NA          | NA         | NA         | NA         | RN7SL840P |
| NA        | ENSG00000272537 | 0          | NA          | NA         | NA         | NA         |           |
| NA        | ENSG00000272540 | 106.901887 | 0.36089611  | 0.22124024 | 0.05149356 | 0.15241417 |           |
| NA        | ENSG00000272541 | 0          | NA          | NA         | NA         | NA         |           |
| NA        | ENSG00000272542 | 0          | NA          | NA         | NA         | NA         |           |
| 100616138 | ENSG00000272543 | 0          | NA          | NA         | NA         | NA         | MIR4787   |
| NA        | ENSG00000272545 | 0          | NA          | NA         | NA         | NA         |           |
| 401286    | ENSG00000272549 | 0          | NA          | NA         | NA         | NA         | LINC02538 |
| NA        | ENSG00000272551 | 13.8179901 | 0.14100289  | 0.36081463 | 0.41706949 | 0.64349161 |           |

|           |                 |            |             |            |            |            |             |
|-----------|-----------------|------------|-------------|------------|------------|------------|-------------|
| NA        | ENSG00000272554 | 0.94612289 | 0.04084733  | 0.38743659 | 0.29648824 | NA         |             |
| NA        | ENSG00000272555 | 0.16735865 | 0.01897177  | 0.38482933 | 0.78225479 | NA         |             |
| NA        | ENSG00000272556 | 487.453173 | -0.18309429 | 0.11616231 | 0.09717903 | 0.24386947 | GTF2IP13    |
| NA        | ENSG00000272558 | 0          | NA          | NA         | NA         | NA         |             |
| NA        | ENSG00000272559 | 0          | NA          | NA         | NA         | NA         | OR51F3P     |
| NA        | ENSG00000272562 | 8.57127899 | -0.25349256 | 0.44560522 | 0.14173111 | 0.32019418 | H3-3A-DT    |
| NA        | ENSG00000272563 | 1.60959431 | -0.01408084 | 0.37573845 | 0.86482202 | NA         |             |
| NA        | ENSG00000272564 | 0          | NA          | NA         | NA         | NA         |             |
| NA        | ENSG00000272566 | 0          | NA          | NA         | NA         | NA         |             |
| NA        | ENSG00000272567 | 0.75003066 | -0.0434525  | 0.38756843 | 0.34453641 | NA         |             |
| 100506497 | ENSG00000272568 | 8.12669703 | 0.1642367   | 0.39096048 | 0.29256252 | 0.51862406 |             |
| NA        | ENSG00000272569 | 0          | NA          | NA         | NA         | NA         | OR5BL1P     |
| NA        | ENSG00000272572 | 7.89216033 | -0.05834438 | 0.35653783 | 0.6851084  | 0.84671809 |             |
| 389125    | ENSG00000272573 | 0          | NA          | NA         | NA         | NA         | MUSTN1      |
| NA        | ENSG00000272574 | 3.23502012 | -0.03305758 | 0.36979215 | 0.75953848 | 0.88850157 |             |
| NA        | ENSG00000272575 | 0          | NA          | NA         | NA         | NA         | LINC02098   |
| NA        | ENSG00000272576 | 3.00835837 | 4.42E-05    | 0.37215715 | 0.99846034 | 0.99943937 |             |
| NA        | ENSG00000272578 | 202.841286 | 0.08487502  | 0.22442215 | 0.64256501 | 0.82136499 |             |
| NA        | ENSG00000272582 | 1.26456345 | -0.01625965 | 0.37945782 | 0.80711185 | NA         |             |
| NA        | ENSG00000272583 | 0          | NA          | NA         | NA         | NA         |             |
| NA        | ENSG00000272588 | 5.63093578 | 0.1727629   | 0.41346845 | 0.19329144 | 0.39600394 |             |
| 100507331 | ENSG00000272589 | 18.5761872 | 0.87983229  | 1.00144708 | 0.01595002 | 0.06058746 | ZSWIM8-AS1  |
| NA        | ENSG00000272592 | 0          | NA          | NA         | NA         | NA         |             |
| NA        | ENSG00000272595 | 0          | NA          | NA         | NA         | NA         | OR10AH1P    |
| NA        | ENSG00000272597 | 0.67211649 | 0.02540968  | 0.38353837 | 0.59295383 | NA         |             |
| NA        | ENSG00000272599 | 34.9423839 | -0.06431072 | 0.27726402 | 0.73838905 | 0.87630444 |             |
| NA        | ENSG00000272600 | 0          | NA          | NA         | NA         | NA         |             |
| NA        | ENSG00000272601 | 1.80838944 | -0.06680738 | 0.39257749 | 0.11652773 | NA         |             |
| 152687    | ENSG00000272602 | 1765.09275 | -0.33139911 | 0.0707908  | 1.83E-06   | 1.98E-05   | ZNF595      |
| NA        | ENSG00000272604 | 64.9658738 | -0.14645817 | 0.2556898  | 0.44999837 | 0.67340229 |             |
| NA        | ENSG00000272606 | 12.5488113 | 0.02273341  | 0.33466662 | 0.89345948 | 0.95389529 | PPP4R3B-DT  |
| NA        | ENSG00000272609 | 0.14931947 | -0.01844332 | 0.38480212 | 0.84537521 | NA         |             |
| 151877    | ENSG00000272610 | 0.8586218  | 0.0203234   | 0.38147581 | 0.71955895 | NA         | MAGI1-IT1   |
| NA        | ENSG00000272617 | 39.2597758 | 0.05420954  | 0.37908409 | 0.55749324 | 0.76263048 |             |
| NA        | ENSG00000272619 | 0          | NA          | NA         | NA         | NA         | FAM131B-AS1 |
| 84740     | ENSG00000272620 | 122.37189  | 0.0502064   | 0.18344844 | 0.7566911  | 0.88697677 | AFAP1-AS1   |
| NA        | ENSG00000272622 | 3.09936703 | 0.0109416   | 0.369243   | 0.91867726 | 0.96558446 |             |
| NA        | ENSG00000272625 | 2.03653729 | -0.01297395 | 0.37874571 | 0.8497693  | NA         |             |



|           |                 |            |             |            |            |            |            |
|-----------|-----------------|------------|-------------|------------|------------|------------|------------|
| NA        | ENSG00000272626 | 0          | NA          | NA         | NA         | NA         |            |
| NA        | ENSG00000272627 | 0          | NA          | NA         | NA         | NA         |            |
| NA        | ENSG00000272630 | 16.9560729 | -0.06218418 | 0.32878908 | 0.72259295 | 0.86754018 |            |
| NA        | ENSG00000272631 | 49.4895338 | -0.04039915 | 0.2573453  | 0.83143983 | 0.9237845  |            |
| NA        | ENSG00000272632 | 0          | NA          | NA         | NA         | NA         |            |
| NA        | ENSG00000272634 | 0          | NA          | NA         | NA         | NA         | OR51F5P    |
| 8447      | ENSG00000272636 | 1696.4223  | 1.56023343  | 0.09385938 | 4.43E-63   | 6.19E-61   | DOC2B      |
| NA        | ENSG00000272638 | 4.8283085  | 0.03292403  | 0.38690463 | 0.12791686 | 0.29849645 |            |
| NA        | ENSG00000272639 | 0          | NA          | NA         | NA         | NA         |            |
| NA        | ENSG00000272642 | 0.30001727 | -0.0229446  | 0.38527539 | 0.68644787 | NA         |            |
| NA        | ENSG00000272645 | 507.180394 | 0.03823897  | 0.12815633 | 0.75280298 | 0.8843065  | GTF2IP20   |
| NA        | ENSG00000272646 | 0.68095976 | 0.00395362  | 0.38130109 | 0.93838798 | NA         |            |
| NA        | ENSG00000272647 | 15.5188754 | 0.28733505  | 0.42127438 | 0.16330947 | 0.3522953  |            |
| NA        | ENSG00000272650 | 0.18922458 | 0.01954053  | 0.38488496 | 0.78225479 | NA         |            |
| NA        | ENSG00000272654 | 49.3091496 | 0.21847067  | 0.29159804 | 0.28887852 | 0.51485356 |            |
| NA        | ENSG00000272655 | 210.640749 | 0.45701935  | 0.19447652 | 0.00741771 | 0.03245146 | POLR2J4    |
| NA        | ENSG00000272656 | 0.82777189 | -0.00226868 | 0.3820341  | 0.96197569 | NA         |            |
| NA        | ENSG00000272657 | 1.71986812 | 0.00179552  | 0.37807156 | 0.98112108 | NA         |            |
| NA        | ENSG00000272660 | 0          | NA          | NA         | NA         | NA         |            |
| NA        | ENSG00000272661 | 2.34302115 | 0.08334855  | 0.39733461 | 0.0564492  | NA         |            |
| NA        | ENSG00000272662 | 0.50844843 | 0.01515941  | 0.38311791 | 0.7412051  | NA         | TIMMDC1-DT |
| NA        | ENSG00000272663 | 3.75630742 | -0.04133506 | 0.36922571 | 0.7133561  | 0.86190557 | PPP1R21-DT |
| NA        | ENSG00000272664 | 0          | NA          | NA         | NA         | NA         | OR51C4P    |
| 105373098 | ENSG00000272666 | 0          | NA          | NA         | NA         | NA         | KLHDC7B-DT |
| NA        | ENSG00000272667 | 38.1629822 | -0.14535502 | 0.29201629 | 0.46373847 | 0.68655856 |            |
| 107985216 | ENSG00000272668 | 39.8384691 | 2.58118651  | 0.45037853 | 6.31E-10   | 1.12E-08   |            |
| NA        | ENSG00000272669 | 3.92439114 | -0.05353356 | 0.37286806 | 0.62360028 | 0.80806149 |            |
| NA        | ENSG00000272672 | 0          | NA          | NA         | NA         | NA         |            |
| 57717     | ENSG00000272674 | 76.3938639 | -0.75988828 | 0.31338539 | 0.00233742 | 0.01223599 | PCDHB16    |
| NA        | ENSG00000272676 | 0          | NA          | NA         | NA         | NA         | OR5A01P    |
| NA        | ENSG00000272677 | 18.1487669 | 0.15792257  | 0.3535649  | 0.39354614 | 0.62254469 | HNRNPD-DT  |
| NA        | ENSG00000272678 | 0          | NA          | NA         | NA         | NA         |            |
| NA        | ENSG00000272679 | 0          | NA          | NA         | NA         | NA         |            |
| NA        | ENSG00000272682 | 6.73055317 | 0.09046051  | 0.36605507 | 0.52875098 | 0.74043051 |            |
| NA        | ENSG00000272685 | 0          | NA          | NA         | NA         | NA         | OR9I3P     |
| NA        | ENSG00000272686 | 185.863032 | 0.05346408  | 0.15731547 | 0.7107397  | 0.86113439 | WASL-DT    |
| NA        | ENSG00000272688 | 1.5069912  | -0.05820786 | 0.39056928 | 0.16274765 | NA         |            |
| NA        | ENSG00000272689 | 0          | NA          | NA         | NA         | NA         |            |

|           |                 |            |             |            |            |            |                     |
|-----------|-----------------|------------|-------------|------------|------------|------------|---------------------|
| 107986100 | ENSG00000272690 | 18.6899854 | 0.26173205  | 0.3768544  | 0.21102218 | 0.42005418 | LINC02018           |
| NA        | ENSG00000272691 | 0          | NA          | NA         | NA         | NA         |                     |
| NA        | ENSG00000272692 | 10.2678705 | -0.00891918 | 0.34482131 | 0.95148643 | 0.98008882 |                     |
| 441242    | ENSG00000272693 | 18.0488127 | 0.02598379  | 0.3585148  | 0.84393884 | 0.92948521 |                     |
| NA        | ENSG00000272694 | 0          | NA          | NA         | NA         | NA         |                     |
| 100506394 | ENSG00000272695 | 12.8993154 | -0.16758168 | 0.37061591 | 0.34367686 | 0.57400025 | GAS6-DT             |
| NA        | ENSG00000272696 | 8.78832302 | 0.09081275  | 0.35473131 | 0.56860644 | 0.76931138 |                     |
| NA        | ENSG00000272699 | 0.6777068  | 0.00272807  | 0.38187519 | 0.95322363 | NA         |                     |
| NA        | ENSG00000272701 | 3.00414698 | 0.03389172  | 0.37473566 | 0.71978405 | 0.86597043 | MESTIT1             |
| NA        | ENSG00000272702 | 4.79587427 | -0.05660069 | 0.38136829 | 0.45804657 | 0.6814881  |                     |
| NA        | ENSG00000272703 | 0          | NA          | NA         | NA         | NA         |                     |
| NA        | ENSG00000272707 | 0.18922458 | 0.01954053  | 0.38488496 | 0.78225479 | NA         |                     |
| NA        | ENSG00000272710 | 0.49222765 | -0.00743227 | 0.38317613 | 0.85179108 | NA         |                     |
| NA        | ENSG00000272711 | 105.202309 | 0.30421906  | 0.23919961 | 0.11549395 | 0.27727493 | HK2-DT              |
| NA        | ENSG00000272714 | 0          | NA          | NA         | NA         | NA         |                     |
| NA        | ENSG00000272715 | 0.16735865 | 0.01897177  | 0.38482933 | 0.78225479 | NA         |                     |
| NA        | ENSG00000272716 | 10.5782901 | 0.03441622  | 0.33962426 | 0.83381956 | 0.92431452 | SLC30A6-DT          |
| NA        | ENSG00000272717 | 11.764779  | 0.02635001  | 0.33468725 | 0.87687157 | 0.94566867 |                     |
| NA        | ENSG00000272719 | 0.16735865 | 0.01897177  | 0.38482933 | 0.78225479 | NA         |                     |
| NA        | ENSG00000272720 | 30.5770187 | 0.10337799  | 0.29055194 | 0.59852731 | 0.78996686 |                     |
| NA        | ENSG00000272721 | 0.96372549 | -0.04919793 | 0.3855111  | 0.39475308 | NA         | EIF2B5-DT           |
| 105377466 | ENSG00000272727 | 1.04523632 | -0.04362878 | 0.38786366 | 0.28148328 | NA         | LINC02266           |
| NA        | ENSG00000272729 | 18.0411256 | 0.05471078  | 0.31514522 | 0.76784422 | 0.89307241 |                     |
| NA        | ENSG00000272732 | 13.7434107 | 0.38229076  | 0.51114106 | 0.08625518 | 0.22361201 |                     |
| NA        | ENSG00000272733 | 3.5428879  | 0.14290799  | 0.40371217 | 0.21996307 | 0.43209275 |                     |
| NA        | ENSG00000272734 | 0          | NA          | NA         | NA         | NA         | ADIRF-AS1           |
| NA        | ENSG00000272735 | 0.83571595 | -0.03593446 | 0.383658   | 0.49624319 | NA         |                     |
| NA        | ENSG00000272736 | 0          | NA          | NA         | NA         | NA         |                     |
| NA        | ENSG00000272741 | 1.86585137 | -0.06461608 | 0.38779721 | 0.31871552 | NA         |                     |
| NA        | ENSG00000272742 | 0.99883964 | -0.01510195 | 0.38131165 | 0.78445073 | NA         |                     |
| NA        | ENSG00000272744 | 2.81885536 | -0.06699856 | 0.38012599 | 0.48883121 | 0.7085856  |                     |
| NA        | ENSG00000272745 | 1.62856487 | 0.01392925  | 0.37722067 | 0.857593   | NA         |                     |
| NA        | ENSG00000272748 | 0.78570652 | -0.00665839 | 0.38158116 | 0.89700437 | NA         |                     |
| NA        | ENSG00000272750 | 40.7342325 | 0.23005746  | 0.31080974 | 0.27134082 | 0.49475249 |                     |
| 101752399 | ENSG00000272752 | 701.276514 | 0.14808527  | 0.12837014 | 0.220807   | 0.43318608 | J3L5P-PVRIG2P-PILRB |
| NA        | ENSG00000272754 | 0.87656483 | 0.03867045  | 0.38480722 | 0.4432786  | NA         |                     |
| NA        | ENSG00000272755 | 4.5354949  | -0.03021395 | 0.36592374 | 0.79596819 | 0.90627136 |                     |
| NA        | ENSG00000272758 | 129.699813 | -0.38453595 | 0.26856749 | 0.06394174 | 0.1796757  | WDR5B-DT            |

|           |                 |            |             |            |            |            |            |
|-----------|-----------------|------------|-------------|------------|------------|------------|------------|
| NA        | ENSG00000272760 | 0          | NA          | NA         | NA         | NA         |            |
| NA        | ENSG00000272762 | 0.15069912 | -0.01848503 | 0.38480575 | 0.84537521 | NA         |            |
| NA        | ENSG00000272763 | 0          | NA          | NA         | NA         | NA         |            |
| NA        | ENSG00000272764 | 0.14931947 | -0.01844332 | 0.38480212 | 0.84537521 | NA         |            |
| 84989     | ENSG00000272767 | 44.8306693 | 0.15419809  | 0.26967817 | 0.43665739 | 0.66177394 | JMJD1C-AS1 |
| NA        | ENSG00000272768 | 9.36784695 | 0.01333173  | 0.34144016 | 0.93473994 | 0.97292421 |            |
| NA        | ENSG00000272769 | 3.62087291 | 0.05511668  | 0.37603117 | 0.58718492 | 0.78237765 |            |
| NA        | ENSG00000272770 | 0.3000157  | -0.02294459 | 0.38527538 | 0.68644885 | NA         |            |
| NA        | ENSG00000272772 | 2.58139376 | 0.01989295  | 0.37594666 | 0.81409787 | 0.91592004 |            |
| NA        | ENSG00000272774 | 1.39061423 | 0.00721341  | 0.37880739 | 0.91569918 | NA         |            |
| NA        | ENSG00000272777 | 7.84488206 | 0.00025863  | 0.35008744 | 0.99949099 | 0.99966662 |            |
| NA        | ENSG00000272779 | 116.984864 | 0.0748322   | 0.19015492 | 0.65199288 | 0.82607871 |            |
| NA        | ENSG00000272783 | 0          | NA          | NA         | NA         | NA         |            |
| NA        | ENSG00000272784 | 0.34324743 | 0.00341845  | 0.38340028 | 0.95503462 | NA         |            |
| NA        | ENSG00000272787 | 2.58803952 | -0.03448289 | 0.37353116 | 0.72347811 | 0.86787628 |            |
| NA        | ENSG00000272788 | 0          | NA          | NA         | NA         | NA         |            |
| NA        | ENSG00000272789 | 0          | NA          | NA         | NA         | NA         |            |
| NA        | ENSG00000272791 | 9.64806875 | 0.16160112  | 0.37940476 | 0.33416167 | 0.56389725 |            |
| NA        | ENSG00000272795 | 0.14931947 | -0.01844332 | 0.38480212 | 0.84537521 | NA         | GAR1-DT    |
| NA        | ENSG00000272797 | 0.3630569  | 0.00151758  | 0.38336915 | 0.9614879  | NA         |            |
| NA        | ENSG00000272798 | 5.73299024 | 0.36015136  | 0.61905895 | 0.02920982 | 0.09830752 |            |
| NA        | ENSG00000272799 | 0          | NA          | NA         | NA         | NA         |            |
| NA        | ENSG00000272800 | 10.3849043 | -0.0176871  | 0.34713248 | 0.90454131 | 0.95823316 |            |
| NA        | ENSG00000272801 | 0          | NA          | NA         | NA         | NA         |            |
| 386675    | ENSG00000272804 | 0          | NA          | NA         | NA         | NA         | KRTAP10-7  |
| NA        | ENSG00000272807 | 14.0910154 | -0.08312108 | 0.34139713 | 0.62339254 | 0.80795061 |            |
| 105369201 | ENSG00000272808 | 0.81987503 | -0.04651854 | 0.38803644 | 0.31213564 | NA         |            |
| NA        | ENSG00000272810 | 0          | NA          | NA         | NA         | NA         |            |
| NA        | ENSG00000272812 | 16.0277524 | -0.07398675 | 0.33480189 | 0.66821692 | 0.83690573 |            |
| NA        | ENSG00000272814 | 0          | NA          | NA         | NA         | NA         |            |
| NA        | ENSG00000272815 | 0          | NA          | NA         | NA         | NA         |            |
| NA        | ENSG00000272817 | 1.20925854 | 0.04161644  | 0.38305433 | 0.50918306 | NA         |            |
| NA        | ENSG00000272821 | 0          | NA          | NA         | NA         | NA         |            |
| NA        | ENSG00000272822 | 5.29089152 | 0.21593306  | 0.47290811 | 0.01731516 | 0.06489096 |            |
| NA        | ENSG00000272823 | 0.50207596 | 0.02562368  | 0.38565771 | 0.52549886 | NA         |            |
| NA        | ENSG00000272824 | 0          | NA          | NA         | NA         | NA         |            |
| NA        | ENSG00000272825 | 3.43647588 | 0.01029899  | 0.3699153  | 0.9220568  | 0.9673527  |            |
| NA        | ENSG00000272829 | 0.95490578 | 0.00382216  | 0.38091821 | 0.94469847 | NA         |            |

|           |    |                 |            |             |            |            |            |            |
|-----------|----|-----------------|------------|-------------|------------|------------|------------|------------|
|           | NA | ENSG00000272831 | 33.1386195 | -0.19431101 | 0.30635123 | 0.34096705 | 0.57125369 |            |
|           | NA | ENSG00000272832 | 0          | NA          | NA         | NA         | NA         |            |
|           | NA | ENSG00000272834 | 0.31825616 | 0.00120607  | 0.38336717 | 0.9655221  | NA         |            |
|           | NA | ENSG00000272836 | 13.3806147 | 0.06252259  | 0.33224995 | 0.72067839 | 0.8666434  |            |
|           | NA | ENSG00000272837 | 0          | NA          | NA         | NA         | NA         | OR10AE3P   |
|           | NA | ENSG00000272839 | 2.19216451 | -0.11754432 | 0.40177266 | 0.17504664 | NA         |            |
| 105374312 |    | ENSG00000272840 | 0          | NA          | NA         | NA         | NA         |            |
|           | NA | ENSG00000272841 | 73.9046483 | -0.26177869 | 0.28103278 | 0.20425981 | 0.41088053 | MAP3K4-AS1 |
|           | NA | ENSG00000272842 | 6.13186198 | -0.02069192 | 0.35699648 | 0.87616121 | 0.94534688 |            |
|           | NA | ENSG00000272843 | 3.70838627 | -0.10127837 | 0.38308195 | 0.39085138 | 0.62016086 |            |
|           | NA | ENSG00000272844 | 0.45042492 | -0.02733342 | 0.38571582 | 0.56134338 | NA         |            |
|           | NA | ENSG00000272848 | 18.2271337 | 0.34953931  | 0.42445592 | 0.12304546 | 0.29041423 |            |
|           | NA | ENSG00000272849 | 15.9042483 | -0.04359666 | 0.3484184  | 0.77300877 | 0.89561741 |            |
|           | NA | ENSG00000272851 | 0          | NA          | NA         | NA         | NA         |            |
|           | NA | ENSG00000272853 | 18.0921063 | 0.04682867  | 0.32074104 | 0.79663192 | 0.90658744 | SUV39H2-DT |
|           | NA | ENSG00000272854 | 2.50168455 | -0.08115293 | 0.38604329 | 0.37321205 | NA         |            |
|           | NA | ENSG00000272855 | 0.18922458 | 0.01954053  | 0.38488496 | 0.78225479 | NA         |            |
|           | NA | ENSG00000272856 | 0          | NA          | NA         | NA         | NA         |            |
|           | NA | ENSG00000272858 | 1.01148859 | -0.02273697 | 0.38123212 | 0.70241693 | NA         |            |
|           | NA | ENSG00000272861 | 0.31696589 | 0.00135345  | 0.38336845 | 0.96488519 | NA         |            |
|           | NA | ENSG00000272862 | 0.8281687  | 0.03623177  | 0.38460152 | 0.46749524 | NA         |            |
|           | NA | ENSG00000272864 | 0          | NA          | NA         | NA         | NA         |            |
|           | NA | ENSG00000272865 | 3.14368971 | 0.00274609  | 0.3691795  | 0.98060663 | 0.99355086 |            |
|           | NA | ENSG00000272866 | 0.63835532 | 0.00331716  | 0.38252103 | 0.93668948 | NA         |            |
| 105377540 |    | ENSG00000272870 | 95.0666617 | 0.42243465  | 0.24191972 | 0.03280719 | 0.10769268 | SAP30-DT   |
|           | NA | ENSG00000272871 | 14.9991385 | -0.04985831 | 0.33010717 | 0.77211644 | 0.89539725 |            |
|           | NA | ENSG00000272872 | 193.536961 | -0.29670865 | 0.16398694 | 0.0450958  | 0.13737152 |            |
|           | NA | ENSG00000272874 | 0.173733   | 0.01914545  | 0.38484597 | 0.78225479 | NA         |            |
|           | NA | ENSG00000272880 | 0          | NA          | NA         | NA         | NA         |            |
|           | NA | ENSG00000272882 | 0          | NA          | NA         | NA         | NA         | OR2BH1P    |
|           | NA | ENSG00000272884 | 33.8988533 | 0.12483118  | 0.32656817 | 0.51166934 | 0.72687381 |            |
|           | NA | ENSG00000272885 | 1.73259801 | -0.03950865 | 0.380853   | 0.58466446 | NA         |            |
| 55802     |    | ENSG00000272886 | 1350.89167 | 0.10253991  | 0.09423666 | 0.26170867 | 0.48367956 | DCP1A      |
|           | NA | ENSG00000272887 | 153.555181 | 0.46987621  | 0.20617406 | 0.00855035 | 0.03647367 | CSPG4P5    |
|           | NA | ENSG00000272888 | 607.042582 | -0.36542461 | 0.13286316 | 0.00330633 | 0.01642774 | CHASERR    |
|           | NA | ENSG00000272892 | 4.08007464 | -0.15855008 | 0.41001468 | 0.19445402 | 0.39748277 |            |
|           | NA | ENSG00000272894 | 52.9109046 | 0.20726548  | 0.30139198 | 0.31139897 | 0.53905904 | MIOS-DT    |
|           | NA | ENSG00000272895 | 0.18922458 | 0.01954053  | 0.38488496 | 0.78225479 | NA         |            |

|           |                 |            |             |            |            |            |            |
|-----------|-----------------|------------|-------------|------------|------------|------------|------------|
| NA        | ENSG00000272896 | 6.58192047 | 0.0310268   | 0.35383869 | 0.82946563 | 0.92261925 |            |
| NA        | ENSG00000272897 | 0.84069178 | 0.047866    | 0.38830597 | 0.2790679  | NA         |            |
| 100130705 | ENSG00000272899 | 50.3381996 | 0.17489385  | 0.27793152 | 0.38376622 | 0.61293849 | ATP6V1FNB  |
| NA        | ENSG00000272900 | 0          | NA          | NA         | NA         | NA         | OR10Q2P    |
| 100506286 | ENSG00000272902 | 32.0961981 | 0.42957803  | 0.41971427 | 0.07959269 | 0.21058343 | TBC1D8-AS1 |
| NA        | ENSG00000272904 | 5.27413102 | -0.17216437 | 0.41531377 | 0.1819056  | 0.37957585 |            |
| NA        | ENSG00000272905 | 10.3989568 | -0.11387623 | 0.35903713 | 0.48382841 | 0.70413645 |            |
| NA        | ENSG00000272906 | 5.06136903 | 0.04237473  | 0.36701689 | 0.7237244  | 0.86794586 |            |
| NA        | ENSG00000272908 | 0          | NA          | NA         | NA         | NA         |            |
| NA        | ENSG00000272909 | 35.6261262 | -0.06097528 | 0.29165101 | 0.7490901  | 0.88205755 |            |
| NA        | ENSG00000272910 | 2.59235155 | -0.09463544 | 0.38764216 | 0.34339869 | 0.57368054 |            |
| NA        | ENSG00000272911 | 0.173124   | -0.01911262 | 0.38486262 | 0.84537521 | NA         |            |
| NA        | ENSG00000272912 | 1.4333354  | -0.02650588 | 0.37867106 | 0.72244426 | NA         |            |
| NA        | ENSG00000272913 | 32.5522262 | -0.00520012 | 0.27715477 | 0.97673676 | 0.99208812 |            |
| NA        | ENSG00000272914 | 4.9127188  | 0.05043597  | 0.36975966 | 0.6647509  | 0.83451391 |            |
| NA        | ENSG00000272915 | 0.44795842 | -0.02501848 | 0.38558245 | 0.5807882  | NA         |            |
| NA        | ENSG00000272916 | 111.33383  | -0.00411579 | 0.24169328 | 0.98022306 | 0.99338199 |            |
| NA        | ENSG00000272917 | 0          | NA          | NA         | NA         | NA         |            |
| NA        | ENSG00000272918 | 43.1617795 | -0.18609808 | 0.28395418 | 0.35567815 | 0.58599659 |            |
| NA        | ENSG00000272920 | 0          | NA          | NA         | NA         | NA         |            |
| NA        | ENSG00000272921 | 0          | NA          | NA         | NA         | NA         |            |
| NA        | ENSG00000272922 | 0.34121988 | 0.02362737  | 0.38535353 | 0.62404755 | NA         |            |
| NA        | ENSG00000272927 | 20.0614145 | 0.27482681  | 0.37909315 | 0.19623292 | 0.3999652  |            |
| NA        | ENSG00000272931 | 10.6140837 | 0.04373196  | 0.34677572 | 0.7798362  | 0.89930494 | LRRRC8D-DT |
| NA        | ENSG00000272933 | 104.073372 | -0.63231374 | 0.27621245 | 0.00479365 | 0.02242007 |            |
| NA        | ENSG00000272934 | 0.47009673 | -0.00720332 | 0.38322688 | 0.86855718 | NA         |            |
| NA        | ENSG00000272936 | 0          | NA          | NA         | NA         | NA         |            |
| NA        | ENSG00000272937 | 0          | NA          | NA         | NA         | NA         | OR6U2P     |
| NA        | ENSG00000272940 | 1.59740546 | -0.06056543 | 0.38590963 | 0.37793567 | NA         |            |
| NA        | ENSG00000272941 | 18.2794666 | -0.12536582 | 0.34139599 | 0.48879979 | 0.7085856  |            |
| NA        | ENSG00000272942 | 9.01093988 | 0.309931    | 0.49358756 | 0.0962009  | 0.2422114  |            |
| NA        | ENSG00000272944 | 0          | NA          | NA         | NA         | NA         |            |
| NA        | ENSG00000272945 | 0.15069912 | -0.01848503 | 0.38480575 | 0.84537521 | NA         |            |
| NA        | ENSG00000272948 | 10.478987  | 0.12646173  | 0.36896994 | 0.42570461 | 0.65149487 |            |
| NA        | ENSG00000272950 | 2.08856832 | 0.09648569  | 0.39573379 | 0.19963999 | NA         |            |
| NA        | ENSG00000272953 | 3.0989464  | -0.08819494 | 0.3873859  | 0.35020473 | 0.58060182 |            |
| NA        | ENSG00000272954 | 2.71768385 | 0.09612279  | 0.39158084 | 0.28345306 | 0.508585   |            |
| NA        | ENSG00000272958 | 0          | NA          | NA         | NA         | NA         |            |

|           |                 |            |             |            |            |            |               |
|-----------|-----------------|------------|-------------|------------|------------|------------|---------------|
| NA        | ENSG00000272963 | 0          | NA          | NA         | NA         | NA         | OR7A19P       |
| NA        | ENSG00000272966 | 0.30001617 | -0.02294459 | 0.38527538 | 0.68644856 | NA         |               |
| NA        | ENSG00000272967 | 0          | NA          | NA         | NA         | NA         |               |
| 100533952 | ENSG00000272968 | 6.50348123 | -0.03697664 | 0.36069742 | 0.77495325 | 0.89613481 | RBAK-RBAKDN   |
| NA        | ENSG00000272969 | 1.18094779 | 0.02316509  | 0.37865912 | 0.75205916 | NA         |               |
| 107986163 | ENSG00000272970 | 37.849355  | 0.02141106  | 0.26816896 | 0.91304597 | 0.96283789 |               |
| NA        | ENSG00000272971 | 1.57374137 | 0.09721763  | 0.39795796 | 0.14128412 | NA         |               |
| NA        | ENSG00000272973 | 0.30139824 | -0.02296476 | 0.38527817 | 0.68536535 | NA         |               |
| NA        | ENSG00000272975 | 0          | NA          | NA         | NA         | NA         | MYHAS         |
| NA        | ENSG00000272977 | 18.2185924 | 0.07080874  | 0.32862906 | 0.69205885 | 0.85113114 |               |
| NA        | ENSG00000272979 | 3.35621602 | -0.0579541  | 0.37404125 | 0.59082421 | 0.78554834 |               |
| NA        | ENSG00000272980 | 47.403309  | -0.50026786 | 0.34425517 | 0.03861425 | 0.1222836  |               |
| NA        | ENSG00000272982 | 0          | NA          | NA         | NA         | NA         |               |
| NA        | ENSG00000272983 | 20.2042834 | 0.08023636  | 0.31231231 | 0.67123313 | 0.83824921 |               |
| NA        | ENSG00000272984 | 0.15069912 | -0.01848503 | 0.38480575 | 0.84537521 | NA         |               |
| NA        | ENSG00000272986 | 3.15979773 | -0.10445237 | 0.38912258 | 0.32632389 | 0.55454098 |               |
| NA        | ENSG00000272987 | 0          | NA          | NA         | NA         | NA         | OR5AL1        |
| NA        | ENSG00000272988 | 0          | NA          | NA         | NA         | NA         |               |
| NA        | ENSG00000272989 | 14.9151136 | -0.1074664  | 0.34267375 | 0.53967204 | 0.74869322 | LINC02012     |
| NA        | ENSG00000272990 | 7.64474158 | -0.07498757 | 0.36054884 | 0.60196597 | 0.79229168 |               |
| NA        | ENSG00000272991 | 5.40324921 | -0.27289148 | 0.51698973 | 0.03245947 | 0.10681637 |               |
| NA        | ENSG00000272994 | 212.161917 | 0.2973657   | 0.15816878 | 0.03887949 | 0.12284903 | C2orf49-DT    |
| NA        | ENSG00000272995 | 0.3233797  | -0.02326139 | 0.38531978 | 0.66909333 | NA         |               |
| NA        | ENSG00000273001 | 1.94165522 | -0.04168002 | 0.37769188 | 0.63152799 | NA         | PFKP-DT       |
| 107985209 | ENSG00000273002 | 6.55085426 | -0.05126242 | 0.362431   | 0.69598347 | 0.8531799  | ARHGEF2-AS2   |
| NA        | ENSG00000273003 | 11.4558859 | 0.03559535  | 0.38336875 | 0.53725056 | 0.74759591 | ARL2-SNX15    |
| NA        | ENSG00000273004 | 10.7956822 | -0.05456623 | 0.34272577 | 0.73472516 | 0.87375845 |               |
| NA        | ENSG00000273006 | 0          | NA          | NA         | NA         | NA         |               |
| NA        | ENSG00000273007 | 16.4042975 | -0.21823665 | 0.36869155 | 0.26957643 | 0.4927127  |               |
| NA        | ENSG00000273008 | 28.3850093 | 0.13765081  | 0.30624283 | 0.4865941  | 0.70642667 | CSGALNACT2-DT |
| NA        | ENSG00000273010 | 11.2758479 | 0.21637701  | 0.39750818 | 0.23752124 | 0.45473526 |               |
| NA        | ENSG00000273011 | 0.34698358 | 0.00059867  | 0.383363   | 0.96279417 | NA         |               |
| NA        | ENSG00000273012 | 0          | NA          | NA         | NA         | NA         |               |
| NA        | ENSG00000273013 | 0.51937201 | -0.02557462 | 0.38567603 | 0.54680819 | NA         |               |
| NA        | ENSG00000273014 | 10.1192769 | -0.38682288 | 0.56693708 | 0.06473944 | 0.1813399  |               |
| NA        | ENSG00000273015 | 345.448598 | -0.17577606 | 0.1263004  | 0.14182783 | 0.32033973 |               |
| NA        | ENSG00000273017 | 0.50207596 | 0.02562368  | 0.38565771 | 0.52549886 | NA         |               |
| NA        | ENSG00000273018 | 5.45629528 | -0.20492082 | 0.44380517 | 0.09457504 | 0.23911926 | FAM106A       |

|           |                 |            |             |            |            |            |             |
|-----------|-----------------|------------|-------------|------------|------------|------------|-------------|
| NA        | ENSG00000273024 | 1.06688213 | 0.05288711  | 0.38714788 | 0.32363634 | NA         | INTS4P2     |
| NA        | ENSG00000273025 | 0          | NA          | NA         | NA         | NA         |             |
| NA        | ENSG00000273026 | 9.70551344 | -0.0710412  | 0.35013907 | 0.65052671 | 0.82543169 |             |
| NA        | ENSG00000273027 | 4.9949346  | -0.00301293 | 0.36209687 | 0.97843064 | 0.9926398  |             |
| 26220     | ENSG00000273032 | 280.959127 | -0.77943118 | 0.15316003 | 6.86E-08   | 9.24E-07   |             |
| 100129550 | ENSG00000273033 | 237.939835 | 0.16529771  | 0.1491642  | 0.22877523 | 0.44407598 | LINC02035   |
| NA        | ENSG00000273035 | 0.46426594 | -0.00763385 | 0.38326473 | 0.86723465 | NA         |             |
| NA        | ENSG00000273036 | 19.0626717 | -0.33456128 | 0.43484129 | 0.12761579 | 0.29804636 |             |
| NA        | ENSG00000273041 | 0.3180365  | 0.00096881  | 0.38336551 | 0.96779347 | NA         | ATF4P2      |
| NA        | ENSG00000273044 | 0.14931947 | -0.01844332 | 0.38480212 | 0.84537521 | NA         |             |
| 150590    | ENSG00000273045 | 21.7561417 | -0.00212005 | 0.30206877 | 0.98911037 | 0.99604194 | C2orf15     |
| NA        | ENSG00000273046 | 1.5069912  | -0.05820786 | 0.39056928 | 0.16274765 | NA         |             |
| NA        | ENSG00000273047 | 0          | NA          | NA         | NA         | NA         |             |
| NA        | ENSG00000273049 | 0          | NA          | NA         | NA         | NA         |             |
| NA        | ENSG00000273051 | 0          | NA          | NA         | NA         | NA         | OR51F4P     |
| NA        | ENSG00000273055 | 100.461663 | 0.28641136  | 0.22553063 | 0.12399145 | 0.29179342 |             |
| NA        | ENSG00000273056 | 2.32921392 | 0.04052841  | 0.37528266 | 0.67151442 | NA         |             |
| NA        | ENSG00000273058 | 15.7856366 | 0.227143    | 0.38489791 | 0.24338669 | 0.46186348 |             |
| NA        | ENSG00000273059 | 0.173124   | -0.01911262 | 0.38486262 | 0.84537521 | NA         |             |
| 101929351 | ENSG00000273061 | 11.2905877 | -0.24356869 | 0.42889353 | 0.16649104 | 0.35710079 | CDC37L1-DT  |
| NA        | ENSG00000273062 | 4.2913967  | -0.00337209 | 0.36385543 | 0.97541751 | 0.99139237 | RALGPS2-AS1 |
| NA        | ENSG00000273063 | 0.45056176 | -0.02734009 | 0.38571637 | 0.5612304  | NA         |             |
| NA        | ENSG00000273064 | 6.29189511 | -0.16311089 | 0.40023726 | 0.25301263 | 0.47325073 |             |
| NA        | ENSG00000273066 | 150.662302 | -0.09931862 | 0.23582495 | 0.59384192 | 0.78750669 |             |
| NA        | ENSG00000273068 | 0          | NA          | NA         | NA         | NA         |             |
| NA        | ENSG00000273069 | 1.70109813 | 0.01288291  | 0.37528281 | 0.8799868  | NA         |             |
| NA        | ENSG00000273073 | 8.06636876 | 0.01182138  | 0.35252571 | 0.93591017 | 0.97325384 |             |
| NA        | ENSG00000273076 | 0.71500695 | 0.00503863  | 0.38184368 | 0.91565785 | NA         |             |
| NA        | ENSG00000273077 | 0.32261288 | -0.0232552  | 0.38531884 | 0.6695365  | NA         |             |
| 2904      | ENSG00000273079 | 0          | NA          | NA         | NA         | NA         | GRIN2B      |
| NA        | ENSG00000273080 | 7.49546117 | 0.05869892  | 0.35319064 | 0.69730965 | 0.85388368 |             |
| NA        | ENSG00000273082 | 0.173733   | 0.01914545  | 0.38484597 | 0.78225479 | NA         | LARGE1-AS1  |
| NA        | ENSG00000273084 | 23.7994319 | 0.35984343  | 0.40123675 | 0.11928136 | 0.28396234 |             |
| NA        | ENSG00000273085 | 0          | NA          | NA         | NA         | NA         | OR52E1      |
| NA        | ENSG00000273088 | 4.921156   | 0.12788015  | 0.39491479 | 0.27877747 | 0.50317912 |             |
| NA        | ENSG00000273090 | 0          | NA          | NA         | NA         | NA         |             |
| NA        | ENSG00000273091 | 2.54640742 | 0.01151675  | 0.37472181 | 0.89596311 | NA         |             |
| NA        | ENSG00000273093 | 0          | NA          | NA         | NA         | NA         |             |

|           |                 |            |             |            |            |            |           |
|-----------|-----------------|------------|-------------|------------|------------|------------|-----------|
| NA        | ENSG00000273096 | 0          | NA          | NA         | NA         | NA         |           |
| NA        | ENSG00000273098 | 0          | NA          | NA         | NA         | NA         |           |
| NA        | ENSG00000273100 | 0          | NA          | NA         | NA         | NA         |           |
| NA        | ENSG00000273102 | 0.14931947 | -0.01844332 | 0.38480212 | 0.84537521 | NA         |           |
| NA        | ENSG00000273104 | 0.34044002 | -2.62E-05   | 0.38336211 | 0.96550067 | NA         |           |
| NA        | ENSG00000273106 | 0          | NA          | NA         | NA         | NA         | PPM1B-DT  |
| NA        | ENSG00000273107 | 0          | NA          | NA         | NA         | NA         |           |
| NA        | ENSG00000273108 | 50.2443885 | -1.14490738 | 0.3659385  | 0.0001565  | 0.00113818 |           |
| NA        | ENSG00000273110 | 0          | NA          | NA         | NA         | NA         |           |
| 147719    | ENSG00000273111 | 0          | NA          | NA         | NA         | NA         | LYPD4     |
| NA        | ENSG00000273112 | 0          | NA          | NA         | NA         | NA         |           |
| NA        | ENSG00000273113 | 2.68478571 | -0.01637514 | 0.37184912 | 0.86526396 | 0.94028794 |           |
| NA        | ENSG00000273115 | 0          | NA          | NA         | NA         | NA         |           |
| NA        | ENSG00000273117 | 88.9819447 | -0.01594236 | 0.20520197 | 0.92554382 | 0.96901263 | INSIG1-DT |
| NA        | ENSG00000273118 | 0          | NA          | NA         | NA         | NA         |           |
| NA        | ENSG00000273119 | 0          | NA          | NA         | NA         | NA         |           |
| NA        | ENSG00000273123 | 0.68237702 | 0.04061125  | 0.38717467 | 0.35747339 | NA         |           |
| NA        | ENSG00000273124 | 0          | NA          | NA         | NA         | NA         |           |
| 101929607 | ENSG00000273125 | 0.55226451 | 0.03291112  | 0.38623594 | 0.45181855 | NA         | LINC01990 |
| NA        | ENSG00000273129 | 0          | NA          | NA         | NA         | NA         | PACERR    |
| NA        | ENSG00000273132 | 0          | NA          | NA         | NA         | NA         |           |
| NA        | ENSG00000273133 | 0.36298846 | 0.023895    | 0.38539244 | 0.60994977 | NA         |           |
| 101060684 | ENSG00000273136 | 343.78244  | -0.07217374 | 0.12729428 | 0.54696309 | 0.75411728 | NBPF26    |
| NA        | ENSG00000273137 | 18.7872964 | 0.21979328  | 0.36764854 | 0.27046552 | 0.49374646 |           |
| NA        | ENSG00000273138 | 1.9370492  | 0.05695687  | 0.38060701 | 0.51259533 | NA         |           |
| NA        | ENSG00000273139 | 1.11797581 | 0.0491569   | 0.38630505 | 0.332334   | NA         |           |
| NA        | ENSG00000273141 | 0.50841583 | 0.01477599  | 0.38308761 | 0.74590412 | NA         |           |
| NA        | ENSG00000273142 | 297.084622 | 0.19889677  | 0.17565816 | 0.20322837 | 0.40930371 | LINC02604 |
| NA        | ENSG00000273143 | 2.08047128 | 0.02690827  | 0.38146572 | 0.65897877 | NA         | DUSP5-DT  |
| NA        | ENSG00000273145 | 12.5063985 | -0.01396069 | 0.33220116 | 0.93176445 | 0.9715756  |           |
| NA        | ENSG00000273148 | 10.7795054 | 0.08440044  | 0.34650264 | 0.61264818 | 0.80056246 | LINC00653 |
| NA        | ENSG00000273149 | 1.46390003 | -0.05047363 | 0.38397403 | 0.45013818 | NA         |           |
| NA        | ENSG00000273151 | 261.019783 | 0.21960036  | 0.15539532 | 0.1216678  | 0.28819117 |           |
| NA        | ENSG00000273153 | 0          | NA          | NA         | NA         | NA         |           |
| NA        | ENSG00000273154 | 352.8693   | 0.20035746  | 0.13633148 | 0.11501886 | 0.27640192 |           |
| NA        | ENSG00000273155 | 3.97249625 | -0.00137538 | 0.37586991 | 0.98353097 | 0.99435663 |           |
| NA        | ENSG00000273156 | 13.587068  | -0.01123372 | 0.33301653 | 0.94442636 | 0.97733251 |           |
| NA        | ENSG00000273160 | 0.31846409 | 0.00139471  | 0.38336876 | 0.96371555 | NA         |           |



|        |                 |            |             |            |            |            |           |
|--------|-----------------|------------|-------------|------------|------------|------------|-----------|
| NA     | ENSG00000273162 | 18.1078045 | -0.03800323 | 0.32506986 | 0.82714121 | 0.92186288 |           |
| NA     | ENSG00000273165 | 1.0735089  | 0.07602588  | 0.39411779 | 0.1442128  | NA         |           |
| NA     | ENSG00000273167 | 2.72493025 | -0.04154914 | 0.38109004 | 0.56822882 | 0.76919502 |           |
| NA     | ENSG00000273171 | 0          | NA          | NA         | NA         | NA         |           |
| NA     | ENSG00000273172 | 0.173733   | 0.01914545  | 0.38484597 | 0.78225479 | NA         | LINC02091 |
| 8926   | ENSG00000273173 | 59.6325703 | -0.58401369 | 0.33688631 | 0.01798228 | 0.06689825 | SNURF     |
| NA     | ENSG00000273174 | 1.41735518 | 0.0229786   | 0.38085275 | 0.7100029  | NA         |           |
| NA     | ENSG00000273175 | 0.84833329 | 0.00871022  | 0.38216892 | 0.85175958 | NA         |           |
| NA     | ENSG00000273176 | 0          | NA          | NA         | NA         | NA         |           |
| NA     | ENSG00000273177 | 0          | NA          | NA         | NA         | NA         |           |
| NA     | ENSG00000273179 | 1.03820031 | 0.04817237  | 0.38631521 | 0.35473948 | NA         |           |
| NA     | ENSG00000273180 | 0          | NA          | NA         | NA         | NA         |           |
| NA     | ENSG00000273181 | 1.50576572 | 0.00040359  | 0.37808868 | 0.99645464 | NA         |           |
| NA     | ENSG00000273183 | 5.41687497 | 0.10890338  | 0.38475909 | 0.37200818 | 0.60104858 |           |
| NA     | ENSG00000273184 | 17.5671196 | 0.25824019  | 0.40766749 | 0.19352088 | 0.39626941 |           |
| NA     | ENSG00000273186 | 4.02803566 | -0.00282407 | 0.36427388 | 0.97896903 | 0.99288138 |           |
| NA     | ENSG00000273188 | 9.52785827 | -0.05448737 | 0.34673561 | 0.727228   | 0.86953012 |           |
| NA     | ENSG00000273189 | 10.4366192 | 0.02428034  | 0.34345567 | 0.87867695 | 0.94627867 |           |
| NA     | ENSG00000273192 | 79.0063119 | -0.01592314 | 0.24752136 | 0.92981663 | 0.97064482 |           |
| NA     | ENSG00000273196 | 0          | NA          | NA         | NA         | NA         |           |
| NA     | ENSG00000273198 | 0          | NA          | NA         | NA         | NA         |           |
| NA     | ENSG00000273199 | 3.0311861  | 0.04775274  | 0.37876872 | 0.58601296 | 0.7817695  |           |
| NA     | ENSG00000273203 | 0          | NA          | NA         | NA         | NA         |           |
| NA     | ENSG00000273204 | 8.11283216 | 0.01856497  | 0.34867769 | 0.90239021 | 0.95713489 |           |
| NA     | ENSG00000273209 | 1.21899515 | 0.01852344  | 0.38007489 | 0.7726523  | NA         |           |
| NA     | ENSG00000273210 | 0.62245556 | -0.04504729 | 0.38756459 | 0.37437136 | NA         |           |
| NA     | ENSG00000273211 | 0          | NA          | NA         | NA         | NA         |           |
| NA     | ENSG00000273212 | 2.43394888 | -0.05133668 | 0.37680174 | 0.5926574  | NA         |           |
| 440686 | ENSG00000273213 | 691.850872 | -0.2505302  | 0.13846636 | 0.05130463 | 0.15201373 | H3-2      |
| NA     | ENSG00000273214 | 0          | NA          | NA         | NA         | NA         |           |
| NA     | ENSG00000273216 | 0.16735865 | 0.01897177  | 0.38482933 | 0.78225479 | NA         |           |
| NA     | ENSG00000273217 | 0          | NA          | NA         | NA         | NA         |           |
| NA     | ENSG00000273218 | 8.9497846  | -0.0469109  | 0.34768063 | 0.7596151  | 0.88850157 |           |
| NA     | ENSG00000273219 | 0.29863895 | -0.02292439 | 0.3852726  | 0.68753245 | NA         |           |
| NA     | ENSG00000273221 | 0          | NA          | NA         | NA         | NA         |           |
| NA     | ENSG00000273225 | 0          | NA          | NA         | NA         | NA         | FAM25BP   |
| NA     | ENSG00000273226 | 15.1548602 | -0.95607176 | 0.85539752 | 0.01297963 | 0.05137984 |           |
| NA     | ENSG00000273228 | 0          | NA          | NA         | NA         | NA         | OR5BQ1P   |

|           |    |                 |            |             |            |            |            |               |
|-----------|----|-----------------|------------|-------------|------------|------------|------------|---------------|
|           | NA | ENSG00000273230 | 174.480994 | -0.04148043 | 0.18176603 | 0.79459284 | 0.90579008 |               |
|           | NA | ENSG00000273232 | 0          | NA          | NA         | NA         | NA         |               |
|           | NA | ENSG00000273233 | 0.16735865 | 0.01897177  | 0.38482933 | 0.78225479 | NA         |               |
|           | NA | ENSG00000273234 | 0          | NA          | NA         | NA         | NA         | OR2A13P       |
| 112441426 | NA | ENSG00000273238 | 0          | NA          | NA         | NA         | NA         | TMEM271       |
|           | NA | ENSG00000273240 | 1.67486072 | -0.01406913 | 0.37570972 | 0.86462934 | NA         |               |
|           | NA | ENSG00000273243 | 2.70656588 | -0.10073345 | 0.3898788  | 0.31479958 | 0.54253159 |               |
|           | NA | ENSG00000273244 | 0          | NA          | NA         | NA         | NA         |               |
|           | NA | ENSG00000273245 | 0.69327898 | 0.02697194  | 0.38368185 | 0.57355129 | NA         |               |
|           | NA | ENSG00000273247 | 77.5080155 | 0.02280609  | 0.25320627 | 0.90659385 | 0.95939951 | RAB33B-AS1    |
|           | NA | ENSG00000273248 | 0.47250978 | -0.02839964 | 0.38580503 | 0.54357767 | NA         |               |
|           | NA | ENSG00000273249 | 2.56658324 | 0.00213144  | 0.37357709 | 0.98279132 | 0.99428951 | WDR5-DT       |
|           | NA | ENSG00000273252 | 0          | NA          | NA         | NA         | NA         | OR7E39P       |
|           | NA | ENSG00000273253 | 36.0458173 | 0.04827621  | 0.27444188 | 0.80447527 | 0.91118482 |               |
|           | NA | ENSG00000273254 | 3.55442584 | -0.02185626 | 0.37302589 | 0.81661876 | 0.9166503  |               |
|           | NA | ENSG00000273255 | 0          | NA          | NA         | NA         | NA         | OR5BP1P       |
|           | NA | ENSG00000273257 | 0.73237123 | 0.0016194   | 0.38231429 | 0.98454636 | NA         |               |
|           | NA | ENSG00000273258 | 0          | NA          | NA         | NA         | NA         |               |
|           | NA | ENSG00000273259 | 0.173733   | 0.01914545  | 0.38484597 | 0.78225479 | NA         |               |
|           | NA | ENSG00000273261 | 6.65442316 | 0.06382095  | 0.35933143 | 0.65566891 | 0.82872301 |               |
|           | NA | ENSG00000273262 | 1.00415192 | 0.04322574  | 0.38779947 | 0.2717111  | NA         |               |
|           | NA | ENSG00000273264 | 0          | NA          | NA         | NA         | NA         |               |
| 100506036 | NA | ENSG00000273265 | 1.18631879 | 0.02484254  | 0.37880756 | 0.73484574 | NA         | CNNM3-DT      |
|           | NA | ENSG00000273267 | 0          | NA          | NA         | NA         | NA         |               |
|           | NA | ENSG00000273269 | 0          | NA          | NA         | NA         | NA         |               |
|           | NA | ENSG00000273270 | 298.765906 | 0.08818837  | 0.14453006 | 0.51117855 | 0.72640667 |               |
|           | NA | ENSG00000273271 | 12.3704297 | 0.08586769  | 0.33905329 | 0.62141232 | 0.80672374 |               |
|           | NA | ENSG00000273272 | 0.36299781 | 0.02389507  | 0.38539245 | 0.60994514 | NA         |               |
| 728116    | NA | ENSG00000273274 | 238.055755 | 0.19627549  | 0.15557537 | 0.16697382 | 0.35786546 | ZBTB8B        |
|           | NA | ENSG00000273275 | 40.7529106 | -0.04240736 | 0.37789781 | 0.62133776 | 0.80672374 |               |
|           | NA | ENSG00000273284 | 6.15791364 | -0.33709994 | 0.57206296 | 0.04268053 | 0.1320147  |               |
|           | NA | ENSG00000273287 | 0.51306686 | -0.00993385 | 0.38277317 | 0.81940099 | NA         |               |
|           | NA | ENSG00000273289 | 0.37844916 | 0.02407552  | 0.3854191  | 0.60038877 | NA         |               |
|           | NA | ENSG00000273291 | 0.77530575 | 0.04492505  | 0.38782832 | 0.30817868 | NA         |               |
|           | NA | ENSG00000273293 | 0.48996948 | 0.01329378  | 0.38302935 | 0.76945177 | NA         |               |
|           | NA | ENSG00000273294 | 112.138778 | 0.19446954  | 0.21367729 | 0.27721718 | 0.50164071 | C1QTNF3-AMACR |
|           | NA | ENSG00000273295 | 103.818234 | 0.29222659  | 0.22139029 | 0.11250507 | 0.27167728 |               |
| 105375519 | NA | ENSG00000273297 | 148.113978 | -0.35855684 | 0.2211749  | 0.05225007 | 0.15402903 |               |

|        |                 |            |             |            |            |            |                |
|--------|-----------------|------------|-------------|------------|------------|------------|----------------|
| NA     | ENSG00000273299 | 0.49136829 | 0.01450547  | 0.38311666 | 0.75411907 | NA         |                |
| NA     | ENSG00000273300 | 2.2775773  | 0.00831359  | 0.37958242 | 0.8985308  | NA         |                |
| NA     | ENSG00000273301 | 112.324805 | -0.10067829 | 0.20493007 | 0.56104779 | 0.7645572  |                |
| NA     | ENSG00000273302 | 11.181024  | -0.09088754 | 0.35006321 | 0.57751164 | 0.77590783 |                |
| NA     | ENSG00000273305 | 2.44108653 | -0.02049251 | 0.3747374  | 0.81596471 | NA         |                |
| NA     | ENSG00000273306 | 19.0836803 | 0.09031453  | 0.31654091 | 0.63190324 | 0.81371846 |                |
| NA     | ENSG00000273308 | 6.99468637 | -0.01041078 | 0.35282279 | 0.93924436 | 0.97474024 |                |
| 25786  | ENSG00000273311 | 22.2509701 | 0.03330579  | 0.3071041  | 0.85916774 | 0.9373598  | DGCR11         |
| NA     | ENSG00000273312 | 6.4689875  | 3.36235316  | 1.41164058 | 0.00127655 | 0.00729491 |                |
| NA     | ENSG00000273313 | 8.91093243 | -0.09846031 | 0.35705453 | 0.53420466 | 0.74539459 | RBAKDN         |
| NA     | ENSG00000273314 | 93.3002908 | -0.01100638 | 0.20698458 | 0.94839517 | 0.97876335 |                |
| NA     | ENSG00000273319 | 0.36290964 | 0.02389445  | 0.38539235 | 0.6099888  | NA         |                |
| NA     | ENSG00000273320 | 4.08451115 | -0.03892196 | 0.36557884 | 0.74649018 | 0.8807279  |                |
| NA     | ENSG00000273321 | 0.62297018 | -0.01917206 | 0.38301901 | 0.68805772 | NA         |                |
| NA     | ENSG00000273325 | 1.78895943 | -0.05078052 | 0.38097495 | 0.52693221 | NA         |                |
| NA     | ENSG00000273327 | 0.34049423 | -0.00028011 | 0.38336247 | 0.96790782 | NA         | OR6L2P         |
| NA     | ENSG00000273328 | 2.71014592 | 0.08384097  | 0.38617539 | 0.37133839 | 0.60057374 |                |
| NA     | ENSG00000273329 | 266.153566 | 0.47502432  | 0.14970047 | 0.00061093 | 0.00384424 |                |
| NA     | ENSG00000273330 | 0          | NA          | NA         | NA         | NA         | CYP4F36P       |
| NA     | ENSG00000273331 | 0          | NA          | NA         | NA         | NA         | M4SF19-DYNLT2B |
| NA     | ENSG00000273333 | 0          | NA          | NA         | NA         | NA         |                |
| NA     | ENSG00000273335 | 0          | NA          | NA         | NA         | NA         |                |
| NA     | ENSG00000273336 | 0.51320642 | -0.01009698 | 0.38327553 | 0.81997864 | NA         | OR7M1P         |
| NA     | ENSG00000273338 | 1.97047759 | 0.14209317  | 0.42107893 | 0.02540943 | NA         |                |
| NA     | ENSG00000273340 | 0          | NA          | NA         | NA         | NA         | MICE           |
| NA     | ENSG00000273341 | 0.32240824 | -0.02325355 | 0.38531859 | 0.66965487 | NA         |                |
| NA     | ENSG00000273342 | 0.85194666 | 0.01721239  | 0.38195429 | 0.74013619 | NA         |                |
| NA     | ENSG00000273343 | 6.73097478 | -0.30133852 | 0.50958145 | 0.07507445 | 0.20158032 |                |
| 202781 | ENSG00000273344 | 132.913905 | 0.11744523  | 0.1807007  | 0.46229145 | 0.6851832  | PAXIP1-DT      |
| NA     | ENSG00000273345 | 9.99455711 | 0.05878832  | 0.34656957 | 0.7120217  | 0.86159535 |                |
| NA     | ENSG00000273348 | 0          | NA          | NA         | NA         | NA         |                |
| NA     | ENSG00000273350 | 1.26204712 | -0.03129963 | 0.38242734 | 0.58998026 | NA         |                |
| NA     | ENSG00000273353 | 0.63781295 | -0.01731702 | 0.3828002  | 0.69755348 | NA         |                |
| NA     | ENSG00000273355 | 3.46107717 | 0.03155084  | 0.36872496 | 0.77831141 | 0.89847614 |                |
| NA     | ENSG00000273356 | 9.26630595 | 1.51375723  | 1.00714266 | 0.00450885 | 0.02133899 | LINC02019      |
| NA     | ENSG00000273360 | 0          | NA          | NA         | NA         | NA         |                |
| NA     | ENSG00000273361 | 2.84411219 | 0.0385761   | 0.37555074 | 0.68040602 | 0.84380894 |                |
| NA     | ENSG00000273362 | 6.59845158 | 0.04873244  | 0.3581873  | 0.72825245 | 0.87007881 |                |

|           |                 |            |             |            |            |            |             |
|-----------|-----------------|------------|-------------|------------|------------|------------|-------------|
| NA        | ENSG00000273363 | 0.173733   | 0.01914545  | 0.38484597 | 0.78225479 | NA         |             |
| NA        | ENSG00000273365 | 0.8822784  | 0.0491118   | 0.38594165 | 0.38174434 | NA         |             |
| NA        | ENSG00000273367 | 7.86058265 | -0.26965111 | 0.47568969 | 0.09978604 | 0.2488914  |             |
| NA        | ENSG00000273368 | 0          | NA          | NA         | NA         | NA         |             |
| NA        | ENSG00000273369 | 6.55371053 | -0.13430743 | 0.38228195 | 0.3556922  | 0.58599659 |             |
| NA        | ENSG00000273370 | 0          | NA          | NA         | NA         | NA         |             |
| NA        | ENSG00000273372 | 2.7944773  | 0.15498157  | 0.4186469  | 0.11660909 | 0.27930996 | SFTPD-AS1   |
| NA        | ENSG00000273373 | 70.9673821 | -0.0411265  | 0.25135751 | 0.8278457  | 0.92210075 |             |
| NA        | ENSG00000273374 | 8.06973347 | -0.11112643 | 0.37486207 | 0.42969861 | 0.6553325  |             |
| NA        | ENSG00000273375 | 0.14931947 | -0.01844332 | 0.38480212 | 0.84537521 | NA         |             |
| NA        | ENSG00000273377 | 0          | NA          | NA         | NA         | NA         | OR2Q1P      |
| NA        | ENSG00000273381 | 5.964334   | 0.02946192  | 0.36212394 | 0.81735179 | 0.91683043 |             |
| NA        | ENSG00000273382 | 29.1595445 | -0.10088699 | 0.30098686 | 0.60120686 | 0.79187494 | TMEM167B-DT |
| NA        | ENSG00000273384 | 1.19296341 | 0.01937686  | 0.38004309 | 0.76463233 | NA         |             |
| NA        | ENSG00000273387 | 14.0133615 | -0.23544255 | 0.39232246 | 0.22625631 | 0.44057103 |             |
| NA        | ENSG00000273388 | 2.52309057 | 0.04197342  | 0.37789016 | 0.629741   | NA         |             |
| NA        | ENSG00000273391 | 6.96729044 | 0.03032878  | 0.3581442  | 0.82380183 | 0.91986742 |             |
| NA        | ENSG00000273394 | 0.16735865 | 0.01897177  | 0.38482933 | 0.78225479 | NA         |             |
| 103695434 | ENSG00000273396 | 2.80809465 | 0.03837741  | 0.37749954 | 0.65801186 | 0.83031782 | LINC01396   |
| NA        | ENSG00000273398 | 56.3337038 | 0.04359553  | 0.29231584 | 0.82172782 | 0.91847813 |             |
| NA        | ENSG00000273399 | 1.22568669 | -0.0673182  | 0.38897029 | 0.2729977  | NA         |             |
| NA        | ENSG00000273402 | 5.27002365 | -0.00266205 | 0.36490575 | 0.9794265  | 0.99317507 |             |
| NA        | ENSG00000273403 | 1.5588933  | -0.06399782 | 0.38643232 | 0.36392227 | NA         |             |
| NA        | ENSG00000273406 | 0.173733   | 0.01914545  | 0.38484597 | 0.78225479 | NA         |             |
| NA        | ENSG00000273407 | 0          | NA          | NA         | NA         | NA         |             |
| NA        | ENSG00000273408 | 0          | NA          | NA         | NA         | NA         | OR5B15P     |
| 101929497 | ENSG00000273409 | 0.33471731 | 0.02354391  | 0.38534154 | 0.62842204 | NA         | LINC02712   |
| NA        | ENSG00000273413 | 0          | NA          | NA         | NA         | NA         |             |
| NA        | ENSG00000273415 | 1.36127629 | 0.04460079  | 0.38314288 | 0.49319603 | NA         | LINC02725   |
| NA        | ENSG00000273416 | 1.86151439 | 0.04653283  | 0.37991511 | 0.56990853 | NA         |             |
| NA        | ENSG00000273419 | 47.3576924 | 0.39839066  | 0.34957372 | 0.08753269 | 0.22594959 |             |
| NA        | ENSG00000273420 | 7.20041158 | -0.03044746 | 0.38668766 | 0.11258087 | 0.27178103 |             |
| NA        | ENSG00000273423 | 0          | NA          | NA         | NA         | NA         | OR13IIP     |
| NA        | ENSG00000273424 | 0.32251227 | -0.02325439 | 0.38531872 | 0.66959469 | NA         |             |
| NA        | ENSG00000273428 | 9.26049486 | 0.11267858  | 0.36381778 | 0.4760779  | 0.69810684 |             |
| NA        | ENSG00000273432 | 47.8377139 | 0.72637044  | 0.35240391 | 0.00616031 | 0.02770185 |             |
| NA        | ENSG00000273433 | 0          | NA          | NA         | NA         | NA         |             |
| NA        | ENSG00000273434 | 0          | NA          | NA         | NA         | NA         | OR8S21P     |

|           |                 |            |             |            |            |            |           |
|-----------|-----------------|------------|-------------|------------|------------|------------|-----------|
| NA        | ENSG00000273437 | 0.64833426 | -0.04641449 | 0.3877699  | 0.35932432 | NA         |           |
| NA        | ENSG00000273442 | 0          | NA          | NA         | NA         | NA         |           |
| NA        | ENSG00000273443 | 0.16735865 | 0.01897177  | 0.38482933 | 0.78225479 | NA         |           |
| NA        | ENSG00000273444 | 0          | NA          | NA         | NA         | NA         |           |
| NA        | ENSG00000273445 | 0.56767373 | 0.02627943  | 0.38574813 | 0.49686938 | NA         |           |
| NA        | ENSG00000273447 | 10.5859396 | 0.16531878  | 0.38068746 | 0.32427549 | 0.55216104 |           |
| NA        | ENSG00000273448 | 33.1771327 | 0.03129024  | 0.28654752 | 0.87189488 | 0.94401928 |           |
| NA        | ENSG00000273449 | 14.6220952 | 0.02872798  | 0.32502659 | 0.87180688 | 0.94401928 |           |
| NA        | ENSG00000273450 | 0.52119901 | 0.02576573  | 0.38568143 | 0.51723676 | NA         |           |
| NA        | ENSG00000273451 | 0.68552688 | 0.0032603   | 0.38127879 | 0.94902697 | NA         |           |
| NA        | ENSG00000273454 | 0.31813092 | 0.00107704  | 0.38336622 | 0.96675748 | NA         |           |
| NA        | ENSG00000273455 | 0.32257539 | -0.0232549  | 0.3853188  | 0.66955818 | NA         |           |
| NA        | ENSG00000273456 | 13.8516545 | 0.00757901  | 0.33173219 | 0.96644789 | 0.98704448 |           |
| NA        | ENSG00000273461 | 0          | NA          | NA         | NA         | NA         |           |
| NA        | ENSG00000273464 | 1.4292285  | -0.02416512 | 0.37996274 | 0.719505   | NA         |           |
| NA        | ENSG00000273471 | 0          | NA          | NA         | NA         | NA         |           |
| NA        | ENSG00000273472 | 31.6099179 | -0.06114867 | 0.28410573 | 0.7501326  | 0.88245661 |           |
| NA        | ENSG00000273473 | 1.89856324 | 0.0785093   | 0.38792523 | 0.33574004 | NA         |           |
| NA        | ENSG00000273474 | 0.36324572 | 0.02389681  | 0.38539272 | 0.60982254 | NA         |           |
| NA        | ENSG00000273476 | 0.48416117 | -0.00604647 | 0.38313776 | 0.873672   | NA         |           |
| NA        | ENSG00000273481 | 0.173124   | -0.01911262 | 0.38486262 | 0.84537521 | NA         |           |
| NA        | ENSG00000273483 | 2.97036638 | 0.01689339  | 0.36971308 | 0.8734419  | 0.94441388 |           |
| NA        | ENSG00000273484 | 0          | NA          | NA         | NA         | NA         | OR6R2P    |
| NA        | ENSG00000273485 | 1.01752141 | 0.00610693  | 0.38164515 | 0.90333485 | NA         |           |
| NA        | ENSG00000273486 | 19.9061676 | 0.20572794  | 0.34904908 | 0.30659659 | 0.53422766 |           |
| NA        | ENSG00000273487 | 0.69200296 | 0.006362    | 0.38192389 | 0.89342941 | NA         |           |
| NA        | ENSG00000273489 | 22.0470706 | 0.06980336  | 0.32890481 | 0.6963613  | 0.85340714 |           |
| NA        | ENSG00000273492 | 46.9217237 | -0.99226688 | 0.36169465 | 0.00063245 | 0.00395828 | APP-DT    |
| NA        | ENSG00000273493 | 0          | NA          | NA         | NA         | NA         |           |
| NA        | ENSG00000273497 | 0          | NA          | NA         | NA         | NA         |           |
| NA        | ENSG00000273499 | 0          | NA          | NA         | NA         | NA         |           |
| 102465137 | ENSG00000273500 | 0          | NA          | NA         | NA         | NA         | MIR6129   |
| NA        | ENSG00000273507 | 0.18922458 | 0.01954053  | 0.38488496 | 0.78225479 | NA         |           |
| NA        | ENSG00000273509 | 0          | NA          | NA         | NA         | NA         | CNTNAP3P1 |
| NA        | ENSG00000273512 | 1.0225731  | 0.05709178  | 0.38721029 | 0.32058587 | NA         |           |
| 101060351 | ENSG00000273513 | 0          | NA          | NA         | NA         | NA         | TBC1D3K   |
| 102723859 | ENSG00000273513 | 0          | NA          | NA         | NA         | NA         | TBC1D3K   |
| 653404    | ENSG00000273514 | 3.39522362 | 0.01943413  | 0.37206037 | 0.84504607 | 0.92965052 | FOX4L6    |

|           |                 |            |             |            |            |            |          |
|-----------|-----------------|------------|-------------|------------|------------|------------|----------|
| NA        | ENSG00000273515 | 0          | NA          | NA         | NA         | NA         |          |
| NA        | ENSG00000273516 | 0          | NA          | NA         | NA         | NA         |          |
| 643862    | ENSG00000273520 | 5.98296126 | 0.07433916  | 0.37981945 | 0.47719989 | 0.69909912 | SPDYE8   |
| 728524    | ENSG00000273520 | 5.98296126 | 0.07433916  | 0.37981945 | 0.47719989 | 0.69909912 | SPDYE8   |
| NA        | ENSG00000273521 | 18.454209  | 0.06421406  | 0.31850007 | 0.72790686 | 0.86992552 |          |
| 101929657 | ENSG00000273523 | 1.62347141 | -0.01112676 | 0.3782708  | 0.87488563 | NA         |          |
| NA        | ENSG00000273524 | 0.18922458 | 0.01954053  | 0.38488496 | 0.78225479 | NA         |          |
| NA        | ENSG00000273536 | 0          | NA          | NA         | NA         | NA         |          |
| NA        | ENSG00000273537 | 0          | NA          | NA         | NA         | NA         |          |
| 123624    | ENSG00000273540 | 9.87668783 | 0.23558476  | 0.44471516 | 0.13242864 | 0.30558086 | AGBL1    |
| NA        | ENSG00000273541 | 6.03140125 | -0.14172658 | 0.40621669 | 0.19376512 | 0.39664672 |          |
| 8362      | ENSG00000273542 | 26.8374456 | -0.01074375 | 0.38335063 | NA         | NA         | H4C12    |
| 677825    | ENSG00000273544 | 0          | NA          | NA         | NA         | NA         | SNORA44  |
| NA        | ENSG00000273549 | 0          | NA          | NA         | NA         | NA         |          |
| NA        | ENSG00000273550 | 0          | NA          | NA         | NA         | NA         |          |
| NA        | ENSG00000273551 | 0          | NA          | NA         | NA         | NA         |          |
| NA        | ENSG00000273552 | 0.48506202 | 0.01079663  | 0.38337133 | 0.7925782  | NA         |          |
| NA        | ENSG00000273553 | 0          | NA          | NA         | NA         | NA         |          |
| 102465487 | ENSG00000273555 | 0          | NA          | NA         | NA         | NA         | MIR6812  |
| NA        | ENSG00000273557 | 0          | NA          | NA         | NA         | NA         |          |
| NA        | ENSG00000273558 | 5.24687024 | -0.05651077 | 0.37158141 | 0.61950367 | 0.80561992 |          |
| 54883     | ENSG00000273559 | 409.359026 | 0.29908708  | 0.12555545 | 0.01148658 | 0.04651844 | CWC25    |
| NA        | ENSG00000273565 | 0.71016046 | 0.02861205  | 0.38385852 | 0.55375428 | NA         |          |
| NA        | ENSG00000273566 | 0          | NA          | NA         | NA         | NA         |          |
| NA        | ENSG00000273567 | 0          | NA          | NA         | NA         | NA         | REXO1L3P |
| NA        | ENSG00000273568 | 3.09913912 | 0.1686786   | 0.42661739 | 0.09710519 | 0.24374582 |          |
| NA        | ENSG00000273569 | 0          | NA          | NA         | NA         | NA         |          |
| NA        | ENSG00000273570 | 0          | NA          | NA         | NA         | NA         |          |
| NA        | ENSG00000273571 | 0          | NA          | NA         | NA         | NA         |          |
| NA        | ENSG00000273573 | 0          | NA          | NA         | NA         | NA         |          |
| NA        | ENSG00000273576 | 27.4544177 | 0.31548654  | 0.35981266 | 0.15658625 | 0.34316665 |          |
| NA        | ENSG00000273580 | 0          | NA          | NA         | NA         | NA         |          |
| NA        | ENSG00000273582 | 0          | NA          | NA         | NA         | NA         |          |
| NA        | ENSG00000273584 | 0.173733   | 0.01914545  | 0.38484597 | 0.78225479 | NA         |          |
| NA        | ENSG00000273586 | 0          | NA          | NA         | NA         | NA         | OR10G1P  |
| 677844    | ENSG00000273587 | 0          | NA          | NA         | NA         | NA         | SNORA78  |
| NA        | ENSG00000273589 | 0          | NA          | NA         | NA         | NA         |          |
| 102723553 | ENSG00000273590 | 110.718688 | -0.06104986 | 0.38324703 | 0.44783845 | 0.67179153 | SMIM11B  |

|           |                 |            |             |            |            |            |           |
|-----------|-----------------|------------|-------------|------------|------------|------------|-----------|
| 102465695 | ENSG00000273593 | 0          | NA          | NA         | NA         | NA         | MIR7160   |
| NA        | ENSG00000273595 | 0          | NA          | NA         | NA         | NA         |           |
| NA        | ENSG00000273596 | 0          | NA          | NA         | NA         | NA         |           |
| NA        | ENSG00000273597 | 1.78573937 | 0.03078507  | 0.38077428 | 0.64826877 | NA         |           |
| NA        | ENSG00000273598 | 15.5095578 | 0.19231756  | 0.37498498 | 0.30033886 | 0.52746065 |           |
| NA        | ENSG00000273599 | 137.828804 | 0.42532084  | 0.22212582 | 0.02318916 | 0.08202407 |           |
| NA        | ENSG00000273600 | 0          | NA          | NA         | NA         | NA         |           |
| 100170841 | ENSG00000273604 | 601.918951 | 0.07387528  | 0.1135442  | 0.49635155 | 0.714811   | EPOP      |
| 102465465 | ENSG00000273606 | 0          | NA          | NA         | NA         | NA         | MIR6776   |
| NA        | ENSG00000273609 | 0          | NA          | NA         | NA         | NA         |           |
| NA        | ENSG00000273610 | 0          | NA          | NA         | NA         | NA         | RN7SL386P |
| 9326      | ENSG00000273611 | 465.786635 | -0.06778746 | 0.1111421  | 0.52319093 | 0.73618679 | ZNHIT3    |
| NA        | ENSG00000273612 | 0          | NA          | NA         | NA         | NA         |           |
| NA        | ENSG00000273614 | 0          | NA          | NA         | NA         | NA         |           |
| NA        | ENSG00000273618 | 5.52130672 | 0.01200868  | 0.35816412 | 0.92934662 | 0.97049075 |           |
| NA        | ENSG00000273619 | 51.195664  | -0.10561759 | 0.25950864 | 0.58443174 | 0.78060629 |           |
| NA        | ENSG00000273621 | 0          | NA          | NA         | NA         | NA         |           |
| NA        | ENSG00000273623 | 0          | NA          | NA         | NA         | NA         |           |
| 100616153 | ENSG00000273627 | 0          | NA          | NA         | NA         | NA         | MIR4726   |
| NA        | ENSG00000273628 | 0.15069912 | -0.01848503 | 0.38480575 | 0.84537521 | NA         |           |
| NA        | ENSG00000273629 | 0          | NA          | NA         | NA         | NA         |           |
| NA        | ENSG00000273634 | 0          | NA          | NA         | NA         | NA         |           |
| NA        | ENSG00000273637 | 0.60279648 | -0.02752712 | 0.38588313 | 0.49730371 | NA         |           |
| NA        | ENSG00000273639 | 4.62898641 | 0.11103104  | 0.3833754  | 0.37810423 | 0.60702282 |           |
| NA        | ENSG00000273640 | 0          | NA          | NA         | NA         | NA         | WBP1LP8   |
| NA        | ENSG00000273643 | 0          | NA          | NA         | NA         | NA         | PPP1R26P2 |
| NA        | ENSG00000273644 | 0          | NA          | NA         | NA         | NA         |           |
| 102465867 | ENSG00000273648 | 0          | NA          | NA         | NA         | NA         | MIR8065   |
| NA        | ENSG00000273650 | 0.31696544 | 0.00135306  | 0.38336844 | 0.96488897 | NA         |           |
| NA        | ENSG00000273654 | 5.52372768 | 0.13901379  | 0.38874064 | 0.32087086 | 0.54869068 |           |
| 102465475 | ENSG00000273657 | 0          | NA          | NA         | NA         | NA         | MIR6792   |
| NA        | ENSG00000273658 | 0          | NA          | NA         | NA         | NA         |           |
| NA        | ENSG00000273659 | 0          | NA          | NA         | NA         | NA         |           |
| NA        | ENSG00000273664 | 0          | NA          | NA         | NA         | NA         |           |
| NA        | ENSG00000273668 | 0          | NA          | NA         | NA         | NA         |           |
| NA        | ENSG00000273669 | 0.18922458 | 0.01954053  | 0.38488496 | 0.78225479 | NA         |           |
| NA        | ENSG00000273674 | 6.10159018 | -0.19044613 | 0.42136295 | 0.1653882  | 0.35542698 |           |
| NA        | ENSG00000273675 | 0          | NA          | NA         | NA         | NA         |           |

|           |                 |            |             |            |            |            |           |
|-----------|-----------------|------------|-------------|------------|------------|------------|-----------|
| NA        | ENSG00000273677 | 0          | NA          | NA         | NA         | NA         |           |
| NA        | ENSG00000273679 | 0          | NA          | NA         | NA         | NA         |           |
| NA        | ENSG00000273680 | 2.33240757 | -0.09636727 | 0.39139437 | 0.28847912 | NA         |           |
| NA        | ENSG00000273682 | 0          | NA          | NA         | NA         | NA         |           |
| NA        | ENSG00000273687 | 1.2414287  | 0.04467263  | 0.38354185 | 0.48025505 | NA         |           |
| NA        | ENSG00000273691 | 0.15069912 | -0.01848503 | 0.38480575 | 0.84537521 | NA         |           |
| NA        | ENSG00000273692 | 0          | NA          | NA         | NA         | NA         | LONRF2P5  |
| NA        | ENSG00000273693 | 2.00049288 | 0.01116044  | 0.37383483 | 0.90252001 | NA         | CDRT15P10 |
| NA        | ENSG00000273694 | 0          | NA          | NA         | NA         | NA         |           |
| 101060211 | ENSG00000273696 | 0          | NA          | NA         | NA         | NA         | CT45A7    |
| NA        | ENSG00000273698 | 0          | NA          | NA         | NA         | NA         | MRPL57P1  |
| 102465455 | ENSG00000273700 | 0          | NA          | NA         | NA         | NA         | MIR6760   |
| NA        | ENSG00000273701 | 0          | NA          | NA         | NA         | NA         |           |
| NA        | ENSG00000273702 | 34.0548247 | -0.17417736 | 0.29319767 | 0.38750473 | 0.61647774 |           |
| 8342      | ENSG00000273703 | 2.03133258 | -0.13321738 | 0.4122872  | 0.0820654  | NA         | H2BC14    |
| NA        | ENSG00000273704 | 0          | NA          | NA         | NA         | NA         |           |
| 3975      | ENSG00000273706 | 3.04225477 | -0.07049332 | 0.38725298 | 0.23784244 | 0.45521841 | LHX1      |
| NA        | ENSG00000273710 | 0          | NA          | NA         | NA         | NA         |           |
| NA        | ENSG00000273711 | 13.0053431 | 0.02696293  | 0.33185168 | 0.87533611 | 0.94499851 |           |
| NA        | ENSG00000273712 | 0.173733   | 0.01914545  | 0.38484597 | 0.78225479 | NA         |           |
| NA        | ENSG00000273716 | 0          | NA          | NA         | NA         | NA         |           |
| NA        | ENSG00000273719 | 0          | NA          | NA         | NA         | NA         |           |
| NA        | ENSG00000273720 | 0          | NA          | NA         | NA         | NA         |           |
| NA        | ENSG00000273721 | 0          | NA          | NA         | NA         | NA         |           |
| 116435302 | ENSG00000273723 | 8.36318104 | 0.1157054   | 0.37125449 | 0.43959353 | 0.66481822 | SUGT1-DT  |
| NA        | ENSG00000273724 | 0          | NA          | NA         | NA         | NA         |           |
| NA        | ENSG00000273725 | 0          | NA          | NA         | NA         | NA         |           |
| NA        | ENSG00000273727 | 0          | NA          | NA         | NA         | NA         |           |
| NA        | ENSG00000273729 | 38.8080935 | -0.12100208 | 0.28366909 | 0.53775555 | 0.74776213 |           |
| NA        | ENSG00000273731 | 0          | NA          | NA         | NA         | NA         |           |
| NA        | ENSG00000273732 | 0          | NA          | NA         | NA         | NA         | VN1R74P   |
| NA        | ENSG00000273733 | 1.71336891 | 0.03979853  | 0.37963239 | 0.61206071 | NA         |           |
| NA        | ENSG00000273734 | 0          | NA          | NA         | NA         | NA         |           |
| NA        | ENSG00000273736 | 0          | NA          | NA         | NA         | NA         |           |
| 102466103 | ENSG00000273742 | 0          | NA          | NA         | NA         | NA         | MIR6075   |
| NA        | ENSG00000273744 | 0          | NA          | NA         | NA         | NA         |           |
| 102465525 | ENSG00000273745 | 0          | NA          | NA         | NA         | NA         | MIR6870   |
| NA        | ENSG00000273746 | 0          | NA          | NA         | NA         | NA         |           |



|           |                 |            |             |            |            |            |           |
|-----------|-----------------|------------|-------------|------------|------------|------------|-----------|
| NA        | ENSG00000273747 | 4.34369444 | -0.11187502 | 0.38394261 | 0.37131401 | 0.60057374 |           |
| 23191     | ENSG00000273749 | 3197.28941 | 0.06601874  | 0.07130045 | 0.34641671 | 0.57719207 | CYFIP1    |
| NA        | ENSG00000273750 | 0          | NA          | NA         | NA         | NA         |           |
| 102723623 | ENSG00000273756 | 0          | NA          | NA         | NA         | NA         |           |
| 102465473 | ENSG00000273758 | 0          | NA          | NA         | NA         | NA         | MIR6790   |
| NA        | ENSG00000273759 | 9.31787736 | 0.0706021   | 0.35390581 | 0.64574246 | 0.82359463 |           |
| NA        | ENSG00000273760 | 0.173733   | 0.01914545  | 0.38484597 | 0.78225479 | NA         |           |
| NA        | ENSG00000273762 | 0          | NA          | NA         | NA         | NA         | VN1R76P   |
| NA        | ENSG00000273763 | 22.4640765 | -0.08677268 | 0.31492646 | 0.64292058 | 0.82150733 |           |
| NA        | ENSG00000273765 | 0.173733   | 0.01914545  | 0.38484597 | 0.78225479 | NA         |           |
| NA        | ENSG00000273767 | 0          | NA          | NA         | NA         | NA         |           |
| 100996465 | ENSG00000273769 | 0          | NA          | NA         | NA         | NA         |           |
| NA        | ENSG00000273771 | 0          | NA          | NA         | NA         | NA         |           |
| NA        | ENSG00000273773 | 0          | NA          | NA         | NA         | NA         |           |
| 102465134 | ENSG00000273776 | 0          | NA          | NA         | NA         | NA         | MIR6126   |
| 125931    | ENSG00000273777 | 0          | NA          | NA         | NA         | NA         | CEACAM20  |
| 102465458 | ENSG00000273778 | 0          | NA          | NA         | NA         | NA         | MIR6765   |
| NA        | ENSG00000273782 | 0          | NA          | NA         | NA         | NA         |           |
| NA        | ENSG00000273783 | 12.5002621 | -0.16050067 | 0.37036663 | 0.35555099 | 0.58594    |           |
| NA        | ENSG00000273784 | 258.99396  | 0.20933872  | 0.16382417 | 0.15739803 | 0.34418351 |           |
| NA        | ENSG00000273786 | 1.68927961 | 0.01616289  | 0.37698759 | 0.83773501 | NA         |           |
| NA        | ENSG00000273788 | 0          | NA          | NA         | NA         | NA         |           |
| NA        | ENSG00000273791 | 0.35629283 | 0.02381426  | 0.38538062 | 0.61421315 | NA         |           |
| NA        | ENSG00000273792 | 0.51383522 | -0.01018715 | 0.38327958 | 0.81858748 | NA         |           |
| NA        | ENSG00000273796 | 2.37135717 | -0.01497825 | 0.37242351 | 0.8737515  | NA         |           |
| NA        | ENSG00000273797 | 0          | NA          | NA         | NA         | NA         |           |
| NA        | ENSG00000273800 | 0          | NA          | NA         | NA         | NA         |           |
| 8339      | ENSG00000273802 | 64.190943  | -0.61862246 | 0.31262349 | 0.00998839 | 0.04143207 | H2BC8     |
| NA        | ENSG00000273805 | 3.00594884 | 0.13395441  | 0.40869191 | 0.14066872 | 0.318644   |           |
| NA        | ENSG00000273806 | 0          | NA          | NA         | NA         | NA         |           |
| NA        | ENSG00000273812 | 0          | NA          | NA         | NA         | NA         |           |
| NA        | ENSG00000273813 | 0          | NA          | NA         | NA         | NA         |           |
| NA        | ENSG00000273816 | 0          | NA          | NA         | NA         | NA         |           |
| NA        | ENSG00000273818 | 0.15069912 | -0.01848503 | 0.38480575 | 0.84537521 | NA         | RN7SL673P |
| NA        | ENSG00000273819 | 0          | NA          | NA         | NA         | NA         | ENPP7P7   |
| 389856    | ENSG00000273820 | 92.4276602 | -0.28295076 | 0.22845135 | 0.13046712 | 0.30263856 | USP27X    |
| NA        | ENSG00000273821 | 0.14931947 | -0.01844332 | 0.38480212 | 0.84537521 | NA         |           |
| NA        | ENSG00000273824 | 0          | NA          | NA         | NA         | NA         |           |

|           |                 |            |             |            |            |            |             |
|-----------|-----------------|------------|-------------|------------|------------|------------|-------------|
| NA        | ENSG00000273825 | 0.173124   | -0.01911262 | 0.38486262 | 0.84537521 | NA         |             |
| NA        | ENSG00000273828 | 36.8847272 | -0.00228197 | 0.27611831 | 0.98877407 | 0.99604194 |             |
| NA        | ENSG00000273829 | 0          | NA          | NA         | NA         | NA         |             |
| 102465832 | ENSG00000273830 | 0          | NA          | NA         | NA         | NA         | MIR7843     |
| 100033450 | ENSG00000273835 | 0          | NA          | NA         | NA         | NA         | SNORD115-13 |
| 102465507 | ENSG00000273836 | 0          | NA          | NA         | NA         | NA         | MIR6842     |
| NA        | ENSG00000273837 | 0          | NA          | NA         | NA         | NA         |             |
| NA        | ENSG00000273838 | 0          | NA          | NA         | NA         | NA         |             |
| NA        | ENSG00000273840 | 0.15069912 | -0.01848503 | 0.38480575 | 0.84537521 | NA         |             |
| 6880      | ENSG00000273841 | 737.451964 | -0.52680456 | 0.10030306 | 5.36E-08   | 7.34E-07   | TAF9        |
| NA        | ENSG00000273844 | 0          | NA          | NA         | NA         | NA         |             |
| NA        | ENSG00000273846 | 0          | NA          | NA         | NA         | NA         |             |
| NA        | ENSG00000273849 | 0          | NA          | NA         | NA         | NA         | SDR42E1P4   |
| NA        | ENSG00000273851 | 0.173733   | 0.01914545  | 0.38484597 | 0.78225479 | NA         |             |
| NA        | ENSG00000273853 | 0          | NA          | NA         | NA         | NA         |             |
| NA        | ENSG00000273855 | 1.35956203 | 0.008325    | 0.38101472 | 0.88092178 | NA         |             |
| NA        | ENSG00000273858 | 0          | NA          | NA         | NA         | NA         |             |
| NA        | ENSG00000273860 | 0          | NA          | NA         | NA         | NA         |             |
| NA        | ENSG00000273863 | 0          | NA          | NA         | NA         | NA         |             |
| NA        | ENSG00000273866 | 0          | NA          | NA         | NA         | NA         |             |
| NA        | ENSG00000273870 | 0          | NA          | NA         | NA         | NA         |             |
| NA        | ENSG00000273872 | 0          | NA          | NA         | NA         | NA         | SLC25A15P4  |
| NA        | ENSG00000273876 | 0          | NA          | NA         | NA         | NA         |             |
| 105373373 | ENSG00000273877 | 0          | NA          | NA         | NA         | NA         |             |
| 102465868 | ENSG00000273882 | 0          | NA          | NA         | NA         | NA         | MIR8066     |
| NA        | ENSG00000273885 | 0          | NA          | NA         | NA         | NA         |             |
| NA        | ENSG00000273886 | 0          | NA          | NA         | NA         | NA         |             |
| 145438    | ENSG00000273888 | 17.9196197 | 0.19156661  | 0.35089271 | 0.33061358 | 0.55938713 | FRMD6-AS1   |
| NA        | ENSG00000273890 | 1.6756175  | 0.03559906  | 0.37895226 | 0.6512946  | NA         |             |
| NA        | ENSG00000273891 | 27.3929183 | 0.00243736  | 0.29617504 | 0.99156721 | 0.9972471  |             |
| NA        | ENSG00000273893 | 15.4684172 | -0.11424828 | 0.34133889 | 0.52151771 | 0.73489677 |             |
| NA        | ENSG00000273894 | 0          | NA          | NA         | NA         | NA         | SLC20A1P2   |
| NA        | ENSG00000273897 | 11.2774062 | 0.34639675  | 0.54765595 | 0.06604461 | 0.18375052 | PMS2P8      |
| 102466738 | ENSG00000273898 | 0          | NA          | NA         | NA         | NA         | MIR6798     |
| 79159     | ENSG00000273899 | 373.031119 | 0.04617783  | 0.12131982 | 0.69038617 | 0.84996969 | NOL12       |
| NA        | ENSG00000273900 | 0          | NA          | NA         | NA         | NA         |             |
| NA        | ENSG00000273901 | 2.2283432  | 0.02170449  | 0.37561975 | 0.80140058 | NA         |             |
| NA        | ENSG00000273904 | 0          | NA          | NA         | NA         | NA         |             |

|           |    |                 |            |             |            |            |            |           |
|-----------|----|-----------------|------------|-------------|------------|------------|------------|-----------|
|           | NA | ENSG00000273906 | 0          | NA          | NA         | NA         | NA         |           |
|           | NA | ENSG00000273907 | 0.15069912 | -0.01848503 | 0.38480575 | 0.84537521 | NA         | CA15P2    |
|           | NA | ENSG00000273908 | 0          | NA          | NA         | NA         | NA         |           |
| 102466876 |    | ENSG00000273912 | 0          | NA          | NA         | NA         | NA         | MIR8068   |
|           | NA | ENSG00000273913 | 0          | NA          | NA         | NA         | NA         |           |
|           | NA | ENSG00000273919 | 0          | NA          | NA         | NA         | NA         |           |
|           | NA | ENSG00000273920 | 1.74128978 | 0.08998463  | 0.39274768 | 0.24508824 | NA         |           |
|           | NA | ENSG00000273923 | 0          | NA          | NA         | NA         | NA         |           |
|           | NA | ENSG00000273925 | 0.34106966 | 0.02362622  | 0.38535335 | 0.62412716 | NA         |           |
| 102465528 |    | ENSG00000273932 | 0          | NA          | NA         | NA         | NA         | MIR6877   |
|           | NA | ENSG00000273933 | 0          | NA          | NA         | NA         | NA         |           |
|           | NA | ENSG00000273942 | 0          | NA          | NA         | NA         | NA         |           |
| 102466201 |    | ENSG00000273945 | 0          | NA          | NA         | NA         | NA         | MIR6853   |
|           | NA | ENSG00000273946 | 0.14931947 | -0.01844332 | 0.38480212 | 0.84537521 | NA         | RN7SL733P |
|           | NA | ENSG00000273948 | 0.56520299 | 0.03352065  | 0.38630047 | 0.44328881 | NA         |           |
|           | NA | ENSG00000273950 | 0.34624801 | -0.02356563 | 0.38536324 | 0.65270996 | NA         |           |
|           | NA | ENSG00000273951 | 0.69340209 | 0.02771289  | 0.38378069 | 0.56529785 | NA         |           |
|           | NA | ENSG00000273956 | 0          | NA          | NA         | NA         | NA         |           |
|           | NA | ENSG00000273957 | 0          | NA          | NA         | NA         | NA         |           |
|           | NA | ENSG00000273958 | 1.13344109 | -0.00278938 | 0.37951417 | 0.96463043 | NA         |           |
|           | NA | ENSG00000273961 | 0          | NA          | NA         | NA         | NA         |           |
|           | NA | ENSG00000273962 | 0          | NA          | NA         | NA         | NA         | IGKV2-40  |
|           | NA | ENSG00000273963 | 0          | NA          | NA         | NA         | NA         | ENPP7P14  |
|           | NA | ENSG00000273964 | 0          | NA          | NA         | NA         | NA         |           |
|           | NA | ENSG00000273965 | 0          | NA          | NA         | NA         | NA         |           |
|           | NA | ENSG00000273966 | 0          | NA          | NA         | NA         | NA         |           |
|           | NA | ENSG00000273971 | 0          | NA          | NA         | NA         | NA         |           |
|           | NA | ENSG00000273972 | 0          | NA          | NA         | NA         | NA         |           |
|           | NA | ENSG00000273973 | 1.14846119 | -0.00360765 | 0.37937502 | 0.95489675 | NA         |           |
|           | NA | ENSG00000273974 | 0          | NA          | NA         | NA         | NA         |           |
|           | NA | ENSG00000273975 | 0          | NA          | NA         | NA         | NA         |           |
| 283767    |    | ENSG00000273976 | 0          | NA          | NA         | NA         | NA         | GOLGA6L1  |
|           | NA | ENSG00000273978 | 0          | NA          | NA         | NA         | NA         |           |
|           | NA | ENSG00000273979 | 0          | NA          | NA         | NA         | NA         |           |
|           | NA | ENSG00000273980 | 1.35394521 | 0.04528064  | 0.38456293 | 0.44130171 | NA         |           |
|           | NA | ENSG00000273981 | 0          | NA          | NA         | NA         | NA         | RN7SL106P |
|           | NA | ENSG00000273982 | 0.37844916 | 0.02407552  | 0.3854191  | 0.60038877 | NA         |           |
| 8355      |    | ENSG00000273983 | 16.5714545 | -1.61490429 | 0.69238626 | 0.00102356 | 0.00602593 | H3C8      |

|           |                 |            |             |            |            |            |             |
|-----------|-----------------|------------|-------------|------------|------------|------------|-------------|
| NA        | ENSG00000273986 | 0          | NA          | NA         | NA         | NA         |             |
| NA        | ENSG00000273987 | 4.31681249 | 0.12106028  | 0.39267595 | 0.29698605 | 0.5236583  |             |
| NA        | ENSG00000273988 | 0          | NA          | NA         | NA         | NA         |             |
| NA        | ENSG00000273989 | 0.32358083 | -0.02327105 | 0.38532104 | 0.66874861 | NA         |             |
| NA        | ENSG00000273994 | 0          | NA          | NA         | NA         | NA         | SDR42E1P1   |
| NA        | ENSG00000273997 | 0          | NA          | NA         | NA         | NA         |             |
| NA        | ENSG00000273998 | 5.17910338 | -0.15924424 | 0.40946478 | 0.20025661 | 0.40533473 |             |
| NA        | ENSG00000273999 | 0          | NA          | NA         | NA         | NA         | RBM17P2     |
| NA        | ENSG00000274001 | 0.34182578 | 0.0029294   | 0.38339003 | 0.95971821 | NA         |             |
| NA        | ENSG00000274002 | 0.49271324 | 0.01203236  | 0.3834385  | 0.77470409 | NA         |             |
| NA        | ENSG00000274004 | 0          | NA          | NA         | NA         | NA         |             |
| NA        | ENSG00000274006 | 0          | NA          | NA         | NA         | NA         |             |
| NA        | ENSG00000274008 | 0          | NA          | NA         | NA         | NA         |             |
| NA        | ENSG00000274010 | 1.57301788 | 0.06887645  | 0.38796502 | 0.32034787 | NA         | ZFP91P1     |
| NA        | ENSG00000274011 | 0.31824229 | 0.00119245  | 0.38336706 | 0.96565251 | NA         |             |
| 378706    | ENSG00000274012 | 184.748731 | -1.10937461 | 0.30732197 | 2.99E-05   | 0.00025716 | RN7SL2      |
| NA        | ENSG00000274015 | 7.63575055 | 0.03587783  | 0.35128677 | 0.80974599 | 0.91359357 |             |
| NA        | ENSG00000274017 | 0          | NA          | NA         | NA         | NA         |             |
| NA        | ENSG00000274019 | 0          | NA          | NA         | NA         | NA         |             |
| NA        | ENSG00000274020 | 3.13792669 | 0.01000605  | 0.36875565 | 0.92683389 | 0.96934024 | LINC01138   |
| NA        | ENSG00000274021 | 76.8590139 | 0.56247886  | 0.2664051  | 0.00918479 | 0.0386728  |             |
| NA        | ENSG00000274022 | 0          | NA          | NA         | NA         | NA         |             |
| NA        | ENSG00000274023 | 0          | NA          | NA         | NA         | NA         |             |
| NA        | ENSG00000274024 | 2.46415801 | 0.08058449  | 0.38894705 | 0.31619953 | NA         |             |
| 100131997 | ENSG00000274026 | 81.113894  | -0.36534713 | 0.24891368 | 0.06637511 | 0.18441146 | FAM27E3     |
| NA        | ENSG00000274028 | 0          | NA          | NA         | NA         | NA         |             |
| NA        | ENSG00000274029 | 0          | NA          | NA         | NA         | NA         |             |
| NA        | ENSG00000274033 | 0          | NA          | NA         | NA         | NA         |             |
| 102466741 | ENSG00000274034 | 0          | NA          | NA         | NA         | NA         | MIR6813     |
| NA        | ENSG00000274038 | 0          | NA          | NA         | NA         | NA         |             |
| 729461    | ENSG00000274044 | 0          | NA          | NA         | NA         | NA         | FAM230J     |
| NA        | ENSG00000274049 | 4.13749043 | -0.14965697 | 0.40788581 | 0.19564653 | 0.39926221 | INO80B-WBP1 |
| NA        | ENSG00000274051 | 1.10731954 | -0.02950199 | 0.38147934 | 0.63574007 | NA         |             |
| NA        | ENSG00000274052 | 0          | NA          | NA         | NA         | NA         | OR7E156P    |
| 100616416 | ENSG00000274054 | 0          | NA          | NA         | NA         | NA         | MIR4727     |
| NA        | ENSG00000274055 | 0          | NA          | NA         | NA         | NA         |             |
| 102465253 | ENSG00000274056 | 0          | NA          | NA         | NA         | NA         | MIR6507     |
| NA        | ENSG00000274059 | 0          | NA          | NA         | NA         | NA         | RNA5SP534   |

|           |    |                 |            |             |            |            |            |           |
|-----------|----|-----------------|------------|-------------|------------|------------|------------|-----------|
|           | NA | ENSG00000274064 | 0.64763328 | -0.03782306 | 0.38679898 | 0.40957271 | NA         |           |
| 102465257 | NA | ENSG00000274066 | 0          | NA          | NA         | NA         | NA         | MIR6514   |
|           | NA | ENSG00000274067 | 0          | NA          | NA         | NA         | NA         |           |
| 729438    | NA | ENSG00000274070 | 838.907419 | -0.04603132 | 0.1050123  | 0.64760419 | 0.82430661 | CASTOR2   |
|           | NA | ENSG00000274072 | 0          | NA          | NA         | NA         | NA         |           |
|           | NA | ENSG00000274075 | 0          | NA          | NA         | NA         | NA         |           |
|           | NA | ENSG00000274079 | 0          | NA          | NA         | NA         | NA         |           |
|           | NA | ENSG00000274080 | 6.4808568  | 0.13690123  | 0.39665054 | 0.26926592 | 0.49229778 |           |
|           | NA | ENSG00000274086 | 0          | NA          | NA         | NA         | NA         |           |
|           | NA | ENSG00000274090 | 0          | NA          | NA         | NA         | NA         |           |
|           | NA | ENSG00000274091 | 0          | NA          | NA         | NA         | NA         | SNORD1C   |
|           | NA | ENSG00000274092 | 0          | NA          | NA         | NA         | NA         |           |
|           | NA | ENSG00000274093 | 0.15069912 | -0.01848503 | 0.38480575 | 0.84537521 | NA         |           |
|           | NA | ENSG00000274097 | 0          | NA          | NA         | NA         | NA         | RNA5SP535 |
|           | NA | ENSG00000274098 | 0.53180095 | -0.00851321 | 0.38313237 | 0.82615413 | NA         | RN7SL787P |
|           | NA | ENSG00000274099 | 4.30536661 | 0.07951418  | 0.37585819 | 0.50070666 | 0.71795498 | ABCB10P1  |
| 390538    | NA | ENSG00000274102 | 0          | NA          | NA         | NA         | NA         | OR4M2     |
|           | NA | ENSG00000274104 | 7.87633461 | 0.10696165  | 0.36669687 | 0.47877829 | 0.70035842 |           |
|           | NA | ENSG00000274105 | 8.29365824 | -0.05487564 | 0.35156308 | 0.71439256 | 0.86242659 |           |
| 102465466 | NA | ENSG00000274111 | 0          | NA          | NA         | NA         | NA         | MIR6777   |
|           | NA | ENSG00000274114 | 1.90153184 | -0.10295627 | 0.39671564 | 0.20473829 | NA         | ALOX15P1  |
| 102466518 | NA | ENSG00000274115 | 0          | NA          | NA         | NA         | NA         | MIR6081   |
|           | NA | ENSG00000274116 | 0          | NA          | NA         | NA         | NA         |           |
|           | NA | ENSG00000274118 | 0          | NA          | NA         | NA         | NA         |           |
|           | NA | ENSG00000274121 | 0          | NA          | NA         | NA         | NA         |           |
|           | NA | ENSG00000274124 | 1.61879989 | -0.03599071 | 0.37972052 | 0.63101432 | NA         |           |
|           | NA | ENSG00000274127 | 0          | NA          | NA         | NA         | NA         |           |
|           | NA | ENSG00000274128 | 0          | NA          | NA         | NA         | NA         |           |
|           | NA | ENSG00000274133 | 0          | NA          | NA         | NA         | NA         |           |
| 102466732 | NA | ENSG00000274134 | 0          | NA          | NA         | NA         | NA         | MIR6774   |
|           | NA | ENSG00000274135 | 0.56767373 | 0.02627943  | 0.38574813 | 0.49686938 | NA         |           |
|           | NA | ENSG00000274139 | 0.16735865 | 0.01897177  | 0.38482933 | 0.78225479 | NA         |           |
|           | NA | ENSG00000274149 | 0          | NA          | NA         | NA         | NA         |           |
|           | NA | ENSG00000274150 | 0          | NA          | NA         | NA         | NA         | FADS2B    |
|           | NA | ENSG00000274154 | 0          | NA          | NA         | NA         | NA         |           |
|           | NA | ENSG00000274156 | 0.72610877 | 0.04264551  | 0.38746003 | 0.33477614 | NA         |           |
|           | NA | ENSG00000274157 | 0          | NA          | NA         | NA         | NA         |           |
|           | NA | ENSG00000274159 | 0          | NA          | NA         | NA         | NA         |           |

|           |    |                 |            |             |            |            |            |           |
|-----------|----|-----------------|------------|-------------|------------|------------|------------|-----------|
|           | NA | ENSG00000274162 | 0.15069912 | -0.01848503 | 0.38480575 | 0.84537521 | NA         | SNX18P1Y  |
|           | NA | ENSG00000274164 | 0          | NA          | NA         | NA         | NA         | RNA5SP439 |
|           | NA | ENSG00000274167 | 0          | NA          | NA         | NA         | NA         |           |
|           | NA | ENSG00000274168 | 0          | NA          | NA         | NA         | NA         | RN7SL585P |
|           | NA | ENSG00000274170 | 0          | NA          | NA         | NA         | NA         |           |
| 102465871 | NA | ENSG00000274172 | 0          | NA          | NA         | NA         | NA         | MIR8071-1 |
|           | NA | ENSG00000274173 | 0          | NA          | NA         | NA         | NA         |           |
|           | NA | ENSG00000274177 | 0.69249601 | -0.03077728 | 0.38619256 | 0.44510896 | NA         |           |
|           | NA | ENSG00000274178 | 0          | NA          | NA         | NA         | NA         | PRAMEF28P |
| 256302    | NA | ENSG00000274180 | 393.68764  | 0.29651237  | 0.12528726 | 0.01206824 | 0.04848802 | NATD1     |
|           | NA | ENSG00000274181 | 0          | NA          | NA         | NA         | NA         | RBPJP2    |
| 474382    | NA | ENSG00000274183 | 0          | NA          | NA         | NA         | NA         | H2AB1     |
|           | NA | ENSG00000274184 | 15.1199358 | 0.01180132  | 0.32730628 | 0.94749858 | 0.97852939 |           |
|           | NA | ENSG00000274186 | 0          | NA          | NA         | NA         | NA         | RN7SL248P |
|           | NA | ENSG00000274191 | 3.80061406 | 0.10245942  | 0.38392941 | 0.38291855 | 0.61227467 |           |
|           | NA | ENSG00000274197 | 0          | NA          | NA         | NA         | NA         |           |
|           | NA | ENSG00000274198 | 0          | NA          | NA         | NA         | NA         |           |
|           | NA | ENSG00000274199 | 0          | NA          | NA         | NA         | NA         |           |
|           | NA | ENSG00000274204 | 9.04951297 | 1.03286638  | 1.46810395 | 0.01242749 | 0.04959996 |           |
|           | NA | ENSG00000274206 | 0          | NA          | NA         | NA         | NA         |           |
| 195977    | NA | ENSG00000274209 | 0          | NA          | NA         | NA         | NA         | ANTXRL    |
|           | NA | ENSG00000274210 | 0          | NA          | NA         | NA         | NA         | RNVU1-27  |
| 30837     | NA | ENSG00000274211 | 1991.13596 | 0.13603071  | 0.07942594 | 0.079907   | 0.21107109 | SOCS7     |
|           | NA | ENSG00000274212 | 0          | NA          | NA         | NA         | NA         |           |
|           | NA | ENSG00000274213 | 2.48915487 | 0.03970746  | 0.37922403 | 0.62211235 | NA         |           |
|           | NA | ENSG00000274214 | 0          | NA          | NA         | NA         | NA         |           |
|           | NA | ENSG00000274215 | 0          | NA          | NA         | NA         | NA         |           |
|           | NA | ENSG00000274216 | 0          | NA          | NA         | NA         | NA         |           |
|           | NA | ENSG00000274219 | 0          | NA          | NA         | NA         | NA         |           |
|           | NA | ENSG00000274220 | 11.2116742 | -0.03925134 | 0.3392831  | 0.8080457  | 0.9131433  |           |
|           | NA | ENSG00000274225 | 2.06562126 | 0.12625418  | 0.40621313 | 0.14628579 | NA         |           |
| 729877    | NA | ENSG00000274226 | 0          | NA          | NA         | NA         | NA         | TBC1D3H   |
|           | NA | ENSG00000274227 | 14.1148458 | 0.03046819  | 0.32682403 | 0.86289139 | 0.93914999 |           |
|           | NA | ENSG00000274228 | 0          | NA          | NA         | NA         | NA         | RNA5SP414 |
|           | NA | ENSG00000274230 | 0          | NA          | NA         | NA         | NA         |           |
|           | NA | ENSG00000274231 | 0          | NA          | NA         | NA         | NA         |           |
|           | NA | ENSG00000274234 | 0          | NA          | NA         | NA         | NA         | RN7SL818P |
|           | NA | ENSG00000274235 | 0          | NA          | NA         | NA         | NA         |           |

|           |                 |            |             |            |            |            |             |
|-----------|-----------------|------------|-------------|------------|------------|------------|-------------|
| NA        | ENSG00000274238 | 0          | NA          | NA         | NA         | NA         |             |
| NA        | ENSG00000274242 | 0          | NA          | NA         | NA         | NA         |             |
| NA        | ENSG00000274244 | 0          | NA          | NA         | NA         | NA         |             |
| NA        | ENSG00000274248 | 7.29802353 | 0.00747034  | 0.35191861 | 0.96036736 | 0.98392401 |             |
| NA        | ENSG00000274251 | 2.65073181 | 0.08968824  | 0.39380594 | 0.22239422 | 0.43535977 |             |
| 728226    | ENSG00000274252 | 1.45515111 | 0.06973456  | 0.39041261 | 0.21039724 | NA         | GGTLC3      |
| 283683    | ENSG00000274253 | 140.710811 | -0.49460517 | 0.249065   | 0.01506887 | 0.05791677 |             |
| NA        | ENSG00000274256 | 0          | NA          | NA         | NA         | NA         |             |
| 102465436 | ENSG00000274258 | 0          | NA          | NA         | NA         | NA         | MIR6728     |
| NA        | ENSG00000274259 | 4.41570455 | 0.06291086  | 0.37047487 | 0.60175731 | 0.79216856 | SYNGAP1-AS1 |
| NA        | ENSG00000274261 | 0          | NA          | NA         | NA         | NA         |             |
| 102465800 | ENSG00000274263 | 0          | NA          | NA         | NA         | NA         | MIR7702     |
| NA        | ENSG00000274265 | 77.6537499 | -0.26137978 | 0.24838563 | 0.1813293  | 0.37869193 |             |
| NA        | ENSG00000274266 | 0          | NA          | NA         | NA         | NA         | SNORA73A    |
| NA        | ENSG00000274269 | 0.33471731 | 0.02354391  | 0.38534154 | 0.62842204 | NA         |             |
| NA        | ENSG00000274270 | 19.038583  | 0.74683621  | 0.63743876 | 0.02094931 | 0.07555646 |             |
| NA        | ENSG00000274272 | 117.079252 | 0.7506356   | 0.21812978 | 0.00010845 | 0.0008181  |             |
| 645051    | ENSG00000274274 | 0          | NA          | NA         | NA         | NA         | GAGE13      |
| NA        | ENSG00000274275 | 0          | NA          | NA         | NA         | NA         |             |
| 102724560 | ENSG00000274276 | 2183.4699  | -0.07370829 | 0.06995575 | 0.28340886 | 0.5085774  | CBSL        |
| NA        | ENSG00000274279 | 0          | NA          | NA         | NA         | NA         | SPATA31E3P  |
| 102464824 | ENSG00000274280 | 0          | NA          | NA         | NA         | NA         | MIR6069     |
| NA        | ENSG00000274281 | 0.18922458 | 0.01954053  | 0.38488496 | 0.78225479 | NA         |             |
| NA        | ENSG00000274282 | 0          | NA          | NA         | NA         | NA         |             |
| 151       | ENSG00000274286 | 0.6807897  | 0.03096768  | 0.38354157 | 0.55084064 | NA         | ADRA2B      |
| 8344      | ENSG00000274290 | 6.39813398 | -0.04878947 | 0.36211129 | 0.70296687 | 0.85716076 | H2BC6       |
| NA        | ENSG00000274292 | 204.491819 | -0.03047629 | 0.16270532 | 0.83433279 | 0.9243819  |             |
| NA        | ENSG00000274293 | 0          | NA          | NA         | NA         | NA         |             |
| NA        | ENSG00000274294 | 0.87904907 | 0.0392975   | 0.38491726 | 0.43853969 | NA         |             |
| NA        | ENSG00000274295 | 0          | NA          | NA         | NA         | NA         |             |
| NA        | ENSG00000274297 | 0.33747948 | 0.00158493  | 0.38337006 | 0.97331276 | NA         |             |
| NA        | ENSG00000274299 | 0          | NA          | NA         | NA         | NA         |             |
| 102465521 | ENSG00000274300 | 0          | NA          | NA         | NA         | NA         | MIR6864     |
| NA        | ENSG00000274303 | 0          | NA          | NA         | NA         | NA         |             |
| 100847074 | ENSG00000274306 | 0          | NA          | NA         | NA         | NA         | MIR5088     |
| NA        | ENSG00000274308 | 0          | NA          | NA         | NA         | NA         |             |
| NA        | ENSG00000274309 | 0          | NA          | NA         | NA         | NA         | SNORA71E    |
| NA        | ENSG00000274310 | 0          | NA          | NA         | NA         | NA         |             |

|           |                 |            |             |            |            |            |           |
|-----------|-----------------|------------|-------------|------------|------------|------------|-----------|
| NA        | ENSG00000274312 | 0          | NA          | NA         | NA         | NA         |           |
| 102466727 | ENSG00000274314 | 0          | NA          | NA         | NA         | NA         | MIR6749   |
| NA        | ENSG00000274315 | 1.04710907 | -0.05792922 | 0.39013071 | 0.21701288 | NA         |           |
| NA        | ENSG00000274316 | 0          | NA          | NA         | NA         | NA         | ZNF646P1  |
| NA        | ENSG00000274317 | 1.06230311 | 0.0031455   | 0.3802134  | 0.91164827 | NA         | LINC02334 |
| NA        | ENSG00000274319 | 0          | NA          | NA         | NA         | NA         | RPSAP73   |
| NA        | ENSG00000274321 | 0          | NA          | NA         | NA         | NA         |           |
| NA        | ENSG00000274322 | 5.50422483 | 0.11155011  | 0.37838126 | 0.41256169 | 0.64014381 |           |
| NA        | ENSG00000274326 | 0          | NA          | NA         | NA         | NA         |           |
| NA        | ENSG00000274328 | 0.173124   | -0.01911262 | 0.38486262 | 0.84537521 | NA         |           |
| NA        | ENSG00000274330 | 9.0606137  | 0.02675302  | 0.34731168 | 0.86184507 | 0.93871152 |           |
| NA        | ENSG00000274331 | 0          | NA          | NA         | NA         | NA         |           |
| NA        | ENSG00000274333 | 700.543649 | -0.19073796 | 0.09294036 | 0.0340059  | 0.11087545 |           |
| NA        | ENSG00000274340 | 3.29059127 | -0.05388123 | 0.37220008 | 0.62590611 | 0.80978006 |           |
| NA        | ENSG00000274341 | 0.62004808 | -0.01521293 | 0.38330923 | 0.7230174  | NA         |           |
| NA        | ENSG00000274342 | 0          | NA          | NA         | NA         | NA         |           |
| NA        | ENSG00000274343 | 0          | NA          | NA         | NA         | NA         |           |
| NA        | ENSG00000274344 | 0          | NA          | NA         | NA         | NA         |           |
| NA        | ENSG00000274346 | 0          | NA          | NA         | NA         | NA         |           |
| NA        | ENSG00000274347 | 0          | NA          | NA         | NA         | NA         |           |
| 26149     | ENSG00000274349 | 151.185926 | -0.1204322  | 0.1906353  | 0.46538842 | 0.68812835 | ZNF658    |
| NA        | ENSG00000274350 | 0          | NA          | NA         | NA         | NA         | RN7SL853P |
| NA        | ENSG00000274351 | 0.32332512 | -0.02326095 | 0.38531971 | 0.66912485 | NA         |           |
| NA        | ENSG00000274353 | 0          | NA          | NA         | NA         | NA         |           |
| NA        | ENSG00000274354 | 0          | NA          | NA         | NA         | NA         |           |
| NA        | ENSG00000274355 | 0          | NA          | NA         | NA         | NA         | FAM74A3   |
| NA        | ENSG00000274356 | 0          | NA          | NA         | NA         | NA         |           |
| NA        | ENSG00000274357 | 0          | NA          | NA         | NA         | NA         |           |
| NA        | ENSG00000274363 | 1.15195234 | -0.02754    | 0.38118361 | 0.65831178 | NA         |           |
| NA        | ENSG00000274364 | 0          | NA          | NA         | NA         | NA         |           |
| NA        | ENSG00000274365 | 0          | NA          | NA         | NA         | NA         |           |
| NA        | ENSG00000274367 | 0.66413053 | 0.00264273  | 0.38131556 | 0.95821429 | NA         |           |
| NA        | ENSG00000274369 | 0          | NA          | NA         | NA         | NA         | GRAMD4P4  |
| NA        | ENSG00000274370 | 1.02847385 | -0.02101201 | 0.3810477  | 0.72385348 | NA         |           |
| NA        | ENSG00000274372 | 2.85039666 | 0.02296955  | 0.37109383 | 0.82106351 | 0.91847813 | LINC02804 |
| NA        | ENSG00000274373 | 0          | NA          | NA         | NA         | NA         |           |
| NA        | ENSG00000274374 | 0          | NA          | NA         | NA         | NA         | TUBAP6    |
| NA        | ENSG00000274376 | 1.75802723 | 0.0916447   | 0.39302013 | 0.24384267 | NA         | ADAMTS7P1 |



|           |                 |            |             |            |            |            |           |
|-----------|-----------------|------------|-------------|------------|------------|------------|-----------|
| NA        | ENSG00000274378 | 8.18991316 | 0.05520465  | 0.35308021 | 0.71306941 | 0.86187687 |           |
| NA        | ENSG00000274379 | 0          | NA          | NA         | NA         | NA         |           |
| 102466984 | ENSG00000274380 | 0          | NA          | NA         | NA         | NA         | MIR6801   |
| NA        | ENSG00000274381 | 0          | NA          | NA         | NA         | NA         |           |
| NA        | ENSG00000274383 | 24.8237934 | -0.13578038 | 0.31404714 | 0.48603654 | 0.70617338 |           |
| NA        | ENSG00000274385 | 0          | NA          | NA         | NA         | NA         |           |
| 100129924 | ENSG00000274386 | 12.2144952 | 0.30205067  | 0.45894063 | 0.12639193 | 0.29584897 | TMEM269   |
| NA        | ENSG00000274387 | 0          | NA          | NA         | NA         | NA         |           |
| 102465533 | ENSG00000274390 | 0          | NA          | NA         | NA         | NA         | MIR6885   |
| 7179      | ENSG00000274391 | 0          | NA          | NA         | NA         | NA         | TPTE      |
| NA        | ENSG00000274396 | 0          | NA          | NA         | NA         | NA         |           |
| NA        | ENSG00000274397 | 0          | NA          | NA         | NA         | NA         |           |
| NA        | ENSG00000274398 | 0          | NA          | NA         | NA         | NA         |           |
| NA        | ENSG00000274400 | 0.29863895 | -0.02292439 | 0.3852726  | 0.68753245 | NA         |           |
| NA        | ENSG00000274403 | 6.42833948 | -0.00073897 | 0.35498347 | 0.99365919 | 0.99798514 |           |
| NA        | ENSG00000274408 | 0          | NA          | NA         | NA         | NA         | RNA5SP536 |
| NA        | ENSG00000274409 | 0          | NA          | NA         | NA         | NA         |           |
| NA        | ENSG00000274414 | 2.6412246  | 0.0528548   | 0.38128696 | 0.51532537 | 0.72968723 |           |
| NA        | ENSG00000274415 | 0          | NA          | NA         | NA         | NA         |           |
| 102466659 | ENSG00000274417 | 0          | NA          | NA         | NA         | NA         | MIR6515   |
| 101060389 | ENSG00000274419 | 0          | NA          | NA         | NA         | NA         | TBC1D3D   |
| NA        | ENSG00000274420 | 0          | NA          | NA         | NA         | NA         |           |
| NA        | ENSG00000274421 | 0.30002044 | -0.02294463 | 0.38527539 | 0.6864459  | NA         |           |
| NA        | ENSG00000274422 | 124.702077 | -0.18136568 | 0.19352395 | 0.27814186 | 0.50258055 |           |
| NA        | ENSG00000274423 | 0.84802004 | 0.04944339  | 0.38854554 | 0.27012619 | NA         | SEC22B2P  |
| NA        | ENSG00000274424 | 0.173733   | 0.01914545  | 0.38484597 | 0.78225479 | NA         | RN7SL196P |
| NA        | ENSG00000274425 | 81.043578  | 0.06592285  | 0.24582431 | 0.72988163 | 0.87081915 |           |
| NA        | ENSG00000274427 | 0.46731215 | -0.00782407 | 0.38326614 | 0.86368266 | NA         |           |
| NA        | ENSG00000274428 | 0.15069912 | -0.01848503 | 0.38480575 | 0.84537521 | NA         | RNVU1-25  |
| NA        | ENSG00000274430 | 0          | NA          | NA         | NA         | NA         |           |
| NA        | ENSG00000274441 | 0          | NA          | NA         | NA         | NA         |           |
| 100130301 | ENSG00000274443 | 0          | NA          | NA         | NA         | NA         | C8orf89   |
| NA        | ENSG00000274444 | 4.09572257 | -0.06207174 | 0.36983618 | 0.60681959 | 0.79639829 |           |
| NA        | ENSG00000274445 | 0          | NA          | NA         | NA         | NA         |           |
| NA        | ENSG00000274446 | 0          | NA          | NA         | NA         | NA         |           |
| NA        | ENSG00000274447 | 6.00438377 | 0.1555539   | 0.39934582 | 0.25819075 | 0.47950675 |           |
| NA        | ENSG00000274450 | 0          | NA          | NA         | NA         | NA         |           |
| NA        | ENSG00000274451 | 0          | NA          | NA         | NA         | NA         |           |

|           |                 |            |             |            |            |            |            |
|-----------|-----------------|------------|-------------|------------|------------|------------|------------|
| NA        | ENSG00000274452 | 0          | NA          | NA         | NA         | NA         |            |
| NA        | ENSG00000274455 | 0.16735865 | 0.01897177  | 0.38482933 | 0.78225479 | NA         | GUSBP7     |
| NA        | ENSG00000274458 | 0          | NA          | NA         | NA         | NA         |            |
| NA        | ENSG00000274459 | 0          | NA          | NA         | NA         | NA         |            |
| NA        | ENSG00000274460 | 6.93224659 | -0.13673042 | 0.38139262 | 0.35595497 | 0.58601111 |            |
| 105378516 | ENSG00000274461 | 8.68230919 | 0.16727683  | 0.39740639 | 0.2651586  | 0.48737693 |            |
| 102466247 | ENSG00000274466 | 0          | NA          | NA         | NA         | NA         | MIR1273H   |
| NA        | ENSG00000274467 | 0          | NA          | NA         | NA         | NA         | RNA5SP257  |
| NA        | ENSG00000274468 | 0          | NA          | NA         | NA         | NA         |            |
| NA        | ENSG00000274469 | 0          | NA          | NA         | NA         | NA         | LINC01746  |
| 100132101 | ENSG00000274471 | 172.471392 | 0.17759861  | 0.16738486 | 0.23829383 | 0.45586245 |            |
| NA        | ENSG00000274472 | 0          | NA          | NA         | NA         | NA         |            |
| NA        | ENSG00000274475 | 0.76492998 | -0.02877682 | 0.38367148 | 0.56506396 | NA         | RN7SL650P  |
| NA        | ENSG00000274478 | 0          | NA          | NA         | NA         | NA         |            |
| NA        | ENSG00000274481 | 0          | NA          | NA         | NA         | NA         |            |
| NA        | ENSG00000274486 | 0          | NA          | NA         | NA         | NA         |            |
| NA        | ENSG00000274487 | 218.66069  | 0.33050411  | 0.15665911 | 0.0208314  | 0.07532259 | NPEPPSP1   |
| NA        | ENSG00000274489 | 0          | NA          | NA         | NA         | NA         |            |
| NA        | ENSG00000274491 | 0          | NA          | NA         | NA         | NA         |            |
| NA        | ENSG00000274492 | 14.241961  | -0.03385752 | 0.32574989 | 0.84497608 | 0.92965052 |            |
| NA        | ENSG00000274493 | 0          | NA          | NA         | NA         | NA         | MRPS17P5   |
| 102466745 | ENSG00000274494 | 0          | NA          | NA         | NA         | NA         | MIR6832    |
| NA        | ENSG00000274499 | 0          | NA          | NA         | NA         | NA         |            |
| NA        | ENSG00000274500 | 0          | NA          | NA         | NA         | NA         |            |
| NA        | ENSG00000274501 | 0          | NA          | NA         | NA         | NA         |            |
| NA        | ENSG00000274502 | 0          | NA          | NA         | NA         | NA         | ANKRD20A6P |
| NA        | ENSG00000274503 | 0          | NA          | NA         | NA         | NA         |            |
| NA        | ENSG00000274505 | 0.18922458 | 0.01954053  | 0.38488496 | 0.78225479 | NA         |            |
| NA        | ENSG00000274507 | 0.18922458 | 0.01954053  | 0.38488496 | 0.78225479 | NA         |            |
| NA        | ENSG00000274508 | 0          | NA          | NA         | NA         | NA         |            |
| NA        | ENSG00000274510 | 0          | NA          | NA         | NA         | NA         |            |
| 729873    | ENSG00000274512 | 587.834158 | 0.45104998  | 0.10654476 | 1.04E-05   | 9.88E-05   | TBC1D3L    |
| 101060376 | ENSG00000274512 | 587.834158 | 0.45104998  | 0.10654476 | 1.04E-05   | 9.88E-05   | TBC1D3L    |
| NA        | ENSG00000274514 | 0.4870864  | 0.0110717   | 0.38338449 | 0.78832856 | NA         |            |
| NA        | ENSG00000274515 | 0.99554035 | 0.04603107  | 0.38595385 | 0.3729823  | NA         |            |
| 653123    | ENSG00000274516 | 0          | NA          | NA         | NA         | NA         | FAM74A6    |
| NA        | ENSG00000274520 | 0          | NA          | NA         | NA         | NA         |            |
| 81554     | ENSG00000274523 | 1402.26182 | 0.06813338  | 0.07549155 | 0.35741093 | 0.58754104 | RCC1L      |

|           |                 |            |             |            |            |            |          |
|-----------|-----------------|------------|-------------|------------|------------|------------|----------|
| NA        | ENSG00000274525 | 0          | NA          | NA         | NA         | NA         |          |
| NA        | ENSG00000274528 | 6.06629872 | -0.0835798  | 0.36535071 | 0.55137822 | 0.7578347  |          |
| 645832    | ENSG00000274529 | 0          | NA          | NA         | NA         | NA         | SEBOX    |
| NA        | ENSG00000274532 | 0          | NA          | NA         | NA         | NA         |          |
| NA        | ENSG00000274535 | 0          | NA          | NA         | NA         | NA         |          |
| 115891964 | ENSG00000274536 | 0          | NA          | NA         | NA         | NA         | MIR223HG |
| NA        | ENSG00000274541 | 0          | NA          | NA         | NA         | NA         |          |
| 9300      | ENSG00000274544 | 0          | NA          | NA         | NA         | NA         | SNORD28  |
| NA        | ENSG00000274547 | 0          | NA          | NA         | NA         | NA         |          |
| NA        | ENSG00000274549 | 0          | NA          | NA         | NA         | NA         |          |
| NA        | ENSG00000274551 | 0          | NA          | NA         | NA         | NA         |          |
| 102466758 | ENSG00000274552 | 0          | NA          | NA         | NA         | NA         | MIR6889  |
| NA        | ENSG00000274553 | 29.025408  | -0.06639235 | 0.29974195 | 0.72647085 | 0.8694162  | CICP15   |
| NA        | ENSG00000274554 | 6.92995786 | 0.14560024  | 0.38540435 | 0.33133984 | 0.56018597 |          |
| 102724334 | ENSG00000274559 | 0.68240605 | 0.04061254  | 0.38717484 | 0.35745922 | NA         |          |
| NA        | ENSG00000274560 | 0          | NA          | NA         | NA         | NA         |          |
| NA        | ENSG00000274561 | 26.156357  | -0.17090231 | 0.32121736 | 0.39076473 | 0.62011007 |          |
| NA        | ENSG00000274562 | 0          | NA          | NA         | NA         | NA         |          |
| NA        | ENSG00000274565 | 69.311215  | 1.57129388  | 0.32214876 | 8.13E-08   | 1.08E-06   |          |
| NA        | ENSG00000274569 | 1.13185546 | -0.00321079 | 0.38044149 | 0.95552118 | NA         |          |
| NA        | ENSG00000274570 | 19.2196392 | 0.17140342  | 0.35517909 | 0.36157116 | 0.59139092 | SPDYE10P |
| NA        | ENSG00000274572 | 0          | NA          | NA         | NA         | NA         | ZYXP1    |
| NA        | ENSG00000274576 | 0          | NA          | NA         | NA         | NA         | IGHV2-70 |
| NA        | ENSG00000274578 | 0          | NA          | NA         | NA         | NA         |          |
| NA        | ENSG00000274579 | 0          | NA          | NA         | NA         | NA         |          |
| NA        | ENSG00000274582 | 0          | NA          | NA         | NA         | NA         | SNORA16A |
| 401508    | ENSG00000274583 | 0          | NA          | NA         | NA         | NA         | FAM74A4  |
| NA        | ENSG00000274584 | 0          | NA          | NA         | NA         | NA         |          |
| 6066      | ENSG00000274585 | 7.82250067 | 0.20883788  | 0.42148293 | 0.18582733 | 0.38528731 | RNU2-1   |
| 139189    | ENSG00000274588 | 11.4959678 | 1.96297625  | 0.84340268 | 0.00093018 | 0.00557042 | DGKK     |
| NA        | ENSG00000274589 | 0          | NA          | NA         | NA         | NA         |          |
| NA        | ENSG00000274591 | 0          | NA          | NA         | NA         | NA         |          |
| NA        | ENSG00000274594 | 0          | NA          | NA         | NA         | NA         |          |
| NA        | ENSG00000274598 | 0.34624801 | -0.02356563 | 0.38536324 | 0.65270996 | NA         |          |
| NA        | ENSG00000274599 | 0          | NA          | NA         | NA         | NA         | DUX4L24  |
| 440804    | ENSG00000274600 | 4.51056498 | -0.09435393 | 0.38956247 | 0.31764335 | 0.54548517 | RIMBP3B  |
| NA        | ENSG00000274601 | 0          | NA          | NA         | NA         | NA         |          |
| 728233    | ENSG00000274602 | 910.979734 | 0.62410786  | 0.09690454 | 3.39E-11   | 6.85E-10   | PI4KAP1  |

|           |    |                 |            |             |            |            |            |           |
|-----------|----|-----------------|------------|-------------|------------|------------|------------|-----------|
|           | NA | ENSG00000274603 | 0          | NA          | NA         | NA         | NA         |           |
| 105370333 |    | ENSG00000274605 | 69.9623924 | 0.55082785  | 0.27674297 | 0.01246261 | 0.04970013 | PCCA-DT   |
|           | NA | ENSG00000274606 | 0          | NA          | NA         | NA         | NA         |           |
|           | NA | ENSG00000274607 | 0          | NA          | NA         | NA         | NA         | RNU6-866P |
| 729873    |    | ENSG00000274611 | 0          | NA          | NA         | NA         | NA         | TBC1D3    |
|           | NA | ENSG00000274612 | 0          | NA          | NA         | NA         | NA         |           |
|           | NA | ENSG00000274614 | 0.34083044 | 0.00253236  | 0.38338288 | 0.96351172 | NA         |           |
|           | NA | ENSG00000274615 | 28.0840257 | 0.013908    | 0.37344391 | 0.88601302 | 0.95015905 |           |
|           | NA | ENSG00000274617 | 0          | NA          | NA         | NA         | NA         |           |
| 8361      |    | ENSG00000274618 | 0          | NA          | NA         | NA         | NA         | H4C6      |
| 102465136 |    | ENSG00000274620 | 0          | NA          | NA         | NA         | NA         | MIR378J   |
| 102465523 |    | ENSG00000274621 | 0          | NA          | NA         | NA         | NA         | MIR6867   |
|           | NA | ENSG00000274624 | 0          | NA          | NA         | NA         | NA         |           |
|           | NA | ENSG00000274625 | 0          | NA          | NA         | NA         | NA         |           |
| 105379252 |    | ENSG00000274628 | 10.1436024 | -0.05204424 | 0.38578435 | 0.38431246 | 0.61337119 |           |
|           | NA | ENSG00000274629 | 1.20901605 | 0.06104929  | 0.38868312 | 0.26908396 | NA         |           |
|           | NA | ENSG00000274630 | 0.18922458 | 0.01954053  | 0.38488496 | 0.78225479 | NA         |           |
|           | NA | ENSG00000274631 | 0          | NA          | NA         | NA         | NA         |           |
|           | NA | ENSG00000274632 | 0          | NA          | NA         | NA         | NA         | RN7SL719P |
|           | NA | ENSG00000274637 | 0          | NA          | NA         | NA         | NA         |           |
| 338428    |    | ENSG00000274640 | 0          | NA          | NA         | NA         | NA         | SNORD109A |
| 8348      |    | ENSG00000274641 | 2.61658636 | -0.08460625 | 0.38718119 | 0.35166762 | 0.58172313 | H2BC17    |
|           | NA | ENSG00000274642 | 13.7671774 | -0.00373247 | 0.33249023 | 0.98002667 | 0.99338199 |           |
|           | NA | ENSG00000274647 | 0          | NA          | NA         | NA         | NA         |           |
|           | NA | ENSG00000274649 | 4.17564919 | -0.13647594 | 0.400795   | 0.23233265 | 0.44909196 |           |
|           | NA | ENSG00000274652 | 0          | NA          | NA         | NA         | NA         |           |
|           | NA | ENSG00000274653 | 12.1233567 | -0.00472784 | 0.33544291 | 0.97497514 | 0.99122005 |           |
|           | NA | ENSG00000274654 | 0.14931947 | -0.01844332 | 0.38480212 | 0.84537521 | NA         |           |
|           | NA | ENSG00000274655 | 0          | NA          | NA         | NA         | NA         |           |
|           | NA | ENSG00000274656 | 0          | NA          | NA         | NA         | NA         | RN7SL625P |
|           | NA | ENSG00000274658 | 0          | NA          | NA         | NA         | NA         | TBC1D3J   |
| 107984539 |    | ENSG00000274659 | 11.0381003 | 0.2211422   | 0.41178686 | 0.20565911 | 0.41264935 | LINC02371 |
|           | NA | ENSG00000274660 | 0.51937201 | -0.02557462 | 0.38567603 | 0.54680819 | NA         |           |
|           | NA | ENSG00000274662 | 0          | NA          | NA         | NA         | NA         | RN7SKP236 |
|           | NA | ENSG00000274664 | 0          | NA          | NA         | NA         | NA         |           |
|           | NA | ENSG00000274666 | 0          | NA          | NA         | NA         | NA         |           |
|           | NA | ENSG00000274667 | 5.80137682 | -0.18483876 | 0.41810994 | 0.18213685 | 0.37982563 |           |
|           | NA | ENSG00000274670 | 0          | NA          | NA         | NA         | NA         |           |

|           |                 |            |             |            |            |            |          |
|-----------|-----------------|------------|-------------|------------|------------|------------|----------|
| NA        | ENSG00000274677 | 1.69439131 | 0.02988238  | 0.37870117 | 0.69620391 | NA         |          |
| NA        | ENSG00000274678 | 0.34688985 | 0.00033641  | 0.38336228 | 0.96527377 | NA         |          |
| NA        | ENSG00000274680 | 0          | NA          | NA         | NA         | NA         | MYO5BP1  |
| NA        | ENSG00000274682 | 0.32375399 | 0.00189807  | 0.38337402 | 0.96291048 | NA         |          |
| NA        | ENSG00000274685 | 0          | NA          | NA         | NA         | NA         |          |
| NA        | ENSG00000274686 | 0          | NA          | NA         | NA         | NA         |          |
| NA        | ENSG00000274688 | 0          | NA          | NA         | NA         | NA         |          |
| NA        | ENSG00000274691 | 0          | NA          | NA         | NA         | NA         |          |
| NA        | ENSG00000274693 | 0          | NA          | NA         | NA         | NA         |          |
| NA        | ENSG00000274695 | 1.42953443 | 0.04570986  | 0.38430169 | 0.44746795 | NA         |          |
| 102465456 | ENSG00000274697 | 0          | NA          | NA         | NA         | NA         | MIR6761  |
| NA        | ENSG00000274698 | 10.7507993 | -0.07571234 | 0.34262053 | 0.64905599 | 0.82497477 |          |
| NA        | ENSG00000274701 | 0          | NA          | NA         | NA         | NA         |          |
| NA        | ENSG00000274702 | 0          | NA          | NA         | NA         | NA         |          |
| NA        | ENSG00000274704 | 0          | NA          | NA         | NA         | NA         |          |
| 619554    | ENSG00000274705 | 0          | NA          | NA         | NA         | NA         | MIR486-1 |
| NA        | ENSG00000274709 | 0          | NA          | NA         | NA         | NA         |          |
| NA        | ENSG00000274711 | 0          | NA          | NA         | NA         | NA         |          |
| NA        | ENSG00000274712 | 108.329199 | 0.12566085  | 0.19739098 | 0.45929368 | 0.68256874 |          |
| 102465856 | ENSG00000274713 | 0          | NA          | NA         | NA         | NA         | MIR7974  |
| NA        | ENSG00000274716 | 0          | NA          | NA         | NA         | NA         |          |
| NA        | ENSG00000274717 | 0          | NA          | NA         | NA         | NA         |          |
| NA        | ENSG00000274718 | 11.935499  | 0.08254229  | 0.34103208 | 0.63026042 | 0.81297489 |          |
| NA        | ENSG00000274719 | 0          | NA          | NA         | NA         | NA         |          |
| NA        | ENSG00000274721 | 0          | NA          | NA         | NA         | NA         |          |
| NA        | ENSG00000274723 | 0          | NA          | NA         | NA         | NA         |          |
| NA        | ENSG00000274727 | 0.14931947 | -0.01844332 | 0.38480212 | 0.84537521 | NA         |          |
| NA        | ENSG00000274730 | 0          | NA          | NA         | NA         | NA         |          |
| NA        | ENSG00000274732 | 0          | NA          | NA         | NA         | NA         |          |
| 6368      | ENSG00000274736 | 0          | NA          | NA         | NA         | NA         | CCL23    |
| NA        | ENSG00000274737 | 1.13151902 | -0.03292857 | 0.38101065 | 0.62249179 | NA         |          |
| NA        | ENSG00000274740 | 0          | NA          | NA         | NA         | NA         |          |
| NA        | ENSG00000274742 | 0          | NA          | NA         | NA         | NA         |          |
| NA        | ENSG00000274748 | 0          | NA          | NA         | NA         | NA         |          |
| 337878    | ENSG00000274749 | 0          | NA          | NA         | NA         | NA         | KRTAP7-1 |
| 8353      | ENSG00000274750 | 38.3041383 | -1.91567606 | 0.44875331 | 1.14E-06   | 1.28E-05   | H3C6     |
| NA        | ENSG00000274751 | 2.89548085 | 0.02697231  | 0.3707122  | 0.79665245 | 0.90658744 |          |
| NA        | ENSG00000274752 | 0          | NA          | NA         | NA         | NA         | TRBV12-3 |

|           |                 |            |             |            |            |            |              |
|-----------|-----------------|------------|-------------|------------|------------|------------|--------------|
| NA        | ENSG00000274755 | 0          | NA          | NA         | NA         | NA         |              |
| NA        | ENSG00000274756 | 5.43442781 | 0.03642179  | 0.36092945 | 0.78246584 | 0.90094146 |              |
| NA        | ENSG00000274758 | 0          | NA          | NA         | NA         | NA         |              |
| NA        | ENSG00000274759 | 0          | NA          | NA         | NA         | NA         | RNA5SP527    |
| NA        | ENSG00000274760 | 0          | NA          | NA         | NA         | NA         |              |
| 101929983 | ENSG00000274764 | 0          | NA          | NA         | NA         | NA         | PRAMEF27     |
| NA        | ENSG00000274765 | 1.33897908 | -0.01946439 | 0.37868265 | 0.78526736 | NA         |              |
| NA        | ENSG00000274766 | 0          | NA          | NA         | NA         | NA         |              |
| NA        | ENSG00000274767 | 0          | NA          | NA         | NA         | NA         |              |
| NA        | ENSG00000274769 | 1.58214468 | 0.06691701  | 0.38708675 | 0.34078498 | NA         |              |
| 102465135 | ENSG00000274770 | 0          | NA          | NA         | NA         | NA         | MIR6128      |
| NA        | ENSG00000274772 | 0          | NA          | NA         | NA         | NA         |              |
| NA        | ENSG00000274775 | 1.48970129 | 0.06667684  | 0.3896999  | 0.26168237 | NA         |              |
| NA        | ENSG00000274776 | 5.11791005 | -0.25036867 | 0.47336367 | 0.08362961 | 0.21843227 |              |
| NA        | ENSG00000274777 | 0          | NA          | NA         | NA         | NA         |              |
| NA        | ENSG00000274797 | 0.15069912 | -0.01848503 | 0.38480575 | 0.84537521 | NA         |              |
| NA        | ENSG00000274798 | 0          | NA          | NA         | NA         | NA         |              |
| NA        | ENSG00000274799 | 0          | NA          | NA         | NA         | NA         |              |
| NA        | ENSG00000274800 | 0          | NA          | NA         | NA         | NA         |              |
| 102465460 | ENSG00000274805 | 0          | NA          | NA         | NA         | NA         | MIR6768      |
| 414059    | ENSG00000274808 | 28.5894643 | 0.3997647   | 0.39373272 | 0.09319653 | 0.23650796 | TBC1D3B      |
| 102464829 | ENSG00000274809 | 0          | NA          | NA         | NA         | NA         | MIR6078      |
| NA        | ENSG00000274810 | 82.501323  | 0.84283607  | 0.51610588 | 0.00953952 | 0.03991321 | NPHP3-ACAD11 |
| NA        | ENSG00000274813 | 0          | NA          | NA         | NA         | NA         |              |
| NA        | ENSG00000274814 | 0          | NA          | NA         | NA         | NA         |              |
| 102465463 | ENSG00000274816 | 0          | NA          | NA         | NA         | NA         | MIR6772      |
| NA        | ENSG00000274817 | 0          | NA          | NA         | NA         | NA         |              |
| NA        | ENSG00000274818 | 2.94907649 | 0.03905602  | 0.37540853 | 0.68012379 | 0.84377539 |              |
| NA        | ENSG00000274819 | 0          | NA          | NA         | NA         | NA         |              |
| NA        | ENSG00000274820 | 0          | NA          | NA         | NA         | NA         |              |
| 102465457 | ENSG00000274822 | 0          | NA          | NA         | NA         | NA         | MIR6762      |
| NA        | ENSG00000274823 | 0          | NA          | NA         | NA         | NA         | APONP        |
| 102465689 | ENSG00000274824 | 0          | NA          | NA         | NA         | NA         | MIR7152      |
| NA        | ENSG00000274825 | 7.53173882 | -0.1513161  | 0.39008979 | 0.30463608 | 0.53198909 |              |
| NA        | ENSG00000274827 | 69.6196964 | -0.128257   | 0.32504451 | 0.49648623 | 0.714811   | LINC01297    |
| NA        | ENSG00000274828 | 129.284817 | -0.05185963 | 0.19814366 | 0.758967   | 0.88821479 |              |
| NA        | ENSG00000274832 | 0          | NA          | NA         | NA         | NA         |              |
| NA        | ENSG00000274833 | 0          | NA          | NA         | NA         | NA         |              |

|           |                 |            |             |            |            |            |             |
|-----------|-----------------|------------|-------------|------------|------------|------------|-------------|
| NA        | ENSG00000274834 | 0          | NA          | NA         | NA         | NA         |             |
| NA        | ENSG00000274835 | 0          | NA          | NA         | NA         | NA         |             |
| NA        | ENSG00000274836 | 0          | NA          | NA         | NA         | NA         |             |
| NA        | ENSG00000274837 | 0          | NA          | NA         | NA         | NA         |             |
| 102466735 | ENSG00000274838 | 0          | NA          | NA         | NA         | NA         | MIR6788     |
| NA        | ENSG00000274840 | 0          | NA          | NA         | NA         | NA         |             |
| NA        | ENSG00000274841 | 0          | NA          | NA         | NA         | NA         |             |
| NA        | ENSG00000274844 | 0          | NA          | NA         | NA         | NA         |             |
| NA        | ENSG00000274845 | 0          | NA          | NA         | NA         | NA         |             |
| NA        | ENSG00000274848 | 0          | NA          | NA         | NA         | NA         |             |
| NA        | ENSG00000274849 | 0.31840502 | 0.00134376  | 0.3833683  | 0.96420353 | NA         |             |
| NA        | ENSG00000274852 | 0          | NA          | NA         | NA         | NA         | RN7SL422P   |
| NA        | ENSG00000274855 | 0          | NA          | NA         | NA         | NA         |             |
| NA        | ENSG00000274859 | 0.67207931 | 0.03946721  | 0.38703518 | 0.36706737 | NA         |             |
| NA        | ENSG00000274860 | 0          | NA          | NA         | NA         | NA         |             |
| NA        | ENSG00000274863 | 0          | NA          | NA         | NA         | NA         |             |
| NA        | ENSG00000274864 | 0          | NA          | NA         | NA         | NA         |             |
| NA        | ENSG00000274866 | 0          | NA          | NA         | NA         | NA         |             |
| NA        | ENSG00000274867 | 0          | NA          | NA         | NA         | NA         |             |
| NA        | ENSG00000274874 | 9.28465747 | -0.12920473 | 0.39151988 | 0.30474072 | 0.53198909 |             |
| NA        | ENSG00000274878 | 0          | NA          | NA         | NA         | NA         |             |
| NA        | ENSG00000274879 | 0          | NA          | NA         | NA         | NA         |             |
| NA        | ENSG00000274883 | 0          | NA          | NA         | NA         | NA         |             |
| NA        | ENSG00000274884 | 0          | NA          | NA         | NA         | NA         |             |
| NA        | ENSG00000274886 | 0          | NA          | NA         | NA         | NA         | SEPTIN14P17 |
| NA        | ENSG00000274892 | 0.98508362 | -0.02140857 | 0.38026156 | 0.73898147 | NA         |             |
| NA        | ENSG00000274893 | 1.93198978 | -0.04965104 | 0.3823129  | 0.50086672 | NA         |             |
| NA        | ENSG00000274895 | 117.50137  | 0.02078947  | 0.18803169 | 0.90748683 | 0.95963244 |             |
| NA        | ENSG00000274898 | 0.32404202 | -0.02327475 | 0.3853216  | 0.6684831  | NA         |             |
| NA        | ENSG00000274899 | 0          | NA          | NA         | NA         | NA         |             |
| NA        | ENSG00000274901 | 0          | NA          | NA         | NA         | NA         |             |
| NA        | ENSG00000274902 | 0.173733   | 0.01914545  | 0.38484597 | 0.78225479 | NA         |             |
| NA        | ENSG00000274903 | 0          | NA          | NA         | NA         | NA         |             |
| NA        | ENSG00000274904 | 0          | NA          | NA         | NA         | NA         |             |
| NA        | ENSG00000274915 | 0          | NA          | NA         | NA         | NA         |             |
| NA        | ENSG00000274918 | 1.02262494 | 0.03305002  | 0.38227156 | 0.58427861 | NA         |             |
| NA        | ENSG00000274919 | 0          | NA          | NA         | NA         | NA         |             |
| NA        | ENSG00000274922 | 10.1824766 | 0.07201772  | 0.35385928 | 0.64083767 | 0.82008361 |             |

|           |                 |            |             |            |            |            |            |
|-----------|-----------------|------------|-------------|------------|------------|------------|------------|
| NA        | ENSG00000274923 | 0          | NA          | NA         | NA         | NA         |            |
| NA        | ENSG00000274925 | 44.0133382 | -0.86993568 | 0.38653994 | 0.00280817 | 0.01432239 | ZKSCAN2-DT |
| NA        | ENSG00000274927 | 0          | NA          | NA         | NA         | NA         |            |
| NA        | ENSG00000274928 | 0          | NA          | NA         | NA         | NA         | KRT89P     |
| NA        | ENSG00000274929 | 1.32967323 | 0.0511678   | 0.38478181 | 0.42318315 | NA         |            |
| NA        | ENSG00000274930 | 0          | NA          | NA         | NA         | NA         |            |
| 102465688 | ENSG00000274932 | 0          | NA          | NA         | NA         | NA         | MIR7150    |
| 102724862 | ENSG00000274933 | 10.4906917 | 0.22755422  | 0.40975297 | 0.20950556 | 0.41783176 | TBC1D3I    |
| NA        | ENSG00000274934 | 0          | NA          | NA         | NA         | NA         |            |
| NA        | ENSG00000274937 | 0          | NA          | NA         | NA         | NA         |            |
| 102466879 | ENSG00000274940 | 0          | NA          | NA         | NA         | NA         | MIR8083    |
| NA        | ENSG00000274943 | 5.12265889 | -0.10963189 | 0.38006916 | 0.40191979 | 0.63031025 |            |
| NA        | ENSG00000274944 | 6.66100762 | -0.05556745 | 0.36721522 | 0.65263887 | 0.82652592 |            |
| NA        | ENSG00000274949 | 0          | NA          | NA         | NA         | NA         |            |
| NA        | ENSG00000274954 | 0          | NA          | NA         | NA         | NA         |            |
| NA        | ENSG00000274963 | 0.64833169 | -0.03785315 | 0.38680253 | 0.40920246 | NA         | RN7SL600P  |
| NA        | ENSG00000274964 | 36.9891799 | -0.05511113 | 0.28374683 | 0.77356256 | 0.89594169 |            |
| NA        | ENSG00000274966 | 1.21396301 | 0.03849613  | 0.38347665 | 0.50780781 | NA         |            |
| NA        | ENSG00000274967 | 0          | NA          | NA         | NA         | NA         |            |
| 102465462 | ENSG00000274969 | 0          | NA          | NA         | NA         | NA         | MIR6771    |
| NA        | ENSG00000274970 | 0          | NA          | NA         | NA         | NA         |            |
| NA        | ENSG00000274973 | 0          | NA          | NA         | NA         | NA         | BSNDP2     |
| 102465440 | ENSG00000274975 | 0          | NA          | NA         | NA         | NA         | MIR6735    |
| NA        | ENSG00000274976 | 0          | NA          | NA         | NA         | NA         |            |
| NA        | ENSG00000274977 | 0          | NA          | NA         | NA         | NA         |            |
| 26824     | ENSG00000274978 | 0          | NA          | NA         | NA         | NA         | RNU11      |
| NA        | ENSG00000274979 | 0.15069912 | -0.01848503 | 0.38480575 | 0.84537521 | NA         |            |
| NA        | ENSG00000274985 | 1.73733004 | 0.0666956   | 0.39256376 | 0.11031626 | NA         | PTCHD3P1   |
| 102466192 | ENSG00000274986 | 0          | NA          | NA         | NA         | NA         | MIR6750    |
| NA        | ENSG00000274987 | 2.99241304 | -0.06515497 | 0.37835988 | 0.51691137 | 0.7308667  |            |
| 102465527 | ENSG00000274988 | 0          | NA          | NA         | NA         | NA         | MIR6876    |
| NA        | ENSG00000274993 | 0          | NA          | NA         | NA         | NA         |            |
| 102465862 | ENSG00000274994 | 0          | NA          | NA         | NA         | NA         | MIR8056    |
| NA        | ENSG00000274995 | 0.15069912 | -0.01848503 | 0.38480575 | 0.84537521 | NA         |            |
| NA        | ENSG00000274996 | 0.6631221  | -0.02215187 | 0.38322551 | 0.65086796 | NA         |            |
| 85235     | ENSG00000274997 | 2.5592136  | -0.07653956 | 0.38946422 | 0.29365574 | NA         | H2AC12     |
| 677804    | ENSG00000274998 | 0          | NA          | NA         | NA         | NA         | SNORA17A   |
| 102466873 | ENSG00000274999 | 0          | NA          | NA         | NA         | NA         | MIR8052    |



|           |                 |            |             |            |            |            |            |
|-----------|-----------------|------------|-------------|------------|------------|------------|------------|
| NA        | ENSG00000275001 | 0          | NA          | NA         | NA         | NA         |            |
| NA        | ENSG00000275002 | 0          | NA          | NA         | NA         | NA         |            |
| 140883    | ENSG00000275004 | 143.575433 | -0.3174507  | 0.19724419 | 0.06237285 | 0.17645478 | ZNF280B    |
| NA        | ENSG00000275005 | 0.507094   | 0.01470963  | 0.38308525 | 0.74698398 | NA         |            |
| NA        | ENSG00000275011 | 0          | NA          | NA         | NA         | NA         | ALOXE3P1   |
| NA        | ENSG00000275012 | 0          | NA          | NA         | NA         | NA         |            |
| NA        | ENSG00000275014 | 0          | NA          | NA         | NA         | NA         | RN7SL166P  |
| NA        | ENSG00000275015 | 0          | NA          | NA         | NA         | NA         |            |
| NA        | ENSG00000275016 | 0          | NA          | NA         | NA         | NA         |            |
| NA        | ENSG00000275017 | 2.22598363 | -0.00665057 | 0.37513968 | 0.93584231 | NA         |            |
| 102465451 | ENSG00000275022 | 0          | NA          | NA         | NA         | NA         | MIR6753    |
| 4302      | ENSG00000275023 | 7050.65389 | 0.08354947  | 0.05020285 | 0.09465062 | 0.23921889 | MLLT6      |
| NA        | ENSG00000275024 | 0          | NA          | NA         | NA         | NA         |            |
| NA        | ENSG00000275025 | 0.34124419 | 0.02362755  | 0.38535356 | 0.62403467 | NA         |            |
| NA        | ENSG00000275026 | 2.28194564 | 0.0593951   | 0.3854902  | 0.37855538 | NA         | GXYLT1P4   |
| NA        | ENSG00000275029 | 0.18922458 | 0.01954053  | 0.38488496 | 0.78225479 | NA         | HMGB1P24   |
| NA        | ENSG00000275033 | 0          | NA          | NA         | NA         | NA         |            |
| 102724101 | ENSG00000275034 | 0          | NA          | NA         | NA         | NA         | TP53TG3E   |
| 102465880 | ENSG00000275036 | 0          | NA          | NA         | NA         | NA         | MIR8086    |
| NA        | ENSG00000275038 | 39.6298872 | -0.5558167  | 0.40840232 | 0.0341676  | 0.1112929  |            |
| NA        | ENSG00000275040 | 0          | NA          | NA         | NA         | NA         |            |
| NA        | ENSG00000275041 | 0          | NA          | NA         | NA         | NA         |            |
| 9303      | ENSG00000275043 | 0          | NA          | NA         | NA         | NA         | SNORD25    |
| NA        | ENSG00000275046 | 0          | NA          | NA         | NA         | NA         |            |
| NA        | ENSG00000275048 | 0.29863895 | -0.02292439 | 0.3852726  | 0.68753245 | NA         | BSNDP1     |
| 57223     | ENSG00000275052 | 1721.7623  | -0.45106753 | 0.07157484 | 1.36E-10   | 2.58E-09   | PPP4R3B    |
| NA        | ENSG00000275054 | 0          | NA          | NA         | NA         | NA         |            |
| NA        | ENSG00000275055 | 11.4839146 | 0.07739385  | 0.36066397 | 0.59749383 | 0.78921427 |            |
| NA        | ENSG00000275056 | 4.40580247 | 0.10633716  | 0.38123593 | 0.40125641 | 0.62960674 |            |
| NA        | ENSG00000275060 | 0          | NA          | NA         | NA         | NA         | PPP1R26P3  |
| NA        | ENSG00000275061 | 0          | NA          | NA         | NA         | NA         | SEPTIN7P15 |
| NA        | ENSG00000275064 | 2.45240912 | 0.08021086  | 0.38731487 | 0.34889684 | NA         | PDE4DIPP5  |
| 11276     | ENSG00000275066 | 1607.9659  | -0.00279918 | 0.07733618 | 0.96933362 | 0.98853525 | SYNRG      |
| 102466199 | ENSG00000275067 | 0          | NA          | NA         | NA         | NA         | MIR6825    |
| NA        | ENSG00000275068 | 0          | NA          | NA         | NA         | NA         |            |
| NA        | ENSG00000275069 | 0          | NA          | NA         | NA         | NA         |            |
| NA        | ENSG00000275070 | 0.16735865 | 0.01897177  | 0.38482933 | 0.78225479 | NA         |            |
| NA        | ENSG00000275071 | 0          | NA          | NA         | NA         | NA         |            |

|           |                 |            |             |            |            |            |             |
|-----------|-----------------|------------|-------------|------------|------------|------------|-------------|
| NA        | ENSG00000275072 | 0          | NA          | NA         | NA         | NA         | SNORD50B    |
| 79873     | ENSG00000275074 | 55.8969565 | 0.04895164  | 0.2548828  | 0.79996926 | 0.90844199 | NUDT18      |
| NA        | ENSG00000275075 | 0          | NA          | NA         | NA         | NA         |             |
| NA        | ENSG00000275078 | 0          | NA          | NA         | NA         | NA         |             |
| NA        | ENSG00000275084 | 0.16735865 | 0.01897177  | 0.38482933 | 0.78225479 | NA         | SNORD91B    |
| NA        | ENSG00000275088 | 18.4208607 | -0.04341181 | 0.3225074  | 0.80562974 | 0.91194694 |             |
| NA        | ENSG00000275090 | 0          | NA          | NA         | NA         | NA         | RN7SL296P   |
| NA        | ENSG00000275091 | 0          | NA          | NA         | NA         | NA         |             |
| NA        | ENSG00000275092 | 0.32254335 | -0.02325464 | 0.38531876 | 0.66957671 | NA         |             |
| NA        | ENSG00000275094 | 0          | NA          | NA         | NA         | NA         |             |
| NA        | ENSG00000275097 | 2.1451777  | -0.02998273 | 0.37480342 | 0.74278259 | NA         |             |
| 102466983 | ENSG00000275101 | 0          | NA          | NA         | NA         | NA         | MIR6766     |
| NA        | ENSG00000275103 | 0          | NA          | NA         | NA         | NA         |             |
| NA        | ENSG00000275106 | 4.67332424 | 0.22478259  | 0.45146884 | 0.10715011 | 0.26222501 |             |
| 102465469 | ENSG00000275107 | 0          | NA          | NA         | NA         | NA         | MIR6782     |
| NA        | ENSG00000275108 | 0          | NA          | NA         | NA         | NA         |             |
| 102465251 | ENSG00000275109 | 0          | NA          | NA         | NA         | NA         | MIR6504     |
| NA        | ENSG00000275110 | 0          | NA          | NA         | NA         | NA         |             |
| 7549      | ENSG00000275111 | 152.008716 | -0.00127092 | 0.1758576  | 0.9922713  | 0.99756121 | ZNF2        |
| 729428    | ENSG00000275113 | 0          | NA          | NA         | NA         | NA         | GAGE2E      |
| NA        | ENSG00000275115 | 0          | NA          | NA         | NA         | NA         |             |
| NA        | ENSG00000275119 | 0          | NA          | NA         | NA         | NA         |             |
| NA        | ENSG00000275120 | 1.95436295 | -0.01661832 | 0.37463117 | 0.84934566 | NA         |             |
| NA        | ENSG00000275121 | 0          | NA          | NA         | NA         | NA         |             |
| 8368      | ENSG00000275126 | 0.49831077 | -0.01002562 | 0.38282434 | 0.83017314 | NA         | H4C13       |
| NA        | ENSG00000275127 | 0          | NA          | NA         | NA         | NA         | SNORD116-22 |
| NA        | ENSG00000275128 | 0          | NA          | NA         | NA         | NA         | RN7SL203P   |
| NA        | ENSG00000275129 | 0          | NA          | NA         | NA         | NA         |             |
| NA        | ENSG00000275130 | 0          | NA          | NA         | NA         | NA         |             |
| NA        | ENSG00000275131 | 271.909769 | -0.17429838 | 0.16002164 | 0.2183417  | 0.43039238 | PDE4DIPP2   |
| NA        | ENSG00000275132 | 0.3183378  | 0.00128338  | 0.38336779 | 0.96478182 | NA         | RN7SL663P   |
| NA        | ENSG00000275134 | 0          | NA          | NA         | NA         | NA         |             |
| NA        | ENSG00000275138 | 0          | NA          | NA         | NA         | NA         |             |
| NA        | ENSG00000275139 | 2.16825608 | -0.1587413  | 0.43046186 | 0.0203003  | NA         |             |
| NA        | ENSG00000275140 | 0.173124   | -0.01911262 | 0.38486262 | 0.84537521 | NA         | SEC22B3P    |
| 102465535 | ENSG00000275141 | 0          | NA          | NA         | NA         | NA         | MIR6888     |
| 677781    | ENSG00000275143 | 0          | NA          | NA         | NA         | NA         | SCARNA16    |
| NA        | ENSG00000275144 | 3.47861121 | -0.07275593 | 0.37724176 | 0.50524461 | 0.72150391 | SNX18P5     |

|           |                 |            |             |            |            |            |           |
|-----------|-----------------|------------|-------------|------------|------------|------------|-----------|
| NA        | ENSG00000275146 | 0          | NA          | NA         | NA         | NA         |           |
| 6360      | ENSG00000275152 | 0          | NA          | NA         | NA         | NA         | CCL16     |
| NA        | ENSG00000275154 | 0          | NA          | NA         | NA         | NA         |           |
| NA        | ENSG00000275155 | 12.7850514 | 0.00119077  | 0.32789439 | 0.99637498 | 0.99873692 |           |
| NA        | ENSG00000275157 | 0          | NA          | NA         | NA         | NA         |           |
| NA        | ENSG00000275158 | 0          | NA          | NA         | NA         | NA         | TRBV12-5  |
| NA        | ENSG00000275160 | 15.7564571 | -0.07168015 | 0.33952811 | 0.67004393 | 0.83758072 |           |
| NA        | ENSG00000275161 | 0          | NA          | NA         | NA         | NA         |           |
| NA        | ENSG00000275162 | 0.5239031  | 0.01090335  | 0.38326671 | 0.76974956 | NA         |           |
| NA        | ENSG00000275163 | 0.18922458 | 0.01954053  | 0.38488496 | 0.78225479 | NA         |           |
| 102465488 | ENSG00000275166 | 0          | NA          | NA         | NA         | NA         | MIR6814   |
| 102465489 | ENSG00000275167 | 0          | NA          | NA         | NA         | NA         | MIR6815   |
| NA        | ENSG00000275170 | 0          | NA          | NA         | NA         | NA         | FRG2MP    |
| NA        | ENSG00000275173 | 0          | NA          | NA         | NA         | NA         |           |
| NA        | ENSG00000275178 | 0          | NA          | NA         | NA         | NA         |           |
| NA        | ENSG00000275180 | 8.89320922 | -0.18839379 | 0.39986176 | 0.24835327 | 0.46753287 |           |
| 94059     | ENSG00000275183 | 24.4086506 | -0.71913465 | 0.54511053 | 0.0200141  | 0.07296577 | LENG9     |
| NA        | ENSG00000275185 | 14.3393081 | -0.10743027 | 0.36842046 | 0.46841283 | 0.69118513 |           |
| NA        | ENSG00000275186 | 0          | NA          | NA         | NA         | NA         |           |
| NA        | ENSG00000275191 | 1.34558828 | -0.0605444  | 0.38817922 | 0.27256589 | NA         |           |
| NA        | ENSG00000275194 | 0          | NA          | NA         | NA         | NA         |           |
| NA        | ENSG00000275197 | 0          | NA          | NA         | NA         | NA         |           |
| NA        | ENSG00000275198 | 10.1702906 | -0.09671078 | 0.35910727 | 0.53276596 | 0.74395247 |           |
| NA        | ENSG00000275201 | 0          | NA          | NA         | NA         | NA         |           |
| NA        | ENSG00000275202 | 16.6249083 | 0.1609462   | 0.34757376 | 0.39548232 | 0.62498088 |           |
| NA        | ENSG00000275206 | 0          | NA          | NA         | NA         | NA         |           |
| 102465443 | ENSG00000275207 | 0          | NA          | NA         | NA         | NA         | MIR6740   |
| 102466726 | ENSG00000275208 | 0          | NA          | NA         | NA         | NA         | MIR6745   |
| NA        | ENSG00000275210 | 0          | NA          | NA         | NA         | NA         |           |
| NA        | ENSG00000275212 | 0          | NA          | NA         | NA         | NA         | LINC02826 |
| NA        | ENSG00000275213 | 0          | NA          | NA         | NA         | NA         |           |
| NA        | ENSG00000275216 | 0.29863895 | -0.02292439 | 0.3852726  | 0.68753245 | NA         |           |
| 8330      | ENSG00000275221 | 12.082347  | 0.00679338  | 0.33021581 | 0.97002663 | 0.98871453 | H2AC15    |
| NA        | ENSG00000275222 | 0          | NA          | NA         | NA         | NA         |           |
| NA        | ENSG00000275223 | 7.11239628 | -0.23420562 | 0.44484892 | 0.13510404 | 0.30959088 |           |
| 400121    | ENSG00000275226 | 0          | NA          | NA         | NA         | NA         | LINC00547 |
| NA        | ENSG00000275227 | 1.12153197 | 0.01062995  | 0.38156229 | 0.83906679 | NA         |           |
| NA        | ENSG00000275228 | 0          | NA          | NA         | NA         | NA         |           |

|           |                 |            |             |            |             |            |           |
|-----------|-----------------|------------|-------------|------------|-------------|------------|-----------|
| NA        | ENSG00000275231 | 0          | NA          | NA         | NA          | NA         |           |
| NA        | ENSG00000275232 | 0          | NA          | NA         | NA          | NA         |           |
| NA        | ENSG00000275234 | 0.30001588 | -0.02294459 | 0.38527538 | 0.68644875  | NA         |           |
| NA        | ENSG00000275236 | 1.75591718 | 0.03862431  | 0.38247915 | 0.544441058 | NA         |           |
| 100616203 | ENSG00000275238 | 0          | NA          | NA         | NA          | NA         | MIR4734   |
| 105379447 | ENSG00000275239 | 0.173124   | -0.01911262 | 0.38486262 | 0.84537521  | NA         | FAM242F   |
| NA        | ENSG00000275243 | 0          | NA          | NA         | NA          | NA         | TRBV16    |
| NA        | ENSG00000275248 | 0.59806775 | -0.03500956 | 0.38647881 | 0.44350579  | NA         |           |
| NA        | ENSG00000275250 | 0          | NA          | NA         | NA          | NA         |           |
| NA        | ENSG00000275254 | 0          | NA          | NA         | NA          | NA         |           |
| NA        | ENSG00000275256 | 0          | NA          | NA         | NA          | NA         | MRPS31P1  |
| 102466268 | ENSG00000275259 | 0          | NA          | NA         | NA          | NA         | MIR6511A1 |
| NA        | ENSG00000275263 | 1.18439593 | 0.04765922  | 0.38323686 | 0.48181234  | NA         |           |
| NA        | ENSG00000275265 | 0.32250609 | -0.02325434 | 0.38531871 | 0.66959827  | NA         |           |
| NA        | ENSG00000275266 | 0          | NA          | NA         | NA          | NA         |           |
| NA        | ENSG00000275268 | 0          | NA          | NA         | NA          | NA         |           |
| 102466195 | ENSG00000275273 | 0          | NA          | NA         | NA          | NA         | MIR6780A  |
| NA        | ENSG00000275278 | 0.52463495 | 0.01257629  | 0.38339254 | 0.76010767  | NA         |           |
| NA        | ENSG00000275280 | 0          | NA          | NA         | NA          | NA         |           |
| NA        | ENSG00000275285 | 0          | NA          | NA         | NA          | NA         |           |
| NA        | ENSG00000275286 | 0          | NA          | NA         | NA          | NA         |           |
| NA        | ENSG00000275287 | 0          | NA          | NA         | NA          | NA         |           |
| NA        | ENSG00000275291 | 0.173124   | -0.01911262 | 0.38486262 | 0.84537521  | NA         | RNVU1-26  |
| NA        | ENSG00000275293 | 0          | NA          | NA         | NA          | NA         |           |
| NA        | ENSG00000275294 | 0.34121266 | 0.0032571   | 0.38339677 | 0.95734534  | NA         | LINC02340 |
| NA        | ENSG00000275295 | 0          | NA          | NA         | NA          | NA         |           |
| NA        | ENSG00000275296 | 0          | NA          | NA         | NA          | NA         |           |
| NA        | ENSG00000275297 | 2.13328347 | -0.07095862 | 0.38576036 | 0.37485664  | NA         |           |
| 6351      | ENSG00000275302 | 0          | NA          | NA         | NA          | NA         | CCL4      |
| NA        | ENSG00000275305 | 0          | NA          | NA         | NA          | NA         | RNA5SP528 |
| NA        | ENSG00000275307 | 0          | NA          | NA         | NA          | NA         |           |
| NA        | ENSG00000275310 | 0          | NA          | NA         | NA          | NA         |           |
| NA        | ENSG00000275312 | 0          | NA          | NA         | NA          | NA         |           |
| NA        | ENSG00000275314 | 0          | NA          | NA         | NA          | NA         |           |
| NA        | ENSG00000275315 | 0          | NA          | NA         | NA          | NA         |           |
| NA        | ENSG00000275318 | 9.59351567 | -0.13089923 | 0.36479139 | 0.42641135  | 0.65221241 |           |
| NA        | ENSG00000275319 | 0          | NA          | NA         | NA          | NA         |           |
| NA        | ENSG00000275320 | 0          | NA          | NA         | NA          | NA         |           |

|           |                 |            |             |            |            |            |           |
|-----------|-----------------|------------|-------------|------------|------------|------------|-----------|
| NA        | ENSG00000275322 | 0          | NA          | NA         | NA         | NA         |           |
| NA        | ENSG00000275325 | 0.173124   | -0.01911262 | 0.38486262 | 0.84537521 | NA         | PDCD6IPP1 |
| NA        | ENSG00000275327 | 0          | NA          | NA         | NA         | NA         |           |
| NA        | ENSG00000275328 | 0.81896853 | 0.02824183  | 0.38426392 | 0.52436467 | NA         | SPDYE19P  |
| NA        | ENSG00000275329 | 3.78473497 | -0.10310435 | 0.38491855 | 0.37150541 | 0.60060191 |           |
| NA        | ENSG00000275332 | 1.02385664 | 0.02916522  | 0.38188676 | 0.62431558 | NA         |           |
| 102464817 | ENSG00000275334 | 0          | NA          | NA         | NA         | NA         | MIR5787   |
| 102466880 | ENSG00000275335 | 0          | NA          | NA         | NA         | NA         | MIR8088   |
| NA        | ENSG00000275337 | 0          | NA          | NA         | NA         | NA         | RN7SL680P |
| NA        | ENSG00000275339 | 0.34074461 | 0.00249524  | 0.38338226 | 0.96386597 | NA         |           |
| 100132526 | ENSG00000275340 | 0.43926905 | -0.02678308 | 0.38567104 | 0.57076965 | NA         | FGD5P1    |
| 157285    | ENSG00000275342 | 145.590996 | -0.26168776 | 0.18031748 | 0.1002531  | 0.24968886 | PRAG1     |
| NA        | ENSG00000275343 | 0.99902444 | 0.00719801  | 0.37930657 | 0.91199826 | NA         |           |
| 102465250 | ENSG00000275344 | 0          | NA          | NA         | NA         | NA         | MIR6503   |
| NA        | ENSG00000275345 | 1.34124196 | 0.00751432  | 0.3790812  | 0.91050007 | NA         |           |
| NA        | ENSG00000275348 | 0          | NA          | NA         | NA         | NA         |           |
| NA        | ENSG00000275350 | 0          | NA          | NA         | NA         | NA         |           |
| NA        | ENSG00000275352 | 0          | NA          | NA         | NA         | NA         |           |
| NA        | ENSG00000275355 | 0          | NA          | NA         | NA         | NA         |           |
| NA        | ENSG00000275356 | 0.15069912 | -0.01848503 | 0.38480575 | 0.84537521 | NA         | C7orf77   |
| NA        | ENSG00000275358 | 0          | NA          | NA         | NA         | NA         |           |
| NA        | ENSG00000275359 | 0          | NA          | NA         | NA         | NA         |           |
| 102466753 | ENSG00000275360 | 0          | NA          | NA         | NA         | NA         | MIR6868   |
| NA        | ENSG00000275361 | 0          | NA          | NA         | NA         | NA         |           |
| NA        | ENSG00000275362 | 0          | NA          | NA         | NA         | NA         |           |
| NA        | ENSG00000275363 | 0          | NA          | NA         | NA         | NA         |           |
| NA        | ENSG00000275367 | 12.0682079 | 0.16687886  | 0.37119489 | 0.34523082 | 0.57572324 |           |
| NA        | ENSG00000275371 | 4.46032129 | 0.07243928  | 0.37164661 | 0.55644989 | 0.76206018 |           |
| NA        | ENSG00000275372 | 0          | NA          | NA         | NA         | NA         |           |
| 102466906 | ENSG00000275373 | 0          | NA          | NA         | NA         | NA         | MIR6124   |
| NA        | ENSG00000275374 | 2.41835047 | 0.07061336  | 0.38096739 | 0.46818526 | NA         |           |
| 100302167 | ENSG00000275377 | 0          | NA          | NA         | NA         | NA         | MIR1299   |
| 8354      | ENSG00000275379 | 0.4743659  | -0.0090349  | 0.38283827 | 0.8496212  | NA         | H3C11     |
| NA        | ENSG00000275381 | 1.94964589 | -0.04189819 | 0.37819764 | 0.62285957 | NA         |           |
| NA        | ENSG00000275383 | 3.42962787 | -0.01838998 | 0.36833896 | 0.86405606 | 0.93979893 |           |
| 6362      | ENSG00000275385 | 0          | NA          | NA         | NA         | NA         | CCL18     |
| NA        | ENSG00000275386 | 0          | NA          | NA         | NA         | NA         |           |
| NA        | ENSG00000275387 | 0          | NA          | NA         | NA         | NA         |           |

|           |                 |            |             |            |            |            |           |
|-----------|-----------------|------------|-------------|------------|------------|------------|-----------|
| NA        | ENSG00000275389 | 12.9061274 | -0.05464373 | 0.34516805 | 0.72902911 | 0.87045369 |           |
| NA        | ENSG00000275390 | 0          | NA          | NA         | NA         | NA         |           |
| NA        | ENSG00000275392 | 0          | NA          | NA         | NA         | NA         |           |
| NA        | ENSG00000275393 | 0          | NA          | NA         | NA         | NA         |           |
| 8857      | ENSG00000275395 | 26.8286201 | 0.50473833  | 0.47371641 | 0.05373241 | 0.15725785 | FCGBP     |
| NA        | ENSG00000275400 | 0          | NA          | NA         | NA         | NA         |           |
| NA        | ENSG00000275401 | 5.74275388 | -0.13627036 | 0.38912556 | 0.3179757  | 0.54561048 |           |
| NA        | ENSG00000275406 | 0          | NA          | NA         | NA         | NA         |           |
| NA        | ENSG00000275409 | 1.52869554 | 0.02025013  | 0.3769027  | 0.80075001 | NA         |           |
| 6928      | ENSG00000275410 | 0          | NA          | NA         | NA         | NA         | HNFB1B    |
| 102465531 | ENSG00000275411 | 0          | NA          | NA         | NA         | NA         | MIR6882   |
| NA        | ENSG00000275413 | 2.73394067 | -0.10333392 | 0.39095265 | 0.30260019 | 0.52987991 |           |
| NA        | ENSG00000275414 | 0          | NA          | NA         | NA         | NA         |           |
| NA        | ENSG00000275417 | 0          | NA          | NA         | NA         | NA         |           |
| NA        | ENSG00000275418 | 0          | NA          | NA         | NA         | NA         |           |
| NA        | ENSG00000275419 | 0          | NA          | NA         | NA         | NA         |           |
| NA        | ENSG00000275423 | 0          | NA          | NA         | NA         | NA         | VN1R18P   |
| NA        | ENSG00000275426 | 0.30139824 | -0.02296476 | 0.38527817 | 0.68536535 | NA         |           |
| 286083    | ENSG00000275427 | 1.09703248 | -0.07824596 | 0.3945799  | 0.14950252 | NA         |           |
| 102465520 | ENSG00000275429 | 0          | NA          | NA         | NA         | NA         | MIR6862-1 |
| NA        | ENSG00000275431 | 0          | NA          | NA         | NA         | NA         |           |
| NA        | ENSG00000275432 | 0          | NA          | NA         | NA         | NA         |           |
| NA        | ENSG00000275437 | 23.2517789 | -0.13412085 | 0.31468339 | 0.49071049 | 0.71027185 |           |
| NA        | ENSG00000275438 | 0          | NA          | NA         | NA         | NA         |           |
| NA        | ENSG00000275441 | 5.93736296 | 0.18814939  | 0.41854531 | 0.18449735 | 0.38321058 |           |
| NA        | ENSG00000275443 | 0          | NA          | NA         | NA         | NA         |           |
| NA        | ENSG00000275445 | 2.28509958 | -0.0847911  | 0.38885885 | 0.31779699 | NA         |           |
| NA        | ENSG00000275448 | 0          | NA          | NA         | NA         | NA         |           |
| 442421    | ENSG00000275450 | 22.7025024 | 0.021743    | 0.31653697 | 0.90612225 | 0.95910507 |           |
| 102464834 | ENSG00000275451 | 0          | NA          | NA         | NA         | NA         | MIR6085   |
| 100616190 | ENSG00000275453 | 0          | NA          | NA         | NA         | NA         | MIR548O2  |
| NA        | ENSG00000275454 | 23.8561335 | 0.29535475  | 0.37424031 | 0.17590264 | 0.37016424 |           |
| 102465839 | ENSG00000275455 | 0          | NA          | NA         | NA         | NA         | MIR7852   |
| NA        | ENSG00000275457 | 53.0090567 | 0.18580004  | 0.26661242 | 0.35083882 | 0.58113897 |           |
| 102465485 | ENSG00000275458 | 0          | NA          | NA         | NA         | NA         | MIR6809   |
| NA        | ENSG00000275460 | 0          | NA          | NA         | NA         | NA         |           |
| NA        | ENSG00000275461 | 0          | NA          | NA         | NA         | NA         |           |
| 102724159 | ENSG00000275464 | 1100.01769 | -0.08682739 | 0.08005767 | 0.26676825 | 0.48915731 |           |

|           |                 |                 |            |             |            |            |             |
|-----------|-----------------|-----------------|------------|-------------|------------|------------|-------------|
| 158434    | ENSG00000275465 | 0               | NA         | NA          | NA         | NA         |             |
|           | NA              | ENSG00000275467 | 0.32262866 | -0.02325533 | 0.38531886 | 0.66952738 | NA          |
|           | NA              | ENSG00000275468 | 3.22302316 | -0.11983864 | 0.39462993 | 0.27396488 | 0.49757079  |
| 102466967 | ENSG00000275469 | 0               | NA         | NA          | NA         | NA         | MIR6130     |
|           | NA              | ENSG00000275475 | 0          | NA          | NA         | NA         | IGHV3-54    |
|           | NA              | ENSG00000275476 | 0.98428559 | 0.00497625  | 0.37927368 | 0.93904665 | NA          |
|           | NA              | ENSG00000275479 | 0          | NA          | NA         | NA         | NA          |
|           | NA              | ENSG00000275480 | 0          | NA          | NA         | NA         | NA          |
|           | NA              | ENSG00000275481 | 10.2213971 | -0.05875163 | 0.34425963 | 0.71387697 | 0.86198765  |
|           | NA              | ENSG00000275484 | 0.70079973 | 0.00152792  | 0.38181744 | 0.97337694 | NA          |
|           | NA              | ENSG00000275485 | 0.62219298 | -0.01872511 | 0.38297827 | 0.69318189 | NA          |
|           | NA              | ENSG00000275488 | 0          | NA          | NA         | NA         | NA          |
| 388381    | ENSG00000275489 | 0               | NA         | NA          | NA         | NA         | C17orf98    |
|           | NA              | ENSG00000275490 | 0          | NA          | NA         | NA         | NA          |
|           | NA              | ENSG00000275491 | 0.70464601 | 0.05125728  | 0.38859865 | 0.29588782 | NA          |
|           | NA              | ENSG00000275493 | 10.4020239 | -0.35700456 | 0.5188283  | 0.08482647 | 0.22086345  |
|           | NA              | ENSG00000275494 | 7.58811598 | 0.20375226  | 0.41198506 | 0.21251206 | 0.42238326  |
| 102724701 | ENSG00000275496 | 356.166963      | 0.14561182 | 0.13587052  | 0.25106256 | 0.47102422 |             |
|           | NA              | ENSG00000275497 | 0          | NA          | NA         | NA         | NA          |
|           | NA              | ENSG00000275502 | 0          | NA          | NA         | NA         | NA          |
|           | NA              | ENSG00000275503 | 0          | NA          | NA         | NA         | NA          |
|           | NA              | ENSG00000275504 | 0          | NA          | NA         | NA         | NA          |
|           | NA              | ENSG00000275506 | 0.3412599  | 0.02362767  | 0.38535357 | 0.62402634 | NA          |
|           | NA              | ENSG00000275508 | 0          | NA          | NA         | NA         | NA          |
|           | NA              | ENSG00000275512 | 1.57671834 | -0.03321601 | 0.380278   | 0.63941399 | NA          |
|           | NA              | ENSG00000275515 | 0          | NA          | NA         | NA         | NA          |
|           | NA              | ENSG00000275516 | 0.37844916 | 0.02407552  | 0.3854191  | 0.60038877 | NA          |
| 102465430 | ENSG00000275518 | 0               | NA         | NA          | NA         | NA         | MIR6718     |
| 102465482 | ENSG00000275519 | 0               | NA         | NA          | NA         | NA         | MIR6804     |
| 100129407 | ENSG00000275520 | 0               | NA         | NA          | NA         | NA         | FAM236A     |
| 102466972 | ENSG00000275523 | 0               | NA         | NA          | NA         | NA         | MIR6508     |
| 100033802 | ENSG00000275524 | 0               | NA         | NA          | NA         | NA         | SNORD115-26 |
|           | NA              | ENSG00000275527 | 1.34992438 | -0.07354325 | 0.39380243 | 0.13399721 | NA          |
|           | NA              | ENSG00000275529 | 0          | NA          | NA         | NA         | NA          |
|           | NA              | ENSG00000275532 | 1.23749543 | -0.06890547 | 0.38939597 | 0.26459467 | NA          |
| 101954277 | ENSG00000275538 | 0               | NA         | NA          | NA         | NA         | RNVU1-19    |
|           | NA              | ENSG00000275540 | 0          | NA          | NA         | NA         | NA          |
|           | NA              | ENSG00000275547 | 0          | NA          | NA         | NA         | NA          |

|           |                 |            |             |            |            |            |            |
|-----------|-----------------|------------|-------------|------------|------------|------------|------------|
| 100129722 | ENSG00000275549 | 6.11127928 | 0.18369859  | 0.41537834 | 0.19394393 | 0.39680804 | STPG3-AS1  |
| NA        | ENSG00000275550 | 0          | NA          | NA         | NA         | NA         |            |
| NA        | ENSG00000275552 | 0.86311863 | 0.04882696  | 0.38846814 | 0.27018207 | NA         |            |
| NA        | ENSG00000275553 | 0.34624801 | -0.02356563 | 0.38536324 | 0.65270996 | NA         | ELOA3CP    |
| NA        | ENSG00000275558 | 0          | NA          | NA         | NA         | NA         | RN7SKP175  |
| NA        | ENSG00000275559 | 0          | NA          | NA         | NA         | NA         |            |
| NA        | ENSG00000275562 | 0          | NA          | NA         | NA         | NA         | SEPTIN7P12 |
| 100508046 | ENSG00000275563 | 0          | NA          | NA         | NA         | NA         |            |
| NA        | ENSG00000275567 | 0          | NA          | NA         | NA         | NA         |            |
| NA        | ENSG00000275569 | 0          | NA          | NA         | NA         | NA         |            |
| 402635    | ENSG00000275572 | 0          | NA          | NA         | NA         | NA         | GRIFIN     |
| NA        | ENSG00000275576 | 0.31838769 | 0.00132846  | 0.38336817 | 0.96435013 | NA         |            |
| NA        | ENSG00000275578 | 0          | NA          | NA         | NA         | NA         |            |
| NA        | ENSG00000275580 | 4.22988791 | 0.13773062  | 0.39792485 | 0.25896156 | 0.48036523 |            |
| NA        | ENSG00000275582 | 6.46641565 | -0.01296442 | 0.35823534 | 0.9193884  | 0.96583003 |            |
| 101929798 | ENSG00000275585 | 0          | NA          | NA         | NA         | NA         | PDE4DIPP4  |
| NA        | ENSG00000275586 | 0.46758901 | -0.00787554 | 0.38326801 | 0.86287349 | NA         |            |
| NA        | ENSG00000275588 | 0          | NA          | NA         | NA         | NA         | RN7SL341P  |
| NA        | ENSG00000275589 | 0          | NA          | NA         | NA         | NA         |            |
| 389610    | ENSG00000275591 | 336.097518 | 0.54229044  | 0.14984073 | 9.91E-05   | 0.00075484 | XKR5       |
| NA        | ENSG00000275592 | 0          | NA          | NA         | NA         | NA         | VN1R7P     |
| NA        | ENSG00000275597 | 0          | NA          | NA         | NA         | NA         | ANAPC1P5   |
| NA        | ENSG00000275598 | 0          | NA          | NA         | NA         | NA         |            |
| NA        | ENSG00000275601 | 6.8311497  | 0.00993579  | 0.35608124 | 0.9436281  | 0.97701605 |            |
| NA        | ENSG00000275607 | 0          | NA          | NA         | NA         | NA         |            |
| NA        | ENSG00000275609 | 0.173124   | -0.01911262 | 0.38486262 | 0.84537521 | NA         |            |
| NA        | ENSG00000275610 | 0          | NA          | NA         | NA         | NA         | DUX4L21    |
| NA        | ENSG00000275612 | 0          | NA          | NA         | NA         | NA         |            |
| NA        | ENSG00000275613 | 0          | NA          | NA         | NA         | NA         |            |
| 100192386 | ENSG00000275620 | 0          | NA          | NA         | NA         | NA         |            |
| NA        | ENSG00000275625 | 0          | NA          | NA         | NA         | NA         |            |
| 107987066 | ENSG00000275628 | 0          | NA          | NA         | NA         | NA         |            |
| NA        | ENSG00000275630 | 0.47335527 | -0.02843933 | 0.38580837 | 0.54293336 | NA         |            |
| NA        | ENSG00000275631 | 0          | NA          | NA         | NA         | NA         |            |
| NA        | ENSG00000275632 | 36.1187779 | 0.17880097  | 0.30481964 | 0.37841379 | 0.60737234 |            |
| NA        | ENSG00000275634 | 0          | NA          | NA         | NA         | NA         |            |
| NA        | ENSG00000275635 | 0          | NA          | NA         | NA         | NA         |            |
| NA        | ENSG00000275636 | 0.14931947 | -0.01844332 | 0.38480212 | 0.84537521 | NA         |            |



|           |                 |            |             |            |            |            |             |
|-----------|-----------------|------------|-------------|------------|------------|------------|-------------|
| NA        | ENSG00000275638 | 0.75689831 | 0.03380966  | 0.38651369 | 0.3822658  | NA         |             |
| 102466737 | ENSG00000275640 | 0          | NA          | NA         | NA         | NA         | MIR6793     |
| NA        | ENSG00000275642 | 0          | NA          | NA         | NA         | NA         |             |
| NA        | ENSG00000275643 | 0          | NA          | NA         | NA         | NA         | RBM22P6     |
| NA        | ENSG00000275645 | 4.97694227 | 0.03393717  | 0.36487218 | 0.78103254 | 0.8998656  |             |
| NA        | ENSG00000275646 | 0          | NA          | NA         | NA         | NA         |             |
| NA        | ENSG00000275647 | 0          | NA          | NA         | NA         | NA         |             |
| NA        | ENSG00000275649 | 0          | NA          | NA         | NA         | NA         |             |
| 102465512 | ENSG00000275651 | 0          | NA          | NA         | NA         | NA         | MIR6851     |
| 102465477 | ENSG00000275652 | 0          | NA          | NA         | NA         | NA         | MIR6796     |
| NA        | ENSG00000275654 | 0          | NA          | NA         | NA         | NA         |             |
| NA        | ENSG00000275655 | 0          | NA          | NA         | NA         | NA         | RN7SL313P   |
| NA        | ENSG00000275656 | 0          | NA          | NA         | NA         | NA         |             |
| 692215    | ENSG00000275662 | 0          | NA          | NA         | NA         | NA         | SNORD112    |
| 8369      | ENSG00000275663 | 0          | NA          | NA         | NA         | NA         | H4C7        |
| NA        | ENSG00000275664 | 0          | NA          | NA         | NA         | NA         |             |
| NA        | ENSG00000275665 | 0.30139824 | -0.02296476 | 0.38527817 | 0.68536535 | NA         |             |
| NA        | ENSG00000275666 | 0          | NA          | NA         | NA         | NA         |             |
| 102465505 | ENSG00000275667 | 0          | NA          | NA         | NA         | NA         | MIR6839     |
| 102466725 | ENSG00000275669 | 0          | NA          | NA         | NA         | NA         | MIR6744     |
| 102466253 | ENSG00000275670 | 0          | NA          | NA         | NA         | NA         | MIR8076     |
| NA        | ENSG00000275672 | 0.35663197 | 0.02381671  | 0.385381   | 0.61404184 | NA         |             |
| NA        | ENSG00000275674 | 1.1602756  | 0.01902791  | 0.37918971 | 0.78327777 | NA         |             |
| NA        | ENSG00000275675 | 0.173124   | -0.01911262 | 0.38486262 | 0.84537521 | NA         |             |
| NA        | ENSG00000275676 | 0          | NA          | NA         | NA         | NA         |             |
| NA        | ENSG00000275678 | 0          | NA          | NA         | NA         | NA         |             |
| NA        | ENSG00000275680 | 0.69249601 | -0.03077728 | 0.38619256 | 0.44510896 | NA         |             |
| NA        | ENSG00000275681 | 0          | NA          | NA         | NA         | NA         |             |
| NA        | ENSG00000275688 | 0          | NA          | NA         | NA         | NA         | CCL15-CCL14 |
| NA        | ENSG00000275689 | 0          | NA          | NA         | NA         | NA         |             |
| NA        | ENSG00000275691 | 0          | NA          | NA         | NA         | NA         | MT1IP       |
| NA        | ENSG00000275693 | 0          | NA          | NA         | NA         | NA         |             |
| NA        | ENSG00000275695 | 5.86580128 | 0.16603096  | 0.40189286 | 0.2469746  | 0.46604299 | UBE2Q2P6    |
| NA        | ENSG00000275696 | 0          | NA          | NA         | NA         | NA         |             |
| 26574     | ENSG00000275700 | 830.629296 | -0.50318292 | 0.10953537 | 1.68E-06   | 1.83E-05   | AATF        |
| NA        | ENSG00000275703 | 1.01237889 | 0.05734702  | 0.38730226 | 0.3204351  | NA         |             |
| 100500862 | ENSG00000275708 | 0.52119901 | 0.02576573  | 0.38568143 | 0.51723676 | NA         | MIR3648-1   |
| NA        | ENSG00000275709 | 2.5705127  | -0.09943303 | 0.39444095 | 0.24107048 | 0.45895616 |             |

|           |                 |            |             |            |            |            |           |
|-----------|-----------------|------------|-------------|------------|------------|------------|-----------|
| NA        | ENSG00000275710 | 0          | NA          | NA         | NA         | NA         |           |
| 102465476 | ENSG00000275711 | 0          | NA          | NA         | NA         | NA         | MIR6795   |
| 8345      | ENSG00000275713 | 38.400946  | -1.30902767 | 0.41499034 | 0.00012196 | 0.0009073  | H2BC9     |
| 8350      | ENSG00000275714 | 3.85377703 | 0.01017465  | 0.36427419 | 0.93316264 | 0.97202552 | H3C1      |
| NA        | ENSG00000275716 | 0          | NA          | NA         | NA         | NA         |           |
| 6359      | ENSG00000275718 | 0          | NA          | NA         | NA         | NA         | CCL15     |
| NA        | ENSG00000275719 | 9.60077705 | -0.14388536 | 0.38008311 | 0.35199594 | 0.58206363 |           |
| NA        | ENSG00000275720 | 1.19493605 | 0.03205391  | 0.38253457 | 0.5791205  | NA         |           |
| 57151     | ENSG00000275722 | 0          | NA          | NA         | NA         | NA         | LYZL6     |
| NA        | ENSG00000275725 | 0          | NA          | NA         | NA         | NA         |           |
| 102464836 | ENSG00000275726 | 0          | NA          | NA         | NA         | NA         | MIR6088   |
| NA        | ENSG00000275728 | 0.5039178  | 0.01240425  | 0.38343549 | 0.76711209 | NA         |           |
| NA        | ENSG00000275733 | 0          | NA          | NA         | NA         | NA         |           |
| NA        | ENSG00000275734 | 11.8323048 | -0.05318148 | 0.339918   | 0.74499451 | 0.87988222 |           |
| NA        | ENSG00000275740 | 146.971581 | -0.16099344 | 0.21058741 | 0.36133527 | 0.59120004 |           |
| NA        | ENSG00000275741 | 0          | NA          | NA         | NA         | NA         |           |
| NA        | ENSG00000275743 | 0          | NA          | NA         | NA         | NA         | TRBV14    |
| NA        | ENSG00000275745 | 0          | NA          | NA         | NA         | NA         |           |
| NA        | ENSG00000275747 | 0          | NA          | NA         | NA         | NA         | IGHV3-79  |
| NA        | ENSG00000275756 | 0.34017565 | 0.00223427  | 0.38337819 | 0.96635522 | NA         |           |
| NA        | ENSG00000275759 | 3.63217667 | 0.01425533  | 0.37176511 | 0.88626448 | 0.95015905 |           |
| 400658    | ENSG00000275763 | 14.5544968 | -0.19876538 | 0.37242629 | 0.29248377 | 0.51857713 | ZNF516-DT |
| NA        | ENSG00000275764 | 77.0470403 | -0.04154386 | 0.21841476 | 0.81602891 | 0.9163678  |           |
| NA        | ENSG00000275765 | 3.37533919 | -0.00842777 | 0.36776213 | 0.93644566 | 0.97351594 |           |
| NA        | ENSG00000275767 | 0.34746601 | 0.02370763  | 0.3853651  | 0.61987128 | NA         |           |
| NA        | ENSG00000275768 | 0          | NA          | NA         | NA         | NA         | SLC2AXP1  |
| NA        | ENSG00000275769 | 1.29465491 | -0.01220992 | 0.38037789 | 0.83865858 | NA         |           |
| 102466657 | ENSG00000275770 | 0          | NA          | NA         | NA         | NA         | MIR6505   |
| NA        | ENSG00000275771 | 0          | NA          | NA         | NA         | NA         | OR4G6P    |
| NA        | ENSG00000275772 | 0          | NA          | NA         | NA         | NA         |           |
| NA        | ENSG00000275773 | 0          | NA          | NA         | NA         | NA         |           |
| 440563    | ENSG00000275774 | 0          | NA          | NA         | NA         | NA         | HNRNPCL2  |
| NA        | ENSG00000275776 | 0          | NA          | NA         | NA         | NA         | RN7SL185P |
| NA        | ENSG00000275778 | 116.935195 | -0.0538274  | 0.19494861 | 0.7474538  | 0.88138554 |           |
| NA        | ENSG00000275785 | 0          | NA          | NA         | NA         | NA         |           |
| NA        | ENSG00000275787 | 0          | NA          | NA         | NA         | NA         | OR7G15P   |
| NA        | ENSG00000275788 | 0          | NA          | NA         | NA         | NA         |           |
| 102465866 | ENSG00000275789 | 0          | NA          | NA         | NA         | NA         | MIR8064   |

|           |                 |            |             |            |            |            |           |
|-----------|-----------------|------------|-------------|------------|------------|------------|-----------|
| NA        | ENSG00000275791 | 0          | NA          | NA         | NA         | NA         | TRBV10-3  |
| 85376     | ENSG00000275793 | 6.27649441 | -0.29625189 | 0.52211547 | 0.05441659 | 0.15876841 | RIMBP3    |
| NA        | ENSG00000275799 | 0          | NA          | NA         | NA         | NA         |           |
| NA        | ENSG00000275800 | 0          | NA          | NA         | NA         | NA         | EIF5P2    |
| NA        | ENSG00000275801 | 0          | NA          | NA         | NA         | NA         |           |
| NA        | ENSG00000275803 | 0          | NA          | NA         | NA         | NA         | RN7SL736P |
| NA        | ENSG00000275805 | 4.31850397 | 0.1078244   | 0.38477704 | 0.37004403 | 0.59932029 |           |
| NA        | ENSG00000275807 | 79.9420482 | 0.21870907  | 0.24770808 | 0.26087591 | 0.48276874 |           |
| NA        | ENSG00000275808 | 0          | NA          | NA         | NA         | NA         |           |
| 102465878 | ENSG00000275810 | 0          | NA          | NA         | NA         | NA         | MIR8082   |
| NA        | ENSG00000275811 | 0          | NA          | NA         | NA         | NA         | HTR1DP1   |
| NA        | ENSG00000275812 | 0          | NA          | NA         | NA         | NA         |           |
| 102466656 | ENSG00000275816 | 0          | NA          | NA         | NA         | NA         | MIR6500   |
| 102466742 | ENSG00000275818 | 0          | NA          | NA         | NA         | NA         | MIR6818   |
| NA        | ENSG00000275823 | 0          | NA          | NA         | NA         | NA         |           |
| NA        | ENSG00000275826 | 0          | NA          | NA         | NA         | NA         |           |
| NA        | ENSG00000275827 | 0          | NA          | NA         | NA         | NA         |           |
| NA        | ENSG00000275828 | 0          | NA          | NA         | NA         | NA         | CHEK2P1   |
| NA        | ENSG00000275830 | 0          | NA          | NA         | NA         | NA         |           |
| 57636     | ENSG00000275832 | 737.268598 | -0.62471583 | 0.17925443 | 0.00012491 | 0.00092645 | ARHGAP23  |
| NA        | ENSG00000275833 | 0          | NA          | NA         | NA         | NA         |           |
| NA        | ENSG00000275834 | 0          | NA          | NA         | NA         | NA         |           |
| 114791    | ENSG00000275835 | 469.233215 | -0.15275016 | 0.13974182 | 0.23877206 | 0.45651322 | TUBGCP5   |
| 102464823 | ENSG00000275836 | 0          | NA          | NA         | NA         | NA         | MIR6068   |
| NA        | ENSG00000275839 | 0.3184176  | 0.00135477  | 0.3833684  | 0.9640981  | NA         |           |
| NA        | ENSG00000275840 | 0          | NA          | NA         | NA         | NA         |           |
| NA        | ENSG00000275846 | 1.80104108 | -0.00607291 | 0.37549373 | 0.94050287 | NA         |           |
| NA        | ENSG00000275850 | 0.32289827 | 0.00128339  | 0.38336763 | 0.96879171 | NA         |           |
| 105376992 | ENSG00000275852 | 0.14931947 | -0.01844332 | 0.38480212 | 0.84537521 | NA         | LINC01742 |
| NA        | ENSG00000275853 | 0          | NA          | NA         | NA         | NA         |           |
| NA        | ENSG00000275854 | 21.0296253 | -0.03118745 | 0.30620943 | 0.86765029 | 0.94200403 |           |
| NA        | ENSG00000275856 | 0          | NA          | NA         | NA         | NA         |           |
| NA        | ENSG00000275857 | 2.32859019 | -0.11469969 | 0.40845615 | 0.03554031 | NA         |           |
| 102466720 | ENSG00000275859 | 0          | NA          | NA         | NA         | NA         | MIR6720   |
| NA        | ENSG00000275860 | 0.15069912 | -0.01848503 | 0.38480575 | 0.84537521 | NA         |           |
| NA        | ENSG00000275862 | 0          | NA          | NA         | NA         | NA         |           |
| 102466872 | ENSG00000275863 | 0          | NA          | NA         | NA         | NA         | MIR7975   |
| NA        | ENSG00000275866 | 0          | NA          | NA         | NA         | NA         |           |

|           |                 |            |             |            |            |            |           |
|-----------|-----------------|------------|-------------|------------|------------|------------|-----------|
| 102465860 | ENSG00000275868 | 0          | NA          | NA         | NA         | NA         | MIR8054   |
| NA        | ENSG00000275871 | 0          | NA          | NA         | NA         | NA         |           |
| 378825    | ENSG00000275874 | 0          | NA          | NA         | NA         | NA         | PIC SAR   |
| NA        | ENSG00000275875 | 0          | NA          | NA         | NA         | NA         |           |
| NA        | ENSG00000275877 | 0          | NA          | NA         | NA         | NA         |           |
| NA        | ENSG00000275878 | 0          | NA          | NA         | NA         | NA         | RN7SL43P  |
| NA        | ENSG00000275880 | 6.84731691 | 0.19907859  | 0.4183717  | 0.19150528 | 0.39331932 |           |
| NA        | ENSG00000275881 | 0.173124   | -0.01911262 | 0.38486262 | 0.84537521 | NA         |           |
| NA        | ENSG00000275882 | 22.617534  | 0.04130058  | 0.38413657 | 0.48208044 | 0.70272402 | IKBKGP1   |
| NA        | ENSG00000275888 | 16.131502  | -0.04834384 | 0.3286083  | 0.77986601 | 0.89930494 |           |
| NA        | ENSG00000275894 | 0.98410437 | 0.025105    | 0.38220209 | 0.64882158 | NA         |           |
| 102724594 | ENSG00000275895 | 1327.01479 | 0.28601764  | 0.27768632 | 0.16771667 | 0.35871254 | U2AF1L5   |
| 5645      | ENSG00000275896 | 0          | NA          | NA         | NA         | NA         | PRSS2     |
| NA        | ENSG00000275897 | 1.16937571 | 0.02106153  | 0.3793365  | 0.76112925 | NA         |           |
| NA        | ENSG00000275898 | 0          | NA          | NA         | NA         | NA         |           |
| NA        | ENSG00000275900 | 0          | NA          | NA         | NA         | NA         |           |
| NA        | ENSG00000275901 | 0          | NA          | NA         | NA         | NA         |           |
| NA        | ENSG00000275902 | 15.6216568 | 0.0494582   | 0.3556713  | 0.73301811 | 0.87261966 |           |
| NA        | ENSG00000275905 | 0          | NA          | NA         | NA         | NA         |           |
| NA        | ENSG00000275906 | 0          | NA          | NA         | NA         | NA         | NAPGP2    |
| NA        | ENSG00000275908 | 0          | NA          | NA         | NA         | NA         |           |
| NA        | ENSG00000275909 | 0          | NA          | NA         | NA         | NA         |           |
| NA        | ENSG00000275910 | 4.67887122 | -0.06956046 | 0.3727286  | 0.55674421 | 0.76220019 |           |
| NA        | ENSG00000275915 | 0          | NA          | NA         | NA         | NA         |           |
| NA        | ENSG00000275919 | 0          | NA          | NA         | NA         | NA         |           |
| NA        | ENSG00000275923 | 0          | NA          | NA         | NA         | NA         |           |
| 102465976 | ENSG00000275924 | 0          | NA          | NA         | NA         | NA         | MIR6807   |
| NA        | ENSG00000275927 | 0.173733   | 0.01914545  | 0.38484597 | 0.78225479 | NA         |           |
| NA        | ENSG00000275928 | 0          | NA          | NA         | NA         | NA         | REXO1L11P |
| NA        | ENSG00000275929 | 0          | NA          | NA         | NA         | NA         |           |
| NA        | ENSG00000275933 | 0          | NA          | NA         | NA         | NA         |           |
| NA        | ENSG00000275936 | 2.17290616 | -0.05086072 | 0.38011868 | 0.54391441 | NA         |           |
| NA        | ENSG00000275939 | 0          | NA          | NA         | NA         | NA         |           |
| NA        | ENSG00000275940 | 0.36212185 | 0.00052322  | 0.3833627  | 0.97084777 | NA         | MRPL57P3  |
| NA        | ENSG00000275942 | 0          | NA          | NA         | NA         | NA         |           |
| NA        | ENSG00000275944 | 0          | NA          | NA         | NA         | NA         |           |
| NA        | ENSG00000275945 | 0          | NA          | NA         | NA         | NA         | EIF3FP1   |
| NA        | ENSG00000275948 | 0          | NA          | NA         | NA         | NA         |           |

|           |                 |            |             |            |            |            |           |
|-----------|-----------------|------------|-------------|------------|------------|------------|-----------|
| 102465433 | ENSG00000275950 | 0          | NA          | NA         | NA         | NA         | MIR6724-1 |
| NA        | ENSG00000275953 | 0          | NA          | NA         | NA         | NA         |           |
| 84218     | ENSG00000275954 | 0          | NA          | NA         | NA         | NA         | TBC1D3F   |
| NA        | ENSG00000275956 | 6.66834022 | -0.03391413 | 0.35322179 | 0.8117707  | 0.91472316 |           |
| NA        | ENSG00000275958 | 0          | NA          | NA         | NA         | NA         |           |
| NA        | ENSG00000275959 | 0          | NA          | NA         | NA         | NA         |           |
| NA        | ENSG00000275961 | 0          | NA          | NA         | NA         | NA         | RN7SL210P |
| NA        | ENSG00000275963 | 4.37256146 | 0.07428068  | 0.3735068  | 0.53729981 | 0.74759591 |           |
| NA        | ENSG00000275964 | 95.3090428 | 0.28965653  | 0.22849747 | 0.12304364 | 0.29041423 |           |
| NA        | ENSG00000275965 | 0          | NA          | NA         | NA         | NA         |           |
| 102466204 | ENSG00000275967 | 0          | NA          | NA         | NA         | NA         | MIR6880   |
| NA        | ENSG00000275968 | 0          | NA          | NA         | NA         | NA         |           |
| 727830    | ENSG00000275969 | 0          | NA          | NA         | NA         | NA         | SPATA31A3 |
| NA        | ENSG00000275971 | 0          | NA          | NA         | NA         | NA         |           |
| NA        | ENSG00000275975 | 0          | NA          | NA         | NA         | NA         |           |
| NA        | ENSG00000275976 | 3.54739679 | -0.09118615 | 0.3898791  | 0.3082454  | 0.53579716 |           |
| NA        | ENSG00000275978 | 0          | NA          | NA         | NA         | NA         |           |
| NA        | ENSG00000275980 | 0          | NA          | NA         | NA         | NA         |           |
| NA        | ENSG00000275981 | 0          | NA          | NA         | NA         | NA         |           |
| NA        | ENSG00000275982 | 0          | NA          | NA         | NA         | NA         |           |
| NA        | ENSG00000275989 | 0          | NA          | NA         | NA         | NA         |           |
| 102724428 | ENSG00000275993 | 119.06843  | -0.07307324 | 0.20586134 | 0.67345096 | 0.83953925 | SIK1B     |
| 677809    | ENSG00000275994 | 0          | NA          | NA         | NA         | NA         | SNORA24   |
| NA        | ENSG00000275995 | 0.32254058 | 0.00091873  | 0.38336503 | 0.97227703 | NA         |           |
| 9301      | ENSG00000275996 | 0          | NA          | NA         | NA         | NA         | SNORD27   |
| NA        | ENSG00000275997 | 0          | NA          | NA         | NA         | NA         |           |
| NA        | ENSG00000276002 | 0          | NA          | NA         | NA         | NA         |           |
| NA        | ENSG00000276003 | 0          | NA          | NA         | NA         | NA         |           |
| NA        | ENSG00000276006 | 0          | NA          | NA         | NA         | NA         | REXO1L12P |
| NA        | ENSG00000276007 | 17.3030348 | -0.07406396 | 0.3257741  | 0.6794558  | 0.84357967 |           |
| NA        | ENSG00000276012 | 0.29863895 | -0.02292439 | 0.3852726  | 0.68753245 | NA         |           |
| NA        | ENSG00000276014 | 0          | NA          | NA         | NA         | NA         | RN7SL301P |
| NA        | ENSG00000276015 | 0          | NA          | NA         | NA         | NA         |           |
| NA        | ENSG00000276019 | 0          | NA          | NA         | NA         | NA         |           |
| 11072     | ENSG00000276023 | 203.727373 | 0.00975703  | 0.16146931 | 0.95025926 | 0.97957708 | DUSP14    |
| 267010    | ENSG00000276027 | 0          | NA          | NA         | NA         | NA         | RNU12     |
| 100616184 | ENSG00000276029 | 0          | NA          | NA         | NA         | NA         | MIR4477A  |
| NA        | ENSG00000276030 | 0.173733   | 0.01914545  | 0.38484597 | 0.78225479 | NA         |           |

|           |                 |            |             |            |            |            |             |
|-----------|-----------------|------------|-------------|------------|------------|------------|-------------|
| NA        | ENSG00000276031 | 0          | NA          | NA         | NA         | NA         | RN7SL197P   |
| NA        | ENSG00000276036 | 0          | NA          | NA         | NA         | NA         | RNA5SP440   |
| NA        | ENSG00000276039 | 0          | NA          | NA         | NA         | NA         |             |
| 26165     | ENSG00000276040 | 0          | NA          | NA         | NA         | NA         | SPATA31A7   |
| 29128     | ENSG00000276043 | 3438.07753 | -0.51979213 | 0.0660325  | 1.34E-15   | 3.81E-14   | UHRF1       |
| 84876     | ENSG00000276045 | 172.334925 | 0.00242496  | 0.16379061 | 0.98806716 | 0.99589897 | ORAI1       |
| NA        | ENSG00000276046 | 0          | NA          | NA         | NA         | NA         | DUX4L13     |
| NA        | ENSG00000276047 | 0          | NA          | NA         | NA         | NA         | RN7SL711P   |
| NA        | ENSG00000276048 | 7.95710431 | -0.03118855 | 0.35511644 | 0.82167859 | 0.91847813 |             |
| NA        | ENSG00000276050 | 0          | NA          | NA         | NA         | NA         | IGKV2OR2-10 |
| NA        | ENSG00000276054 | 0.3404858  | -0.00025305 | 0.38336241 | 0.96765125 | NA         |             |
| NA        | ENSG00000276055 | 0          | NA          | NA         | NA         | NA         |             |
| NA        | ENSG00000276057 | 0          | NA          | NA         | NA         | NA         |             |
| NA        | ENSG00000276058 | 0          | NA          | NA         | NA         | NA         | STMN1P1     |
| NA        | ENSG00000276063 | 0          | NA          | NA         | NA         | NA         |             |
| NA        | ENSG00000276064 | 0          | NA          | NA         | NA         | NA         |             |
| NA        | ENSG00000276067 | 0.16735865 | 0.01897177  | 0.38482933 | 0.78225479 | NA         | SLC23A4P    |
| 9560      | ENSG00000276070 | 0          | NA          | NA         | NA         | NA         | CCL4L2      |
| 388372    | ENSG00000276070 | 0          | NA          | NA         | NA         | NA         | CCL4L2      |
| NA        | ENSG00000276071 | 19.6428832 | -0.03541971 | 0.31169249 | 0.84573238 | 0.93001499 |             |
| NA        | ENSG00000276074 | 0          | NA          | NA         | NA         | NA         |             |
| NA        | ENSG00000276075 | 6.28659324 | 0.01025086  | 0.35530119 | 0.94248585 | 0.97629193 |             |
| 102724652 | ENSG00000276076 | 1.41481843 | 0.05238813  | 0.38438394 | 0.43018988 | NA         | CRYAA2      |
| NA        | ENSG00000276077 | 45.7896523 | -0.01957102 | 0.38445002 | 0.5491759  | 0.75564532 |             |
| 102466995 | ENSG00000276081 | 0          | NA          | NA         | NA         | NA         | MIR7156     |
| 102465857 | ENSG00000276083 | 0          | NA          | NA         | NA         | NA         | MIR7976     |
| 6349      | ENSG00000276085 | 0          | NA          | NA         | NA         | NA         | CCL3L3      |
| 414062    | ENSG00000276085 | 0          | NA          | NA         | NA         | NA         | CCL3L3      |
| 6349      | ENSG00000276085 | 0          | NA          | NA         | NA         | NA         | CCL3L1      |
| 414062    | ENSG00000276085 | 0          | NA          | NA         | NA         | NA         | CCL3L1      |
| NA        | ENSG00000276087 | 4.66636835 | -0.08414667 | 0.37327814 | 0.50527093 | 0.72150391 |             |
| NA        | ENSG00000276088 | 0          | NA          | NA         | NA         | NA         | RN7SL620P   |
| NA        | ENSG00000276089 | 0          | NA          | NA         | NA         | NA         |             |
| NA        | ENSG00000276092 | 0.32532018 | 0.00195183  | 0.38337465 | 0.96162451 | NA         |             |
| NA        | ENSG00000276093 | 0          | NA          | NA         | NA         | NA         |             |
| NA        | ENSG00000276094 | 0          | NA          | NA         | NA         | NA         |             |
| NA        | ENSG00000276095 | 0.30139824 | -0.02296476 | 0.38527817 | 0.68536535 | NA         | FAM230F     |
| NA        | ENSG00000276096 | 0          | NA          | NA         | NA         | NA         |             |

|           |                 |            |             |            |            |            |           |
|-----------|-----------------|------------|-------------|------------|------------|------------|-----------|
| NA        | ENSG00000276097 | 0.18922458 | 0.01954053  | 0.38488496 | 0.78225479 | NA         |           |
| NA        | ENSG00000276098 | 0          | NA          | NA         | NA         | NA         |           |
| NA        | ENSG00000276100 | 0          | NA          | NA         | NA         | NA         |           |
| NA        | ENSG00000276101 | 0          | NA          | NA         | NA         | NA         |           |
| 102465447 | ENSG00000276102 | 0          | NA          | NA         | NA         | NA         | MIR6747   |
| NA        | ENSG00000276103 | 0          | NA          | NA         | NA         | NA         |           |
| NA        | ENSG00000276105 | 0          | NA          | NA         | NA         | NA         |           |
| NA        | ENSG00000276107 | 0          | NA          | NA         | NA         | NA         | THBS1-IT1 |
| NA        | ENSG00000276109 | 0          | NA          | NA         | NA         | NA         |           |
| NA        | ENSG00000276110 | 0.86564112 | -0.0082628  | 0.38212851 | 0.86120773 | NA         |           |
| NA        | ENSG00000276115 | 28.8008591 | -0.24295786 | 0.3376906  | 0.24712356 | 0.46606087 |           |
| NA        | ENSG00000276116 | 12.985552  | 0.15107517  | 0.35635886 | 0.40378774 | 0.63179407 | FUT8-AS1  |
| NA        | ENSG00000276118 | 0          | NA          | NA         | NA         | NA         |           |
| 392376    | ENSG00000276119 | 0          | NA          | NA         | NA         | NA         | OR13C2    |
| NA        | ENSG00000276121 | 0          | NA          | NA         | NA         | NA         |           |
| NA        | ENSG00000276122 | 0          | NA          | NA         | NA         | NA         |           |
| NA        | ENSG00000276123 | 0          | NA          | NA         | NA         | NA         |           |
| 102466750 | ENSG00000276124 | 0          | NA          | NA         | NA         | NA         | MIR6855   |
| NA        | ENSG00000276127 | 0          | NA          | NA         | NA         | NA         |           |
| NA        | ENSG00000276128 | 7.14718379 | 0.04323833  | 0.35541773 | 0.76132849 | 0.88963735 |           |
| NA        | ENSG00000276131 | 19.0843288 | -0.03042212 | 0.32645898 | 0.85955284 | 0.93751308 |           |
| NA        | ENSG00000276136 | 1.19462447 | 0.01861751  | 0.37911443 | 0.78790431 | NA         |           |
| 102465139 | ENSG00000276137 | 0          | NA          | NA         | NA         | NA         | MIR6133   |
| NA        | ENSG00000276140 | 0          | NA          | NA         | NA         | NA         |           |
| NA        | ENSG00000276141 | 13.7054498 | -0.16202983 | 0.3637846  | 0.36438139 | 0.59407731 | WHAMMP3   |
| 102465247 | ENSG00000276147 | 0          | NA          | NA         | NA         | NA         | MIR548AY  |
| NA        | ENSG00000276148 | 0.61187858 | -0.01558678 | 0.38336658 | 0.72334844 | NA         |           |
| NA        | ENSG00000276149 | 0          | NA          | NA         | NA         | NA         |           |
| NA        | ENSG00000276150 | 0          | NA          | NA         | NA         | NA         |           |
| NA        | ENSG00000276156 | 0          | NA          | NA         | NA         | NA         |           |
| 100302251 | ENSG00000276158 | 0          | NA          | NA         | NA         | NA         | MIR1264   |
| NA        | ENSG00000276160 | 0.34746601 | 0.02370763  | 0.3853651  | 0.61987128 | NA         | GGTLC5P   |
| NA        | ENSG00000276161 | 0          | NA          | NA         | NA         | NA         | SNORA17B  |
| 102466081 | ENSG00000276162 | 0          | NA          | NA         | NA         | NA         | MIR5739   |
| NA        | ENSG00000276166 | 6.0854194  | -0.09416699 | 0.3726233  | 0.48046427 | 0.70158112 |           |
| 6029      | ENSG00000276168 | 168.916333 | -0.4607483  | 0.195896   | 0.00732477 | 0.03209438 | RN7SL1    |
| 102466912 | ENSG00000276169 | 0          | NA          | NA         | NA         | NA         | MIR6871   |
| NA        | ENSG00000276170 | 0          | NA          | NA         | NA         | NA         |           |

|           |                 |            |             |            |            |            |            |
|-----------|-----------------|------------|-------------|------------|------------|------------|------------|
| NA        | ENSG00000276172 | 0          | NA          | NA         | NA         | NA         | ELMO2P1    |
| NA        | ENSG00000276174 | 0.93652842 | -0.01827041 | 0.38097417 | 0.75717385 | NA         |            |
| 102466104 | ENSG00000276176 | 0          | NA          | NA         | NA         | NA         | MIR6090    |
| NA        | ENSG00000276178 | 0          | NA          | NA         | NA         | NA         |            |
| NA        | ENSG00000276179 | 0          | NA          | NA         | NA         | NA         |            |
| 8294      | ENSG00000276180 | 22.4384117 | -0.44909258 | 0.44732272 | 0.07162458 | 0.19481541 | H4C9       |
| 102466196 | ENSG00000276181 | 0          | NA          | NA         | NA         | NA         | MIR6794    |
| NA        | ENSG00000276183 | 0          | NA          | NA         | NA         | NA         |            |
| NA        | ENSG00000276185 | 0          | NA          | NA         | NA         | NA         |            |
| NA        | ENSG00000276188 | 0.83738314 | -0.01013442 | 0.38086921 | 0.85813783 | NA         |            |
| NA        | ENSG00000276189 | 0          | NA          | NA         | NA         | NA         |            |
| NA        | ENSG00000276193 | 0          | NA          | NA         | NA         | NA         |            |
| NA        | ENSG00000276200 | 0          | NA          | NA         | NA         | NA         | RN7SL820P  |
| NA        | ENSG00000276202 | 0          | NA          | NA         | NA         | NA         |            |
| 642929    | ENSG00000276203 | 9.60846347 | -2.34776075 | 1.03015663 | 0.00094674 | 0.0056542  | ANKRD20A3P |
| NA        | ENSG00000276204 | 0          | NA          | NA         | NA         | NA         |            |
| NA        | ENSG00000276205 | 0          | NA          | NA         | NA         | NA         |            |
| NA        | ENSG00000276206 | 0          | NA          | NA         | NA         | NA         |            |
| NA        | ENSG00000276208 | 0          | NA          | NA         | NA         | NA         |            |
| NA        | ENSG00000276210 | 0          | NA          | NA         | NA         | NA         | LINC00226  |
| NA        | ENSG00000276213 | 0          | NA          | NA         | NA         | NA         |            |
| NA        | ENSG00000276214 | 0          | NA          | NA         | NA         | NA         |            |
| NA        | ENSG00000276216 | 2.52852851 | -0.0394821  | 0.37659847 | 0.65754126 | NA         |            |
| 102466874 | ENSG00000276221 | 0          | NA          | NA         | NA         | NA         | MIR8057    |
| NA        | ENSG00000276223 | 0.33951523 | 0.0026274   | 0.38338453 | 0.96337238 | NA         |            |
| NA        | ENSG00000276225 | 0          | NA          | NA         | NA         | NA         |            |
| NA        | ENSG00000276229 | 0          | NA          | NA         | NA         | NA         |            |
| 146850    | ENSG00000276231 | 0          | NA          | NA         | NA         | NA         | PIK3R6     |
| NA        | ENSG00000276232 | 0          | NA          | NA         | NA         | NA         |            |
| NA        | ENSG00000276233 | 0          | NA          | NA         | NA         | NA         |            |
| 6871      | ENSG00000276234 | 378.434298 | -0.14137843 | 0.12961723 | 0.24715643 | 0.46606087 | TADA2A     |
| 26687     | ENSG00000276240 | 0          | NA          | NA         | NA         | NA         | OR4E1      |
| NA        | ENSG00000276241 | 0          | NA          | NA         | NA         | NA         |            |
| NA        | ENSG00000276248 | 77.3703348 | -0.01969177 | 0.21662543 | 0.91111186 | 0.96217913 |            |
| NA        | ENSG00000276250 | 1.7969963  | 0.00017869  | 0.37748987 | 0.99943827 | NA         |            |
| NA        | ENSG00000276251 | 0.68713811 | -0.01906805 | 0.38352241 | 0.66664813 | NA         |            |
| 100506571 | ENSG00000276255 | 2.99082638 | 0.10086764  | 0.39169053 | 0.29330646 | 0.51947867 | LINC02809  |
| NA        | ENSG00000276259 | 0          | NA          | NA         | NA         | NA         |            |



|           |                 |            |             |            |            |            |           |
|-----------|-----------------|------------|-------------|------------|------------|------------|-----------|
| NA        | ENSG00000276261 | 0.35704402 | 0.02381967  | 0.38538147 | 0.61383382 | NA         |           |
| NA        | ENSG00000276266 | 0.14931947 | -0.01844332 | 0.38480212 | 0.84537521 | NA         |           |
| NA        | ENSG00000276269 | 0          | NA          | NA         | NA         | NA         |           |
| 102465479 | ENSG00000276270 | 0          | NA          | NA         | NA         | NA         | MIR6799   |
| NA        | ENSG00000276272 | 2.66986563 | -0.03854964 | 0.37613833 | 0.67054382 | 0.83767652 |           |
| NA        | ENSG00000276277 | 0          | NA          | NA         | NA         | NA         |           |
| NA        | ENSG00000276278 | 0          | NA          | NA         | NA         | NA         |           |
| NA        | ENSG00000276281 | 0          | NA          | NA         | NA         | NA         | RN7SL126P |
| NA        | ENSG00000276282 | 1.00544885 | -0.01895689 | 0.38080664 | 0.75198963 | NA         |           |
| 102723475 | ENSG00000276289 | 0          | NA          | NA         | NA         | NA         | KCNE1B    |
| NA        | ENSG00000276290 | 0.16735865 | 0.01897177  | 0.38482933 | 0.78225479 | NA         | RBBP4P3   |
| NA        | ENSG00000276291 | 377.027608 | 0.19894882  | 0.12419205 | 0.08994969 | 0.23053894 | FRG1HP    |
| NA        | ENSG00000276292 | 0.46771414 | -0.00950395 | 0.38288401 | 0.84882537 | NA         |           |
| 8396      | ENSG00000276293 | 4204.04889 | -0.20053999 | 0.06027045 | 0.00074754 | 0.00458458 | PIP4K2B   |
| NA        | ENSG00000276294 | 0          | NA          | NA         | NA         | NA         |           |
| NA        | ENSG00000276298 | 0.83650145 | -0.03468234 | 0.38346448 | 0.50632851 | NA         |           |
| NA        | ENSG00000276302 | 3.5190504  | -0.02120763 | 0.37071794 | 0.83436648 | 0.9243819  |           |
| NA        | ENSG00000276304 | 0          | NA          | NA         | NA         | NA         |           |
| NA        | ENSG00000276308 | 0          | NA          | NA         | NA         | NA         |           |
| NA        | ENSG00000276309 | 0          | NA          | NA         | NA         | NA         | RN7SKP251 |
| 91380     | ENSG00000276314 | 0          | NA          | NA         | NA         | NA         | SNORD107  |
| NA        | ENSG00000276316 | 0          | NA          | NA         | NA         | NA         | OR8G7P    |
| NA        | ENSG00000276317 | 5.87430093 | 0.21591348  | 0.43935965 | 0.13526853 | 0.30983738 |           |
| NA        | ENSG00000276318 | 0          | NA          | NA         | NA         | NA         | GTF2IP8   |
| 102465876 | ENSG00000276319 | 0          | NA          | NA         | NA         | NA         | MIR8079   |
| 100422969 | ENSG00000276326 | 0          | NA          | NA         | NA         | NA         | MIR2909   |
| NA        | ENSG00000276332 | 0          | NA          | NA         | NA         | NA         |           |
| NA        | ENSG00000276334 | 48.7581535 | 0.16650683  | 0.2644393  | 0.39975384 | 0.62831531 |           |
| NA        | ENSG00000276337 | 3.22346779 | -0.05941554 | 0.37393664 | 0.58689596 | 0.78237765 |           |
| NA        | ENSG00000276348 | 0          | NA          | NA         | NA         | NA         |           |
| 102465517 | ENSG00000276350 | 0          | NA          | NA         | NA         | NA         | MIR6858   |
| 768214    | ENSG00000276352 | 0          | NA          | NA         | NA         | NA         | MIR668    |
| NA        | ENSG00000276353 | 0          | NA          | NA         | NA         | NA         |           |
| NA        | ENSG00000276359 | 0          | NA          | NA         | NA         | NA         |           |
| NA        | ENSG00000276362 | 0          | NA          | NA         | NA         | NA         |           |
| 406937    | ENSG00000276365 | 0          | NA          | NA         | NA         | NA         | MIR145    |
| NA        | ENSG00000276366 | 0          | NA          | NA         | NA         | NA         |           |
| 8331      | ENSG00000276368 | 4.97983557 | 0.09311851  | 0.37397877 | 0.47760352 | 0.69938463 | H2AC14    |

|           |                 |            |             |            |            |            |           |
|-----------|-----------------|------------|-------------|------------|------------|------------|-----------|
| NA        | ENSG00000276375 | 0          | NA          | NA         | NA         | NA         |           |
| NA        | ENSG00000276376 | 0          | NA          | NA         | NA         | NA         |           |
| 389898    | ENSG00000276380 | 0          | NA          | NA         | NA         | NA         | UBE2NL    |
| NA        | ENSG00000276384 | 0.53677124 | 0.01456045  | 0.38297824 | 0.72907664 | NA         |           |
| NA        | ENSG00000276385 | 0          | NA          | NA         | NA         | NA         |           |
| NA        | ENSG00000276386 | 0          | NA          | NA         | NA         | NA         | CNTNAP3P2 |
| NA        | ENSG00000276388 | 0          | NA          | NA         | NA         | NA         |           |
| NA        | ENSG00000276390 | 0.68121916 | 0.03109317  | 0.38355837 | 0.54962576 | NA         |           |
| NA        | ENSG00000276391 | 0.15069912 | -0.01848503 | 0.38480575 | 0.84537521 | NA         |           |
| NA        | ENSG00000276393 | 0          | NA          | NA         | NA         | NA         |           |
| NA        | ENSG00000276396 | 0          | NA          | NA         | NA         | NA         |           |
| 400661    | ENSG00000276397 | 0          | NA          | NA         | NA         | NA         | LINC01879 |
| NA        | ENSG00000276398 | 0          | NA          | NA         | NA         | NA         |           |
| 284124    | ENSG00000276399 | 3.80952611 | -0.12166872 | 0.39580717 | 0.26482032 | 0.48706137 |           |
| NA        | ENSG00000276400 | 0          | NA          | NA         | NA         | NA         | VN1R9P    |
| NA        | ENSG00000276403 | 0          | NA          | NA         | NA         | NA         |           |
| 102465502 | ENSG00000276404 | 0          | NA          | NA         | NA         | NA         | MIR6835   |
| NA        | ENSG00000276405 | 0.32263008 | -0.02325534 | 0.38531886 | 0.66952656 | NA         | TRBV13    |
| NA        | ENSG00000276406 | 0          | NA          | NA         | NA         | NA         |           |
| NA        | ENSG00000276407 | 0          | NA          | NA         | NA         | NA         |           |
| NA        | ENSG00000276408 | 1.54756073 | 0.02384472  | 0.37814908 | 0.75407751 | NA         |           |
| 6358      | ENSG00000276409 | 0          | NA          | NA         | NA         | NA         | CCL14     |
| 3018      | ENSG00000276410 | 0          | NA          | NA         | NA         | NA         | H2BC3     |
| NA        | ENSG00000276411 | 0          | NA          | NA         | NA         | NA         |           |
| NA        | ENSG00000276412 | 0.68701652 | 0.00324998  | 0.3812756  | 0.94919995 | NA         |           |
| NA        | ENSG00000276413 | 0          | NA          | NA         | NA         | NA         |           |
| NA        | ENSG00000276417 | 2.26396549 | 0.11803459  | 0.40014203 | 0.20193854 | NA         |           |
| NA        | ENSG00000276418 | 2.48404286 | -0.07900588 | 0.3854693  | 0.38404381 | NA         |           |
| NA        | ENSG00000276422 | 0          | NA          | NA         | NA         | NA         |           |
| NA        | ENSG00000276426 | 0          | NA          | NA         | NA         | NA         |           |
| NA        | ENSG00000276427 | 0          | NA          | NA         | NA         | NA         | IGLL4P    |
| NA        | ENSG00000276428 | 0          | NA          | NA         | NA         | NA         |           |
| NA        | ENSG00000276431 | 0          | NA          | NA         | NA         | NA         |           |
| NA        | ENSG00000276434 | 2.91941937 | -0.08600427 | 0.38494558 | 0.38628691 | 0.61547802 |           |
| NA        | ENSG00000276436 | 0.45209736 | -0.02505403 | 0.38558831 | 0.57865948 | NA         |           |
| NA        | ENSG00000276445 | 3.32446456 | -0.06143515 | 0.37456975 | 0.57167861 | 0.7718342  |           |
| NA        | ENSG00000276449 | 41.7788933 | 0.24679967  | 0.29971738 | 0.23867972 | 0.45642463 |           |
| NA        | ENSG00000276454 | 0          | NA          | NA         | NA         | NA         |           |

|           |                 |            |             |            |            |            |          |
|-----------|-----------------|------------|-------------|------------|------------|------------|----------|
| NA        | ENSG00000276457 | 0          | NA          | NA         | NA         | NA         | FKBP4P8  |
| NA        | ENSG00000276460 | 0          | NA          | NA         | NA         | NA         |          |
| 440896    | ENSG00000276462 | 0.16735865 | 0.01897177  | 0.38482933 | 0.78225479 | NA         |          |
| NA        | ENSG00000276467 | 0          | NA          | NA         | NA         | NA         |          |
| NA        | ENSG00000276470 | 0          | NA          | NA         | NA         | NA         |          |
| NA        | ENSG00000276471 | 0          | NA          | NA         | NA         | NA         |          |
| NA        | ENSG00000276473 | 0          | NA          | NA         | NA         | NA         |          |
| NA        | ENSG00000276474 | 0          | NA          | NA         | NA         | NA         |          |
| NA        | ENSG00000276475 | 0          | NA          | NA         | NA         | NA         |          |
| 100506622 | ENSG00000276476 | 0          | NA          | NA         | NA         | NA         |          |
| NA        | ENSG00000276478 | 0          | NA          | NA         | NA         | NA         |          |
| 102466162 | ENSG00000276479 | 0          | NA          | NA         | NA         | NA         | MIR548AZ |
| NA        | ENSG00000276484 | 0          | NA          | NA         | NA         | NA         |          |
| NA        | ENSG00000276486 | 0          | NA          | NA         | NA         | NA         |          |
| NA        | ENSG00000276487 | 0          | NA          | NA         | NA         | NA         |          |
| NA        | ENSG00000276488 | 19.1171241 | 0.18624994  | 0.3587826  | 0.33216318 | 0.56133881 |          |
| 102465977 | ENSG00000276489 | 0          | NA          | NA         | NA         | NA         | MIR6829  |
| NA        | ENSG00000276490 | 0          | NA          | NA         | NA         | NA         |          |
| NA        | ENSG00000276493 | 0          | NA          | NA         | NA         | NA         |          |
| NA        | ENSG00000276494 | 0          | NA          | NA         | NA         | NA         |          |
| NA        | ENSG00000276496 | 0          | NA          | NA         | NA         | NA         |          |
| NA        | ENSG00000276500 | 0.15069912 | -0.01848503 | 0.38480575 | 0.84537521 | NA         | BMS1P14  |
| NA        | ENSG00000276502 | 0          | NA          | NA         | NA         | NA         |          |
| NA        | ENSG00000276505 | 2.53395198 | -0.0587973  | 0.37907006 | 0.53148983 | NA         |          |
| NA        | ENSG00000276507 | 0          | NA          | NA         | NA         | NA         |          |
| NA        | ENSG00000276508 | 0          | NA          | NA         | NA         | NA         |          |
| NA        | ENSG00000276509 | 0          | NA          | NA         | NA         | NA         |          |
| NA        | ENSG00000276514 | 0          | NA          | NA         | NA         | NA         |          |
| NA        | ENSG00000276517 | 40.5793905 | 0.0467387   | 0.26433332 | 0.80835065 | 0.91317199 |          |
| NA        | ENSG00000276519 | 0          | NA          | NA         | NA         | NA         |          |
| NA        | ENSG00000276520 | 0          | NA          | NA         | NA         | NA         |          |
| NA        | ENSG00000276521 | 0          | NA          | NA         | NA         | NA         |          |
| NA        | ENSG00000276523 | 10.5946635 | -0.03768097 | 0.34001885 | 0.81432526 | 0.91592004 |          |
| NA        | ENSG00000276524 | 2.31439863 | -0.01218419 | 0.3722753  | 0.89718892 | NA         |          |
| NA        | ENSG00000276525 | 0          | NA          | NA         | NA         | NA         |          |
| NA        | ENSG00000276527 | 0.34624801 | -0.02356563 | 0.38536324 | 0.65270996 | NA         |          |
| NA        | ENSG00000276528 | 0          | NA          | NA         | NA         | NA         |          |
| NA        | ENSG00000276529 | 49.7241084 | 0.3817449   | 0.3018198  | 0.08316794 | 0.21765622 |          |

|           |                 |            |             |            |            |            |           |
|-----------|-----------------|------------|-------------|------------|------------|------------|-----------|
| NA        | ENSG00000276530 | 0          | NA          | NA         | NA         | NA         |           |
| NA        | ENSG00000276531 | 0          | NA          | NA         | NA         | NA         | SNX19P4   |
| NA        | ENSG00000276532 | 0.14931947 | -0.01844332 | 0.38480212 | 0.84537521 | NA         |           |
| NA        | ENSG00000276533 | 1.72725701 | 0.03050331  | 0.37860118 | 0.69255693 | NA         |           |
| NA        | ENSG00000276535 | 0          | NA          | NA         | NA         | NA         |           |
| NA        | ENSG00000276538 | 0          | NA          | NA         | NA         | NA         |           |
| NA        | ENSG00000276540 | 0          | NA          | NA         | NA         | NA         | REXO1L10P |
| NA        | ENSG00000276542 | 0          | NA          | NA         | NA         | NA         |           |
| NA        | ENSG00000276545 | 1.96685766 | -0.01840045 | 0.37396164 | 0.83870637 | NA         | PCDHGB9P  |
| 56101     | ENSG00000276547 | 11.6930162 | -2.2301475  | 0.85289824 | 0.00043235 | 0.00284129 | PCDHGB5   |
| NA        | ENSG00000276548 | 0          | NA          | NA         | NA         | NA         |           |
| NA        | ENSG00000276550 | 2920.49418 | 0.36689971  | 0.0743051  | 4.68E-07   | 5.61E-06   | HERC2P2   |
| NA        | ENSG00000276556 | 0          | NA          | NA         | NA         | NA         |           |
| NA        | ENSG00000276557 | 0          | NA          | NA         | NA         | NA         | TRBV18    |
| NA        | ENSG00000276562 | 0.33471731 | 0.02354391  | 0.38534154 | 0.62842204 | NA         | RN7SL565P |
| NA        | ENSG00000276563 | 0          | NA          | NA         | NA         | NA         |           |
| NA        | ENSG00000276564 | 4.94792543 | -0.12283122 | 0.38509809 | 0.3522174  | 0.58213871 |           |
| NA        | ENSG00000276566 | 0          | NA          | NA         | NA         | NA         | IGKV1D-13 |
| NA        | ENSG00000276568 | 0          | NA          | NA         | NA         | NA         |           |
| NA        | ENSG00000276569 | 0.14931947 | -0.01844332 | 0.38480212 | 0.84537521 | NA         |           |
| NA        | ENSG00000276570 | 97.0699919 | -0.0037875  | 0.20200197 | 0.98108167 | 0.99355086 |           |
| NA        | ENSG00000276571 | 5.88257718 | 0.06985454  | 0.36645279 | 0.59897752 | 0.7902982  |           |
| NA        | ENSG00000276573 | 0          | NA          | NA         | NA         | NA         |           |
| 102465539 | ENSG00000276575 | 0          | NA          | NA         | NA         | NA         | MIR6895   |
| NA        | ENSG00000276576 | 0          | NA          | NA         | NA         | NA         | MRPL30P1  |
| NA        | ENSG00000276577 | 0          | NA          | NA         | NA         | NA         | RNU6-467P |
| NA        | ENSG00000276578 | 0.33471731 | 0.02354391  | 0.38534154 | 0.62842204 | NA         |           |
| 102465861 | ENSG00000276580 | 0          | NA          | NA         | NA         | NA         | MIR8055   |
| 727905    | ENSG00000276581 | 0          | NA          | NA         | NA         | NA         | SPATA31A5 |
| 102465441 | ENSG00000276584 | 0          | NA          | NA         | NA         | NA         | MIR6737   |
| NA        | ENSG00000276586 | 0          | NA          | NA         | NA         | NA         |           |
| NA        | ENSG00000276588 | 0          | NA          | NA         | NA         | NA         | RN7SL322P |
| NA        | ENSG00000276592 | 8.90498429 | 0.09965346  | 0.37448549 | 0.45944449 | 0.68258752 | PHBP6     |
| NA        | ENSG00000276593 | 0.32226603 | -0.0232524  | 0.38531842 | 0.66973715 | NA         |           |
| NA        | ENSG00000276597 | 0          | NA          | NA         | NA         | NA         | TRBV11-3  |
| 102466271 | ENSG00000276598 | 0          | NA          | NA         | NA         | NA         | MIR6893   |
| NA        | ENSG00000276599 | 0          | NA          | NA         | NA         | NA         | RNA5SP411 |
| 338382    | ENSG00000276600 | 2.60522964 | 0.14670188  | 0.41655553 | 0.10370718 | 0.25616912 | RAB7B     |

|           |                 |            |             |            |            |            |            |
|-----------|-----------------|------------|-------------|------------|------------|------------|------------|
| NA        | ENSG00000276601 | 0          | NA          | NA         | NA         | NA         |            |
| NA        | ENSG00000276603 | 8.30237667 | 0.04707498  | 0.34984612 | 0.75823587 | 0.88767331 |            |
| NA        | ENSG00000276605 | 0          | NA          | NA         | NA         | NA         |            |
| NA        | ENSG00000276609 | 0          | NA          | NA         | NA         | NA         |            |
| 347686    | ENSG00000276610 | 0          | NA          | NA         | NA         | NA         | SNORD64    |
| NA        | ENSG00000276612 | 3.16468152 | -0.09884366 | 0.40281625 | 0.0316241  | 0.10460523 |            |
| NA        | ENSG00000276620 | 0          | NA          | NA         | NA         | NA         |            |
| 102465246 | ENSG00000276622 | 0          | NA          | NA         | NA         | NA         | MIR6499    |
| NA        | ENSG00000276623 | 0          | NA          | NA         | NA         | NA         |            |
| NA        | ENSG00000276626 | 0          | NA          | NA         | NA         | NA         |            |
| NA        | ENSG00000276627 | 0          | NA          | NA         | NA         | NA         |            |
| NA        | ENSG00000276631 | 0          | NA          | NA         | NA         | NA         |            |
| NA        | ENSG00000276632 | 0          | NA          | NA         | NA         | NA         |            |
| NA        | ENSG00000276633 | 2.67921445 | -0.01143558 | 0.37325097 | 0.89935829 | 0.95557174 |            |
| NA        | ENSG00000276637 | 0          | NA          | NA         | NA         | NA         |            |
| NA        | ENSG00000276638 | 0          | NA          | NA         | NA         | NA         |            |
| 102465691 | ENSG00000276639 | 0          | NA          | NA         | NA         | NA         | MIR7154    |
| 102466731 | ENSG00000276641 | 0          | NA          | NA         | NA         | NA         | MIR6769A   |
| NA        | ENSG00000276642 | 0          | NA          | NA         | NA         | NA         |            |
| NA        | ENSG00000276643 | 0          | NA          | NA         | NA         | NA         |            |
| 1602      | ENSG00000276644 | 1138.93472 | 4.01002781  | 0.10958321 | 1.66E-294  | 8.24E-291  | DACH1      |
| NA        | ENSG00000276645 | 0          | NA          | NA         | NA         | NA         |            |
| NA        | ENSG00000276647 | 0          | NA          | NA         | NA         | NA         | KRTAP12-6P |
| NA        | ENSG00000276649 | 0.53049881 | 0.01326049  | 0.38343034 | 0.74975254 | NA         |            |
| NA        | ENSG00000276650 | 0          | NA          | NA         | NA         | NA         |            |
| NA        | ENSG00000276651 | 1.50441073 | 0.03963016  | 0.38174129 | 0.56370798 | NA         |            |
| NA        | ENSG00000276653 | 0          | NA          | NA         | NA         | NA         | RN7SL856P  |
| 102464832 | ENSG00000276656 | 0          | NA          | NA         | NA         | NA         | MIR6083    |
| NA        | ENSG00000276662 | 0.173124   | -0.01911262 | 0.38486262 | 0.84537521 | NA         |            |
| NA        | ENSG00000276663 | 2.36074624 | -0.07695585 | 0.38781934 | 0.33303631 | NA         |            |
| NA        | ENSG00000276664 | 0          | NA          | NA         | NA         | NA         |            |
| NA        | ENSG00000276667 | 0          | NA          | NA         | NA         | NA         |            |
| NA        | ENSG00000276668 | 0          | NA          | NA         | NA         | NA         |            |
| NA        | ENSG00000276669 | 0          | NA          | NA         | NA         | NA         |            |
| NA        | ENSG00000276670 | 0          | NA          | NA         | NA         | NA         |            |
| NA        | ENSG00000276672 | 97.8543013 | -0.74062199 | 0.24851519 | 0.00051875 | 0.00333181 |            |
| NA        | ENSG00000276673 | 0          | NA          | NA         | NA         | NA         |            |
| NA        | ENSG00000276674 | 0.70570654 | 0.05131008  | 0.38860761 | 0.29541608 | NA         | IGKV1OR1-1 |

|           |                 |            |             |            |            |            |          |
|-----------|-----------------|------------|-------------|------------|------------|------------|----------|
| NA        | ENSG00000276675 | 0          | NA          | NA         | NA         | NA         |          |
| NA        | ENSG00000276678 | 0          | NA          | NA         | NA         | NA         |          |
| NA        | ENSG00000276680 | 0          | NA          | NA         | NA         | NA         |          |
| NA        | ENSG00000276685 | 0          | NA          | NA         | NA         | NA         |          |
| NA        | ENSG00000276687 | 0          | NA          | NA         | NA         | NA         |          |
| NA        | ENSG00000276688 | 0          | NA          | NA         | NA         | NA         |          |
| NA        | ENSG00000276689 | 0          | NA          | NA         | NA         | NA         |          |
| NA        | ENSG00000276690 | 0          | NA          | NA         | NA         | NA         |          |
| NA        | ENSG00000276691 | 0.32408082 | -0.02327506 | 0.38532165 | 0.66846077 | NA         |          |
| NA        | ENSG00000276693 | 0          | NA          | NA         | NA         | NA         |          |
| NA        | ENSG00000276696 | 0          | NA          | NA         | NA         | NA         |          |
| NA        | ENSG00000276698 | 8.04910117 | -0.04099162 | 0.35242121 | 0.77807349 | 0.8983839  |          |
| NA        | ENSG00000276699 | 0          | NA          | NA         | NA         | NA         | TRAJ36   |
| NA        | ENSG00000276702 | 0.60003146 | -0.03562257 | 0.38653686 | 0.43872569 | NA         |          |
| NA        | ENSG00000276703 | 0          | NA          | NA         | NA         | NA         | RPS29P32 |
| NA        | ENSG00000276704 | 0.63771199 | 0.00378457  | 0.38197571 | 0.93497191 | NA         |          |
| NA        | ENSG00000276706 | 0          | NA          | NA         | NA         | NA         |          |
| NA        | ENSG00000276707 | 0          | NA          | NA         | NA         | NA         |          |
| NA        | ENSG00000276710 | 448.847845 | 0.24625784  | 0.1190435  | 0.02917187 | 0.09819645 | CSPG4P10 |
| 102465668 | ENSG00000276712 | 0          | NA          | NA         | NA         | NA         | MIR7111  |
| NA        | ENSG00000276713 | 0          | NA          | NA         | NA         | NA         |          |
| 284100    | ENSG00000276715 | 0          | NA          | NA         | NA         | NA         | YWHAEP7  |
| 138652    | ENSG00000276717 | 0          | NA          | NA         | NA         | NA         | PRSS47   |
| NA        | ENSG00000276718 | 2.10761536 | -0.00142752 | 0.37291694 | 0.98636314 | NA         |          |
| NA        | ENSG00000276721 | 0          | NA          | NA         | NA         | NA         |          |
| NA        | ENSG00000276722 | 0          | NA          | NA         | NA         | NA         |          |
| NA        | ENSG00000276723 | 0          | NA          | NA         | NA         | NA         |          |
| NA        | ENSG00000276724 | 14.8462314 | 0.02435173  | 0.3285627  | 0.88936518 | 0.95181279 |          |
| NA        | ENSG00000276727 | 1.46019832 | 0.03756734  | 0.381584   | 0.58026397 | NA         |          |
| NA        | ENSG00000276728 | 17.5151265 | -0.10784387 | 0.32656919 | 0.56076933 | 0.76437187 |          |
| NA        | ENSG00000276729 | 0          | NA          | NA         | NA         | NA         |          |
| NA        | ENSG00000276730 | 0          | NA          | NA         | NA         | NA         |          |
| 102465693 | ENSG00000276733 | 0          | NA          | NA         | NA         | NA         | MIR7158  |
| NA        | ENSG00000276735 | 0          | NA          | NA         | NA         | NA         |          |
| NA        | ENSG00000276738 | 0          | NA          | NA         | NA         | NA         |          |
| NA        | ENSG00000276740 | 3.53096051 | 0.02532255  | 0.37079065 | 0.80823618 | 0.91317199 |          |
| NA        | ENSG00000276742 | 3.61721762 | -0.11298968 | 0.39956734 | 0.19530713 | 0.39885676 |          |
| NA        | ENSG00000276744 | 2.74610496 | -0.00203422 | 0.37225637 | 0.98116685 | 0.99355086 |          |

|           |                 |            |             |            |            |            |           |
|-----------|-----------------|------------|-------------|------------|------------|------------|-----------|
| NA        | ENSG00000276746 | 0.173733   | 0.01914545  | 0.38484597 | 0.78225479 | NA         |           |
| 353238    | ENSG00000276747 | 0          | NA          | NA         | NA         | NA         | PADI6     |
| 102465493 | ENSG00000276753 | 0          | NA          | NA         | NA         | NA         | MIR6821   |
| NA        | ENSG00000276754 | 0          | NA          | NA         | NA         | NA         |           |
| NA        | ENSG00000276755 | 0          | NA          | NA         | NA         | NA         |           |
| 101927429 | ENSG00000276756 | 0          | NA          | NA         | NA         | NA         |           |
| NA        | ENSG00000276757 | 1.96679103 | 0.01420474  | 0.37556035 | 0.86723251 | NA         | RN7SL192P |
| NA        | ENSG00000276758 | 0          | NA          | NA         | NA         | NA         |           |
| 100506422 | ENSG00000276759 | 0          | NA          | NA         | NA         | NA         |           |
| NA        | ENSG00000276763 | 1.29722529 | -0.04671242 | 0.38248005 | 0.50707354 | NA         |           |
| NA        | ENSG00000276764 | 0          | NA          | NA         | NA         | NA         |           |
| 102465872 | ENSG00000276765 | 0          | NA          | NA         | NA         | NA         | MIR8073   |
| NA        | ENSG00000276768 | 1.09852966 | 0.05084136  | 0.38677412 | 0.33197309 | NA         |           |
| 102465450 | ENSG00000276769 | 0          | NA          | NA         | NA         | NA         | MIR6752   |
| 102466746 | ENSG00000276770 | 0          | NA          | NA         | NA         | NA         | MIR6780B  |
| NA        | ENSG00000276771 | 0          | NA          | NA         | NA         | NA         |           |
| NA        | ENSG00000276772 | 1.04377002 | 0.02693717  | 0.38147744 | 0.65445005 | NA         |           |
| NA        | ENSG00000276775 | 0          | NA          | NA         | NA         | NA         | IGHV4-4   |
| 101927697 | ENSG00000276778 | 0.18922458 | 0.01954053  | 0.38488496 | 0.78225479 | NA         | LINC02227 |
| NA        | ENSG00000276782 | 0          | NA          | NA         | NA         | NA         |           |
| NA        | ENSG00000276784 | 0          | NA          | NA         | NA         | NA         |           |
| NA        | ENSG00000276786 | 0          | NA          | NA         | NA         | NA         |           |
| 9302      | ENSG00000276788 | 0          | NA          | NA         | NA         | NA         | SNORD26   |
| NA        | ENSG00000276789 | 0          | NA          | NA         | NA         | NA         | MRGPRX8P  |
| NA        | ENSG00000276790 | 0          | NA          | NA         | NA         | NA         |           |
| NA        | ENSG00000276791 | 40.1223873 | 0.10575899  | 0.27863391 | 0.59104561 | 0.78568476 |           |
| NA        | ENSG00000276800 | 0          | NA          | NA         | NA         | NA         |           |
| NA        | ENSG00000276805 | 301.502199 | 0.42204341  | 0.14209629 | 0.00141286 | 0.00797085 |           |
| NA        | ENSG00000276807 | 0.173733   | 0.01914545  | 0.38484597 | 0.78225479 | NA         |           |
| NA        | ENSG00000276809 | 0          | NA          | NA         | NA         | NA         |           |
| NA        | ENSG00000276810 | 0          | NA          | NA         | NA         | NA         |           |
| NA        | ENSG00000276814 | 9.8234205  | 0.079061    | 0.35024309 | 0.6232102  | 0.80781983 |           |
| NA        | ENSG00000276819 | 0          | NA          | NA         | NA         | NA         | TRBV15    |
| NA        | ENSG00000276822 | 0          | NA          | NA         | NA         | NA         |           |
| NA        | ENSG00000276823 | 0          | NA          | NA         | NA         | NA         |           |
| 102466816 | ENSG00000276824 | 0          | NA          | NA         | NA         | NA         | MIR7159   |
| NA        | ENSG00000276828 | 0          | NA          | NA         | NA         | NA         |           |
| NA        | ENSG00000276829 | 0          | NA          | NA         | NA         | NA         |           |

|           |                 |            |             |            |            |            |             |
|-----------|-----------------|------------|-------------|------------|------------|------------|-------------|
| 102466722 | ENSG00000276830 | 0          | NA          | NA         | NA         | NA         | MIR6730     |
| NA        | ENSG00000276831 | 0.30139824 | -0.02296476 | 0.38527817 | 0.68536535 | NA         |             |
| NA        | ENSG00000276832 | 1.21626245 | 0.03965742  | 0.38256794 | 0.533389   | NA         | CDRT15P6    |
| 102466615 | ENSG00000276835 | 0          | NA          | NA         | NA         | NA         | MIR6127     |
| NA        | ENSG00000276839 | 0          | NA          | NA         | NA         | NA         |             |
| NA        | ENSG00000276840 | 9.55734828 | 0.13313262  | 0.36976171 | 0.40921821 | 0.63717543 | PMS2P10     |
| NA        | ENSG00000276841 | 0          | NA          | NA         | NA         | NA         |             |
| NA        | ENSG00000276842 | 0.173733   | 0.01914545  | 0.38484597 | 0.78225479 | NA         |             |
| 100873857 | ENSG00000276844 | 0          | NA          | NA         | NA         | NA         | SNORD115-46 |
| NA        | ENSG00000276845 | 0          | NA          | NA         | NA         | NA         |             |
| NA        | ENSG00000276846 | 8.04270553 | 0.06037458  | 0.35554821 | 0.68364593 | 0.84581786 |             |
| NA        | ENSG00000276850 | 1.14858857 | -0.03549141 | 0.38374256 | 0.50832842 | NA         |             |
| NA        | ENSG00000276851 | 0          | NA          | NA         | NA         | NA         |             |
| NA        | ENSG00000276853 | 0.67473129 | 0.00384526  | 0.38189887 | 0.93462458 | NA         |             |
| NA        | ENSG00000276854 | 0          | NA          | NA         | NA         | NA         |             |
| NA        | ENSG00000276855 | 26.986756  | 0.33734509  | 0.37213583 | 0.13631995 | 0.3113874  |             |
| 102466189 | ENSG00000276857 | 0          | NA          | NA         | NA         | NA         | MIR6715A    |
| NA        | ENSG00000276859 | 0          | NA          | NA         | NA         | NA         |             |
| NA        | ENSG00000276863 | 2.52948539 | 0.03096919  | 0.37223509 | 0.75973879 | NA         |             |
| 102466814 | ENSG00000276866 | 0          | NA          | NA         | NA         | NA         | MIR7151     |
| NA        | ENSG00000276867 | 1.96655492 | -0.01337974 | 0.3740002  | 0.88031473 | NA         |             |
| NA        | ENSG00000276868 | 0          | NA          | NA         | NA         | NA         |             |
| 102466982 | ENSG00000276869 | 0          | NA          | NA         | NA         | NA         | MIR6729     |
| NA        | ENSG00000276871 | 0          | NA          | NA         | NA         | NA         |             |
| NA        | ENSG00000276873 | 0          | NA          | NA         | NA         | NA         |             |
| NA        | ENSG00000276874 | 0          | NA          | NA         | NA         | NA         |             |
| 102464827 | ENSG00000276878 | 0          | NA          | NA         | NA         | NA         | MIR6074     |
| NA        | ENSG00000276884 | 0          | NA          | NA         | NA         | NA         |             |
| NA        | ENSG00000276888 | 0          | NA          | NA         | NA         | NA         |             |
| NA        | ENSG00000276890 | 0          | NA          | NA         | NA         | NA         |             |
| NA        | ENSG00000276892 | 0          | NA          | NA         | NA         | NA         |             |
| NA        | ENSG00000276894 | 0          | NA          | NA         | NA         | NA         | RAB28P4     |
| NA        | ENSG00000276897 | 0          | NA          | NA         | NA         | NA         |             |
| NA        | ENSG00000276898 | 0          | NA          | NA         | NA         | NA         |             |
| NA        | ENSG00000276900 | 26.4719937 | 0.18604143  | 0.32061597 | 0.35873274 | 0.58907942 |             |
| NA        | ENSG00000276902 | 0          | NA          | NA         | NA         | NA         |             |
| 8332      | ENSG00000276903 | 3.62351963 | 0.00610356  | 0.37090029 | 0.9530699  | 0.98058207 | H2AC16      |
| 102466222 | ENSG00000276908 | 0          | NA          | NA         | NA         | NA         | MIR7106     |



|           |                 |            |             |            |            |            |           |
|-----------|-----------------|------------|-------------|------------|------------|------------|-----------|
| NA        | ENSG00000276915 | 0          | NA          | NA         | NA         | NA         |           |
| NA        | ENSG00000276916 | 0.65098547 | 0.00359692  | 0.3825002  | 0.93181962 | NA         |           |
| 102465877 | ENSG00000276917 | 0          | NA          | NA         | NA         | NA         | MIR8080   |
| NA        | ENSG00000276918 | 0.173733   | 0.01914545  | 0.38484597 | 0.78225479 | NA         |           |
| NA        | ENSG00000276919 | 0          | NA          | NA         | NA         | NA         |           |
| NA        | ENSG00000276923 | 0          | NA          | NA         | NA         | NA         |           |
| NA        | ENSG00000276925 | 0.45209736 | -0.02505403 | 0.38558831 | 0.57865948 | NA         |           |
| 102465478 | ENSG00000276926 | 0          | NA          | NA         | NA         | NA         | MIR6797   |
| NA        | ENSG00000276928 | 0          | NA          | NA         | NA         | NA         |           |
| NA        | ENSG00000276929 | 0          | NA          | NA         | NA         | NA         |           |
| NA        | ENSG00000276931 | 7.33038048 | -0.02836818 | 0.35403337 | 0.83882211 | 0.92674595 |           |
| NA        | ENSG00000276934 | 0.32260595 | -0.02325515 | 0.38531883 | 0.66954051 | NA         |           |
| NA        | ENSG00000276940 | 0          | NA          | NA         | NA         | NA         | PLCE1P1   |
| 100616223 | ENSG00000276941 | 0          | NA          | NA         | NA         | NA         | MIR4509-1 |
| NA        | ENSG00000276945 | 0.70331416 | 0.02958609  | 0.38326776 | 0.54748446 | NA         |           |
| NA        | ENSG00000276949 | 0          | NA          | NA         | NA         | NA         |           |
| 25774     | ENSG00000276950 | 0          | NA          | NA         | NA         | NA         | GSTT4     |
| NA        | ENSG00000276951 | 0          | NA          | NA         | NA         | NA         |           |
| NA        | ENSG00000276952 | 5.40885854 | 0.03048993  | 0.36128039 | 0.81391223 | 0.91592004 |           |
| NA        | ENSG00000276953 | 0          | NA          | NA         | NA         | NA         | TRBV12-4  |
| NA        | ENSG00000276956 | 0          | NA          | NA         | NA         | NA         | RN7SL769P |
| NA        | ENSG00000276957 | 0.75104288 | -0.04349784 | 0.38757508 | 0.34403672 | NA         |           |
| NA        | ENSG00000276958 | 0          | NA          | NA         | NA         | NA         |           |
| NA        | ENSG00000276960 | 0          | NA          | NA         | NA         | NA         |           |
| 102466865 | ENSG00000276961 | 0          | NA          | NA         | NA         | NA         | MIR7848   |
| NA        | ENSG00000276963 | 0          | NA          | NA         | NA         | NA         |           |
| NA        | ENSG00000276965 | 0          | NA          | NA         | NA         | NA         |           |
| 8367      | ENSG00000276966 | 8.09806559 | -0.14937405 | 0.38044031 | 0.34416296 | 0.57451506 | H4C5      |
| NA        | ENSG00000276968 | 2.59024499 | 0.05250777  | 0.37835912 | 0.56851877 | 0.76931138 |           |
| NA        | ENSG00000276972 | 0          | NA          | NA         | NA         | NA         |           |
| NA        | ENSG00000276975 | 0.5837379  | 0.0245281   | 0.38472593 | 0.69335578 | NA         | HYDIN2    |
| NA        | ENSG00000276980 | 0          | NA          | NA         | NA         | NA         |           |
| NA        | ENSG00000276984 | 0          | NA          | NA         | NA         | NA         |           |
| NA        | ENSG00000276988 | 0.173733   | 0.01914545  | 0.38484597 | 0.78225479 | NA         |           |
| NA        | ENSG00000276991 | 0          | NA          | NA         | NA         | NA         |           |
| NA        | ENSG00000276992 | 0          | NA          | NA         | NA         | NA         |           |
| NA        | ENSG00000276993 | 0          | NA          | NA         | NA         | NA         |           |
| NA        | ENSG00000276997 | 47.649042  | 0.07361798  | 0.27709036 | 0.70576177 | 0.85814264 |           |

|           |                 |            |             |            |            |            |            |
|-----------|-----------------|------------|-------------|------------|------------|------------|------------|
| NA        | ENSG00000276998 | 0          | NA          | NA         | NA         | NA         | REXO1L2P   |
| NA        | ENSG00000277000 | 0          | NA          | NA         | NA         | NA         | DUSP12P1   |
| NA        | ENSG00000277001 | 0          | NA          | NA         | NA         | NA         |            |
| NA        | ENSG00000277003 | 0          | NA          | NA         | NA         | NA         |            |
| NA        | ENSG00000277004 | 0          | NA          | NA         | NA         | NA         | RNA5SP412  |
| NA        | ENSG00000277007 | 16.7665123 | 0.25864358  | 0.39820124 | 0.20098163 | 0.40615916 |            |
| NA        | ENSG00000277008 | 0          | NA          | NA         | NA         | NA         | TEX28P2    |
| NA        | ENSG00000277009 | 0          | NA          | NA         | NA         | NA         |            |
| NA        | ENSG00000277010 | 0          | NA          | NA         | NA         | NA         |            |
| NA        | ENSG00000277011 | 0          | NA          | NA         | NA         | NA         |            |
| NA        | ENSG00000277013 | 1.63069617 | -0.01231367 | 0.37862262 | 0.85887314 | NA         |            |
| NA        | ENSG00000277017 | 0          | NA          | NA         | NA         | NA         |            |
| NA        | ENSG00000277020 | 0          | NA          | NA         | NA         | NA         |            |
| NA        | ENSG00000277022 | 2.33644147 | 0.04229494  | 0.38352298 | 0.49541098 | NA         |            |
| NA        | ENSG00000277024 | 0          | NA          | NA         | NA         | NA         |            |
| NA        | ENSG00000277027 | 2.53075038 | -0.09880392 | 0.39372731 | 0.25053928 | NA         | RMRP       |
| NA        | ENSG00000277029 | 0          | NA          | NA         | NA         | NA         | RNU6-1192P |
| NA        | ENSG00000277031 | 0          | NA          | NA         | NA         | NA         | RN7SL796P  |
| NA        | ENSG00000277034 | 0          | NA          | NA         | NA         | NA         |            |
| NA        | ENSG00000277035 | 0          | NA          | NA         | NA         | NA         |            |
| NA        | ENSG00000277039 | 0          | NA          | NA         | NA         | NA         |            |
| NA        | ENSG00000277040 | 0          | NA          | NA         | NA         | NA         |            |
| NA        | ENSG00000277041 | 0          | NA          | NA         | NA         | NA         |            |
| NA        | ENSG00000277043 | 0          | NA          | NA         | NA         | NA         | EEF1A1P42  |
| NA        | ENSG00000277047 | 0          | NA          | NA         | NA         | NA         |            |
| NA        | ENSG00000277049 | 0          | NA          | NA         | NA         | NA         | RNA5SP530  |
| NA        | ENSG00000277050 | 1.87752011 | 0.05496092  | 0.38138124 | 0.50707635 | NA         |            |
| NA        | ENSG00000277051 | 0          | NA          | NA         | NA         | NA         |            |
| 102465975 | ENSG00000277052 | 0          | NA          | NA         | NA         | NA         | MIR6763    |
| 2970      | ENSG00000277053 | 3674.72758 | 0.0338334   | 0.06260318 | 0.60400108 | 0.79417995 | GTF2IP1    |
| NA        | ENSG00000277056 | 0          | NA          | NA         | NA         | NA         |            |
| 102465467 | ENSG00000277057 | 0          | NA          | NA         | NA         | NA         | MIR6779    |
| 649330    | ENSG00000277058 | 0          | NA          | NA         | NA         | NA         | HNRNPCL3   |
| NA        | ENSG00000277062 | 0          | NA          | NA         | NA         | NA         | RN7SL88P   |
| 102467005 | ENSG00000277063 | 0          | NA          | NA         | NA         | NA         | MIR8084    |
| NA        | ENSG00000277066 | 0          | NA          | NA         | NA         | NA         |            |
| NA        | ENSG00000277067 | 346.451001 | -0.42663999 | 0.15627968 | 0.00288046 | 0.01462342 |            |
| NA        | ENSG00000277072 | 516.505749 | -0.12286361 | 0.12256953 | 0.28896021 | 0.51490664 | STAG3L2    |

|           |                 |            |             |            |            |            |             |
|-----------|-----------------|------------|-------------|------------|------------|------------|-------------|
| 102465138 | ENSG00000277073 | 0          | NA          | NA         | NA         | NA         | MIR6131     |
| 3012      | ENSG00000277075 | 8.6826497  | -0.20633414 | 0.40936425 | 0.21642593 | 0.42733782 | H2AC8       |
| NA        | ENSG00000277077 | 0          | NA          | NA         | NA         | NA         |             |
| NA        | ENSG00000277081 | 0          | NA          | NA         | NA         | NA         |             |
| NA        | ENSG00000277083 | 0          | NA          | NA         | NA         | NA         | PRSS3P3     |
| NA        | ENSG00000277084 | 0          | NA          | NA         | NA         | NA         | RNU2-4P     |
| NA        | ENSG00000277087 | 0.173124   | -0.01911262 | 0.38486262 | 0.84537521 | NA         |             |
| NA        | ENSG00000277089 | 0          | NA          | NA         | NA         | NA         | CCL3-AS1    |
| NA        | ENSG00000277095 | 0          | NA          | NA         | NA         | NA         |             |
| NA        | ENSG00000277096 | 0          | NA          | NA         | NA         | NA         |             |
| NA        | ENSG00000277099 | 0          | NA          | NA         | NA         | NA         |             |
| NA        | ENSG00000277103 | 1.13498982 | -0.03511928 | 0.38113819 | 0.60434823 | NA         |             |
| NA        | ENSG00000277108 | 0          | NA          | NA         | NA         | NA         | SNORD49B    |
| NA        | ENSG00000277109 | 0          | NA          | NA         | NA         | NA         |             |
| NA        | ENSG00000277112 | 3.2610848  | 0.02746528  | 0.37113567 | 0.79189304 | 0.90499209 | ANKRD20A21P |
| 102723996 | ENSG00000277117 | 0          | NA          | NA         | NA         | NA         |             |
| NA        | ENSG00000277118 | 0          | NA          | NA         | NA         | NA         |             |
| NA        | ENSG00000277119 | 0          | NA          | NA         | NA         | NA         |             |
| 102464837 | ENSG00000277120 | 0          | NA          | NA         | NA         | NA         | MIR6089     |
| NA        | ENSG00000277124 | 0          | NA          | NA         | NA         | NA         |             |
| NA        | ENSG00000277125 | 2.07748803 | -0.07321787 | 0.39427469 | 0.0897377  | NA         |             |
| NA        | ENSG00000277127 | 0          | NA          | NA         | NA         | NA         |             |
| NA        | ENSG00000277128 | 98.1064543 | 0.40525206  | 0.25991275 | 0.04913135 | 0.14706789 |             |
| NA        | ENSG00000277129 | 0          | NA          | NA         | NA         | NA         |             |
| NA        | ENSG00000277130 | 1.93658565 | -0.08883542 | 0.39567851 | 0.14550975 | NA         |             |
| NA        | ENSG00000277133 | 0          | NA          | NA         | NA         | NA         |             |
| NA        | ENSG00000277135 | 0          | NA          | NA         | NA         | NA         |             |
| NA        | ENSG00000277136 | 0          | NA          | NA         | NA         | NA         |             |
| 102465254 | ENSG00000277138 | 0          | NA          | NA         | NA         | NA         | MIR6509     |
| NA        | ENSG00000277141 | 0          | NA          | NA         | NA         | NA         |             |
| NA        | ENSG00000277142 | 81.3494196 | 0.27044083  | 0.24075592 | 0.16109577 | 0.34915229 | LINC00235   |
| NA        | ENSG00000277143 | 0          | NA          | NA         | NA         | NA         |             |
| NA        | ENSG00000277144 | 0.50950033 | 0.03083596  | 0.38602543 | 0.48207482 | NA         |             |
| NA        | ENSG00000277146 | 0          | NA          | NA         | NA         | NA         |             |
| 57234     | ENSG00000277147 | 46.0263142 | -0.5745598  | 0.4147109  | 0.03030895 | 0.10118282 | LINC00869   |
| 388692    | ENSG00000277147 | 46.0263142 | -0.5745598  | 0.4147109  | 0.03030895 | 0.10118282 | LINC00869   |
| 441250    | ENSG00000277149 | 94.9852216 | -0.00839545 | 0.21731513 | 0.96116186 | 0.98419142 | TYW1B       |
| NA        | ENSG00000277151 | 8.12744213 | -0.0221062  | 0.3473051  | 0.88195582 | 0.94788752 |             |

|           |                 |            |             |            |            |            |             |
|-----------|-----------------|------------|-------------|------------|------------|------------|-------------|
| NA        | ENSG00000277152 | 0.31661717 | 0.00100689  | 0.3833658  | 0.96820561 | NA         |             |
| NA        | ENSG00000277156 | 66.0211702 | 0.52585481  | 0.30052973 | 0.02186686 | 0.07829605 | TOMM40P1    |
| 8360      | ENSG00000277157 | 1.91574386 | -0.00936822 | 0.37569551 | 0.90850667 | NA         | H4C4        |
| NA        | ENSG00000277159 | 7.32226491 | 0.10904186  | 0.36809368 | 0.46915455 | 0.69153662 |             |
| 284098    | ENSG00000277161 | 394.664641 | -0.14840934 | 0.1475959  | 0.27459151 | 0.4984351  | PIGW        |
| NA        | ENSG00000277162 | 0          | NA          | NA         | NA         | NA         |             |
| NA        | ENSG00000277168 | 0          | NA          | NA         | NA         | NA         |             |
| NA        | ENSG00000277170 | 0.82647502 | 0.02862744  | 0.38430188 | 0.51875666 | NA         |             |
| NA        | ENSG00000277171 | 0.173733   | 0.01914545  | 0.38484597 | 0.78225479 | NA         |             |
| NA        | ENSG00000277172 | 0          | NA          | NA         | NA         | NA         | GAPDHP41    |
| NA        | ENSG00000277173 | 0.80601274 | -0.00859791 | 0.38154563 | 0.8686143  | NA         |             |
| NA        | ENSG00000277174 | 0          | NA          | NA         | NA         | NA         |             |
| NA        | ENSG00000277182 | 50.3771273 | -0.2132056  | 0.2930743  | 0.29757197 | 0.52431106 |             |
| 677798    | ENSG00000277184 | 0          | NA          | NA         | NA         | NA         | SNORA9      |
| NA        | ENSG00000277186 | 0.173124   | -0.01911262 | 0.38486262 | 0.84537521 | NA         |             |
| NA        | ENSG00000277188 | 0          | NA          | NA         | NA         | NA         |             |
| NA        | ENSG00000277191 | 0          | NA          | NA         | NA         | NA         |             |
| 9304      | ENSG00000277194 | 0          | NA          | NA         | NA         | NA         | SNORD22     |
| NA        | ENSG00000277198 | 0          | NA          | NA         | NA         | NA         | RN7SL270P   |
| NA        | ENSG00000277199 | 0          | NA          | NA         | NA         | NA         | LINC01632   |
| NA        | ENSG00000277200 | 342.850466 | -1.76021504 | 0.13985327 | 1.93E-37   | 1.38E-35   |             |
| 102466875 | ENSG00000277202 | 0          | NA          | NA         | NA         | NA         | MIR8063     |
| NA        | ENSG00000277206 | 0          | NA          | NA         | NA         | NA         |             |
| NA        | ENSG00000277209 | 1.96363706 | -0.13298422 | 0.4161262  | 0.03372911 | NA         | RPPH1       |
| NA        | ENSG00000277210 | 0          | NA          | NA         | NA         | NA         |             |
| NA        | ENSG00000277211 | 0          | NA          | NA         | NA         | NA         |             |
| NA        | ENSG00000277213 | 0          | NA          | NA         | NA         | NA         | SDR42E1P2   |
| NA        | ENSG00000277214 | 0          | NA          | NA         | NA         | NA         |             |
| 619455    | ENSG00000277215 | 2.22546517 | -0.11434922 | 0.4011309  | 0.14874405 | NA         | SPANXA2-OT1 |
| NA        | ENSG00000277217 | 0          | NA          | NA         | NA         | NA         |             |
| NA        | ENSG00000277218 | 0.47503159 | -0.00860591 | 0.38281558 | 0.85503437 | NA         |             |
| NA        | ENSG00000277223 | 0          | NA          | NA         | NA         | NA         |             |
| 8343      | ENSG00000277224 | 6.94884745 | -0.0286918  | 0.35617669 | 0.83303005 | 0.9239848  | H2BC7       |
| NA        | ENSG00000277227 | 0          | NA          | NA         | NA         | NA         |             |
| NA        | ENSG00000277228 | 0          | NA          | NA         | NA         | NA         |             |
| NA        | ENSG00000277229 | 0          | NA          | NA         | NA         | NA         |             |
| 150384    | ENSG00000277232 | 10.1042854 | -0.20567693 | 0.40099024 | 0.23631203 | 0.45308809 | GTSE1-DT    |
| NA        | ENSG00000277233 | 0          | NA          | NA         | NA         | NA         |             |

|           |                 |            |             |            |            |            |             |
|-----------|-----------------|------------|-------------|------------|------------|------------|-------------|
| NA        | ENSG00000277234 | 0          | NA          | NA         | NA         | NA         | RNU1-5P     |
| NA        | ENSG00000277235 | 0.32353916 | 0.00176334  | 0.38337241 | 0.96420038 | NA         |             |
| NA        | ENSG00000277241 | 0.31671811 | 0.00111794  | 0.38336656 | 0.96714189 | NA         |             |
| NA        | ENSG00000277245 | 1.33880028 | 0.05123838  | 0.38450617 | 0.43223915 | NA         |             |
| NA        | ENSG00000277246 | 0.34127421 | 0.02362778  | 0.38535359 | 0.62401876 | NA         |             |
| NA        | ENSG00000277247 | 0.50207596 | 0.02562368  | 0.38565771 | 0.52549886 | NA         |             |
| NA        | ENSG00000277248 | 0          | NA          | NA         | NA         | NA         |             |
| 102465470 | ENSG00000277249 | 0          | NA          | NA         | NA         | NA         | MIR6784     |
| NA        | ENSG00000277250 | 0.46469525 | -0.00771561 | 0.38326764 | 0.86594819 | NA         |             |
| NA        | ENSG00000277252 | 0          | NA          | NA         | NA         | NA         |             |
| NA        | ENSG00000277253 | 0          | NA          | NA         | NA         | NA         | CICP28      |
| 102465840 | ENSG00000277255 | 0          | NA          | NA         | NA         | NA         | MIR7854     |
| 7703      | ENSG00000277258 | 1548.46724 | 0.01751509  | 0.07610764 | 0.8150474  | 0.91599551 | PCGF2       |
| NA        | ENSG00000277260 | 0          | NA          | NA         | NA         | NA         | FAM74A7     |
| 102465500 | ENSG00000277264 | 0          | NA          | NA         | NA         | NA         | MIR6833     |
| NA        | ENSG00000277265 | 0          | NA          | NA         | NA         | NA         | RN7SL556P   |
| 102723471 | ENSG00000277268 | 0.14931947 | -0.01844332 | 0.38480212 | 0.84537521 | NA         | LHX1-DT     |
| NA        | ENSG00000277269 | 0          | NA          | NA         | NA         | NA         |             |
| NA        | ENSG00000277270 | 0          | NA          | NA         | NA         | NA         |             |
| 102723451 | ENSG00000277277 | 15.6116915 | -0.0234639  | 0.33726787 | 0.88348898 | 0.94886707 | FAM243B     |
| NA        | ENSG00000277282 | 0          | NA          | NA         | NA         | NA         | IGHV1OR21-1 |
| NA        | ENSG00000277283 | 74.3805466 | 0.08631026  | 0.22123369 | 0.6354184  | 0.8165276  |             |
| NA        | ENSG00000277287 | 9.05821472 | 2.17364466  | 1.00462974 | 0.00134194 | 0.00761556 |             |
| 100130539 | ENSG00000277288 | 0.29863895 | -0.02292439 | 0.3852726  | 0.68753245 | NA         | LINC02881   |
| NA        | ENSG00000277289 | 0          | NA          | NA         | NA         | NA         |             |
| NA        | ENSG00000277290 | 6.92912513 | -0.1347291  | 0.38300853 | 0.35215834 | 0.5821381  |             |
| NA        | ENSG00000277297 | 0          | NA          | NA         | NA         | NA         | ATP5F1AP10  |
| NA        | ENSG00000277299 | 3.89221496 | 0.01793463  | 0.3762501  | 0.83030432 | 0.92307731 |             |
| 101929698 | ENSG00000277301 | 7.33243741 | -0.14534228 | 0.38310155 | 0.33870339 | 0.56895057 |             |
| NA        | ENSG00000277304 | 0.79660237 | -0.03640383 | 0.38384886 | 0.50523634 | NA         |             |
| NA        | ENSG00000277306 | 0          | NA          | NA         | NA         | NA         |             |
| NA        | ENSG00000277308 | 0          | NA          | NA         | NA         | NA         |             |
| NA        | ENSG00000277310 | 0.15069912 | -0.01848503 | 0.38480575 | 0.84537521 | NA         |             |
| NA        | ENSG00000277311 | 6.53409698 | -0.00611845 | 0.35300249 | 0.96315668 | 0.98545957 |             |
| NA        | ENSG00000277313 | 0          | NA          | NA         | NA         | NA         |             |
| NA        | ENSG00000277315 | 0          | NA          | NA         | NA         | NA         |             |
| NA        | ENSG00000277319 | 0          | NA          | NA         | NA         | NA         |             |
| NA        | ENSG00000277320 | 0          | NA          | NA         | NA         | NA         |             |

|           |                 |            |             |            |            |            |           |
|-----------|-----------------|------------|-------------|------------|------------|------------|-----------|
| 727832    | ENSG00000277322 | 0          | NA          | NA         | NA         | NA         | GOLGA6L6  |
| NA        | ENSG00000277324 | 9.78014198 | 0.12417251  | 0.37502545 | 0.40684052 | 0.6351181  |           |
| NA        | ENSG00000277327 | 0          | NA          | NA         | NA         | NA         | SPDYE20P  |
| 101928087 | ENSG00000277332 | 0          | NA          | NA         | NA         | NA         |           |
| NA        | ENSG00000277340 | 0          | NA          | NA         | NA         | NA         |           |
| NA        | ENSG00000277342 | 3.83226939 | -0.13531955 | 0.40011366 | 0.23929486 | 0.4571163  |           |
| NA        | ENSG00000277344 | 0          | NA          | NA         | NA         | NA         | RNU1-6P   |
| NA        | ENSG00000277349 | 0.63708765 | -0.01498604 | 0.38324064 | 0.71472828 | NA         | CICP25    |
| NA        | ENSG00000277350 | 0          | NA          | NA         | NA         | NA         |           |
| NA        | ENSG00000277351 | 0          | NA          | NA         | NA         | NA         |           |
| NA        | ENSG00000277352 | 12.7706719 | -0.29719402 | 0.48122283 | 0.10523728 | 0.25872462 |           |
| NA        | ENSG00000277357 | 0          | NA          | NA         | NA         | NA         | NPAP1P7   |
| NA        | ENSG00000277358 | 0          | NA          | NA         | NA         | NA         |           |
| 80725     | ENSG00000277363 | 734.407979 | 0.11009399  | 0.14265146 | 0.40562941 | 0.63387583 | SRCIN1    |
| NA        | ENSG00000277367 | 9.59607523 | 0.10104699  | 0.35824851 | 0.52593104 | 0.73808697 | NEK2P1    |
| NA        | ENSG00000277368 | 0.66469329 | -0.022253   | 0.38323252 | 0.64947803 | NA         |           |
| NA        | ENSG00000277369 | 2.76271077 | -0.0466558  | 0.37588891 | 0.62722892 | 0.81085696 |           |
| 26800     | ENSG00000277370 | 0          | NA          | NA         | NA         | NA         | SNORD49A  |
| NA        | ENSG00000277371 | 0.36345498 | 0.02389827  | 0.38539295 | 0.60971906 | NA         |           |
| NA        | ENSG00000277373 | 0          | NA          | NA         | NA         | NA         |           |
| NA        | ENSG00000277382 | 0          | NA          | NA         | NA         | NA         |           |
| NA        | ENSG00000277383 | 3.68432989 | 0.07259081  | 0.37398165 | 0.53899769 | 0.74843996 |           |
| NA        | ENSG00000277385 | 0          | NA          | NA         | NA         | NA         |           |
| NA        | ENSG00000277386 | 0          | NA          | NA         | NA         | NA         |           |
| 102465863 | ENSG00000277387 | 0          | NA          | NA         | NA         | NA         | MIR8058   |
| 102467004 | ENSG00000277388 | 0          | NA          | NA         | NA         | NA         | MIR8053   |
| 102465530 | ENSG00000277391 | 0          | NA          | NA         | NA         | NA         | MIR6881   |
| NA        | ENSG00000277396 | 0          | NA          | NA         | NA         | NA         |           |
| NA        | ENSG00000277397 | 0          | NA          | NA         | NA         | NA         |           |
| 440435    | ENSG00000277399 | 4.74211642 | 0.06943612  | 0.37021377 | 0.57901918 | 0.77677602 | GPR179    |
| 102465537 | ENSG00000277402 | 0          | NA          | NA         | NA         | NA         | MIR6891   |
| NA        | ENSG00000277406 | 12.0240522 | -0.13780504 | 0.36198231 | 0.41803378 | 0.64417788 | SEC22B4P  |
| NA        | ENSG00000277408 | 0          | NA          | NA         | NA         | NA         |           |
| NA        | ENSG00000277410 | 0          | NA          | NA         | NA         | NA         | H2BP5     |
| NA        | ENSG00000277411 | 0          | NA          | NA         | NA         | NA         |           |
| NA        | ENSG00000277412 | 0          | NA          | NA         | NA         | NA         |           |
| NA        | ENSG00000277413 | 0          | NA          | NA         | NA         | NA         |           |
| NA        | ENSG00000277418 | 0          | NA          | NA         | NA         | NA         | RNA5SP531 |

|           |                 |            |             |            |            |            |           |
|-----------|-----------------|------------|-------------|------------|------------|------------|-----------|
| 100288527 | ENSG00000277422 | 0          | NA          | NA         | NA         | NA         | REXO1L6P  |
| NA        | ENSG00000277423 | 3.13957157 | 0.03801386  | 0.37406919 | 0.69837339 | 0.85455335 |           |
| NA        | ENSG00000277425 | 1.71337632 | 0.04595531  | 0.38342143 | 0.48469983 | NA         |           |
| NA        | ENSG00000277426 | 0          | NA          | NA         | NA         | NA         |           |
| NA        | ENSG00000277435 | 0          | NA          | NA         | NA         | NA         |           |
| NA        | ENSG00000277436 | 0          | NA          | NA         | NA         | NA         | REXO1L5P  |
| NA        | ENSG00000277437 | 0          | NA          | NA         | NA         | NA         |           |
| NA        | ENSG00000277438 | 0          | NA          | NA         | NA         | NA         | KDM5DP1   |
| NA        | ENSG00000277440 | 0.29863895 | -0.02292439 | 0.3852726  | 0.68753245 | NA         |           |
| 4082      | ENSG00000277443 | 6304.63247 | -0.25759556 | 0.06419524 | 4.55E-05   | 0.00037686 | MARCKS    |
| NA        | ENSG00000277444 | 0          | NA          | NA         | NA         | NA         |           |
| NA        | ENSG00000277446 | 0          | NA          | NA         | NA         | NA         |           |
| NA        | ENSG00000277447 | 0          | NA          | NA         | NA         | NA         |           |
| 101926897 | ENSG00000277448 | 0          | NA          | NA         | NA         | NA         | LINC02338 |
| NA        | ENSG00000277449 | 4.73074488 | -0.06380491 | 0.3689222  | 0.60615273 | 0.79600676 | CEBPB-AS1 |
| NA        | ENSG00000277450 | 0.77153168 | -0.05542405 | 0.38929499 | 0.28050096 | NA         |           |
| NA        | ENSG00000277452 | 0.47278626 | -0.02841159 | 0.38580594 | 0.54339681 | NA         | RN7SL473P |
| NA        | ENSG00000277453 | 0.4732471  | -0.03505899 | 0.38628472 | 0.49594069 | NA         |           |
| NA        | ENSG00000277455 | 0          | NA          | NA         | NA         | NA         |           |
| NA        | ENSG00000277458 | 0          | NA          | NA         | NA         | NA         |           |
| NA        | ENSG00000277459 | 0          | NA          | NA         | NA         | NA         |           |
| NA        | ENSG00000277460 | 0          | NA          | NA         | NA         | NA         |           |
| 93474     | ENSG00000277462 | 200.310987 | -0.37405913 | 0.16589922 | 0.012613   | 0.05020907 | ZNF670    |
| NA        | ENSG00000277463 | 0.30001542 | -0.02294458 | 0.38527538 | 0.68644903 | NA         |           |
| NA        | ENSG00000277465 | 0          | NA          | NA         | NA         | NA         |           |
| NA        | ENSG00000277466 | 0          | NA          | NA         | NA         | NA         |           |
| NA        | ENSG00000277467 | 0          | NA          | NA         | NA         | NA         | RN7SL628P |
| NA        | ENSG00000277468 | 0          | NA          | NA         | NA         | NA         |           |
| NA        | ENSG00000277469 | 0          | NA          | NA         | NA         | NA         |           |
| NA        | ENSG00000277473 | 0          | NA          | NA         | NA         | NA         |           |
| 102466759 | ENSG00000277474 | 0          | NA          | NA         | NA         | NA         | MIR6894   |
| NA        | ENSG00000277476 | 373.914799 | 0.13529324  | 0.1321939  | 0.27626947 | 0.50042786 |           |
| 102465141 | ENSG00000277478 | 0          | NA          | NA         | NA         | NA         | MIR6165   |
| NA        | ENSG00000277479 | 0.173124   | -0.01911262 | 0.38486262 | 0.84537521 | NA         |           |
| 342372    | ENSG00000277481 | 0.72458649 | 0.00161892  | 0.38233228 | 0.96930106 | NA         | PKD1L3    |
| NA        | ENSG00000277482 | 0          | NA          | NA         | NA         | NA         |           |
| NA        | ENSG00000277483 | 0          | NA          | NA         | NA         | NA         | RN7SL321P |
| NA        | ENSG00000277486 | 0          | NA          | NA         | NA         | NA         | SAGE3P    |

|           |                 |            |             |            |            |            |            |
|-----------|-----------------|------------|-------------|------------|------------|------------|------------|
| NA        | ENSG00000277488 | 0          | NA          | NA         | NA         | NA         |            |
| NA        | ENSG00000277490 | 0          | NA          | NA         | NA         | NA         |            |
| NA        | ENSG00000277491 | 3.700021   | 0.05011586  | 0.37012606 | 0.66369402 | 0.83407238 |            |
| NA        | ENSG00000277492 | 0          | NA          | NA         | NA         | NA         |            |
| NA        | ENSG00000277493 | 0          | NA          | NA         | NA         | NA         |            |
| 338328    | ENSG00000277494 | 0          | NA          | NA         | NA         | NA         | GPIHBP1    |
| NA        | ENSG00000277496 | 50.9453738 | 0.154122    | 0.25933979 | 0.43188596 | 0.65749681 |            |
| NA        | ENSG00000277498 | 0          | NA          | NA         | NA         | NA         |            |
| NA        | ENSG00000277499 | 0          | NA          | NA         | NA         | NA         |            |
| NA        | ENSG00000277500 | 0          | NA          | NA         | NA         | NA         |            |
| NA        | ENSG00000277501 | 1.26432659 | -0.01613004 | 0.37944969 | 0.80860479 | NA         |            |
| NA        | ENSG00000277502 | 0          | NA          | NA         | NA         | NA         |            |
| NA        | ENSG00000277504 | 3.00738711 | 0.04434564  | 0.37304609 | 0.67159734 | 0.83826144 |            |
| NA        | ENSG00000277505 | 0          | NA          | NA         | NA         | NA         |            |
| NA        | ENSG00000277506 | 0          | NA          | NA         | NA         | NA         | RN7SL802P  |
| NA        | ENSG00000277508 | 0.173733   | 0.01914545  | 0.38484597 | 0.78225479 | NA         | BSNDP3     |
| NA        | ENSG00000277509 | 0          | NA          | NA         | NA         | NA         |            |
| NA        | ENSG00000277510 | 0          | NA          | NA         | NA         | NA         |            |
| NA        | ENSG00000277511 | 6.80682631 | 0.15641679  | 0.38959794 | 0.30429474 | 0.53154043 |            |
| 692106    | ENSG00000277512 | 0          | NA          | NA         | NA         | NA         | SNORD65    |
| NA        | ENSG00000277513 | 0          | NA          | NA         | NA         | NA         |            |
| NA        | ENSG00000277514 | 0          | NA          | NA         | NA         | NA         | OR52Q1P    |
| NA        | ENSG00000277515 | 0          | NA          | NA         | NA         | NA         | RN7SL495P  |
| NA        | ENSG00000277516 | 0          | NA          | NA         | NA         | NA         |            |
| NA        | ENSG00000277519 | 0          | NA          | NA         | NA         | NA         | OFD1P16Y   |
| 102466878 | ENSG00000277521 | 0          | NA          | NA         | NA         | NA         | MIR8078    |
| NA        | ENSG00000277524 | 0          | NA          | NA         | NA         | NA         |            |
| 101927815 | ENSG00000277526 | 0          | NA          | NA         | NA         | NA         |            |
| NA        | ENSG00000277527 | 0.15069912 | -0.01848503 | 0.38480575 | 0.84537521 | NA         | LINC01796  |
| NA        | ENSG00000277529 | 3.18476067 | -0.12919353 | 0.40144809 | 0.21329021 | 0.42329476 | NF1P10     |
| 110806277 | ENSG00000277531 | 233.984208 | -0.06366627 | 0.14539159 | 0.63522571 | 0.8164601  | PNMA8C     |
| NA        | ENSG00000277532 | 0          | NA          | NA         | NA         | NA         |            |
| 102465875 | ENSG00000277533 | 0          | NA          | NA         | NA         | NA         | MIR8077    |
| NA        | ENSG00000277534 | 67.5963869 | -0.74682806 | 0.33096068 | 0.00372778 | 0.01819412 |            |
| NA        | ENSG00000277535 | 0          | NA          | NA         | NA         | NA         |            |
| NA        | ENSG00000277541 | 0.36314819 | 0.02389612  | 0.38539262 | 0.60987077 | NA         | ZNF630-AS1 |
| NA        | ENSG00000277542 | 0          | NA          | NA         | NA         | NA         |            |
| NA        | ENSG00000277543 | 0          | NA          | NA         | NA         | NA         |            |



|           |                 |            |             |            |            |            |           |
|-----------|-----------------|------------|-------------|------------|------------|------------|-----------|
| NA        | ENSG00000277544 | 0.30139824 | -0.02296476 | 0.38527817 | 0.68536535 | NA         |           |
| NA        | ENSG00000277545 | 0          | NA          | NA         | NA         | NA         |           |
| NA        | ENSG00000277548 | 1.74554229 | 0.11645956  | 0.40527081 | 0.10068427 | NA         |           |
| NA        | ENSG00000277549 | 0          | NA          | NA         | NA         | NA         |           |
| NA        | ENSG00000277550 | 0.96477504 | -0.0193963  | 0.38090758 | 0.74591366 | NA         |           |
| NA        | ENSG00000277553 | 0          | NA          | NA         | NA         | NA         |           |
| 138799    | ENSG00000277556 | 0          | NA          | NA         | NA         | NA         | OR13C5    |
| NA        | ENSG00000277558 | 0.6229292  | -0.03614317 | 0.38660915 | 0.42800951 | NA         |           |
| NA        | ENSG00000277559 | 29.5371033 | -0.98668324 | 0.49859457 | 0.00399757 | 0.01929256 |           |
| 283796    | ENSG00000277561 | 3.6321078  | -0.03173796 | 0.36957167 | 0.76854081 | 0.89330656 | GOLGA8IP  |
| NA        | ENSG00000277562 | 0          | NA          | NA         | NA         | NA         |           |
| NA        | ENSG00000277563 | 0          | NA          | NA         | NA         | NA         |           |
| NA        | ENSG00000277565 | 0          | NA          | NA         | NA         | NA         |           |
| NA        | ENSG00000277566 | 0.96350255 | -0.02377553 | 0.38050819 | 0.7118308  | NA         |           |
| NA        | ENSG00000277568 | 0          | NA          | NA         | NA         | NA         |           |
| 102465140 | ENSG00000277569 | 0          | NA          | NA         | NA         | NA         | MIR6134   |
| NA        | ENSG00000277572 | 0          | NA          | NA         | NA         | NA         |           |
| NA        | ENSG00000277575 | 0          | NA          | NA         | NA         | NA         |           |
| NA        | ENSG00000277576 | 0          | NA          | NA         | NA         | NA         |           |
| NA        | ENSG00000277577 | 0          | NA          | NA         | NA         | NA         |           |
| NA        | ENSG00000277578 | 0.51937201 | -0.02557462 | 0.38567603 | 0.54680819 | NA         |           |
| NA        | ENSG00000277579 | 0          | NA          | NA         | NA         | NA         |           |
| NA        | ENSG00000277581 | 0.4868795  | 0.0110439   | 0.38338315 | 0.78875801 | NA         |           |
| NA        | ENSG00000277583 | 0          | NA          | NA         | NA         | NA         |           |
| 4747      | ENSG00000277586 | 1939.67287 | -1.46697683 | 0.07226521 | 1.11E-92   | 3.11E-90   | NEFL      |
| NA        | ENSG00000277587 | 0          | NA          | NA         | NA         | NA         |           |
| 102465484 | ENSG00000277588 | 0          | NA          | NA         | NA         | NA         | MIR6806   |
| NA        | ENSG00000277589 | 0.75071698 | -0.04348325 | 0.38757294 | 0.34419736 | NA         |           |
| 102465835 | ENSG00000277590 | 0          | NA          | NA         | NA         | NA         | MIR7845   |
| NA        | ENSG00000277591 | 0          | NA          | NA         | NA         | NA         | RN7SL575P |
| NA        | ENSG00000277592 | 0          | NA          | NA         | NA         | NA         |           |
| NA        | ENSG00000277595 | 1.47842583 | -0.00507152 | 0.37834354 | 0.94126949 | NA         |           |
| NA        | ENSG00000277597 | 0.173124   | -0.01911262 | 0.38486262 | 0.84537521 | NA         |           |
| NA        | ENSG00000277598 | 0          | NA          | NA         | NA         | NA         |           |
| NA        | ENSG00000277599 | 0          | NA          | NA         | NA         | NA         |           |
| NA        | ENSG00000277602 | 0.16735865 | 0.01897177  | 0.38482933 | 0.78225479 | NA         |           |
| NA        | ENSG00000277604 | 0          | NA          | NA         | NA         | NA         |           |
| NA        | ENSG00000277605 | 0          | NA          | NA         | NA         | NA         |           |

|           |                 |            |             |            |            |            |            |
|-----------|-----------------|------------|-------------|------------|------------|------------|------------|
| NA        | ENSG00000277608 | 0          | NA          | NA         | NA         | NA         |            |
| 101954264 | ENSG00000277610 | 0          | NA          | NA         | NA         | NA         | RNVU1-4    |
| 101954268 | ENSG00000277610 | 0          | NA          | NA         | NA         | NA         | RNVU1-4    |
| NA        | ENSG00000277611 | 0.7723502  | -0.02835293 | 0.38358708 | 0.56476296 | NA         |            |
| NA        | ENSG00000277617 | 0          | NA          | NA         | NA         | NA         |            |
| NA        | ENSG00000277618 | 0          | NA          | NA         | NA         | NA         |            |
| NA        | ENSG00000277619 | 0.173124   | -0.01911262 | 0.38486262 | 0.84537521 | NA         |            |
| NA        | ENSG00000277621 | 0          | NA          | NA         | NA         | NA         |            |
| NA        | ENSG00000277628 | 0          | NA          | NA         | NA         | NA         |            |
| 101929127 | ENSG00000277631 | 0          | NA          | NA         | NA         | NA         | PGM5P3-AS1 |
| 6348      | ENSG00000277632 | 0          | NA          | NA         | NA         | NA         | CCL3       |
| NA        | ENSG00000277634 | 0          | NA          | NA         | NA         | NA         |            |
| NA        | ENSG00000277635 | 0          | NA          | NA         | NA         | NA         |            |
| 102466251 | ENSG00000277636 | 0          | NA          | NA         | NA         | NA         | MIR8061    |
| 105371267 | ENSG00000277639 | 1.35019714 | 0.07376177  | 0.39396036 | 0.12133241 | NA         |            |
| NA        | ENSG00000277640 | 0          | NA          | NA         | NA         | NA         |            |
| NA        | ENSG00000277646 | 0          | NA          | NA         | NA         | NA         |            |
| NA        | ENSG00000277647 | 0          | NA          | NA         | NA         | NA         |            |
| NA        | ENSG00000277651 | 0.18922458 | 0.01954053  | 0.38488496 | 0.78225479 | NA         |            |
| NA        | ENSG00000277653 | 0          | NA          | NA         | NA         | NA         |            |
| NA        | ENSG00000277654 | 0.29863895 | -0.02292439 | 0.3852726  | 0.68753245 | NA         |            |
| NA        | ENSG00000277655 | 0          | NA          | NA         | NA         | NA         |            |
| NA        | ENSG00000277661 | 0          | NA          | NA         | NA         | NA         |            |
| NA        | ENSG00000277662 | 1.90549123 | -0.06640158 | 0.3838497  | 0.42627949 | NA         |            |
| NA        | ENSG00000277668 | 0          | NA          | NA         | NA         | NA         |            |
| NA        | ENSG00000277670 | 0          | NA          | NA         | NA         | NA         |            |
| NA        | ENSG00000277672 | 0          | NA          | NA         | NA         | NA         |            |
| NA        | ENSG00000277673 | 0          | NA          | NA         | NA         | NA         |            |
| NA        | ENSG00000277675 | 0          | NA          | NA         | NA         | NA         |            |
| NA        | ENSG00000277677 | 0          | NA          | NA         | NA         | NA         |            |
| 102466724 | ENSG00000277681 | 0          | NA          | NA         | NA         | NA         | MIR6739    |
| NA        | ENSG00000277684 | 0          | NA          | NA         | NA         | NA         |            |
| NA        | ENSG00000277687 | 6.90715563 | -0.00507163 | 0.35237149 | 0.96928443 | 0.98853525 |            |
| NA        | ENSG00000277688 | 0.56767373 | 0.02627943  | 0.38574813 | 0.49686938 | NA         |            |
| NA        | ENSG00000277689 | 0          | NA          | NA         | NA         | NA         |            |
| NA        | ENSG00000277690 | 0          | NA          | NA         | NA         | NA         |            |
| NA        | ENSG00000277692 | 1.21840951 | -0.00098751 | 0.37938711 | 0.98714546 | NA         |            |
| NA        | ENSG00000277693 | 0.173124   | -0.01911262 | 0.38486262 | 0.84537521 | NA         |            |

|           |                 |            |             |            |            |            |            |
|-----------|-----------------|------------|-------------|------------|------------|------------|------------|
| NA        | ENSG00000277694 | 0          | NA          | NA         | NA         | NA         |            |
| NA        | ENSG00000277695 | 0          | NA          | NA         | NA         | NA         |            |
| NA        | ENSG00000277701 | 237.962599 | -0.2770045  | 0.1851484  | 0.08779065 | 0.22632101 |            |
| NA        | ENSG00000277702 | 0          | NA          | NA         | NA         | NA         |            |
| NA        | ENSG00000277704 | 0          | NA          | NA         | NA         | NA         |            |
| NA        | ENSG00000277705 | 0          | NA          | NA         | NA         | NA         |            |
| NA        | ENSG00000277708 | 0          | NA          | NA         | NA         | NA         | PGBD4P2    |
| NA        | ENSG00000277710 | 0          | NA          | NA         | NA         | NA         | NBEAP5     |
| NA        | ENSG00000277711 | 0          | NA          | NA         | NA         | NA         |            |
| 102465515 | ENSG00000277713 | 0          | NA          | NA         | NA         | NA         | MIR6856    |
| NA        | ENSG00000277715 | 8.7496331  | 0.13690854  | 0.37742048 | 0.37533734 | 0.60449338 |            |
| NA        | ENSG00000277717 | 0          | NA          | NA         | NA         | NA         |            |
| NA        | ENSG00000277718 | 0          | NA          | NA         | NA         | NA         | LINC02255  |
| NA        | ENSG00000277720 | 0          | NA          | NA         | NA         | NA         | H3C5P      |
| NA        | ENSG00000277721 | 0          | NA          | NA         | NA         | NA         |            |
| NA        | ENSG00000277728 | 10.0789779 | -0.07993746 | 0.34973803 | 0.61715244 | 0.80395958 |            |
| NA        | ENSG00000277732 | 0          | NA          | NA         | NA         | NA         |            |
| NA        | ENSG00000277734 | 0          | NA          | NA         | NA         | NA         | TRAC       |
| NA        | ENSG00000277737 | 0          | NA          | NA         | NA         | NA         |            |
| NA        | ENSG00000277738 | 0.51268225 | 0.01529209  | 0.38311666 | 0.73938031 | NA         |            |
| NA        | ENSG00000277740 | 0.18922458 | 0.01954053  | 0.38488496 | 0.78225479 | NA         |            |
| NA        | ENSG00000277741 | 11.7258498 | 0.39592131  | 0.56980993 | 0.06429715 | 0.18040664 | GOLGA6L17P |
| NA        | ENSG00000277743 | 0          | NA          | NA         | NA         | NA         |            |
| NA        | ENSG00000277744 | 6.62333366 | 0.03804389  | 0.35400189 | 0.79274264 | 0.90515734 |            |
| NA        | ENSG00000277746 | 0          | NA          | NA         | NA         | NA         |            |
| NA        | ENSG00000277747 | 0          | NA          | NA         | NA         | NA         |            |
| NA        | ENSG00000277748 | 0          | NA          | NA         | NA         | NA         |            |
| NA        | ENSG00000277749 | 0          | NA          | NA         | NA         | NA         |            |
| NA        | ENSG00000277752 | 0          | NA          | NA         | NA         | NA         |            |
| NA        | ENSG00000277754 | 0          | NA          | NA         | NA         | NA         |            |
| NA        | ENSG00000277755 | 0          | NA          | NA         | NA         | NA         |            |
| NA        | ENSG00000277757 | 0          | NA          | NA         | NA         | NA         |            |
| 102724488 | ENSG00000277758 | 83.0052401 | -0.27648047 | 0.23599257 | 0.14681045 | 0.32800893 |            |
| 102465974 | ENSG00000277759 | 0          | NA          | NA         | NA         | NA         | MIR6719    |
| NA        | ENSG00000277762 | 0          | NA          | NA         | NA         | NA         | RN7SL261P  |
| NA        | ENSG00000277763 | 0          | NA          | NA         | NA         | NA         |            |
| NA        | ENSG00000277764 | 0.72773645 | 0.02476885  | 0.38329278 | 0.57676848 | NA         |            |
| NA        | ENSG00000277766 | 0          | NA          | NA         | NA         | NA         |            |

|           |                 |            |             |            |            |            |             |
|-----------|-----------------|------------|-------------|------------|------------|------------|-------------|
| NA        | ENSG00000277767 | 8.40265235 | 0.08264654  | 0.36010866 | 0.57867413 | 0.77656626 |             |
| NA        | ENSG00000277769 | 0          | NA          | NA         | NA         | NA         | RBM22P4     |
| NA        | ENSG00000277770 | 0          | NA          | NA         | NA         | NA         |             |
| NA        | ENSG00000277771 | 0          | NA          | NA         | NA         | NA         |             |
| NA        | ENSG00000277774 | 0.53180095 | -0.00851321 | 0.38313237 | 0.82615413 | NA         | RN7SL763P   |
| 8968      | ENSG00000277775 | 2.81654914 | -0.13801246 | 0.40840253 | 0.16165484 | 0.3500826  | H3C7        |
| NA        | ENSG00000277777 | 0          | NA          | NA         | NA         | NA         |             |
| 595135    | ENSG00000277778 | 7.6021818  | 0.32641161  | 0.52750525 | 0.07183473 | 0.19526459 | PGM5P2      |
| NA        | ENSG00000277782 | 6.7128599  | 0.16218255  | 0.393338   | 0.28502572 | 0.51037097 |             |
| 102465471 | ENSG00000277784 | 0          | NA          | NA         | NA         | NA         | MIR6786     |
| NA        | ENSG00000277785 | 0          | NA          | NA         | NA         | NA         | SNORD116-21 |
| NA        | ENSG00000277790 | 0          | NA          | NA         | NA         | NA         |             |
| 5691      | ENSG00000277791 | 1056.23752 | 0.23727389  | 0.09185128 | 0.00769526 | 0.03339325 | PSMB3       |
| NA        | ENSG00000277794 | 0          | NA          | NA         | NA         | NA         |             |
| NA        | ENSG00000277795 | 1.06820469 | 0.03481772  | 0.38244114 | 0.56520474 | NA         |             |
| NA        | ENSG00000277797 | 0          | NA          | NA         | NA         | NA         |             |
| NA        | ENSG00000277801 | 26.9614435 | 0.03290331  | 0.38281648 | 0.57817847 | 0.77627805 |             |
| NA        | ENSG00000277803 | 0          | NA          | NA         | NA         | NA         |             |
| NA        | ENSG00000277806 | 10.6601264 | -0.47183339 | 0.65381167 | 0.04690413 | 0.14176508 |             |
| NA        | ENSG00000277809 | 4.45200387 | -0.14902171 | 0.40238317 | 0.23503792 | 0.45186105 |             |
| 102465442 | ENSG00000277817 | 0          | NA          | NA         | NA         | NA         | MIR6738     |
| NA        | ENSG00000277818 | 0          | NA          | NA         | NA         | NA         |             |
| NA        | ENSG00000277825 | 0          | NA          | NA         | NA         | NA         |             |
| NA        | ENSG00000277826 | 0          | NA          | NA         | NA         | NA         |             |
| NA        | ENSG00000277828 | 0          | NA          | NA         | NA         | NA         |             |
| NA        | ENSG00000277829 | 1.51062814 | 0.0219098   | 0.37801453 | 0.77337963 | NA         |             |
| NA        | ENSG00000277830 | 0          | NA          | NA         | NA         | NA         |             |
| NA        | ENSG00000277831 | 4.51453533 | -0.08379369 | 0.37912655 | 0.45810368 | 0.68152197 |             |
| NA        | ENSG00000277837 | 0.36288928 | 0.02389431  | 0.38539233 | 0.60999888 | NA         |             |
| NA        | ENSG00000277840 | 1.53500397 | -0.10950345 | 0.40524211 | 0.06498382 | NA         |             |
| 102465486 | ENSG00000277842 | 0          | NA          | NA         | NA         | NA         | MIR6811     |
| 9299      | ENSG00000277846 | 0          | NA          | NA         | NA         | NA         | SNORD30     |
| NA        | ENSG00000277851 | 0          | NA          | NA         | NA         | NA         | LINC02391   |
| NA        | ENSG00000277852 | 0          | NA          | NA         | NA         | NA         |             |
| NA        | ENSG00000277855 | 1.03496184 | 0.03602994  | 0.38182326 | 0.57858867 | NA         |             |
| 474381    | ENSG00000277858 | 5.74021611 | 0.03616111  | 0.36221827 | 0.77893661 | 0.89886014 | H2AB2       |
| NA        | ENSG00000277859 | 0          | NA          | NA         | NA         | NA         |             |
| NA        | ENSG00000277862 | 0          | NA          | NA         | NA         | NA         | PRAMEF34P   |

|           |                 |            |             |            |            |            |           |
|-----------|-----------------|------------|-------------|------------|------------|------------|-----------|
| NA        | ENSG00000277863 | 0          | NA          | NA         | NA         | NA         |           |
| 677778    | ENSG00000277864 | 0          | NA          | NA         | NA         | NA         | SCARNA15  |
| 440243    | ENSG00000277865 | 0          | NA          | NA         | NA         | NA         | GOLGA6L22 |
| NA        | ENSG00000277866 | 0          | NA          | NA         | NA         | NA         |           |
| NA        | ENSG00000277867 | 0          | NA          | NA         | NA         | NA         |           |
| NA        | ENSG00000277869 | 0          | NA          | NA         | NA         | NA         |           |
| 653203    | ENSG00000277870 | 0          | NA          | NA         | NA         | NA         | FAM230A   |
| 102466198 | ENSG00000277872 | 0          | NA          | NA         | NA         | NA         | MIR6817   |
| NA        | ENSG00000277873 | 2.60120613 | 0.03531307  | 0.37513746 | 0.70662922 | 0.85861856 |           |
| NA        | ENSG00000277876 | 0          | NA          | NA         | NA         | NA         |           |
| NA        | ENSG00000277878 | 0          | NA          | NA         | NA         | NA         |           |
| NA        | ENSG00000277879 | 18.7734308 | -0.07209822 | 0.32021862 | 0.69221057 | 0.85116657 |           |
| NA        | ENSG00000277880 | 0          | NA          | NA         | NA         | NA         | TRBV17    |
| NA        | ENSG00000277881 | 0          | NA          | NA         | NA         | NA         |           |
| NA        | ENSG00000277882 | 0.16735865 | 0.01897177  | 0.38482933 | 0.78225479 | NA         |           |
| NA        | ENSG00000277883 | 0          | NA          | NA         | NA         | NA         | NLRP3P1   |
| 677842    | ENSG00000277887 | 0          | NA          | NA         | NA         | NA         | SNORA50C  |
| 102465509 | ENSG00000277888 | 0          | NA          | NA         | NA         | NA         | MIR6846   |
| 102465995 | ENSG00000277889 | 0          | NA          | NA         | NA         | NA         | MIR8081   |
| 102465446 | ENSG00000277892 | 0          | NA          | NA         | NA         | NA         | MIR6746   |
| 6716      | ENSG00000277893 | 0.35656428 | 0.02381622  | 0.38538093 | 0.61407602 | NA         | SRD5A2    |
| NA        | ENSG00000277895 | 1.51609109 | 0.01885613  | 0.3775557  | 0.80663304 | NA         |           |
| NA        | ENSG00000277899 | 0          | NA          | NA         | NA         | NA         | MLECP1    |
| NA        | ENSG00000277900 | 0          | NA          | NA         | NA         | NA         |           |
| NA        | ENSG00000277901 | 0          | NA          | NA         | NA         | NA         |           |
| 102465838 | ENSG00000277904 | 0          | NA          | NA         | NA         | NA         | MIR7850   |
| NA        | ENSG00000277907 | 0          | NA          | NA         | NA         | NA         |           |
| NA        | ENSG00000277911 | 0          | NA          | NA         | NA         | NA         |           |
| 102465882 | ENSG00000277912 | 0          | NA          | NA         | NA         | NA         | MIR8089   |
| NA        | ENSG00000277913 | 0          | NA          | NA         | NA         | NA         |           |
| NA        | ENSG00000277914 | 0          | NA          | NA         | NA         | NA         | DDX6P2    |
| NA        | ENSG00000277916 | 0          | NA          | NA         | NA         | NA         |           |
| NA        | ENSG00000277918 | 0.173124   | -0.01911262 | 0.38486262 | 0.84537521 | NA         | RNVU1-28  |
| 102465869 | ENSG00000277919 | 0          | NA          | NA         | NA         | NA         | MIR8067   |
| NA        | ENSG00000277922 | 0          | NA          | NA         | NA         | NA         |           |
| NA        | ENSG00000277925 | 2.96317227 | -0.07938276 | 0.38747985 | 0.34304134 | 0.57318007 |           |
| NA        | ENSG00000277930 | 0          | NA          | NA         | NA         | NA         |           |
| 390082    | ENSG00000277932 | 0          | NA          | NA         | NA         | NA         | OR52E5    |

|           |                 |            |             |            |            |            |              |
|-----------|-----------------|------------|-------------|------------|------------|------------|--------------|
| NA        | ENSG00000277935 | 0          | NA          | NA         | NA         | NA         |              |
| NA        | ENSG00000277938 | 19.5309559 | -0.08866098 | 0.31801408 | 0.63356293 | 0.81495647 |              |
| NA        | ENSG00000277941 | 0          | NA          | NA         | NA         | NA         |              |
| 102465874 | ENSG00000277942 | 0          | NA          | NA         | NA         | NA         | MIR8075      |
| NA        | ENSG00000277945 | 0          | NA          | NA         | NA         | NA         |              |
| NA        | ENSG00000277946 | 0          | NA          | NA         | NA         | NA         | RN7SL478P    |
| NA        | ENSG00000277947 | 0          | NA          | NA         | NA         | NA         | SNORD3D      |
| NA        | ENSG00000277948 | 0.82733536 | 0.01495534  | 0.38183585 | 0.77226947 | NA         |              |
| NA        | ENSG00000277950 | 0          | NA          | NA         | NA         | NA         |              |
| NA        | ENSG00000277952 | 0          | NA          | NA         | NA         | NA         |              |
| NA        | ENSG00000277954 | 0.97921084 | 0.00399808  | 0.38003248 | 0.94743213 | NA         |              |
| NA        | ENSG00000277957 | 172.310965 | 0.16635976  | 0.20243333 | 0.33574567 | 0.56575456 | SENP3-EIF4A1 |
| NA        | ENSG00000277958 | 0          | NA          | NA         | NA         | NA         |              |
| NA        | ENSG00000277959 | 2.70801879 | 0.03875319  | 0.37502073 | 0.68481366 | 0.84658029 |              |
| NA        | ENSG00000277965 | 0          | NA          | NA         | NA         | NA         |              |
| NA        | ENSG00000277966 | 0          | NA          | NA         | NA         | NA         |              |
| NA        | ENSG00000277967 | 0          | NA          | NA         | NA         | NA         |              |
| NA        | ENSG00000277968 | 0          | NA          | NA         | NA         | NA         |              |
| NA        | ENSG00000277969 | 64.6730142 | -0.04394219 | 0.24520634 | 0.81483174 | 0.91598064 |              |
| NA        | ENSG00000277971 | 0.33471731 | 0.02354391  | 0.38534154 | 0.62842204 | NA         |              |
| 284106    | ENSG00000277972 | 640.32557  | -0.13835023 | 0.10436021 | 0.16736665 | 0.35828164 | CISD3        |
| NA        | ENSG00000277973 | 0          | NA          | NA         | NA         | NA         |              |
| NA        | ENSG00000277975 | 0          | NA          | NA         | NA         | NA         | CSTP2        |
| NA        | ENSG00000277977 | 0          | NA          | NA         | NA         | NA         |              |
| NA        | ENSG00000277978 | 9.06690493 | -0.07267787 | 0.3504559  | 0.64318516 | 0.82173956 |              |
| NA        | ENSG00000277981 | 0          | NA          | NA         | NA         | NA         |              |
| NA        | ENSG00000277984 | 0.18922458 | 0.01954053  | 0.38488496 | 0.78225479 | NA         |              |
| 26781     | ENSG00000277985 | 0          | NA          | NA         | NA         | NA         | SNORA67      |
| NA        | ENSG00000277986 | 0          | NA          | NA         | NA         | NA         |              |
| NA        | ENSG00000277987 | 0          | NA          | NA         | NA         | NA         | LINC02351    |
| NA        | ENSG00000277988 | 0          | NA          | NA         | NA         | NA         | FAM30B       |
| NA        | ENSG00000277991 | 134.541625 | -0.00877605 | 0.37678069 | 0.89955713 | 0.95557174 |              |
| NA        | ENSG00000277994 | 0          | NA          | NA         | NA         | NA         |              |
| NA        | ENSG00000277997 | 0.37844916 | 0.02407552  | 0.3854191  | 0.60038877 | NA         |              |
| NA        | ENSG00000277998 | 0.44795842 | -0.02501848 | 0.38558245 | 0.5807882  | NA         |              |
| NA        | ENSG00000277999 | 4.19782376 | -0.10912543 | 0.38332066 | 0.37944067 | 0.60845927 |              |
| NA        | ENSG00000278000 | 11.5096021 | 0.08030611  | 0.34165788 | 0.63710086 | 0.81722218 |              |
| NA        | ENSG00000278001 | 0.16735865 | 0.01897177  | 0.38482933 | 0.78225479 | NA         |              |

|           |                 |            |             |            |            |            |           |
|-----------|-----------------|------------|-------------|------------|------------|------------|-----------|
| NA        | ENSG00000278002 | 2.8447598  | 0.00337593  | 0.36881766 | 0.97610887 | 0.99170422 |           |
| NA        | ENSG00000278004 | 0          | NA          | NA         | NA         | NA         |           |
| NA        | ENSG00000278007 | 0          | NA          | NA         | NA         | NA         |           |
| NA        | ENSG00000278008 | 0          | NA          | NA         | NA         | NA         | PPP1R26P4 |
| NA        | ENSG00000278009 | 0          | NA          | NA         | NA         | NA         |           |
| NA        | ENSG00000278011 | 0.70489816 | 0.0409702   | 0.38723849 | 0.34959344 | NA         |           |
| NA        | ENSG00000278012 | 9.06281425 | -1.59874112 | 1.06622931 | 0.00502727 | 0.02331489 |           |
| NA        | ENSG00000278013 | 0          | NA          | NA         | NA         | NA         |           |
| NA        | ENSG00000278017 | 0.86036123 | 0.02069328  | 0.38150589 | 0.71468923 | NA         |           |
| NA        | ENSG00000278020 | 0          | NA          | NA         | NA         | NA         |           |
| NA        | ENSG00000278022 | 1.06410736 | 0.0585575   | 0.38726333 | 0.30305039 | NA         |           |
| 201299    | ENSG00000278023 | 30.2074773 | -0.13408429 | 0.29666217 | 0.49643108 | 0.714811   | RDM1      |
| NA        | ENSG00000278026 | 0          | NA          | NA         | NA         | NA         |           |
| NA        | ENSG00000278028 | 0          | NA          | NA         | NA         | NA         |           |
| NA        | ENSG00000278030 | 0          | NA          | NA         | NA         | NA         | TRBV7-9   |
| 102465437 | ENSG00000278034 | 0          | NA          | NA         | NA         | NA         | MIR6731   |
| NA        | ENSG00000278035 | 0.47080897 | -0.02831678 | 0.38579781 | 0.54496267 | NA         |           |
| 102464828 | ENSG00000278038 | 0          | NA          | NA         | NA         | NA         | MIR6076   |
| NA        | ENSG00000278039 | 0          | NA          | NA         | NA         | NA         |           |
| NA        | ENSG00000278040 | 0          | NA          | NA         | NA         | NA         |           |
| NA        | ENSG00000278041 | 0.16735865 | 0.01897177  | 0.38482933 | 0.78225479 | NA         |           |
| NA        | ENSG00000278044 | 18.7157477 | 2.58341203  | 0.72215711 | 1.80E-05   | 0.00016326 | FAM247B   |
| NA        | ENSG00000278045 | 0          | NA          | NA         | NA         | NA         |           |
| NA        | ENSG00000278050 | 0          | NA          | NA         | NA         | NA         |           |
| NA        | ENSG00000278052 | 1.47984827 | -0.06187611 | 0.38522183 | 0.39757567 | NA         |           |
| 11056     | ENSG00000278053 | 879.372483 | -0.01902954 | 0.09823197 | 0.84000779 | 0.92739563 | DDX52     |
| NA        | ENSG00000278054 | 0          | NA          | NA         | NA         | NA         |           |
| NA        | ENSG00000278055 | 0          | NA          | NA         | NA         | NA         |           |
| 1527      | ENSG00000278057 | 0          | NA          | NA         | NA         | NA         | TEX28     |
| NA        | ENSG00000278058 | 0.50207596 | 0.02562368  | 0.38565771 | 0.52549886 | NA         |           |
| NA        | ENSG00000278060 | 0          | NA          | NA         | NA         | NA         |           |
| NA        | ENSG00000278068 | 1.62771406 | 0.00844661  | 0.37799588 | 0.90812477 | NA         |           |
| 102465944 | ENSG00000278069 | 0          | NA          | NA         | NA         | NA         | MIR6072   |
| NA        | ENSG00000278071 | 2.49396569 | -0.00185543 | 0.37332573 | 0.9820459  | NA         |           |
| NA        | ENSG00000278072 | 0          | NA          | NA         | NA         | NA         |           |
| 102465434 | ENSG00000278073 | 0          | NA          | NA         | NA         | NA         | MIR6726   |
| NA        | ENSG00000278075 | 0.6776341  | 0.02140031  | 0.38376904 | 0.61960586 | NA         |           |
| NA        | ENSG00000278077 | 0.173124   | -0.01911262 | 0.38486262 | 0.84537521 | NA         |           |

|           |                 |            |             |            |            |            |                |
|-----------|-----------------|------------|-------------|------------|------------|------------|----------------|
| NA        | ENSG00000278078 | 0          | NA          | NA         | NA         | NA         |                |
| NA        | ENSG00000278083 | 0          | NA          | NA         | NA         | NA         |                |
| NA        | ENSG00000278084 | 0          | NA          | NA         | NA         | NA         |                |
| 102723737 | ENSG00000278085 | 0          | NA          | NA         | NA         | NA         | CT45A8         |
| 100033444 | ENSG00000278089 | 0          | NA          | NA         | NA         | NA         | SNORD115-7     |
| NA        | ENSG00000278090 | 1.2473202  | -0.00713196 | 0.38038465 | 0.90239454 | NA         | LUNAR1         |
| NA        | ENSG00000278095 | 0          | NA          | NA         | NA         | NA         |                |
| NA        | ENSG00000278097 | 0          | NA          | NA         | NA         | NA         |                |
| 102466250 | ENSG00000278098 | 0          | NA          | NA         | NA         | NA         | MIR7973-1      |
| 6063      | ENSG00000278099 | 0          | NA          | NA         | NA         | NA         | RNVU1-2A       |
| NA        | ENSG00000278100 | 0          | NA          | NA         | NA         | NA         |                |
| NA        | ENSG00000278102 | 0          | NA          | NA         | NA         | NA         |                |
| 102465864 | ENSG00000278103 | 0          | NA          | NA         | NA         | NA         | MIR8060        |
| NA        | ENSG00000278104 | 0          | NA          | NA         | NA         | NA         |                |
| NA        | ENSG00000278106 | 0          | NA          | NA         | NA         | NA         |                |
| NA        | ENSG00000278107 | 1.46675239 | 0.01842956  | 0.37807365 | 0.80528647 | NA         |                |
| 102466193 | ENSG00000278108 | 0          | NA          | NA         | NA         | NA         | MIR6757        |
| NA        | ENSG00000278109 | 0          | NA          | NA         | NA         | NA         |                |
| NA        | ENSG00000278110 | 0          | NA          | NA         | NA         | NA         | SUSD2P2        |
| NA        | ENSG00000278112 | 4.04381828 | 0.0692336   | 0.37332645 | 0.55585707 | 0.76151114 |                |
| NA        | ENSG00000278113 | 0          | NA          | NA         | NA         | NA         |                |
| NA        | ENSG00000278122 | 0          | NA          | NA         | NA         | NA         | AQP7P5         |
| NA        | ENSG00000278123 | 0          | NA          | NA         | NA         | NA         | SNORD116-28    |
| NA        | ENSG00000278124 | 0          | NA          | NA         | NA         | NA         | RN7SL186P      |
| NA        | ENSG00000278126 | 7.84742375 | -0.36222825 | 0.56275881 | 0.06213471 | 0.17598182 |                |
| NA        | ENSG00000278128 | 0          | NA          | NA         | NA         | NA         |                |
| 7554      | ENSG00000278129 | 583.780624 | -0.1495606  | 0.09958344 | 0.11920572 | 0.28385039 | ZNF8           |
| NA        | ENSG00000278130 | 0          | NA          | NA         | NA         | NA         |                |
| NA        | ENSG00000278131 | 0.173124   | -0.01911262 | 0.38486262 | 0.84537521 | NA         |                |
| NA        | ENSG00000278133 | 51.1174267 | -0.14666529 | 0.27454474 | 0.45790685 | 0.68143353 |                |
| NA        | ENSG00000278135 | 0          | NA          | NA         | NA         | NA         |                |
| NA        | ENSG00000278138 | 0          | NA          | NA         | NA         | NA         | CLUHP11        |
| 110117499 | ENSG00000278139 | 0          | NA          | NA         | NA         | NA         | P3R3URF-PIK3R3 |
| NA        | ENSG00000278143 | 0          | NA          | NA         | NA         | NA         | NF1P7          |
| NA        | ENSG00000278144 | 0          | NA          | NA         | NA         | NA         |                |
| NA        | ENSG00000278146 | 0          | NA          | NA         | NA         | NA         |                |
| NA        | ENSG00000278147 | 0.56767373 | 0.02627943  | 0.38574813 | 0.49686938 | NA         |                |
| NA        | ENSG00000278151 | 0          | NA          | NA         | NA         | NA         |                |



|           |                 |            |             |            |            |            |             |
|-----------|-----------------|------------|-------------|------------|------------|------------|-------------|
| NA        | ENSG00000278153 | 0.83278349 | 0.01685618  | 0.38196368 | 0.7445549  | NA         |             |
| 641467    | ENSG00000278156 | 11.7118968 | -0.10288178 | 0.35241041 | 0.53332406 | 0.74452219 | TSC22D1-AS1 |
| NA        | ENSG00000278158 | 0          | NA          | NA         | NA         | NA         |             |
| 102465865 | ENSG00000278159 | 0          | NA          | NA         | NA         | NA         | MIR8062     |
| NA        | ENSG00000278160 | 0          | NA          | NA         | NA         | NA         |             |
| NA        | ENSG00000278171 | 0          | NA          | NA         | NA         | NA         |             |
| NA        | ENSG00000278172 | 0          | NA          | NA         | NA         | NA         |             |
| 389741    | ENSG00000278175 | 349.760582 | -0.03195662 | 0.12245717 | 0.78076642 | 0.89976799 | GLIDR       |
| NA        | ENSG00000278177 | 13.6401952 | -0.04190262 | 0.33804548 | 0.79711209 | 0.90675443 |             |
| NA        | ENSG00000278180 | 0          | NA          | NA         | NA         | NA         |             |
| NA        | ENSG00000278181 | 0          | NA          | NA         | NA         | NA         |             |
| NA        | ENSG00000278182 | 0.65904102 | 0.02044319  | 0.3837048  | 0.63306849 | NA         |             |
| NA        | ENSG00000278184 | 7.20326071 | -0.08356002 | 0.36204264 | 0.56558179 | 0.76741504 | NF1P11      |
| NA        | ENSG00000278188 | 0          | NA          | NA         | NA         | NA         |             |
| NA        | ENSG00000278192 | 0.7405897  | 0.0425834   | 0.3874668  | 0.33165218 | NA         |             |
| NA        | ENSG00000278193 | 0          | NA          | NA         | NA         | NA         |             |
| 6753      | ENSG00000278195 | 51.0768424 | -0.40303697 | 0.30181864 | 0.06844955 | 0.18843333 | SSTR3       |
| NA        | ENSG00000278196 | 0          | NA          | NA         | NA         | NA         | IGLV2-8     |
| NA        | ENSG00000278197 | 0          | NA          | NA         | NA         | NA         |             |
| NA        | ENSG00000278200 | 19.0967094 | -0.54963001 | 0.57233932 | 0.04388071 | 0.13457928 | LINC01971   |
| NA        | ENSG00000278202 | 48.5730799 | 0.43242651  | 0.34356435 | 0.06592509 | 0.18357247 |             |
| 102465516 | ENSG00000278204 | 0          | NA          | NA         | NA         | NA         | MIR6857     |
| NA        | ENSG00000278205 | 0          | NA          | NA         | NA         | NA         |             |
| NA        | ENSG00000278206 | 20.1115164 | -0.0438478  | 0.31323041 | 0.80951305 | 0.91359357 |             |
| NA        | ENSG00000278212 | 155.762601 | -0.10352813 | 0.1827563  | 0.51842128 | 0.73221886 |             |
| NA        | ENSG00000278213 | 0.18922458 | 0.01954053  | 0.38488496 | 0.78225479 | NA         | CNTNAP3P5   |
| 400548    | ENSG00000278214 | 2.84717739 | 0.0023427   | 0.37209107 | 0.98221323 | 0.99408818 | LINC02139   |
| NA        | ENSG00000278215 | 0          | NA          | NA         | NA         | NA         |             |
| NA        | ENSG00000278217 | 0          | NA          | NA         | NA         | NA         |             |
| NA        | ENSG00000278218 | 0          | NA          | NA         | NA         | NA         |             |
| NA        | ENSG00000278222 | 0          | NA          | NA         | NA         | NA         | RN7SL536P   |
| 102466734 | ENSG00000278223 | 0          | NA          | NA         | NA         | NA         | MIR6783     |
| 29964     | ENSG00000278224 | 14.0904155 | 0.15143955  | 0.37326713 | 0.3627627  | 0.59250943 | PRICKLE4    |
| NA        | ENSG00000278226 | 0          | NA          | NA         | NA         | NA         |             |
| NA        | ENSG00000278231 | 0.32401952 | -0.02327457 | 0.38532158 | 0.66849605 | NA         |             |
| 109864281 | ENSG00000278233 | 1.76056704 | -0.09173946 | 0.3928806  | 0.25055962 | NA         | RNA5-8SN2   |
| NA        | ENSG00000278234 | 0          | NA          | NA         | NA         | NA         |             |
| NA        | ENSG00000278236 | 0.15069912 | -0.01848503 | 0.38480575 | 0.84537521 | NA         |             |

|           |                 |            |             |            |            |            |           |
|-----------|-----------------|------------|-------------|------------|------------|------------|-----------|
| NA        | ENSG00000278237 | 0          | NA          | NA         | NA         | NA         |           |
| NA        | ENSG00000278238 | 10.6607581 | -0.08769856 | 0.34629528 | 0.59769299 | 0.78939082 |           |
| NA        | ENSG00000278239 | 0          | NA          | NA         | NA         | NA         |           |
| 677766    | ENSG00000278249 | 0.50538484 | 0.03063184  | 0.38600554 | 0.48515041 | NA         | SCARNA2   |
| NA        | ENSG00000278250 | 0          | NA          | NA         | NA         | NA         |           |
| NA        | ENSG00000278254 | 0          | NA          | NA         | NA         | NA         |           |
| NA        | ENSG00000278255 | 0          | NA          | NA         | NA         | NA         |           |
| NA        | ENSG00000278256 | 0          | NA          | NA         | NA         | NA         |           |
| 80179     | ENSG00000278259 | 1699.80254 | 0.00510698  | 0.07115406 | 0.94194874 | 0.97594973 | MYO19     |
| NA        | ENSG00000278261 | 0          | NA          | NA         | NA         | NA         | SNORD1A   |
| NA        | ENSG00000278263 | 0          | NA          | NA         | NA         | NA         |           |
| 102466739 | ENSG00000278264 | 0          | NA          | NA         | NA         | NA         | MIR6803   |
| 102465461 | ENSG00000278265 | 0          | NA          | NA         | NA         | NA         | MIR6770-1 |
| NA        | ENSG00000278266 | 18.2144482 | -0.07077685 | 0.32876258 | 0.6890925  | 0.8490152  |           |
| 102466751 | ENSG00000278267 | 0          | NA          | NA         | NA         | NA         | MIR6859-1 |
| NA        | ENSG00000278273 | 0          | NA          | NA         | NA         | NA         |           |
| 677838    | ENSG00000278274 | 0          | NA          | NA         | NA         | NA         | SNORA61   |
| NA        | ENSG00000278275 | 0          | NA          | NA         | NA         | NA         |           |
| NA        | ENSG00000278276 | 0.30139824 | -0.02296476 | 0.38527817 | 0.68536535 | NA         |           |
| 102465490 | ENSG00000278278 | 0          | NA          | NA         | NA         | NA         | MIR6816   |
| 102465842 | ENSG00000278281 | 0          | NA          | NA         | NA         | NA         | MIR7856   |
| NA        | ENSG00000278283 | 0          | NA          | NA         | NA         | NA         |           |
| NA        | ENSG00000278287 | 0          | NA          | NA         | NA         | NA         |           |
| 541465    | ENSG00000278289 | 0          | NA          | NA         | NA         | NA         | CT45A6    |
| NA        | ENSG00000278291 | 83.6179296 | -0.69972271 | 0.30386569 | 0.00377336 | 0.01836688 |           |
| NA        | ENSG00000278292 | 0          | NA          | NA         | NA         | NA         | RFPL4AP6  |
| 414060    | ENSG00000278299 | 0.50207596 | 0.02562368  | 0.38565771 | 0.52549886 | NA         | TBC1D3C   |
| NA        | ENSG00000278301 | 5.60378784 | -0.09594073 | 0.37281129 | 0.47531088 | 0.69749763 | GRAMD4P3  |
| NA        | ENSG00000278305 | 0          | NA          | NA         | NA         | NA         |           |
| 79893     | ENSG00000278311 | 960.777635 | -0.22098096 | 0.10078725 | 0.02267781 | 0.08056002 | GGNBP2    |
| NA        | ENSG00000278313 | 0.33471731 | 0.02354391  | 0.38534154 | 0.62842204 | NA         |           |
| NA        | ENSG00000278317 | 0          | NA          | NA         | NA         | NA         | H3P46     |
| 7772      | ENSG00000278318 | 207.292772 | -0.18356775 | 0.22700305 | 0.31897714 | 0.54659755 | ZNF229    |
| NA        | ENSG00000278319 | 0          | NA          | NA         | NA         | NA         |           |
| NA        | ENSG00000278324 | 0          | NA          | NA         | NA         | NA         |           |
| 102465481 | ENSG00000278328 | 0          | NA          | NA         | NA         | NA         | MIR6802   |
| NA        | ENSG00000278330 | 0          | NA          | NA         | NA         | NA         |           |
| NA        | ENSG00000278331 | 0          | NA          | NA         | NA         | NA         | RNU6-156P |

|           |                 |            |             |            |            |            |          |
|-----------|-----------------|------------|-------------|------------|------------|------------|----------|
| NA        | ENSG00000278332 | 0          | NA          | NA         | NA         | NA         |          |
| NA        | ENSG00000278333 | 0.14931947 | -0.01844332 | 0.38480212 | 0.84537521 | NA         |          |
| NA        | ENSG00000278334 | 0          | NA          | NA         | NA         | NA         |          |
| NA        | ENSG00000278337 | 0          | NA          | NA         | NA         | NA         |          |
| 100507240 | ENSG00000278338 | 2.68572256 | -0.05633416 | 0.37974244 | 0.52846493 | 0.74019836 | VWA8-AS1 |
| NA        | ENSG00000278341 | 9.95971708 | 0.30632809  | 0.49284256 | 0.09676754 | 0.24320599 |          |
| NA        | ENSG00000278342 | 0          | NA          | NA         | NA         | NA         |          |
| NA        | ENSG00000278344 | 0.49254283 | -0.00725599 | 0.38270352 | 0.85969911 | NA         |          |
| NA        | ENSG00000278346 | 0          | NA          | NA         | NA         | NA         |          |
| NA        | ENSG00000278348 | 0.48529996 | -0.00634339 | 0.38314649 | 0.86911804 | NA         |          |
| 102466728 | ENSG00000278349 | 0          | NA          | NA         | NA         | NA         | MIR6754  |
| NA        | ENSG00000278351 | 0          | NA          | NA         | NA         | NA         |          |
| NA        | ENSG00000278356 | 0.81044393 | -0.0053165  | 0.38076178 | 0.92529415 | NA         |          |
| NA        | ENSG00000278358 | 0          | NA          | NA         | NA         | NA         |          |
| 102466815 | ENSG00000278359 | 0          | NA          | NA         | NA         | NA         | MIR7155  |
| NA        | ENSG00000278367 | 0          | NA          | NA         | NA         | NA         |          |
| NA        | ENSG00000278370 | 0.32393624 | 0.00200546  | 0.3833754  | 0.96188194 | NA         |          |
| NA        | ENSG00000278374 | 0          | NA          | NA         | NA         | NA         |          |
| NA        | ENSG00000278376 | 7.41730633 | -0.0218728  | 0.35213361 | 0.87695647 | 0.94569064 |          |
| NA        | ENSG00000278381 | 0          | NA          | NA         | NA         | NA         |          |
| NA        | ENSG00000278382 | 0          | NA          | NA         | NA         | NA         |          |
| NA        | ENSG00000278383 | 6.23031926 | 0.08859932  | 0.36882307 | 0.52112572 | 0.73457437 |          |
| NA        | ENSG00000278385 | 0.50807617 | 0.0307655   | 0.38601855 | 0.4831334  | NA         |          |
| NA        | ENSG00000278388 | 0          | NA          | NA         | NA         | NA         |          |
| NA        | ENSG00000278389 | 1.03004097 | 0.03842953  | 0.38218793 | 0.5548429  | NA         |          |
| 101929140 | ENSG00000278390 | 19.0483948 | 0.77250192  | 0.66599945 | 0.01865449 | 0.06881836 |          |
| NA        | ENSG00000278395 | 0          | NA          | NA         | NA         | NA         |          |
| NA        | ENSG00000278396 | 2.24953474 | -0.1154891  | 0.4087133  | 0.03660847 | NA         |          |
| NA        | ENSG00000278399 | 0          | NA          | NA         | NA         | NA         |          |
| NA        | ENSG00000278400 | 0          | NA          | NA         | NA         | NA         |          |
| NA        | ENSG00000278404 | 0          | NA          | NA         | NA         | NA         |          |
| NA        | ENSG00000278406 | 0          | NA          | NA         | NA         | NA         |          |
| NA        | ENSG00000278408 | 0          | NA          | NA         | NA         | NA         |          |
| NA        | ENSG00000278410 | 0          | NA          | NA         | NA         | NA         |          |
| 102465514 | ENSG00000278412 | 0          | NA          | NA         | NA         | NA         | MIR6854  |
| NA        | ENSG00000278413 | 0          | NA          | NA         | NA         | NA         |          |
| NA        | ENSG00000278416 | 12.6707782 | -0.0136392  | 0.33083258 | 0.93392674 | 0.97240128 | PMS2P2   |
| 102465255 | ENSG00000278418 | 0          | NA          | NA         | NA         | NA         | MIR6512  |

|           |    |                 |            |             |            |            |            |           |
|-----------|----|-----------------|------------|-------------|------------|------------|------------|-----------|
|           | NA | ENSG00000278419 | 0.173124   | -0.01911262 | 0.38486262 | 0.84537521 | NA         |           |
| 102465491 | NA | ENSG00000278420 | 0          | NA          | NA         | NA         | NA         | MIR6819   |
|           | NA | ENSG00000278421 | 0          | NA          | NA         | NA         | NA         |           |
|           | NA | ENSG00000278422 | 0          | NA          | NA         | NA         | NA         | RN7SL331P |
|           | NA | ENSG00000278424 | 0          | NA          | NA         | NA         | NA         |           |
|           | NA | ENSG00000278428 | 0          | NA          | NA         | NA         | NA         |           |
|           | NA | ENSG00000278431 | 0.16735865 | 0.01897177  | 0.38482933 | 0.78225479 | NA         |           |
| 102464825 | NA | ENSG00000278433 | 0          | NA          | NA         | NA         | NA         | MIR6070   |
|           | NA | ENSG00000278434 | 13.16938   | -0.0453307  | 0.33509103 | 0.78558825 | 0.90248778 |           |
| 102465837 | NA | ENSG00000278438 | 0          | NA          | NA         | NA         | NA         | MIR7849   |
|           | NA | ENSG00000278441 | 0          | NA          | NA         | NA         | NA         |           |
|           | NA | ENSG00000278445 | 0          | NA          | NA         | NA         | NA         |           |
|           | NA | ENSG00000278446 | 0          | NA          | NA         | NA         | NA         |           |
| 102465468 | NA | ENSG00000278447 | 0          | NA          | NA         | NA         | NA         | MIR6781   |
| 102465538 | NA | ENSG00000278449 | 0          | NA          | NA         | NA         | NA         | MIR6892   |
|           | NA | ENSG00000278454 | 0          | NA          | NA         | NA         | NA         |           |
|           | NA | ENSG00000278455 | 0          | NA          | NA         | NA         | NA         | CICP21    |
|           | NA | ENSG00000278456 | 8.39239292 | 0.38035541  | 0.59687202 | 0.05091403 | 0.15112722 |           |
|           | NA | ENSG00000278459 | 0          | NA          | NA         | NA         | NA         |           |
|           | NA | ENSG00000278462 | 0.18922458 | 0.01954053  | 0.38488496 | 0.78225479 | NA         |           |
| 8335      | NA | ENSG00000278463 | 1.4320746  | -0.00360749 | 0.37843703 | 0.95775116 | NA         | H2AC4     |
|           | NA | ENSG00000278464 | 0          | NA          | NA         | NA         | NA         |           |
| 102466202 | NA | ENSG00000278465 | 0          | NA          | NA         | NA         | NA         | MIR6769B  |
|           | NA | ENSG00000278467 | 4.55225185 | 0.04451573  | 0.3689646  | 0.69980049 | 0.8552838  |           |
|           | NA | ENSG00000278469 | 0          | NA          | NA         | NA         | NA         |           |
|           | NA | ENSG00000278472 | 1.36667463 | -0.03582163 | 0.38293725 | 0.54108399 | NA         |           |
|           | NA | ENSG00000278473 | 0          | NA          | NA         | NA         | NA         | IGHV3-41  |
|           | NA | ENSG00000278475 | 0          | NA          | NA         | NA         | NA         |           |
|           | NA | ENSG00000278477 | 0          | NA          | NA         | NA         | NA         |           |
|           | NA | ENSG00000278478 | 0          | NA          | NA         | NA         | NA         |           |
|           | NA | ENSG00000278480 | 0.68547972 | 0.00328355  | 0.3812791  | 0.94867406 | NA         | ZBTB2P1   |
|           | NA | ENSG00000278482 | 0          | NA          | NA         | NA         | NA         |           |
| 102465881 | NA | ENSG00000278483 | 0          | NA          | NA         | NA         | NA         | MIR8087   |
|           | NA | ENSG00000278484 | 0          | NA          | NA         | NA         | NA         |           |
|           | NA | ENSG00000278485 | 0          | NA          | NA         | NA         | NA         |           |
|           | NA | ENSG00000278486 | 0.18922458 | 0.01954053  | 0.38488496 | 0.78225479 | NA         | YRDCP1    |
|           | NA | ENSG00000278487 | 0          | NA          | NA         | NA         | NA         |           |
|           | NA | ENSG00000278492 | 0.30139824 | -0.02296476 | 0.38527817 | 0.68536535 | NA         |           |

|           |                 |            |             |            |            |            |            |
|-----------|-----------------|------------|-------------|------------|------------|------------|------------|
| NA        | ENSG00000278493 | 0.5534485  | 0.03296731  | 0.38624184 | 0.45102479 | NA         |            |
| NA        | ENSG00000278496 | 0.87144992 | 0.03647478  | 0.38450086 | 0.44956136 | NA         |            |
| NA        | ENSG00000278497 | 0          | NA          | NA         | NA         | NA         | RN7SL759P  |
| NA        | ENSG00000278498 | 0          | NA          | NA         | NA         | NA         |            |
| NA        | ENSG00000278499 | 0          | NA          | NA         | NA         | NA         | NPAPIL     |
| 102466953 | ENSG00000278502 | 0          | NA          | NA         | NA         | NA         | MIR6082    |
| 284099    | ENSG00000278505 | 0.99975097 | 0.00408929  | 0.38084762 | 0.94127624 | NA         | C17orf78   |
| NA        | ENSG00000278513 | 0          | NA          | NA         | NA         | NA         |            |
| NA        | ENSG00000278514 | 0.6222258  | -0.03611121 | 0.38660537 | 0.42844537 | NA         |            |
| 102465522 | ENSG00000278517 | 0          | NA          | NA         | NA         | NA         | MIR6865    |
| NA        | ENSG00000278518 | 0          | NA          | NA         | NA         | NA         |            |
| 102467003 | ENSG00000278520 | 0          | NA          | NA         | NA         | NA         | MIR7851    |
| 102724631 | ENSG00000278522 | 0          | NA          | NA         | NA         | NA         | POTEB3     |
| NA        | ENSG00000278523 | 0          | NA          | NA         | NA         | NA         |            |
| 102466197 | ENSG00000278524 | 0          | NA          | NA         | NA         | NA         | MIR6810    |
| NA        | ENSG00000278525 | 0          | NA          | NA         | NA         | NA         | RN7SL607P  |
| NA        | ENSG00000278526 | 0          | NA          | NA         | NA         | NA         |            |
| NA        | ENSG00000278527 | 0          | NA          | NA         | NA         | NA         |            |
| NA        | ENSG00000278528 | 0          | NA          | NA         | NA         | NA         |            |
| 102465870 | ENSG00000278529 | 0          | NA          | NA         | NA         | NA         | MIR8070    |
| 101060146 | ENSG00000278530 | 0          | NA          | NA         | NA         | NA         | CHMP1B2P   |
| NA        | ENSG00000278531 | 0          | NA          | NA         | NA         | NA         |            |
| NA        | ENSG00000278532 | 0.33956028 | 0.00191429  | 0.38337383 | 0.96940382 | NA         |            |
| 79154     | ENSG00000278535 | 168.664341 | 0.12406215  | 0.16948227 | 0.41588125 | 0.6427079  | DHRS11     |
| NA        | ENSG00000278537 | 0          | NA          | NA         | NA         | NA         | IGKV2OR2-8 |
| 31        | ENSG00000278540 | 3467.15719 | -0.68658758 | 0.07485253 | 1.13E-20   | 4.38E-19   | ACACA      |
| NA        | ENSG00000278541 | 0          | NA          | NA         | NA         | NA         |            |
| NA        | ENSG00000278543 | 0.16735865 | 0.01897177  | 0.38482933 | 0.78225479 | NA         |            |
| NA        | ENSG00000278546 | 0          | NA          | NA         | NA         | NA         |            |
| 102466191 | ENSG00000278549 | 0          | NA          | NA         | NA         | NA         | MIR6736    |
| NA        | ENSG00000278552 | 0          | NA          | NA         | NA         | NA         |            |
| NA        | ENSG00000278554 | 0          | NA          | NA         | NA         | NA         |            |
| 728229    | ENSG00000278558 | 10.164942  | 0.29470146  | 0.49142631 | 0.08932063 | 0.22925243 | TMEM191B   |
| NA        | ENSG00000278561 | 0.55282966 | 0.01200788  | 0.3832686  | 0.74832422 | NA         | PTPN20CP   |
| NA        | ENSG00000278569 | 0          | NA          | NA         | NA         | NA         |            |
| 10002     | ENSG00000278570 | 1.11957622 | -0.03745927 | 0.38149601 | 0.58149907 | NA         | NR2E3      |
| 102465694 | ENSG00000278571 | 0          | NA          | NA         | NA         | NA         | MIR7161    |
| NA        | ENSG00000278572 | 0          | NA          | NA         | NA         | NA         |            |

|           |                 |            |             |            |            |            |           |
|-----------|-----------------|------------|-------------|------------|------------|------------|-----------|
| NA        | ENSG00000278576 | 14.3092489 | -0.04676827 | 0.33237357 | 0.78277586 | 0.90108377 |           |
| NA        | ENSG00000278577 | 0          | NA          | NA         | NA         | NA         |           |
| NA        | ENSG00000278580 | 0          | NA          | NA         | NA         | NA         |           |
| 102464831 | ENSG00000278581 | 0          | NA          | NA         | NA         | NA         | MIR6080   |
| NA        | ENSG00000278582 | 0          | NA          | NA         | NA         | NA         | DNM1P5    |
| NA        | ENSG00000278585 | 0          | NA          | NA         | NA         | NA         | SNX3P1Y   |
| NA        | ENSG00000278586 | 0          | NA          | NA         | NA         | NA         |           |
| NA        | ENSG00000278587 | 0          | NA          | NA         | NA         | NA         |           |
| 8346      | ENSG00000278588 | 0.84130257 | 0.01937507  | 0.38142915 | 0.7315091  | NA         | H2BC10    |
| NA        | ENSG00000278589 | 0          | NA          | NA         | NA         | NA         | ZACNP1    |
| NA        | ENSG00000278590 | 0.82448947 | -0.00283967 | 0.38204694 | 0.95221949 | NA         | RN7SL113P |
| NA        | ENSG00000278592 | 0          | NA          | NA         | NA         | NA         |           |
| NA        | ENSG00000278593 | 0          | NA          | NA         | NA         | NA         |           |
| NA        | ENSG00000278594 | 0.65522314 | 0.0036232   | 0.38193527 | 0.93798669 | NA         |           |
| NA        | ENSG00000278595 | 0.18922458 | 0.01954053  | 0.38488496 | 0.78225479 | NA         |           |
| 102466225 | ENSG00000278596 | 0          | NA          | NA         | NA         | NA         | MIR6077   |
| 102465464 | ENSG00000278598 | 0          | NA          | NA         | NA         | NA         | MIR6775   |
| 102723859 | ENSG00000278599 | 0          | NA          | NA         | NA         | NA         | TBC1D3E   |
| NA        | ENSG00000278600 | 99.9828502 | 0.04472726  | 0.20332442 | 0.79233711 | 0.9050068  |           |
| NA        | ENSG00000278601 | 10.3448064 | -0.00222734 | 0.34245929 | 0.98656312 | 0.99555514 |           |
| NA        | ENSG00000278602 | 0          | NA          | NA         | NA         | NA         |           |
| NA        | ENSG00000278603 | 9.4506115  | -0.11682477 | 0.36322784 | 0.46399499 | 0.68678459 |           |
| NA        | ENSG00000278607 | 0          | NA          | NA         | NA         | NA         |           |
| 101928238 | ENSG00000278611 | 2.43512987 | 0.04607772  | 0.37608657 | 0.62651845 | NA         | ZNF426-DT |
| 102288414 | ENSG00000278615 | 509.565151 | -0.15255086 | 0.1143856  | 0.16128979 | 0.34953462 | C11orf98  |
| NA        | ENSG00000278616 | 90.5451505 | -0.02344081 | 0.21620607 | 0.8934377  | 0.95389529 | BEND3P3   |
| 102465873 | ENSG00000278617 | 0          | NA          | NA         | NA         | NA         | MIR8074   |
| 79922     | ENSG00000278619 | 90.4019753 | -0.32172598 | 0.26872294 | 0.11667233 | 0.27939454 | MRM1      |
| NA        | ENSG00000278621 | 0.61510575 | -0.01593721 | 0.38339031 | 0.71833531 | NA         | THBS1-AS1 |
| NA        | ENSG00000278626 | 0          | NA          | NA         | NA         | NA         |           |
| NA        | ENSG00000278627 | 5.53065667 | 0.03175635  | 0.35799927 | 0.81579728 | 0.9163678  |           |
| NA        | ENSG00000278630 | 0          | NA          | NA         | NA         | NA         | LINC02335 |
| NA        | ENSG00000278631 | 0          | NA          | NA         | NA         | NA         | SOWAHCP5  |
| NA        | ENSG00000278635 | 0.51365004 | 0.01575541  | 0.38315252 | 0.73354043 | NA         |           |
| NA        | ENSG00000278636 | 0          | NA          | NA         | NA         | NA         |           |
| 8359      | ENSG00000278637 | 0.66076816 | 0.00142247  | 0.38189773 | 0.97474967 | NA         | H4C1      |
| NA        | ENSG00000278638 | 0.34685906 | 0.00013747  | 0.38336204 | 0.96715476 | NA         |           |
| NA        | ENSG00000278640 | 0          | NA          | NA         | NA         | NA         |           |

|           |                 |            |             |            |            |            |             |
|-----------|-----------------|------------|-------------|------------|------------|------------|-------------|
| NA        | ENSG00000278642 | 0          | NA          | NA         | NA         | NA         |             |
| NA        | ENSG00000278643 | 0          | NA          | NA         | NA         | NA         |             |
| NA        | ENSG00000278646 | 0          | NA          | NA         | NA         | NA         |             |
| NA        | ENSG00000278647 | 0          | NA          | NA         | NA         | NA         | CDK2AP2P1   |
| NA        | ENSG00000278650 | 0          | NA          | NA         | NA         | NA         |             |
| NA        | ENSG00000278654 | 0.14931947 | -0.01844332 | 0.38480212 | 0.84537521 | NA         |             |
| NA        | ENSG00000278655 | 0          | NA          | NA         | NA         | NA         |             |
| NA        | ENSG00000278657 | 0          | NA          | NA         | NA         | NA         |             |
| 102465496 | ENSG00000278658 | 0          | NA          | NA         | NA         | NA         | MIR6826     |
| NA        | ENSG00000278661 | 0          | NA          | NA         | NA         | NA         | TRAJ37      |
| 643707    | ENSG00000278662 | 17.563364  | 0.18083861  | 0.35264553 | 0.34872569 | 0.57940857 | GOLGA6L10   |
| 647042    | ENSG00000278662 | 17.563364  | 0.18083861  | 0.35264553 | 0.34872569 | 0.57940857 | GOLGA6L10   |
| NA        | ENSG00000278664 | 0          | NA          | NA         | NA         | NA         | DUX4L10     |
| NA        | ENSG00000278665 | 0          | NA          | NA         | NA         | NA         |             |
| NA        | ENSG00000278667 | 0          | NA          | NA         | NA         | NA         |             |
| NA        | ENSG00000278668 | 0.90779507 | -0.0358039  | 0.38415971 | 0.48068148 | NA         |             |
| 102466918 | ENSG00000278672 | 0          | NA          | NA         | NA         | NA         | MIR8059     |
| 8336      | ENSG00000278677 | 12.471278  | -0.1815213  | 0.37451258 | 0.31439126 | 0.5421676  | H2AC17      |
| NA        | ENSG00000278678 | 0          | NA          | NA         | NA         | NA         | CYCSP41     |
| NA        | ENSG00000278681 | 0          | NA          | NA         | NA         | NA         |             |
| NA        | ENSG00000278683 | 0          | NA          | NA         | NA         | NA         |             |
| NA        | ENSG00000278684 | 0          | NA          | NA         | NA         | NA         |             |
| 392843    | ENSG00000278685 | 0.33471731 | 0.02354391  | 0.38534154 | 0.62842204 | NA         | IQCA1L      |
| NA        | ENSG00000278687 | 0          | NA          | NA         | NA         | NA         |             |
| NA        | ENSG00000278690 | 0          | NA          | NA         | NA         | NA         |             |
| NA        | ENSG00000278694 | 0          | NA          | NA         | NA         | NA         |             |
| NA        | ENSG00000278698 | 0          | NA          | NA         | NA         | NA         |             |
| NA        | ENSG00000278700 | 0          | NA          | NA         | NA         | NA         |             |
| NA        | ENSG00000278701 | 0          | NA          | NA         | NA         | NA         |             |
| NA        | ENSG00000278702 | 0.16735865 | 0.01897177  | 0.38482933 | 0.78225479 | NA         |             |
| NA        | ENSG00000278703 | 0.73483863 | 0.0240338   | 0.38394958 | 0.58025588 | NA         |             |
| 8366      | ENSG00000278705 | 0.93850641 | -0.04705871 | 0.38526582 | 0.40980939 | NA         | H4C2        |
| NA        | ENSG00000278708 | 0          | NA          | NA         | NA         | NA         |             |
| 105416157 | ENSG00000278709 | 92.712284  | -0.36310715 | 0.24352678 | 0.06469213 | 0.18123296 | NKILA       |
| NA        | ENSG00000278713 | 0.66943461 | 0.03059546  | 0.38616409 | 0.42784935 | NA         |             |
| NA        | ENSG00000278715 | 0          | NA          | NA         | NA         | NA         | SNORD116-20 |
| NA        | ENSG00000278716 | 0.30139824 | -0.02296476 | 0.38527817 | 0.68536535 | NA         |             |
| NA        | ENSG00000278719 | 0.82901937 | -0.00343036 | 0.38204835 | 0.94218727 | NA         | MCM8-AS1    |

|           |                 |            |             |            |            |            |           |
|-----------|-----------------|------------|-------------|------------|------------|------------|-----------|
| NA        | ENSG00000278720 | 0          | NA          | NA         | NA         | NA         |           |
| NA        | ENSG00000278722 | 0          | NA          | NA         | NA         | NA         |           |
| NA        | ENSG00000278724 | 0          | NA          | NA         | NA         | NA         |           |
| NA        | ENSG00000278725 | 0          | NA          | NA         | NA         | NA         |           |
| NA        | ENSG00000278727 | 6.49985499 | -0.51164563 | 0.91336746 | 0.02074618 | 0.07509654 |           |
| NA        | ENSG00000278730 | 1232.95636 | -0.14384618 | 0.07649248 | 0.05468881 | 0.15944542 |           |
| NA        | ENSG00000278732 | 0          | NA          | NA         | NA         | NA         |           |
| NA        | ENSG00000278733 | 1.44872382 | 0.01681854  | 0.38007297 | 0.79268203 | NA         |           |
| NA        | ENSG00000278734 | 0          | NA          | NA         | NA         | NA         |           |
| NA        | ENSG00000278736 | 0          | NA          | NA         | NA         | NA         |           |
| NA        | ENSG00000278737 | 0.52119901 | 0.02576573  | 0.38568143 | 0.51723676 | NA         |           |
| NA        | ENSG00000278740 | 0.6305333  | 0.00167151  | 0.38196374 | 0.97026748 | NA         |           |
| NA        | ENSG00000278743 | 3.76116721 | 0.0393628   | 0.36916179 | 0.72777116 | 0.86981806 |           |
| NA        | ENSG00000278744 | 0.33471731 | 0.02354391  | 0.38534154 | 0.62842204 | NA         |           |
| NA        | ENSG00000278745 | 0          | NA          | NA         | NA         | NA         |           |
| NA        | ENSG00000278746 | 0          | NA          | NA         | NA         | NA         | RN7SL660P |
| NA        | ENSG00000278752 | 0          | NA          | NA         | NA         | NA         |           |
| NA        | ENSG00000278754 | 0          | NA          | NA         | NA         | NA         |           |
| 102465431 | ENSG00000278756 | 0          | NA          | NA         | NA         | NA         | MIR6722   |
| NA        | ENSG00000278761 | 0.37844916 | 0.02407552  | 0.3854191  | 0.60038877 | NA         | DUX4L11   |
| NA        | ENSG00000278763 | 0          | NA          | NA         | NA         | NA         | FAM27B    |
| NA        | ENSG00000278764 | 0          | NA          | NA         | NA         | NA         |           |
| NA        | ENSG00000278765 | 8.02557242 | -0.01941339 | 0.35635624 | 0.88392508 | 0.94897201 |           |
| NA        | ENSG00000278766 | 0.61755868 | -0.01596221 | 0.38274428 | 0.71754976 | NA         |           |
| NA        | ENSG00000278768 | 317.376176 | 0.05478906  | 0.17152859 | 0.72201724 | 0.86742752 | BACE1-AS  |
| NA        | ENSG00000278769 | 6.91457461 | 0.01114498  | 0.38269353 | 0.80714738 | 0.91260538 |           |
| NA        | ENSG00000278770 | 1.66632551 | 0.00979817  | 0.3767871  | 0.9010465  | NA         |           |
| 378707    | ENSG00000278771 | 1.59050933 | 0.00544309  | 0.37939544 | 0.93415365 | NA         | RN7SL3    |
| NA        | ENSG00000278773 | 0          | NA          | NA         | NA         | NA         |           |
| NA        | ENSG00000278774 | 0          | NA          | NA         | NA         | NA         |           |
| NA        | ENSG00000278778 | 0          | NA          | NA         | NA         | NA         |           |
| 102466516 | ENSG00000278783 | 0          | NA          | NA         | NA         | NA         | MIR6071   |
| NA        | ENSG00000278784 | 48.5388491 | 0.29099932  | 0.28621468 | 0.16579362 | 0.35599996 |           |
| NA        | ENSG00000278790 | 0.51937201 | -0.02557462 | 0.38567603 | 0.54680819 | NA         | DUX4L12   |
| NA        | ENSG00000278791 | 0          | NA          | NA         | NA         | NA         |           |
| NA        | ENSG00000278794 | 0.34624801 | -0.02356563 | 0.38536324 | 0.65270996 | NA         |           |
| NA        | ENSG00000278797 | 0          | NA          | NA         | NA         | NA         |           |
| 102465494 | ENSG00000278799 | 0          | NA          | NA         | NA         | NA         | MIR6823   |



|           |                 |                 |             |             |            |            |            |           |
|-----------|-----------------|-----------------|-------------|-------------|------------|------------|------------|-----------|
|           | NA              | ENSG00000278802 | 0           | NA          | NA         | NA         | NA         |           |
|           | NA              | ENSG00000278803 | 0           | NA          | NA         | NA         | NA         | PWWP4     |
| 100289211 | ENSG00000278811 | 45.0937049      | -0.0951132  | 0.27270826  | 0.62453578 | 0.80860493 |            | LINC00624 |
|           | NA              | ENSG00000278813 | 0           | NA          | NA         | NA         | NA         |           |
|           | NA              | ENSG00000278815 | 0           | NA          | NA         | NA         | NA         |           |
|           | NA              | ENSG00000278816 | 0.68099355  | 0.00399434  | 0.38130172 | 0.9377688  | NA         |           |
|           | NA              | ENSG00000278818 | 0           | NA          | NA         | NA         | NA         |           |
|           | NA              | ENSG00000278819 | 0           | NA          | NA         | NA         | NA         |           |
|           | NA              | ENSG00000278822 | 0           | NA          | NA         | NA         | NA         |           |
|           | NA              | ENSG00000278824 | 0           | NA          | NA         | NA         | NA         |           |
|           | NA              | ENSG00000278825 | 0           | NA          | NA         | NA         | NA         | RN7SL640P |
| 8357      | ENSG00000278828 | 19.4001617      | -1.54846802 | 0.609767    | 0.00063295 | 0.00396015 |            | H3C10     |
|           | NA              | ENSG00000278829 | 2.0212972   | -0.03974361 | 0.3782839  | 0.63269431 | NA         |           |
|           | NA              | ENSG00000278830 | 0           | NA          | NA         | NA         | NA         |           |
|           | NA              | ENSG00000278831 | 2.56263446  | -0.00050754 | 0.37142003 | 0.99425013 | 0.9982983  |           |
|           | NA              | ENSG00000278834 | 66.2526028  | -0.0646649  | 0.24169653 | 0.73065461 | 0.87116511 |           |
|           | NA              | ENSG00000278837 | 0           | NA          | NA         | NA         | NA         |           |
|           | NA              | ENSG00000278838 | 0           | NA          | NA         | NA         | NA         |           |
|           | NA              | ENSG00000278840 | 0.34624801  | -0.02356563 | 0.38536324 | 0.65270996 | NA         |           |
|           | NA              | ENSG00000278842 | 0.15069912  | -0.01848503 | 0.38480575 | 0.84537521 | NA         |           |
| 84311     | ENSG00000278845 | 549.872591      | -0.1227529  | 0.10418397  | 0.21914696 | 0.43105634 |            | MRPL45    |
|           | NA              | ENSG00000278847 | 0           | NA          | NA         | NA         | NA         |           |
| 102724127 | ENSG00000278848 | 1.01803244      | 0.02822651  | 0.38250567  | 0.61034369 | NA         |            | TP53TG3F  |
| 102466756 | ENSG00000278851 | 0               | NA          | NA          | NA         | NA         |            | MIR6879   |
|           | NA              | ENSG00000278852 | 0           | NA          | NA         | NA         | NA         |           |
|           | NA              | ENSG00000278854 | 0           | NA          | NA         | NA         | NA         |           |
|           | NA              | ENSG00000278857 | 0           | NA          | NA         | NA         | NA         | IGKV1D-12 |
|           | NA              | ENSG00000278859 | 0           | NA          | NA         | NA         | NA         |           |
|           | NA              | ENSG00000278860 | 0           | NA          | NA         | NA         | NA         |           |
|           | NA              | ENSG00000278861 | 9.23455918  | -0.00551427 | 0.34260495 | 0.96984832 | 0.98858357 |           |
|           | NA              | ENSG00000278862 | 0           | NA          | NA         | NA         | NA         |           |
|           | NA              | ENSG00000278863 | 0           | NA          | NA         | NA         | NA         |           |
|           | NA              | ENSG00000278864 | 283.679135  | -0.17614354 | 0.14079704 | 0.17746525 | 0.37250429 |           |
|           | NA              | ENSG00000278865 | 0           | NA          | NA         | NA         | NA         |           |
|           | NA              | ENSG00000278866 | 0           | NA          | NA         | NA         | NA         |           |
|           | NA              | ENSG00000278867 | 17.5500169  | 0.0894502   | 0.32040938 | 0.63188629 | 0.81371846 |           |
|           | NA              | ENSG00000278869 | 1.05217154  | 0.03036692  | 0.38186909 | 0.61499831 | NA         |           |
| 79324     | ENSG00000278870 | 0               | NA          | NA          | NA         | NA         |            | OR51G1    |

|           |                 |            |             |            |            |            |       |
|-----------|-----------------|------------|-------------|------------|------------|------------|-------|
| NA        | ENSG00000278872 | 0          | NA          | NA         | NA         | NA         |       |
| 100133319 | ENSG00000278873 | 0          | NA          | NA         | NA         | NA         |       |
| NA        | ENSG00000278874 | 0          | NA          | NA         | NA         | NA         |       |
| NA        | ENSG00000278875 | 10.6496355 | 0.33712803  | 0.49683096 | 0.09782388 | 0.24511566 |       |
| NA        | ENSG00000278876 | 2.20085399 | -0.04334936 | 0.37990436 | 0.58435561 | NA         |       |
| NA        | ENSG00000278877 | 0          | NA          | NA         | NA         | NA         |       |
| NA        | ENSG00000278878 | 17.5115536 | 0.27619974  | 0.39242704 | 0.18910637 | 0.38988574 |       |
| NA        | ENSG00000278879 | 24.3023661 | -0.074257   | 0.3022171  | 0.69589249 | 0.8531799  |       |
| NA        | ENSG00000278880 | 0          | NA          | NA         | NA         | NA         |       |
| NA        | ENSG00000278881 | 0.34624801 | -0.02356563 | 0.38536324 | 0.65270996 | NA         |       |
| NA        | ENSG00000278884 | 0          | NA          | NA         | NA         | NA         |       |
| NA        | ENSG00000278885 | 0          | NA          | NA         | NA         | NA         |       |
| NA        | ENSG00000278886 | 0          | NA          | NA         | NA         | NA         |       |
| 56656     | ENSG00000278889 | 0          | NA          | NA         | NA         | NA         | OR2S2 |
| NA        | ENSG00000278890 | 0          | NA          | NA         | NA         | NA         |       |
| NA        | ENSG00000278891 | 0.32455646 | 0.00143451  | 0.38336892 | 0.96657217 | NA         |       |
| NA        | ENSG00000278892 | 0          | NA          | NA         | NA         | NA         |       |
| NA        | ENSG00000278893 | 0.15069912 | -0.01848503 | 0.38480575 | 0.84537521 | NA         |       |
| NA        | ENSG00000278894 | 0          | NA          | NA         | NA         | NA         |       |
| NA        | ENSG00000278895 | 0          | NA          | NA         | NA         | NA         |       |
| NA        | ENSG00000278896 | 0.65817586 | 0.0053283   | 0.38137513 | 0.91720367 | NA         |       |
| NA        | ENSG00000278897 | 71.8632558 | -0.08549874 | 0.22766136 | 0.64103145 | 0.82014987 |       |
| NA        | ENSG00000278898 | 0          | NA          | NA         | NA         | NA         |       |
| 645967    | ENSG00000278899 | 8.79696341 | 0.01470368  | 0.34496469 | 0.92552726 | 0.96901263 |       |
| NA        | ENSG00000278900 | 0.173733   | 0.01914545  | 0.38484597 | 0.78225479 | NA         |       |
| NA        | ENSG00000278901 | 0.51937201 | -0.02557462 | 0.38567603 | 0.54680819 | NA         |       |
| NA        | ENSG00000278902 | 0          | NA          | NA         | NA         | NA         |       |
| NA        | ENSG00000278903 | 94.4379908 | -0.43799353 | 0.24680945 | 0.02890319 | 0.09740774 |       |
| NA        | ENSG00000278905 | 4.60718622 | 0.13149554  | 0.40090538 | 0.22440085 | 0.43811384 |       |
| NA        | ENSG00000278907 | 0          | NA          | NA         | NA         | NA         |       |
| NA        | ENSG00000278908 | 0          | NA          | NA         | NA         | NA         |       |
| NA        | ENSG00000278909 | 0.16735865 | 0.01897177  | 0.38482933 | 0.78225479 | NA         |       |
| NA        | ENSG00000278910 | 0          | NA          | NA         | NA         | NA         | BANCR |
| NA        | ENSG00000278911 | 0.173733   | 0.01914545  | 0.38484597 | 0.78225479 | NA         |       |
| NA        | ENSG00000278912 | 0.37844916 | 0.02407552  | 0.3854191  | 0.60038877 | NA         |       |
| NA        | ENSG00000278913 | 0          | NA          | NA         | NA         | NA         |       |
| NA        | ENSG00000278914 | 0          | NA          | NA         | NA         | NA         |       |
| NA        | ENSG00000278915 | 20.5365684 | -0.22071148 | 0.35281411 | 0.27767254 | 0.50221169 |       |

|           |                 |            |             |            |            |            |             |
|-----------|-----------------|------------|-------------|------------|------------|------------|-------------|
| 144486    | ENSG00000278916 | 30.5211371 | -0.19531082 | 0.33999062 | 0.32902129 | 0.55760064 | CEP83-DT    |
| NA        | ENSG00000278917 | 36.3396416 | 0.06718164  | 0.28469286 | 0.73010199 | 0.8709773  |             |
| NA        | ENSG00000278918 | 33.9175335 | 0.39448763  | 0.37198202 | 0.09427336 | 0.23856932 |             |
| NA        | ENSG00000278920 | 0.48411431 | 0.01092148  | 0.38338295 | 0.7918823  | NA         |             |
| 54508     | ENSG00000278921 | 13.4965489 | 0.46402081  | 0.58861706 | 0.05716494 | 0.16506603 | EPB41L4A-DT |
| NA        | ENSG00000278922 | 113.620491 | 0.02476068  | 0.19438999 | 0.88532542 | 0.95004523 |             |
| NA        | ENSG00000278923 | 0          | NA          | NA         | NA         | NA         |             |
| NA        | ENSG00000278924 | 0          | NA          | NA         | NA         | NA         |             |
| NA        | ENSG00000278925 | 0          | NA          | NA         | NA         | NA         |             |
| NA        | ENSG00000278926 | 0          | NA          | NA         | NA         | NA         |             |
| NA        | ENSG00000278927 | 0.16735865 | 0.01897177  | 0.38482933 | 0.78225479 | NA         |             |
| NA        | ENSG00000278928 | 0          | NA          | NA         | NA         | NA         |             |
| NA        | ENSG00000278929 | 0          | NA          | NA         | NA         | NA         |             |
| NA        | ENSG00000278931 | 40.5792079 | 0.13068355  | 0.28149383 | 0.50964231 | 0.72529255 |             |
| NA        | ENSG00000278932 | 109.860385 | 0.26356223  | 0.20967218 | 0.13740934 | 0.31303264 |             |
| NA        | ENSG00000278933 | 0          | NA          | NA         | NA         | NA         |             |
| NA        | ENSG00000278934 | 5.32940292 | 0.24876126  | 0.47568593 | 0.07645403 | 0.20428929 |             |
| NA        | ENSG00000278935 | 2.03287166 | -0.09789836 | 0.39561331 | 0.21308672 | NA         |             |
| NA        | ENSG00000278936 | 0          | NA          | NA         | NA         | NA         |             |
| NA        | ENSG00000278941 | 0          | NA          | NA         | NA         | NA         | SMG6-IT1    |
| NA        | ENSG00000278942 | 0          | NA          | NA         | NA         | NA         |             |
| NA        | ENSG00000278943 | 0.66618562 | 0.00296743  | 0.38131587 | 0.95326965 | NA         |             |
| NA        | ENSG00000278944 | 0          | NA          | NA         | NA         | NA         |             |
| NA        | ENSG00000278945 | 0          | NA          | NA         | NA         | NA         |             |
| NA        | ENSG00000278946 | 0.37844916 | 0.02407552  | 0.3854191  | 0.60038877 | NA         |             |
| NA        | ENSG00000278948 | 79.4422354 | 0.23865679  | 0.23756236 | 0.21126153 | 0.42040408 |             |
| NA        | ENSG00000278949 | 22.0308491 | 0.07996991  | 0.31455282 | 0.67068802 | 0.83771678 |             |
| NA        | ENSG00000278950 | 137.349973 | -0.272815   | 0.19374438 | 0.10424126 | 0.2570084  |             |
| NA        | ENSG00000278952 | 18.809168  | 0.33281958  | 0.42024393 | 0.1345701  | 0.30894131 |             |
| NA        | ENSG00000278953 | 0          | NA          | NA         | NA         | NA         |             |
| NA        | ENSG00000278954 | 0.14931947 | -0.01844332 | 0.38480212 | 0.84537521 | NA         |             |
| NA        | ENSG00000278955 | 0.33471731 | 0.02354391  | 0.38534154 | 0.62842204 | NA         |             |
| NA        | ENSG00000278957 | 3.96038837 | -0.07928254 | 0.37720275 | 0.48715095 | 0.70702032 |             |
| NA        | ENSG00000278958 | 0.3225121  | 0.00088373  | 0.38336483 | 0.97261144 | NA         |             |
| NA        | ENSG00000278959 | 17.0084576 | 0.36677888  | 0.44797686 | 0.10887605 | 0.2651081  |             |
| NA        | ENSG00000278960 | 0.16735865 | 0.01897177  | 0.38482933 | 0.78225479 | NA         |             |
| 107983987 | ENSG00000278961 | 0.66381455 | 0.00212446  | 0.38131084 | 0.96612837 | NA         | SMIM34B     |
| NA        | ENSG00000278962 | 73.7849615 | -0.09597437 | 0.22528213 | 0.59952406 | 0.79057618 |             |

|           |                 |            |             |            |            |            |        |
|-----------|-----------------|------------|-------------|------------|------------|------------|--------|
| NA        | ENSG00000278963 | 6.2839363  | 0.04197755  | 0.3561721  | 0.76745894 | 0.89288602 |        |
| NA        | ENSG00000278964 | 0.69249601 | -0.03077728 | 0.38619256 | 0.44510896 | NA         |        |
| NA        | ENSG00000278965 | 0          | NA          | NA         | NA         | NA         |        |
| NA        | ENSG00000278966 | 0.34624801 | -0.02356563 | 0.38536324 | 0.65270996 | NA         |        |
| NA        | ENSG00000278967 | 0.9178025  | -0.01093156 | 0.38208463 | 0.82211475 | NA         |        |
| NA        | ENSG00000278969 | 0          | NA          | NA         | NA         | NA         |        |
| 100859930 | ENSG00000278970 | 293.912137 | -0.06122568 | 0.15039426 | 0.65706455 | 0.82978985 | HEIH   |
| NA        | ENSG00000278971 | 14.9879682 | 0.14783323  | 0.3540019  | 0.41471644 | 0.64180766 |        |
| NA        | ENSG00000278972 | 0          | NA          | NA         | NA         | NA         |        |
| NA        | ENSG00000278973 | 0.34112427 | 0.02362663  | 0.38535341 | 0.62409822 | NA         |        |
| NA        | ENSG00000278974 | 82.2045048 | -0.17829963 | 0.23215218 | 0.33985613 | 0.57023391 |        |
| NA        | ENSG00000278975 | 0          | NA          | NA         | NA         | NA         |        |
| NA        | ENSG00000278977 | 16.7048788 | 0.02908379  | 0.38153742 | 0.64778252 | 0.82432206 |        |
| NA        | ENSG00000278979 | 0.3166985  | 0.00109722  | 0.38336642 | 0.96734037 | NA         |        |
| NA        | ENSG00000278980 | 0          | NA          | NA         | NA         | NA         |        |
| NA        | ENSG00000278981 | 0          | NA          | NA         | NA         | NA         |        |
| NA        | ENSG00000278982 | 6.77012459 | -0.50414974 | 0.86705715 | 0.02347241 | 0.08280453 |        |
| NA        | ENSG00000278983 | 3.08420214 | -0.04651093 | 0.37280675 | 0.65867333 | 0.83073135 |        |
| NA        | ENSG00000278985 | 4.72978029 | 0.04725575  | 0.36753133 | 0.69468907 | 0.85235814 |        |
| NA        | ENSG00000278986 | 26.9345065 | 0.08535142  | 0.30814619 | 0.65561812 | 0.82871199 |        |
| NA        | ENSG00000278987 | 14.4929987 | 0.02271516  | 0.32638438 | 0.89794903 | 0.95529566 |        |
| NA        | ENSG00000278988 | 1.1480568  | -0.07789501 | 0.39456556 | 0.14496953 | NA         |        |
| NA        | ENSG00000278989 | 26.6130032 | -0.19919599 | 0.33370787 | 0.32436387 | 0.55220346 |        |
| NA        | ENSG00000278990 | 0          | NA          | NA         | NA         | NA         |        |
| NA        | ENSG00000278991 | 30.1177343 | 0.16418592  | 0.30900909 | 0.41402031 | 0.64129366 |        |
| NA        | ENSG00000278992 | 0          | NA          | NA         | NA         | NA         |        |
| NA        | ENSG00000278993 | 34.3896577 | 0.1212737   | 0.28535363 | 0.54016894 | 0.748907   |        |
| NA        | ENSG00000278994 | 0          | NA          | NA         | NA         | NA         |        |
| NA        | ENSG00000278995 | 0          | NA          | NA         | NA         | NA         |        |
| NA        | ENSG00000278996 | 3.8569005  | 0.05470191  | 0.38155652 | 0.50729372 | 0.72324715 |        |
| NA        | ENSG00000278997 | 8.47341118 | 0.10897027  | 0.36319963 | 0.48756588 | 0.70737163 |        |
| NA        | ENSG00000278998 | 0          | NA          | NA         | NA         | NA         |        |
| NA        | ENSG00000278999 | 0.14931947 | -0.01844332 | 0.38480212 | 0.84537521 | NA         |        |
| 390093    | ENSG00000279000 | 0          | NA          | NA         | NA         | NA         | OR10A6 |
| NA        | ENSG00000279001 | 0          | NA          | NA         | NA         | NA         |        |
| NA        | ENSG00000279002 | 0          | NA          | NA         | NA         | NA         |        |
| NA        | ENSG00000279004 | 0          | NA          | NA         | NA         | NA         |        |
| NA        | ENSG00000279005 | 0          | NA          | NA         | NA         | NA         |        |

|        |                 |            |             |            |            |            |          |
|--------|-----------------|------------|-------------|------------|------------|------------|----------|
| NA     | ENSG00000279006 | 0.45209736 | -0.02505403 | 0.38558831 | 0.57865948 | NA         |          |
| NA     | ENSG00000279009 | 0          | NA          | NA         | NA         | NA         |          |
| NA     | ENSG00000279011 | 0          | NA          | NA         | NA         | NA         |          |
| 79345  | ENSG00000279012 | 0          | NA          | NA         | NA         | NA         | OR51B2   |
| NA     | ENSG00000279013 | 3.57769257 | -0.12553649 | 0.39762453 | 0.24878759 | 0.468084   |          |
| NA     | ENSG00000279014 | 0          | NA          | NA         | NA         | NA         |          |
| NA     | ENSG00000279015 | 0          | NA          | NA         | NA         | NA         |          |
| NA     | ENSG00000279016 | 0          | NA          | NA         | NA         | NA         |          |
| NA     | ENSG00000279017 | 0          | NA          | NA         | NA         | NA         |          |
| NA     | ENSG00000279019 | 33.9024654 | 0.30795862  | 0.33887969 | 0.16301181 | 0.35195933 |          |
| 147276 | ENSG00000279020 | 0.14931947 | -0.01844332 | 0.38480212 | 0.84537521 | NA         | C18orf15 |
| NA     | ENSG00000279021 | 0          | NA          | NA         | NA         | NA         |          |
| NA     | ENSG00000279022 | 4.01786963 | -0.02181016 | 0.36625377 | 0.84741556 | 0.93065124 |          |
| NA     | ENSG00000279023 | 0          | NA          | NA         | NA         | NA         |          |
| NA     | ENSG00000279024 | 0          | NA          | NA         | NA         | NA         |          |
| NA     | ENSG00000279025 | 0          | NA          | NA         | NA         | NA         |          |
| NA     | ENSG00000279026 | 40.7409378 | -0.04970243 | 0.27022671 | 0.79544854 | 0.90598116 |          |
| NA     | ENSG00000279028 | 0.83187721 | 0.0210533   | 0.38087126 | 0.72877196 | NA         |          |
| NA     | ENSG00000279029 | 0          | NA          | NA         | NA         | NA         |          |
| NA     | ENSG00000279030 | 1.76114394 | -0.02752435 | 0.3776185  | 0.72999327 | NA         |          |
| NA     | ENSG00000279031 | 1.09912901 | -0.02385504 | 0.38187235 | 0.67226597 | NA         |          |
| NA     | ENSG00000279032 | 0          | NA          | NA         | NA         | NA         |          |
| NA     | ENSG00000279033 | 0.94612289 | 0.04084733  | 0.38743659 | 0.29648824 | NA         |          |
| NA     | ENSG00000279034 | 0          | NA          | NA         | NA         | NA         |          |
| NA     | ENSG00000279035 | 45.275524  | 0.19357851  | 0.28344155 | 0.34024612 | 0.57056767 |          |
| NA     | ENSG00000279036 | 1.50986807 | 0.01506161  | 0.37988069 | 0.81474392 | NA         |          |
| NA     | ENSG00000279039 | 21.6342454 | -0.43027103 | 0.44322309 | 0.07932401 | 0.21009055 |          |
| NA     | ENSG00000279040 | 0          | NA          | NA         | NA         | NA         |          |
| NA     | ENSG00000279041 | 22.3863828 | 0.90533461  | 0.617159   | 0.01054258 | 0.04322478 |          |
| NA     | ENSG00000279042 | 0          | NA          | NA         | NA         | NA         |          |
| NA     | ENSG00000279043 | 0          | NA          | NA         | NA         | NA         |          |
| NA     | ENSG00000279044 | 4.04065517 | -0.10743732 | 0.38825358 | 0.33635403 | 0.56629871 |          |
| NA     | ENSG00000279045 | 0          | NA          | NA         | NA         | NA         |          |
| NA     | ENSG00000279046 | 0          | NA          | NA         | NA         | NA         |          |
| NA     | ENSG00000279047 | 34.927362  | 0.8511479   | 0.47815048 | 0.00761251 | 0.0331284  |          |
| NA     | ENSG00000279048 | 5.53625832 | 0.09739529  | 0.37467461 | 0.46420683 | 0.68694439 |          |
| NA     | ENSG00000279049 | 0          | NA          | NA         | NA         | NA         |          |
| 145624 | ENSG00000279050 | 0.30139824 | -0.02296476 | 0.38527817 | 0.68536535 | NA         | PWAR1    |

|           |                 |            |             |            |            |            |           |
|-----------|-----------------|------------|-------------|------------|------------|------------|-----------|
| 219952    | ENSG00000279051 | 0          | NA          | NA         | NA         | NA         | OR6Q1     |
| NA        | ENSG00000279056 | 0          | NA          | NA         | NA         | NA         |           |
| NA        | ENSG00000279057 | 11.2219251 | 0.04983154  | 0.34499121 | 0.75528689 | 0.88614698 |           |
| NA        | ENSG00000279058 | 30.8087955 | 0.08488103  | 0.28923303 | 0.66358225 | 0.83404953 | AGAP14P   |
| NA        | ENSG00000279059 | 226.686631 | -0.15309974 | 0.15726797 | 0.28477276 | 0.51005611 |           |
| NA        | ENSG00000279061 | 0          | NA          | NA         | NA         | NA         |           |
| NA        | ENSG00000279062 | 0.7290186  | 0.02670617  | 0.38352953 | 0.5576775  | NA         | CDRT15P8  |
| NA        | ENSG00000279063 | 0          | NA          | NA         | NA         | NA         |           |
| NA        | ENSG00000279064 | 2.43194105 | 0.16794006  | 0.43312093 | 0.03972682 | NA         |           |
| NA        | ENSG00000279065 | 0          | NA          | NA         | NA         | NA         |           |
| NA        | ENSG00000279066 | 13.4045141 | 0.2236145   | 0.40136177 | 0.22485916 | 0.43874524 | HEXD-IT1  |
| NA        | ENSG00000279067 | 0.16735865 | 0.01897177  | 0.38482933 | 0.78225479 | NA         |           |
| NA        | ENSG00000279068 | 4.34772726 | -0.02949564 | 0.36667598 | 0.79723962 | 0.90684749 |           |
| NA        | ENSG00000279069 | 181.964315 | 0.12996219  | 0.16261564 | 0.37805138 | 0.60702282 |           |
| NA        | ENSG00000279070 | 1.0248884  | 0.04600433  | 0.38566903 | 0.36437967 | NA         |           |
| NA        | ENSG00000279071 | 2.30369212 | -0.01865884 | 0.37473538 | 0.83120618 | NA         |           |
| NA        | ENSG00000279072 | 58.5070756 | -0.18749505 | 0.35634081 | 0.32233833 | 0.54993486 |           |
| NA        | ENSG00000279073 | 1.08475736 | -0.02627946 | 0.38216588 | 0.64167213 | NA         |           |
| NA        | ENSG00000279074 | 0          | NA          | NA         | NA         | NA         |           |
| NA        | ENSG00000279075 | 0.656374   | 0.00541802  | 0.38197191 | 0.90814526 | NA         |           |
| NA        | ENSG00000279076 | 0          | NA          | NA         | NA         | NA         |           |
| NA        | ENSG00000279077 | 2.41270143 | 0.10674948  | 0.39669484 | 0.22044735 | NA         |           |
| 27099     | ENSG00000279078 | 0.29863895 | -0.02292439 | 0.3852726  | 0.68753245 | NA         | SND1-IT1  |
| NA        | ENSG00000279080 | 1.14152209 | 0.03339803  | 0.38297376 | 0.55606094 | NA         |           |
| NA        | ENSG00000279081 | 0          | NA          | NA         | NA         | NA         |           |
| NA        | ENSG00000279082 | 0          | NA          | NA         | NA         | NA         | LINC01727 |
| NA        | ENSG00000279083 | 0          | NA          | NA         | NA         | NA         |           |
| NA        | ENSG00000279085 | 0.173733   | 0.01914545  | 0.38484597 | 0.78225479 | NA         |           |
| NA        | ENSG00000279086 | 5.41473639 | 0.06654949  | 0.36583044 | 0.61483562 | 0.80225838 |           |
| NA        | ENSG00000279087 | 0          | NA          | NA         | NA         | NA         |           |
| NA        | ENSG00000279088 | 138.955252 | -0.11141069 | 0.18332897 | 0.48824275 | 0.70797163 |           |
| NA        | ENSG00000279089 | 92.7649512 | 0.03003359  | 0.20847132 | 0.86520516 | 0.94028794 |           |
| NA        | ENSG00000279090 | 0          | NA          | NA         | NA         | NA         |           |
| NA        | ENSG00000279091 | 1.13745111 | 0.02023175  | 0.38032863 | 0.75131922 | NA         |           |
| NA        | ENSG00000279092 | 21.2060193 | -0.07181149 | 0.31641971 | 0.6963188  | 0.85340714 |           |
| NA        | ENSG00000279093 | 0          | NA          | NA         | NA         | NA         |           |
| 105379487 | ENSG00000279094 | 104.621854 | 0.00345522  | 0.21070142 | 0.98587465 | 0.99515406 | LINC01670 |
| NA        | ENSG00000279095 | 0          | NA          | NA         | NA         | NA         |           |

|        |                 |            |             |            |            |            |        |
|--------|-----------------|------------|-------------|------------|------------|------------|--------|
| NA     | ENSG00000279096 | 0.50581125 | 0.01462881  | 0.38308364 | 0.74912365 | NA         |        |
| NA     | ENSG00000279097 | 0          | NA          | NA         | NA         | NA         |        |
| NA     | ENSG00000279098 | 0          | NA          | NA         | NA         | NA         |        |
| NA     | ENSG00000279099 | 0          | NA          | NA         | NA         | NA         |        |
| NA     | ENSG00000279100 | 0.173733   | 0.01914545  | 0.38484597 | 0.78225479 | NA         |        |
| NA     | ENSG00000279103 | 7.62610028 | -0.03761709 | 0.35020992 | 0.79912075 | 0.90801909 |        |
| NA     | ENSG00000279104 | 0          | NA          | NA         | NA         | NA         |        |
| NA     | ENSG00000279106 | 0.32322354 | 0.00154498  | 0.38337005 | 0.96628991 | NA         |        |
| NA     | ENSG00000279107 | 0.4737611  | -0.00950241 | 0.38286386 | 0.84370504 | NA         |        |
| NA     | ENSG00000279108 | 13.1647972 | 0.64099989  | 0.73555944 | 0.03075019 | 0.10226009 |        |
| NA     | ENSG00000279110 | 3.07133414 | -0.02457609 | 0.37002126 | 0.81407333 | 0.91592004 |        |
| 128367 | ENSG00000279111 | 0          | NA          | NA         | NA         | NA         | OR10X1 |
| NA     | ENSG00000279113 | 0          | NA          | NA         | NA         | NA         |        |
| NA     | ENSG00000279114 | 5.79369815 | -0.07358869 | 0.36727119 | 0.5770776  | 0.77557535 |        |
| 283160 | ENSG00000279116 | 0          | NA          | NA         | NA         | NA         | OR8D2  |
| NA     | ENSG00000279117 | 41.1359249 | -0.00508327 | 0.38295893 | 0.88541167 | 0.95005774 |        |
| NA     | ENSG00000279118 | 1.43722135 | 0.10262279  | 0.40274337 | 0.06970179 | NA         |        |
| NA     | ENSG00000279119 | 61.1250234 | -0.17761443 | 0.27912413 | 0.37546462 | 0.60454618 |        |
| NA     | ENSG00000279120 | 0          | NA          | NA         | NA         | NA         |        |
| NA     | ENSG00000279121 | 0.34047663 | -0.00022102 | 0.38336234 | 0.96734762 | NA         |        |
| NA     | ENSG00000279122 | 0          | NA          | NA         | NA         | NA         |        |
| NA     | ENSG00000279123 | 0.46855008 | -0.02820609 | 0.38578816 | 0.54682367 | NA         |        |
| NA     | ENSG00000279124 | 0.173124   | -0.01911262 | 0.38486262 | 0.84537521 | NA         |        |
| NA     | ENSG00000279125 | 0          | NA          | NA         | NA         | NA         |        |
| NA     | ENSG00000279127 | 0          | NA          | NA         | NA         | NA         |        |
| NA     | ENSG00000279128 | 0          | NA          | NA         | NA         | NA         |        |
| NA     | ENSG00000279129 | 0.96293393 | 0.00473491  | 0.38092206 | 0.93163203 | NA         |        |
| NA     | ENSG00000279130 | 0          | NA          | NA         | NA         | NA         |        |
| NA     | ENSG00000279133 | 14.2321104 | -0.11053898 | 0.34190316 | 0.53166884 | 0.74289103 |        |
| NA     | ENSG00000279134 | 0          | NA          | NA         | NA         | NA         |        |
| NA     | ENSG00000279135 | 2.00725604 | 0.03960454  | 0.37647642 | 0.66274674 | NA         |        |
| NA     | ENSG00000279136 | 0          | NA          | NA         | NA         | NA         |        |
| NA     | ENSG00000279137 | 22.7422296 | -0.15195454 | 0.33744931 | 0.4250118  | 0.65083623 |        |
| NA     | ENSG00000279138 | 3.27711685 | -0.047473   | 0.37521398 | 0.63084243 | 0.81335546 |        |
| NA     | ENSG00000279139 | 0          | NA          | NA         | NA         | NA         |        |
| NA     | ENSG00000279140 | 1.91966509 | -0.01583798 | 0.37618404 | 0.84561577 | NA         |        |
| 401561 | ENSG00000279141 | 0          | NA          | NA         | NA         | NA         |        |
| NA     | ENSG00000279142 | 0          | NA          | NA         | NA         | NA         |        |

|           |                 |            |             |            |            |            |          |
|-----------|-----------------|------------|-------------|------------|------------|------------|----------|
| NA        | ENSG00000279143 | 0          | NA          | NA         | NA         | NA         |          |
| NA        | ENSG00000279144 | 0.30139824 | -0.02296476 | 0.38527817 | 0.68536535 | NA         |          |
| NA        | ENSG00000279145 | 19.1401075 | 0.1322963   | 0.34302779 | 0.47139094 | 0.69371391 |          |
| NA        | ENSG00000279146 | 36.1956206 | -0.84404641 | 0.41953469 | 0.00499696 | 0.02321227 |          |
| NA        | ENSG00000279147 | 2.30933728 | 0.03504663  | 0.37632825 | 0.69453753 | NA         |          |
| NA        | ENSG00000279148 | 5.43245453 | -0.03384286 | 0.35906811 | 0.79804487 | 0.9074513  |          |
| NA        | ENSG00000279149 | 2.03275454 | 0.04607283  | 0.3818133  | 0.53149338 | NA         |          |
| NA        | ENSG00000279151 | 0          | NA          | NA         | NA         | NA         |          |
| NA        | ENSG00000279152 | 0          | NA          | NA         | NA         | NA         |          |
| NA        | ENSG00000279153 | 0          | NA          | NA         | NA         | NA         |          |
| NA        | ENSG00000279154 | 0          | NA          | NA         | NA         | NA         |          |
| NA        | ENSG00000279155 | 10.6242858 | -0.16449554 | 0.37482012 | 0.33844886 | 0.56881111 |          |
| NA        | ENSG00000279156 | 0          | NA          | NA         | NA         | NA         |          |
| NA        | ENSG00000279157 | 0          | NA          | NA         | NA         | NA         |          |
| NA        | ENSG00000279159 | 122.684305 | 0.00222219  | 0.19045145 | 0.99546258 | 0.99852582 |          |
| NA        | ENSG00000279160 | 0          | NA          | NA         | NA         | NA         |          |
| NA        | ENSG00000279161 | 550.254428 | 0.11011066  | 0.10252532 | 0.26515509 | 0.48737693 |          |
| NA        | ENSG00000279162 | 8.23656017 | -0.07548941 | 0.3604042  | 0.6012103  | 0.79187494 |          |
| NA        | ENSG00000279163 | 0          | NA          | NA         | NA         | NA         |          |
| NA        | ENSG00000279164 | 0          | NA          | NA         | NA         | NA         |          |
| NA        | ENSG00000279165 | 0          | NA          | NA         | NA         | NA         |          |
| NA        | ENSG00000279166 | 0.68448699 | -0.01791781 | 0.38340603 | 0.67748979 | NA         |          |
| NA        | ENSG00000279167 | 0          | NA          | NA         | NA         | NA         |          |
| NA        | ENSG00000279168 | 24.484787  | -0.04991385 | 0.30729443 | 0.78923431 | 0.90431711 |          |
| 400736    | ENSG00000279169 | 0          | NA          | NA         | NA         | NA         | PRAMEF13 |
| 100130890 | ENSG00000279170 | 149.133618 | 0.18167179  | 0.17726411 | 0.24849993 | 0.46776458 | TSTD3    |
| NA        | ENSG00000279171 | 0          | NA          | NA         | NA         | NA         |          |
| NA        | ENSG00000279172 | 0          | NA          | NA         | NA         | NA         |          |
| NA        | ENSG00000279173 | 0.74876195 | -0.04239829 | 0.38743873 | 0.35082369 | NA         |          |
| NA        | ENSG00000279174 | 0.48850857 | -0.00709999 | 0.38317036 | 0.85750295 | NA         |          |
| NA        | ENSG00000279175 | 1.36458645 | 0.03394953  | 0.37994257 | 0.64188365 | NA         |          |
| NA        | ENSG00000279176 | 0          | NA          | NA         | NA         | NA         |          |
| NA        | ENSG00000279179 | 9.43905476 | 0.0237237   | 0.34920452 | 0.87509256 | 0.94496469 |          |
| NA        | ENSG00000279180 | 0          | NA          | NA         | NA         | NA         |          |
| NA        | ENSG00000279181 | 0.16735865 | 0.01897177  | 0.38482933 | 0.78225479 | NA         |          |
| NA        | ENSG00000279182 | 13.3903515 | -0.04653401 | 0.33007943 | 0.78617701 | 0.90280441 |          |
| NA        | ENSG00000279186 | 6.93097416 | 0.02907237  | 0.35364006 | 0.84012449 | 0.92740601 |          |
| NA        | ENSG00000279187 | 19.6889479 | 0.08482465  | 0.31606529 | 0.65194639 | 0.82607871 |          |



|    |                 |            |             |            |            |            |          |
|----|-----------------|------------|-------------|------------|------------|------------|----------|
| NA | ENSG00000279189 | 0          | NA          | NA         | NA         | NA         |          |
| NA | ENSG00000279190 | 0          | NA          | NA         | NA         | NA         |          |
| NA | ENSG00000279192 | 50.0765758 | -0.3942557  | 0.38431666 | 0.0948677  | 0.23964543 | PWAR5    |
| NA | ENSG00000279193 | 0          | NA          | NA         | NA         | NA         |          |
| NA | ENSG00000279196 | 111.449768 | 0.34901989  | 0.22032171 | 0.05863098 | 0.1682196  |          |
| NA | ENSG00000279197 | 0.47090853 | -0.02832164 | 0.38579823 | 0.54488124 | NA         |          |
| NA | ENSG00000279198 | 228.61233  | 0.2765694   | 0.1616435  | 0.05901442 | 0.16897765 |          |
| NA | ENSG00000279199 | 7.87423583 | 0.02065642  | 0.34774909 | 0.89236443 | 0.95349581 |          |
| NA | ENSG00000279200 | 0.35661734 | 0.0238166   | 0.38538099 | 0.61404922 | NA         |          |
| NA | ENSG00000279201 | 0.15069912 | -0.01848503 | 0.38480575 | 0.84537521 | NA         |          |
| NA | ENSG00000279202 | 0          | NA          | NA         | NA         | NA         |          |
| NA | ENSG00000279203 | 2.04111769 | -0.10348504 | 0.39636246 | 0.21580913 | NA         |          |
| NA | ENSG00000279204 | 1.88344011 | 0.00244094  | 0.37770123 | 0.97472554 | NA         |          |
| NA | ENSG00000279205 | 2.79654461 | -0.0459653  | 0.37486248 | 0.64167318 | 0.82065338 |          |
| NA | ENSG00000279206 | 1.17038299 | 0.02077448  | 0.38018855 | 0.74817677 | NA         |          |
| NA | ENSG00000279207 | 717.411584 | 0.13444253  | 0.12684265 | 0.262633   | 0.4846655  |          |
| NA | ENSG00000279208 | 26.1618601 | 0.25766101  | 0.3576436  | 0.22310452 | 0.43623174 |          |
| NA | ENSG00000279209 | 0          | NA          | NA         | NA         | NA         |          |
| NA | ENSG00000279211 | 0          | NA          | NA         | NA         | NA         |          |
| NA | ENSG00000279212 | 4.27648048 | -0.0518753  | 0.36718983 | 0.66989822 | 0.83753108 |          |
| NA | ENSG00000279213 | 2.23051044 | 0.07526085  | 0.38481772 | 0.39761984 | NA         | SNX18P10 |
| NA | ENSG00000279214 | 0.37844916 | 0.02407552  | 0.3854191  | 0.60038877 | NA         |          |
| NA | ENSG00000279217 | 0.16735865 | 0.01897177  | 0.38482933 | 0.78225479 | NA         |          |
| NA | ENSG00000279218 | 0          | NA          | NA         | NA         | NA         |          |
| NA | ENSG00000279220 | 0          | NA          | NA         | NA         | NA         | GPR1-AS  |
| NA | ENSG00000279221 | 1.28186884 | -0.0724298  | 0.39003593 | 0.25003726 | NA         |          |
| NA | ENSG00000279222 | 0          | NA          | NA         | NA         | NA         |          |
| NA | ENSG00000279223 | 0          | NA          | NA         | NA         | NA         |          |
| NA | ENSG00000279225 | 0          | NA          | NA         | NA         | NA         |          |
| NA | ENSG00000279226 | 0.34074347 | 0.00309568  | 0.38339338 | 0.95889232 | NA         |          |
| NA | ENSG00000279227 | 23.86746   | 0.38061476  | 0.42336748 | 0.10479673 | 0.25792917 |          |
| NA | ENSG00000279228 | 5.19816433 | 0.00959037  | 0.38237434 | 0.84050203 | 0.92760529 |          |
| NA | ENSG00000279231 | 0          | NA          | NA         | NA         | NA         |          |
| NA | ENSG00000279232 | 24.5366476 | 0.42085157  | 0.52470573 | 0.07391197 | 0.19929513 |          |
| NA | ENSG00000279233 | 118.248452 | -0.29531667 | 0.20181529 | 0.08771711 | 0.22627844 |          |
| NA | ENSG00000279235 | 1.29318812 | -0.01288463 | 0.37942781 | 0.84364452 | NA         |          |
| NA | ENSG00000279236 | 0.8622387  | 0.03734404  | 0.384704   | 0.4539977  | NA         |          |
| NA | ENSG00000279237 | 1.37245473 | 0.00402148  | 0.37785259 | 0.95620517 | NA         |          |

|           |                 |            |             |            |            |            |           |
|-----------|-----------------|------------|-------------|------------|------------|------------|-----------|
| NA        | ENSG00000279239 | 0          | NA          | NA         | NA         | NA         |           |
| NA        | ENSG00000279240 | 0          | NA          | NA         | NA         | NA         |           |
| NA        | ENSG00000279243 | 0.87095166 | -0.03046877 | 0.38459469 | 0.50479984 | NA         | LINC02736 |
| 100132967 | ENSG00000279245 | 1.31999213 | 0.00744171  | 0.37690963 | 0.92370479 | NA         | FAM223A   |
| NA        | ENSG00000279246 | 32.2408872 | 0.67568796  | 0.46609726 | 0.02018688 | 0.07344722 |           |
| NA        | ENSG00000279248 | 0          | NA          | NA         | NA         | NA         |           |
| NA        | ENSG00000279249 | 15.5453793 | -1.43719996 | 0.84155617 | 0.0031426  | 0.0157487  |           |
| NA        | ENSG00000279250 | 0.16735865 | 0.01897177  | 0.38482933 | 0.78225479 | NA         |           |
| NA        | ENSG00000279251 | 0          | NA          | NA         | NA         | NA         |           |
| NA        | ENSG00000279253 | 19.0829554 | -0.13154262 | 0.33194697 | 0.48481889 | 0.70488105 |           |
| NA        | ENSG00000279254 | 14.414514  | 0.77095288  | 0.74054421 | 0.02079249 | 0.07522674 |           |
| NA        | ENSG00000279255 | 9.51590547 | 0.1153225   | 0.36990399 | 0.4452586  | 0.67004935 |           |
| NA        | ENSG00000279256 | 0.14931947 | -0.01844332 | 0.38480212 | 0.84537521 | NA         |           |
| NA        | ENSG00000279259 | 15.9317377 | -0.01224017 | 0.31966309 | 0.94304205 | 0.97661312 |           |
| 100130249 | ENSG00000279261 | 0          | NA          | NA         | NA         | NA         |           |
| NA        | ENSG00000279262 | 0.173733   | 0.01914545  | 0.38484597 | 0.78225479 | NA         |           |
| 391190    | ENSG00000279263 | 0.18922458 | 0.01954053  | 0.38488496 | 0.78225479 | NA         | OR2L8     |
| NA        | ENSG00000279264 | 0          | NA          | NA         | NA         | NA         |           |
| NA        | ENSG00000279265 | 24.3067607 | 0.08161088  | 0.30812754 | 0.66885727 | 0.83720078 |           |
| NA        | ENSG00000279266 | 5.27197976 | -0.16514017 | 0.405068   | 0.23084898 | 0.44684775 |           |
| NA        | ENSG00000279267 | 34.808581  | 0.17968306  | 0.31285867 | 0.37593571 | 0.60500552 |           |
| NA        | ENSG00000279268 | 0          | NA          | NA         | NA         | NA         |           |
| NA        | ENSG00000279269 | 0.18922458 | 0.01954053  | 0.38488496 | 0.78225479 | NA         |           |
| 119695    | ENSG00000279270 | 0          | NA          | NA         | NA         | NA         | OR52R1    |
| NA        | ENSG00000279271 | 0          | NA          | NA         | NA         | NA         |           |
| NA        | ENSG00000279273 | 0.15069912 | -0.01848503 | 0.38480575 | 0.84537521 | NA         |           |
| NA        | ENSG00000279274 | 0          | NA          | NA         | NA         | NA         |           |
| NA        | ENSG00000279275 | 0          | NA          | NA         | NA         | NA         |           |
| NA        | ENSG00000279276 | 0          | NA          | NA         | NA         | NA         |           |
| NA        | ENSG00000279277 | 14.6793667 | 0.1601024   | 0.35715542 | 0.38376401 | 0.61293849 |           |
| NA        | ENSG00000279278 | 143.726626 | -0.0838805  | 0.1763856  | 0.59149378 | 0.78612249 |           |
| NA        | ENSG00000279281 | 0.47332573 | -0.03506298 | 0.38628512 | 0.49588574 | NA         |           |
| NA        | ENSG00000279283 | 10.2294131 | 0.00967539  | 0.3475468  | 0.95071858 | 0.97972521 |           |
| NA        | ENSG00000279284 | 0          | NA          | NA         | NA         | NA         |           |
| NA        | ENSG00000279285 | 0.18922458 | 0.01954053  | 0.38488496 | 0.78225479 | NA         |           |
| NA        | ENSG00000279286 | 0          | NA          | NA         | NA         | NA         |           |
| NA        | ENSG00000279288 | 5.91685055 | -0.13650259 | 0.38936969 | 0.31672662 | 0.54452953 |           |
| NA        | ENSG00000279289 | 1.28450162 | 0.06052265  | 0.38869508 | 0.26230722 | NA         |           |

|        |                 |            |             |            |            |            |            |
|--------|-----------------|------------|-------------|------------|------------|------------|------------|
| NA     | ENSG00000279294 | 1.88468751 | -0.03421861 | 0.37915748 | 0.6558224  | NA         |            |
| NA     | ENSG00000279295 | 0          | NA          | NA         | NA         | NA         |            |
| NA     | ENSG00000279296 | 0          | NA          | NA         | NA         | NA         | PRAL       |
| NA     | ENSG00000279297 | 0          | NA          | NA         | NA         | NA         |            |
| NA     | ENSG00000279298 | 0          | NA          | NA         | NA         | NA         |            |
| NA     | ENSG00000279299 | 0          | NA          | NA         | NA         | NA         |            |
| NA     | ENSG00000279300 | 8.34050582 | -0.48696876 | 0.73208722 | 0.03683838 | 0.11801604 |            |
| 127077 | ENSG00000279301 | 0          | NA          | NA         | NA         | NA         | OR2T11     |
| NA     | ENSG00000279302 | 0.33471731 | 0.02354391  | 0.38534154 | 0.62842204 | NA         |            |
| NA     | ENSG00000279304 | 0          | NA          | NA         | NA         | NA         |            |
| NA     | ENSG00000279305 | 0          | NA          | NA         | NA         | NA         |            |
| NA     | ENSG00000279306 | 3.90275741 | 0.0248843   | 0.36706011 | 0.82820076 | 0.92220943 |            |
| NA     | ENSG00000279307 | 0          | NA          | NA         | NA         | NA         | NDUFAF2P1  |
| NA     | ENSG00000279310 | 0          | NA          | NA         | NA         | NA         |            |
| NA     | ENSG00000279311 | 0          | NA          | NA         | NA         | NA         |            |
| NA     | ENSG00000279314 | 1.63403445 | -0.03962993 | 0.37951333 | 0.61194302 | NA         |            |
| NA     | ENSG00000279315 | 1.10482407 | -0.00480762 | 0.38054683 | 0.93333037 | NA         |            |
| NA     | ENSG00000279317 | 1.05421865 | -0.04483009 | 0.3850982  | 0.43839487 | NA         |            |
| NA     | ENSG00000279319 | 0.87530628 | 0.04489936  | 0.38505532 | 0.40222368 | NA         |            |
| NA     | ENSG00000279320 | 0          | NA          | NA         | NA         | NA         |            |
| NA     | ENSG00000279321 | 0          | NA          | NA         | NA         | NA         |            |
| NA     | ENSG00000279322 | 0          | NA          | NA         | NA         | NA         |            |
| NA     | ENSG00000279324 | 0          | NA          | NA         | NA         | NA         |            |
| NA     | ENSG00000279325 | 0          | NA          | NA         | NA         | NA         |            |
| NA     | ENSG00000279326 | 0          | NA          | NA         | NA         | NA         |            |
| NA     | ENSG00000279328 | 1.81771115 | -0.00644767 | 0.37440687 | 0.93995218 | NA         |            |
| NA     | ENSG00000279329 | 28.8697467 | -0.15662089 | 0.31376346 | 0.42893856 | 0.65462623 |            |
| NA     | ENSG00000279330 | 0.3411058  | 0.02362649  | 0.38535339 | 0.62410801 | NA         |            |
| 55472  | ENSG00000279331 | 26.6143833 | -0.03845104 | 0.29173481 | 0.83890832 | 0.92674595 | RBM12B-AS1 |
| NA     | ENSG00000279332 | 6.23145787 | 0.10455617  | 0.37206    | 0.46155824 | 0.68465911 |            |
| NA     | ENSG00000279333 | 98.4267096 | -0.06639771 | 0.38483837 | 0.40480878 | 0.63319191 |            |
| NA     | ENSG00000279334 | 0          | NA          | NA         | NA         | NA         |            |
| NA     | ENSG00000279336 | 0          | NA          | NA         | NA         | NA         |            |
| NA     | ENSG00000279337 | 0.71316646 | 0.04204752  | 0.38737424 | 0.34133814 | NA         |            |
| NA     | ENSG00000279339 | 4.13753589 | -0.0949305  | 0.38807457 | 0.34061518 | 0.57088546 |            |
| NA     | ENSG00000279340 | 0          | NA          | NA         | NA         | NA         |            |
| NA     | ENSG00000279341 | 0          | NA          | NA         | NA         | NA         |            |
| NA     | ENSG00000279342 | 73.9172766 | 0.05223496  | 0.26054828 | 0.78674577 | 0.90296292 |            |

|    |                 |            |             |            |            |            |
|----|-----------------|------------|-------------|------------|------------|------------|
| NA | ENSG00000279343 | 8.9390618  | 0.1421535   | 0.37438877 | 0.3775141  | 0.60636177 |
| NA | ENSG00000279344 | 3.25428293 | -0.05053682 | 0.37551661 | 0.61163175 | 0.79965575 |
| NA | ENSG00000279345 | 11.8731653 | 0.11324216  | 0.34895067 | 0.51351279 | 0.72876207 |
| NA | ENSG00000279347 | 27.328016  | -0.00790045 | 0.29271458 | 0.96507867 | 0.98622874 |
| NA | ENSG00000279348 | 256.399828 | -0.51248173 | 0.1707447  | 0.00094198 | 0.0056302  |
| NA | ENSG00000279349 | 2.86644258 | -0.0266089  | 0.37394581 | 0.77495708 | 0.89613481 |
| NA | ENSG00000279352 | 0.85949424 | 0.00280834  | 0.38176947 | 0.90639607 | NA         |
| NA | ENSG00000279353 | 0.64683575 | -0.02476056 | 0.38289533 | 0.63607921 | NA         |
| NA | ENSG00000279354 | 0          | NA          | NA         | NA         | NA         |
| NA | ENSG00000279356 | 10.5745789 | 0.0239766   | 0.34052023 | 0.88312633 | 0.94857242 |
| NA | ENSG00000279357 | 0          | NA          | NA         | NA         | NA         |
| NA | ENSG00000279358 | 0.14931947 | -0.01844332 | 0.38480212 | 0.84537521 | NA         |
| NA | ENSG00000279359 | 0          | NA          | NA         | NA         | NA         |
| NA | ENSG00000279360 | 0.47334471 | -0.02843881 | 0.38580833 | 0.54294196 | NA         |
| NA | ENSG00000279361 | 0.48972294 | -0.01115736 | 0.38291616 | 0.82145309 | NA         |
| NA | ENSG00000279364 | 0          | NA          | NA         | NA         | NA         |
| NA | ENSG00000279365 | 0          | NA          | NA         | NA         | NA         |
| NA | ENSG00000279366 | 0          | NA          | NA         | NA         | NA         |
| NA | ENSG00000279367 | 0          | NA          | NA         | NA         | NA         |
| NA | ENSG00000279368 | 7.79420417 | 2.65E-05    | 0.35468304 | 0.99789108 | 0.99926338 |
| NA | ENSG00000279369 | 367.782439 | 0.15845791  | 0.12868915 | 0.1907791  | 0.39211202 |
| NA | ENSG00000279370 | 0          | NA          | NA         | NA         | NA         |
| NA | ENSG00000279372 | 0.79966144 | -0.00515853 | 0.38151553 | 0.92036824 | NA         |
| NA | ENSG00000279373 | 1.15185517 | -0.00808252 | 0.37780836 | 0.91146135 | NA         |
| NA | ENSG00000279375 | 3.20248978 | 0.008723    | 0.36783542 | 0.93772969 | 0.97366414 |
| NA | ENSG00000279376 | 0          | NA          | NA         | NA         | NA         |
| NA | ENSG00000279377 | 5.20441625 | -0.0568213  | 0.37836974 | 0.54829614 | 0.75480124 |
| NA | ENSG00000279378 | 0.16735865 | 0.01897177  | 0.38482933 | 0.78225479 | NA         |
| NA | ENSG00000279379 | 0          | NA          | NA         | NA         | NA         |
| NA | ENSG00000279381 | 0          | NA          | NA         | NA         | NA         |
| NA | ENSG00000279382 | 129.923992 | -0.10914131 | 0.18438091 | 0.49912038 | 0.71669126 |
| NA | ENSG00000279384 | 0.16735865 | 0.01897177  | 0.38482933 | 0.78225479 | NA         |
| NA | ENSG00000279386 | 0.8116539  | 0.01392593  | 0.38179888 | 0.78695563 | NA         |
| NA | ENSG00000279387 | 0          | NA          | NA         | NA         | NA         |
| NA | ENSG00000279388 | 0          | NA          | NA         | NA         | NA         |
| NA | ENSG00000279390 | 0          | NA          | NA         | NA         | NA         |
| NA | ENSG00000279391 | 0.51193778 | -0.00978207 | 0.38276834 | 0.8216555  | NA         |
| NA | ENSG00000279392 | 0          | NA          | NA         | NA         | NA         |

|        |                 |            |             |            |            |            |           |
|--------|-----------------|------------|-------------|------------|------------|------------|-----------|
| NA     | ENSG00000279393 | 0          | NA          | NA         | NA         | NA         |           |
| NA     | ENSG00000279394 | 0          | NA          | NA         | NA         | NA         |           |
| 219437 | ENSG00000279395 | 0          | NA          | NA         | NA         | NA         | OR5L1     |
| NA     | ENSG00000279397 | 0          | NA          | NA         | NA         | NA         |           |
| NA     | ENSG00000279398 | 0          | NA          | NA         | NA         | NA         |           |
| NA     | ENSG00000279399 | 2.08147036 | 0.07583563  | 0.39503561 | 0.07619506 | NA         |           |
| NA     | ENSG00000279401 | 0.18922458 | 0.01954053  | 0.38488496 | 0.78225479 | NA         |           |
| NA     | ENSG00000279403 | 0          | NA          | NA         | NA         | NA         |           |
| NA     | ENSG00000279404 | 2.92464834 | 0.13404627  | 0.40573221 | 0.18076533 | 0.37779249 |           |
| NA     | ENSG00000279405 | 0.37844916 | 0.02407552  | 0.3854191  | 0.60038877 | NA         |           |
| NA     | ENSG00000279406 | 23.2714862 | -0.03891823 | 0.30038371 | 0.83552124 | 0.92498975 |           |
| NA     | ENSG00000279407 | 125.727735 | -0.10873074 | 0.18481619 | 0.50139854 | 0.71841948 |           |
| NA     | ENSG00000279408 | 0          | NA          | NA         | NA         | NA         | OR4N4C    |
| NA     | ENSG00000279409 | 0          | NA          | NA         | NA         | NA         |           |
| NA     | ENSG00000279410 | 0.15069912 | -0.01848503 | 0.38480575 | 0.84537521 | NA         |           |
| NA     | ENSG00000279411 | 0          | NA          | NA         | NA         | NA         |           |
| NA     | ENSG00000279412 | 19.1749057 | -0.06229833 | 0.31834221 | 0.73147392 | 0.87167053 |           |
| NA     | ENSG00000279413 | 17.7753105 | 0.02367044  | 0.32132292 | 0.89607398 | 0.95469109 |           |
| NA     | ENSG00000279414 | 2.36752091 | -0.04853381 | 0.37705172 | 0.60414678 | NA         | CDRT15P9  |
| NA     | ENSG00000279415 | 3.00940366 | 0.09618464  | 0.38592961 | 0.36880155 | 0.59818694 |           |
| NA     | ENSG00000279416 | 0.34624801 | -0.02356563 | 0.38536324 | 0.65270996 | NA         |           |
| NA     | ENSG00000279417 | 74.4297794 | 0.17741653  | 0.24127474 | 0.35289285 | 0.58306081 |           |
| 64433  | ENSG00000279418 | 0.3182969  | 0.00124524  | 0.38336748 | 0.96514705 | NA         | LINC00244 |
| NA     | ENSG00000279419 | 2.96863582 | 0.06807216  | 0.38041276 | 0.48606369 | 0.70617338 |           |
| NA     | ENSG00000279420 | 0          | NA          | NA         | NA         | NA         |           |
| NA     | ENSG00000279421 | 0          | NA          | NA         | NA         | NA         |           |
| NA     | ENSG00000279422 | 0.45021439 | -0.02732314 | 0.38571498 | 0.5615173  | NA         |           |
| NA     | ENSG00000279423 | 0          | NA          | NA         | NA         | NA         |           |
| NA     | ENSG00000279425 | 15.6020713 | -0.09430018 | 0.3352957  | 0.59595257 | 0.78826859 |           |
| NA     | ENSG00000279426 | 0          | NA          | NA         | NA         | NA         |           |
| NA     | ENSG00000279427 | 0          | NA          | NA         | NA         | NA         |           |
| NA     | ENSG00000279428 | 1.21735524 | 0.01828534  | 0.37906018 | 0.79157184 | NA         |           |
| NA     | ENSG00000279429 | 0          | NA          | NA         | NA         | NA         |           |
| NA     | ENSG00000279430 | 0          | NA          | NA         | NA         | NA         |           |
| NA     | ENSG00000279431 | 0          | NA          | NA         | NA         | NA         |           |
| NA     | ENSG00000279432 | 4.47812985 | 0.10355222  | 0.38540144 | 0.36770062 | 0.59703579 |           |
| NA     | ENSG00000279433 | 0          | NA          | NA         | NA         | NA         |           |
| NA     | ENSG00000279434 | 24.1568259 | -0.11326435 | 0.31202478 | 0.55539483 | 0.76129842 |           |

|           |                 |            |             |            |            |            |         |
|-----------|-----------------|------------|-------------|------------|------------|------------|---------|
| NA        | ENSG00000279437 | 0          | NA          | NA         | NA         | NA         |         |
| NA        | ENSG00000279438 | 0          | NA          | NA         | NA         | NA         |         |
| NA        | ENSG00000279439 | 0          | NA          | NA         | NA         | NA         |         |
| NA        | ENSG00000279440 | 0          | NA          | NA         | NA         | NA         |         |
| NA        | ENSG00000279441 | 0          | NA          | NA         | NA         | NA         |         |
| NA        | ENSG00000279442 | 0          | NA          | NA         | NA         | NA         |         |
| NA        | ENSG00000279443 | 28.4470775 | -0.05766741 | 0.29650059 | 0.76110067 | 0.88960984 |         |
| NA        | ENSG00000279444 | 0          | NA          | NA         | NA         | NA         |         |
| NA        | ENSG00000279445 | 0          | NA          | NA         | NA         | NA         | OR4N3BP |
| NA        | ENSG00000279446 | 0          | NA          | NA         | NA         | NA         |         |
| NA        | ENSG00000279447 | 0          | NA          | NA         | NA         | NA         |         |
| NA        | ENSG00000279450 | 0          | NA          | NA         | NA         | NA         |         |
| NA        | ENSG00000279452 | 16.8596423 | -0.18370941 | 0.3517243  | 0.34193951 | 0.57202996 |         |
| NA        | ENSG00000279453 | 71.4123858 | 0.26230037  | 0.27269262 | 0.19951185 | 0.40415714 |         |
| NA        | ENSG00000279454 | 0          | NA          | NA         | NA         | NA         |         |
| NA        | ENSG00000279455 | 0.15069912 | -0.01848503 | 0.38480575 | 0.84537521 | NA         |         |
| NA        | ENSG00000279456 | 7.93071593 | 0.32133992  | 0.51507987 | 0.08107989 | 0.21357208 |         |
| 102723897 | ENSG00000279457 | 287.853062 | 0.20426945  | 0.13898078 | 0.11407768 | 0.27453921 | WASH9P  |
| NA        | ENSG00000279458 | 0          | NA          | NA         | NA         | NA         |         |
| NA        | ENSG00000279459 | 0.52937226 | 0.01290619  | 0.38340476 | 0.75389051 | NA         |         |
| NA        | ENSG00000279460 | 0          | NA          | NA         | NA         | NA         |         |
| NA        | ENSG00000279461 | 0          | NA          | NA         | NA         | NA         |         |
| NA        | ENSG00000279462 | 0          | NA          | NA         | NA         | NA         |         |
| NA        | ENSG00000279463 | 0          | NA          | NA         | NA         | NA         |         |
| NA        | ENSG00000279464 | 4.85036831 | -0.04615834 | 0.36667959 | 0.7008124  | 0.85575596 |         |
| NA        | ENSG00000279465 | 0.53663768 | 0.03215986  | 0.38615775 | 0.46259439 | NA         |         |
| NA        | ENSG00000279466 | 0          | NA          | NA         | NA         | NA         |         |
| NA        | ENSG00000279467 | 6.61177194 | 0.03102596  | 0.36067985 | 0.81222004 | 0.91499949 |         |
| NA        | ENSG00000279469 | 1.22610399 | -0.02878607 | 0.38122885 | 0.64496394 | NA         |         |
| NA        | ENSG00000279470 | 0          | NA          | NA         | NA         | NA         |         |
| NA        | ENSG00000279472 | 0.37844916 | 0.02407552  | 0.3854191  | 0.60038877 | NA         |         |
| NA        | ENSG00000279474 | 0          | NA          | NA         | NA         | NA         |         |
| NA        | ENSG00000279475 | 0          | NA          | NA         | NA         | NA         |         |
| NA        | ENSG00000279476 | 0.67656633 | 0.00370303  | 0.38245091 | 0.9305055  | NA         |         |
| NA        | ENSG00000279477 | 0          | NA          | NA         | NA         | NA         |         |
| NA        | ENSG00000279478 | 1.01910947 | 0.0577923   | 0.38723499 | 0.32002523 | NA         |         |
| NA        | ENSG00000279479 | 0.173733   | 0.01914545  | 0.38484597 | 0.78225479 | NA         |         |
| NA        | ENSG00000279480 | 0          | NA          | NA         | NA         | NA         |         |

|        |                 |            |             |            |            |            |            |
|--------|-----------------|------------|-------------|------------|------------|------------|------------|
| NA     | ENSG00000279481 | 1.70821593 | 0.02957588  | 0.3785081  | 0.70137769 | NA         |            |
| NA     | ENSG00000279482 | 0          | NA          | NA         | NA         | NA         |            |
| NA     | ENSG00000279483 | 0          | NA          | NA         | NA         | NA         |            |
| NA     | ENSG00000279484 | 0.16735865 | 0.01897177  | 0.38482933 | 0.78225479 | NA         | KLHL30-AS1 |
| NA     | ENSG00000279485 | 0          | NA          | NA         | NA         | NA         |            |
| 144125 | ENSG00000279486 | 0          | NA          | NA         | NA         | NA         | OR2AG1     |
| NA     | ENSG00000279488 | 103.919513 | 0.47859377  | 0.2325301  | 0.01398979 | 0.05452994 |            |
| NA     | ENSG00000279489 | 2.0182195  | 0.08012294  | 0.39195448 | 0.23173173 | NA         |            |
| NA     | ENSG00000279490 | 0.97548222 | 0.02518382  | 0.38232206 | 0.6438864  | NA         |            |
| 399900 | ENSG00000279491 | 5.32674122 | -0.05531379 | 0.36976197 | 0.63678645 | 0.81722218 |            |
| NA     | ENSG00000279493 | 0          | NA          | NA         | NA         | NA         |            |
| NA     | ENSG00000279494 | 0.6878106  | 0.00016205  | 0.38183718 | 0.99591911 | NA         |            |
| NA     | ENSG00000279495 | 52.531948  | 0.05785271  | 0.24851912 | 0.76248892 | 0.89044559 |            |
| NA     | ENSG00000279497 | 0          | NA          | NA         | NA         | NA         |            |
| NA     | ENSG00000279498 | 0          | NA          | NA         | NA         | NA         |            |
| NA     | ENSG00000279499 | 0.55872782 | 0.0127596   | 0.38330847 | 0.73727584 | NA         |            |
| NA     | ENSG00000279500 | 22.8753056 | -0.14005458 | 0.32559369 | 0.46843722 | 0.69118513 |            |
| NA     | ENSG00000279501 | 0          | NA          | NA         | NA         | NA         |            |
| NA     | ENSG00000279502 | 0          | NA          | NA         | NA         | NA         |            |
| NA     | ENSG00000279503 | 0          | NA          | NA         | NA         | NA         |            |
| NA     | ENSG00000279504 | 6.76055342 | 0.10598266  | 0.36985071 | 0.46842306 | 0.69118513 |            |
| NA     | ENSG00000279505 | 0          | NA          | NA         | NA         | NA         |            |
| NA     | ENSG00000279507 | 0.16735865 | 0.01897177  | 0.38482933 | 0.78225479 | NA         |            |
| NA     | ENSG00000279509 | 0.30139824 | -0.02296476 | 0.38527817 | 0.68536535 | NA         |            |
| NA     | ENSG00000279511 | 0          | NA          | NA         | NA         | NA         |            |
| NA     | ENSG00000279512 | 0.15069912 | -0.01848503 | 0.38480575 | 0.84537521 | NA         |            |
| NA     | ENSG00000279513 | 2.81895785 | 0.01569897  | 0.37548188 | 0.85424661 | 0.93466347 |            |
| 219428 | ENSG00000279514 | 0          | NA          | NA         | NA         | NA         | OR4C16     |
| 26080  | ENSG00000279516 | 0          | NA          | NA         | NA         | NA         | FAM230C    |
| NA     | ENSG00000279518 | 11.1689128 | -0.26397771 | 0.43241287 | 0.16159234 | 0.34999912 |            |
| NA     | ENSG00000279519 | 0          | NA          | NA         | NA         | NA         |            |
| NA     | ENSG00000279520 | 24.5936927 | 0.34762573  | 0.39503004 | 0.1279292  | 0.29849645 |            |
| NA     | ENSG00000279521 | 0          | NA          | NA         | NA         | NA         |            |
| NA     | ENSG00000279523 | 0          | NA          | NA         | NA         | NA         |            |
| NA     | ENSG00000279525 | 0.34624801 | -0.02356563 | 0.38536324 | 0.65270996 | NA         |            |
| NA     | ENSG00000279526 | 0.3230143  | 0.00138213  | 0.38336849 | 0.96784752 | NA         |            |
| NA     | ENSG00000279527 | 0.173733   | 0.01914545  | 0.38484597 | 0.78225479 | NA         |            |
| NA     | ENSG00000279528 | 0          | NA          | NA         | NA         | NA         |            |

|           |                 |            |             |            |            |            |           |
|-----------|-----------------|------------|-------------|------------|------------|------------|-----------|
| NA        | ENSG00000279529 | 28.1634904 | -0.1100328  | 0.30341601 | 0.56987731 | 0.77039833 |           |
| NA        | ENSG00000279530 | 46.1788768 | -0.28472056 | 0.31338538 | 0.18419359 | 0.38278002 |           |
| NA        | ENSG00000279531 | 0          | NA          | NA         | NA         | NA         |           |
| NA        | ENSG00000279532 | 4.81324569 | -0.1660781  | 0.41863748 | 0.14893881 | 0.33152468 |           |
| NA        | ENSG00000279534 | 0          | NA          | NA         | NA         | NA         |           |
| NA        | ENSG00000279536 | 1.62345639 | -0.04768967 | 0.38016034 | 0.55799666 | NA         |           |
| NA        | ENSG00000279537 | 0.18922458 | 0.01954053  | 0.38488496 | 0.78225479 | NA         |           |
| NA        | ENSG00000279539 | 21.2478909 | -0.22957763 | 0.35899094 | 0.26064286 | 0.48260891 |           |
| NA        | ENSG00000279541 | 5.17171546 | -0.01537652 | 0.36695005 | 0.88875517 | 0.95146564 |           |
| NA        | ENSG00000279542 | 0          | NA          | NA         | NA         | NA         |           |
| NA        | ENSG00000279543 | 0.15069912 | -0.01848503 | 0.38480575 | 0.84537521 | NA         |           |
| NA        | ENSG00000279544 | 3.50472661 | -0.00706902 | 0.3678351  | 0.9462211  | 0.97814213 |           |
| NA        | ENSG00000279548 | 0          | NA          | NA         | NA         | NA         |           |
| NA        | ENSG00000279549 | 7.20101821 | 0.00638289  | 0.3537277  | 0.96574339 | 0.98663622 |           |
| NA        | ENSG00000279550 | 0          | NA          | NA         | NA         | NA         |           |
| NA        | ENSG00000279551 | 0          | NA          | NA         | NA         | NA         |           |
| NA        | ENSG00000279554 | 0          | NA          | NA         | NA         | NA         |           |
| NA        | ENSG00000279555 | 29.8403955 | 0.1655988   | 0.31130212 | 0.40955692 | 0.63760274 |           |
| NA        | ENSG00000279557 | 5.07877111 | 0.0686874   | 0.36807746 | 0.59424901 | 0.7877158  |           |
| NA        | ENSG00000279558 | 0          | NA          | NA         | NA         | NA         |           |
| NA        | ENSG00000279559 | 0          | NA          | NA         | NA         | NA         |           |
| 100132249 | ENSG00000279561 | 204.947054 | -0.2812061  | 0.17154322 | 0.06676981 | 0.18527454 |           |
| NA        | ENSG00000279562 | 0          | NA          | NA         | NA         | NA         |           |
| NA        | ENSG00000279565 | 0          | NA          | NA         | NA         | NA         |           |
| NA        | ENSG00000279567 | 0          | NA          | NA         | NA         | NA         |           |
| NA        | ENSG00000279568 | 18.3382026 | 0.15521703  | 0.3458166  | 0.41054916 | 0.63819598 |           |
| NA        | ENSG00000279569 | 44.793695  | -0.03033839 | 0.27389455 | 0.87299362 | 0.94439555 |           |
| NA        | ENSG00000279570 | 0.53706505 | 0.01398942  | 0.38347261 | 0.73874474 | NA         |           |
| NA        | ENSG00000279571 | 28.9640571 | -0.30309654 | 0.36067871 | 0.16781616 | 0.35875832 |           |
| NA        | ENSG00000279572 | 0          | NA          | NA         | NA         | NA         |           |
| NA        | ENSG00000279573 | 1.13839249 | -0.00905865 | 0.37867937 | 0.89504161 | NA         |           |
| NA        | ENSG00000279575 | 0          | NA          | NA         | NA         | NA         |           |
| NA        | ENSG00000279578 | 0          | NA          | NA         | NA         | NA         |           |
| 101930100 | ENSG00000279579 | 4.80827962 | -0.01097963 | 0.36686015 | 0.9160352  | 0.96435405 | LINC01666 |
| NA        | ENSG00000279581 | 0.34624801 | -0.02356563 | 0.38536324 | 0.65270996 | NA         |           |
| NA        | ENSG00000279583 | 3.07043322 | -0.1066449  | 0.38947663 | 0.32228267 | 0.54988719 |           |
| NA        | ENSG00000279584 | 0          | NA          | NA         | NA         | NA         |           |
| NA        | ENSG00000279585 | 0          | NA          | NA         | NA         | NA         |           |



|    |                 |            |             |            |            |            |           |
|----|-----------------|------------|-------------|------------|------------|------------|-----------|
| NA | ENSG00000279586 | 0          | NA          | NA         | NA         | NA         |           |
| NA | ENSG00000279587 | 8.12085708 | 0.12406518  | 0.36921727 | 0.42962008 | 0.6552631  |           |
| NA | ENSG00000279588 | 0          | NA          | NA         | NA         | NA         |           |
| NA | ENSG00000279589 | 0.96905748 | -0.00900091 | 0.38190594 | 0.8542754  | NA         |           |
| NA | ENSG00000279590 | 1.55464333 | 0.01984292  | 0.37923172 | 0.77483074 | NA         |           |
| NA | ENSG00000279591 | 0.33471731 | 0.02354391  | 0.38534154 | 0.62842204 | NA         |           |
| NA | ENSG00000279592 | 44.2678563 | -0.02763406 | 0.37565543 | 0.7467416  | 0.88092242 |           |
| NA | ENSG00000279593 | 0.31825086 | 0.00120088  | 0.38336713 | 0.96557175 | NA         |           |
| NA | ENSG00000279594 | 5.79376583 | 0.04593487  | 0.3618066  | 0.72909271 | 0.87045369 |           |
| NA | ENSG00000279595 | 0.47586314 | -0.00792913 | 0.38324692 | 0.85664911 | NA         |           |
| NA | ENSG00000279597 | 0          | NA          | NA         | NA         | NA         |           |
| NA | ENSG00000279598 | 7.23519644 | -0.10500824 | 0.36650891 | 0.48218431 | 0.70272402 |           |
| NA | ENSG00000279599 | 0.33471731 | 0.02354391  | 0.38534154 | 0.62842204 | NA         |           |
| NA | ENSG00000279600 | 0          | NA          | NA         | NA         | NA         |           |
| NA | ENSG00000279601 | 5.47343023 | 0.10180953  | 0.38155919 | 0.40547495 | 0.63375238 |           |
| NA | ENSG00000279602 | 31.309358  | -0.04307364 | 0.2858462  | 0.82142963 | 0.91847813 |           |
| NA | ENSG00000279603 | 0          | NA          | NA         | NA         | NA         |           |
| NA | ENSG00000279604 | 0          | NA          | NA         | NA         | NA         |           |
| NA | ENSG00000279605 | 44.6402454 | -0.0177462  | 0.27206923 | 0.92489007 | 0.96868601 |           |
| NA | ENSG00000279606 | 0          | NA          | NA         | NA         | NA         |           |
| NA | ENSG00000279607 | 0          | NA          | NA         | NA         | NA         |           |
| NA | ENSG00000279608 | 2.50151926 | 0.05563846  | 0.37667667 | 0.57754327 | NA         |           |
| NA | ENSG00000279609 | 3.46843186 | 0.02887202  | 0.36889672 | 0.79450599 | 0.90579008 |           |
| NA | ENSG00000279610 | 0          | NA          | NA         | NA         | NA         | C20orf181 |
| NA | ENSG00000279611 | 33.4020723 | 0.27903335  | 0.33752951 | 0.19725548 | 0.40121304 |           |
| NA | ENSG00000279613 | 3.64349263 | 0.06773909  | 0.37422624 | 0.55470353 | 0.76061359 |           |
| NA | ENSG00000279615 | 0          | NA          | NA         | NA         | NA         |           |
| NA | ENSG00000279616 | 0.47371164 | -0.03508253 | 0.38628708 | 0.49561647 | NA         |           |
| NA | ENSG00000279617 | 0          | NA          | NA         | NA         | NA         |           |
| NA | ENSG00000279619 | 1.67778268 | 0.02922384  | 0.37826474 | 0.70846001 | NA         |           |
| NA | ENSG00000279620 | 1.89073965 | 0.0459101   | 0.37966225 | 0.57712561 | NA         |           |
| NA | ENSG00000279621 | 2.60123501 | -0.00038285 | 0.37072874 | 0.99537801 | 0.99852582 |           |
| NA | ENSG00000279622 | 0          | NA          | NA         | NA         | NA         |           |
| NA | ENSG00000279623 | 0.51031984 | 0.03087643  | 0.38602938 | 0.48146828 | NA         |           |
| NA | ENSG00000279625 | 0.80617796 | -0.0089422  | 0.38155904 | 0.86338986 | NA         |           |
| NA | ENSG00000279626 | 0          | NA          | NA         | NA         | NA         | DUX4L28   |
| NA | ENSG00000279628 | 0          | NA          | NA         | NA         | NA         |           |
| NA | ENSG00000279629 | 0          | NA          | NA         | NA         | NA         |           |

|       |                 |            |             |            |            |            |
|-------|-----------------|------------|-------------|------------|------------|------------|
| NA    | ENSG00000279630 | 1.0181634  | -0.05408554 | 0.38940487 | 0.23838755 | NA         |
| NA    | ENSG00000279631 | 9.97454313 | 0.0204366   | 0.33802162 | 0.90188533 | 0.95686657 |
| NA    | ENSG00000279632 | 3.87288525 | 0.0311618   | 0.36743904 | 0.78677016 | 0.90296292 |
| NA    | ENSG00000279633 | 1.61333659 | 0.08052312  | 0.39058694 | 0.27184229 | NA         |
| NA    | ENSG00000279635 | 0          | NA          | NA         | NA         | NA         |
| 55451 | ENSG00000279636 | 8.86246469 | -0.11406404 | 0.36752533 | 0.45624544 | 0.67972588 |
| NA    | ENSG00000279637 | 0          | NA          | NA         | NA         | NA         |
| NA    | ENSG00000279638 | 0          | NA          | NA         | NA         | NA         |
| NA    | ENSG00000279639 | 0          | NA          | NA         | NA         | NA         |
| NA    | ENSG00000279640 | 2.01772206 | 0.03679773  | 0.37624162 | 0.68293509 | NA         |
| NA    | ENSG00000279641 | 19.2265602 | -0.02419003 | 0.31412308 | 0.89247409 | 0.95350475 |
| NA    | ENSG00000279642 | 0          | NA          | NA         | NA         | NA         |
| NA    | ENSG00000279647 | 0          | NA          | NA         | NA         | NA         |
| NA    | ENSG00000279648 | 0          | NA          | NA         | NA         | NA         |
| NA    | ENSG00000279649 | 44.7271724 | -0.04604337 | 0.26898074 | 0.81054662 | 0.91417457 |
| NA    | ENSG00000279650 | 0          | NA          | NA         | NA         | NA         |
| NA    | ENSG00000279652 | 4.14254087 | 0.1675646   | 0.41910624 | 0.14991316 | 0.33295389 |
| NA    | ENSG00000279653 | 1.32285033 | 0.02374489  | 0.38129658 | 0.69258101 | NA         |
| NA    | ENSG00000279655 | 0          | NA          | NA         | NA         | NA         |
| NA    | ENSG00000279656 | 17.9860743 | 0.1272485   | 0.34282729 | 0.48547648 | 0.70561001 |
| NA    | ENSG00000279657 | 0          | NA          | NA         | NA         | NA         |
| NA    | ENSG00000279658 | 0          | NA          | NA         | NA         | NA         |
| NA    | ENSG00000279659 | 27.2039864 | -0.0892877  | 0.29523727 | 0.64354564 | 0.8219015  |
| NA    | ENSG00000279660 | 0.32294295 | 0.00132224  | 0.38336796 | 0.96842019 | NA         |
| NA    | ENSG00000279662 | 28.3993767 | 0.77093197  | 0.52158361 | 0.0145601  | 0.05625557 |
| NA    | ENSG00000279663 | 0.18922458 | 0.01954053  | 0.38488496 | 0.78225479 | NA         |
| NA    | ENSG00000279665 | 0          | NA          | NA         | NA         | NA         |
| NA    | ENSG00000279666 | 0          | NA          | NA         | NA         | NA         |
| NA    | ENSG00000279667 | 5.76628395 | 0.09440824  | 0.37465148 | 0.46968904 | 0.69206549 |
| NA    | ENSG00000279668 | 0.18922458 | 0.01954053  | 0.38488496 | 0.78225479 | NA         |
| NA    | ENSG00000279669 | 0.16735865 | 0.01897177  | 0.38482933 | 0.78225479 | NA         |
| NA    | ENSG00000279670 | 6.25787065 | -0.01796767 | 0.353331   | 0.89670708 | 0.95469109 |
| NA    | ENSG00000279671 | 0          | NA          | NA         | NA         | NA         |
| NA    | ENSG00000279672 | 31.5364259 | 0.06870759  | 0.28268587 | 0.72436805 | 0.86820892 |
| NA    | ENSG00000279673 | 22.7278855 | -0.55449422 | 0.49833344 | 0.04237465 | 0.13123837 |
| NA    | ENSG00000279674 | 0          | NA          | NA         | NA         | NA         |
| NA    | ENSG00000279675 | 0.87297177 | 0.06329406  | 0.39096424 | 0.21010384 | NA         |
| NA    | ENSG00000279676 | 0          | NA          | NA         | NA         | NA         |

|           |                 |            |             |            |            |            |          |
|-----------|-----------------|------------|-------------|------------|------------|------------|----------|
| NA        | ENSG00000279677 | 0.5056223  | 0.03064366  | 0.38600669 | 0.48497154 | NA         |          |
| NA        | ENSG00000279678 | 0.66825088 | -0.03816111 | 0.38685478 | 0.40139125 | NA         |          |
| NA        | ENSG00000279679 | 0          | NA          | NA         | NA         | NA         |          |
| NA        | ENSG00000279681 | 0          | NA          | NA         | NA         | NA         |          |
| NA        | ENSG00000279682 | 0          | NA          | NA         | NA         | NA         |          |
| NA        | ENSG00000279683 | 0          | NA          | NA         | NA         | NA         |          |
| NA        | ENSG00000279684 | 0          | NA          | NA         | NA         | NA         |          |
| 100130148 | ENSG00000279685 | 5.01093291 | -0.23566247 | 0.47031645 | 0.06744391 | 0.18646699 | MAPT-IT1 |
| NA        | ENSG00000279686 | 0          | NA          | NA         | NA         | NA         |          |
| NA        | ENSG00000279687 | 0          | NA          | NA         | NA         | NA         |          |
| 112267859 | ENSG00000279688 | 0          | NA          | NA         | NA         | NA         | AQP7P3   |
| NA        | ENSG00000279689 | 81.4945443 | 0.52220045  | 0.25673345 | 0.0125908  | 0.05013072 |          |
| NA        | ENSG00000279690 | 0.52119901 | 0.02576573  | 0.38568143 | 0.51723676 | NA         |          |
| NA        | ENSG00000279691 | 0          | NA          | NA         | NA         | NA         |          |
| NA        | ENSG00000279692 | 66.5273978 | 0.131077    | 0.24937852 | 0.49658868 | 0.71482827 |          |
| NA        | ENSG00000279693 | 37.6332241 | -3.07068462 | 0.47532875 | 8.53E-12   | 1.83E-10   |          |
| NA        | ENSG00000279694 | 11.9704508 | 0.20074842  | 0.38637535 | 0.27069439 | 0.49398241 |          |
| NA        | ENSG00000279695 | 0          | NA          | NA         | NA         | NA         |          |
| NA        | ENSG00000279696 | 81.8545672 | -0.01241557 | 0.21573307 | 0.94084196 | 0.97550585 |          |
| NA        | ENSG00000279697 | 0          | NA          | NA         | NA         | NA         |          |
| NA        | ENSG00000279698 | 0          | NA          | NA         | NA         | NA         |          |
| NA        | ENSG00000279699 | 2.18389603 | 0.12579321  | 0.40659964 | 0.13891004 | NA         |          |
| NA        | ENSG00000279700 | 21.9256006 | 0.47359682  | 0.51574222 | 0.06247812 | 0.17665184 |          |
| NA        | ENSG00000279701 | 0          | NA          | NA         | NA         | NA         |          |
| NA        | ENSG00000279702 | 0          | NA          | NA         | NA         | NA         |          |
| NA        | ENSG00000279703 | 0          | NA          | NA         | NA         | NA         |          |
| NA        | ENSG00000279704 | 0          | NA          | NA         | NA         | NA         |          |
| NA        | ENSG00000279705 | 0          | NA          | NA         | NA         | NA         |          |
| NA        | ENSG00000279706 | 0.73336583 | 0.02408596  | 0.38396131 | 0.58063632 | NA         |          |
| NA        | ENSG00000279707 | 0          | NA          | NA         | NA         | NA         |          |
| NA        | ENSG00000279708 | 0          | NA          | NA         | NA         | NA         |          |
| NA        | ENSG00000279709 | 0          | NA          | NA         | NA         | NA         |          |
| NA        | ENSG00000279711 | 0          | NA          | NA         | NA         | NA         |          |
| NA        | ENSG00000279712 | 11.4185004 | 0.07099108  | 0.34077312 | 0.67435644 | 0.84019291 |          |
| NA        | ENSG00000279713 | 35.4306959 | 1.30037904  | 0.43536504 | 0.00020958 | 0.00148393 |          |
| NA        | ENSG00000279714 | 0          | NA          | NA         | NA         | NA         |          |
| NA        | ENSG00000279715 | 0          | NA          | NA         | NA         | NA         |          |
| NA        | ENSG00000279716 | 4.47958422 | -0.0301695  | 0.38662021 | 0.1583881  | 0.3455487  |          |

|           |                 |            |             |            |            |            |           |
|-----------|-----------------|------------|-------------|------------|------------|------------|-----------|
| NA        | ENSG00000279717 | 0          | NA          | NA         | NA         | NA         |           |
| NA        | ENSG00000279718 | 17.5546756 | 0.04946308  | 0.31563889 | 0.78900254 | 0.90421733 | SNX18P12  |
| NA        | ENSG00000279719 | 0          | NA          | NA         | NA         | NA         |           |
| NA        | ENSG00000279720 | 7.69064972 | -0.13624287 | 0.37595978 | 0.37882688 | 0.60778953 | SOWAHCP2  |
| NA        | ENSG00000279721 | 1.21336015 | 0.07402768  | 0.39082102 | 0.23189415 | NA         |           |
| NA        | ENSG00000279722 | 21.2322206 | 0.10617978  | 0.33341217 | 0.5618971  | 0.76508177 |           |
| NA        | ENSG00000279724 | 0          | NA          | NA         | NA         | NA         |           |
| NA        | ENSG00000279725 | 0          | NA          | NA         | NA         | NA         |           |
| NA        | ENSG00000279726 | 12.2529152 | 0.05518022  | 0.35699283 | 0.69726273 | 0.85387893 |           |
| 105377031 | ENSG00000279727 | 0          | NA          | NA         | NA         | NA         | LINC02033 |
| NA        | ENSG00000279728 | 0          | NA          | NA         | NA         | NA         |           |
| NA        | ENSG00000279729 | 0          | NA          | NA         | NA         | NA         |           |
| NA        | ENSG00000279730 | 2.23332665 | 0.05054805  | 0.37754829 | 0.58794113 | NA         | KMT5AP1   |
| NA        | ENSG00000279732 | 0          | NA          | NA         | NA         | NA         |           |
| NA        | ENSG00000279733 | 0          | NA          | NA         | NA         | NA         |           |
| NA        | ENSG00000279734 | 0          | NA          | NA         | NA         | NA         |           |
| NA        | ENSG00000279735 | 0.46949027 | -0.00707581 | 0.38322263 | 0.87054784 | NA         |           |
| NA        | ENSG00000279737 | 0          | NA          | NA         | NA         | NA         |           |
| NA        | ENSG00000279738 | 59.0734879 | -0.20782297 | 0.26450734 | 0.29606233 | 0.52267989 |           |
| NA        | ENSG00000279739 | 0          | NA          | NA         | NA         | NA         |           |
| NA        | ENSG00000279741 | 0          | NA          | NA         | NA         | NA         |           |
| NA        | ENSG00000279742 | 4.12511985 | 0.03546953  | 0.36697499 | 0.76365903 | 0.89118258 |           |
| NA        | ENSG00000279743 | 0          | NA          | NA         | NA         | NA         |           |
| NA        | ENSG00000279744 | 73.05433   | 0.07906138  | 0.22327477 | 0.66569172 | 0.83494641 |           |
| NA        | ENSG00000279746 | 0          | NA          | NA         | NA         | NA         |           |
| NA        | ENSG00000279747 | 0.29863895 | -0.02292439 | 0.3852726  | 0.68753245 | NA         |           |
| NA        | ENSG00000279748 | 16.7279392 | -0.08808154 | 0.33668158 | 0.61393439 | 0.80155688 |           |
| NA        | ENSG00000279749 | 0          | NA          | NA         | NA         | NA         |           |
| NA        | ENSG00000279750 | 0          | NA          | NA         | NA         | NA         |           |
| NA        | ENSG00000279751 | 0          | NA          | NA         | NA         | NA         |           |
| NA        | ENSG00000279752 | 0.173124   | -0.01911262 | 0.38486262 | 0.84537521 | NA         |           |
| NA        | ENSG00000279753 | 0          | NA          | NA         | NA         | NA         |           |
| NA        | ENSG00000279754 | 0          | NA          | NA         | NA         | NA         |           |
| NA        | ENSG00000279755 | 0          | NA          | NA         | NA         | NA         |           |
| NA        | ENSG00000279756 | 0          | NA          | NA         | NA         | NA         |           |
| NA        | ENSG00000279757 | 0          | NA          | NA         | NA         | NA         |           |
| NA        | ENSG00000279758 | 2.02185437 | 0.03236322  | 0.3776186  | 0.69522968 | NA         |           |
| NA        | ENSG00000279759 | 108.361203 | -0.1442562  | 0.19618811 | 0.39217809 | 0.62147071 |           |

|           |                 |            |             |            |            |            |           |
|-----------|-----------------|------------|-------------|------------|------------|------------|-----------|
| 390142    | ENSG00000279761 | 0          | NA          | NA         | NA         | NA         | OR5D13    |
| NA        | ENSG00000279762 | 3.25742328 | 0.02305306  | 0.37046928 | 0.82539546 | 0.92066374 |           |
| NA        | ENSG00000279764 | 1.92531328 | -0.08447993 | 0.39105273 | 0.26789339 | NA         |           |
| NA        | ENSG00000279765 | 10.3042213 | -0.1103148  | 0.35949674 | 0.4916174  | 0.71085847 |           |
| NA        | ENSG00000279766 | 0.33471731 | 0.02354391  | 0.38534154 | 0.62842204 | NA         |           |
| NA        | ENSG00000279769 | 0.32305891 | 0.00141835  | 0.38336882 | 0.9675011  | NA         |           |
| 100130386 | ENSG00000279770 | 4.87003526 | -0.02718968 | 0.36287166 | 0.82497699 | 0.92054353 | LINC00552 |
| NA        | ENSG00000279771 | 2.91922313 | -0.13043037 | 0.40116491 | 0.22038737 | 0.43277467 |           |
| NA        | ENSG00000279772 | 0.16735865 | 0.01897177  | 0.38482933 | 0.78225479 | NA         |           |
| NA        | ENSG00000279773 | 0          | NA          | NA         | NA         | NA         |           |
| NA        | ENSG00000279774 | 0          | NA          | NA         | NA         | NA         |           |
| NA        | ENSG00000279775 | 0          | NA          | NA         | NA         | NA         |           |
| NA        | ENSG00000279778 | 0          | NA          | NA         | NA         | NA         |           |
| NA        | ENSG00000279779 | 0          | NA          | NA         | NA         | NA         |           |
| NA        | ENSG00000279780 | 38.4983285 | -0.22018546 | 0.30775331 | 0.28723369 | 0.51298195 |           |
| NA        | ENSG00000279781 | 0.48784937 | 0.01117364  | 0.38338945 | 0.78675417 | NA         |           |
| NA        | ENSG00000279783 | 0          | NA          | NA         | NA         | NA         |           |
| NA        | ENSG00000279784 | 0.18922458 | 0.01954053  | 0.38488496 | 0.78225479 | NA         |           |
| NA        | ENSG00000279785 | 0.65933967 | 0.00149417  | 0.38190127 | 0.97353866 | NA         |           |
| NA        | ENSG00000279786 | 0.51937201 | -0.02557462 | 0.38567603 | 0.54680819 | NA         |           |
| NA        | ENSG00000279788 | 0          | NA          | NA         | NA         | NA         |           |
| NA        | ENSG00000279789 | 65.5286737 | -0.00885033 | 0.2400466  | 0.96084452 | 0.98409417 |           |
| NA        | ENSG00000279790 | 0          | NA          | NA         | NA         | NA         |           |
| NA        | ENSG00000279791 | 4.06136477 | 0.04519237  | 0.36680681 | 0.70917166 | 0.86044311 |           |
| NA        | ENSG00000279792 | 27.7032078 | 0.13293142  | 0.31168293 | 0.49831017 | 0.71619429 |           |
| NA        | ENSG00000279793 | 0          | NA          | NA         | NA         | NA         |           |
| NA        | ENSG00000279794 | 11.5721904 | -0.0352682  | 0.3396027  | 0.82616212 | 0.92125524 |           |
| NA        | ENSG00000279795 | 40.1127632 | -0.25469544 | 0.30616746 | 0.22671387 | 0.44128749 |           |
| NA        | ENSG00000279796 | 0.16735865 | 0.01897177  | 0.38482933 | 0.78225479 | NA         |           |
| 101926951 | ENSG00000279797 | 0          | NA          | NA         | NA         | NA         | LINC02339 |
| NA        | ENSG00000279798 | 0          | NA          | NA         | NA         | NA         |           |
| NA        | ENSG00000279799 | 7.71862309 | -0.04279743 | 0.35016405 | 0.77398137 | 0.89604057 |           |
| NA        | ENSG00000279800 | 0.97680641 | 0.0236407   | 0.38227553 | 0.65974948 | NA         | BCLAF1P2  |
| NA        | ENSG00000279801 | 11.0076513 | -0.03280113 | 0.33829029 | 0.83911614 | 0.92674595 |           |
| NA        | ENSG00000279803 | 7.32715819 | -0.08047394 | 0.36574659 | 0.55990901 | 0.76415299 |           |
| 391003    | ENSG00000279804 | 0          | NA          | NA         | NA         | NA         | PRAMEF18  |
| NA        | ENSG00000279805 | 0.32321634 | 0.00153966  | 0.38336999 | 0.96634086 | NA         |           |
| NA        | ENSG00000279806 | 0          | NA          | NA         | NA         | NA         |           |

|        |                 |            |             |            |            |            |         |
|--------|-----------------|------------|-------------|------------|------------|------------|---------|
| NA     | ENSG00000279807 | 0.173733   | 0.01914545  | 0.38484597 | 0.78225479 | NA         |         |
| NA     | ENSG00000279809 | 3.04360673 | 0.23736368  | 0.49662565 | 0.00385439 | 0.0186788  |         |
| NA     | ENSG00000279810 | 0          | NA          | NA         | NA         | NA         |         |
| NA     | ENSG00000279811 | 0          | NA          | NA         | NA         | NA         |         |
| NA     | ENSG00000279812 | 0.47355552 | -0.03507465 | 0.3862863  | 0.49572448 | NA         |         |
| NA     | ENSG00000279813 | 0          | NA          | NA         | NA         | NA         |         |
| NA     | ENSG00000279814 | 0          | NA          | NA         | NA         | NA         |         |
| NA     | ENSG00000279815 | 0.14931947 | -0.01844332 | 0.38480212 | 0.84537521 | NA         |         |
| NA     | ENSG00000279817 | 0.16735865 | 0.01897177  | 0.38482933 | 0.78225479 | NA         |         |
| NA     | ENSG00000279818 | 0          | NA          | NA         | NA         | NA         |         |
| NA     | ENSG00000279819 | 0          | NA          | NA         | NA         | NA         |         |
| NA     | ENSG00000279821 | 51.2683815 | 0.19727381  | 0.26772991 | 0.32405138 | 0.55195565 |         |
| NA     | ENSG00000279822 | 6.23299602 | -0.00979779 | 0.35539211 | 0.94081801 | 0.97550585 |         |
| NA     | ENSG00000279825 | 0.9689746  | -0.01537374 | 0.38157819 | 0.77485869 | NA         |         |
| NA     | ENSG00000279827 | 0.87913425 | 0.05082743  | 0.38878686 | 0.25808735 | NA         |         |
| NA     | ENSG00000279829 | 0.48518808 | 0.01081396  | 0.38337215 | 0.79231039 | NA         |         |
| NA     | ENSG00000279833 | 13.9635747 | 0.1551217   | 0.35464883 | 0.39797375 | 0.62714847 |         |
| NA     | ENSG00000279834 | 0.18922458 | 0.01954053  | 0.38488496 | 0.78225479 | NA         |         |
| NA     | ENSG00000279835 | 0          | NA          | NA         | NA         | NA         |         |
| NA     | ENSG00000279836 | 0          | NA          | NA         | NA         | NA         |         |
| NA     | ENSG00000279837 | 5.72024164 | 0.05989837  | 0.36482407 | 0.64962259 | 0.82525848 |         |
| NA     | ENSG00000279838 | 28.4291675 | 0.20747439  | 0.31884635 | 0.31455816 | 0.54225684 |         |
| NA     | ENSG00000279839 | 0          | NA          | NA         | NA         | NA         |         |
| NA     | ENSG00000279840 | 0          | NA          | NA         | NA         | NA         |         |
| NA     | ENSG00000279841 | 2.20082379 | -0.00015637 | 0.37423327 | 0.99708344 | NA         |         |
| NA     | ENSG00000279842 | 0          | NA          | NA         | NA         | NA         |         |
| NA     | ENSG00000279844 | 0          | NA          | NA         | NA         | NA         |         |
| NA     | ENSG00000279845 | 1.08438247 | -0.02533341 | 0.38190927 | 0.65801954 | NA         |         |
| NA     | ENSG00000279846 | 0          | NA          | NA         | NA         | NA         |         |
| 389676 | ENSG00000279847 | 0          | NA          | NA         | NA         | NA         | C8orf87 |
| NA     | ENSG00000279848 | 0          | NA          | NA         | NA         | NA         |         |
| NA     | ENSG00000279851 | 1.10639405 | -0.03224143 | 0.38182949 | 0.6057203  | NA         |         |
| NA     | ENSG00000279852 | 7.67530671 | -0.23018752 | 0.43760689 | 0.15144812 | 0.33539121 |         |
| NA     | ENSG00000279853 | 10.9579326 | 0.112732    | 0.35599858 | 0.49837408 | 0.71619429 |         |
| NA     | ENSG00000279855 | 0          | NA          | NA         | NA         | NA         |         |
| NA     | ENSG00000279856 | 0          | NA          | NA         | NA         | NA         |         |
| NA     | ENSG00000279858 | 0          | NA          | NA         | NA         | NA         |         |
| NA     | ENSG00000279859 | 0.96615368 | 0.00497046  | 0.38007117 | 0.93460016 | NA         |         |

|           |    |                 |            |             |            |            |            |            |
|-----------|----|-----------------|------------|-------------|------------|------------|------------|------------|
|           | NA | ENSG00000279860 | 0          | NA          | NA         | NA         | NA         |            |
|           | NA | ENSG00000279861 | 11.3877415 | -0.0202266  | 0.3373749  | 0.89925299 | 0.95557174 |            |
|           | NA | ENSG00000279862 | 0          | NA          | NA         | NA         | NA         |            |
|           | NA | ENSG00000279863 | 6.7209199  | -0.15482189 | 0.39009299 | 0.30171898 | 0.52913363 |            |
|           | NA | ENSG00000279864 | 0.14931947 | -0.01844332 | 0.38480212 | 0.84537521 | NA         | NCOR1P4    |
|           | NA | ENSG00000279865 | 4.74930611 | 0.0013909   | 0.36287307 | 0.99362355 | 0.99798514 |            |
|           | NA | ENSG00000279869 | 0          | NA          | NA         | NA         | NA         |            |
| 100129726 | NA | ENSG00000279873 | 28.1816341 | 0.31464008  | 0.36362979 | 0.15742225 | 0.34419853 | LINC01126  |
|           | NA | ENSG00000279874 | 0          | NA          | NA         | NA         | NA         |            |
|           | NA | ENSG00000279875 | 1.45052723 | 0.01624903  | 0.3802131  | 0.79666447 | NA         |            |
|           | NA | ENSG00000279876 | 0          | NA          | NA         | NA         | NA         |            |
|           | NA | ENSG00000279878 | 2.57354379 | -0.13333419 | 0.41028028 | 0.12209679 | 0.28889688 |            |
|           | NA | ENSG00000279879 | 7.64145486 | -0.08333088 | 0.36167091 | 0.5679474  | 0.76919502 |            |
|           | NA | ENSG00000279880 | 21.6476271 | 0.04659932  | 0.30775793 | 0.80466461 | 0.91125251 |            |
|           | NA | ENSG00000279881 | 0.69371319 | 0.00028351  | 0.38238348 | 0.99329973 | NA         |            |
|           | NA | ENSG00000279882 | 0          | NA          | NA         | NA         | NA         |            |
|           | NA | ENSG00000279883 | 0.32528127 | 0.00192875  | 0.38337435 | 0.96184539 | NA         |            |
|           | NA | ENSG00000279884 | 0          | NA          | NA         | NA         | NA         |            |
|           | NA | ENSG00000279885 | 0.68156821 | 0.03292933  | 0.38382789 | 0.53367125 | NA         |            |
|           | NA | ENSG00000279886 | 0          | NA          | NA         | NA         | NA         |            |
|           | NA | ENSG00000279887 | 0          | NA          | NA         | NA         | NA         |            |
|           | NA | ENSG00000279889 | 0          | NA          | NA         | NA         | NA         |            |
| 401105    | NA | ENSG00000279891 | 0          | NA          | NA         | NA         | NA         |            |
|           | NA | ENSG00000279894 | 4.98925155 | -0.09513954 | 0.37692847 | 0.4511167  | 0.67451619 |            |
|           | NA | ENSG00000279895 | 0          | NA          | NA         | NA         | NA         |            |
| 103752586 | NA | ENSG00000279897 | 1.01717178 | -0.00019738 | 0.38088444 | 0.99713809 | NA         | BIRC6-AS2  |
|           | NA | ENSG00000279900 | 5.08068347 | 0.05465403  | 0.36534527 | 0.66972439 | 0.83753108 |            |
|           | NA | ENSG00000279901 | 3.69470372 | -0.09015772 | 0.38238445 | 0.41295635 | 0.64038252 |            |
|           | NA | ENSG00000279903 | 0          | NA          | NA         | NA         | NA         | SLC7A2-IT1 |
|           | NA | ENSG00000279904 | 0          | NA          | NA         | NA         | NA         |            |
|           | NA | ENSG00000279905 | 202.39651  | -0.24165752 | 0.16454536 | 0.10326323 | 0.25526319 |            |
|           | NA | ENSG00000279907 | 0          | NA          | NA         | NA         | NA         |            |
|           | NA | ENSG00000279908 | 0.32439098 | 0.00129656  | 0.3833677  | 0.96789054 | NA         |            |
|           | NA | ENSG00000279910 | 0.64743634 | -0.02431668 | 0.38284395 | 0.640378   | NA         |            |
|           | NA | ENSG00000279912 | 107.598984 | 0.23262425  | 0.20726749 | 0.18596435 | 0.38549082 |            |
|           | NA | ENSG00000279913 | 0          | NA          | NA         | NA         | NA         |            |
|           | NA | ENSG00000279914 | 0.18922458 | 0.01954053  | 0.38488496 | 0.78225479 | NA         |            |
|           | NA | ENSG00000279917 | 0.33880969 | 0.00231733  | 0.38337947 | 0.96633319 | NA         |            |

|           |    |                 |            |             |            |            |            |           |
|-----------|----|-----------------|------------|-------------|------------|------------|------------|-----------|
|           | NA | ENSG00000279918 | 0          | NA          | NA         | NA         | NA         |           |
|           | NA | ENSG00000279919 | 0          | NA          | NA         | NA         | NA         |           |
| 105372944 |    | ENSG00000279920 | 0          | NA          | NA         | NA         | NA         | LINC01651 |
|           | NA | ENSG00000279923 | 3.36070399 | -0.03461752 | 0.36957558 | 0.75023031 | 0.88246691 |           |
|           | NA | ENSG00000279924 | 0          | NA          | NA         | NA         | NA         |           |
|           | NA | ENSG00000279925 | 0.14931947 | -0.01844332 | 0.38480212 | 0.84537521 | NA         |           |
|           | NA | ENSG00000279926 | 18.1864495 | 0.60776937  | 0.58710182 | 0.03505362 | 0.11342589 |           |
|           | NA | ENSG00000279927 | 0          | NA          | NA         | NA         | NA         |           |
|           | NA | ENSG00000279928 | 0          | NA          | NA         | NA         | NA         | DDX11L17  |
|           | NA | ENSG00000279929 | 0          | NA          | NA         | NA         | NA         |           |
|           | NA | ENSG00000279930 | 9.51018252 | -0.15580721 | 0.3756968  | 0.34966718 | 0.58009841 |           |
|           | NA | ENSG00000279931 | 0          | NA          | NA         | NA         | NA         |           |
|           | NA | ENSG00000279932 | 0          | NA          | NA         | NA         | NA         |           |
|           | NA | ENSG00000279933 | 0          | NA          | NA         | NA         | NA         |           |
|           | NA | ENSG00000279935 | 0          | NA          | NA         | NA         | NA         |           |
|           | NA | ENSG00000279936 | 1.04528185 | 0.07462451  | 0.39373796 | 0.15071147 | NA         |           |
|           | NA | ENSG00000279939 | 0.50207596 | 0.02562368  | 0.38565771 | 0.52549886 | NA         |           |
|           | NA | ENSG00000279940 | 0          | NA          | NA         | NA         | NA         |           |
|           | NA | ENSG00000279942 | 0          | NA          | NA         | NA         | NA         |           |
| 651430    |    | ENSG00000279943 | 6.91226779 | -0.03309788 | 0.35597712 | 0.80975519 | 0.91359357 |           |
|           | NA | ENSG00000279945 | 0          | NA          | NA         | NA         | NA         |           |
|           | NA | ENSG00000279946 | 0          | NA          | NA         | NA         | NA         |           |
|           | NA | ENSG00000279948 | 3.74724612 | -0.07055526 | 0.37430009 | 0.54037585 | 0.74909565 |           |
|           | NA | ENSG00000279949 | 1.75300165 | 0.06000157  | 0.38385287 | 0.43655148 | NA         |           |
|           | NA | ENSG00000279951 | 2.82423002 | -0.05252798 | 0.37566879 | 0.6011356  | 0.79187494 |           |
|           | NA | ENSG00000279952 | 0          | NA          | NA         | NA         | NA         |           |
|           | NA | ENSG00000279953 | 2.3154527  | 0.01422021  | 0.37250832 | 0.8828127  | NA         |           |
|           | NA | ENSG00000279954 | 3.82267925 | 0.0435972   | 0.37080458 | 0.69367322 | 0.85183585 |           |
|           | NA | ENSG00000279955 | 0          | NA          | NA         | NA         | NA         |           |
|           | NA | ENSG00000279956 | 0          | NA          | NA         | NA         | NA         |           |
|           | NA | ENSG00000279957 | 0          | NA          | NA         | NA         | NA         |           |
|           | NA | ENSG00000279958 | 0          | NA          | NA         | NA         | NA         |           |
|           | NA | ENSG00000279959 | 0          | NA          | NA         | NA         | NA         |           |
|           | NA | ENSG00000279960 | 0          | NA          | NA         | NA         | NA         |           |
| 219479    |    | ENSG00000279961 | 0          | NA          | NA         | NA         | NA         | OR8U3     |
|           | NA | ENSG00000279962 | 0          | NA          | NA         | NA         | NA         |           |
|           | NA | ENSG00000279964 | 0          | NA          | NA         | NA         | NA         |           |
|           | NA | ENSG00000279965 | 0          | NA          | NA         | NA         | NA         |           |



|           |                 |            |             |            |            |            |             |
|-----------|-----------------|------------|-------------|------------|------------|------------|-------------|
| NA        | ENSG00000279966 | 0          | NA          | NA         | NA         | NA         |             |
| 100507462 | ENSG00000279968 | 4.82542572 | -0.09310208 | 0.38827222 | 0.32193599 | 0.54956623 | CCDC28A-AS1 |
| NA        | ENSG00000279970 | 22.1692247 | 0.12351442  | 0.32746068 | 0.51442046 | 0.72931984 |             |
| NA        | ENSG00000279971 | 2.23047573 | -0.01193199 | 0.37491    | 0.88856255 | NA         |             |
| NA        | ENSG00000279972 | 1.29096607 | -0.01802254 | 0.37862931 | 0.80050135 | NA         |             |
| NA        | ENSG00000279973 | 0          | NA          | NA         | NA         | NA         |             |
| NA        | ENSG00000279976 | 0          | NA          | NA         | NA         | NA         |             |
| NA        | ENSG00000279977 | 1.1596605  | -0.03704499 | 0.38137421 | 0.58545682 | NA         |             |
| NA        | ENSG00000279979 | 0          | NA          | NA         | NA         | NA         |             |
| 23766     | ENSG00000279980 | 1.48536434 | -0.00195577 | 0.37828844 | 0.97673097 | NA         |             |
| NA        | ENSG00000279981 | 0          | NA          | NA         | NA         | NA         |             |
| NA        | ENSG00000279982 | 1.40079691 | 0.03364842  | 0.38031338 | 0.63531022 | NA         |             |
| NA        | ENSG00000279983 | 1.08904556 | -0.05692165 | 0.38696985 | 0.33304047 | NA         |             |
| NA        | ENSG00000279985 | 0          | NA          | NA         | NA         | NA         |             |
| NA        | ENSG00000279987 | 0          | NA          | NA         | NA         | NA         |             |
| NA        | ENSG00000279989 | 16.9907179 | 0.0981595   | 0.34297083 | 0.57220819 | 0.77228642 |             |
| NA        | ENSG00000279990 | 0          | NA          | NA         | NA         | NA         | RPSAP68     |
| NA        | ENSG00000279991 | 0          | NA          | NA         | NA         | NA         |             |
| NA        | ENSG00000279993 | 0          | NA          | NA         | NA         | NA         |             |
| NA        | ENSG00000279994 | 0          | NA          | NA         | NA         | NA         |             |
| NA        | ENSG00000279995 | 0          | NA          | NA         | NA         | NA         |             |
| NA        | ENSG00000279996 | 0          | NA          | NA         | NA         | NA         |             |
| NA        | ENSG00000279997 | 1.15042057 | -0.00729294 | 0.3804109  | 0.90094497 | NA         |             |
| NA        | ENSG00000279998 | 0.16735865 | 0.01897177  | 0.38482933 | 0.78225479 | NA         |             |
| NA        | ENSG00000280000 | 0          | NA          | NA         | NA         | NA         |             |
| NA        | ENSG00000280002 | 0          | NA          | NA         | NA         | NA         |             |
| NA        | ENSG00000280003 | 0.173733   | 0.01914545  | 0.38484597 | 0.78225479 | NA         |             |
| NA        | ENSG00000280004 | 0          | NA          | NA         | NA         | NA         |             |
| NA        | ENSG00000280005 | 0          | NA          | NA         | NA         | NA         |             |
| NA        | ENSG00000280007 | 54.9232563 | -0.02682351 | 0.24454077 | 0.88571812 | 0.95015905 |             |
| NA        | ENSG00000280009 | 0          | NA          | NA         | NA         | NA         |             |
| NA        | ENSG00000280010 | 17.0116159 | 0.10633256  | 0.33410406 | 0.56035709 | 0.76415299 |             |
| NA        | ENSG00000280011 | 0          | NA          | NA         | NA         | NA         |             |
| NA        | ENSG00000280012 | 0          | NA          | NA         | NA         | NA         | RPL23AP61   |
| NA        | ENSG00000280013 | 0          | NA          | NA         | NA         | NA         |             |
| NA        | ENSG00000280014 | 0          | NA          | NA         | NA         | NA         |             |
| NA        | ENSG00000280015 | 0          | NA          | NA         | NA         | NA         |             |
| NA        | ENSG00000280016 | 0          | NA          | NA         | NA         | NA         |             |

|        |                 |            |             |            |            |            |          |
|--------|-----------------|------------|-------------|------------|------------|------------|----------|
| NA     | ENSG00000280017 | 0          | NA          | NA         | NA         | NA         |          |
| NA     | ENSG00000280018 | 202.018947 | -0.31798808 | 0.1622449  | 0.03039528 | 0.10138572 |          |
| NA     | ENSG00000280019 | 0          | NA          | NA         | NA         | NA         |          |
| NA     | ENSG00000280020 | 6.14257295 | -0.09193313 | 0.37146218 | 0.49659668 | 0.71482827 |          |
| 256892 | ENSG00000280021 | 0          | NA          | NA         | NA         | NA         | OR51F1   |
| NA     | ENSG00000280022 | 2.88986972 | -0.0313855  | 0.37450464 | 0.73466526 | 0.87374168 |          |
| NA     | ENSG00000280023 | 1.77865211 | 0.02404099  | 0.37716139 | 0.76686465 | NA         |          |
| NA     | ENSG00000280024 | 0          | NA          | NA         | NA         | NA         |          |
| NA     | ENSG00000280025 | 0.34044927 | -9.55E-05   | 0.38336216 | 0.9661575  | NA         |          |
| NA     | ENSG00000280026 | 0          | NA          | NA         | NA         | NA         |          |
| NA     | ENSG00000280027 | 0          | NA          | NA         | NA         | NA         |          |
| NA     | ENSG00000280028 | 0.32334675 | 0.00163358  | 0.38337097 | 0.96544224 | NA         |          |
| NA     | ENSG00000280029 | 0.52119901 | 0.02576573  | 0.38568143 | 0.51723676 | NA         |          |
| NA     | ENSG00000280032 | 0          | NA          | NA         | NA         | NA         |          |
| NA     | ENSG00000280033 | 4.78616821 | -0.03479983 | 0.36326442 | 0.77903294 | 0.89891619 |          |
| NA     | ENSG00000280035 | 2.88804897 | 0.05282604  | 0.37503179 | 0.60810236 | 0.79695264 |          |
| NA     | ENSG00000280036 | 0          | NA          | NA         | NA         | NA         |          |
| NA     | ENSG00000280037 | 0.94006391 | -0.0192786  | 0.38104709 | 0.74436982 | NA         |          |
| NA     | ENSG00000280038 | 25.7157193 | 0.19343888  | 0.32922968 | 0.34029754 | 0.57056767 | DNM1P41  |
| NA     | ENSG00000280039 | 7.22472246 | 0.23828446  | 0.45113741 | 0.12341067 | 0.29106845 | RN7SKP23 |
| NA     | ENSG00000280040 | 0.15069912 | -0.01848503 | 0.38480575 | 0.84537521 | NA         |          |
| NA     | ENSG00000280042 | 0.72569254 | 0.02630244  | 0.38348625 | 0.56214768 | NA         |          |
| NA     | ENSG00000280043 | 3.99386798 | 0.0475177   | 0.36780241 | 0.69192531 | 0.85101966 |          |
| NA     | ENSG00000280044 | 0          | NA          | NA         | NA         | NA         |          |
| NA     | ENSG00000280046 | 165.375706 | 0.4390687   | 0.18024527 | 0.00636666 | 0.02851342 |          |
| NA     | ENSG00000280047 | 13.6486741 | -0.14241757 | 0.34939796 | 0.43281185 | 0.65815798 |          |
| NA     | ENSG00000280048 | 0          | NA          | NA         | NA         | NA         |          |
| NA     | ENSG00000280049 | 0          | NA          | NA         | NA         | NA         |          |
| NA     | ENSG00000280051 | 0          | NA          | NA         | NA         | NA         |          |
| NA     | ENSG00000280053 | 4.86825442 | 0.0014919   | 0.36778449 | 0.9915517  | 0.9972471  |          |
| NA     | ENSG00000280054 | 4.67188913 | 0.2109972   | 0.44050469 | 0.12343565 | 0.29109274 |          |
| 641384 | ENSG00000280055 | 1.34046633 | 0.00891184  | 0.37906881 | 0.89435533 | NA         | TMEM75   |
| NA     | ENSG00000280056 | 0          | NA          | NA         | NA         | NA         |          |
| NA     | ENSG00000280057 | 14.8739262 | -0.19943884 | 0.37162359 | 0.29350831 | 0.51969701 |          |
| NA     | ENSG00000280058 | 0          | NA          | NA         | NA         | NA         |          |
| NA     | ENSG00000280059 | 0          | NA          | NA         | NA         | NA         |          |
| NA     | ENSG00000280060 | 0          | NA          | NA         | NA         | NA         |          |
| NA     | ENSG00000280061 | 85.7197799 | -0.02659437 | 0.23919664 | 0.88562255 | 0.95015905 |          |

|           |    |                 |            |             |            |            |            |              |
|-----------|----|-----------------|------------|-------------|------------|------------|------------|--------------|
|           | NA | ENSG00000280062 | 4.69327357 | -0.03140912 | 0.3639308  | 0.79632502 | 0.90654923 |              |
|           | NA | ENSG00000280063 | 45.7260643 | -0.01684023 | 0.27476477 | 0.92785959 | 0.96977267 |              |
|           | NA | ENSG00000280064 | 33.6378051 | 0.05980828  | 0.3794742  | 0.53103807 | 0.74258495 |              |
|           | NA | ENSG00000280067 | 38.2344463 | 0.1717838   | 0.294289   | 0.39548369 | 0.62498088 |              |
|           | NA | ENSG00000280068 | 0.30139824 | -0.02296476 | 0.38527817 | 0.68536535 | NA         |              |
|           | NA | ENSG00000280069 | 10.2676952 | 0.16393839  | 0.38898677 | 0.3013424  | 0.52872103 |              |
|           | NA | ENSG00000280070 | 3.50040911 | -0.01706479 | 0.36764966 | 0.8752014  | 0.94499851 |              |
| 102724023 |    | ENSG00000280071 | 1564.48379 | 0.03087477  | 0.07834435 | 0.68941688 | 0.84925064 | GATD3B       |
|           | NA | ENSG00000280073 | 5.17289798 | -0.09834083 | 0.37590072 | 0.45128638 | 0.67456655 |              |
|           | NA | ENSG00000280077 | 62.9301495 | 0.01498527  | 0.23425698 | 0.93731384 | 0.97357765 |              |
|           | NA | ENSG00000280078 | 2.24775201 | 0.01220117  | 0.37679536 | 0.87842361 | NA         |              |
|           | NA | ENSG00000280079 | 116.663492 | -0.64089725 | 0.22408421 | 0.00098714 | 0.00584276 |              |
| 642757    |    | ENSG00000280080 | 0.756379   | -0.04034354 | 0.38708346 | 0.37505909 | NA         | TBC1D22A-AS1 |
| 441058    |    | ENSG00000280081 | 6.92715906 | -2.7485253  | 1.36325782 | 0.00205664 | 0.01095992 | LINC01667    |
|           | NA | ENSG00000280082 | 0          | NA          | NA         | NA         | NA         |              |
|           | NA | ENSG00000280083 | 3.39426516 | 0.09436065  | 0.38384145 | 0.39301873 | 0.62215525 |              |
|           | NA | ENSG00000280085 | 0          | NA          | NA         | NA         | NA         |              |
|           | NA | ENSG00000280086 | 0          | NA          | NA         | NA         | NA         |              |
|           | NA | ENSG00000280087 | 2.74849102 | -0.03097481 | 0.3769567  | 0.71056299 | 0.86102546 |              |
|           | NA | ENSG00000280088 | 33.7575181 | -0.24466159 | 0.32261994 | 0.24550112 | 0.46454384 |              |
|           | NA | ENSG00000280089 | 0.15069912 | -0.01848503 | 0.38480575 | 0.84537521 | NA         |              |
| 283162    |    | ENSG00000280090 | 0          | NA          | NA         | NA         | NA         | OR8B4        |
|           | NA | ENSG00000280091 | 0          | NA          | NA         | NA         | NA         |              |
|           | NA | ENSG00000280092 | 0.14931947 | -0.01844332 | 0.38480212 | 0.84537521 | NA         |              |
|           | NA | ENSG00000280093 | 0          | NA          | NA         | NA         | NA         |              |
| 347169    |    | ENSG00000280094 | 0          | NA          | NA         | NA         | NA         | OR1B1        |
|           | NA | ENSG00000280095 | 0.3225183  | -0.02325444 | 0.38531873 | 0.6695912  | NA         |              |
|           | NA | ENSG00000280097 | 0          | NA          | NA         | NA         | NA         |              |
|           | NA | ENSG00000280098 | 0          | NA          | NA         | NA         | NA         |              |
|           | NA | ENSG00000280099 | 0          | NA          | NA         | NA         | NA         |              |
|           | NA | ENSG00000280103 | 0          | NA          | NA         | NA         | NA         |              |
|           | NA | ENSG00000280104 | 0          | NA          | NA         | NA         | NA         |              |
|           | NA | ENSG00000280105 | 0          | NA          | NA         | NA         | NA         |              |
|           | NA | ENSG00000280106 | 32.5777491 | -0.32976993 | 0.34815619 | 0.14093945 | 0.31898686 |              |
|           | NA | ENSG00000280107 | 20.7774715 | 0.07756151  | 0.31057544 | 0.6822866  | 0.8449992  |              |
|           | NA | ENSG00000280108 | 0          | NA          | NA         | NA         | NA         |              |
| 191585    |    | ENSG00000280109 | 0          | NA          | NA         | NA         | NA         | PLAC4        |
|           | NA | ENSG00000280110 | 0          | NA          | NA         | NA         | NA         |              |

|        |                 |            |             |            |            |            |
|--------|-----------------|------------|-------------|------------|------------|------------|
| NA     | ENSG00000280113 | 0.173124   | -0.01911262 | 0.38486262 | 0.84537521 | NA         |
| NA     | ENSG00000280114 | 1.34388691 | 0.05072054  | 0.38431835 | 0.43839244 | NA         |
| NA     | ENSG00000280115 | 0          | NA          | NA         | NA         | NA         |
| NA     | ENSG00000280116 | 0          | NA          | NA         | NA         | NA         |
| NA     | ENSG00000280117 | 0.14931947 | -0.01844332 | 0.38480212 | 0.84537521 | NA         |
| NA     | ENSG00000280118 | 0          | NA          | NA         | NA         | NA         |
| 285097 | ENSG00000280119 | 54.1973332 | 0.23622525  | 0.27905331 | 0.24869928 | 0.46802661 |
| NA     | ENSG00000280120 | 114.863092 | -0.09169126 | 0.19568052 | 0.58536922 | 0.78132918 |
| NA     | ENSG00000280121 | 0          | NA          | NA         | NA         | NA         |
| NA     | ENSG00000280122 | 13.9386407 | -0.11763059 | 0.34944666 | 0.49600085 | 0.71469655 |
| NA     | ENSG00000280124 | 0          | NA          | NA         | NA         | NA         |
| NA     | ENSG00000280125 | 0          | NA          | NA         | NA         | NA         |
| NA     | ENSG00000280128 | 644.632436 | 0.00115     | 0.10976454 | 0.9926586  | 0.99756121 |
| NA     | ENSG00000280129 | 23.1730767 | -0.0600971  | 0.30528436 | 0.74861199 | 0.88205755 |
| NA     | ENSG00000280131 | 0.16735865 | 0.01897177  | 0.38482933 | 0.78225479 | NA         |
| NA     | ENSG00000280132 | 26.7086279 | 0.05427523  | 0.29456429 | 0.77833213 | 0.89847614 |
| NA     | ENSG00000280134 | 1.27568143 | -0.0904728  | 0.39827151 | 0.10707122 | NA         |
| NA     | ENSG00000280135 | 3.9753836  | -0.07767347 | 0.37857432 | 0.4789916  | 0.70041426 |
| NA     | ENSG00000280136 | 9.26387666 | -0.06988298 | 0.36843387 | 0.58367991 | 0.77995982 |
| NA     | ENSG00000280137 | 1.0577093  | 0.04796513  | 0.3860053  | 0.34826076 | NA         |
| NA     | ENSG00000280138 | 152.811236 | 0.02929453  | 0.17252746 | 0.85063282 | 0.93240636 |
| NA     | ENSG00000280139 | 0          | NA          | NA         | NA         | NA         |
| NA     | ENSG00000280140 | 0          | NA          | NA         | NA         | NA         |
| NA     | ENSG00000280142 | 0          | NA          | NA         | NA         | NA         |
| NA     | ENSG00000280143 | 118.561062 | 0.12329257  | 0.20528778 | 0.47957563 | 0.70069817 |
| NA     | ENSG00000280144 | 0          | NA          | NA         | NA         | NA         |
| NA     | ENSG00000280145 | 76.0193841 | -0.02955534 | 0.28165991 | 0.87504589 | 0.94496469 |
| NA     | ENSG00000280147 | 0          | NA          | NA         | NA         | NA         |
| NA     | ENSG00000280148 | 0.16735865 | 0.01897177  | 0.38482933 | 0.78225479 | NA         |
| NA     | ENSG00000280149 | 10.2514558 | 0.19676363  | 0.39883392 | 0.24749385 | 0.46645136 |
| NA     | ENSG00000280150 | 0          | NA          | NA         | NA         | NA         |
| NA     | ENSG00000280152 | 27.271894  | -0.27668923 | 0.3470457  | 0.19941315 | 0.40399847 |
| NA     | ENSG00000280153 | 12.6340802 | -0.51241645 | 0.64170199 | 0.04629181 | 0.14032535 |
| NA     | ENSG00000280154 | 0          | NA          | NA         | NA         | NA         |
| NA     | ENSG00000280155 | 0          | NA          | NA         | NA         | NA         |
| NA     | ENSG00000280157 | 11.9324207 | 0.0183722   | 0.34004657 | 0.91095282 | 0.96206238 |
| NA     | ENSG00000280159 | 0.173733   | 0.01914545  | 0.38484597 | 0.78225479 | NA         |
| NA     | ENSG00000280160 | 36.0330295 | 0.14118821  | 0.28703943 | 0.47890184 | 0.70038424 |

|           |                 |            |             |            |            |            |           |
|-----------|-----------------|------------|-------------|------------|------------|------------|-----------|
| NA        | ENSG00000280161 | 25.7535513 | 0.01109314  | 0.29440788 | 0.955181   | 0.98160111 |           |
| NA        | ENSG00000280162 | 1.40443449 | 0.07728331  | 0.39490835 | 0.10990336 | NA         |           |
| NA        | ENSG00000280163 | 2.60563823 | -0.02368985 | 0.37619977 | 0.77656408 | 0.89727048 |           |
| NA        | ENSG00000280164 | 59.0803268 | 0.1823755   | 0.25459016 | 0.35141315 | 0.58156116 |           |
| 64881     | ENSG00000280165 | 23.527394  | 0.73191022  | 0.56267029 | 0.01957888 | 0.07168205 | PCDH20    |
| NA        | ENSG00000280166 | 0          | NA          | NA         | NA         | NA         |           |
| NA        | ENSG00000280167 | 0          | NA          | NA         | NA         | NA         |           |
| NA        | ENSG00000280168 | 0          | NA          | NA         | NA         | NA         |           |
| NA        | ENSG00000280169 | 1.27445772 | -0.04248103 | 0.38202909 | 0.53791317 | NA         |           |
| NA        | ENSG00000280171 | 0.67119703 | -0.02051835 | 0.38302648 | 0.66345118 | NA         |           |
| NA        | ENSG00000280172 | 0.173733   | 0.01914545  | 0.38484597 | 0.78225479 | NA         |           |
| NA        | ENSG00000280173 | 52.3695693 | -0.18434002 | 0.28071784 | 0.35943284 | 0.58949503 |           |
| NA        | ENSG00000280176 | 0          | NA          | NA         | NA         | NA         |           |
| NA        | ENSG00000280177 | 6.26840845 | -0.00374223 | 0.38215038 | 0.92873372 | 0.97013584 |           |
| 102724398 | ENSG00000280179 | 3.95301529 | 0.07872306  | 0.38832712 | 0.32974317 | 0.55849471 |           |
| NA        | ENSG00000280180 | 238.243752 | 1.03821244  | 0.16574087 | 4.65E-11   | 9.25E-10   |           |
| NA        | ENSG00000280181 | 0.15069912 | -0.01848503 | 0.38480575 | 0.84537521 | NA         |           |
| NA        | ENSG00000280182 | 0          | NA          | NA         | NA         | NA         |           |
| NA        | ENSG00000280183 | 0.14931947 | -0.01844332 | 0.38480212 | 0.84537521 | NA         |           |
| NA        | ENSG00000280184 | 15.9740526 | -0.01782393 | 0.32707581 | 0.91603913 | 0.96435405 |           |
| NA        | ENSG00000280185 | 0          | NA          | NA         | NA         | NA         |           |
| NA        | ENSG00000280186 | 4.65905799 | -0.10269231 | 0.38490071 | 0.37027233 | 0.59943356 |           |
| NA        | ENSG00000280187 | 106.666146 | 0.14197902  | 0.19876484 | 0.40548653 | 0.63375238 |           |
| NA        | ENSG00000280189 | 0          | NA          | NA         | NA         | NA         |           |
| NA        | ENSG00000280190 | 0          | NA          | NA         | NA         | NA         |           |
| 102724354 | ENSG00000280191 | 0.82835318 | 0.03219782  | 0.38494716 | 0.48165175 | NA         | LINC01669 |
| NA        | ENSG00000280193 | 18.1896101 | 0.10499093  | 0.33081973 | 0.56814273 | 0.76919502 |           |
| NA        | ENSG00000280194 | 2.37128846 | 0.10125087  | 0.3955158  | 0.22732082 | NA         |           |
| NA        | ENSG00000280195 | 117.257104 | 0.08415591  | 0.1929247  | 0.61537705 | 0.80264813 |           |
| NA        | ENSG00000280196 | 0          | NA          | NA         | NA         | NA         |           |
| 84322     | ENSG00000280197 | 0          | NA          | NA         | NA         | NA         | C18orf12  |
| NA        | ENSG00000280198 | 10.4792981 | 0.02966056  | 0.33820153 | 0.85781666 | 0.93653665 |           |
| NA        | ENSG00000280199 | 0          | NA          | NA         | NA         | NA         |           |
| NA        | ENSG00000280200 | 0          | NA          | NA         | NA         | NA         |           |
| NA        | ENSG00000280201 | 0          | NA          | NA         | NA         | NA         |           |
| NA        | ENSG00000280202 | 37.7294765 | -1.70671335 | 0.43505953 | 5.69E-06   | 5.67E-05   |           |
| 219959    | ENSG00000280204 | 0          | NA          | NA         | NA         | NA         | OR1S1     |
| NA        | ENSG00000280205 | 0.6860614  | 0.02666311  | 0.38366116 | 0.57783366 | NA         |           |

|           |    |                 |            |             |            |            |            |           |
|-----------|----|-----------------|------------|-------------|------------|------------|------------|-----------|
|           | NA | ENSG00000280206 | 116.302876 | -0.18411189 | 0.21210465 | 0.29943122 | 0.52642582 |           |
|           | NA | ENSG00000280207 | 0          | NA          | NA         | NA         | NA         |           |
|           | NA | ENSG00000280208 | 0          | NA          | NA         | NA         | NA         | GGT4P     |
|           | NA | ENSG00000280211 | 47.5312242 | 0.12057138  | 0.27356151 | 0.54120415 | 0.74967974 |           |
|           | NA | ENSG00000280212 | 1.18867795 | 0.04576684  | 0.38366721 | 0.47501999 | NA         |           |
| 100113386 | NA | ENSG00000280213 | 77.6090994 | 0.07832487  | 0.22719435 | 0.67211024 | 0.83855284 | UCKL1-AS1 |
|           | NA | ENSG00000280214 | 5.22962429 | 0.07410697  | 0.37300558 | 0.54183715 | 0.75017788 |           |
|           | NA | ENSG00000280215 | 0          | NA          | NA         | NA         | NA         |           |
|           | NA | ENSG00000280216 | 2.92577708 | 0.01742041  | 0.37148822 | 0.86260693 | 0.93899493 |           |
|           | NA | ENSG00000280217 | 0          | NA          | NA         | NA         | NA         |           |
|           | NA | ENSG00000280219 | 16.0389064 | 0.40939548  | 0.49920011 | 0.08257399 | 0.21637154 |           |
|           | NA | ENSG00000280220 | 0.32381209 | -0.0232729  | 0.38532132 | 0.66861544 | NA         |           |
|           | NA | ENSG00000280222 | 0.44795842 | -0.02501848 | 0.38558245 | 0.5807882  | NA         |           |
|           | NA | ENSG00000280223 | 0          | NA          | NA         | NA         | NA         |           |
|           | NA | ENSG00000280224 | 0          | NA          | NA         | NA         | NA         |           |
|           | NA | ENSG00000280225 | 0          | NA          | NA         | NA         | NA         |           |
|           | NA | ENSG00000280227 | 0.15069912 | -0.01848503 | 0.38480575 | 0.84537521 | NA         |           |
|           | NA | ENSG00000280228 | 0.82792963 | 0.02873317  | 0.3843143  | 0.51749698 | NA         |           |
|           | NA | ENSG00000280229 | 0          | NA          | NA         | NA         | NA         |           |
|           | NA | ENSG00000280231 | 3.13732451 | 0.02850655  | 0.37415928 | 0.76159798 | 0.88972737 |           |
|           | NA | ENSG00000280232 | 0          | NA          | NA         | NA         | NA         |           |
|           | NA | ENSG00000280233 | 3.68792218 | -0.06010741 | 0.37644364 | 0.55951501 | 0.76413192 |           |
|           | NA | ENSG00000280234 | 0.37844916 | 0.02407552  | 0.3854191  | 0.60038877 | NA         |           |
| 26529     | NA | ENSG00000280236 | 0          | NA          | NA         | NA         | NA         | OR12D2    |
|           | NA | ENSG00000280238 | 0          | NA          | NA         | NA         | NA         |           |
|           | NA | ENSG00000280239 | 73.1578739 | 0.55514331  | 0.27942379 | 0.01233471 | 0.04936867 |           |
|           | NA | ENSG00000280241 | 0          | NA          | NA         | NA         | NA         |           |
|           | NA | ENSG00000280242 | 0          | NA          | NA         | NA         | NA         |           |
|           | NA | ENSG00000280243 | 9.17129409 | 0.03612032  | 0.34311522 | 0.82150659 | 0.91847813 | MTCO1P1   |
|           | NA | ENSG00000280244 | 0.49693547 | -0.00999754 | 0.38282664 | 0.83091944 | NA         |           |
|           | NA | ENSG00000280245 | 0.32380114 | -0.02327281 | 0.38532131 | 0.66862175 | NA         |           |
|           | NA | ENSG00000280247 | 0.29863895 | -0.02292439 | 0.3852726  | 0.68753245 | NA         |           |
|           | NA | ENSG00000280248 | 10.5189012 | 0.23204276  | 0.41403094 | 0.20025554 | 0.40533473 |           |
|           | NA | ENSG00000280249 | 0          | NA          | NA         | NA         | NA         |           |
|           | NA | ENSG00000280250 | 0.15069912 | -0.01848503 | 0.38480575 | 0.84537521 | NA         |           |
|           | NA | ENSG00000280251 | 0          | NA          | NA         | NA         | NA         |           |
|           | NA | ENSG00000280254 | 21.4761319 | -0.06512062 | 0.30833395 | 0.72470702 | 0.86844186 |           |
|           | NA | ENSG00000280255 | 0.98337978 | -0.01987168 | 0.38014042 | 0.7569012  | NA         |           |

|        |                 |            |             |            |            |            |           |
|--------|-----------------|------------|-------------|------------|------------|------------|-----------|
| NA     | ENSG00000280257 | 0          | NA          | NA         | NA         | NA         |           |
| NA     | ENSG00000280261 | 0          | NA          | NA         | NA         | NA         |           |
| NA     | ENSG00000280262 | 0          | NA          | NA         | NA         | NA         |           |
| 440888 | ENSG00000280263 | 0          | NA          | NA         | NA         | NA         | ACTR3BP6  |
| NA     | ENSG00000280265 | 0          | NA          | NA         | NA         | NA         |           |
| NA     | ENSG00000280266 | 0.63335279 | 0.00213701  | 0.38196166 | 0.96249508 | NA         |           |
| 645359 | ENSG00000280267 | 0          | NA          | NA         | NA         | NA         | PRAMEF26  |
| NA     | ENSG00000280268 | 0          | NA          | NA         | NA         | NA         |           |
| NA     | ENSG00000280269 | 0          | NA          | NA         | NA         | NA         |           |
| NA     | ENSG00000280270 | 0          | NA          | NA         | NA         | NA         |           |
| NA     | ENSG00000280272 | 0          | NA          | NA         | NA         | NA         |           |
| NA     | ENSG00000280273 | 47.5272632 | -0.19598413 | 0.27279948 | 0.32811365 | 0.55658129 |           |
| NA     | ENSG00000280274 | 0.14931947 | -0.01844332 | 0.38480212 | 0.84537521 | NA         |           |
| NA     | ENSG00000280275 | 0          | NA          | NA         | NA         | NA         |           |
| NA     | ENSG00000280276 | 0          | NA          | NA         | NA         | NA         |           |
| NA     | ENSG00000280277 | 3.12131117 | -0.02605443 | 0.36851678 | 0.8110048  | 0.91443142 |           |
| 146512 | ENSG00000280278 | 1.15285155 | -0.02929524 | 0.38226596 | 0.61138103 | NA         |           |
| NA     | ENSG00000280279 | 6.6867431  | -0.22379932 | 0.4351082  | 0.15368039 | 0.33878786 | LINC02887 |
| NA     | ENSG00000280280 | 0          | NA          | NA         | NA         | NA         |           |
| NA     | ENSG00000280281 | 0.173733   | 0.01914545  | 0.38484597 | 0.78225479 | NA         |           |
| NA     | ENSG00000280282 | 1.5069912  | -0.05820786 | 0.39056928 | 0.16274765 | NA         |           |
| NA     | ENSG00000280283 | 0          | NA          | NA         | NA         | NA         |           |
| NA     | ENSG00000280284 | 0          | NA          | NA         | NA         | NA         |           |
| NA     | ENSG00000280285 | 0          | NA          | NA         | NA         | NA         |           |
| NA     | ENSG00000280286 | 2.5040316  | -0.04072859 | 0.3794786  | 0.60823912 | NA         | FRG1KP    |
| NA     | ENSG00000280287 | 106.387422 | 0.19472021  | 0.22378331 | 0.29007794 | 0.51606405 |           |
| NA     | ENSG00000280288 | 0          | NA          | NA         | NA         | NA         |           |
| NA     | ENSG00000280291 | 0          | NA          | NA         | NA         | NA         |           |
| NA     | ENSG00000280294 | 55.8475868 | 0.1845701   | 0.26163912 | 0.35113622 | 0.58132031 |           |
| NA     | ENSG00000280295 | 2.44569412 | 0.04170957  | 0.37882987 | 0.61758329 | NA         |           |
| NA     | ENSG00000280296 | 0.173124   | -0.01911262 | 0.38486262 | 0.84537521 | NA         |           |
| NA     | ENSG00000280299 | 0          | NA          | NA         | NA         | NA         |           |
| NA     | ENSG00000280300 | 12.7357747 | 0.41212921  | 0.54027277 | 0.07319254 | 0.19780754 |           |
| NA     | ENSG00000280302 | 0          | NA          | NA         | NA         | NA         |           |
| NA     | ENSG00000280303 | 25.5257313 | 0.1567107   | 0.32567726 | 0.42633124 | 0.65220231 | ERICD     |
| NA     | ENSG00000280304 | 0          | NA          | NA         | NA         | NA         |           |
| NA     | ENSG00000280305 | 0          | NA          | NA         | NA         | NA         |           |
| NA     | ENSG00000280306 | 0          | NA          | NA         | NA         | NA         |           |

|           |                 |            |             |            |            |            |           |
|-----------|-----------------|------------|-------------|------------|------------|------------|-----------|
| NA        | ENSG00000280307 | 0          | NA          | NA         | NA         | NA         |           |
| NA        | ENSG00000280309 | 12.8028403 | -0.11692601 | 0.34926228 | 0.49932025 | 0.71682702 |           |
| NA        | ENSG00000280310 | 12.6941867 | 0.01488425  | 0.33391318 | 0.93090437 | 0.97114011 |           |
| NA        | ENSG00000280311 | 1.32733469 | -0.02360882 | 0.37903983 | 0.74162051 | NA         |           |
| NA        | ENSG00000280312 | 0          | NA          | NA         | NA         | NA         |           |
| 219473    | ENSG00000280314 | 0          | NA          | NA         | NA         | NA         | OR8K3     |
| NA        | ENSG00000280317 | 0          | NA          | NA         | NA         | NA         |           |
| NA        | ENSG00000280318 | 0          | NA          | NA         | NA         | NA         |           |
| NA        | ENSG00000280319 | 0          | NA          | NA         | NA         | NA         |           |
| NA        | ENSG00000280320 | 4.60286192 | -0.00120827 | 0.38291735 | 0.96853128 | 0.98817646 |           |
| NA        | ENSG00000280321 | 1.13820649 | -0.0379551  | 0.38154225 | 0.57691811 | NA         |           |
| NA        | ENSG00000280323 | 0          | NA          | NA         | NA         | NA         |           |
| NA        | ENSG00000280325 | 0          | NA          | NA         | NA         | NA         |           |
| NA        | ENSG00000280326 | 0.49649903 | -0.01048061 | 0.38285465 | 0.82485091 | NA         |           |
| NA        | ENSG00000280327 | 6.70733981 | 0.03975835  | 0.35770637 | 0.77481547 | 0.89613481 |           |
| NA        | ENSG00000280330 | 21.3549798 | 0.01145229  | 0.31258737 | 0.95197812 | 0.98012235 | CTBP2P10  |
| NA        | ENSG00000280331 | 0.94965319 | -0.03190806 | 0.3845317  | 0.48831035 | NA         |           |
| NA        | ENSG00000280332 | 37.4764519 | -0.10173771 | 0.27518974 | 0.60150034 | 0.79200883 |           |
| NA        | ENSG00000280333 | 0          | NA          | NA         | NA         | NA         |           |
| NA        | ENSG00000280334 | 30.1192521 | 0.29847077  | 0.3504447  | 0.17487573 | 0.36874637 |           |
| NA        | ENSG00000280335 | 0          | NA          | NA         | NA         | NA         |           |
| NA        | ENSG00000280336 | 1.18345788 | 0.02403722  | 0.38047015 | 0.7105494  | NA         |           |
| NA        | ENSG00000280337 | 0          | NA          | NA         | NA         | NA         | DUX4L25   |
| NA        | ENSG00000280338 | 0          | NA          | NA         | NA         | NA         |           |
| NA        | ENSG00000280339 | 0.8810732  | 0.05091533  | 0.3888027  | 0.25732174 | NA         |           |
| NA        | ENSG00000280340 | 0          | NA          | NA         | NA         | NA         |           |
| NA        | ENSG00000280341 | 0.18922458 | 0.01954053  | 0.38488496 | 0.78225479 | NA         |           |
| NA        | ENSG00000280344 | 0          | NA          | NA         | NA         | NA         |           |
| NA        | ENSG00000280345 | 0          | NA          | NA         | NA         | NA         |           |
| NA        | ENSG00000280346 | 0.14931947 | -0.01844332 | 0.38480212 | 0.84537521 | NA         |           |
| NA        | ENSG00000280347 | 272.202636 | -0.08375588 | 0.14729875 | 0.53685646 | 0.74734999 |           |
| NA        | ENSG00000280348 | 0.16735865 | 0.01897177  | 0.38482933 | 0.78225479 | NA         |           |
| NA        | ENSG00000280349 | 0          | NA          | NA         | NA         | NA         |           |
| 101929608 | ENSG00000280350 | 0          | NA          | NA         | NA         | NA         | LINC01726 |
| 100129503 | ENSG00000280351 | 47.0852512 | -0.12863757 | 0.26494462 | 0.5100139  | 0.72545712 |           |
| NA        | ENSG00000280352 | 0          | NA          | NA         | NA         | NA         |           |
| NA        | ENSG00000280353 | 3.89294669 | 0.00132429  | 0.36653575 | 0.99252356 | 0.99756121 |           |
| NA        | ENSG00000280354 | 0.15069912 | -0.01848503 | 0.38480575 | 0.84537521 | NA         |           |



|    |                 |            |             |            |            |            |
|----|-----------------|------------|-------------|------------|------------|------------|
| NA | ENSG00000280355 | 48.6204061 | 0.02523778  | 0.25331454 | 0.896379   | 0.95469109 |
| NA | ENSG00000280356 | 0          | NA          | NA         | NA         | NA         |
| NA | ENSG00000280357 | 0          | NA          | NA         | NA         | NA         |
| NA | ENSG00000280359 | 0          | NA          | NA         | NA         | NA         |
| NA | ENSG00000280360 | 0.173124   | -0.01911262 | 0.38486262 | 0.84537521 | NA         |
| NA | ENSG00000280362 | 0.14931947 | -0.01844332 | 0.38480212 | 0.84537521 | NA         |
| NA | ENSG00000280364 | 0          | NA          | NA         | NA         | NA         |
| NA | ENSG00000280365 | 0          | NA          | NA         | NA         | NA         |
| NA | ENSG00000280366 | 0          | NA          | NA         | NA         | NA         |
| NA | ENSG00000280367 | 7.73218533 | -0.04431105 | 0.35308731 | 0.75988033 | 0.88870701 |
| NA | ENSG00000280368 | 0          | NA          | NA         | NA         | NA         |
| NA | ENSG00000280369 | 0          | NA          | NA         | NA         | NA         |
| NA | ENSG00000280371 | 0          | NA          | NA         | NA         | NA         |
| NA | ENSG00000280372 | 1.88334297 | -0.02892759 | 0.37660882 | 0.73181695 | NA         |
| NA | ENSG00000280373 | 0          | NA          | NA         | NA         | NA         |
| NA | ENSG00000280374 | 18.1140244 | 0.13098726  | 0.34062043 | 0.47769213 | 0.69938463 |
| NA | ENSG00000280375 | 0          | NA          | NA         | NA         | NA         |
| NA | ENSG00000280376 | 0          | NA          | NA         | NA         | NA         |
| NA | ENSG00000280377 | 0          | NA          | NA         | NA         | NA         |
| NA | ENSG00000280378 | 8.48822105 | -0.18314755 | 0.3948495  | 0.26602475 | 0.4882904  |
| NA | ENSG00000280379 | 5.47912496 | -0.23236874 | 0.4670369  | 0.06960545 | 0.19068932 |
| NA | ENSG00000280380 | 0          | NA          | NA         | NA         | NA         |
| NA | ENSG00000280381 | 0.18922458 | 0.01954053  | 0.38488496 | 0.78225479 | NA         |
| NA | ENSG00000280382 | 0          | NA          | NA         | NA         | NA         |
| NA | ENSG00000280383 | 24.3440265 | -0.1789921  | 0.32426051 | 0.37152015 | 0.60060191 |
| NA | ENSG00000280384 | 1.10906238 | -0.03160641 | 0.38174194 | 0.61273679 | NA         |
| NA | ENSG00000280385 | 244.846795 | -0.00465491 | 0.1462762  | 0.97150201 | 0.98930349 |
| NA | ENSG00000280387 | 1.02105913 | 0.02120463  | 0.38183483 | 0.69820489 | NA         |
| NA | ENSG00000280388 | 13.2370489 | -0.02364146 | 0.33405819 | 0.88534201 | 0.95004523 |
| NA | ENSG00000280390 | 0          | NA          | NA         | NA         | NA         |
| NA | ENSG00000280392 | 1.11644985 | -0.02431789 | 0.3818946  | 0.66661074 | NA         |
| NA | ENSG00000280393 | 0          | NA          | NA         | NA         | NA         |
| NA | ENSG00000280394 | 0          | NA          | NA         | NA         | NA         |
| NA | ENSG00000280395 | 0          | NA          | NA         | NA         | NA         |
| NA | ENSG00000280396 | 0          | NA          | NA         | NA         | NA         |
| NA | ENSG00000280397 | 0          | NA          | NA         | NA         | NA         |
| NA | ENSG00000280398 | 0          | NA          | NA         | NA         | NA         |
| NA | ENSG00000280399 | 12.7674697 | 0.16298215  | 0.36790129 | 0.35829849 | 0.58854144 |

|        |                 |            |             |            |            |            |           |
|--------|-----------------|------------|-------------|------------|------------|------------|-----------|
| NA     | ENSG00000280400 | 0          | NA          | NA         | NA         | NA         |           |
| NA     | ENSG00000280401 | 62.6812774 | 1.12148369  | 0.31502351 | 3.64E-05   | 0.00030901 |           |
| NA     | ENSG00000280402 | 8.4239944  | -0.05235649 | 0.36682854 | 0.66952266 | 0.83743094 |           |
| NA     | ENSG00000280404 | 0          | NA          | NA         | NA         | NA         |           |
| NA     | ENSG00000280405 | 0          | NA          | NA         | NA         | NA         |           |
| NA     | ENSG00000280406 | 0.53587291 | 0.01317257  | 0.38288023 | 0.74588587 | NA         |           |
| NA     | ENSG00000280407 | 69.4643621 | 0.06311096  | 0.23963693 | 0.73841016 | 0.87630444 |           |
| NA     | ENSG00000280408 | 0          | NA          | NA         | NA         | NA         |           |
| 84931  | ENSG00000280409 | 0          | NA          | NA         | NA         | NA         | LINC01101 |
| NA     | ENSG00000280411 | 0          | NA          | NA         | NA         | NA         | IGHV1-69D |
| NA     | ENSG00000280412 | 0          | NA          | NA         | NA         | NA         |           |
| NA     | ENSG00000280414 | 0          | NA          | NA         | NA         | NA         |           |
| NA     | ENSG00000280415 | 0          | NA          | NA         | NA         | NA         |           |
| NA     | ENSG00000280416 | 8.63832717 | 0.03153682  | 0.38677406 | 0.08983751 | 0.23031092 |           |
| NA     | ENSG00000280417 | 7.87608112 | -0.01666481 | 0.35149658 | 0.90572001 | 0.95887485 |           |
| NA     | ENSG00000280418 | 0          | NA          | NA         | NA         | NA         |           |
| NA     | ENSG00000280419 | 0          | NA          | NA         | NA         | NA         |           |
| NA     | ENSG00000280420 | 0.16735865 | 0.01897177  | 0.38482933 | 0.78225479 | NA         |           |
| NA     | ENSG00000280422 | 37.0190459 | 0.1274522   | 0.28165468 | 0.52004689 | 0.73354906 |           |
| NA     | ENSG00000280423 | 0          | NA          | NA         | NA         | NA         |           |
| 730668 | ENSG00000280424 | 1.73418436 | 0.00800982  | 0.37800529 | 0.91244698 | NA         |           |
| NA     | ENSG00000280425 | 3.52802042 | 0.10967822  | 0.39352419 | 0.27871722 | 0.50316193 |           |
| NA     | ENSG00000280426 | 11.3107875 | -0.07462328 | 0.34362356 | 0.65172202 | 0.82602754 |           |
| NA     | ENSG00000280429 | 0          | NA          | NA         | NA         | NA         |           |
| NA     | ENSG00000280430 | 0          | NA          | NA         | NA         | NA         |           |
| NA     | ENSG00000280431 | 1.95133437 | -0.03535565 | 0.37726772 | 0.67655325 | NA         |           |
| NA     | ENSG00000280432 | 0.52119901 | 0.02576573  | 0.38568143 | 0.51723676 | NA         |           |
| NA     | ENSG00000280433 | 236.930157 | 0.01944704  | 0.16941993 | 0.89955706 | 0.95557174 |           |
| NA     | ENSG00000280434 | 10.015868  | -0.02022978 | 0.34208741 | 0.89575486 | 0.95469109 |           |
| NA     | ENSG00000280435 | 107.624172 | -0.07074268 | 0.20144692 | 0.67903047 | 0.84320727 |           |
| NA     | ENSG00000280436 | 0.14931947 | -0.01844332 | 0.38480212 | 0.84537521 | NA         |           |
| NA     | ENSG00000280438 | 0          | NA          | NA         | NA         | NA         |           |
| NA     | ENSG00000280439 | 0          | NA          | NA         | NA         | NA         |           |
| NA     | ENSG00000280440 | 0          | NA          | NA         | NA         | NA         |           |
| NA     | ENSG00000280441 | 7.14479738 | 1.62765219  | 2.11879893 | 0.0080964  | 0.03488221 |           |
| NA     | ENSG00000280443 | 0          | NA          | NA         | NA         | NA         |           |
| NA     | ENSG00000280444 | 0          | NA          | NA         | NA         | NA         |           |
| NA     | ENSG00000280445 | 0          | NA          | NA         | NA         | NA         |           |

|           |                 |            |             |            |            |            |            |
|-----------|-----------------|------------|-------------|------------|------------|------------|------------|
| NA        | ENSG00000280446 | 0          | NA          | NA         | NA         | NA         |            |
| NA        | ENSG00000280449 | 0          | NA          | NA         | NA         | NA         |            |
| NA        | ENSG00000280450 | 0          | NA          | NA         | NA         | NA         |            |
| NA        | ENSG00000280451 | 0          | NA          | NA         | NA         | NA         |            |
| NA        | ENSG00000280453 | 0          | NA          | NA         | NA         | NA         |            |
| NA        | ENSG00000280454 | 0          | NA          | NA         | NA         | NA         |            |
| NA        | ENSG00000280455 | 0          | NA          | NA         | NA         | NA         |            |
| NA        | ENSG00000280466 | 0.34624801 | -0.02356563 | 0.38536324 | 0.65270996 | NA         | SCARNA4    |
| NA        | ENSG00000280474 | 0          | NA          | NA         | NA         | NA         |            |
| NA        | ENSG00000280485 | 0          | NA          | NA         | NA         | NA         |            |
| NA        | ENSG00000280486 | 22.5287085 | 0.03570259  | 0.3123668  | 0.84788103 | 0.93082999 |            |
| NA        | ENSG00000280494 | 0          | NA          | NA         | NA         | NA         |            |
| 677824    | ENSG00000280496 | 0          | NA          | NA         | NA         | NA         | SNORA17B   |
| 692073    | ENSG00000280498 | 0          | NA          | NA         | NA         | NA         | SNORA16A   |
| NA        | ENSG00000280502 | 2.38202539 | 0.0736394   | 0.3819546  | 0.44824936 | NA         |            |
| NA        | ENSG00000280511 | 0          | NA          | NA         | NA         | NA         |            |
| 104548973 | ENSG00000280515 | 0.173733   | 0.01914545  | 0.38484597 | 0.78225479 | NA         | SALRNA2    |
| NA        | ENSG00000280537 | 34.1894353 | -0.21720131 | 0.33291844 | 0.29144065 | 0.51742125 |            |
| 100507117 | ENSG00000280543 | 2.40177303 | 0.0005034   | 0.37602714 | 0.9968782  | NA         | ASAP1-IT2  |
| NA        | ENSG00000280554 | 0          | NA          | NA         | NA         | NA         |            |
| 105378425 | ENSG00000280560 | 0          | NA          | NA         | NA         | NA         | LINC01374  |
| NA        | ENSG00000280561 | 0          | NA          | NA         | NA         | NA         |            |
| NA        | ENSG00000280571 | 180.170602 | -0.26393739 | 0.18423835 | 0.10285447 | 0.25469704 |            |
| NA        | ENSG00000280580 | 0          | NA          | NA         | NA         | NA         | LINC02342  |
| NA        | ENSG00000280587 | 0          | NA          | NA         | NA         | NA         | LINC01348  |
| 110806272 | ENSG00000280594 | 32.2177675 | 0.26454453  | 0.38831536 | 0.19751715 | 0.40156333 | BTG3-AS1   |
| NA        | ENSG00000280604 | 185.393368 | -0.44954615 | 0.1970943  | 0.00906655 | 0.03821552 |            |
| NA        | ENSG00000280607 | 0          | NA          | NA         | NA         | NA         |            |
| 100861563 | ENSG00000280620 | 0.16735865 | 0.01897177  | 0.38482933 | 0.78225479 | NA         | SCAANT1    |
| NA        | ENSG00000280623 | 3.27304801 | 0.19697384  | 0.45980461 | 0.00532842 | 0.02455678 | PCAT14     |
| 102659353 | ENSG00000280634 | 5.86094525 | -0.03033953 | 0.38666163 | 0.13096343 | 0.30336422 | THRIL      |
| NA        | ENSG00000280636 | 0          | NA          | NA         | NA         | NA         |            |
| 101929151 | ENSG00000280639 | 0.47448925 | -0.02849448 | 0.3858132  | 0.54201415 | NA         | LINC02204  |
| NA        | ENSG00000280646 | 0          | NA          | NA         | NA         | NA         | RNA5SP196  |
| NA        | ENSG00000280649 | 0.14931947 | -0.01844332 | 0.38480212 | 0.84537521 | NA         |            |
| 359822    | ENSG00000280650 | 0          | NA          | NA         | NA         | NA         | KCNIP4-IT1 |
| NA        | ENSG00000280655 | 0          | NA          | NA         | NA         | NA         |            |
| NA        | ENSG00000280660 | 3.32328838 | 0.01823809  | 0.37277581 | 0.84944018 | 0.93154246 |            |

|           |                 |            |             |            |            |            |              |
|-----------|-----------------|------------|-------------|------------|------------|------------|--------------|
| NA        | ENSG00000280665 | 0          | NA          | NA         | NA         | NA         |              |
| 126661    | ENSG00000280670 | 40.3303577 | 0.2147775   | 0.29400794 | 0.29717186 | 0.52379972 | CCDC163      |
| NA        | ENSG00000280683 | 0          | NA          | NA         | NA         | NA         | LINC01242    |
| 100505839 | ENSG00000280693 | 1.00322593 | -0.01568096 | 0.38142993 | 0.7741948  | NA         | SH3PXD2A-AS1 |
| NA        | ENSG00000280703 | 0          | NA          | NA         | NA         | NA         |              |
| 109617015 | ENSG00000280704 | 0          | NA          | NA         | NA         | NA         | SNORD3E      |
| 112590798 | ENSG00000280707 | 0          | NA          | NA         | NA         | NA         |              |
| 727924    | ENSG00000280709 | 0          | NA          | NA         | NA         | NA         | LINC02203    |
| NA        | ENSG00000280710 | 0.66204575 | -0.01945895 | 0.38293396 | 0.66896697 | NA         |              |
| NA        | ENSG00000280711 | 0.15069912 | -0.01848503 | 0.38480575 | 0.84537521 | NA         | JADRR        |
| 102578074 | ENSG00000280719 | 0          | NA          | NA         | NA         | NA         | PCAT5        |
| NA        | ENSG00000280721 | 0.34112889 | 0.02362667  | 0.38535342 | 0.62409576 | NA         | LINC01943    |
| 552859    | ENSG00000280725 | 0          | NA          | NA         | NA         | NA         | LINC00251    |
| NA        | ENSG00000280734 | 11.401797  | -0.25871722 | 0.43906552 | 0.15014567 | 0.33339565 | LINC01232    |
| 440952    | ENSG00000280739 | 6.02995007 | -0.0264832  | 0.3688022  | 0.79393042 | 0.90579008 | EIF1B-AS1    |
| 106144537 | ENSG00000280744 | 0          | NA          | NA         | NA         | NA         | LINC01173    |
| 101241891 | ENSG00000280752 | 0          | NA          | NA         | NA         | NA         | LINC00850    |
| NA        | ENSG00000280758 | 0.34117581 | 0.02362703  | 0.38535347 | 0.6240709  | NA         |              |
| NA        | ENSG00000280767 | 0          | NA          | NA         | NA         | NA         |              |
| NA        | ENSG00000280773 | 0          | NA          | NA         | NA         | NA         |              |
| NA        | ENSG00000280776 | 0          | NA          | NA         | NA         | NA         | LINC01202    |
| NA        | ENSG00000280778 | 1.0250612  | 0.02719345  | 0.38236728 | 0.62378775 | NA         |              |
| 153469    | ENSG00000280780 | 0.47109082 | -0.00740688 | 0.38323381 | 0.86537808 | NA         | JAKMIP2-AS1  |
| 79447     | ENSG00000280789 | 710.480606 | -0.11416679 | 0.10614198 | 0.26209933 | 0.48399579 | PAGRI        |
| 283267    | ENSG00000280798 | 452.770143 | -0.11809884 | 0.11736907 | 0.28964288 | 0.51556744 | LINC00294    |
| NA        | ENSG00000280800 | 7397.91363 | -0.08149405 | 0.17436594 | 0.5984059  | 0.78991172 |              |
| 101929052 | ENSG00000280809 | 0          | NA          | NA         | NA         | NA         | LINC00836    |
| NA        | ENSG00000280828 | 97.4661889 | 0.14102891  | 0.2122238  | 0.42790568 | 0.65375395 |              |
| NA        | ENSG00000280832 | 95.6643945 | 0.4385519   | 0.2704993  | 0.03863182 | 0.12228832 | GSEC         |
| NA        | ENSG00000280836 | 0          | NA          | NA         | NA         | NA         |              |
| 29034     | ENSG00000280837 | 0          | NA          | NA         | NA         | NA         | CPS1-IT1     |
| NA        | ENSG00000280850 | 0          | NA          | NA         | NA         | NA         |              |
| 653653    | ENSG00000280852 | 7.21639263 | -0.10875007 | 0.37213914 | 0.44385103 | 0.66889513 |              |
| 101928469 | ENSG00000280870 | 0          | NA          | NA         | NA         | NA         |              |
| NA        | ENSG00000280878 | 0          | NA          | NA         | NA         | NA         |              |
| NA        | ENSG00000280881 | 0          | NA          | NA         | NA         | NA         |              |
| NA        | ENSG00000280890 | 0.32396111 | -0.0232741  | 0.38532151 | 0.66852967 | NA         | ELDR         |
| NA        | ENSG00000280893 | 246.400561 | -0.38871459 | 0.16438158 | 0.00903086 | 0.03811757 |              |

|           |                 |            |             |            |            |            |             |
|-----------|-----------------|------------|-------------|------------|------------|------------|-------------|
| 109616958 | ENSG00000280894 | 0          | NA          | NA         | NA         | NA         | SNORA50D    |
| NA        | ENSG00000280904 | 0          | NA          | NA         | NA         | NA         |             |
| 1517      | ENSG00000280913 | 0.65815201 | -0.00463994 | 0.381953   | 0.92419624 | NA         | CTSLP3      |
| NA        | ENSG00000280916 | 4.23905536 | 0.10918783  | 0.38338555 | 0.38044519 | 0.60938575 | FOXCUT      |
| NA        | ENSG00000280920 | 0          | NA          | NA         | NA         | NA         |             |
| 127841    | ENSG00000280924 | 0          | NA          | NA         | NA         | NA         | LINC00628   |
| 285463    | ENSG00000280927 | 108.188017 | 0.3950068   | 0.2423807  | 0.04515286 | 0.13752421 | CTBP1-AS    |
| NA        | ENSG00000280936 | 1.02257315 | 0.05863774  | 0.38743372 | 0.31427748 | NA         |             |
| 101927381 | ENSG00000280953 | 0.3411008  | 0.02362645  | 0.38535339 | 0.62411065 | NA         | LINC01163   |
| NA        | ENSG00000280958 | 0.173733   | 0.01914545  | 0.38484597 | 0.78225479 | NA         |             |
| 474148    | ENSG00000280961 | 0          | NA          | NA         | NA         | NA         | TTY3B       |
| NA        | ENSG00000280968 | 0          | NA          | NA         | NA         | NA         |             |
| 140032    | ENSG00000280969 | 0          | NA          | NA         | NA         | NA         | RPS4Y2      |
| 9782      | ENSG00000280987 | 1191.71224 | -0.79776399 | 0.14736728 | 9.44E-09   | 1.43E-07   |             |
| 100874531 | ENSG00000280989 | 20.2695003 | 0.20583932  | 0.34969076 | 0.30617382 | 0.53388623 | LINC00581   |
| NA        | ENSG00000280991 | 0          | NA          | NA         | NA         | NA         |             |
| 101805488 | ENSG00000280997 | 0.34110698 | 0.0236265   | 0.38535339 | 0.62410738 | NA         | CCAT2       |
| 780854    | ENSG00000281000 | 0          | NA          | NA         | NA         | NA         | SNORD3D     |
| 283876    | ENSG00000281005 | 0.99557055 | 0.04650068  | 0.38588675 | 0.37361023 | NA         | LINC00921   |
| NA        | ENSG00000281008 | 0.14931947 | -0.01844332 | 0.38480212 | 0.84537521 | NA         |             |
| NA        | ENSG00000281010 | 0          | NA          | NA         | NA         | NA         |             |
| NA        | ENSG00000281016 | 2.01992501 | 0.01216221  | 0.37543234 | 0.88625242 | NA         |             |
| NA        | ENSG00000281021 | 0.15069912 | -0.01848503 | 0.38480575 | 0.84537521 | NA         |             |
| 116828    | ENSG00000281026 | 46.7481974 | 0.24673646  | 0.28821436 | 0.23470765 | 0.45159871 | N4BP2L2-IT2 |
| NA        | ENSG00000281039 | 1.1804095  | -0.04940219 | 0.38602525 | 0.3467585  | NA         |             |
| NA        | ENSG00000281058 | 8.15442817 | 0.03149161  | 0.38676592 | 0.09394427 | 0.23791861 | DUX4L6      |
| NA        | ENSG00000281087 | 0          | NA          | NA         | NA         | NA         |             |
| NA        | ENSG00000281091 | 24.5608014 | -0.06250258 | 0.32345952 | 0.72360408 | 0.86792244 |             |
| 101929557 | ENSG00000281097 | 0.14931947 | -0.01844332 | 0.38480212 | 0.84537521 | NA         | LINC01395   |
| NA        | ENSG00000281100 | 0.16735865 | 0.01897177  | 0.38482933 | 0.78225479 | NA         |             |
| 100506776 | ENSG00000281103 | 0.16735865 | 0.01897177  | 0.38482933 | 0.78225479 | NA         | TRG-AS1     |
| 283521    | ENSG00000281106 | 6.64398681 | 0.07388879  | 0.36364922 | 0.59751617 | 0.78921427 | TMEM272     |
| NA        | ENSG00000281112 | 0          | NA          | NA         | NA         | NA         |             |
| NA        | ENSG00000281113 | 0          | NA          | NA         | NA         | NA         |             |
| NA        | ENSG00000281120 | 0          | NA          | NA         | NA         | NA         |             |
| 101243555 | ENSG00000281128 | 59.7826466 | -0.24557595 | 0.31975074 | 0.24133729 | 0.45933728 | PTENP1-AS   |
| 101669767 | ENSG00000281131 | 0          | NA          | NA         | NA         | NA         | SCHLAP1     |
| NA        | ENSG00000281133 | 0          | NA          | NA         | NA         | NA         |             |

|           |                 |            |             |            |            |            |             |
|-----------|-----------------|------------|-------------|------------|------------|------------|-------------|
| 100500918 | ENSG00000281156 | 0          | NA          | NA         | NA         | NA         | MIR3651     |
| NA        | ENSG00000281159 | 0          | NA          | NA         | NA         | NA         |             |
| NA        | ENSG00000281160 | 0          | NA          | NA         | NA         | NA         |             |
| NA        | ENSG00000281162 | 0          | NA          | NA         | NA         | NA         | LINC01127   |
| NA        | ENSG00000281167 | 0          | NA          | NA         | NA         | NA         |             |
| NA        | ENSG00000281179 | 0          | NA          | NA         | NA         | NA         |             |
| NA        | ENSG00000281183 | 64.9888055 | -0.14765096 | 0.24026662 | 0.43522557 | 0.66041111 | NPTN-IT1    |
| 100652997 | ENSG00000281186 | 0          | NA          | NA         | NA         | NA         | LINC00706   |
| 102723099 | ENSG00000281189 | 27.9986571 | 0.12030308  | 0.30922506 | 0.53798771 | 0.74792769 | GHET1       |
| NA        | ENSG00000281195 | 18.3477376 | 0.11424896  | 0.33484604 | 0.53429216 | 0.74545404 |             |
| 144742    | ENSG00000281196 | 0.34049957 | -0.00029626 | 0.3833625  | 0.96806087 | NA         | LINC00934   |
| 285547    | ENSG00000281202 | 0          | NA          | NA         | NA         | NA         | LINC01097   |
| 100507178 | ENSG00000281207 | 31.5001554 | -0.12079501 | 0.29625198 | 0.53753122 | 0.74765981 | SLFNL1-AS1  |
| 64735     | ENSG00000281219 | 0          | NA          | NA         | NA         | NA         | LINC00254   |
| NA        | ENSG00000281248 | 0          | NA          | NA         | NA         | NA         | LINC02536   |
| 104548972 | ENSG00000281264 | 0          | NA          | NA         | NA         | NA         | SALRNA3     |
| NA        | ENSG00000281269 | 0          | NA          | NA         | NA         | NA         |             |
| NA        | ENSG00000281295 | 0          | NA          | NA         | NA         | NA         |             |
| NA        | ENSG00000281311 | 0          | NA          | NA         | NA         | NA         |             |
| NA        | ENSG00000281327 | 1.56803685 | 0.10115557  | 0.39913326 | 0.13562081 | NA         | LINC01338   |
| NA        | ENSG00000281332 | 76.9306033 | -0.26338261 | 0.23697208 | 0.16719105 | 0.35821495 | LINC00997   |
| NA        | ENSG00000281333 | 9.97909502 | -0.07068122 | 0.35416985 | 0.64088308 | 0.82008361 |             |
| NA        | ENSG00000281344 | 101.221153 | -0.24779003 | 0.23459059 | 0.19040603 | 0.39167661 | HELLPAR     |
| 440225    | ENSG00000281347 | 0          | NA          | NA         | NA         | NA         | NF1P9       |
| NA        | ENSG00000281348 | 0.91713019 | 0.05250338  | 0.38909013 | 0.24411211 | NA         |             |
| 100129716 | ENSG00000281357 | 17.2541745 | -0.06765859 | 0.33387345 | 0.69221637 | 0.85116657 | ARRDC3-AS1  |
| 102060282 | ENSG00000281358 | 13.7553184 | 0.07063719  | 0.33689064 | 0.68155252 | 0.84433357 | RASSF1-AS1  |
| NA        | ENSG00000281365 | 0.15069912 | -0.01848503 | 0.38480575 | 0.84537521 | NA         |             |
| NA        | ENSG00000281369 | 0          | NA          | NA         | NA         | NA         |             |
| 8551      | ENSG00000281371 | 1.55811602 | -0.0591945  | 0.39078067 | 0.1562132  | NA         | INE2        |
| 103021294 | ENSG00000281376 | 1.37187813 | -0.03585495 | 0.3827254  | 0.54777752 | NA         | ABALON      |
| NA        | ENSG00000281379 | 1.01807273 | -0.01122327 | 0.3813522  | 0.83124159 | NA         | SEPTIN14P19 |
| NA        | ENSG00000281383 | 4.43416438 | -0.12078499 | 0.38955067 | 0.32215426 | 0.54971536 |             |
| NA        | ENSG00000281386 | 0.15069912 | -0.01848503 | 0.38480575 | 0.84537521 | NA         |             |
| 100846978 | ENSG00000281392 | 0.34044541 | -7.02E-05   | 0.38336214 | 0.96591772 | NA         |             |
| 677771    | ENSG00000281394 | 0          | NA          | NA         | NA         | NA         | SCARNA4     |
| NA        | ENSG00000281398 | 307.042205 | -0.38265259 | 0.14284666 | 0.00386486 | 0.01871586 | SNHG4       |
| 100506516 | ENSG00000281404 | 70.502634  | 0.31485843  | 0.26984802 | 0.125929   | 0.29508254 | LINC01176   |

|           |                 |            |             |            |            |            |             |
|-----------|-----------------|------------|-------------|------------|------------|------------|-------------|
| NA        | ENSG00000281406 | 0.45209736 | -0.02505403 | 0.38558831 | 0.57865948 | NA         | BLACAT1     |
| NA        | ENSG00000281420 | 0          | NA          | NA         | NA         | NA         |             |
| 103504735 | ENSG00000281426 | 0          | NA          | NA         | NA         | NA         | MIR548BB    |
| 101154753 | ENSG00000281450 | 0          | NA          | NA         | NA         | NA         | PANDAR      |
| 103611157 | ENSG00000281453 | 0          | NA          | NA         | NA         | NA         | TGFB2-OT1   |
| NA        | ENSG00000281460 | 0          | NA          | NA         | NA         | NA         |             |
| NA        | ENSG00000281468 | 6.54273786 | -0.00240884 | 0.35316382 | 0.98435836 | 0.99457273 |             |
| NA        | ENSG00000281469 | 0          | NA          | NA         | NA         | NA         |             |
| 140464    | ENSG00000281473 | 0          | NA          | NA         | NA         | NA         | PISRT1      |
| NA        | ENSG00000281477 | 0          | NA          | NA         | NA         | NA         | LINC01955   |
| NA        | ENSG00000281490 | 836.095889 | 0.03937591  | 0.08842583 | 0.6502308  | 0.82529572 | CICP14      |
| 101926900 | ENSG00000281491 | 0.32316806 | 0.00150345  | 0.38336963 | 0.96668717 | NA         | DNAJB5-DT   |
| NA        | ENSG00000281501 | 30.6493894 | -0.45246312 | 0.43785016 | 0.06756983 | 0.18665906 | SEPSECS-AS1 |
| NA        | ENSG00000281516 | 0          | NA          | NA         | NA         | NA         |             |
| NA        | ENSG00000281530 | 1.79223313 | -0.02739638 | 0.37891502 | 0.71108544 | NA         |             |
| NA        | ENSG00000281538 | 0.47400237 | -0.02847082 | 0.38581113 | 0.54240812 | NA         |             |
| NA        | ENSG00000281548 | 0          | NA          | NA         | NA         | NA         | LINC00895   |
| NA        | ENSG00000281550 | 0          | NA          | NA         | NA         | NA         |             |
| 101234261 | ENSG00000281560 | 0          | NA          | NA         | NA         | NA         | LSINCT5     |
| NA        | ENSG00000281566 | 0          | NA          | NA         | NA         | NA         |             |
| NA        | ENSG00000281571 | 49.5206854 | -0.3277787  | 0.29179889 | 0.12432471 | 0.29228609 |             |
| 100419743 | ENSG00000281591 | 1.01999182 | 0.05775254  | 0.38722297 | 0.32019083 | NA         | DBET        |
| NA        | ENSG00000281593 | 0.79673301 | -0.00520746 | 0.38152121 | 0.91959642 | NA         |             |
| NA        | ENSG00000281613 | 0          | NA          | NA         | NA         | NA         |             |
| NA        | ENSG00000281641 | 0          | NA          | NA         | NA         | NA         | SAMD12-AS1  |
| 100506710 | ENSG00000281649 | 1291.52849 | -0.14292951 | 0.10909971 | 0.17053939 | 0.36241447 | EBLN3P      |
| NA        | ENSG00000281652 | 2.77972806 | 0.09366769  | 0.4008849  | 0.03675572 | 0.1178464  | DUX4L7      |
| NA        | ENSG00000281655 | 0          | NA          | NA         | NA         | NA         |             |
| 100861504 | ENSG00000281664 | 6.10750116 | -0.18642409 | 0.41439607 | 0.19839081 | 0.40266738 | LINC00538   |
| 100775107 | ENSG00000281691 | 24.4356063 | 0.03166694  | 0.32232216 | 0.86052089 | 0.93799827 | RBM5-AS1    |
| NA        | ENSG00000281692 | 0.86160908 | -0.02410945 | 0.38190647 | 0.67067233 | NA         | PACRG-AS1   |
| 100302234 | ENSG00000281696 | 0          | NA          | NA         | NA         | NA         | MIR664A     |
| 100507173 | ENSG00000281706 | 94.9119739 | 0.13917762  | 0.22142861 | 0.44489395 | 0.66965299 |             |
| 711       | ENSG00000281708 | 0.33471731 | 0.02354391  | 0.38534154 | 0.62842204 | NA         | ERC2-IT1    |
| NA        | ENSG00000281710 | 0          | NA          | NA         | NA         | NA         |             |
| NA        | ENSG00000281720 | 0.52169806 | 0.0314307   | 0.38608368 | 0.47329223 | NA         | DUX4L8      |
| NA        | ENSG00000281721 | 0          | NA          | NA         | NA         | NA         | LINC01080   |
| 101929741 | ENSG00000281731 | 13.916386  | 0.14480027  | 0.34877387 | 0.43019718 | 0.65583601 | METTL14-DT  |

|           |                 |            |             |            |            |            |               |
|-----------|-----------------|------------|-------------|------------|------------|------------|---------------|
| 284933    | ENSG00000281732 | 0          | NA          | NA         | NA         | NA         |               |
| NA        | ENSG00000281741 | 0.32330323 | 0.00160283  | 0.38337064 | 0.9657365  | NA         |               |
| 102060414 | ENSG00000281756 | 0.18922458 | 0.01954053  | 0.38488496 | 0.78225479 | NA         | C2-AS1        |
| NA        | ENSG00000281769 | 0          | NA          | NA         | NA         | NA         | LINC01230     |
| NA        | ENSG00000281772 | 0          | NA          | NA         | NA         | NA         |               |
| 338862    | ENSG00000281778 | 0          | NA          | NA         | NA         | NA         | LINC00550     |
| NA        | ENSG00000281780 | 0          | NA          | NA         | NA         | NA         |               |
| NA        | ENSG00000281808 | 0          | NA          | NA         | NA         | NA         |               |
| NA        | ENSG00000281809 | 0          | NA          | NA         | NA         | NA         | LINC01394     |
| NA        | ENSG00000281825 | 0          | NA          | NA         | NA         | NA         |               |
| 352990    | ENSG00000281831 | 3.80950647 | 0.13519301  | 0.40228826 | 0.21875773 | 0.4306135  |               |
| 441177    | ENSG00000281832 | 9.66840358 | 0.70593889  | 1.30607038 | 0.01780235 | 0.0663533  | LINC00602     |
| 100302221 | ENSG00000281842 | 0          | NA          | NA         | NA         | NA         | MIR1291       |
| NA        | ENSG00000281849 | 2.75368253 | -0.02203545 | 0.3714338  | 0.8250093  | 0.92054353 |               |
| NA        | ENSG00000281852 | 1.09629072 | -0.02415968 | 0.3817628  | 0.67299777 | NA         | LINC00891     |
| NA        | ENSG00000281856 | 0          | NA          | NA         | NA         | NA         |               |
| 94163     | ENSG00000281859 | 0          | NA          | NA         | NA         | NA         | SNORD38B      |
| NA        | ENSG00000281863 | 0          | NA          | NA         | NA         | NA         |               |
| 440034    | ENSG00000281880 | 0          | NA          | NA         | NA         | NA         | PAUPAR        |
| 103157000 | ENSG00000281880 | 0          | NA          | NA         | NA         | NA         | PAUPAR        |
| NA        | ENSG00000281883 | 0.4728694  | -0.00734562 | 0.3832263  | 0.86575425 | NA         |               |
| 100527949 | ENSG00000281887 | 0          | NA          | NA         | NA         | NA         | GIMAP1-GIMAP5 |
| NA        | ENSG00000281896 | 0          | NA          | NA         | NA         | NA         |               |
| NA        | ENSG00000281903 | 0          | NA          | NA         | NA         | NA         | LINC02246     |
| NA        | ENSG00000281904 | 1.8895775  | -0.0546498  | 0.38163686 | 0.49919915 | NA         |               |
| NA        | ENSG00000281909 | 7.53797688 | 0.04782842  | 0.36095505 | 0.72235852 | 0.86754018 | HERC2P7       |
| 677830    | ENSG00000281910 | 0          | NA          | NA         | NA         | NA         | SNORA50A      |
| 400752    | ENSG00000281912 | 16.6758515 | 0.10299942  | 0.33188446 | 0.57361418 | 0.77312328 | LINC01144     |
| NA        | ENSG00000281920 | 0.48998405 | -0.01099376 | 0.38290568 | 0.82348709 | NA         |               |
| NA        | ENSG00000281938 | 0          | NA          | NA         | NA         | NA         |               |
| NA        | ENSG00000281941 | 0          | NA          | NA         | NA         | NA         |               |
| NA        | ENSG00000281955 | 0          | NA          | NA         | NA         | NA         |               |
| NA        | ENSG00000281958 | 0          | NA          | NA         | NA         | NA         | TRBJ1-4       |
| NA        | ENSG00000281961 | 1.13610958 | 0.01817542  | 0.38003308 | 0.77829198 | NA         |               |
| NA        | ENSG00000281969 | 5.15738299 | 0.30829871  | 0.55323125 | 0.03271316 | 0.10743737 |               |
| NA        | ENSG00000281974 | 0          | NA          | NA         | NA         | NA         |               |
| NA        | ENSG00000281990 | 0          | NA          | NA         | NA         | NA         | IGHV1-69-2    |
| 100862671 | ENSG00000281991 | 0          | NA          | NA         | NA         | NA         | TMEM265       |



|           |                 |            |             |            |            |            |                 |
|-----------|-----------------|------------|-------------|------------|------------|------------|-----------------|
| NA        | ENSG00000282012 | 0          | NA          | NA         | NA         | NA         |                 |
| NA        | ENSG00000282021 | 7.3345695  | 0.43016619  | 0.68217638 | 0.03694772 | 0.11823272 |                 |
| NA        | ENSG00000282022 | 2.21857034 | -0.12703114 | 0.40569159 | 0.15662982 | NA         |                 |
| NA        | ENSG00000282024 | 0          | NA          | NA         | NA         | NA         |                 |
| 105373553 | ENSG00000282033 | 1.09287987 | -0.05977195 | 0.39051601 | 0.20404504 | NA         |                 |
| NA        | ENSG00000282034 | 1240.15367 | 0.02959997  | 0.10948308 | 0.77893524 | 0.89886014 |                 |
| NA        | ENSG00000282041 | 0          | NA          | NA         | NA         | NA         |                 |
| NA        | ENSG00000282048 | 0          | NA          | NA         | NA         | NA         |                 |
| NA        | ENSG00000282051 | 13.9682477 | -0.12557164 | 0.35902724 | 0.45528843 | 0.67865683 |                 |
| NA        | ENSG00000282057 | 6.12356033 | -0.09211304 | 0.38496031 | 0.37139165 | 0.60057374 |                 |
| NA        | ENSG00000282059 | 0          | NA          | NA         | NA         | NA         | CICP19          |
| NA        | ENSG00000282080 | 0          | NA          | NA         | NA         | NA         |                 |
| NA        | ENSG00000282097 | 0          | NA          | NA         | NA         | NA         |                 |
| NA        | ENSG00000282100 | 0.16735865 | 0.01897177  | 0.38482933 | 0.78225479 | NA         | HSP90AB4P       |
| NA        | ENSG00000282111 | 0          | NA          | NA         | NA         | NA         | LINC02815       |
| NA        | ENSG00000282121 | 0          | NA          | NA         | NA         | NA         |                 |
| NA        | ENSG00000282122 | 0          | NA          | NA         | NA         | NA         | IGHV7-4-1       |
| NA        | ENSG00000282133 | 0          | NA          | NA         | NA         | NA         | TRBJ1-3         |
| NA        | ENSG00000282137 | 0          | NA          | NA         | NA         | NA         | OR4G3P          |
| NA        | ENSG00000282142 | 0          | NA          | NA         | NA         | NA         |                 |
| NA        | ENSG00000282143 | 2.5133848  | 0.04789376  | 0.38208141 | 0.51879903 | NA         |                 |
| NA        | ENSG00000282160 | 0          | NA          | NA         | NA         | NA         |                 |
| 359809    | ENSG00000282164 | 8.99919303 | -0.12984162 | 0.37045729 | 0.41021845 | 0.63808185 | PEG13           |
| NA        | ENSG00000282173 | 0          | NA          | NA         | NA         | NA         | TRBJ1-5         |
| NA        | ENSG00000282199 | 0          | NA          | NA         | NA         | NA         |                 |
| NA        | ENSG00000282206 | 0          | NA          | NA         | NA         | NA         |                 |
| NA        | ENSG00000282218 | 0          | NA          | NA         | NA         | NA         |                 |
| NA        | ENSG00000282221 | 0          | NA          | NA         | NA         | NA         |                 |
| NA        | ENSG00000282222 | 0          | NA          | NA         | NA         | NA         |                 |
| NA        | ENSG00000282246 | 6.06049976 | -0.09758444 | 0.37973696 | 0.42452199 | 0.65018652 |                 |
| NA        | ENSG00000282265 | 0          | NA          | NA         | NA         | NA         |                 |
| NA        | ENSG00000282277 | 0          | NA          | NA         | NA         | NA         | CYP3A51P        |
| NA        | ENSG00000282278 | 0          | NA          | NA         | NA         | NA         |                 |
| NA        | ENSG00000282299 | 0          | NA          | NA         | NA         | NA         |                 |
| NA        | ENSG00000282300 | 0          | NA          | NA         | NA         | NA         |                 |
| 100861540 | ENSG00000282301 | 0.74659737 | -0.03303578 | 0.38644226 | 0.4112877  | NA         | CYP3A7-CYP3A51P |
| NA        | ENSG00000282304 | 0          | NA          | NA         | NA         | NA         |                 |
| NA        | ENSG00000282306 | 0          | NA          | NA         | NA         | NA         |                 |

|           |                 |            |             |            |            |            |              |
|-----------|-----------------|------------|-------------|------------|------------|------------|--------------|
| NA        | ENSG00000282308 | 0.15069912 | -0.01848503 | 0.38480575 | 0.84537521 | NA         | DPRXP3       |
| NA        | ENSG00000282317 | 0.29863895 | -0.02292439 | 0.3852726  | 0.68753245 | NA         |              |
| NA        | ENSG00000282320 | 0          | NA          | NA         | NA         | NA         | TRBJ1-1      |
| NA        | ENSG00000282321 | 0          | NA          | NA         | NA         | NA         | MTND1P7      |
| NA        | ENSG00000282327 | 0          | NA          | NA         | NA         | NA         |              |
| NA        | ENSG00000282339 | 0          | NA          | NA         | NA         | NA         |              |
| NA        | ENSG00000282358 | 0          | NA          | NA         | NA         | NA         |              |
| 401442    | ENSG00000282375 | 0          | NA          | NA         | NA         | NA         |              |
| NA        | ENSG00000282381 | 49.2622526 | 0.12715283  | 0.27610931 | 0.52063886 | 0.7341489  |              |
| NA        | ENSG00000282386 | 23.2275449 | -0.08979839 | 0.30560469 | 0.63755182 | 0.81738469 |              |
| NA        | ENSG00000282390 | 905.111848 | -0.49985009 | 0.09070326 | 1.41E-08   | 2.08E-07   |              |
| NA        | ENSG00000282393 | 60.3341313 | -0.53294081 | 0.34167816 | 0.02878328 | 0.09716868 |              |
| 105377924 | ENSG00000282408 | 0          | NA          | NA         | NA         | NA         |              |
| NA        | ENSG00000282413 | 0          | NA          | NA         | NA         | NA         |              |
| NA        | ENSG00000282416 | 0          | NA          | NA         | NA         | NA         |              |
| NA        | ENSG00000282418 | 0          | NA          | NA         | NA         | NA         |              |
| 100132015 | ENSG00000282419 | 0          | NA          | NA         | NA         | NA         | TEX13D       |
| NA        | ENSG00000282420 | 0          | NA          | NA         | NA         | NA         | TRBJ1-2      |
| NA        | ENSG00000282431 | 0          | NA          | NA         | NA         | NA         | TRBD1        |
| NA        | ENSG00000282432 | 0          | NA          | NA         | NA         | NA         |              |
| NA        | ENSG00000282440 | 0          | NA          | NA         | NA         | NA         |              |
| 375690    | ENSG00000282458 | 1336.6396  | -0.05351074 | 0.08492907 | 0.51754493 | 0.73141449 | WASH5P       |
| NA        | ENSG00000282478 | 0          | NA          | NA         | NA         | NA         |              |
| NA        | ENSG00000282499 | 0          | NA          | NA         | NA         | NA         | TRBV25-1     |
| NA        | ENSG00000282501 | 0          | NA          | NA         | NA         | NA         |              |
| NA        | ENSG00000282502 | 0          | NA          | NA         | NA         | NA         | FKBP1AP4     |
| NA        | ENSG00000282508 | 357.920701 | 0.13188382  | 0.16849271 | 0.38403994 | 0.61317821 | LINC01002    |
| NA        | ENSG00000282511 | 0          | NA          | NA         | NA         | NA         | CLUHP10      |
| NA        | ENSG00000282520 | 0          | NA          | NA         | NA         | NA         | IGHD3OR15-3A |
| NA        | ENSG00000282527 | 0          | NA          | NA         | NA         | NA         |              |
| NA        | ENSG00000282535 | 0.80275184 | -0.00472613 | 0.38076461 | 0.93360236 | NA         |              |
| NA        | ENSG00000282542 | 37.6283114 | -0.02165878 | 0.27039413 | 0.90881836 | 0.96052398 |              |
| 101927825 | ENSG00000282556 | 0          | NA          | NA         | NA         | NA         |              |
| NA        | ENSG00000282564 | 1.22514447 | -0.08324437 | 0.39612859 | 0.124547   | NA         |              |
| NA        | ENSG00000282572 | 0          | NA          | NA         | NA         | NA         |              |
| 641702    | ENSG00000282591 | 0          | NA          | NA         | NA         | NA         | FAM138F      |
| NA        | ENSG00000282599 | 0          | NA          | NA         | NA         | NA         | IGHD2OR15-2A |
| NA        | ENSG00000282600 | 0          | NA          | NA         | NA         | NA         | IGHV3-69-1   |

|           |                 |            |             |            |            |            |            |
|-----------|-----------------|------------|-------------|------------|------------|------------|------------|
| NA        | ENSG00000282602 | 0          | NA          | NA         | NA         | NA         |            |
| 140       | ENSG00000282608 | 0          | NA          | NA         | NA         | NA         | ADORA3     |
| NA        | ENSG00000282625 | 0          | NA          | NA         | NA         | NA         | MRPL57P8   |
| NA        | ENSG00000282639 | 0          | NA          | NA         | NA         | NA         | IGHV3-64D  |
| NA        | ENSG00000282651 | 0          | NA          | NA         | NA         | NA         | IGHV5-10-1 |
| NA        | ENSG00000282668 | 0          | NA          | NA         | NA         | NA         |            |
| NA        | ENSG00000282686 | 0          | NA          | NA         | NA         | NA         |            |
| NA        | ENSG00000282692 | 0          | NA          | NA         | NA         | NA         |            |
| NA        | ENSG00000282697 | 0          | NA          | NA         | NA         | NA         |            |
| NA        | ENSG00000282718 | 0          | NA          | NA         | NA         | NA         |            |
| NA        | ENSG00000282728 | 0          | NA          | NA         | NA         | NA         | PGR-AS1    |
| NA        | ENSG00000282732 | 0          | NA          | NA         | NA         | NA         |            |
| NA        | ENSG00000282738 | 0          | NA          | NA         | NA         | NA         |            |
| NA        | ENSG00000282740 | 1.26717688 | -0.01036707 | 0.38127388 | 0.84732592 | NA         |            |
| NA        | ENSG00000282742 | 0.15069912 | -0.01848503 | 0.38480575 | 0.84537521 | NA         |            |
| 100033411 | ENSG00000282757 | 0          | NA          | NA         | NA         | NA         | DUXB       |
| NA        | ENSG00000282759 | 0          | NA          | NA         | NA         | NA         |            |
| NA        | ENSG00000282772 | 2.53793174 | 0.08344857  | 0.38403113 | 0.40290889 | NA         |            |
| NA        | ENSG00000282780 | 0          | NA          | NA         | NA         | NA         | TRBJ1-6    |
| NA        | ENSG00000282785 | 0.15069912 | -0.01848503 | 0.38480575 | 0.84537521 | NA         | MALLP1     |
| NA        | ENSG00000282787 | 1.98074868 | 0.01019504  | 0.37380217 | 0.91107162 | NA         |            |
| NA        | ENSG00000282793 | 0          | NA          | NA         | NA         | NA         |            |
| NA        | ENSG00000282798 | 43.9138611 | -0.07656045 | 0.26479398 | 0.69098909 | 0.85031724 |            |
| NA        | ENSG00000282804 | 0          | NA          | NA         | NA         | NA         |            |
| NA        | ENSG00000282807 | 0          | NA          | NA         | NA         | NA         |            |
| 100129520 | ENSG00000282815 | 2.29695515 | -0.16152857 | 0.43244911 | 0.0178796  | NA         | TEX13C     |
| NA        | ENSG00000282816 | 0          | NA          | NA         | NA         | NA         |            |
| 100289097 | ENSG00000282826 | 252.12043  | -0.08322469 | 0.14529367 | 0.53552432 | 0.74643828 | FRG1CP     |
| NA        | ENSG00000282828 | 0          | NA          | NA         | NA         | NA         |            |
| NA        | ENSG00000282834 | 0          | NA          | NA         | NA         | NA         |            |
| NA        | ENSG00000282836 | 0          | NA          | NA         | NA         | NA         |            |
| NA        | ENSG00000282840 | 0.53183694 | 0.01341201  | 0.38343896 | 0.74746207 | NA         |            |
| NA        | ENSG00000282842 | 0          | NA          | NA         | NA         | NA         | FRG2EP     |
| NA        | ENSG00000282843 | 0          | NA          | NA         | NA         | NA         |            |
| NA        | ENSG00000282849 | 0          | NA          | NA         | NA         | NA         |            |
| NA        | ENSG00000282850 | 0          | NA          | NA         | NA         | NA         | RHOXF1P2   |
| 105221694 | ENSG00000282851 | 5.21108735 | 0.10512239  | 0.38554395 | 0.36410239 | 0.59381904 | BISPR      |
| NA        | ENSG00000282852 | 0          | NA          | NA         | NA         | NA         |            |

|           |    |                 |            |             |            |            |            |           |
|-----------|----|-----------------|------------|-------------|------------|------------|------------|-----------|
|           | NA | ENSG00000282855 | 1.54243004 | 0.05138464  | 0.38199583 | 0.50461163 | NA         |           |
|           | NA | ENSG00000282859 | 0          | NA          | NA         | NA         | NA         |           |
|           | NA | ENSG00000282860 | 0          | NA          | NA         | NA         | NA         |           |
|           | NA | ENSG00000282863 | 0          | NA          | NA         | NA         | NA         |           |
|           | NA | ENSG00000282864 | 0          | NA          | NA         | NA         | NA         |           |
|           | NA | ENSG00000282865 | 0.15069912 | -0.01848503 | 0.38480575 | 0.84537521 | NA         |           |
|           | NA | ENSG00000282870 | 11.1823913 | 0.06865414  | 0.34365888 | 0.6777636  | 0.84270098 | FRG1DP    |
| 110806296 | NA | ENSG00000282872 | 0          | NA          | NA         | NA         | NA         | C1orf232  |
|           | NA | ENSG00000282876 | 0.34048065 | -0.00023546 | 0.38336237 | 0.96748451 | NA         |           |
|           | NA | ENSG00000282879 | 0.18922458 | 0.01954053  | 0.38488496 | 0.78225479 | NA         |           |
| 105378696 | NA | ENSG00000282881 | 0          | NA          | NA         | NA         | NA         | TMEM275   |
|           | NA | ENSG00000282882 | 0          | NA          | NA         | NA         | NA         |           |
|           | NA | ENSG00000282885 | 5.48631939 | 0.14580176  | 0.39360713 | 0.29190701 | 0.5179626  |           |
|           | NA | ENSG00000282886 | 0          | NA          | NA         | NA         | NA         | PTMAP12   |
|           | NA | ENSG00000282887 | 0          | NA          | NA         | NA         | NA         |           |
|           | NA | ENSG00000282890 | 0          | NA          | NA         | NA         | NA         |           |
|           | NA | ENSG00000282894 | 0          | NA          | NA         | NA         | NA         | DUX4L33   |
|           | NA | ENSG00000282897 | 0          | NA          | NA         | NA         | NA         |           |
|           | NA | ENSG00000282898 | 0          | NA          | NA         | NA         | NA         |           |
| 107986277 | NA | ENSG00000282904 | 0          | NA          | NA         | NA         | NA         |           |
|           | NA | ENSG00000282906 | 0.37844916 | 0.02407552  | 0.3854191  | 0.60038877 | NA         |           |
|           | NA | ENSG00000282907 | 10.855381  | 0.04670189  | 0.33961724 | 0.77782451 | 0.89820373 |           |
|           | NA | ENSG00000282909 | 0          | NA          | NA         | NA         | NA         |           |
|           | NA | ENSG00000282911 | 5.33317622 | -0.02634758 | 0.35990192 | 0.83768851 | 0.92628758 | DUX4L35   |
|           | NA | ENSG00000282912 | 0.29863895 | -0.02292439 | 0.3852726  | 0.68753245 | NA         |           |
|           | NA | ENSG00000282914 | 0          | NA          | NA         | NA         | NA         |           |
|           | NA | ENSG00000282915 | 0          | NA          | NA         | NA         | NA         |           |
| 105369431 | NA | ENSG00000282916 | 0          | NA          | NA         | NA         | NA         | LINC02746 |
|           | NA | ENSG00000282917 | 0          | NA          | NA         | NA         | NA         |           |
|           | NA | ENSG00000282921 | 0          | NA          | NA         | NA         | NA         | CFTRP2    |
|           | NA | ENSG00000282924 | 0          | NA          | NA         | NA         | NA         |           |
|           | NA | ENSG00000282925 | 0          | NA          | NA         | NA         | NA         |           |
|           | NA | ENSG00000282933 | 33.3375053 | 0.14532374  | 0.30384635 | 0.46518599 | 0.68793158 | RHOXF1P3  |
|           | NA | ENSG00000282935 | 6.07679712 | -0.00622184 | 0.36027409 | 0.95865594 | 0.98300251 | DUX4L34   |
|           | NA | ENSG00000282936 | 134.122759 | -0.01183928 | 0.18164111 | 0.94129092 | 0.97559098 |           |
|           | NA | ENSG00000282939 | 0          | NA          | NA         | NA         | NA         | TRBV7-2   |
|           | NA | ENSG00000282943 | 0          | NA          | NA         | NA         | NA         |           |
|           | NA | ENSG00000282944 | 0          | NA          | NA         | NA         | NA         |           |

|           |                 |            |             |            |            |            |           |
|-----------|-----------------|------------|-------------|------------|------------|------------|-----------|
| NA        | ENSG00000282946 | 0          | NA          | NA         | NA         | NA         |           |
| NA        | ENSG00000282949 | 0          | NA          | NA         | NA         | NA         | PCMTD1P7  |
| NA        | ENSG00000282950 | 0          | NA          | NA         | NA         | NA         |           |
| NA        | ENSG00000282951 | 1.08500343 | -0.02595637 | 0.38197936 | 0.65080815 | NA         |           |
| NA        | ENSG00000282952 | 0          | NA          | NA         | NA         | NA         |           |
| 101867536 | ENSG00000282961 | 0.82789504 | -0.05713817 | 0.38965713 | 0.26162661 | NA         | PRNCR1    |
| NA        | ENSG00000282964 | 0          | NA          | NA         | NA         | NA         |           |
| NA        | ENSG00000282965 | 0          | NA          | NA         | NA         | NA         |           |
| NA        | ENSG00000282968 | 0.49231983 | -0.00734    | 0.38270741 | 0.85866497 | NA         | AGGF1P10  |
| NA        | ENSG00000282973 | 0          | NA          | NA         | NA         | NA         |           |
| NA        | ENSG00000282975 | 0.173733   | 0.01914545  | 0.38484597 | 0.78225479 | NA         | LINC02034 |
| 102157401 | ENSG00000282977 | 14.2944085 | 0.19036089  | 0.36856187 | 0.31282325 | 0.54072254 | PCBP2-OT1 |
| NA        | ENSG00000282978 | 0.55709423 | 0.01255592  | 0.38329745 | 0.74026706 | NA         |           |
| NA        | ENSG00000282980 | 0          | NA          | NA         | NA         | NA         |           |
| NA        | ENSG00000282987 | 0          | NA          | NA         | NA         | NA         |           |
| NA        | ENSG00000282988 | 11.6968797 | 0.05950172  | 0.33897245 | 0.72309585 | 0.86764418 |           |
| NA        | ENSG00000282989 | 0          | NA          | NA         | NA         | NA         | PDCL3P2   |
| NA        | ENSG00000282993 | 0          | NA          | NA         | NA         | NA         |           |
| NA        | ENSG00000282994 | 0          | NA          | NA         | NA         | NA         |           |
| NA        | ENSG00000282995 | 24.0297952 | 0.3893511   | 0.43668474 | 0.09858703 | 0.24665406 | FRG1EP    |
| NA        | ENSG00000282996 | 0          | NA          | NA         | NA         | NA         | MPP7-DT   |
| NA        | ENSG00000282997 | 0          | NA          | NA         | NA         | NA         |           |
| NA        | ENSG00000282998 | 0          | NA          | NA         | NA         | NA         |           |
| NA        | ENSG00000283000 | 0          | NA          | NA         | NA         | NA         | LINC02635 |
| NA        | ENSG00000283001 | 0          | NA          | NA         | NA         | NA         |           |
| NA        | ENSG00000283003 | 0          | NA          | NA         | NA         | NA         |           |
| NA        | ENSG00000283005 | 0          | NA          | NA         | NA         | NA         | CDC27P3   |
| NA        | ENSG00000283010 | 1.59654122 | 0.07755208  | 0.38926264 | 0.29747321 | NA         |           |
| NA        | ENSG00000283016 | 0.173733   | 0.01914545  | 0.38484597 | 0.78225479 | NA         | ATP5MC1P2 |
| NA        | ENSG00000283020 | 74.3363194 | -0.31254217 | 0.25548456 | 0.11818756 | 0.28210313 | DUX4L37   |
| NA        | ENSG00000283023 | 21.6820275 | 0.02429456  | 0.3091853  | 0.89723045 | 0.95488961 | FRG1GP    |
| NA        | ENSG00000283025 | 0          | NA          | NA         | NA         | NA         |           |
| NA        | ENSG00000283031 | 9.28967309 | -0.13220954 | 0.37227522 | 0.39937862 | 0.62816488 |           |
| NA        | ENSG00000283033 | 0          | NA          | NA         | NA         | NA         |           |
| 100506319 | ENSG00000283036 | 0.18922458 | 0.01954053  | 0.38488496 | 0.78225479 | NA         | LINC01988 |
| 105378952 | ENSG00000283039 | 0          | NA          | NA         | NA         | NA         | KLF18     |
| NA        | ENSG00000283040 | 0          | NA          | NA         | NA         | NA         |           |
| NA        | ENSG00000283041 | 13.9660602 | 0.02926918  | 0.33636597 | 0.8611002  | 0.93812292 |           |

|           |                 |            |             |            |            |            |            |
|-----------|-----------------|------------|-------------|------------|------------|------------|------------|
| NA        | ENSG00000283043 | 0          | NA          | NA         | NA         | NA         |            |
| NA        | ENSG00000283044 | 0          | NA          | NA         | NA         | NA         |            |
| NA        | ENSG00000283045 | 0.84278955 | 0.01723914  | 0.38204651 | 0.73688744 | NA         |            |
| NA        | ENSG00000283047 | 6.77610678 | 0.05828551  | 0.35801596 | 0.68449909 | 0.84639838 | FRG1FP     |
| 101926918 | ENSG00000283050 | 764.090484 | 0.04351688  | 0.10185809 | 0.65843823 | 0.83063614 | GTF2IP12   |
| 101928311 | ENSG00000283051 | 0.31676053 | 0.00116154  | 0.38336688 | 0.96672414 | NA         | LINC01668  |
| NA        | ENSG00000283052 | 0          | NA          | NA         | NA         | NA         | LINC02456  |
| NA        | ENSG00000283053 | 0          | NA          | NA         | NA         | NA         |            |
| NA        | ENSG00000283057 | 0          | NA          | NA         | NA         | NA         |            |
| NA        | ENSG00000283058 | 0          | NA          | NA         | NA         | NA         |            |
| NA        | ENSG00000283061 | 0          | NA          | NA         | NA         | NA         |            |
| NA        | ENSG00000283063 | 0          | NA          | NA         | NA         | NA         | TRBV6-2    |
| NA        | ENSG00000283064 | 55.3512585 | -0.32876711 | 0.28703506 | 0.1209266  | 0.28694937 |            |
| NA        | ENSG00000283065 | 0          | NA          | NA         | NA         | NA         |            |
| NA        | ENSG00000283069 | 0          | NA          | NA         | NA         | NA         | DUX4L32    |
| 107984640 | ENSG00000283071 | 0.29863895 | -0.02292439 | 0.3852726  | 0.68753245 | NA         | LBHD2      |
| NA        | ENSG00000283072 | 0          | NA          | NA         | NA         | NA         |            |
| NA        | ENSG00000283075 | 0          | NA          | NA         | NA         | NA         |            |
| NA        | ENSG00000283076 | 0          | NA          | NA         | NA         | NA         |            |
| NA        | ENSG00000283078 | 14.096005  | -0.15611998 | 0.35736879 | 0.38912875 | 0.61831766 |            |
| 102723525 | ENSG00000283083 | 0          | NA          | NA         | NA         | NA         | LINC02498  |
| NA        | ENSG00000283084 | 0          | NA          | NA         | NA         | NA         |            |
| 441495    | ENSG00000283093 | 8.52588285 | 3.91087803  | 1.29711538 | 0.00026844 | 0.00185118 | CENPVL2    |
| NA        | ENSG00000283095 | 0.15069912 | -0.01848503 | 0.38480575 | 0.84537521 | NA         |            |
| NA        | ENSG00000283096 | 0          | NA          | NA         | NA         | NA         |            |
| NA        | ENSG00000283097 | 0          | NA          | NA         | NA         | NA         |            |
| NA        | ENSG00000283098 | 0          | NA          | NA         | NA         | NA         |            |
| NA        | ENSG00000283101 | 0.173124   | -0.01911262 | 0.38486262 | 0.84537521 | NA         | BMS1P21    |
| NA        | ENSG00000283103 | 519.385966 | 0.06459651  | 0.10736063 | 0.53156142 | 0.74286115 |            |
| NA        | ENSG00000283108 | 1.90503103 | -0.03764336 | 0.37712179 | 0.66451556 | NA         |            |
| NA        | ENSG00000283110 | 0.14931947 | -0.01844332 | 0.38480212 | 0.84537521 | NA         |            |
| 79150     | ENSG00000283117 | 0.31857747 | 0.00148771  | 0.38336963 | 0.96282469 | NA         |            |
| NA        | ENSG00000283118 | 0          | NA          | NA         | NA         | NA         |            |
| NA        | ENSG00000283122 | 2.29727395 | 0.17541249  | 0.44187428 | 0.01274386 | NA         | HYMAI      |
| NA        | ENSG00000283123 | 0.14931947 | -0.01844332 | 0.38480212 | 0.84537521 | NA         | RARRES2P11 |
| NA        | ENSG00000283125 | 0          | NA          | NA         | NA         | NA         |            |
| 100302187 | ENSG00000283126 | 0          | NA          | NA         | NA         | NA         | MIR1297    |
| NA        | ENSG00000283128 | 1.42472977 | -0.02970101 | 0.37901972 | 0.6914121  | NA         |            |

|           |                 |            |             |            |            |            |             |
|-----------|-----------------|------------|-------------|------------|------------|------------|-------------|
| NA        | ENSG00000283130 | 0          | NA          | NA         | NA         | NA         |             |
| NA        | ENSG00000283131 | 0          | NA          | NA         | NA         | NA         | MTND2P41    |
| NA        | ENSG00000283132 | 0          | NA          | NA         | NA         | NA         |             |
| NA        | ENSG00000283133 | 0          | NA          | NA         | NA         | NA         |             |
| NA        | ENSG00000283136 | 0          | NA          | NA         | NA         | NA         |             |
| NA        | ENSG00000283138 | 0          | NA          | NA         | NA         | NA         |             |
| NA        | ENSG00000283141 | 1.34373175 | 0.00872004  | 0.37692432 | 0.91054454 | NA         | LINC02666   |
| NA        | ENSG00000283142 | 0          | NA          | NA         | NA         | NA         |             |
| NA        | ENSG00000283145 | 0          | NA          | NA         | NA         | NA         |             |
| 100847045 | ENSG00000283146 | 0          | NA          | NA         | NA         | NA         | MIR548AU    |
| NA        | ENSG00000283148 | 0          | NA          | NA         | NA         | NA         |             |
| NA        | ENSG00000283149 | 25.5018375 | -8.72739302 | 2.80370625 | 2.29E-10   | 4.22E-09   |             |
| 100422882 | ENSG00000283152 | 0          | NA          | NA         | NA         | NA         | MIR3120     |
| 29970     | ENSG00000283154 | 98.1111021 | -0.09234969 | 0.20704143 | 0.59595917 | 0.78826859 | IQCJ-SCHIP1 |
| 100505385 | ENSG00000283154 | 98.1111021 | -0.09234969 | 0.20704143 | 0.59595917 | 0.78826859 | IQCJ-SCHIP1 |
| NA        | ENSG00000283155 | 0          | NA          | NA         | NA         | NA         |             |
| NA        | ENSG00000283156 | 2.33853016 | -0.0212014  | 0.37253018 | 0.82486685 | NA         |             |
| NA        | ENSG00000283157 | 0          | NA          | NA         | NA         | NA         |             |
| 100126315 | ENSG00000283159 | 0          | NA          | NA         | NA         | NA         | MIR665      |
| 100616406 | ENSG00000283160 | 0          | NA          | NA         | NA         | NA         | MIR4521     |
| NA        | ENSG00000283162 | 140.698653 | 0.45683028  | 0.20175992 | 0.00927073 | 0.03896025 |             |
| NA        | ENSG00000283164 | 0          | NA          | NA         | NA         | NA         |             |
| 100616173 | ENSG00000283165 | 0          | NA          | NA         | NA         | NA         | MIR203B     |
| NA        | ENSG00000283166 | 0          | NA          | NA         | NA         | NA         |             |
| NA        | ENSG00000283167 | 0          | NA          | NA         | NA         | NA         |             |
| 494331    | ENSG00000283170 | 0          | NA          | NA         | NA         | NA         | MIR382      |
| 693130    | ENSG00000283172 | 0          | NA          | NA         | NA         | NA         | MIR548D1    |
| NA        | ENSG00000283174 | 0          | NA          | NA         | NA         | NA         | MTCO1P38    |
| 101929130 | ENSG00000283175 | 0          | NA          | NA         | NA         | NA         |             |
| NA        | ENSG00000283176 | 0          | NA          | NA         | NA         | NA         |             |
| NA        | ENSG00000283178 | 0          | NA          | NA         | NA         | NA         |             |
| 102465459 | ENSG00000283180 | 0          | NA          | NA         | NA         | NA         | MIR6767     |
| 105374338 | ENSG00000283183 | 0.14931947 | -0.01844332 | 0.38480212 | 0.84537521 | NA         |             |
| 100302260 | ENSG00000283188 | 0          | NA          | NA         | NA         | NA         | MIR2052     |
| NA        | ENSG00000283189 | 124.521891 | 0.30922575  | 0.29603593 | 0.14777337 | 0.32978893 |             |
| 100302188 | ENSG00000283193 | 0          | NA          | NA         | NA         | NA         | MIR1243     |
| NA        | ENSG00000283195 | 0.56036038 | 0.03329365  | 0.38627631 | 0.44644536 | NA         | IGHVII-43-1 |
| 645166    | ENSG00000283196 | 198.255149 | 0.13511805  | 0.15375596 | 0.3388206  | 0.56905111 |             |

|           |                 |            |             |            |            |            |           |
|-----------|-----------------|------------|-------------|------------|------------|------------|-----------|
| 654342    | ENSG00000283196 | 198.255149 | 0.13511805  | 0.15375596 | 0.3388206  | 0.56905111 |           |
| 107985911 | ENSG00000283196 | 198.255149 | 0.13511805  | 0.15375596 | 0.3388206  | 0.56905111 |           |
| NA        | ENSG00000283197 | 0          | NA          | NA         | NA         | NA         |           |
| 100507747 | ENSG00000283199 | 2.30369161 | -0.02154041 | 0.37840572 | 0.79336972 | NA         | C13orf46  |
| 100302170 | ENSG00000283200 | 0          | NA          | NA         | NA         | NA         | MIR1206   |
| 440519    | ENSG00000283201 | 2.63778592 | -0.01826422 | 0.37979969 | 0.77912627 | 0.89892214 |           |
| NA        | ENSG00000283202 | 0          | NA          | NA         | NA         | NA         |           |
| 100302142 | ENSG00000283203 | 0          | NA          | NA         | NA         | NA         | MIR1246   |
| 100616419 | ENSG00000283204 | 0          | NA          | NA         | NA         | NA         | MIR4434   |
| NA        | ENSG00000283205 | 0          | NA          | NA         | NA         | NA         |           |
| 100126329 | ENSG00000283206 | 0          | NA          | NA         | NA         | NA         | MIR941-1  |
| 100313806 | ENSG00000283207 | 0          | NA          | NA         | NA         | NA         | MIR1255B1 |
| NA        | ENSG00000283208 | 19.7683633 | -0.15788172 | 0.34928366 | 0.39713097 | 0.62616852 |           |
| NA        | ENSG00000283209 | 0          | NA          | NA         | NA         | NA         |           |
| 100302166 | ENSG00000283210 | 0          | NA          | NA         | NA         | NA         | MIR1322   |
| NA        | ENSG00000283211 | 0          | NA          | NA         | NA         | NA         |           |
| 100500845 | ENSG00000283212 | 0          | NA          | NA         | NA         | NA         | MIR642B   |
| NA        | ENSG00000283213 | 3.09161204 | -0.07232426 | 0.38073837 | 0.46842543 | 0.69118513 |           |
| NA        | ENSG00000283214 | 0          | NA          | NA         | NA         | NA         |           |
| 285857    | ENSG00000283215 | 0          | NA          | NA         | NA         | NA         | LINC02537 |
| NA        | ENSG00000283217 | 0          | NA          | NA         | NA         | NA         |           |
| 100302131 | ENSG00000283218 | 0          | NA          | NA         | NA         | NA         | MIR302F   |
| NA        | ENSG00000283219 | 0          | NA          | NA         | NA         | NA         |           |
| NA        | ENSG00000283221 | 0          | NA          | NA         | NA         | NA         |           |
| 100616265 | ENSG00000283222 | 0          | NA          | NA         | NA         | NA         | MIR4433A  |
| 100422998 | ENSG00000283225 | 0          | NA          | NA         | NA         | NA         | MIR3199-2 |
| NA        | ENSG00000283227 | 0          | NA          | NA         | NA         | NA         | SPRR5     |
| NA        | ENSG00000283228 | 36.9694017 | -0.07162941 | 0.38831249 | 0.31766813 | 0.54548517 |           |
| NA        | ENSG00000283230 | 0          | NA          | NA         | NA         | NA         |           |
| NA        | ENSG00000283232 | 0          | NA          | NA         | NA         | NA         | CYP2C23P  |
| NA        | ENSG00000283234 | 0          | NA          | NA         | NA         | NA         |           |
| NA        | ENSG00000283235 | 3.31853421 | 0.00072411  | 0.37262356 | 0.99608338 | 0.99859366 |           |
| NA        | ENSG00000283236 | 35.1355264 | -0.3897242  | 0.36166487 | 0.09490586 | 0.2397113  |           |
| 100500883 | ENSG00000283237 | 0          | NA          | NA         | NA         | NA         | MIR550B1  |
| 100616324 | ENSG00000283238 | 0          | NA          | NA         | NA         | NA         | MIR1245B  |
| 104266957 | ENSG00000283239 | 1.35629208 | -0.05365626 | 0.38963083 | 0.19370279 | NA         |           |
| NA        | ENSG00000283240 | 0          | NA          | NA         | NA         | NA         |           |
| 494333    | ENSG00000283242 | 0          | NA          | NA         | NA         | NA         | MIR384    |



|           |                 |            |             |            |            |            |           |
|-----------|-----------------|------------|-------------|------------|------------|------------|-----------|
| NA        | ENSG00000283246 | 0          | NA          | NA         | NA         | NA         | MEP1AP1   |
| NA        | ENSG00000283247 | 0.45209736 | -0.02505403 | 0.38558831 | 0.57865948 | NA         | CCDC201   |
| NA        | ENSG00000283249 | 0          | NA          | NA         | NA         | NA         |           |
| NA        | ENSG00000283251 | 0.16735865 | 0.01897177  | 0.38482933 | 0.78225479 | NA         |           |
| NA        | ENSG00000283255 | 0.34746601 | 0.02370763  | 0.3853651  | 0.61987128 | NA         |           |
| NA        | ENSG00000283256 | 0          | NA          | NA         | NA         | NA         |           |
| NA        | ENSG00000283257 | 0          | NA          | NA         | NA         | NA         |           |
| NA        | ENSG00000283258 | 0          | NA          | NA         | NA         | NA         |           |
| NA        | ENSG00000283259 | 0          | NA          | NA         | NA         | NA         |           |
| NA        | ENSG00000283262 | 0          | NA          | NA         | NA         | NA         |           |
| NA        | ENSG00000283265 | 0          | NA          | NA         | NA         | NA         |           |
| 107986818 | ENSG00000283267 | 1.7083448  | 0.05027555  | 0.38306776 | 0.48031006 | NA         | FAM237B   |
| NA        | ENSG00000283268 | 0.16735865 | 0.01897177  | 0.38482933 | 0.78225479 | NA         | TEX54     |
| NA        | ENSG00000283269 | 0          | NA          | NA         | NA         | NA         |           |
| NA        | ENSG00000283270 | 0          | NA          | NA         | NA         | NA         | MALLP2    |
| NA        | ENSG00000283271 | 0          | NA          | NA         | NA         | NA         |           |
| NA        | ENSG00000283273 | 0          | NA          | NA         | NA         | NA         |           |
| NA        | ENSG00000283274 | 0          | NA          | NA         | NA         | NA         |           |
| 100422937 | ENSG00000283275 | 0          | NA          | NA         | NA         | NA         | MIR4275   |
| 100500920 | ENSG00000283278 | 0          | NA          | NA         | NA         | NA         | MIR3914-2 |
| 442913    | ENSG00000283279 | 0          | NA          | NA         | NA         | NA         | MIR376C   |
| 102465859 | ENSG00000283281 | 0          | NA          | NA         | NA         | NA         | MIR7978   |
| NA        | ENSG00000283283 | 0          | NA          | NA         | NA         | NA         |           |
| NA        | ENSG00000283285 | 0          | NA          | NA         | NA         | NA         |           |
| NA        | ENSG00000283286 | 0.14931947 | -0.01844332 | 0.38480212 | 0.84537521 | NA         |           |
| 111064649 | ENSG00000283288 | 0          | NA          | NA         | NA         | NA         | SMIM33    |
| 574478    | ENSG00000283289 | 0          | NA          | NA         | NA         | NA         | MIR524    |
| NA        | ENSG00000283290 | 0          | NA          | NA         | NA         | NA         |           |
| NA        | ENSG00000283291 | 0          | NA          | NA         | NA         | NA         |           |
| 125050    | ENSG00000283293 | 15.9290232 | 0.16818726  | 0.36692278 | 0.35251292 | 0.58253009 | RN7SK     |
| NA        | ENSG00000283294 | 0          | NA          | NA         | NA         | NA         |           |
| 100422976 | ENSG00000283296 | 0          | NA          | NA         | NA         | NA         | MIR4256   |
| 101929469 | ENSG00000283297 | 5.84254506 | -0.00986907 | 0.35632899 | 0.93975964 | 0.97474024 | TEX52     |
| 100422941 | ENSG00000283298 | 0          | NA          | NA         | NA         | NA         | MIR4272   |
| NA        | ENSG00000283300 | 0          | NA          | NA         | NA         | NA         |           |
| 100616466 | ENSG00000283301 | 0          | NA          | NA         | NA         | NA         | MIR4520-2 |
| NA        | ENSG00000283303 | 0.33471731 | 0.02354391  | 0.38534154 | 0.62842204 | NA         |           |
| NA        | ENSG00000283304 | 0          | NA          | NA         | NA         | NA         | LINC02183 |

|           |                 |            |             |            |            |            |           |
|-----------|-----------------|------------|-------------|------------|------------|------------|-----------|
| 219525    | ENSG00000283307 | 0.15069912 | -0.01848503 | 0.38480575 | 0.84537521 | NA         | OR5AK4P   |
| NA        | ENSG00000283311 | 0.15069912 | -0.01848503 | 0.38480575 | 0.84537521 | NA         | MTND6P29  |
| NA        | ENSG00000283312 | 28.9080765 | 0.03020773  | 0.30196133 | 0.87435878 | 0.94470892 |           |
| NA        | ENSG00000283313 | 0          | NA          | NA         | NA         | NA         |           |
| 105374540 | ENSG00000283314 | 0          | NA          | NA         | NA         | NA         | LINC02357 |
| NA        | ENSG00000283317 | 0.96885912 | -0.01661016 | 0.38155452 | 0.7605772  | NA         |           |
| 100302282 | ENSG00000283320 | 0          | NA          | NA         | NA         | NA         | MIR103B2  |
| NA        | ENSG00000283321 | 0          | NA          | NA         | NA         | NA         |           |
| 100996521 | ENSG00000283324 | 0          | NA          | NA         | NA         | NA         | CTXND2    |
| 102465518 | ENSG00000283326 | 0          | NA          | NA         | NA         | NA         | MIR6860   |
| 102465506 | ENSG00000283327 | 0          | NA          | NA         | NA         | NA         | MIR6841   |
| 110806297 | ENSG00000283329 | 0          | NA          | NA         | NA         | NA         | FAM240B   |
| 574489    | ENSG00000283330 | 0          | NA          | NA         | NA         | NA         | MIR518D   |
| 102465858 | ENSG00000283333 | 0          | NA          | NA         | NA         | NA         | MIR7977   |
| 100616155 | ENSG00000283334 | 0          | NA          | NA         | NA         | NA         | MIR4536-1 |
| 100616335 | ENSG00000283335 | 0          | NA          | NA         | NA         | NA         | MIR219B   |
| NA        | ENSG00000283337 | 0          | NA          | NA         | NA         | NA         |           |
| NA        | ENSG00000283338 | 0          | NA          | NA         | NA         | NA         |           |
| NA        | ENSG00000283339 | 0          | NA          | NA         | NA         | NA         |           |
| 100422839 | ENSG00000283340 | 0          | NA          | NA         | NA         | NA         | MIR3119-1 |
| NA        | ENSG00000283341 | 29.1336669 | 0.01851867  | 0.29539296 | 0.92389483 | 0.96841047 |           |
| NA        | ENSG00000283342 | 0.16735865 | 0.01897177  | 0.38482933 | 0.78225479 | NA         | NBPF13P   |
| 100422865 | ENSG00000283343 | 0          | NA          | NA         | NA         | NA         | MIR4320   |
| NA        | ENSG00000283345 | 0.16735865 | 0.01897177  | 0.38482933 | 0.78225479 | NA         |           |
| 102465985 | ENSG00000283346 | 0          | NA          | NA         | NA         | NA         | MIR6511B2 |
| NA        | ENSG00000283347 | 0          | NA          | NA         | NA         | NA         |           |
| NA        | ENSG00000283349 | 0          | NA          | NA         | NA         | NA         | PFN5P     |
| 100500902 | ENSG00000283351 | 0          | NA          | NA         | NA         | NA         | MIR3910-2 |
| NA        | ENSG00000283352 | 7.70995652 | 0.09134567  | 0.35935544 | 0.55267564 | 0.75905858 |           |
| NA        | ENSG00000283354 | 0          | NA          | NA         | NA         | NA         |           |
| NA        | ENSG00000283355 | 16.6287159 | 0.11774096  | 0.33707019 | 0.52006558 | 0.73354906 |           |
| NA        | ENSG00000283356 | 0          | NA          | NA         | NA         | NA         |           |
| 100616297 | ENSG00000283359 | 0          | NA          | NA         | NA         | NA         | MIR3977   |
| NA        | ENSG00000283360 | 0.44795842 | -0.02501848 | 0.38558245 | 0.5807882  | NA         |           |
| 101929355 | ENSG00000283361 | 0          | NA          | NA         | NA         | NA         | CFAP97D2  |
| 100616273 | ENSG00000283364 | 0          | NA          | NA         | NA         | NA         | MIR451B   |
| NA        | ENSG00000283365 | 0          | NA          | NA         | NA         | NA         | NCOA5LP   |
| NA        | ENSG00000283366 | 0          | NA          | NA         | NA         | NA         |           |

|           |                 |            |             |            |            |           |            |
|-----------|-----------------|------------|-------------|------------|------------|-----------|------------|
| NA        | ENSG00000283367 | 0          | NA          | NA         | NA         | NA        |            |
| NA        | ENSG00000283369 | 0          | NA          | NA         | NA         | NA        |            |
| NA        | ENSG00000283371 | 0          | NA          | NA         | NA         | NA        |            |
| NA        | ENSG00000283372 | 0          | NA          | NA         | NA         | NA        |            |
| NA        | ENSG00000283375 | 0          | NA          | NA         | NA         | NA        |            |
| NA        | ENSG00000283376 | 0          | NA          | NA         | NA         | NA        |            |
| NA        | ENSG00000283377 | 0          | NA          | NA         | NA         | NA        |            |
| 100289279 | ENSG00000283378 | 41.6981336 | -0.70798256 | 0.41212737 | 0.01220378 | 0.0488841 | CNTNAP3C   |
| 100616303 | ENSG00000283379 | 0          | NA          | NA         | NA         | NA        | MIR3688-2  |
| NA        | ENSG00000283380 | 0.49316615 | -0.00703121 | 0.38269325 | 0.86246238 | NA        |            |
| NA        | ENSG00000283381 | 0          | NA          | NA         | NA         | NA        |            |
| NA        | ENSG00000283383 | 0          | NA          | NA         | NA         | NA        |            |
| NA        | ENSG00000283384 | 0          | NA          | NA         | NA         | NA        |            |
| 100616316 | ENSG00000283385 | 0          | NA          | NA         | NA         | NA        | MIR4524A   |
| 100616372 | ENSG00000283386 | 0          | NA          | NA         | NA         | NA        | MIR4659B   |
| NA        | ENSG00000283389 | 0          | NA          | NA         | NA         | NA        |            |
| NA        | ENSG00000283390 | 0          | NA          | NA         | NA         | NA        |            |
| NA        | ENSG00000283392 | 0          | NA          | NA         | NA         | NA        |            |
| NA        | ENSG00000283393 | 0          | NA          | NA         | NA         | NA        |            |
| 102466235 | ENSG00000283394 | 0          | NA          | NA         | NA         | NA        | MIR7515    |
| NA        | ENSG00000283399 | 0          | NA          | NA         | NA         | NA        |            |
| NA        | ENSG00000283400 | 0          | NA          | NA         | NA         | NA        |            |
| NA        | ENSG00000283402 | 0.173124   | -0.01911262 | 0.38486262 | 0.84537521 | NA        |            |
| 100420587 | ENSG00000283403 | 0          | NA          | NA         | NA         | NA        |            |
| NA        | ENSG00000283405 | 15.1092982 | 3.74912183  | 0.87181752 | 1.66E-06   | 1.81E-05  |            |
| NA        | ENSG00000283408 | 0          | NA          | NA         | NA         | NA        | MIR548A1HG |
| 100500880 | ENSG00000283409 | 0          | NA          | NA         | NA         | NA        | MIR3662    |
| NA        | ENSG00000283411 | 0          | NA          | NA         | NA         | NA        |            |
| NA        | ENSG00000283412 | 0          | NA          | NA         | NA         | NA        |            |
| NA        | ENSG00000283413 | 0          | NA          | NA         | NA         | NA        |            |
| NA        | ENSG00000283414 | 0          | NA          | NA         | NA         | NA        |            |
| NA        | ENSG00000283415 | 0          | NA          | NA         | NA         | NA        |            |
| 100302261 | ENSG00000283416 | 0          | NA          | NA         | NA         | NA        | MIR1910    |
| NA        | ENSG00000283417 | 0          | NA          | NA         | NA         | NA        |            |
| NA        | ENSG00000283418 | 0          | NA          | NA         | NA         | NA        |            |
| 102466203 | ENSG00000283419 | 0          | NA          | NA         | NA         | NA        | MIR6874    |
| 100422999 | ENSG00000283420 | 0          | NA          | NA         | NA         | NA        | MIR4278    |
| NA        | ENSG00000283421 | 0          | NA          | NA         | NA         | NA        |            |

|           |                 |            |             |            |            |            |           |
|-----------|-----------------|------------|-------------|------------|------------|------------|-----------|
| NA        | ENSG00000283422 | 0          | NA          | NA         | NA         | NA         | LINC02452 |
| NA        | ENSG00000283423 | 0          | NA          | NA         | NA         | NA         |           |
| NA        | ENSG00000283426 | 0          | NA          | NA         | NA         | NA         | SMBD1P    |
| NA        | ENSG00000283427 | 0.696933   | 0.05084159  | 0.38852661 | 0.29969858 | NA         |           |
| NA        | ENSG00000283428 | 0          | NA          | NA         | NA         | NA         | CCDC195   |
| NA        | ENSG00000283431 | 1.42332722 | -0.10061329 | 0.40180859 | 0.08140798 | NA         |           |
| NA        | ENSG00000283432 | 0          | NA          | NA         | NA         | NA         |           |
| NA        | ENSG00000283433 | 0          | NA          | NA         | NA         | NA         | RNA5SP532 |
| 111064647 | ENSG00000283434 | 0          | NA          | NA         | NA         | NA         | CSNKA2IP  |
| 100302171 | ENSG00000283435 | 0          | NA          | NA         | NA         | NA         | MIR1321   |
| NA        | ENSG00000283436 | 0          | NA          | NA         | NA         | NA         | LINC01958 |
| NA        | ENSG00000283438 | 0          | NA          | NA         | NA         | NA         |           |
| 107983988 | ENSG00000283439 | 0.29863895 | -0.02292439 | 0.3852726  | 0.68753245 | NA         | SPEM3     |
| NA        | ENSG00000283440 | 0.14931947 | -0.01844332 | 0.38480212 | 0.84537521 | NA         | LINC01260 |
| 100616134 | ENSG00000283441 | 0          | NA          | NA         | NA         | NA         | MIR499B   |
| NA        | ENSG00000283442 | 0          | NA          | NA         | NA         | NA         |           |
| NA        | ENSG00000283443 | 7.01089034 | -0.00351998 | 0.35511294 | 0.97757186 | 0.99237749 |           |
| NA        | ENSG00000283444 | 0          | NA          | NA         | NA         | NA         | GPR141BP  |
| NA        | ENSG00000283445 | 0.29863895 | -0.02292439 | 0.3852726  | 0.68753245 | NA         |           |
| NA        | ENSG00000283446 | 0          | NA          | NA         | NA         | NA         |           |
| 102465696 | ENSG00000283450 | 0          | NA          | NA         | NA         | NA         | MIR486-2  |
| NA        | ENSG00000283451 | 0          | NA          | NA         | NA         | NA         |           |
| NA        | ENSG00000283452 | 0          | NA          | NA         | NA         | NA         |           |
| NA        | ENSG00000283453 | 0          | NA          | NA         | NA         | NA         |           |
| 574471    | ENSG00000283455 | 0          | NA          | NA         | NA         | NA         | MIR523    |
| NA        | ENSG00000283456 | 0          | NA          | NA         | NA         | NA         | MTND1P37  |
| NA        | ENSG00000283457 | 0          | NA          | NA         | NA         | NA         |           |
| NA        | ENSG00000283458 | 1.48355597 | -0.00282572 | 0.37853229 | 0.96626563 | NA         |           |
| NA        | ENSG00000283459 | 0          | NA          | NA         | NA         | NA         |           |
| 100500830 | ENSG00000283461 | 0          | NA          | NA         | NA         | NA         | MIR550B2  |
| NA        | ENSG00000283462 | 0          | NA          | NA         | NA         | NA         |           |
| 101927685 | ENSG00000283463 | 1.13024046 | -0.03625027 | 0.38130318 | 0.59315499 | NA         | HSFX4     |
| NA        | ENSG00000283464 | 25.4121643 | 0.14378019  | 0.32892546 | 0.4567714  | 0.68025406 |           |
| 100616234 | ENSG00000283468 | 0          | NA          | NA         | NA         | NA         | MIR4454   |
| 100422993 | ENSG00000283469 | 0          | NA          | NA         | NA         | NA         | MIR3130-1 |
| 102466752 | ENSG00000283471 | 0          | NA          | NA         | NA         | NA         | MIR6863   |
| 100132146 | ENSG00000283473 | 0          | NA          | NA         | NA         | NA         | FAM240A   |
| 102465497 | ENSG00000283474 | 0          | NA          | NA         | NA         | NA         | MIR6828   |

|           |                 |            |             |            |            |            |              |
|-----------|-----------------|------------|-------------|------------|------------|------------|--------------|
| 100302182 | ENSG00000283476 | 0          | NA          | NA         | NA         | NA         | MIR1279      |
| 102464830 | ENSG00000283477 | 0          | NA          | NA         | NA         | NA         | MIR6079      |
| NA        | ENSG00000283479 | 0          | NA          | NA         | NA         | NA         |              |
| NA        | ENSG00000283480 | 0.15069912 | -0.01848503 | 0.38480575 | 0.84537521 | NA         |              |
| NA        | ENSG00000283481 | 0          | NA          | NA         | NA         | NA         | MTND4LP32    |
| NA        | ENSG00000283483 | 0.14931947 | -0.01844332 | 0.38480212 | 0.84537521 | NA         |              |
| 100616238 | ENSG00000283484 | 0          | NA          | NA         | NA         | NA         | MIR3529      |
| 100289137 | ENSG00000283486 | 173.448027 | -1.60145278 | 0.19164862 | 5.20E-18   | 1.73E-16   | FAM95C       |
| 100616137 | ENSG00000283487 | 0          | NA          | NA         | NA         | NA         | MIR4501      |
| NA        | ENSG00000283489 | 0          | NA          | NA         | NA         | NA         |              |
| 574477    | ENSG00000283490 | 0          | NA          | NA         | NA         | NA         | MIR518C      |
| NA        | ENSG00000283491 | 0.80134498 | -0.00397982 | 0.38075474 | 0.94415038 | NA         |              |
| 102465690 | ENSG00000283492 | 0          | NA          | NA         | NA         | NA         | MIR7153      |
| 102466519 | ENSG00000283493 | 0          | NA          | NA         | NA         | NA         | MIR6086      |
| NA        | ENSG00000283496 | 0          | NA          | NA         | NA         | NA         | ZNF511-PRAP1 |
| 100422825 | ENSG00000283497 | 0          | NA          | NA         | NA         | NA         | MIR3160-2    |
| NA        | ENSG00000283499 | 0          | NA          | NA         | NA         | NA         |              |
| NA        | ENSG00000283502 | 0          | NA          | NA         | NA         | NA         |              |
| NA        | ENSG00000283503 | 21.763118  | -0.53237171 | 0.49875611 | 0.04698652 | 0.1418461  | LINC01902    |
| NA        | ENSG00000283504 | 0          | NA          | NA         | NA         | NA         |              |
| 100847091 | ENSG00000283505 | 0          | NA          | NA         | NA         | NA         | MIR5681B     |
| 102465692 | ENSG00000283506 | 0          | NA          | NA         | NA         | NA         | MIR7157      |
| 100302227 | ENSG00000283507 | 0          | NA          | NA         | NA         | NA         | MIR1302-1    |
| NA        | ENSG00000283509 | 0          | NA          | NA         | NA         | NA         |              |
| NA        | ENSG00000283511 | 0.173124   | -0.01911262 | 0.38486262 | 0.84537521 | NA         |              |
| 100616257 | ENSG00000283514 | 0          | NA          | NA         | NA         | NA         | MIR3975      |
| NA        | ENSG00000283515 | 4.85567428 | 0.00252178  | 0.38292506 | 0.95606736 | 0.98190167 |              |
| 101929989 | ENSG00000283516 | 0          | NA          | NA         | NA         | NA         | LITAFD       |
| NA        | ENSG00000283517 | 0          | NA          | NA         | NA         | NA         |              |
| NA        | ENSG00000283518 | 0.49770933 | -0.01072397 | 0.38286524 | 0.82140443 | NA         | LINC02775    |
| NA        | ENSG00000283519 | 0          | NA          | NA         | NA         | NA         |              |
| 100422964 | ENSG00000283522 | 0          | NA          | NA         | NA         | NA         | MIR3150A     |
| 100500838 | ENSG00000283523 | 0          | NA          | NA         | NA         | NA         | MIR3926-2    |
| NA        | ENSG00000283524 | 0          | NA          | NA         | NA         | NA         | OR11J7P      |
| 105372412 | ENSG00000283525 | 0          | NA          | NA         | NA         | NA         |              |
| 642515    | ENSG00000283526 | 0          | NA          | NA         | NA         | NA         | PRRT1B       |
| NA        | ENSG00000283527 | 0          | NA          | NA         | NA         | NA         |              |
| NA        | ENSG00000283528 | 0.29863895 | -0.02292439 | 0.3852726  | 0.68753245 | NA         | TCAF2C       |

|           |                 |            |             |            |            |            |            |
|-----------|-----------------|------------|-------------|------------|------------|------------|------------|
| NA        | ENSG00000283529 | 1.26561378 | 0.04622343  | 0.38647747 | 0.31972873 | NA         |            |
| 100422840 | ENSG00000283532 | 0          | NA          | NA         | NA         | NA         | MIR4317    |
| 100500807 | ENSG00000283534 | 0          | NA          | NA         | NA         | NA         | MIR374C    |
| NA        | ENSG00000283535 | 0          | NA          | NA         | NA         | NA         |            |
| NA        | ENSG00000283536 | 0.33471731 | 0.02354391  | 0.38534154 | 0.62842204 | NA         |            |
| NA        | ENSG00000283537 | 0.52119901 | 0.02576573  | 0.38568143 | 0.51723676 | NA         |            |
| NA        | ENSG00000283538 | 4.35496224 | -0.119308   | 0.38903015 | 0.32625884 | 0.55447793 |            |
| 574464    | ENSG00000283540 | 0          | NA          | NA         | NA         | NA         | MIR520F    |
| NA        | ENSG00000283541 | 0          | NA          | NA         | NA         | NA         |            |
| NA        | ENSG00000283542 | 0          | NA          | NA         | NA         | NA         | OASL2P     |
| NA        | ENSG00000283544 | 0          | NA          | NA         | NA         | NA         |            |
| NA        | ENSG00000283545 | 0          | NA          | NA         | NA         | NA         |            |
| NA        | ENSG00000283546 | 0          | NA          | NA         | NA         | NA         |            |
| NA        | ENSG00000283547 | 0.14931947 | -0.01844332 | 0.38480212 | 0.84537521 | NA         | MTATP6P8   |
| NA        | ENSG00000283549 | 11.1356882 | 0.2109465   | 0.40231005 | 0.23231458 | 0.44909196 |            |
| 100302267 | ENSG00000283550 | 0          | NA          | NA         | NA         | NA         | MIR2054    |
| 692211    | ENSG00000283551 | 0          | NA          | NA         | NA         | NA         | SNORD98    |
| 105370177 | ENSG00000283554 | 0          | NA          | NA         | NA         | NA         | LINC02341  |
| NA        | ENSG00000283555 | 0          | NA          | NA         | NA         | NA         |            |
| 574435    | ENSG00000283556 | 0          | NA          | NA         | NA         | NA         | MIR376B    |
| 100423033 | ENSG00000283558 | 0          | NA          | NA         | NA         | NA         | MIR3158-2  |
| NA        | ENSG00000283559 | 1.43444932 | -0.06820226 | 0.39058648 | 0.22754853 | NA         |            |
| 664615    | ENSG00000283561 | 0          | NA          | NA         | NA         | NA         | MIR376A2   |
| NA        | ENSG00000283562 | 0          | NA          | NA         | NA         | NA         | IGHVIII-44 |
| NA        | ENSG00000283563 | 2.01725806 | 0.00942594  | 0.37519835 | 0.91252732 | NA         |            |
| NA        | ENSG00000283564 | 0          | NA          | NA         | NA         | NA         |            |
| NA        | ENSG00000283566 | 0          | NA          | NA         | NA         | NA         |            |
| 111064650 | ENSG00000283567 | 0.18922458 | 0.01954053  | 0.38488496 | 0.78225479 | NA         | C19orf85   |
| NA        | ENSG00000283568 | 0          | NA          | NA         | NA         | NA         |            |
| 100616418 | ENSG00000283569 | 0          | NA          | NA         | NA         | NA         | MIR4773-2  |
| NA        | ENSG00000283571 | 0          | NA          | NA         | NA         | NA         |            |
| 100422968 | ENSG00000283572 | 0          | NA          | NA         | NA         | NA         | MIR4251    |
| NA        | ENSG00000283573 | 0          | NA          | NA         | NA         | NA         |            |
| NA        | ENSG00000283575 | 0          | NA          | NA         | NA         | NA         |            |
| NA        | ENSG00000283576 | 0          | NA          | NA         | NA         | NA         |            |
| NA        | ENSG00000283578 | 1.40526702 | 0.08531081  | 0.39415875 | 0.17908055 | NA         | MTND5P42   |
| NA        | ENSG00000283579 | 0          | NA          | NA         | NA         | NA         |            |
| NA        | ENSG00000283580 | 50.6318277 | -0.03166857 | 0.29772054 | 0.86492042 | 0.94027513 |            |

|           |                 |            |             |            |            |    |              |
|-----------|-----------------|------------|-------------|------------|------------|----|--------------|
| NA        | ENSG00000283582 | 0          | NA          | NA         | NA         | NA | SULT6B2P     |
| NA        | ENSG00000283583 | 0          | NA          | NA         | NA         | NA |              |
| NA        | ENSG00000283584 | 0          | NA          | NA         | NA         | NA |              |
| NA        | ENSG00000283586 | 0          | NA          | NA         | NA         | NA | GKN3P        |
| NA        | ENSG00000283587 | 0          | NA          | NA         | NA         | NA |              |
| 494325    | ENSG00000283588 | 0          | NA          | NA         | NA         | NA | MIR376A1     |
| 100616136 | ENSG00000283591 | 0          | NA          | NA         | NA         | NA | MIR4430      |
| NA        | ENSG00000283592 | 0          | NA          | NA         | NA         | NA |              |
| NA        | ENSG00000283597 | 0.14931947 | -0.01844332 | 0.38480212 | 0.84537521 | NA | FAM169B      |
| 100847009 | ENSG00000283598 | 0          | NA          | NA         | NA         | NA | MIR1295B     |
| 101059915 | ENSG00000283599 | 0          | NA          | NA         | NA         | NA |              |
| NA        | ENSG00000283601 | 0          | NA          | NA         | NA         | NA | MS4A19P      |
| NA        | ENSG00000283602 | 0          | NA          | NA         | NA         | NA |              |
| 100422897 | ENSG00000283603 | 0          | NA          | NA         | NA         | NA | MIR4302      |
| 442906    | ENSG00000283604 | 0          | NA          | NA         | NA         | NA | MIR338       |
| NA        | ENSG00000283605 | 0          | NA          | NA         | NA         | NA | OR4C48P      |
| NA        | ENSG00000283607 | 0          | NA          | NA         | NA         | NA | IGHVII-30-21 |
| NA        | ENSG00000283608 | 0          | NA          | NA         | NA         | NA |              |
| 100616221 | ENSG00000283609 | 0          | NA          | NA         | NA         | NA | MIR4662A     |
| 113391335 | ENSG00000283611 | 0          | NA          | NA         | NA         | NA | TMEM274P     |
| 100302238 | ENSG00000283612 | 0          | NA          | NA         | NA         | NA | MIR103B1     |
| NA        | ENSG00000283613 | 0          | NA          | NA         | NA         | NA | CUPIN1P      |
| 102465855 | ENSG00000283614 | 0          | NA          | NA         | NA         | NA | MIR7973-2    |
| 100126323 | ENSG00000283615 | 0          | NA          | NA         | NA         | NA | MIR924       |
| 100847034 | ENSG00000283616 | 0          | NA          | NA         | NA         | NA | MIR5683      |
| NA        | ENSG00000283618 | 0          | NA          | NA         | NA         | NA |              |
| 102466729 | ENSG00000283621 | 0          | NA          | NA         | NA         | NA | MIR6759      |
| 100422932 | ENSG00000283622 | 0          | NA          | NA         | NA         | NA | MIR4328      |
| NA        | ENSG00000283625 | 0          | NA          | NA         | NA         | NA |              |
| NA        | ENSG00000283626 | 0          | NA          | NA         | NA         | NA | MTATP6P10    |
| NA        | ENSG00000283627 | 0.14931947 | -0.01844332 | 0.38480212 | 0.84537521 | NA |              |
| NA        | ENSG00000283629 | 0          | NA          | NA         | NA         | NA |              |
| NA        | ENSG00000283631 | 0          | NA          | NA         | NA         | NA |              |
| 90332     | ENSG00000283632 | 0.62868221 | -0.03639905 | 0.38663966 | 0.4245043  | NA | EXOC3L2      |
| NA        | ENSG00000283633 | 0          | NA          | NA         | NA         | NA |              |
| 100628560 | ENSG00000283634 | 0          | NA          | NA         | NA         | NA | MIR3155B     |
| NA        | ENSG00000283635 | 0.77407682 | -0.05445781 | 0.38914488 | 0.28416662 | NA |              |
| NA        | ENSG00000283636 | 0          | NA          | NA         | NA         | NA |              |

|           |                 |            |             |            |            |            |           |
|-----------|-----------------|------------|-------------|------------|------------|------------|-----------|
| 100616472 | ENSG00000283637 | 0          | NA          | NA         | NA         | NA         | MIR4776-2 |
| NA        | ENSG00000283638 | 1.59099842 | 0.11696533  | 0.40854866 | 0.04921996 | NA         |           |
| 103504730 | ENSG00000283639 | 0          | NA          | NA         | NA         | NA         | MIR9500   |
| 110806299 | ENSG00000283644 | 0          | NA          | NA         | NA         | NA         | ETDC      |
| 100846997 | ENSG00000283645 | 0          | NA          | NA         | NA         | NA         | MIR5583-2 |
| 105377068 | ENSG00000283646 | 0          | NA          | NA         | NA         | NA         | LINC02009 |
| NA        | ENSG00000283647 | 5.27007976 | -0.03935421 | 0.3643729  | 0.74947424 | 0.88205755 |           |
| NA        | ENSG00000283648 | 0          | NA          | NA         | NA         | NA         |           |
| NA        | ENSG00000283653 | 0          | NA          | NA         | NA         | NA         |           |
| 100128908 | ENSG00000283654 | 0.68116115 | 0.02386856  | 0.38330621 | 0.59416408 | NA         | LMLN2     |
| 100616162 | ENSG00000283656 | 0          | NA          | NA         | NA         | NA         | MIR4483   |
| NA        | ENSG00000283657 | 0          | NA          | NA         | NA         | NA         |           |
| NA        | ENSG00000283659 | 0          | NA          | NA         | NA         | NA         |           |
| NA        | ENSG00000283662 | 90.2211069 | 0.23077789  | 0.24091103 | 0.23037028 | 0.44631785 |           |
| NA        | ENSG00000283663 | 0          | NA          | NA         | NA         | NA         |           |
| 100616128 | ENSG00000283664 | 0          | NA          | NA         | NA         | NA         | MIR4679-1 |
| 100616279 | ENSG00000283665 | 0          | NA          | NA         | NA         | NA         | MIR3974   |
| NA        | ENSG00000283666 | 0          | NA          | NA         | NA         | NA         |           |
| NA        | ENSG00000283667 | 8.62178645 | -0.18647761 | 0.39439899 | 0.26486417 | 0.48706137 |           |
| NA        | ENSG00000283669 | 0          | NA          | NA         | NA         | NA         |           |
| 100616296 | ENSG00000283672 | 0          | NA          | NA         | NA         | NA         | MIR4678   |
| 100616355 | ENSG00000283673 | 0          | NA          | NA         | NA         | NA         | MIR4531   |
| 729732    | ENSG00000283674 | 27.4260579 | 0.00570432  | 0.28831457 | 0.97788429 | 0.99249544 |           |
| NA        | ENSG00000283675 | 0          | NA          | NA         | NA         | NA         |           |
| 100847044 | ENSG00000283676 | 0          | NA          | NA         | NA         | NA         | MIR5087   |
| 100500868 | ENSG00000283677 | 0          | NA          | NA         | NA         | NA         | MIR3913-2 |
| 102465498 | ENSG00000283678 | 0          | NA          | NA         | NA         | NA         | MIR6830   |
| NA        | ENSG00000283679 | 0          | NA          | NA         | NA         | NA         |           |
| NA        | ENSG00000283680 | 0          | NA          | NA         | NA         | NA         | OR11K1P   |
| 100616254 | ENSG00000283682 | 0          | NA          | NA         | NA         | NA         | MIR548AH  |
| 110806290 | ENSG00000283683 | 0          | NA          | NA         | NA         | NA         | MYOCOS    |
| NA        | ENSG00000283684 | 0          | NA          | NA         | NA         | NA         |           |
| 574495    | ENSG00000283685 | 0          | NA          | NA         | NA         | NA         | MIR522    |
| NA        | ENSG00000283686 | 0          | NA          | NA         | NA         | NA         |           |
| 102465427 | ENSG00000283688 | 0          | NA          | NA         | NA         | NA         | MIR6715B  |
| NA        | ENSG00000283689 | 16.5650707 | -0.34692002 | 0.442461   | 0.11924528 | 0.28391051 |           |
| 100422946 | ENSG00000283690 | 0          | NA          | NA         | NA         | NA         | MIR3116-2 |
| NA        | ENSG00000283691 | 0          | NA          | NA         | NA         | NA         |           |



|           |                 |            |             |            |            |            |           |
|-----------|-----------------|------------|-------------|------------|------------|------------|-----------|
| NA        | ENSG00000283692 | 0          | NA          | NA         | NA         | NA         |           |
| 100422877 | ENSG00000283694 | 0          | NA          | NA         | NA         | NA         | MIR3202-2 |
| NA        | ENSG00000283695 | 0          | NA          | NA         | NA         | NA         |           |
| NA        | ENSG00000283696 | 12.5850532 | 0.17711662  | 0.37473913 | 0.32194856 | 0.54956623 |           |
| 101928917 | ENSG00000283697 | 0          | NA          | NA         | NA         | NA         | HSFX3     |
| NA        | ENSG00000283698 | 2.33871198 | 0.12227237  | 0.40762393 | 0.08314043 | NA         | VINAC1P   |
| 100616320 | ENSG00000283699 | 0          | NA          | NA         | NA         | NA         | MIR4481   |
| 693140    | ENSG00000283701 | 0          | NA          | NA         | NA         | NA         | MIR555    |
| 338667    | ENSG00000283703 | 2.35254896 | 0.05452041  | 0.38079904 | 0.51021507 | NA         | VSIG10L2  |
| NA        | ENSG00000283704 | 0          | NA          | NA         | NA         | NA         |           |
| 407048    | ENSG00000283705 | 0          | NA          | NA         | NA         | NA         | MIR92A1   |
| 29122     | ENSG00000283706 | 2.21345368 | 0.11723146  | 0.4096197  | 0.03167783 | NA         | PRSS50    |
| 387644    | ENSG00000283709 | 8.56241234 | 0.09953102  | 0.361604   | 0.51678971 | 0.73085094 | FAM238C   |
| 100302185 | ENSG00000283710 | 0          | NA          | NA         | NA         | NA         | MIR1204   |
| 102465435 | ENSG00000283712 | 0          | NA          | NA         | NA         | NA         | MIR6727   |
| 102465499 | ENSG00000283717 | 0          | NA          | NA         | NA         | NA         | MIR6831   |
| 102466757 | ENSG00000283721 | 0          | NA          | NA         | NA         | NA         | MIR6884   |
| 102465438 | ENSG00000283724 | 0          | NA          | NA         | NA         | NA         | MIR6732   |
| 100847079 | ENSG00000283726 | 0          | NA          | NA         | NA         | NA         | MIR5193   |
| 102466806 | ENSG00000283728 | 0          | NA          | NA         | NA         | NA         | MIR7108   |
| 406938    | ENSG00000283733 | 0          | NA          | NA         | NA         | NA         | MIR146A   |
| 100616364 | ENSG00000283734 | 0          | NA          | NA         | NA         | NA         | MIR4785   |
| 619553    | ENSG00000283736 | 0          | NA          | NA         | NA         | NA         | MIR484    |
| NA        | ENSG00000283737 | 1.05017058 | 0.04363986  | 0.38456176 | 0.40099766 | NA         |           |
| NA        | ENSG00000283740 | 0          | NA          | NA         | NA         | NA         | TAF11L11  |
| NA        | ENSG00000283743 | 6.40158128 | -0.16263646 | 0.40970291 | 0.20167739 | 0.40713058 |           |
| 102465452 | ENSG00000283744 | 0          | NA          | NA         | NA         | NA         | MIR6755   |
| 442920    | ENSG00000283745 | 0          | NA          | NA         | NA         | NA         | MIR196B   |
| 100616315 | ENSG00000283749 | 0          | NA          | NA         | NA         | NA         | MIR4781   |
| 574412    | ENSG00000283751 | 0          | NA          | NA         | NA         | NA         | MIR452    |
| NA        | ENSG00000283752 | 0          | NA          | NA         | NA         | NA         |           |
| 105371346 | ENSG00000283755 | 0          | NA          | NA         | NA         | NA         | CPHXL     |
| NA        | ENSG00000283757 | 9.13263087 | -0.00673562 | 0.34735608 | 0.96207011 | 0.98470041 |           |
| NA        | ENSG00000283758 | 0          | NA          | NA         | NA         | NA         | PMIS2     |
| 693199    | ENSG00000283759 | 0          | NA          | NA         | NA         | NA         | MIR614    |
| NA        | ENSG00000283761 | 41.9999311 | 0.27937029  | 0.3587648  | 0.1952717  | 0.39882545 |           |
| 406982    | ENSG00000283762 | 0          | NA          | NA         | NA         | NA         | MIR20A    |
| 102465978 | ENSG00000283764 | 0          | NA          | NA         | NA         | NA         | MIR6850   |

|           |                 |            |             |            |            |            |           |
|-----------|-----------------|------------|-------------|------------|------------|------------|-----------|
| NA        | ENSG00000283765 | 19.1758723 | -0.05083894 | 0.3796098  | 0.55306138 | 0.75935901 |           |
| NA        | ENSG00000283766 | 0          | NA          | NA         | NA         | NA         |           |
| 100302274 | ENSG00000283768 | 0          | NA          | NA         | NA         | NA         | MIR1178   |
| NA        | ENSG00000283769 | 0.34624801 | -0.02356563 | 0.38536324 | 0.65270996 | NA         |           |
| 102466749 | ENSG00000283770 | 0          | NA          | NA         | NA         | NA         | MIR6849   |
| 102466733 | ENSG00000283772 | 0          | NA          | NA         | NA         | NA         | MIR6778   |
| NA        | ENSG00000283773 | 0.60279648 | -0.02752712 | 0.38588313 | 0.49730371 | NA         |           |
| 693217    | ENSG00000283774 | 0          | NA          | NA         | NA         | NA         | MIR632    |
| 100423009 | ENSG00000283775 | 0          | NA          | NA         | NA         | NA         | MIR4329   |
| NA        | ENSG00000283776 | 0          | NA          | NA         | NA         | NA         | TAF11L13  |
| NA        | ENSG00000283782 | 118.559481 | -0.07125855 | 0.38591139 | 0.37818354 | 0.60710102 |           |
| 693207    | ENSG00000283783 | 0          | NA          | NA         | NA         | NA         | MIR622    |
| 406948    | ENSG00000283785 | 0          | NA          | NA         | NA         | NA         | MIR15A    |
| NA        | ENSG00000283787 | 2.35077911 | 0.00868353  | 0.37151853 | 0.93057064 | NA         | PRR33     |
| 100126326 | ENSG00000283788 | 0          | NA          | NA         | NA         | NA         | MIR936    |
| 102465836 | ENSG00000283789 | 0          | NA          | NA         | NA         | NA         | MIR7846   |
| 693197    | ENSG00000283791 | 0          | NA          | NA         | NA         | NA         | MIR612    |
| 100616193 | ENSG00000283792 | 0          | NA          | NA         | NA         | NA         | MIR4453   |
| 102465519 | ENSG00000283793 | 0          | NA          | NA         | NA         | NA         | MIR6861   |
| 100616345 | ENSG00000283795 | 0          | NA          | NA         | NA         | NA         | MIR4426   |
| 102466658 | ENSG00000283796 | 0          | NA          | NA         | NA         | NA         | MIR6510   |
| 407024    | ENSG00000283797 | 0          | NA          | NA         | NA         | NA         | MIR29B1   |
| 693215    | ENSG00000283798 | 0          | NA          | NA         | NA         | NA         | MIR630    |
| 100302132 | ENSG00000283799 | 0          | NA          | NA         | NA         | NA         | MIR1182   |
| 100616400 | ENSG00000283803 | 0          | NA          | NA         | NA         | NA         | MIR3198-2 |
| 693221    | ENSG00000283805 | 0          | NA          | NA         | NA         | NA         | MIR636    |
| NA        | ENSG00000283809 | 12.1601259 | -0.04206189 | 0.33534816 | 0.80006845 | 0.90845064 |           |
| 100616263 | ENSG00000283813 | 0          | NA          | NA         | NA         | NA         | MIR4485   |
| 406953    | ENSG00000283815 | 0          | NA          | NA         | NA         | NA         | MIR18A    |
| 102465834 | ENSG00000283818 | 0          | NA          | NA         | NA         | NA         | MIR7844   |
| 406936    | ENSG00000283819 | 0          | NA          | NA         | NA         | NA         | MIR144    |
| 102466755 | ENSG00000283821 | 0          | NA          | NA         | NA         | NA         | MIR6875   |
| 693224    | ENSG00000283822 | 0          | NA          | NA         | NA         | NA         | MIR639    |
| 407004    | ENSG00000283824 | 0          | NA          | NA         | NA         | NA         | MIR22     |
| 102724474 | ENSG00000283828 | 22.0051306 | 0.16044145  | 0.32888972 | 0.41444436 | 0.64168691 |           |
| 100616259 | ENSG00000283829 | 0          | NA          | NA         | NA         | NA         | MIR378I   |
| 102466723 | ENSG00000283836 | 0          | NA          | NA         | NA         | NA         | MIR6734   |
| 105373780 | ENSG00000283839 | 5.31874915 | 0.04148536  | 0.36636638 | 0.73165814 | 0.87183768 |           |

|           |                 |            |             |            |            |            |               |
|-----------|-----------------|------------|-------------|------------|------------|------------|---------------|
| 102466730 | ENSG00000283840 | 0          | NA          | NA         | NA         | NA         | MIR6764       |
| 100616483 | ENSG00000283842 | 0          | NA          | NA         | NA         | NA         | MIR4751       |
| 406996    | ENSG00000283844 | 0          | NA          | NA         | NA         | NA         | MIR214        |
| 100616256 | ENSG00000283845 | 0          | NA          | NA         | NA         | NA         | MIR4721       |
| 102465526 | ENSG00000283848 | 0          | NA          | NA         | NA         | NA         | MIR6872       |
| NA        | ENSG00000283849 | 0.51937201 | -0.02557462 | 0.38567603 | 0.54680819 | NA         |               |
| 100616282 | ENSG00000283853 | 0          | NA          | NA         | NA         | NA         | MIR4738       |
| 102465801 | ENSG00000283856 | 0          | NA          | NA         | NA         | NA         | MIR7703       |
| 100302145 | ENSG00000283857 | 0          | NA          | NA         | NA         | NA         | MIR1247       |
| 100500912 | ENSG00000283858 | 0          | NA          | NA         | NA         | NA         | MIR3674       |
| 100616250 | ENSG00000283863 | 0          | NA          | NA         | NA         | NA         | MIR3960       |
| NA        | ENSG00000283865 | 0          | NA          | NA         | NA         | NA         | MTND3P18      |
| 100302174 | ENSG00000283867 | 0          | NA          | NA         | NA         | NA         | MIR1307       |
| 406920    | ENSG00000283871 | 0          | NA          | NA         | NA         | NA         | MIR130B       |
| NA        | ENSG00000283873 | 0          | NA          | NA         | NA         | NA         | SSU72P4       |
| 100500872 | ENSG00000283874 | 0          | NA          | NA         | NA         | NA         | MIR3911       |
| 100422894 | ENSG00000283876 | 0          | NA          | NA         | NA         | NA         | MIR4260       |
| NA        | ENSG00000283877 | 0          | NA          | NA         | NA         | NA         |               |
| NA        | ENSG00000283879 | 0          | NA          | NA         | NA         | NA         | MTND6P35      |
| 102465802 | ENSG00000283880 | 0          | NA          | NA         | NA         | NA         | MIR7704       |
| 100500849 | ENSG00000283881 | 0          | NA          | NA         | NA         | NA         | MIR3916       |
| 100500913 | ENSG00000283885 | 0          | NA          | NA         | NA         | NA         | MIR3714       |
| NA        | ENSG00000283886 | 41.7533272 | 0.10734265  | 0.28779962 | 0.58599681 | 0.7817695  |               |
| 100302258 | ENSG00000283888 | 0          | NA          | NA         | NA         | NA         | MIR1469       |
| 693213    | ENSG00000283891 | 0          | NA          | NA         | NA         | NA         | MIR628        |
| 100302212 | ENSG00000283894 | 0          | NA          | NA         | NA         | NA         | MIR1324       |
| NA        | ENSG00000283897 | 1.24810752 | 0.06863342  | 0.3926137  | 0.14355154 | NA         |               |
| 100313892 | ENSG00000283899 | 0          | NA          | NA         | NA         | NA         | MIR761        |
| 102800317 | ENSG00000283900 | 3.24591522 | -0.07636564 | 0.38131512 | 0.44916045 | 0.6728081  | TPTEP2-CSNK1E |
| 406947    | ENSG00000283904 | 0          | NA          | NA         | NA         | NA         | MIR155        |
| NA        | ENSG00000283906 | 0          | NA          | NA         | NA         | NA         | IGHV4-80      |
| NA        | ENSG00000283907 | 0          | NA          | NA         | NA         | NA         |               |
| NA        | ENSG00000283913 | 6.2006693  | 0.02178367  | 0.35595196 | 0.87564496 | 0.94509825 |               |
| NA        | ENSG00000283914 | 0.34746601 | 0.02370763  | 0.3853651  | 0.61987128 | NA         |               |
| 102465445 | ENSG00000283920 | 0          | NA          | NA         | NA         | NA         | MIR6743       |
| 102466616 | ENSG00000283923 | 0          | NA          | NA         | NA         | NA         | MIR6132       |
| 406967    | ENSG00000283926 | 0          | NA          | NA         | NA         | NA         | MIR192        |
| 406922    | ENSG00000283927 | 0          | NA          | NA         | NA         | NA         | MIR133A1      |

|           |                 |            |             |            |            |            |              |
|-----------|-----------------|------------|-------------|------------|------------|------------|--------------|
| 693222    | ENSG00000283928 | 0          | NA          | NA         | NA         | NA         | MIR637       |
| 100847046 | ENSG00000283929 | 0          | NA          | NA         | NA         | NA         | MIR5010      |
| NA        | ENSG00000283930 | 51.9752939 | -0.01408775 | 0.25244248 | 0.93948947 | 0.97474024 | PLD5P1       |
| 574033    | ENSG00000283931 | 0          | NA          | NA         | NA         | NA         | MIR18B       |
| 102465529 | ENSG00000283933 | 0          | NA          | NA         | NA         | NA         | MIR6878      |
| 494335    | ENSG00000283935 | 0          | NA          | NA         | NA         | NA         | MIR423       |
| 100500832 | ENSG00000283936 | 0          | NA          | NA         | NA         | NA         | MIR3658      |
| 100500808 | ENSG00000283938 | 0          | NA          | NA         | NA         | NA         | MIR3917      |
| NA        | ENSG00000283940 | 0          | NA          | NA         | NA         | NA         | MTND3P15     |
| 693185    | ENSG00000283941 | 0          | NA          | NA         | NA         | NA         | MIR600       |
| 100616211 | ENSG00000283944 | 0          | NA          | NA         | NA         | NA         | MIR4709      |
| 158035    | ENSG00000283945 | 0.38338912 | 0.0240051   | 0.38541055 | 0.60568153 | NA         | LINC00032    |
| NA        | ENSG00000283948 | 0          | NA          | NA         | NA         | NA         | IGHVIII-16-1 |
| 102465474 | ENSG00000283950 | 0          | NA          | NA         | NA         | NA         | MIR6791      |
| NA        | ENSG00000283952 | 0          | NA          | NA         | NA         | NA         |              |
| 100500914 | ENSG00000283956 | 0          | NA          | NA         | NA         | NA         | MIR3610      |
| 100302143 | ENSG00000283958 | 0          | NA          | NA         | NA         | NA         | MIR1248      |
| NA        | ENSG00000283959 | 4.40908787 | 0.07254787  | 0.37049581 | 0.56413289 | 0.76676005 |              |
| NA        | ENSG00000283967 | 0          | NA          | NA         | NA         | NA         | TAF11L8      |
| 102465504 | ENSG00000283969 | 0          | NA          | NA         | NA         | NA         | MIR6838      |
| 100616477 | ENSG00000283971 | 0          | NA          | NA         | NA         | NA         | MIR4442      |
| NA        | ENSG00000283972 | 2.60341802 | 0.08283535  | 0.39146462 | 0.25649915 | 0.47758495 | FAM247A      |
| NA        | ENSG00000283973 | 0          | NA          | NA         | NA         | NA         |              |
| NA        | ENSG00000283977 | 19.9425339 | -0.00068796 | 0.37342223 | 0.98833409 | 0.99601505 |              |
| 100126356 | ENSG00000283978 | 0          | NA          | NA         | NA         | NA         | MIR365B      |
| 105372280 | ENSG00000283980 | 0.92118844 | 0.06431746  | 0.39123152 | 0.19918195 | NA         | GNG14        |
| 101929563 | ENSG00000283982 | 1.64825477 | -0.0547555  | 0.38562385 | 0.38805521 | NA         |              |
| NA        | ENSG00000283988 | 0          | NA          | NA         | NA         | NA         | TAF11L9      |
| 406883    | ENSG00000283990 | 0          | NA          | NA         | NA         | NA         | MIRLET7A3    |
| NA        | ENSG00000283991 | 0          | NA          | NA         | NA         | NA         |              |
| 432355    | ENSG00000283992 | 0          | NA          | NA         | NA         | NA         | SLURP2       |
| NA        | ENSG00000283994 | 0          | NA          | NA         | NA         | NA         |              |
| 574449    | ENSG00000283998 | 0          | NA          | NA         | NA         | NA         | MIR492       |
| NA        | ENSG00000283999 | 0          | NA          | NA         | NA         | NA         |              |
| 100616142 | ENSG00000284000 | 0          | NA          | NA         | NA         | NA         | MIR4458      |
| NA        | ENSG00000284003 | 0          | NA          | NA         | NA         | NA         |              |
| 102464833 | ENSG00000284005 | 0          | NA          | NA         | NA         | NA         | MIR6084      |
| 102465429 | ENSG00000284008 | 0          | NA          | NA         | NA         | NA         | MIR6511B1    |

|           |                 |            |             |            |            |            |           |
|-----------|-----------------|------------|-------------|------------|------------|------------|-----------|
| 100033819 | ENSG00000284010 | 0          | NA          | NA         | NA         | NA         | MIR675    |
| 102465249 | ENSG00000284011 | 0          | NA          | NA         | NA         | NA         | MIR6502   |
| 102466747 | ENSG00000284012 | 0          | NA          | NA         | NA         | NA         | MIR6840   |
| 100302237 | ENSG00000284015 | 0          | NA          | NA         | NA         | NA         | MIR1281   |
| NA        | ENSG00000284018 | 0          | NA          | NA         | NA         | NA         | SSU72P5   |
| 100616119 | ENSG00000284020 | 0          | NA          | NA         | NA         | NA         | MIR4697   |
| 100421372 | ENSG00000284024 | 665.23691  | -0.27084776 | 0.09945966 | 0.00473989 | 0.02221577 |           |
| 574456    | ENSG00000284027 | 0          | NA          | NA         | NA         | NA         | MIR497    |
| 100616226 | ENSG00000284028 | 0          | NA          | NA         | NA         | NA         | MIR4468   |
| 102465483 | ENSG00000284029 | 0          | NA          | NA         | NA         | NA         | MIR6805   |
| 100616414 | ENSG00000284031 | 0          | NA          | NA         | NA         | NA         | MIR4761   |
| 407021    | ENSG00000284032 | 0          | NA          | NA         | NA         | NA         | MIR29A    |
| 100847070 | ENSG00000284034 | 0          | NA          | NA         | NA         | NA         | MIR5196   |
| 100847090 | ENSG00000284035 | 0          | NA          | NA         | NA         | NA         | MIR5187   |
| 406902    | ENSG00000284038 | 0          | NA          | NA         | NA         | NA         | MIR10A    |
| 407022    | ENSG00000284040 | 0          | NA          | NA         | NA         | NA         | MIR296    |
| NA        | ENSG00000284042 | 0          | NA          | NA         | NA         | NA         | TAF11L6   |
| 574032    | ENSG00000284043 | 0          | NA          | NA         | NA         | NA         | MIR20B    |
| 102465503 | ENSG00000284047 | 0          | NA          | NA         | NA         | NA         | MIR6836   |
| NA        | ENSG00000284048 | 10.5719022 | 0.17243085  | 0.40338268 | 0.24106256 | 0.45895616 |           |
| 723778    | ENSG00000284049 | 0          | NA          | NA         | NA         | NA         | MIR650    |
| NA        | ENSG00000284052 | 13.1352681 | 0.55720913  | 0.69081844 | 0.03828595 | 0.1214766  |           |
| 102465906 | ENSG00000284054 | 0          | NA          | NA         | NA         | NA         | MIR7112   |
| 100423004 | ENSG00000284055 | 0          | NA          | NA         | NA         | NA         | MIR4315-1 |
| NA        | ENSG00000284057 | 12.0967298 | 0.29988953  | 0.52172824 | 0.05986538 | 0.17094548 |           |
| 100847042 | ENSG00000284059 | 0          | NA          | NA         | NA         | NA         | MIR5572   |
| NA        | ENSG00000284060 | 0.37844916 | 0.02407552  | 0.3854191  | 0.60038877 | NA         |           |
| 100616115 | ENSG00000284062 | 0          | NA          | NA         | NA         | NA         | MIR4469   |
| 102465501 | ENSG00000284064 | 0          | NA          | NA         | NA         | NA         | MIR6834   |
| 102466205 | ENSG00000284065 | 0          | NA          | NA         | NA         | NA         | MIR6887   |
| 102466985 | ENSG00000284067 | 0          | NA          | NA         | NA         | NA         | MIR6837   |
| NA        | ENSG00000284070 | 17.4625873 | 0.44897793  | 0.50080816 | 0.07081875 | 0.19313319 |           |
| NA        | ENSG00000284071 | 0          | NA          | NA         | NA         | NA         |           |
| 100616340 | ENSG00000284074 | 0          | NA          | NA         | NA         | NA         | MIR4758   |
| NA        | ENSG00000284078 | 0          | NA          | NA         | NA         | NA         | SNORD138  |
| 100616361 | ENSG00000284079 | 0          | NA          | NA         | NA         | NA         | MIR4775   |
| 102466515 | ENSG00000284081 | 0          | NA          | NA         | NA         | NA         | MIR1199   |
| 102465666 | ENSG00000284082 | 0          | NA          | NA         | NA         | NA         | MIR7109   |

|           |                 |            |             |            |            |            |             |
|-----------|-----------------|------------|-------------|------------|------------|------------|-------------|
| NA        | ENSG00000284084 | 0          | NA          | NA         | NA         | NA         | AOX3P-AOX2P |
| 100616385 | ENSG00000284085 | 0          | NA          | NA         | NA         | NA         | MIR4732     |
| 102466200 | ENSG00000284087 | 0          | NA          | NA         | NA         | NA         | MIR6844     |
| 100847081 | ENSG00000284092 | 0          | NA          | NA         | NA         | NA         | MIR5703     |
| 102464826 | ENSG00000284094 | 0          | NA          | NA         | NA         | NA         | MIR6073     |
| NA        | ENSG00000284095 | 3.455447   | 0.0071145   | 0.36606859 | 0.95180413 | 0.98012235 |             |
| NA        | ENSG00000284098 | 0          | NA          | NA         | NA         | NA         |             |
| 406981    | ENSG00000284107 | 0          | NA          | NA         | NA         | NA         | MIR19B2     |
| 693196    | ENSG00000284108 | 0          | NA          | NA         | NA         | NA         | MIR611      |
| 406971    | ENSG00000284112 | 0          | NA          | NA         | NA         | NA         | MIR195      |
| 102465480 | ENSG00000284114 | 0          | NA          | NA         | NA         | NA         | MIR6800     |
| NA        | ENSG00000284116 | 39.5619524 | -0.06963393 | 0.2752802  | 0.71791511 | 0.8643386  |             |
| 102465532 | ENSG00000284117 | 0          | NA          | NA         | NA         | NA         | MIR6883     |
| 100616424 | ENSG00000284118 | 0          | NA          | NA         | NA         | NA         | MIR4707     |
| 406975    | ENSG00000284121 | 0          | NA          | NA         | NA         | NA         | MIR198      |
| 102465428 | ENSG00000284122 | 0          | NA          | NA         | NA         | NA         | MIR6717     |
| 100302183 | ENSG00000284125 | 0          | NA          | NA         | NA         | NA         | MIR1825     |
| NA        | ENSG00000284128 | 27.0347083 | 1.59383013  | 0.51867709 | 0.00012928 | 0.00095742 |             |
| 102466736 | ENSG00000284129 | 0          | NA          | NA         | NA         | NA         | MIR6789     |
| NA        | ENSG00000284130 | 0.15069912 | -0.01848503 | 0.38480575 | 0.84537521 | NA         |             |
| 693153    | ENSG00000284134 | 0          | NA          | NA         | NA         | NA         | MIR568      |
| 100500804 | ENSG00000284135 | 0          | NA          | NA         | NA         | NA         | MIR3654     |
| NA        | ENSG00000284138 | 0          | NA          | NA         | NA         | NA         | ATP6V0CP4   |
| 100302196 | ENSG00000284139 | 0          | NA          | NA         | NA         | NA         | MIR1234     |
| 100500860 | ENSG00000284140 | 0          | NA          | NA         | NA         | NA         | MIR3618     |
| 102466748 | ENSG00000284142 | 0          | NA          | NA         | NA         | NA         | MIR6845     |
| 100616329 | ENSG00000284143 | 0          | NA          | NA         | NA         | NA         | MIR4700     |
| 102466986 | ENSG00000284144 | 0          | NA          | NA         | NA         | NA         | MIR6866     |
| 100126321 | ENSG00000284146 | 0          | NA          | NA         | NA         | NA         | MIR922      |
| 100500907 | ENSG00000284147 | 0          | NA          | NA         | NA         | NA         | MIR3150B    |
| 102465453 | ENSG00000284148 | 0          | NA          | NA         | NA         | NA         | MIR6756     |
| 100616378 | ENSG00000284149 | 0          | NA          | NA         | NA         | NA         | MIR4784     |
| 102465454 | ENSG00000284152 | 0          | NA          | NA         | NA         | NA         | MIR6758     |
| 100500853 | ENSG00000284154 | 0          | NA          | NA         | NA         | NA         | MIR3605     |
| 406970    | ENSG00000284155 | 0          | NA          | NA         | NA         | NA         | MIR194-2    |
| 406899    | ENSG00000284157 | 0          | NA          | NA         | NA         | NA         | MIR106A     |
| 102466743 | ENSG00000284158 | 0          | NA          | NA         | NA         | NA         | MIR6822     |
| 100500888 | ENSG00000284159 | 0          | NA          | NA         | NA         | NA         | MIR3940     |

|           |                 |            |             |            |            |            |           |
|-----------|-----------------|------------|-------------|------------|------------|------------|-----------|
| 102465803 | ENSG00000284160 | 0          | NA          | NA         | NA         | NA         | MIR7706   |
| 100616122 | ENSG00000284162 | 0          | NA          | NA         | NA         | NA         | MIR4523   |
| 100500810 | ENSG00000284163 | 0          | NA          | NA         | NA         | NA         | MIR3620   |
| NA        | ENSG00000284167 | 0          | NA          | NA         | NA         | NA         | MTATP6P5  |
| NA        | ENSG00000284171 | 0          | NA          | NA         | NA         | NA         |           |
| 102465256 | ENSG00000284173 | 0          | NA          | NA         | NA         | NA         | MIR6513   |
| 100616143 | ENSG00000284175 | 0          | NA          | NA         | NA         | NA         | MIR4763   |
| 100847073 | ENSG00000284176 | 0          | NA          | NA         | NA         | NA         | MIR5090   |
| 407043    | ENSG00000284179 | 0          | NA          | NA         | NA         | NA         | MIR7-1    |
| 100500837 | ENSG00000284180 | 0          | NA          | NA         | NA         | NA         | MIR3606   |
| 406935    | ENSG00000284182 | 0          | NA          | NA         | NA         | NA         | MIR143    |
| 102465252 | ENSG00000284184 | 0          | NA          | NA         | NA         | NA         | MIR6506   |
| 407003    | ENSG00000284185 | 0          | NA          | NA         | NA         | NA         | MIR219A2  |
| 100500847 | ENSG00000284186 | 0          | NA          | NA         | NA         | NA         | MIR3615   |
| NA        | ENSG00000284188 | 0.18922458 | 0.01954053  | 0.38488496 | 0.78225479 | NA         |           |
| 406991    | ENSG00000284190 | 0          | NA          | NA         | NA         | NA         | MIR21     |
| 768213    | ENSG00000284191 | 0          | NA          | NA         | NA         | NA         | MIR671    |
| 100302168 | ENSG00000284193 | 0          | NA          | NA         | NA         | NA         | MIR1257   |
| 9997      | ENSG00000284194 | 146.207093 | -0.53250093 | 0.22845271 | 0.005982   | 0.02709036 | SCO2      |
| 102465513 | ENSG00000284195 | 0          | NA          | NA         | NA         | NA         | MIR6852   |
| NA        | ENSG00000284196 | 0          | NA          | NA         | NA         | NA         |           |
| 724028    | ENSG00000284197 | 0          | NA          | NA         | NA         | NA         | MIR658    |
| 102465510 | ENSG00000284200 | 0          | NA          | NA         | NA         | NA         | MIR6847   |
| 406928    | ENSG00000284202 | 0          | NA          | NA         | NA         | NA         | MIR137    |
| 407025    | ENSG00000284203 | 0          | NA          | NA         | NA         | NA         | MIR29B2   |
| 406979    | ENSG00000284204 | 0          | NA          | NA         | NA         | NA         | MIR19A    |
| NA        | ENSG00000284209 | 0          | NA          | NA         | NA         | NA         |           |
| 407026    | ENSG00000284214 | 0          | NA          | NA         | NA         | NA         | MIR29C    |
| 100302210 | ENSG00000284216 | 0.16735865 | 0.01897177  | 0.38482933 | 0.78225479 | NA         | MIR1909   |
| 574448    | ENSG00000284219 | 0          | NA          | NA         | NA         | NA         | MIR202    |
| NA        | ENSG00000284221 | 0          | NA          | NA         | NA         | NA         |           |
| 100126338 | ENSG00000284224 | 0          | NA          | NA         | NA         | NA         | MIR937    |
| 102465511 | ENSG00000284229 | 0          | NA          | NA         | NA         | NA         | MIR6848   |
| 494336    | ENSG00000284231 | 0          | NA          | NA         | NA         | NA         | MIR424    |
| NA        | ENSG00000284233 | 0          | NA          | NA         | NA         | NA         |           |
| NA        | ENSG00000284234 | 0          | NA          | NA         | NA         | NA         | TAF11L5   |
| NA        | ENSG00000284237 | 6.02528862 | -0.0494932  | 0.36017544 | 0.71374673 | 0.86192204 | LINC02767 |
| 100302257 | ENSG00000284239 | 0          | NA          | NA         | NA         | NA         | MIR1539   |

|           |                 |            |             |            |            |            |           |
|-----------|-----------------|------------|-------------|------------|------------|------------|-----------|
| 101927844 | ENSG00000284240 | 0          | NA          | NA         | NA         | NA         | LINC02801 |
| NA        | ENSG00000284242 | 0          | NA          | NA         | NA         | NA         |           |
| 102466719 | ENSG00000284246 | 0          | NA          | NA         | NA         | NA         | MIR6716   |
| 100616452 | ENSG00000284247 | 0          | NA          | NA         | NA         | NA         | MIR2682   |
| 102466864 | ENSG00000284250 | 0          | NA          | NA         | NA         | NA         | MIR6516   |
| 100313843 | ENSG00000284251 | 0          | NA          | NA         | NA         | NA         | MIR711    |
| 100616394 | ENSG00000284252 | 0          | NA          | NA         | NA         | NA         | MIR4444-1 |
| 100302290 | ENSG00000284253 | 0          | NA          | NA         | NA         | NA         | MIR1973   |
| 100847012 | ENSG00000284256 | 0          | NA          | NA         | NA         | NA         | MIR5004   |
| 102465879 | ENSG00000284258 | 0          | NA          | NA         | NA         | NA         | MIR8085   |
| 102466194 | ENSG00000284259 | 0          | NA          | NA         | NA         | NA         | MIR6773   |
| 100616393 | ENSG00000284261 | 0          | NA          | NA         | NA         | NA         | MIR4657   |
| NA        | ENSG00000284263 | 0          | NA          | NA         | NA         | NA         |           |
| 100616500 | ENSG00000284265 | 0          | NA          | NA         | NA         | NA         | MIR4683   |
| 100616146 | ENSG00000284266 | 0          | NA          | NA         | NA         | NA         | MIR4534   |
| 100302213 | ENSG00000284268 | 0          | NA          | NA         | NA         | NA         | MIR1181   |
| 102465841 | ENSG00000284269 | 0          | NA          | NA         | NA         | NA         | MIR7855   |
| 100423031 | ENSG00000284272 | 0          | NA          | NA         | NA         | NA         | MIR4321   |
| 100616358 | ENSG00000284276 | 0          | NA          | NA         | NA         | NA         | MIR4800   |
| 102466227 | ENSG00000284277 | 0          | NA          | NA         | NA         | NA         | MIR7162   |
| 102465508 | ENSG00000284280 | 0          | NA          | NA         | NA         | NA         | MIR6843   |
| NA        | ENSG00000284283 | 0          | NA          | NA         | NA         | NA         | TAF11L4   |
| 100616396 | ENSG00000284284 | 0          | NA          | NA         | NA         | NA         | MIR4712   |
| 100313781 | ENSG00000284286 | 0          | NA          | NA         | NA         | NA         | MIR718    |
| 100616169 | ENSG00000284288 | 0          | NA          | NA         | NA         | NA         | MIR378D2  |
| 102465492 | ENSG00000284289 | 0          | NA          | NA         | NA         | NA         | MIR6820   |
| NA        | ENSG00000284291 | 0          | NA          | NA         | NA         | NA         | MTCO2P10  |
| NA        | ENSG00000284292 | 47.1819028 | -0.39851128 | 0.42012829 | 0.09403859 | 0.23812708 |           |
| 102465669 | ENSG00000284293 | 0          | NA          | NA         | NA         | NA         | MIR7113   |
| NA        | ENSG00000284294 | 0.50785465 | 0.03075452  | 0.38601748 | 0.48329858 | NA         |           |
| NA        | ENSG00000284299 | 69.1614659 | -0.43276813 | 0.27007192 | 0.04055922 | 0.12666377 |           |
| NA        | ENSG00000284300 | 0          | NA          | NA         | NA         | NA         |           |
| 100422960 | ENSG00000284305 | 0          | NA          | NA         | NA         | NA         | MIR3179-1 |
| NA        | ENSG00000284306 | 0          | NA          | NA         | NA         | NA         | SSU72P2   |
| 388963    | ENSG00000284308 | 307.394895 | 0.17375264  | 0.13787626 | 0.17620184 | 0.37063662 | C2orf81   |
| NA        | ENSG00000284309 | 0          | NA          | NA         | NA         | NA         |           |
| 100126351 | ENSG00000284310 | 0          | NA          | NA         | NA         | NA         | MIR939    |
| 102465444 | ENSG00000284311 | 0          | NA          | NA         | NA         | NA         | MIR6742   |



|           |                 |            |             |            |            |    |           |
|-----------|-----------------|------------|-------------|------------|------------|----|-----------|
| 102466223 | ENSG00000284317 | 0          | NA          | NA         | NA         | NA | MIR7114   |
| 406907    | ENSG00000284321 | 0          | NA          | NA         | NA         | NA | MIR124-1  |
| 100422995 | ENSG00000284324 | 0          | NA          | NA         | NA         | NA | MIR3175   |
| 100500820 | ENSG00000284325 | 0          | NA          | NA         | NA         | NA | MIR3655   |
| NA        | ENSG00000284327 | 0          | NA          | NA         | NA         | NA |           |
| NA        | ENSG00000284328 | 0          | NA          | NA         | NA         | NA |           |
| 407051    | ENSG00000284329 | 0          | NA          | NA         | NA         | NA | MIR9-3    |
| 100616139 | ENSG00000284331 | 0          | NA          | NA         | NA         | NA | MIR4741   |
| 100302278 | ENSG00000284332 | 0          | NA          | NA         | NA         | NA | MIR1302-2 |
| 100616270 | ENSG00000284334 | 0          | NA          | NA         | NA         | NA | MIR4651   |
| 100313887 | ENSG00000284336 | 0          | NA          | NA         | NA         | NA | MIR2277   |
| NA        | ENSG00000284337 | 0.91156524 | -0.00602042 | 0.38128778 | 0.90873531 | NA |           |
| NA        | ENSG00000284341 | 0          | NA          | NA         | NA         | NA |           |
| 693216    | ENSG00000284343 | 0          | NA          | NA         | NA         | NA | MIR631    |
| 100313779 | ENSG00000284344 | 0          | NA          | NA         | NA         | NA | MIR2117   |
| 100126328 | ENSG00000284346 | 0          | NA          | NA         | NA         | NA | MIR940    |
| 100500858 | ENSG00000284351 | 0          | NA          | NA         | NA         | NA | MIR3622A  |
| 406934    | ENSG00000284353 | 0          | NA          | NA         | NA         | NA | MIR142    |
| 407040    | ENSG00000284357 | 0          | NA          | NA         | NA         | NA | MIR34A    |
| 102465133 | ENSG00000284360 | 0          | NA          | NA         | NA         | NA | MIR6125   |
| 100616459 | ENSG00000284361 | 0          | NA          | NA         | NA         | NA | MIR4745   |
| 574500    | ENSG00000284362 | 0          | NA          | NA         | NA         | NA | MIR519A2  |
| 407009    | ENSG00000284363 | 0          | NA          | NA         | NA         | NA | MIR224    |
| 102465495 | ENSG00000284364 | 0          | NA          | NA         | NA         | NA | MIR6824   |
| 100616408 | ENSG00000284368 | 0          | NA          | NA         | NA         | NA | MIR5047   |
| 100616237 | ENSG00000284370 | 0          | NA          | NA         | NA         | NA | MIR4640   |
| 102466740 | ENSG00000284372 | 0          | NA          | NA         | NA         | NA | MIR6808   |
| NA        | ENSG00000284373 | 0          | NA          | NA         | NA         | NA | TAF11L2   |
| 406980    | ENSG00000284375 | 0          | NA          | NA         | NA         | NA | MIR19B1   |
| NA        | ENSG00000284376 | 0          | NA          | NA         | NA         | NA |           |
| 105373347 | ENSG00000284377 | 0          | NA          | NA         | NA         | NA |           |
| 100302285 | ENSG00000284378 | 0          | NA          | NA         | NA         | NA | MIR1244-1 |
| 100423035 | ENSG00000284385 | 0          | NA          | NA         | NA         | NA | MIR4313   |
| 100126311 | ENSG00000284386 | 0          | NA          | NA         | NA         | NA | MIR147B   |
| 407013    | ENSG00000284387 | 0          | NA          | NA         | NA         | NA | MIR24-2   |
| 100616240 | ENSG00000284388 | 0          | NA          | NA         | NA         | NA | MIR4496   |
| 105373244 | ENSG00000284391 | 2.1254333  | -0.0068428  | 0.37516109 | 0.93402365 | NA |           |
| NA        | ENSG00000284393 | 0          | NA          | NA         | NA         | NA |           |

|           |                 |            |             |            |            |            |         |
|-----------|-----------------|------------|-------------|------------|------------|------------|---------|
| 100616314 | ENSG00000284394 | 0          | NA          | NA         | NA         | NA         | MIR4750 |
| 105371045 | ENSG00000284395 | 5.12831058 | -0.04807637 | 0.36224548 | 0.71266853 | 0.86169546 | PERCC1  |
| 100423003 | ENSG00000284399 | 0          | NA          | NA         | NA         | NA         | MIR3184 |
| 102465665 | ENSG00000284402 | 0          | NA          | NA         | NA         | NA         | MIR7107 |
| 100847037 | ENSG00000284407 | 0          | NA          | NA         | NA         | NA         | MIR5001 |
| 102465439 | ENSG00000284410 | 0          | NA          | NA         | NA         | NA         | MIR6733 |
| 100422832 | ENSG00000284411 | 0          | NA          | NA         | NA         | NA         | MIR3191 |
| 100616346 | ENSG00000284412 | 0          | NA          | NA         | NA         | NA         | MIR4649 |
| 100302133 | ENSG00000284415 | 0          | NA          | NA         | NA         | NA         | MIR1287 |
| 100302263 | ENSG00000284416 | 0          | NA          | NA         | NA         | NA         | MIR1908 |
| NA        | ENSG00000284418 | 0          | NA          | NA         | NA         | NA         |         |
| 724033    | ENSG00000284419 | 0          | NA          | NA         | NA         | NA         | MIR663A |
| 102465667 | ENSG00000284421 | 0          | NA          | NA         | NA         | NA         | MIR7110 |
| 100616248 | ENSG00000284424 | 0          | NA          | NA         | NA         | NA         | MIR4724 |
| 102466877 | ENSG00000284425 | 0          | NA          | NA         | NA         | NA         | MIR8072 |
| 100616124 | ENSG00000284427 | 0          | NA          | NA         | NA         | NA         | MIR4647 |
| NA        | ENSG00000284428 | 102.039291 | -0.03751535 | 0.2128837  | 0.83113676 | 0.92369221 |         |
| NA        | ENSG00000284430 | 2.11821724 | 0.02203944  | 0.37560004 | 0.79966398 | NA         |         |
| NA        | ENSG00000284431 | 16.2917712 | 0.07276752  | 0.35587521 | 0.63181774 | 0.81371846 |         |
| 100302137 | ENSG00000284433 | 0          | NA          | NA         | NA         | NA         | MIR1914 |
| 100616403 | ENSG00000284435 | 0          | NA          | NA         | NA         | NA         | MIR4691 |
| 102465524 | ENSG00000284436 | 0          | NA          | NA         | NA         | NA         | MIR6869 |
| NA        | ENSG00000284438 | 0          | NA          | NA         | NA         | NA         | SSU72P7 |
| NA        | ENSG00000284439 | 0          | NA          | NA         | NA         | NA         | TAF11L3 |
| 406906    | ENSG00000284440 | 0          | NA          | NA         | NA         | NA         | MIR122  |
| 100302224 | ENSG00000284442 | 0          | NA          | NA         | NA         | NA         | MIR2110 |
| 406974    | ENSG00000284443 | 0          | NA          | NA         | NA         | NA         | MIR197  |
| 100302242 | ENSG00000284446 | 0          | NA          | NA         | NA         | NA         | MIR1236 |
| 407047    | ENSG00000284447 | 0          | NA          | NA         | NA         | NA         | MIR9-2  |
| 102465248 | ENSG00000284448 | 0          | NA          | NA         | NA         | NA         | MIR6501 |
| 100847052 | ENSG00000284450 | 0          | NA          | NA         | NA         | NA         | MIR664B |
| NA        | ENSG00000284452 | 0          | NA          | NA         | NA         | NA         |         |
| 406905    | ENSG00000284453 | 0          | NA          | NA         | NA         | NA         | MIR1-2  |
| 100302240 | ENSG00000284458 | 0          | NA          | NA         | NA         | NA         | MIR1304 |
| 407012    | ENSG00000284459 | 0          | NA          | NA         | NA         | NA         | MIR24-1 |
| NA        | ENSG00000284461 | 21.3158842 | -0.17355998 | 0.35820386 | 0.35306586 | 0.58322456 |         |
| 442894    | ENSG00000284463 | 0          | NA          | NA         | NA         | NA         | MIR302B |
| 100302197 | ENSG00000284464 | 0          | NA          | NA         | NA         | NA         | MIR1306 |

|           |                 |            |             |            |            |            |              |
|-----------|-----------------|------------|-------------|------------|------------|------------|--------------|
| NA        | ENSG00000284465 | 0          | NA          | NA         | NA         | NA         | TAF11L7      |
| 102466190 | ENSG00000284469 | 0          | NA          | NA         | NA         | NA         | MIR6721      |
| 100132874 | ENSG00000284471 | 6.54631683 | 0.2929333   | 0.51226762 | 0.06484655 | 0.18146058 |              |
| 100616150 | ENSG00000284473 | 0          | NA          | NA         | NA         | NA         | MIR4720      |
| NA        | ENSG00000284474 | 0          | NA          | NA         | NA         | NA         |              |
| NA        | ENSG00000284479 | 0          | NA          | NA         | NA         | NA         | SMIM39       |
| 100302138 | ENSG00000284481 | 0          | NA          | NA         | NA         | NA         | MIR1292      |
| 100616113 | ENSG00000284482 | 0          | NA          | NA         | NA         | NA         | MIR4680      |
| NA        | ENSG00000284484 | 0          | NA          | NA         | NA         | NA         |              |
| 406988    | ENSG00000284485 | 0          | NA          | NA         | NA         | NA         | MIR205       |
| 102465536 | ENSG00000284488 | 0          | NA          | NA         | NA         | NA         | MIR6890      |
| 102465449 | ENSG00000284489 | 0          | NA          | NA         | NA         | NA         | MIR6751      |
| NA        | ENSG00000284490 | 0          | NA          | NA         | NA         | NA         |              |
| 111644133 | ENSG00000284491 | 3.79315239 | 0.0775267   | 0.37694397 | 0.49846847 | 0.71624312 | THSD8        |
| 693149    | ENSG00000284498 | 0          | NA          | NA         | NA         | NA         | MIR564       |
| 574031    | ENSG00000284499 | 0          | NA          | NA         | NA         | NA         | MIR363       |
| NA        | ENSG00000284500 | 0          | NA          | NA         | NA         | NA         |              |
| 100500842 | ENSG00000284503 | 0          | NA          | NA         | NA         | NA         | MIR3652      |
| 111188157 | ENSG00000284505 | 3.53064887 | -0.00033491 | 0.36715641 | 0.99570901 | 0.99852582 | LYNX1-SLURP2 |
| 406923    | ENSG00000284508 | 0          | NA          | NA         | NA         | NA         | MIR133A2     |
| NA        | ENSG00000284512 | 11.763278  | -0.10468482 | 0.35282443 | 0.52153964 | 0.73489677 |              |
| NA        | ENSG00000284513 | 0          | NA          | NA         | NA         | NA         |              |
| 105377307 | ENSG00000284516 | 0          | NA          | NA         | NA         | NA         | VAMP9P       |
| 102466754 | ENSG00000284517 | 0          | NA          | NA         | NA         | NA         | MIR6873      |
| 100616439 | ENSG00000284518 | 0          | NA          | NA         | NA         | NA         | MIR4658      |
| 102466270 | ENSG00000284519 | 0          | NA          | NA         | NA         | NA         | MIR6741      |
| 406884    | ENSG00000284520 | 0          | NA          | NA         | NA         | NA         | MIRLET7B     |
| NA        | ENSG00000284522 | 0          | NA          | NA         | NA         | NA         |              |
| NA        | ENSG00000284523 | 12.2018268 | 0.16771229  | 0.38771269 | 0.29797445 | 0.52474818 |              |
| 100616453 | ENSG00000284525 | 0          | NA          | NA         | NA         | NA         | MIR4687      |
| NA        | ENSG00000284526 | 22.274561  | -0.22062402 | 0.37584135 | 0.2588946  | 0.48036523 |              |
| 100616388 | ENSG00000284532 | 0          | NA          | NA         | NA         | NA         | MIR4723      |
| NA        | ENSG00000284534 | 0          | NA          | NA         | NA         | NA         |              |
| 102465448 | ENSG00000284535 | 0          | NA          | NA         | NA         | NA         | MIR6748      |
| 406952    | ENSG00000284536 | 0          | NA          | NA         | NA         | NA         | MIR17        |
| 407049    | ENSG00000284538 | 0          | NA          | NA         | NA         | NA         | MIR92A2      |
| NA        | ENSG00000284540 | 12.6685294 | -0.17073185 | 0.39273811 | 0.27213942 | 0.49552552 |              |
| 100616487 | ENSG00000284541 | 0          | NA          | NA         | NA         | NA         | MIR4517      |

|           |                 |            |             |            |            |            |           |
|-----------|-----------------|------------|-------------|------------|------------|------------|-----------|
| 100500827 | ENSG00000284542 | 0          | NA          | NA         | NA         | NA         | MIR3614   |
| NA        | ENSG00000284543 | 0          | NA          | NA         | NA         | NA         | LINC01226 |
| 442902    | ENSG00000284544 | 0          | NA          | NA         | NA         | NA         | MIR330    |
| NA        | ENSG00000284546 | 0          | NA          | NA         | NA         | NA         | SSU72P3   |
| 100422910 | ENSG00000284547 | 0          | NA          | NA         | NA         | NA         | MIR2861   |
| 102466252 | ENSG00000284550 | 0          | NA          | NA         | NA         | NA         | MIR8069-1 |
| 102465534 | ENSG00000284553 | 0          | NA          | NA         | NA         | NA         | MIR6886   |
| NA        | ENSG00000284554 | 0.86562001 | -0.0370931  | 0.38692692 | 0.35638876 | NA         |           |
| NA        | ENSG00000284558 | 0          | NA          | NA         | NA         | NA         |           |
| 100616387 | ENSG00000284564 | 0          | NA          | NA         | NA         | NA         | MIR3064   |
| 574411    | ENSG00000284565 | 0          | NA          | NA         | NA         | NA         | MIR451A   |
| 407008    | ENSG00000284567 | 0          | NA          | NA         | NA         | NA         | MIR223    |
| 100616185 | ENSG00000284568 | 0          | NA          | NA         | NA         | NA         | MIR371B   |
| 102466854 | ENSG00000284570 | 0          | NA          | NA         | NA         | NA         | MIR7705   |
| NA        | ENSG00000284572 | 0.14931947 | -0.01844332 | 0.38480212 | 0.84537521 | NA         |           |
| 102465472 | ENSG00000284574 | 0          | NA          | NA         | NA         | NA         | MIR6787   |
| 100616112 | ENSG00000284575 | 0          | NA          | NA         | NA         | NA         | MIR4793   |
| 100126325 | ENSG00000284583 | 0          | NA          | NA         | NA         | NA         | MIR935    |
| 100847026 | ENSG00000284584 | 0          | NA          | NA         | NA         | NA         | MIR5006   |
| 100616167 | ENSG00000284585 | 0          | NA          | NA         | NA         | NA         | MIR4722   |
| 693235    | ENSG00000284586 | 0          | NA          | NA         | NA         | NA         | MIR92B    |
| 100126332 | ENSG00000284587 | 0          | NA          | NA         | NA         | NA         | MIR943    |
| NA        | ENSG00000284591 | 0          | NA          | NA         | NA         | NA         |           |
| NA        | ENSG00000284592 | 0          | NA          | NA         | NA         | NA         |           |
| 102465993 | ENSG00000284594 | 0          | NA          | NA         | NA         | NA         | MIR7847   |
| 102466911 | ENSG00000284595 | 0          | NA          | NA         | NA         | NA         | MIR6785   |
| 100616367 | ENSG00000284596 | 0          | NA          | NA         | NA         | NA         | MIR4467   |
| NA        | ENSG00000284600 | 6.42296524 | -0.07963799 | 0.3684118  | 0.54786293 | 0.75451702 |           |
| 105378736 | ENSG00000284601 | 0          | NA          | NA         | NA         | NA         |           |
| NA        | ENSG00000284602 | 19.3712511 | -0.27777789 | 0.38454591 | 0.18975601 | 0.39090014 |           |
| NA        | ENSG00000284603 | 0          | NA          | NA         | NA         | NA         |           |
| NA        | ENSG00000284604 | 0          | NA          | NA         | NA         | NA         |           |
| NA        | ENSG00000284605 | 0          | NA          | NA         | NA         | NA         |           |
| NA        | ENSG00000284606 | 4.93939716 | 0.00804854  | 0.36458073 | 0.94751474 | 0.97852939 |           |
| 105374988 | ENSG00000284607 | 0.173124   | -0.01911262 | 0.38486262 | 0.84537521 | NA         |           |
| NA        | ENSG00000284608 | 0          | NA          | NA         | NA         | NA         |           |
| 390271    | ENSG00000284609 | 0          | NA          | NA         | NA         | NA         | OR8B3     |
| NA        | ENSG00000284610 | 31.6113657 | -1.04816582 | 0.63331224 | 0.00567151 | 0.02589109 |           |

|    |                 |            |             |            |            |            |           |
|----|-----------------|------------|-------------|------------|------------|------------|-----------|
| NA | ENSG00000284611 | 0          | NA          | NA         | NA         | NA         |           |
| NA | ENSG00000284612 | 0          | NA          | NA         | NA         | NA         |           |
| NA | ENSG00000284613 | 0          | NA          | NA         | NA         | NA         |           |
| NA | ENSG00000284614 | 0          | NA          | NA         | NA         | NA         |           |
| NA | ENSG00000284615 | 0          | NA          | NA         | NA         | NA         |           |
| NA | ENSG00000284616 | 0          | NA          | NA         | NA         | NA         |           |
| NA | ENSG00000284617 | 0          | NA          | NA         | NA         | NA         |           |
| NA | ENSG00000284618 | 0          | NA          | NA         | NA         | NA         |           |
| NA | ENSG00000284619 | 0          | NA          | NA         | NA         | NA         |           |
| NA | ENSG00000284620 | 5.60877846 | -0.04939086 | 0.3603125  | 0.71358407 | 0.86192204 |           |
| NA | ENSG00000284621 | 0          | NA          | NA         | NA         | NA         |           |
| NA | ENSG00000284622 | 0          | NA          | NA         | NA         | NA         | SCYGR10   |
| NA | ENSG00000284623 | 0          | NA          | NA         | NA         | NA         | LINC02786 |
| NA | ENSG00000284624 | 14.6011906 | 0.15117293  | 0.35675342 | 0.40213171 | 0.63039611 |           |
| NA | ENSG00000284625 | 0          | NA          | NA         | NA         | NA         |           |
| NA | ENSG00000284626 | 17.3701811 | 0.27362976  | 0.40026094 | 0.18491751 | 0.38376187 |           |
| NA | ENSG00000284627 | 0          | NA          | NA         | NA         | NA         |           |
| NA | ENSG00000284628 | 0          | NA          | NA         | NA         | NA         |           |
| NA | ENSG00000284629 | 0          | NA          | NA         | NA         | NA         | SCYGR1    |
| NA | ENSG00000284630 | 3.09232187 | 0.0616658   | 0.37814035 | 0.53475486 | 0.74572704 |           |
| NA | ENSG00000284631 | 0          | NA          | NA         | NA         | NA         | SCYGR4    |
| NA | ENSG00000284632 | 0          | NA          | NA         | NA         | NA         |           |
| NA | ENSG00000284633 | 0          | NA          | NA         | NA         | NA         |           |
| NA | ENSG00000284634 | 57.3771367 | -0.30562505 | 0.32288123 | 0.15944413 | 0.34700764 |           |
| NA | ENSG00000284635 | 0          | NA          | NA         | NA         | NA         | SCYGR8    |
| NA | ENSG00000284636 | 0          | NA          | NA         | NA         | NA         |           |
| NA | ENSG00000284637 | 0          | NA          | NA         | NA         | NA         |           |
| NA | ENSG00000284638 | 0          | NA          | NA         | NA         | NA         |           |
| NA | ENSG00000284639 | 0.90419472 | -0.03873466 | 0.3871499  | 0.33610152 | NA         |           |
| NA | ENSG00000284640 | 0          | NA          | NA         | NA         | NA         |           |
| NA | ENSG00000284641 | 0          | NA          | NA         | NA         | NA         |           |
| NA | ENSG00000284642 | 14.1897481 | -0.30782755 | 0.4531839  | 0.12663081 | 0.29633821 |           |
| NA | ENSG00000284643 | 0          | NA          | NA         | NA         | NA         | SCYGR2    |
| NA | ENSG00000284644 | 0          | NA          | NA         | NA         | NA         |           |
| NA | ENSG00000284645 | 0.14931947 | -0.01844332 | 0.38480212 | 0.84537521 | NA         |           |
| NA | ENSG00000284646 | 0          | NA          | NA         | NA         | NA         |           |
| NA | ENSG00000284648 | 0          | NA          | NA         | NA         | NA         |           |
| NA | ENSG00000284649 | 0.46824962 | -0.0079969  | 0.38327245 | 0.86096576 | NA         |           |

|           |                 |            |             |            |            |            |           |
|-----------|-----------------|------------|-------------|------------|------------|------------|-----------|
| NA        | ENSG00000284650 | 0.44931959 | -0.02727943 | 0.38571141 | 0.562258   | NA         |           |
| NA        | ENSG00000284651 | 0          | NA          | NA         | NA         | NA         |           |
| NA        | ENSG00000284652 | 4.60005589 | -0.00413854 | 0.36111385 | 0.97118429 | 0.98918303 |           |
| NA        | ENSG00000284653 | 0          | NA          | NA         | NA         | NA         |           |
| NA        | ENSG00000284654 | 0          | NA          | NA         | NA         | NA         |           |
| NA        | ENSG00000284655 | 0          | NA          | NA         | NA         | NA         |           |
| NA        | ENSG00000284656 | 0          | NA          | NA         | NA         | NA         |           |
| NA        | ENSG00000284657 | 2.86872871 | -0.20112206 | 0.45577316 | 0.0278843  | 0.0946978  |           |
| NA        | ENSG00000284659 | 0          | NA          | NA         | NA         | NA         |           |
| NA        | ENSG00000284660 | 0          | NA          | NA         | NA         | NA         |           |
| NA        | ENSG00000284661 | 0          | NA          | NA         | NA         | NA         |           |
| 81399     | ENSG00000284662 | 0          | NA          | NA         | NA         | NA         | OR4F16    |
| NA        | ENSG00000284663 | 0          | NA          | NA         | NA         | NA         |           |
| NA        | ENSG00000284664 | 7.3004292  | 0.11717552  | 0.36924562 | 0.44438922 | 0.66929948 |           |
| NA        | ENSG00000284665 | 0          | NA          | NA         | NA         | NA         |           |
| NA        | ENSG00000284666 | 0.15069912 | -0.01848503 | 0.38480575 | 0.84537521 | NA         |           |
| NA        | ENSG00000284667 | 0          | NA          | NA         | NA         | NA         | SCYGR5    |
| 105376673 | ENSG00000284668 | 0          | NA          | NA         | NA         | NA         | LINC02780 |
| NA        | ENSG00000284669 | 1.82009409 | 0.01907386  | 0.37813317 | 0.79885033 | NA         |           |
| NA        | ENSG00000284670 | 0.18922458 | 0.01954053  | 0.38488496 | 0.78225479 | NA         | RPSAP56   |
| NA        | ENSG00000284671 | 0          | NA          | NA         | NA         | NA         |           |
| NA        | ENSG00000284672 | 0.70406155 | 0.05122625  | 0.38859327 | 0.29616985 | NA         |           |
| NA        | ENSG00000284673 | 0          | NA          | NA         | NA         | NA         |           |
| 105376680 | ENSG00000284674 | 0          | NA          | NA         | NA         | NA         | LINC02781 |
| NA        | ENSG00000284675 | 0.95358926 | -0.01510531 | 0.38158613 | 0.77831349 | NA         |           |
| NA        | ENSG00000284676 | 0.50590997 | 0.01465593  | 0.38308553 | 0.74877065 | NA         |           |
| NA        | ENSG00000284677 | 0          | NA          | NA         | NA         | NA         |           |
| NA        | ENSG00000284678 | 0          | NA          | NA         | NA         | NA         | LINC02811 |
| NA        | ENSG00000284679 | 0          | NA          | NA         | NA         | NA         |           |
| 26595     | ENSG00000284680 | 0          | NA          | NA         | NA         | NA         | OR8B2     |
| NA        | ENSG00000284682 | 0          | NA          | NA         | NA         | NA         |           |
| NA        | ENSG00000284684 | 0          | NA          | NA         | NA         | NA         |           |
| NA        | ENSG00000284685 | 12.2131359 | -0.28167762 | 0.43911645 | 0.14898561 | 0.33152472 |           |
| NA        | ENSG00000284686 | 25.5983046 | 0.12971752  | 0.31607962 | 0.50461317 | 0.72111066 |           |
| NA        | ENSG00000284687 | 0          | NA          | NA         | NA         | NA         |           |
| NA        | ENSG00000284688 | 0          | NA          | NA         | NA         | NA         | BTN1A1P1  |
| NA        | ENSG00000284689 | 0          | NA          | NA         | NA         | NA         | OR7E84P   |
| 100130520 | ENSG00000284690 | 0          | NA          | NA         | NA         | NA         | CD300H    |

|           |    |                 |            |             |            |            |            |           |
|-----------|----|-----------------|------------|-------------|------------|------------|------------|-----------|
|           | NA | ENSG00000284691 | 155.289165 | 0.14283136  | 0.18198135 | 0.37388752 | 0.60293654 |           |
|           | NA | ENSG00000284692 | 0          | NA          | NA         | NA         | NA         |           |
| 100506022 | NA | ENSG00000284693 | 22.3172544 | 0.02287923  | 0.31171223 | 0.90269006 | 0.95736199 | LINC02606 |
|           | NA | ENSG00000284694 | 0          | NA          | NA         | NA         | NA         |           |
|           | NA | ENSG00000284695 | 0          | NA          | NA         | NA         | NA         |           |
| 105378712 | NA | ENSG00000284696 | 0          | NA          | NA         | NA         | NA         | LINC02808 |
|           | NA | ENSG00000284697 | 4.30487261 | -0.07833827 | 0.38126321 | 0.44562403 | 0.67028199 |           |
|           | NA | ENSG00000284698 | 0          | NA          | NA         | NA         | NA         |           |
|           | NA | ENSG00000284699 | 0          | NA          | NA         | NA         | NA         |           |
|           | NA | ENSG00000284700 | 0          | NA          | NA         | NA         | NA         |           |
| 388946    | NA | ENSG00000284701 | 0          | NA          | NA         | NA         | NA         | TMEM247   |
|           | NA | ENSG00000284702 | 0          | NA          | NA         | NA         | NA         |           |
|           | NA | ENSG00000284703 | 0.14931947 | -0.01844332 | 0.38480212 | 0.84537521 | NA         |           |
|           | NA | ENSG00000284704 | 0          | NA          | NA         | NA         | NA         | SCYGR3    |
|           | NA | ENSG00000284705 | 0.173124   | -0.01911262 | 0.38486262 | 0.84537521 | NA         |           |
|           | NA | ENSG00000284706 | 0          | NA          | NA         | NA         | NA         |           |
|           | NA | ENSG00000284707 | 851.503934 | 0.42582024  | 0.11521024 | 0.0001058  | 0.00080022 |           |
|           | NA | ENSG00000284708 | 0.49659491 | -0.02954544 | 0.3859062  | 0.52492465 | NA         |           |
|           | NA | ENSG00000284709 | 0.88759711 | 0.06404567  | 0.39113129 | 0.20527472 | NA         |           |
|           | NA | ENSG00000284710 | 0          | NA          | NA         | NA         | NA         |           |
|           | NA | ENSG00000284711 | 0          | NA          | NA         | NA         | NA         |           |
| 107984345 | NA | ENSG00000284713 | 11.3763507 | -0.0527668  | 0.3384855  | 0.74918832 | 0.88205755 | SMIM38    |
|           | NA | ENSG00000284715 | 0          | NA          | NA         | NA         | NA         |           |
|           | NA | ENSG00000284716 | 0          | NA          | NA         | NA         | NA         |           |
|           | NA | ENSG00000284717 | 0          | NA          | NA         | NA         | NA         |           |
|           | NA | ENSG00000284718 | 0          | NA          | NA         | NA         | NA         | SCYGR7    |
|           | NA | ENSG00000284719 | 2.23605505 | -0.06814076 | 0.38454206 | 0.40324984 | NA         |           |
|           | NA | ENSG00000284720 | 0          | NA          | NA         | NA         | NA         |           |
|           | NA | ENSG00000284721 | 0          | NA          | NA         | NA         | NA         |           |
|           | NA | ENSG00000284722 | 0.36243367 | 0.00097355  | 0.38336482 | 0.96661039 | NA         |           |
|           | NA | ENSG00000284723 | 0          | NA          | NA         | NA         | NA         | OR8S1     |
|           | NA | ENSG00000284724 | 0          | NA          | NA         | NA         | NA         |           |
|           | NA | ENSG00000284725 | 0          | NA          | NA         | NA         | NA         | SCYGR6    |
|           | NA | ENSG00000284726 | 4.00612407 | 0.02893955  | 0.36474882 | 0.81175391 | 0.91472316 |           |
|           | NA | ENSG00000284727 | 0.16735865 | 0.01897177  | 0.38482933 | 0.78225479 | NA         |           |
|           | NA | ENSG00000284728 | 0          | NA          | NA         | NA         | NA         |           |
| 112163659 | NA | ENSG00000284730 | 2.68327228 | 0.03419953  | 0.37839141 | 0.66989417 | 0.83753108 | TMDD1     |
|           | NA | ENSG00000284731 | 0          | NA          | NA         | NA         | NA         |           |

|           |                 |            |             |            |            |            |           |
|-----------|-----------------|------------|-------------|------------|------------|------------|-----------|
| NA        | ENSG00000284732 | 0          | NA          | NA         | NA         | NA         |           |
| 729759    | ENSG00000284733 | 0          | NA          | NA         | NA         | NA         | OR4F29    |
| NA        | ENSG00000284734 | 0.173733   | 0.01914545  | 0.38484597 | 0.78225479 | NA         |           |
| NA        | ENSG00000284735 | 10.6446619 | -0.38589437 | 0.57207719 | 0.05828534 | 0.16750367 |           |
| NA        | ENSG00000284736 | 0          | NA          | NA         | NA         | NA         | RNA5SP343 |
| 101928059 | ENSG00000284738 | 13.558553  | 0.00989165  | 0.32820471 | 0.95600115 | 0.98188817 |           |
| NA        | ENSG00000284739 | 0          | NA          | NA         | NA         | NA         |           |
| NA        | ENSG00000284740 | 2.36972491 | -0.02915483 | 0.3792792  | 0.69012571 | NA         |           |
| 50940     | ENSG00000284741 | 0          | NA          | NA         | NA         | NA         |           |
| NA        | ENSG00000284742 | 0          | NA          | NA         | NA         | NA         | OR11PIP   |
| NA        | ENSG00000284743 | 0          | NA          | NA         | NA         | NA         |           |
| NA        | ENSG00000284744 | 0          | NA          | NA         | NA         | NA         |           |
| NA        | ENSG00000284745 | 0          | NA          | NA         | NA         | NA         |           |
| NA        | ENSG00000284746 | 0          | NA          | NA         | NA         | NA         |           |
| NA        | ENSG00000284747 | 11.9924565 | -0.01335697 | 0.33860368 | 0.93147315 | 0.97149202 |           |
| NA        | ENSG00000284748 | 0          | NA          | NA         | NA         | NA         |           |
| 110599564 | ENSG00000284753 | 114.935441 | -0.29150669 | 0.21317255 | 0.10414003 | 0.25686895 | EEF1AKMT4 |
| 8622      | ENSG00000284762 | 5.85021826 | 0.03912516  | 0.36596872 | 0.7480454  | 0.88173637 |           |
| NA        | ENSG00000284763 | 0          | NA          | NA         | NA         | NA         |           |
| 6905      | ENSG00000284770 | 623.080057 | -0.33327518 | 0.10682544 | 0.00112083 | 0.00651078 | TBCE      |
| NA        | ENSG00000284772 | 0.75689831 | 0.03380966  | 0.38651369 | 0.3822658  | NA         |           |
| NA        | ENSG00000284773 | 41.5953975 | 0.44727516  | 0.41814866 | 0.0709467  | 0.19345554 |           |
| NA        | ENSG00000284776 | 259.816848 | -0.00183004 | 0.14431416 | 0.98803442 | 0.99589897 |           |
| NA        | ENSG00000284779 | 1.21186802 | -0.04870754 | 0.38870204 | 0.23295075 | NA         |           |
| NA        | ENSG00000284783 | 0.68211779 | 0.04059968  | 0.38717316 | 0.35759994 | NA         |           |
| NA        | ENSG00000284788 | 0          | NA          | NA         | NA         | NA         |           |
| 113523638 | ENSG00000284791 | 0          | NA          | NA         | NA         | NA         | SMIM41    |
| 729966    | ENSG00000284797 | 0          | NA          | NA         | NA         | NA         |           |
| NA        | ENSG00000284800 | 0          | NA          | NA         | NA         | NA         |           |
| NA        | ENSG00000284803 | 0          | NA          | NA         | NA         | NA         |           |
| NA        | ENSG00000284808 | 0.44795842 | -0.02501848 | 0.38558245 | 0.5807882  | NA         |           |
| NA        | ENSG00000284809 | 0          | NA          | NA         | NA         | NA         |           |
| NA        | ENSG00000284820 | 109.068256 | 0.10462648  | 0.21666793 | 0.56040453 | 0.76415299 |           |
| NA        | ENSG00000284823 | 0          | NA          | NA         | NA         | NA         |           |
| NA        | ENSG00000284825 | 0.65785638 | 0.02052179  | 0.38371801 | 0.63311365 | NA         |           |
| NA        | ENSG00000284829 | 0.44795842 | -0.02501848 | 0.38558245 | 0.5807882  | NA         |           |
| 101928718 | ENSG00000284830 | 5.71005247 | 0.15886158  | 0.40824482 | 0.20896041 | 0.41699602 |           |
| NA        | ENSG00000284834 | 0          | NA          | NA         | NA         | NA         |           |



|           |                 |            |             |            |            |            |                |
|-----------|-----------------|------------|-------------|------------|------------|------------|----------------|
| 339166    | ENSG00000284837 | 0          | NA          | NA         | NA         | NA         |                |
| NA        | ENSG00000284839 | 0          | NA          | NA         | NA         | NA         |                |
| NA        | ENSG00000284840 | 0          | NA          | NA         | NA         | NA         |                |
| NA        | ENSG00000284842 | 0.76212873 | -0.02288198 | 0.38372141 | 0.60951288 | NA         | FAM91A2P       |
| NA        | ENSG00000284844 | 1.00415192 | 0.04322574  | 0.38779947 | 0.2717111  | NA         |                |
| NA        | ENSG00000284846 | 0          | NA          | NA         | NA         | NA         |                |
| NA        | ENSG00000284847 | 0          | NA          | NA         | NA         | NA         |                |
| 101927464 | ENSG00000284848 | 0          | NA          | NA         | NA         | NA         | LINC02359      |
| NA        | ENSG00000284858 | 0          | NA          | NA         | NA         | NA         |                |
| 339829    | ENSG00000284862 | 111.529894 | -0.0006403  | 0.19486672 | 0.99563694 | 0.99852582 | CCDC39         |
| NA        | ENSG00000284873 | 0          | NA          | NA         | NA         | NA         | OOSP1          |
| NA        | ENSG00000284874 | 1019.62401 | -0.40770861 | 0.10307982 | 3.88E-05   | 0.00032659 |                |
| NA        | ENSG00000284876 | 0          | NA          | NA         | NA         | NA         |                |
| NA        | ENSG00000284879 | 80.1201104 | -0.07270835 | 0.23234968 | 0.69379638 | 0.85189505 |                |
| NA        | ENSG00000284882 | 1.2249117  | 0.05626205  | 0.3847626  | 0.41648581 | NA         |                |
| NA        | ENSG00000284883 | 0          | NA          | NA         | NA         | NA         |                |
| NA        | ENSG00000284892 | 0          | NA          | NA         | NA         | NA         | OR4H6P         |
| NA        | ENSG00000284895 | 0          | NA          | NA         | NA         | NA         |                |
| NA        | ENSG00000284902 | 0.51716852 | 0.01740952  | 0.38328923 | 0.71277553 | NA         |                |
| NA        | ENSG00000284906 | 142.607022 | 0.21182211  | 0.20187945 | 0.21980114 | 0.43189606 |                |
| NA        | ENSG00000284914 | 0          | NA          | NA         | NA         | NA         |                |
| 110599583 | ENSG00000284917 | 0          | NA          | NA         | NA         | NA         | EEF1AKMT4-ECE2 |
| 220074    | ENSG00000284922 | 33.2108533 | 0.16120362  | 0.2974155  | 0.42367818 | 0.64959604 |                |
| NA        | ENSG00000284928 | 0.18922458 | 0.01954053  | 0.38488496 | 0.78225479 | NA         |                |
| 101928143 | ENSG00000284930 | 3.87002904 | -0.05619538 | 0.37696405 | 0.56815358 | 0.76919502 |                |
| NA        | ENSG00000284931 | 0          | NA          | NA         | NA         | NA         |                |
| NA        | ENSG00000284932 | 0          | NA          | NA         | NA         | NA         |                |
| NA        | ENSG00000284934 | 178.503824 | 0.08052087  | 0.18761221 | 0.62411175 | 0.80835469 |                |
| NA        | ENSG00000284946 | 830.074907 | -0.1933663  | 0.10249829 | 0.04970748 | 0.14834779 |                |
| 254896    | ENSG00000284948 | 0.82461574 | 0.01418887  | 0.38179066 | 0.78349566 | NA         |                |
| NA        | ENSG00000284951 | 0          | NA          | NA         | NA         | NA         |                |
| NA        | ENSG00000284952 | 1.17151057 | 0.04905867  | 0.3887731  | 0.21859307 | NA         |                |
| 100507547 | ENSG00000284954 | 12.0858416 | -0.04624358 | 0.33795116 | 0.77816166 | 0.8983839  |                |
| NA        | ENSG00000284956 | 0          | NA          | NA         | NA         | NA         |                |
| NA        | ENSG00000284957 | 0          | NA          | NA         | NA         | NA         |                |
| NA        | ENSG00000284959 | 11.0572717 | 0.10069496  | 0.35137982 | 0.54602432 | 0.75333225 |                |
| NA        | ENSG00000284964 | 0          | NA          | NA         | NA         | NA         |                |
| NA        | ENSG00000284966 | 43.5912548 | 1.29488193  | 0.63693146 | 0.0020787  | 0.01105077 |                |

|           |    |                 |            |             |            |            |            |             |
|-----------|----|-----------------|------------|-------------|------------|------------|------------|-------------|
|           | NA | ENSG00000284968 | 4.69975744 | -0.13085659 | 0.39820496 | 0.24909399 | 0.46846413 |             |
|           | NA | ENSG00000284969 | 0          | NA          | NA         | NA         | NA         |             |
|           | NA | ENSG00000284976 | 58.201597  | 0.1056079   | 0.39658029 | 0.23053413 | 0.44648547 |             |
|           | NA | ENSG00000284977 | 1.39833683 | 0.09117442  | 0.39616735 | 0.15719859 | NA         |             |
| 107983993 |    | ENSG00000284981 | 204.267276 | 0.32915473  | 0.16323533 | 0.02597593 | 0.08972187 | UPK3BL2     |
|           | NA | ENSG00000284985 | 0          | NA          | NA         | NA         | NA         |             |
|           | NA | ENSG00000284986 | 0          | NA          | NA         | NA         | NA         |             |
|           | NA | ENSG00000284987 | 0.78980912 | -0.04507899 | 0.38780683 | 0.32721442 | NA         |             |
| 727924    |    | ENSG00000284988 | 0          | NA          | NA         | NA         | NA         | LINC02203   |
|           | NA | ENSG00000284989 | 0          | NA          | NA         | NA         | NA         |             |
|           | NA | ENSG00000284994 | 0.34045735 | -0.00013971 | 0.38336222 | 0.96657694 | NA         |             |
|           | NA | ENSG00000284999 | 0          | NA          | NA         | NA         | NA         |             |
|           | NA | ENSG00000285000 | 8.57935758 | -0.03847111 | 0.38665403 | 0.27777364 | 0.5022529  |             |
|           | NA | ENSG00000285006 | 0.50565615 | -0.01332257 | 0.38353042 | 0.77769421 | NA         |             |
|           | NA | ENSG00000285010 | 0          | NA          | NA         | NA         | NA         | OOSP4A      |
|           | NA | ENSG00000285012 | 0          | NA          | NA         | NA         | NA         |             |
|           | NA | ENSG00000285016 | 0.173733   | 0.01914545  | 0.38484597 | 0.78225479 | NA         |             |
|           | NA | ENSG00000285018 | 5.10933746 | -0.01662934 | 0.36467173 | 0.88550273 | 0.95010405 |             |
|           | NA | ENSG00000285020 | 0          | NA          | NA         | NA         | NA         |             |
|           | NA | ENSG00000285025 | 0          | NA          | NA         | NA         | NA         |             |
|           | NA | ENSG00000285030 | 0.14931947 | -0.01844332 | 0.38480212 | 0.84537521 | NA         |             |
|           | NA | ENSG00000285035 | 14.8230409 | 0.05906017  | 0.33402242 | 0.73241231 | 0.87210781 |             |
|           | NA | ENSG00000285040 | 0          | NA          | NA         | NA         | NA         |             |
|           | NA | ENSG00000285041 | 0.44795842 | -0.02501848 | 0.38558245 | 0.5807882  | NA         |             |
|           | NA | ENSG00000285042 | 0          | NA          | NA         | NA         | NA         |             |
| 112694756 |    | ENSG00000285043 | 727.277175 | -0.4105641  | 0.11051945 | 0.00010209 | 0.00077482 |             |
|           | NA | ENSG00000285045 | 0          | NA          | NA         | NA         | NA         |             |
| 101928583 |    | ENSG00000285051 | 1.25289642 | -0.06413367 | 0.38829991 | 0.27538257 | NA         | SLC7A14-AS1 |
| 6905      |    | ENSG00000285053 | 436.60001  | -0.09818233 | 0.1198403  | 0.38649001 | 0.61565323 | TBCE        |
|           | NA | ENSG00000285057 | 0          | NA          | NA         | NA         | NA         |             |
|           | NA | ENSG00000285062 | 0          | NA          | NA         | NA         | NA         |             |
|           | NA | ENSG00000285064 | 0          | NA          | NA         | NA         | NA         |             |
|           | NA | ENSG00000285068 | 0          | NA          | NA         | NA         | NA         |             |
| 89839     |    | ENSG00000285077 | 181.67886  | -0.35790835 | 0.1808209  | 0.02527809 | 0.0878468  | ARHGAP11B   |
|           | NA | ENSG00000285079 | 0          | NA          | NA         | NA         | NA         |             |
|           | NA | ENSG00000285080 | 0.173733   | 0.01914545  | 0.38484597 | 0.78225479 | NA         |             |
|           | NA | ENSG00000285081 | 0.53027241 | 0.03939888  | 0.38680911 | 0.41709277 | NA         |             |
|           | NA | ENSG00000285082 | 19.8253615 | 4.05859536  | 0.78569014 | 2.68E-08   | 3.81E-07   |             |

|      |                 |            |             |            |            |            |           |
|------|-----------------|------------|-------------|------------|------------|------------|-----------|
| NA   | ENSG00000285085 | 14.1383044 | 0.22013191  | 0.40969716 | 0.21196628 | 0.4215951  |           |
| NA   | ENSG00000285090 | 0          | NA          | NA         | NA         | NA         |           |
| NA   | ENSG00000285091 | 1.86566113 | 0.08739215  | 0.39306334 | 0.23090007 | NA         |           |
| NA   | ENSG00000285094 | 0          | NA          | NA         | NA         | NA         | LINC01488 |
| NA   | ENSG00000285095 | 2.84713599 | 0.0984573   | 0.3907668  | 0.28800732 | 0.5137162  |           |
| NA   | ENSG00000285100 | 0          | NA          | NA         | NA         | NA         |           |
| NA   | ENSG00000285102 | 0          | NA          | NA         | NA         | NA         |           |
| NA   | ENSG00000285103 | 85.8733542 | -0.05632691 | 0.21535407 | 0.75282749 | 0.8843065  |           |
| NA   | ENSG00000285106 | 8.28611406 | 0.2150837   | 0.43386876 | 0.15250788 | 0.33701897 |           |
| NA   | ENSG00000285108 | 0.34746601 | 0.02370763  | 0.3853651  | 0.61987128 | NA         |           |
| NA   | ENSG00000285115 | 0          | NA          | NA         | NA         | NA         |           |
| NA   | ENSG00000285116 | 0          | NA          | NA         | NA         | NA         | OR4H6BP   |
| NA   | ENSG00000285117 | 0.14931947 | -0.01844332 | 0.38480212 | 0.84537521 | NA         |           |
| NA   | ENSG00000285122 | 0          | NA          | NA         | NA         | NA         | PIGY-DT   |
| NA   | ENSG00000285128 | 0          | NA          | NA         | NA         | NA         |           |
| NA   | ENSG00000285130 | 64.3002656 | 0.18325764  | 0.32569736 | 0.36189069 | 0.59157216 |           |
| NA   | ENSG00000285133 | 0          | NA          | NA         | NA         | NA         |           |
| NA   | ENSG00000285135 | 0          | NA          | NA         | NA         | NA         | OR4Q1P    |
| NA   | ENSG00000285142 | 0          | NA          | NA         | NA         | NA         |           |
| NA   | ENSG00000285144 | 0          | NA          | NA         | NA         | NA         |           |
| NA   | ENSG00000285151 | 4.13712657 | 0.19586071  | 0.43410591 | 0.12447015 | 0.29255867 |           |
| NA   | ENSG00000285155 | 0          | NA          | NA         | NA         | NA         |           |
| NA   | ENSG00000285159 | 0.16735865 | 0.01897177  | 0.38482933 | 0.78225479 | NA         |           |
| NA   | ENSG00000285160 | 15.3557631 | 0.03739246  | 0.32869928 | 0.83124231 | 0.92375777 | THSD1P1   |
| 1124 | ENSG00000285162 | 5.71048134 | 0.11594944  | 0.38321251 | 0.37525608 | 0.60449338 |           |
| NA   | ENSG00000285163 | 0          | NA          | NA         | NA         | NA         |           |
| NA   | ENSG00000285165 | 0          | NA          | NA         | NA         | NA         |           |
| NA   | ENSG00000285169 | 0          | NA          | NA         | NA         | NA         |           |
| NA   | ENSG00000285171 | 0          | NA          | NA         | NA         | NA         |           |
| NA   | ENSG00000285177 | 0          | NA          | NA         | NA         | NA         |           |
| NA   | ENSG00000285179 | 0          | NA          | NA         | NA         | NA         |           |
| NA   | ENSG00000285184 | 129.606247 | -0.06484255 | 0.20138845 | 0.70483564 | 0.85803894 |           |
| NA   | ENSG00000285188 | 68.8528285 | -0.35231594 | 0.27098881 | 0.08977468 | 0.2301796  |           |
| NA   | ENSG00000285190 | 12.5909678 | 0.14816799  | 0.37215039 | 0.37311369 | 0.60212913 |           |
| NA   | ENSG00000285191 | 0          | NA          | NA         | NA         | NA         |           |
| NA   | ENSG00000285201 | 0          | NA          | NA         | NA         | NA         |           |
| NA   | ENSG00000285205 | 10.9470869 | 0.14376288  | 0.36781999 | 0.39314124 | 0.62217456 |           |
| NA   | ENSG00000285210 | 0.33410177 | 0.00489494  | 0.38344114 | 0.93324204 | NA         | LINC02795 |

|           |                 |            |             |            |            |            |             |
|-----------|-----------------|------------|-------------|------------|------------|------------|-------------|
| NA        | ENSG00000285212 | 1.08338438 | -0.05627384 | 0.38682611 | 0.33737349 | NA         |             |
| NA        | ENSG00000285215 | 0          | NA          | NA         | NA         | NA         |             |
| NA        | ENSG00000285216 | 0          | NA          | NA         | NA         | NA         |             |
| NA        | ENSG00000285218 | 0          | NA          | NA         | NA         | NA         |             |
| 100506207 | ENSG00000285219 | 27.3312377 | 0.12107717  | 0.30767705 | 0.53588828 | 0.74657844 | HULC        |
| NA        | ENSG00000285220 | 0          | NA          | NA         | NA         | NA         |             |
| NA        | ENSG00000285228 | 0          | NA          | NA         | NA         | NA         |             |
| 101926888 | ENSG00000285230 | 55.7245145 | -0.27259568 | 0.30857224 | 0.19872201 | 0.4031334  | RALY-AS1    |
| 112577461 | ENSG00000285231 | 0          | NA          | NA         | NA         | NA         | OOSP3       |
| NA        | ENSG00000285237 | 0.16735865 | 0.01897177  | 0.38482933 | 0.78225479 | NA         | PRSS52P     |
| NA        | ENSG00000285238 | 11.5201946 | -0.02799798 | 0.38138918 | 0.64770273 | 0.82431548 |             |
| NA        | ENSG00000285239 | 0          | NA          | NA         | NA         | NA         |             |
| 108783646 | ENSG00000285244 | 2.34680772 | 0.0273855   | 0.37721697 | 0.73893987 | NA         | DINOL       |
| NA        | ENSG00000285245 | 21.9009354 | -0.02007764 | 0.38112628 | 0.72691565 | 0.86953012 |             |
| 54816     | ENSG00000285253 | 21.7905001 | 0.09365978  | 0.32574732 | 0.61208454 | 0.80008943 |             |
| NA        | ENSG00000285254 | 0.71334474 | 0.0420553   | 0.3873753  | 0.34125643 | NA         |             |
| NA        | ENSG00000285257 | 4.55862763 | -0.01923679 | 0.36240962 | 0.87491809 | 0.94487915 |             |
| NA        | ENSG00000285268 | 0          | NA          | NA         | NA         | NA         |             |
| 11046     | ENSG00000285269 | 0.81542993 | -0.03212774 | 0.38394919 | 0.52764493 | NA         |             |
| 109729173 | ENSG00000285278 | 6.28491944 | -0.14299236 | 0.38636989 | 0.32689721 | 0.55525384 |             |
| NA        | ENSG00000285280 | 0.82763666 | 0.01070071  | 0.38092371 | 0.84820368 | NA         |             |
| NA        | ENSG00000285283 | 0.7534956  | -0.03327829 | 0.38646938 | 0.40782637 | NA         |             |
| NA        | ENSG00000285287 | 0.18922458 | 0.01954053  | 0.38488496 | 0.78225479 | NA         |             |
| 114483834 | ENSG00000285292 | 525.221062 | 0.02679638  | 0.12356445 | 0.82028237 | 0.91817957 | ABCF2-H2BE1 |
| 643650    | ENSG00000285294 | 1.02608344 | 0.05671547  | 0.38711172 | 0.32313118 | NA         | LINC00842   |
| NA        | ENSG00000285300 | 0.14931947 | -0.01844332 | 0.38480212 | 0.84537521 | NA         |             |
| NA        | ENSG00000285303 | 0          | NA          | NA         | NA         | NA         |             |
| NA        | ENSG00000285304 | 111.047525 | -0.06093885 | 0.23157669 | 0.74103441 | 0.87768627 |             |
| NA        | ENSG00000285314 | 0          | NA          | NA         | NA         | NA         |             |
| NA        | ENSG00000285323 | 0.51937201 | -0.02557462 | 0.38567603 | 0.54680819 | NA         |             |
| NA        | ENSG00000285325 | 0          | NA          | NA         | NA         | NA         |             |
| NA        | ENSG00000285329 | 10.0119182 | -0.01451995 | 0.37939838 | 0.82164661 | 0.91847813 |             |
| NA        | ENSG00000285330 | 0.51937201 | -0.02557462 | 0.38567603 | 0.54680819 | NA         |             |
| 145783    | ENSG00000285331 | 212.540028 | 0.28314249  | 0.16358585 | 0.05568122 | 0.16176825 |             |
| 101928882 | ENSG00000285336 | 0          | NA          | NA         | NA         | NA         |             |
| NA        | ENSG00000285338 | 6.85533593 | -0.08921252 | 0.36541726 | 0.53290707 | 0.74405906 |             |
| NA        | ENSG00000285347 | 0          | NA          | NA         | NA         | NA         |             |
| NA        | ENSG00000285354 | 0          | NA          | NA         | NA         | NA         |             |

|           |                 |            |             |            |            |            |            |
|-----------|-----------------|------------|-------------|------------|------------|------------|------------|
| NA        | ENSG00000285361 | 0.34696883 | 0.00056652  | 0.38336289 | 0.96309824 | NA         |            |
| NA        | ENSG00000285366 | 0          | NA          | NA         | NA         | NA         |            |
| NA        | ENSG00000285367 | 0          | NA          | NA         | NA         | NA         |            |
| 100505984 | ENSG00000285373 | 0          | NA          | NA         | NA         | NA         | LINC02478  |
| NA        | ENSG00000285374 | 0          | NA          | NA         | NA         | NA         |            |
| NA        | ENSG00000285382 | 36.0770178 | -0.03001714 | 0.28776869 | 0.87374093 | 0.94441388 |            |
| NA        | ENSG00000285388 | 0          | NA          | NA         | NA         | NA         |            |
| NA        | ENSG00000285398 | 0          | NA          | NA         | NA         | NA         |            |
| NA        | ENSG00000285401 | 0          | NA          | NA         | NA         | NA         |            |
| NA        | ENSG00000285402 | 0.32445905 | 0.00135493  | 0.3833682  | 0.9673327  | NA         |            |
| NA        | ENSG00000285404 | 0          | NA          | NA         | NA         | NA         |            |
| NA        | ENSG00000285405 | 0          | NA          | NA         | NA         | NA         | OR11J6P    |
| NA        | ENSG00000285407 | 0          | NA          | NA         | NA         | NA         |            |
| NA        | ENSG00000285409 | 0          | NA          | NA         | NA         | NA         |            |
| 55056     | ENSG00000285410 | 698.604022 | -0.00093972 | 0.09744744 | 0.99036866 | 0.99675646 | GABPB1-IT1 |
| 101928168 | ENSG00000285412 | 0          | NA          | NA         | NA         | NA         |            |
| NA        | ENSG00000285413 | 0.54628823 | 0.03262329  | 0.38620557 | 0.45594453 | NA         |            |
| NA        | ENSG00000285416 | 0          | NA          | NA         | NA         | NA         |            |
| NA        | ENSG00000285417 | 0          | NA          | NA         | NA         | NA         |            |
| NA        | ENSG00000285420 | 0          | NA          | NA         | NA         | NA         | PDGFRL2P   |
| NA        | ENSG00000285424 | 0          | NA          | NA         | NA         | NA         |            |
| 100129518 | ENSG00000285427 | 31.3310314 | -0.07614334 | 0.29239472 | 0.69169338 | 0.85089265 | SOD2-OT1   |
| 548644    | ENSG00000285437 | 639.016535 | 0.16935709  | 0.11426082 | 0.12008646 | 0.28533117 | POLR2J3    |
| NA        | ENSG00000285444 | 0          | NA          | NA         | NA         | NA         |            |
| NA        | ENSG00000285445 | 0          | NA          | NA         | NA         | NA         | TUSC2P2    |
| NA        | ENSG00000285446 | 0.50207596 | 0.02562368  | 0.38565771 | 0.52549886 | NA         |            |
| NA        | ENSG00000285448 | 0          | NA          | NA         | NA         | NA         |            |
| NA        | ENSG00000285454 | 10.1433631 | 0.00128156  | 0.34462277 | 0.99551684 | 0.99852582 |            |
| NA        | ENSG00000285458 | 4.80398404 | 0.03654544  | 0.36372331 | 0.77140646 | 0.89516899 |            |
| NA        | ENSG00000285462 | 0          | NA          | NA         | NA         | NA         | LINC02792  |
| NA        | ENSG00000285467 | 3.65973791 | -0.02862276 | 0.37019774 | 0.7849401  | 0.90211502 |            |
| NA        | ENSG00000285470 | 0          | NA          | NA         | NA         | NA         | TUSC2P1    |
| NA        | ENSG00000285471 | 0          | NA          | NA         | NA         | NA         |            |
| NA        | ENSG00000285472 | 0          | NA          | NA         | NA         | NA         |            |
| NA        | ENSG00000285473 | 0          | NA          | NA         | NA         | NA         |            |
| NA        | ENSG00000285476 | 0.16735865 | 0.01897177  | 0.38482933 | 0.78225479 | NA         |            |
| 114483833 | ENSG00000285480 | 0.15069912 | -0.01848503 | 0.38480575 | 0.84537521 | NA         | H2BE1      |
| NA        | ENSG00000285483 | 0          | NA          | NA         | NA         | NA         |            |

|           |    |                 |            |             |            |            |            |             |
|-----------|----|-----------------|------------|-------------|------------|------------|------------|-------------|
|           | NA | ENSG00000285486 | 0.77339162 | -0.05552358 | 0.38931393 | 0.27965178 | NA         |             |
|           | NA | ENSG00000285491 | 0          | NA          | NA         | NA         | NA         | OR1Q1BP     |
| 112267968 | NA | ENSG00000285492 | 0.18922458 | 0.01954053  | 0.38488496 | 0.78225479 | NA         |             |
|           | NA | ENSG00000285498 | 0          | NA          | NA         | NA         | NA         |             |
|           | NA | ENSG00000285505 | 144.098648 | -0.91333118 | 0.75902846 | 0.012452   | 0.04966782 |             |
|           | NA | ENSG00000285508 | 0          | NA          | NA         | NA         | NA         |             |
|           | NA | ENSG00000285509 | 17.8357472 | 0.25163742  | 0.39186624 | 0.2100669  | 0.41859431 | TBCEL-TECTA |
|           | NA | ENSG00000285513 | 0          | NA          | NA         | NA         | NA         |             |
|           | NA | ENSG00000285517 | 6.92290044 | 0.04634719  | 0.37200076 | 0.65959153 | 0.83124537 |             |
|           | NA | ENSG00000285518 | 2.22725772 | -0.12855453 | 0.40642703 | 0.15274394 | NA         |             |
|           | NA | ENSG00000285519 | 0          | NA          | NA         | NA         | NA         |             |
|           | NA | ENSG00000285520 | 0.14931947 | -0.01844332 | 0.38480212 | 0.84537521 | NA         |             |
|           | NA | ENSG00000285521 | 0.6725322  | 0.00194051  | 0.38187707 | 0.96624857 | NA         |             |
|           | NA | ENSG00000285522 | 0          | NA          | NA         | NA         | NA         |             |
|           | NA | ENSG00000285523 | 0.173733   | 0.01914545  | 0.38484597 | 0.78225479 | NA         |             |
|           | NA | ENSG00000285524 | 0.37844916 | 0.02407552  | 0.3854191  | 0.60038877 | NA         |             |
|           | NA | ENSG00000285525 | 0          | NA          | NA         | NA         | NA         |             |
| 5349      | NA | ENSG00000285526 | 0          | NA          | NA         | NA         | NA         |             |
|           | NA | ENSG00000285527 | 0.362329   | 0.00084903  | 0.3833641  | 0.96778224 | NA         |             |
|           | NA | ENSG00000285528 | 2.37901626 | -0.12442863 | 0.40582904 | 0.1442707  | NA         |             |
|           | NA | ENSG00000285529 | 0          | NA          | NA         | NA         | NA         |             |
|           | NA | ENSG00000285530 | 2.5532012  | -0.00468012 | 0.37597406 | 0.9519909  | NA         |             |
|           | NA | ENSG00000285531 | 5.95805529 | -0.11287986 | 0.37741245 | 0.41237219 | 0.64005916 |             |
|           | NA | ENSG00000285532 | 0.173733   | 0.01914545  | 0.38484597 | 0.78225479 | NA         | LINC02788   |
| 105369347 | NA | ENSG00000285533 | 52.4606985 | 0.28455179  | 0.27607993 | 0.16874211 | 0.36013807 | RELA-DT     |
|           | NA | ENSG00000285534 | 0.37844916 | 0.02407552  | 0.3854191  | 0.60038877 | NA         |             |
|           | NA | ENSG00000285535 | 0.18922458 | 0.01954053  | 0.38488496 | 0.78225479 | NA         |             |
|           | NA | ENSG00000285536 | 0          | NA          | NA         | NA         | NA         | LINC02838   |
|           | NA | ENSG00000285537 | 0.173124   | -0.01911262 | 0.38486262 | 0.84537521 | NA         |             |
|           | NA | ENSG00000285538 | 0          | NA          | NA         | NA         | NA         |             |
|           | NA | ENSG00000285539 | 0          | NA          | NA         | NA         | NA         |             |
|           | NA | ENSG00000285540 | 0          | NA          | NA         | NA         | NA         |             |
|           | NA | ENSG00000285541 | 0          | NA          | NA         | NA         | NA         |             |
|           | NA | ENSG00000285542 | 14.7778823 | -0.05475042 | 0.345578   | 0.72794876 | 0.86992552 |             |
|           | NA | ENSG00000285543 | 0.15069912 | -0.01848503 | 0.38480575 | 0.84537521 | NA         |             |
|           | NA | ENSG00000285544 | 0          | NA          | NA         | NA         | NA         |             |
|           | NA | ENSG00000285545 | 0.64116647 | -0.02472658 | 0.38291319 | 0.64099507 | NA         |             |
|           | NA | ENSG00000285547 | 31.8658516 | -0.17355072 | 0.35539934 | 0.35639923 | 0.58641239 |             |

|           |                 |            |             |            |            |            |
|-----------|-----------------|------------|-------------|------------|------------|------------|
| NA        | ENSG00000285548 | 0          | NA          | NA         | NA         | NA         |
| NA        | ENSG00000285549 | 0          | NA          | NA         | NA         | NA         |
| NA        | ENSG00000285550 | 0          | NA          | NA         | NA         | NA         |
| NA        | ENSG00000285551 | 0.34624801 | -0.02356563 | 0.38536324 | 0.65270996 | NA         |
| NA        | ENSG00000285552 | 0          | NA          | NA         | NA         | NA         |
| NA        | ENSG00000285553 | 0          | NA          | NA         | NA         | NA         |
| NA        | ENSG00000285554 | 2.27982575 | 0.03287224  | 0.37662622 | 0.70609231 | NA         |
| NA        | ENSG00000285555 | 0.15069912 | -0.01848503 | 0.38480575 | 0.84537521 | NA         |
| NA        | ENSG00000285556 | 0          | NA          | NA         | NA         | NA         |
| NA        | ENSG00000285557 | 0          | NA          | NA         | NA         | NA         |
| NA        | ENSG00000285558 | 0.29863895 | -0.02292439 | 0.3852726  | 0.68753245 | NA         |
| NA        | ENSG00000285559 | 0.18922458 | 0.01954053  | 0.38488496 | 0.78225479 | NA         |
| NA        | ENSG00000285560 | 3.68871778 | 0.01163015  | 0.36742725 | 0.91786253 | 0.9652015  |
| NA        | ENSG00000285561 | 0          | NA          | NA         | NA         | NA         |
| NA        | ENSG00000285562 | 0          | NA          | NA         | NA         | NA         |
| NA        | ENSG00000285563 | 0          | NA          | NA         | NA         | NA         |
| NA        | ENSG00000285564 | 5.25519981 | 0.30397614  | 0.5373846  | 0.04455625 | 0.13608807 |
| NA        | ENSG00000285565 | 4.74490665 | 0.09440232  | 0.39313657 | 0.2540031  | 0.47451017 |
| 647264    | ENSG00000285566 | 0          | NA          | NA         | NA         | NA         |
| NA        | ENSG00000285567 | 0.33471731 | 0.02354391  | 0.38534154 | 0.62842204 | NA         |
| NA        | ENSG00000285568 | 0          | NA          | NA         | NA         | NA         |
| NA        | ENSG00000285569 | 1.45287156 | 0.02372685  | 0.37874958 | 0.74574238 | NA         |
| NA        | ENSG00000285570 | 11.8915469 | 0.22104046  | 0.40530827 | 0.22117588 | 0.43373822 |
| NA        | ENSG00000285571 | 62.84327   | -0.07000776 | 0.2471517  | 0.71104309 | 0.86118643 |
| NA        | ENSG00000285572 | 0.44795842 | -0.02501848 | 0.38558245 | 0.5807882  | NA         |
| NA        | ENSG00000285573 | 0          | NA          | NA         | NA         | NA         |
| NA        | ENSG00000285575 | 0          | NA          | NA         | NA         | NA         |
| 112268117 | ENSG00000285576 | 0          | NA          | NA         | NA         | NA         |
| NA        | ENSG00000285577 | 0          | NA          | NA         | NA         | NA         |
| NA        | ENSG00000285578 | 0.173124   | -0.01911262 | 0.38486262 | 0.84537521 | NA         |
| NA        | ENSG00000285579 | 15.3130697 | -0.05168203 | 0.32617262 | 0.76839981 | 0.89324733 |
| NA        | ENSG00000285580 | 0.18922458 | 0.01954053  | 0.38488496 | 0.78225479 | NA         |
| NA        | ENSG00000285581 | 1.84812228 | -0.10908144 | 0.4021968  | 0.11666552 | NA         |
| NA        | ENSG00000285582 | 1.03791755 | 0.0055612   | 0.37997033 | 0.92734068 | NA         |
| NA        | ENSG00000285583 | 6.19016499 | -0.13114194 | 0.38429003 | 0.34837446 | 0.57911259 |
| NA        | ENSG00000285584 | 0          | NA          | NA         | NA         | NA         |
| NA        | ENSG00000285585 | 1.43671364 | 0.07853851  | 0.39527103 | 0.10523329 | NA         |
| NA        | ENSG00000285586 | 0.45061487 | -0.02734269 | 0.38571658 | 0.56118657 | NA         |

|           |                 |            |             |            |            |            |           |
|-----------|-----------------|------------|-------------|------------|------------|------------|-----------|
| 107984273 | ENSG00000285587 | 0.34624801 | -0.02356563 | 0.38536324 | 0.65270996 | NA         |           |
| NA        | ENSG00000285588 | 0          | NA          | NA         | NA         | NA         |           |
| NA        | ENSG00000285589 | 355.267406 | 0.26095562  | 0.12439756 | 0.02619477 | 0.09030481 |           |
| NA        | ENSG00000285590 | 0          | NA          | NA         | NA         | NA         |           |
| NA        | ENSG00000285591 | 0          | NA          | NA         | NA         | NA         |           |
| NA        | ENSG00000285592 | 0          | NA          | NA         | NA         | NA         |           |
| NA        | ENSG00000285593 | 0          | NA          | NA         | NA         | NA         |           |
| 112268216 | ENSG00000285594 | 0          | NA          | NA         | NA         | NA         | LINC02856 |
| NA        | ENSG00000285595 | 0          | NA          | NA         | NA         | NA         |           |
| NA        | ENSG00000285596 | 39.2723828 | -0.0246788  | 0.26832271 | 0.8966317  | 0.95469109 |           |
| NA        | ENSG00000285597 | 0.173733   | 0.01914545  | 0.38484597 | 0.78225479 | NA         |           |
| NA        | ENSG00000285598 | 0          | NA          | NA         | NA         | NA         |           |
| NA        | ENSG00000285599 | 0.85996855 | 0.03754393  | 0.38474755 | 0.45326468 | NA         |           |
| NA        | ENSG00000285600 | 20.3835516 | -0.37267097 | 0.43932021 | 0.10640829 | 0.26082782 |           |
| NA        | ENSG00000285601 | 10.1685218 | -0.1939939  | 0.38917636 | 0.27046555 | 0.49374646 |           |
| NA        | ENSG00000285602 | 4.38214253 | -0.06433562 | 0.37014059 | 0.59614585 | 0.78832911 |           |
| NA        | ENSG00000285603 | 0          | NA          | NA         | NA         | NA         |           |
| NA        | ENSG00000285604 | 0          | NA          | NA         | NA         | NA         |           |
| NA        | ENSG00000285605 | 0          | NA          | NA         | NA         | NA         |           |
| NA        | ENSG00000285606 | 0          | NA          | NA         | NA         | NA         |           |
| NA        | ENSG00000285607 | 0          | NA          | NA         | NA         | NA         | FAM90A9P  |
| NA        | ENSG00000285608 | 33.545218  | -0.01826075 | 0.38417594 | 0.59311856 | 0.78711401 |           |
| NA        | ENSG00000285609 | 0          | NA          | NA         | NA         | NA         |           |
| NA        | ENSG00000285610 | 0          | NA          | NA         | NA         | NA         |           |
| NA        | ENSG00000285611 | 0          | NA          | NA         | NA         | NA         |           |
| NA        | ENSG00000285612 | 10.8727742 | 0.03758415  | 0.3522437  | 0.79946471 | 0.90803676 |           |
| NA        | ENSG00000285613 | 0          | NA          | NA         | NA         | NA         |           |
| NA        | ENSG00000285614 | 0.173733   | 0.01914545  | 0.38484597 | 0.78225479 | NA         |           |
| NA        | ENSG00000285615 | 0          | NA          | NA         | NA         | NA         |           |
| NA        | ENSG00000285616 | 0          | NA          | NA         | NA         | NA         |           |
| NA        | ENSG00000285618 | 0.4699285  | -0.02827372 | 0.38579405 | 0.54568495 | NA         |           |
| NA        | ENSG00000285619 | 0          | NA          | NA         | NA         | NA         |           |
| NA        | ENSG00000285620 | 0          | NA          | NA         | NA         | NA         | FAM90A16P |
| NA        | ENSG00000285621 | 0.51937201 | -0.02557462 | 0.38567603 | 0.54680819 | NA         |           |
| NA        | ENSG00000285622 | 0          | NA          | NA         | NA         | NA         |           |
| NA        | ENSG00000285623 | 0.70222264 | 0.00361638  | 0.38183902 | 0.93887938 | NA         |           |
| NA        | ENSG00000285624 | 0          | NA          | NA         | NA         | NA         |           |
| NA        | ENSG00000285625 | 4.97405248 | 0.00543388  | 0.3820357  | 0.91469691 | 0.96396402 |           |



|    |                 |            |             |            |            |            |         |
|----|-----------------|------------|-------------|------------|------------|------------|---------|
| NA | ENSG00000285626 | 0          | NA          | NA         | NA         | NA         |         |
| NA | ENSG00000285627 | 0.14931947 | -0.01844332 | 0.38480212 | 0.84537521 | NA         |         |
| NA | ENSG00000285628 | 94.4198384 | 0.31391463  | 0.24598258 | 0.10993534 | 0.26699929 |         |
| NA | ENSG00000285629 | 1.88656971 | 0.07361862  | 0.38651142 | 0.36355216 | NA         |         |
| NA | ENSG00000285630 | 0          | NA          | NA         | NA         | NA         |         |
| NA | ENSG00000285631 | 0          | NA          | NA         | NA         | NA         |         |
| NA | ENSG00000285632 | 2.0436807  | 0.00513218  | 0.37558913 | 0.95174455 | NA         |         |
| NA | ENSG00000285633 | 0          | NA          | NA         | NA         | NA         |         |
| NA | ENSG00000285634 | 0          | NA          | NA         | NA         | NA         |         |
| NA | ENSG00000285635 | 0          | NA          | NA         | NA         | NA         |         |
| NA | ENSG00000285636 | 0          | NA          | NA         | NA         | NA         |         |
| NA | ENSG00000285637 | 11.7561275 | -0.12041368 | 0.356779   | 0.47353762 | 0.69551963 |         |
| NA | ENSG00000285638 | 0          | NA          | NA         | NA         | NA         |         |
| NA | ENSG00000285639 | 0.18922458 | 0.01954053  | 0.38488496 | 0.78225479 | NA         |         |
| NA | ENSG00000285640 | 0          | NA          | NA         | NA         | NA         |         |
| NA | ENSG00000285641 | 279.719683 | -0.08747578 | 0.14788135 | 0.51964004 | 0.73315733 |         |
| NA | ENSG00000285642 | 0          | NA          | NA         | NA         | NA         |         |
| NA | ENSG00000285643 | 0          | NA          | NA         | NA         | NA         |         |
| NA | ENSG00000285644 | 1.14593927 | -0.00841923 | 0.37864742 | 0.90241325 | NA         |         |
| NA | ENSG00000285645 | 0.14931947 | -0.01844332 | 0.38480212 | 0.84537521 | NA         |         |
| NA | ENSG00000285646 | 6.74305223 | -0.02360192 | 0.35324193 | 0.86565154 | 0.94050307 |         |
| NA | ENSG00000285647 | 0          | NA          | NA         | NA         | NA         |         |
| NA | ENSG00000285648 | 0          | NA          | NA         | NA         | NA         |         |
| NA | ENSG00000285649 | 5.37967473 | 0.02714126  | 0.35963636 | 0.83760884 | 0.92628758 |         |
| NA | ENSG00000285650 | 13.5371291 | 0.02283658  | 0.32839487 | 0.89648176 | 0.95469109 |         |
| NA | ENSG00000285651 | 3.9127065  | -0.05526265 | 0.37098452 | 0.62945051 | 0.8124371  |         |
| NA | ENSG00000285652 | 0.87010324 | 0.04614257  | 0.38535453 | 0.40472848 | NA         |         |
| NA | ENSG00000285653 | 0          | NA          | NA         | NA         | NA         |         |
| NA | ENSG00000285654 | 0          | NA          | NA         | NA         | NA         |         |
| NA | ENSG00000285655 | 0.18922458 | 0.01954053  | 0.38488496 | 0.78225479 | NA         |         |
| NA | ENSG00000285656 | 0.18922458 | 0.01954053  | 0.38488496 | 0.78225479 | NA         |         |
| NA | ENSG00000285658 | 0          | NA          | NA         | NA         | NA         |         |
| NA | ENSG00000285659 | 0          | NA          | NA         | NA         | NA         |         |
| NA | ENSG00000285660 | 0          | NA          | NA         | NA         | NA         |         |
| NA | ENSG00000285661 | 0          | NA          | NA         | NA         | NA         |         |
| NA | ENSG00000285662 | 0.53671507 | 0.03216363  | 0.38615814 | 0.46253944 | NA         | FAM245B |
| NA | ENSG00000285663 | 0          | NA          | NA         | NA         | NA         |         |
| NA | ENSG00000285664 | 4.76717224 | 0.13203737  | 0.39050809 | 0.31630552 | 0.54434505 |         |

|           |                 |            |             |            |            |            |           |
|-----------|-----------------|------------|-------------|------------|------------|------------|-----------|
| NA        | ENSG00000285665 | 0          | NA          | NA         | NA         | NA         | TOP1P1    |
| NA        | ENSG00000285666 | 0          | NA          | NA         | NA         | NA         |           |
| NA        | ENSG00000285667 | 1.66301218 | 0.01078011  | 0.37682547 | 0.89111619 | NA         |           |
| NA        | ENSG00000285668 | 0          | NA          | NA         | NA         | NA         |           |
| NA        | ENSG00000285669 | 44.5522796 | -0.39388    | 0.32117159 | 0.08153864 | 0.21429626 |           |
| NA        | ENSG00000285670 | 0          | NA          | NA         | NA         | NA         |           |
| NA        | ENSG00000285671 | 0          | NA          | NA         | NA         | NA         |           |
| NA        | ENSG00000285672 | 4.77530495 | -0.11222178 | 0.38225719 | 0.38235293 | 0.61160786 |           |
| NA        | ENSG00000285673 | 0.50207596 | 0.02562368  | 0.38565771 | 0.52549886 | NA         |           |
| NA        | ENSG00000285674 | 0          | NA          | NA         | NA         | NA         |           |
| NA        | ENSG00000285675 | 0          | NA          | NA         | NA         | NA         |           |
| NA        | ENSG00000285676 | 0.49841226 | 0.01148072  | 0.38338203 | 0.78005594 | NA         |           |
| NA        | ENSG00000285677 | 6.60270571 | 0.20011051  | 0.42333553 | 0.17492972 | 0.36882101 |           |
| NA        | ENSG00000285679 | 2.43292166 | -0.13252283 | 0.40985672 | 0.12524089 | NA         |           |
| NA        | ENSG00000285680 | 0          | NA          | NA         | NA         | NA         |           |
| NA        | ENSG00000285681 | 0.18922458 | 0.01954053  | 0.38488496 | 0.78225479 | NA         |           |
| NA        | ENSG00000285683 | 0          | NA          | NA         | NA         | NA         |           |
| NA        | ENSG00000285684 | 0.34119706 | 0.00325186  | 0.38339666 | 0.95739559 | NA         |           |
| NA        | ENSG00000285685 | 0          | NA          | NA         | NA         | NA         |           |
| 105376124 | ENSG00000285686 | 0          | NA          | NA         | NA         | NA         | LINC02834 |
| NA        | ENSG00000285687 | 0          | NA          | NA         | NA         | NA         | FAM90A22P |
| NA        | ENSG00000285688 | 0.88552547 | 0.03630387  | 0.38443633 | 0.44924045 | NA         |           |
| NA        | ENSG00000285689 | 0          | NA          | NA         | NA         | NA         |           |
| NA        | ENSG00000285690 | 0          | NA          | NA         | NA         | NA         |           |
| NA        | ENSG00000285691 | 0          | NA          | NA         | NA         | NA         |           |
| NA        | ENSG00000285692 | 0          | NA          | NA         | NA         | NA         |           |
| NA        | ENSG00000285693 | 9.75095904 | 0.06630189  | 0.34685095 | 0.68096765 | 0.84413609 |           |
| NA        | ENSG00000285694 | 0          | NA          | NA         | NA         | NA         |           |
| NA        | ENSG00000285695 | 0          | NA          | NA         | NA         | NA         |           |
| NA        | ENSG00000285696 | 1.47381851 | -0.00753908 | 0.37724828 | 0.91969486 | NA         |           |
| NA        | ENSG00000285697 | 0.15069912 | -0.01848503 | 0.38480575 | 0.84537521 | NA         |           |
| NA        | ENSG00000285698 | 0.173124   | -0.01911262 | 0.38486262 | 0.84537521 | NA         |           |
| NA        | ENSG00000285699 | 0          | NA          | NA         | NA         | NA         |           |
| NA        | ENSG00000285700 | 0          | NA          | NA         | NA         | NA         |           |
| NA        | ENSG00000285701 | 0.15069912 | -0.01848503 | 0.38480575 | 0.84537521 | NA         |           |
| NA        | ENSG00000285702 | 47.2511493 | 0.22363049  | 0.28650698 | 0.2763955  | 0.50061043 |           |
| NA        | ENSG00000285703 | 0          | NA          | NA         | NA         | NA         |           |
| NA        | ENSG00000285704 | 0.97508073 | -0.0168734  | 0.3799411  | 0.79233224 | NA         |           |

|           |                 |            |             |            |            |            |           |
|-----------|-----------------|------------|-------------|------------|------------|------------|-----------|
| NA        | ENSG00000285705 | 0.34746601 | 0.02370763  | 0.3853651  | 0.61987128 | NA         |           |
| NA        | ENSG00000285706 | 0.97696449 | 0.00497266  | 0.38090352 | 0.92837007 | NA         |           |
| NA        | ENSG00000285707 | 0          | NA          | NA         | NA         | NA         |           |
| NA        | ENSG00000285708 | 0.97213901 | -0.00594883 | 0.38147552 | 0.76955861 | NA         |           |
| NA        | ENSG00000285709 | 0          | NA          | NA         | NA         | NA         |           |
| NA        | ENSG00000285710 | 0.30001678 | -0.02294459 | 0.38527539 | 0.68644818 | NA         |           |
| 105377256 | ENSG00000285711 | 0          | NA          | NA         | NA         | NA         | LINC02835 |
| NA        | ENSG00000285712 | 0.49594515 | 0.01140521  | 0.38338399 | 0.78244793 | NA         |           |
| NA        | ENSG00000285713 | 3.70925644 | -0.07643892 | 0.37923391 | 0.47376767 | 0.69579915 |           |
| NA        | ENSG00000285714 | 0          | NA          | NA         | NA         | NA         |           |
| NA        | ENSG00000285715 | 0          | NA          | NA         | NA         | NA         |           |
| NA        | ENSG00000285716 | 0          | NA          | NA         | NA         | NA         |           |
| NA        | ENSG00000285717 | 0          | NA          | NA         | NA         | NA         |           |
| NA        | ENSG00000285718 | 0          | NA          | NA         | NA         | NA         |           |
| NA        | ENSG00000285719 | 0          | NA          | NA         | NA         | NA         |           |
| NA        | ENSG00000285722 | 0          | NA          | NA         | NA         | NA         |           |
| NA        | ENSG00000285723 | 0.60279648 | -0.02752712 | 0.38588313 | 0.49730371 | NA         |           |
| NA        | ENSG00000285724 | 0          | NA          | NA         | NA         | NA         |           |
| NA        | ENSG00000285725 | 127.229228 | 0.41704265  | 0.22071911 | 0.02526578 | 0.08783478 |           |
| NA        | ENSG00000285726 | 0          | NA          | NA         | NA         | NA         |           |
| NA        | ENSG00000285727 | 0          | NA          | NA         | NA         | NA         |           |
| NA        | ENSG00000285728 | 92.5081856 | -0.15051404 | 0.2145512  | 0.39841407 | 0.62729427 |           |
| NA        | ENSG00000285729 | 0          | NA          | NA         | NA         | NA         |           |
| NA        | ENSG00000285730 | 15.1471046 | -0.2395881  | 0.3854188  | 0.22866525 | 0.44394937 |           |
| NA        | ENSG00000285731 | 0.53305333 | 0.01354839  | 0.38344679 | 0.74540167 | NA         |           |
| NA        | ENSG00000285732 | 7.65067883 | 0.18310546  | 0.40493741 | 0.23605794 | 0.45289523 |           |
| NA        | ENSG00000285733 | 19.8810192 | 0.54527982  | 0.54441312 | 0.04580218 | 0.13911746 |           |
| NA        | ENSG00000285734 | 0          | NA          | NA         | NA         | NA         |           |
| NA        | ENSG00000285735 | 26.6645739 | -0.03594345 | 0.29566746 | 0.84827637 | 0.93095493 | LINC02717 |
| NA        | ENSG00000285736 | 0.45209736 | -0.02505403 | 0.38558831 | 0.57865948 | NA         |           |
| NA        | ENSG00000285737 | 0          | NA          | NA         | NA         | NA         | LINC02680 |
| NA        | ENSG00000285738 | 0          | NA          | NA         | NA         | NA         |           |
| NA        | ENSG00000285739 | 0          | NA          | NA         | NA         | NA         |           |
| NA        | ENSG00000285740 | 0          | NA          | NA         | NA         | NA         |           |
| NA        | ENSG00000285741 | 0          | NA          | NA         | NA         | NA         |           |
| NA        | ENSG00000285742 | 0          | NA          | NA         | NA         | NA         |           |
| NA        | ENSG00000285743 | 0          | NA          | NA         | NA         | NA         |           |
| NA        | ENSG00000285744 | 31.5640479 | -0.03786149 | 0.29235418 | 0.84109982 | 0.92789889 |           |

|           |                 |            |             |            |            |            |           |
|-----------|-----------------|------------|-------------|------------|------------|------------|-----------|
| NA        | ENSG00000285745 | 0          | NA          | NA         | NA         | NA         |           |
| 100129307 | ENSG00000285746 | 0          | NA          | NA         | NA         | NA         |           |
| NA        | ENSG00000285747 | 0          | NA          | NA         | NA         | NA         |           |
| NA        | ENSG00000285748 | 0.14931947 | -0.01844332 | 0.38480212 | 0.84537521 | NA         |           |
| NA        | ENSG00000285749 | 0          | NA          | NA         | NA         | NA         |           |
| NA        | ENSG00000285750 | 0.84223073 | 0.04793292  | 0.38831714 | 0.2784428  | NA         |           |
| NA        | ENSG00000285751 | 0          | NA          | NA         | NA         | NA         |           |
| NA        | ENSG00000285752 | 60.257129  | -0.23708096 | 0.26928573 | 0.23958154 | 0.45753178 | CDC42-AS1 |
| NA        | ENSG00000285753 | 0          | NA          | NA         | NA         | NA         | LCEP3     |
| NA        | ENSG00000285754 | 0          | NA          | NA         | NA         | NA         |           |
| NA        | ENSG00000285755 | 0.50394461 | 0.03056002  | 0.38599856 | 0.48623932 | NA         |           |
| NA        | ENSG00000285756 | 2872.72764 | 0.11741819  | 0.06042847 | 0.04908093 | 0.14693914 |           |
| NA        | ENSG00000285758 | 1.32276611 | 0.03753272  | 0.38068317 | 0.60333111 | NA         |           |
| NA        | ENSG00000285759 | 0          | NA          | NA         | NA         | NA         |           |
| NA        | ENSG00000285760 | 0          | NA          | NA         | NA         | NA         |           |
| NA        | ENSG00000285761 | 0          | NA          | NA         | NA         | NA         |           |
| NA        | ENSG00000285762 | 3.76971488 | 0.06218403  | 0.38058073 | 0.49943905 | 0.71682702 |           |
| NA        | ENSG00000285763 | 19.9336117 | 0.10739799  | 0.32743946 | 0.56449626 | 0.76699122 |           |
| NA        | ENSG00000285764 | 0          | NA          | NA         | NA         | NA         |           |
| NA        | ENSG00000285765 | 0          | NA          | NA         | NA         | NA         | FAM90A23P |
| NA        | ENSG00000285766 | 2.47025544 | -0.02180452 | 0.37396098 | 0.81093135 | NA         |           |
| 105375622 | ENSG00000285768 | 0          | NA          | NA         | NA         | NA         | LINC02849 |
| NA        | ENSG00000285769 | 0          | NA          | NA         | NA         | NA         |           |
| NA        | ENSG00000285770 | 1.9137893  | 0.02056035  | 0.37667225 | 0.80055704 | NA         |           |
| NA        | ENSG00000285771 | 0          | NA          | NA         | NA         | NA         |           |
| NA        | ENSG00000285772 | 0          | NA          | NA         | NA         | NA         |           |
| NA        | ENSG00000285773 | 0          | NA          | NA         | NA         | NA         |           |
| NA        | ENSG00000285774 | 0.82489937 | -0.01394717 | 0.38109261 | 0.80504284 | NA         |           |
| NA        | ENSG00000285775 | 0          | NA          | NA         | NA         | NA         |           |
| NA        | ENSG00000285776 | 0          | NA          | NA         | NA         | NA         |           |
| NA        | ENSG00000285777 | 6.9461812  | 0.01051095  | 0.38273372 | 0.81601477 | 0.9163678  |           |
| NA        | ENSG00000285778 | 0          | NA          | NA         | NA         | NA         |           |
| NA        | ENSG00000285779 | 0.75689831 | 0.03380966  | 0.38651369 | 0.3822658  | NA         |           |
| NA        | ENSG00000285780 | 0          | NA          | NA         | NA         | NA         |           |
| NA        | ENSG00000285781 | 1.51184259 | 0.08762068  | 0.39506071 | 0.16406336 | NA         |           |
| NA        | ENSG00000285782 | 0          | NA          | NA         | NA         | NA         |           |
| NA        | ENSG00000285783 | 0.35657449 | 0.02381629  | 0.38538094 | 0.61407086 | NA         |           |
| NA        | ENSG00000285784 | 0          | NA          | NA         | NA         | NA         |           |

|           |                 |            |             |            |            |            |             |
|-----------|-----------------|------------|-------------|------------|------------|------------|-------------|
| NA        | ENSG00000285785 | 0          | NA          | NA         | NA         | NA         |             |
| NA        | ENSG00000285786 | 0.16735865 | 0.01897177  | 0.38482933 | 0.78225479 | NA         |             |
| NA        | ENSG00000285788 | 0.14931947 | -0.01844332 | 0.38480212 | 0.84537521 | NA         |             |
| NA        | ENSG00000285789 | 0          | NA          | NA         | NA         | NA         |             |
| NA        | ENSG00000285790 | 0          | NA          | NA         | NA         | NA         |             |
| NA        | ENSG00000285791 | 5.40173646 | -0.02669065 | 0.37776602 | 0.70387671 | 0.85759525 |             |
| NA        | ENSG00000285792 | 0.173124   | -0.01911262 | 0.38486262 | 0.84537521 | NA         |             |
| 285074    | ENSG00000285793 | 240.263089 | 0.04822796  | 0.14811657 | 0.72519651 | 0.86851978 |             |
| NA        | ENSG00000285794 | 0          | NA          | NA         | NA         | NA         |             |
| NA        | ENSG00000285796 | 142.001806 | 0.38356391  | 0.19603655 | 0.02462339 | 0.08611458 |             |
| NA        | ENSG00000285797 | 0          | NA          | NA         | NA         | NA         |             |
| NA        | ENSG00000285798 | 0          | NA          | NA         | NA         | NA         |             |
| NA        | ENSG00000285799 | 3.11815588 | 0.15381382  | 0.41966908 | 0.10361406 | 0.25597099 |             |
| NA        | ENSG00000285800 | 0          | NA          | NA         | NA         | NA         |             |
| NA        | ENSG00000285801 | 0          | NA          | NA         | NA         | NA         |             |
| NA        | ENSG00000285802 | 0          | NA          | NA         | NA         | NA         |             |
| NA        | ENSG00000285803 | 28.5755636 | -0.20046063 | 0.31884441 | 0.32663394 | 0.5549728  |             |
| NA        | ENSG00000285804 | 103.352556 | 0.15624487  | 0.20821927 | 0.37409506 | 0.60317318 |             |
| NA        | ENSG00000285805 | 7.05204984 | -0.0747831  | 0.35884613 | 0.60969599 | 0.79807141 |             |
| NA        | ENSG00000285806 | 0          | NA          | NA         | NA         | NA         |             |
| NA        | ENSG00000285807 | 0          | NA          | NA         | NA         | NA         |             |
| NA        | ENSG00000285808 | 0          | NA          | NA         | NA         | NA         | LINC02797   |
| NA        | ENSG00000285809 | 0          | NA          | NA         | NA         | NA         |             |
| NA        | ENSG00000285810 | 0.173733   | 0.01914545  | 0.38484597 | 0.78225479 | NA         |             |
| NA        | ENSG00000285811 | 0          | NA          | NA         | NA         | NA         |             |
| NA        | ENSG00000285812 | 15.9229937 | -0.09785256 | 0.33451403 | 0.58352986 | 0.77994081 |             |
| NA        | ENSG00000285813 | 108.011598 | 0.02562903  | 0.19395438 | 0.87969115 | 0.94663299 |             |
| NA        | ENSG00000285814 | 0.18922458 | 0.01954053  | 0.38488496 | 0.78225479 | NA         | FAM90A14P   |
| 106865373 | ENSG00000285815 | 15.8796864 | 1.8260735   | 1.31777939 | 0.00408502 | 0.01964299 | GET1-SH3BGR |
| NA        | ENSG00000285816 | 143.816567 | -0.22071159 | 0.23518336 | 0.24237812 | 0.46064214 |             |
| NA        | ENSG00000285817 | 0          | NA          | NA         | NA         | NA         |             |
| 100131107 | ENSG00000285818 | 0          | NA          | NA         | NA         | NA         |             |
| NA        | ENSG00000285819 | 4.03748086 | -0.05620922 | 0.37644718 | 0.57308961 | 0.7727401  |             |
| NA        | ENSG00000285820 | 0.339237   | 0.00250954  | 0.38338253 | 0.96449827 | NA         |             |
| NA        | ENSG00000285821 | 0          | NA          | NA         | NA         | NA         |             |
| NA        | ENSG00000285822 | 97.7229989 | 0.23761002  | 0.22596114 | 0.20095711 | 0.40615916 |             |
| 105376879 | ENSG00000285823 | 0          | NA          | NA         | NA         | NA         | LINC02793   |
| NA        | ENSG00000285824 | 0.33471731 | 0.02354391  | 0.38534154 | 0.62842204 | NA         |             |

|    |                 |            |             |            |            |            |           |
|----|-----------------|------------|-------------|------------|------------|------------|-----------|
| NA | ENSG00000285825 | 25.2921548 | -0.19848282 | 0.34884248 | 0.31662699 | 0.54452953 | CCDC15-DT |
| NA | ENSG00000285826 | 0          | NA          | NA         | NA         | NA         |           |
| NA | ENSG00000285827 | 40.7241317 | -0.24692609 | 0.30424669 | 0.23860082 | 0.45631774 |           |
| NA | ENSG00000285829 | 0          | NA          | NA         | NA         | NA         |           |
| NA | ENSG00000285830 | 6.82151312 | 0.02903157  | 0.36620954 | 0.80665289 | 0.91242836 |           |
| NA | ENSG00000285831 | 0          | NA          | NA         | NA         | NA         |           |
| NA | ENSG00000285833 | 0.48468479 | 0.01074459  | 0.38336887 | 0.79338221 | NA         |           |
| NA | ENSG00000285834 | 0          | NA          | NA         | NA         | NA         |           |
| NA | ENSG00000285835 | 0          | NA          | NA         | NA         | NA         |           |
| NA | ENSG00000285836 | 0          | NA          | NA         | NA         | NA         |           |
| NA | ENSG00000285837 | 1.04057035 | 0.0005402   | 0.38152195 | 0.99158274 | NA         |           |
| NA | ENSG00000285838 | 0          | NA          | NA         | NA         | NA         |           |
| NA | ENSG00000285839 | 0.90419472 | -0.03873466 | 0.3871499  | 0.33610152 | NA         |           |
| NA | ENSG00000285840 | 0.36234643 | 0.00087098  | 0.38336422 | 0.96757572 | NA         |           |
| NA | ENSG00000285841 | 0.8440687  | -0.03188058 | 0.38391606 | 0.52111366 | NA         |           |
| NA | ENSG00000285842 | 0          | NA          | NA         | NA         | NA         |           |
| NA | ENSG00000285843 | 0          | NA          | NA         | NA         | NA         | SCYGR9    |
| NA | ENSG00000285844 | 9.93063793 | 0.09078328  | 0.35709861 | 0.56149162 | 0.76495184 |           |
| NA | ENSG00000285845 | 0          | NA          | NA         | NA         | NA         |           |
| NA | ENSG00000285846 | 0          | NA          | NA         | NA         | NA         |           |
| NA | ENSG00000285847 | 6.78035447 | -0.09973504 | 0.36816035 | 0.48902222 | 0.70870715 |           |
| NA | ENSG00000285848 | 0          | NA          | NA         | NA         | NA         |           |
| NA | ENSG00000285849 | 4.1859846  | 0.29056956  | 0.53049458 | 0.03776662 | 0.12027123 |           |
| NA | ENSG00000285850 | 0.173733   | 0.01914545  | 0.38484597 | 0.78225479 | NA         |           |
| NA | ENSG00000285851 | 5.40454563 | -0.01715244 | 0.36153969 | 0.88912217 | 0.95172289 |           |
| NA | ENSG00000285852 | 2.22144605 | -0.08973681 | 0.38996272 | 0.30506753 | NA         |           |
| NA | ENSG00000285853 | 1.36549155 | 0.06415212  | 0.38945072 | 0.24023296 | NA         |           |
| NA | ENSG00000285854 | 3.7129938  | 0.00812471  | 0.36959423 | 0.93956829 | 0.97474024 |           |
| NA | ENSG00000285855 | 0          | NA          | NA         | NA         | NA         |           |
| NA | ENSG00000285856 | 4.06344372 | -0.11411343 | 0.38783023 | 0.33747479 | 0.5678002  |           |
| NA | ENSG00000285857 | 1.65539152 | 0.00872431  | 0.37665878 | 0.91244811 | NA         |           |
| NA | ENSG00000285858 | 0          | NA          | NA         | NA         | NA         |           |
| NA | ENSG00000285859 | 0.15069912 | -0.01848503 | 0.38480575 | 0.84537521 | NA         |           |
| NA | ENSG00000285860 | 0          | NA          | NA         | NA         | NA         |           |
| NA | ENSG00000285861 | 0          | NA          | NA         | NA         | NA         |           |
| NA | ENSG00000285862 | 0          | NA          | NA         | NA         | NA         |           |
| NA | ENSG00000285863 | 8.99070503 | -0.04729198 | 0.34762722 | 0.7576053  | 0.88724923 |           |
| NA | ENSG00000285864 | 22.5043068 | -0.17318656 | 0.39262776 | 0.2787     | 0.50316193 |           |

|           |                 |                 |             |             |            |            |            |           |
|-----------|-----------------|-----------------|-------------|-------------|------------|------------|------------|-----------|
|           | NA              | ENSG00000285865 | 5.53270214  | 0.16670125  | 0.40800322 | 0.21592625 | 0.42669091 |           |
| 105370985 | ENSG00000285866 | 0               | NA          | NA          | NA         | NA         | NA         | LINC02852 |
|           | NA              | ENSG00000285867 | 0           | NA          | NA         | NA         | NA         |           |
|           | NA              | ENSG00000285868 | 32.5039834  | 1.22586995  | 0.5001206  | 0.00100404 | 0.00592863 |           |
| 105371113 | ENSG00000285869 | 0               | NA          | NA          | NA         | NA         | NA         | LINC02858 |
|           | NA              | ENSG00000285870 | 1.54667121  | -0.00252404 | 0.37708371 | 0.9723749  | NA         |           |
|           | NA              | ENSG00000285871 | 0.66473873  | -0.02208907 | 0.38321439 | 0.65123807 | NA         |           |
|           | NA              | ENSG00000285872 | 7.62905699  | 0.11246797  | 0.36863968 | 0.4576858  | 0.68122697 |           |
| 105376845 | ENSG00000285873 | 1.24217685      | 0.06069247  | 0.38851098  | 0.26996404 | NA         | NA         |           |
|           | NA              | ENSG00000285876 | 0.14931947  | -0.01844332 | 0.38480212 | 0.84537521 | NA         |           |
|           | NA              | ENSG00000285877 | 3.44560736  | 0.13609487  | 0.40419191 | 0.20067006 | 0.40584036 |           |
|           | NA              | ENSG00000285878 | 4.54810556  | -0.1810488  | 0.42236347 | 0.15717566 | 0.34396456 |           |
|           | NA              | ENSG00000285879 | 0           | NA          | NA         | NA         | NA         |           |
|           | NA              | ENSG00000285880 | 0           | NA          | NA         | NA         | NA         |           |
|           | NA              | ENSG00000285881 | 0.173124    | -0.01911262 | 0.38486262 | 0.84537521 | NA         |           |
|           | NA              | ENSG00000285882 | 0           | NA          | NA         | NA         | NA         |           |
|           | NA              | ENSG00000285883 | 0           | NA          | NA         | NA         | NA         |           |
|           | NA              | ENSG00000285884 | 9.13734737  | 0.10125674  | 0.35992935 | 0.52055468 | 0.73413455 |           |
|           | NA              | ENSG00000285885 | 0.18922458  | 0.01954053  | 0.38488496 | 0.78225479 | NA         |           |
|           | NA              | ENSG00000285886 | 24.3219689  | -0.15475868 | 0.31688238 | 0.43308316 | 0.65846961 |           |
|           | NA              | ENSG00000285887 | 23.4620127  | 0.03292301  | 0.30002939 | 0.86277737 | 0.93907741 |           |
|           | NA              | ENSG00000285888 | 0           | NA          | NA         | NA         | NA         |           |
|           | NA              | ENSG00000285889 | 3.08310948  | 0.05156294  | 0.37667812 | 0.59509821 | 0.78790447 |           |
|           | NA              | ENSG00000285890 | 0           | NA          | NA         | NA         | NA         |           |
| 102724657 | ENSG00000285891 | 0               | NA          | NA          | NA         | NA         | NA         | MSANTD5   |
|           | NA              | ENSG00000285892 | 0           | NA          | NA         | NA         | NA         |           |
|           | NA              | ENSG00000285894 | 0           | NA          | NA         | NA         | NA         |           |
|           | NA              | ENSG00000285895 | 0           | NA          | NA         | NA         | NA         |           |
|           | NA              | ENSG00000285896 | 0           | NA          | NA         | NA         | NA         |           |
|           | NA              | ENSG00000285897 | 2.5155816   | 0.00442326  | 0.37451328 | 0.96105299 | NA         |           |
|           | NA              | ENSG00000285898 | 0           | NA          | NA         | NA         | NA         |           |
|           | NA              | ENSG00000285899 | 0           | NA          | NA         | NA         | NA         |           |
|           | NA              | ENSG00000285900 | 0           | NA          | NA         | NA         | NA         |           |
|           | NA              | ENSG00000285901 | 0           | NA          | NA         | NA         | NA         |           |
|           | NA              | ENSG00000285902 | 0           | NA          | NA         | NA         | NA         |           |
|           | NA              | ENSG00000285904 | 7.47024357  | 0.13677419  | 0.37650166 | 0.37848983 | 0.60739613 |           |
| 105378666 | ENSG00000285905 | 1.42022464      | -0.08444201 | 0.39326095  | 0.19756163 | NA         | NA         | BMP8B-AS1 |
|           | NA              | ENSG00000285906 | 0           | NA          | NA         | NA         | NA         |           |

|    |                 |            |             |            |            |            |           |
|----|-----------------|------------|-------------|------------|------------|------------|-----------|
| NA | ENSG00000285907 | 6.78006848 | 0.368644    | 0.63511932 | 0.02055723 | 0.07452136 |           |
| NA | ENSG00000285908 | 0.16735865 | 0.01897177  | 0.38482933 | 0.78225479 | NA         |           |
| NA | ENSG00000285909 | 0          | NA          | NA         | NA         | NA         |           |
| NA | ENSG00000285910 | 0          | NA          | NA         | NA         | NA         |           |
| NA | ENSG00000285911 | 0.52350241 | 0.03152011  | 0.38609273 | 0.47195973 | NA         |           |
| NA | ENSG00000285912 | 0          | NA          | NA         | NA         | NA         |           |
| NA | ENSG00000285913 | 0          | NA          | NA         | NA         | NA         | FAM90A18P |
| NA | ENSG00000285914 | 0          | NA          | NA         | NA         | NA         |           |
| NA | ENSG00000285915 | 0          | NA          | NA         | NA         | NA         |           |
| NA | ENSG00000285917 | 0          | NA          | NA         | NA         | NA         |           |
| NA | ENSG00000285918 | 0.30139824 | -0.02296476 | 0.38527817 | 0.68536535 | NA         |           |
| NA | ENSG00000285919 | 0          | NA          | NA         | NA         | NA         |           |
| NA | ENSG00000285920 | 33.0003154 | -0.00585279 | 0.32291648 | 0.97106808 | 0.98911805 |           |
| NA | ENSG00000285921 | 0          | NA          | NA         | NA         | NA         |           |
| NA | ENSG00000285922 | 14.9963049 | -0.51385057 | 0.58825691 | 0.04987394 | 0.14870738 |           |
| NA | ENSG00000285923 | 0          | NA          | NA         | NA         | NA         |           |
| NA | ENSG00000285925 | 0          | NA          | NA         | NA         | NA         |           |
| NA | ENSG00000285926 | 0.15069912 | -0.01848503 | 0.38480575 | 0.84537521 | NA         |           |
| NA | ENSG00000285927 | 0          | NA          | NA         | NA         | NA         |           |
| NA | ENSG00000285928 | 3.65603479 | -0.05268506 | 0.37164348 | 0.63700557 | 0.81722218 |           |
| NA | ENSG00000285929 | 0          | NA          | NA         | NA         | NA         |           |
| NA | ENSG00000285930 | 0.173733   | 0.01914545  | 0.38484597 | 0.78225479 | NA         |           |
| NA | ENSG00000285931 | 0          | NA          | NA         | NA         | NA         |           |
| NA | ENSG00000285932 | 16.3951946 | 0.24273799  | 0.4456705  | 0.14075666 | 0.31875496 |           |
| NA | ENSG00000285933 | 0.16735865 | 0.01897177  | 0.38482933 | 0.78225479 | NA         |           |
| NA | ENSG00000285934 | 0.29863895 | -0.02292439 | 0.3852726  | 0.68753245 | NA         |           |
| NA | ENSG00000285935 | 14.1182624 | -0.18755325 | 0.40487598 | 0.23276494 | 0.44970849 |           |
| NA | ENSG00000285936 | 0          | NA          | NA         | NA         | NA         |           |
| NA | ENSG00000285937 | 0          | NA          | NA         | NA         | NA         | FAM90A8P  |
| NA | ENSG00000285938 | 0          | NA          | NA         | NA         | NA         |           |
| NA | ENSG00000285939 | 0          | NA          | NA         | NA         | NA         |           |
| NA | ENSG00000285940 | 7.62847313 | -0.47355632 | 0.89019316 | 0.01343575 | 0.05285849 |           |
| NA | ENSG00000285941 | 0          | NA          | NA         | NA         | NA         |           |
| NA | ENSG00000285942 | 3.97371613 | 0.03078647  | 0.38663295 | 0.15933116 | 0.34688536 |           |
| NA | ENSG00000285943 | 347.109059 | 0.47107092  | 0.14841248 | 0.00061459 | 0.00386236 |           |
| NA | ENSG00000285944 | 0          | NA          | NA         | NA         | NA         | H2AL1SP   |
| NA | ENSG00000285945 | 0          | NA          | NA         | NA         | NA         |           |
| NA | ENSG00000285946 | 0          | NA          | NA         | NA         | NA         |           |



|        |                 |            |             |            |            |            |           |
|--------|-----------------|------------|-------------|------------|------------|------------|-----------|
| NA     | ENSG00000285947 | 0          | NA          | NA         | NA         | NA         |           |
| NA     | ENSG00000285948 | 2.10021467 | 0.10662345  | 0.39535618 | 0.24297028 | NA         |           |
| NA     | ENSG00000285950 | 0          | NA          | NA         | NA         | NA         | FAM90A10P |
| NA     | ENSG00000285952 | 1.05489384 | -0.04391844 | 0.38790839 | 0.27834512 | NA         |           |
| NA     | ENSG00000285953 | 121.556523 | -0.33073213 | 0.22968303 | 0.07965727 | 0.21062825 |           |
| NA     | ENSG00000285954 | 0.31663777 | 0.00103049  | 0.38336596 | 0.96797953 | NA         |           |
| NA     | ENSG00000285955 | 0.15069912 | -0.01848503 | 0.38480575 | 0.84537521 | NA         |           |
| NA     | ENSG00000285957 | 0.16735865 | 0.01897177  | 0.38482933 | 0.78225479 | NA         |           |
| NA     | ENSG00000285958 | 0.16735865 | 0.01897177  | 0.38482933 | 0.78225479 | NA         |           |
| NA     | ENSG00000285959 | 0          | NA          | NA         | NA         | NA         |           |
| NA     | ENSG00000285960 | 0          | NA          | NA         | NA         | NA         |           |
| NA     | ENSG00000285961 | 0          | NA          | NA         | NA         | NA         |           |
| NA     | ENSG00000285963 | 0          | NA          | NA         | NA         | NA         |           |
| NA     | ENSG00000285964 | 0          | NA          | NA         | NA         | NA         |           |
| NA     | ENSG00000285966 | 0          | NA          | NA         | NA         | NA         |           |
| 646719 | ENSG00000285967 | 530.549439 | -0.12435081 | 0.10664003 | 0.22286735 | 0.43593496 | NIPBL-DT  |
| NA     | ENSG00000285968 | 0          | NA          | NA         | NA         | NA         |           |
| NA     | ENSG00000285969 | 0.31661098 | 0.00099969  | 0.38336576 | 0.96827453 | NA         |           |
| NA     | ENSG00000285970 | 0          | NA          | NA         | NA         | NA         |           |
| NA     | ENSG00000285971 | 0          | NA          | NA         | NA         | NA         |           |
| 642934 | ENSG00000285972 | 0          | NA          | NA         | NA         | NA         | CERNA2    |
| NA     | ENSG00000285973 | 29.3736572 | -0.51387037 | 0.43995335 | 0.04888657 | 0.14644564 |           |
| NA     | ENSG00000285974 | 0.173124   | -0.01911262 | 0.38486262 | 0.84537521 | NA         |           |
| NA     | ENSG00000285975 | 0          | NA          | NA         | NA         | NA         | FAM90A7P  |
| NA     | ENSG00000285976 | 66.9195943 | 0.13784941  | 0.41852826 | 0.04002723 | 0.12543678 |           |
| NA     | ENSG00000285977 | 0          | NA          | NA         | NA         | NA         |           |
| NA     | ENSG00000285978 | 0.16735865 | 0.01897177  | 0.38482933 | 0.78225479 | NA         |           |
| NA     | ENSG00000285979 | 101.633522 | 0.04679949  | 0.20728511 | 0.79020464 | 0.90434126 |           |
| NA     | ENSG00000285980 | 0          | NA          | NA         | NA         | NA         |           |
| NA     | ENSG00000285981 | 0          | NA          | NA         | NA         | NA         |           |
| NA     | ENSG00000285982 | 19.0450676 | -2.37130401 | 0.76791061 | 9.45E-05   | 0.00072411 |           |
| NA     | ENSG00000285984 | 1.14918443 | -0.02355908 | 0.381764   | 0.6769741  | NA         |           |
| NA     | ENSG00000285985 | 0          | NA          | NA         | NA         | NA         | LINC02689 |
| NA     | ENSG00000285986 | 0          | NA          | NA         | NA         | NA         |           |
| NA     | ENSG00000285987 | 0          | NA          | NA         | NA         | NA         |           |
| NA     | ENSG00000285988 | 0          | NA          | NA         | NA         | NA         |           |
| NA     | ENSG00000285989 | 0          | NA          | NA         | NA         | NA         | H2AQ1P    |
| NA     | ENSG00000285990 | 0          | NA          | NA         | NA         | NA         | NBEAP6    |

|           |                 |            |             |            |            |            |           |
|-----------|-----------------|------------|-------------|------------|------------|------------|-----------|
| NA        | ENSG00000285991 | 1.1707741  | -0.00608111 | 0.38034506 | 0.91736964 | NA         |           |
| NA        | ENSG00000285992 | 0          | NA          | NA         | NA         | NA         |           |
| NA        | ENSG00000285993 | 0.15069912 | -0.01848503 | 0.38480575 | 0.84537521 | NA         |           |
| NA        | ENSG00000285994 | 0.79718068 | -0.05675365 | 0.38954931 | 0.26941011 | NA         |           |
| NA        | ENSG00000285996 | 23.2404174 | 0.17125284  | 0.33897906 | 0.38233557 | 0.61160786 |           |
| NA        | ENSG00000285997 | 0          | NA          | NA         | NA         | NA         |           |
| NA        | ENSG00000285998 | 0          | NA          | NA         | NA         | NA         |           |
| NA        | ENSG00000285999 | 2.90388707 | -0.03380177 | 0.37352134 | 0.72822606 | 0.87007881 |           |
| NA        | ENSG00000286000 | 4.26343253 | 0.02706004  | 0.3649414  | 0.82284642 | 0.91926758 |           |
| NA        | ENSG00000286001 | 79.8276555 | 0.20837508  | 0.27800268 | 0.30453185 | 0.53190526 |           |
| NA        | ENSG00000286002 | 0          | NA          | NA         | NA         | NA         |           |
| NA        | ENSG00000286003 | 0.173733   | 0.01914545  | 0.38484597 | 0.78225479 | NA         |           |
| NA        | ENSG00000286004 | 31.4954859 | -0.42439509 | 0.39196279 | 0.0790665  | 0.20976104 |           |
| NA        | ENSG00000286005 | 0          | NA          | NA         | NA         | NA         |           |
| NA        | ENSG00000286006 | 0          | NA          | NA         | NA         | NA         |           |
| NA        | ENSG00000286007 | 0          | NA          | NA         | NA         | NA         |           |
| NA        | ENSG00000286008 | 0          | NA          | NA         | NA         | NA         |           |
| NA        | ENSG00000286009 | 0          | NA          | NA         | NA         | NA         |           |
| NA        | ENSG00000286010 | 0.173124   | -0.01911262 | 0.38486262 | 0.84537521 | NA         |           |
| NA        | ENSG00000286011 | 5.84472633 | 0.29313004  | 0.5223586  | 0.05063445 | 0.15040987 |           |
| NA        | ENSG00000286012 | 0          | NA          | NA         | NA         | NA         |           |
| NA        | ENSG00000286013 | 0          | NA          | NA         | NA         | NA         |           |
| NA        | ENSG00000286015 | 2.08143977 | -0.03416295 | 0.37978807 | 0.64246686 | NA         |           |
| NA        | ENSG00000286016 | 0          | NA          | NA         | NA         | NA         |           |
| NA        | ENSG00000286017 | 0.34111042 | 0.02362653  | 0.3853534  | 0.62410555 | NA         |           |
| NA        | ENSG00000286018 | 15.3809232 | 0.25233791  | 0.40794324 | 0.19558518 | 0.39920852 |           |
| 100996763 | ENSG00000286019 | 0          | NA          | NA         | NA         | NA         | NOTCH2NLB |
| NA        | ENSG00000286020 | 0          | NA          | NA         | NA         | NA         |           |
| 102724834 | ENSG00000286021 | 0          | NA          | NA         | NA         | NA         | LINC02822 |
| NA        | ENSG00000286022 | 0.69493202 | 0.03154416  | 0.38626309 | 0.41391645 | NA         |           |
| NA        | ENSG00000286023 | 0          | NA          | NA         | NA         | NA         |           |
| NA        | ENSG00000286024 | 5.91785486 | -0.0822577  | 0.37459144 | 0.49915524 | 0.71669126 |           |
| NA        | ENSG00000286025 | 9.88427207 | -0.18613812 | 0.39934048 | 0.25088682 | 0.47082809 | FAM246C   |
| NA        | ENSG00000286026 | 0          | NA          | NA         | NA         | NA         |           |
| 105372808 | ENSG00000286027 | 0          | NA          | NA         | NA         | NA         | PCSEAT    |
| 728196    | ENSG00000286028 | 0          | NA          | NA         | NA         | NA         |           |
| NA        | ENSG00000286030 | 0          | NA          | NA         | NA         | NA         |           |
| NA        | ENSG00000286031 | 0.90419472 | -0.03873466 | 0.3871499  | 0.33610152 | NA         |           |

|           |                 |            |             |            |            |            |           |
|-----------|-----------------|------------|-------------|------------|------------|------------|-----------|
| NA        | ENSG00000286032 | 0          | NA          | NA         | NA         | NA         |           |
| NA        | ENSG00000286033 | 3.70100283 | 0.051391    | 0.37164671 | 0.64625149 | 0.82370422 |           |
| NA        | ENSG00000286034 | 0          | NA          | NA         | NA         | NA         |           |
| NA        | ENSG00000286035 | 1.13292973 | 0.01706827  | 0.37995777 | 0.79143391 | NA         |           |
| NA        | ENSG00000286036 | 0          | NA          | NA         | NA         | NA         |           |
| NA        | ENSG00000286037 | 0.34624801 | -0.02356563 | 0.38536324 | 0.65270996 | NA         |           |
| 105180390 | ENSG00000286038 | 0          | NA          | NA         | NA         | NA         | SPDYE13   |
| NA        | ENSG00000286039 | 643.253048 | 1.26718027  | 0.12244611 | 4.28E-26   | 2.12E-24   |           |
| NA        | ENSG00000286040 | 0          | NA          | NA         | NA         | NA         |           |
| NA        | ENSG00000286041 | 0          | NA          | NA         | NA         | NA         |           |
| 80078     | ENSG00000286042 | 0          | NA          | NA         | NA         | NA         | LCAL1     |
| NA        | ENSG00000286043 | 0.3629531  | 0.02389476  | 0.3853924  | 0.60996727 | NA         |           |
| NA        | ENSG00000286044 | 1.11374591 | 0.00090995  | 0.37953272 | 0.98888636 | NA         |           |
| NA        | ENSG00000286045 | 4.75403257 | -0.14260767 | 0.39781968 | 0.26308048 | 0.48504013 |           |
| NA        | ENSG00000286046 | 0          | NA          | NA         | NA         | NA         |           |
| NA        | ENSG00000286047 | 0          | NA          | NA         | NA         | NA         |           |
| NA        | ENSG00000286048 | 0          | NA          | NA         | NA         | NA         |           |
| NA        | ENSG00000286049 | 0          | NA          | NA         | NA         | NA         |           |
| NA        | ENSG00000286050 | 0          | NA          | NA         | NA         | NA         |           |
| NA        | ENSG00000286051 | 45.5302107 | -0.09143064 | 0.2720759  | 0.63754109 | 0.81738469 | MAGEA6-DT |
| NA        | ENSG00000286052 | 0          | NA          | NA         | NA         | NA         |           |
| 110599588 | ENSG00000286053 | 60.8731799 | -0.40246035 | 0.32283294 | 0.07632368 | 0.20405092 | ASDURF    |
| NA        | ENSG00000286055 | 0.37844916 | 0.02407552  | 0.3854191  | 0.60038877 | NA         |           |
| NA        | ENSG00000286056 | 0.47321585 | -0.00782202 | 0.38324845 | 0.8588922  | NA         |           |
| NA        | ENSG00000286057 | 0.14931947 | -0.01844332 | 0.38480212 | 0.84537521 | NA         |           |
| NA        | ENSG00000286058 | 0.14931947 | -0.01844332 | 0.38480212 | 0.84537521 | NA         |           |
| NA        | ENSG00000286059 | 0          | NA          | NA         | NA         | NA         |           |
| NA        | ENSG00000286060 | 7.48833433 | 0.11944245  | 0.3697662  | 0.43697061 | 0.6620969  |           |
| 100750325 | ENSG00000286061 | 0.34746601 | 0.02370763  | 0.3853651  | 0.61987128 | NA         | RCAN3AS   |
| NA        | ENSG00000286062 | 0          | NA          | NA         | NA         | NA         |           |
| NA        | ENSG00000286063 | 0          | NA          | NA         | NA         | NA         |           |
| NA        | ENSG00000286064 | 3.07683703 | 0.04244503  | 0.3726682  | 0.68466841 | 0.84650223 |           |
| NA        | ENSG00000286065 | 0          | NA          | NA         | NA         | NA         | SLFN12L   |
| NA        | ENSG00000286066 | 0          | NA          | NA         | NA         | NA         |           |
| NA        | ENSG00000286067 | 30.3036539 | 0.08806905  | 0.28803835 | 0.65220933 | 0.8261929  |           |
| NA        | ENSG00000286068 | 0.31816708 | 0.00111578  | 0.38336649 | 0.96638655 | NA         |           |
| NA        | ENSG00000286069 | 0.173124   | -0.01911262 | 0.38486262 | 0.84537521 | NA         |           |
| NA        | ENSG00000286070 | 534.730631 | 0.00729676  | 0.13157767 | 0.95033776 | 0.97957708 |           |

|           |                 |            |             |            |            |            |           |
|-----------|-----------------|------------|-------------|------------|------------|------------|-----------|
| 105373170 | ENSG00000286071 | 2.69670474 | -0.05694176 | 0.37808519 | 0.54431861 | 0.75224863 |           |
| NA        | ENSG00000286072 | 0          | NA          | NA         | NA         | NA         |           |
| NA        | ENSG00000286073 | 0          | NA          | NA         | NA         | NA         |           |
| NA        | ENSG00000286074 | 0.87113442 | 0.01031318  | 0.38220506 | 0.8257461  | NA         |           |
| NA        | ENSG00000286075 | 0          | NA          | NA         | NA         | NA         |           |
| NA        | ENSG00000286076 | 0          | NA          | NA         | NA         | NA         |           |
| NA        | ENSG00000286077 | 0.81686393 | 0.01402616  | 0.381795   | 0.78564754 | NA         |           |
| NA        | ENSG00000286078 | 1.07252787 | 0.06034257  | 0.39066986 | 0.18906303 | NA         |           |
| NA        | ENSG00000286080 | 0.34746601 | 0.02370763  | 0.3853651  | 0.61987128 | NA         |           |
| 105373682 | ENSG00000286081 | 0.50144324 | -0.02977137 | 0.38592656 | 0.52133521 | NA         |           |
| NA        | ENSG00000286082 | 0.36243254 | 0.00097228  | 0.38336481 | 0.96662234 | NA         |           |
| NA        | ENSG00000286083 | 0          | NA          | NA         | NA         | NA         |           |
| NA        | ENSG00000286084 | 4.44417651 | 0.01433844  | 0.36360588 | 0.90692118 | 0.95954118 |           |
| NA        | ENSG00000286085 | 0          | NA          | NA         | NA         | NA         |           |
| NA        | ENSG00000286086 | 2.21986676 | 0.04930488  | 0.37857199 | 0.57975235 | NA         |           |
| NA        | ENSG00000286087 | 0.29863895 | -0.02292439 | 0.3852726  | 0.68753245 | NA         |           |
| NA        | ENSG00000286088 | 8.62176871 | -0.00761712 | 0.34792755 | 0.95713069 | 0.98264776 |           |
| NA        | ENSG00000286089 | 0.61435017 | -0.01559244 | 0.3833607  | 0.72276535 | NA         |           |
| NA        | ENSG00000286090 | 0          | NA          | NA         | NA         | NA         |           |
| NA        | ENSG00000286092 | 1.46811293 | -0.02862623 | 0.38004601 | 0.67916622 | NA         |           |
| NA        | ENSG00000286093 | 1.31063771 | -0.05113184 | 0.38329852 | 0.47050215 | NA         |           |
| 100996693 | ENSG00000286095 | 7.54638065 | 0.04456636  | 0.36567177 | 0.71116043 | 0.86120368 | SPEGNB    |
| 110806308 | ENSG00000286096 | 0          | NA          | NA         | NA         | NA         | GPC3-AS1  |
| NA        | ENSG00000286097 | 0          | NA          | NA         | NA         | NA         |           |
| 284391    | ENSG00000286098 | 50.6415497 | -0.13872948 | 0.28777178 | 0.48330698 | 0.70366262 |           |
| NA        | ENSG00000286099 | 0.5377344  | 0.03221325  | 0.38616327 | 0.46181732 | NA         |           |
| NA        | ENSG00000286100 | 0.30139824 | -0.02296476 | 0.38527817 | 0.68536535 | NA         |           |
| 105373514 | ENSG00000286101 | 0          | NA          | NA         | NA         | NA         |           |
| NA        | ENSG00000286102 | 0          | NA          | NA         | NA         | NA         | FAM246A   |
| NA        | ENSG00000286103 | 0          | NA          | NA         | NA         | NA         |           |
| NA        | ENSG00000286104 | 86.8407816 | -0.15577749 | 0.23278813 | 0.40377766 | 0.63179407 |           |
| 221468    | ENSG00000286105 | 0          | NA          | NA         | NA         | NA         |           |
| NA        | ENSG00000286106 | 0          | NA          | NA         | NA         | NA         | NOTCH2NLR |
| NA        | ENSG00000286107 | 1.65370733 | 0.01105658  | 0.37933369 | 0.86810724 | NA         |           |
| NA        | ENSG00000286108 | 0.65247001 | 0.01984897  | 0.38365474 | 0.64117148 | NA         |           |
| NA        | ENSG00000286109 | 0          | NA          | NA         | NA         | NA         |           |
| NA        | ENSG00000286110 | 0.16735865 | 0.01897177  | 0.38482933 | 0.78225479 | NA         |           |
| NA        | ENSG00000286111 | 0          | NA          | NA         | NA         | NA         |           |

|           |                 |            |             |            |            |            |       |
|-----------|-----------------|------------|-------------|------------|------------|------------|-------|
| 883       | ENSG00000286112 | 163.318811 | -0.27211002 | 0.22534876 | 0.1420208  | 0.32062958 |       |
| NA        | ENSG00000286113 | 0          | NA          | NA         | NA         | NA         |       |
| NA        | ENSG00000286114 | 0          | NA          | NA         | NA         | NA         |       |
| NA        | ENSG00000286115 | 0.30001567 | -0.02294458 | 0.38527538 | 0.68644887 | NA         |       |
| NA        | ENSG00000286116 | 4.01697659 | 0.04930318  | 0.37389917 | 0.63745423 | 0.81736521 |       |
| 105372573 | ENSG00000286117 | 0          | NA          | NA         | NA         | NA         |       |
| NA        | ENSG00000286118 | 0.44795842 | -0.02501848 | 0.38558245 | 0.5807882  | NA         |       |
| NA        | ENSG00000286119 | 0          | NA          | NA         | NA         | NA         |       |
| NA        | ENSG00000286120 | 0          | NA          | NA         | NA         | NA         |       |
| NA        | ENSG00000286121 | 0.30139824 | -0.02296476 | 0.38527817 | 0.68536535 | NA         |       |
| NA        | ENSG00000286122 | 0          | NA          | NA         | NA         | NA         |       |
| NA        | ENSG00000286123 | 0          | NA          | NA         | NA         | NA         |       |
| NA        | ENSG00000286124 | 0          | NA          | NA         | NA         | NA         |       |
| NA        | ENSG00000286125 | 124.346436 | -0.51107034 | 0.29320447 | 0.02336413 | 0.08251055 |       |
| NA        | ENSG00000286126 | 0          | NA          | NA         | NA         | NA         |       |
| NA        | ENSG00000286127 | 0          | NA          | NA         | NA         | NA         |       |
| NA        | ENSG00000286128 | 1.58344543 | 0.00399279  | 0.38042638 | 0.94688301 | NA         |       |
| NA        | ENSG00000286129 | 194.510666 | 0.12854244  | 0.15847132 | 0.37156189 | 0.60060191 |       |
| NA        | ENSG00000286130 | 0          | NA          | NA         | NA         | NA         |       |
| NA        | ENSG00000286131 | 0          | NA          | NA         | NA         | NA         |       |
| NA        | ENSG00000286132 | 2.59760358 | -0.03605237 | 0.37310491 | 0.71709104 | 0.86381491 |       |
| NA        | ENSG00000286133 | 0          | NA          | NA         | NA         | NA         |       |
| NA        | ENSG00000286134 | 0          | NA          | NA         | NA         | NA         |       |
| 112577516 | ENSG00000286135 | 0          | NA          | NA         | NA         | NA         |       |
| NA        | ENSG00000286136 | 3.13018456 | -0.03548016 | 0.376078   | 0.69145026 | 0.85064631 |       |
| NA        | ENSG00000286138 | 3.43735954 | -0.02343802 | 0.36725954 | 0.83354761 | 0.92422788 |       |
| 113455421 | ENSG00000286140 | 655.739121 | -0.30841053 | 0.11588081 | 0.00509025 | 0.0235794  | DERPC |
| NA        | ENSG00000286141 | 0          | NA          | NA         | NA         | NA         |       |
| NA        | ENSG00000286142 | 0          | NA          | NA         | NA         | NA         |       |
| NA        | ENSG00000286143 | 0          | NA          | NA         | NA         | NA         |       |
| NA        | ENSG00000286144 | 0          | NA          | NA         | NA         | NA         |       |
| NA        | ENSG00000286145 | 1.2280233  | 0.0526426   | 0.38403599 | 0.44108337 | NA         |       |
| NA        | ENSG00000286146 | 0          | NA          | NA         | NA         | NA         |       |
| NA        | ENSG00000286147 | 19.1987146 | 2.2256684   | 0.64011759 | 2.71E-05   | 0.00023639 |       |
| NA        | ENSG00000286150 | 0          | NA          | NA         | NA         | NA         |       |
| NA        | ENSG00000286151 | 0          | NA          | NA         | NA         | NA         |       |
| NA        | ENSG00000286152 | 0          | NA          | NA         | NA         | NA         |       |
| NA        | ENSG00000286153 | 0          | NA          | NA         | NA         | NA         |       |

|           |                 |            |             |            |            |            |         |
|-----------|-----------------|------------|-------------|------------|------------|------------|---------|
| NA        | ENSG00000286154 | 0.173733   | 0.01914545  | 0.38484597 | 0.78225479 | NA         |         |
| NA        | ENSG00000286155 | 0.16735865 | 0.01897177  | 0.38482933 | 0.78225479 | NA         |         |
| NA        | ENSG00000286156 | 46.2721842 | 0.04327959  | 0.25744195 | 0.82311886 | 0.919424   | BMS1P23 |
| NA        | ENSG00000286157 | 0          | NA          | NA         | NA         | NA         |         |
| NA        | ENSG00000286158 | 7.03867927 | -0.07006682 | 0.36577776 | 0.59829898 | 0.78987568 |         |
| NA        | ENSG00000286159 | 1.51995946 | 0.02035757  | 0.37787787 | 0.78908105 | NA         |         |
| NA        | ENSG00000286160 | 0          | NA          | NA         | NA         | NA         |         |
| NA        | ENSG00000286161 | 13.5027641 | -0.07371651 | 0.33831224 | 0.6638808  | 0.83421338 |         |
| NA        | ENSG00000286162 | 8.90283177 | 0.25494295  | 0.4490158  | 0.13489291 | 0.309396   |         |
| NA        | ENSG00000286163 | 0          | NA          | NA         | NA         | NA         |         |
| NA        | ENSG00000286164 | 0          | NA          | NA         | NA         | NA         |         |
| NA        | ENSG00000286165 | 1.95934923 | -0.13524776 | 0.41721671 | 0.03274222 | NA         |         |
| NA        | ENSG00000286167 | 0          | NA          | NA         | NA         | NA         |         |
| NA        | ENSG00000286168 | 0          | NA          | NA         | NA         | NA         |         |
| NA        | ENSG00000286170 | 0          | NA          | NA         | NA         | NA         |         |
| NA        | ENSG00000286171 | 0.16735865 | 0.01897177  | 0.38482933 | 0.78225479 | NA         |         |
| 101447996 | ENSG00000286172 | 0          | NA          | NA         | NA         | NA         | RNVU1-8 |
| NA        | ENSG00000286173 | 0          | NA          | NA         | NA         | NA         |         |
| NA        | ENSG00000286174 | 0          | NA          | NA         | NA         | NA         |         |
| NA        | ENSG00000286175 | 0          | NA          | NA         | NA         | NA         | FAM246B |
| 107986257 | ENSG00000286176 | 3.9002896  | -0.1862753  | 0.43354756 | 0.10532246 | 0.25877695 |         |
| 105372401 | ENSG00000286177 | 14.607473  | 0.08537059  | 0.33975822 | 0.62197008 | 0.80695268 |         |
| NA        | ENSG00000286179 | 0          | NA          | NA         | NA         | NA         |         |
| NA        | ENSG00000286180 | 3.55779665 | 0.1369673   | 0.40612216 | 0.18338092 | 0.38157078 |         |
| NA        | ENSG00000286181 | 5.87538461 | -0.12592699 | 0.39126754 | 0.29512233 | 0.52176323 |         |
| NA        | ENSG00000286182 | 0          | NA          | NA         | NA         | NA         |         |
| NA        | ENSG00000286183 | 0          | NA          | NA         | NA         | NA         |         |
| NA        | ENSG00000286185 | 2.58146366 | 0.12520882  | 0.41356654 | 0.02232309 | 0.07952777 |         |
| NA        | ENSG00000286186 | 0          | NA          | NA         | NA         | NA         |         |
| NA        | ENSG00000286187 | 0          | NA          | NA         | NA         | NA         |         |
| NA        | ENSG00000286188 | 0          | NA          | NA         | NA         | NA         |         |
| NA        | ENSG00000286189 | 0.34746601 | 0.02370763  | 0.3853651  | 0.61987128 | NA         |         |
| 728392    | ENSG00000286190 | 575.857465 | -0.32338606 | 0.1049259  | 0.00130884 | 0.00744692 |         |
| NA        | ENSG00000286191 | 0          | NA          | NA         | NA         | NA         |         |
| NA        | ENSG00000286192 | 68.3837531 | 0.10974517  | 0.25352689 | 0.57048446 | 0.77085145 |         |
| 105374727 | ENSG00000286193 | 2.97010602 | 0.05680465  | 0.38123909 | 0.46992283 | 0.6922856  |         |
| NA        | ENSG00000286194 | 0          | NA          | NA         | NA         | NA         |         |
| NA        | ENSG00000286195 | 0          | NA          | NA         | NA         | NA         |         |

|           |                 |            |             |            |            |            |           |
|-----------|-----------------|------------|-------------|------------|------------|------------|-----------|
| NA        | ENSG00000286196 | 2.73958626 | -0.08027558 | 0.38218458 | 0.43064096 | 0.65606363 |           |
| NA        | ENSG00000286197 | 0          | NA          | NA         | NA         | NA         |           |
| NA        | ENSG00000286198 | 0.94556401 | -0.06630678 | 0.39158691 | 0.20460536 | NA         |           |
| NA        | ENSG00000286199 | 0          | NA          | NA         | NA         | NA         |           |
| NA        | ENSG00000286201 | 0          | NA          | NA         | NA         | NA         |           |
| NA        | ENSG00000286202 | 5.54475697 | -0.100023   | 0.37672762 | 0.4408025  | 0.66576747 |           |
| NA        | ENSG00000286203 | 0          | NA          | NA         | NA         | NA         |           |
| NA        | ENSG00000286204 | 0          | NA          | NA         | NA         | NA         |           |
| NA        | ENSG00000286205 | 1.68870801 | 0.03076552  | 0.37962312 | 0.67324387 | NA         |           |
| NA        | ENSG00000286206 | 0          | NA          | NA         | NA         | NA         |           |
| NA        | ENSG00000286207 | 78.2187543 | 0.224887    | 0.23756903 | 0.23792669 | 0.45533573 |           |
| NA        | ENSG00000286208 | 1.16551367 | 0.03565956  | 0.38327444 | 0.5307006  | NA         |           |
| NA        | ENSG00000286209 | 0          | NA          | NA         | NA         | NA         |           |
| NA        | ENSG00000286210 | 0          | NA          | NA         | NA         | NA         |           |
| NA        | ENSG00000286211 | 0          | NA          | NA         | NA         | NA         |           |
| NA        | ENSG00000286212 | 0          | NA          | NA         | NA         | NA         |           |
| NA        | ENSG00000286213 | 0          | NA          | NA         | NA         | NA         |           |
| NA        | ENSG00000286214 | 15.9774797 | 2.46073159  | 0.74295527 | 5.23E-05   | 0.00042527 |           |
| NA        | ENSG00000286215 | 1.83892626 | -0.00482101 | 0.37727993 | 0.94750633 | NA         |           |
| NA        | ENSG00000286216 | 7.63384735 | 0.13841246  | 0.37864754 | 0.36778113 | 0.59711764 |           |
| NA        | ENSG00000286217 | 0          | NA          | NA         | NA         | NA         | LINC00279 |
| NA        | ENSG00000286218 | 0.32325887 | -0.02326846 | 0.38532065 | 0.66893403 | NA         |           |
| 100996717 | ENSG00000286219 | 32.5192638 | 0.44100423  | 0.40396764 | 0.07191808 | 0.19537925 | NOTCH2NLC |
| NA        | ENSG00000286220 | 8.87883813 | -0.00079511 | 0.34285574 | 0.99391514 | 0.99814114 |           |
| NA        | ENSG00000286221 | 2.44690178 | 0.09602718  | 0.39495354 | 0.22174706 | NA         |           |
| NA        | ENSG00000286222 | 0          | NA          | NA         | NA         | NA         |           |
| NA        | ENSG00000286223 | 11.2107193 | 0.04170177  | 0.33587815 | 0.80469476 | 0.91125251 |           |
| NA        | ENSG00000286224 | 0          | NA          | NA         | NA         | NA         |           |
| NA        | ENSG00000286225 | 0          | NA          | NA         | NA         | NA         |           |
| NA        | ENSG00000286226 | 0.51922449 | 0.01763103  | 0.38330303 | 0.70885699 | NA         |           |
| NA        | ENSG00000286227 | 0          | NA          | NA         | NA         | NA         |           |
| NA        | ENSG00000286229 | 0          | NA          | NA         | NA         | NA         |           |
| NA        | ENSG00000286230 | 2.35555851 | -0.01484151 | 0.37665379 | 0.85023275 | NA         |           |
| NA        | ENSG00000286231 | 152.359049 | 0.02438424  | 0.17846124 | 0.87869415 | 0.94627867 |           |
| NA        | ENSG00000286232 | 0          | NA          | NA         | NA         | NA         |           |
| NA        | ENSG00000286233 | 3.91705384 | 0.03515671  | 0.3669456  | 0.76464352 | 0.8916054  |           |
| NA        | ENSG00000286234 | 0.51541588 | 0.03112685  | 0.38605393 | 0.4777362  | NA         |           |
| NA        | ENSG00000286235 | 6.1174772  | -0.17323215 | 0.43460573 | 0.05625919 | 0.16304154 |           |

|           |                 |            |             |            |            |            |         |
|-----------|-----------------|------------|-------------|------------|------------|------------|---------|
| NA        | ENSG00000286236 | 0          | NA          | NA         | NA         | NA         |         |
| 100528062 | ENSG00000286237 | 87.4920164 | -0.10517878 | 0.24505572 | 0.57867541 | 0.77656626 |         |
| NA        | ENSG00000286238 | 0          | NA          | NA         | NA         | NA         |         |
| NA        | ENSG00000286239 | 10.1369958 | 0.00749434  | 0.3532682  | 0.95985621 | 0.98360159 |         |
| NA        | ENSG00000286240 | 6.44862521 | 0.12642576  | 0.37913414 | 0.383526   | 0.61270278 |         |
| NA        | ENSG00000286241 | 0          | NA          | NA         | NA         | NA         |         |
| NA        | ENSG00000286242 | 7.31066119 | -0.33811537 | 0.55006263 | 0.05927905 | 0.16956407 |         |
| NA        | ENSG00000286243 | 0          | NA          | NA         | NA         | NA         |         |
| NA        | ENSG00000286244 | 2.16922231 | -0.0392246  | 0.37971639 | 0.61030594 | NA         |         |
| NA        | ENSG00000286245 | 0.14931947 | -0.01844332 | 0.38480212 | 0.84537521 | NA         |         |
| NA        | ENSG00000286246 | 0          | NA          | NA         | NA         | NA         |         |
| NA        | ENSG00000286247 | 0          | NA          | NA         | NA         | NA         |         |
| NA        | ENSG00000286248 | 10.1457374 | -2.04697727 | 1.1381818  | 0.00265111 | 0.01363917 |         |
| NA        | ENSG00000286249 | 0          | NA          | NA         | NA         | NA         |         |
| NA        | ENSG00000286250 | 0.14931947 | -0.01844332 | 0.38480212 | 0.84537521 | NA         |         |
| NA        | ENSG00000286251 | 0          | NA          | NA         | NA         | NA         |         |
| NA        | ENSG00000286252 | 0          | NA          | NA         | NA         | NA         |         |
| NA        | ENSG00000286253 | 0          | NA          | NA         | NA         | NA         |         |
| NA        | ENSG00000286254 | 0          | NA          | NA         | NA         | NA         |         |
| NA        | ENSG00000286255 | 0          | NA          | NA         | NA         | NA         | OR4F8BP |
| NA        | ENSG00000286256 | 0.14931947 | -0.01844332 | 0.38480212 | 0.84537521 | NA         |         |
| NA        | ENSG00000286257 | 1.81844151 | -0.05993769 | 0.38604148 | 0.33891553 | NA         |         |
| NA        | ENSG00000286258 | 0          | NA          | NA         | NA         | NA         |         |
| NA        | ENSG00000286259 | 0.49159845 | 0.011894    | 0.38343132 | 0.77684163 | NA         |         |
| NA        | ENSG00000286260 | 0          | NA          | NA         | NA         | NA         |         |
| NA        | ENSG00000286262 | 0          | NA          | NA         | NA         | NA         |         |
| NA        | ENSG00000286263 | 0          | NA          | NA         | NA         | NA         |         |
| 114841035 | ENSG00000286264 | 118.890751 | 0.38797135  | 0.21431558 | 0.03296642 | 0.10807232 |         |
| NA        | ENSG00000286266 | 0          | NA          | NA         | NA         | NA         |         |
| NA        | ENSG00000286268 | 12.5229025 | -0.15068466 | 0.38660665 | 0.31785204 | 0.54556488 |         |
| NA        | ENSG00000286269 | 1.24575879 | 0.06131446  | 0.38873786 | 0.26510732 | NA         |         |
| NA        | ENSG00000286270 | 0          | NA          | NA         | NA         | NA         |         |
| NA        | ENSG00000286271 | 0.44795842 | -0.02501848 | 0.38558245 | 0.5807882  | NA         |         |
| NA        | ENSG00000286272 | 0          | NA          | NA         | NA         | NA         |         |
| NA        | ENSG00000286273 | 0          | NA          | NA         | NA         | NA         |         |
| NA        | ENSG00000286274 | 0.173733   | 0.01914545  | 0.38484597 | 0.78225479 | NA         |         |
| NA        | ENSG00000286275 | 0          | NA          | NA         | NA         | NA         |         |
| NA        | ENSG00000286276 | 3.00734071 | 0.04008107  | 0.37290079 | 0.69725696 | 0.85387893 |         |



|           |                 |            |             |            |            |            |
|-----------|-----------------|------------|-------------|------------|------------|------------|
| NA        | ENSG00000286277 | 0          | NA          | NA         | NA         | NA         |
| NA        | ENSG00000286278 | 0          | NA          | NA         | NA         | NA         |
| NA        | ENSG00000286279 | 0          | NA          | NA         | NA         | NA         |
| NA        | ENSG00000286280 | 0          | NA          | NA         | NA         | NA         |
| NA        | ENSG00000286281 | 0.31807844 | 0.00101826  | 0.38336582 | 0.96732012 | NA         |
| NA        | ENSG00000286282 | 0          | NA          | NA         | NA         | NA         |
| NA        | ENSG00000286283 | 0          | NA          | NA         | NA         | NA         |
| NA        | ENSG00000286284 | 0.15069912 | -0.01848503 | 0.38480575 | 0.84537521 | NA         |
| NA        | ENSG00000286285 | 0.68266508 | 0.00340883  | 0.3818754  | 0.94199355 | NA         |
| NA        | ENSG00000286286 | 0          | NA          | NA         | NA         | NA         |
| NA        | ENSG00000286288 | 0.33471731 | 0.02354391  | 0.38534154 | 0.62842204 | NA         |
| 107984270 | ENSG00000286289 | 0          | NA          | NA         | NA         | NA         |
| NA        | ENSG00000286290 | 0          | NA          | NA         | NA         | NA         |
| NA        | ENSG00000286291 | 0          | NA          | NA         | NA         | NA         |
| NA        | ENSG00000286292 | 1.67656665 | 0.05816018  | 0.38366128 | 0.4468164  | NA         |
| NA        | ENSG00000286293 | 0.62188284 | -0.01806414 | 0.3829177  | 0.70060704 | NA         |
| NA        | ENSG00000286294 | 0.75689831 | 0.03380966  | 0.38651369 | 0.3822658  | NA         |
| NA        | ENSG00000286295 | 0          | NA          | NA         | NA         | NA         |
| NA        | ENSG00000286296 | 0          | NA          | NA         | NA         | NA         |
| NA        | ENSG00000286297 | 0          | NA          | NA         | NA         | NA         |
| NA        | ENSG00000286299 | 1.53241924 | 0.02439146  | 0.37724208 | 0.76139616 | NA         |
| NA        | ENSG00000286300 | 0          | NA          | NA         | NA         | NA         |
| NA        | ENSG00000286301 | 0          | NA          | NA         | NA         | NA         |
| NA        | ENSG00000286302 | 0.8107717  | -0.02884516 | 0.38354391 | 0.54676952 | NA         |
| NA        | ENSG00000286303 | 0          | NA          | NA         | NA         | NA         |
| NA        | ENSG00000286305 | 33.2553241 | 0.02980333  | 0.28111204 | 0.87855314 | 0.94627217 |
| NA        | ENSG00000286306 | 0          | NA          | NA         | NA         | NA         |
| NA        | ENSG00000286307 | 1.99949034 | -0.11289833 | 0.40363724 | 0.10247376 | NA         |
| NA        | ENSG00000286308 | 0          | NA          | NA         | NA         | NA         |
| NA        | ENSG00000286309 | 1.70715179 | 0.05506559  | 0.38392735 | 0.44568744 | NA         |
| NA        | ENSG00000286310 | 3.92794746 | -0.04927617 | 0.37231977 | 0.64708158 | 0.82430661 |
| NA        | ENSG00000286311 | 22.9821855 | -0.0502925  | 0.31096772 | 0.7842603  | 0.90175162 |
| NA        | ENSG00000286312 | 0.50878214 | 0.01553554  | 0.38314772 | 0.73654137 | NA         |
| NA        | ENSG00000286313 | 0.18922458 | 0.01954053  | 0.38488496 | 0.78225479 | NA         |
| NA        | ENSG00000286314 | 0.3626185  | 0.00116158  | 0.38336609 | 0.96484049 | NA         |
| NA        | ENSG00000286315 | 7.23661177 | 0.01901739  | 0.35228954 | 0.89618082 | 0.95469109 |
| NA        | ENSG00000286316 | 0          | NA          | NA         | NA         | NA         |
| NA        | ENSG00000286317 | 0.15069912 | -0.01848503 | 0.38480575 | 0.84537521 | NA         |

|           |                 |            |             |            |            |            |
|-----------|-----------------|------------|-------------|------------|------------|------------|
| NA        | ENSG00000286318 | 0.16735865 | 0.01897177  | 0.38482933 | 0.78225479 | NA         |
| NA        | ENSG00000286319 | 0.173124   | -0.01911262 | 0.38486262 | 0.84537521 | NA         |
| NA        | ENSG00000286320 | 0.82638329 | -0.00415965 | 0.38206675 | 0.92974673 | NA         |
| NA        | ENSG00000286321 | 0          | NA          | NA         | NA         | NA         |
| NA        | ENSG00000286322 | 0          | NA          | NA         | NA         | NA         |
| NA        | ENSG00000286323 | 0          | NA          | NA         | NA         | NA         |
| NA        | ENSG00000286324 | 0          | NA          | NA         | NA         | NA         |
| NA        | ENSG00000286325 | 0          | NA          | NA         | NA         | NA         |
| NA        | ENSG00000286326 | 0          | NA          | NA         | NA         | NA         |
| NA        | ENSG00000286327 | 3.04290821 | -0.01298929 | 0.37158804 | 0.89299728 | 0.95376109 |
| NA        | ENSG00000286328 | 0.14931947 | -0.01844332 | 0.38480212 | 0.84537521 | NA         |
| NA        | ENSG00000286329 | 0          | NA          | NA         | NA         | NA         |
| 105370259 | ENSG00000286330 | 3.24254546 | -0.00158763 | 0.37235596 | 0.98444222 | 0.99457273 |
| NA        | ENSG00000286331 | 2.009578   | 0.00794451  | 0.37724331 | 0.91782491 | NA         |
| NA        | ENSG00000286332 | 0          | NA          | NA         | NA         | NA         |
| NA        | ENSG00000286333 | 0          | NA          | NA         | NA         | NA         |
| NA        | ENSG00000286334 | 0          | NA          | NA         | NA         | NA         |
| NA        | ENSG00000286335 | 0          | NA          | NA         | NA         | NA         |
| NA        | ENSG00000286337 | 2.98975407 | -0.05602977 | 0.37754044 | 0.56168083 | 0.76502898 |
| NA        | ENSG00000286338 | 0.14931947 | -0.01844332 | 0.38480212 | 0.84537521 | NA         |
| NA        | ENSG00000286339 | 0.14931947 | -0.01844332 | 0.38480212 | 0.84537521 | NA         |
| NA        | ENSG00000286340 | 37.7389359 | -0.07650275 | 0.27690371 | 0.69270699 | 0.8515339  |
| NA        | ENSG00000286341 | 0          | NA          | NA         | NA         | NA         |
| NA        | ENSG00000286342 | 16.9106076 | 0.10500278  | 0.33401484 | 0.56480765 | 0.76715163 |
| NA        | ENSG00000286343 | 0          | NA          | NA         | NA         | NA         |
| 105378531 | ENSG00000286344 | 0          | NA          | NA         | NA         | NA         |
| NA        | ENSG00000286345 | 0          | NA          | NA         | NA         | NA         |
| NA        | ENSG00000286346 | 0          | NA          | NA         | NA         | NA         |
| NA        | ENSG00000286347 | 0          | NA          | NA         | NA         | NA         |
| NA        | ENSG00000286348 | 0          | NA          | NA         | NA         | NA         |
| NA        | ENSG00000286349 | 0.44918704 | -0.02727294 | 0.38571088 | 0.56236792 | NA         |
| NA        | ENSG00000286350 | 0          | NA          | NA         | NA         | NA         |
| NA        | ENSG00000286351 | 0          | NA          | NA         | NA         | NA         |
| 105376975 | ENSG00000286352 | 0          | NA          | NA         | NA         | NA         |
| NA        | ENSG00000286353 | 0.47325637 | -0.03505946 | 0.38628477 | 0.49593422 | NA         |
| NA        | ENSG00000286354 | 0          | NA          | NA         | NA         | NA         |
| NA        | ENSG00000286355 | 3.62920235 | 0.12765547  | 0.39865458 | 0.24234794 | 0.46064214 |
| NA        | ENSG00000286356 | 0          | NA          | NA         | NA         | NA         |

|           |                 |            |             |            |            |            |
|-----------|-----------------|------------|-------------|------------|------------|------------|
| NA        | ENSG00000286357 | 0          | NA          | NA         | NA         | NA         |
| NA        | ENSG00000286358 | 0          | NA          | NA         | NA         | NA         |
| NA        | ENSG00000286359 | 0          | NA          | NA         | NA         | NA         |
| NA        | ENSG00000286360 | 17.0509324 | 0.20784418  | 0.36093358 | 0.2942348  | 0.52042599 |
| NA        | ENSG00000286361 | 0          | NA          | NA         | NA         | NA         |
| NA        | ENSG00000286362 | 1.71666706 | -0.01117471 | 0.37807021 | 0.87535512 | NA         |
| NA        | ENSG00000286363 | 0.30139824 | -0.02296476 | 0.38527817 | 0.68536535 | NA         |
| NA        | ENSG00000286364 | 0          | NA          | NA         | NA         | NA         |
| NA        | ENSG00000286365 | 13.1917853 | 0.04129816  | 0.33006129 | 0.81254069 | 0.91507108 |
| NA        | ENSG00000286366 | 7.34442154 | 0.2581894   | 0.45514769 | 0.12930145 | 0.30077861 |
| 112268289 | ENSG00000286367 | 4.79409158 | -0.00570342 | 0.36622756 | 0.95737632 | 0.98264776 |
| NA        | ENSG00000286368 | 3.03657381 | 0.08420945  | 0.388159   | 0.33590128 | 0.56585025 |
| NA        | ENSG00000286369 | 4.36529397 | 0.07718298  | 0.37681137 | 0.49970469 | 0.71690947 |
| NA        | ENSG00000286370 | 0.34110158 | 0.02362646  | 0.38535339 | 0.62411024 | NA         |
| NA        | ENSG00000286371 | 0          | NA          | NA         | NA         | NA         |
| NA        | ENSG00000286372 | 0.18922458 | 0.01954053  | 0.38488496 | 0.78225479 | NA         |
| NA        | ENSG00000286373 | 49.6920353 | -0.11215263 | 0.26808381 | 0.56461711 | 0.7670095  |
| NA        | ENSG00000286374 | 0          | NA          | NA         | NA         | NA         |
| NA        | ENSG00000286375 | 0.99929199 | 0.03468374  | 0.3825447  | 0.56549717 | NA         |
| NA        | ENSG00000286376 | 0          | NA          | NA         | NA         | NA         |
| NA        | ENSG00000286377 | 0          | NA          | NA         | NA         | NA         |
| NA        | ENSG00000286378 | 0.3469095  | 0.00040821  | 0.38336244 | 0.96459498 | NA         |
| NA        | ENSG00000286379 | 11.9211281 | 0.46586552  | 0.63072949 | 0.05113267 | 0.15166274 |
| 105375501 | ENSG00000286380 | 0.173733   | 0.01914545  | 0.38484597 | 0.78225479 | NA         |
| 105373085 | ENSG00000286381 | 0.34048358 | -0.0002456  | 0.38336239 | 0.9675806  | NA         |
| NA        | ENSG00000286382 | 0          | NA          | NA         | NA         | NA         |
| NA        | ENSG00000286383 | 0          | NA          | NA         | NA         | NA         |
| NA        | ENSG00000286384 | 0          | NA          | NA         | NA         | NA         |
| NA        | ENSG00000286385 | 0          | NA          | NA         | NA         | NA         |
| NA        | ENSG00000286386 | 0          | NA          | NA         | NA         | NA         |
| NA        | ENSG00000286387 | 0          | NA          | NA         | NA         | NA         |
| NA        | ENSG00000286388 | 172.594479 | -0.05487463 | 0.16252418 | 0.70845265 | 0.8597973  |
| 105373289 | ENSG00000286389 | 16.222643  | 0.226386    | 0.37562078 | 0.25429717 | 0.47479259 |
| NA        | ENSG00000286390 | 0          | NA          | NA         | NA         | NA         |
| 107985206 | ENSG00000286391 | 43.7603635 | -1.08031809 | 0.3905262  | 0.00051018 | 0.00328419 |
| NA        | ENSG00000286393 | 0          | NA          | NA         | NA         | NA         |
| NA        | ENSG00000286394 | 0          | NA          | NA         | NA         | NA         |
| NA        | ENSG00000286395 | 0.173733   | 0.01914545  | 0.38484597 | 0.78225479 | NA         |

|           |                 |            |             |            |            |            |
|-----------|-----------------|------------|-------------|------------|------------|------------|
| NA        | ENSG00000286396 | 0          | NA          | NA         | NA         | NA         |
| NA        | ENSG00000286397 | 0          | NA          | NA         | NA         | NA         |
| NA        | ENSG00000286398 | 0          | NA          | NA         | NA         | NA         |
| NA        | ENSG00000286399 | 0          | NA          | NA         | NA         | NA         |
| NA        | ENSG00000286400 | 0.173124   | -0.01911262 | 0.38486262 | 0.84537521 | NA         |
| NA        | ENSG00000286401 | 0          | NA          | NA         | NA         | NA         |
| NA        | ENSG00000286402 | 0          | NA          | NA         | NA         | NA         |
| NA        | ENSG00000286403 | 0.14931947 | -0.01844332 | 0.38480212 | 0.84537521 | NA         |
| NA        | ENSG00000286404 | 0          | NA          | NA         | NA         | NA         |
| NA        | ENSG00000286405 | 0          | NA          | NA         | NA         | NA         |
| NA        | ENSG00000286406 | 42.0267611 | 0.08161312  | 0.26181183 | 0.67432347 | 0.84019291 |
| NA        | ENSG00000286407 | 2.54223447 | 0.05736494  | 0.38083626 | 0.5084313  | NA         |
| NA        | ENSG00000286408 | 12.7382022 | -0.18582704 | 0.3723548  | 0.31191846 | 0.53958168 |
| NA        | ENSG00000286409 | 0.78742621 | -0.03571395 | 0.38377143 | 0.51550849 | NA         |
| NA        | ENSG00000286410 | 0          | NA          | NA         | NA         | NA         |
| NA        | ENSG00000286411 | 0.16735865 | 0.01897177  | 0.38482933 | 0.78225479 | NA         |
| NA        | ENSG00000286412 | 0.79602116 | -0.04547981 | 0.38787308 | 0.32285141 | NA         |
| NA        | ENSG00000286413 | 0          | NA          | NA         | NA         | NA         |
| NA        | ENSG00000286414 | 0.92203964 | -0.06316035 | 0.39092907 | 0.21892645 | NA         |
| NA        | ENSG00000286415 | 0.70442538 | 0.05124626  | 0.38859678 | 0.29598644 | NA         |
| NA        | ENSG00000286416 | 21.2704668 | -0.22583172 | 0.35575541 | 0.26775612 | 0.49033426 |
| NA        | ENSG00000286417 | 0          | NA          | NA         | NA         | NA         |
| NA        | ENSG00000286418 | 0.34047292 | -0.00020708 | 0.38336232 | 0.9672155  | NA         |
| NA        | ENSG00000286419 | 0          | NA          | NA         | NA         | NA         |
| NA        | ENSG00000286420 | 0          | NA          | NA         | NA         | NA         |
| 105372937 | ENSG00000286421 | 0          | NA          | NA         | NA         | NA         |
| NA        | ENSG00000286422 | 0          | NA          | NA         | NA         | NA         |
| NA        | ENSG00000286423 | 1.57723862 | -0.11066795 | 0.40575503 | 0.06200095 | NA         |
| NA        | ENSG00000286424 | 0.173733   | 0.01914545  | 0.38484597 | 0.78225479 | NA         |
| NA        | ENSG00000286425 | 0          | NA          | NA         | NA         | NA         |
| NA        | ENSG00000286426 | 0          | NA          | NA         | NA         | NA         |
| NA        | ENSG00000286427 | 2.31391284 | 0.04004698  | 0.37550487 | 0.6721576  | NA         |
| NA        | ENSG00000286428 | 0          | NA          | NA         | NA         | NA         |
| 102724319 | ENSG00000286429 | 1.19528028 | 0.00149711  | 0.3803352  | 0.98004524 | NA         |
| NA        | ENSG00000286430 | 6.14087229 | -0.05017791 | 0.36625127 | 0.68359808 | 0.84581141 |
| NA        | ENSG00000286431 | 284.202209 | 0.04909251  | 0.13517421 | 0.69894155 | 0.8548268  |
| NA        | ENSG00000286432 | 0          | NA          | NA         | NA         | NA         |
| NA        | ENSG00000286433 | 0.44795842 | -0.02501848 | 0.38558245 | 0.5807882  | NA         |

|           |                 |            |             |            |            |            |
|-----------|-----------------|------------|-------------|------------|------------|------------|
| NA        | ENSG00000286434 | 0          | NA          | NA         | NA         | NA         |
| NA        | ENSG00000286435 | 0.16735865 | 0.01897177  | 0.38482933 | 0.78225479 | NA         |
| NA        | ENSG00000286436 | 0          | NA          | NA         | NA         | NA         |
| NA        | ENSG00000286437 | 3.48575261 | 0.09005836  | 0.3828873  | 0.40777091 | 0.63603571 |
| NA        | ENSG00000286438 | 0          | NA          | NA         | NA         | NA         |
| NA        | ENSG00000286439 | 0          | NA          | NA         | NA         | NA         |
| NA        | ENSG00000286440 | 0          | NA          | NA         | NA         | NA         |
| 107986376 | ENSG00000286441 | 0          | NA          | NA         | NA         | NA         |
| NA        | ENSG00000286442 | 0          | NA          | NA         | NA         | NA         |
| NA        | ENSG00000286443 | 22.8564932 | 0.09687087  | 0.33902498 | 0.58397498 | 0.78020525 |
| NA        | ENSG00000286444 | 2.50737793 | -0.02483531 | 0.37384818 | 0.7882029  | NA         |
| NA        | ENSG00000286445 | 7.63152456 | 0.04071175  | 0.35839419 | 0.76814938 | 0.89321994 |
| NA        | ENSG00000286446 | 0          | NA          | NA         | NA         | NA         |
| NA        | ENSG00000286447 | 6.555272   | -1.31029375 | 2.96082826 | 0.01006725 | 0.04165471 |
| NA        | ENSG00000286448 | 0          | NA          | NA         | NA         | NA         |
| NA        | ENSG00000286449 | 34.4142591 | 0.03970711  | 0.27577053 | 0.83869796 | 0.92674595 |
| NA        | ENSG00000286450 | 0.173733   | 0.01914545  | 0.38484597 | 0.78225479 | NA         |
| NA        | ENSG00000286451 | 27.4912268 | -0.18095149 | 0.33148983 | 0.36306914 | 0.59281472 |
| NA        | ENSG00000286452 | 0          | NA          | NA         | NA         | NA         |
| NA        | ENSG00000286453 | 0          | NA          | NA         | NA         | NA         |
| NA        | ENSG00000286454 | 0          | NA          | NA         | NA         | NA         |
| NA        | ENSG00000286455 | 0          | NA          | NA         | NA         | NA         |
| NA        | ENSG00000286456 | 43.1606518 | 0.00361251  | 0.29304015 | 0.98690845 | 0.99565021 |
| NA        | ENSG00000286457 | 0.81434439 | -0.01152316 | 0.38028654 | 0.84970521 | NA         |
| NA        | ENSG00000286458 | 0          | NA          | NA         | NA         | NA         |
| NA        | ENSG00000286459 | 36.7255086 | 0.20068052  | 0.30149458 | 0.32821732 | 0.55670955 |
| NA        | ENSG00000286460 | 8.32603614 | -0.03434697 | 0.34763707 | 0.81946192 | 0.91765674 |
| NA        | ENSG00000286461 | 0.173733   | 0.01914545  | 0.38484597 | 0.78225479 | NA         |
| NA        | ENSG00000286462 | 0          | NA          | NA         | NA         | NA         |
| NA        | ENSG00000286463 | 0          | NA          | NA         | NA         | NA         |
| NA        | ENSG00000286464 | 0          | NA          | NA         | NA         | NA         |
| NA        | ENSG00000286465 | 0          | NA          | NA         | NA         | NA         |
| NA        | ENSG00000286466 | 0          | NA          | NA         | NA         | NA         |
| NA        | ENSG00000286467 | 0          | NA          | NA         | NA         | NA         |
| NA        | ENSG00000286468 | 0          | NA          | NA         | NA         | NA         |
| NA        | ENSG00000286469 | 0          | NA          | NA         | NA         | NA         |
| NA        | ENSG00000286470 | 0          | NA          | NA         | NA         | NA         |
| NA        | ENSG00000286471 | 0          | NA          | NA         | NA         | NA         |

|           |                 |            |             |            |            |            |
|-----------|-----------------|------------|-------------|------------|------------|------------|
| NA        | ENSG00000286472 | 0.47497082 | -0.00864618 | 0.38281767 | 0.8545254  | NA         |
| NA        | ENSG00000286473 | 1.2451479  | -0.08899173 | 0.39778647 | 0.11199166 | NA         |
| NA        | ENSG00000286474 | 0          | NA          | NA         | NA         | NA         |
| NA        | ENSG00000286475 | 0          | NA          | NA         | NA         | NA         |
| NA        | ENSG00000286476 | 0          | NA          | NA         | NA         | NA         |
| 102723684 | ENSG00000286477 | 0          | NA          | NA         | NA         | NA         |
| NA        | ENSG00000286478 | 0          | NA          | NA         | NA         | NA         |
| NA        | ENSG00000286479 | 0.16735865 | 0.01897177  | 0.38482933 | 0.78225479 | NA         |
| NA        | ENSG00000286480 | 0.53910477 | 0.01420991  | 0.38348564 | 0.7354271  | NA         |
| NA        | ENSG00000286481 | 0          | NA          | NA         | NA         | NA         |
| NA        | ENSG00000286482 | 56.2592933 | 0.64047578  | 0.33442645 | 0.01068468 | 0.0437622  |
| NA        | ENSG00000286483 | 1.5197603  | -0.00207859 | 0.37710105 | 0.97711553 | NA         |
| NA        | ENSG00000286484 | 0          | NA          | NA         | NA         | NA         |
| NA        | ENSG00000286485 | 21.0221583 | -0.18197131 | 0.34070215 | 0.35492954 | 0.58535346 |
| NA        | ENSG00000286486 | 0          | NA          | NA         | NA         | NA         |
| NA        | ENSG00000286487 | 0          | NA          | NA         | NA         | NA         |
| NA        | ENSG00000286488 | 3.99582625 | -0.01123318 | 0.36532595 | 0.92088888 | 0.96670947 |
| NA        | ENSG00000286489 | 0          | NA          | NA         | NA         | NA         |
| NA        | ENSG00000286490 | 0          | NA          | NA         | NA         | NA         |
| 105373044 | ENSG00000286491 | 0.68507071 | -0.01976497 | 0.38290628 | 0.66091013 | NA         |
| NA        | ENSG00000286492 | 0          | NA          | NA         | NA         | NA         |
| NA        | ENSG00000286493 | 0          | NA          | NA         | NA         | NA         |
| NA        | ENSG00000286494 | 0          | NA          | NA         | NA         | NA         |
| NA        | ENSG00000286495 | 0          | NA          | NA         | NA         | NA         |
| NA        | ENSG00000286496 | 13.824711  | -0.576085   | 0.69108043 | 0.0369966  | 0.11835094 |
| NA        | ENSG00000286497 | 0          | NA          | NA         | NA         | NA         |
| NA        | ENSG00000286498 | 0.34685963 | 0.00014551  | 0.38336205 | 0.9670787  | NA         |
| NA        | ENSG00000286499 | 0          | NA          | NA         | NA         | NA         |
| NA        | ENSG00000286500 | 0.65523757 | 0.00564697  | 0.38198012 | 0.90432265 | NA         |
| NA        | ENSG00000286501 | 0          | NA          | NA         | NA         | NA         |
| NA        | ENSG00000286502 | 0          | NA          | NA         | NA         | NA         |
| NA        | ENSG00000286503 | 1.50299861 | 0.04991064  | 0.3812992  | 0.52636641 | NA         |
| NA        | ENSG00000286504 | 0          | NA          | NA         | NA         | NA         |
| NA        | ENSG00000286505 | 0          | NA          | NA         | NA         | NA         |
| 102724904 | ENSG00000286506 | 0          | NA          | NA         | NA         | NA         |
| NA        | ENSG00000286507 | 0.16735865 | 0.01897177  | 0.38482933 | 0.78225479 | NA         |
| NA        | ENSG00000286508 | 0          | NA          | NA         | NA         | NA         |
| NA        | ENSG00000286509 | 0          | NA          | NA         | NA         | NA         |

|        |                 |            |             |            |            |            |         |
|--------|-----------------|------------|-------------|------------|------------|------------|---------|
| NA     | ENSG00000286510 | 0          | NA          | NA         | NA         | NA         |         |
| NA     | ENSG00000286511 | 10.9972065 | -0.25170549 | 0.42939139 | 0.16782439 | 0.35875832 |         |
| NA     | ENSG00000286512 | 3.25115062 | -0.04652922 | 0.37358229 | 0.65144987 | 0.82589873 |         |
| NA     | ENSG00000286513 | 0          | NA          | NA         | NA         | NA         |         |
| NA     | ENSG00000286514 | 0          | NA          | NA         | NA         | NA         |         |
| NA     | ENSG00000286515 | 0          | NA          | NA         | NA         | NA         |         |
| NA     | ENSG00000286516 | 0          | NA          | NA         | NA         | NA         |         |
| NA     | ENSG00000286517 | 0          | NA          | NA         | NA         | NA         |         |
| NA     | ENSG00000286518 | 0          | NA          | NA         | NA         | NA         |         |
| NA     | ENSG00000286519 | 7.19418328 | -0.05742541 | 0.3571179  | 0.68751738 | 0.84817465 |         |
| NA     | ENSG00000286520 | 0          | NA          | NA         | NA         | NA         |         |
| NA     | ENSG00000286521 | 0          | NA          | NA         | NA         | NA         |         |
| 8358   | ENSG00000286522 | 3.72970397 | -0.09733984 | 0.38712519 | 0.34974507 | 0.58009871 | H3C2    |
| NA     | ENSG00000286523 | 0          | NA          | NA         | NA         | NA         |         |
| NA     | ENSG00000286524 | 0          | NA          | NA         | NA         | NA         |         |
| NA     | ENSG00000286525 | 0          | NA          | NA         | NA         | NA         |         |
| NA     | ENSG00000286526 | 0          | NA          | NA         | NA         | NA         |         |
| NA     | ENSG00000286527 | 0.66519946 | 0.00598431  | 0.38137645 | 0.90734797 | NA         |         |
| NA     | ENSG00000286528 | 0          | NA          | NA         | NA         | NA         |         |
| NA     | ENSG00000286529 | 1.66919968 | 0.06318523  | 0.38429095 | 0.42350932 | NA         |         |
| NA     | ENSG00000286530 | 0          | NA          | NA         | NA         | NA         |         |
| NA     | ENSG00000286531 | 0          | NA          | NA         | NA         | NA         |         |
| NA     | ENSG00000286532 | 30.403348  | 0.03180381  | 0.28984897 | 0.86974457 | 0.9431939  | PARTICL |
| NA     | ENSG00000286533 | 0.15069912 | -0.01848503 | 0.38480575 | 0.84537521 | NA         |         |
| NA     | ENSG00000286534 | 0          | NA          | NA         | NA         | NA         |         |
| NA     | ENSG00000286535 | 6.78966816 | -0.17160556 | 0.39729755 | 0.26447405 | 0.48671731 |         |
| NA     | ENSG00000286536 | 0          | NA          | NA         | NA         | NA         |         |
| NA     | ENSG00000286537 | 0          | NA          | NA         | NA         | NA         |         |
| NA     | ENSG00000286538 | 0.49756614 | 0.01137016  | 0.38337654 | 0.78175317 | NA         |         |
| NA     | ENSG00000286539 | 0          | NA          | NA         | NA         | NA         |         |
| NA     | ENSG00000286540 | 0          | NA          | NA         | NA         | NA         |         |
| NA     | ENSG00000286541 | 0          | NA          | NA         | NA         | NA         |         |
| NA     | ENSG00000286542 | 1.54472419 | 0.08784444  | 0.39500307 | 0.15689234 | NA         |         |
| NA     | ENSG00000286543 | 1.67635601 | 0.03688228  | 0.3792307  | 0.63782742 | NA         |         |
| NA     | ENSG00000286544 | 0          | NA          | NA         | NA         | NA         |         |
| NA     | ENSG00000286545 | 88.9925498 | -0.4466924  | 0.26154994 | 0.03181192 | 0.10505134 |         |
| 613266 | ENSG00000286546 | 0.32422302 | -0.0232762  | 0.38532183 | 0.66837895 | NA         |         |
| NA     | ENSG00000286547 | 0          | NA          | NA         | NA         | NA         |         |

|           |                 |            |             |            |            |            |
|-----------|-----------------|------------|-------------|------------|------------|------------|
| NA        | ENSG00000286548 | 4.60472474 | 0.07072287  | 0.37319316 | 0.55115882 | 0.75759119 |
| NA        | ENSG00000286549 | 0.65487687 | 0.02006841  | 0.38367307 | 0.63817521 | NA         |
| NA        | ENSG00000286550 | 1.72386785 | 0.03880404  | 0.3784353  | 0.63855912 | NA         |
| NA        | ENSG00000286551 | 0.14931947 | -0.01844332 | 0.38480212 | 0.84537521 | NA         |
| NA        | ENSG00000286552 | 0          | NA          | NA         | NA         | NA         |
| NA        | ENSG00000286553 | 0          | NA          | NA         | NA         | NA         |
| NA        | ENSG00000286554 | 0          | NA          | NA         | NA         | NA         |
| NA        | ENSG00000286555 | 2.68308828 | -0.01001503 | 0.37319779 | 0.91154758 | 0.96233193 |
| NA        | ENSG00000286556 | 0          | NA          | NA         | NA         | NA         |
| NA        | ENSG00000286557 | 0          | NA          | NA         | NA         | NA         |
| NA        | ENSG00000286558 | 0          | NA          | NA         | NA         | NA         |
| NA        | ENSG00000286559 | 0.173733   | 0.01914545  | 0.38484597 | 0.78225479 | NA         |
| NA        | ENSG00000286561 | 0          | NA          | NA         | NA         | NA         |
| NA        | ENSG00000286562 | 0          | NA          | NA         | NA         | NA         |
| NA        | ENSG00000286563 | 0.49301126 | 0.01560647  | 0.38320171 | 0.74017593 | NA         |
| NA        | ENSG00000286564 | 0          | NA          | NA         | NA         | NA         |
| NA        | ENSG00000286565 | 0.5236849  | 0.03152913  | 0.38609364 | 0.47182565 | NA         |
| NA        | ENSG00000286566 | 0          | NA          | NA         | NA         | NA         |
| NA        | ENSG00000286567 | 0          | NA          | NA         | NA         | NA         |
| NA        | ENSG00000286568 | 0.32479768 | 0.0024512   | 0.38338192 | 0.95760849 | NA         |
| NA        | ENSG00000286569 | 0          | NA          | NA         | NA         | NA         |
| NA        | ENSG00000286570 | 0          | NA          | NA         | NA         | NA         |
| NA        | ENSG00000286571 | 0          | NA          | NA         | NA         | NA         |
| NA        | ENSG00000286572 | 0          | NA          | NA         | NA         | NA         |
| NA        | ENSG00000286573 | 0          | NA          | NA         | NA         | NA         |
| 107984265 | ENSG00000286575 | 5.31411916 | 0.11884615  | 0.38634086 | 0.34858487 | 0.57927162 |
| NA        | ENSG00000286576 | 0.30139824 | -0.02296476 | 0.38527817 | 0.68536535 | NA         |
| NA        | ENSG00000286577 | 0.68247098 | 0.00445144  | 0.38130641 | 0.93084475 | NA         |
| NA        | ENSG00000286578 | 0          | NA          | NA         | NA         | NA         |
| NA        | ENSG00000286579 | 1.0657602  | -0.07400963 | 0.39350404 | 0.16369868 | NA         |
| NA        | ENSG00000286580 | 0          | NA          | NA         | NA         | NA         |
| NA        | ENSG00000286581 | 0          | NA          | NA         | NA         | NA         |
| NA        | ENSG00000286582 | 0          | NA          | NA         | NA         | NA         |
| NA        | ENSG00000286583 | 0.62024682 | -0.01622452 | 0.38340428 | 0.71372494 | NA         |
| NA        | ENSG00000286584 | 4.77556676 | 0.03939272  | 0.36424645 | 0.75345343 | 0.88478934 |
| NA        | ENSG00000286585 | 3.38368616 | -0.00887929 | 0.37047182 | 0.92788279 | 0.96977267 |
| NA        | ENSG00000286586 | 0.173733   | 0.01914545  | 0.38484597 | 0.78225479 | NA         |
| NA        | ENSG00000286587 | 0          | NA          | NA         | NA         | NA         |



|           |                 |            |             |            |            |            |           |
|-----------|-----------------|------------|-------------|------------|------------|------------|-----------|
| NA        | ENSG00000286588 | 9.87956915 | 0.02341128  | 0.34213081 | 0.88433233 | 0.94931033 |           |
| NA        | ENSG00000286589 | 0          | NA          | NA         | NA         | NA         |           |
| NA        | ENSG00000286590 | 0.52885382 | 0.01307196  | 0.38341975 | 0.75260376 | NA         |           |
| NA        | ENSG00000286591 | 1.92166762 | 0.01990722  | 0.37844552 | 0.78604336 | NA         |           |
| NA        | ENSG00000286592 | 0          | NA          | NA         | NA         | NA         | LINC02885 |
| NA        | ENSG00000286593 | 0          | NA          | NA         | NA         | NA         |           |
| NA        | ENSG00000286594 | 2.67152676 | 0.03835029  | 0.37316307 | 0.70516146 | 0.85803894 |           |
| NA        | ENSG00000286595 | 0          | NA          | NA         | NA         | NA         |           |
| NA        | ENSG00000286596 | 0          | NA          | NA         | NA         | NA         |           |
| NA        | ENSG00000286597 | 0          | NA          | NA         | NA         | NA         |           |
| 105370728 | ENSG00000286598 | 0          | NA          | NA         | NA         | NA         |           |
| NA        | ENSG00000286599 | 29.5585118 | -0.25764834 | 0.33957027 | 0.22509944 | 0.43891626 |           |
| NA        | ENSG00000286600 | 0          | NA          | NA         | NA         | NA         |           |
| NA        | ENSG00000286601 | 0          | NA          | NA         | NA         | NA         |           |
| NA        | ENSG00000286602 | 0.29863895 | -0.02292439 | 0.3852726  | 0.68753245 | NA         |           |
| NA        | ENSG00000286603 | 0          | NA          | NA         | NA         | NA         |           |
| NA        | ENSG00000286604 | 0          | NA          | NA         | NA         | NA         |           |
| NA        | ENSG00000286605 | 0          | NA          | NA         | NA         | NA         |           |
| NA        | ENSG00000286606 | 12.3952807 | 0.11481843  | 0.35519782 | 0.4948375  | 0.71369409 |           |
| NA        | ENSG00000286607 | 1.13546876 | -0.03696854 | 0.381403   | 0.58651441 | NA         |           |
| NA        | ENSG00000286608 | 1.87700721 | 0.06801497  | 0.38614391 | 0.37348106 | NA         |           |
| NA        | ENSG00000286609 | 0          | NA          | NA         | NA         | NA         |           |
| NA        | ENSG00000286610 | 2.66990204 | -0.04386247 | 0.3742253  | 0.65971396 | 0.8312756  |           |
| NA        | ENSG00000286611 | 0          | NA          | NA         | NA         | NA         |           |
| NA        | ENSG00000286612 | 0          | NA          | NA         | NA         | NA         |           |
| NA        | ENSG00000286613 | 5.66036841 | -0.01211977 | 0.35768969 | 0.92536592 | 0.96892907 |           |
| NA        | ENSG00000286614 | 36.074545  | -0.07737376 | 0.27570014 | 0.68914016 | 0.8490152  |           |
| NA        | ENSG00000286615 | 0.8788244  | 0.06220936  | 0.39076241 | 0.21290698 | NA         |           |
| NA        | ENSG00000286616 | 4.63459643 | -0.10851066 | 0.3810988  | 0.39682633 | 0.62588715 |           |
| NA        | ENSG00000286617 | 0          | NA          | NA         | NA         | NA         |           |
| NA        | ENSG00000286618 | 0          | NA          | NA         | NA         | NA         |           |
| NA        | ENSG00000286619 | 269.338034 | 0.12480652  | 0.14468626 | 0.35209091 | 0.5820803  |           |
| NA        | ENSG00000286620 | 0.173733   | 0.01914545  | 0.38484597 | 0.78225479 | NA         |           |
| NA        | ENSG00000286621 | 0          | NA          | NA         | NA         | NA         |           |
| NA        | ENSG00000286622 | 0.64075491 | -0.02490706 | 0.38293474 | 0.63926895 | NA         |           |
| NA        | ENSG00000286623 | 3.9185577  | -0.1935361  | 0.43937476 | 0.09323911 | 0.23658576 |           |
| NA        | ENSG00000286624 | 0          | NA          | NA         | NA         | NA         |           |
| NA        | ENSG00000286625 | 0.18922458 | 0.01954053  | 0.38488496 | 0.78225479 | NA         |           |

|    |                 |            |             |            |            |            |         |
|----|-----------------|------------|-------------|------------|------------|------------|---------|
| NA | ENSG00000286626 | 2.24243755 | 0.08848801  | 0.3874525  | 0.3482299  | NA         |         |
| NA | ENSG00000286627 | 0.15069912 | -0.01848503 | 0.38480575 | 0.84537521 | NA         |         |
| NA | ENSG00000286628 | 0          | NA          | NA         | NA         | NA         |         |
| NA | ENSG00000286629 | 0          | NA          | NA         | NA         | NA         |         |
| NA | ENSG00000286630 | 0.34746601 | 0.02370763  | 0.3853651  | 0.61987128 | NA         |         |
| NA | ENSG00000286631 | 0          | NA          | NA         | NA         | NA         |         |
| NA | ENSG00000286632 | 0.173124   | -0.01911262 | 0.38486262 | 0.84537521 | NA         |         |
| NA | ENSG00000286633 | 0.16735865 | 0.01897177  | 0.38482933 | 0.78225479 | NA         |         |
| NA | ENSG00000286634 | 3.39550248 | 0.05589603  | 0.3715855  | 0.62455111 | 0.80860493 |         |
| NA | ENSG00000286635 | 0.46367757 | -0.0071095  | 0.38324134 | 0.87490906 | NA         |         |
| NA | ENSG00000286636 | 0.66943461 | 0.03059546  | 0.38616409 | 0.42784935 | NA         |         |
| NA | ENSG00000286637 | 0          | NA          | NA         | NA         | NA         |         |
| NA | ENSG00000286638 | 1.13126718 | -0.03157666 | 0.38170383 | 0.61338068 | NA         |         |
| NA | ENSG00000286639 | 0          | NA          | NA         | NA         | NA         |         |
| NA | ENSG00000286640 | 0.29863895 | -0.02292439 | 0.3852726  | 0.68753245 | NA         |         |
| NA | ENSG00000286641 | 0          | NA          | NA         | NA         | NA         |         |
| NA | ENSG00000286642 | 2.39598817 | 0.07042332  | 0.38208516 | 0.45189459 | NA         |         |
| NA | ENSG00000286643 | 0.173124   | -0.01911262 | 0.38486262 | 0.84537521 | NA         |         |
| NA | ENSG00000286644 | 0.15069912 | -0.01848503 | 0.38480575 | 0.84537521 | NA         |         |
| NA | ENSG00000286645 | 0.32302702 | 0.00139256  | 0.38336859 | 0.96774783 | NA         |         |
| NA | ENSG00000286646 | 0          | NA          | NA         | NA         | NA         |         |
| NA | ENSG00000286647 | 0.29863895 | -0.02292439 | 0.3852726  | 0.68753245 | NA         |         |
| NA | ENSG00000286648 | 0          | NA          | NA         | NA         | NA         |         |
| NA | ENSG00000286649 | 0.5972779  | -0.02732172 | 0.38586499 | 0.50076333 | NA         |         |
| NA | ENSG00000286650 | 3.67963556 | 0.06655269  | 0.37430673 | 0.55783509 | 0.76280883 |         |
| NA | ENSG00000286651 | 0.51012343 | 0.03066183  | 0.38599082 | 0.48709274 | NA         | PRSS43P |
| NA | ENSG00000286652 | 0.83618442 | 0.01602308  | 0.38118764 | 0.77594841 | NA         |         |
| NA | ENSG00000286653 | 0          | NA          | NA         | NA         | NA         |         |
| NA | ENSG00000286654 | 0          | NA          | NA         | NA         | NA         |         |
| NA | ENSG00000286655 | 7.64298005 | 0.20098554  | 0.41280633 | 0.21016769 | 0.41873137 |         |
| NA | ENSG00000286656 | 0          | NA          | NA         | NA         | NA         |         |
| NA | ENSG00000286657 | 6.36361288 | -0.16516769 | 0.39868008 | 0.26073565 | 0.48269458 |         |
| NA | ENSG00000286658 | 0          | NA          | NA         | NA         | NA         |         |
| NA | ENSG00000286659 | 2.58434552 | -0.00935101 | 0.37149295 | 0.92243727 | 0.96749493 |         |
| NA | ENSG00000286660 | 0          | NA          | NA         | NA         | NA         |         |
| NA | ENSG00000286661 | 0.15069912 | -0.01848503 | 0.38480575 | 0.84537521 | NA         |         |
| NA | ENSG00000286662 | 0          | NA          | NA         | NA         | NA         |         |
| NA | ENSG00000286663 | 0          | NA          | NA         | NA         | NA         |         |

|           |                 |            |             |            |            |            |        |
|-----------|-----------------|------------|-------------|------------|------------|------------|--------|
| NA        | ENSG00000286664 | 0          | NA          | NA         | NA         | NA         |        |
| NA        | ENSG00000286665 | 0          | NA          | NA         | NA         | NA         |        |
| NA        | ENSG00000286666 | 0          | NA          | NA         | NA         | NA         |        |
| NA        | ENSG00000286667 | 0.34624801 | -0.02356563 | 0.38536324 | 0.65270996 | NA         |        |
| NA        | ENSG00000286668 | 0          | NA          | NA         | NA         | NA         |        |
| NA        | ENSG00000286669 | 9.00314895 | -0.22830418 | 0.43101137 | 0.16632703 | 0.35682615 |        |
| NA        | ENSG00000286670 | 0          | NA          | NA         | NA         | NA         |        |
| NA        | ENSG00000286671 | 0.16735865 | 0.01897177  | 0.38482933 | 0.78225479 | NA         |        |
| NA        | ENSG00000286672 | 1.98874512 | 0.01378243  | 0.37395305 | 0.87961158 | NA         |        |
| NA        | ENSG00000286674 | 0          | NA          | NA         | NA         | NA         |        |
| NA        | ENSG00000286675 | 9.93915483 | -0.0496316  | 0.34206018 | 0.75728612 | 0.88697677 |        |
| NA        | ENSG00000286676 | 0.16735865 | 0.01897177  | 0.38482933 | 0.78225479 | NA         | ACTBP4 |
| NA        | ENSG00000286677 | 3.22214615 | 0.06714788  | 0.38281611 | 0.44736441 | 0.67128346 |        |
| NA        | ENSG00000286678 | 0          | NA          | NA         | NA         | NA         |        |
| 107985953 | ENSG00000286679 | 0          | NA          | NA         | NA         | NA         |        |
| NA        | ENSG00000286680 | 0          | NA          | NA         | NA         | NA         |        |
| NA        | ENSG00000286681 | 53.3732058 | -0.29785938 | 0.30706361 | 0.16469713 | 0.3543692  |        |
| NA        | ENSG00000286682 | 0.173733   | 0.01914545  | 0.38484597 | 0.78225479 | NA         |        |
| NA        | ENSG00000286683 | 0          | NA          | NA         | NA         | NA         |        |
| NA        | ENSG00000286684 | 0          | NA          | NA         | NA         | NA         |        |
| NA        | ENSG00000286685 | 0          | NA          | NA         | NA         | NA         |        |
| NA        | ENSG00000286686 | 0.62148574 | -0.03607755 | 0.38660139 | 0.4289048  | NA         |        |
| NA        | ENSG00000286687 | 0          | NA          | NA         | NA         | NA         |        |
| NA        | ENSG00000286688 | 3.11616134 | 0.00549576  | 0.37089326 | 0.95786958 | 0.98268084 |        |
| NA        | ENSG00000286689 | 12.0908915 | -0.06603877 | 0.33739239 | 0.69605242 | 0.8531867  |        |
| NA        | ENSG00000286690 | 0          | NA          | NA         | NA         | NA         |        |
| 107986631 | ENSG00000286691 | 0          | NA          | NA         | NA         | NA         |        |
| NA        | ENSG00000286692 | 0.35714874 | 0.02382043  | 0.38538158 | 0.61378098 | NA         |        |
| NA        | ENSG00000286693 | 0.14931947 | -0.01844332 | 0.38480212 | 0.84537521 | NA         |        |
| NA        | ENSG00000286694 | 0.49832483 | -0.00941461 | 0.38279284 | 0.8380646  | NA         |        |
| NA        | ENSG00000286695 | 0          | NA          | NA         | NA         | NA         |        |
| NA        | ENSG00000286696 | 1.95373199 | -0.01505507 | 0.37552748 | 0.85707199 | NA         |        |
| NA        | ENSG00000286697 | 0          | NA          | NA         | NA         | NA         |        |
| NA        | ENSG00000286698 | 0          | NA          | NA         | NA         | NA         |        |
| NA        | ENSG00000286699 | 28.9130976 | -0.05385715 | 0.29274547 | 0.77690536 | 0.89761253 |        |
| NA        | ENSG00000286700 | 0.48918406 | 0.0113498   | 0.38339811 | 0.78403402 | NA         |        |
| NA        | ENSG00000286701 | 0          | NA          | NA         | NA         | NA         |        |
| NA        | ENSG00000286703 | 0.18922458 | 0.01954053  | 0.38488496 | 0.78225479 | NA         |        |

|           |                 |            |             |            |            |            |
|-----------|-----------------|------------|-------------|------------|------------|------------|
| NA        | ENSG00000286704 | 0          | NA          | NA         | NA         | NA         |
| NA        | ENSG00000286705 | 3.92525633 | -0.08398981 | 0.38168434 | 0.4288773  | 0.65462623 |
| NA        | ENSG00000286707 | 2.89844451 | 0.07890103  | 0.38359135 | 0.41635145 | 0.64306408 |
| NA        | ENSG00000286708 | 0          | NA          | NA         | NA         | NA         |
| NA        | ENSG00000286709 | 0          | NA          | NA         | NA         | NA         |
| 116435278 | ENSG00000286710 | 0          | NA          | NA         | NA         | NA         |
| NA        | ENSG00000286711 | 0          | NA          | NA         | NA         | NA         |
| NA        | ENSG00000286712 | 0          | NA          | NA         | NA         | NA         |
| NA        | ENSG00000286713 | 0          | NA          | NA         | NA         | NA         |
| NA        | ENSG00000286714 | 0          | NA          | NA         | NA         | NA         |
| NA        | ENSG00000286715 | 0          | NA          | NA         | NA         | NA         |
| NA        | ENSG00000286716 | 0          | NA          | NA         | NA         | NA         |
| NA        | ENSG00000286717 | 0          | NA          | NA         | NA         | NA         |
| NA        | ENSG00000286718 | 0.77333634 | -0.05441909 | 0.38913761 | 0.28450718 | NA         |
| NA        | ENSG00000286719 | 0          | NA          | NA         | NA         | NA         |
| NA        | ENSG00000286720 | 0          | NA          | NA         | NA         | NA         |
| NA        | ENSG00000286721 | 2.56897715 | 0.03324031  | 0.3735553  | 0.73384229 | 0.87327664 |
| NA        | ENSG00000286722 | 1.21478189 | 0.01807118  | 0.38004684 | 0.77801274 | NA         |
| NA        | ENSG00000286723 | 0.49808047 | -0.01031526 | 0.38284096 | 0.82652867 | NA         |
| 101928415 | ENSG00000286724 | 20.2010801 | 0.09087101  | 0.32792783 | 0.61910663 | 0.80528916 |
| NA        | ENSG00000286725 | 0          | NA          | NA         | NA         | NA         |
| NA        | ENSG00000286727 | 0          | NA          | NA         | NA         | NA         |
| NA        | ENSG00000286728 | 0.72583446 | 0.04263364  | 0.38745839 | 0.33489864 | NA         |
| NA        | ENSG00000286729 | 3.16708802 | 2.20E-06    | 0.36737659 | 0.99830199 | 0.99941443 |
| NA        | ENSG00000286730 | 0.18922458 | 0.01954053  | 0.38488496 | 0.78225479 | NA         |
| NA        | ENSG00000286731 | 0          | NA          | NA         | NA         | NA         |
| NA        | ENSG00000286732 | 12.0567119 | 0.11198002  | 0.34875929 | 0.51763058 | 0.73141449 |
| 101927505 | ENSG00000286733 | 22.7227047 | 0.10212387  | 0.3239369  | 0.58463168 | 0.78071566 |
| NA        | ENSG00000286734 | 0          | NA          | NA         | NA         | NA         |
| NA        | ENSG00000286735 | 0.16735865 | 0.01897177  | 0.38482933 | 0.78225479 | NA         |
| NA        | ENSG00000286736 | 0          | NA          | NA         | NA         | NA         |
| NA        | ENSG00000286737 | 0          | NA          | NA         | NA         | NA         |
| NA        | ENSG00000286738 | 0          | NA          | NA         | NA         | NA         |
| NA        | ENSG00000286739 | 0.52119901 | 0.02576573  | 0.38568143 | 0.51723676 | NA         |
| NA        | ENSG00000286740 | 0          | NA          | NA         | NA         | NA         |
| NA        | ENSG00000286741 | 2.03425472 | 0.08741638  | 0.39037868 | 0.29467491 | NA         |
| NA        | ENSG00000286742 | 4.38304112 | 0.17145736  | 0.42266899 | 0.13352072 | 0.30735016 |
| NA        | ENSG00000286743 | 0.68581147 | 0.00050839  | 0.38184153 | 0.99016254 | NA         |

|           |                 |            |             |            |            |            |
|-----------|-----------------|------------|-------------|------------|------------|------------|
| NA        | ENSG00000286744 | 0          | NA          | NA         | NA         | NA         |
| NA        | ENSG00000286745 | 0          | NA          | NA         | NA         | NA         |
| NA        | ENSG00000286746 | 2.27276895 | -0.01953266 | 0.37546161 | 0.813137   | NA         |
| NA        | ENSG00000286747 | 14.4510794 | 0.06806053  | 0.33559411 | 0.69427322 | 0.85205868 |
| NA        | ENSG00000286748 | 0.14931947 | -0.01844332 | 0.38480212 | 0.84537521 | NA         |
| NA        | ENSG00000286749 | 0          | NA          | NA         | NA         | NA         |
| NA        | ENSG00000286750 | 0          | NA          | NA         | NA         | NA         |
| NA        | ENSG00000286751 | 0          | NA          | NA         | NA         | NA         |
| NA        | ENSG00000286752 | 0          | NA          | NA         | NA         | NA         |
| NA        | ENSG00000286753 | 8.11204193 | 0.12121852  | 0.37005226 | 0.43235757 | 0.65788827 |
| NA        | ENSG00000286754 | 0.14931947 | -0.01844332 | 0.38480212 | 0.84537521 | NA         |
| NA        | ENSG00000286755 | 0.32463936 | 0.00149904  | 0.38336954 | 0.96595537 | NA         |
| NA        | ENSG00000286756 | 0.16735865 | 0.01897177  | 0.38482933 | 0.78225479 | NA         |
| NA        | ENSG00000286757 | 11.6675381 | 0.08596084  | 0.34473659 | 0.61003586 | 0.79837997 |
| NA        | ENSG00000286758 | 0          | NA          | NA         | NA         | NA         |
| NA        | ENSG00000286759 | 0          | NA          | NA         | NA         | NA         |
| 100289495 | ENSG00000286760 | 45.0604184 | -0.00506596 | 0.26449244 | 0.97730492 | 0.99232877 |
| NA        | ENSG00000286761 | 0          | NA          | NA         | NA         | NA         |
| NA        | ENSG00000286763 | 2.29133935 | -0.06485826 | 0.38184568 | 0.46745358 | NA         |
| NA        | ENSG00000286764 | 0          | NA          | NA         | NA         | NA         |
| NA        | ENSG00000286765 | 0          | NA          | NA         | NA         | NA         |
| NA        | ENSG00000286766 | 0          | NA          | NA         | NA         | NA         |
| NA        | ENSG00000286767 | 0          | NA          | NA         | NA         | NA         |
| NA        | ENSG00000286769 | 0          | NA          | NA         | NA         | NA         |
| NA        | ENSG00000286770 | 0          | NA          | NA         | NA         | NA         |
| NA        | ENSG00000286771 | 0.18922458 | 0.01954053  | 0.38488496 | 0.78225479 | NA         |
| NA        | ENSG00000286772 | 0          | NA          | NA         | NA         | NA         |
| NA        | ENSG00000286773 | 0.18922458 | 0.01954053  | 0.38488496 | 0.78225479 | NA         |
| NA        | ENSG00000286774 | 0          | NA          | NA         | NA         | NA         |
| NA        | ENSG00000286775 | 0          | NA          | NA         | NA         | NA         |
| NA        | ENSG00000286776 | 0          | NA          | NA         | NA         | NA         |
| NA        | ENSG00000286777 | 0          | NA          | NA         | NA         | NA         |
| NA        | ENSG00000286778 | 0          | NA          | NA         | NA         | NA         |
| NA        | ENSG00000286779 | 0          | NA          | NA         | NA         | NA         |
| NA        | ENSG00000286780 | 0          | NA          | NA         | NA         | NA         |
| NA        | ENSG00000286781 | 2.23270529 | 0.08902388  | 0.387422   | 0.34885798 | NA         |
| NA        | ENSG00000286782 | 0.18922458 | 0.01954053  | 0.38488496 | 0.78225479 | NA         |
| NA        | ENSG00000286784 | 0          | NA          | NA         | NA         | NA         |

|           |                 |            |             |            |            |            |           |
|-----------|-----------------|------------|-------------|------------|------------|------------|-----------|
| 285768    | ENSG00000286785 | 0          | NA          | NA         | NA         | NA         | LINC01622 |
| NA        | ENSG00000286786 | 19.632306  | -0.15601979 | 0.3440217  | 0.40810449 | 0.63634022 |           |
| 105372493 | ENSG00000286787 | 2.76803543 | 0.04609233  | 0.37504834 | 0.64172307 | 0.82066429 |           |
| NA        | ENSG00000286788 | 0          | NA          | NA         | NA         | NA         |           |
| NA        | ENSG00000286789 | 0          | NA          | NA         | NA         | NA         |           |
| NA        | ENSG00000286790 | 0          | NA          | NA         | NA         | NA         |           |
| NA        | ENSG00000286791 | 0.78706685 | -0.02783812 | 0.38346595 | 0.55997956 | NA         |           |
| NA        | ENSG00000286792 | 0          | NA          | NA         | NA         | NA         |           |
| NA        | ENSG00000286793 | 0          | NA          | NA         | NA         | NA         |           |
| 105373299 | ENSG00000286794 | 0          | NA          | NA         | NA         | NA         |           |
| NA        | ENSG00000286795 | 0.16735865 | 0.01897177  | 0.38482933 | 0.78225479 | NA         |           |
| NA        | ENSG00000286796 | 0.14931947 | -0.01844332 | 0.38480212 | 0.84537521 | NA         |           |
| NA        | ENSG00000286797 | 0          | NA          | NA         | NA         | NA         |           |
| 102725080 | ENSG00000286798 | 0          | NA          | NA         | NA         | NA         |           |
| NA        | ENSG00000286799 | 0.68709227 | 0.04015618  | 0.387127   | 0.358996   | NA         |           |
| NA        | ENSG00000286800 | 0          | NA          | NA         | NA         | NA         |           |
| NA        | ENSG00000286801 | 0          | NA          | NA         | NA         | NA         |           |
| NA        | ENSG00000286802 | 0.15069912 | -0.01848503 | 0.38480575 | 0.84537521 | NA         |           |
| NA        | ENSG00000286803 | 0          | NA          | NA         | NA         | NA         |           |
| NA        | ENSG00000286804 | 1.86372947 | -0.03173826 | 0.37670418 | 0.70865427 | NA         |           |
| NA        | ENSG00000286805 | 0          | NA          | NA         | NA         | NA         |           |
| NA        | ENSG00000286806 | 1.08887092 | 0.06154383  | 0.39092067 | 0.1830315  | NA         |           |
| NA        | ENSG00000286807 | 0          | NA          | NA         | NA         | NA         |           |
| NA        | ENSG00000286808 | 45.8131001 | 0.04502228  | 0.26716999 | 0.81717374 | 0.91675019 |           |
| NA        | ENSG00000286809 | 0          | NA          | NA         | NA         | NA         |           |
| NA        | ENSG00000286810 | 0          | NA          | NA         | NA         | NA         |           |
| NA        | ENSG00000286811 | 0          | NA          | NA         | NA         | NA         |           |
| NA        | ENSG00000286812 | 0.173124   | -0.01911262 | 0.38486262 | 0.84537521 | NA         |           |
| NA        | ENSG00000286813 | 7.33505111 | 0.09681541  | 0.36610093 | 0.50918399 | 0.72484827 |           |
| NA        | ENSG00000286815 | 0          | NA          | NA         | NA         | NA         |           |
| NA        | ENSG00000286816 | 0.14931947 | -0.01844332 | 0.38480212 | 0.84537521 | NA         |           |
| NA        | ENSG00000286817 | 7.39047825 | -0.08515446 | 0.36883016 | 0.52740248 | 0.73916821 |           |
| NA        | ENSG00000286818 | 0.14931947 | -0.01844332 | 0.38480212 | 0.84537521 | NA         |           |
| NA        | ENSG00000286819 | 0.16735865 | 0.01897177  | 0.38482933 | 0.78225479 | NA         |           |
| 101927072 | ENSG00000286820 | 0          | NA          | NA         | NA         | NA         |           |
| 112268472 | ENSG00000286821 | 0          | NA          | NA         | NA         | NA         |           |
| 105374134 | ENSG00000286822 | 0          | NA          | NA         | NA         | NA         |           |
| NA        | ENSG00000286823 | 0.36281997 | 0.02389382  | 0.38539226 | 0.61003321 | NA         |           |

|           |                 |            |             |            |            |            |
|-----------|-----------------|------------|-------------|------------|------------|------------|
| NA        | ENSG00000286824 | 0          | NA          | NA         | NA         | NA         |
| NA        | ENSG00000286825 | 0.68711994 | 0.00028445  | 0.38183864 | 0.99388528 | NA         |
| NA        | ENSG00000286826 | 0          | NA          | NA         | NA         | NA         |
| NA        | ENSG00000286827 | 6.77511238 | -0.14848988 | 0.3888073  | 0.31035859 | 0.53805614 |
| NA        | ENSG00000286828 | 1.8312897  | 0.02449018  | 0.37864141 | 0.74257389 | NA         |
| NA        | ENSG00000286829 | 0          | NA          | NA         | NA         | NA         |
| NA        | ENSG00000286830 | 1.87580934 | 0.02400962  | 0.37672411 | 0.77094572 | NA         |
| NA        | ENSG00000286831 | 0          | NA          | NA         | NA         | NA         |
| NA        | ENSG00000286832 | 0          | NA          | NA         | NA         | NA         |
| NA        | ENSG00000286833 | 8.38969964 | 0.18405511  | 0.39860439 | 0.25726559 | 0.47832659 |
| NA        | ENSG00000286834 | 180.979215 | 0.15370239  | 0.16132096 | 0.29398406 | 0.52021105 |
| NA        | ENSG00000286835 | 14.4560435 | -0.02145884 | 0.33099428 | 0.89717906 | 0.95488961 |
| NA        | ENSG00000286836 | 1.58464229 | -0.07357544 | 0.39122803 | 0.20792045 | NA         |
| NA        | ENSG00000286837 | 5.66784274 | 0.1275874   | 0.38660757 | 0.34011535 | 0.57050123 |
| NA        | ENSG00000286838 | 0.173733   | 0.01914545  | 0.38484597 | 0.78225479 | NA         |
| 105379127 | ENSG00000286839 | 0          | NA          | NA         | NA         | NA         |
| NA        | ENSG00000286840 | 0          | NA          | NA         | NA         | NA         |
| NA        | ENSG00000286841 | 0          | NA          | NA         | NA         | NA         |
| NA        | ENSG00000286842 | 0          | NA          | NA         | NA         | NA         |
| NA        | ENSG00000286843 | 0.15069912 | -0.01848503 | 0.38480575 | 0.84537521 | NA         |
| NA        | ENSG00000286844 | 0          | NA          | NA         | NA         | NA         |
| NA        | ENSG00000286845 | 0          | NA          | NA         | NA         | NA         |
| NA        | ENSG00000286846 | 9.98426539 | -0.05890407 | 0.34246065 | 0.7168385  | 0.8637162  |
| 105375216 | ENSG00000286847 | 0.94215957 | -0.04680842 | 0.38506129 | 0.4106815  | NA         |
| NA        | ENSG00000286848 | 0          | NA          | NA         | NA         | NA         |
| NA        | ENSG00000286849 | 0.37844916 | 0.02407552  | 0.3854191  | 0.60038877 | NA         |
| NA        | ENSG00000286850 | 0          | NA          | NA         | NA         | NA         |
| NA        | ENSG00000286851 | 0          | NA          | NA         | NA         | NA         |
| NA        | ENSG00000286852 | 0          | NA          | NA         | NA         | NA         |
| NA        | ENSG00000286853 | 0          | NA          | NA         | NA         | NA         |
| NA        | ENSG00000286854 | 0          | NA          | NA         | NA         | NA         |
| NA        | ENSG00000286855 | 0.34624801 | -0.02356563 | 0.38536324 | 0.65270996 | NA         |
| NA        | ENSG00000286856 | 0          | NA          | NA         | NA         | NA         |
| NA        | ENSG00000286857 | 0          | NA          | NA         | NA         | NA         |
| NA        | ENSG00000286858 | 0          | NA          | NA         | NA         | NA         |
| NA        | ENSG00000286860 | 0          | NA          | NA         | NA         | NA         |
| NA        | ENSG00000286861 | 5.14257768 | 0.15161455  | 0.40019085 | 0.25229149 | 0.47222371 |
| NA        | ENSG00000286862 | 0          | NA          | NA         | NA         | NA         |

|           |                 |            |             |            |            |            |
|-----------|-----------------|------------|-------------|------------|------------|------------|
| NA        | ENSG00000286863 | 5.36951069 | -0.24232332 | 0.48744954 | 0.03353704 | 0.10961695 |
| NA        | ENSG00000286864 | 2.33499297 | -0.15503122 | 0.42408019 | 0.05560937 | NA         |
| NA        | ENSG00000286865 | 0.16735865 | 0.01897177  | 0.38482933 | 0.78225479 | NA         |
| NA        | ENSG00000286866 | 0.18922458 | 0.01954053  | 0.38488496 | 0.78225479 | NA         |
| NA        | ENSG00000286867 | 0          | NA          | NA         | NA         | NA         |
| NA        | ENSG00000286868 | 0          | NA          | NA         | NA         | NA         |
| NA        | ENSG00000286869 | 0          | NA          | NA         | NA         | NA         |
| NA        | ENSG00000286870 | 0          | NA          | NA         | NA         | NA         |
| NA        | ENSG00000286871 | 0          | NA          | NA         | NA         | NA         |
| NA        | ENSG00000286872 | 10.7192049 | 0.23898896  | 0.42883838 | 0.17202809 | 0.36458    |
| NA        | ENSG00000286873 | 14.561687  | -0.02929618 | 0.32802079 | 0.86363699 | 0.93960776 |
| NA        | ENSG00000286874 | 3.34869944 | -0.17853412 | 0.43110368 | 0.0980024  | 0.24550095 |
| NA        | ENSG00000286875 | 0          | NA          | NA         | NA         | NA         |
| NA        | ENSG00000286876 | 0          | NA          | NA         | NA         | NA         |
| NA        | ENSG00000286877 | 1.75844161 | -0.02764039 | 0.37752296 | 0.73037896 | NA         |
| NA        | ENSG00000286878 | 0.71318353 | 0.04204826  | 0.38737434 | 0.34133032 | NA         |
| NA        | ENSG00000286879 | 0.18922458 | 0.01954053  | 0.38488496 | 0.78225479 | NA         |
| NA        | ENSG00000286880 | 0.14931947 | -0.01844332 | 0.38480212 | 0.84537521 | NA         |
| NA        | ENSG00000286881 | 1.76610533 | -0.00446492 | 0.37646071 | 0.95364742 | NA         |
| NA        | ENSG00000286882 | 0          | NA          | NA         | NA         | NA         |
| NA        | ENSG00000286883 | 25.9184784 | -0.02589882 | 0.30348995 | 0.88878593 | 0.95146564 |
| NA        | ENSG00000286884 | 0          | NA          | NA         | NA         | NA         |
| NA        | ENSG00000286885 | 6.27384878 | 0.13577642  | 0.39564809 | 0.26397485 | 0.48609939 |
| NA        | ENSG00000286886 | 19.9999779 | -1.07039358 | 0.64582943 | 0.00612397 | 0.02759471 |
| NA        | ENSG00000286887 | 0          | NA          | NA         | NA         | NA         |
| NA        | ENSG00000286888 | 0.50071496 | 0.01177752  | 0.383397   | 0.7755175  | NA         |
| NA        | ENSG00000286889 | 0          | NA          | NA         | NA         | NA         |
| NA        | ENSG00000286890 | 0          | NA          | NA         | NA         | NA         |
| NA        | ENSG00000286891 | 0          | NA          | NA         | NA         | NA         |
| NA        | ENSG00000286892 | 2.42206767 | 0.09652056  | 0.39038606 | 0.30605709 | NA         |
| NA        | ENSG00000286893 | 0          | NA          | NA         | NA         | NA         |
| NA        | ENSG00000286894 | 0.15069912 | -0.01848503 | 0.38480575 | 0.84537521 | NA         |
| NA        | ENSG00000286895 | 0.97521765 | 0.00424385  | 0.38089202 | 0.93881288 | NA         |
| NA        | ENSG00000286896 | 0          | NA          | NA         | NA         | NA         |
| NA        | ENSG00000286897 | 0          | NA          | NA         | NA         | NA         |
| 105376806 | ENSG00000286898 | 0.32378453 | 0.00191647  | 0.38337425 | 0.96273424 | NA         |
| NA        | ENSG00000286899 | 0.82401124 | 0.01651394  | 0.381955   | 0.74915811 | NA         |
| NA        | ENSG00000286900 | 2.19895714 | 0.10348067  | 0.39491516 | 0.24322493 | NA         |



|           |                 |            |             |            |            |            |        |
|-----------|-----------------|------------|-------------|------------|------------|------------|--------|
| NA        | ENSG00000286901 | 0          | NA          | NA         | NA         | NA         |        |
| NA        | ENSG00000286902 | 0          | NA          | NA         | NA         | NA         |        |
| NA        | ENSG00000286903 | 0.7978927  | -0.05678814 | 0.38955584 | 0.26913418 | NA         |        |
| NA        | ENSG00000286904 | 1.02117312 | 0.03346046  | 0.38149162 | 0.60512006 | NA         |        |
| NA        | ENSG00000286905 | 53.4373329 | 0.42076812  | 0.31886634 | 0.06515604 | 0.18206982 |        |
| NA        | ENSG00000286906 | 0          | NA          | NA         | NA         | NA         |        |
| NA        | ENSG00000286907 | 0.173733   | 0.01914545  | 0.38484597 | 0.78225479 | NA         |        |
| NA        | ENSG00000286908 | 0          | NA          | NA         | NA         | NA         |        |
| NA        | ENSG00000286909 | 29.0613423 | 0.44969328  | 0.40697374 | 0.06940636 | 0.19027528 |        |
| NA        | ENSG00000286910 | 0          | NA          | NA         | NA         | NA         |        |
| NA        | ENSG00000286911 | 0.56767373 | 0.02627943  | 0.38574813 | 0.49686938 | NA         |        |
| NA        | ENSG00000286912 | 2.00853725 | 0.00914277  | 0.37519334 | 0.91519396 | NA         |        |
| NA        | ENSG00000286913 | 0          | NA          | NA         | NA         | NA         |        |
| NA        | ENSG00000286914 | 0          | NA          | NA         | NA         | NA         |        |
| NA        | ENSG00000286915 | 0          | NA          | NA         | NA         | NA         |        |
| NA        | ENSG00000286916 | 0          | NA          | NA         | NA         | NA         |        |
| NA        | ENSG00000286917 | 0          | NA          | NA         | NA         | NA         |        |
| NA        | ENSG00000286918 | 0.61234863 | -0.0356613  | 0.38655259 | 0.43461759 | NA         |        |
| NA        | ENSG00000286919 | 0          | NA          | NA         | NA         | NA         |        |
| 113523636 | ENSG00000286920 | 0          | NA          | NA         | NA         | NA         | SMIM40 |
| NA        | ENSG00000286921 | 0          | NA          | NA         | NA         | NA         |        |
| NA        | ENSG00000286922 | 0          | NA          | NA         | NA         | NA         |        |
| 105375423 | ENSG00000286923 | 0          | NA          | NA         | NA         | NA         |        |
| NA        | ENSG00000286924 | 5.51900612 | -0.12036793 | 0.38534808 | 0.35237128 | 0.58234454 |        |
| NA        | ENSG00000286926 | 0          | NA          | NA         | NA         | NA         |        |
| NA        | ENSG00000286927 | 0          | NA          | NA         | NA         | NA         |        |
| NA        | ENSG00000286928 | 0          | NA          | NA         | NA         | NA         |        |
| NA        | ENSG00000286929 | 0          | NA          | NA         | NA         | NA         |        |
| NA        | ENSG00000286931 | 22.4020959 | -0.01767147 | 0.31118137 | 0.9227505  | 0.96767112 |        |
| NA        | ENSG00000286932 | 0.52733761 | 0.0113867   | 0.38329012 | 0.76253286 | NA         |        |
| NA        | ENSG00000286933 | 0.33471731 | 0.02354391  | 0.38534154 | 0.62842204 | NA         |        |
| NA        | ENSG00000286934 | 0          | NA          | NA         | NA         | NA         |        |
| NA        | ENSG00000286935 | 0          | NA          | NA         | NA         | NA         |        |
| NA        | ENSG00000286936 | 0          | NA          | NA         | NA         | NA         |        |
| NA        | ENSG00000286937 | 0          | NA          | NA         | NA         | NA         |        |
| NA        | ENSG00000286938 | 0.44795842 | -0.02501848 | 0.38558245 | 0.5807882  | NA         |        |
| NA        | ENSG00000286939 | 0.16735865 | 0.01897177  | 0.38482933 | 0.78225479 | NA         |        |
| 102725068 | ENSG00000286940 | 0.18922458 | 0.01954053  | 0.38488496 | 0.78225479 | NA         |        |

|           |                 |            |             |            |            |            |
|-----------|-----------------|------------|-------------|------------|------------|------------|
| NA        | ENSG00000286941 | 1.33494061 | 0.0039516   | 0.37789221 | 0.95691776 | NA         |
| NA        | ENSG00000286942 | 2.11080848 | -0.00158624 | 0.37531925 | 0.98332343 | NA         |
| NA        | ENSG00000286943 | 2.98221185 | 0.04165131  | 0.37355877 | 0.68255634 | 0.84510221 |
| NA        | ENSG00000286944 | 0.16735865 | 0.01897177  | 0.38482933 | 0.78225479 | NA         |
| NA        | ENSG00000286945 | 0          | NA          | NA         | NA         | NA         |
| NA        | ENSG00000286946 | 0          | NA          | NA         | NA         | NA         |
| NA        | ENSG00000286947 | 0          | NA          | NA         | NA         | NA         |
| NA        | ENSG00000286948 | 1.58410144 | -0.06983539 | 0.38651768 | 0.36058118 | NA         |
| NA        | ENSG00000286949 | 0          | NA          | NA         | NA         | NA         |
| NA        | ENSG00000286950 | 4.43787873 | 0.1216997   | 0.4010247  | 0.20196195 | 0.40745627 |
| NA        | ENSG00000286951 | 0          | NA          | NA         | NA         | NA         |
| NA        | ENSG00000286952 | 1.83801924 | -0.00506618 | 0.3760907  | 0.9484128  | NA         |
| NA        | ENSG00000286953 | 0.99953073 | 0.00888791  | 0.38013056 | 0.88376311 | NA         |
| NA        | ENSG00000286954 | 1.51586502 | 0.03246952  | 0.38201871 | 0.59832001 | NA         |
| NA        | ENSG00000286955 | 0          | NA          | NA         | NA         | NA         |
| NA        | ENSG00000286956 | 0          | NA          | NA         | NA         | NA         |
| NA        | ENSG00000286957 | 6.35870181 | -0.0182944  | 0.35308051 | 0.89527447 | 0.95469109 |
| 105376435 | ENSG00000286958 | 0          | NA          | NA         | NA         | NA         |
| NA        | ENSG00000286959 | 0.34086471 | 0.00254703  | 0.38338312 | 0.96337167 | NA         |
| NA        | ENSG00000286960 | 0.98532204 | -0.04199463 | 0.38508844 | 0.42489094 | NA         |
| NA        | ENSG00000286961 | 0          | NA          | NA         | NA         | NA         |
| NA        | ENSG00000286962 | 2.32361946 | 0.036732    | 0.37437359 | 0.70411156 | NA         |
| NA        | ENSG00000286963 | 0.45028347 | -0.02732651 | 0.38571526 | 0.56146022 | NA         |
| NA        | ENSG00000286964 | 54.9902412 | -0.00897893 | 0.25066048 | 0.96076562 | 0.98407795 |
| NA        | ENSG00000286965 | 0.173733   | 0.01914545  | 0.38484597 | 0.78225479 | NA         |
| NA        | ENSG00000286966 | 0.173124   | -0.01911262 | 0.38486262 | 0.84537521 | NA         |
| 105377146 | ENSG00000286967 | 0          | NA          | NA         | NA         | NA         |
| NA        | ENSG00000286968 | 0          | NA          | NA         | NA         | NA         |
| NA        | ENSG00000286969 | 0          | NA          | NA         | NA         | NA         |
| NA        | ENSG00000286970 | 0.80768827 | 0.01619536  | 0.38125342 | 0.7731359  | NA         |
| NA        | ENSG00000286971 | 0.16735865 | 0.01897177  | 0.38482933 | 0.78225479 | NA         |
| NA        | ENSG00000286972 | 0          | NA          | NA         | NA         | NA         |
| NA        | ENSG00000286973 | 0          | NA          | NA         | NA         | NA         |
| NA        | ENSG00000286974 | 7.87184526 | 0.22135507  | 0.42427184 | 0.18208821 | 0.37980817 |
| NA        | ENSG00000286975 | 3.86185178 | 0.13051186  | 0.39680819 | 0.26230852 | 0.48429192 |
| NA        | ENSG00000286976 | 0.50130722 | -0.02976505 | 0.38592599 | 0.52143527 | NA         |
| NA        | ENSG00000286977 | 38.5961858 | 0.10321435  | 0.28531154 | 0.59981483 | 0.79066681 |
| NA        | ENSG00000286978 | 0          | NA          | NA         | NA         | NA         |

|           |                 |            |             |            |            |            |
|-----------|-----------------|------------|-------------|------------|------------|------------|
| NA        | ENSG00000286979 | 0.45209736 | -0.02505403 | 0.38558831 | 0.57865948 | NA         |
| NA        | ENSG00000286980 | 0          | NA          | NA         | NA         | NA         |
| NA        | ENSG00000286981 | 0.89428804 | 0.04438024  | 0.38490716 | 0.40367646 | NA         |
| NA        | ENSG00000286982 | 0.15069912 | -0.01848503 | 0.38480575 | 0.84537521 | NA         |
| NA        | ENSG00000286983 | 0          | NA          | NA         | NA         | NA         |
| NA        | ENSG00000286984 | 1.02991789 | 0.06002038  | 0.38776843 | 0.30637856 | NA         |
| 105379242 | ENSG00000286985 | 33.866037  | -3.07278858 | 0.56252788 | 2.42E-09   | 3.94E-08   |
| NA        | ENSG00000286986 | 0          | NA          | NA         | NA         | NA         |
| NA        | ENSG00000286987 | 0          | NA          | NA         | NA         | NA         |
| NA        | ENSG00000286988 | 0.16735865 | 0.01897177  | 0.38482933 | 0.78225479 | NA         |
| NA        | ENSG00000286989 | 12.4692612 | 0.01170369  | 0.33389898 | 0.94607697 | 0.97814213 |
| NA        | ENSG00000286990 | 6.4300595  | 0.16157746  | 0.39382122 | 0.28403595 | 0.50919216 |
| NA        | ENSG00000286991 | 0          | NA          | NA         | NA         | NA         |
| NA        | ENSG00000286992 | 0          | NA          | NA         | NA         | NA         |
| NA        | ENSG00000286993 | 0          | NA          | NA         | NA         | NA         |
| NA        | ENSG00000286994 | 0          | NA          | NA         | NA         | NA         |
| NA        | ENSG00000286995 | 0          | NA          | NA         | NA         | NA         |
| NA        | ENSG00000286996 | 3.08041981 | -0.06790597 | 0.37708887 | 0.5230379  | 0.73611918 |
| NA        | ENSG00000286997 | 0.35651236 | 0.02381585  | 0.38538087 | 0.61410224 | NA         |
| NA        | ENSG00000286998 | 0          | NA          | NA         | NA         | NA         |
| NA        | ENSG00000286999 | 1.92830354 | 0.13338539  | 0.4166049  | 0.02969895 | NA         |
| NA        | ENSG00000287000 | 0          | NA          | NA         | NA         | NA         |
| NA        | ENSG00000287001 | 0.64755851 | -0.0463745  | 0.38776383 | 0.35975444 | NA         |
| NA        | ENSG00000287002 | 0          | NA          | NA         | NA         | NA         |
| NA        | ENSG00000287003 | 0.30001555 | -0.02294458 | 0.38527538 | 0.68644895 | NA         |
| NA        | ENSG00000287004 | 0          | NA          | NA         | NA         | NA         |
| NA        | ENSG00000287005 | 1.4704399  | -0.00437826 | 0.37966886 | 0.9435065  | NA         |
| 105369496 | ENSG00000287006 | 0          | NA          | NA         | NA         | NA         |
| NA        | ENSG00000287007 | 1.15132353 | -0.02788053 | 0.38122247 | 0.65444549 | NA         |
| NA        | ENSG00000287008 | 0          | NA          | NA         | NA         | NA         |
| NA        | ENSG00000287009 | 9.21840838 | -0.02516516 | 0.34410924 | 0.86967126 | 0.94316595 |
| NA        | ENSG00000287010 | 0          | NA          | NA         | NA         | NA         |
| NA        | ENSG00000287011 | 1.10613658 | -0.00731964 | 0.37965631 | 0.90789005 | NA         |
| NA        | ENSG00000287012 | 0.14931947 | -0.01844332 | 0.38480212 | 0.84537521 | NA         |
| NA        | ENSG00000287014 | 0          | NA          | NA         | NA         | NA         |
| NA        | ENSG00000287015 | 0          | NA          | NA         | NA         | NA         |
| NA        | ENSG00000287016 | 10.0591251 | -0.19524787 | 0.40905886 | 0.21853611 | 0.43050004 |
| NA        | ENSG00000287017 | 0          | NA          | NA         | NA         | NA         |

|           |                 |            |             |            |            |            |
|-----------|-----------------|------------|-------------|------------|------------|------------|
| NA        | ENSG00000287018 | 0          | NA          | NA         | NA         | NA         |
| NA        | ENSG00000287019 | 0          | NA          | NA         | NA         | NA         |
| NA        | ENSG00000287020 | 0          | NA          | NA         | NA         | NA         |
| NA        | ENSG00000287021 | 0.14931947 | -0.01844332 | 0.38480212 | 0.84537521 | NA         |
| NA        | ENSG00000287022 | 2.33770445 | -0.07133517 | 0.38232849 | 0.445625   | NA         |
| NA        | ENSG00000287023 | 0          | NA          | NA         | NA         | NA         |
| NA        | ENSG00000287024 | 0          | NA          | NA         | NA         | NA         |
| NA        | ENSG00000287025 | 0          | NA          | NA         | NA         | NA         |
| NA        | ENSG00000287026 | 0.68160118 | 0.0329326   | 0.38382831 | 0.53363667 | NA         |
| NA        | ENSG00000287027 | 0          | NA          | NA         | NA         | NA         |
| NA        | ENSG00000287028 | 0          | NA          | NA         | NA         | NA         |
| NA        | ENSG00000287029 | 3.84137734 | -0.11796154 | 0.39258161 | 0.29219869 | 0.51825408 |
| NA        | ENSG00000287030 | 2.07102073 | -0.14960922 | 0.42496619 | 0.02466322 | NA         |
| NA        | ENSG00000287031 | 2.23298434 | 0.08536761  | 0.38646638 | 0.36437147 | NA         |
| NA        | ENSG00000287032 | 4.91033754 | -0.06469195 | 0.36921691 | 0.60104239 | 0.79181148 |
| NA        | ENSG00000287033 | 1.84755375 | 0.02504814  | 0.37545162 | 0.77580724 | NA         |
| 105372980 | ENSG00000287034 | 0          | NA          | NA         | NA         | NA         |
| NA        | ENSG00000287035 | 0.173733   | 0.01914545  | 0.38484597 | 0.78225479 | NA         |
| NA        | ENSG00000287036 | 0          | NA          | NA         | NA         | NA         |
| NA        | ENSG00000287037 | 0          | NA          | NA         | NA         | NA         |
| NA        | ENSG00000287038 | 17.6878237 | 0.40595039  | 0.47603587 | 0.08716794 | 0.22540384 |
| NA        | ENSG00000287039 | 0          | NA          | NA         | NA         | NA         |
| NA        | ENSG00000287040 | 0          | NA          | NA         | NA         | NA         |
| NA        | ENSG00000287041 | 2.30748591 | 0.05372617  | 0.38005678 | 0.53740745 | NA         |
| NA        | ENSG00000287042 | 9.85301678 | 0.04341237  | 0.34160507 | 0.78970492 | 0.9043268  |
| NA        | ENSG00000287043 | 12.947402  | -0.12697561 | 0.34771693 | 0.47484145 | 0.69706654 |
| NA        | ENSG00000287044 | 0.34624801 | -0.02356563 | 0.38536324 | 0.65270996 | NA         |
| NA        | ENSG00000287045 | 4.74680254 | -0.12338672 | 0.38940439 | 0.32132626 | 0.54905805 |
| NA        | ENSG00000287046 | 0          | NA          | NA         | NA         | NA         |
| NA        | ENSG00000287047 | 0          | NA          | NA         | NA         | NA         |
| NA        | ENSG00000287048 | 0.173733   | 0.01914545  | 0.38484597 | 0.78225479 | NA         |
| NA        | ENSG00000287049 | 3.74365235 | 0.03179824  | 0.36962824 | 0.7712317  | 0.89515442 |
| 101928743 | ENSG00000287050 | 0          | NA          | NA         | NA         | NA         |
| NA        | ENSG00000287051 | 0          | NA          | NA         | NA         | NA         |
| NA        | ENSG00000287052 | 0          | NA          | NA         | NA         | NA         |
| NA        | ENSG00000287053 | 0          | NA          | NA         | NA         | NA         |
| NA        | ENSG00000287054 | 0          | NA          | NA         | NA         | NA         |
| NA        | ENSG00000287055 | 4.27123331 | -0.0058809  | 0.36449863 | 0.95809065 | 0.98270788 |

|           |                 |            |             |            |            |            |          |
|-----------|-----------------|------------|-------------|------------|------------|------------|----------|
| NA        | ENSG00000287056 | 0          | NA          | NA         | NA         | NA         |          |
| 105378402 | ENSG00000287057 | 0          | NA          | NA         | NA         | NA         |          |
| NA        | ENSG00000287058 | 0          | NA          | NA         | NA         | NA         |          |
| NA        | ENSG00000287059 | 0.14931947 | -0.01844332 | 0.38480212 | 0.84537521 | NA         |          |
| NA        | ENSG00000287060 | 0          | NA          | NA         | NA         | NA         |          |
| NA        | ENSG00000287061 | 4.53348612 | -0.10022549 | 0.37960098 | 0.4210556  | 0.64707537 |          |
| NA        | ENSG00000287062 | 0          | NA          | NA         | NA         | NA         |          |
| NA        | ENSG00000287063 | 32.0074314 | -0.11659285 | 0.30678379 | 0.54749906 | 0.75431125 |          |
| NA        | ENSG00000287064 | 12.5861485 | -1.54258275 | 0.90584887 | 0.00362638 | 0.01779112 |          |
| NA        | ENSG00000287065 | 0          | NA          | NA         | NA         | NA         |          |
| NA        | ENSG00000287066 | 0          | NA          | NA         | NA         | NA         |          |
| NA        | ENSG00000287067 | 2.92934332 | -0.00325457 | 0.36986641 | 0.9728585  | 0.98992269 |          |
| NA        | ENSG00000287068 | 0          | NA          | NA         | NA         | NA         |          |
| NA        | ENSG00000287069 | 3.48423347 | -0.03790557 | 0.37638127 | 0.67032086 | 0.8376372  |          |
| NA        | ENSG00000287070 | 0.49286474 | -0.00713869 | 0.38269814 | 0.86114154 | NA         |          |
| NA        | ENSG00000287071 | 2.18844471 | 0.07660992  | 0.3849023  | 0.3960867  | NA         | CDRT15P4 |
| NA        | ENSG00000287072 | 0          | NA          | NA         | NA         | NA         |          |
| NA        | ENSG00000287073 | 0          | NA          | NA         | NA         | NA         |          |
| NA        | ENSG00000287074 | 0.53606247 | 0.01388041  | 0.38346616 | 0.74038917 | NA         |          |
| 105369685 | ENSG00000287075 | 0          | NA          | NA         | NA         | NA         |          |
| NA        | ENSG00000287076 | 0          | NA          | NA         | NA         | NA         |          |
| NA        | ENSG00000287077 | 25.2036168 | 0.1797844   | 0.32853089 | 0.37042984 | 0.59947926 |          |
| NA        | ENSG00000287078 | 0.14931947 | -0.01844332 | 0.38480212 | 0.84537521 | NA         |          |
| NA        | ENSG00000287079 | 0          | NA          | NA         | NA         | NA         |          |
| 8352      | ENSG00000287080 | 5.78660108 | -0.05044092 | 0.35989043 | 0.70980907 | 0.860757   | H3C3     |
| NA        | ENSG00000287081 | 0          | NA          | NA         | NA         | NA         |          |
| 101928398 | ENSG00000287082 | 0          | NA          | NA         | NA         | NA         |          |
| NA        | ENSG00000287083 | 0          | NA          | NA         | NA         | NA         |          |
| NA        | ENSG00000287084 | 0.14931947 | -0.01844332 | 0.38480212 | 0.84537521 | NA         |          |
| NA        | ENSG00000287085 | 0          | NA          | NA         | NA         | NA         |          |
| NA        | ENSG00000287086 | 34.1659703 | -0.01598873 | 0.38392755 | 0.6433496  | 0.82181194 |          |
| NA        | ENSG00000287087 | 0.92680311 | -0.01550594 | 0.38079647 | 0.79270984 | NA         |          |
| NA        | ENSG00000287088 | 7.54490671 | -0.18634118 | 0.40816908 | 0.22348333 | 0.43679532 |          |
| NA        | ENSG00000287089 | 11.5307755 | -0.02519136 | 0.34415327 | 0.87027828 | 0.94334099 |          |
| NA        | ENSG00000287090 | 0.83106328 | 0.03654478  | 0.38455701 | 0.46707981 | NA         |          |
| NA        | ENSG00000287091 | 3.99202661 | 0.0245564   | 0.36451105 | 0.8395185  | 0.92703551 |          |
| NA        | ENSG00000287092 | 0          | NA          | NA         | NA         | NA         |          |
| NA        | ENSG00000287093 | 0.32380214 | -0.02327282 | 0.38532131 | 0.66862118 | NA         |          |

|           |                 |            |             |            |            |            |
|-----------|-----------------|------------|-------------|------------|------------|------------|
| NA        | ENSG00000287094 | 0.36296572 | 0.02389484  | 0.38539242 | 0.60996102 | NA         |
| NA        | ENSG00000287095 | 0          | NA          | NA         | NA         | NA         |
| NA        | ENSG00000287096 | 0          | NA          | NA         | NA         | NA         |
| 107986639 | ENSG00000287097 | 0.33471731 | 0.02354391  | 0.38534154 | 0.62842204 | NA         |
| NA        | ENSG00000287098 | 0          | NA          | NA         | NA         | NA         |
| NA        | ENSG00000287099 | 0          | NA          | NA         | NA         | NA         |
| NA        | ENSG00000287100 | 0.34729481 | 0.00105945  | 0.38336537 | 0.9584369  | NA         |
| NA        | ENSG00000287101 | 0          | NA          | NA         | NA         | NA         |
| NA        | ENSG00000287102 | 0          | NA          | NA         | NA         | NA         |
| NA        | ENSG00000287103 | 1.45498743 | -0.05668047 | 0.38481925 | 0.41481129 | NA         |
| NA        | ENSG00000287104 | 39.1969946 | -0.13554323 | 0.30124144 | 0.4912601  | 0.71060078 |
| NA        | ENSG00000287105 | 0          | NA          | NA         | NA         | NA         |
| NA        | ENSG00000287106 | 0          | NA          | NA         | NA         | NA         |
| NA        | ENSG00000287107 | 0          | NA          | NA         | NA         | NA         |
| NA        | ENSG00000287108 | 0          | NA          | NA         | NA         | NA         |
| NA        | ENSG00000287109 | 7.66599512 | 0.02298209  | 0.35489083 | 0.87073129 | 0.94350971 |
| NA        | ENSG00000287110 | 58.6172419 | -0.89900882 | 0.38955941 | 0.00229562 | 0.01204578 |
| NA        | ENSG00000287111 | 0          | NA          | NA         | NA         | NA         |
| NA        | ENSG00000287112 | 0          | NA          | NA         | NA         | NA         |
| NA        | ENSG00000287113 | 0.51255641 | -0.00934739 | 0.38274456 | 0.82701989 | NA         |
| NA        | ENSG00000287114 | 0          | NA          | NA         | NA         | NA         |
| NA        | ENSG00000287115 | 0.8280377  | -0.00851831 | 0.3808229  | 0.8804451  | NA         |
| NA        | ENSG00000287116 | 0          | NA          | NA         | NA         | NA         |
| NA        | ENSG00000287117 | 1.29270325 | 0.00496064  | 0.3800818  | 0.93546284 | NA         |
| NA        | ENSG00000287118 | 0          | NA          | NA         | NA         | NA         |
| NA        | ENSG00000287119 | 0.16735865 | 0.01897177  | 0.38482933 | 0.78225479 | NA         |
| NA        | ENSG00000287120 | 0.45010957 | -0.02731802 | 0.38571456 | 0.56160394 | NA         |
| NA        | ENSG00000287121 | 0.3239303  | -0.02327385 | 0.38532147 | 0.6685474  | NA         |
| NA        | ENSG00000287122 | 0          | NA          | NA         | NA         | NA         |
| NA        | ENSG00000287123 | 0.173733   | 0.01914545  | 0.38484597 | 0.78225479 | NA         |
| NA        | ENSG00000287124 | 0          | NA          | NA         | NA         | NA         |
| NA        | ENSG00000287125 | 3.32258372 | 0.03926614  | 0.37270103 | 0.70424613 | 0.85782437 |
| NA        | ENSG00000287126 | 150.569983 | 0.09110792  | 0.18327696 | 0.57283162 | 0.7725692  |
| NA        | ENSG00000287127 | 0.78563373 | -0.02778018 | 0.38347591 | 0.5681584  | NA         |
| NA        | ENSG00000287128 | 0          | NA          | NA         | NA         | NA         |
| NA        | ENSG00000287129 | 2.8518047  | 0.08546309  | 0.38733496 | 0.34952854 | 0.58004303 |
| NA        | ENSG00000287130 | 2.02357244 | -0.05764259 | 0.38393035 | 0.43741635 | NA         |
| NA        | ENSG00000287131 | 0          | NA          | NA         | NA         | NA         |

|           |                 |            |             |            |            |            |          |
|-----------|-----------------|------------|-------------|------------|------------|------------|----------|
| NA        | ENSG00000287132 | 0          | NA          | NA         | NA         | NA         |          |
| NA        | ENSG00000287133 | 1.32497894 | -0.03668267 | 0.38291999 | 0.53836626 | NA         |          |
| NA        | ENSG00000287134 | 1.23471442 | -0.03398256 | 0.38171189 | 0.59561386 | NA         |          |
| NA        | ENSG00000287135 | 0          | NA          | NA         | NA         | NA         |          |
| NA        | ENSG00000287136 | 0          | NA          | NA         | NA         | NA         |          |
| NA        | ENSG00000287137 | 0          | NA          | NA         | NA         | NA         |          |
| NA        | ENSG00000287138 | 0          | NA          | NA         | NA         | NA         |          |
| NA        | ENSG00000287139 | 0.16735865 | 0.01897177  | 0.38482933 | 0.78225479 | NA         |          |
| NA        | ENSG00000287140 | 0          | NA          | NA         | NA         | NA         |          |
| NA        | ENSG00000287141 | 0.66589341 | 0.02586518  | 0.38361454 | 0.58932241 | NA         |          |
| NA        | ENSG00000287142 | 0          | NA          | NA         | NA         | NA         |          |
| NA        | ENSG00000287143 | 0.173733   | 0.01914545  | 0.38484597 | 0.78225479 | NA         |          |
| NA        | ENSG00000287144 | 0          | NA          | NA         | NA         | NA         |          |
| NA        | ENSG00000287145 | 0          | NA          | NA         | NA         | NA         |          |
| NA        | ENSG00000287146 | 2.69191522 | -0.09764962 | 0.38982308 | 0.31425175 | 0.54212505 |          |
| NA        | ENSG00000287147 | 0          | NA          | NA         | NA         | NA         |          |
| 107986443 | ENSG00000287148 | 0          | NA          | NA         | NA         | NA         | LINCADL  |
| NA        | ENSG00000287149 | 0          | NA          | NA         | NA         | NA         |          |
| NA        | ENSG00000287150 | 0          | NA          | NA         | NA         | NA         |          |
| NA        | ENSG00000287151 | 116.129585 | -0.15694542 | 0.19551384 | 0.35256159 | 0.582562   | C2orf27A |
| NA        | ENSG00000287152 | 0          | NA          | NA         | NA         | NA         |          |
| NA        | ENSG00000287153 | 0          | NA          | NA         | NA         | NA         |          |
| NA        | ENSG00000287154 | 0          | NA          | NA         | NA         | NA         |          |
| NA        | ENSG00000287155 | 0          | NA          | NA         | NA         | NA         |          |
| NA        | ENSG00000287156 | 0          | NA          | NA         | NA         | NA         |          |
| NA        | ENSG00000287157 | 0.173733   | 0.01914545  | 0.38484597 | 0.78225479 | NA         |          |
| NA        | ENSG00000287158 | 0.173124   | -0.01911262 | 0.38486262 | 0.84537521 | NA         |          |
| NA        | ENSG00000287159 | 0          | NA          | NA         | NA         | NA         |          |
| NA        | ENSG00000287160 | 80.1029238 | -0.08864222 | 0.21922172 | 0.62201246 | 0.80695268 |          |
| NA        | ENSG00000287161 | 0          | NA          | NA         | NA         | NA         |          |
| 101929154 | ENSG00000287162 | 0          | NA          | NA         | NA         | NA         |          |
| NA        | ENSG00000287163 | 0          | NA          | NA         | NA         | NA         |          |
| NA        | ENSG00000287164 | 0.34624801 | -0.02356563 | 0.38536324 | 0.65270996 | NA         |          |
| NA        | ENSG00000287165 | 0.32260095 | -0.02325511 | 0.38531883 | 0.6695434  | NA         |          |
| NA        | ENSG00000287166 | 12.0781942 | 0.18600529  | 0.38647916 | 0.28715955 | 0.51294189 |          |
| NA        | ENSG00000287167 | 4.12817938 | 0.06548967  | 0.37240641 | 0.57673609 | 0.77528586 |          |
| NA        | ENSG00000287168 | 183.65149  | -0.20513912 | 0.17742792 | 0.19142153 | 0.39318804 |          |
| NA        | ENSG00000287169 | 0          | NA          | NA         | NA         | NA         |          |

|           |                 |            |             |            |            |            |
|-----------|-----------------|------------|-------------|------------|------------|------------|
| NA        | ENSG00000287170 | 12.043073  | -0.22349834 | 0.40451184 | 0.21909745 | 0.43102563 |
| NA        | ENSG00000287171 | 0          | NA          | NA         | NA         | NA         |
| NA        | ENSG00000287172 | 0          | NA          | NA         | NA         | NA         |
| NA        | ENSG00000287173 | 0          | NA          | NA         | NA         | NA         |
| NA        | ENSG00000287174 | 0          | NA          | NA         | NA         | NA         |
| NA        | ENSG00000287175 | 0          | NA          | NA         | NA         | NA         |
| NA        | ENSG00000287176 | 0          | NA          | NA         | NA         | NA         |
| NA        | ENSG00000287177 | 0          | NA          | NA         | NA         | NA         |
| NA        | ENSG00000287178 | 0          | NA          | NA         | NA         | NA         |
| NA        | ENSG00000287179 | 0          | NA          | NA         | NA         | NA         |
| NA        | ENSG00000287180 | 2.27014436 | 0.00360621  | 0.37546121 | 0.9664757  | NA         |
| NA        | ENSG00000287181 | 0          | NA          | NA         | NA         | NA         |
| NA        | ENSG00000287182 | 0.14931947 | -0.01844332 | 0.38480212 | 0.84537521 | NA         |
| NA        | ENSG00000287183 | 3.586557   | 0.12224964  | 0.39776189 | 0.24538954 | 0.46442129 |
| NA        | ENSG00000287184 | 0          | NA          | NA         | NA         | NA         |
| NA        | ENSG00000287185 | 0.36234396 | 0.0008679   | 0.3833642  | 0.96760468 | NA         |
| NA        | ENSG00000287186 | 0          | NA          | NA         | NA         | NA         |
| 112268039 | ENSG00000287187 | 0          | NA          | NA         | NA         | NA         |
| NA        | ENSG00000287188 | 0.88118982 | 0.05092059  | 0.38880364 | 0.25727615 | NA         |
| NA        | ENSG00000287189 | 7.89438361 | -0.0823619  | 0.35796255 | 0.58480151 | 0.78078479 |
| NA        | ENSG00000287190 | 3.59141464 | 0.11305989  | 0.38956013 | 0.32398432 | 0.5518888  |
| NA        | ENSG00000287191 | 0.15069912 | -0.01848503 | 0.38480575 | 0.84537521 | NA         |
| NA        | ENSG00000287192 | 1.76422894 | 0.07909201  | 0.39000183 | 0.27940807 | NA         |
| NA        | ENSG00000287193 | 1.12403091 | -0.07957828 | 0.39495704 | 0.14355102 | NA         |
| NA        | ENSG00000287194 | 0          | NA          | NA         | NA         | NA         |
| NA        | ENSG00000287195 | 0.34746601 | 0.02370763  | 0.3853651  | 0.61987128 | NA         |
| NA        | ENSG00000287196 | 0.16735865 | 0.01897177  | 0.38482933 | 0.78225479 | NA         |
| NA        | ENSG00000287197 | 0          | NA          | NA         | NA         | NA         |
| NA        | ENSG00000287198 | 0          | NA          | NA         | NA         | NA         |
| NA        | ENSG00000287199 | 0          | NA          | NA         | NA         | NA         |
| NA        | ENSG00000287200 | 11.1991574 | 1.12162505  | 1.16414398 | 0.01081044 | 0.04419191 |
| NA        | ENSG00000287201 | 0          | NA          | NA         | NA         | NA         |
| NA        | ENSG00000287202 | 28.4192018 | 0.06830289  | 0.29057168 | 0.72482267 | 0.86844186 |
| NA        | ENSG00000287203 | 0          | NA          | NA         | NA         | NA         |
| NA        | ENSG00000287204 | 0          | NA          | NA         | NA         | NA         |
| NA        | ENSG00000287205 | 0.79072358 | -0.03673849 | 0.38392706 | 0.50642689 | NA         |
| NA        | ENSG00000287206 | 0          | NA          | NA         | NA         | NA         |
| NA        | ENSG00000287207 | 3.30867434 | 0.01541251  | 0.3717961  | 0.87688843 | 0.94566867 |



|           |                 |            |             |            |            |            |
|-----------|-----------------|------------|-------------|------------|------------|------------|
| NA        | ENSG00000287208 | 0          | NA          | NA         | NA         | NA         |
| NA        | ENSG00000287209 | 13.4640399 | -4.64190961 | 1.15775383 | 1.45E-05   | 0.00013397 |
| NA        | ENSG00000287210 | 0          | NA          | NA         | NA         | NA         |
| NA        | ENSG00000287211 | 0          | NA          | NA         | NA         | NA         |
| NA        | ENSG00000287212 | 0.173733   | 0.01914545  | 0.38484597 | 0.78225479 | NA         |
| NA        | ENSG00000287213 | 0.66357644 | 0.00189918  | 0.38130914 | 0.96957087 | NA         |
| NA        | ENSG00000287214 | 0.29863895 | -0.02292439 | 0.3852726  | 0.68753245 | NA         |
| 105377209 | ENSG00000287215 | 0          | NA          | NA         | NA         | NA         |
| NA        | ENSG00000287216 | 2.45259686 | -0.02258293 | 0.3721629  | 0.81638052 | NA         |
| NA        | ENSG00000287217 | 0          | NA          | NA         | NA         | NA         |
| NA        | ENSG00000287218 | 5.30912666 | 0.29471325  | 0.51754734 | 0.05994312 | 0.17111821 |
| NA        | ENSG00000287219 | 0.82898374 | -0.00812725 | 0.38080788 | 0.88591375 | NA         |
| NA        | ENSG00000287220 | 0          | NA          | NA         | NA         | NA         |
| NA        | ENSG00000287221 | 4.004182   | 0.02281575  | 0.3650088  | 0.84886336 | 0.93134154 |
| NA        | ENSG00000287222 | 103.805314 | -0.26591237 | 0.214747   | 0.13937932 | 0.31624951 |
| NA        | ENSG00000287223 | 0          | NA          | NA         | NA         | NA         |
| NA        | ENSG00000287224 | 0          | NA          | NA         | NA         | NA         |
| NA        | ENSG00000287225 | 0          | NA          | NA         | NA         | NA         |
| NA        | ENSG00000287226 | 0          | NA          | NA         | NA         | NA         |
| NA        | ENSG00000287227 | 0          | NA          | NA         | NA         | NA         |
| NA        | ENSG00000287229 | 0          | NA          | NA         | NA         | NA         |
| NA        | ENSG00000287230 | 0          | NA          | NA         | NA         | NA         |
| NA        | ENSG00000287231 | 0          | NA          | NA         | NA         | NA         |
| NA        | ENSG00000287232 | 10.0775757 | -0.12933774 | 0.36771906 | 0.41987728 | 0.6458148  |
| NA        | ENSG00000287233 | 0          | NA          | NA         | NA         | NA         |
| NA        | ENSG00000287234 | 2.60461958 | -0.09174652 | 0.39132314 | 0.27775924 | 0.5022529  |
| 105376381 | ENSG00000287235 | 0          | NA          | NA         | NA         | NA         |
| NA        | ENSG00000287236 | 21.5501503 | 0.92174025  | 0.57387688 | 0.0086087  | 0.03665162 |
| NA        | ENSG00000287237 | 0          | NA          | NA         | NA         | NA         |
| NA        | ENSG00000287238 | 0.30139824 | -0.02296476 | 0.38527817 | 0.68536535 | NA         |
| NA        | ENSG00000287239 | 0          | NA          | NA         | NA         | NA         |
| NA        | ENSG00000287240 | 0          | NA          | NA         | NA         | NA         |
| NA        | ENSG00000287241 | 0          | NA          | NA         | NA         | NA         |
| NA        | ENSG00000287242 | 6.85214978 | 0.03964951  | 0.3526822  | 0.78749818 | 0.90348487 |
| 100129223 | ENSG00000287243 | 2.14394795 | -0.13960027 | 0.41980602 | 0.02686811 | NA         |
| NA        | ENSG00000287244 | 0          | NA          | NA         | NA         | NA         |
| NA        | ENSG00000287245 | 0          | NA          | NA         | NA         | NA         |
| NA        | ENSG00000287246 | 0          | NA          | NA         | NA         | NA         |

|           |                 |            |             |            |            |            |
|-----------|-----------------|------------|-------------|------------|------------|------------|
| NA        | ENSG00000287247 | 0          | NA          | NA         | NA         | NA         |
| NA        | ENSG00000287248 | 1.98905412 | -0.07970774 | 0.39051984 | 0.27007122 | NA         |
| NA        | ENSG00000287249 | 3.67098922 | -0.03594645 | 0.36910787 | 0.74514244 | 0.87992536 |
| NA        | ENSG00000287250 | 0.49337857 | -0.00695545 | 0.38268985 | 0.86339383 | NA         |
| NA        | ENSG00000287251 | 0          | NA          | NA         | NA         | NA         |
| NA        | ENSG00000287252 | 0          | NA          | NA         | NA         | NA         |
| NA        | ENSG00000287253 | 0          | NA          | NA         | NA         | NA         |
| NA        | ENSG00000287254 | 1.36799836 | 0.007227    | 0.37685669 | 0.92589751 | NA         |
| NA        | ENSG00000287255 | 0          | NA          | NA         | NA         | NA         |
| NA        | ENSG00000287256 | 0          | NA          | NA         | NA         | NA         |
| NA        | ENSG00000287257 | 0          | NA          | NA         | NA         | NA         |
| NA        | ENSG00000287258 | 0          | NA          | NA         | NA         | NA         |
| NA        | ENSG00000287259 | 0          | NA          | NA         | NA         | NA         |
| 101928868 | ENSG00000287260 | 5.59070713 | 0.17742471  | 0.40859308 | 0.22070486 | 0.43307135 |
| NA        | ENSG00000287261 | 1.43392035 | 0.06872088  | 0.39015175 | 0.21572442 | NA         |
| NA        | ENSG00000287262 | 20.2129884 | -0.01158905 | 0.30867811 | 0.94803522 | 0.97876335 |
| NA        | ENSG00000287263 | 0          | NA          | NA         | NA         | NA         |
| NA        | ENSG00000287264 | 1.47482142 | -0.03649519 | 0.37884242 | 0.64509215 | NA         |
| NA        | ENSG00000287265 | 3.02861362 | 0.07531477  | 0.38401121 | 0.41489912 | 0.64204029 |
| NA        | ENSG00000287266 | 0.29863895 | -0.02292439 | 0.3852726  | 0.68753245 | NA         |
| NA        | ENSG00000287267 | 0          | NA          | NA         | NA         | NA         |
| NA        | ENSG00000287268 | 1.00964679 | -0.0672522  | 0.39187117 | 0.19235231 | NA         |
| NA        | ENSG00000287269 | 0          | NA          | NA         | NA         | NA         |
| NA        | ENSG00000287270 | 0          | NA          | NA         | NA         | NA         |
| NA        | ENSG00000287271 | 46.3917879 | -0.25431532 | 0.29092072 | 0.22112165 | 0.43371759 |
| NA        | ENSG00000287272 | 0          | NA          | NA         | NA         | NA         |
| NA        | ENSG00000287273 | 0          | NA          | NA         | NA         | NA         |
| NA        | ENSG00000287274 | 0          | NA          | NA         | NA         | NA         |
| NA        | ENSG00000287275 | 8.00458489 | 0.08474417  | 0.35859421 | 0.57787904 | 0.77608611 |
| NA        | ENSG00000287276 | 0.15069912 | -0.01848503 | 0.38480575 | 0.84537521 | NA         |
| NA        | ENSG00000287277 | 3.58187922 | -0.03806366 | 0.37218373 | 0.71148254 | 0.86137148 |
| NA        | ENSG00000287278 | 0          | NA          | NA         | NA         | NA         |
| NA        | ENSG00000287279 | 2.27436361 | -0.03893985 | 0.37549194 | 0.67592671 | NA         |
| NA        | ENSG00000287280 | 0          | NA          | NA         | NA         | NA         |
| 107985177 | ENSG00000287281 | 0.18922458 | 0.01954053  | 0.38488496 | 0.78225479 | NA         |
| NA        | ENSG00000287282 | 0          | NA          | NA         | NA         | NA         |
| NA        | ENSG00000287283 | 0.16735865 | 0.01897177  | 0.38482933 | 0.78225479 | NA         |
| NA        | ENSG00000287284 | 0.173124   | -0.01911262 | 0.38486262 | 0.84537521 | NA         |

|           |                 |            |             |            |            |            |
|-----------|-----------------|------------|-------------|------------|------------|------------|
| NA        | ENSG00000287285 | 0          | NA          | NA         | NA         | NA         |
| NA        | ENSG00000287286 | 0.51937201 | -0.02557462 | 0.38567603 | 0.54680819 | NA         |
| NA        | ENSG00000287287 | 0          | NA          | NA         | NA         | NA         |
| NA        | ENSG00000287288 | 0          | NA          | NA         | NA         | NA         |
| NA        | ENSG00000287289 | 0          | NA          | NA         | NA         | NA         |
| NA        | ENSG00000287290 | 3.39128197 | -0.03175995 | 0.36942066 | 0.76957542 | 0.89405696 |
| NA        | ENSG00000287291 | 0.14931947 | -0.01844332 | 0.38480212 | 0.84537521 | NA         |
| NA        | ENSG00000287292 | 0          | NA          | NA         | NA         | NA         |
| NA        | ENSG00000287293 | 0          | NA          | NA         | NA         | NA         |
| NA        | ENSG00000287294 | 0          | NA          | NA         | NA         | NA         |
| NA        | ENSG00000287295 | 0          | NA          | NA         | NA         | NA         |
| NA        | ENSG00000287296 | 0          | NA          | NA         | NA         | NA         |
| NA        | ENSG00000287297 | 0          | NA          | NA         | NA         | NA         |
| NA        | ENSG00000287298 | 0          | NA          | NA         | NA         | NA         |
| NA        | ENSG00000287299 | 8.32266975 | -0.08687205 | 0.3564201  | 0.57453354 | 0.77361067 |
| NA        | ENSG00000287300 | 0.173733   | 0.01914545  | 0.38484597 | 0.78225479 | NA         |
| 107986888 | ENSG00000287301 | 0          | NA          | NA         | NA         | NA         |
| NA        | ENSG00000287302 | 0.15069912 | -0.01848503 | 0.38480575 | 0.84537521 | NA         |
| NA        | ENSG00000287303 | 0.15069912 | -0.01848503 | 0.38480575 | 0.84537521 | NA         |
| NA        | ENSG00000287305 | 0.85745142 | 0.03020695  | 0.38447068 | 0.49983913 | NA         |
| NA        | ENSG00000287306 | 7.48328166 | 0.1938666   | 0.40735166 | 0.22883673 | 0.4441519  |
| NA        | ENSG00000287307 | 0          | NA          | NA         | NA         | NA         |
| NA        | ENSG00000287308 | 0          | NA          | NA         | NA         | NA         |
| NA        | ENSG00000287309 | 0          | NA          | NA         | NA         | NA         |
| NA        | ENSG00000287310 | 2.10897793 | 0.05055941  | 0.38218534 | 0.50425437 | NA         |
| NA        | ENSG00000287311 | 0          | NA          | NA         | NA         | NA         |
| NA        | ENSG00000287312 | 0          | NA          | NA         | NA         | NA         |
| NA        | ENSG00000287313 | 0          | NA          | NA         | NA         | NA         |
| NA        | ENSG00000287314 | 0          | NA          | NA         | NA         | NA         |
| NA        | ENSG00000287315 | 209.865875 | -0.15895569 | 0.15199942 | 0.25344275 | 0.4738319  |
| NA        | ENSG00000287316 | 0          | NA          | NA         | NA         | NA         |
| NA        | ENSG00000287317 | 0.173733   | 0.01914545  | 0.38484597 | 0.78225479 | NA         |
| NA        | ENSG00000287318 | 0          | NA          | NA         | NA         | NA         |
| NA        | ENSG00000287319 | 1.05360696 | 0.07503966  | 0.39384938 | 0.14876868 | NA         |
| NA        | ENSG00000287320 | 0          | NA          | NA         | NA         | NA         |
| NA        | ENSG00000287321 | 0          | NA          | NA         | NA         | NA         |
| NA        | ENSG00000287322 | 0.16735865 | 0.01897177  | 0.38482933 | 0.78225479 | NA         |
| NA        | ENSG00000287323 | 0          | NA          | NA         | NA         | NA         |

|           |                 |            |             |            |            |            |
|-----------|-----------------|------------|-------------|------------|------------|------------|
| NA        | ENSG00000287324 | 0          | NA          | NA         | NA         | NA         |
| NA        | ENSG00000287325 | 0          | NA          | NA         | NA         | NA         |
| 728158    | ENSG00000287326 | 0          | NA          | NA         | NA         | NA         |
| NA        | ENSG00000287327 | 0          | NA          | NA         | NA         | NA         |
| NA        | ENSG00000287328 | 0          | NA          | NA         | NA         | NA         |
| NA        | ENSG00000287329 | 5.85865215 | 0.11263195  | 0.38351272 | 0.37680785 | 0.60570261 |
| NA        | ENSG00000287330 | 0          | NA          | NA         | NA         | NA         |
| NA        | ENSG00000287331 | 0          | NA          | NA         | NA         | NA         |
| NA        | ENSG00000287332 | 0          | NA          | NA         | NA         | NA         |
| NA        | ENSG00000287333 | 0          | NA          | NA         | NA         | NA         |
| NA        | ENSG00000287334 | 0          | NA          | NA         | NA         | NA         |
| NA        | ENSG00000287335 | 1.69704887 | -0.04020098 | 0.38165016 | 0.5610572  | NA         |
| NA        | ENSG00000287336 | 2.45960715 | 0.12812514  | 0.4050042  | 0.16916583 | NA         |
| 105371841 | ENSG00000287337 | 0.65127857 | 0.00359797  | 0.38194257 | 0.93835047 | NA         |
| 107985323 | ENSG00000287338 | 14.5809897 | -0.5142354  | 0.58613876 | 0.05004571 | 0.14908511 |
| NA        | ENSG00000287339 | 0          | NA          | NA         | NA         | NA         |
| NA        | ENSG00000287340 | 0          | NA          | NA         | NA         | NA         |
| 105375118 | ENSG00000287342 | 0.66287476 | 0.00439302  | 0.38134412 | 0.93152265 | NA         |
| NA        | ENSG00000287343 | 0.15069912 | -0.01848503 | 0.38480575 | 0.84537521 | NA         |
| NA        | ENSG00000287344 | 0          | NA          | NA         | NA         | NA         |
| NA        | ENSG00000287345 | 0          | NA          | NA         | NA         | NA         |
| 105370689 | ENSG00000287346 | 0.35699843 | 0.02381934  | 0.38538142 | 0.61385682 | NA         |
| NA        | ENSG00000287347 | 0.36293774 | 0.02389465  | 0.38539239 | 0.60997488 | NA         |
| NA        | ENSG00000287348 | 0.18922458 | 0.01954053  | 0.38488496 | 0.78225479 | NA         |
| NA        | ENSG00000287349 | 0.53649169 | 0.0143611   | 0.38296386 | 0.73151298 | NA         |
| NA        | ENSG00000287350 | 0          | NA          | NA         | NA         | NA         |
| NA        | ENSG00000287351 | 0          | NA          | NA         | NA         | NA         |
| NA        | ENSG00000287352 | 0          | NA          | NA         | NA         | NA         |
| NA        | ENSG00000287353 | 0          | NA          | NA         | NA         | NA         |
| NA        | ENSG00000287354 | 0          | NA          | NA         | NA         | NA         |
| NA        | ENSG00000287355 | 0.32329274 | -0.02326069 | 0.38531968 | 0.66914356 | NA         |
| NA        | ENSG00000287356 | 70.8524757 | 1.47602118  | 0.34447979 | 1.33E-06   | 1.48E-05   |
| NA        | ENSG00000287357 | 0          | NA          | NA         | NA         | NA         |
| NA        | ENSG00000287358 | 4.44020583 | -0.36571071 | 0.66427524 | 0.0146482  | 0.05656294 |
| NA        | ENSG00000287359 | 0          | NA          | NA         | NA         | NA         |
| NA        | ENSG00000287360 | 0          | NA          | NA         | NA         | NA         |
| NA        | ENSG00000287361 | 0          | NA          | NA         | NA         | NA         |
| NA        | ENSG00000287362 | 0.97084341 | 0.00673181  | 0.38021202 | 0.91066605 | NA         |

|           |                 |                 |             |             |            |            |            |
|-----------|-----------------|-----------------|-------------|-------------|------------|------------|------------|
| 114841037 | ENSG00000287363 | 0               | NA          | NA          | NA         | NA         | GUCA1ANB   |
| 105371672 | ENSG00000287364 | 0.37844916      | 0.02407552  | 0.3854191   | 0.60038877 | NA         |            |
|           | NA              | ENSG00000287365 | 0           | NA          | NA         | NA         |            |
|           | NA              | ENSG00000287366 | 0           | NA          | NA         | NA         |            |
|           | NA              | ENSG00000287367 | 0.18922458  | 0.01954053  | 0.38488496 | 0.78225479 | NA         |
|           | NA              | ENSG00000287368 | 0.173124    | -0.01911262 | 0.38486262 | 0.84537521 | NA         |
|           | NA              | ENSG00000287369 | 0           | NA          | NA         | NA         | NA         |
|           | NA              | ENSG00000287370 | 0.51937201  | -0.02557462 | 0.38567603 | 0.54680819 | NA         |
|           | NA              | ENSG00000287372 | 0           | NA          | NA         | NA         | NA         |
|           | NA              | ENSG00000287373 | 0.74086129  | 0.02170582  | 0.38362983 | 0.59346893 | NA         |
|           | NA              | ENSG00000287374 | 0.51509093  | 0.03111094  | 0.38605236 | 0.47797223 | NA         |
|           | NA              | ENSG00000287375 | 0           | NA          | NA         | NA         | NA         |
| 105370295 | ENSG00000287376 | 5.96738353      | 3.16262828  | 1.43172772  | 0.00187508 | 0.01011737 |            |
|           | NA              | ENSG00000287377 | 4.07936016  | 0.1174871   | 0.39103864 | 0.31113467 | 0.53874253 |
|           | NA              | ENSG00000287378 | 0.46612035  | -0.00631207 | 0.38319853 | 0.88246282 | NA         |
|           | NA              | ENSG00000287379 | 0           | NA          | NA         | NA         | NA         |
|           | NA              | ENSG00000287380 | 0.173733    | 0.01914545  | 0.38484597 | 0.78225479 | NA         |
|           | NA              | ENSG00000287381 | 0           | NA          | NA         | NA         | NA         |
|           | NA              | ENSG00000287382 | 0           | NA          | NA         | NA         | NA         |
|           | NA              | ENSG00000287383 | 1.93351433  | 0.08902953  | 0.38963953 | 0.30928236 | NA         |
|           | NA              | ENSG00000287384 | 0.49034266  | -0.0081585  | 0.38274684 | 0.84856621 | NA         |
| 107984016 | ENSG00000287385 | 4.25463058      | -0.03070623 | 0.36431005  | 0.7992006  | 0.90801909 |            |
|           | NA              | ENSG00000287386 | 0           | NA          | NA         | NA         | NA         |
|           | NA              | ENSG00000287387 | 6.80399674  | -0.10191314 | 0.36832676 | 0.48299667 | 0.7034173  |
|           | NA              | ENSG00000287388 | 22.3545731  | -0.09626044 | 0.31895233 | 0.60639634 | 0.79607018 |
|           | NA              | ENSG00000287389 | 0           | NA          | NA         | NA         | NA         |
|           | NA              | ENSG00000287390 | 0           | NA          | NA         | NA         | NA         |
|           | NA              | ENSG00000287391 | 0           | NA          | NA         | NA         | NA         |
|           | NA              | ENSG00000287392 | 0           | NA          | NA         | NA         | NA         |
|           | NA              | ENSG00000287393 | 0           | NA          | NA         | NA         | NA         |
|           | NA              | ENSG00000287394 | 18.2310833  | 0.19641408  | 0.35197049 | 0.32103732 | 0.54880065 |
|           | NA              | ENSG00000287395 | 0           | NA          | NA         | NA         | NA         |
|           | NA              | ENSG00000287396 | 0           | NA          | NA         | NA         | NA         |
|           | NA              | ENSG00000287397 | 0           | NA          | NA         | NA         | NA         |
|           | NA              | ENSG00000287398 | 0           | NA          | NA         | NA         | NA         |
|           | NA              | ENSG00000287399 | 0.68793809  | -0.01914114 | 0.38352829 | 0.66564279 | NA         |
|           | NA              | ENSG00000287400 | 0.34109046  | 0.02362638  | 0.38535337 | 0.62411613 | NA         |
|           | NA              | ENSG00000287401 | 1.34917831  | 0.0078195   | 0.37689417 | 0.91978359 | NA         |

|           |                 |            |             |            |            |            |       |
|-----------|-----------------|------------|-------------|------------|------------|------------|-------|
| NA        | ENSG00000287402 | 0.71965469 | 0.05205413  | 0.38873839 | 0.28870587 | NA         |       |
| NA        | ENSG00000287403 | 0.34047086 | -0.00019907 | 0.38336231 | 0.96713961 | NA         |       |
| NA        | ENSG00000287404 | 0.34047275 | -0.00020643 | 0.38336232 | 0.96720935 | NA         |       |
| NA        | ENSG00000287405 | 2.0821091  | -0.02292342 | 0.37689629 | 0.77639148 | NA         |       |
| NA        | ENSG00000287406 | 0          | NA          | NA         | NA         | NA         |       |
| NA        | ENSG00000287407 | 0          | NA          | NA         | NA         | NA         |       |
| NA        | ENSG00000287408 | 3.97369839 | 0.05592843  | 0.37187677 | 0.62176087 | 0.80694287 |       |
| NA        | ENSG00000287409 | 0          | NA          | NA         | NA         | NA         |       |
| NA        | ENSG00000287410 | 0          | NA          | NA         | NA         | NA         |       |
| NA        | ENSG00000287411 | 0.15069912 | -0.01848503 | 0.38480575 | 0.84537521 | NA         |       |
| NA        | ENSG00000287412 | 0          | NA          | NA         | NA         | NA         |       |
| NA        | ENSG00000287413 | 0          | NA          | NA         | NA         | NA         |       |
| NA        | ENSG00000287414 | 0.32276844 | -0.02325646 | 0.38531903 | 0.66944655 | NA         |       |
| NA        | ENSG00000287415 | 0          | NA          | NA         | NA         | NA         |       |
| NA        | ENSG00000287416 | 0          | NA          | NA         | NA         | NA         |       |
| NA        | ENSG00000287417 | 0          | NA          | NA         | NA         | NA         |       |
| NA        | ENSG00000287418 | 0          | NA          | NA         | NA         | NA         |       |
| NA        | ENSG00000287419 | 2.80429746 | -0.0981068  | 0.39116335 | 0.2945806  | 0.52089831 |       |
| NA        | ENSG00000287420 | 0          | NA          | NA         | NA         | NA         |       |
| NA        | ENSG00000287421 | 0          | NA          | NA         | NA         | NA         |       |
| NA        | ENSG00000287422 | 0          | NA          | NA         | NA         | NA         |       |
| NA        | ENSG00000287423 | 0          | NA          | NA         | NA         | NA         |       |
| NA        | ENSG00000287424 | 0          | NA          | NA         | NA         | NA         |       |
| NA        | ENSG00000287425 | 2.125093   | -0.00112263 | 0.37307698 | 0.9888966  | NA         |       |
| NA        | ENSG00000287426 | 0.75009898 | -0.04345556 | 0.38756888 | 0.34450261 | NA         |       |
| NA        | ENSG00000287427 | 0          | NA          | NA         | NA         | NA         |       |
| NA        | ENSG00000287428 | 0          | NA          | NA         | NA         | NA         |       |
| NA        | ENSG00000287429 | 0          | NA          | NA         | NA         | NA         |       |
| NA        | ENSG00000287430 | 0          | NA          | NA         | NA         | NA         |       |
| NA        | ENSG00000287431 | 335.890401 | -0.52965487 | 0.14360599 | 7.92E-05   | 0.0006177  | RENO1 |
| NA        | ENSG00000287432 | 0          | NA          | NA         | NA         | NA         |       |
| NA        | ENSG00000287433 | 1.80711656 | -0.00231088 | 0.37434512 | 0.97774054 | NA         |       |
| NA        | ENSG00000287434 | 1.01877506 | 0.00222282  | 0.37994568 | 0.97089972 | NA         |       |
| 105374802 | ENSG00000287435 | 0          | NA          | NA         | NA         | NA         |       |
| NA        | ENSG00000287437 | 1.8004396  | -0.02555109 | 0.37756121 | 0.74596687 | NA         |       |
| NA        | ENSG00000287438 | 0          | NA          | NA         | NA         | NA         |       |
| NA        | ENSG00000287439 | 0.16735865 | 0.01897177  | 0.38482933 | 0.78225479 | NA         |       |
| 105374088 | ENSG00000287440 | 0.173124   | -0.01911262 | 0.38486262 | 0.84537521 | NA         |       |

|    |                 |            |             |            |            |            |
|----|-----------------|------------|-------------|------------|------------|------------|
| NA | ENSG00000287441 | 0          | NA          | NA         | NA         | NA         |
| NA | ENSG00000287442 | 0          | NA          | NA         | NA         | NA         |
| NA | ENSG00000287443 | 0          | NA          | NA         | NA         | NA         |
| NA | ENSG00000287444 | 0.18922458 | 0.01954053  | 0.38488496 | 0.78225479 | NA         |
| NA | ENSG00000287445 | 3.74719665 | 0.0788378   | 0.37589211 | 0.5025951  | 0.71944348 |
| NA | ENSG00000287446 | 0          | NA          | NA         | NA         | NA         |
| NA | ENSG00000287447 | 0.82945023 | -0.00504061 | 0.38072168 | 0.92926679 | NA         |
| NA | ENSG00000287448 | 1.97141813 | 0.00842559  | 0.37577103 | 0.91973793 | NA         |
| NA | ENSG00000287449 | 1.47206238 | 0.02235226  | 0.37808929 | 0.76904654 | NA         |
| NA | ENSG00000287450 | 0          | NA          | NA         | NA         | NA         |
| NA | ENSG00000287451 | 0          | NA          | NA         | NA         | NA         |
| NA | ENSG00000287452 | 0          | NA          | NA         | NA         | NA         |
| NA | ENSG00000287453 | 0          | NA          | NA         | NA         | NA         |
| NA | ENSG00000287454 | 1.16699611 | -0.00481939 | 0.37937107 | 0.93996423 | NA         |
| NA | ENSG00000287455 | 0          | NA          | NA         | NA         | NA         |
| NA | ENSG00000287456 | 0.51324805 | 0.01348299  | 0.38349547 | 0.75057469 | NA         |
| NA | ENSG00000287457 | 0          | NA          | NA         | NA         | NA         |
| NA | ENSG00000287458 | 0          | NA          | NA         | NA         | NA         |
| NA | ENSG00000287459 | 0          | NA          | NA         | NA         | NA         |
| NA | ENSG00000287460 | 0          | NA          | NA         | NA         | NA         |
| NA | ENSG00000287462 | 0          | NA          | NA         | NA         | NA         |
| NA | ENSG00000287463 | 0.173124   | -0.01911262 | 0.38486262 | 0.84537521 | NA         |
| NA | ENSG00000287464 | 0.34746601 | 0.02370763  | 0.3853651  | 0.61987128 | NA         |
| NA | ENSG00000287465 | 0          | NA          | NA         | NA         | NA         |
| NA | ENSG00000287466 | 0.16735865 | 0.01897177  | 0.38482933 | 0.78225479 | NA         |
| NA | ENSG00000287467 | 0          | NA          | NA         | NA         | NA         |
| NA | ENSG00000287468 | 0          | NA          | NA         | NA         | NA         |
| NA | ENSG00000287469 | 0          | NA          | NA         | NA         | NA         |
| NA | ENSG00000287470 | 0          | NA          | NA         | NA         | NA         |
| NA | ENSG00000287471 | 0          | NA          | NA         | NA         | NA         |
| NA | ENSG00000287472 | 0          | NA          | NA         | NA         | NA         |
| NA | ENSG00000287473 | 0          | NA          | NA         | NA         | NA         |
| NA | ENSG00000287474 | 0          | NA          | NA         | NA         | NA         |
| NA | ENSG00000287475 | 1.99618204 | -0.00063848 | 0.37331819 | 0.99315233 | NA         |
| NA | ENSG00000287476 | 0          | NA          | NA         | NA         | NA         |
| NA | ENSG00000287477 | 0          | NA          | NA         | NA         | NA         |
| NA | ENSG00000287478 | 0          | NA          | NA         | NA         | NA         |
| NA | ENSG00000287479 | 0          | NA          | NA         | NA         | NA         |

|    |                 |            |             |            |            |            |
|----|-----------------|------------|-------------|------------|------------|------------|
| NA | ENSG00000287480 | 0.83012048 | -0.0296279  | 0.38352544 | 0.53795708 | NA         |
| NA | ENSG00000287481 | 0          | NA          | NA         | NA         | NA         |
| NA | ENSG00000287482 | 0          | NA          | NA         | NA         | NA         |
| NA | ENSG00000287483 | 0          | NA          | NA         | NA         | NA         |
| NA | ENSG00000287484 | 0          | NA          | NA         | NA         | NA         |
| NA | ENSG00000287485 | 0          | NA          | NA         | NA         | NA         |
| NA | ENSG00000287486 | 1.58135821 | 0.02102508  | 0.37816668 | 0.77856962 | NA         |
| NA | ENSG00000287488 | 0          | NA          | NA         | NA         | NA         |
| NA | ENSG00000287489 | 0          | NA          | NA         | NA         | NA         |
| NA | ENSG00000287490 | 1.09232058 | -0.02985166 | 0.38172731 | 0.62637922 | NA         |
| NA | ENSG00000287492 | 0          | NA          | NA         | NA         | NA         |
| NA | ENSG00000287493 | 0.71081751 | 0.04124882  | 0.38727712 | 0.34646938 | NA         |
| NA | ENSG00000287494 | 0          | NA          | NA         | NA         | NA         |
| NA | ENSG00000287495 | 0.173124   | -0.01911262 | 0.38486262 | 0.84537521 | NA         |
| NA | ENSG00000287496 | 18.9303966 | -0.58538332 | 0.80707293 | 0.03036672 | 0.10131192 |
| NA | ENSG00000287497 | 0          | NA          | NA         | NA         | NA         |
| NA | ENSG00000287498 | 0          | NA          | NA         | NA         | NA         |
| NA | ENSG00000287499 | 0          | NA          | NA         | NA         | NA         |
| NA | ENSG00000287500 | 0.173124   | -0.01911262 | 0.38486262 | 0.84537521 | NA         |
| NA | ENSG00000287501 | 0          | NA          | NA         | NA         | NA         |
| NA | ENSG00000287502 | 4.78701994 | 0.05871653  | 0.36805591 | 0.63687878 | 0.81722218 |
| NA | ENSG00000287503 | 0.32341108 | 0.00167804  | 0.38337145 | 0.96501678 | NA         |
| NA | ENSG00000287504 | 0          | NA          | NA         | NA         | NA         |
| NA | ENSG00000287505 | 0          | NA          | NA         | NA         | NA         |
| NA | ENSG00000287506 | 0.53540129 | 0.03209951  | 0.38615152 | 0.46347494 | NA         |
| NA | ENSG00000287507 | 0          | NA          | NA         | NA         | NA         |
| NA | ENSG00000287508 | 2.29433128 | -0.01040613 | 0.37275367 | 0.91020881 | NA         |
| NA | ENSG00000287509 | 0          | NA          | NA         | NA         | NA         |
| NA | ENSG00000287510 | 0.8494435  | 0.02770689  | 0.38408874 | 0.51418293 | NA         |
| NA | ENSG00000287511 | 0          | NA          | NA         | NA         | NA         |
| NA | ENSG00000287512 | 0          | NA          | NA         | NA         | NA         |
| NA | ENSG00000287513 | 4.40507066 | 0.14757127  | 0.40168663 | 0.24022125 | 0.45820056 |
| NA | ENSG00000287514 | 0.15069912 | -0.01848503 | 0.38480575 | 0.84537521 | NA         |
| NA | ENSG00000287515 | 38.404795  | 0.34062239  | 0.36827686 | 0.13358695 | 0.30743129 |
| NA | ENSG00000287516 | 12.2047903 | 0.13307379  | 0.3598596  | 0.43593482 | 0.66108284 |
| NA | ENSG00000287517 | 0          | NA          | NA         | NA         | NA         |
| NA | ENSG00000287518 | 0          | NA          | NA         | NA         | NA         |
| NA | ENSG00000287519 | 0.15069912 | -0.01848503 | 0.38480575 | 0.84537521 | NA         |



|      |                 |            |             |            |            |            |
|------|-----------------|------------|-------------|------------|------------|------------|
| NA   | ENSG00000287520 | 1.54621006 | -0.00040696 | 0.37707464 | 0.99474387 | NA         |
| NA   | ENSG00000287521 | 0          | NA          | NA         | NA         | NA         |
| NA   | ENSG00000287522 | 0.173733   | 0.01914545  | 0.38484597 | 0.78225479 | NA         |
| NA   | ENSG00000287523 | 0          | NA          | NA         | NA         | NA         |
| NA   | ENSG00000287524 | 0          | NA          | NA         | NA         | NA         |
| NA   | ENSG00000287525 | 0          | NA          | NA         | NA         | NA         |
| NA   | ENSG00000287526 | 0          | NA          | NA         | NA         | NA         |
| NA   | ENSG00000287527 | 0.32308754 | -0.02326708 | 0.38532044 | 0.66903341 | NA         |
| NA   | ENSG00000287528 | 0.36296491 | 0.02389484  | 0.38539241 | 0.60996142 | NA         |
| NA   | ENSG00000287529 | 0          | NA          | NA         | NA         | NA         |
| NA   | ENSG00000287530 | 0.14931947 | -0.01844332 | 0.38480212 | 0.84537521 | NA         |
| NA   | ENSG00000287531 | 0          | NA          | NA         | NA         | NA         |
| NA   | ENSG00000287532 | 0.18922458 | 0.01954053  | 0.38488496 | 0.78225479 | NA         |
| NA   | ENSG00000287533 | 1.76567614 | 0.02040635  | 0.37983306 | 0.75857794 | NA         |
| NA   | ENSG00000287534 | 2.32503812 | 0.04126739  | 0.37648896 | 0.65340605 | NA         |
| NA   | ENSG00000287535 | 2.14571337 | 0.06972521  | 0.38434415 | 0.41500024 | NA         |
| NA   | ENSG00000287536 | 0          | NA          | NA         | NA         | NA         |
| NA   | ENSG00000287537 | 0.44795842 | -0.02501848 | 0.38558245 | 0.5807882  | NA         |
| NA   | ENSG00000287538 | 0          | NA          | NA         | NA         | NA         |
| NA   | ENSG00000287539 | 21.2484005 | 0.16963477  | 0.33421556 | 0.38925226 | 0.61846439 |
| NA   | ENSG00000287540 | 0          | NA          | NA         | NA         | NA         |
| NA   | ENSG00000287541 | 0          | NA          | NA         | NA         | NA         |
| 8916 | ENSG00000287542 | 39.9988993 | -0.23849963 | 0.30255623 | 0.25211837 | 0.47202308 |
| NA   | ENSG00000287543 | 4.33923297 | 0.02015235  | 0.36349072 | 0.86997929 | 0.94329375 |
| NA   | ENSG00000287544 | 0          | NA          | NA         | NA         | NA         |
| NA   | ENSG00000287545 | 0          | NA          | NA         | NA         | NA         |
| NA   | ENSG00000287546 | 0          | NA          | NA         | NA         | NA         |
| NA   | ENSG00000287547 | 0          | NA          | NA         | NA         | NA         |
| NA   | ENSG00000287548 | 1.75976181 | -0.05409931 | 0.38165014 | 0.5022345  | NA         |
| NA   | ENSG00000287549 | 0          | NA          | NA         | NA         | NA         |
| NA   | ENSG00000287550 | 0          | NA          | NA         | NA         | NA         |
| NA   | ENSG00000287551 | 0.14931947 | -0.01844332 | 0.38480212 | 0.84537521 | NA         |
| NA   | ENSG00000287552 | 0          | NA          | NA         | NA         | NA         |
| NA   | ENSG00000287553 | 19.8835854 | -0.17941662 | 0.35413381 | 0.34815148 | 0.57889083 |
| NA   | ENSG00000287554 | 0.53700688 | 0.01398311  | 0.38347224 | 0.73883981 | NA         |
| NA   | ENSG00000287555 | 0.16735865 | 0.01897177  | 0.38482933 | 0.78225479 | NA         |
| NA   | ENSG00000287556 | 0          | NA          | NA         | NA         | NA         |
| NA   | ENSG00000287557 | 0          | NA          | NA         | NA         | NA         |

|           |                 |            |             |            |            |            |
|-----------|-----------------|------------|-------------|------------|------------|------------|
| NA        | ENSG00000287558 | 0          | NA          | NA         | NA         | NA         |
| NA        | ENSG00000287559 | 0          | NA          | NA         | NA         | NA         |
| NA        | ENSG00000287560 | 0          | NA          | NA         | NA         | NA         |
| NA        | ENSG00000287561 | 0.87094103 | 0.01724536  | 0.38120905 | 0.76042189 | NA         |
| NA        | ENSG00000287562 | 80.3954157 | 0.06817176  | 0.21942832 | 0.7069061  | 0.8587972  |
| NA        | ENSG00000287563 | 0          | NA          | NA         | NA         | NA         |
| NA        | ENSG00000287564 | 0.53765943 | 0.01384465  | 0.38345827 | 0.73973399 | NA         |
| NA        | ENSG00000287565 | 0          | NA          | NA         | NA         | NA         |
| 105376380 | ENSG00000287566 | 0          | NA          | NA         | NA         | NA         |
| NA        | ENSG00000287567 | 0          | NA          | NA         | NA         | NA         |
| NA        | ENSG00000287568 | 0          | NA          | NA         | NA         | NA         |
| NA        | ENSG00000287569 | 19.1782895 | -0.16867218 | 0.34096345 | 0.38309287 | 0.61240159 |
| NA        | ENSG00000287570 | 0          | NA          | NA         | NA         | NA         |
| NA        | ENSG00000287571 | 0          | NA          | NA         | NA         | NA         |
| NA        | ENSG00000287574 | 21.5534259 | 0.29545836  | 0.3954363  | 0.16996562 | 0.36181523 |
| NA        | ENSG00000287575 | 1.13534237 | -0.00458801 | 0.37953721 | 0.94212712 | NA         |
| NA        | ENSG00000287576 | 9.51766258 | 0.15584246  | 0.37752963 | 0.34676522 | 0.57745693 |
| NA        | ENSG00000287577 | 0.34746601 | 0.02370763  | 0.3853651  | 0.61987128 | NA         |
| NA        | ENSG00000287578 | 2.34161801 | -0.06174706 | 0.38073739 | 0.49621678 | NA         |
| NA        | ENSG00000287579 | 0.29863895 | -0.02292439 | 0.3852726  | 0.68753245 | NA         |
| NA        | ENSG00000287580 | 1.68921331 | -0.07256536 | 0.38760153 | 0.33335367 | NA         |
| NA        | ENSG00000287581 | 0.49110256 | -0.01126615 | 0.3829189  | 0.81968611 | NA         |
| NA        | ENSG00000287582 | 0          | NA          | NA         | NA         | NA         |
| NA        | ENSG00000287583 | 2.47356871 | 0.07622158  | 0.38734778 | 0.34888161 | NA         |
| NA        | ENSG00000287584 | 4.86116567 | -0.01384539 | 0.36112784 | 0.91033726 | 0.96161704 |
| NA        | ENSG00000287585 | 0          | NA          | NA         | NA         | NA         |
| NA        | ENSG00000287586 | 0.30001722 | -0.0229446  | 0.38527539 | 0.68644791 | NA         |
| NA        | ENSG00000287587 | 0.80016032 | -0.00605972 | 0.38147056 | 0.90729511 | NA         |
| NA        | ENSG00000287588 | 1.626856   | -0.05105024 | 0.38038189 | 0.53905169 | NA         |
| NA        | ENSG00000287589 | 0.32283864 | -0.02325702 | 0.38531912 | 0.66940596 | NA         |
| NA        | ENSG00000287590 | 0.16735865 | 0.01897177  | 0.38482933 | 0.78225479 | NA         |
| NA        | ENSG00000287591 | 0.16735865 | 0.01897177  | 0.38482933 | 0.78225479 | NA         |
| NA        | ENSG00000287592 | 0          | NA          | NA         | NA         | NA         |
| NA        | ENSG00000287593 | 0          | NA          | NA         | NA         | NA         |
| NA        | ENSG00000287594 | 0          | NA          | NA         | NA         | NA         |
| NA        | ENSG00000287595 | 9.31127805 | 0.14550618  | 0.37399994 | 0.37432041 | 0.60343844 |
| NA        | ENSG00000287596 | 0          | NA          | NA         | NA         | NA         |
| NA        | ENSG00000287597 | 0          | NA          | NA         | NA         | NA         |

|    |                 |            |             |            |            |            |
|----|-----------------|------------|-------------|------------|------------|------------|
| NA | ENSG00000287598 | 0          | NA          | NA         | NA         | NA         |
| NA | ENSG00000287599 | 0.37844916 | 0.02407552  | 0.3854191  | 0.60038877 | NA         |
| NA | ENSG00000287600 | 17.8882563 | 0.11836986  | 0.32781115 | 0.52980589 | 0.74152324 |
| NA | ENSG00000287601 | 6.44455661 | -0.04323345 | 0.35715767 | 0.75412933 | 0.88532106 |
| NA | ENSG00000287602 | 0          | NA          | NA         | NA         | NA         |
| NA | ENSG00000287603 | 0          | NA          | NA         | NA         | NA         |
| NA | ENSG00000287605 | 0          | NA          | NA         | NA         | NA         |
| NA | ENSG00000287608 | 28.6176542 | -0.06204928 | 0.29173722 | 0.74509655 | 0.87992355 |
| NA | ENSG00000287609 | 1.09468256 | -0.04706066 | 0.38594721 | 0.37437834 | NA         |
| NA | ENSG00000287610 | 0          | NA          | NA         | NA         | NA         |
| NA | ENSG00000287611 | 0          | NA          | NA         | NA         | NA         |
| NA | ENSG00000287612 | 0          | NA          | NA         | NA         | NA         |
| NA | ENSG00000287613 | 0          | NA          | NA         | NA         | NA         |
| NA | ENSG00000287614 | 0.15069912 | -0.01848503 | 0.38480575 | 0.84537521 | NA         |
| NA | ENSG00000287615 | 0          | NA          | NA         | NA         | NA         |
| NA | ENSG00000287616 | 5.06903359 | -0.02308438 | 0.3663152  | 0.83784096 | 0.92628758 |
| NA | ENSG00000287617 | 0.81768494 | 0.01769635  | 0.38134204 | 0.7531872  | NA         |
| NA | ENSG00000287618 | 0.173124   | -0.01911262 | 0.38486262 | 0.84537521 | NA         |
| NA | ENSG00000287619 | 3.90268568 | -0.0913865  | 0.38169976 | 0.41779033 | 0.64393487 |
| NA | ENSG00000287620 | 8.10386043 | 0.07025184  | 0.35894363 | 0.63024231 | 0.81297489 |
| NA | ENSG00000287621 | 0.4686253  | -0.00878113 | 0.38284474 | 0.85803056 | NA         |
| NA | ENSG00000287622 | 0          | NA          | NA         | NA         | NA         |
| NA | ENSG00000287623 | 0          | NA          | NA         | NA         | NA         |
| NA | ENSG00000287624 | 0          | NA          | NA         | NA         | NA         |
| NA | ENSG00000287625 | 14.4370108 | 0.00224972  | 0.32361396 | 0.99168637 | 0.99727164 |
| NA | ENSG00000287626 | 0          | NA          | NA         | NA         | NA         |
| NA | ENSG00000287627 | 0          | NA          | NA         | NA         | NA         |
| NA | ENSG00000287628 | 0          | NA          | NA         | NA         | NA         |
| NA | ENSG00000287629 | 12.0180737 | 0.21960379  | 0.40395122 | 0.22398539 | 0.43762114 |
| NA | ENSG00000287630 | 0.64232229 | 0.0044171   | 0.38138956 | 0.93087069 | NA         |
| NA | ENSG00000287631 | 0.16735865 | 0.01897177  | 0.38482933 | 0.78225479 | NA         |
| NA | ENSG00000287632 | 0          | NA          | NA         | NA         | NA         |
| NA | ENSG00000287633 | 0.48146784 | -0.0089095  | 0.38328466 | 0.84134016 | NA         |
| NA | ENSG00000287634 | 0.16735865 | 0.01897177  | 0.38482933 | 0.78225479 | NA         |
| NA | ENSG00000287635 | 0.31800295 | 0.00207007  | 0.38337646 | 0.95801104 | NA         |
| NA | ENSG00000287636 | 0          | NA          | NA         | NA         | NA         |
| NA | ENSG00000287637 | 0.47297415 | -0.02842076 | 0.38580675 | 0.54324361 | NA         |
| NA | ENSG00000287639 | 0          | NA          | NA         | NA         | NA         |

|           |                 |            |             |            |            |            |
|-----------|-----------------|------------|-------------|------------|------------|------------|
| NA        | ENSG00000287640 | 0          | NA          | NA         | NA         | NA         |
| NA        | ENSG00000287641 | 0          | NA          | NA         | NA         | NA         |
| 729870    | ENSG00000287642 | 0.3629592  | 0.0238948   | 0.38539241 | 0.60996425 | NA         |
| NA        | ENSG00000287643 | 1.31717585 | 0.00979642  | 0.37913231 | 0.88372286 | NA         |
| NA        | ENSG00000287644 | 1.67351601 | -0.0618428  | 0.38613707 | 0.36832097 | NA         |
| NA        | ENSG00000287645 | 0.14931947 | -0.01844332 | 0.38480212 | 0.84537521 | NA         |
| NA        | ENSG00000287646 | 1.58781402 | 0.07927943  | 0.38979166 | 0.28780041 | NA         |
| NA        | ENSG00000287647 | 0          | NA          | NA         | NA         | NA         |
| NA        | ENSG00000287649 | 0          | NA          | NA         | NA         | NA         |
| NA        | ENSG00000287650 | 1.31388259 | 0.03798369  | 0.3836085  | 0.50161849 | NA         |
| NA        | ENSG00000287651 | 0.34624801 | -0.02356563 | 0.38536324 | 0.65270996 | NA         |
| NA        | ENSG00000287652 | 0.16735865 | 0.01897177  | 0.38482933 | 0.78225479 | NA         |
| NA        | ENSG00000287653 | 0          | NA          | NA         | NA         | NA         |
| NA        | ENSG00000287654 | 1.38775517 | -0.07860417 | 0.39173461 | 0.21628768 | NA         |
| NA        | ENSG00000287655 | 2.45761374 | -0.04472137 | 0.37694384 | 0.62378695 | NA         |
| NA        | ENSG00000287656 | 0          | NA          | NA         | NA         | NA         |
| NA        | ENSG00000287657 | 0.14931947 | -0.01844332 | 0.38480212 | 0.84537521 | NA         |
| NA        | ENSG00000287658 | 0          | NA          | NA         | NA         | NA         |
| NA        | ENSG00000287659 | 0          | NA          | NA         | NA         | NA         |
| NA        | ENSG00000287660 | 0          | NA          | NA         | NA         | NA         |
| NA        | ENSG00000287661 | 0.95637525 | -0.01442336 | 0.3815352  | 0.78814707 | NA         |
| NA        | ENSG00000287662 | 0          | NA          | NA         | NA         | NA         |
| NA        | ENSG00000287663 | 0          | NA          | NA         | NA         | NA         |
| 102723851 | ENSG00000287664 | 0          | NA          | NA         | NA         | NA         |
| NA        | ENSG00000287665 | 0.98281023 | 0.00270368  | 0.38000783 | 0.96444496 | NA         |
| NA        | ENSG00000287666 | 0          | NA          | NA         | NA         | NA         |
| NA        | ENSG00000287667 | 0          | NA          | NA         | NA         | NA         |
| NA        | ENSG00000287668 | 0          | NA          | NA         | NA         | NA         |
| NA        | ENSG00000287669 | 0          | NA          | NA         | NA         | NA         |
| NA        | ENSG00000287670 | 2.77824034 | -0.01845422 | 0.37048806 | 0.85495604 | 0.93507872 |
| NA        | ENSG00000287671 | 1.72325675 | -0.08315933 | 0.39102785 | 0.25697057 | NA         |
| 112267986 | ENSG00000287672 | 19.864768  | -0.4021809  | 0.49250206 | 0.08424285 | 0.21965806 |
| NA        | ENSG00000287673 | 1.44273253 | -0.05407331 | 0.38426274 | 0.43474088 | NA         |
| NA        | ENSG00000287674 | 0          | NA          | NA         | NA         | NA         |
| NA        | ENSG00000287675 | 0          | NA          | NA         | NA         | NA         |
| NA        | ENSG00000287676 | 1.20568776 | 0.04339035  | 0.38336701 | 0.49154653 | NA         |
| NA        | ENSG00000287677 | 0          | NA          | NA         | NA         | NA         |
| NA        | ENSG00000287678 | 6.23108444 | 0.02844653  | 0.36058475 | 0.8282905  | 0.92220943 |

|           |                 |            |             |            |            |            |
|-----------|-----------------|------------|-------------|------------|------------|------------|
| NA        | ENSG00000287679 | 0          | NA          | NA         | NA         | NA         |
| NA        | ENSG00000287680 | 0          | NA          | NA         | NA         | NA         |
| NA        | ENSG00000287682 | 0          | NA          | NA         | NA         | NA         |
| NA        | ENSG00000287683 | 0          | NA          | NA         | NA         | NA         |
| NA        | ENSG00000287684 | 0          | NA          | NA         | NA         | NA         |
| NA        | ENSG00000287685 | 0          | NA          | NA         | NA         | NA         |
| 102724482 | ENSG00000287687 | 0.49467153 | -0.02945455 | 0.38589797 | 0.52638879 | NA         |
| NA        | ENSG00000287688 | 1.36783041 | 0.02514271  | 0.38027242 | 0.70410974 | NA         |
| NA        | ENSG00000287689 | 0          | NA          | NA         | NA         | NA         |
| NA        | ENSG00000287690 | 0.47457363 | -0.00889574 | 0.38283082 | 0.85137796 | NA         |
| NA        | ENSG00000287691 | 0          | NA          | NA         | NA         | NA         |
| NA        | ENSG00000287692 | 0.15069912 | -0.01848503 | 0.38480575 | 0.84537521 | NA         |
| NA        | ENSG00000287693 | 9.13926502 | -0.21417859 | 0.41735177 | 0.19621843 | 0.3999652  |
| NA        | ENSG00000287694 | 0          | NA          | NA         | NA         | NA         |
| NA        | ENSG00000287695 | 0.29863895 | -0.02292439 | 0.3852726  | 0.68753245 | NA         |
| NA        | ENSG00000287696 | 0          | NA          | NA         | NA         | NA         |
| NA        | ENSG00000287697 | 5.92186294 | 0.03876569  | 0.35860636 | 0.77649145 | 0.89723881 |
| NA        | ENSG00000287698 | 0          | NA          | NA         | NA         | NA         |
| NA        | ENSG00000287699 | 0          | NA          | NA         | NA         | NA         |
| NA        | ENSG00000287700 | 0          | NA          | NA         | NA         | NA         |
| NA        | ENSG00000287701 | 0          | NA          | NA         | NA         | NA         |
| NA        | ENSG00000287702 | 0          | NA          | NA         | NA         | NA         |
| NA        | ENSG00000287703 | 0          | NA          | NA         | NA         | NA         |
| NA        | ENSG00000287704 | 0          | NA          | NA         | NA         | NA         |
| NA        | ENSG00000287705 | 37.8104245 | -1.20786394 | 0.41628826 | 0.00029791 | 0.00203247 |
| NA        | ENSG00000287706 | 0.173733   | 0.01914545  | 0.38484597 | 0.78225479 | NA         |
| NA        | ENSG00000287707 | 20.1454735 | -0.23929971 | 0.37508917 | 0.23639017 | 0.45318204 |
| NA        | ENSG00000287708 | 2.28671739 | 0.04963476  | 0.38070109 | 0.54288206 | NA         |
| NA        | ENSG00000287709 | 0          | NA          | NA         | NA         | NA         |
| NA        | ENSG00000287710 | 8.38584208 | -0.23160059 | 0.42686502 | 0.17532232 | 0.36929556 |
| NA        | ENSG00000287712 | 3.30151605 | -0.06280339 | 0.37449464 | 0.56698802 | 0.76856463 |
| NA        | ENSG00000287713 | 0          | NA          | NA         | NA         | NA         |
| NA        | ENSG00000287714 | 0          | NA          | NA         | NA         | NA         |
| NA        | ENSG00000287715 | 5.29348586 | 0.19810064  | 0.43713009 | 0.11652424 | 0.27914042 |
| NA        | ENSG00000287717 | 0.29863895 | -0.02292439 | 0.3852726  | 0.68753245 | NA         |
| NA        | ENSG00000287718 | 0          | NA          | NA         | NA         | NA         |
| NA        | ENSG00000287719 | 0          | NA          | NA         | NA         | NA         |
| NA        | ENSG00000287720 | 1.71935304 | 0.06826027  | 0.38523292 | 0.39468037 | NA         |

|           |                 |            |             |            |            |            |
|-----------|-----------------|------------|-------------|------------|------------|------------|
| NA        | ENSG00000287721 | 7.9088804  | -0.11229525 | 0.36708484 | 0.46165579 | 0.68473119 |
| NA        | ENSG00000287722 | 0          | NA          | NA         | NA         | NA         |
| NA        | ENSG00000287723 | 0.32435025 | -0.02327722 | 0.38532198 | 0.66830576 | NA         |
| NA        | ENSG00000287724 | 0          | NA          | NA         | NA         | NA         |
| NA        | ENSG00000287725 | 51.1149593 | 0.99666389  | 0.34553    | 0.00041619 | 0.00274175 |
| NA        | ENSG00000287726 | 14.8340975 | -1.28966831 | 0.752029   | 0.00437539 | 0.02083719 |
| NA        | ENSG00000287727 | 3.91088205 | 0.07634094  | 0.37682519 | 0.50172636 | 0.71856283 |
| NA        | ENSG00000287728 | 0          | NA          | NA         | NA         | NA         |
| 105373174 | ENSG00000287729 | 8.63971392 | -0.01934924 | 0.34541026 | 0.89758136 | 0.95510937 |
| 105377503 | ENSG00000287730 | 5.19513928 | -0.13928411 | 0.3952298  | 0.27830295 | 0.50270347 |
| NA        | ENSG00000287731 | 7.45314782 | -0.15232286 | 0.40291602 | 0.23504063 | 0.45186105 |
| NA        | ENSG00000287732 | 0          | NA          | NA         | NA         | NA         |
| NA        | ENSG00000287733 | 14.688467  | -0.05764794 | 0.33049512 | 0.73908426 | 0.87678975 |
| 105370340 | ENSG00000287734 | 0          | NA          | NA         | NA         | NA         |
| NA        | ENSG00000287735 | 16.6099373 | -0.15553096 | 0.34769455 | 0.40484657 | 0.6332011  |
| 100302522 | ENSG00000287736 | 0.37844916 | 0.02407552  | 0.3854191  | 0.60038877 | NA         |
| NA        | ENSG00000287737 | 39.8483492 | 0.08581163  | 0.27825518 | 0.66142954 | 0.8324506  |
| NA        | ENSG00000287738 | 0          | NA          | NA         | NA         | NA         |
| NA        | ENSG00000287739 | 0.18922458 | 0.01954053  | 0.38488496 | 0.78225479 | NA         |
| NA        | ENSG00000287740 | 0          | NA          | NA         | NA         | NA         |
| NA        | ENSG00000287741 | 0          | NA          | NA         | NA         | NA         |
| NA        | ENSG00000287742 | 1.18938041 | 0.01460834  | 0.37985013 | 0.81935323 | NA         |
| NA        | ENSG00000287743 | 2.43483398 | -0.02906042 | 0.37444566 | 0.75308019 | NA         |
| NA        | ENSG00000287744 | 0          | NA          | NA         | NA         | NA         |
| NA        | ENSG00000287745 | 0          | NA          | NA         | NA         | NA         |
| NA        | ENSG00000287746 | 0.37844916 | 0.02407552  | 0.3854191  | 0.60038877 | NA         |
| NA        | ENSG00000287747 | 0.173733   | 0.01914545  | 0.38484597 | 0.78225479 | NA         |
| NA        | ENSG00000287748 | 0          | NA          | NA         | NA         | NA         |
| NA        | ENSG00000287749 | 0          | NA          | NA         | NA         | NA         |
| NA        | ENSG00000287750 | 2.92132282 | -0.01011889 | 0.37161443 | 0.91572789 | 0.96423105 |
| NA        | ENSG00000287751 | 2.2371623  | 0.02382108  | 0.3755746  | 0.78446418 | NA         |
| NA        | ENSG00000287752 | 0          | NA          | NA         | NA         | NA         |
| NA        | ENSG00000287754 | 0.173733   | 0.01914545  | 0.38484597 | 0.78225479 | NA         |
| NA        | ENSG00000287755 | 0.34746601 | 0.02370763  | 0.3853651  | 0.61987128 | NA         |
| NA        | ENSG00000287756 | 0          | NA          | NA         | NA         | NA         |
| NA        | ENSG00000287757 | 2.49736985 | 0.03079573  | 0.37284393 | 0.75671977 | NA         |
| NA        | ENSG00000287758 | 0          | NA          | NA         | NA         | NA         |
| NA        | ENSG00000287759 | 5.38583847 | 0.12913132  | 0.38668509 | 0.33986976 | 0.57023391 |

|           |                 |            |             |            |            |            |
|-----------|-----------------|------------|-------------|------------|------------|------------|
| NA        | ENSG00000287760 | 7.91464248 | -0.05560449 | 0.3578664  | 0.6927297  | 0.8515339  |
| NA        | ENSG00000287761 | 0          | NA          | NA         | NA         | NA         |
| NA        | ENSG00000287762 | 3.44952104 | -0.0440376  | 0.36999554 | 0.69309749 | 0.8516694  |
| NA        | ENSG00000287763 | 16.5824798 | 0.09222569  | 0.32901032 | 0.61329578 | 0.80098666 |
| NA        | ENSG00000287765 | 0.60279648 | -0.02752712 | 0.38588313 | 0.49730371 | NA         |
| NA        | ENSG00000287766 | 6.85554655 | 0.11749634  | 0.3721411  | 0.43241643 | 0.65788827 |
| NA        | ENSG00000287767 | 0          | NA          | NA         | NA         | NA         |
| NA        | ENSG00000287768 | 0          | NA          | NA         | NA         | NA         |
| NA        | ENSG00000287769 | 54.7472372 | 0.23007701  | 0.26990755 | 0.25499602 | 0.47574957 |
| NA        | ENSG00000287770 | 0          | NA          | NA         | NA         | NA         |
| NA        | ENSG00000287771 | 0          | NA          | NA         | NA         | NA         |
| NA        | ENSG00000287772 | 0          | NA          | NA         | NA         | NA         |
| NA        | ENSG00000287773 | 0.34048877 | -0.00026283 | 0.38336243 | 0.96774397 | NA         |
| NA        | ENSG00000287774 | 0          | NA          | NA         | NA         | NA         |
| NA        | ENSG00000287775 | 0          | NA          | NA         | NA         | NA         |
| 101928359 | ENSG00000287776 | 0.69493202 | 0.03154416  | 0.38626309 | 0.41391645 | NA         |
| NA        | ENSG00000287777 | 0          | NA          | NA         | NA         | NA         |
| NA        | ENSG00000287778 | 0.44795842 | -0.02501848 | 0.38558245 | 0.5807882  | NA         |
| NA        | ENSG00000287779 | 0          | NA          | NA         | NA         | NA         |
| NA        | ENSG00000287780 | 0.60003139 | -0.03562257 | 0.38653686 | 0.43872573 | NA         |
| NA        | ENSG00000287781 | 0          | NA          | NA         | NA         | NA         |
| NA        | ENSG00000287782 | 1.27915462 | 0.07088135  | 0.39316303 | 0.13507999 | NA         |
| NA        | ENSG00000287783 | 1.69441396 | -0.08000106 | 0.38889503 | 0.31346596 | NA         |
| NA        | ENSG00000287784 | 0.79747063 | -0.05676769 | 0.38955197 | 0.26929783 | NA         |
| NA        | ENSG00000287785 | 0          | NA          | NA         | NA         | NA         |
| NA        | ENSG00000287786 | 0.16735865 | 0.01897177  | 0.38482933 | 0.78225479 | NA         |
| NA        | ENSG00000287787 | 11.4485315 | -0.20861336 | 0.40065397 | 0.23537638 | 0.45219979 |
| NA        | ENSG00000287788 | 0          | NA          | NA         | NA         | NA         |
| NA        | ENSG00000287789 | 0.16735865 | 0.01897177  | 0.38482933 | 0.78225479 | NA         |
| NA        | ENSG00000287790 | 0          | NA          | NA         | NA         | NA         |
| NA        | ENSG00000287791 | 0          | NA          | NA         | NA         | NA         |
| NA        | ENSG00000287792 | 3.9543925  | -0.24293521 | 0.48401714 | 0.04641761 | 0.14061674 |
| NA        | ENSG00000287793 | 0          | NA          | NA         | NA         | NA         |
| NA        | ENSG00000287794 | 0          | NA          | NA         | NA         | NA         |
| NA        | ENSG00000287795 | 0.53368853 | 0.01340264  | 0.38343265 | 0.7463963  | NA         |
| NA        | ENSG00000287796 | 0          | NA          | NA         | NA         | NA         |
| NA        | ENSG00000287797 | 0          | NA          | NA         | NA         | NA         |
| NA        | ENSG00000287798 | 0.76967324 | -0.05423102 | 0.38910258 | 0.28616281 | NA         |

|           |                 |            |             |            |            |            |
|-----------|-----------------|------------|-------------|------------|------------|------------|
| NA        | ENSG00000287799 | 0.51585562 | 0.03114837  | 0.38605604 | 0.47741718 | NA         |
| NA        | ENSG00000287800 | 0          | NA          | NA         | NA         | NA         |
| NA        | ENSG00000287801 | 0.173124   | -0.01911262 | 0.38486262 | 0.84537521 | NA         |
| NA        | ENSG00000287802 | 0          | NA          | NA         | NA         | NA         |
| 105372045 | ENSG00000287803 | 0          | NA          | NA         | NA         | NA         |
| NA        | ENSG00000287804 | 0.33471731 | 0.02354391  | 0.38534154 | 0.62842204 | NA         |
| NA        | ENSG00000287805 | 0          | NA          | NA         | NA         | NA         |
| NA        | ENSG00000287806 | 0          | NA          | NA         | NA         | NA         |
| NA        | ENSG00000287807 | 0.45209736 | -0.02505403 | 0.38558831 | 0.57865948 | NA         |
| NA        | ENSG00000287808 | 15.9221175 | 0.05460331  | 0.3243193  | 0.76156435 | 0.88972737 |
| NA        | ENSG00000287809 | 5.86364118 | -0.08594918 | 0.37053533 | 0.51575394 | 0.73002247 |
| NA        | ENSG00000287810 | 0          | NA          | NA         | NA         | NA         |
| NA        | ENSG00000287811 | 12.2289519 | 0.00504616  | 0.33302508 | 0.97791171 | 0.99249544 |
| NA        | ENSG00000287812 | 0          | NA          | NA         | NA         | NA         |
| NA        | ENSG00000287813 | 0.72579929 | 0.02635104  | 0.38349217 | 0.56165757 | NA         |
| NA        | ENSG00000287814 | 0          | NA          | NA         | NA         | NA         |
| 107986742 | ENSG00000287815 | 0.67094579 | 0.0208231   | 0.38371794 | 0.62740958 | NA         |
| NA        | ENSG00000287816 | 0.82180424 | 0.01534523  | 0.38187413 | 0.76628267 | NA         |
| NA        | ENSG00000287817 | 10.7684764 | -0.00243394 | 0.33955383 | 0.98575665 | 0.99508557 |
| NA        | ENSG00000287818 | 0          | NA          | NA         | NA         | NA         |
| NA        | ENSG00000287819 | 0          | NA          | NA         | NA         | NA         |
| NA        | ENSG00000287820 | 0          | NA          | NA         | NA         | NA         |
| NA        | ENSG00000287821 | 0          | NA          | NA         | NA         | NA         |
| NA        | ENSG00000287822 | 0          | NA          | NA         | NA         | NA         |
| NA        | ENSG00000287823 | 36.0492377 | 0.06954549  | 0.27661991 | 0.72161082 | 0.86710427 |
| NA        | ENSG00000287824 | 0.16735865 | 0.01897177  | 0.38482933 | 0.78225479 | NA         |
| NA        | ENSG00000287825 | 16.4993664 | -0.02858622 | 0.32060993 | 0.87073422 | 0.94350971 |
| NA        | ENSG00000287826 | 0          | NA          | NA         | NA         | NA         |
| NA        | ENSG00000287827 | 0.15069912 | -0.01848503 | 0.38480575 | 0.84537521 | NA         |
| NA        | ENSG00000287828 | 0          | NA          | NA         | NA         | NA         |
| NA        | ENSG00000287829 | 1.19982456 | 0.01103254  | 0.3804794  | 0.85228292 | NA         |
| NA        | ENSG00000287830 | 0          | NA          | NA         | NA         | NA         |
| NA        | ENSG00000287831 | 0          | NA          | NA         | NA         | NA         |
| NA        | ENSG00000287832 | 0          | NA          | NA         | NA         | NA         |
| NA        | ENSG00000287833 | 0.18922458 | 0.01954053  | 0.38488496 | 0.78225479 | NA         |
| NA        | ENSG00000287834 | 0.16735865 | 0.01897177  | 0.38482933 | 0.78225479 | NA         |
| NA        | ENSG00000287835 | 0          | NA          | NA         | NA         | NA         |
| NA        | ENSG00000287836 | 8.57022953 | 0.09447298  | 0.35673206 | 0.5510514  | 0.75754294 |



|           |                 |            |             |            |            |            |
|-----------|-----------------|------------|-------------|------------|------------|------------|
| NA        | ENSG00000287837 | 86.1927706 | 0.33573544  | 0.26440203 | 0.10158855 | 0.2522865  |
| 101927042 | ENSG00000287838 | 0.84346184 | 0.03686889  | 0.38467262 | 0.46092622 | NA         |
| NA        | ENSG00000287839 | 3.71296532 | 0.04127906  | 0.36959502 | 0.7145013  | 0.86242659 |
| NA        | ENSG00000287840 | 0          | NA          | NA         | NA         | NA         |
| NA        | ENSG00000287841 | 0          | NA          | NA         | NA         | NA         |
| NA        | ENSG00000287842 | 0.16735865 | 0.01897177  | 0.38482933 | 0.78225479 | NA         |
| NA        | ENSG00000287843 | 2.45429742 | -0.0604727  | 0.3807432  | 0.49618501 | NA         |
| NA        | ENSG00000287844 | 0          | NA          | NA         | NA         | NA         |
| NA        | ENSG00000287845 | 1.72867794 | 0.02644642  | 0.37918405 | 0.71511956 | NA         |
| NA        | ENSG00000287846 | 0          | NA          | NA         | NA         | NA         |
| NA        | ENSG00000287847 | 0          | NA          | NA         | NA         | NA         |
| NA        | ENSG00000287848 | 0          | NA          | NA         | NA         | NA         |
| NA        | ENSG00000287849 | 0          | NA          | NA         | NA         | NA         |
| NA        | ENSG00000287850 | 0          | NA          | NA         | NA         | NA         |
| NA        | ENSG00000287851 | 0          | NA          | NA         | NA         | NA         |
| NA        | ENSG00000287852 | 0          | NA          | NA         | NA         | NA         |
| NA        | ENSG00000287853 | 32.3736625 | 0.08856423  | 0.28757635 | 0.65033635 | 0.82529572 |
| NA        | ENSG00000287854 | 0          | NA          | NA         | NA         | NA         |
| NA        | ENSG00000287855 | 2.93076177 | 0.01430693  | 0.37039821 | 0.89046088 | 0.95232275 |
| NA        | ENSG00000287856 | 3.8244224  | 0.35995464  | 0.69029444 | 0.00101068 | 0.00596003 |
| NA        | ENSG00000287857 | 1.35166901 | 0.01125905  | 0.37809282 | 0.87651762 | NA         |
| NA        | ENSG00000287858 | 0          | NA          | NA         | NA         | NA         |
| NA        | ENSG00000287859 | 0.49354374 | 0.01280602  | 0.3829857  | 0.77385479 | NA         |
| NA        | ENSG00000287860 | 0          | NA          | NA         | NA         | NA         |
| NA        | ENSG00000287861 | 0          | NA          | NA         | NA         | NA         |
| NA        | ENSG00000287862 | 0.83697927 | -0.036404   | 0.38459084 | 0.48210076 | NA         |
| NA        | ENSG00000287863 | 0          | NA          | NA         | NA         | NA         |
| NA        | ENSG00000287864 | 0          | NA          | NA         | NA         | NA         |
| NA        | ENSG00000287865 | 0          | NA          | NA         | NA         | NA         |
| NA        | ENSG00000287866 | 0.49841598 | 0.01148121  | 0.38338205 | 0.78004852 | NA         |
| NA        | ENSG00000287867 | 0          | NA          | NA         | NA         | NA         |
| NA        | ENSG00000287868 | 0.60003385 | -0.03562268 | 0.38653687 | 0.4387243  | NA         |
| NA        | ENSG00000287869 | 0.96383085 | -0.02457552 | 0.38058365 | 0.70272939 | NA         |
| NA        | ENSG00000287870 | 2.84012507 | 0.17190809  | 0.43291531 | 0.06402536 | 0.17979744 |
| NA        | ENSG00000287871 | 0          | NA          | NA         | NA         | NA         |
| NA        | ENSG00000287872 | 17.4514145 | -0.07600199 | 0.3319228  | 0.66509849 | 0.8346334  |
| NA        | ENSG00000287873 | 0          | NA          | NA         | NA         | NA         |
| NA        | ENSG00000287875 | 0          | NA          | NA         | NA         | NA         |

|           |                 |            |             |            |            |            |         |
|-----------|-----------------|------------|-------------|------------|------------|------------|---------|
| NA        | ENSG00000287876 | 0          | NA          | NA         | NA         | NA         |         |
| NA        | ENSG00000287877 | 0          | NA          | NA         | NA         | NA         |         |
| NA        | ENSG00000287878 | 19.8363739 | -0.07768149 | 0.31983319 | 0.67181431 | 0.83832583 |         |
| NA        | ENSG00000287879 | 5.27528199 | 0.19189469  | 0.42520857 | 0.15998294 | 0.3476138  |         |
| NA        | ENSG00000287880 | 0          | NA          | NA         | NA         | NA         |         |
| NA        | ENSG00000287881 | 0          | NA          | NA         | NA         | NA         |         |
| NA        | ENSG00000287882 | 0.173733   | 0.01914545  | 0.38484597 | 0.78225479 | NA         |         |
| NA        | ENSG00000287883 | 0          | NA          | NA         | NA         | NA         |         |
| NA        | ENSG00000287884 | 1.09706966 | -0.02569648 | 0.38192734 | 0.65373155 | NA         |         |
| 105371272 | ENSG00000287885 | 0          | NA          | NA         | NA         | NA         |         |
| NA        | ENSG00000287886 | 0          | NA          | NA         | NA         | NA         |         |
| NA        | ENSG00000287887 | 0          | NA          | NA         | NA         | NA         |         |
| NA        | ENSG00000287888 | 0          | NA          | NA         | NA         | NA         |         |
| 105379478 | ENSG00000287889 | 0.29863895 | -0.02292439 | 0.3852726  | 0.68753245 | NA         | FAM242B |
| NA        | ENSG00000287891 | 0          | NA          | NA         | NA         | NA         |         |
| NA        | ENSG00000287892 | 2.60558162 | 0.04889668  | 0.37609843 | 0.61438552 | 0.80188203 |         |
| NA        | ENSG00000287893 | 0          | NA          | NA         | NA         | NA         |         |
| NA        | ENSG00000287894 | 2.89974789 | 0.08729326  | 0.38306597 | 0.41050178 | 0.63818422 |         |
| NA        | ENSG00000287895 | 3.32708198 | 0.06664946  | 0.37700538 | 0.53161001 | 0.74286115 |         |
| NA        | ENSG00000287896 | 11.0386513 | -0.06230485 | 0.34497441 | 0.69748467 | 0.85389371 |         |
| NA        | ENSG00000287897 | 0          | NA          | NA         | NA         | NA         |         |
| NA        | ENSG00000287898 | 1.15196696 | -0.00673664 | 0.37777312 | 0.92607535 | NA         |         |
| NA        | ENSG00000287899 | 0          | NA          | NA         | NA         | NA         |         |
| NA        | ENSG00000287900 | 6.48007289 | -0.35187218 | 0.61750661 | 0.01997707 | 0.07288434 |         |
| NA        | ENSG00000287901 | 0          | NA          | NA         | NA         | NA         |         |
| NA        | ENSG00000287902 | 0          | NA          | NA         | NA         | NA         |         |
| NA        | ENSG00000287903 | 0          | NA          | NA         | NA         | NA         |         |
| NA        | ENSG00000287904 | 0          | NA          | NA         | NA         | NA         |         |
| NA        | ENSG00000287905 | 0          | NA          | NA         | NA         | NA         |         |
| NA        | ENSG00000287906 | 0          | NA          | NA         | NA         | NA         |         |
| NA        | ENSG00000287907 | 0          | NA          | NA         | NA         | NA         |         |
| NA        | ENSG00000287908 | 90.1543751 | 0.43349032  | 0.25853343 | 0.03546513 | 0.11446692 |         |
| NA        | ENSG00000287909 | 0          | NA          | NA         | NA         | NA         |         |
| NA        | ENSG00000287910 | 9.24461723 | 0.06281092  | 0.34812383 | 0.69220521 | 0.85116657 |         |
| NA        | ENSG00000287912 | 0          | NA          | NA         | NA         | NA         |         |
| NA        | ENSG00000287913 | 1.40358258 | 0.02106454  | 0.3808631  | 0.72894553 | NA         |         |
| NA        | ENSG00000287914 | 0          | NA          | NA         | NA         | NA         |         |
| NA        | ENSG00000287915 | 0          | NA          | NA         | NA         | NA         |         |

|           |                 |            |             |            |            |            |
|-----------|-----------------|------------|-------------|------------|------------|------------|
| NA        | ENSG00000287916 | 1.84991999 | -0.02403728 | 0.37831144 | 0.74787186 | NA         |
| NA        | ENSG00000287917 | 9.21873595 | 0.40340335  | 0.63282853 | 0.04329872 | 0.13328883 |
| 107985693 | ENSG00000287918 | 8.83730605 | 0.245731    | 0.44092761 | 0.15379631 | 0.33890581 |
| NA        | ENSG00000287919 | 0.33471731 | 0.02354391  | 0.38534154 | 0.62842204 | NA         |
| NA        | ENSG00000287920 | 1.32736555 | 0.00976309  | 0.37697897 | 0.89982968 | NA         |
| NA        | ENSG00000287921 | 2.25860577 | -0.05520292 | 0.38055866 | 0.51869659 | NA         |
| NA        | ENSG00000287922 | 1.18738166 | 0.02563718  | 0.37888244 | 0.72681807 | NA         |
| NA        | ENSG00000287923 | 0          | NA          | NA         | NA         | NA         |
| NA        | ENSG00000287924 | 0          | NA          | NA         | NA         | NA         |
| 101928701 | ENSG00000287925 | 0.50207596 | 0.02562368  | 0.38565771 | 0.52549886 | NA         |
| NA        | ENSG00000287926 | 0          | NA          | NA         | NA         | NA         |
| 107986954 | ENSG00000287927 | 0          | NA          | NA         | NA         | NA         |
| NA        | ENSG00000287928 | 0          | NA          | NA         | NA         | NA         |
| NA        | ENSG00000287929 | 3.06444207 | -0.17234658 | 0.43232321 | 0.07138682 | 0.19425517 |
| NA        | ENSG00000287930 | 0.16735865 | 0.01897177  | 0.38482933 | 0.78225479 | NA         |
| NA        | ENSG00000287931 | 0          | NA          | NA         | NA         | NA         |
| NA        | ENSG00000287932 | 2.99146277 | 0.01526773  | 0.37192929 | 0.87717575 | 0.94574195 |
| NA        | ENSG00000287933 | 0          | NA          | NA         | NA         | NA         |
| NA        | ENSG00000287934 | 13.9189106 | 0.22707762  | 0.38527565 | 0.24420779 | 0.46275861 |
| NA        | ENSG00000287935 | 8.83579877 | -0.04417958 | 0.34894543 | 0.77001172 | 0.89438748 |
| NA        | ENSG00000287936 | 3.00860046 | 0.01845499  | 0.37068475 | 0.85799284 | 0.936593   |
| NA        | ENSG00000287937 | 0.173733   | 0.01914545  | 0.38484597 | 0.78225479 | NA         |
| NA        | ENSG00000287938 | 0          | NA          | NA         | NA         | NA         |
| NA        | ENSG00000287939 | 0          | NA          | NA         | NA         | NA         |
| NA        | ENSG00000287940 | 0          | NA          | NA         | NA         | NA         |
| NA        | ENSG00000287941 | 0          | NA          | NA         | NA         | NA         |
| NA        | ENSG00000287942 | 0          | NA          | NA         | NA         | NA         |
| NA        | ENSG00000287943 | 0          | NA          | NA         | NA         | NA         |
| NA        | ENSG00000287944 | 0.16735865 | 0.01897177  | 0.38482933 | 0.78225479 | NA         |
| NA        | ENSG00000287945 | 0          | NA          | NA         | NA         | NA         |
| NA        | ENSG00000287946 | 0          | NA          | NA         | NA         | NA         |
| NA        | ENSG00000287947 | 0          | NA          | NA         | NA         | NA         |
| NA        | ENSG00000287948 | 0          | NA          | NA         | NA         | NA         |
| NA        | ENSG00000287949 | 1.74925639 | 0.03720272  | 0.38065701 | 0.60584933 | NA         |
| NA        | ENSG00000287950 | 0.18922458 | 0.01954053  | 0.38488496 | 0.78225479 | NA         |
| NA        | ENSG00000287951 | 0          | NA          | NA         | NA         | NA         |
| NA        | ENSG00000287952 | 0.68784205 | 0.02668661  | 0.38365797 | 0.57651621 | NA         |
| NA        | ENSG00000287953 | 0          | NA          | NA         | NA         | NA         |

|           |                 |            |             |            |            |            |
|-----------|-----------------|------------|-------------|------------|------------|------------|
| NA        | ENSG00000287954 | 0          | NA          | NA         | NA         | NA         |
| NA        | ENSG00000287955 | 0.15069912 | -0.01848503 | 0.38480575 | 0.84537521 | NA         |
| NA        | ENSG00000287956 | 0          | NA          | NA         | NA         | NA         |
| NA        | ENSG00000287957 | 28.6149639 | -0.31300532 | 0.3664988  | 0.15792629 | 0.34494256 |
| NA        | ENSG00000287958 | 0          | NA          | NA         | NA         | NA         |
| NA        | ENSG00000287959 | 0.32459987 | 0.00146864  | 0.38336925 | 0.96624594 | NA         |
| 105372268 | ENSG00000287960 | 1.05188022 | 0.0046835   | 0.37992989 | 0.93887772 | NA         |
| NA        | ENSG00000287961 | 0.37844916 | 0.02407552  | 0.3854191  | 0.60038877 | NA         |
| NA        | ENSG00000287962 | 0          | NA          | NA         | NA         | NA         |
| NA        | ENSG00000287963 | 0          | NA          | NA         | NA         | NA         |
| NA        | ENSG00000287964 | 0          | NA          | NA         | NA         | NA         |
| NA        | ENSG00000287965 | 1.06518785 | 0.0594317   | 0.3876906  | 0.30384132 | NA         |
| NA        | ENSG00000287966 | 20.0398036 | -0.01670211 | 0.31381625 | 0.92437198 | 0.96852    |
| NA        | ENSG00000287967 | 2.36981147 | -0.01747701 | 0.375016   | 0.83873842 | NA         |
| NA        | ENSG00000287968 | 0          | NA          | NA         | NA         | NA         |
| NA        | ENSG00000287969 | 1.2569777  | -0.04004106 | 0.38258868 | 0.53439041 | NA         |
| NA        | ENSG00000287970 | 0.56767373 | 0.02627943  | 0.38574813 | 0.49686938 | NA         |
| NA        | ENSG00000287971 | 0.173733   | 0.01914545  | 0.38484597 | 0.78225479 | NA         |
| NA        | ENSG00000287972 | 0          | NA          | NA         | NA         | NA         |
| NA        | ENSG00000287973 | 0          | NA          | NA         | NA         | NA         |
| NA        | ENSG00000287974 | 0          | NA          | NA         | NA         | NA         |
| NA        | ENSG00000287975 | 0.30139824 | -0.02296476 | 0.38527817 | 0.68536535 | NA         |
| NA        | ENSG00000287976 | 0          | NA          | NA         | NA         | NA         |
| NA        | ENSG00000287977 | 0          | NA          | NA         | NA         | NA         |
| 100996756 | ENSG00000287978 | 26.392324  | 0.07410138  | 0.29690003 | 0.70162216 | 0.85636319 |
| NA        | ENSG00000287979 | 1.26503409 | -0.07336534 | 0.39035182 | 0.24684899 | NA         |
| NA        | ENSG00000287980 | 0          | NA          | NA         | NA         | NA         |
| NA        | ENSG00000287981 | 0          | NA          | NA         | NA         | NA         |
| NA        | ENSG00000287982 | 0          | NA          | NA         | NA         | NA         |
| NA        | ENSG00000287983 | 0          | NA          | NA         | NA         | NA         |
| 105376650 | ENSG00000287984 | 0          | NA          | NA         | NA         | NA         |
| NA        | ENSG00000287985 | 2.96310391 | 0.0750714   | 0.38088429 | 0.45832237 | 0.68173128 |
| NA        | ENSG00000287986 | 0          | NA          | NA         | NA         | NA         |
| NA        | ENSG00000287987 | 0          | NA          | NA         | NA         | NA         |
| NA        | ENSG00000287988 | 0.173124   | -0.01911262 | 0.38486262 | 0.84537521 | NA         |
| NA        | ENSG00000287989 | 0          | NA          | NA         | NA         | NA         |
| NA        | ENSG00000287990 | 0.15069912 | -0.01848503 | 0.38480575 | 0.84537521 | NA         |
| NA        | ENSG00000287991 | 0          | NA          | NA         | NA         | NA         |

|           |                 |            |             |            |            |            |
|-----------|-----------------|------------|-------------|------------|------------|------------|
| NA        | ENSG00000287992 | 0          | NA          | NA         | NA         | NA         |
| NA        | ENSG00000287993 | 0          | NA          | NA         | NA         | NA         |
| NA        | ENSG00000287994 | 0          | NA          | NA         | NA         | NA         |
| NA        | ENSG00000287995 | 0          | NA          | NA         | NA         | NA         |
| NA        | ENSG00000287996 | 0          | NA          | NA         | NA         | NA         |
| NA        | ENSG00000287997 | 0.70251025 | 0.00112653  | 0.38181126 | 0.98003478 | NA         |
| NA        | ENSG00000287998 | 0.34079289 | 0.00311307  | 0.38339374 | 0.95872571 | NA         |
| NA        | ENSG00000287999 | 0.6344316  | -0.01466707 | 0.38322023 | 0.71918516 | NA         |
| NA        | ENSG00000288000 | 0.69249601 | -0.03077728 | 0.38619256 | 0.44510896 | NA         |
| NA        | ENSG00000288001 | 0          | NA          | NA         | NA         | NA         |
| NA        | ENSG00000288002 | 0          | NA          | NA         | NA         | NA         |
| NA        | ENSG00000288003 | 0          | NA          | NA         | NA         | NA         |
| NA        | ENSG00000288004 | 0          | NA          | NA         | NA         | NA         |
| NA        | ENSG00000288005 | 0          | NA          | NA         | NA         | NA         |
| NA        | ENSG00000288006 | 0          | NA          | NA         | NA         | NA         |
| NA        | ENSG00000288007 | 0.33846081 | 0.00214826  | 0.38337698 | 0.96794605 | NA         |
| NA        | ENSG00000288008 | 0          | NA          | NA         | NA         | NA         |
| 101929004 | ENSG00000288009 | 8.24108961 | 0.10672545  | 0.36852551 | 0.47188204 | 0.69421175 |
| NA        | ENSG00000288010 | 0.32448402 | 0.00137575  | 0.38336839 | 0.96713373 | NA         |
| 283045    | ENSG00000288011 | 2.12543912 | -0.10199038 | 0.39771671 | 0.18730111 | NA         |
| NA        | ENSG00000288012 | 23.1396081 | 0.43180522  | 0.45275585 | 0.07888858 | 0.20935653 |
| NA        | ENSG00000288013 | 0          | NA          | NA         | NA         | NA         |
| NA        | ENSG00000288014 | 0          | NA          | NA         | NA         | NA         |
| 105370224 | ENSG00000288015 | 0.6211681  | -0.0449786  | 0.38755447 | 0.3751414  | NA         |
| NA        | ENSG00000288016 | 0          | NA          | NA         | NA         | NA         |
| NA        | ENSG00000288017 | 0          | NA          | NA         | NA         | NA         |
| NA        | ENSG00000288018 | 1.22002958 | 0.08546955  | 0.39689241 | 0.10921912 | NA         |
| NA        | ENSG00000288019 | 0          | NA          | NA         | NA         | NA         |
| NA        | ENSG00000288020 | 0.44795842 | -0.02501848 | 0.38558245 | 0.5807882  | NA         |
| NA        | ENSG00000288021 | 9.24061745 | -0.14085925 | 0.37744805 | 0.36687582 | 0.59618256 |
| NA        | ENSG00000288022 | 0          | NA          | NA         | NA         | NA         |
| NA        | ENSG00000288023 | 0          | NA          | NA         | NA         | NA         |
| NA        | ENSG00000288024 | 0          | NA          | NA         | NA         | NA         |
| NA        | ENSG00000288025 | 5.46786627 | 0.40617892  | 0.68877743 | 0.02667639 | 0.09159412 |
| NA        | ENSG00000288026 | 0          | NA          | NA         | NA         | NA         |
| NA        | ENSG00000288028 | 0          | NA          | NA         | NA         | NA         |
| NA        | ENSG00000288029 | 0          | NA          | NA         | NA         | NA         |
| NA        | ENSG00000288030 | 0          | NA          | NA         | NA         | NA         |

|           |                 |            |             |            |            |            |
|-----------|-----------------|------------|-------------|------------|------------|------------|
| NA        | ENSG00000288031 | 3.60010025 | 0.0617972   | 0.37641301 | 0.5553748  | 0.76129842 |
| NA        | ENSG00000288032 | 0.55182218 | 0.0328901   | 0.38623373 | 0.45211583 | NA         |
| NA        | ENSG00000288033 | 1.50895707 | 0.02285736  | 0.37689267 | 0.7786331  | NA         |
| NA        | ENSG00000288034 | 0          | NA          | NA         | NA         | NA         |
| NA        | ENSG00000288035 | 5.82064428 | -0.10756818 | 0.37443748 | 0.43940926 | 0.66472587 |
| NA        | ENSG00000288036 | 0          | NA          | NA         | NA         | NA         |
| NA        | ENSG00000288037 | 0.4870685  | 0.01131508  | 0.38340208 | 0.78579198 | NA         |
| NA        | ENSG00000288038 | 0          | NA          | NA         | NA         | NA         |
| NA        | ENSG00000288039 | 0.16735865 | 0.01897177  | 0.38482933 | 0.78225479 | NA         |
| NA        | ENSG00000288040 | 0          | NA          | NA         | NA         | NA         |
| NA        | ENSG00000288041 | 0          | NA          | NA         | NA         | NA         |
| NA        | ENSG00000288042 | 0          | NA          | NA         | NA         | NA         |
| NA        | ENSG00000288043 | 0          | NA          | NA         | NA         | NA         |
| NA        | ENSG00000288044 | 23.5051383 | 0.3750264   | 0.40610276 | 0.10899928 | 0.26527794 |
| NA        | ENSG00000288045 | 9.09716989 | -0.0246558  | 0.34687264 | 0.86901067 | 0.94281029 |
| NA        | ENSG00000288046 | 0          | NA          | NA         | NA         | NA         |
| NA        | ENSG00000288047 | 0          | NA          | NA         | NA         | NA         |
| NA        | ENSG00000288048 | 2.29842101 | -0.05127088 | 0.38146623 | 0.51594659 | NA         |
| 105377224 | ENSG00000288049 | 0          | NA          | NA         | NA         | NA         |
| NA        | ENSG00000288050 | 2.65166202 | 0.1305819   | 0.40615111 | 0.16100794 | 0.34903818 |
| NA        | ENSG00000288051 | 0          | NA          | NA         | NA         | NA         |
| NA        | ENSG00000288052 | 0          | NA          | NA         | NA         | NA         |
| NA        | ENSG00000288053 | 0          | NA          | NA         | NA         | NA         |
| NA        | ENSG00000288054 | 0          | NA          | NA         | NA         | NA         |
| NA        | ENSG00000288055 | 0.52225033 | 0.01066263  | 0.3832554  | 0.77334613 | NA         |
| NA        | ENSG00000288056 | 8.45562689 | 0.02589642  | 0.3495282  | 0.86345215 | 0.93955414 |
| NA        | ENSG00000288057 | 0          | NA          | NA         | NA         | NA         |
| NA        | ENSG00000288059 | 0.34043931 | -1.91E-05   | 0.38336211 | 0.96543398 | NA         |
| NA        | ENSG00000288060 | 0          | NA          | NA         | NA         | NA         |
| NA        | ENSG00000288061 | 0.84891326 | 0.01880729  | 0.38136832 | 0.73927142 | NA         |
| 101929748 | ENSG00000288062 | 0.32248581 | -0.02325418 | 0.38531869 | 0.66960999 | NA         |
| NA        | ENSG00000288063 | 2.75737297 | 0.00619391  | 0.37286586 | 0.94847299 | 0.97876335 |
| NA        | ENSG00000288064 | 0          | NA          | NA         | NA         | NA         |
| NA        | ENSG00000288065 | 15.236156  | -0.14612814 | 0.35410707 | 0.4154693  | 0.64244323 |
| NA        | ENSG00000288066 | 141.126305 | 0.21883523  | 0.19942814 | 0.20061223 | 0.40580613 |
| NA        | ENSG00000288067 | 1.17756742 | -0.00788849 | 0.37859147 | 0.90849347 | NA         |
| NA        | ENSG00000288068 | 0          | NA          | NA         | NA         | NA         |
| NA        | ENSG00000288069 | 0          | NA          | NA         | NA         | NA         |

|           |                 |            |             |            |            |            |
|-----------|-----------------|------------|-------------|------------|------------|------------|
| NA        | ENSG00000288070 | 1.3726424  | -0.09411864 | 0.39959527 | 0.09336401 | NA         |
| NA        | ENSG00000288071 | 0          | NA          | NA         | NA         | NA         |
| NA        | ENSG00000288072 | 0.15069912 | -0.01848503 | 0.38480575 | 0.84537521 | NA         |
| NA        | ENSG00000288073 | 0          | NA          | NA         | NA         | NA         |
| NA        | ENSG00000288074 | 1.06498201 | 0.02828769  | 0.38159657 | 0.63907646 | NA         |
| NA        | ENSG00000288075 | 2.09549727 | 0.04643377  | 0.38222828 | 0.49804545 | NA         |
| NA        | ENSG00000288076 | 0          | NA          | NA         | NA         | NA         |
| NA        | ENSG00000288077 | 0.3566638  | 0.02381694  | 0.38538104 | 0.61402576 | NA         |
| NA        | ENSG00000288078 | 0          | NA          | NA         | NA         | NA         |
| NA        | ENSG00000288079 | 11.4918418 | 0.06054155  | 0.33694812 | 0.72244227 | 0.86754018 |
| NA        | ENSG00000288080 | 0.15069912 | -0.01848503 | 0.38480575 | 0.84537521 | NA         |
| NA        | ENSG00000288081 | 0          | NA          | NA         | NA         | NA         |
| NA        | ENSG00000288082 | 0.14931947 | -0.01844332 | 0.38480212 | 0.84537521 | NA         |
| NA        | ENSG00000288083 | 0          | NA          | NA         | NA         | NA         |
| NA        | ENSG00000288084 | 0          | NA          | NA         | NA         | NA         |
| NA        | ENSG00000288085 | 0          | NA          | NA         | NA         | NA         |
| NA        | ENSG00000288086 | 0.14931947 | -0.01844332 | 0.38480212 | 0.84537521 | NA         |
| NA        | ENSG00000288087 | 0          | NA          | NA         | NA         | NA         |
| NA        | ENSG00000288088 | 0          | NA          | NA         | NA         | NA         |
| NA        | ENSG00000288089 | 0.30001814 | -0.02294461 | 0.38527539 | 0.68644733 | NA         |
| NA        | ENSG00000288090 | 0          | NA          | NA         | NA         | NA         |
| NA        | ENSG00000288091 | 0          | NA          | NA         | NA         | NA         |
| NA        | ENSG00000288092 | 0          | NA          | NA         | NA         | NA         |
| NA        | ENSG00000288093 | 15.4206696 | -0.07684221 | 0.33019571 | 0.66417261 | 0.83431586 |
| 105372749 | ENSG00000288094 | 0          | NA          | NA         | NA         | NA         |
| NA        | ENSG00000288095 | 2.67479381 | 0.04213425  | 0.37639344 | 0.64961019 | 0.82525848 |
| NA        | ENSG00000288096 | 0.5073853  | 0.00974035  | 0.38323688 | 0.78944135 | NA         |
| NA        | ENSG00000288097 | 0          | NA          | NA         | NA         | NA         |
| NA        | ENSG00000288098 | 0          | NA          | NA         | NA         | NA         |
| NA        | ENSG00000288099 | 0          | NA          | NA         | NA         | NA         |
| NA        | ENSG00000288100 | 0          | NA          | NA         | NA         | NA         |
| NA        | ENSG00000288101 | 0          | NA          | NA         | NA         | NA         |
| NA        | ENSG00000288102 | 0          | NA          | NA         | NA         | NA         |
| NA        | ENSG00000288103 | 1.37458876 | -0.01994679 | 0.37867623 | 0.77991078 | NA         |
| NA        | ENSG00000288104 | 0          | NA          | NA         | NA         | NA         |
| NA        | ENSG00000288105 | 0          | NA          | NA         | NA         | NA         |
| NA        | ENSG00000288106 | 0.18922458 | 0.01954053  | 0.38488496 | 0.78225479 | NA         |
| NA        | ENSG00000288107 | 0.87251274 | 0.04638608  | 0.38539524 | 0.40204632 | NA         |

|    |                 |            |             |            |            |            |         |
|----|-----------------|------------|-------------|------------|------------|------------|---------|
| NA | ENSG00000288108 | 0          | NA          | NA         | NA         | NA         |         |
| NA | ENSG00000288109 | 0          | NA          | NA         | NA         | NA         |         |
| NA | ENSG00000288110 | 0          | NA          | NA         | NA         | NA         |         |
| NA | ENSG00000288111 | 0          | NA          | NA         | NA         | NA         |         |
| NA | ENSG00000288139 | 0          | NA          | NA         | NA         | NA         |         |
| NA | ENSG00000288153 | 0          | NA          | NA         | NA         | NA         |         |
| NA | ENSG00000288156 | 1.88587181 | -0.0673179  | 0.38454367 | 0.41164027 | NA         |         |
| NA | ENSG00000288162 | 0          | NA          | NA         | NA         | NA         |         |
| NA | ENSG00000288172 | 0          | NA          | NA         | NA         | NA         |         |
| NA | ENSG00000288177 | 0          | NA          | NA         | NA         | NA         |         |
| NA | ENSG00000288187 | 44.6022682 | 0.13180928  | 0.27812843 | 0.50594711 | 0.72177288 |         |
| NA | ENSG00000288208 | 13.5085055 | 0.07143486  | 0.35392562 | 0.64268498 | 0.82136499 |         |
| NA | ENSG00000288218 | 0          | NA          | NA         | NA         | NA         |         |
| NA | ENSG00000288225 | 0          | NA          | NA         | NA         | NA         |         |
| NA | ENSG00000288234 | 1.30042642 | -0.04538914 | 0.38223812 | 0.51859008 | NA         |         |
| NA | ENSG00000288235 | 1.16908709 | -0.02847233 | 0.38213789 | 0.62166995 | NA         | FAM106C |
| NA | ENSG00000288245 | 0          | NA          | NA         | NA         | NA         |         |
| NA | ENSG00000288252 | 0          | NA          | NA         | NA         | NA         |         |
| NA | ENSG00000288253 | 29.3022709 | 0.14689761  | 0.31157558 | 0.45878757 | 0.68223245 |         |
| NA | ENSG00000288255 | 0          | NA          | NA         | NA         | NA         |         |
| NA | ENSG00000288258 | 1.2678036  | -0.009054   | 0.38121207 | 0.86643421 | NA         |         |
| NA | ENSG00000288262 | 0.173733   | 0.01914545  | 0.38484597 | 0.78225479 | NA         |         |
| NA | ENSG00000288266 | 0          | NA          | NA         | NA         | NA         |         |
| NA | ENSG00000288271 | 0          | NA          | NA         | NA         | NA         |         |
| NA | ENSG00000288300 | 0          | NA          | NA         | NA         | NA         |         |
| NA | ENSG00000288302 | 0          | NA          | NA         | NA         | NA         |         |
| NA | ENSG00000288321 | 0          | NA          | NA         | NA         | NA         |         |
| NA | ENSG00000288330 | 0          | NA          | NA         | NA         | NA         |         |
| NA | ENSG00000288349 | 17.5780737 | 0.02162531  | 0.33364461 | 0.89954808 | 0.95557174 |         |
| NA | ENSG00000288393 | 0          | NA          | NA         | NA         | NA         |         |
| NA | ENSG00000288398 | 145.184801 | 0.27885388  | 0.19600031 | 0.09990511 | 0.249041   |         |
| NA | ENSG00000288434 | 0          | NA          | NA         | NA         | NA         |         |
| NA | ENSG00000288437 | 0.51425717 | 0.01263696  | 0.38290254 | 0.75789216 | NA         |         |
| NA | ENSG00000288459 | 2.28273362 | -0.00769513 | 0.3742036  | 0.92894305 | NA         |         |
| NA | ENSG00000288460 | 0          | NA          | NA         | NA         | NA         | SMIM42  |
| NA | ENSG00000288473 | 138.864841 | 0.1730317   | 0.19926372 | 0.31146487 | 0.53912607 |         |
| NA | ENSG00000288484 | 0          | NA          | NA         | NA         | NA         |         |
| NA | ENSG00000288520 | 3.51453172 | 0.03063794  | 0.38660396 | 0.17312841 | 0.36587852 |         |



|           |                 |            |             |            |            |            |              |
|-----------|-----------------|------------|-------------|------------|------------|------------|--------------|
| NA        | ENSG00000288523 | 0          | NA          | NA         | NA         | NA         |              |
| NA        | ENSG00000288524 | 0          | NA          | NA         | NA         | NA         |              |
| NA        | ENSG00000288525 | 0          | NA          | NA         | NA         | NA         |              |
| NA        | ENSG00000288526 | 0          | NA          | NA         | NA         | NA         |              |
| NA        | ENSG00000288527 | 0          | NA          | NA         | NA         | NA         |              |
| NA        | ENSG00000288528 | 0          | NA          | NA         | NA         | NA         |              |
| NA        | ENSG00000288529 | 0          | NA          | NA         | NA         | NA         |              |
| NA        | ENSG00000288530 | 0.66024908 | 0.02535309  | 0.38356404 | 0.59476787 | NA         |              |
| 107984850 | ENSG00000288531 | 0.173124   | -0.01911262 | 0.38486262 | 0.84537521 | NA         |              |
| NA        | ENSG00000288532 | 0          | NA          | NA         | NA         | NA         |              |
| NA        | ENSG00000288533 | 4.81654729 | 0.16379771  | 0.40689553 | 0.22065345 | 0.43304726 |              |
| NA        | ENSG00000288534 | 1337.35394 | -0.5694716  | 0.13197383 | 5.04E-06   | 5.06E-05   |              |
| NA        | ENSG00000288535 | 0          | NA          | NA         | NA         | NA         |              |
| NA        | ENSG00000288536 | 0          | NA          | NA         | NA         | NA         |              |
| 101929116 | ENSG00000288537 | 0          | NA          | NA         | NA         | NA         |              |
| NA        | ENSG00000288538 | 17.1835476 | 0.10160121  | 0.3385091  | 0.56854688 | 0.76931138 |              |
| NA        | ENSG00000288539 | 0.36291386 | 0.02389448  | 0.38539236 | 0.6099867  | NA         |              |
| NA        | ENSG00000288540 | 0          | NA          | NA         | NA         | NA         |              |
| NA        | ENSG00000288541 | 0          | NA          | NA         | NA         | NA         |              |
| NA        | ENSG00000288542 | 0          | NA          | NA         | NA         | NA         |              |
| NA        | ENSG00000288543 | 1.2213874  | 0.07008191  | 0.38976228 | 0.23838605 | NA         |              |
| NA        | ENSG00000288545 | 0.18922458 | 0.01954053  | 0.38488496 | 0.78225479 | NA         |              |
| NA        | ENSG00000288546 | 0          | NA          | NA         | NA         | NA         |              |
| 80111     | ENSG00000288547 | 0          | NA          | NA         | NA         | NA         |              |
| NA        | ENSG00000288548 | 3.80249933 | 0.0574665   | 0.37188699 | 0.61613231 | 0.8032108  |              |
| NA        | ENSG00000288549 | 0.15069912 | -0.01848503 | 0.38480575 | 0.84537521 | NA         |              |
| NA        | ENSG00000288550 | 1.19141972 | 0.02561433  | 0.38175322 | 0.65734625 | NA         |              |
| NA        | ENSG00000288551 | 1.21519092 | 0.01522332  | 0.37985143 | 0.81213248 | NA         |              |
| NA        | ENSG00000288552 | 0          | NA          | NA         | NA         | NA         |              |
| NA        | ENSG00000288553 | 0          | NA          | NA         | NA         | NA         |              |
| NA        | ENSG00000288554 | 0          | NA          | NA         | NA         | NA         |              |
| NA        | ENSG00000288555 | 0          | NA          | NA         | NA         | NA         |              |
| NA        | ENSG00000288556 | 0          | NA          | NA         | NA         | NA         |              |
| NA        | ENSG00000288557 | 0.8693871  | 0.01853958  | 0.38131019 | 0.74306202 | NA         |              |
| 115253422 | ENSG00000288558 | 334.585022 | 0.21313872  | 0.13152363 | 0.08393072 | 0.21898015 | DUS4L-BCAP29 |
| NA        | ENSG00000288559 | 59.943817  | -0.06645909 | 0.24657996 | 0.72508767 | 0.86844186 |              |
| NA        | ENSG00000288560 | 0          | NA          | NA         | NA         | NA         |              |
| NA        | ENSG00000288561 | 2.63058891 | -0.08281275 | 0.38628294 | 0.3652969  | 0.5947154  |              |

C3orf36

|           |                 |            |             |            |            |            |            |
|-----------|-----------------|------------|-------------|------------|------------|------------|------------|
| NA        | ENSG00000288562 | 0          | NA          | NA         | NA         | NA         |            |
| NA        | ENSG00000288563 | 0          | NA          | NA         | NA         | NA         |            |
| NA        | ENSG00000288564 | 0          | NA          | NA         | NA         | NA         |            |
| NA        | ENSG00000288565 | 0          | NA          | NA         | NA         | NA         |            |
| NA        | ENSG00000288566 | 0          | NA          | NA         | NA         | NA         |            |
| NA        | ENSG00000288567 | 0          | NA          | NA         | NA         | NA         |            |
| 101928737 | ENSG00000288568 | 8.54159087 | -0.18633697 | 0.40010769 | 0.24634932 | 0.46561593 |            |
| NA        | ENSG00000288569 | 0.173733   | 0.01914545  | 0.38484597 | 0.78225479 | NA         | LINC01949  |
| NA        | ENSG00000288570 | 0          | NA          | NA         | NA         | NA         |            |
| NA        | ENSG00000288571 | 0.93874407 | -0.03677204 | 0.38436783 | 0.45957655 | NA         |            |
| NA        | ENSG00000288573 | 8.63268634 | -0.07101328 | 0.35724188 | 0.62899803 | 0.81208569 |            |
| NA        | ENSG00000288574 | 0          | NA          | NA         | NA         | NA         |            |
| NA        | ENSG00000288575 | 0          | NA          | NA         | NA         | NA         |            |
| NA        | ENSG00000288576 | 0          | NA          | NA         | NA         | NA         |            |
| NA        | ENSG00000288577 | 9.67924823 | -0.09096574 | 0.35894847 | 0.5524538  | 0.75887409 |            |
| 105369292 | ENSG00000288578 | 0          | NA          | NA         | NA         | NA         |            |
| NA        | ENSG00000288579 | 0.16735865 | 0.01897177  | 0.38482933 | 0.78225479 | NA         |            |
| NA        | ENSG00000288580 | 0          | NA          | NA         | NA         | NA         |            |
| NA        | ENSG00000288581 | 0          | NA          | NA         | NA         | NA         |            |
| NA        | ENSG00000288582 | 0          | NA          | NA         | NA         | NA         | NABP1-OT1  |
| NA        | ENSG00000288583 | 0.15069912 | -0.01848503 | 0.38480575 | 0.84537521 | NA         |            |
| NA        | ENSG00000288584 | 0          | NA          | NA         | NA         | NA         |            |
| NA        | ENSG00000288585 | 0.53458746 | -0.00900356 | 0.38315162 | 0.81876473 | NA         |            |
| NA        | ENSG00000288586 | 7.32344012 | -0.1205574  | 0.37403437 | 0.41527106 | 0.64231527 |            |
| NA        | ENSG00000288587 | 0          | NA          | NA         | NA         | NA         |            |
| NA        | ENSG00000288588 | 1.41732335 | -0.02721791 | 0.37994643 | 0.69362091 | NA         |            |
| NA        | ENSG00000288589 | 0.16735865 | 0.01897177  | 0.38482933 | 0.78225479 | NA         |            |
| NA        | ENSG00000288591 | 0          | NA          | NA         | NA         | NA         |            |
| NA        | ENSG00000288592 | 0          | NA          | NA         | NA         | NA         |            |
| NA        | ENSG00000288593 | 0.173733   | 0.01914545  | 0.38484597 | 0.78225479 | NA         |            |
| NA        | ENSG00000288595 | 0.173124   | -0.01911262 | 0.38486262 | 0.84537521 | NA         |            |
| 56260     | ENSG00000288596 | 58.4680958 | 0.50819372  | 0.32948061 | 0.03264477 | 0.10723051 | C8orf44    |
| NA        | ENSG00000288597 | 37.6240638 | -0.118234   | 0.28197266 | 0.54659205 | 0.75371048 |            |
| 105370174 | ENSG00000288598 | 10.5992448 | 0.07932107  | 0.3462977  | 0.63095843 | 0.81344688 |            |
| NA        | ENSG00000288600 | 0          | NA          | NA         | NA         | NA         |            |
| NA        | ENSG00000288601 | 0          | NA          | NA         | NA         | NA         |            |
| 100533105 | ENSG00000288602 | 5.9422875  | 0.02201747  | 0.37139376 | 0.83013489 | 0.92296908 |            |
| 109617009 | ENSG00000288603 | 0          | NA          | NA         | NA         | NA         | SNORA74C-2 |

|        |                 |            |             |            |            |            |            |
|--------|-----------------|------------|-------------|------------|------------|------------|------------|
| NA     | ENSG00000288604 | 15.0649277 | -0.07934864 | 0.33392387 | 0.64737    | 0.82430661 |            |
| NA     | ENSG00000288605 | 0          | NA          | NA         | NA         | NA         |            |
| NA     | ENSG00000288606 | 0          | NA          | NA         | NA         | NA         |            |
| NA     | ENSG00000288607 | 0.87354854 | 0.03848948  | 0.38478448 | 0.44581347 | NA         |            |
| NA     | ENSG00000288608 | 0          | NA          | NA         | NA         | NA         |            |
| NA     | ENSG00000288610 | 0          | NA          | NA         | NA         | NA         |            |
| 2831   | ENSG00000288611 | 0          | NA          | NA         | NA         | NA         | NPBWR1     |
| NA     | ENSG00000288612 | 7.4321476  | 0.18090401  | 0.40100778 | 0.24980377 | 0.46950614 |            |
| NA     | ENSG00000288614 | 0          | NA          | NA         | NA         | NA         |            |
| NA     | ENSG00000288615 | 0          | NA          | NA         | NA         | NA         |            |
| NA     | ENSG00000288616 | 1.17151057 | 0.04905867  | 0.3887731  | 0.21859307 | NA         |            |
| NA     | ENSG00000288618 | 0          | NA          | NA         | NA         | NA         |            |
| NA     | ENSG00000288620 | 0          | NA          | NA         | NA         | NA         |            |
| NA     | ENSG00000288622 | 16.2273092 | 0.02403285  | 0.38096846 | 0.70704947 | 0.85886619 | PDCD6-AHRR |
| NA     | ENSG00000288623 | 0          | NA          | NA         | NA         | NA         |            |
| NA     | ENSG00000288625 | 0          | NA          | NA         | NA         | NA         |            |
| NA     | ENSG00000288626 | 0          | NA          | NA         | NA         | NA         |            |
| NA     | ENSG00000288627 | 0          | NA          | NA         | NA         | NA         |            |
| NA     | ENSG00000288629 | 0          | NA          | NA         | NA         | NA         |            |
| NA     | ENSG00000288630 | 3.31190259 | 0.0110888   | 0.38339009 | 0.77302189 | 0.89561741 |            |
| NA     | ENSG00000288631 | 0.87354854 | 0.03848948  | 0.38478448 | 0.44581347 | NA         |            |
| NA     | ENSG00000288632 | 214.383882 | 0.12396564  | 0.16702869 | 0.4113804  | 0.63908755 |            |
| NA     | ENSG00000288633 | 0          | NA          | NA         | NA         | NA         |            |
| NA     | ENSG00000288634 | 0          | NA          | NA         | NA         | NA         |            |
| NA     | ENSG00000288635 | 1.75232291 | -0.02629877 | 0.37766539 | 0.73917043 | NA         |            |
| NA     | ENSG00000288636 | 0          | NA          | NA         | NA         | NA         |            |
| NA     | ENSG00000288637 | 31.4979007 | 1.05747257  | 0.5418603  | 0.00365892 | 0.01791092 |            |
| NA     | ENSG00000288638 | 1.16541485 | -0.00646963 | 0.38024095 | 0.98721962 | NA         | LNCDAT     |
| NA     | ENSG00000288639 | 0          | NA          | NA         | NA         | NA         |            |
| NA     | ENSG00000288640 | 112.458303 | 0.26470288  | 0.32485218 | 0.21626318 | 0.427144   |            |
| 1038   | ENSG00000288642 | 0          | NA          | NA         | NA         | NA         | CDR1       |
| NA     | ENSG00000288643 | 0          | NA          | NA         | NA         | NA         |            |
| NA     | ENSG00000288644 | 0          | NA          | NA         | NA         | NA         |            |
| NA     | ENSG00000288645 | 0          | NA          | NA         | NA         | NA         |            |
| NA     | ENSG00000288646 | 0          | NA          | NA         | NA         | NA         |            |
| NA     | ENSG00000288648 | 0.29863895 | -0.02292439 | 0.3852726  | 0.68753245 | NA         |            |
| 170487 | ENSG00000288649 | 28.1140125 | -0.33884902 | 0.37006446 | 0.13465977 | 0.30907563 | ACTL10     |
| NA     | ENSG00000288654 | 0          | NA          | NA         | NA         | NA         |            |

|           |                 |            |             |            |            |            |        |
|-----------|-----------------|------------|-------------|------------|------------|------------|--------|
| NA        | ENSG00000288656 | 1.31456701 | -0.00157611 | 0.38019082 | 0.97791793 | NA         |        |
| NA        | ENSG00000288657 | 0          | NA          | NA         | NA         | NA         |        |
| NA        | ENSG00000288658 | 32.5725932 | -0.45271413 | 0.39592808 | 0.06600412 | 0.18369334 |        |
| NA        | ENSG00000288659 | 0          | NA          | NA         | NA         | NA         |        |
| NA        | ENSG00000288661 | 0          | NA          | NA         | NA         | NA         |        |
| NA        | ENSG00000288662 | 0          | NA          | NA         | NA         | NA         |        |
| NA        | ENSG00000288663 | 151.829556 | 0.14727793  | 0.22464807 | 0.42262766 | 0.64863717 |        |
| NA        | ENSG00000288665 | 0          | NA          | NA         | NA         | NA         |        |
| NA        | ENSG00000288667 | 0          | NA          | NA         | NA         | NA         |        |
| NA        | ENSG00000288669 | 0          | NA          | NA         | NA         | NA         |        |
| NA        | ENSG00000288670 | 146.332126 | 0.08745586  | 0.17650341 | 0.577998   | 0.77614203 |        |
| NA        | ENSG00000288671 | 0          | NA          | NA         | NA         | NA         |        |
| NA        | ENSG00000288674 | 62.3237455 | 0.49814543  | 0.32376766 | 0.0344997  | 0.11209861 |        |
| 101927423 | ENSG00000288675 | 48.8224192 | -0.09851075 | 0.26671136 | 0.61145189 | 0.79952583 |        |
| NA        | ENSG00000288677 | 0          | NA          | NA         | NA         | NA         |        |
| NA        | ENSG00000288678 | 0          | NA          | NA         | NA         | NA         |        |
| NA        | ENSG00000288679 | 0          | NA          | NA         | NA         | NA         |        |
| NA        | ENSG00000288680 | 0          | NA          | NA         | NA         | NA         |        |
| NA        | ENSG00000288681 | 0          | NA          | NA         | NA         | NA         |        |
| NA        | ENSG00000288683 | 98.5339339 | 0.00578012  | 0.24291619 | 0.97730359 | 0.99232877 |        |
| NA        | ENSG00000288684 | 64.6662933 | 0.35066398  | 0.35291126 | 0.1233547  | 0.29097102 |        |
| NA        | ENSG00000288685 | 0.64810743 | 0.0036264   | 0.38250683 | 0.9311994  | NA         |        |
| 100132596 | ENSG00000288686 | 0          | NA          | NA         | NA         | NA         | XGY2   |
| 644316    | ENSG00000288690 | 37.3286602 | 0.06348459  | 0.2929227  | 0.74309183 | 0.87881151 |        |
| 105377369 | ENSG00000288691 | 0          | NA          | NA         | NA         | NA         |        |
| NA        | ENSG00000288692 | 0          | NA          | NA         | NA         | NA         |        |
| NA        | ENSG00000288694 | 14.4465974 | 0.00912869  | 0.32642424 | 0.95995351 | 0.98360159 |        |
| NA        | ENSG00000288695 | 13.3285046 | -0.05861833 | 0.35938778 | 0.671351   | 0.83825699 |        |
| NA        | ENSG00000288696 | 0          | NA          | NA         | NA         | NA         |        |
| NA        | ENSG00000288697 | 0          | NA          | NA         | NA         | NA         |        |
| NA        | ENSG00000288698 | 32.1286745 | 0.41348348  | 0.58009315 | 0.06163702 | 0.17502196 |        |
| NA        | ENSG00000288699 | 2.24785004 | 0.10787431  | 0.40043448 | 0.15742727 | NA         |        |
| NA        | ENSG00000288700 | 2.08474005 | -0.0301077  | 0.38161686 | 0.49512093 | NA         |        |
| 84726     | ENSG00000288701 | 12288.4978 | 0.04235117  | 0.066723   | 0.52794689 | 0.73966995 | PRRC2B |
| 54659     | ENSG00000288702 | 0          | NA          | NA         | NA         | NA         | UGT1A3 |
| NA        | ENSG00000288703 | 0          | NA          | NA         | NA         | NA         |        |
| NA        | ENSG00000288704 | 3.00954847 | 0.02922899  | 0.37420458 | 0.75683118 | 0.88697677 |        |
| 54579     | ENSG00000288705 | 0          | NA          | NA         | NA         | NA         | UGT1A5 |

|           |                 |            |             |            |            |            |      |
|-----------|-----------------|------------|-------------|------------|------------|------------|------|
| NA        | ENSG00000288706 | 0          | NA          | NA         | NA         | NA         |      |
| NA        | ENSG00000288707 | 0.37844916 | 0.02407552  | 0.3854191  | 0.60038877 | NA         |      |
| NA        | ENSG00000288708 | 0          | NA          | NA         | NA         | NA         |      |
| 474383    | ENSG00000288709 | 58.572572  | -0.25369983 | 0.29537754 | 0.22455455 | 0.43832765 | F8A2 |
| NA        | ENSG00000288710 | 17.3397815 | 0.06147093  | 0.34064698 | 0.71457651 | 0.86245136 |      |
| NA        | ENSG00000288711 | 0          | NA          | NA         | NA         | NA         |      |
| NA        | ENSG00000288712 | 0          | NA          | NA         | NA         | NA         |      |
| NA        | ENSG00000288713 | 0          | NA          | NA         | NA         | NA         |      |
| NA        | ENSG00000288714 | 0          | NA          | NA         | NA         | NA         |      |
| NA        | ENSG00000288715 | 0          | NA          | NA         | NA         | NA         |      |
| NA        | ENSG00000288716 | 0          | NA          | NA         | NA         | NA         |      |
| 105377063 | ENSG00000288717 | 0.173733   | 0.01914545  | 0.38484597 | 0.78225479 | NA         |      |
| NA        | ENSG00000288718 | 0          | NA          | NA         | NA         | NA         |      |
| NA        | ENSG00000288719 | 0.31721277 | 0.00155378  | 0.38337034 | 0.96296489 | NA         |      |
| NA        | ENSG00000288720 | 8.31317506 | -0.05761979 | 0.35050031 | 0.70544308 | 0.85803894 |      |
| NA        | ENSG00000288721 | 46.7350714 | -0.00937959 | 0.2724291  | 0.95909767 | 0.9831126  |      |
| 8263      | ENSG00000288722 | 264.787516 | -0.03090688 | 0.15075692 | 0.82258271 | 0.91907647 | F8A1 |
| NA        | ENSG00000288723 | 1.04215866 | 0.05993633  | 0.38771203 | 0.30543089 | NA         |      |
| NA        | ENSG00000288724 | 0          | NA          | NA         | NA         | NA         |      |
| NA        | ENSG00000288725 | 1.65769032 | -0.06259268 | 0.39155497 | 0.13741231 | NA         |      |
