# Supplementary material for: SIRT2 functions as a histone delactylase and inhibits the proliferation and migration of neuroblastoma cells
Source: PubMed Central journal article supplement (PMC9174446; doi:10.1038/s41421-022-00398-y), 2022-06-07
Supplement: 41421_2022_398_MOESM3_ESM.pdf [file 41421_2022_398_MOESM3_ESM.pdf]

**Table S3. ChIP-seq peaks and annotated genes by anti-H4K8la antibody in control SH-SY5Y cells.**

| chr | start    | end      | peakid            | -LOG(pvalue) | gene                                                                           |
|-----|----------|----------|-------------------|--------------|--------------------------------------------------------------------------------|
| 1   | 1310091  | 1310445  | 5Y-H4K8la_peak_1  | 7.16957      | AURKAIP1_ENSG00000175756                                                       |
| 1   | 1963748  | 1964083  | 5Y-H4K8la_peak_2  | 10.0574      |                                                                                |
| 1   | 2246087  | 2246283  | 5Y-H4K8la_peak_3  | 7.1479       |                                                                                |
| 1   | 2413810  | 2414189  | 5Y-H4K8la_peak_4  | 8.15295      |                                                                                |
| 1   | 3087463  | 3087674  | 5Y-H4K8la_peak_5  | 6.53263      |                                                                                |
| 1   | 3737152  | 3737388  | 5Y-H4K8la_peak_6  | 5.27516      |                                                                                |
| 1   | 6420335  | 6420539  | 5Y-H4K8la_peak_7  | 5.78576      |                                                                                |
| 1   | 7690798  | 7691257  | 5Y-H4K8la_peak_8  | 6.53263      |                                                                                |
| 1   | 7740602  | 7740798  | 5Y-H4K8la_peak_9  | 11.11308     |                                                                                |
| 1   | 7741024  | 7741625  | 5Y-H4K8la_peak_10 | 7.20156      |                                                                                |
| 1   | 10961510 | 10961966 | 5Y-H4K8la_peak_11 | 7.42863      |                                                                                |
| 1   | 10964767 | 10965025 | 5Y-H4K8la_peak_12 | 5.02936      |                                                                                |
| 1   | 11001824 | 11002045 | 5Y-H4K8la_peak_13 | 7.31696      |                                                                                |
| 1   | 11751314 | 11751562 | 5Y-H4K8la_peak_14 | 7.32908      | MAD2L2_ENSG00000116670;DRAXIN_ENSG00000162490                                  |
| 1   | 14026852 | 14027106 | 5Y-H4K8la_peak_15 | 6.97847      | PRDM2_ENSG00000116731                                                          |
| 1   | 16010120 | 16010609 | 5Y-H4K8la_peak_16 | 8.34321      | RP4-680D5.9_ENSG00000271742;PLEKHM2_ENSG00000116786;AL121992.1_ENSG00000264048 |
| 1   | 16692693 | 16693102 | 5Y-H4K8la_peak_17 | 10.12966     |                                                                                |
| 1   | 16971762 | 16972198 | 5Y-H4K8la_peak_18 | 17.84833     | CROCCP2_ENSG00000215908;MST1P2_ENSG00000186301                                 |
| 1   | 17306910 | 17307345 | 5Y-H4K8la_peak_19 | 11.50519     | MFAP2_ENSG00000117122                                                          |
| 1   | 20812884 | 20813235 | 5Y-H4K8la_peak_20 | 7.20129      | CAMK2N1_ENSG00000162545                                                        |
| 1   | 21503703 | 21503982 | 5Y-H4K8la_peak_21 | 6.9507       | EIF4G3_ENSG00000075151;AL031005.1_ENSG00000266867                              |
| 1   | 22378601 | 22378915 | 5Y-H4K8la_peak_22 | 10.17199     | CDC42_ENSG00000070831                                                          |
| 1   | 23961148 | 23961359 | 5Y-H4K8la_peak_23 | 9.00262      |                                                                                |
| 1   | 25429666 | 25429869 | 5Y-H4K8la_peak_24 | 4.96761      |                                                                                |
| 1   | 26125876 | 26126165 | 5Y-H4K8la_peak_25 | 10.44872     | SEPN1_ENSG00000162430                                                          |
| 1   | 26868246 | 26868463 | 5Y-H4K8la_peak_26 | 5.41836      |                                                                                |
| 1   | 27023553 | 27023941 | 5Y-H4K8la_peak_27 | 9.61758      |                                                                                |
| 1   | 27854486 | 27854742 | 5Y-H4K8la_peak_28 | 6.72615      |                                                                                |
| 1   | 29138818 | 29139205 | 5Y-H4K8la_peak_29 | 13.42677     | OPRD1_ENSG00000116329                                                          |
| 1   | 29508056 | 29508323 | 5Y-H4K8la_peak_30 | 5.60833      | SRSF4_ENSG00000116350                                                          |
| 1   | 29797079 | 29797482 | 5Y-H4K8la_peak_31 | 12.63314     |                                                                                |
| 1   | 29797994 | 29798209 | 5Y-H4K8la_peak_32 | 8.84908      |                                                                                |
| 1   | 30180601 | 30180926 | 5Y-H4K8la_peak_33 | 5.82532      |                                                                                |
| 1   | 32279617 | 32280307 | 5Y-H4K8la_peak_34 | 9.9061       |                                                                                |
| 1   | 33438576 | 33438815 | 5Y-H4K8la_peak_35 | 8.03849      | FKSG48_ENSG00000267885                                                         |
| 1   | 35658036 | 35658533 | 5Y-H4K8la_peak_36 | 11.16506     | SFPQ_ENSG00000116560                                                           |
| 1   | 36173221 | 36173586 | 5Y-H4K8la_peak_37 | 10.01769     |                                                                                |
| 1   | 36553954 | 36554200 | 5Y-H4K8la_peak_38 | 10.00392     | ADPRHL2_ENSG00000116863                                                        |
| 1   | 39491230 | 39491429 | 5Y-H4K8la_peak_39 | 8.89577      | NDUFS5_ENSG00000168653                                                         |
| 1   | 42921423 | 42921627 | 5Y-H4K8la_peak_40 | 5.02936      | ZMYND12_ENSG00000066185;PPCS_ENSG00000127125                                   |
| 1   | 44445077 | 44445273 | 5Y-H4K8la_peak_41 | 11.69305     | B4GALT2_ENSG00000117411                                                        |
| 1   | 45204065 | 45204261 | 5Y-H4K8la_peak_42 | 9.24465      |                                                                                |
| 1   | 49364629 | 49364832 | 5Y-H4K8la_peak_43 | 9.82869      |                                                                                |
| 1   | 53098668 | 53099065 | 5Y-H4K8la_peak_44 | 7.69436      | FAM159A_ENSG00000182183                                                        |

|   |           |           |                   |          |                                                      |
|---|-----------|-----------|-------------------|----------|------------------------------------------------------|
| 1 | 53527328  | 53527591  | 5Y-H4K8la_peak_45 | 5.02936  | PODN_ENSG00000174348                                 |
| 1 | 62827053  | 62827276  | 5Y-H4K8la_peak_46 | 6.03474  |                                                      |
| 1 | 64970907  | 64971169  | 5Y-H4K8la_peak_47 | 5.93696  |                                                      |
| 1 | 85313611  | 85313909  | 5Y-H4K8la_peak_48 | 7.39065  |                                                      |
| 1 | 96407471  | 96407679  | 5Y-H4K8la_peak_49 | 6.97847  |                                                      |
| 1 | 110603207 | 110603567 | 5Y-H4K8la_peak_50 | 6.09172  |                                                      |
| 1 | 116915375 | 116915642 | 5Y-H4K8la_peak_51 | 10.44872 | ATP1A1_ENSG00000163399                               |
| 1 | 117453028 | 117453271 | 5Y-H4K8la_peak_52 | 7.35213  | RP4-753F5.1_ENSG00000272715;PTGFRN_ENSG00000134247   |
| 1 | 117893643 | 117893846 | 5Y-H4K8la_peak_53 | 6.46211  |                                                      |
| 1 | 150185421 | 150185656 | 5Y-H4K8la_peak_54 | 7.29177  |                                                      |
| 1 | 153509013 | 153509290 | 5Y-H4K8la_peak_55 | 6.4327   | S100A6_ENSG00000197956                               |
| 1 | 153962588 | 153962806 | 5Y-H4K8la_peak_56 | 7.08077  | RPS27_ENSG00000177954                                |
| 1 | 154976955 | 154977377 | 5Y-H4K8la_peak_57 | 8.11274  |                                                      |
| 1 | 155162974 | 155163315 | 5Y-H4K8la_peak_58 | 13.64172 | MUC1_ENSG00000185499                                 |
| 1 | 155197628 | 155197874 | 5Y-H4K8la_peak_59 | 8.80583  | GBAPI_ENSG00000160766                                |
| 1 | 156883490 | 156883946 | 5Y-H4K8la_peak_60 | 8.14442  |                                                      |
| 1 | 160231846 | 160232146 | 5Y-H4K8la_peak_61 | 6.71102  | RP11-574F21.2_ENSG00000228606                        |
| 1 | 161068363 | 161068606 | 5Y-H4K8la_peak_62 | 7.47094  | KLHDC9_ENSG00000162755                               |
| 1 | 161171327 | 161171533 | 5Y-H4K8la_peak_63 | 5.60833  |                                                      |
| 1 | 162851375 | 162851793 | 5Y-H4K8la_peak_64 | 7.72393  |                                                      |
| 1 | 162887711 | 162887983 | 5Y-H4K8la_peak_65 | 6.89955  |                                                      |
| 1 | 166845113 | 166845332 | 5Y-H4K8la_peak_66 | 9.24465  | TADA1_ENSG00000152382                                |
| 1 | 170501434 | 170501760 | 5Y-H4K8la_peak_67 | 5.81948  | RP11-576I22.2_ENSG00000231407;GORAB_ENSG00000120370  |
| 1 | 172419356 | 172419577 | 5Y-H4K8la_peak_68 | 8.2602   |                                                      |
| 1 | 180896297 | 180896495 | 5Y-H4K8la_peak_69 | 8.78149  |                                                      |
| 1 | 185285755 | 185286273 | 5Y-H4K8la_peak_70 | 9.00262  | IVNS1ABP_ENSG00000116679;GS1-279B7.2_ENSG00000273004 |
| 1 | 193027866 | 193028320 | 5Y-H4K8la_peak_71 | 8.3797   | UCHL5_ENSG00000116750;TROVE2_ENSG00000116747         |
| 1 | 203456393 | 203456764 | 5Y-H4K8la_peak_72 | 6.14037  |                                                      |
| 1 | 205473857 | 205474064 | 5Y-H4K8la_peak_73 | 9.99013  | CDK18_ENSG00000117266                                |
| 1 | 208137266 | 208137529 | 5Y-H4K8la_peak_74 | 10.48208 |                                                      |
| 1 | 210425072 | 210425480 | 5Y-H4K8la_peak_75 | 10.86348 |                                                      |
| 1 | 210743644 | 210743933 | 5Y-H4K8la_peak_76 | 8.53959  |                                                      |
| 1 | 211663563 | 211663806 | 5Y-H4K8la_peak_77 | 6.35224  |                                                      |
| 1 | 211664984 | 211665180 | 5Y-H4K8la_peak_78 | 5.17488  | RP11-359E8.3_ENSG00000223649                         |
| 1 | 211790121 | 211790424 | 5Y-H4K8la_peak_79 | 5.17488  |                                                      |
| 1 | 212731656 | 212731903 | 5Y-H4K8la_peak_80 | 7.5782   | RP11-61J19.4_ENSG00000260805                         |
| 1 | 224363777 | 224364030 | 5Y-H4K8la_peak_81 | 7.79008  | RP11-365O16.1_ENSG00000236773;DEGS1_ENSG00000143753  |
| 1 | 226310130 | 226310345 | 5Y-H4K8la_peak_82 | 5.89028  |                                                      |
| 1 | 227127366 | 227127577 | 5Y-H4K8la_peak_83 | 6.66609  |                                                      |
| 1 | 227750667 | 227750947 | 5Y-H4K8la_peak_84 | 12.59446 | ZNF678_ENSG00000181450                               |
| 1 | 228074866 | 228075367 | 5Y-H4K8la_peak_85 | 10.77389 |                                                      |
| 1 | 230416827 | 230417024 | 5Y-H4K8la_peak_86 | 5.41836  | RP5-956O18.3_ENSG00000224407                         |
| 1 | 231004756 | 231005032 | 5Y-H4K8la_peak_87 | 7.09368  | C1orf198_ENSG00000119280                             |
| 1 | 233007170 | 233007426 | 5Y-H4K8la_peak_88 | 10.84781 |                                                      |
| 1 | 233430994 | 233431194 | 5Y-H4K8la_peak_89 | 6.11939  | PCNXL2_ENSG00000135749;RP5-862P8.3_ENSG00000251508   |
| 1 | 234614148 | 234614387 | 5Y-H4K8la_peak_90 | 8.27701  | TARBP1_ENSG00000059588                               |

|    |           |           |                    |          |                                                                             |
|----|-----------|-----------|--------------------|----------|-----------------------------------------------------------------------------|
| 1  | 235183447 | 235183719 | 5Y-H4K8la_peak_91  | 9.93134  |                                                                             |
| 1  | 243660184 | 243660388 | 5Y-H4K8la_peak_92  | 10.84781 |                                                                             |
| 1  | 245916082 | 245916303 | 5Y-H4K8la_peak_93  | 9.56697  |                                                                             |
| 10 | 1316974   | 1317298   | 5Y-H4K8la_peak_94  | 10.01769 |                                                                             |
| 10 | 13389302  | 13389572  | 5Y-H4K8la_peak_95  | 10.84781 | SEPHS1_ENSG00000086475                                                      |
| 10 | 23003712  | 23004025  | 5Y-H4K8la_peak_96  | 8.13463  | PIP4K2A_ENSG00000150867                                                     |
| 10 | 43367703  | 43367949  | 5Y-H4K8la_peak_97  | 8.15295  | RP11-124O11.1_ENSG00000234944                                               |
| 10 | 44143974  | 44144183  | 5Y-H4K8la_peak_98  | 7.79008  | ZNF32_ENSG00000169740                                                       |
| 10 | 46168569  | 46168861  | 5Y-H4K8la_peak_99  | 10.87965 | ZFAND4_ENSG00000172671                                                      |
| 10 | 46222243  | 46222513  | 5Y-H4K8la_peak_100 | 6.33552  | FAM21FP_ENSG00000237840;RP11-671E7.1_ENSG00000228702;FAM21C_ENSG00000172661 |
| 10 | 62492811  | 62493069  | 5Y-H4K8la_peak_101 | 7.71476  | ANK3_ENSG00000151150                                                        |
| 10 | 65281298  | 65281521  | 5Y-H4K8la_peak_102 | 6.32424  | REEP3_ENSG00000165476                                                       |
| 10 | 72995166  | 72995492  | 5Y-H4K8la_peak_103 | 6.89955  |                                                                             |
| 10 | 73019843  | 73020098  | 5Y-H4K8la_peak_104 | 6.11939  |                                                                             |
| 10 | 73022976  | 73023172  | 5Y-H4K8la_peak_105 | 6.0804   |                                                                             |
| 10 | 73804292  | 73804513  | 5Y-H4K8la_peak_106 | 8.24368  |                                                                             |
| 10 | 74032986  | 74033261  | 5Y-H4K8la_peak_107 | 8.69005  | DDIT4_ENSG00000168209                                                       |
| 10 | 74082560  | 74082876  | 5Y-H4K8la_peak_108 | 5.1759   |                                                                             |
| 10 | 74095232  | 74095498  | 5Y-H4K8la_peak_109 | 8.23998  |                                                                             |
| 10 | 79471029  | 79471238  | 5Y-H4K8la_peak_110 | 7.57826  |                                                                             |
| 10 | 79972520  | 79972792  | 5Y-H4K8la_peak_111 | 8.3797   |                                                                             |
| 10 | 80416320  | 80416573  | 5Y-H4K8la_peak_112 | 8.15295  |                                                                             |
| 10 | 80981738  | 80982148  | 5Y-H4K8la_peak_113 | 9.8767   |                                                                             |
| 10 | 80982390  | 80983073  | 5Y-H4K8la_peak_114 | 8.41069  |                                                                             |
| 10 | 81035066  | 81035344  | 5Y-H4K8la_peak_115 | 9.24465  |                                                                             |
| 10 | 88026343  | 88026645  | 5Y-H4K8la_peak_116 | 5.78576  |                                                                             |
| 10 | 94450014  | 94450241  | 5Y-H4K8la_peak_117 | 8.97426  |                                                                             |
| 10 | 95653289  | 95653522  | 5Y-H4K8la_peak_118 | 7.1479   | SLC35G1_ENSG00000176273                                                     |
| 10 | 100027744 | 100027957 | 5Y-H4K8la_peak_119 | 6.88861  | LOXL4_ENSG00000138131                                                       |
| 10 | 102472751 | 102472960 | 5Y-H4K8la_peak_120 | 6.68187  |                                                                             |
| 10 | 102473723 | 102473961 | 5Y-H4K8la_peak_121 | 9.8767   |                                                                             |
| 10 | 103816406 | 103816730 | 5Y-H4K8la_peak_122 | 8.9585   | C10orf76_ENSG00000120029                                                    |
| 10 | 104387685 | 104387910 | 5Y-H4K8la_peak_123 | 11.39542 |                                                                             |
| 10 | 111767021 | 111767233 | 5Y-H4K8la_peak_124 | 11.09733 |                                                                             |
| 10 | 112403449 | 112403721 | 5Y-H4K8la_peak_125 | 7.95926  | Y_RNA_ENSG00000223302;RBM20_ENSG00000203867                                 |
| 10 | 119805997 | 119806279 | 5Y-H4K8la_peak_126 | 14.48633 | RAB11FIP2_ENSG00000107560;CASC2_ENSG00000177640                             |
| 10 | 123900286 | 123900523 | 5Y-H4K8la_peak_127 | 10.78118 |                                                                             |
| 10 | 131264859 | 131265125 | 5Y-H4K8la_peak_128 | 9.24465  | MGMT_ENSG00000170430                                                        |
| 11 | 355533    | 355973    | 5Y-H4K8la_peak_129 | 9.34762  |                                                                             |
| 11 | 728475    | 728697    | 5Y-H4K8la_peak_130 | 7.16957  |                                                                             |
| 11 | 855284    | 855539    | 5Y-H4K8la_peak_131 | 9.11759  |                                                                             |
| 11 | 890225    | 890428    | 5Y-H4K8la_peak_132 | 6.09172  |                                                                             |
| 11 | 1331312   | 1331523   | 5Y-H4K8la_peak_133 | 6.53263  | TOLLIP_ENSG00000078902;TOLLIP-AS1_ENSG00000255153                           |
| 11 | 1714824   | 1715316   | 5Y-H4K8la_peak_134 | 13.55423 |                                                                             |
| 11 | 1897588   | 1897832   | 5Y-H4K8la_peak_135 | 11.27875 |                                                                             |
| 11 | 1899087   | 1899458   | 5Y-H4K8la_peak_136 | 8.53671  |                                                                             |

|    |           |                              |          |                                                  |
|----|-----------|------------------------------|----------|--------------------------------------------------|
| 11 | 1968607   | 1969192 5Y-H4K8la_peak_137   | 14.92651 | MRPL23_ENSG00000214026                           |
| 11 | 1977938   | 1978246 5Y-H4K8la_peak_138   | 5.41836  |                                                  |
| 11 | 2000697   | 2001421 5Y-H4K8la_peak_139   | 9.30692  |                                                  |
| 11 | 2002335   | 2002899 5Y-H4K8la_peak_140   | 10.21971 |                                                  |
| 11 | 2003816   | 2004051 5Y-H4K8la_peak_141   | 9.62047  |                                                  |
| 11 | 2422086   | 2422309 5Y-H4K8la_peak_142   | 8.34321  | TSSC4_ENSG00000184281                            |
| 11 | 2799397   | 2799773 5Y-H4K8la_peak_143   | 10.00392 |                                                  |
| 11 | 8249799   | 8250071 5Y-H4K8la_peak_144   | 7.32908  |                                                  |
| 11 | 11991030  | 11991328 5Y-H4K8la_peak_145  | 6.65331  |                                                  |
| 11 | 16838513  | 16838749 5Y-H4K8la_peak_146  | 7.95926  |                                                  |
| 11 | 43946926  | 43947194 5Y-H4K8la_peak_147  | 6.11939  | C11orf96_ENSG00000187479                         |
| 11 | 46739689  | 46739888 5Y-H4K8la_peak_148  | 8.75054  | F2_ENSG00000180210                               |
| 11 | 55640444  | 55640755 5Y-H4K8la_peak_149  | 6.03474  |                                                  |
| 11 | 63685848  | 63686407 5Y-H4K8la_peak_150  | 7.69149  |                                                  |
| 11 | 63824133  | 63824436 5Y-H4K8la_peak_151  | 7.42863  |                                                  |
| 11 | 63917054  | 63917262 5Y-H4K8la_peak_152  | 5.89026  |                                                  |
| 11 | 64258225  | 64258437 5Y-H4K8la_peak_153  | 8.03849  |                                                  |
| 11 | 64334621  | 64334971 5Y-H4K8la_peak_154  | 6.53263  |                                                  |
| 11 | 64612219  | 64612523 5Y-H4K8la_peak_155  | 5.70363  | CDC42BPG_ENSG00000171219                         |
| 11 | 65679508  | 65679724 5Y-H4K8la_peak_156  | 9.8767   |                                                  |
| 11 | 66496022  | 66496395 5Y-H4K8la_peak_157  | 10.37149 | SPTBN2_ENSG00000173898                           |
| 11 | 66885852  | 66886087 5Y-H4K8la_peak_158  | 6.71638  | KDM2A_ENSG00000173120                            |
| 11 | 67771902  | 67772141 5Y-H4K8la_peak_159  | 5.82532  | UNC93B1_ENSG00000110057                          |
| 11 | 68427161  | 68427378 5Y-H4K8la_peak_160  | 6.53263  |                                                  |
| 11 | 68452271  | 68452475 5Y-H4K8la_peak_161  | 6.54023  |                                                  |
| 11 | 68459620  | 68459846 5Y-H4K8la_peak_162  | 7.79699  |                                                  |
| 11 | 68924385  | 68924675 5Y-H4K8la_peak_163  | 13.94218 |                                                  |
| 11 | 72859273  | 72859502 5Y-H4K8la_peak_164  | 7.46877  |                                                  |
| 11 | 75266286  | 75266606 5Y-H4K8la_peak_165  | 8.96376  |                                                  |
| 11 | 75294522  | 75294815 5Y-H4K8la_peak_166  | 9.06236  | CTD-2530H12.4_ENSG00000255326                    |
| 11 | 76327104  | 76327321 5Y-H4K8la_peak_167  | 6.28883  |                                                  |
| 11 | 78730362  | 78730584 5Y-H4K8la_peak_168  | 10.72928 |                                                  |
| 11 | 115529818 | 115530142 5Y-H4K8la_peak_169 | 12.27803 | AP000797.3_ENSG00000256717                       |
| 11 | 117186184 | 117186386 5Y-H4K8la_peak_170 | 5.27516  | BACE1_ENSG00000186318;CEP164_ENSG00000110274     |
| 11 | 117314621 | 117314949 5Y-H4K8la_peak_171 | 9.10112  |                                                  |
| 11 | 118560052 | 118560318 5Y-H4K8la_peak_172 | 10.40816 | AP002954.6_ENSG00000255239                       |
| 11 | 124588058 | 124588287 5Y-H4K8la_peak_173 | 7.1479   |                                                  |
| 11 | 125820715 | 125820961 5Y-H4K8la_peak_174 | 9.03201  | RP11-680F20.6_ENSG00000254967                    |
| 11 | 125984559 | 125984983 5Y-H4K8la_peak_175 | 7.45648  |                                                  |
| 11 | 126413729 | 126413955 5Y-H4K8la_peak_176 | 8.20666  | KIRREL3-AS1_ENSG00000257271                      |
| 11 | 128106833 | 128107367 5Y-H4K8la_peak_177 | 11.71161 |                                                  |
| 11 | 129871884 | 129872116 5Y-H4K8la_peak_178 | 7.57826  | PRDM10_ENSG00000170325;LINC00167_ENSG00000233220 |
| 12 | 6387406   | 6387893 5Y-H4K8la_peak_179   | 8.9585   |                                                  |
| 12 | 6721729   | 6722066 5Y-H4K8la_peak_180   | 8.03849  |                                                  |
| 12 | 6798265   | 6798506 5Y-H4K8la_peak_181   | 11.67604 | ZNF384_ENSG00000126746                           |
| 12 | 7046377   | 7046962 5Y-H4K8la_peak_182   | 5.41836  |                                                  |

|    |           |           |                    |          |                                                       |
|----|-----------|-----------|--------------------|----------|-------------------------------------------------------|
| 12 | 12502790  | 12503027  | 5Y-H4K8la_peak_183 | 6.37554  | MANSC1_ENSG00000111261                                |
| 12 | 12869714  | 12869944  | 5Y-H4K8la_peak_184 | 8.03849  |                                                       |
| 12 | 22199261  | 22199486  | 5Y-H4K8la_peak_185 | 10.021   | CMAS_ENSG00000111726                                  |
| 12 | 26379604  | 26379821  | 5Y-H4K8la_peak_186 | 6.9195   |                                                       |
| 12 | 29302424  | 29302680  | 5Y-H4K8la_peak_187 | 7.79008  | RP11-946L16.1_ENSG00000257258;FAR2_ENSG00000064763    |
| 12 | 32440755  | 32440969  | 5Y-H4K8la_peak_188 | 8.97426  |                                                       |
| 12 | 46662890  | 46663099  | 5Y-H4K8la_peak_189 | 6.90369  | SLC38A1_ENSG00000111371                               |
| 12 | 48222964  | 48223168  | 5Y-H4K8la_peak_190 | 5.46366  |                                                       |
| 12 | 52242245  | 52242469  | 5Y-H4K8la_peak_191 | 10.67724 | RP11-923I11.5_ENSG00000259887                         |
| 12 | 52597479  | 52597749  | 5Y-H4K8la_peak_192 | 8.0821   |                                                       |
| 12 | 53441414  | 53441667  | 5Y-H4K8la_peak_193 | 8.15295  | TENC1_ENSG00000111077                                 |
| 12 | 56321147  | 56321492  | 5Y-H4K8la_peak_194 | 6.84763  | DGKA_ENSG00000065357                                  |
| 12 | 69202093  | 69202303  | 5Y-H4K8la_peak_195 | 6.97847  | MDM2_ENSG00000135679                                  |
| 12 | 89739652  | 89739889  | 5Y-H4K8la_peak_196 | 8.03849  |                                                       |
| 12 | 104531237 | 104531654 | 5Y-H4K8la_peak_197 | 6.97847  | NFYB_ENSG00000120837                                  |
| 12 | 109770175 | 109770492 | 5Y-H4K8la_peak_198 | 6.53263  |                                                       |
| 12 | 109970847 | 109971245 | 5Y-H4K8la_peak_199 | 6.53263  |                                                       |
| 12 | 112280216 | 112280436 | 5Y-H4K8la_peak_200 | 8.02705  | MAPKAPK5-AS1_ENSG00000234608;MAPKAPK5_ENSG00000089022 |
| 12 | 120801150 | 120801379 | 5Y-H4K8la_peak_201 | 11.41209 |                                                       |
| 12 | 122238621 | 122238909 | 5Y-H4K8la_peak_202 | 6.14037  |                                                       |
| 12 | 127630810 | 127631108 | 5Y-H4K8la_peak_203 | 9.82869  | RP11-575F12.2_ENSG00000256001                         |
| 12 | 133758170 | 133758455 | 5Y-H4K8la_peak_204 | 9.8767   |                                                       |
| 13 | 25874953  | 25875235  | 5Y-H4K8la_peak_205 | 10.2251  | RP11-271M24.2_ENSG00000260509;NUPL1_ENSG00000139496   |
| 13 | 46039174  | 46039415  | 5Y-H4K8la_peak_206 | 10.17199 | COG3_ENSG00000136152                                  |
| 13 | 74709274  | 74709474  | 5Y-H4K8la_peak_207 | 10.44337 | KLF12_ENSG00000118922                                 |
| 13 | 76209715  | 76210008  | 5Y-H4K8la_peak_208 | 8.90889  | RP11-173B14.5_ENSG00000261105                         |
| 13 | 96185985  | 96186184  | 5Y-H4K8la_peak_209 | 8.97426  | CLDN10-AS1_ENSG00000223392                            |
| 13 | 99852523  | 99852810  | 5Y-H4K8la_peak_210 | 9.0527   | UBAC2-AS1_ENSG00000228889;UBAC2_ENSG00000134882       |
| 13 | 114829837 | 114830035 | 5Y-H4K8la_peak_211 | 6.53263  |                                                       |
| 13 | 115000502 | 115000713 | 5Y-H4K8la_peak_212 | 7.32908  | CDC16_ENSG00000130177                                 |
| 14 | 21728876  | 21729104  | 5Y-H4K8la_peak_213 | 8.97426  |                                                       |
| 14 | 23789800  | 23789998  | 5Y-H4K8la_peak_214 | 6.11939  | PABPN1_ENSG00000100836                                |
| 14 | 24438741  | 24439037  | 5Y-H4K8la_peak_215 | 5.13147  | DHRS4L2_ENSG00000187630                               |
| 14 | 24520771  | 24520997  | 5Y-H4K8la_peak_216 | 7.46931  | LRRC16B_ENSG00000186648                               |
| 14 | 24838725  | 24838980  | 5Y-H4K8la_peak_217 | 7.47094  |                                                       |
| 14 | 54976721  | 54976951  | 5Y-H4K8la_peak_218 | 7.71476  | CGRRF1_ENSG00000100532                                |
| 14 | 61104125  | 61104377  | 5Y-H4K8la_peak_219 | 6.0804   |                                                       |
| 14 | 69262142  | 69262442  | 5Y-H4K8la_peak_220 | 8.03849  | ZFP36L1_ENSG00000185650                               |
| 14 | 69283034  | 69283460  | 5Y-H4K8la_peak_221 | 10.17199 |                                                       |
| 14 | 74253554  | 74253754  | 5Y-H4K8la_peak_222 | 5.5367   | RP5-102I120.1_ENSG00000259065                         |
| 14 | 75078550  | 75078758  | 5Y-H4K8la_peak_223 | 10.18615 | LTBP2_ENSG00000119681                                 |
| 14 | 77494652  | 77494852  | 5Y-H4K8la_peak_224 | 5.56085  | IRF2BPL_ENSG00000119669                               |
| 14 | 77499149  | 77499438  | 5Y-H4K8la_peak_225 | 8.15295  |                                                       |
| 14 | 77504379  | 77504635  | 5Y-H4K8la_peak_226 | 7.47283  |                                                       |
| 14 | 90917660  | 90917931  | 5Y-H4K8la_peak_227 | 9.34955  |                                                       |
| 14 | 91749646  | 91750149  | 5Y-H4K8la_peak_228 | 8.15295  |                                                       |

|    |           |           |                    |          |                                                                                     |
|----|-----------|-----------|--------------------|----------|-------------------------------------------------------------------------------------|
| 14 | 91884566  | 91884832  | 5Y-H4K8la_peak_229 | 6.9195   | CCDC88C_ENSG00000015133;RP11-895M11.3_ENSG00000258798;RP11-895M11.2_ENSG00000258446 |
| 14 | 93384387  | 93384613  | 5Y-H4K8la_peak_230 | 12.39425 |                                                                                     |
| 14 | 93474192  | 93474618  | 5Y-H4K8la_peak_231 | 8.31681  |                                                                                     |
| 14 | 100039189 | 100039400 | 5Y-H4K8la_peak_232 | 8.15295  |                                                                                     |
| 14 | 100240163 | 100240652 | 5Y-H4K8la_peak_233 | 8.39578  |                                                                                     |
| 14 | 100751969 | 100752232 | 5Y-H4K8la_peak_234 | 6.62475  |                                                                                     |
| 14 | 100907695 | 100907894 | 5Y-H4K8la_peak_235 | 8.01893  |                                                                                     |
| 14 | 100910265 | 100910508 | 5Y-H4K8la_peak_236 | 13.09586 |                                                                                     |
| 14 | 101241986 | 101242264 | 5Y-H4K8la_peak_237 | 8.3797   |                                                                                     |
| 14 | 101242505 | 101242710 | 5Y-H4K8la_peak_238 | 7.73692  |                                                                                     |
| 14 | 101245823 | 101246445 | 5Y-H4K8la_peak_239 | 9.99013  | MEG3_ENSG00000214548                                                                |
| 14 | 101249539 | 101249912 | 5Y-H4K8la_peak_240 | 9.44926  |                                                                                     |
| 14 | 101251444 | 101251648 | 5Y-H4K8la_peak_241 | 7.53185  |                                                                                     |
| 14 | 101593150 | 101593365 | 5Y-H4K8la_peak_242 | 5.96979  |                                                                                     |
| 14 | 103213037 | 103213272 | 5Y-H4K8la_peak_243 | 6.22411  |                                                                                     |
| 14 | 103589219 | 103589585 | 5Y-H4K8la_peak_244 | 10.76437 | LINC00677_ENSG00000259717;TNFAIP2_ENSG00000185215                                   |
| 14 | 104602176 | 104602398 | 5Y-H4K8la_peak_245 | 6.62448  |                                                                                     |
| 14 | 104678644 | 104678920 | 5Y-H4K8la_peak_246 | 8.70467  |                                                                                     |
| 14 | 104903214 | 104903808 | 5Y-H4K8la_peak_247 | 9.85416  |                                                                                     |
| 14 | 105218504 | 105218745 | 5Y-H4K8la_peak_248 | 7.20129  | SIVA1_ENSG00000184990                                                               |
| 15 | 27212901  | 27213121  | 5Y-H4K8la_peak_249 | 6.03474  |                                                                                     |
| 15 | 31507951  | 31508308  | 5Y-H4K8la_peak_250 | 5.02936  | RP11-16E12.1_ENSG00000259448                                                        |
| 15 | 31690712  | 31690990  | 5Y-H4K8la_peak_251 | 10.77389 |                                                                                     |
| 15 | 34331163  | 34331453  | 5Y-H4K8la_peak_252 | 11.09733 | AVEN_ENSG00000169857                                                                |
| 15 | 37388241  | 37388522  | 5Y-H4K8la_peak_253 | 6.39254  |                                                                                     |
| 15 | 38544783  | 38544979  | 5Y-H4K8la_peak_254 | 7.42863  | SPRED1_ENSG00000166068                                                              |
| 15 | 40728779  | 40728977  | 5Y-H4K8la_peak_255 | 10.10129 |                                                                                     |
| 15 | 41244671  | 41245085  | 5Y-H4K8la_peak_256 | 5.76537  | CHAC1_ENSG00000128965                                                               |
| 15 | 42186597  | 42186857  | 5Y-H4K8la_peak_257 | 6.53263  | SPTBN5_ENSG00000137877                                                              |
| 15 | 45458816  | 45459097  | 5Y-H4K8la_peak_258 | 10.21547 | CTD-2651B20.1_ENSG00000259539                                                       |
| 15 | 47857410  | 47857609  | 5Y-H4K8la_peak_259 | 6.03474  |                                                                                     |
| 15 | 57998219  | 57998434  | 5Y-H4K8la_peak_260 | 9.53456  |                                                                                     |
| 15 | 63797065  | 63797263  | 5Y-H4K8la_peak_261 | 8.69005  | USP3_ENSG00000140455                                                                |
| 15 | 73430980  | 73431202  | 5Y-H4K8la_peak_262 | 6.97847  |                                                                                     |
| 15 | 74429791  | 74430228  | 5Y-H4K8la_peak_263 | 5.76108  |                                                                                     |
| 15 | 74516324  | 74516642  | 5Y-H4K8la_peak_264 | 8.05492  |                                                                                     |
| 15 | 74584417  | 74584705  | 5Y-H4K8la_peak_265 | 10.77389 |                                                                                     |
| 15 | 74585002  | 74585236  | 5Y-H4K8la_peak_266 | 10.24966 |                                                                                     |
| 15 | 75182504  | 75182733  | 5Y-H4K8la_peak_267 | 5.76537  | MPI_ENSG00000178802                                                                 |
| 15 | 78912969  | 78913197  | 5Y-H4K8la_peak_268 | 7.95919  | CHRNA3_ENSG00000080644                                                              |
| 15 | 79044016  | 79044303  | 5Y-H4K8la_peak_269 | 12.77906 | RP11-160C18.4_ENSG00000238166                                                       |
| 15 | 79051069  | 79051275  | 5Y-H4K8la_peak_270 | 7.71476  |                                                                                     |
| 15 | 79053515  | 79053985  | 5Y-H4K8la_peak_271 | 7.19867  |                                                                                     |
| 15 | 90293536  | 90294002  | 5Y-H4K8la_peak_272 | 6.04448  | MESPI_ENSG00000166823                                                               |
| 15 | 90319146  | 90319721  | 5Y-H4K8la_peak_273 | 9.9061   |                                                                                     |
| 15 | 93364290  | 93364573  | 5Y-H4K8la_peak_274 | 11.42306 |                                                                                     |

|    |           |           |                    |          |                                                                                  |
|----|-----------|-----------|--------------------|----------|----------------------------------------------------------------------------------|
| 15 | 93821308  | 93821516  | 5Y-H4K8la_peak_275 | 6.75415  |                                                                                  |
| 15 | 101306981 | 101307177 | 5Y-H4K8la_peak_276 | 7.92423  |                                                                                  |
| 15 | 101404722 | 101404934 | 5Y-H4K8la_peak_277 | 8.3533   |                                                                                  |
| 15 | 101689030 | 101689415 | 5Y-H4K8la_peak_278 | 7.79008  |                                                                                  |
| 15 | 102192843 | 102193178 | 5Y-H4K8la_peak_279 | 5.56085  | TM2D3_ENSG00000184277                                                            |
| 15 | 102506188 | 102506443 | 5Y-H4K8la_peak_280 | 6.04448  |                                                                                  |
| 16 | 691449    | 691660    | 5Y-H4K8la_peak_281 | 7.91054  | AL022341.1_ENSG00000197727;FAM195A_ENSG00000172366                               |
| 16 | 1582038   | 1582318   | 5Y-H4K8la_peak_282 | 6.53263  |                                                                                  |
| 16 | 1979989   | 1980267   | 5Y-H4K8la_peak_283 | 12.77906 |                                                                                  |
| 16 | 2087947   | 2088160   | 5Y-H4K8la_peak_284 | 7.32908  |                                                                                  |
| 16 | 2301942   | 2302177   | 5Y-H4K8la_peak_285 | 7.54283  | ECI1_ENSG00000167969                                                             |
| 16 | 2827970   | 2828186   | 5Y-H4K8la_peak_286 | 6.62448  | TCEB2_ENSG00000103363                                                            |
| 16 | 4442950   | 4443175   | 5Y-H4K8la_peak_287 | 8.34321  |                                                                                  |
| 16 | 5083424   | 5083642   | 5Y-H4K8la_peak_288 | 7.71476  | NAGPA_ENSG00000103174;ALG1_ENSG00000033011                                       |
| 16 | 15952262  | 15952471  | 5Y-H4K8la_peak_289 | 5.57055  |                                                                                  |
| 16 | 27280281  | 27280730  | 5Y-H4K8la_peak_290 | 5.82532  | NSMCE1_ENSG00000169189;CTD-3203P2.2_ENSG00000245888                              |
| 16 | 28525591  | 28525951  | 5Y-H4K8la_peak_291 | 6.75415  |                                                                                  |
| 16 | 28834610  | 28834987  | 5Y-H4K8la_peak_292 | 13.13483 | ATXN2L_ENSG00000168488                                                           |
| 16 | 29187984  | 29188209  | 5Y-H4K8la_peak_293 | 10.77389 |                                                                                  |
| 16 | 29875201  | 29875412  | 5Y-H4K8la_peak_294 | 12.008   | CDIPT_ENSG00000103502;CDIPT-AS1_ENSG00000214725                                  |
| 16 | 30537534  | 30537757  | 5Y-H4K8la_peak_295 | 6.48484  | ZNF768_ENSG00000169957                                                           |
| 16 | 30938956  | 30939234  | 5Y-H4K8la_peak_296 | 10.0197  |                                                                                  |
| 16 | 47270133  | 47270360  | 5Y-H4K8la_peak_297 | 6.97847  |                                                                                  |
| 16 | 48573805  | 48574053  | 5Y-H4K8la_peak_298 | 5.81948  |                                                                                  |
| 16 | 57541962  | 57542632  | 5Y-H4K8la_peak_299 | 6.76954  |                                                                                  |
| 16 | 67596995  | 67597196  | 5Y-H4K8la_peak_300 | 8.3797   | CTD-2012K14.6_ENSG00000261386;CTD-2012K14.7_ENSG00000259804;CTCF_ENSG00000102974 |
| 16 | 67816998  | 67817212  | 5Y-H4K8la_peak_301 | 7.1479   |                                                                                  |
| 16 | 70333141  | 70333441  | 5Y-H4K8la_peak_302 | 10.31591 | RP11-529K1.3_ENSG00000260537                                                     |
| 16 | 81764237  | 81764446  | 5Y-H4K8la_peak_303 | 7.54839  |                                                                                  |
| 16 | 82204085  | 82204361  | 5Y-H4K8la_peak_304 | 6.97847  | MPHOSPH6_ENSG00000135698;CTD-2588J6.2_ENSG00000261029                            |
| 16 | 85191831  | 85192476  | 5Y-H4K8la_peak_305 | 7.9701   |                                                                                  |
| 16 | 85253444  | 85253846  | 5Y-H4K8la_peak_306 | 9.17304  |                                                                                  |
| 16 | 85685175  | 85685985  | 5Y-H4K8la_peak_307 | 9.77417  |                                                                                  |
| 16 | 87903373  | 87903677  | 5Y-H4K8la_peak_308 | 6.22227  | SLC7A5_ENSG00000103257                                                           |
| 16 | 88126274  | 88126587  | 5Y-H4K8la_peak_309 | 9.00262  |                                                                                  |
| 16 | 89883323  | 89883638  | 5Y-H4K8la_peak_310 | 6.36955  | SPIRE2_ENSG00000204991;FANCA_ENSG00000187741                                     |
| 16 | 90038353  | 90038736  | 5Y-H4K8la_peak_311 | 11.91101 | CENPBD1_ENSG00000177946;AFG3L1P_ENSG00000223959                                  |
| 17 | 150758    | 150979    | 5Y-H4K8la_peak_312 | 6.62475  |                                                                                  |
| 17 | 1666244   | 1666458   | 5Y-H4K8la_peak_313 | 5.74411  | SERPINF1_ENSG00000132386                                                         |
| 17 | 2089021   | 2089303   | 5Y-H4K8la_peak_314 | 8.03849  |                                                                                  |
| 17 | 2283965   | 2284285   | 5Y-H4K8la_peak_315 | 7.1479   |                                                                                  |
| 17 | 2863731   | 2863947   | 5Y-H4K8la_peak_316 | 5.46366  |                                                                                  |
| 17 | 5014713   | 5014934   | 5Y-H4K8la_peak_317 | 5.46366  | AC012146.7_ENSG00000234327                                                       |
| 17 | 7452592   | 7452994   | 5Y-H4K8la_peak_318 | 6.53263  | TNFSF12_ENSG00000239697;TNFSF12-TNFSF13_ENSG00000248871                          |
| 17 | 7476258   | 7476495   | 5Y-H4K8la_peak_319 | 9.18087  | EIF4A1_ENSG00000161960;SNORA67_ENSG00000264772                                   |
| 17 | 7486366   | 7486678   | 5Y-H4K8la_peak_320 | 9.18087  | AC113189.5_ENSG00000233223;MPDU1_ENSG00000129255                                 |

|    |          |                             |          |                                                           |
|----|----------|-----------------------------|----------|-----------------------------------------------------------|
| 17 | 16934502 | 16934800 5Y-H4K8la_peak_321 | 5.76537  |                                                           |
| 17 | 17584909 | 17585242 5Y-H4K8la_peak_322 | 12.91038 | RAI1_ENSG00000108557                                      |
| 17 | 17739873 | 17740193 5Y-H4K8la_peak_323 | 11.33283 | SREBF1_ENSG00000072310                                    |
| 17 | 18085897 | 18086201 5Y-H4K8la_peak_324 | 8.03849  | ALKBH5_ENSG00000091542                                    |
| 17 | 19647737 | 19647959 5Y-H4K8la_peak_325 | 8.15295  |                                                           |
| 17 | 19912016 | 19912223 5Y-H4K8la_peak_326 | 7.39065  | RP11-209D14.2_ENSG00000261033;SPEC11_ENSG00000128487      |
| 17 | 20945970 | 20946263 5Y-H4K8la_peak_327 | 9.00262  | USP22_ENSG00000124422                                     |
| 17 | 27388182 | 27388406 5Y-H4K8la_peak_328 | 5.26936  |                                                           |
| 17 | 29152019 | 29152251 5Y-H4K8la_peak_329 | 8.3533   | CRLF3_ENSG00000176390                                     |
| 17 | 29829000 | 29829203 5Y-H4K8la_peak_330 | 5.13147  |                                                           |
| 17 | 30608371 | 30608572 5Y-H4K8la_peak_331 | 6.30996  | RP11-443G13.2_ENSG00000263674                             |
| 17 | 34111993 | 34112205 5Y-H4K8la_peak_332 | 5.8673   |                                                           |
| 17 | 36571332 | 36571555 5Y-H4K8la_peak_333 | 9.61758  |                                                           |
| 17 | 36860456 | 36860652 5Y-H4K8la_peak_334 | 8.15295  |                                                           |
| 17 | 38507633 | 38507854 5Y-H4K8la_peak_335 | 9.17304  |                                                           |
| 17 | 40718276 | 40718803 5Y-H4K8la_peak_336 | 6.84763  | MLX_ENSG00000108788                                       |
| 17 | 40832206 | 40832446 5Y-H4K8la_peak_337 | 5.43901  | CTD-3193K9.4_ENSG00000267042                              |
| 17 | 40976561 | 40976814 5Y-H4K8la_peak_338 | 7.46931  | PSME3_ENSG00000131467                                     |
| 17 | 42061310 | 42061589 5Y-H4K8la_peak_339 | 9.06236  |                                                           |
| 17 | 43239644 | 43239850 5Y-H4K8la_peak_340 | 5.02936  | AC002117.1_ENSG00000224505                                |
| 17 | 43926790 | 43926995 5Y-H4K8la_peak_341 | 8.99659  |                                                           |
| 17 | 44270356 | 44270683 5Y-H4K8la_peak_342 | 10.21547 | KANSL1-AS1_ENSG00000214401                                |
| 17 | 46089119 | 46089322 5Y-H4K8la_peak_343 | 8.27752  |                                                           |
| 17 | 46090014 | 46090372 5Y-H4K8la_peak_344 | 8.79833  |                                                           |
| 17 | 46091609 | 46091935 5Y-H4K8la_peak_345 | 10.21971 |                                                           |
| 17 | 48239353 | 48239592 5Y-H4K8la_peak_346 | 7.9701   | RP11-893F2.13_ENSG00000253730                             |
| 17 | 49021533 | 49021862 5Y-H4K8la_peak_347 | 16.20851 | RP11-700H6.1_ENSG00000247011;RP11-700H6.2_ENSG00000251665 |
| 17 | 55215589 | 55215789 5Y-H4K8la_peak_348 | 5.76537  |                                                           |
| 17 | 55624243 | 55624559 5Y-H4K8la_peak_349 | 10.13769 |                                                           |
| 17 | 55636660 | 55636972 5Y-H4K8la_peak_350 | 5.88707  |                                                           |
| 17 | 56159983 | 56160445 5Y-H4K8la_peak_351 | 13.719   | RP11-159D12.10_ENSG00000266290;DYNLL2_ENSG00000264364     |
| 17 | 56401453 | 56401803 5Y-H4K8la_peak_352 | 9.32141  |                                                           |
| 17 | 59461497 | 59461693 5Y-H4K8la_peak_353 | 4.99806  |                                                           |
| 17 | 59494688 | 59494951 5Y-H4K8la_peak_354 | 9.31339  |                                                           |
| 17 | 59565638 | 59565837 5Y-H4K8la_peak_355 | 6.85433  |                                                           |
| 17 | 60730316 | 60730541 5Y-H4K8la_peak_356 | 9.43441  |                                                           |
| 17 | 61523861 | 61524561 5Y-H4K8la_peak_357 | 16.78473 | CYB561_ENSG00000008283                                    |
| 17 | 61698923 | 61699171 5Y-H4K8la_peak_358 | 8.27701  | MAP3K3_ENSG00000198909                                    |
| 17 | 63300162 | 63300395 5Y-H4K8la_peak_359 | 8.03849  |                                                           |
| 17 | 64960173 | 64960421 5Y-H4K8la_peak_360 | 5.44443  | CACNG4_ENSG00000075461                                    |
| 17 | 64965372 | 64965595 5Y-H4K8la_peak_361 | 8.31614  |                                                           |
| 17 | 65014336 | 65014728 5Y-H4K8la_peak_362 | 4.99806  |                                                           |
| 17 | 65015907 | 65016331 5Y-H4K8la_peak_363 | 8.04592  |                                                           |
| 17 | 66031991 | 66032220 5Y-H4K8la_peak_364 | 6.11939  | KPNA2_ENSG00000182481                                     |
| 17 | 67323605 | 67323898 5Y-H4K8la_peak_365 | 7.1479   | ABCA5_ENSG00000154265                                     |
| 17 | 72239288 | 72239484 5Y-H4K8la_peak_366 | 6.50125  |                                                           |



|    |          |          |                    |          |                                                             |
|----|----------|----------|--------------------|----------|-------------------------------------------------------------|
| 17 | 73268312 | 73268583 | 5Y-H4K8la_peak_367 | 7.82398  | RP11-649A18.12_ENSG00000263843                              |
| 17 | 73750084 | 73750514 | 5Y-H4K8la_peak_368 | 9.19627  |                                                             |
| 17 | 73823926 | 73824122 | 5Y-H4K8la_peak_369 | 8.3797   |                                                             |
| 17 | 74033115 | 74033327 | 5Y-H4K8la_peak_370 | 8.85235  |                                                             |
| 17 | 74100167 | 74100659 | 5Y-H4K8la_peak_371 | 8.99659  |                                                             |
| 17 | 74117922 | 74118253 | 5Y-H4K8la_peak_372 | 6.11939  | EXOC7_ENSG00000182473                                       |
| 17 | 74526283 | 74526533 | 5Y-H4K8la_peak_373 | 7.5782   |                                                             |
| 17 | 74534256 | 74534468 | 5Y-H4K8la_peak_374 | 8.29908  |                                                             |
| 17 | 74536439 | 74536677 | 5Y-H4K8la_peak_375 | 10.89523 |                                                             |
| 17 | 74540414 | 74540634 | 5Y-H4K8la_peak_376 | 12.20171 |                                                             |
| 17 | 74541169 | 74541549 | 5Y-H4K8la_peak_377 | 11.71161 |                                                             |
| 17 | 74542131 | 74542351 | 5Y-H4K8la_peak_378 | 9.29994  |                                                             |
| 17 | 74667175 | 74667444 | 5Y-H4K8la_peak_379 | 11.27875 | RP11-318A15.2_ENSG00000261335                               |
| 17 | 75084199 | 75084497 | 5Y-H4K8la_peak_380 | 19.2484  | AC015815.3_ENSG00000203316                                  |
| 17 | 75429299 | 75429529 | 5Y-H4K8la_peak_381 | 8.96386  |                                                             |
| 17 | 75432618 | 75432836 | 5Y-H4K8la_peak_382 | 8.27752  |                                                             |
| 17 | 75860019 | 75860246 | 5Y-H4K8la_peak_383 | 12.60518 |                                                             |
| 17 | 76921665 | 76921922 | 5Y-H4K8la_peak_384 | 8.93736  | TIMP2_ENSG00000035862                                       |
| 17 | 76976487 | 76976822 | 5Y-H4K8la_peak_385 | 5.44443  | LGALS3BP_ENSG00000108679                                    |
| 17 | 77701822 | 77702160 | 5Y-H4K8la_peak_386 | 9.57151  |                                                             |
| 17 | 77702651 | 77702987 | 5Y-H4K8la_peak_387 | 16.35057 |                                                             |
| 17 | 77771770 | 77772133 | 5Y-H4K8la_peak_388 | 16.04433 |                                                             |
| 17 | 77787563 | 77787899 | 5Y-H4K8la_peak_389 | 17.18548 |                                                             |
| 17 | 77813579 | 77813850 | 5Y-H4K8la_peak_390 | 9.0527   | CBX4_ENSG00000141582                                        |
| 17 | 77817958 | 77818347 | 5Y-H4K8la_peak_391 | 11.46595 |                                                             |
| 17 | 78233889 | 78234154 | 5Y-H4K8la_peak_392 | 18.72022 | RNF213_ENSG00000173821                                      |
| 17 | 78419525 | 78419723 | 5Y-H4K8la_peak_393 | 5.82613  |                                                             |
| 17 | 78427671 | 78428442 | 5Y-H4K8la_peak_394 | 10.49072 | CTD-2526A2.2_ENSG00000260369                                |
| 17 | 78428858 | 78429164 | 5Y-H4K8la_peak_395 | 7.60153  | CTD-2526A2.2_ENSG00000260369                                |
| 17 | 78429751 | 78429947 | 5Y-H4K8la_peak_396 | 5.17488  |                                                             |
| 17 | 78833706 | 78834330 | 5Y-H4K8la_peak_397 | 14.41622 |                                                             |
| 17 | 78965828 | 78966175 | 5Y-H4K8la_peak_398 | 11.65167 | CHMP6_ENSG00000176108                                       |
| 17 | 79139499 | 79139709 | 5Y-H4K8la_peak_399 | 6.48219  | AATK_ENSG00000181409;AATK-AS1_ENSG00000225180               |
| 17 | 79283834 | 79284089 | 5Y-H4K8la_peak_400 | 11.13219 | LINC00482_ENSG00000185168                                   |
| 17 | 79284305 | 79284505 | 5Y-H4K8la_peak_401 | 6.50125  |                                                             |
| 17 | 79288745 | 79289116 | 5Y-H4K8la_peak_402 | 8.66894  |                                                             |
| 17 | 79302391 | 79302717 | 5Y-H4K8la_peak_403 | 8.57784  |                                                             |
| 17 | 79304782 | 79305056 | 5Y-H4K8la_peak_404 | 6.95057  | TMEM105_ENSG00000185332                                     |
| 17 | 79313277 | 79313759 | 5Y-H4K8la_peak_405 | 8.66743  |                                                             |
| 17 | 79315125 | 79315477 | 5Y-H4K8la_peak_406 | 9.04397  |                                                             |
| 17 | 79319457 | 79319708 | 5Y-H4K8la_peak_407 | 7.82398  |                                                             |
| 17 | 79480102 | 79480410 | 5Y-H4K8la_peak_408 | 11.54753 | RP13-766D20.1_ENSG00000229947;RP13-766D20.2_ENSG00000229848 |
| 17 | 79633874 | 79634121 | 5Y-H4K8la_peak_409 | 7.53185  | OXLD1_ENSG00000204237;CCDC137_ENSG00000185298               |
| 17 | 79829449 | 79830231 | 5Y-H4K8la_peak_410 | 9.43458  | ARHGDI1A_ENSG00000141522                                    |
| 17 | 79924479 | 79925717 | 5Y-H4K8la_peak_411 | 8.99659  | RP11-498C9.17_ENSG00000264735                               |
| 17 | 79950492 | 79950826 | 5Y-H4K8la_peak_412 | 5.60833  |                                                             |

|    |          |          |                    |          |                                                                               |
|----|----------|----------|--------------------|----------|-------------------------------------------------------------------------------|
| 17 | 79970587 | 79970811 | 5Y-H4K8la_peak_413 | 10.59072 |                                                                               |
| 17 | 80023805 | 80024167 | 5Y-H4K8la_peak_414 | 19.91533 | DUS1L_ENSG00000169718                                                         |
| 17 | 80057029 | 80057344 | 5Y-H4K8la_peak_415 | 11.84648 | FASN_ENSG00000169710                                                          |
| 17 | 80057595 | 80057813 | 5Y-H4K8la_peak_416 | 9.49545  |                                                                               |
| 17 | 80454802 | 80455011 | 5Y-H4K8la_peak_417 | 6.84763  |                                                                               |
| 17 | 81010079 | 81010324 | 5Y-H4K8la_peak_418 | 9.24737  | B3GNTL1_ENSG00000175711                                                       |
| 18 | 3590534  | 3590733  | 5Y-H4K8la_peak_419 | 6.46211  |                                                                               |
| 18 | 19180134 | 19180381 | 5Y-H4K8la_peak_420 | 6.12664  | ESCO1_ENSG00000141446                                                         |
| 18 | 46308980 | 46309182 | 5Y-H4K8la_peak_421 | 7.34702  |                                                                               |
| 18 | 61090188 | 61090389 | 5Y-H4K8la_peak_422 | 9.07974  | VPS4B_ENSG00000119541                                                         |
| 18 | 61899211 | 61899442 | 5Y-H4K8la_peak_423 | 7.95926  |                                                                               |
| 18 | 74534964 | 74535209 | 5Y-H4K8la_peak_424 | 5.46366  | RP11-162A12.2_ENSG00000264278;ZNF236_ENSG00000130856                          |
| 18 | 76828731 | 76829090 | 5Y-H4K8la_peak_425 | 19.32723 | ATP9B_ENSG00000166377                                                         |
| 19 | 524327   | 524664   | 5Y-H4K8la_peak_426 | 11.90661 |                                                                               |
| 19 | 796293   | 796507   | 5Y-H4K8la_peak_427 | 8.34321  | PTBP1_ENSG00000011304                                                         |
| 19 | 940436   | 940736   | 5Y-H4K8la_peak_428 | 7.32908  |                                                                               |
| 19 | 2221726  | 2221995  | 5Y-H4K8la_peak_429 | 8.13463  |                                                                               |
| 19 | 2307647  | 2307876  | 5Y-H4K8la_peak_430 | 8.87282  | LINGO3_ENSG00000220008                                                        |
| 19 | 3441347  | 3441593  | 5Y-H4K8la_peak_431 | 11.22499 |                                                                               |
| 19 | 3442085  | 3442329  | 5Y-H4K8la_peak_432 | 9.9061   |                                                                               |
| 19 | 3990649  | 3990856  | 5Y-H4K8la_peak_433 | 9.82869  |                                                                               |
| 19 | 4374719  | 4374929  | 5Y-H4K8la_peak_434 | 6.72615  |                                                                               |
| 19 | 4791935  | 4792149  | 5Y-H4K8la_peak_435 | 9.9061   | AC005523.3_ENSG00000268536;FEM1A_ENSG00000141965                              |
| 19 | 4816223  | 4816614  | 5Y-H4K8la_peak_436 | 6.53263  |                                                                               |
| 19 | 6739094  | 6739301  | 5Y-H4K8la_peak_437 | 5.67525  |                                                                               |
| 19 | 8455344  | 8455543  | 5Y-H4K8la_peak_438 | 19.83344 | RAB11B-AS1_ENSG00000269386;RAB11B_ENSG00000185236                             |
| 19 | 12793037 | 12793401 | 5Y-H4K8la_peak_439 | 6.7474   | DHPS_ENSG00000095059                                                          |
| 19 | 13085782 | 13086259 | 5Y-H4K8la_peak_440 | 7.71476  |                                                                               |
| 19 | 13201661 | 13201970 | 5Y-H4K8la_peak_441 | 6.90369  |                                                                               |
| 19 | 13203452 | 13203672 | 5Y-H4K8la_peak_442 | 7.82398  |                                                                               |
| 19 | 16221551 | 16221843 | 5Y-H4K8la_peak_443 | 6.84763  | RAB8A_ENSG00000167461                                                         |
| 19 | 17325194 | 17325542 | 5Y-H4K8la_peak_444 | 10.84781 | USE1_ENSG00000053501                                                          |
| 19 | 18335719 | 18335958 | 5Y-H4K8la_peak_445 | 6.28883  |                                                                               |
| 19 | 22018657 | 22018862 | 5Y-H4K8la_peak_446 | 6.25718  |                                                                               |
| 19 | 22816027 | 22816271 | 5Y-H4K8la_peak_447 | 7.95926  | ZNF492_ENSG00000229676                                                        |
| 19 | 32836696 | 32837014 | 5Y-H4K8la_peak_448 | 5.46366  | ZNF507_ENSG00000168813                                                        |
| 19 | 32896049 | 32896300 | 5Y-H4K8la_peak_449 | 12.59811 | AC007773.2_ENSG00000267213;AC007773.3_ENSG00000269093;DPY19L3_ENSG00000178904 |
| 19 | 33361282 | 33361491 | 5Y-H4K8la_peak_450 | 5.46366  | SLC7A9_ENSG00000021488                                                        |
| 19 | 34359852 | 34360188 | 5Y-H4K8la_peak_451 | 5.17488  |                                                                               |
| 19 | 35599758 | 35599965 | 5Y-H4K8la_peak_452 | 5.41648  |                                                                               |
| 19 | 35615894 | 35616098 | 5Y-H4K8la_peak_453 | 7.82398  |                                                                               |
| 19 | 39678362 | 39678559 | 5Y-H4K8la_peak_454 | 6.03474  |                                                                               |
| 19 | 41081915 | 41082290 | 5Y-H4K8la_peak_455 | 11.09733 | SHKBP1_ENSG00000160410                                                        |
| 19 | 42574767 | 42574982 | 5Y-H4K8la_peak_456 | 7.32908  |                                                                               |
| 19 | 46119675 | 46119969 | 5Y-H4K8la_peak_457 | 7.02081  |                                                                               |
| 19 | 47134483 | 47134927 | 5Y-H4K8la_peak_458 | 9.46533  |                                                                               |

|    |          |          |                    |          |                                                       |
|----|----------|----------|--------------------|----------|-------------------------------------------------------|
| 19 | 47363818 | 47364030 | 5Y-H4K8la_peak_459 | 7.32908  |                                                       |
| 19 | 47615048 | 47615412 | 5Y-H4K8la_peak_460 | 9.18087  |                                                       |
| 19 | 51871825 | 51872026 | 5Y-H4K8la_peak_461 | 6.62475  | CTD-2616J11.11_ENSG00000269403;CLDND2_ENSG00000160318 |
| 19 | 55668354 | 55668584 | 5Y-H4K8la_peak_462 | 8.35333  | TNNI3_ENSG00000129991                                 |
| 19 | 55771236 | 55771555 | 5Y-H4K8la_peak_463 | 10.87965 | PPP6R1_ENSG00000105063                                |
| 19 | 56145731 | 56145928 | 5Y-H4K8la_peak_464 | 7.02081  | ZNF580_ENSG00000213015;ZNF581_ENSG00000171425         |
| 19 | 56146480 | 56146939 | 5Y-H4K8la_peak_465 | 8.13463  | ZNF580_ENSG00000213015;ZNF581_ENSG00000171425         |
| 19 | 57702429 | 57702633 | 5Y-H4K8la_peak_466 | 6.53263  | ZNF264_ENSG00000083844                                |
| 19 | 57922784 | 57923100 | 5Y-H4K8la_peak_467 | 5.41836  | ZNF17_ENSG00000186272                                 |
| 19 | 58258437 | 58258714 | 5Y-H4K8la_peak_468 | 6.97847  | ZNF776_ENSG00000152443                                |
| 19 | 58897659 | 58897975 | 5Y-H4K8la_peak_469 | 7.32908  | RPS5_ENSG00000083845;MIR4754_ENSG00000266640          |
| 19 | 59065868 | 59066102 | 5Y-H4K8la_peak_470 | 6.28883  | CHMP2A_ENSG00000130724                                |
| 2  | 3105881  | 3106530  | 5Y-H4K8la_peak_471 | 9.96103  |                                                       |
| 2  | 3129510  | 3130584  | 5Y-H4K8la_peak_472 | 10.38546 | AC019118.2_ENSG00000234423                            |
| 2  | 3307012  | 3307247  | 5Y-H4K8la_peak_473 | 10.79855 |                                                       |
| 2  | 3317441  | 3317837  | 5Y-H4K8la_peak_474 | 8.47909  |                                                       |
| 2  | 3318531  | 3318731  | 5Y-H4K8la_peak_475 | 5.17488  |                                                       |
| 2  | 3650931  | 3651234  | 5Y-H4K8la_peak_476 | 7.20129  | AC010907.2_ENSG00000237370                            |
| 2  | 3697986  | 3698286  | 5Y-H4K8la_peak_477 | 8.6002   |                                                       |
| 2  | 5260486  | 5260689  | 5Y-H4K8la_peak_478 | 11.97923 |                                                       |
| 2  | 10588815 | 10589158 | 5Y-H4K8la_peak_479 | 8.27752  | ODC1_ENSG00000115758;RP11-320M2.1_ENSG00000257135     |
| 2  | 20368666 | 20368988 | 5Y-H4K8la_peak_480 | 6.37554  |                                                       |
| 2  | 20732659 | 20732860 | 5Y-H4K8la_peak_481 | 8.04355  |                                                       |
| 2  | 25050214 | 25050436 | 5Y-H4K8la_peak_482 | 7.92423  |                                                       |
| 2  | 26875707 | 26875999 | 5Y-H4K8la_peak_483 | 8.56836  |                                                       |
| 2  | 27294849 | 27295053 | 5Y-H4K8la_peak_484 | 8.04189  | OST4_ENSG00000228474                                  |
| 2  | 29117706 | 29118131 | 5Y-H4K8la_peak_485 | 9.34955  | WDR43_ENSG00000163811                                 |
| 2  | 29338401 | 29338912 | 5Y-H4K8la_peak_486 | 5.24601  |                                                       |
| 2  | 29495905 | 29496176 | 5Y-H4K8la_peak_487 | 10.84781 |                                                       |
| 2  | 29739187 | 29739424 | 5Y-H4K8la_peak_488 | 7.54283  |                                                       |
| 2  | 29804274 | 29804610 | 5Y-H4K8la_peak_489 | 9.68419  |                                                       |
| 2  | 36664245 | 36664476 | 5Y-H4K8la_peak_490 | 7.1479   |                                                       |
| 2  | 37899042 | 37899284 | 5Y-H4K8la_peak_491 | 9.59502  |                                                       |
| 2  | 42720622 | 42720857 | 5Y-H4K8la_peak_492 | 6.4327   | KCNG3_ENSG00000171126;MTA3_ENSG00000057935            |
| 2  | 43038262 | 43038502 | 5Y-H4K8la_peak_493 | 5.41836  |                                                       |
| 2  | 43195291 | 43195572 | 5Y-H4K8la_peak_494 | 7.82398  |                                                       |
| 2  | 43273511 | 43273732 | 5Y-H4K8la_peak_495 | 7.21152  |                                                       |
| 2  | 44224104 | 44224353 | 5Y-H4K8la_peak_496 | 7.30826  | LRPPRC_ENSG00000138095                                |
| 2  | 47290927 | 47291263 | 5Y-H4K8la_peak_497 | 5.60833  |                                                       |
| 2  | 47306990 | 47307442 | 5Y-H4K8la_peak_498 | 7.71217  |                                                       |
| 2  | 47314292 | 47314603 | 5Y-H4K8la_peak_499 | 10.84781 |                                                       |
| 2  | 48339296 | 48339826 | 5Y-H4K8la_peak_500 | 8.76859  |                                                       |
| 2  | 48647381 | 48647622 | 5Y-H4K8la_peak_501 | 7.32908  |                                                       |
| 2  | 64246357 | 64246592 | 5Y-H4K8la_peak_502 | 6.86977  | VPS54_ENSG00000143952                                 |
| 2  | 69170983 | 69171527 | 5Y-H4K8la_peak_503 | 14.48633 |                                                       |
| 2  | 70369171 | 70369391 | 5Y-H4K8la_peak_504 | 10.00392 |                                                       |

|    |           |           |                    |          |                                                                              |
|----|-----------|-----------|--------------------|----------|------------------------------------------------------------------------------|
| 2  | 85645230  | 85645470  | 5Y-H4K8la_peak_505 | 14.21197 | CAPG_ENSG00000042493;SH2D6_ENSG00000152292                                   |
| 2  | 104994899 | 104995169 | 5Y-H4K8la_peak_506 | 6.97847  |                                                                              |
| 2  | 114341187 | 114341549 | 5Y-H4K8la_peak_507 | 24.94722 | MIR1302-3_ENSG00000221055;WASH2P_ENSG00000146556                             |
| 2  | 121584454 | 121584663 | 5Y-H4K8la_peak_508 | 6.36955  |                                                                              |
| 2  | 129207774 | 129207999 | 5Y-H4K8la_peak_509 | 8.23102  |                                                                              |
| 2  | 174313606 | 174313956 | 5Y-H4K8la_peak_510 | 7.95926  |                                                                              |
| 2  | 176986567 | 176986767 | 5Y-H4K8la_peak_511 | 7.95919  | HOXD9_ENSG00000128709                                                        |
| 2  | 178077652 | 178077900 | 5Y-H4K8la_peak_512 | 6.11939  | AC079305.8_ENSG00000229337;HNRNPA3_ENSG00000170144;MIR4444-2_ENSG00000263721 |
| 2  | 182548869 | 182549137 | 5Y-H4K8la_peak_513 | 8.8671   |                                                                              |
| 2  | 202423405 | 202423601 | 5Y-H4K8la_peak_514 | 7.46931  |                                                                              |
| 2  | 216176844 | 216177066 | 5Y-H4K8la_peak_515 | 7.32908  | ATIC_ENSG00000138363                                                         |
| 2  | 218868697 | 218868912 | 5Y-H4K8la_peak_516 | 6.51244  | TNS1_ENSG00000079308                                                         |
| 2  | 219745295 | 219745522 | 5Y-H4K8la_peak_517 | 9.06738  | WNT10A_ENSG00000135925                                                       |
| 2  | 219773456 | 219773668 | 5Y-H4K8la_peak_518 | 11.54902 |                                                                              |
| 2  | 219885816 | 219886046 | 5Y-H4K8la_peak_519 | 6.53263  |                                                                              |
| 2  | 220375170 | 220375474 | 5Y-H4K8la_peak_520 | 7.83001  |                                                                              |
| 2  | 220492442 | 220492748 | 5Y-H4K8la_peak_521 | 10.01769 | SLC4A3_ENSG00000114923                                                       |
| 2  | 226146945 | 226147149 | 5Y-H4K8la_peak_522 | 6.97847  |                                                                              |
| 2  | 227655889 | 227656141 | 5Y-H4K8la_peak_523 | 10.01769 |                                                                              |
| 2  | 232253238 | 232253538 | 5Y-H4K8la_peak_524 | 10.44872 | AC017104.6_ENSG00000224376                                                   |
| 2  | 232260352 | 232260714 | 5Y-H4K8la_peak_525 | 8.01893  | B3GNT7_ENSG00000156966                                                       |
| 2  | 232478377 | 232479099 | 5Y-H4K8la_peak_526 | 10.62464 |                                                                              |
| 2  | 232545252 | 232545712 | 5Y-H4K8la_peak_527 | 6.50125  |                                                                              |
| 2  | 232546189 | 232546491 | 5Y-H4K8la_peak_528 | 4.99806  |                                                                              |
| 2  | 233415494 | 233415696 | 5Y-H4K8la_peak_529 | 8.5108   | TIGD1_ENSG00000221944;EIF4E2_ENSG00000135930;MIR5001_ENSG00000266620         |
| 2  | 238383714 | 238383949 | 5Y-H4K8la_peak_530 | 12.89902 |                                                                              |
| 2  | 238794082 | 238795033 | 5Y-H4K8la_peak_531 | 10.86735 |                                                                              |
| 2  | 241508103 | 241508360 | 5Y-H4K8la_peak_532 | 5.15153  | ANKMY1_ENSG00000144504                                                       |
| 2  | 242744324 | 242744564 | 5Y-H4K8la_peak_533 | 8.9585   |                                                                              |
| 2  | 242752128 | 242752329 | 5Y-H4K8la_peak_534 | 8.84365  | AC114730.3_ENSG00000224272                                                   |
| 2  | 242823353 | 242823563 | 5Y-H4K8la_peak_535 | 5.29825  | AC131097.3_ENSG00000233806                                                   |
| 20 | 825767    | 826190    | 5Y-H4K8la_peak_536 | 5.44443  |                                                                              |
| 20 | 2820607   | 2821144   | 5Y-H4K8la_peak_537 | 12.6484  | PCED1A_ENSG00000132635;VPS16_ENSG00000215305                                 |
| 20 | 30225546  | 30226114  | 5Y-H4K8la_peak_538 | 13.02594 | COX4I2_ENSG00000131055                                                       |
| 20 | 30499081  | 30499430  | 5Y-H4K8la_peak_539 | 6.60529  |                                                                              |
| 20 | 32599591  | 32599829  | 5Y-H4K8la_peak_540 | 6.03474  |                                                                              |
| 20 | 34560797  | 34561022  | 5Y-H4K8la_peak_541 | 6.83084  |                                                                              |
| 20 | 34823794  | 34824064  | 5Y-H4K8la_peak_542 | 7.15878  | AAR2_ENSG00000131043                                                         |
| 20 | 36024037  | 36024564  | 5Y-H4K8la_peak_543 | 9.56697  |                                                                              |
| 20 | 36226413  | 36226611  | 5Y-H4K8la_peak_544 | 7.43825  |                                                                              |
| 20 | 37075489  | 37075716  | 5Y-H4K8la_peak_545 | 9.46366  | SNHG11_ENSG00000174365                                                       |
| 20 | 37502689  | 37502915  | 5Y-H4K8la_peak_546 | 5.02936  |                                                                              |
| 20 | 37504403  | 37504820  | 5Y-H4K8la_peak_547 | 7.17106  |                                                                              |
| 20 | 37509759  | 37509969  | 5Y-H4K8la_peak_548 | 6.37554  |                                                                              |
| 20 | 43159887  | 43160189  | 5Y-H4K8la_peak_549 | 6.6495   | PKIG_ENSG00000168734                                                         |
| 20 | 44400110  | 44400584  | 5Y-H4K8la_peak_550 | 15.39737 |                                                                              |

|    |          |                             |          |                                                         |
|----|----------|-----------------------------|----------|---------------------------------------------------------|
| 20 | 45985777 | 45986069 5Y-H4K8la_peak_551 | 8.66894  | ZMYND8_ENSG00000101040                                  |
| 20 | 48531528 | 48531783 5Y-H4K8la_peak_552 | 7.27616  | SPATA2_ENSG00000158480                                  |
| 20 | 49462126 | 49462383 5Y-H4K8la_peak_553 | 7.40394  |                                                         |
| 20 | 49547088 | 49547349 5Y-H4K8la_peak_554 | 9.93066  | ADNP_ENSG00000101126;RP5-914P20.5_ENSG00000259456       |
| 20 | 55965495 | 55965934 5Y-H4K8la_peak_555 | 9.11759  | RBM38_ENSG00000132819                                   |
| 20 | 56595422 | 56595660 5Y-H4K8la_peak_556 | 10.40411 |                                                         |
| 20 | 56623048 | 56623249 5Y-H4K8la_peak_557 | 9.69532  |                                                         |
| 20 | 57226380 | 57226596 5Y-H4K8la_peak_558 | 8.23102  | STX16_ENSG00000124222;STX16-NPEPL1_ENSG00000254995      |
| 20 | 62085704 | 62086403 5Y-H4K8la_peak_559 | 8.3797   |                                                         |
| 20 | 62086951 | 62087243 5Y-H4K8la_peak_560 | 8.20071  |                                                         |
| 20 | 62088806 | 62089126 5Y-H4K8la_peak_561 | 6.78126  |                                                         |
| 20 | 62089564 | 62090084 5Y-H4K8la_peak_562 | 7.24062  |                                                         |
| 20 | 62257768 | 62258003 5Y-H4K8la_peak_563 | 5.76537  | GMEB2_ENSG00000101216;CTD-3184A7.4_ENSG00000232442      |
| 20 | 62673699 | 62674021 5Y-H4K8la_peak_564 | 6.11939  |                                                         |
| 21 | 10602380 | 10602611 5Y-H4K8la_peak_565 | 6.3274   |                                                         |
| 21 | 11157246 | 11157470 5Y-H4K8la_peak_566 | 7.08077  |                                                         |
| 21 | 30391328 | 30391544 5Y-H4K8la_peak_567 | 8.97426  | RWDD2B_ENSG00000156253                                  |
| 21 | 30391896 | 30392243 5Y-H4K8la_peak_568 | 8.97426  | RWDD2B_ENSG00000156253                                  |
| 21 | 43373441 | 43373644 5Y-H4K8la_peak_569 | 8.31121  | C2CD2_ENSG00000157617                                   |
| 21 | 43933372 | 43933676 5Y-H4K8la_peak_570 | 8.2602   |                                                         |
| 21 | 44393769 | 44394231 5Y-H4K8la_peak_571 | 9.33999  | PKNOX1_ENSG00000160199                                  |
| 21 | 44847436 | 44847934 5Y-H4K8la_peak_572 | 10.37149 | SIK1_ENSG00000142178                                    |
| 21 | 44870776 | 44871032 5Y-H4K8la_peak_573 | 8.6002   |                                                         |
| 21 | 45285235 | 45285656 5Y-H4K8la_peak_574 | 8.03849  | AGPAT3_ENSG00000160216                                  |
| 21 | 46676599 | 46676795 5Y-H4K8la_peak_575 | 8.54502  |                                                         |
| 21 | 47062166 | 47062457 5Y-H4K8la_peak_576 | 7.79008  |                                                         |
| 22 | 17680013 | 17680252 5Y-H4K8la_peak_577 | 9.46366  |                                                         |
| 22 | 19158748 | 19158967 5Y-H4K8la_peak_578 | 8.8671   | AC004463.6_ENSG00000260924                              |
| 22 | 19159528 | 19159733 5Y-H4K8la_peak_579 | 8.9585   | AC004463.6_ENSG00000260924                              |
| 22 | 20066729 | 20066962 5Y-H4K8la_peak_580 | 9.54093  | DGCR8_ENSG00000128191                                   |
| 22 | 20747803 | 20748112 5Y-H4K8la_peak_581 | 13.57341 | ZNF74_ENSG00000185252                                   |
| 22 | 21922093 | 21922305 5Y-H4K8la_peak_582 | 9.9061   |                                                         |
| 22 | 21983910 | 21984124 5Y-H4K8la_peak_583 | 10.00392 | YDJC_ENSG00000161179                                    |
| 22 | 23745209 | 23745919 5Y-H4K8la_peak_584 | 14.21197 | ZDHC8P1_ENSG00000133519                                 |
| 22 | 24191540 | 24191788 5Y-H4K8la_peak_585 | 8.99659  |                                                         |
| 22 | 24667232 | 24667480 5Y-H4K8la_peak_586 | 8.14665  | SPECC1L_ENSG00000100014;SPECC1L-ADORA2A_ENSG00000258555 |
| 22 | 24802252 | 24802505 5Y-H4K8la_peak_587 | 5.76537  |                                                         |
| 22 | 27654863 | 27655126 5Y-H4K8la_peak_588 | 6.11939  |                                                         |
| 22 | 29784179 | 29784400 5Y-H4K8la_peak_589 | 5.73215  |                                                         |
| 22 | 35863731 | 35864128 5Y-H4K8la_peak_590 | 12.61503 |                                                         |
| 22 | 36433277 | 36433649 5Y-H4K8la_peak_591 | 6.88861  |                                                         |
| 22 | 36878499 | 36878814 5Y-H4K8la_peak_592 | 6.11939  | TXN2_ENSG00000100348                                    |
| 22 | 37562845 | 37563052 5Y-H4K8la_peak_593 | 10.35984 | RP1-151B14.6_ENSG00000235237                            |
| 22 | 44319950 | 44320163 5Y-H4K8la_peak_594 | 6.84763  | PNPLA3_ENSG00000100344                                  |
| 22 | 45124974 | 45125208 5Y-H4K8la_peak_595 | 5.92398  |                                                         |
| 22 | 45125829 | 45126252 5Y-H4K8la_peak_596 | 6.9434   |                                                         |

|    |           |                              |          |                               |
|----|-----------|------------------------------|----------|-------------------------------|
| 22 | 46466113  | 46466319 5Y-H4K8la_peak_597  | 9.73458  | RP6-109B7.4_ENSG00000235159   |
| 22 | 46646429  | 46646639 5Y-H4K8la_peak_598  | 8.65079  | CDPF1_ENSG00000205643         |
| 22 | 46972441  | 46972677 5Y-H4K8la_peak_599  | 8.69005  | GRAMD4_ENSG00000075240        |
| 22 | 47016604  | 47016827 5Y-H4K8la_peak_600  | 8.66894  |                               |
| 22 | 49547368  | 49547583 5Y-H4K8la_peak_601  | 7.6269   |                               |
| 22 | 50707734  | 50708294 5Y-H4K8la_peak_602  | 7.02081  | MAPK11_ENSG00000185386        |
| 22 | 50709372  | 50709650 5Y-H4K8la_peak_603  | 7.98787  | MAPK11_ENSG00000185386        |
| 22 | 50746470  | 50746758 5Y-H4K8la_peak_604  | 7.32908  | PLXNB2_ENSG00000196576        |
| 22 | 50875034  | 50875295 5Y-H4K8la_peak_605  | 6.97847  |                               |
| 3  | 4344508   | 4344720 5Y-H4K8la_peak_606   | 5.13147  | SETMAR_ENSG00000170364        |
| 3  | 4546916   | 4547218 5Y-H4K8la_peak_607   | 6.9507   |                               |
| 3  | 8665004   | 8665210 5Y-H4K8la_peak_608   | 7.32908  |                               |
| 3  | 9932508   | 9932774 5Y-H4K8la_peak_609   | 8.9585   | JAGN1_ENSG00000171135         |
| 3  | 13462061  | 13462297 5Y-H4K8la_peak_610  | 5.80897  | NUP210_ENSG00000132182        |
| 3  | 16646780  | 16646986 5Y-H4K8la_peak_611  | 6.03474  |                               |
| 3  | 24563141  | 24563487 5Y-H4K8la_peak_612  | 7.95926  | MIR4792_ENSG00000265028       |
| 3  | 32858224  | 32858438 5Y-H4K8la_peak_613  | 5.81161  |                               |
| 3  | 42922103  | 42922499 5Y-H4K8la_peak_614  | 10.77389 |                               |
| 3  | 49203997  | 49204489 5Y-H4K8la_peak_615  | 7.20129  | CCDC71_ENSG00000177352        |
| 3  | 50424665  | 50425180 5Y-H4K8la_peak_616  | 11.69305 |                               |
| 3  | 50465072  | 50465395 5Y-H4K8la_peak_617  | 5.41836  |                               |
| 3  | 52064557  | 52064806 5Y-H4K8la_peak_618  | 8.36909  |                               |
| 3  | 52102810  | 52103084 5Y-H4K8la_peak_619  | 6.11939  |                               |
| 3  | 52345906  | 52346206 5Y-H4K8la_peak_620  | 11.87772 |                               |
| 3  | 56716790  | 56717054 5Y-H4K8la_peak_621  | 5.32615  | FAM208A_ENSG00000163946       |
| 3  | 73318214  | 73318433 5Y-H4K8la_peak_622  | 7.57826  |                               |
| 3  | 75057460  | 75057714 5Y-H4K8la_peak_623  | 5.81948  |                               |
| 3  | 115377519 | 115377806 5Y-H4K8la_peak_624 | 7.35213  | RP11-326J18.1_ENSG00000241596 |
| 3  | 119013417 | 119013662 5Y-H4K8la_peak_625 | 7.46931  | ARHGAP31_ENSG00000031081      |
| 3  | 119053062 | 119053267 5Y-H4K8la_peak_626 | 5.02936  |                               |
| 3  | 119378940 | 119379197 5Y-H4K8la_peak_627 | 10.47134 |                               |
| 3  | 126046177 | 126046395 5Y-H4K8la_peak_628 | 6.97847  |                               |
| 3  | 127416867 | 127417073 5Y-H4K8la_peak_629 | 8.2602   |                               |
| 3  | 128126623 | 128126907 5Y-H4K8la_peak_630 | 9.53858  |                               |
| 3  | 128128543 | 128129018 5Y-H4K8la_peak_631 | 10.51622 |                               |
| 3  | 128129789 | 128130099 5Y-H4K8la_peak_632 | 10.41836 |                               |
| 3  | 128131225 | 128131610 5Y-H4K8la_peak_633 | 8.42533  |                               |
| 3  | 128173276 | 128173480 5Y-H4K8la_peak_634 | 6.49152  |                               |
| 3  | 128175652 | 128175875 5Y-H4K8la_peak_635 | 9.18087  |                               |
| 3  | 128176370 | 128176605 5Y-H4K8la_peak_636 | 9.35387  |                               |
| 3  | 128176849 | 128177075 5Y-H4K8la_peak_637 | 6.84763  |                               |
| 3  | 128216043 | 128216398 5Y-H4K8la_peak_638 | 5.02936  |                               |
| 3  | 139062157 | 139062621 5Y-H4K8la_peak_639 | 8.03849  |                               |
| 3  | 193988457 | 193988885 5Y-H4K8la_peak_640 | 7.46931  |                               |
| 3  | 194901368 | 194901622 5Y-H4K8la_peak_641 | 6.62475  |                               |
| 3  | 195636962 | 195637181 5Y-H4K8la_peak_642 | 8.34321  |                               |

|   |           |                              |          |                                                      |
|---|-----------|------------------------------|----------|------------------------------------------------------|
| 4 | 52100     | 52451 5Y-H4K8la_peak_643     | 10.596   | ZNF595_ENSG00000197701                               |
| 4 | 468418    | 468651 5Y-H4K8la_peak_644    | 10.021   | ABCA11P_ENSG00000251595                              |
| 4 | 967589    | 968016 5Y-H4K8la_peak_645    | 8.03849  |                                                      |
| 4 | 1685610   | 1685838 5Y-H4K8la_peak_646   | 5.56085  | FAM53A_ENSG00000174137;Y_RNA_ENSG00000207009         |
| 4 | 1722228   | 1722438 5Y-H4K8la_peak_647   | 6.36955  | TMEM129_ENSG00000168936;TACC3_ENSG00000013810        |
| 4 | 8442740   | 8442964 5Y-H4K8la_peak_648   | 7.46931  | ACOX3_ENSG00000087008                                |
| 4 | 9382719   | 9382979 5Y-H4K8la_peak_649   | 9.46366  |                                                      |
| 4 | 39182176  | 39182373 5Y-H4K8la_peak_650  | 7.83962  |                                                      |
| 4 | 40058604  | 40058812 5Y-H4K8la_peak_651  | 10.87965 | RP11-333E13.4_ENSG00000205794;N4BP2_ENSG00000078177  |
| 4 | 41883637  | 41884230 5Y-H4K8la_peak_652  | 14.36156 | LINC00682_ENSG00000245870                            |
| 4 | 83294412  | 83294771 5Y-H4K8la_peak_653  | 5.5367   | HNRNPD_ENSG00000138668;RP11-127B20.3_ENSG00000272677 |
| 4 | 148652823 | 148653041 5Y-H4K8la_peak_654 | 6.84763  | ARHGAP10_ENSG00000071205                             |
| 4 | 174452733 | 174452982 5Y-H4K8la_peak_655 | 7.61397  |                                                      |
| 5 | 34191636  | 34191942 5Y-H4K8la_peak_656  | 10.85054 |                                                      |
| 5 | 34192404  | 34193045 5Y-H4K8la_peak_657  | 17.31746 |                                                      |
| 5 | 50678656  | 50678940 5Y-H4K8la_peak_658  | 6.03474  | CTD-2314G24.2_ENSG00000259663;ISL1_ENSG00000016082   |
| 5 | 67830349  | 67830623 5Y-H4K8la_peak_659  | 6.28883  | CTC-537E7.2_ENSG00000248359                          |
| 5 | 90104573  | 90104818 5Y-H4K8la_peak_660  | 5.5367   |                                                      |
| 5 | 90648118  | 90648434 5Y-H4K8la_peak_661  | 7.79008  |                                                      |
| 5 | 94955849  | 94956133 5Y-H4K8la_peak_662  | 5.46366  | GPR150_ENSG00000178015                               |
| 5 | 126113545 | 126113822 5Y-H4K8la_peak_663 | 5.76537  |                                                      |
| 5 | 130500523 | 130500753 5Y-H4K8la_peak_664 | 7.23632  |                                                      |
| 5 | 134735121 | 134735373 5Y-H4K8la_peak_665 | 7.16957  | H2AFY_ENSG00000113648;CTC-203F4.2_ENSG00000270021    |
| 5 | 139089372 | 139089862 5Y-H4K8la_peak_666 | 8.86211  |                                                      |
| 5 | 141062133 | 141062332 5Y-H4K8la_peak_667 | 7.96941  | ARAP3_ENSG00000120318                                |
| 5 | 151150495 | 151150721 5Y-H4K8la_peak_668 | 6.30734  | G3BP1_ENSG00000145907                                |
| 5 | 174220326 | 174220528 5Y-H4K8la_peak_669 | 6.97847  |                                                      |
| 5 | 176560147 | 176560462 5Y-H4K8la_peak_670 | 8.79833  | NSD1_ENSG00000165671                                 |
| 5 | 176900223 | 176900442 5Y-H4K8la_peak_671 | 6.11939  | DBN1_ENSG00000113758                                 |
| 5 | 177775519 | 177775811 5Y-H4K8la_peak_672 | 8.15295  |                                                      |
| 5 | 178737073 | 178737309 5Y-H4K8la_peak_673 | 8.01893  |                                                      |
| 5 | 178752793 | 178753038 5Y-H4K8la_peak_674 | 9.66663  |                                                      |
| 5 | 179051313 | 179051511 5Y-H4K8la_peak_675 | 6.11154  |                                                      |
| 6 | 291691    | 292001 5Y-H4K8la_peak_676    | 5.82532  | DUSP22_ENSG00000112679                               |
| 6 | 22557824  | 22558043 5Y-H4K8la_peak_677  | 7.1479   |                                                      |
| 6 | 30685868  | 30686090 5Y-H4K8la_peak_678  | 8.54502  | MDC1_ENSG00000137337                                 |
| 6 | 34394350  | 34394570 5Y-H4K8la_peak_679  | 7.95926  | RPS10-NUDT3_ENSG00000270800;RPS10_ENSG00000124614    |
| 6 | 35465428  | 35465669 5Y-H4K8la_peak_680  | 7.92423  | TEAD3_ENSG00000007866                                |
| 6 | 36098895  | 36099259 5Y-H4K8la_peak_681  | 13.03385 |                                                      |
| 6 | 40688779  | 40688989 5Y-H4K8la_peak_682  | 6.68187  |                                                      |
| 6 | 40996037  | 40996293 5Y-H4K8la_peak_683  | 12.63314 |                                                      |
| 6 | 41040956  | 41041221 5Y-H4K8la_peak_684  | 9.8767   | NFYA_ENSG00000001167                                 |
| 6 | 74231371  | 74231572 5Y-H4K8la_peak_685  | 7.95926  |                                                      |
| 6 | 99275497  | 99275729 5Y-H4K8la_peak_686  | 10.8901  |                                                      |
| 6 | 110679509 | 110679841 5Y-H4K8la_peak_687 | 7.1479   | METTL24_ENSG00000053328                              |
| 6 | 110864117 | 110864373 5Y-H4K8la_peak_688 | 6.97847  |                                                      |

|   |           |           |                    |          |                                                                                    |
|---|-----------|-----------|--------------------|----------|------------------------------------------------------------------------------------|
| 6 | 137365687 | 137365891 | 5Y-H4K8la_peak_689 | 8.80583  | IL20RA_ENSG00000016402                                                             |
| 6 | 143832511 | 143832748 | 5Y-H4K8la_peak_690 | 7.32908  | FUCA2_ENSG00000001036                                                              |
| 6 | 146864405 | 146864619 | 5Y-H4K8la_peak_691 | 8.15295  | RAB32_ENSG000000118508                                                             |
| 6 | 149638878 | 149639174 | 5Y-H4K8la_peak_692 | 7.95926  |                                                                                    |
| 6 | 158243698 | 158244118 | 5Y-H4K8la_peak_693 | 13.09444 | SNX9_ENSG000000130340                                                              |
| 6 | 167032986 | 167033189 | 5Y-H4K8la_peak_694 | 9.38089  |                                                                                    |
| 6 | 167441588 | 167441797 | 5Y-H4K8la_peak_695 | 5.46366  |                                                                                    |
| 6 | 168216200 | 168216402 | 5Y-H4K8la_peak_696 | 6.03474  |                                                                                    |
| 6 | 170102508 | 170102726 | 5Y-H4K8la_peak_697 | 9.25671  | WDR27_ENSG000000184465;C6orf120_ENSG000000185127                                   |
| 6 | 170124908 | 170125256 | 5Y-H4K8la_peak_698 | 10.87965 | PHF10_ENSG000000130024;RP1-266L20.2_ENSG000000232640;RP1-266L20.4_ENSG000000227704 |
| 7 | 119224    | 119465    | 5Y-H4K8la_peak_699 | 7.32908  |                                                                                    |
| 7 | 149847    | 150646    | 5Y-H4K8la_peak_700 | 9.43441  | AC093627.9_ENSG000000242474;AC093627.10_ENSG000000240859                           |
| 7 | 751918    | 752150    | 5Y-H4K8la_peak_701 | 10.77389 |                                                                                    |
| 7 | 1513522   | 1513733   | 5Y-H4K8la_peak_702 | 8.76859  |                                                                                    |
| 7 | 1625862   | 1626089   | 5Y-H4K8la_peak_703 | 10.89943 |                                                                                    |
| 7 | 1682012   | 1682211   | 5Y-H4K8la_peak_704 | 5.31882  |                                                                                    |
| 7 | 1687291   | 1687841   | 5Y-H4K8la_peak_705 | 5.82532  |                                                                                    |
| 7 | 2491800   | 2491999   | 5Y-H4K8la_peak_706 | 5.55047  |                                                                                    |
| 7 | 3422737   | 3422992   | 5Y-H4K8la_peak_707 | 8.58413  |                                                                                    |
| 7 | 4183358   | 4183590   | 5Y-H4K8la_peak_708 | 6.50125  |                                                                                    |
| 7 | 5229200   | 5229550   | 5Y-H4K8la_peak_709 | 6.84763  | WIPI2_ENSG000000157954                                                             |
| 7 | 5569802   | 5570012   | 5Y-H4K8la_peak_710 | 10.89943 |                                                                                    |
| 7 | 5595793   | 5596056   | 5Y-H4K8la_peak_711 | 7.92423  | CTB-161C1.1_ENSG000000272719                                                       |
| 7 | 5614678   | 5615137   | 5Y-H4K8la_peak_712 | 7.85758  |                                                                                    |
| 7 | 6413538   | 6413790   | 5Y-H4K8la_peak_713 | 8.56836  | RAC1_ENSG000000136238                                                              |
| 7 | 6704044   | 6704247   | 5Y-H4K8la_peak_714 | 10.0197  | AC073343.13_ENSG000000228010                                                       |
| 7 | 8301509   | 8302096   | 5Y-H4K8la_peak_715 | 11.76723 | ICA1_ENSG000000003147;AC007009.1_ENSG000000244239;AC007128.1_ENSG000000229970      |
| 7 | 11065444  | 11065645  | 5Y-H4K8la_peak_716 | 9.00262  |                                                                                    |
| 7 | 26438468  | 26438733  | 5Y-H4K8la_peak_717 | 9.24465  | AC004540.5_ENSG000000214870                                                        |
| 7 | 29287100  | 29287337  | 5Y-H4K8la_peak_718 | 7.26933  |                                                                                    |
| 7 | 30795022  | 30795223  | 5Y-H4K8la_peak_719 | 8.36751  |                                                                                    |
| 7 | 44143417  | 44143634  | 5Y-H4K8la_peak_720 | 8.27752  | AEBP1_ENSG000000106624                                                             |
| 7 | 44316044  | 44316349  | 5Y-H4K8la_peak_721 | 8.27752  |                                                                                    |
| 7 | 47576492  | 47576876  | 5Y-H4K8la_peak_722 | 10.79611 |                                                                                    |
| 7 | 47674739  | 47674938  | 5Y-H4K8la_peak_723 | 11.3563  |                                                                                    |
| 7 | 47802339  | 47802604  | 5Y-H4K8la_peak_724 | 8.3797   |                                                                                    |
| 7 | 50518348  | 50518622  | 5Y-H4K8la_peak_725 | 12.68645 | FIGNL1_ENSG000000132436                                                            |
| 7 | 50635766  | 50636073  | 5Y-H4K8la_peak_726 | 8.54843  |                                                                                    |
| 7 | 56032460  | 56032683  | 5Y-H4K8la_peak_727 | 7.32908  |                                                                                    |
| 7 | 64699701  | 64699949  | 5Y-H4K8la_peak_728 | 6.95057  |                                                                                    |
| 7 | 66162050  | 66162250  | 5Y-H4K8la_peak_729 | 5.76537  |                                                                                    |
| 7 | 69043149  | 69043406  | 5Y-H4K8la_peak_730 | 6.68187  |                                                                                    |
| 7 | 72843201  | 72843615  | 5Y-H4K8la_peak_731 | 9.43441  |                                                                                    |
| 7 | 73284282  | 73284494  | 5Y-H4K8la_peak_732 | 6.007    |                                                                                    |
| 7 | 73441929  | 73442148  | 5Y-H4K8la_peak_733 | 6.50125  | ELN_ENSG000000049540                                                               |
| 7 | 73507524  | 73507735  | 5Y-H4K8la_peak_734 | 7.82398  |                                                                                    |



|   |           |           |                    |          |                                                                         |
|---|-----------|-----------|--------------------|----------|-------------------------------------------------------------------------|
| 7 | 73588751  | 73588964  | 5Y-H4K8la_peak_735 | 14.21033 | EIF4H_ENSG00000106682                                                   |
| 7 | 74072100  | 74072495  | 5Y-H4K8la_peak_736 | 8.27752  | GTF2I_ENSG00000077809                                                   |
| 7 | 74306324  | 74306540  | 5Y-H4K8la_peak_737 | 7.32908  | STAG3L2_ENSG00000160828;PMS2P5_ENSG00000123965                          |
| 7 | 75814573  | 75814795  | 5Y-H4K8la_peak_738 | 9.88272  |                                                                         |
| 7 | 75923766  | 75924015  | 5Y-H4K8la_peak_739 | 12.62719 |                                                                         |
| 7 | 75946754  | 75946991  | 5Y-H4K8la_peak_740 | 8.76859  |                                                                         |
| 7 | 75987711  | 75987965  | 5Y-H4K8la_peak_741 | 5.50596  | YWHAG_ENSG00000170027                                                   |
| 7 | 77045805  | 77046061  | 5Y-H4K8la_peak_742 | 10.84781 | GSAP_ENSG00000186088;RP5-899E9.1_ENSG00000273341                        |
| 7 | 86849628  | 86849834  | 5Y-H4K8la_peak_743 | 8.15295  | TMEM243_ENSG00000135185                                                 |
| 7 | 87806101  | 87806338  | 5Y-H4K8la_peak_744 | 8.15295  |                                                                         |
| 7 | 91195170  | 91195366  | 5Y-H4K8la_peak_745 | 5.02936  |                                                                         |
| 7 | 94285191  | 94285392  | 5Y-H4K8la_peak_746 | 9.9061   | SGCE_ENSG00000127990;PEG10_ENSG00000242265                              |
| 7 | 98246076  | 98246313  | 5Y-H4K8la_peak_747 | 12.20171 | NPTX2_ENSG00000106236                                                   |
| 7 | 99177564  | 99177854  | 5Y-H4K8la_peak_748 | 5.41836  |                                                                         |
| 7 | 99213715  | 99213926  | 5Y-H4K8la_peak_749 | 12.008   | ZSCAN25_ENSG00000197037                                                 |
| 7 | 99698650  | 99698896  | 5Y-H4K8la_peak_750 | 10.12311 | MCM7_ENSG00000166508;AP4M1_ENSG00000221838                              |
| 7 | 99725510  | 99725725  | 5Y-H4K8la_peak_751 | 5.26481  | RP11-506M12.1_ENSG00000242798                                           |
| 7 | 100200135 | 100200399 | 5Y-H4K8la_peak_752 | 8.3797   | PCOLCE_ENSG00000106333                                                  |
| 7 | 100208892 | 100209376 | 5Y-H4K8la_peak_753 | 5.76537  | MOSPD3_ENSG00000106330                                                  |
| 7 | 100471697 | 100472144 | 5Y-H4K8la_peak_754 | 11.5543  | SRRT_ENSG00000087087                                                    |
| 7 | 100488504 | 100488811 | 5Y-H4K8la_peak_755 | 6.24256  |                                                                         |
| 7 | 100796982 | 100797179 | 5Y-H4K8la_peak_756 | 7.5782   | AP1S1_ENSG00000106367                                                   |
| 7 | 100824100 | 100824298 | 5Y-H4K8la_peak_757 | 6.4137   | NAT16_ENSG00000167011                                                   |
| 7 | 100836145 | 100836543 | 5Y-H4K8la_peak_758 | 6.34953  |                                                                         |
| 7 | 112430585 | 112430840 | 5Y-H4K8la_peak_759 | 7.99376  | TMEM168_ENSG00000146802                                                 |
| 7 | 123673375 | 123673603 | 5Y-H4K8la_peak_760 | 7.92423  | TMEM229A_ENSG00000234224                                                |
| 7 | 127291024 | 127291223 | 5Y-H4K8la_peak_761 | 9.31722  | AC073934.6_ENSG00000240790                                              |
| 7 | 127905329 | 127905555 | 5Y-H4K8la_peak_762 | 9.20868  | RP11-62J1.4_ENSG00000272915                                             |
| 7 | 128001327 | 128001982 | 5Y-H4K8la_peak_763 | 17.12679 | PRRT4_ENSG00000224940                                                   |
| 7 | 128019104 | 128019349 | 5Y-H4K8la_peak_764 | 9.59502  |                                                                         |
| 7 | 128020741 | 128021232 | 5Y-H4K8la_peak_765 | 10.61974 |                                                                         |
| 7 | 131242594 | 131242876 | 5Y-H4K8la_peak_766 | 7.02042  | PODXL_ENSG00000128567                                                   |
| 7 | 133640548 | 133640861 | 5Y-H4K8la_peak_767 | 7.32908  |                                                                         |
| 7 | 139691776 | 139691992 | 5Y-H4K8la_peak_768 | 7.32908  |                                                                         |
| 7 | 149118910 | 149119452 | 5Y-H4K8la_peak_769 | 11.83122 | RP11-143I21.1_ENSG00000261842                                           |
| 7 | 150948584 | 150948788 | 5Y-H4K8la_peak_770 | 8.23102  |                                                                         |
| 7 | 155547005 | 155547239 | 5Y-H4K8la_peak_771 | 7.79699  |                                                                         |
| 7 | 156432970 | 156433167 | 5Y-H4K8la_peak_772 | 11.26428 | LINC01006_ENSG00000182648;C7orf13_ENSG00000244291;RNF32_ENSG00000105982 |
| 7 | 157903517 | 157903792 | 5Y-H4K8la_peak_773 | 11.83122 |                                                                         |
| 8 | 11141448  | 11141691  | 5Y-H4K8la_peak_774 | 6.97847  | MTMR9_ENSG00000104643                                                   |
| 8 | 11471019  | 11471537  | 5Y-H4K8la_peak_775 | 10.77389 |                                                                         |
| 8 | 21915168  | 21915404  | 5Y-H4K8la_peak_776 | 7.15878  |                                                                         |
| 8 | 22069356  | 22069569  | 5Y-H4K8la_peak_777 | 7.42863  |                                                                         |
| 8 | 22089232  | 22089436  | 5Y-H4K8la_peak_778 | 9.24465  | PHYHIP_ENSG00000168490                                                  |
| 8 | 22297987  | 22298224  | 5Y-H4K8la_peak_779 | 9.35159  | PPP3CC_ENSG00000120910                                                  |
| 8 | 22853240  | 22853494  | 5Y-H4K8la_peak_780 | 6.58555  |                                                                         |

|   |           |           |                    |          |                                                         |
|---|-----------|-----------|--------------------|----------|---------------------------------------------------------|
| 8 | 29230419  | 29231033  | 5Y-H4K8la_peak_781 | 7.31397  |                                                         |
| 8 | 48920368  | 48920741  | 5Y-H4K8la_peak_782 | 12.49539 | UBE2V2_ENSG00000169139                                  |
| 8 | 72519367  | 72519584  | 5Y-H4K8la_peak_783 | 6.28883  |                                                         |
| 8 | 74005524  | 74005720  | 5Y-H4K8la_peak_784 | 10.01769 |                                                         |
| 8 | 80215818  | 80216056  | 5Y-H4K8la_peak_785 | 10.021   |                                                         |
| 8 | 80739845  | 80740070  | 5Y-H4K8la_peak_786 | 7.39065  |                                                         |
| 8 | 99306237  | 99306435  | 5Y-H4K8la_peak_787 | 6.97847  | NIPAL2_ENSG00000104361                                  |
| 8 | 101942426 | 101942634 | 5Y-H4K8la_peak_788 | 6.03474  |                                                         |
| 8 | 142412416 | 142412617 | 5Y-H4K8la_peak_789 | 6.53263  |                                                         |
| 8 | 143864253 | 143864625 | 5Y-H4K8la_peak_790 | 7.32908  |                                                         |
| 8 | 144333238 | 144333456 | 5Y-H4K8la_peak_791 | 6.03474  |                                                         |
| 8 | 144427437 | 144427643 | 5Y-H4K8la_peak_792 | 9.12339  |                                                         |
| 8 | 144718347 | 144718669 | 5Y-H4K8la_peak_793 | 7.56321  | ZNF623_ENSG00000183309                                  |
| 8 | 145330343 | 145330553 | 5Y-H4K8la_peak_794 | 7.95926  | KM-PA-2_ENSG00000204775                                 |
| 8 | 145597048 | 145597284 | 5Y-H4K8la_peak_795 | 7.31397  | ADCK5_ENSG00000173137                                   |
| 8 | 146053096 | 146053333 | 5Y-H4K8la_peak_796 | 9.9061   | ZNF7_ENSG00000147789                                    |
| 9 | 6412446   | 6412819   | 5Y-H4K8la_peak_797 | 7.95926  | UHRF2_ENSG00000147854                                   |
| 9 | 14314916  | 14315262  | 5Y-H4K8la_peak_798 | 10.57306 |                                                         |
| 9 | 14693499  | 14693718  | 5Y-H4K8la_peak_799 | 7.32908  | ZDHHC21_ENSG00000175893                                 |
| 9 | 33817515  | 33817775  | 5Y-H4K8la_peak_800 | 10.77389 | UBE2R2_ENSG00000107341                                  |
| 9 | 35675994  | 35676336  | 5Y-H4K8la_peak_801 | 6.84763  | ARHGEF39_ENSG00000137135                                |
| 9 | 38233041  | 38233261  | 5Y-H4K8la_peak_802 | 11.12382 |                                                         |
| 9 | 66458093  | 66458373  | 5Y-H4K8la_peak_803 | 8.10903  | RP11-262H14.1_ENSG00000238113;RNA5SP283_ENSG00000202474 |
| 9 | 92716289  | 92716633  | 5Y-H4K8la_peak_804 | 7.1479   |                                                         |
| 9 | 94698083  | 94698280  | 5Y-H4K8la_peak_805 | 6.53263  |                                                         |
| 9 | 99179983  | 99180489  | 5Y-H4K8la_peak_806 | 10.2251  | ZNF367_ENSG00000165244                                  |
| 9 | 100744944 | 100745249 | 5Y-H4K8la_peak_807 | 13.13483 | ANP32B_ENSG00000136938                                  |
| 9 | 100746200 | 100746433 | 5Y-H4K8la_peak_808 | 9.8767   | ANP32B_ENSG00000136938                                  |
| 9 | 127082351 | 127082576 | 5Y-H4K8la_peak_809 | 8.3797   |                                                         |
| 9 | 127239431 | 127239754 | 5Y-H4K8la_peak_810 | 12.61503 |                                                         |
| 9 | 127275211 | 127275456 | 5Y-H4K8la_peak_811 | 10.01769 |                                                         |
| 9 | 129270482 | 129270690 | 5Y-H4K8la_peak_812 | 7.60153  |                                                         |
| 9 | 129284077 | 129284849 | 5Y-H4K8la_peak_813 | 9.00262  |                                                         |
| 9 | 129293909 | 129294166 | 5Y-H4K8la_peak_814 | 6.53263  | AL356309.1_ENSG00000221768                              |
| 9 | 129295199 | 129295428 | 5Y-H4K8la_peak_815 | 10.77389 |                                                         |
| 9 | 129485057 | 129485446 | 5Y-H4K8la_peak_816 | 13.5242  |                                                         |
| 9 | 130185836 | 130186043 | 5Y-H4K8la_peak_817 | 7.50839  | ZNF79_ENSG00000196152                                   |
| 9 | 132082582 | 132082800 | 5Y-H4K8la_peak_818 | 11.4564  | C9orf106_ENSG00000179082                                |
| 9 | 132222060 | 132222390 | 5Y-H4K8la_peak_819 | 7.79008  |                                                         |
| 9 | 132411864 | 132412233 | 5Y-H4K8la_peak_820 | 6.51199  |                                                         |
| 9 | 132460137 | 132460381 | 5Y-H4K8la_peak_821 | 8.15295  |                                                         |
| 9 | 133455184 | 133455383 | 5Y-H4K8la_peak_822 | 9.82869  | FUBP3_ENSG00000107164                                   |
| 9 | 134153777 | 134154088 | 5Y-H4K8la_peak_823 | 10.17199 |                                                         |
| 9 | 134406903 | 134407187 | 5Y-H4K8la_peak_824 | 10.44872 | UCK1_ENSG00000130717                                    |
| 9 | 136379847 | 136380098 | 5Y-H4K8la_peak_825 | 15.1968  |                                                         |
| 9 | 136380456 | 136380958 | 5Y-H4K8la_peak_826 | 6.4137   |                                                         |

|     |           |           |                    |          |                                            |
|-----|-----------|-----------|--------------------|----------|--------------------------------------------|
| 9   | 136499475 | 136499737 | 5Y-H4K8la_peak_827 | 9.51625  |                                            |
| 9   | 136500641 | 136500887 | 5Y-H4K8la_peak_828 | 11.0515  | DBH_ENSG00000123454                        |
| 9   | 136548090 | 136548527 | 5Y-H4K8la_peak_829 | 10.49857 |                                            |
| 9   | 137028568 | 137028871 | 5Y-H4K8la_peak_830 | 10.44337 | RNU6ATAC_ENSG00000221676                   |
| 9   | 137347588 | 137348072 | 5Y-H4K8la_peak_831 | 11.54902 |                                            |
| 9   | 137599742 | 137599988 | 5Y-H4K8la_peak_832 | 7.1479   |                                            |
| 9   | 138884356 | 138884558 | 5Y-H4K8la_peak_833 | 9.93134  |                                            |
| 9   | 139221274 | 139221494 | 5Y-H4K8la_peak_834 | 4.99806  | GPSM1_ENSG00000160360                      |
| 9   | 139560703 | 139560945 | 5Y-H4K8la_peak_835 | 6.9161   |                                            |
| 9   | 139844754 | 139845384 | 5Y-H4K8la_peak_836 | 14.80859 | LCN12_ENSG00000184925                      |
| 9   | 139948803 | 139949060 | 5Y-H4K8la_peak_837 | 8.32039  | ENTPD2_ENSG00000054179                     |
| 9   | 139965866 | 139966186 | 5Y-H4K8la_peak_838 | 7.32908  | SAPCD2_ENSG00000186193                     |
| 9   | 139971350 | 139971578 | 5Y-H4K8la_peak_839 | 5.82532  | UAP1L1_ENSG00000197355                     |
| 9   | 140317255 | 140317525 | 5Y-H4K8la_peak_840 | 10.00392 | EXD3_ENSG00000187609;NOXA1_ENSG00000188747 |
| 9   | 140771763 | 140771997 | 5Y-H4K8la_peak_841 | 8.3797   | CACNA1B_ENSG00000148408                    |
| GLI | 30187     | 30483     | 5Y-H4K8la_peak_842 | 4.96385  |                                            |
| GLI | 111035    | 111255    | 5Y-H4K8la_peak_843 | 7.5579   |                                            |
| GLI | 111534    | 111833    | 5Y-H4K8la_peak_844 | 6.33529  |                                            |
| GLI | 135086    | 135303    | 5Y-H4K8la_peak_845 | 8.27951  |                                            |
| GLI | 47559     | 47961     | 5Y-H4K8la_peak_846 | 6.97847  |                                            |
| GLI | 99985     | 100352    | 5Y-H4K8la_peak_847 | 16.22176 |                                            |
| GLI | 137550    | 137748    | 5Y-H4K8la_peak_848 | 17.50283 |                                            |
| GLI | 145261    | 145508    | 5Y-H4K8la_peak_849 | 17.0743  |                                            |
| X   | 2418336   | 2418562   | 5Y-H4K8la_peak_850 | 8.9585   | ZBED1_ENSG00000214717                      |
| X   | 9982662   | 9982863   | 5Y-H4K8la_peak_851 | 6.97847  | WWC3_ENSG00000047644                       |
| X   | 115004625 | 115005182 | 5Y-H4K8la_peak_852 | 27.69216 |                                            |
