# Supplementary material for: SIRT2 functions as a histone delactylase and inhibits the proliferation and migration of neuroblastoma cells
Source: PubMed Central journal article supplement (PMC9174446; doi:10.1038/s41421-022-00398-y), 2022-06-07
Supplement: 41421_2022_398_MOESM4_ESM.pdf [file 41421_2022_398_MOESM4_ESM.pdf]

**Table S4. CHIP-seq peaks and annotated genes by anti-H4K8ac antibody in control SH-SY5Y cells.**

| chr | start   | end     | peakid            | -LOG(pvalue) | gene                                                        |
|-----|---------|---------|-------------------|--------------|-------------------------------------------------------------|
| 1   | 713436  | 713628  | 5Y-H4K8ac_peak_1  | 8.16382      | RP11-206L10.2_ENSG00000228327;RP11-206L10.9_ENSG00000237491 |
| 1   | 762556  | 763195  | 5Y-H4K8ac_peak_2  | 7.34185      | LINC00115_ENSG00000225880;LINC01128_ENSG00000228794         |
| 1   | 839340  | 839886  | 5Y-H4K8ac_peak_3  | 6.77436      | RP11-54O7.16_ENSG00000272438                                |
| 1   | 853731  | 853935  | 5Y-H4K8ac_peak_4  | 5.92809      |                                                             |
| 1   | 875280  | 875501  | 5Y-H4K8ac_peak_5  | 6.10343      |                                                             |
| 1   | 877612  | 878346  | 5Y-H4K8ac_peak_6  | 9.64915      |                                                             |
| 1   | 896077  | 896542  | 5Y-H4K8ac_peak_7  | 8.14913      | KLHL17_ENSG00000187961                                      |
| 1   | 911336  | 911557  | 5Y-H4K8ac_peak_8  | 4.36976      |                                                             |
| 1   | 935903  | 936103  | 5Y-H4K8ac_peak_9  | 8.46442      | HES4_ENSG00000188290                                        |
| 1   | 936995  | 937243  | 5Y-H4K8ac_peak_10 | 8.78946      |                                                             |
| 1   | 949144  | 949536  | 5Y-H4K8ac_peak_11 | 5.39991      | RP11-54O7.11_ENSG00000224969;ISG15_ENSG00000187608          |
| 1   | 994829  | 995171  | 5Y-H4K8ac_peak_12 | 5.56894      | RP11-465B22.3_ENSG00000217801                               |
| 1   | 1079541 | 1080571 | 5Y-H4K8ac_peak_13 | 9.78792      |                                                             |
| 1   | 1092995 | 1093365 | 5Y-H4K8ac_peak_14 | 9.79526      |                                                             |
| 1   | 1143726 | 1144076 | 5Y-H4K8ac_peak_15 | 8.47164      |                                                             |
| 1   | 1144555 | 1144805 | 5Y-H4K8ac_peak_16 | 5.12213      |                                                             |
| 1   | 1166987 | 1167299 | 5Y-H4K8ac_peak_17 | 9.30505      | SDF4_ENSG00000078808;B3GALT6_ENSG00000176022                |
| 1   | 1167763 | 1168116 | 5Y-H4K8ac_peak_18 | 12.26606     | SDF4_ENSG00000078808;B3GALT6_ENSG00000176022                |
| 1   | 1176444 | 1176663 | 5Y-H4K8ac_peak_19 | 6.50117      |                                                             |
| 1   | 1208894 | 1209167 | 5Y-H4K8ac_peak_20 | 4.29586      | UBE2J2_ENSG00000160087                                      |
| 1   | 1209459 | 1210209 | 5Y-H4K8ac_peak_21 | 20.81622     | UBE2J2_ENSG00000160087;RP5-902P8.10_ENSG00000230415         |
| 1   | 1239838 | 1240110 | 5Y-H4K8ac_peak_22 | 8.98784      |                                                             |
| 1   | 1240323 | 1241357 | 5Y-H4K8ac_peak_23 | 17.1861      |                                                             |
| 1   | 1243538 | 1243803 | 5Y-H4K8ac_peak_24 | 15.82359     | PUSL1_ENSG00000169972                                       |
| 1   | 1295087 | 1295780 | 5Y-H4K8ac_peak_25 | 13.71233     |                                                             |
| 1   | 1310185 | 1310519 | 5Y-H4K8ac_peak_26 | 13.72401     | AURKAIP1_ENSG00000175756                                    |
| 1   | 1311255 | 1311880 | 5Y-H4K8ac_peak_27 | 9.7353       | AURKAIP1_ENSG00000175756                                    |
| 1   | 1334967 | 1335192 | 5Y-H4K8ac_peak_28 | 7.03573      | CCNL2_ENSG00000221978;RP4-758J18.2_ENSG00000224870          |
| 1   | 1341865 | 1342578 | 5Y-H4K8ac_peak_29 | 7.89273      | RN7SL657P_ENSG00000264293;MRPL20_ENSG00000242485            |
| 1   | 1342947 | 1343251 | 5Y-H4K8ac_peak_30 | 7.63144      | MRPL20_ENSG00000242485                                      |
| 1   | 1354452 | 1354851 | 5Y-H4K8ac_peak_31 | 6.73047      | RP4-758J18.7_ENSG00000225905                                |
| 1   | 1355767 | 1355958 | 5Y-H4K8ac_peak_32 | 7.49746      | RP4-758J18.7_ENSG00000225905                                |
| 1   | 1362962 | 1363247 | 5Y-H4K8ac_peak_33 | 12.21176     |                                                             |
| 1   | 1367370 | 1367635 | 5Y-H4K8ac_peak_34 | 5.79005      |                                                             |
| 1   | 1397319 | 1397981 | 5Y-H4K8ac_peak_35 | 9.31608      |                                                             |
| 1   | 1446873 | 1447308 | 5Y-H4K8ac_peak_36 | 7.61515      | ATAD3A_ENSG00000197785                                      |
| 1   | 1475626 | 1475825 | 5Y-H4K8ac_peak_37 | 7.24844      | TMEM240_ENSG00000205090                                     |
| 1   | 1476180 | 1476384 | 5Y-H4K8ac_peak_38 | 7.59101      | TMEM240_ENSG00000205090                                     |
| 1   | 1509652 | 1510180 | 5Y-H4K8ac_peak_39 | 9.58986      | SSU72_ENSG00000160075;AL645728.1_ENSG00000215014            |
| 1   | 1534751 | 1534970 | 5Y-H4K8ac_peak_40 | 8.21582      | C1orf233_ENSG00000228594                                    |
| 1   | 1590496 | 1590704 | 5Y-H4K8ac_peak_41 | 5.64909      | CDK11B_ENSG00000248333;RP11-345P4.10_ENSG00000272004        |
| 1   | 1623766 | 1624326 | 5Y-H4K8ac_peak_42 | 12.71156     | SLC35E2B_ENSG00000189339                                    |
| 1   | 1709492 | 1709841 | 5Y-H4K8ac_peak_43 | 5.9856       |                                                             |
| 1   | 1710450 | 1710711 | 5Y-H4K8ac_peak_44 | 11.71078     |                                                             |

|   |         |         |                   |          |                                                        |
|---|---------|---------|-------------------|----------|--------------------------------------------------------|
| 1 | 1821861 | 1822413 | 5Y-H4K8ac_peak_45 | 9.58986  | GNB1_ENSG00000078369;RP1-140A9.1_ENSG00000231050       |
| 1 | 1840865 | 1841064 | 5Y-H4K8ac_peak_46 | 4.1776   |                                                        |
| 1 | 1851203 | 1851488 | 5Y-H4K8ac_peak_47 | 9.48719  | TMEM52_ENSG00000178821                                 |
| 1 | 1875023 | 1875509 | 5Y-H4K8ac_peak_48 | 9.02782  |                                                        |
| 1 | 1963786 | 1964848 | 5Y-H4K8ac_peak_49 | 10.4678  |                                                        |
| 1 | 1976035 | 1976390 | 5Y-H4K8ac_peak_50 | 9.89244  |                                                        |
| 1 | 1981130 | 1981511 | 5Y-H4K8ac_peak_51 | 6.64195  | RP11-547D24.3_ENSG00000226969;PRK CZ_ENSG00000067606   |
| 1 | 2058331 | 2058562 | 5Y-H4K8ac_peak_52 | 7.31815  |                                                        |
| 1 | 2126347 | 2126543 | 5Y-H4K8ac_peak_53 | 7.60057  |                                                        |
| 1 | 2130403 | 2130622 | 5Y-H4K8ac_peak_54 | 11.09973 |                                                        |
| 1 | 2136841 | 2137321 | 5Y-H4K8ac_peak_55 | 5.87725  |                                                        |
| 1 | 2146000 | 2146297 | 5Y-H4K8ac_peak_56 | 6.50117  | AL590822.1_ENSG00000203301                             |
| 1 | 2158219 | 2158620 | 5Y-H4K8ac_peak_57 | 8.47129  |                                                        |
| 1 | 2201855 | 2202154 | 5Y-H4K8ac_peak_58 | 5.37237  |                                                        |
| 1 | 2245657 | 2246603 | 5Y-H4K8ac_peak_59 | 22.45371 |                                                        |
| 1 | 2246818 | 2247703 | 5Y-H4K8ac_peak_60 | 9.51254  |                                                        |
| 1 | 2257906 | 2258480 | 5Y-H4K8ac_peak_61 | 6.78128  | RP4-713A8.1_ENSG00000272161;AL589739.1_ENSG00000269753 |
| 1 | 2343476 | 2343908 | 5Y-H4K8ac_peak_62 | 4.642    |                                                        |
| 1 | 2344316 | 2344658 | 5Y-H4K8ac_peak_63 | 5.89922  | PEX10_ENSG00000157911                                  |
| 1 | 2399565 | 2399760 | 5Y-H4K8ac_peak_64 | 4.77126  |                                                        |
| 1 | 2401677 | 2402378 | 5Y-H4K8ac_peak_65 | 5.87725  |                                                        |
| 1 | 2404005 | 2404364 | 5Y-H4K8ac_peak_66 | 4.95697  |                                                        |
| 1 | 2405392 | 2405908 | 5Y-H4K8ac_peak_67 | 7.8267   |                                                        |
| 1 | 2406150 | 2407212 | 5Y-H4K8ac_peak_68 | 9.19793  |                                                        |
| 1 | 2411360 | 2411595 | 5Y-H4K8ac_peak_69 | 9.93116  |                                                        |
| 1 | 2411979 | 2412242 | 5Y-H4K8ac_peak_70 | 7.09658  |                                                        |
| 1 | 2412778 | 2413251 | 5Y-H4K8ac_peak_71 | 9.79526  |                                                        |
| 1 | 2413678 | 2414401 | 5Y-H4K8ac_peak_72 | 17.04999 |                                                        |
| 1 | 2473877 | 2474107 | 5Y-H4K8ac_peak_73 | 7.11863  |                                                        |
| 1 | 2474366 | 2476673 | 5Y-H4K8ac_peak_74 | 8.09118  |                                                        |
| 1 | 2477235 | 2477470 | 5Y-H4K8ac_peak_75 | 6.71016  | RP3-395M20.12_ENSG00000272449                          |
| 1 | 2517194 | 2517626 | 5Y-H4K8ac_peak_76 | 7.28311  | FAM213B_ENSG00000157870                                |
| 1 | 2543143 | 2543341 | 5Y-H4K8ac_peak_77 | 5.91107  |                                                        |
| 1 | 2574211 | 2574424 | 5Y-H4K8ac_peak_78 | 5.41472  |                                                        |
| 1 | 3073262 | 3073510 | 5Y-H4K8ac_peak_79 | 6.08523  |                                                        |
| 1 | 3086228 | 3086537 | 5Y-H4K8ac_peak_80 | 12.34314 |                                                        |
| 1 | 3086799 | 3087780 | 5Y-H4K8ac_peak_81 | 12.06963 |                                                        |
| 1 | 3375020 | 3375235 | 5Y-H4K8ac_peak_82 | 9.44864  |                                                        |
| 1 | 3375983 | 3376173 | 5Y-H4K8ac_peak_83 | 5.23083  |                                                        |
| 1 | 3419409 | 3419684 | 5Y-H4K8ac_peak_84 | 8.79957  |                                                        |
| 1 | 3433023 | 3434294 | 5Y-H4K8ac_peak_85 | 17.66193 |                                                        |
| 1 | 3462169 | 3462390 | 5Y-H4K8ac_peak_86 | 7.38046  |                                                        |
| 1 | 3489715 | 3490091 | 5Y-H4K8ac_peak_87 | 5.98695  |                                                        |
| 1 | 3490633 | 3490940 | 5Y-H4K8ac_peak_88 | 6.08523  |                                                        |
| 1 | 3497688 | 3497891 | 5Y-H4K8ac_peak_89 | 7.30348  |                                                        |
| 1 | 3515672 | 3515967 | 5Y-H4K8ac_peak_90 | 8.69112  |                                                        |

|   |         |         |                    |          |                                                    |
|---|---------|---------|--------------------|----------|----------------------------------------------------|
| 1 | 3566253 | 3566494 | 5Y-H4K8ac_peak_91  | 7.11863  |                                                    |
| 1 | 3568213 | 3568885 | 5Y-H4K8ac_peak_92  | 8.73985  | WRAP73_ENSG00000116213;TP73_ENSG00000078900        |
| 1 | 3628890 | 3629089 | 5Y-H4K8ac_peak_93  | 6.98394  |                                                    |
| 1 | 3629443 | 3630021 | 5Y-H4K8ac_peak_94  | 7.89273  | RP5-1092A11.2_ENSG00000235131                      |
| 1 | 3630268 | 3630509 | 5Y-H4K8ac_peak_95  | 6.54441  | RP5-1092A11.2_ENSG00000235131                      |
| 1 | 3632478 | 3633451 | 5Y-H4K8ac_peak_96  | 5.64909  |                                                    |
| 1 | 3634163 | 3634580 | 5Y-H4K8ac_peak_97  | 10.58233 |                                                    |
| 1 | 3635199 | 3635432 | 5Y-H4K8ac_peak_98  | 8.43511  |                                                    |
| 1 | 3636213 | 3636436 | 5Y-H4K8ac_peak_99  | 9.18169  |                                                    |
| 1 | 3636762 | 3637078 | 5Y-H4K8ac_peak_100 | 13.00733 |                                                    |
| 1 | 3663346 | 3663864 | 5Y-H4K8ac_peak_101 | 7.7384   | TP73-AS1_ENSG00000227372                           |
| 1 | 3688717 | 3688957 | 5Y-H4K8ac_peak_102 | 8.69112  | SMIM1_ENSG00000235169                              |
| 1 | 3691568 | 3692518 | 5Y-H4K8ac_peak_103 | 5.24695  |                                                    |
| 1 | 3692840 | 3693120 | 5Y-H4K8ac_peak_104 | 6.60109  |                                                    |
| 1 | 3736187 | 3736513 | 5Y-H4K8ac_peak_105 | 3.95366  |                                                    |
| 1 | 3738137 | 3738381 | 5Y-H4K8ac_peak_106 | 12.26606 |                                                    |
| 1 | 3816205 | 3816774 | 5Y-H4K8ac_peak_107 | 10.74739 | C1orf174_ENSG00000198912;LINC01134_ENSG00000236423 |
| 1 | 3817560 | 3817822 | 5Y-H4K8ac_peak_108 | 11.1169  | C1orf174_ENSG00000198912;LINC01134_ENSG00000236423 |
| 1 | 3819782 | 3820095 | 5Y-H4K8ac_peak_109 | 5.87382  |                                                    |
| 1 | 4672108 | 4672793 | 5Y-H4K8ac_peak_110 | 5.98695  |                                                    |
| 1 | 4674037 | 4674443 | 5Y-H4K8ac_peak_111 | 5.48291  |                                                    |
| 1 | 5217703 | 5218172 | 5Y-H4K8ac_peak_112 | 9.26157  |                                                    |
| 1 | 5483599 | 5484080 | 5Y-H4K8ac_peak_113 | 8.4454   |                                                    |
| 1 | 5539625 | 5540036 | 5Y-H4K8ac_peak_114 | 8.43511  |                                                    |
| 1 | 5540380 | 5540606 | 5Y-H4K8ac_peak_115 | 5.65584  |                                                    |
| 1 | 5826246 | 5826443 | 5Y-H4K8ac_peak_116 | 4.79585  |                                                    |
| 1 | 5831032 | 5831286 | 5Y-H4K8ac_peak_117 | 8.24461  |                                                    |
| 1 | 5834572 | 5835025 | 5Y-H4K8ac_peak_118 | 8.31764  |                                                    |
| 1 | 6053444 | 6053665 | 5Y-H4K8ac_peak_119 | 6.5814   | NPHP4_ENSG00000131697                              |
| 1 | 6093770 | 6095291 | 5Y-H4K8ac_peak_120 | 9.30505  |                                                    |
| 1 | 6113375 | 6113724 | 5Y-H4K8ac_peak_121 | 6.82266  |                                                    |
| 1 | 6120272 | 6120512 | 5Y-H4K8ac_peak_122 | 4.728    |                                                    |
| 1 | 6231010 | 6231318 | 5Y-H4K8ac_peak_123 | 7.59101  |                                                    |
| 1 | 6268453 | 6268684 | 5Y-H4K8ac_peak_124 | 9.38276  | RPL22_ENSG00000116251                              |
| 1 | 6295615 | 6295938 | 5Y-H4K8ac_peak_125 | 10.1994  | ICMT_ENSG00000116237;LINC00337_ENSG00000225077     |
| 1 | 6302214 | 6302694 | 5Y-H4K8ac_peak_126 | 6.73385  |                                                    |
| 1 | 6329745 | 6330219 | 5Y-H4K8ac_peak_127 | 6.84317  |                                                    |
| 1 | 6419528 | 6419740 | 5Y-H4K8ac_peak_128 | 4.51497  |                                                    |
| 1 | 6420216 | 6420597 | 5Y-H4K8ac_peak_129 | 7.07069  |                                                    |
| 1 | 6445332 | 6446364 | 5Y-H4K8ac_peak_130 | 15.71541 |                                                    |
| 1 | 6453650 | 6453848 | 5Y-H4K8ac_peak_131 | 8.2913   | RP1-202O8.3_ENSG00000271746;ACOT7_ENSG00000097021  |
| 1 | 6544738 | 6545607 | 5Y-H4K8ac_peak_132 | 11.22005 |                                                    |
| 1 | 6545832 | 6546053 | 5Y-H4K8ac_peak_133 | 12.05638 |                                                    |
| 1 | 6550224 | 6551210 | 5Y-H4K8ac_peak_134 | 8.28468  |                                                    |
| 1 | 6567266 | 6567567 | 5Y-H4K8ac_peak_135 | 8.43511  |                                                    |
| 1 | 6567962 | 6568651 | 5Y-H4K8ac_peak_136 | 6.08523  |                                                    |

|   |         |         |                    |          |                                                                        |
|---|---------|---------|--------------------|----------|------------------------------------------------------------------------|
| 1 | 6571608 | 6571987 | 5Y-H4K8ac_peak_137 | 8.69112  |                                                                        |
| 1 | 6572589 | 6572784 | 5Y-H4K8ac_peak_138 | 4.77126  |                                                                        |
| 1 | 6573154 | 6573352 | 5Y-H4K8ac_peak_139 | 5.77617  |                                                                        |
| 1 | 6614312 | 6614539 | 5Y-H4K8ac_peak_140 | 10.35586 | NOL9_ENSG00000162408;TAS1R1_ENSG00000173662                            |
| 1 | 6615215 | 6615714 | 5Y-H4K8ac_peak_141 | 8.62703  | NOL9_ENSG00000162408;TAS1R1_ENSG00000173662                            |
| 1 | 6639487 | 6639815 | 5Y-H4K8ac_peak_142 | 8.43511  | ZBTB48_ENSG00000204859                                                 |
| 1 | 6662599 | 6662852 | 5Y-H4K8ac_peak_143 | 10.90365 |                                                                        |
| 1 | 6731716 | 6731907 | 5Y-H4K8ac_peak_144 | 6.50117  |                                                                        |
| 1 | 6761351 | 6761715 | 5Y-H4K8ac_peak_145 | 8.73392  | DNAJC11_ENSG00000007923                                                |
| 1 | 7104227 | 7104447 | 5Y-H4K8ac_peak_146 | 6.91702  |                                                                        |
| 1 | 7352924 | 7353475 | 5Y-H4K8ac_peak_147 | 9.01738  |                                                                        |
| 1 | 7401087 | 7401281 | 5Y-H4K8ac_peak_148 | 7.31102  |                                                                        |
| 1 | 7448656 | 7448859 | 5Y-H4K8ac_peak_149 | 9.63153  | RP3-453P22.2_ENSG00000237728                                           |
| 1 | 7449122 | 7449647 | 5Y-H4K8ac_peak_150 | 6.08523  | RP3-453P22.2_ENSG00000237728                                           |
| 1 | 7523042 | 7523364 | 5Y-H4K8ac_peak_151 | 5.72848  |                                                                        |
| 1 | 7536621 | 7537149 | 5Y-H4K8ac_peak_152 | 8.1667   |                                                                        |
| 1 | 7537630 | 7538227 | 5Y-H4K8ac_peak_153 | 10.83079 |                                                                        |
| 1 | 7554483 | 7554679 | 5Y-H4K8ac_peak_154 | 4.40052  |                                                                        |
| 1 | 7569604 | 7569806 | 5Y-H4K8ac_peak_155 | 4.84727  |                                                                        |
| 1 | 7584142 | 7584343 | 5Y-H4K8ac_peak_156 | 8.2913   |                                                                        |
| 1 | 7584656 | 7584862 | 5Y-H4K8ac_peak_157 | 4.07874  |                                                                        |
| 1 | 7618383 | 7618798 | 5Y-H4K8ac_peak_158 | 10.54669 |                                                                        |
| 1 | 7619044 | 7619739 | 5Y-H4K8ac_peak_159 | 7.50148  |                                                                        |
| 1 | 7645726 | 7645919 | 5Y-H4K8ac_peak_160 | 5.23083  |                                                                        |
| 1 | 7648190 | 7648692 | 5Y-H4K8ac_peak_161 | 5.23083  |                                                                        |
| 1 | 7688793 | 7689492 | 5Y-H4K8ac_peak_162 | 8.62703  |                                                                        |
| 1 | 7690836 | 7691958 | 5Y-H4K8ac_peak_163 | 13.68097 |                                                                        |
| 1 | 7706942 | 7707153 | 5Y-H4K8ac_peak_164 | 4.29586  |                                                                        |
| 1 | 7727898 | 7728318 | 5Y-H4K8ac_peak_165 | 10.12457 |                                                                        |
| 1 | 7728851 | 7730918 | 5Y-H4K8ac_peak_166 | 21.92939 |                                                                        |
| 1 | 7731381 | 7731595 | 5Y-H4K8ac_peak_167 | 4.55128  |                                                                        |
| 1 | 7732189 | 7732460 | 5Y-H4K8ac_peak_168 | 5.41472  |                                                                        |
| 1 | 7738874 | 7739170 | 5Y-H4K8ac_peak_169 | 6.14981  |                                                                        |
| 1 | 7739751 | 7739982 | 5Y-H4K8ac_peak_170 | 5.449    |                                                                        |
| 1 | 7740189 | 7741350 | 5Y-H4K8ac_peak_171 | 24.88223 |                                                                        |
| 1 | 7764319 | 7764553 | 5Y-H4K8ac_peak_172 | 7.60057  |                                                                        |
| 1 | 8086577 | 8086953 | 5Y-H4K8ac_peak_173 | 11.22005 | ERRFI1_ENSG00000116285;RP11-431K24.1_ENSG00000238290                   |
| 1 | 8230263 | 8230812 | 5Y-H4K8ac_peak_174 | 4.50834  |                                                                        |
| 1 | 8377747 | 8378042 | 5Y-H4K8ac_peak_175 | 7.29055  | SLC45A1_ENSG00000162426                                                |
| 1 | 8440856 | 8441057 | 5Y-H4K8ac_peak_176 | 5.19372  |                                                                        |
| 1 | 8938430 | 8938646 | 5Y-H4K8ac_peak_177 | 7.59101  | ENO1_ENSG00000074800;ENO1-IT1_ENSG00000236269;ENO1-AS1_ENSG00000230679 |
| 1 | 8938926 | 8939225 | 5Y-H4K8ac_peak_178 | 10.1994  | ENO1_ENSG00000074800;ENO1-IT1_ENSG00000236269;ENO1-AS1_ENSG00000230679 |
| 1 | 9131613 | 9131832 | 5Y-H4K8ac_peak_179 | 5.40331  |                                                                        |
| 1 | 9189656 | 9189849 | 5Y-H4K8ac_peak_180 | 4.24869  | GPR157_ENSG00000180758                                                 |
| 1 | 9206922 | 9207117 | 5Y-H4K8ac_peak_181 | 5.40331  |                                                                        |
| 1 | 9242544 | 9242792 | 5Y-H4K8ac_peak_182 | 8.69112  | RP3-510D11.2_ENSG00000234546                                           |



|   |          |          |                    |          |                                                      |
|---|----------|----------|--------------------|----------|------------------------------------------------------|
| 1 | 9294864  | 9295357  | 5Y-H4K8ac_peak_183 | 6.47245  | H6PD_ENSG00000049239                                 |
| 1 | 9353117  | 9353496  | 5Y-H4K8ac_peak_184 | 9.56187  | SPSB1_ENSG00000171621                                |
| 1 | 9445089  | 9445349  | 5Y-H4K8ac_peak_185 | 7.89273  |                                                      |
| 1 | 9597788  | 9598107  | 5Y-H4K8ac_peak_186 | 7.31815  |                                                      |
| 1 | 9599595  | 9600030  | 5Y-H4K8ac_peak_187 | 5.19372  | SLC25A33_ENSG00000171612                             |
| 1 | 9652307  | 9652559  | 5Y-H4K8ac_peak_188 | 6.37023  |                                                      |
| 1 | 9654083  | 9654343  | 5Y-H4K8ac_peak_189 | 5.91107  |                                                      |
| 1 | 9663190  | 9663421  | 5Y-H4K8ac_peak_190 | 8.43511  |                                                      |
| 1 | 9663690  | 9663989  | 5Y-H4K8ac_peak_191 | 7.89273  |                                                      |
| 1 | 9664669  | 9665033  | 5Y-H4K8ac_peak_192 | 5.41472  |                                                      |
| 1 | 9665905  | 9666769  | 5Y-H4K8ac_peak_193 | 8.08337  |                                                      |
| 1 | 9687300  | 9687579  | 5Y-H4K8ac_peak_194 | 10.1994  |                                                      |
| 1 | 9747297  | 9747504  | 5Y-H4K8ac_peak_195 | 7.30348  | RP11-558F24.4_ENSG00000231789                        |
| 1 | 9883617  | 9883850  | 5Y-H4K8ac_peak_196 | 4.15658  | CLSTN1_ENSG00000171603                               |
| 1 | 9884242  | 9884619  | 5Y-H4K8ac_peak_197 | 7.64648  | CLSTN1_ENSG00000171603                               |
| 1 | 9912908  | 9913234  | 5Y-H4K8ac_peak_198 | 7.50148  |                                                      |
| 1 | 10685348 | 10685538 | 5Y-H4K8ac_peak_199 | 6.86362  |                                                      |
| 1 | 10685750 | 10686499 | 5Y-H4K8ac_peak_200 | 4.90696  |                                                      |
| 1 | 10698297 | 10698629 | 5Y-H4K8ac_peak_201 | 5.23083  | RP4-734G22.3_ENSG00000272078                         |
| 1 | 10699898 | 10700352 | 5Y-H4K8ac_peak_202 | 4.95697  | RP4-734G22.3_ENSG00000272078                         |
| 1 | 10700631 | 10702077 | 5Y-H4K8ac_peak_203 | 12.05638 |                                                      |
| 1 | 10718176 | 10718373 | 5Y-H4K8ac_peak_204 | 5.12213  |                                                      |
| 1 | 10723367 | 10723754 | 5Y-H4K8ac_peak_205 | 5.35202  |                                                      |
| 1 | 10731829 | 10732045 | 5Y-H4K8ac_peak_206 | 7.89142  |                                                      |
| 1 | 10737817 | 10738028 | 5Y-H4K8ac_peak_207 | 4.50834  |                                                      |
| 1 | 10739043 | 10739247 | 5Y-H4K8ac_peak_208 | 8.24952  |                                                      |
| 1 | 10740618 | 10740812 | 5Y-H4K8ac_peak_209 | 6.49458  |                                                      |
| 1 | 10755136 | 10755464 | 5Y-H4K8ac_peak_210 | 6.43775  |                                                      |
| 1 | 10841573 | 10841776 | 5Y-H4K8ac_peak_211 | 5.65765  |                                                      |
| 1 | 10856343 | 10856648 | 5Y-H4K8ac_peak_212 | 4.50834  | CASZ1_ENSG00000130940                                |
| 1 | 10961090 | 10962090 | 5Y-H4K8ac_peak_213 | 10.54764 |                                                      |
| 1 | 10963656 | 10963858 | 5Y-H4K8ac_peak_214 | 5.83608  |                                                      |
| 1 | 10964092 | 10964301 | 5Y-H4K8ac_peak_215 | 7.73231  |                                                      |
| 1 | 10964530 | 10964887 | 5Y-H4K8ac_peak_216 | 10.19948 |                                                      |
| 1 | 10969559 | 10969758 | 5Y-H4K8ac_peak_217 | 5.99504  |                                                      |
| 1 | 10971679 | 10971879 | 5Y-H4K8ac_peak_218 | 4.97006  |                                                      |
| 1 | 10993989 | 10994231 | 5Y-H4K8ac_peak_219 | 3.91125  |                                                      |
| 1 | 10999979 | 11000219 | 5Y-H4K8ac_peak_220 | 10.6196  |                                                      |
| 1 | 11001859 | 11002131 | 5Y-H4K8ac_peak_221 | 10.43045 |                                                      |
| 1 | 11004848 | 11006175 | 5Y-H4K8ac_peak_222 | 9.63153  |                                                      |
| 1 | 11006651 | 11007201 | 5Y-H4K8ac_peak_223 | 7.89273  |                                                      |
| 1 | 11119599 | 11119919 | 5Y-H4K8ac_peak_224 | 8.73985  | SRM_ENSG00000116649                                  |
| 1 | 11159559 | 11159805 | 5Y-H4K8ac_peak_225 | 10.4495  | EXOSC10_ENSG00000171824;RP4-635E18.6_ENSG00000230337 |
| 1 | 11160198 | 11160522 | 5Y-H4K8ac_peak_226 | 7.72887  | EXOSC10_ENSG00000171824;RP4-635E18.6_ENSG00000230337 |
| 1 | 11322241 | 11322522 | 5Y-H4K8ac_peak_227 | 8.69112  | MTOR_ENSG00000198793                                 |
| 1 | 11333340 | 11333906 | 5Y-H4K8ac_peak_228 | 7.38046  | UBIAD1_ENSG00000120942                               |

|   |          |          |                    |          |                                                                                |
|---|----------|----------|--------------------|----------|--------------------------------------------------------------------------------|
| 1 | 11361993 | 11362269 | 5Y-H4K8ac_peak_229 | 11.80885 |                                                                                |
| 1 | 11398403 | 11398636 | 5Y-H4K8ac_peak_230 | 6.81557  |                                                                                |
| 1 | 11518744 | 11518938 | 5Y-H4K8ac_peak_231 | 9.01738  |                                                                                |
| 1 | 11519241 | 11519631 | 5Y-H4K8ac_peak_232 | 12.65187 |                                                                                |
| 1 | 11538596 | 11539154 | 5Y-H4K8ac_peak_233 | 9.32595  | PTCHD2_ENSG00000204624                                                         |
| 1 | 11623540 | 11623743 | 5Y-H4K8ac_peak_234 | 8.90774  |                                                                                |
| 1 | 11689587 | 11689866 | 5Y-H4K8ac_peak_235 | 5.98695  |                                                                                |
| 1 | 11750643 | 11751509 | 5Y-H4K8ac_peak_236 | 7.31102  | MAD2L2_ENSG00000116670;DRAXIN_ENSG00000162490                                  |
| 1 | 11761734 | 11761958 | 5Y-H4K8ac_peak_237 | 6.73385  |                                                                                |
| 1 | 11907122 | 11907411 | 5Y-H4K8ac_peak_238 | 6.37023  | NPPA_ENSG00000175206                                                           |
| 1 | 11907609 | 11907939 | 5Y-H4K8ac_peak_239 | 10.11191 | NPPA_ENSG00000175206                                                           |
| 1 | 11908569 | 11908913 | 5Y-H4K8ac_peak_240 | 5.98695  | NPPA_ENSG00000175206                                                           |
| 1 | 11919176 | 11919514 | 5Y-H4K8ac_peak_241 | 6.35402  | NPPB_ENSG00000120937                                                           |
| 1 | 11940317 | 11940517 | 5Y-H4K8ac_peak_242 | 4.0639   |                                                                                |
| 1 | 11941556 | 11941784 | 5Y-H4K8ac_peak_243 | 10.6196  |                                                                                |
| 1 | 11969250 | 11969447 | 5Y-H4K8ac_peak_244 | 8.4454   | RNU5E-4P_ENSG00000201801                                                       |
| 1 | 11991070 | 11991465 | 5Y-H4K8ac_peak_245 | 6.76096  |                                                                                |
| 1 | 11994203 | 11994952 | 5Y-H4K8ac_peak_246 | 11.80885 | PLOD1_ENSG00000083444                                                          |
| 1 | 12004558 | 12005095 | 5Y-H4K8ac_peak_247 | 13.12848 |                                                                                |
| 1 | 12039260 | 12039479 | 5Y-H4K8ac_peak_248 | 6.1654   | MFN2_ENSG00000116688                                                           |
| 1 | 12114138 | 12114353 | 5Y-H4K8ac_peak_249 | 11.28133 |                                                                                |
| 1 | 12227100 | 12227486 | 5Y-H4K8ac_peak_250 | 7.55879  | TNFRSF1B_ENSG00000028137                                                       |
| 1 | 12244097 | 12245349 | 5Y-H4K8ac_peak_251 | 17.50049 |                                                                                |
| 1 | 12289651 | 12289881 | 5Y-H4K8ac_peak_252 | 5.98695  | VPS13D_ENSG00000048707                                                         |
| 1 | 12404927 | 12405300 | 5Y-H4K8ac_peak_253 | 5.87382  |                                                                                |
| 1 | 12654758 | 12655238 | 5Y-H4K8ac_peak_254 | 4.0639   |                                                                                |
| 1 | 12656894 | 12657161 | 5Y-H4K8ac_peak_255 | 4.30961  |                                                                                |
| 1 | 12677019 | 12677272 | 5Y-H4K8ac_peak_256 | 11.46984 | DHRS3_ENSG00000162496                                                          |
| 1 | 14026296 | 14027256 | 5Y-H4K8ac_peak_257 | 13.04415 | PRDM2_ENSG00000116731                                                          |
| 1 | 14075404 | 14075678 | 5Y-H4K8ac_peak_258 | 7.31815  |                                                                                |
| 1 | 15270964 | 15271245 | 5Y-H4K8ac_peak_259 | 6.37023  |                                                                                |
| 1 | 15272283 | 15272643 | 5Y-H4K8ac_peak_260 | 6.78128  |                                                                                |
| 1 | 15294012 | 15294341 | 5Y-H4K8ac_peak_261 | 6.50117  |                                                                                |
| 1 | 15467402 | 15467721 | 5Y-H4K8ac_peak_262 | 4.50834  |                                                                                |
| 1 | 15479402 | 15479668 | 5Y-H4K8ac_peak_263 | 5.64909  | TMEM51-AS1_ENSG00000175147;TMEM51_ENSG00000171729                              |
| 1 | 15480393 | 15480596 | 5Y-H4K8ac_peak_264 | 4.29586  |                                                                                |
| 1 | 15513167 | 15513965 | 5Y-H4K8ac_peak_265 | 8.16382  |                                                                                |
| 1 | 15720367 | 15720773 | 5Y-H4K8ac_peak_266 | 4.15658  |                                                                                |
| 1 | 15736511 | 15736745 | 5Y-H4K8ac_peak_267 | 7.49746  | RP3-467K16.4_ENSG00000228140;EFHD2_ENSG00000142634                             |
| 1 | 15911160 | 15911520 | 5Y-H4K8ac_peak_268 | 12.69256 | AGMAT_ENSG00000116771                                                          |
| 1 | 15930382 | 15930740 | 5Y-H4K8ac_peak_269 | 4.70501  | RP4-680D5.2_ENSG00000237301;CHCHD2P6_ENSG00000235084                           |
| 1 | 16009986 | 16010694 | 5Y-H4K8ac_peak_270 | 21.10958 | RP4-680D5.9_ENSG00000271742;PLEKHM2_ENSG00000116786;AL121992.1_ENSG00000264048 |
| 1 | 16011094 | 16011423 | 5Y-H4K8ac_peak_271 | 4.84727  | PLEKHM2_ENSG00000116786;AL121992.1_ENSG00000264048                             |
| 1 | 16065660 | 16065869 | 5Y-H4K8ac_peak_272 | 5.99504  |                                                                                |
| 1 | 16076108 | 16076369 | 5Y-H4K8ac_peak_273 | 5.64909  | RP11-169K16.4_ENSG00000224459                                                  |
| 1 | 16083546 | 16084024 | 5Y-H4K8ac_peak_274 | 6.50117  | FBLIM1_ENSG00000162458                                                         |

|   |          |          |                    |          |                                                    |
|---|----------|----------|--------------------|----------|----------------------------------------------------|
| 1 | 16085390 | 16086289 | 5Y-H4K8ac_peak_275 | 6.37023  |                                                    |
| 1 | 16161024 | 16161289 | 5Y-H4K8ac_peak_276 | 6.98416  |                                                    |
| 1 | 16161638 | 16162183 | 5Y-H4K8ac_peak_277 | 13.68515 |                                                    |
| 1 | 16339358 | 16339872 | 5Y-H4K8ac_peak_278 | 10.35586 |                                                    |
| 1 | 16341458 | 16341690 | 5Y-H4K8ac_peak_279 | 8.63295  |                                                    |
| 1 | 16344048 | 16344987 | 5Y-H4K8ac_peak_280 | 15.90073 | CLCNKA_ENSG00000186510                             |
| 1 | 16374722 | 16375193 | 5Y-H4K8ac_peak_281 | 7.9215   |                                                    |
| 1 | 16466640 | 16466877 | 5Y-H4K8ac_peak_282 | 5.30478  |                                                    |
| 1 | 16468040 | 16468743 | 5Y-H4K8ac_peak_283 | 11.04542 |                                                    |
| 1 | 16481448 | 16481756 | 5Y-H4K8ac_peak_284 | 6.38173  | EPHA2_ENSG00000142627;RP11-276H7.2_ENSG00000227959 |
| 1 | 16482050 | 16482438 | 5Y-H4K8ac_peak_285 | 6.49458  | EPHA2_ENSG00000142627;RP11-276H7.2_ENSG00000227959 |
| 1 | 16491934 | 16492153 | 5Y-H4K8ac_peak_286 | 9.45148  |                                                    |
| 1 | 16501498 | 16501768 | 5Y-H4K8ac_peak_287 | 4.95697  |                                                    |
| 1 | 16502157 | 16502604 | 5Y-H4K8ac_peak_288 | 8.62703  |                                                    |
| 1 | 16502887 | 16503416 | 5Y-H4K8ac_peak_289 | 12.05638 |                                                    |
| 1 | 16516317 | 16516512 | 5Y-H4K8ac_peak_290 | 6.78128  |                                                    |
| 1 | 16533348 | 16533718 | 5Y-H4K8ac_peak_291 | 5.98695  |                                                    |
| 1 | 16534503 | 16534832 | 5Y-H4K8ac_peak_292 | 7.59101  |                                                    |
| 1 | 16679147 | 16679344 | 5Y-H4K8ac_peak_293 | 10.69698 | FBXO42_ENSG00000037637;SZRD1_ENSG00000055070       |
| 1 | 16692748 | 16693214 | 5Y-H4K8ac_peak_294 | 8.55081  |                                                    |
| 1 | 16766615 | 16767057 | 5Y-H4K8ac_peak_295 | 13.99721 | NECAP2_ENSG00000157191                             |
| 1 | 16825031 | 16825523 | 5Y-H4K8ac_peak_296 | 7.50148  | CROCCP3_ENSG00000080947                            |
| 1 | 16825923 | 16826213 | 5Y-H4K8ac_peak_297 | 7.58806  | CROCCP3_ENSG00000080947                            |
| 1 | 16940269 | 16940557 | 5Y-H4K8ac_peak_298 | 6.69371  | NBPF1_ENSG00000219481                              |
| 1 | 16970644 | 16972291 | 5Y-H4K8ac_peak_299 | 37.18359 | CROCCP2_ENSG00000215908;MST1P2_ENSG00000186301     |
| 1 | 17026209 | 17026528 | 5Y-H4K8ac_peak_300 | 4.15658  |                                                    |
| 1 | 17030522 | 17031126 | 5Y-H4K8ac_peak_301 | 6.34245  |                                                    |
| 1 | 17201639 | 17201842 | 5Y-H4K8ac_peak_302 | 4.15658  |                                                    |
| 1 | 17230570 | 17230809 | 5Y-H4K8ac_peak_303 | 5.45148  | RP11-108M9.6_ENSG00000272426                       |
| 1 | 17231433 | 17231689 | 5Y-H4K8ac_peak_304 | 26.68337 | RP11-108M9.6_ENSG00000272426                       |
| 1 | 17240089 | 17240320 | 5Y-H4K8ac_peak_305 | 14.89891 |                                                    |
| 1 | 17240724 | 17241232 | 5Y-H4K8ac_peak_306 | 13.09548 |                                                    |
| 1 | 17247702 | 17247943 | 5Y-H4K8ac_peak_307 | 4.89347  |                                                    |
| 1 | 17248144 | 17249251 | 5Y-H4K8ac_peak_308 | 11.69482 |                                                    |
| 1 | 17287123 | 17287919 | 5Y-H4K8ac_peak_309 | 10.5157  |                                                    |
| 1 | 17304622 | 17305080 | 5Y-H4K8ac_peak_310 | 6.00747  | RP1-37C10.3_ENSG00000226526                        |
| 1 | 17306167 | 17307695 | 5Y-H4K8ac_peak_311 | 27.04863 | MFAP2_ENSG00000117122;RP1-37C10.3_ENSG00000226526  |
| 1 | 17380998 | 17381287 | 5Y-H4K8ac_peak_312 | 6.73047  | SDHB_ENSG00000117118                               |
| 1 | 17488038 | 17488237 | 5Y-H4K8ac_peak_313 | 5.87382  |                                                    |
| 1 | 17865573 | 17866116 | 5Y-H4K8ac_peak_314 | 14.99673 | ARHGEF10L_ENSG00000074964                          |
| 1 | 17866422 | 17866707 | 5Y-H4K8ac_peak_315 | 7.50148  | ARHGEF10L_ENSG00000074964                          |
| 1 | 17877921 | 17878111 | 5Y-H4K8ac_peak_316 | 5.23083  |                                                    |
| 1 | 17919648 | 17920571 | 5Y-H4K8ac_peak_317 | 8.69112  |                                                    |
| 1 | 17920886 | 17921145 | 5Y-H4K8ac_peak_318 | 7.03573  |                                                    |
| 1 | 17921930 | 17922155 | 5Y-H4K8ac_peak_319 | 6.08523  |                                                    |
| 1 | 17928546 | 17929670 | 5Y-H4K8ac_peak_320 | 10.35586 |                                                    |

|   |          |          |                    |          |                                                                                 |
|---|----------|----------|--------------------|----------|---------------------------------------------------------------------------------|
| 1 | 17968631 | 17969236 | 5Y-H4K8ac_peak_321 | 10.6196  |                                                                                 |
| 1 | 17997651 | 17998217 | 5Y-H4K8ac_peak_322 | 4.0639   |                                                                                 |
| 1 | 18009174 | 18009607 | 5Y-H4K8ac_peak_323 | 5.65584  |                                                                                 |
| 1 | 18009803 | 18010047 | 5Y-H4K8ac_peak_324 | 4.84727  |                                                                                 |
| 1 | 18100252 | 18100482 | 5Y-H4K8ac_peak_325 | 4.77126  |                                                                                 |
| 1 | 18459844 | 18460045 | 5Y-H4K8ac_peak_326 | 5.03917  |                                                                                 |
| 1 | 18516378 | 18516632 | 5Y-H4K8ac_peak_327 | 5.97532  |                                                                                 |
| 1 | 18525900 | 18526099 | 5Y-H4K8ac_peak_328 | 6.37023  |                                                                                 |
| 1 | 18609944 | 18610160 | 5Y-H4K8ac_peak_329 | 8.47164  |                                                                                 |
| 1 | 19122040 | 19122306 | 5Y-H4K8ac_peak_330 | 11.31171 |                                                                                 |
| 1 | 19248427 | 19248827 | 5Y-H4K8ac_peak_331 | 4.29586  | RP13-279N23.2_ENSG00000255275                                                   |
| 1 | 19392621 | 19392859 | 5Y-H4K8ac_peak_332 | 8.55081  |                                                                                 |
| 1 | 19638253 | 19638535 | 5Y-H4K8ac_peak_333 | 5.64909  | AKR7A2_ENSG00000053371;PQLC2_ENSG00000040487                                    |
| 1 | 19639141 | 19639402 | 5Y-H4K8ac_peak_334 | 7.58806  | AKR7A2_ENSG00000053371;PQLC2_ENSG00000040487                                    |
| 1 | 19657443 | 19657812 | 5Y-H4K8ac_peak_335 | 6.20989  |                                                                                 |
| 1 | 19664772 | 19665263 | 5Y-H4K8ac_peak_336 | 5.80888  |                                                                                 |
| 1 | 19679552 | 19679794 | 5Y-H4K8ac_peak_337 | 6.78815  |                                                                                 |
| 1 | 19698204 | 19698462 | 5Y-H4K8ac_peak_338 | 5.41472  |                                                                                 |
| 1 | 19722366 | 19722721 | 5Y-H4K8ac_peak_339 | 10.19948 |                                                                                 |
| 1 | 19774532 | 19774814 | 5Y-H4K8ac_peak_340 | 9.31608  |                                                                                 |
| 1 | 19778583 | 19779138 | 5Y-H4K8ac_peak_341 | 6.50117  |                                                                                 |
| 1 | 19811542 | 19811969 | 5Y-H4K8ac_peak_342 | 11.76668 | CAPZB_ENSG00000077549                                                           |
| 1 | 19923670 | 19923902 | 5Y-H4K8ac_peak_343 | 6.77436  | RP5-1056L3.1_ENSG00000235185;MINOS1-NBL1_ENSG00000270136;MINOS1_ENSG00000173436 |
| 1 | 19970239 | 19970565 | 5Y-H4K8ac_peak_344 | 7.59101  |                                                                                 |
| 1 | 19971048 | 19971518 | 5Y-H4K8ac_peak_345 | 5.37237  |                                                                                 |
| 1 | 20030802 | 20031174 | 5Y-H4K8ac_peak_346 | 6.77436  |                                                                                 |
| 1 | 20126337 | 20126754 | 5Y-H4K8ac_peak_347 | 9.36633  | TMCO4_ENSG00000162542                                                           |
| 1 | 20478649 | 20478911 | 5Y-H4K8ac_peak_348 | 9.38276  |                                                                                 |
| 1 | 20609164 | 20609380 | 5Y-H4K8ac_peak_349 | 4.84727  |                                                                                 |
| 1 | 20635129 | 20635382 | 5Y-H4K8ac_peak_350 | 7.11863  |                                                                                 |
| 1 | 20668919 | 20669544 | 5Y-H4K8ac_peak_351 | 7.59101  |                                                                                 |
| 1 | 20692649 | 20693071 | 5Y-H4K8ac_peak_352 | 6.34245  |                                                                                 |
| 1 | 20703565 | 20703793 | 5Y-H4K8ac_peak_353 | 9.88125  |                                                                                 |
| 1 | 20713690 | 20713958 | 5Y-H4K8ac_peak_354 | 8.2913   |                                                                                 |
| 1 | 20770856 | 20771078 | 5Y-H4K8ac_peak_355 | 7.97699  |                                                                                 |
| 1 | 20802499 | 20804345 | 5Y-H4K8ac_peak_356 | 7.50148  |                                                                                 |
| 1 | 20811431 | 20811828 | 5Y-H4K8ac_peak_357 | 6.77436  | CAMK2N1_ENSG00000162545                                                         |
| 1 | 20812793 | 20813133 | 5Y-H4K8ac_peak_358 | 12.26606 | CAMK2N1_ENSG00000162545                                                         |
| 1 | 20820619 | 20820964 | 5Y-H4K8ac_peak_359 | 4.95697  |                                                                                 |
| 1 | 20940297 | 20940774 | 5Y-H4K8ac_peak_360 | 6.77436  |                                                                                 |
| 1 | 20988239 | 20988861 | 5Y-H4K8ac_peak_361 | 8.24461  | DDOST_ENSG00000244038                                                           |
| 1 | 21023211 | 21023740 | 5Y-H4K8ac_peak_362 | 7.09658  |                                                                                 |
| 1 | 21043803 | 21044024 | 5Y-H4K8ac_peak_363 | 9.84749  | KIF17_ENSG00000117245                                                           |
| 1 | 21503600 | 21503996 | 5Y-H4K8ac_peak_364 | 13.43531 | EIF4G3_ENSG00000075151;AL031005.1_ENSG00000266867                               |
| 1 | 21543974 | 21544228 | 5Y-H4K8ac_peak_365 | 6.73385  |                                                                                 |
| 1 | 21546620 | 21547449 | 5Y-H4K8ac_peak_366 | 10.54764 |                                                                                 |

|   |          |          |                    |          |                                                                       |
|---|----------|----------|--------------------|----------|-----------------------------------------------------------------------|
| 1 | 21616027 | 21616256 | 5Y-H4K8ac_peak_367 | 6.77436  |                                                                       |
| 1 | 21634758 | 21635398 | 5Y-H4K8ac_peak_368 | 5.50568  |                                                                       |
| 1 | 21635614 | 21635956 | 5Y-H4K8ac_peak_369 | 4.29586  |                                                                       |
| 1 | 21643802 | 21644279 | 5Y-H4K8ac_peak_370 | 6.22669  |                                                                       |
| 1 | 21650678 | 21650924 | 5Y-H4K8ac_peak_371 | 10.508   |                                                                       |
| 1 | 21670972 | 21671219 | 5Y-H4K8ac_peak_372 | 5.8635   | ECE1_ENSG00000117298                                                  |
| 1 | 21762972 | 21763864 | 5Y-H4K8ac_peak_373 | 11.35501 |                                                                       |
| 1 | 21766262 | 21766497 | 5Y-H4K8ac_peak_374 | 4.77126  | NBPF3_ENSG00000142794                                                 |
| 1 | 21835173 | 21835635 | 5Y-H4K8ac_peak_375 | 8.28346  | ALPL_ENSG00000162551                                                  |
| 1 | 21835867 | 21836326 | 5Y-H4K8ac_peak_376 | 10.35586 | ALPL_ENSG00000162551                                                  |
| 1 | 21946613 | 21946988 | 5Y-H4K8ac_peak_377 | 5.59843  |                                                                       |
| 1 | 21949193 | 21950161 | 5Y-H4K8ac_peak_378 | 18.10232 |                                                                       |
| 1 | 21952625 | 21953099 | 5Y-H4K8ac_peak_379 | 4.95697  |                                                                       |
| 1 | 21953352 | 21953767 | 5Y-H4K8ac_peak_380 | 5.98695  |                                                                       |
| 1 | 21968545 | 21968834 | 5Y-H4K8ac_peak_381 | 4.84727  |                                                                       |
| 1 | 21972030 | 21972220 | 5Y-H4K8ac_peak_382 | 6.50117  |                                                                       |
| 1 | 21994987 | 21995385 | 5Y-H4K8ac_peak_383 | 5.77617  | RAP1GAP_ENSG00000076864                                               |
| 1 | 21995628 | 21995824 | 5Y-H4K8ac_peak_384 | 7.20869  | RAP1GAP_ENSG00000076864                                               |
| 1 | 22109190 | 22109514 | 5Y-H4K8ac_peak_385 | 4.83834  | USP48_ENSG00000090686                                                 |
| 1 | 22350779 | 22351014 | 5Y-H4K8ac_peak_386 | 6.77436  | RP1-224A6.3_ENSG00000228397;LINC00339_ENSG00000218510                 |
| 1 | 22351477 | 22351671 | 5Y-H4K8ac_peak_387 | 6.46053  | RP1-224A6.3_ENSG00000228397;LINC00339_ENSG00000218510                 |
| 1 | 22352058 | 22352294 | 5Y-H4K8ac_peak_388 | 7.60057  | RP1-224A6.3_ENSG00000228397;LINC00339_ENSG00000218510                 |
| 1 | 22378720 | 22378939 | 5Y-H4K8ac_peak_389 | 8.47164  | CDC42_ENSG00000070831                                                 |
| 1 | 22379268 | 22379622 | 5Y-H4K8ac_peak_390 | 7.89273  | CDC42_ENSG00000070831                                                 |
| 1 | 22487344 | 22487581 | 5Y-H4K8ac_peak_391 | 6.62622  |                                                                       |
| 1 | 22641895 | 22642572 | 5Y-H4K8ac_peak_392 | 8.04693  |                                                                       |
| 1 | 22655005 | 22655233 | 5Y-H4K8ac_peak_393 | 12.0443  |                                                                       |
| 1 | 22655528 | 22655948 | 5Y-H4K8ac_peak_394 | 10.12457 |                                                                       |
| 1 | 22667195 | 22667495 | 5Y-H4K8ac_peak_395 | 6.33308  |                                                                       |
| 1 | 22668511 | 22669082 | 5Y-H4K8ac_peak_396 | 8.2913   |                                                                       |
| 1 | 22676305 | 22677031 | 5Y-H4K8ac_peak_397 | 12.91364 |                                                                       |
| 1 | 22677667 | 22678141 | 5Y-H4K8ac_peak_398 | 14.61459 |                                                                       |
| 1 | 22777658 | 22778038 | 5Y-H4K8ac_peak_399 | 6.55841  | ZBTB40_ENSG00000184677                                                |
| 1 | 22778557 | 22778904 | 5Y-H4K8ac_peak_400 | 14.39608 | ZBTB40_ENSG00000184677                                                |
| 1 | 22883284 | 22883498 | 5Y-H4K8ac_peak_401 | 9.6443   |                                                                       |
| 1 | 22999965 | 23000176 | 5Y-H4K8ac_peak_402 | 4.50302  |                                                                       |
| 1 | 23036242 | 23036679 | 5Y-H4K8ac_peak_403 | 6.77436  | EPHB2_ENSG00000133216                                                 |
| 1 | 23153105 | 23153489 | 5Y-H4K8ac_peak_404 | 6.92707  |                                                                       |
| 1 | 23504006 | 23504342 | 5Y-H4K8ac_peak_405 | 7.01266  | LUZP1_ENSG00000169641                                                 |
| 1 | 23670327 | 23670645 | 5Y-H4K8ac_peak_406 | 15.3483  | HNRNPR_ENSG00000125944                                                |
| 1 | 23695053 | 23696066 | 5Y-H4K8ac_peak_407 | 10.90365 | ZNF436_ENSG00000125945;C1orf213_ENSG00000249087;Y_RNA_ENSG00000201405 |
| 1 | 23823847 | 23824280 | 5Y-H4K8ac_peak_408 | 7.59101  |                                                                       |
| 1 | 23857350 | 23857652 | 5Y-H4K8ac_peak_409 | 7.20869  | E2F2_ENSG00000007968                                                  |
| 1 | 23871529 | 23871837 | 5Y-H4K8ac_peak_410 | 5.23083  |                                                                       |
| 1 | 23880581 | 23881363 | 5Y-H4K8ac_peak_411 | 19.8038  |                                                                       |
| 1 | 23894062 | 23895124 | 5Y-H4K8ac_peak_412 | 16.99491 |                                                                       |

|   |          |          |                    |          |                                                         |
|---|----------|----------|--------------------|----------|---------------------------------------------------------|
| 1 | 23895450 | 23895764 | 5Y-H4K8ac_peak_413 | 6.19716  |                                                         |
| 1 | 23925107 | 23925575 | 5Y-H4K8ac_peak_414 | 7.52971  |                                                         |
| 1 | 23945987 | 23946293 | 5Y-H4K8ac_peak_415 | 7.59101  |                                                         |
| 1 | 23961108 | 23961575 | 5Y-H4K8ac_peak_416 | 8.21582  |                                                         |
| 1 | 23964169 | 23964429 | 5Y-H4K8ac_peak_417 | 4.70501  |                                                         |
| 1 | 24018419 | 24018682 | 5Y-H4K8ac_peak_418 | 6.78128  | RPL11_ENSG00000142676                                   |
| 1 | 24069411 | 24070461 | 5Y-H4K8ac_peak_419 | 16.71988 | TCEB3_ENSG00000011007                                   |
| 1 | 24104965 | 24105227 | 5Y-H4K8ac_peak_420 | 6.38173  | RP5-886K2.3_ENSG00000236810;PITHD1_ENSG00000057757      |
| 1 | 24127468 | 24127671 | 5Y-H4K8ac_peak_421 | 9.44864  | GALE_ENSG00000117308                                    |
| 1 | 24151661 | 24151861 | 5Y-H4K8ac_peak_422 | 7.11863  |                                                         |
| 1 | 24437635 | 24438114 | 5Y-H4K8ac_peak_423 | 7.41197  | MYOM3_ENSG00000142661                                   |
| 1 | 24438553 | 24438951 | 5Y-H4K8ac_peak_424 | 4.71803  | MYOM3_ENSG00000142661                                   |
| 1 | 24513492 | 24513703 | 5Y-H4K8ac_peak_425 | 10.1994  | IFNLR1_ENSG00000185436                                  |
| 1 | 24739769 | 24740158 | 5Y-H4K8ac_peak_426 | 7.59101  |                                                         |
| 1 | 24740593 | 24740909 | 5Y-H4K8ac_peak_427 | 9.179    |                                                         |
| 1 | 24828827 | 24829037 | 5Y-H4K8ac_peak_428 | 8.97752  | RCAN3_ENSG00000117602                                   |
| 1 | 24969045 | 24969274 | 5Y-H4K8ac_peak_429 | 9.60627  |                                                         |
| 1 | 24969826 | 24970016 | 5Y-H4K8ac_peak_430 | 7.01266  |                                                         |
| 1 | 25240781 | 25241079 | 5Y-H4K8ac_peak_431 | 9.30206  |                                                         |
| 1 | 25566279 | 25566473 | 5Y-H4K8ac_peak_432 | 8.69112  |                                                         |
| 1 | 25757578 | 25758100 | 5Y-H4K8ac_peak_433 | 7.59101  | RHCE_ENSG00000188672;TMEM57_ENSG00000204178             |
| 1 | 25993117 | 25993548 | 5Y-H4K8ac_peak_434 | 6.34046  |                                                         |
| 1 | 26053894 | 26054295 | 5Y-H4K8ac_peak_435 | 11.22005 |                                                         |
| 1 | 26091785 | 26092211 | 5Y-H4K8ac_peak_436 | 4.84727  |                                                         |
| 1 | 26096729 | 26097120 | 5Y-H4K8ac_peak_437 | 5.59843  |                                                         |
| 1 | 26098176 | 26098392 | 5Y-H4K8ac_peak_438 | 9.37812  |                                                         |
| 1 | 26110196 | 26110390 | 5Y-H4K8ac_peak_439 | 4.07874  |                                                         |
| 1 | 26125959 | 26126519 | 5Y-H4K8ac_peak_440 | 12.21176 | SEPN1_ENSG00000162430                                   |
| 1 | 26146465 | 26146892 | 5Y-H4K8ac_peak_441 | 4.44548  | RP1-317E23.3_ENSG00000228172;AL020996.1_ENSG00000223474 |
| 1 | 26201062 | 26201309 | 5Y-H4K8ac_peak_442 | 7.31102  |                                                         |
| 1 | 26201540 | 26201942 | 5Y-H4K8ac_peak_443 | 5.12488  |                                                         |
| 1 | 26202145 | 26202676 | 5Y-H4K8ac_peak_444 | 8.90774  |                                                         |
| 1 | 26232259 | 26232724 | 5Y-H4K8ac_peak_445 | 6.55225  | STMN1_ENSG00000117632;MIR3917_ENSG00000264021           |
| 1 | 26233072 | 26233545 | 5Y-H4K8ac_peak_446 | 13.0168  | STMN1_ENSG00000117632;MIR3917_ENSG00000264021           |
| 1 | 26253459 | 26253931 | 5Y-H4K8ac_peak_447 | 7.87406  |                                                         |
| 1 | 26421510 | 26421742 | 5Y-H4K8ac_peak_448 | 5.35202  |                                                         |
| 1 | 26437594 | 26438062 | 5Y-H4K8ac_peak_449 | 13.99721 | PDIK1L_ENSG00000175087                                  |
| 1 | 26482859 | 26483309 | 5Y-H4K8ac_peak_450 | 9.51254  |                                                         |
| 1 | 26487891 | 26488404 | 5Y-H4K8ac_peak_451 | 8.43511  |                                                         |
| 1 | 26490610 | 26490927 | 5Y-H4K8ac_peak_452 | 5.64909  |                                                         |
| 1 | 26491214 | 26491420 | 5Y-H4K8ac_peak_453 | 7.03573  |                                                         |
| 1 | 26495514 | 26495775 | 5Y-H4K8ac_peak_454 | 5.03917  | ZNF593_ENSG00000142684                                  |
| 1 | 26496080 | 26496279 | 5Y-H4K8ac_peak_455 | 6.78128  | ZNF593_ENSG00000142684                                  |
| 1 | 26560018 | 26560383 | 5Y-H4K8ac_peak_456 | 9.38276  | CEP85_ENSG00000130695                                   |
| 1 | 26647781 | 26648010 | 5Y-H4K8ac_peak_457 | 6.46053  |                                                         |
| 1 | 26663164 | 26663360 | 5Y-H4K8ac_peak_458 | 6.34245  |                                                         |

|   |          |          |                    |          |                                                    |
|---|----------|----------|--------------------|----------|----------------------------------------------------|
| 1 | 26798207 | 26798736 | 5Y-H4K8ac_peak_459 | 16.50659 | HMG2N2_ENSG00000198830                             |
| 1 | 26798985 | 26799318 | 5Y-H4K8ac_peak_460 | 23.51162 | HMG2N2_ENSG00000198830                             |
| 1 | 26826929 | 26827149 | 5Y-H4K8ac_peak_461 | 8.7173   |                                                    |
| 1 | 26855792 | 26856075 | 5Y-H4K8ac_peak_462 | 12.05638 | RPS6KA1_ENSG00000117676                            |
| 1 | 26856311 | 26856512 | 5Y-H4K8ac_peak_463 | 5.64909  | RPS6KA1_ENSG00000117676                            |
| 1 | 26947582 | 26948119 | 5Y-H4K8ac_peak_464 | 8.5915   |                                                    |
| 1 | 27022584 | 27024086 | 5Y-H4K8ac_peak_465 | 13.12848 | ARID1A_ENSG00000117713                             |
| 1 | 27113935 | 27114248 | 5Y-H4K8ac_peak_466 | 6.86362  | PIGV_ENSG00000060642                               |
| 1 | 27114502 | 27115077 | 5Y-H4K8ac_peak_467 | 5.85188  | PIGV_ENSG00000060642                               |
| 1 | 27152691 | 27153051 | 5Y-H4K8ac_peak_468 | 11.04146 | ZDHHC18_ENSG00000204160                            |
| 1 | 27217131 | 27217352 | 5Y-H4K8ac_peak_469 | 6.03632  | GPN2_ENSG00000142751                               |
| 1 | 27226427 | 27226825 | 5Y-H4K8ac_peak_470 | 7.50148  | GPATCH3_ENSG00000198746;NUDC_ENSG00000090273       |
| 1 | 27248323 | 27248733 | 5Y-H4K8ac_peak_471 | 7.89273  |                                                    |
| 1 | 27338860 | 27339328 | 5Y-H4K8ac_peak_472 | 8.21582  | FAM46B_ENSG00000158246                             |
| 1 | 27426507 | 27426834 | 5Y-H4K8ac_peak_473 | 11.68317 |                                                    |
| 1 | 27481124 | 27481564 | 5Y-H4K8ac_peak_474 | 5.23083  |                                                    |
| 1 | 27560464 | 27560773 | 5Y-H4K8ac_peak_475 | 8.2913   | RP11-40H20.4_ENSG00000224311;WDTC1_ENSG00000142784 |
| 1 | 27624435 | 27624636 | 5Y-H4K8ac_peak_476 | 3.94555  |                                                    |
| 1 | 27625465 | 27625791 | 5Y-H4K8ac_peak_477 | 5.98695  |                                                    |
| 1 | 27626589 | 27627393 | 5Y-H4K8ac_peak_478 | 7.44077  |                                                    |
| 1 | 27644838 | 27645058 | 5Y-H4K8ac_peak_479 | 5.87382  |                                                    |
| 1 | 27648816 | 27649140 | 5Y-H4K8ac_peak_480 | 9.23159  | TMEM222_ENSG00000186501                            |
| 1 | 27675567 | 27675981 | 5Y-H4K8ac_peak_481 | 10.60083 |                                                    |
| 1 | 27676176 | 27676394 | 5Y-H4K8ac_peak_482 | 9.63153  |                                                    |
| 1 | 27676640 | 27677339 | 5Y-H4K8ac_peak_483 | 12.82593 |                                                    |
| 1 | 27693197 | 27693439 | 5Y-H4K8ac_peak_484 | 5.41472  | MAP3K6_ENSG00000142733                             |
| 1 | 27817033 | 27817573 | 5Y-H4K8ac_peak_485 | 10.17195 | WASF2_ENSG00000158195                              |
| 1 | 27831187 | 27831527 | 5Y-H4K8ac_peak_486 | 9.22011  |                                                    |
| 1 | 27845844 | 27846418 | 5Y-H4K8ac_peak_487 | 7.50148  |                                                    |
| 1 | 27854186 | 27854905 | 5Y-H4K8ac_peak_488 | 6.03632  |                                                    |
| 1 | 27955245 | 27955584 | 5Y-H4K8ac_peak_489 | 7.38046  |                                                    |
| 1 | 27963445 | 27963784 | 5Y-H4K8ac_peak_490 | 5.59843  |                                                    |
| 1 | 27986064 | 27986533 | 5Y-H4K8ac_peak_491 | 4.0639   |                                                    |
| 1 | 27989304 | 27989586 | 5Y-H4K8ac_peak_492 | 4.95697  | RP11-288L9.1_ENSG00000233975                       |
| 1 | 28086256 | 28086534 | 5Y-H4K8ac_peak_493 | 7.01856  |                                                    |
| 1 | 28156592 | 28156888 | 5Y-H4K8ac_peak_494 | 8.17203  | PPP1R8_ENSG00000117751                             |
| 1 | 28157451 | 28157840 | 5Y-H4K8ac_peak_495 | 7.11863  | PPP1R8_ENSG00000117751                             |
| 1 | 28205776 | 28206012 | 5Y-H4K8ac_peak_496 | 6.50117  |                                                    |
| 1 | 28500368 | 28500752 | 5Y-H4K8ac_peak_497 | 5.65584  |                                                    |
| 1 | 28561890 | 28562364 | 5Y-H4K8ac_peak_498 | 4.84727  | ATPIF1_ENSG00000130770                             |
| 1 | 28574664 | 28574942 | 5Y-H4K8ac_peak_499 | 8.43511  |                                                    |
| 1 | 28696312 | 28696522 | 5Y-H4K8ac_peak_500 | 7.08486  | PHACTR4_ENSG00000204138                            |
| 1 | 28831829 | 28832219 | 5Y-H4K8ac_peak_501 | 6.3265   | RCC1_ENSG00000180198;SNHG3_ENSG00000242125         |
| 1 | 28974146 | 28974340 | 5Y-H4K8ac_peak_502 | 9.44864  | RNU11_ENSG00000270103                              |
| 1 | 28994186 | 28994981 | 5Y-H4K8ac_peak_503 | 4.29586  | GMEB1_ENSG00000162419                              |
| 1 | 28995594 | 28996191 | 5Y-H4K8ac_peak_504 | 13.92877 | GMEB1_ENSG00000162419                              |

|   |          |          |                    |          |                              |
|---|----------|----------|--------------------|----------|------------------------------|
| 1 | 29062834 | 29063138 | 5Y-H4K8ac_peak_505 | 7.4047   | YTHDF2_ENSG00000198492       |
| 1 | 29063555 | 29064095 | 5Y-H4K8ac_peak_506 | 10.48476 | YTHDF2_ENSG00000198492       |
| 1 | 29138477 | 29139317 | 5Y-H4K8ac_peak_507 | 20.32264 | OPRD1_ENSG00000116329        |
| 1 | 29161391 | 29161784 | 5Y-H4K8ac_peak_508 | 8.43511  |                              |
| 1 | 29162239 | 29162445 | 5Y-H4K8ac_peak_509 | 6.76091  |                              |
| 1 | 29211129 | 29211345 | 5Y-H4K8ac_peak_510 | 5.89113  |                              |
| 1 | 29241214 | 29241411 | 5Y-H4K8ac_peak_511 | 5.34199  |                              |
| 1 | 29447892 | 29448506 | 5Y-H4K8ac_peak_512 | 6.54441  |                              |
| 1 | 29451461 | 29452152 | 5Y-H4K8ac_peak_513 | 14.19462 |                              |
| 1 | 29507922 | 29508391 | 5Y-H4K8ac_peak_514 | 9.89244  | SRSF4_ENSG00000116350        |
| 1 | 29508769 | 29509351 | 5Y-H4K8ac_peak_515 | 8.16031  | SRSF4_ENSG00000116350        |
| 1 | 29721197 | 29721509 | 5Y-H4K8ac_peak_516 | 7.63144  |                              |
| 1 | 29753826 | 29754230 | 5Y-H4K8ac_peak_517 | 7.38046  |                              |
| 1 | 29776756 | 29777026 | 5Y-H4K8ac_peak_518 | 5.23083  |                              |
| 1 | 29795053 | 29795244 | 5Y-H4K8ac_peak_519 | 4.79585  |                              |
| 1 | 29795611 | 29796421 | 5Y-H4K8ac_peak_520 | 8.69112  |                              |
| 1 | 29796973 | 29798405 | 5Y-H4K8ac_peak_521 | 19.61244 |                              |
| 1 | 29800111 | 29800761 | 5Y-H4K8ac_peak_522 | 11.22005 |                              |
| 1 | 29801670 | 29802124 | 5Y-H4K8ac_peak_523 | 9.51254  |                              |
| 1 | 29848288 | 29848691 | 5Y-H4K8ac_peak_524 | 5.449    |                              |
| 1 | 30102344 | 30102902 | 5Y-H4K8ac_peak_525 | 8.71064  |                              |
| 1 | 30105832 | 30106055 | 5Y-H4K8ac_peak_526 | 12.6675  |                              |
| 1 | 30106278 | 30106604 | 5Y-H4K8ac_peak_527 | 6.50117  |                              |
| 1 | 30107266 | 30108400 | 5Y-H4K8ac_peak_528 | 12.2918  |                              |
| 1 | 30115961 | 30116318 | 5Y-H4K8ac_peak_529 | 6.14981  |                              |
| 1 | 30124850 | 30125205 | 5Y-H4K8ac_peak_530 | 11.19336 |                              |
| 1 | 30155346 | 30155552 | 5Y-H4K8ac_peak_531 | 5.449    |                              |
| 1 | 30161868 | 30162257 | 5Y-H4K8ac_peak_532 | 7.30348  |                              |
| 1 | 30179477 | 30179874 | 5Y-H4K8ac_peak_533 | 5.16687  |                              |
| 1 | 30180521 | 30181467 | 5Y-H4K8ac_peak_534 | 21.41928 | RP4-656G21.1_ENSG00000228176 |
| 1 | 30182236 | 30183149 | 5Y-H4K8ac_peak_535 | 15.28394 | RP4-656G21.1_ENSG00000228176 |
| 1 | 30226643 | 30226875 | 5Y-H4K8ac_peak_536 | 6.47245  |                              |
| 1 | 30227130 | 30227688 | 5Y-H4K8ac_peak_537 | 7.69843  |                              |
| 1 | 30228185 | 30228662 | 5Y-H4K8ac_peak_538 | 5.24695  |                              |
| 1 | 30274392 | 30274647 | 5Y-H4K8ac_peak_539 | 6.34046  |                              |
| 1 | 30299326 | 30299638 | 5Y-H4K8ac_peak_540 | 6.43775  |                              |
| 1 | 30308895 | 30309139 | 5Y-H4K8ac_peak_541 | 5.13361  |                              |
| 1 | 30574014 | 30574571 | 5Y-H4K8ac_peak_542 | 5.59843  |                              |
| 1 | 30605382 | 30605703 | 5Y-H4K8ac_peak_543 | 11.39862 |                              |
| 1 | 30606120 | 30606713 | 5Y-H4K8ac_peak_544 | 5.41472  |                              |
| 1 | 30805596 | 30805964 | 5Y-H4K8ac_peak_545 | 5.72848  |                              |
| 1 | 30852985 | 30853325 | 5Y-H4K8ac_peak_546 | 8.43511  |                              |
| 1 | 31123233 | 31123434 | 5Y-H4K8ac_peak_547 | 9.33466  |                              |
| 1 | 31165069 | 31165543 | 5Y-H4K8ac_peak_548 | 6.50117  |                              |
| 1 | 31168639 | 31168934 | 5Y-H4K8ac_peak_549 | 4.84727  |                              |
| 1 | 31191698 | 31192093 | 5Y-H4K8ac_peak_550 | 11.19336 | MATN1-AS1_ENSG00000186056    |



|   |          |          |                    |          |                                                                              |
|---|----------|----------|--------------------|----------|------------------------------------------------------------------------------|
| 1 | 31361247 | 31361742 | 5Y-H4K8ac_peak_551 | 7.38046  |                                                                              |
| 1 | 31381816 | 31382059 | 5Y-H4K8ac_peak_552 | 9.23159  | SDC3_ENSG00000162512                                                         |
| 1 | 31386026 | 31386349 | 5Y-H4K8ac_peak_553 | 8.43511  |                                                                              |
| 1 | 31538926 | 31539253 | 5Y-H4K8ac_peak_554 | 4.15658  | PUM1_ENSG00000134644                                                         |
| 1 | 31574200 | 31574390 | 5Y-H4K8ac_peak_555 | 4.61652  |                                                                              |
| 1 | 31627450 | 31627728 | 5Y-H4K8ac_peak_556 | 15.06486 |                                                                              |
| 1 | 31628128 | 31628573 | 5Y-H4K8ac_peak_557 | 6.37023  |                                                                              |
| 1 | 31712268 | 31712521 | 5Y-H4K8ac_peak_558 | 8.564    | NKAIN1_ENSG00000084628                                                       |
| 1 | 32045978 | 32046276 | 5Y-H4K8ac_peak_559 | 7.53429  |                                                                              |
| 1 | 32079763 | 32080143 | 5Y-H4K8ac_peak_560 | 7.76645  |                                                                              |
| 1 | 32083361 | 32083800 | 5Y-H4K8ac_peak_561 | 7.64648  | HCRTR1_ENSG00000121764                                                       |
| 1 | 32092508 | 32093524 | 5Y-H4K8ac_peak_562 | 4.642    |                                                                              |
| 1 | 32095548 | 32095777 | 5Y-H4K8ac_peak_563 | 6.78318  |                                                                              |
| 1 | 32109966 | 32110461 | 5Y-H4K8ac_peak_564 | 14.86775 | PEF1_ENSG00000162517;RP11-73M7.6_ENSG00000235790;RP11-73M7.9_ENSG00000264078 |
| 1 | 32167199 | 32167418 | 5Y-H4K8ac_peak_565 | 7.41519  |                                                                              |
| 1 | 32169222 | 32169873 | 5Y-H4K8ac_peak_566 | 10.4678  | COL16A1_ENSG00000084636                                                      |
| 1 | 32172198 | 32172476 | 5Y-H4K8ac_peak_567 | 6.00382  |                                                                              |
| 1 | 32198265 | 32198693 | 5Y-H4K8ac_peak_568 | 8.63306  |                                                                              |
| 1 | 32199145 | 32199499 | 5Y-H4K8ac_peak_569 | 9.26157  |                                                                              |
| 1 | 32246742 | 32246940 | 5Y-H4K8ac_peak_570 | 6.19178  |                                                                              |
| 1 | 32247281 | 32248048 | 5Y-H4K8ac_peak_571 | 11.64182 |                                                                              |
| 1 | 32248480 | 32248841 | 5Y-H4K8ac_peak_572 | 5.449    |                                                                              |
| 1 | 32264674 | 32264918 | 5Y-H4K8ac_peak_573 | 5.35202  |                                                                              |
| 1 | 32279502 | 32280332 | 5Y-H4K8ac_peak_574 | 8.16031  |                                                                              |
| 1 | 32404200 | 32404485 | 5Y-H4K8ac_peak_575 | 9.30505  |                                                                              |
| 1 | 32420291 | 32420524 | 5Y-H4K8ac_peak_576 | 5.23083  |                                                                              |
| 1 | 32479638 | 32480013 | 5Y-H4K8ac_peak_577 | 7.87406  | KHDRBS1_ENSG00000121774                                                      |
| 1 | 32538121 | 32538326 | 5Y-H4K8ac_peak_578 | 7.59101  | RP11-277A4.4_ENSG00000203325;TMEM39B_ENSG00000121775                         |
| 1 | 32573001 | 32573235 | 5Y-H4K8ac_peak_579 | 6.54441  | KPNA6_ENSG00000025800                                                        |
| 1 | 32596834 | 32597123 | 5Y-H4K8ac_peak_580 | 5.59837  |                                                                              |
| 1 | 32705460 | 32705801 | 5Y-H4K8ac_peak_581 | 7.30348  |                                                                              |
| 1 | 32801174 | 32801389 | 5Y-H4K8ac_peak_582 | 5.44849  | MARCKSL1_ENSG00000175130                                                     |
| 1 | 32817291 | 32817899 | 5Y-H4K8ac_peak_583 | 8.43511  | TSSK3_ENSG00000162526                                                        |
| 1 | 32866806 | 32867026 | 5Y-H4K8ac_peak_584 | 5.98695  |                                                                              |
| 1 | 32892520 | 32892759 | 5Y-H4K8ac_peak_585 | 9.38203  | LRRC37A12P_ENSG00000229259                                                   |
| 1 | 32966010 | 32966467 | 5Y-H4K8ac_peak_586 | 14.86775 |                                                                              |
| 1 | 33116834 | 33117363 | 5Y-H4K8ac_peak_587 | 12.26819 | ZBTB8OS_ENSG00000176261;RBBP4_ENSG00000162521                                |
| 1 | 33168752 | 33169171 | 5Y-H4K8ac_peak_588 | 5.23819  | SYNC_ENSG00000162520                                                         |
| 1 | 33206648 | 33207412 | 5Y-H4K8ac_peak_589 | 6.96612  | KIAA1522_ENSG00000162522                                                     |
| 1 | 33207687 | 33207985 | 5Y-H4K8ac_peak_590 | 9.89244  | KIAA1522_ENSG00000162522                                                     |
| 1 | 33282385 | 33282795 | 5Y-H4K8ac_peak_591 | 15.49523 | YARS_ENSG00000134684;S100PBP_ENSG00000116497                                 |
| 1 | 33283392 | 33283753 | 5Y-H4K8ac_peak_592 | 8.90774  | YARS_ENSG00000134684                                                         |
| 1 | 33335776 | 33336144 | 5Y-H4K8ac_peak_593 | 5.52265  |                                                                              |
| 1 | 33336534 | 33336970 | 5Y-H4K8ac_peak_594 | 5.23083  |                                                                              |
| 1 | 33358927 | 33359132 | 5Y-H4K8ac_peak_595 | 7.11863  |                                                                              |
| 1 | 33367211 | 33367452 | 5Y-H4K8ac_peak_596 | 7.34185  | TMEM54_ENSG00000121900                                                       |

|   |          |          |                    |          |                                                      |
|---|----------|----------|--------------------|----------|------------------------------------------------------|
| 1 | 33438352 | 33438894 | 5Y-H4K8ac_peak_597 | 13.48981 | FKSG48_ENSG00000267885                               |
| 1 | 33618678 | 33618933 | 5Y-H4K8ac_peak_598 | 8.69112  |                                                      |
| 1 | 33626306 | 33626963 | 5Y-H4K8ac_peak_599 | 6.37023  |                                                      |
| 1 | 33721301 | 33721728 | 5Y-H4K8ac_peak_600 | 8.69112  | ZNF362_ENSG00000160094                               |
| 1 | 33723893 | 33724121 | 5Y-H4K8ac_peak_601 | 5.90587  |                                                      |
| 1 | 33815035 | 33815266 | 5Y-H4K8ac_peak_602 | 5.16353  | RP11-415J8.5_ENSG00000233246                         |
| 1 | 33815733 | 33816214 | 5Y-H4K8ac_peak_603 | 8.2913   | RP11-415J8.5_ENSG00000233246                         |
| 1 | 33830171 | 33830516 | 5Y-H4K8ac_peak_604 | 8.42168  |                                                      |
| 1 | 34098891 | 34099176 | 5Y-H4K8ac_peak_605 | 15.27452 |                                                      |
| 1 | 34151940 | 34152442 | 5Y-H4K8ac_peak_606 | 6.6946   |                                                      |
| 1 | 34286287 | 34286547 | 5Y-H4K8ac_peak_607 | 6.78128  |                                                      |
| 1 | 35105183 | 35105487 | 5Y-H4K8ac_peak_608 | 5.34938  |                                                      |
| 1 | 35162369 | 35162692 | 5Y-H4K8ac_peak_609 | 6.73385  |                                                      |
| 1 | 35383723 | 35383967 | 5Y-H4K8ac_peak_610 | 5.12213  |                                                      |
| 1 | 35450581 | 35450827 | 5Y-H4K8ac_peak_611 | 7.11863  | RP11-244H3.1_ENSG00000241014;ZMYM6NB_ENSG00000243749 |
| 1 | 35497301 | 35497539 | 5Y-H4K8ac_peak_612 | 13.2534  | RP11-244H3.4_ENSG00000271741;ZMYM6_ENSG00000163867   |
| 1 | 35545021 | 35545273 | 5Y-H4K8ac_peak_613 | 7.31815  |                                                      |
| 1 | 35657847 | 35658684 | 5Y-H4K8ac_peak_614 | 11.72479 | SFPQ_ENSG00000116560                                 |
| 1 | 35734383 | 35734853 | 5Y-H4K8ac_peak_615 | 22.04676 | ZMYM4_ENSG00000146463                                |
| 1 | 36022658 | 36023290 | 5Y-H4K8ac_peak_616 | 13.00733 | KIAA0319L_ENSG00000142687;NCDN_ENSG00000020129       |
| 1 | 36023488 | 36023971 | 5Y-H4K8ac_peak_617 | 7.90236  | KIAA0319L_ENSG00000142687;NCDN_ENSG00000020129       |
| 1 | 36172926 | 36174303 | 5Y-H4K8ac_peak_618 | 18.21442 |                                                      |
| 1 | 36184381 | 36184898 | 5Y-H4K8ac_peak_619 | 6.78128  | C1orf216_ENSG00000142686                             |
| 1 | 36273424 | 36273754 | 5Y-H4K8ac_peak_620 | 6.73385  | AGO4_ENSG00000134698                                 |
| 1 | 36273949 | 36274342 | 5Y-H4K8ac_peak_621 | 6.37023  | AGO4_ENSG00000134698                                 |
| 1 | 36348138 | 36348525 | 5Y-H4K8ac_peak_622 | 5.98695  |                                                      |
| 1 | 36396362 | 36396553 | 5Y-H4K8ac_peak_623 | 6.22904  | RP4-789D17.5_ENSG00000271914;AGO3_ENSG00000126070    |
| 1 | 36396932 | 36397172 | 5Y-H4K8ac_peak_624 | 8.04693  | AGO3_ENSG00000126070                                 |
| 1 | 36549419 | 36549816 | 5Y-H4K8ac_peak_625 | 8.47164  | TEKT2_ENSG00000092850                                |
| 1 | 36553969 | 36554296 | 5Y-H4K8ac_peak_626 | 9.36633  | ADPRHL2_ENSG00000116863                              |
| 1 | 36554591 | 36554840 | 5Y-H4K8ac_peak_627 | 6.88736  | ADPRHL2_ENSG00000116863                              |
| 1 | 36559813 | 36560277 | 5Y-H4K8ac_peak_628 | 7.72887  |                                                      |
| 1 | 36580250 | 36580883 | 5Y-H4K8ac_peak_629 | 8.43511  |                                                      |
| 1 | 36591106 | 36591416 | 5Y-H4K8ac_peak_630 | 6.37023  | COL8A2_ENSG00000171812                               |
| 1 | 36599190 | 36599402 | 5Y-H4K8ac_peak_631 | 4.50834  |                                                      |
| 1 | 36615948 | 36616488 | 5Y-H4K8ac_peak_632 | 9.63153  | TRAPPC3_ENSG00000054116                              |
| 1 | 36620431 | 36620634 | 5Y-H4K8ac_peak_633 | 7.0618   | MAP7D1_ENSG00000116871                               |
| 1 | 36621540 | 36621875 | 5Y-H4K8ac_peak_634 | 7.50148  | MAP7D1_ENSG00000116871                               |
| 1 | 36626439 | 36626872 | 5Y-H4K8ac_peak_635 | 11.86504 |                                                      |
| 1 | 36690100 | 36690445 | 5Y-H4K8ac_peak_636 | 6.2403   | THRAP3_ENSG00000054118                               |
| 1 | 36852338 | 36852549 | 5Y-H4K8ac_peak_637 | 7.58806  | STK40_ENSG00000196182                                |
| 1 | 36948259 | 36948559 | 5Y-H4K8ac_peak_638 | 6.86362  | CSF3R_ENSG00000119535                                |
| 1 | 37331454 | 37331831 | 5Y-H4K8ac_peak_639 | 7.50081  |                                                      |
| 1 | 37336758 | 37337032 | 5Y-H4K8ac_peak_640 | 5.25819  |                                                      |
| 1 | 37731776 | 37732158 | 5Y-H4K8ac_peak_641 | 4.8188   |                                                      |
| 1 | 38020218 | 38020438 | 5Y-H4K8ac_peak_642 | 9.15007  | SNIP1_ENSG00000163877                                |

|   |          |          |                    |          |                                                     |
|---|----------|----------|--------------------|----------|-----------------------------------------------------|
| 1 | 38259021 | 38259348 | 5Y-H4K8ac_peak_643 | 11.22005 | MANEAL_ENSG00000185090                              |
| 1 | 38259637 | 38259957 | 5Y-H4K8ac_peak_644 | 9.7353   | MANEAL_ENSG00000185090                              |
| 1 | 38273502 | 38273773 | 5Y-H4K8ac_peak_645 | 7.50148  | YRDC_ENSG00000196449;C1orf122_ENSG00000197982       |
| 1 | 38461966 | 38462167 | 5Y-H4K8ac_peak_646 | 5.13364  |                                                     |
| 1 | 38465452 | 38465813 | 5Y-H4K8ac_peak_647 | 10.23399 |                                                     |
| 1 | 38471583 | 38471962 | 5Y-H4K8ac_peak_648 | 6.40964  | FHL3_ENSG00000183386                                |
| 1 | 38478477 | 38478808 | 5Y-H4K8ac_peak_649 | 9.84749  |                                                     |
| 1 | 39338614 | 39338909 | 5Y-H4K8ac_peak_650 | 7.76232  |                                                     |
| 1 | 39491155 | 39491802 | 5Y-H4K8ac_peak_651 | 5.72233  | NDUFS5_ENSG00000168653                              |
| 1 | 39570639 | 39570880 | 5Y-H4K8ac_peak_652 | 9.30206  |                                                     |
| 1 | 40102929 | 40103151 | 5Y-H4K8ac_peak_653 | 5.67588  |                                                     |
| 1 | 40122525 | 40122762 | 5Y-H4K8ac_peak_654 | 6.00598  |                                                     |
| 1 | 40157687 | 40157918 | 5Y-H4K8ac_peak_655 | 7.11863  | HPCAL4_ENSG00000116983;PPIE_ENSG00000084072         |
| 1 | 40158295 | 40158528 | 5Y-H4K8ac_peak_656 | 4.29586  | HPCAL4_ENSG00000116983;PPIE_ENSG00000084072         |
| 1 | 40203962 | 40204272 | 5Y-H4K8ac_peak_657 | 6.77436  |                                                     |
| 1 | 40253792 | 40254289 | 5Y-H4K8ac_peak_658 | 7.9215   | BMP8B_ENSG00000116985;RP1-118J21.25_ENSG00000261798 |
| 1 | 40348924 | 40349122 | 5Y-H4K8ac_peak_659 | 9.63153  | TRIT1_ENSG00000043514                               |
| 1 | 40367357 | 40367605 | 5Y-H4K8ac_peak_660 | 10.54764 | MYCL_ENSG00000116990                                |
| 1 | 40506483 | 40506690 | 5Y-H4K8ac_peak_661 | 9.26157  | CAP1_ENSG00000131236                                |
| 1 | 40626549 | 40626848 | 5Y-H4K8ac_peak_662 | 5.98695  | RLF_ENSG00000117000                                 |
| 1 | 40780548 | 40781441 | 5Y-H4K8ac_peak_663 | 7.50148  |                                                     |
| 1 | 40782471 | 40782719 | 5Y-H4K8ac_peak_664 | 11.68317 | COL9A2_ENSG00000049089                              |
| 1 | 40916373 | 40916744 | 5Y-H4K8ac_peak_665 | 7.17184  | ZFP69B_ENSG00000187801                              |
| 1 | 40943210 | 40943448 | 5Y-H4K8ac_peak_666 | 6.34046  | ZFP69_ENSG00000187815                               |
| 1 | 41157395 | 41157664 | 5Y-H4K8ac_peak_667 | 16.13719 | NFYC-AS1_ENSG00000272145;NFYC_ENSG00000066136       |
| 1 | 41314132 | 41314325 | 5Y-H4K8ac_peak_668 | 4.24332  |                                                     |
| 1 | 41445780 | 41446090 | 5Y-H4K8ac_peak_669 | 10.60083 | CTPS1_ENSG00000171793                               |
| 1 | 41708073 | 41708591 | 5Y-H4K8ac_peak_670 | 12.05638 | SCMH1_ENSG0000010803;RP11-399E6.1_ENSG00000235358   |
| 1 | 41831694 | 41832094 | 5Y-H4K8ac_peak_671 | 14.77593 |                                                     |
| 1 | 41847338 | 41847698 | 5Y-H4K8ac_peak_672 | 6.08523  |                                                     |
| 1 | 41848054 | 41848420 | 5Y-H4K8ac_peak_673 | 4.77126  |                                                     |
| 1 | 41898899 | 41899269 | 5Y-H4K8ac_peak_674 | 6.31818  |                                                     |
| 1 | 41920331 | 41920569 | 5Y-H4K8ac_peak_675 | 8.69112  |                                                     |
| 1 | 41940546 | 41941118 | 5Y-H4K8ac_peak_676 | 4.48815  |                                                     |
| 1 | 41962419 | 41962645 | 5Y-H4K8ac_peak_677 | 10.19948 |                                                     |
| 1 | 41968271 | 41968573 | 5Y-H4K8ac_peak_678 | 10.69698 |                                                     |
| 1 | 41968976 | 41969317 | 5Y-H4K8ac_peak_679 | 5.89113  |                                                     |
| 1 | 41970515 | 41970715 | 5Y-H4K8ac_peak_680 | 7.9412   |                                                     |
| 1 | 41982070 | 41982465 | 5Y-H4K8ac_peak_681 | 9.44542  |                                                     |
| 1 | 42078391 | 42078788 | 5Y-H4K8ac_peak_682 | 6.78815  |                                                     |
| 1 | 42128113 | 42128565 | 5Y-H4K8ac_peak_683 | 6.50117  |                                                     |
| 1 | 42161203 | 42161423 | 5Y-H4K8ac_peak_684 | 9.63153  |                                                     |
| 1 | 42179409 | 42179710 | 5Y-H4K8ac_peak_685 | 10.35586 |                                                     |
| 1 | 42180092 | 42180376 | 5Y-H4K8ac_peak_686 | 6.10343  |                                                     |
| 1 | 42181509 | 42181921 | 5Y-H4K8ac_peak_687 | 11.36989 |                                                     |
| 1 | 42182278 | 42182826 | 5Y-H4K8ac_peak_688 | 7.50148  |                                                     |

|   |          |          |                    |          |                                                                                         |
|---|----------|----------|--------------------|----------|-----------------------------------------------------------------------------------------|
| 1 | 42192979 | 42193273 | 5Y-H4K8ac_peak_689 | 4.96019  |                                                                                         |
| 1 | 42357185 | 42357375 | 5Y-H4K8ac_peak_690 | 6.73385  |                                                                                         |
| 1 | 42501873 | 42502180 | 5Y-H4K8ac_peak_691 | 7.59101  | HIVEP3_ENSG00000127124                                                                  |
| 1 | 42630227 | 42630614 | 5Y-H4K8ac_peak_692 | 5.65584  | GUCA2A_ENSG00000197273                                                                  |
| 1 | 42846618 | 42846877 | 5Y-H4K8ac_peak_693 | 6.08523  | RIMKLA_ENSG00000177181                                                                  |
| 1 | 42921046 | 42921611 | 5Y-H4K8ac_peak_694 | 5.98695  | ZMYND12_ENSG00000066185;PPCS_ENSG00000127125                                            |
| 1 | 42922359 | 42922811 | 5Y-H4K8ac_peak_695 | 11.28133 | ZMYND12_ENSG00000066185;PPCS_ENSG00000127125                                            |
| 1 | 43124255 | 43124488 | 5Y-H4K8ac_peak_696 | 6.37023  | PPIH_ENSG00000171960                                                                    |
| 1 | 43282823 | 43283034 | 5Y-H4K8ac_peak_697 | 11.42066 | CCDC23_ENSG00000177868;ERMAP_ENSG00000164010                                            |
| 1 | 43450905 | 43451173 | 5Y-H4K8ac_peak_698 | 8.2913   |                                                                                         |
| 1 | 43470883 | 43471503 | 5Y-H4K8ac_peak_699 | 9.30505  |                                                                                         |
| 1 | 43524392 | 43524668 | 5Y-H4K8ac_peak_700 | 5.98695  |                                                                                         |
| 1 | 43533961 | 43534268 | 5Y-H4K8ac_peak_701 | 11.71078 |                                                                                         |
| 1 | 43814332 | 43814557 | 5Y-H4K8ac_peak_702 | 6.34245  |                                                                                         |
| 1 | 43824085 | 43824290 | 5Y-H4K8ac_peak_703 | 8.79957  | RP1-92O14.3_ENSG00000234694;CDC20_ENSG00000117399                                       |
| 1 | 43833893 | 43834118 | 5Y-H4K8ac_peak_704 | 12.10416 | ELOVL1_ENSG00000066322                                                                  |
| 1 | 43919073 | 43919818 | 5Y-H4K8ac_peak_705 | 7.31815  | HYI_ENSG00000178922;HYI-AS1_ENSG00000229348                                             |
| 1 | 43996640 | 43996905 | 5Y-H4K8ac_peak_706 | 8.2913   |                                                                                         |
| 1 | 44173248 | 44173657 | 5Y-H4K8ac_peak_707 | 6.77436  | KDM4A-AS1_ENSG00000236200                                                               |
| 1 | 44378362 | 44378766 | 5Y-H4K8ac_peak_708 | 5.65584  |                                                                                         |
| 1 | 44379443 | 44379634 | 5Y-H4K8ac_peak_709 | 5.41472  |                                                                                         |
| 1 | 44401753 | 44401977 | 5Y-H4K8ac_peak_710 | 10.95042 |                                                                                         |
| 1 | 44402345 | 44402556 | 5Y-H4K8ac_peak_711 | 7.11863  |                                                                                         |
| 1 | 44412406 | 44412600 | 5Y-H4K8ac_peak_712 | 9.00954  | RP11-7O11.3_ENSG00000237950;IPO13_ENSG00000117408                                       |
| 1 | 44440153 | 44440371 | 5Y-H4K8ac_peak_713 | 4.642    | ATP6V0B_ENSG00000117410                                                                 |
| 1 | 44445135 | 44445391 | 5Y-H4K8ac_peak_714 | 13.0168  | B4GALT2_ENSG00000117411                                                                 |
| 1 | 44457543 | 44457995 | 5Y-H4K8ac_peak_715 | 4.50302  | CCDC24_ENSG00000159214                                                                  |
| 1 | 44461147 | 44461901 | 5Y-H4K8ac_peak_716 | 8.69112  |                                                                                         |
| 1 | 44462343 | 44462869 | 5Y-H4K8ac_peak_717 | 8.1667   |                                                                                         |
| 1 | 44463254 | 44463558 | 5Y-H4K8ac_peak_718 | 6.77436  |                                                                                         |
| 1 | 44495562 | 44495903 | 5Y-H4K8ac_peak_719 | 8.1667   |                                                                                         |
| 1 | 44496216 | 44496444 | 5Y-H4K8ac_peak_720 | 7.60057  | SLC6A9_ENSG00000196517                                                                  |
| 1 | 44501290 | 44501596 | 5Y-H4K8ac_peak_721 | 5.3989   | RP5-1198O20.4_ENSG00000230615                                                           |
| 1 | 44678152 | 44678818 | 5Y-H4K8ac_peak_722 | 9.23159  | DMAP1_ENSG00000178028                                                                   |
| 1 | 44679141 | 44679413 | 5Y-H4K8ac_peak_723 | 8.43511  | DMAP1_ENSG00000178028                                                                   |
| 1 | 44820692 | 44820913 | 5Y-H4K8ac_peak_724 | 10.1994  | ERI3_ENSG00000117419                                                                    |
| 1 | 45097022 | 45098360 | 5Y-H4K8ac_peak_725 | 21.35466 |                                                                                         |
| 1 | 45197384 | 45197598 | 5Y-H4K8ac_peak_726 | 6.43775  | RNU5D-1_ENSG00000200169                                                                 |
| 1 | 45241414 | 45241854 | 5Y-H4K8ac_peak_727 | 5.03917  | RP11-269F19.2_ENSG00000225721;RPS8_ENSG00000142937;SNORD55_ENSG00000264294;SNORD46_ENSC |
| 1 | 45278749 | 45279755 | 5Y-H4K8ac_peak_728 | 11.1169  |                                                                                         |
| 1 | 45280332 | 45280791 | 5Y-H4K8ac_peak_729 | 4.77016  |                                                                                         |
| 1 | 45296482 | 45296766 | 5Y-H4K8ac_peak_730 | 5.23083  |                                                                                         |
| 1 | 45412710 | 45412948 | 5Y-H4K8ac_peak_731 | 5.65584  |                                                                                         |
| 1 | 45477372 | 45477589 | 5Y-H4K8ac_peak_732 | 5.70209  | HECTD3_ENSG00000126107;UROD_ENSG00000126088                                             |
| 1 | 45769584 | 45770238 | 5Y-H4K8ac_peak_733 | 10.31981 |                                                                                         |
| 1 | 45792568 | 45792870 | 5Y-H4K8ac_peak_734 | 5.64909  | HPDL_ENSG00000186603                                                                    |

|   |          |          |                    |          |                                                      |
|---|----------|----------|--------------------|----------|------------------------------------------------------|
| 1 | 46598882 | 46599281 | 5Y-H4K8ac_peak_735 | 14.43262 | RP4-533D7.5_ENSG00000227857                          |
| 1 | 46663787 | 46664497 | 5Y-H4K8ac_peak_736 | 9.88908  |                                                      |
| 1 | 46767504 | 46768142 | 5Y-H4K8ac_peak_737 | 5.89922  |                                                      |
| 1 | 46768482 | 46768852 | 5Y-H4K8ac_peak_738 | 10.23828 | LRRC41_ENSG00000132128;UQCRH_ENSG00000173660         |
| 1 | 46805916 | 46806788 | 5Y-H4K8ac_peak_739 | 15.40182 | NSUN4_ENSG00000117481                                |
| 1 | 46871696 | 46871955 | 5Y-H4K8ac_peak_740 | 9.96543  |                                                      |
| 1 | 46931755 | 46932913 | 5Y-H4K8ac_peak_741 | 8.5915   |                                                      |
| 1 | 47081879 | 47082071 | 5Y-H4K8ac_peak_742 | 4.96019  | MKNK1_ENSG00000079277;MOB3C_ENSG00000142961          |
| 1 | 47133608 | 47133889 | 5Y-H4K8ac_peak_743 | 6.78128  | TEX38_ENSG00000186118                                |
| 1 | 47184438 | 47184695 | 5Y-H4K8ac_peak_744 | 11.36844 | EFCAB14_ENSG00000159658                              |
| 1 | 47184920 | 47185153 | 5Y-H4K8ac_peak_745 | 8.2913   | EFCAB14_ENSG00000159658                              |
| 1 | 47780483 | 47780884 | 5Y-H4K8ac_peak_746 | 11.36844 | STIL_ENSG00000123473                                 |
| 1 | 47973386 | 47974379 | 5Y-H4K8ac_peak_747 | 15.87289 |                                                      |
| 1 | 47999681 | 47999928 | 5Y-H4K8ac_peak_748 | 7.38046  |                                                      |
| 1 | 48044023 | 48044405 | 5Y-H4K8ac_peak_749 | 11.68317 |                                                      |
| 1 | 48242658 | 48243033 | 5Y-H4K8ac_peak_750 | 7.52971  |                                                      |
| 1 | 48360871 | 48361086 | 5Y-H4K8ac_peak_751 | 4.07874  |                                                      |
| 1 | 48853281 | 48853494 | 5Y-H4K8ac_peak_752 | 6.34046  |                                                      |
| 1 | 49242071 | 49242447 | 5Y-H4K8ac_peak_753 | 6.20875  | BEND5_ENSG00000162373                                |
| 1 | 49513566 | 49513818 | 5Y-H4K8ac_peak_754 | 7.76232  | RP11-141A19.1_ENSG00000229846                        |
| 1 | 50489814 | 50490075 | 5Y-H4K8ac_peak_755 | 4.3419   | AGBL4_ENSG00000186094                                |
| 1 | 50513726 | 50514479 | 5Y-H4K8ac_peak_756 | 10.5157  | ELAVL4_ENSG00000162374                               |
| 1 | 50730912 | 50731414 | 5Y-H4K8ac_peak_757 | 7.31815  |                                                      |
| 1 | 50738942 | 50739216 | 5Y-H4K8ac_peak_758 | 6.43775  |                                                      |
| 1 | 50741713 | 50742097 | 5Y-H4K8ac_peak_759 | 6.19178  |                                                      |
| 1 | 50743496 | 50743807 | 5Y-H4K8ac_peak_760 | 12.0443  |                                                      |
| 1 | 51443235 | 51443494 | 5Y-H4K8ac_peak_761 | 9.23159  |                                                      |
| 1 | 51443798 | 51444055 | 5Y-H4K8ac_peak_762 | 19.17092 |                                                      |
| 1 | 51702400 | 51702684 | 5Y-H4K8ac_peak_763 | 4.50834  | RNF11_ENSG00000123091                                |
| 1 | 51762483 | 51763421 | 5Y-H4K8ac_peak_764 | 11.19336 |                                                      |
| 1 | 51796313 | 51796787 | 5Y-H4K8ac_peak_765 | 8.69112  | RP11-275F13.1_ENSG00000261664                        |
| 1 | 51797053 | 51797495 | 5Y-H4K8ac_peak_766 | 8.8236   |                                                      |
| 1 | 52082816 | 52083008 | 5Y-H4K8ac_peak_767 | 9.23159  |                                                      |
| 1 | 52113839 | 52114029 | 5Y-H4K8ac_peak_768 | 6.77436  |                                                      |
| 1 | 52195000 | 52195217 | 5Y-H4K8ac_peak_769 | 11.19336 |                                                      |
| 1 | 52195565 | 52195827 | 5Y-H4K8ac_peak_770 | 10.36926 |                                                      |
| 1 | 52522055 | 52522375 | 5Y-H4K8ac_peak_771 | 13.92877 | TXNDC12_ENSG00000117862;BTF3L4_ENSG00000134717       |
| 1 | 52607890 | 52608345 | 5Y-H4K8ac_peak_772 | 5.64909  | ZFYVE9_ENSG00000157077                               |
| 1 | 52814628 | 52814870 | 5Y-H4K8ac_peak_773 | 4.09853  |                                                      |
| 1 | 52831493 | 52831757 | 5Y-H4K8ac_peak_774 | 6.37023  | CC2D1B_ENSG00000154222                               |
| 1 | 53018358 | 53018638 | 5Y-H4K8ac_peak_775 | 11.09973 | ZCCHC11_ENSG00000134744                              |
| 1 | 53019230 | 53019793 | 5Y-H4K8ac_peak_776 | 12.6675  | RP11-25O10.2_ENSG00000272371;ZCCHC11_ENSG00000134744 |
| 1 | 53067778 | 53067968 | 5Y-H4K8ac_peak_777 | 5.34294  | GPX7_ENSG00000116157                                 |
| 1 | 53098468 | 53099208 | 5Y-H4K8ac_peak_778 | 8.73985  | FAM159A_ENSG00000182183                              |
| 1 | 53169262 | 53169496 | 5Y-H4K8ac_peak_779 | 5.91107  |                                                      |
| 1 | 53308712 | 53308986 | 5Y-H4K8ac_peak_780 | 4.95697  | ZYG11A_ENSG00000203995                               |

|   |          |          |                    |          |                                                       |
|---|----------|----------|--------------------|----------|-------------------------------------------------------|
| 1 | 53387187 | 53387381 | 5Y-H4K8ac_peak_781 | 4.07874  |                                                       |
| 1 | 53527562 | 53528373 | 5Y-H4K8ac_peak_782 | 11.1169  | PODN_ENSG00000174348                                  |
| 1 | 53611968 | 53612257 | 5Y-H4K8ac_peak_783 | 4.47071  |                                                       |
| 1 | 53686085 | 53687009 | 5Y-H4K8ac_peak_784 | 12.2918  | C1orf123_ENSG00000162384;RP5-1024G6.7_ENSG00000259818 |
| 1 | 53704446 | 53704652 | 5Y-H4K8ac_peak_785 | 9.30505  | MAGOH_ENSG00000162385;RP5-1024G6.5_ENSG00000226754    |
| 1 | 53753243 | 53753445 | 5Y-H4K8ac_peak_786 | 4.70571  | RP4-784A16.2_ENSG00000228838                          |
| 1 | 53760794 | 53760992 | 5Y-H4K8ac_peak_787 | 7.04158  |                                                       |
| 1 | 53780849 | 53781696 | 5Y-H4K8ac_peak_788 | 9.16473  |                                                       |
| 1 | 53782074 | 53782469 | 5Y-H4K8ac_peak_789 | 11.9002  |                                                       |
| 1 | 53783377 | 53783719 | 5Y-H4K8ac_peak_790 | 8.82628  |                                                       |
| 1 | 53793326 | 53793517 | 5Y-H4K8ac_peak_791 | 6.35402  | LRP8_ENSG00000157193;RP4-784A16.5_ENSG00000225675     |
| 1 | 53793946 | 53794324 | 5Y-H4K8ac_peak_792 | 8.47164  | LRP8_ENSG00000157193;RP4-784A16.5_ENSG00000225675     |
| 1 | 53833308 | 53833646 | 5Y-H4K8ac_peak_793 | 9.79526  | RP11-117D22.2_ENSG00000230138                         |
| 1 | 53834017 | 53834736 | 5Y-H4K8ac_peak_794 | 10.54764 | RP11-117D22.2_ENSG00000230138                         |
| 1 | 53837205 | 53837453 | 5Y-H4K8ac_peak_795 | 8.24952  |                                                       |
| 1 | 53858309 | 53858597 | 5Y-H4K8ac_peak_796 | 5.03335  |                                                       |
| 1 | 53875217 | 53875459 | 5Y-H4K8ac_peak_797 | 7.01266  |                                                       |
| 1 | 53978238 | 53978465 | 5Y-H4K8ac_peak_798 | 8.43511  |                                                       |
| 1 | 53979641 | 53979838 | 5Y-H4K8ac_peak_799 | 6.77436  |                                                       |
| 1 | 53992706 | 53993318 | 5Y-H4K8ac_peak_800 | 6.52331  |                                                       |
| 1 | 54056070 | 54056426 | 5Y-H4K8ac_peak_801 | 6.11316  |                                                       |
| 1 | 54058340 | 54058583 | 5Y-H4K8ac_peak_802 | 4.50834  |                                                       |
| 1 | 54121676 | 54121977 | 5Y-H4K8ac_peak_803 | 7.50148  |                                                       |
| 1 | 54151885 | 54152115 | 5Y-H4K8ac_peak_804 | 5.57299  |                                                       |
| 1 | 54303817 | 54304249 | 5Y-H4K8ac_peak_805 | 15.82713 | NDC1_ENSG00000058804                                  |
| 1 | 54695614 | 54696007 | 5Y-H4K8ac_peak_806 | 7.30348  |                                                       |
| 1 | 54704087 | 54704452 | 5Y-H4K8ac_peak_807 | 4.84727  | SSBP3-AS1_ENSG00000198711                             |
| 1 | 54712656 | 54712909 | 5Y-H4K8ac_peak_808 | 7.24844  |                                                       |
| 1 | 54802079 | 54802294 | 5Y-H4K8ac_peak_809 | 6.49308  |                                                       |
| 1 | 54940664 | 54941739 | 5Y-H4K8ac_peak_810 | 6.77436  |                                                       |
| 1 | 54953358 | 54953995 | 5Y-H4K8ac_peak_811 | 6.08523  |                                                       |
| 1 | 54954485 | 54955416 | 5Y-H4K8ac_peak_812 | 9.30505  |                                                       |
| 1 | 54964827 | 54965625 | 5Y-H4K8ac_peak_813 | 13.61292 |                                                       |
| 1 | 55008436 | 55008807 | 5Y-H4K8ac_peak_814 | 5.41472  | ACOT11_ENSG00000162390                                |
| 1 | 55037338 | 55037670 | 5Y-H4K8ac_peak_815 | 5.12213  |                                                       |
| 1 | 55180587 | 55180971 | 5Y-H4K8ac_peak_816 | 5.65584  | TTC4_ENSG00000243725                                  |
| 1 | 55181600 | 55181952 | 5Y-H4K8ac_peak_817 | 9.38203  | TTC4_ENSG00000243725                                  |
| 1 | 55415899 | 55416964 | 5Y-H4K8ac_peak_818 | 8.24461  |                                                       |
| 1 | 55446269 | 55446600 | 5Y-H4K8ac_peak_819 | 5.91107  | TMEM61_ENSG00000143001                                |
| 1 | 55453923 | 55454171 | 5Y-H4K8ac_peak_820 | 8.47164  |                                                       |
| 1 | 55488039 | 55488301 | 5Y-H4K8ac_peak_821 | 6.34046  |                                                       |
| 1 | 55516023 | 55516470 | 5Y-H4K8ac_peak_822 | 6.73047  |                                                       |
| 1 | 55680612 | 55681471 | 5Y-H4K8ac_peak_823 | 13.85283 | USP24_ENSG00000162402                                 |
| 1 | 55841157 | 55841491 | 5Y-H4K8ac_peak_824 | 7.34202  |                                                       |
| 1 | 55843244 | 55843770 | 5Y-H4K8ac_peak_825 | 6.52593  | RN7SKP291_ENSG00000199831                             |
| 1 | 55933781 | 55934018 | 5Y-H4K8ac_peak_826 | 5.93823  |                                                       |

|   |          |          |                    |          |                                                     |
|---|----------|----------|--------------------|----------|-----------------------------------------------------|
| 1 | 56022937 | 56023444 | 5Y-H4K8ac_peak_827 | 7.97699  |                                                     |
| 1 | 56107054 | 56107579 | 5Y-H4K8ac_peak_828 | 5.98695  |                                                     |
| 1 | 56150696 | 56151048 | 5Y-H4K8ac_peak_829 | 9.38203  |                                                     |
| 1 | 56158859 | 56159367 | 5Y-H4K8ac_peak_830 | 5.98695  |                                                     |
| 1 | 56159560 | 56159842 | 5Y-H4K8ac_peak_831 | 8.564    |                                                     |
| 1 | 56160404 | 56160677 | 5Y-H4K8ac_peak_832 | 7.31807  |                                                     |
| 1 | 56232501 | 56232699 | 5Y-H4K8ac_peak_833 | 7.3889   |                                                     |
| 1 | 56666955 | 56667260 | 5Y-H4K8ac_peak_834 | 5.81062  |                                                     |
| 1 | 56828888 | 56829106 | 5Y-H4K8ac_peak_835 | 7.31815  |                                                     |
| 1 | 56842449 | 56842693 | 5Y-H4K8ac_peak_836 | 7.59101  | AC119674.1_ENSG00000223307                          |
| 1 | 56844928 | 56845335 | 5Y-H4K8ac_peak_837 | 6.55906  |                                                     |
| 1 | 56972079 | 56972303 | 5Y-H4K8ac_peak_838 | 5.65584  |                                                     |
| 1 | 58898597 | 58898820 | 5Y-H4K8ac_peak_839 | 9.30505  |                                                     |
| 1 | 59165365 | 59165663 | 5Y-H4K8ac_peak_840 | 13.99721 | MYSM1_ENSG00000162601                               |
| 1 | 59238803 | 59239301 | 5Y-H4K8ac_peak_841 | 9.83437  |                                                     |
| 1 | 59247795 | 59248615 | 5Y-H4K8ac_peak_842 | 7.38046  |                                                     |
| 1 | 59250094 | 59250824 | 5Y-H4K8ac_peak_843 | 8.1667   | JUN_ENSG00000177606;LINC01135_ENSG00000234807       |
| 1 | 59282214 | 59282406 | 5Y-H4K8ac_peak_844 | 7.20869  |                                                     |
| 1 | 59369482 | 59369700 | 5Y-H4K8ac_peak_845 | 8.69112  |                                                     |
| 1 | 59762052 | 59762259 | 5Y-H4K8ac_peak_846 | 4.00285  | FGGY_ENSG00000172456                                |
| 1 | 59912607 | 59913077 | 5Y-H4K8ac_peak_847 | 7.04637  |                                                     |
| 1 | 59963009 | 59963207 | 5Y-H4K8ac_peak_848 | 5.23083  |                                                     |
| 1 | 60279920 | 60280201 | 5Y-H4K8ac_peak_849 | 11.19336 | HOOK1_ENSG00000134709                               |
| 1 | 60280645 | 60281024 | 5Y-H4K8ac_peak_850 | 9.23159  | HOOK1_ENSG00000134709                               |
| 1 | 61331479 | 61331756 | 5Y-H4K8ac_peak_851 | 8.33296  | NFIA_ENSG00000162599                                |
| 1 | 61351189 | 61351381 | 5Y-H4K8ac_peak_852 | 6.34046  |                                                     |
| 1 | 61354025 | 61354373 | 5Y-H4K8ac_peak_853 | 5.64909  |                                                     |
| 1 | 61362899 | 61363094 | 5Y-H4K8ac_peak_854 | 4.51076  |                                                     |
| 1 | 61369158 | 61369857 | 5Y-H4K8ac_peak_855 | 9.23159  |                                                     |
| 1 | 61370060 | 61370523 | 5Y-H4K8ac_peak_856 | 16.27715 |                                                     |
| 1 | 61400800 | 61401095 | 5Y-H4K8ac_peak_857 | 10.69698 |                                                     |
| 1 | 61516227 | 61516544 | 5Y-H4K8ac_peak_858 | 10.35586 |                                                     |
| 1 | 61523374 | 61523642 | 5Y-H4K8ac_peak_859 | 5.18494  |                                                     |
| 1 | 61549264 | 61549496 | 5Y-H4K8ac_peak_860 | 4.9885   | AC096534.1_ENSG00000263380                          |
| 1 | 62190522 | 62191132 | 5Y-H4K8ac_peak_861 | 7.89273  | TM2D1_ENSG00000162604                               |
| 1 | 62208043 | 62208785 | 5Y-H4K8ac_peak_862 | 10.21117 | RP11-430G17.3_ENSG00000271200;INADL_ENSG00000132849 |
| 1 | 62272680 | 62272908 | 5Y-H4K8ac_peak_863 | 5.65584  |                                                     |
| 1 | 62737273 | 62737650 | 5Y-H4K8ac_peak_864 | 13.27281 |                                                     |
| 1 | 62738187 | 62738609 | 5Y-H4K8ac_peak_865 | 6.61077  |                                                     |
| 1 | 62738838 | 62739319 | 5Y-H4K8ac_peak_866 | 9.02782  |                                                     |
| 1 | 62740131 | 62740634 | 5Y-H4K8ac_peak_867 | 13.63503 |                                                     |
| 1 | 62774088 | 62774590 | 5Y-H4K8ac_peak_868 | 10.19948 |                                                     |
| 1 | 62793104 | 62793389 | 5Y-H4K8ac_peak_869 | 14.15915 |                                                     |
| 1 | 62827636 | 62828125 | 5Y-H4K8ac_peak_870 | 7.31815  |                                                     |
| 1 | 62849386 | 62849579 | 5Y-H4K8ac_peak_871 | 8.2913   |                                                     |
| 1 | 62861782 | 62862086 | 5Y-H4K8ac_peak_872 | 5.65584  |                                                     |

|   |          |          |                    |          |                                                                                        |
|---|----------|----------|--------------------|----------|----------------------------------------------------------------------------------------|
| 1 | 62901497 | 62901837 | 5Y-H4K8ac_peak_873 | 7.50501  | USP1_ENSG00000162607                                                                   |
| 1 | 62902610 | 62902879 | 5Y-H4K8ac_peak_874 | 5.73251  | USP1_ENSG00000162607                                                                   |
| 1 | 63153594 | 63154096 | 5Y-H4K8ac_peak_875 | 11.99586 | DOCK7_ENSG00000116641;RP11-230B22.1_ENSG00000235545                                    |
| 1 | 63187200 | 63187401 | 5Y-H4K8ac_peak_876 | 5.65584  |                                                                                        |
| 1 | 63553808 | 63554012 | 5Y-H4K8ac_peak_877 | 4.07874  |                                                                                        |
| 1 | 63832439 | 63833090 | 5Y-H4K8ac_peak_878 | 11.48691 | ALG6_ENSG00000088035                                                                   |
| 1 | 63833392 | 63833598 | 5Y-H4K8ac_peak_879 | 10.60083 | ALG6_ENSG00000088035                                                                   |
| 1 | 64194035 | 64194231 | 5Y-H4K8ac_peak_880 | 4.07874  |                                                                                        |
| 1 | 64239783 | 64239986 | 5Y-H4K8ac_peak_881 | 4.79585  | ROR1_ENSG00000185483                                                                   |
| 1 | 64575341 | 64575559 | 5Y-H4K8ac_peak_882 | 7.30348  |                                                                                        |
| 1 | 64661935 | 64662427 | 5Y-H4K8ac_peak_883 | 9.05168  |                                                                                        |
| 1 | 64749180 | 64749482 | 5Y-H4K8ac_peak_884 | 5.37137  |                                                                                        |
| 1 | 64754572 | 64754795 | 5Y-H4K8ac_peak_885 | 5.68769  |                                                                                        |
| 1 | 64812662 | 64812865 | 5Y-H4K8ac_peak_886 | 8.35139  |                                                                                        |
| 1 | 64935444 | 64935653 | 5Y-H4K8ac_peak_887 | 11.28133 | CACHD1_ENSG00000158966                                                                 |
| 1 | 65061159 | 65061365 | 5Y-H4K8ac_peak_888 | 7.53429  |                                                                                        |
| 1 | 65090982 | 65091326 | 5Y-H4K8ac_peak_889 | 16.27715 |                                                                                        |
| 1 | 65094249 | 65094443 | 5Y-H4K8ac_peak_890 | 5.74859  |                                                                                        |
| 1 | 65210349 | 65210799 | 5Y-H4K8ac_peak_891 | 8.79957  | RAVER2_ENSG00000162437                                                                 |
| 1 | 65532939 | 65533182 | 5Y-H4K8ac_peak_892 | 10.1994  | RP4-535B20.1_ENSG00000231485                                                           |
| 1 | 65533610 | 65533952 | 5Y-H4K8ac_peak_893 | 8.08688  | RP4-535B20.1_ENSG00000231485                                                           |
| 1 | 65731513 | 65731894 | 5Y-H4K8ac_peak_894 | 10.79655 |                                                                                        |
| 1 | 65775540 | 65775764 | 5Y-H4K8ac_peak_895 | 8.35139  |                                                                                        |
| 1 | 65886419 | 65886789 | 5Y-H4K8ac_peak_896 | 13.57931 | LEPR_ENSG00000116678;LEPROT_ENSG00000213625                                            |
| 1 | 65991028 | 65991639 | 5Y-H4K8ac_peak_897 | 15.84891 |                                                                                        |
| 1 | 66998938 | 66999475 | 5Y-H4K8ac_peak_898 | 4.84727  | SGIP1_ENSG00000118473                                                                  |
| 1 | 67519709 | 67520070 | 5Y-H4K8ac_peak_899 | 9.23159  | SLC35D1_ENSG00000116704                                                                |
| 1 | 67895591 | 67896038 | 5Y-H4K8ac_peak_900 | 15.28394 | SERBP1_ENSG00000142864                                                                 |
| 1 | 68075975 | 68076279 | 5Y-H4K8ac_peak_901 | 8.43011  |                                                                                        |
| 1 | 68113174 | 68113378 | 5Y-H4K8ac_peak_902 | 6.3019   |                                                                                        |
| 1 | 68151546 | 68152013 | 5Y-H4K8ac_peak_903 | 4.29586  | GADD45A_ENSG00000116717                                                                |
| 1 | 68178611 | 68178858 | 5Y-H4K8ac_peak_904 | 6.50117  |                                                                                        |
| 1 | 68404810 | 68405418 | 5Y-H4K8ac_peak_905 | 5.98695  |                                                                                        |
| 1 | 68411446 | 68411718 | 5Y-H4K8ac_peak_906 | 6.20875  |                                                                                        |
| 1 | 68412859 | 68413060 | 5Y-H4K8ac_peak_907 | 6.79955  |                                                                                        |
| 1 | 68697974 | 68698195 | 5Y-H4K8ac_peak_908 | 5.65584  | WLS_ENSG00000116729                                                                    |
| 1 | 70598871 | 70599079 | 5Y-H4K8ac_peak_909 | 9.38203  |                                                                                        |
| 1 | 74663321 | 74663648 | 5Y-H4K8ac_peak_910 | 6.1654   | LRRIQ3_ENSG00000162620;FPGT_ENSG00000254685;FPGT-TNNI3K_ENSG00000259030;TNNI3K_ENSG000 |
| 1 | 76081400 | 76081782 | 5Y-H4K8ac_peak_911 | 8.24461  |                                                                                        |
| 1 | 76082035 | 76082520 | 5Y-H4K8ac_peak_912 | 16.38263 |                                                                                        |
| 1 | 76190236 | 76190603 | 5Y-H4K8ac_peak_913 | 5.65584  | RP4-682C21.5_ENSG00000178193;ACADM_ENSG00000117054                                     |
| 1 | 76251430 | 76251652 | 5Y-H4K8ac_peak_914 | 5.23083  | RABGGTB_ENSG00000137955                                                                |
| 1 | 76513636 | 76513842 | 5Y-H4K8ac_peak_915 | 4.51076  |                                                                                        |
| 1 | 77230617 | 77230893 | 5Y-H4K8ac_peak_916 | 16.94054 |                                                                                        |
| 1 | 78148904 | 78149621 | 5Y-H4K8ac_peak_917 | 11.19336 | ZZZ3_ENSG00000036549                                                                   |
| 1 | 78444326 | 78444644 | 5Y-H4K8ac_peak_918 | 9.34935  | FUBP1_ENSG00000162613;DNAJB4_ENSG00000162616;GIPC2_ENSG00000137960                     |



|   |          |          |                    |          |                                                                           |
|---|----------|----------|--------------------|----------|---------------------------------------------------------------------------|
| 1 | 82267272 | 82267497 | 5Y-H4K8ac_peak_919 | 6.14981  |                                                                           |
| 1 | 82268426 | 82268898 | 5Y-H4K8ac_peak_920 | 5.83797  |                                                                           |
| 1 | 84157896 | 84158160 | 5Y-H4K8ac_peak_921 | 4.29586  |                                                                           |
| 1 | 84160166 | 84160781 | 5Y-H4K8ac_peak_922 | 6.59249  |                                                                           |
| 1 | 84167175 | 84167395 | 5Y-H4K8ac_peak_923 | 5.64909  |                                                                           |
| 1 | 84543194 | 84543551 | 5Y-H4K8ac_peak_924 | 6.08523  | RP11-486G15.2_ENSG00000271576;PRKACB_ENSG00000142875                      |
| 1 | 84764293 | 84764529 | 5Y-H4K8ac_peak_925 | 8.46442  | SAMD13_ENSG00000203943                                                    |
| 1 | 84945006 | 84945299 | 5Y-H4K8ac_peak_926 | 7.38046  | RPF1_ENSG00000117133                                                      |
| 1 | 85155677 | 85156200 | 5Y-H4K8ac_peak_927 | 9.23159  | SSX2IP_ENSG00000117155                                                    |
| 1 | 85156552 | 85156793 | 5Y-H4K8ac_peak_928 | 6.50117  | SSX2IP_ENSG00000117155                                                    |
| 1 | 85313630 | 85314142 | 5Y-H4K8ac_peak_929 | 6.79955  |                                                                           |
| 1 | 85410112 | 85410311 | 5Y-H4K8ac_peak_930 | 6.34046  |                                                                           |
| 1 | 85930428 | 85930763 | 5Y-H4K8ac_peak_931 | 8.2913   |                                                                           |
| 1 | 86041993 | 86042327 | 5Y-H4K8ac_peak_932 | 9.7353   |                                                                           |
| 1 | 86046333 | 86046672 | 5Y-H4K8ac_peak_933 | 8.2913   | CYR61_ENSG00000142871                                                     |
| 1 | 86174286 | 86174767 | 5Y-H4K8ac_peak_934 | 7.3889   | ZNHIT6_ENSG00000117174                                                    |
| 1 | 86861373 | 86861602 | 5Y-H4K8ac_peak_935 | 6.50117  | ODF2L_ENSG00000122417                                                     |
| 1 | 87621420 | 87621680 | 5Y-H4K8ac_peak_936 | 4.50834  |                                                                           |
| 1 | 87793760 | 87793971 | 5Y-H4K8ac_peak_937 | 12.21176 | LMO4_ENSG00000143013                                                      |
| 1 | 89989766 | 89990233 | 5Y-H4K8ac_peak_938 | 10.48476 | LRRC8B_ENSG00000197147                                                    |
| 1 | 90227875 | 90228188 | 5Y-H4K8ac_peak_939 | 4.8773   |                                                                           |
| 1 | 90460895 | 90461141 | 5Y-H4K8ac_peak_940 | 5.64909  | ZNF326_ENSG00000162664                                                    |
| 1 | 91316592 | 91317144 | 5Y-H4K8ac_peak_941 | 5.98695  | RP4-665J23.1_ENSG00000233593;RP4-665J23.2_ENSG00000225446                 |
| 1 | 91487339 | 91488207 | 5Y-H4K8ac_peak_942 | 9.30505  | ZNF644_ENSG00000122482                                                    |
| 1 | 91870173 | 91870386 | 5Y-H4K8ac_peak_943 | 6.22669  | HFM1_ENSG00000162669                                                      |
| 1 | 92495018 | 92495665 | 5Y-H4K8ac_peak_944 | 9.30505  | EPHX4_ENSG00000172031                                                     |
| 1 | 92764742 | 92764985 | 5Y-H4K8ac_peak_945 | 7.03573  | RPAP2_ENSG00000122484                                                     |
| 1 | 93251209 | 93251416 | 5Y-H4K8ac_peak_946 | 8.08688  |                                                                           |
| 1 | 93811609 | 93811895 | 5Y-H4K8ac_peak_947 | 4.0639   | RP4-717I23.3_ENSG00000223745;DR1_ENSG00000117505                          |
| 1 | 93913065 | 93913525 | 5Y-H4K8ac_peak_948 | 8.93304  | FNBP1L_ENSG00000137942                                                    |
| 1 | 93913801 | 93914161 | 5Y-H4K8ac_peak_949 | 8.47164  | FNBP1L_ENSG00000137942                                                    |
| 1 | 94041035 | 94041493 | 5Y-H4K8ac_peak_950 | 19.71555 |                                                                           |
| 1 | 94073771 | 94074036 | 5Y-H4K8ac_peak_951 | 5.34407  |                                                                           |
| 1 | 94074975 | 94075363 | 5Y-H4K8ac_peak_952 | 5.64909  |                                                                           |
| 1 | 94082354 | 94082567 | 5Y-H4K8ac_peak_953 | 5.98695  |                                                                           |
| 1 | 94082873 | 94083890 | 5Y-H4K8ac_peak_954 | 9.51254  |                                                                           |
| 1 | 94283257 | 94283623 | 5Y-H4K8ac_peak_955 | 8.21582  |                                                                           |
| 1 | 94293486 | 94293697 | 5Y-H4K8ac_peak_956 | 10.31981 |                                                                           |
| 1 | 94312017 | 94312411 | 5Y-H4K8ac_peak_957 | 8.43511  | BCAR3_ENSG00000137936;MIR760_ENSG00000211575;RP4-561L24.3_ENSG00000260464 |
| 1 | 94509863 | 94510128 | 5Y-H4K8ac_peak_958 | 4.77126  |                                                                           |
| 1 | 94910932 | 94911231 | 5Y-H4K8ac_peak_959 | 9.56187  |                                                                           |
| 1 | 95007739 | 95008071 | 5Y-H4K8ac_peak_960 | 9.05168  | F3_ENSG00000117525                                                        |
| 1 | 95285571 | 95286253 | 5Y-H4K8ac_peak_961 | 7.59101  | LINC01057_ENSG00000224081;SLC44A3_ENSG00000143036                         |
| 1 | 95392147 | 95392383 | 5Y-H4K8ac_peak_962 | 6.64195  | CNN3_ENSG00000117519;RP4-639F20.1_ENSG00000235501                         |
| 1 | 95392937 | 95393152 | 5Y-H4K8ac_peak_963 | 6.37023  | CNN3_ENSG00000117519;RP4-639F20.1_ENSG00000235501                         |
| 1 | 95414832 | 95415103 | 5Y-H4K8ac_peak_964 | 11.20652 |                                                                           |

|   |           |           |                     |          |                                                    |
|---|-----------|-----------|---------------------|----------|----------------------------------------------------|
| 1 | 95468722  | 95468924  | 5Y-H4K8ac_peak_965  | 4.24332  |                                                    |
| 1 | 95773823  | 95774102  | 5Y-H4K8ac_peak_966  | 9.23159  |                                                    |
| 1 | 95774317  | 95774538  | 5Y-H4K8ac_peak_967  | 5.65584  |                                                    |
| 1 | 95790689  | 95791023  | 5Y-H4K8ac_peak_968  | 6.34046  |                                                    |
| 1 | 95846020  | 95846391  | 5Y-H4K8ac_peak_969  | 7.38046  | RP11-14O19.2_ENSG00000237954                       |
| 1 | 95851349  | 95851574  | 5Y-H4K8ac_peak_970  | 6.31594  |                                                    |
| 1 | 95862746  | 95862944  | 5Y-H4K8ac_peak_971  | 7.29091  |                                                    |
| 1 | 97187398  | 97187975  | 5Y-H4K8ac_peak_972  | 10.35586 | PTBP2_ENSG00000117569                              |
| 1 | 97454745  | 97455035  | 5Y-H4K8ac_peak_973  | 7.72345  |                                                    |
| 1 | 98518884  | 98519732  | 5Y-H4K8ac_peak_974  | 15.28394 |                                                    |
| 1 | 98918232  | 98918466  | 5Y-H4K8ac_peak_975  | 5.40331  |                                                    |
| 1 | 98927263  | 98927469  | 5Y-H4K8ac_peak_976  | 6.34046  |                                                    |
| 1 | 99469729  | 99470229  | 5Y-H4K8ac_peak_977  | 10.69698 | LPPR5_ENSG00000117598;RP5-896L10.1_ENSG00000232825 |
| 1 | 99729583  | 99729909  | 5Y-H4K8ac_peak_978  | 5.40331  | LPPR4_ENSG00000117600                              |
| 1 | 100315009 | 100315979 | 5Y-H4K8ac_peak_979  | 13.00733 |                                                    |
| 1 | 100409134 | 100409349 | 5Y-H4K8ac_peak_980  | 5.40331  |                                                    |
| 1 | 100503817 | 100504057 | 5Y-H4K8ac_peak_981  | 7.64648  | HIAT1_ENSG00000156875                              |
| 1 | 101491493 | 101491942 | 5Y-H4K8ac_peak_982  | 10.46287 | DPH5_ENSG00000117543;RP11-421L21.3_ENSG00000233184 |
| 1 | 105680555 | 105681154 | 5Y-H4K8ac_peak_983  | 13.72401 |                                                    |
| 1 | 107598749 | 107599077 | 5Y-H4K8ac_peak_984  | 7.01266  | PRMT6_ENSG00000198890                              |
| 1 | 107599381 | 107600097 | 5Y-H4K8ac_peak_985  | 15.77156 | PRMT6_ENSG00000198890                              |
| 1 | 108507160 | 108507564 | 5Y-H4K8ac_peak_986  | 7.30348  | VAV3_ENSG00000134215;VAV3-AS1_ENSG00000230489      |
| 1 | 109101896 | 109102167 | 5Y-H4K8ac_peak_987  | 4.50834  | FAM102B_ENSG00000162636                            |
| 1 | 109234964 | 109235413 | 5Y-H4K8ac_peak_988  | 9.38276  | PRPF38B_ENSG00000134186                            |
| 1 | 109359566 | 109359885 | 5Y-H4K8ac_peak_989  | 4.15658  |                                                    |
| 1 | 109372781 | 109373427 | 5Y-H4K8ac_peak_990  | 10.19948 |                                                    |
| 1 | 109374374 | 109374606 | 5Y-H4K8ac_peak_991  | 7.3889   |                                                    |
| 1 | 109505732 | 109505940 | 5Y-H4K8ac_peak_992  | 7.38046  | AKNAD1_ENSG00000162641;CLCC1_ENSG00000121940       |
| 1 | 109618844 | 109619498 | 5Y-H4K8ac_peak_993  | 14.86775 | TAF13_ENSG00000197780                              |
| 1 | 109642947 | 109643277 | 5Y-H4K8ac_peak_994  | 6.34245  | SCARNA2_ENSG00000270066                            |
| 1 | 109783368 | 109783648 | 5Y-H4K8ac_peak_995  | 4.79585  |                                                    |
| 1 | 109791523 | 109791722 | 5Y-H4K8ac_peak_996  | 7.11863  | CELSR2_ENSG00000143126                             |
| 1 | 109796335 | 109797244 | 5Y-H4K8ac_peak_997  | 9.47304  |                                                    |
| 1 | 109797578 | 109798092 | 5Y-H4K8ac_peak_998  | 6.19716  |                                                    |
| 1 | 109940880 | 109941100 | 5Y-H4K8ac_peak_999  | 6.78128  | SORT1_ENSG00000134243                              |
| 1 | 110026590 | 110027058 | 5Y-H4K8ac_peak_1000 | 16.15586 | ATXN7L2_ENSG00000162650                            |
| 1 | 110037173 | 110037366 | 5Y-H4K8ac_peak_1001 | 5.70209  | CYB561D1_ENSG00000174151                           |
| 1 | 110041686 | 110041898 | 5Y-H4K8ac_peak_1002 | 7.38046  |                                                    |
| 1 | 110073876 | 110074224 | 5Y-H4K8ac_peak_1003 | 10.55771 |                                                    |
| 1 | 110075218 | 110075438 | 5Y-H4K8ac_peak_1004 | 6.34245  |                                                    |
| 1 | 110183094 | 110183339 | 5Y-H4K8ac_peak_1005 | 6.78128  |                                                    |
| 1 | 110313216 | 110313446 | 5Y-H4K8ac_peak_1006 | 4.84727  |                                                    |
| 1 | 110526675 | 110527149 | 5Y-H4K8ac_peak_1007 | 11.01067 | AHCYL1_ENSG00000168710                             |
| 1 | 110593181 | 110593398 | 5Y-H4K8ac_peak_1008 | 5.23083  |                                                    |
| 1 | 110599919 | 110600501 | 5Y-H4K8ac_peak_1009 | 8.27643  | RP4-773N10.4_ENSG00000258634                       |
| 1 | 110601263 | 110601694 | 5Y-H4K8ac_peak_1010 | 7.65404  | RP4-773N10.4_ENSG00000258634                       |

|   |           |           |                     |          |                                                           |
|---|-----------|-----------|---------------------|----------|-----------------------------------------------------------|
| 1 | 110603026 | 110603355 | 5Y-H4K8ac_peak_1011 | 5.23083  |                                                           |
| 1 | 110604002 | 110604408 | 5Y-H4K8ac_peak_1012 | 6.49786  |                                                           |
| 1 | 110640619 | 110641116 | 5Y-H4K8ac_peak_1013 | 12.44818 |                                                           |
| 1 | 110649014 | 110649350 | 5Y-H4K8ac_peak_1014 | 10.35586 |                                                           |
| 1 | 110777757 | 110778320 | 5Y-H4K8ac_peak_1015 | 12.26606 |                                                           |
| 1 | 110824511 | 110824911 | 5Y-H4K8ac_peak_1016 | 6.34046  |                                                           |
| 1 | 110878457 | 110878674 | 5Y-H4K8ac_peak_1017 | 5.65584  |                                                           |
| 1 | 110950713 | 110950913 | 5Y-H4K8ac_peak_1018 | 6.77436  | LAMTOR5_ENSG00000134248                                   |
| 1 | 111217753 | 111218008 | 5Y-H4K8ac_peak_1019 | 6.78128  | KCNA3_ENSG00000177272                                     |
| 1 | 111506202 | 111506466 | 5Y-H4K8ac_peak_1020 | 7.58806  | LRIF1_ENSG00000121931;RP11-96K19.5_ENSG00000273010        |
| 1 | 111682366 | 111682605 | 5Y-H4K8ac_peak_1021 | 7.3889   | DRAM2_ENSG00000156171;CEPT1_ENSG00000134255               |
| 1 | 111746934 | 111747221 | 5Y-H4K8ac_peak_1022 | 7.13294  | DENND2D_ENSG00000162777                                   |
| 1 | 112050575 | 112050933 | 5Y-H4K8ac_peak_1023 | 8.20773  |                                                           |
| 1 | 112298365 | 112298803 | 5Y-H4K8ac_peak_1024 | 20.19152 | FAM212B_ENSG00000197852;DDX20_ENSG00000064703             |
| 1 | 113161815 | 113162215 | 5Y-H4K8ac_peak_1025 | 9.30206  | CAPZA1_ENSG00000116489                                    |
| 1 | 113217692 | 113218230 | 5Y-H4K8ac_peak_1026 | 10.19948 |                                                           |
| 1 | 113392060 | 113392386 | 5Y-H4K8ac_peak_1027 | 10.35586 | RP3-522D1.1_ENSG00000224167;RP11-426L16.8_ENSG00000215866 |
| 1 | 113498503 | 113498754 | 5Y-H4K8ac_peak_1028 | 9.96543  | SLC16A1_ENSG00000155380;SLC16A1-AS1_ENSG00000226419       |
| 1 | 113683530 | 113683967 | 5Y-H4K8ac_peak_1029 | 10.19948 |                                                           |
| 1 | 113690435 | 113690856 | 5Y-H4K8ac_peak_1030 | 14.00129 |                                                           |
| 1 | 113691163 | 113691523 | 5Y-H4K8ac_peak_1031 | 7.88114  |                                                           |
| 1 | 114472410 | 114472795 | 5Y-H4K8ac_peak_1032 | 11.09973 | RP5-1073O3.7_ENSG00000235527;HIPK1_ENSG00000163349        |
| 1 | 114888637 | 114889003 | 5Y-H4K8ac_peak_1033 | 11.1169  |                                                           |
| 1 | 115124618 | 115124857 | 5Y-H4K8ac_peak_1034 | 8.43511  | BCAS2_ENSG00000116752                                     |
| 1 | 115300235 | 115300575 | 5Y-H4K8ac_peak_1035 | 23.16826 | CSDE1_ENSG00000009307                                     |
| 1 | 115323514 | 115323811 | 5Y-H4K8ac_peak_1036 | 6.43775  | SIKE1_ENSG00000052723                                     |
| 1 | 115793528 | 115793840 | 5Y-H4K8ac_peak_1037 | 9.38203  |                                                           |
| 1 | 115880036 | 115880775 | 5Y-H4K8ac_peak_1038 | 8.43511  | NGF_ENSG00000134259                                       |
| 1 | 115906599 | 115906923 | 5Y-H4K8ac_peak_1039 | 9.30505  |                                                           |
| 1 | 116247646 | 116247864 | 5Y-H4K8ac_peak_1040 | 5.65584  |                                                           |
| 1 | 116371906 | 116372099 | 5Y-H4K8ac_peak_1041 | 4.95697  |                                                           |
| 1 | 116518520 | 116519545 | 5Y-H4K8ac_peak_1042 | 11.19336 | SLC22A15_ENSG00000163393                                  |
| 1 | 116681411 | 116681611 | 5Y-H4K8ac_peak_1043 | 11.93212 |                                                           |
| 1 | 116915240 | 116915660 | 5Y-H4K8ac_peak_1044 | 8.35139  | ATP1A1_ENSG00000163399                                    |
| 1 | 116916408 | 116916720 | 5Y-H4K8ac_peak_1045 | 8.33296  |                                                           |
| 1 | 116960313 | 116960507 | 5Y-H4K8ac_peak_1046 | 5.91107  | ATP1A1OS_ENSG00000203865                                  |
| 1 | 116960857 | 116961155 | 5Y-H4K8ac_peak_1047 | 6.54441  | ATP1A1OS_ENSG00000203865                                  |
| 1 | 117027521 | 117027973 | 5Y-H4K8ac_peak_1048 | 6.78128  |                                                           |
| 1 | 117058101 | 117058328 | 5Y-H4K8ac_peak_1049 | 6.20875  |                                                           |
| 1 | 117113223 | 117113570 | 5Y-H4K8ac_peak_1050 | 5.64909  | CD58_ENSG00000116815                                      |
| 1 | 117113973 | 117114311 | 5Y-H4K8ac_peak_1051 | 10.35586 | CD58_ENSG00000116815                                      |
| 1 | 117229471 | 117229790 | 5Y-H4K8ac_peak_1052 | 5.59843  |                                                           |
| 1 | 117230670 | 117231035 | 5Y-H4K8ac_peak_1053 | 9.30505  |                                                           |
| 1 | 117235683 | 117236269 | 5Y-H4K8ac_peak_1054 | 6.12014  | C1orf137_ENSG00000203864                                  |
| 1 | 117250801 | 117251010 | 5Y-H4K8ac_peak_1055 | 7.50148  |                                                           |
| 1 | 117254243 | 117254509 | 5Y-H4K8ac_peak_1056 | 6.50117  |                                                           |

|   |           |           |                     |          |                                                                                                     |
|---|-----------|-----------|---------------------|----------|-----------------------------------------------------------------------------------------------------|
| 1 | 117367416 | 117367614 | 5Y-H4K8ac_peak_1057 | 9.96543  |                                                                                                     |
| 1 | 117397832 | 117398382 | 5Y-H4K8ac_peak_1058 | 8.8021   |                                                                                                     |
| 1 | 117422062 | 117422269 | 5Y-H4K8ac_peak_1059 | 6.43775  |                                                                                                     |
| 1 | 117452635 | 117453209 | 5Y-H4K8ac_peak_1060 | 17.63051 | RP4-753F5.1_ENSG00000272715;PTGFRN_ENSG00000134247                                                  |
| 1 | 117664594 | 117665236 | 5Y-H4K8ac_peak_1061 | 12.44818 | TRIM45_ENSG00000134253                                                                              |
| 1 | 118370889 | 118371263 | 5Y-H4K8ac_peak_1062 | 6.34046  |                                                                                                     |
| 1 | 120254976 | 120255246 | 5Y-H4K8ac_peak_1063 | 6.79955  |                                                                                                     |
| 1 | 120904719 | 120904981 | 5Y-H4K8ac_peak_1064 | 4.07874  | RP11-439A17.4_ENSG00000227193;HIST2H3DP1_ENSG00000213244                                            |
| 1 | 142618507 | 142619318 | 5Y-H4K8ac_peak_1065 | 12.50545 | RP11-417J8.3_ENSG00000230880                                                                        |
| 1 | 144018062 | 144018345 | 5Y-H4K8ac_peak_1066 | 6.84536  |                                                                                                     |
| 1 | 144534209 | 144534578 | 5Y-H4K8ac_peak_1067 | 6.77436  | RNU1-59P_ENSG00000201699                                                                            |
| 1 | 144931667 | 144931866 | 5Y-H4K8ac_peak_1068 | 6.35183  |                                                                                                     |
| 1 | 145396049 | 145396262 | 5Y-H4K8ac_peak_1069 | 3.96434  |                                                                                                     |
| 1 | 145437780 | 145438051 | 5Y-H4K8ac_peak_1070 | 9.62747  | TXNIP_ENSG00000117289                                                                               |
| 1 | 145472533 | 145472768 | 5Y-H4K8ac_peak_1071 | 7.26691  |                                                                                                     |
| 1 | 145474681 | 145474944 | 5Y-H4K8ac_peak_1072 | 13.45283 |                                                                                                     |
| 1 | 145477299 | 145477501 | 5Y-H4K8ac_peak_1073 | 5.40265  | LIX1L_ENSG00000152022                                                                               |
| 1 | 145506930 | 145507286 | 5Y-H4K8ac_peak_1074 | 6.73385  | RBM8A_ENSG00000131795                                                                               |
| 1 | 145516623 | 145516851 | 5Y-H4K8ac_peak_1075 | 4.95697  | GNRHR2_ENSG00000211451;PEX11B_ENSG00000131779                                                       |
| 1 | 145713492 | 145714172 | 5Y-H4K8ac_peak_1076 | 10.60083 |                                                                                                     |
| 1 | 145719049 | 145719264 | 5Y-H4K8ac_peak_1077 | 4.88619  |                                                                                                     |
| 1 | 145721030 | 145721228 | 5Y-H4K8ac_peak_1078 | 5.99504  |                                                                                                     |
| 1 | 145726670 | 145727468 | 5Y-H4K8ac_peak_1079 | 9.13842  | PDZK1_ENSG00000174827                                                                               |
| 1 | 145826733 | 145826973 | 5Y-H4K8ac_peak_1080 | 6.19716  | GPR89A_ENSG00000117262;WI2-925H4.1_ENSG00000235702                                                  |
| 1 | 146643508 | 146643984 | 5Y-H4K8ac_peak_1081 | 4.48815  | PRKAB2_ENSG00000131791;RP11-337C18.8_ENSG00000237188;RP11-337C18.10_ENSG00000273071                 |
| 1 | 146644403 | 146644714 | 5Y-H4K8ac_peak_1082 | 5.60566  | PRKAB2_ENSG00000131791;RP11-337C18.8_ENSG00000237188;RP11-337C18.10_ENSG00000273071                 |
| 1 | 146714363 | 146714715 | 5Y-H4K8ac_peak_1083 | 20.56946 | FMO5_ENSG00000131781;CHD1L_ENSG00000131778                                                          |
| 1 | 147013816 | 147014047 | 5Y-H4K8ac_peak_1084 | 9.30505  | BCL9_ENSG00000116128                                                                                |
| 1 | 147400609 | 147400952 | 5Y-H4K8ac_peak_1085 | 9.23159  | GPR89B_ENSG00000188092                                                                              |
| 1 | 148000060 | 148000484 | 5Y-H4K8ac_peak_1086 | 6.34046  | RP3-328E19.4_ENSG00000223491                                                                        |
| 1 | 148247321 | 148248353 | 5Y-H4K8ac_peak_1087 | 9.02938  | RP11-89F3.2_ENSG00000236140                                                                         |
| 1 | 148598402 | 148598884 | 5Y-H4K8ac_peak_1088 | 5.87725  | RP11-666A1.5_ENSG00000237253;RP11-666A1.3_ENSG00000226675                                           |
| 1 | 149223436 | 149223691 | 5Y-H4K8ac_peak_1089 | 9.14959  | RNVU1-18_ENSG00000206737                                                                            |
| 1 | 149819119 | 149819386 | 5Y-H4K8ac_peak_1090 | 6.47245  |                                                                                                     |
| 1 | 149859139 | 149859453 | 5Y-H4K8ac_peak_1091 | 12.15235 | HIST2H2BE_ENSG00000184678;HIST2H2AC_ENSG00000184260;HIST2H2AB_ENSG00000184270;BOLA1_ENSG00000178096 |
| 1 | 149871306 | 149871691 | 5Y-H4K8ac_peak_1092 | 11.18476 |                                                                                                     |
| 1 | 149889230 | 149889863 | 5Y-H4K8ac_peak_1093 | 7.21932  | SV2A_ENSG00000159164                                                                                |
| 1 | 149900040 | 149900458 | 5Y-H4K8ac_peak_1094 | 7.70811  | SF3B4_ENSG00000143368                                                                               |
| 1 | 149982190 | 149982496 | 5Y-H4K8ac_peak_1095 | 4.77126  | OTUD7B_ENSG00000163113                                                                              |
| 1 | 149982877 | 149983185 | 5Y-H4K8ac_peak_1096 | 4.95697  | OTUD7B_ENSG00000163113                                                                              |
| 1 | 150039461 | 150039717 | 5Y-H4K8ac_peak_1097 | 10.79081 | VPS45_ENSG00000136631                                                                               |
| 1 | 150121639 | 150122689 | 5Y-H4K8ac_peak_1098 | 14.99673 | PLEKHO1_ENSG0000023902                                                                              |
| 1 | 150185062 | 150185666 | 5Y-H4K8ac_peak_1099 | 6.77436  |                                                                                                     |
| 1 | 150209527 | 150209743 | 5Y-H4K8ac_peak_1100 | 13.92877 | RNU2-17P_ENSG00000222222                                                                            |
| 1 | 150228184 | 150228374 | 5Y-H4K8ac_peak_1101 | 6.89892  |                                                                                                     |
| 1 | 150240993 | 150241266 | 5Y-H4K8ac_peak_1102 | 7.20869  | APH1A_ENSG00000117362;C1orf54_ENSG00000118292                                                       |

|   |           |           |                     |          |                                                                                                         |
|---|-----------|-----------|---------------------|----------|---------------------------------------------------------------------------------------------------------|
| 1 | 150293320 | 150293701 | 5Y-H4K8ac_peak_1103 | 4.48815  | PRPF3_ENSG00000117360                                                                                   |
| 1 | 150335456 | 150335672 | 5Y-H4K8ac_peak_1104 | 10.69239 | RPRD2_ENSG00000163125                                                                                   |
| 1 | 150458830 | 150459034 | 5Y-H4K8ac_peak_1105 | 9.23159  | TARS2_ENSG00000143374                                                                                   |
| 1 | 150460082 | 150460276 | 5Y-H4K8ac_peak_1106 | 6.31818  | TARS2_ENSG00000143374                                                                                   |
| 1 | 150488304 | 150488628 | 5Y-H4K8ac_peak_1107 | 6.03632  | LINC00568_ENSG00000228126                                                                               |
| 1 | 150601812 | 150602004 | 5Y-H4K8ac_peak_1108 | 11.94897 | ENSA_ENSG00000143420                                                                                    |
| 1 | 150849455 | 150849737 | 5Y-H4K8ac_peak_1109 | 7.72887  | ARNT_ENSG00000143437                                                                                    |
| 1 | 150946559 | 150947204 | 5Y-H4K8ac_peak_1110 | 20.94053 | CERS2_ENSG00000143418;RP11-316M1.3_ENSG00000231073                                                      |
| 1 | 150947442 | 150947899 | 5Y-H4K8ac_peak_1111 | 7.90236  | CERS2_ENSG00000143418                                                                                   |
| 1 | 151042836 | 151043115 | 5Y-H4K8ac_peak_1112 | 5.93575  | CDC42SE1_ENSG00000197622;GABPB2_ENSG00000143458                                                         |
| 1 | 151137527 | 151137748 | 5Y-H4K8ac_peak_1113 | 9.51254  | LYSMD1_ENSG00000163155                                                                                  |
| 1 | 151162272 | 151162587 | 5Y-H4K8ac_peak_1114 | 7.90005  |                                                                                                         |
| 1 | 151168512 | 151168721 | 5Y-H4K8ac_peak_1115 | 8.564    | VPS72_ENSG00000163159                                                                                   |
| 1 | 151226620 | 151227024 | 5Y-H4K8ac_peak_1116 | 6.80915  | PSMD4_ENSG00000159352                                                                                   |
| 1 | 151299789 | 151300015 | 5Y-H4K8ac_peak_1117 | 4.29586  | PI4KB_ENSG00000143393;RP11-126K1.9_ENSG00000273481                                                      |
| 1 | 151371429 | 151371890 | 5Y-H4K8ac_peak_1118 | 12.84845 | PSMB4_ENSG00000159377                                                                                   |
| 1 | 151372099 | 151372289 | 5Y-H4K8ac_peak_1119 | 10.31981 | PSMB4_ENSG00000159377                                                                                   |
| 1 | 151584670 | 151584940 | 5Y-H4K8ac_peak_1120 | 15.80786 | RP11-404E16.1_ENSG00000250734;SNX27_ENSG00000143376                                                     |
| 1 | 151702005 | 151702543 | 5Y-H4K8ac_peak_1121 | 8.42168  |                                                                                                         |
| 1 | 151735463 | 151735798 | 5Y-H4K8ac_peak_1122 | 9.79526  | MRPL9_ENSG00000143436;OAZ3_ENSG00000143450                                                              |
| 1 | 151777681 | 151777924 | 5Y-H4K8ac_peak_1123 | 5.16741  | LINGO4_ENSG00000213171                                                                                  |
| 1 | 151795107 | 151795404 | 5Y-H4K8ac_peak_1124 | 11.30958 |                                                                                                         |
| 1 | 151804139 | 151804390 | 5Y-H4K8ac_peak_1125 | 6.93228  | RORC_ENSG00000143365                                                                                    |
| 1 | 151882208 | 151882590 | 5Y-H4K8ac_peak_1126 | 8.36116  | THEM4_ENSG00000159445                                                                                   |
| 1 | 152020786 | 152021132 | 5Y-H4K8ac_peak_1127 | 6.78128  | S100A11_ENSG00000163191                                                                                 |
| 1 | 153497977 | 153498640 | 5Y-H4K8ac_peak_1128 | 9.05168  |                                                                                                         |
| 1 | 153508676 | 153509099 | 5Y-H4K8ac_peak_1129 | 5.40584  | S100A6_ENSG00000197956                                                                                  |
| 1 | 153540843 | 153541209 | 5Y-H4K8ac_peak_1130 | 12.2918  | S100A2_ENSG00000196754                                                                                  |
| 1 | 153541427 | 153541652 | 5Y-H4K8ac_peak_1131 | 8.69112  |                                                                                                         |
| 1 | 153555320 | 153555678 | 5Y-H4K8ac_peak_1132 | 4.13628  |                                                                                                         |
| 1 | 153606003 | 153606255 | 5Y-H4K8ac_peak_1133 | 5.17251  | S100A13_ENSG00000189171;RP1-178F15.5_ENSG00000271853;RP1-178F15.4_ENSG00000272030;CHTOP_ENSG00000160679 |
| 1 | 153606607 | 153606807 | 5Y-H4K8ac_peak_1134 | 9.02938  | S100A13_ENSG00000189171;RP1-178F15.5_ENSG00000271853;RP1-178F15.4_ENSG00000272030;CHTOP_ENSG00000160679 |
| 1 | 153631182 | 153631402 | 5Y-H4K8ac_peak_1135 | 11.60058 | SNAPIN_ENSG00000143553                                                                                  |
| 1 | 153642969 | 153643429 | 5Y-H4K8ac_peak_1136 | 10.72427 | ILF2_ENSG00000143621                                                                                    |
| 1 | 153699816 | 153700119 | 5Y-H4K8ac_peak_1137 | 6.08523  | INTS3_ENSG00000143624;Y_RNA_ENSG00000199565                                                             |
| 1 | 153700589 | 153700959 | 5Y-H4K8ac_peak_1138 | 15.80786 | INTS3_ENSG00000143624                                                                                   |
| 1 | 153755288 | 153755705 | 5Y-H4K8ac_peak_1139 | 6.27467  |                                                                                                         |
| 1 | 153755905 | 153756169 | 5Y-H4K8ac_peak_1140 | 9.58986  |                                                                                                         |
| 1 | 153756460 | 153756927 | 5Y-H4K8ac_peak_1141 | 4.95697  |                                                                                                         |
| 1 | 153853981 | 153854273 | 5Y-H4K8ac_peak_1142 | 7.09658  |                                                                                                         |
| 1 | 153895956 | 153896277 | 5Y-H4K8ac_peak_1143 | 10.12457 | GATAD2B_ENSG00000143614                                                                                 |
| 1 | 153918739 | 153919068 | 5Y-H4K8ac_peak_1144 | 12.45678 | DENND4B_ENSG00000198837                                                                                 |
| 1 | 153935387 | 153935866 | 5Y-H4K8ac_peak_1145 | 5.24695  |                                                                                                         |
| 1 | 153939715 | 153940116 | 5Y-H4K8ac_peak_1146 | 9.99838  | SLC39A1_ENSG00000143570;RP11-422P24.10_ENSG00000273026;CREB3L4_ENSG00000143578                          |
| 1 | 153957915 | 153958178 | 5Y-H4K8ac_peak_1147 | 9.51254  | RAB13_ENSG00000143545                                                                                   |
| 1 | 153959634 | 153959833 | 5Y-H4K8ac_peak_1148 | 9.31608  | RAB13_ENSG00000143545                                                                                   |

|   |           |           |                     |          |                                                     |
|---|-----------|-----------|---------------------|----------|-----------------------------------------------------|
| 1 | 153962515 | 153962850 | 5Y-H4K8ac_peak_1149 | 12.65187 | RPS27_ENSG00000177954                               |
| 1 | 154156508 | 154156773 | 5Y-H4K8ac_peak_1150 | 6.98405  |                                                     |
| 1 | 154192659 | 154193038 | 5Y-H4K8ac_peak_1151 | 15.01223 | C1orf43_ENSG00000143612;UBAP2L_ENSG00000143569      |
| 1 | 154193741 | 154194160 | 5Y-H4K8ac_peak_1152 | 7.90751  | C1orf43_ENSG00000143612                             |
| 1 | 154244764 | 154244956 | 5Y-H4K8ac_peak_1153 | 4.77126  | HAX1_ENSG00000143575                                |
| 1 | 154245202 | 154245518 | 5Y-H4K8ac_peak_1154 | 8.73392  | HAX1_ENSG00000143575                                |
| 1 | 154296708 | 154296969 | 5Y-H4K8ac_peak_1155 | 9.02782  |                                                     |
| 1 | 154297377 | 154297725 | 5Y-H4K8ac_peak_1156 | 6.78128  | ATP8B2_ENSG00000143515                              |
| 1 | 154391953 | 154392144 | 5Y-H4K8ac_peak_1157 | 6.4472   |                                                     |
| 1 | 154530709 | 154531065 | 5Y-H4K8ac_peak_1158 | 9.37812  | UBE2Q1_ENSG00000160714                              |
| 1 | 154531557 | 154532125 | 5Y-H4K8ac_peak_1159 | 15.25284 | UBE2Q1_ENSG00000160714                              |
| 1 | 154580367 | 154580917 | 5Y-H4K8ac_peak_1160 | 14.89891 |                                                     |
| 1 | 154600051 | 154600364 | 5Y-H4K8ac_peak_1161 | 19.58975 | ADAR_ENSG00000160710                                |
| 1 | 154719522 | 154719796 | 5Y-H4K8ac_peak_1162 | 5.17251  |                                                     |
| 1 | 154720286 | 154720608 | 5Y-H4K8ac_peak_1163 | 7.21761  |                                                     |
| 1 | 154733038 | 154733473 | 5Y-H4K8ac_peak_1164 | 9.02938  |                                                     |
| 1 | 154813332 | 154813580 | 5Y-H4K8ac_peak_1165 | 5.41472  |                                                     |
| 1 | 154908935 | 154909431 | 5Y-H4K8ac_peak_1166 | 12.50545 | PMVK_ENSG00000163344;RP11-307C12.13_ENSG00000270361 |
| 1 | 154934327 | 154934936 | 5Y-H4K8ac_peak_1167 | 5.32952  | RP11-307C12.12_ENSG00000271380                      |
| 1 | 154942476 | 154942858 | 5Y-H4K8ac_peak_1168 | 4.55128  |                                                     |
| 1 | 154946358 | 154946863 | 5Y-H4K8ac_peak_1169 | 14.86775 | SHC1_ENSG00000160691;CKS1B_ENSG00000173207          |
| 1 | 154955974 | 154956350 | 5Y-H4K8ac_peak_1170 | 4.90696  | FLAD1_ENSG00000160688                               |
| 1 | 154971788 | 154972790 | 5Y-H4K8ac_peak_1171 | 8.24461  |                                                     |
| 1 | 154975262 | 154975457 | 5Y-H4K8ac_peak_1172 | 8.95951  | ZBTB7B_ENSG00000160685                              |
| 1 | 154975873 | 154977601 | 5Y-H4K8ac_peak_1173 | 12.2918  | ZBTB7B_ENSG00000160685                              |
| 1 | 154989784 | 154989998 | 5Y-H4K8ac_peak_1174 | 6.08471  |                                                     |
| 1 | 155022303 | 155022691 | 5Y-H4K8ac_peak_1175 | 13.33225 | ADAM15_ENSG00000143537                              |
| 1 | 155023114 | 155023490 | 5Y-H4K8ac_peak_1176 | 5.40265  | ADAM15_ENSG00000143537                              |
| 1 | 155042966 | 155044054 | 5Y-H4K8ac_peak_1177 | 4.92482  |                                                     |
| 1 | 155050843 | 155051038 | 5Y-H4K8ac_peak_1178 | 4.75174  |                                                     |
| 1 | 155052751 | 155053341 | 5Y-H4K8ac_peak_1179 | 8.3285   |                                                     |
| 1 | 155058839 | 155059084 | 5Y-H4K8ac_peak_1180 | 8.90774  |                                                     |
| 1 | 155066203 | 155066458 | 5Y-H4K8ac_peak_1181 | 4.70545  |                                                     |
| 1 | 155099046 | 155099493 | 5Y-H4K8ac_peak_1182 | 6.98416  | EFNA1_ENSG00000169242                               |
| 1 | 155099929 | 155100255 | 5Y-H4K8ac_peak_1183 | 14.6127  | EFNA1_ENSG00000169242                               |
| 1 | 155101986 | 155102419 | 5Y-H4K8ac_peak_1184 | 8.27643  |                                                     |
| 1 | 155107807 | 155108130 | 5Y-H4K8ac_peak_1185 | 7.20869  | SLC50A1_ENSG00000169241                             |
| 1 | 155139312 | 155139898 | 5Y-H4K8ac_peak_1186 | 11.5813  |                                                     |
| 1 | 155140159 | 155140466 | 5Y-H4K8ac_peak_1187 | 7.90236  |                                                     |
| 1 | 155145300 | 155145630 | 5Y-H4K8ac_peak_1188 | 8.36116  | KRTCAP2_ENSG00000163463;TRIM46_ENSG00000163462      |
| 1 | 155146403 | 155146838 | 5Y-H4K8ac_peak_1189 | 7.20869  | KRTCAP2_ENSG00000163463;TRIM46_ENSG00000163462      |
| 1 | 155158596 | 155158944 | 5Y-H4K8ac_peak_1190 | 4.50834  | RP11-201K10.3_ENSG00000273088                       |
| 1 | 155162893 | 155163374 | 5Y-H4K8ac_peak_1191 | 17.55395 | MUC1_ENSG00000185499                                |
| 1 | 155163600 | 155164018 | 5Y-H4K8ac_peak_1192 | 6.78128  | MUC1_ENSG00000185499;MIR92B_ENSG00000271748         |
| 1 | 155175821 | 155176056 | 5Y-H4K8ac_peak_1193 | 4.44204  |                                                     |
| 1 | 155177134 | 155178345 | 5Y-H4K8ac_peak_1194 | 6.08523  | THBS3_ENSG00000169231;MTX1_ENSG00000173171          |

|   |           |           |                     |          |                                                 |
|---|-----------|-----------|---------------------|----------|-------------------------------------------------|
| 1 | 155178625 | 155178889 | 5Y-H4K8ac_peak_1195 | 13.92877 | THBS3_ENSG00000169231;MTX1_ENSG00000173171      |
| 1 | 155179102 | 155179298 | 5Y-H4K8ac_peak_1196 | 5.51759  | THBS3_ENSG00000169231;MTX1_ENSG00000173171      |
| 1 | 155197573 | 155197966 | 5Y-H4K8ac_peak_1197 | 12.06963 | GBAP1_ENSG00000160766                           |
| 1 | 155220239 | 155220484 | 5Y-H4K8ac_peak_1198 | 5.50568  |                                                 |
| 1 | 155231777 | 155232005 | 5Y-H4K8ac_peak_1199 | 8.14883  | SCAMP3_ENSG00000116521                          |
| 1 | 155232398 | 155232681 | 5Y-H4K8ac_peak_1200 | 5.70472  | SCAMP3_ENSG00000116521                          |
| 1 | 155242906 | 155243134 | 5Y-H4K8ac_peak_1201 | 16.39907 |                                                 |
| 1 | 155277529 | 155278297 | 5Y-H4K8ac_peak_1202 | 7.31674  | FDPS_ENSG00000160752                            |
| 1 | 155443676 | 155443866 | 5Y-H4K8ac_peak_1203 | 5.09997  |                                                 |
| 1 | 155532348 | 155532546 | 5Y-H4K8ac_peak_1204 | 6.78128  | ASH1L-AS1_ENSG00000235919;ASH1L_ENSG00000116539 |
| 1 | 155532746 | 155532971 | 5Y-H4K8ac_peak_1205 | 11.94897 | ASH1L-AS1_ENSG00000235919;ASH1L_ENSG00000116539 |
| 1 | 155657846 | 155658416 | 5Y-H4K8ac_peak_1206 | 5.84816  | YY1AP1_ENSG00000163374;DAP3_ENSG00000132676     |
| 1 | 155714433 | 155714687 | 5Y-H4K8ac_peak_1207 | 6.43775  |                                                 |
| 1 | 155826656 | 155826910 | 5Y-H4K8ac_peak_1208 | 9.79526  |                                                 |
| 1 | 155830125 | 155830331 | 5Y-H4K8ac_peak_1209 | 6.4759   | SYT11_ENSG00000132718;GON4L_ENSG00000116580     |
| 1 | 155904575 | 155904938 | 5Y-H4K8ac_peak_1210 | 8.18236  | KIAA0907_ENSG00000132680                        |
| 1 | 155909924 | 155910441 | 5Y-H4K8ac_peak_1211 | 8.69112  |                                                 |
| 1 | 155911009 | 155911310 | 5Y-H4K8ac_peak_1212 | 5.24695  | RXFP4_ENSG00000173080                           |
| 1 | 155948441 | 155948799 | 5Y-H4K8ac_peak_1213 | 4.97086  | RP11-336K24.12_ENSG00000273002                  |
| 1 | 156023730 | 156024173 | 5Y-H4K8ac_peak_1214 | 11.26379 | UBQLN4_ENSG00000160803;LAMTOR2_ENSG00000116586  |
| 1 | 156024652 | 156024898 | 5Y-H4K8ac_peak_1215 | 6.78128  | LAMTOR2_ENSG00000116586                         |
| 1 | 156039763 | 156040677 | 5Y-H4K8ac_peak_1216 | 15.80786 |                                                 |
| 1 | 156051961 | 156052239 | 5Y-H4K8ac_peak_1217 | 14.0329  | MEX3A_ENSG00000254726;LMNA_ENSG00000160789      |
| 1 | 156075691 | 156076194 | 5Y-H4K8ac_peak_1218 | 11.22005 |                                                 |
| 1 | 156083934 | 156084323 | 5Y-H4K8ac_peak_1219 | 6.40724  |                                                 |
| 1 | 156095915 | 156096171 | 5Y-H4K8ac_peak_1220 | 4.48815  |                                                 |
| 1 | 156116225 | 156116525 | 5Y-H4K8ac_peak_1221 | 5.01024  | SEMA4A_ENSG00000196189                          |
| 1 | 156162541 | 156162784 | 5Y-H4K8ac_peak_1222 | 5.98695  | SNORA26_ENSG00000252236                         |
| 1 | 156163334 | 156163564 | 5Y-H4K8ac_peak_1223 | 6.95285  | SLC25A44_ENSG00000160785                        |
| 1 | 156182828 | 156183022 | 5Y-H4K8ac_peak_1224 | 13.01447 | PMF1_ENSG00000160783                            |
| 1 | 156221776 | 156221966 | 5Y-H4K8ac_peak_1225 | 6.14551  |                                                 |
| 1 | 156252344 | 156252573 | 5Y-H4K8ac_peak_1226 | 15.03212 | SMG5_ENSG00000198952;TMEM79_ENSG00000163472     |
| 1 | 156266006 | 156266221 | 5Y-H4K8ac_peak_1227 | 9.51254  | C1orf85_ENSG00000198715                         |
| 1 | 156307713 | 156307983 | 5Y-H4K8ac_peak_1228 | 7.89273  | TSACC_ENSG00000163467                           |
| 1 | 156390288 | 156390588 | 5Y-H4K8ac_peak_1229 | 4.70739  | MIR9-1_ENSG00000207933                          |
| 1 | 156390976 | 156391511 | 5Y-H4K8ac_peak_1230 | 10.4495  | MIR9-1_ENSG00000207933                          |
| 1 | 156406053 | 156406263 | 5Y-H4K8ac_peak_1231 | 4.00285  |                                                 |
| 1 | 156416112 | 156416448 | 5Y-H4K8ac_peak_1232 | 4.68359  |                                                 |
| 1 | 156425849 | 156426347 | 5Y-H4K8ac_peak_1233 | 7.90751  | RP11-98G7.1_ENSG00000236947                     |
| 1 | 156457735 | 156457992 | 5Y-H4K8ac_peak_1234 | 4.50302  |                                                 |
| 1 | 156470862 | 156471120 | 5Y-H4K8ac_peak_1235 | 10.60083 | MEF2D_ENSG00000116604                           |
| 1 | 156473875 | 156474184 | 5Y-H4K8ac_peak_1236 | 5.5089   |                                                 |
| 1 | 156474580 | 156474849 | 5Y-H4K8ac_peak_1237 | 14.40623 |                                                 |
| 1 | 156492858 | 156493055 | 5Y-H4K8ac_peak_1238 | 6.85744  |                                                 |
| 1 | 156561137 | 156561407 | 5Y-H4K8ac_peak_1239 | 7.11863  | APOA1BP_ENSG00000163382                         |
| 1 | 156571834 | 156572071 | 5Y-H4K8ac_peak_1240 | 5.69598  | GPATCH4_ENSG00000160818                         |

|   |           |           |                     |          |                                                  |
|---|-----------|-----------|---------------------|----------|--------------------------------------------------|
| 1 | 156594365 | 156594565 | 5Y-H4K8ac_peak_1241 | 6.55841  |                                                  |
| 1 | 156630160 | 156630893 | 5Y-H4K8ac_peak_1242 | 10.46949 | RP11-284F21.7_ENSG00000229953                    |
| 1 | 156631652 | 156631978 | 5Y-H4K8ac_peak_1243 | 7.89273  | RP11-284F21.7_ENSG00000229953                    |
| 1 | 156646807 | 156647038 | 5Y-H4K8ac_peak_1244 | 9.07085  | NES_ENSG00000132688                              |
| 1 | 156662020 | 156662267 | 5Y-H4K8ac_peak_1245 | 5.32676  | RP11-66D17.3_ENSG00000237588                     |
| 1 | 156674719 | 156674914 | 5Y-H4K8ac_peak_1246 | 6.80915  | CRABP2_ENSG00000143320                           |
| 1 | 156675549 | 156675845 | 5Y-H4K8ac_peak_1247 | 16.37893 | CRABP2_ENSG00000143320                           |
| 1 | 156676493 | 156677028 | 5Y-H4K8ac_peak_1248 | 7.87192  | CRABP2_ENSG00000143320                           |
| 1 | 156677343 | 156678160 | 5Y-H4K8ac_peak_1249 | 11.44642 |                                                  |
| 1 | 156679898 | 156680828 | 5Y-H4K8ac_peak_1250 | 10.50008 |                                                  |
| 1 | 156698771 | 156699018 | 5Y-H4K8ac_peak_1251 | 10.16277 | ISG20L2_ENSG00000143319;RRNAD1_ENSG00000143303   |
| 1 | 156704041 | 156704273 | 5Y-H4K8ac_peak_1252 | 4.15658  |                                                  |
| 1 | 156710599 | 156710814 | 5Y-H4K8ac_peak_1253 | 7.16017  | MRPL24_ENSG00000143314                           |
| 1 | 156716642 | 156716904 | 5Y-H4K8ac_peak_1254 | 9.19793  |                                                  |
| 1 | 156717207 | 156717699 | 5Y-H4K8ac_peak_1255 | 6.86362  |                                                  |
| 1 | 156720939 | 156721480 | 5Y-H4K8ac_peak_1256 | 18.51582 | PRCC_ENSG00000143294                             |
| 1 | 156721740 | 156722162 | 5Y-H4K8ac_peak_1257 | 12.00715 |                                                  |
| 1 | 156736502 | 156736837 | 5Y-H4K8ac_peak_1258 | 11.30958 | HDGF_ENSG00000143321                             |
| 1 | 156737376 | 156737746 | 5Y-H4K8ac_peak_1259 | 12.26819 | HDGF_ENSG00000143321                             |
| 1 | 156771014 | 156771225 | 5Y-H4K8ac_peak_1260 | 5.50111  |                                                  |
| 1 | 156798268 | 156798475 | 5Y-H4K8ac_peak_1261 | 4.95697  |                                                  |
| 1 | 156821727 | 156822034 | 5Y-H4K8ac_peak_1262 | 9.74838  |                                                  |
| 1 | 156829297 | 156829611 | 5Y-H4K8ac_peak_1263 | 5.51759  | INSRR_ENSG00000027644                            |
| 1 | 156830778 | 156831106 | 5Y-H4K8ac_peak_1264 | 13.57316 |                                                  |
| 1 | 156852690 | 156852908 | 5Y-H4K8ac_peak_1265 | 8.27643  |                                                  |
| 1 | 156883068 | 156883978 | 5Y-H4K8ac_peak_1266 | 14.21916 |                                                  |
| 1 | 156884430 | 156884911 | 5Y-H4K8ac_peak_1267 | 11.5901  |                                                  |
| 1 | 157015174 | 157015437 | 5Y-H4K8ac_peak_1268 | 6.36723  | ARHGEF11_ENSG00000132694                         |
| 1 | 157015779 | 157016240 | 5Y-H4K8ac_peak_1269 | 8.82628  | ARHGEF11_ENSG00000132694                         |
| 1 | 157108414 | 157109471 | 5Y-H4K8ac_peak_1270 | 16.30401 | ETV3_ENSG00000117036                             |
| 1 | 157110922 | 157111224 | 5Y-H4K8ac_peak_1271 | 5.39991  |                                                  |
| 1 | 159892834 | 159893093 | 5Y-H4K8ac_peak_1272 | 5.24695  |                                                  |
| 1 | 159894055 | 159895155 | 5Y-H4K8ac_peak_1273 | 8.24461  |                                                  |
| 1 | 159915628 | 159916139 | 5Y-H4K8ac_peak_1274 | 6.53157  | IGSF9_ENSG00000085552                            |
| 1 | 160039618 | 160039852 | 5Y-H4K8ac_peak_1275 | 6.37023  | KCNJ10_ENSG00000177807                           |
| 1 | 160051326 | 160051614 | 5Y-H4K8ac_peak_1276 | 4.642    | KCNJ9_ENSG00000162728                            |
| 1 | 160163216 | 160163481 | 5Y-H4K8ac_peak_1277 | 13.99721 |                                                  |
| 1 | 160174228 | 160174952 | 5Y-H4K8ac_peak_1278 | 10.4689  | PEA15_ENSG00000162734;AL121987.1_ENSG00000265381 |
| 1 | 160175292 | 160175542 | 5Y-H4K8ac_peak_1279 | 8.5159   | PEA15_ENSG00000162734;AL121987.1_ENSG00000265381 |
| 1 | 160231638 | 160232183 | 5Y-H4K8ac_peak_1280 | 11.28133 | RP11-574F21.2_ENSG00000228606                    |
| 1 | 160313196 | 160313598 | 5Y-H4K8ac_peak_1281 | 11.94897 | COPA_ENSG00000122218;NCSTN_ENSG00000162736       |
| 1 | 160369554 | 160370194 | 5Y-H4K8ac_peak_1282 | 14.17466 |                                                  |
| 1 | 160370548 | 160371091 | 5Y-H4K8ac_peak_1283 | 6.98416  |                                                  |
| 1 | 161015247 | 161015645 | 5Y-H4K8ac_peak_1284 | 6.53157  | USF1_ENSG00000158773                             |
| 1 | 161068381 | 161068587 | 5Y-H4K8ac_peak_1285 | 4.95697  | KLHDC9_ENSG00000162755                           |
| 1 | 161102324 | 161102544 | 5Y-H4K8ac_peak_1286 | 9.05168  | DEDD_ENSG00000158796                             |



|   |           |           |                     |          |                                                    |
|---|-----------|-----------|---------------------|----------|----------------------------------------------------|
| 1 | 161123943 | 161124447 | 5Y-H4K8ac_peak_1287 | 8.82628  |                                                    |
| 1 | 161136455 | 161136701 | 5Y-H4K8ac_peak_1288 | 7.0618   | PPOX_ENSG00000143224                               |
| 1 | 161166209 | 161167091 | 5Y-H4K8ac_peak_1289 | 6.67135  | NDUFS2_ENSG00000158864                             |
| 1 | 161167585 | 161168245 | 5Y-H4K8ac_peak_1290 | 6.67135  | NDUFS2_ENSG00000158864;ADAMTS4_ENSG00000158859     |
| 1 | 161168941 | 161169199 | 5Y-H4K8ac_peak_1291 | 10.04821 | ADAMTS4_ENSG00000158859                            |
| 1 | 161171071 | 161171332 | 5Y-H4K8ac_peak_1292 | 6.69752  |                                                    |
| 1 | 161171576 | 161171910 | 5Y-H4K8ac_peak_1293 | 9.32595  |                                                    |
| 1 | 161172239 | 161172482 | 5Y-H4K8ac_peak_1294 | 10.90097 |                                                    |
| 1 | 161283535 | 161283786 | 5Y-H4K8ac_peak_1295 | 6.37023  | SDHC_ENSG00000143252                               |
| 1 | 161368161 | 161368562 | 5Y-H4K8ac_peak_1296 | 9.89244  |                                                    |
| 1 | 161368914 | 161369473 | 5Y-H4K8ac_peak_1297 | 13.89096 |                                                    |
| 1 | 161369680 | 161370027 | 5Y-H4K8ac_peak_1298 | 4.00285  |                                                    |
| 1 | 161410302 | 161410574 | 5Y-H4K8ac_peak_1299 | 6.98416  |                                                    |
| 1 | 161696261 | 161696629 | 5Y-H4K8ac_peak_1300 | 8.43511  |                                                    |
| 1 | 161719590 | 161720023 | 5Y-H4K8ac_peak_1301 | 12.52787 | DUSP12_ENSG00000081721                             |
| 1 | 161993226 | 161993624 | 5Y-H4K8ac_peak_1302 | 13.00733 | OLFML2B_ENSG00000162745                            |
| 1 | 162087352 | 162087614 | 5Y-H4K8ac_peak_1303 | 5.87725  |                                                    |
| 1 | 162466983 | 162467233 | 5Y-H4K8ac_peak_1304 | 5.98695  | UHMK1_ENSG00000152332                              |
| 1 | 162467675 | 162468007 | 5Y-H4K8ac_peak_1305 | 15.80786 | UHMK1_ENSG00000152332                              |
| 1 | 162530717 | 162530984 | 5Y-H4K8ac_peak_1306 | 5.449    | RP11-359K18.3_ENSG00000259788;UAP1_ENSG00000117143 |
| 1 | 162760031 | 162760284 | 5Y-H4K8ac_peak_1307 | 8.2913   | HSD17B7_ENSG00000132196                            |
| 1 | 162851226 | 162851994 | 5Y-H4K8ac_peak_1308 | 11.23789 |                                                    |
| 1 | 162857722 | 162857972 | 5Y-H4K8ac_peak_1309 | 7.59101  |                                                    |
| 1 | 162860600 | 162860879 | 5Y-H4K8ac_peak_1310 | 7.50148  |                                                    |
| 1 | 162887161 | 162888127 | 5Y-H4K8ac_peak_1311 | 16.73191 |                                                    |
| 1 | 162888635 | 162889681 | 5Y-H4K8ac_peak_1312 | 8.56189  |                                                    |
| 1 | 163090456 | 163090711 | 5Y-H4K8ac_peak_1313 | 7.83553  |                                                    |
| 1 | 163125479 | 163125679 | 5Y-H4K8ac_peak_1314 | 5.65584  |                                                    |
| 1 | 163157355 | 163157741 | 5Y-H4K8ac_peak_1315 | 6.08523  |                                                    |
| 1 | 163166417 | 163167058 | 5Y-H4K8ac_peak_1316 | 4.29586  |                                                    |
| 1 | 163406490 | 163406700 | 5Y-H4K8ac_peak_1317 | 9.58986  |                                                    |
| 1 | 163408444 | 163408662 | 5Y-H4K8ac_peak_1318 | 5.49268  |                                                    |
| 1 | 163461853 | 163462067 | 5Y-H4K8ac_peak_1319 | 6.46053  |                                                    |
| 1 | 164183061 | 164183263 | 5Y-H4K8ac_peak_1320 | 6.6946   |                                                    |
| 1 | 164290568 | 164290888 | 5Y-H4K8ac_peak_1321 | 7.89273  |                                                    |
| 1 | 164679638 | 164679988 | 5Y-H4K8ac_peak_1322 | 7.65404  |                                                    |
| 1 | 164680482 | 164681073 | 5Y-H4K8ac_peak_1323 | 8.20773  |                                                    |
| 1 | 164682031 | 164682463 | 5Y-H4K8ac_peak_1324 | 8.5915   |                                                    |
| 1 | 164723151 | 164723385 | 5Y-H4K8ac_peak_1325 | 4.18845  |                                                    |
| 1 | 164724442 | 164724662 | 5Y-H4K8ac_peak_1326 | 7.10001  |                                                    |
| 1 | 164895887 | 164896122 | 5Y-H4K8ac_peak_1327 | 4.50834  |                                                    |
| 1 | 165737899 | 165738092 | 5Y-H4K8ac_peak_1328 | 10.60083 | RP11-466F5.8_ENSG00000224358                       |
| 1 | 165796858 | 165797722 | 5Y-H4K8ac_peak_1329 | 10.48476 | TMCO1_ENSG00000143183;UCK2_ENSG00000143179         |
| 1 | 166845016 | 166845484 | 5Y-H4K8ac_peak_1330 | 14.99673 | TADA1_ENSG00000152382                              |
| 1 | 167090356 | 167090996 | 5Y-H4K8ac_peak_1331 | 6.08523  |                                                    |
| 1 | 167105524 | 167105741 | 5Y-H4K8ac_peak_1332 | 4.50834  |                                                    |

|   |           |           |                     |          |                                                      |
|---|-----------|-----------|---------------------|----------|------------------------------------------------------|
| 1 | 167190333 | 167190979 | 5Y-H4K8ac_peak_1333 | 7.18391  | RP11-277B15.3_ENSG00000272205;POU2F1_ENSG00000143190 |
| 1 | 167683500 | 167683846 | 5Y-H4K8ac_peak_1334 | 4.95697  |                                                      |
| 1 | 168147500 | 168147842 | 5Y-H4K8ac_peak_1335 | 7.65114  | TIPRL_ENSG00000143155                                |
| 1 | 168193931 | 168194125 | 5Y-H4K8ac_peak_1336 | 5.60423  |                                                      |
| 1 | 168194434 | 168195370 | 5Y-H4K8ac_peak_1337 | 7.65114  | SFT2D2_ENSG00000213064                               |
| 1 | 168311737 | 168312072 | 5Y-H4K8ac_peak_1338 | 13.99721 |                                                      |
| 1 | 168435702 | 168436093 | 5Y-H4K8ac_peak_1339 | 7.79831  |                                                      |
| 1 | 168482183 | 168482441 | 5Y-H4K8ac_peak_1340 | 4.95697  |                                                      |
| 1 | 168482946 | 168483301 | 5Y-H4K8ac_peak_1341 | 10.4689  |                                                      |
| 1 | 168658830 | 168659020 | 5Y-H4K8ac_peak_1342 | 10.01583 |                                                      |
| 1 | 168660371 | 168660875 | 5Y-H4K8ac_peak_1343 | 8.01306  |                                                      |
| 1 | 168907996 | 168908196 | 5Y-H4K8ac_peak_1344 | 9.30206  | RPL29P7_ENSG00000213063                              |
| 1 | 169055109 | 169055319 | 5Y-H4K8ac_peak_1345 | 4.70545  | LINC00970_ENSG00000203601                            |
| 1 | 169074407 | 169075337 | 5Y-H4K8ac_peak_1346 | 16.13719 | ATP1B1_ENSG00000143153                               |
| 1 | 169076033 | 169076224 | 5Y-H4K8ac_peak_1347 | 5.12488  |                                                      |
| 1 | 169454867 | 169455077 | 5Y-H4K8ac_peak_1348 | 4.6766   | SLC19A2_ENSG00000117479;AL021068.1_ENSG00000213062   |
| 1 | 169862446 | 169862998 | 5Y-H4K8ac_peak_1349 | 7.64648  | SCYL3_ENSG00000000457                                |
| 1 | 169863691 | 169863952 | 5Y-H4K8ac_peak_1350 | 9.58986  | SCYL3_ENSG00000000457                                |
| 1 | 170500780 | 170501045 | 5Y-H4K8ac_peak_1351 | 10.84616 | RP11-576I22.2_ENSG00000231407;GORAB_ENSG00000120370  |
| 1 | 171454858 | 171455175 | 5Y-H4K8ac_peak_1352 | 7.96285  | PRRC2C_ENSG00000117523                               |
| 1 | 171710706 | 171711054 | 5Y-H4K8ac_peak_1353 | 7.02726  | VAMP4_ENSG00000117533                                |
| 1 | 171750152 | 171750358 | 5Y-H4K8ac_peak_1354 | 6.47245  | METTL13_ENSG0000010165                               |
| 1 | 172412771 | 172413041 | 5Y-H4K8ac_peak_1355 | 15.41988 | PIGC_ENSG00000135845                                 |
| 1 | 172419472 | 172419831 | 5Y-H4K8ac_peak_1356 | 6.78318  |                                                      |
| 1 | 173445044 | 173445333 | 5Y-H4K8ac_peak_1357 | 5.67283  |                                                      |
| 1 | 173683726 | 173683929 | 5Y-H4K8ac_peak_1358 | 5.24695  | KLHL20_ENSG00000076321                               |
| 1 | 173684164 | 173684366 | 5Y-H4K8ac_peak_1359 | 10.35586 | KLHL20_ENSG00000076321                               |
| 1 | 173793809 | 173794148 | 5Y-H4K8ac_peak_1360 | 9.23159  | CENPL_ENSG00000120334;DARS2_ENSG00000117593          |
| 1 | 173837498 | 173837819 | 5Y-H4K8ac_peak_1361 | 18.78631 | GAS5_ENSG00000234741;ZBTB37_ENSG00000185278          |
| 1 | 173991215 | 173991901 | 5Y-H4K8ac_peak_1362 | 20.85916 | RC3H1_ENSG00000135870;RP11-160H22.3_ENSG00000224977  |
| 1 | 174232147 | 174232393 | 5Y-H4K8ac_peak_1363 | 7.50148  |                                                      |
| 1 | 174967952 | 174968720 | 5Y-H4K8ac_peak_1364 | 8.46442  | CACYBP_ENSG00000116161                               |
| 1 | 174992789 | 174993669 | 5Y-H4K8ac_peak_1365 | 11.1169  | MRPS14_ENSG00000120333                               |
| 1 | 175343223 | 175343507 | 5Y-H4K8ac_peak_1366 | 5.78188  |                                                      |
| 1 | 175457959 | 175458156 | 5Y-H4K8ac_peak_1367 | 5.65584  |                                                      |
| 1 | 176176007 | 176176598 | 5Y-H4K8ac_peak_1368 | 11.04542 | RFWD2_ENSG00000143207;RP11-195C7.1_ENSG00000236021   |
| 1 | 178510986 | 178511689 | 5Y-H4K8ac_peak_1369 | 13.89096 | C1orf220_ENSG00000213057;C1ORF220_ENSG00000184909    |
| 1 | 178511959 | 178512244 | 5Y-H4K8ac_peak_1370 | 10.29016 | C1orf220_ENSG00000213057;C1ORF220_ENSG00000184909    |
| 1 | 178693855 | 178694284 | 5Y-H4K8ac_peak_1371 | 8.43511  | RALGPS2_ENSG00000116191                              |
| 1 | 178694644 | 178694969 | 5Y-H4K8ac_peak_1372 | 4.95697  | RP11-428K3.1_ENSG00000273062;RALGPS2_ENSG00000116191 |
| 1 | 179179192 | 179179460 | 5Y-H4K8ac_peak_1373 | 4.93618  |                                                      |
| 1 | 179198987 | 179199326 | 5Y-H4K8ac_peak_1374 | 9.179    | ABL2_ENSG00000143322                                 |
| 1 | 179334333 | 179334633 | 5Y-H4K8ac_peak_1375 | 4.32488  | RN7SL374P_ENSG00000263633;AXDND1_ENSG00000162779     |
| 1 | 179676236 | 179676535 | 5Y-H4K8ac_peak_1376 | 7.30348  |                                                      |
| 1 | 179711937 | 179712183 | 5Y-H4K8ac_peak_1377 | 7.17527  | FAM163A_ENSG00000143340                              |
| 1 | 179712405 | 179713844 | 5Y-H4K8ac_peak_1378 | 10.48476 | FAM163A_ENSG00000143340                              |

|   |           |           |                     |          |                                                        |
|---|-----------|-----------|---------------------|----------|--------------------------------------------------------|
| 1 | 179735874 | 179736126 | 5Y-H4K8ac_peak_1379 | 6.37023  |                                                        |
| 1 | 179750669 | 179750964 | 5Y-H4K8ac_peak_1380 | 7.50148  |                                                        |
| 1 | 179751573 | 179751785 | 5Y-H4K8ac_peak_1381 | 11.04542 |                                                        |
| 1 | 179756705 | 179757164 | 5Y-H4K8ac_peak_1382 | 9.02938  |                                                        |
| 1 | 179786281 | 179786516 | 5Y-H4K8ac_peak_1383 | 4.95697  | RP11-12M5.3_ENSG00000229407                            |
| 1 | 179851962 | 179852428 | 5Y-H4K8ac_peak_1384 | 13.35169 | RP11-533E19.7_ENSG00000272906;TOR1AIP1_ENSG00000143337 |
| 1 | 179923958 | 179924238 | 5Y-H4K8ac_peak_1385 | 12.34969 | RP11-533E19.5_ENSG00000260360;CEP350_ENSG00000135837   |
| 1 | 180123620 | 180123852 | 5Y-H4K8ac_peak_1386 | 17.32847 | QSOX1_ENSG00000116260                                  |
| 1 | 180151325 | 180151563 | 5Y-H4K8ac_peak_1387 | 5.34199  |                                                        |
| 1 | 180151972 | 180152381 | 5Y-H4K8ac_peak_1388 | 4.642    |                                                        |
| 1 | 180471198 | 180471909 | 5Y-H4K8ac_peak_1389 | 12.26819 | ACBD6_ENSG00000135847                                  |
| 1 | 180869049 | 180869264 | 5Y-H4K8ac_peak_1390 | 4.90696  |                                                        |
| 1 | 180870269 | 180870629 | 5Y-H4K8ac_peak_1391 | 6.1654   |                                                        |
| 1 | 180890639 | 180890835 | 5Y-H4K8ac_peak_1392 | 6.64195  |                                                        |
| 1 | 180893443 | 180893774 | 5Y-H4K8ac_peak_1393 | 8.66094  |                                                        |
| 1 | 180894221 | 180895464 | 5Y-H4K8ac_peak_1394 | 19.24319 |                                                        |
| 1 | 180896169 | 180897820 | 5Y-H4K8ac_peak_1395 | 35.18826 |                                                        |
| 1 | 180898049 | 180899463 | 5Y-H4K8ac_peak_1396 | 10.86648 |                                                        |
| 1 | 180900144 | 180900660 | 5Y-H4K8ac_peak_1397 | 9.16197  |                                                        |
| 1 | 180900875 | 180901279 | 5Y-H4K8ac_peak_1398 | 10.66841 |                                                        |
| 1 | 180921798 | 180922004 | 5Y-H4K8ac_peak_1399 | 6.37023  |                                                        |
| 1 | 180925111 | 180925596 | 5Y-H4K8ac_peak_1400 | 6.36723  |                                                        |
| 1 | 180991365 | 180991843 | 5Y-H4K8ac_peak_1401 | 11.24252 | STX6_ENSG00000135823                                   |
| 1 | 181073621 | 181074409 | 5Y-H4K8ac_peak_1402 | 15.03212 |                                                        |
| 1 | 181074746 | 181075080 | 5Y-H4K8ac_peak_1403 | 18.62331 |                                                        |
| 1 | 181082282 | 181082983 | 5Y-H4K8ac_peak_1404 | 9.74838  |                                                        |
| 1 | 181102892 | 181103275 | 5Y-H4K8ac_peak_1405 | 5.64909  |                                                        |
| 1 | 181103921 | 181104323 | 5Y-H4K8ac_peak_1406 | 6.37023  |                                                        |
| 1 | 181111370 | 181111708 | 5Y-H4K8ac_peak_1407 | 4.0639   |                                                        |
| 1 | 181998964 | 181999566 | 5Y-H4K8ac_peak_1408 | 16.17072 |                                                        |
| 1 | 182083341 | 182083554 | 5Y-H4K8ac_peak_1409 | 5.718    |                                                        |
| 1 | 182360240 | 182360583 | 5Y-H4K8ac_peak_1410 | 8.24461  |                                                        |
| 1 | 182361156 | 182361705 | 5Y-H4K8ac_peak_1411 | 22.3217  |                                                        |
| 1 | 182584109 | 182584946 | 5Y-H4K8ac_peak_1412 | 10.48476 | RP11-317P15.4_ENSG00000261504                          |
| 1 | 182600164 | 182600532 | 5Y-H4K8ac_peak_1413 | 8.43511  |                                                        |
| 1 | 182602639 | 182603035 | 5Y-H4K8ac_peak_1414 | 5.44849  |                                                        |
| 1 | 182758446 | 182759153 | 5Y-H4K8ac_peak_1415 | 17.76126 | NPL_ENSG00000135838                                    |
| 1 | 182808494 | 182808705 | 5Y-H4K8ac_peak_1416 | 11.9002  | DHX9_ENSG00000135829                                   |
| 1 | 182991861 | 182992180 | 5Y-H4K8ac_peak_1417 | 9.36633  | LAMC1_ENSG00000135862                                  |
| 1 | 182992709 | 182992954 | 5Y-H4K8ac_peak_1418 | 11.04542 | LAMC1_ENSG00000135862                                  |
| 1 | 183300514 | 183300848 | 5Y-H4K8ac_peak_1419 | 5.0078   |                                                        |
| 1 | 183386295 | 183387272 | 5Y-H4K8ac_peak_1420 | 10.77254 | NMNAT2_ENSG00000157064                                 |
| 1 | 183411637 | 183411947 | 5Y-H4K8ac_peak_1421 | 5.98695  |                                                        |
| 1 | 183440489 | 183440778 | 5Y-H4K8ac_peak_1422 | 9.79526  | SMG7-AS1_ENSG00000232860;SMG7_ENSG00000116698          |
| 1 | 183441173 | 183441958 | 5Y-H4K8ac_peak_1423 | 23.58923 | SMG7-AS1_ENSG00000232860;SMG7_ENSG00000116698          |
| 1 | 184006417 | 184006660 | 5Y-H4K8ac_peak_1424 | 6.08523  | COLGALT2_ENSG00000198756                               |

|   |           |           |                     |          |                                                       |
|---|-----------|-----------|---------------------|----------|-------------------------------------------------------|
| 1 | 184020920 | 184021191 | 5Y-H4K8ac_peak_1425 | 13.60583 | TSEN15_ENSG00000198860                                |
| 1 | 184134552 | 184134977 | 5Y-H4K8ac_peak_1426 | 12.47704 |                                                       |
| 1 | 184137142 | 184137336 | 5Y-H4K8ac_peak_1427 | 7.50044  |                                                       |
| 1 | 184267702 | 184268139 | 5Y-H4K8ac_peak_1428 | 7.20869  |                                                       |
| 1 | 184355300 | 184355823 | 5Y-H4K8ac_peak_1429 | 12.38385 | RP11-382D12.2_ENSG00000271387;C1orf21_ENSG00000116667 |
| 1 | 185014100 | 185014360 | 5Y-H4K8ac_peak_1430 | 6.08523  | RNF2_ENSG00000121481                                  |
| 1 | 185014670 | 185015208 | 5Y-H4K8ac_peak_1431 | 9.51254  | RNF2_ENSG00000121481                                  |
| 1 | 185125648 | 185125971 | 5Y-H4K8ac_peak_1432 | 4.41844  | TRMT1L_ENSG00000121486;SWT1_ENSG00000116668           |
| 1 | 185225993 | 185226271 | 5Y-H4K8ac_peak_1433 | 5.59843  | Y_RNA_ENSG00000206640                                 |
| 1 | 185226594 | 185226914 | 5Y-H4K8ac_peak_1434 | 21.90754 | Y_RNA_ENSG00000206640                                 |
| 1 | 185285520 | 185286161 | 5Y-H4K8ac_peak_1435 | 8.43511  | IVNS1ABP_ENSG00000116679;GS1-279B7.2_ENSG00000273004  |
| 1 | 188405686 | 188405919 | 5Y-H4K8ac_peak_1436 | 6.50117  |                                                       |
| 1 | 192815405 | 192815810 | 5Y-H4K8ac_peak_1437 | 4.07874  |                                                       |
| 1 | 193027882 | 193028385 | 5Y-H4K8ac_peak_1438 | 7.11863  | UCHL5_ENSG00000116750;TROVE2_ENSG00000116747          |
| 1 | 193090605 | 193090807 | 5Y-H4K8ac_peak_1439 | 7.50148  | CDC73_ENSG00000134371                                 |
| 1 | 193854599 | 193854821 | 5Y-H4K8ac_peak_1440 | 4.07874  |                                                       |
| 1 | 197115524 | 197115774 | 5Y-H4K8ac_peak_1441 | 7.11863  | ASPM_ENSG00000066279                                  |
| 1 | 197116507 | 197116771 | 5Y-H4K8ac_peak_1442 | 6.54441  | ASPM_ENSG00000066279                                  |
| 1 | 197169985 | 197170322 | 5Y-H4K8ac_peak_1443 | 5.67283  | ZBTB41_ENSG00000177888;CRB1_ENSG00000134376           |
| 1 | 197440249 | 197440784 | 5Y-H4K8ac_peak_1444 | 6.40964  |                                                       |
| 1 | 197654101 | 197654300 | 5Y-H4K8ac_peak_1445 | 7.31815  | Y_RNA_ENSG00000207139                                 |
| 1 | 197744556 | 197744781 | 5Y-H4K8ac_peak_1446 | 10.72427 | DENND1B_ENSG00000213047                               |
| 1 | 197770952 | 197771143 | 5Y-H4K8ac_peak_1447 | 6.1654   |                                                       |
| 1 | 197871268 | 197871998 | 5Y-H4K8ac_peak_1448 | 12.00715 | C1orf53_ENSG00000203724                               |
| 1 | 198871783 | 198872091 | 5Y-H4K8ac_peak_1449 | 6.46053  |                                                       |
| 1 | 199829523 | 199829726 | 5Y-H4K8ac_peak_1450 | 5.23083  |                                                       |
| 1 | 199927316 | 199927578 | 5Y-H4K8ac_peak_1451 | 7.97699  |                                                       |
| 1 | 200270530 | 200270733 | 5Y-H4K8ac_peak_1452 | 4.0639   |                                                       |
| 1 | 200271803 | 200272097 | 5Y-H4K8ac_peak_1453 | 7.38046  |                                                       |
| 1 | 200638605 | 200638983 | 5Y-H4K8ac_peak_1454 | 11.69482 | DDX59_ENSG00000118197;RP11-92G12.3_ENSG00000260088    |
| 1 | 200708179 | 200708895 | 5Y-H4K8ac_peak_1455 | 12.10416 | CAMSAP2_ENSG00000118200                               |
| 1 | 200860183 | 200860942 | 5Y-H4K8ac_peak_1456 | 9.86146  | C1orf106_ENSG00000163362                              |
| 1 | 200986154 | 200986744 | 5Y-H4K8ac_peak_1457 | 5.87725  |                                                       |
| 1 | 201083523 | 201084236 | 5Y-H4K8ac_peak_1458 | 14.89891 |                                                       |
| 1 | 201123286 | 201123479 | 5Y-H4K8ac_peak_1459 | 7.90236  |                                                       |
| 1 | 201123865 | 201124306 | 5Y-H4K8ac_peak_1460 | 7.89273  |                                                       |
| 1 | 201237596 | 201237910 | 5Y-H4K8ac_peak_1461 | 7.20869  |                                                       |
| 1 | 201395477 | 201395957 | 5Y-H4K8ac_peak_1462 | 7.92818  |                                                       |
| 1 | 201400179 | 201400422 | 5Y-H4K8ac_peak_1463 | 5.6957   |                                                       |
| 1 | 201405566 | 201405761 | 5Y-H4K8ac_peak_1464 | 7.63144  |                                                       |
| 1 | 201419902 | 201420321 | 5Y-H4K8ac_peak_1465 | 6.86362  |                                                       |
| 1 | 201437237 | 201437481 | 5Y-H4K8ac_peak_1466 | 8.43511  | PHLDA3_ENSG00000174307                                |
| 1 | 201437706 | 201438313 | 5Y-H4K8ac_peak_1467 | 14.01193 | PHLDA3_ENSG00000174307                                |
| 1 | 201451458 | 201451670 | 5Y-H4K8ac_peak_1468 | 7.02726  |                                                       |
| 1 | 201475954 | 201476638 | 5Y-H4K8ac_peak_1469 | 12.87684 | RP11-134G8.7_ENSG00000224536                          |
| 1 | 201508212 | 201508468 | 5Y-H4K8ac_peak_1470 | 8.24461  |                                                       |

|   |           |           |                     |          |                                                             |
|---|-----------|-----------|---------------------|----------|-------------------------------------------------------------|
| 1 | 201508823 | 201509304 | 5Y-H4K8ac_peak_1471 | 7.59101  |                                                             |
| 1 | 201528692 | 201528893 | 5Y-H4K8ac_peak_1472 | 8.24461  |                                                             |
| 1 | 201561862 | 201562166 | 5Y-H4K8ac_peak_1473 | 5.9192   |                                                             |
| 1 | 201563299 | 201563503 | 5Y-H4K8ac_peak_1474 | 4.93905  |                                                             |
| 1 | 201617855 | 201618050 | 5Y-H4K8ac_peak_1475 | 7.50148  |                                                             |
| 1 | 201664246 | 201664579 | 5Y-H4K8ac_peak_1476 | 6.43068  |                                                             |
| 1 | 201664778 | 201665305 | 5Y-H4K8ac_peak_1477 | 13.00733 |                                                             |
| 1 | 201798393 | 201798635 | 5Y-H4K8ac_peak_1478 | 10.72427 | IPO9-AS1_ENSG00000231871;IPO9_ENSG00000198700               |
| 1 | 201857863 | 201858088 | 5Y-H4K8ac_peak_1479 | 5.45148  | SHISA4_ENSG00000198892                                      |
| 1 | 201951933 | 201952548 | 5Y-H4K8ac_peak_1480 | 6.50031  | RNPEP_ENSG00000176393                                       |
| 1 | 202091721 | 202092289 | 5Y-H4K8ac_peak_1481 | 6.10343  | GPR37L1_ENSG00000170075                                     |
| 1 | 202099807 | 202100010 | 5Y-H4K8ac_peak_1482 | 7.21761  |                                                             |
| 1 | 202113536 | 202114087 | 5Y-H4K8ac_peak_1483 | 7.27671  | ARL8A_ENSG00000143862                                       |
| 1 | 202133494 | 202133980 | 5Y-H4K8ac_peak_1484 | 5.41472  |                                                             |
| 1 | 202136972 | 202137362 | 5Y-H4K8ac_peak_1485 | 19.52902 | PTPRVP_ENSG00000243323                                      |
| 1 | 202137701 | 202137906 | 5Y-H4K8ac_peak_1486 | 4.48815  | PTPRVP_ENSG00000243323                                      |
| 1 | 202206060 | 202206346 | 5Y-H4K8ac_peak_1487 | 7.20869  |                                                             |
| 1 | 202210336 | 202210630 | 5Y-H4K8ac_peak_1488 | 10.1994  |                                                             |
| 1 | 202224324 | 202224566 | 5Y-H4K8ac_peak_1489 | 9.25361  |                                                             |
| 1 | 202273209 | 202273607 | 5Y-H4K8ac_peak_1490 | 5.99756  |                                                             |
| 1 | 202317988 | 202318223 | 5Y-H4K8ac_peak_1491 | 7.44077  | PPP1R12B_ENSG00000077157                                    |
| 1 | 202584478 | 202584772 | 5Y-H4K8ac_peak_1492 | 5.64909  |                                                             |
| 1 | 202636267 | 202636471 | 5Y-H4K8ac_peak_1493 | 5.74271  |                                                             |
| 1 | 202776523 | 202776730 | 5Y-H4K8ac_peak_1494 | 10.4689  |                                                             |
| 1 | 202829631 | 202829982 | 5Y-H4K8ac_peak_1495 | 6.37023  | RP11-480I12.5_ENSG00000214796;RP11-480I12.7_ENSG00000234996 |
| 1 | 202857716 | 202858212 | 5Y-H4K8ac_peak_1496 | 7.74473  | RABIF_ENSG00000183155                                       |
| 1 | 202895999 | 202896262 | 5Y-H4K8ac_peak_1497 | 4.48815  |                                                             |
| 1 | 202896826 | 202897034 | 5Y-H4K8ac_peak_1498 | 4.90696  | KLHL12_ENSG00000117153                                      |
| 1 | 202927059 | 202927371 | 5Y-H4K8ac_peak_1499 | 11.22005 | ADIPOR1_ENSG00000159346                                     |
| 1 | 202936002 | 202936290 | 5Y-H4K8ac_peak_1500 | 9.00954  | CYB5R1_ENSG00000159348                                      |
| 1 | 202975646 | 202976005 | 5Y-H4K8ac_peak_1501 | 7.59101  | TMEM183A_ENSG00000163444                                    |
| 1 | 202976578 | 202976798 | 5Y-H4K8ac_peak_1502 | 9.32595  | TMEM183A_ENSG00000163444                                    |
| 1 | 202995746 | 202996200 | 5Y-H4K8ac_peak_1503 | 7.50148  | PPFIA4_ENSG00000143847                                      |
| 1 | 202998140 | 202998461 | 5Y-H4K8ac_peak_1504 | 4.55128  |                                                             |
| 1 | 203037692 | 203038137 | 5Y-H4K8ac_peak_1505 | 7.89142  |                                                             |
| 1 | 203097007 | 203097315 | 5Y-H4K8ac_peak_1506 | 4.41844  | RP11-335O13.7_ENSG00000234775                               |
| 1 | 203097757 | 203098102 | 5Y-H4K8ac_peak_1507 | 6.77365  | RP11-335O13.7_ENSG00000234775                               |
| 1 | 203242468 | 203242754 | 5Y-H4K8ac_peak_1508 | 8.69112  | CHIT1_ENSG00000133063                                       |
| 1 | 203247585 | 203248298 | 5Y-H4K8ac_peak_1509 | 9.37812  |                                                             |
| 1 | 203256376 | 203256901 | 5Y-H4K8ac_peak_1510 | 9.51254  | RP11-134P9.3_ENSG00000231507                                |
| 1 | 203258875 | 203259145 | 5Y-H4K8ac_peak_1511 | 7.72887  |                                                             |
| 1 | 203259445 | 203260275 | 5Y-H4K8ac_peak_1512 | 10.14791 |                                                             |
| 1 | 203274140 | 203274396 | 5Y-H4K8ac_peak_1513 | 11.86704 | LINC01136_ENSG00000233791;BTG2_ENSG00000159388              |
| 1 | 203296194 | 203296462 | 5Y-H4K8ac_peak_1514 | 6.34245  |                                                             |
| 1 | 203296776 | 203297407 | 5Y-H4K8ac_peak_1515 | 25.35292 |                                                             |
| 1 | 203333272 | 203333824 | 5Y-H4K8ac_peak_1516 | 6.37023  |                                                             |

|   |           |           |                     |          |                            |
|---|-----------|-----------|---------------------|----------|----------------------------|
| 1 | 203456334 | 203457412 | 5Y-H4K8ac_peak_1517 | 13.00733 |                            |
| 1 | 203524517 | 203525870 | 5Y-H4K8ac_peak_1518 | 7.90751  |                            |
| 1 | 203763988 | 203764247 | 5Y-H4K8ac_peak_1519 | 7.31102  | ZC3H11A_ENSG00000058673    |
| 1 | 203830808 | 203831149 | 5Y-H4K8ac_peak_1520 | 7.00938  | SNRPE_ENSG00000182004      |
| 1 | 204076770 | 204076971 | 5Y-H4K8ac_peak_1521 | 5.32832  |                            |
| 1 | 204095422 | 204095632 | 5Y-H4K8ac_peak_1522 | 7.50148  |                            |
| 1 | 204096169 | 204096400 | 5Y-H4K8ac_peak_1523 | 8.24461  |                            |
| 1 | 204098535 | 204098947 | 5Y-H4K8ac_peak_1524 | 8.24461  |                            |
| 1 | 204121647 | 204121911 | 5Y-H4K8ac_peak_1525 | 7.93983  | ETNK2_ENSG00000143845      |
| 1 | 204182703 | 204183111 | 5Y-H4K8ac_peak_1526 | 7.02726  | GOLT1A_ENSG00000174567     |
| 1 | 204303216 | 204303486 | 5Y-H4K8ac_peak_1527 | 7.65114  |                            |
| 1 | 204318120 | 204318397 | 5Y-H4K8ac_peak_1528 | 5.81898  |                            |
| 1 | 204332191 | 204332962 | 5Y-H4K8ac_peak_1529 | 11.4254  |                            |
| 1 | 204380538 | 204380850 | 5Y-H4K8ac_peak_1530 | 9.79526  | PPP1R15B_ENSG00000158615   |
| 1 | 204381375 | 204381938 | 5Y-H4K8ac_peak_1531 | 5.87725  | PPP1R15B_ENSG00000158615   |
| 1 | 204463458 | 204463769 | 5Y-H4K8ac_peak_1532 | 12.45678 | PIK3C2B_ENSG00000133056    |
| 1 | 204485015 | 204485242 | 5Y-H4K8ac_peak_1533 | 8.6813   | MDM4_ENSG00000198625       |
| 1 | 204485576 | 204485828 | 5Y-H4K8ac_peak_1534 | 18.60312 | MDM4_ENSG00000198625       |
| 1 | 204599557 | 204599929 | 5Y-H4K8ac_peak_1535 | 8.54067  |                            |
| 1 | 204607910 | 204608138 | 5Y-H4K8ac_peak_1536 | 9.62747  |                            |
| 1 | 204643052 | 204643252 | 5Y-H4K8ac_peak_1537 | 8.10449  |                            |
| 1 | 204654166 | 204654365 | 5Y-H4K8ac_peak_1538 | 4.75174  | LRRN2_ENSG00000170382      |
| 1 | 205012355 | 205012788 | 5Y-H4K8ac_peak_1539 | 10.69698 | CNTN2_ENSG00000184144      |
| 1 | 205030034 | 205031185 | 5Y-H4K8ac_peak_1540 | 8.24461  | AL583832.1_ENSG00000251696 |
| 1 | 205090751 | 205091061 | 5Y-H4K8ac_peak_1541 | 6.08523  | RBBP5_ENSG00000117222      |
| 1 | 205092215 | 205092443 | 5Y-H4K8ac_peak_1542 | 5.03917  |                            |
| 1 | 205179998 | 205180445 | 5Y-H4K8ac_peak_1543 | 5.0789   | DSTYK_ENSG00000133059      |
| 1 | 205313468 | 205313677 | 5Y-H4K8ac_peak_1544 | 7.41172  |                            |
| 1 | 205321273 | 205321668 | 5Y-H4K8ac_peak_1545 | 7.8267   | SNRPGP10_ENSG00000235363   |
| 1 | 205426116 | 205426367 | 5Y-H4K8ac_peak_1546 | 3.96434  |                            |
| 1 | 205441999 | 205442213 | 5Y-H4K8ac_peak_1547 | 8.41685  |                            |
| 1 | 205470190 | 205470486 | 5Y-H4K8ac_peak_1548 | 8.20773  |                            |
| 1 | 205473841 | 205474062 | 5Y-H4K8ac_peak_1549 | 16.17363 | CDK18_ENSG00000117266      |
| 1 | 205485293 | 205485848 | 5Y-H4K8ac_peak_1550 | 8.33454  |                            |
| 1 | 205497865 | 205498630 | 5Y-H4K8ac_peak_1551 | 8.52662  |                            |
| 1 | 205551629 | 205551980 | 5Y-H4K8ac_peak_1552 | 6.03632  |                            |
| 1 | 205561215 | 205561897 | 5Y-H4K8ac_peak_1553 | 5.87725  |                            |
| 1 | 205600714 | 205600996 | 5Y-H4K8ac_peak_1554 | 9.32595  | ELK4_ENSG00000158711       |
| 1 | 205718767 | 205719098 | 5Y-H4K8ac_peak_1555 | 11.12941 | NUCKS1_ENSG00000069275     |
| 1 | 205719684 | 205719990 | 5Y-H4K8ac_peak_1556 | 5.41472  | NUCKS1_ENSG00000069275     |
| 1 | 205844601 | 205844828 | 5Y-H4K8ac_peak_1557 | 4.90471  |                            |
| 1 | 206136101 | 206136487 | 5Y-H4K8ac_peak_1558 | 10.46287 | FAM72A_ENSG00000196550     |
| 1 | 206235451 | 206235681 | 5Y-H4K8ac_peak_1559 | 6.77436  |                            |
| 1 | 206235980 | 206236679 | 5Y-H4K8ac_peak_1560 | 12.78119 |                            |
| 1 | 206621042 | 206621238 | 5Y-H4K8ac_peak_1561 | 5.98695  |                            |
| 1 | 206663741 | 206664018 | 5Y-H4K8ac_peak_1562 | 4.642    |                            |

|   |           |           |                     |          |                                                     |
|---|-----------|-----------|---------------------|----------|-----------------------------------------------------|
| 1 | 206730362 | 206730898 | 5Y-H4K8ac_peak_1563 | 11.69482 |                                                     |
| 1 | 206785379 | 206785722 | 5Y-H4K8ac_peak_1564 | 9.44542  | EIF2D_ENSG00000143486                               |
| 1 | 206837167 | 206837370 | 5Y-H4K8ac_peak_1565 | 5.98695  |                                                     |
| 1 | 207082723 | 207083330 | 5Y-H4K8ac_peak_1566 | 7.18391  |                                                     |
| 1 | 207224149 | 207224816 | 5Y-H4K8ac_peak_1567 | 9.00954  |                                                     |
| 1 | 207226597 | 207226827 | 5Y-H4K8ac_peak_1568 | 8.24461  | YOD1_ENSG00000180667                                |
| 1 | 207924770 | 207925153 | 5Y-H4K8ac_peak_1569 | 6.00747  | CD46_ENSG00000117335                                |
| 1 | 208042275 | 208042477 | 5Y-H4K8ac_peak_1570 | 9.87124  | C1orf132_ENSG00000203709                            |
| 1 | 208084018 | 208084509 | 5Y-H4K8ac_peak_1571 | 10.12457 | CD34_ENSG00000174059                                |
| 1 | 208136030 | 208136900 | 5Y-H4K8ac_peak_1572 | 14.99099 |                                                     |
| 1 | 208137238 | 208137698 | 5Y-H4K8ac_peak_1573 | 10.79063 |                                                     |
| 1 | 208230773 | 208230996 | 5Y-H4K8ac_peak_1574 | 10.50356 |                                                     |
| 1 | 208232068 | 208232315 | 5Y-H4K8ac_peak_1575 | 3.93392  |                                                     |
| 1 | 208233718 | 208234158 | 5Y-H4K8ac_peak_1576 | 7.82057  |                                                     |
| 1 | 208250723 | 208251096 | 5Y-H4K8ac_peak_1577 | 5.77617  |                                                     |
| 1 | 208256389 | 208256760 | 5Y-H4K8ac_peak_1578 | 11.94897 |                                                     |
| 1 | 208257519 | 208257844 | 5Y-H4K8ac_peak_1579 | 10.79081 |                                                     |
| 1 | 208333432 | 208333835 | 5Y-H4K8ac_peak_1580 | 4.52203  |                                                     |
| 1 | 208336641 | 208337322 | 5Y-H4K8ac_peak_1581 | 4.95697  |                                                     |
| 1 | 208348414 | 208348605 | 5Y-H4K8ac_peak_1582 | 4.62763  |                                                     |
| 1 | 208352862 | 208353085 | 5Y-H4K8ac_peak_1583 | 6.53157  |                                                     |
| 1 | 208561785 | 208562017 | 5Y-H4K8ac_peak_1584 | 4.79585  |                                                     |
| 1 | 208707195 | 208707409 | 5Y-H4K8ac_peak_1585 | 6.37023  |                                                     |
| 1 | 209008602 | 209008839 | 5Y-H4K8ac_peak_1586 | 6.50117  |                                                     |
| 1 | 209279045 | 209279383 | 5Y-H4K8ac_peak_1587 | 4.50834  |                                                     |
| 1 | 209380397 | 209381091 | 5Y-H4K8ac_peak_1588 | 16.13719 |                                                     |
| 1 | 209393162 | 209393432 | 5Y-H4K8ac_peak_1589 | 8.21582  |                                                     |
| 1 | 209475957 | 209476188 | 5Y-H4K8ac_peak_1590 | 4.55128  |                                                     |
| 1 | 209849187 | 209849474 | 5Y-H4K8ac_peak_1591 | 8.24461  | G0S2_ENSG00000123689                                |
| 1 | 209958163 | 209958730 | 5Y-H4K8ac_peak_1592 | 9.30206  | C1orf74_ENSG00000162757                             |
| 1 | 209989225 | 209989676 | 5Y-H4K8ac_peak_1593 | 6.37023  |                                                     |
| 1 | 210000678 | 210001170 | 5Y-H4K8ac_peak_1594 | 8.43511  | DIEXF_ENSG00000117597                               |
| 1 | 210111174 | 210112036 | 5Y-H4K8ac_peak_1595 | 14.17466 | SYT14_ENSG00000143469                               |
| 1 | 210406076 | 210406510 | 5Y-H4K8ac_peak_1596 | 12.34969 | SERTAD4-AS1_ENSG00000203706;SERTAD4_ENSG00000082497 |
| 1 | 210406974 | 210407264 | 5Y-H4K8ac_peak_1597 | 11.01067 | SERTAD4-AS1_ENSG00000203706;SERTAD4_ENSG00000082497 |
| 1 | 210424403 | 210425830 | 5Y-H4K8ac_peak_1598 | 27.35138 |                                                     |
| 1 | 210433804 | 210434087 | 5Y-H4K8ac_peak_1599 | 4.77126  |                                                     |
| 1 | 210465686 | 210466222 | 5Y-H4K8ac_peak_1600 | 8.09013  |                                                     |
| 1 | 210466514 | 210466828 | 5Y-H4K8ac_peak_1601 | 7.44077  |                                                     |
| 1 | 210485110 | 210485346 | 5Y-H4K8ac_peak_1602 | 5.76631  |                                                     |
| 1 | 210501976 | 210503351 | 5Y-H4K8ac_peak_1603 | 12.79198 | HHAT_ENSG00000054392                                |
| 1 | 210706786 | 210706976 | 5Y-H4K8ac_peak_1604 | 6.73047  |                                                     |
| 1 | 210707219 | 210707583 | 5Y-H4K8ac_peak_1605 | 9.26003  |                                                     |
| 1 | 210708908 | 210709135 | 5Y-H4K8ac_peak_1606 | 5.78188  |                                                     |
| 1 | 210710604 | 210711004 | 5Y-H4K8ac_peak_1607 | 8.11614  |                                                     |
| 1 | 210743529 | 210745085 | 5Y-H4K8ac_peak_1608 | 18.64118 |                                                     |

|   |           |           |                     |          |                                                     |
|---|-----------|-----------|---------------------|----------|-----------------------------------------------------|
| 1 | 210745843 | 210746297 | 5Y-H4K8ac_peak_1609 | 12.50545 |                                                     |
| 1 | 210746596 | 210746830 | 5Y-H4K8ac_peak_1610 | 6.22904  |                                                     |
| 1 | 210757964 | 210758160 | 5Y-H4K8ac_peak_1611 | 7.24864  |                                                     |
| 1 | 210759102 | 210759366 | 5Y-H4K8ac_peak_1612 | 6.37023  |                                                     |
| 1 | 210821371 | 210821705 | 5Y-H4K8ac_peak_1613 | 4.29586  |                                                     |
| 1 | 210836291 | 210836698 | 5Y-H4K8ac_peak_1614 | 6.08523  |                                                     |
| 1 | 210837007 | 210837244 | 5Y-H4K8ac_peak_1615 | 11.1169  |                                                     |
| 1 | 211306694 | 211306923 | 5Y-H4K8ac_peak_1616 | 8.24461  | KCNH1_ENSG00000143473;KCNH1-IT1_ENSG00000234233     |
| 1 | 211307187 | 211307468 | 5Y-H4K8ac_peak_1617 | 12.10416 | KCNH1_ENSG00000143473;KCNH1-IT1_ENSG00000234233     |
| 1 | 211307750 | 211308265 | 5Y-H4K8ac_peak_1618 | 9.41701  | KCNH1_ENSG00000143473                               |
| 1 | 211431949 | 211432300 | 5Y-H4K8ac_peak_1619 | 7.50464  | RCOR3_ENSG00000117625                               |
| 1 | 211432821 | 211433073 | 5Y-H4K8ac_peak_1620 | 25.89424 |                                                     |
| 1 | 211499698 | 211500550 | 5Y-H4K8ac_peak_1621 | 8.75963  | TRAF5_ENSG00000082512                               |
| 1 | 211556247 | 211556515 | 5Y-H4K8ac_peak_1622 | 11.88337 | LINC00467_ENSG00000153363                           |
| 1 | 211589701 | 211590204 | 5Y-H4K8ac_peak_1623 | 5.64909  | SNX25P1_ENSG00000236809                             |
| 1 | 211662130 | 211662386 | 5Y-H4K8ac_peak_1624 | 7.11863  |                                                     |
| 1 | 211663382 | 211663901 | 5Y-H4K8ac_peak_1625 | 16.11404 |                                                     |
| 1 | 211664134 | 211665360 | 5Y-H4K8ac_peak_1626 | 16.79029 | RD3_ENSG00000198570;RP11-359E8.3_ENSG00000223649    |
| 1 | 211665569 | 211665835 | 5Y-H4K8ac_peak_1627 | 10.15788 | RD3_ENSG00000198570;RP11-359E8.3_ENSG00000223649    |
| 1 | 211666509 | 211667556 | 5Y-H4K8ac_peak_1628 | 10.08244 | RD3_ENSG00000198570;RP11-359E8.3_ENSG00000223649    |
| 1 | 211689161 | 211689513 | 5Y-H4K8ac_peak_1629 | 7.48932  |                                                     |
| 1 | 211817050 | 211817445 | 5Y-H4K8ac_peak_1630 | 9.07085  | RP11-354K1.2_ENSG00000228792                        |
| 1 | 212003542 | 212004073 | 5Y-H4K8ac_peak_1631 | 6.88736  | LPGAT1_ENSG00000123684;RP11-552D8.1_ENSG00000229258 |
| 1 | 212119402 | 212119652 | 5Y-H4K8ac_peak_1632 | 5.59837  |                                                     |
| 1 | 212376060 | 212376261 | 5Y-H4K8ac_peak_1633 | 6.50117  |                                                     |
| 1 | 212588748 | 212589099 | 5Y-H4K8ac_peak_1634 | 9.32639  | TMEM206_ENSG00000065600                             |
| 1 | 212659704 | 212659954 | 5Y-H4K8ac_peak_1635 | 5.81898  |                                                     |
| 1 | 212691861 | 212692507 | 5Y-H4K8ac_peak_1636 | 11.71078 |                                                     |
| 1 | 212731692 | 212732285 | 5Y-H4K8ac_peak_1637 | 5.93036  | RP11-61J19.4_ENSG00000260805                        |
| 1 | 212781268 | 212781573 | 5Y-H4K8ac_peak_1638 | 7.54409  |                                                     |
| 1 | 212782146 | 212782461 | 5Y-H4K8ac_peak_1639 | 11.64833 |                                                     |
| 1 | 212809159 | 212809368 | 5Y-H4K8ac_peak_1640 | 8.80077  |                                                     |
| 1 | 212809746 | 212809950 | 5Y-H4K8ac_peak_1641 | 7.14092  |                                                     |
| 1 | 212810394 | 212810712 | 5Y-H4K8ac_peak_1642 | 4.77126  |                                                     |
| 1 | 212964735 | 212965089 | 5Y-H4K8ac_peak_1643 | 10.1994  | NSL1_ENSG00000117697;TATDN3_ENSG00000203705         |
| 1 | 212965292 | 212965678 | 5Y-H4K8ac_peak_1644 | 7.58806  | NSL1_ENSG00000117697;TATDN3_ENSG00000203705         |
| 1 | 213031769 | 213032165 | 5Y-H4K8ac_peak_1645 | 6.37023  | FLVCR1-AS1_ENSG00000198468;FLVCR1_ENSG00000162769   |
| 1 | 213101951 | 213102267 | 5Y-H4K8ac_peak_1646 | 4.642    |                                                     |
| 1 | 213188532 | 213188805 | 5Y-H4K8ac_peak_1647 | 10.4495  | ANGEL2_ENSG00000174606                              |
| 1 | 213189373 | 213189720 | 5Y-H4K8ac_peak_1648 | 14.5825  | ANGEL2_ENSG00000174606                              |
| 1 | 213224293 | 213224531 | 5Y-H4K8ac_peak_1649 | 6.43068  | RPS6KC1_ENSG00000136643                             |
| 1 | 214156097 | 214157063 | 5Y-H4K8ac_peak_1650 | 12.8095  | PROX1_ENSG00000117707                               |
| 1 | 214162528 | 214162751 | 5Y-H4K8ac_peak_1651 | 6.36723  |                                                     |
| 1 | 214193600 | 214193838 | 5Y-H4K8ac_peak_1652 | 4.77126  |                                                     |
| 1 | 214327641 | 214328143 | 5Y-H4K8ac_peak_1653 | 8.69112  |                                                     |
| 1 | 214328886 | 214329136 | 5Y-H4K8ac_peak_1654 | 5.23083  |                                                     |



|   |           |           |                     |          |                                                      |
|---|-----------|-----------|---------------------|----------|------------------------------------------------------|
| 1 | 214339726 | 214339946 | 5Y-H4K8ac_peak_1655 | 4.50834  |                                                      |
| 1 | 214453725 | 214454765 | 5Y-H4K8ac_peak_1656 | 19.72309 | SMYD2_ENSG00000143499                                |
| 1 | 214776606 | 214776941 | 5Y-H4K8ac_peak_1657 | 5.64909  | CENPF_ENSG00000117724                                |
| 1 | 215740598 | 215741067 | 5Y-H4K8ac_peak_1658 | 6.19716  | KCTD3_ENSG00000136636                                |
| 1 | 216227086 | 216227317 | 5Y-H4K8ac_peak_1659 | 6.50117  |                                                      |
| 1 | 216773543 | 216773787 | 5Y-H4K8ac_peak_1660 | 7.30348  |                                                      |
| 1 | 216774272 | 216774696 | 5Y-H4K8ac_peak_1661 | 12.65187 |                                                      |
| 1 | 217262959 | 217263191 | 5Y-H4K8ac_peak_1662 | 13.1133  |                                                      |
| 1 | 217263603 | 217263894 | 5Y-H4K8ac_peak_1663 | 11.23789 |                                                      |
| 1 | 217580728 | 217581128 | 5Y-H4K8ac_peak_1664 | 6.1654   |                                                      |
| 1 | 218337985 | 218339010 | 5Y-H4K8ac_peak_1665 | 13.72401 |                                                      |
| 1 | 218456853 | 218457455 | 5Y-H4K8ac_peak_1666 | 10.5157  |                                                      |
| 1 | 218457936 | 218458246 | 5Y-H4K8ac_peak_1667 | 15.80786 | RRP15_ENSG00000067533                                |
| 1 | 218458818 | 218459064 | 5Y-H4K8ac_peak_1668 | 6.47245  | RRP15_ENSG00000067533                                |
| 1 | 218497629 | 218497825 | 5Y-H4K8ac_peak_1669 | 5.12213  |                                                      |
| 1 | 219028831 | 219029055 | 5Y-H4K8ac_peak_1670 | 4.47071  |                                                      |
| 1 | 219347263 | 219347670 | 5Y-H4K8ac_peak_1671 | 11.68317 | RP11-135J2.4_ENSG00000228063;LYPLAL1_ENSG00000143353 |
| 1 | 219967006 | 219967276 | 5Y-H4K8ac_peak_1672 | 4.96019  |                                                      |
| 1 | 220101166 | 220101779 | 5Y-H4K8ac_peak_1673 | 8.62703  |                                                      |
| 1 | 220220316 | 220221070 | 5Y-H4K8ac_peak_1674 | 8.47129  | EPRS_ENSG00000136628                                 |
| 1 | 220267521 | 220267769 | 5Y-H4K8ac_peak_1675 | 11.86504 | IARS2_ENSG00000067704                                |
| 1 | 220445451 | 220445727 | 5Y-H4K8ac_peak_1676 | 12.2918  | RAB3GAP2_ENSG00000118873                             |
| 1 | 220585707 | 220586043 | 5Y-H4K8ac_peak_1677 | 4.79585  |                                                      |
| 1 | 220701868 | 220702530 | 5Y-H4K8ac_peak_1678 | 9.74838  | MARK1_ENSG00000116141                                |
| 1 | 220863771 | 220863988 | 5Y-H4K8ac_peak_1679 | 6.77436  | C1orf115_ENSG00000162817                             |
| 1 | 220906058 | 220906305 | 5Y-H4K8ac_peak_1680 | 8.86184  |                                                      |
| 1 | 220959547 | 220959876 | 5Y-H4K8ac_peak_1681 | 9.44542  | MARC1_ENSG00000186205                                |
| 1 | 220960261 | 220960664 | 5Y-H4K8ac_peak_1682 | 14.18025 | MARC1_ENSG00000186205                                |
| 1 | 222790920 | 222791111 | 5Y-H4K8ac_peak_1683 | 5.67588  | MIA3_ENSG00000154305                                 |
| 1 | 222816719 | 222817462 | 5Y-H4K8ac_peak_1684 | 7.89273  |                                                      |
| 1 | 222885957 | 222886150 | 5Y-H4K8ac_peak_1685 | 9.00954  | AIDA_ENSG00000186063;BROX_ENSG00000162819            |
| 1 | 222988410 | 222988627 | 5Y-H4K8ac_peak_1686 | 13.14766 | RP11-452F19.3_ENSG00000228106;DISP1_ENSG00000154309  |
| 1 | 223196232 | 223197001 | 5Y-H4K8ac_peak_1687 | 5.89922  |                                                      |
| 1 | 223316234 | 223317042 | 5Y-H4K8ac_peak_1688 | 12.11208 | TLR5_ENSG00000187554;RP11-239E10.2_ENSG00000236846   |
| 1 | 223886331 | 223886657 | 5Y-H4K8ac_peak_1689 | 11.12941 |                                                      |
| 1 | 223899913 | 223900629 | 5Y-H4K8ac_peak_1690 | 14.00559 |                                                      |
| 1 | 223914227 | 223914750 | 5Y-H4K8ac_peak_1691 | 9.38276  |                                                      |
| 1 | 224033099 | 224033600 | 5Y-H4K8ac_peak_1692 | 9.44542  | TP53BP2_ENSG00000143514                              |
| 1 | 224034024 | 224034837 | 5Y-H4K8ac_peak_1693 | 11.9002  | TP53BP2_ENSG00000143514                              |
| 1 | 224179153 | 224179576 | 5Y-H4K8ac_peak_1694 | 4.29586  |                                                      |
| 1 | 224301867 | 224302380 | 5Y-H4K8ac_peak_1695 | 6.67135  | FBXO28_ENSG00000143756                               |
| 1 | 224363519 | 224363866 | 5Y-H4K8ac_peak_1696 | 9.7353   | RP11-365O16.1_ENSG00000236773;DEGS1_ENSG00000143753  |
| 1 | 224371136 | 224371698 | 5Y-H4K8ac_peak_1697 | 6.03632  |                                                      |
| 1 | 224517500 | 224517719 | 5Y-H4K8ac_peak_1698 | 7.59101  | NVL_ENSG00000143748                                  |
| 1 | 224528586 | 224528825 | 5Y-H4K8ac_peak_1699 | 8.24461  |                                                      |
| 1 | 224540379 | 224540617 | 5Y-H4K8ac_peak_1700 | 4.50834  |                                                      |

|   |           |           |                     |          |                                                     |
|---|-----------|-----------|---------------------|----------|-----------------------------------------------------|
| 1 | 224544691 | 224545156 | 5Y-H4K8ac_peak_1701 | 9.30505  | CNIH4_ENSG00000143771                               |
| 1 | 224622577 | 224622870 | 5Y-H4K8ac_peak_1702 | 15.82359 | CNIH3_ENSG00000143786                               |
| 1 | 224690468 | 224690671 | 5Y-H4K8ac_peak_1703 | 16.01457 |                                                     |
| 1 | 225117059 | 225117837 | 5Y-H4K8ac_peak_1704 | 7.64648  |                                                     |
| 1 | 225615974 | 225616477 | 5Y-H4K8ac_peak_1705 | 10.21117 | LBR_ENSG00000143815                                 |
| 1 | 225662971 | 225663237 | 5Y-H4K8ac_peak_1706 | 4.75174  |                                                     |
| 1 | 225840259 | 225840769 | 5Y-H4K8ac_peak_1707 | 16.01457 | ENAH_ENSG00000154380                                |
| 1 | 225841191 | 225841534 | 5Y-H4K8ac_peak_1708 | 14.00559 | ENAH_ENSG00000154380                                |
| 1 | 226070204 | 226070685 | 5Y-H4K8ac_peak_1709 | 7.64648  | TMEM63A_ENSG00000196187                             |
| 1 | 226070977 | 226071186 | 5Y-H4K8ac_peak_1710 | 6.37023  | TMEM63A_ENSG00000196187                             |
| 1 | 226104420 | 226104664 | 5Y-H4K8ac_peak_1711 | 10.07378 |                                                     |
| 1 | 226111571 | 226111909 | 5Y-H4K8ac_peak_1712 | 8.57063  | RP4-559A3.7_ENSG00000255835;PYCR2_ENSG00000143811   |
| 1 | 226112338 | 226112764 | 5Y-H4K8ac_peak_1713 | 9.38692  | RP4-559A3.7_ENSG00000255835;PYCR2_ENSG00000143811   |
| 1 | 226135347 | 226135619 | 5Y-H4K8ac_peak_1714 | 4.94375  |                                                     |
| 1 | 226187395 | 226187702 | 5Y-H4K8ac_peak_1715 | 13.81505 | SDE2_ENSG00000143751                                |
| 1 | 226249496 | 226249859 | 5Y-H4K8ac_peak_1716 | 10.14791 | RP11-396C23.4_ENSG00000272562;H3F3A_ENSG00000163041 |
| 1 | 226271339 | 226271604 | 5Y-H4K8ac_peak_1717 | 6.83052  | RP11-396C23.2_ENSG00000225518                       |
| 1 | 226297865 | 226298702 | 5Y-H4K8ac_peak_1718 | 15.90416 |                                                     |
| 1 | 226308343 | 226308601 | 5Y-H4K8ac_peak_1719 | 7.11753  |                                                     |
| 1 | 226308968 | 226310816 | 5Y-H4K8ac_peak_1720 | 13.82621 |                                                     |
| 1 | 226323051 | 226323255 | 5Y-H4K8ac_peak_1721 | 8.5915   |                                                     |
| 1 | 226373971 | 226374377 | 5Y-H4K8ac_peak_1722 | 10.15788 | ACBD3_ENSG00000182827                               |
| 1 | 226374633 | 226374937 | 5Y-H4K8ac_peak_1723 | 7.34185  | ACBD3_ENSG00000182827                               |
| 1 | 226411133 | 226411534 | 5Y-H4K8ac_peak_1724 | 8.36588  | MIXL1_ENSG00000185155                               |
| 1 | 226496396 | 226496809 | 5Y-H4K8ac_peak_1725 | 16.09729 | LIN9_ENSG00000183814                                |
| 1 | 226497059 | 226497371 | 5Y-H4K8ac_peak_1726 | 10.48476 | LIN9_ENSG00000183814                                |
| 1 | 226595356 | 226595725 | 5Y-H4K8ac_peak_1727 | 7.41197  | PARP1_ENSG00000143799                               |
| 1 | 226596178 | 226596433 | 5Y-H4K8ac_peak_1728 | 5.67517  | PARP1_ENSG00000143799                               |
| 1 | 226661638 | 226661897 | 5Y-H4K8ac_peak_1729 | 7.60057  |                                                     |
| 1 | 226821676 | 226821879 | 5Y-H4K8ac_peak_1730 | 4.95697  |                                                     |
| 1 | 226828287 | 226828834 | 5Y-H4K8ac_peak_1731 | 5.64909  |                                                     |
| 1 | 226890871 | 226891695 | 5Y-H4K8ac_peak_1732 | 21.88077 |                                                     |
| 1 | 227126597 | 227126792 | 5Y-H4K8ac_peak_1733 | 9.07585  |                                                     |
| 1 | 227127145 | 227127642 | 5Y-H4K8ac_peak_1734 | 13.00733 |                                                     |
| 1 | 227241066 | 227241268 | 5Y-H4K8ac_peak_1735 | 4.84727  |                                                     |
| 1 | 227469553 | 227469799 | 5Y-H4K8ac_peak_1736 | 7.59101  |                                                     |
| 1 | 227505483 | 227506096 | 5Y-H4K8ac_peak_1737 | 9.36633  | CDC42BPA_ENSG00000143776                            |
| 1 | 227506292 | 227506868 | 5Y-H4K8ac_peak_1738 | 4.642    | CDC42BPA_ENSG00000143776                            |
| 1 | 227729459 | 227730228 | 5Y-H4K8ac_peak_1739 | 14.21916 |                                                     |
| 1 | 227730557 | 227730992 | 5Y-H4K8ac_peak_1740 | 7.90751  |                                                     |
| 1 | 227922663 | 227922928 | 5Y-H4K8ac_peak_1741 | 9.45199  | JMJD4_ENSG00000081692                               |
| 1 | 227923194 | 227923462 | 5Y-H4K8ac_peak_1742 | 9.13842  | JMJD4_ENSG00000081692                               |
| 1 | 228074559 | 228075558 | 5Y-H4K8ac_peak_1743 | 10.35586 |                                                     |
| 1 | 228269807 | 228270148 | 5Y-H4K8ac_peak_1744 | 13.84318 | ARF1_ENSG00000143761                                |
| 1 | 228270540 | 228270904 | 5Y-H4K8ac_peak_1745 | 5.73383  | ARF1_ENSG00000143761                                |
| 1 | 228291469 | 228291662 | 5Y-H4K8ac_peak_1746 | 6.98416  |                                                     |

|   |           |           |                     |          |                                                                                   |
|---|-----------|-----------|---------------------|----------|-----------------------------------------------------------------------------------|
| 1 | 228296739 | 228296945 | 5Y-H4K8ac_peak_1747 | 12.42757 | MRPL55_ENSG00000162910                                                            |
| 1 | 228327184 | 228327578 | 5Y-H4K8ac_peak_1748 | 9.87097  | GUK1_ENSG00000143774                                                              |
| 1 | 228350602 | 228350922 | 5Y-H4K8ac_peak_1749 | 4.97006  |                                                                                   |
| 1 | 228353453 | 228353720 | 5Y-H4K8ac_peak_1750 | 28.84212 | IBA57-AS1_ENSG00000203684;IBA57_ENSG00000181873                                   |
| 1 | 228565672 | 228565959 | 5Y-H4K8ac_peak_1751 | 7.80036  |                                                                                   |
| 1 | 228566281 | 228567194 | 5Y-H4K8ac_peak_1752 | 6.80915  |                                                                                   |
| 1 | 228604038 | 228604361 | 5Y-H4K8ac_peak_1753 | 12.05638 | TRIM17_ENSG00000162931                                                            |
| 1 | 228674097 | 228675016 | 5Y-H4K8ac_peak_1754 | 18.62331 | RNF187_ENSG00000168159                                                            |
| 1 | 228782770 | 228783103 | 5Y-H4K8ac_peak_1755 | 4.15658  | RNA5S17_ENSG00000200370;RNA5SP18_ENSG00000212237                                  |
| 1 | 228871307 | 228871893 | 5Y-H4K8ac_peak_1756 | 7.50148  | RHOA_ENSG00000116574                                                              |
| 1 | 229002208 | 229002675 | 5Y-H4K8ac_peak_1757 | 11.4254  |                                                                                   |
| 1 | 229003774 | 229005069 | 5Y-H4K8ac_peak_1758 | 11.69482 |                                                                                   |
| 1 | 229007347 | 229007676 | 5Y-H4K8ac_peak_1759 | 5.83797  |                                                                                   |
| 1 | 229034324 | 229034714 | 5Y-H4K8ac_peak_1760 | 7.75012  |                                                                                   |
| 1 | 229035334 | 229035702 | 5Y-H4K8ac_peak_1761 | 8.24461  |                                                                                   |
| 1 | 229047126 | 229047430 | 5Y-H4K8ac_peak_1762 | 4.3419   |                                                                                   |
| 1 | 229114738 | 229115028 | 5Y-H4K8ac_peak_1763 | 5.77617  |                                                                                   |
| 1 | 229123518 | 229123762 | 5Y-H4K8ac_peak_1764 | 8.79172  |                                                                                   |
| 1 | 229126169 | 229126482 | 5Y-H4K8ac_peak_1765 | 7.46945  |                                                                                   |
| 1 | 229139345 | 229139599 | 5Y-H4K8ac_peak_1766 | 7.16882  |                                                                                   |
| 1 | 229193955 | 229194585 | 5Y-H4K8ac_peak_1767 | 10.12457 |                                                                                   |
| 1 | 229195371 | 229195819 | 5Y-H4K8ac_peak_1768 | 8.46442  |                                                                                   |
| 1 | 229197827 | 229198018 | 5Y-H4K8ac_peak_1769 | 8.43511  |                                                                                   |
| 1 | 229249096 | 229249488 | 5Y-H4K8ac_peak_1770 | 8.2581   |                                                                                   |
| 1 | 229253595 | 229253938 | 5Y-H4K8ac_peak_1771 | 6.97863  |                                                                                   |
| 1 | 229388696 | 229389028 | 5Y-H4K8ac_peak_1772 | 8.16382  |                                                                                   |
| 1 | 229406709 | 229407252 | 5Y-H4K8ac_peak_1773 | 11.19935 | RP5-1061H20.4_ENSG00000177788;RP5-1061H20.3_ENSG00000240524;RAB4A_ENSG00000168118 |
| 1 | 229544186 | 229544564 | 5Y-H4K8ac_peak_1774 | 7.98754  |                                                                                   |
| 1 | 229545454 | 229546362 | 5Y-H4K8ac_peak_1775 | 10.60083 | RN7SKP276_ENSG00000252051                                                         |
| 1 | 229643734 | 229644041 | 5Y-H4K8ac_peak_1776 | 12.50545 | NUP133_ENSG00000069248;RP4-613A2.1_ENSG00000223635                                |
| 1 | 229714929 | 229715411 | 5Y-H4K8ac_peak_1777 | 8.69112  |                                                                                   |
| 1 | 229761658 | 229762417 | 5Y-H4K8ac_peak_1778 | 13.0168  | TAF5L_ENSG00000135801;URB2_ENSG00000135763                                        |
| 1 | 229828590 | 229829061 | 5Y-H4K8ac_peak_1779 | 8.69112  |                                                                                   |
| 1 | 229829433 | 229830114 | 5Y-H4K8ac_peak_1780 | 7.74473  |                                                                                   |
| 1 | 229830721 | 229830969 | 5Y-H4K8ac_peak_1781 | 6.55841  |                                                                                   |
| 1 | 230078330 | 230078537 | 5Y-H4K8ac_peak_1782 | 5.21777  |                                                                                   |
| 1 | 230079414 | 230080066 | 5Y-H4K8ac_peak_1783 | 16.91444 |                                                                                   |
| 1 | 230403190 | 230403391 | 5Y-H4K8ac_peak_1784 | 6.47527  | RP5-956O18.2_ENSG00000227006                                                      |
| 1 | 230404282 | 230404773 | 5Y-H4K8ac_peak_1785 | 9.74838  | RP5-956O18.2_ENSG00000227006                                                      |
| 1 | 230405526 | 230405901 | 5Y-H4K8ac_peak_1786 | 7.89273  |                                                                                   |
| 1 | 230406854 | 230407656 | 5Y-H4K8ac_peak_1787 | 12.10416 |                                                                                   |
| 1 | 230416824 | 230417176 | 5Y-H4K8ac_peak_1788 | 8.80077  | RP5-956O18.3_ENSG00000224407                                                      |
| 1 | 230435011 | 230435547 | 5Y-H4K8ac_peak_1789 | 9.30505  |                                                                                   |
| 1 | 230435793 | 230436044 | 5Y-H4K8ac_peak_1790 | 6.73385  |                                                                                   |
| 1 | 230879171 | 230879515 | 5Y-H4K8ac_peak_1791 | 7.1449   |                                                                                   |
| 1 | 231004696 | 231005094 | 5Y-H4K8ac_peak_1792 | 12.50545 | C1orf198_ENSG00000119280                                                          |

|   |           |           |                     |          |                                                                                 |
|---|-----------|-----------|---------------------|----------|---------------------------------------------------------------------------------|
| 1 | 231113992 | 231114319 | 5Y-H4K8ac_peak_1793 | 9.37812  | TTC13_ENSG00000143643;ARV1_ENSG00000173409                                      |
| 1 | 231297923 | 231298471 | 5Y-H4K8ac_peak_1794 | 8.5159   | TRIM67_ENSG00000119283                                                          |
| 1 | 231298790 | 231299191 | 5Y-H4K8ac_peak_1795 | 5.40265  | TRIM67_ENSG00000119283                                                          |
| 1 | 231328421 | 231328613 | 5Y-H4K8ac_peak_1796 | 4.77126  |                                                                                 |
| 1 | 231376508 | 231376782 | 5Y-H4K8ac_peak_1797 | 4.0639   | C1orf131_ENSG00000143633;GNPAT_ENSG00000116906                                  |
| 1 | 231557706 | 231557962 | 5Y-H4K8ac_peak_1798 | 7.89273  |                                                                                 |
| 1 | 231558169 | 231558552 | 5Y-H4K8ac_peak_1799 | 19.75467 |                                                                                 |
| 1 | 231663689 | 231663903 | 5Y-H4K8ac_peak_1800 | 7.87192  | RP11-295G20.2_ENSG00000233461;TSNAX-DISC1_ENSG00000270106;TSNAX_ENSG00000116918 |
| 1 | 231762533 | 231763125 | 5Y-H4K8ac_peak_1801 | 9.36633  | DISC1_ENSG00000162946                                                           |
| 1 | 231829777 | 231831341 | 5Y-H4K8ac_peak_1802 | 19.99409 |                                                                                 |
| 1 | 231832714 | 231832962 | 5Y-H4K8ac_peak_1803 | 14.02873 |                                                                                 |
| 1 | 232071689 | 232071954 | 5Y-H4K8ac_peak_1804 | 9.66296  |                                                                                 |
| 1 | 232766148 | 232766389 | 5Y-H4K8ac_peak_1805 | 4.81081  |                                                                                 |
| 1 | 232941043 | 232941700 | 5Y-H4K8ac_peak_1806 | 14.89523 | MAP10_ENSG00000212916                                                           |
| 1 | 233006982 | 233007665 | 5Y-H4K8ac_peak_1807 | 13.12848 |                                                                                 |
| 1 | 233113368 | 233113741 | 5Y-H4K8ac_peak_1808 | 6.37023  |                                                                                 |
| 1 | 233464056 | 233464284 | 5Y-H4K8ac_peak_1809 | 5.0789   | MLK4_ENSG00000143674                                                            |
| 1 | 233582999 | 233583321 | 5Y-H4K8ac_peak_1810 | 7.50148  |                                                                                 |
| 1 | 233590359 | 233590987 | 5Y-H4K8ac_peak_1811 | 11.22005 |                                                                                 |
| 1 | 233750583 | 233750782 | 5Y-H4K8ac_peak_1812 | 4.50302  | KCNK1_ENSG00000135750                                                           |
| 1 | 234041232 | 234041463 | 5Y-H4K8ac_peak_1813 | 6.03632  | SLC35F3_ENSG00000183780                                                         |
| 1 | 234247706 | 234247909 | 5Y-H4K8ac_peak_1814 | 5.67283  |                                                                                 |
| 1 | 234381735 | 234382089 | 5Y-H4K8ac_peak_1815 | 4.79585  |                                                                                 |
| 1 | 234418045 | 234418307 | 5Y-H4K8ac_peak_1816 | 9.51254  |                                                                                 |
| 1 | 234445317 | 234445523 | 5Y-H4K8ac_peak_1817 | 5.98695  |                                                                                 |
| 1 | 234509261 | 234509652 | 5Y-H4K8ac_peak_1818 | 6.4759   | RP5-827C21.4_ENSG00000231663;COA6_ENSG00000168275                               |
| 1 | 234613941 | 234614855 | 5Y-H4K8ac_peak_1819 | 8.82628  | TARBP1_ENSG00000059588                                                          |
| 1 | 234634707 | 234635647 | 5Y-H4K8ac_peak_1820 | 14.72057 |                                                                                 |
| 1 | 234645085 | 234645736 | 5Y-H4K8ac_peak_1821 | 9.30505  |                                                                                 |
| 1 | 234670250 | 234670483 | 5Y-H4K8ac_peak_1822 | 10.35586 |                                                                                 |
| 1 | 234678025 | 234678246 | 5Y-H4K8ac_peak_1823 | 8.5915   |                                                                                 |
| 1 | 234679433 | 234679954 | 5Y-H4K8ac_peak_1824 | 7.11863  |                                                                                 |
| 1 | 234680692 | 234681284 | 5Y-H4K8ac_peak_1825 | 7.26691  |                                                                                 |
| 1 | 234688925 | 234689262 | 5Y-H4K8ac_peak_1826 | 12.00715 |                                                                                 |
| 1 | 234690459 | 234690653 | 5Y-H4K8ac_peak_1827 | 5.83797  |                                                                                 |
| 1 | 234694595 | 234694796 | 5Y-H4K8ac_peak_1828 | 7.59339  |                                                                                 |
| 1 | 234706680 | 234706905 | 5Y-H4K8ac_peak_1829 | 7.59101  |                                                                                 |
| 1 | 234708350 | 234708615 | 5Y-H4K8ac_peak_1830 | 7.59101  |                                                                                 |
| 1 | 234744731 | 234745270 | 5Y-H4K8ac_peak_1831 | 6.53157  | IRF2BP2_ENSG00000168264                                                         |
| 1 | 234746142 | 234746752 | 5Y-H4K8ac_peak_1832 | 16.92114 | IRF2BP2_ENSG00000168264                                                         |
| 1 | 234811536 | 234812417 | 5Y-H4K8ac_peak_1833 | 13.58472 |                                                                                 |
| 1 | 234860516 | 234861754 | 5Y-H4K8ac_peak_1834 | 12.72376 | LINC01132_ENSG00000227630                                                       |
| 1 | 234905786 | 234906154 | 5Y-H4K8ac_peak_1835 | 9.58986  |                                                                                 |
| 1 | 235044225 | 235044458 | 5Y-H4K8ac_peak_1836 | 8.31536  |                                                                                 |
| 1 | 235093224 | 235093827 | 5Y-H4K8ac_peak_1837 | 9.51254  | RP11-443B7.2_ENSG00000237520                                                    |
| 1 | 235105657 | 235105954 | 5Y-H4K8ac_peak_1838 | 15.49523 | RP11-443B7.1_ENSG00000238005                                                    |

|   |           |           |                     |          |                                                 |
|---|-----------|-----------|---------------------|----------|-------------------------------------------------|
| 1 | 235183543 | 235184002 | 5Y-H4K8ac_peak_1839 | 9.56702  |                                                 |
| 1 | 235184966 | 235185250 | 5Y-H4K8ac_peak_1840 | 10.79063 |                                                 |
| 1 | 235291843 | 235292053 | 5Y-H4K8ac_peak_1841 | 7.33686  | TOMM20_ENSG00000173726;SNORA14B_ENSG00000207181 |
| 1 | 235490826 | 235491414 | 5Y-H4K8ac_peak_1842 | 9.51254  | ARID4B_ENSG00000054267;GGPS1_ENSG00000152904    |
| 1 | 235668489 | 235668824 | 5Y-H4K8ac_peak_1843 | 8.24461  | B3GALNT2_ENSG00000162885                        |
| 1 | 235710250 | 235710550 | 5Y-H4K8ac_peak_1844 | 9.02782  |                                                 |
| 1 | 235711594 | 235712128 | 5Y-H4K8ac_peak_1845 | 7.20869  |                                                 |
| 1 | 235712400 | 235712838 | 5Y-H4K8ac_peak_1846 | 10.79081 |                                                 |
| 1 | 235713498 | 235713923 | 5Y-H4K8ac_peak_1847 | 6.08523  |                                                 |
| 1 | 235714320 | 235714570 | 5Y-H4K8ac_peak_1848 | 6.84536  |                                                 |
| 1 | 235715512 | 235716270 | 5Y-H4K8ac_peak_1849 | 11.37095 |                                                 |
| 1 | 235717353 | 235717909 | 5Y-H4K8ac_peak_1850 | 10.12457 |                                                 |
| 1 | 235812546 | 235813061 | 5Y-H4K8ac_peak_1851 | 5.87725  | GNG4_ENSG00000168243                            |
| 1 | 236030420 | 236030954 | 5Y-H4K8ac_peak_1852 | 8.62703  |                                                 |
| 1 | 236228250 | 236228842 | 5Y-H4K8ac_peak_1853 | 6.80915  | NID1_ENSG00000116962                            |
| 1 | 236304676 | 236305004 | 5Y-H4K8ac_peak_1854 | 7.1449   | GPR137B_ENSG00000077585                         |
| 1 | 236444315 | 236444539 | 5Y-H4K8ac_peak_1855 | 6.77436  | ERO1LB_ENSG00000086619                          |
| 1 | 236686671 | 236687743 | 5Y-H4K8ac_peak_1856 | 12.10416 | LGALS8-AS1_ENSG00000223776                      |
| 1 | 236767980 | 236768721 | 5Y-H4K8ac_peak_1857 | 14.86775 | HEATR1_ENSG00000119285                          |
| 1 | 236849845 | 236850323 | 5Y-H4K8ac_peak_1858 | 9.30206  | ACTN2_ENSG00000077522                           |
| 1 | 237008137 | 237008427 | 5Y-H4K8ac_peak_1859 | 8.2913   |                                                 |
| 1 | 237045786 | 237045986 | 5Y-H4K8ac_peak_1860 | 5.03438  |                                                 |
| 1 | 237056347 | 237056695 | 5Y-H4K8ac_peak_1861 | 5.72233  |                                                 |
| 1 | 237057609 | 237057837 | 5Y-H4K8ac_peak_1862 | 5.60566  |                                                 |
| 1 | 237058207 | 237058412 | 5Y-H4K8ac_peak_1863 | 10.23828 |                                                 |
| 1 | 237058611 | 237058931 | 5Y-H4K8ac_peak_1864 | 24.20876 |                                                 |
| 1 | 237059709 | 237060065 | 5Y-H4K8ac_peak_1865 | 5.67517  |                                                 |
| 1 | 237070125 | 237070574 | 5Y-H4K8ac_peak_1866 | 7.28023  |                                                 |
| 1 | 237076151 | 237076731 | 5Y-H4K8ac_peak_1867 | 7.11863  |                                                 |
| 1 | 237269541 | 237269747 | 5Y-H4K8ac_peak_1868 | 5.76631  |                                                 |
| 1 | 237997955 | 237998437 | 5Y-H4K8ac_peak_1869 | 5.23083  |                                                 |
| 1 | 238126682 | 238126897 | 5Y-H4K8ac_peak_1870 | 4.07874  |                                                 |
| 1 | 238133008 | 238133450 | 5Y-H4K8ac_peak_1871 | 6.82266  |                                                 |
| 1 | 239340972 | 239341208 | 5Y-H4K8ac_peak_1872 | 5.65584  |                                                 |
| 1 | 239550093 | 239550627 | 5Y-H4K8ac_peak_1873 | 7.72887  | CHRM3_ENSG00000133019                           |
| 1 | 239993841 | 239994740 | 5Y-H4K8ac_peak_1874 | 9.51254  |                                                 |
| 1 | 239995528 | 239995955 | 5Y-H4K8ac_peak_1875 | 12.44818 |                                                 |
| 1 | 239996160 | 239996843 | 5Y-H4K8ac_peak_1876 | 10.34353 |                                                 |
| 1 | 240007612 | 240007967 | 5Y-H4K8ac_peak_1877 | 5.39991  |                                                 |
| 1 | 240031270 | 240031551 | 5Y-H4K8ac_peak_1878 | 4.48815  |                                                 |
| 1 | 240031934 | 240032610 | 5Y-H4K8ac_peak_1879 | 15.54885 |                                                 |
| 1 | 240041215 | 240041640 | 5Y-H4K8ac_peak_1880 | 5.23083  |                                                 |
| 1 | 240042015 | 240042653 | 5Y-H4K8ac_peak_1881 | 10.14791 |                                                 |
| 1 | 240056630 | 240056848 | 5Y-H4K8ac_peak_1882 | 4.48815  |                                                 |
| 1 | 240059301 | 240059988 | 5Y-H4K8ac_peak_1883 | 9.59156  |                                                 |
| 1 | 240061015 | 240061218 | 5Y-H4K8ac_peak_1884 | 5.76631  |                                                 |

|   |           |           |                     |          |                                                     |
|---|-----------|-----------|---------------------|----------|-----------------------------------------------------|
| 1 | 240128581 | 240128869 | 5Y-H4K8ac_peak_1885 | 7.11863  |                                                     |
| 1 | 240161240 | 240161533 | 5Y-H4K8ac_peak_1886 | 4.0639   |                                                     |
| 1 | 240308423 | 240308634 | 5Y-H4K8ac_peak_1887 | 5.65584  | RP11-567G24.1_ENSG00000228818                       |
| 1 | 241128873 | 241129078 | 5Y-H4K8ac_peak_1888 | 8.2913   |                                                     |
| 1 | 241520090 | 241520757 | 5Y-H4K8ac_peak_1889 | 7.50148  | RGS7_ENSG00000182901                                |
| 1 | 241587217 | 241588181 | 5Y-H4K8ac_peak_1890 | 13.92877 | RP11-527D7.1_ENSG00000225554                        |
| 1 | 241803877 | 241804488 | 5Y-H4K8ac_peak_1891 | 10.90365 |                                                     |
| 1 | 241826574 | 241826861 | 5Y-H4K8ac_peak_1892 | 6.5814   |                                                     |
| 1 | 242011253 | 242011754 | 5Y-H4K8ac_peak_1893 | 11.69482 | EXO1_ENSG00000174371                                |
| 1 | 242162314 | 242162521 | 5Y-H4K8ac_peak_1894 | 5.98695  | MAP1LC3C_ENSG00000197769                            |
| 1 | 242375396 | 242376048 | 5Y-H4K8ac_peak_1895 | 5.98695  |                                                     |
| 1 | 242609817 | 242610035 | 5Y-H4K8ac_peak_1896 | 8.47164  |                                                     |
| 1 | 242612496 | 242612736 | 5Y-H4K8ac_peak_1897 | 6.87095  |                                                     |
| 1 | 242687214 | 242687659 | 5Y-H4K8ac_peak_1898 | 4.0639   | PLD5_ENSG00000180287                                |
| 1 | 243140752 | 243140953 | 5Y-H4K8ac_peak_1899 | 5.07473  |                                                     |
| 1 | 243181219 | 243181457 | 5Y-H4K8ac_peak_1900 | 8.2913   |                                                     |
| 1 | 243257221 | 243257448 | 5Y-H4K8ac_peak_1901 | 8.84534  |                                                     |
| 1 | 243418209 | 243418401 | 5Y-H4K8ac_peak_1902 | 4.00285  | CEP170_ENSG00000143702;SDCCAG8_ENSG00000054282      |
| 1 | 243645773 | 243646004 | 5Y-H4K8ac_peak_1903 | 6.78318  |                                                     |
| 1 | 243646274 | 243646794 | 5Y-H4K8ac_peak_1904 | 9.32595  |                                                     |
| 1 | 243658640 | 243659015 | 5Y-H4K8ac_peak_1905 | 10.60083 |                                                     |
| 1 | 243659980 | 243660422 | 5Y-H4K8ac_peak_1906 | 9.87097  |                                                     |
| 1 | 244013702 | 244014520 | 5Y-H4K8ac_peak_1907 | 12.65187 | AKT3_ENSG00000117020                                |
| 1 | 244069214 | 244069469 | 5Y-H4K8ac_peak_1908 | 9.02242  |                                                     |
| 1 | 244080441 | 244081083 | 5Y-H4K8ac_peak_1909 | 7.64648  | RP11-278H7.1_ENSG00000226828                        |
| 1 | 244218222 | 244218423 | 5Y-H4K8ac_peak_1910 | 5.59843  |                                                     |
| 1 | 244419529 | 244419725 | 5Y-H4K8ac_peak_1911 | 7.57406  |                                                     |
| 1 | 244614738 | 244615126 | 5Y-H4K8ac_peak_1912 | 8.36588  | ADSS_ENSG00000035687                                |
| 1 | 244624511 | 244625532 | 5Y-H4K8ac_peak_1913 | 14.26354 |                                                     |
| 1 | 244997291 | 244997517 | 5Y-H4K8ac_peak_1914 | 8.3285   |                                                     |
| 1 | 244998147 | 244998467 | 5Y-H4K8ac_peak_1915 | 9.02782  | COX20_ENSG00000203667                               |
| 1 | 244998660 | 244998854 | 5Y-H4K8ac_peak_1916 | 16.23405 | COX20_ENSG00000203667                               |
| 1 | 245026671 | 245027722 | 5Y-H4K8ac_peak_1917 | 13.00733 | HNRNPU_ENSG00000153187;RP11-11N7.4_ENSG00000273175  |
| 1 | 245133150 | 245133882 | 5Y-H4K8ac_peak_1918 | 12.26606 | RP11-156E8.1_ENSG00000272195;EFCAB2_ENSG00000203666 |
| 1 | 245134110 | 245134741 | 5Y-H4K8ac_peak_1919 | 22.9394  | RP11-156E8.1_ENSG00000272195                        |
| 1 | 245317203 | 245318035 | 5Y-H4K8ac_peak_1920 | 19.64191 | KIF26B_ENSG00000162849                              |
| 1 | 245320039 | 245320517 | 5Y-H4K8ac_peak_1921 | 15.41988 |                                                     |
| 1 | 245343228 | 245343442 | 5Y-H4K8ac_peak_1922 | 5.60566  |                                                     |
| 1 | 245364293 | 245364510 | 5Y-H4K8ac_peak_1923 | 8.31764  |                                                     |
| 1 | 245378610 | 245378846 | 5Y-H4K8ac_peak_1924 | 4.95697  |                                                     |
| 1 | 245404066 | 245404260 | 5Y-H4K8ac_peak_1925 | 5.12213  |                                                     |
| 1 | 245730719 | 245730988 | 5Y-H4K8ac_peak_1926 | 8.69112  |                                                     |
| 1 | 245762105 | 245762348 | 5Y-H4K8ac_peak_1927 | 5.51472  |                                                     |
| 1 | 245769258 | 245769456 | 5Y-H4K8ac_peak_1928 | 3.94247  |                                                     |
| 1 | 245777489 | 245778023 | 5Y-H4K8ac_peak_1929 | 8.08337  | RP11-522M21.2_ENSG00000238224                       |
| 1 | 245785806 | 245786071 | 5Y-H4K8ac_peak_1930 | 4.95697  |                                                     |

|    |           |           |                     |          |                                                      |
|----|-----------|-----------|---------------------|----------|------------------------------------------------------|
| 1  | 245846801 | 245847225 | 5Y-H4K8ac_peak_1931 | 8.69112  |                                                      |
| 1  | 245915057 | 245915399 | 5Y-H4K8ac_peak_1932 | 5.91107  |                                                      |
| 1  | 245916126 | 245916420 | 5Y-H4K8ac_peak_1933 | 8.27643  |                                                      |
| 1  | 245971769 | 245971994 | 5Y-H4K8ac_peak_1934 | 6.53157  |                                                      |
| 1  | 246036657 | 246037399 | 5Y-H4K8ac_peak_1935 | 8.43511  |                                                      |
| 1  | 246039131 | 246039410 | 5Y-H4K8ac_peak_1936 | 4.95697  |                                                      |
| 1  | 246887054 | 246888026 | 5Y-H4K8ac_peak_1937 | 16.51777 | SCCPDH_ENSG00000143653                               |
| 1  | 247171056 | 247171265 | 5Y-H4K8ac_peak_1938 | 8.1667   | ZNF695_ENSG00000197472                               |
| 1  | 247171849 | 247172079 | 5Y-H4K8ac_peak_1939 | 9.11392  | ZNF695_ENSG00000197472                               |
| 1  | 247241662 | 247242008 | 5Y-H4K8ac_peak_1940 | 7.02726  | ZNF670_ENSG00000135747                               |
| 1  | 247267370 | 247267612 | 5Y-H4K8ac_peak_1941 | 7.87192  | ZNF669_ENSG00000188295                               |
| 1  | 247268330 | 247268580 | 5Y-H4K8ac_peak_1942 | 7.89142  | ZNF669_ENSG00000188295                               |
| 1  | 247274309 | 247275180 | 5Y-H4K8ac_peak_1943 | 9.44542  | C1orf229_ENSG00000221953                             |
| 1  | 247275527 | 247275836 | 5Y-H4K8ac_peak_1944 | 8.26455  | C1orf229_ENSG00000221953                             |
| 1  | 247276203 | 247276411 | 5Y-H4K8ac_peak_1945 | 4.13628  | C1orf229_ENSG00000221953                             |
| 1  | 247373806 | 247374071 | 5Y-H4K8ac_peak_1946 | 3.96434  | MIR3916_ENSG00000227671                              |
| 1  | 247494642 | 247494940 | 5Y-H4K8ac_peak_1947 | 7.29055  | ZNF496_ENSG00000162714                               |
| 1  | 247495307 | 247495973 | 5Y-H4K8ac_peak_1948 | 6.19716  | ZNF496_ENSG00000162714                               |
| 1  | 247611339 | 247611529 | 5Y-H4K8ac_peak_1949 | 11.86504 |                                                      |
| 1  | 249132727 | 249132935 | 5Y-H4K8ac_peak_1950 | 5.26789  | ZNF672_ENSG00000171161                               |
| 1  | 249152100 | 249153040 | 5Y-H4K8ac_peak_1951 | 9.63153  | ZNF692_ENSG00000171163;AL672294.1_ENSG00000227237    |
| 1  | 249153513 | 249154057 | 5Y-H4K8ac_peak_1952 | 9.63153  | ZNF692_ENSG00000171163;AL672294.1_ENSG00000227237    |
| 1  | 249157664 | 249158023 | 5Y-H4K8ac_peak_1953 | 15.82359 |                                                      |
| 10 | 119801    | 120156    | 5Y-H4K8ac_peak_1954 | 17.50049 | TUBB8_ENSG00000173876                                |
| 10 | 122094    | 122954    | 5Y-H4K8ac_peak_1955 | 5.98695  |                                                      |
| 10 | 180603    | 181217    | 5Y-H4K8ac_peak_1956 | 7.20869  | ZMYND11_ENSG00000015171                              |
| 10 | 181559    | 181751    | 5Y-H4K8ac_peak_1957 | 7.34185  |                                                      |
| 10 | 414336    | 414930    | 5Y-H4K8ac_peak_1958 | 7.11863  |                                                      |
| 10 | 416237    | 416440    | 5Y-H4K8ac_peak_1959 | 12.69256 |                                                      |
| 10 | 418697    | 418896    | 5Y-H4K8ac_peak_1960 | 4.5753   |                                                      |
| 10 | 977946    | 978183    | 5Y-H4K8ac_peak_1961 | 10.46287 | LARP4B_ENSG00000107929;RP11-363N22.2_ENSG00000229869 |
| 10 | 1034465   | 1034812   | 5Y-H4K8ac_peak_1962 | 7.90751  | AL359878.1_ENSG00000205740;GTPBP4_ENSG00000107937    |
| 10 | 1102323   | 1102600   | 5Y-H4K8ac_peak_1963 | 16.01457 |                                                      |
| 10 | 1178580   | 1178783   | 5Y-H4K8ac_peak_1964 | 5.40331  |                                                      |
| 10 | 1313882   | 1314146   | 5Y-H4K8ac_peak_1965 | 6.75784  |                                                      |
| 10 | 1314922   | 1315245   | 5Y-H4K8ac_peak_1966 | 10.73603 |                                                      |
| 10 | 1315581   | 1315778   | 5Y-H4K8ac_peak_1967 | 6.53157  |                                                      |
| 10 | 1317002   | 1317636   | 5Y-H4K8ac_peak_1968 | 14.72057 |                                                      |
| 10 | 1321465   | 1321763   | 5Y-H4K8ac_peak_1969 | 8.564    |                                                      |
| 10 | 1330833   | 1331151   | 5Y-H4K8ac_peak_1970 | 7.76768  |                                                      |
| 10 | 1334034   | 1334351   | 5Y-H4K8ac_peak_1971 | 12.06254 |                                                      |
| 10 | 1336476   | 1336699   | 5Y-H4K8ac_peak_1972 | 5.60566  |                                                      |
| 10 | 1337035   | 1337310   | 5Y-H4K8ac_peak_1973 | 4.29586  |                                                      |
| 10 | 2267530   | 2267730   | 5Y-H4K8ac_peak_1974 | 4.77126  |                                                      |
| 10 | 2634160   | 2634358   | 5Y-H4K8ac_peak_1975 | 4.07874  |                                                      |
| 10 | 2654064   | 2654344   | 5Y-H4K8ac_peak_1976 | 4.14761  |                                                      |

|    |          |          |                     |          |                                                      |
|----|----------|----------|---------------------|----------|------------------------------------------------------|
| 10 | 2666009  | 2666230  | 5Y-H4K8ac_peak_1977 | 7.89142  |                                                      |
| 10 | 3115326  | 3115718  | 5Y-H4K8ac_peak_1978 | 4.84727  |                                                      |
| 10 | 3880450  | 3880791  | 5Y-H4K8ac_peak_1979 | 6.34046  |                                                      |
| 10 | 4867868  | 4868129  | 5Y-H4K8ac_peak_1980 | 14.19462 |                                                      |
| 10 | 5596125  | 5596338  | 5Y-H4K8ac_peak_1981 | 4.90471  |                                                      |
| 10 | 5625863  | 5626374  | 5Y-H4K8ac_peak_1982 | 6.77436  |                                                      |
| 10 | 5632921  | 5633138  | 5Y-H4K8ac_peak_1983 | 9.63153  |                                                      |
| 10 | 5637691  | 5637961  | 5Y-H4K8ac_peak_1984 | 5.65584  | RP13-463N16.6_ENSG00000242147                        |
| 10 | 5638893  | 5639519  | 5Y-H4K8ac_peak_1985 | 7.63144  | RP13-463N16.6_ENSG00000242147                        |
| 10 | 5726881  | 5727328  | 5Y-H4K8ac_peak_1986 | 5.65584  | FAM208B_ENSG00000108021                              |
| 10 | 5734525  | 5734814  | 5Y-H4K8ac_peak_1987 | 5.23083  |                                                      |
| 10 | 5854804  | 5855322  | 5Y-H4K8ac_peak_1988 | 5.98695  | RP11-318E3.9_ENSG00000272764                         |
| 10 | 5855668  | 5855963  | 5Y-H4K8ac_peak_1989 | 10.1994  | RP11-318E3.9_ENSG00000272764                         |
| 10 | 5917961  | 5918259  | 5Y-H4K8ac_peak_1990 | 4.84727  |                                                      |
| 10 | 6131012  | 6131254  | 5Y-H4K8ac_peak_1991 | 8.62703  | RBM17_ENSG00000134453                                |
| 10 | 7293702  | 7293954  | 5Y-H4K8ac_peak_1992 | 11.57334 |                                                      |
| 10 | 7294758  | 7294992  | 5Y-H4K8ac_peak_1993 | 8.04493  |                                                      |
| 10 | 7308187  | 7308802  | 5Y-H4K8ac_peak_1994 | 7.83553  |                                                      |
| 10 | 7309030  | 7309545  | 5Y-H4K8ac_peak_1995 | 8.71064  |                                                      |
| 10 | 7449973  | 7450259  | 5Y-H4K8ac_peak_1996 | 4.1776   |                                                      |
| 10 | 7453175  | 7453836  | 5Y-H4K8ac_peak_1997 | 12.24192 | SFMBT2_ENSG00000198879                               |
| 10 | 8090103  | 8090358  | 5Y-H4K8ac_peak_1998 | 8.69112  |                                                      |
| 10 | 8091466  | 8091699  | 5Y-H4K8ac_peak_1999 | 7.59101  |                                                      |
| 10 | 8091928  | 8093067  | 5Y-H4K8ac_peak_2000 | 9.31608  | RP11-379F12.4_ENSG00000232638                        |
| 10 | 8093461  | 8093673  | 5Y-H4K8ac_peak_2001 | 7.90751  | RP11-379F12.4_ENSG00000232638                        |
| 10 | 8096773  | 8097272  | 5Y-H4K8ac_peak_2002 | 5.98695  |                                                      |
| 10 | 8114082  | 8114435  | 5Y-H4K8ac_peak_2003 | 4.50834  |                                                      |
| 10 | 8137371  | 8138017  | 5Y-H4K8ac_peak_2004 | 5.64909  |                                                      |
| 10 | 8154218  | 8154615  | 5Y-H4K8ac_peak_2005 | 6.78128  |                                                      |
| 10 | 8158078  | 8158335  | 5Y-H4K8ac_peak_2006 | 6.73385  |                                                      |
| 10 | 8159526  | 8160024  | 5Y-H4K8ac_peak_2007 | 14.15915 |                                                      |
| 10 | 8340750  | 8341289  | 5Y-H4K8ac_peak_2008 | 8.17203  | RP5-1119O21.2_ENSG00000226861                        |
| 10 | 8342430  | 8342627  | 5Y-H4K8ac_peak_2009 | 7.76232  |                                                      |
| 10 | 8681547  | 8681813  | 5Y-H4K8ac_peak_2010 | 6.50117  |                                                      |
| 10 | 9284780  | 9285007  | 5Y-H4K8ac_peak_2011 | 4.50834  |                                                      |
| 10 | 11653193 | 11653390 | 5Y-H4K8ac_peak_2012 | 7.03573  | USP6NL_ENSG00000148429;RP11-138I18.1_ENSG00000271360 |
| 10 | 11784606 | 11785018 | 5Y-H4K8ac_peak_2013 | 4.77126  | ECHDC3_ENSG00000134463                               |
| 10 | 12084956 | 12085155 | 5Y-H4K8ac_peak_2014 | 11.1169  | UPF2_ENSG00000151461                                 |
| 10 | 12095924 | 12096120 | 5Y-H4K8ac_peak_2015 | 7.14616  |                                                      |
| 10 | 12110314 | 12110612 | 5Y-H4K8ac_peak_2016 | 6.22669  | DHTKD1_ENSG00000181192                               |
| 10 | 12111024 | 12111235 | 5Y-H4K8ac_peak_2017 | 13.73676 | DHTKD1_ENSG00000181192                               |
| 10 | 12305940 | 12306144 | 5Y-H4K8ac_peak_2018 | 5.87382  |                                                      |
| 10 | 13141561 | 13141829 | 5Y-H4K8ac_peak_2019 | 4.84727  | CCDC3_ENSG00000151468;OPTN_ENSG00000123240           |
| 10 | 13341729 | 13342045 | 5Y-H4K8ac_peak_2020 | 9.31608  |                                                      |
| 10 | 13344084 | 13344353 | 5Y-H4K8ac_peak_2021 | 7.89142  | PHYH_ENSG00000107537                                 |
| 10 | 13389295 | 13389648 | 5Y-H4K8ac_peak_2022 | 14.77644 | SEPHS1_ENSG00000086475                               |



|    |          |          |                     |          |                                                       |
|----|----------|----------|---------------------|----------|-------------------------------------------------------|
| 10 | 13390500 | 13390774 | 5Y-H4K8ac_peak_2023 | 10.35586 | SEPHS1_ENSG00000086475                                |
| 10 | 13482388 | 13482618 | 5Y-H4K8ac_peak_2024 | 7.3889   |                                                       |
| 10 | 13571250 | 13571493 | 5Y-H4K8ac_peak_2025 | 8.30301  | BEND7_ENSG00000165626;RP11-214D15.2_ENSG00000227175   |
| 10 | 13629015 | 13629225 | 5Y-H4K8ac_peak_2026 | 5.35202  | PRPF18_ENSG00000165630                                |
| 10 | 14131206 | 14131439 | 5Y-H4K8ac_peak_2027 | 5.98695  |                                                       |
| 10 | 14921014 | 14921318 | 5Y-H4K8ac_peak_2028 | 4.67245  | RP11-398C13.6_ENSG00000272853;SUV39H2_ENSG00000152455 |
| 10 | 15002748 | 15002965 | 5Y-H4K8ac_peak_2029 | 6.77436  |                                                       |
| 10 | 15139174 | 15139650 | 5Y-H4K8ac_peak_2030 | 6.53157  | C10orf111_ENSG00000176236;RPP38_ENSG00000152464       |
| 10 | 15412370 | 15412740 | 5Y-H4K8ac_peak_2031 | 12.98738 | FAM171A1_ENSG00000148468                              |
| 10 | 16562799 | 16563001 | 5Y-H4K8ac_peak_2032 | 6.37023  |                                                       |
| 10 | 17007163 | 17007431 | 5Y-H4K8ac_peak_2033 | 7.31815  |                                                       |
| 10 | 17243486 | 17243690 | 5Y-H4K8ac_peak_2034 | 13.03079 | TRDMT1_ENSG00000107614                                |
| 10 | 17270791 | 17271011 | 5Y-H4K8ac_peak_2035 | 6.77436  | VIM-AS1_ENSG00000229124;VIM_ENSG00000026025           |
| 10 | 18448101 | 18448316 | 5Y-H4K8ac_peak_2036 | 8.2913   |                                                       |
| 10 | 18916346 | 18916687 | 5Y-H4K8ac_peak_2037 | 9.30505  |                                                       |
| 10 | 19391992 | 19392183 | 5Y-H4K8ac_peak_2038 | 6.34046  |                                                       |
| 10 | 20257199 | 20257624 | 5Y-H4K8ac_peak_2039 | 10.19948 |                                                       |
| 10 | 21243470 | 21243695 | 5Y-H4K8ac_peak_2040 | 7.38046  |                                                       |
| 10 | 21250745 | 21250943 | 5Y-H4K8ac_peak_2041 | 8.00339  |                                                       |
| 10 | 21357926 | 21358201 | 5Y-H4K8ac_peak_2042 | 7.9215   |                                                       |
| 10 | 21387597 | 21388009 | 5Y-H4K8ac_peak_2043 | 7.38046  |                                                       |
| 10 | 21389073 | 21389537 | 5Y-H4K8ac_peak_2044 | 5.67283  |                                                       |
| 10 | 21462408 | 21462746 | 5Y-H4K8ac_peak_2045 | 5.65584  | NEBL_ENSG00000078114;NEBL-AS1_ENSG000000231920        |
| 10 | 21463327 | 21463689 | 5Y-H4K8ac_peak_2046 | 6.37023  | NEBL_ENSG00000078114;NEBL-AS1_ENSG000000231920        |
| 10 | 21653206 | 21653439 | 5Y-H4K8ac_peak_2047 | 6.46053  |                                                       |
| 10 | 21785282 | 21785660 | 5Y-H4K8ac_peak_2048 | 9.23159  | CASC10_ENSG00000204682;MIR1915_ENSG00000222071        |
| 10 | 21808964 | 21809255 | 5Y-H4K8ac_peak_2049 | 6.66026  |                                                       |
| 10 | 21813849 | 21814044 | 5Y-H4K8ac_peak_2050 | 7.76232  | SKIDA1_ENSG00000180592                                |
| 10 | 21814835 | 21815307 | 5Y-H4K8ac_peak_2051 | 4.95697  | SKIDA1_ENSG00000180592                                |
| 10 | 22541314 | 22541855 | 5Y-H4K8ac_peak_2052 | 5.41472  |                                                       |
| 10 | 22604869 | 22605064 | 5Y-H4K8ac_peak_2053 | 7.38046  | COMMD3_ENSG00000148444;COMMD3-BMI1_ENSG00000269897    |
| 10 | 22605394 | 22605604 | 5Y-H4K8ac_peak_2054 | 13.8759  | COMMD3_ENSG00000148444;COMMD3-BMI1_ENSG00000269897    |
| 10 | 22610190 | 22610717 | 5Y-H4K8ac_peak_2055 | 10.1994  | BMI1_ENSG00000168283                                  |
| 10 | 22625079 | 22625383 | 5Y-H4K8ac_peak_2056 | 13.00733 |                                                       |
| 10 | 22629389 | 22629943 | 5Y-H4K8ac_peak_2057 | 13.85283 | RP11-573G6.10_ENSG00000272366                         |
| 10 | 22764955 | 22765238 | 5Y-H4K8ac_peak_2058 | 7.09658  |                                                       |
| 10 | 23003647 | 23004186 | 5Y-H4K8ac_peak_2059 | 12.11208 | PIP4K2A_ENSG00000150867                               |
| 10 | 23384537 | 23385099 | 5Y-H4K8ac_peak_2060 | 10.1994  | MSRB2_ENSG00000148450                                 |
| 10 | 23408604 | 23409088 | 5Y-H4K8ac_peak_2061 | 4.51076  |                                                       |
| 10 | 24404513 | 24404726 | 5Y-H4K8ac_peak_2062 | 7.21112  |                                                       |
| 10 | 24544035 | 24544581 | 5Y-H4K8ac_peak_2063 | 6.77436  |                                                       |
| 10 | 25011658 | 25012511 | 5Y-H4K8ac_peak_2064 | 11.22005 | ARHGAP21_ENSG00000107863                              |
| 10 | 25241094 | 25242002 | 5Y-H4K8ac_peak_2065 | 13.85283 | PRTFDC1_ENSG00000099256;RP11-165A20.3_ENSG00000273107 |
| 10 | 25305754 | 25305975 | 5Y-H4K8ac_peak_2066 | 9.93099  | ENKUR_ENSG00000151023;THNSL1_ENSG00000185875          |
| 10 | 26985810 | 26986731 | 5Y-H4K8ac_peak_2067 | 8.69112  | PDSS1_ENSG00000148459                                 |
| 10 | 27149302 | 27149746 | 5Y-H4K8ac_peak_2068 | 6.50117  | ABI1_ENSG00000136754                                  |

|    |          |          |                     |          |                                                                                        |
|----|----------|----------|---------------------|----------|----------------------------------------------------------------------------------------|
| 10 | 27444383 | 27444618 | 5Y-H4K8ac_peak_2069 | 5.64909  | YME1L1_ENSG00000136758;MASTL_ENSG00000120539                                           |
| 10 | 27793407 | 27793752 | 5Y-H4K8ac_peak_2070 | 5.41472  | RAB18_ENSG00000099246                                                                  |
| 10 | 28821295 | 28821881 | 5Y-H4K8ac_peak_2071 | 9.51254  | WAC-AS1_ENSG00000254635;WAC_ENSG00000095787                                            |
| 10 | 28822128 | 28822493 | 5Y-H4K8ac_peak_2072 | 8.35139  | WAC-AS1_ENSG00000254635;WAC_ENSG00000095787                                            |
| 10 | 28965830 | 28966162 | 5Y-H4K8ac_peak_2073 | 9.05168  | BAMBI_ENSG00000095739                                                                  |
| 10 | 29099407 | 29099886 | 5Y-H4K8ac_peak_2074 | 8.00339  |                                                                                        |
| 10 | 29121646 | 29121874 | 5Y-H4K8ac_peak_2075 | 9.11354  |                                                                                        |
| 10 | 29371272 | 29371593 | 5Y-H4K8ac_peak_2076 | 8.35139  |                                                                                        |
| 10 | 29541772 | 29542312 | 5Y-H4K8ac_peak_2077 | 8.564    |                                                                                        |
| 10 | 29543862 | 29544076 | 5Y-H4K8ac_peak_2078 | 9.05766  |                                                                                        |
| 10 | 29698004 | 29698923 | 5Y-H4K8ac_peak_2079 | 13.8759  | PTCHD3P1_ENSG00000224597                                                               |
| 10 | 29992416 | 29992631 | 5Y-H4K8ac_peak_2080 | 5.65584  |                                                                                        |
| 10 | 30638446 | 30639194 | 5Y-H4K8ac_peak_2081 | 8.2913   |                                                                                        |
| 10 | 30722439 | 30723391 | 5Y-H4K8ac_peak_2082 | 13.99721 | MAP3K8_ENSG00000107968                                                                 |
| 10 | 30894017 | 30894399 | 5Y-H4K8ac_peak_2083 | 4.84727  |                                                                                        |
| 10 | 30994963 | 30995233 | 5Y-H4K8ac_peak_2084 | 7.31807  |                                                                                        |
| 10 | 31064685 | 31064894 | 5Y-H4K8ac_peak_2085 | 4.14761  |                                                                                        |
| 10 | 31073829 | 31074257 | 5Y-H4K8ac_peak_2086 | 8.73985  |                                                                                        |
| 10 | 31423232 | 31423606 | 5Y-H4K8ac_peak_2087 | 15.3483  |                                                                                        |
| 10 | 31608191 | 31608659 | 5Y-H4K8ac_peak_2088 | 8.04493  | ZEB1-AS1_ENSG00000237036;ZEB1_ENSG00000148516                                          |
| 10 | 31871809 | 31872032 | 5Y-H4K8ac_peak_2089 | 7.66481  |                                                                                        |
| 10 | 31873569 | 31873851 | 5Y-H4K8ac_peak_2090 | 9.00954  |                                                                                        |
| 10 | 31892826 | 31893026 | 5Y-H4K8ac_peak_2091 | 5.8635   | RP11-472N13.2_ENSG00000223834                                                          |
| 10 | 31937793 | 31938046 | 5Y-H4K8ac_peak_2092 | 8.97752  |                                                                                        |
| 10 | 32039219 | 32039546 | 5Y-H4K8ac_peak_2093 | 6.31818  |                                                                                        |
| 10 | 32063436 | 32063775 | 5Y-H4K8ac_peak_2094 | 4.50834  |                                                                                        |
| 10 | 32344949 | 32345294 | 5Y-H4K8ac_peak_2095 | 10.69698 | KIF5B_ENSG00000170759;Y_RNA_ENSG00000206660                                            |
| 10 | 32635391 | 32636043 | 5Y-H4K8ac_peak_2096 | 20.88791 | RP11-135A24.4_ENSG00000233825;AL391839.1_ENSG00000222309;RP11-135A24.2_ENSG00000229327 |
| 10 | 32636336 | 32636648 | 5Y-H4K8ac_peak_2097 | 5.449    | RP11-135A24.4_ENSG00000233825;AL391839.1_ENSG00000222309;RP11-135A24.2_ENSG00000229327 |
| 10 | 33246759 | 33247111 | 5Y-H4K8ac_peak_2098 | 4.51497  | RP11-462L8.1_ENSG00000229656                                                           |
| 10 | 33247455 | 33247833 | 5Y-H4K8ac_peak_2099 | 15.59156 | RP11-462L8.1_ENSG00000229656                                                           |
| 10 | 33269505 | 33269733 | 5Y-H4K8ac_peak_2100 | 4.29586  |                                                                                        |
| 10 | 33270664 | 33270882 | 5Y-H4K8ac_peak_2101 | 10.54764 |                                                                                        |
| 10 | 34502971 | 34503161 | 5Y-H4K8ac_peak_2102 | 5.40331  |                                                                                        |
| 10 | 35082049 | 35082281 | 5Y-H4K8ac_peak_2103 | 4.728    |                                                                                        |
| 10 | 35103861 | 35104117 | 5Y-H4K8ac_peak_2104 | 9.60627  | PARD3_ENSG00000148498;PARD3-AS1_ENSG00000226386                                        |
| 10 | 35379348 | 35379560 | 5Y-H4K8ac_peak_2105 | 7.59101  | CUL2_ENSG00000108094                                                                   |
| 10 | 35896660 | 35897094 | 5Y-H4K8ac_peak_2106 | 10.12234 | RP11-425A6.5_ENSG00000273312                                                           |
| 10 | 38146716 | 38146987 | 5Y-H4K8ac_peak_2107 | 23.70116 | ZNF248_ENSG00000198105;RP11-162G10.5_ENSG00000236514                                   |
| 10 | 38299667 | 38299950 | 5Y-H4K8ac_peak_2108 | 9.02938  | ZNF33A_ENSG00000189180                                                                 |
| 10 | 38382335 | 38382628 | 5Y-H4K8ac_peak_2109 | 9.15977  | ZNF37A_ENSG00000075407                                                                 |
| 10 | 38691454 | 38691728 | 5Y-H4K8ac_peak_2110 | 6.77436  | SEPT7P9_ENSG00000120555                                                                |
| 10 | 42971139 | 42971504 | 5Y-H4K8ac_peak_2111 | 5.89922  | LINC00839_ENSG00000185904                                                              |
| 10 | 43133663 | 43133976 | 5Y-H4K8ac_peak_2112 | 16.38263 | ZNF33B_ENSG00000272373;ZNF33B_ENSG00000196693                                          |
| 10 | 43277111 | 43277406 | 5Y-H4K8ac_peak_2113 | 5.97089  | BMS1_ENSG00000165733                                                                   |
| 10 | 43277703 | 43278048 | 5Y-H4K8ac_peak_2114 | 7.61515  | BMS1_ENSG00000165733                                                                   |

|    |          |          |                     |          |                                                                             |
|----|----------|----------|---------------------|----------|-----------------------------------------------------------------------------|
| 10 | 43331628 | 43331846 | 5Y-H4K8ac_peak_2115 | 8.23578  |                                                                             |
| 10 | 43332504 | 43332784 | 5Y-H4K8ac_peak_2116 | 5.62788  |                                                                             |
| 10 | 43361828 | 43362228 | 5Y-H4K8ac_peak_2117 | 10.60083 |                                                                             |
| 10 | 43366293 | 43366816 | 5Y-H4K8ac_peak_2118 | 7.41197  | RP11-124O11.1_ENSG00000234944                                               |
| 10 | 43367339 | 43368059 | 5Y-H4K8ac_peak_2119 | 10.94041 | RP11-124O11.1_ENSG00000234944                                               |
| 10 | 43429756 | 43429982 | 5Y-H4K8ac_peak_2120 | 5.23083  |                                                                             |
| 10 | 43456751 | 43458053 | 5Y-H4K8ac_peak_2121 | 9.23159  |                                                                             |
| 10 | 43464824 | 43465663 | 5Y-H4K8ac_peak_2122 | 10.60083 |                                                                             |
| 10 | 43466421 | 43467106 | 5Y-H4K8ac_peak_2123 | 8.76608  |                                                                             |
| 10 | 43476461 | 43476975 | 5Y-H4K8ac_peak_2124 | 6.78318  | RP11-124O11.2_ENSG00000229630                                               |
| 10 | 43477351 | 43477617 | 5Y-H4K8ac_peak_2125 | 6.53157  | RP11-124O11.2_ENSG00000229630                                               |
| 10 | 43535179 | 43535470 | 5Y-H4K8ac_peak_2126 | 13.00733 |                                                                             |
| 10 | 43552057 | 43552510 | 5Y-H4K8ac_peak_2127 | 10.1994  |                                                                             |
| 10 | 43578895 | 43579217 | 5Y-H4K8ac_peak_2128 | 14.13577 |                                                                             |
| 10 | 43588731 | 43588924 | 5Y-H4K8ac_peak_2129 | 4.8188   |                                                                             |
| 10 | 43600735 | 43600962 | 5Y-H4K8ac_peak_2130 | 9.37812  |                                                                             |
| 10 | 43633326 | 43633698 | 5Y-H4K8ac_peak_2131 | 5.24695  | RP11-351D16.3_ENSG00000273008;CSGALNACT2_ENSG00000169826                    |
| 10 | 43633964 | 43634207 | 5Y-H4K8ac_peak_2132 | 9.87097  | RP11-351D16.3_ENSG00000273008;CSGALNACT2_ENSG00000169826                    |
| 10 | 43714781 | 43715116 | 5Y-H4K8ac_peak_2133 | 7.07936  |                                                                             |
| 10 | 43857376 | 43857577 | 5Y-H4K8ac_peak_2134 | 9.13842  |                                                                             |
| 10 | 43858016 | 43858564 | 5Y-H4K8ac_peak_2135 | 12.00715 |                                                                             |
| 10 | 43892442 | 43892689 | 5Y-H4K8ac_peak_2136 | 9.31608  |                                                                             |
| 10 | 43902783 | 43903009 | 5Y-H4K8ac_peak_2137 | 8.69112  |                                                                             |
| 10 | 43904918 | 43905445 | 5Y-H4K8ac_peak_2138 | 5.67517  | HNRNPF_ENSG00000169813                                                      |
| 10 | 43916099 | 43916782 | 5Y-H4K8ac_peak_2139 | 8.43511  | RP11-517P14.2_ENSG00000230555                                               |
| 10 | 43951400 | 43951791 | 5Y-H4K8ac_peak_2140 | 7.89273  |                                                                             |
| 10 | 44069507 | 44070027 | 5Y-H4K8ac_peak_2141 | 11.28133 | ZNF239_ENSG00000196793                                                      |
| 10 | 44101942 | 44102477 | 5Y-H4K8ac_peak_2142 | 10.12457 | CAP1P2_ENSG00000232004;ZNF485_ENSG00000198298                               |
| 10 | 44143543 | 44144221 | 5Y-H4K8ac_peak_2143 | 17.04999 | ZNF32_ENSG00000169740                                                       |
| 10 | 44184802 | 44185222 | 5Y-H4K8ac_peak_2144 | 4.95697  |                                                                             |
| 10 | 44277155 | 44277419 | 5Y-H4K8ac_peak_2145 | 5.718    |                                                                             |
| 10 | 44756318 | 44756595 | 5Y-H4K8ac_peak_2146 | 4.5753   | RP11-20J15.2_ENSG00000237590                                                |
| 10 | 45469709 | 45470307 | 5Y-H4K8ac_peak_2147 | 12.71088 |                                                                             |
| 10 | 45495784 | 45496951 | 5Y-H4K8ac_peak_2148 | 8.43511  | C10orf25_ENSG00000165511;ZNF22_ENSG00000165512                              |
| 10 | 46168403 | 46168998 | 5Y-H4K8ac_peak_2149 | 11.19336 | ZFAND4_ENSG00000172671                                                      |
| 10 | 46222124 | 46222995 | 5Y-H4K8ac_peak_2150 | 12.00715 | FAM21FP_ENSG00000237840;RP11-671E7.1_ENSG00000228702;FAM21C_ENSG00000172661 |
| 10 | 46973982 | 46974735 | 5Y-H4K8ac_peak_2151 | 5.41472  |                                                                             |
| 10 | 46975019 | 46975414 | 5Y-H4K8ac_peak_2152 | 10.14791 |                                                                             |
| 10 | 46992923 | 46993681 | 5Y-H4K8ac_peak_2153 | 15.48671 | GPRIN2_ENSG00000204175                                                      |
| 10 | 47056505 | 47056984 | 5Y-H4K8ac_peak_2154 | 8.09118  |                                                                             |
| 10 | 47057909 | 47058210 | 5Y-H4K8ac_peak_2155 | 4.44548  |                                                                             |
| 10 | 47083446 | 47083741 | 5Y-H4K8ac_peak_2156 | 7.38868  | NPY4R_ENSG00000204174                                                       |
| 10 | 47618113 | 47618312 | 5Y-H4K8ac_peak_2157 | 5.64909  |                                                                             |
| 10 | 47627016 | 47627235 | 5Y-H4K8ac_peak_2158 | 8.60027  |                                                                             |
| 10 | 47653881 | 47654258 | 5Y-H4K8ac_peak_2159 | 7.11863  |                                                                             |
| 10 | 47656047 | 47656257 | 5Y-H4K8ac_peak_2160 | 4.55128  | RP11-292F22.7_ENSG00000259942                                               |

|    |          |          |                     |          |                                                       |
|----|----------|----------|---------------------|----------|-------------------------------------------------------|
| 10 | 48354551 | 48354775 | 5Y-H4K8ac_peak_2161 | 7.11863  | ZNF488_ENSG00000165388                                |
| 10 | 48452081 | 48452451 | 5Y-H4K8ac_peak_2162 | 5.64909  |                                                       |
| 10 | 49514755 | 49515019 | 5Y-H4K8ac_peak_2163 | 10.48476 | MAPK8_ENSG00000107643                                 |
| 10 | 49664381 | 49664683 | 5Y-H4K8ac_peak_2164 | 7.43638  |                                                       |
| 10 | 49863466 | 49863661 | 5Y-H4K8ac_peak_2165 | 5.40331  | ARHGAP22_ENSG00000128805                              |
| 10 | 49863988 | 49864220 | 5Y-H4K8ac_peak_2166 | 9.38203  | ARHGAP22_ENSG00000128805                              |
| 10 | 49864841 | 49865232 | 5Y-H4K8ac_peak_2167 | 5.23083  | ARHGAP22_ENSG00000128805                              |
| 10 | 49866627 | 49867072 | 5Y-H4K8ac_peak_2168 | 5.59843  |                                                       |
| 10 | 50209651 | 50209959 | 5Y-H4K8ac_peak_2169 | 6.34046  |                                                       |
| 10 | 50323022 | 50323329 | 5Y-H4K8ac_peak_2170 | 6.77436  | VSTM4_ENSG00000165633                                 |
| 10 | 50506485 | 50506924 | 5Y-H4K8ac_peak_2171 | 4.50834  | C10orf71-AS1_ENSG00000236208;C10orf71_ENSG00000177354 |
| 10 | 50507692 | 50507983 | 5Y-H4K8ac_peak_2172 | 8.24461  | C10orf71-AS1_ENSG00000236208;C10orf71_ENSG00000177354 |
| 10 | 50508771 | 50509115 | 5Y-H4K8ac_peak_2173 | 6.35402  |                                                       |
| 10 | 50526151 | 50526476 | 5Y-H4K8ac_peak_2174 | 4.84727  |                                                       |
| 10 | 50567352 | 50567674 | 5Y-H4K8ac_peak_2175 | 14.99238 |                                                       |
| 10 | 50568859 | 50569582 | 5Y-H4K8ac_peak_2176 | 9.44542  |                                                       |
| 10 | 50569876 | 50570217 | 5Y-H4K8ac_peak_2177 | 7.11863  |                                                       |
| 10 | 50603588 | 50604069 | 5Y-H4K8ac_peak_2178 | 5.41472  | DRGX_ENSG00000165606                                  |
| 10 | 50605216 | 50605582 | 5Y-H4K8ac_peak_2179 | 7.03573  |                                                       |
| 10 | 50606194 | 50606525 | 5Y-H4K8ac_peak_2180 | 4.642    |                                                       |
| 10 | 50625285 | 50625538 | 5Y-H4K8ac_peak_2181 | 6.43775  |                                                       |
| 10 | 50803185 | 50803433 | 5Y-H4K8ac_peak_2182 | 5.56912  |                                                       |
| 10 | 50841430 | 50841660 | 5Y-H4K8ac_peak_2183 | 7.63144  |                                                       |
| 10 | 50861668 | 50861929 | 5Y-H4K8ac_peak_2184 | 4.07874  |                                                       |
| 10 | 50872667 | 50873218 | 5Y-H4K8ac_peak_2185 | 7.03573  |                                                       |
| 10 | 50887747 | 50888018 | 5Y-H4K8ac_peak_2186 | 20.04267 | C10orf53_ENSG00000178645                              |
| 10 | 50899175 | 50899369 | 5Y-H4K8ac_peak_2187 | 6.77436  |                                                       |
| 10 | 50969878 | 50970214 | 5Y-H4K8ac_peak_2188 | 10.54764 | OGDHL_ENSG00000197444                                 |
| 10 | 51489203 | 51489461 | 5Y-H4K8ac_peak_2189 | 6.80915  |                                                       |
| 10 | 51497842 | 51498054 | 5Y-H4K8ac_peak_2190 | 6.1654   |                                                       |
| 10 | 52384506 | 52385004 | 5Y-H4K8ac_peak_2191 | 7.90236  | SGMS1_ENSG00000198964;RP11-50E11.3_ENSG00000226200    |
| 10 | 52498755 | 52499585 | 5Y-H4K8ac_peak_2192 | 5.64909  | ASAH2B_ENSG00000204147                                |
| 10 | 55163175 | 55163469 | 5Y-H4K8ac_peak_2193 | 7.31815  |                                                       |
| 10 | 55163860 | 55164133 | 5Y-H4K8ac_peak_2194 | 9.23159  |                                                       |
| 10 | 60094412 | 60094974 | 5Y-H4K8ac_peak_2195 | 10.19948 | UBE2D1_ENSG00000072401                                |
| 10 | 60145234 | 60145551 | 5Y-H4K8ac_peak_2196 | 9.31608  | TFAM_ENSG00000108064                                  |
| 10 | 60409007 | 60409323 | 5Y-H4K8ac_peak_2197 | 7.31815  |                                                       |
| 10 | 60935960 | 60936185 | 5Y-H4K8ac_peak_2198 | 11.5813  | PHYHIPL_ENSG00000165443                               |
| 10 | 60936474 | 60937123 | 5Y-H4K8ac_peak_2199 | 8.69112  | PHYHIPL_ENSG00000165443                               |
| 10 | 61469101 | 61469553 | 5Y-H4K8ac_peak_2200 | 7.72887  |                                                       |
| 10 | 61469745 | 61469964 | 5Y-H4K8ac_peak_2201 | 3.96434  |                                                       |
| 10 | 61493260 | 61493456 | 5Y-H4K8ac_peak_2202 | 6.34046  |                                                       |
| 10 | 62492714 | 62493302 | 5Y-H4K8ac_peak_2203 | 8.69112  | ANK3_ENSG00000151150;RP11-131N11.4_ENSG00000254271    |
| 10 | 62703708 | 62704654 | 5Y-H4K8ac_peak_2204 | 6.78128  |                                                       |
| 10 | 62761343 | 62761571 | 5Y-H4K8ac_peak_2205 | 12.57157 | RHOBTB1_ENSG00000072422                               |
| 10 | 63212038 | 63212261 | 5Y-H4K8ac_peak_2206 | 15.27452 | TMEM26_ENSG00000196932;RP11-809M12.1_ENSG00000237233  |

|    |          |          |                     |          |                                                   |
|----|----------|----------|---------------------|----------|---------------------------------------------------|
| 10 | 64133888 | 64134851 | 5Y-H4K8ac_peak_2207 | 8.47164  | ZNF365_ENSG00000138311                            |
| 10 | 64563977 | 64564178 | 5Y-H4K8ac_peak_2208 | 11.4254  | ADO_ENSG00000181915                               |
| 10 | 64564647 | 64564959 | 5Y-H4K8ac_peak_2209 | 6.77436  | RP11-436D10.3_ENSG00000238280;ADO_ENSG00000181915 |
| 10 | 65280689 | 65280935 | 5Y-H4K8ac_peak_2210 | 12.49811 | REEP3_ENSG00000165476                             |
| 10 | 65281271 | 65281600 | 5Y-H4K8ac_peak_2211 | 8.93923  | REEP3_ENSG00000165476                             |
| 10 | 65389387 | 65389880 | 5Y-H4K8ac_peak_2212 | 15.94046 |                                                   |
| 10 | 65470670 | 65470968 | 5Y-H4K8ac_peak_2213 | 4.0639   |                                                   |
| 10 | 65471348 | 65471599 | 5Y-H4K8ac_peak_2214 | 6.14981  |                                                   |
| 10 | 69598261 | 69598474 | 5Y-H4K8ac_peak_2215 | 7.31815  | DNAJC12_ENSG00000108176                           |
| 10 | 69609557 | 69609807 | 5Y-H4K8ac_peak_2216 | 7.17184  | RP11-57G10.8_ENSG00000272892                      |
| 10 | 69991533 | 69991790 | 5Y-H4K8ac_peak_2217 | 6.73047  | ATOH7_ENSG00000179774                             |
| 10 | 70090604 | 70090885 | 5Y-H4K8ac_peak_2218 | 13.2534  | HNRNPH3_ENSG00000096746                           |
| 10 | 70091101 | 70091321 | 5Y-H4K8ac_peak_2219 | 7.50148  | HNRNPH3_ENSG00000096746                           |
| 10 | 70092018 | 70092637 | 5Y-H4K8ac_peak_2220 | 11.86504 | PBLD_ENSG00000108187                              |
| 10 | 70166582 | 70167398 | 5Y-H4K8ac_peak_2221 | 13.99721 | RUFY2_ENSG00000204130                             |
| 10 | 70320194 | 70320390 | 5Y-H4K8ac_peak_2222 | 5.41472  | TET1_ENSG00000138336                              |
| 10 | 70359224 | 70359489 | 5Y-H4K8ac_peak_2223 | 8.16382  |                                                   |
| 10 | 70481099 | 70481482 | 5Y-H4K8ac_peak_2224 | 6.08523  | CCAR1_ENSG00000060339                             |
| 10 | 70586872 | 70587436 | 5Y-H4K8ac_peak_2225 | 6.77436  | STOX1_ENSG00000165730                             |
| 10 | 70660486 | 70660819 | 5Y-H4K8ac_peak_2226 | 15.84891 | DDX50_ENSG00000107625                             |
| 10 | 70661106 | 70661401 | 5Y-H4K8ac_peak_2227 | 10.69698 | DDX50_ENSG00000107625                             |
| 10 | 70714740 | 70715038 | 5Y-H4K8ac_peak_2228 | 6.37023  | DDX21_ENSG00000165732                             |
| 10 | 70716121 | 70716340 | 5Y-H4K8ac_peak_2229 | 14.43262 | DDX21_ENSG00000165732                             |
| 10 | 70940048 | 70940394 | 5Y-H4K8ac_peak_2230 | 10.12457 | SUPV3L1_ENSG00000156502                           |
| 10 | 70985322 | 70985578 | 5Y-H4K8ac_peak_2231 | 5.65584  |                                                   |
| 10 | 71077699 | 71078368 | 5Y-H4K8ac_peak_2232 | 10.44054 |                                                   |
| 10 | 71078909 | 71079146 | 5Y-H4K8ac_peak_2233 | 8.69895  |                                                   |
| 10 | 71094832 | 71095030 | 5Y-H4K8ac_peak_2234 | 8.35138  |                                                   |
| 10 | 71158633 | 71159168 | 5Y-H4K8ac_peak_2235 | 7.03573  |                                                   |
| 10 | 71211397 | 71211643 | 5Y-H4K8ac_peak_2236 | 7.89273  | TSPAN15_ENSG00000099282                           |
| 10 | 71267101 | 71267298 | 5Y-H4K8ac_peak_2237 | 10.46287 |                                                   |
| 10 | 71267507 | 71267769 | 5Y-H4K8ac_peak_2238 | 8.33296  |                                                   |
| 10 | 71389402 | 71389717 | 5Y-H4K8ac_peak_2239 | 8.73985  | C10orf35_ENSG00000171224                          |
| 10 | 71390063 | 71390495 | 5Y-H4K8ac_peak_2240 | 11.04542 | C10orf35_ENSG00000171224                          |
| 10 | 71446194 | 71446547 | 5Y-H4K8ac_peak_2241 | 7.46096  |                                                   |
| 10 | 71517022 | 71517717 | 5Y-H4K8ac_peak_2242 | 7.11863  |                                                   |
| 10 | 71518167 | 71518400 | 5Y-H4K8ac_peak_2243 | 6.73047  |                                                   |
| 10 | 71626485 | 71627303 | 5Y-H4K8ac_peak_2244 | 7.38046  |                                                   |
| 10 | 71812620 | 71813469 | 5Y-H4K8ac_peak_2245 | 11.5813  | H2AFY2_ENSG00000099284                            |
| 10 | 71892341 | 71892638 | 5Y-H4K8ac_peak_2246 | 5.72233  | AIFM2_ENSG00000042286                             |
| 10 | 71905968 | 71906271 | 5Y-H4K8ac_peak_2247 | 5.51767  | TYSND1_ENSG00000156521                            |
| 10 | 72123338 | 72124130 | 5Y-H4K8ac_peak_2248 | 9.34555  |                                                   |
| 10 | 72141932 | 72142246 | 5Y-H4K8ac_peak_2249 | 16.01457 | LRRC20_ENSG00000172731                            |
| 10 | 72218277 | 72218747 | 5Y-H4K8ac_peak_2250 | 12.21176 |                                                   |
| 10 | 72238360 | 72238577 | 5Y-H4K8ac_peak_2251 | 7.18391  | PALD1_ENSG00000107719                             |
| 10 | 72344242 | 72344710 | 5Y-H4K8ac_peak_2252 | 5.23083  |                                                   |

|    |          |          |                     |          |                         |
|----|----------|----------|---------------------|----------|-------------------------|
| 10 | 72450208 | 72450521 | 5Y-H4K8ac_peak_2253 | 5.40331  |                         |
| 10 | 72453391 | 72453638 | 5Y-H4K8ac_peak_2254 | 7.31102  |                         |
| 10 | 72455181 | 72455742 | 5Y-H4K8ac_peak_2255 | 4.98439  |                         |
| 10 | 72647931 | 72648199 | 5Y-H4K8ac_peak_2256 | 6.50117  | PCBD1_ENSG00000166228   |
| 10 | 72951177 | 72951805 | 5Y-H4K8ac_peak_2257 | 4.00285  |                         |
| 10 | 72972516 | 72972778 | 5Y-H4K8ac_peak_2258 | 7.37325  | UNC5B_ENSG00000107731   |
| 10 | 72993464 | 72993713 | 5Y-H4K8ac_peak_2259 | 6.53157  |                         |
| 10 | 72993926 | 72994194 | 5Y-H4K8ac_peak_2260 | 15.05532 |                         |
| 10 | 72994938 | 72995704 | 5Y-H4K8ac_peak_2261 | 19.58975 |                         |
| 10 | 72996031 | 72996852 | 5Y-H4K8ac_peak_2262 | 8.19376  |                         |
| 10 | 72999292 | 72999763 | 5Y-H4K8ac_peak_2263 | 8.9562   |                         |
| 10 | 72999980 | 73000754 | 5Y-H4K8ac_peak_2264 | 15.49948 |                         |
| 10 | 73000987 | 73001197 | 5Y-H4K8ac_peak_2265 | 8.22388  |                         |
| 10 | 73001695 | 73002574 | 5Y-H4K8ac_peak_2266 | 9.01738  |                         |
| 10 | 73003849 | 73004385 | 5Y-H4K8ac_peak_2267 | 8.76608  |                         |
| 10 | 73005093 | 73006027 | 5Y-H4K8ac_peak_2268 | 4.77126  |                         |
| 10 | 73007175 | 73007516 | 5Y-H4K8ac_peak_2269 | 6.31818  |                         |
| 10 | 73008997 | 73009334 | 5Y-H4K8ac_peak_2270 | 7.59101  |                         |
| 10 | 73009662 | 73010206 | 5Y-H4K8ac_peak_2271 | 13.0168  |                         |
| 10 | 73010693 | 73010916 | 5Y-H4K8ac_peak_2272 | 4.40975  |                         |
| 10 | 73012421 | 73014475 | 5Y-H4K8ac_peak_2273 | 9.30505  |                         |
| 10 | 73015606 | 73016066 | 5Y-H4K8ac_peak_2274 | 13.19488 |                         |
| 10 | 73016354 | 73017406 | 5Y-H4K8ac_peak_2275 | 12.65187 |                         |
| 10 | 73017911 | 73018162 | 5Y-H4K8ac_peak_2276 | 6.77436  |                         |
| 10 | 73018407 | 73019015 | 5Y-H4K8ac_peak_2277 | 8.564    |                         |
| 10 | 73019457 | 73020162 | 5Y-H4K8ac_peak_2278 | 7.89273  |                         |
| 10 | 73020567 | 73020873 | 5Y-H4K8ac_peak_2279 | 5.24695  |                         |
| 10 | 73022684 | 73023275 | 5Y-H4K8ac_peak_2280 | 8.21582  |                         |
| 10 | 73025085 | 73025718 | 5Y-H4K8ac_peak_2281 | 12.10416 |                         |
| 10 | 73025978 | 73026621 | 5Y-H4K8ac_peak_2282 | 12.10416 |                         |
| 10 | 73027534 | 73027913 | 5Y-H4K8ac_peak_2283 | 7.03573  |                         |
| 10 | 73030627 | 73031721 | 5Y-H4K8ac_peak_2284 | 10.0346  |                         |
| 10 | 73033272 | 73033542 | 5Y-H4K8ac_peak_2285 | 9.30505  |                         |
| 10 | 73037085 | 73037509 | 5Y-H4K8ac_peak_2286 | 5.12488  |                         |
| 10 | 73038247 | 73038638 | 5Y-H4K8ac_peak_2287 | 14.0329  |                         |
| 10 | 73039206 | 73039898 | 5Y-H4K8ac_peak_2288 | 17.8819  |                         |
| 10 | 73078256 | 73078746 | 5Y-H4K8ac_peak_2289 | 12.05638 | SLC29A3_ENSG00000198246 |
| 10 | 73136781 | 73137149 | 5Y-H4K8ac_peak_2290 | 5.24695  |                         |
| 10 | 73156173 | 73156505 | 5Y-H4K8ac_peak_2291 | 10.19948 | CDH23_ENSG00000107736   |
| 10 | 73485029 | 73485487 | 5Y-H4K8ac_peak_2292 | 13.99721 |                         |
| 10 | 73486382 | 73486607 | 5Y-H4K8ac_peak_2293 | 8.20773  |                         |
| 10 | 73487017 | 73487445 | 5Y-H4K8ac_peak_2294 | 14.20885 |                         |
| 10 | 73596039 | 73596254 | 5Y-H4K8ac_peak_2295 | 6.50117  |                         |
| 10 | 73610580 | 73610873 | 5Y-H4K8ac_peak_2296 | 10.44054 | PSAP_ENSG00000197746    |
| 10 | 73611362 | 73611737 | 5Y-H4K8ac_peak_2297 | 9.60458  | PSAP_ENSG00000197746    |
| 10 | 73640805 | 73641006 | 5Y-H4K8ac_peak_2298 | 8.43511  |                         |

|    |          |          |                     |          |                                                     |
|----|----------|----------|---------------------|----------|-----------------------------------------------------|
| 10 | 73649235 | 73649491 | 5Y-H4K8ac_peak_2299 | 5.12213  |                                                     |
| 10 | 73723541 | 73724474 | 5Y-H4K8ac_peak_2300 | 12.06963 | CHST3_ENSG00000122863                               |
| 10 | 73741088 | 73741298 | 5Y-H4K8ac_peak_2301 | 5.65584  |                                                     |
| 10 | 73757667 | 73757898 | 5Y-H4K8ac_peak_2302 | 6.95844  |                                                     |
| 10 | 73758210 | 73758407 | 5Y-H4K8ac_peak_2303 | 9.79526  |                                                     |
| 10 | 73769084 | 73769968 | 5Y-H4K8ac_peak_2304 | 7.50148  |                                                     |
| 10 | 73804169 | 73804508 | 5Y-H4K8ac_peak_2305 | 8.43511  |                                                     |
| 10 | 73817293 | 73817493 | 5Y-H4K8ac_peak_2306 | 5.87382  |                                                     |
| 10 | 73828736 | 73828947 | 5Y-H4K8ac_peak_2307 | 4.55128  |                                                     |
| 10 | 73847398 | 73848100 | 5Y-H4K8ac_peak_2308 | 13.14766 | SPOCK2_ENSG00000107742                              |
| 10 | 74008423 | 74008628 | 5Y-H4K8ac_peak_2309 | 4.84727  |                                                     |
| 10 | 74014818 | 74015012 | 5Y-H4K8ac_peak_2310 | 6.08523  |                                                     |
| 10 | 74020784 | 74020987 | 5Y-H4K8ac_peak_2311 | 8.1667   |                                                     |
| 10 | 74030466 | 74030671 | 5Y-H4K8ac_peak_2312 | 4.29586  |                                                     |
| 10 | 74032868 | 74033342 | 5Y-H4K8ac_peak_2313 | 14.31711 | DDIT4_ENSG00000168209                               |
| 10 | 74057101 | 74057548 | 5Y-H4K8ac_peak_2314 | 6.37023  |                                                     |
| 10 | 74058098 | 74058688 | 5Y-H4K8ac_peak_2315 | 7.64716  |                                                     |
| 10 | 74068073 | 74068895 | 5Y-H4K8ac_peak_2316 | 11.19336 |                                                     |
| 10 | 74079007 | 74079328 | 5Y-H4K8ac_peak_2317 | 9.41701  |                                                     |
| 10 | 74079591 | 74079959 | 5Y-H4K8ac_peak_2318 | 11.22005 |                                                     |
| 10 | 74081156 | 74081410 | 5Y-H4K8ac_peak_2319 | 12.44818 |                                                     |
| 10 | 74081791 | 74082749 | 5Y-H4K8ac_peak_2320 | 12.44818 |                                                     |
| 10 | 74084687 | 74085411 | 5Y-H4K8ac_peak_2321 | 6.47527  |                                                     |
| 10 | 74090894 | 74091251 | 5Y-H4K8ac_peak_2322 | 8.73392  |                                                     |
| 10 | 74092242 | 74092454 | 5Y-H4K8ac_peak_2323 | 9.0011   |                                                     |
| 10 | 74093258 | 74093605 | 5Y-H4K8ac_peak_2324 | 6.90928  |                                                     |
| 10 | 74094411 | 74095505 | 5Y-H4K8ac_peak_2325 | 5.72233  |                                                     |
| 10 | 74114502 | 74114759 | 5Y-H4K8ac_peak_2326 | 13.94477 | DNAJB12_ENSG00000148719                             |
| 10 | 74713384 | 74713811 | 5Y-H4K8ac_peak_2327 | 8.8021   | PLA2G12B_ENSG00000138308                            |
| 10 | 74870842 | 74871055 | 5Y-H4K8ac_peak_2328 | 8.2913   | NUDT13_ENSG00000166321                              |
| 10 | 75006710 | 75006946 | 5Y-H4K8ac_peak_2329 | 12.10416 | DNAJC9-AS1_ENSG00000236756                          |
| 10 | 75118216 | 75118437 | 5Y-H4K8ac_peak_2330 | 7.76232  | TTC18_ENSG00000156042                               |
| 10 | 75256320 | 75256515 | 5Y-H4K8ac_peak_2331 | 5.10404  | PPP3CB_ENSG00000107758                              |
| 10 | 75385918 | 75386405 | 5Y-H4K8ac_peak_2332 | 10.46287 | USP54_ENSG00000166348;RP11-464F9.20_ENSG00000268584 |
| 10 | 75406542 | 75407591 | 5Y-H4K8ac_peak_2333 | 12.05638 |                                                     |
| 10 | 75407876 | 75408296 | 5Y-H4K8ac_peak_2334 | 7.60057  |                                                     |
| 10 | 75634671 | 75634863 | 5Y-H4K8ac_peak_2335 | 7.59101  | CAMK2G_ENSG00000148660                              |
| 10 | 76585348 | 76585555 | 5Y-H4K8ac_peak_2336 | 8.43511  | KAT6B_ENSG00000156650                               |
| 10 | 76857984 | 76858208 | 5Y-H4K8ac_peak_2337 | 7.4047   |                                                     |
| 10 | 76870661 | 76870921 | 5Y-H4K8ac_peak_2338 | 5.64909  |                                                     |
| 10 | 76969893 | 76970114 | 5Y-H4K8ac_peak_2339 | 6.78128  | VDAC2_ENSG00000165637                               |
| 10 | 76970736 | 76970999 | 5Y-H4K8ac_peak_2340 | 7.89142  | VDAC2_ENSG00000165637                               |
| 10 | 76994739 | 76994965 | 5Y-H4K8ac_peak_2341 | 5.24695  | COMTD1_ENSG00000165644                              |
| 10 | 76998414 | 76998612 | 5Y-H4K8ac_peak_2342 | 7.44355  |                                                     |
| 10 | 77022508 | 77022807 | 5Y-H4K8ac_peak_2343 | 7.63144  |                                                     |
| 10 | 77053019 | 77053213 | 5Y-H4K8ac_peak_2344 | 7.05631  |                                                     |

|    |          |          |                     |          |                                                               |
|----|----------|----------|---------------------|----------|---------------------------------------------------------------|
| 10 | 77053557 | 77054398 | 5Y-H4K8ac_peak_2345 | 10.02453 |                                                               |
| 10 | 77054936 | 77055267 | 5Y-H4K8ac_peak_2346 | 5.98695  |                                                               |
| 10 | 77165212 | 77165406 | 5Y-H4K8ac_peak_2347 | 7.41519  |                                                               |
| 10 | 77169092 | 77169315 | 5Y-H4K8ac_peak_2348 | 4.50834  | RP11-399K21.13_ENSG00000273248;RP11-399K21.14_ENSG00000272692 |
| 10 | 77190980 | 77191759 | 5Y-H4K8ac_peak_2349 | 7.9215   | RP11-399K21.10_ENSG00000236842                                |
| 10 | 77238579 | 77238807 | 5Y-H4K8ac_peak_2350 | 9.02242  |                                                               |
| 10 | 77523862 | 77524059 | 5Y-H4K8ac_peak_2351 | 4.36976  |                                                               |
| 10 | 78192592 | 78193294 | 5Y-H4K8ac_peak_2352 | 9.23159  |                                                               |
| 10 | 78729357 | 78729709 | 5Y-H4K8ac_peak_2353 | 11.72217 |                                                               |
| 10 | 78730374 | 78730592 | 5Y-H4K8ac_peak_2354 | 8.43511  |                                                               |
| 10 | 78731784 | 78731995 | 5Y-H4K8ac_peak_2355 | 8.2913   |                                                               |
| 10 | 78801231 | 78801523 | 5Y-H4K8ac_peak_2356 | 5.98695  |                                                               |
| 10 | 78850914 | 78851544 | 5Y-H4K8ac_peak_2357 | 11.19336 |                                                               |
| 10 | 78864424 | 78865002 | 5Y-H4K8ac_peak_2358 | 10.90097 |                                                               |
| 10 | 78866508 | 78866756 | 5Y-H4K8ac_peak_2359 | 7.56545  |                                                               |
| 10 | 79471178 | 79471693 | 5Y-H4K8ac_peak_2360 | 5.8635   |                                                               |
| 10 | 79563694 | 79563893 | 5Y-H4K8ac_peak_2361 | 4.27459  |                                                               |
| 10 | 79597559 | 79597945 | 5Y-H4K8ac_peak_2362 | 9.22312  |                                                               |
| 10 | 79606057 | 79606406 | 5Y-H4K8ac_peak_2363 | 8.564    |                                                               |
| 10 | 79632338 | 79632758 | 5Y-H4K8ac_peak_2364 | 5.98695  |                                                               |
| 10 | 79633113 | 79633329 | 5Y-H4K8ac_peak_2365 | 6.73385  |                                                               |
| 10 | 79637289 | 79637552 | 5Y-H4K8ac_peak_2366 | 7.89273  |                                                               |
| 10 | 79638075 | 79639142 | 5Y-H4K8ac_peak_2367 | 14.39608 |                                                               |
| 10 | 79639443 | 79640375 | 5Y-H4K8ac_peak_2368 | 4.95697  |                                                               |
| 10 | 79686464 | 79686817 | 5Y-H4K8ac_peak_2369 | 8.16382  | DLG5_ENSG00000151208;DLG5-AS1_ENSG00000233871                 |
| 10 | 79807508 | 79807727 | 5Y-H4K8ac_peak_2370 | 8.748    |                                                               |
| 10 | 79899132 | 79899931 | 5Y-H4K8ac_peak_2371 | 7.69843  |                                                               |
| 10 | 79954879 | 79955092 | 5Y-H4K8ac_peak_2372 | 5.87725  |                                                               |
| 10 | 79972532 | 79973009 | 5Y-H4K8ac_peak_2373 | 14.43262 |                                                               |
| 10 | 80053884 | 80054201 | 5Y-H4K8ac_peak_2374 | 5.78188  | RP11-90J7.2_ENSG00000229543                                   |
| 10 | 80054818 | 80055040 | 5Y-H4K8ac_peak_2375 | 9.23159  |                                                               |
| 10 | 80055540 | 80055752 | 5Y-H4K8ac_peak_2376 | 6.50117  |                                                               |
| 10 | 80062410 | 80062991 | 5Y-H4K8ac_peak_2377 | 11.1169  |                                                               |
| 10 | 80076252 | 80076536 | 5Y-H4K8ac_peak_2378 | 4.24332  |                                                               |
| 10 | 80167328 | 80167640 | 5Y-H4K8ac_peak_2379 | 7.31102  |                                                               |
| 10 | 80192560 | 80193277 | 5Y-H4K8ac_peak_2380 | 8.69112  |                                                               |
| 10 | 80194748 | 80194979 | 5Y-H4K8ac_peak_2381 | 6.54441  |                                                               |
| 10 | 80195884 | 80196138 | 5Y-H4K8ac_peak_2382 | 7.09658  |                                                               |
| 10 | 80201755 | 80201979 | 5Y-H4K8ac_peak_2383 | 5.12213  |                                                               |
| 10 | 80202934 | 80203496 | 5Y-H4K8ac_peak_2384 | 9.72464  |                                                               |
| 10 | 80224436 | 80225019 | 5Y-H4K8ac_peak_2385 | 11.19336 |                                                               |
| 10 | 80230112 | 80230635 | 5Y-H4K8ac_peak_2386 | 7.46829  |                                                               |
| 10 | 80231014 | 80231601 | 5Y-H4K8ac_peak_2387 | 24.2291  |                                                               |
| 10 | 80232284 | 80232524 | 5Y-H4K8ac_peak_2388 | 17.64055 |                                                               |
| 10 | 80270424 | 80270647 | 5Y-H4K8ac_peak_2389 | 8.564    |                                                               |
| 10 | 80274982 | 80275176 | 5Y-H4K8ac_peak_2390 | 5.317    |                                                               |



|    |          |          |                     |          |                           |
|----|----------|----------|---------------------|----------|---------------------------|
| 10 | 80357690 | 80357964 | 5Y-H4K8ac_peak_2391 | 5.65584  |                           |
| 10 | 80386088 | 80386331 | 5Y-H4K8ac_peak_2392 | 8.43511  |                           |
| 10 | 80416100 | 80416936 | 5Y-H4K8ac_peak_2393 | 14.31711 |                           |
| 10 | 80448885 | 80449625 | 5Y-H4K8ac_peak_2394 | 12.21176 |                           |
| 10 | 80451145 | 80451536 | 5Y-H4K8ac_peak_2395 | 5.98695  |                           |
| 10 | 80500984 | 80501368 | 5Y-H4K8ac_peak_2396 | 6.11316  |                           |
| 10 | 80502247 | 80502813 | 5Y-H4K8ac_peak_2397 | 10.1046  |                           |
| 10 | 80503765 | 80505141 | 5Y-H4K8ac_peak_2398 | 9.74838  |                           |
| 10 | 80505687 | 80506340 | 5Y-H4K8ac_peak_2399 | 7.90751  |                           |
| 10 | 80506555 | 80507007 | 5Y-H4K8ac_peak_2400 | 7.90236  |                           |
| 10 | 80513662 | 80514378 | 5Y-H4K8ac_peak_2401 | 10.19948 |                           |
| 10 | 80517506 | 80517813 | 5Y-H4K8ac_peak_2402 | 4.50834  |                           |
| 10 | 80531512 | 80531926 | 5Y-H4K8ac_peak_2403 | 4.84727  |                           |
| 10 | 80562030 | 80562226 | 5Y-H4K8ac_peak_2404 | 7.11439  |                           |
| 10 | 80562510 | 80563121 | 5Y-H4K8ac_peak_2405 | 7.50148  |                           |
| 10 | 80564233 | 80564770 | 5Y-H4K8ac_peak_2406 | 7.11863  |                           |
| 10 | 80567348 | 80567901 | 5Y-H4K8ac_peak_2407 | 6.4221   |                           |
| 10 | 80568501 | 80568963 | 5Y-H4K8ac_peak_2408 | 7.34185  |                           |
| 10 | 80620401 | 80620594 | 5Y-H4K8ac_peak_2409 | 4.36976  |                           |
| 10 | 80621539 | 80621858 | 5Y-H4K8ac_peak_2410 | 4.00285  |                           |
| 10 | 80721934 | 80722573 | 5Y-H4K8ac_peak_2411 | 7.82914  |                           |
| 10 | 80723092 | 80723372 | 5Y-H4K8ac_peak_2412 | 3.94247  |                           |
| 10 | 80723757 | 80724002 | 5Y-H4K8ac_peak_2413 | 11.24252 |                           |
| 10 | 80724691 | 80725141 | 5Y-H4K8ac_peak_2414 | 6.53157  |                           |
| 10 | 80732397 | 80732682 | 5Y-H4K8ac_peak_2415 | 8.62703  |                           |
| 10 | 80733069 | 80733414 | 5Y-H4K8ac_peak_2416 | 6.98416  |                           |
| 10 | 80777979 | 80778313 | 5Y-H4K8ac_peak_2417 | 5.80888  |                           |
| 10 | 80787295 | 80787623 | 5Y-H4K8ac_peak_2418 | 8.43511  |                           |
| 10 | 80808264 | 80809064 | 5Y-H4K8ac_peak_2419 | 9.79526  |                           |
| 10 | 80809727 | 80809944 | 5Y-H4K8ac_peak_2420 | 6.3265   |                           |
| 10 | 80812147 | 80812531 | 5Y-H4K8ac_peak_2421 | 8.11614  |                           |
| 10 | 80826619 | 80826929 | 5Y-H4K8ac_peak_2422 | 9.51254  | ZMIZ1-AS1_ENSG00000224596 |
| 10 | 80829203 | 80829427 | 5Y-H4K8ac_peak_2423 | 7.11863  | ZMIZ1_ENSG00000108175     |
| 10 | 80842483 | 80842747 | 5Y-H4K8ac_peak_2424 | 8.16031  |                           |
| 10 | 80872745 | 80873426 | 5Y-H4K8ac_peak_2425 | 8.2913   |                           |
| 10 | 80889677 | 80890163 | 5Y-H4K8ac_peak_2426 | 4.29586  |                           |
| 10 | 80936969 | 80937592 | 5Y-H4K8ac_peak_2427 | 11.4254  |                           |
| 10 | 80937837 | 80938301 | 5Y-H4K8ac_peak_2428 | 6.08523  |                           |
| 10 | 80939075 | 80939506 | 5Y-H4K8ac_peak_2429 | 16.13719 |                           |
| 10 | 80954711 | 80954936 | 5Y-H4K8ac_peak_2430 | 6.89892  |                           |
| 10 | 80956891 | 80957257 | 5Y-H4K8ac_peak_2431 | 7.86017  |                           |
| 10 | 80962712 | 80962998 | 5Y-H4K8ac_peak_2432 | 9.79526  |                           |
| 10 | 80963191 | 80963493 | 5Y-H4K8ac_peak_2433 | 10.73603 |                           |
| 10 | 80963998 | 80964314 | 5Y-H4K8ac_peak_2434 | 7.90236  |                           |
| 10 | 80967010 | 80967582 | 5Y-H4K8ac_peak_2435 | 5.9726   |                           |
| 10 | 80980046 | 80980442 | 5Y-H4K8ac_peak_2436 | 5.23083  |                           |

|    |          |          |                     |          |                                                                            |
|----|----------|----------|---------------------|----------|----------------------------------------------------------------------------|
| 10 | 80981006 | 80981970 | 5Y-H4K8ac_peak_2437 | 11.71078 |                                                                            |
| 10 | 80982321 | 80983268 | 5Y-H4K8ac_peak_2438 | 14.00894 |                                                                            |
| 10 | 80983490 | 80983854 | 5Y-H4K8ac_peak_2439 | 5.67283  |                                                                            |
| 10 | 80984085 | 80984431 | 5Y-H4K8ac_peak_2440 | 8.43511  |                                                                            |
| 10 | 80990581 | 80990777 | 5Y-H4K8ac_peak_2441 | 4.36976  |                                                                            |
| 10 | 80995155 | 80995412 | 5Y-H4K8ac_peak_2442 | 7.98641  |                                                                            |
| 10 | 80999245 | 80999489 | 5Y-H4K8ac_peak_2443 | 5.67283  |                                                                            |
| 10 | 81020820 | 81021028 | 5Y-H4K8ac_peak_2444 | 10.90365 |                                                                            |
| 10 | 81029509 | 81030327 | 5Y-H4K8ac_peak_2445 | 10.35586 |                                                                            |
| 10 | 81031386 | 81031783 | 5Y-H4K8ac_peak_2446 | 9.41701  |                                                                            |
| 10 | 81032177 | 81032371 | 5Y-H4K8ac_peak_2447 | 6.01077  |                                                                            |
| 10 | 81032920 | 81033143 | 5Y-H4K8ac_peak_2448 | 9.00954  |                                                                            |
| 10 | 81033432 | 81034567 | 5Y-H4K8ac_peak_2449 | 12.15659 |                                                                            |
| 10 | 81034792 | 81036146 | 5Y-H4K8ac_peak_2450 | 6.37023  |                                                                            |
| 10 | 81106296 | 81106716 | 5Y-H4K8ac_peak_2451 | 9.51254  | PPIF_ENSG00000108179                                                       |
| 10 | 81107427 | 81107943 | 5Y-H4K8ac_peak_2452 | 9.11629  | PPIF_ENSG00000108179                                                       |
| 10 | 81159283 | 81159516 | 5Y-H4K8ac_peak_2453 | 6.18374  |                                                                            |
| 10 | 81160780 | 81161129 | 5Y-H4K8ac_peak_2454 | 10.11191 |                                                                            |
| 10 | 81161650 | 81161965 | 5Y-H4K8ac_peak_2455 | 11.09973 |                                                                            |
| 10 | 81664182 | 81664477 | 5Y-H4K8ac_peak_2456 | 6.18374  | MBL1P_ENSG00000242600                                                      |
| 10 | 81741659 | 81742175 | 5Y-H4K8ac_peak_2457 | 8.43511  | SFTPD_ENSG00000133661;ZNRFP3_ENSG00000235924;RP11-479O17.7_ENSG00000225100 |
| 10 | 81837856 | 81838804 | 5Y-H4K8ac_peak_2458 | 8.47164  | TMEM254-AS1_ENSG00000230091;TMEM254_ENSG00000133678                        |
| 10 | 81964656 | 81964892 | 5Y-H4K8ac_peak_2459 | 9.7353   | ANXA11_ENSG00000122359                                                     |
| 10 | 81965096 | 81965317 | 5Y-H4K8ac_peak_2460 | 6.77436  | ANXA11_ENSG00000122359                                                     |
| 10 | 82116131 | 82116579 | 5Y-H4K8ac_peak_2461 | 10.1994  | DYDC1_ENSG00000170788                                                      |
| 10 | 82117076 | 82117517 | 5Y-H4K8ac_peak_2462 | 8.17203  | DYDC1_ENSG00000170788                                                      |
| 10 | 82167115 | 82167376 | 5Y-H4K8ac_peak_2463 | 7.01856  | FAM213A_ENSG00000122378                                                    |
| 10 | 82202419 | 82202688 | 5Y-H4K8ac_peak_2464 | 4.07874  |                                                                            |
| 10 | 82213510 | 82213828 | 5Y-H4K8ac_peak_2465 | 10.94674 | TSPAN14_ENSG00000108219                                                    |
| 10 | 82214172 | 82214743 | 5Y-H4K8ac_peak_2466 | 8.04493  | TSPAN14_ENSG00000108219                                                    |
| 10 | 82219375 | 82219771 | 5Y-H4K8ac_peak_2467 | 7.88114  |                                                                            |
| 10 | 82220375 | 82220599 | 5Y-H4K8ac_peak_2468 | 6.50117  |                                                                            |
| 10 | 83634614 | 83634869 | 5Y-H4K8ac_peak_2469 | 5.98695  | NRG3_ENSG00000185737                                                       |
| 10 | 85303925 | 85304195 | 5Y-H4K8ac_peak_2470 | 8.04493  |                                                                            |
| 10 | 86302539 | 86302854 | 5Y-H4K8ac_peak_2471 | 6.08523  |                                                                            |
| 10 | 87923970 | 87924196 | 5Y-H4K8ac_peak_2472 | 5.62788  |                                                                            |
| 10 | 88011550 | 88011823 | 5Y-H4K8ac_peak_2473 | 7.50044  |                                                                            |
| 10 | 88013514 | 88013883 | 5Y-H4K8ac_peak_2474 | 4.95697  |                                                                            |
| 10 | 88026460 | 88026700 | 5Y-H4K8ac_peak_2475 | 8.05083  |                                                                            |
| 10 | 88101108 | 88101511 | 5Y-H4K8ac_peak_2476 | 4.29586  |                                                                            |
| 10 | 88126694 | 88127175 | 5Y-H4K8ac_peak_2477 | 10.1994  | GRID1_ENSG00000182771                                                      |
| 10 | 88136903 | 88137118 | 5Y-H4K8ac_peak_2478 | 9.23159  |                                                                            |
| 10 | 88281122 | 88281459 | 5Y-H4K8ac_peak_2479 | 7.89273  | WAPAL_ENSG00000062650;RP11-77P6.2_ENSG00000227896                          |
| 10 | 88429227 | 88429486 | 5Y-H4K8ac_peak_2480 | 5.81394  |                                                                            |
| 10 | 88432770 | 88432976 | 5Y-H4K8ac_peak_2481 | 7.9412   |                                                                            |
| 10 | 88433442 | 88433678 | 5Y-H4K8ac_peak_2482 | 6.50117  |                                                                            |

|    |          |          |                     |          |                                                                               |
|----|----------|----------|---------------------|----------|-------------------------------------------------------------------------------|
| 10 | 88433904 | 88434148 | 5Y-H4K8ac_peak_2483 | 5.23819  |                                                                               |
| 10 | 88470258 | 88471590 | 5Y-H4K8ac_peak_2484 | 11.94897 |                                                                               |
| 10 | 88471853 | 88472227 | 5Y-H4K8ac_peak_2485 | 8.50349  |                                                                               |
| 10 | 88515845 | 88516069 | 5Y-H4K8ac_peak_2486 | 6.08523  | RP11-359E3.4_ENSG00000272631;BMPR1A_ENSG00000107779                           |
| 10 | 88655663 | 88655859 | 5Y-H4K8ac_peak_2487 | 5.40331  |                                                                               |
| 10 | 88726546 | 88726823 | 5Y-H4K8ac_peak_2488 | 11.48679 |                                                                               |
| 10 | 88777500 | 88777696 | 5Y-H4K8ac_peak_2489 | 6.53157  |                                                                               |
| 10 | 88779235 | 88779911 | 5Y-H4K8ac_peak_2490 | 6.61077  | FAM25A_ENSG00000188100                                                        |
| 10 | 88854356 | 88854601 | 5Y-H4K8ac_peak_2491 | 7.38046  | FAM35A_ENSG00000122376                                                        |
| 10 | 88855068 | 88855262 | 5Y-H4K8ac_peak_2492 | 9.05168  |                                                                               |
| 10 | 89623512 | 89623818 | 5Y-H4K8ac_peak_2493 | 6.18374  | KLLN_ENSG00000227268;PTEN_ENSG00000171862                                     |
| 10 | 90640030 | 90640373 | 5Y-H4K8ac_peak_2494 | 5.12488  | STAMBPL1_ENSG00000138134                                                      |
| 10 | 90640594 | 90640839 | 5Y-H4K8ac_peak_2495 | 6.54441  |                                                                               |
| 10 | 91044606 | 91044885 | 5Y-H4K8ac_peak_2496 | 4.8773   |                                                                               |
| 10 | 91045228 | 91045557 | 5Y-H4K8ac_peak_2497 | 10.6025  |                                                                               |
| 10 | 91174397 | 91174864 | 5Y-H4K8ac_peak_2498 | 7.38046  | LIPA_ENSG00000107798;IFIT5_ENSG00000152778                                    |
| 10 | 91404192 | 91405009 | 5Y-H4K8ac_peak_2499 | 7.11863  | PANK1_ENSG00000152782;RP11-80H5.5_ENSG00000249962;RP11-80H5.2_ENSG00000232936 |
| 10 | 92922869 | 92923323 | 5Y-H4K8ac_peak_2500 | 7.88114  |                                                                               |
| 10 | 93169471 | 93169969 | 5Y-H4K8ac_peak_2501 | 13.35169 | HECTD2_ENSG00000165338                                                        |
| 10 | 93350547 | 93351044 | 5Y-H4K8ac_peak_2502 | 7.29055  |                                                                               |
| 10 | 93430503 | 93430772 | 5Y-H4K8ac_peak_2503 | 5.23083  |                                                                               |
| 10 | 93431641 | 93431985 | 5Y-H4K8ac_peak_2504 | 13.8759  |                                                                               |
| 10 | 93558265 | 93558823 | 5Y-H4K8ac_peak_2505 | 10.5157  | TNKS2-AS1_ENSG00000228701;TNKS2_ENSG00000107854                               |
| 10 | 93646979 | 93647606 | 5Y-H4K8ac_peak_2506 | 12.71156 |                                                                               |
| 10 | 94051037 | 94051463 | 5Y-H4K8ac_peak_2507 | 13.06587 | CPEB3_ENSG00000107864;MARCH5_ENSG00000198060                                  |
| 10 | 94333297 | 94333737 | 5Y-H4K8ac_peak_2508 | 7.11863  | IDE_ENSG00000119912                                                           |
| 10 | 94333972 | 94334212 | 5Y-H4K8ac_peak_2509 | 6.6946   | IDE_ENSG00000119912                                                           |
| 10 | 94352995 | 94353305 | 5Y-H4K8ac_peak_2510 | 6.47245  | KIF11_ENSG00000138160                                                         |
| 10 | 94449248 | 94449482 | 5Y-H4K8ac_peak_2511 | 16.01457 |                                                                               |
| 10 | 94449684 | 94450183 | 5Y-H4K8ac_peak_2512 | 15.06486 |                                                                               |
| 10 | 94607984 | 94608853 | 5Y-H4K8ac_peak_2513 | 19.15843 |                                                                               |
| 10 | 95653766 | 95653979 | 5Y-H4K8ac_peak_2514 | 10.19948 | SLC35G1_ENSG00000176273                                                       |
| 10 | 95753428 | 95753657 | 5Y-H4K8ac_peak_2515 | 9.7353   | PLCE1_ENSG00000138193                                                         |
| 10 | 96123160 | 96123489 | 5Y-H4K8ac_peak_2516 | 6.13909  | NOC3L_ENSG00000173145                                                         |
| 10 | 96161508 | 96161762 | 5Y-H4K8ac_peak_2517 | 6.14981  | TBC1D12_ENSG00000108239                                                       |
| 10 | 96304348 | 96304644 | 5Y-H4K8ac_peak_2518 | 8.63306  | HELLS_ENSG00000119969                                                         |
| 10 | 96305306 | 96305949 | 5Y-H4K8ac_peak_2519 | 8.2913   | HELLS_ENSG00000119969                                                         |
| 10 | 96943132 | 96943444 | 5Y-H4K8ac_peak_2520 | 5.449    | PAWRP1_ENSG00000225533                                                        |
| 10 | 97415866 | 97416278 | 5Y-H4K8ac_peak_2521 | 7.46096  | ALDH18A1_ENSG00000059573                                                      |
| 10 | 97802903 | 97803129 | 5Y-H4K8ac_peak_2522 | 9.02782  | CCNJ_ENSG00000107443                                                          |
| 10 | 97803378 | 97803774 | 5Y-H4K8ac_peak_2523 | 8.62703  | CCNJ_ENSG00000107443                                                          |
| 10 | 97849701 | 97850603 | 5Y-H4K8ac_peak_2524 | 9.52603  | ENTPD1-AS1_ENSG00000226688                                                    |
| 10 | 97889530 | 97889733 | 5Y-H4K8ac_peak_2525 | 7.34185  | ZNF518A_ENSG00000177853                                                       |
| 10 | 98134859 | 98135187 | 5Y-H4K8ac_peak_2526 | 7.79831  |                                                                               |
| 10 | 98346454 | 98346710 | 5Y-H4K8ac_peak_2527 | 7.21591  | TM9SF3_ENSG00000077147                                                        |
| 10 | 98479857 | 98480610 | 5Y-H4K8ac_peak_2528 | 18.68977 | PIK3AP1_ENSG00000155629                                                       |

|    |           |           |                     |          |                                                                                             |
|----|-----------|-----------|---------------------|----------|---------------------------------------------------------------------------------------------|
| 10 | 98591629  | 98592249  | 5Y-H4K8ac_peak_2529 | 17.63051 | LCOR_ENSG00000196233                                                                        |
| 10 | 98734684  | 98734915  | 5Y-H4K8ac_peak_2530 | 4.50834  |                                                                                             |
| 10 | 98899536  | 98899726  | 5Y-H4K8ac_peak_2531 | 4.84727  |                                                                                             |
| 10 | 98900005  | 98900656  | 5Y-H4K8ac_peak_2532 | 10.19948 |                                                                                             |
| 10 | 98940463  | 98940776  | 5Y-H4K8ac_peak_2533 | 5.62406  |                                                                                             |
| 10 | 98941033  | 98941368  | 5Y-H4K8ac_peak_2534 | 6.46606  |                                                                                             |
| 10 | 98944705  | 98945762  | 5Y-H4K8ac_peak_2535 | 9.79526  | SLIT1_ENSG00000187122                                                                       |
| 10 | 99078764  | 99078971  | 5Y-H4K8ac_peak_2536 | 12.21176 | FRAT1_ENSG00000165879                                                                       |
| 10 | 99094474  | 99094737  | 5Y-H4K8ac_peak_2537 | 13.00733 | FRAT2_ENSG00000181274;RP11-452K12.4_ENSG00000225850                                         |
| 10 | 99186084  | 99186340  | 5Y-H4K8ac_peak_2538 | 16.38263 | AL355490.1_ENSG00000224474;PGAM1_ENSG00000171314                                            |
| 10 | 99257696  | 99258112  | 5Y-H4K8ac_peak_2539 | 9.51254  | MMS19_ENSG00000155229;UBTD1_ENSG00000165886                                                 |
| 10 | 99277349  | 99277553  | 5Y-H4K8ac_peak_2540 | 5.8635   |                                                                                             |
| 10 | 99277848  | 99278078  | 5Y-H4K8ac_peak_2541 | 5.74859  |                                                                                             |
| 10 | 99392830  | 99393114  | 5Y-H4K8ac_peak_2542 | 4.9885   | MORN4_ENSG00000171160                                                                       |
| 10 | 99419892  | 99420148  | 5Y-H4K8ac_peak_2543 | 5.64909  |                                                                                             |
| 10 | 99473099  | 99473323  | 5Y-H4K8ac_peak_2544 | 16.38263 | MARVELD1_ENSG00000155254                                                                    |
| 10 | 99474020  | 99474613  | 5Y-H4K8ac_peak_2545 | 15.01219 |                                                                                             |
| 10 | 99496017  | 99496787  | 5Y-H4K8ac_peak_2546 | 13.8759  | ZFYVE27_ENSG00000155256                                                                     |
| 10 | 99540879  | 99541452  | 5Y-H4K8ac_peak_2547 | 15.92074 |                                                                                             |
| 10 | 99608848  | 99609069  | 5Y-H4K8ac_peak_2548 | 5.317    | LINC00866_ENSG00000227356;GOLGA7B_ENSG00000155265                                           |
| 10 | 99628890  | 99629271  | 5Y-H4K8ac_peak_2549 | 7.89273  |                                                                                             |
| 10 | 99649057  | 99649674  | 5Y-H4K8ac_peak_2550 | 9.30505  |                                                                                             |
| 10 | 99674522  | 99674983  | 5Y-H4K8ac_peak_2551 | 8.47164  |                                                                                             |
| 10 | 100027630 | 100028083 | 5Y-H4K8ac_peak_2552 | 10.90365 | LOXL4_ENSG00000138131                                                                       |
| 10 | 100068819 | 100069387 | 5Y-H4K8ac_peak_2553 | 11.68317 |                                                                                             |
| 10 | 100081184 | 100081528 | 5Y-H4K8ac_peak_2554 | 6.77436  |                                                                                             |
| 10 | 100174493 | 100174687 | 5Y-H4K8ac_peak_2555 | 8.46442  | PYROXD2_ENSG00000119943                                                                     |
| 10 | 100206592 | 100206967 | 5Y-H4K8ac_peak_2556 | 6.78128  | HPS1_ENSG00000107521                                                                        |
| 10 | 100227609 | 100227864 | 5Y-H4K8ac_peak_2557 | 7.20869  |                                                                                             |
| 10 | 100766829 | 100767048 | 5Y-H4K8ac_peak_2558 | 5.40331  |                                                                                             |
| 10 | 101056717 | 101057039 | 5Y-H4K8ac_peak_2559 | 9.78792  |                                                                                             |
| 10 | 101089345 | 101089875 | 5Y-H4K8ac_peak_2560 | 6.77436  | CNNM1_ENSG00000119946                                                                       |
| 10 | 101190780 | 101190991 | 5Y-H4K8ac_peak_2561 | 5.64909  | GOT1_ENSG00000120053;RP11-441O15.3_ENSG00000224934                                          |
| 10 | 101380658 | 101381032 | 5Y-H4K8ac_peak_2562 | 7.87406  | SLC25A28_ENSG00000155287;RP11-85A1.3_ENSG00000260475                                        |
| 10 | 101381740 | 101382081 | 5Y-H4K8ac_peak_2563 | 5.98695  | RP11-85A1.3_ENSG00000260475                                                                 |
| 10 | 101989490 | 101989905 | 5Y-H4K8ac_peak_2564 | 11.57334 | CHUK_ENSG00000213341;RP11-316M21.6_ENSG00000227492                                          |
| 10 | 102027056 | 102027246 | 5Y-H4K8ac_peak_2565 | 8.33296  | CWF19L1_ENSG00000095485                                                                     |
| 10 | 102046106 | 102046629 | 5Y-H4K8ac_peak_2566 | 8.2913   | BLOC1S2_ENSG00000196072                                                                     |
| 10 | 102105384 | 102105578 | 5Y-H4K8ac_peak_2567 | 5.91107  | RP11-34D15.2_ENSG00000231188                                                                |
| 10 | 102106198 | 102106448 | 5Y-H4K8ac_peak_2568 | 5.70472  | RP11-34D15.2_ENSG00000231188;SCD_ENSG00000099194                                            |
| 10 | 102289795 | 102290019 | 5Y-H4K8ac_peak_2569 | 7.04637  | SEC31B_ENSG00000075826;NDUFB8_ENSG00000255339;NDUFB8_ENSG00000166136;HIF1AN_ENSG00000166135 |
| 10 | 102397496 | 102397850 | 5Y-H4K8ac_peak_2570 | 10.19948 |                                                                                             |
| 10 | 102441244 | 102441457 | 5Y-H4K8ac_peak_2571 | 8.43511  |                                                                                             |
| 10 | 102443102 | 102443667 | 5Y-H4K8ac_peak_2572 | 6.37023  |                                                                                             |
| 10 | 102444869 | 102445506 | 5Y-H4K8ac_peak_2573 | 14.10646 |                                                                                             |
| 10 | 102448005 | 102448239 | 5Y-H4K8ac_peak_2574 | 6.77436  |                                                                                             |

|    |           |           |                     |          |                                                        |
|----|-----------|-----------|---------------------|----------|--------------------------------------------------------|
| 10 | 102470054 | 102470251 | 5Y-H4K8ac_peak_2575 | 5.87725  |                                                        |
| 10 | 102472836 | 102473279 | 5Y-H4K8ac_peak_2576 | 8.2913   |                                                        |
| 10 | 102568391 | 102568644 | 5Y-H4K8ac_peak_2577 | 6.82266  |                                                        |
| 10 | 102728827 | 102729021 | 5Y-H4K8ac_peak_2578 | 4.77126  | SEMA4G_ENSG00000095539                                 |
| 10 | 102746744 | 102747188 | 5Y-H4K8ac_peak_2579 | 6.86362  | MRPL43_ENSG00000055950;C10orf2_ENSG00000107815         |
| 10 | 102757561 | 102757866 | 5Y-H4K8ac_peak_2580 | 8.43511  |                                                        |
| 10 | 102758059 | 102758368 | 5Y-H4K8ac_peak_2581 | 6.43068  |                                                        |
| 10 | 102758680 | 102759322 | 5Y-H4K8ac_peak_2582 | 13.92877 |                                                        |
| 10 | 102778433 | 102778687 | 5Y-H4K8ac_peak_2583 | 5.91107  |                                                        |
| 10 | 102791821 | 102792030 | 5Y-H4K8ac_peak_2584 | 4.97086  | PDZD7_ENSG00000186862;SFXN3_ENSG00000107819            |
| 10 | 102792665 | 102792875 | 5Y-H4K8ac_peak_2585 | 5.96059  |                                                        |
| 10 | 102820515 | 102821795 | 5Y-H4K8ac_peak_2586 | 22.54299 | RP11-108L7.15_ENSG00000273162;KAZALD1_ENSG00000107821  |
| 10 | 102901661 | 102902125 | 5Y-H4K8ac_peak_2587 | 16.9826  |                                                        |
| 10 | 103051120 | 103051517 | 5Y-H4K8ac_peak_2588 | 13.00733 |                                                        |
| 10 | 103052581 | 103053062 | 5Y-H4K8ac_peak_2589 | 4.50834  |                                                        |
| 10 | 103070115 | 103070451 | 5Y-H4K8ac_peak_2590 | 9.79526  | RP11-107I14.2_ENSG00000225208                          |
| 10 | 103319492 | 103319825 | 5Y-H4K8ac_peak_2591 | 6.78128  |                                                        |
| 10 | 103347451 | 103347854 | 5Y-H4K8ac_peak_2592 | 6.37023  | POLL_ENSG00000166169                                   |
| 10 | 103453919 | 103455214 | 5Y-H4K8ac_peak_2593 | 10.60083 | FBXW4_ENSG00000107829                                  |
| 10 | 103590852 | 103591056 | 5Y-H4K8ac_peak_2594 | 8.43511  |                                                        |
| 10 | 103815466 | 103815860 | 5Y-H4K8ac_peak_2595 | 7.31102  | C10orf76_ENSG00000120029                               |
| 10 | 103816334 | 103816611 | 5Y-H4K8ac_peak_2596 | 8.2913   | C10orf76_ENSG00000120029                               |
| 10 | 103825132 | 103825579 | 5Y-H4K8ac_peak_2597 | 5.87725  | HPS6_ENSG00000166189                                   |
| 10 | 103873904 | 103874456 | 5Y-H4K8ac_peak_2598 | 6.67017  |                                                        |
| 10 | 103876850 | 103877105 | 5Y-H4K8ac_peak_2599 | 12.05638 |                                                        |
| 10 | 103877797 | 103878048 | 5Y-H4K8ac_peak_2600 | 8.69112  |                                                        |
| 10 | 103881150 | 103881656 | 5Y-H4K8ac_peak_2601 | 9.96543  | LDB1_ENSG00000198728                                   |
| 10 | 103892884 | 103893074 | 5Y-H4K8ac_peak_2602 | 6.22904  | PPRC1_ENSG00000148840                                  |
| 10 | 103911469 | 103911695 | 5Y-H4K8ac_peak_2603 | 6.50117  | NOLC1_ENSG00000166197                                  |
| 10 | 103929843 | 103930103 | 5Y-H4K8ac_peak_2604 | 8.93923  |                                                        |
| 10 | 104169106 | 104169372 | 5Y-H4K8ac_peak_2605 | 4.84727  |                                                        |
| 10 | 104179547 | 104179789 | 5Y-H4K8ac_peak_2606 | 8.43511  | FBXL15_ENSG00000107872                                 |
| 10 | 104192861 | 104193064 | 5Y-H4K8ac_peak_2607 | 6.24511  | CUEDC2_ENSG00000107874                                 |
| 10 | 104210440 | 104210860 | 5Y-H4K8ac_peak_2608 | 13.68515 | RP11-18I14.10_ENSG00000269609;C10orf95_ENSG00000120055 |
| 10 | 104220130 | 104220381 | 5Y-H4K8ac_peak_2609 | 5.67283  | TMEM180_ENSG00000138111                                |
| 10 | 104387053 | 104388104 | 5Y-H4K8ac_peak_2610 | 18.22112 |                                                        |
| 10 | 104388411 | 104389407 | 5Y-H4K8ac_peak_2611 | 8.73985  |                                                        |
| 10 | 104390084 | 104390280 | 5Y-H4K8ac_peak_2612 | 6.52343  |                                                        |
| 10 | 104402146 | 104402535 | 5Y-H4K8ac_peak_2613 | 13.86507 |                                                        |
| 10 | 104420286 | 104421406 | 5Y-H4K8ac_peak_2614 | 9.30338  |                                                        |
| 10 | 104473472 | 104474011 | 5Y-H4K8ac_peak_2615 | 9.52603  | ARL3_ENSG00000138175;SFXN2_ENSG00000156398             |
| 10 | 104629602 | 104629858 | 5Y-H4K8ac_peak_2616 | 7.63144  | AS3MT_ENSG00000214435                                  |
| 10 | 104678289 | 104678499 | 5Y-H4K8ac_peak_2617 | 5.98695  | CNNM2_ENSG00000148842                                  |
| 10 | 104953181 | 104953406 | 5Y-H4K8ac_peak_2618 | 11.99586 | NT5C2_ENSG00000076685                                  |
| 10 | 105037019 | 105037218 | 5Y-H4K8ac_peak_2619 | 5.24695  | INA_ENSG00000148798                                    |
| 10 | 105110348 | 105110563 | 5Y-H4K8ac_peak_2620 | 9.7353   | PCGF6_ENSG00000156374                                  |

|    |           |           |                     |          |                                                   |
|----|-----------|-----------|---------------------|----------|---------------------------------------------------|
| 10 | 105126624 | 105126908 | 5Y-H4K8ac_peak_2621 | 6.49308  | TAF5_ENSG00000148835                              |
| 10 | 105261958 | 105262161 | 5Y-H4K8ac_peak_2622 | 4.29586  |                                                   |
| 10 | 105303832 | 105304038 | 5Y-H4K8ac_peak_2623 | 5.35202  |                                                   |
| 10 | 105315151 | 105315416 | 5Y-H4K8ac_peak_2624 | 4.07874  |                                                   |
| 10 | 105377846 | 105378398 | 5Y-H4K8ac_peak_2625 | 8.27643  |                                                   |
| 10 | 105480500 | 105480770 | 5Y-H4K8ac_peak_2626 | 5.99504  |                                                   |
| 10 | 105486639 | 105487588 | 5Y-H4K8ac_peak_2627 | 21.35466 |                                                   |
| 10 | 105492277 | 105492556 | 5Y-H4K8ac_peak_2628 | 9.05168  |                                                   |
| 10 | 105498192 | 105498403 | 5Y-H4K8ac_peak_2629 | 8.47164  |                                                   |
| 10 | 105539088 | 105539291 | 5Y-H4K8ac_peak_2630 | 5.449    |                                                   |
| 10 | 105564673 | 105565108 | 5Y-H4K8ac_peak_2631 | 7.07936  |                                                   |
| 10 | 105633530 | 105633749 | 5Y-H4K8ac_peak_2632 | 4.79658  |                                                   |
| 10 | 105881073 | 105881294 | 5Y-H4K8ac_peak_2633 | 7.59101  | SFR1_ENSG00000156384                              |
| 10 | 105881929 | 105882129 | 5Y-H4K8ac_peak_2634 | 10.1994  | SFR1_ENSG00000156384                              |
| 10 | 106014410 | 106015031 | 5Y-H4K8ac_peak_2635 | 8.62703  |                                                   |
| 10 | 106059352 | 106059710 | 5Y-H4K8ac_peak_2636 | 5.98695  |                                                   |
| 10 | 106060153 | 106060507 | 5Y-H4K8ac_peak_2637 | 7.97699  |                                                   |
| 10 | 106398425 | 106398626 | 5Y-H4K8ac_peak_2638 | 6.10478  |                                                   |
| 10 | 106492507 | 106492717 | 5Y-H4K8ac_peak_2639 | 6.79955  |                                                   |
| 10 | 108327247 | 108327444 | 5Y-H4K8ac_peak_2640 | 4.07874  |                                                   |
| 10 | 108328163 | 108328436 | 5Y-H4K8ac_peak_2641 | 6.34046  |                                                   |
| 10 | 108475378 | 108475584 | 5Y-H4K8ac_peak_2642 | 6.43775  |                                                   |
| 10 | 108602432 | 108602730 | 5Y-H4K8ac_peak_2643 | 14.81591 |                                                   |
| 10 | 108762687 | 108762929 | 5Y-H4K8ac_peak_2644 | 6.13909  |                                                   |
| 10 | 108924062 | 108924375 | 5Y-H4K8ac_peak_2645 | 6.53157  | SORCS1_ENSG00000108018                            |
| 10 | 109304553 | 109304759 | 5Y-H4K8ac_peak_2646 | 5.87382  |                                                   |
| 10 | 109305327 | 109305761 | 5Y-H4K8ac_peak_2647 | 11.42066 |                                                   |
| 10 | 109674044 | 109674509 | 5Y-H4K8ac_peak_2648 | 7.38046  |                                                   |
| 10 | 111766932 | 111767549 | 5Y-H4K8ac_peak_2649 | 13.2534  |                                                   |
| 10 | 111970059 | 111970508 | 5Y-H4K8ac_peak_2650 | 6.00382  |                                                   |
| 10 | 112219520 | 112220475 | 5Y-H4K8ac_peak_2651 | 8.75926  |                                                   |
| 10 | 112395927 | 112396272 | 5Y-H4K8ac_peak_2652 | 5.28616  |                                                   |
| 10 | 112403509 | 112404219 | 5Y-H4K8ac_peak_2653 | 11.53521 | Y_RNA_ENSG00000223302;RBM20_ENSG00000203867       |
| 10 | 112541365 | 112541749 | 5Y-H4K8ac_peak_2654 | 5.03335  |                                                   |
| 10 | 112545848 | 112546441 | 5Y-H4K8ac_peak_2655 | 8.31252  |                                                   |
| 10 | 112549275 | 112549572 | 5Y-H4K8ac_peak_2656 | 5.64909  |                                                   |
| 10 | 112554566 | 112554899 | 5Y-H4K8ac_peak_2657 | 6.52593  |                                                   |
| 10 | 112580042 | 112580286 | 5Y-H4K8ac_peak_2658 | 6.20875  |                                                   |
| 10 | 112631836 | 112632049 | 5Y-H4K8ac_peak_2659 | 7.89273  | PDCD4-AS1_ENSG00000203497;PDCD4_ENSG00000150593   |
| 10 | 113943077 | 113943433 | 5Y-H4K8ac_peak_2660 | 7.31815  |                                                   |
| 10 | 114207037 | 114207228 | 5Y-H4K8ac_peak_2661 | 7.97699  | ZDHHC6_ENSG0000023041;VTI1A_ENSG00000151532       |
| 10 | 115613730 | 115614340 | 5Y-H4K8ac_peak_2662 | 8.30301  | DCLRE1A_ENSG00000198924;NHLRC2_ENSG00000196865    |
| 10 | 115614540 | 115614992 | 5Y-H4K8ac_peak_2663 | 13.2534  | DCLRE1A_ENSG00000198924;NHLRC2_ENSG00000196865    |
| 10 | 115707143 | 115707794 | 5Y-H4K8ac_peak_2664 | 9.79526  |                                                   |
| 10 | 115860615 | 115860849 | 5Y-H4K8ac_peak_2665 | 6.50117  |                                                   |
| 10 | 115933524 | 115933874 | 5Y-H4K8ac_peak_2666 | 5.91107  | C10orf118_ENSG00000165813;MIR2110_ENSG00000238742 |

|    |           |           |                     |          |                                                   |
|----|-----------|-----------|---------------------|----------|---------------------------------------------------|
| 10 | 116070329 | 116070556 | 5Y-H4K8ac_peak_2667 | 5.8635   |                                                   |
| 10 | 116127237 | 116127503 | 5Y-H4K8ac_peak_2668 | 5.23083  |                                                   |
| 10 | 116527610 | 116527896 | 5Y-H4K8ac_peak_2669 | 4.07874  |                                                   |
| 10 | 116581591 | 116582108 | 5Y-H4K8ac_peak_2670 | 9.30505  | FAM160B1_ENSG00000151553                          |
| 10 | 117863391 | 117863703 | 5Y-H4K8ac_peak_2671 | 7.17184  |                                                   |
| 10 | 117945591 | 117945802 | 5Y-H4K8ac_peak_2672 | 6.34046  |                                                   |
| 10 | 118011165 | 118011389 | 5Y-H4K8ac_peak_2673 | 5.40331  |                                                   |
| 10 | 118481309 | 118482121 | 5Y-H4K8ac_peak_2674 | 8.43511  |                                                   |
| 10 | 118482962 | 118483394 | 5Y-H4K8ac_peak_2675 | 9.31608  |                                                   |
| 10 | 118501395 | 118501614 | 5Y-H4K8ac_peak_2676 | 5.12213  | HSPA12A_ENSG00000165868                           |
| 10 | 118502696 | 118502947 | 5Y-H4K8ac_peak_2677 | 10.11191 | HSPA12A_ENSG00000165868                           |
| 10 | 118595685 | 118595878 | 5Y-H4K8ac_peak_2678 | 6.34046  |                                                   |
| 10 | 118609087 | 118609490 | 5Y-H4K8ac_peak_2679 | 8.08688  | RP11-539I5.1_ENSG00000225302;ENO4_ENSG00000188316 |
| 10 | 118764445 | 118764678 | 5Y-H4K8ac_peak_2680 | 7.60057  |                                                   |
| 10 | 118976479 | 118976996 | 5Y-H4K8ac_peak_2681 | 8.8021   |                                                   |
| 10 | 119135207 | 119135493 | 5Y-H4K8ac_peak_2682 | 6.75784  | PDZD8_ENSG00000165650                             |
| 10 | 119261195 | 119261405 | 5Y-H4K8ac_peak_2683 | 6.55906  |                                                   |
| 10 | 119262287 | 119262570 | 5Y-H4K8ac_peak_2684 | 9.89244  |                                                   |
| 10 | 119263090 | 119263479 | 5Y-H4K8ac_peak_2685 | 8.04943  |                                                   |
| 10 | 119806208 | 119806813 | 5Y-H4K8ac_peak_2686 | 12.71156 | RAB11FIP2_ENSG00000107560;CASC2_ENSG00000177640   |
| 10 | 120101940 | 120102157 | 5Y-H4K8ac_peak_2687 | 5.91107  | FAM204A_ENSG00000165669                           |
| 10 | 120207039 | 120207333 | 5Y-H4K8ac_peak_2688 | 4.77126  |                                                   |
| 10 | 120369344 | 120369813 | 5Y-H4K8ac_peak_2689 | 5.59843  |                                                   |
| 10 | 120374783 | 120375081 | 5Y-H4K8ac_peak_2690 | 5.72848  |                                                   |
| 10 | 120429531 | 120430786 | 5Y-H4K8ac_peak_2691 | 13.12848 |                                                   |
| 10 | 120667885 | 120668496 | 5Y-H4K8ac_peak_2692 | 8.43511  |                                                   |
| 10 | 120782387 | 120782657 | 5Y-H4K8ac_peak_2693 | 5.54013  |                                                   |
| 10 | 120783128 | 120783357 | 5Y-H4K8ac_peak_2694 | 9.23159  |                                                   |
| 10 | 120784708 | 120785015 | 5Y-H4K8ac_peak_2695 | 8.69112  |                                                   |
| 10 | 120788408 | 120788774 | 5Y-H4K8ac_peak_2696 | 5.98695  | NANOS1_ENSG00000188613                            |
| 10 | 120839782 | 120840155 | 5Y-H4K8ac_peak_2697 | 10.1994  | EIF3A_ENSG00000107581                             |
| 10 | 120863687 | 120863995 | 5Y-H4K8ac_peak_2698 | 6.77436  | FAM45A_ENSG00000119979                            |
| 10 | 120966541 | 120966849 | 5Y-H4K8ac_peak_2699 | 11.4254  | GRK5_ENSG00000198873                              |
| 10 | 120982274 | 120982491 | 5Y-H4K8ac_peak_2700 | 5.23083  |                                                   |
| 10 | 121171596 | 121171802 | 5Y-H4K8ac_peak_2701 | 7.89273  |                                                   |
| 10 | 121173093 | 121173502 | 5Y-H4K8ac_peak_2702 | 6.50117  |                                                   |
| 10 | 121302562 | 121302900 | 5Y-H4K8ac_peak_2703 | 4.89128  | RGS10_ENSG00000148908                             |
| 10 | 121355747 | 121355971 | 5Y-H4K8ac_peak_2704 | 8.43511  | TIAL1_ENSG00000151923                             |
| 10 | 121356165 | 121356424 | 5Y-H4K8ac_peak_2705 | 10.54764 | TIAL1_ENSG00000151923                             |
| 10 | 121410474 | 121410690 | 5Y-H4K8ac_peak_2706 | 7.20869  | BAG3_ENSG00000151929                              |
| 10 | 121415918 | 121416139 | 5Y-H4K8ac_peak_2707 | 7.21406  |                                                   |
| 10 | 121484992 | 121485268 | 5Y-H4K8ac_peak_2708 | 13.27281 | INPP5F_ENSG00000198825                            |
| 10 | 121485651 | 121485950 | 5Y-H4K8ac_peak_2709 | 6.54441  | INPP5F_ENSG00000198825                            |
| 10 | 121631790 | 121632363 | 5Y-H4K8ac_peak_2710 | 14.31711 |                                                   |
| 10 | 121632665 | 121633083 | 5Y-H4K8ac_peak_2711 | 10.1994  |                                                   |
| 10 | 122610030 | 122610386 | 5Y-H4K8ac_peak_2712 | 11.36844 | WDR11-AS1_ENSG00000227165;WDR11_ENSG00000120008   |

|    |           |           |                     |          |                                                                            |
|----|-----------|-----------|---------------------|----------|----------------------------------------------------------------------------|
| 10 | 122610941 | 122611260 | 5Y-H4K8ac_peak_2713 | 4.29586  | WDR11-AS1_ENSG00000227165;WDR11_ENSG00000120008                            |
| 10 | 122802711 | 122802951 | 5Y-H4K8ac_peak_2714 | 5.65584  |                                                                            |
| 10 | 123357434 | 123357815 | 5Y-H4K8ac_peak_2715 | 12.65187 | FGFR2_ENSG00000066468                                                      |
| 10 | 123368114 | 123368620 | 5Y-H4K8ac_peak_2716 | 9.44542  |                                                                            |
| 10 | 123403881 | 123404153 | 5Y-H4K8ac_peak_2717 | 4.15658  |                                                                            |
| 10 | 123427306 | 123427665 | 5Y-H4K8ac_peak_2718 | 9.19468  |                                                                            |
| 10 | 123429272 | 123429469 | 5Y-H4K8ac_peak_2719 | 8.20773  |                                                                            |
| 10 | 123469748 | 123470318 | 5Y-H4K8ac_peak_2720 | 5.41472  |                                                                            |
| 10 | 123687033 | 123687488 | 5Y-H4K8ac_peak_2721 | 11.53136 | ATE1_ENSG00000107669;ATE1-AS1_ENSG00000226864                              |
| 10 | 123687741 | 123688036 | 5Y-H4K8ac_peak_2722 | 9.51254  | ATE1_ENSG00000107669;ATE1-AS1_ENSG00000226864                              |
| 10 | 123734459 | 123734760 | 5Y-H4K8ac_peak_2723 | 12.52787 | NSMCE4A_ENSG00000107672                                                    |
| 10 | 123872653 | 123873500 | 5Y-H4K8ac_peak_2724 | 7.65114  |                                                                            |
| 10 | 123900196 | 123901073 | 5Y-H4K8ac_peak_2725 | 14.99673 |                                                                            |
| 10 | 123901703 | 123902406 | 5Y-H4K8ac_peak_2726 | 12.05638 |                                                                            |
| 10 | 123922523 | 123922737 | 5Y-H4K8ac_peak_2727 | 8.73392  |                                                                            |
| 10 | 123923225 | 123923503 | 5Y-H4K8ac_peak_2728 | 13.56578 |                                                                            |
| 10 | 123992810 | 123993475 | 5Y-H4K8ac_peak_2729 | 10.69698 |                                                                            |
| 10 | 124058588 | 124058867 | 5Y-H4K8ac_peak_2730 | 10.4689  |                                                                            |
| 10 | 124638859 | 124639424 | 5Y-H4K8ac_peak_2731 | 5.12213  | CUZD1_ENSG00000138161;FAM24B_ENSG00000213185;RP11-564D11.3_ENSG00000255624 |
| 10 | 124739729 | 124740143 | 5Y-H4K8ac_peak_2732 | 15.06486 |                                                                            |
| 10 | 124767767 | 124768244 | 5Y-H4K8ac_peak_2733 | 10.27264 | IKZF5_ENSG00000095574;ACADSB_ENSG00000196177                               |
| 10 | 124913932 | 124914192 | 5Y-H4K8ac_peak_2734 | 11.19336 | BUB3_ENSG00000154473                                                       |
| 10 | 125981513 | 125981757 | 5Y-H4K8ac_peak_2735 | 8.564    |                                                                            |
| 10 | 126043114 | 126043475 | 5Y-H4K8ac_peak_2736 | 9.99623  |                                                                            |
| 10 | 126185252 | 126185562 | 5Y-H4K8ac_peak_2737 | 4.29586  |                                                                            |
| 10 | 126210961 | 126211226 | 5Y-H4K8ac_peak_2738 | 8.2913   |                                                                            |
| 10 | 126213588 | 126214804 | 5Y-H4K8ac_peak_2739 | 13.99721 |                                                                            |
| 10 | 126224509 | 126224792 | 5Y-H4K8ac_peak_2740 | 6.72926  |                                                                            |
| 10 | 126228566 | 126228782 | 5Y-H4K8ac_peak_2741 | 6.12014  |                                                                            |
| 10 | 126336449 | 126337280 | 5Y-H4K8ac_peak_2742 | 9.38276  |                                                                            |
| 10 | 126337888 | 126338280 | 5Y-H4K8ac_peak_2743 | 7.37325  |                                                                            |
| 10 | 126358696 | 126359020 | 5Y-H4K8ac_peak_2744 | 7.0618   |                                                                            |
| 10 | 126359826 | 126360185 | 5Y-H4K8ac_peak_2745 | 5.90602  |                                                                            |
| 10 | 126367150 | 126367375 | 5Y-H4K8ac_peak_2746 | 5.56894  |                                                                            |
| 10 | 126431785 | 126432150 | 5Y-H4K8ac_peak_2747 | 6.36454  | FAM53B_ENSG00000189319                                                     |
| 10 | 126432406 | 126432669 | 5Y-H4K8ac_peak_2748 | 5.67283  | FAM53B_ENSG00000189319                                                     |
| 10 | 126479375 | 126479656 | 5Y-H4K8ac_peak_2749 | 6.50117  | RP11-12J10.3_ENSG00000258539;METTL10_ENSG00000203791                       |
| 10 | 126479910 | 126480629 | 5Y-H4K8ac_peak_2750 | 7.31102  | RP11-12J10.3_ENSG00000258539;METTL10_ENSG00000203791                       |
| 10 | 126481410 | 126481607 | 5Y-H4K8ac_peak_2751 | 4.29586  | METTL10_ENSG00000203791                                                    |
| 10 | 126490478 | 126490721 | 5Y-H4K8ac_peak_2752 | 8.76608  | FAM175B_ENSG00000165660                                                    |
| 10 | 126605910 | 126606208 | 5Y-H4K8ac_peak_2753 | 4.84727  | RP11-298J20.4_ENSG00000249456                                              |
| 10 | 126703416 | 126703850 | 5Y-H4K8ac_peak_2754 | 5.57299  |                                                                            |
| 10 | 126711079 | 126711870 | 5Y-H4K8ac_peak_2755 | 11.22005 |                                                                            |
| 10 | 126745459 | 126745675 | 5Y-H4K8ac_peak_2756 | 8.83356  |                                                                            |
| 10 | 126848286 | 126848488 | 5Y-H4K8ac_peak_2757 | 10.11191 |                                                                            |
| 10 | 126848745 | 126849042 | 5Y-H4K8ac_peak_2758 | 4.84727  | CTBP2_ENSG00000175029                                                      |



|    |           |           |                     |          |                                                      |
|----|-----------|-----------|---------------------|----------|------------------------------------------------------|
| 10 | 126850317 | 126850955 | 5Y-H4K8ac_peak_2759 | 11.09973 | CTBP2_ENSG00000175029                                |
| 10 | 127202107 | 127202720 | 5Y-H4K8ac_peak_2760 | 6.50117  |                                                      |
| 10 | 127584324 | 127584685 | 5Y-H4K8ac_peak_2761 | 5.03564  | DHX32_ENSG00000089876;FANK1_ENSG00000203780          |
| 10 | 127746262 | 127746863 | 5Y-H4K8ac_peak_2762 | 10.19948 |                                                      |
| 10 | 127923651 | 127924087 | 5Y-H4K8ac_peak_2763 | 9.23159  |                                                      |
| 10 | 127924349 | 127924652 | 5Y-H4K8ac_peak_2764 | 9.15007  |                                                      |
| 10 | 127947150 | 127947474 | 5Y-H4K8ac_peak_2765 | 6.34046  |                                                      |
| 10 | 128062541 | 128062825 | 5Y-H4K8ac_peak_2766 | 4.50834  |                                                      |
| 10 | 128077050 | 128077509 | 5Y-H4K8ac_peak_2767 | 6.50117  | ADAM12_ENSG00000148848                               |
| 10 | 128594421 | 128594612 | 5Y-H4K8ac_peak_2768 | 5.41472  | DOCK1_ENSG00000150760                                |
| 10 | 129185177 | 129185370 | 5Y-H4K8ac_peak_2769 | 6.34046  |                                                      |
| 10 | 129686199 | 129686522 | 5Y-H4K8ac_peak_2770 | 5.28616  |                                                      |
| 10 | 129948484 | 129948817 | 5Y-H4K8ac_peak_2771 | 10.86079 |                                                      |
| 10 | 130008906 | 130009626 | 5Y-H4K8ac_peak_2772 | 7.38046  |                                                      |
| 10 | 130010796 | 130011095 | 5Y-H4K8ac_peak_2773 | 5.51139  |                                                      |
| 10 | 130324329 | 130324553 | 5Y-H4K8ac_peak_2774 | 7.69843  |                                                      |
| 10 | 131264910 | 131265242 | 5Y-H4K8ac_peak_2775 | 17.04136 | MGMT_ENSG00000170430                                 |
| 10 | 131265525 | 131265974 | 5Y-H4K8ac_peak_2776 | 14.49096 | MGMT_ENSG00000170430                                 |
| 10 | 131366430 | 131366685 | 5Y-H4K8ac_peak_2777 | 6.77436  |                                                      |
| 10 | 131645324 | 131645517 | 5Y-H4K8ac_peak_2778 | 5.90587  |                                                      |
| 10 | 131661853 | 131662063 | 5Y-H4K8ac_peak_2779 | 4.79585  |                                                      |
| 10 | 131663791 | 131663990 | 5Y-H4K8ac_peak_2780 | 5.68769  |                                                      |
| 10 | 131668619 | 131669022 | 5Y-H4K8ac_peak_2781 | 7.89273  |                                                      |
| 10 | 131687385 | 131687854 | 5Y-H4K8ac_peak_2782 | 6.14981  |                                                      |
| 10 | 131748312 | 131748558 | 5Y-H4K8ac_peak_2783 | 9.78792  |                                                      |
| 10 | 131846550 | 131846792 | 5Y-H4K8ac_peak_2784 | 5.65584  |                                                      |
| 10 | 131909662 | 131910057 | 5Y-H4K8ac_peak_2785 | 7.30348  | LINC00959_ENSG00000237489                            |
| 10 | 131934130 | 131934443 | 5Y-H4K8ac_peak_2786 | 9.38276  |                                                      |
| 10 | 131989012 | 131989285 | 5Y-H4K8ac_peak_2787 | 10.79063 |                                                      |
| 10 | 132893080 | 132893323 | 5Y-H4K8ac_peak_2788 | 5.07473  | TCERG1L-AS1_ENSG00000230098                          |
| 10 | 132897238 | 132897455 | 5Y-H4K8ac_peak_2789 | 4.84727  |                                                      |
| 10 | 133794993 | 133795272 | 5Y-H4K8ac_peak_2790 | 9.15007  | BNIP3_ENSG00000176171                                |
| 10 | 133795758 | 133796357 | 5Y-H4K8ac_peak_2791 | 9.01738  | BNIP3_ENSG00000176171                                |
| 10 | 133999864 | 134000163 | 5Y-H4K8ac_peak_2792 | 9.38276  | RP11-140A10.3_ENSG00000235010;DPYSL4_ENSG00000151640 |
| 10 | 134036909 | 134037362 | 5Y-H4K8ac_peak_2793 | 9.30505  |                                                      |
| 10 | 134050947 | 134051309 | 5Y-H4K8ac_peak_2794 | 12.3708  |                                                      |
| 10 | 134052484 | 134052750 | 5Y-H4K8ac_peak_2795 | 6.08523  |                                                      |
| 10 | 134052997 | 134053203 | 5Y-H4K8ac_peak_2796 | 4.55128  |                                                      |
| 10 | 134053619 | 134054002 | 5Y-H4K8ac_peak_2797 | 5.60566  |                                                      |
| 10 | 134078708 | 134079046 | 5Y-H4K8ac_peak_2798 | 4.00285  |                                                      |
| 10 | 134083285 | 134083606 | 5Y-H4K8ac_peak_2799 | 5.59843  |                                                      |
| 10 | 134095248 | 134095543 | 5Y-H4K8ac_peak_2800 | 5.68769  |                                                      |
| 10 | 134106606 | 134107818 | 5Y-H4K8ac_peak_2801 | 13.12848 |                                                      |
| 10 | 134110418 | 134110672 | 5Y-H4K8ac_peak_2802 | 10.1994  |                                                      |
| 10 | 134122147 | 134122434 | 5Y-H4K8ac_peak_2803 | 9.52603  |                                                      |
| 10 | 134210313 | 134210531 | 5Y-H4K8ac_peak_2804 | 7.47209  | PWWP2B_ENSG00000171813                               |

|    |           |           |                     |          |                                                   |
|----|-----------|-----------|---------------------|----------|---------------------------------------------------|
| 10 | 134330439 | 134331014 | 5Y-H4K8ac_peak_2805 | 6.08523  | RP11-432J24.5_ENSG00000226900                     |
| 10 | 134331214 | 134331404 | 5Y-H4K8ac_peak_2806 | 8.58926  | RP11-432J24.5_ENSG00000226900                     |
| 10 | 134350388 | 134350787 | 5Y-H4K8ac_peak_2807 | 9.23159  | INPP5A_ENSG00000068383                            |
| 10 | 134549896 | 134550168 | 5Y-H4K8ac_peak_2808 | 7.56545  |                                                   |
| 10 | 134755800 | 134756892 | 5Y-H4K8ac_peak_2809 | 10.19948 | TTC40_ENSG00000171811                             |
| 10 | 134800968 | 134801214 | 5Y-H4K8ac_peak_2810 | 7.87406  |                                                   |
| 10 | 134801786 | 134802186 | 5Y-H4K8ac_peak_2811 | 12.76485 |                                                   |
| 10 | 135132079 | 135132652 | 5Y-H4K8ac_peak_2812 | 20.04267 |                                                   |
| 10 | 135139412 | 135139725 | 5Y-H4K8ac_peak_2813 | 5.98695  |                                                   |
| 10 | 135171264 | 135171478 | 5Y-H4K8ac_peak_2814 | 8.79957  | FUOM_ENSG00000148803                              |
| 10 | 135171925 | 135172162 | 5Y-H4K8ac_peak_2815 | 9.62714  | FUOM_ENSG00000148803                              |
| 10 | 135186975 | 135187170 | 5Y-H4K8ac_peak_2816 | 6.53157  | ECHS1_ENSG00000127884                             |
| 10 | 135207844 | 135208182 | 5Y-H4K8ac_peak_2817 | 5.23083  | MTG1_ENSG00000148824                              |
| 11 | 208250    | 208695    | 5Y-H4K8ac_peak_2818 | 4.68359  | BET1L_ENSG00000177951;RIC8A_ENSG00000177963       |
| 11 | 237051    | 237324    | 5Y-H4K8ac_peak_2819 | 9.78792  | SIRT3_ENSG00000142082;PSMD13_ENSG00000185627      |
| 11 | 355560    | 356047    | 5Y-H4K8ac_peak_2820 | 14.31711 |                                                   |
| 11 | 396446    | 396932    | 5Y-H4K8ac_peak_2821 | 8.564    |                                                   |
| 11 | 506384    | 506739    | 5Y-H4K8ac_peak_2822 | 10.35586 | RNH1_ENSG00000023191                              |
| 11 | 534839    | 535164    | 5Y-H4K8ac_peak_2823 | 6.55225  |                                                   |
| 11 | 535870    | 536174    | 5Y-H4K8ac_peak_2824 | 6.69752  |                                                   |
| 11 | 568861    | 569220    | 5Y-H4K8ac_peak_2825 | 8.24461  | MIR210HG_ENSG00000247095;MIR210_ENSG00000199038   |
| 11 | 576225    | 576680    | 5Y-H4K8ac_peak_2826 | 8.69112  | PHRF1_ENSG00000070047                             |
| 11 | 695868    | 696254    | 5Y-H4K8ac_peak_2827 | 6.64195  | TMEM80_ENSG00000177042                            |
| 11 | 721040    | 721445    | 5Y-H4K8ac_peak_2828 | 8.51022  |                                                   |
| 11 | 728318    | 728572    | 5Y-H4K8ac_peak_2829 | 8.79957  |                                                   |
| 11 | 746924    | 747223    | 5Y-H4K8ac_peak_2830 | 8.4454   | TALDO1_ENSG00000177156                            |
| 11 | 793213    | 793518    | 5Y-H4K8ac_peak_2831 | 6.37023  |                                                   |
| 11 | 804856    | 805192    | 5Y-H4K8ac_peak_2832 | 4.15658  |                                                   |
| 11 | 805454    | 805942    | 5Y-H4K8ac_peak_2833 | 6.78128  |                                                   |
| 11 | 808886    | 809779    | 5Y-H4K8ac_peak_2834 | 9.51254  | PIDD_ENSG00000177595;RPLP2_ENSG00000177600        |
| 11 | 810195    | 810475    | 5Y-H4K8ac_peak_2835 | 6.77436  | PIDD_ENSG00000177595;RPLP2_ENSG00000177600        |
| 11 | 818833    | 819383    | 5Y-H4K8ac_peak_2836 | 9.23159  | PNPLA2_ENSG00000177666                            |
| 11 | 855263    | 856116    | 5Y-H4K8ac_peak_2837 | 10.6523  |                                                   |
| 11 | 856309    | 856598    | 5Y-H4K8ac_peak_2838 | 5.89922  |                                                   |
| 11 | 856960    | 857188    | 5Y-H4K8ac_peak_2839 | 9.76277  |                                                   |
| 11 | 890145    | 890597    | 5Y-H4K8ac_peak_2840 | 6.52343  |                                                   |
| 11 | 911166    | 911713    | 5Y-H4K8ac_peak_2841 | 5.24695  |                                                   |
| 11 | 924836    | 925634    | 5Y-H4K8ac_peak_2842 | 9.51254  | AP2A2_ENSG00000183020                             |
| 11 | 1054083   | 1054358   | 5Y-H4K8ac_peak_2843 | 6.00382  |                                                   |
| 11 | 1331037   | 1331573   | 5Y-H4K8ac_peak_2844 | 17.04999 | TOLLIP_ENSG00000078902;TOLLIP-AS1_ENSG00000255153 |
| 11 | 1403855   | 1404456   | 5Y-H4K8ac_peak_2845 | 7.20869  |                                                   |
| 11 | 1420050   | 1420424   | 5Y-H4K8ac_peak_2846 | 5.34199  |                                                   |
| 11 | 1522808   | 1523014   | 5Y-H4K8ac_peak_2847 | 6.57504  | MOB2_ENSG00000182208                              |
| 11 | 1567752   | 1569051   | 5Y-H4K8ac_peak_2848 | 21.33748 |                                                   |
| 11 | 1569461   | 1569832   | 5Y-H4K8ac_peak_2849 | 8.2913   |                                                   |
| 11 | 1592633   | 1592921   | 5Y-H4K8ac_peak_2850 | 6.50117  | DUSP8_ENSG00000184545;KRTAP5-AS1_ENSG00000233930  |

|    |         |         |                     |          |                                                                            |
|----|---------|---------|---------------------|----------|----------------------------------------------------------------------------|
| 11 | 1593718 | 1594158 | 5Y-H4K8ac_peak_2851 | 14.2053  | DUSP8_ENSG00000184545                                                      |
| 11 | 1649720 | 1650091 | 5Y-H4K8ac_peak_2852 | 6.78128  | KRTAP5-5_ENSG00000185940                                                   |
| 11 | 1661093 | 1661283 | 5Y-H4K8ac_peak_2853 | 6.43068  |                                                                            |
| 11 | 1661630 | 1661971 | 5Y-H4K8ac_peak_2854 | 6.1654   |                                                                            |
| 11 | 1674167 | 1674722 | 5Y-H4K8ac_peak_2855 | 7.89273  |                                                                            |
| 11 | 1714736 | 1715891 | 5Y-H4K8ac_peak_2856 | 17.63051 |                                                                            |
| 11 | 1765499 | 1766334 | 5Y-H4K8ac_peak_2857 | 13.99721 |                                                                            |
| 11 | 1767730 | 1767954 | 5Y-H4K8ac_peak_2858 | 10.3915  |                                                                            |
| 11 | 1769202 | 1769395 | 5Y-H4K8ac_peak_2859 | 7.50148  |                                                                            |
| 11 | 1769712 | 1770433 | 5Y-H4K8ac_peak_2860 | 15.49668 |                                                                            |
| 11 | 1771008 | 1771533 | 5Y-H4K8ac_peak_2861 | 5.98695  | IFITM10_ENSG00000244242                                                    |
| 11 | 1772148 | 1772569 | 5Y-H4K8ac_peak_2862 | 5.23083  | IFITM10_ENSG00000244242                                                    |
| 11 | 1773394 | 1773960 | 5Y-H4K8ac_peak_2863 | 7.09658  |                                                                            |
| 11 | 1784825 | 1785070 | 5Y-H4K8ac_peak_2864 | 5.50568  | CTSD_ENSG00000117984;AC068580.5_ENSG00000229512;AC068580.1_ENSG00000265587 |
| 11 | 1847823 | 1848537 | 5Y-H4K8ac_peak_2865 | 10.90365 | SYT8_ENSG00000149043                                                       |
| 11 | 1848804 | 1849376 | 5Y-H4K8ac_peak_2866 | 5.24695  | SYT8_ENSG00000149043                                                       |
| 11 | 1851666 | 1851890 | 5Y-H4K8ac_peak_2867 | 4.67245  |                                                                            |
| 11 | 1856276 | 1856592 | 5Y-H4K8ac_peak_2868 | 4.642    |                                                                            |
| 11 | 1885384 | 1885672 | 5Y-H4K8ac_peak_2869 | 16.50659 | AC051649.12_ENSG00000249086                                                |
| 11 | 1895758 | 1896099 | 5Y-H4K8ac_peak_2870 | 4.90696  |                                                                            |
| 11 | 1896678 | 1897885 | 5Y-H4K8ac_peak_2871 | 25.55525 |                                                                            |
| 11 | 1898554 | 1899602 | 5Y-H4K8ac_peak_2872 | 15.20402 |                                                                            |
| 11 | 1901940 | 1902342 | 5Y-H4K8ac_peak_2873 | 6.54915  |                                                                            |
| 11 | 1928022 | 1928227 | 5Y-H4K8ac_peak_2874 | 4.84727  |                                                                            |
| 11 | 1960381 | 1960681 | 5Y-H4K8ac_peak_2875 | 5.98695  |                                                                            |
| 11 | 1967790 | 1968193 | 5Y-H4K8ac_peak_2876 | 11.28133 | MRPL23_ENSG00000214026                                                     |
| 11 | 1968594 | 1970293 | 5Y-H4K8ac_peak_2877 | 21.44514 | MRPL23_ENSG00000214026                                                     |
| 11 | 1975178 | 1976102 | 5Y-H4K8ac_peak_2878 | 8.24461  |                                                                            |
| 11 | 1977189 | 1978199 | 5Y-H4K8ac_peak_2879 | 15.45397 |                                                                            |
| 11 | 1988025 | 1988690 | 5Y-H4K8ac_peak_2880 | 11.67591 |                                                                            |
| 11 | 1989485 | 1991458 | 5Y-H4K8ac_peak_2881 | 13.34872 |                                                                            |
| 11 | 1997909 | 1998199 | 5Y-H4K8ac_peak_2882 | 9.99838  |                                                                            |
| 11 | 1999034 | 1999489 | 5Y-H4K8ac_peak_2883 | 11.4254  |                                                                            |
| 11 | 1999782 | 2000057 | 5Y-H4K8ac_peak_2884 | 8.27639  |                                                                            |
| 11 | 2000696 | 2004937 | 5Y-H4K8ac_peak_2885 | 14.89891 |                                                                            |
| 11 | 2006021 | 2006612 | 5Y-H4K8ac_peak_2886 | 5.57299  |                                                                            |
| 11 | 2009107 | 2009793 | 5Y-H4K8ac_peak_2887 | 15.15651 |                                                                            |
| 11 | 2010122 | 2010683 | 5Y-H4K8ac_peak_2888 | 9.31608  | MRPL23-AS1_ENSG00000226416                                                 |
| 11 | 2010978 | 2011187 | 5Y-H4K8ac_peak_2889 | 5.16687  | MRPL23-AS1_ENSG00000226416                                                 |
| 11 | 2011822 | 2012605 | 5Y-H4K8ac_peak_2890 | 9.93175  | MRPL23-AS1_ENSG00000226416;AC051649.6_ENSG00000232987                      |
| 11 | 2014704 | 2016045 | 5Y-H4K8ac_peak_2891 | 10.97738 |                                                                            |
| 11 | 2017959 | 2018270 | 5Y-H4K8ac_peak_2892 | 7.04158  |                                                                            |
| 11 | 2018523 | 2018942 | 5Y-H4K8ac_peak_2893 | 5.64909  |                                                                            |
| 11 | 2190290 | 2190678 | 5Y-H4K8ac_peak_2894 | 5.54773  |                                                                            |
| 11 | 2206456 | 2207143 | 5Y-H4K8ac_peak_2895 | 11.93212 |                                                                            |
| 11 | 2211238 | 2211810 | 5Y-H4K8ac_peak_2896 | 11.39862 |                                                                            |

|    |         |         |                     |          |                                                                             |
|----|---------|---------|---------------------|----------|-----------------------------------------------------------------------------|
| 11 | 2212012 | 2212872 | 5Y-H4K8ac_peak_2897 | 12.84845 |                                                                             |
| 11 | 2213871 | 2214552 | 5Y-H4K8ac_peak_2898 | 12.00715 |                                                                             |
| 11 | 2214818 | 2215225 | 5Y-H4K8ac_peak_2899 | 10.1994  |                                                                             |
| 11 | 2215648 | 2216145 | 5Y-H4K8ac_peak_2900 | 13.94026 |                                                                             |
| 11 | 2216466 | 2216711 | 5Y-H4K8ac_peak_2901 | 7.41197  |                                                                             |
| 11 | 2233989 | 2234188 | 5Y-H4K8ac_peak_2902 | 5.23083  |                                                                             |
| 11 | 2325280 | 2325471 | 5Y-H4K8ac_peak_2903 | 7.65114  |                                                                             |
| 11 | 2326280 | 2326539 | 5Y-H4K8ac_peak_2904 | 5.56912  |                                                                             |
| 11 | 2327554 | 2327838 | 5Y-H4K8ac_peak_2905 | 7.31807  |                                                                             |
| 11 | 2336519 | 2336920 | 5Y-H4K8ac_peak_2906 | 12.50545 |                                                                             |
| 11 | 2420610 | 2421412 | 5Y-H4K8ac_peak_2907 | 11.22005 | TSSC4_ENSG00000184281                                                       |
| 11 | 2422031 | 2422442 | 5Y-H4K8ac_peak_2908 | 16.00537 | TSSC4_ENSG00000184281                                                       |
| 11 | 2441354 | 2441866 | 5Y-H4K8ac_peak_2909 | 5.60566  |                                                                             |
| 11 | 2603290 | 2603619 | 5Y-H4K8ac_peak_2910 | 5.99504  |                                                                             |
| 11 | 2604200 | 2604451 | 5Y-H4K8ac_peak_2911 | 9.01738  |                                                                             |
| 11 | 2729615 | 2729828 | 5Y-H4K8ac_peak_2912 | 6.49458  |                                                                             |
| 11 | 2734643 | 2735512 | 5Y-H4K8ac_peak_2913 | 14.01193 |                                                                             |
| 11 | 2735712 | 2735923 | 5Y-H4K8ac_peak_2914 | 6.54441  |                                                                             |
| 11 | 2738186 | 2738380 | 5Y-H4K8ac_peak_2915 | 4.95697  |                                                                             |
| 11 | 2769664 | 2769998 | 5Y-H4K8ac_peak_2916 | 5.59843  |                                                                             |
| 11 | 2798011 | 2798255 | 5Y-H4K8ac_peak_2917 | 7.11863  |                                                                             |
| 11 | 2798864 | 2799928 | 5Y-H4K8ac_peak_2918 | 23.07898 |                                                                             |
| 11 | 2800546 | 2801580 | 5Y-H4K8ac_peak_2919 | 9.02938  |                                                                             |
| 11 | 2801932 | 2802326 | 5Y-H4K8ac_peak_2920 | 10.4689  |                                                                             |
| 11 | 2905591 | 2905992 | 5Y-H4K8ac_peak_2921 | 6.3265   |                                                                             |
| 11 | 2907433 | 2908023 | 5Y-H4K8ac_peak_2922 | 10.69698 | CDKN1C_ENSG00000129757                                                      |
| 11 | 2913030 | 2913301 | 5Y-H4K8ac_peak_2923 | 4.8509   |                                                                             |
| 11 | 2913496 | 2913793 | 5Y-H4K8ac_peak_2924 | 11.86504 |                                                                             |
| 11 | 2923526 | 2923868 | 5Y-H4K8ac_peak_2925 | 12.09312 |                                                                             |
| 11 | 3013840 | 3014262 | 5Y-H4K8ac_peak_2926 | 6.77436  | NAP1L4_ENSG00000205531                                                      |
| 11 | 3078252 | 3078564 | 5Y-H4K8ac_peak_2927 | 6.36723  | CARS_ENSG00000110619                                                        |
| 11 | 3078863 | 3079417 | 5Y-H4K8ac_peak_2928 | 7.50148  | CARS_ENSG00000110619                                                        |
| 11 | 3253574 | 3253820 | 5Y-H4K8ac_peak_2929 | 7.8267   | MRGPRE_ENSG00000184350                                                      |
| 11 | 3399910 | 3400333 | 5Y-H4K8ac_peak_2930 | 13.00733 | ZNF195_ENSG00000005801                                                      |
| 11 | 3401033 | 3401262 | 5Y-H4K8ac_peak_2931 | 4.69231  | ZNF195_ENSG00000005801;TSSC2_ENSG00000223756                                |
| 11 | 3443448 | 3443643 | 5Y-H4K8ac_peak_2932 | 7.46096  | FAM86GP_ENSG00000166492                                                     |
| 11 | 3819219 | 3819429 | 5Y-H4K8ac_peak_2933 | 8.21582  | NUP98_ENSG00000110713;PGAP2_ENSG00000148985                                 |
| 11 | 3862533 | 3862739 | 5Y-H4K8ac_peak_2934 | 5.65765  | RHOG_ENSG00000177105                                                        |
| 11 | 3863373 | 3863626 | 5Y-H4K8ac_peak_2935 | 7.57144  |                                                                             |
| 11 | 3875749 | 3875962 | 5Y-H4K8ac_peak_2936 | 6.78128  | AC090587.5_ENSG00000228661;STIM1_ENSG00000167323;AC090587.4_ENSG00000229368 |
| 11 | 4115512 | 4115839 | 5Y-H4K8ac_peak_2937 | 6.08523  | RRM1_ENSG00000167325                                                        |
| 11 | 4414516 | 4414832 | 5Y-H4K8ac_peak_2938 | 6.79955  | TRIM21_ENSG00000132109                                                      |
| 11 | 4629021 | 4629368 | 5Y-H4K8ac_peak_2939 | 13.04415 | TRIM68_ENSG00000167333                                                      |
| 11 | 6598028 | 6598385 | 5Y-H4K8ac_peak_2940 | 5.40331  |                                                                             |
| 11 | 6607940 | 6608426 | 5Y-H4K8ac_peak_2941 | 13.68515 |                                                                             |
| 11 | 6633593 | 6633918 | 5Y-H4K8ac_peak_2942 | 9.02782  | TAF10_ENSG00000166337                                                       |

|    |          |          |                     |          |                                                        |
|----|----------|----------|---------------------|----------|--------------------------------------------------------|
| 11 | 6668198  | 6668397  | 5Y-H4K8ac_peak_2943 | 9.05168  |                                                        |
| 11 | 6676764  | 6676998  | 5Y-H4K8ac_peak_2944 | 6.52593  | DCHS1_ENSG00000166341                                  |
| 11 | 6704162  | 6704443  | 5Y-H4K8ac_peak_2945 | 8.24461  | MRPL17_ENSG00000158042                                 |
| 11 | 7041012  | 7041390  | 5Y-H4K8ac_peak_2946 | 6.46053  | ZNF214_ENSG00000149050;NLRP14_ENSG00000158077          |
| 11 | 7593318  | 7593594  | 5Y-H4K8ac_peak_2947 | 6.00382  | CTD-2516F10.4_ENSG00000254864                          |
| 11 | 7597765  | 7598189  | 5Y-H4K8ac_peak_2948 | 14.6127  |                                                        |
| 11 | 8008256  | 8008478  | 5Y-H4K8ac_peak_2949 | 7.11863  |                                                        |
| 11 | 8040776  | 8041178  | 5Y-H4K8ac_peak_2950 | 11.53136 | TUB_ENSG00000166402                                    |
| 11 | 8087802  | 8088472  | 5Y-H4K8ac_peak_2951 | 6.1654   |                                                        |
| 11 | 8088713  | 8088918  | 5Y-H4K8ac_peak_2952 | 7.04637  |                                                        |
| 11 | 8090105  | 8090501  | 5Y-H4K8ac_peak_2953 | 14.77414 |                                                        |
| 11 | 8100944  | 8101141  | 5Y-H4K8ac_peak_2954 | 4.12295  |                                                        |
| 11 | 8102281  | 8102487  | 5Y-H4K8ac_peak_2955 | 10.95042 |                                                        |
| 11 | 8102979  | 8103392  | 5Y-H4K8ac_peak_2956 | 11.22005 |                                                        |
| 11 | 8134980  | 8135220  | 5Y-H4K8ac_peak_2957 | 7.49746  |                                                        |
| 11 | 8190363  | 8191311  | 5Y-H4K8ac_peak_2958 | 8.24461  | RIC3_ENSG00000166405;RP11-379P15.1_ENSG00000246820     |
| 11 | 8228466  | 8228896  | 5Y-H4K8ac_peak_2959 | 11.1169  |                                                        |
| 11 | 8249777  | 8250588  | 5Y-H4K8ac_peak_2960 | 8.43511  |                                                        |
| 11 | 8251440  | 8251653  | 5Y-H4K8ac_peak_2961 | 6.54441  |                                                        |
| 11 | 8251946  | 8253032  | 5Y-H4K8ac_peak_2962 | 11.05199 |                                                        |
| 11 | 8253685  | 8255225  | 5Y-H4K8ac_peak_2963 | 9.30505  |                                                        |
| 11 | 8255933  | 8256648  | 5Y-H4K8ac_peak_2964 | 20.25522 |                                                        |
| 11 | 8257593  | 8257913  | 5Y-H4K8ac_peak_2965 | 9.96543  |                                                        |
| 11 | 8259085  | 8259320  | 5Y-H4K8ac_peak_2966 | 7.11863  |                                                        |
| 11 | 8264235  | 8265061  | 5Y-H4K8ac_peak_2967 | 7.64648  |                                                        |
| 11 | 8265289  | 8265828  | 5Y-H4K8ac_peak_2968 | 9.22478  |                                                        |
| 11 | 8283928  | 8285035  | 5Y-H4K8ac_peak_2969 | 18.22112 |                                                        |
| 11 | 8289538  | 8290216  | 5Y-H4K8ac_peak_2970 | 13.61292 | LMO1_ENSG00000166407                                   |
| 11 | 8305417  | 8305787  | 5Y-H4K8ac_peak_2971 | 13.0168  |                                                        |
| 11 | 8350697  | 8351162  | 5Y-H4K8ac_peak_2972 | 12.10416 |                                                        |
| 11 | 8365108  | 8365376  | 5Y-H4K8ac_peak_2973 | 5.29015  |                                                        |
| 11 | 8376354  | 8376834  | 5Y-H4K8ac_peak_2974 | 9.58986  |                                                        |
| 11 | 8615482  | 8615759  | 5Y-H4K8ac_peak_2975 | 5.41472  | STK33_ENSG00000130413                                  |
| 11 | 8703891  | 8704145  | 5Y-H4K8ac_peak_2976 | 14.87721 | RPL27A_ENSG00000166441                                 |
| 11 | 8704402  | 8704769  | 5Y-H4K8ac_peak_2977 | 14.19462 | RPL27A_ENSG00000166441                                 |
| 11 | 8892274  | 8892610  | 5Y-H4K8ac_peak_2978 | 6.22669  |                                                        |
| 11 | 8932855  | 8933161  | 5Y-H4K8ac_peak_2979 | 4.95697  | ST5_ENSG00000166444;AKIP1_ENSG00000166452              |
| 11 | 9025134  | 9026097  | 5Y-H4K8ac_peak_2980 | 6.08523  | NRIP3_ENSG00000175352;RP11-467K18.2_ENSG00000253973    |
| 11 | 9336772  | 9337053  | 5Y-H4K8ac_peak_2981 | 12.09312 | TMEM41B_ENSG00000166471                                |
| 11 | 9385588  | 9385937  | 5Y-H4K8ac_peak_2982 | 7.59101  |                                                        |
| 11 | 9406240  | 9406536  | 5Y-H4K8ac_peak_2983 | 8.09118  | IPO7_ENSG00000205339                                   |
| 11 | 9595279  | 9595568  | 5Y-H4K8ac_peak_2984 | 6.75784  | WEE1_ENSG00000166483                                   |
| 11 | 9779525  | 9779755  | 5Y-H4K8ac_peak_2985 | 14.72057 | SBF2-AS1_ENSG00000246273                               |
| 11 | 9779960  | 9781058  | 5Y-H4K8ac_peak_2986 | 11.12941 | SBF2-AS1_ENSG00000246273;RP11-540A21.2_ENSG00000245522 |
| 11 | 10315889 | 10316302 | 5Y-H4K8ac_peak_2987 | 9.01738  | SBF2_ENSG00000133812                                   |
| 11 | 10324082 | 10324509 | 5Y-H4K8ac_peak_2988 | 4.50834  | RP11-351I24.1_ENSG00000254554                          |

|    |          |          |                     |          |                                                     |
|----|----------|----------|---------------------|----------|-----------------------------------------------------|
| 11 | 10326195 | 10326432 | 5Y-H4K8ac_peak_2989 | 11.1169  | RP11-351I24.1_ENSG00000254554;ADM_ENSG00000148926   |
| 11 | 10429277 | 10429784 | 5Y-H4K8ac_peak_2990 | 6.50117  |                                                     |
| 11 | 10476660 | 10476853 | 5Y-H4K8ac_peak_2991 | 7.01266  |                                                     |
| 11 | 10562192 | 10562625 | 5Y-H4K8ac_peak_2992 | 8.21582  | RNF141_ENSG00000110315;MRV11-AS1_ENSG00000177112    |
| 11 | 10772911 | 10773123 | 5Y-H4K8ac_peak_2993 | 6.78128  | CTR9_ENSG00000198730                                |
| 11 | 10829510 | 10830110 | 5Y-H4K8ac_peak_2994 | 11.1169  | RP11-685M7.3_ENSG00000246308;EIF4G2_ENSG00000110321 |
| 11 | 10830841 | 10831149 | 5Y-H4K8ac_peak_2995 | 6.37023  | RP11-685M7.3_ENSG00000246308;EIF4G2_ENSG00000110321 |
| 11 | 10878955 | 10879264 | 5Y-H4K8ac_peak_2996 | 6.73385  | ZBED5-AS1_ENSG00000247271                           |
| 11 | 10880116 | 10880379 | 5Y-H4K8ac_peak_2997 | 5.5192   | ZBED5_ENSG00000236287;ZBED5-AS1_ENSG00000247271     |
| 11 | 10952365 | 10952647 | 5Y-H4K8ac_peak_2998 | 6.77436  |                                                     |
| 11 | 11602216 | 11602487 | 5Y-H4K8ac_peak_2999 | 5.91107  |                                                     |
| 11 | 11603671 | 11603940 | 5Y-H4K8ac_peak_3000 | 8.8236   |                                                     |
| 11 | 11643916 | 11644108 | 5Y-H4K8ac_peak_3001 | 6.73047  | GALNT18_ENSG00000110328                             |
| 11 | 11862979 | 11863319 | 5Y-H4K8ac_peak_3002 | 6.54441  | USP47_ENSG00000170242                               |
| 11 | 11986963 | 11987420 | 5Y-H4K8ac_peak_3003 | 6.50117  |                                                     |
| 11 | 11989905 | 11990133 | 5Y-H4K8ac_peak_3004 | 3.96434  |                                                     |
| 11 | 11990607 | 11991643 | 5Y-H4K8ac_peak_3005 | 12.05638 |                                                     |
| 11 | 12000869 | 12001204 | 5Y-H4K8ac_peak_3006 | 4.29586  |                                                     |
| 11 | 12001453 | 12001939 | 5Y-H4K8ac_peak_3007 | 6.38173  |                                                     |
| 11 | 12398831 | 12399368 | 5Y-H4K8ac_peak_3008 | 7.50148  | PARVA_ENSG00000197702                               |
| 11 | 12528695 | 12529208 | 5Y-H4K8ac_peak_3009 | 6.20875  |                                                     |
| 11 | 12695430 | 12695644 | 5Y-H4K8ac_peak_3010 | 13.0168  | TEAD1_ENSG00000187079                               |
| 11 | 12696622 | 12696832 | 5Y-H4K8ac_peak_3011 | 10.46287 | TEAD1_ENSG00000187079                               |
| 11 | 12714171 | 12714601 | 5Y-H4K8ac_peak_3012 | 5.23083  |                                                     |
| 11 | 12822104 | 12822627 | 5Y-H4K8ac_peak_3013 | 5.13364  |                                                     |
| 11 | 12834839 | 12835316 | 5Y-H4K8ac_peak_3014 | 4.07874  |                                                     |
| 11 | 12835724 | 12836170 | 5Y-H4K8ac_peak_3015 | 5.98695  |                                                     |
| 11 | 12868451 | 12868710 | 5Y-H4K8ac_peak_3016 | 7.09444  |                                                     |
| 11 | 13126563 | 13126785 | 5Y-H4K8ac_peak_3017 | 6.79955  |                                                     |
| 11 | 13316907 | 13317129 | 5Y-H4K8ac_peak_3018 | 6.00388  |                                                     |
| 11 | 13317553 | 13317774 | 5Y-H4K8ac_peak_3019 | 4.93237  |                                                     |
| 11 | 13320920 | 13321206 | 5Y-H4K8ac_peak_3020 | 9.23159  |                                                     |
| 11 | 13350793 | 13351220 | 5Y-H4K8ac_peak_3021 | 6.54441  |                                                     |
| 11 | 13352405 | 13352764 | 5Y-H4K8ac_peak_3022 | 8.51022  |                                                     |
| 11 | 13689565 | 13689765 | 5Y-H4K8ac_peak_3023 | 9.38276  | FAR1_ENSG00000197601                                |
| 11 | 13690334 | 13690575 | 5Y-H4K8ac_peak_3024 | 5.29015  | FAR1_ENSG00000197601;FAR1-IT1_ENSG00000254791       |
| 11 | 14380380 | 14380642 | 5Y-H4K8ac_peak_3025 | 5.65584  |                                                     |
| 11 | 14402520 | 14403064 | 5Y-H4K8ac_peak_3026 | 13.0168  |                                                     |
| 11 | 14541530 | 14541843 | 5Y-H4K8ac_peak_3027 | 4.50834  | PSMA1_ENSG00000256206                               |
| 11 | 14542129 | 14542471 | 5Y-H4K8ac_peak_3028 | 9.38203  | PSMA1_ENSG00000256206                               |
| 11 | 14542914 | 14543209 | 5Y-H4K8ac_peak_3029 | 5.40331  |                                                     |
| 11 | 14665353 | 14665762 | 5Y-H4K8ac_peak_3030 | 9.78792  | PSMA1_ENSG00000129084;PDE3B_ENSG00000152270         |
| 11 | 14913386 | 14913656 | 5Y-H4K8ac_peak_3031 | 9.30505  | CYP2R1_ENSG00000186104                              |
| 11 | 15136030 | 15136284 | 5Y-H4K8ac_peak_3032 | 10.99773 |                                                     |
| 11 | 15643811 | 15644100 | 5Y-H4K8ac_peak_3033 | 8.88899  | RP11-531H8.2_ENSG00000254789                        |
| 11 | 15864217 | 15864439 | 5Y-H4K8ac_peak_3034 | 7.3889   |                                                     |

|    |          |          |                     |          |                                                                       |
|----|----------|----------|---------------------|----------|-----------------------------------------------------------------------|
| 11 | 15907399 | 15907735 | 5Y-H4K8ac_peak_3035 | 6.42825  |                                                                       |
| 11 | 17036083 | 17036644 | 5Y-H4K8ac_peak_3036 | 13.2534  | PLEKHA7_ENSG00000166689;OR7E14P_ENSG00000184669                       |
| 11 | 17099503 | 17100008 | 5Y-H4K8ac_peak_3037 | 15.06486 | RPS13_ENSG00000110700                                                 |
| 11 | 17297872 | 17298375 | 5Y-H4K8ac_peak_3038 | 8.21582  |                                                                       |
| 11 | 17373092 | 17373485 | 5Y-H4K8ac_peak_3039 | 9.30505  | NCR3LG1_ENSG00000188211                                               |
| 11 | 17373816 | 17374190 | 5Y-H4K8ac_peak_3040 | 12.71156 | NCR3LG1_ENSG00000188211                                               |
| 11 | 17375024 | 17375241 | 5Y-H4K8ac_peak_3041 | 7.3889   |                                                                       |
| 11 | 17426754 | 17427080 | 5Y-H4K8ac_peak_3042 | 9.33466  |                                                                       |
| 11 | 17500722 | 17501113 | 5Y-H4K8ac_peak_3043 | 5.15917  |                                                                       |
| 11 | 17757369 | 17757710 | 5Y-H4K8ac_peak_3044 | 6.73047  |                                                                       |
| 11 | 17790308 | 17790505 | 5Y-H4K8ac_peak_3045 | 5.65765  |                                                                       |
| 11 | 18034049 | 18034266 | 5Y-H4K8ac_peak_3046 | 10.11191 | SERGEF_ENSG00000129158                                                |
| 11 | 18034919 | 18035214 | 5Y-H4K8ac_peak_3047 | 7.38046  | SERGEF_ENSG00000129158                                                |
| 11 | 18127290 | 18127629 | 5Y-H4K8ac_peak_3048 | 9.00954  | SAAL1_ENSG00000166788;HIGD1AP5_ENSG00000255254                        |
| 11 | 18405461 | 18405914 | 5Y-H4K8ac_peak_3049 | 6.31818  |                                                                       |
| 11 | 18406193 | 18406427 | 5Y-H4K8ac_peak_3050 | 10.07308 |                                                                       |
| 11 | 18548203 | 18548398 | 5Y-H4K8ac_peak_3051 | 9.89244  | TSG101_ENSG00000074319                                                |
| 11 | 18727466 | 18727759 | 5Y-H4K8ac_peak_3052 | 4.79585  | RP11-1081L13.4_ENSG00000254966                                        |
| 11 | 19262861 | 19263257 | 5Y-H4K8ac_peak_3053 | 10.14566 | E2F8_ENSG00000129173                                                  |
| 11 | 19586392 | 19586594 | 5Y-H4K8ac_peak_3054 | 5.64909  |                                                                       |
| 11 | 19617784 | 19618336 | 5Y-H4K8ac_peak_3055 | 11.1169  |                                                                       |
| 11 | 19654944 | 19655217 | 5Y-H4K8ac_peak_3056 | 8.2913   |                                                                       |
| 11 | 19701834 | 19702182 | 5Y-H4K8ac_peak_3057 | 10.11191 |                                                                       |
| 11 | 19733541 | 19733804 | 5Y-H4K8ac_peak_3058 | 7.59101  | RP11-359E10.1_ENSG00000270607                                         |
| 11 | 19758493 | 19759217 | 5Y-H4K8ac_peak_3059 | 7.97699  |                                                                       |
| 11 | 19760110 | 19760398 | 5Y-H4K8ac_peak_3060 | 5.64909  |                                                                       |
| 11 | 19828975 | 19829239 | 5Y-H4K8ac_peak_3061 | 11.61993 |                                                                       |
| 11 | 20408484 | 20408947 | 5Y-H4K8ac_peak_3062 | 7.38046  | PRMT3_ENSG00000185238                                                 |
| 11 | 20409259 | 20409772 | 5Y-H4K8ac_peak_3063 | 9.15007  | PRMT3_ENSG00000185238                                                 |
| 11 | 20520906 | 20521102 | 5Y-H4K8ac_peak_3064 | 4.07874  |                                                                       |
| 11 | 20630212 | 20630405 | 5Y-H4K8ac_peak_3065 | 5.23083  |                                                                       |
| 11 | 20639328 | 20639532 | 5Y-H4K8ac_peak_3066 | 5.29015  |                                                                       |
| 11 | 22151811 | 22152268 | 5Y-H4K8ac_peak_3067 | 4.50834  |                                                                       |
| 11 | 22215014 | 22215328 | 5Y-H4K8ac_peak_3068 | 10.12234 | ANO5_ENSG00000171714                                                  |
| 11 | 22646857 | 22647344 | 5Y-H4K8ac_peak_3069 | 9.38203  | FANCF_ENSG00000183161;AC103801.2_ENSG00000229387;GAS2_ENSG00000148935 |
| 11 | 22688317 | 22688846 | 5Y-H4K8ac_peak_3070 | 7.3889   |                                                                       |
| 11 | 23134684 | 23134923 | 5Y-H4K8ac_peak_3071 | 6.50117  |                                                                       |
| 11 | 26974618 | 26975177 | 5Y-H4K8ac_peak_3072 | 5.65584  |                                                                       |
| 11 | 27493899 | 27494155 | 5Y-H4K8ac_peak_3073 | 5.23083  | LGR4_ENSG00000205213;RP11-159H22.2_ENSG00000254862                    |
| 11 | 27740500 | 27740892 | 5Y-H4K8ac_peak_3074 | 14.86775 |                                                                       |
| 11 | 30606867 | 30607097 | 5Y-H4K8ac_peak_3075 | 6.77436  |                                                                       |
| 11 | 32604585 | 32604928 | 5Y-H4K8ac_peak_3076 | 7.38046  | EIF3M_ENSG00000149100                                                 |
| 11 | 32605450 | 32605709 | 5Y-H4K8ac_peak_3077 | 5.35202  | EIF3M_ENSG00000149100                                                 |
| 11 | 32914799 | 32915446 | 5Y-H4K8ac_peak_3078 | 4.77126  | QSER1_ENSG00000060749                                                 |
| 11 | 33279009 | 33279630 | 5Y-H4K8ac_peak_3079 | 13.72401 | HIPK3_ENSG00000110422                                                 |
| 11 | 33722699 | 33722889 | 5Y-H4K8ac_peak_3080 | 6.5814   | C11orf91_ENSG00000205177                                              |

|    |          |          |                     |          |                                                      |
|----|----------|----------|---------------------|----------|------------------------------------------------------|
| 11 | 34011530 | 34011726 | 5Y-H4K8ac_peak_3081 | 6.34046  |                                                      |
| 11 | 34073996 | 34074211 | 5Y-H4K8ac_peak_3082 | 7.28023  | CAPRIN1_ENSG00000135387                              |
| 11 | 34181347 | 34181868 | 5Y-H4K8ac_peak_3083 | 11.09973 |                                                      |
| 11 | 34937692 | 34937891 | 5Y-H4K8ac_peak_3084 | 8.43511  | APIP_ENSG00000149089;PDHX_ENSG00000110435            |
| 11 | 34938270 | 34938506 | 5Y-H4K8ac_peak_3085 | 7.89142  | APIP_ENSG00000149089;PDHX_ENSG00000110435            |
| 11 | 35160698 | 35161096 | 5Y-H4K8ac_peak_3086 | 7.31815  | CD44_ENSG00000026508                                 |
| 11 | 35441824 | 35442224 | 5Y-H4K8ac_peak_3087 | 8.12305  | SLC1A2_ENSG00000110436                               |
| 11 | 35684000 | 35684862 | 5Y-H4K8ac_peak_3088 | 15.19225 | TRIM44_ENSG00000166326                               |
| 11 | 35949308 | 35949583 | 5Y-H4K8ac_peak_3089 | 13.8759  |                                                      |
| 11 | 35966213 | 35966546 | 5Y-H4K8ac_peak_3090 | 5.67283  | LDLRAD3_ENSG00000179241                              |
| 11 | 36181291 | 36181596 | 5Y-H4K8ac_peak_3091 | 11.1169  |                                                      |
| 11 | 36273363 | 36273794 | 5Y-H4K8ac_peak_3092 | 7.3889   |                                                      |
| 11 | 36588187 | 36588384 | 5Y-H4K8ac_peak_3093 | 8.16031  |                                                      |
| 11 | 36640401 | 36640687 | 5Y-H4K8ac_peak_3094 | 11.19336 |                                                      |
| 11 | 36649656 | 36650028 | 5Y-H4K8ac_peak_3095 | 13.0168  |                                                      |
| 11 | 36774067 | 36774536 | 5Y-H4K8ac_peak_3096 | 8.2913   |                                                      |
| 11 | 36970361 | 36970587 | 5Y-H4K8ac_peak_3097 | 7.38046  |                                                      |
| 11 | 36977969 | 36978389 | 5Y-H4K8ac_peak_3098 | 6.20875  |                                                      |
| 11 | 43380532 | 43381052 | 5Y-H4K8ac_peak_3099 | 9.00954  | RP11-484D2.2_ENSG00000254907;TTC17_ENSG00000052841   |
| 11 | 43665825 | 43666161 | 5Y-H4K8ac_peak_3100 | 5.65584  |                                                      |
| 11 | 43902459 | 43902753 | 5Y-H4K8ac_peak_3101 | 5.87725  | RP11-613D13.5_ENSG00000246250;ALKBH3_ENSG00000166199 |
| 11 | 43945909 | 43946347 | 5Y-H4K8ac_peak_3102 | 3.96434  | C11orf96_ENSG00000187479                             |
| 11 | 43946829 | 43947430 | 5Y-H4K8ac_peak_3103 | 14.44021 | C11orf96_ENSG00000187479                             |
| 11 | 43948319 | 43948575 | 5Y-H4K8ac_peak_3104 | 10.0695  |                                                      |
| 11 | 43956110 | 43956350 | 5Y-H4K8ac_peak_3105 | 5.98695  |                                                      |
| 11 | 43962848 | 43963078 | 5Y-H4K8ac_peak_3106 | 7.11863  |                                                      |
| 11 | 43963754 | 43964164 | 5Y-H4K8ac_peak_3107 | 11.22005 |                                                      |
| 11 | 43964472 | 43965192 | 5Y-H4K8ac_peak_3108 | 7.89273  |                                                      |
| 11 | 44008829 | 44009072 | 5Y-H4K8ac_peak_3109 | 12.65187 |                                                      |
| 11 | 44009823 | 44010116 | 5Y-H4K8ac_peak_3110 | 4.50834  |                                                      |
| 11 | 44010575 | 44010911 | 5Y-H4K8ac_peak_3111 | 6.1654   |                                                      |
| 11 | 44026799 | 44026997 | 5Y-H4K8ac_peak_3112 | 8.47164  |                                                      |
| 11 | 44299727 | 44299931 | 5Y-H4K8ac_peak_3113 | 6.59249  |                                                      |
| 11 | 44337801 | 44338152 | 5Y-H4K8ac_peak_3114 | 5.67283  |                                                      |
| 11 | 44617634 | 44617977 | 5Y-H4K8ac_peak_3115 | 9.48719  |                                                      |
| 11 | 44621485 | 44621887 | 5Y-H4K8ac_peak_3116 | 6.35402  |                                                      |
| 11 | 44656042 | 44656255 | 5Y-H4K8ac_peak_3117 | 5.98695  |                                                      |
| 11 | 44656552 | 44656771 | 5Y-H4K8ac_peak_3118 | 6.43775  |                                                      |
| 11 | 44675478 | 44675724 | 5Y-H4K8ac_peak_3119 | 4.66683  |                                                      |
| 11 | 44715585 | 44716076 | 5Y-H4K8ac_peak_3120 | 10.31981 |                                                      |
| 11 | 44716853 | 44717294 | 5Y-H4K8ac_peak_3121 | 6.77436  | RP11-45A12.1_ENSG00000255079                         |
| 11 | 44724715 | 44724928 | 5Y-H4K8ac_peak_3122 | 6.50117  |                                                      |
| 11 | 44732705 | 44733164 | 5Y-H4K8ac_peak_3123 | 6.77436  |                                                      |
| 11 | 44748073 | 44748344 | 5Y-H4K8ac_peak_3124 | 8.2913   | TSPAN18_ENSG00000157570                              |
| 11 | 44750002 | 44750204 | 5Y-H4K8ac_peak_3125 | 4.29586  |                                                      |
| 11 | 44750847 | 44751041 | 5Y-H4K8ac_peak_3126 | 7.87406  |                                                      |



|    |          |          |                     |          |                                                |
|----|----------|----------|---------------------|----------|------------------------------------------------|
| 11 | 44765153 | 44765375 | 5Y-H4K8ac_peak_3127 | 4.51497  |                                                |
| 11 | 44774728 | 44775178 | 5Y-H4K8ac_peak_3128 | 8.45687  |                                                |
| 11 | 44776088 | 44776365 | 5Y-H4K8ac_peak_3129 | 7.11863  |                                                |
| 11 | 44777292 | 44777630 | 5Y-H4K8ac_peak_3130 | 10.1994  |                                                |
| 11 | 44802691 | 44802908 | 5Y-H4K8ac_peak_3131 | 6.60109  |                                                |
| 11 | 44804964 | 44805854 | 5Y-H4K8ac_peak_3132 | 8.43511  |                                                |
| 11 | 44807297 | 44807541 | 5Y-H4K8ac_peak_3133 | 4.95697  |                                                |
| 11 | 44807875 | 44808087 | 5Y-H4K8ac_peak_3134 | 7.65114  |                                                |
| 11 | 44889965 | 44890477 | 5Y-H4K8ac_peak_3135 | 7.46945  |                                                |
| 11 | 44971291 | 44972325 | 5Y-H4K8ac_peak_3136 | 9.7353   | TP53I11_ENSG00000175274                        |
| 11 | 45011850 | 45012443 | 5Y-H4K8ac_peak_3137 | 11.28133 |                                                |
| 11 | 45012805 | 45013013 | 5Y-H4K8ac_peak_3138 | 6.0873   |                                                |
| 11 | 45047345 | 45048141 | 5Y-H4K8ac_peak_3139 | 14.99673 |                                                |
| 11 | 45113483 | 45113826 | 5Y-H4K8ac_peak_3140 | 5.87382  |                                                |
| 11 | 45126979 | 45127175 | 5Y-H4K8ac_peak_3141 | 5.84208  |                                                |
| 11 | 45167656 | 45168180 | 5Y-H4K8ac_peak_3142 | 8.16382  |                                                |
| 11 | 45168906 | 45169272 | 5Y-H4K8ac_peak_3143 | 15.3483  |                                                |
| 11 | 45201798 | 45202065 | 5Y-H4K8ac_peak_3144 | 6.86362  |                                                |
| 11 | 45202311 | 45202702 | 5Y-H4K8ac_peak_3145 | 10.12457 |                                                |
| 11 | 45307601 | 45307803 | 5Y-H4K8ac_peak_3146 | 7.38046  | SYT13_ENSG00000019505                          |
| 11 | 45433056 | 45433316 | 5Y-H4K8ac_peak_3147 | 11.82621 |                                                |
| 11 | 45582316 | 45582579 | 5Y-H4K8ac_peak_3148 | 6.77436  |                                                |
| 11 | 45680840 | 45681042 | 5Y-H4K8ac_peak_3149 | 5.89922  |                                                |
| 11 | 45903762 | 45904092 | 5Y-H4K8ac_peak_3150 | 4.50834  |                                                |
| 11 | 45904365 | 45904613 | 5Y-H4K8ac_peak_3151 | 5.77617  |                                                |
| 11 | 45906760 | 45907034 | 5Y-H4K8ac_peak_3152 | 7.89142  | MAPK8IP1_ENSG00000121653                       |
| 11 | 45919237 | 45919583 | 5Y-H4K8ac_peak_3153 | 7.17997  |                                                |
| 11 | 45943733 | 45944819 | 5Y-H4K8ac_peak_3154 | 13.00733 | GYLTL1B_ENSG00000165905                        |
| 11 | 46143230 | 46143732 | 5Y-H4K8ac_peak_3155 | 8.51022  | PHF21A_ENSG00000135365                         |
| 11 | 46259596 | 46259846 | 5Y-H4K8ac_peak_3156 | 10.07308 | CTD-2589M5.5_ENSG00000254639                   |
| 11 | 46264462 | 46264869 | 5Y-H4K8ac_peak_3157 | 8.43511  |                                                |
| 11 | 46383098 | 46383481 | 5Y-H4K8ac_peak_3158 | 11.12941 |                                                |
| 11 | 46383775 | 46383970 | 5Y-H4K8ac_peak_3159 | 4.15658  |                                                |
| 11 | 46401398 | 46401742 | 5Y-H4K8ac_peak_3160 | 9.36633  | MDK_ENSG00000110492                            |
| 11 | 46402412 | 46402921 | 5Y-H4K8ac_peak_3161 | 15.82359 | MDK_ENSG00000110492                            |
| 11 | 46403409 | 46404020 | 5Y-H4K8ac_peak_3162 | 6.98416  |                                                |
| 11 | 46639223 | 46639456 | 5Y-H4K8ac_peak_3163 | 4.71803  | HARBI1_ENSG00000180423;ATG13_ENSG00000175224   |
| 11 | 46721947 | 46722144 | 5Y-H4K8ac_peak_3164 | 12.44818 | ARHGAP1_ENSG00000175220;ZNF408_ENSG00000175213 |
| 11 | 46722806 | 46723189 | 5Y-H4K8ac_peak_3165 | 5.64909  | ARHGAP1_ENSG00000175220;ZNF408_ENSG00000175213 |
| 11 | 46739655 | 46740181 | 5Y-H4K8ac_peak_3166 | 6.17374  | F2_ENSG00000180210                             |
| 11 | 46867448 | 46867772 | 5Y-H4K8ac_peak_3167 | 8.16382  | CKAP5_ENSG00000175216;LRP4-AS1_ENSG00000247675 |
| 11 | 47198055 | 47198380 | 5Y-H4K8ac_peak_3168 | 10.16277 | ARFGAP2_ENSG00000149182                        |
| 11 | 47207486 | 47207928 | 5Y-H4K8ac_peak_3169 | 6.37023  | PACSIN3_ENSG00000165912                        |
| 11 | 47236698 | 47237043 | 5Y-H4K8ac_peak_3170 | 12.05638 | DDB2_ENSG00000134574                           |
| 11 | 47270172 | 47271258 | 5Y-H4K8ac_peak_3171 | 12.10416 | ACP2_ENSG00000134575;NR1H3_ENSG00000025434     |
| 11 | 47290152 | 47291116 | 5Y-H4K8ac_peak_3172 | 5.67283  | MADD_ENSG00000110514                           |

|    |          |          |                     |          |                                                                        |
|----|----------|----------|---------------------|----------|------------------------------------------------------------------------|
| 11 | 47376693 | 47377180 | 5Y-H4K8ac_peak_3173 | 5.98695  |                                                                        |
| 11 | 47421450 | 47421765 | 5Y-H4K8ac_peak_3174 | 8.78565  | MIR4487_ENSG00000264583                                                |
| 11 | 47429364 | 47429837 | 5Y-H4K8ac_peak_3175 | 4.29586  | SLC39A13_ENSG00000165915;RP11-750H9.5_ENSG00000255197                  |
| 11 | 47430263 | 47430602 | 5Y-H4K8ac_peak_3176 | 5.23083  | RP11-750H9.5_ENSG00000255197                                           |
| 11 | 47447622 | 47447978 | 5Y-H4K8ac_peak_3177 | 8.1667   | PSMC3_ENSG00000165916                                                  |
| 11 | 47586585 | 47586947 | 5Y-H4K8ac_peak_3178 | 8.43511  | CELF1_ENSG00000149187;NDUFS3_ENSG00000213619;PTPMT1_ENSG00000110536    |
| 11 | 47587206 | 47587527 | 5Y-H4K8ac_peak_3179 | 5.56894  | CELF1_ENSG00000149187;NDUFS3_ENSG00000213619;PTPMT1_ENSG00000110536    |
| 11 | 47789291 | 47789568 | 5Y-H4K8ac_peak_3180 | 5.64909  | FNBP4_ENSG00000109920                                                  |
| 11 | 47790374 | 47790694 | 5Y-H4K8ac_peak_3181 | 10.19948 |                                                                        |
| 11 | 47869631 | 47870015 | 5Y-H4K8ac_peak_3182 | 14.72546 | NUP160_ENSG00000030066                                                 |
| 11 | 48001572 | 48001835 | 5Y-H4K8ac_peak_3183 | 6.50117  | PTPRJ_ENSG00000149177                                                  |
| 11 | 55640523 | 55640823 | 5Y-H4K8ac_peak_3184 | 7.31815  |                                                                        |
| 11 | 56612564 | 56613199 | 5Y-H4K8ac_peak_3185 | 9.23159  |                                                                        |
| 11 | 56613578 | 56613818 | 5Y-H4K8ac_peak_3186 | 5.23083  |                                                                        |
| 11 | 56867179 | 56867370 | 5Y-H4K8ac_peak_3187 | 5.40331  |                                                                        |
| 11 | 56921874 | 56922067 | 5Y-H4K8ac_peak_3188 | 6.98118  |                                                                        |
| 11 | 57008907 | 57009309 | 5Y-H4K8ac_peak_3189 | 12.11208 |                                                                        |
| 11 | 57009804 | 57010018 | 5Y-H4K8ac_peak_3190 | 5.68769  |                                                                        |
| 11 | 57102895 | 57103231 | 5Y-H4K8ac_peak_3191 | 10.1994  | SSRP1_ENSG00000149136                                                  |
| 11 | 57243630 | 57244531 | 5Y-H4K8ac_peak_3192 | 9.38276  | RP11-624G17.3_ENSG00000255301                                          |
| 11 | 57249770 | 57250157 | 5Y-H4K8ac_peak_3193 | 9.36633  |                                                                        |
| 11 | 57261215 | 57261687 | 5Y-H4K8ac_peak_3194 | 5.65584  |                                                                        |
| 11 | 57281998 | 57283163 | 5Y-H4K8ac_peak_3195 | 10.54764 | SLC43A1_ENSG00000149150                                                |
| 11 | 57405127 | 57405668 | 5Y-H4K8ac_peak_3196 | 18.77281 | AP000662.4_ENSG00000254602                                             |
| 11 | 57405993 | 57406221 | 5Y-H4K8ac_peak_3197 | 4.50834  | AP000662.4_ENSG00000254602                                             |
| 11 | 57417779 | 57417997 | 5Y-H4K8ac_peak_3198 | 7.09444  | YPEL4_ENSG00000166793                                                  |
| 11 | 57434429 | 57434700 | 5Y-H4K8ac_peak_3199 | 9.26157  | ZDHHC5_ENSG00000156599                                                 |
| 11 | 57480228 | 57480438 | 5Y-H4K8ac_peak_3200 | 6.34046  | MED19_ENSG00000156603;TMX2_ENSG00000213593;TMX2-CTNND1_ENSG00000254462 |
| 11 | 57509741 | 57509971 | 5Y-H4K8ac_peak_3201 | 5.56912  | RP11-691N7.6_ENSG00000254732;C11orf31_ENSG00000211450                  |
| 11 | 58346016 | 58346317 | 5Y-H4K8ac_peak_3202 | 13.0168  | LPXN_ENSG00000110031;ZFP91_ENSG00000186660;ZFP91-CNTF_ENSG00000255073  |
| 11 | 58346666 | 58347074 | 5Y-H4K8ac_peak_3203 | 21.45231 | LPXN_ENSG00000110031;ZFP91_ENSG00000186660;ZFP91-CNTF_ENSG00000255073  |
| 11 | 59332797 | 59333048 | 5Y-H4K8ac_peak_3204 | 9.02242  | AP000442.4_ENSG00000255008                                             |
| 11 | 59522611 | 59523144 | 5Y-H4K8ac_peak_3205 | 8.2913   | AP000640.10_ENSG00000254477                                            |
| 11 | 59577544 | 59577770 | 5Y-H4K8ac_peak_3206 | 6.46053  | MRPL16_ENSG00000166902                                                 |
| 11 | 60608813 | 60609334 | 5Y-H4K8ac_peak_3207 | 8.60024  | CCDC86_ENSG00000110104                                                 |
| 11 | 60673741 | 60674012 | 5Y-H4K8ac_peak_3208 | 6.37023  | PRPF19_ENSG00000110107;RP11-881M11.2_ENSG00000257052                   |
| 11 | 60681461 | 60681942 | 5Y-H4K8ac_peak_3209 | 6.77436  | RP11-881M11.1_ENSG00000256944;TMEM109_ENSG00000110108                  |
| 11 | 60691975 | 60692246 | 5Y-H4K8ac_peak_3210 | 10.72427 | RP11-881M11.4_ENSG00000256196;TMEM132A_ENSG00000006118                 |
| 11 | 60745747 | 60745944 | 5Y-H4K8ac_peak_3211 | 6.43775  |                                                                        |
| 11 | 60775043 | 60775434 | 5Y-H4K8ac_peak_3212 | 12.05638 |                                                                        |
| 11 | 60835643 | 60835887 | 5Y-H4K8ac_peak_3213 | 6.37023  |                                                                        |
| 11 | 60849759 | 60850014 | 5Y-H4K8ac_peak_3214 | 11.57334 |                                                                        |
| 11 | 60893965 | 60894309 | 5Y-H4K8ac_peak_3215 | 7.3889   |                                                                        |
| 11 | 60928705 | 60929126 | 5Y-H4K8ac_peak_3216 | 9.00954  | VPS37C_ENSG00000167987                                                 |
| 11 | 61061799 | 61062861 | 5Y-H4K8ac_peak_3217 | 6.53157  | VWCE_ENSG00000167992                                                   |
| 11 | 61104244 | 61104525 | 5Y-H4K8ac_peak_3218 | 6.77436  |                                                                        |

|    |          |          |                     |          |                                                                                           |
|----|----------|----------|---------------------|----------|-------------------------------------------------------------------------------------------|
| 11 | 61112449 | 61112653 | 5Y-H4K8ac_peak_3219 | 8.60024  |                                                                                           |
| 11 | 61112952 | 61113325 | 5Y-H4K8ac_peak_3220 | 9.7353   |                                                                                           |
| 11 | 61129458 | 61129695 | 5Y-H4K8ac_peak_3221 | 13.00733 | CYB561A3_ENSG00000162144;TMEM138_ENSG00000149483                                          |
| 11 | 61159350 | 61159903 | 5Y-H4K8ac_peak_3222 | 5.41472  | TMEM216_ENSG00000187049                                                                   |
| 11 | 61197021 | 61197300 | 5Y-H4K8ac_peak_3223 | 7.90751  | CPSF7_ENSG00000149532;RP11-286N22.8_ENSG00000256591;SDHAF2_ENSG00000167985                |
| 11 | 61198489 | 61198680 | 5Y-H4K8ac_peak_3224 | 5.97532  | CPSF7_ENSG00000149532;SDHAF2_ENSG00000167985                                              |
| 11 | 61284734 | 61284975 | 5Y-H4K8ac_peak_3225 | 9.34555  |                                                                                           |
| 11 | 61322670 | 61322900 | 5Y-H4K8ac_peak_3226 | 8.21582  |                                                                                           |
| 11 | 61366793 | 61367179 | 5Y-H4K8ac_peak_3227 | 4.50834  |                                                                                           |
| 11 | 61447995 | 61448199 | 5Y-H4K8ac_peak_3228 | 4.83834  |                                                                                           |
| 11 | 61485595 | 61485904 | 5Y-H4K8ac_peak_3229 | 11.51936 |                                                                                           |
| 11 | 61486334 | 61486566 | 5Y-H4K8ac_peak_3230 | 7.03573  |                                                                                           |
| 11 | 61515083 | 61515297 | 5Y-H4K8ac_peak_3231 | 8.1667   |                                                                                           |
| 11 | 61520169 | 61520417 | 5Y-H4K8ac_peak_3232 | 4.8188   | MYRF_ENSG00000124920                                                                      |
| 11 | 61559782 | 61560551 | 5Y-H4K8ac_peak_3233 | 16.33454 | TMEM258_ENSG00000134825;MIR611_ENSG00000207601;FEN1_ENSG00000168496;FADS2_ENSG00000134824 |
| 11 | 61582980 | 61584304 | 5Y-H4K8ac_peak_3234 | 11.22005 | MIR1908_ENSG00000222326                                                                   |
| 11 | 61594331 | 61595034 | 5Y-H4K8ac_peak_3235 | 12.69256 |                                                                                           |
| 11 | 61595628 | 61596168 | 5Y-H4K8ac_peak_3236 | 11.36989 | FADS1_ENSG00000149485                                                                     |
| 11 | 61658628 | 61658925 | 5Y-H4K8ac_peak_3237 | 7.56545  | FADS3_ENSG00000221968                                                                     |
| 11 | 61684719 | 61685354 | 5Y-H4K8ac_peak_3238 | 9.52603  |                                                                                           |
| 11 | 61690904 | 61691586 | 5Y-H4K8ac_peak_3239 | 7.50148  |                                                                                           |
| 11 | 61735701 | 61736022 | 5Y-H4K8ac_peak_3240 | 8.43511  | FTH1_ENSG00000167996;AP003733.1_ENSG00000269089                                           |
| 11 | 61879812 | 61880360 | 5Y-H4K8ac_peak_3241 | 18.10232 |                                                                                           |
| 11 | 62168579 | 62168778 | 5Y-H4K8ac_peak_3242 | 5.21093  |                                                                                           |
| 11 | 62310497 | 62310700 | 5Y-H4K8ac_peak_3243 | 8.43511  |                                                                                           |
| 11 | 62359424 | 62359704 | 5Y-H4K8ac_peak_3244 | 4.15658  | MIR3654_ENSG00000255508;TUT1_ENSG00000149016                                              |
| 11 | 62368797 | 62369240 | 5Y-H4K8ac_peak_3245 | 10.60083 | MTA2_ENSG00000149480                                                                      |
| 11 | 62370057 | 62370319 | 5Y-H4K8ac_peak_3246 | 7.82914  | MTA2_ENSG00000149480                                                                      |
| 11 | 62379284 | 62379500 | 5Y-H4K8ac_peak_3247 | 6.77436  | EML3_ENSG00000149499;ROM1_ENSG00000149489                                                 |
| 11 | 62379702 | 62380131 | 5Y-H4K8ac_peak_3248 | 8.43511  | EML3_ENSG00000149499;ROM1_ENSG00000149489                                                 |
| 11 | 62413751 | 62413979 | 5Y-H4K8ac_peak_3249 | 11.19336 | GANAB_ENSG00000089597                                                                     |
| 11 | 62420356 | 62420689 | 5Y-H4K8ac_peak_3250 | 7.59101  | INTS5_ENSG00000185085                                                                     |
| 11 | 62439376 | 62439566 | 5Y-H4K8ac_peak_3251 | 8.43511  | C11orf48_ENSG00000162194                                                                  |
| 11 | 62446180 | 62446848 | 5Y-H4K8ac_peak_3252 | 6.08523  | UBXN1_ENSG00000162191                                                                     |
| 11 | 62494724 | 62494929 | 5Y-H4K8ac_peak_3253 | 10.35586 | HNRNPUL2-BSCL2_ENSG00000234857;HNRNPUL2_ENSG00000214753;TTC9C_ENSG00000162222             |
| 11 | 62521949 | 62522333 | 5Y-H4K8ac_peak_3254 | 9.23159  | ZBTB3_ENSG00000185670                                                                     |
| 11 | 62606694 | 62606980 | 5Y-H4K8ac_peak_3255 | 7.89273  |                                                                                           |
| 11 | 62607545 | 62607774 | 5Y-H4K8ac_peak_3256 | 12.05638 |                                                                                           |
| 11 | 62609613 | 62610100 | 5Y-H4K8ac_peak_3257 | 10.11191 | WDR74_ENSG00000133316;RNU2-2P_ENSG00000222328                                             |
| 11 | 62648474 | 62648936 | 5Y-H4K8ac_peak_3258 | 5.98695  |                                                                                           |
| 11 | 62695848 | 62696203 | 5Y-H4K8ac_peak_3259 | 10.36926 |                                                                                           |
| 11 | 63438330 | 63438937 | 5Y-H4K8ac_peak_3260 | 8.62703  | ATL3_ENSG00000184743                                                                      |
| 11 | 63536323 | 63537060 | 5Y-H4K8ac_peak_3261 | 12.76485 | C11orf95_ENSG00000188070;RP11-466C23.4_ENSG00000255651                                    |
| 11 | 63551520 | 63551778 | 5Y-H4K8ac_peak_3262 | 11.85279 |                                                                                           |
| 11 | 63683295 | 63683605 | 5Y-H4K8ac_peak_3263 | 4.95697  | RCOR2_ENSG00000167771                                                                     |
| 11 | 63683965 | 63684373 | 5Y-H4K8ac_peak_3264 | 7.38046  | RCOR2_ENSG00000167771                                                                     |

|    |          |          |                     |          |                                                        |
|----|----------|----------|---------------------|----------|--------------------------------------------------------|
| 11 | 63684815 | 63685331 | 5Y-H4K8ac_peak_3265 | 17.04999 | RCOR2_ENSG00000167771                                  |
| 11 | 63685688 | 63686949 | 5Y-H4K8ac_peak_3266 | 14.00894 |                                                        |
| 11 | 63729798 | 63729996 | 5Y-H4K8ac_peak_3267 | 6.43775  |                                                        |
| 11 | 63742168 | 63742368 | 5Y-H4K8ac_peak_3268 | 5.65584  | COX8A_ENSG00000176340;AP000721.4_ENSG00000256100       |
| 11 | 63754088 | 63754402 | 5Y-H4K8ac_peak_3269 | 5.24695  | OTUB1_ENSG00000167770                                  |
| 11 | 63810595 | 63810801 | 5Y-H4K8ac_peak_3270 | 5.37237  |                                                        |
| 11 | 63812971 | 63813176 | 5Y-H4K8ac_peak_3271 | 7.50501  |                                                        |
| 11 | 63820028 | 63820827 | 5Y-H4K8ac_peak_3272 | 10.75877 |                                                        |
| 11 | 63823480 | 63823693 | 5Y-H4K8ac_peak_3273 | 7.20869  |                                                        |
| 11 | 63824028 | 63825952 | 5Y-H4K8ac_peak_3274 | 9.44542  |                                                        |
| 11 | 63826874 | 63827099 | 5Y-H4K8ac_peak_3275 | 6.34245  |                                                        |
| 11 | 63827809 | 63828609 | 5Y-H4K8ac_peak_3276 | 9.13495  |                                                        |
| 11 | 63834987 | 63835275 | 5Y-H4K8ac_peak_3277 | 5.79005  |                                                        |
| 11 | 63841124 | 63841365 | 5Y-H4K8ac_peak_3278 | 5.64909  |                                                        |
| 11 | 63845474 | 63845749 | 5Y-H4K8ac_peak_3279 | 6.16949  |                                                        |
| 11 | 63846027 | 63846443 | 5Y-H4K8ac_peak_3280 | 7.07275  |                                                        |
| 11 | 63846915 | 63847150 | 5Y-H4K8ac_peak_3281 | 5.64909  |                                                        |
| 11 | 63851771 | 63852776 | 5Y-H4K8ac_peak_3282 | 9.9863   |                                                        |
| 11 | 63853524 | 63853901 | 5Y-H4K8ac_peak_3283 | 13.61292 |                                                        |
| 11 | 63864094 | 63864399 | 5Y-H4K8ac_peak_3284 | 8.20773  |                                                        |
| 11 | 63864689 | 63864892 | 5Y-H4K8ac_peak_3285 | 4.44548  |                                                        |
| 11 | 63868431 | 63868837 | 5Y-H4K8ac_peak_3286 | 9.30505  |                                                        |
| 11 | 63900410 | 63901274 | 5Y-H4K8ac_peak_3287 | 10.26997 |                                                        |
| 11 | 63911600 | 63911808 | 5Y-H4K8ac_peak_3288 | 5.14442  |                                                        |
| 11 | 63912215 | 63913231 | 5Y-H4K8ac_peak_3289 | 4.77126  |                                                        |
| 11 | 63915391 | 63915701 | 5Y-H4K8ac_peak_3290 | 5.98695  |                                                        |
| 11 | 63916386 | 63917283 | 5Y-H4K8ac_peak_3291 | 8.43511  |                                                        |
| 11 | 63918258 | 63918708 | 5Y-H4K8ac_peak_3292 | 9.02782  |                                                        |
| 11 | 63933154 | 63933349 | 5Y-H4K8ac_peak_3293 | 4.50834  | MACROD1_ENSG00000133315                                |
| 11 | 63933752 | 63934103 | 5Y-H4K8ac_peak_3294 | 7.11863  | MACROD1_ENSG00000133315                                |
| 11 | 64007982 | 64008321 | 5Y-H4K8ac_peak_3295 | 8.24461  | FKBP2_ENSG00000173486                                  |
| 11 | 64013923 | 64014246 | 5Y-H4K8ac_peak_3296 | 9.67903  | PPP1R14B_ENSG00000173457;RP11-783K16.5_ENSG00000256940 |
| 11 | 64014497 | 64014751 | 5Y-H4K8ac_peak_3297 | 7.2422   | PPP1R14B_ENSG00000173457                               |
| 11 | 64015086 | 64015539 | 5Y-H4K8ac_peak_3298 | 11.57236 | PPP1R14B_ENSG00000173457                               |
| 11 | 64036583 | 64037354 | 5Y-H4K8ac_peak_3299 | 22.01094 | GPR137_ENSG00000173264                                 |
| 11 | 64051704 | 64051933 | 5Y-H4K8ac_peak_3300 | 6.03632  | BAD_ENSG00000002330                                    |
| 11 | 64052661 | 64053084 | 5Y-H4K8ac_peak_3301 | 8.73392  | BAD_ENSG00000002330                                    |
| 11 | 64059255 | 64059460 | 5Y-H4K8ac_peak_3302 | 7.11863  | KCNK4_ENSG00000182450;RP11-783K16.10_ENSG00000257069   |
| 11 | 64084326 | 64084978 | 5Y-H4K8ac_peak_3303 | 10.54764 | TRMT112_ENSG00000173113;PRDX5_ENSG00000126432          |
| 11 | 64086451 | 64086711 | 5Y-H4K8ac_peak_3304 | 5.70209  | TRMT112_ENSG00000173113;PRDX5_ENSG00000126432          |
| 11 | 64126169 | 64126478 | 5Y-H4K8ac_peak_3305 | 5.98695  | RPS6KA4_ENSG00000162302                                |
| 11 | 64126729 | 64126945 | 5Y-H4K8ac_peak_3306 | 8.16382  | RPS6KA4_ENSG00000162302                                |
| 11 | 64333777 | 64333982 | 5Y-H4K8ac_peak_3307 | 4.44712  |                                                        |
| 11 | 64334328 | 64335349 | 5Y-H4K8ac_peak_3308 | 12.05638 |                                                        |
| 11 | 64387744 | 64388142 | 5Y-H4K8ac_peak_3309 | 7.01266  |                                                        |
| 11 | 64404500 | 64404774 | 5Y-H4K8ac_peak_3310 | 9.89244  |                                                        |

|    |          |          |                     |          |                                                    |
|----|----------|----------|---------------------|----------|----------------------------------------------------|
| 11 | 64405331 | 64405805 | 5Y-H4K8ac_peak_3311 | 17.50049 |                                                    |
| 11 | 64410453 | 64410679 | 5Y-H4K8ac_peak_3312 | 6.39626  |                                                    |
| 11 | 64455630 | 64455834 | 5Y-H4K8ac_peak_3313 | 9.38276  |                                                    |
| 11 | 64461536 | 64462370 | 5Y-H4K8ac_peak_3314 | 12.10416 |                                                    |
| 11 | 64479498 | 64479806 | 5Y-H4K8ac_peak_3315 | 5.65584  |                                                    |
| 11 | 64490780 | 64491308 | 5Y-H4K8ac_peak_3316 | 21.88077 | NRXN2_ENSG00000110076                              |
| 11 | 64512480 | 64512926 | 5Y-H4K8ac_peak_3317 | 9.179    | RASGRP2_ENSG00000068831                            |
| 11 | 64545656 | 64546094 | 5Y-H4K8ac_peak_3318 | 14.78466 | SF1_ENSG00000168066;AP001462.6_ENSG00000269038     |
| 11 | 64611884 | 64612538 | 5Y-H4K8ac_peak_3319 | 7.89273  | CDC42BPG_ENSG00000171219                           |
| 11 | 64614803 | 64615035 | 5Y-H4K8ac_peak_3320 | 7.38046  |                                                    |
| 11 | 64655261 | 64655467 | 5Y-H4K8ac_peak_3321 | 12.14232 | EHD1_ENSG00000110047                               |
| 11 | 64655672 | 64655946 | 5Y-H4K8ac_peak_3322 | 6.50117  | EHD1_ENSG00000110047                               |
| 11 | 64690993 | 64691507 | 5Y-H4K8ac_peak_3323 | 7.89273  |                                                    |
| 11 | 64781735 | 64782554 | 5Y-H4K8ac_peak_3324 | 10.90365 | ARL2_ENSG00000213465;RP11-399J13.3_ENSG00000273003 |
| 11 | 64863175 | 64863490 | 5Y-H4K8ac_peak_3325 | 6.08523  |                                                    |
| 11 | 64863744 | 64864180 | 5Y-H4K8ac_peak_3326 | 9.51254  |                                                    |
| 11 | 64883998 | 64885102 | 5Y-H4K8ac_peak_3327 | 14.19462 | ZNHIT2_ENSG00000174276;AP003068.12_ENSG00000255173 |
| 11 | 64901778 | 64902436 | 5Y-H4K8ac_peak_3328 | 9.51254  | SYVN1_ENSG00000162298                              |
| 11 | 64918386 | 64918775 | 5Y-H4K8ac_peak_3329 | 13.27648 |                                                    |
| 11 | 64937354 | 64937831 | 5Y-H4K8ac_peak_3330 | 5.40331  | SPDYC_ENSG00000204710                              |
| 11 | 64949427 | 64949643 | 5Y-H4K8ac_peak_3331 | 16.01457 | AP003068.23_ENSG00000254614                        |
| 11 | 64992488 | 64992684 | 5Y-H4K8ac_peak_3332 | 5.64909  |                                                    |
| 11 | 64993351 | 64993865 | 5Y-H4K8ac_peak_3333 | 5.72233  |                                                    |
| 11 | 65029572 | 65029831 | 5Y-H4K8ac_peak_3334 | 7.72887  | POLA2_ENSG00000014138                              |
| 11 | 65066529 | 65067087 | 5Y-H4K8ac_peak_3335 | 11.36844 |                                                    |
| 11 | 65100788 | 65101179 | 5Y-H4K8ac_peak_3336 | 9.15007  | DPF2_ENSG00000133884                               |
| 11 | 65149279 | 65149763 | 5Y-H4K8ac_peak_3337 | 10.86711 |                                                    |
| 11 | 65149956 | 65150404 | 5Y-H4K8ac_peak_3338 | 7.11863  | SLC25A45_ENSG00000162241                           |
| 11 | 65153630 | 65154310 | 5Y-H4K8ac_peak_3339 | 14.67885 | FRMD8_ENSG00000126391                              |
| 11 | 65183569 | 65183843 | 5Y-H4K8ac_peak_3340 | 5.98695  |                                                    |
| 11 | 65189421 | 65189647 | 5Y-H4K8ac_peak_3341 | 7.61515  | NEAT1_ENSG00000245532                              |
| 11 | 65220123 | 65220736 | 5Y-H4K8ac_peak_3342 | 5.74859  |                                                    |
| 11 | 65244485 | 65244942 | 5Y-H4K8ac_peak_3343 | 13.18589 |                                                    |
| 11 | 65245305 | 65245505 | 5Y-H4K8ac_peak_3344 | 9.30505  |                                                    |
| 11 | 65255475 | 65256207 | 5Y-H4K8ac_peak_3345 | 8.24461  |                                                    |
| 11 | 65265319 | 65266085 | 5Y-H4K8ac_peak_3346 | 7.44077  | MALAT1_ENSG00000251562;AP000769.7_ENSG00000270117  |
| 11 | 65292624 | 65292851 | 5Y-H4K8ac_peak_3347 | 8.90223  | SCYL1_ENSG00000142186                              |
| 11 | 65325620 | 65325891 | 5Y-H4K8ac_peak_3348 | 8.62703  | LTBP3_ENSG00000168056                              |
| 11 | 65326134 | 65326846 | 5Y-H4K8ac_peak_3349 | 11.08964 | LTBP3_ENSG00000168056                              |
| 11 | 65419671 | 65419970 | 5Y-H4K8ac_peak_3350 | 6.35402  |                                                    |
| 11 | 65420607 | 65420921 | 5Y-H4K8ac_peak_3351 | 7.18918  |                                                    |
| 11 | 65430003 | 65430229 | 5Y-H4K8ac_peak_3352 | 4.26524  | RELA_ENSG00000173039                               |
| 11 | 65430610 | 65430881 | 5Y-H4K8ac_peak_3353 | 4.77126  | RELA_ENSG00000173039                               |
| 11 | 65478267 | 65478794 | 5Y-H4K8ac_peak_3354 | 7.28023  | KAT5_ENSG00000172977                               |
| 11 | 65479529 | 65479892 | 5Y-H4K8ac_peak_3355 | 10.44054 | KAT5_ENSG00000172977                               |
| 11 | 65547863 | 65548247 | 5Y-H4K8ac_peak_3356 | 14.01193 | AP5B1_ENSG00000254470;AP001266.1_ENSG00000175827   |

|    |          |          |                     |          |                                                                                                |
|----|----------|----------|---------------------|----------|------------------------------------------------------------------------------------------------|
| 11 | 65585345 | 65585657 | 5Y-H4K8ac_peak_3357 | 9.23159  |                                                                                                |
| 11 | 65600713 | 65601291 | 5Y-H4K8ac_peak_3358 | 10.60083 | SNX32_ENSG00000172803                                                                          |
| 11 | 65627095 | 65627470 | 5Y-H4K8ac_peak_3359 | 6.77436  |                                                                                                |
| 11 | 65639531 | 65640318 | 5Y-H4K8ac_peak_3360 | 6.69752  | EFEMP2_ENSG00000172638                                                                         |
| 11 | 65658345 | 65658554 | 5Y-H4K8ac_peak_3361 | 4.77126  | CCDC85B_ENSG00000175602                                                                        |
| 11 | 65666715 | 65666944 | 5Y-H4K8ac_peak_3362 | 5.98695  |                                                                                                |
| 11 | 65679084 | 65679360 | 5Y-H4K8ac_peak_3363 | 7.38046  |                                                                                                |
| 11 | 65686052 | 65686360 | 5Y-H4K8ac_peak_3364 | 13.12848 | C11orf68_ENSG00000175573;DRAP1_ENSG00000175550                                                 |
| 11 | 65728524 | 65728832 | 5Y-H4K8ac_peak_3365 | 7.89142  | SART1_ENSG00000175467                                                                          |
| 11 | 65769755 | 65770102 | 5Y-H4K8ac_peak_3366 | 12.05638 | EIF1AD_ENSG00000175376;BANF1_ENSG00000175334                                                   |
| 11 | 65789801 | 65790018 | 5Y-H4K8ac_peak_3367 | 9.74189  |                                                                                                |
| 11 | 65816810 | 65817009 | 5Y-H4K8ac_peak_3368 | 7.59101  | GAL3ST3_ENSG00000175229                                                                        |
| 11 | 65819297 | 65819530 | 5Y-H4K8ac_peak_3369 | 6.08471  |                                                                                                |
| 11 | 65838082 | 65838330 | 5Y-H4K8ac_peak_3370 | 9.52603  | RP11-1167A19.2_ENSG00000255038;PACS1_ENSG00000175115                                           |
| 11 | 66024746 | 66025060 | 5Y-H4K8ac_peak_3371 | 7.09658  | KLC2_ENSG00000174996                                                                           |
| 11 | 66050326 | 66050586 | 5Y-H4K8ac_peak_3372 | 8.51022  |                                                                                                |
| 11 | 66059436 | 66059760 | 5Y-H4K8ac_peak_3373 | 5.91107  | TMEM151A_ENSG00000179292                                                                       |
| 11 | 66080637 | 66081562 | 5Y-H4K8ac_peak_3374 | 11.4254  | RP11-867G23.13_ENSG00000254458                                                                 |
| 11 | 66084234 | 66084514 | 5Y-H4K8ac_peak_3375 | 9.32595  | CD248_ENSG00000174807                                                                          |
| 11 | 66084740 | 66085339 | 5Y-H4K8ac_peak_3376 | 13.89642 | CD248_ENSG00000174807                                                                          |
| 11 | 66094107 | 66094418 | 5Y-H4K8ac_peak_3377 | 13.0168  |                                                                                                |
| 11 | 66095740 | 66095936 | 5Y-H4K8ac_peak_3378 | 8.62703  |                                                                                                |
| 11 | 66103540 | 66104178 | 5Y-H4K8ac_peak_3379 | 12.21176 | RIN1_ENSG00000174791                                                                           |
| 11 | 66104532 | 66104989 | 5Y-H4K8ac_peak_3380 | 14.10494 | RIN1_ENSG00000174791                                                                           |
| 11 | 66105404 | 66105603 | 5Y-H4K8ac_peak_3381 | 4.29586  |                                                                                                |
| 11 | 66138489 | 66139137 | 5Y-H4K8ac_peak_3382 | 9.69901  | SLC29A2_ENSG00000174669                                                                        |
| 11 | 66208429 | 66208660 | 5Y-H4K8ac_peak_3383 | 4.03329  |                                                                                                |
| 11 | 66234898 | 66235096 | 5Y-H4K8ac_peak_3384 | 8.67356  | MRPL11_ENSG00000174547;PELI3_ENSG00000174516                                                   |
| 11 | 66247112 | 66247553 | 5Y-H4K8ac_peak_3385 | 13.23366 | CTD-3074O7.5_ENSG00000255517;DPP3_ENSG00000254986                                              |
| 11 | 66335771 | 66336007 | 5Y-H4K8ac_peak_3386 | 7.89273  | CTSF_ENSG00000174080                                                                           |
| 11 | 66383529 | 66383817 | 5Y-H4K8ac_peak_3387 | 14.59308 | RNU4-39P_ENSG00000199325;RBM14_ENSG00000239306;RBM4_ENSG00000173933;RBM14-RBM4_ENSG00000248643 |
| 11 | 66405421 | 66405611 | 5Y-H4K8ac_peak_3388 | 4.50834  |                                                                                                |
| 11 | 66495162 | 66495369 | 5Y-H4K8ac_peak_3389 | 10.1994  |                                                                                                |
| 11 | 66495946 | 66496475 | 5Y-H4K8ac_peak_3390 | 16.45525 | SPTBN2_ENSG00000173898                                                                         |
| 11 | 66511780 | 66512073 | 5Y-H4K8ac_peak_3391 | 8.24461  | C11orf80_ENSG00000173715                                                                       |
| 11 | 66611005 | 66611434 | 5Y-H4K8ac_peak_3392 | 7.30348  | RCE1_ENSG00000173653                                                                           |
| 11 | 66623471 | 66624167 | 5Y-H4K8ac_peak_3393 | 10.07308 | LRFN4_ENSG00000173621                                                                          |
| 11 | 66649729 | 66650714 | 5Y-H4K8ac_peak_3394 | 12.20141 |                                                                                                |
| 11 | 66719173 | 66719445 | 5Y-H4K8ac_peak_3395 | 5.03917  |                                                                                                |
| 11 | 66816872 | 66817115 | 5Y-H4K8ac_peak_3396 | 6.20989  |                                                                                                |
| 11 | 66883101 | 66883423 | 5Y-H4K8ac_peak_3397 | 5.84208  |                                                                                                |
| 11 | 66885788 | 66886182 | 5Y-H4K8ac_peak_3398 | 13.0168  | KDM2A_ENSG00000173120                                                                          |
| 11 | 67033447 | 67033658 | 5Y-H4K8ac_peak_3399 | 5.98695  | ADRBK1_ENSG00000173020                                                                         |
| 11 | 67055635 | 67055929 | 5Y-H4K8ac_peak_3400 | 11.30548 | ANKRD13D_ENSG00000172932                                                                       |
| 11 | 67056147 | 67056378 | 5Y-H4K8ac_peak_3401 | 6.53157  | ANKRD13D_ENSG00000172932                                                                       |
| 11 | 67070568 | 67071696 | 5Y-H4K8ac_peak_3402 | 10.35586 | SSH3_ENSG00000172830                                                                           |

|    |          |          |                     |          |                                                      |
|----|----------|----------|---------------------|----------|------------------------------------------------------|
| 11 | 67121385 | 67121639 | 5Y-H4K8ac_peak_3403 | 6.89892  |                                                      |
| 11 | 67139812 | 67140117 | 5Y-H4K8ac_peak_3404 | 7.89273  | AP003419.11_ENSG00000256514                          |
| 11 | 67158976 | 67159256 | 5Y-H4K8ac_peak_3405 | 12.50545 | RAD9A_ENSG00000172613                                |
| 11 | 67168644 | 67169205 | 5Y-H4K8ac_peak_3406 | 8.24461  |                                                      |
| 11 | 67169657 | 67169848 | 5Y-H4K8ac_peak_3407 | 7.59101  |                                                      |
| 11 | 67194704 | 67195046 | 5Y-H4K8ac_peak_3408 | 8.35207  | RPS6KB2_ENSG00000175634                              |
| 11 | 67232348 | 67232773 | 5Y-H4K8ac_peak_3409 | 14.87721 |                                                      |
| 11 | 67236960 | 67237169 | 5Y-H4K8ac_peak_3410 | 10.19948 | TMEM134_ENSG00000172663                              |
| 11 | 67276337 | 67276566 | 5Y-H4K8ac_peak_3411 | 7.59101  | CDK2AP2_ENSG00000167797                              |
| 11 | 67499404 | 67499742 | 5Y-H4K8ac_peak_3412 | 9.30505  |                                                      |
| 11 | 67573732 | 67573963 | 5Y-H4K8ac_peak_3413 | 6.82266  | FAM86C2P_ENSG00000160172                             |
| 11 | 67722536 | 67722913 | 5Y-H4K8ac_peak_3414 | 4.70501  |                                                      |
| 11 | 67771144 | 67771587 | 5Y-H4K8ac_peak_3415 | 6.73385  | UNC93B1_ENSG00000110057                              |
| 11 | 67787928 | 67788454 | 5Y-H4K8ac_peak_3416 | 6.1654   |                                                      |
| 11 | 67807673 | 67808492 | 5Y-H4K8ac_peak_3417 | 10.11191 |                                                      |
| 11 | 67889627 | 67889873 | 5Y-H4K8ac_peak_3418 | 6.46606  | CHKA_ENSG00000110721;CTD-2655K5.1_ENSG00000255236    |
| 11 | 67895411 | 67895620 | 5Y-H4K8ac_peak_3419 | 5.41472  |                                                      |
| 11 | 67980874 | 67982178 | 5Y-H4K8ac_peak_3420 | 16.41521 | SUV420H1_ENSG00000110066                             |
| 11 | 68039658 | 68039909 | 5Y-H4K8ac_peak_3421 | 7.20869  | C11orf24_ENSG00000171067                             |
| 11 | 68064936 | 68065162 | 5Y-H4K8ac_peak_3422 | 9.23159  |                                                      |
| 11 | 68080152 | 68080416 | 5Y-H4K8ac_peak_3423 | 7.59832  | LRP5_ENSG00000162337                                 |
| 11 | 68140207 | 68141085 | 5Y-H4K8ac_peak_3424 | 11.1169  |                                                      |
| 11 | 68142309 | 68142994 | 5Y-H4K8ac_peak_3425 | 21.48346 |                                                      |
| 11 | 68144511 | 68144730 | 5Y-H4K8ac_peak_3426 | 7.11863  |                                                      |
| 11 | 68210152 | 68210432 | 5Y-H4K8ac_peak_3427 | 4.84727  |                                                      |
| 11 | 68427016 | 68427986 | 5Y-H4K8ac_peak_3428 | 7.90236  |                                                      |
| 11 | 68428452 | 68429500 | 5Y-H4K8ac_peak_3429 | 3.94247  |                                                      |
| 11 | 68451460 | 68452640 | 5Y-H4K8ac_peak_3430 | 14.00894 | GAL_ENSG00000069482                                  |
| 11 | 68518723 | 68518964 | 5Y-H4K8ac_peak_3431 | 18.33883 | MTL5_ENSG00000132749                                 |
| 11 | 68532203 | 68532410 | 5Y-H4K8ac_peak_3432 | 6.79955  |                                                      |
| 11 | 68671085 | 68671683 | 5Y-H4K8ac_peak_3433 | 23.3512  | MRPL21_ENSG00000197345;IGHMBP2_ENSG00000132740       |
| 11 | 68766240 | 68766441 | 5Y-H4K8ac_peak_3434 | 9.15007  |                                                      |
| 11 | 68769399 | 68769630 | 5Y-H4K8ac_peak_3435 | 4.36976  | RP11-554A11.4_ENSG00000261625                        |
| 11 | 68780534 | 68781238 | 5Y-H4K8ac_peak_3436 | 6.37023  | MRGPRF_ENSG00000172935;RP11-554A11.6_ENSG00000256508 |
| 11 | 68874193 | 68874564 | 5Y-H4K8ac_peak_3437 | 8.24461  |                                                      |
| 11 | 68899327 | 68899642 | 5Y-H4K8ac_peak_3438 | 8.564    |                                                      |
| 11 | 68923799 | 68924691 | 5Y-H4K8ac_peak_3439 | 15.08122 | RP11-554A11.9_ENSG00000259799                        |
| 11 | 68924902 | 68925750 | 5Y-H4K8ac_peak_3440 | 14.92663 |                                                      |
| 11 | 68933926 | 68934408 | 5Y-H4K8ac_peak_3441 | 6.11316  |                                                      |
| 11 | 68950950 | 68951419 | 5Y-H4K8ac_peak_3442 | 7.82914  |                                                      |
| 11 | 68953391 | 68953706 | 5Y-H4K8ac_peak_3443 | 12.10416 |                                                      |
| 11 | 68959800 | 68960236 | 5Y-H4K8ac_peak_3444 | 8.08337  |                                                      |
| 11 | 68960436 | 68960641 | 5Y-H4K8ac_peak_3445 | 7.31102  |                                                      |
| 11 | 68964382 | 68964580 | 5Y-H4K8ac_peak_3446 | 5.98695  |                                                      |
| 11 | 68967905 | 68968312 | 5Y-H4K8ac_peak_3447 | 10.4689  |                                                      |
| 11 | 68979767 | 68980021 | 5Y-H4K8ac_peak_3448 | 10.95042 |                                                      |

|    |          |          |                     |          |                                                     |
|----|----------|----------|---------------------|----------|-----------------------------------------------------|
| 11 | 69195233 | 69195513 | 5Y-H4K8ac_peak_3449 | 7.59101  |                                                     |
| 11 | 69257456 | 69257976 | 5Y-H4K8ac_peak_3450 | 9.48616  |                                                     |
| 11 | 69258386 | 69259243 | 5Y-H4K8ac_peak_3451 | 10.54764 | AP000439.2_ENSG00000255606                          |
| 11 | 69263831 | 69264262 | 5Y-H4K8ac_peak_3452 | 6.36723  |                                                     |
| 11 | 69264866 | 69265226 | 5Y-H4K8ac_peak_3453 | 9.23159  |                                                     |
| 11 | 69452794 | 69453358 | 5Y-H4K8ac_peak_3454 | 8.43511  |                                                     |
| 11 | 69455061 | 69455607 | 5Y-H4K8ac_peak_3455 | 5.65584  | CCND1_ENSG00000110092                               |
| 11 | 69456044 | 69456357 | 5Y-H4K8ac_peak_3456 | 6.79169  | CCND1_ENSG00000110092                               |
| 11 | 69456889 | 69457161 | 5Y-H4K8ac_peak_3457 | 14.31711 |                                                     |
| 11 | 69457705 | 69458113 | 5Y-H4K8ac_peak_3458 | 5.78188  |                                                     |
| 11 | 69458811 | 69459140 | 5Y-H4K8ac_peak_3459 | 10.35586 |                                                     |
| 11 | 69518856 | 69519359 | 5Y-H4K8ac_peak_3460 | 12.21176 | FGF19_ENSG00000162344                               |
| 11 | 69555896 | 69556101 | 5Y-H4K8ac_peak_3461 | 5.97089  |                                                     |
| 11 | 69707292 | 69708110 | 5Y-H4K8ac_peak_3462 | 10.79063 |                                                     |
| 11 | 69708454 | 69708779 | 5Y-H4K8ac_peak_3463 | 8.24461  |                                                     |
| 11 | 70244675 | 70244955 | 5Y-H4K8ac_peak_3464 | 11.68317 | AP000487.5_ENSG00000246889;CTTN_ENSG00000085733     |
| 11 | 70428030 | 70428243 | 5Y-H4K8ac_peak_3465 | 7.31102  |                                                     |
| 11 | 70430644 | 70430877 | 5Y-H4K8ac_peak_3466 | 4.98439  |                                                     |
| 11 | 70431149 | 70431391 | 5Y-H4K8ac_peak_3467 | 6.82266  |                                                     |
| 11 | 70456401 | 70456644 | 5Y-H4K8ac_peak_3468 | 9.41037  |                                                     |
| 11 | 70487918 | 70488224 | 5Y-H4K8ac_peak_3469 | 13.33225 |                                                     |
| 11 | 70508310 | 70508526 | 5Y-H4K8ac_peak_3470 | 11.09973 |                                                     |
| 11 | 70508871 | 70509474 | 5Y-H4K8ac_peak_3471 | 13.92877 |                                                     |
| 11 | 70516634 | 70516848 | 5Y-H4K8ac_peak_3472 | 5.35202  |                                                     |
| 11 | 71199653 | 71199936 | 5Y-H4K8ac_peak_3473 | 12.09463 |                                                     |
| 11 | 71200428 | 71200665 | 5Y-H4K8ac_peak_3474 | 4.9885   |                                                     |
| 11 | 71497490 | 71497741 | 5Y-H4K8ac_peak_3475 | 6.77436  | FAM86C1_ENSG00000158483                             |
| 11 | 71524403 | 71524886 | 5Y-H4K8ac_peak_3476 | 12.21176 |                                                     |
| 11 | 71639069 | 71639940 | 5Y-H4K8ac_peak_3477 | 10.36926 | RP11-849H4.2_ENSG00000254469;RNF121_ENSG00000137522 |
| 11 | 71752437 | 71753323 | 5Y-H4K8ac_peak_3478 | 10.19948 |                                                     |
| 11 | 71792024 | 71792351 | 5Y-H4K8ac_peak_3479 | 11.1169  | NUMA1_ENSG00000137497;LRTOMT_ENSG00000184154        |
| 11 | 71813955 | 71814293 | 5Y-H4K8ac_peak_3480 | 12.21176 | LAMTOR1_ENSG00000149357;snoU13_ENSG00000238768      |
| 11 | 71814646 | 71814968 | 5Y-H4K8ac_peak_3481 | 9.26157  | LAMTOR1_ENSG00000149357;snoU13_ENSG00000238768      |
| 11 | 71824387 | 71824823 | 5Y-H4K8ac_peak_3482 | 10.89497 | ANAPC15_ENSG00000110200                             |
| 11 | 71934737 | 71935193 | 5Y-H4K8ac_peak_3483 | 7.27597  | INPPL1_ENSG00000165458                              |
| 11 | 71948375 | 71948819 | 5Y-H4K8ac_peak_3484 | 5.98695  |                                                     |
| 11 | 71951734 | 71952115 | 5Y-H4K8ac_peak_3485 | 7.89273  |                                                     |
| 11 | 71955936 | 71956349 | 5Y-H4K8ac_peak_3486 | 8.69112  | PHOX2A_ENSG00000165462                              |
| 11 | 72017347 | 72018201 | 5Y-H4K8ac_peak_3487 | 7.89273  |                                                     |
| 11 | 72018617 | 72019587 | 5Y-H4K8ac_peak_3488 | 7.20869  |                                                     |
| 11 | 72022736 | 72022951 | 5Y-H4K8ac_peak_3489 | 8.43511  |                                                     |
| 11 | 72030939 | 72031196 | 5Y-H4K8ac_peak_3490 | 10.90543 |                                                     |
| 11 | 72032799 | 72033422 | 5Y-H4K8ac_peak_3491 | 8.28346  |                                                     |
| 11 | 72046313 | 72047274 | 5Y-H4K8ac_peak_3492 | 7.97699  |                                                     |
| 11 | 72053358 | 72053593 | 5Y-H4K8ac_peak_3493 | 4.50834  |                                                     |
| 11 | 72055153 | 72055397 | 5Y-H4K8ac_peak_3494 | 5.65584  |                                                     |



|    |          |          |                     |          |                                                                        |
|----|----------|----------|---------------------|----------|------------------------------------------------------------------------|
| 11 | 72060426 | 72060837 | 5Y-H4K8ac_peak_3495 | 8.79957  |                                                                        |
| 11 | 72067042 | 72067257 | 5Y-H4K8ac_peak_3496 | 6.20989  |                                                                        |
| 11 | 72068060 | 72068587 | 5Y-H4K8ac_peak_3497 | 7.80086  |                                                                        |
| 11 | 72068872 | 72069660 | 5Y-H4K8ac_peak_3498 | 10.35586 |                                                                        |
| 11 | 72071022 | 72071330 | 5Y-H4K8ac_peak_3499 | 11.19336 |                                                                        |
| 11 | 72081664 | 72081940 | 5Y-H4K8ac_peak_3500 | 4.8509   |                                                                        |
| 11 | 72122320 | 72122710 | 5Y-H4K8ac_peak_3501 | 5.03335  | RP11-7N14.1_ENSG00000256403                                            |
| 11 | 72124915 | 72125221 | 5Y-H4K8ac_peak_3502 | 6.50117  |                                                                        |
| 11 | 72336592 | 72336842 | 5Y-H4K8ac_peak_3503 | 4.67245  |                                                                        |
| 11 | 72339884 | 72340526 | 5Y-H4K8ac_peak_3504 | 9.79526  |                                                                        |
| 11 | 72341112 | 72341391 | 5Y-H4K8ac_peak_3505 | 7.387    |                                                                        |
| 11 | 72348337 | 72348567 | 5Y-H4K8ac_peak_3506 | 4.50302  |                                                                        |
| 11 | 72385939 | 72386359 | 5Y-H4K8ac_peak_3507 | 10.19948 | PDE2A_ENSG00000186642                                                  |
| 11 | 72424101 | 72424345 | 5Y-H4K8ac_peak_3508 | 7.01364  |                                                                        |
| 11 | 72433830 | 72434063 | 5Y-H4K8ac_peak_3509 | 8.11614  |                                                                        |
| 11 | 72462771 | 72463446 | 5Y-H4K8ac_peak_3510 | 6.50117  |                                                                        |
| 11 | 72492357 | 72492569 | 5Y-H4K8ac_peak_3511 | 7.04158  |                                                                        |
| 11 | 72504055 | 72504245 | 5Y-H4K8ac_peak_3512 | 5.77617  | ARAP1_ENSG00000186635;STARD10_ENSG00000214530                          |
| 11 | 72525150 | 72525352 | 5Y-H4K8ac_peak_3513 | 8.90774  | ATG16L2_ENSG00000168010                                                |
| 11 | 72532619 | 72533162 | 5Y-H4K8ac_peak_3514 | 16.79029 |                                                                        |
| 11 | 72944377 | 72944568 | 5Y-H4K8ac_peak_3515 | 6.17973  |                                                                        |
| 11 | 72953349 | 72953774 | 5Y-H4K8ac_peak_3516 | 7.63144  |                                                                        |
| 11 | 72981791 | 72982594 | 5Y-H4K8ac_peak_3517 | 7.59101  |                                                                        |
| 11 | 73019331 | 73019902 | 5Y-H4K8ac_peak_3518 | 9.7353   | RP11-800A3.7_ENSG00000257038;ARHGEF17_ENSG00000110237                  |
| 11 | 73024146 | 73024676 | 5Y-H4K8ac_peak_3519 | 6.92707  |                                                                        |
| 11 | 73032998 | 73033628 | 5Y-H4K8ac_peak_3520 | 8.73392  |                                                                        |
| 11 | 73045457 | 73046404 | 5Y-H4K8ac_peak_3521 | 6.53157  |                                                                        |
| 11 | 73053978 | 73054365 | 5Y-H4K8ac_peak_3522 | 6.4472   |                                                                        |
| 11 | 73086634 | 73087202 | 5Y-H4K8ac_peak_3523 | 11.12941 | RELT_ENSG00000054967                                                   |
| 11 | 73309804 | 73310005 | 5Y-H4K8ac_peak_3524 | 10.55504 | FAM168A_ENSG00000054965                                                |
| 11 | 73371662 | 73371903 | 5Y-H4K8ac_peak_3525 | 6.43775  |                                                                        |
| 11 | 73440862 | 73441071 | 5Y-H4K8ac_peak_3526 | 6.7002   |                                                                        |
| 11 | 73472744 | 73473089 | 5Y-H4K8ac_peak_3527 | 10.27264 | RAB6A_ENSG00000175582                                                  |
| 11 | 74108944 | 74109245 | 5Y-H4K8ac_peak_3528 | 5.22422  | PGM2L1_ENSG00000165434;RP11-702H23.4_ENSG00000254631                   |
| 11 | 74204462 | 74204752 | 5Y-H4K8ac_peak_3529 | 10.44054 | LIPT2_ENSG00000175536;AP001372.2_ENSG00000254837;POLD3_ENSG00000077514 |
| 11 | 74303779 | 74304008 | 5Y-H4K8ac_peak_3530 | 5.77617  |                                                                        |
| 11 | 74383809 | 74384036 | 5Y-H4K8ac_peak_3531 | 11.19336 |                                                                        |
| 11 | 74394337 | 74394595 | 5Y-H4K8ac_peak_3532 | 9.07085  |                                                                        |
| 11 | 74402203 | 74402407 | 5Y-H4K8ac_peak_3533 | 4.9885   |                                                                        |
| 11 | 74906591 | 74906937 | 5Y-H4K8ac_peak_3534 | 4.84727  |                                                                        |
| 11 | 74952501 | 74952719 | 5Y-H4K8ac_peak_3535 | 8.1667   | CTD-2562J17.4_ENSG00000255136                                          |
| 11 | 75012288 | 75012786 | 5Y-H4K8ac_peak_3536 | 6.43068  |                                                                        |
| 11 | 75015400 | 75015707 | 5Y-H4K8ac_peak_3537 | 6.3265   |                                                                        |
| 11 | 75022928 | 75023130 | 5Y-H4K8ac_peak_3538 | 6.34245  |                                                                        |
| 11 | 75050763 | 75051439 | 5Y-H4K8ac_peak_3539 | 5.64909  |                                                                        |
| 11 | 75051639 | 75051871 | 5Y-H4K8ac_peak_3540 | 6.06162  |                                                                        |

|    |          |          |                     |          |                                                    |
|----|----------|----------|---------------------|----------|----------------------------------------------------|
| 11 | 75060776 | 75061051 | 5Y-H4K8ac_peak_3541 | 8.18236  |                                                    |
| 11 | 75062392 | 75062635 | 5Y-H4K8ac_peak_3542 | 9.31608  | ARRB1_ENSG00000137486                              |
| 11 | 75062827 | 75063302 | 5Y-H4K8ac_peak_3543 | 7.20869  | ARRB1_ENSG00000137486                              |
| 11 | 75110612 | 75111135 | 5Y-H4K8ac_peak_3544 | 11.22005 | RPS3_ENSG00000149273;SNORD15A_ENSG00000206941      |
| 11 | 75141325 | 75141857 | 5Y-H4K8ac_peak_3545 | 13.03079 | KLHL35_ENSG00000149243                             |
| 11 | 75180269 | 75180465 | 5Y-H4K8ac_peak_3546 | 4.07874  |                                                    |
| 11 | 75218385 | 75218648 | 5Y-H4K8ac_peak_3547 | 4.71803  | RP11-939C17.4_ENSG00000254460                      |
| 11 | 75265857 | 75266780 | 5Y-H4K8ac_peak_3548 | 16.13719 |                                                    |
| 11 | 75273154 | 75273577 | 5Y-H4K8ac_peak_3549 | 12.42757 | SERPINH1_ENSG00000149257                           |
| 11 | 75274084 | 75274536 | 5Y-H4K8ac_peak_3550 | 6.10343  | SERPINH1_ENSG00000149257                           |
| 11 | 75293979 | 75294962 | 5Y-H4K8ac_peak_3551 | 23.51162 | CTD-2530H12.4_ENSG00000255326                      |
| 11 | 75295179 | 75295643 | 5Y-H4K8ac_peak_3552 | 6.77436  | CTD-2530H12.4_ENSG00000255326                      |
| 11 | 75336108 | 75336314 | 5Y-H4K8ac_peak_3553 | 5.65584  |                                                    |
| 11 | 75338863 | 75339682 | 5Y-H4K8ac_peak_3554 | 9.15007  |                                                    |
| 11 | 75378386 | 75378649 | 5Y-H4K8ac_peak_3555 | 5.70472  |                                                    |
| 11 | 75417599 | 75417840 | 5Y-H4K8ac_peak_3556 | 8.564    |                                                    |
| 11 | 75425213 | 75425441 | 5Y-H4K8ac_peak_3557 | 5.34938  |                                                    |
| 11 | 75444288 | 75444763 | 5Y-H4K8ac_peak_3558 | 8.2913   |                                                    |
| 11 | 75479146 | 75480042 | 5Y-H4K8ac_peak_3559 | 16.94054 | CTD-2530H12.1_ENSG00000247867                      |
| 11 | 75871722 | 75872964 | 5Y-H4K8ac_peak_3560 | 9.51254  |                                                    |
| 11 | 75873158 | 75873641 | 5Y-H4K8ac_peak_3561 | 5.23083  |                                                    |
| 11 | 75891705 | 75891931 | 5Y-H4K8ac_peak_3562 | 5.74859  |                                                    |
| 11 | 75945122 | 75945319 | 5Y-H4K8ac_peak_3563 | 7.59101  |                                                    |
| 11 | 75945641 | 75946018 | 5Y-H4K8ac_peak_3564 | 7.11863  |                                                    |
| 11 | 76310382 | 76310646 | 5Y-H4K8ac_peak_3565 | 7.30348  |                                                    |
| 11 | 76314063 | 76314454 | 5Y-H4K8ac_peak_3566 | 6.17973  |                                                    |
| 11 | 76314786 | 76315388 | 5Y-H4K8ac_peak_3567 | 11.99586 |                                                    |
| 11 | 76321875 | 76322342 | 5Y-H4K8ac_peak_3568 | 6.77436  |                                                    |
| 11 | 76326798 | 76327169 | 5Y-H4K8ac_peak_3569 | 7.01364  |                                                    |
| 11 | 76382127 | 76382331 | 5Y-H4K8ac_peak_3570 | 3.99744  | LRRC32_ENSG00000137507                             |
| 11 | 76432642 | 76432894 | 5Y-H4K8ac_peak_3571 | 8.97839  |                                                    |
| 11 | 76494413 | 76494835 | 5Y-H4K8ac_peak_3572 | 11.36989 | RP11-21L23.3_ENSG00000255100                       |
| 11 | 76777095 | 76777307 | 5Y-H4K8ac_peak_3573 | 7.25081  | CAPN5_ENSG00000149260                              |
| 11 | 76784542 | 76785686 | 5Y-H4K8ac_peak_3574 | 11.1169  |                                                    |
| 11 | 76793886 | 76794122 | 5Y-H4K8ac_peak_3575 | 6.73385  |                                                    |
| 11 | 76837847 | 76838477 | 5Y-H4K8ac_peak_3576 | 8.2913   | MYO7A_ENSG00000137474                              |
| 11 | 76839357 | 76839623 | 5Y-H4K8ac_peak_3577 | 13.2534  | MYO7A_ENSG00000137474                              |
| 11 | 77184328 | 77184729 | 5Y-H4K8ac_peak_3578 | 11.53136 | PAK1_ENSG00000149269;DKFZP434E1119_ENSG00000268635 |
| 11 | 77348490 | 77348773 | 5Y-H4K8ac_peak_3579 | 7.59101  | CLNS1A_ENSG00000074201                             |
| 11 | 77531324 | 77531799 | 5Y-H4K8ac_peak_3580 | 7.72887  | RSF1_ENSG00000048649;AAMDC_ENSG00000087884         |
| 11 | 77741133 | 77741589 | 5Y-H4K8ac_peak_3581 | 8.27399  |                                                    |
| 11 | 77850316 | 77850597 | 5Y-H4K8ac_peak_3582 | 8.24461  | ALG8_ENSG00000159063;KCTD21-AS1_ENSG00000246174    |
| 11 | 78063161 | 78063352 | 5Y-H4K8ac_peak_3583 | 6.31818  |                                                    |
| 11 | 78064284 | 78064506 | 5Y-H4K8ac_peak_3584 | 8.17203  |                                                    |
| 11 | 78128185 | 78128789 | 5Y-H4K8ac_peak_3585 | 9.88125  | GAB2_ENSG00000033327                               |
| 11 | 78129129 | 78129412 | 5Y-H4K8ac_peak_3586 | 4.55128  | GAB2_ENSG00000033327                               |

|    |           |           |                     |          |                                                   |
|----|-----------|-----------|---------------------|----------|---------------------------------------------------|
| 11 | 78131000  | 78131425  | 5Y-H4K8ac_peak_3587 | 11.32351 |                                                   |
| 11 | 78285540  | 78285733  | 5Y-H4K8ac_peak_3588 | 4.95697  | NARS2_ENSG00000137513                             |
| 11 | 78448229  | 78448468  | 5Y-H4K8ac_peak_3589 | 5.65584  |                                                   |
| 11 | 78450917  | 78451230  | 5Y-H4K8ac_peak_3590 | 13.63503 |                                                   |
| 11 | 78453656  | 78453931  | 5Y-H4K8ac_peak_3591 | 5.35202  |                                                   |
| 11 | 78563438  | 78563927  | 5Y-H4K8ac_peak_3592 | 8.43511  |                                                   |
| 11 | 78652499  | 78652885  | 5Y-H4K8ac_peak_3593 | 7.09444  |                                                   |
| 11 | 78655558  | 78655765  | 5Y-H4K8ac_peak_3594 | 5.38149  |                                                   |
| 11 | 78661104  | 78661391  | 5Y-H4K8ac_peak_3595 | 5.98695  |                                                   |
| 11 | 78661996  | 78662188  | 5Y-H4K8ac_peak_3596 | 4.03329  |                                                   |
| 11 | 78692726  | 78692936  | 5Y-H4K8ac_peak_3597 | 6.94416  |                                                   |
| 11 | 78694100  | 78694522  | 5Y-H4K8ac_peak_3598 | 5.87382  |                                                   |
| 11 | 78701380  | 78701641  | 5Y-H4K8ac_peak_3599 | 6.34046  |                                                   |
| 11 | 78729984  | 78730532  | 5Y-H4K8ac_peak_3600 | 5.65584  |                                                   |
| 11 | 78757160  | 78757557  | 5Y-H4K8ac_peak_3601 | 9.58986  |                                                   |
| 11 | 78773795  | 78774003  | 5Y-H4K8ac_peak_3602 | 5.56894  |                                                   |
| 11 | 78788892  | 78789217  | 5Y-H4K8ac_peak_3603 | 5.35202  |                                                   |
| 11 | 78790291  | 78790516  | 5Y-H4K8ac_peak_3604 | 8.71064  |                                                   |
| 11 | 78798831  | 78799089  | 5Y-H4K8ac_peak_3605 | 8.43511  |                                                   |
| 11 | 78799319  | 78799515  | 5Y-H4K8ac_peak_3606 | 5.65765  |                                                   |
| 11 | 79148581  | 79148962  | 5Y-H4K8ac_peak_3607 | 7.89142  |                                                   |
| 11 | 82444636  | 82444868  | 5Y-H4K8ac_peak_3608 | 7.11863  | FAM181B_ENSG00000182103                           |
| 11 | 82461598  | 82461822  | 5Y-H4K8ac_peak_3609 | 9.38203  |                                                   |
| 11 | 82502836  | 82503051  | 5Y-H4K8ac_peak_3610 | 7.76232  | RP11-718B12.2_ENSG00000255382                     |
| 11 | 85566285  | 85566487  | 5Y-H4K8ac_peak_3611 | 8.47164  | AP000974.1_ENSG00000215504;CCDC83_ENSG00000150676 |
| 11 | 86013399  | 86013716  | 5Y-H4K8ac_peak_3612 | 7.97699  | C11orf73_ENSG00000149196                          |
| 11 | 86383575  | 86383776  | 5Y-H4K8ac_peak_3613 | 5.65584  | ME3_ENSG00000151376                               |
| 11 | 86748415  | 86748710  | 5Y-H4K8ac_peak_3614 | 8.21582  | TMEM135_ENSG00000166575                           |
| 11 | 88070605  | 88070836  | 5Y-H4K8ac_peak_3615 | 6.22669  | CTSC_ENSG00000109861                              |
| 11 | 89224389  | 89224813  | 5Y-H4K8ac_peak_3616 | 5.65584  |                                                   |
| 11 | 89955787  | 89956123  | 5Y-H4K8ac_peak_3617 | 10.79063 | CHORDC1_ENSG00000110172                           |
| 11 | 92930779  | 92931033  | 5Y-H4K8ac_peak_3618 | 6.08523  | SLC36A4_ENSG00000180773                           |
| 11 | 93063750  | 93064116  | 5Y-H4K8ac_peak_3619 | 14.59308 | CCDC67_ENSG00000165325                            |
| 11 | 93517517  | 93518081  | 5Y-H4K8ac_peak_3620 | 17.04999 | TAF1D_ENSG00000166012;MED17_ENSG00000042429       |
| 11 | 93583078  | 93583720  | 5Y-H4K8ac_peak_3621 | 7.89273  | VSTM5_ENSG00000214376                             |
| 11 | 93861466  | 93861788  | 5Y-H4K8ac_peak_3622 | 5.81062  | PANX1_ENSG00000110218                             |
| 11 | 93862068  | 93862549  | 5Y-H4K8ac_peak_3623 | 5.64909  | PANX1_ENSG00000110218                             |
| 11 | 94501785  | 94502195  | 5Y-H4K8ac_peak_3624 | 5.87725  |                                                   |
| 11 | 94800215  | 94800906  | 5Y-H4K8ac_peak_3625 | 13.04415 | SRSF8_ENSG00000180771;SRSF8_ENSG00000271885       |
| 11 | 94822637  | 94822829  | 5Y-H4K8ac_peak_3626 | 8.35139  | ENDOD1_ENSG00000149218                            |
| 11 | 95656954  | 95657230  | 5Y-H4K8ac_peak_3627 | 16.01457 |                                                   |
| 11 | 95976430  | 95976676  | 5Y-H4K8ac_peak_3628 | 7.3889   |                                                   |
| 11 | 103197061 | 103197307 | 5Y-H4K8ac_peak_3629 | 7.38046  |                                                   |
| 11 | 103398069 | 103398283 | 5Y-H4K8ac_peak_3630 | 7.31815  |                                                   |
| 11 | 103406988 | 103407644 | 5Y-H4K8ac_peak_3631 | 9.83437  |                                                   |
| 11 | 105948582 | 105948783 | 5Y-H4K8ac_peak_3632 | 6.43775  | KBTBD3_ENSG00000182359                            |

|    |           |           |                     |          |                                                                             |
|----|-----------|-----------|---------------------|----------|-----------------------------------------------------------------------------|
| 11 | 107328290 | 107328501 | 5Y-H4K8ac_peak_3633 | 10.19948 | CWF19L2_ENSG00000152404                                                     |
| 11 | 107879698 | 107880349 | 5Y-H4K8ac_peak_3634 | 25.80181 | CUL5_ENSG00000166266                                                        |
| 11 | 108336963 | 108337245 | 5Y-H4K8ac_peak_3635 | 5.40331  |                                                                             |
| 11 | 108369331 | 108369643 | 5Y-H4K8ac_peak_3636 | 7.34185  | KDELC2_ENSG00000178202                                                      |
| 11 | 109963884 | 109964589 | 5Y-H4K8ac_peak_3637 | 7.64648  | ZC3H12C_ENSG00000149289                                                     |
| 11 | 110166671 | 110167280 | 5Y-H4K8ac_peak_3638 | 8.14883  | RDX_ENSG00000137710                                                         |
| 11 | 111101560 | 111101855 | 5Y-H4K8ac_peak_3639 | 7.30348  |                                                                             |
| 11 | 111383325 | 111383593 | 5Y-H4K8ac_peak_3640 | 6.49308  | BTG4_ENSG00000137707;MIR34B_ENSG00000207811;MIR34C_ENSG00000207562          |
| 11 | 111750051 | 111750491 | 5Y-H4K8ac_peak_3641 | 5.35202  | ALG9_ENSG00000258529;C11orf1_ENSG00000137720                                |
| 11 | 111895846 | 111896356 | 5Y-H4K8ac_peak_3642 | 9.30206  | DLAT_ENSG00000150768                                                        |
| 11 | 111945293 | 111945486 | 5Y-H4K8ac_peak_3643 | 8.2913   | PIH1D2_ENSG00000150773;C11orf57_ENSG00000150776                             |
| 11 | 111957231 | 111957459 | 5Y-H4K8ac_peak_3644 | 9.38276  | TIMM8B_ENSG00000150779;SDHD_ENSG00000204370;SDHD_ENSG00000255292            |
| 11 | 112160497 | 112160776 | 5Y-H4K8ac_peak_3645 | 6.1654   |                                                                             |
| 11 | 112647775 | 112648349 | 5Y-H4K8ac_peak_3646 | 11.1169  |                                                                             |
| 11 | 112704895 | 112705139 | 5Y-H4K8ac_peak_3647 | 4.84193  |                                                                             |
| 11 | 112705894 | 112706133 | 5Y-H4K8ac_peak_3648 | 6.38173  |                                                                             |
| 11 | 112707063 | 112707334 | 5Y-H4K8ac_peak_3649 | 5.70472  |                                                                             |
| 11 | 112886224 | 112886591 | 5Y-H4K8ac_peak_3650 | 6.34046  |                                                                             |
| 11 | 113063723 | 113064194 | 5Y-H4K8ac_peak_3651 | 4.84727  |                                                                             |
| 11 | 113185413 | 113185818 | 5Y-H4K8ac_peak_3652 | 6.37023  | RP11-839D17.3_ENSG00000255129;TTC12_ENSG00000149292                         |
| 11 | 113241318 | 113241522 | 5Y-H4K8ac_peak_3653 | 7.21112  |                                                                             |
| 11 | 113308271 | 113308467 | 5Y-H4K8ac_peak_3654 | 4.07874  |                                                                             |
| 11 | 113318313 | 113319076 | 5Y-H4K8ac_peak_3655 | 6.24411  |                                                                             |
| 11 | 113319286 | 113319692 | 5Y-H4K8ac_peak_3656 | 4.84727  |                                                                             |
| 11 | 113420442 | 113420841 | 5Y-H4K8ac_peak_3657 | 9.15007  |                                                                             |
| 11 | 113448115 | 113448331 | 5Y-H4K8ac_peak_3658 | 7.46829  |                                                                             |
| 11 | 113461129 | 113461334 | 5Y-H4K8ac_peak_3659 | 4.95697  |                                                                             |
| 11 | 113644031 | 113644355 | 5Y-H4K8ac_peak_3660 | 5.40331  | ZW10_ENSG00000086827                                                        |
| 11 | 114270841 | 114271105 | 5Y-H4K8ac_peak_3661 | 7.93983  | C11orf71_ENSG00000180425;RBM7_ENSG00000076053;RP11-212D19.4_ENSG00000255663 |
| 11 | 115451404 | 115451607 | 5Y-H4K8ac_peak_3662 | 4.642    |                                                                             |
| 11 | 115452585 | 115452896 | 5Y-H4K8ac_peak_3663 | 6.39626  | RP11-136I14.5_ENSG00000255689                                               |
| 11 | 115477389 | 115477654 | 5Y-H4K8ac_peak_3664 | 4.07874  |                                                                             |
| 11 | 115529855 | 115530769 | 5Y-H4K8ac_peak_3665 | 11.19336 | AP000797.3_ENSG00000256717                                                  |
| 11 | 115540502 | 115540839 | 5Y-H4K8ac_peak_3666 | 6.94416  |                                                                             |
| 11 | 115541041 | 115541279 | 5Y-H4K8ac_peak_3667 | 7.01266  |                                                                             |
| 11 | 115608627 | 115609000 | 5Y-H4K8ac_peak_3668 | 5.84208  |                                                                             |
| 11 | 115615491 | 115615865 | 5Y-H4K8ac_peak_3669 | 5.34199  |                                                                             |
| 11 | 115617785 | 115618079 | 5Y-H4K8ac_peak_3670 | 5.64982  |                                                                             |
| 11 | 115619492 | 115619822 | 5Y-H4K8ac_peak_3671 | 7.87406  |                                                                             |
| 11 | 115932872 | 115933196 | 5Y-H4K8ac_peak_3672 | 9.32595  |                                                                             |
| 11 | 115935675 | 115935953 | 5Y-H4K8ac_peak_3673 | 8.97183  |                                                                             |
| 11 | 115949120 | 115949403 | 5Y-H4K8ac_peak_3674 | 6.77436  |                                                                             |
| 11 | 116051134 | 116051392 | 5Y-H4K8ac_peak_3675 | 11.1169  |                                                                             |
| 11 | 116064255 | 116064534 | 5Y-H4K8ac_peak_3676 | 9.22011  |                                                                             |
| 11 | 116078464 | 116079249 | 5Y-H4K8ac_peak_3677 | 11.1169  |                                                                             |
| 11 | 116147535 | 116147991 | 5Y-H4K8ac_peak_3678 | 4.15658  |                                                                             |

|    |           |           |                     |          |                                                     |
|----|-----------|-----------|---------------------|----------|-----------------------------------------------------|
| 11 | 116182070 | 116182379 | 5Y-H4K8ac_peak_3679 | 5.18558  |                                                     |
| 11 | 116182713 | 116183675 | 5Y-H4K8ac_peak_3680 | 5.98695  |                                                     |
| 11 | 116184133 | 116184388 | 5Y-H4K8ac_peak_3681 | 7.37325  |                                                     |
| 11 | 116200323 | 116200565 | 5Y-H4K8ac_peak_3682 | 7.25081  |                                                     |
| 11 | 116254377 | 116254616 | 5Y-H4K8ac_peak_3683 | 9.48616  |                                                     |
| 11 | 116255496 | 116255731 | 5Y-H4K8ac_peak_3684 | 6.34245  |                                                     |
| 11 | 116256544 | 116256760 | 5Y-H4K8ac_peak_3685 | 5.67517  |                                                     |
| 11 | 116293793 | 116294021 | 5Y-H4K8ac_peak_3686 | 8.79957  |                                                     |
| 11 | 116294831 | 116295208 | 5Y-H4K8ac_peak_3687 | 8.73227  |                                                     |
| 11 | 116299362 | 116300346 | 5Y-H4K8ac_peak_3688 | 7.09658  |                                                     |
| 11 | 116369026 | 116369370 | 5Y-H4K8ac_peak_3689 | 5.96059  |                                                     |
| 11 | 116370819 | 116371250 | 5Y-H4K8ac_peak_3690 | 6.34245  | AP001891.1_ENSG00000236437                          |
| 11 | 116373217 | 116373678 | 5Y-H4K8ac_peak_3691 | 10.4689  |                                                     |
| 11 | 116375417 | 116375835 | 5Y-H4K8ac_peak_3692 | 6.67135  |                                                     |
| 11 | 116427875 | 116428212 | 5Y-H4K8ac_peak_3693 | 5.98695  |                                                     |
| 11 | 116430845 | 116431079 | 5Y-H4K8ac_peak_3694 | 9.23159  |                                                     |
| 11 | 116511866 | 116512079 | 5Y-H4K8ac_peak_3695 | 4.79585  |                                                     |
| 11 | 116512271 | 116512786 | 5Y-H4K8ac_peak_3696 | 12.24192 |                                                     |
| 11 | 116574446 | 116574990 | 5Y-H4K8ac_peak_3697 | 7.01266  |                                                     |
| 11 | 116643364 | 116643656 | 5Y-H4K8ac_peak_3698 | 8.24461  | BUD13_ENSG00000137656;AP006216.10_ENSG00000226645   |
| 11 | 116662248 | 116662505 | 5Y-H4K8ac_peak_3699 | 9.01738  | APOA5_ENSG00000110243                               |
| 11 | 116699534 | 116700179 | 5Y-H4K8ac_peak_3700 | 10.8165  | APOC3_ENSG00000110245                               |
| 11 | 117103045 | 117103242 | 5Y-H4K8ac_peak_3701 | 8.43511  | PCSK7_ENSG00000160613;RNF214_ENSG00000167257        |
| 11 | 117103726 | 117103969 | 5Y-H4K8ac_peak_3702 | 9.23159  | PCSK7_ENSG00000160613;RNF214_ENSG00000167257        |
| 11 | 117281658 | 117281894 | 5Y-H4K8ac_peak_3703 | 7.38046  |                                                     |
| 11 | 117313651 | 117315108 | 5Y-H4K8ac_peak_3704 | 19.93272 |                                                     |
| 11 | 117315713 | 117316325 | 5Y-H4K8ac_peak_3705 | 11.1169  |                                                     |
| 11 | 117360503 | 117360757 | 5Y-H4K8ac_peak_3706 | 6.77436  |                                                     |
| 11 | 117361607 | 117361875 | 5Y-H4K8ac_peak_3707 | 6.27097  |                                                     |
| 11 | 117406945 | 117407163 | 5Y-H4K8ac_peak_3708 | 6.62622  |                                                     |
| 11 | 117489827 | 117490106 | 5Y-H4K8ac_peak_3709 | 4.07874  |                                                     |
| 11 | 117534056 | 117534255 | 5Y-H4K8ac_peak_3710 | 4.29586  |                                                     |
| 11 | 117595797 | 117596046 | 5Y-H4K8ac_peak_3711 | 7.89273  |                                                     |
| 11 | 117679766 | 117680098 | 5Y-H4K8ac_peak_3712 | 5.03335  |                                                     |
| 11 | 117687007 | 117688008 | 5Y-H4K8ac_peak_3713 | 7.44355  | DSCAML1_ENSG00000177103                             |
| 11 | 118016392 | 118016910 | 5Y-H4K8ac_peak_3714 | 7.35333  |                                                     |
| 11 | 118122614 | 118123081 | 5Y-H4K8ac_peak_3715 | 7.89273  | MPZL3_ENSG00000160588                               |
| 11 | 118271536 | 118271925 | 5Y-H4K8ac_peak_3716 | 7.59101  | RP11-770J1.5_ENSG00000254873;ATP5L_ENSG00000167283  |
| 11 | 118272369 | 118272564 | 5Y-H4K8ac_peak_3717 | 6.77436  | RP11-770J1.5_ENSG00000254873;ATP5L_ENSG00000167283  |
| 11 | 118305577 | 118305993 | 5Y-H4K8ac_peak_3718 | 17.50049 | RP11-770J1.4_ENSG00000255384                        |
| 11 | 118401274 | 118401794 | 5Y-H4K8ac_peak_3719 | 8.2913   | RP11-770J1.3_ENSG00000255435;TMEM25_ENSG00000149582 |
| 11 | 118436438 | 118436637 | 5Y-H4K8ac_peak_3720 | 7.31102  |                                                     |
| 11 | 118437012 | 118437223 | 5Y-H4K8ac_peak_3721 | 6.1654   |                                                     |
| 11 | 118443178 | 118443445 | 5Y-H4K8ac_peak_3722 | 7.90751  | IFT46_ENSG00000118096;ARCN1_ENSG00000095139         |
| 11 | 118493791 | 118494380 | 5Y-H4K8ac_peak_3723 | 5.64909  |                                                     |
| 11 | 118560151 | 118560405 | 5Y-H4K8ac_peak_3724 | 8.43511  | AP002954.6_ENSG00000255239                          |

|    |           |           |                     |          |                                                      |
|----|-----------|-----------|---------------------|----------|------------------------------------------------------|
| 11 | 118561355 | 118561769 | 5Y-H4K8ac_peak_3725 | 7.92287  | AP002954.6_ENSG00000255239                           |
| 11 | 118576802 | 118577290 | 5Y-H4K8ac_peak_3726 | 7.76232  |                                                      |
| 11 | 118661378 | 118662577 | 5Y-H4K8ac_peak_3727 | 9.00954  | DDX6_ENSG00000110367                                 |
| 11 | 118691177 | 118691386 | 5Y-H4K8ac_peak_3728 | 7.38046  |                                                      |
| 11 | 118778028 | 118778488 | 5Y-H4K8ac_peak_3729 | 9.63153  |                                                      |
| 11 | 118780330 | 118780605 | 5Y-H4K8ac_peak_3730 | 4.642    | MIR4492_ENSG00000264211                              |
| 11 | 118789464 | 118789661 | 5Y-H4K8ac_peak_3731 | 6.73385  |                                                      |
| 11 | 118868865 | 118869334 | 5Y-H4K8ac_peak_3732 | 9.38276  | RP11-110I1.12_ENSG00000255121;CCDC84_ENSG00000186166 |
| 11 | 118927587 | 118927786 | 5Y-H4K8ac_peak_3733 | 5.64909  | HYOU1_ENSG00000149428                                |
| 11 | 118937700 | 118938067 | 5Y-H4K8ac_peak_3734 | 6.77436  | RP11-110I1.13_ENSG00000272186;VPS11_ENSG00000160695  |
| 11 | 118966781 | 118967011 | 5Y-H4K8ac_peak_3735 | 11.28133 | H2AFX_ENSG00000188486                                |
| 11 | 118977604 | 118977801 | 5Y-H4K8ac_peak_3736 | 8.1667   |                                                      |
| 11 | 119019659 | 119019861 | 5Y-H4K8ac_peak_3737 | 4.90696  | ABCG4_ENSG00000172350                                |
| 11 | 119039539 | 119040224 | 5Y-H4K8ac_peak_3738 | 9.02938  |                                                      |
| 11 | 119205277 | 119205626 | 5Y-H4K8ac_peak_3739 | 8.2913   | RNF26_ENSG00000173456                                |
| 11 | 119210419 | 119210669 | 5Y-H4K8ac_peak_3740 | 4.52203  |                                                      |
| 11 | 119210910 | 119211241 | 5Y-H4K8ac_peak_3741 | 6.98416  |                                                      |
| 11 | 119238174 | 119238404 | 5Y-H4K8ac_peak_3742 | 4.70501  |                                                      |
| 11 | 119239659 | 119239924 | 5Y-H4K8ac_peak_3743 | 9.24789  |                                                      |
| 11 | 119246015 | 119247029 | 5Y-H4K8ac_peak_3744 | 8.04693  |                                                      |
| 11 | 119294105 | 119294679 | 5Y-H4K8ac_peak_3745 | 5.87725  |                                                      |
| 11 | 119438338 | 119438528 | 5Y-H4K8ac_peak_3746 | 5.40331  |                                                      |
| 11 | 119454802 | 119455008 | 5Y-H4K8ac_peak_3747 | 5.91107  |                                                      |
| 11 | 119514682 | 119515092 | 5Y-H4K8ac_peak_3748 | 7.04637  |                                                      |
| 11 | 119542152 | 119542532 | 5Y-H4K8ac_peak_3749 | 5.64909  |                                                      |
| 11 | 119543171 | 119543605 | 5Y-H4K8ac_peak_3750 | 7.24967  |                                                      |
| 11 | 119554550 | 119555000 | 5Y-H4K8ac_peak_3751 | 6.37023  |                                                      |
| 11 | 119555223 | 119555584 | 5Y-H4K8ac_peak_3752 | 7.41197  |                                                      |
| 11 | 119555944 | 119556417 | 5Y-H4K8ac_peak_3753 | 9.30505  |                                                      |
| 11 | 119571520 | 119571788 | 5Y-H4K8ac_peak_3754 | 7.01266  |                                                      |
| 11 | 119572108 | 119572300 | 5Y-H4K8ac_peak_3755 | 6.43775  |                                                      |
| 11 | 119573586 | 119574112 | 5Y-H4K8ac_peak_3756 | 9.56516  |                                                      |
| 11 | 119575162 | 119575601 | 5Y-H4K8ac_peak_3757 | 9.56516  |                                                      |
| 11 | 119591772 | 119592097 | 5Y-H4K8ac_peak_3758 | 5.47303  |                                                      |
| 11 | 119594099 | 119594306 | 5Y-H4K8ac_peak_3759 | 6.61077  |                                                      |
| 11 | 119600523 | 119600723 | 5Y-H4K8ac_peak_3760 | 7.58806  | PVRL1_ENSG00000110400;CTD-2523D13.2_ENSG00000254854  |
| 11 | 119613521 | 119613868 | 5Y-H4K8ac_peak_3761 | 6.69752  |                                                      |
| 11 | 119620759 | 119620952 | 5Y-H4K8ac_peak_3762 | 5.65584  |                                                      |
| 11 | 119635088 | 119635888 | 5Y-H4K8ac_peak_3763 | 4.95697  |                                                      |
| 11 | 119649313 | 119649953 | 5Y-H4K8ac_peak_3764 | 7.50148  |                                                      |
| 11 | 119650553 | 119651418 | 5Y-H4K8ac_peak_3765 | 11.64182 |                                                      |
| 11 | 119653310 | 119653517 | 5Y-H4K8ac_peak_3766 | 7.11863  |                                                      |
| 11 | 119658015 | 119658297 | 5Y-H4K8ac_peak_3767 | 5.94703  |                                                      |
| 11 | 119659832 | 119660265 | 5Y-H4K8ac_peak_3768 | 6.12014  |                                                      |
| 11 | 119667270 | 119667649 | 5Y-H4K8ac_peak_3769 | 6.77436  |                                                      |
| 11 | 119702733 | 119703098 | 5Y-H4K8ac_peak_3770 | 6.95541  |                                                      |

|    |           |           |                     |          |                                                     |
|----|-----------|-----------|---------------------|----------|-----------------------------------------------------|
| 11 | 119736197 | 119736407 | 5Y-H4K8ac_peak_3771 | 8.2913   |                                                     |
| 11 | 119746543 | 119746770 | 5Y-H4K8ac_peak_3772 | 9.05168  |                                                     |
| 11 | 119760262 | 119760672 | 5Y-H4K8ac_peak_3773 | 9.87097  |                                                     |
| 11 | 119761344 | 119761599 | 5Y-H4K8ac_peak_3774 | 7.31674  |                                                     |
| 11 | 119779168 | 119779443 | 5Y-H4K8ac_peak_3775 | 13.72401 |                                                     |
| 11 | 119884249 | 119884532 | 5Y-H4K8ac_peak_3776 | 6.78318  |                                                     |
| 11 | 120039603 | 120039810 | 5Y-H4K8ac_peak_3777 | 7.89273  | AP000679.2_ENSG00000176984                          |
| 11 | 120040111 | 120040302 | 5Y-H4K8ac_peak_3778 | 9.00954  | AP000679.2_ENSG00000176984                          |
| 11 | 120055109 | 120055483 | 5Y-H4K8ac_peak_3779 | 4.15658  | TRIM29_ENSG00000137699                              |
| 11 | 120056996 | 120057900 | 5Y-H4K8ac_peak_3780 | 6.53157  | TRIM29_ENSG00000137699                              |
| 11 | 120064069 | 120064282 | 5Y-H4K8ac_peak_3781 | 5.23083  |                                                     |
| 11 | 120081013 | 120081248 | 5Y-H4K8ac_peak_3782 | 8.2913   | OAF_ENSG00000184232                                 |
| 11 | 120081799 | 120082122 | 5Y-H4K8ac_peak_3783 | 8.2913   | OAF_ENSG00000184232                                 |
| 11 | 120195639 | 120196339 | 5Y-H4K8ac_peak_3784 | 21.88077 | TMEM136_ENSG00000181264                             |
| 11 | 120206527 | 120206821 | 5Y-H4K8ac_peak_3785 | 4.0639   | ARHGEF12_ENSG00000196914                            |
| 11 | 120207167 | 120207429 | 5Y-H4K8ac_peak_3786 | 11.22005 | ARHGEF12_ENSG00000196914                            |
| 11 | 120495023 | 120495241 | 5Y-H4K8ac_peak_3787 | 3.95677  |                                                     |
| 11 | 120611000 | 120611212 | 5Y-H4K8ac_peak_3788 | 5.41472  |                                                     |
| 11 | 120618817 | 120619223 | 5Y-H4K8ac_peak_3789 | 5.57299  |                                                     |
| 11 | 120656591 | 120656913 | 5Y-H4K8ac_peak_3790 | 5.37237  |                                                     |
| 11 | 120769099 | 120769357 | 5Y-H4K8ac_peak_3791 | 6.37023  |                                                     |
| 11 | 120795631 | 120795847 | 5Y-H4K8ac_peak_3792 | 7.97699  |                                                     |
| 11 | 120803641 | 120803888 | 5Y-H4K8ac_peak_3793 | 4.93618  |                                                     |
| 11 | 120824130 | 120824622 | 5Y-H4K8ac_peak_3794 | 6.54441  |                                                     |
| 11 | 120856588 | 120856856 | 5Y-H4K8ac_peak_3795 | 5.98695  |                                                     |
| 11 | 120894847 | 120895058 | 5Y-H4K8ac_peak_3796 | 9.30505  | TBCEL_ENSG00000154114                               |
| 11 | 121323071 | 121323320 | 5Y-H4K8ac_peak_3797 | 13.04415 | RP11-730K11.1_ENSG00000246790;SORL1_ENSG00000137642 |
| 11 | 121336432 | 121336783 | 5Y-H4K8ac_peak_3798 | 8.21582  |                                                     |
| 11 | 121526592 | 121526834 | 5Y-H4K8ac_peak_3799 | 12.10416 |                                                     |
| 11 | 121527256 | 121527855 | 5Y-H4K8ac_peak_3800 | 15.82713 |                                                     |
| 11 | 121543723 | 121543968 | 5Y-H4K8ac_peak_3801 | 9.62747  |                                                     |
| 11 | 121593589 | 121594250 | 5Y-H4K8ac_peak_3802 | 10.19948 |                                                     |
| 11 | 122029875 | 122030100 | 5Y-H4K8ac_peak_3803 | 7.31815  |                                                     |
| 11 | 122376041 | 122376446 | 5Y-H4K8ac_peak_3804 | 7.38046  |                                                     |
| 11 | 122386797 | 122387072 | 5Y-H4K8ac_peak_3805 | 7.21112  |                                                     |
| 11 | 122395883 | 122396138 | 5Y-H4K8ac_peak_3806 | 6.34046  |                                                     |
| 11 | 122753731 | 122754101 | 5Y-H4K8ac_peak_3807 | 6.43775  | C11orf63_ENSG00000109944                            |
| 11 | 122855193 | 122855408 | 5Y-H4K8ac_peak_3808 | 5.41472  |                                                     |
| 11 | 122933454 | 122933782 | 5Y-H4K8ac_peak_3809 | 9.74838  | HSPA8_ENSG00000109971                               |
| 11 | 123008026 | 123008445 | 5Y-H4K8ac_peak_3810 | 8.4454   | RP11-762B21.5_ENSG00000255342                       |
| 11 | 123065386 | 123066269 | 5Y-H4K8ac_peak_3811 | 11.22005 | CLMP_ENSG00000166250                                |
| 11 | 123066595 | 123067052 | 5Y-H4K8ac_peak_3812 | 4.642    | CLMP_ENSG00000166250                                |
| 11 | 123072849 | 123073335 | 5Y-H4K8ac_peak_3813 | 5.87382  |                                                     |
| 11 | 123073686 | 123073894 | 5Y-H4K8ac_peak_3814 | 4.95697  |                                                     |
| 11 | 123131952 | 123132426 | 5Y-H4K8ac_peak_3815 | 7.49746  |                                                     |
| 11 | 123229172 | 123229582 | 5Y-H4K8ac_peak_3816 | 6.1654   |                                                     |

|    |           |           |                     |          |                                                       |
|----|-----------|-----------|---------------------|----------|-------------------------------------------------------|
| 11 | 123348728 | 123348936 | 5Y-H4K8ac_peak_3817 | 6.77436  |                                                       |
| 11 | 123380766 | 123381107 | 5Y-H4K8ac_peak_3818 | 5.87725  |                                                       |
| 11 | 123389674 | 123389940 | 5Y-H4K8ac_peak_3819 | 9.43096  |                                                       |
| 11 | 123553584 | 123553785 | 5Y-H4K8ac_peak_3820 | 4.84727  |                                                       |
| 11 | 123612545 | 123612841 | 5Y-H4K8ac_peak_3821 | 5.98695  | ZNF202_ENSG00000166261                                |
| 11 | 124543244 | 124543551 | 5Y-H4K8ac_peak_3822 | 6.37023  | SPA17_ENSG00000064199                                 |
| 11 | 124588297 | 124588487 | 5Y-H4K8ac_peak_3823 | 9.60627  |                                                       |
| 11 | 124616090 | 124616513 | 5Y-H4K8ac_peak_3824 | 6.50117  | RP11-677M14.2_ENSG00000255045                         |
| 11 | 124669561 | 124670829 | 5Y-H4K8ac_peak_3825 | 9.30505  | MSANTD2_ENSG00000120458;RP11-677M14.7_ENSG00000245498 |
| 11 | 124712844 | 124713333 | 5Y-H4K8ac_peak_3826 | 8.30301  | AP000866.1_ENSG00000215942                            |
| 11 | 124732738 | 124732940 | 5Y-H4K8ac_peak_3827 | 7.49746  |                                                       |
| 11 | 124745836 | 124746514 | 5Y-H4K8ac_peak_3828 | 12.05638 |                                                       |
| 11 | 124747058 | 124747373 | 5Y-H4K8ac_peak_3829 | 6.50117  |                                                       |
| 11 | 124790250 | 124790491 | 5Y-H4K8ac_peak_3830 | 14.12043 |                                                       |
| 11 | 124933500 | 124933741 | 5Y-H4K8ac_peak_3831 | 6.50117  | SLC37A2_ENSG00000134955                               |
| 11 | 125274552 | 125274838 | 5Y-H4K8ac_peak_3832 | 4.71803  |                                                       |
| 11 | 125365244 | 125365460 | 5Y-H4K8ac_peak_3833 | 5.35202  | FEZ1_ENSG00000149557;AP000708.1_ENSG00000255537       |
| 11 | 125461809 | 125462096 | 5Y-H4K8ac_peak_3834 | 5.98695  | STT3A-AS1_ENSG00000254671;STT3A_ENSG00000134910       |
| 11 | 125757648 | 125757991 | 5Y-H4K8ac_peak_3835 | 11.01287 |                                                       |
| 11 | 125758288 | 125758510 | 5Y-H4K8ac_peak_3836 | 4.07874  |                                                       |
| 11 | 125774402 | 125774813 | 5Y-H4K8ac_peak_3837 | 9.78792  |                                                       |
| 11 | 125820688 | 125820956 | 5Y-H4K8ac_peak_3838 | 10.16277 | RP11-680F20.6_ENSG00000254967                         |
| 11 | 125821771 | 125822062 | 5Y-H4K8ac_peak_3839 | 4.76429  |                                                       |
| 11 | 125932458 | 125932660 | 5Y-H4K8ac_peak_3840 | 5.35202  | CDON_ENSG00000064309                                  |
| 11 | 125932972 | 125933659 | 5Y-H4K8ac_peak_3841 | 12.49811 | CDON_ENSG00000064309                                  |
| 11 | 125980724 | 125980923 | 5Y-H4K8ac_peak_3842 | 6.22904  |                                                       |
| 11 | 125981744 | 125982442 | 5Y-H4K8ac_peak_3843 | 10.60083 |                                                       |
| 11 | 125982843 | 125983204 | 5Y-H4K8ac_peak_3844 | 6.78128  |                                                       |
| 11 | 125983397 | 125983638 | 5Y-H4K8ac_peak_3845 | 10.86711 |                                                       |
| 11 | 125983956 | 125984505 | 5Y-H4K8ac_peak_3846 | 6.78318  |                                                       |
| 11 | 125984824 | 125985093 | 5Y-H4K8ac_peak_3847 | 14.65178 |                                                       |
| 11 | 125985632 | 125985831 | 5Y-H4K8ac_peak_3848 | 4.642    |                                                       |
| 11 | 126011203 | 126011519 | 5Y-H4K8ac_peak_3849 | 7.04158  |                                                       |
| 11 | 126152696 | 126153262 | 5Y-H4K8ac_peak_3850 | 12.05638 | TIRAP_ENSG00000150455                                 |
| 11 | 126173634 | 126173826 | 5Y-H4K8ac_peak_3851 | 5.24695  | RP11-712L6.5_ENSG00000255062;DCPS_ENSG00000110063     |
| 11 | 126224879 | 126225410 | 5Y-H4K8ac_peak_3852 | 19.00192 | ST3GAL4_ENSG00000110080                               |
| 11 | 126225615 | 126225852 | 5Y-H4K8ac_peak_3853 | 9.63153  | ST3GAL4_ENSG00000110080                               |
| 11 | 126264381 | 126264576 | 5Y-H4K8ac_peak_3854 | 5.99504  |                                                       |
| 11 | 126312558 | 126312847 | 5Y-H4K8ac_peak_3855 | 9.51254  |                                                       |
| 11 | 126313571 | 126313796 | 5Y-H4K8ac_peak_3856 | 5.12213  |                                                       |
| 11 | 126349754 | 126350017 | 5Y-H4K8ac_peak_3857 | 5.51139  |                                                       |
| 11 | 126350351 | 126350760 | 5Y-H4K8ac_peak_3858 | 16.97602 |                                                       |
| 11 | 126388827 | 126389108 | 5Y-H4K8ac_peak_3859 | 12.52787 |                                                       |
| 11 | 126391185 | 126391408 | 5Y-H4K8ac_peak_3860 | 5.77617  |                                                       |
| 11 | 126413488 | 126414127 | 5Y-H4K8ac_peak_3861 | 19.39444 | KIRREL3-AS1_ENSG00000257271                           |
| 11 | 126728730 | 126729204 | 5Y-H4K8ac_peak_3862 | 5.29015  |                                                       |



|    |           |           |                     |          |                                                                                |
|----|-----------|-----------|---------------------|----------|--------------------------------------------------------------------------------|
| 11 | 126859946 | 126860203 | 5Y-H4K8ac_peak_3863 | 7.34185  |                                                                                |
| 11 | 126872899 | 126873376 | 5Y-H4K8ac_peak_3864 | 5.64909  | KIRREL3_ENSG00000149571;KIRREL3-AS3_ENSG00000218109;AP002833.1_ENSG00000256527 |
| 11 | 126873664 | 126874031 | 5Y-H4K8ac_peak_3865 | 10.54764 | KIRREL3_ENSG00000149571;KIRREL3-AS3_ENSG00000218109;AP002833.1_ENSG00000256527 |
| 11 | 127052273 | 127052671 | 5Y-H4K8ac_peak_3866 | 5.40331  |                                                                                |
| 11 | 127063719 | 127063984 | 5Y-H4K8ac_peak_3867 | 6.43775  |                                                                                |
| 11 | 127923336 | 127923530 | 5Y-H4K8ac_peak_3868 | 6.00388  |                                                                                |
| 11 | 128106824 | 128107481 | 5Y-H4K8ac_peak_3869 | 16.74969 |                                                                                |
| 11 | 128291019 | 128292021 | 5Y-H4K8ac_peak_3870 | 6.40964  |                                                                                |
| 11 | 128325451 | 128325915 | 5Y-H4K8ac_peak_3871 | 6.50117  |                                                                                |
| 11 | 128326201 | 128326713 | 5Y-H4K8ac_peak_3872 | 9.15977  |                                                                                |
| 11 | 128418424 | 128418770 | 5Y-H4K8ac_peak_3873 | 23.16993 |                                                                                |
| 11 | 128646683 | 128646993 | 5Y-H4K8ac_peak_3874 | 7.50148  |                                                                                |
| 11 | 129620408 | 129620780 | 5Y-H4K8ac_peak_3875 | 5.56912  |                                                                                |
| 11 | 129685585 | 129686115 | 5Y-H4K8ac_peak_3876 | 9.51254  | TMEM45B_ENSG00000151715                                                        |
| 11 | 129838556 | 129838933 | 5Y-H4K8ac_peak_3877 | 6.94416  |                                                                                |
| 11 | 129871633 | 129872320 | 5Y-H4K8ac_peak_3878 | 14.72547 | PRDM10_ENSG00000170325;LINC00167_ENSG00000233220                               |
| 11 | 129872593 | 129872818 | 5Y-H4K8ac_peak_3879 | 5.91107  | PRDM10_ENSG00000170325;LINC00167_ENSG00000233220                               |
| 11 | 130185669 | 130185867 | 5Y-H4K8ac_peak_3880 | 9.78792  | RP11-121M22.1_ENSG00000175773                                                  |
| 11 | 130785706 | 130786281 | 5Y-H4K8ac_peak_3881 | 6.94416  | SNX19_ENSG00000120451                                                          |
| 11 | 133098495 | 133098752 | 5Y-H4K8ac_peak_3882 | 7.89142  |                                                                                |
| 11 | 133797906 | 133798112 | 5Y-H4K8ac_peak_3883 | 7.387    |                                                                                |
| 11 | 133805393 | 133805831 | 5Y-H4K8ac_peak_3884 | 8.5915   |                                                                                |
| 11 | 133806443 | 133806739 | 5Y-H4K8ac_peak_3885 | 8.62703  |                                                                                |
| 11 | 133807663 | 133807883 | 5Y-H4K8ac_peak_3886 | 5.32103  |                                                                                |
| 11 | 133815448 | 133815743 | 5Y-H4K8ac_peak_3887 | 5.23083  |                                                                                |
| 11 | 133818716 | 133818943 | 5Y-H4K8ac_peak_3888 | 4.15658  |                                                                                |
| 11 | 133827254 | 133827574 | 5Y-H4K8ac_peak_3889 | 6.64036  | IGSF9B_ENSG00000080854;AP000911.1_ENSG00000264674                              |
| 11 | 133835787 | 133836598 | 5Y-H4K8ac_peak_3890 | 8.2913   |                                                                                |
| 11 | 133902567 | 133903304 | 5Y-H4K8ac_peak_3891 | 6.08523  | RP11-713P17.3_ENSG00000204241                                                  |
| 11 | 133904588 | 133905051 | 5Y-H4K8ac_peak_3892 | 7.50081  |                                                                                |
| 11 | 133990931 | 133991279 | 5Y-H4K8ac_peak_3893 | 6.14981  |                                                                                |
| 11 | 134146807 | 134147154 | 5Y-H4K8ac_peak_3894 | 4.29586  |                                                                                |
| 11 | 134281671 | 134281892 | 5Y-H4K8ac_peak_3895 | 10.4326  | B3GAT1_ENSG00000109956                                                         |
| 11 | 134443184 | 134443512 | 5Y-H4K8ac_peak_3896 | 7.35333  |                                                                                |
| 11 | 134874864 | 134875145 | 5Y-H4K8ac_peak_3897 | 5.59843  |                                                                                |
| 12 | 73701     | 74098     | 5Y-H4K8ac_peak_3898 | 21.56204 | AC215219.1_ENSG00000238823;ABC7-42389800N19.1_ENSG00000226210                  |
| 12 | 74600     | 74793     | 5Y-H4K8ac_peak_3899 | 10.46287 | ABC7-42389800N19.1_ENSG00000226210                                             |
| 12 | 187056    | 187258    | 5Y-H4K8ac_peak_3900 | 6.79955  |                                                                                |
| 12 | 191950    | 192285    | 5Y-H4K8ac_peak_3901 | 5.83608  |                                                                                |
| 12 | 281691    | 282572    | 5Y-H4K8ac_peak_3902 | 7.89273  |                                                                                |
| 12 | 284187    | 284830    | 5Y-H4K8ac_peak_3903 | 6.27467  |                                                                                |
| 12 | 285175    | 285751    | 5Y-H4K8ac_peak_3904 | 9.02782  |                                                                                |
| 12 | 286614    | 287269    | 5Y-H4K8ac_peak_3905 | 14.26354 |                                                                                |
| 12 | 312601    | 312884    | 5Y-H4K8ac_peak_3906 | 7.11863  | RP11-283I3.2_ENSG00000256577                                                   |
| 12 | 329449    | 329676    | 5Y-H4K8ac_peak_3907 | 5.51139  |                                                                                |
| 12 | 498926    | 499197    | 5Y-H4K8ac_peak_3908 | 7.3889   | KDM5A_ENSG00000073614;CCDC77_ENSG00000120647                                   |

|    |         |         |                     |          |                                                                         |
|----|---------|---------|---------------------|----------|-------------------------------------------------------------------------|
| 12 | 569653  | 570131  | 5Y-H4K8ac_peak_3909 | 5.23819  | B4GALNT3_ENSG00000139044                                                |
| 12 | 685044  | 685420  | 5Y-H4K8ac_peak_3910 | 9.00954  |                                                                         |
| 12 | 701497  | 701826  | 5Y-H4K8ac_peak_3911 | 13.76914 |                                                                         |
| 12 | 768493  | 768794  | 5Y-H4K8ac_peak_3912 | 7.05631  |                                                                         |
| 12 | 861876  | 862075  | 5Y-H4K8ac_peak_3913 | 4.51497  | WNK1_ENSG00000060237                                                    |
| 12 | 1058556 | 1058797 | 5Y-H4K8ac_peak_3914 | 9.23159  |                                                                         |
| 12 | 1059309 | 1059579 | 5Y-H4K8ac_peak_3915 | 7.63144  |                                                                         |
| 12 | 1099685 | 1099882 | 5Y-H4K8ac_peak_3916 | 4.0639   | RAD52_ENSG0000002016;RP11-359B12.2_ENSG00000250132;ERC1_ENSG00000082805 |
| 12 | 1640450 | 1640665 | 5Y-H4K8ac_peak_3917 | 7.04637  |                                                                         |
| 12 | 1703305 | 1703521 | 5Y-H4K8ac_peak_3918 | 8.2913   | FBXL14_ENSG00000171823                                                  |
| 12 | 1739093 | 1739515 | 5Y-H4K8ac_peak_3919 | 7.18391  |                                                                         |
| 12 | 1770631 | 1770926 | 5Y-H4K8ac_peak_3920 | 14.24171 |                                                                         |
| 12 | 1771163 | 1771490 | 5Y-H4K8ac_peak_3921 | 12.31844 |                                                                         |
| 12 | 1905632 | 1906015 | 5Y-H4K8ac_peak_3922 | 5.87725  |                                                                         |
| 12 | 1909886 | 1910202 | 5Y-H4K8ac_peak_3923 | 6.73385  |                                                                         |
| 12 | 1913935 | 1914533 | 5Y-H4K8ac_peak_3924 | 6.34245  |                                                                         |
| 12 | 1935742 | 1935984 | 5Y-H4K8ac_peak_3925 | 5.23083  |                                                                         |
| 12 | 1939365 | 1939613 | 5Y-H4K8ac_peak_3926 | 7.31102  |                                                                         |
| 12 | 1945249 | 1946889 | 5Y-H4K8ac_peak_3927 | 9.00954  |                                                                         |
| 12 | 1947973 | 1948561 | 5Y-H4K8ac_peak_3928 | 9.95485  |                                                                         |
| 12 | 2033196 | 2033460 | 5Y-H4K8ac_peak_3929 | 4.86522  |                                                                         |
| 12 | 2113238 | 2113602 | 5Y-H4K8ac_peak_3930 | 15.19225 | DCP1B_ENSG00000151065;RP5-1096D14.6_ENSG00000203593                     |
| 12 | 2144238 | 2144762 | 5Y-H4K8ac_peak_3931 | 11.1169  |                                                                         |
| 12 | 2322192 | 2322418 | 5Y-H4K8ac_peak_3932 | 6.13909  |                                                                         |
| 12 | 2348534 | 2348739 | 5Y-H4K8ac_peak_3933 | 8.4454   |                                                                         |
| 12 | 2392861 | 2393220 | 5Y-H4K8ac_peak_3934 | 7.56545  |                                                                         |
| 12 | 2893021 | 2893213 | 5Y-H4K8ac_peak_3935 | 6.37023  |                                                                         |
| 12 | 2985747 | 2986102 | 5Y-H4K8ac_peak_3936 | 5.317    | FOXM1_ENSG00000111206;RHNO1_ENSG00000171792;TULP3_ENSG00000078246       |
| 12 | 2999102 | 2999375 | 5Y-H4K8ac_peak_3937 | 6.86362  |                                                                         |
| 12 | 3085748 | 3085990 | 5Y-H4K8ac_peak_3938 | 6.17374  |                                                                         |
| 12 | 3185924 | 3186380 | 5Y-H4K8ac_peak_3939 | 15.15055 | TSPAN9_ENSG00000011105                                                  |
| 12 | 3206844 | 3207187 | 5Y-H4K8ac_peak_3940 | 4.8509   |                                                                         |
| 12 | 3213613 | 3213896 | 5Y-H4K8ac_peak_3941 | 6.47245  |                                                                         |
| 12 | 3214615 | 3214810 | 5Y-H4K8ac_peak_3942 | 9.96543  |                                                                         |
| 12 | 3314723 | 3315110 | 5Y-H4K8ac_peak_3943 | 14.31711 |                                                                         |
| 12 | 3333338 | 3333822 | 5Y-H4K8ac_peak_3944 | 6.1654   |                                                                         |
| 12 | 3373244 | 3373435 | 5Y-H4K8ac_peak_3945 | 5.74859  |                                                                         |
| 12 | 3412990 | 3413632 | 5Y-H4K8ac_peak_3946 | 7.12953  |                                                                         |
| 12 | 3451467 | 3451739 | 5Y-H4K8ac_peak_3947 | 8.564    |                                                                         |
| 12 | 3474855 | 3475472 | 5Y-H4K8ac_peak_3948 | 6.37023  |                                                                         |
| 12 | 3529822 | 3530070 | 5Y-H4K8ac_peak_3949 | 4.51076  |                                                                         |
| 12 | 3713371 | 3714254 | 5Y-H4K8ac_peak_3950 | 8.2913   |                                                                         |
| 12 | 3795968 | 3796202 | 5Y-H4K8ac_peak_3951 | 6.34046  |                                                                         |
| 12 | 3862000 | 3862416 | 5Y-H4K8ac_peak_3952 | 9.23159  |                                                                         |
| 12 | 3981821 | 3982112 | 5Y-H4K8ac_peak_3953 | 5.59843  | PARP11_ENSG00000111224;RP11-664D1.1_ENSG00000256862                     |
| 12 | 4714134 | 4714459 | 5Y-H4K8ac_peak_3954 | 6.50117  | RP11-500M8.7_ENSG00000272921                                            |

|    |          |          |                     |          |                                                                                                        |
|----|----------|----------|---------------------|----------|--------------------------------------------------------------------------------------------------------|
| 12 | 6310158  | 6310355  | 5Y-H4K8ac_peak_3955 | 5.13364  |                                                                                                        |
| 12 | 6387365  | 6387913  | 5Y-H4K8ac_peak_3956 | 7.97699  |                                                                                                        |
| 12 | 6560325  | 6560517  | 5Y-H4K8ac_peak_3957 | 9.05168  | CD27-AS1_ENSG00000215039;TAPBPL_ENSG00000139192                                                        |
| 12 | 6601921  | 6602296  | 5Y-H4K8ac_peak_3958 | 8.33296  | MRPL51_ENSG00000111639;NCAPD2_ENSG00000010292                                                          |
| 12 | 6642517  | 6643409  | 5Y-H4K8ac_peak_3959 | 15.09867 | RP5-940J5.3_ENSG00000255966;GAPDH_ENSG00000111640                                                      |
| 12 | 6722514  | 6722738  | 5Y-H4K8ac_peak_3960 | 18.10232 |                                                                                                        |
| 12 | 6723396  | 6723665  | 5Y-H4K8ac_peak_3961 | 9.01738  |                                                                                                        |
| 12 | 6797849  | 6798560  | 5Y-H4K8ac_peak_3962 | 22.66    | ZNF384_ENSG00000126746                                                                                 |
| 12 | 6833626  | 6833867  | 5Y-H4K8ac_peak_3963 | 10.11191 | COPS7A_ENSG00000111652                                                                                 |
| 12 | 6863166  | 6863487  | 5Y-H4K8ac_peak_3964 | 6.1654   |                                                                                                        |
| 12 | 6874350  | 6874631  | 5Y-H4K8ac_peak_3965 | 4.47077  | PTMS_ENSG00000159335                                                                                   |
| 12 | 6936098  | 6936523  | 5Y-H4K8ac_peak_3966 | 10.60003 |                                                                                                        |
| 12 | 6938053  | 6938365  | 5Y-H4K8ac_peak_3967 | 6.78128  | LEPREL2_ENSG00000110811                                                                                |
| 12 | 6976068  | 6976259  | 5Y-H4K8ac_peak_3968 | 4.50834  | TPI1_ENSG00000111669                                                                                   |
| 12 | 7000681  | 7000995  | 5Y-H4K8ac_peak_3969 | 5.98695  |                                                                                                        |
| 12 | 7013340  | 7013776  | 5Y-H4K8ac_peak_3970 | 5.03335  |                                                                                                        |
| 12 | 7023179  | 7023445  | 5Y-H4K8ac_peak_3971 | 10.35586 | ENO2_ENSG00000111674                                                                                   |
| 12 | 7046337  | 7047106  | 5Y-H4K8ac_peak_3972 | 18.78631 |                                                                                                        |
| 12 | 7047740  | 7047996  | 5Y-H4K8ac_peak_3973 | 8.43511  |                                                                                                        |
| 12 | 7052075  | 7052677  | 5Y-H4K8ac_peak_3974 | 7.86017  | C12orf57_ENSG00000111678;RNU7-1_ENSG00000238923                                                        |
| 12 | 7053274  | 7053482  | 5Y-H4K8ac_peak_3975 | 10.21117 | U47924.31_ENSG00000272173;RNU7-1_ENSG00000238923                                                       |
| 12 | 7071062  | 7071264  | 5Y-H4K8ac_peak_3976 | 4.8509   |                                                                                                        |
| 12 | 7079180  | 7079769  | 5Y-H4K8ac_peak_3977 | 10.60083 | PHB2_ENSG00000215021                                                                                   |
| 12 | 7080122  | 7080758  | 5Y-H4K8ac_peak_3978 | 11.19336 | PHB2_ENSG00000215021                                                                                   |
| 12 | 7082391  | 7082619  | 5Y-H4K8ac_peak_3979 | 4.84727  |                                                                                                        |
| 12 | 7125751  | 7125985  | 5Y-H4K8ac_peak_3980 | 4.50834  | LPCAT3_ENSG00000111684                                                                                 |
| 12 | 8332957  | 8333286  | 5Y-H4K8ac_peak_3981 | 7.20869  | FAM66C_ENSG00000226711                                                                                 |
| 12 | 9217103  | 9217385  | 5Y-H4K8ac_peak_3982 | 7.31102  | LINC00612_ENSG00000214851;A2M-AS1_ENSG00000245105                                                      |
| 12 | 9800476  | 9800837  | 5Y-H4K8ac_peak_3983 | 9.96543  | RP11-705C15.4_ENSG00000256442                                                                          |
| 12 | 11323809 | 11324015 | 5Y-H4K8ac_peak_3984 | 11.1169  | PRR4_ENSG00000111215;TAS2R14_ENSG00000212127;RP11-785H5.2_ENSG00000256712;RP11-785H5.1_ENSG00000256537 |
| 12 | 11698559 | 11698959 | 5Y-H4K8ac_peak_3985 | 5.40331  | RNU7-60P_ENSG00000251747                                                                               |
| 12 | 11801620 | 11802056 | 5Y-H4K8ac_peak_3986 | 11.12941 | ETV6_ENSG00000139083                                                                                   |
| 12 | 11802856 | 11803112 | 5Y-H4K8ac_peak_3987 | 7.72345  | ETV6_ENSG00000139083                                                                                   |
| 12 | 12419991 | 12420187 | 5Y-H4K8ac_peak_3988 | 8.20773  | LRP6_ENSG00000070018                                                                                   |
| 12 | 12459291 | 12459481 | 5Y-H4K8ac_peak_3989 | 6.34046  |                                                                                                        |
| 12 | 12502791 | 12503032 | 5Y-H4K8ac_peak_3990 | 9.63153  | MANSC1_ENSG00000111261                                                                                 |
| 12 | 12664094 | 12664309 | 5Y-H4K8ac_peak_3991 | 4.84727  |                                                                                                        |
| 12 | 12714891 | 12715139 | 5Y-H4K8ac_peak_3992 | 5.65584  | DUSP16_ENSG00000111266                                                                                 |
| 12 | 12869645 | 12869996 | 5Y-H4K8ac_peak_3993 | 22.60818 |                                                                                                        |
| 12 | 12876761 | 12877567 | 5Y-H4K8ac_peak_3994 | 7.50148  | RP11-180M15.4_ENSG00000256658                                                                          |
| 12 | 12940019 | 12940364 | 5Y-H4K8ac_peak_3995 | 4.00285  |                                                                                                        |
| 12 | 13154488 | 13154810 | 5Y-H4K8ac_peak_3996 | 6.59249  |                                                                                                        |
| 12 | 13254512 | 13254878 | 5Y-H4K8ac_peak_3997 | 8.2913   |                                                                                                        |
| 12 | 14720388 | 14720711 | 5Y-H4K8ac_peak_3998 | 7.30348  | PLBD1_ENSG00000121316;RP11-695J4.2_ENSG00000256751                                                     |
| 12 | 14924327 | 14924538 | 5Y-H4K8ac_peak_3999 | 5.87382  | HIST4H4_ENSG00000197837                                                                                |
| 12 | 14926645 | 14926839 | 5Y-H4K8ac_peak_4000 | 4.12295  | H2AFJ_ENSG00000246705                                                                                  |

|    |          |          |                     |          |                                                             |
|----|----------|----------|---------------------|----------|-------------------------------------------------------------|
| 12 | 15475618 | 15476024 | 5Y-H4K8ac_peak_4001 | 8.47164  | PTPRO_ENSG00000151490                                       |
| 12 | 15942535 | 15942819 | 5Y-H4K8ac_peak_4002 | 7.34185  |                                                             |
| 12 | 16064289 | 16064496 | 5Y-H4K8ac_peak_4003 | 8.43511  | DERA_ENSG00000023697                                        |
| 12 | 19282835 | 19283687 | 5Y-H4K8ac_peak_4004 | 11.93212 | PLEKHA5_ENSG00000052126                                     |
| 12 | 19592598 | 19592856 | 5Y-H4K8ac_peak_4005 | 11.57334 |                                                             |
| 12 | 20098058 | 20098464 | 5Y-H4K8ac_peak_4006 | 6.50117  |                                                             |
| 12 | 20522215 | 20522606 | 5Y-H4K8ac_peak_4007 | 13.99721 | RP11-284H19.1_ENSG00000256879;PDE3A_ENSG00000172572         |
| 12 | 20741632 | 20742062 | 5Y-H4K8ac_peak_4008 | 7.01856  |                                                             |
| 12 | 22199213 | 22199536 | 5Y-H4K8ac_peak_4009 | 12.71156 | CMAS_ENSG00000111726                                        |
| 12 | 22696952 | 22697341 | 5Y-H4K8ac_peak_4010 | 5.41472  | C2CD5_ENSG00000111731                                       |
| 12 | 22777423 | 22778000 | 5Y-H4K8ac_peak_4011 | 8.43511  | RP11-268P4.4_ENSG00000257023;ETNK1_ENSG00000139163          |
| 12 | 22778270 | 22778846 | 5Y-H4K8ac_peak_4012 | 4.50834  | RP11-268P4.4_ENSG00000257023;ETNK1_ENSG00000139163          |
| 12 | 25101475 | 25102007 | 5Y-H4K8ac_peak_4013 | 5.23083  | BCAT1_ENSG00000060982;RP11-662I13.2_ENSG00000255921         |
| 12 | 25404189 | 25404396 | 5Y-H4K8ac_peak_4014 | 9.78792  | KRAS_ENSG00000133703                                        |
| 12 | 25803352 | 25803616 | 5Y-H4K8ac_peak_4015 | 7.01856  |                                                             |
| 12 | 26266952 | 26267153 | 5Y-H4K8ac_peak_4016 | 5.23083  |                                                             |
| 12 | 26348418 | 26348852 | 5Y-H4K8ac_peak_4017 | 4.29586  |                                                             |
| 12 | 26379499 | 26379935 | 5Y-H4K8ac_peak_4018 | 17.63051 |                                                             |
| 12 | 27006498 | 27006757 | 5Y-H4K8ac_peak_4019 | 4.50834  |                                                             |
| 12 | 27396803 | 27397020 | 5Y-H4K8ac_peak_4020 | 7.38046  | STK38L_ENSG00000211455                                      |
| 12 | 27485437 | 27486277 | 5Y-H4K8ac_peak_4021 | 7.89273  | ARNTL2_ENSG00000029153                                      |
| 12 | 27932398 | 27933561 | 5Y-H4K8ac_peak_4022 | 9.02938  | KLHL42_ENSG00000087448;RP11-860B13.1_ENSG00000256747        |
| 12 | 28123467 | 28123662 | 5Y-H4K8ac_peak_4023 | 6.1654   |                                                             |
| 12 | 29301480 | 29302693 | 5Y-H4K8ac_peak_4024 | 7.89273  | RP11-946L16.1_ENSG00000257258;FAR2_ENSG00000064763          |
| 12 | 29533737 | 29533987 | 5Y-H4K8ac_peak_4025 | 5.98695  | ERGIC2_ENSG00000087502                                      |
| 12 | 29936377 | 29936797 | 5Y-H4K8ac_peak_4026 | 7.76232  | TMTC1_ENSG00000133687                                       |
| 12 | 30848940 | 30849245 | 5Y-H4K8ac_peak_4027 | 8.43511  | IPO8_ENSG00000133704                                        |
| 12 | 30949260 | 30949643 | 5Y-H4K8ac_peak_4028 | 9.38203  |                                                             |
| 12 | 31078600 | 31079091 | 5Y-H4K8ac_peak_4029 | 7.59101  | TSPAN11_ENSG00000110900                                     |
| 12 | 31079542 | 31080062 | 5Y-H4K8ac_peak_4030 | 4.77126  | TSPAN11_ENSG00000110900                                     |
| 12 | 31226419 | 31226649 | 5Y-H4K8ac_peak_4031 | 7.11863  | DDX11-AS1_ENSG00000245614;DDX11_ENSG00000013573             |
| 12 | 31270250 | 31270547 | 5Y-H4K8ac_peak_4032 | 5.65584  |                                                             |
| 12 | 31388126 | 31388317 | 5Y-H4K8ac_peak_4033 | 5.59837  |                                                             |
| 12 | 31478172 | 31478526 | 5Y-H4K8ac_peak_4034 | 4.3419   | AC024940.1_ENSG00000177340                                  |
| 12 | 32112374 | 32112803 | 5Y-H4K8ac_peak_4035 | 10.69698 | KIAA1551_ENSG00000174718                                    |
| 12 | 32259154 | 32259568 | 5Y-H4K8ac_peak_4036 | 26.24446 | RP11-843B15.2_ENSG00000257530;BICD1_ENSG00000151746         |
| 12 | 32831305 | 32831717 | 5Y-H4K8ac_peak_4037 | 9.60627  | DNM1L_ENSG00000087470                                       |
| 12 | 32908327 | 32908758 | 5Y-H4K8ac_peak_4038 | 9.79526  | YARS2_ENSG00000139131                                       |
| 12 | 34175551 | 34175798 | 5Y-H4K8ac_peak_4039 | 11.57334 | ALG10_ENSG00000139133                                       |
| 12 | 34496532 | 34496838 | 5Y-H4K8ac_peak_4040 | 7.38046  |                                                             |
| 12 | 37937570 | 37937838 | 5Y-H4K8ac_peak_4041 | 5.25503  | RP11-125N22.3_ENSG00000257899;RP11-125N22.1_ENSG00000257933 |
| 12 | 38710599 | 38711088 | 5Y-H4K8ac_peak_4042 | 16.27715 | ALG10B_ENSG00000175548                                      |
| 12 | 39299892 | 39300546 | 5Y-H4K8ac_peak_4043 | 11.57334 | CPNE8_ENSG00000139117;RP11-396F22.1_ENSG00000257718         |
| 12 | 39785633 | 39785855 | 5Y-H4K8ac_peak_4044 | 7.53429  |                                                             |
| 12 | 40618385 | 40618871 | 5Y-H4K8ac_peak_4045 | 6.53157  | AC079630.4_ENSG00000225342                                  |
| 12 | 41039500 | 41039704 | 5Y-H4K8ac_peak_4046 | 6.20875  |                                                             |

|    |          |          |                     |          |                                                      |
|----|----------|----------|---------------------|----------|------------------------------------------------------|
| 12 | 42325892 | 42326325 | 5Y-H4K8ac_peak_4047 | 10.1994  | RP11-630C16.2_ENSG00000257239                        |
| 12 | 42538306 | 42538501 | 5Y-H4K8ac_peak_4048 | 4.29586  | GXYLT1_ENSG00000151233                               |
| 12 | 44229466 | 44230187 | 5Y-H4K8ac_peak_4049 | 4.77126  | TMEM117_ENSG00000139173                              |
| 12 | 46004998 | 46005208 | 5Y-H4K8ac_peak_4050 | 4.51076  | RP11-352M15.1_ENSG00000257657                        |
| 12 | 46122871 | 46123085 | 5Y-H4K8ac_peak_4051 | 4.24332  | ARID2_ENSG00000189079                                |
| 12 | 46123642 | 46124488 | 5Y-H4K8ac_peak_4052 | 10.22205 | ARID2_ENSG00000189079                                |
| 12 | 46662926 | 46663757 | 5Y-H4K8ac_peak_4053 | 13.27281 | SLC38A1_ENSG00000111371                              |
| 12 | 46765970 | 46766195 | 5Y-H4K8ac_peak_4054 | 8.75926  | SLC38A2_ENSG00000134294;RP11-474P2.2_ENSG00000258096 |
| 12 | 46776693 | 46777074 | 5Y-H4K8ac_peak_4055 | 22.6507  | RP11-96H19.1_ENSG00000257261                         |
| 12 | 48111598 | 48111807 | 5Y-H4K8ac_peak_4056 | 5.29015  |                                                      |
| 12 | 48131103 | 48131668 | 5Y-H4K8ac_peak_4057 | 8.43511  |                                                      |
| 12 | 48134658 | 48135257 | 5Y-H4K8ac_peak_4058 | 13.72401 |                                                      |
| 12 | 48212843 | 48213485 | 5Y-H4K8ac_peak_4059 | 15.40182 |                                                      |
| 12 | 48213827 | 48214312 | 5Y-H4K8ac_peak_4060 | 8.24461  |                                                      |
| 12 | 48222851 | 48223420 | 5Y-H4K8ac_peak_4061 | 11.56948 |                                                      |
| 12 | 48357497 | 48357732 | 5Y-H4K8ac_peak_4062 | 4.48815  | TMEM106C_ENSG00000134291                             |
| 12 | 48384359 | 48385265 | 5Y-H4K8ac_peak_4063 | 7.90236  |                                                      |
| 12 | 48499425 | 48500144 | 5Y-H4K8ac_peak_4064 | 14.99673 | SENP1_ENSG00000079387;PFKM_ENSG00000152556           |
| 12 | 48500449 | 48500811 | 5Y-H4K8ac_peak_4065 | 6.73047  | SENP1_ENSG00000079387                                |
| 12 | 48592665 | 48593010 | 5Y-H4K8ac_peak_4066 | 4.70501  | DKFZP779L1853_ENSG00000269514                        |
| 12 | 49075553 | 49075895 | 5Y-H4K8ac_peak_4067 | 10.1994  | KANSL2_ENSG00000139620                               |
| 12 | 49110915 | 49111579 | 5Y-H4K8ac_peak_4068 | 12.61054 | CCNT1_ENSG00000129315                                |
| 12 | 49182917 | 49183282 | 5Y-H4K8ac_peak_4069 | 14.86775 | ADCY6_ENSG00000174233;RP11-579D7.4_ENSG00000257660   |
| 12 | 49183707 | 49183965 | 5Y-H4K8ac_peak_4070 | 7.11863  | ADCY6_ENSG00000174233;RP11-579D7.4_ENSG00000257660   |
| 12 | 49208086 | 49208307 | 5Y-H4K8ac_peak_4071 | 4.67245  | CACNB3_ENSG00000167535                               |
| 12 | 49208773 | 49209013 | 5Y-H4K8ac_peak_4072 | 6.96612  |                                                      |
| 12 | 49211634 | 49211916 | 5Y-H4K8ac_peak_4073 | 8.46442  |                                                      |
| 12 | 49259921 | 49260116 | 5Y-H4K8ac_peak_4074 | 8.2589   | RND1_ENSG00000172602                                 |
| 12 | 49350922 | 49351184 | 5Y-H4K8ac_peak_4075 | 11.42066 | RP11-302B13.5_ENSG00000272822;ARF3_ENSG00000134287   |
| 12 | 49391468 | 49391672 | 5Y-H4K8ac_peak_4076 | 5.98695  | RP11-386G11.5_ENSG00000257913                        |
| 12 | 49391945 | 49392373 | 5Y-H4K8ac_peak_4077 | 5.23083  | DDN_ENSG00000181418;RP11-386G11.5_ENSG00000257913    |
| 12 | 49411827 | 49412446 | 5Y-H4K8ac_peak_4078 | 4.0639   | PRKAG1_ENSG00000181929                               |
| 12 | 49454001 | 49454566 | 5Y-H4K8ac_peak_4079 | 14.2053  | KMT2D_ENSG00000167548                                |
| 12 | 49524714 | 49525127 | 5Y-H4K8ac_peak_4080 | 12.00715 | TUBA1B_ENSG00000123416                               |
| 12 | 49582322 | 49582617 | 5Y-H4K8ac_peak_4081 | 5.98695  | TUBA1A_ENSG00000167552;TUBA1C_ENSG00000167553        |
| 12 | 49688163 | 49688373 | 5Y-H4K8ac_peak_4082 | 5.64909  |                                                      |
| 12 | 49717350 | 49717550 | 5Y-H4K8ac_peak_4083 | 9.93099  | RP11-161H23.9_ENSG00000258334;TROAP_ENSG00000135451  |
| 12 | 49730300 | 49730959 | 5Y-H4K8ac_peak_4084 | 7.88114  | C1QL4_ENSG00000186897                                |
| 12 | 49740954 | 49741184 | 5Y-H4K8ac_peak_4085 | 6.54441  | DNAJC22_ENSG00000178401                              |
| 12 | 49760708 | 49760957 | 5Y-H4K8ac_peak_4086 | 18.10232 | SPATS2_ENSG00000123352                               |
| 12 | 49961553 | 49961807 | 5Y-H4K8ac_peak_4087 | 4.77126  | MCRS1_ENSG00000187778;PRPF40B_ENSG00000110844        |
| 12 | 50017654 | 50017854 | 5Y-H4K8ac_peak_4088 | 10.46287 |                                                      |
| 12 | 50067271 | 50067645 | 5Y-H4K8ac_peak_4089 | 9.30206  |                                                      |
| 12 | 50222454 | 50222658 | 5Y-H4K8ac_peak_4090 | 5.56912  | NCKAP5L_ENSG00000167566;BCDIN3D-AS1_ENSG00000258057  |
| 12 | 50262094 | 50262543 | 5Y-H4K8ac_peak_4091 | 9.59918  |                                                      |
| 12 | 50263628 | 50264117 | 5Y-H4K8ac_peak_4092 | 5.77617  |                                                      |

|    |          |          |                     |          |                                                   |
|----|----------|----------|---------------------|----------|---------------------------------------------------|
| 12 | 50264900 | 50265160 | 5Y-H4K8ac_peak_4093 | 4.83834  |                                                   |
| 12 | 50297931 | 50298336 | 5Y-H4K8ac_peak_4094 | 7.60057  | FAIM2_ENSG00000135472                             |
| 12 | 50368220 | 50368439 | 5Y-H4K8ac_peak_4095 | 8.73392  |                                                   |
| 12 | 50369142 | 50369479 | 5Y-H4K8ac_peak_4096 | 8.43511  |                                                   |
| 12 | 50371942 | 50372211 | 5Y-H4K8ac_peak_4097 | 10.21117 |                                                   |
| 12 | 50374010 | 50374327 | 5Y-H4K8ac_peak_4098 | 5.41472  |                                                   |
| 12 | 50375454 | 50375773 | 5Y-H4K8ac_peak_4099 | 8.49231  |                                                   |
| 12 | 50377290 | 50377575 | 5Y-H4K8ac_peak_4100 | 11.19336 |                                                   |
| 12 | 50402342 | 50402825 | 5Y-H4K8ac_peak_4101 | 4.50834  |                                                   |
| 12 | 50442313 | 50442509 | 5Y-H4K8ac_peak_4102 | 4.9885   |                                                   |
| 12 | 50444257 | 50444517 | 5Y-H4K8ac_peak_4103 | 8.2913   |                                                   |
| 12 | 50444997 | 50445272 | 5Y-H4K8ac_peak_4104 | 8.1667   |                                                   |
| 12 | 50504663 | 50505442 | 5Y-H4K8ac_peak_4105 | 11.75922 | COX14_ENSG00000178449;RP4-605O3.4_ENSG00000272368 |
| 12 | 50560595 | 50560792 | 5Y-H4K8ac_peak_4106 | 7.58806  | CERS5_ENSG00000139624                             |
| 12 | 50561537 | 50561834 | 5Y-H4K8ac_peak_4107 | 5.65584  | CERS5_ENSG00000139624                             |
| 12 | 50677503 | 50677874 | 5Y-H4K8ac_peak_4108 | 9.38203  | LIMA1_ENSG00000050405;AC008147.2_ENSG00000203433  |
| 12 | 50793448 | 50793778 | 5Y-H4K8ac_peak_4109 | 4.47071  |                                                   |
| 12 | 50899235 | 50899455 | 5Y-H4K8ac_peak_4110 | 7.87406  | DIP2B_ENSG00000066084                             |
| 12 | 51157884 | 51158124 | 5Y-H4K8ac_peak_4111 | 14.2053  | ATF1_ENSG00000123268                              |
| 12 | 51477042 | 51477244 | 5Y-H4K8ac_peak_4112 | 7.31815  | CSRNP2_ENSG00000110925                            |
| 12 | 51611481 | 51611755 | 5Y-H4K8ac_peak_4113 | 7.50148  | POU6F1_ENSG00000184271                            |
| 12 | 51611949 | 51612178 | 5Y-H4K8ac_peak_4114 | 11.9478  | POU6F1_ENSG00000184271                            |
| 12 | 51632647 | 51632877 | 5Y-H4K8ac_peak_4115 | 14.31711 | DAZAP2_ENSG00000183283                            |
| 12 | 51784946 | 51785840 | 5Y-H4K8ac_peak_4116 | 7.89273  | GALNT6_ENSG00000139629;SLC4A8_ENSG00000050438     |
| 12 | 51818704 | 51818957 | 5Y-H4K8ac_peak_4117 | 9.36633  | RP11-607P23.1_ENSG00000271065                     |
| 12 | 51984160 | 51984497 | 5Y-H4K8ac_peak_4118 | 5.23083  | SCN8A_ENSG00000196876                             |
| 12 | 51985085 | 51985363 | 5Y-H4K8ac_peak_4119 | 7.89273  |                                                   |
| 12 | 52208094 | 52208543 | 5Y-H4K8ac_peak_4120 | 8.90774  |                                                   |
| 12 | 52214888 | 52215176 | 5Y-H4K8ac_peak_4121 | 10.48476 |                                                   |
| 12 | 52240981 | 52241220 | 5Y-H4K8ac_peak_4122 | 4.56708  | RP11-923I11.5_ENSG00000259887                     |
| 12 | 52242194 | 52242451 | 5Y-H4K8ac_peak_4123 | 12.29232 | RP11-923I11.5_ENSG00000259887                     |
| 12 | 52262472 | 52263162 | 5Y-H4K8ac_peak_4124 | 9.62747  |                                                   |
| 12 | 52263377 | 52263621 | 5Y-H4K8ac_peak_4125 | 12.87247 |                                                   |
| 12 | 52305691 | 52306341 | 5Y-H4K8ac_peak_4126 | 12.21176 |                                                   |
| 12 | 52311571 | 52312024 | 5Y-H4K8ac_peak_4127 | 7.59101  |                                                   |
| 12 | 52334952 | 52335308 | 5Y-H4K8ac_peak_4128 | 5.51139  |                                                   |
| 12 | 52345563 | 52345924 | 5Y-H4K8ac_peak_4129 | 8.69112  | ACVR1B_ENSG00000135503                            |
| 12 | 52431105 | 52431354 | 5Y-H4K8ac_peak_4130 | 5.5592   |                                                   |
| 12 | 52444414 | 52444876 | 5Y-H4K8ac_peak_4131 | 8.43511  |                                                   |
| 12 | 52456644 | 52456919 | 5Y-H4K8ac_peak_4132 | 6.47245  |                                                   |
| 12 | 52463565 | 52464000 | 5Y-H4K8ac_peak_4133 | 11.86504 | C12orf44_ENSG00000123395                          |
| 12 | 52577526 | 52578243 | 5Y-H4K8ac_peak_4134 | 10.31981 |                                                   |
| 12 | 52579174 | 52579367 | 5Y-H4K8ac_peak_4135 | 8.47164  |                                                   |
| 12 | 52593373 | 52594050 | 5Y-H4K8ac_peak_4136 | 10.54764 |                                                   |
| 12 | 52594906 | 52595535 | 5Y-H4K8ac_peak_4137 | 8.69112  |                                                   |
| 12 | 52596179 | 52596970 | 5Y-H4K8ac_peak_4138 | 9.24789  |                                                   |

|    |          |          |                     |          |                                                             |
|----|----------|----------|---------------------|----------|-------------------------------------------------------------|
| 12 | 52597390 | 52597827 | 5Y-H4K8ac_peak_4139 | 8.63295  |                                                             |
| 12 | 52637993 | 52638417 | 5Y-H4K8ac_peak_4140 | 6.08523  |                                                             |
| 12 | 53400424 | 53400625 | 5Y-H4K8ac_peak_4141 | 5.29015  | EIF4B_ENSG00000063046                                       |
| 12 | 53441440 | 53441843 | 5Y-H4K8ac_peak_4142 | 7.58806  | TENC1_ENSG00000111077                                       |
| 12 | 53443192 | 53443647 | 5Y-H4K8ac_peak_4143 | 6.22904  |                                                             |
| 12 | 53444010 | 53444209 | 5Y-H4K8ac_peak_4144 | 5.69598  |                                                             |
| 12 | 53448026 | 53448547 | 5Y-H4K8ac_peak_4145 | 9.96543  | RP11-983P16.4_ENSG00000257337                               |
| 12 | 53490948 | 53492238 | 5Y-H4K8ac_peak_4146 | 9.23159  | IGFBP6_ENSG00000167779                                      |
| 12 | 53553554 | 53553813 | 5Y-H4K8ac_peak_4147 | 7.34185  | RP11-1136G11.8_ENSG00000257808                              |
| 12 | 53565535 | 53565735 | 5Y-H4K8ac_peak_4148 | 5.3176   |                                                             |
| 12 | 53616334 | 53616795 | 5Y-H4K8ac_peak_4149 | 5.12213  |                                                             |
| 12 | 53625445 | 53625974 | 5Y-H4K8ac_peak_4150 | 9.51254  | RARG_ENSG00000172819                                        |
| 12 | 53628431 | 53628629 | 5Y-H4K8ac_peak_4151 | 6.09071  |                                                             |
| 12 | 53645961 | 53646242 | 5Y-H4K8ac_peak_4152 | 8.43511  | MFSD5_ENSG00000182544                                       |
| 12 | 53689416 | 53689637 | 5Y-H4K8ac_peak_4153 | 6.76425  | PFDN5_ENSG00000123349                                       |
| 12 | 53693615 | 53693992 | 5Y-H4K8ac_peak_4154 | 6.43775  | RP11-680A11.5_ENSG00000257605;C12orf10_ENSG00000139637      |
| 12 | 53718854 | 53719617 | 5Y-H4K8ac_peak_4155 | 8.24461  | AAA5_ENSG00000094914                                        |
| 12 | 53738271 | 53738569 | 5Y-H4K8ac_peak_4156 | 7.66481  | SP7_ENSG00000170374                                         |
| 12 | 53774215 | 53774406 | 5Y-H4K8ac_peak_4157 | 4.68359  | SP1_ENSG00000185591                                         |
| 12 | 53808585 | 53808790 | 5Y-H4K8ac_peak_4158 | 8.17203  |                                                             |
| 12 | 53895523 | 53896027 | 5Y-H4K8ac_peak_4159 | 12.05638 | RP11-793H13.11_ENSG00000270175;TARBP2_ENSG00000139546       |
| 12 | 54070296 | 54070584 | 5Y-H4K8ac_peak_4160 | 8.5159   | ATP5G2_ENSG00000135390                                      |
| 12 | 54393421 | 54393650 | 5Y-H4K8ac_peak_4161 | 11.75922 | HOXC-AS1_ENSG00000250451                                    |
| 12 | 54393965 | 54394447 | 5Y-H4K8ac_peak_4162 | 13.78819 | HOXC-AS1_ENSG00000250451                                    |
| 12 | 54411955 | 54412609 | 5Y-H4K8ac_peak_4163 | 18.10232 |                                                             |
| 12 | 54413735 | 54413931 | 5Y-H4K8ac_peak_4164 | 6.33308  | AC012531.25_ENSG00000260597                                 |
| 12 | 54415842 | 54416072 | 5Y-H4K8ac_peak_4165 | 4.07874  |                                                             |
| 12 | 54428309 | 54428656 | 5Y-H4K8ac_peak_4166 | 9.52107  | MIR615_ENSG00000207571                                      |
| 12 | 54445389 | 54445729 | 5Y-H4K8ac_peak_4167 | 7.34202  |                                                             |
| 12 | 54446364 | 54446712 | 5Y-H4K8ac_peak_4168 | 9.07085  | HOXC4_ENSG00000273266                                       |
| 12 | 54447243 | 54447443 | 5Y-H4K8ac_peak_4169 | 7.11863  | HOXC4_ENSG00000273266                                       |
| 12 | 54447802 | 54447995 | 5Y-H4K8ac_peak_4170 | 6.40964  | HOXC4_ENSG00000273266                                       |
| 12 | 54473191 | 54473392 | 5Y-H4K8ac_peak_4171 | 5.35202  |                                                             |
| 12 | 54484078 | 54484345 | 5Y-H4K8ac_peak_4172 | 6.08523  |                                                             |
| 12 | 54506895 | 54507087 | 5Y-H4K8ac_peak_4173 | 8.748    |                                                             |
| 12 | 54519882 | 54520252 | 5Y-H4K8ac_peak_4174 | 7.11863  | RP11-834C11.5_ENSG00000250432;RP11-834C11.4_ENSG00000250742 |
| 12 | 54529157 | 54529499 | 5Y-H4K8ac_peak_4175 | 7.37325  |                                                             |
| 12 | 54558178 | 54558448 | 5Y-H4K8ac_peak_4176 | 7.60057  | RP11-834C11.10_ENSG00000257534                              |
| 12 | 54567081 | 54567347 | 5Y-H4K8ac_peak_4177 | 8.24461  |                                                             |
| 12 | 54591129 | 54591480 | 5Y-H4K8ac_peak_4178 | 5.64909  |                                                             |
| 12 | 54654040 | 54654296 | 5Y-H4K8ac_peak_4179 | 8.35138  |                                                             |
| 12 | 54656824 | 54657031 | 5Y-H4K8ac_peak_4180 | 6.49308  | RP11-968A15.2_ENSG00000257596                               |
| 12 | 54745800 | 54746109 | 5Y-H4K8ac_peak_4181 | 6.78128  |                                                             |
| 12 | 54747381 | 54747695 | 5Y-H4K8ac_peak_4182 | 8.43511  | RP11-753H16.3_ENSG00000258137;RP11-753H16.5_ENSG00000258086 |
| 12 | 54753372 | 54753689 | 5Y-H4K8ac_peak_4183 | 9.30505  |                                                             |
| 12 | 54772705 | 54772974 | 5Y-H4K8ac_peak_4184 | 11.9478  |                                                             |

|    |          |          |                     |          |                                                        |
|----|----------|----------|---------------------|----------|--------------------------------------------------------|
| 12 | 54779158 | 54779518 | 5Y-H4K8ac_peak_4185 | 11.22005 |                                                        |
| 12 | 54784890 | 54785086 | 5Y-H4K8ac_peak_4186 | 7.38046  | ZNF385A_ENSG00000161642                                |
| 12 | 56241420 | 56241620 | 5Y-H4K8ac_peak_4187 | 8.4454   |                                                        |
| 12 | 56320639 | 56320856 | 5Y-H4K8ac_peak_4188 | 8.93923  | DGKA_ENSG00000065357                                   |
| 12 | 56321122 | 56321683 | 5Y-H4K8ac_peak_4189 | 11.22005 | DGKA_ENSG00000065357                                   |
| 12 | 56367952 | 56368232 | 5Y-H4K8ac_peak_4190 | 8.73392  | PMEL_ENSG00000185664;RAB5B_ENSG00000111540             |
| 12 | 56401275 | 56401530 | 5Y-H4K8ac_peak_4191 | 12.84845 | IKZF4_ENSG00000123411                                  |
| 12 | 56415127 | 56415400 | 5Y-H4K8ac_peak_4192 | 11.09973 |                                                        |
| 12 | 56435767 | 56436261 | 5Y-H4K8ac_peak_4193 | 10.69698 | RP11-603J24.4_ENSG00000257449;RPS26_ENSG00000197728    |
| 12 | 56473788 | 56474137 | 5Y-H4K8ac_peak_4194 | 7.89142  | ERBB3_ENSG00000065361                                  |
| 12 | 56512094 | 56512400 | 5Y-H4K8ac_peak_4195 | 4.55128  | ZC3H10_ENSG00000135482;ESYT1_ENSG00000139641           |
| 12 | 56618291 | 56618513 | 5Y-H4K8ac_peak_4196 | 9.51254  |                                                        |
| 12 | 56652296 | 56652504 | 5Y-H4K8ac_peak_4197 | 7.89273  | ANKRD52_ENSG00000139645                                |
| 12 | 56709478 | 56709703 | 5Y-H4K8ac_peak_4198 | 6.78318  | RP11-977G19.10_ENSG00000144785;CNPY2_ENSG00000257727   |
| 12 | 56726984 | 56727422 | 5Y-H4K8ac_peak_4199 | 10.21117 | PAN2_ENSG00000135473                                   |
| 12 | 56728116 | 56728435 | 5Y-H4K8ac_peak_4200 | 7.89142  | PAN2_ENSG00000135473                                   |
| 12 | 56881585 | 56882157 | 5Y-H4K8ac_peak_4201 | 9.15007  |                                                        |
| 12 | 56882362 | 56882620 | 5Y-H4K8ac_peak_4202 | 6.77436  |                                                        |
| 12 | 57028543 | 57028776 | 5Y-H4K8ac_peak_4203 | 8.43511  |                                                        |
| 12 | 57039522 | 57039712 | 5Y-H4K8ac_peak_4204 | 7.89142  | ATP5B_ENSG00000110955;SNORD59A_ENSG00000207031         |
| 12 | 57081643 | 57082027 | 5Y-H4K8ac_peak_4205 | 7.00004  | PTGES3_ENSG00000110958                                 |
| 12 | 57082397 | 57082744 | 5Y-H4K8ac_peak_4206 | 9.51254  | PTGES3_ENSG00000110958                                 |
| 12 | 57118412 | 57119036 | 5Y-H4K8ac_peak_4207 | 7.50148  |                                                        |
| 12 | 57420496 | 57420737 | 5Y-H4K8ac_peak_4208 | 6.31818  |                                                        |
| 12 | 57423664 | 57423913 | 5Y-H4K8ac_peak_4209 | 5.12213  | TAC3_ENSG00000166863                                   |
| 12 | 57481254 | 57481477 | 5Y-H4K8ac_peak_4210 | 10.19948 | TMEM194A_ENSG00000166881                               |
| 12 | 57498065 | 57498274 | 5Y-H4K8ac_peak_4211 | 7.53429  |                                                        |
| 12 | 57545127 | 57545561 | 5Y-H4K8ac_peak_4212 | 10.69698 |                                                        |
| 12 | 57546126 | 57546712 | 5Y-H4K8ac_peak_4213 | 9.52107  |                                                        |
| 12 | 57548235 | 57548537 | 5Y-H4K8ac_peak_4214 | 7.9592   |                                                        |
| 12 | 57569357 | 57569718 | 5Y-H4K8ac_peak_4215 | 10.35586 |                                                        |
| 12 | 57633651 | 57633922 | 5Y-H4K8ac_peak_4216 | 8.69112  | NDUFA4L2_ENSG00000185633                               |
| 12 | 57847087 | 57847420 | 5Y-H4K8ac_peak_4217 | 5.87382  | INHBE_ENSG00000139269                                  |
| 12 | 57848376 | 57848596 | 5Y-H4K8ac_peak_4218 | 4.77016  |                                                        |
| 12 | 57881937 | 57882182 | 5Y-H4K8ac_peak_4219 | 13.63503 | ARHGAP9_ENSG00000123329                                |
| 12 | 57914843 | 57915081 | 5Y-H4K8ac_peak_4220 | 5.75508  | DDIT3_ENSG00000175197;MBD6_ENSG00000166987             |
| 12 | 57940653 | 57940938 | 5Y-H4K8ac_peak_4221 | 11.68317 | DCTN2_ENSG00000175203                                  |
| 12 | 57998171 | 57999160 | 5Y-H4K8ac_peak_4222 | 14.77644 | DTX3_ENSG00000178498                                   |
| 12 | 58004671 | 58005434 | 5Y-H4K8ac_peak_4223 | 16.01457 | ARHGEF25_ENSG00000240771                               |
| 12 | 58026112 | 58026387 | 5Y-H4K8ac_peak_4224 | 7.9057   | B4GALNT1_ENSG00000135454                               |
| 12 | 58026704 | 58027183 | 5Y-H4K8ac_peak_4225 | 9.23159  | B4GALNT1_ENSG00000135454                               |
| 12 | 58119647 | 58120499 | 5Y-H4K8ac_peak_4226 | 14.72057 | RP11-571M6.8_ENSG00000257499;AGAP2-AS1_ENSG00000255737 |
| 12 | 58120888 | 58121174 | 5Y-H4K8ac_peak_4227 | 12.57157 | AGAP2-AS1_ENSG00000255737                              |
| 12 | 58148916 | 58149106 | 5Y-H4K8ac_peak_4228 | 7.24844  | CDK4_ENSG00000135446;MARCH9_ENSG00000139266            |
| 12 | 58166423 | 58166623 | 5Y-H4K8ac_peak_4229 | 5.24695  | METTL1_ENSG00000037897;RP11-571M6.15_ENSG00000257921   |
| 12 | 58262510 | 58262825 | 5Y-H4K8ac_peak_4230 | 8.79957  |                                                        |



|    |          |          |                     |          |                                                                                 |
|----|----------|----------|---------------------|----------|---------------------------------------------------------------------------------|
| 12 | 58280618 | 58280907 | 5Y-H4K8ac_peak_4231 | 7.04637  |                                                                                 |
| 12 | 58282441 | 58282674 | 5Y-H4K8ac_peak_4232 | 9.30505  |                                                                                 |
| 12 | 58287024 | 58287613 | 5Y-H4K8ac_peak_4233 | 9.93099  |                                                                                 |
| 12 | 58289929 | 58290793 | 5Y-H4K8ac_peak_4234 | 20.85916 | RP11-620J15.2_ENSG00000245651                                                   |
| 12 | 58291474 | 58291673 | 5Y-H4K8ac_peak_4235 | 6.79955  |                                                                                 |
| 12 | 59448643 | 59448846 | 5Y-H4K8ac_peak_4236 | 4.07874  | RP11-557F20.2_ENSG00000257288                                                   |
| 12 | 62860636 | 62861086 | 5Y-H4K8ac_peak_4237 | 13.2534  | MON2_ENSG00000061987                                                            |
| 12 | 62996713 | 62997001 | 5Y-H4K8ac_peak_4238 | 10.18556 | C12orf61_ENSG00000221949;RP11-631N16.2_ENSG00000257354;MIRLET7I_ENSG00000199179 |
| 12 | 63025750 | 63026591 | 5Y-H4K8ac_peak_4239 | 7.8267   |                                                                                 |
| 12 | 64333676 | 64333997 | 5Y-H4K8ac_peak_4240 | 7.42477  |                                                                                 |
| 12 | 64616177 | 64616736 | 5Y-H4K8ac_peak_4241 | 9.78792  | C12orf66_ENSG00000174206;RPS11P6_ENSG00000243024                                |
| 12 | 64798350 | 64798897 | 5Y-H4K8ac_peak_4242 | 6.78128  | XPOT_ENSG00000184575                                                            |
| 12 | 64936462 | 64936666 | 5Y-H4K8ac_peak_4243 | 4.84727  |                                                                                 |
| 12 | 65003725 | 65003931 | 5Y-H4K8ac_peak_4244 | 8.1667   | RP11-338E21.1_ENSG00000256670;RASSF3_ENSG00000153179                            |
| 12 | 65152943 | 65153135 | 5Y-H4K8ac_peak_4245 | 5.87725  | GNS_ENSG00000135677;RP11-629N8.3_ENSG00000215159                                |
| 12 | 65563072 | 65563640 | 5Y-H4K8ac_peak_4246 | 6.37023  | LEMD3_ENSG00000174106                                                           |
| 12 | 66563197 | 66563750 | 5Y-H4K8ac_peak_4247 | 14.1808  | TMBIM4_ENSG00000228144;TMBIM4_ENSG00000155957                                   |
| 12 | 66564017 | 66564386 | 5Y-H4K8ac_peak_4248 | 7.84116  | TMBIM4_ENSG00000228144;TMBIM4_ENSG00000155957                                   |
| 12 | 68043026 | 68043483 | 5Y-H4K8ac_peak_4249 | 6.78318  | DYRK2_ENSG00000127334                                                           |
| 12 | 68043700 | 68043968 | 5Y-H4K8ac_peak_4250 | 7.58806  |                                                                                 |
| 12 | 68639343 | 68639634 | 5Y-H4K8ac_peak_4251 | 5.87382  |                                                                                 |
| 12 | 69080824 | 69081060 | 5Y-H4K8ac_peak_4252 | 8.73392  | RP11-637A17.2_ENSG00000247363;NUP107_ENSG00000111581                            |
| 12 | 69202000 | 69202395 | 5Y-H4K8ac_peak_4253 | 22.6507  | MDM2_ENSG00000135679                                                            |
| 12 | 69633525 | 69634008 | 5Y-H4K8ac_peak_4254 | 9.62747  | CPSF6_ENSG00000111605                                                           |
| 12 | 69724787 | 69724980 | 5Y-H4K8ac_peak_4255 | 7.31815  |                                                                                 |
| 12 | 69753554 | 69753808 | 5Y-H4K8ac_peak_4256 | 8.5159   | YEATS4_ENSG00000127337                                                          |
| 12 | 69978190 | 69978395 | 5Y-H4K8ac_peak_4257 | 7.17184  | MIR3913-1_ENSG00000264405;CCT2_ENSG00000166226                                  |
| 12 | 69979312 | 69979539 | 5Y-H4K8ac_peak_4258 | 13.2534  | MIR3913-1_ENSG00000264405;CCT2_ENSG00000166226                                  |
| 12 | 70330074 | 70330280 | 5Y-H4K8ac_peak_4259 | 6.34046  |                                                                                 |
| 12 | 70636804 | 70636999 | 5Y-H4K8ac_peak_4260 | 7.50148  | RP11-611E13.2_ENSG00000257815;CNOT2_ENSG00000111596                             |
| 12 | 70637248 | 70637730 | 5Y-H4K8ac_peak_4261 | 9.15007  | RP11-611E13.2_ENSG00000257815;CNOT2_ENSG00000111596                             |
| 12 | 70760654 | 70761071 | 5Y-H4K8ac_peak_4262 | 7.17184  | KCNMB4_ENSG00000135643                                                          |
| 12 | 71003494 | 71004046 | 5Y-H4K8ac_peak_4263 | 4.77126  |                                                                                 |
| 12 | 72056848 | 72057560 | 5Y-H4K8ac_peak_4264 | 10.46287 | THAP2_ENSG00000173451                                                           |
| 12 | 75785155 | 75785422 | 5Y-H4K8ac_peak_4265 | 6.50117  | CAPS2_ENSG00000180881                                                           |
| 12 | 75973819 | 75974024 | 5Y-H4K8ac_peak_4266 | 5.40331  |                                                                                 |
| 12 | 76178882 | 76179133 | 5Y-H4K8ac_peak_4267 | 8.21582  |                                                                                 |
| 12 | 76195083 | 76195296 | 5Y-H4K8ac_peak_4268 | 5.56912  |                                                                                 |
| 12 | 76397661 | 76397858 | 5Y-H4K8ac_peak_4269 | 4.07874  |                                                                                 |
| 12 | 76742394 | 76742822 | 5Y-H4K8ac_peak_4270 | 6.54441  | BBS10_ENSG00000179941                                                           |
| 12 | 77458830 | 77459265 | 5Y-H4K8ac_peak_4271 | 8.63306  | E2F7_ENSG00000165891                                                            |
| 12 | 77459621 | 77459875 | 5Y-H4K8ac_peak_4272 | 7.31102  | E2F7_ENSG00000165891                                                            |
| 12 | 78490275 | 78490643 | 5Y-H4K8ac_peak_4273 | 10.36926 |                                                                                 |
| 12 | 83102276 | 83102605 | 5Y-H4K8ac_peak_4274 | 5.03335  |                                                                                 |
| 12 | 83234507 | 83234708 | 5Y-H4K8ac_peak_4275 | 5.56912  |                                                                                 |
| 12 | 88536197 | 88536442 | 5Y-H4K8ac_peak_4276 | 7.89142  | CEP290_ENSG00000198707;TMTC3_ENSG00000139324                                    |

|    |           |           |                     |          |                                                                                                        |
|----|-----------|-----------|---------------------|----------|--------------------------------------------------------------------------------------------------------|
| 12 | 89739628  | 89740096  | 5Y-H4K8ac_peak_4277 | 8.2913   |                                                                                                        |
| 12 | 89747128  | 89748493  | 5Y-H4K8ac_peak_4278 | 12.84845 | DUSP6_ENSG00000139318                                                                                  |
| 12 | 89919256  | 89919919  | 5Y-H4K8ac_peak_4279 | 9.38276  | POC1B_ENSG00000139323;GALNT4_ENSG00000257594;POC1B-GALNT4_ENSG00000259075;RP11-734K2.4_ENSG00000270344 |
| 12 | 91950867  | 91951105  | 5Y-H4K8ac_peak_4280 | 4.79585  |                                                                                                        |
| 12 | 92757356  | 92757649  | 5Y-H4K8ac_peak_4281 | 7.31815  |                                                                                                        |
| 12 | 92758172  | 92758396  | 5Y-H4K8ac_peak_4282 | 5.65584  |                                                                                                        |
| 12 | 93323377  | 93323635  | 5Y-H4K8ac_peak_4283 | 6.79955  | EEA1_ENSG00000102189                                                                                   |
| 12 | 93692701  | 93692921  | 5Y-H4K8ac_peak_4284 | 6.34046  |                                                                                                        |
| 12 | 93693666  | 93694077  | 5Y-H4K8ac_peak_4285 | 6.77436  |                                                                                                        |
| 12 | 93861330  | 93861691  | 5Y-H4K8ac_peak_4286 | 13.06587 | MRPL42_ENSG00000198015                                                                                 |
| 12 | 93964810  | 93965512  | 5Y-H4K8ac_peak_4287 | 11.09973 | SOCS2-AS1_ENSG00000246985                                                                              |
| 12 | 93965720  | 93966022  | 5Y-H4K8ac_peak_4288 | 12.11208 | SOCS2-AS1_ENSG00000246985                                                                              |
| 12 | 94070171  | 94070649  | 5Y-H4K8ac_peak_4289 | 15.34073 | CRADD_ENSG00000169372                                                                                  |
| 12 | 94071258  | 94071767  | 5Y-H4K8ac_peak_4290 | 9.30505  | CRADD_ENSG00000169372                                                                                  |
| 12 | 94179134  | 94179364  | 5Y-H4K8ac_peak_4291 | 7.72345  |                                                                                                        |
| 12 | 94288248  | 94288509  | 5Y-H4K8ac_peak_4292 | 4.07874  |                                                                                                        |
| 12 | 94853376  | 94853585  | 5Y-H4K8ac_peak_4293 | 12.49199 | CCDC41_ENSG00000173588                                                                                 |
| 12 | 94853892  | 94854403  | 5Y-H4K8ac_peak_4294 | 12.05638 | CCDC41_ENSG00000173588                                                                                 |
| 12 | 94926850  | 94927282  | 5Y-H4K8ac_peak_4295 | 7.58806  |                                                                                                        |
| 12 | 95266952  | 95267515  | 5Y-H4K8ac_peak_4296 | 8.24461  |                                                                                                        |
| 12 | 95467947  | 95468152  | 5Y-H4K8ac_peak_4297 | 7.38046  | NR2C1_ENSG00000120798                                                                                  |
| 12 | 95611635  | 95611846  | 5Y-H4K8ac_peak_4298 | 8.69112  | FGD6_ENSG00000180263;VEZT_ENSG00000028203                                                              |
| 12 | 95941649  | 95941914  | 5Y-H4K8ac_peak_4299 | 4.15658  |                                                                                                        |
| 12 | 96336287  | 96336694  | 5Y-H4K8ac_peak_4300 | 20.27109 | CCDC38_ENSG00000165972;AMDHD1_ENSG00000139344                                                          |
| 12 | 96545911  | 96546262  | 5Y-H4K8ac_peak_4301 | 9.15977  |                                                                                                        |
| 12 | 96587116  | 96587534  | 5Y-H4K8ac_peak_4302 | 7.17184  | ELK3_ENSG00000111145                                                                                   |
| 12 | 96587725  | 96588018  | 5Y-H4K8ac_peak_4303 | 16.52279 | ELK3_ENSG00000111145                                                                                   |
| 12 | 97300752  | 97301212  | 5Y-H4K8ac_peak_4304 | 8.69112  | NEDD1_ENSG00000139350                                                                                  |
| 12 | 98909488  | 98910238  | 5Y-H4K8ac_peak_4305 | 12.69256 | TMPO-AS1_ENSG00000257167;TMPO_ENSG00000120802                                                          |
| 12 | 101801888 | 101802180 | 5Y-H4K8ac_peak_4306 | 6.77436  | ARL1_ENSG00000120805;RP11-321F8.4_ENSG00000257543                                                      |
| 12 | 102091687 | 102092269 | 5Y-H4K8ac_peak_4307 | 10.42746 | CHPT1_ENSG00000111666                                                                                  |
| 12 | 102270929 | 102271421 | 5Y-H4K8ac_peak_4308 | 4.70501  | DRAM1_ENSG00000136048                                                                                  |
| 12 | 102455439 | 102455743 | 5Y-H4K8ac_peak_4309 | 11.19336 | CCDC53_ENSG00000120860                                                                                 |
| 12 | 104323106 | 104323452 | 5Y-H4K8ac_peak_4310 | 9.58986  | RP11-642P15.1_ENSG00000214198;HSP90B1_ENSG00000166598;MIR3652_ENSG00000265072                          |
| 12 | 104350412 | 104350860 | 5Y-H4K8ac_peak_4311 | 7.04637  |                                                                                                        |
| 12 | 104359060 | 104359367 | 5Y-H4K8ac_peak_4312 | 6.78318  | C12orf73_ENSG00000204954;TDG_ENSG00000139372                                                           |
| 12 | 104359720 | 104359922 | 5Y-H4K8ac_peak_4313 | 9.74838  | C12orf73_ENSG00000204954;TDG_ENSG00000139372                                                           |
| 12 | 104457761 | 104458106 | 5Y-H4K8ac_peak_4314 | 8.47164  | HCFC2_ENSG00000111727                                                                                  |
| 12 | 104531084 | 104531752 | 5Y-H4K8ac_peak_4315 | 29.46868 | NFYB_ENSG00000120837                                                                                   |
| 12 | 104532165 | 104532557 | 5Y-H4K8ac_peak_4316 | 11.19336 | NFYB_ENSG00000120837                                                                                   |
| 12 | 104697691 | 104697979 | 5Y-H4K8ac_peak_4317 | 7.29091  | EID3_ENSG00000255150                                                                                   |
| 12 | 105062569 | 105062805 | 5Y-H4K8ac_peak_4318 | 6.54441  |                                                                                                        |
| 12 | 105351675 | 105351898 | 5Y-H4K8ac_peak_4319 | 7.59101  | SLC41A2_ENSG00000136052                                                                                |
| 12 | 105352218 | 105352589 | 5Y-H4K8ac_peak_4320 | 7.89273  | SLC41A2_ENSG00000136052                                                                                |
| 12 | 105352864 | 105353058 | 5Y-H4K8ac_peak_4321 | 7.53429  | SLC41A2_ENSG00000136052                                                                                |
| 12 | 105629523 | 105629852 | 5Y-H4K8ac_peak_4322 | 10.19948 | APPL2_ENSG00000136044;C12orf75_ENSG00000235162                                                         |

|    |           |           |                     |          |                                              |
|----|-----------|-----------|---------------------|----------|----------------------------------------------|
| 12 | 105724539 | 105725012 | 5Y-H4K8ac_peak_4323 | 7.3889   |                                              |
| 12 | 106532588 | 106533727 | 5Y-H4K8ac_peak_4324 | 15.03212 | NUAK1_ENSG00000074590                        |
| 12 | 106641515 | 106641775 | 5Y-H4K8ac_peak_4325 | 15.87289 | RP11-651L5.2_ENSG00000258355                 |
| 12 | 106642088 | 106642499 | 5Y-H4K8ac_peak_4326 | 5.74859  |                                              |
| 12 | 106696317 | 106696528 | 5Y-H4K8ac_peak_4327 | 8.24461  | TCP11L2_ENSG00000166046                      |
| 12 | 107524032 | 107524393 | 5Y-H4K8ac_peak_4328 | 8.33296  |                                              |
| 12 | 107525844 | 107526389 | 5Y-H4K8ac_peak_4329 | 6.34046  |                                              |
| 12 | 107767483 | 107768188 | 5Y-H4K8ac_peak_4330 | 10.79063 | SNORD74_ENSG00000200897                      |
| 12 | 107775100 | 107775311 | 5Y-H4K8ac_peak_4331 | 6.06152  |                                              |
| 12 | 107776727 | 107777012 | 5Y-H4K8ac_peak_4332 | 8.2913   |                                              |
| 12 | 107799510 | 107799726 | 5Y-H4K8ac_peak_4333 | 4.9603   |                                              |
| 12 | 108001148 | 108001339 | 5Y-H4K8ac_peak_4334 | 9.23159  |                                              |
| 12 | 108001594 | 108001804 | 5Y-H4K8ac_peak_4335 | 5.59843  |                                              |
| 12 | 108039560 | 108039751 | 5Y-H4K8ac_peak_4336 | 4.95697  |                                              |
| 12 | 108236709 | 108236910 | 5Y-H4K8ac_peak_4337 | 4.24332  |                                              |
| 12 | 108239081 | 108239367 | 5Y-H4K8ac_peak_4338 | 4.15658  |                                              |
| 12 | 108646844 | 108647187 | 5Y-H4K8ac_peak_4339 | 7.97699  |                                              |
| 12 | 108698495 | 108698727 | 5Y-H4K8ac_peak_4340 | 9.66296  |                                              |
| 12 | 108787089 | 108787424 | 5Y-H4K8ac_peak_4341 | 4.93237  |                                              |
| 12 | 108839979 | 108840337 | 5Y-H4K8ac_peak_4342 | 4.84727  |                                              |
| 12 | 108954747 | 108955123 | 5Y-H4K8ac_peak_4343 | 4.15658  | SART3_ENSG00000075856                        |
| 12 | 109003320 | 109003533 | 5Y-H4K8ac_peak_4344 | 7.63144  |                                              |
| 12 | 109085829 | 109086094 | 5Y-H4K8ac_peak_4345 | 8.564    |                                              |
| 12 | 109244638 | 109245005 | 5Y-H4K8ac_peak_4346 | 5.64909  |                                              |
| 12 | 109251563 | 109252150 | 5Y-H4K8ac_peak_4347 | 4.95697  | SSH1_ENSG00000084112;DAO_ENSG00000110887     |
| 12 | 109489514 | 109489716 | 5Y-H4K8ac_peak_4348 | 7.38046  |                                              |
| 12 | 109535482 | 109535704 | 5Y-H4K8ac_peak_4349 | 10.73603 | UNG_ENSG00000076248                          |
| 12 | 109553603 | 109553842 | 5Y-H4K8ac_peak_4350 | 6.50117  | ACACB_ENSG00000076555                        |
| 12 | 109725826 | 109726062 | 5Y-H4K8ac_peak_4351 | 8.45687  |                                              |
| 12 | 109728057 | 109728953 | 5Y-H4K8ac_peak_4352 | 7.56545  |                                              |
| 12 | 109729698 | 109730069 | 5Y-H4K8ac_peak_4353 | 8.24461  |                                              |
| 12 | 109747911 | 109748257 | 5Y-H4K8ac_peak_4354 | 6.31818  | FOXN4_ENSG00000139445                        |
| 12 | 109770046 | 109770687 | 5Y-H4K8ac_peak_4355 | 5.64909  |                                              |
| 12 | 109915208 | 109915807 | 5Y-H4K8ac_peak_4356 | 9.32595  | KCTD10_ENSG00000110906;UBE3B_ENSG00000151148 |
| 12 | 109959911 | 109960477 | 5Y-H4K8ac_peak_4357 | 8.43511  |                                              |
| 12 | 109961380 | 109961680 | 5Y-H4K8ac_peak_4358 | 4.642    |                                              |
| 12 | 109969827 | 109970079 | 5Y-H4K8ac_peak_4359 | 8.2913   |                                              |
| 12 | 109970560 | 109970954 | 5Y-H4K8ac_peak_4360 | 9.56516  |                                              |
| 12 | 109971241 | 109971638 | 5Y-H4K8ac_peak_4361 | 5.64909  |                                              |
| 12 | 109976466 | 109976857 | 5Y-H4K8ac_peak_4362 | 5.23083  |                                              |
| 12 | 109978643 | 109979079 | 5Y-H4K8ac_peak_4363 | 5.12488  |                                              |
| 12 | 110044969 | 110045277 | 5Y-H4K8ac_peak_4364 | 11.94897 |                                              |
| 12 | 110049563 | 110049793 | 5Y-H4K8ac_peak_4365 | 5.98695  |                                              |
| 12 | 110061614 | 110062108 | 5Y-H4K8ac_peak_4366 | 7.11863  |                                              |
| 12 | 110064249 | 110064492 | 5Y-H4K8ac_peak_4367 | 4.00285  |                                              |
| 12 | 110092035 | 110092450 | 5Y-H4K8ac_peak_4368 | 10.93537 |                                              |

|    |           |           |                     |          |                                                                                  |
|----|-----------|-----------|---------------------|----------|----------------------------------------------------------------------------------|
| 12 | 110093215 | 110093455 | 5Y-H4K8ac_peak_4369 | 7.01266  |                                                                                  |
| 12 | 110093851 | 110094239 | 5Y-H4K8ac_peak_4370 | 8.35207  |                                                                                  |
| 12 | 110157478 | 110157712 | 5Y-H4K8ac_peak_4371 | 7.28023  |                                                                                  |
| 12 | 110158466 | 110158699 | 5Y-H4K8ac_peak_4372 | 5.59843  |                                                                                  |
| 12 | 110164520 | 110165234 | 5Y-H4K8ac_peak_4373 | 7.89273  |                                                                                  |
| 12 | 110169329 | 110169631 | 5Y-H4K8ac_peak_4374 | 9.79526  |                                                                                  |
| 12 | 110171856 | 110172167 | 5Y-H4K8ac_peak_4375 | 5.54882  |                                                                                  |
| 12 | 110176005 | 110176365 | 5Y-H4K8ac_peak_4376 | 4.642    |                                                                                  |
| 12 | 110196831 | 110197102 | 5Y-H4K8ac_peak_4377 | 4.15658  |                                                                                  |
| 12 | 110198191 | 110198383 | 5Y-H4K8ac_peak_4378 | 8.63295  |                                                                                  |
| 12 | 110283030 | 110283572 | 5Y-H4K8ac_peak_4379 | 7.31815  |                                                                                  |
| 12 | 110318599 | 110318792 | 5Y-H4K8ac_peak_4380 | 5.72848  | RP1-7G5.6_ENSG00000249094                                                        |
| 12 | 110338070 | 110338426 | 5Y-H4K8ac_peak_4381 | 10.90543 | TCHP_ENSG00000139437                                                             |
| 12 | 110562268 | 110562476 | 5Y-H4K8ac_peak_4382 | 5.64909  | IFT81_ENSG00000122970                                                            |
| 12 | 110719470 | 110719724 | 5Y-H4K8ac_peak_4383 | 10.19948 | ATP2A2_ENSG00000174437                                                           |
| 12 | 110887766 | 110888070 | 5Y-H4K8ac_peak_4384 | 11.86504 | ARPC3_ENSG00000111229                                                            |
| 12 | 110906711 | 110906918 | 5Y-H4K8ac_peak_4385 | 7.64648  | GPN3_ENSG00000111231;FAM216A_ENSG00000204856                                     |
| 12 | 110940126 | 110940350 | 5Y-H4K8ac_peak_4386 | 4.15658  | VPS29_ENSG00000111237;RAD9B_ENSG00000151164                                      |
| 12 | 111137559 | 111137901 | 5Y-H4K8ac_peak_4387 | 9.15007  |                                                                                  |
| 12 | 111181431 | 111181666 | 5Y-H4K8ac_peak_4388 | 6.73385  | PPP1CC_ENSG00000186298                                                           |
| 12 | 111472054 | 111472854 | 5Y-H4K8ac_peak_4389 | 8.43511  | CUX2_ENSG00000111249                                                             |
| 12 | 111474093 | 111474312 | 5Y-H4K8ac_peak_4390 | 5.65584  |                                                                                  |
| 12 | 111497334 | 111497615 | 5Y-H4K8ac_peak_4391 | 7.31807  |                                                                                  |
| 12 | 111498490 | 111498685 | 5Y-H4K8ac_peak_4392 | 6.50117  |                                                                                  |
| 12 | 111616758 | 111617834 | 5Y-H4K8ac_peak_4393 | 12.64868 |                                                                                  |
| 12 | 111620083 | 111620378 | 5Y-H4K8ac_peak_4394 | 6.08523  |                                                                                  |
| 12 | 111621088 | 111621361 | 5Y-H4K8ac_peak_4395 | 4.31078  |                                                                                  |
| 12 | 111623976 | 111624502 | 5Y-H4K8ac_peak_4396 | 7.43638  |                                                                                  |
| 12 | 111639230 | 111639444 | 5Y-H4K8ac_peak_4397 | 9.80622  |                                                                                  |
| 12 | 111641666 | 111642218 | 5Y-H4K8ac_peak_4398 | 16.78315 |                                                                                  |
| 12 | 111645763 | 111645958 | 5Y-H4K8ac_peak_4399 | 6.20989  |                                                                                  |
| 12 | 111646934 | 111647530 | 5Y-H4K8ac_peak_4400 | 6.52593  |                                                                                  |
| 12 | 111663203 | 111663475 | 5Y-H4K8ac_peak_4401 | 5.65584  |                                                                                  |
| 12 | 111867576 | 111868028 | 5Y-H4K8ac_peak_4402 | 7.4047   |                                                                                  |
| 12 | 111882833 | 111883058 | 5Y-H4K8ac_peak_4403 | 5.449    |                                                                                  |
| 12 | 112036736 | 112037404 | 5Y-H4K8ac_peak_4404 | 17.76126 | ATXN2_ENSG00000204842;RP11-686G8.2_ENSG00000258099                               |
| 12 | 112279335 | 112279587 | 5Y-H4K8ac_peak_4405 | 7.64675  | AC003029.1_ENSG00000248594;MAPKAPK5_ENSG00000089022                              |
| 12 | 112279868 | 112280668 | 5Y-H4K8ac_peak_4406 | 12.21176 | MAPKAPK5-AS1_ENSG00000234608;AC003029.1_ENSG00000248594;MAPKAPK5_ENSG00000089022 |
| 12 | 112450418 | 112450827 | 5Y-H4K8ac_peak_4407 | 10.54764 | TMEM116_ENSG00000198270;ERP29_ENSG00000089248                                    |
| 12 | 112451280 | 112451575 | 5Y-H4K8ac_peak_4408 | 13.61292 | TMEM116_ENSG00000198270;ERP29_ENSG00000089248                                    |
| 12 | 112553919 | 112554357 | 5Y-H4K8ac_peak_4409 | 5.91107  |                                                                                  |
| 12 | 112846627 | 112847359 | 5Y-H4K8ac_peak_4410 | 5.87725  |                                                                                  |
| 12 | 112856759 | 112857021 | 5Y-H4K8ac_peak_4411 | 12.06963 | RPL6_ENSG00000089009;PTPN11_ENSG00000179295                                      |
| 12 | 113246288 | 113246721 | 5Y-H4K8ac_peak_4412 | 7.59101  |                                                                                  |
| 12 | 113247617 | 113248106 | 5Y-H4K8ac_peak_4413 | 5.23083  |                                                                                  |
| 12 | 113252583 | 113253263 | 5Y-H4K8ac_peak_4414 | 8.2913   |                                                                                  |

|    |           |           |                     |          |                                                      |
|----|-----------|-----------|---------------------|----------|------------------------------------------------------|
| 12 | 113262582 | 113262805 | 5Y-H4K8ac_peak_4415 | 5.449    |                                                      |
| 12 | 113494482 | 113495133 | 5Y-H4K8ac_peak_4416 | 11.09973 | DTX1_ENSG00000135144                                 |
| 12 | 113554855 | 113555113 | 5Y-H4K8ac_peak_4417 | 7.93065  |                                                      |
| 12 | 113568321 | 113568588 | 5Y-H4K8ac_peak_4418 | 6.43775  |                                                      |
| 12 | 113622847 | 113623518 | 5Y-H4K8ac_peak_4419 | 12.10416 | DDX54_ENSG00000123064;RITA1_ENSG00000139405          |
| 12 | 113683136 | 113683525 | 5Y-H4K8ac_peak_4420 | 9.63153  |                                                      |
| 12 | 113684242 | 113684912 | 5Y-H4K8ac_peak_4421 | 9.51254  |                                                      |
| 12 | 114203767 | 114204100 | 5Y-H4K8ac_peak_4422 | 10.15101 |                                                      |
| 12 | 114403724 | 114403966 | 5Y-H4K8ac_peak_4423 | 9.7353   | RBM19_ENSG00000122965                                |
| 12 | 115112136 | 115112463 | 5Y-H4K8ac_peak_4424 | 5.04571  |                                                      |
| 12 | 115122488 | 115122802 | 5Y-H4K8ac_peak_4425 | 6.75784  | TBX3_ENSG00000135111                                 |
| 12 | 115450585 | 115450954 | 5Y-H4K8ac_peak_4426 | 8.59175  |                                                      |
| 12 | 115451151 | 115451423 | 5Y-H4K8ac_peak_4427 | 5.29015  |                                                      |
| 12 | 115648918 | 115649125 | 5Y-H4K8ac_peak_4428 | 6.07082  |                                                      |
| 12 | 116715757 | 116716119 | 5Y-H4K8ac_peak_4429 | 8.43511  | MED13L_ENSG00000123066                               |
| 12 | 117131293 | 117131677 | 5Y-H4K8ac_peak_4430 | 5.89113  |                                                      |
| 12 | 117256808 | 117257229 | 5Y-H4K8ac_peak_4431 | 8.43511  |                                                      |
| 12 | 117348855 | 117349149 | 5Y-H4K8ac_peak_4432 | 16.27715 | FBXW8_ENSG00000174989                                |
| 12 | 117408047 | 117408268 | 5Y-H4K8ac_peak_4433 | 8.43511  |                                                      |
| 12 | 117483371 | 117483689 | 5Y-H4K8ac_peak_4434 | 5.24695  |                                                      |
| 12 | 117537093 | 117537806 | 5Y-H4K8ac_peak_4435 | 5.87725  | TESC_ENSG00000088992;RP11-103B5.2_ENSG00000258285    |
| 12 | 117846094 | 117846354 | 5Y-H4K8ac_peak_4436 | 10.27264 |                                                      |
| 12 | 117876679 | 117877743 | 5Y-H4K8ac_peak_4437 | 11.1169  |                                                      |
| 12 | 117930126 | 117930352 | 5Y-H4K8ac_peak_4438 | 8.63306  |                                                      |
| 12 | 118541361 | 118542201 | 5Y-H4K8ac_peak_4439 | 10.89622 |                                                      |
| 12 | 118763555 | 118763812 | 5Y-H4K8ac_peak_4440 | 4.51076  |                                                      |
| 12 | 119446828 | 119447239 | 5Y-H4K8ac_peak_4441 | 9.68432  |                                                      |
| 12 | 119511326 | 119511545 | 5Y-H4K8ac_peak_4442 | 8.21582  |                                                      |
| 12 | 119616396 | 119616863 | 5Y-H4K8ac_peak_4443 | 5.65584  | HSPB8_ENSG00000152137                                |
| 12 | 120105799 | 120106027 | 5Y-H4K8ac_peak_4444 | 9.30505  | RP11-768F21.1_ENSG00000248636;PRKAB1_ENSG00000111725 |
| 12 | 120314819 | 120315016 | 5Y-H4K8ac_peak_4445 | 9.38276  | CIT_ENSG00000122966                                  |
| 12 | 120531002 | 120531372 | 5Y-H4K8ac_peak_4446 | 12.24654 |                                                      |
| 12 | 120554772 | 120555147 | 5Y-H4K8ac_peak_4447 | 8.8021   | RAB35_ENSG00000111737                                |
| 12 | 120632158 | 120633133 | 5Y-H4K8ac_peak_4448 | 12.50545 | GCN1L1_ENSG00000089154                               |
| 12 | 120654856 | 120655199 | 5Y-H4K8ac_peak_4449 | 7.24844  |                                                      |
| 12 | 120668155 | 120668392 | 5Y-H4K8ac_peak_4450 | 8.43511  |                                                      |
| 12 | 120799161 | 120799626 | 5Y-H4K8ac_peak_4451 | 6.98416  |                                                      |
| 12 | 120799847 | 120800401 | 5Y-H4K8ac_peak_4452 | 9.87097  |                                                      |
| 12 | 120807123 | 120807483 | 5Y-H4K8ac_peak_4453 | 16.19089 | MSI1_ENSG00000135097;RPS27P25_ENSG00000239881        |
| 12 | 120884280 | 120884585 | 5Y-H4K8ac_peak_4454 | 11.22005 | TRIAP1_ENSG00000170855;GATC_ENSG00000257218          |
| 12 | 120907247 | 120907482 | 5Y-H4K8ac_peak_4455 | 15.45397 | SRSF9_ENSG00000111786;DYNLL1_ENSG00000088986         |
| 12 | 121022405 | 121022603 | 5Y-H4K8ac_peak_4456 | 5.93823  |                                                      |
| 12 | 121079161 | 121079417 | 5Y-H4K8ac_peak_4457 | 5.65584  | RP11-728G15.1_ENSG00000256008;CABP1_ENSG00000157782  |
| 12 | 121124422 | 121124625 | 5Y-H4K8ac_peak_4458 | 6.54441  | MLEC_ENSG00000110917                                 |
| 12 | 121163671 | 121163872 | 5Y-H4K8ac_peak_4459 | 7.89142  | ACADS_ENSG00000122971                                |
| 12 | 121342349 | 121342540 | 5Y-H4K8ac_peak_4460 | 7.41172  | SPPL3_ENSG00000157837                                |

|    |           |           |                     |          |                                                                        |
|----|-----------|-----------|---------------------|----------|------------------------------------------------------------------------|
| 12 | 121453611 | 121453823 | 5Y-H4K8ac_peak_4461 | 9.05168  | C12orf43_ENSG00000157895                                               |
| 12 | 121571101 | 121571320 | 5Y-H4K8ac_peak_4462 | 11.86504 | P2RX7_ENSG00000089041                                                  |
| 12 | 121648043 | 121648435 | 5Y-H4K8ac_peak_4463 | 13.4304  | P2RX4_ENSG00000135124                                                  |
| 12 | 121734897 | 121735521 | 5Y-H4K8ac_peak_4464 | 7.65114  | CAMKK2_ENSG00000110931                                                 |
| 12 | 121838058 | 121838309 | 5Y-H4K8ac_peak_4465 | 6.73385  | ANAPC5_ENSG00000089053;RNF34_ENSG00000170633                           |
| 12 | 121904296 | 121904517 | 5Y-H4K8ac_peak_4466 | 8.63306  |                                                                        |
| 12 | 121905472 | 121905809 | 5Y-H4K8ac_peak_4467 | 7.59101  |                                                                        |
| 12 | 121976054 | 121976416 | 5Y-H4K8ac_peak_4468 | 5.99504  |                                                                        |
| 12 | 122016994 | 122017486 | 5Y-H4K8ac_peak_4469 | 13.22169 |                                                                        |
| 12 | 122110749 | 122111256 | 5Y-H4K8ac_peak_4470 | 6.77436  | MORN3_ENSG00000139714                                                  |
| 12 | 122119720 | 122119939 | 5Y-H4K8ac_peak_4471 | 8.21582  |                                                                        |
| 12 | 122125229 | 122125724 | 5Y-H4K8ac_peak_4472 | 16.50659 |                                                                        |
| 12 | 122204659 | 122205273 | 5Y-H4K8ac_peak_4473 | 8.66584  |                                                                        |
| 12 | 122231309 | 122231520 | 5Y-H4K8ac_peak_4474 | 6.77436  |                                                                        |
| 12 | 122237720 | 122239385 | 5Y-H4K8ac_peak_4475 | 20.25522 |                                                                        |
| 12 | 122239722 | 122239957 | 5Y-H4K8ac_peak_4476 | 4.63981  |                                                                        |
| 12 | 122241850 | 122242155 | 5Y-H4K8ac_peak_4477 | 11.8513  | SETD1B_ENSG00000139718;RHOF_ENSG00000139725;AC084018.1_ENSG00000212694 |
| 12 | 122249543 | 122249756 | 5Y-H4K8ac_peak_4478 | 4.50834  |                                                                        |
| 12 | 122279009 | 122279244 | 5Y-H4K8ac_peak_4479 | 6.20989  |                                                                        |
| 12 | 122310807 | 122311296 | 5Y-H4K8ac_peak_4480 | 8.55081  |                                                                        |
| 12 | 122326127 | 122326332 | 5Y-H4K8ac_peak_4481 | 9.15977  | PSMD9_ENSG00000110801;RP11-87C12.2_ENSG00000256950                     |
| 12 | 122459304 | 122459674 | 5Y-H4K8ac_peak_4482 | 5.03564  |                                                                        |
| 12 | 122667804 | 122668148 | 5Y-H4K8ac_peak_4483 | 13.85283 |                                                                        |
| 12 | 122712088 | 122712416 | 5Y-H4K8ac_peak_4484 | 4.91235  | DIABLO_ENSG00000184047                                                 |
| 12 | 122713452 | 122713809 | 5Y-H4K8ac_peak_4485 | 9.23159  |                                                                        |
| 12 | 122750669 | 122750917 | 5Y-H4K8ac_peak_4486 | 9.01738  | RP11-512M8.5_ENSG00000256861;VPS33A_ENSG00000139719                    |
| 12 | 122906568 | 122906983 | 5Y-H4K8ac_peak_4487 | 9.89244  | CLIP1_ENSG00000130779                                                  |
| 12 | 122985123 | 122985339 | 5Y-H4K8ac_peak_4488 | 5.64909  | ZCCHC8_ENSG00000033030                                                 |
| 12 | 122986513 | 122986706 | 5Y-H4K8ac_peak_4489 | 4.93237  | ZCCHC8_ENSG00000033030                                                 |
| 12 | 123237417 | 123237679 | 5Y-H4K8ac_peak_4490 | 8.93923  | DENR_ENSG00000139726                                                   |
| 12 | 123258977 | 123259352 | 5Y-H4K8ac_peak_4491 | 6.50117  | CCDC62_ENSG00000130783                                                 |
| 12 | 123356448 | 123356656 | 5Y-H4K8ac_peak_4492 | 6.73047  |                                                                        |
| 12 | 123380816 | 123381043 | 5Y-H4K8ac_peak_4493 | 5.8635   | VPS37B_ENSG00000139722                                                 |
| 12 | 123459414 | 123459680 | 5Y-H4K8ac_peak_4494 | 8.75963  | OGFOD2_ENSG00000111325;RP11-197N18.2_ENSG00000256028                   |
| 12 | 123465290 | 123465833 | 5Y-H4K8ac_peak_4495 | 9.66296  | ABCB9_ENSG00000150967;ARL6IP4_ENSG00000182196                          |
| 12 | 123634853 | 123635197 | 5Y-H4K8ac_peak_4496 | 4.15658  | PITPNM2_ENSG00000090975                                                |
| 12 | 123718051 | 123718309 | 5Y-H4K8ac_peak_4497 | 11.68317 | C12orf65_ENSG00000130921                                               |
| 12 | 123752335 | 123754098 | 5Y-H4K8ac_peak_4498 | 14.43262 |                                                                        |
| 12 | 123754459 | 123754862 | 5Y-H4K8ac_peak_4499 | 11.98202 |                                                                        |
| 12 | 123755179 | 123755505 | 5Y-H4K8ac_peak_4500 | 5.24695  |                                                                        |
| 12 | 123755819 | 123756634 | 5Y-H4K8ac_peak_4501 | 12.11208 | CDK2AP1_ENSG00000111328                                                |
| 12 | 123920764 | 123921119 | 5Y-H4K8ac_peak_4502 | 4.95697  | RILPL2_ENSG00000150977                                                 |
| 12 | 123942814 | 123943094 | 5Y-H4K8ac_peak_4503 | 6.22669  | SNRNP35_ENSG00000184209                                                |
| 12 | 123946353 | 123946614 | 5Y-H4K8ac_peak_4504 | 4.50834  |                                                                        |
| 12 | 124017727 | 124018078 | 5Y-H4K8ac_peak_4505 | 7.42477  | RILPL1_ENSG00000188026                                                 |
| 12 | 124018403 | 124018863 | 5Y-H4K8ac_peak_4506 | 6.37023  | RILPL1_ENSG00000188026                                                 |

|    |           |           |                     |          |                                                                                                     |
|----|-----------|-----------|---------------------|----------|-----------------------------------------------------------------------------------------------------|
| 12 | 124055519 | 124055729 | 5Y-H4K8ac_peak_4507 | 5.23083  |                                                                                                     |
| 12 | 124086353 | 124086556 | 5Y-H4K8ac_peak_4508 | 7.29055  | DDX55_ENSG00000111364                                                                               |
| 12 | 124086848 | 124087053 | 5Y-H4K8ac_peak_4509 | 8.5915   | DDX55_ENSG00000111364                                                                               |
| 12 | 124456874 | 124457117 | 5Y-H4K8ac_peak_4510 | 6.64195  | CCDC92_ENSG00000119242;RP11-214K3.18_ENSG00000270095;ZNF664_ENSG00000179195;FAM101A_ENSG00000178882 |
| 12 | 124773801 | 124774247 | 5Y-H4K8ac_peak_4511 | 7.58806  |                                                                                                     |
| 12 | 124854279 | 124854808 | 5Y-H4K8ac_peak_4512 | 8.24461  |                                                                                                     |
| 12 | 124876923 | 124877359 | 5Y-H4K8ac_peak_4513 | 5.60566  |                                                                                                     |
| 12 | 124878404 | 124878652 | 5Y-H4K8ac_peak_4514 | 9.24789  |                                                                                                     |
| 12 | 124881125 | 124881322 | 5Y-H4K8ac_peak_4515 | 9.32595  |                                                                                                     |
| 12 | 124895181 | 124895432 | 5Y-H4K8ac_peak_4516 | 7.01266  |                                                                                                     |
| 12 | 124907453 | 124907839 | 5Y-H4K8ac_peak_4517 | 19.11901 |                                                                                                     |
| 12 | 124911772 | 124912430 | 5Y-H4K8ac_peak_4518 | 9.08389  |                                                                                                     |
| 12 | 124913919 | 124914309 | 5Y-H4K8ac_peak_4519 | 8.04693  |                                                                                                     |
| 12 | 124989776 | 124990122 | 5Y-H4K8ac_peak_4520 | 6.50117  |                                                                                                     |
| 12 | 124990319 | 124990877 | 5Y-H4K8ac_peak_4521 | 10.93537 |                                                                                                     |
| 12 | 124992020 | 124992344 | 5Y-H4K8ac_peak_4522 | 7.64648  |                                                                                                     |
| 12 | 124994559 | 124995399 | 5Y-H4K8ac_peak_4523 | 8.69112  |                                                                                                     |
| 12 | 125021989 | 125022332 | 5Y-H4K8ac_peak_4524 | 5.23819  |                                                                                                     |
| 12 | 125023867 | 125024182 | 5Y-H4K8ac_peak_4525 | 4.95697  |                                                                                                     |
| 12 | 125028009 | 125028467 | 5Y-H4K8ac_peak_4526 | 5.77617  |                                                                                                     |
| 12 | 125041060 | 125041279 | 5Y-H4K8ac_peak_4527 | 5.03335  |                                                                                                     |
| 12 | 125051773 | 125051971 | 5Y-H4K8ac_peak_4528 | 8.43511  | NCOR2_ENSG00000196498                                                                               |
| 12 | 125053429 | 125053970 | 5Y-H4K8ac_peak_4529 | 9.7353   |                                                                                                     |
| 12 | 125066637 | 125066885 | 5Y-H4K8ac_peak_4530 | 6.6946   |                                                                                                     |
| 12 | 125087539 | 125088464 | 5Y-H4K8ac_peak_4531 | 11.22005 |                                                                                                     |
| 12 | 125088736 | 125089300 | 5Y-H4K8ac_peak_4532 | 5.98695  |                                                                                                     |
| 12 | 125089688 | 125089973 | 5Y-H4K8ac_peak_4533 | 4.95697  |                                                                                                     |
| 12 | 125139236 | 125139696 | 5Y-H4K8ac_peak_4534 | 11.05822 |                                                                                                     |
| 12 | 125140277 | 125140937 | 5Y-H4K8ac_peak_4535 | 9.96543  |                                                                                                     |
| 12 | 125158682 | 125159232 | 5Y-H4K8ac_peak_4536 | 8.43511  |                                                                                                     |
| 12 | 125166060 | 125166429 | 5Y-H4K8ac_peak_4537 | 5.75508  |                                                                                                     |
| 12 | 125198111 | 125198333 | 5Y-H4K8ac_peak_4538 | 9.15007  |                                                                                                     |
| 12 | 125199837 | 125200047 | 5Y-H4K8ac_peak_4539 | 9.15007  |                                                                                                     |
| 12 | 125204584 | 125204994 | 5Y-H4K8ac_peak_4540 | 10.07308 |                                                                                                     |
| 12 | 125226912 | 125227438 | 5Y-H4K8ac_peak_4541 | 11.12941 |                                                                                                     |
| 12 | 125230300 | 125230578 | 5Y-H4K8ac_peak_4542 | 12.20141 |                                                                                                     |
| 12 | 125270639 | 125271144 | 5Y-H4K8ac_peak_4543 | 7.63144  |                                                                                                     |
| 12 | 125318570 | 125319022 | 5Y-H4K8ac_peak_4544 | 4.50834  |                                                                                                     |
| 12 | 125326371 | 125327540 | 5Y-H4K8ac_peak_4545 | 13.29029 |                                                                                                     |
| 12 | 125348634 | 125349209 | 5Y-H4K8ac_peak_4546 | 9.96543  |                                                                                                     |
| 12 | 125383123 | 125383338 | 5Y-H4K8ac_peak_4547 | 5.65584  |                                                                                                     |
| 12 | 125398994 | 125399669 | 5Y-H4K8ac_peak_4548 | 12.84845 | MIR5188_ENSG00000265345                                                                             |
| 12 | 125474062 | 125474301 | 5Y-H4K8ac_peak_4549 | 6.27984  | DHX37_ENSG00000150990                                                                               |
| 12 | 125477639 | 125477914 | 5Y-H4K8ac_peak_4550 | 4.69231  | BRI3BP_ENSG00000184992                                                                              |
| 12 | 125478294 | 125478793 | 5Y-H4K8ac_peak_4551 | 9.34555  | BRI3BP_ENSG00000184992                                                                              |
| 12 | 125479083 | 125479306 | 5Y-H4K8ac_peak_4552 | 8.2913   | BRI3BP_ENSG00000184992                                                                              |

|    |           |           |                     |          |                                                                                                   |
|----|-----------|-----------|---------------------|----------|---------------------------------------------------------------------------------------------------|
| 12 | 127630780 | 127631184 | 5Y-H4K8ac_peak_4553 | 13.64163 | RP11-575F12.2_ENSG00000256001                                                                     |
| 12 | 129308756 | 129308979 | 5Y-H4K8ac_peak_4554 | 6.64195  | SLC15A4_ENSG00000139370                                                                           |
| 12 | 129309222 | 129309423 | 5Y-H4K8ac_peak_4555 | 3.96434  | SLC15A4_ENSG00000139370                                                                           |
| 12 | 130875357 | 130875829 | 5Y-H4K8ac_peak_4556 | 4.95697  |                                                                                                   |
| 12 | 130969008 | 130969243 | 5Y-H4K8ac_peak_4557 | 5.65584  |                                                                                                   |
| 12 | 131041698 | 131042111 | 5Y-H4K8ac_peak_4558 | 7.89142  |                                                                                                   |
| 12 | 131056838 | 131057055 | 5Y-H4K8ac_peak_4559 | 6.22669  |                                                                                                   |
| 12 | 131061155 | 131061555 | 5Y-H4K8ac_peak_4560 | 9.52603  |                                                                                                   |
| 12 | 131104516 | 131104918 | 5Y-H4K8ac_peak_4561 | 12.69256 |                                                                                                   |
| 12 | 131105400 | 131105603 | 5Y-H4K8ac_peak_4562 | 8.24461  |                                                                                                   |
| 12 | 131118204 | 131118691 | 5Y-H4K8ac_peak_4563 | 8.2913   |                                                                                                   |
| 12 | 131170600 | 131170988 | 5Y-H4K8ac_peak_4564 | 6.08523  |                                                                                                   |
| 12 | 131356087 | 131356314 | 5Y-H4K8ac_peak_4565 | 7.89273  | RAN_ENSG00000132341                                                                               |
| 12 | 131356782 | 131357228 | 5Y-H4K8ac_peak_4566 | 7.89273  | RAN_ENSG00000132341                                                                               |
| 12 | 131436254 | 131436670 | 5Y-H4K8ac_peak_4567 | 7.04637  |                                                                                                   |
| 12 | 131714016 | 131714218 | 5Y-H4K8ac_peak_4568 | 7.76232  |                                                                                                   |
| 12 | 131714802 | 131715162 | 5Y-H4K8ac_peak_4569 | 4.84727  |                                                                                                   |
| 12 | 131851931 | 131852442 | 5Y-H4K8ac_peak_4570 | 11.43902 | RP13-507P19.1_ENSG00000256484                                                                     |
| 12 | 131852957 | 131853157 | 5Y-H4K8ac_peak_4571 | 8.43511  |                                                                                                   |
| 12 | 131871895 | 131872143 | 5Y-H4K8ac_peak_4572 | 6.50117  |                                                                                                   |
| 12 | 131872786 | 131873032 | 5Y-H4K8ac_peak_4573 | 7.24844  |                                                                                                   |
| 12 | 131930806 | 131930997 | 5Y-H4K8ac_peak_4574 | 4.84727  |                                                                                                   |
| 12 | 131939825 | 131940131 | 5Y-H4K8ac_peak_4575 | 6.77436  |                                                                                                   |
| 12 | 132040477 | 132040722 | 5Y-H4K8ac_peak_4576 | 8.2913   |                                                                                                   |
| 12 | 132058737 | 132059150 | 5Y-H4K8ac_peak_4577 | 5.77617  |                                                                                                   |
| 12 | 132124128 | 132124362 | 5Y-H4K8ac_peak_4578 | 9.30505  |                                                                                                   |
| 12 | 132124846 | 132125151 | 5Y-H4K8ac_peak_4579 | 10.39333 |                                                                                                   |
| 12 | 132125918 | 132126261 | 5Y-H4K8ac_peak_4580 | 8.3285   |                                                                                                   |
| 12 | 132194961 | 132196186 | 5Y-H4K8ac_peak_4581 | 12.19856 | SFSWAP_ENSG00000061936                                                                            |
| 12 | 132314824 | 132315642 | 5Y-H4K8ac_peak_4582 | 7.89273  |                                                                                                   |
| 12 | 132318295 | 132318700 | 5Y-H4K8ac_peak_4583 | 7.92287  |                                                                                                   |
| 12 | 132336910 | 132337357 | 5Y-H4K8ac_peak_4584 | 6.14981  |                                                                                                   |
| 12 | 132345327 | 132345668 | 5Y-H4K8ac_peak_4585 | 16.67379 |                                                                                                   |
| 12 | 132433930 | 132434167 | 5Y-H4K8ac_peak_4586 | 12.11208 | EP400_ENSG00000183495                                                                             |
| 12 | 132434600 | 132434881 | 5Y-H4K8ac_peak_4587 | 11.04542 | EP400_ENSG00000183495                                                                             |
| 12 | 133136705 | 133137791 | 5Y-H4K8ac_peak_4588 | 5.64909  |                                                                                                   |
| 12 | 133180623 | 133180833 | 5Y-H4K8ac_peak_4589 | 4.83834  |                                                                                                   |
| 12 | 133264219 | 133264520 | 5Y-H4K8ac_peak_4590 | 7.34185  | POLE_ENSG00000177084;PXMP2_ENSG00000176894;RP13-672B3.2_ENSG00000256632                           |
| 12 | 133337885 | 133338378 | 5Y-H4K8ac_peak_4591 | 13.76914 | ANKLE2_ENSG00000176915                                                                            |
| 12 | 133338569 | 133339124 | 5Y-H4K8ac_peak_4592 | 5.98695  | ANKLE2_ENSG00000176915                                                                            |
| 12 | 133405904 | 133406191 | 5Y-H4K8ac_peak_4593 | 4.95697  | GOLGA3_ENSG00000090615                                                                            |
| 12 | 133464524 | 133465009 | 5Y-H4K8ac_peak_4594 | 7.65114  | RP11-46H11.12_ENSG00000236617                                                                     |
| 12 | 133706503 | 133706861 | 5Y-H4K8ac_peak_4595 | 12.26819 | ZNF891_ENSG00000214029;ZNF10_ENSG00000256223;ZNF268_ENSG00000090612;CTD-2140B24.4_ENSG00000256825 |
| 12 | 133758223 | 133758455 | 5Y-H4K8ac_peak_4596 | 5.23819  |                                                                                                   |
| 13 | 20176107  | 20176812  | 5Y-H4K8ac_peak_4597 | 8.79957  |                                                                                                   |
| 13 | 20356618  | 20356908  | 5Y-H4K8ac_peak_4598 | 7.59101  | PSPC1_ENSG00000121390                                                                             |



|    |          |          |                     |          |                                                     |
|----|----------|----------|---------------------|----------|-----------------------------------------------------|
| 13 | 20357284 | 20357732 | 5Y-H4K8ac_peak_4599 | 11.1169  | PSPC1_ENSG00000121390                               |
| 13 | 20438087 | 20439293 | 5Y-H4K8ac_peak_4600 | 15.82359 | ZMYM5_ENSG00000132950                               |
| 13 | 20531739 | 20532336 | 5Y-H4K8ac_peak_4601 | 18.78631 | ZMYM2_ENSG00000121741                               |
| 13 | 20533429 | 20533844 | 5Y-H4K8ac_peak_4602 | 9.38203  | ZMYM2_ENSG00000121741                               |
| 13 | 20692475 | 20692813 | 5Y-H4K8ac_peak_4603 | 6.43775  |                                                     |
| 13 | 21099643 | 21099903 | 5Y-H4K8ac_peak_4604 | 6.50117  | CRYL1_ENSG00000165475                               |
| 13 | 21277174 | 21277433 | 5Y-H4K8ac_peak_4605 | 6.43775  | IL17D_ENSG00000172458;AL161772.1_ENSG00000265710    |
| 13 | 21347457 | 21347874 | 5Y-H4K8ac_peak_4606 | 7.90751  | N6AMT2_ENSG00000150456                              |
| 13 | 21348311 | 21348547 | 5Y-H4K8ac_peak_4607 | 4.50834  | N6AMT2_ENSG00000150456                              |
| 13 | 21476594 | 21477336 | 5Y-H4K8ac_peak_4608 | 17.63051 | XPO4_ENSG00000132953                                |
| 13 | 21750844 | 21751256 | 5Y-H4K8ac_peak_4609 | 7.59101  | SKA3_ENSG00000165480;MRP63_ENSG00000173141          |
| 13 | 22177996 | 22178247 | 5Y-H4K8ac_peak_4610 | 10.19948 | MICU2_ENSG00000165487                               |
| 13 | 24040339 | 24040982 | 5Y-H4K8ac_peak_4611 | 12.0443  | LINC00327_ENSG00000232977                           |
| 13 | 25080913 | 25081127 | 5Y-H4K8ac_peak_4612 | 5.93823  |                                                     |
| 13 | 25086530 | 25087294 | 5Y-H4K8ac_peak_4613 | 8.2913   | PARP4_ENSG00000102699                               |
| 13 | 25875020 | 25875471 | 5Y-H4K8ac_peak_4614 | 17.56739 | RP11-271M24.2_ENSG00000260509;NUPL1_ENSG00000139496 |
| 13 | 26547982 | 26548317 | 5Y-H4K8ac_peak_4615 | 6.34046  |                                                     |
| 13 | 26548666 | 26548966 | 5Y-H4K8ac_peak_4616 | 4.84727  |                                                     |
| 13 | 26797017 | 26797247 | 5Y-H4K8ac_peak_4617 | 4.5753   | RNF6_ENSG00000127870                                |
| 13 | 26828035 | 26828504 | 5Y-H4K8ac_peak_4618 | 11.4254  | CDK8_ENSG00000132964                                |
| 13 | 27075019 | 27075275 | 5Y-H4K8ac_peak_4619 | 8.39058  |                                                     |
| 13 | 27131890 | 27132585 | 5Y-H4K8ac_peak_4620 | 9.30505  | WASF3_ENSG00000132970                               |
| 13 | 27137253 | 27137465 | 5Y-H4K8ac_peak_4621 | 4.74398  |                                                     |
| 13 | 27825839 | 27826194 | 5Y-H4K8ac_peak_4622 | 8.43511  | RPL21_ENSG00000122026                               |
| 13 | 28024405 | 28025280 | 5Y-H4K8ac_peak_4623 | 12.21176 | MTIF3_ENSG00000122033                               |
| 13 | 28713119 | 28713346 | 5Y-H4K8ac_peak_4624 | 5.98695  | PAN3-AS1_ENSG00000261485;PAN3_ENSG00000152520       |
| 13 | 29233383 | 29233617 | 5Y-H4K8ac_peak_4625 | 5.59843  | POMP_ENSG00000132963                                |
| 13 | 29329098 | 29329336 | 5Y-H4K8ac_peak_4626 | 7.59101  |                                                     |
| 13 | 30168900 | 30169743 | 5Y-H4K8ac_peak_4627 | 12.2918  | SLC7A1_ENSG00000139514                              |
| 13 | 30717404 | 30717607 | 5Y-H4K8ac_peak_4628 | 9.02782  |                                                     |
| 13 | 31038660 | 31038890 | 5Y-H4K8ac_peak_4629 | 7.76232  |                                                     |
| 13 | 31039702 | 31039969 | 5Y-H4K8ac_peak_4630 | 11.53136 |                                                     |
| 13 | 31248219 | 31248413 | 5Y-H4K8ac_peak_4631 | 9.23159  |                                                     |
| 13 | 31270481 | 31270692 | 5Y-H4K8ac_peak_4632 | 5.40331  |                                                     |
| 13 | 31384553 | 31384745 | 5Y-H4K8ac_peak_4633 | 4.79585  |                                                     |
| 13 | 31407878 | 31408107 | 5Y-H4K8ac_peak_4634 | 6.14981  |                                                     |
| 13 | 31457106 | 31457333 | 5Y-H4K8ac_peak_4635 | 6.77436  | LINC00545_ENSG00000236094                           |
| 13 | 31481577 | 31481767 | 5Y-H4K8ac_peak_4636 | 5.65584  |                                                     |
| 13 | 31572934 | 31573389 | 5Y-H4K8ac_peak_4637 | 4.642    |                                                     |
| 13 | 31618322 | 31618663 | 5Y-H4K8ac_peak_4638 | 4.40812  |                                                     |
| 13 | 31782909 | 31783279 | 5Y-H4K8ac_peak_4639 | 10.69698 |                                                     |
| 13 | 33160734 | 33161012 | 5Y-H4K8ac_peak_4640 | 10.46287 | PDS5B_ENSG00000083642                               |
| 13 | 33515522 | 33515749 | 5Y-H4K8ac_peak_4641 | 6.50117  |                                                     |
| 13 | 34459051 | 34459261 | 5Y-H4K8ac_peak_4642 | 8.33296  |                                                     |
| 13 | 34931950 | 34932143 | 5Y-H4K8ac_peak_4643 | 4.07874  |                                                     |
| 13 | 34993749 | 34994095 | 5Y-H4K8ac_peak_4644 | 6.14981  |                                                     |

|    |          |          |                     |          |                                                                               |
|----|----------|----------|---------------------|----------|-------------------------------------------------------------------------------|
| 13 | 36052486 | 36053059 | 5Y-H4K8ac_peak_4645 | 12.10416 |                                                                               |
| 13 | 36196211 | 36196421 | 5Y-H4K8ac_peak_4646 | 7.31815  |                                                                               |
| 13 | 36287873 | 36288095 | 5Y-H4K8ac_peak_4647 | 4.03329  |                                                                               |
| 13 | 36339623 | 36339819 | 5Y-H4K8ac_peak_4648 | 4.84727  |                                                                               |
| 13 | 36359101 | 36359791 | 5Y-H4K8ac_peak_4649 | 5.64909  |                                                                               |
| 13 | 36384818 | 36385147 | 5Y-H4K8ac_peak_4650 | 6.79955  |                                                                               |
| 13 | 36705794 | 36706066 | 5Y-H4K8ac_peak_4651 | 7.38046  | DCLK1_ENSG00000133083                                                         |
| 13 | 36871650 | 36872194 | 5Y-H4K8ac_peak_4652 | 9.15007  | SOHLH2_ENSG00000120669;CCDC169-SOHLH2_ENSG00000250709;CCDC169_ENSG00000242715 |
| 13 | 36920393 | 36920754 | 5Y-H4K8ac_peak_4653 | 15.82359 | SPG20OS_ENSG00000120664                                                       |
| 13 | 37493792 | 37494039 | 5Y-H4K8ac_peak_4654 | 5.40331  | SMAD9_ENSG00000120693                                                         |
| 13 | 37494395 | 37495001 | 5Y-H4K8ac_peak_4655 | 17.51157 | SMAD9_ENSG00000120693                                                         |
| 13 | 37574059 | 37574419 | 5Y-H4K8ac_peak_4656 | 12.1498  | ALG5_ENSG00000120697                                                          |
| 13 | 37574741 | 37575569 | 5Y-H4K8ac_peak_4657 | 6.43775  | ALG5_ENSG00000120697                                                          |
| 13 | 39611679 | 39612098 | 5Y-H4K8ac_peak_4658 | 9.23159  | PROSER1_ENSG00000120685;NHLRC3_ENSG00000188811                                |
| 13 | 41346209 | 41346462 | 5Y-H4K8ac_peak_4659 | 6.13909  | MRPS31_ENSG00000102738                                                        |
| 13 | 41363707 | 41364211 | 5Y-H4K8ac_peak_4660 | 6.77436  | SLC25A15_ENSG00000102743                                                      |
| 13 | 41496018 | 41496406 | 5Y-H4K8ac_peak_4661 | 8.33296  | TPTE2P5_ENSG00000168852;SUGT1P3_ENSG00000239827                               |
| 13 | 41768003 | 41768363 | 5Y-H4K8ac_peak_4662 | 12.21176 | KBTD7_ENSG00000120696                                                         |
| 13 | 42534807 | 42535754 | 5Y-H4K8ac_peak_4663 | 9.30505  | VWAS8_ENSG00000102763                                                         |
| 13 | 42614236 | 42614499 | 5Y-H4K8ac_peak_4664 | 6.37023  | DGKH_ENSG00000102780                                                          |
| 13 | 42622658 | 42623020 | 5Y-H4K8ac_peak_4665 | 5.56912  |                                                                               |
| 13 | 42845290 | 42846052 | 5Y-H4K8ac_peak_4666 | 10.79655 | AKAP11_ENSG00000023516                                                        |
| 13 | 44361302 | 44361603 | 5Y-H4K8ac_peak_4667 | 6.08471  | ENOX1_ENSG00000120658;RP11-168P13.1_ENSG00000270522                           |
| 13 | 44453100 | 44453623 | 5Y-H4K8ac_peak_4668 | 11.86504 | CCDC122_ENSG00000151773;LACC1_ENSG00000179630                                 |
| 13 | 44715857 | 44716054 | 5Y-H4K8ac_peak_4669 | 6.50117  | SMIM2-AS1_ENSG00000227258                                                     |
| 13 | 44846233 | 44846568 | 5Y-H4K8ac_peak_4670 | 6.50117  |                                                                               |
| 13 | 44905691 | 44905915 | 5Y-H4K8ac_peak_4671 | 7.58806  |                                                                               |
| 13 | 44946943 | 44947195 | 5Y-H4K8ac_peak_4672 | 5.03335  | SERP2_ENSG00000151778                                                         |
| 13 | 44947505 | 44948150 | 5Y-H4K8ac_peak_4673 | 13.61292 | SERP2_ENSG00000151778                                                         |
| 13 | 44977126 | 44977343 | 5Y-H4K8ac_peak_4674 | 6.50117  |                                                                               |
| 13 | 44978339 | 44979009 | 5Y-H4K8ac_peak_4675 | 9.30505  |                                                                               |
| 13 | 45151861 | 45152304 | 5Y-H4K8ac_peak_4676 | 15.80786 | TSC22D1_ENSG00000102804                                                       |
| 13 | 45308511 | 45308987 | 5Y-H4K8ac_peak_4677 | 6.78128  |                                                                               |
| 13 | 45504407 | 45504750 | 5Y-H4K8ac_peak_4678 | 4.90471  |                                                                               |
| 13 | 45563165 | 45563484 | 5Y-H4K8ac_peak_4679 | 8.28346  | NUFIP1_ENSG00000083635;GPALPP1_ENSG00000133114                                |
| 13 | 45694653 | 45694871 | 5Y-H4K8ac_peak_4680 | 9.15007  | GTF2F2_ENSG00000188342                                                        |
| 13 | 45914933 | 45915192 | 5Y-H4K8ac_peak_4681 | 10.69698 | TPT1_ENSG00000133112;RP11-290D2.6_ENSG00000273149;TPT1-AS1_ENSG00000170919    |
| 13 | 46039101 | 46039507 | 5Y-H4K8ac_peak_4682 | 11.68317 | COG3_ENSG00000136152                                                          |
| 13 | 46626486 | 46626804 | 5Y-H4K8ac_peak_4683 | 14.74967 | ZC3H13_ENSG00000123200;CPB2-AS1_ENSG00000235903                               |
| 13 | 47127929 | 47128128 | 5Y-H4K8ac_peak_4684 | 5.24695  | LRCH1_ENSG00000136141                                                         |
| 13 | 47187304 | 47187496 | 5Y-H4K8ac_peak_4685 | 6.79955  |                                                                               |
| 13 | 47203676 | 47204021 | 5Y-H4K8ac_peak_4686 | 6.77436  |                                                                               |
| 13 | 47323034 | 47323302 | 5Y-H4K8ac_peak_4687 | 6.39626  |                                                                               |
| 13 | 48574905 | 48575391 | 5Y-H4K8ac_peak_4688 | 6.08523  | SUCLA2-AS1_ENSG00000227848                                                    |
| 13 | 48668857 | 48669091 | 5Y-H4K8ac_peak_4689 | 13.60015 | MED4_ENSG00000136146                                                          |
| 13 | 48877250 | 48877581 | 5Y-H4K8ac_peak_4690 | 10.36926 | LINC00441_ENSG00000231473;RB1_ENSG00000139687                                 |

|    |          |          |                     |          |                                                       |
|----|----------|----------|---------------------|----------|-------------------------------------------------------|
| 13 | 49106975 | 49107200 | 5Y-H4K8ac_peak_4691 | 11.22005 | RCBTB2_ENSG00000136161                                |
| 13 | 49549798 | 49549989 | 5Y-H4K8ac_peak_4692 | 7.65114  | FNDC3A_ENSG00000102531                                |
| 13 | 50159860 | 50160153 | 5Y-H4K8ac_peak_4693 | 11.68317 | RCBTB1_ENSG00000136144                                |
| 13 | 50422356 | 50422572 | 5Y-H4K8ac_peak_4694 | 9.20645  |                                                       |
| 13 | 50570337 | 50570928 | 5Y-H4K8ac_peak_4695 | 10.42746 | TRIM13_ENSG00000204977;MIR3613_ENSG00000264864        |
| 13 | 50655512 | 50656009 | 5Y-H4K8ac_peak_4696 | 7.11863  | DLEU1_ENSG00000176124                                 |
| 13 | 50699009 | 50700358 | 5Y-H4K8ac_peak_4697 | 21.10958 | DLEU2_ENSG00000231607                                 |
| 13 | 51483977 | 51484615 | 5Y-H4K8ac_peak_4698 | 12.72376 | RNASEH2B-AS1_ENSG00000233672;RNASEH2B_ENSG00000136104 |
| 13 | 52026092 | 52026832 | 5Y-H4K8ac_peak_4699 | 12.11208 | INTS6-AS1_ENSG00000236778                             |
| 13 | 52027631 | 52028014 | 5Y-H4K8ac_peak_4700 | 8.2913   | INTS6_ENSG00000102786;RPS4XP16_ENSG00000224892        |
| 13 | 52157603 | 52157895 | 5Y-H4K8ac_peak_4701 | 5.64909  | WDFY2_ENSG00000139668                                 |
| 13 | 52194652 | 52194855 | 5Y-H4K8ac_peak_4702 | 4.84727  |                                                       |
| 13 | 52195363 | 52195608 | 5Y-H4K8ac_peak_4703 | 7.09444  |                                                       |
| 13 | 52207217 | 52207507 | 5Y-H4K8ac_peak_4704 | 8.39058  |                                                       |
| 13 | 52209107 | 52209349 | 5Y-H4K8ac_peak_4705 | 5.59843  |                                                       |
| 13 | 52311909 | 52312121 | 5Y-H4K8ac_peak_4706 | 5.87382  |                                                       |
| 13 | 52356252 | 52356451 | 5Y-H4K8ac_peak_4707 | 4.50834  |                                                       |
| 13 | 52361420 | 52361724 | 5Y-H4K8ac_peak_4708 | 18.54495 |                                                       |
| 13 | 52378037 | 52378247 | 5Y-H4K8ac_peak_4709 | 7.11863  | DHRS12_ENSG00000102796;RP11-327P2.5_ENSG00000231856   |
| 13 | 52378469 | 52378758 | 5Y-H4K8ac_peak_4710 | 5.23819  | DHRS12_ENSG00000102796;RP11-327P2.5_ENSG00000231856   |
| 13 | 52733292 | 52733682 | 5Y-H4K8ac_peak_4711 | 12.21176 | NEK3_ENSG00000136098                                  |
| 13 | 52769571 | 52769775 | 5Y-H4K8ac_peak_4712 | 4.07874  | MRPS31P5_ENSG00000243406                              |
| 13 | 53024368 | 53024708 | 5Y-H4K8ac_peak_4713 | 13.1133  | VPS36_ENSG00000136100                                 |
| 13 | 53029742 | 53029992 | 5Y-H4K8ac_peak_4714 | 7.63144  | CKAP2_ENSG00000136108                                 |
| 13 | 60218908 | 60219132 | 5Y-H4K8ac_peak_4715 | 10.46135 |                                                       |
| 13 | 60737678 | 60737955 | 5Y-H4K8ac_peak_4716 | 7.97699  | DIAPH3_ENSG00000139734                                |
| 13 | 60971094 | 60971292 | 5Y-H4K8ac_peak_4717 | 7.89273  | TDRD3_ENSG00000083544                                 |
| 13 | 71199021 | 71199226 | 5Y-H4K8ac_peak_4718 | 9.38203  |                                                       |
| 13 | 73301558 | 73301749 | 5Y-H4K8ac_peak_4719 | 7.89273  | MZT1_ENSG00000204899;BORA_ENSG00000136122             |
| 13 | 73355688 | 73355937 | 5Y-H4K8ac_peak_4720 | 8.93923  | DIS3_ENSG00000083520;PIBF1_ENSG00000083535            |
| 13 | 74339304 | 74339577 | 5Y-H4K8ac_peak_4721 | 6.90749  |                                                       |
| 13 | 74621440 | 74621668 | 5Y-H4K8ac_peak_4722 | 6.34046  |                                                       |
| 13 | 74708738 | 74709594 | 5Y-H4K8ac_peak_4723 | 15.17389 | KLF12_ENSG00000118922                                 |
| 13 | 74709827 | 74710073 | 5Y-H4K8ac_peak_4724 | 7.11863  |                                                       |
| 13 | 74862749 | 74863078 | 5Y-H4K8ac_peak_4725 | 5.56912  | RNY1P5_ENSG00000206617                                |
| 13 | 75129221 | 75129565 | 5Y-H4K8ac_peak_4726 | 6.43775  |                                                       |
| 13 | 75149600 | 75149885 | 5Y-H4K8ac_peak_4727 | 6.22669  |                                                       |
| 13 | 75150223 | 75150463 | 5Y-H4K8ac_peak_4728 | 3.96434  |                                                       |
| 13 | 75150720 | 75150959 | 5Y-H4K8ac_peak_4729 | 4.36976  |                                                       |
| 13 | 76209751 | 76210336 | 5Y-H4K8ac_peak_4730 | 12.21176 | RP11-173B14.5_ENSG00000261105                         |
| 13 | 76210940 | 76211158 | 5Y-H4K8ac_peak_4731 | 4.95697  | RP11-173B14.5_ENSG00000261105                         |
| 13 | 77459567 | 77459966 | 5Y-H4K8ac_peak_4732 | 5.98695  | KCTD12_ENSG00000178695;AC000403.1_ENSG00000264908     |
| 13 | 77600960 | 77601285 | 5Y-H4K8ac_peak_4733 | 11.1169  | FBXL3_ENSG00000005812                                 |
| 13 | 79057881 | 79058123 | 5Y-H4K8ac_peak_4734 | 7.17184  |                                                       |
| 13 | 79979943 | 79980149 | 5Y-H4K8ac_peak_4735 | 9.15007  | RBM26_ENSG00000139746;RBM26-AS1_ENSG00000227354       |
| 13 | 79980566 | 79980801 | 5Y-H4K8ac_peak_4736 | 8.69112  | RBM26_ENSG00000139746;RBM26-AS1_ENSG00000227354       |

|    |           |           |                     |          |                                                     |
|----|-----------|-----------|---------------------|----------|-----------------------------------------------------|
| 13 | 80054975  | 80055197  | 5Y-H4K8ac_peak_4737 | 8.93304  | NDFIP2-AS1_ENSG00000232132;NDFIP2_ENSG00000102471   |
| 13 | 80055557  | 80055852  | 5Y-H4K8ac_peak_4738 | 6.77436  | NDFIP2-AS1_ENSG00000232132;NDFIP2_ENSG00000102471   |
| 13 | 80232616  | 80233011  | 5Y-H4K8ac_peak_4739 | 9.38203  |                                                     |
| 13 | 80247492  | 80247761  | 5Y-H4K8ac_peak_4740 | 6.34046  |                                                     |
| 13 | 80250205  | 80250469  | 5Y-H4K8ac_peak_4741 | 8.33296  |                                                     |
| 13 | 80399922  | 80400116  | 5Y-H4K8ac_peak_4742 | 7.31815  |                                                     |
| 13 | 80408403  | 80408624  | 5Y-H4K8ac_peak_4743 | 8.33296  |                                                     |
| 13 | 86395188  | 86395500  | 5Y-H4K8ac_peak_4744 | 4.84727  |                                                     |
| 13 | 91079714  | 91080022  | 5Y-H4K8ac_peak_4745 | 4.84727  |                                                     |
| 13 | 91999982  | 92001309  | 5Y-H4K8ac_peak_4746 | 28.49394 | MIR17HG_ENSG00000215417                             |
| 13 | 92051115  | 92051585  | 5Y-H4K8ac_peak_4747 | 8.33296  | GPC5_ENSG00000179399                                |
| 13 | 92274181  | 92274377  | 5Y-H4K8ac_peak_4748 | 6.00388  |                                                     |
| 13 | 93879706  | 93880106  | 5Y-H4K8ac_peak_4749 | 7.87406  | GPC6_ENSG00000183098                                |
| 13 | 95202248  | 95202446  | 5Y-H4K8ac_peak_4750 | 6.53157  |                                                     |
| 13 | 95248806  | 95249324  | 5Y-H4K8ac_peak_4751 | 8.79957  | TGDS_ENSG00000088451                                |
| 13 | 95512573  | 95512793  | 5Y-H4K8ac_peak_4752 | 5.26353  |                                                     |
| 13 | 95953281  | 95953997  | 5Y-H4K8ac_peak_4753 | 5.98695  | ABCC4_ENSG00000125257                               |
| 13 | 96296389  | 96296658  | 5Y-H4K8ac_peak_4754 | 8.21582  | DZIP1_ENSG00000134874                               |
| 13 | 96328887  | 96329129  | 5Y-H4K8ac_peak_4755 | 7.31815  | DNAJC3-AS1_ENSG00000247400;DNAJC3_ENSG00000102580   |
| 13 | 96329561  | 96329798  | 5Y-H4K8ac_peak_4756 | 8.2913   | DNAJC3-AS1_ENSG00000247400;DNAJC3_ENSG00000102580   |
| 13 | 96705304  | 96705537  | 5Y-H4K8ac_peak_4757 | 7.58806  | UGGT2_ENSG00000102595                               |
| 13 | 97176842  | 97177050  | 5Y-H4K8ac_peak_4758 | 7.31815  |                                                     |
| 13 | 97450425  | 97450618  | 5Y-H4K8ac_peak_4759 | 7.31815  |                                                     |
| 13 | 98085888  | 98086126  | 5Y-H4K8ac_peak_4760 | 4.29586  | RAP2A_ENSG00000125249                               |
| 13 | 98627776  | 98628569  | 5Y-H4K8ac_peak_4761 | 14.81591 |                                                     |
| 13 | 98628938  | 98629318  | 5Y-H4K8ac_peak_4762 | 8.79957  |                                                     |
| 13 | 98794504  | 98795176  | 5Y-H4K8ac_peak_4763 | 5.91107  | FARP1_ENSG00000152767                               |
| 13 | 99229528  | 99229871  | 5Y-H4K8ac_peak_4764 | 4.642    | STK24_ENSG00000102572;STK24-AS1_ENSG00000224418     |
| 13 | 99275301  | 99275494  | 5Y-H4K8ac_peak_4765 | 5.65584  |                                                     |
| 13 | 99610457  | 99610694  | 5Y-H4K8ac_peak_4766 | 6.79955  |                                                     |
| 13 | 99738296  | 99738497  | 5Y-H4K8ac_peak_4767 | 7.73231  | DOCK9_ENSG00000088387                               |
| 13 | 99852398  | 99852889  | 5Y-H4K8ac_peak_4768 | 9.89244  | UBAC2-AS1_ENSG00000228889;UBAC2_ENSG00000134882     |
| 13 | 99853162  | 99853521  | 5Y-H4K8ac_peak_4769 | 5.24695  | UBAC2-AS1_ENSG00000228889;UBAC2_ENSG00000134882     |
| 13 | 99965214  | 99965454  | 5Y-H4K8ac_peak_4770 | 6.59249  |                                                     |
| 13 | 100259016 | 100259246 | 5Y-H4K8ac_peak_4771 | 11.57334 | CLYBL_ENSG00000125246                               |
| 13 | 100741489 | 100741716 | 5Y-H4K8ac_peak_4772 | 8.21582  | PCCA_ENSG00000175198                                |
| 13 | 101240646 | 101241060 | 5Y-H4K8ac_peak_4773 | 13.27281 | GGACT_ENSG00000134864                               |
| 13 | 101326620 | 101327050 | 5Y-H4K8ac_peak_4774 | 9.23159  | TMTC4_ENSG00000125247                               |
| 13 | 101327495 | 101327771 | 5Y-H4K8ac_peak_4775 | 8.43511  | TMTC4_ENSG00000125247                               |
| 13 | 103047018 | 103047356 | 5Y-H4K8ac_peak_4776 | 9.63153  | FGF14-IT1_ENSG00000243319;FGF14-AS2_ENSG00000272143 |
| 13 | 103208786 | 103209102 | 5Y-H4K8ac_peak_4777 | 5.03335  |                                                     |
| 13 | 103426508 | 103426857 | 5Y-H4K8ac_peak_4778 | 7.11863  | TEX30_ENSG00000151287                               |
| 13 | 103497881 | 103498323 | 5Y-H4K8ac_peak_4779 | 8.35139  | ERCC5_ENSG00000134899                               |
| 13 | 104659730 | 104660023 | 5Y-H4K8ac_peak_4780 | 6.34046  |                                                     |
| 13 | 107220167 | 107220357 | 5Y-H4K8ac_peak_4781 | 4.50834  |                                                     |
| 13 | 107570051 | 107570518 | 5Y-H4K8ac_peak_4782 | 18.31877 |                                                     |

|    |           |           |                     |          |                                               |
|----|-----------|-----------|---------------------|----------|-----------------------------------------------|
| 13 | 108870915 | 108871218 | 5Y-H4K8ac_peak_4783 | 6.77436  | LIG4_ENSG00000174405;ABHD13_ENSG00000139826   |
| 13 | 109985032 | 109985270 | 5Y-H4K8ac_peak_4784 | 4.16635  |                                               |
| 13 | 109986719 | 109987038 | 5Y-H4K8ac_peak_4785 | 10.1994  |                                               |
| 13 | 110021970 | 110022440 | 5Y-H4K8ac_peak_4786 | 12.06963 |                                               |
| 13 | 110308047 | 110308314 | 5Y-H4K8ac_peak_4787 | 9.30505  |                                               |
| 13 | 110319111 | 110319311 | 5Y-H4K8ac_peak_4788 | 4.8773   |                                               |
| 13 | 110321579 | 110321842 | 5Y-H4K8ac_peak_4789 | 6.50117  |                                               |
| 13 | 110322343 | 110322657 | 5Y-H4K8ac_peak_4790 | 12.82003 |                                               |
| 13 | 110434677 | 110434995 | 5Y-H4K8ac_peak_4791 | 7.58806  |                                               |
| 13 | 110439514 | 110439725 | 5Y-H4K8ac_peak_4792 | 4.50834  | IRS2_ENSG00000185950                          |
| 13 | 110790834 | 110791343 | 5Y-H4K8ac_peak_4793 | 12.71156 |                                               |
| 13 | 110958775 | 110959834 | 5Y-H4K8ac_peak_4794 | 13.85283 | COL4A1_ENSG00000187498;COL4A2_ENSG00000134871 |
| 13 | 111267362 | 111267659 | 5Y-H4K8ac_peak_4795 | 10.79063 | CARKD_ENSG00000213995                         |
| 13 | 111364964 | 111365227 | 5Y-H4K8ac_peak_4796 | 13.12848 | CARS2_ENSG00000134905;ING1_ENSG00000153487    |
| 13 | 111566498 | 111566722 | 5Y-H4K8ac_peak_4797 | 7.03573  | ANKRD10_ENSG00000088448                       |
| 13 | 111567083 | 111567332 | 5Y-H4K8ac_peak_4798 | 8.62703  | ANKRD10_ENSG00000088448                       |
| 13 | 111568038 | 111568252 | 5Y-H4K8ac_peak_4799 | 7.89273  | ANKRD10_ENSG00000088448                       |
| 13 | 111767947 | 111768154 | 5Y-H4K8ac_peak_4800 | 7.38046  | ARHGEF7-AS2_ENSG00000235875                   |
| 13 | 111805509 | 111805838 | 5Y-H4K8ac_peak_4801 | 9.38203  |                                               |
| 13 | 111935206 | 111935648 | 5Y-H4K8ac_peak_4802 | 7.01856  |                                               |
| 13 | 113187438 | 113187736 | 5Y-H4K8ac_peak_4803 | 7.89273  |                                               |
| 13 | 113242031 | 113242935 | 5Y-H4K8ac_peak_4804 | 16.83629 | TUBGCP3_ENSG00000126216                       |
| 13 | 113343893 | 113344132 | 5Y-H4K8ac_peak_4805 | 7.89273  | ATP11A_ENSG00000068650                        |
| 13 | 113344491 | 113345042 | 5Y-H4K8ac_peak_4806 | 8.55081  | ATP11A_ENSG00000068650                        |
| 13 | 113436408 | 113436621 | 5Y-H4K8ac_peak_4807 | 6.77436  |                                               |
| 13 | 113548848 | 113549088 | 5Y-H4K8ac_peak_4808 | 6.73385  | MCF2L_ENSG00000126217                         |
| 13 | 113598001 | 113598340 | 5Y-H4K8ac_peak_4809 | 7.87406  |                                               |
| 13 | 113623138 | 113623377 | 5Y-H4K8ac_peak_4810 | 5.64909  | MCF2L-AS1_ENSG00000235280                     |
| 13 | 113654821 | 113655221 | 5Y-H4K8ac_peak_4811 | 6.77436  |                                               |
| 13 | 113656119 | 113656942 | 5Y-H4K8ac_peak_4812 | 9.79526  |                                               |
| 13 | 113863087 | 113863762 | 5Y-H4K8ac_peak_4813 | 9.58986  | PCID2_ENSG00000126226;CUL4A_ENSG00000139842   |
| 13 | 113864022 | 113864304 | 5Y-H4K8ac_peak_4814 | 6.50117  | PCID2_ENSG00000126226                         |
| 13 | 113950605 | 113951158 | 5Y-H4K8ac_peak_4815 | 9.01738  | LAMP1_ENSG00000185896                         |
| 13 | 114061911 | 114062458 | 5Y-H4K8ac_peak_4816 | 9.74838  |                                               |
| 13 | 114067805 | 114068064 | 5Y-H4K8ac_peak_4817 | 4.33206  |                                               |
| 13 | 114076330 | 114076544 | 5Y-H4K8ac_peak_4818 | 6.77436  |                                               |
| 13 | 114077237 | 114077440 | 5Y-H4K8ac_peak_4819 | 7.59101  |                                               |
| 13 | 114198379 | 114198594 | 5Y-H4K8ac_peak_4820 | 7.90751  |                                               |
| 13 | 114199903 | 114200258 | 5Y-H4K8ac_peak_4821 | 10.69698 |                                               |
| 13 | 114203621 | 114203975 | 5Y-H4K8ac_peak_4822 | 11.28133 |                                               |
| 13 | 114238478 | 114238734 | 5Y-H4K8ac_peak_4823 | 7.76232  | TFDP1_ENSG00000198176                         |
| 13 | 114239148 | 114239800 | 5Y-H4K8ac_peak_4824 | 8.67475  | TFDP1_ENSG00000198176                         |
| 13 | 114273548 | 114274199 | 5Y-H4K8ac_peak_4825 | 7.59101  |                                               |
| 13 | 114307735 | 114307982 | 5Y-H4K8ac_peak_4826 | 6.03718  |                                               |
| 13 | 114450174 | 114450402 | 5Y-H4K8ac_peak_4827 | 10.86079 |                                               |
| 13 | 114461848 | 114462080 | 5Y-H4K8ac_peak_4828 | 7.59101  | TMEM255B_ENSG00000184497                      |

|    |           |           |                     |          |                                                                                 |
|----|-----------|-----------|---------------------|----------|---------------------------------------------------------------------------------|
| 13 | 114504644 | 114506021 | 5Y-H4K8ac_peak_4829 | 19.93272 |                                                                                 |
| 13 | 114515370 | 114515653 | 5Y-H4K8ac_peak_4830 | 4.90696  |                                                                                 |
| 13 | 114540284 | 114541105 | 5Y-H4K8ac_peak_4831 | 10.69698 |                                                                                 |
| 13 | 114631951 | 114632357 | 5Y-H4K8ac_peak_4832 | 5.23083  | LINC00565_ENSG00000260910                                                       |
| 13 | 114829737 | 114830514 | 5Y-H4K8ac_peak_4833 | 9.05168  |                                                                                 |
| 13 | 114830808 | 114831184 | 5Y-H4K8ac_peak_4834 | 5.60566  |                                                                                 |
| 13 | 114863370 | 114863665 | 5Y-H4K8ac_peak_4835 | 9.93099  |                                                                                 |
| 13 | 114864705 | 114864964 | 5Y-H4K8ac_peak_4836 | 7.21406  |                                                                                 |
| 13 | 114875426 | 114875786 | 5Y-H4K8ac_peak_4837 | 4.90696  |                                                                                 |
| 13 | 114999979 | 115000260 | 5Y-H4K8ac_peak_4838 | 10.19948 | CDC16_ENSG00000130177                                                           |
| 13 | 115000493 | 115000756 | 5Y-H4K8ac_peak_4839 | 6.50117  | CDC16_ENSG00000130177                                                           |
| 13 | 115046630 | 115047273 | 5Y-H4K8ac_peak_4840 | 8.24461  | UPF3A_ENSG00000169062                                                           |
| 13 | 115075338 | 115075778 | 5Y-H4K8ac_peak_4841 | 6.50117  |                                                                                 |
| 13 | 115078952 | 115079387 | 5Y-H4K8ac_peak_4842 | 6.50117  | CHAMP1_ENSG00000198824                                                          |
| 14 | 20881758  | 20882099  | 5Y-H4K8ac_peak_4843 | 6.17374  | TEP1_ENSG00000129566                                                            |
| 14 | 21537471  | 21538117  | 5Y-H4K8ac_peak_4844 | 5.64909  | NDRG2_ENSG00000165795;ARHGEF40_ENSG00000165801                                  |
| 14 | 21538424  | 21538684  | 5Y-H4K8ac_peak_4845 | 12.06963 | NDRG2_ENSG00000165795;ARHGEF40_ENSG00000165801                                  |
| 14 | 21560260  | 21560489  | 5Y-H4K8ac_peak_4846 | 7.35333  |                                                                                 |
| 14 | 21565845  | 21566066  | 5Y-H4K8ac_peak_4847 | 6.07082  |                                                                                 |
| 14 | 21575328  | 21575557  | 5Y-H4K8ac_peak_4848 | 4.29586  | RP11-998D10.4_ENSG00000178107                                                   |
| 14 | 21769063  | 21769533  | 5Y-H4K8ac_peak_4849 | 7.31102  |                                                                                 |
| 14 | 21978923  | 21979350  | 5Y-H4K8ac_peak_4850 | 8.17203  | METTL3_ENSG00000165819                                                          |
| 14 | 23025129  | 23025658  | 5Y-H4K8ac_peak_4851 | 6.43775  | AE000662.93_ENSG00000259054;AE000662.92_ENSG00000259003                         |
| 14 | 23026110  | 23026447  | 5Y-H4K8ac_peak_4852 | 5.24695  | AE000662.93_ENSG00000259054;AE000662.92_ENSG00000259003                         |
| 14 | 23236046  | 23236315  | 5Y-H4K8ac_peak_4853 | 10.1994  | CTD-2555K7.2_ENSG00000258458;OXA1L_ENSG00000155463                              |
| 14 | 23291585  | 23291813  | 5Y-H4K8ac_peak_4854 | 8.2913   | AL135998.1_ENSG00000215306                                                      |
| 14 | 23298360  | 23298638  | 5Y-H4K8ac_peak_4855 | 6.72926  | MRPL52_ENSG00000172590;SLC7A7_ENSG00000155465                                   |
| 14 | 23317759  | 23319015  | 5Y-H4K8ac_peak_4856 | 7.9057   |                                                                                 |
| 14 | 23341276  | 23341514  | 5Y-H4K8ac_peak_4857 | 5.35202  | LRP10_ENSG00000197324                                                           |
| 14 | 23355817  | 23356402  | 5Y-H4K8ac_peak_4858 | 9.36633  |                                                                                 |
| 14 | 23450950  | 23451187  | 5Y-H4K8ac_peak_4859 | 4.55128  | RP11-298I3.5_ENSG00000259132;AJUBA_ENSG00000129474;RP11-298I3.4_ENSG00000258457 |
| 14 | 23476003  | 23476297  | 5Y-H4K8ac_peak_4860 | 12.44818 |                                                                                 |
| 14 | 23771347  | 23771773  | 5Y-H4K8ac_peak_4861 | 7.59101  | PPP1R3E_ENSG00000235194                                                         |
| 14 | 23775609  | 23775897  | 5Y-H4K8ac_peak_4862 | 7.18918  | BCL2L2-PABPN1_ENSG00000258643                                                   |
| 14 | 23776088  | 23776374  | 5Y-H4K8ac_peak_4863 | 12.05638 | BCL2L2-PABPN1_ENSG00000258643                                                   |
| 14 | 23790799  | 23791055  | 5Y-H4K8ac_peak_4864 | 7.89273  | AL049829.1_ENSG00000268702;PABPN1_ENSG00000100836                               |
| 14 | 23834116  | 23835472  | 5Y-H4K8ac_peak_4865 | 7.90005  | EFS_ENSG00000100842                                                             |
| 14 | 23835830  | 23836252  | 5Y-H4K8ac_peak_4866 | 7.92287  | EFS_ENSG00000100842                                                             |
| 14 | 23938129  | 23938352  | 5Y-H4K8ac_peak_4867 | 8.35139  | NGDN_ENSG00000129460                                                            |
| 14 | 23981119  | 23981609  | 5Y-H4K8ac_peak_4868 | 6.34046  | RP11-66N24.4_ENSG00000157306                                                    |
| 14 | 23982167  | 23982359  | 5Y-H4K8ac_peak_4869 | 5.23083  |                                                                                 |
| 14 | 23982646  | 23983149  | 5Y-H4K8ac_peak_4870 | 6.50117  |                                                                                 |
| 14 | 24021120  | 24021644  | 5Y-H4K8ac_peak_4871 | 9.30338  |                                                                                 |
| 14 | 24025182  | 24025405  | 5Y-H4K8ac_peak_4872 | 10.35586 | ZFH2_ENSG00000136367;THTPA_ENSG00000259431                                      |
| 14 | 24046550  | 24046802  | 5Y-H4K8ac_peak_4873 | 4.79658  |                                                                                 |
| 14 | 24048416  | 24048657  | 5Y-H4K8ac_peak_4874 | 4.29586  | JPH4_ENSG00000092051                                                            |

|    |          |          |                     |          |                                                                                              |
|----|----------|----------|---------------------|----------|----------------------------------------------------------------------------------------------|
| 14 | 24049672 | 24049981 | 5Y-H4K8ac_peak_4875 | 6.50117  |                                                                                              |
| 14 | 24422981 | 24423225 | 5Y-H4K8ac_peak_4876 | 12.21176 | DHRS4_ENSG00000157326                                                                        |
| 14 | 24438736 | 24439424 | 5Y-H4K8ac_peak_4877 | 11.57334 | DHRS4L2_ENSG00000187630                                                                      |
| 14 | 24476350 | 24476637 | 5Y-H4K8ac_peak_4878 | 11.01287 |                                                                                              |
| 14 | 24505582 | 24505815 | 5Y-H4K8ac_peak_4879 | 8.24461  | RP11-468E2.9_ENSG00000225766                                                                 |
| 14 | 24520584 | 24521111 | 5Y-H4K8ac_peak_4880 | 19.79054 | LRRRC16B_ENSG00000186648                                                                     |
| 14 | 24521360 | 24521685 | 5Y-H4K8ac_peak_4881 | 11.19336 | LRRRC16B_ENSG00000186648                                                                     |
| 14 | 24521911 | 24522182 | 5Y-H4K8ac_peak_4882 | 8.71064  | LRRRC16B_ENSG00000186648                                                                     |
| 14 | 24549491 | 24549834 | 5Y-H4K8ac_peak_4883 | 5.15917  |                                                                                              |
| 14 | 24550460 | 24551137 | 5Y-H4K8ac_peak_4884 | 6.78128  |                                                                                              |
| 14 | 24551859 | 24552071 | 5Y-H4K8ac_peak_4885 | 5.94703  |                                                                                              |
| 14 | 24562752 | 24563078 | 5Y-H4K8ac_peak_4886 | 8.36588  | PCK2_ENSG00000100889                                                                         |
| 14 | 24616227 | 24616453 | 5Y-H4K8ac_peak_4887 | 9.63153  | PSME2_ENSG00000100911;RNF31_ENSG00000092098                                                  |
| 14 | 24657695 | 24657886 | 5Y-H4K8ac_peak_4888 | 5.65584  | IPO4_ENSG00000196497                                                                         |
| 14 | 24664264 | 24664873 | 5Y-H4K8ac_peak_4889 | 17.67055 |                                                                                              |
| 14 | 24740006 | 24740200 | 5Y-H4K8ac_peak_4890 | 8.47164  | RABGGTA_ENSG00000100949                                                                      |
| 14 | 24740456 | 24740724 | 5Y-H4K8ac_peak_4891 | 17.18444 | RABGGTA_ENSG00000100949                                                                      |
| 14 | 24836716 | 24837075 | 5Y-H4K8ac_peak_4892 | 12.10275 |                                                                                              |
| 14 | 24838560 | 24838854 | 5Y-H4K8ac_peak_4893 | 6.54441  |                                                                                              |
| 14 | 24860813 | 24861022 | 5Y-H4K8ac_peak_4894 | 8.12924  |                                                                                              |
| 14 | 24867572 | 24867772 | 5Y-H4K8ac_peak_4895 | 10.27264 | NYNRIN_ENSG00000205978                                                                       |
| 14 | 24868245 | 24868563 | 5Y-H4K8ac_peak_4896 | 6.79955  | NYNRIN_ENSG00000205978                                                                       |
| 14 | 24898471 | 24899455 | 5Y-H4K8ac_peak_4897 | 12.69256 | CBLN3_ENSG00000139899;KHNYN_ENSG00000100441                                                  |
| 14 | 24911672 | 24911903 | 5Y-H4K8ac_peak_4898 | 10.35586 | SDR39U1_ENSG00000100445                                                                      |
| 14 | 31342973 | 31344252 | 5Y-H4K8ac_peak_4899 | 7.90005  | COCH_ENSG00000100473                                                                         |
| 14 | 31495103 | 31495416 | 5Y-H4K8ac_peak_4900 | 4.642    | STRN3_ENSG00000196792;AP4S1_ENSG00000100478                                                  |
| 14 | 31676359 | 31676824 | 5Y-H4K8ac_peak_4901 | 5.18558  | HECTD1_ENSG00000092148                                                                       |
| 14 | 32420508 | 32420914 | 5Y-H4K8ac_peak_4902 | 12.43358 |                                                                                              |
| 14 | 32546761 | 32547071 | 5Y-H4K8ac_peak_4903 | 4.84727  | ARHGAP5-AS1_ENSG00000258655                                                                  |
| 14 | 34407502 | 34407859 | 5Y-H4K8ac_peak_4904 | 6.08523  |                                                                                              |
| 14 | 34529166 | 34529813 | 5Y-H4K8ac_peak_4905 | 10.15788 |                                                                                              |
| 14 | 35098851 | 35099253 | 5Y-H4K8ac_peak_4906 | 4.50834  | SNX6_ENSG00000129515                                                                         |
| 14 | 35099445 | 35099723 | 5Y-H4K8ac_peak_4907 | 9.30505  | SNX6_ENSG00000129515                                                                         |
| 14 | 35183506 | 35184090 | 5Y-H4K8ac_peak_4908 | 9.20645  | CFL2_ENSG00000165410                                                                         |
| 14 | 35591457 | 35591724 | 5Y-H4K8ac_peak_4909 | 7.65114  | PPP2R3C_ENSG00000092020;KIAA0391_ENSG00000100890;KIAA0391_ENSG00000258790                    |
| 14 | 35760711 | 35760914 | 5Y-H4K8ac_peak_4910 | 5.34938  | AL121594.1_ENSG00000265530                                                                   |
| 14 | 35761657 | 35762044 | 5Y-H4K8ac_peak_4911 | 10.11191 | AL121594.1_ENSG00000265530                                                                   |
| 14 | 36002748 | 36002991 | 5Y-H4K8ac_peak_4912 | 6.55841  | INSM2_ENSG00000168348                                                                        |
| 14 | 36277924 | 36278179 | 5Y-H4K8ac_peak_4913 | 8.75926  | RALGAPA1_ENSG00000174373;AL162311.1_ENSG00000266264                                          |
| 14 | 36295619 | 36295866 | 5Y-H4K8ac_peak_4914 | 8.69112  | RP11-317N8.5_ENSG00000258938;BRMS1L_ENSG00000100916                                          |
| 14 | 50065280 | 50066035 | 5Y-H4K8ac_peak_4915 | 12.69256 | RPS29_ENSG00000213741;AL139099.1_ENSG00000253459;LRR1_ENSG00000165501;RHOQP1_ENSG00000258568 |
| 14 | 50100350 | 50100801 | 5Y-H4K8ac_peak_4916 | 9.51254  |                                                                                              |
| 14 | 50159645 | 50160250 | 5Y-H4K8ac_peak_4917 | 12.0443  | KLHDC1_ENSG00000197776                                                                       |
| 14 | 50357841 | 50358037 | 5Y-H4K8ac_peak_4918 | 7.14616  |                                                                                              |
| 14 | 50469945 | 50470443 | 5Y-H4K8ac_peak_4919 | 9.38276  |                                                                                              |
| 14 | 50998842 | 50999130 | 5Y-H4K8ac_peak_4920 | 9.7353   | ATL1_ENSG00000198513                                                                         |

|    |          |          |                     |          |                                                                                |
|----|----------|----------|---------------------|----------|--------------------------------------------------------------------------------|
| 14 | 51027303 | 51027870 | 5Y-H4K8ac_peak_4921 | 12.05638 | MAP4K5_ENSG00000012983                                                         |
| 14 | 51297546 | 51297806 | 5Y-H4K8ac_peak_4922 | 10.1994  | NIN_ENSG00000100503                                                            |
| 14 | 51326124 | 51326455 | 5Y-H4K8ac_peak_4923 | 6.34046  |                                                                                |
| 14 | 51562074 | 51562760 | 5Y-H4K8ac_peak_4924 | 7.89273  | TRIM9_ENSG00000100505                                                          |
| 14 | 51974722 | 51975031 | 5Y-H4K8ac_peak_4925 | 11.09973 |                                                                                |
| 14 | 52117970 | 52118360 | 5Y-H4K8ac_peak_4926 | 12.21176 |                                                                                |
| 14 | 52242716 | 52242926 | 5Y-H4K8ac_peak_4927 | 5.40331  |                                                                                |
| 14 | 52456296 | 52456508 | 5Y-H4K8ac_peak_4928 | 10.1994  | C14orf166_ENSG00000087302                                                      |
| 14 | 53172461 | 53172656 | 5Y-H4K8ac_peak_4929 | 7.38046  |                                                                                |
| 14 | 53258715 | 53258984 | 5Y-H4K8ac_peak_4930 | 5.23083  | GNPNAT1_ENSG00000100522                                                        |
| 14 | 53418150 | 53418357 | 5Y-H4K8ac_peak_4931 | 8.24461  | FERMT2_ENSG00000073712                                                         |
| 14 | 53620137 | 53620519 | 5Y-H4K8ac_peak_4932 | 4.29586  | DDHD1_ENSG00000100523;AL356020.1_ENSG00000266552;RP11-547D23.1_ENSG00000258731 |
| 14 | 54811226 | 54811575 | 5Y-H4K8ac_peak_4933 | 8.69112  |                                                                                |
| 14 | 54955306 | 54955652 | 5Y-H4K8ac_peak_4934 | 7.20869  | GMFB_ENSG00000197045                                                           |
| 14 | 55251302 | 55251591 | 5Y-H4K8ac_peak_4935 | 5.10825  |                                                                                |
| 14 | 55276138 | 55276338 | 5Y-H4K8ac_peak_4936 | 8.14913  |                                                                                |
| 14 | 55282173 | 55282505 | 5Y-H4K8ac_peak_4937 | 7.10001  |                                                                                |
| 14 | 55284186 | 55285192 | 5Y-H4K8ac_peak_4938 | 13.03079 |                                                                                |
| 14 | 55286307 | 55286832 | 5Y-H4K8ac_peak_4939 | 5.23083  |                                                                                |
| 14 | 55303583 | 55303804 | 5Y-H4K8ac_peak_4940 | 7.31815  |                                                                                |
| 14 | 55337797 | 55337997 | 5Y-H4K8ac_peak_4941 | 4.47071  |                                                                                |
| 14 | 55344422 | 55344992 | 5Y-H4K8ac_peak_4942 | 6.77436  | MIR4308_ENSG00000265432                                                        |
| 14 | 55350379 | 55350642 | 5Y-H4K8ac_peak_4943 | 5.65584  |                                                                                |
| 14 | 55352224 | 55352645 | 5Y-H4K8ac_peak_4944 | 9.38807  | FDPSP3_ENSG00000258872                                                         |
| 14 | 55369225 | 55369431 | 5Y-H4K8ac_peak_4945 | 7.38046  | GCH1_ENSG00000131979                                                           |
| 14 | 55517598 | 55518027 | 5Y-H4K8ac_peak_4946 | 8.75926  | MAPK1IP1L_ENSG00000168175                                                      |
| 14 | 55518425 | 55518721 | 5Y-H4K8ac_peak_4947 | 15.84891 | MAPK1IP1L_ENSG00000168175                                                      |
| 14 | 55878145 | 55878808 | 5Y-H4K8ac_peak_4948 | 12.05638 | ATG14_ENSG00000126775                                                          |
| 14 | 57046309 | 57046515 | 5Y-H4K8ac_peak_4949 | 10.19948 |                                                                                |
| 14 | 57735236 | 57735530 | 5Y-H4K8ac_peak_4950 | 8.69112  | EXOC5_ENSG00000070367;AP5M1_ENSG00000053770                                    |
| 14 | 57856911 | 57857170 | 5Y-H4K8ac_peak_4951 | 7.31815  | NAA30_ENSG00000139977                                                          |
| 14 | 58862232 | 58863090 | 5Y-H4K8ac_peak_4952 | 12.14222 | RP11-517O13.3_ENSG00000258658;TOMM20L_ENSG00000196860                          |
| 14 | 59930954 | 59931256 | 5Y-H4K8ac_peak_4953 | 4.94258  | GPR135_ENSG00000181619                                                         |
| 14 | 59950841 | 59951037 | 5Y-H4K8ac_peak_4954 | 7.87406  | L3HYPDH_ENSG00000126790;JKAMP_ENSG00000050130                                  |
| 14 | 60558716 | 60558972 | 5Y-H4K8ac_peak_4955 | 6.53157  | RP11-16B13.1_ENSG00000258553;PCNXL4_ENSG00000126773                            |
| 14 | 60715394 | 60715672 | 5Y-H4K8ac_peak_4956 | 11.1169  | CTD-2184C24.2_ENSG00000254718                                                  |
| 14 | 60716133 | 60716440 | 5Y-H4K8ac_peak_4957 | 11.53521 | CTD-2184C24.2_ENSG00000254718                                                  |
| 14 | 60780857 | 60781116 | 5Y-H4K8ac_peak_4958 | 7.53429  |                                                                                |
| 14 | 60816445 | 60816680 | 5Y-H4K8ac_peak_4959 | 6.50117  |                                                                                |
| 14 | 60981479 | 60982189 | 5Y-H4K8ac_peak_4960 | 11.48691 | C14orf39_ENSG00000179008;RP11-1042B17.3_ENSG00000258670                        |
| 14 | 61104028 | 61104631 | 5Y-H4K8ac_peak_4961 | 17.50045 |                                                                                |
| 14 | 61747448 | 61748337 | 5Y-H4K8ac_peak_4962 | 12.71156 | TMEM30B_ENSG00000182107                                                        |
| 14 | 61936747 | 61937070 | 5Y-H4K8ac_peak_4963 | 4.84727  |                                                                                |
| 14 | 61937661 | 61937990 | 5Y-H4K8ac_peak_4964 | 6.88532  |                                                                                |
| 14 | 61939899 | 61940200 | 5Y-H4K8ac_peak_4965 | 7.18391  |                                                                                |
| 14 | 61950666 | 61950880 | 5Y-H4K8ac_peak_4966 | 4.33574  |                                                                                |



|    |          |          |                     |          |                                                       |
|----|----------|----------|---------------------|----------|-------------------------------------------------------|
| 14 | 62028455 | 62028838 | 5Y-H4K8ac_peak_4967 | 5.12213  |                                                       |
| 14 | 62043081 | 62043397 | 5Y-H4K8ac_peak_4968 | 7.46096  |                                                       |
| 14 | 62074660 | 62074945 | 5Y-H4K8ac_peak_4969 | 5.24695  |                                                       |
| 14 | 62162463 | 62163073 | 5Y-H4K8ac_peak_4970 | 7.11863  | HIF1A-AS1_ENSG00000258777;HIF1A_ENSG00000100644       |
| 14 | 62228583 | 62228826 | 5Y-H4K8ac_peak_4971 | 6.50117  | SNAPC1_ENSG00000023608                                |
| 14 | 62278867 | 62279198 | 5Y-H4K8ac_peak_4972 | 6.50117  | CTD-2277K2.1_ENSG00000258882                          |
| 14 | 62279716 | 62280028 | 5Y-H4K8ac_peak_4973 | 7.11863  |                                                       |
| 14 | 64009651 | 64009895 | 5Y-H4K8ac_peak_4974 | 8.43511  | PPP2R5E_ENSG00000154001;CTD-2302E22.4_ENSG00000261242 |
| 14 | 64320140 | 64320363 | 5Y-H4K8ac_peak_4975 | 7.89142  | SYNE2_ENSG00000054654                                 |
| 14 | 64804633 | 64804905 | 5Y-H4K8ac_peak_4976 | 5.64909  | ESR2_ENSG00000140009;RP11-544I20.2_ENSG00000214770    |
| 14 | 64805736 | 64806028 | 5Y-H4K8ac_peak_4977 | 9.69628  | ESR2_ENSG00000140009;RP11-544I20.2_ENSG00000214770    |
| 14 | 64932263 | 64932455 | 5Y-H4K8ac_peak_4978 | 8.08609  | AKAP5_ENSG00000179841                                 |
| 14 | 64970758 | 64971916 | 5Y-H4K8ac_peak_4979 | 15.45397 | ZBTB25_ENSG00000089775;ZBTB1_ENSG00000126804          |
| 14 | 65006247 | 65006809 | 5Y-H4K8ac_peak_4980 | 12.69256 | RP11-973N13.4_ENSG00000259116                         |
| 14 | 65103144 | 65103381 | 5Y-H4K8ac_peak_4981 | 9.97632  |                                                       |
| 14 | 65170731 | 65171027 | 5Y-H4K8ac_peak_4982 | 13.4304  | PLEKHG3_ENSG00000126822                               |
| 14 | 65228107 | 65228483 | 5Y-H4K8ac_peak_4983 | 6.1654   |                                                       |
| 14 | 65229110 | 65229351 | 5Y-H4K8ac_peak_4984 | 5.65584  |                                                       |
| 14 | 65229739 | 65230060 | 5Y-H4K8ac_peak_4985 | 7.63144  |                                                       |
| 14 | 65230757 | 65231444 | 5Y-H4K8ac_peak_4986 | 7.20869  |                                                       |
| 14 | 65231887 | 65232299 | 5Y-H4K8ac_peak_4987 | 14.61459 |                                                       |
| 14 | 65290156 | 65290503 | 5Y-H4K8ac_peak_4988 | 14.87721 |                                                       |
| 14 | 65438715 | 65438915 | 5Y-H4K8ac_peak_4989 | 5.449    | RAB15_ENSG00000139998                                 |
| 14 | 65439120 | 65439421 | 5Y-H4K8ac_peak_4990 | 7.38046  | RAB15_ENSG00000139998                                 |
| 14 | 65696414 | 65696649 | 5Y-H4K8ac_peak_4991 | 11.19336 |                                                       |
| 14 | 65878713 | 65879132 | 5Y-H4K8ac_peak_4992 | 6.78318  |                                                       |
| 14 | 65936780 | 65937011 | 5Y-H4K8ac_peak_4993 | 7.76232  | MIR625_ENSG00000207781                                |
| 14 | 66699528 | 66700003 | 5Y-H4K8ac_peak_4994 | 5.23083  |                                                       |
| 14 | 66700781 | 66701065 | 5Y-H4K8ac_peak_4995 | 8.17203  |                                                       |
| 14 | 67981651 | 67981877 | 5Y-H4K8ac_peak_4996 | 10.60083 |                                                       |
| 14 | 67999510 | 67999755 | 5Y-H4K8ac_peak_4997 | 10.35586 | TMEM229B_ENSG00000198133;PLEKHH1_ENSG00000054690      |
| 14 | 68067158 | 68067512 | 5Y-H4K8ac_peak_4998 | 8.73392  | PIGH_ENSG00000100564                                  |
| 14 | 68141033 | 68141621 | 5Y-H4K8ac_peak_4999 | 16.01457 | VTI1B_ENSG00000100568                                 |
| 14 | 68141812 | 68142097 | 5Y-H4K8ac_peak_5000 | 5.65584  | VTI1B_ENSG00000100568                                 |
| 14 | 68285839 | 68286128 | 5Y-H4K8ac_peak_5001 | 10.19948 | RAD51B_ENSG00000182185                                |
| 14 | 69051915 | 69052216 | 5Y-H4K8ac_peak_5002 | 7.69843  |                                                       |
| 14 | 69121039 | 69121774 | 5Y-H4K8ac_peak_5003 | 11.22005 |                                                       |
| 14 | 69122190 | 69122981 | 5Y-H4K8ac_peak_5004 | 9.45148  |                                                       |
| 14 | 69155927 | 69156220 | 5Y-H4K8ac_peak_5005 | 5.35202  |                                                       |
| 14 | 69156524 | 69157090 | 5Y-H4K8ac_peak_5006 | 5.65584  |                                                       |
| 14 | 69157306 | 69158068 | 5Y-H4K8ac_peak_5007 | 8.43511  |                                                       |
| 14 | 69262135 | 69263165 | 5Y-H4K8ac_peak_5008 | 13.00733 | ZFP36L1_ENSG00000185650                               |
| 14 | 69273958 | 69274305 | 5Y-H4K8ac_peak_5009 | 7.38046  |                                                       |
| 14 | 69282798 | 69283541 | 5Y-H4K8ac_peak_5010 | 14.99673 |                                                       |
| 14 | 69290865 | 69291519 | 5Y-H4K8ac_peak_5011 | 7.59101  |                                                       |
| 14 | 69404424 | 69404622 | 5Y-H4K8ac_peak_5012 | 7.03573  |                                                       |

|    |          |          |                     |          |                                                                                |
|----|----------|----------|---------------------|----------|--------------------------------------------------------------------------------|
| 14 | 69405737 | 69406261 | 5Y-H4K8ac_peak_5013 | 10.72893 |                                                                                |
| 14 | 69620210 | 69620432 | 5Y-H4K8ac_peak_5014 | 5.87382  | DCAF5_ENSG00000139990                                                          |
| 14 | 69658401 | 69658718 | 5Y-H4K8ac_peak_5015 | 6.77436  | EXD2_ENSG00000081177                                                           |
| 14 | 69754859 | 69755100 | 5Y-H4K8ac_peak_5016 | 4.50834  |                                                                                |
| 14 | 70038977 | 70039205 | 5Y-H4K8ac_peak_5017 | 6.96612  | CCDC177_ENSG00000255994                                                        |
| 14 | 70193444 | 70193673 | 5Y-H4K8ac_peak_5018 | 10.90365 | SRSF5_ENSG00000100650                                                          |
| 14 | 70512623 | 70512821 | 5Y-H4K8ac_peak_5019 | 5.64909  |                                                                                |
| 14 | 70513016 | 70513259 | 5Y-H4K8ac_peak_5020 | 8.43511  |                                                                                |
| 14 | 70560678 | 70561298 | 5Y-H4K8ac_peak_5021 | 5.78188  |                                                                                |
| 14 | 70654621 | 70654869 | 5Y-H4K8ac_peak_5022 | 6.50117  | SLC8A3_ENSG00000100678;RP11-486O13.2_ENSG00000258422                           |
| 14 | 71108691 | 71108885 | 5Y-H4K8ac_peak_5023 | 4.29586  | CTD-2540L5.5_ENSG00000259115;CTD-2540L5.6_ENSG00000245466;TTC9_ENSG00000133985 |
| 14 | 71288524 | 71288926 | 5Y-H4K8ac_peak_5024 | 7.38046  |                                                                                |
| 14 | 71703728 | 71703932 | 5Y-H4K8ac_peak_5025 | 6.50117  |                                                                                |
| 14 | 71787431 | 71787756 | 5Y-H4K8ac_peak_5026 | 7.89273  | RP1-261D10.2_ENSG00000259146;SIPA1L1_ENSG00000197555                           |
| 14 | 72062903 | 72063108 | 5Y-H4K8ac_peak_5027 | 6.34046  |                                                                                |
| 14 | 73026994 | 73027228 | 5Y-H4K8ac_peak_5028 | 8.39058  |                                                                                |
| 14 | 73204841 | 73205287 | 5Y-H4K8ac_peak_5029 | 8.21582  |                                                                                |
| 14 | 73207194 | 73207463 | 5Y-H4K8ac_peak_5030 | 9.26003  |                                                                                |
| 14 | 73208543 | 73209308 | 5Y-H4K8ac_peak_5031 | 12.26606 |                                                                                |
| 14 | 74036124 | 74036651 | 5Y-H4K8ac_peak_5032 | 7.27671  |                                                                                |
| 14 | 74058425 | 74058913 | 5Y-H4K8ac_peak_5033 | 7.65114  | ACOT4_ENSG00000177465                                                          |
| 14 | 74110649 | 74110854 | 5Y-H4K8ac_peak_5034 | 9.23159  | DNAL1_ENSG00000119661                                                          |
| 14 | 74253417 | 74254234 | 5Y-H4K8ac_peak_5035 | 5.98695  | RP5-102I120.1_ENSG00000259065                                                  |
| 14 | 74352972 | 74353168 | 5Y-H4K8ac_peak_5036 | 6.00388  | ZNF410_ENSG00000119725                                                         |
| 14 | 74353604 | 74354037 | 5Y-H4K8ac_peak_5037 | 7.59101  | ZNF410_ENSG00000119725                                                         |
| 14 | 74417035 | 74417356 | 5Y-H4K8ac_peak_5038 | 9.30505  | FAM161B_ENSG00000156050;COQ6_ENSG00000119723                                   |
| 14 | 74723874 | 74724189 | 5Y-H4K8ac_peak_5039 | 5.87725  |                                                                                |
| 14 | 74769311 | 74769591 | 5Y-H4K8ac_peak_5040 | 7.34185  | ABCD4_ENSG00000119688;VRTN_ENSG00000133980                                     |
| 14 | 74869242 | 74869590 | 5Y-H4K8ac_peak_5041 | 6.00382  |                                                                                |
| 14 | 75078467 | 75079024 | 5Y-H4K8ac_peak_5042 | 11.19336 | LTBP2_ENSG00000119681                                                          |
| 14 | 75103403 | 75104180 | 5Y-H4K8ac_peak_5043 | 9.56516  |                                                                                |
| 14 | 75348731 | 75349022 | 5Y-H4K8ac_peak_5044 | 8.79957  | DLST_ENSG00000119689                                                           |
| 14 | 75389404 | 75389982 | 5Y-H4K8ac_peak_5045 | 12.21176 | RPS6KL1_ENSG00000198208                                                        |
| 14 | 75421947 | 75422169 | 5Y-H4K8ac_peak_5046 | 9.38276  | PGF_ENSG00000119630                                                            |
| 14 | 75439906 | 75440336 | 5Y-H4K8ac_peak_5047 | 5.91107  |                                                                                |
| 14 | 75444049 | 75445014 | 5Y-H4K8ac_peak_5048 | 9.01966  |                                                                                |
| 14 | 75446487 | 75447018 | 5Y-H4K8ac_peak_5049 | 10.69698 |                                                                                |
| 14 | 75469715 | 75469955 | 5Y-H4K8ac_peak_5050 | 6.31818  | EIF2B2_ENSG00000119718                                                         |
| 14 | 75536401 | 75536663 | 5Y-H4K8ac_peak_5051 | 11.12941 | ACYPI1_ENSG00000119640                                                         |
| 14 | 75593180 | 75594026 | 5Y-H4K8ac_peak_5052 | 7.50148  | NEK9_ENSG00000119638;RP11-950C14.7_ENSG00000259138                             |
| 14 | 75594238 | 75594434 | 5Y-H4K8ac_peak_5053 | 5.64909  | NEK9_ENSG00000119638;RP11-950C14.7_ENSG00000259138                             |
| 14 | 75642872 | 75643201 | 5Y-H4K8ac_peak_5054 | 11.57334 | TMED10_ENSG00000170348                                                         |
| 14 | 75703860 | 75704104 | 5Y-H4K8ac_peak_5055 | 3.93411  |                                                                                |
| 14 | 75770610 | 75770807 | 5Y-H4K8ac_peak_5056 | 7.38046  |                                                                                |
| 14 | 75777504 | 75777795 | 5Y-H4K8ac_peak_5057 | 5.65584  |                                                                                |
| 14 | 76445387 | 76445762 | 5Y-H4K8ac_peak_5058 | 4.29586  |                                                                                |

|    |          |          |                     |          |                                                    |
|----|----------|----------|---------------------|----------|----------------------------------------------------|
| 14 | 76448559 | 76448849 | 5Y-H4K8ac_peak_5059 | 9.52603  | TGFB3_ENSG00000119699                              |
| 14 | 76605038 | 76605268 | 5Y-H4K8ac_peak_5060 | 5.91897  |                                                    |
| 14 | 77227371 | 77227632 | 5Y-H4K8ac_peak_5061 | 10.54321 | RP11-99E15.2_ENSG00000258569;VASH1_ENSG00000071246 |
| 14 | 77228385 | 77228614 | 5Y-H4K8ac_peak_5062 | 7.44077  | RP11-99E15.2_ENSG00000258569;VASH1_ENSG00000071246 |
| 14 | 77278838 | 77279087 | 5Y-H4K8ac_peak_5063 | 7.09658  |                                                    |
| 14 | 77370799 | 77371501 | 5Y-H4K8ac_peak_5064 | 7.38046  |                                                    |
| 14 | 77385144 | 77386324 | 5Y-H4K8ac_peak_5065 | 13.0168  |                                                    |
| 14 | 77386685 | 77387456 | 5Y-H4K8ac_peak_5066 | 12.10416 |                                                    |
| 14 | 77391027 | 77391546 | 5Y-H4K8ac_peak_5067 | 6.77436  | RP11-488C13.4_ENSG00000259058                      |
| 14 | 77393327 | 77393527 | 5Y-H4K8ac_peak_5068 | 6.14981  |                                                    |
| 14 | 77412861 | 77413585 | 5Y-H4K8ac_peak_5069 | 10.12457 |                                                    |
| 14 | 77414706 | 77415087 | 5Y-H4K8ac_peak_5070 | 5.41472  |                                                    |
| 14 | 77419659 | 77420209 | 5Y-H4K8ac_peak_5071 | 12.10416 |                                                    |
| 14 | 77421183 | 77421843 | 5Y-H4K8ac_peak_5072 | 9.41549  |                                                    |
| 14 | 77422559 | 77422953 | 5Y-H4K8ac_peak_5073 | 11.22005 |                                                    |
| 14 | 77459930 | 77460215 | 5Y-H4K8ac_peak_5074 | 5.77946  |                                                    |
| 14 | 77494347 | 77494735 | 5Y-H4K8ac_peak_5075 | 4.77126  | IRF2BPL_ENSG00000119669                            |
| 14 | 77498012 | 77498327 | 5Y-H4K8ac_peak_5076 | 4.728    |                                                    |
| 14 | 77499043 | 77499511 | 5Y-H4K8ac_peak_5077 | 17.04999 |                                                    |
| 14 | 77500090 | 77500450 | 5Y-H4K8ac_peak_5078 | 8.73985  |                                                    |
| 14 | 77503747 | 77503940 | 5Y-H4K8ac_peak_5079 | 5.23083  |                                                    |
| 14 | 77504203 | 77504716 | 5Y-H4K8ac_peak_5080 | 15.10396 |                                                    |
| 14 | 77506097 | 77506484 | 5Y-H4K8ac_peak_5081 | 6.20989  | RP11-7F17.5_ENSG00000246548                        |
| 14 | 77507031 | 77507687 | 5Y-H4K8ac_peak_5082 | 17.04999 | RP11-7F17.5_ENSG00000246548                        |
| 14 | 77517663 | 77517867 | 5Y-H4K8ac_peak_5083 | 7.20869  |                                                    |
| 14 | 77519201 | 77519444 | 5Y-H4K8ac_peak_5084 | 8.04693  |                                                    |
| 14 | 77607747 | 77608062 | 5Y-H4K8ac_peak_5085 | 7.31102  | AC007375.1_ENSG00000269883                         |
| 14 | 77608289 | 77608523 | 5Y-H4K8ac_peak_5086 | 7.84116  | ZDHHC22_ENSG00000177108                            |
| 14 | 77612521 | 77612731 | 5Y-H4K8ac_peak_5087 | 4.9603   |                                                    |
| 14 | 77624370 | 77624689 | 5Y-H4K8ac_peak_5088 | 7.38046  |                                                    |
| 14 | 77624946 | 77625478 | 5Y-H4K8ac_peak_5089 | 11.19336 |                                                    |
| 14 | 77648356 | 77648965 | 5Y-H4K8ac_peak_5090 | 11.39862 |                                                    |
| 14 | 77924164 | 77924857 | 5Y-H4K8ac_peak_5091 | 10.10203 | VIPAS39_ENSG00000151445;AHSA1_ENSG00000100591      |
| 14 | 78266499 | 78267003 | 5Y-H4K8ac_peak_5092 | 9.00954  | ADCK1_ENSG00000063761                              |
| 14 | 78348793 | 78349107 | 5Y-H4K8ac_peak_5093 | 9.30505  |                                                    |
| 14 | 78349922 | 78350434 | 5Y-H4K8ac_peak_5094 | 17.50049 |                                                    |
| 14 | 78350631 | 78350863 | 5Y-H4K8ac_peak_5095 | 6.50117  |                                                    |
| 14 | 78447341 | 78447546 | 5Y-H4K8ac_peak_5096 | 4.84727  |                                                    |
| 14 | 78630118 | 78630429 | 5Y-H4K8ac_peak_5097 | 5.23083  |                                                    |
| 14 | 78715542 | 78715786 | 5Y-H4K8ac_peak_5098 | 5.97089  |                                                    |
| 14 | 78787369 | 78787618 | 5Y-H4K8ac_peak_5099 | 4.74398  |                                                    |
| 14 | 81636443 | 81636691 | 5Y-H4K8ac_peak_5100 | 12.26606 | RP11-114N19.3_ENSG00000258999                      |
| 14 | 88458692 | 88459263 | 5Y-H4K8ac_peak_5101 | 7.01266  | GALC_ENSG00000054983                               |
| 14 | 88459733 | 88460202 | 5Y-H4K8ac_peak_5102 | 4.77126  | GALC_ENSG00000054983                               |
| 14 | 89258432 | 89258707 | 5Y-H4K8ac_peak_5103 | 8.47164  | EML5_ENSG00000165521                               |
| 14 | 89291122 | 89291319 | 5Y-H4K8ac_peak_5104 | 7.03573  | TTC8_ENSG00000165533                               |

|    |          |          |                     |          |                                                                                    |
|----|----------|----------|---------------------|----------|------------------------------------------------------------------------------------|
| 14 | 89292365 | 89292660 | 5Y-H4K8ac_peak_5105 | 9.78792  |                                                                                    |
| 14 | 89371482 | 89372049 | 5Y-H4K8ac_peak_5106 | 13.10145 |                                                                                    |
| 14 | 89451103 | 89451473 | 5Y-H4K8ac_peak_5107 | 9.11392  |                                                                                    |
| 14 | 89452710 | 89453296 | 5Y-H4K8ac_peak_5108 | 9.95819  |                                                                                    |
| 14 | 89629002 | 89629202 | 5Y-H4K8ac_peak_5109 | 4.07874  |                                                                                    |
| 14 | 89882836 | 89883243 | 5Y-H4K8ac_peak_5110 | 6.73385  | FOXN3-AS1_ENSG00000258920                                                          |
| 14 | 89895217 | 89895463 | 5Y-H4K8ac_peak_5111 | 4.77016  |                                                                                    |
| 14 | 90091239 | 90091522 | 5Y-H4K8ac_peak_5112 | 6.20875  |                                                                                    |
| 14 | 90091918 | 90092132 | 5Y-H4K8ac_peak_5113 | 11.19336 |                                                                                    |
| 14 | 90125582 | 90125974 | 5Y-H4K8ac_peak_5114 | 12.71156 |                                                                                    |
| 14 | 90127009 | 90127259 | 5Y-H4K8ac_peak_5115 | 7.57144  |                                                                                    |
| 14 | 90797335 | 90797650 | 5Y-H4K8ac_peak_5116 | 8.2913   | NRDE2_ENSG00000119720                                                              |
| 14 | 90798031 | 90798327 | 5Y-H4K8ac_peak_5117 | 7.11863  | NRDE2_ENSG00000119720                                                              |
| 14 | 90848635 | 90848910 | 5Y-H4K8ac_peak_5118 | 6.73047  |                                                                                    |
| 14 | 90849186 | 90849483 | 5Y-H4K8ac_peak_5119 | 7.83553  |                                                                                    |
| 14 | 90849829 | 90850441 | 5Y-H4K8ac_peak_5120 | 8.62703  |                                                                                    |
| 14 | 90909254 | 90909899 | 5Y-H4K8ac_peak_5121 | 12.34314 |                                                                                    |
| 14 | 90916565 | 90916788 | 5Y-H4K8ac_peak_5122 | 11.22005 |                                                                                    |
| 14 | 90917387 | 90918218 | 5Y-H4K8ac_peak_5123 | 12.52787 |                                                                                    |
| 14 | 90918760 | 90918995 | 5Y-H4K8ac_peak_5124 | 9.69677  |                                                                                    |
| 14 | 90919263 | 90919612 | 5Y-H4K8ac_peak_5125 | 9.00954  |                                                                                    |
| 14 | 90919909 | 90920718 | 5Y-H4K8ac_peak_5126 | 14.99673 | RP11-1078H9.1_ENSG00000258678;LINC00642_ENSG00000233208                            |
| 14 | 90920949 | 90921985 | 5Y-H4K8ac_peak_5127 | 17.34187 | RP11-1078H9.1_ENSG00000258678;LINC00642_ENSG00000233208                            |
| 14 | 90958049 | 90958419 | 5Y-H4K8ac_peak_5128 | 8.20773  | RP11-1078H9.6_ENSG00000259789                                                      |
| 14 | 90978246 | 90978686 | 5Y-H4K8ac_peak_5129 | 5.91107  |                                                                                    |
| 14 | 90988687 | 90989365 | 5Y-H4K8ac_peak_5130 | 13.12848 |                                                                                    |
| 14 | 91011846 | 91012217 | 5Y-H4K8ac_peak_5131 | 9.01738  |                                                                                    |
| 14 | 91012718 | 91013032 | 5Y-H4K8ac_peak_5132 | 5.99504  |                                                                                    |
| 14 | 91018363 | 91018679 | 5Y-H4K8ac_peak_5133 | 6.68024  |                                                                                    |
| 14 | 91082261 | 91082660 | 5Y-H4K8ac_peak_5134 | 6.94897  |                                                                                    |
| 14 | 91096041 | 91096244 | 5Y-H4K8ac_peak_5135 | 6.46606  |                                                                                    |
| 14 | 91283125 | 91283326 | 5Y-H4K8ac_peak_5136 | 9.6443   | TTC7B_ENSG00000165914                                                              |
| 14 | 91589140 | 91589479 | 5Y-H4K8ac_peak_5137 | 8.43511  |                                                                                    |
| 14 | 91716109 | 91716410 | 5Y-H4K8ac_peak_5138 | 7.31102  |                                                                                    |
| 14 | 91719459 | 91720702 | 5Y-H4K8ac_peak_5139 | 14.86775 | GPR68_ENSG00000119714                                                              |
| 14 | 91730439 | 91731296 | 5Y-H4K8ac_peak_5140 | 4.95697  |                                                                                    |
| 14 | 91749511 | 91750155 | 5Y-H4K8ac_peak_5141 | 8.73985  |                                                                                    |
| 14 | 91787346 | 91787690 | 5Y-H4K8ac_peak_5142 | 8.43511  |                                                                                    |
| 14 | 91838527 | 91838753 | 5Y-H4K8ac_peak_5143 | 7.03573  |                                                                                    |
| 14 | 91843443 | 91843746 | 5Y-H4K8ac_peak_5144 | 11.8513  |                                                                                    |
| 14 | 91844077 | 91844317 | 5Y-H4K8ac_peak_5145 | 7.04158  |                                                                                    |
| 14 | 91845601 | 91846290 | 5Y-H4K8ac_peak_5146 | 5.24695  |                                                                                    |
| 14 | 91859528 | 91859795 | 5Y-H4K8ac_peak_5147 | 7.01856  |                                                                                    |
| 14 | 91860688 | 91860886 | 5Y-H4K8ac_peak_5148 | 7.57144  |                                                                                    |
| 14 | 91865238 | 91865764 | 5Y-H4K8ac_peak_5149 | 5.98695  |                                                                                    |
| 14 | 91883780 | 91884976 | 5Y-H4K8ac_peak_5150 | 9.96543  | CCDC88C_ENSG0000015133;RP11-895M11.3_ENSG00000258798;RP11-895M11.2_ENSG00000258446 |

|    |          |          |                     |          |                                                                            |
|----|----------|----------|---------------------|----------|----------------------------------------------------------------------------|
| 14 | 91976105 | 91976327 | 5Y-H4K8ac_peak_5151 | 7.89142  | SMEK1_ENSG00000100796                                                      |
| 14 | 91976604 | 91977325 | 5Y-H4K8ac_peak_5152 | 10.60083 | SMEK1_ENSG00000100796                                                      |
| 14 | 92572679 | 92572875 | 5Y-H4K8ac_peak_5153 | 10.1994  | ATXN3_ENSG00000066427                                                      |
| 14 | 92573387 | 92573611 | 5Y-H4K8ac_peak_5154 | 8.33296  | ATXN3_ENSG00000066427                                                      |
| 14 | 93382519 | 93382740 | 5Y-H4K8ac_peak_5155 | 9.30505  |                                                                            |
| 14 | 93383000 | 93383602 | 5Y-H4K8ac_peak_5156 | 8.79957  |                                                                            |
| 14 | 93384205 | 93384739 | 5Y-H4K8ac_peak_5157 | 9.52603  |                                                                            |
| 14 | 93389128 | 93389336 | 5Y-H4K8ac_peak_5158 | 5.64909  | CHGA_ENSG00000100604                                                       |
| 14 | 93389631 | 93389979 | 5Y-H4K8ac_peak_5159 | 5.449    | CHGA_ENSG00000100604                                                       |
| 14 | 93426293 | 93426798 | 5Y-H4K8ac_peak_5160 | 6.01761  |                                                                            |
| 14 | 93453649 | 93454153 | 5Y-H4K8ac_peak_5161 | 6.78128  |                                                                            |
| 14 | 93473945 | 93474481 | 5Y-H4K8ac_peak_5162 | 10.19948 |                                                                            |
| 14 | 93475666 | 93475871 | 5Y-H4K8ac_peak_5163 | 9.44864  |                                                                            |
| 14 | 93476350 | 93477169 | 5Y-H4K8ac_peak_5164 | 6.49458  |                                                                            |
| 14 | 93484309 | 93484536 | 5Y-H4K8ac_peak_5165 | 6.46053  |                                                                            |
| 14 | 93485499 | 93486048 | 5Y-H4K8ac_peak_5166 | 12.09312 |                                                                            |
| 14 | 93490479 | 93490721 | 5Y-H4K8ac_peak_5167 | 8.53555  |                                                                            |
| 14 | 93581903 | 93582194 | 5Y-H4K8ac_peak_5168 | 12.87098 | ITPK1_ENSG00000100605                                                      |
| 14 | 93644794 | 93644997 | 5Y-H4K8ac_peak_5169 | 6.50117  |                                                                            |
| 14 | 93650925 | 93651120 | 5Y-H4K8ac_peak_5170 | 11.62198 | MOAP1_ENSG00000165943;TMEM251_ENSG00000153485;RP11-371E8.4_ENSG00000259066 |
| 14 | 93697123 | 93697693 | 5Y-H4K8ac_peak_5171 | 9.58986  |                                                                            |
| 14 | 93799090 | 93799305 | 5Y-H4K8ac_peak_5172 | 8.43511  | BTBD7_ENSG00000011114;UNC79_ENSG00000133958                                |
| 14 | 93896776 | 93896975 | 5Y-H4K8ac_peak_5173 | 7.50148  |                                                                            |
| 14 | 94211782 | 94212055 | 5Y-H4K8ac_peak_5174 | 7.72887  |                                                                            |
| 14 | 94214644 | 94214948 | 5Y-H4K8ac_peak_5175 | 10.1994  |                                                                            |
| 14 | 94215296 | 94215790 | 5Y-H4K8ac_peak_5176 | 9.01966  |                                                                            |
| 14 | 94216026 | 94216716 | 5Y-H4K8ac_peak_5177 | 7.387    |                                                                            |
| 14 | 94226060 | 94226479 | 5Y-H4K8ac_peak_5178 | 4.95697  |                                                                            |
| 14 | 94254520 | 94255321 | 5Y-H4K8ac_peak_5179 | 9.36633  | PRIMA1_ENSG00000175785                                                     |
| 14 | 94255575 | 94256031 | 5Y-H4K8ac_peak_5180 | 9.00954  | PRIMA1_ENSG00000175785                                                     |
| 14 | 94358649 | 94358855 | 5Y-H4K8ac_peak_5181 | 4.17859  |                                                                            |
| 14 | 94359070 | 94359316 | 5Y-H4K8ac_peak_5182 | 8.21582  |                                                                            |
| 14 | 94360629 | 94360843 | 5Y-H4K8ac_peak_5183 | 7.11863  |                                                                            |
| 14 | 94372953 | 94373171 | 5Y-H4K8ac_peak_5184 | 8.12305  |                                                                            |
| 14 | 94492925 | 94493556 | 5Y-H4K8ac_peak_5185 | 16.50659 | OTUB2_ENSG00000089723                                                      |
| 14 | 95156135 | 95156408 | 5Y-H4K8ac_peak_5186 | 12.11208 |                                                                            |
| 14 | 95236064 | 95236346 | 5Y-H4K8ac_peak_5187 | 7.59101  | GSC_ENSG00000133937                                                        |
| 14 | 95403331 | 95403562 | 5Y-H4K8ac_peak_5188 | 10.1994  |                                                                            |
| 14 | 95536910 | 95537151 | 5Y-H4K8ac_peak_5189 | 8.97752  |                                                                            |
| 14 | 95623211 | 95623646 | 5Y-H4K8ac_peak_5190 | 7.50148  | DICER1_ENSG00000100697;DICER1-AS1_ENSG00000235706                          |
| 14 | 95624876 | 95625087 | 5Y-H4K8ac_peak_5191 | 5.56912  | DICER1_ENSG00000100697;DICER1-AS1_ENSG00000235706                          |
| 14 | 95880412 | 95880697 | 5Y-H4K8ac_peak_5192 | 5.97089  |                                                                            |
| 14 | 95909482 | 95909708 | 5Y-H4K8ac_peak_5193 | 7.38046  |                                                                            |
| 14 | 95948328 | 95948555 | 5Y-H4K8ac_peak_5194 | 8.16031  |                                                                            |
| 14 | 95982601 | 95983260 | 5Y-H4K8ac_peak_5195 | 8.73985  | RP11-1070N10.3_ENSG00000258572                                             |
| 14 | 95986769 | 95987050 | 5Y-H4K8ac_peak_5196 | 4.07435  |                                                                            |

|    |           |           |                     |          |                                                      |
|----|-----------|-----------|---------------------|----------|------------------------------------------------------|
| 14 | 96000665  | 96000879  | 5Y-H4K8ac_peak_5197 | 9.7353   | SNHG10_ENSG00000247092;SCARNA13_ENSG00000252481      |
| 14 | 96126376  | 96126577  | 5Y-H4K8ac_peak_5198 | 6.34046  |                                                      |
| 14 | 96343099  | 96343562  | 5Y-H4K8ac_peak_5199 | 7.38046  | LINC00617_ENSG00000250366                            |
| 14 | 96353087  | 96353301  | 5Y-H4K8ac_peak_5200 | 6.1654   |                                                      |
| 14 | 96505279  | 96505497  | 5Y-H4K8ac_peak_5201 | 7.89142  | C14orf132_ENSG00000227051                            |
| 14 | 96505893  | 96506310  | 5Y-H4K8ac_peak_5202 | 8.24461  | C14orf132_ENSG00000227051                            |
| 14 | 96734290  | 96734509  | 5Y-H4K8ac_peak_5203 | 6.43775  | RP11-404P21.3_ENSG00000258793                        |
| 14 | 96839108  | 96839442  | 5Y-H4K8ac_peak_5204 | 8.33296  |                                                      |
| 14 | 96968845  | 96969097  | 5Y-H4K8ac_peak_5205 | 9.51254  | RP11-872J21.3_ENSG00000260806                        |
| 14 | 97059095  | 97059548  | 5Y-H4K8ac_peak_5206 | 7.59101  | RP11-433J8.1_ENSG00000258702                         |
| 14 | 99947807  | 99947997  | 5Y-H4K8ac_peak_5207 | 8.62703  | SETD3_ENSG00000183576;CCNK_ENSG00000090061           |
| 14 | 99981702  | 99981941  | 5Y-H4K8ac_peak_5208 | 5.65584  |                                                      |
| 14 | 100029844 | 100030123 | 5Y-H4K8ac_peak_5209 | 7.29176  |                                                      |
| 14 | 100030557 | 100030757 | 5Y-H4K8ac_peak_5210 | 8.30418  |                                                      |
| 14 | 100035473 | 100035818 | 5Y-H4K8ac_peak_5211 | 5.47078  |                                                      |
| 14 | 100038210 | 100038670 | 5Y-H4K8ac_peak_5212 | 7.27597  |                                                      |
| 14 | 100039208 | 100039568 | 5Y-H4K8ac_peak_5213 | 7.03573  |                                                      |
| 14 | 100041224 | 100041724 | 5Y-H4K8ac_peak_5214 | 8.73985  |                                                      |
| 14 | 100042417 | 100042791 | 5Y-H4K8ac_peak_5215 | 5.64909  |                                                      |
| 14 | 100057541 | 100057949 | 5Y-H4K8ac_peak_5216 | 6.36723  |                                                      |
| 14 | 100071036 | 100071574 | 5Y-H4K8ac_peak_5217 | 20.96132 | CCDC85C_ENSG00000205476;RP11-543C4.1_ENSG00000247970 |
| 14 | 100204075 | 100204395 | 5Y-H4K8ac_peak_5218 | 6.43775  | EML1_ENSG00000066629                                 |
| 14 | 100239337 | 100240729 | 5Y-H4K8ac_peak_5219 | 14.77644 |                                                      |
| 14 | 100259065 | 100259518 | 5Y-H4K8ac_peak_5220 | 18.77281 |                                                      |
| 14 | 100432985 | 100433181 | 5Y-H4K8ac_peak_5221 | 6.50117  |                                                      |
| 14 | 100437412 | 100437637 | 5Y-H4K8ac_peak_5222 | 10.1994  | EVL_ENSG00000196405                                  |
| 14 | 100438473 | 100438844 | 5Y-H4K8ac_peak_5223 | 15.16038 | EVL_ENSG00000196405                                  |
| 14 | 100609542 | 100609874 | 5Y-H4K8ac_peak_5224 | 9.52107  |                                                      |
| 14 | 100658669 | 100659226 | 5Y-H4K8ac_peak_5225 | 13.92877 |                                                      |
| 14 | 100659573 | 100660256 | 5Y-H4K8ac_peak_5226 | 9.99623  |                                                      |
| 14 | 100680152 | 100680750 | 5Y-H4K8ac_peak_5227 | 6.78128  |                                                      |
| 14 | 100751515 | 100752582 | 5Y-H4K8ac_peak_5228 | 17.50045 |                                                      |
| 14 | 100772500 | 100772716 | 5Y-H4K8ac_peak_5229 | 5.41472  | SLC25A29_ENSG00000197119                             |
| 14 | 100773095 | 100773626 | 5Y-H4K8ac_peak_5230 | 11.1169  | SLC25A29_ENSG00000197119;MIR345_ENSG00000198984      |
| 14 | 100856119 | 100856318 | 5Y-H4K8ac_peak_5231 | 7.89142  |                                                      |
| 14 | 100867553 | 100867898 | 5Y-H4K8ac_peak_5232 | 12.52787 |                                                      |
| 14 | 100886339 | 100886563 | 5Y-H4K8ac_peak_5233 | 4.15658  |                                                      |
| 14 | 100889575 | 100889768 | 5Y-H4K8ac_peak_5234 | 6.85744  |                                                      |
| 14 | 100890247 | 100891318 | 5Y-H4K8ac_peak_5235 | 12.10416 |                                                      |
| 14 | 100894153 | 100895000 | 5Y-H4K8ac_peak_5236 | 9.99623  |                                                      |
| 14 | 100895493 | 100895740 | 5Y-H4K8ac_peak_5237 | 12.11208 |                                                      |
| 14 | 100902905 | 100903192 | 5Y-H4K8ac_peak_5238 | 4.77126  |                                                      |
| 14 | 100905156 | 100905691 | 5Y-H4K8ac_peak_5239 | 14.77644 |                                                      |
| 14 | 100906681 | 100907047 | 5Y-H4K8ac_peak_5240 | 5.80888  |                                                      |
| 14 | 100907630 | 100908779 | 5Y-H4K8ac_peak_5241 | 17.55091 |                                                      |
| 14 | 100910209 | 100910697 | 5Y-H4K8ac_peak_5242 | 11.8513  |                                                      |

|    |           |           |                     |          |                               |
|----|-----------|-----------|---------------------|----------|-------------------------------|
| 14 | 100952000 | 100952236 | 5Y-H4K8ac_peak_5243 | 4.79585  |                               |
| 14 | 100952879 | 100953136 | 5Y-H4K8ac_peak_5244 | 9.30505  | RN7SKP92_ENSG00000253075      |
| 14 | 101016469 | 101016677 | 5Y-H4K8ac_peak_5245 | 6.68024  |                               |
| 14 | 101033941 | 101034171 | 5Y-H4K8ac_peak_5246 | 4.77126  |                               |
| 14 | 101034862 | 101035082 | 5Y-H4K8ac_peak_5247 | 10.60083 |                               |
| 14 | 101052414 | 101053701 | 5Y-H4K8ac_peak_5248 | 12.05638 | BEGAIN_ENSG00000183092        |
| 14 | 101054133 | 101054562 | 5Y-H4K8ac_peak_5249 | 10.1994  | BEGAIN_ENSG00000183092        |
| 14 | 101055133 | 101055549 | 5Y-H4K8ac_peak_5250 | 9.45148  | CTD-2644I21.1_ENSG00000258576 |
| 14 | 101075295 | 101075579 | 5Y-H4K8ac_peak_5251 | 4.50834  |                               |
| 14 | 101080126 | 101080337 | 5Y-H4K8ac_peak_5252 | 4.50834  |                               |
| 14 | 101106957 | 101107166 | 5Y-H4K8ac_peak_5253 | 5.59843  |                               |
| 14 | 101120128 | 101120498 | 5Y-H4K8ac_peak_5254 | 7.89273  |                               |
| 14 | 101120949 | 101121756 | 5Y-H4K8ac_peak_5255 | 8.04693  |                               |
| 14 | 101123092 | 101123296 | 5Y-H4K8ac_peak_5256 | 4.15907  | LINC00523_ENSG00000196273     |
| 14 | 101124603 | 101125039 | 5Y-H4K8ac_peak_5257 | 5.18558  |                               |
| 14 | 101125968 | 101126405 | 5Y-H4K8ac_peak_5258 | 4.15658  |                               |
| 14 | 101131177 | 101131447 | 5Y-H4K8ac_peak_5259 | 8.73227  |                               |
| 14 | 101134042 | 101134258 | 5Y-H4K8ac_peak_5260 | 6.37023  |                               |
| 14 | 101138723 | 101139947 | 5Y-H4K8ac_peak_5261 | 15.59156 |                               |
| 14 | 101140602 | 101141588 | 5Y-H4K8ac_peak_5262 | 13.00733 |                               |
| 14 | 101142066 | 101143359 | 5Y-H4K8ac_peak_5263 | 9.79526  |                               |
| 14 | 101143587 | 101144971 | 5Y-H4K8ac_peak_5264 | 13.59183 |                               |
| 14 | 101145210 | 101145413 | 5Y-H4K8ac_peak_5265 | 6.34245  | RP11-566J3.2_ENSG00000258717  |
| 14 | 101146106 | 101146345 | 5Y-H4K8ac_peak_5266 | 15.39698 | RP11-566J3.2_ENSG00000258717  |
| 14 | 101147003 | 101147581 | 5Y-H4K8ac_peak_5267 | 11.60073 | RP11-566J3.2_ENSG00000258717  |
| 14 | 101157324 | 101157536 | 5Y-H4K8ac_peak_5268 | 4.15658  |                               |
| 14 | 101159220 | 101159521 | 5Y-H4K8ac_peak_5269 | 9.05168  |                               |
| 14 | 101162562 | 101162772 | 5Y-H4K8ac_peak_5270 | 12.69256 |                               |
| 14 | 101163052 | 101163433 | 5Y-H4K8ac_peak_5271 | 7.21932  |                               |
| 14 | 101165305 | 101165895 | 5Y-H4K8ac_peak_5272 | 8.52802  |                               |
| 14 | 101172323 | 101172594 | 5Y-H4K8ac_peak_5273 | 7.12953  |                               |
| 14 | 101175286 | 101175872 | 5Y-H4K8ac_peak_5274 | 4.55128  |                               |
| 14 | 101192630 | 101192862 | 5Y-H4K8ac_peak_5275 | 4.29586  | DLK1_ENSG00000185559          |
| 14 | 101204606 | 101204860 | 5Y-H4K8ac_peak_5276 | 7.31102  | RP11-566J3.4_ENSG00000273087  |
| 14 | 101236746 | 101237455 | 5Y-H4K8ac_peak_5277 | 11.04542 |                               |
| 14 | 101238381 | 101239505 | 5Y-H4K8ac_peak_5278 | 16.51777 |                               |
| 14 | 101239824 | 101240748 | 5Y-H4K8ac_peak_5279 | 15.03212 |                               |
| 14 | 101241901 | 101244058 | 5Y-H4K8ac_peak_5280 | 17.78344 |                               |
| 14 | 101244853 | 101246789 | 5Y-H4K8ac_peak_5281 | 15.27603 | MEG3_ENSG00000214548          |
| 14 | 101247174 | 101247653 | 5Y-H4K8ac_peak_5282 | 6.19716  |                               |
| 14 | 101248182 | 101248966 | 5Y-H4K8ac_peak_5283 | 10.35586 |                               |
| 14 | 101249389 | 101250246 | 5Y-H4K8ac_peak_5284 | 21.95908 |                               |
| 14 | 101250854 | 101251788 | 5Y-H4K8ac_peak_5285 | 11.4254  |                               |
| 14 | 101251991 | 101252790 | 5Y-H4K8ac_peak_5286 | 12.44818 |                               |
| 14 | 101254759 | 101255155 | 5Y-H4K8ac_peak_5287 | 7.0618   |                               |
| 14 | 101256474 | 101257005 | 5Y-H4K8ac_peak_5288 | 4.50834  |                               |

|    |           |           |                     |          |                                                   |
|----|-----------|-----------|---------------------|----------|---------------------------------------------------|
| 14 | 101307750 | 101308049 | 5Y-H4K8ac_peak_5289 | 4.98439  |                                                   |
| 14 | 101363061 | 101363278 | 5Y-H4K8ac_peak_5290 | 6.77436  |                                                   |
| 14 | 101365317 | 101365904 | 5Y-H4K8ac_peak_5291 | 10.58128 |                                                   |
| 14 | 101366876 | 101367117 | 5Y-H4K8ac_peak_5292 | 10.97738 |                                                   |
| 14 | 101367519 | 101369136 | 5Y-H4K8ac_peak_5293 | 7.44077  | AL117190.1_ENSG00000221077                        |
| 14 | 101543273 | 101543500 | 5Y-H4K8ac_peak_5294 | 6.78318  | AL132709.1_ENSG00000230805                        |
| 14 | 101593103 | 101593534 | 5Y-H4K8ac_peak_5295 | 7.17997  |                                                   |
| 14 | 101597164 | 101597417 | 5Y-H4K8ac_peak_5296 | 6.49458  |                                                   |
| 14 | 101642546 | 101642872 | 5Y-H4K8ac_peak_5297 | 5.98695  |                                                   |
| 14 | 101697121 | 101697327 | 5Y-H4K8ac_peak_5298 | 5.23083  |                                                   |
| 14 | 101700942 | 101701211 | 5Y-H4K8ac_peak_5299 | 15.62779 |                                                   |
| 14 | 101701472 | 101702035 | 5Y-H4K8ac_peak_5300 | 6.73047  |                                                   |
| 14 | 101702924 | 101703142 | 5Y-H4K8ac_peak_5301 | 5.25503  |                                                   |
| 14 | 101925580 | 101926033 | 5Y-H4K8ac_peak_5302 | 14.30055 |                                                   |
| 14 | 102054306 | 102054870 | 5Y-H4K8ac_peak_5303 | 6.77436  |                                                   |
| 14 | 102056216 | 102056496 | 5Y-H4K8ac_peak_5304 | 8.63295  |                                                   |
| 14 | 102062977 | 102063243 | 5Y-H4K8ac_peak_5305 | 4.84727  |                                                   |
| 14 | 102094125 | 102094451 | 5Y-H4K8ac_peak_5306 | 11.20395 |                                                   |
| 14 | 102095078 | 102095411 | 5Y-H4K8ac_peak_5307 | 7.20869  |                                                   |
| 14 | 102096539 | 102096995 | 5Y-H4K8ac_peak_5308 | 7.20869  |                                                   |
| 14 | 102247418 | 102248287 | 5Y-H4K8ac_peak_5309 | 7.38046  |                                                   |
| 14 | 102276342 | 102276574 | 5Y-H4K8ac_peak_5310 | 8.63306  | CTD-2017C7.2_ENSG00000259088                      |
| 14 | 102304965 | 102305262 | 5Y-H4K8ac_peak_5311 | 8.86184  | CTD-2017C7.1_ENSG00000256705                      |
| 14 | 102307888 | 102308366 | 5Y-H4K8ac_peak_5312 | 10.21117 |                                                   |
| 14 | 102343516 | 102343832 | 5Y-H4K8ac_peak_5313 | 4.84727  |                                                   |
| 14 | 102413433 | 102414305 | 5Y-H4K8ac_peak_5314 | 6.77436  | RP11-1017G21.5_ENSG00000271780                    |
| 14 | 102414820 | 102415417 | 5Y-H4K8ac_peak_5315 | 7.89273  | RP11-1017G21.5_ENSG00000271780                    |
| 14 | 102552959 | 102553291 | 5Y-H4K8ac_peak_5316 | 13.2534  |                                                   |
| 14 | 102553703 | 102554011 | 5Y-H4K8ac_peak_5317 | 6.98416  |                                                   |
| 14 | 102656759 | 102657239 | 5Y-H4K8ac_peak_5318 | 6.59249  |                                                   |
| 14 | 102783694 | 102783889 | 5Y-H4K8ac_peak_5319 | 7.59101  | ZNF839_ENSG00000022976                            |
| 14 | 102786342 | 102786709 | 5Y-H4K8ac_peak_5320 | 16.41521 |                                                   |
| 14 | 102983519 | 102984229 | 5Y-H4K8ac_peak_5321 | 7.44077  |                                                   |
| 14 | 102990382 | 102990869 | 5Y-H4K8ac_peak_5322 | 12.26606 |                                                   |
| 14 | 103006632 | 103007071 | 5Y-H4K8ac_peak_5323 | 12.87098 | MIR4309_ENSG00000266015                           |
| 14 | 103011716 | 103012178 | 5Y-H4K8ac_peak_5324 | 6.27097  | CTD-2555C10.3_ENSG00000259230                     |
| 14 | 103059056 | 103059266 | 5Y-H4K8ac_peak_5325 | 10.90365 | RCOR1_ENSG00000089902                             |
| 14 | 103244258 | 103244463 | 5Y-H4K8ac_peak_5326 | 5.98695  | TRAF3_ENSG00000131323                             |
| 14 | 103291683 | 103291890 | 5Y-H4K8ac_peak_5327 | 4.8773   |                                                   |
| 14 | 103315812 | 103316191 | 5Y-H4K8ac_peak_5328 | 6.03718  |                                                   |
| 14 | 103317876 | 103318143 | 5Y-H4K8ac_peak_5329 | 5.23083  |                                                   |
| 14 | 103557566 | 103558308 | 5Y-H4K8ac_peak_5330 | 13.33225 |                                                   |
| 14 | 103578597 | 103579002 | 5Y-H4K8ac_peak_5331 | 5.98695  |                                                   |
| 14 | 103579255 | 103579534 | 5Y-H4K8ac_peak_5332 | 11.19336 |                                                   |
| 14 | 103588693 | 103589403 | 5Y-H4K8ac_peak_5333 | 18.71546 | LINC00677_ENSG00000259717;TNFAIP2_ENSG00000185215 |
| 14 | 103593047 | 103593958 | 5Y-H4K8ac_peak_5334 | 10.4689  |                                                   |



|    |           |           |                     |          |                                                                                               |
|----|-----------|-----------|---------------------|----------|-----------------------------------------------------------------------------------------------|
| 14 | 103622061 | 103622252 | 5Y-H4K8ac_peak_5335 | 5.51139  |                                                                                               |
| 14 | 103673775 | 103674333 | 5Y-H4K8ac_peak_5336 | 9.58986  | RP11-736N17.9_ENSG00000270705                                                                 |
| 14 | 103702286 | 103702476 | 5Y-H4K8ac_peak_5337 | 8.43511  |                                                                                               |
| 14 | 103726324 | 103726729 | 5Y-H4K8ac_peak_5338 | 4.50834  |                                                                                               |
| 14 | 103800610 | 103800932 | 5Y-H4K8ac_peak_5339 | 7.90751  | EIF5_ENSG00000100664                                                                          |
| 14 | 103851194 | 103851407 | 5Y-H4K8ac_peak_5340 | 6.00747  | MARK3_ENSG00000075413                                                                         |
| 14 | 103989369 | 103989729 | 5Y-H4K8ac_peak_5341 | 6.37023  | CKB_ENSG00000166165                                                                           |
| 14 | 104008927 | 104009152 | 5Y-H4K8ac_peak_5342 | 7.52971  |                                                                                               |
| 14 | 104028772 | 104029372 | 5Y-H4K8ac_peak_5343 | 15.17389 | BAG5_ENSG00000166170;KLC1_ENSG00000126214;RP11-73M18.2_ENSG00000256500;APOPT1_ENSG00000256053 |
| 14 | 104094455 | 104095867 | 5Y-H4K8ac_peak_5344 | 20.44546 |                                                                                               |
| 14 | 104314097 | 104314915 | 5Y-H4K8ac_peak_5345 | 22.1484  | PPP1R13B_ENSG00000088808;LINC00637_ENSG00000258735                                            |
| 14 | 104321796 | 104322137 | 5Y-H4K8ac_peak_5346 | 9.7353   |                                                                                               |
| 14 | 104346425 | 104348608 | 5Y-H4K8ac_peak_5347 | 8.62703  | CTD-2134A5.4_ENSG00000258534                                                                  |
| 14 | 104349191 | 104350116 | 5Y-H4K8ac_peak_5348 | 5.41472  |                                                                                               |
| 14 | 104392106 | 104392366 | 5Y-H4K8ac_peak_5349 | 5.35202  |                                                                                               |
| 14 | 104516512 | 104516713 | 5Y-H4K8ac_peak_5350 | 5.87382  |                                                                                               |
| 14 | 104549125 | 104549460 | 5Y-H4K8ac_peak_5351 | 5.07473  |                                                                                               |
| 14 | 104570519 | 104570723 | 5Y-H4K8ac_peak_5352 | 4.8509   |                                                                                               |
| 14 | 104615042 | 104616431 | 5Y-H4K8ac_peak_5353 | 14.97676 |                                                                                               |
| 14 | 104617099 | 104617582 | 5Y-H4K8ac_peak_5354 | 7.59101  |                                                                                               |
| 14 | 104625508 | 104625843 | 5Y-H4K8ac_peak_5355 | 7.08486  |                                                                                               |
| 14 | 104667943 | 104668160 | 5Y-H4K8ac_peak_5356 | 4.642    |                                                                                               |
| 14 | 104677685 | 104677877 | 5Y-H4K8ac_peak_5357 | 4.50834  |                                                                                               |
| 14 | 104686668 | 104686914 | 5Y-H4K8ac_peak_5358 | 5.37237  |                                                                                               |
| 14 | 104687481 | 104688165 | 5Y-H4K8ac_peak_5359 | 6.78128  |                                                                                               |
| 14 | 104688986 | 104689627 | 5Y-H4K8ac_peak_5360 | 12.87247 | RP11-260M19.2_ENSG00000258913                                                                 |
| 14 | 104689972 | 104690372 | 5Y-H4K8ac_peak_5361 | 13.81505 | RP11-260M19.2_ENSG00000258913                                                                 |
| 14 | 104690719 | 104691596 | 5Y-H4K8ac_peak_5362 | 14.59308 | RP11-260M19.2_ENSG00000258913                                                                 |
| 14 | 104695125 | 104695761 | 5Y-H4K8ac_peak_5363 | 4.66162  |                                                                                               |
| 14 | 104696911 | 104697143 | 5Y-H4K8ac_peak_5364 | 7.28023  |                                                                                               |
| 14 | 104719911 | 104720239 | 5Y-H4K8ac_peak_5365 | 4.9885   |                                                                                               |
| 14 | 104746998 | 104747227 | 5Y-H4K8ac_peak_5366 | 7.9592   |                                                                                               |
| 14 | 104750780 | 104750989 | 5Y-H4K8ac_peak_5367 | 7.95453  |                                                                                               |
| 14 | 104757161 | 104757354 | 5Y-H4K8ac_peak_5368 | 4.04213  |                                                                                               |
| 14 | 104758846 | 104759127 | 5Y-H4K8ac_peak_5369 | 9.08389  |                                                                                               |
| 14 | 104759712 | 104759998 | 5Y-H4K8ac_peak_5370 | 6.08523  |                                                                                               |
| 14 | 104761179 | 104761870 | 5Y-H4K8ac_peak_5371 | 6.98416  |                                                                                               |
| 14 | 104762231 | 104763005 | 5Y-H4K8ac_peak_5372 | 16.07596 |                                                                                               |
| 14 | 104763275 | 104763694 | 5Y-H4K8ac_peak_5373 | 8.1667   |                                                                                               |
| 14 | 104835223 | 104835430 | 5Y-H4K8ac_peak_5374 | 8.86778  |                                                                                               |
| 14 | 104889606 | 104890267 | 5Y-H4K8ac_peak_5375 | 8.2913   |                                                                                               |
| 14 | 104890618 | 104890893 | 5Y-H4K8ac_peak_5376 | 4.95697  |                                                                                               |
| 14 | 104893589 | 104893807 | 5Y-H4K8ac_peak_5377 | 6.88532  |                                                                                               |
| 14 | 104901800 | 104902196 | 5Y-H4K8ac_peak_5378 | 5.64909  |                                                                                               |
| 14 | 104902780 | 104903896 | 5Y-H4K8ac_peak_5379 | 18.60331 |                                                                                               |
| 14 | 104927462 | 104927682 | 5Y-H4K8ac_peak_5380 | 6.37023  |                                                                                               |

|    |           |           |                     |          |                                                     |
|----|-----------|-----------|---------------------|----------|-----------------------------------------------------|
| 14 | 104973374 | 104973593 | 5Y-H4K8ac_peak_5381 | 5.87725  |                                                     |
| 14 | 104976175 | 104976437 | 5Y-H4K8ac_peak_5382 | 8.05083  |                                                     |
| 14 | 104977652 | 104977878 | 5Y-H4K8ac_peak_5383 | 7.18391  |                                                     |
| 14 | 105029644 | 105030756 | 5Y-H4K8ac_peak_5384 | 11.36989 |                                                     |
| 14 | 105046719 | 105046918 | 5Y-H4K8ac_peak_5385 | 8.43511  | C14orf180_ENSG00000184601                           |
| 14 | 105048020 | 105048238 | 5Y-H4K8ac_peak_5386 | 7.11863  |                                                     |
| 14 | 105048612 | 105048948 | 5Y-H4K8ac_peak_5387 | 7.73538  |                                                     |
| 14 | 105050487 | 105050684 | 5Y-H4K8ac_peak_5388 | 5.90602  |                                                     |
| 14 | 105053532 | 105053843 | 5Y-H4K8ac_peak_5389 | 9.02938  |                                                     |
| 14 | 105054745 | 105055152 | 5Y-H4K8ac_peak_5390 | 4.95697  |                                                     |
| 14 | 105055377 | 105055672 | 5Y-H4K8ac_peak_5391 | 9.07085  | RP11-614O9.1_ENSG00000259037                        |
| 14 | 105064883 | 105065441 | 5Y-H4K8ac_peak_5392 | 5.83799  |                                                     |
| 14 | 105070066 | 105070439 | 5Y-H4K8ac_peak_5393 | 10.07308 |                                                     |
| 14 | 105070697 | 105070892 | 5Y-H4K8ac_peak_5394 | 4.95697  |                                                     |
| 14 | 105071535 | 105071737 | 5Y-H4K8ac_peak_5395 | 5.94703  | TMEM179_ENSG00000258986                             |
| 14 | 105147178 | 105147607 | 5Y-H4K8ac_peak_5396 | 4.84727  | RP11-982M15.6_ENSG00000256050                       |
| 14 | 105154647 | 105156357 | 5Y-H4K8ac_peak_5397 | 12.1498  | INF2_ENSG00000203485                                |
| 14 | 105218334 | 105218849 | 5Y-H4K8ac_peak_5398 | 7.11863  | SIVA1_ENSG00000184990                               |
| 14 | 105266174 | 105266825 | 5Y-H4K8ac_peak_5399 | 9.95819  | ZBTB42_ENSG00000179627                              |
| 14 | 105282553 | 105283133 | 5Y-H4K8ac_peak_5400 | 7.90751  |                                                     |
| 14 | 105292581 | 105292858 | 5Y-H4K8ac_peak_5401 | 9.179    |                                                     |
| 14 | 105297162 | 105297388 | 5Y-H4K8ac_peak_5402 | 7.13294  | RPS26P49_ENSG00000239365                            |
| 14 | 105331041 | 105331315 | 5Y-H4K8ac_peak_5403 | 10.94674 | CEP170B_ENSG00000099814                             |
| 14 | 105399533 | 105399874 | 5Y-H4K8ac_peak_5404 | 9.79526  |                                                     |
| 14 | 105434389 | 105434961 | 5Y-H4K8ac_peak_5405 | 6.77436  |                                                     |
| 14 | 105559214 | 105559505 | 5Y-H4K8ac_peak_5406 | 9.87124  | RP11-44N21.1_ENSG00000257556                        |
| 14 | 105634039 | 105634351 | 5Y-H4K8ac_peak_5407 | 4.99136  | JAG2_ENSG00000184916                                |
| 14 | 105646935 | 105647214 | 5Y-H4K8ac_peak_5408 | 7.59101  | RP11-44N21.4_ENSG00000257622;NUDT14_ENSG00000183828 |
| 14 | 105659801 | 105660111 | 5Y-H4K8ac_peak_5409 | 6.73047  |                                                     |
| 14 | 105660525 | 105660847 | 5Y-H4K8ac_peak_5410 | 6.12014  |                                                     |
| 14 | 105714443 | 105714744 | 5Y-H4K8ac_peak_5411 | 5.13361  | BTBD6_ENSG00000184887                               |
| 14 | 105759101 | 105759609 | 5Y-H4K8ac_peak_5412 | 11.69482 |                                                     |
| 14 | 105759821 | 105760180 | 5Y-H4K8ac_peak_5413 | 14.43262 |                                                     |
| 14 | 105760375 | 105760653 | 5Y-H4K8ac_peak_5414 | 11.68317 |                                                     |
| 14 | 105761802 | 105762022 | 5Y-H4K8ac_peak_5415 | 5.49775  |                                                     |
| 14 | 105766840 | 105767228 | 5Y-H4K8ac_peak_5416 | 5.77617  | PACS2_ENSG00000179364                               |
| 14 | 105863781 | 105865578 | 5Y-H4K8ac_peak_5417 | 12.06963 | TEX22_ENSG00000226174                               |
| 14 | 105877441 | 105877661 | 5Y-H4K8ac_peak_5418 | 6.55841  |                                                     |
| 14 | 105880769 | 105881546 | 5Y-H4K8ac_peak_5419 | 8.47164  |                                                     |
| 14 | 105885697 | 105886140 | 5Y-H4K8ac_peak_5420 | 15.59156 | RP11-521B24.3_ENSG00000251602;MTA1_ENSG00000182979  |
| 14 | 105886700 | 105887112 | 5Y-H4K8ac_peak_5421 | 6.53157  | RP11-521B24.3_ENSG00000251602;MTA1_ENSG00000182979  |
| 14 | 105887433 | 105888826 | 5Y-H4K8ac_peak_5422 | 6.61077  |                                                     |
| 14 | 105937319 | 105937600 | 5Y-H4K8ac_peak_5423 | 4.0639   | RP11-521B24.5_ENSG00000257270                       |
| 14 | 105940688 | 105940895 | 5Y-H4K8ac_peak_5424 | 6.62731  |                                                     |
| 14 | 105943079 | 105943505 | 5Y-H4K8ac_peak_5425 | 4.15658  |                                                     |
| 14 | 105946869 | 105947191 | 5Y-H4K8ac_peak_5426 | 9.96543  |                                                     |

|    |           |           |                     |          |                                                                               |
|----|-----------|-----------|---------------------|----------|-------------------------------------------------------------------------------|
| 14 | 105947412 | 105947992 | 5Y-H4K8ac_peak_5427 | 9.00954  |                                                                               |
| 14 | 105948768 | 105949100 | 5Y-H4K8ac_peak_5428 | 5.87725  |                                                                               |
| 14 | 105952177 | 105952808 | 5Y-H4K8ac_peak_5429 | 9.92042  | CRIP1_ENSG00000213145;CRIP1_ENSG00000257341                                   |
| 14 | 105956248 | 105956914 | 5Y-H4K8ac_peak_5430 | 9.66296  | C14orf80_ENSG00000185347                                                      |
| 14 | 105993329 | 105993595 | 5Y-H4K8ac_peak_5431 | 5.62406  | TMEM121_ENSG00000184986                                                       |
| 14 | 105994211 | 105994720 | 5Y-H4K8ac_peak_5432 | 7.90751  |                                                                               |
| 14 | 106025741 | 106026083 | 5Y-H4K8ac_peak_5433 | 8.2913   |                                                                               |
| 14 | 106040145 | 106040387 | 5Y-H4K8ac_peak_5434 | 4.07874  |                                                                               |
| 14 | 106318573 | 106318903 | 5Y-H4K8ac_peak_5435 | 8.31252  |                                                                               |
| 14 | 106345664 | 106345859 | 5Y-H4K8ac_peak_5436 | 4.29586  |                                                                               |
| 14 | 106938565 | 106939000 | 5Y-H4K8ac_peak_5437 | 10.11191 | LINC00221_ENSG00000187156                                                     |
| 14 | 107253018 | 107253212 | 5Y-H4K8ac_peak_5438 | 6.43775  |                                                                               |
| 15 | 22832842  | 22833052  | 5Y-H4K8ac_peak_5439 | 9.47421  | TUBGCP5_ENSG00000153575                                                       |
| 15 | 22833568  | 22833785  | 5Y-H4K8ac_peak_5440 | 8.43511  | TUBGCP5_ENSG00000153575                                                       |
| 15 | 22892126  | 22892530  | 5Y-H4K8ac_peak_5441 | 10.90365 | CYFIP1_ENSG00000068793                                                        |
| 15 | 23035067  | 23035273  | 5Y-H4K8ac_peak_5442 | 4.50834  | NIPA2_ENSG00000140157                                                         |
| 15 | 23810915  | 23811333  | 5Y-H4K8ac_peak_5443 | 9.30505  | MKRN3_ENSG00000179455                                                         |
| 15 | 27018518  | 27018819  | 5Y-H4K8ac_peak_5444 | 7.11863  |                                                                               |
| 15 | 27136982  | 27137190  | 5Y-H4K8ac_peak_5445 | 9.36633  |                                                                               |
| 15 | 27342189  | 27342418  | 5Y-H4K8ac_peak_5446 | 4.40812  |                                                                               |
| 15 | 28235093  | 28235365  | 5Y-H4K8ac_peak_5447 | 7.38046  |                                                                               |
| 15 | 28265861  | 28266156  | 5Y-H4K8ac_peak_5448 | 6.20875  |                                                                               |
| 15 | 28266522  | 28266873  | 5Y-H4K8ac_peak_5449 | 9.25361  |                                                                               |
| 15 | 28351623  | 28351846  | 5Y-H4K8ac_peak_5450 | 6.13909  |                                                                               |
| 15 | 28699830  | 28700155  | 5Y-H4K8ac_peak_5451 | 5.84208  |                                                                               |
| 15 | 28834216  | 28834417  | 5Y-H4K8ac_peak_5452 | 19.93272 | HERC2P9_ENSG00000206149                                                       |
| 15 | 28982806  | 28983304  | 5Y-H4K8ac_peak_5453 | 9.30505  | GOLGA8M_ENSG00000188626;RP11-578F21.6_ENSG00000261480;WHAMMP2_ENSG00000248334 |
| 15 | 29130292  | 29132084  | 5Y-H4K8ac_peak_5454 | 18.63671 | APBA2_ENSG00000034053                                                         |
| 15 | 29155538  | 29155809  | 5Y-H4K8ac_peak_5455 | 5.13364  |                                                                               |
| 15 | 29157566  | 29157778  | 5Y-H4K8ac_peak_5456 | 5.65584  |                                                                               |
| 15 | 29405069  | 29405274  | 5Y-H4K8ac_peak_5457 | 4.79585  |                                                                               |
| 15 | 29519275  | 29519792  | 5Y-H4K8ac_peak_5458 | 7.38046  |                                                                               |
| 15 | 30260395  | 30261075  | 5Y-H4K8ac_peak_5459 | 12.71156 | TJP1_ENSG00000104067                                                          |
| 15 | 30488320  | 30488680  | 5Y-H4K8ac_peak_5460 | 12.05638 | AC026150.5_ENSG00000225930                                                    |
| 15 | 30504473  | 30504678  | 5Y-H4K8ac_peak_5461 | 4.84727  |                                                                               |
| 15 | 30659346  | 30659741  | 5Y-H4K8ac_peak_5462 | 11.57334 |                                                                               |
| 15 | 31284086  | 31284388  | 5Y-H4K8ac_peak_5463 | 9.63153  | MTMR10_ENSG00000166912                                                        |
| 15 | 31508024  | 31508288  | 5Y-H4K8ac_peak_5464 | 7.87048  | RP11-16E12.1_ENSG00000259448                                                  |
| 15 | 31556008  | 31557023  | 5Y-H4K8ac_peak_5465 | 8.69112  |                                                                               |
| 15 | 31572299  | 31572686  | 5Y-H4K8ac_peak_5466 | 7.89273  |                                                                               |
| 15 | 31593144  | 31593756  | 5Y-H4K8ac_peak_5467 | 10.11191 |                                                                               |
| 15 | 31596659  | 31597108  | 5Y-H4K8ac_peak_5468 | 7.79831  |                                                                               |
| 15 | 31598311  | 31598707  | 5Y-H4K8ac_peak_5469 | 9.89244  |                                                                               |
| 15 | 31617688  | 31617897  | 5Y-H4K8ac_peak_5470 | 9.52603  |                                                                               |
| 15 | 31664341  | 31664560  | 5Y-H4K8ac_peak_5471 | 7.50148  |                                                                               |
| 15 | 31665134  | 31665392  | 5Y-H4K8ac_peak_5472 | 8.73985  |                                                                               |

|    |          |          |                     |          |                                                 |
|----|----------|----------|---------------------|----------|-------------------------------------------------|
| 15 | 31665808 | 31666010 | 5Y-H4K8ac_peak_5473 | 7.89142  |                                                 |
| 15 | 31690530 | 31691140 | 5Y-H4K8ac_peak_5474 | 7.60057  |                                                 |
| 15 | 31732716 | 31733725 | 5Y-H4K8ac_peak_5475 | 12.20548 |                                                 |
| 15 | 32163185 | 32163559 | 5Y-H4K8ac_peak_5476 | 7.76232  | OTUD7A_ENSG00000169918                          |
| 15 | 32269704 | 32269989 | 5Y-H4K8ac_peak_5477 | 4.00285  |                                                 |
| 15 | 32385624 | 32385831 | 5Y-H4K8ac_peak_5478 | 7.17184  |                                                 |
| 15 | 32389171 | 32389487 | 5Y-H4K8ac_peak_5479 | 4.5753   |                                                 |
| 15 | 32412746 | 32413105 | 5Y-H4K8ac_peak_5480 | 5.12213  |                                                 |
| 15 | 32426345 | 32426540 | 5Y-H4K8ac_peak_5481 | 7.04637  |                                                 |
| 15 | 32455513 | 32455730 | 5Y-H4K8ac_peak_5482 | 6.34046  |                                                 |
| 15 | 33453843 | 33454037 | 5Y-H4K8ac_peak_5483 | 7.60893  |                                                 |
| 15 | 34330564 | 34331493 | 5Y-H4K8ac_peak_5484 | 16.27715 | AVEN_ENSG00000169857                            |
| 15 | 34501885 | 34502139 | 5Y-H4K8ac_peak_5485 | 6.98118  | KATNBL1_ENSG00000134152                         |
| 15 | 34517308 | 34517525 | 5Y-H4K8ac_peak_5486 | 5.99504  | EMC4_ENSG00000128463                            |
| 15 | 34658514 | 34658706 | 5Y-H4K8ac_peak_5487 | 6.77436  | LPCAT4_ENSG00000176454                          |
| 15 | 34659579 | 34659777 | 5Y-H4K8ac_peak_5488 | 6.98416  | LPCAT4_ENSG00000176454                          |
| 15 | 34875848 | 34876350 | 5Y-H4K8ac_peak_5489 | 5.64909  |                                                 |
| 15 | 34880639 | 34880853 | 5Y-H4K8ac_peak_5490 | 6.90749  | GOLGA8A_ENSG00000175265;GOLGA8B_ENSG00000215252 |
| 15 | 35280630 | 35281001 | 5Y-H4K8ac_peak_5491 | 11.57334 | ZNF770_ENSG00000198146                          |
| 15 | 35837871 | 35838675 | 5Y-H4K8ac_peak_5492 | 12.50545 | DPH6_ENSG00000134146;DPH6-AS1_ENSG00000248079   |
| 15 | 37389796 | 37389992 | 5Y-H4K8ac_peak_5493 | 7.58806  |                                                 |
| 15 | 37391151 | 37391553 | 5Y-H4K8ac_peak_5494 | 6.85387  | RP11-128A17.1_ENSG00000259460                   |
| 15 | 37402495 | 37402743 | 5Y-H4K8ac_peak_5495 | 9.83437  |                                                 |
| 15 | 37970402 | 37970617 | 5Y-H4K8ac_peak_5496 | 7.31815  |                                                 |
| 15 | 38113523 | 38113730 | 5Y-H4K8ac_peak_5497 | 8.93923  |                                                 |
| 15 | 38365034 | 38365503 | 5Y-H4K8ac_peak_5498 | 13.14766 | RP11-1008C21.2_ENSG00000236914                  |
| 15 | 38544742 | 38545035 | 5Y-H4K8ac_peak_5499 | 5.23083  | SPRED1_ENSG00000166068                          |
| 15 | 38856329 | 38856584 | 5Y-H4K8ac_peak_5500 | 10.19948 |                                                 |
| 15 | 38988420 | 38988802 | 5Y-H4K8ac_peak_5501 | 10.27264 | C15orf53_ENSG00000175779                        |
| 15 | 38994992 | 38995253 | 5Y-H4K8ac_peak_5502 | 6.24411  |                                                 |
| 15 | 39172636 | 39172888 | 5Y-H4K8ac_peak_5503 | 5.65584  |                                                 |
| 15 | 39177113 | 39177318 | 5Y-H4K8ac_peak_5504 | 10.69866 |                                                 |
| 15 | 40330812 | 40331302 | 5Y-H4K8ac_peak_5505 | 14.00129 | SRP14_ENSG00000140319;SRP14-AS1_ENSG00000248508 |
| 15 | 40361786 | 40362221 | 5Y-H4K8ac_peak_5506 | 10.60083 |                                                 |
| 15 | 40374169 | 40374632 | 5Y-H4K8ac_peak_5507 | 7.59101  |                                                 |
| 15 | 40395145 | 40395350 | 5Y-H4K8ac_peak_5508 | 4.51497  |                                                 |
| 15 | 40531112 | 40531786 | 5Y-H4K8ac_peak_5509 | 15.84891 |                                                 |
| 15 | 40540387 | 40540611 | 5Y-H4K8ac_peak_5510 | 6.15578  |                                                 |
| 15 | 40545059 | 40545495 | 5Y-H4K8ac_peak_5511 | 4.15658  | C15orf56_ENSG00000176753                        |
| 15 | 40574920 | 40575304 | 5Y-H4K8ac_peak_5512 | 6.08523  | ANKRD63_ENSG00000230778                         |
| 15 | 40583240 | 40583843 | 5Y-H4K8ac_peak_5513 | 12.05638 |                                                 |
| 15 | 40594294 | 40594951 | 5Y-H4K8ac_peak_5514 | 16.41092 |                                                 |
| 15 | 40630814 | 40631453 | 5Y-H4K8ac_peak_5515 | 6.4221   |                                                 |
| 15 | 40632383 | 40633082 | 5Y-H4K8ac_peak_5516 | 15.80786 | C15orf52_ENSG00000188549                        |
| 15 | 40636988 | 40637336 | 5Y-H4K8ac_peak_5517 | 10.85484 |                                                 |
| 15 | 40646842 | 40647183 | 5Y-H4K8ac_peak_5518 | 13.00733 |                                                 |

|    |          |          |                     |          |                                                      |
|----|----------|----------|---------------------|----------|------------------------------------------------------|
| 15 | 40674679 | 40674999 | 5Y-H4K8ac_peak_5519 | 7.59101  | KNSTRN_ENSG00000128944                               |
| 15 | 40675387 | 40675659 | 5Y-H4K8ac_peak_5520 | 11.19336 | KNSTRN_ENSG00000128944                               |
| 15 | 40727902 | 40729038 | 5Y-H4K8ac_peak_5521 | 12.21176 |                                                      |
| 15 | 40762694 | 40762904 | 5Y-H4K8ac_peak_5522 | 11.68317 | CHST14_ENSG00000169105                               |
| 15 | 40763483 | 40763870 | 5Y-H4K8ac_peak_5523 | 9.09778  | CHST14_ENSG00000169105                               |
| 15 | 40799286 | 40799622 | 5Y-H4K8ac_peak_5524 | 6.37023  |                                                      |
| 15 | 40856948 | 40857145 | 5Y-H4K8ac_peak_5525 | 7.30348  | C15orf57_ENSG00000128891                             |
| 15 | 41049718 | 41050207 | 5Y-H4K8ac_peak_5526 | 9.31608  |                                                      |
| 15 | 41059472 | 41059915 | 5Y-H4K8ac_peak_5527 | 4.76429  |                                                      |
| 15 | 41061000 | 41062611 | 5Y-H4K8ac_peak_5528 | 10.1046  | C15orf62_ENSG00000188277                             |
| 15 | 41136539 | 41136813 | 5Y-H4K8ac_peak_5529 | 5.99504  | RP11-532F12.5_ENSG00000261183;SPINT1_ENSG00000166145 |
| 15 | 41165806 | 41166419 | 5Y-H4K8ac_peak_5530 | 8.24461  | RHOV_ENSG00000104140                                 |
| 15 | 41198836 | 41199178 | 5Y-H4K8ac_peak_5531 | 11.5813  | RP11-540O11.1_ENSG00000251161                        |
| 15 | 41199525 | 41200083 | 5Y-H4K8ac_peak_5532 | 7.59101  | RP11-540O11.1_ENSG00000251161                        |
| 15 | 41207001 | 41207297 | 5Y-H4K8ac_peak_5533 | 7.31102  |                                                      |
| 15 | 41232621 | 41233072 | 5Y-H4K8ac_peak_5534 | 10.65816 |                                                      |
| 15 | 41233747 | 41234583 | 5Y-H4K8ac_peak_5535 | 9.36633  |                                                      |
| 15 | 41244550 | 41245367 | 5Y-H4K8ac_peak_5536 | 20.32264 | CHAC1_ENSG00000128965                                |
| 15 | 41245794 | 41246001 | 5Y-H4K8ac_peak_5537 | 10.97604 | CHAC1_ENSG00000128965                                |
| 15 | 41407854 | 41408660 | 5Y-H4K8ac_peak_5538 | 9.51254  | INO80_ENSG00000128908                                |
| 15 | 41575427 | 41575782 | 5Y-H4K8ac_peak_5539 | 10.21117 | OIP5-AS1_ENSG00000247556                             |
| 15 | 41694988 | 41695552 | 5Y-H4K8ac_peak_5540 | 8.21525  | NDUFAF1_ENSG00000137806                              |
| 15 | 41835976 | 41836340 | 5Y-H4K8ac_peak_5541 | 5.23083  | RPAP1_ENSG00000103932                                |
| 15 | 41851800 | 41851991 | 5Y-H4K8ac_peak_5542 | 5.91107  |                                                      |
| 15 | 41913217 | 41913483 | 5Y-H4K8ac_peak_5543 | 6.47245  | MGA_ENSG00000174197                                  |
| 15 | 42096763 | 42096967 | 5Y-H4K8ac_peak_5544 | 8.21582  |                                                      |
| 15 | 42186157 | 42187366 | 5Y-H4K8ac_peak_5545 | 14.99673 | SPTBN5_ENSG00000137877                               |
| 15 | 42281637 | 42281834 | 5Y-H4K8ac_peak_5546 | 7.60893  |                                                      |
| 15 | 42349005 | 42349209 | 5Y-H4K8ac_peak_5547 | 4.66683  |                                                      |
| 15 | 42356405 | 42356672 | 5Y-H4K8ac_peak_5548 | 4.07874  |                                                      |
| 15 | 42399830 | 42400035 | 5Y-H4K8ac_peak_5549 | 8.33296  |                                                      |
| 15 | 42500109 | 42500448 | 5Y-H4K8ac_peak_5550 | 8.2913   | VPS39_ENSG00000166887;RP11-546B15.1_ENSG00000261002  |
| 15 | 42565842 | 42566274 | 5Y-H4K8ac_peak_5551 | 7.89142  | TMEM87A_ENSG00000103978;GANC_ENSG00000214013         |
| 15 | 42783421 | 42783665 | 5Y-H4K8ac_peak_5552 | 9.51254  | ZNF106_ENSG00000103994;SNAP23_ENSG00000092531        |
| 15 | 43212678 | 43212879 | 5Y-H4K8ac_peak_5553 | 6.73047  | TTBK2_ENSG00000128881                                |
| 15 | 43425859 | 43426296 | 5Y-H4K8ac_peak_5554 | 13.81505 |                                                      |
| 15 | 43622006 | 43622418 | 5Y-H4K8ac_peak_5555 | 6.53157  | LCMT2_ENSG00000168806;ADAL_ENSG00000168803           |
| 15 | 43663401 | 43663625 | 5Y-H4K8ac_peak_5556 | 9.23159  | ZSCAN29_ENSG00000140265                              |
| 15 | 44037915 | 44038418 | 5Y-H4K8ac_peak_5557 | 7.11863  | PDIA3_ENSG00000167004;CATSPER2P1_ENSG00000205771     |
| 15 | 44083343 | 44083571 | 5Y-H4K8ac_peak_5558 | 7.57144  |                                                      |
| 15 | 44084650 | 44084902 | 5Y-H4K8ac_peak_5559 | 4.77126  |                                                      |
| 15 | 44486481 | 44487089 | 5Y-H4K8ac_peak_5560 | 6.20875  | FRMD5_ENSG00000171877                                |
| 15 | 44487744 | 44488062 | 5Y-H4K8ac_peak_5561 | 11.19336 | FRMD5_ENSG00000171877                                |
| 15 | 44955460 | 44955744 | 5Y-H4K8ac_peak_5562 | 11.69482 | SPG11_ENSG00000104133                                |
| 15 | 45076331 | 45076538 | 5Y-H4K8ac_peak_5563 | 4.29586  |                                                      |
| 15 | 45111563 | 45111846 | 5Y-H4K8ac_peak_5564 | 4.84727  |                                                      |

|    |          |          |                     |          |                                                                           |
|----|----------|----------|---------------------|----------|---------------------------------------------------------------------------|
| 15 | 45114654 | 45114975 | 5Y-H4K8ac_peak_5565 | 6.20875  |                                                                           |
| 15 | 45314706 | 45315185 | 5Y-H4K8ac_peak_5566 | 9.78792  | SORD_ENSG00000140263                                                      |
| 15 | 45458816 | 45459442 | 5Y-H4K8ac_peak_5567 | 18.33806 | CTD-2651B20.1_ENSG00000259539                                             |
| 15 | 45460793 | 45461857 | 5Y-H4K8ac_peak_5568 | 9.79526  | RP11-519G16.2_ENSG00000259519                                             |
| 15 | 45479145 | 45479951 | 5Y-H4K8ac_peak_5569 | 7.59101  |                                                                           |
| 15 | 45572007 | 45572288 | 5Y-H4K8ac_peak_5570 | 6.20875  | CTD-2651B20.3_ENSG00000259520                                             |
| 15 | 45670513 | 45670971 | 5Y-H4K8ac_peak_5571 | 8.4454   |                                                                           |
| 15 | 45878406 | 45878825 | 5Y-H4K8ac_peak_5572 | 7.24844  | BLOC1S6_ENSG00000104164;RP11-96O20.4_ENSG00000260170                      |
| 15 | 45926960 | 45927209 | 5Y-H4K8ac_peak_5573 | 7.11863  |                                                                           |
| 15 | 46007216 | 46007459 | 5Y-H4K8ac_peak_5574 | 5.38149  |                                                                           |
| 15 | 46373051 | 46373457 | 5Y-H4K8ac_peak_5575 | 4.51076  |                                                                           |
| 15 | 47477090 | 47477474 | 5Y-H4K8ac_peak_5576 | 5.98695  | SEMA6D_ENSG00000137872                                                    |
| 15 | 47657583 | 47657984 | 5Y-H4K8ac_peak_5577 | 8.08688  |                                                                           |
| 15 | 48470001 | 48470854 | 5Y-H4K8ac_peak_5578 | 19.17092 | MYEF2_ENSG00000104177                                                     |
| 15 | 48838846 | 48839079 | 5Y-H4K8ac_peak_5579 | 8.33296  |                                                                           |
| 15 | 48938223 | 48938655 | 5Y-H4K8ac_peak_5580 | 8.69112  | FBN1_ENSG00000166147;RP11-227D13.1_ENSG00000259705                        |
| 15 | 49170386 | 49170728 | 5Y-H4K8ac_peak_5581 | 8.93923  | EID1_ENSG00000255302;AC012379.1_ENSG00000235883                           |
| 15 | 49268188 | 49268519 | 5Y-H4K8ac_peak_5582 | 6.78128  |                                                                           |
| 15 | 49447324 | 49447661 | 5Y-H4K8ac_peak_5583 | 5.23819  | NDUF4F4P1_ENSG00000259467;COPS2_ENSG00000166200;GALK2_ENSG00000156958     |
| 15 | 50474362 | 50474624 | 5Y-H4K8ac_peak_5584 | 11.19336 | ATP8B4_ENSG00000104043;SLC27A2_ENSG00000140284                            |
| 15 | 50646385 | 50647282 | 5Y-H4K8ac_peak_5585 | 13.99721 | GABPB1_ENSG00000104064;GABPB1-AS1_ENSG00000244879                         |
| 15 | 50715778 | 50715978 | 5Y-H4K8ac_peak_5586 | 4.1776   | USP8_ENSG00000138592                                                      |
| 15 | 51057720 | 51058173 | 5Y-H4K8ac_peak_5587 | 9.15007  | SPPL2A_ENSG00000138600                                                    |
| 15 | 51633962 | 51634192 | 5Y-H4K8ac_peak_5588 | 6.49308  |                                                                           |
| 15 | 51973479 | 51973689 | 5Y-H4K8ac_peak_5589 | 4.50834  | SCG3_ENSG00000104112                                                      |
| 15 | 52587401 | 52587925 | 5Y-H4K8ac_peak_5590 | 7.89273  | MYO5C_ENSG00000128833                                                     |
| 15 | 52821352 | 52821584 | 5Y-H4K8ac_peak_5591 | 7.65114  | MYO5A_ENSG00000197535                                                     |
| 15 | 53097956 | 53098161 | 5Y-H4K8ac_peak_5592 | 5.98695  | RP11-209K10.2_ENSG00000259203                                             |
| 15 | 55489446 | 55489849 | 5Y-H4K8ac_peak_5593 | 6.46053  | RSL24D1_ENSG00000137876                                                   |
| 15 | 55582957 | 55583221 | 5Y-H4K8ac_peak_5594 | 10.17195 |                                                                           |
| 15 | 55611444 | 55611738 | 5Y-H4K8ac_peak_5595 | 7.89142  | RAB27A_ENSG00000069974;RP11-139H15.1_ENSG00000225973;PIGB_ENSG00000069943 |
| 15 | 55673041 | 55673245 | 5Y-H4K8ac_peak_5596 | 7.17184  |                                                                           |
| 15 | 55790848 | 55791132 | 5Y-H4K8ac_peak_5597 | 9.05168  | DYX1C1-CCPG1_ENSG00000261771                                              |
| 15 | 55880757 | 55881088 | 5Y-H4K8ac_peak_5598 | 7.3889   | PYGO1_ENSG00000171016                                                     |
| 15 | 56035403 | 56035740 | 5Y-H4K8ac_peak_5599 | 14.00559 | PRTG_ENSG00000166450                                                      |
| 15 | 56535570 | 56535872 | 5Y-H4K8ac_peak_5600 | 12.71156 | RFX7_ENSG00000181827;TEX9_ENSG00000151575                                 |
| 15 | 56536070 | 56536311 | 5Y-H4K8ac_peak_5601 | 10.22205 | RFX7_ENSG00000181827;TEX9_ENSG00000151575                                 |
| 15 | 57025273 | 57026126 | 5Y-H4K8ac_peak_5602 | 13.0168  |                                                                           |
| 15 | 57179661 | 57179953 | 5Y-H4K8ac_peak_5603 | 8.2913   |                                                                           |
| 15 | 57209972 | 57210619 | 5Y-H4K8ac_peak_5604 | 7.59101  | ZNF280D_ENSG00000137871;TCF12_ENSG00000140262                             |
| 15 | 57210937 | 57212038 | 5Y-H4K8ac_peak_5605 | 17.72591 | ZNF280D_ENSG00000137871;TCF12_ENSG00000140262                             |
| 15 | 57598551 | 57598803 | 5Y-H4K8ac_peak_5606 | 10.32379 |                                                                           |
| 15 | 57668178 | 57668867 | 5Y-H4K8ac_peak_5607 | 10.32379 | CGNL1_ENSG00000128849                                                     |
| 15 | 57789145 | 57789342 | 5Y-H4K8ac_peak_5608 | 7.59101  |                                                                           |
| 15 | 57918995 | 57919365 | 5Y-H4K8ac_peak_5609 | 8.33296  |                                                                           |
| 15 | 57998285 | 57998569 | 5Y-H4K8ac_peak_5610 | 6.50117  |                                                                           |

|    |          |          |                     |          |                                                     |
|----|----------|----------|---------------------|----------|-----------------------------------------------------|
| 15 | 57998949 | 57999324 | 5Y-H4K8ac_peak_5611 | 7.90751  |                                                     |
| 15 | 58358002 | 58358252 | 5Y-H4K8ac_peak_5612 | 6.22669  | CTD-2330J20.2_ENSG00000259285                       |
| 15 | 59225228 | 59225580 | 5Y-H4K8ac_peak_5613 | 11.4254  | SLTM_ENSG00000137776                                |
| 15 | 59462071 | 59462717 | 5Y-H4K8ac_peak_5614 | 11.42066 | MIR2116_ENSG00000253030                             |
| 15 | 59463253 | 59463535 | 5Y-H4K8ac_peak_5615 | 6.98118  | MIR2116_ENSG00000253030                             |
| 15 | 59730484 | 59730791 | 5Y-H4K8ac_peak_5616 | 4.84727  |                                                     |
| 15 | 59981274 | 59981494 | 5Y-H4K8ac_peak_5617 | 7.31102  | RP11-361D15.2_ENSG00000259238;BNIP2_ENSG00000140299 |
| 15 | 60666897 | 60667152 | 5Y-H4K8ac_peak_5618 | 11.93212 |                                                     |
| 15 | 61377422 | 61377621 | 5Y-H4K8ac_peak_5619 | 7.97699  |                                                     |
| 15 | 61480258 | 61480488 | 5Y-H4K8ac_peak_5620 | 6.34046  |                                                     |
| 15 | 61497471 | 61497761 | 5Y-H4K8ac_peak_5621 | 6.00382  |                                                     |
| 15 | 62207283 | 62207572 | 5Y-H4K8ac_peak_5622 | 8.75926  | RN7SL613P_ENSG00000264376                           |
| 15 | 62360433 | 62360712 | 5Y-H4K8ac_peak_5623 | 17.50049 |                                                     |
| 15 | 62403522 | 62403756 | 5Y-H4K8ac_peak_5624 | 4.07874  |                                                     |
| 15 | 62456210 | 62456416 | 5Y-H4K8ac_peak_5625 | 4.07874  |                                                     |
| 15 | 62456615 | 62456848 | 5Y-H4K8ac_peak_5626 | 7.97699  | C2CD4B_ENSG00000205502                              |
| 15 | 62682287 | 62682730 | 5Y-H4K8ac_peak_5627 | 19.43764 | TLN2_ENSG00000171914                                |
| 15 | 63227630 | 63227889 | 5Y-H4K8ac_peak_5628 | 12.71599 |                                                     |
| 15 | 63340850 | 63341087 | 5Y-H4K8ac_peak_5629 | 10.18556 | RP11-244F12.3_ENSG00000259498                       |
| 15 | 63413575 | 63413777 | 5Y-H4K8ac_peak_5630 | 4.84727  | LACTB_ENSG00000103642                               |
| 15 | 63449830 | 63450022 | 5Y-H4K8ac_peak_5631 | 7.96285  | RPS27L_ENSG00000185088                              |
| 15 | 63481093 | 63481361 | 5Y-H4K8ac_peak_5632 | 5.29015  | RAB8B_ENSG00000166128                               |
| 15 | 63796879 | 63797711 | 5Y-H4K8ac_peak_5633 | 13.27281 | USP3_ENSG00000140455                                |
| 15 | 63893546 | 63893822 | 5Y-H4K8ac_peak_5634 | 5.64988  | USP3-AS1_ENSG00000259248                            |
| 15 | 64205685 | 64205905 | 5Y-H4K8ac_peak_5635 | 7.49746  |                                                     |
| 15 | 64237409 | 64237912 | 5Y-H4K8ac_peak_5636 | 6.37023  |                                                     |
| 15 | 64338821 | 64339037 | 5Y-H4K8ac_peak_5637 | 5.89113  |                                                     |
| 15 | 64388263 | 64388469 | 5Y-H4K8ac_peak_5638 | 6.39626  |                                                     |
| 15 | 64680122 | 64680358 | 5Y-H4K8ac_peak_5639 | 7.61515  | KIAA0101_ENSG00000166803;TRIP4_ENSG00000103671      |
| 15 | 65067086 | 65067304 | 5Y-H4K8ac_peak_5640 | 4.70501  | BBPMS2_ENSG00000166831                              |
| 15 | 65137615 | 65137844 | 5Y-H4K8ac_peak_5641 | 3.91471  |                                                     |
| 15 | 65203605 | 65203918 | 5Y-H4K8ac_peak_5642 | 7.46829  | ANKDD1A_ENSG00000166839                             |
| 15 | 65425713 | 65425986 | 5Y-H4K8ac_peak_5643 | 8.16382  | PDCD7_ENSG00000090470                               |
| 15 | 65503958 | 65504418 | 5Y-H4K8ac_peak_5644 | 5.64909  | CILP_ENSG00000138615                                |
| 15 | 65578574 | 65579008 | 5Y-H4K8ac_peak_5645 | 14.31711 | SNORA24_ENSG00000206903                             |
| 15 | 65596039 | 65596319 | 5Y-H4K8ac_peak_5646 | 6.14981  | RNU5B-1_ENSG00000200156                             |
| 15 | 65713538 | 65713858 | 5Y-H4K8ac_peak_5647 | 4.07874  |                                                     |
| 15 | 65822959 | 65823481 | 5Y-H4K8ac_peak_5648 | 9.30505  | PTPLAD1_ENSG00000074696                             |
| 15 | 65904222 | 65904473 | 5Y-H4K8ac_peak_5649 | 5.41472  | VWA9_ENSG00000138614;SLC24A1_ENSG00000074621        |
| 15 | 66161921 | 66162176 | 5Y-H4K8ac_peak_5650 | 9.15977  |                                                     |
| 15 | 66504494 | 66504878 | 5Y-H4K8ac_peak_5651 | 6.77436  |                                                     |
| 15 | 66585670 | 66586461 | 5Y-H4K8ac_peak_5652 | 11.18077 | RP11-653J6.1_ENSG00000261318;DIS3L_ENSG00000166938  |
| 15 | 66678290 | 66678521 | 5Y-H4K8ac_peak_5653 | 6.34046  | TIPIN_ENSG00000075131;MAP2K1_ENSG00000169032        |
| 15 | 66796901 | 66797115 | 5Y-H4K8ac_peak_5654 | 7.38046  | ZWILCH_ENSG00000174442                              |
| 15 | 66923318 | 66923670 | 5Y-H4K8ac_peak_5655 | 16.73191 |                                                     |
| 15 | 66924591 | 66924793 | 5Y-H4K8ac_peak_5656 | 11.1169  |                                                     |

|    |          |          |                     |          |                                                           |
|----|----------|----------|---------------------|----------|-----------------------------------------------------------|
| 15 | 66971887 | 66972458 | 5Y-H4K8ac_peak_5657 | 12.11208 |                                                           |
| 15 | 67037455 | 67037691 | 5Y-H4K8ac_peak_5658 | 4.84727  |                                                           |
| 15 | 67066436 | 67066751 | 5Y-H4K8ac_peak_5659 | 8.21582  |                                                           |
| 15 | 67142479 | 67142906 | 5Y-H4K8ac_peak_5660 | 8.19789  |                                                           |
| 15 | 67318094 | 67318379 | 5Y-H4K8ac_peak_5661 | 6.77436  |                                                           |
| 15 | 67357222 | 67357720 | 5Y-H4K8ac_peak_5662 | 8.43511  |                                                           |
| 15 | 67384293 | 67384483 | 5Y-H4K8ac_peak_5663 | 6.50117  |                                                           |
| 15 | 67413529 | 67413777 | 5Y-H4K8ac_peak_5664 | 9.26157  |                                                           |
| 15 | 67480868 | 67481381 | 5Y-H4K8ac_peak_5665 | 6.50117  |                                                           |
| 15 | 67481574 | 67481961 | 5Y-H4K8ac_peak_5666 | 10.46287 |                                                           |
| 15 | 67813623 | 67813883 | 5Y-H4K8ac_peak_5667 | 9.51254  | IQCH-AS1_ENSG00000259673;C15orf61_ENSG00000189227         |
| 15 | 68097171 | 68097640 | 5Y-H4K8ac_peak_5668 | 8.2913   |                                                           |
| 15 | 68132828 | 68133046 | 5Y-H4K8ac_peak_5669 | 5.26353  | RNU6-1_ENSG00000206625                                    |
| 15 | 68260128 | 68260414 | 5Y-H4K8ac_peak_5670 | 6.37023  |                                                           |
| 15 | 68502897 | 68503146 | 5Y-H4K8ac_peak_5671 | 5.449    |                                                           |
| 15 | 68521560 | 68521967 | 5Y-H4K8ac_peak_5672 | 6.50117  | RP11-315D16.2_ENSG00000260007;AC107871.1_ENSG00000264779  |
| 15 | 68568677 | 68568929 | 5Y-H4K8ac_peak_5673 | 7.73231  |                                                           |
| 15 | 68569257 | 68570585 | 5Y-H4K8ac_peak_5674 | 12.69256 | RP11-315D16.4_ENSG00000260657;FEM1B_ENSG00000169018       |
| 15 | 68992440 | 68992965 | 5Y-H4K8ac_peak_5675 | 5.23083  |                                                           |
| 15 | 69110574 | 69111320 | 5Y-H4K8ac_peak_5676 | 6.37023  | SPESP1_ENSG00000258484                                    |
| 15 | 69327776 | 69328111 | 5Y-H4K8ac_peak_5677 | 5.48291  |                                                           |
| 15 | 69366610 | 69366933 | 5Y-H4K8ac_peak_5678 | 8.90038  |                                                           |
| 15 | 69618834 | 69619033 | 5Y-H4K8ac_peak_5679 | 8.33296  |                                                           |
| 15 | 69754435 | 69754822 | 5Y-H4K8ac_peak_5680 | 8.71681  | RP11-253M7.4_ENSG00000259215;RP11-279F6.1_ENSG00000245750 |
| 15 | 70168205 | 70168579 | 5Y-H4K8ac_peak_5681 | 4.84727  |                                                           |
| 15 | 70169125 | 70169351 | 5Y-H4K8ac_peak_5682 | 7.38046  |                                                           |
| 15 | 70289438 | 70289802 | 5Y-H4K8ac_peak_5683 | 6.34046  |                                                           |
| 15 | 70389506 | 70389881 | 5Y-H4K8ac_peak_5684 | 4.95697  | TLE3_ENSG00000140332                                      |
| 15 | 70391028 | 70391638 | 5Y-H4K8ac_peak_5685 | 8.76581  | TLE3_ENSG00000140332                                      |
| 15 | 70477151 | 70477412 | 5Y-H4K8ac_peak_5686 | 4.84727  |                                                           |
| 15 | 70478054 | 70478285 | 5Y-H4K8ac_peak_5687 | 6.14981  |                                                           |
| 15 | 70487690 | 70488075 | 5Y-H4K8ac_peak_5688 | 6.14981  |                                                           |
| 15 | 70488747 | 70489029 | 5Y-H4K8ac_peak_5689 | 9.38276  |                                                           |
| 15 | 70492091 | 70492361 | 5Y-H4K8ac_peak_5690 | 8.43511  |                                                           |
| 15 | 70632729 | 70632919 | 5Y-H4K8ac_peak_5691 | 5.81394  |                                                           |
| 15 | 70641390 | 70641829 | 5Y-H4K8ac_peak_5692 | 8.93923  |                                                           |
| 15 | 70677638 | 70678294 | 5Y-H4K8ac_peak_5693 | 13.43594 |                                                           |
| 15 | 70679346 | 70679863 | 5Y-H4K8ac_peak_5694 | 5.98695  |                                                           |
| 15 | 70731002 | 70731381 | 5Y-H4K8ac_peak_5695 | 7.38046  |                                                           |
| 15 | 70740366 | 70740601 | 5Y-H4K8ac_peak_5696 | 4.0639   |                                                           |
| 15 | 70755620 | 70755995 | 5Y-H4K8ac_peak_5697 | 5.32832  |                                                           |
| 15 | 70819701 | 70820086 | 5Y-H4K8ac_peak_5698 | 9.60627  |                                                           |
| 15 | 70851612 | 70852014 | 5Y-H4K8ac_peak_5699 | 8.17203  |                                                           |
| 15 | 70920107 | 70920340 | 5Y-H4K8ac_peak_5700 | 9.30338  |                                                           |
| 15 | 70921000 | 70921231 | 5Y-H4K8ac_peak_5701 | 5.23083  |                                                           |
| 15 | 70962581 | 70962787 | 5Y-H4K8ac_peak_5702 | 4.07874  |                                                           |



|    |          |          |                     |          |                                |
|----|----------|----------|---------------------|----------|--------------------------------|
| 15 | 71184375 | 71184606 | 5Y-H4K8ac_peak_5703 | 8.43511  | THAP10_ENSG00000129028         |
| 15 | 72410821 | 72411021 | 5Y-H4K8ac_peak_5704 | 7.89142  | MYO9A_ENSG00000066933          |
| 15 | 72489856 | 72490101 | 5Y-H4K8ac_peak_5705 | 7.9057   | GRAMD2_ENSG00000175318         |
| 15 | 72522940 | 72523494 | 5Y-H4K8ac_peak_5706 | 8.43511  | PKM_ENSG00000067225            |
| 15 | 72766135 | 72766455 | 5Y-H4K8ac_peak_5707 | 9.30505  | ARIH1_ENSG00000166233          |
| 15 | 72929441 | 72929660 | 5Y-H4K8ac_peak_5708 | 15.06486 | RP11-1006G14.2_ENSG00000259783 |
| 15 | 73075704 | 73075974 | 5Y-H4K8ac_peak_5709 | 5.23083  | ADPGK-AS1_ENSG00000260898      |
| 15 | 73303345 | 73303538 | 5Y-H4K8ac_peak_5710 | 4.24332  |                                |
| 15 | 73343859 | 73344310 | 5Y-H4K8ac_peak_5711 | 10.11191 | NEO1_ENSG00000067141           |
| 15 | 73429826 | 73430030 | 5Y-H4K8ac_peak_5712 | 6.34046  |                                |
| 15 | 73615407 | 73615737 | 5Y-H4K8ac_peak_5713 | 4.93237  |                                |
| 15 | 73925261 | 73925468 | 5Y-H4K8ac_peak_5714 | 6.77436  |                                |
| 15 | 73976626 | 73977274 | 5Y-H4K8ac_peak_5715 | 12.50545 | CD276_ENSG00000103855          |
| 15 | 74045067 | 74045455 | 5Y-H4K8ac_peak_5716 | 6.73385  | C15orf59_ENSG00000205363       |
| 15 | 74110557 | 74110936 | 5Y-H4K8ac_peak_5717 | 8.28346  |                                |
| 15 | 74189832 | 74190172 | 5Y-H4K8ac_peak_5718 | 5.56912  |                                |
| 15 | 74191498 | 74191817 | 5Y-H4K8ac_peak_5719 | 9.43096  |                                |
| 15 | 74236405 | 74236983 | 5Y-H4K8ac_peak_5720 | 7.20869  |                                |
| 15 | 74243684 | 74244469 | 5Y-H4K8ac_peak_5721 | 8.24461  |                                |
| 15 | 74244665 | 74244906 | 5Y-H4K8ac_peak_5722 | 6.70695  |                                |
| 15 | 74265777 | 74266162 | 5Y-H4K8ac_peak_5723 | 7.11863  |                                |
| 15 | 74284819 | 74285153 | 5Y-H4K8ac_peak_5724 | 8.16382  |                                |
| 15 | 74420535 | 74422390 | 5Y-H4K8ac_peak_5725 | 16.41521 | RP11-247C2.2_ENSG00000248540   |
| 15 | 74422734 | 74423034 | 5Y-H4K8ac_peak_5726 | 10.31981 |                                |
| 15 | 74427456 | 74428122 | 5Y-H4K8ac_peak_5727 | 7.89273  |                                |
| 15 | 74428376 | 74428765 | 5Y-H4K8ac_peak_5728 | 15.82359 |                                |
| 15 | 74429026 | 74429422 | 5Y-H4K8ac_peak_5729 | 7.89273  |                                |
| 15 | 74429684 | 74430175 | 5Y-H4K8ac_peak_5730 | 7.9412   |                                |
| 15 | 74449961 | 74450158 | 5Y-H4K8ac_peak_5731 | 4.84727  |                                |
| 15 | 74468145 | 74468362 | 5Y-H4K8ac_peak_5732 | 4.16635  |                                |
| 15 | 74468776 | 74469223 | 5Y-H4K8ac_peak_5733 | 6.69752  |                                |
| 15 | 74493691 | 74493943 | 5Y-H4K8ac_peak_5734 | 5.18558  |                                |
| 15 | 74494974 | 74495198 | 5Y-H4K8ac_peak_5735 | 8.1667   | RP11-60L3.1_ENSG00000259264    |
| 15 | 74513863 | 74514490 | 5Y-H4K8ac_peak_5736 | 5.60566  |                                |
| 15 | 74516303 | 74516750 | 5Y-H4K8ac_peak_5737 | 13.0168  |                                |
| 15 | 74519782 | 74520027 | 5Y-H4K8ac_peak_5738 | 9.24789  |                                |
| 15 | 74520275 | 74521031 | 5Y-H4K8ac_peak_5739 | 13.12848 |                                |
| 15 | 74521291 | 74522254 | 5Y-H4K8ac_peak_5740 | 8.0168   |                                |
| 15 | 74523972 | 74524194 | 5Y-H4K8ac_peak_5741 | 6.47245  |                                |
| 15 | 74526450 | 74527090 | 5Y-H4K8ac_peak_5742 | 5.12488  |                                |
| 15 | 74531784 | 74532166 | 5Y-H4K8ac_peak_5743 | 9.87097  |                                |
| 15 | 74534545 | 74534888 | 5Y-H4K8ac_peak_5744 | 6.24511  |                                |
| 15 | 74535640 | 74536029 | 5Y-H4K8ac_peak_5745 | 5.37588  |                                |
| 15 | 74537281 | 74537489 | 5Y-H4K8ac_peak_5746 | 7.10001  |                                |
| 15 | 74543579 | 74543890 | 5Y-H4K8ac_peak_5747 | 6.96612  |                                |
| 15 | 74551253 | 74551745 | 5Y-H4K8ac_peak_5748 | 13.23366 |                                |

|    |          |          |                     |          |                                                      |
|----|----------|----------|---------------------|----------|------------------------------------------------------|
| 15 | 74552429 | 74552737 | 5Y-H4K8ac_peak_5749 | 6.32323  |                                                      |
| 15 | 74579496 | 74579744 | 5Y-H4K8ac_peak_5750 | 9.34873  |                                                      |
| 15 | 74581614 | 74582372 | 5Y-H4K8ac_peak_5751 | 7.92287  |                                                      |
| 15 | 74582725 | 74583260 | 5Y-H4K8ac_peak_5752 | 10.1994  |                                                      |
| 15 | 74584089 | 74585345 | 5Y-H4K8ac_peak_5753 | 20.38467 |                                                      |
| 15 | 74585931 | 74586492 | 5Y-H4K8ac_peak_5754 | 5.23083  |                                                      |
| 15 | 74587727 | 74588216 | 5Y-H4K8ac_peak_5755 | 7.89142  |                                                      |
| 15 | 74589260 | 74590275 | 5Y-H4K8ac_peak_5756 | 7.89273  |                                                      |
| 15 | 74593707 | 74594045 | 5Y-H4K8ac_peak_5757 | 7.30348  |                                                      |
| 15 | 74594582 | 74596090 | 5Y-H4K8ac_peak_5758 | 15.17389 | RP11-60L3.2_ENSG00000261384                          |
| 15 | 74597075 | 74597715 | 5Y-H4K8ac_peak_5759 | 5.41472  |                                                      |
| 15 | 74600384 | 74600578 | 5Y-H4K8ac_peak_5760 | 9.66405  |                                                      |
| 15 | 74601231 | 74601476 | 5Y-H4K8ac_peak_5761 | 7.11863  |                                                      |
| 15 | 74609927 | 74610117 | 5Y-H4K8ac_peak_5762 | 6.27205  |                                                      |
| 15 | 74610564 | 74610814 | 5Y-H4K8ac_peak_5763 | 13.81774 |                                                      |
| 15 | 74611900 | 74612598 | 5Y-H4K8ac_peak_5764 | 9.84563  |                                                      |
| 15 | 74667172 | 74667506 | 5Y-H4K8ac_peak_5765 | 5.40331  |                                                      |
| 15 | 74833614 | 74833850 | 5Y-H4K8ac_peak_5766 | 7.11863  | ARID3B_ENSG00000179361                               |
| 15 | 74877160 | 74877461 | 5Y-H4K8ac_peak_5767 | 4.84727  |                                                      |
| 15 | 74907216 | 74908003 | 5Y-H4K8ac_peak_5768 | 11.29141 | CTD-3154N5.1_ENSG00000260919                         |
| 15 | 74908252 | 74908487 | 5Y-H4K8ac_peak_5769 | 9.51254  | CTD-3154N5.1_ENSG00000260919                         |
| 15 | 74988399 | 74988604 | 5Y-H4K8ac_peak_5770 | 6.08523  | EDC3_ENSG00000179151                                 |
| 15 | 75074504 | 75074700 | 5Y-H4K8ac_peak_5771 | 5.81394  | CSK_ENSG00000103653                                  |
| 15 | 75115553 | 75115748 | 5Y-H4K8ac_peak_5772 | 6.09071  |                                                      |
| 15 | 75135130 | 75135479 | 5Y-H4K8ac_peak_5773 | 13.0168  | ULK3_ENSG00000140474                                 |
| 15 | 75136220 | 75136499 | 5Y-H4K8ac_peak_5774 | 9.30505  | ULK3_ENSG00000140474                                 |
| 15 | 75181765 | 75181987 | 5Y-H4K8ac_peak_5775 | 8.97839  | MPI_ENSG00000178802                                  |
| 15 | 75182437 | 75182876 | 5Y-H4K8ac_peak_5776 | 9.23159  | MPI_ENSG00000178802                                  |
| 15 | 75230735 | 75231293 | 5Y-H4K8ac_peak_5777 | 11.09973 | COX5A_ENSG00000178741                                |
| 15 | 75248167 | 75248370 | 5Y-H4K8ac_peak_5778 | 8.47164  |                                                      |
| 15 | 75248770 | 75249033 | 5Y-H4K8ac_peak_5779 | 10.11191 | RPP25_ENSG00000178718;SCAMP5_ENSG00000198794         |
| 15 | 75249245 | 75250269 | 5Y-H4K8ac_peak_5780 | 6.78128  | RPP25_ENSG00000178718;SCAMP5_ENSG00000198794         |
| 15 | 75287944 | 75288290 | 5Y-H4K8ac_peak_5781 | 11.30958 |                                                      |
| 15 | 75316028 | 75316254 | 5Y-H4K8ac_peak_5782 | 15.28394 | RP11-151H2.1_ENSG00000260483;PPCDC_ENSG00000138621   |
| 15 | 75339733 | 75340088 | 5Y-H4K8ac_peak_5783 | 7.65885  |                                                      |
| 15 | 75472737 | 75473071 | 5Y-H4K8ac_peak_5784 | 10.21121 |                                                      |
| 15 | 75488056 | 75488761 | 5Y-H4K8ac_peak_5785 | 10.21117 | C15orf39_ENSG00000167173                             |
| 15 | 75628435 | 75628880 | 5Y-H4K8ac_peak_5786 | 11.19336 | COMMD4_ENSG00000140365                               |
| 15 | 75640374 | 75640693 | 5Y-H4K8ac_peak_5787 | 14.19462 |                                                      |
| 15 | 75660492 | 75660804 | 5Y-H4K8ac_peak_5788 | 7.27671  | MAN2C1_ENSG00000140400;RP11-817O13.8_ENSG00000260274 |
| 15 | 75918206 | 75918650 | 5Y-H4K8ac_peak_5789 | 8.43511  | SNUPN_ENSG00000169371                                |
| 15 | 75939870 | 75940093 | 5Y-H4K8ac_peak_5790 | 6.1654   | IMP3_ENSG00000177971;SNX33_ENSG00000173548           |
| 15 | 75986340 | 75986611 | 5Y-H4K8ac_peak_5791 | 10.21117 |                                                      |
| 15 | 75992786 | 75993114 | 5Y-H4K8ac_peak_5792 | 5.41472  |                                                      |
| 15 | 75995705 | 75995960 | 5Y-H4K8ac_peak_5793 | 6.40964  |                                                      |
| 15 | 76001648 | 76002165 | 5Y-H4K8ac_peak_5794 | 5.65584  |                                                      |

|    |          |          |                     |          |                                                    |
|----|----------|----------|---------------------|----------|----------------------------------------------------|
| 15 | 76031217 | 76031643 | 5Y-H4K8ac_peak_5795 | 7.76645  | DNM1P35_ENSG00000246877;AC019294.1_ENSG00000256530 |
| 15 | 76050988 | 76051432 | 5Y-H4K8ac_peak_5796 | 9.30505  |                                                    |
| 15 | 76136213 | 76136568 | 5Y-H4K8ac_peak_5797 | 5.41472  | UBE2Q2_ENSG00000140367                             |
| 15 | 76195807 | 76196022 | 5Y-H4K8ac_peak_5798 | 4.77126  | FBXO22_ENSG00000167196                             |
| 15 | 76488507 | 76488698 | 5Y-H4K8ac_peak_5799 | 5.0078   |                                                    |
| 15 | 76627598 | 76627823 | 5Y-H4K8ac_peak_5800 | 6.50117  |                                                    |
| 15 | 76628256 | 76628483 | 5Y-H4K8ac_peak_5801 | 8.52802  | ISL2_ENSG00000159556                               |
| 15 | 77287381 | 77288189 | 5Y-H4K8ac_peak_5802 | 14.2053  |                                                    |
| 15 | 77362933 | 77363379 | 5Y-H4K8ac_peak_5803 | 5.70472  |                                                    |
| 15 | 77820332 | 77820540 | 5Y-H4K8ac_peak_5804 | 6.73385  |                                                    |
| 15 | 77835389 | 77836207 | 5Y-H4K8ac_peak_5805 | 6.53157  |                                                    |
| 15 | 77896493 | 77896804 | 5Y-H4K8ac_peak_5806 | 5.87725  |                                                    |
| 15 | 77898673 | 77898904 | 5Y-H4K8ac_peak_5807 | 4.77126  |                                                    |
| 15 | 77899533 | 77899911 | 5Y-H4K8ac_peak_5808 | 6.57504  |                                                    |
| 15 | 77925004 | 77925371 | 5Y-H4K8ac_peak_5809 | 8.21582  |                                                    |
| 15 | 77987975 | 77988456 | 5Y-H4K8ac_peak_5810 | 6.52593  |                                                    |
| 15 | 78010058 | 78010356 | 5Y-H4K8ac_peak_5811 | 6.54441  |                                                    |
| 15 | 78031252 | 78031505 | 5Y-H4K8ac_peak_5812 | 4.8188   |                                                    |
| 15 | 78241425 | 78241814 | 5Y-H4K8ac_peak_5813 | 4.95697  |                                                    |
| 15 | 78266222 | 78266517 | 5Y-H4K8ac_peak_5814 | 5.41472  |                                                    |
| 15 | 78267354 | 78267629 | 5Y-H4K8ac_peak_5815 | 7.60057  | ADAMTS7P3_ENSG00000261143                          |
| 15 | 78270767 | 78271014 | 5Y-H4K8ac_peak_5816 | 4.68359  |                                                    |
| 15 | 78280632 | 78281091 | 5Y-H4K8ac_peak_5817 | 6.77436  |                                                    |
| 15 | 78283210 | 78283776 | 5Y-H4K8ac_peak_5818 | 9.13842  |                                                    |
| 15 | 78284563 | 78284867 | 5Y-H4K8ac_peak_5819 | 4.90696  | RP11-114H24.6_ENSG00000259792                      |
| 15 | 78285725 | 78286826 | 5Y-H4K8ac_peak_5820 | 13.00733 | RP11-114H24.6_ENSG00000259792                      |
| 15 | 78290660 | 78291498 | 5Y-H4K8ac_peak_5821 | 9.02782  |                                                    |
| 15 | 78423013 | 78423291 | 5Y-H4K8ac_peak_5822 | 4.95697  | CIB2_ENSG00000136425;IDH3A_ENSG00000166411         |
| 15 | 78424116 | 78424362 | 5Y-H4K8ac_peak_5823 | 5.56894  | CIB2_ENSG00000136425;IDH3A_ENSG00000166411         |
| 15 | 78608077 | 78608617 | 5Y-H4K8ac_peak_5824 | 8.47164  |                                                    |
| 15 | 78715027 | 78715281 | 5Y-H4K8ac_peak_5825 | 5.23083  |                                                    |
| 15 | 78729372 | 78729714 | 5Y-H4K8ac_peak_5826 | 6.39626  | IREB2_ENSG00000136381                              |
| 15 | 78800039 | 78800230 | 5Y-H4K8ac_peak_5827 | 7.01266  | HYKK_ENSG00000188266                               |
| 15 | 78912183 | 78913806 | 5Y-H4K8ac_peak_5828 | 11.18363 | CHRNA3_ENSG00000080644                             |
| 15 | 78929942 | 78930315 | 5Y-H4K8ac_peak_5829 | 7.64675  |                                                    |
| 15 | 78930553 | 78931187 | 5Y-H4K8ac_peak_5830 | 8.75926  |                                                    |
| 15 | 78932538 | 78932930 | 5Y-H4K8ac_peak_5831 | 7.31102  |                                                    |
| 15 | 78933504 | 78934329 | 5Y-H4K8ac_peak_5832 | 8.69112  |                                                    |
| 15 | 78944496 | 78944761 | 5Y-H4K8ac_peak_5833 | 5.74859  |                                                    |
| 15 | 78960923 | 78961201 | 5Y-H4K8ac_peak_5834 | 7.11262  |                                                    |
| 15 | 78963191 | 78963467 | 5Y-H4K8ac_peak_5835 | 8.2913   |                                                    |
| 15 | 78964776 | 78965162 | 5Y-H4K8ac_peak_5836 | 6.80915  |                                                    |
| 15 | 78965720 | 78966293 | 5Y-H4K8ac_peak_5837 | 8.73392  |                                                    |
| 15 | 78971191 | 78972297 | 5Y-H4K8ac_peak_5838 | 15.45397 |                                                    |
| 15 | 78973025 | 78973337 | 5Y-H4K8ac_peak_5839 | 5.36617  |                                                    |
| 15 | 78974604 | 78975083 | 5Y-H4K8ac_peak_5840 | 9.66296  |                                                    |

|    |          |          |                     |          |                                                        |
|----|----------|----------|---------------------|----------|--------------------------------------------------------|
| 15 | 78975443 | 78975861 | 5Y-H4K8ac_peak_5841 | 19.85404 |                                                        |
| 15 | 79002012 | 79002378 | 5Y-H4K8ac_peak_5842 | 7.14616  |                                                        |
| 15 | 79043974 | 79044758 | 5Y-H4K8ac_peak_5843 | 11.22005 | RP11-160C18.4_ENSG00000238166                          |
| 15 | 79045135 | 79045425 | 5Y-H4K8ac_peak_5844 | 14.86775 | RP11-160C18.4_ENSG00000238166                          |
| 15 | 79046037 | 79046786 | 5Y-H4K8ac_peak_5845 | 9.51254  |                                                        |
| 15 | 79049210 | 79049931 | 5Y-H4K8ac_peak_5846 | 7.89273  |                                                        |
| 15 | 79050427 | 79050717 | 5Y-H4K8ac_peak_5847 | 7.52971  |                                                        |
| 15 | 79051047 | 79051381 | 5Y-H4K8ac_peak_5848 | 11.12941 |                                                        |
| 15 | 79051704 | 79052474 | 5Y-H4K8ac_peak_5849 | 15.35687 |                                                        |
| 15 | 79052988 | 79053921 | 5Y-H4K8ac_peak_5850 | 31.89748 |                                                        |
| 15 | 79054260 | 79054743 | 5Y-H4K8ac_peak_5851 | 12.05638 |                                                        |
| 15 | 79056827 | 79057035 | 5Y-H4K8ac_peak_5852 | 6.86362  |                                                        |
| 15 | 79057377 | 79057724 | 5Y-H4K8ac_peak_5853 | 6.37023  |                                                        |
| 15 | 79104070 | 79104639 | 5Y-H4K8ac_peak_5854 | 11.22005 | ADAMTS7_ENSG00000136378                                |
| 15 | 79165386 | 79165598 | 5Y-H4K8ac_peak_5855 | 9.00954  |                                                        |
| 15 | 79237156 | 79237349 | 5Y-H4K8ac_peak_5856 | 10.1994  |                                                        |
| 15 | 79271180 | 79271502 | 5Y-H4K8ac_peak_5857 | 6.47245  | RP11-16K12.1_ENSG00000177699                           |
| 15 | 79271837 | 79272177 | 5Y-H4K8ac_peak_5858 | 12.26606 | RP11-16K12.1_ENSG00000177699                           |
| 15 | 79290280 | 79290512 | 5Y-H4K8ac_peak_5859 | 6.94897  |                                                        |
| 15 | 79603540 | 79603778 | 5Y-H4K8ac_peak_5860 | 8.79957  | TMED3_ENSG00000166557                                  |
| 15 | 80189192 | 80189669 | 5Y-H4K8ac_peak_5861 | 10.46287 | MTHFS_ENSG00000136371                                  |
| 15 | 80696225 | 80697053 | 5Y-H4K8ac_peak_5862 | 12.2918  | RP11-210M15.2_ENSG00000259495;ARNT2_ENSG00000172379    |
| 15 | 80987098 | 80987339 | 5Y-H4K8ac_peak_5863 | 7.59101  |                                                        |
| 15 | 81127899 | 81128194 | 5Y-H4K8ac_peak_5864 | 4.29586  |                                                        |
| 15 | 81292585 | 81293114 | 5Y-H4K8ac_peak_5865 | 18.09952 | MESDC1_ENSG00000140406                                 |
| 15 | 81293326 | 81293709 | 5Y-H4K8ac_peak_5866 | 8.1667   | MESDC1_ENSG00000140406                                 |
| 15 | 81452605 | 81452969 | 5Y-H4K8ac_peak_5867 | 6.50117  | IL16_ENSG00000172349                                   |
| 15 | 81453435 | 81453658 | 5Y-H4K8ac_peak_5868 | 5.65584  |                                                        |
| 15 | 81616139 | 81616410 | 5Y-H4K8ac_peak_5869 | 6.79955  | STARD5_ENSG00000172345;RP11-761I4.3_ENSG00000259343    |
| 15 | 81616829 | 81617028 | 5Y-H4K8ac_peak_5870 | 7.04637  | STARD5_ENSG00000172345;RP11-761I4.3_ENSG00000259343    |
| 15 | 82042325 | 82042605 | 5Y-H4K8ac_peak_5871 | 5.23819  |                                                        |
| 15 | 82043724 | 82043956 | 5Y-H4K8ac_peak_5872 | 5.23083  |                                                        |
| 15 | 82201815 | 82202011 | 5Y-H4K8ac_peak_5873 | 5.45466  |                                                        |
| 15 | 82206537 | 82206804 | 5Y-H4K8ac_peak_5874 | 6.43068  |                                                        |
| 15 | 82338845 | 82339297 | 5Y-H4K8ac_peak_5875 | 18.77281 | MEX3B_ENSG00000183496                                  |
| 15 | 82399214 | 82399502 | 5Y-H4K8ac_peak_5876 | 7.38046  |                                                        |
| 15 | 83315870 | 83316705 | 5Y-H4K8ac_peak_5877 | 10.79063 | CPEB1_ENSG00000214575;RP11-752G15.3_ENSG00000259462    |
| 15 | 83378801 | 83379314 | 5Y-H4K8ac_peak_5878 | 7.34185  | AP3B2_ENSG00000103723                                  |
| 15 | 83519471 | 83519676 | 5Y-H4K8ac_peak_5879 | 8.43511  |                                                        |
| 15 | 83654288 | 83654806 | 5Y-H4K8ac_peak_5880 | 6.53157  | HOMER2_ENSG00000103942;FAM103A1_ENSG00000169612        |
| 15 | 83679975 | 83680299 | 5Y-H4K8ac_peak_5881 | 11.22005 | C15orf40_ENSG00000169609                               |
| 15 | 83680515 | 83681227 | 5Y-H4K8ac_peak_5882 | 10.69698 | C15orf40_ENSG00000169609;RP11-382A20.7_ENSG00000260608 |
| 15 | 83735617 | 83735950 | 5Y-H4K8ac_peak_5883 | 7.20869  | BTBD1_ENSG00000064726;MIR4515_ENSG00000263643          |
| 15 | 83736280 | 83736850 | 5Y-H4K8ac_peak_5884 | 6.73047  | BTBD1_ENSG00000064726;MIR4515_ENSG00000263643          |
| 15 | 83876728 | 83877153 | 5Y-H4K8ac_peak_5885 | 15.40182 | HDGFRP3_ENSG00000166503                                |
| 15 | 84864121 | 84864412 | 5Y-H4K8ac_peak_5886 | 5.87725  |                                                        |

|    |          |          |                     |          |                                                         |
|----|----------|----------|---------------------|----------|---------------------------------------------------------|
| 15 | 84865368 | 84865921 | 5Y-H4K8ac_peak_5887 | 14.31711 |                                                         |
| 15 | 85113514 | 85113886 | 5Y-H4K8ac_peak_5888 | 5.89922  | LINC00933_ENSG00000259728;UBE2Q2P1_ENSG00000189136      |
| 15 | 85174783 | 85174975 | 5Y-H4K8ac_peak_5889 | 8.17203  | SCAND2P_ENSG00000176700                                 |
| 15 | 85291201 | 85291437 | 5Y-H4K8ac_peak_5890 | 7.59101  | ZNF592_ENSG00000166716                                  |
| 15 | 85291824 | 85292064 | 5Y-H4K8ac_peak_5891 | 11.1169  | ZNF592_ENSG00000166716                                  |
| 15 | 85458784 | 85459397 | 5Y-H4K8ac_peak_5892 | 10.55504 |                                                         |
| 15 | 85498812 | 85499090 | 5Y-H4K8ac_peak_5893 | 8.43511  |                                                         |
| 15 | 85522999 | 85523202 | 5Y-H4K8ac_peak_5894 | 7.38046  | PDE8A_ENSG00000073417                                   |
| 15 | 85799634 | 85799900 | 5Y-H4K8ac_peak_5895 | 4.50834  |                                                         |
| 15 | 88418436 | 88418634 | 5Y-H4K8ac_peak_5896 | 5.65584  |                                                         |
| 15 | 89114832 | 89115088 | 5Y-H4K8ac_peak_5897 | 8.93923  |                                                         |
| 15 | 89191057 | 89191286 | 5Y-H4K8ac_peak_5898 | 10.68564 |                                                         |
| 15 | 89561574 | 89561887 | 5Y-H4K8ac_peak_5899 | 8.79957  |                                                         |
| 15 | 89630923 | 89631184 | 5Y-H4K8ac_peak_5900 | 7.90236  | RP11-326A19.3_ENSG00000261407;ABHD2_ENSG00000140526     |
| 15 | 89688338 | 89688537 | 5Y-H4K8ac_peak_5901 | 5.84208  |                                                         |
| 15 | 89786541 | 89787011 | 5Y-H4K8ac_peak_5902 | 15.40182 | FANCI_ENSG00000140525                                   |
| 15 | 89902017 | 89902713 | 5Y-H4K8ac_peak_5903 | 14.10646 |                                                         |
| 15 | 89904899 | 89905101 | 5Y-H4K8ac_peak_5904 | 7.30348  | LINC00925_ENSG00000255571                               |
| 15 | 89910976 | 89911307 | 5Y-H4K8ac_peak_5905 | 10.73606 | MIR9-3_ENSG00000207819                                  |
| 15 | 89927112 | 89927308 | 5Y-H4K8ac_peak_5906 | 6.1654   |                                                         |
| 15 | 89942576 | 89943173 | 5Y-H4K8ac_peak_5907 | 11.5813  |                                                         |
| 15 | 89943473 | 89943957 | 5Y-H4K8ac_peak_5908 | 7.11863  |                                                         |
| 15 | 89992587 | 89992954 | 5Y-H4K8ac_peak_5909 | 9.79526  |                                                         |
| 15 | 90118962 | 90119192 | 5Y-H4K8ac_peak_5910 | 8.4454   | TICRR_ENSG00000140534                                   |
| 15 | 90208910 | 90209647 | 5Y-H4K8ac_peak_5911 | 9.62747  |                                                         |
| 15 | 90293570 | 90294944 | 5Y-H4K8ac_peak_5912 | 18.68977 | MESP1_ENSG00000166823;MRPL15P1_ENSG00000259441          |
| 15 | 90319245 | 90320575 | 5Y-H4K8ac_peak_5913 | 13.99776 |                                                         |
| 15 | 90358211 | 90358458 | 5Y-H4K8ac_peak_5914 | 5.41472  | ANPEP_ENSG00000166825                                   |
| 15 | 90358736 | 90358959 | 5Y-H4K8ac_peak_5915 | 4.29586  | ANPEP_ENSG00000166825                                   |
| 15 | 90456046 | 90456532 | 5Y-H4K8ac_peak_5916 | 9.44542  | C15orf38-AP3S2_ENSG00000250021;C15orf38_ENSG00000242498 |
| 15 | 90544471 | 90544703 | 5Y-H4K8ac_peak_5917 | 6.31818  | ZNF710_ENSG00000140548                                  |
| 15 | 90545232 | 90545490 | 5Y-H4K8ac_peak_5918 | 10.55771 | ZNF710_ENSG00000140548                                  |
| 15 | 90718506 | 90718795 | 5Y-H4K8ac_peak_5919 | 6.50117  |                                                         |
| 15 | 90736204 | 90736586 | 5Y-H4K8ac_peak_5920 | 7.64716  |                                                         |
| 15 | 90808429 | 90809178 | 5Y-H4K8ac_peak_5921 | 9.36633  | NGRN_ENSG00000182768                                    |
| 15 | 90844234 | 90844498 | 5Y-H4K8ac_peak_5922 | 11.22005 |                                                         |
| 15 | 90894986 | 90895241 | 5Y-H4K8ac_peak_5923 | 5.67283  | ZNF774_ENSG00000196391                                  |
| 15 | 91072689 | 91073721 | 5Y-H4K8ac_peak_5924 | 6.78128  | CRTC3_ENSG00000140577                                   |
| 15 | 91208662 | 91209098 | 5Y-H4K8ac_peak_5925 | 10.79081 |                                                         |
| 15 | 91366970 | 91367232 | 5Y-H4K8ac_peak_5926 | 4.84727  |                                                         |
| 15 | 91415253 | 91415480 | 5Y-H4K8ac_peak_5927 | 10.11191 |                                                         |
| 15 | 91438453 | 91438820 | 5Y-H4K8ac_peak_5928 | 8.46442  |                                                         |
| 15 | 91446160 | 91446778 | 5Y-H4K8ac_peak_5929 | 8.55081  | MAN2A2_ENSG00000196547                                  |
| 15 | 91475273 | 91475730 | 5Y-H4K8ac_peak_5930 | 7.03573  | HDDC3_ENSG00000184508                                   |
| 15 | 91498301 | 91498672 | 5Y-H4K8ac_peak_5931 | 5.24695  | AC068831.6_ENSG00000258384;RCCD1_ENSG00000166965        |
| 15 | 91500047 | 91500612 | 5Y-H4K8ac_peak_5932 | 7.03573  |                                                         |

|    |           |           |                     |          |                                                    |
|----|-----------|-----------|---------------------|----------|----------------------------------------------------|
| 15 | 91538993  | 91539271  | 5Y-H4K8ac_peak_5933 | 5.68769  | PRC1_ENSG00000198901                               |
| 15 | 92040234  | 92040649  | 5Y-H4K8ac_peak_5934 | 4.84727  |                                                    |
| 15 | 92937134  | 92937664  | 5Y-H4K8ac_peak_5935 | 7.18918  | ST8SIA2_ENSG00000140557                            |
| 15 | 92937939  | 92938453  | 5Y-H4K8ac_peak_5936 | 9.92042  | ST8SIA2_ENSG00000140557                            |
| 15 | 93042463  | 93042814  | 5Y-H4K8ac_peak_5937 | 5.65584  |                                                    |
| 15 | 93161069  | 93161260  | 5Y-H4K8ac_peak_5938 | 10.19948 |                                                    |
| 15 | 93257756  | 93258113  | 5Y-H4K8ac_peak_5939 | 12.21176 |                                                    |
| 15 | 93277017  | 93277281  | 5Y-H4K8ac_peak_5940 | 8.33296  | RP11-386M24.4_ENSG00000258741                      |
| 15 | 93364171  | 93364510  | 5Y-H4K8ac_peak_5941 | 8.17203  |                                                    |
| 15 | 93426392  | 93426741  | 5Y-H4K8ac_peak_5942 | 10.46287 | AC013394.2_ENSG00000272888;CHD2_ENSG00000173575    |
| 15 | 99190591  | 99191107  | 5Y-H4K8ac_peak_5943 | 8.2913   | RP11-35015.1_ENSG00000259424                       |
| 15 | 99192235  | 99192572  | 5Y-H4K8ac_peak_5944 | 7.76232  | IGF1R_ENSG00000140443                              |
| 15 | 99270722  | 99271075  | 5Y-H4K8ac_peak_5945 | 6.87117  |                                                    |
| 15 | 99271395  | 99271976  | 5Y-H4K8ac_peak_5946 | 5.41472  |                                                    |
| 15 | 99279955  | 99280205  | 5Y-H4K8ac_peak_5947 | 6.14981  |                                                    |
| 15 | 99280957  | 99281168  | 5Y-H4K8ac_peak_5948 | 8.33296  |                                                    |
| 15 | 99434542  | 99434793  | 5Y-H4K8ac_peak_5949 | 6.34046  |                                                    |
| 15 | 99558044  | 99558415  | 5Y-H4K8ac_peak_5950 | 5.64909  |                                                    |
| 15 | 99602523  | 99602818  | 5Y-H4K8ac_peak_5951 | 9.79526  |                                                    |
| 15 | 99640629  | 99640858  | 5Y-H4K8ac_peak_5952 | 8.2913   |                                                    |
| 15 | 99645446  | 99645663  | 5Y-H4K8ac_peak_5953 | 7.38046  | RP11-654A16.3_ENSG00000259475                      |
| 15 | 99663610  | 99663945  | 5Y-H4K8ac_peak_5954 | 15.82359 |                                                    |
| 15 | 100027214 | 100027747 | 5Y-H4K8ac_peak_5955 | 9.38203  |                                                    |
| 15 | 100105259 | 100105873 | 5Y-H4K8ac_peak_5956 | 8.69112  |                                                    |
| 15 | 100273931 | 100274404 | 5Y-H4K8ac_peak_5957 | 12.82003 | LYSMD4_ENSG00000183060                             |
| 15 | 100890076 | 100890336 | 5Y-H4K8ac_peak_5958 | 9.51254  | SPATA41_ENSG00000189419                            |
| 15 | 100913337 | 100913787 | 5Y-H4K8ac_peak_5959 | 5.65584  | RP11-168G16.2_ENSG00000259430                      |
| 15 | 101207952 | 101208161 | 5Y-H4K8ac_peak_5960 | 7.01364  |                                                    |
| 15 | 101209497 | 101209791 | 5Y-H4K8ac_peak_5961 | 11.09973 |                                                    |
| 15 | 101254533 | 101254774 | 5Y-H4K8ac_peak_5962 | 4.24869  |                                                    |
| 15 | 101305194 | 101305547 | 5Y-H4K8ac_peak_5963 | 6.22904  |                                                    |
| 15 | 101305861 | 101306412 | 5Y-H4K8ac_peak_5964 | 16.6076  |                                                    |
| 15 | 101310041 | 101310400 | 5Y-H4K8ac_peak_5965 | 4.95697  |                                                    |
| 15 | 101311211 | 101311999 | 5Y-H4K8ac_peak_5966 | 5.41472  |                                                    |
| 15 | 101314252 | 101314677 | 5Y-H4K8ac_peak_5967 | 7.59101  |                                                    |
| 15 | 101315467 | 101315722 | 5Y-H4K8ac_peak_5968 | 5.18494  |                                                    |
| 15 | 101321321 | 101321675 | 5Y-H4K8ac_peak_5969 | 14.89891 |                                                    |
| 15 | 101322119 | 101322473 | 5Y-H4K8ac_peak_5970 | 6.37023  |                                                    |
| 15 | 101328443 | 101328649 | 5Y-H4K8ac_peak_5971 | 7.42477  |                                                    |
| 15 | 101370849 | 101371040 | 5Y-H4K8ac_peak_5972 | 5.5192   |                                                    |
| 15 | 101419224 | 101420171 | 5Y-H4K8ac_peak_5973 | 22.01193 |                                                    |
| 15 | 101440769 | 101441296 | 5Y-H4K8ac_peak_5974 | 8.43511  |                                                    |
| 15 | 101459613 | 101460206 | 5Y-H4K8ac_peak_5975 | 9.51254  | RP11-66B24.4_ENSG00000259583;LRRK1_ENSG00000154237 |
| 15 | 101666842 | 101667377 | 5Y-H4K8ac_peak_5976 | 10.11191 |                                                    |
| 15 | 101674056 | 101674348 | 5Y-H4K8ac_peak_5977 | 6.66026  |                                                    |
| 15 | 101688907 | 101689547 | 5Y-H4K8ac_peak_5978 | 17.63051 |                                                    |

|    |           |           |                     |          |                                                       |
|----|-----------|-----------|---------------------|----------|-------------------------------------------------------|
| 15 | 101690709 | 101691012 | 5Y-H4K8ac_peak_5979 | 4.40052  |                                                       |
| 15 | 101835174 | 101835407 | 5Y-H4K8ac_peak_5980 | 12.69256 | SNRPA1_ENSG00000131876;RP11-299G20.2_ENSG00000259172  |
| 15 | 101990107 | 101991359 | 5Y-H4K8ac_peak_5981 | 4.15658  |                                                       |
| 15 | 102041816 | 102042190 | 5Y-H4K8ac_peak_5982 | 7.46096  |                                                       |
| 15 | 102192840 | 102193310 | 5Y-H4K8ac_peak_5983 | 5.91107  | TM2D3_ENSG00000184277                                 |
| 15 | 102264145 | 102264442 | 5Y-H4K8ac_peak_5984 | 4.50834  | TARSL2_ENSG00000185418                                |
| 15 | 102506189 | 102506477 | 5Y-H4K8ac_peak_5985 | 4.48815  |                                                       |
| 16 | 128305    | 128526    | 5Y-H4K8ac_peak_5986 | 7.18391  |                                                       |
| 16 | 188839    | 189071    | 5Y-H4K8ac_peak_5987 | 10.1994  | NPRL3_ENSG00000103148                                 |
| 16 | 231236    | 231457    | 5Y-H4K8ac_peak_5988 | 7.09658  | HBQ1_ENSG00000086506                                  |
| 16 | 279196    | 279406    | 5Y-H4K8ac_peak_5989 | 11.04542 | LUC7L_ENSG00000007392                                 |
| 16 | 324958    | 325265    | 5Y-H4K8ac_peak_5990 | 4.95697  | RGS11_ENSG00000076344                                 |
| 16 | 330759    | 331253    | 5Y-H4K8ac_peak_5991 | 9.23159  |                                                       |
| 16 | 431538    | 431807    | 5Y-H4K8ac_peak_5992 | 10.90543 | Z97634.3_ENSG00000236829                              |
| 16 | 432263    | 432461    | 5Y-H4K8ac_peak_5993 | 6.50117  | Z97634.3_ENSG00000236829                              |
| 16 | 447234    | 447518    | 5Y-H4K8ac_peak_5994 | 14.10646 | NME4_ENSG00000103202                                  |
| 16 | 476001    | 476397    | 5Y-H4K8ac_peak_5995 | 9.93099  | RAB11FIP3_ENSG00000090565                             |
| 16 | 508110    | 508318    | 5Y-H4K8ac_peak_5996 | 8.19789  |                                                       |
| 16 | 576931    | 577351    | 5Y-H4K8ac_peak_5997 | 4.95697  | CAPN15_ENSG00000103326                                |
| 16 | 614769    | 615062    | 5Y-H4K8ac_peak_5998 | 4.29586  |                                                       |
| 16 | 617014    | 617424    | 5Y-H4K8ac_peak_5999 | 8.43511  | PIGQ_ENSG00000007541;NHLRC4_ENSG00000257108           |
| 16 | 619348    | 619836    | 5Y-H4K8ac_peak_6000 | 8.24461  |                                                       |
| 16 | 620055    | 620275    | 5Y-H4K8ac_peak_6001 | 6.37023  |                                                       |
| 16 | 638586    | 639820    | 5Y-H4K8ac_peak_6002 | 13.9425  | RAB40C_ENSG00000197562                                |
| 16 | 685979    | 686250    | 5Y-H4K8ac_peak_6003 | 9.51254  | C16orf13_ENSG00000130731                              |
| 16 | 691506    | 691805    | 5Y-H4K8ac_peak_6004 | 6.50117  | AL022341.1_ENSG00000197727;FAM195A_ENSG00000172366    |
| 16 | 692035    | 692372    | 5Y-H4K8ac_peak_6005 | 9.51785  | AL022341.1_ENSG00000197727;FAM195A_ENSG00000172366    |
| 16 | 698712    | 699096    | 5Y-H4K8ac_peak_6006 | 13.10659 | AL022341.3_ENSG00000228201;WDR90_ENSG00000161996      |
| 16 | 699466    | 699793    | 5Y-H4K8ac_peak_6007 | 7.15925  | AL022341.3_ENSG00000228201;WDR90_ENSG00000161996      |
| 16 | 710061    | 710543    | 5Y-H4K8ac_peak_6008 | 8.82628  |                                                       |
| 16 | 733743    | 734265    | 5Y-H4K8ac_peak_6009 | 8.73227  | JMJD8_ENSG00000161999                                 |
| 16 | 739746    | 740348    | 5Y-H4K8ac_peak_6010 | 11.22005 | WDR24_ENSG00000127580;LA16c-313D11.12_ENSG00000261659 |
| 16 | 740639    | 741192    | 5Y-H4K8ac_peak_6011 | 10.90365 | WDR24_ENSG00000127580                                 |
| 16 | 759875    | 760315    | 5Y-H4K8ac_peak_6012 | 8.19789  | LA16c-380A1.1_ENSG00000259840                         |
| 16 | 760958    | 761150    | 5Y-H4K8ac_peak_6013 | 5.41472  | LA16c-380A1.1_ENSG00000259840                         |
| 16 | 770042    | 770245    | 5Y-H4K8ac_peak_6014 | 7.19446  | FAM173A_ENSG00000103254                               |
| 16 | 770646    | 771352    | 5Y-H4K8ac_peak_6015 | 7.50501  | FAM173A_ENSG00000103254                               |
| 16 | 791216    | 791573    | 5Y-H4K8ac_peak_6016 | 7.60057  | NARFL_ENSG00000103245                                 |
| 16 | 857339    | 857768    | 5Y-H4K8ac_peak_6017 | 9.38276  |                                                       |
| 16 | 858022    | 858269    | 5Y-H4K8ac_peak_6018 | 10.1994  |                                                       |
| 16 | 1020518   | 1020812   | 5Y-H4K8ac_peak_6019 | 5.87725  |                                                       |
| 16 | 1358688   | 1358899   | 5Y-H4K8ac_peak_6020 | 11.48679 |                                                       |
| 16 | 1359122   | 1359913   | 5Y-H4K8ac_peak_6021 | 20.93228 |                                                       |
| 16 | 1401450   | 1401799   | 5Y-H4K8ac_peak_6022 | 9.23159  | TSR3_ENSG00000007520;GNPTG_ENSG00000090581            |
| 16 | 1402081   | 1402324   | 5Y-H4K8ac_peak_6023 | 4.29586  | TSR3_ENSG00000007520;GNPTG_ENSG00000090581            |
| 16 | 1471395   | 1472122   | 5Y-H4K8ac_peak_6024 | 7.04637  |                                                       |

|    |         |         |                     |          |                                                                         |
|----|---------|---------|---------------------|----------|-------------------------------------------------------------------------|
| 16 | 1480305 | 1480676 | 5Y-H4K8ac_peak_6025 | 5.50568  | C16orf91_ENSG00000174109                                                |
| 16 | 1487511 | 1487870 | 5Y-H4K8ac_peak_6026 | 6.50117  |                                                                         |
| 16 | 1524496 | 1524710 | 5Y-H4K8ac_peak_6027 | 5.23819  | CLCN7_ENSG00000103249                                                   |
| 16 | 1525145 | 1525543 | 5Y-H4K8ac_peak_6028 | 18.78631 | CLCN7_ENSG00000103249                                                   |
| 16 | 1543399 | 1543797 | 5Y-H4K8ac_peak_6029 | 4.95697  | TELO2_ENSG00000100726                                                   |
| 16 | 1580664 | 1581003 | 5Y-H4K8ac_peak_6030 | 4.70545  |                                                                         |
| 16 | 1581490 | 1581774 | 5Y-H4K8ac_peak_6031 | 6.43068  |                                                                         |
| 16 | 1755672 | 1755988 | 5Y-H4K8ac_peak_6032 | 14.81591 | MAPK8IP3_ENSG00000138834                                                |
| 16 | 1820813 | 1821056 | 5Y-H4K8ac_peak_6033 | 5.77617  | NME3_ENSG00000103024                                                    |
| 16 | 1823239 | 1823491 | 5Y-H4K8ac_peak_6034 | 8.09118  | MRPS34_ENSG00000074071;EME2_ENSG00000197774                             |
| 16 | 1922588 | 1922791 | 5Y-H4K8ac_peak_6035 | 5.28616  |                                                                         |
| 16 | 1946305 | 1946580 | 5Y-H4K8ac_peak_6036 | 4.84727  |                                                                         |
| 16 | 1952760 | 1952970 | 5Y-H4K8ac_peak_6037 | 6.14981  |                                                                         |
| 16 | 1953837 | 1954248 | 5Y-H4K8ac_peak_6038 | 10.54764 |                                                                         |
| 16 | 1954466 | 1954725 | 5Y-H4K8ac_peak_6039 | 8.71064  |                                                                         |
| 16 | 1956444 | 1956772 | 5Y-H4K8ac_peak_6040 | 5.05812  |                                                                         |
| 16 | 1957587 | 1957901 | 5Y-H4K8ac_peak_6041 | 6.77436  |                                                                         |
| 16 | 1958442 | 1958797 | 5Y-H4K8ac_peak_6042 | 4.95697  |                                                                         |
| 16 | 1979942 | 1980397 | 5Y-H4K8ac_peak_6043 | 10.35586 |                                                                         |
| 16 | 2004039 | 2004493 | 5Y-H4K8ac_peak_6044 | 10.69698 |                                                                         |
| 16 | 2008567 | 2009176 | 5Y-H4K8ac_peak_6045 | 10.99576 | RPL3L_ENSG00000140986;NDUFB10_ENSG00000140990                           |
| 16 | 2009613 | 2009916 | 5Y-H4K8ac_peak_6046 | 12.21176 | NDUFB10_ENSG00000140990                                                 |
| 16 | 2014382 | 2014792 | 5Y-H4K8ac_peak_6047 | 15.39044 | AC005363.9_ENSG00000255513;RPS2_ENSG00000140988;SNHG9_ENSG00000255198   |
| 16 | 2015070 | 2015527 | 5Y-H4K8ac_peak_6048 | 11.19336 | AC005363.9_ENSG00000255513;RPS2_ENSG00000140988;SNHG9_ENSG00000255198   |
| 16 | 2059399 | 2059593 | 5Y-H4K8ac_peak_6049 | 6.24511  | ZNF598_ENSG00000167962;NPW_ENSG00000183971                              |
| 16 | 2083259 | 2083870 | 5Y-H4K8ac_peak_6050 | 9.7353   |                                                                         |
| 16 | 2085430 | 2085823 | 5Y-H4K8ac_peak_6051 | 5.23083  |                                                                         |
| 16 | 2086286 | 2086525 | 5Y-H4K8ac_peak_6052 | 5.67283  |                                                                         |
| 16 | 2088070 | 2088278 | 5Y-H4K8ac_peak_6053 | 6.77436  |                                                                         |
| 16 | 2097476 | 2097739 | 5Y-H4K8ac_peak_6054 | 8.43511  | NTHL1_ENSG00000065057;TSC2_ENSG00000103197                              |
| 16 | 2171976 | 2172597 | 5Y-H4K8ac_peak_6055 | 9.62747  |                                                                         |
| 16 | 2172814 | 2173359 | 5Y-H4K8ac_peak_6056 | 9.51254  |                                                                         |
| 16 | 2173720 | 2173915 | 5Y-H4K8ac_peak_6057 | 8.24461  |                                                                         |
| 16 | 2174142 | 2175077 | 5Y-H4K8ac_peak_6058 | 13.12848 |                                                                         |
| 16 | 2175418 | 2176376 | 5Y-H4K8ac_peak_6059 | 9.79526  |                                                                         |
| 16 | 2176914 | 2177129 | 5Y-H4K8ac_peak_6060 | 7.50148  |                                                                         |
| 16 | 2197556 | 2197890 | 5Y-H4K8ac_peak_6061 | 6.86362  |                                                                         |
| 16 | 2198291 | 2198512 | 5Y-H4K8ac_peak_6062 | 7.90236  |                                                                         |
| 16 | 2198978 | 2199210 | 5Y-H4K8ac_peak_6063 | 5.41472  |                                                                         |
| 16 | 2246838 | 2247033 | 5Y-H4K8ac_peak_6064 | 8.05083  | CASKIN1_ENSG00000167971                                                 |
| 16 | 2255166 | 2255953 | 5Y-H4K8ac_peak_6065 | 18.12001 | MLST8_ENSG00000167965;AC009065.3_ENSG00000252958                        |
| 16 | 2265749 | 2266109 | 5Y-H4K8ac_peak_6066 | 4.642    | PGP_ENSG00000184207                                                     |
| 16 | 2273664 | 2273892 | 5Y-H4K8ac_peak_6067 | 11.1169  | E4F1_ENSG00000167967                                                    |
| 16 | 2274116 | 2274388 | 5Y-H4K8ac_peak_6068 | 4.50834  | E4F1_ENSG00000167967                                                    |
| 16 | 2301251 | 2302173 | 5Y-H4K8ac_peak_6069 | 10.1994  | ECI1_ENSG00000167969                                                    |
| 16 | 2317751 | 2318110 | 5Y-H4K8ac_peak_6070 | 13.14766 | RNPS1_ENSG00000205937;AC009065.2_ENSG00000207715;MIR940_ENSG00000260778 |



|    |         |         |                     |          |                                                    |
|----|---------|---------|---------------------|----------|----------------------------------------------------|
| 16 | 2391055 | 2391362 | 5Y-H4K8ac_peak_6071 | 11.1169  | ABCA3_ENSG00000167972                              |
| 16 | 2478570 | 2479007 | 5Y-H4K8ac_peak_6072 | 4.97086  | CCNF_ENSG00000162063                               |
| 16 | 2517352 | 2517544 | 5Y-H4K8ac_peak_6073 | 7.65114  | RP11-715J22.2_ENSG00000259895                      |
| 16 | 2517805 | 2518571 | 5Y-H4K8ac_peak_6074 | 20.56946 | RP11-715J22.2_ENSG00000259895                      |
| 16 | 2518961 | 2520589 | 5Y-H4K8ac_peak_6075 | 11.12941 | RP11-715J22.2_ENSG00000259895;NTN3_ENSG00000162068 |
| 16 | 2521474 | 2522072 | 5Y-H4K8ac_peak_6076 | 8.5915   | NTN3_ENSG00000162068                               |
| 16 | 2523679 | 2524006 | 5Y-H4K8ac_peak_6077 | 7.50148  |                                                    |
| 16 | 2524555 | 2524928 | 5Y-H4K8ac_peak_6078 | 6.40724  | TBC1D24_ENSG00000162065                            |
| 16 | 2532239 | 2532697 | 5Y-H4K8ac_peak_6079 | 10.03452 |                                                    |
| 16 | 2563742 | 2563956 | 5Y-H4K8ac_peak_6080 | 9.51254  | ATP6V0C_ENSG00000185883;ATP6C_ENSG00000259784      |
| 16 | 2570732 | 2571043 | 5Y-H4K8ac_peak_6081 | 5.3989   | AMDHD2_ENSG00000162066                             |
| 16 | 2581594 | 2581849 | 5Y-H4K8ac_peak_6082 | 9.30505  | CEMP1_ENSG00000205923;MIR3178_ENSG00000266232      |
| 16 | 2653471 | 2653749 | 5Y-H4K8ac_peak_6083 | 8.69112  | AC141586.5_ENSG00000215154                         |
| 16 | 2732581 | 2732906 | 5Y-H4K8ac_peak_6084 | 7.11863  | KCTD5_ENSG00000167977                              |
| 16 | 2770114 | 2771067 | 5Y-H4K8ac_peak_6085 | 8.20773  | PRSS27_ENSG00000172382                             |
| 16 | 2801799 | 2802893 | 5Y-H4K8ac_peak_6086 | 20.83471 | SRRM2-AS1_ENSG00000205913;SRRM2_ENSG00000167978    |
| 16 | 2826827 | 2827066 | 5Y-H4K8ac_peak_6087 | 6.77436  | TCEB2_ENSG00000103363                              |
| 16 | 2827416 | 2828116 | 5Y-H4K8ac_peak_6088 | 12.65187 | TCEB2_ENSG00000103363                              |
| 16 | 2870305 | 2870549 | 5Y-H4K8ac_peak_6089 | 6.62622  |                                                    |
| 16 | 2902362 | 2902690 | 5Y-H4K8ac_peak_6090 | 9.15007  |                                                    |
| 16 | 2917944 | 2918478 | 5Y-H4K8ac_peak_6091 | 6.08471  | LA16c-325D7.2_ENSG00000263280                      |
| 16 | 2918814 | 2919005 | 5Y-H4K8ac_peak_6092 | 4.67245  |                                                    |
| 16 | 2954540 | 2954754 | 5Y-H4K8ac_peak_6093 | 8.52802  |                                                    |
| 16 | 3018631 | 3018957 | 5Y-H4K8ac_peak_6094 | 7.59101  | PAQR4_ENSG00000162073                              |
| 16 | 3019722 | 3019914 | 5Y-H4K8ac_peak_6095 | 4.90696  | PAQR4_ENSG00000162073                              |
| 16 | 3030164 | 3030419 | 5Y-H4K8ac_peak_6096 | 16.01457 | PKMYT1_ENSG00000127564                             |
| 16 | 3030650 | 3030873 | 5Y-H4K8ac_peak_6097 | 13.0168  | PKMYT1_ENSG00000127564                             |
| 16 | 3033951 | 3034244 | 5Y-H4K8ac_peak_6098 | 10.54764 |                                                    |
| 16 | 3109593 | 3109992 | 5Y-H4K8ac_peak_6099 | 7.11863  | RP11-473M20.7_ENSG00000261971                      |
| 16 | 3162411 | 3162918 | 5Y-H4K8ac_peak_6100 | 7.59101  | ZNF205_ENSG00000122386                             |
| 16 | 3184373 | 3184772 | 5Y-H4K8ac_peak_6101 | 8.01306  | RP11-473M20.14_ENSG00000263072                     |
| 16 | 3199565 | 3199771 | 5Y-H4K8ac_peak_6102 | 8.86184  |                                                    |
| 16 | 3238293 | 3238581 | 5Y-H4K8ac_peak_6103 | 5.17251  | AJ003147.9_ENSG00000262668                         |
| 16 | 3332788 | 3333276 | 5Y-H4K8ac_peak_6104 | 12.44818 |                                                    |
| 16 | 3333540 | 3333766 | 5Y-H4K8ac_peak_6105 | 9.05168  |                                                    |
| 16 | 3355584 | 3356081 | 5Y-H4K8ac_peak_6106 | 10.69698 | TIGD7_ENSG00000140993;ZNF75A_ENSG00000162086       |
| 16 | 3507114 | 3507384 | 5Y-H4K8ac_peak_6107 | 9.38203  | LA16c-306E5.3_ENSG00000263212                      |
| 16 | 3507700 | 3507943 | 5Y-H4K8ac_peak_6108 | 11.57334 | LA16c-306E5.3_ENSG00000263212                      |
| 16 | 3508302 | 3508517 | 5Y-H4K8ac_peak_6109 | 9.23159  | LA16c-306E5.3_ENSG00000263212                      |
| 16 | 3767703 | 3768001 | 5Y-H4K8ac_peak_6110 | 10.35586 | TRAP1_ENSG00000126602                              |
| 16 | 3930187 | 3930404 | 5Y-H4K8ac_peak_6111 | 10.69698 | CREBBP_ENSG00000005339                             |
| 16 | 3930909 | 3931648 | 5Y-H4K8ac_peak_6112 | 19.17092 | CREBBP_ENSG00000005339                             |
| 16 | 3988998 | 3989376 | 5Y-H4K8ac_peak_6113 | 7.63144  |                                                    |
| 16 | 4233196 | 4233843 | 5Y-H4K8ac_peak_6114 | 12.11208 | RP11-95P2.3_ENSG00000263105                        |
| 16 | 4234252 | 4234455 | 5Y-H4K8ac_peak_6115 | 8.47164  | RP11-95P2.3_ENSG00000263105                        |
| 16 | 4321156 | 4322596 | 5Y-H4K8ac_peak_6116 | 10.60083 | TFAP4_ENSG00000090447                              |

|    |          |          |                     |          |                                              |
|----|----------|----------|---------------------|----------|----------------------------------------------|
| 16 | 4357834  | 4358250  | 5Y-H4K8ac_peak_6117 | 9.23159  |                                              |
| 16 | 4365077  | 4365709  | 5Y-H4K8ac_peak_6118 | 13.77072 |                                              |
| 16 | 4378387  | 4378874  | 5Y-H4K8ac_peak_6119 | 10.90097 | AC005356.1_ENSG00000262686                   |
| 16 | 4400976  | 4401196  | 5Y-H4K8ac_peak_6120 | 6.37023  |                                              |
| 16 | 4433744  | 4434252  | 5Y-H4K8ac_peak_6121 | 5.23083  |                                              |
| 16 | 4436294  | 4436585  | 5Y-H4K8ac_peak_6122 | 5.98695  |                                              |
| 16 | 4441611  | 4442540  | 5Y-H4K8ac_peak_6123 | 8.62703  |                                              |
| 16 | 4442859  | 4443218  | 5Y-H4K8ac_peak_6124 | 11.68317 |                                              |
| 16 | 4443664  | 4444308  | 5Y-H4K8ac_peak_6125 | 7.98641  |                                              |
| 16 | 4444531  | 4444942  | 5Y-H4K8ac_peak_6126 | 13.00792 |                                              |
| 16 | 4466194  | 4466482  | 5Y-H4K8ac_peak_6127 | 8.16382  |                                              |
| 16 | 4475579  | 4476144  | 5Y-H4K8ac_peak_6128 | 10.18964 | CORO7_ENSG00000262246;DNAJA3_ENSG00000103423 |
| 16 | 4664357  | 4664762  | 5Y-H4K8ac_peak_6129 | 6.54441  | UBALD1_ENSG00000153443                       |
| 16 | 4665737  | 4666175  | 5Y-H4K8ac_peak_6130 | 8.97839  | UBALD1_ENSG00000153443;MGRN1_ENSG00000102858 |
| 16 | 4666618  | 4667108  | 5Y-H4K8ac_peak_6131 | 6.47245  | MGRN1_ENSG00000102858                        |
| 16 | 4795429  | 4795658  | 5Y-H4K8ac_peak_6132 | 5.40331  |                                              |
| 16 | 4797368  | 4797571  | 5Y-H4K8ac_peak_6133 | 4.79585  |                                              |
| 16 | 4819332  | 4819545  | 5Y-H4K8ac_peak_6134 | 5.98695  |                                              |
| 16 | 4822092  | 4822449  | 5Y-H4K8ac_peak_6135 | 5.29015  |                                              |
| 16 | 4845663  | 4846149  | 5Y-H4K8ac_peak_6136 | 5.59837  | RP11-127I20.5_ENSG00000267077                |
| 16 | 4896864  | 4897262  | 5Y-H4K8ac_peak_6137 | 7.01266  | UBN1_ENSG00000118900                         |
| 16 | 5083432  | 5083863  | 5Y-H4K8ac_peak_6138 | 9.30505  | NAGPA_ENSG00000103174;ALG1_ENSG00000033011   |
| 16 | 5121821  | 5122202  | 5Y-H4K8ac_peak_6139 | 7.38046  |                                              |
| 16 | 5555854  | 5556355  | 5Y-H4K8ac_peak_6140 | 8.4454   |                                              |
| 16 | 5665834  | 5666216  | 5Y-H4K8ac_peak_6141 | 12.10416 | RP11-124K4.1_ENSG00000260338                 |
| 16 | 8715585  | 8715902  | 5Y-H4K8ac_peak_6142 | 7.59101  | METTL22_ENSG00000067365                      |
| 16 | 8806867  | 8807077  | 5Y-H4K8ac_peak_6143 | 8.24461  |                                              |
| 16 | 8860101  | 8860936  | 5Y-H4K8ac_peak_6144 | 8.24461  |                                              |
| 16 | 8891739  | 8892128  | 5Y-H4K8ac_peak_6145 | 13.12848 | TMEM186_ENSG00000184857                      |
| 16 | 8892354  | 8892609  | 5Y-H4K8ac_peak_6146 | 9.97324  | TMEM186_ENSG00000184857                      |
| 16 | 8915660  | 8915869  | 5Y-H4K8ac_peak_6147 | 5.29015  |                                              |
| 16 | 8918994  | 8919192  | 5Y-H4K8ac_peak_6148 | 5.81062  |                                              |
| 16 | 9184218  | 9184652  | 5Y-H4K8ac_peak_6149 | 6.43068  | C16orf72_ENSG00000182831                     |
| 16 | 9186012  | 9186604  | 5Y-H4K8ac_peak_6150 | 10.54764 | C16orf72_ENSG00000182831                     |
| 16 | 10674745 | 10674992 | 5Y-H4K8ac_peak_6151 | 4.15658  | EMP2_ENSG00000213853                         |
| 16 | 10710610 | 10711176 | 5Y-H4K8ac_peak_6152 | 8.2913   |                                              |
| 16 | 10747054 | 10747272 | 5Y-H4K8ac_peak_6153 | 4.15658  |                                              |
| 16 | 10837689 | 10837900 | 5Y-H4K8ac_peak_6154 | 9.23159  | NUBP1_ENSG00000103274                        |
| 16 | 10838808 | 10839038 | 5Y-H4K8ac_peak_6155 | 5.97532  |                                              |
| 16 | 11225023 | 11225445 | 5Y-H4K8ac_peak_6156 | 7.38046  |                                              |
| 16 | 11349079 | 11349399 | 5Y-H4K8ac_peak_6157 | 4.95697  | SOCS1_ENSG00000185338                        |
| 16 | 11396927 | 11397157 | 5Y-H4K8ac_peak_6158 | 8.04943  |                                              |
| 16 | 11397505 | 11397776 | 5Y-H4K8ac_peak_6159 | 11.08752 |                                              |
| 16 | 11439413 | 11439645 | 5Y-H4K8ac_peak_6160 | 13.00733 | RP11-485G7.5_ENSG00000263080                 |
| 16 | 11490419 | 11490671 | 5Y-H4K8ac_peak_6161 | 7.11863  |                                              |
| 16 | 11504647 | 11504844 | 5Y-H4K8ac_peak_6162 | 4.00596  |                                              |

|    |          |          |                     |          |                                                                                       |
|----|----------|----------|---------------------|----------|---------------------------------------------------------------------------------------|
| 16 | 11505216 | 11505413 | 5Y-H4K8ac_peak_6163 | 5.87725  |                                                                                       |
| 16 | 11597298 | 11597917 | 5Y-H4K8ac_peak_6164 | 6.46053  |                                                                                       |
| 16 | 11680082 | 11680648 | 5Y-H4K8ac_peak_6165 | 8.2913   |                                                                                       |
| 16 | 11680991 | 11681315 | 5Y-H4K8ac_peak_6166 | 5.56894  |                                                                                       |
| 16 | 11712190 | 11712393 | 5Y-H4K8ac_peak_6167 | 8.35138  |                                                                                       |
| 16 | 11891454 | 11891803 | 5Y-H4K8ac_peak_6168 | 9.30505  | ZC3H7A_ENSG00000122299                                                                |
| 16 | 12070670 | 12070872 | 5Y-H4K8ac_peak_6169 | 9.65108  | RP11-166B2.1_ENSG00000234719;SNX29_ENSG00000048471;RP11-166B2.7_ENSG00000260488       |
| 16 | 12897017 | 12897730 | 5Y-H4K8ac_peak_6170 | 14.81591 | CPPED1_ENSG00000103381                                                                |
| 16 | 14014106 | 14014527 | 5Y-H4K8ac_peak_6171 | 9.01738  | ERCC4_ENSG00000175595                                                                 |
| 16 | 14164534 | 14165016 | 5Y-H4K8ac_peak_6172 | 10.21117 | MKL2_ENSG00000186260                                                                  |
| 16 | 14404615 | 14404858 | 5Y-H4K8ac_peak_6173 | 7.68492  |                                                                                       |
| 16 | 14726884 | 14727197 | 5Y-H4K8ac_peak_6174 | 8.21582  | PARN_ENSG00000140694;BFAR_ENSG00000103429                                             |
| 16 | 15122796 | 15123146 | 5Y-H4K8ac_peak_6175 | 5.41472  |                                                                                       |
| 16 | 15234634 | 15234833 | 5Y-H4K8ac_peak_6176 | 7.30348  |                                                                                       |
| 16 | 15235417 | 15235677 | 5Y-H4K8ac_peak_6177 | 6.73385  |                                                                                       |
| 16 | 15236180 | 15236503 | 5Y-H4K8ac_peak_6178 | 9.26003  |                                                                                       |
| 16 | 15236751 | 15238118 | 5Y-H4K8ac_peak_6179 | 9.02938  |                                                                                       |
| 16 | 15238548 | 15239454 | 5Y-H4K8ac_peak_6180 | 5.87725  |                                                                                       |
| 16 | 15240327 | 15240568 | 5Y-H4K8ac_peak_6181 | 9.92042  |                                                                                       |
| 16 | 15489509 | 15489820 | 5Y-H4K8ac_peak_6182 | 6.77436  | RP11-1021N1.1_ENSG00000261130;MPV17L_ENSG00000156968                                  |
| 16 | 15490015 | 15490392 | 5Y-H4K8ac_peak_6183 | 10.19948 | RP11-1021N1.1_ENSG00000261130;MPV17L_ENSG00000156968                                  |
| 16 | 15528749 | 15528991 | 5Y-H4K8ac_peak_6184 | 7.31815  | C16orf45_ENSG00000166780                                                              |
| 16 | 15616613 | 15616870 | 5Y-H4K8ac_peak_6185 | 4.95697  |                                                                                       |
| 16 | 15736687 | 15736887 | 5Y-H4K8ac_peak_6186 | 10.54764 | KIAA0430_ENSG00000166783;NDE1_ENSG00000072864;MIR484_ENSG00000272213                  |
| 16 | 15737172 | 15737417 | 5Y-H4K8ac_peak_6187 | 7.60893  | KIAA0430_ENSG00000166783;NDE1_ENSG00000072864;MIR484_ENSG00000272213                  |
| 16 | 15952084 | 15952385 | 5Y-H4K8ac_peak_6188 | 6.34046  |                                                                                       |
| 16 | 16043708 | 16044059 | 5Y-H4K8ac_peak_6189 | 4.77126  | ABCC1_ENSG00000103222                                                                 |
| 16 | 16244547 | 16244750 | 5Y-H4K8ac_peak_6190 | 8.2913   |                                                                                       |
| 16 | 16317334 | 16317739 | 5Y-H4K8ac_peak_6191 | 10.46287 | ABCC6_ENSG00000091262;RP11-517A5.7_ENSG00000262332                                    |
| 16 | 17363730 | 17364325 | 5Y-H4K8ac_peak_6192 | 6.83519  |                                                                                       |
| 16 | 17430347 | 17430544 | 5Y-H4K8ac_peak_6193 | 4.15658  |                                                                                       |
| 16 | 17685091 | 17685340 | 5Y-H4K8ac_peak_6194 | 8.46442  |                                                                                       |
| 16 | 17686382 | 17686776 | 5Y-H4K8ac_peak_6195 | 4.84727  |                                                                                       |
| 16 | 17842320 | 17842556 | 5Y-H4K8ac_peak_6196 | 7.97699  |                                                                                       |
| 16 | 18064943 | 18065144 | 5Y-H4K8ac_peak_6197 | 6.39626  |                                                                                       |
| 16 | 18066118 | 18066606 | 5Y-H4K8ac_peak_6198 | 10.31981 |                                                                                       |
| 16 | 18801929 | 18802263 | 5Y-H4K8ac_peak_6199 | 4.71803  | RPS15A_ENSG00000134419                                                                |
| 16 | 18813234 | 18813431 | 5Y-H4K8ac_peak_6200 | 9.89244  | RP11-1035H13.3_ENSG00000260342;ARL6IP1_ENSG00000170540;RP11-1035H13.2_ENSG00000260017 |
| 16 | 19097697 | 19097943 | 5Y-H4K8ac_peak_6201 | 13.0168  | RP11-626G11.4_ENSG00000260430                                                         |
| 16 | 19125642 | 19126101 | 5Y-H4K8ac_peak_6202 | 13.4304  | ITPRIPL2_ENSG00000205730;CTD-2349B8.1_ENSG00000261427                                 |
| 16 | 19566333 | 19566654 | 5Y-H4K8ac_peak_6203 | 12.26606 | C16orf62_ENSG00000103544                                                              |
| 16 | 19567240 | 19567441 | 5Y-H4K8ac_peak_6204 | 4.0639   | C16orf62_ENSG00000103544                                                              |
| 16 | 19729065 | 19729399 | 5Y-H4K8ac_peak_6205 | 5.23819  | KNOP1_ENSG00000103550                                                                 |
| 16 | 20817162 | 20817723 | 5Y-H4K8ac_peak_6206 | 10.95042 | AC004381.6_ENSG00000005189                                                            |
| 16 | 20818385 | 20818590 | 5Y-H4K8ac_peak_6207 | 4.9885   | AC004381.6_ENSG00000005189                                                            |
| 16 | 20912224 | 20912532 | 5Y-H4K8ac_peak_6208 | 11.94897 | ERI2_ENSG00000196678;DCUN1D3_ENSG00000188215                                          |

|    |          |          |                     |          |                                                        |
|----|----------|----------|---------------------|----------|--------------------------------------------------------|
| 16 | 21170071 | 21170593 | 5Y-H4K8ac_peak_6209 | 4.50834  | DNAH3_ENSG00000158486;TMEM159_ENSG00000011638          |
| 16 | 21532020 | 21532548 | 5Y-H4K8ac_peak_6210 | 12.74275 | CTD-2547E10.2_ENSG00000180747;SLC7A5P2_ENSG00000258186 |
| 16 | 21565803 | 21566090 | 5Y-H4K8ac_peak_6211 | 7.00004  |                                                        |
| 16 | 21566420 | 21566721 | 5Y-H4K8ac_peak_6212 | 7.3297   |                                                        |
| 16 | 21568353 | 21568616 | 5Y-H4K8ac_peak_6213 | 10.48476 |                                                        |
| 16 | 21610356 | 21610588 | 5Y-H4K8ac_peak_6214 | 7.50148  |                                                        |
| 16 | 21831379 | 21831612 | 5Y-H4K8ac_peak_6215 | 4.03329  | RRN3P1_ENSG00000248124                                 |
| 16 | 21964766 | 21965137 | 5Y-H4K8ac_peak_6216 | 8.73392  | UQCRC2_ENSG00000140740                                 |
| 16 | 22018887 | 22019352 | 5Y-H4K8ac_peak_6217 | 13.14766 | C16orf52_ENSG00000185716                               |
| 16 | 22308843 | 22309287 | 5Y-H4K8ac_peak_6218 | 7.59101  | POLR3E_ENSG00000058600                                 |
| 16 | 22774563 | 22775174 | 5Y-H4K8ac_peak_6219 | 5.41472  |                                                        |
| 16 | 22967750 | 22968301 | 5Y-H4K8ac_peak_6220 | 4.95697  |                                                        |
| 16 | 22981791 | 22982099 | 5Y-H4K8ac_peak_6221 | 4.50834  |                                                        |
| 16 | 23568450 | 23568666 | 5Y-H4K8ac_peak_6222 | 11.09973 | EARS2_ENSG00000103356;UBFD1_ENSG00000103353            |
| 16 | 23569107 | 23569495 | 5Y-H4K8ac_peak_6223 | 6.78128  | EARS2_ENSG00000103356;UBFD1_ENSG00000103353            |
| 16 | 23607383 | 23607573 | 5Y-H4K8ac_peak_6224 | 4.642    | NDUFAB1_ENSG00000004779                                |
| 16 | 23690282 | 23690479 | 5Y-H4K8ac_peak_6225 | 7.03573  |                                                        |
| 16 | 24550940 | 24551178 | 5Y-H4K8ac_peak_6226 | 11.1169  |                                                        |
| 16 | 24740213 | 24740585 | 5Y-H4K8ac_peak_6227 | 9.23159  | TNRC6A_ENSG00000090905                                 |
| 16 | 24741050 | 24741337 | 5Y-H4K8ac_peak_6228 | 4.95697  | TNRC6A_ENSG00000090905                                 |
| 16 | 24864870 | 24865256 | 5Y-H4K8ac_peak_6229 | 6.08523  |                                                        |
| 16 | 25026830 | 25027030 | 5Y-H4K8ac_peak_6230 | 6.08523  | ARHGAP17_ENSG00000140750;RP11-266L9.1_ENSG00000260714  |
| 16 | 25078282 | 25078481 | 5Y-H4K8ac_peak_6231 | 10.1994  | RP11-266L9.5_ENSG00000262155                           |
| 16 | 25118140 | 25118419 | 5Y-H4K8ac_peak_6232 | 14.87721 |                                                        |
| 16 | 25269412 | 25269887 | 5Y-H4K8ac_peak_6233 | 4.77126  | ZKSCAN2_ENSG00000155592                                |
| 16 | 27215435 | 27215660 | 5Y-H4K8ac_peak_6234 | 8.24461  | KDM8_ENSG00000155666                                   |
| 16 | 27234597 | 27235101 | 5Y-H4K8ac_peak_6235 | 6.36454  |                                                        |
| 16 | 27280233 | 27280818 | 5Y-H4K8ac_peak_6236 | 9.51254  | NSMCE1_ENSG00000169189;CTD-3203P2.2_ENSG00000245888    |
| 16 | 27711857 | 27712061 | 5Y-H4K8ac_peak_6237 | 4.84727  |                                                        |
| 16 | 27795442 | 27795941 | 5Y-H4K8ac_peak_6238 | 9.58986  |                                                        |
| 16 | 27797872 | 27798077 | 5Y-H4K8ac_peak_6239 | 6.46606  |                                                        |
| 16 | 27991371 | 27991588 | 5Y-H4K8ac_peak_6240 | 6.24411  |                                                        |
| 16 | 28289280 | 28289516 | 5Y-H4K8ac_peak_6241 | 6.78318  |                                                        |
| 16 | 28302333 | 28302569 | 5Y-H4K8ac_peak_6242 | 10.69698 | RP11-57A19.2_ENSG00000246465                           |
| 16 | 28303103 | 28303424 | 5Y-H4K8ac_peak_6243 | 5.39991  | RP11-57A19.2_ENSG00000246465;SBK1_ENSG00000188322      |
| 16 | 28304856 | 28305069 | 5Y-H4K8ac_peak_6244 | 4.642    |                                                        |
| 16 | 28502837 | 28503268 | 5Y-H4K8ac_peak_6245 | 7.90236  | CLN3_ENSG00000261832                                   |
| 16 | 28508240 | 28508448 | 5Y-H4K8ac_peak_6246 | 5.28616  |                                                        |
| 16 | 28564741 | 28564970 | 5Y-H4K8ac_peak_6247 | 10.32379 | CCDC101_ENSG00000176476                                |
| 16 | 28565946 | 28566162 | 5Y-H4K8ac_peak_6248 | 5.48291  | CCDC101_ENSG00000176476                                |
| 16 | 28761416 | 28761622 | 5Y-H4K8ac_peak_6249 | 8.33296  | RP11-1348G14.6_ENSG00000270424                         |
| 16 | 28834585 | 28835135 | 5Y-H4K8ac_peak_6250 | 21.85855 | ATXN2L_ENSG00000168488                                 |
| 16 | 28857414 | 28857612 | 5Y-H4K8ac_peak_6251 | 5.41472  | TUFM_ENSG00000178952;SH2B1_ENSG00000178188             |
| 16 | 28873573 | 28873923 | 5Y-H4K8ac_peak_6252 | 6.12014  | RP11-22P6.2_ENSG00000261766                            |
| 16 | 28874140 | 28874505 | 5Y-H4K8ac_peak_6253 | 5.65584  | RP11-22P6.2_ENSG00000261766                            |
| 16 | 28875370 | 28875777 | 5Y-H4K8ac_peak_6254 | 6.77436  | RP11-22P6.2_ENSG00000261766                            |

|    |          |          |                     |          |                                                 |
|----|----------|----------|---------------------|----------|-------------------------------------------------|
| 16 | 28890794 | 28891017 | 5Y-H4K8ac_peak_6255 | 7.03573  | RP11-22P6.3_ENSG00000260442                     |
| 16 | 28891451 | 28891839 | 5Y-H4K8ac_peak_6256 | 14.6127  | RP11-22P6.3_ENSG00000260442                     |
| 16 | 28936367 | 28937118 | 5Y-H4K8ac_peak_6257 | 11.42066 |                                                 |
| 16 | 28956632 | 28956867 | 5Y-H4K8ac_peak_6258 | 5.72233  |                                                 |
| 16 | 28961306 | 28961897 | 5Y-H4K8ac_peak_6259 | 8.4454   | NFATC2IP_ENSG00000176953                        |
| 16 | 29142552 | 29143252 | 5Y-H4K8ac_peak_6260 | 8.43511  |                                                 |
| 16 | 29144038 | 29144402 | 5Y-H4K8ac_peak_6261 | 7.04637  |                                                 |
| 16 | 29169310 | 29170395 | 5Y-H4K8ac_peak_6262 | 11.19336 |                                                 |
| 16 | 29180639 | 29180833 | 5Y-H4K8ac_peak_6263 | 9.7353   |                                                 |
| 16 | 29181094 | 29181878 | 5Y-H4K8ac_peak_6264 | 10.60083 |                                                 |
| 16 | 29183084 | 29183436 | 5Y-H4K8ac_peak_6265 | 7.80086  |                                                 |
| 16 | 29186782 | 29186984 | 5Y-H4K8ac_peak_6266 | 6.7002   |                                                 |
| 16 | 29188539 | 29189552 | 5Y-H4K8ac_peak_6267 | 16.17072 |                                                 |
| 16 | 29190789 | 29191329 | 5Y-H4K8ac_peak_6268 | 8.40854  |                                                 |
| 16 | 29191726 | 29192030 | 5Y-H4K8ac_peak_6269 | 10.4678  |                                                 |
| 16 | 29194012 | 29194272 | 5Y-H4K8ac_peak_6270 | 9.30505  |                                                 |
| 16 | 29202391 | 29202772 | 5Y-H4K8ac_peak_6271 | 7.59101  |                                                 |
| 16 | 29212515 | 29212979 | 5Y-H4K8ac_peak_6272 | 7.60057  |                                                 |
| 16 | 29214328 | 29214559 | 5Y-H4K8ac_peak_6273 | 5.98695  |                                                 |
| 16 | 29231520 | 29231908 | 5Y-H4K8ac_peak_6274 | 5.67283  | RP11-426C22.4_ENSG00000259807                   |
| 16 | 29239831 | 29240244 | 5Y-H4K8ac_peak_6275 | 4.55128  |                                                 |
| 16 | 29270272 | 29270637 | 5Y-H4K8ac_peak_6276 | 10.61721 |                                                 |
| 16 | 29271334 | 29271791 | 5Y-H4K8ac_peak_6277 | 14.89891 |                                                 |
| 16 | 29272013 | 29272235 | 5Y-H4K8ac_peak_6278 | 7.11863  |                                                 |
| 16 | 29272754 | 29273010 | 5Y-H4K8ac_peak_6279 | 8.0168   |                                                 |
| 16 | 29273246 | 29273774 | 5Y-H4K8ac_peak_6280 | 8.62703  |                                                 |
| 16 | 29275525 | 29275746 | 5Y-H4K8ac_peak_6281 | 5.64982  | RP11-426C22.6_ENSG00000260953                   |
| 16 | 29275988 | 29276182 | 5Y-H4K8ac_peak_6282 | 7.59101  | RP11-426C22.6_ENSG00000260953                   |
| 16 | 29278454 | 29278822 | 5Y-H4K8ac_peak_6283 | 5.57299  |                                                 |
| 16 | 29303270 | 29303651 | 5Y-H4K8ac_peak_6284 | 5.29015  |                                                 |
| 16 | 29625338 | 29625812 | 5Y-H4K8ac_peak_6285 | 10.36926 | SLC7A5P1_ENSG00000260727                        |
| 16 | 29689835 | 29690858 | 5Y-H4K8ac_peak_6286 | 13.29029 |                                                 |
| 16 | 29732733 | 29733002 | 5Y-H4K8ac_peak_6287 | 10.11191 |                                                 |
| 16 | 29801330 | 29801575 | 5Y-H4K8ac_peak_6288 | 4.68335  | KIF22_ENSG00000079616                           |
| 16 | 29818516 | 29818808 | 5Y-H4K8ac_peak_6289 | 7.11863  | AC009133.15_ENSG00000259952                     |
| 16 | 29827790 | 29828110 | 5Y-H4K8ac_peak_6290 | 5.67483  | PAGR1_ENSG00000185928;PAGR1_ENSG00000263136     |
| 16 | 29875049 | 29875547 | 5Y-H4K8ac_peak_6291 | 4.77126  | CDIPT_ENSG00000103502;CDIPT-AS1_ENSG00000214725 |
| 16 | 29985769 | 29985967 | 5Y-H4K8ac_peak_6292 | 4.50834  | TAOK2_ENSG00000149930                           |
| 16 | 30006500 | 30006907 | 5Y-H4K8ac_peak_6293 | 16.23118 | HIRIP3_ENSG00000149929;INO80E_ENSG00000169592   |
| 16 | 30021360 | 30021638 | 5Y-H4K8ac_peak_6294 | 4.95697  |                                                 |
| 16 | 30022103 | 30022307 | 5Y-H4K8ac_peak_6295 | 6.08523  |                                                 |
| 16 | 30022928 | 30023382 | 5Y-H4K8ac_peak_6296 | 10.72893 |                                                 |
| 16 | 30042492 | 30043243 | 5Y-H4K8ac_peak_6297 | 5.24695  |                                                 |
| 16 | 30064058 | 30064254 | 5Y-H4K8ac_peak_6298 | 5.8635   | FAM57B_ENSG00000149926;ALDOA_ENSG00000149925    |
| 16 | 30074980 | 30075285 | 5Y-H4K8ac_peak_6299 | 5.87725  |                                                 |
| 16 | 30076497 | 30076874 | 5Y-H4K8ac_peak_6300 | 8.27643  |                                                 |

|    |          |          |                     |          |                                                                           |
|----|----------|----------|---------------------|----------|---------------------------------------------------------------------------|
| 16 | 30102828 | 30103253 | 5Y-H4K8ac_peak_6301 | 11.22005 | TBX6_ENSG00000149922                                                      |
| 16 | 30107819 | 30108348 | 5Y-H4K8ac_peak_6302 | 17.55091 | YPEL3_ENSG00000090238;RP11-455F5.3_ENSG00000250616                        |
| 16 | 30133933 | 30134300 | 5Y-H4K8ac_peak_6303 | 7.89273  | MAPK3_ENSG00000102882                                                     |
| 16 | 30135077 | 30135312 | 5Y-H4K8ac_peak_6304 | 7.87406  | MAPK3_ENSG00000102882                                                     |
| 16 | 30194139 | 30194579 | 5Y-H4K8ac_peak_6305 | 12.87098 | CORO1A_ENSG00000102879                                                    |
| 16 | 30217318 | 30217535 | 5Y-H4K8ac_peak_6306 | 8.33296  |                                                                           |
| 16 | 30366293 | 30366552 | 5Y-H4K8ac_peak_6307 | 16.6076  | CD2BP2_ENSG00000169217;RP11-347C12.10_ENSG00000260219                     |
| 16 | 30366885 | 30367467 | 5Y-H4K8ac_peak_6308 | 11.68317 | CD2BP2_ENSG00000169217;RP11-347C12.10_ENSG00000260219                     |
| 16 | 30381428 | 30381665 | 5Y-H4K8ac_peak_6309 | 8.16382  | TBC1D10B_ENSG00000169221;MYLPPF_ENSG00000180209                           |
| 16 | 30382868 | 30383095 | 5Y-H4K8ac_peak_6310 | 4.66162  | MYLPPF_ENSG00000180209                                                    |
| 16 | 30388290 | 30388765 | 5Y-H4K8ac_peak_6311 | 7.59101  | ZNF48_ENSG00000180035                                                     |
| 16 | 30389304 | 30389515 | 5Y-H4K8ac_peak_6312 | 15.19225 | ZNF48_ENSG00000180035                                                     |
| 16 | 30404945 | 30405160 | 5Y-H4K8ac_peak_6313 | 5.70209  |                                                                           |
| 16 | 30405659 | 30406141 | 5Y-H4K8ac_peak_6314 | 11.31171 |                                                                           |
| 16 | 30406336 | 30406581 | 5Y-H4K8ac_peak_6315 | 13.14766 | SEPT1_ENSG00000180096                                                     |
| 16 | 30411575 | 30412314 | 5Y-H4K8ac_peak_6316 | 10.03452 |                                                                           |
| 16 | 30428867 | 30429117 | 5Y-H4K8ac_peak_6317 | 15.84891 |                                                                           |
| 16 | 30441773 | 30442110 | 5Y-H4K8ac_peak_6318 | 5.87725  | DCTPP1_ENSG00000179958                                                    |
| 16 | 30456847 | 30457145 | 5Y-H4K8ac_peak_6319 | 11.22005 | SEPHS2_ENSG00000179918                                                    |
| 16 | 30537506 | 30537859 | 5Y-H4K8ac_peak_6320 | 8.66584  | ZNF768_ENSG00000169957                                                    |
| 16 | 30538234 | 30538635 | 5Y-H4K8ac_peak_6321 | 13.12848 | ZNF768_ENSG00000169957                                                    |
| 16 | 30545179 | 30545407 | 5Y-H4K8ac_peak_6322 | 7.59101  | ZNF747_ENSG00000261459;AC002310.12_ENSG00000235560                        |
| 16 | 30545693 | 30546142 | 5Y-H4K8ac_peak_6323 | 12.26606 | ZNF747_ENSG00000169955;ZNF747_ENSG00000261459;AC002310.12_ENSG00000235560 |
| 16 | 30547020 | 30547518 | 5Y-H4K8ac_peak_6324 | 7.01266  | ZNF747_ENSG00000169955;ZNF747_ENSG00000261459;AC002310.12_ENSG00000235560 |
| 16 | 30569042 | 30569667 | 5Y-H4K8ac_peak_6325 | 8.90774  | AC002310.13_ENSG00000260869;ZNF764_ENSG00000169951                        |
| 16 | 30570251 | 30570444 | 5Y-H4K8ac_peak_6326 | 6.78128  | AC002310.13_ENSG00000260869;ZNF764_ENSG00000169951                        |
| 16 | 30582445 | 30583174 | 5Y-H4K8ac_peak_6327 | 12.84845 | ZNF688_ENSG00000229809;AC002310.7_ENSG00000239791                         |
| 16 | 30596597 | 30596928 | 5Y-H4K8ac_peak_6328 | 7.90751  | ZNF785_ENSG00000197162;RP11-146F11.5_ENSG00000260167                      |
| 16 | 30597524 | 30597800 | 5Y-H4K8ac_peak_6329 | 9.8829   | ZNF785_ENSG00000197162;RP11-146F11.5_ENSG00000260167                      |
| 16 | 30621155 | 30621641 | 5Y-H4K8ac_peak_6330 | 21.35466 |                                                                           |
| 16 | 30661243 | 30661906 | 5Y-H4K8ac_peak_6331 | 14.86775 | PRR14_ENSG00000156858                                                     |
| 16 | 30662297 | 30662512 | 5Y-H4K8ac_peak_6332 | 6.61077  | PRR14_ENSG00000156858                                                     |
| 16 | 30709571 | 30710333 | 5Y-H4K8ac_peak_6333 | 16.51777 | RP11-146F11.1_ENSG00000261840;SRCAP_ENSG00000080603                       |
| 16 | 30786852 | 30787275 | 5Y-H4K8ac_peak_6334 | 7.44077  |                                                                           |
| 16 | 30798271 | 30799164 | 5Y-H4K8ac_peak_6335 | 10.4689  | ZNF629_ENSG00000102870                                                    |
| 16 | 30816971 | 30817392 | 5Y-H4K8ac_peak_6336 | 12.57157 |                                                                           |
| 16 | 30825473 | 30825675 | 5Y-H4K8ac_peak_6337 | 9.79526  |                                                                           |
| 16 | 30886349 | 30886605 | 5Y-H4K8ac_peak_6338 | 15.27603 | MIR4519_ENSG00000260083;MIR4519_ENSG00000265991                           |
| 16 | 30887297 | 30887667 | 5Y-H4K8ac_peak_6339 | 9.30505  | MIR4519_ENSG00000260083;MIR4519_ENSG00000265991                           |
| 16 | 30888113 | 30888367 | 5Y-H4K8ac_peak_6340 | 6.08523  |                                                                           |
| 16 | 30905661 | 30905862 | 5Y-H4K8ac_peak_6341 | 7.34185  | BCL7C_ENSG00000099385;AC106782.20_ENSG00000262721;MIR762_ENSG00000211591  |
| 16 | 30907978 | 30908238 | 5Y-H4K8ac_peak_6342 | 7.89273  | CTF1_ENSG00000150281                                                      |
| 16 | 30913224 | 30913516 | 5Y-H4K8ac_peak_6343 | 4.29586  |                                                                           |
| 16 | 30915285 | 30915487 | 5Y-H4K8ac_peak_6344 | 9.01738  |                                                                           |
| 16 | 30935518 | 30935761 | 5Y-H4K8ac_peak_6345 | 7.61752  | FBXL19-AS1_ENSG00000260852                                                |
| 16 | 30938942 | 30939208 | 5Y-H4K8ac_peak_6346 | 5.25819  |                                                                           |

|    |          |          |                     |          |                                                             |
|----|----------|----------|---------------------|----------|-------------------------------------------------------------|
| 16 | 30967915 | 30968333 | 5Y-H4K8ac_peak_6347 | 4.15658  | SETD1A_ENSG00000099381                                      |
| 16 | 30968609 | 30968869 | 5Y-H4K8ac_peak_6348 | 10.73603 | SETD1A_ENSG00000099381                                      |
| 16 | 30969074 | 30969512 | 5Y-H4K8ac_peak_6349 | 10.90097 | SETD1A_ENSG00000099381                                      |
| 16 | 31044223 | 31044533 | 5Y-H4K8ac_peak_6350 | 10.23399 | STX4_ENSG00000103496                                        |
| 16 | 31084144 | 31084468 | 5Y-H4K8ac_peak_6351 | 5.64909  |                                                             |
| 16 | 31084673 | 31085327 | 5Y-H4K8ac_peak_6352 | 5.64909  | ZNF668_ENSG00000167394;ZNF646_ENSG00000167395               |
| 16 | 31105675 | 31106114 | 5Y-H4K8ac_peak_6353 | 4.95697  | RP11-196G11.1_ENSG00000255439                               |
| 16 | 31119380 | 31119624 | 5Y-H4K8ac_peak_6354 | 8.564    | AC135050.1_ENSG00000252809                                  |
| 16 | 31119858 | 31120230 | 5Y-H4K8ac_peak_6355 | 10.1994  | AC135050.1_ENSG00000252809                                  |
| 16 | 31145031 | 31145436 | 5Y-H4K8ac_peak_6356 | 4.85014  |                                                             |
| 16 | 31152824 | 31153343 | 5Y-H4K8ac_peak_6357 | 4.77126  |                                                             |
| 16 | 31153975 | 31154353 | 5Y-H4K8ac_peak_6358 | 8.43511  |                                                             |
| 16 | 31191264 | 31191708 | 5Y-H4K8ac_peak_6359 | 9.18646  | FUS_ENSG00000089280                                         |
| 16 | 31439364 | 31439575 | 5Y-H4K8ac_peak_6360 | 5.98695  | COX6A2_ENSG00000156885                                      |
| 16 | 31454611 | 31454811 | 5Y-H4K8ac_peak_6361 | 7.31815  | ZNF843_ENSG00000176723                                      |
| 16 | 31470414 | 31471028 | 5Y-H4K8ac_peak_6362 | 11.88337 | RP11-452L6.5_ENSG00000260267                                |
| 16 | 31471802 | 31472005 | 5Y-H4K8ac_peak_6363 | 5.59837  | RP11-452L6.5_ENSG00000260267                                |
| 16 | 31483070 | 31483336 | 5Y-H4K8ac_peak_6364 | 6.6946   | TGFB1I1_ENSG00000140682                                     |
| 16 | 31483606 | 31484175 | 5Y-H4K8ac_peak_6365 | 8.67475  | TGFB1I1_ENSG00000140682                                     |
| 16 | 31519330 | 31519606 | 5Y-H4K8ac_peak_6366 | 4.77126  | RP11-452L6.7_ENSG00000260625                                |
| 16 | 31885162 | 31885388 | 5Y-H4K8ac_peak_6367 | 10.19948 | ZNF267_ENSG00000185947                                      |
| 16 | 32265588 | 32265925 | 5Y-H4K8ac_peak_6368 | 7.59101  | RP11-56L13.7_ENSG00000260575                                |
| 16 | 33319020 | 33319210 | 5Y-H4K8ac_peak_6369 | 6.37023  |                                                             |
| 16 | 33509198 | 33509646 | 5Y-H4K8ac_peak_6370 | 11.28133 |                                                             |
| 16 | 34441331 | 34441756 | 5Y-H4K8ac_peak_6371 | 11.09973 | RP11-244B22.5_ENSG00000261274;RP11-488I20.8_ENSG00000260958 |
| 16 | 46824005 | 46824331 | 5Y-H4K8ac_peak_6372 | 9.23159  | MYLK3_ENSG00000140795;RP11-480G7.2_ENSG00000260782          |
| 16 | 47007714 | 47007923 | 5Y-H4K8ac_peak_6373 | 6.78128  | DNAJA2_ENSG00000069345;RP11-169E6.1_ENSG00000261173         |
| 16 | 47176811 | 47177812 | 5Y-H4K8ac_peak_6374 | 16.27715 | NETO2_ENSG00000171208;RP11-329J18.2_ENSG00000260281         |
| 16 | 47494741 | 47495152 | 5Y-H4K8ac_peak_6375 | 9.62747  | PHKB_ENSG00000102893                                        |
| 16 | 47746553 | 47746770 | 5Y-H4K8ac_peak_6376 | 8.35139  |                                                             |
| 16 | 48151084 | 48151459 | 5Y-H4K8ac_peak_6377 | 7.11262  |                                                             |
| 16 | 48199325 | 48199545 | 5Y-H4K8ac_peak_6378 | 9.38203  |                                                             |
| 16 | 48418962 | 48419231 | 5Y-H4K8ac_peak_6379 | 15.82359 |                                                             |
| 16 | 48419499 | 48420330 | 5Y-H4K8ac_peak_6380 | 10.1994  |                                                             |
| 16 | 48427889 | 48428139 | 5Y-H4K8ac_peak_6381 | 9.30505  |                                                             |
| 16 | 48565362 | 48565649 | 5Y-H4K8ac_peak_6382 | 6.47245  |                                                             |
| 16 | 48644352 | 48644589 | 5Y-H4K8ac_peak_6383 | 5.23083  |                                                             |
| 16 | 49474783 | 49475195 | 5Y-H4K8ac_peak_6384 | 7.04637  |                                                             |
| 16 | 49526777 | 49527289 | 5Y-H4K8ac_peak_6385 | 6.33308  |                                                             |
| 16 | 49527866 | 49528169 | 5Y-H4K8ac_peak_6386 | 5.62788  |                                                             |
| 16 | 49557549 | 49558518 | 5Y-H4K8ac_peak_6387 | 9.31608  |                                                             |
| 16 | 49558889 | 49559202 | 5Y-H4K8ac_peak_6388 | 11.4254  |                                                             |
| 16 | 49560225 | 49560425 | 5Y-H4K8ac_peak_6389 | 8.86778  |                                                             |
| 16 | 49561044 | 49561437 | 5Y-H4K8ac_peak_6390 | 4.50834  |                                                             |
| 16 | 49563497 | 49563764 | 5Y-H4K8ac_peak_6391 | 6.67017  |                                                             |
| 16 | 49564694 | 49565431 | 5Y-H4K8ac_peak_6392 | 9.30505  |                                                             |

|    |           |          |                     |          |                                                     |
|----|-----------|----------|---------------------|----------|-----------------------------------------------------|
| 16 | 49566280  | 49566501 | 5Y-H4K8ac_peak_6393 | 8.18236  |                                                     |
| 16 | 49581341  | 49581644 | 5Y-H4K8ac_peak_6394 | 8.04493  |                                                     |
| 16 | 49628728  | 49629075 | 5Y-H4K8ac_peak_6395 | 10.79063 |                                                     |
| 16 | 49634800  | 49635118 | 5Y-H4K8ac_peak_6396 | 8.38675  |                                                     |
| 16 | 49636203  | 49636509 | 5Y-H4K8ac_peak_6397 | 7.56545  |                                                     |
| 16 | 49638140  | 49638336 | 5Y-H4K8ac_peak_6398 | 4.84727  |                                                     |
| 16 | 49671907  | 49672389 | 5Y-H4K8ac_peak_6399 | 6.46606  |                                                     |
| 16 | 49695340  | 49695773 | 5Y-H4K8ac_peak_6400 | 6.43775  |                                                     |
| 16 | 49697496  | 49699616 | 5Y-H4K8ac_peak_6401 | 18.62331 |                                                     |
| 16 | 49730759  | 49731172 | 5Y-H4K8ac_peak_6402 | 5.98695  |                                                     |
| 16 | 49731498  | 49731842 | 5Y-H4K8ac_peak_6403 | 10.11191 |                                                     |
| 16 | 49733002  | 49733378 | 5Y-H4K8ac_peak_6404 | 7.01266  |                                                     |
| 16 | 49733794  | 49734041 | 5Y-H4K8ac_peak_6405 | 10.1994  |                                                     |
| 16 | 49734279  | 49734777 | 5Y-H4K8ac_peak_6406 | 13.2534  |                                                     |
| 16 | 49739650  | 49740534 | 5Y-H4K8ac_peak_6407 | 12.05638 |                                                     |
| 16 | 49740954  | 49741199 | 5Y-H4K8ac_peak_6408 | 8.21582  | MRPS21P7_ENSG00000260024                            |
| 16 | 49788988  | 49789179 | 5Y-H4K8ac_peak_6409 | 10.35586 |                                                     |
| 16 | 49834595  | 49834830 | 5Y-H4K8ac_peak_6410 | 4.24869  |                                                     |
| 16 | 49843583  | 49843796 | 5Y-H4K8ac_peak_6411 | 4.00285  |                                                     |
| 16 | 49845185  | 49845425 | 5Y-H4K8ac_peak_6412 | 5.64909  |                                                     |
| 16 | 49855473  | 49855876 | 5Y-H4K8ac_peak_6413 | 11.86504 |                                                     |
| 16 | 49868527  | 49868887 | 5Y-H4K8ac_peak_6414 | 9.7353   |                                                     |
| 16 | 49869411  | 49869728 | 5Y-H4K8ac_peak_6415 | 5.87725  |                                                     |
| 16 | 49888365  | 49889385 | 5Y-H4K8ac_peak_6416 | 11.78766 |                                                     |
| 16 | 49891829  | 49892079 | 5Y-H4K8ac_peak_6417 | 7.90751  | ZNF423_ENSG00000102935                              |
| 16 | 49900321  | 49900701 | 5Y-H4K8ac_peak_6418 | 12.79198 |                                                     |
| 16 | 49955587  | 49955895 | 5Y-H4K8ac_peak_6419 | 14.31711 |                                                     |
| 16 | 50059234  | 50059506 | 5Y-H4K8ac_peak_6420 | 7.30348  | CNEP1R1_ENSG00000205423                             |
| 16 | 50099996  | 50100221 | 5Y-H4K8ac_peak_6421 | 7.11863  | RP11-429P3.3_ENSG00000259843;HEATR3_ENSG00000155393 |
| 16 | 50279558  | 50279790 | 5Y-H4K8ac_peak_6422 | 7.87406  | ADCY7_ENSG00000121281                               |
| 16 | 50281111  | 50281314 | 5Y-H4K8ac_peak_6423 | 4.24332  |                                                     |
| 16 | 50318062  | 50318301 | 5Y-H4K8ac_peak_6424 | 5.10825  |                                                     |
| 16 | 50349189  | 50349434 | 5Y-H4K8ac_peak_6425 | 5.23083  |                                                     |
| 16 | 50402487  | 50402855 | 5Y-H4K8ac_peak_6426 | 7.38046  | BRD7_ENSG00000166164;RP11-21B23.1_ENSG00000261393   |
| 16 | 50423786  | 50424908 | 5Y-H4K8ac_peak_6427 | 11.1169  |                                                     |
| 16 | 50502310  | 50502524 | 5Y-H4K8ac_peak_6428 | 7.50148  |                                                     |
| 16 | 50503338  | 50503746 | 5Y-H4K8ac_peak_6429 | 6.43775  |                                                     |
| 16 | 50625910  | 50626230 | 5Y-H4K8ac_peak_6430 | 6.36454  |                                                     |
| 16 | 50727224  | 50727677 | 5Y-H4K8ac_peak_6431 | 9.30505  | NOD2_ENSG00000167207                                |
| 16 | 53088359  | 53088597 | 5Y-H4K8ac_peak_6432 | 8.73392  | CHD9_ENSG00000177200                                |
| 16 | 53105663  | 53105980 | 5Y-H4K8ac_peak_6433 | 5.84208  |                                                     |
| 16 | 531117896 | 53118098 | 5Y-H4K8ac_peak_6434 | 7.04158  |                                                     |
| 16 | 53125023  | 53125586 | 5Y-H4K8ac_peak_6435 | 7.87048  |                                                     |
| 16 | 53132885  | 53133105 | 5Y-H4K8ac_peak_6436 | 6.1654   |                                                     |
| 16 | 53133510  | 53134016 | 5Y-H4K8ac_peak_6437 | 6.34245  |                                                     |
| 16 | 53163913  | 53164200 | 5Y-H4K8ac_peak_6438 | 4.95697  |                                                     |



|    |          |          |                     |          |                                                     |
|----|----------|----------|---------------------|----------|-----------------------------------------------------|
| 16 | 54096379 | 54096666 | 5Y-H4K8ac_peak_6439 | 4.70501  |                                                     |
| 16 | 54209275 | 54209475 | 5Y-H4K8ac_peak_6440 | 5.26353  |                                                     |
| 16 | 54211169 | 54211461 | 5Y-H4K8ac_peak_6441 | 4.95697  |                                                     |
| 16 | 54227865 | 54228571 | 5Y-H4K8ac_peak_6442 | 11.12941 |                                                     |
| 16 | 54319568 | 54320147 | 5Y-H4K8ac_peak_6443 | 9.23159  | IRX3_ENSG00000177508                                |
| 16 | 54321026 | 54321505 | 5Y-H4K8ac_peak_6444 | 11.22005 | IRX3_ENSG00000177508                                |
| 16 | 54516553 | 54516785 | 5Y-H4K8ac_peak_6445 | 6.00388  |                                                     |
| 16 | 54666655 | 54666907 | 5Y-H4K8ac_peak_6446 | 6.90749  |                                                     |
| 16 | 54962408 | 54962768 | 5Y-H4K8ac_peak_6447 | 13.2534  | CRNDE_ENSG00000245694                               |
| 16 | 54964921 | 54965407 | 5Y-H4K8ac_peak_6448 | 5.59843  | IRX5_ENSG00000176842                                |
| 16 | 55090469 | 55090750 | 5Y-H4K8ac_peak_6449 | 7.31807  |                                                     |
| 16 | 55358731 | 55358937 | 5Y-H4K8ac_peak_6450 | 8.75926  |                                                     |
| 16 | 55407643 | 55407848 | 5Y-H4K8ac_peak_6451 | 6.1654   |                                                     |
| 16 | 55685093 | 55685325 | 5Y-H4K8ac_peak_6452 | 5.07797  |                                                     |
| 16 | 55690614 | 55690891 | 5Y-H4K8ac_peak_6453 | 6.37023  |                                                     |
| 16 | 56080682 | 56081016 | 5Y-H4K8ac_peak_6454 | 8.51022  |                                                     |
| 16 | 56135585 | 56135849 | 5Y-H4K8ac_peak_6455 | 9.52603  |                                                     |
| 16 | 56291701 | 56291902 | 5Y-H4K8ac_peak_6456 | 5.98695  |                                                     |
| 16 | 56297732 | 56298097 | 5Y-H4K8ac_peak_6457 | 5.98695  |                                                     |
| 16 | 56352029 | 56352319 | 5Y-H4K8ac_peak_6458 | 8.79957  |                                                     |
| 16 | 56554680 | 56555015 | 5Y-H4K8ac_peak_6459 | 6.77436  | BBS2_ENSG00000125124                                |
| 16 | 56742905 | 56743100 | 5Y-H4K8ac_peak_6460 | 4.12295  |                                                     |
| 16 | 56894250 | 56894600 | 5Y-H4K8ac_peak_6461 | 4.50834  |                                                     |
| 16 | 56908033 | 56908859 | 5Y-H4K8ac_peak_6462 | 8.38675  |                                                     |
| 16 | 56965267 | 56965826 | 5Y-H4K8ac_peak_6463 | 18.63671 | HERPUD1_ENSG00000051108                             |
| 16 | 56966127 | 56966317 | 5Y-H4K8ac_peak_6464 | 8.1667   | HERPUD1_ENSG00000051108                             |
| 16 | 57094765 | 57094975 | 5Y-H4K8ac_peak_6465 | 7.50148  |                                                     |
| 16 | 57095225 | 57095805 | 5Y-H4K8ac_peak_6466 | 11.01067 |                                                     |
| 16 | 57125780 | 57126333 | 5Y-H4K8ac_peak_6467 | 17.56739 | RP11-407G23.1_ENSG00000260148;CPNE2_ENSG00000140848 |
| 16 | 57150497 | 57150710 | 5Y-H4K8ac_peak_6468 | 4.84193  |                                                     |
| 16 | 57219503 | 57219808 | 5Y-H4K8ac_peak_6469 | 4.642    | FAM192A_ENSG00000172775;RSPRY1_ENSG00000159579      |
| 16 | 57279233 | 57279462 | 5Y-H4K8ac_peak_6470 | 10.21117 | ARL2BP_ENSG00000102931                              |
| 16 | 57296782 | 57297028 | 5Y-H4K8ac_peak_6471 | 6.20989  |                                                     |
| 16 | 57297766 | 57298116 | 5Y-H4K8ac_peak_6472 | 4.48815  |                                                     |
| 16 | 57318278 | 57318926 | 5Y-H4K8ac_peak_6473 | 9.59236  | PLLP_ENSG00000102934                                |
| 16 | 57405365 | 57405710 | 5Y-H4K8ac_peak_6474 | 8.47164  | CX3CL1_ENSG00000006210                              |
| 16 | 57406049 | 57406240 | 5Y-H4K8ac_peak_6475 | 6.51488  | CX3CL1_ENSG00000006210                              |
| 16 | 57406445 | 57406777 | 5Y-H4K8ac_peak_6476 | 5.87725  | CX3CL1_ENSG00000006210                              |
| 16 | 57450166 | 57451403 | 5Y-H4K8ac_peak_6477 | 9.30505  |                                                     |
| 16 | 57507134 | 57507957 | 5Y-H4K8ac_peak_6478 | 11.22005 |                                                     |
| 16 | 57513287 | 57513717 | 5Y-H4K8ac_peak_6479 | 5.87725  |                                                     |
| 16 | 57514053 | 57514714 | 5Y-H4K8ac_peak_6480 | 9.32595  |                                                     |
| 16 | 57515267 | 57515480 | 5Y-H4K8ac_peak_6481 | 5.95028  |                                                     |
| 16 | 57518317 | 57518694 | 5Y-H4K8ac_peak_6482 | 5.41472  |                                                     |
| 16 | 57519069 | 57519298 | 5Y-H4K8ac_peak_6483 | 4.6766   |                                                     |
| 16 | 57521495 | 57521695 | 5Y-H4K8ac_peak_6484 | 7.03573  | DOK4_ENSG00000125170                                |

|    |          |          |                     |          |                                                       |
|----|----------|----------|---------------------|----------|-------------------------------------------------------|
| 16 | 57541065 | 57542646 | 5Y-H4K8ac_peak_6485 | 17.32862 |                                                       |
| 16 | 57543550 | 57544143 | 5Y-H4K8ac_peak_6486 | 9.38276  |                                                       |
| 16 | 57544576 | 57545160 | 5Y-H4K8ac_peak_6487 | 11.22005 |                                                       |
| 16 | 57552121 | 57552378 | 5Y-H4K8ac_peak_6488 | 8.16031  |                                                       |
| 16 | 57570264 | 57571003 | 5Y-H4K8ac_peak_6489 | 14.86775 | CCDC102A_ENSG00000135736                              |
| 16 | 57662279 | 57662607 | 5Y-H4K8ac_peak_6490 | 6.37023  |                                                       |
| 16 | 57768646 | 57769102 | 5Y-H4K8ac_peak_6491 | 8.69112  | KATNB1_ENSG00000140854                                |
| 16 | 58018474 | 58018688 | 5Y-H4K8ac_peak_6492 | 6.37023  |                                                       |
| 16 | 58033764 | 58034411 | 5Y-H4K8ac_peak_6493 | 6.64195  | ZNF319_ENSG00000166188;USB1_ENSG00000103005           |
| 16 | 58497102 | 58497333 | 5Y-H4K8ac_peak_6494 | 7.69843  | NDRG4_ENSG00000103034                                 |
| 16 | 58521558 | 58521972 | 5Y-H4K8ac_peak_6495 | 6.73385  |                                                       |
| 16 | 58529754 | 58530278 | 5Y-H4K8ac_peak_6496 | 10.69698 | RNU6-103P_ENSG00000200556                             |
| 16 | 58533304 | 58533634 | 5Y-H4K8ac_peak_6497 | 7.89273  |                                                       |
| 16 | 58663488 | 58663703 | 5Y-H4K8ac_peak_6498 | 9.30505  | CNOT1_ENSG00000125107                                 |
| 16 | 58672834 | 58673039 | 5Y-H4K8ac_peak_6499 | 6.49308  |                                                       |
| 16 | 58686605 | 58686997 | 5Y-H4K8ac_peak_6500 | 4.07874  |                                                       |
| 16 | 58718208 | 58718538 | 5Y-H4K8ac_peak_6501 | 10.19948 | SLC38A7_ENSG00000103042                               |
| 16 | 58767454 | 58768117 | 5Y-H4K8ac_peak_6502 | 9.23159  | GOT2_ENSG00000125166;RP11-410D17.2_ENSG00000245768    |
| 16 | 62069283 | 62069642 | 5Y-H4K8ac_peak_6503 | 6.34046  |                                                       |
| 16 | 64187221 | 64187419 | 5Y-H4K8ac_peak_6504 | 6.34046  |                                                       |
| 16 | 64470874 | 64471127 | 5Y-H4K8ac_peak_6505 | 7.31815  |                                                       |
| 16 | 65156587 | 65156915 | 5Y-H4K8ac_peak_6506 | 12.11208 |                                                       |
| 16 | 66304124 | 66304432 | 5Y-H4K8ac_peak_6507 | 9.74838  |                                                       |
| 16 | 66512859 | 66513195 | 5Y-H4K8ac_peak_6508 | 4.29586  |                                                       |
| 16 | 66583265 | 66584019 | 5Y-H4K8ac_peak_6509 | 11.71078 | Y_RNA_ENSG00000261519                                 |
| 16 | 66729992 | 66730409 | 5Y-H4K8ac_peak_6510 | 11.4254  | CMTM4_ENSG00000183723                                 |
| 16 | 66785264 | 66785699 | 5Y-H4K8ac_peak_6511 | 8.69112  | DYNC1LI2_ENSG00000135720;RP11-61A14.4_ENSG00000246777 |
| 16 | 66864401 | 66864792 | 5Y-H4K8ac_peak_6512 | 10.79063 |                                                       |
| 16 | 66906911 | 66907123 | 5Y-H4K8ac_peak_6513 | 10.19038 | NAE1_ENSG00000159593                                  |
| 16 | 66913966 | 66914256 | 5Y-H4K8ac_peak_6514 | 7.34185  |                                                       |
| 16 | 66933446 | 66933845 | 5Y-H4K8ac_peak_6515 | 10.69698 |                                                       |
| 16 | 66934143 | 66934628 | 5Y-H4K8ac_peak_6516 | 9.88125  |                                                       |
| 16 | 67011229 | 67011530 | 5Y-H4K8ac_peak_6517 | 6.22669  |                                                       |
| 16 | 67034162 | 67034424 | 5Y-H4K8ac_peak_6518 | 12.65187 |                                                       |
| 16 | 67047395 | 67048053 | 5Y-H4K8ac_peak_6519 | 13.68515 |                                                       |
| 16 | 67048288 | 67048514 | 5Y-H4K8ac_peak_6520 | 8.76608  |                                                       |
| 16 | 67063186 | 67063485 | 5Y-H4K8ac_peak_6521 | 6.43775  | CBFB_ENSG00000067955                                  |
| 16 | 67143274 | 67143605 | 5Y-H4K8ac_peak_6522 | 5.59843  | C16orf70_ENSG00000125149                              |
| 16 | 67196771 | 67197000 | 5Y-H4K8ac_peak_6523 | 4.15658  | HSF4_ENSG00000102878;RP11-5A19.5_ENSG00000265690      |
| 16 | 67197266 | 67197480 | 5Y-H4K8ac_peak_6524 | 5.64909  | HSF4_ENSG00000102878;RP11-5A19.5_ENSG00000265690      |
| 16 | 67198607 | 67199019 | 5Y-H4K8ac_peak_6525 | 13.86507 |                                                       |
| 16 | 67203475 | 67203699 | 5Y-H4K8ac_peak_6526 | 6.77436  | NOL3_ENSG00000140939                                  |
| 16 | 67204735 | 67204999 | 5Y-H4K8ac_peak_6527 | 7.20869  | NOL3_ENSG00000140939                                  |
| 16 | 67207550 | 67208047 | 5Y-H4K8ac_peak_6528 | 5.98695  |                                                       |
| 16 | 67208435 | 67208642 | 5Y-H4K8ac_peak_6529 | 6.34245  |                                                       |
| 16 | 67217675 | 67217875 | 5Y-H4K8ac_peak_6530 | 10.11191 | KIAA0895L_ENSG00000196123                             |

|    |          |          |                     |          |                                                                                  |
|----|----------|----------|---------------------|----------|----------------------------------------------------------------------------------|
| 16 | 67241164 | 67241825 | 5Y-H4K8ac_peak_6531 | 12.11208 |                                                                                  |
| 16 | 67261191 | 67261434 | 5Y-H4K8ac_peak_6532 | 7.87406  | LRRRC29_ENSG00000125122;AC040160.1_ENSG00000237102;TMEM208_ENSG00000168701       |
| 16 | 67282404 | 67282741 | 5Y-H4K8ac_peak_6533 | 5.64909  | FHOD1_ENSG00000135723                                                            |
| 16 | 67282950 | 67283449 | 5Y-H4K8ac_peak_6534 | 5.91107  |                                                                                  |
| 16 | 67313560 | 67313996 | 5Y-H4K8ac_peak_6535 | 9.37812  |                                                                                  |
| 16 | 67360259 | 67360749 | 5Y-H4K8ac_peak_6536 | 6.34245  | KCTD19_ENSG00000168676;LRRRC36_ENSG00000159708                                   |
| 16 | 67450059 | 67450324 | 5Y-H4K8ac_peak_6537 | 9.79526  | ZDHHC1_ENSG00000159714                                                           |
| 16 | 67515494 | 67515694 | 5Y-H4K8ac_peak_6538 | 6.1654   | ATP6V0D1_ENSG00000159720;RP11-297D21.4_ENSG00000270049                           |
| 16 | 67516005 | 67516774 | 5Y-H4K8ac_peak_6539 | 5.23083  | ATP6V0D1_ENSG00000159720;RP11-297D21.4_ENSG00000270049;AGRP_ENSG00000159723      |
| 16 | 67555320 | 67555539 | 5Y-H4K8ac_peak_6540 | 5.91107  |                                                                                  |
| 16 | 67563041 | 67563304 | 5Y-H4K8ac_peak_6541 | 5.23083  |                                                                                  |
| 16 | 67596984 | 67597414 | 5Y-H4K8ac_peak_6542 | 11.68317 | CTD-2012K14.6_ENSG00000261386;CTD-2012K14.7_ENSG00000259804;CTCF_ENSG00000102974 |
| 16 | 67678804 | 67679314 | 5Y-H4K8ac_peak_6543 | 8.69112  | RLTPR_ENSG00000159753                                                            |
| 16 | 67686448 | 67686745 | 5Y-H4K8ac_peak_6544 | 14.99238 |                                                                                  |
| 16 | 67687070 | 67687318 | 5Y-H4K8ac_peak_6545 | 4.95697  |                                                                                  |
| 16 | 67875680 | 67876675 | 5Y-H4K8ac_peak_6546 | 7.11863  | THAP11_ENSG00000168286                                                           |
| 16 | 67907080 | 67907294 | 5Y-H4K8ac_peak_6547 | 6.43775  | EDC4_ENSG00000038358                                                             |
| 16 | 67927253 | 67927445 | 5Y-H4K8ac_peak_6548 | 7.11863  | PSKH1_ENSG00000159792                                                            |
| 16 | 68001905 | 68002421 | 5Y-H4K8ac_peak_6549 | 6.78318  |                                                                                  |
| 16 | 68002804 | 68003078 | 5Y-H4K8ac_peak_6550 | 6.53157  | SLC12A4_ENSG00000124067                                                          |
| 16 | 68026741 | 68027600 | 5Y-H4K8ac_peak_6551 | 5.72233  |                                                                                  |
| 16 | 68117994 | 68118471 | 5Y-H4K8ac_peak_6552 | 14.0329  | NFATC3_ENSG00000072736                                                           |
| 16 | 68118715 | 68118924 | 5Y-H4K8ac_peak_6553 | 5.87725  | NFATC3_ENSG00000072736                                                           |
| 16 | 68122508 | 68122703 | 5Y-H4K8ac_peak_6554 | 5.10404  | Y_RNA_ENSG00000201850                                                            |
| 16 | 68271788 | 68272357 | 5Y-H4K8ac_peak_6555 | 15.17389 | ESRP2_ENSG00000103067;RP11-96D1.6_ENSG00000261469                                |
| 16 | 68298089 | 68298314 | 5Y-H4K8ac_peak_6556 | 7.58806  | SLC7A6_ENSG00000103064                                                           |
| 16 | 68344296 | 68344740 | 5Y-H4K8ac_peak_6557 | 6.77436  | SLC7A6OS_ENSG00000103061;PRMT7_ENSG00000132600                                   |
| 16 | 68344966 | 68345180 | 5Y-H4K8ac_peak_6558 | 7.38046  | SLC7A6OS_ENSG00000103061;PRMT7_ENSG00000132600                                   |
| 16 | 68480651 | 68480911 | 5Y-H4K8ac_peak_6559 | 11.86504 |                                                                                  |
| 16 | 68679272 | 68679811 | 5Y-H4K8ac_peak_6560 | 4.36976  | RP11-615I2.2_ENSG00000260577                                                     |
| 16 | 68877457 | 68877918 | 5Y-H4K8ac_peak_6561 | 13.00733 | TANGO6_ENSG00000103047                                                           |
| 16 | 69165859 | 69166127 | 5Y-H4K8ac_peak_6562 | 10.84616 | CHTF8_ENSG00000168802;CIRH1A_ENSG00000141076                                     |
| 16 | 69166551 | 69166809 | 5Y-H4K8ac_peak_6563 | 15.34073 | CHTF8_ENSG00000168802                                                            |
| 16 | 69363929 | 69364449 | 5Y-H4K8ac_peak_6564 | 9.38276  | PDF_ENSG00000258429                                                              |
| 16 | 69373802 | 69374067 | 5Y-H4K8ac_peak_6565 | 5.64909  | COG8_ENSG00000213380;NIP7_ENSG00000132603                                        |
| 16 | 69419580 | 69419838 | 5Y-H4K8ac_peak_6566 | 5.41472  |                                                                                  |
| 16 | 69529157 | 69529946 | 5Y-H4K8ac_peak_6567 | 9.23159  |                                                                                  |
| 16 | 69794758 | 69794955 | 5Y-H4K8ac_peak_6568 | 4.79585  |                                                                                  |
| 16 | 69864009 | 69864590 | 5Y-H4K8ac_peak_6569 | 7.38046  |                                                                                  |
| 16 | 69923918 | 69924152 | 5Y-H4K8ac_peak_6570 | 5.8635   |                                                                                  |
| 16 | 70285250 | 70285783 | 5Y-H4K8ac_peak_6571 | 6.77436  | EXOSC6_ENSG00000223496                                                           |
| 16 | 70323087 | 70323351 | 5Y-H4K8ac_peak_6572 | 14.87721 | AARS_ENSG00000090861;DDX19B_ENSG00000157349                                      |
| 16 | 70323784 | 70324418 | 5Y-H4K8ac_peak_6573 | 9.23159  | AARS_ENSG00000090861;DDX19B_ENSG00000157349                                      |
| 16 | 70333172 | 70333438 | 5Y-H4K8ac_peak_6574 | 6.98118  | RP11-529K1.3_ENSG00000260537                                                     |
| 16 | 70379807 | 70380585 | 5Y-H4K8ac_peak_6575 | 7.58806  | RP11-529K1.2_ENSG00000261777;DDX19A_ENSG00000168872                              |
| 16 | 70414937 | 70415239 | 5Y-H4K8ac_peak_6576 | 9.51254  |                                                                                  |

|    |          |          |                     |          |                                                    |
|----|----------|----------|---------------------|----------|----------------------------------------------------|
| 16 | 70464531 | 70464733 | 5Y-H4K8ac_peak_6577 | 6.08523  |                                                    |
| 16 | 70473372 | 70473699 | 5Y-H4K8ac_peak_6578 | 8.09118  | ST3GAL2_ENSG00000157350                            |
| 16 | 70488286 | 70488923 | 5Y-H4K8ac_peak_6579 | 13.06587 | FUK_ENSG00000157353                                |
| 16 | 70557234 | 70557426 | 5Y-H4K8ac_peak_6580 | 12.69256 | COG4_ENSG00000103051;SF3B3_ENSG00000189091         |
| 16 | 70557797 | 70558109 | 5Y-H4K8ac_peak_6581 | 11.12941 | COG4_ENSG00000103051;SF3B3_ENSG00000189091         |
| 16 | 70680590 | 70680875 | 5Y-H4K8ac_peak_6582 | 6.08523  |                                                    |
| 16 | 70687932 | 70688296 | 5Y-H4K8ac_peak_6583 | 7.63144  |                                                    |
| 16 | 70721841 | 70722173 | 5Y-H4K8ac_peak_6584 | 5.98695  |                                                    |
| 16 | 70722917 | 70723126 | 5Y-H4K8ac_peak_6585 | 6.4221   |                                                    |
| 16 | 70725351 | 70725774 | 5Y-H4K8ac_peak_6586 | 7.20869  |                                                    |
| 16 | 70729621 | 70730010 | 5Y-H4K8ac_peak_6587 | 6.81557  |                                                    |
| 16 | 70737308 | 70738403 | 5Y-H4K8ac_peak_6588 | 6.29918  |                                                    |
| 16 | 70748834 | 70749070 | 5Y-H4K8ac_peak_6589 | 6.19716  |                                                    |
| 16 | 70770864 | 70771366 | 5Y-H4K8ac_peak_6590 | 7.50148  |                                                    |
| 16 | 70771851 | 70772498 | 5Y-H4K8ac_peak_6591 | 7.50148  |                                                    |
| 16 | 70834635 | 70835009 | 5Y-H4K8ac_peak_6592 | 11.22005 | VAC14_ENSG00000103043                              |
| 16 | 71264175 | 71264403 | 5Y-H4K8ac_peak_6593 | 5.87382  | HYDIN_ENSG00000157423                              |
| 16 | 71495752 | 71496089 | 5Y-H4K8ac_peak_6594 | 10.60083 | ZNF23_ENSG00000167377;RP11-510M2.2_ENSG00000247324 |
| 16 | 71518087 | 71518434 | 5Y-H4K8ac_peak_6595 | 10.69698 |                                                    |
| 16 | 71518964 | 71519343 | 5Y-H4K8ac_peak_6596 | 5.40331  |                                                    |
| 16 | 71879447 | 71879693 | 5Y-H4K8ac_peak_6597 | 14.86775 | ATXN1L_ENSG00000224470;IST1_ENSG00000182149        |
| 16 | 71917549 | 71918038 | 5Y-H4K8ac_peak_6598 | 14.00559 |                                                    |
| 16 | 72231094 | 72231701 | 5Y-H4K8ac_peak_6599 | 7.59101  |                                                    |
| 16 | 72232389 | 72232628 | 5Y-H4K8ac_peak_6600 | 8.21582  |                                                    |
| 16 | 72233162 | 72233466 | 5Y-H4K8ac_peak_6601 | 8.21582  |                                                    |
| 16 | 72233686 | 72234123 | 5Y-H4K8ac_peak_6602 | 7.89273  |                                                    |
| 16 | 72981936 | 72982150 | 5Y-H4K8ac_peak_6603 | 6.88532  |                                                    |
| 16 | 72996350 | 72996563 | 5Y-H4K8ac_peak_6604 | 4.36976  |                                                    |
| 16 | 73082158 | 73082528 | 5Y-H4K8ac_peak_6605 | 11.80583 |                                                    |
| 16 | 73091653 | 73091883 | 5Y-H4K8ac_peak_6606 | 10.1994  |                                                    |
| 16 | 73092124 | 73092599 | 5Y-H4K8ac_peak_6607 | 9.23159  | ZFH3_ENSG00000140836                               |
| 16 | 73204434 | 73204697 | 5Y-H4K8ac_peak_6608 | 8.33296  |                                                    |
| 16 | 73216936 | 73217170 | 5Y-H4K8ac_peak_6609 | 5.64909  |                                                    |
| 16 | 73338105 | 73338311 | 5Y-H4K8ac_peak_6610 | 4.642    |                                                    |
| 16 | 74330790 | 74331058 | 5Y-H4K8ac_peak_6611 | 6.22669  | AC009120.4_ENSG00000261404;PSMD7_ENSG00000103035   |
| 16 | 74700271 | 74700583 | 5Y-H4K8ac_peak_6612 | 4.84727  | RFWD3_ENSG00000168411;RP11-144N1.1_ENSG00000262904 |
| 16 | 74734158 | 74734440 | 5Y-H4K8ac_peak_6613 | 4.71803  | MLKL_ENSG00000168404                               |
| 16 | 75032220 | 75032540 | 5Y-H4K8ac_peak_6614 | 5.16353  | ZNRF1_ENSG00000186187                              |
| 16 | 75032963 | 75033384 | 5Y-H4K8ac_peak_6615 | 10.89622 | WDR59_ENSG00000103091;ZNRF1_ENSG00000186187        |
| 16 | 75103274 | 75103538 | 5Y-H4K8ac_peak_6616 | 13.0168  |                                                    |
| 16 | 75139200 | 75139415 | 5Y-H4K8ac_peak_6617 | 6.73385  |                                                    |
| 16 | 75139826 | 75140070 | 5Y-H4K8ac_peak_6618 | 8.35138  |                                                    |
| 16 | 75182418 | 75182818 | 5Y-H4K8ac_peak_6619 | 23.33415 | ZFP1_ENSG00000184517                               |
| 16 | 75290544 | 75290759 | 5Y-H4K8ac_peak_6620 | 5.94703  |                                                    |
| 16 | 75298915 | 75299648 | 5Y-H4K8ac_peak_6621 | 14.2053  |                                                    |
| 16 | 75299995 | 75300263 | 5Y-H4K8ac_peak_6622 | 13.03079 |                                                    |

|    |          |          |                     |          |                                                        |
|----|----------|----------|---------------------|----------|--------------------------------------------------------|
| 16 | 75300828 | 75301047 | 5Y-H4K8ac_peak_6623 | 7.50148  | BCAR1_ENSG00000050820                                  |
| 16 | 75467001 | 75467233 | 5Y-H4K8ac_peak_6624 | 7.90236  | CFDP1_ENSG00000153774                                  |
| 16 | 75550940 | 75551136 | 5Y-H4K8ac_peak_6625 | 6.78128  | RP11-77K12.5_ENSG00000262583                           |
| 16 | 75551619 | 75551839 | 5Y-H4K8ac_peak_6626 | 8.2913   |                                                        |
| 16 | 75658118 | 75658323 | 5Y-H4K8ac_peak_6627 | 7.31815  | ADAT1_ENSG00000065457                                  |
| 16 | 75681157 | 75681450 | 5Y-H4K8ac_peak_6628 | 8.90038  | TERF2IP_ENSG00000166848                                |
| 16 | 76691661 | 76691865 | 5Y-H4K8ac_peak_6629 | 4.07874  |                                                        |
| 16 | 77246365 | 77246886 | 5Y-H4K8ac_peak_6630 | 5.64909  |                                                        |
| 16 | 77756490 | 77756772 | 5Y-H4K8ac_peak_6631 | 4.95697  | NUDT7_ENSG00000140876                                  |
| 16 | 77821873 | 77822145 | 5Y-H4K8ac_peak_6632 | 7.64675  | VAT1L_ENSG00000171724                                  |
| 16 | 78036486 | 78036686 | 5Y-H4K8ac_peak_6633 | 5.22422  |                                                        |
| 16 | 79463728 | 79463936 | 5Y-H4K8ac_peak_6634 | 4.30075  |                                                        |
| 16 | 81040326 | 81040753 | 5Y-H4K8ac_peak_6635 | 14.86775 | CENPN_ENSG00000166451                                  |
| 16 | 81110984 | 81111384 | 5Y-H4K8ac_peak_6636 | 7.49746  | C16orf46_ENSG00000166455;RP11-303E16.7_ENSG00000245059 |
| 16 | 81349070 | 81349339 | 5Y-H4K8ac_peak_6637 | 5.81062  | GAN_ENSG00000261609                                    |
| 16 | 81477650 | 81478330 | 5Y-H4K8ac_peak_6638 | 10.1994  | CMIP_ENSG00000153815                                   |
| 16 | 81549332 | 81549945 | 5Y-H4K8ac_peak_6639 | 6.08523  |                                                        |
| 16 | 81763976 | 81764526 | 5Y-H4K8ac_peak_6640 | 20.51189 |                                                        |
| 16 | 82203418 | 82204314 | 5Y-H4K8ac_peak_6641 | 8.2913   | MPHOSPH6_ENSG00000135698;CTD-2588J6.2_ENSG00000261029  |
| 16 | 83841040 | 83841336 | 5Y-H4K8ac_peak_6642 | 6.31818  | RP11-483P21.2_ENSG00000260228;HSBP1_ENSG00000230989    |
| 16 | 83841717 | 83842003 | 5Y-H4K8ac_peak_6643 | 6.86362  | RP11-483P21.2_ENSG00000260228;HSBP1_ENSG00000230989    |
| 16 | 84268153 | 84268612 | 5Y-H4K8ac_peak_6644 | 6.1654   |                                                        |
| 16 | 84538622 | 84539222 | 5Y-H4K8ac_peak_6645 | 7.87406  |                                                        |
| 16 | 84860056 | 84860423 | 5Y-H4K8ac_peak_6646 | 11.36989 |                                                        |
| 16 | 84861065 | 84861559 | 5Y-H4K8ac_peak_6647 | 6.78128  | RP11-254F19.2_ENSG00000260859                          |
| 16 | 85045328 | 85045539 | 5Y-H4K8ac_peak_6648 | 7.90236  | ZDHHC7_ENSG00000153786                                 |
| 16 | 85146051 | 85146394 | 5Y-H4K8ac_peak_6649 | 11.20395 | FAM92B_ENSG00000153789                                 |
| 16 | 85170713 | 85170999 | 5Y-H4K8ac_peak_6650 | 10.16277 |                                                        |
| 16 | 85178135 | 85178486 | 5Y-H4K8ac_peak_6651 | 4.93618  |                                                        |
| 16 | 85180484 | 85180758 | 5Y-H4K8ac_peak_6652 | 6.47245  |                                                        |
| 16 | 85185060 | 85185257 | 5Y-H4K8ac_peak_6653 | 7.11863  |                                                        |
| 16 | 85185677 | 85186344 | 5Y-H4K8ac_peak_6654 | 8.69112  |                                                        |
| 16 | 85191396 | 85192744 | 5Y-H4K8ac_peak_6655 | 12.10416 |                                                        |
| 16 | 85203295 | 85203736 | 5Y-H4K8ac_peak_6656 | 6.83255  |                                                        |
| 16 | 85235619 | 85236471 | 5Y-H4K8ac_peak_6657 | 9.44542  |                                                        |
| 16 | 85236735 | 85237006 | 5Y-H4K8ac_peak_6658 | 4.29586  |                                                        |
| 16 | 85239220 | 85240273 | 5Y-H4K8ac_peak_6659 | 14.30055 |                                                        |
| 16 | 85240703 | 85241492 | 5Y-H4K8ac_peak_6660 | 7.20869  |                                                        |
| 16 | 85241848 | 85242101 | 5Y-H4K8ac_peak_6661 | 6.73047  |                                                        |
| 16 | 85253343 | 85253873 | 5Y-H4K8ac_peak_6662 | 16.05821 |                                                        |
| 16 | 85254655 | 85255413 | 5Y-H4K8ac_peak_6663 | 11.18363 |                                                        |
| 16 | 85268570 | 85268955 | 5Y-H4K8ac_peak_6664 | 7.87406  |                                                        |
| 16 | 85269194 | 85269479 | 5Y-H4K8ac_peak_6665 | 6.81557  |                                                        |
| 16 | 85269698 | 85269917 | 5Y-H4K8ac_peak_6666 | 6.73385  |                                                        |
| 16 | 85292623 | 85293119 | 5Y-H4K8ac_peak_6667 | 7.31102  |                                                        |
| 16 | 85299729 | 85300022 | 5Y-H4K8ac_peak_6668 | 7.08802  |                                                        |

|    |          |          |                     |          |                               |
|----|----------|----------|---------------------|----------|-------------------------------|
| 16 | 85300718 | 85301083 | 5Y-H4K8ac_peak_6669 | 9.59236  |                               |
| 16 | 85334536 | 85334781 | 5Y-H4K8ac_peak_6670 | 8.89349  |                               |
| 16 | 85335405 | 85335846 | 5Y-H4K8ac_peak_6671 | 7.90227  |                               |
| 16 | 85382083 | 85382280 | 5Y-H4K8ac_peak_6672 | 7.31102  |                               |
| 16 | 85383577 | 85384145 | 5Y-H4K8ac_peak_6673 | 12.96197 |                               |
| 16 | 85389894 | 85390098 | 5Y-H4K8ac_peak_6674 | 7.41519  | RP11-680G10.1_ENSG00000261567 |
| 16 | 85390693 | 85390894 | 5Y-H4K8ac_peak_6675 | 5.0561   | RP11-680G10.1_ENSG00000261567 |
| 16 | 85395070 | 85395802 | 5Y-H4K8ac_peak_6676 | 9.04239  |                               |
| 16 | 85398386 | 85398762 | 5Y-H4K8ac_peak_6677 | 6.92707  |                               |
| 16 | 85399493 | 85399798 | 5Y-H4K8ac_peak_6678 | 9.30505  |                               |
| 16 | 85400649 | 85401248 | 5Y-H4K8ac_peak_6679 | 12.44818 |                               |
| 16 | 85404622 | 85404967 | 5Y-H4K8ac_peak_6680 | 8.46442  |                               |
| 16 | 85409856 | 85410272 | 5Y-H4K8ac_peak_6681 | 4.15658  |                               |
| 16 | 85411190 | 85412131 | 5Y-H4K8ac_peak_6682 | 13.4304  |                               |
| 16 | 85412325 | 85412928 | 5Y-H4K8ac_peak_6683 | 5.23083  |                               |
| 16 | 85415092 | 85415388 | 5Y-H4K8ac_peak_6684 | 4.77307  |                               |
| 16 | 85415688 | 85416229 | 5Y-H4K8ac_peak_6685 | 10.79063 |                               |
| 16 | 85417285 | 85417986 | 5Y-H4K8ac_peak_6686 | 7.76645  |                               |
| 16 | 85419243 | 85419606 | 5Y-H4K8ac_peak_6687 | 7.21406  |                               |
| 16 | 85429546 | 85429981 | 5Y-H4K8ac_peak_6688 | 14.59308 |                               |
| 16 | 85449109 | 85449305 | 5Y-H4K8ac_peak_6689 | 5.77946  |                               |
| 16 | 85470485 | 85470710 | 5Y-H4K8ac_peak_6690 | 5.91107  |                               |
| 16 | 85472599 | 85473004 | 5Y-H4K8ac_peak_6691 | 6.08523  |                               |
| 16 | 85477845 | 85478150 | 5Y-H4K8ac_peak_6692 | 4.53347  |                               |
| 16 | 85478356 | 85478894 | 5Y-H4K8ac_peak_6693 | 8.24461  |                               |
| 16 | 85479356 | 85479637 | 5Y-H4K8ac_peak_6694 | 11.4254  |                               |
| 16 | 85480038 | 85480811 | 5Y-H4K8ac_peak_6695 | 12.15235 |                               |
| 16 | 85481278 | 85482237 | 5Y-H4K8ac_peak_6696 | 5.24695  |                               |
| 16 | 85482588 | 85482816 | 5Y-H4K8ac_peak_6697 | 6.29621  |                               |
| 16 | 85483025 | 85483544 | 5Y-H4K8ac_peak_6698 | 5.12488  |                               |
| 16 | 85495489 | 85495719 | 5Y-H4K8ac_peak_6699 | 6.37023  |                               |
| 16 | 85496446 | 85496844 | 5Y-H4K8ac_peak_6700 | 9.89244  |                               |
| 16 | 85497367 | 85497669 | 5Y-H4K8ac_peak_6701 | 7.50148  |                               |
| 16 | 85499955 | 85500146 | 5Y-H4K8ac_peak_6702 | 6.00747  |                               |
| 16 | 85508686 | 85508887 | 5Y-H4K8ac_peak_6703 | 5.52265  |                               |
| 16 | 85548819 | 85549110 | 5Y-H4K8ac_peak_6704 | 9.23159  |                               |
| 16 | 85551613 | 85551965 | 5Y-H4K8ac_peak_6705 | 9.93099  |                               |
| 16 | 85557313 | 85557891 | 5Y-H4K8ac_peak_6706 | 5.99504  |                               |
| 16 | 85558357 | 85558865 | 5Y-H4K8ac_peak_6707 | 7.89142  |                               |
| 16 | 85560808 | 85561247 | 5Y-H4K8ac_peak_6708 | 7.98641  |                               |
| 16 | 85568818 | 85569186 | 5Y-H4K8ac_peak_6709 | 4.09461  |                               |
| 16 | 85607982 | 85608459 | 5Y-H4K8ac_peak_6710 | 6.77436  |                               |
| 16 | 85616147 | 85616363 | 5Y-H4K8ac_peak_6711 | 5.5592   | RP11-118F19.1_ENSG00000270124 |
| 16 | 85627594 | 85628585 | 5Y-H4K8ac_peak_6712 | 8.93923  |                               |
| 16 | 85640081 | 85640403 | 5Y-H4K8ac_peak_6713 | 7.89273  |                               |
| 16 | 85641305 | 85641518 | 5Y-H4K8ac_peak_6714 | 6.53157  |                               |

|    |          |          |                     |          |                                             |
|----|----------|----------|---------------------|----------|---------------------------------------------|
| 16 | 85644461 | 85644794 | 5Y-H4K8ac_peak_6715 | 10.6523  | GSE1_ENSG00000131149                        |
| 16 | 85645022 | 85645302 | 5Y-H4K8ac_peak_6716 | 13.14841 | GSE1_ENSG00000131149                        |
| 16 | 85645559 | 85645794 | 5Y-H4K8ac_peak_6717 | 14.99673 | GSE1_ENSG00000131149                        |
| 16 | 85646980 | 85647237 | 5Y-H4K8ac_peak_6718 | 8.8624   |                                             |
| 16 | 85659895 | 85660300 | 5Y-H4K8ac_peak_6719 | 6.52593  |                                             |
| 16 | 85680662 | 85680944 | 5Y-H4K8ac_peak_6720 | 5.23083  |                                             |
| 16 | 85683202 | 85684325 | 5Y-H4K8ac_peak_6721 | 7.89273  |                                             |
| 16 | 85684767 | 85686726 | 5Y-H4K8ac_peak_6722 | 16.60632 |                                             |
| 16 | 85722962 | 85723202 | 5Y-H4K8ac_peak_6723 | 6.3265   | GINS2_ENSG00000131153                       |
| 16 | 85784320 | 85784588 | 5Y-H4K8ac_peak_6724 | 5.18558  | C16orf74_ENSG00000154102                    |
| 16 | 85832855 | 85833049 | 5Y-H4K8ac_peak_6725 | 7.03573  | EMC8_ENSG00000131148;COX4I1_ENSG00000131143 |
| 16 | 85833423 | 85833617 | 5Y-H4K8ac_peak_6726 | 8.1667   | EMC8_ENSG00000131148                        |
| 16 | 86588416 | 86588685 | 5Y-H4K8ac_peak_6727 | 7.89273  | MTHFSD_ENSG00000103248                      |
| 16 | 87358674 | 87358864 | 5Y-H4K8ac_peak_6728 | 7.89142  |                                             |
| 16 | 87385508 | 87385705 | 5Y-H4K8ac_peak_6729 | 7.31102  |                                             |
| 16 | 87403689 | 87403881 | 5Y-H4K8ac_peak_6730 | 5.64909  |                                             |
| 16 | 87417867 | 87418398 | 5Y-H4K8ac_peak_6731 | 13.99721 | MAP1LC3B_ENSG00000140941                    |
| 16 | 87491829 | 87492041 | 5Y-H4K8ac_peak_6732 | 11.48691 |                                             |
| 16 | 87498439 | 87498760 | 5Y-H4K8ac_peak_6733 | 6.73385  |                                             |
| 16 | 87526891 | 87527233 | 5Y-H4K8ac_peak_6734 | 15.3483  | RP11-482M8.1_ENSG00000260750                |
| 16 | 87590861 | 87591213 | 5Y-H4K8ac_peak_6735 | 7.87406  |                                             |
| 16 | 87604048 | 87604717 | 5Y-H4K8ac_peak_6736 | 10.5157  |                                             |
| 16 | 87755918 | 87756769 | 5Y-H4K8ac_peak_6737 | 8.24461  |                                             |
| 16 | 87799675 | 87800450 | 5Y-H4K8ac_peak_6738 | 10.73603 | KLHDC4_ENSG00000104731                      |
| 16 | 87812252 | 87813662 | 5Y-H4K8ac_peak_6739 | 14.00559 | RP4-536B24.4_ENSG00000260498                |
| 16 | 87839951 | 87841106 | 5Y-H4K8ac_peak_6740 | 13.00733 | RP4-536B24.3_ENSG00000260177                |
| 16 | 87845801 | 87845998 | 5Y-H4K8ac_peak_6741 | 5.41472  |                                             |
| 16 | 87869341 | 87869795 | 5Y-H4K8ac_peak_6742 | 5.65584  | RP4-536B24.2_ENSG00000260466                |
| 16 | 87903303 | 87903591 | 5Y-H4K8ac_peak_6743 | 8.43511  | SLC7A5_ENSG00000103257                      |
| 16 | 87904909 | 87905126 | 5Y-H4K8ac_peak_6744 | 5.64909  |                                             |
| 16 | 87905574 | 87905830 | 5Y-H4K8ac_peak_6745 | 6.61077  |                                             |
| 16 | 87963883 | 87964230 | 5Y-H4K8ac_peak_6746 | 13.19488 |                                             |
| 16 | 87965697 | 87966273 | 5Y-H4K8ac_peak_6747 | 6.50117  |                                             |
| 16 | 87979107 | 87979574 | 5Y-H4K8ac_peak_6748 | 7.38046  | CTD-3057O21.1_ENSG00000260443               |
| 16 | 87984202 | 87984460 | 5Y-H4K8ac_peak_6749 | 9.07803  |                                             |
| 16 | 87985241 | 87985617 | 5Y-H4K8ac_peak_6750 | 15.90416 |                                             |
| 16 | 88076770 | 88076967 | 5Y-H4K8ac_peak_6751 | 7.63144  |                                             |
| 16 | 88096246 | 88096948 | 5Y-H4K8ac_peak_6752 | 7.50148  |                                             |
| 16 | 88110102 | 88110468 | 5Y-H4K8ac_peak_6753 | 8.43511  |                                             |
| 16 | 88111052 | 88111619 | 5Y-H4K8ac_peak_6754 | 13.23366 |                                             |
| 16 | 88125116 | 88125416 | 5Y-H4K8ac_peak_6755 | 6.37023  |                                             |
| 16 | 88126236 | 88126578 | 5Y-H4K8ac_peak_6756 | 12.21176 |                                             |
| 16 | 88152989 | 88153341 | 5Y-H4K8ac_peak_6757 | 5.12213  |                                             |
| 16 | 88153676 | 88153870 | 5Y-H4K8ac_peak_6758 | 7.89273  |                                             |
| 16 | 88165142 | 88165439 | 5Y-H4K8ac_peak_6759 | 6.79169  |                                             |
| 16 | 88165970 | 88166707 | 5Y-H4K8ac_peak_6760 | 7.11863  |                                             |

|    |          |          |                     |          |                                             |
|----|----------|----------|---------------------|----------|---------------------------------------------|
| 16 | 88175160 | 88175376 | 5Y-H4K8ac_peak_6761 | 9.3149   |                                             |
| 16 | 88176298 | 88176601 | 5Y-H4K8ac_peak_6762 | 6.37023  |                                             |
| 16 | 88177438 | 88178130 | 5Y-H4K8ac_peak_6763 | 14.43262 |                                             |
| 16 | 88179073 | 88179349 | 5Y-H4K8ac_peak_6764 | 5.449    |                                             |
| 16 | 88179566 | 88179812 | 5Y-H4K8ac_peak_6765 | 9.31608  |                                             |
| 16 | 88180018 | 88180451 | 5Y-H4K8ac_peak_6766 | 9.30505  |                                             |
| 16 | 88182221 | 88182654 | 5Y-H4K8ac_peak_6767 | 7.79831  |                                             |
| 16 | 88192101 | 88192313 | 5Y-H4K8ac_peak_6768 | 5.35202  |                                             |
| 16 | 88263843 | 88264133 | 5Y-H4K8ac_peak_6769 | 6.33308  |                                             |
| 16 | 88266184 | 88266544 | 5Y-H4K8ac_peak_6770 | 7.89142  |                                             |
| 16 | 88267181 | 88267403 | 5Y-H4K8ac_peak_6771 | 5.17251  | LA16c-444G7.1_ENSG00000261273               |
| 16 | 88268079 | 88268406 | 5Y-H4K8ac_peak_6772 | 13.72401 | LA16c-444G7.1_ENSG00000261273               |
| 16 | 88268603 | 88269115 | 5Y-H4K8ac_peak_6773 | 9.23159  | LA16c-444G7.1_ENSG00000261273               |
| 16 | 88271766 | 88272219 | 5Y-H4K8ac_peak_6774 | 6.54441  |                                             |
| 16 | 88278866 | 88279222 | 5Y-H4K8ac_peak_6775 | 7.59101  |                                             |
| 16 | 88302297 | 88302526 | 5Y-H4K8ac_peak_6776 | 4.8773   |                                             |
| 16 | 88303844 | 88304079 | 5Y-H4K8ac_peak_6777 | 7.14616  |                                             |
| 16 | 88308092 | 88308470 | 5Y-H4K8ac_peak_6778 | 8.1667   |                                             |
| 16 | 88309052 | 88309768 | 5Y-H4K8ac_peak_6779 | 14.99673 |                                             |
| 16 | 88315878 | 88316159 | 5Y-H4K8ac_peak_6780 | 6.77436  |                                             |
| 16 | 88323567 | 88323763 | 5Y-H4K8ac_peak_6781 | 4.84727  |                                             |
| 16 | 88328445 | 88328700 | 5Y-H4K8ac_peak_6782 | 5.51139  |                                             |
| 16 | 88330244 | 88330709 | 5Y-H4K8ac_peak_6783 | 4.29586  |                                             |
| 16 | 88443193 | 88443696 | 5Y-H4K8ac_peak_6784 | 7.3889   |                                             |
| 16 | 88449308 | 88450865 | 5Y-H4K8ac_peak_6785 | 15.68832 |                                             |
| 16 | 88471787 | 88472334 | 5Y-H4K8ac_peak_6786 | 9.58986  |                                             |
| 16 | 88472554 | 88473047 | 5Y-H4K8ac_peak_6787 | 9.7353   |                                             |
| 16 | 88473394 | 88473599 | 5Y-H4K8ac_peak_6788 | 8.31764  |                                             |
| 16 | 88545750 | 88545967 | 5Y-H4K8ac_peak_6789 | 10.90365 |                                             |
| 16 | 88554248 | 88554470 | 5Y-H4K8ac_peak_6790 | 6.77436  |                                             |
| 16 | 88572226 | 88572453 | 5Y-H4K8ac_peak_6791 | 7.66481  |                                             |
| 16 | 88577060 | 88577402 | 5Y-H4K8ac_peak_6792 | 5.64988  |                                             |
| 16 | 88577841 | 88578059 | 5Y-H4K8ac_peak_6793 | 6.55225  |                                             |
| 16 | 88578664 | 88579499 | 5Y-H4K8ac_peak_6794 | 13.0168  |                                             |
| 16 | 88579983 | 88581009 | 5Y-H4K8ac_peak_6795 | 11.86504 |                                             |
| 16 | 88636905 | 88637131 | 5Y-H4K8ac_peak_6796 | 5.37237  | ZC3H18_ENSG00000158545                      |
| 16 | 88772299 | 88772756 | 5Y-H4K8ac_peak_6797 | 7.89273  | RNF166_ENSG00000158717;CTU2_ENSG00000174177 |
| 16 | 88773130 | 88773431 | 5Y-H4K8ac_peak_6798 | 9.20645  | RNF166_ENSG00000158717;CTU2_ENSG00000174177 |
| 16 | 88797341 | 88797744 | 5Y-H4K8ac_peak_6799 | 7.30348  | RP5-1142A6.2_ENSG00000224888                |
| 16 | 88803970 | 88804368 | 5Y-H4K8ac_peak_6800 | 8.43511  |                                             |
| 16 | 88837355 | 88837601 | 5Y-H4K8ac_peak_6801 | 5.35202  |                                             |
| 16 | 88851693 | 88851919 | 5Y-H4K8ac_peak_6802 | 5.91107  | PIEZO1_ENSG00000103335                      |
| 16 | 88869572 | 88869887 | 5Y-H4K8ac_peak_6803 | 7.34185  | CDT1_ENSG00000167513                        |
| 16 | 88870178 | 88870455 | 5Y-H4K8ac_peak_6804 | 16.01457 | CDT1_ENSG00000167513                        |
| 16 | 89120148 | 89120360 | 5Y-H4K8ac_peak_6805 | 4.95697  | CTD-2555A7.2_ENSG00000256982                |
| 16 | 89137756 | 89137978 | 5Y-H4K8ac_peak_6806 | 5.98695  |                                             |



|    |          |          |                     |          |                                                  |
|----|----------|----------|---------------------|----------|--------------------------------------------------|
| 16 | 89138327 | 89138606 | 5Y-H4K8ac_peak_6807 | 9.51254  |                                                  |
| 16 | 89159864 | 89160089 | 5Y-H4K8ac_peak_6808 | 6.37023  |                                                  |
| 16 | 89160518 | 89160716 | 5Y-H4K8ac_peak_6809 | 7.34185  |                                                  |
| 16 | 89216714 | 89216990 | 5Y-H4K8ac_peak_6810 | 5.72233  |                                                  |
| 16 | 89239605 | 89239810 | 5Y-H4K8ac_peak_6811 | 4.95697  |                                                  |
| 16 | 89277618 | 89277971 | 5Y-H4K8ac_peak_6812 | 4.29586  |                                                  |
| 16 | 89307019 | 89307417 | 5Y-H4K8ac_peak_6813 | 11.99586 |                                                  |
| 16 | 89313346 | 89313659 | 5Y-H4K8ac_peak_6814 | 7.59101  |                                                  |
| 16 | 89574187 | 89574624 | 5Y-H4K8ac_peak_6815 | 9.00699  |                                                  |
| 16 | 89627128 | 89627609 | 5Y-H4K8ac_peak_6816 | 14.59308 | RPL13_ENSG00000167526;SNORD68_ENSG00000200084    |
| 16 | 89787559 | 89787806 | 5Y-H4K8ac_peak_6817 | 6.98394  | VPS9D1_ENSG00000075399;ZNF276_ENSG00000158805    |
| 16 | 89846067 | 89846270 | 5Y-H4K8ac_peak_6818 | 5.65584  |                                                  |
| 16 | 89868644 | 89868899 | 5Y-H4K8ac_peak_6819 | 8.60024  |                                                  |
| 16 | 89882762 | 89883001 | 5Y-H4K8ac_peak_6820 | 13.2534  | FANCA_ENSG00000187741                            |
| 16 | 89883204 | 89883808 | 5Y-H4K8ac_peak_6821 | 14.15915 | SPIRE2_ENSG00000204991;FANCA_ENSG00000187741     |
| 16 | 89939490 | 89939863 | 5Y-H4K8ac_peak_6822 | 18.10232 | TCF25_ENSG00000141002                            |
| 16 | 89977075 | 89977395 | 5Y-H4K8ac_peak_6823 | 4.5753   |                                                  |
| 16 | 89984488 | 89985240 | 5Y-H4K8ac_peak_6824 | 7.65114  | AC092143.1_ENSG00000256390;TUBB3_ENSG00000198211 |
| 16 | 89989246 | 89989446 | 5Y-H4K8ac_peak_6825 | 7.90227  | RP11-566K11.4_ENSG00000259006                    |
| 16 | 90014588 | 90014984 | 5Y-H4K8ac_peak_6826 | 5.65584  | DEF8_ENSG00000140995                             |
| 16 | 90038426 | 90039493 | 5Y-H4K8ac_peak_6827 | 19.93272 | CENPBD1_ENSG00000177946;AFG3L1P_ENSG00000223959  |
| 16 | 90085516 | 90085740 | 5Y-H4K8ac_peak_6828 | 8.20773  | DBNDD1_ENSG00000003249;GAS8_ENSG00000141013      |
| 16 | 90113511 | 90114053 | 5Y-H4K8ac_peak_6829 | 13.0168  | URAHF1_ENSG00000222019                           |
| 16 | 90144049 | 90144893 | 5Y-H4K8ac_peak_6830 | 9.38276  |                                                  |
| 17 | 29868    | 30172    | 5Y-H4K8ac_peak_6831 | 6.54441  |                                                  |
| 17 | 30485    | 30973    | 5Y-H4K8ac_peak_6832 | 5.98695  | DOC2B_ENSG00000272636                            |
| 17 | 148697   | 149011   | 5Y-H4K8ac_peak_6833 | 7.57144  |                                                  |
| 17 | 150581   | 150791   | 5Y-H4K8ac_peak_6834 | 8.43511  |                                                  |
| 17 | 183923   | 184116   | 5Y-H4K8ac_peak_6835 | 8.2913   |                                                  |
| 17 | 258919   | 259151   | 5Y-H4K8ac_peak_6836 | 5.37237  | C17orf97_ENSG00000187624                         |
| 17 | 502252   | 502546   | 5Y-H4K8ac_peak_6837 | 13.22169 |                                                  |
| 17 | 635259   | 635487   | 5Y-H4K8ac_peak_6838 | 9.30505  | FAM57A_ENSG00000167695                           |
| 17 | 655096   | 655309   | 5Y-H4K8ac_peak_6839 | 6.339    | DBIL5P_ENSG00000231784                           |
| 17 | 655650   | 656370   | 5Y-H4K8ac_peak_6840 | 7.44077  | GEMIN4_ENSG00000179409;DBIL5P_ENSG00000231784    |
| 17 | 883630   | 883986   | 5Y-H4K8ac_peak_6841 | 5.68769  | NXN_ENSG00000167693                              |
| 17 | 900297   | 900666   | 5Y-H4K8ac_peak_6842 | 5.98695  | TIMM22_ENSG00000177370                           |
| 17 | 973783   | 973998   | 5Y-H4K8ac_peak_6843 | 4.642    |                                                  |
| 17 | 974675   | 975115   | 5Y-H4K8ac_peak_6844 | 8.04943  |                                                  |
| 17 | 981729   | 981975   | 5Y-H4K8ac_peak_6845 | 4.29586  |                                                  |
| 17 | 982364   | 982896   | 5Y-H4K8ac_peak_6846 | 9.05766  |                                                  |
| 17 | 983374   | 983617   | 5Y-H4K8ac_peak_6847 | 4.85014  |                                                  |
| 17 | 1012559  | 1012910  | 5Y-H4K8ac_peak_6848 | 10.35586 |                                                  |
| 17 | 1057369  | 1057942  | 5Y-H4K8ac_peak_6849 | 15.3483  |                                                  |
| 17 | 1083522  | 1083761  | 5Y-H4K8ac_peak_6850 | 7.89142  |                                                  |
| 17 | 1171676  | 1172140  | 5Y-H4K8ac_peak_6851 | 12.44818 |                                                  |
| 17 | 1302892  | 1303266  | 5Y-H4K8ac_peak_6852 | 6.03632  | YWHAE_ENSG00000108953                            |

|    |         |         |                     |          |                                                     |
|----|---------|---------|---------------------|----------|-----------------------------------------------------|
| 17 | 1388755 | 1389143 | 5Y-H4K8ac_peak_6853 | 7.28023  |                                                     |
| 17 | 1389541 | 1389786 | 5Y-H4K8ac_peak_6854 | 9.30505  |                                                     |
| 17 | 1395087 | 1395408 | 5Y-H4K8ac_peak_6855 | 11.67591 | MYO1C_ENSG00000197879                               |
| 17 | 1466321 | 1466536 | 5Y-H4K8ac_peak_6856 | 5.67283  | PITPNA_ENSG00000174238                              |
| 17 | 1478252 | 1478476 | 5Y-H4K8ac_peak_6857 | 5.98695  |                                                     |
| 17 | 1478904 | 1479117 | 5Y-H4K8ac_peak_6858 | 5.56912  |                                                     |
| 17 | 1533002 | 1533197 | 5Y-H4K8ac_peak_6859 | 5.41472  | SLC43A2_ENSG00000167703                             |
| 17 | 1551811 | 1552195 | 5Y-H4K8ac_peak_6860 | 5.98695  |                                                     |
| 17 | 1587831 | 1588089 | 5Y-H4K8ac_peak_6861 | 6.73385  | PRPF8_ENSG00000174231                               |
| 17 | 1613300 | 1613565 | 5Y-H4K8ac_peak_6862 | 8.43011  | TLCD2_ENSG00000185561                               |
| 17 | 1620058 | 1620312 | 5Y-H4K8ac_peak_6863 | 4.0639   | MIR22HG_ENSG00000186594;WDR81_ENSG00000167716       |
| 17 | 1628107 | 1628537 | 5Y-H4K8ac_peak_6864 | 7.89273  |                                                     |
| 17 | 1658622 | 1659231 | 5Y-H4K8ac_peak_6865 | 9.51254  |                                                     |
| 17 | 1665658 | 1666479 | 5Y-H4K8ac_peak_6866 | 6.98416  | SERPINF1_ENSG00000132386                            |
| 17 | 1666755 | 1668011 | 5Y-H4K8ac_peak_6867 | 7.90751  |                                                     |
| 17 | 1802225 | 1802473 | 5Y-H4K8ac_peak_6868 | 12.11208 |                                                     |
| 17 | 1846226 | 1846747 | 5Y-H4K8ac_peak_6869 | 10.31981 |                                                     |
| 17 | 1899163 | 1899607 | 5Y-H4K8ac_peak_6870 | 8.43511  | CTD-2545H1.2_ENSG00000262445                        |
| 17 | 1945873 | 1946078 | 5Y-H4K8ac_peak_6871 | 7.59101  | OVCA2_ENSG00000262664;RP11-667K14.4_ENSG00000262533 |
| 17 | 1953905 | 1954262 | 5Y-H4K8ac_peak_6872 | 10.1994  | MIR132_ENSG00000267200;MIR212_ENSG00000267195       |
| 17 | 1958429 | 1958947 | 5Y-H4K8ac_peak_6873 | 9.23159  | HIC1_ENSG00000177374                                |
| 17 | 1977339 | 1977700 | 5Y-H4K8ac_peak_6874 | 6.40964  |                                                     |
| 17 | 1978723 | 1979191 | 5Y-H4K8ac_peak_6875 | 9.01738  |                                                     |
| 17 | 1980130 | 1980374 | 5Y-H4K8ac_peak_6876 | 13.99721 |                                                     |
| 17 | 1985827 | 1986038 | 5Y-H4K8ac_peak_6877 | 9.63153  |                                                     |
| 17 | 1987395 | 1987596 | 5Y-H4K8ac_peak_6878 | 10.41081 |                                                     |
| 17 | 2058404 | 2058620 | 5Y-H4K8ac_peak_6879 | 7.31815  |                                                     |
| 17 | 2082292 | 2082519 | 5Y-H4K8ac_peak_6880 | 6.77436  |                                                     |
| 17 | 2087544 | 2088139 | 5Y-H4K8ac_peak_6881 | 7.59101  |                                                     |
| 17 | 2094469 | 2094812 | 5Y-H4K8ac_peak_6882 | 5.84208  |                                                     |
| 17 | 2116583 | 2116782 | 5Y-H4K8ac_peak_6883 | 7.53429  | AC090617.1_ENSG00000236838                          |
| 17 | 2239098 | 2239663 | 5Y-H4K8ac_peak_6884 | 14.30055 |                                                     |
| 17 | 2283743 | 2284238 | 5Y-H4K8ac_peak_6885 | 12.05638 |                                                     |
| 17 | 2296682 | 2297093 | 5Y-H4K8ac_peak_6886 | 13.00733 |                                                     |
| 17 | 2302478 | 2302685 | 5Y-H4K8ac_peak_6887 | 7.6267   |                                                     |
| 17 | 2496490 | 2496736 | 5Y-H4K8ac_peak_6888 | 7.17184  | PAFAH1B1_ENSG00000007168                            |
| 17 | 2497245 | 2497736 | 5Y-H4K8ac_peak_6889 | 11.19336 | PAFAH1B1_ENSG00000007168                            |
| 17 | 2615222 | 2615610 | 5Y-H4K8ac_peak_6890 | 8.75963  | CLUH_ENSG00000132361;RP11-74E22.3_ENSG00000262050   |
| 17 | 2653062 | 2653295 | 5Y-H4K8ac_peak_6891 | 9.00954  | RP11-74E22.4_ENSG00000261963                        |
| 17 | 2659054 | 2659366 | 5Y-H4K8ac_peak_6892 | 6.77436  |                                                     |
| 17 | 2679507 | 2679937 | 5Y-H4K8ac_peak_6893 | 10.86648 | RAP1GAP2_ENSG00000132359                            |
| 17 | 2756321 | 2756765 | 5Y-H4K8ac_peak_6894 | 7.59101  |                                                     |
| 17 | 2787040 | 2787244 | 5Y-H4K8ac_peak_6895 | 7.31815  |                                                     |
| 17 | 2801681 | 2802130 | 5Y-H4K8ac_peak_6896 | 6.20989  |                                                     |
| 17 | 2805727 | 2805952 | 5Y-H4K8ac_peak_6897 | 6.38173  |                                                     |
| 17 | 2831573 | 2831911 | 5Y-H4K8ac_peak_6898 | 4.84727  |                                                     |

|    |         |         |                     |          |                                                                                                             |
|----|---------|---------|---------------------|----------|-------------------------------------------------------------------------------------------------------------|
| 17 | 2832474 | 2832871 | 5Y-H4K8ac_peak_6899 | 8.39058  |                                                                                                             |
| 17 | 2862342 | 2862544 | 5Y-H4K8ac_peak_6900 | 6.39626  |                                                                                                             |
| 17 | 2863599 | 2864077 | 5Y-H4K8ac_peak_6901 | 9.93099  |                                                                                                             |
| 17 | 2905840 | 2907209 | 5Y-H4K8ac_peak_6902 | 8.79957  |                                                                                                             |
| 17 | 2907778 | 2908091 | 5Y-H4K8ac_peak_6903 | 21.48346 |                                                                                                             |
| 17 | 3438917 | 3439266 | 5Y-H4K8ac_peak_6904 | 5.40331  |                                                                                                             |
| 17 | 3572164 | 3572378 | 5Y-H4K8ac_peak_6905 | 11.57714 | TAX1BP3_ENSG00000213977;EMC6_ENSG00000127774                                                                |
| 17 | 3598286 | 3599074 | 5Y-H4K8ac_peak_6906 | 10.5157  | P2RX5-TAX1BP3_ENSG00000257950;P2RX5_ENSG00000083454                                                         |
| 17 | 3599288 | 3599720 | 5Y-H4K8ac_peak_6907 | 9.51254  | P2RX5-TAX1BP3_ENSG00000257950;P2RX5_ENSG00000083454                                                         |
| 17 | 3749127 | 3749399 | 5Y-H4K8ac_peak_6908 | 5.24695  | C17orf85_ENSG00000074356                                                                                    |
| 17 | 3782814 | 3783673 | 5Y-H4K8ac_peak_6909 | 7.50148  |                                                                                                             |
| 17 | 3793180 | 3793407 | 5Y-H4K8ac_peak_6910 | 5.98695  |                                                                                                             |
| 17 | 3795985 | 3796189 | 5Y-H4K8ac_peak_6911 | 6.37023  |                                                                                                             |
| 17 | 3796546 | 3797028 | 5Y-H4K8ac_peak_6912 | 9.7353   |                                                                                                             |
| 17 | 3848319 | 3848997 | 5Y-H4K8ac_peak_6913 | 9.36633  |                                                                                                             |
| 17 | 4378125 | 4379164 | 5Y-H4K8ac_peak_6914 | 10.35586 |                                                                                                             |
| 17 | 4437291 | 4438024 | 5Y-H4K8ac_peak_6915 | 9.79526  |                                                                                                             |
| 17 | 4459259 | 4459479 | 5Y-H4K8ac_peak_6916 | 11.1169  | MYBBP1A_ENSG00000132382                                                                                     |
| 17 | 4607054 | 4607323 | 5Y-H4K8ac_peak_6917 | 5.23083  | PELP1_ENSG00000141456;RP11-314A20.2_ENSG00000244184                                                         |
| 17 | 4607632 | 4607910 | 5Y-H4K8ac_peak_6918 | 5.40331  | PELP1_ENSG00000141456;RP11-314A20.2_ENSG00000244184;RP11-314A20.1_ENSG00000213939                           |
| 17 | 4612278 | 4612758 | 5Y-H4K8ac_peak_6919 | 13.27446 |                                                                                                             |
| 17 | 4736777 | 4737092 | 5Y-H4K8ac_peak_6920 | 11.99586 | MINK1_ENSG00000141503                                                                                       |
| 17 | 4812672 | 4813405 | 5Y-H4K8ac_peak_6921 | 14.24171 |                                                                                                             |
| 17 | 4842721 | 4843214 | 5Y-H4K8ac_peak_6922 | 12.43028 | SLC25A11_ENSG00000108528;RNF167_ENSG00000108523                                                             |
| 17 | 4843543 | 4843799 | 5Y-H4K8ac_peak_6923 | 5.98695  | SLC25A11_ENSG00000108528;RNF167_ENSG00000108523                                                             |
| 17 | 4851380 | 4851773 | 5Y-H4K8ac_peak_6924 | 7.03573  | PFN1_ENSG00000108518;ENO3_ENSG00000108515                                                                   |
| 17 | 4852495 | 4853273 | 5Y-H4K8ac_peak_6925 | 16.79568 | PFN1_ENSG00000108518                                                                                        |
| 17 | 4853471 | 4853713 | 5Y-H4K8ac_peak_6926 | 7.60057  |                                                                                                             |
| 17 | 4854658 | 4854916 | 5Y-H4K8ac_peak_6927 | 9.51254  |                                                                                                             |
| 17 | 4870032 | 4870269 | 5Y-H4K8ac_peak_6928 | 8.69112  | SPAG7_ENSG00000091640                                                                                       |
| 17 | 4890441 | 4891330 | 5Y-H4K8ac_peak_6929 | 10.35586 | CAMTA2_ENSG00000108509;RP5-1050D4.4_ENSG00000262678;AC004771.1_ENSG00000203562;RP5-1050D4.5_ENSG00000262227 |
| 17 | 4935286 | 4935599 | 5Y-H4K8ac_peak_6930 | 4.07874  |                                                                                                             |
| 17 | 4980965 | 4981668 | 5Y-H4K8ac_peak_6931 | 7.11863  | RP11-46I8.3_ENSG00000262693;ZFP3_ENSG00000180787                                                            |
| 17 | 5014685 | 5015124 | 5Y-H4K8ac_peak_6932 | 16.01457 | AC012146.7_ENSG00000234327                                                                                  |
| 17 | 5016030 | 5016227 | 5Y-H4K8ac_peak_6933 | 9.11392  |                                                                                                             |
| 17 | 5026009 | 5026296 | 5Y-H4K8ac_peak_6934 | 8.2913   | ZNF232_ENSG00000167840                                                                                      |
| 17 | 5094648 | 5095100 | 5Y-H4K8ac_peak_6935 | 11.19336 | ZNF594_ENSG00000180626;RP11-333E1.1_ENSG00000261879                                                         |
| 17 | 5323485 | 5323704 | 5Y-H4K8ac_peak_6936 | 6.37023  | NUP88_ENSG00000108559;RPAIN_ENSG00000129197                                                                 |
| 17 | 5342959 | 5343229 | 5Y-H4K8ac_peak_6937 | 11.04146 |                                                                                                             |
| 17 | 5372618 | 5372841 | 5Y-H4K8ac_peak_6938 | 6.86362  | DHX33_ENSG00000005100;CTC-524C5.5_ENSG00000262099                                                           |
| 17 | 6357095 | 6357303 | 5Y-H4K8ac_peak_6939 | 10.35586 |                                                                                                             |
| 17 | 6358042 | 6358881 | 5Y-H4K8ac_peak_6940 | 13.81774 |                                                                                                             |
| 17 | 6542945 | 6543623 | 5Y-H4K8ac_peak_6941 | 5.56894  | KIAA0753_ENSG00000198920;TXNDC17_ENSG00000129235                                                            |
| 17 | 6550037 | 6550291 | 5Y-H4K8ac_peak_6942 | 5.40331  |                                                                                                             |
| 17 | 6555095 | 6555594 | 5Y-H4K8ac_peak_6943 | 18.60331 | MED31_ENSG00000108590;C17orf100_ENSG00000212734;AC004706.1_ENSG00000256806                                  |
| 17 | 6915706 | 6916168 | 5Y-H4K8ac_peak_6944 | 16.01457 | AC027763.2_ENSG00000215067;RNASEK_ENSG00000219200;RNASEK-C17orf49_ENSG00000161939                           |

|    |         |         |                     |          |                                                                           |
|----|---------|---------|---------------------|----------|---------------------------------------------------------------------------|
| 17 | 6921703 | 6921923 | 5Y-H4K8ac_peak_6945 | 5.25819  | RP11-589P10.7_ENSG00000267047                                             |
| 17 | 6922723 | 6923387 | 5Y-H4K8ac_peak_6946 | 19.71555 | RP11-589P10.7_ENSG00000267047;MIR497HG_ENSG00000267532                    |
| 17 | 6923588 | 6923804 | 5Y-H4K8ac_peak_6947 | 8.56781  | RP11-589P10.7_ENSG00000267047;MIR497HG_ENSG00000267532                    |
| 17 | 6925209 | 6925460 | 5Y-H4K8ac_peak_6948 | 10.90365 | BCL6B_ENSG00000161940                                                     |
| 17 | 6939386 | 6939639 | 5Y-H4K8ac_peak_6949 | 6.90749  | SLC16A13_ENSG00000174327                                                  |
| 17 | 7081581 | 7081784 | 5Y-H4K8ac_peak_6950 | 6.77436  |                                                                           |
| 17 | 7118720 | 7118931 | 5Y-H4K8ac_peak_6951 | 6.47245  |                                                                           |
| 17 | 7121125 | 7121327 | 5Y-H4K8ac_peak_6952 | 5.98695  | ACADVL_ENSG00000072778                                                    |
| 17 | 7121686 | 7121907 | 5Y-H4K8ac_peak_6953 | 6.79169  |                                                                           |
| 17 | 7154350 | 7155269 | 5Y-H4K8ac_peak_6954 | 18.77281 | CTDNEP1_ENSG00000175826;ELP5_ENSG00000170291                              |
| 17 | 7164160 | 7164888 | 5Y-H4K8ac_peak_6955 | 11.19336 | RP1-4G17.5_ENSG00000262302                                                |
| 17 | 7197494 | 7197979 | 5Y-H4K8ac_peak_6956 | 7.92287  | YBX2_ENSG00000006047                                                      |
| 17 | 7211216 | 7211869 | 5Y-H4K8ac_peak_6957 | 9.56187  | EIF5A_ENSG00000132507                                                     |
| 17 | 7218814 | 7219177 | 5Y-H4K8ac_peak_6958 | 8.73985  | GPS2_ENSG00000132522                                                      |
| 17 | 7233926 | 7234272 | 5Y-H4K8ac_peak_6959 | 6.29918  | AC026954.6_ENSG00000224647                                                |
| 17 | 7254500 | 7254930 | 5Y-H4K8ac_peak_6960 | 4.29586  | KCTD11_ENSG00000213859                                                    |
| 17 | 7255213 | 7255660 | 5Y-H4K8ac_peak_6961 | 7.41197  | KCTD11_ENSG00000213859                                                    |
| 17 | 7287144 | 7287918 | 5Y-H4K8ac_peak_6962 | 7.20869  |                                                                           |
| 17 | 7308641 | 7308935 | 5Y-H4K8ac_peak_6963 | 7.11863  | NLGN2_ENSG00000169992                                                     |
| 17 | 7342917 | 7343219 | 5Y-H4K8ac_peak_6964 | 8.25419  | RP11-104H15.10_ENSG00000272884                                            |
| 17 | 7343598 | 7344269 | 5Y-H4K8ac_peak_6965 | 7.11863  | RP11-104H15.10_ENSG00000272884                                            |
| 17 | 7382543 | 7382789 | 5Y-H4K8ac_peak_6966 | 11.75922 |                                                                           |
| 17 | 7385937 | 7386202 | 5Y-H4K8ac_peak_6967 | 5.24695  |                                                                           |
| 17 | 7386878 | 7387148 | 5Y-H4K8ac_peak_6968 | 6.78318  | ZBTB4_ENSG00000174282;POLR2A_ENSG00000181222                              |
| 17 | 7452428 | 7453087 | 5Y-H4K8ac_peak_6969 | 16.01457 | TNFSF12_ENSG00000239697;TNFSF12-TNFSF13_ENSG00000248871                   |
| 17 | 7460648 | 7461062 | 5Y-H4K8ac_peak_6970 | 5.98695  | TNFSF13_ENSG00000161955                                                   |
| 17 | 7465361 | 7465680 | 5Y-H4K8ac_peak_6971 | 7.34185  | SENTP3_ENSG00000161956;SENTP3-EIF4A1_ENSG00000265500                      |
| 17 | 7476230 | 7476685 | 5Y-H4K8ac_peak_6972 | 13.0168  | EIF4A1_ENSG00000161960;SNORA67_ENSG00000264772                            |
| 17 | 7486099 | 7486831 | 5Y-H4K8ac_peak_6973 | 9.58986  | AC113189.5_ENSG00000233223;MPDU1_ENSG00000129255                          |
| 17 | 7492416 | 7492685 | 5Y-H4K8ac_peak_6974 | 6.38173  | SOX15_ENSG00000129194                                                     |
| 17 | 7590059 | 7590250 | 5Y-H4K8ac_peak_6975 | 6.81557  | TP53_ENSG00000141510;RP11-199F11.2_ENSG00000262251;WRAP53_ENSG00000141499 |
| 17 | 7620186 | 7620424 | 5Y-H4K8ac_peak_6976 | 11.48691 | DNAH2_ENSG00000183914                                                     |
| 17 | 7620788 | 7620992 | 5Y-H4K8ac_peak_6977 | 9.23159  | DNAH2_ENSG00000183914                                                     |
| 17 | 7739203 | 7739531 | 5Y-H4K8ac_peak_6978 | 5.98695  |                                                                           |
| 17 | 7745167 | 7745396 | 5Y-H4K8ac_peak_6979 | 6.03632  |                                                                           |
| 17 | 7788327 | 7789223 | 5Y-H4K8ac_peak_6980 | 13.4304  | LSMD1_ENSG00000183011;CHD3_ENSG00000170004                                |
| 17 | 7791283 | 7791620 | 5Y-H4K8ac_peak_6981 | 5.12488  |                                                                           |
| 17 | 7791830 | 7792126 | 5Y-H4K8ac_peak_6982 | 8.69112  |                                                                           |
| 17 | 7819465 | 7819857 | 5Y-H4K8ac_peak_6983 | 8.69112  | AC025335.1_ENSG00000179859                                                |
| 17 | 8065812 | 8066196 | 5Y-H4K8ac_peak_6984 | 11.69482 | RP11-599B13.6_ENSG00000263620;VAMP2_ENSG00000220205                       |
| 17 | 8066630 | 8067845 | 5Y-H4K8ac_peak_6985 | 14.31711 | RP11-599B13.6_ENSG00000263620;VAMP2_ENSG00000220205                       |
| 17 | 8079944 | 8080422 | 5Y-H4K8ac_peak_6986 | 9.51254  | TMEM107_ENSG00000179029;RP11-599B13.7_ENSG00000266824                     |
| 17 | 8122732 | 8123002 | 5Y-H4K8ac_peak_6987 | 7.72345  |                                                                           |
| 17 | 8126910 | 8127122 | 5Y-H4K8ac_peak_6988 | 10.31981 | LINC00324_ENSG00000178977                                                 |
| 17 | 8191361 | 8191552 | 5Y-H4K8ac_peak_6989 | 4.95697  | RANGRF_ENSG00000108961                                                    |
| 17 | 8192110 | 8192370 | 5Y-H4K8ac_peak_6990 | 9.7353   | RANGRF_ENSG00000108961                                                    |

|    |          |          |                     |          |                                                                                |
|----|----------|----------|---------------------|----------|--------------------------------------------------------------------------------|
| 17 | 8230304  | 8230513  | 5Y-H4K8ac_peak_6991 | 4.95697  |                                                                                |
| 17 | 8287014  | 8287261  | 5Y-H4K8ac_peak_6992 | 9.23159  | RP11-849F2.7_ENSG00000263809;RPL26_ENSG00000161970                             |
| 17 | 8339291  | 8339599  | 5Y-H4K8ac_peak_6993 | 7.38046  |                                                                                |
| 17 | 8534438  | 8534959  | 5Y-H4K8ac_peak_6994 | 9.38203  | MYH10_ENSG00000133026                                                          |
| 17 | 8584302  | 8584551  | 5Y-H4K8ac_peak_6995 | 9.38203  |                                                                                |
| 17 | 8585167  | 8585383  | 5Y-H4K8ac_peak_6996 | 9.30505  |                                                                                |
| 17 | 8600268  | 8600512  | 5Y-H4K8ac_peak_6997 | 5.16353  |                                                                                |
| 17 | 9143593  | 9143851  | 5Y-H4K8ac_peak_6998 | 4.77126  |                                                                                |
| 17 | 10600399 | 10600794 | 5Y-H4K8ac_peak_6999 | 8.43511  | SCO1_ENSG00000133028;ADPRM_ENSG00000170222                                     |
| 17 | 10632706 | 10633357 | 5Y-H4K8ac_peak_7000 | 6.43775  | TMEM220_ENSG00000187824;CTC-297N7.5_ENSG00000263400                            |
| 17 | 11900235 | 11900682 | 5Y-H4K8ac_peak_7001 | 7.20869  | ZNF18_ENSG00000154957                                                          |
| 17 | 11901216 | 11901669 | 5Y-H4K8ac_peak_7002 | 4.50834  | ZNF18_ENSG00000154957                                                          |
| 17 | 11924333 | 11924709 | 5Y-H4K8ac_peak_7003 | 11.57334 | RPL21P122_ENSG00000241185;MAP2K4_ENSG00000065559                               |
| 17 | 12692861 | 12693061 | 5Y-H4K8ac_peak_7004 | 5.23083  | RP11-1090M7.1_ENSG00000265489;ARHGAP44_ENSG00000006740                         |
| 17 | 13973016 | 13973233 | 5Y-H4K8ac_peak_7005 | 8.20773  | COX10-AS1_ENSG00000236088;COX10_ENSG00000006695                                |
| 17 | 15302546 | 15303220 | 5Y-H4K8ac_peak_7006 | 11.57334 |                                                                                |
| 17 | 15587108 | 15587550 | 5Y-H4K8ac_peak_7007 | 9.23159  | TRIM16_ENSG00000221926                                                         |
| 17 | 15603128 | 15603409 | 5Y-H4K8ac_peak_7008 | 12.71156 | ZNF286A_ENSG00000187607;ZNF286A_ENSG00000255104                                |
| 17 | 15689221 | 15689945 | 5Y-H4K8ac_peak_7009 | 8.69112  | MEIS3P1_ENSG00000179277                                                        |
| 17 | 15847680 | 15848004 | 5Y-H4K8ac_peak_7010 | 9.30206  | ADORA2B_ENSG00000170425                                                        |
| 17 | 15848840 | 15849268 | 5Y-H4K8ac_peak_7011 | 6.1654   | ADORA2B_ENSG00000170425                                                        |
| 17 | 15902714 | 15902962 | 5Y-H4K8ac_peak_7012 | 7.31815  | ZSWIM7_ENSG00000214941;TTC19_ENSG00000011295                                   |
| 17 | 16118565 | 16118774 | 5Y-H4K8ac_peak_7013 | 11.62198 |                                                                                |
| 17 | 16119759 | 16120006 | 5Y-H4K8ac_peak_7014 | 5.99504  |                                                                                |
| 17 | 16256164 | 16256623 | 5Y-H4K8ac_peak_7015 | 11.09973 | CENPV_ENSG00000166582                                                          |
| 17 | 16256987 | 16257223 | 5Y-H4K8ac_peak_7016 | 6.39626  | CENPV_ENSG00000166582                                                          |
| 17 | 16283408 | 16283906 | 5Y-H4K8ac_peak_7017 | 4.95697  | UBB_ENSG00000170315                                                            |
| 17 | 16311398 | 16311591 | 5Y-H4K8ac_peak_7018 | 6.79955  |                                                                                |
| 17 | 16365355 | 16365569 | 5Y-H4K8ac_peak_7019 | 5.94703  |                                                                                |
| 17 | 16395604 | 16395819 | 5Y-H4K8ac_peak_7020 | 8.08337  | FAM211A_ENSG00000181350                                                        |
| 17 | 16556763 | 16557017 | 5Y-H4K8ac_peak_7021 | 7.50148  | ZNF624_ENSG00000197566;RP11-92B11.4_ENSG00000264765                            |
| 17 | 16928003 | 16928313 | 5Y-H4K8ac_peak_7022 | 15.75437 |                                                                                |
| 17 | 16932763 | 16933052 | 5Y-H4K8ac_peak_7023 | 4.642    |                                                                                |
| 17 | 16933385 | 16933750 | 5Y-H4K8ac_peak_7024 | 9.96543  |                                                                                |
| 17 | 16934489 | 16934871 | 5Y-H4K8ac_peak_7025 | 9.04239  |                                                                                |
| 17 | 16935643 | 16936041 | 5Y-H4K8ac_peak_7026 | 6.34245  |                                                                                |
| 17 | 17109102 | 17109411 | 5Y-H4K8ac_peak_7027 | 9.30505  | PLD6_ENSG00000179598                                                           |
| 17 | 17140215 | 17140760 | 5Y-H4K8ac_peak_7028 | 18.77281 | RP11-45M22.4_ENSG00000264187;FLCN_ENSG00000154803;RP11-45M22.5_ENSG00000266498 |
| 17 | 17206303 | 17206891 | 5Y-H4K8ac_peak_7029 | 11.72217 | NT5M_ENSG00000205309                                                           |
| 17 | 17207128 | 17207335 | 5Y-H4K8ac_peak_7030 | 10.508   | NT5M_ENSG00000205309                                                           |
| 17 | 17254527 | 17255140 | 5Y-H4K8ac_peak_7031 | 8.18236  |                                                                                |
| 17 | 17255384 | 17256155 | 5Y-H4K8ac_peak_7032 | 10.03452 |                                                                                |
| 17 | 17256540 | 17256910 | 5Y-H4K8ac_peak_7033 | 9.30505  |                                                                                |
| 17 | 17288291 | 17288556 | 5Y-H4K8ac_peak_7034 | 7.87406  | RPL13P12_ENSG00000215030                                                       |
| 17 | 17306241 | 17306450 | 5Y-H4K8ac_peak_7035 | 4.69231  |                                                                                |
| 17 | 17306761 | 17306970 | 5Y-H4K8ac_peak_7036 | 6.77436  |                                                                                |

|    |          |          |                     |          |                                             |
|----|----------|----------|---------------------|----------|---------------------------------------------|
| 17 | 17307179 | 17307913 | 5Y-H4K8ac_peak_7037 | 4.00285  |                                             |
| 17 | 17317588 | 17317805 | 5Y-H4K8ac_peak_7038 | 4.50834  |                                             |
| 17 | 17379786 | 17380106 | 5Y-H4K8ac_peak_7039 | 10.99773 | MED9_ENSG00000141026                        |
| 17 | 17380337 | 17380741 | 5Y-H4K8ac_peak_7040 | 5.98695  | MED9_ENSG00000141026                        |
| 17 | 17399836 | 17400165 | 5Y-H4K8ac_peak_7041 | 7.11863  | RASD1_ENSG00000108551                       |
| 17 | 17400391 | 17400673 | 5Y-H4K8ac_peak_7042 | 4.642    | RASD1_ENSG00000108551                       |
| 17 | 17418604 | 17419046 | 5Y-H4K8ac_peak_7043 | 5.96059  |                                             |
| 17 | 17444542 | 17444742 | 5Y-H4K8ac_peak_7044 | 9.01738  |                                             |
| 17 | 17450202 | 17450647 | 5Y-H4K8ac_peak_7045 | 10.94041 |                                             |
| 17 | 17451384 | 17451637 | 5Y-H4K8ac_peak_7046 | 9.89244  |                                             |
| 17 | 17566152 | 17566576 | 5Y-H4K8ac_peak_7047 | 5.23083  |                                             |
| 17 | 17572533 | 17572885 | 5Y-H4K8ac_peak_7048 | 7.53429  |                                             |
| 17 | 17584727 | 17585215 | 5Y-H4K8ac_peak_7049 | 13.45646 | RAI1_ENSG00000108557                        |
| 17 | 17585428 | 17586154 | 5Y-H4K8ac_peak_7050 | 7.64648  | RAI1_ENSG00000108557                        |
| 17 | 17586641 | 17586846 | 5Y-H4K8ac_peak_7051 | 7.38046  |                                             |
| 17 | 17588942 | 17589322 | 5Y-H4K8ac_peak_7052 | 7.63144  |                                             |
| 17 | 17596461 | 17597183 | 5Y-H4K8ac_peak_7053 | 10.68758 |                                             |
| 17 | 17643047 | 17643801 | 5Y-H4K8ac_peak_7054 | 13.96066 |                                             |
| 17 | 17649454 | 17649871 | 5Y-H4K8ac_peak_7055 | 5.83799  |                                             |
| 17 | 17652078 | 17652357 | 5Y-H4K8ac_peak_7056 | 7.30348  |                                             |
| 17 | 17655994 | 17656251 | 5Y-H4K8ac_peak_7057 | 4.50834  |                                             |
| 17 | 17688131 | 17688405 | 5Y-H4K8ac_peak_7058 | 7.39248  |                                             |
| 17 | 17688870 | 17689068 | 5Y-H4K8ac_peak_7059 | 4.19948  |                                             |
| 17 | 17693054 | 17693421 | 5Y-H4K8ac_peak_7060 | 8.65166  |                                             |
| 17 | 17694179 | 17695310 | 5Y-H4K8ac_peak_7061 | 7.64648  |                                             |
| 17 | 17722729 | 17722978 | 5Y-H4K8ac_peak_7062 | 7.15925  |                                             |
| 17 | 17727666 | 17728105 | 5Y-H4K8ac_peak_7063 | 5.44849  |                                             |
| 17 | 17735344 | 17736158 | 5Y-H4K8ac_peak_7064 | 7.30348  |                                             |
| 17 | 17738913 | 17739392 | 5Y-H4K8ac_peak_7065 | 4.29586  | SREBF1_ENSG00000072310                      |
| 17 | 17739754 | 17741143 | 5Y-H4K8ac_peak_7066 | 9.77183  | SREBF1_ENSG00000072310                      |
| 17 | 17742893 | 17744304 | 5Y-H4K8ac_peak_7067 | 9.00954  |                                             |
| 17 | 17750486 | 17750817 | 5Y-H4K8ac_peak_7068 | 6.08523  |                                             |
| 17 | 17764116 | 17764331 | 5Y-H4K8ac_peak_7069 | 3.95366  |                                             |
| 17 | 17780662 | 17780852 | 5Y-H4K8ac_peak_7070 | 6.43775  |                                             |
| 17 | 17815510 | 17815792 | 5Y-H4K8ac_peak_7071 | 8.75926  |                                             |
| 17 | 17817404 | 17817735 | 5Y-H4K8ac_peak_7072 | 4.24332  |                                             |
| 17 | 17929296 | 17929524 | 5Y-H4K8ac_peak_7073 | 6.46053  |                                             |
| 17 | 17991332 | 17991584 | 5Y-H4K8ac_peak_7074 | 11.1169  | DRG2_ENSG00000108591                        |
| 17 | 18007991 | 18008204 | 5Y-H4K8ac_peak_7075 | 5.37237  |                                             |
| 17 | 18056612 | 18057005 | 5Y-H4K8ac_peak_7076 | 5.65765  |                                             |
| 17 | 18085946 | 18086554 | 5Y-H4K8ac_peak_7077 | 10.10203 | ALKBH5_ENSG00000091542                      |
| 17 | 18127974 | 18128173 | 5Y-H4K8ac_peak_7078 | 8.16382  |                                             |
| 17 | 18217915 | 18218229 | 5Y-H4K8ac_peak_7079 | 5.03564  | TOP3A_ENSG00000177302;SMCR8_ENSG00000176994 |
| 17 | 18218646 | 18219211 | 5Y-H4K8ac_peak_7080 | 8.43511  | TOP3A_ENSG00000177302;SMCR8_ENSG00000176994 |
| 17 | 18266518 | 18266751 | 5Y-H4K8ac_peak_7081 | 7.11863  | SHMT1_ENSG00000176974                       |
| 17 | 18281219 | 18281414 | 5Y-H4K8ac_peak_7082 | 4.5753   | EVPLL_ENSG00000214860                       |

|    |          |          |                     |          |                                                                            |
|----|----------|----------|---------------------|----------|----------------------------------------------------------------------------|
| 17 | 18601384 | 18601719 | 5Y-H4K8ac_peak_7083 | 7.58806  | TRIM16L_ENSG00000108448                                                    |
| 17 | 18761501 | 18761746 | 5Y-H4K8ac_peak_7084 | 12.82003 |                                                                            |
| 17 | 18864433 | 18864975 | 5Y-H4K8ac_peak_7085 | 11.66706 |                                                                            |
| 17 | 18907809 | 18908238 | 5Y-H4K8ac_peak_7086 | 5.41472  | FAM83G_ENSG00000188522                                                     |
| 17 | 19140761 | 19141010 | 5Y-H4K8ac_peak_7087 | 8.08688  |                                                                            |
| 17 | 19268001 | 19268712 | 5Y-H4K8ac_peak_7088 | 5.64909  |                                                                            |
| 17 | 19281085 | 19281434 | 5Y-H4K8ac_peak_7089 | 4.77126  | B9D1_ENSG00000108641;MAPK7_ENSG00000166484                                 |
| 17 | 19289099 | 19289331 | 5Y-H4K8ac_peak_7090 | 6.10343  |                                                                            |
| 17 | 19290862 | 19291132 | 5Y-H4K8ac_peak_7091 | 14.55234 | MFAP4_ENSG00000166482                                                      |
| 17 | 19291590 | 19292139 | 5Y-H4K8ac_peak_7092 | 15.67761 |                                                                            |
| 17 | 19305903 | 19306143 | 5Y-H4K8ac_peak_7093 | 7.59832  |                                                                            |
| 17 | 19314226 | 19314710 | 5Y-H4K8ac_peak_7094 | 5.64909  | RNF112_ENSG00000128482                                                     |
| 17 | 19410369 | 19410713 | 5Y-H4K8ac_peak_7095 | 4.69231  |                                                                            |
| 17 | 19483148 | 19484048 | 5Y-H4K8ac_peak_7096 | 10.31981 | AC025627.7_ENSG00000228983                                                 |
| 17 | 19551193 | 19551875 | 5Y-H4K8ac_peak_7097 | 12.05638 | ALDH3A2_ENSG00000072210                                                    |
| 17 | 19647766 | 19648174 | 5Y-H4K8ac_peak_7098 | 16.01457 |                                                                            |
| 17 | 19648456 | 19648676 | 5Y-H4K8ac_peak_7099 | 5.12488  |                                                                            |
| 17 | 19770534 | 19771771 | 5Y-H4K8ac_peak_7100 | 18.21442 | ULK2_ENSG00000083290                                                       |
| 17 | 19881284 | 19881885 | 5Y-H4K8ac_peak_7101 | 13.12848 | AKAP10_ENSG00000108599                                                     |
| 17 | 19911989 | 19912459 | 5Y-H4K8ac_peak_7102 | 14.31711 | RP11-209D14.2_ENSG00000261033;SPEC11_ENSG00000128487                       |
| 17 | 20224009 | 20224404 | 5Y-H4K8ac_peak_7103 | 7.89142  | CCDC144CP_ENSG00000154898                                                  |
| 17 | 20771051 | 20771429 | 5Y-H4K8ac_peak_7104 | 11.19336 | RP11-344E13.3_ENSG00000233098                                              |
| 17 | 20810992 | 20811380 | 5Y-H4K8ac_peak_7105 | 9.51254  |                                                                            |
| 17 | 20945857 | 20946292 | 5Y-H4K8ac_peak_7106 | 20.25522 | USP22_ENSG00000124422                                                      |
| 17 | 21030336 | 21030556 | 5Y-H4K8ac_peak_7107 | 7.90751  |                                                                            |
| 17 | 21178929 | 21179133 | 5Y-H4K8ac_peak_7108 | 7.59101  |                                                                            |
| 17 | 21190743 | 21190936 | 5Y-H4K8ac_peak_7109 | 4.82467  |                                                                            |
| 17 | 21357383 | 21357575 | 5Y-H4K8ac_peak_7110 | 7.38046  |                                                                            |
| 17 | 21825338 | 21825534 | 5Y-H4K8ac_peak_7111 | 8.2913   | FAM27L_ENSG00000178130;RP11-1109M24.14_ENSG00000264811                     |
| 17 | 25680390 | 25680798 | 5Y-H4K8ac_peak_7112 | 6.78318  | RP11-173M1.5_ENSG00000265683                                               |
| 17 | 25681098 | 25681410 | 5Y-H4K8ac_peak_7113 | 10.36926 |                                                                            |
| 17 | 25708306 | 25708602 | 5Y-H4K8ac_peak_7114 | 4.47071  |                                                                            |
| 17 | 25782798 | 25783349 | 5Y-H4K8ac_peak_7115 | 10.95042 | KSR1_ENSG00000141068                                                       |
| 17 | 25981321 | 25981734 | 5Y-H4K8ac_peak_7116 | 6.43775  |                                                                            |
| 17 | 26120412 | 26120650 | 5Y-H4K8ac_peak_7117 | 9.30505  |                                                                            |
| 17 | 26132375 | 26133316 | 5Y-H4K8ac_peak_7118 | 8.97752  |                                                                            |
| 17 | 26662871 | 26663140 | 5Y-H4K8ac_peak_7119 | 4.77126  | IIFT20_ENSG00000109083;TNFAIP1_ENSG00000109079                             |
| 17 | 26683938 | 26684463 | 5Y-H4K8ac_peak_7120 | 6.34245  | POLDIP2_ENSG00000004142;TMEM199_ENSG00000244045;CTB-96E2.3_ENSG00000258924 |
| 17 | 26698874 | 26699292 | 5Y-H4K8ac_peak_7121 | 6.77436  | VTN_ENSG00000109072                                                        |
| 17 | 26732025 | 26733504 | 5Y-H4K8ac_peak_7122 | 13.2534  | SLC46A1_ENSG00000076351;CTD-2350C19.2_ENSG00000265254                      |
| 17 | 26853511 | 26853839 | 5Y-H4K8ac_peak_7123 | 4.84727  |                                                                            |
| 17 | 26973658 | 26973931 | 5Y-H4K8ac_peak_7124 | 4.8509   |                                                                            |
| 17 | 26988700 | 26989153 | 5Y-H4K8ac_peak_7125 | 7.89273  | SDF2_ENSG00000132581;SUPT6H_ENSG00000109111                                |
| 17 | 27038561 | 27038983 | 5Y-H4K8ac_peak_7126 | 7.87406  | PROCA1_ENSG00000167525                                                     |
| 17 | 27047073 | 27047425 | 5Y-H4K8ac_peak_7127 | 6.08523  | RPL23A_ENSG00000198242;SNORD42B_ENSG00000238423                            |
| 17 | 27052645 | 27053008 | 5Y-H4K8ac_peak_7128 | 7.96285  | NEK8_ENSG00000160602                                                       |

|    |          |          |                     |          |                                                                          |
|----|----------|----------|---------------------|----------|--------------------------------------------------------------------------|
| 17 | 27055592 | 27055909 | 5Y-H4K8ac_peak_7129 | 4.95697  | TLCD1_ENSG00000160606                                                    |
| 17 | 27140948 | 27141157 | 5Y-H4K8ac_peak_7130 | 7.31807  |                                                                          |
| 17 | 27170086 | 27170342 | 5Y-H4K8ac_peak_7131 | 5.99504  |                                                                          |
| 17 | 27181112 | 27181630 | 5Y-H4K8ac_peak_7132 | 9.23159  | FAM222B_ENSG00000173065;ERAL1_ENSG00000132591                            |
| 17 | 27224198 | 27224966 | 5Y-H4K8ac_peak_7133 | 10.12457 | FLOT2_ENSG00000132589;RP11-20B24.4_ENSG00000266642                       |
| 17 | 27229348 | 27229596 | 5Y-H4K8ac_peak_7134 | 5.64909  | DHRS13_ENSG00000167536                                                   |
| 17 | 27370020 | 27370251 | 5Y-H4K8ac_peak_7135 | 7.20869  |                                                                          |
| 17 | 27375889 | 27376250 | 5Y-H4K8ac_peak_7136 | 11.94897 |                                                                          |
| 17 | 27378318 | 27378703 | 5Y-H4K8ac_peak_7137 | 4.74441  |                                                                          |
| 17 | 27381801 | 27382177 | 5Y-H4K8ac_peak_7138 | 9.7353   |                                                                          |
| 17 | 27387742 | 27388120 | 5Y-H4K8ac_peak_7139 | 11.09973 |                                                                          |
| 17 | 27412294 | 27412548 | 5Y-H4K8ac_peak_7140 | 6.52331  |                                                                          |
| 17 | 27429594 | 27430348 | 5Y-H4K8ac_peak_7141 | 6.37023  |                                                                          |
| 17 | 27476083 | 27476678 | 5Y-H4K8ac_peak_7142 | 5.29015  |                                                                          |
| 17 | 27506744 | 27507016 | 5Y-H4K8ac_peak_7143 | 4.50834  | MYO18A_ENSG00000196535                                                   |
| 17 | 27507621 | 27507836 | 5Y-H4K8ac_peak_7144 | 6.75784  | MYO18A_ENSG00000196535                                                   |
| 17 | 27568264 | 27568482 | 5Y-H4K8ac_peak_7145 | 8.88899  |                                                                          |
| 17 | 27717400 | 27717718 | 5Y-H4K8ac_peak_7146 | 9.23159  | MIR4523_ENSG00000264808;TAOK1_ENSG00000160551;MIR4523_ENSG00000263719    |
| 17 | 27918181 | 27918393 | 5Y-H4K8ac_peak_7147 | 4.642    | RP11-68I3.7_ENSG00000264647                                              |
| 17 | 27919636 | 27919957 | 5Y-H4K8ac_peak_7148 | 4.29586  | RP11-68I3.7_ENSG00000264647                                              |
| 17 | 28053155 | 28053387 | 5Y-H4K8ac_peak_7149 | 9.38203  |                                                                          |
| 17 | 28256587 | 28256945 | 5Y-H4K8ac_peak_7150 | 7.04637  | SSH2_ENSG00000141298;EFCAB5_ENSG00000176927                              |
| 17 | 28432121 | 28432520 | 5Y-H4K8ac_peak_7151 | 6.50117  |                                                                          |
| 17 | 28619140 | 28619406 | 5Y-H4K8ac_peak_7152 | 9.05168  | BLMH_ENSG00000108578                                                     |
| 17 | 28927908 | 28928193 | 5Y-H4K8ac_peak_7153 | 5.28616  | SMURF2P1_ENSG00000248121                                                 |
| 17 | 28973701 | 28973910 | 5Y-H4K8ac_peak_7154 | 4.51076  |                                                                          |
| 17 | 28994178 | 28994476 | 5Y-H4K8ac_peak_7155 | 6.78128  |                                                                          |
| 17 | 28994810 | 28995134 | 5Y-H4K8ac_peak_7156 | 16.50659 |                                                                          |
| 17 | 29036819 | 29037204 | 5Y-H4K8ac_peak_7157 | 7.65114  | SUZ12P_ENSG00000264538                                                   |
| 17 | 29057839 | 29058059 | 5Y-H4K8ac_peak_7158 | 5.98695  |                                                                          |
| 17 | 29151222 | 29151653 | 5Y-H4K8ac_peak_7159 | 9.23159  | CRLF3_ENSG00000176390                                                    |
| 17 | 29151948 | 29152245 | 5Y-H4K8ac_peak_7160 | 8.75926  | CRLF3_ENSG00000176390                                                    |
| 17 | 29157846 | 29158130 | 5Y-H4K8ac_peak_7161 | 8.08688  | CTD-2349P21.1_ENSG00000242439;ATAD5_ENSG00000176208                      |
| 17 | 29422250 | 29422440 | 5Y-H4K8ac_peak_7162 | 9.78792  | RP11-848P1.5_ENSG00000264107;MIR4733_ENSG00000265444;NF1_ENSG00000196712 |
| 17 | 29718016 | 29718507 | 5Y-H4K8ac_peak_7163 | 8.69112  | RAB11FIP4_ENSG00000131242                                                |
| 17 | 29733287 | 29733478 | 5Y-H4K8ac_peak_7164 | 9.84749  |                                                                          |
| 17 | 29752613 | 29753230 | 5Y-H4K8ac_peak_7165 | 10.19948 |                                                                          |
| 17 | 29754890 | 29755189 | 5Y-H4K8ac_peak_7166 | 4.50834  |                                                                          |
| 17 | 29876336 | 29876937 | 5Y-H4K8ac_peak_7167 | 10.19948 |                                                                          |
| 17 | 29877270 | 29877720 | 5Y-H4K8ac_peak_7168 | 7.59101  |                                                                          |
| 17 | 29886310 | 29886587 | 5Y-H4K8ac_peak_7169 | 15.34073 | MIR193A_ENSG00000207614                                                  |
| 17 | 29908323 | 29908651 | 5Y-H4K8ac_peak_7170 | 8.5159   |                                                                          |
| 17 | 30263384 | 30263588 | 5Y-H4K8ac_peak_7171 | 4.95697  | SUZ12_ENSG00000178691                                                    |
| 17 | 30264106 | 30264437 | 5Y-H4K8ac_peak_7172 | 9.63153  | SUZ12_ENSG00000178691                                                    |
| 17 | 30406783 | 30407379 | 5Y-H4K8ac_peak_7173 | 5.23083  |                                                                          |
| 17 | 30410689 | 30411135 | 5Y-H4K8ac_peak_7174 | 9.30505  | RP11-640N20.6_ENSG00000264164                                            |



|    |          |          |                     |          |                                                                            |
|----|----------|----------|---------------------|----------|----------------------------------------------------------------------------|
| 17 | 30454477 | 30454676 | 5Y-H4K8ac_peak_7175 | 4.5753   |                                                                            |
| 17 | 30469558 | 30469904 | 5Y-H4K8ac_peak_7176 | 8.2913   | AC090616.2_ENSG00000214708;RHOT1_ENSG00000126858                           |
| 17 | 30592278 | 30592534 | 5Y-H4K8ac_peak_7177 | 4.95697  | RHBDL3_ENSG00000141314                                                     |
| 17 | 30607553 | 30608668 | 5Y-H4K8ac_peak_7178 | 14.66739 | RP11-443G13.2_ENSG00000263674                                              |
| 17 | 30650843 | 30651053 | 5Y-H4K8ac_peak_7179 | 7.58806  | RP11-227G15.3_ENSG00000265794                                              |
| 17 | 30668365 | 30669128 | 5Y-H4K8ac_peak_7180 | 7.89273  |                                                                            |
| 17 | 30770975 | 30771189 | 5Y-H4K8ac_peak_7181 | 6.50117  | PSMD11_ENSG00000108671                                                     |
| 17 | 30810729 | 30810993 | 5Y-H4K8ac_peak_7182 | 8.1667   |                                                                            |
| 17 | 30813046 | 30814297 | 5Y-H4K8ac_peak_7183 | 14.99673 | CDK5R1_ENSG00000176749                                                     |
| 17 | 30821977 | 30822480 | 5Y-H4K8ac_peak_7184 | 9.89244  | RP11-466A19.1_ENSG00000266718                                              |
| 17 | 30846066 | 30846476 | 5Y-H4K8ac_peak_7185 | 7.20869  | RP11-466A19.6_ENSG00000263717;RP11-466A19.3_ENSG00000266599                |
| 17 | 31254861 | 31255135 | 5Y-H4K8ac_peak_7186 | 12.26606 | TMEM98_ENSG0000006042                                                      |
| 17 | 32940621 | 32941058 | 5Y-H4K8ac_peak_7187 | 10.65037 |                                                                            |
| 17 | 32943119 | 32944048 | 5Y-H4K8ac_peak_7188 | 14.31711 |                                                                            |
| 17 | 32992968 | 32993332 | 5Y-H4K8ac_peak_7189 | 5.64909  |                                                                            |
| 17 | 33288092 | 33288449 | 5Y-H4K8ac_peak_7190 | 7.89273  | ZNF830_ENSG00000198783                                                     |
| 17 | 33307633 | 33308201 | 5Y-H4K8ac_peak_7191 | 7.90236  | LIG3_ENSG00000005156;CCT6B_ENSG00000132141                                 |
| 17 | 33415957 | 33416173 | 5Y-H4K8ac_peak_7192 | 7.18391  | RFFL_ENSG00000092871                                                       |
| 17 | 33446326 | 33447401 | 5Y-H4K8ac_peak_7193 | 15.06486 |                                                                            |
| 17 | 33914391 | 33914847 | 5Y-H4K8ac_peak_7194 | 7.38046  |                                                                            |
| 17 | 34077064 | 34077267 | 5Y-H4K8ac_peak_7195 | 7.89273  |                                                                            |
| 17 | 34092652 | 34092940 | 5Y-H4K8ac_peak_7196 | 8.79957  |                                                                            |
| 17 | 34111956 | 34112151 | 5Y-H4K8ac_peak_7197 | 5.25503  |                                                                            |
| 17 | 34114524 | 34114757 | 5Y-H4K8ac_peak_7198 | 5.87382  |                                                                            |
| 17 | 34122165 | 34122545 | 5Y-H4K8ac_peak_7199 | 9.34555  | MMP28_ENSG00000129270                                                      |
| 17 | 34838593 | 34838884 | 5Y-H4K8ac_peak_7200 | 9.30505  |                                                                            |
| 17 | 34839097 | 34839377 | 5Y-H4K8ac_peak_7201 | 8.9562   |                                                                            |
| 17 | 34890172 | 34890646 | 5Y-H4K8ac_peak_7202 | 7.59101  | PIGW_ENSG00000184886                                                       |
| 17 | 34891078 | 34891275 | 5Y-H4K8ac_peak_7203 | 8.43011  | PIGW_ENSG00000184886                                                       |
| 17 | 34900246 | 34900659 | 5Y-H4K8ac_peak_7204 | 12.26819 | MYO19_ENSG00000141140;GGNBP2_ENSG00000005955                               |
| 17 | 34900911 | 34901162 | 5Y-H4K8ac_peak_7205 | 8.43511  | GGNBP2_ENSG00000005955                                                     |
| 17 | 34997874 | 34998784 | 5Y-H4K8ac_peak_7206 | 10.48476 |                                                                            |
| 17 | 35036274 | 35036639 | 5Y-H4K8ac_peak_7207 | 9.32595  |                                                                            |
| 17 | 35036846 | 35037158 | 5Y-H4K8ac_peak_7208 | 7.50148  |                                                                            |
| 17 | 35083255 | 35084377 | 5Y-H4K8ac_peak_7209 | 11.32039 |                                                                            |
| 17 | 35085155 | 35085479 | 5Y-H4K8ac_peak_7210 | 12.19856 |                                                                            |
| 17 | 35086288 | 35087004 | 5Y-H4K8ac_peak_7211 | 6.47245  |                                                                            |
| 17 | 35087392 | 35087893 | 5Y-H4K8ac_peak_7212 | 11.24252 |                                                                            |
| 17 | 35098705 | 35098991 | 5Y-H4K8ac_peak_7213 | 6.50117  |                                                                            |
| 17 | 35154731 | 35154921 | 5Y-H4K8ac_peak_7214 | 4.84727  |                                                                            |
| 17 | 35165270 | 35166186 | 5Y-H4K8ac_peak_7215 | 14.89891 |                                                                            |
| 17 | 35242007 | 35242293 | 5Y-H4K8ac_peak_7216 | 5.00877  |                                                                            |
| 17 | 35716535 | 35716764 | 5Y-H4K8ac_peak_7217 | 4.50834  |                                                                            |
| 17 | 35766491 | 35766894 | 5Y-H4K8ac_peak_7218 | 13.2534  | ACACA_ENSG00000132142;TADA2A_ENSG00000108264                               |
| 17 | 35767323 | 35768135 | 5Y-H4K8ac_peak_7219 | 9.43096  | RP11-378E13.4_ENSG00000267613;ACACA_ENSG00000132142;TADA2A_ENSG00000108264 |
| 17 | 35849238 | 35849686 | 5Y-H4K8ac_peak_7220 | 7.89142  | DUSP14_ENSG00000161326                                                     |

|    |          |          |                     |          |                                                      |
|----|----------|----------|---------------------|----------|------------------------------------------------------|
| 17 | 35969140 | 35969361 | 5Y-H4K8ac_peak_7221 | 9.79526  | SYNRG_ENSG00000006114;RP11-697E22.1_ENSG00000267542  |
| 17 | 36003087 | 36003441 | 5Y-H4K8ac_peak_7222 | 7.11863  | DDX52_ENSG00000141141;RP11-697E22.2_ENSG00000267668  |
| 17 | 36413512 | 36413727 | 5Y-H4K8ac_peak_7223 | 10.46287 |                                                      |
| 17 | 36433090 | 36433327 | 5Y-H4K8ac_peak_7224 | 5.97089  |                                                      |
| 17 | 36452320 | 36452686 | 5Y-H4K8ac_peak_7225 | 8.35139  | MRPL45_ENSG00000174100                               |
| 17 | 36570900 | 36572331 | 5Y-H4K8ac_peak_7226 | 25.87888 |                                                      |
| 17 | 36572590 | 36572833 | 5Y-H4K8ac_peak_7227 | 6.87095  |                                                      |
| 17 | 36666039 | 36666667 | 5Y-H4K8ac_peak_7228 | 19.79054 |                                                      |
| 17 | 36735044 | 36735254 | 5Y-H4K8ac_peak_7229 | 8.47164  |                                                      |
| 17 | 36850275 | 36850669 | 5Y-H4K8ac_peak_7230 | 8.79957  |                                                      |
| 17 | 36858875 | 36859133 | 5Y-H4K8ac_peak_7231 | 6.39716  | MIR4734_ENSG00000265930;CTB-58E17.1_ENSG00000261005  |
| 17 | 36860320 | 36860598 | 5Y-H4K8ac_peak_7232 | 12.05638 |                                                      |
| 17 | 36861001 | 36861306 | 5Y-H4K8ac_peak_7233 | 6.78128  | MLLT6_ENSG00000108292                                |
| 17 | 36881772 | 36882178 | 5Y-H4K8ac_peak_7234 | 14.2053  |                                                      |
| 17 | 36886674 | 36886912 | 5Y-H4K8ac_peak_7235 | 8.69112  | CISD3_ENSG00000230055                                |
| 17 | 36903964 | 36904320 | 5Y-H4K8ac_peak_7236 | 8.08595  |                                                      |
| 17 | 36955984 | 36956191 | 5Y-H4K8ac_peak_7237 | 10.07308 | PIP4K2B_ENSG00000141720                              |
| 17 | 37009699 | 37009930 | 5Y-H4K8ac_peak_7238 | 13.14766 | RPL23_ENSG00000125691;SNORA21_ENSG00000199293        |
| 17 | 37025660 | 37026091 | 5Y-H4K8ac_peak_7239 | 7.59101  | LASP1_ENSG00000002834                                |
| 17 | 37311971 | 37312216 | 5Y-H4K8ac_peak_7240 | 5.98695  |                                                      |
| 17 | 37321359 | 37321611 | 5Y-H4K8ac_peak_7241 | 13.81505 |                                                      |
| 17 | 37354159 | 37354387 | 5Y-H4K8ac_peak_7242 | 9.32595  | CACNB1_ENSG00000067191                               |
| 17 | 37356437 | 37356735 | 5Y-H4K8ac_peak_7243 | 4.93618  | RPL19_ENSG00000108298                                |
| 17 | 37365922 | 37366435 | 5Y-H4K8ac_peak_7244 | 8.27643  |                                                      |
| 17 | 37387335 | 37387729 | 5Y-H4K8ac_peak_7245 | 5.98695  |                                                      |
| 17 | 37387944 | 37388267 | 5Y-H4K8ac_peak_7246 | 4.07874  |                                                      |
| 17 | 37607939 | 37608477 | 5Y-H4K8ac_peak_7247 | 7.87406  | MED1_ENSG00000125686                                 |
| 17 | 37617064 | 37617429 | 5Y-H4K8ac_peak_7248 | 7.90751  | CDK12_ENSG00000167258                                |
| 17 | 37773513 | 37773802 | 5Y-H4K8ac_peak_7249 | 4.51497  |                                                      |
| 17 | 37774856 | 37775625 | 5Y-H4K8ac_peak_7250 | 9.96543  | AC087491.2_ENSG00000214546                           |
| 17 | 37792785 | 37793235 | 5Y-H4K8ac_peak_7251 | 8.76581  | STARD3_ENSG00000131748                               |
| 17 | 37823397 | 37823847 | 5Y-H4K8ac_peak_7252 | 7.31102  | PNMT_ENSG00000141744                                 |
| 17 | 37824322 | 37824677 | 5Y-H4K8ac_peak_7253 | 7.11863  | PNMT_ENSG00000141744                                 |
| 17 | 37844113 | 37844921 | 5Y-H4K8ac_peak_7254 | 10.19948 | ERBB2_ENSG00000141736                                |
| 17 | 37886710 | 37887021 | 5Y-H4K8ac_peak_7255 | 5.41472  | MIEN1_ENSG00000141741                                |
| 17 | 37910031 | 37910488 | 5Y-H4K8ac_peak_7256 | 10.15788 |                                                      |
| 17 | 37910811 | 37911069 | 5Y-H4K8ac_peak_7257 | 5.24695  |                                                      |
| 17 | 38084200 | 38084531 | 5Y-H4K8ac_peak_7258 | 7.89142  | ORMDL3_ENSG00000172057;RP11-387H17.4_ENSG00000264968 |
| 17 | 38109632 | 38110241 | 5Y-H4K8ac_peak_7259 | 10.35586 |                                                      |
| 17 | 38115485 | 38115712 | 5Y-H4K8ac_peak_7260 | 6.20989  |                                                      |
| 17 | 38210792 | 38211025 | 5Y-H4K8ac_peak_7261 | 9.7353   |                                                      |
| 17 | 38219308 | 38219598 | 5Y-H4K8ac_peak_7262 | 6.50117  |                                                      |
| 17 | 38228849 | 38229330 | 5Y-H4K8ac_peak_7263 | 8.25419  |                                                      |
| 17 | 38231420 | 38231822 | 5Y-H4K8ac_peak_7264 | 5.23083  |                                                      |
| 17 | 38264484 | 38264724 | 5Y-H4K8ac_peak_7265 | 6.17973  |                                                      |
| 17 | 38268990 | 38269242 | 5Y-H4K8ac_peak_7266 | 6.50117  |                                                      |

|    |          |          |                     |          |                                                                                   |
|----|----------|----------|---------------------|----------|-----------------------------------------------------------------------------------|
| 17 | 38278516 | 38278726 | 5Y-H4K8ac_peak_7267 | 12.82003 | MSL1_ENSG00000188895                                                              |
| 17 | 38348180 | 38348449 | 5Y-H4K8ac_peak_7268 | 5.64909  |                                                                                   |
| 17 | 38444326 | 38444601 | 5Y-H4K8ac_peak_7269 | 4.50834  | CDC6_ENSG00000094804                                                              |
| 17 | 38461004 | 38461299 | 5Y-H4K8ac_peak_7270 | 4.77126  |                                                                                   |
| 17 | 38462825 | 38463264 | 5Y-H4K8ac_peak_7271 | 7.59101  |                                                                                   |
| 17 | 38466322 | 38466520 | 5Y-H4K8ac_peak_7272 | 6.73047  | RARA_ENSG00000131759                                                              |
| 17 | 38467550 | 38468114 | 5Y-H4K8ac_peak_7273 | 8.2913   |                                                                                   |
| 17 | 38473175 | 38473629 | 5Y-H4K8ac_peak_7274 | 10.11191 |                                                                                   |
| 17 | 38501446 | 38501759 | 5Y-H4K8ac_peak_7275 | 7.30348  |                                                                                   |
| 17 | 38505897 | 38506123 | 5Y-H4K8ac_peak_7276 | 5.41472  |                                                                                   |
| 17 | 38507660 | 38507884 | 5Y-H4K8ac_peak_7277 | 10.6196  |                                                                                   |
| 17 | 38508103 | 38508457 | 5Y-H4K8ac_peak_7278 | 6.87095  |                                                                                   |
| 17 | 38574565 | 38575014 | 5Y-H4K8ac_peak_7279 | 7.31102  | TOP2A_ENSG00000131747                                                             |
| 17 | 38588323 | 38588520 | 5Y-H4K8ac_peak_7280 | 7.35333  |                                                                                   |
| 17 | 38589807 | 38590018 | 5Y-H4K8ac_peak_7281 | 11.01287 |                                                                                   |
| 17 | 38599128 | 38600369 | 5Y-H4K8ac_peak_7282 | 14.49348 | IGFBP4_ENSG00000141753                                                            |
| 17 | 38614388 | 38614639 | 5Y-H4K8ac_peak_7283 | 4.55128  |                                                                                   |
| 17 | 38618016 | 38618721 | 5Y-H4K8ac_peak_7284 | 7.89273  |                                                                                   |
| 17 | 38646475 | 38646853 | 5Y-H4K8ac_peak_7285 | 10.03452 |                                                                                   |
| 17 | 38697752 | 38698911 | 5Y-H4K8ac_peak_7286 | 14.99673 |                                                                                   |
| 17 | 38700225 | 38700556 | 5Y-H4K8ac_peak_7287 | 8.56781  |                                                                                   |
| 17 | 38703967 | 38704224 | 5Y-H4K8ac_peak_7288 | 4.95697  |                                                                                   |
| 17 | 38705279 | 38706074 | 5Y-H4K8ac_peak_7289 | 6.08523  |                                                                                   |
| 17 | 38712978 | 38713306 | 5Y-H4K8ac_peak_7290 | 10.65816 |                                                                                   |
| 17 | 38713831 | 38714352 | 5Y-H4K8ac_peak_7291 | 6.70695  |                                                                                   |
| 17 | 38803685 | 38804034 | 5Y-H4K8ac_peak_7292 | 12.05638 | SMARCE1_ENSG00000073584                                                           |
| 17 | 38804317 | 38804835 | 5Y-H4K8ac_peak_7293 | 11.5813  | SMARCE1_ENSG00000073584                                                           |
| 17 | 39677476 | 39677666 | 5Y-H4K8ac_peak_7294 | 6.81557  |                                                                                   |
| 17 | 39686232 | 39686465 | 5Y-H4K8ac_peak_7295 | 6.31818  |                                                                                   |
| 17 | 39687151 | 39687527 | 5Y-H4K8ac_peak_7296 | 8.21582  |                                                                                   |
| 17 | 39705023 | 39705260 | 5Y-H4K8ac_peak_7297 | 6.69752  |                                                                                   |
| 17 | 39894529 | 39895069 | 5Y-H4K8ac_peak_7298 | 8.20773  |                                                                                   |
| 17 | 39968047 | 39968719 | 5Y-H4K8ac_peak_7299 | 5.34199  | LEPREL4_ENSG00000141696;FKBP10_ENSG00000141756                                    |
| 17 | 39992197 | 39992469 | 5Y-H4K8ac_peak_7300 | 10.90097 | KLHL10_ENSG00000161594;NT5C3B_ENSG00000141698                                     |
| 17 | 40021267 | 40021590 | 5Y-H4K8ac_peak_7301 | 7.90236  | KLHL11_ENSG00000178502                                                            |
| 17 | 40052419 | 40052706 | 5Y-H4K8ac_peak_7302 | 5.35202  |                                                                                   |
| 17 | 40118892 | 40119163 | 5Y-H4K8ac_peak_7303 | 4.15658  | CNP_ENSG00000173786                                                               |
| 17 | 40168997 | 40169392 | 5Y-H4K8ac_peak_7304 | 13.45283 |                                                                                   |
| 17 | 40202241 | 40203081 | 5Y-H4K8ac_peak_7305 | 9.93099  |                                                                                   |
| 17 | 40250213 | 40250481 | 5Y-H4K8ac_peak_7306 | 9.33466  |                                                                                   |
| 17 | 40306606 | 40306908 | 5Y-H4K8ac_peak_7307 | 9.05168  | CTD-2132N18.3_ENSG00000267261;RAB5C_ENSG00000108774;RP11-358B23.1_ENSG00000267658 |
| 17 | 40307368 | 40307657 | 5Y-H4K8ac_peak_7308 | 6.31818  | CTD-2132N18.3_ENSG00000267261;RAB5C_ENSG00000108774;RP11-358B23.1_ENSG00000267658 |
| 17 | 40428119 | 40428395 | 5Y-H4K8ac_peak_7309 | 7.30348  | STAT5B_ENSG00000173757                                                            |
| 17 | 40428593 | 40429105 | 5Y-H4K8ac_peak_7310 | 13.61292 | STAT5B_ENSG00000173757                                                            |
| 17 | 40463320 | 40463680 | 5Y-H4K8ac_peak_7311 | 8.564    |                                                                                   |
| 17 | 40688330 | 40688658 | 5Y-H4K8ac_peak_7312 | 12.69256 | RP11-400F19.8_ENSG00000266929                                                     |

|    |          |          |                     |          |                                                                        |
|----|----------|----------|---------------------|----------|------------------------------------------------------------------------|
| 17 | 40713343 | 40713852 | 5Y-H4K8ac_peak_7313 | 8.2913   | COASY_ENSG00000068120                                                  |
| 17 | 40718568 | 40718800 | 5Y-H4K8ac_peak_7314 | 5.98695  | MLX_ENSG00000108788                                                    |
| 17 | 40830679 | 40832518 | 5Y-H4K8ac_peak_7315 | 11.01287 | CTD-3193K9.4_ENSG00000267042                                           |
| 17 | 40834271 | 40834497 | 5Y-H4K8ac_peak_7316 | 5.47303  | CNTNAP1_ENSG00000108797                                                |
| 17 | 40896501 | 40896937 | 5Y-H4K8ac_peak_7317 | 7.80156  | EZH1_ENSG00000108799                                                   |
| 17 | 40897672 | 40898065 | 5Y-H4K8ac_peak_7318 | 4.71803  | EZH1_ENSG00000108799                                                   |
| 17 | 40912771 | 40913717 | 5Y-H4K8ac_peak_7319 | 13.00733 | RAMP2-AS1_ENSG00000197291                                              |
| 17 | 40950935 | 40951185 | 5Y-H4K8ac_peak_7320 | 8.4454   | COA3_ENSG00000183978;CNTD1_ENSG00000176563                             |
| 17 | 40976462 | 40976967 | 5Y-H4K8ac_peak_7321 | 13.85283 | PSME3_ENSG00000131467                                                  |
| 17 | 41116753 | 41116965 | 5Y-H4K8ac_peak_7322 | 4.79585  | AARSD1_ENSG00000266967                                                 |
| 17 | 41173107 | 41173517 | 5Y-H4K8ac_peak_7323 | 3.96434  |                                                                        |
| 17 | 41392478 | 41392720 | 5Y-H4K8ac_peak_7324 | 8.47164  |                                                                        |
| 17 | 41411402 | 41411672 | 5Y-H4K8ac_peak_7325 | 4.07874  |                                                                        |
| 17 | 41437214 | 41437482 | 5Y-H4K8ac_peak_7326 | 5.8635   |                                                                        |
| 17 | 41439417 | 41439666 | 5Y-H4K8ac_peak_7327 | 7.38046  |                                                                        |
| 17 | 41445881 | 41446078 | 5Y-H4K8ac_peak_7328 | 6.27097  |                                                                        |
| 17 | 41446426 | 41447116 | 5Y-H4K8ac_peak_7329 | 5.72233  |                                                                        |
| 17 | 41560664 | 41560865 | 5Y-H4K8ac_peak_7330 | 7.87406  | DHX8_ENSG00000067596                                                   |
| 17 | 41669626 | 41669896 | 5Y-H4K8ac_peak_7331 | 5.91107  |                                                                        |
| 17 | 41755041 | 41755313 | 5Y-H4K8ac_peak_7332 | 9.7353   |                                                                        |
| 17 | 41790993 | 41791608 | 5Y-H4K8ac_peak_7333 | 6.08523  |                                                                        |
| 17 | 41797759 | 41798210 | 5Y-H4K8ac_peak_7334 | 13.2534  | RP11-209M4.1_ENSG00000267253                                           |
| 17 | 41855939 | 41856203 | 5Y-H4K8ac_peak_7335 | 10.31981 | DUSP3_ENSG00000108861                                                  |
| 17 | 42051016 | 42051224 | 5Y-H4K8ac_peak_7336 | 5.42666  |                                                                        |
| 17 | 42060970 | 42061641 | 5Y-H4K8ac_peak_7337 | 11.53136 |                                                                        |
| 17 | 42072042 | 42072341 | 5Y-H4K8ac_peak_7338 | 10.16277 |                                                                        |
| 17 | 42091871 | 42092300 | 5Y-H4K8ac_peak_7339 | 17.50049 |                                                                        |
| 17 | 42143695 | 42143942 | 5Y-H4K8ac_peak_7340 | 8.35139  |                                                                        |
| 17 | 42144310 | 42144647 | 5Y-H4K8ac_peak_7341 | 11.56948 | LSM12_ENSG00000161654                                                  |
| 17 | 42147483 | 42147732 | 5Y-H4K8ac_peak_7342 | 8.2913   | G6PC3_ENSG00000141349                                                  |
| 17 | 42148356 | 42148576 | 5Y-H4K8ac_peak_7343 | 5.64909  | G6PC3_ENSG00000141349                                                  |
| 17 | 42173178 | 42173577 | 5Y-H4K8ac_peak_7344 | 10.46135 |                                                                        |
| 17 | 42218847 | 42219047 | 5Y-H4K8ac_peak_7345 | 6.78318  | C17orf53_ENSG00000125319                                               |
| 17 | 42277851 | 42278279 | 5Y-H4K8ac_peak_7346 | 18.63671 | ATXN7L3_ENSG00000087152                                                |
| 17 | 42295399 | 42295791 | 5Y-H4K8ac_peak_7347 | 5.13361  |                                                                        |
| 17 | 42296709 | 42296940 | 5Y-H4K8ac_peak_7348 | 9.00954  |                                                                        |
| 17 | 42462965 | 42463515 | 5Y-H4K8ac_peak_7349 | 8.69112  |                                                                        |
| 17 | 42685190 | 42687194 | 5Y-H4K8ac_peak_7350 | 9.23159  |                                                                        |
| 17 | 42766848 | 42767057 | 5Y-H4K8ac_peak_7351 | 7.87192  | CCDC43_ENSG00000180329                                                 |
| 17 | 42835933 | 42836317 | 5Y-H4K8ac_peak_7352 | 8.69112  | ADAM11_ENSG00000073670                                                 |
| 17 | 42857026 | 42857309 | 5Y-H4K8ac_peak_7353 | 4.55128  |                                                                        |
| 17 | 42906947 | 42907556 | 5Y-H4K8ac_peak_7354 | 8.1667   | GJC1_ENSG00000182963                                                   |
| 17 | 42976843 | 42977222 | 5Y-H4K8ac_peak_7355 | 8.2913   | EFTUD2_ENSG00000108883;CCDC103_ENSG00000167131;FAM187A_ENSG00000214447 |
| 17 | 43045075 | 43045551 | 5Y-H4K8ac_peak_7356 | 7.61752  | C1QL1_ENSG00000131094                                                  |
| 17 | 43047482 | 43047893 | 5Y-H4K8ac_peak_7357 | 4.77126  |                                                                        |
| 17 | 43108055 | 43108350 | 5Y-H4K8ac_peak_7358 | 4.15658  |                                                                        |

|    |          |          |                     |          |                                                                                |
|----|----------|----------|---------------------|----------|--------------------------------------------------------------------------------|
| 17 | 43109683 | 43109967 | 5Y-H4K8ac_peak_7359 | 9.30206  |                                                                                |
| 17 | 43127330 | 43127877 | 5Y-H4K8ac_peak_7360 | 7.9215   |                                                                                |
| 17 | 43213093 | 43213393 | 5Y-H4K8ac_peak_7361 | 4.15658  |                                                                                |
| 17 | 43224515 | 43225336 | 5Y-H4K8ac_peak_7362 | 7.89273  | HEXIM1_ENSG00000186834                                                         |
| 17 | 43238456 | 43238843 | 5Y-H4K8ac_peak_7363 | 10.98149 | AC002117.1_ENSG00000224505;HEXIM2_ENSG00000168517                              |
| 17 | 43239422 | 43240138 | 5Y-H4K8ac_peak_7364 | 7.24967  | AC002117.1_ENSG00000224505                                                     |
| 17 | 43249899 | 43250437 | 5Y-H4K8ac_peak_7365 | 9.30505  | RP13-890H12.2_ENSG00000267288                                                  |
| 17 | 43274444 | 43274853 | 5Y-H4K8ac_peak_7366 | 5.91107  |                                                                                |
| 17 | 43318454 | 43319060 | 5Y-H4K8ac_peak_7367 | 10.16277 | CTD-2020K17.3_ENSG00000233175                                                  |
| 17 | 43325411 | 43325751 | 5Y-H4K8ac_peak_7368 | 8.73392  | CTD-2020K17.4_ENSG00000233483;MAP3K14-AS1_ENSG00000267278                      |
| 17 | 43365864 | 43366285 | 5Y-H4K8ac_peak_7369 | 9.89244  |                                                                                |
| 17 | 43367349 | 43367592 | 5Y-H4K8ac_peak_7370 | 8.43999  |                                                                                |
| 17 | 43371266 | 43371512 | 5Y-H4K8ac_peak_7371 | 10.11191 |                                                                                |
| 17 | 43394097 | 43394359 | 5Y-H4K8ac_peak_7372 | 7.56545  | MAP3K14_ENSG00000006062                                                        |
| 17 | 43449056 | 43449276 | 5Y-H4K8ac_peak_7373 | 5.91107  | CTB-39G8.2_ENSG00000267446                                                     |
| 17 | 43482382 | 43483399 | 5Y-H4K8ac_peak_7374 | 10.35586 |                                                                                |
| 17 | 43508624 | 43509004 | 5Y-H4K8ac_peak_7375 | 4.79658  |                                                                                |
| 17 | 43514246 | 43514732 | 5Y-H4K8ac_peak_7376 | 20.27109 |                                                                                |
| 17 | 43661815 | 43662877 | 5Y-H4K8ac_peak_7377 | 5.78084  | DND1P1_ENSG00000264070                                                         |
| 17 | 43663942 | 43664153 | 5Y-H4K8ac_peak_7378 | 8.27643  | DND1P1_ENSG00000264070                                                         |
| 17 | 43697915 | 43698123 | 5Y-H4K8ac_peak_7379 | 6.46053  | CRHR1-IT1_ENSG00000204650                                                      |
| 17 | 43861722 | 43861921 | 5Y-H4K8ac_peak_7380 | 6.43068  |                                                                                |
| 17 | 43862660 | 43862920 | 5Y-H4K8ac_peak_7381 | 4.15658  |                                                                                |
| 17 | 43886498 | 43886711 | 5Y-H4K8ac_peak_7382 | 4.0639   |                                                                                |
| 17 | 43892452 | 43892797 | 5Y-H4K8ac_peak_7383 | 8.3285   |                                                                                |
| 17 | 43926156 | 43926974 | 5Y-H4K8ac_peak_7384 | 15.93748 |                                                                                |
| 17 | 43937835 | 43938098 | 5Y-H4K8ac_peak_7385 | 5.67483  |                                                                                |
| 17 | 43938336 | 43938577 | 5Y-H4K8ac_peak_7386 | 4.642    |                                                                                |
| 17 | 43971330 | 43971602 | 5Y-H4K8ac_peak_7387 | 10.90097 | MAPT_ENSG00000186868                                                           |
| 17 | 44270208 | 44270759 | 5Y-H4K8ac_peak_7388 | 33.58964 | KANSL1-AS1_ENSG00000214401                                                     |
| 17 | 44271040 | 44271273 | 5Y-H4K8ac_peak_7389 | 6.78128  | KANSL1-AS1_ENSG00000214401                                                     |
| 17 | 44302303 | 44302629 | 5Y-H4K8ac_peak_7390 | 7.90751  | KANSL1_ENSG00000120071                                                         |
| 17 | 44343754 | 44344114 | 5Y-H4K8ac_peak_7391 | 10.15788 | RP11-259G18.1_ENSG00000261575                                                  |
| 17 | 44848059 | 44848994 | 5Y-H4K8ac_peak_7392 | 14.89891 |                                                                                |
| 17 | 44849343 | 44849893 | 5Y-H4K8ac_peak_7393 | 11.60058 |                                                                                |
| 17 | 45000320 | 45000840 | 5Y-H4K8ac_peak_7394 | 14.43262 | RP11-63A1.1_ENSG00000261886;GOSR2_ENSG00000108433;RP11-156P1.2_ENSG00000262633 |
| 17 | 45079207 | 45079425 | 5Y-H4K8ac_peak_7395 | 10.93537 |                                                                                |
| 17 | 45144655 | 45144862 | 5Y-H4K8ac_peak_7396 | 12.73673 |                                                                                |
| 17 | 45177207 | 45177599 | 5Y-H4K8ac_peak_7397 | 10.35586 | RP11-156P1.3_ENSG00000262879                                                   |
| 17 | 45352804 | 45353110 | 5Y-H4K8ac_peak_7398 | 6.77436  |                                                                                |
| 17 | 45400777 | 45401202 | 5Y-H4K8ac_peak_7399 | 8.69112  | RP11-290H9.4_ENSG00000263293;EFCAB13_ENSG00000178852                           |
| 17 | 45570294 | 45570631 | 5Y-H4K8ac_peak_7400 | 8.69895  | MRPL45P2_ENSG00000228782                                                       |
| 17 | 45607801 | 45608063 | 5Y-H4K8ac_peak_7401 | 7.59101  |                                                                                |
| 17 | 45726608 | 45726836 | 5Y-H4K8ac_peak_7402 | 6.37023  | RP11-580I16.2_ENSG00000263766;KPNB1_ENSG00000108424                            |
| 17 | 45727651 | 45727862 | 5Y-H4K8ac_peak_7403 | 11.09973 | RP11-580I16.2_ENSG00000263766;KPNB1_ENSG00000108424                            |
| 17 | 45728204 | 45728412 | 5Y-H4K8ac_peak_7404 | 10.1994  |                                                                                |

|    |          |          |                     |          |                                                       |
|----|----------|----------|---------------------|----------|-------------------------------------------------------|
| 17 | 45804277 | 45804536 | 5Y-H4K8ac_peak_7405 | 9.74838  |                                                       |
| 17 | 45866911 | 45867778 | 5Y-H4K8ac_peak_7406 | 7.64648  |                                                       |
| 17 | 45898741 | 45898948 | 5Y-H4K8ac_peak_7407 | 6.59112  | OSBPL7_ENSG0000006025                                 |
| 17 | 45918134 | 45918356 | 5Y-H4K8ac_peak_7408 | 3.93392  | SCRN2_ENSG00000141295                                 |
| 17 | 45918548 | 45919263 | 5Y-H4K8ac_peak_7409 | 13.60583 | SCRN2_ENSG00000141295                                 |
| 17 | 45972704 | 45972912 | 5Y-H4K8ac_peak_7410 | 3.96434  | RP11-6N17.4_ENSG00000264920;SP2_ENSG00000167182       |
| 17 | 45973609 | 45974163 | 5Y-H4K8ac_peak_7411 | 20.47833 | RP11-6N17.4_ENSG00000264920;SP2_ENSG00000167182       |
| 17 | 46018022 | 46018726 | 5Y-H4K8ac_peak_7412 | 15.17389 | AC003665.1_ENSG00000234494;PNPO_ENSG00000108439       |
| 17 | 46048525 | 46048900 | 5Y-H4K8ac_peak_7413 | 10.72427 |                                                       |
| 17 | 46059373 | 46059695 | 5Y-H4K8ac_peak_7414 | 10.68758 |                                                       |
| 17 | 46059920 | 46060887 | 5Y-H4K8ac_peak_7415 | 6.37023  |                                                       |
| 17 | 46064407 | 46065761 | 5Y-H4K8ac_peak_7416 | 12.93132 |                                                       |
| 17 | 46068441 | 46069127 | 5Y-H4K8ac_peak_7417 | 14.99673 |                                                       |
| 17 | 46072240 | 46072437 | 5Y-H4K8ac_peak_7418 | 8.73392  |                                                       |
| 17 | 46073451 | 46073748 | 5Y-H4K8ac_peak_7419 | 13.29549 | RP11-6N17.10_ENSG00000264701                          |
| 17 | 46074008 | 46074324 | 5Y-H4K8ac_peak_7420 | 10.60083 | RP11-6N17.10_ENSG00000264701                          |
| 17 | 46079282 | 46080084 | 5Y-H4K8ac_peak_7421 | 9.00954  |                                                       |
| 17 | 46080471 | 46081152 | 5Y-H4K8ac_peak_7422 | 8.3285   |                                                       |
| 17 | 46081862 | 46082165 | 5Y-H4K8ac_peak_7423 | 12.06963 |                                                       |
| 17 | 46082583 | 46082808 | 5Y-H4K8ac_peak_7424 | 7.49539  |                                                       |
| 17 | 46088812 | 46089464 | 5Y-H4K8ac_peak_7425 | 21.56204 |                                                       |
| 17 | 46089944 | 46090791 | 5Y-H4K8ac_peak_7426 | 16.71698 |                                                       |
| 17 | 46091299 | 46091986 | 5Y-H4K8ac_peak_7427 | 3.96434  |                                                       |
| 17 | 46092610 | 46092804 | 5Y-H4K8ac_peak_7428 | 4.48815  |                                                       |
| 17 | 46125205 | 46125400 | 5Y-H4K8ac_peak_7429 | 8.3285   | RP5-890E16.2_ENSG00000263412;NFE2L1_ENSG00000082641   |
| 17 | 46125746 | 46125936 | 5Y-H4K8ac_peak_7430 | 11.94897 | RP5-890E16.2_ENSG00000263412;NFE2L1_ENSG00000082641   |
| 17 | 46178529 | 46178765 | 5Y-H4K8ac_peak_7431 | 10.90097 | CBX1_ENSG00000108468                                  |
| 17 | 46185376 | 46185629 | 5Y-H4K8ac_peak_7432 | 10.73603 |                                                       |
| 17 | 46908627 | 46909019 | 5Y-H4K8ac_peak_7433 | 7.21591  | CALCOCO2_ENSG00000136436                              |
| 17 | 46969256 | 46969591 | 5Y-H4K8ac_peak_7434 | 8.56121  | ATP5G1_ENSG00000159199                                |
| 17 | 46986005 | 46986198 | 5Y-H4K8ac_peak_7435 | 10.1994  | SUMO2P17_ENSG00000248278;UBE2Z_ENSG00000159202        |
| 17 | 47022284 | 47022556 | 5Y-H4K8ac_peak_7436 | 9.28683  | SNF8_ENSG00000159210                                  |
| 17 | 47269628 | 47269832 | 5Y-H4K8ac_peak_7437 | 9.02938  |                                                       |
| 17 | 47438964 | 47439412 | 5Y-H4K8ac_peak_7438 | 15.80786 | ZNF652_ENSG00000198740;RP11-1079K10.3_ENSG00000248714 |
| 17 | 47439884 | 47440212 | 5Y-H4K8ac_peak_7439 | 5.23083  | ZNF652_ENSG00000198740                                |
| 17 | 47532460 | 47532753 | 5Y-H4K8ac_peak_7440 | 10.31981 |                                                       |
| 17 | 47548690 | 47548996 | 5Y-H4K8ac_peak_7441 | 7.17527  |                                                       |
| 17 | 47549696 | 47550078 | 5Y-H4K8ac_peak_7442 | 8.47129  |                                                       |
| 17 | 47592617 | 47593199 | 5Y-H4K8ac_peak_7443 | 15.19225 |                                                       |
| 17 | 47596948 | 47597278 | 5Y-H4K8ac_peak_7444 | 8.41209  |                                                       |
| 17 | 47633260 | 47634073 | 5Y-H4K8ac_peak_7445 | 7.90751  |                                                       |
| 17 | 47785076 | 47785537 | 5Y-H4K8ac_peak_7446 | 16.93245 | SLC35B1_ENSG00000121073;RP11-613C6.2_ENSG00000250751  |
| 17 | 47864968 | 47865608 | 5Y-H4K8ac_peak_7447 | 10.8904  | FAM117A_ENSG00000121104;KAT7_ENSG00000136504          |
| 17 | 47866076 | 47866349 | 5Y-H4K8ac_peak_7448 | 15.48671 | FAM117A_ENSG00000121104;KAT7_ENSG00000136504          |
| 17 | 48046117 | 48046402 | 5Y-H4K8ac_peak_7449 | 6.31818  | DLX4_ENSG00000108813                                  |
| 17 | 48104575 | 48105013 | 5Y-H4K8ac_peak_7450 | 6.34245  |                                                       |

|    |          |          |                     |          |                                                      |
|----|----------|----------|---------------------|----------|------------------------------------------------------|
| 17 | 48134097 | 48134448 | 5Y-H4K8ac_peak_7451 | 7.27386  | RP11-1094H24.4_ENSG00000246640;ITGA3_ENSG00000005884 |
| 17 | 48189240 | 48189668 | 5Y-H4K8ac_peak_7452 | 6.339    |                                                      |
| 17 | 48189976 | 48190570 | 5Y-H4K8ac_peak_7453 | 5.24695  |                                                      |
| 17 | 48206782 | 48207299 | 5Y-H4K8ac_peak_7454 | 10.07378 | SAMD14_ENSG00000167100                               |
| 17 | 48207595 | 48207839 | 5Y-H4K8ac_peak_7455 | 9.3585   | SAMD14_ENSG00000167100                               |
| 17 | 48228709 | 48229084 | 5Y-H4K8ac_peak_7456 | 8.33454  | PPP1R9B_ENSG00000108819                              |
| 17 | 48229573 | 48230380 | 5Y-H4K8ac_peak_7457 | 17.67055 |                                                      |
| 17 | 48239286 | 48239562 | 5Y-H4K8ac_peak_7458 | 12.79198 | RP11-893F2.13_ENSG00000253730                        |
| 17 | 48250375 | 48250866 | 5Y-H4K8ac_peak_7459 | 8.51726  |                                                      |
| 17 | 48251106 | 48251388 | 5Y-H4K8ac_peak_7460 | 6.62037  |                                                      |
| 17 | 48254421 | 48254649 | 5Y-H4K8ac_peak_7461 | 5.22001  |                                                      |
| 17 | 48255211 | 48256316 | 5Y-H4K8ac_peak_7462 | 17.13377 |                                                      |
| 17 | 48260706 | 48261113 | 5Y-H4K8ac_peak_7463 | 4.25295  |                                                      |
| 17 | 48278356 | 48278588 | 5Y-H4K8ac_peak_7464 | 4.642    | COL1A1_ENSG00000108821                               |
| 17 | 48285275 | 48285567 | 5Y-H4K8ac_peak_7465 | 6.96612  | RP11-893F2.5_ENSG00000249406                         |
| 17 | 48287253 | 48287470 | 5Y-H4K8ac_peak_7466 | 6.35459  | RP11-893F2.5_ENSG00000249406                         |
| 17 | 48287818 | 48288509 | 5Y-H4K8ac_peak_7467 | 9.13842  |                                                      |
| 17 | 48343847 | 48344070 | 5Y-H4K8ac_peak_7468 | 5.83797  |                                                      |
| 17 | 48350412 | 48350614 | 5Y-H4K8ac_peak_7469 | 10.75771 |                                                      |
| 17 | 48423018 | 48423209 | 5Y-H4K8ac_peak_7470 | 5.60566  | XYLT2_ENSG0000015532                                 |
| 17 | 48423555 | 48423806 | 5Y-H4K8ac_peak_7471 | 5.22001  | XYLT2_ENSG0000015532                                 |
| 17 | 48450292 | 48450857 | 5Y-H4K8ac_peak_7472 | 14.84178 | MRPL27_ENSG00000108826;EME1_ENSG00000154920          |
| 17 | 48474573 | 48474812 | 5Y-H4K8ac_peak_7473 | 8.39119  | LRR59_ENSG00000108829;RP1-117B12.4_ENSG00000253102   |
| 17 | 48475097 | 48475540 | 5Y-H4K8ac_peak_7474 | 12.06963 | LRR59_ENSG00000108829                                |
| 17 | 48502789 | 48503284 | 5Y-H4K8ac_peak_7475 | 15.82359 | ACSF2_ENSG00000167107                                |
| 17 | 48503596 | 48504056 | 5Y-H4K8ac_peak_7476 | 6.08523  | ACSF2_ENSG00000167107                                |
| 17 | 48555417 | 48556069 | 5Y-H4K8ac_peak_7477 | 7.89273  | RSAD1_ENSG00000136444                                |
| 17 | 48585282 | 48585878 | 5Y-H4K8ac_peak_7478 | 16.57564 | RP11-94C24.6_ENSG00000249451;MYCBPAP_ENSG00000136449 |
| 17 | 48610174 | 48610425 | 5Y-H4K8ac_peak_7479 | 7.18391  | EPN3_ENSG0000049283                                  |
| 17 | 48624565 | 48624947 | 5Y-H4K8ac_peak_7480 | 12.93794 |                                                      |
| 17 | 48634036 | 48634270 | 5Y-H4K8ac_peak_7481 | 7.8267   |                                                      |
| 17 | 48638558 | 48638796 | 5Y-H4K8ac_peak_7482 | 6.53157  | CACNA1G-AS1_ENSG00000250107;CACNA1G_ENSG00000006283  |
| 17 | 48641964 | 48643247 | 5Y-H4K8ac_peak_7483 | 13.92877 | RP11-94C24.11_ENSG00000250976                        |
| 17 | 48647112 | 48647393 | 5Y-H4K8ac_peak_7484 | 5.69194  |                                                      |
| 17 | 48670470 | 48670705 | 5Y-H4K8ac_peak_7485 | 7.96285  |                                                      |
| 17 | 48679294 | 48679946 | 5Y-H4K8ac_peak_7486 | 10.86648 |                                                      |
| 17 | 48681271 | 48681853 | 5Y-H4K8ac_peak_7487 | 9.68742  |                                                      |
| 17 | 48683019 | 48683547 | 5Y-H4K8ac_peak_7488 | 6.16949  |                                                      |
| 17 | 48686424 | 48686828 | 5Y-H4K8ac_peak_7489 | 7.44077  |                                                      |
| 17 | 48703582 | 48703913 | 5Y-H4K8ac_peak_7490 | 6.10343  |                                                      |
| 17 | 48705573 | 48705829 | 5Y-H4K8ac_peak_7491 | 4.0639   |                                                      |
| 17 | 48737668 | 48737869 | 5Y-H4K8ac_peak_7492 | 5.60566  |                                                      |
| 17 | 48767730 | 48767991 | 5Y-H4K8ac_peak_7493 | 13.10899 |                                                      |
| 17 | 48784747 | 48785241 | 5Y-H4K8ac_peak_7494 | 14.19462 | ANKRD40_ENSG00000154945                              |
| 17 | 48786416 | 48786823 | 5Y-H4K8ac_peak_7495 | 4.77126  |                                                      |
| 17 | 48796264 | 48796740 | 5Y-H4K8ac_peak_7496 | 7.89273  | LUC7L3_ENSG00000108848                               |

|    |          |          |                     |          |                                                                     |
|----|----------|----------|---------------------|----------|---------------------------------------------------------------------|
| 17 | 48797058 | 48797435 | 5Y-H4K8ac_peak_7497 | 11.67326 | LUC7L3_ENSG00000108848                                              |
| 17 | 48910760 | 48911010 | 5Y-H4K8ac_peak_7498 | 6.98416  |                                                                     |
| 17 | 48911406 | 48911604 | 5Y-H4K8ac_peak_7499 | 7.07378  | WFIKKN2_ENSG00000173714                                             |
| 17 | 48944135 | 48944513 | 5Y-H4K8ac_peak_7500 | 10.72427 | TOB1_ENSG00000141232;TOB1-AS1_ENSG00000229980                       |
| 17 | 48982077 | 48983095 | 5Y-H4K8ac_peak_7501 | 10.98149 |                                                                     |
| 17 | 48995921 | 48997029 | 5Y-H4K8ac_peak_7502 | 12.708   |                                                                     |
| 17 | 48997404 | 48997696 | 5Y-H4K8ac_peak_7503 | 9.11686  |                                                                     |
| 17 | 49007216 | 49007536 | 5Y-H4K8ac_peak_7504 | 6.03632  |                                                                     |
| 17 | 49008317 | 49009242 | 5Y-H4K8ac_peak_7505 | 21.45803 |                                                                     |
| 17 | 49021416 | 49021955 | 5Y-H4K8ac_peak_7506 | 12.79198 | RP11-700H6.1_ENSG00000247011;RP11-700H6.2_ENSG00000251665           |
| 17 | 49025449 | 49025687 | 5Y-H4K8ac_peak_7507 | 7.91521  |                                                                     |
| 17 | 49026968 | 49027557 | 5Y-H4K8ac_peak_7508 | 6.17806  |                                                                     |
| 17 | 49198635 | 49198837 | 5Y-H4K8ac_peak_7509 | 7.11863  | SPAG9_ENSG00000008294                                               |
| 17 | 49199233 | 49199493 | 5Y-H4K8ac_peak_7510 | 7.59101  |                                                                     |
| 17 | 49229718 | 49229950 | 5Y-H4K8ac_peak_7511 | 8.24461  | NME1_ENSG00000239672;NME1-NME2_ENSG00000243678                      |
| 17 | 49230977 | 49231392 | 5Y-H4K8ac_peak_7512 | 8.62008  | NME1_ENSG00000239672;NME1-NME2_ENSG00000243678;NME2_ENSG00000011052 |
| 17 | 49244266 | 49244503 | 5Y-H4K8ac_peak_7513 | 8.06489  |                                                                     |
| 17 | 49432510 | 49433021 | 5Y-H4K8ac_peak_7514 | 6.03632  |                                                                     |
| 17 | 53046322 | 53046596 | 5Y-H4K8ac_peak_7515 | 6.73385  | COX11_ENSG00000166260;STXBP4_ENSG00000166263                        |
| 17 | 53828376 | 53828843 | 5Y-H4K8ac_peak_7516 | 13.59183 | PCTP_ENSG00000141179                                                |
| 17 | 54911516 | 54911740 | 5Y-H4K8ac_peak_7517 | 8.62703  | DGKE_ENSG00000153933                                                |
| 17 | 54991544 | 54991769 | 5Y-H4K8ac_peak_7518 | 15.41988 | TRIM25_ENSG00000121060                                              |
| 17 | 55037032 | 55037584 | 5Y-H4K8ac_peak_7519 | 7.47209  | COIL_ENSG00000121058                                                |
| 17 | 55038111 | 55038367 | 5Y-H4K8ac_peak_7520 | 14.86775 | COIL_ENSG00000121058                                                |
| 17 | 55162685 | 55162912 | 5Y-H4K8ac_peak_7521 | 9.02938  | RP11-166P13.3_ENSG00000263004;AKAP1_ENSG00000121057                 |
| 17 | 55213480 | 55213707 | 5Y-H4K8ac_peak_7522 | 4.95697  |                                                                     |
| 17 | 55223839 | 55224141 | 5Y-H4K8ac_peak_7523 | 7.89273  |                                                                     |
| 17 | 55333109 | 55333599 | 5Y-H4K8ac_peak_7524 | 10.21117 | MSI2_ENSG00000153944                                                |
| 17 | 55498742 | 55498965 | 5Y-H4K8ac_peak_7525 | 8.24461  |                                                                     |
| 17 | 55515415 | 55515612 | 5Y-H4K8ac_peak_7526 | 5.87725  |                                                                     |
| 17 | 55520630 | 55520964 | 5Y-H4K8ac_peak_7527 | 7.6267   |                                                                     |
| 17 | 55573849 | 55574075 | 5Y-H4K8ac_peak_7528 | 6.37023  |                                                                     |
| 17 | 55583875 | 55584158 | 5Y-H4K8ac_peak_7529 | 8.24461  |                                                                     |
| 17 | 55586014 | 55586329 | 5Y-H4K8ac_peak_7530 | 8.69112  |                                                                     |
| 17 | 55588449 | 55588660 | 5Y-H4K8ac_peak_7531 | 5.99504  |                                                                     |
| 17 | 55603383 | 55603613 | 5Y-H4K8ac_peak_7532 | 5.57299  |                                                                     |
| 17 | 55614365 | 55614866 | 5Y-H4K8ac_peak_7533 | 8.3285   |                                                                     |
| 17 | 55615130 | 55615709 | 5Y-H4K8ac_peak_7534 | 10.86648 |                                                                     |
| 17 | 55619978 | 55620283 | 5Y-H4K8ac_peak_7535 | 9.58986  |                                                                     |
| 17 | 55620692 | 55620889 | 5Y-H4K8ac_peak_7536 | 10.8904  |                                                                     |
| 17 | 55622668 | 55622870 | 5Y-H4K8ac_peak_7537 | 6.78128  |                                                                     |
| 17 | 55623929 | 55624591 | 5Y-H4K8ac_peak_7538 | 16.73191 |                                                                     |
| 17 | 55628632 | 55628908 | 5Y-H4K8ac_peak_7539 | 8.1667   |                                                                     |
| 17 | 55629274 | 55629543 | 5Y-H4K8ac_peak_7540 | 4.95697  |                                                                     |
| 17 | 55636134 | 55636331 | 5Y-H4K8ac_peak_7541 | 4.92207  |                                                                     |
| 17 | 55636596 | 55637224 | 5Y-H4K8ac_peak_7542 | 4.97086  |                                                                     |



|    |          |          |                     |          |                                                       |
|----|----------|----------|---------------------|----------|-------------------------------------------------------|
| 17 | 55639833 | 55640272 | 5Y-H4K8ac_peak_7543 | 6.97863  |                                                       |
| 17 | 55641190 | 55641381 | 5Y-H4K8ac_peak_7544 | 5.41472  |                                                       |
| 17 | 55642647 | 55642859 | 5Y-H4K8ac_peak_7545 | 5.24695  |                                                       |
| 17 | 55643194 | 55643399 | 5Y-H4K8ac_peak_7546 | 8.03282  |                                                       |
| 17 | 55643937 | 55644364 | 5Y-H4K8ac_peak_7547 | 6.4298   |                                                       |
| 17 | 55644958 | 55645588 | 5Y-H4K8ac_peak_7548 | 12.26819 |                                                       |
| 17 | 55661026 | 55661427 | 5Y-H4K8ac_peak_7549 | 9.61943  |                                                       |
| 17 | 55662028 | 55662257 | 5Y-H4K8ac_peak_7550 | 4.642    |                                                       |
| 17 | 55663006 | 55663295 | 5Y-H4K8ac_peak_7551 | 4.75174  |                                                       |
| 17 | 55664008 | 55664710 | 5Y-H4K8ac_peak_7552 | 10.4495  |                                                       |
| 17 | 55665346 | 55665594 | 5Y-H4K8ac_peak_7553 | 8.90224  |                                                       |
| 17 | 55671300 | 55671797 | 5Y-H4K8ac_peak_7554 | 5.98695  |                                                       |
| 17 | 55673288 | 55673957 | 5Y-H4K8ac_peak_7555 | 8.24461  |                                                       |
| 17 | 55674230 | 55674522 | 5Y-H4K8ac_peak_7556 | 9.31608  |                                                       |
| 17 | 55676032 | 55677245 | 5Y-H4K8ac_peak_7557 | 16.47427 |                                                       |
| 17 | 55680443 | 55680876 | 5Y-H4K8ac_peak_7558 | 7.50148  |                                                       |
| 17 | 55682630 | 55682988 | 5Y-H4K8ac_peak_7559 | 7.83354  |                                                       |
| 17 | 55685529 | 55685926 | 5Y-H4K8ac_peak_7560 | 5.24064  | RP11-118E18.4_ENSG00000263499                         |
| 17 | 55686957 | 55687179 | 5Y-H4K8ac_peak_7561 | 4.31838  |                                                       |
| 17 | 55699422 | 55699630 | 5Y-H4K8ac_peak_7562 | 6.08523  |                                                       |
| 17 | 55701630 | 55702923 | 5Y-H4K8ac_peak_7563 | 8.62703  |                                                       |
| 17 | 55703215 | 55703728 | 5Y-H4K8ac_peak_7564 | 6.78128  |                                                       |
| 17 | 55713735 | 55714208 | 5Y-H4K8ac_peak_7565 | 9.07585  |                                                       |
| 17 | 55716655 | 55716941 | 5Y-H4K8ac_peak_7566 | 5.5369   |                                                       |
| 17 | 55717243 | 55717462 | 5Y-H4K8ac_peak_7567 | 6.13242  |                                                       |
| 17 | 55738888 | 55739357 | 5Y-H4K8ac_peak_7568 | 6.71016  |                                                       |
| 17 | 55742392 | 55742585 | 5Y-H4K8ac_peak_7569 | 7.72887  |                                                       |
| 17 | 55746483 | 55746782 | 5Y-H4K8ac_peak_7570 | 5.87725  |                                                       |
| 17 | 55747642 | 55747858 | 5Y-H4K8ac_peak_7571 | 7.21591  |                                                       |
| 17 | 55777000 | 55777268 | 5Y-H4K8ac_peak_7572 | 9.69677  |                                                       |
| 17 | 55785323 | 55785544 | 5Y-H4K8ac_peak_7573 | 4.50834  |                                                       |
| 17 | 55817651 | 55817879 | 5Y-H4K8ac_peak_7574 | 6.08523  |                                                       |
| 17 | 55828009 | 55828600 | 5Y-H4K8ac_peak_7575 | 5.12488  |                                                       |
| 17 | 55829123 | 55829479 | 5Y-H4K8ac_peak_7576 | 11.22005 |                                                       |
| 17 | 55859651 | 55860645 | 5Y-H4K8ac_peak_7577 | 10.31072 |                                                       |
| 17 | 55887371 | 55887662 | 5Y-H4K8ac_peak_7578 | 7.18391  |                                                       |
| 17 | 55888300 | 55888639 | 5Y-H4K8ac_peak_7579 | 9.93175  |                                                       |
| 17 | 55981952 | 55982208 | 5Y-H4K8ac_peak_7580 | 6.78128  |                                                       |
| 17 | 55982750 | 55982999 | 5Y-H4K8ac_peak_7581 | 11.1169  |                                                       |
| 17 | 55993502 | 55994015 | 5Y-H4K8ac_peak_7582 | 6.86362  |                                                       |
| 17 | 56031997 | 56032383 | 5Y-H4K8ac_peak_7583 | 9.00954  | CUEDC1_ENSG00000180891                                |
| 17 | 56065189 | 56066106 | 5Y-H4K8ac_peak_7584 | 23.60332 | VEZF1_ENSG00000136451                                 |
| 17 | 56070562 | 56070769 | 5Y-H4K8ac_peak_7585 | 4.92498  |                                                       |
| 17 | 56084037 | 56084561 | 5Y-H4K8ac_peak_7586 | 13.48948 | SRSF1_ENSG00000136450                                 |
| 17 | 56160038 | 56160575 | 5Y-H4K8ac_peak_7587 | 32.18204 | RP11-159D12.10_ENSG00000266290;DYNLL2_ENSG00000264364 |
| 17 | 56296937 | 56297269 | 5Y-H4K8ac_peak_7588 | 5.12488  | MKS1_ENSG00000011143                                  |

|    |          |          |                     |          |                                                     |
|----|----------|----------|---------------------|----------|-----------------------------------------------------|
| 17 | 56401370 | 56402561 | 5Y-H4K8ac_peak_7589 | 17.87582 | BZRAP1-AS1_ENSG00000265148                          |
| 17 | 56429701 | 56430012 | 5Y-H4K8ac_peak_7590 | 7.51382  | SUPT4H1_ENSG00000213246                             |
| 17 | 56591676 | 56591915 | 5Y-H4K8ac_peak_7591 | 13.92877 |                                                     |
| 17 | 56594929 | 56595201 | 5Y-H4K8ac_peak_7592 | 9.68742  | MTMR4_ENSG00000108389                               |
| 17 | 56596314 | 56597020 | 5Y-H4K8ac_peak_7593 | 7.20869  | RP11-112H10.4_ENSG00000264672                       |
| 17 | 56709760 | 56710061 | 5Y-H4K8ac_peak_7594 | 6.96612  | U3_ENSG00000212195                                  |
| 17 | 56769124 | 56769740 | 5Y-H4K8ac_peak_7595 | 9.89244  | TEX14_ENSG00000121101;RAD51C_ENSG00000108384        |
| 17 | 56770013 | 56770247 | 5Y-H4K8ac_peak_7596 | 5.24695  | TEX14_ENSG00000121101;RAD51C_ENSG00000108384        |
| 17 | 56833262 | 56833742 | 5Y-H4K8ac_peak_7597 | 11.71078 | PPM1E_ENSG00000175175                               |
| 17 | 56863451 | 56863678 | 5Y-H4K8ac_peak_7598 | 5.39991  |                                                     |
| 17 | 57092578 | 57092792 | 5Y-H4K8ac_peak_7599 | 6.27097  |                                                     |
| 17 | 57184478 | 57184681 | 5Y-H4K8ac_peak_7600 | 4.00285  | TRIM37_ENSG00000108395;AC099850.1_ENSG00000224738   |
| 17 | 57231868 | 57232508 | 5Y-H4K8ac_peak_7601 | 8.69112  | SKA2_ENSG00000182628;PRR11_ENSG00000068489          |
| 17 | 57287420 | 57287959 | 5Y-H4K8ac_peak_7602 | 9.02938  | SMG8_ENSG00000167447                                |
| 17 | 57296828 | 57297096 | 5Y-H4K8ac_peak_7603 | 5.449    | GDPD1_ENSG00000153982                               |
| 17 | 57405862 | 57406108 | 5Y-H4K8ac_peak_7604 | 7.2422   |                                                     |
| 17 | 57464033 | 57464251 | 5Y-H4K8ac_peak_7605 | 5.77617  |                                                     |
| 17 | 57465346 | 57465639 | 5Y-H4K8ac_peak_7606 | 5.03917  |                                                     |
| 17 | 57484753 | 57485102 | 5Y-H4K8ac_peak_7607 | 11.8592  |                                                     |
| 17 | 57562000 | 57562213 | 5Y-H4K8ac_peak_7608 | 5.21093  |                                                     |
| 17 | 57591121 | 57591481 | 5Y-H4K8ac_peak_7609 | 6.15578  |                                                     |
| 17 | 57592286 | 57592480 | 5Y-H4K8ac_peak_7610 | 8.07508  |                                                     |
| 17 | 57623783 | 57624075 | 5Y-H4K8ac_peak_7611 | 10.37708 |                                                     |
| 17 | 57625429 | 57625639 | 5Y-H4K8ac_peak_7612 | 5.77617  |                                                     |
| 17 | 57696706 | 57697564 | 5Y-H4K8ac_peak_7613 | 9.79526  | CLTC_ENSG00000141367                                |
| 17 | 57784191 | 57784556 | 5Y-H4K8ac_peak_7614 | 7.50148  | PTRH2_ENSG00000141378;VMP1_ENSG00000062716          |
| 17 | 57970532 | 57970884 | 5Y-H4K8ac_peak_7615 | 8.99358  | TUBD1_ENSG00000108423;RPS6KB1_ENSG00000108443       |
| 17 | 58042610 | 58042904 | 5Y-H4K8ac_peak_7616 | 9.51254  | RNFT1_ENSG00000189050;RP11-178C3.2_ENSG00000267302  |
| 17 | 58469839 | 58470293 | 5Y-H4K8ac_peak_7617 | 9.51254  | C17orf64_ENSG00000141371                            |
| 17 | 58498852 | 58499274 | 5Y-H4K8ac_peak_7618 | 19.26009 | USP32_ENSG00000170832                               |
| 17 | 58603316 | 58603525 | 5Y-H4K8ac_peak_7619 | 10.12457 | APPBP2_ENSG00000062725;RP11-15E18.1_ENSG00000259349 |
| 17 | 58677059 | 58677363 | 5Y-H4K8ac_peak_7620 | 12.00715 | PPM1D_ENSG00000170836                               |
| 17 | 59223335 | 59223618 | 5Y-H4K8ac_peak_7621 | 9.38276  |                                                     |
| 17 | 59252345 | 59252625 | 5Y-H4K8ac_peak_7622 | 9.96543  |                                                     |
| 17 | 59272850 | 59273118 | 5Y-H4K8ac_peak_7623 | 6.77436  |                                                     |
| 17 | 59391404 | 59391853 | 5Y-H4K8ac_peak_7624 | 5.88408  |                                                     |
| 17 | 59458616 | 59458825 | 5Y-H4K8ac_peak_7625 | 7.64648  |                                                     |
| 17 | 59459065 | 59459529 | 5Y-H4K8ac_peak_7626 | 7.25122  | RP11-332H18.3_ENSG00000266934                       |
| 17 | 59460156 | 59461029 | 5Y-H4K8ac_peak_7627 | 12.15235 | RP11-332H18.3_ENSG00000266934                       |
| 17 | 59461242 | 59462252 | 5Y-H4K8ac_peak_7628 | 25.65133 |                                                     |
| 17 | 59462843 | 59463165 | 5Y-H4K8ac_peak_7629 | 14.82927 |                                                     |
| 17 | 59463545 | 59464057 | 5Y-H4K8ac_peak_7630 | 11.69482 |                                                     |
| 17 | 59464457 | 59464877 | 5Y-H4K8ac_peak_7631 | 7.20869  |                                                     |
| 17 | 59468992 | 59469252 | 5Y-H4K8ac_peak_7632 | 7.89273  |                                                     |
| 17 | 59473835 | 59475107 | 5Y-H4K8ac_peak_7633 | 10.30425 |                                                     |
| 17 | 59475454 | 59475682 | 5Y-H4K8ac_peak_7634 | 6.08523  |                                                     |

|    |          |          |                     |          |                                                        |
|----|----------|----------|---------------------|----------|--------------------------------------------------------|
| 17 | 59476343 | 59476884 | 5Y-H4K8ac_peak_7635 | 9.76673  | RP11-332H18.5_ENSG00000267131;TBX2_ENSG00000121068     |
| 17 | 59487713 | 59488089 | 5Y-H4K8ac_peak_7636 | 4.15658  | RP11-332H18.4_ENSG00000267280                          |
| 17 | 59488600 | 59489683 | 5Y-H4K8ac_peak_7637 | 11.79142 | RP11-332H18.4_ENSG00000267280;C17orf82_ENSG00000187013 |
| 17 | 59490016 | 59490635 | 5Y-H4K8ac_peak_7638 | 10.48476 | C17orf82_ENSG00000187013                               |
| 17 | 59491615 | 59492122 | 5Y-H4K8ac_peak_7639 | 6.27435  |                                                        |
| 17 | 59493528 | 59494228 | 5Y-H4K8ac_peak_7640 | 13.33225 |                                                        |
| 17 | 59540013 | 59540521 | 5Y-H4K8ac_peak_7641 | 4.00285  | RP11-15K2.2_ENSG00000267137                            |
| 17 | 59553983 | 59554188 | 5Y-H4K8ac_peak_7642 | 4.55128  |                                                        |
| 17 | 59554923 | 59555119 | 5Y-H4K8ac_peak_7643 | 10.35586 |                                                        |
| 17 | 59562663 | 59563094 | 5Y-H4K8ac_peak_7644 | 8.62703  |                                                        |
| 17 | 59563582 | 59564230 | 5Y-H4K8ac_peak_7645 | 9.64738  |                                                        |
| 17 | 59565326 | 59565766 | 5Y-H4K8ac_peak_7646 | 22.81411 |                                                        |
| 17 | 59573926 | 59574252 | 5Y-H4K8ac_peak_7647 | 5.64909  |                                                        |
| 17 | 59628911 | 59629338 | 5Y-H4K8ac_peak_7648 | 7.31102  |                                                        |
| 17 | 60004874 | 60005271 | 5Y-H4K8ac_peak_7649 | 16.23405 | INTS2_ENSG00000108506                                  |
| 17 | 60215502 | 60216480 | 5Y-H4K8ac_peak_7650 | 9.22492  |                                                        |
| 17 | 60501419 | 60501821 | 5Y-H4K8ac_peak_7651 | 6.53157  | METTL2A_ENSG00000087995                                |
| 17 | 60549502 | 60549751 | 5Y-H4K8ac_peak_7652 | 5.5592   |                                                        |
| 17 | 60555337 | 60555914 | 5Y-H4K8ac_peak_7653 | 7.89273  |                                                        |
| 17 | 60556168 | 60556928 | 5Y-H4K8ac_peak_7654 | 16.15771 |                                                        |
| 17 | 60706395 | 60706668 | 5Y-H4K8ac_peak_7655 | 6.88736  |                                                        |
| 17 | 60729588 | 60730615 | 5Y-H4K8ac_peak_7656 | 15.80786 |                                                        |
| 17 | 60781375 | 60781583 | 5Y-H4K8ac_peak_7657 | 7.33686  |                                                        |
| 17 | 60781865 | 60782087 | 5Y-H4K8ac_peak_7658 | 11.79376 |                                                        |
| 17 | 60827310 | 60827809 | 5Y-H4K8ac_peak_7659 | 7.11863  |                                                        |
| 17 | 60948204 | 60948399 | 5Y-H4K8ac_peak_7660 | 7.387    |                                                        |
| 17 | 60975870 | 60976088 | 5Y-H4K8ac_peak_7661 | 8.31536  |                                                        |
| 17 | 61000366 | 61000723 | 5Y-H4K8ac_peak_7662 | 10.35586 |                                                        |
| 17 | 61143359 | 61143576 | 5Y-H4K8ac_peak_7663 | 5.23083  |                                                        |
| 17 | 61296878 | 61297075 | 5Y-H4K8ac_peak_7664 | 5.37137  |                                                        |
| 17 | 61503429 | 61503804 | 5Y-H4K8ac_peak_7665 | 6.06178  |                                                        |
| 17 | 61505840 | 61506095 | 5Y-H4K8ac_peak_7666 | 4.0639   |                                                        |
| 17 | 61508352 | 61508561 | 5Y-H4K8ac_peak_7667 | 5.87725  | RP11-269G24.3_ENSG00000263644                          |
| 17 | 61509978 | 61510619 | 5Y-H4K8ac_peak_7668 | 11.21854 | RP11-269G24.4_ENSG00000265282                          |
| 17 | 61510895 | 61511436 | 5Y-H4K8ac_peak_7669 | 10.54669 |                                                        |
| 17 | 61511717 | 61512083 | 5Y-H4K8ac_peak_7670 | 5.51759  |                                                        |
| 17 | 61512345 | 61512854 | 5Y-H4K8ac_peak_7671 | 10.48476 |                                                        |
| 17 | 61513361 | 61513752 | 5Y-H4K8ac_peak_7672 | 7.38868  |                                                        |
| 17 | 61515995 | 61516664 | 5Y-H4K8ac_peak_7673 | 11.94533 |                                                        |
| 17 | 61517588 | 61519191 | 5Y-H4K8ac_peak_7674 | 15.90416 |                                                        |
| 17 | 61519483 | 61520088 | 5Y-H4K8ac_peak_7675 | 9.87097  |                                                        |
| 17 | 61520535 | 61521167 | 5Y-H4K8ac_peak_7676 | 7.50148  |                                                        |
| 17 | 61522114 | 61522729 | 5Y-H4K8ac_peak_7677 | 11.40596 |                                                        |
| 17 | 61522962 | 61525267 | 5Y-H4K8ac_peak_7678 | 25.44315 | CYB561_ENSG00000008283                                 |
| 17 | 61527788 | 61527983 | 5Y-H4K8ac_peak_7679 | 6.55841  |                                                        |
| 17 | 61532095 | 61532540 | 5Y-H4K8ac_peak_7680 | 5.51759  | RP11-269G24.6_ENSG00000265971                          |

|    |          |          |                     |          |                                            |
|----|----------|----------|---------------------|----------|--------------------------------------------|
| 17 | 61534052 | 61534259 | 5Y-H4K8ac_peak_7681 | 6.78318  |                                            |
| 17 | 61553237 | 61553622 | 5Y-H4K8ac_peak_7682 | 6.98416  | ACE_ENSG00000159640                        |
| 17 | 61554019 | 61555591 | 5Y-H4K8ac_peak_7683 | 9.32595  | ACE_ENSG00000159640                        |
| 17 | 61558750 | 61559031 | 5Y-H4K8ac_peak_7684 | 6.20944  |                                            |
| 17 | 61615229 | 61615457 | 5Y-H4K8ac_peak_7685 | 10.18556 |                                            |
| 17 | 61619275 | 61619481 | 5Y-H4K8ac_peak_7686 | 5.72376  |                                            |
| 17 | 61627135 | 61627345 | 5Y-H4K8ac_peak_7687 | 8.09118  | DCAF7_ENSG00000136485                      |
| 17 | 61678271 | 61678788 | 5Y-H4K8ac_peak_7688 | 10.7427  | TACO1_ENSG00000136463                      |
| 17 | 61698984 | 61699262 | 5Y-H4K8ac_peak_7689 | 13.60583 | MAP3K3_ENSG00000198909                     |
| 17 | 61776618 | 61777096 | 5Y-H4K8ac_peak_7690 | 12.29582 |                                            |
| 17 | 61777296 | 61778536 | 5Y-H4K8ac_peak_7691 | 26.34191 | LIMD2_ENSG00000136490                      |
| 17 | 61851686 | 61851970 | 5Y-H4K8ac_peak_7692 | 12.87247 | DDX42_ENSG00000198231                      |
| 17 | 61904845 | 61905236 | 5Y-H4K8ac_peak_7693 | 8.24461  | PSMC5_ENSG00000087191                      |
| 17 | 61919621 | 61919995 | 5Y-H4K8ac_peak_7694 | 8.54067  | SMARCD2_ENSG00000108604                    |
| 17 | 61920562 | 61921140 | 5Y-H4K8ac_peak_7695 | 8.84335  | SMARCD2_ENSG00000108604                    |
| 17 | 61959356 | 61959549 | 5Y-H4K8ac_peak_7696 | 4.9885   | GH2_ENSG00000136487                        |
| 17 | 61966601 | 61966808 | 5Y-H4K8ac_peak_7697 | 5.40331  |                                            |
| 17 | 62207789 | 62208002 | 5Y-H4K8ac_peak_7698 | 6.37023  | ERN1_ENSG00000178607                       |
| 17 | 62255499 | 62255760 | 5Y-H4K8ac_peak_7699 | 8.79399  |                                            |
| 17 | 62256146 | 62256356 | 5Y-H4K8ac_peak_7700 | 4.642    |                                            |
| 17 | 62293891 | 62294330 | 5Y-H4K8ac_peak_7701 | 7.15925  |                                            |
| 17 | 62294614 | 62294927 | 5Y-H4K8ac_peak_7702 | 5.98695  |                                            |
| 17 | 62340836 | 62341388 | 5Y-H4K8ac_peak_7703 | 8.69112  | TEX2_ENSG00000136478                       |
| 17 | 62493399 | 62493775 | 5Y-H4K8ac_peak_7704 | 5.23083  | POLG2_ENSG00000256525                      |
| 17 | 62501731 | 62501993 | 5Y-H4K8ac_peak_7705 | 5.24695  | CEP95_ENSG00000258890                      |
| 17 | 62503159 | 62503493 | 5Y-H4K8ac_peak_7706 | 6.66983  | CEP95_ENSG00000258890;DDX5_ENSG00000108654 |
| 17 | 62658048 | 62658401 | 5Y-H4K8ac_peak_7707 | 17.15332 | SMURF2_ENSG00000108854                     |
| 17 | 62772479 | 62772939 | 5Y-H4K8ac_peak_7708 | 14.70562 |                                            |
| 17 | 62778002 | 62778314 | 5Y-H4K8ac_peak_7709 | 10.21121 | hsa-mir-6080_ENSG00000215769               |
| 17 | 62915758 | 62916436 | 5Y-H4K8ac_peak_7710 | 11.35213 | LRRC37A3_ENSG00000176809                   |
| 17 | 62962009 | 62962227 | 5Y-H4K8ac_peak_7711 | 9.36633  |                                            |
| 17 | 62971236 | 62971592 | 5Y-H4K8ac_peak_7712 | 5.60566  | AMZ2P1_ENSG00000214174                     |
| 17 | 63052513 | 63052858 | 5Y-H4K8ac_peak_7713 | 13.00733 | GNA13_ENSG00000120063                      |
| 17 | 63053083 | 63053832 | 5Y-H4K8ac_peak_7714 | 10.14791 | GNA13_ENSG00000120063                      |
| 17 | 63075836 | 63076086 | 5Y-H4K8ac_peak_7715 | 7.87406  |                                            |
| 17 | 63118828 | 63119509 | 5Y-H4K8ac_peak_7716 | 7.50148  |                                            |
| 17 | 63119838 | 63120090 | 5Y-H4K8ac_peak_7717 | 8.1667   |                                            |
| 17 | 63133523 | 63133733 | 5Y-H4K8ac_peak_7718 | 8.36588  | RGS9_ENSG00000108370                       |
| 17 | 63170113 | 63170432 | 5Y-H4K8ac_peak_7719 | 5.37237  |                                            |
| 17 | 63175823 | 63176015 | 5Y-H4K8ac_peak_7720 | 7.16761  |                                            |
| 17 | 63179776 | 63180034 | 5Y-H4K8ac_peak_7721 | 6.95844  |                                            |
| 17 | 63198930 | 63199121 | 5Y-H4K8ac_peak_7722 | 5.49775  |                                            |
| 17 | 63290062 | 63290395 | 5Y-H4K8ac_peak_7723 | 6.81557  |                                            |
| 17 | 63435186 | 63435385 | 5Y-H4K8ac_peak_7724 | 5.99504  |                                            |
| 17 | 63556709 | 63556984 | 5Y-H4K8ac_peak_7725 | 5.59311  | AXIN2_ENSG00000168646                      |
| 17 | 64244238 | 64244438 | 5Y-H4K8ac_peak_7726 | 6.5814   |                                            |

|    |          |          |                     |          |                                                   |
|----|----------|----------|---------------------|----------|---------------------------------------------------|
| 17 | 64298082 | 64298362 | 5Y-H4K8ac_peak_7727 | 11.48691 | PRKCA_ENSG00000154229                             |
| 17 | 64401084 | 64401477 | 5Y-H4K8ac_peak_7728 | 6.37023  |                                                   |
| 17 | 64659948 | 64660615 | 5Y-H4K8ac_peak_7729 | 10.03452 |                                                   |
| 17 | 64769814 | 64770028 | 5Y-H4K8ac_peak_7730 | 5.14442  |                                                   |
| 17 | 64772058 | 64772488 | 5Y-H4K8ac_peak_7731 | 8.69112  |                                                   |
| 17 | 64830988 | 64831622 | 5Y-H4K8ac_peak_7732 | 11.69482 | CACNG5_ENSG00000075429                            |
| 17 | 64899942 | 64900196 | 5Y-H4K8ac_peak_7733 | 6.37023  |                                                   |
| 17 | 64900941 | 64901516 | 5Y-H4K8ac_peak_7734 | 7.95414  |                                                   |
| 17 | 64949301 | 64949655 | 5Y-H4K8ac_peak_7735 | 7.64648  |                                                   |
| 17 | 64950125 | 64950389 | 5Y-H4K8ac_peak_7736 | 4.642    |                                                   |
| 17 | 64960152 | 64960467 | 5Y-H4K8ac_peak_7737 | 9.02938  | CACNG4_ENSG00000075461                            |
| 17 | 64960785 | 64961153 | 5Y-H4K8ac_peak_7738 | 5.449    | CACNG4_ENSG00000075461                            |
| 17 | 64961353 | 64961653 | 5Y-H4K8ac_peak_7739 | 16.30551 | CACNG4_ENSG00000075461                            |
| 17 | 64961970 | 64962407 | 5Y-H4K8ac_peak_7740 | 6.67135  | CACNG4_ENSG00000075461                            |
| 17 | 64963424 | 64964389 | 5Y-H4K8ac_peak_7741 | 8.20773  |                                                   |
| 17 | 64965241 | 64966583 | 5Y-H4K8ac_peak_7742 | 17.0779  |                                                   |
| 17 | 64967170 | 64967379 | 5Y-H4K8ac_peak_7743 | 9.02938  |                                                   |
| 17 | 64968238 | 64969005 | 5Y-H4K8ac_peak_7744 | 19.41527 |                                                   |
| 17 | 64969486 | 64969980 | 5Y-H4K8ac_peak_7745 | 10.60083 |                                                   |
| 17 | 64970460 | 64970972 | 5Y-H4K8ac_peak_7746 | 8.56853  |                                                   |
| 17 | 64971792 | 64972387 | 5Y-H4K8ac_peak_7747 | 6.78128  |                                                   |
| 17 | 64973679 | 64974593 | 5Y-H4K8ac_peak_7748 | 12.99645 |                                                   |
| 17 | 64975024 | 64975244 | 5Y-H4K8ac_peak_7749 | 9.74838  |                                                   |
| 17 | 64979356 | 64979644 | 5Y-H4K8ac_peak_7750 | 5.03564  |                                                   |
| 17 | 64980956 | 64981277 | 5Y-H4K8ac_peak_7751 | 14.6127  |                                                   |
| 17 | 64982098 | 64982679 | 5Y-H4K8ac_peak_7752 | 14.68223 |                                                   |
| 17 | 64983778 | 64984841 | 5Y-H4K8ac_peak_7753 | 12.79198 |                                                   |
| 17 | 64988619 | 64988832 | 5Y-H4K8ac_peak_7754 | 4.97086  |                                                   |
| 17 | 64989062 | 64989287 | 5Y-H4K8ac_peak_7755 | 7.7384   |                                                   |
| 17 | 64991350 | 64991628 | 5Y-H4K8ac_peak_7756 | 5.37237  |                                                   |
| 17 | 65012548 | 65016520 | 5Y-H4K8ac_peak_7757 | 25.65408 |                                                   |
| 17 | 65017101 | 65018958 | 5Y-H4K8ac_peak_7758 | 12.77513 | RP11-349A8.3_ENSG00000264491                      |
| 17 | 65019773 | 65020027 | 5Y-H4K8ac_peak_7759 | 6.37023  |                                                   |
| 17 | 65021673 | 65021910 | 5Y-H4K8ac_peak_7760 | 4.642    |                                                   |
| 17 | 65118256 | 65118531 | 5Y-H4K8ac_peak_7761 | 8.04693  |                                                   |
| 17 | 65122639 | 65122914 | 5Y-H4K8ac_peak_7762 | 14.30055 |                                                   |
| 17 | 65147039 | 65147257 | 5Y-H4K8ac_peak_7763 | 5.56912  |                                                   |
| 17 | 65240782 | 65241232 | 5Y-H4K8ac_peak_7764 | 6.08523  | HELZ_ENSG00000198265;RP11-401F2.3_ENSG00000266473 |
| 17 | 65241540 | 65242089 | 5Y-H4K8ac_peak_7765 | 6.08523  | HELZ_ENSG00000198265;RP11-401F2.3_ENSG00000266473 |
| 17 | 65362339 | 65362655 | 5Y-H4K8ac_peak_7766 | 15.35687 | PSMD12_ENSG00000197170                            |
| 17 | 65373422 | 65373667 | 5Y-H4K8ac_peak_7767 | 12.14222 | PITPNC1_ENSG00000154217                           |
| 17 | 65434560 | 65434750 | 5Y-H4K8ac_peak_7768 | 5.30478  |                                                   |
| 17 | 65439227 | 65439556 | 5Y-H4K8ac_peak_7769 | 6.08523  |                                                   |
| 17 | 65524940 | 65525244 | 5Y-H4K8ac_peak_7770 | 15.92074 |                                                   |
| 17 | 65989396 | 65989600 | 5Y-H4K8ac_peak_7771 | 7.87406  | C17orf58_ENSG00000186665                          |
| 17 | 65990054 | 65990405 | 5Y-H4K8ac_peak_7772 | 9.74838  | C17orf58_ENSG00000186665                          |

|    |          |          |                     |          |                                                      |
|----|----------|----------|---------------------|----------|------------------------------------------------------|
| 17 | 66016301 | 66016520 | 5Y-H4K8ac_peak_7773 | 12.2918  |                                                      |
| 17 | 66031888 | 66032378 | 5Y-H4K8ac_peak_7774 | 12.15659 | KPNA2_ENSG00000182481                                |
| 17 | 66097969 | 66098179 | 5Y-H4K8ac_peak_7775 | 10.60083 | AC145343.2_ENSG00000265055;LINC00674_ENSG00000237854 |
| 17 | 66197253 | 66197510 | 5Y-H4K8ac_peak_7776 | 7.72887  |                                                      |
| 17 | 66243513 | 66243954 | 5Y-H4K8ac_peak_7777 | 14.53477 | RP11-147L13.2_ENSG00000265100;AMZ2_ENSG00000196704   |
| 17 | 66244250 | 66244552 | 5Y-H4K8ac_peak_7778 | 13.03153 | RP11-147L13.2_ENSG00000265100;AMZ2_ENSG00000196704   |
| 17 | 66508656 | 66508919 | 5Y-H4K8ac_peak_7779 | 6.31818  | PRKAR1A_ENSG00000108946                              |
| 17 | 67323512 | 67323785 | 5Y-H4K8ac_peak_7780 | 9.7353   | ABCA5_ENSG00000154265                                |
| 17 | 67410080 | 67410359 | 5Y-H4K8ac_peak_7781 | 6.43775  | MAP2K6_ENSG00000108984                               |
| 17 | 68648123 | 68648334 | 5Y-H4K8ac_peak_7782 | 4.64156  |                                                      |
| 17 | 69283550 | 69283820 | 5Y-H4K8ac_peak_7783 | 5.59843  |                                                      |
| 17 | 70216503 | 70216697 | 5Y-H4K8ac_peak_7784 | 4.79585  |                                                      |
| 17 | 70374693 | 70374932 | 5Y-H4K8ac_peak_7785 | 6.78128  |                                                      |
| 17 | 70378217 | 70378423 | 5Y-H4K8ac_peak_7786 | 4.0639   |                                                      |
| 17 | 71007881 | 71008100 | 5Y-H4K8ac_peak_7787 | 7.65114  |                                                      |
| 17 | 71089145 | 71089374 | 5Y-H4K8ac_peak_7788 | 11.04356 | SLC39A11_ENSG00000133195                             |
| 17 | 71114786 | 71114991 | 5Y-H4K8ac_peak_7789 | 5.87725  |                                                      |
| 17 | 71130634 | 71130861 | 5Y-H4K8ac_peak_7790 | 7.89142  |                                                      |
| 17 | 71188129 | 71188321 | 5Y-H4K8ac_peak_7791 | 4.50834  | COG1_ENSG00000166685                                 |
| 17 | 71189238 | 71189553 | 5Y-H4K8ac_peak_7792 | 5.87725  | COG1_ENSG00000166685                                 |
| 17 | 71281186 | 71281701 | 5Y-H4K8ac_peak_7793 | 6.96612  |                                                      |
| 17 | 71306035 | 71306697 | 5Y-H4K8ac_peak_7794 | 13.92877 |                                                      |
| 17 | 71308372 | 71308604 | 5Y-H4K8ac_peak_7795 | 7.44077  | CDC42EP4_ENSG00000179604                             |
| 17 | 71337546 | 71337990 | 5Y-H4K8ac_peak_7796 | 11.67591 |                                                      |
| 17 | 71338396 | 71338883 | 5Y-H4K8ac_peak_7797 | 10.90097 |                                                      |
| 17 | 71339154 | 71340300 | 5Y-H4K8ac_peak_7798 | 8.6437   |                                                      |
| 17 | 71345119 | 71345845 | 5Y-H4K8ac_peak_7799 | 6.37023  |                                                      |
| 17 | 71352914 | 71353200 | 5Y-H4K8ac_peak_7800 | 11.88337 |                                                      |
| 17 | 71353904 | 71354181 | 5Y-H4K8ac_peak_7801 | 9.86146  |                                                      |
| 17 | 71365635 | 71366068 | 5Y-H4K8ac_peak_7802 | 4.642    |                                                      |
| 17 | 71471241 | 71471450 | 5Y-H4K8ac_peak_7803 | 6.03632  |                                                      |
| 17 | 71488242 | 71488871 | 5Y-H4K8ac_peak_7804 | 10.0444  |                                                      |
| 17 | 71490316 | 71490628 | 5Y-H4K8ac_peak_7805 | 8.27643  |                                                      |
| 17 | 71529134 | 71529533 | 5Y-H4K8ac_peak_7806 | 7.8267   |                                                      |
| 17 | 71715246 | 71715943 | 5Y-H4K8ac_peak_7807 | 17.55091 |                                                      |
| 17 | 71716248 | 71716888 | 5Y-H4K8ac_peak_7808 | 12.10416 |                                                      |
| 17 | 71766412 | 71766731 | 5Y-H4K8ac_peak_7809 | 5.24695  |                                                      |
| 17 | 71948693 | 71949008 | 5Y-H4K8ac_peak_7810 | 5.12488  |                                                      |
| 17 | 72121520 | 72121936 | 5Y-H4K8ac_peak_7811 | 4.97006  |                                                      |
| 17 | 72143594 | 72143891 | 5Y-H4K8ac_peak_7812 | 5.64909  |                                                      |
| 17 | 72144099 | 72144352 | 5Y-H4K8ac_peak_7813 | 7.89273  |                                                      |
| 17 | 72178045 | 72178396 | 5Y-H4K8ac_peak_7814 | 5.71283  |                                                      |
| 17 | 72199926 | 72200205 | 5Y-H4K8ac_peak_7815 | 3.94247  | RPL38_ENSG00000172809                                |
| 17 | 72208990 | 72209468 | 5Y-H4K8ac_peak_7816 | 8.9562   | CTD-2514K5.2_ENSG00000246731;TTYH2_ENSG00000141540   |
| 17 | 72210086 | 72210302 | 5Y-H4K8ac_peak_7817 | 7.65404  | CTD-2514K5.2_ENSG00000246731;TTYH2_ENSG00000141540   |
| 17 | 72239195 | 72239639 | 5Y-H4K8ac_peak_7818 | 8.69112  |                                                      |

|    |          |          |                     |          |                                                                          |
|----|----------|----------|---------------------|----------|--------------------------------------------------------------------------|
| 17 | 72240403 | 72240618 | 5Y-H4K8ac_peak_7819 | 5.27937  |                                                                          |
| 17 | 72253514 | 72253748 | 5Y-H4K8ac_peak_7820 | 5.89113  |                                                                          |
| 17 | 72321948 | 72322212 | 5Y-H4K8ac_peak_7821 | 6.10343  | KIF19_ENSG00000196169                                                    |
| 17 | 72375819 | 72376180 | 5Y-H4K8ac_peak_7822 | 6.96612  |                                                                          |
| 17 | 72449823 | 72450128 | 5Y-H4K8ac_peak_7823 | 14.26354 |                                                                          |
| 17 | 72450424 | 72451022 | 5Y-H4K8ac_peak_7824 | 11.09673 |                                                                          |
| 17 | 72453483 | 72453686 | 5Y-H4K8ac_peak_7825 | 5.67483  |                                                                          |
| 17 | 72595368 | 72595597 | 5Y-H4K8ac_peak_7826 | 12.19856 | CTD-2006K23.1_ENSG00000261222                                            |
| 17 | 72628766 | 72628980 | 5Y-H4K8ac_peak_7827 | 7.50148  |                                                                          |
| 17 | 72744225 | 72744510 | 5Y-H4K8ac_peak_7828 | 11.40439 | MIR3615_ENSG00000266036;MIR3615_ENSG00000264624;SLC9A3R1_ENSG00000109062 |
| 17 | 72754230 | 72754506 | 5Y-H4K8ac_peak_7829 | 7.11863  |                                                                          |
| 17 | 72754885 | 72755094 | 5Y-H4K8ac_peak_7830 | 5.03564  |                                                                          |
| 17 | 72755327 | 72755904 | 5Y-H4K8ac_peak_7831 | 5.12488  |                                                                          |
| 17 | 72756190 | 72756785 | 5Y-H4K8ac_peak_7832 | 15.80786 |                                                                          |
| 17 | 72757317 | 72757712 | 5Y-H4K8ac_peak_7833 | 8.34719  |                                                                          |
| 17 | 72838548 | 72838993 | 5Y-H4K8ac_peak_7834 | 9.07085  |                                                                          |
| 17 | 72839237 | 72839570 | 5Y-H4K8ac_peak_7835 | 5.17251  |                                                                          |
| 17 | 72951467 | 72951949 | 5Y-H4K8ac_peak_7836 | 6.25061  |                                                                          |
| 17 | 72954286 | 72954557 | 5Y-H4K8ac_peak_7837 | 10.44473 |                                                                          |
| 17 | 72967730 | 72968093 | 5Y-H4K8ac_peak_7838 | 11.22005 | RP11-309N17.4_ENSG00000263586                                            |
| 17 | 72977531 | 72978345 | 5Y-H4K8ac_peak_7839 | 12.00715 |                                                                          |
| 17 | 72978600 | 72978927 | 5Y-H4K8ac_peak_7840 | 12.00715 |                                                                          |
| 17 | 72985179 | 72985377 | 5Y-H4K8ac_peak_7841 | 3.94247  |                                                                          |
| 17 | 72986713 | 72986937 | 5Y-H4K8ac_peak_7842 | 6.08523  |                                                                          |
| 17 | 73008315 | 73009377 | 5Y-H4K8ac_peak_7843 | 8.19942  | ICT1_ENSG00000167862                                                     |
| 17 | 73030651 | 73031163 | 5Y-H4K8ac_peak_7844 | 16.79029 |                                                                          |
| 17 | 73031763 | 73032136 | 5Y-H4K8ac_peak_7845 | 8.06489  |                                                                          |
| 17 | 73043521 | 73043797 | 5Y-H4K8ac_peak_7846 | 5.12488  | ATP5H_ENSG00000167863                                                    |
| 17 | 73087079 | 73087348 | 5Y-H4K8ac_peak_7847 | 12.05638 |                                                                          |
| 17 | 73105234 | 73105799 | 5Y-H4K8ac_peak_7848 | 7.90751  | ARMC7_ENSG00000125449                                                    |
| 17 | 73127367 | 73128331 | 5Y-H4K8ac_peak_7849 | 7.27671  | NT5C_ENSG00000125458                                                     |
| 17 | 73149758 | 73150196 | 5Y-H4K8ac_peak_7850 | 6.10343  |                                                                          |
| 17 | 73178346 | 73179030 | 5Y-H4K8ac_peak_7851 | 16.17072 | SUMO2_ENSG00000188612                                                    |
| 17 | 73179371 | 73179856 | 5Y-H4K8ac_peak_7852 | 13.23366 | SUMO2_ENSG00000188612                                                    |
| 17 | 73200826 | 73201044 | 5Y-H4K8ac_peak_7853 | 5.87725  | NUP85_ENSG00000125450                                                    |
| 17 | 73201558 | 73202021 | 5Y-H4K8ac_peak_7854 | 13.89096 | NUP85_ENSG00000125450                                                    |
| 17 | 73240326 | 73240553 | 5Y-H4K8ac_peak_7855 | 6.78128  |                                                                          |
| 17 | 73241786 | 73242169 | 5Y-H4K8ac_peak_7856 | 8.36588  |                                                                          |
| 17 | 73257335 | 73258487 | 5Y-H4K8ac_peak_7857 | 9.8327   | GGA3_ENSG00000125447;MRPS7_ENSG00000125445                               |
| 17 | 73266883 | 73267195 | 5Y-H4K8ac_peak_7858 | 7.90751  | MIF4GD_ENSG00000125457;RP11-649A18.12_ENSG00000263843                    |
| 17 | 73267542 | 73268341 | 5Y-H4K8ac_peak_7859 | 13.33225 | MIF4GD_ENSG00000125457;RP11-649A18.12_ENSG00000263843                    |
| 17 | 73268555 | 73268848 | 5Y-H4K8ac_peak_7860 | 6.19716  |                                                                          |
| 17 | 73401372 | 73401703 | 5Y-H4K8ac_peak_7861 | 9.93175  | GRB2_ENSG00000177885;MIR3678_ENSG00000264511                             |
| 17 | 73452817 | 73453447 | 5Y-H4K8ac_peak_7862 | 8.09118  |                                                                          |
| 17 | 73511336 | 73511567 | 5Y-H4K8ac_peak_7863 | 8.73392  | CASKIN2_ENSG00000177303;TSEN54_ENSG00000182173                           |
| 17 | 73512142 | 73512410 | 5Y-H4K8ac_peak_7864 | 11.62198 | CASKIN2_ENSG00000177303;TSEN54_ENSG00000182173                           |

|    |          |          |                     |          |                                                                      |
|----|----------|----------|---------------------|----------|----------------------------------------------------------------------|
| 17 | 73512672 | 73512972 | 5Y-H4K8ac_peak_7865 | 7.8267   | TSEN54_ENSG00000182173                                               |
| 17 | 73548885 | 73549106 | 5Y-H4K8ac_peak_7866 | 6.73385  |                                                                      |
| 17 | 73553384 | 73553759 | 5Y-H4K8ac_peak_7867 | 8.04693  |                                                                      |
| 17 | 73554197 | 73554521 | 5Y-H4K8ac_peak_7868 | 5.37237  |                                                                      |
| 17 | 73584271 | 73585242 | 5Y-H4K8ac_peak_7869 | 12.79198 | MYO15B_ENSG00000266714                                               |
| 17 | 73585573 | 73586219 | 5Y-H4K8ac_peak_7870 | 11.26379 |                                                                      |
| 17 | 73616447 | 73616689 | 5Y-H4K8ac_peak_7871 | 8.76608  |                                                                      |
| 17 | 73629265 | 73629493 | 5Y-H4K8ac_peak_7872 | 7.72887  | SMIM5_ENSG00000204323                                                |
| 17 | 73662905 | 73663181 | 5Y-H4K8ac_peak_7873 | 14.99673 | RECQL5_ENSG00000108469;SAP30BP_ENSG00000161526                       |
| 17 | 73745726 | 73746076 | 5Y-H4K8ac_peak_7874 | 12.00715 |                                                                      |
| 17 | 73749283 | 73750508 | 5Y-H4K8ac_peak_7875 | 21.41794 |                                                                      |
| 17 | 73760582 | 73761166 | 5Y-H4K8ac_peak_7876 | 15.41988 | GALK1_ENSG00000108479                                                |
| 17 | 73775233 | 73775730 | 5Y-H4K8ac_peak_7877 | 7.72887  |                                                                      |
| 17 | 73780217 | 73780616 | 5Y-H4K8ac_peak_7878 | 8.26455  | MIR4738_ENSG00000263565;UNK_ENSG00000132478                          |
| 17 | 73781207 | 73781614 | 5Y-H4K8ac_peak_7879 | 17.69008 | H3F3B_ENSG00000132475;MIR4738_ENSG00000263565;UNK_ENSG00000132478    |
| 17 | 73822771 | 73823202 | 5Y-H4K8ac_peak_7880 | 10.55714 |                                                                      |
| 17 | 73823883 | 73824376 | 5Y-H4K8ac_peak_7881 | 17.89499 |                                                                      |
| 17 | 73824884 | 73825108 | 5Y-H4K8ac_peak_7882 | 5.87725  |                                                                      |
| 17 | 73839698 | 73840115 | 5Y-H4K8ac_peak_7883 | 5.51759  | UNC13D_ENSG00000092929                                               |
| 17 | 73857207 | 73857481 | 5Y-H4K8ac_peak_7884 | 8.16382  |                                                                      |
| 17 | 73872087 | 73872402 | 5Y-H4K8ac_peak_7885 | 8.3285   | RP11-552F3.9_ENSG00000267801                                         |
| 17 | 73874350 | 73874616 | 5Y-H4K8ac_peak_7886 | 6.80915  | TRIM47_ENSG00000132481                                               |
| 17 | 73892329 | 73892931 | 5Y-H4K8ac_peak_7887 | 10.14791 | TRIM65_ENSG00000141569;RP11-552F3.10_ENSG00000267342                 |
| 17 | 73900532 | 73900790 | 5Y-H4K8ac_peak_7888 | 7.50501  |                                                                      |
| 17 | 73901330 | 73901644 | 5Y-H4K8ac_peak_7889 | 7.20869  |                                                                      |
| 17 | 73906014 | 73906246 | 5Y-H4K8ac_peak_7890 | 3.93327  | MRPL38_ENSG00000204316                                               |
| 17 | 73975307 | 73976186 | 5Y-H4K8ac_peak_7891 | 11.34483 | ACOX1_ENSG00000161533;TEN1_ENSG00000257949;TEN1-CDK3_ENSG00000261408 |
| 17 | 74010098 | 74010343 | 5Y-H4K8ac_peak_7892 | 7.7384   |                                                                      |
| 17 | 74033037 | 74033333 | 5Y-H4K8ac_peak_7893 | 8.49078  |                                                                      |
| 17 | 74068198 | 74068469 | 5Y-H4K8ac_peak_7894 | 9.02782  | SRP68_ENSG00000167881;ZACN_ENSG00000186919                           |
| 17 | 74068748 | 74069047 | 5Y-H4K8ac_peak_7895 | 11.26379 | SRP68_ENSG00000167881;ZACN_ENSG00000186919                           |
| 17 | 74099672 | 74100849 | 5Y-H4K8ac_peak_7896 | 13.33225 |                                                                      |
| 17 | 74235797 | 74236231 | 5Y-H4K8ac_peak_7897 | 8.09118  | RNF157_ENSG00000141576                                               |
| 17 | 74236898 | 74237181 | 5Y-H4K8ac_peak_7898 | 10.0444  | RNF157_ENSG00000141576                                               |
| 17 | 74261654 | 74261865 | 5Y-H4K8ac_peak_7899 | 8.36027  | UBALD2_ENSG00000185262                                               |
| 17 | 74350041 | 74350257 | 5Y-H4K8ac_peak_7900 | 12.51536 |                                                                      |
| 17 | 74364145 | 74364553 | 5Y-H4K8ac_peak_7901 | 8.22388  |                                                                      |
| 17 | 74382201 | 74382458 | 5Y-H4K8ac_peak_7902 | 12.34969 |                                                                      |
| 17 | 74493890 | 74494236 | 5Y-H4K8ac_peak_7903 | 5.24695  |                                                                      |
| 17 | 74496998 | 74498041 | 5Y-H4K8ac_peak_7904 | 7.20869  | RHBDF2_ENSG00000129667                                               |
| 17 | 74502228 | 74502938 | 5Y-H4K8ac_peak_7905 | 11.86704 |                                                                      |
| 17 | 74525694 | 74526014 | 5Y-H4K8ac_peak_7906 | 6.08523  |                                                                      |
| 17 | 74526209 | 74527032 | 5Y-H4K8ac_peak_7907 | 11.23789 |                                                                      |
| 17 | 74534155 | 74535186 | 5Y-H4K8ac_peak_7908 | 15.81923 |                                                                      |
| 17 | 74536129 | 74536966 | 5Y-H4K8ac_peak_7909 | 14.86775 |                                                                      |
| 17 | 74537265 | 74537727 | 5Y-H4K8ac_peak_7910 | 5.72233  |                                                                      |



|    |          |          |                     |          |                                                                              |
|----|----------|----------|---------------------|----------|------------------------------------------------------------------------------|
| 17 | 74538245 | 74539961 | 5Y-H4K8ac_peak_7911 | 23.29116 |                                                                              |
| 17 | 74540337 | 74541684 | 5Y-H4K8ac_peak_7912 | 19.8038  |                                                                              |
| 17 | 74548585 | 74548781 | 5Y-H4K8ac_peak_7913 | 5.24695  |                                                                              |
| 17 | 74549795 | 74550033 | 5Y-H4K8ac_peak_7914 | 9.79526  |                                                                              |
| 17 | 74553328 | 74553642 | 5Y-H4K8ac_peak_7915 | 4.642    | RP11-666A8.8_ENSG00000267546;SNHG16_ENSG00000163597                          |
| 17 | 74632436 | 74632770 | 5Y-H4K8ac_peak_7916 | 5.65584  |                                                                              |
| 17 | 74667035 | 74667707 | 5Y-H4K8ac_peak_7917 | 16.01457 | RP11-318A15.2_ENSG00000261335                                                |
| 17 | 74668158 | 74668357 | 5Y-H4K8ac_peak_7918 | 8.1667   | RP11-318A15.2_ENSG00000261335                                                |
| 17 | 74705654 | 74706025 | 5Y-H4K8ac_peak_7919 | 7.59101  |                                                                              |
| 17 | 74706362 | 74706608 | 5Y-H4K8ac_peak_7920 | 7.89273  | MXRA7_ENSG00000182534                                                        |
| 17 | 74722361 | 74722552 | 5Y-H4K8ac_peak_7921 | 7.00004  | JMJD6_ENSG00000070495;METTL23_ENSG00000181038                                |
| 17 | 74722991 | 74723319 | 5Y-H4K8ac_peak_7922 | 13.82621 | JMJD6_ENSG00000070495;METTL23_ENSG00000181038                                |
| 17 | 74732672 | 74733367 | 5Y-H4K8ac_peak_7923 | 11.4254  | SRSF2_ENSG00000161547;MFSD11_ENSG00000092931;MIR636_ENSG00000207556          |
| 17 | 74733774 | 74734024 | 5Y-H4K8ac_peak_7924 | 12.26819 | SRSF2_ENSG00000161547                                                        |
| 17 | 74816148 | 74816402 | 5Y-H4K8ac_peak_7925 | 4.642    |                                                                              |
| 17 | 74816839 | 74817053 | 5Y-H4K8ac_peak_7926 | 7.82914  |                                                                              |
| 17 | 74837709 | 74838141 | 5Y-H4K8ac_peak_7927 | 11.22005 |                                                                              |
| 17 | 74864778 | 74865006 | 5Y-H4K8ac_peak_7928 | 7.08486  | MGAT5B_ENSG00000167889                                                       |
| 17 | 74865950 | 74866383 | 5Y-H4K8ac_peak_7929 | 6.78128  |                                                                              |
| 17 | 74965195 | 74965622 | 5Y-H4K8ac_peak_7930 | 11.40439 | RP11-87G24.3_ENSG00000267568                                                 |
| 17 | 74966149 | 74966350 | 5Y-H4K8ac_peak_7931 | 9.36633  | RP11-87G24.3_ENSG00000267568                                                 |
| 17 | 75081576 | 75082156 | 5Y-H4K8ac_peak_7932 | 9.44016  | LINC00338_ENSG00000234912;SEC14L1_ENSG00000129657                            |
| 17 | 75083744 | 75084535 | 5Y-H4K8ac_peak_7933 | 13.00733 | LINC00338_ENSG00000234912;SEC14L1_ENSG00000129657;AC015815.3_ENSG00000203316 |
| 17 | 75084812 | 75085209 | 5Y-H4K8ac_peak_7934 | 23.16211 |                                                                              |
| 17 | 75242849 | 75243598 | 5Y-H4K8ac_peak_7935 | 10.56003 |                                                                              |
| 17 | 75260639 | 75260987 | 5Y-H4K8ac_peak_7936 | 8.69112  | RP11-285E9.5_ENSG00000265121                                                 |
| 17 | 75274104 | 75274358 | 5Y-H4K8ac_peak_7937 | 5.27937  |                                                                              |
| 17 | 75277540 | 75277828 | 5Y-H4K8ac_peak_7938 | 6.80915  | RP11-285E9.6_ENSG00000263718;SEPT9_ENSG00000184640                           |
| 17 | 75278885 | 75279130 | 5Y-H4K8ac_peak_7939 | 5.87725  | RP11-285E9.6_ENSG00000263718                                                 |
| 17 | 75283494 | 75284684 | 5Y-H4K8ac_peak_7940 | 9.88714  |                                                                              |
| 17 | 75302301 | 75302807 | 5Y-H4K8ac_peak_7941 | 5.60566  |                                                                              |
| 17 | 75303046 | 75303621 | 5Y-H4K8ac_peak_7942 | 9.19793  |                                                                              |
| 17 | 75304782 | 75305537 | 5Y-H4K8ac_peak_7943 | 6.35459  |                                                                              |
| 17 | 75306198 | 75306829 | 5Y-H4K8ac_peak_7944 | 6.53157  |                                                                              |
| 17 | 75307042 | 75307239 | 5Y-H4K8ac_peak_7945 | 7.20726  |                                                                              |
| 17 | 75309231 | 75309489 | 5Y-H4K8ac_peak_7946 | 7.72887  |                                                                              |
| 17 | 75310725 | 75311155 | 5Y-H4K8ac_peak_7947 | 9.79526  |                                                                              |
| 17 | 75311753 | 75312234 | 5Y-H4K8ac_peak_7948 | 7.68528  |                                                                              |
| 17 | 75316734 | 75317113 | 5Y-H4K8ac_peak_7949 | 7.00889  |                                                                              |
| 17 | 75318758 | 75319071 | 5Y-H4K8ac_peak_7950 | 7.3565   |                                                                              |
| 17 | 75347565 | 75347823 | 5Y-H4K8ac_peak_7951 | 5.60566  |                                                                              |
| 17 | 75350530 | 75350789 | 5Y-H4K8ac_peak_7952 | 7.8511   |                                                                              |
| 17 | 75359078 | 75359357 | 5Y-H4K8ac_peak_7953 | 12.26819 |                                                                              |
| 17 | 75359730 | 75359941 | 5Y-H4K8ac_peak_7954 | 3.93392  |                                                                              |
| 17 | 75360288 | 75360931 | 5Y-H4K8ac_peak_7955 | 9.98604  |                                                                              |
| 17 | 75370050 | 75370400 | 5Y-H4K8ac_peak_7956 | 3.94247  |                                                                              |

|    |          |          |                     |          |                              |
|----|----------|----------|---------------------|----------|------------------------------|
| 17 | 75372818 | 75373150 | 5Y-H4K8ac_peak_7957 | 9.02938  | RP11-936I5.1_ENSG00000266998 |
| 17 | 75373608 | 75373985 | 5Y-H4K8ac_peak_7958 | 13.59183 | RP11-936I5.1_ENSG00000266998 |
| 17 | 75384118 | 75384397 | 5Y-H4K8ac_peak_7959 | 8.13307  |                              |
| 17 | 75385029 | 75385800 | 5Y-H4K8ac_peak_7960 | 16.41608 |                              |
| 17 | 75386768 | 75387222 | 5Y-H4K8ac_peak_7961 | 7.11863  |                              |
| 17 | 75420413 | 75420637 | 5Y-H4K8ac_peak_7962 | 9.31478  |                              |
| 17 | 75421439 | 75422286 | 5Y-H4K8ac_peak_7963 | 8.09118  |                              |
| 17 | 75429015 | 75429846 | 5Y-H4K8ac_peak_7964 | 20.22935 |                              |
| 17 | 75430275 | 75431102 | 5Y-H4K8ac_peak_7965 | 9.45199  |                              |
| 17 | 75432673 | 75433303 | 5Y-H4K8ac_peak_7966 | 8.3438   |                              |
| 17 | 75446624 | 75446907 | 5Y-H4K8ac_peak_7967 | 5.46519  |                              |
| 17 | 75447199 | 75447406 | 5Y-H4K8ac_peak_7968 | 6.53157  |                              |
| 17 | 75447626 | 75448023 | 5Y-H4K8ac_peak_7969 | 20.79772 |                              |
| 17 | 75476073 | 75476954 | 5Y-H4K8ac_peak_7970 | 8.09118  |                              |
| 17 | 75524296 | 75525114 | 5Y-H4K8ac_peak_7971 | 9.44542  |                              |
| 17 | 75686942 | 75687786 | 5Y-H4K8ac_peak_7972 | 8.38845  |                              |
| 17 | 75696613 | 75696908 | 5Y-H4K8ac_peak_7973 | 7.59101  |                              |
| 17 | 75719859 | 75720049 | 5Y-H4K8ac_peak_7974 | 6.54441  |                              |
| 17 | 75730223 | 75730715 | 5Y-H4K8ac_peak_7975 | 7.89273  |                              |
| 17 | 75731185 | 75731833 | 5Y-H4K8ac_peak_7976 | 9.87124  |                              |
| 17 | 75732306 | 75732532 | 5Y-H4K8ac_peak_7977 | 6.37023  |                              |
| 17 | 75775462 | 75776277 | 5Y-H4K8ac_peak_7978 | 15.90416 |                              |
| 17 | 75777982 | 75778242 | 5Y-H4K8ac_peak_7979 | 6.78318  |                              |
| 17 | 75798309 | 75798560 | 5Y-H4K8ac_peak_7980 | 9.30505  |                              |
| 17 | 75798759 | 75799093 | 5Y-H4K8ac_peak_7981 | 8.73985  |                              |
| 17 | 75799324 | 75799565 | 5Y-H4K8ac_peak_7982 | 6.31818  |                              |
| 17 | 75860023 | 75860473 | 5Y-H4K8ac_peak_7983 | 15.82359 |                              |
| 17 | 75861460 | 75861730 | 5Y-H4K8ac_peak_7984 | 13.00733 |                              |
| 17 | 75869840 | 75870483 | 5Y-H4K8ac_peak_7985 | 15.82359 |                              |
| 17 | 75870968 | 75871279 | 5Y-H4K8ac_peak_7986 | 4.6766   |                              |
| 17 | 75876394 | 75876589 | 5Y-H4K8ac_peak_7987 | 8.62703  |                              |
| 17 | 75877092 | 75877688 | 5Y-H4K8ac_peak_7988 | 11.86704 | FLJ45079_ENSG00000204283     |
| 17 | 75878719 | 75879368 | 5Y-H4K8ac_peak_7989 | 9.79526  | FLJ45079_ENSG00000204283     |
| 17 | 75924127 | 75924380 | 5Y-H4K8ac_peak_7990 | 7.65404  |                              |
| 17 | 75927389 | 75927775 | 5Y-H4K8ac_peak_7991 | 6.20292  |                              |
| 17 | 75953969 | 75954427 | 5Y-H4K8ac_peak_7992 | 11.22005 |                              |
| 17 | 76037008 | 76037299 | 5Y-H4K8ac_peak_7993 | 5.12488  |                              |
| 17 | 76113131 | 76114047 | 5Y-H4K8ac_peak_7994 | 6.9958   |                              |
| 17 | 76121678 | 76122244 | 5Y-H4K8ac_peak_7995 | 4.0639   |                              |
| 17 | 76124549 | 76124788 | 5Y-H4K8ac_peak_7996 | 7.20869  |                              |
| 17 | 76128141 | 76128412 | 5Y-H4K8ac_peak_7997 | 9.30206  | TMC6_ENSG00000141524         |
| 17 | 76164086 | 76164512 | 5Y-H4K8ac_peak_7998 | 12.2918  | SYNGR2_ENSG00000108639       |
| 17 | 76210417 | 76210799 | 5Y-H4K8ac_peak_7999 | 8.20773  | BIRC5_ENSG00000089685        |
| 17 | 76219523 | 76219750 | 5Y-H4K8ac_peak_8000 | 4.97086  | AC087645.1_ENSG00000268310   |
| 17 | 76221225 | 76221848 | 5Y-H4K8ac_peak_8001 | 9.758    | AC087645.1_ENSG00000268310   |
| 17 | 76227733 | 76228020 | 5Y-H4K8ac_peak_8002 | 12.67841 | TMEM235_ENSG00000204278      |

|    |          |          |                     |          |                                                     |
|----|----------|----------|---------------------|----------|-----------------------------------------------------|
| 17 | 76230610 | 76230984 | 5Y-H4K8ac_peak_8003 | 6.78128  |                                                     |
| 17 | 76233934 | 76234554 | 5Y-H4K8ac_peak_8004 | 6.55841  |                                                     |
| 17 | 76246677 | 76246950 | 5Y-H4K8ac_peak_8005 | 7.96285  |                                                     |
| 17 | 76249905 | 76250577 | 5Y-H4K8ac_peak_8006 | 10.74494 | THA1P_ENSG00000267676                               |
| 17 | 76252357 | 76252735 | 5Y-H4K8ac_peak_8007 | 5.73383  |                                                     |
| 17 | 76253061 | 76253438 | 5Y-H4K8ac_peak_8008 | 9.01738  |                                                     |
| 17 | 76253822 | 76254037 | 5Y-H4K8ac_peak_8009 | 12.42757 |                                                     |
| 17 | 76254485 | 76254797 | 5Y-H4K8ac_peak_8010 | 14.93667 |                                                     |
| 17 | 76309868 | 76310632 | 5Y-H4K8ac_peak_8011 | 10.35586 |                                                     |
| 17 | 76320815 | 76321015 | 5Y-H4K8ac_peak_8012 | 5.84816  |                                                     |
| 17 | 76337643 | 76338307 | 5Y-H4K8ac_peak_8013 | 11.23789 |                                                     |
| 17 | 76349149 | 76349381 | 5Y-H4K8ac_peak_8014 | 9.00954  |                                                     |
| 17 | 76355792 | 76356179 | 5Y-H4K8ac_peak_8015 | 8.62703  | SOCS3_ENSG00000184557;RP11-806H10.4_ENSG00000266970 |
| 17 | 76365653 | 76366192 | 5Y-H4K8ac_peak_8016 | 10.37549 |                                                     |
| 17 | 76373900 | 76374135 | 5Y-H4K8ac_peak_8017 | 5.18558  | PGS1_ENSG00000087157                                |
| 17 | 76374435 | 76375067 | 5Y-H4K8ac_peak_8018 | 12.26819 | PGS1_ENSG00000087157                                |
| 17 | 76525740 | 76525981 | 5Y-H4K8ac_peak_8019 | 8.24461  |                                                     |
| 17 | 76712855 | 76713450 | 5Y-H4K8ac_peak_8020 | 10.1994  |                                                     |
| 17 | 76719833 | 76720309 | 5Y-H4K8ac_peak_8021 | 6.16671  |                                                     |
| 17 | 76836469 | 76836779 | 5Y-H4K8ac_peak_8022 | 5.87918  | USP36_ENSG00000055483                               |
| 17 | 76837290 | 76837538 | 5Y-H4K8ac_peak_8023 | 10.12457 | USP36_ENSG00000055483                               |
| 17 | 76878271 | 76879115 | 5Y-H4K8ac_peak_8024 | 12.50545 |                                                     |
| 17 | 76879355 | 76880615 | 5Y-H4K8ac_peak_8025 | 11.30548 |                                                     |
| 17 | 76887559 | 76888188 | 5Y-H4K8ac_peak_8026 | 4.55128  |                                                     |
| 17 | 76888494 | 76888782 | 5Y-H4K8ac_peak_8027 | 6.03632  |                                                     |
| 17 | 76912797 | 76912997 | 5Y-H4K8ac_peak_8028 | 4.00285  |                                                     |
| 17 | 76921610 | 76921993 | 5Y-H4K8ac_peak_8029 | 38.70009 | TIMP2_ENSG00000035862                               |
| 17 | 76922265 | 76922647 | 5Y-H4K8ac_peak_8030 | 10.35586 | TIMP2_ENSG00000035862                               |
| 17 | 76929263 | 76930308 | 5Y-H4K8ac_peak_8031 | 11.67272 |                                                     |
| 17 | 76930755 | 76931487 | 5Y-H4K8ac_peak_8032 | 13.1133  |                                                     |
| 17 | 76931958 | 76932190 | 5Y-H4K8ac_peak_8033 | 8.46718  |                                                     |
| 17 | 76932626 | 76932820 | 5Y-H4K8ac_peak_8034 | 8.32351  |                                                     |
| 17 | 76970735 | 76971007 | 5Y-H4K8ac_peak_8035 | 11.03999 |                                                     |
| 17 | 76975375 | 76975965 | 5Y-H4K8ac_peak_8036 | 10.18556 | LGALS3BP_ENSG00000108679                            |
| 17 | 76976217 | 76977058 | 5Y-H4K8ac_peak_8037 | 14.40623 | LGALS3BP_ENSG00000108679                            |
| 17 | 77005455 | 77005807 | 5Y-H4K8ac_peak_8038 | 7.54409  | CANT1_ENSG00000171302                               |
| 17 | 77006023 | 77006486 | 5Y-H4K8ac_peak_8039 | 9.13842  | CANT1_ENSG00000171302                               |
| 17 | 77019977 | 77020450 | 5Y-H4K8ac_peak_8040 | 12.34969 |                                                     |
| 17 | 77021034 | 77021251 | 5Y-H4K8ac_peak_8041 | 6.75784  |                                                     |
| 17 | 77023303 | 77023554 | 5Y-H4K8ac_peak_8042 | 5.60566  | C1QTNF1-AS1_ENSG00000265096                         |
| 17 | 77023884 | 77024251 | 5Y-H4K8ac_peak_8043 | 9.69453  | C1QTNF1-AS1_ENSG00000265096                         |
| 17 | 77042632 | 77043089 | 5Y-H4K8ac_peak_8044 | 4.44548  |                                                     |
| 17 | 77043533 | 77043847 | 5Y-H4K8ac_peak_8045 | 8.67963  |                                                     |
| 17 | 77071170 | 77071512 | 5Y-H4K8ac_peak_8046 | 6.78128  | ENGASE_ENSG00000167280                              |
| 17 | 77210557 | 77210764 | 5Y-H4K8ac_peak_8047 | 5.12488  |                                                     |
| 17 | 77211102 | 77211447 | 5Y-H4K8ac_peak_8048 | 7.44077  |                                                     |

|    |          |          |                     |          |                                                |
|----|----------|----------|---------------------|----------|------------------------------------------------|
| 17 | 77242723 | 77242916 | 5Y-H4K8ac_peak_8049 | 7.65114  |                                                |
| 17 | 77255403 | 77255739 | 5Y-H4K8ac_peak_8050 | 7.02726  |                                                |
| 17 | 77301734 | 77301956 | 5Y-H4K8ac_peak_8051 | 4.18845  |                                                |
| 17 | 77302270 | 77302938 | 5Y-H4K8ac_peak_8052 | 10.12457 |                                                |
| 17 | 77701756 | 77702442 | 5Y-H4K8ac_peak_8053 | 19.99409 |                                                |
| 17 | 77702642 | 77703124 | 5Y-H4K8ac_peak_8054 | 15.2347  |                                                |
| 17 | 77751372 | 77751630 | 5Y-H4K8ac_peak_8055 | 5.03564  | CBX2_ENSG00000173894                           |
| 17 | 77752045 | 77752501 | 5Y-H4K8ac_peak_8056 | 15.54885 | CBX2_ENSG00000173894                           |
| 17 | 77771717 | 77772270 | 5Y-H4K8ac_peak_8057 | 35.28442 |                                                |
| 17 | 77783239 | 77783512 | 5Y-H4K8ac_peak_8058 | 8.24461  | AC100791.2_ENSG00000238331                     |
| 17 | 77783746 | 77784003 | 5Y-H4K8ac_peak_8059 | 13.27075 | AC100791.2_ENSG00000238331                     |
| 17 | 77784782 | 77785984 | 5Y-H4K8ac_peak_8060 | 11.26379 | AC100791.2_ENSG00000238331                     |
| 17 | 77786251 | 77787962 | 5Y-H4K8ac_peak_8061 | 43.68056 |                                                |
| 17 | 77805113 | 77805593 | 5Y-H4K8ac_peak_8062 | 10.23828 |                                                |
| 17 | 77805840 | 77806587 | 5Y-H4K8ac_peak_8063 | 15.17389 |                                                |
| 17 | 77813468 | 77813825 | 5Y-H4K8ac_peak_8064 | 13.27075 | CBX4_ENSG00000141582                           |
| 17 | 77817314 | 77818377 | 5Y-H4K8ac_peak_8065 | 18.65264 |                                                |
| 17 | 77818773 | 77819106 | 5Y-H4K8ac_peak_8066 | 9.44542  |                                                |
| 17 | 77893877 | 77894094 | 5Y-H4K8ac_peak_8067 | 4.47015  | RP11-353N14.4_ENSG00000262188                  |
| 17 | 77904117 | 77904521 | 5Y-H4K8ac_peak_8068 | 6.78128  |                                                |
| 17 | 78009820 | 78010261 | 5Y-H4K8ac_peak_8069 | 10.35586 | TBC1D16_ENSG00000167291;CCDC40_ENSG00000141519 |
| 17 | 78070576 | 78071146 | 5Y-H4K8ac_peak_8070 | 11.60058 |                                                |
| 17 | 78074978 | 78075193 | 5Y-H4K8ac_peak_8071 | 12.71428 | GAA_ENSG00000171298                            |
| 17 | 78120487 | 78120737 | 5Y-H4K8ac_peak_8072 | 6.37023  | EIF4A3_ENSG00000141543                         |
| 17 | 78193742 | 78194101 | 5Y-H4K8ac_peak_8073 | 8.62703  | SGSH_ENSG00000181523;SLC26A11_ENSG00000181045  |
| 17 | 78233646 | 78234289 | 5Y-H4K8ac_peak_8074 | 17.34187 | RNF213_ENSG00000173821                         |
| 17 | 78235148 | 78235623 | 5Y-H4K8ac_peak_8075 | 4.56212  | RNF213_ENSG00000173821                         |
| 17 | 78236568 | 78237090 | 5Y-H4K8ac_peak_8076 | 4.72465  |                                                |
| 17 | 78362902 | 78363474 | 5Y-H4K8ac_peak_8077 | 5.87725  |                                                |
| 17 | 78413607 | 78413886 | 5Y-H4K8ac_peak_8078 | 11.36989 |                                                |
| 17 | 78417719 | 78418310 | 5Y-H4K8ac_peak_8079 | 8.77023  |                                                |
| 17 | 78418728 | 78419259 | 5Y-H4K8ac_peak_8080 | 6.78128  |                                                |
| 17 | 78419502 | 78419830 | 5Y-H4K8ac_peak_8081 | 5.42736  |                                                |
| 17 | 78426856 | 78427318 | 5Y-H4K8ac_peak_8082 | 7.6757   |                                                |
| 17 | 78427620 | 78428491 | 5Y-H4K8ac_peak_8083 | 26.34191 | CTD-2526A2.2_ENSG00000260369                   |
| 17 | 78428773 | 78429339 | 5Y-H4K8ac_peak_8084 | 18.31883 | CTD-2526A2.2_ENSG00000260369                   |
| 17 | 78465833 | 78466027 | 5Y-H4K8ac_peak_8085 | 6.73047  |                                                |
| 17 | 78517863 | 78518176 | 5Y-H4K8ac_peak_8086 | 8.69112  | RPTOR_ENSG00000141564                          |
| 17 | 78518699 | 78519064 | 5Y-H4K8ac_peak_8087 | 10.54669 | RPTOR_ENSG00000141564                          |
| 17 | 78670402 | 78670700 | 5Y-H4K8ac_peak_8088 | 4.29586  |                                                |
| 17 | 78800495 | 78800687 | 5Y-H4K8ac_peak_8089 | 7.60057  |                                                |
| 17 | 78806806 | 78807025 | 5Y-H4K8ac_peak_8090 | 11.4254  |                                                |
| 17 | 78808437 | 78808664 | 5Y-H4K8ac_peak_8091 | 4.77126  |                                                |
| 17 | 78810206 | 78810511 | 5Y-H4K8ac_peak_8092 | 4.89128  |                                                |
| 17 | 78832782 | 78833171 | 5Y-H4K8ac_peak_8093 | 13.86769 |                                                |
| 17 | 78833601 | 78834470 | 5Y-H4K8ac_peak_8094 | 22.3803  |                                                |

|    |          |          |                     |          |                                                       |
|----|----------|----------|---------------------|----------|-------------------------------------------------------|
| 17 | 78835407 | 78836193 | 5Y-H4K8ac_peak_8095 | 6.34245  |                                                       |
| 17 | 78965401 | 78966463 | 5Y-H4K8ac_peak_8096 | 11.69482 | CHMP6_ENSG00000176108                                 |
| 17 | 79009377 | 79009567 | 5Y-H4K8ac_peak_8097 | 7.89273  | BAIAP2-AS1_ENSG00000226137;BAIAP2_ENSG00000175866     |
| 17 | 79031002 | 79031194 | 5Y-H4K8ac_peak_8098 | 8.5159   |                                                       |
| 17 | 79038181 | 79038430 | 5Y-H4K8ac_peak_8099 | 10.48695 |                                                       |
| 17 | 79038736 | 79039271 | 5Y-H4K8ac_peak_8100 | 8.24461  |                                                       |
| 17 | 79040948 | 79041163 | 5Y-H4K8ac_peak_8101 | 4.44729  |                                                       |
| 17 | 79041486 | 79041862 | 5Y-H4K8ac_peak_8102 | 4.97086  |                                                       |
| 17 | 79049173 | 79049664 | 5Y-H4K8ac_peak_8103 | 7.93983  |                                                       |
| 17 | 79050548 | 79050754 | 5Y-H4K8ac_peak_8104 | 4.48815  |                                                       |
| 17 | 79056846 | 79057043 | 5Y-H4K8ac_peak_8105 | 7.18391  |                                                       |
| 17 | 79088522 | 79088746 | 5Y-H4K8ac_peak_8106 | 6.78128  |                                                       |
| 17 | 79088956 | 79089497 | 5Y-H4K8ac_peak_8107 | 9.79526  |                                                       |
| 17 | 79090077 | 79090421 | 5Y-H4K8ac_peak_8108 | 6.98416  |                                                       |
| 17 | 79138508 | 79138798 | 5Y-H4K8ac_peak_8109 | 7.11863  | AATK-AS1_ENSG00000225180                              |
| 17 | 79139104 | 79139834 | 5Y-H4K8ac_peak_8110 | 10.48476 | AATK_ENSG00000181409;AATK-AS1_ENSG00000225180         |
| 17 | 79140393 | 79140716 | 5Y-H4K8ac_peak_8111 | 7.50148  | AATK_ENSG00000181409                                  |
| 17 | 79213147 | 79213532 | 5Y-H4K8ac_peak_8112 | 17.69008 | ENTHD2_ENSG00000167302;C17orf89_ENSG00000224877       |
| 17 | 79226067 | 79227035 | 5Y-H4K8ac_peak_8113 | 11.16796 |                                                       |
| 17 | 79268576 | 79268927 | 5Y-H4K8ac_peak_8114 | 6.56228  | SLC38A10_ENSG00000157637                              |
| 17 | 79283444 | 79284926 | 5Y-H4K8ac_peak_8115 | 15.2347  | LINC00482_ENSG00000185168                             |
| 17 | 79285162 | 79286013 | 5Y-H4K8ac_peak_8116 | 10.48476 |                                                       |
| 17 | 79287462 | 79288000 | 5Y-H4K8ac_peak_8117 | 7.67774  |                                                       |
| 17 | 79288232 | 79289155 | 5Y-H4K8ac_peak_8118 | 14.00559 |                                                       |
| 17 | 79290436 | 79290721 | 5Y-H4K8ac_peak_8119 | 4.92207  |                                                       |
| 17 | 79291857 | 79292083 | 5Y-H4K8ac_peak_8120 | 10.60083 |                                                       |
| 17 | 79296273 | 79296635 | 5Y-H4K8ac_peak_8121 | 6.339    |                                                       |
| 17 | 79297922 | 79298317 | 5Y-H4K8ac_peak_8122 | 8.01363  |                                                       |
| 17 | 79302268 | 79303017 | 5Y-H4K8ac_peak_8123 | 19.8038  |                                                       |
| 17 | 79303221 | 79306253 | 5Y-H4K8ac_peak_8124 | 16.73191 | TMEM105_ENSG00000185332                               |
| 17 | 79308401 | 79308770 | 5Y-H4K8ac_peak_8125 | 6.55841  |                                                       |
| 17 | 79312247 | 79312705 | 5Y-H4K8ac_peak_8126 | 5.41191  |                                                       |
| 17 | 79313290 | 79313853 | 5Y-H4K8ac_peak_8127 | 10.89466 |                                                       |
| 17 | 79314215 | 79315882 | 5Y-H4K8ac_peak_8128 | 15.41988 |                                                       |
| 17 | 79316568 | 79316994 | 5Y-H4K8ac_peak_8129 | 9.64738  |                                                       |
| 17 | 79317229 | 79317601 | 5Y-H4K8ac_peak_8130 | 13.89357 |                                                       |
| 17 | 79317923 | 79318223 | 5Y-H4K8ac_peak_8131 | 8.24461  |                                                       |
| 17 | 79319260 | 79319785 | 5Y-H4K8ac_peak_8132 | 16.86751 |                                                       |
| 17 | 79320290 | 79320550 | 5Y-H4K8ac_peak_8133 | 8.22976  |                                                       |
| 17 | 79366904 | 79367192 | 5Y-H4K8ac_peak_8134 | 5.60566  |                                                       |
| 17 | 79367434 | 79367769 | 5Y-H4K8ac_peak_8135 | 7.90005  |                                                       |
| 17 | 79373605 | 79373851 | 5Y-H4K8ac_peak_8136 | 4.90516  | RP11-1055B8.7_ENSG00000171282;MIR4740_ENSG00000266392 |
| 17 | 79392957 | 79393941 | 5Y-H4K8ac_peak_8137 | 7.44077  |                                                       |
| 17 | 79438712 | 79439040 | 5Y-H4K8ac_peak_8138 | 9.02938  |                                                       |
| 17 | 79440142 | 79440372 | 5Y-H4K8ac_peak_8139 | 4.37349  |                                                       |
| 17 | 79446527 | 79446766 | 5Y-H4K8ac_peak_8140 | 9.11495  |                                                       |

|    |          |          |                     |          |                                                                                                        |
|----|----------|----------|---------------------|----------|--------------------------------------------------------------------------------------------------------|
| 17 | 79448744 | 79449022 | 5Y-H4K8ac_peak_8141 | 6.80915  |                                                                                                        |
| 17 | 79449963 | 79450309 | 5Y-H4K8ac_peak_8142 | 5.83797  |                                                                                                        |
| 17 | 79450527 | 79451226 | 5Y-H4K8ac_peak_8143 | 4.83889  |                                                                                                        |
| 17 | 79451547 | 79452172 | 5Y-H4K8ac_peak_8144 | 11.41007 |                                                                                                        |
| 17 | 79454645 | 79455646 | 5Y-H4K8ac_peak_8145 | 13.99124 |                                                                                                        |
| 17 | 79480118 | 79480652 | 5Y-H4K8ac_peak_8146 | 12.00715 | RP13-766D20.1_ENSG00000229947;RP13-766D20.2_ENSG00000229848                                            |
| 17 | 79481235 | 79482352 | 5Y-H4K8ac_peak_8147 | 12.26819 | RP13-766D20.2_ENSG00000229848                                                                          |
| 17 | 79490977 | 79491311 | 5Y-H4K8ac_peak_8148 | 5.80081  | ACTG1_ENSG00000184009                                                                                  |
| 17 | 79519133 | 79519370 | 5Y-H4K8ac_peak_8149 | 10.29016 |                                                                                                        |
| 17 | 79519752 | 79519957 | 5Y-H4K8ac_peak_8150 | 6.80915  |                                                                                                        |
| 17 | 79520865 | 79521267 | 5Y-H4K8ac_peak_8151 | 11.5813  | C17orf70_ENSG00000185504                                                                               |
| 17 | 79603683 | 79604060 | 5Y-H4K8ac_peak_8152 | 9.30505  | TSPAN10_ENSG00000182612                                                                                |
| 17 | 79632201 | 79632417 | 5Y-H4K8ac_peak_8153 | 4.77126  | CCDC137_ENSG00000185298                                                                                |
| 17 | 79633816 | 79634622 | 5Y-H4K8ac_peak_8154 | 13.45283 | OXLD1_ENSG00000204237;CCDC137_ENSG00000185298                                                          |
| 17 | 79650147 | 79650699 | 5Y-H4K8ac_peak_8155 | 8.3285   | ARL16_ENSG00000214087;HGS_ENSG00000185359                                                              |
| 17 | 79651140 | 79651416 | 5Y-H4K8ac_peak_8156 | 9.79526  | ARL16_ENSG00000214087;HGS_ENSG00000185359                                                              |
| 17 | 79669941 | 79670193 | 5Y-H4K8ac_peak_8157 | 10.35586 | RP13-1032I1.7_ENSG00000262049;MRPL12_ENSG00000262814;SLC25A10_ENSG00000262660;SLC25A10_ENSG00000183048 |
| 17 | 79677827 | 79678339 | 5Y-H4K8ac_peak_8158 | 5.64815  |                                                                                                        |
| 17 | 79679449 | 79679642 | 5Y-H4K8ac_peak_8159 | 6.34245  |                                                                                                        |
| 17 | 79772731 | 79773140 | 5Y-H4K8ac_peak_8160 | 5.92809  |                                                                                                        |
| 17 | 79791297 | 79791867 | 5Y-H4K8ac_peak_8161 | 13.33225 | FAM195B_ENSG00000225663                                                                                |
| 17 | 79818167 | 79818358 | 5Y-H4K8ac_peak_8162 | 7.44077  | P4HB_ENSG00000185624                                                                                   |
| 17 | 79819539 | 79819740 | 5Y-H4K8ac_peak_8163 | 8.24461  | P4HB_ENSG00000185624                                                                                   |
| 17 | 79825962 | 79826172 | 5Y-H4K8ac_peak_8164 | 5.24064  | RP11-498C9.3_ENSG00000262413                                                                           |
| 17 | 79828430 | 79828733 | 5Y-H4K8ac_peak_8165 | 3.94247  | ARHGDI1_ENSG00000141522                                                                                |
| 17 | 79829316 | 79830313 | 5Y-H4K8ac_peak_8166 | 28.91936 | ARHGDI1_ENSG00000141522                                                                                |
| 17 | 79848733 | 79849045 | 5Y-H4K8ac_peak_8167 | 11.18846 | ALYREF_ENSG00000183684;ANAPC11_ENSG00000141552                                                         |
| 17 | 79849696 | 79850163 | 5Y-H4K8ac_peak_8168 | 3.94247  | ALYREF_ENSG00000183684                                                                                 |
| 17 | 79860321 | 79860516 | 5Y-H4K8ac_peak_8169 | 5.31535  |                                                                                                        |
| 17 | 79886083 | 79886947 | 5Y-H4K8ac_peak_8170 | 9.96717  | MAFG_ENSG00000197063;MAFG-AS1_ENSG00000265688                                                          |
| 17 | 79894557 | 79895046 | 5Y-H4K8ac_peak_8171 | 5.99756  |                                                                                                        |
| 17 | 79895347 | 79896346 | 5Y-H4K8ac_peak_8172 | 6.17806  |                                                                                                        |
| 17 | 79917059 | 79917997 | 5Y-H4K8ac_peak_8173 | 10.15788 |                                                                                                        |
| 17 | 79924216 | 79925913 | 5Y-H4K8ac_peak_8174 | 28.41881 | RP11-498C9.17_ENSG00000264735                                                                          |
| 17 | 79926225 | 79926869 | 5Y-H4K8ac_peak_8175 | 9.30505  |                                                                                                        |
| 17 | 79934453 | 79934844 | 5Y-H4K8ac_peak_8176 | 5.87725  | ASPSCR1_ENSG00000169696                                                                                |
| 17 | 79935042 | 79935300 | 5Y-H4K8ac_peak_8177 | 15.35687 | ASPSCR1_ENSG00000169696                                                                                |
| 17 | 79935516 | 79936791 | 5Y-H4K8ac_peak_8178 | 17.37977 | ASPSCR1_ENSG00000169696                                                                                |
| 17 | 79949981 | 79951215 | 5Y-H4K8ac_peak_8179 | 8.62703  |                                                                                                        |
| 17 | 79964637 | 79964895 | 5Y-H4K8ac_peak_8180 | 7.61515  |                                                                                                        |
| 17 | 79965316 | 79965940 | 5Y-H4K8ac_peak_8181 | 8.68553  |                                                                                                        |
| 17 | 79970379 | 79971213 | 5Y-H4K8ac_peak_8182 | 5.03564  |                                                                                                        |
| 17 | 79981360 | 79981621 | 5Y-H4K8ac_peak_8183 | 8.24461  | STRA13_ENSG00000169689;LRRRC45_ENSG00000169683                                                         |
| 17 | 80009074 | 80009445 | 5Y-H4K8ac_peak_8184 | 12.10416 | RFNG_ENSG00000169733;GPS1_ENSG00000169727                                                              |
| 17 | 80023745 | 80024681 | 5Y-H4K8ac_peak_8185 | 23.58923 | DUS1L_ENSG00000169718                                                                                  |
| 17 | 80055591 | 80055945 | 5Y-H4K8ac_peak_8186 | 8.47129  | FASN_ENSG00000169710                                                                                   |

|    |          |          |                     |          |                                                             |
|----|----------|----------|---------------------|----------|-------------------------------------------------------------|
| 17 | 80056851 | 80057862 | 5Y-H4K8ac_peak_8187 | 26.70591 | FASN_ENSG00000169710                                        |
| 17 | 80058116 | 80058309 | 5Y-H4K8ac_peak_8188 | 7.20869  |                                                             |
| 17 | 80059605 | 80060039 | 5Y-H4K8ac_peak_8189 | 5.85463  |                                                             |
| 17 | 80062690 | 80063144 | 5Y-H4K8ac_peak_8190 | 7.44077  |                                                             |
| 17 | 80063466 | 80064078 | 5Y-H4K8ac_peak_8191 | 14.68695 |                                                             |
| 17 | 80064514 | 80065064 | 5Y-H4K8ac_peak_8192 | 7.64648  |                                                             |
| 17 | 80170825 | 80171538 | 5Y-H4K8ac_peak_8193 | 16.0768  | CCDC57_ENSG00000176155;RP13-516M14.2_ENSG00000264548        |
| 17 | 80199385 | 80199720 | 5Y-H4K8ac_peak_8194 | 5.03564  |                                                             |
| 17 | 80231040 | 80231487 | 5Y-H4K8ac_peak_8195 | 9.51254  | CSNK1D_ENSG00000141551                                      |
| 17 | 80231805 | 80232051 | 5Y-H4K8ac_peak_8196 | 9.02938  | CSNK1D_ENSG00000141551                                      |
| 17 | 80241542 | 80241919 | 5Y-H4K8ac_peak_8197 | 10.0861  |                                                             |
| 17 | 80250228 | 80250618 | 5Y-H4K8ac_peak_8198 | 17.29652 | RP13-516M14.4_ENSG00000265692;RP13-516M14.1_ENSG00000260563 |
| 17 | 80255754 | 80256026 | 5Y-H4K8ac_peak_8199 | 10.01993 |                                                             |
| 17 | 80256320 | 80256646 | 5Y-H4K8ac_peak_8200 | 11.05566 |                                                             |
| 17 | 80316462 | 80317288 | 5Y-H4K8ac_peak_8201 | 8.62703  | TEX19_ENSG00000182459                                       |
| 17 | 80341818 | 80342095 | 5Y-H4K8ac_peak_8202 | 7.89273  |                                                             |
| 17 | 80357784 | 80357979 | 5Y-H4K8ac_peak_8203 | 10.72427 |                                                             |
| 17 | 80408230 | 80408503 | 5Y-H4K8ac_peak_8204 | 8.43511  | C17orf62_ENSG00000178927                                    |
| 17 | 80416049 | 80416392 | 5Y-H4K8ac_peak_8205 | 41.21512 | RP13-20L14.6_ENSG00000265458;NARF_ENSG00000141562           |
| 17 | 80451992 | 80452311 | 5Y-H4K8ac_peak_8206 | 6.19716  |                                                             |
| 17 | 80454565 | 80455084 | 5Y-H4K8ac_peak_8207 | 13.0871  |                                                             |
| 17 | 80456023 | 80456238 | 5Y-H4K8ac_peak_8208 | 6.36248  |                                                             |
| 17 | 80477890 | 80478141 | 5Y-H4K8ac_peak_8209 | 7.50148  | FOXK2_ENSG00000141568                                       |
| 17 | 80551380 | 80551585 | 5Y-H4K8ac_peak_8210 | 4.97086  |                                                             |
| 17 | 80605846 | 80606213 | 5Y-H4K8ac_peak_8211 | 6.08523  | WDR45B_ENSG00000141580                                      |
| 17 | 80606888 | 80607081 | 5Y-H4K8ac_peak_8212 | 6.78318  | WDR45B_ENSG00000141580                                      |
| 17 | 80673940 | 80674201 | 5Y-H4K8ac_peak_8213 | 5.64909  | RP11-388C12.1_ENSG00000263063;FN3KRP_ENSG00000141560        |
| 17 | 80693114 | 80693398 | 5Y-H4K8ac_peak_8214 | 10.30425 | FN3K_ENSG00000167363                                        |
| 17 | 80751345 | 80751561 | 5Y-H4K8ac_peak_8215 | 6.78128  |                                                             |
| 17 | 80751846 | 80752061 | 5Y-H4K8ac_peak_8216 | 7.65114  |                                                             |
| 17 | 80787966 | 80788225 | 5Y-H4K8ac_peak_8217 | 5.34199  |                                                             |
| 17 | 80788469 | 80788661 | 5Y-H4K8ac_peak_8218 | 8.3285   |                                                             |
| 17 | 80824339 | 80824661 | 5Y-H4K8ac_peak_8219 | 6.71125  |                                                             |
| 17 | 80825866 | 80826149 | 5Y-H4K8ac_peak_8220 | 10.35586 |                                                             |
| 17 | 81009911 | 81010405 | 5Y-H4K8ac_peak_8221 | 23.03824 | B3GNTL1_ENSG00000175711                                     |
| 18 | 267700   | 267947   | 5Y-H4K8ac_peak_8222 | 5.91107  | THOC1_ENSG00000079134;RP11-705O1.8_ENSG00000263884          |
| 18 | 268245   | 268515   | 5Y-H4K8ac_peak_8223 | 4.77126  | THOC1_ENSG00000079134;RP11-705O1.8_ENSG00000263884          |
| 18 | 268755   | 269230   | 5Y-H4K8ac_peak_8224 | 6.34046  | THOC1_ENSG00000079134;RP11-705O1.8_ENSG00000263884          |
| 18 | 2655004  | 2655393  | 5Y-H4K8ac_peak_8225 | 4.50834  | CBX3P2_ENSG00000266405;SMCHD1_ENSG00000101596               |
| 18 | 2906232  | 2907128  | 5Y-H4K8ac_peak_8226 | 13.63503 |                                                             |
| 18 | 3012630  | 3013095  | 5Y-H4K8ac_peak_8227 | 7.59101  | LPIN2_ENSG00000101577                                       |
| 18 | 3247910  | 3248282  | 5Y-H4K8ac_peak_8228 | 9.05168  | RP13-270P17.3_ENSG00000272688;MYL12A_ENSG00000101608        |
| 18 | 3261893  | 3262256  | 5Y-H4K8ac_peak_8229 | 7.38046  | RP13-270P17.1_ENSG00000264235;MYL12B_ENSG00000118680        |
| 18 | 3592456  | 3592765  | 5Y-H4K8ac_peak_8230 | 5.87382  | DLGAP1-AS1_ENSG00000177337                                  |
| 18 | 3593375  | 3593580  | 5Y-H4K8ac_peak_8231 | 4.29586  | DLGAP1-AS1_ENSG00000177337                                  |
| 18 | 3594531  | 3594828  | 5Y-H4K8ac_peak_8232 | 6.55906  | DLGAP1-AS1_ENSG00000177337                                  |

|    |          |          |                     |          |                                                         |
|----|----------|----------|---------------------|----------|---------------------------------------------------------|
| 18 | 3623389  | 3623722  | 5Y-H4K8ac_peak_8233 | 5.23819  |                                                         |
| 18 | 5237162  | 5237526  | 5Y-H4K8ac_peak_8234 | 7.38046  | RP11-835E18.5_ENSG00000265091                           |
| 18 | 5237827  | 5238314  | 5Y-H4K8ac_peak_8235 | 11.1169  | RP11-835E18.5_ENSG00000265091;LINC00526_ENSG00000264575 |
| 18 | 5295635  | 5295902  | 5Y-H4K8ac_peak_8236 | 9.38203  |                                                         |
| 18 | 5890799  | 5891237  | 5Y-H4K8ac_peak_8237 | 6.77436  |                                                         |
| 18 | 6414385  | 6414879  | 5Y-H4K8ac_peak_8238 | 8.24461  | L3MBTL4_ENSG00000154655                                 |
| 18 | 8257044  | 8257321  | 5Y-H4K8ac_peak_8239 | 5.98695  |                                                         |
| 18 | 8259808  | 8260184  | 5Y-H4K8ac_peak_8240 | 4.84727  |                                                         |
| 18 | 8260706  | 8260961  | 5Y-H4K8ac_peak_8241 | 11.1169  |                                                         |
| 18 | 8263328  | 8263895  | 5Y-H4K8ac_peak_8242 | 4.07874  |                                                         |
| 18 | 8264434  | 8264770  | 5Y-H4K8ac_peak_8243 | 19.33296 |                                                         |
| 18 | 8608799  | 8609123  | 5Y-H4K8ac_peak_8244 | 8.30301  | RAB12_ENSG00000206418                                   |
| 18 | 8661853  | 8662061  | 5Y-H4K8ac_peak_8245 | 5.40331  |                                                         |
| 18 | 8765414  | 8765679  | 5Y-H4K8ac_peak_8246 | 9.63153  |                                                         |
| 18 | 8794413  | 8794609  | 5Y-H4K8ac_peak_8247 | 9.22011  |                                                         |
| 18 | 9016920  | 9017304  | 5Y-H4K8ac_peak_8248 | 8.67475  |                                                         |
| 18 | 9101285  | 9101503  | 5Y-H4K8ac_peak_8249 | 4.51076  |                                                         |
| 18 | 9102693  | 9102988  | 5Y-H4K8ac_peak_8250 | 20.96132 | NDUFV2_ENSG00000178127;RP11-21J18.1_ENSG00000265257     |
| 18 | 9136198  | 9136485  | 5Y-H4K8ac_peak_8251 | 4.95697  | RP11-143J12.2_ENSG00000266053;ANKRD12_ENSG00000101745   |
| 18 | 9474542  | 9475149  | 5Y-H4K8ac_peak_8252 | 8.43511  | RP11-61L19.2_ENSG00000273335;RALBP1_ENSG00000017797     |
| 18 | 9614744  | 9615363  | 5Y-H4K8ac_peak_8253 | 11.53136 | PPP4R1_ENSG00000154845;RP11-692N5.1_ENSG00000263627     |
| 18 | 9708043  | 9708789  | 5Y-H4K8ac_peak_8254 | 9.38276  | RAB31_ENSG00000168461                                   |
| 18 | 11851457 | 11851652 | 5Y-H4K8ac_peak_8255 | 5.23083  | CHMPIB_ENSG00000255112                                  |
| 18 | 12076422 | 12076767 | 5Y-H4K8ac_peak_8256 | 10.1994  | RP11-815J4.6_ENSG00000256616                            |
| 18 | 12271402 | 12271747 | 5Y-H4K8ac_peak_8257 | 5.04571  |                                                         |
| 18 | 12376755 | 12377043 | 5Y-H4K8ac_peak_8258 | 5.23083  | AFG3L2_ENSG00000141385                                  |
| 18 | 12420038 | 12420565 | 5Y-H4K8ac_peak_8259 | 5.98695  |                                                         |
| 18 | 12420871 | 12421348 | 5Y-H4K8ac_peak_8260 | 10.508   |                                                         |
| 18 | 12702296 | 12703019 | 5Y-H4K8ac_peak_8261 | 11.69482 | CEP76_ENSG00000101624                                   |
| 18 | 12884001 | 12884236 | 5Y-H4K8ac_peak_8262 | 10.11191 |                                                         |
| 18 | 12948021 | 12948247 | 5Y-H4K8ac_peak_8263 | 6.6946   | SEH1L_ENSG00000085415                                   |
| 18 | 13136601 | 13137122 | 5Y-H4K8ac_peak_8264 | 9.36633  |                                                         |
| 18 | 13217915 | 13218501 | 5Y-H4K8ac_peak_8265 | 8.73392  | LDLRAD4_ENSG00000168675                                 |
| 18 | 13222702 | 13222956 | 5Y-H4K8ac_peak_8266 | 5.56894  |                                                         |
| 18 | 13223289 | 13223700 | 5Y-H4K8ac_peak_8267 | 5.56894  |                                                         |
| 18 | 13223905 | 13224272 | 5Y-H4K8ac_peak_8268 | 6.50117  |                                                         |
| 18 | 13446611 | 13446906 | 5Y-H4K8ac_peak_8269 | 8.43511  |                                                         |
| 18 | 13448161 | 13448459 | 5Y-H4K8ac_peak_8270 | 5.94703  |                                                         |
| 18 | 13489411 | 13489620 | 5Y-H4K8ac_peak_8271 | 4.07874  |                                                         |
| 18 | 13500181 | 13500682 | 5Y-H4K8ac_peak_8272 | 9.179    | RP11-53B2.5_ENSG00000267366                             |
| 18 | 13502050 | 13502277 | 5Y-H4K8ac_peak_8273 | 4.66683  | RP11-53B2.5_ENSG00000267366                             |
| 18 | 13583865 | 13584148 | 5Y-H4K8ac_peak_8274 | 7.63144  |                                                         |
| 18 | 13627772 | 13628010 | 5Y-H4K8ac_peak_8275 | 4.03329  |                                                         |
| 18 | 14132960 | 14133223 | 5Y-H4K8ac_peak_8276 | 6.34046  | ZNF519_ENSG00000175322                                  |
| 18 | 19179954 | 19180471 | 5Y-H4K8ac_peak_8277 | 9.88125  | ESCO1_ENSG00000141446                                   |
| 18 | 19320813 | 19321234 | 5Y-H4K8ac_peak_8278 | 9.23159  |                                                         |



|    |          |          |                     |          |                                                       |
|----|----------|----------|---------------------|----------|-------------------------------------------------------|
| 18 | 19321674 | 19321872 | 5Y-H4K8ac_peak_8279 | 6.77436  |                                                       |
| 18 | 20513303 | 20513960 | 5Y-H4K8ac_peak_8280 | 14.31711 | RP11-739L10.1_ENSG00000265943;MIR4741_ENSG00000264817 |
| 18 | 20723707 | 20724111 | 5Y-H4K8ac_peak_8281 | 7.41197  |                                                       |
| 18 | 20772469 | 20772684 | 5Y-H4K8ac_peak_8282 | 5.64909  |                                                       |
| 18 | 20839082 | 20839382 | 5Y-H4K8ac_peak_8283 | 9.179    | RP11-17J14.2_ENSG00000266495                          |
| 18 | 20839622 | 20840137 | 5Y-H4K8ac_peak_8284 | 12.05638 | RP11-17J14.2_ENSG00000266495                          |
| 18 | 20840927 | 20841379 | 5Y-H4K8ac_peak_8285 | 5.65584  | RP11-17J14.2_ENSG00000266495                          |
| 18 | 20860088 | 20860479 | 5Y-H4K8ac_peak_8286 | 5.65584  |                                                       |
| 18 | 21018666 | 21018902 | 5Y-H4K8ac_peak_8287 | 5.65584  | TMEM241_ENSG00000134490                               |
| 18 | 21033464 | 21033664 | 5Y-H4K8ac_peak_8288 | 5.35202  | RIOK3_ENSG00000101782                                 |
| 18 | 21082704 | 21083239 | 5Y-H4K8ac_peak_8289 | 7.50148  | C18orf8_ENSG00000141452                               |
| 18 | 21242754 | 21242976 | 5Y-H4K8ac_peak_8290 | 4.51076  | ANKRD29_ENSG00000154065                               |
| 18 | 21269583 | 21270140 | 5Y-H4K8ac_peak_8291 | 6.08523  | LAMA3_ENSG00000053747                                 |
| 18 | 21594135 | 21594455 | 5Y-H4K8ac_peak_8292 | 9.32595  | RP11-403A21.2_ENSG00000264745                         |
| 18 | 21594851 | 21595379 | 5Y-H4K8ac_peak_8293 | 4.77126  | RP11-403A21.2_ENSG00000264745                         |
| 18 | 22006325 | 22006520 | 5Y-H4K8ac_peak_8294 | 12.10416 | IMPACT_ENSG00000154059                                |
| 18 | 22006756 | 22007129 | 5Y-H4K8ac_peak_8295 | 14.86775 | IMPACT_ENSG00000154059                                |
| 18 | 22250935 | 22251147 | 5Y-H4K8ac_peak_8296 | 4.07874  |                                                       |
| 18 | 22251412 | 22251720 | 5Y-H4K8ac_peak_8297 | 6.14981  |                                                       |
| 18 | 22929478 | 22929896 | 5Y-H4K8ac_peak_8298 | 11.36844 |                                                       |
| 18 | 23184814 | 23185175 | 5Y-H4K8ac_peak_8299 | 16.38263 |                                                       |
| 18 | 23406202 | 23406417 | 5Y-H4K8ac_peak_8300 | 7.31815  |                                                       |
| 18 | 23670583 | 23670842 | 5Y-H4K8ac_peak_8301 | 18.06205 | SS18_ENSG00000141380                                  |
| 18 | 23671110 | 23671458 | 5Y-H4K8ac_peak_8302 | 6.79955  | SS18_ENSG00000141380                                  |
| 18 | 23806544 | 23806819 | 5Y-H4K8ac_peak_8303 | 5.03917  | TAF4B_ENSG00000141384                                 |
| 18 | 24084058 | 24084690 | 5Y-H4K8ac_peak_8304 | 6.50117  |                                                       |
| 18 | 24128251 | 24128523 | 5Y-H4K8ac_peak_8305 | 14.31711 |                                                       |
| 18 | 24235607 | 24235814 | 5Y-H4K8ac_peak_8306 | 7.31815  | AQP4-AS1_ENSG00000260372                              |
| 18 | 24236364 | 24237296 | 5Y-H4K8ac_peak_8307 | 30.87849 | KCTD1_ENSG00000134504;AQP4-AS1_ENSG00000260372        |
| 18 | 24443152 | 24443428 | 5Y-H4K8ac_peak_8308 | 5.23083  |                                                       |
| 18 | 24443635 | 24443898 | 5Y-H4K8ac_peak_8309 | 5.56912  |                                                       |
| 18 | 25757410 | 25757890 | 5Y-H4K8ac_peak_8310 | 14.1808  | CDH2_ENSG00000170558                                  |
| 18 | 29264788 | 29265303 | 5Y-H4K8ac_peak_8311 | 8.75926  | B4GALT6_ENSG00000118276;RP11-549B18.1_ENSG00000259985 |
| 18 | 29265714 | 29265985 | 5Y-H4K8ac_peak_8312 | 7.01266  | B4GALT6_ENSG00000118276;RP11-549B18.1_ENSG00000259985 |
| 18 | 29522505 | 29522926 | 5Y-H4K8ac_peak_8313 | 5.64909  | RP11-326K13.4_ENSG00000263823                         |
| 18 | 29671903 | 29672323 | 5Y-H4K8ac_peak_8314 | 15.40182 | RP11-53I6.3_ENSG00000265008;RNF138_ENSG00000134758    |
| 18 | 30050219 | 30050790 | 5Y-H4K8ac_peak_8315 | 9.38203  | GAREM_ENSG00000141441                                 |
| 18 | 30350155 | 30350404 | 5Y-H4K8ac_peak_8316 | 5.449    | AC012123.1_ENSG00000228835                            |
| 18 | 30350747 | 30351166 | 5Y-H4K8ac_peak_8317 | 9.30505  | AC012123.1_ENSG00000228835                            |
| 18 | 31020500 | 31020882 | 5Y-H4K8ac_peak_8318 | 13.8759  | CCDC178_ENSG00000166960                               |
| 18 | 31157812 | 31158142 | 5Y-H4K8ac_peak_8319 | 6.77436  | RP11-258B16.1_ENSG00000267642;ASXL3_ENSG00000141431   |
| 18 | 31158672 | 31158938 | 5Y-H4K8ac_peak_8320 | 4.77126  | RP11-258B16.1_ENSG00000267642;ASXL3_ENSG00000141431   |
| 18 | 31739065 | 31739992 | 5Y-H4K8ac_peak_8321 | 13.2534  |                                                       |
| 18 | 31802555 | 31802873 | 5Y-H4K8ac_peak_8322 | 12.50545 | RP11-379L18.1_ENSG00000267746                         |
| 18 | 32702852 | 32703136 | 5Y-H4K8ac_peak_8323 | 5.35202  |                                                       |
| 18 | 32820581 | 32821242 | 5Y-H4K8ac_peak_8324 | 12.71156 | ZNF397_ENSG00000186812                                |

|    |          |          |                     |          |                                                                             |
|----|----------|----------|---------------------|----------|-----------------------------------------------------------------------------|
| 18 | 32870398 | 32870643 | 5Y-H4K8ac_peak_8325 | 9.38203  | ZSCAN30_ENSG00000186814;RP11-158H5.7_ENSG00000268573;ZNF271_ENSG00000257267 |
| 18 | 32924022 | 32924379 | 5Y-H4K8ac_peak_8326 | 22.85923 |                                                                             |
| 18 | 33161079 | 33161395 | 5Y-H4K8ac_peak_8327 | 11.22005 | GALNT1_ENSG00000141429                                                      |
| 18 | 33530133 | 33530396 | 5Y-H4K8ac_peak_8328 | 10.1994  |                                                                             |
| 18 | 33709498 | 33709740 | 5Y-H4K8ac_peak_8329 | 16.79568 | SLC39A6_ENSG00000141424;ELP2_ENSG00000134759                                |
| 18 | 33709964 | 33710164 | 5Y-H4K8ac_peak_8330 | 7.97699  | SLC39A6_ENSG00000141424;ELP2_ENSG00000134759                                |
| 18 | 33767447 | 33767652 | 5Y-H4K8ac_peak_8331 | 7.3889   | RP11-49I11.1_ENSG00000260552;MOCOS_ENSG00000075643                          |
| 18 | 33944730 | 33944984 | 5Y-H4K8ac_peak_8332 | 6.20875  |                                                                             |
| 18 | 33961962 | 33962296 | 5Y-H4K8ac_peak_8333 | 6.50117  |                                                                             |
| 18 | 34408597 | 34408920 | 5Y-H4K8ac_peak_8334 | 7.89273  | TPGS2_ENSG00000134779;KIAA1328_ENSG00000150477                              |
| 18 | 35020202 | 35020430 | 5Y-H4K8ac_peak_8335 | 4.47071  |                                                                             |
| 18 | 35025135 | 35025409 | 5Y-H4K8ac_peak_8336 | 4.36976  |                                                                             |
| 18 | 35028458 | 35028882 | 5Y-H4K8ac_peak_8337 | 4.84727  |                                                                             |
| 18 | 35029860 | 35030052 | 5Y-H4K8ac_peak_8338 | 7.11863  |                                                                             |
| 18 | 35031582 | 35031949 | 5Y-H4K8ac_peak_8339 | 4.50834  |                                                                             |
| 18 | 35082587 | 35082796 | 5Y-H4K8ac_peak_8340 | 6.47245  |                                                                             |
| 18 | 35095495 | 35095768 | 5Y-H4K8ac_peak_8341 | 5.59843  |                                                                             |
| 18 | 35097019 | 35097266 | 5Y-H4K8ac_peak_8342 | 8.79957  |                                                                             |
| 18 | 35114948 | 35115215 | 5Y-H4K8ac_peak_8343 | 7.59101  |                                                                             |
| 18 | 35130463 | 35130668 | 5Y-H4K8ac_peak_8344 | 4.07874  |                                                                             |
| 18 | 35132299 | 35132557 | 5Y-H4K8ac_peak_8345 | 8.8021   |                                                                             |
| 18 | 35146682 | 35147016 | 5Y-H4K8ac_peak_8346 | 14.31711 | CELF4_ENSG00000101489                                                       |
| 18 | 35297600 | 35297823 | 5Y-H4K8ac_peak_8347 | 4.84727  |                                                                             |
| 18 | 37421193 | 37421447 | 5Y-H4K8ac_peak_8348 | 10.19948 |                                                                             |
| 18 | 38971914 | 38972115 | 5Y-H4K8ac_peak_8349 | 5.04571  |                                                                             |
| 18 | 39178798 | 39179022 | 5Y-H4K8ac_peak_8350 | 4.84727  |                                                                             |
| 18 | 39252973 | 39253183 | 5Y-H4K8ac_peak_8351 | 7.31815  |                                                                             |
| 18 | 39693890 | 39694082 | 5Y-H4K8ac_peak_8352 | 10.46287 |                                                                             |
| 18 | 40857242 | 40857614 | 5Y-H4K8ac_peak_8353 | 7.31815  | SYT4_ENSG00000132872                                                        |
| 18 | 41170385 | 41170583 | 5Y-H4K8ac_peak_8354 | 6.73047  |                                                                             |
| 18 | 41175363 | 41175580 | 5Y-H4K8ac_peak_8355 | 8.21525  |                                                                             |
| 18 | 42259178 | 42259683 | 5Y-H4K8ac_peak_8356 | 13.2534  | RP11-456K23.1_ENSG00000267414;SETBP1_ENSG00000152217                        |
| 18 | 42260269 | 42260659 | 5Y-H4K8ac_peak_8357 | 10.69698 | RP11-456K23.1_ENSG00000267414;SETBP1_ENSG00000152217                        |
| 18 | 42323427 | 42324154 | 5Y-H4K8ac_peak_8358 | 10.3915  |                                                                             |
| 18 | 42324350 | 42324603 | 5Y-H4K8ac_peak_8359 | 6.73385  |                                                                             |
| 18 | 42596253 | 42596469 | 5Y-H4K8ac_peak_8360 | 7.38046  |                                                                             |
| 18 | 43417275 | 43418109 | 5Y-H4K8ac_peak_8361 | 6.50117  |                                                                             |
| 18 | 43418871 | 43419137 | 5Y-H4K8ac_peak_8362 | 4.95697  |                                                                             |
| 18 | 43546994 | 43547184 | 5Y-H4K8ac_peak_8363 | 5.8635   | EPG5_ENSG00000152223                                                        |
| 18 | 43607910 | 43608477 | 5Y-H4K8ac_peak_8364 | 8.43511  | RP11-8H2.1_ENSG00000267293                                                  |
| 18 | 43652034 | 43652489 | 5Y-H4K8ac_peak_8365 | 6.08523  | PSTPIP2_ENSG00000152229                                                     |
| 18 | 43684436 | 43684710 | 5Y-H4K8ac_peak_8366 | 5.65584  | ATP5A1_ENSG00000152234;HAUS1_ENSG00000152240                                |
| 18 | 43753549 | 43753740 | 5Y-H4K8ac_peak_8367 | 6.53157  | C18orf25_ENSG00000152242                                                    |
| 18 | 43913433 | 43913812 | 5Y-H4K8ac_peak_8368 | 10.36926 |                                                                             |
| 18 | 43914324 | 43914518 | 5Y-H4K8ac_peak_8369 | 9.15007  |                                                                             |
| 18 | 44203461 | 44203843 | 5Y-H4K8ac_peak_8370 | 8.12305  |                                                                             |

|    |          |          |                     |          |                                                                                                 |
|----|----------|----------|---------------------|----------|-------------------------------------------------------------------------------------------------|
| 18 | 44292450 | 44292739 | 5Y-H4K8ac_peak_8371 | 6.49308  |                                                                                                 |
| 18 | 44497609 | 44497857 | 5Y-H4K8ac_peak_8372 | 13.61292 | KATNAL2_ENSG00000167216                                                                         |
| 18 | 45456661 | 45457416 | 5Y-H4K8ac_peak_8373 | 8.21582  | SMAD2_ENSG00000175387                                                                           |
| 18 | 45457714 | 45457937 | 5Y-H4K8ac_peak_8374 | 7.03573  | SMAD2_ENSG00000175387                                                                           |
| 18 | 45533905 | 45534661 | 5Y-H4K8ac_peak_8375 | 6.53157  |                                                                                                 |
| 18 | 45548961 | 45549204 | 5Y-H4K8ac_peak_8376 | 7.63144  |                                                                                                 |
| 18 | 45550119 | 45550715 | 5Y-H4K8ac_peak_8377 | 8.2913   |                                                                                                 |
| 18 | 45560964 | 45561170 | 5Y-H4K8ac_peak_8378 | 5.64909  |                                                                                                 |
| 18 | 45561661 | 45562826 | 5Y-H4K8ac_peak_8379 | 7.11863  |                                                                                                 |
| 18 | 45564137 | 45564423 | 5Y-H4K8ac_peak_8380 | 4.84727  |                                                                                                 |
| 18 | 45587071 | 45587457 | 5Y-H4K8ac_peak_8381 | 7.09444  |                                                                                                 |
| 18 | 45591963 | 45592197 | 5Y-H4K8ac_peak_8382 | 5.64909  |                                                                                                 |
| 18 | 45599062 | 45599311 | 5Y-H4K8ac_peak_8383 | 10.54764 |                                                                                                 |
| 18 | 45599871 | 45600856 | 5Y-H4K8ac_peak_8384 | 7.89273  |                                                                                                 |
| 18 | 45663068 | 45663261 | 5Y-H4K8ac_peak_8385 | 9.38276  |                                                                                                 |
| 18 | 45688175 | 45688510 | 5Y-H4K8ac_peak_8386 | 8.564    |                                                                                                 |
| 18 | 45712423 | 45712630 | 5Y-H4K8ac_peak_8387 | 10.31981 |                                                                                                 |
| 18 | 45847208 | 45847621 | 5Y-H4K8ac_peak_8388 | 7.87406  |                                                                                                 |
| 18 | 45868640 | 45869031 | 5Y-H4K8ac_peak_8389 | 8.564    |                                                                                                 |
| 18 | 45972814 | 45973032 | 5Y-H4K8ac_peak_8390 | 8.43511  |                                                                                                 |
| 18 | 46203519 | 46203746 | 5Y-H4K8ac_peak_8391 | 8.18236  |                                                                                                 |
| 18 | 46278652 | 46279018 | 5Y-H4K8ac_peak_8392 | 4.07874  |                                                                                                 |
| 18 | 46307137 | 46307336 | 5Y-H4K8ac_peak_8393 | 6.78318  |                                                                                                 |
| 18 | 46308392 | 46308590 | 5Y-H4K8ac_peak_8394 | 10.39333 |                                                                                                 |
| 18 | 46359534 | 46359752 | 5Y-H4K8ac_peak_8395 | 5.8635   |                                                                                                 |
| 18 | 46385390 | 46388174 | 5Y-H4K8ac_peak_8396 | 10.4689  |                                                                                                 |
| 18 | 46478663 | 46479442 | 5Y-H4K8ac_peak_8397 | 14.45841 |                                                                                                 |
| 18 | 46501811 | 46502171 | 5Y-H4K8ac_peak_8398 | 12.21176 |                                                                                                 |
| 18 | 46502429 | 46502993 | 5Y-H4K8ac_peak_8399 | 14.26884 |                                                                                                 |
| 18 | 46544743 | 46544941 | 5Y-H4K8ac_peak_8400 | 4.82324  |                                                                                                 |
| 18 | 46552038 | 46552354 | 5Y-H4K8ac_peak_8401 | 7.04637  |                                                                                                 |
| 18 | 46578991 | 46579347 | 5Y-H4K8ac_peak_8402 | 5.64909  |                                                                                                 |
| 18 | 46587248 | 46588125 | 5Y-H4K8ac_peak_8403 | 11.4254  |                                                                                                 |
| 18 | 46588784 | 46589387 | 5Y-H4K8ac_peak_8404 | 9.38807  |                                                                                                 |
| 18 | 46986697 | 46986946 | 5Y-H4K8ac_peak_8405 | 5.65584  | DYM_ENSG00000141627                                                                             |
| 18 | 47339495 | 47339809 | 5Y-H4K8ac_peak_8406 | 4.24332  | ACA2_ENSG00000167315;SCARNA17_ENSG00000267322;SCARNA17_ENSG00000251992;SCARNA18_ENSG00000252139 |
| 18 | 47435929 | 47436164 | 5Y-H4K8ac_peak_8407 | 4.90471  |                                                                                                 |
| 18 | 47807579 | 47808080 | 5Y-H4K8ac_peak_8408 | 4.0639   | MBD1_ENSG00000141644                                                                            |
| 18 | 47808369 | 47808651 | 5Y-H4K8ac_peak_8409 | 5.5192   | MBD1_ENSG00000141644                                                                            |
| 18 | 48085839 | 48086191 | 5Y-H4K8ac_peak_8410 | 7.31815  | MAPK4_ENSG00000141639                                                                           |
| 18 | 48086510 | 48087354 | 5Y-H4K8ac_peak_8411 | 7.59101  | MAPK4_ENSG00000141639                                                                           |
| 18 | 48254468 | 48254816 | 5Y-H4K8ac_peak_8412 | 4.84727  |                                                                                                 |
| 18 | 48493608 | 48494066 | 5Y-H4K8ac_peak_8413 | 9.34555  | ELAC1_ENSG00000141642;RP11-729L2.2_ENSG00000267699;SMAD4_ENSG00000141646                        |
| 18 | 48494473 | 48494772 | 5Y-H4K8ac_peak_8414 | 10.90097 | ELAC1_ENSG00000141642;RP11-729L2.2_ENSG00000267699;SMAD4_ENSG00000141646                        |
| 18 | 48556646 | 48556929 | 5Y-H4K8ac_peak_8415 | 11.71078 |                                                                                                 |
| 18 | 48636364 | 48636795 | 5Y-H4K8ac_peak_8416 | 6.98118  |                                                                                                 |

|    |          |          |                     |          |                                               |
|----|----------|----------|---------------------|----------|-----------------------------------------------|
| 18 | 48723318 | 48723565 | 5Y-H4K8ac_peak_8417 | 10.46287 |                                               |
| 18 | 48724856 | 48725114 | 5Y-H4K8ac_peak_8418 | 8.21582  |                                               |
| 18 | 52442225 | 52442435 | 5Y-H4K8ac_peak_8419 | 6.62622  |                                               |
| 18 | 52968554 | 52968775 | 5Y-H4K8ac_peak_8420 | 11.1169  |                                               |
| 18 | 52989770 | 52990125 | 5Y-H4K8ac_peak_8421 | 25.32943 |                                               |
| 18 | 53005180 | 53005600 | 5Y-H4K8ac_peak_8422 | 6.34046  |                                               |
| 18 | 53255229 | 53255444 | 5Y-H4K8ac_peak_8423 | 9.38203  |                                               |
| 18 | 53257300 | 53257715 | 5Y-H4K8ac_peak_8424 | 8.69112  |                                               |
| 18 | 53447003 | 53447796 | 5Y-H4K8ac_peak_8425 | 15.06486 |                                               |
| 18 | 54305431 | 54305726 | 5Y-H4K8ac_peak_8426 | 4.15658  |                                               |
| 18 | 54318723 | 54318981 | 5Y-H4K8ac_peak_8427 | 5.23819  | TXNL1_ENSG00000091164;WDR7_ENSG00000091157    |
| 18 | 54715695 | 54716358 | 5Y-H4K8ac_peak_8428 | 6.49308  |                                               |
| 18 | 55018978 | 55019398 | 5Y-H4K8ac_peak_8429 | 5.65584  | ST8SIA3_ENSG00000177511                       |
| 18 | 55020146 | 55020557 | 5Y-H4K8ac_peak_8430 | 7.38046  |                                               |
| 18 | 55021053 | 55021687 | 5Y-H4K8ac_peak_8431 | 7.50148  |                                               |
| 18 | 55253594 | 55254181 | 5Y-H4K8ac_peak_8432 | 6.08523  | FECH_ENSG00000066926                          |
| 18 | 55289258 | 55289460 | 5Y-H4K8ac_peak_8433 | 8.59175  | NARS_ENSG00000134440                          |
| 18 | 55297167 | 55297384 | 5Y-H4K8ac_peak_8434 | 10.69698 | RP11-35G9.3_ENSG00000267040                   |
| 18 | 55583419 | 55583729 | 5Y-H4K8ac_peak_8435 | 9.30505  |                                               |
| 18 | 56451946 | 56452238 | 5Y-H4K8ac_peak_8436 | 4.5753   |                                               |
| 18 | 56530891 | 56531329 | 5Y-H4K8ac_peak_8437 | 7.64648  |                                               |
| 18 | 57137979 | 57138260 | 5Y-H4K8ac_peak_8438 | 4.84727  |                                               |
| 18 | 57367440 | 57367684 | 5Y-H4K8ac_peak_8439 | 8.93923  |                                               |
| 18 | 57386739 | 57386929 | 5Y-H4K8ac_peak_8440 | 4.84727  |                                               |
| 18 | 57566854 | 57567049 | 5Y-H4K8ac_peak_8441 | 6.53157  | PMAIP1_ENSG00000141682                        |
| 18 | 59001770 | 59001972 | 5Y-H4K8ac_peak_8442 | 5.98695  | CDH20_ENSG00000101542                         |
| 18 | 59249083 | 59249487 | 5Y-H4K8ac_peak_8443 | 6.34046  |                                               |
| 18 | 59465672 | 59465919 | 5Y-H4K8ac_peak_8444 | 6.34046  |                                               |
| 18 | 59466126 | 59466366 | 5Y-H4K8ac_peak_8445 | 4.84727  |                                               |
| 18 | 59490920 | 59491129 | 5Y-H4K8ac_peak_8446 | 4.14761  |                                               |
| 18 | 59561943 | 59562169 | 5Y-H4K8ac_peak_8447 | 4.50834  | RNF152_ENSG00000176641                        |
| 18 | 60755463 | 60756009 | 5Y-H4K8ac_peak_8448 | 5.65584  |                                               |
| 18 | 60987692 | 60987956 | 5Y-H4K8ac_peak_8449 | 18.76707 | BCL2_ENSG00000171791                          |
| 18 | 60988163 | 60988526 | 5Y-H4K8ac_peak_8450 | 8.33296  | BCL2_ENSG00000171791                          |
| 18 | 61089322 | 61089628 | 5Y-H4K8ac_peak_8451 | 9.78792  | VPS4B_ENSG00000119541                         |
| 18 | 61089943 | 61090191 | 5Y-H4K8ac_peak_8452 | 8.67475  | VPS4B_ENSG00000119541                         |
| 18 | 61603767 | 61604126 | 5Y-H4K8ac_peak_8453 | 9.31608  |                                               |
| 18 | 61637327 | 61637718 | 5Y-H4K8ac_peak_8454 | 11.71078 | SERPIN8_ENSG00000166401                       |
| 18 | 66381962 | 66382260 | 5Y-H4K8ac_peak_8455 | 11.36844 | TMX3_ENSG00000166479;CCDC102B_ENSG00000150636 |
| 18 | 67067662 | 67068036 | 5Y-H4K8ac_peak_8456 | 16.38263 | DOK6_ENSG00000206052                          |
| 18 | 67955632 | 67956028 | 5Y-H4K8ac_peak_8457 | 7.38046  | SOCS6_ENSG00000170677                         |
| 18 | 67956245 | 67957032 | 5Y-H4K8ac_peak_8458 | 6.08523  | SOCS6_ENSG00000170677                         |
| 18 | 68138518 | 68138750 | 5Y-H4K8ac_peak_8459 | 5.03335  |                                               |
| 18 | 68650658 | 68650982 | 5Y-H4K8ac_peak_8460 | 7.01266  |                                               |
| 18 | 68695550 | 68695876 | 5Y-H4K8ac_peak_8461 | 9.30505  | RP11-529J17.1_ENSG00000265639                 |
| 18 | 68696208 | 68696828 | 5Y-H4K8ac_peak_8462 | 12.55063 | RP11-529J17.1_ENSG00000265639                 |

|    |          |          |                     |          |                                                      |
|----|----------|----------|---------------------|----------|------------------------------------------------------|
| 18 | 70210998 | 70211189 | 5Y-H4K8ac_peak_8463 | 8.47164  |                                                      |
| 18 | 72162900 | 72163172 | 5Y-H4K8ac_peak_8464 | 7.17184  | CNDP2_ENSG00000133313                                |
| 18 | 72264532 | 72264900 | 5Y-H4K8ac_peak_8465 | 8.73985  | LINC00909_ENSG00000264247;ZNF407_ENSG00000215421     |
| 18 | 72837317 | 72838131 | 5Y-H4K8ac_peak_8466 | 7.20869  |                                                      |
| 18 | 72916010 | 72916259 | 5Y-H4K8ac_peak_8467 | 6.50117  |                                                      |
| 18 | 72960804 | 72961191 | 5Y-H4K8ac_peak_8468 | 11.1169  |                                                      |
| 18 | 73627955 | 73628350 | 5Y-H4K8ac_peak_8469 | 5.10404  |                                                      |
| 18 | 74397908 | 74398099 | 5Y-H4K8ac_peak_8470 | 6.34046  |                                                      |
| 18 | 74533922 | 74534175 | 5Y-H4K8ac_peak_8471 | 6.34046  | RP11-162A12.2_ENSG00000264278;ZNF236_ENSG00000130856 |
| 18 | 74534395 | 74534685 | 5Y-H4K8ac_peak_8472 | 17.51157 | RP11-162A12.2_ENSG00000264278;ZNF236_ENSG00000130856 |
| 18 | 74535017 | 74535350 | 5Y-H4K8ac_peak_8473 | 8.43511  | RP11-162A12.2_ENSG00000264278;ZNF236_ENSG00000130856 |
| 18 | 76828644 | 76829039 | 5Y-H4K8ac_peak_8474 | 15.06486 | ATP9B_ENSG00000166377                                |
| 18 | 76829460 | 76829796 | 5Y-H4K8ac_peak_8475 | 6.34046  | ATP9B_ENSG00000166377                                |
| 18 | 77439021 | 77439217 | 5Y-H4K8ac_peak_8476 | 5.85188  | RP11-567M16.3_ENSG00000178412;CTDP1_ENSG00000060069  |
| 18 | 77711851 | 77712497 | 5Y-H4K8ac_peak_8477 | 8.69112  | PQLC1_ENSG00000122490                                |
| 18 | 77724009 | 77724714 | 5Y-H4K8ac_peak_8478 | 8.43511  | HSBP1L1_ENSG00000226742                              |
| 18 | 77748706 | 77748946 | 5Y-H4K8ac_peak_8479 | 10.69698 |                                                      |
| 18 | 77866916 | 77867300 | 5Y-H4K8ac_peak_8480 | 15.82359 | ADNP2_ENSG00000101544                                |
| 19 | 267244   | 267772   | 5Y-H4K8ac_peak_8481 | 7.89273  |                                                      |
| 19 | 290713   | 291151   | 5Y-H4K8ac_peak_8482 | 9.51254  | PPAP2C_ENSG00000141934                               |
| 19 | 291740   | 292232   | 5Y-H4K8ac_peak_8483 | 8.53555  | PPAP2C_ENSG00000141934                               |
| 19 | 344603   | 345401   | 5Y-H4K8ac_peak_8484 | 7.11863  | MIER2_ENSG00000105556                                |
| 19 | 408776   | 409079   | 5Y-H4K8ac_peak_8485 | 15.44907 | C2CD4C_ENSG00000183186                               |
| 19 | 460825   | 461271   | 5Y-H4K8ac_peak_8486 | 7.38046  | SHC2_ENSG00000129946                                 |
| 19 | 488538   | 488873   | 5Y-H4K8ac_peak_8487 | 11.22005 | MADCAM1_ENSG00000099866                              |
| 19 | 489552   | 489909   | 5Y-H4K8ac_peak_8488 | 7.59101  | MADCAM1_ENSG00000099866                              |
| 19 | 524127   | 524797   | 5Y-H4K8ac_peak_8489 | 11.37188 |                                                      |
| 19 | 531244   | 531545   | 5Y-H4K8ac_peak_8490 | 6.37023  | CDC34_ENSG00000099804                                |
| 19 | 532124   | 532467   | 5Y-H4K8ac_peak_8491 | 6.13919  | CDC34_ENSG00000099804                                |
| 19 | 572716   | 573186   | 5Y-H4K8ac_peak_8492 | 11.1169  | AC009005.2_ENSG00000267751                           |
| 19 | 608684   | 608930   | 5Y-H4K8ac_peak_8493 | 7.89273  |                                                      |
| 19 | 609301   | 609521   | 5Y-H4K8ac_peak_8494 | 6.08523  |                                                      |
| 19 | 610935   | 611513   | 5Y-H4K8ac_peak_8495 | 8.43511  |                                                      |
| 19 | 633189   | 633463   | 5Y-H4K8ac_peak_8496 | 11.1169  | POLRMT_ENSG00000099821                               |
| 19 | 664709   | 664900   | 5Y-H4K8ac_peak_8497 | 5.59843  |                                                      |
| 19 | 665176   | 665377   | 5Y-H4K8ac_peak_8498 | 8.49231  |                                                      |
| 19 | 680116   | 680320   | 5Y-H4K8ac_peak_8499 | 11.48691 |                                                      |
| 19 | 681363   | 681560   | 5Y-H4K8ac_peak_8500 | 4.50834  |                                                      |
| 19 | 708230   | 708703   | 5Y-H4K8ac_peak_8501 | 10.19948 | PALM_ENSG00000099864                                 |
| 19 | 719634   | 719890   | 5Y-H4K8ac_peak_8502 | 7.18391  |                                                      |
| 19 | 788818   | 790074   | 5Y-H4K8ac_peak_8503 | 8.62703  |                                                      |
| 19 | 796144   | 796891   | 5Y-H4K8ac_peak_8504 | 13.27443 | PTBP1_ENSG00000011304                                |
| 19 | 821344   | 821553   | 5Y-H4K8ac_peak_8505 | 9.52603  | LPPR3_ENSG00000129951                                |
| 19 | 821828   | 822154   | 5Y-H4K8ac_peak_8506 | 6.37023  | LPPR3_ENSG00000129951                                |
| 19 | 913180   | 913756   | 5Y-H4K8ac_peak_8507 | 6.77436  | R3HDM4_ENSG00000198858                               |
| 19 | 917248   | 917586   | 5Y-H4K8ac_peak_8508 | 4.29586  | KISS1R_ENSG00000116014                               |

|    |         |         |                     |          |                                                     |
|----|---------|---------|---------------------|----------|-----------------------------------------------------|
| 19 | 924841  | 925090  | 5Y-H4K8ac_peak_8509 | 9.30505  | ARID3A_ENSG00000116017                              |
| 19 | 925513  | 925704  | 5Y-H4K8ac_peak_8510 | 9.30206  | ARID3A_ENSG00000116017                              |
| 19 | 926183  | 926810  | 5Y-H4K8ac_peak_8511 | 8.43511  | ARID3A_ENSG00000116017                              |
| 19 | 932588  | 933309  | 5Y-H4K8ac_peak_8512 | 8.62703  |                                                     |
| 19 | 933508  | 933760  | 5Y-H4K8ac_peak_8513 | 9.48719  |                                                     |
| 19 | 934131  | 934503  | 5Y-H4K8ac_peak_8514 | 4.29586  |                                                     |
| 19 | 935015  | 936122  | 5Y-H4K8ac_peak_8515 | 11.31171 |                                                     |
| 19 | 940314  | 941290  | 5Y-H4K8ac_peak_8516 | 9.30505  |                                                     |
| 19 | 944460  | 944860  | 5Y-H4K8ac_peak_8517 | 17.32862 |                                                     |
| 19 | 945443  | 945903  | 5Y-H4K8ac_peak_8518 | 6.37023  |                                                     |
| 19 | 956525  | 956874  | 5Y-H4K8ac_peak_8519 | 7.18391  |                                                     |
| 19 | 983597  | 984173  | 5Y-H4K8ac_peak_8520 | 6.65369  | WDR18_ENSG00000065268                               |
| 19 | 1026281 | 1026490 | 5Y-H4K8ac_peak_8521 | 9.02782  | CNN2_ENSG00000064666                                |
| 19 | 1026998 | 1027221 | 5Y-H4K8ac_peak_8522 | 5.449    | CNN2_ENSG00000064666                                |
| 19 | 1027895 | 1028090 | 5Y-H4K8ac_peak_8523 | 6.77436  |                                                     |
| 19 | 1028789 | 1029060 | 5Y-H4K8ac_peak_8524 | 8.63676  |                                                     |
| 19 | 1074430 | 1074796 | 5Y-H4K8ac_peak_8525 | 14.00559 |                                                     |
| 19 | 1074994 | 1075226 | 5Y-H4K8ac_peak_8526 | 7.10001  |                                                     |
| 19 | 1105060 | 1105253 | 5Y-H4K8ac_peak_8527 | 5.98695  |                                                     |
| 19 | 1203055 | 1203331 | 5Y-H4K8ac_peak_8528 | 6.76096  | HMGB2P1_ENSG00000267736                             |
| 19 | 1237518 | 1237892 | 5Y-H4K8ac_peak_8529 | 7.82914  | C19orf26_ENSG00000099625;AC004221.2_ENSG00000267778 |
| 19 | 1239903 | 1240225 | 5Y-H4K8ac_peak_8530 | 12.22486 |                                                     |
| 19 | 1247995 | 1249571 | 5Y-H4K8ac_peak_8531 | 16.79568 | MIDN_ENSG00000167470                                |
| 19 | 1251125 | 1251354 | 5Y-H4K8ac_peak_8532 | 10.58128 |                                                     |
| 19 | 1252728 | 1252958 | 5Y-H4K8ac_peak_8533 | 6.34245  |                                                     |
| 19 | 1261346 | 1261645 | 5Y-H4K8ac_peak_8534 | 5.87725  |                                                     |
| 19 | 1269376 | 1269631 | 5Y-H4K8ac_peak_8535 | 12.52787 | CIRBP-AS1_ENSG00000267493                           |
| 19 | 1275099 | 1275339 | 5Y-H4K8ac_peak_8536 | 6.10343  | C19orf24_ENSG00000228300                            |
| 19 | 1285479 | 1285715 | 5Y-H4K8ac_peak_8537 | 10.74494 | MUM1_ENSG00000160953;EFNA2_ENSG00000099617          |
| 19 | 1286443 | 1286699 | 5Y-H4K8ac_peak_8538 | 5.5369   | MUM1_ENSG00000160953;EFNA2_ENSG00000099617          |
| 19 | 1324881 | 1325104 | 5Y-H4K8ac_peak_8539 | 5.23083  |                                                     |
| 19 | 1325472 | 1325676 | 5Y-H4K8ac_peak_8540 | 5.64909  |                                                     |
| 19 | 1354219 | 1354745 | 5Y-H4K8ac_peak_8541 | 22.1484  |                                                     |
| 19 | 1383948 | 1384452 | 5Y-H4K8ac_peak_8542 | 11.09973 | NDUFS7_ENSG00000115286                              |
| 19 | 1401698 | 1401910 | 5Y-H4K8ac_peak_8543 | 8.82628  | GAMT_ENSG00000130005                                |
| 19 | 1407787 | 1408317 | 5Y-H4K8ac_peak_8544 | 9.72967  | DAZAP1_ENSG00000071626                              |
| 19 | 1448954 | 1449441 | 5Y-H4K8ac_peak_8545 | 8.18236  |                                                     |
| 19 | 1450164 | 1450885 | 5Y-H4K8ac_peak_8546 | 12.11208 |                                                     |
| 19 | 1473386 | 1473853 | 5Y-H4K8ac_peak_8547 | 6.62622  |                                                     |
| 19 | 1479469 | 1479846 | 5Y-H4K8ac_peak_8548 | 7.11863  | C19orf25_ENSG00000119559                            |
| 19 | 1503273 | 1503664 | 5Y-H4K8ac_peak_8549 | 6.03632  |                                                     |
| 19 | 1566848 | 1567357 | 5Y-H4K8ac_peak_8550 | 8.37729  | MEX3D_ENSG00000181588                               |
| 19 | 1568563 | 1568805 | 5Y-H4K8ac_peak_8551 | 12.02397 | MEX3D_ENSG00000181588                               |
| 19 | 1591923 | 1592312 | 5Y-H4K8ac_peak_8552 | 15.92074 | MBD3_ENSG00000071655                                |
| 19 | 1605082 | 1605366 | 5Y-H4K8ac_peak_8553 | 6.31818  | UQCR11_ENSG00000267059;UQCR11_ENSG00000127540       |
| 19 | 1651541 | 1652255 | 5Y-H4K8ac_peak_8554 | 12.64868 | TCF3_ENSG00000071564                                |

|    |         |         |                     |          |                                                    |
|----|---------|---------|---------------------|----------|----------------------------------------------------|
| 19 | 1652681 | 1652907 | 5Y-H4K8ac_peak_8555 | 26.19116 | TCF3_ENSG00000071564                               |
| 19 | 1653242 | 1653432 | 5Y-H4K8ac_peak_8556 | 6.87095  | TCF3_ENSG00000071564                               |
| 19 | 1667432 | 1667672 | 5Y-H4K8ac_peak_8557 | 6.50117  |                                                    |
| 19 | 1725253 | 1725665 | 5Y-H4K8ac_peak_8558 | 13.99721 |                                                    |
| 19 | 1725880 | 1726272 | 5Y-H4K8ac_peak_8559 | 6.77436  |                                                    |
| 19 | 1848033 | 1848717 | 5Y-H4K8ac_peak_8560 | 18.10232 | REXO1_ENSG00000079313                              |
| 19 | 1855603 | 1856036 | 5Y-H4K8ac_peak_8561 | 8.43511  |                                                    |
| 19 | 1864711 | 1865540 | 5Y-H4K8ac_peak_8562 | 6.49458  |                                                    |
| 19 | 1905429 | 1906348 | 5Y-H4K8ac_peak_8563 | 9.7353   | SCAMP4_ENSG00000227500;ADAT3_ENSG00000213638       |
| 19 | 2014801 | 2015055 | 5Y-H4K8ac_peak_8564 | 6.38173  |                                                    |
| 19 | 2032350 | 2032959 | 5Y-H4K8ac_peak_8565 | 11.9478  |                                                    |
| 19 | 2041648 | 2042051 | 5Y-H4K8ac_peak_8566 | 7.11863  |                                                    |
| 19 | 2042372 | 2042836 | 5Y-H4K8ac_peak_8567 | 5.41472  |                                                    |
| 19 | 2051506 | 2051767 | 5Y-H4K8ac_peak_8568 | 4.0639   | MKNK2_ENSG00000099875                              |
| 19 | 2051978 | 2052212 | 5Y-H4K8ac_peak_8569 | 10.6196  | MKNK2_ENSG00000099875                              |
| 19 | 2055937 | 2056626 | 5Y-H4K8ac_peak_8570 | 13.99721 |                                                    |
| 19 | 2059480 | 2060247 | 5Y-H4K8ac_peak_8571 | 11.22005 |                                                    |
| 19 | 2060753 | 2061375 | 5Y-H4K8ac_peak_8572 | 12.10416 |                                                    |
| 19 | 2062170 | 2062444 | 5Y-H4K8ac_peak_8573 | 7.87406  |                                                    |
| 19 | 2096081 | 2096559 | 5Y-H4K8ac_peak_8574 | 12.57157 | MOB3A_ENSG00000172081;IZUMO4_ENSG00000099840       |
| 19 | 2163200 | 2163622 | 5Y-H4K8ac_peak_8575 | 12.11208 | AP3D1_ENSG00000065000;DOT1L_ENSG00000104885        |
| 19 | 2164284 | 2164543 | 5Y-H4K8ac_peak_8576 | 8.43511  | AP3D1_ENSG00000065000;DOT1L_ENSG00000104885        |
| 19 | 2221642 | 2222134 | 5Y-H4K8ac_peak_8577 | 14.30055 |                                                    |
| 19 | 2235760 | 2235989 | 5Y-H4K8ac_peak_8578 | 4.94889  | SF3A2_ENSG00000104897                              |
| 19 | 2236907 | 2237466 | 5Y-H4K8ac_peak_8579 | 10.0695  | PLEKHJ1_ENSG00000104886;SF3A2_ENSG00000104897      |
| 19 | 2243107 | 2243568 | 5Y-H4K8ac_peak_8580 | 11.02589 |                                                    |
| 19 | 2307742 | 2308003 | 5Y-H4K8ac_peak_8581 | 7.46829  | LINGO3_ENSG00000220008                             |
| 19 | 2308262 | 2308666 | 5Y-H4K8ac_peak_8582 | 13.10076 | LINGO3_ENSG00000220008                             |
| 19 | 2427142 | 2427895 | 5Y-H4K8ac_peak_8583 | 16.94054 | TIMM13_ENSG00000099800                             |
| 19 | 2462013 | 2462516 | 5Y-H4K8ac_peak_8584 | 9.02782  | AC005624.2_ENSG00000267201                         |
| 19 | 2543317 | 2544183 | 5Y-H4K8ac_peak_8585 | 7.89273  |                                                    |
| 19 | 2721107 | 2721323 | 5Y-H4K8ac_peak_8586 | 9.38276  | DIRAS1_ENSG00000176490                             |
| 19 | 2739393 | 2740032 | 5Y-H4K8ac_peak_8587 | 6.34046  | AC006538.4_ENSG00000267001;SLC39A3_ENSG00000141873 |
| 19 | 2740273 | 2740824 | 5Y-H4K8ac_peak_8588 | 4.50834  | AC006538.4_ENSG00000267001;SLC39A3_ENSG00000141873 |
| 19 | 2785580 | 2785816 | 5Y-H4K8ac_peak_8589 | 6.22904  | THOP1_ENSG00000172009                              |
| 19 | 2812736 | 2813647 | 5Y-H4K8ac_peak_8590 | 10.90365 |                                                    |
| 19 | 2841017 | 2841219 | 5Y-H4K8ac_peak_8591 | 9.36633  | ZNF555_ENSG00000186300                             |
| 19 | 2841531 | 2841955 | 5Y-H4K8ac_peak_8592 | 4.8509   | ZNF555_ENSG00000186300                             |
| 19 | 2982641 | 2982857 | 5Y-H4K8ac_peak_8593 | 8.12305  |                                                    |
| 19 | 2983562 | 2983907 | 5Y-H4K8ac_peak_8594 | 9.7353   |                                                    |
| 19 | 2987199 | 2987426 | 5Y-H4K8ac_peak_8595 | 5.89922  |                                                    |
| 19 | 3005708 | 3006035 | 5Y-H4K8ac_peak_8596 | 6.50117  |                                                    |
| 19 | 3034786 | 3035176 | 5Y-H4K8ac_peak_8597 | 5.77617  |                                                    |
| 19 | 3035962 | 3036163 | 5Y-H4K8ac_peak_8598 | 4.36976  |                                                    |
| 19 | 3046610 | 3046820 | 5Y-H4K8ac_peak_8599 | 8.60024  | TLE2_ENSG00000065717                               |
| 19 | 3061547 | 3061774 | 5Y-H4K8ac_peak_8600 | 4.642    |                                                    |

|    |         |         |                     |          |                                                   |
|----|---------|---------|---------------------|----------|---------------------------------------------------|
| 19 | 3062572 | 3062907 | 5Y-H4K8ac_peak_8601 | 8.45687  | AES_ENSG00000104964                               |
| 19 | 3067679 | 3067944 | 5Y-H4K8ac_peak_8602 | 8.79957  |                                                   |
| 19 | 3076212 | 3076492 | 5Y-H4K8ac_peak_8603 | 4.27459  |                                                   |
| 19 | 3079707 | 3079916 | 5Y-H4K8ac_peak_8604 | 4.84727  |                                                   |
| 19 | 3093585 | 3094109 | 5Y-H4K8ac_peak_8605 | 6.06152  | GNA11_ENSG00000088256                             |
| 19 | 3196929 | 3197137 | 5Y-H4K8ac_peak_8606 | 5.41472  |                                                   |
| 19 | 3336700 | 3337556 | 5Y-H4K8ac_peak_8607 | 11.09973 |                                                   |
| 19 | 3358190 | 3358485 | 5Y-H4K8ac_peak_8608 | 9.30505  |                                                   |
| 19 | 3359811 | 3360075 | 5Y-H4K8ac_peak_8609 | 13.99721 | NFIC_ENSG00000141905                              |
| 19 | 3365674 | 3365884 | 5Y-H4K8ac_peak_8610 | 9.30505  |                                                   |
| 19 | 3366753 | 3367592 | 5Y-H4K8ac_peak_8611 | 15.88359 |                                                   |
| 19 | 3386578 | 3386813 | 5Y-H4K8ac_peak_8612 | 11.28133 |                                                   |
| 19 | 3387148 | 3387765 | 5Y-H4K8ac_peak_8613 | 5.72233  |                                                   |
| 19 | 3388182 | 3388562 | 5Y-H4K8ac_peak_8614 | 9.87097  |                                                   |
| 19 | 3404933 | 3405315 | 5Y-H4K8ac_peak_8615 | 5.65584  |                                                   |
| 19 | 3428520 | 3428719 | 5Y-H4K8ac_peak_8616 | 5.98695  |                                                   |
| 19 | 3434610 | 3435266 | 5Y-H4K8ac_peak_8617 | 10.1994  |                                                   |
| 19 | 3435472 | 3435928 | 5Y-H4K8ac_peak_8618 | 6.1654   |                                                   |
| 19 | 3441392 | 3442354 | 5Y-H4K8ac_peak_8619 | 12.21176 |                                                   |
| 19 | 3500454 | 3500858 | 5Y-H4K8ac_peak_8620 | 8.24461  | DOHH_ENSG00000129932;RN7SL866P_ENSG00000264159    |
| 19 | 3537099 | 3537295 | 5Y-H4K8ac_peak_8621 | 8.67475  |                                                   |
| 19 | 3573097 | 3573509 | 5Y-H4K8ac_peak_8622 | 6.78318  | MFSD12_ENSG00000161091;HMG20B_ENSG00000064961     |
| 19 | 3585824 | 3586054 | 5Y-H4K8ac_peak_8623 | 4.29586  | GIPC3_ENSG00000179855                             |
| 19 | 3606252 | 3606523 | 5Y-H4K8ac_peak_8624 | 9.18646  | TBXA2R_ENSG00000006638;CACTIN-AS1_ENSG00000226800 |
| 19 | 3626452 | 3626721 | 5Y-H4K8ac_peak_8625 | 8.79399  | CACTIN_ENSG00000105298                            |
| 19 | 3801323 | 3801748 | 5Y-H4K8ac_peak_8626 | 5.03335  | MATK_ENSG00000007264                              |
| 19 | 3825958 | 3826768 | 5Y-H4K8ac_peak_8627 | 8.93923  |                                                   |
| 19 | 3868781 | 3869253 | 5Y-H4K8ac_peak_8628 | 5.67588  | ZFR2_ENSG00000105278                              |
| 19 | 3988176 | 3988542 | 5Y-H4K8ac_peak_8629 | 6.94897  |                                                   |
| 19 | 3990524 | 3990919 | 5Y-H4K8ac_peak_8630 | 7.38046  |                                                   |
| 19 | 4007781 | 4008018 | 5Y-H4K8ac_peak_8631 | 9.87097  | PIAS4_ENSG00000105229                             |
| 19 | 4014759 | 4016384 | 5Y-H4K8ac_peak_8632 | 15.84891 |                                                   |
| 19 | 4066330 | 4066622 | 5Y-H4K8ac_peak_8633 | 8.90223  | ZBTB7A_ENSG00000178951                            |
| 19 | 4140646 | 4141116 | 5Y-H4K8ac_peak_8634 | 9.11354  |                                                   |
| 19 | 4181916 | 4182496 | 5Y-H4K8ac_peak_8635 | 14.19462 | SIRT6_ENSG00000077463;ANKRD24_ENSG00000089847     |
| 19 | 4232895 | 4233191 | 5Y-H4K8ac_peak_8636 | 7.63144  |                                                   |
| 19 | 4246531 | 4246764 | 5Y-H4K8ac_peak_8637 | 4.95697  | CCDC94_ENSG00000105248                            |
| 19 | 4267585 | 4267786 | 5Y-H4K8ac_peak_8638 | 9.15977  |                                                   |
| 19 | 4277793 | 4278458 | 5Y-H4K8ac_peak_8639 | 12.57157 | SHD_ENSG00000105251                               |
| 19 | 4278792 | 4280028 | 5Y-H4K8ac_peak_8640 | 15.82359 | SHD_ENSG00000105251                               |
| 19 | 4302034 | 4302448 | 5Y-H4K8ac_peak_8641 | 11.19336 | TMIGD2_ENSG00000167664                            |
| 19 | 4342106 | 4342647 | 5Y-H4K8ac_peak_8642 | 7.89273  | STAP2_ENSG00000178078;MPND_ENSG00000008382        |
| 19 | 4374139 | 4374788 | 5Y-H4K8ac_peak_8643 | 11.04542 |                                                   |
| 19 | 4375959 | 4376382 | 5Y-H4K8ac_peak_8644 | 4.70571  |                                                   |
| 19 | 4386105 | 4386315 | 5Y-H4K8ac_peak_8645 | 5.22422  |                                                   |
| 19 | 4470697 | 4471192 | 5Y-H4K8ac_peak_8646 | 6.73385  | CTB-50L17.16_ENSG00000267011                      |



|    |         |         |                     |          |                                                    |
|----|---------|---------|---------------------|----------|----------------------------------------------------|
| 19 | 4472594 | 4472795 | 5Y-H4K8ac_peak_8647 | 6.03255  | HDGFRP2_ENSG00000167674                            |
| 19 | 4474923 | 4475243 | 5Y-H4K8ac_peak_8648 | 10.23399 |                                                    |
| 19 | 4531700 | 4531924 | 5Y-H4K8ac_peak_8649 | 6.98118  |                                                    |
| 19 | 4584361 | 4584865 | 5Y-H4K8ac_peak_8650 | 11.5813  |                                                    |
| 19 | 4636082 | 4636341 | 5Y-H4K8ac_peak_8651 | 14.31711 |                                                    |
| 19 | 4685115 | 4685341 | 5Y-H4K8ac_peak_8652 | 3.91125  |                                                    |
| 19 | 4738466 | 4738941 | 5Y-H4K8ac_peak_8653 | 9.02242  |                                                    |
| 19 | 4742752 | 4743178 | 5Y-H4K8ac_peak_8654 | 7.89273  |                                                    |
| 19 | 4760104 | 4760323 | 5Y-H4K8ac_peak_8655 | 9.22011  |                                                    |
| 19 | 4791768 | 4792388 | 5Y-H4K8ac_peak_8656 | 18.28763 | AC005523.3_ENSG00000268536;FEM1A_ENSG00000141965   |
| 19 | 4811585 | 4811820 | 5Y-H4K8ac_peak_8657 | 5.98695  |                                                    |
| 19 | 4816015 | 4816822 | 5Y-H4K8ac_peak_8658 | 9.30505  |                                                    |
| 19 | 4830892 | 4831200 | 5Y-H4K8ac_peak_8659 | 4.71803  | TICAM1_ENSG00000127666                             |
| 19 | 4831494 | 4831915 | 5Y-H4K8ac_peak_8660 | 6.37023  | TICAM1_ENSG00000127666                             |
| 19 | 4908893 | 4909273 | 5Y-H4K8ac_peak_8661 | 12.45737 |                                                    |
| 19 | 5036424 | 5036795 | 5Y-H4K8ac_peak_8662 | 5.60566  |                                                    |
| 19 | 5038707 | 5038990 | 5Y-H4K8ac_peak_8663 | 5.34199  |                                                    |
| 19 | 5144733 | 5144929 | 5Y-H4K8ac_peak_8664 | 4.35388  |                                                    |
| 19 | 5308409 | 5308695 | 5Y-H4K8ac_peak_8665 | 6.78128  |                                                    |
| 19 | 5436090 | 5436326 | 5Y-H4K8ac_peak_8666 | 10.74739 |                                                    |
| 19 | 5539284 | 5539542 | 5Y-H4K8ac_peak_8667 | 9.31608  |                                                    |
| 19 | 5687470 | 5687840 | 5Y-H4K8ac_peak_8668 | 7.09658  |                                                    |
| 19 | 5719735 | 5720113 | 5Y-H4K8ac_peak_8669 | 9.15007  | LONP1_ENSG00000196365;CATSPERD_ENSG00000174898     |
| 19 | 5772866 | 5773107 | 5Y-H4K8ac_peak_8670 | 9.01738  |                                                    |
| 19 | 5773404 | 5773899 | 5Y-H4K8ac_peak_8671 | 6.08523  |                                                    |
| 19 | 5774128 | 5774340 | 5Y-H4K8ac_peak_8672 | 7.84116  |                                                    |
| 19 | 5790875 | 5791141 | 5Y-H4K8ac_peak_8673 | 6.08471  | DUS3L_ENSG00000141994                              |
| 19 | 5799515 | 5800311 | 5Y-H4K8ac_peak_8674 | 12.05638 |                                                    |
| 19 | 5826903 | 5827227 | 5Y-H4K8ac_peak_8675 | 5.35202  |                                                    |
| 19 | 5827425 | 5827670 | 5Y-H4K8ac_peak_8676 | 7.38046  |                                                    |
| 19 | 5828470 | 5829285 | 5Y-H4K8ac_peak_8677 | 9.07085  |                                                    |
| 19 | 5876624 | 5876891 | 5Y-H4K8ac_peak_8678 | 4.77126  |                                                    |
| 19 | 5892037 | 5892557 | 5Y-H4K8ac_peak_8679 | 5.449    |                                                    |
| 19 | 5894275 | 5894479 | 5Y-H4K8ac_peak_8680 | 5.98695  |                                                    |
| 19 | 5895089 | 5895493 | 5Y-H4K8ac_peak_8681 | 5.64909  |                                                    |
| 19 | 5927614 | 5927972 | 5Y-H4K8ac_peak_8682 | 5.98695  |                                                    |
| 19 | 5933056 | 5933816 | 5Y-H4K8ac_peak_8683 | 5.64909  |                                                    |
| 19 | 5935896 | 5936458 | 5Y-H4K8ac_peak_8684 | 9.77183  |                                                    |
| 19 | 5951943 | 5952234 | 5Y-H4K8ac_peak_8685 | 6.1654   |                                                    |
| 19 | 5992965 | 5993201 | 5Y-H4K8ac_peak_8686 | 6.34245  |                                                    |
| 19 | 5994935 | 5995405 | 5Y-H4K8ac_peak_8687 | 8.43511  |                                                    |
| 19 | 6241511 | 6242018 | 5Y-H4K8ac_peak_8688 | 5.64909  |                                                    |
| 19 | 6361582 | 6361817 | 5Y-H4K8ac_peak_8689 | 10.21117 | CTB-180A7.3_ENSG00000269802;CLPP_ENSG00000125656   |
| 19 | 6393599 | 6394316 | 5Y-H4K8ac_peak_8690 | 12.52787 | GTF2F1_ENSG00000125651;CTB-180A7.8_ENSG00000214347 |
| 19 | 6425661 | 6426116 | 5Y-H4K8ac_peak_8691 | 8.47164  | KHSRP_ENSG00000088247                              |
| 19 | 6459004 | 6459735 | 5Y-H4K8ac_peak_8692 | 10.47399 |                                                    |

|    |         |         |                     |          |                                                                             |
|----|---------|---------|---------------------|----------|-----------------------------------------------------------------------------|
| 19 | 6475730 | 6475988 | 5Y-H4K8ac_peak_8693 | 4.07874  |                                                                             |
| 19 | 6476392 | 6476614 | 5Y-H4K8ac_peak_8694 | 11.36844 |                                                                             |
| 19 | 6737289 | 6737562 | 5Y-H4K8ac_peak_8695 | 19.26368 | GPR108_ENSG00000125734;TRIP10_ENSG00000125733                               |
| 19 | 6738243 | 6738487 | 5Y-H4K8ac_peak_8696 | 7.89273  | GPR108_ENSG00000125734;TRIP10_ENSG00000125733                               |
| 19 | 6738935 | 6739377 | 5Y-H4K8ac_peak_8697 | 6.06152  | TRIP10_ENSG00000125733                                                      |
| 19 | 7069491 | 7069935 | 5Y-H4K8ac_peak_8698 | 8.43511  | ZNF557_ENSG00000130544                                                      |
| 19 | 7098822 | 7099199 | 5Y-H4K8ac_peak_8699 | 8.84534  |                                                                             |
| 19 | 7197056 | 7197422 | 5Y-H4K8ac_peak_8700 | 6.50117  |                                                                             |
| 19 | 7444831 | 7445118 | 5Y-H4K8ac_peak_8701 | 5.23083  | CTD-2207O23.3_ENSG00000268861                                               |
| 19 | 7460070 | 7460424 | 5Y-H4K8ac_peak_8702 | 12.21176 | CTB-133G6.2_ENSG00000267852;ARHGEF18_ENSG00000104880                        |
| 19 | 7548238 | 7548456 | 5Y-H4K8ac_peak_8703 | 5.24695  |                                                                             |
| 19 | 7559128 | 7559807 | 5Y-H4K8ac_peak_8704 | 13.06587 |                                                                             |
| 19 | 7566206 | 7566527 | 5Y-H4K8ac_peak_8705 | 8.19789  |                                                                             |
| 19 | 7570723 | 7570937 | 5Y-H4K8ac_peak_8706 | 4.69231  |                                                                             |
| 19 | 7580223 | 7580885 | 5Y-H4K8ac_peak_8707 | 14.31711 | ZNF358_ENSG00000198816                                                      |
| 19 | 7581248 | 7581616 | 5Y-H4K8ac_peak_8708 | 8.24461  |                                                                             |
| 19 | 7581813 | 7582039 | 5Y-H4K8ac_peak_8709 | 6.77436  |                                                                             |
| 19 | 7598443 | 7598887 | 5Y-H4K8ac_peak_8710 | 6.96612  | CTD-2207O23.10_ENSG00000268614;PNPLA6_ENSG00000032444                       |
| 19 | 7600829 | 7601210 | 5Y-H4K8ac_peak_8711 | 4.90696  |                                                                             |
| 19 | 7615752 | 7615967 | 5Y-H4K8ac_peak_8712 | 10.27264 |                                                                             |
| 19 | 7616580 | 7616854 | 5Y-H4K8ac_peak_8713 | 7.38046  |                                                                             |
| 19 | 7682625 | 7683117 | 5Y-H4K8ac_peak_8714 | 9.22312  |                                                                             |
| 19 | 7745767 | 7746183 | 5Y-H4K8ac_peak_8715 | 11.86504 | TRAPPC5_ENSG00000181029                                                     |
| 19 | 7938981 | 7939936 | 5Y-H4K8ac_peak_8716 | 12.11208 | CTD-3193O13.9_ENSG00000183248                                               |
| 19 | 7967870 | 7968319 | 5Y-H4K8ac_peak_8717 | 8.16382  | AC010336.1_ENSG00000214248;RN7SL115P_ENSG00000264166;MAP2K7_ENSG00000076984 |
| 19 | 7981440 | 7981711 | 5Y-H4K8ac_peak_8718 | 4.95697  | TGFBR3L_ENSG00000260001                                                     |
| 19 | 7984619 | 7984911 | 5Y-H4K8ac_peak_8719 | 4.50834  | CTD-3193O13.1_ENSG00000260500;SNAPC2_ENSG00000104976                        |
| 19 | 8008032 | 8008467 | 5Y-H4K8ac_peak_8720 | 11.1169  | TIMM44_ENSG00000104980                                                      |
| 19 | 8115130 | 8115474 | 5Y-H4K8ac_peak_8721 | 9.23159  |                                                                             |
| 19 | 8273363 | 8273870 | 5Y-H4K8ac_peak_8722 | 15.21338 |                                                                             |
| 19 | 8432037 | 8432230 | 5Y-H4K8ac_peak_8723 | 8.08609  |                                                                             |
| 19 | 8455315 | 8455524 | 5Y-H4K8ac_peak_8724 | 12.00715 | RAB11B-AS1_ENSG00000269386;RAB11B_ENSG00000185236                           |
| 19 | 8478215 | 8478511 | 5Y-H4K8ac_peak_8725 | 11.1169  | MARCH2_ENSG00000099785                                                      |
| 19 | 8509984 | 8510359 | 5Y-H4K8ac_peak_8726 | 10.69698 | HNRNPM_ENSG00000099783                                                      |
| 19 | 8577649 | 8578080 | 5Y-H4K8ac_peak_8727 | 7.34185  | ZNF414_ENSG00000133250                                                      |
| 19 | 8579304 | 8579530 | 5Y-H4K8ac_peak_8728 | 5.98695  | ZNF414_ENSG00000133250                                                      |
| 19 | 8674248 | 8674530 | 5Y-H4K8ac_peak_8729 | 7.11863  |                                                                             |
| 19 | 9394073 | 9394594 | 5Y-H4K8ac_peak_8730 | 6.50117  |                                                                             |
| 19 | 9419898 | 9420216 | 5Y-H4K8ac_peak_8731 | 4.03329  | ZNF699_ENSG00000196110                                                      |
| 19 | 9546313 | 9546525 | 5Y-H4K8ac_peak_8732 | 9.89244  | ZNF266_ENSG00000174652                                                      |
| 19 | 9649030 | 9649602 | 5Y-H4K8ac_peak_8733 | 8.69112  | ZNF426_ENSG00000130818                                                      |
| 19 | 9694943 | 9695144 | 5Y-H4K8ac_peak_8734 | 10.15788 | ZNF121_ENSG00000197961                                                      |
| 19 | 9731614 | 9732381 | 5Y-H4K8ac_peak_8735 | 6.37023  | ZNF561_ENSG00000171469;C19orf82_ENSG00000267106                             |
| 19 | 9785906 | 9786168 | 5Y-H4K8ac_peak_8736 | 9.01738  | ZNF562_ENSG00000171466                                                      |
| 19 | 9878860 | 9879073 | 5Y-H4K8ac_peak_8737 | 4.90696  |                                                                             |
| 19 | 9903697 | 9903912 | 5Y-H4K8ac_peak_8738 | 5.23083  | ZNF846_ENSG00000196605;CTD-2623N2.5_ENSG00000266950                         |

|    |          |          |                     |          |                                                                     |
|----|----------|----------|---------------------|----------|---------------------------------------------------------------------|
| 19 | 9929498  | 9929706  | 5Y-H4K8ac_peak_8739 | 10.12457 | SNORA70_ENSG00000200237                                             |
| 19 | 9946172  | 9946367  | 5Y-H4K8ac_peak_8740 | 5.77617  | CTD-2623N2.11_ENSG00000267289;PIN1_ENSG00000127445                  |
| 19 | 10056090 | 10056946 | 5Y-H4K8ac_peak_8741 | 7.50148  |                                                                     |
| 19 | 10197590 | 10197991 | 5Y-H4K8ac_peak_8742 | 7.24844  | C19orf66_ENSG00000130813                                            |
| 19 | 10207113 | 10207596 | 5Y-H4K8ac_peak_8743 | 11.88337 |                                                                     |
| 19 | 10216435 | 10216691 | 5Y-H4K8ac_peak_8744 | 6.53157  | PPAN-P2RY11_ENSG00000243207;PPAN_ENSG00000130810                    |
| 19 | 10217064 | 10217280 | 5Y-H4K8ac_peak_8745 | 7.64648  | PPAN-P2RY11_ENSG00000243207;PPAN_ENSG00000130810                    |
| 19 | 10248860 | 10249519 | 5Y-H4K8ac_peak_8746 | 13.03079 |                                                                     |
| 19 | 10304977 | 10305600 | 5Y-H4K8ac_peak_8747 | 10.1994  |                                                                     |
| 19 | 10337297 | 10337516 | 5Y-H4K8ac_peak_8748 | 6.88532  |                                                                     |
| 19 | 10337961 | 10338272 | 5Y-H4K8ac_peak_8749 | 6.77436  |                                                                     |
| 19 | 10341223 | 10341927 | 5Y-H4K8ac_peak_8750 | 8.3285   | DNMT1_ENSG00000130816;S1PR2_ENSG00000267534;MIR4322_ENSG00000264266 |
| 19 | 10515556 | 10516028 | 5Y-H4K8ac_peak_8751 | 7.01266  |                                                                     |
| 19 | 10613070 | 10614436 | 5Y-H4K8ac_peak_8752 | 21.45562 | KEAP1_ENSG00000079999                                               |
| 19 | 10654156 | 10654398 | 5Y-H4K8ac_peak_8753 | 7.59101  | ATG4D_ENSG00000130734                                               |
| 19 | 10654625 | 10654857 | 5Y-H4K8ac_peak_8754 | 10.35586 | ATG4D_ENSG00000130734                                               |
| 19 | 10676189 | 10676496 | 5Y-H4K8ac_peak_8755 | 6.37023  | KRI1_ENSG00000129347                                                |
| 19 | 10679958 | 10680403 | 5Y-H4K8ac_peak_8756 | 10.69698 | CDKN2D_ENSG00000129355                                              |
| 19 | 10713753 | 10713996 | 5Y-H4K8ac_peak_8757 | 5.98695  | SLC44A2_ENSG00000129353                                             |
| 19 | 10735922 | 10736415 | 5Y-H4K8ac_peak_8758 | 6.77436  |                                                                     |
| 19 | 10754934 | 10755400 | 5Y-H4K8ac_peak_8759 | 7.11863  |                                                                     |
| 19 | 10765032 | 10765289 | 5Y-H4K8ac_peak_8760 | 14.59308 | ILF3-AS1_ENSG00000267100;ILF3_ENSG00000129351                       |
| 19 | 10827475 | 10827796 | 5Y-H4K8ac_peak_8761 | 9.96543  | DNM2_ENSG00000079805                                                |
| 19 | 10928072 | 10928332 | 5Y-H4K8ac_peak_8762 | 10.1994  | MIR199A1_ENSG00000207752                                            |
| 19 | 10945654 | 10945875 | 5Y-H4K8ac_peak_8763 | 7.31807  |                                                                     |
| 19 | 10946682 | 10946902 | 5Y-H4K8ac_peak_8764 | 7.89273  | TMED1_ENSG00000099203;C19orf38_ENSG00000214212                      |
| 19 | 10947242 | 10947819 | 5Y-H4K8ac_peak_8765 | 13.2534  | TMED1_ENSG00000099203;C19orf38_ENSG00000214212                      |
| 19 | 10974839 | 10975141 | 5Y-H4K8ac_peak_8766 | 8.67475  |                                                                     |
| 19 | 10975428 | 10975818 | 5Y-H4K8ac_peak_8767 | 7.38046  |                                                                     |
| 19 | 10980685 | 10980893 | 5Y-H4K8ac_peak_8768 | 5.28616  |                                                                     |
| 19 | 10989653 | 10989875 | 5Y-H4K8ac_peak_8769 | 9.23159  |                                                                     |
| 19 | 10998632 | 10998835 | 5Y-H4K8ac_peak_8770 | 4.29586  |                                                                     |
| 19 | 10999622 | 10999831 | 5Y-H4K8ac_peak_8771 | 5.98695  |                                                                     |
| 19 | 11047624 | 11047868 | 5Y-H4K8ac_peak_8772 | 6.37023  |                                                                     |
| 19 | 11070934 | 11071191 | 5Y-H4K8ac_peak_8773 | 4.15658  | SMARCA4_ENSG00000127616                                             |
| 19 | 11253454 | 11253993 | 5Y-H4K8ac_peak_8774 | 11.09673 |                                                                     |
| 19 | 11354275 | 11354565 | 5Y-H4K8ac_peak_8775 | 7.31102  |                                                                     |
| 19 | 11465594 | 11465890 | 5Y-H4K8ac_peak_8776 | 8.79957  | DKFZP761J1410_ENSG00000105520                                       |
| 19 | 11564000 | 11564205 | 5Y-H4K8ac_peak_8777 | 5.97532  |                                                                     |
| 19 | 11590898 | 11591222 | 5Y-H4K8ac_peak_8778 | 5.24695  | ELAVL3_ENSG00000196361                                              |
| 19 | 11593130 | 11593415 | 5Y-H4K8ac_peak_8779 | 9.51254  |                                                                     |
| 19 | 11616243 | 11616584 | 5Y-H4K8ac_peak_8780 | 14.31711 | CTC-398G3.6_ENSG00000267477;ZNF653_ENSG00000161914                  |
| 19 | 11616951 | 11617188 | 5Y-H4K8ac_peak_8781 | 9.68432  | CTC-398G3.6_ENSG00000267477;ZNF653_ENSG00000161914                  |
| 19 | 11639544 | 11639940 | 5Y-H4K8ac_peak_8782 | 13.71233 | ECSIT_ENSG00000130159                                               |
| 19 | 11640260 | 11640502 | 5Y-H4K8ac_peak_8783 | 5.98695  | ECSIT_ENSG00000130159                                               |
| 19 | 11650703 | 11650922 | 5Y-H4K8ac_peak_8784 | 8.2913   |                                                                     |

|    |          |          |                     |          |                                                                      |
|----|----------|----------|---------------------|----------|----------------------------------------------------------------------|
| 19 | 11698987 | 11699180 | 5Y-H4K8ac_peak_8785 | 4.50834  |                                                                      |
| 19 | 11708311 | 11708722 | 5Y-H4K8ac_peak_8786 | 13.33225 |                                                                      |
| 19 | 11850033 | 11850569 | 5Y-H4K8ac_peak_8787 | 11.68317 | ZNF823_ENSG00000197933                                               |
| 19 | 11909534 | 11909774 | 5Y-H4K8ac_peak_8788 | 6.14981  | CTC-499B15.7_ENSG00000267646                                         |
| 19 | 12035944 | 12036294 | 5Y-H4K8ac_peak_8789 | 9.30505  | ZNF700_ENSG00000196757;ZNF763_ENSG00000197054;ZNF763_ENSG00000267179 |
| 19 | 12076032 | 12076292 | 5Y-H4K8ac_peak_8790 | 5.23083  |                                                                      |
| 19 | 12444727 | 12445003 | 5Y-H4K8ac_peak_8791 | 8.35139  | ZNF563_ENSG00000188868                                               |
| 19 | 12445230 | 12445542 | 5Y-H4K8ac_peak_8792 | 6.27984  | ZNF563_ENSG00000188868                                               |
| 19 | 12675291 | 12675497 | 5Y-H4K8ac_peak_8793 | 4.12295  |                                                                      |
| 19 | 12779967 | 12780177 | 5Y-H4K8ac_peak_8794 | 7.50148  | CTD-2192J16.24_ENSG00000269590                                       |
| 19 | 12792344 | 12792692 | 5Y-H4K8ac_peak_8795 | 10.60083 | DHPS_ENSG00000095059                                                 |
| 19 | 12792987 | 12793409 | 5Y-H4K8ac_peak_8796 | 11.18077 | DHPS_ENSG00000095059                                                 |
| 19 | 12808392 | 12808727 | 5Y-H4K8ac_peak_8797 | 4.50834  | FBXW9_ENSG00000132004                                                |
| 19 | 12845080 | 12845359 | 5Y-H4K8ac_peak_8798 | 12.60508 | C19orf43_ENSG00000123144                                             |
| 19 | 12845823 | 12846261 | 5Y-H4K8ac_peak_8799 | 7.59101  | C19orf43_ENSG00000123144                                             |
| 19 | 12868749 | 12869009 | 5Y-H4K8ac_peak_8800 | 10.73603 |                                                                      |
| 19 | 12889449 | 12890485 | 5Y-H4K8ac_peak_8801 | 6.08523  |                                                                      |
| 19 | 12893091 | 12894080 | 5Y-H4K8ac_peak_8802 | 15.95288 |                                                                      |
| 19 | 12895006 | 12895801 | 5Y-H4K8ac_peak_8803 | 8.67356  | CTD-2659N19.9_ENSG00000267212                                        |
| 19 | 12896595 | 12897762 | 5Y-H4K8ac_peak_8804 | 12.3912  | CTD-2659N19.9_ENSG00000267212;MIR5684_ENSG00000263800                |
| 19 | 12899681 | 12899957 | 5Y-H4K8ac_peak_8805 | 12.05638 |                                                                      |
| 19 | 12900309 | 12900591 | 5Y-H4K8ac_peak_8806 | 8.4454   |                                                                      |
| 19 | 12912167 | 12912594 | 5Y-H4K8ac_peak_8807 | 9.37812  | PRDX2_ENSG00000167815                                                |
| 19 | 12916863 | 12917223 | 5Y-H4K8ac_peak_8808 | 7.89142  | RNASEH2A_ENSG00000104889                                             |
| 19 | 12944854 | 12945149 | 5Y-H4K8ac_peak_8809 | 9.69901  | MAST1_ENSG00000105613                                                |
| 19 | 12996214 | 12996809 | 5Y-H4K8ac_peak_8810 | 7.31102  |                                                                      |
| 19 | 13023460 | 13024426 | 5Y-H4K8ac_peak_8811 | 8.79957  |                                                                      |
| 19 | 13044687 | 13044979 | 5Y-H4K8ac_peak_8812 | 9.7353   | FARSA_ENSG00000179115                                                |
| 19 | 13048827 | 13049059 | 5Y-H4K8ac_peak_8813 | 9.00954  | CALR_ENSG00000179218                                                 |
| 19 | 13056105 | 13056325 | 5Y-H4K8ac_peak_8814 | 5.65584  | CTC-425F1.4_ENSG00000267458;RAD23A_ENSG00000179262                   |
| 19 | 13056807 | 13057144 | 5Y-H4K8ac_peak_8815 | 9.23159  | RAD23A_ENSG00000179262                                               |
| 19 | 13063444 | 13063700 | 5Y-H4K8ac_peak_8816 | 5.91107  |                                                                      |
| 19 | 13064355 | 13064643 | 5Y-H4K8ac_peak_8817 | 11.1169  |                                                                      |
| 19 | 13079801 | 13080935 | 5Y-H4K8ac_peak_8818 | 14.66739 |                                                                      |
| 19 | 13081628 | 13082039 | 5Y-H4K8ac_peak_8819 | 8.71064  |                                                                      |
| 19 | 13082954 | 13083390 | 5Y-H4K8ac_peak_8820 | 5.03335  |                                                                      |
| 19 | 13085136 | 13086766 | 5Y-H4K8ac_peak_8821 | 18.78631 |                                                                      |
| 19 | 13086995 | 13087623 | 5Y-H4K8ac_peak_8822 | 7.72345  |                                                                      |
| 19 | 13088935 | 13089197 | 5Y-H4K8ac_peak_8823 | 6.1654   |                                                                      |
| 19 | 13133131 | 13133558 | 5Y-H4K8ac_peak_8824 | 7.11863  |                                                                      |
| 19 | 13164477 | 13164871 | 5Y-H4K8ac_peak_8825 | 6.77436  |                                                                      |
| 19 | 13165220 | 13165869 | 5Y-H4K8ac_peak_8826 | 9.89244  |                                                                      |
| 19 | 13166179 | 13166854 | 5Y-H4K8ac_peak_8827 | 19.17092 |                                                                      |
| 19 | 13170907 | 13171599 | 5Y-H4K8ac_peak_8828 | 10.69698 |                                                                      |
| 19 | 13180036 | 13180879 | 5Y-H4K8ac_peak_8829 | 10.35586 |                                                                      |
| 19 | 13200445 | 13200916 | 5Y-H4K8ac_peak_8830 | 6.53157  |                                                                      |

|    |          |          |                     |          |                                                                       |
|----|----------|----------|---------------------|----------|-----------------------------------------------------------------------|
| 19 | 13201119 | 13201983 | 5Y-H4K8ac_peak_8831 | 7.90236  |                                                                       |
| 19 | 13202444 | 13203698 | 5Y-H4K8ac_peak_8832 | 12.14222 |                                                                       |
| 19 | 13211523 | 13211831 | 5Y-H4K8ac_peak_8833 | 5.10825  |                                                                       |
| 19 | 13213134 | 13214186 | 5Y-H4K8ac_peak_8834 | 7.50148  | LYL1_ENSG00000104903                                                  |
| 19 | 13273566 | 13273774 | 5Y-H4K8ac_peak_8835 | 10.44054 |                                                                       |
| 19 | 13274131 | 13274740 | 5Y-H4K8ac_peak_8836 | 15.80786 |                                                                       |
| 19 | 13275115 | 13276223 | 5Y-H4K8ac_peak_8837 | 10.90365 |                                                                       |
| 19 | 13278568 | 13278759 | 5Y-H4K8ac_peak_8838 | 5.91107  |                                                                       |
| 19 | 13279071 | 13279262 | 5Y-H4K8ac_peak_8839 | 8.21582  |                                                                       |
| 19 | 13282969 | 13283263 | 5Y-H4K8ac_peak_8840 | 7.87406  |                                                                       |
| 19 | 13291929 | 13292210 | 5Y-H4K8ac_peak_8841 | 5.94703  |                                                                       |
| 19 | 13842632 | 13842849 | 5Y-H4K8ac_peak_8842 | 10.1994  | CCDC130_ENSG00000104957                                               |
| 19 | 13947368 | 13947575 | 5Y-H4K8ac_peak_8843 | 6.77436  | MIR24-2_ENSG00000267519;MIR27A_ENSG00000207808;MIR23A_ENSG00000207980 |
| 19 | 13949503 | 13949695 | 5Y-H4K8ac_peak_8844 | 4.50302  |                                                                       |
| 19 | 13950035 | 13950519 | 5Y-H4K8ac_peak_8845 | 8.09118  |                                                                       |
| 19 | 13951149 | 13951479 | 5Y-H4K8ac_peak_8846 | 5.64909  |                                                                       |
| 19 | 13952061 | 13952413 | 5Y-H4K8ac_peak_8847 | 5.23083  |                                                                       |
| 19 | 13953974 | 13954190 | 5Y-H4K8ac_peak_8848 | 9.30505  |                                                                       |
| 19 | 13957537 | 13958402 | 5Y-H4K8ac_peak_8849 | 15.82359 |                                                                       |
| 19 | 13960965 | 13961363 | 5Y-H4K8ac_peak_8850 | 10.8165  |                                                                       |
| 19 | 13961570 | 13961948 | 5Y-H4K8ac_peak_8851 | 8.564    |                                                                       |
| 19 | 13962270 | 13962553 | 5Y-H4K8ac_peak_8852 | 4.29586  |                                                                       |
| 19 | 13972415 | 13972880 | 5Y-H4K8ac_peak_8853 | 7.31102  | NANOS3_ENSG00000187556                                                |
| 19 | 13975656 | 13975963 | 5Y-H4K8ac_peak_8854 | 8.18236  |                                                                       |
| 19 | 13976754 | 13976955 | 5Y-H4K8ac_peak_8855 | 5.67283  |                                                                       |
| 19 | 14017134 | 14017387 | 5Y-H4K8ac_peak_8856 | 6.96612  | C19orf57_ENSG00000132016;CC2D1A_ENSG00000132024                       |
| 19 | 14048479 | 14048756 | 5Y-H4K8ac_peak_8857 | 6.77436  |                                                                       |
| 19 | 14096634 | 14097342 | 5Y-H4K8ac_peak_8858 | 14.00559 |                                                                       |
| 19 | 14097566 | 14098436 | 5Y-H4K8ac_peak_8859 | 7.20869  |                                                                       |
| 19 | 14117572 | 14118066 | 5Y-H4K8ac_peak_8860 | 20.25522 | RFX1_ENSG00000132005                                                  |
| 19 | 14142033 | 14142882 | 5Y-H4K8ac_peak_8861 | 7.64648  | CTB-55O6.4_ENSG00000267670;IL27RA_ENSG00000104998                     |
| 19 | 14182629 | 14182979 | 5Y-H4K8ac_peak_8862 | 5.94703  | hsa-mir-1199_ENSG00000141854                                          |
| 19 | 14183514 | 14183795 | 5Y-H4K8ac_peak_8863 | 7.89142  | hsa-mir-1199_ENSG00000141854                                          |
| 19 | 14191222 | 14191429 | 5Y-H4K8ac_peak_8864 | 5.65584  |                                                                       |
| 19 | 14201977 | 14202286 | 5Y-H4K8ac_peak_8865 | 9.15007  | SAMD1_ENSG00000141858                                                 |
| 19 | 14229224 | 14229434 | 5Y-H4K8ac_peak_8866 | 6.37023  | PRKACA_ENSG00000072062;CTB-55O6.10_ENSG00000267783                    |
| 19 | 14316722 | 14316927 | 5Y-H4K8ac_peak_8867 | 7.80086  | LPHN1_ENSG00000072071                                                 |
| 19 | 14317708 | 14318125 | 5Y-H4K8ac_peak_8868 | 18.09952 | LPHN1_ENSG00000072071                                                 |
| 19 | 14318447 | 14318813 | 5Y-H4K8ac_peak_8869 | 6.08523  |                                                                       |
| 19 | 14320243 | 14320977 | 5Y-H4K8ac_peak_8870 | 11.68317 |                                                                       |
| 19 | 14358867 | 14359279 | 5Y-H4K8ac_peak_8871 | 12.26819 |                                                                       |
| 19 | 14359657 | 14360370 | 5Y-H4K8ac_peak_8872 | 14.17466 |                                                                       |
| 19 | 14492428 | 14492627 | 5Y-H4K8ac_peak_8873 | 6.08523  |                                                                       |
| 19 | 14530538 | 14530744 | 5Y-H4K8ac_peak_8874 | 4.16635  | DDX39A_ENSG00000123136                                                |
| 19 | 14543789 | 14544080 | 5Y-H4K8ac_peak_8875 | 14.05114 | PKN1_ENSG00000123143                                                  |
| 19 | 14544318 | 14544829 | 5Y-H4K8ac_peak_8876 | 7.50148  | PKN1_ENSG00000123143                                                  |

|    |          |          |                     |          |                                                                           |
|----|----------|----------|---------------------|----------|---------------------------------------------------------------------------|
| 19 | 14545481 | 14545671 | 5Y-H4K8ac_peak_8877 | 5.65584  |                                                                           |
| 19 | 14583230 | 14583759 | 5Y-H4K8ac_peak_8878 | 9.97324  |                                                                           |
| 19 | 14586223 | 14586764 | 5Y-H4K8ac_peak_8879 | 4.56212  | PTGER1_ENSG00000160951                                                    |
| 19 | 14628790 | 14629097 | 5Y-H4K8ac_peak_8880 | 11.27554 | TECR_ENSG00000099797                                                      |
| 19 | 15217847 | 15219012 | 5Y-H4K8ac_peak_8881 | 13.99721 | SYDE1_ENSG00000105137                                                     |
| 19 | 15305934 | 15306171 | 5Y-H4K8ac_peak_8882 | 7.46829  |                                                                           |
| 19 | 15310482 | 15310807 | 5Y-H4K8ac_peak_8883 | 5.98695  | NOTCH3_ENSG00000074181                                                    |
| 19 | 15333062 | 15333945 | 5Y-H4K8ac_peak_8884 | 6.50117  | AC004257.1_ENSG00000269635                                                |
| 19 | 15442512 | 15443143 | 5Y-H4K8ac_peak_8885 | 12.71156 | BRD4_ENSG00000141867                                                      |
| 19 | 15489992 | 15490397 | 5Y-H4K8ac_peak_8886 | 6.22904  | AKAP8_ENSG00000105127;AC005785.2_ENSG00000268189                          |
| 19 | 15490991 | 15491241 | 5Y-H4K8ac_peak_8887 | 5.77617  | AKAP8_ENSG00000105127                                                     |
| 19 | 15532072 | 15532293 | 5Y-H4K8ac_peak_8888 | 8.2913   |                                                                           |
| 19 | 15560113 | 15560326 | 5Y-H4K8ac_peak_8889 | 5.75508  | WIZ_ENSG00000011451;MIR1470_ENSG00000269782                               |
| 19 | 15561102 | 15561322 | 5Y-H4K8ac_peak_8890 | 8.11614  | WIZ_ENSG00000011451;MIR1470_ENSG00000269782                               |
| 19 | 16187373 | 16187763 | 5Y-H4K8ac_peak_8891 | 11.28133 |                                                                           |
| 19 | 16188246 | 16188988 | 5Y-H4K8ac_peak_8892 | 8.2913   |                                                                           |
| 19 | 16221490 | 16221834 | 5Y-H4K8ac_peak_8893 | 16.49365 | RAB8A_ENSG00000167461                                                     |
| 19 | 16295651 | 16295916 | 5Y-H4K8ac_peak_8894 | 10.74494 | FAM32A_ENSG00000105058                                                    |
| 19 | 16308826 | 16309115 | 5Y-H4K8ac_peak_8895 | 6.37023  | APIM1_ENSG00000072958                                                     |
| 19 | 16568681 | 16569114 | 5Y-H4K8ac_peak_8896 | 5.24695  |                                                                           |
| 19 | 16582273 | 16582532 | 5Y-H4K8ac_peak_8897 | 6.78128  | EPS15L1_ENSG00000127527                                                   |
| 19 | 16682823 | 16683062 | 5Y-H4K8ac_peak_8898 | 6.64195  | SLC35E1_ENSG00000127526                                                   |
| 19 | 16739365 | 16740042 | 5Y-H4K8ac_peak_8899 | 10.1994  | CTD-3222D19.2_ENSG00000141979;MED26_ENSG00000105085                       |
| 19 | 16935828 | 16936128 | 5Y-H4K8ac_peak_8900 | 4.51076  |                                                                           |
| 19 | 16999382 | 16999573 | 5Y-H4K8ac_peak_8901 | 7.38046  | F2RL3_ENSG00000127533                                                     |
| 19 | 17245589 | 17245885 | 5Y-H4K8ac_peak_8902 | 7.24844  |                                                                           |
| 19 | 17246972 | 17247220 | 5Y-H4K8ac_peak_8903 | 10.19948 |                                                                           |
| 19 | 17325075 | 17325730 | 5Y-H4K8ac_peak_8904 | 7.90236  | USE1_ENSG00000053501                                                      |
| 19 | 17326194 | 17326391 | 5Y-H4K8ac_peak_8905 | 10.35586 | USE1_ENSG00000053501                                                      |
| 19 | 17337435 | 17337900 | 5Y-H4K8ac_peak_8906 | 7.58806  | OCEL1_ENSG00000099330                                                     |
| 19 | 17357356 | 17357898 | 5Y-H4K8ac_peak_8907 | 6.77436  | NR2F6_ENSG00000160113                                                     |
| 19 | 17392213 | 17392650 | 5Y-H4K8ac_peak_8908 | 9.15007  | USHBP1_ENSG00000130307;ANKLE1_ENSG00000160117                             |
| 19 | 17413405 | 17414109 | 5Y-H4K8ac_peak_8909 | 6.43068  |                                                                           |
| 19 | 17416988 | 17417262 | 5Y-H4K8ac_peak_8910 | 4.67245  |                                                                           |
| 19 | 17444664 | 17444854 | 5Y-H4K8ac_peak_8911 | 5.98695  | ANO8_ENSG00000074855;GTPBP3_ENSG00000130299                               |
| 19 | 17447243 | 17447648 | 5Y-H4K8ac_peak_8912 | 4.75045  |                                                                           |
| 19 | 17458927 | 17459250 | 5Y-H4K8ac_peak_8913 | 6.55906  |                                                                           |
| 19 | 17459510 | 17459879 | 5Y-H4K8ac_peak_8914 | 9.43096  |                                                                           |
| 19 | 17501443 | 17501799 | 5Y-H4K8ac_peak_8915 | 4.95697  |                                                                           |
| 19 | 17516593 | 17516829 | 5Y-H4K8ac_peak_8916 | 4.8773   | BST2_ENSG00000130303;CTD-2521M24.9_ENSG00000269640;MVB12A_ENSG00000141971 |
| 19 | 17529889 | 17530171 | 5Y-H4K8ac_peak_8917 | 5.59837  | CTD-2521M24.4_ENSG00000254503;CTD-2521M24.8_ENSG00000269053               |
| 19 | 17530977 | 17531448 | 5Y-H4K8ac_peak_8918 | 5.72233  | CTD-2521M24.8_ENSG00000269053                                             |
| 19 | 17622471 | 17622714 | 5Y-H4K8ac_peak_8919 | 15.82359 | CTD-3131K8.2_ENSG00000269439                                              |
| 19 | 17666505 | 17666856 | 5Y-H4K8ac_peak_8920 | 5.98695  | COLGALT1_ENSG00000130309                                                  |
| 19 | 17716412 | 17716670 | 5Y-H4K8ac_peak_8921 | 11.53136 |                                                                           |
| 19 | 17817364 | 17817640 | 5Y-H4K8ac_peak_8922 | 8.564    |                                                                           |

|    |          |          |                     |          |                                              |
|----|----------|----------|---------------------|----------|----------------------------------------------|
| 19 | 17830340 | 17830663 | 5Y-H4K8ac_peak_8923 | 8.93923  | MAP1S_ENSG00000130479                        |
| 19 | 17873651 | 17873845 | 5Y-H4K8ac_peak_8924 | 8.93923  |                                              |
| 19 | 17889257 | 17889535 | 5Y-H4K8ac_peak_8925 | 6.46053  |                                              |
| 19 | 17901710 | 17901942 | 5Y-H4K8ac_peak_8926 | 4.95697  |                                              |
| 19 | 17902976 | 17903246 | 5Y-H4K8ac_peak_8927 | 8.24952  |                                              |
| 19 | 17940591 | 17940874 | 5Y-H4K8ac_peak_8928 | 4.84727  |                                              |
| 19 | 17941234 | 17941476 | 5Y-H4K8ac_peak_8929 | 8.23578  |                                              |
| 19 | 17953701 | 17953941 | 5Y-H4K8ac_peak_8930 | 5.67283  |                                              |
| 19 | 17958622 | 17959107 | 5Y-H4K8ac_peak_8931 | 12.64868 | JAK3_ENSG00000105639                         |
| 19 | 17970699 | 17971305 | 5Y-H4K8ac_peak_8932 | 13.77072 | RPL18A_ENSG00000105640                       |
| 19 | 18042650 | 18042940 | 5Y-H4K8ac_peak_8933 | 5.62788  | CCDC124_ENSG00000007080                      |
| 19 | 18043186 | 18043411 | 5Y-H4K8ac_peak_8934 | 7.97699  | CCDC124_ENSG00000007080                      |
| 19 | 18043853 | 18044168 | 5Y-H4K8ac_peak_8935 | 10.90365 | CCDC124_ENSG00000007080                      |
| 19 | 18111843 | 18112540 | 5Y-H4K8ac_peak_8936 | 11.19336 | ARRDC2_ENSG00000105643                       |
| 19 | 18119100 | 18119307 | 5Y-H4K8ac_peak_8937 | 7.65114  |                                              |
| 19 | 18133538 | 18133992 | 5Y-H4K8ac_peak_8938 | 4.77016  | CTB-52I2.4_ENSG00000268032                   |
| 19 | 18169019 | 18169255 | 5Y-H4K8ac_peak_8939 | 7.87406  |                                              |
| 19 | 18169472 | 18169675 | 5Y-H4K8ac_peak_8940 | 4.69231  |                                              |
| 19 | 18271708 | 18272207 | 5Y-H4K8ac_peak_8941 | 12.06963 |                                              |
| 19 | 18334820 | 18335257 | 5Y-H4K8ac_peak_8942 | 9.96543  |                                              |
| 19 | 18335635 | 18336105 | 5Y-H4K8ac_peak_8943 | 7.30348  |                                              |
| 19 | 18336609 | 18337253 | 5Y-H4K8ac_peak_8944 | 13.0168  |                                              |
| 19 | 18391870 | 18392093 | 5Y-H4K8ac_peak_8945 | 6.67017  | JUND_ENSG00000130522;MIR3188_ENSG00000267959 |
| 19 | 18392876 | 18393077 | 5Y-H4K8ac_peak_8946 | 9.51254  | JUND_ENSG00000130522;MIR3188_ENSG00000267959 |
| 19 | 18402211 | 18402537 | 5Y-H4K8ac_peak_8947 | 7.08486  |                                              |
| 19 | 18402889 | 18403464 | 5Y-H4K8ac_peak_8948 | 10.79063 |                                              |
| 19 | 18403869 | 18404326 | 5Y-H4K8ac_peak_8949 | 4.50834  |                                              |
| 19 | 18415311 | 18416308 | 5Y-H4K8ac_peak_8950 | 11.8513  |                                              |
| 19 | 18428887 | 18429298 | 5Y-H4K8ac_peak_8951 | 6.78128  |                                              |
| 19 | 18433450 | 18433786 | 5Y-H4K8ac_peak_8952 | 9.96543  | LSM4_ENSG00000130520                         |
| 19 | 18475169 | 18475369 | 5Y-H4K8ac_peak_8953 | 9.66296  |                                              |
| 19 | 18484474 | 18484845 | 5Y-H4K8ac_peak_8954 | 9.05168  | GDF15_ENSG00000130513                        |
| 19 | 18499053 | 18499260 | 5Y-H4K8ac_peak_8955 | 7.59101  |                                              |
| 19 | 18527368 | 18527691 | 5Y-H4K8ac_peak_8956 | 5.03917  |                                              |
| 19 | 18528029 | 18528442 | 5Y-H4K8ac_peak_8957 | 6.37023  |                                              |
| 19 | 18528729 | 18528990 | 5Y-H4K8ac_peak_8958 | 13.00792 | SSBP4_ENSG00000130511                        |
| 19 | 18529261 | 18529638 | 5Y-H4K8ac_peak_8959 | 4.61816  | SSBP4_ENSG00000130511                        |
| 19 | 18530259 | 18530557 | 5Y-H4K8ac_peak_8960 | 6.37023  | SSBP4_ENSG00000130511                        |
| 19 | 18543746 | 18544404 | 5Y-H4K8ac_peak_8961 | 7.34185  |                                              |
| 19 | 18548631 | 18548876 | 5Y-H4K8ac_peak_8962 | 11.19336 | ISYNA1_ENSG00000105655                       |
| 19 | 18667394 | 18667741 | 5Y-H4K8ac_peak_8963 | 4.50834  | KXD1_ENSG00000105700                         |
| 19 | 18668768 | 18668980 | 5Y-H4K8ac_peak_8964 | 9.23159  | KXD1_ENSG00000105700                         |
| 19 | 18699156 | 18699888 | 5Y-H4K8ac_peak_8965 | 5.72233  | C19orf60_ENSG00000006015                     |
| 19 | 18722600 | 18722842 | 5Y-H4K8ac_peak_8966 | 4.16635  |                                              |
| 19 | 18723445 | 18723639 | 5Y-H4K8ac_peak_8967 | 7.8267   |                                              |
| 19 | 18747902 | 18748107 | 5Y-H4K8ac_peak_8968 | 7.58806  | KLHL26_ENSG00000167487                       |

|    |          |          |                     |          |                                                                                                    |
|----|----------|----------|---------------------|----------|----------------------------------------------------------------------------------------------------|
| 19 | 18771068 | 18771299 | 5Y-H4K8ac_peak_8969 | 4.79585  |                                                                                                    |
| 19 | 18793831 | 18794272 | 5Y-H4K8ac_peak_8970 | 13.60015 | CRTC1_ENSG00000105662                                                                              |
| 19 | 18830461 | 18830844 | 5Y-H4K8ac_peak_8971 | 8.79957  |                                                                                                    |
| 19 | 18846717 | 18847441 | 5Y-H4K8ac_peak_8972 | 11.71078 |                                                                                                    |
| 19 | 18853336 | 18854128 | 5Y-H4K8ac_peak_8973 | 16.05821 |                                                                                                    |
| 19 | 18854446 | 18855130 | 5Y-H4K8ac_peak_8974 | 10.90365 |                                                                                                    |
| 19 | 18872444 | 18873285 | 5Y-H4K8ac_peak_8975 | 7.50148  |                                                                                                    |
| 19 | 18874642 | 18874924 | 5Y-H4K8ac_peak_8976 | 9.01966  |                                                                                                    |
| 19 | 18942803 | 18943156 | 5Y-H4K8ac_peak_8977 | 9.15007  | UPF1_ENSG0000005007                                                                                |
| 19 | 19006513 | 19006804 | 5Y-H4K8ac_peak_8978 | 9.01787  | CERS1_ENSG00000223802;GDF1_ENSG00000130283                                                         |
| 19 | 19144442 | 19144658 | 5Y-H4K8ac_peak_8979 | 16.01457 | SUGP2_ENSG00000064607;ARMC6_ENSG00000105676                                                        |
| 19 | 19221205 | 19221615 | 5Y-H4K8ac_peak_8980 | 5.74859  |                                                                                                    |
| 19 | 19248976 | 19249215 | 5Y-H4K8ac_peak_8981 | 6.54441  | TMEM161A_ENSG00000064545                                                                           |
| 19 | 19256596 | 19256964 | 5Y-H4K8ac_peak_8982 | 11.4254  |                                                                                                    |
| 19 | 19302610 | 19302843 | 5Y-H4K8ac_peak_8983 | 7.90236  | MEF2BNB-MEF2B_ENSG00000064489;MEF2B_ENSG00000213999;MEF2BNB_ENSG00000254901;RFXANK_ENSG00000064490 |
| 19 | 19303057 | 19303311 | 5Y-H4K8ac_peak_8984 | 8.75963  | MEF2BNB-MEF2B_ENSG00000064489;MEF2B_ENSG00000213999;MEF2BNB_ENSG00000254901;RFXANK_ENSG00000064490 |
| 19 | 19372206 | 19372474 | 5Y-H4K8ac_peak_8985 | 7.87048  |                                                                                                    |
| 19 | 19383942 | 19384163 | 5Y-H4K8ac_peak_8986 | 7.9057   | AC138430.4_ENSG00000267629;TM6SF2_ENSG00000213996                                                  |
| 19 | 19431042 | 19431243 | 5Y-H4K8ac_peak_8987 | 9.51254  | SUGP1_ENSG00000105705;MAU2_ENSG00000129933                                                         |
| 19 | 19431685 | 19432006 | 5Y-H4K8ac_peak_8988 | 13.10659 | SUGP1_ENSG00000105705;MAU2_ENSG00000129933                                                         |
| 19 | 19477433 | 19477708 | 5Y-H4K8ac_peak_8989 | 11.57334 |                                                                                                    |
| 19 | 19495808 | 19496245 | 5Y-H4K8ac_peak_8990 | 12.21176 | GATAD2A_ENSG00000167491                                                                            |
| 19 | 19496856 | 19497227 | 5Y-H4K8ac_peak_8991 | 8.24461  | GATAD2A_ENSG00000167491                                                                            |
| 19 | 19516789 | 19517112 | 5Y-H4K8ac_peak_8992 | 10.55771 |                                                                                                    |
| 19 | 19626254 | 19626878 | 5Y-H4K8ac_peak_8993 | 14.01193 | TSSK6_ENSG00000178093;NDUFA13_ENSG00000186010;YJEFN3_ENSG00000250067;CTC-260F20.3_ENSG00000258674  |
| 19 | 19627150 | 19627650 | 5Y-H4K8ac_peak_8994 | 6.2403   | TSSK6_ENSG00000178093;NDUFA13_ENSG00000186010;YJEFN3_ENSG00000250067;CTC-260F20.3_ENSG00000258674  |
| 19 | 19738684 | 19739008 | 5Y-H4K8ac_peak_8995 | 10.60083 | LPAR2_ENSG00000064547                                                                              |
| 19 | 19739587 | 19740025 | 5Y-H4K8ac_peak_8996 | 5.98695  | LPAR2_ENSG00000064547                                                                              |
| 19 | 19740313 | 19740550 | 5Y-H4K8ac_peak_8997 | 5.37137  | LPAR2_ENSG00000064547                                                                              |
| 19 | 19754051 | 19754300 | 5Y-H4K8ac_peak_8998 | 6.37023  | GMIP_ENSG00000089639                                                                               |
| 19 | 19774019 | 19774714 | 5Y-H4K8ac_peak_8999 | 15.17389 | ATP13A1_ENSG00000105726                                                                            |
| 19 | 19779670 | 19780094 | 5Y-H4K8ac_peak_9000 | 4.50834  | ZNF101_ENSG00000181896                                                                             |
| 19 | 19843606 | 19843849 | 5Y-H4K8ac_peak_9001 | 10.11191 | ZNF14_ENSG00000105708                                                                              |
| 19 | 19932108 | 19932476 | 5Y-H4K8ac_peak_9002 | 4.0639   | CTC-559E9.4_ENSG00000267581;ZNF506_ENSG00000081665                                                 |
| 19 | 20149970 | 20150208 | 5Y-H4K8ac_peak_9003 | 8.21582  | ZNF682_ENSG00000197124                                                                             |
| 19 | 20162511 | 20162768 | 5Y-H4K8ac_peak_9004 | 6.34046  |                                                                                                    |
| 19 | 20349703 | 20349953 | 5Y-H4K8ac_peak_9005 | 5.65584  |                                                                                                    |
| 19 | 20607339 | 20607721 | 5Y-H4K8ac_peak_9006 | 7.11863  | ZNF826P_ENSG00000231205                                                                            |
| 19 | 20843996 | 20844319 | 5Y-H4K8ac_peak_9007 | 8.97752  | CTC-513N18.7_ENSG00000269110;ZNF626_ENSG00000188171                                                |
| 19 | 21203527 | 21203717 | 5Y-H4K8ac_peak_9008 | 5.65584  | ZNF430_ENSG00000118620                                                                             |
| 19 | 21324881 | 21325237 | 5Y-H4K8ac_peak_9009 | 6.31818  | ZNF431_ENSG00000196705                                                                             |
| 19 | 21511887 | 21512099 | 5Y-H4K8ac_peak_9010 | 4.84727  | ZNF708_ENSG00000182141                                                                             |
| 19 | 21512487 | 21512717 | 5Y-H4K8ac_peak_9011 | 6.73047  | ZNF708_ENSG00000182141                                                                             |
| 19 | 21646387 | 21646897 | 5Y-H4K8ac_peak_9012 | 6.50117  | CTD-2561J22.5_ENSG00000268119                                                                      |
| 19 | 21786230 | 21786479 | 5Y-H4K8ac_peak_9013 | 8.79957  |                                                                                                    |
| 19 | 22018633 | 22018934 | 5Y-H4K8ac_peak_9014 | 7.57144  |                                                                                                    |



|    |          |          |                     |          |                                                                                                                                    |
|----|----------|----------|---------------------|----------|------------------------------------------------------------------------------------------------------------------------------------|
| 19 | 22816065 | 22816603 | 5Y-H4K8ac_peak_9015 | 6.34046  | ZNF492_ENSG00000229676                                                                                                             |
| 19 | 23258301 | 23258684 | 5Y-H4K8ac_peak_9016 | 5.65584  | CTD-2291D10.4_ENSG00000267886;ZNF730_ENSG00000183850                                                                               |
| 19 | 23299910 | 23300217 | 5Y-H4K8ac_peak_9017 | 7.97699  |                                                                                                                                    |
| 19 | 23945930 | 23946136 | 5Y-H4K8ac_peak_9018 | 5.35202  | RP11-255H23.2_ENSG00000233836;RPSAP58_ENSG00000205246                                                                              |
| 19 | 24097125 | 24097383 | 5Y-H4K8ac_peak_9019 | 8.97752  | ZNF726_ENSG00000213967                                                                                                             |
| 19 | 24224107 | 24224443 | 5Y-H4K8ac_peak_9020 | 4.51076  |                                                                                                                                    |
| 19 | 29703604 | 29703893 | 5Y-H4K8ac_peak_9021 | 7.59101  | UQCRFS1_ENSG00000169021;CTB-32O4.2_ENSG00000267498                                                                                 |
| 19 | 30206218 | 30206857 | 5Y-H4K8ac_peak_9022 | 16.65971 | C19orf12_ENSG00000131943                                                                                                           |
| 19 | 30301899 | 30302449 | 5Y-H4K8ac_peak_9023 | 11.42066 | CCNE1_ENSG00000105173                                                                                                              |
| 19 | 30303331 | 30303562 | 5Y-H4K8ac_peak_9024 | 5.98695  | CCNE1_ENSG00000105173                                                                                                              |
| 19 | 30364028 | 30364520 | 5Y-H4K8ac_peak_9025 | 12.26819 |                                                                                                                                    |
| 19 | 30384406 | 30384720 | 5Y-H4K8ac_peak_9026 | 7.76232  |                                                                                                                                    |
| 19 | 30433490 | 30433699 | 5Y-H4K8ac_peak_9027 | 5.28616  |                                                                                                                                    |
| 19 | 30583820 | 30584264 | 5Y-H4K8ac_peak_9028 | 4.84727  |                                                                                                                                    |
| 19 | 30602411 | 30602783 | 5Y-H4K8ac_peak_9029 | 9.01738  |                                                                                                                                    |
| 19 | 30643689 | 30644173 | 5Y-H4K8ac_peak_9030 | 15.17973 |                                                                                                                                    |
| 19 | 30865739 | 30866384 | 5Y-H4K8ac_peak_9031 | 5.77617  |                                                                                                                                    |
| 19 | 31057703 | 31057929 | 5Y-H4K8ac_peak_9032 | 8.47164  |                                                                                                                                    |
| 19 | 31160182 | 31160429 | 5Y-H4K8ac_peak_9033 | 7.09658  | CTC-565M22.1_ENSG00000267760                                                                                                       |
| 19 | 31182715 | 31182935 | 5Y-H4K8ac_peak_9034 | 6.09071  |                                                                                                                                    |
| 19 | 31210761 | 31211149 | 5Y-H4K8ac_peak_9035 | 7.09658  |                                                                                                                                    |
| 19 | 31234276 | 31234978 | 5Y-H4K8ac_peak_9036 | 8.43511  |                                                                                                                                    |
| 19 | 31807939 | 31808424 | 5Y-H4K8ac_peak_9037 | 5.23083  |                                                                                                                                    |
| 19 | 31830059 | 31830405 | 5Y-H4K8ac_peak_9038 | 7.04637  |                                                                                                                                    |
| 19 | 31831604 | 31831858 | 5Y-H4K8ac_peak_9039 | 10.46287 |                                                                                                                                    |
| 19 | 31835458 | 31835711 | 5Y-H4K8ac_peak_9040 | 8.75926  |                                                                                                                                    |
| 19 | 31842224 | 31842509 | 5Y-H4K8ac_peak_9041 | 10.31981 |                                                                                                                                    |
| 19 | 32514329 | 32514646 | 5Y-H4K8ac_peak_9042 | 7.84116  |                                                                                                                                    |
| 19 | 32692524 | 32692978 | 5Y-H4K8ac_peak_9043 | 7.31815  |                                                                                                                                    |
| 19 | 32835991 | 32836305 | 5Y-H4K8ac_peak_9044 | 7.17184  | ZNF507_ENSG00000168813                                                                                                             |
| 19 | 32836584 | 32836910 | 5Y-H4K8ac_peak_9045 | 13.64163 | ZNF507_ENSG00000168813                                                                                                             |
| 19 | 32895956 | 32896378 | 5Y-H4K8ac_peak_9046 | 14.26884 | AC007773.2_ENSG00000267213;AC007773.3_ENSG00000269093;DPY19L3_ENSG00000178904                                                      |
| 19 | 33182717 | 33183004 | 5Y-H4K8ac_peak_9047 | 9.13842  | CTD-2538C1.2_ENSG00000267475;NUDT19_ENSG00000213965                                                                                |
| 19 | 33667334 | 33667710 | 5Y-H4K8ac_peak_9048 | 7.04637  | AC008738.2_ENSG00000264355;LRP3_ENSG00000130881                                                                                    |
| 19 | 33685515 | 33685750 | 5Y-H4K8ac_peak_9049 | 4.91235  |                                                                                                                                    |
| 19 | 33784504 | 33784913 | 5Y-H4K8ac_peak_9050 | 8.90038  |                                                                                                                                    |
| 19 | 33793003 | 33793373 | 5Y-H4K8ac_peak_9051 | 9.93099  | CEBPA_ENSG00000245848;AC008738.1_ENSG00000230259;CTD-2540B15.7_ENSG00000267727;CEBPA-AS1_ENSG00000267296;CEBPA-AS1_ENSG00000178863 |
| 19 | 33793733 | 33794032 | 5Y-H4K8ac_peak_9052 | 7.09658  | CEBPA_ENSG00000245848;AC008738.1_ENSG00000230259;CEBPA-AS1_ENSG00000267296;CEBPA-AS1_ENSG00000178863                               |
| 19 | 33864075 | 33864272 | 5Y-H4K8ac_peak_9053 | 9.51254  | CEBPG_ENSG00000153879                                                                                                              |
| 19 | 33864690 | 33864929 | 5Y-H4K8ac_peak_9054 | 12.81408 | CEBPG_ENSG00000153879                                                                                                              |
| 19 | 33897453 | 33897768 | 5Y-H4K8ac_peak_9055 | 7.11863  |                                                                                                                                    |
| 19 | 33898039 | 33898410 | 5Y-H4K8ac_peak_9056 | 5.23083  |                                                                                                                                    |
| 19 | 33925862 | 33926148 | 5Y-H4K8ac_peak_9057 | 6.34245  |                                                                                                                                    |
| 19 | 33926404 | 33926964 | 5Y-H4K8ac_peak_9058 | 14.00559 |                                                                                                                                    |
| 19 | 33927175 | 33928000 | 5Y-H4K8ac_peak_9059 | 8.73985  |                                                                                                                                    |
| 19 | 33929304 | 33929545 | 5Y-H4K8ac_peak_9060 | 6.37023  |                                                                                                                                    |

|    |          |          |                     |          |                                                                                                      |
|----|----------|----------|---------------------|----------|------------------------------------------------------------------------------------------------------|
| 19 | 33995256 | 33995533 | 5Y-H4K8ac_peak_9061 | 8.69112  |                                                                                                      |
| 19 | 33996227 | 33996510 | 5Y-H4K8ac_peak_9062 | 14.30055 |                                                                                                      |
| 19 | 33998015 | 33998255 | 5Y-H4K8ac_peak_9063 | 6.37023  |                                                                                                      |
| 19 | 33998917 | 33999609 | 5Y-H4K8ac_peak_9064 | 5.51759  |                                                                                                      |
| 19 | 34013118 | 34013440 | 5Y-H4K8ac_peak_9065 | 9.15007  | PEPD_ENSG00000124299                                                                                 |
| 19 | 34168377 | 34168833 | 5Y-H4K8ac_peak_9066 | 6.50117  |                                                                                                      |
| 19 | 34175809 | 34176002 | 5Y-H4K8ac_peak_9067 | 10.1994  |                                                                                                      |
| 19 | 34177954 | 34178282 | 5Y-H4K8ac_peak_9068 | 8.1667   |                                                                                                      |
| 19 | 34178667 | 34178869 | 5Y-H4K8ac_peak_9069 | 6.53157  |                                                                                                      |
| 19 | 34254308 | 34254543 | 5Y-H4K8ac_peak_9070 | 12.44818 |                                                                                                      |
| 19 | 34285716 | 34285918 | 5Y-H4K8ac_peak_9071 | 8.24461  | KCTD15_ENSG00000153885                                                                               |
| 19 | 34286505 | 34287534 | 5Y-H4K8ac_peak_9072 | 19.41832 | KCTD15_ENSG00000153885                                                                               |
| 19 | 34287816 | 34288090 | 5Y-H4K8ac_peak_9073 | 9.30505  | KCTD15_ENSG00000153885                                                                               |
| 19 | 34303705 | 34303922 | 5Y-H4K8ac_peak_9074 | 7.28023  |                                                                                                      |
| 19 | 34359742 | 34360193 | 5Y-H4K8ac_peak_9075 | 7.89273  |                                                                                                      |
| 19 | 34396571 | 34396990 | 5Y-H4K8ac_peak_9076 | 8.24461  |                                                                                                      |
| 19 | 34662885 | 34663222 | 5Y-H4K8ac_peak_9077 | 8.3285   | LSM14A_ENSG00000257103                                                                               |
| 19 | 34745153 | 34745344 | 5Y-H4K8ac_peak_9078 | 7.38046  | KIAA0355_ENSG00000166398                                                                             |
| 19 | 34895383 | 34895575 | 5Y-H4K8ac_peak_9079 | 7.89273  | PDCD2L_ENSG00000126249                                                                               |
| 19 | 34919046 | 34919707 | 5Y-H4K8ac_peak_9080 | 9.78792  | CTD-2588C8.8_ENSG00000267024;UBA2_ENSG00000126261                                                    |
| 19 | 35136938 | 35137267 | 5Y-H4K8ac_peak_9081 | 8.2913   | SCGB2B3P_ENSG00000269811                                                                             |
| 19 | 35168694 | 35168897 | 5Y-H4K8ac_peak_9082 | 8.24461  | AC020910.2_ENSG00000256383;ZNF302_ENSG00000089335                                                    |
| 19 | 35225205 | 35225465 | 5Y-H4K8ac_peak_9083 | 7.90751  | ZNF181_ENSG00000197841                                                                               |
| 19 | 35328736 | 35329385 | 5Y-H4K8ac_peak_9084 | 6.76425  | CTC-523E23.5_ENSG00000269086                                                                         |
| 19 | 35454656 | 35454924 | 5Y-H4K8ac_peak_9085 | 10.79063 | ZNF792_ENSG00000180884                                                                               |
| 19 | 35584886 | 35585176 | 5Y-H4K8ac_peak_9086 | 4.66683  |                                                                                                      |
| 19 | 35758370 | 35758572 | 5Y-H4K8ac_peak_9087 | 6.43775  |                                                                                                      |
| 19 | 36103665 | 36103917 | 5Y-H4K8ac_peak_9088 | 11.5813  | AC002115.9_ENSG00000267626;HAUS5_ENSG00000249115                                                     |
| 19 | 36120041 | 36120439 | 5Y-H4K8ac_peak_9089 | 5.98695  | RBM42_ENSG00000126254                                                                                |
| 19 | 36192708 | 36193256 | 5Y-H4K8ac_peak_9090 | 15.40182 |                                                                                                      |
| 19 | 36206837 | 36207388 | 5Y-H4K8ac_peak_9091 | 6.37023  |                                                                                                      |
| 19 | 36208071 | 36208316 | 5Y-H4K8ac_peak_9092 | 7.03573  | KMT2B_ENSG00000105663;KMT2B_ENSG00000272333                                                          |
| 19 | 36236056 | 36236259 | 5Y-H4K8ac_peak_9093 | 9.30505  | AD000671.6_ENSG00000267120;U2AF1L4_ENSG00000161265;PSENEN_ENSG00000205155;AC002398.9_ENSG00000188223 |
| 19 | 36248142 | 36248343 | 5Y-H4K8ac_peak_9094 | 4.00285  | HSPB6_ENSG00000004776;C19orf55_ENSG00000167595                                                       |
| 19 | 36249052 | 36249403 | 5Y-H4K8ac_peak_9095 | 8.69112  | HSPB6_ENSG000000004776;C19orf55_ENSG00000167595                                                      |
| 19 | 36267180 | 36267388 | 5Y-H4K8ac_peak_9096 | 4.84727  |                                                                                                      |
| 19 | 36358971 | 36359313 | 5Y-H4K8ac_peak_9097 | 4.50834  | NPHS1_ENSG00000161270;APLP1_ENSG00000105290                                                          |
| 19 | 36478582 | 36478893 | 5Y-H4K8ac_peak_9098 | 7.46096  |                                                                                                      |
| 19 | 36484822 | 36485253 | 5Y-H4K8ac_peak_9099 | 7.01364  | SDHAF1_ENSG00000205138                                                                               |
| 19 | 36486142 | 36486469 | 5Y-H4K8ac_peak_9100 | 5.64909  | SDHAF1_ENSG00000205138                                                                               |
| 19 | 36500102 | 36500374 | 5Y-H4K8ac_peak_9101 | 8.16382  | SYNE4_ENSG00000181392                                                                                |
| 19 | 36523922 | 36524161 | 5Y-H4K8ac_peak_9102 | 10.65037 | CLIP3_ENSG00000105270                                                                                |
| 19 | 36602098 | 36602290 | 5Y-H4K8ac_peak_9103 | 6.17973  | OVOL3_ENSG00000105261                                                                                |
| 19 | 36705125 | 36705347 | 5Y-H4K8ac_peak_9104 | 4.93237  | ZNF146_ENSG00000167635                                                                               |
| 19 | 36748276 | 36748718 | 5Y-H4K8ac_peak_9105 | 6.75784  |                                                                                                      |
| 19 | 36869527 | 36870050 | 5Y-H4K8ac_peak_9106 | 10.19948 | ZFP14_ENSG00000142065;CTD-3162L10.3_ENSG00000266973                                                  |

|    |          |          |                     |          |                                                                            |
|----|----------|----------|---------------------|----------|----------------------------------------------------------------------------|
| 19 | 36870359 | 36870657 | 5Y-H4K8ac_peak_9107 | 7.04637  | ZFP14_ENSG00000142065                                                      |
| 19 | 36908931 | 36909473 | 5Y-H4K8ac_peak_9108 | 7.31102  | ZFP82_ENSG00000181007                                                      |
| 19 | 37018994 | 37019290 | 5Y-H4K8ac_peak_9109 | 7.3889   | ZNF260_ENSG00000254004;AC092295.4_ENSG00000228629                          |
| 19 | 37064378 | 37064833 | 5Y-H4K8ac_peak_9110 | 6.73385  | AC092295.7_ENSG00000233527                                                 |
| 19 | 37096305 | 37096569 | 5Y-H4K8ac_peak_9111 | 11.86504 | ZNF529_ENSG00000186020;ZNF382_ENSG00000161298                              |
| 19 | 37178613 | 37178814 | 5Y-H4K8ac_peak_9112 | 7.11863  | AC074138.3_ENSG00000225975;ZNF567_ENSG00000189042                          |
| 19 | 37263768 | 37264264 | 5Y-H4K8ac_peak_9113 | 6.50117  | ZNF850_ENSG00000267041;CTD-2162K18.4_ENSG00000267260                       |
| 19 | 37329402 | 37329608 | 5Y-H4K8ac_peak_9114 | 10.19948 |                                                                            |
| 19 | 37406610 | 37407197 | 5Y-H4K8ac_peak_9115 | 12.10416 | ZNF829_ENSG00000185869;ZNF568_ENSG00000198453                              |
| 19 | 37463423 | 37464241 | 5Y-H4K8ac_peak_9116 | 16.50659 |                                                                            |
| 19 | 37708841 | 37709124 | 5Y-H4K8ac_peak_9117 | 9.38203  | ZNF585B_ENSG00000245680;ZNF383_ENSG00000188283                             |
| 19 | 38145963 | 38146590 | 5Y-H4K8ac_peak_9118 | 10.4689  |                                                                            |
| 19 | 38183659 | 38183851 | 5Y-H4K8ac_peak_9119 | 6.47245  | ZFP30_ENSG00000120784;ZNF781_ENSG00000196381;CTD-2528L19.3_ENSG00000267319 |
| 19 | 38210324 | 38210540 | 5Y-H4K8ac_peak_9120 | 10.1994  | CTD-2528L19.4_ENSG00000267552;ZNF607_ENSG00000198182                       |
| 19 | 38397072 | 38397513 | 5Y-H4K8ac_peak_9121 | 6.78128  | WDR87_ENSG00000171804;SIPA1L3_ENSG00000105738                              |
| 19 | 38494819 | 38495082 | 5Y-H4K8ac_peak_9122 | 6.50117  |                                                                            |
| 19 | 38584110 | 38584645 | 5Y-H4K8ac_peak_9123 | 9.41037  |                                                                            |
| 19 | 38642786 | 38643663 | 5Y-H4K8ac_peak_9124 | 10.31981 |                                                                            |
| 19 | 38664216 | 38664778 | 5Y-H4K8ac_peak_9125 | 8.43511  |                                                                            |
| 19 | 38700584 | 38700878 | 5Y-H4K8ac_peak_9126 | 6.34046  |                                                                            |
| 19 | 38724649 | 38724950 | 5Y-H4K8ac_peak_9127 | 8.43511  |                                                                            |
| 19 | 38734684 | 38735215 | 5Y-H4K8ac_peak_9128 | 6.1654   | SPINT2_ENSG00000167642                                                     |
| 19 | 38741911 | 38742109 | 5Y-H4K8ac_peak_9129 | 4.84727  |                                                                            |
| 19 | 38743776 | 38744175 | 5Y-H4K8ac_peak_9130 | 11.99586 |                                                                            |
| 19 | 38754479 | 38755136 | 5Y-H4K8ac_peak_9131 | 9.05168  |                                                                            |
| 19 | 38806932 | 38807248 | 5Y-H4K8ac_peak_9132 | 6.27205  | YIF1B_ENSG00000167645                                                      |
| 19 | 38810082 | 38810391 | 5Y-H4K8ac_peak_9133 | 7.28023  | KCNK6_ENSG00000099337                                                      |
| 19 | 38825591 | 38826089 | 5Y-H4K8ac_peak_9134 | 8.79957  | CATSPERG_ENSG00000099338                                                   |
| 19 | 38893945 | 38894238 | 5Y-H4K8ac_peak_9135 | 13.29029 | FAM98C_ENSG00000130244                                                     |
| 19 | 39005944 | 39006172 | 5Y-H4K8ac_peak_9136 | 9.23159  |                                                                            |
| 19 | 39109189 | 39109414 | 5Y-H4K8ac_peak_9137 | 7.50501  | EIF3K_ENSG00000178982;MAP4K1_ENSG00000104814                               |
| 19 | 39210404 | 39210609 | 5Y-H4K8ac_peak_9138 | 5.18494  |                                                                            |
| 19 | 39225963 | 39226183 | 5Y-H4K8ac_peak_9139 | 8.564    |                                                                            |
| 19 | 39321984 | 39322295 | 5Y-H4K8ac_peak_9140 | 8.21582  | ECH1_ENSG00000104823                                                       |
| 19 | 39322774 | 39322997 | 5Y-H4K8ac_peak_9141 | 4.50834  | ECH1_ENSG00000104823                                                       |
| 19 | 39340262 | 39340570 | 5Y-H4K8ac_peak_9142 | 26.19116 |                                                                            |
| 19 | 39341474 | 39341685 | 5Y-H4K8ac_peak_9143 | 6.43775  |                                                                            |
| 19 | 39341972 | 39342339 | 5Y-H4K8ac_peak_9144 | 5.42666  | HNRNPL_ENSG00000104824                                                     |
| 19 | 39368758 | 39369391 | 5Y-H4K8ac_peak_9145 | 10.69698 | RINL_ENSG00000187994                                                       |
| 19 | 39407744 | 39408255 | 5Y-H4K8ac_peak_9146 | 8.55081  |                                                                            |
| 19 | 39521723 | 39521942 | 5Y-H4K8ac_peak_9147 | 8.08688  | CTB-189B5.3_ENSG00000267992                                                |
| 19 | 39522582 | 39522785 | 5Y-H4K8ac_peak_9148 | 5.24695  | FBXO27_ENSG00000161243                                                     |
| 19 | 39616452 | 39616699 | 5Y-H4K8ac_peak_9149 | 10.35586 | PAK4_ENSG00000130669                                                       |
| 19 | 39657454 | 39657804 | 5Y-H4K8ac_peak_9150 | 7.87406  |                                                                            |
| 19 | 39658185 | 39658427 | 5Y-H4K8ac_peak_9151 | 4.642    |                                                                            |
| 19 | 39811156 | 39811387 | 5Y-H4K8ac_peak_9152 | 6.37023  | CTC-246B18.8_ENSG00000268262                                               |

|    |          |          |                     |          |                                              |
|----|----------|----------|---------------------|----------|----------------------------------------------|
| 19 | 39893595 | 39893805 | 5Y-H4K8ac_peak_9153 | 6.73385  |                                              |
| 19 | 39900569 | 39900800 | 5Y-H4K8ac_peak_9154 | 10.77539 | MIR4530_ENSG00000266559                      |
| 19 | 39903736 | 39903958 | 5Y-H4K8ac_peak_9155 | 4.29586  | PLEKHG2_ENSG00000090924                      |
| 19 | 39904240 | 39904661 | 5Y-H4K8ac_peak_9156 | 6.54441  |                                              |
| 19 | 39926216 | 39926525 | 5Y-H4K8ac_peak_9157 | 10.1994  | RPS16_ENSG00000105193;SUPT5H_ENSG00000196235 |
| 19 | 39927151 | 39927351 | 5Y-H4K8ac_peak_9158 | 5.65584  | RPS16_ENSG00000105193;SUPT5H_ENSG00000196235 |
| 19 | 39936357 | 39936655 | 5Y-H4K8ac_peak_9159 | 9.38276  |                                              |
| 19 | 39971545 | 39971835 | 5Y-H4K8ac_peak_9160 | 8.1667   | TIMM50_ENSG00000105197                       |
| 19 | 40005867 | 40006428 | 5Y-H4K8ac_peak_9161 | 9.15007  | SELV_ENSG00000186838                         |
| 19 | 40030399 | 40030738 | 5Y-H4K8ac_peak_9162 | 8.69112  | EID2_ENSG00000176396                         |
| 19 | 40315605 | 40315902 | 5Y-H4K8ac_peak_9163 | 7.11863  |                                              |
| 19 | 40316164 | 40316478 | 5Y-H4K8ac_peak_9164 | 6.73047  |                                              |
| 19 | 40323846 | 40324078 | 5Y-H4K8ac_peak_9165 | 11.09973 | DYRK1B_ENSG00000105204                       |
| 19 | 40324481 | 40324675 | 5Y-H4K8ac_peak_9166 | 6.50117  | DYRK1B_ENSG00000105204                       |
| 19 | 40365973 | 40366348 | 5Y-H4K8ac_peak_9167 | 6.98416  |                                              |
| 19 | 40397790 | 40398060 | 5Y-H4K8ac_peak_9168 | 10.19948 |                                              |
| 19 | 40696988 | 40697259 | 5Y-H4K8ac_peak_9169 | 9.15007  | MAP3K10_ENSG00000130758                      |
| 19 | 40697484 | 40697991 | 5Y-H4K8ac_peak_9170 | 8.78565  | MAP3K10_ENSG00000130758                      |
| 19 | 40723247 | 40723680 | 5Y-H4K8ac_peak_9171 | 7.31815  | TTC9B_ENSG00000174521                        |
| 19 | 40724018 | 40724287 | 5Y-H4K8ac_peak_9172 | 11.57334 | TTC9B_ENSG00000174521                        |
| 19 | 40790668 | 40791261 | 5Y-H4K8ac_peak_9173 | 8.69112  | AKT2_ENSG00000105221                         |
| 19 | 40928687 | 40928935 | 5Y-H4K8ac_peak_9174 | 13.27281 |                                              |
| 19 | 40931398 | 40931651 | 5Y-H4K8ac_peak_9175 | 6.77436  | SERTAD1_ENSG00000197019                      |
| 19 | 40939183 | 40940188 | 5Y-H4K8ac_peak_9176 | 13.27281 |                                              |
| 19 | 41035705 | 41036245 | 5Y-H4K8ac_peak_9177 | 7.59101  |                                              |
| 19 | 41054959 | 41055226 | 5Y-H4K8ac_peak_9178 | 10.11191 |                                              |
| 19 | 41081933 | 41082353 | 5Y-H4K8ac_peak_9179 | 10.46287 | SHKBP1_ENSG00000160410                       |
| 19 | 41083080 | 41083299 | 5Y-H4K8ac_peak_9180 | 8.33296  | SHKBP1_ENSG00000160410                       |
| 19 | 41116436 | 41116747 | 5Y-H4K8ac_peak_9181 | 8.83356  |                                              |
| 19 | 41196814 | 41197409 | 5Y-H4K8ac_peak_9182 | 9.23159  | NUMBL_ENSG00000105245                        |
| 19 | 41197651 | 41198089 | 5Y-H4K8ac_peak_9183 | 10.19948 | NUMBL_ENSG00000105245                        |
| 19 | 41220415 | 41220671 | 5Y-H4K8ac_peak_9184 | 7.3889   |                                              |
| 19 | 41221201 | 41221523 | 5Y-H4K8ac_peak_9185 | 7.63144  |                                              |
| 19 | 41224920 | 41225173 | 5Y-H4K8ac_peak_9186 | 7.38046  | ADCK4_ENSG00000123815                        |
| 19 | 41255899 | 41256215 | 5Y-H4K8ac_peak_9187 | 7.38046  | SNRPA_ENSG00000077312                        |
| 19 | 41282921 | 41283225 | 5Y-H4K8ac_peak_9188 | 5.80888  | RAB4B_ENSG00000167578                        |
| 19 | 41770380 | 41770841 | 5Y-H4K8ac_peak_9189 | 14.59308 |                                              |
| 19 | 41815852 | 41816225 | 5Y-H4K8ac_peak_9190 | 7.60057  | CCDC97_ENSG00000142039                       |
| 19 | 41882408 | 41882857 | 5Y-H4K8ac_peak_9191 | 8.93923  |                                              |
| 19 | 41933953 | 41934220 | 5Y-H4K8ac_peak_9192 | 11.36989 | B3GNT8_ENSG00000177191                       |
| 19 | 42386895 | 42387107 | 5Y-H4K8ac_peak_9193 | 10.16277 | ARHGEF1_ENSG00000076928                      |
| 19 | 42443992 | 42444345 | 5Y-H4K8ac_peak_9194 | 4.77126  |                                              |
| 19 | 42444689 | 42445340 | 5Y-H4K8ac_peak_9195 | 7.50148  |                                              |
| 19 | 42463150 | 42463349 | 5Y-H4K8ac_peak_9196 | 7.30348  | RABAC1_ENSG00000105404                       |
| 19 | 42500535 | 42501639 | 5Y-H4K8ac_peak_9197 | 7.08486  | ATP1A3_ENSG00000105409                       |
| 19 | 42502303 | 42503456 | 5Y-H4K8ac_peak_9198 | 10.12457 | ATP1A3_ENSG00000105409                       |

|    |          |          |                     |          |                                                                          |
|----|----------|----------|---------------------|----------|--------------------------------------------------------------------------|
| 19 | 42573901 | 42574398 | 5Y-H4K8ac_peak_9199 | 13.0168  | GRIK5_ENSG00000105737                                                    |
| 19 | 42574597 | 42575129 | 5Y-H4K8ac_peak_9200 | 7.73726  | GRIK5_ENSG00000105737                                                    |
| 19 | 42579294 | 42579950 | 5Y-H4K8ac_peak_9201 | 9.79526  |                                                                          |
| 19 | 42595776 | 42596276 | 5Y-H4K8ac_peak_9202 | 7.05631  |                                                                          |
| 19 | 42633460 | 42633750 | 5Y-H4K8ac_peak_9203 | 5.5192   |                                                                          |
| 19 | 42648455 | 42648775 | 5Y-H4K8ac_peak_9204 | 9.76527  | SNORD112_ENSG00000252356                                                 |
| 19 | 42657872 | 42658080 | 5Y-H4K8ac_peak_9205 | 4.67245  |                                                                          |
| 19 | 42746322 | 42746681 | 5Y-H4K8ac_peak_9206 | 8.43511  | AC006486.1_ENSG00000204957;GSK3A_ENSG00000105723                         |
| 19 | 42759861 | 42760143 | 5Y-H4K8ac_peak_9207 | 11.01699 | AC006486.9_ENSG00000268643;ERF_ENSG00000105722                           |
| 19 | 42781929 | 42782310 | 5Y-H4K8ac_peak_9208 | 8.56121  |                                                                          |
| 19 | 42783138 | 42783391 | 5Y-H4K8ac_peak_9209 | 6.54441  |                                                                          |
| 19 | 42784334 | 42784529 | 5Y-H4K8ac_peak_9210 | 5.24695  |                                                                          |
| 19 | 42785359 | 42785596 | 5Y-H4K8ac_peak_9211 | 5.98695  |                                                                          |
| 19 | 42807407 | 42807726 | 5Y-H4K8ac_peak_9212 | 6.77436  | PAFAH1B3_ENSG00000079462                                                 |
| 19 | 42891547 | 42891801 | 5Y-H4K8ac_peak_9213 | 4.50834  |                                                                          |
| 19 | 42927909 | 42928476 | 5Y-H4K8ac_peak_9214 | 11.57714 | CTB-50E14.4_ENSG00000268605                                              |
| 19 | 44008713 | 44008950 | 5Y-H4K8ac_peak_9215 | 4.95697  | PHLDB3_ENSG00000176531                                                   |
| 19 | 44123208 | 44123678 | 5Y-H4K8ac_peak_9216 | 11.69482 | ZNF428_ENSG00000131116                                                   |
| 19 | 44258870 | 44259776 | 5Y-H4K8ac_peak_9217 | 15.66931 | SMG9_ENSG00000105771                                                     |
| 19 | 44289337 | 44289537 | 5Y-H4K8ac_peak_9218 | 9.06776  |                                                                          |
| 19 | 44331146 | 44331339 | 5Y-H4K8ac_peak_9219 | 5.87725  | LYPD5_ENSG00000159871;ZNF283_ENSG00000167637                             |
| 19 | 44529579 | 44529820 | 5Y-H4K8ac_peak_9220 | 11.68317 | AC067968.3_ENSG00000267144;ZNF222_ENSG00000159885;ZNF223_ENSG00000267022 |
| 19 | 44645773 | 44646104 | 5Y-H4K8ac_peak_9221 | 14.1808  | ZNF234_ENSG00000263002                                                   |
| 19 | 44668596 | 44668801 | 5Y-H4K8ac_peak_9222 | 10.46287 | ZNF226_ENSG00000167380                                                   |
| 19 | 44669301 | 44669507 | 5Y-H4K8ac_peak_9223 | 8.33296  | ZNF226_ENSG00000167380                                                   |
| 19 | 44764077 | 44764342 | 5Y-H4K8ac_peak_9224 | 7.17184  |                                                                          |
| 19 | 44808904 | 44809098 | 5Y-H4K8ac_peak_9225 | 10.46287 | ZNF235_ENSG00000159917                                                   |
| 19 | 45004656 | 45004950 | 5Y-H4K8ac_peak_9226 | 9.63153  | ZNF180_ENSG00000167384                                                   |
| 19 | 45146740 | 45147052 | 5Y-H4K8ac_peak_9227 | 12.05638 | PVR_ENSG00000073008                                                      |
| 19 | 45394635 | 45394892 | 5Y-H4K8ac_peak_9228 | 9.23159  | CTB-129P6.4_ENSG00000267282;TOMM40_ENSG00000130204                       |
| 19 | 45417793 | 45418145 | 5Y-H4K8ac_peak_9229 | 7.18391  | APOC1_ENSG00000130208                                                    |
| 19 | 45430093 | 45430345 | 5Y-H4K8ac_peak_9230 | 10.73603 | APOC1P1_ENSG00000214855                                                  |
| 19 | 45542418 | 45542608 | 5Y-H4K8ac_peak_9231 | 11.48691 | CLASRP_ENSG00000104859                                                   |
| 19 | 45581919 | 45582337 | 5Y-H4K8ac_peak_9232 | 10.36926 | GEMIN7_ENSG00000142252;MARK4_ENSG00000007047                             |
| 19 | 45665009 | 45665226 | 5Y-H4K8ac_peak_9233 | 4.86522  |                                                                          |
| 19 | 45682551 | 45682809 | 5Y-H4K8ac_peak_9234 | 5.23819  | BLOC1S3_ENSG00000189114;AC005779.2_ENSG00000267545                       |
| 19 | 45694270 | 45694496 | 5Y-H4K8ac_peak_9235 | 6.76425  |                                                                          |
| 19 | 45827066 | 45827381 | 5Y-H4K8ac_peak_9236 | 7.9057   | CKM_ENSG00000104879                                                      |
| 19 | 45829241 | 45829501 | 5Y-H4K8ac_peak_9237 | 10.69866 |                                                                          |
| 19 | 45874194 | 45874496 | 5Y-H4K8ac_peak_9238 | 9.7353   | ERCC2_ENSG00000104884                                                    |
| 19 | 45908151 | 45908637 | 5Y-H4K8ac_peak_9239 | 5.64909  | PPP1R13L_ENSG00000104881;CD3EAP_ENSG00000117877                          |
| 19 | 45909106 | 45909311 | 5Y-H4K8ac_peak_9240 | 5.64909  | PPP1R13L_ENSG00000104881;CD3EAP_ENSG00000117877                          |
| 19 | 45947747 | 45947971 | 5Y-H4K8ac_peak_9241 | 6.98394  |                                                                          |
| 19 | 46110769 | 46111091 | 5Y-H4K8ac_peak_9242 | 12.69256 |                                                                          |
| 19 | 46119604 | 46120111 | 5Y-H4K8ac_peak_9243 | 9.38807  |                                                                          |
| 19 | 46148280 | 46148650 | 5Y-H4K8ac_peak_9244 | 7.59101  | EML2_ENSG00000125746                                                     |

|    |          |          |                     |          |                                                                         |
|----|----------|----------|---------------------|----------|-------------------------------------------------------------------------|
| 19 | 46184428 | 46184749 | 5Y-H4K8ac_peak_9245 | 9.96543  |                                                                         |
| 19 | 46234674 | 46234895 | 5Y-H4K8ac_peak_9246 | 4.29586  | FBXO46_ENSG00000177051                                                  |
| 19 | 46365544 | 46366173 | 5Y-H4K8ac_peak_9247 | 7.01266  | SYMPK_ENSG00000125755                                                   |
| 19 | 46367267 | 46367672 | 5Y-H4K8ac_peak_9248 | 12.06963 | SYMPK_ENSG00000125755;FOXA3_ENSG00000170608                             |
| 19 | 46388772 | 46389257 | 5Y-H4K8ac_peak_9249 | 7.38046  | IRF2BP1_ENSG00000170604                                                 |
| 19 | 46390210 | 46390527 | 5Y-H4K8ac_peak_9250 | 9.00954  | IRF2BP1_ENSG00000170604                                                 |
| 19 | 46457363 | 46457617 | 5Y-H4K8ac_peak_9251 | 5.65584  |                                                                         |
| 19 | 46476415 | 46476651 | 5Y-H4K8ac_peak_9252 | 6.08523  | NOVA2_ENSG00000104967                                                   |
| 19 | 46850332 | 46850558 | 5Y-H4K8ac_peak_9253 | 12.2918  | PPP5C_ENSG00000011485                                                   |
| 19 | 46999320 | 46999538 | 5Y-H4K8ac_peak_9254 | 7.12953  | PNMAL2_ENSG00000204851                                                  |
| 19 | 47104761 | 47105043 | 5Y-H4K8ac_peak_9255 | 4.642    | PPP5D1_ENSG00000230510;AC011551.3_ENSG00000268423;CALM3_ENSG00000160014 |
| 19 | 47123112 | 47123404 | 5Y-H4K8ac_peak_9256 | 5.64909  |                                                                         |
| 19 | 47123880 | 47124178 | 5Y-H4K8ac_peak_9257 | 9.63153  |                                                                         |
| 19 | 47124416 | 47125219 | 5Y-H4K8ac_peak_9258 | 5.41472  |                                                                         |
| 19 | 47129206 | 47129883 | 5Y-H4K8ac_peak_9259 | 8.43999  | PTGIR_ENSG00000160013                                                   |
| 19 | 47130214 | 47130460 | 5Y-H4K8ac_peak_9260 | 4.00285  |                                                                         |
| 19 | 47133266 | 47133523 | 5Y-H4K8ac_peak_9261 | 13.99721 |                                                                         |
| 19 | 47133788 | 47134203 | 5Y-H4K8ac_peak_9262 | 12.78119 |                                                                         |
| 19 | 47134420 | 47135304 | 5Y-H4K8ac_peak_9263 | 13.81774 |                                                                         |
| 19 | 47137959 | 47138645 | 5Y-H4K8ac_peak_9264 | 8.69112  | GNG8_ENSG00000167414                                                    |
| 19 | 47142610 | 47142804 | 5Y-H4K8ac_peak_9265 | 8.69112  |                                                                         |
| 19 | 47143076 | 47143401 | 5Y-H4K8ac_peak_9266 | 9.59236  |                                                                         |
| 19 | 47217830 | 47218074 | 5Y-H4K8ac_peak_9267 | 9.22312  |                                                                         |
| 19 | 47249411 | 47249650 | 5Y-H4K8ac_peak_9268 | 11.88337 | STRN4_ENSG00000090372;FKRP_ENSG00000181027                              |
| 19 | 47249884 | 47250190 | 5Y-H4K8ac_peak_9269 | 8.3285   | STRN4_ENSG00000090372;FKRP_ENSG00000181027                              |
| 19 | 47353624 | 47353957 | 5Y-H4K8ac_peak_9270 | 4.95697  | AP2S1_ENSG00000042753                                                   |
| 19 | 47363692 | 47364059 | 5Y-H4K8ac_peak_9271 | 14.31711 |                                                                         |
| 19 | 47364347 | 47364562 | 5Y-H4K8ac_peak_9272 | 7.38046  |                                                                         |
| 19 | 47481182 | 47481410 | 5Y-H4K8ac_peak_9273 | 5.91107  |                                                                         |
| 19 | 47496127 | 47496317 | 5Y-H4K8ac_peak_9274 | 6.94897  |                                                                         |
| 19 | 47552506 | 47552725 | 5Y-H4K8ac_peak_9275 | 8.86184  | TMEM160_ENSG00000130748                                                 |
| 19 | 47614247 | 47616389 | 5Y-H4K8ac_peak_9276 | 21.35466 | ZC3H4_ENSG00000130749;SAE1_ENSG00000142230                              |
| 19 | 47616643 | 47616992 | 5Y-H4K8ac_peak_9277 | 10.11191 | ZC3H4_ENSG00000130749;SAE1_ENSG00000142230                              |
| 19 | 47733994 | 47734223 | 5Y-H4K8ac_peak_9278 | 4.36976  |                                                                         |
| 19 | 47747835 | 47748049 | 5Y-H4K8ac_peak_9279 | 5.18558  |                                                                         |
| 19 | 47759120 | 47759855 | 5Y-H4K8ac_peak_9280 | 9.79526  | CCDC9_ENSG00000105321                                                   |
| 19 | 47922356 | 47922659 | 5Y-H4K8ac_peak_9281 | 7.31807  | MEIS3_ENSG00000105419                                                   |
| 19 | 47922969 | 47923395 | 5Y-H4K8ac_peak_9282 | 6.77436  | MEIS3_ENSG00000105419                                                   |
| 19 | 47924400 | 47924789 | 5Y-H4K8ac_peak_9283 | 4.44548  |                                                                         |
| 19 | 47986659 | 47986997 | 5Y-H4K8ac_peak_9284 | 6.86362  | KPTN_ENSG00000118162;NAPA-AS1_ENSG00000268061                           |
| 19 | 47987298 | 47987713 | 5Y-H4K8ac_peak_9285 | 6.77436  | KPTN_ENSG00000118162;NAPA-AS1_ENSG00000268061                           |
| 19 | 47996524 | 47997889 | 5Y-H4K8ac_peak_9286 | 8.3285   |                                                                         |
| 19 | 47998493 | 47998766 | 5Y-H4K8ac_peak_9287 | 11.68317 |                                                                         |
| 19 | 47999036 | 47999246 | 5Y-H4K8ac_peak_9288 | 5.64909  |                                                                         |
| 19 | 48000348 | 48000618 | 5Y-H4K8ac_peak_9289 | 8.46442  |                                                                         |
| 19 | 48018931 | 48019178 | 5Y-H4K8ac_peak_9290 | 7.89142  | NAPA_ENSG00000105402                                                    |

|    |          |          |                     |          |                                                       |
|----|----------|----------|---------------------|----------|-------------------------------------------------------|
| 19 | 48113212 | 48113455 | 5Y-H4K8ac_peak_9291 | 10.2787  |                                                       |
| 19 | 48222145 | 48222453 | 5Y-H4K8ac_peak_9292 | 8.69112  |                                                       |
| 19 | 48246266 | 48246642 | 5Y-H4K8ac_peak_9293 | 8.24461  |                                                       |
| 19 | 48281706 | 48281918 | 5Y-H4K8ac_peak_9294 | 13.92877 | SEPW1_ENSG00000178980                                 |
| 19 | 48673262 | 48673842 | 5Y-H4K8ac_peak_9295 | 7.59101  | LIG1_ENSG00000105486;C19orf68_ENSG00000185453         |
| 19 | 48759585 | 48759798 | 5Y-H4K8ac_peak_9296 | 4.24332  | CARD8_ENSG00000105483;CTC-241F20.3_ENSG00000268001    |
| 19 | 48775292 | 48775514 | 5Y-H4K8ac_peak_9297 | 8.21582  | CTC-241F20.4_ENSG00000268186                          |
| 19 | 48866669 | 48867107 | 5Y-H4K8ac_peak_9298 | 11.48691 | TMEM143_ENSG00000161558;SYNGR4_ENSG00000105467        |
| 19 | 48867680 | 48867970 | 5Y-H4K8ac_peak_9299 | 7.65114  | TMEM143_ENSG00000161558;SYNGR4_ENSG00000105467        |
| 19 | 48894143 | 48894438 | 5Y-H4K8ac_peak_9300 | 9.96543  | KDELRL1_ENSG00000105438                               |
| 19 | 48896614 | 48896923 | 5Y-H4K8ac_peak_9301 | 8.21582  |                                                       |
| 19 | 48899500 | 48899838 | 5Y-H4K8ac_peak_9302 | 5.47303  |                                                       |
| 19 | 48901371 | 48901878 | 5Y-H4K8ac_peak_9303 | 5.72848  |                                                       |
| 19 | 48972677 | 48972916 | 5Y-H4K8ac_peak_9304 | 12.50545 | CTC-273B12.5_ENSG00000268530;CYTH2_ENSG00000105443    |
| 19 | 49000802 | 49001180 | 5Y-H4K8ac_peak_9305 | 6.78128  |                                                       |
| 19 | 49013608 | 49013841 | 5Y-H4K8ac_peak_9306 | 5.91107  |                                                       |
| 19 | 49016629 | 49017141 | 5Y-H4K8ac_peak_9307 | 6.77436  | LMTK3_ENSG00000142235;CTC-273B12.10_ENSG00000269814   |
| 19 | 49017333 | 49017718 | 5Y-H4K8ac_peak_9308 | 8.31252  | LMTK3_ENSG00000142235;CTC-273B12.10_ENSG00000269814   |
| 19 | 49077575 | 49077828 | 5Y-H4K8ac_peak_9309 | 8.69112  |                                                       |
| 19 | 49111958 | 49112371 | 5Y-H4K8ac_peak_9310 | 5.98695  |                                                       |
| 19 | 49127706 | 49127980 | 5Y-H4K8ac_peak_9311 | 6.3019   | AC022154.7_ENSG00000268093                            |
| 19 | 49138057 | 49138356 | 5Y-H4K8ac_peak_9312 | 8.20773  |                                                       |
| 19 | 49147646 | 49147938 | 5Y-H4K8ac_peak_9313 | 4.84727  |                                                       |
| 19 | 49149550 | 49149923 | 5Y-H4K8ac_peak_9314 | 9.51254  | CA11_ENSG00000063180                                  |
| 19 | 49157545 | 49158340 | 5Y-H4K8ac_peak_9315 | 6.87117  |                                                       |
| 19 | 49223396 | 49223793 | 5Y-H4K8ac_peak_9316 | 8.38675  | MAMSTR_ENSG00000176909                                |
| 19 | 49224047 | 49224325 | 5Y-H4K8ac_peak_9317 | 7.56545  |                                                       |
| 19 | 49242362 | 49242815 | 5Y-H4K8ac_peak_9318 | 6.37023  |                                                       |
| 19 | 49255662 | 49256449 | 5Y-H4K8ac_peak_9319 | 8.1667   |                                                       |
| 19 | 49285472 | 49285745 | 5Y-H4K8ac_peak_9320 | 7.59101  |                                                       |
| 19 | 49338741 | 49338996 | 5Y-H4K8ac_peak_9321 | 5.41472  | HSD17B14_ENSG00000087076                              |
| 19 | 49371806 | 49372063 | 5Y-H4K8ac_peak_9322 | 10.11191 | PLEKHA4_ENSG00000105559                               |
| 19 | 49375763 | 49376016 | 5Y-H4K8ac_peak_9323 | 6.38173  | PPP1R15A_ENSG00000087074                              |
| 19 | 49399155 | 49399571 | 5Y-H4K8ac_peak_9324 | 14.31711 |                                                       |
| 19 | 49399817 | 49400120 | 5Y-H4K8ac_peak_9325 | 4.36976  |                                                       |
| 19 | 49436809 | 49437019 | 5Y-H4K8ac_peak_9326 | 5.77946  | DHDH_ENSG00000104808                                  |
| 19 | 49458391 | 49458601 | 5Y-H4K8ac_peak_9327 | 4.15658  | BAX_ENSG00000087088                                   |
| 19 | 49467882 | 49468230 | 5Y-H4K8ac_peak_9328 | 5.21093  | CTD-2639E6.9_ENSG00000267898;FTL_ENSG00000087086      |
| 19 | 49522397 | 49522645 | 5Y-H4K8ac_peak_9329 | 5.23083  | CTB-60B18.10_ENSG00000268655                          |
| 19 | 49522989 | 49523180 | 5Y-H4K8ac_peak_9330 | 6.27097  | CTB-60B18.10_ENSG00000268655                          |
| 19 | 49524360 | 49524556 | 5Y-H4K8ac_peak_9331 | 4.82324  |                                                       |
| 19 | 49588742 | 49589017 | 5Y-H4K8ac_peak_9332 | 12.05638 | SNRNP70_ENSG00000104852                               |
| 19 | 49653934 | 49654162 | 5Y-H4K8ac_peak_9333 | 7.89273  |                                                       |
| 19 | 49957438 | 49957762 | 5Y-H4K8ac_peak_9334 | 7.11262  | PIH1D1_ENSG00000104872                                |
| 19 | 49977191 | 49978000 | 5Y-H4K8ac_peak_9335 | 13.48981 | FLT3LG_ENSG00000090554;CTD-3148I10.15_ENSG00000273189 |
| 19 | 49989794 | 49990537 | 5Y-H4K8ac_peak_9336 | 16.72648 | RPL13A_ENSG00000142541                                |

|    |          |          |                     |          |                                                                  |
|----|----------|----------|---------------------|----------|------------------------------------------------------------------|
| 19 | 49991042 | 49991246 | 5Y-H4K8ac_peak_9337 | 5.37237  | RPL13A_ENSG00000142541                                           |
| 19 | 49998588 | 49999165 | 5Y-H4K8ac_peak_9338 | 8.22388  | RPS11_ENSG00000142534                                            |
| 19 | 50015705 | 50016034 | 5Y-H4K8ac_peak_9339 | 6.50117  |                                                                  |
| 19 | 50030587 | 50030833 | 5Y-H4K8ac_peak_9340 | 12.20548 | RCN3_ENSG00000142552                                             |
| 19 | 50084283 | 50084661 | 5Y-H4K8ac_peak_9341 | 6.43775  | PRRG2_ENSG00000126460                                            |
| 19 | 50094484 | 50094680 | 5Y-H4K8ac_peak_9342 | 11.22796 | NOSIP_ENSG00000142546;PRR12_ENSG00000126464                      |
| 19 | 50144031 | 50144708 | 5Y-H4K8ac_peak_9343 | 8.66584  | RRAS_ENSG00000126458;SCAF1_ENSG00000126461                       |
| 19 | 50145545 | 50145763 | 5Y-H4K8ac_peak_9344 | 8.1667   | SCAF1_ENSG00000126461                                            |
| 19 | 50180527 | 50180717 | 5Y-H4K8ac_peak_9345 | 9.7353   |                                                                  |
| 19 | 50181058 | 50181257 | 5Y-H4K8ac_peak_9346 | 4.1776   |                                                                  |
| 19 | 50195418 | 50195898 | 5Y-H4K8ac_peak_9347 | 7.11863  |                                                                  |
| 19 | 50204624 | 50204880 | 5Y-H4K8ac_peak_9348 | 4.79658  |                                                                  |
| 19 | 50268873 | 50269154 | 5Y-H4K8ac_peak_9349 | 8.33296  | RNU6-841P_ENSG00000206599                                        |
| 19 | 50305060 | 50305380 | 5Y-H4K8ac_peak_9350 | 7.50044  |                                                                  |
| 19 | 50306111 | 50306378 | 5Y-H4K8ac_peak_9351 | 4.29586  |                                                                  |
| 19 | 50315998 | 50316343 | 5Y-H4K8ac_peak_9352 | 7.8267   |                                                                  |
| 19 | 50379592 | 50379869 | 5Y-H4K8ac_peak_9353 | 19.49156 | TBC1D17_ENSG00000104946                                          |
| 19 | 50432263 | 50433084 | 5Y-H4K8ac_peak_9354 | 10.35586 | IL4I1_ENSG00000104951;NUP62_ENSG00000213024;ATF5_ENSG00000169136 |
| 19 | 50501237 | 50501608 | 5Y-H4K8ac_peak_9355 | 7.97699  |                                                                  |
| 19 | 50529434 | 50529633 | 5Y-H4K8ac_peak_9356 | 6.54441  | VRK3_ENSG00000105053;ZNF473_ENSG00000142528                      |
| 19 | 50818540 | 50818751 | 5Y-H4K8ac_peak_9357 | 8.2913   |                                                                  |
| 19 | 50819058 | 50819913 | 5Y-H4K8ac_peak_9358 | 8.33296  |                                                                  |
| 19 | 50831626 | 50831830 | 5Y-H4K8ac_peak_9359 | 4.5753   |                                                                  |
| 19 | 50836420 | 50836730 | 5Y-H4K8ac_peak_9360 | 9.63153  | KCNC3_ENSG00000131398                                            |
| 19 | 50872093 | 50872513 | 5Y-H4K8ac_peak_9361 | 5.84208  | CTB-191K22.6_ENSG00000269392                                     |
| 19 | 50873009 | 50873367 | 5Y-H4K8ac_peak_9362 | 12.03996 | CTB-191K22.6_ENSG00000269392                                     |
| 19 | 50934317 | 50934768 | 5Y-H4K8ac_peak_9363 | 6.1654   |                                                                  |
| 19 | 50979159 | 50979505 | 5Y-H4K8ac_peak_9364 | 7.50148  | FAM71E1_ENSG00000142530;EMC10_ENSG00000161671                    |
| 19 | 51015328 | 51015605 | 5Y-H4K8ac_peak_9365 | 11.13396 | JOSD2_ENSG00000161677                                            |
| 19 | 51015882 | 51016211 | 5Y-H4K8ac_peak_9366 | 7.97699  |                                                                  |
| 19 | 51016662 | 51017900 | 5Y-H4K8ac_peak_9367 | 13.10076 | ASPDH_ENSG00000204653                                            |
| 19 | 51018195 | 51018551 | 5Y-H4K8ac_peak_9368 | 3.96434  | ASPDH_ENSG00000204653                                            |
| 19 | 51109039 | 51109348 | 5Y-H4K8ac_peak_9369 | 4.642    |                                                                  |
| 19 | 51153060 | 51153419 | 5Y-H4K8ac_peak_9370 | 5.67283  | C19orf81_ENSG00000235034                                         |
| 19 | 51161102 | 51161317 | 5Y-H4K8ac_peak_9371 | 9.15007  |                                                                  |
| 19 | 51198901 | 51199215 | 5Y-H4K8ac_peak_9372 | 7.64648  |                                                                  |
| 19 | 51227369 | 51227594 | 5Y-H4K8ac_peak_9373 | 6.77436  | CLEC11A_ENSG00000105472                                          |
| 19 | 51339591 | 51339832 | 5Y-H4K8ac_peak_9374 | 7.34185  | KLK15_ENSG00000174562                                            |
| 19 | 51612192 | 51612429 | 5Y-H4K8ac_peak_9375 | 7.59101  | CTU1_ENSG00000142544                                             |
| 19 | 51626158 | 51626352 | 5Y-H4K8ac_peak_9376 | 4.84727  |                                                                  |
| 19 | 51815265 | 51815482 | 5Y-H4K8ac_peak_9377 | 6.37023  |                                                                  |
| 19 | 51843492 | 51844093 | 5Y-H4K8ac_peak_9378 | 5.41472  | CTD-2616J11.16_ENSG00000267905                                   |
| 19 | 51871223 | 51872151 | 5Y-H4K8ac_peak_9379 | 5.12488  | CTD-2616J11.11_ENSG00000269403;CLDND2_ENSG00000160318            |
| 19 | 51896938 | 51897213 | 5Y-H4K8ac_peak_9380 | 8.43511  | CTD-2616J11.14_ENSG00000268889                                   |
| 19 | 51963894 | 51964213 | 5Y-H4K8ac_peak_9381 | 5.65584  |                                                                  |
| 19 | 52096973 | 52097483 | 5Y-H4K8ac_peak_9382 | 7.88114  | AC018755.1_ENSG00000167765;AC018755.16_ENSG00000269388           |



|    |          |          |                     |          |                                                        |
|----|----------|----------|---------------------|----------|--------------------------------------------------------|
| 19 | 52097842 | 52098186 | 5Y-H4K8ac_peak_9383 | 6.78128  | AC018755.1_ENSG00000167765;AC018755.16_ENSG00000269388 |
| 19 | 52193556 | 52193986 | 5Y-H4K8ac_peak_9384 | 7.04637  |                                                        |
| 19 | 52207585 | 52207804 | 5Y-H4K8ac_peak_9385 | 7.59101  |                                                        |
| 19 | 52511564 | 52511935 | 5Y-H4K8ac_peak_9386 | 7.76232  | ZNF615_ENSG00000197619                                 |
| 19 | 52531350 | 52531958 | 5Y-H4K8ac_peak_9387 | 11.57334 |                                                        |
| 19 | 52552247 | 52552484 | 5Y-H4K8ac_peak_9388 | 8.33296  |                                                        |
| 19 | 52773000 | 52773296 | 5Y-H4K8ac_peak_9389 | 5.87725  | ZNF766_ENSG00000196214                                 |
| 19 | 52800517 | 52800718 | 5Y-H4K8ac_peak_9390 | 10.1994  | CTD-2525I3.5_ENSG00000269102;ZNF480_ENSG00000198464    |
| 19 | 52901199 | 52901734 | 5Y-H4K8ac_peak_9391 | 10.46287 | CTD-3018O17.3_ENSG00000269834;ZNF528_ENSG00000167555   |
| 19 | 53140898 | 53141094 | 5Y-H4K8ac_peak_9392 | 6.66026  |                                                        |
| 19 | 53194011 | 53194281 | 5Y-H4K8ac_peak_9393 | 10.36926 | ZNF83_ENSG00000167766                                  |
| 19 | 53400469 | 53400730 | 5Y-H4K8ac_peak_9394 | 9.23159  | ZNF320_ENSG00000182986                                 |
| 19 | 53426105 | 53426592 | 5Y-H4K8ac_peak_9395 | 6.34046  | ZNF888_ENSG00000213793;CTD-2331H12.7_ENSG00000269646   |
| 19 | 53445536 | 53445856 | 5Y-H4K8ac_peak_9396 | 7.31815  | ZNF816-ZNF321P_ENSG00000213801                         |
| 19 | 53606342 | 53606589 | 5Y-H4K8ac_peak_9397 | 12.11208 | ZNF160_ENSG00000170949                                 |
| 19 | 53696887 | 53697142 | 5Y-H4K8ac_peak_9398 | 7.29091  | ZNF665_ENSG00000197497                                 |
| 19 | 53868337 | 53868612 | 5Y-H4K8ac_peak_9399 | 10.37534 | ZNF525_ENSG00000203326                                 |
| 19 | 53897756 | 53897976 | 5Y-H4K8ac_peak_9400 | 7.76232  |                                                        |
| 19 | 53971174 | 53971390 | 5Y-H4K8ac_peak_9401 | 7.04637  | ZNF813_ENSG00000198346                                 |
| 19 | 54023317 | 54023780 | 5Y-H4K8ac_peak_9402 | 11.57334 | ZNF331_ENSG00000130844                                 |
| 19 | 54040549 | 54040794 | 5Y-H4K8ac_peak_9403 | 4.77126  |                                                        |
| 19 | 54372312 | 54372517 | 5Y-H4K8ac_peak_9404 | 6.96612  | AC008753.6_ENSG00000228323                             |
| 19 | 54385538 | 54385765 | 5Y-H4K8ac_peak_9405 | 4.95697  |                                                        |
| 19 | 54392802 | 54393045 | 5Y-H4K8ac_peak_9406 | 7.3889   |                                                        |
| 19 | 54463262 | 54463601 | 5Y-H4K8ac_peak_9407 | 4.84727  |                                                        |
| 19 | 54641565 | 54642061 | 5Y-H4K8ac_peak_9408 | 9.96543  | CNOT3_ENSG00000088038                                  |
| 19 | 54664019 | 54664349 | 5Y-H4K8ac_peak_9409 | 5.42666  | LENG1_ENSG00000105617                                  |
| 19 | 54974332 | 54974827 | 5Y-H4K8ac_peak_9410 | 7.89273  | LENG9_ENSG00000182909                                  |
| 19 | 54976560 | 54976782 | 5Y-H4K8ac_peak_9411 | 6.77436  |                                                        |
| 19 | 55629955 | 55630184 | 5Y-H4K8ac_peak_9412 | 7.50501  |                                                        |
| 19 | 55653253 | 55653559 | 5Y-H4K8ac_peak_9413 | 6.73047  |                                                        |
| 19 | 55658133 | 55658535 | 5Y-H4K8ac_peak_9414 | 4.77126  |                                                        |
| 19 | 55739676 | 55739933 | 5Y-H4K8ac_peak_9415 | 6.61077  |                                                        |
| 19 | 55770022 | 55770342 | 5Y-H4K8ac_peak_9416 | 11.86504 | PPP6R1_ENSG00000105063                                 |
| 19 | 55771185 | 55771643 | 5Y-H4K8ac_peak_9417 | 11.19336 | PPP6R1_ENSG00000105063                                 |
| 19 | 55791234 | 55791434 | 5Y-H4K8ac_peak_9418 | 6.78128  | HSPBP1_ENSG00000133265                                 |
| 19 | 55791956 | 55792284 | 5Y-H4K8ac_peak_9419 | 13.2534  | HSPBP1_ENSG00000133265                                 |
| 19 | 55795507 | 55795823 | 5Y-H4K8ac_peak_9420 | 19.19899 |                                                        |
| 19 | 55856550 | 55856851 | 5Y-H4K8ac_peak_9421 | 7.64716  |                                                        |
| 19 | 55894692 | 55894981 | 5Y-H4K8ac_peak_9422 | 7.61752  | TMEM238_ENSG00000233493                                |
| 19 | 55895384 | 55895846 | 5Y-H4K8ac_peak_9423 | 11.22005 | TMEM238_ENSG00000233493;RPL28_ENSG00000108107          |
| 19 | 55919810 | 55920276 | 5Y-H4K8ac_peak_9424 | 14.15915 | UBE2S_ENSG00000108106                                  |
| 19 | 55951957 | 55952150 | 5Y-H4K8ac_peak_9425 | 6.77436  |                                                        |
| 19 | 55972660 | 55972955 | 5Y-H4K8ac_peak_9426 | 10.19948 | ISOC2_ENSG00000063241                                  |
| 19 | 55979466 | 55979873 | 5Y-H4K8ac_peak_9427 | 5.23712  |                                                        |
| 19 | 55987227 | 55987649 | 5Y-H4K8ac_peak_9428 | 7.44077  | CTD-2537I9.16_ENSG00000269859;ZNF628_ENSG00000197483   |

|    |          |          |                     |          |                                                                                                    |
|----|----------|----------|---------------------|----------|----------------------------------------------------------------------------------------------------|
| 19 | 55996181 | 55996458 | 5Y-H4K8ac_peak_9429 | 7.34185  | NAT14_ENSG00000090971                                                                              |
| 19 | 55997213 | 55998340 | 5Y-H4K8ac_peak_9430 | 11.55992 | NAT14_ENSG00000090971                                                                              |
| 19 | 56014890 | 56015127 | 5Y-H4K8ac_peak_9431 | 9.87097  |                                                                                                    |
| 19 | 56028609 | 56028833 | 5Y-H4K8ac_peak_9432 | 7.97699  |                                                                                                    |
| 19 | 56039437 | 56039658 | 5Y-H4K8ac_peak_9433 | 7.63144  |                                                                                                    |
| 19 | 56057946 | 56058151 | 5Y-H4K8ac_peak_9434 | 4.84727  |                                                                                                    |
| 19 | 56058544 | 56058869 | 5Y-H4K8ac_peak_9435 | 6.34046  |                                                                                                    |
| 19 | 56061249 | 56061513 | 5Y-H4K8ac_peak_9436 | 5.98695  |                                                                                                    |
| 19 | 56092465 | 56092779 | 5Y-H4K8ac_peak_9437 | 8.71064  | ZNF579_ENSG00000218891                                                                             |
| 19 | 56110614 | 56110874 | 5Y-H4K8ac_peak_9438 | 10.35586 | ZNF524_ENSG00000171443                                                                             |
| 19 | 56115631 | 56115821 | 5Y-H4K8ac_peak_9439 | 6.77436  | ZNF865_ENSG00000261221                                                                             |
| 19 | 56117183 | 56117434 | 5Y-H4K8ac_peak_9440 | 6.37023  | ZNF865_ENSG00000261221                                                                             |
| 19 | 56146442 | 56146906 | 5Y-H4K8ac_peak_9441 | 6.94897  | ZNF580_ENSG00000213015;ZNF581_ENSG00000171425                                                      |
| 19 | 56151682 | 56152831 | 5Y-H4K8ac_peak_9442 | 7.27671  | CCDC106_ENSG00000173581                                                                            |
| 19 | 56155000 | 56155374 | 5Y-H4K8ac_peak_9443 | 4.728    |                                                                                                    |
| 19 | 56159476 | 56160304 | 5Y-H4K8ac_peak_9444 | 7.29055  |                                                                                                    |
| 19 | 56166411 | 56166842 | 5Y-H4K8ac_peak_9445 | 9.51254  | U2AF2_ENSG00000063244                                                                              |
| 19 | 56631807 | 56632021 | 5Y-H4K8ac_peak_9446 | 9.23159  | ZNF787_ENSG00000142409                                                                             |
| 19 | 56905110 | 56905340 | 5Y-H4K8ac_peak_9447 | 6.73385  | ZNF582_ENSG00000018869;ZNF582-AS1_ENSG00000267454                                                  |
| 19 | 57049510 | 57050060 | 5Y-H4K8ac_peak_9448 | 9.23159  | ZFP28_ENSG00000196867;AC005498.3_ENSG00000267421                                                   |
| 19 | 57106656 | 57107024 | 5Y-H4K8ac_peak_9449 | 15.34073 | ZNF71_ENSG00000197951                                                                              |
| 19 | 57182624 | 57183087 | 5Y-H4K8ac_peak_9450 | 10.69698 | ZNF835_ENSG00000127903;AC007228.5_ENSG00000268352                                                  |
| 19 | 57183374 | 57183695 | 5Y-H4K8ac_peak_9451 | 8.16382  | ZNF835_ENSG00000127903;AC007228.5_ENSG00000268352                                                  |
| 19 | 57702223 | 57702616 | 5Y-H4K8ac_peak_9452 | 7.31102  | ZNF264_ENSG00000083844                                                                             |
| 19 | 57791432 | 57791684 | 5Y-H4K8ac_peak_9453 | 4.15658  | CTC-444N24.6_ENSG00000267871;ZNF460_ENSG00000197714                                                |
| 19 | 57831493 | 57831687 | 5Y-H4K8ac_peak_9454 | 10.46287 | ZNF543_ENSG00000178229                                                                             |
| 19 | 57901515 | 57901748 | 5Y-H4K8ac_peak_9455 | 7.31102  | ZNF548_ENSG00000188785;AC003002.6_ENSG00000269533                                                  |
| 19 | 57922056 | 57922312 | 5Y-H4K8ac_peak_9456 | 4.71803  | ZNF17_ENSG00000186272                                                                              |
| 19 | 57988596 | 57988807 | 5Y-H4K8ac_peak_9457 | 6.78128  | AC004076.9_ENSG00000268163;ZNF772_ENSG00000197128;AC003005.2_ENSG00000268266                       |
| 19 | 57999138 | 57999456 | 5Y-H4K8ac_peak_9458 | 10.11191 | ZNF419_ENSG00000105136;AC003005.4_ENSG00000268107                                                  |
| 19 | 58011377 | 58011591 | 5Y-H4K8ac_peak_9459 | 7.11863  | ZNF773_ENSG00000152439                                                                             |
| 19 | 58125711 | 58126043 | 5Y-H4K8ac_peak_9460 | 6.96612  | ZNF134_ENSG00000213762                                                                             |
| 19 | 58193519 | 58193813 | 5Y-H4K8ac_peak_9461 | 5.87725  | ZNF551_ENSG00000204519;AC003006.7_ENSG00000269026                                                  |
| 19 | 58258317 | 58258571 | 5Y-H4K8ac_peak_9462 | 7.31815  | ZNF776_ENSG00000152443                                                                             |
| 19 | 58315188 | 58315432 | 5Y-H4K8ac_peak_9463 | 7.31815  |                                                                                                    |
| 19 | 58331140 | 58331420 | 5Y-H4K8ac_peak_9464 | 10.60083 | CTD-2583A14.10_ENSG00000268750;ZNF587B_ENSG00000269343                                             |
| 19 | 58427661 | 58427887 | 5Y-H4K8ac_peak_9465 | 6.34046  | CTD-2583A14.9_ENSG00000269476;ZNF417_ENSG00000173480                                               |
| 19 | 58458728 | 58459010 | 5Y-H4K8ac_peak_9466 | 5.64909  | ZNF256_ENSG00000152454                                                                             |
| 19 | 58513608 | 58514093 | 5Y-H4K8ac_peak_9467 | 10.12457 | ZNF606_ENSG00000166704;CTD-2368P22.1_ENSG00000176593                                               |
| 19 | 58609281 | 58609516 | 5Y-H4K8ac_peak_9468 | 8.69112  |                                                                                                    |
| 19 | 58666134 | 58666427 | 5Y-H4K8ac_peak_9469 | 19.59417 | ZNF329_ENSG00000181894                                                                             |
| 19 | 58694457 | 58694690 | 5Y-H4K8ac_peak_9470 | 11.48691 | ZNF274_ENSG00000171606                                                                             |
| 19 | 58790412 | 58790898 | 5Y-H4K8ac_peak_9471 | 8.16382  | CTD-3138B18.5_ENSG00000268516;ZNF8_ENSG00000083842;ZNF8_ENSG00000273439;AC010642.1_ENSG00000267216 |
| 19 | 58872787 | 58872986 | 5Y-H4K8ac_peak_9472 | 6.47245  | CTD-2619J13.3_ENSG00000269054                                                                      |
| 19 | 58873187 | 58873462 | 5Y-H4K8ac_peak_9473 | 14.2053  | CTD-2619J13.8_ENSG00000268230;ZNF497_ENSG00000174586;CTD-2619J13.3_ENSG00000269054                 |
| 19 | 58897162 | 58898083 | 5Y-H4K8ac_peak_9474 | 20.85916 | RPS5_ENSG00000083845;MIR4754_ENSG00000266640                                                       |

|    |          |          |                     |          |                                                       |
|----|----------|----------|---------------------|----------|-------------------------------------------------------|
| 19 | 58898747 | 58899023 | 5Y-H4K8ac_peak_9475 | 5.65584  | RPS5_ENSG00000083845;MIR4754_ENSG00000266640          |
| 19 | 58951008 | 58951509 | 5Y-H4K8ac_peak_9476 | 14.15915 | ZNF132_ENSG00000131849;CTD-2619J13.19_ENSG00000269473 |
| 19 | 58951881 | 58952242 | 5Y-H4K8ac_peak_9477 | 6.1654   | ZNF132_ENSG00000131849;CTD-2619J13.19_ENSG00000269473 |
| 19 | 59011387 | 59011580 | 5Y-H4K8ac_peak_9478 | 4.79585  |                                                       |
| 19 | 59025032 | 59025305 | 5Y-H4K8ac_peak_9479 | 5.87725  |                                                       |
| 19 | 59030504 | 59031108 | 5Y-H4K8ac_peak_9480 | 11.1169  |                                                       |
| 19 | 59054781 | 59055209 | 5Y-H4K8ac_peak_9481 | 8.564    | RN7SL525P_ENSG00000264910;TRIM28_ENSG00000130726      |
| 19 | 59055827 | 59056036 | 5Y-H4K8ac_peak_9482 | 12.21176 | RN7SL525P_ENSG00000264910;TRIM28_ENSG00000130726      |
| 19 | 59065870 | 59066294 | 5Y-H4K8ac_peak_9483 | 7.59101  | CHMP2A_ENSG00000130724                                |
| 19 | 59066706 | 59067054 | 5Y-H4K8ac_peak_9484 | 6.50117  | CHMP2A_ENSG00000130724                                |
| 19 | 59070059 | 59070266 | 5Y-H4K8ac_peak_9485 | 12.51872 | UBE2M_ENSG00000130725;AC016629.8_ENSG00000267858      |
| 19 | 59071118 | 59071621 | 5Y-H4K8ac_peak_9486 | 8.69112  | UBE2M_ENSG00000130725;AC016629.8_ENSG00000267858      |
| 19 | 59074386 | 59075003 | 5Y-H4K8ac_peak_9487 | 10.72427 |                                                       |
| 19 | 59083771 | 59084068 | 5Y-H4K8ac_peak_9488 | 6.78318  | MZF1_ENSG00000099326;CENPBD1P1_ENSG00000213753        |
| 19 | 59084317 | 59084614 | 5Y-H4K8ac_peak_9489 | 3.94247  | MZF1_ENSG00000099326;CENPBD1P1_ENSG00000213753        |
| 2  | 263929   | 264528   | 5Y-H4K8ac_peak_9490 | 15.82359 | ACP1_ENSG00000143727                                  |
| 2  | 468358   | 468559   | 5Y-H4K8ac_peak_9491 | 7.73231  |                                                       |
| 2  | 579525   | 579723   | 5Y-H4K8ac_peak_9492 | 6.50117  |                                                       |
| 2  | 636602   | 637121   | 5Y-H4K8ac_peak_9493 | 10.60083 |                                                       |
| 2  | 677166   | 677389   | 5Y-H4K8ac_peak_9494 | 16.51777 | TMEM18_ENSG00000151353;AC092159.2_ENSG00000233296     |
| 2  | 677629   | 677856   | 5Y-H4K8ac_peak_9495 | 8.43511  | TMEM18_ENSG00000151353;AC092159.2_ENSG00000233296     |
| 2  | 854261   | 854527   | 5Y-H4K8ac_peak_9496 | 5.98695  |                                                       |
| 2  | 945730   | 945998   | 5Y-H4K8ac_peak_9497 | 4.95697  | AC116614.1_ENSG00000235688;SNTG2_ENSG00000172554      |
| 2  | 1286618  | 1286952  | 5Y-H4K8ac_peak_9498 | 8.43511  |                                                       |
| 2  | 1545715  | 1546041  | 5Y-H4K8ac_peak_9499 | 7.89273  |                                                       |
| 2  | 1546687  | 1546910  | 5Y-H4K8ac_peak_9500 | 7.95414  |                                                       |
| 2  | 1598265  | 1598890  | 5Y-H4K8ac_peak_9501 | 6.08471  |                                                       |
| 2  | 1608866  | 1609057  | 5Y-H4K8ac_peak_9502 | 5.12488  |                                                       |
| 2  | 1628946  | 1629295  | 5Y-H4K8ac_peak_9503 | 5.12488  | AC144450.2_ENSG00000203635                            |
| 2  | 1669916  | 1670163  | 5Y-H4K8ac_peak_9504 | 5.18947  |                                                       |
| 2  | 1711948  | 1712475  | 5Y-H4K8ac_peak_9505 | 7.8267   |                                                       |
| 2  | 1717242  | 1717592  | 5Y-H4K8ac_peak_9506 | 11.29141 |                                                       |
| 2  | 1717976  | 1718404  | 5Y-H4K8ac_peak_9507 | 8.04693  |                                                       |
| 2  | 1719283  | 1720018  | 5Y-H4K8ac_peak_9508 | 10.31981 |                                                       |
| 2  | 1735164  | 1735487  | 5Y-H4K8ac_peak_9509 | 13.80949 |                                                       |
| 2  | 1747668  | 1748651  | 5Y-H4K8ac_peak_9510 | 12.01623 | PXDN_ENSG00000130508                                  |
| 2  | 1812346  | 1812617  | 5Y-H4K8ac_peak_9511 | 4.00285  |                                                       |
| 2  | 1994850  | 1995140  | 5Y-H4K8ac_peak_9512 | 8.69112  |                                                       |
| 2  | 2117075  | 2117271  | 5Y-H4K8ac_peak_9513 | 7.00198  |                                                       |
| 2  | 2186633  | 2187093  | 5Y-H4K8ac_peak_9514 | 5.99504  |                                                       |
| 2  | 2196456  | 2196655  | 5Y-H4K8ac_peak_9515 | 8.47164  |                                                       |
| 2  | 2297356  | 2297548  | 5Y-H4K8ac_peak_9516 | 6.37023  |                                                       |
| 2  | 2325032  | 2325258  | 5Y-H4K8ac_peak_9517 | 4.50834  |                                                       |
| 2  | 2329823  | 2330063  | 5Y-H4K8ac_peak_9518 | 6.78128  |                                                       |
| 2  | 2337851  | 2338114  | 5Y-H4K8ac_peak_9519 | 7.89273  |                                                       |
| 2  | 2467646  | 2468466  | 5Y-H4K8ac_peak_9520 | 11.68317 |                                                       |

|   |         |         |                     |          |                            |
|---|---------|---------|---------------------|----------|----------------------------|
| 2 | 2528486 | 2528679 | 5Y-H4K8ac_peak_9521 | 7.59101  |                            |
| 2 | 2585504 | 2585772 | 5Y-H4K8ac_peak_9522 | 9.59236  |                            |
| 2 | 2616858 | 2617152 | 5Y-H4K8ac_peak_9523 | 10.32379 |                            |
| 2 | 2712708 | 2713315 | 5Y-H4K8ac_peak_9524 | 7.20869  |                            |
| 2 | 2721313 | 2721607 | 5Y-H4K8ac_peak_9525 | 8.31764  |                            |
| 2 | 2773901 | 2774319 | 5Y-H4K8ac_peak_9526 | 8.27643  |                            |
| 2 | 2791005 | 2791196 | 5Y-H4K8ac_peak_9527 | 3.93327  |                            |
| 2 | 2791740 | 2792184 | 5Y-H4K8ac_peak_9528 | 5.12488  |                            |
| 2 | 2849947 | 2850922 | 5Y-H4K8ac_peak_9529 | 12.71428 |                            |
| 2 | 2852188 | 2852491 | 5Y-H4K8ac_peak_9530 | 6.78128  |                            |
| 2 | 2852827 | 2855514 | 5Y-H4K8ac_peak_9531 | 19.58975 |                            |
| 2 | 2873340 | 2873677 | 5Y-H4K8ac_peak_9532 | 6.43068  |                            |
| 2 | 2879239 | 2879440 | 5Y-H4K8ac_peak_9533 | 4.70501  |                            |
| 2 | 2922849 | 2923223 | 5Y-H4K8ac_peak_9534 | 6.53157  |                            |
| 2 | 2936556 | 2936851 | 5Y-H4K8ac_peak_9535 | 7.52147  |                            |
| 2 | 2937736 | 2938200 | 5Y-H4K8ac_peak_9536 | 7.89273  |                            |
| 2 | 2941931 | 2942527 | 5Y-H4K8ac_peak_9537 | 6.08523  |                            |
| 2 | 3045930 | 3046429 | 5Y-H4K8ac_peak_9538 | 9.11686  |                            |
| 2 | 3046624 | 3047013 | 5Y-H4K8ac_peak_9539 | 7.90751  |                            |
| 2 | 3080614 | 3081030 | 5Y-H4K8ac_peak_9540 | 7.50148  |                            |
| 2 | 3103598 | 3103804 | 5Y-H4K8ac_peak_9541 | 4.0639   |                            |
| 2 | 3104238 | 3105302 | 5Y-H4K8ac_peak_9542 | 21.41794 |                            |
| 2 | 3105599 | 3107216 | 5Y-H4K8ac_peak_9543 | 20.07459 |                            |
| 2 | 3107967 | 3108886 | 5Y-H4K8ac_peak_9544 | 9.33021  |                            |
| 2 | 3109497 | 3109706 | 5Y-H4K8ac_peak_9545 | 6.88736  |                            |
| 2 | 3111403 | 3111602 | 5Y-H4K8ac_peak_9546 | 4.0639   |                            |
| 2 | 3129081 | 3131071 | 5Y-H4K8ac_peak_9547 | 22.59279 | AC019118.2_ENSG00000234423 |
| 2 | 3131589 | 3132004 | 5Y-H4K8ac_peak_9548 | 21.6611  |                            |
| 2 | 3132423 | 3132916 | 5Y-H4K8ac_peak_9549 | 8.49078  |                            |
| 2 | 3133901 | 3134182 | 5Y-H4K8ac_peak_9550 | 5.95943  |                            |
| 2 | 3134824 | 3135248 | 5Y-H4K8ac_peak_9551 | 12.87247 |                            |
| 2 | 3135464 | 3135705 | 5Y-H4K8ac_peak_9552 | 7.89273  |                            |
| 2 | 3187624 | 3187819 | 5Y-H4K8ac_peak_9553 | 6.53157  |                            |
| 2 | 3193714 | 3193989 | 5Y-H4K8ac_peak_9554 | 6.75784  |                            |
| 2 | 3203986 | 3204279 | 5Y-H4K8ac_peak_9555 | 5.54882  |                            |
| 2 | 3207713 | 3207927 | 5Y-H4K8ac_peak_9556 | 4.95697  |                            |
| 2 | 3282062 | 3282288 | 5Y-H4K8ac_peak_9557 | 4.15658  |                            |
| 2 | 3286887 | 3287632 | 5Y-H4K8ac_peak_9558 | 12.60556 |                            |
| 2 | 3297076 | 3297330 | 5Y-H4K8ac_peak_9559 | 5.18558  |                            |
| 2 | 3306313 | 3307354 | 5Y-H4K8ac_peak_9560 | 29.54963 |                            |
| 2 | 3307820 | 3308079 | 5Y-H4K8ac_peak_9561 | 11.05199 |                            |
| 2 | 3316839 | 3317990 | 5Y-H4K8ac_peak_9562 | 8.43511  |                            |
| 2 | 3318352 | 3318711 | 5Y-H4K8ac_peak_9563 | 6.08523  |                            |
| 2 | 3381984 | 3382419 | 5Y-H4K8ac_peak_9564 | 9.37812  | TSSC1_ENSG00000032389      |
| 2 | 3383297 | 3383730 | 5Y-H4K8ac_peak_9565 | 7.20869  | TRAPPC12_ENSG00000171853   |
| 2 | 3403752 | 3403942 | 5Y-H4K8ac_peak_9566 | 9.04239  |                            |

|   |         |         |                     |          |                                                                             |
|---|---------|---------|---------------------|----------|-----------------------------------------------------------------------------|
| 2 | 3452211 | 3452644 | 5Y-H4K8ac_peak_9567 | 11.22005 |                                                                             |
| 2 | 3463489 | 3463689 | 5Y-H4K8ac_peak_9568 | 5.64909  |                                                                             |
| 2 | 3464739 | 3465117 | 5Y-H4K8ac_peak_9569 | 4.15658  |                                                                             |
| 2 | 3522262 | 3522567 | 5Y-H4K8ac_peak_9570 | 8.04693  | AD11_ENSG00000182551;AC142528.1_ENSG00000235078                             |
| 2 | 3523098 | 3523585 | 5Y-H4K8ac_peak_9571 | 19.06379 | AD11_ENSG00000182551;AC142528.1_ENSG00000235078                             |
| 2 | 3584370 | 3584563 | 5Y-H4K8ac_peak_9572 | 5.449    | AC108488.4_ENSG00000242282                                                  |
| 2 | 3605453 | 3605840 | 5Y-H4K8ac_peak_9573 | 6.34245  | RNASEH1_ENSG00000171865;RNASEH1-AS1_ENSG00000234171                         |
| 2 | 3606182 | 3606615 | 5Y-H4K8ac_peak_9574 | 9.40888  | RNASEH1_ENSG00000171865;RNASEH1-AS1_ENSG00000234171                         |
| 2 | 3622386 | 3622631 | 5Y-H4K8ac_peak_9575 | 6.53157  | RPS7_ENSG00000171863                                                        |
| 2 | 3632415 | 3632646 | 5Y-H4K8ac_peak_9576 | 7.29176  |                                                                             |
| 2 | 3633050 | 3633328 | 5Y-H4K8ac_peak_9577 | 6.78128  |                                                                             |
| 2 | 3642412 | 3643265 | 5Y-H4K8ac_peak_9578 | 9.79526  | COLEC11_ENSG00000118004                                                     |
| 2 | 3650961 | 3651840 | 5Y-H4K8ac_peak_9579 | 12.00715 | AC010907.2_ENSG00000237370                                                  |
| 2 | 3653774 | 3654246 | 5Y-H4K8ac_peak_9580 | 15.25284 |                                                                             |
| 2 | 3654520 | 3654711 | 5Y-H4K8ac_peak_9581 | 8.4382   |                                                                             |
| 2 | 3698145 | 3698350 | 5Y-H4K8ac_peak_9582 | 5.69598  |                                                                             |
| 2 | 3699523 | 3699936 | 5Y-H4K8ac_peak_9583 | 7.89273  |                                                                             |
| 2 | 3976060 | 3976526 | 5Y-H4K8ac_peak_9584 | 7.3889   |                                                                             |
| 2 | 5813266 | 5813722 | 5Y-H4K8ac_peak_9585 | 9.58986  |                                                                             |
| 2 | 5831666 | 5832328 | 5Y-H4K8ac_peak_9586 | 12.72596 | AC107057.2_ENSG00000224128;AC108025.2_ENSG00000230090;SOX11_ENSG00000176887 |
| 2 | 6052716 | 6053296 | 5Y-H4K8ac_peak_9587 | 8.22388  |                                                                             |
| 2 | 6120862 | 6121191 | 5Y-H4K8ac_peak_9588 | 13.0728  |                                                                             |
| 2 | 6121492 | 6122186 | 5Y-H4K8ac_peak_9589 | 9.02938  |                                                                             |
| 2 | 6214460 | 6214709 | 5Y-H4K8ac_peak_9590 | 8.25419  |                                                                             |
| 2 | 6220646 | 6221036 | 5Y-H4K8ac_peak_9591 | 10.72427 |                                                                             |
| 2 | 6258660 | 6258853 | 5Y-H4K8ac_peak_9592 | 5.84208  |                                                                             |
| 2 | 6429588 | 6429976 | 5Y-H4K8ac_peak_9593 | 5.24695  |                                                                             |
| 2 | 6430523 | 6431714 | 5Y-H4K8ac_peak_9594 | 9.59156  |                                                                             |
| 2 | 6450920 | 6451141 | 5Y-H4K8ac_peak_9595 | 10.1994  |                                                                             |
| 2 | 6665582 | 6665818 | 5Y-H4K8ac_peak_9596 | 9.30505  |                                                                             |
| 2 | 7005410 | 7006454 | 5Y-H4K8ac_peak_9597 | 3.93392  | CMPK2_ENSG00000134326;RSAD2_ENSG00000134321                                 |
| 2 | 7133394 | 7133817 | 5Y-H4K8ac_peak_9598 | 14.39337 |                                                                             |
| 2 | 7148096 | 7148526 | 5Y-H4K8ac_peak_9599 | 9.02938  |                                                                             |
| 2 | 7148736 | 7149295 | 5Y-H4K8ac_peak_9600 | 5.51767  |                                                                             |
| 2 | 7157071 | 7157420 | 5Y-H4K8ac_peak_9601 | 12.80227 |                                                                             |
| 2 | 7237818 | 7238088 | 5Y-H4K8ac_peak_9602 | 5.41472  |                                                                             |
| 2 | 8665854 | 8666177 | 5Y-H4K8ac_peak_9603 | 9.45199  |                                                                             |
| 2 | 8667144 | 8667357 | 5Y-H4K8ac_peak_9604 | 5.47078  |                                                                             |
| 2 | 8675247 | 8675469 | 5Y-H4K8ac_peak_9605 | 7.90751  |                                                                             |
| 2 | 8678889 | 8679317 | 5Y-H4K8ac_peak_9606 | 6.78128  |                                                                             |
| 2 | 8679820 | 8680068 | 5Y-H4K8ac_peak_9607 | 6.40778  |                                                                             |
| 2 | 8684124 | 8684739 | 5Y-H4K8ac_peak_9608 | 6.80915  |                                                                             |
| 2 | 8688518 | 8688708 | 5Y-H4K8ac_peak_9609 | 5.77617  |                                                                             |
| 2 | 8714521 | 8715021 | 5Y-H4K8ac_peak_9610 | 6.86362  | AC011747.3_ENSG00000231435                                                  |
| 2 | 8715438 | 8715678 | 5Y-H4K8ac_peak_9611 | 5.98695  | AC011747.3_ENSG00000231435                                                  |
| 2 | 8817350 | 8817769 | 5Y-H4K8ac_peak_9612 | 6.78318  |                                                                             |

|   |          |          |                     |          |                                                   |
|---|----------|----------|---------------------|----------|---------------------------------------------------|
| 2 | 8818022  | 8818685  | 5Y-H4K8ac_peak_9613 | 7.61752  | ID2_ENSG00000115738                               |
| 2 | 8819100  | 8819557  | 5Y-H4K8ac_peak_9614 | 22.60484 | ID2_ENSG00000115738                               |
| 2 | 9144239  | 9144603  | 5Y-H4K8ac_peak_9615 | 15.03212 | MBOAT2_ENSG00000143797                            |
| 2 | 9246092  | 9246292  | 5Y-H4K8ac_peak_9616 | 4.95697  | RP11-734K21.5_ENSG00000261104                     |
| 2 | 9347539  | 9347933  | 5Y-H4K8ac_peak_9617 | 9.02938  | ASAP2_ENSG00000151693                             |
| 2 | 9371962  | 9372232  | 5Y-H4K8ac_peak_9618 | 7.53011  |                                                   |
| 2 | 9375780  | 9376364  | 5Y-H4K8ac_peak_9619 | 10.72427 |                                                   |
| 2 | 9387008  | 9387316  | 5Y-H4K8ac_peak_9620 | 7.41172  |                                                   |
| 2 | 9408843  | 9409078  | 5Y-H4K8ac_peak_9621 | 6.59112  |                                                   |
| 2 | 9563293  | 9563575  | 5Y-H4K8ac_peak_9622 | 12.26819 | ITGB1BP1_ENSG00000119185;CPSF3_ENSG00000119203    |
| 2 | 9563849  | 9564041  | 5Y-H4K8ac_peak_9623 | 6.53157  | ITGB1BP1_ENSG00000119185;CPSF3_ENSG00000119203    |
| 2 | 9614362  | 9615180  | 5Y-H4K8ac_peak_9624 | 12.26819 | IAH1_ENSG00000134330                              |
| 2 | 9770408  | 9771072  | 5Y-H4K8ac_peak_9625 | 9.87097  | YWHAQ_ENSG00000134308                             |
| 2 | 9883779  | 9884003  | 5Y-H4K8ac_peak_9626 | 3.90241  |                                                   |
| 2 | 9892848  | 9893087  | 5Y-H4K8ac_peak_9627 | 4.50834  |                                                   |
| 2 | 9910838  | 9911074  | 5Y-H4K8ac_peak_9628 | 4.642    | RP11-521D12.5_ENSG00000243491                     |
| 2 | 9983164  | 9983396  | 5Y-H4K8ac_peak_9629 | 15.75437 | TAF1B_ENSG00000115750                             |
| 2 | 9983633  | 9983892  | 5Y-H4K8ac_peak_9630 | 8.3285   | TAF1B_ENSG00000115750                             |
| 2 | 10149820 | 10150434 | 5Y-H4K8ac_peak_9631 | 15.2347  |                                                   |
| 2 | 10168899 | 10169135 | 5Y-H4K8ac_peak_9632 | 3.94555  |                                                   |
| 2 | 10176536 | 10176898 | 5Y-H4K8ac_peak_9633 | 8.31536  |                                                   |
| 2 | 10183785 | 10184165 | 5Y-H4K8ac_peak_9634 | 9.36633  | KLF11_ENSG00000172059                             |
| 2 | 10261781 | 10262660 | 5Y-H4K8ac_peak_9635 | 13.33225 | RP11-254F7.4_ENSG00000272524;RRM2_ENSG00000171848 |
| 2 | 10262932 | 10263264 | 5Y-H4K8ac_peak_9636 | 6.08523  | RRM2_ENSG00000171848                              |
| 2 | 10311128 | 10311491 | 5Y-H4K8ac_peak_9637 | 7.21591  |                                                   |
| 2 | 10410187 | 10410621 | 5Y-H4K8ac_peak_9638 | 4.76429  |                                                   |
| 2 | 10425781 | 10427465 | 5Y-H4K8ac_peak_9639 | 14.17466 |                                                   |
| 2 | 10466341 | 10466772 | 5Y-H4K8ac_peak_9640 | 5.51767  |                                                   |
| 2 | 10467030 | 10467310 | 5Y-H4K8ac_peak_9641 | 5.24695  |                                                   |
| 2 | 10470945 | 10471136 | 5Y-H4K8ac_peak_9642 | 4.00596  |                                                   |
| 2 | 10498372 | 10498586 | 5Y-H4K8ac_peak_9643 | 5.30014  |                                                   |
| 2 | 10500727 | 10501312 | 5Y-H4K8ac_peak_9644 | 6.34027  |                                                   |
| 2 | 10513150 | 10513359 | 5Y-H4K8ac_peak_9645 | 5.50568  |                                                   |
| 2 | 10513899 | 10514093 | 5Y-H4K8ac_peak_9646 | 6.88736  |                                                   |
| 2 | 10530861 | 10531422 | 5Y-H4K8ac_peak_9647 | 4.48815  |                                                   |
| 2 | 10531866 | 10532528 | 5Y-H4K8ac_peak_9648 | 8.62703  |                                                   |
| 2 | 10532869 | 10533158 | 5Y-H4K8ac_peak_9649 | 13.92701 |                                                   |
| 2 | 10533767 | 10534023 | 5Y-H4K8ac_peak_9650 | 9.87124  |                                                   |
| 2 | 10534324 | 10534617 | 5Y-H4K8ac_peak_9651 | 4.0639   |                                                   |
| 2 | 10536945 | 10537220 | 5Y-H4K8ac_peak_9652 | 7.72519  |                                                   |
| 2 | 10537589 | 10537885 | 5Y-H4K8ac_peak_9653 | 4.6766   |                                                   |
| 2 | 10544589 | 10544995 | 5Y-H4K8ac_peak_9654 | 9.79526  |                                                   |
| 2 | 10545439 | 10545721 | 5Y-H4K8ac_peak_9655 | 6.20938  |                                                   |
| 2 | 10546406 | 10546601 | 5Y-H4K8ac_peak_9656 | 4.15658  |                                                   |
| 2 | 10588133 | 10588652 | 5Y-H4K8ac_peak_9657 | 10.86648 | ODC1_ENSG00000115758;RP11-320M2.1_ENSG00000257135 |
| 2 | 10588871 | 10589218 | 5Y-H4K8ac_peak_9658 | 14.00559 | ODC1_ENSG00000115758;RP11-320M2.1_ENSG00000257135 |

|   |          |          |                     |          |                                                    |
|---|----------|----------|---------------------|----------|----------------------------------------------------|
| 2 | 10593991 | 10594403 | 5Y-H4K8ac_peak_9659 | 7.29055  |                                                    |
| 2 | 10688718 | 10689013 | 5Y-H4K8ac_peak_9660 | 11.69482 |                                                    |
| 2 | 10899661 | 10899860 | 5Y-H4K8ac_peak_9661 | 6.77436  |                                                    |
| 2 | 10951888 | 10952158 | 5Y-H4K8ac_peak_9662 | 4.61721  |                                                    |
| 2 | 10954448 | 10954671 | 5Y-H4K8ac_peak_9663 | 8.24461  |                                                    |
| 2 | 10954873 | 10955206 | 5Y-H4K8ac_peak_9664 | 11.22005 | RNU7-176P_ENSG00000238962                          |
| 2 | 11008940 | 11009269 | 5Y-H4K8ac_peak_9665 | 10.86648 |                                                    |
| 2 | 11294809 | 11295006 | 5Y-H4K8ac_peak_9666 | 6.08523  | PQLC3_ENSG00000162976                              |
| 2 | 11295668 | 11296007 | 5Y-H4K8ac_peak_9667 | 7.11439  | PQLC3_ENSG00000162976                              |
| 2 | 11485001 | 11485714 | 5Y-H4K8ac_peak_9668 | 13.12848 |                                                    |
| 2 | 11605728 | 11606207 | 5Y-H4K8ac_peak_9669 | 20.32089 | E2F6_ENSG00000169016                               |
| 2 | 11606534 | 11606833 | 5Y-H4K8ac_peak_9670 | 5.64909  | E2F6_ENSG00000169016                               |
| 2 | 11622131 | 11622500 | 5Y-H4K8ac_peak_9671 | 8.24461  |                                                    |
| 2 | 11623070 | 11623300 | 5Y-H4K8ac_peak_9672 | 11.29141 |                                                    |
| 2 | 11821980 | 11822209 | 5Y-H4K8ac_peak_9673 | 5.00069  | AC106875.1_ENSG00000228496                         |
| 2 | 11836898 | 11837801 | 5Y-H4K8ac_peak_9674 | 6.67135  |                                                    |
| 2 | 11883420 | 11884194 | 5Y-H4K8ac_peak_9675 | 8.95951  |                                                    |
| 2 | 11886219 | 11886489 | 5Y-H4K8ac_peak_9676 | 6.43068  | AC012456.4_ENSG00000230790                         |
| 2 | 11970172 | 11970451 | 5Y-H4K8ac_peak_9677 | 4.97086  |                                                    |
| 2 | 12223846 | 12224038 | 5Y-H4K8ac_peak_9678 | 5.37237  |                                                    |
| 2 | 12316316 | 12316745 | 5Y-H4K8ac_peak_9679 | 7.01364  |                                                    |
| 2 | 12856590 | 12856836 | 5Y-H4K8ac_peak_9680 | 5.93036  | TRIB2_ENSG00000071575                              |
| 2 | 12858913 | 12859314 | 5Y-H4K8ac_peak_9681 | 7.59101  |                                                    |
| 2 | 13087752 | 13087982 | 5Y-H4K8ac_peak_9682 | 6.37023  |                                                    |
| 2 | 13088864 | 13089506 | 5Y-H4K8ac_peak_9683 | 6.77436  |                                                    |
| 2 | 13091268 | 13091529 | 5Y-H4K8ac_peak_9684 | 8.35138  |                                                    |
| 2 | 13105142 | 13105389 | 5Y-H4K8ac_peak_9685 | 8.43511  |                                                    |
| 2 | 13120841 | 13121249 | 5Y-H4K8ac_peak_9686 | 8.31252  |                                                    |
| 2 | 13124107 | 13124298 | 5Y-H4K8ac_peak_9687 | 5.42666  |                                                    |
| 2 | 14772269 | 14772565 | 5Y-H4K8ac_peak_9688 | 8.62703  | FAM84A_ENSG00000162981                             |
| 2 | 15732114 | 15732445 | 5Y-H4K8ac_peak_9689 | 13.1133  | DDX1_ENSG00000079785                               |
| 2 | 15982727 | 15983576 | 5Y-H4K8ac_peak_9690 | 14.99099 |                                                    |
| 2 | 16079728 | 16079926 | 5Y-H4K8ac_peak_9691 | 11.34154 | MYCN_ENSG00000134323                               |
| 2 | 16080161 | 16080440 | 5Y-H4K8ac_peak_9692 | 10.1994  | MYCN_ENSG00000134323                               |
| 2 | 16124280 | 16124787 | 5Y-H4K8ac_peak_9693 | 4.86161  |                                                    |
| 2 | 16234168 | 16235200 | 5Y-H4K8ac_peak_9694 | 6.78128  |                                                    |
| 2 | 16378911 | 16379329 | 5Y-H4K8ac_peak_9695 | 8.24461  |                                                    |
| 2 | 16688896 | 16689441 | 5Y-H4K8ac_peak_9696 | 8.82628  |                                                    |
| 2 | 17721358 | 17721696 | 5Y-H4K8ac_peak_9697 | 9.00954  | VSNL1_ENSG00000163032                              |
| 2 | 18741262 | 18742275 | 5Y-H4K8ac_peak_9698 | 12.05638 | RDH14_ENSG00000240857                              |
| 2 | 19547405 | 19547696 | 5Y-H4K8ac_peak_9699 | 5.51759  | MIR4757_ENSG00000266738;AC092594.1_ENSG00000236204 |
| 2 | 20101058 | 20101706 | 5Y-H4K8ac_peak_9700 | 13.99721 | TTC32_ENSG00000183891;RP11-79O8.1_ENSG00000271991  |
| 2 | 20211898 | 20212318 | 5Y-H4K8ac_peak_9701 | 6.67135  | MATN3_ENSG00000132031                              |
| 2 | 20212538 | 20212862 | 5Y-H4K8ac_peak_9702 | 24.56462 | MATN3_ENSG00000132031                              |
| 2 | 20270601 | 20270940 | 5Y-H4K8ac_peak_9703 | 7.50148  |                                                    |
| 2 | 20271132 | 20271624 | 5Y-H4K8ac_peak_9704 | 8.73392  |                                                    |

|   |          |          |                     |          |                                                     |
|---|----------|----------|---------------------|----------|-----------------------------------------------------|
| 2 | 20271848 | 20272098 | 5Y-H4K8ac_peak_9705 | 6.49786  |                                                     |
| 2 | 20272399 | 20272765 | 5Y-H4K8ac_peak_9706 | 7.19446  |                                                     |
| 2 | 20273190 | 20273666 | 5Y-H4K8ac_peak_9707 | 4.67245  |                                                     |
| 2 | 20274087 | 20274290 | 5Y-H4K8ac_peak_9708 | 7.20869  |                                                     |
| 2 | 20274551 | 20274901 | 5Y-H4K8ac_peak_9709 | 6.00747  |                                                     |
| 2 | 20367375 | 20368063 | 5Y-H4K8ac_peak_9710 | 6.34245  |                                                     |
| 2 | 20368574 | 20369333 | 5Y-H4K8ac_peak_9711 | 17.64055 |                                                     |
| 2 | 20423304 | 20424568 | 5Y-H4K8ac_peak_9712 | 11.60058 | SDC1_ENSG00000115884                                |
| 2 | 20425394 | 20425825 | 5Y-H4K8ac_peak_9713 | 6.34245  | SDC1_ENSG00000115884                                |
| 2 | 20550042 | 20550435 | 5Y-H4K8ac_peak_9714 | 20.25522 |                                                     |
| 2 | 20550816 | 20551530 | 5Y-H4K8ac_peak_9715 | 10.90097 | PUM2_ENSG00000055917                                |
| 2 | 20624643 | 20625039 | 5Y-H4K8ac_peak_9716 | 7.50148  |                                                     |
| 2 | 20646096 | 20646295 | 5Y-H4K8ac_peak_9717 | 8.24461  | RHOB_ENSG00000143878                                |
| 2 | 20646964 | 20647340 | 5Y-H4K8ac_peak_9718 | 10.4495  | RHOB_ENSG00000143878                                |
| 2 | 20798727 | 20799022 | 5Y-H4K8ac_peak_9719 | 5.23083  |                                                     |
| 2 | 20835875 | 20836136 | 5Y-H4K8ac_peak_9720 | 6.75871  |                                                     |
| 2 | 20850565 | 20850816 | 5Y-H4K8ac_peak_9721 | 12.42952 | HS1BP3_ENSG00000118960                              |
| 2 | 20851275 | 20851618 | 5Y-H4K8ac_peak_9722 | 6.75784  | HS1BP3_ENSG00000118960                              |
| 2 | 21212715 | 21213215 | 5Y-H4K8ac_peak_9723 | 9.22492  |                                                     |
| 2 | 21490412 | 21490644 | 5Y-H4K8ac_peak_9724 | 4.62763  |                                                     |
| 2 | 21498298 | 21498621 | 5Y-H4K8ac_peak_9725 | 7.98792  |                                                     |
| 2 | 21502165 | 21502658 | 5Y-H4K8ac_peak_9726 | 4.95697  |                                                     |
| 2 | 23551424 | 23551621 | 5Y-H4K8ac_peak_9727 | 8.43511  |                                                     |
| 2 | 23573783 | 23575015 | 5Y-H4K8ac_peak_9728 | 15.01223 |                                                     |
| 2 | 23607585 | 23607835 | 5Y-H4K8ac_peak_9729 | 5.41472  | KLHL29_ENSG00000119771                              |
| 2 | 23859896 | 23860286 | 5Y-H4K8ac_peak_9730 | 6.19716  |                                                     |
| 2 | 23892369 | 23892620 | 5Y-H4K8ac_peak_9731 | 8.69112  |                                                     |
| 2 | 24149557 | 24149808 | 5Y-H4K8ac_peak_9732 | 7.49287  | ATAD2B_ENSG00000119778;UBXN2A_ENSG00000173960       |
| 2 | 24232619 | 24233066 | 5Y-H4K8ac_peak_9733 | 9.89244  | MFSD2B_ENSG00000205639                              |
| 2 | 24270659 | 24270899 | 5Y-H4K8ac_peak_9734 | 11.57236 |                                                     |
| 2 | 24306371 | 24306630 | 5Y-H4K8ac_peak_9735 | 6.00747  |                                                     |
| 2 | 24307405 | 24307656 | 5Y-H4K8ac_peak_9736 | 9.87124  |                                                     |
| 2 | 24346371 | 24347010 | 5Y-H4K8ac_peak_9737 | 8.75963  | PFN4_ENSG00000176732;RP11-507M3.1_ENSG00000266118   |
| 2 | 24392808 | 24393026 | 5Y-H4K8ac_peak_9738 | 4.50834  |                                                     |
| 2 | 24582871 | 24583270 | 5Y-H4K8ac_peak_9739 | 5.12488  | ITSN2_ENSG00000198399                               |
| 2 | 24583471 | 24584112 | 5Y-H4K8ac_peak_9740 | 10.31072 | ITSN2_ENSG00000198399                               |
| 2 | 24625534 | 24625964 | 5Y-H4K8ac_peak_9741 | 11.64182 |                                                     |
| 2 | 24713516 | 24713969 | 5Y-H4K8ac_peak_9742 | 7.89273  | NCOA1_ENSG00000084676                               |
| 2 | 25142665 | 25143043 | 5Y-H4K8ac_peak_9743 | 4.55128  | ADCY3_ENSG00000138031                               |
| 2 | 25143396 | 25143685 | 5Y-H4K8ac_peak_9744 | 8.69112  | ADCY3_ENSG00000138031                               |
| 2 | 25194217 | 25194857 | 5Y-H4K8ac_peak_9745 | 16.35065 | DNAJC27_ENSG00000115137;DNAJC27-AS1_ENSG00000224165 |
| 2 | 25195114 | 25195342 | 5Y-H4K8ac_peak_9746 | 6.00598  | DNAJC27_ENSG00000115137;DNAJC27-AS1_ENSG00000224165 |
| 2 | 25436093 | 25436356 | 5Y-H4K8ac_peak_9747 | 8.79957  |                                                     |
| 2 | 25474178 | 25475022 | 5Y-H4K8ac_peak_9748 | 27.05751 |                                                     |
| 2 | 25481909 | 25482190 | 5Y-H4K8ac_peak_9749 | 4.0639   |                                                     |
| 2 | 25512462 | 25512675 | 5Y-H4K8ac_peak_9750 | 5.72233  |                                                     |



|   |          |          |                     |          |                                               |
|---|----------|----------|---------------------|----------|-----------------------------------------------|
| 2 | 25513758 | 25513977 | 5Y-H4K8ac_peak_9751 | 9.74838  |                                               |
| 2 | 25514277 | 25514905 | 5Y-H4K8ac_peak_9752 | 8.54067  |                                               |
| 2 | 25517591 | 25518211 | 5Y-H4K8ac_peak_9753 | 10.62421 |                                               |
| 2 | 25533330 | 25533880 | 5Y-H4K8ac_peak_9754 | 16.1726  |                                               |
| 2 | 25534839 | 25535939 | 5Y-H4K8ac_peak_9755 | 11.69482 |                                               |
| 2 | 25536792 | 25537245 | 5Y-H4K8ac_peak_9756 | 6.33649  |                                               |
| 2 | 25537531 | 25537841 | 5Y-H4K8ac_peak_9757 | 8.47417  |                                               |
| 2 | 25563226 | 25563666 | 5Y-H4K8ac_peak_9758 | 15.55712 |                                               |
| 2 | 25564236 | 25564713 | 5Y-H4K8ac_peak_9759 | 11.57236 | DNMT3A_ENSG00000119772                        |
| 2 | 25565127 | 25565761 | 5Y-H4K8ac_peak_9760 | 8.62703  | DNMT3A_ENSG00000119772                        |
| 2 | 25590713 | 25590962 | 5Y-H4K8ac_peak_9761 | 9.51254  |                                               |
| 2 | 25599153 | 25599642 | 5Y-H4K8ac_peak_9762 | 13.57316 | AC012074.2_ENSG00000235072                    |
| 2 | 25600028 | 25600539 | 5Y-H4K8ac_peak_9763 | 14.00559 |                                               |
| 2 | 25896069 | 25896421 | 5Y-H4K8ac_peak_9764 | 9.51254  | DTNB_ENSG00000138101                          |
| 2 | 25896646 | 25896967 | 5Y-H4K8ac_peak_9765 | 17.78344 | DTNB_ENSG00000138101                          |
| 2 | 26100902 | 26101145 | 5Y-H4K8ac_peak_9766 | 5.41472  | ASXL2_ENSG00000143970                         |
| 2 | 26160046 | 26160376 | 5Y-H4K8ac_peak_9767 | 5.42736  |                                               |
| 2 | 26174530 | 26174967 | 5Y-H4K8ac_peak_9768 | 7.89273  |                                               |
| 2 | 26204645 | 26204943 | 5Y-H4K8ac_peak_9769 | 6.19716  | KIF3C_ENSG00000084731                         |
| 2 | 26205731 | 26206285 | 5Y-H4K8ac_peak_9770 | 20.46741 | KIF3C_ENSG00000084731                         |
| 2 | 26256100 | 26256585 | 5Y-H4K8ac_peak_9771 | 6.53157  | RAB10_ENSG00000084733                         |
| 2 | 26257027 | 26257242 | 5Y-H4K8ac_peak_9772 | 7.03859  | RAB10_ENSG00000084733                         |
| 2 | 26467225 | 26467702 | 5Y-H4K8ac_peak_9773 | 13.03153 | HADHA_ENSG00000084754                         |
| 2 | 26686827 | 26687133 | 5Y-H4K8ac_peak_9774 | 4.86927  |                                               |
| 2 | 26785028 | 26785226 | 5Y-H4K8ac_peak_9775 | 6.54441  | C2orf70_ENSG00000173557                       |
| 2 | 26838940 | 26839203 | 5Y-H4K8ac_peak_9776 | 5.41472  |                                               |
| 2 | 26875600 | 26876123 | 5Y-H4K8ac_peak_9777 | 16.9826  |                                               |
| 2 | 26876889 | 26877130 | 5Y-H4K8ac_peak_9778 | 6.03611  |                                               |
| 2 | 26914487 | 26914937 | 5Y-H4K8ac_peak_9779 | 12.10416 | KCNK3_ENSG00000171303                         |
| 2 | 26986416 | 26986868 | 5Y-H4K8ac_peak_9780 | 6.88736  | SLC35F6_ENSG00000213699;CENPA_ENSG00000115163 |
| 2 | 27009031 | 27009342 | 5Y-H4K8ac_peak_9781 | 6.78128  |                                               |
| 2 | 27070447 | 27070746 | 5Y-H4K8ac_peak_9782 | 8.26455  | DPYSL5_ENSG00000157851                        |
| 2 | 27071036 | 27071367 | 5Y-H4K8ac_peak_9783 | 5.03564  | DPYSL5_ENSG00000157851                        |
| 2 | 27072312 | 27072609 | 5Y-H4K8ac_peak_9784 | 9.10532  |                                               |
| 2 | 27255973 | 27256232 | 5Y-H4K8ac_peak_9785 | 4.642    | TMEM214_ENSG00000119777                       |
| 2 | 27274167 | 27274595 | 5Y-H4K8ac_peak_9786 | 10.43761 |                                               |
| 2 | 27294767 | 27295821 | 5Y-H4K8ac_peak_9787 | 14.54171 | OST4_ENSG00000228474                          |
| 2 | 27299975 | 27300944 | 5Y-H4K8ac_peak_9788 | 11.30548 | EMILIN1_ENSG00000138080                       |
| 2 | 27301539 | 27302347 | 5Y-H4K8ac_peak_9789 | 9.68742  | EMILIN1_ENSG00000138080                       |
| 2 | 27308923 | 27309178 | 5Y-H4K8ac_peak_9790 | 8.23286  | KHK_ENSG00000138030                           |
| 2 | 27318425 | 27318649 | 5Y-H4K8ac_peak_9791 | 5.53736  |                                               |
| 2 | 27318921 | 27319245 | 5Y-H4K8ac_peak_9792 | 5.87725  |                                               |
| 2 | 27341327 | 27341986 | 5Y-H4K8ac_peak_9793 | 14.97676 | CGREF1_ENSG00000138028                        |
| 2 | 27346479 | 27347062 | 5Y-H4K8ac_peak_9794 | 23.10777 | ABHD1_ENSG00000143994                         |
| 2 | 27357772 | 27358092 | 5Y-H4K8ac_peak_9795 | 12.45678 | PREB_ENSG00000138073                          |
| 2 | 27440376 | 27440777 | 5Y-H4K8ac_peak_9796 | 8.62703  | CAD_ENSG00000084774                           |

|   |          |          |                     |          |                                                                                 |
|---|----------|----------|---------------------|----------|---------------------------------------------------------------------------------|
| 2 | 27487408 | 27487940 | 5Y-H4K8ac_peak_9797 | 9.56315  |                                                                                 |
| 2 | 27526034 | 27526321 | 5Y-H4K8ac_peak_9798 | 12.05638 |                                                                                 |
| 2 | 27529449 | 27529686 | 5Y-H4K8ac_peak_9799 | 6.25061  |                                                                                 |
| 2 | 27545318 | 27545578 | 5Y-H4K8ac_peak_9800 | 10.8904  |                                                                                 |
| 2 | 27546083 | 27546337 | 5Y-H4K8ac_peak_9801 | 10.90097 |                                                                                 |
| 2 | 27579281 | 27579565 | 5Y-H4K8ac_peak_9802 | 6.80915  | GTF3C2_ENSG00000115207;AC074117.10_ENSG00000234072                              |
| 2 | 27580048 | 27580238 | 5Y-H4K8ac_peak_9803 | 7.54409  | GTF3C2_ENSG00000115207;AC074117.10_ENSG00000234072                              |
| 2 | 27601287 | 27601581 | 5Y-H4K8ac_peak_9804 | 5.01024  |                                                                                 |
| 2 | 27603910 | 27604319 | 5Y-H4K8ac_peak_9805 | 9.37812  | ZNF513_ENSG00000163795                                                          |
| 2 | 27632018 | 27632391 | 5Y-H4K8ac_peak_9806 | 6.78128  | PPM1G_ENSG00000115241                                                           |
| 2 | 27804998 | 27805544 | 5Y-H4K8ac_peak_9807 | 8.7173   | AC074091.1_ENSG00000221531;ZNF512_ENSG00000243943;RP11-158I13.2_ENSG00000259080 |
| 2 | 27852603 | 27852801 | 5Y-H4K8ac_peak_9808 | 3.97334  | CCDC121_ENSG00000176714                                                         |
| 2 | 27886179 | 27886468 | 5Y-H4K8ac_peak_9809 | 13.12848 | SUPT7L_ENSG00000119760;SLC4A1AP_ENSG00000163798                                 |
| 2 | 27886827 | 27887167 | 5Y-H4K8ac_peak_9810 | 4.00147  | SUPT7L_ENSG00000119760;SLC4A1AP_ENSG00000163798                                 |
| 2 | 27937826 | 27938620 | 5Y-H4K8ac_peak_9811 | 7.64648  | AC074091.13_ENSG00000205334                                                     |
| 2 | 27958304 | 27958584 | 5Y-H4K8ac_peak_9812 | 4.77126  |                                                                                 |
| 2 | 27961122 | 27961441 | 5Y-H4K8ac_peak_9813 | 12.50545 |                                                                                 |
| 2 | 28113694 | 28114090 | 5Y-H4K8ac_peak_9814 | 8.24461  | BRE_ENSG00000158019;RBKS_ENSG00000171174                                        |
| 2 | 28557231 | 28557441 | 5Y-H4K8ac_peak_9815 | 4.55128  |                                                                                 |
| 2 | 28578049 | 28579099 | 5Y-H4K8ac_peak_9816 | 12.87883 |                                                                                 |
| 2 | 28579553 | 28580118 | 5Y-H4K8ac_peak_9817 | 6.34245  |                                                                                 |
| 2 | 28613204 | 28614136 | 5Y-H4K8ac_peak_9818 | 12.60556 |                                                                                 |
| 2 | 28659566 | 28659877 | 5Y-H4K8ac_peak_9819 | 6.78128  |                                                                                 |
| 2 | 28887466 | 28887731 | 5Y-H4K8ac_peak_9820 | 12.79198 | AC074011.2_ENSG00000230730                                                      |
| 2 | 28914754 | 28914993 | 5Y-H4K8ac_peak_9821 | 7.59101  |                                                                                 |
| 2 | 28974965 | 28975365 | 5Y-H4K8ac_peak_9822 | 6.08471  | PPP1CB_ENSG00000213639                                                          |
| 2 | 29033741 | 29034114 | 5Y-H4K8ac_peak_9823 | 11.60143 | RP11-713D19.1_ENSG00000273233                                                   |
| 2 | 29116902 | 29117184 | 5Y-H4K8ac_peak_9824 | 14.11825 | WDR43_ENSG00000163811                                                           |
| 2 | 29117650 | 29118293 | 5Y-H4K8ac_peak_9825 | 19.06379 | WDR43_ENSG00000163811                                                           |
| 2 | 29287780 | 29288294 | 5Y-H4K8ac_peak_9826 | 4.55128  |                                                                                 |
| 2 | 29294117 | 29294424 | 5Y-H4K8ac_peak_9827 | 9.25505  |                                                                                 |
| 2 | 29338263 | 29338953 | 5Y-H4K8ac_peak_9828 | 20.51174 |                                                                                 |
| 2 | 29388191 | 29388403 | 5Y-H4K8ac_peak_9829 | 7.63144  |                                                                                 |
| 2 | 29469313 | 29469786 | 5Y-H4K8ac_peak_9830 | 6.37023  |                                                                                 |
| 2 | 29472016 | 29472753 | 5Y-H4K8ac_peak_9831 | 9.00574  |                                                                                 |
| 2 | 29473350 | 29473621 | 5Y-H4K8ac_peak_9832 | 4.23251  |                                                                                 |
| 2 | 29473855 | 29474417 | 5Y-H4K8ac_peak_9833 | 9.59236  |                                                                                 |
| 2 | 29483425 | 29483677 | 5Y-H4K8ac_peak_9834 | 5.41472  |                                                                                 |
| 2 | 29484898 | 29485373 | 5Y-H4K8ac_peak_9835 | 8.24461  |                                                                                 |
| 2 | 29486161 | 29487240 | 5Y-H4K8ac_peak_9836 | 8.26455  |                                                                                 |
| 2 | 29489602 | 29490496 | 5Y-H4K8ac_peak_9837 | 12.26819 |                                                                                 |
| 2 | 29491106 | 29491523 | 5Y-H4K8ac_peak_9838 | 10.07545 |                                                                                 |
| 2 | 29491794 | 29492584 | 5Y-H4K8ac_peak_9839 | 7.50501  |                                                                                 |
| 2 | 29493329 | 29493522 | 5Y-H4K8ac_peak_9840 | 5.41472  |                                                                                 |
| 2 | 29493814 | 29494062 | 5Y-H4K8ac_peak_9841 | 7.90751  |                                                                                 |
| 2 | 29494459 | 29496575 | 5Y-H4K8ac_peak_9842 | 16.79568 |                                                                                 |

|   |          |          |                     |          |                        |
|---|----------|----------|---------------------|----------|------------------------|
| 2 | 29497259 | 29498424 | 5Y-H4K8ac_peak_9843 | 12.77513 |                        |
| 2 | 29504066 | 29504387 | 5Y-H4K8ac_peak_9844 | 10.56003 |                        |
| 2 | 29613784 | 29614005 | 5Y-H4K8ac_peak_9845 | 5.98695  |                        |
| 2 | 29620983 | 29621753 | 5Y-H4K8ac_peak_9846 | 5.60566  |                        |
| 2 | 29666297 | 29666533 | 5Y-H4K8ac_peak_9847 | 8.60027  |                        |
| 2 | 29738704 | 29739684 | 5Y-H4K8ac_peak_9848 | 17.82613 |                        |
| 2 | 29749622 | 29749852 | 5Y-H4K8ac_peak_9849 | 7.65114  |                        |
| 2 | 29750488 | 29750786 | 5Y-H4K8ac_peak_9850 | 4.89128  |                        |
| 2 | 29751219 | 29751822 | 5Y-H4K8ac_peak_9851 | 7.90236  |                        |
| 2 | 29752425 | 29752856 | 5Y-H4K8ac_peak_9852 | 11.62198 |                        |
| 2 | 29753180 | 29753435 | 5Y-H4K8ac_peak_9853 | 7.98023  |                        |
| 2 | 29784636 | 29785064 | 5Y-H4K8ac_peak_9854 | 8.22125  |                        |
| 2 | 29796981 | 29797406 | 5Y-H4K8ac_peak_9855 | 6.64195  |                        |
| 2 | 29798631 | 29798980 | 5Y-H4K8ac_peak_9856 | 6.47214  |                        |
| 2 | 29799172 | 29799566 | 5Y-H4K8ac_peak_9857 | 18.03442 |                        |
| 2 | 29801492 | 29802117 | 5Y-H4K8ac_peak_9858 | 5.60566  |                        |
| 2 | 29802537 | 29802742 | 5Y-H4K8ac_peak_9859 | 7.41172  |                        |
| 2 | 29803871 | 29804814 | 5Y-H4K8ac_peak_9860 | 14.89335 |                        |
| 2 | 29805549 | 29806039 | 5Y-H4K8ac_peak_9861 | 5.86226  |                        |
| 2 | 29832602 | 29833148 | 5Y-H4K8ac_peak_9862 | 8.0168   |                        |
| 2 | 29833880 | 29834196 | 5Y-H4K8ac_peak_9863 | 12.68559 |                        |
| 2 | 29835236 | 29835814 | 5Y-H4K8ac_peak_9864 | 7.59101  |                        |
| 2 | 29837205 | 29838018 | 5Y-H4K8ac_peak_9865 | 7.00004  |                        |
| 2 | 29838887 | 29839460 | 5Y-H4K8ac_peak_9866 | 10.08165 |                        |
| 2 | 30247999 | 30248345 | 5Y-H4K8ac_peak_9867 | 5.40265  |                        |
| 2 | 30294849 | 30295148 | 5Y-H4K8ac_peak_9868 | 5.77617  |                        |
| 2 | 30369902 | 30370101 | 5Y-H4K8ac_peak_9869 | 8.73392  | YPEL5_ENSG00000119801  |
| 2 | 30426125 | 30426319 | 5Y-H4K8ac_peak_9870 | 4.84727  |                        |
| 2 | 30522973 | 30523385 | 5Y-H4K8ac_peak_9871 | 4.95697  |                        |
| 2 | 30644409 | 30644670 | 5Y-H4K8ac_peak_9872 | 9.05168  |                        |
| 2 | 30670121 | 30670430 | 5Y-H4K8ac_peak_9873 | 8.3285   | LCLAT1_ENSG00000172954 |
| 2 | 30978490 | 30978937 | 5Y-H4K8ac_peak_9874 | 4.48815  |                        |
| 2 | 30979271 | 30979773 | 5Y-H4K8ac_peak_9875 | 6.95844  |                        |
| 2 | 30980007 | 30980313 | 5Y-H4K8ac_peak_9876 | 11.94897 |                        |
| 2 | 30980954 | 30981586 | 5Y-H4K8ac_peak_9877 | 6.85744  |                        |
| 2 | 30993736 | 30993966 | 5Y-H4K8ac_peak_9878 | 4.2721   |                        |
| 2 | 31088439 | 31089053 | 5Y-H4K8ac_peak_9879 | 4.29586  |                        |
| 2 | 31095701 | 31095924 | 5Y-H4K8ac_peak_9880 | 5.64909  |                        |
| 2 | 31202907 | 31203171 | 5Y-H4K8ac_peak_9881 | 10.11377 |                        |
| 2 | 31213401 | 31213601 | 5Y-H4K8ac_peak_9882 | 7.33115  |                        |
| 2 | 31216350 | 31217163 | 5Y-H4K8ac_peak_9883 | 11.63557 |                        |
| 2 | 31229427 | 31229663 | 5Y-H4K8ac_peak_9884 | 6.20292  |                        |
| 2 | 31229998 | 31230272 | 5Y-H4K8ac_peak_9885 | 4.15658  |                        |
| 2 | 31230866 | 31231500 | 5Y-H4K8ac_peak_9886 | 8.43511  |                        |
| 2 | 31234552 | 31234771 | 5Y-H4K8ac_peak_9887 | 11.12941 |                        |
| 2 | 31353186 | 31353479 | 5Y-H4K8ac_peak_9888 | 5.65584  |                        |

|   |          |          |                     |          |                                                    |
|---|----------|----------|---------------------|----------|----------------------------------------------------|
| 2 | 31360350 | 31360879 | 5Y-H4K8ac_peak_9889 | 9.76673  |                                                    |
| 2 | 31361104 | 31361822 | 5Y-H4K8ac_peak_9890 | 9.44542  |                                                    |
| 2 | 31525569 | 31526081 | 5Y-H4K8ac_peak_9891 | 5.23083  |                                                    |
| 2 | 32501873 | 32502107 | 5Y-H4K8ac_peak_9892 | 6.37237  | YIPF4_ENSG00000119820                              |
| 2 | 32503192 | 32503487 | 5Y-H4K8ac_peak_9893 | 6.03632  | YIPF4_ENSG00000119820                              |
| 2 | 32582623 | 32582839 | 5Y-H4K8ac_peak_9894 | 6.78128  | BIRC6_ENSG00000115760                              |
| 2 | 36824989 | 36825215 | 5Y-H4K8ac_peak_9895 | 11.93705 |                                                    |
| 2 | 36846202 | 36846454 | 5Y-H4K8ac_peak_9896 | 4.75045  |                                                    |
| 2 | 37383772 | 37384370 | 5Y-H4K8ac_peak_9897 | 14.26354 | EIF2AK2_ENSG00000055332                            |
| 2 | 37423013 | 37423216 | 5Y-H4K8ac_peak_9898 | 7.89273  | SULT6B1_ENSG00000138068;CEBPZ-AS1_ENSG00000218739  |
| 2 | 37551539 | 37551877 | 5Y-H4K8ac_peak_9899 | 4.42435  | PRKD3_ENSG00000115825;AC007391.2_ENSG00000232028   |
| 2 | 37617647 | 37617858 | 5Y-H4K8ac_peak_9900 | 4.70571  |                                                    |
| 2 | 37734109 | 37734336 | 5Y-H4K8ac_peak_9901 | 5.65584  |                                                    |
| 2 | 37898447 | 37898756 | 5Y-H4K8ac_peak_9902 | 5.41472  |                                                    |
| 2 | 37899036 | 37899300 | 5Y-H4K8ac_peak_9903 | 9.01738  |                                                    |
| 2 | 37899522 | 37899794 | 5Y-H4K8ac_peak_9904 | 5.87725  |                                                    |
| 2 | 38082515 | 38083267 | 5Y-H4K8ac_peak_9905 | 16.9826  |                                                    |
| 2 | 38083649 | 38084174 | 5Y-H4K8ac_peak_9906 | 21.54805 |                                                    |
| 2 | 38084662 | 38085098 | 5Y-H4K8ac_peak_9907 | 7.59101  |                                                    |
| 2 | 38152184 | 38152577 | 5Y-H4K8ac_peak_9908 | 16.81039 |                                                    |
| 2 | 38152815 | 38153221 | 5Y-H4K8ac_peak_9909 | 7.90751  |                                                    |
| 2 | 38302950 | 38304639 | 5Y-H4K8ac_peak_9910 | 13.35169 | CYP1B1-AS1_ENSG00000232973                         |
| 2 | 38332774 | 38333259 | 5Y-H4K8ac_peak_9911 | 9.36633  |                                                    |
| 2 | 38445377 | 38445569 | 5Y-H4K8ac_peak_9912 | 9.8829   |                                                    |
| 2 | 38603996 | 38604354 | 5Y-H4K8ac_peak_9913 | 20.97372 | ATL2_ENSG00000119787                               |
| 2 | 38763091 | 38763650 | 5Y-H4K8ac_peak_9914 | 14.89891 | RP11-541E12.1_ENSG00000271443                      |
| 2 | 38829367 | 38829960 | 5Y-H4K8ac_peak_9915 | 10.86648 | AC011247.3_ENSG00000235586;HNRNPLL_ENSG00000143889 |
| 2 | 38977706 | 38978457 | 5Y-H4K8ac_peak_9916 | 14.26354 | SRSF7_ENSG00000115875;GEMIN6_ENSG00000152147       |
| 2 | 39347838 | 39348440 | 5Y-H4K8ac_peak_9917 | 12.2918  |                                                    |
| 2 | 39350901 | 39351391 | 5Y-H4K8ac_peak_9918 | 6.78128  | SOS1_ENSG00000115904                               |
| 2 | 39471555 | 39471839 | 5Y-H4K8ac_peak_9919 | 7.89273  |                                                    |
| 2 | 39893040 | 39893665 | 5Y-H4K8ac_peak_9920 | 8.3285   | TMEM178A_ENSG00000152154                           |
| 2 | 40006097 | 40006348 | 5Y-H4K8ac_peak_9921 | 14.40623 | THUMPD2_ENSG00000138050                            |
| 2 | 40679397 | 40679611 | 5Y-H4K8ac_peak_9922 | 7.64648  |                                                    |
| 2 | 42068349 | 42068606 | 5Y-H4K8ac_peak_9923 | 8.3285   |                                                    |
| 2 | 42112933 | 42113123 | 5Y-H4K8ac_peak_9924 | 4.29586  |                                                    |
| 2 | 42113986 | 42114205 | 5Y-H4K8ac_peak_9925 | 7.59101  |                                                    |
| 2 | 42182011 | 42182468 | 5Y-H4K8ac_peak_9926 | 7.90005  | C2orf91_ENSG00000205086                            |
| 2 | 42252478 | 42252765 | 5Y-H4K8ac_peak_9927 | 5.64909  | AC013480.2_ENSG00000226398                         |
| 2 | 42274437 | 42274848 | 5Y-H4K8ac_peak_9928 | 5.99756  | PKDCC_ENSG00000162878                              |
| 2 | 42275603 | 42275983 | 5Y-H4K8ac_peak_9929 | 6.08523  | PKDCC_ENSG00000162878                              |
| 2 | 42359922 | 42360187 | 5Y-H4K8ac_peak_9930 | 7.29055  |                                                    |
| 2 | 42361144 | 42361431 | 5Y-H4K8ac_peak_9931 | 14.50475 |                                                    |
| 2 | 42361675 | 42361930 | 5Y-H4K8ac_peak_9932 | 9.87097  |                                                    |
| 2 | 42364559 | 42364790 | 5Y-H4K8ac_peak_9933 | 10.35586 |                                                    |
| 2 | 42396066 | 42396288 | 5Y-H4K8ac_peak_9934 | 6.67135  | EML4_ENSG00000143924                               |

|   |          |          |                     |          |                                               |
|---|----------|----------|---------------------|----------|-----------------------------------------------|
| 2 | 42459909 | 42460177 | 5Y-H4K8ac_peak_9935 | 4.00314  |                                               |
| 2 | 42720530 | 42721032 | 5Y-H4K8ac_peak_9936 | 16.74969 | KCNG3_ENSG00000171126;MTA3_ENSG00000057935    |
| 2 | 42721344 | 42721586 | 5Y-H4K8ac_peak_9937 | 9.23858  | KCNG3_ENSG00000171126;MTA3_ENSG00000057935    |
| 2 | 42795130 | 42795506 | 5Y-H4K8ac_peak_9938 | 9.02938  |                                               |
| 2 | 42795792 | 42796560 | 5Y-H4K8ac_peak_9939 | 22.81411 |                                               |
| 2 | 42981486 | 42981799 | 5Y-H4K8ac_peak_9940 | 4.642    |                                               |
| 2 | 42982576 | 42982843 | 5Y-H4K8ac_peak_9941 | 6.86362  |                                               |
| 2 | 42998708 | 42999025 | 5Y-H4K8ac_peak_9942 | 9.28129  |                                               |
| 2 | 43013900 | 43014155 | 5Y-H4K8ac_peak_9943 | 6.08523  |                                               |
| 2 | 43036943 | 43037599 | 5Y-H4K8ac_peak_9944 | 17.67055 |                                               |
| 2 | 43037858 | 43038657 | 5Y-H4K8ac_peak_9945 | 14.59308 |                                               |
| 2 | 43038916 | 43039378 | 5Y-H4K8ac_peak_9946 | 6.77436  |                                               |
| 2 | 43195129 | 43195580 | 5Y-H4K8ac_peak_9947 | 10.74494 |                                               |
| 2 | 43202112 | 43202660 | 5Y-H4K8ac_peak_9948 | 13.84142 |                                               |
| 2 | 43268571 | 43268899 | 5Y-H4K8ac_peak_9949 | 6.75784  |                                               |
| 2 | 43273348 | 43273770 | 5Y-H4K8ac_peak_9950 | 11.06021 |                                               |
| 2 | 43307673 | 43307956 | 5Y-H4K8ac_peak_9951 | 7.72887  |                                               |
| 2 | 43309163 | 43309716 | 5Y-H4K8ac_peak_9952 | 5.99756  |                                               |
| 2 | 43309994 | 43310243 | 5Y-H4K8ac_peak_9953 | 7.87192  |                                               |
| 2 | 43311338 | 43312076 | 5Y-H4K8ac_peak_9954 | 10.79676 |                                               |
| 2 | 43367476 | 43367752 | 5Y-H4K8ac_peak_9955 | 5.95028  |                                               |
| 2 | 43395511 | 43396015 | 5Y-H4K8ac_peak_9956 | 4.642    |                                               |
| 2 | 43444723 | 43445017 | 5Y-H4K8ac_peak_9957 | 7.89273  |                                               |
| 2 | 43445579 | 43446109 | 5Y-H4K8ac_peak_9958 | 8.8315   |                                               |
| 2 | 43446716 | 43447596 | 5Y-H4K8ac_peak_9959 | 6.98416  |                                               |
| 2 | 43452864 | 43453692 | 5Y-H4K8ac_peak_9960 | 7.80036  | ZFP36L2_ENSG00000152518                       |
| 2 | 43454064 | 43454306 | 5Y-H4K8ac_peak_9961 | 10.18556 | ZFP36L2_ENSG00000152518                       |
| 2 | 43454721 | 43454918 | 5Y-H4K8ac_peak_9962 | 3.96434  | ZFP36L2_ENSG00000152518                       |
| 2 | 43540832 | 43541063 | 5Y-H4K8ac_peak_9963 | 5.24695  |                                               |
| 2 | 43555676 | 43555955 | 5Y-H4K8ac_peak_9964 | 4.48815  |                                               |
| 2 | 43822953 | 43823150 | 5Y-H4K8ac_peak_9965 | 8.62703  | THADA_ENSG00000115970                         |
| 2 | 43823377 | 43823619 | 5Y-H4K8ac_peak_9966 | 9.36633  | THADA_ENSG00000115970                         |
| 2 | 43903413 | 43903615 | 5Y-H4K8ac_peak_9967 | 4.84727  | AC011242.6_ENSG00000223658                    |
| 2 | 44222703 | 44223131 | 5Y-H4K8ac_peak_9968 | 9.30206  | LRPPRC_ENSG00000138095                        |
| 2 | 44271532 | 44272048 | 5Y-H4K8ac_peak_9969 | 16.79568 |                                               |
| 2 | 44314884 | 44315144 | 5Y-H4K8ac_peak_9970 | 5.01024  |                                               |
| 2 | 44906056 | 44906341 | 5Y-H4K8ac_peak_9971 | 5.49775  |                                               |
| 2 | 44932412 | 44932837 | 5Y-H4K8ac_peak_9972 | 11.67083 |                                               |
| 2 | 45161363 | 45161558 | 5Y-H4K8ac_peak_9973 | 4.48815  |                                               |
| 2 | 45162087 | 45162397 | 5Y-H4K8ac_peak_9974 | 7.21591  |                                               |
| 2 | 45166888 | 45167081 | 5Y-H4K8ac_peak_9975 | 7.2696   | RP11-89K21.1_ENSG00000259439                  |
| 2 | 45168111 | 45168438 | 5Y-H4K8ac_peak_9976 | 11.4254  | SIX3-AS1_ENSG00000236502;SIX3_ENSG00000138083 |
| 2 | 45182430 | 45182633 | 5Y-H4K8ac_peak_9977 | 8.82628  | AC012354.6_ENSG00000225156                    |
| 2 | 45236278 | 45236494 | 5Y-H4K8ac_peak_9978 | 7.57115  | SIX2_ENSG00000170577                          |
| 2 | 45240813 | 45241287 | 5Y-H4K8ac_peak_9979 | 10.48476 | AC093702.1_ENSG00000231156                    |
| 2 | 45282230 | 45282467 | 5Y-H4K8ac_peak_9980 | 11.28133 |                                               |

|   |          |          |                      |          |                                               |
|---|----------|----------|----------------------|----------|-----------------------------------------------|
| 2 | 45396733 | 45397290 | 5Y-H4K8ac_peak_9981  | 11.04356 |                                               |
| 2 | 45417572 | 45417983 | 5Y-H4K8ac_peak_9982  | 10.1994  |                                               |
| 2 | 45447279 | 45447988 | 5Y-H4K8ac_peak_9983  | 11.62198 |                                               |
| 2 | 45488546 | 45488870 | 5Y-H4K8ac_peak_9984  | 4.80442  |                                               |
| 2 | 45490639 | 45490991 | 5Y-H4K8ac_peak_9985  | 6.80779  |                                               |
| 2 | 45870566 | 45870821 | 5Y-H4K8ac_peak_9986  | 6.84536  |                                               |
| 2 | 45878420 | 45878678 | 5Y-H4K8ac_peak_9987  | 11.62198 | PRKCE_ENSG00000171132                         |
| 2 | 45971903 | 45972124 | 5Y-H4K8ac_peak_9988  | 5.23083  |                                               |
| 2 | 46040448 | 46040859 | 5Y-H4K8ac_peak_9989  | 8.1667   |                                               |
| 2 | 46048672 | 46049077 | 5Y-H4K8ac_peak_9990  | 5.23083  |                                               |
| 2 | 46050851 | 46051051 | 5Y-H4K8ac_peak_9991  | 7.03573  |                                               |
| 2 | 46463358 | 46463559 | 5Y-H4K8ac_peak_9992  | 6.34245  |                                               |
| 2 | 46463854 | 46464179 | 5Y-H4K8ac_peak_9993  | 5.64909  |                                               |
| 2 | 46523760 | 46524275 | 5Y-H4K8ac_peak_9994  | 7.07275  |                                               |
| 2 | 46557808 | 46558091 | 5Y-H4K8ac_peak_9995  | 9.47304  |                                               |
| 2 | 46558912 | 46559256 | 5Y-H4K8ac_peak_9996  | 5.71283  |                                               |
| 2 | 46560081 | 46560272 | 5Y-H4K8ac_peak_9997  | 6.78128  |                                               |
| 2 | 46560605 | 46560911 | 5Y-H4K8ac_peak_9998  | 16.74969 |                                               |
| 2 | 46562927 | 46563245 | 5Y-H4K8ac_peak_9999  | 6.08523  |                                               |
| 2 | 46565479 | 46565975 | 5Y-H4K8ac_peak_10000 | 10.07378 |                                               |
| 2 | 46566748 | 46567092 | 5Y-H4K8ac_peak_10001 | 16.29955 |                                               |
| 2 | 46567687 | 46568384 | 5Y-H4K8ac_peak_10002 | 17.50136 |                                               |
| 2 | 46569182 | 46569396 | 5Y-H4K8ac_peak_10003 | 3.96434  |                                               |
| 2 | 46576505 | 46576714 | 5Y-H4K8ac_peak_10004 | 5.5192   |                                               |
| 2 | 46768705 | 46769684 | 5Y-H4K8ac_peak_10005 | 13.01516 | ATP6V1E2_ENSG00000250565;RHOQ_ENSG00000119729 |
| 2 | 47039655 | 47039875 | 5Y-H4K8ac_peak_10006 | 5.36319  |                                               |
| 2 | 47073719 | 47074370 | 5Y-H4K8ac_peak_10007 | 7.90236  |                                               |
| 2 | 47074738 | 47075445 | 5Y-H4K8ac_peak_10008 | 9.64915  |                                               |
| 2 | 47075729 | 47076089 | 5Y-H4K8ac_peak_10009 | 11.23789 |                                               |
| 2 | 47142524 | 47142862 | 5Y-H4K8ac_peak_10010 | 9.74838  | TTC7A_ENSG00000068724                         |
| 2 | 47210377 | 47210773 | 5Y-H4K8ac_peak_10011 | 6.5677   |                                               |
| 2 | 47213820 | 47214235 | 5Y-H4K8ac_peak_10012 | 5.87725  |                                               |
| 2 | 47215055 | 47215279 | 5Y-H4K8ac_peak_10013 | 7.18391  |                                               |
| 2 | 47227783 | 47228098 | 5Y-H4K8ac_peak_10014 | 7.02726  |                                               |
| 2 | 47229972 | 47230575 | 5Y-H4K8ac_peak_10015 | 10.85667 |                                               |
| 2 | 47240575 | 47240770 | 5Y-H4K8ac_peak_10016 | 4.95697  |                                               |
| 2 | 47241441 | 47242017 | 5Y-H4K8ac_peak_10017 | 4.15658  |                                               |
| 2 | 47260319 | 47261086 | 5Y-H4K8ac_peak_10018 | 12.1872  |                                               |
| 2 | 47261301 | 47261517 | 5Y-H4K8ac_peak_10019 | 11.01067 |                                               |
| 2 | 47269966 | 47270210 | 5Y-H4K8ac_peak_10020 | 13.12848 |                                               |
| 2 | 47270702 | 47271263 | 5Y-H4K8ac_peak_10021 | 8.69112  |                                               |
| 2 | 47282758 | 47283676 | 5Y-H4K8ac_peak_10022 | 12.42289 |                                               |
| 2 | 47283907 | 47284823 | 5Y-H4K8ac_peak_10023 | 12.64789 |                                               |
| 2 | 47285135 | 47286060 | 5Y-H4K8ac_peak_10024 | 4.89347  |                                               |
| 2 | 47288018 | 47288750 | 5Y-H4K8ac_peak_10025 | 11.4254  |                                               |
| 2 | 47290716 | 47291956 | 5Y-H4K8ac_peak_10026 | 13.59183 |                                               |

|   |          |          |                      |          |                                                       |
|---|----------|----------|----------------------|----------|-------------------------------------------------------|
| 2 | 47299076 | 47299504 | 5Y-H4K8ac_peak_10027 | 13.24325 |                                                       |
| 2 | 47306876 | 47307440 | 5Y-H4K8ac_peak_10028 | 5.12488  |                                                       |
| 2 | 47307985 | 47308349 | 5Y-H4K8ac_peak_10029 | 6.62037  |                                                       |
| 2 | 47310215 | 47310783 | 5Y-H4K8ac_peak_10030 | 4.48815  |                                                       |
| 2 | 47311090 | 47311448 | 5Y-H4K8ac_peak_10031 | 7.20869  |                                                       |
| 2 | 47313007 | 47313821 | 5Y-H4K8ac_peak_10032 | 7.90005  |                                                       |
| 2 | 47314304 | 47314718 | 5Y-H4K8ac_peak_10033 | 21.80568 |                                                       |
| 2 | 47315975 | 47316732 | 5Y-H4K8ac_peak_10034 | 11.22005 |                                                       |
| 2 | 47403043 | 47403361 | 5Y-H4K8ac_peak_10035 | 8.62703  | RP11-761B3.1_ENSG00000273269;CALM2_ENSG00000143933    |
| 2 | 47546603 | 47547047 | 5Y-H4K8ac_peak_10036 | 9.30206  |                                                       |
| 2 | 47548747 | 47549047 | 5Y-H4K8ac_peak_10037 | 7.60057  |                                                       |
| 2 | 47596183 | 47597072 | 5Y-H4K8ac_peak_10038 | 8.62703  |                                                       |
| 2 | 47629225 | 47629475 | 5Y-H4K8ac_peak_10039 | 5.89922  | MSH2_ENSG00000095002                                  |
| 2 | 47630483 | 47630679 | 5Y-H4K8ac_peak_10040 | 4.87387  | MSH2_ENSG00000095002                                  |
| 2 | 47747549 | 47748193 | 5Y-H4K8ac_peak_10041 | 13.86751 |                                                       |
| 2 | 47748595 | 47749148 | 5Y-H4K8ac_peak_10042 | 19.06379 |                                                       |
| 2 | 48009772 | 48010048 | 5Y-H4K8ac_peak_10043 | 6.34245  |                                                       |
| 2 | 48010349 | 48010885 | 5Y-H4K8ac_peak_10044 | 20.40213 |                                                       |
| 2 | 48132099 | 48132339 | 5Y-H4K8ac_peak_10045 | 7.96285  | FBXO11_ENSG00000138081;AC079807.2_ENSG00000233230     |
| 2 | 48133410 | 48133618 | 5Y-H4K8ac_peak_10046 | 11.04542 | FBXO11_ENSG00000138081;AC079807.2_ENSG00000233230     |
| 2 | 48339152 | 48339771 | 5Y-H4K8ac_peak_10047 | 10.12457 |                                                       |
| 2 | 48647453 | 48647711 | 5Y-H4K8ac_peak_10048 | 6.08523  |                                                       |
| 2 | 48667523 | 48667731 | 5Y-H4K8ac_peak_10049 | 11.43902 | RP11-191L17.1_ENSG00000272663;PPP1R21_ENSG00000162869 |
| 2 | 48757411 | 48757641 | 5Y-H4K8ac_peak_10050 | 8.97752  | STON1_ENSG00000243244;STON1-GTF2A1L_ENSG00000068781   |
| 2 | 51259462 | 51259869 | 5Y-H4K8ac_peak_10051 | 4.29586  | NRXN1_ENSG00000179915;AC007682.1_ENSG00000231918      |
| 2 | 53995195 | 53995420 | 5Y-H4K8ac_peak_10052 | 6.50117  | CHAC2_ENSG00000143942                                 |
| 2 | 54013674 | 54013953 | 5Y-H4K8ac_peak_10053 | 7.38046  | ERLEC1_ENSG00000068912                                |
| 2 | 54197606 | 54197819 | 5Y-H4K8ac_peak_10054 | 5.98695  | PSME4_ENSG00000068878;ACYP2_ENSG00000170634           |
| 2 | 54198356 | 54198556 | 5Y-H4K8ac_peak_10055 | 8.2913   | PSME4_ENSG00000068878;ACYP2_ENSG00000170634           |
| 2 | 54342588 | 54342932 | 5Y-H4K8ac_peak_10056 | 20.88791 |                                                       |
| 2 | 54682993 | 54683260 | 5Y-H4K8ac_peak_10057 | 13.63503 | SPTBN1_ENSG00000115306                                |
| 2 | 54742110 | 54742313 | 5Y-H4K8ac_peak_10058 | 5.07473  |                                                       |
| 2 | 54785944 | 54786261 | 5Y-H4K8ac_peak_10059 | 5.51139  |                                                       |
| 2 | 55276388 | 55276654 | 5Y-H4K8ac_peak_10060 | 6.37023  |                                                       |
| 2 | 55496095 | 55496304 | 5Y-H4K8ac_peak_10061 | 6.34046  | MTIF2_ENSG00000085760                                 |
| 2 | 55844413 | 55844657 | 5Y-H4K8ac_peak_10062 | 5.91107  | RP11-554J4.1_ENSG00000272606                          |
| 2 | 56235992 | 56236198 | 5Y-H4K8ac_peak_10063 | 7.31815  |                                                       |
| 2 | 58654878 | 58655100 | 5Y-H4K8ac_peak_10064 | 6.20875  | LINC01122_ENSG00000233723                             |
| 2 | 58655933 | 58656437 | 5Y-H4K8ac_peak_10065 | 8.33296  | LINC01122_ENSG00000233723                             |
| 2 | 60808744 | 60809034 | 5Y-H4K8ac_peak_10066 | 9.00954  |                                                       |
| 2 | 61108121 | 61108396 | 5Y-H4K8ac_peak_10067 | 8.43511  | AC010733.4_ENSG00000228414;REL_ENSG00000162924        |
| 2 | 61404079 | 61404305 | 5Y-H4K8ac_peak_10068 | 8.69112  | AHSA2_ENSG00000173209                                 |
| 2 | 61404710 | 61405238 | 5Y-H4K8ac_peak_10069 | 15.84891 | AHSA2_ENSG00000173209                                 |
| 2 | 61697375 | 61697816 | 5Y-H4K8ac_peak_10070 | 8.75926  | USP34_ENSG00000115464;RP11-355B11.2_ENSG00000270820   |
| 2 | 61764953 | 61765245 | 5Y-H4K8ac_peak_10071 | 7.17184  | XPO1_ENSG00000082898                                  |
| 2 | 61766045 | 61766476 | 5Y-H4K8ac_peak_10072 | 6.43775  | XPO1_ENSG00000082898                                  |

|   |          |          |                      |          |                                                      |
|---|----------|----------|----------------------|----------|------------------------------------------------------|
| 2 | 61922070 | 61922300 | 5Y-H4K8ac_peak_10073 | 7.31815  |                                                      |
| 2 | 61991642 | 61991862 | 5Y-H4K8ac_peak_10074 | 10.95042 |                                                      |
| 2 | 62115368 | 62115964 | 5Y-H4K8ac_peak_10075 | 9.74189  | CCT4_ENSG00000115484;COMMD1_ENSG00000173163          |
| 2 | 62132941 | 62133193 | 5Y-H4K8ac_peak_10076 | 4.77126  |                                                      |
| 2 | 62403923 | 62404159 | 5Y-H4K8ac_peak_10077 | 9.43096  |                                                      |
| 2 | 62422718 | 62423066 | 5Y-H4K8ac_peak_10078 | 9.51254  | B3GNT2_ENSG00000170340                               |
| 2 | 62536403 | 62537117 | 5Y-H4K8ac_peak_10079 | 10.86079 |                                                      |
| 2 | 62568366 | 62568634 | 5Y-H4K8ac_peak_10080 | 10.46135 |                                                      |
| 2 | 62638926 | 62639118 | 5Y-H4K8ac_peak_10081 | 9.52603  |                                                      |
| 2 | 62684397 | 62684606 | 5Y-H4K8ac_peak_10082 | 9.89244  |                                                      |
| 2 | 62702406 | 62702651 | 5Y-H4K8ac_peak_10083 | 4.0639   |                                                      |
| 2 | 64067445 | 64067778 | 5Y-H4K8ac_peak_10084 | 6.98118  | UGP2_ENSG00000169764                                 |
| 2 | 64068237 | 64068686 | 5Y-H4K8ac_peak_10085 | 5.98695  | UGP2_ENSG00000169764                                 |
| 2 | 64246014 | 64247061 | 5Y-H4K8ac_peak_10086 | 12.49811 | VPS54_ENSG00000143952                                |
| 2 | 64501087 | 64501289 | 5Y-H4K8ac_peak_10087 | 7.05631  |                                                      |
| 2 | 64681257 | 64681469 | 5Y-H4K8ac_peak_10088 | 9.34555  | AC008074.3_ENSG00000223935;LGALSL_ENSG00000119862    |
| 2 | 64681669 | 64681972 | 5Y-H4K8ac_peak_10089 | 11.93212 | AC008074.3_ENSG00000223935;LGALSL_ENSG00000119862    |
| 2 | 64881429 | 64881620 | 5Y-H4K8ac_peak_10090 | 7.50148  |                                                      |
| 2 | 64995072 | 64995563 | 5Y-H4K8ac_peak_10091 | 10.95042 |                                                      |
| 2 | 65215501 | 65216049 | 5Y-H4K8ac_peak_10092 | 11.36989 | SLC1A4_ENSG00000115902                               |
| 2 | 65282959 | 65283176 | 5Y-H4K8ac_peak_10093 | 6.03718  | CEP68_ENSG00000011523                                |
| 2 | 65357876 | 65358272 | 5Y-H4K8ac_peak_10094 | 5.48291  | RAB1A_ENSG00000138069                                |
| 2 | 65454978 | 65455214 | 5Y-H4K8ac_peak_10095 | 9.63153  | ACTR2_ENSG00000138071                                |
| 2 | 65664691 | 65664965 | 5Y-H4K8ac_peak_10096 | 8.16031  | AC074391.1_ENSG00000204929                           |
| 2 | 66297072 | 66297409 | 5Y-H4K8ac_peak_10097 | 7.59101  |                                                      |
| 2 | 66652925 | 66653255 | 5Y-H4K8ac_peak_10098 | 7.58806  |                                                      |
| 2 | 66659270 | 66659473 | 5Y-H4K8ac_peak_10099 | 6.77436  |                                                      |
| 2 | 66660028 | 66660264 | 5Y-H4K8ac_peak_10100 | 4.84727  | MEIS1-AS3_ENSG00000226819;MEIS1_ENSG00000143995      |
| 2 | 66660948 | 66661959 | 5Y-H4K8ac_peak_10101 | 13.2534  | MEIS1-AS3_ENSG00000226819;MEIS1_ENSG00000143995      |
| 2 | 66665296 | 66665572 | 5Y-H4K8ac_peak_10102 | 9.38276  |                                                      |
| 2 | 66667940 | 66668201 | 5Y-H4K8ac_peak_10103 | 8.12924  | AC092669.1_ENSG00000244522;MEIS1-AS2_ENSG00000230749 |
| 2 | 67440540 | 67440851 | 5Y-H4K8ac_peak_10104 | 10.36926 |                                                      |
| 2 | 67543434 | 67543692 | 5Y-H4K8ac_peak_10105 | 7.57144  |                                                      |
| 2 | 67552071 | 67552315 | 5Y-H4K8ac_peak_10106 | 5.98695  | AC023115.4_ENSG00000236605                           |
| 2 | 67624621 | 67624898 | 5Y-H4K8ac_peak_10107 | 11.68317 | ETAA1_ENSG00000143971                                |
| 2 | 67876919 | 67877239 | 5Y-H4K8ac_peak_10108 | 8.2913   |                                                      |
| 2 | 68073336 | 68073573 | 5Y-H4K8ac_peak_10109 | 4.47071  |                                                      |
| 2 | 68107619 | 68107858 | 5Y-H4K8ac_peak_10110 | 8.2913   |                                                      |
| 2 | 68271666 | 68271862 | 5Y-H4K8ac_peak_10111 | 9.20645  |                                                      |
| 2 | 68384322 | 68384533 | 5Y-H4K8ac_peak_10112 | 4.8509   | WDR92_ENSG00000243667;PNO1_ENSG00000115946           |
| 2 | 68479096 | 68479516 | 5Y-H4K8ac_peak_10113 | 6.77436  | RP11-474G23.3_ENSG00000273064                        |
| 2 | 68546189 | 68546787 | 5Y-H4K8ac_peak_10114 | 6.78128  | CNRIP1_ENSG00000119865                               |
| 2 | 68870452 | 68870722 | 5Y-H4K8ac_peak_10115 | 4.15658  | PROKR1_ENSG00000169618                               |
| 2 | 69027312 | 69027611 | 5Y-H4K8ac_peak_10116 | 5.40331  |                                                      |
| 2 | 69170884 | 69171547 | 5Y-H4K8ac_peak_10117 | 17.51157 |                                                      |
| 2 | 69240508 | 69240935 | 5Y-H4K8ac_peak_10118 | 4.50834  | ANTXR1_ENSG00000169604                               |



|   |          |          |                      |          |                                                          |
|---|----------|----------|----------------------|----------|----------------------------------------------------------|
| 2 | 69440987 | 69441274 | 5Y-H4K8ac_peak_10119 | 11.22005 |                                                          |
| 2 | 69533692 | 69533922 | 5Y-H4K8ac_peak_10120 | 9.30505  |                                                          |
| 2 | 69664222 | 69664442 | 5Y-H4K8ac_peak_10121 | 5.87725  | NFU1_ENSG00000169599                                     |
| 2 | 69870970 | 69871235 | 5Y-H4K8ac_peak_10122 | 16.03077 | ANXA4_ENSG00000196975                                    |
| 2 | 69968854 | 69969547 | 5Y-H4K8ac_peak_10123 | 9.23159  |                                                          |
| 2 | 70120649 | 70120954 | 5Y-H4K8ac_peak_10124 | 7.3889   | SNRNP27_ENSG00000124380                                  |
| 2 | 70141360 | 70141587 | 5Y-H4K8ac_peak_10125 | 7.89273  |                                                          |
| 2 | 70299005 | 70299239 | 5Y-H4K8ac_peak_10126 | 5.29015  |                                                          |
| 2 | 70313509 | 70314383 | 5Y-H4K8ac_peak_10127 | 20.21988 | PCBP1_ENSG00000169564                                    |
| 2 | 70314880 | 70315448 | 5Y-H4K8ac_peak_10128 | 5.98695  | PCBP1-AS1_ENSG00000179818;PCBP1_ENSG00000169564          |
| 2 | 70336274 | 70336477 | 5Y-H4K8ac_peak_10129 | 4.9885   |                                                          |
| 2 | 70351341 | 70351557 | 5Y-H4K8ac_peak_10130 | 6.53157  | AC016700.5_ENSG00000231327                               |
| 2 | 70351932 | 70352451 | 5Y-H4K8ac_peak_10131 | 13.2534  | AC016700.5_ENSG00000231327                               |
| 2 | 70359984 | 70360186 | 5Y-H4K8ac_peak_10132 | 7.01266  |                                                          |
| 2 | 70368760 | 70369577 | 5Y-H4K8ac_peak_10133 | 20.25522 |                                                          |
| 2 | 70475417 | 70475713 | 5Y-H4K8ac_peak_10134 | 15.40182 | C2orf42_ENSG00000115998;TIA1_ENSG00000116001             |
| 2 | 70476683 | 70476916 | 5Y-H4K8ac_peak_10135 | 8.75926  | C2orf42_ENSG00000115998;TIA1_ENSG00000116001             |
| 2 | 70520518 | 70520719 | 5Y-H4K8ac_peak_10136 | 6.77436  | SNRPG_ENSG00000143977                                    |
| 2 | 70528693 | 70528975 | 5Y-H4K8ac_peak_10137 | 5.60566  | FAM136A_ENSG00000035141;AC022201.5_ENSG00000233849       |
| 2 | 70780790 | 70781275 | 5Y-H4K8ac_peak_10138 | 4.15658  | TGFA_ENSG00000163235                                     |
| 2 | 70994743 | 70995288 | 5Y-H4K8ac_peak_10139 | 6.50117  | ADD2_ENSG00000075340                                     |
| 2 | 71228029 | 71228329 | 5Y-H4K8ac_peak_10140 | 5.24695  |                                                          |
| 2 | 71228609 | 71228912 | 5Y-H4K8ac_peak_10141 | 7.31102  |                                                          |
| 2 | 71270589 | 71270831 | 5Y-H4K8ac_peak_10142 | 11.36844 |                                                          |
| 2 | 71294818 | 71295166 | 5Y-H4K8ac_peak_10143 | 6.08523  | RP11-467P9.1_ENSG00000272735                             |
| 2 | 71558457 | 71558655 | 5Y-H4K8ac_peak_10144 | 7.76232  |                                                          |
| 2 | 71683290 | 71683727 | 5Y-H4K8ac_peak_10145 | 5.12213  |                                                          |
| 2 | 72079721 | 72080149 | 5Y-H4K8ac_peak_10146 | 8.1667   |                                                          |
| 2 | 73089893 | 73090185 | 5Y-H4K8ac_peak_10147 | 5.98695  |                                                          |
| 2 | 73340488 | 73340682 | 5Y-H4K8ac_peak_10148 | 5.23083  | RP11-44N22.3_ENSG00000272702                             |
| 2 | 73461539 | 73461915 | 5Y-H4K8ac_peak_10149 | 14.31711 | CCT7_ENSG00000135624                                     |
| 2 | 73964826 | 73965491 | 5Y-H4K8ac_peak_10150 | 11.99586 | TPRKB_ENSG00000144034                                    |
| 2 | 74056196 | 74056585 | 5Y-H4K8ac_peak_10151 | 6.77436  | STAMPB_ENSG00000124356                                   |
| 2 | 74153304 | 74153539 | 5Y-H4K8ac_peak_10152 | 4.84727  | DGUOK_ENSG00000114956                                    |
| 2 | 74211440 | 74212293 | 5Y-H4K8ac_peak_10153 | 19.93272 | AC073046.25_ENSG00000235499                              |
| 2 | 74212600 | 74213028 | 5Y-H4K8ac_peak_10154 | 8.35207  | AC073046.25_ENSG00000235499;RP11-711M9.1_ENSG00000255989 |
| 2 | 74347502 | 74347791 | 5Y-H4K8ac_peak_10155 | 12.10416 | FNBP1P1_ENSG00000257800                                  |
| 2 | 74374549 | 74374959 | 5Y-H4K8ac_peak_10156 | 4.15658  | BOLA3_ENSG00000163170;BOLA3-AS1_ENSG00000225439          |
| 2 | 74425799 | 74426246 | 5Y-H4K8ac_peak_10157 | 14.99673 | MTHFD2_ENSG00000065911                                   |
| 2 | 74618650 | 74618907 | 5Y-H4K8ac_peak_10158 | 6.31818  | DCTN1_ENSG00000204843                                    |
| 2 | 74648930 | 74649827 | 5Y-H4K8ac_peak_10159 | 4.95697  | C2orf81_ENSG00000159239;WDR54_ENSG00000005448            |
| 2 | 74667697 | 74668167 | 5Y-H4K8ac_peak_10160 | 12.26819 |                                                          |
| 2 | 74699226 | 74699438 | 5Y-H4K8ac_peak_10161 | 4.95697  |                                                          |
| 2 | 74734615 | 74734813 | 5Y-H4K8ac_peak_10162 | 11.1169  | PCGF1_ENSG00000115289                                    |
| 2 | 74735042 | 74735347 | 5Y-H4K8ac_peak_10163 | 26.97738 | PCGF1_ENSG00000115289                                    |
| 2 | 74739986 | 74740228 | 5Y-H4K8ac_peak_10164 | 5.77617  | TLX2_ENSG00000115297                                     |

|   |          |          |                      |          |                                            |
|---|----------|----------|----------------------|----------|--------------------------------------------|
| 2 | 74740694 | 74741187 | 5Y-H4K8ac_peak_10165 | 7.58806  | TLX2_ENSG00000115297                       |
| 2 | 74741751 | 74742068 | 5Y-H4K8ac_peak_10166 | 4.95697  |                                            |
| 2 | 74775902 | 74776548 | 5Y-H4K8ac_peak_10167 | 8.73392  | DOK1_ENSG00000115325                       |
| 2 | 74781279 | 74781765 | 5Y-H4K8ac_peak_10168 | 13.31667 |                                            |
| 2 | 75006177 | 75006479 | 5Y-H4K8ac_peak_10169 | 9.30505  |                                            |
| 2 | 75185349 | 75185577 | 5Y-H4K8ac_peak_10170 | 3.96434  | POLE4_ENSG00000115350                      |
| 2 | 75873974 | 75874405 | 5Y-H4K8ac_peak_10171 | 5.41472  | MRPL19_ENSG00000115364                     |
| 2 | 75937559 | 75937787 | 5Y-H4K8ac_peak_10172 | 7.50148  | GCFC2_ENSG00000005436                      |
| 2 | 75938067 | 75938383 | 5Y-H4K8ac_peak_10173 | 4.0639   | GCFC2_ENSG00000005436                      |
| 2 | 76897793 | 76897993 | 5Y-H4K8ac_peak_10174 | 6.34046  |                                            |
| 2 | 76918184 | 76918380 | 5Y-H4K8ac_peak_10175 | 8.33296  |                                            |
| 2 | 77035165 | 77035378 | 5Y-H4K8ac_peak_10176 | 7.31815  |                                            |
| 2 | 78768641 | 78768914 | 5Y-H4K8ac_peak_10177 | 4.51076  |                                            |
| 2 | 79740139 | 79740329 | 5Y-H4K8ac_peak_10178 | 8.33296  |                                            |
| 2 | 85132828 | 85133029 | 5Y-H4K8ac_peak_10179 | 8.36588  | TMSB10_ENSG000000034510                    |
| 2 | 85443243 | 85443797 | 5Y-H4K8ac_peak_10180 | 6.43775  |                                            |
| 2 | 85482375 | 85482582 | 5Y-H4K8ac_peak_10181 | 6.08523  |                                            |
| 2 | 85484684 | 85484917 | 5Y-H4K8ac_peak_10182 | 9.96543  |                                            |
| 2 | 85485380 | 85485712 | 5Y-H4K8ac_peak_10183 | 8.43511  |                                            |
| 2 | 85500905 | 85501235 | 5Y-H4K8ac_peak_10184 | 7.56545  |                                            |
| 2 | 85501445 | 85501703 | 5Y-H4K8ac_peak_10185 | 10.11191 |                                            |
| 2 | 85645050 | 85646408 | 5Y-H4K8ac_peak_10186 | 19.75467 | CAPG_ENSG00000042493;SH2D6_ENSG00000152292 |
| 2 | 85648105 | 85648358 | 5Y-H4K8ac_peak_10187 | 7.8267   |                                            |
| 2 | 85658965 | 85659178 | 5Y-H4K8ac_peak_10188 | 7.50044  |                                            |
| 2 | 85660331 | 85660883 | 5Y-H4K8ac_peak_10189 | 9.51254  | Y_RNA_ENSG00000207207                      |
| 2 | 85661560 | 85662002 | 5Y-H4K8ac_peak_10190 | 8.45687  | Y_RNA_ENSG00000207207                      |
| 2 | 85662690 | 85662970 | 5Y-H4K8ac_peak_10191 | 7.89142  |                                            |
| 2 | 85663714 | 85664371 | 5Y-H4K8ac_peak_10192 | 7.11863  |                                            |
| 2 | 85665458 | 85665758 | 5Y-H4K8ac_peak_10193 | 16.38263 |                                            |
| 2 | 85672902 | 85673724 | 5Y-H4K8ac_peak_10194 | 5.99756  |                                            |
| 2 | 85674062 | 85674277 | 5Y-H4K8ac_peak_10195 | 6.62731  |                                            |
| 2 | 85750200 | 85750623 | 5Y-H4K8ac_peak_10196 | 6.66026  |                                            |
| 2 | 85765342 | 85765750 | 5Y-H4K8ac_peak_10197 | 10.4689  | MAT2A_ENSG00000168906                      |
| 2 | 85766347 | 85766559 | 5Y-H4K8ac_peak_10198 | 7.89142  | MAT2A_ENSG00000168906                      |
| 2 | 85811505 | 85812073 | 5Y-H4K8ac_peak_10199 | 10.90365 | VAMP5_ENSG00000168899                      |
| 2 | 85838757 | 85839010 | 5Y-H4K8ac_peak_10200 | 10.95042 | C2orf68_ENSG00000168887                    |
| 2 | 85839394 | 85840084 | 5Y-H4K8ac_peak_10201 | 7.59101  | C2orf68_ENSG00000168887                    |
| 2 | 85842648 | 85843042 | 5Y-H4K8ac_peak_10202 | 8.01306  |                                            |
| 2 | 85843336 | 85843574 | 5Y-H4K8ac_peak_10203 | 9.96543  |                                            |
| 2 | 85968287 | 85968827 | 5Y-H4K8ac_peak_10204 | 9.07085  |                                            |
| 2 | 85969077 | 85969326 | 5Y-H4K8ac_peak_10205 | 4.95697  |                                            |
| 2 | 85969979 | 85970310 | 5Y-H4K8ac_peak_10206 | 9.66296  |                                            |
| 2 | 86000162 | 86000763 | 5Y-H4K8ac_peak_10207 | 9.93175  |                                            |
| 2 | 86021904 | 86022347 | 5Y-H4K8ac_peak_10208 | 8.73392  |                                            |
| 2 | 86054829 | 86055101 | 5Y-H4K8ac_peak_10209 | 10.11191 |                                            |
| 2 | 86263021 | 86263222 | 5Y-H4K8ac_peak_10210 | 8.28468  |                                            |

|   |          |          |                      |          |                                                                           |
|---|----------|----------|----------------------|----------|---------------------------------------------------------------------------|
| 2 | 86263818 | 86264648 | 5Y-H4K8ac_peak_10211 | 13.40522 |                                                                           |
| 2 | 86422272 | 86422467 | 5Y-H4K8ac_peak_10212 | 11.04542 | IMMT_ENSG00000132305;RP11-301O19.1_ENSG00000273080                        |
| 2 | 86422875 | 86423211 | 5Y-H4K8ac_peak_10213 | 8.62703  | IMMT_ENSG00000132305;RP11-301O19.1_ENSG00000273080                        |
| 2 | 86450386 | 86450775 | 5Y-H4K8ac_peak_10214 | 8.00339  |                                                                           |
| 2 | 86478575 | 86478785 | 5Y-H4K8ac_peak_10215 | 8.55081  |                                                                           |
| 2 | 86789937 | 86790508 | 5Y-H4K8ac_peak_10216 | 5.64909  | AC015971.2_ENSG00000228363                                                |
| 2 | 86850056 | 86850736 | 5Y-H4K8ac_peak_10217 | 7.3889   | RNF103_ENSG00000239305                                                    |
| 2 | 86860359 | 86860647 | 5Y-H4K8ac_peak_10218 | 6.20875  |                                                                           |
| 2 | 86947490 | 86947741 | 5Y-H4K8ac_peak_10219 | 7.50148  | CHMP3_ENSG00000115561;RNF103-CHMP3_ENSG00000249884;RMND5A_ENSG00000153561 |
| 2 | 87033678 | 87033902 | 5Y-H4K8ac_peak_10220 | 7.01266  |                                                                           |
| 2 | 87035027 | 87035361 | 5Y-H4K8ac_peak_10221 | 6.79955  | CD8A_ENSG00000153563                                                      |
| 2 | 87036670 | 87036861 | 5Y-H4K8ac_peak_10222 | 7.59101  |                                                                           |
| 2 | 87510745 | 87511194 | 5Y-H4K8ac_peak_10223 | 4.07874  |                                                                           |
| 2 | 87568981 | 87569202 | 5Y-H4K8ac_peak_10224 | 8.24461  |                                                                           |
| 2 | 87569427 | 87569665 | 5Y-H4K8ac_peak_10225 | 7.50148  |                                                                           |
| 2 | 87893508 | 87893704 | 5Y-H4K8ac_peak_10226 | 8.2913   |                                                                           |
| 2 | 87894185 | 87894927 | 5Y-H4K8ac_peak_10227 | 7.59101  |                                                                           |
| 2 | 87934092 | 87934693 | 5Y-H4K8ac_peak_10228 | 11.53136 |                                                                           |
| 2 | 88354860 | 88355245 | 5Y-H4K8ac_peak_10229 | 14.1808  | KRCC1_ENSG00000172086                                                     |
| 2 | 88500465 | 88500706 | 5Y-H4K8ac_peak_10230 | 7.38046  |                                                                           |
| 2 | 88564590 | 88564803 | 5Y-H4K8ac_peak_10231 | 7.31815  |                                                                           |
| 2 | 88650094 | 88650650 | 5Y-H4K8ac_peak_10232 | 10.84616 |                                                                           |
| 2 | 88676136 | 88676336 | 5Y-H4K8ac_peak_10233 | 5.16353  |                                                                           |
| 2 | 88802724 | 88803068 | 5Y-H4K8ac_peak_10234 | 10.11191 |                                                                           |
| 2 | 88901389 | 88901582 | 5Y-H4K8ac_peak_10235 | 8.33296  |                                                                           |
| 2 | 88991265 | 88991489 | 5Y-H4K8ac_peak_10236 | 5.64909  | RPIA_ENSG00000153574                                                      |
| 2 | 91757479 | 91757702 | 5Y-H4K8ac_peak_10237 | 5.51759  |                                                                           |
| 2 | 91761826 | 91762329 | 5Y-H4K8ac_peak_10238 | 9.59331  |                                                                           |
| 2 | 91845736 | 91845957 | 5Y-H4K8ac_peak_10239 | 6.96612  |                                                                           |
| 2 | 91847128 | 91847901 | 5Y-H4K8ac_peak_10240 | 12.14222 | AC027612.6_ENSG00000143429                                                |
| 2 | 91848176 | 91848388 | 5Y-H4K8ac_peak_10241 | 7.29055  | AC027612.6_ENSG00000143429                                                |
| 2 | 95787295 | 95787739 | 5Y-H4K8ac_peak_10242 | 10.60083 |                                                                           |
| 2 | 95872975 | 95873634 | 5Y-H4K8ac_peak_10243 | 6.78128  | AC092835.2_ENSG00000233757                                                |
| 2 | 95968884 | 95969119 | 5Y-H4K8ac_peak_10244 | 8.564    |                                                                           |
| 2 | 96068146 | 96068712 | 5Y-H4K8ac_peak_10245 | 11.1169  | FAHD2A_ENSG00000115042                                                    |
| 2 | 96675764 | 96676233 | 5Y-H4K8ac_peak_10246 | 10.16277 | FAHD2CP_ENSG00000231584                                                   |
| 2 | 96737253 | 96737816 | 5Y-H4K8ac_peak_10247 | 10.46287 |                                                                           |
| 2 | 96755401 | 96755616 | 5Y-H4K8ac_peak_10248 | 5.23083  |                                                                           |
| 2 | 96810443 | 96810762 | 5Y-H4K8ac_peak_10249 | 6.76096  | DUSP2_ENSG00000158050                                                     |
| 2 | 96812313 | 96812937 | 5Y-H4K8ac_peak_10250 | 8.69112  | AC012307.2_ENSG00000228873                                                |
| 2 | 96813553 | 96813988 | 5Y-H4K8ac_peak_10251 | 13.14766 | AC012307.2_ENSG00000228873                                                |
| 2 | 96874161 | 96874504 | 5Y-H4K8ac_peak_10252 | 7.57144  | STARD7_ENSG00000084090;STARD7-AS1_ENSG00000204685                         |
| 2 | 96875194 | 96875448 | 5Y-H4K8ac_peak_10253 | 5.65584  | STARD7_ENSG00000084090                                                    |
| 2 | 96971826 | 96972086 | 5Y-H4K8ac_peak_10254 | 9.30206  | SNRNP200_ENSG00000144028                                                  |
| 2 | 96986883 | 96987298 | 5Y-H4K8ac_peak_10255 | 8.2913   | AC021188.4_ENSG00000230747                                                |
| 2 | 97073316 | 97073628 | 5Y-H4K8ac_peak_10256 | 4.36976  |                                                                           |

|   |           |           |                      |          |                                                                          |
|---|-----------|-----------|----------------------|----------|--------------------------------------------------------------------------|
| 2 | 97219370  | 97219627  | 5Y-H4K8ac_peak_10257 | 7.76768  |                                                                          |
| 2 | 97426044  | 97426440  | 5Y-H4K8ac_peak_10258 | 9.23159  | CNNM4_ENSG00000158158                                                    |
| 2 | 97505708  | 97505929  | 5Y-H4K8ac_peak_10259 | 4.56708  |                                                                          |
| 2 | 97523313  | 97523558  | 5Y-H4K8ac_peak_10260 | 8.4454   | ANKRD23_ENSG00000163126;ANKRD39_ENSG00000213337                          |
| 2 | 97534067  | 97534277  | 5Y-H4K8ac_peak_10261 | 7.87406  |                                                                          |
| 2 | 97534534  | 97536321  | 5Y-H4K8ac_peak_10262 | 10.60083 | SEMA4C_ENSG00000168758                                                   |
| 2 | 97572857  | 97573267  | 5Y-H4K8ac_peak_10263 | 7.89273  |                                                                          |
| 2 | 97573468  | 97574016  | 5Y-H4K8ac_peak_10264 | 5.64909  |                                                                          |
| 2 | 97778407  | 97778675  | 5Y-H4K8ac_peak_10265 | 7.11863  | ANKRD36_ENSG00000135976                                                  |
| 2 | 97778915  | 97779135  | 5Y-H4K8ac_peak_10266 | 8.21582  | ANKRD36_ENSG00000135976                                                  |
| 2 | 98207037  | 98207260  | 5Y-H4K8ac_peak_10267 | 8.24461  | ANKRD36B_ENSG00000196912                                                 |
| 2 | 98280054  | 98280276  | 5Y-H4K8ac_peak_10268 | 6.86362  | ACTR1B_ENSG00000115073;LINC01125_ENSG00000228486;RNU4-8P_ENSG00000201806 |
| 2 | 98611959  | 98612163  | 5Y-H4K8ac_peak_10269 | 5.98695  | TMEM131_ENSG00000075568                                                  |
| 2 | 99086855  | 99087057  | 5Y-H4K8ac_peak_10270 | 4.07874  |                                                                          |
| 2 | 99096273  | 99096482  | 5Y-H4K8ac_peak_10271 | 4.79585  |                                                                          |
| 2 | 99153922  | 99154126  | 5Y-H4K8ac_peak_10272 | 5.77617  |                                                                          |
| 2 | 99225180  | 99225609  | 5Y-H4K8ac_peak_10273 | 7.38046  | COA5_ENSG00000183513;UNC50_ENSG00000115446                               |
| 2 | 99347744  | 99348065  | 5Y-H4K8ac_peak_10274 | 10.27264 | MGAT4A_ENSG00000071073                                                   |
| 2 | 99422226  | 99422476  | 5Y-H4K8ac_peak_10275 | 5.15917  |                                                                          |
| 2 | 99439116  | 99439852  | 5Y-H4K8ac_peak_10276 | 13.45283 |                                                                          |
| 2 | 99952508  | 99952707  | 5Y-H4K8ac_peak_10277 | 8.564    |                                                                          |
| 2 | 100261507 | 100261996 | 5Y-H4K8ac_peak_10278 | 8.75926  |                                                                          |
| 2 | 100454070 | 100454336 | 5Y-H4K8ac_peak_10279 | 6.27097  |                                                                          |
| 2 | 100859214 | 100859441 | 5Y-H4K8ac_peak_10280 | 4.84727  |                                                                          |
| 2 | 100937998 | 100938635 | 5Y-H4K8ac_peak_10281 | 9.38203  | LONRF2_ENSG00000170500                                                   |
| 2 | 101033770 | 101034101 | 5Y-H4K8ac_peak_10282 | 8.16382  | CHST10_ENSG00000115526                                                   |
| 2 | 101178366 | 101178682 | 5Y-H4K8ac_peak_10283 | 8.88899  | PDCL3_ENSG00000115539                                                    |
| 2 | 101436892 | 101437149 | 5Y-H4K8ac_peak_10284 | 9.38203  | NPAS2_ENSG00000170485                                                    |
| 2 | 101618190 | 101618555 | 5Y-H4K8ac_peak_10285 | 11.1169  | AC016738.4_ENSG00000223947;RPL31_ENSG00000071082                         |
| 2 | 101618865 | 101619158 | 5Y-H4K8ac_peak_10286 | 5.72233  | AC016738.4_ENSG00000223947;RPL31_ENSG00000071082                         |
| 2 | 101869464 | 101869728 | 5Y-H4K8ac_peak_10287 | 4.00285  | TBC1D8_ENSG00000204634;CNOT11_ENSG00000158435                            |
| 2 | 101924576 | 101925018 | 5Y-H4K8ac_peak_10288 | 8.2913   | MIR5696_ENSG00000264857;RNF149_ENSG00000163162                           |
| 2 | 101925351 | 101925580 | 5Y-H4K8ac_peak_10289 | 8.24461  | MIR5696_ENSG00000264857;RNF149_ENSG00000163162                           |
| 2 | 102090404 | 102090982 | 5Y-H4K8ac_peak_10290 | 11.42348 | RFX8_ENSG00000196460                                                     |
| 2 | 102096152 | 102096426 | 5Y-H4K8ac_peak_10291 | 4.35388  | AC092570.2_ENSG00000223826                                               |
| 2 | 102313533 | 102313975 | 5Y-H4K8ac_peak_10292 | 12.71156 | MAP4K4_ENSG00000071054                                                   |
| 2 | 102314367 | 102314789 | 5Y-H4K8ac_peak_10293 | 8.33296  |                                                                          |
| 2 | 104994914 | 104995255 | 5Y-H4K8ac_peak_10294 | 7.31815  |                                                                          |
| 2 | 104995710 | 104996024 | 5Y-H4K8ac_peak_10295 | 8.33296  |                                                                          |
| 2 | 105274994 | 105275187 | 5Y-H4K8ac_peak_10296 | 8.33296  | AC013402.5_ENSG00000230690                                               |
| 2 | 105275403 | 105276212 | 5Y-H4K8ac_peak_10297 | 8.33296  | AC013402.5_ENSG00000230690                                               |
| 2 | 105946279 | 105946830 | 5Y-H4K8ac_peak_10298 | 10.32379 | TGFBRAP1_ENSG00000135966                                                 |
| 2 | 105953716 | 105954007 | 5Y-H4K8ac_peak_10299 | 21.33748 | RP11-332H14.2_ENSG00000272994;C2orf49_ENSG00000135974                    |
| 2 | 106681821 | 106682316 | 5Y-H4K8ac_peak_10300 | 13.92877 |                                                                          |
| 2 | 107503242 | 107503485 | 5Y-H4K8ac_peak_10301 | 7.31102  | ST6GAL2_ENSG00000144057                                                  |
| 2 | 107503724 | 107504236 | 5Y-H4K8ac_peak_10302 | 5.41472  | ST6GAL2_ENSG00000144057                                                  |

|   |           |           |                      |          |                                                     |
|---|-----------|-----------|----------------------|----------|-----------------------------------------------------|
| 2 | 108208849 | 108209071 | 5Y-H4K8ac_peak_10303 | 6.50117  |                                                     |
| 2 | 109065280 | 109065480 | 5Y-H4K8ac_peak_10304 | 5.98695  | GCC2_ENSG00000135968                                |
| 2 | 109335023 | 109335554 | 5Y-H4K8ac_peak_10305 | 9.38203  | RANBP2_ENSG00000153201                              |
| 2 | 109345146 | 109345351 | 5Y-H4K8ac_peak_10306 | 6.34046  |                                                     |
| 2 | 109403375 | 109403626 | 5Y-H4K8ac_peak_10307 | 4.07874  | CCDC138_ENSG00000163006                             |
| 2 | 109746073 | 109746334 | 5Y-H4K8ac_peak_10308 | 4.90696  | SH3RF3-AS1_ENSG00000259863;SH3RF3_ENSG00000172985   |
| 2 | 109787995 | 109788482 | 5Y-H4K8ac_peak_10309 | 5.41472  |                                                     |
| 2 | 110090831 | 110091252 | 5Y-H4K8ac_peak_10310 | 8.24461  |                                                     |
| 2 | 110858282 | 110858948 | 5Y-H4K8ac_peak_10311 | 9.51254  |                                                     |
| 2 | 111596320 | 111596515 | 5Y-H4K8ac_peak_10312 | 7.13294  |                                                     |
| 2 | 112020363 | 112020704 | 5Y-H4K8ac_peak_10313 | 4.07874  |                                                     |
| 2 | 112070559 | 112070797 | 5Y-H4K8ac_peak_10314 | 8.43511  |                                                     |
| 2 | 112123953 | 112124163 | 5Y-H4K8ac_peak_10315 | 11.57334 |                                                     |
| 2 | 112221207 | 112221413 | 5Y-H4K8ac_peak_10316 | 7.31815  |                                                     |
| 2 | 112230663 | 112230899 | 5Y-H4K8ac_peak_10317 | 8.17203  |                                                     |
| 2 | 112238975 | 112239501 | 5Y-H4K8ac_peak_10318 | 6.34046  |                                                     |
| 2 | 112268413 | 112268712 | 5Y-H4K8ac_peak_10319 | 5.65584  |                                                     |
| 2 | 112269459 | 112269657 | 5Y-H4K8ac_peak_10320 | 8.33296  |                                                     |
| 2 | 112271224 | 112271553 | 5Y-H4K8ac_peak_10321 | 6.34046  |                                                     |
| 2 | 112280657 | 112280880 | 5Y-H4K8ac_peak_10322 | 8.23578  |                                                     |
| 2 | 112323731 | 112324038 | 5Y-H4K8ac_peak_10323 | 4.07874  |                                                     |
| 2 | 112641627 | 112642097 | 5Y-H4K8ac_peak_10324 | 9.20645  | ANAPC1_ENSG00000153107                              |
| 2 | 113033192 | 113033402 | 5Y-H4K8ac_peak_10325 | 11.71078 | ZC3H6_ENSG00000188177                               |
| 2 | 113299107 | 113299506 | 5Y-H4K8ac_peak_10326 | 5.98695  | POLR1B_ENSG00000125630                              |
| 2 | 113299787 | 113300199 | 5Y-H4K8ac_peak_10327 | 10.79063 | POLR1B_ENSG00000125630                              |
| 2 | 113384342 | 113384735 | 5Y-H4K8ac_peak_10328 | 9.23159  |                                                     |
| 2 | 113403550 | 113403910 | 5Y-H4K8ac_peak_10329 | 8.73392  | AC079922.3_ENSG00000237753;SLC20A1_ENSG00000144136  |
| 2 | 113484000 | 113484378 | 5Y-H4K8ac_peak_10330 | 7.11863  |                                                     |
| 2 | 114195573 | 114195782 | 5Y-H4K8ac_peak_10331 | 6.34046  | CBWD2_ENSG00000136682                               |
| 2 | 114341177 | 114341602 | 5Y-H4K8ac_peak_10332 | 42.57279 | MIR1302-3_ENSG00000221055;WASH2P_ENSG00000146556    |
| 2 | 114341947 | 114342175 | 5Y-H4K8ac_peak_10333 | 10.84616 | WASH2P_ENSG00000146556                              |
| 2 | 114361491 | 114361701 | 5Y-H4K8ac_peak_10334 | 11.19336 |                                                     |
| 2 | 114646770 | 114647227 | 5Y-H4K8ac_peak_10335 | 7.31815  | RP11-141B14.1_ENSG00000270019;ACTR3_ENSG00000115091 |
| 2 | 118394712 | 118394924 | 5Y-H4K8ac_peak_10336 | 5.74859  |                                                     |
| 2 | 118476696 | 118477280 | 5Y-H4K8ac_peak_10337 | 9.38203  |                                                     |
| 2 | 118477805 | 118478205 | 5Y-H4K8ac_peak_10338 | 10.95042 |                                                     |
| 2 | 118479301 | 118479670 | 5Y-H4K8ac_peak_10339 | 7.3889   |                                                     |
| 2 | 118572321 | 118572629 | 5Y-H4K8ac_peak_10340 | 5.98695  | DDX18_ENSG00000088205                               |
| 2 | 118771217 | 118771436 | 5Y-H4K8ac_peak_10341 | 6.53157  | CCDC93_ENSG00000125633                              |
| 2 | 118944134 | 118944461 | 5Y-H4K8ac_peak_10342 | 11.99586 | AC093901.1_ENSG00000226856                          |
| 2 | 119981065 | 119981264 | 5Y-H4K8ac_peak_10343 | 5.5192   | STEAP3_ENSG00000115107                              |
| 2 | 119981800 | 119982087 | 5Y-H4K8ac_peak_10344 | 5.59843  | STEAP3_ENSG00000115107                              |
| 2 | 119998013 | 119998314 | 5Y-H4K8ac_peak_10345 | 6.14981  |                                                     |
| 2 | 120123967 | 120124195 | 5Y-H4K8ac_peak_10346 | 5.59843  | C2orf76_ENSG00000186132;DBI_ENSG00000155368         |
| 2 | 120124599 | 120124974 | 5Y-H4K8ac_peak_10347 | 8.75926  | C2orf76_ENSG00000186132;DBI_ENSG00000155368         |
| 2 | 120189126 | 120189356 | 5Y-H4K8ac_peak_10348 | 9.30505  |                                                     |

|   |           |           |                      |          |                                                             |
|---|-----------|-----------|----------------------|----------|-------------------------------------------------------------|
| 2 | 120239584 | 120239775 | 5Y-H4K8ac_peak_10349 | 7.3889   |                                                             |
| 2 | 120240060 | 120240360 | 5Y-H4K8ac_peak_10350 | 9.23159  |                                                             |
| 2 | 120240882 | 120241087 | 5Y-H4K8ac_peak_10351 | 8.17203  |                                                             |
| 2 | 120441329 | 120441786 | 5Y-H4K8ac_peak_10352 | 7.17997  |                                                             |
| 2 | 120517540 | 120518005 | 5Y-H4K8ac_peak_10353 | 4.0639   | PTPN4_ENSG00000088179                                       |
| 2 | 120980336 | 120980960 | 5Y-H4K8ac_peak_10354 | 9.87124  | TMEM185B_ENSG00000226479                                    |
| 2 | 121010561 | 121010816 | 5Y-H4K8ac_peak_10355 | 5.70472  |                                                             |
| 2 | 121076239 | 121076450 | 5Y-H4K8ac_peak_10356 | 7.31815  | AC012363.13_ENSG00000235840                                 |
| 2 | 121334240 | 121334451 | 5Y-H4K8ac_peak_10357 | 4.95697  |                                                             |
| 2 | 121334760 | 121334986 | 5Y-H4K8ac_peak_10358 | 4.03329  |                                                             |
| 2 | 121499322 | 121499668 | 5Y-H4K8ac_peak_10359 | 11.22005 |                                                             |
| 2 | 121577981 | 121578174 | 5Y-H4K8ac_peak_10360 | 5.54773  |                                                             |
| 2 | 121660936 | 121661305 | 5Y-H4K8ac_peak_10361 | 4.14065  |                                                             |
| 2 | 122363170 | 122363477 | 5Y-H4K8ac_peak_10362 | 7.04637  |                                                             |
| 2 | 122530150 | 122530435 | 5Y-H4K8ac_peak_10363 | 7.37325  |                                                             |
| 2 | 123289420 | 123289649 | 5Y-H4K8ac_peak_10364 | 9.38203  |                                                             |
| 2 | 124671162 | 124671390 | 5Y-H4K8ac_peak_10365 | 4.40812  |                                                             |
| 2 | 127733976 | 127734610 | 5Y-H4K8ac_peak_10366 | 8.93923  |                                                             |
| 2 | 127783092 | 127783516 | 5Y-H4K8ac_peak_10367 | 5.64909  | RP11-521O16.1_ENSG00000260634;RP11-521O16.2_ENSG00000260163 |
| 2 | 127807320 | 127807606 | 5Y-H4K8ac_peak_10368 | 7.59101  |                                                             |
| 2 | 127829615 | 127830042 | 5Y-H4K8ac_peak_10369 | 8.43011  |                                                             |
| 2 | 127863017 | 127863476 | 5Y-H4K8ac_peak_10370 | 11.09973 |                                                             |
| 2 | 127977599 | 127977960 | 5Y-H4K8ac_peak_10371 | 7.38046  | CYP27C1_ENSG00000186684                                     |
| 2 | 128145066 | 128145444 | 5Y-H4K8ac_peak_10372 | 13.2534  | MAP3K2_ENSG00000169967                                      |
| 2 | 128165801 | 128166368 | 5Y-H4K8ac_peak_10373 | 6.77436  |                                                             |
| 2 | 128173466 | 128173657 | 5Y-H4K8ac_peak_10374 | 4.84727  |                                                             |
| 2 | 128406953 | 128407175 | 5Y-H4K8ac_peak_10375 | 9.51254  |                                                             |
| 2 | 128409092 | 128409604 | 5Y-H4K8ac_peak_10376 | 4.55128  |                                                             |
| 2 | 128410287 | 128410907 | 5Y-H4K8ac_peak_10377 | 9.10532  |                                                             |
| 2 | 128453027 | 128453431 | 5Y-H4K8ac_peak_10378 | 8.00339  |                                                             |
| 2 | 128459103 | 128459453 | 5Y-H4K8ac_peak_10379 | 18.62509 | SFT2D3_ENSG00000173349                                      |
| 2 | 128568992 | 128569226 | 5Y-H4K8ac_peak_10380 | 5.12488  | WDR33_ENSG00000136709                                       |
| 2 | 129039885 | 129040536 | 5Y-H4K8ac_peak_10381 | 9.78792  |                                                             |
| 2 | 129076650 | 129076951 | 5Y-H4K8ac_peak_10382 | 5.41472  | HS6ST1_ENSG00000136720                                      |
| 2 | 129079663 | 129080175 | 5Y-H4K8ac_peak_10383 | 17.55395 |                                                             |
| 2 | 129104641 | 129105234 | 5Y-H4K8ac_peak_10384 | 5.23083  |                                                             |
| 2 | 129119972 | 129120243 | 5Y-H4K8ac_peak_10385 | 4.9885   |                                                             |
| 2 | 129124606 | 129125125 | 5Y-H4K8ac_peak_10386 | 6.34046  |                                                             |
| 2 | 129169514 | 129169908 | 5Y-H4K8ac_peak_10387 | 6.52331  |                                                             |
| 2 | 129170970 | 129171189 | 5Y-H4K8ac_peak_10388 | 8.43511  |                                                             |
| 2 | 129181545 | 129181747 | 5Y-H4K8ac_peak_10389 | 6.24511  |                                                             |
| 2 | 129206740 | 129206976 | 5Y-H4K8ac_peak_10390 | 8.47164  |                                                             |
| 2 | 129207220 | 129208120 | 5Y-H4K8ac_peak_10391 | 8.43511  |                                                             |
| 2 | 129361063 | 129361320 | 5Y-H4K8ac_peak_10392 | 6.14981  |                                                             |
| 2 | 129396403 | 129396644 | 5Y-H4K8ac_peak_10393 | 8.33296  |                                                             |
| 2 | 129493625 | 129494070 | 5Y-H4K8ac_peak_10394 | 7.38046  |                                                             |

|   |           |           |                      |          |                                                   |
|---|-----------|-----------|----------------------|----------|---------------------------------------------------|
| 2 | 130538043 | 130538249 | 5Y-H4K8ac_peak_10395 | 4.84727  |                                                   |
| 2 | 130901825 | 130902090 | 5Y-H4K8ac_peak_10396 | 5.40331  | CCDC74B_ENSG00000152076                           |
| 2 | 130938923 | 130939702 | 5Y-H4K8ac_peak_10397 | 14.05114 | MZT2B_ENSG00000152082;SMPD4_ENSG00000136699       |
| 2 | 131100477 | 131100815 | 5Y-H4K8ac_peak_10398 | 7.59101  | CCDC115_ENSG00000136710;IMP4_ENSG00000136718      |
| 2 | 131130390 | 131130833 | 5Y-H4K8ac_peak_10399 | 6.08523  |                                                   |
| 2 | 131148991 | 131149426 | 5Y-H4K8ac_peak_10400 | 11.22005 |                                                   |
| 2 | 131485589 | 131486066 | 5Y-H4K8ac_peak_10401 | 7.03573  | GPR148_ENSG00000173302                            |
| 2 | 131502548 | 131502863 | 5Y-H4K8ac_peak_10402 | 7.59101  |                                                   |
| 2 | 131513226 | 131514260 | 5Y-H4K8ac_peak_10403 | 6.77436  | AMER3_ENSG00000178171;AC140481.8_ENSG00000229797  |
| 2 | 131555359 | 131555576 | 5Y-H4K8ac_peak_10404 | 4.642    |                                                   |
| 2 | 131792430 | 131793257 | 5Y-H4K8ac_peak_10405 | 4.95697  |                                                   |
| 2 | 131793456 | 131793779 | 5Y-H4K8ac_peak_10406 | 4.29586  |                                                   |
| 2 | 131850518 | 131850963 | 5Y-H4K8ac_peak_10407 | 8.69112  | FAM168B_ENSG00000152102                           |
| 2 | 132182346 | 132182654 | 5Y-H4K8ac_peak_10408 | 8.43511  | GNAQP1_ENSG00000214077                            |
| 2 | 132249815 | 132250248 | 5Y-H4K8ac_peak_10409 | 6.37023  | MZT2A_ENSG00000173272;AC093838.4_ENSG00000152117  |
| 2 | 132439402 | 132439885 | 5Y-H4K8ac_peak_10410 | 9.38276  |                                                   |
| 2 | 133015229 | 133015622 | 5Y-H4K8ac_peak_10411 | 7.11863  | ANKRD30BL_ENSG00000163046;MIR663B_ENSG00000221288 |
| 2 | 133062678 | 133062927 | 5Y-H4K8ac_peak_10412 | 8.43511  |                                                   |
| 2 | 133105170 | 133105437 | 5Y-H4K8ac_peak_10413 | 7.20869  | RP11-725P16.2_ENSG00000272769                     |
| 2 | 133110406 | 133111061 | 5Y-H4K8ac_peak_10414 | 20.72418 | FAM201B_ENSG00000230992                           |
| 2 | 134024234 | 134024451 | 5Y-H4K8ac_peak_10415 | 8.33296  |                                                   |
| 2 | 134917807 | 134918049 | 5Y-H4K8ac_peak_10416 | 5.54773  |                                                   |
| 2 | 135117539 | 135117898 | 5Y-H4K8ac_peak_10417 | 6.90749  |                                                   |
| 2 | 135118570 | 135118973 | 5Y-H4K8ac_peak_10418 | 5.64909  |                                                   |
| 2 | 136633592 | 136633855 | 5Y-H4K8ac_peak_10419 | 5.91107  | MCM6_ENSG00000076003                              |
| 2 | 136634221 | 136634477 | 5Y-H4K8ac_peak_10420 | 4.71803  | MCM6_ENSG00000076003                              |
| 2 | 136742733 | 136743047 | 5Y-H4K8ac_peak_10421 | 8.24461  | DARS_ENSG00000115866;AC093391.2_ENSG00000231890   |
| 2 | 136743406 | 136743671 | 5Y-H4K8ac_peak_10422 | 7.41197  | DARS_ENSG00000115866;AC093391.2_ENSG00000231890   |
| 2 | 136824919 | 136825109 | 5Y-H4K8ac_peak_10423 | 5.62788  |                                                   |
| 2 | 137084775 | 137085171 | 5Y-H4K8ac_peak_10424 | 6.79955  |                                                   |
| 2 | 137179348 | 137179553 | 5Y-H4K8ac_peak_10425 | 5.65584  |                                                   |
| 2 | 139148292 | 139148486 | 5Y-H4K8ac_peak_10426 | 4.51076  |                                                   |
| 2 | 139258763 | 139259201 | 5Y-H4K8ac_peak_10427 | 6.08523  | AC097721.2_ENSG00000228043;SPOPL_ENSG00000144228  |
| 2 | 139259578 | 139259786 | 5Y-H4K8ac_peak_10428 | 6.73385  | AC097721.2_ENSG00000228043;SPOPL_ENSG00000144228  |
| 2 | 144694215 | 144694765 | 5Y-H4K8ac_peak_10429 | 9.15007  | AC016910.1_ENSG00000232377                        |
| 2 | 144694979 | 144695174 | 5Y-H4K8ac_peak_10430 | 6.22669  | AC016910.1_ENSG00000232377                        |
| 2 | 145089399 | 145089698 | 5Y-H4K8ac_peak_10431 | 7.38046  | GTDC1_ENSG00000121964                             |
| 2 | 145188833 | 145189029 | 5Y-H4K8ac_peak_10432 | 4.51076  |                                                   |
| 2 | 145274274 | 145274892 | 5Y-H4K8ac_peak_10433 | 9.38203  | ZEB2-AS1_ENSG00000238057                          |
| 2 | 145280379 | 145280574 | 5Y-H4K8ac_peak_10434 | 5.64909  |                                                   |
| 2 | 148601380 | 148601664 | 5Y-H4K8ac_peak_10435 | 4.95697  | ACVR2A_ENSG00000121989                            |
| 2 | 149401857 | 149402120 | 5Y-H4K8ac_peak_10436 | 14.31711 | EPC2_ENSG00000135999                              |
| 2 | 149402352 | 149402745 | 5Y-H4K8ac_peak_10437 | 7.11863  | EPC2_ENSG00000135999                              |
| 2 | 149569626 | 149569949 | 5Y-H4K8ac_peak_10438 | 5.29015  |                                                   |
| 2 | 149645601 | 149646143 | 5Y-H4K8ac_peak_10439 | 11.36844 | AC105402.4_ENSG00000231079                        |
| 2 | 149895132 | 149895419 | 5Y-H4K8ac_peak_10440 | 8.08609  | LYPD6B_ENSG00000150556                            |

|   |           |           |                      |          |                                                                         |
|---|-----------|-----------|----------------------|----------|-------------------------------------------------------------------------|
| 2 | 150186023 | 150186227 | 5Y-H4K8ac_peak_10441 | 7.17184  | LYPD6_ENSG00000187123                                                   |
| 2 | 150443806 | 150444149 | 5Y-H4K8ac_peak_10442 | 9.23159  | MMADHC_ENSG00000168288;AC144449.1_ENSG00000231969                       |
| 2 | 151184262 | 151184497 | 5Y-H4K8ac_peak_10443 | 5.65584  |                                                                         |
| 2 | 152117919 | 152118607 | 5Y-H4K8ac_peak_10444 | 4.77126  | RBM43_ENSG00000184898                                                   |
| 2 | 152146027 | 152146309 | 5Y-H4K8ac_peak_10445 | 5.23083  | NMI_ENSG00000123609                                                     |
| 2 | 152216007 | 152216237 | 5Y-H4K8ac_peak_10446 | 6.77436  |                                                                         |
| 2 | 152216562 | 152216807 | 5Y-H4K8ac_peak_10447 | 6.50117  |                                                                         |
| 2 | 152266625 | 152266815 | 5Y-H4K8ac_peak_10448 | 5.77617  | RIF1_ENSG00000080345                                                    |
| 2 | 153574793 | 153575007 | 5Y-H4K8ac_peak_10449 | 13.35169 | PRPF40A_ENSG00000196504;ARL6IP6_ENSG00000177917                         |
| 2 | 154079063 | 154079412 | 5Y-H4K8ac_peak_10450 | 13.2534  |                                                                         |
| 2 | 157292007 | 157292753 | 5Y-H4K8ac_peak_10451 | 12.87247 | GPD2_ENSG00000115159                                                    |
| 2 | 158858922 | 158859322 | 5Y-H4K8ac_peak_10452 | 6.73047  |                                                                         |
| 2 | 159824488 | 159825024 | 5Y-H4K8ac_peak_10453 | 12.69256 | TANC1_ENSG00000115183                                                   |
| 2 | 160472352 | 160472686 | 5Y-H4K8ac_peak_10454 | 7.59101  | BAZ2B_ENSG00000123636;AC009506.1_ENSG00000224152                        |
| 2 | 160569087 | 160569375 | 5Y-H4K8ac_peak_10455 | 7.03573  | AC009961.3_ENSG00000226266;MARCH7_ENSG00000136536                       |
| 2 | 161099746 | 161099952 | 5Y-H4K8ac_peak_10456 | 5.07473  |                                                                         |
| 2 | 161335664 | 161336102 | 5Y-H4K8ac_peak_10457 | 4.07874  |                                                                         |
| 2 | 162016978 | 162017202 | 5Y-H4K8ac_peak_10458 | 5.65584  | AC009313.1_ENSG00000224467                                              |
| 2 | 162095084 | 162095579 | 5Y-H4K8ac_peak_10459 | 9.51254  |                                                                         |
| 2 | 162165033 | 162165244 | 5Y-H4K8ac_peak_10460 | 7.50148  | PSMD14_ENSG00000115233                                                  |
| 2 | 164592689 | 164593324 | 5Y-H4K8ac_peak_10461 | 16.38263 | FIGN_ENSG00000182263                                                    |
| 2 | 165478168 | 165478590 | 5Y-H4K8ac_peak_10462 | 4.90471  | GRB14_ENSG00000115290                                                   |
| 2 | 165698295 | 165698559 | 5Y-H4K8ac_peak_10463 | 12.72376 |                                                                         |
| 2 | 166619376 | 166619701 | 5Y-H4K8ac_peak_10464 | 8.33296  |                                                                         |
| 2 | 168149107 | 168149303 | 5Y-H4K8ac_peak_10465 | 11.12941 | AC074363.1_ENSG00000228222                                              |
| 2 | 169104221 | 169104478 | 5Y-H4K8ac_peak_10466 | 5.87725  | STK39_ENSG00000198648                                                   |
| 2 | 169312435 | 169312628 | 5Y-H4K8ac_peak_10467 | 11.1169  | CERS6_ENSG00000172292                                                   |
| 2 | 169312896 | 169313513 | 5Y-H4K8ac_peak_10468 | 7.30348  | CERS6_ENSG00000172292                                                   |
| 2 | 170335574 | 170335866 | 5Y-H4K8ac_peak_10469 | 4.95697  | BBS5_ENSG00000163093;RP11-724O16.1_ENSG00000251569                      |
| 2 | 170430008 | 170430207 | 5Y-H4K8ac_peak_10470 | 6.34046  | FASTKD1_ENSG00000138399                                                 |
| 2 | 170440889 | 170441273 | 5Y-H4K8ac_peak_10471 | 10.1994  | PPIG_ENSG00000138398                                                    |
| 2 | 170551078 | 170551388 | 5Y-H4K8ac_peak_10472 | 7.38046  | CCDC173_ENSG00000154479;PHOSPHO2_ENSG00000144362;KLHL23_ENSG00000213160 |
| 2 | 170573003 | 170573806 | 5Y-H4K8ac_peak_10473 | 19.18935 |                                                                         |
| 2 | 170574145 | 170574444 | 5Y-H4K8ac_peak_10474 | 7.58806  |                                                                         |
| 2 | 170590393 | 170590905 | 5Y-H4K8ac_peak_10475 | 7.64648  |                                                                         |
| 2 | 171785810 | 171786247 | 5Y-H4K8ac_peak_10476 | 7.30348  | GORASP2_ENSG00000115806                                                 |
| 2 | 171829865 | 171830774 | 5Y-H4K8ac_peak_10477 | 18.10232 |                                                                         |
| 2 | 172290826 | 172291104 | 5Y-H4K8ac_peak_10478 | 13.27281 | METTL8_ENSG00000123600;DCAF17_ENSG00000115827                           |
| 2 | 172379457 | 172380299 | 5Y-H4K8ac_peak_10479 | 6.77436  | CYBRD1_ENSG00000071967                                                  |
| 2 | 172778199 | 172778420 | 5Y-H4K8ac_peak_10480 | 4.84727  | HAT1_ENSG00000128708                                                    |
| 2 | 172779170 | 172779390 | 5Y-H4K8ac_peak_10481 | 4.95697  | HAT1_ENSG00000128708                                                    |
| 2 | 173099520 | 173099780 | 5Y-H4K8ac_peak_10482 | 4.36976  |                                                                         |
| 2 | 173941235 | 173941487 | 5Y-H4K8ac_peak_10483 | 5.65584  |                                                                         |
| 2 | 174219287 | 174219877 | 5Y-H4K8ac_peak_10484 | 6.08523  | CDCA7_ENSG00000144354                                                   |
| 2 | 174313738 | 174314058 | 5Y-H4K8ac_peak_10485 | 13.2534  |                                                                         |
| 2 | 174829723 | 174829987 | 5Y-H4K8ac_peak_10486 | 7.11863  | SP3_ENSG00000172845                                                     |



|   |            |            |                      |          |                                                                              |
|---|------------|------------|----------------------|----------|------------------------------------------------------------------------------|
| 2 | 174830311  | 174830562  | 5Y-H4K8ac_peak_10487 | 11.22005 | SP3_ENSG00000172845                                                          |
| 2 | 174904417  | 174904660  | 5Y-H4K8ac_peak_10488 | 9.32595  |                                                                              |
| 2 | 175113574  | 175113806  | 5Y-H4K8ac_peak_10489 | 9.00954  | OLA1_ENSG00000138430                                                         |
| 2 | 175527822  | 175528056  | 5Y-H4K8ac_peak_10490 | 7.64675  |                                                                              |
| 2 | 175546979  | 175548028  | 5Y-H4K8ac_peak_10491 | 14.99673 | WIPF1_ENSG00000115935                                                        |
| 2 | 175636951  | 175637221  | 5Y-H4K8ac_peak_10492 | 4.9885   |                                                                              |
| 2 | 175652240  | 175652485  | 5Y-H4K8ac_peak_10493 | 9.38203  | AC018890.4_ENSG00000237104                                                   |
| 2 | 175869447  | 175870027  | 5Y-H4K8ac_peak_10494 | 14.39608 | CHN1_ENSG00000128656                                                         |
| 2 | 176032584  | 176032789  | 5Y-H4K8ac_peak_10495 | 5.85188  | ATF2_ENSG00000115966;MIR933_ENSG00000215973;AC096649.2_ENSG00000229750       |
| 2 | 176756553  | 176756756  | 5Y-H4K8ac_peak_10496 | 6.50117  |                                                                              |
| 2 | 176866691  | 176866914  | 5Y-H4K8ac_peak_10497 | 8.43511  | KIAA1715_ENSG00000144320                                                     |
| 2 | 176986514  | 176986770  | 5Y-H4K8ac_peak_10498 | 7.50044  | HOXD9_ENSG00000128709                                                        |
| 2 | 176987533  | 176987875  | 5Y-H4K8ac_peak_10499 | 8.73985  | HOXD9_ENSG00000128709                                                        |
| 2 | 176994165  | 176994411  | 5Y-H4K8ac_peak_10500 | 7.09658  | HOXD8_ENSG00000175879                                                        |
| 2 | 177001266  | 177001851  | 5Y-H4K8ac_peak_10501 | 9.36633  | HOXD-AS2_ENSG00000237380;HOXD3_ENSG00000128652                               |
| 2 | 177021119  | 177021399  | 5Y-H4K8ac_peak_10502 | 6.54441  |                                                                              |
| 2 | 177021840  | 177022628  | 5Y-H4K8ac_peak_10503 | 12.57157 |                                                                              |
| 2 | 177053030  | 177053355  | 5Y-H4K8ac_peak_10504 | 9.96543  | HOXD-AS1_ENSG00000224189;HOXD1_ENSG00000128645                               |
| 2 | 177053687  | 177054095  | 5Y-H4K8ac_peak_10505 | 6.37023  | HOXD-AS1_ENSG00000224189;HOXD1_ENSG00000128645                               |
| 2 | 177133968  | 177134575  | 5Y-H4K8ac_peak_10506 | 9.51254  | MTX2_ENSG00000128654                                                         |
| 2 | 177502319  | 177502843  | 5Y-H4K8ac_peak_10507 | 8.24461  | LINC01116_ENSG00000163364;LINC01117_ENSG00000224577                          |
| 2 | 178077483  | 178077903  | 5Y-H4K8ac_peak_10508 | 12.21176 | AC079305.8_ENSG00000229337;HNRNPA3_ENSG00000170144;MIR4444-2_ENSG00000263721 |
| 2 | 178128618  | 178129369  | 5Y-H4K8ac_peak_10509 | 5.12488  | AC079305.10_ENSG00000222043                                                  |
| 2 | 178256891  | 178257841  | 5Y-H4K8ac_peak_10510 | 14.2053  | NFE2L2_ENSG00000116044;AC074286.1_ENSG00000213963;AGPS_ENSG00000018510       |
| 2 | 178417176  | 178417875  | 5Y-H4K8ac_peak_10511 | 9.02242  | TTC30B_ENSG00000196659                                                       |
| 2 | 178483275  | 178483706  | 5Y-H4K8ac_peak_10512 | 11.99586 | TTC30A_ENSG00000197557                                                       |
| 2 | 179058715  | 179058950  | 5Y-H4K8ac_peak_10513 | 8.21582  | OSBPL6_ENSG00000079156                                                       |
| 2 | 179277976  | 179278232  | 5Y-H4K8ac_peak_10514 | 10.79063 | AC009948.5_ENSG00000223960                                                   |
| 2 | 179315678  | 179315878  | 5Y-H4K8ac_peak_10515 | 7.31102  | PRKRA_ENSG00000180228;DFNB59_ENSG00000204311                                 |
| 2 | 179316143  | 179316859  | 5Y-H4K8ac_peak_10516 | 15.06486 | PRKRA_ENSG00000180228;DFNB59_ENSG00000204311                                 |
| 2 | 180128947  | 180129206  | 5Y-H4K8ac_peak_10517 | 5.35202  | SESTD1_ENSG00000187231                                                       |
| 2 | 180725652  | 180726025  | 5Y-H4K8ac_peak_10518 | 10.5157  | ZNF385B_ENSG00000144331;MIR1258_ENSG00000221240                              |
| 2 | 180871548  | 180871776  | 5Y-H4K8ac_peak_10519 | 6.77436  | CWC22_ENSG00000163510                                                        |
| 2 | 181844791  | 181845447  | 5Y-H4K8ac_peak_10520 | 13.92877 | AC104076.3_ENSG00000236153                                                   |
| 2 | 181845840  | 181846067  | 5Y-H4K8ac_peak_10521 | 8.33296  |                                                                              |
| 2 | 182321712  | 182322650  | 5Y-H4K8ac_peak_10522 | 13.63503 | ITGA4_ENSG00000115232                                                        |
| 2 | 182545739  | 182545931  | 5Y-H4K8ac_peak_10523 | 5.8635   | CERKL_ENSG00000188452;NEUROD1_ENSG00000162992                                |
| 2 | 182548312  | 182549151  | 5Y-H4K8ac_peak_10524 | 17.10724 | AC013733.3_ENSG00000234595                                                   |
| 2 | 1833580865 | 1833581201 | 5Y-H4K8ac_peak_10525 | 4.70501  | DNAJC10_ENSG00000077232                                                      |
| 2 | 183902375  | 183903055  | 5Y-H4K8ac_peak_10526 | 9.23159  | NCKAP1_ENSG00000061676                                                       |
| 2 | 183989210  | 183989527  | 5Y-H4K8ac_peak_10527 | 9.51254  |                                                                              |
| 2 | 187350553  | 187350776  | 5Y-H4K8ac_peak_10528 | 9.38203  | ZC3H15_ENSG00000065548                                                       |
| 2 | 187351026  | 187351399  | 5Y-H4K8ac_peak_10529 | 5.40331  | ZC3H15_ENSG00000065548                                                       |
| 2 | 187454284  | 187455185  | 5Y-H4K8ac_peak_10530 | 15.06486 | ITGAV_ENSG00000138448                                                        |
| 2 | 187558068  | 187558383  | 5Y-H4K8ac_peak_10531 | 4.50834  | FAM171B_ENSG00000144369                                                      |
| 2 | 188859070  | 188859431  | 5Y-H4K8ac_peak_10532 | 6.1654   |                                                                              |

|   |           |           |                      |          |                                                     |
|---|-----------|-----------|----------------------|----------|-----------------------------------------------------|
| 2 | 190305371 | 190305686 | 5Y-H4K8ac_peak_10533 | 7.31102  | WDR75_ENSG00000115368                               |
| 2 | 190445620 | 190445933 | 5Y-H4K8ac_peak_10534 | 13.85283 |                                                     |
| 2 | 190539278 | 190539581 | 5Y-H4K8ac_peak_10535 | 5.23083  | ANKAR_ENSG00000151687                               |
| 2 | 190627094 | 190627403 | 5Y-H4K8ac_peak_10536 | 5.16353  | OSGEPL1_ENSG00000128694;OSGEPL1-AS1_ENSG00000253559 |
| 2 | 191045030 | 191045317 | 5Y-H4K8ac_peak_10537 | 4.15658  |                                                     |
| 2 | 191208263 | 191208463 | 5Y-H4K8ac_peak_10538 | 7.59101  | HIBCH_ENSG00000198130;INPP1_ENSG00000151689         |
| 2 | 191272586 | 191273009 | 5Y-H4K8ac_peak_10539 | 14.31711 | MFSD6_ENSG00000151690                               |
| 2 | 191399245 | 191399779 | 5Y-H4K8ac_peak_10540 | 9.15007  | TMEM194B_ENSG00000189362;AC093388.3_ENSG00000233654 |
| 2 | 191745067 | 191745267 | 5Y-H4K8ac_peak_10541 | 5.65584  |                                                     |
| 2 | 191746240 | 191746665 | 5Y-H4K8ac_peak_10542 | 9.78792  | AC005540.3_ENSG00000235852                          |
| 2 | 191885865 | 191886132 | 5Y-H4K8ac_peak_10543 | 6.72926  | STAT1_ENSG00000115415;AC067945.4_ENSG00000231858    |
| 2 | 192344884 | 192345248 | 5Y-H4K8ac_peak_10544 | 4.79658  |                                                     |
| 2 | 192365814 | 192366109 | 5Y-H4K8ac_peak_10545 | 6.43775  |                                                     |
| 2 | 195937671 | 195938019 | 5Y-H4K8ac_peak_10546 | 8.33296  |                                                     |
| 2 | 197457818 | 197458380 | 5Y-H4K8ac_peak_10547 | 14.31711 | HECW2_ENSG00000138411                               |
| 2 | 197663889 | 197664301 | 5Y-H4K8ac_peak_10548 | 5.65584  | GTF3C3_ENSG00000119041                              |
| 2 | 197664675 | 197665192 | 5Y-H4K8ac_peak_10549 | 11.57334 | GTF3C3_ENSG00000119041                              |
| 2 | 197915844 | 197916266 | 5Y-H4K8ac_peak_10550 | 9.74189  |                                                     |
| 2 | 197917604 | 197917887 | 5Y-H4K8ac_peak_10551 | 14.36519 |                                                     |
| 2 | 197955920 | 197956248 | 5Y-H4K8ac_peak_10552 | 8.33296  |                                                     |
| 2 | 197958833 | 197959023 | 5Y-H4K8ac_peak_10553 | 5.65584  |                                                     |
| 2 | 198070070 | 198070261 | 5Y-H4K8ac_peak_10554 | 7.3889   |                                                     |
| 2 | 198144475 | 198144782 | 5Y-H4K8ac_peak_10555 | 6.34046  |                                                     |
| 2 | 198224682 | 198225343 | 5Y-H4K8ac_peak_10556 | 11.19336 |                                                     |
| 2 | 198235497 | 198235743 | 5Y-H4K8ac_peak_10557 | 8.33296  |                                                     |
| 2 | 198243509 | 198243936 | 5Y-H4K8ac_peak_10558 | 7.38046  |                                                     |
| 2 | 198299368 | 198299681 | 5Y-H4K8ac_peak_10559 | 16.38263 | SF3B1_ENSG00000115524                               |
| 2 | 198380788 | 198381130 | 5Y-H4K8ac_peak_10560 | 8.35139  | HSPD1_ENSG00000144381;MOB4_ENSG00000115540          |
| 2 | 200776135 | 200776393 | 5Y-H4K8ac_peak_10561 | 6.08523  | AC073043.1_ENSG00000232732;C2orf69_ENSG00000178074  |
| 2 | 200820292 | 200820896 | 5Y-H4K8ac_peak_10562 | 8.69112  | TYW5_ENSG00000162971;C2orf47_ENSG00000162972        |
| 2 | 201172039 | 201172378 | 5Y-H4K8ac_peak_10563 | 5.64909  |                                                     |
| 2 | 201374364 | 201374807 | 5Y-H4K8ac_peak_10564 | 7.3889   | SGOL2_ENSG00000163535                               |
| 2 | 201375004 | 201375480 | 5Y-H4K8ac_peak_10565 | 4.50834  | SGOL2_ENSG00000163535                               |
| 2 | 201728803 | 201729279 | 5Y-H4K8ac_peak_10566 | 11.19336 | CLK1_ENSG0000013441;Y_RNA_ENSG00000252759           |
| 2 | 201729671 | 201729946 | 5Y-H4K8ac_peak_10567 | 5.65584  | CLK1_ENSG0000013441                                 |
| 2 | 201754188 | 201754509 | 5Y-H4K8ac_peak_10568 | 4.29586  | PPIL3_ENSG00000240344;NIF3L1_ENSG00000196290        |
| 2 | 201980578 | 201981728 | 5Y-H4K8ac_peak_10569 | 8.35139  | CFLAR_ENSG00000003402                               |
| 2 | 201982566 | 201982889 | 5Y-H4K8ac_peak_10570 | 4.84727  |                                                     |
| 2 | 202009622 | 202009912 | 5Y-H4K8ac_peak_10571 | 6.83519  |                                                     |
| 2 | 202298560 | 202298805 | 5Y-H4K8ac_peak_10572 | 6.46053  |                                                     |
| 2 | 202507582 | 202507981 | 5Y-H4K8ac_peak_10573 | 10.60083 | TMEM237_ENSG00000155755                             |
| 2 | 202508805 | 202509081 | 5Y-H4K8ac_peak_10574 | 7.11262  | TMEM237_ENSG00000155755                             |
| 2 | 202645355 | 202645582 | 5Y-H4K8ac_peak_10575 | 11.19336 | ALS2_ENSG00000003393                                |
| 2 | 202831419 | 202831760 | 5Y-H4K8ac_peak_10576 | 6.47245  |                                                     |
| 2 | 202832147 | 202832634 | 5Y-H4K8ac_peak_10577 | 10.90365 |                                                     |
| 2 | 202862440 | 202862639 | 5Y-H4K8ac_peak_10578 | 7.37325  |                                                     |

|   |           |           |                      |          |                                                                               |
|---|-----------|-----------|----------------------|----------|-------------------------------------------------------------------------------|
| 2 | 202881386 | 202881610 | 5Y-H4K8ac_peak_10579 | 6.55906  |                                                                               |
| 2 | 202884218 | 202884415 | 5Y-H4K8ac_peak_10580 | 5.26353  |                                                                               |
| 2 | 202897594 | 202897875 | 5Y-H4K8ac_peak_10581 | 7.46096  | RP11-107N15.1_ENSG00000273209                                                 |
| 2 | 203103811 | 203104209 | 5Y-H4K8ac_peak_10582 | 8.35139  | SUMO1_ENSG00000116030;AC079354.2_ENSG00000267889                              |
| 2 | 203130038 | 203130283 | 5Y-H4K8ac_peak_10583 | 7.11863  | NOP58_ENSG00000055044                                                         |
| 2 | 203240437 | 203240665 | 5Y-H4K8ac_peak_10584 | 5.87725  | RP11-686O6.2_ENSG00000273456;BMPR2_ENSG00000204217                            |
| 2 | 203453605 | 203454035 | 5Y-H4K8ac_peak_10585 | 9.38276  |                                                                               |
| 2 | 203499980 | 203500420 | 5Y-H4K8ac_peak_10586 | 7.01266  | FAM117B_ENSG00000138439                                                       |
| 2 | 203736278 | 203736536 | 5Y-H4K8ac_peak_10587 | 8.33296  | ICA1L_ENSG00000163596                                                         |
| 2 | 204103711 | 204104172 | 5Y-H4K8ac_peak_10588 | 18.09952 | CYP20A1_ENSG00000119004                                                       |
| 2 | 204191641 | 204191831 | 5Y-H4K8ac_peak_10589 | 4.29586  |                                                                               |
| 2 | 204192476 | 204192708 | 5Y-H4K8ac_peak_10590 | 7.59101  | ABI2_ENSG00000138443                                                          |
| 2 | 204193296 | 204193497 | 5Y-H4K8ac_peak_10591 | 7.04637  | ABI2_ENSG00000138443;RP11-363J17.1_ENSG00000256458                            |
| 2 | 204399421 | 204399897 | 5Y-H4K8ac_peak_10592 | 7.59101  | RAPH1_ENSG00000173166                                                         |
| 2 | 204650504 | 204650718 | 5Y-H4K8ac_peak_10593 | 5.28616  |                                                                               |
| 2 | 205409777 | 205410159 | 5Y-H4K8ac_peak_10594 | 7.01266  | PARD3B_ENSG00000116117                                                        |
| 2 | 205410356 | 205410971 | 5Y-H4K8ac_peak_10595 | 9.63153  | PARD3B_ENSG00000116117                                                        |
| 2 | 206594750 | 206594998 | 5Y-H4K8ac_peak_10596 | 12.49811 |                                                                               |
| 2 | 206949874 | 206950802 | 5Y-H4K8ac_peak_10597 | 14.31711 | INO80D_ENSG00000114933;AC007383.3_ENSG00000227946                             |
| 2 | 207139807 | 207140000 | 5Y-H4K8ac_peak_10598 | 6.50117  | ZDBF2_ENSG00000204186                                                         |
| 2 | 208031105 | 208031578 | 5Y-H4K8ac_peak_10599 | 29.7739  | KLF7_ENSG00000118263                                                          |
| 2 | 208277932 | 208278133 | 5Y-H4K8ac_peak_10600 | 4.9603   |                                                                               |
| 2 | 208489649 | 208489965 | 5Y-H4K8ac_peak_10601 | 6.34245  | METTL21A_ENSG00000144401                                                      |
| 2 | 208490280 | 208491353 | 5Y-H4K8ac_peak_10602 | 4.15658  | METTL21A_ENSG00000144401                                                      |
| 2 | 208575221 | 208575442 | 5Y-H4K8ac_peak_10603 | 6.72926  | CCNYL1_ENSG00000163249                                                        |
| 2 | 208889981 | 208890221 | 5Y-H4K8ac_peak_10604 | 10.1994  | PLEKHM3_ENSG00000178385                                                       |
| 2 | 208994108 | 208994311 | 5Y-H4K8ac_peak_10605 | 8.17203  | CRYGC_ENSG00000163254                                                         |
| 2 | 209225011 | 209225215 | 5Y-H4K8ac_peak_10606 | 8.2913   | AC012362.3_ENSG00000213081;PTH2R_ENSG00000144407                              |
| 2 | 210288291 | 210288535 | 5Y-H4K8ac_peak_10607 | 8.35139  | MAP2_ENSG00000078018                                                          |
| 2 | 210636374 | 210636994 | 5Y-H4K8ac_peak_10608 | 7.59101  | UNC80_ENSG00000144406                                                         |
| 2 | 210866801 | 210867020 | 5Y-H4K8ac_peak_10609 | 5.59843  | RPE_ENSG00000197713                                                           |
| 2 | 210867468 | 210867675 | 5Y-H4K8ac_peak_10610 | 8.47164  | RPE_ENSG00000197713                                                           |
| 2 | 211035645 | 211035931 | 5Y-H4K8ac_peak_10611 | 14.99673 | KANSL1L_ENSG00000144445;AC006994.3_ENSG00000263530;AC006994.2_ENSG00000231294 |
| 2 | 216176017 | 216176585 | 5Y-H4K8ac_peak_10612 | 10.27264 | ATIC_ENSG00000138363                                                          |
| 2 | 216176844 | 216177169 | 5Y-H4K8ac_peak_10613 | 10.19948 | ATIC_ENSG00000138363                                                          |
| 2 | 216946201 | 216946482 | 5Y-H4K8ac_peak_10614 | 10.55504 | TMEM169_ENSG00000163449                                                       |
| 2 | 216979775 | 216980194 | 5Y-H4K8ac_peak_10615 | 5.87382  |                                                                               |
| 2 | 217068116 | 217068308 | 5Y-H4K8ac_peak_10616 | 8.33296  |                                                                               |
| 2 | 217083637 | 217083925 | 5Y-H4K8ac_peak_10617 | 5.40331  |                                                                               |
| 2 | 217144711 | 217145020 | 5Y-H4K8ac_peak_10618 | 8.35138  |                                                                               |
| 2 | 217236073 | 217236446 | 5Y-H4K8ac_peak_10619 | 4.50834  | MARCH4_ENSG00000144583                                                        |
| 2 | 217236987 | 217237209 | 5Y-H4K8ac_peak_10620 | 10.11191 | MARCH4_ENSG00000144583                                                        |
| 2 | 217398384 | 217398574 | 5Y-H4K8ac_peak_10621 | 9.30505  |                                                                               |
| 2 | 217459958 | 217460571 | 5Y-H4K8ac_peak_10622 | 6.46053  |                                                                               |
| 2 | 217483871 | 217484099 | 5Y-H4K8ac_peak_10623 | 7.90236  |                                                                               |
| 2 | 217484812 | 217485271 | 5Y-H4K8ac_peak_10624 | 12.52413 |                                                                               |

|   |           |           |                      |          |                                                      |
|---|-----------|-----------|----------------------|----------|------------------------------------------------------|
| 2 | 217497672 | 217498003 | 5Y-H4K8ac_peak_10625 | 9.30505  | IGFBP2_ENSG00000115457                               |
| 2 | 217500572 | 217501013 | 5Y-H4K8ac_peak_10626 | 8.31252  |                                                      |
| 2 | 217558996 | 217559752 | 5Y-H4K8ac_peak_10627 | 5.89113  | IGFBP5_ENSG00000115461;AC007563.5_ENSG00000236886    |
| 2 | 217656645 | 217656907 | 5Y-H4K8ac_peak_10628 | 5.64909  |                                                      |
| 2 | 218593992 | 218594262 | 5Y-H4K8ac_peak_10629 | 6.43775  |                                                      |
| 2 | 218672625 | 218672838 | 5Y-H4K8ac_peak_10630 | 6.14981  |                                                      |
| 2 | 218786062 | 218786312 | 5Y-H4K8ac_peak_10631 | 6.1654   |                                                      |
| 2 | 218798312 | 218798582 | 5Y-H4K8ac_peak_10632 | 12.21176 |                                                      |
| 2 | 218802626 | 218802835 | 5Y-H4K8ac_peak_10633 | 5.65584  |                                                      |
| 2 | 218869746 | 218870041 | 5Y-H4K8ac_peak_10634 | 6.06162  |                                                      |
| 2 | 218874456 | 218874659 | 5Y-H4K8ac_peak_10635 | 7.30348  |                                                      |
| 2 | 218875186 | 218875467 | 5Y-H4K8ac_peak_10636 | 5.91107  |                                                      |
| 2 | 218881655 | 218882346 | 5Y-H4K8ac_peak_10637 | 10.11191 |                                                      |
| 2 | 218900127 | 218900349 | 5Y-H4K8ac_peak_10638 | 5.74859  | RUFY4_ENSG00000188282                                |
| 2 | 219081387 | 219081678 | 5Y-H4K8ac_peak_10639 | 4.84727  | ARPC2_ENSG00000163466                                |
| 2 | 219124353 | 219124585 | 5Y-H4K8ac_peak_10640 | 5.64909  | GPBAR1_ENSG00000179921                               |
| 2 | 219135391 | 219135634 | 5Y-H4K8ac_peak_10641 | 9.7353   | AAAMP_ENSG00000127837;PNKD_ENSG00000127838           |
| 2 | 219146788 | 219147622 | 5Y-H4K8ac_peak_10642 | 11.93705 |                                                      |
| 2 | 219232373 | 219232941 | 5Y-H4K8ac_peak_10643 | 10.35586 | AC021016.6_ENSG00000225062                           |
| 2 | 219263513 | 219263982 | 5Y-H4K8ac_peak_10644 | 6.46606  | CTDSP1_ENSG00000144579;RP11-378A13.2_ENSG00000273361 |
| 2 | 219271476 | 219272319 | 5Y-H4K8ac_peak_10645 | 7.01266  |                                                      |
| 2 | 219432743 | 219432995 | 5Y-H4K8ac_peak_10646 | 11.08752 | USP37_ENSG00000135913;RQCD1_ENSG00000144580          |
| 2 | 219433356 | 219434038 | 5Y-H4K8ac_peak_10647 | 9.7353   | USP37_ENSG00000135913;RQCD1_ENSG00000144580          |
| 2 | 219472906 | 219473098 | 5Y-H4K8ac_peak_10648 | 5.56894  | PLCD4_ENSG00000115556                                |
| 2 | 219537154 | 219537387 | 5Y-H4K8ac_peak_10649 | 6.37023  | RNF25_ENSG00000163481;STK36_ENSG00000163482          |
| 2 | 219722879 | 219723205 | 5Y-H4K8ac_peak_10650 | 4.95697  |                                                      |
| 2 | 219724662 | 219725262 | 5Y-H4K8ac_peak_10651 | 7.38046  | WNT6_ENSG00000115596                                 |
| 2 | 219744796 | 219745091 | 5Y-H4K8ac_peak_10652 | 7.92287  | WNT10A_ENSG00000135925                               |
| 2 | 219757316 | 219758059 | 5Y-H4K8ac_peak_10653 | 14.99673 |                                                      |
| 2 | 219773566 | 219774131 | 5Y-H4K8ac_peak_10654 | 10.19948 |                                                      |
| 2 | 219823774 | 219824137 | 5Y-H4K8ac_peak_10655 | 8.16382  | CDK5R2_ENSG00000171450                               |
| 2 | 219827391 | 219827765 | 5Y-H4K8ac_peak_10656 | 10.58128 | AC097468.7_ENSG00000235024                           |
| 2 | 219848833 | 219850034 | 5Y-H4K8ac_peak_10657 | 11.86504 | FEV_ENSG00000163497                                  |
| 2 | 219850919 | 219851148 | 5Y-H4K8ac_peak_10658 | 7.58806  | FEV_ENSG00000163497                                  |
| 2 | 219863138 | 219863595 | 5Y-H4K8ac_peak_10659 | 6.29888  |                                                      |
| 2 | 219863873 | 219864330 | 5Y-H4K8ac_peak_10660 | 8.69112  |                                                      |
| 2 | 219865144 | 219865579 | 5Y-H4K8ac_peak_10661 | 6.75871  | MIR375_ENSG00000198973                               |
| 2 | 219866473 | 219866667 | 5Y-H4K8ac_peak_10662 | 7.09658  | MIR375_ENSG00000198973;AC097468.4_ENSG00000224090    |
| 2 | 219867350 | 219867901 | 5Y-H4K8ac_peak_10663 | 9.32595  | MIR375_ENSG00000198973;AC097468.4_ENSG00000224090    |
| 2 | 219884115 | 219884550 | 5Y-H4K8ac_peak_10664 | 4.8509   |                                                      |
| 2 | 219885950 | 219886150 | 5Y-H4K8ac_peak_10665 | 8.56781  |                                                      |
| 2 | 219886423 | 219886659 | 5Y-H4K8ac_peak_10666 | 7.70703  |                                                      |
| 2 | 220071018 | 220071356 | 5Y-H4K8ac_peak_10667 | 6.22669  |                                                      |
| 2 | 220083211 | 220083623 | 5Y-H4K8ac_peak_10668 | 10.1994  | ABCB6_ENSG00000115657                                |
| 2 | 220093740 | 220093997 | 5Y-H4K8ac_peak_10669 | 6.98118  | ATG9A_ENSG00000198925;ANKZF1_ENSG00000163516         |
| 2 | 220109901 | 220110091 | 5Y-H4K8ac_peak_10670 | 10.31072 | STK16_ENSG00000115661                                |

|   |           |           |                      |          |                                                         |
|---|-----------|-----------|----------------------|----------|---------------------------------------------------------|
| 2 | 220110370 | 220110580 | 5Y-H4K8ac_peak_10671 | 3.93392  | STK16_ENSG00000115661                                   |
| 2 | 220134334 | 220134624 | 5Y-H4K8ac_peak_10672 | 8.19789  |                                                         |
| 2 | 220142615 | 220142905 | 5Y-H4K8ac_peak_10673 | 6.37023  | TUBA4A_ENSG00000127824                                  |
| 2 | 220159206 | 220159636 | 5Y-H4K8ac_peak_10674 | 11.22005 | MIR153-1_ENSG00000207647                                |
| 2 | 220306200 | 220307082 | 5Y-H4K8ac_peak_10675 | 10.11191 |                                                         |
| 2 | 220318122 | 220318334 | 5Y-H4K8ac_peak_10676 | 5.3989   |                                                         |
| 2 | 220362469 | 220363078 | 5Y-H4K8ac_peak_10677 | 6.37023  | RP11-316O14.1_ENSG00000268603;GMPPA_ENSG00000144591     |
| 2 | 220369721 | 220369914 | 5Y-H4K8ac_peak_10678 | 4.75045  |                                                         |
| 2 | 220370660 | 220372115 | 5Y-H4K8ac_peak_10679 | 13.86751 |                                                         |
| 2 | 220373162 | 220373434 | 5Y-H4K8ac_peak_10680 | 11.86504 |                                                         |
| 2 | 220373746 | 220374062 | 5Y-H4K8ac_peak_10681 | 9.21468  |                                                         |
| 2 | 220374669 | 220374903 | 5Y-H4K8ac_peak_10682 | 7.79037  |                                                         |
| 2 | 220375116 | 220375601 | 5Y-H4K8ac_peak_10683 | 8.33212  |                                                         |
| 2 | 220377421 | 220377810 | 5Y-H4K8ac_peak_10684 | 8.73985  |                                                         |
| 2 | 220378723 | 220379416 | 5Y-H4K8ac_peak_10685 | 9.01738  | ASIC4_ENSG00000072182                                   |
| 2 | 220386306 | 220386570 | 5Y-H4K8ac_peak_10686 | 7.38046  |                                                         |
| 2 | 220387389 | 220387587 | 5Y-H4K8ac_peak_10687 | 5.44849  |                                                         |
| 2 | 220394685 | 220394958 | 5Y-H4K8ac_peak_10688 | 10.6196  |                                                         |
| 2 | 220408092 | 220408412 | 5Y-H4K8ac_peak_10689 | 6.43775  | CHPF_ENSG00000123989;TMEM198_ENSG00000188760            |
| 2 | 220435378 | 220435825 | 5Y-H4K8ac_peak_10690 | 4.50834  | OBSL1_ENSG00000124006                                   |
| 2 | 220436376 | 220436651 | 5Y-H4K8ac_peak_10691 | 10.1994  | OBSL1_ENSG00000124006                                   |
| 2 | 220437018 | 220437353 | 5Y-H4K8ac_peak_10692 | 9.80622  | OBSL1_ENSG00000124006                                   |
| 2 | 220476389 | 220476580 | 5Y-H4K8ac_peak_10693 | 4.40812  |                                                         |
| 2 | 220491809 | 220493092 | 5Y-H4K8ac_peak_10694 | 13.2534  | AC009955.8_ENSG00000228973;SLC4A3_ENSG00000114923       |
| 2 | 223183636 | 223183996 | 5Y-H4K8ac_peak_10695 | 7.76232  | RP11-384O8.1_ENSG00000267034;AC010980.2_ENSG00000237732 |
| 2 | 223536115 | 223536610 | 5Y-H4K8ac_peak_10696 | 8.73985  | MOGAT1_ENSG00000124003                                  |
| 2 | 223615648 | 223615991 | 5Y-H4K8ac_peak_10697 | 7.31815  |                                                         |
| 2 | 224478133 | 224478374 | 5Y-H4K8ac_peak_10698 | 5.40331  |                                                         |
| 2 | 224702487 | 224702693 | 5Y-H4K8ac_peak_10699 | 5.8635   | AP1S3_ENSG00000152056                                   |
| 2 | 224809659 | 224809927 | 5Y-H4K8ac_peak_10700 | 5.5192   | WDFY1_ENSG00000085449                                   |
| 2 | 224822245 | 224822547 | 5Y-H4K8ac_peak_10701 | 6.96612  | MRPL44_ENSG00000135900                                  |
| 2 | 225307117 | 225307575 | 5Y-H4K8ac_peak_10702 | 6.34046  |                                                         |
| 2 | 225906692 | 225906949 | 5Y-H4K8ac_peak_10703 | 5.40331  | DOCK10_ENSG00000135905                                  |
| 2 | 227655952 | 227656178 | 5Y-H4K8ac_peak_10704 | 7.97699  |                                                         |
| 2 | 227700259 | 227700564 | 5Y-H4K8ac_peak_10705 | 8.43511  | RHBDD1_ENSG00000144468                                  |
| 2 | 227700809 | 227701127 | 5Y-H4K8ac_peak_10706 | 8.2913   | RHBDD1_ENSG00000144468                                  |
| 2 | 228189998 | 228190420 | 5Y-H4K8ac_peak_10707 | 7.89273  | AC097662.2_ENSG00000236432;MFF_ENSG00000168958          |
| 2 | 230786297 | 230786538 | 5Y-H4K8ac_peak_10708 | 11.09973 | FBXO36_ENSG00000153832                                  |
| 2 | 230786869 | 230787171 | 5Y-H4K8ac_peak_10709 | 9.60627  | TRIP12_ENSG00000153827;FBXO36_ENSG00000153832           |
| 2 | 230845627 | 230845853 | 5Y-H4K8ac_peak_10710 | 6.34046  |                                                         |
| 2 | 230932603 | 230932910 | 5Y-H4K8ac_peak_10711 | 7.50148  | SLC16A14_ENSG00000163053                                |
| 2 | 230933102 | 230933507 | 5Y-H4K8ac_peak_10712 | 6.77436  | SLC16A14_ENSG00000163053                                |
| 2 | 231729109 | 231729367 | 5Y-H4K8ac_peak_10713 | 5.16687  | ITM2C_ENSG00000135916                                   |
| 2 | 231733425 | 231733678 | 5Y-H4K8ac_peak_10714 | 9.51254  |                                                         |
| 2 | 231734681 | 231735415 | 5Y-H4K8ac_peak_10715 | 9.00954  |                                                         |
| 2 | 231736196 | 231736906 | 5Y-H4K8ac_peak_10716 | 9.01738  |                                                         |

|   |           |           |                      |          |                                                                      |
|---|-----------|-----------|----------------------|----------|----------------------------------------------------------------------|
| 2 | 231917457 | 231917651 | 5Y-H4K8ac_peak_10717 | 10.15788 | RP11-223I10.1_ENSG00000261829                                        |
| 2 | 231918046 | 231918354 | 5Y-H4K8ac_peak_10718 | 5.23083  |                                                                      |
| 2 | 231921417 | 231921910 | 5Y-H4K8ac_peak_10719 | 7.50148  | PSMD1_ENSG00000173692                                                |
| 2 | 232057161 | 232057351 | 5Y-H4K8ac_peak_10720 | 7.53429  |                                                                      |
| 2 | 232224684 | 232224961 | 5Y-H4K8ac_peak_10721 | 5.64909  |                                                                      |
| 2 | 232229417 | 232230226 | 5Y-H4K8ac_peak_10722 | 11.68317 |                                                                      |
| 2 | 232230540 | 232230861 | 5Y-H4K8ac_peak_10723 | 7.66481  |                                                                      |
| 2 | 232252789 | 232253776 | 5Y-H4K8ac_peak_10724 | 12.57157 | AC017104.6_ENSG00000224376                                           |
| 2 | 232260301 | 232260606 | 5Y-H4K8ac_peak_10725 | 4.77307  | B3GNT7_ENSG00000156966                                               |
| 2 | 232276898 | 232277096 | 5Y-H4K8ac_peak_10726 | 5.17251  |                                                                      |
| 2 | 232277388 | 232277670 | 5Y-H4K8ac_peak_10727 | 11.19336 |                                                                      |
| 2 | 232329565 | 232330466 | 5Y-H4K8ac_peak_10728 | 6.08523  |                                                                      |
| 2 | 232347166 | 232347431 | 5Y-H4K8ac_peak_10729 | 7.88114  | NCL_ENSG00000115053                                                  |
| 2 | 232347697 | 232348063 | 5Y-H4K8ac_peak_10730 | 7.89273  | NCL_ENSG00000115053                                                  |
| 2 | 232348399 | 232348770 | 5Y-H4K8ac_peak_10731 | 5.35202  | NCL_ENSG00000115053                                                  |
| 2 | 232379292 | 232379681 | 5Y-H4K8ac_peak_10732 | 5.87725  | LINC00471_ENSG00000181798                                            |
| 2 | 232394798 | 232395081 | 5Y-H4K8ac_peak_10733 | 9.79526  | NMUR1_ENSG00000171596                                                |
| 2 | 232400755 | 232400974 | 5Y-H4K8ac_peak_10734 | 5.3176   |                                                                      |
| 2 | 232458877 | 232459234 | 5Y-H4K8ac_peak_10735 | 6.17973  |                                                                      |
| 2 | 232459787 | 232459993 | 5Y-H4K8ac_peak_10736 | 7.58806  |                                                                      |
| 2 | 232468588 | 232469369 | 5Y-H4K8ac_peak_10737 | 19.26368 |                                                                      |
| 2 | 232469654 | 232470046 | 5Y-H4K8ac_peak_10738 | 7.58806  |                                                                      |
| 2 | 232476931 | 232477243 | 5Y-H4K8ac_peak_10739 | 4.95697  |                                                                      |
| 2 | 232478234 | 232479108 | 5Y-H4K8ac_peak_10740 | 11.10114 |                                                                      |
| 2 | 232479335 | 232479619 | 5Y-H4K8ac_peak_10741 | 5.98695  |                                                                      |
| 2 | 232545090 | 232546543 | 5Y-H4K8ac_peak_10742 | 11.22005 |                                                                      |
| 2 | 232552188 | 232552480 | 5Y-H4K8ac_peak_10743 | 12.84845 |                                                                      |
| 2 | 232571186 | 232571616 | 5Y-H4K8ac_peak_10744 | 6.22904  | MGC4771_ENSG00000269363;PTMA_ENSG00000187514                         |
| 2 | 232571969 | 232572837 | 5Y-H4K8ac_peak_10745 | 15.80786 | MGC4771_ENSG00000269363;PTMA_ENSG00000187514                         |
| 2 | 232573570 | 232574056 | 5Y-H4K8ac_peak_10746 | 11.01067 |                                                                      |
| 2 | 232825713 | 232826906 | 5Y-H4K8ac_peak_10747 | 9.00954  | DIS3L2_ENSG00000144535                                               |
| 2 | 233367968 | 233368324 | 5Y-H4K8ac_peak_10748 | 6.34245  |                                                                      |
| 2 | 233371614 | 233371996 | 5Y-H4K8ac_peak_10749 | 6.03255  |                                                                      |
| 2 | 233415471 | 233415814 | 5Y-H4K8ac_peak_10750 | 12.65187 | TIGD1_ENSG00000221944;EIF4E2_ENSG00000135930;MIR5001_ENSG00000266620 |
| 2 | 233498167 | 233498411 | 5Y-H4K8ac_peak_10751 | 4.8509   |                                                                      |
| 2 | 233561458 | 233561731 | 5Y-H4K8ac_peak_10752 | 5.98695  | GIGYF2_ENSG00000204120                                               |
| 2 | 233741023 | 233741811 | 5Y-H4K8ac_peak_10753 | 7.59101  |                                                                      |
| 2 | 234378325 | 234378687 | 5Y-H4K8ac_peak_10754 | 6.50117  |                                                                      |
| 2 | 235242273 | 235242539 | 5Y-H4K8ac_peak_10755 | 4.84727  |                                                                      |
| 2 | 235244825 | 235245331 | 5Y-H4K8ac_peak_10756 | 15.34073 |                                                                      |
| 2 | 235405989 | 235406310 | 5Y-H4K8ac_peak_10757 | 14.30055 | ARL4C_ENSG00000188042                                                |
| 2 | 235465891 | 235466209 | 5Y-H4K8ac_peak_10758 | 4.84727  |                                                                      |
| 2 | 235909287 | 235909564 | 5Y-H4K8ac_peak_10759 | 4.0639   |                                                                      |
| 2 | 235958485 | 235959057 | 5Y-H4K8ac_peak_10760 | 13.11741 |                                                                      |
| 2 | 236174284 | 236174605 | 5Y-H4K8ac_peak_10761 | 4.84727  |                                                                      |
| 2 | 236401695 | 236402097 | 5Y-H4K8ac_peak_10762 | 5.89922  | AGAP1_ENSG00000157985                                                |

|   |           |           |                      |          |                                                 |
|---|-----------|-----------|----------------------|----------|-------------------------------------------------|
| 2 | 236403464 | 236403689 | 5Y-H4K8ac_peak_10763 | 6.52593  | AGAP1_ENSG00000157985                           |
| 2 | 236570366 | 236570876 | 5Y-H4K8ac_peak_10764 | 11.1169  |                                                 |
| 2 | 236578386 | 236578686 | 5Y-H4K8ac_peak_10765 | 9.23159  |                                                 |
| 2 | 236579814 | 236580049 | 5Y-H4K8ac_peak_10766 | 5.16353  |                                                 |
| 2 | 238117677 | 238117985 | 5Y-H4K8ac_peak_10767 | 7.59101  |                                                 |
| 2 | 238316943 | 238317137 | 5Y-H4K8ac_peak_10768 | 7.38046  |                                                 |
| 2 | 238350416 | 238350759 | 5Y-H4K8ac_peak_10769 | 5.65584  |                                                 |
| 2 | 238360127 | 238360551 | 5Y-H4K8ac_peak_10770 | 9.7353   |                                                 |
| 2 | 238360839 | 238361381 | 5Y-H4K8ac_peak_10771 | 12.21176 |                                                 |
| 2 | 238382374 | 238382707 | 5Y-H4K8ac_peak_10772 | 6.55906  |                                                 |
| 2 | 238383091 | 238384110 | 5Y-H4K8ac_peak_10773 | 16.01457 |                                                 |
| 2 | 238481464 | 238481677 | 5Y-H4K8ac_peak_10774 | 9.38203  |                                                 |
| 2 | 238521698 | 238521931 | 5Y-H4K8ac_peak_10775 | 3.91125  | AC096574.5_ENSG00000227107                      |
| 2 | 238535696 | 238535955 | 5Y-H4K8ac_peak_10776 | 5.41472  | LRRFIP1_ENSG00000124831                         |
| 2 | 238536343 | 238536609 | 5Y-H4K8ac_peak_10777 | 6.77436  | LRRFIP1_ENSG00000124831                         |
| 2 | 238600120 | 238600360 | 5Y-H4K8ac_peak_10778 | 10.1994  |                                                 |
| 2 | 238601143 | 238601374 | 5Y-H4K8ac_peak_10779 | 4.36976  |                                                 |
| 2 | 238641697 | 238642023 | 5Y-H4K8ac_peak_10780 | 7.31815  |                                                 |
| 2 | 238767639 | 238768422 | 5Y-H4K8ac_peak_10781 | 13.0168  | RAMP1_ENSG00000132329                           |
| 2 | 238773217 | 238773472 | 5Y-H4K8ac_peak_10782 | 7.50148  |                                                 |
| 2 | 238775513 | 238775763 | 5Y-H4K8ac_peak_10783 | 4.28733  |                                                 |
| 2 | 238780790 | 238781244 | 5Y-H4K8ac_peak_10784 | 7.677    |                                                 |
| 2 | 238784883 | 238785201 | 5Y-H4K8ac_peak_10785 | 5.24695  |                                                 |
| 2 | 238791043 | 238792326 | 5Y-H4K8ac_peak_10786 | 13.86507 |                                                 |
| 2 | 238793198 | 238795284 | 5Y-H4K8ac_peak_10787 | 13.1133  |                                                 |
| 2 | 238795951 | 238796264 | 5Y-H4K8ac_peak_10788 | 4.15658  |                                                 |
| 2 | 238803227 | 238803525 | 5Y-H4K8ac_peak_10789 | 9.05168  |                                                 |
| 2 | 238804145 | 238805297 | 5Y-H4K8ac_peak_10790 | 10.1994  |                                                 |
| 2 | 238805637 | 238805862 | 5Y-H4K8ac_peak_10791 | 8.43511  |                                                 |
| 2 | 238807173 | 238807496 | 5Y-H4K8ac_peak_10792 | 6.37023  |                                                 |
| 2 | 238831754 | 238832075 | 5Y-H4K8ac_peak_10793 | 10.44054 |                                                 |
| 2 | 238864675 | 238864932 | 5Y-H4K8ac_peak_10794 | 4.79658  |                                                 |
| 2 | 239047059 | 239047274 | 5Y-H4K8ac_peak_10795 | 5.64988  | KLHL30_ENSG00000168427                          |
| 2 | 239067588 | 239067915 | 5Y-H4K8ac_peak_10796 | 12.24654 | FAM132B_ENSG00000178752                         |
| 2 | 239149114 | 239149371 | 5Y-H4K8ac_peak_10797 | 14.45841 | HES6_ENSG00000144485                            |
| 2 | 239335159 | 239335449 | 5Y-H4K8ac_peak_10798 | 9.88714  | ASB1_ENSG00000065802;AC016999.2_ENSG00000229915 |
| 2 | 239335704 | 239336188 | 5Y-H4K8ac_peak_10799 | 13.00733 | ASB1_ENSG00000065802;AC016999.2_ENSG00000229915 |
| 2 | 240000359 | 240000657 | 5Y-H4K8ac_peak_10800 | 9.30338  |                                                 |
| 2 | 240003867 | 240004291 | 5Y-H4K8ac_peak_10801 | 8.43511  |                                                 |
| 2 | 240014097 | 240014405 | 5Y-H4K8ac_peak_10802 | 8.76581  |                                                 |
| 2 | 240015033 | 240015237 | 5Y-H4K8ac_peak_10803 | 6.89892  |                                                 |
| 2 | 240017077 | 240017451 | 5Y-H4K8ac_peak_10804 | 6.22669  |                                                 |
| 2 | 240018685 | 240019031 | 5Y-H4K8ac_peak_10805 | 6.78128  |                                                 |
| 2 | 240043426 | 240043703 | 5Y-H4K8ac_peak_10806 | 5.04571  |                                                 |
| 2 | 240055156 | 240055358 | 5Y-H4K8ac_peak_10807 | 7.31815  |                                                 |
| 2 | 240148737 | 240148944 | 5Y-H4K8ac_peak_10808 | 5.98695  |                                                 |

|   |           |           |                      |          |                                                   |
|---|-----------|-----------|----------------------|----------|---------------------------------------------------|
| 2 | 240161544 | 240161789 | 5Y-H4K8ac_peak_10809 | 6.08523  |                                                   |
| 2 | 240193153 | 240193522 | 5Y-H4K8ac_peak_10810 | 10.69698 |                                                   |
| 2 | 240196118 | 240196357 | 5Y-H4K8ac_peak_10811 | 6.54915  |                                                   |
| 2 | 240197219 | 240197523 | 5Y-H4K8ac_peak_10812 | 16.23405 |                                                   |
| 2 | 240197889 | 240198493 | 5Y-H4K8ac_peak_10813 | 12.26819 |                                                   |
| 2 | 240198915 | 240199418 | 5Y-H4K8ac_peak_10814 | 8.73985  |                                                   |
| 2 | 240271473 | 240271792 | 5Y-H4K8ac_peak_10815 | 10.79655 |                                                   |
| 2 | 240323102 | 240323756 | 5Y-H4K8ac_peak_10816 | 13.99721 | HDAC4_ENSG00000068024;AC062017.1_ENSG00000222020  |
| 2 | 240638159 | 240638503 | 5Y-H4K8ac_peak_10817 | 4.90471  |                                                   |
| 2 | 240964322 | 240964561 | 5Y-H4K8ac_peak_10818 | 9.93099  | NDUFA10_ENSG00000130414                           |
| 2 | 240964851 | 240965300 | 5Y-H4K8ac_peak_10819 | 21.14873 | NDUFA10_ENSG00000130414                           |
| 2 | 241075430 | 241075648 | 5Y-H4K8ac_peak_10820 | 5.44849  | MYEOV2_ENSG00000172428                            |
| 2 | 241076032 | 241076247 | 5Y-H4K8ac_peak_10821 | 7.11863  | MYEOV2_ENSG00000172428                            |
| 2 | 241172264 | 241172619 | 5Y-H4K8ac_peak_10822 | 7.17184  |                                                   |
| 2 | 241291248 | 241291450 | 5Y-H4K8ac_peak_10823 | 7.41519  |                                                   |
| 2 | 241292303 | 241292971 | 5Y-H4K8ac_peak_10824 | 6.78128  |                                                   |
| 2 | 241499789 | 241500465 | 5Y-H4K8ac_peak_10825 | 13.92877 | DUSP28_ENSG00000188542                            |
| 2 | 241505518 | 241505859 | 5Y-H4K8ac_peak_10826 | 4.77126  | RNPEPL1_ENSG00000142327                           |
| 2 | 241543911 | 241544379 | 5Y-H4K8ac_peak_10827 | 5.74859  | GPR35_ENSG00000178623                             |
| 2 | 241759107 | 241759315 | 5Y-H4K8ac_peak_10828 | 6.96612  | KIF1A_ENSG00000130294                             |
| 2 | 241760156 | 241761258 | 5Y-H4K8ac_peak_10829 | 6.19716  | KIF1A_ENSG00000130294                             |
| 2 | 241905419 | 241905703 | 5Y-H4K8ac_peak_10830 | 4.84727  |                                                   |
| 2 | 241926391 | 241926581 | 5Y-H4K8ac_peak_10831 | 7.59101  | AC104809.2_ENSG00000223991                        |
| 2 | 241949558 | 241949917 | 5Y-H4K8ac_peak_10832 | 8.69112  | AC093585.6_ENSG00000229996                        |
| 2 | 242041312 | 242042053 | 5Y-H4K8ac_peak_10833 | 7.11863  | MTERFD2_ENSG00000122085                           |
| 2 | 242156800 | 242157025 | 5Y-H4K8ac_peak_10834 | 8.79957  |                                                   |
| 2 | 242242383 | 242242972 | 5Y-H4K8ac_peak_10835 | 6.14981  |                                                   |
| 2 | 242244515 | 242244768 | 5Y-H4K8ac_peak_10836 | 5.87382  |                                                   |
| 2 | 242254192 | 242254518 | 5Y-H4K8ac_peak_10837 | 7.58806  | SEPT2_ENSG00000168385                             |
| 2 | 242430269 | 242430508 | 5Y-H4K8ac_peak_10838 | 7.97699  |                                                   |
| 2 | 242431507 | 242431730 | 5Y-H4K8ac_peak_10839 | 6.62622  |                                                   |
| 2 | 242448343 | 242448890 | 5Y-H4K8ac_peak_10840 | 13.92877 | STK25_ENSG00000115694                             |
| 2 | 242556753 | 242557526 | 5Y-H4K8ac_peak_10841 | 10.0732  |                                                   |
| 2 | 242576502 | 242576771 | 5Y-H4K8ac_peak_10842 | 8.69112  | THAP4_ENSG00000176946;ATG4B_ENSG00000168397       |
| 2 | 242606319 | 242606577 | 5Y-H4K8ac_peak_10843 | 13.14766 |                                                   |
| 2 | 242626503 | 242626821 | 5Y-H4K8ac_peak_10844 | 8.43511  | DTYMK_ENSG00000168393                             |
| 2 | 242640940 | 242641205 | 5Y-H4K8ac_peak_10845 | 6.53157  | ING5_ENSG00000168395                              |
| 2 | 242673520 | 242673844 | 5Y-H4K8ac_peak_10846 | 10.54764 | D2HGDH_ENSG00000180902                            |
| 2 | 242674105 | 242674600 | 5Y-H4K8ac_peak_10847 | 5.12488  | D2HGDH_ENSG00000180902;AC114730.8_ENSG00000215692 |
| 2 | 242703876 | 242704532 | 5Y-H4K8ac_peak_10848 | 6.50117  |                                                   |
| 2 | 242743574 | 242744690 | 5Y-H4K8ac_peak_10849 | 17.63051 |                                                   |
| 2 | 242749833 | 242750209 | 5Y-H4K8ac_peak_10850 | 5.91107  | NEU4_ENSG00000204099                              |
| 2 | 242786266 | 242786539 | 5Y-H4K8ac_peak_10851 | 14.31711 | AC114730.2_ENSG00000235151                        |
| 2 | 242796633 | 242796879 | 5Y-H4K8ac_peak_10852 | 4.5753   |                                                   |
| 2 | 242802629 | 242803143 | 5Y-H4K8ac_peak_10853 | 5.65584  |                                                   |
| 2 | 242809986 | 242810633 | 5Y-H4K8ac_peak_10854 | 8.33296  |                                                   |



|    |           |           |                      |          |                                                    |
|----|-----------|-----------|----------------------|----------|----------------------------------------------------|
| 2  | 242822619 | 242823140 | 5Y-H4K8ac_peak_10855 | 8.2913   | AC131097.3_ENSG00000233806                         |
| 2  | 242827210 | 242827737 | 5Y-H4K8ac_peak_10856 | 7.38046  |                                                    |
| 2  | 242893198 | 242893535 | 5Y-H4K8ac_peak_10857 | 11.04919 |                                                    |
| 20 | 270750    | 271099    | 5Y-H4K8ac_peak_10858 | 9.23159  | C20orf96_ENSG00000196476                           |
| 20 | 278271    | 278595    | 5Y-H4K8ac_peak_10859 | 6.86362  | ZCCHC3_ENSG00000177764;AL034548.1_ENSG00000247315  |
| 20 | 306564    | 306843    | 5Y-H4K8ac_peak_10860 | 9.96543  | SOX12_ENSG00000177732                              |
| 20 | 328035    | 328278    | 5Y-H4K8ac_peak_10861 | 11.68317 | RP5-1103G7.4_ENSG00000225377;NRSN2_ENSG00000125841 |
| 20 | 344298    | 344490    | 5Y-H4K8ac_peak_10862 | 7.28311  |                                                    |
| 20 | 352502    | 352838    | 5Y-H4K8ac_peak_10863 | 3.97334  |                                                    |
| 20 | 360785    | 361094    | 5Y-H4K8ac_peak_10864 | 6.46053  | TRIB3_ENSG00000101255                              |
| 20 | 361925    | 362500    | 5Y-H4K8ac_peak_10865 | 8.12924  | TRIB3_ENSG00000101255                              |
| 20 | 524060    | 524329    | 5Y-H4K8ac_peak_10866 | 13.92877 | CSNK2A1_ENSG00000101266                            |
| 20 | 524903    | 525269    | 5Y-H4K8ac_peak_10867 | 6.1654   | CSNK2A1_ENSG00000101266                            |
| 20 | 633455    | 634391    | 5Y-H4K8ac_peak_10868 | 10.1994  | SRXN1_ENSG00000271303                              |
| 20 | 655960    | 656399    | 5Y-H4K8ac_peak_10869 | 6.19716  | RP5-850E9.3_ENSG00000270299;SCRT2_ENSG00000215397  |
| 20 | 657459    | 657680    | 5Y-H4K8ac_peak_10870 | 10.18556 | SCRT2_ENSG00000215397                              |
| 20 | 680047    | 680342    | 5Y-H4K8ac_peak_10871 | 6.10343  |                                                    |
| 20 | 680812    | 681257    | 5Y-H4K8ac_peak_10872 | 7.89273  |                                                    |
| 20 | 690581    | 690858    | 5Y-H4K8ac_peak_10873 | 7.89273  |                                                    |
| 20 | 814321    | 814562    | 5Y-H4K8ac_peak_10874 | 17.63051 | FAM110A_ENSG00000125898                            |
| 20 | 825421    | 826071    | 5Y-H4K8ac_peak_10875 | 6.37023  |                                                    |
| 20 | 983093    | 983539    | 5Y-H4K8ac_peak_10876 | 6.37023  | RSPO4_ENSG00000101282                              |
| 20 | 1233967   | 1234157   | 5Y-H4K8ac_peak_10877 | 6.34046  |                                                    |
| 20 | 1294017   | 1294219   | 5Y-H4K8ac_peak_10878 | 7.21112  |                                                    |
| 20 | 1306212   | 1306697   | 5Y-H4K8ac_peak_10879 | 5.5192   | SDCBP2-AS1_ENSG00000234684                         |
| 20 | 1757570   | 1757988   | 5Y-H4K8ac_peak_10880 | 10.69866 |                                                    |
| 20 | 2082814   | 2083615   | 5Y-H4K8ac_peak_10881 | 7.18391  | STK35_ENSG00000125834                              |
| 20 | 2187528   | 2188150   | 5Y-H4K8ac_peak_10882 | 9.05168  | RP11-128M1.1_ENSG00000226644                       |
| 20 | 2450999   | 2451304   | 5Y-H4K8ac_peak_10883 | 4.97086  | SNRPB_ENSG00000125835                              |
| 20 | 2489343   | 2490127   | 5Y-H4K8ac_peak_10884 | 8.4454   | RP4-734P14.4_ENSG00000256566                       |
| 20 | 2672863   | 2673140   | 5Y-H4K8ac_peak_10885 | 10.1994  | EBF4_ENSG00000088881                               |
| 20 | 2780772   | 2781522   | 5Y-H4K8ac_peak_10886 | 11.12941 | CPXM1_ENSG00000088882                              |
| 20 | 2781810   | 2782150   | 5Y-H4K8ac_peak_10887 | 7.03573  | CPXM1_ENSG00000088882                              |
| 20 | 2820422   | 2821363   | 5Y-H4K8ac_peak_10888 | 25.39295 | PCED1A_ENSG00000132635;VPS16_ENSG00000215305       |
| 20 | 2853494   | 2853948   | 5Y-H4K8ac_peak_10889 | 7.11863  |                                                    |
| 20 | 2854244   | 2854640   | 5Y-H4K8ac_peak_10890 | 11.86504 |                                                    |
| 20 | 3025639   | 3025969   | 5Y-H4K8ac_peak_10891 | 5.32832  | MRPS26_ENSG00000125901                             |
| 20 | 3026380   | 3027230   | 5Y-H4K8ac_peak_10892 | 12.51872 | MRPS26_ENSG00000125901                             |
| 20 | 3084322   | 3084537   | 5Y-H4K8ac_peak_10893 | 5.51139  |                                                    |
| 20 | 3140169   | 3140473   | 5Y-H4K8ac_peak_10894 | 8.2913   | UBOX5_ENSG00000185019;FASTKD5_ENSG00000215251      |
| 20 | 3140707   | 3140905   | 5Y-H4K8ac_peak_10895 | 7.11262  | UBOX5_ENSG00000185019;FASTKD5_ENSG00000215251      |
| 20 | 3141212   | 3141455   | 5Y-H4K8ac_peak_10896 | 6.3019   | UBOX5_ENSG00000185019;FASTKD5_ENSG00000215251      |
| 20 | 3144414   | 3144687   | 5Y-H4K8ac_peak_10897 | 4.24332  |                                                    |
| 20 | 3154863   | 3155261   | 5Y-H4K8ac_peak_10898 | 6.36454  | LZTS3_ENSG00000088899                              |
| 20 | 3189979   | 3190365   | 5Y-H4K8ac_peak_10899 | 8.47164  | ITPA_ENSG00000125877                               |
| 20 | 3263850   | 3264130   | 5Y-H4K8ac_peak_10900 | 8.8021   |                                                    |

|    |          |          |                      |          |                                                     |
|----|----------|----------|----------------------|----------|-----------------------------------------------------|
| 20 | 3389748  | 3390316  | 5Y-H4K8ac_peak_10901 | 5.64909  |                                                     |
| 20 | 3722689  | 3723004  | 5Y-H4K8ac_peak_10902 | 5.41472  |                                                     |
| 20 | 3748762  | 3749236  | 5Y-H4K8ac_peak_10903 | 6.78128  | C20orf27_ENSG00000101220                            |
| 20 | 3758102  | 3758436  | 5Y-H4K8ac_peak_10904 | 8.2913   |                                                     |
| 20 | 3758740  | 3759098  | 5Y-H4K8ac_peak_10905 | 5.18558  |                                                     |
| 20 | 3776530  | 3776733  | 5Y-H4K8ac_peak_10906 | 7.03573  |                                                     |
| 20 | 3777207  | 3777475  | 5Y-H4K8ac_peak_10907 | 7.59101  |                                                     |
| 20 | 3792645  | 3793329  | 5Y-H4K8ac_peak_10908 | 5.41472  |                                                     |
| 20 | 3799479  | 3799694  | 5Y-H4K8ac_peak_10909 | 5.41472  |                                                     |
| 20 | 3801144  | 3801345  | 5Y-H4K8ac_peak_10910 | 6.78128  | AP5S1_ENSG00000125843                               |
| 20 | 3869448  | 3869709  | 5Y-H4K8ac_peak_10911 | 9.87097  | RP11-119B16.2_ENSG00000229539;PANK2_ENSG00000125779 |
| 20 | 3995612  | 3995985  | 5Y-H4K8ac_peak_10912 | 9.63153  | RNF24_ENSG00000101236                               |
| 20 | 4044836  | 4045160  | 5Y-H4K8ac_peak_10913 | 5.40331  |                                                     |
| 20 | 4088997  | 4089290  | 5Y-H4K8ac_peak_10914 | 5.65584  |                                                     |
| 20 | 4093890  | 4094106  | 5Y-H4K8ac_peak_10915 | 7.97699  |                                                     |
| 20 | 4152811  | 4153136  | 5Y-H4K8ac_peak_10916 | 8.79957  |                                                     |
| 20 | 5383772  | 5383966  | 5Y-H4K8ac_peak_10917 | 4.84727  |                                                     |
| 20 | 5390715  | 5390915  | 5Y-H4K8ac_peak_10918 | 6.77436  |                                                     |
| 20 | 5392177  | 5392486  | 5Y-H4K8ac_peak_10919 | 10.4689  |                                                     |
| 20 | 5428624  | 5428854  | 5Y-H4K8ac_peak_10920 | 7.31815  |                                                     |
| 20 | 5484839  | 5485294  | 5Y-H4K8ac_peak_10921 | 7.29091  | LINC00654_ENSG00000205181                           |
| 20 | 5730328  | 5730858  | 5Y-H4K8ac_peak_10922 | 4.15658  | C20orf196_ENSG00000171984                           |
| 20 | 5892162  | 5892474  | 5Y-H4K8ac_peak_10923 | 7.89273  | CHGB_ENSG00000089199                                |
| 20 | 5930847  | 5931073  | 5Y-H4K8ac_peak_10924 | 13.64163 | TRMT6_ENSG00000089195;MCM8_ENSG00000125885          |
| 20 | 7999926  | 8000319  | 5Y-H4K8ac_peak_10925 | 7.90236  | TMX4_ENSG00000125827;RP5-971N18.3_ENSG00000229766   |
| 20 | 9048039  | 9048301  | 5Y-H4K8ac_peak_10926 | 7.01266  | AL121898.1_ENSG00000252819                          |
| 20 | 9496413  | 9496890  | 5Y-H4K8ac_peak_10927 | 7.59101  | RP5-1119D9.4_ENSG00000225988                        |
| 20 | 9513523  | 9513740  | 5Y-H4K8ac_peak_10928 | 7.3889   |                                                     |
| 20 | 9820032  | 9820275  | 5Y-H4K8ac_peak_10929 | 10.90365 | PAK7_ENSG00000101349                                |
| 20 | 10153023 | 10153314 | 5Y-H4K8ac_peak_10930 | 7.31815  | RP11-416N4.4_ENSG00000230506                        |
| 20 | 10198392 | 10198684 | 5Y-H4K8ac_peak_10931 | 11.20652 | SNAP25_ENSG00000132639                              |
| 20 | 10414585 | 10414797 | 5Y-H4K8ac_peak_10932 | 8.79957  | MKKS_ENSG00000125863                                |
| 20 | 10654855 | 10655381 | 5Y-H4K8ac_peak_10933 | 6.64195  | JAG1_ENSG00000101384                                |
| 20 | 11871551 | 11871946 | 5Y-H4K8ac_peak_10934 | 10.5157  | BTBD3_ENSG00000132640                               |
| 20 | 12906144 | 12906697 | 5Y-H4K8ac_peak_10935 | 4.50834  |                                                     |
| 20 | 13765864 | 13766174 | 5Y-H4K8ac_peak_10936 | 6.77436  | ESF1_ENSG00000089048;NDUFAF5_ENSG00000101247        |
| 20 | 16088041 | 16088282 | 5Y-H4K8ac_peak_10937 | 7.63144  |                                                     |
| 20 | 16227545 | 16227817 | 5Y-H4K8ac_peak_10938 | 5.718    |                                                     |
| 20 | 16330932 | 16331144 | 5Y-H4K8ac_peak_10939 | 7.38046  |                                                     |
| 20 | 16423255 | 16423510 | 5Y-H4K8ac_peak_10940 | 6.07082  |                                                     |
| 20 | 16555048 | 16555391 | 5Y-H4K8ac_peak_10941 | 7.57144  | KIF16B_ENSG00000089177                              |
| 20 | 16631792 | 16632181 | 5Y-H4K8ac_peak_10942 | 6.20989  |                                                     |
| 20 | 16635017 | 16635319 | 5Y-H4K8ac_peak_10943 | 7.59101  |                                                     |
| 20 | 16636265 | 16636782 | 5Y-H4K8ac_peak_10944 | 5.98695  |                                                     |
| 20 | 16651441 | 16651787 | 5Y-H4K8ac_peak_10945 | 7.13294  | Y_RNA_ENSG00000200494                               |
| 20 | 16710764 | 16711192 | 5Y-H4K8ac_peak_10946 | 8.20773  | SNRPB2_ENSG00000125870;RP4-705D16.3_ENSG00000228809 |

|    |          |          |                      |          |                                                         |
|----|----------|----------|----------------------|----------|---------------------------------------------------------|
| 20 | 17485076 | 17485352 | 5Y-H4K8ac_peak_10947 | 5.23083  |                                                         |
| 20 | 17511619 | 17512063 | 5Y-H4K8ac_peak_10948 | 6.43068  |                                                         |
| 20 | 17854416 | 17854707 | 5Y-H4K8ac_peak_10949 | 7.58806  |                                                         |
| 20 | 17856638 | 17857034 | 5Y-H4K8ac_peak_10950 | 9.38276  |                                                         |
| 20 | 17948900 | 17949430 | 5Y-H4K8ac_peak_10951 | 13.00733 | SNX5_ENSG00000089006;MGME1_ENSG00000125871              |
| 20 | 17949634 | 17950036 | 5Y-H4K8ac_peak_10952 | 8.21582  | SNX5_ENSG00000089006;MGME1_ENSG00000125871              |
| 20 | 17988226 | 17988631 | 5Y-H4K8ac_peak_10953 | 6.79955  |                                                         |
| 20 | 18118052 | 18118355 | 5Y-H4K8ac_peak_10954 | 9.30505  | PET117_ENSG00000232838;CSRP2BP_ENSG00000149474          |
| 20 | 18118547 | 18118929 | 5Y-H4K8ac_peak_10955 | 7.11863  | PET117_ENSG00000232838;CSRP2BP_ENSG00000149474          |
| 20 | 18549406 | 18549602 | 5Y-H4K8ac_peak_10956 | 4.95697  |                                                         |
| 20 | 18568749 | 18569027 | 5Y-H4K8ac_peak_10957 | 10.4689  | DTD1_ENSG00000125821                                    |
| 20 | 18774983 | 18775293 | 5Y-H4K8ac_peak_10958 | 5.40331  | LINC00652_ENSG00000179935;RP5-1068E13.7_ENSG00000273148 |
| 20 | 19738091 | 19738530 | 5Y-H4K8ac_peak_10959 | 5.23083  | AL121761.2_ENSG00000268628;RP1-122P22.2_ENSG00000233895 |
| 20 | 19738899 | 19739347 | 5Y-H4K8ac_peak_10960 | 8.43511  | AL121761.2_ENSG00000268628;RP1-122P22.2_ENSG00000233895 |
| 20 | 19998388 | 19998588 | 5Y-H4K8ac_peak_10961 | 5.41472  | NAA20_ENSG00000173418                                   |
| 20 | 20032769 | 20033014 | 5Y-H4K8ac_peak_10962 | 12.05638 | C20orf26_ENSG00000089101                                |
| 20 | 20184467 | 20184841 | 5Y-H4K8ac_peak_10963 | 8.21525  |                                                         |
| 20 | 21082639 | 21082890 | 5Y-H4K8ac_peak_10964 | 7.42477  |                                                         |
| 20 | 21272365 | 21272994 | 5Y-H4K8ac_peak_10965 | 9.38276  |                                                         |
| 20 | 23342206 | 23342441 | 5Y-H4K8ac_peak_10966 | 7.11863  | GZF1_ENSG00000125812                                    |
| 20 | 23342879 | 23343281 | 5Y-H4K8ac_peak_10967 | 7.63144  | GZF1_ENSG00000125812                                    |
| 20 | 23401696 | 23401985 | 5Y-H4K8ac_peak_10968 | 10.36926 | NAPB_ENSG00000125814                                    |
| 20 | 23402304 | 23402528 | 5Y-H4K8ac_peak_10969 | 8.93923  | NAPB_ENSG00000125814                                    |
| 20 | 23618152 | 23618469 | 5Y-H4K8ac_peak_10970 | 7.63144  | CST3_ENSG00000101439                                    |
| 20 | 24973554 | 24973772 | 5Y-H4K8ac_peak_10971 | 14.99673 | APMAP_ENSG00000101474                                   |
| 20 | 25227993 | 25228269 | 5Y-H4K8ac_peak_10972 | 6.79955  | PYGB_ENSG00000100994                                    |
| 20 | 25565758 | 25566124 | 5Y-H4K8ac_peak_10973 | 10.4689  | NINL_ENSG00000101004                                    |
| 20 | 25676928 | 25677439 | 5Y-H4K8ac_peak_10974 | 9.15007  | ZNF337_ENSG00000130684                                  |
| 20 | 25834446 | 25834756 | 5Y-H4K8ac_peak_10975 | 8.78565  |                                                         |
| 20 | 25967619 | 25967918 | 5Y-H4K8ac_peak_10976 | 5.59843  |                                                         |
| 20 | 30157650 | 30158105 | 5Y-H4K8ac_peak_10977 | 8.4454   |                                                         |
| 20 | 30160790 | 30161023 | 5Y-H4K8ac_peak_10978 | 6.78318  | HM13-AS1_ENSG00000230613                                |
| 20 | 30191825 | 30192052 | 5Y-H4K8ac_peak_10979 | 4.8887   |                                                         |
| 20 | 30225348 | 30226113 | 5Y-H4K8ac_peak_10980 | 11.19336 | COX4I2_ENSG00000131055                                  |
| 20 | 30226466 | 30227011 | 5Y-H4K8ac_peak_10981 | 11.36844 | COX4I2_ENSG00000131055                                  |
| 20 | 30310435 | 30310633 | 5Y-H4K8ac_peak_10982 | 8.78565  |                                                         |
| 20 | 30310838 | 30311311 | 5Y-H4K8ac_peak_10983 | 13.72401 | BCL2L1_ENSG00000171552                                  |
| 20 | 30449648 | 30449841 | 5Y-H4K8ac_peak_10984 | 7.20869  |                                                         |
| 20 | 30458098 | 30458674 | 5Y-H4K8ac_peak_10985 | 7.11863  | DUSP15_ENSG00000149599;TTLL9_ENSG00000131044            |
| 20 | 30468290 | 30468547 | 5Y-H4K8ac_peak_10986 | 6.73047  |                                                         |
| 20 | 30498867 | 30499329 | 5Y-H4K8ac_peak_10987 | 8.93304  |                                                         |
| 20 | 30555401 | 30556248 | 5Y-H4K8ac_peak_10988 | 13.05418 | XKR7_ENSG00000260903                                    |
| 20 | 30680058 | 30680264 | 5Y-H4K8ac_peak_10989 | 6.07082  |                                                         |
| 20 | 30697392 | 30697888 | 5Y-H4K8ac_peak_10990 | 19.72309 | TM9SF4_ENSG00000101337                                  |
| 20 | 30738286 | 30738476 | 5Y-H4K8ac_peak_10991 | 5.19372  |                                                         |
| 20 | 30777888 | 30778079 | 5Y-H4K8ac_peak_10992 | 6.54441  | TSPY26P_ENSG00000235217                                 |

|    |          |          |                      |          |                                                    |
|----|----------|----------|----------------------|----------|----------------------------------------------------|
| 20 | 30795160 | 30795375 | 5Y-H4K8ac_peak_10993 | 6.53157  | POFUT1_ENSG00000101346                             |
| 20 | 30795779 | 30795970 | 5Y-H4K8ac_peak_10994 | 6.96612  | POFUT1_ENSG00000101346                             |
| 20 | 30946157 | 30946357 | 5Y-H4K8ac_peak_10995 | 7.59832  | ASXL1_ENSG00000171456                              |
| 20 | 31044311 | 31044845 | 5Y-H4K8ac_peak_10996 | 9.89244  |                                                    |
| 20 | 31070452 | 31070647 | 5Y-H4K8ac_peak_10997 | 6.50117  |                                                    |
| 20 | 31071691 | 31072110 | 5Y-H4K8ac_peak_10998 | 27.06242 |                                                    |
| 20 | 31072376 | 31072729 | 5Y-H4K8ac_peak_10999 | 5.87725  |                                                    |
| 20 | 31082719 | 31083233 | 5Y-H4K8ac_peak_11000 | 8.2913   |                                                    |
| 20 | 31084004 | 31084707 | 5Y-H4K8ac_peak_11001 | 4.0639   |                                                    |
| 20 | 31085322 | 31085943 | 5Y-H4K8ac_peak_11002 | 9.7353   |                                                    |
| 20 | 31096907 | 31097259 | 5Y-H4K8ac_peak_11003 | 8.27399  |                                                    |
| 20 | 31104589 | 31105094 | 5Y-H4K8ac_peak_11004 | 14.39608 |                                                    |
| 20 | 31105872 | 31106128 | 5Y-H4K8ac_peak_11005 | 6.00598  |                                                    |
| 20 | 31110410 | 31111002 | 5Y-H4K8ac_peak_11006 | 7.41172  |                                                    |
| 20 | 31112992 | 31113223 | 5Y-H4K8ac_peak_11007 | 6.90765  |                                                    |
| 20 | 31114923 | 31115683 | 5Y-H4K8ac_peak_11008 | 8.66584  |                                                    |
| 20 | 31115948 | 31116547 | 5Y-H4K8ac_peak_11009 | 12.69256 |                                                    |
| 20 | 31123673 | 31124210 | 5Y-H4K8ac_peak_11010 | 10.55771 |                                                    |
| 20 | 31124963 | 31125275 | 5Y-H4K8ac_peak_11011 | 6.55225  |                                                    |
| 20 | 31170850 | 31171112 | 5Y-H4K8ac_peak_11012 | 9.29721  |                                                    |
| 20 | 31171316 | 31171730 | 5Y-H4K8ac_peak_11013 | 6.14981  |                                                    |
| 20 | 31198750 | 31198953 | 5Y-H4K8ac_peak_11014 | 8.46999  |                                                    |
| 20 | 31214578 | 31215669 | 5Y-H4K8ac_peak_11015 | 10.90097 |                                                    |
| 20 | 31226534 | 31226752 | 5Y-H4K8ac_peak_11016 | 8.73985  |                                                    |
| 20 | 31330661 | 31330975 | 5Y-H4K8ac_peak_11017 | 9.15977  | COMMD7_ENSG00000149600                             |
| 20 | 31331237 | 31331611 | 5Y-H4K8ac_peak_11018 | 13.33591 | COMMD7_ENSG00000149600                             |
| 20 | 31349490 | 31349900 | 5Y-H4K8ac_peak_11019 | 4.5753   | DNMT3B_ENSG00000088305                             |
| 20 | 31350492 | 31350767 | 5Y-H4K8ac_peak_11020 | 5.12488  | DNMT3B_ENSG00000088305                             |
| 20 | 31407058 | 31407453 | 5Y-H4K8ac_peak_11021 | 11.19336 | MAPRE1_ENSG00000101367                             |
| 20 | 31490560 | 31491167 | 5Y-H4K8ac_peak_11022 | 5.41472  |                                                    |
| 20 | 32031230 | 32031612 | 5Y-H4K8ac_peak_11023 | 4.5753   | SNTA1_ENSG00000101400                              |
| 20 | 32078099 | 32078434 | 5Y-H4K8ac_peak_11024 | 7.59101  | CBFA2T2_ENSG00000078699                            |
| 20 | 32086568 | 32086802 | 5Y-H4K8ac_peak_11025 | 5.67588  |                                                    |
| 20 | 32099773 | 32099966 | 5Y-H4K8ac_peak_11026 | 5.97089  |                                                    |
| 20 | 32121507 | 32121796 | 5Y-H4K8ac_peak_11027 | 5.40331  |                                                    |
| 20 | 32237904 | 32238168 | 5Y-H4K8ac_peak_11028 | 11.22005 |                                                    |
| 20 | 32254175 | 32254437 | 5Y-H4K8ac_peak_11029 | 9.05168  | ACTL10_ENSG00000182584                             |
| 20 | 32261811 | 32262006 | 5Y-H4K8ac_peak_11030 | 4.59665  | NECAB3_ENSG00000125967;RP1-63M2.5_ENSG00000271803  |
| 20 | 32272742 | 32272949 | 5Y-H4K8ac_peak_11031 | 3.93411  |                                                    |
| 20 | 32273729 | 32274126 | 5Y-H4K8ac_peak_11032 | 6.47245  | E2F1_ENSG00000101412                               |
| 20 | 32320006 | 32320261 | 5Y-H4K8ac_peak_11033 | 6.31818  | RP4-553F4.2_ENSG00000229188;ZNF341_ENSG00000131061 |
| 20 | 32377104 | 32377327 | 5Y-H4K8ac_peak_11034 | 7.90751  |                                                    |
| 20 | 32399393 | 32399592 | 5Y-H4K8ac_peak_11035 | 7.18391  | RP4-553F4.6_ENSG00000230753;CHMP4B_ENSG00000101421 |
| 20 | 32582302 | 32582538 | 5Y-H4K8ac_peak_11036 | 6.46053  | RP5-1125A11.1_ENSG00000228265;RALY_ENSG00000125970 |
| 20 | 32699607 | 32700042 | 5Y-H4K8ac_peak_11037 | 17.67751 | EIF2S2_ENSG00000125977                             |
| 20 | 32900398 | 32900799 | 5Y-H4K8ac_peak_11038 | 9.78792  | AHCY_ENSG00000101444                               |

|    |          |          |                      |          |                                                                                  |
|----|----------|----------|----------------------|----------|----------------------------------------------------------------------------------|
| 20 | 32951252 | 32951733 | 5Y-H4K8ac_peak_11039 | 8.69112  | ITCH_ENSG00000078747                                                             |
| 20 | 33103683 | 33104022 | 5Y-H4K8ac_peak_11040 | 5.91107  | DYNLRB1_ENSG00000125971                                                          |
| 20 | 33104276 | 33104489 | 5Y-H4K8ac_peak_11041 | 6.77436  | DYNLRB1_ENSG00000125971                                                          |
| 20 | 33292209 | 33292752 | 5Y-H4K8ac_peak_11042 | 9.01738  | TP53INP2_ENSG00000078804                                                         |
| 20 | 33296720 | 33297523 | 5Y-H4K8ac_peak_11043 | 5.98695  |                                                                                  |
| 20 | 33413042 | 33413309 | 5Y-H4K8ac_peak_11044 | 4.77126  | NCOA6_ENSG00000198646                                                            |
| 20 | 33543182 | 33543462 | 5Y-H4K8ac_peak_11045 | 5.65584  | GSS_ENSG00000100983                                                              |
| 20 | 33543733 | 33544109 | 5Y-H4K8ac_peak_11046 | 7.59101  | GSS_ENSG00000100983                                                              |
| 20 | 33680833 | 33681114 | 5Y-H4K8ac_peak_11047 | 5.98695  | TRPC4AP_ENSG00000100991                                                          |
| 20 | 33734852 | 33735054 | 5Y-H4K8ac_peak_11048 | 11.61993 |                                                                                  |
| 20 | 33872188 | 33872441 | 5Y-H4K8ac_peak_11049 | 9.23159  | EIF6_ENSG00000242372;FAM83C-AS1_ENSG00000235214                                  |
| 20 | 33872717 | 33873196 | 5Y-H4K8ac_peak_11050 | 7.59101  | EIF6_ENSG00000242372;FAM83C-AS1_ENSG00000235214                                  |
| 20 | 33878138 | 33878509 | 5Y-H4K8ac_peak_11051 | 10.19948 |                                                                                  |
| 20 | 33884096 | 33884536 | 5Y-H4K8ac_peak_11052 | 7.03573  |                                                                                  |
| 20 | 33999409 | 33999676 | 5Y-H4K8ac_peak_11053 | 8.79957  | UQCC1_ENSG00000101019                                                            |
| 20 | 34000083 | 34000310 | 5Y-H4K8ac_peak_11054 | 5.77617  | UQCC1_ENSG00000101019                                                            |
| 20 | 34042105 | 34042491 | 5Y-H4K8ac_peak_11055 | 4.07874  | GDF5_ENSG00000125965;MIR1289-1_ENSG00000221763;CEP250_ENSG00000126001            |
| 20 | 34129927 | 34130235 | 5Y-H4K8ac_peak_11056 | 9.62747  | ERGIC3_ENSG00000125991                                                           |
| 20 | 34203751 | 34204016 | 5Y-H4K8ac_peak_11057 | 6.77436  | SPAG4_ENSG00000061656                                                            |
| 20 | 34252264 | 34252810 | 5Y-H4K8ac_peak_11058 | 13.03079 | CPNE1_ENSG00000214078;RBM12_ENSG00000244462                                      |
| 20 | 34287418 | 34287757 | 5Y-H4K8ac_peak_11059 | 11.01287 | NFS1_ENSG00000244005;ROMO1_ENSG00000125995                                       |
| 20 | 34359969 | 34360437 | 5Y-H4K8ac_peak_11060 | 7.59101  | PHF20_ENSG00000025293                                                            |
| 20 | 34474081 | 34474299 | 5Y-H4K8ac_peak_11061 | 8.97839  |                                                                                  |
| 20 | 34541838 | 34542301 | 5Y-H4K8ac_peak_11062 | 12.10416 |                                                                                  |
| 20 | 34560562 | 34560812 | 5Y-H4K8ac_peak_11063 | 4.50834  |                                                                                  |
| 20 | 34638517 | 34638838 | 5Y-H4K8ac_peak_11064 | 10.69698 | LINC00657_ENSG00000260032                                                        |
| 20 | 34639045 | 34639639 | 5Y-H4K8ac_peak_11065 | 10.35586 | LINC00657_ENSG00000260032                                                        |
| 20 | 34652237 | 34652517 | 5Y-H4K8ac_peak_11066 | 8.79957  |                                                                                  |
| 20 | 34742709 | 34742901 | 5Y-H4K8ac_peak_11067 | 4.50834  | RP11-234K24.3_ENSG00000232406                                                    |
| 20 | 34823838 | 34824116 | 5Y-H4K8ac_peak_11068 | 6.78318  | AAR2_ENSG00000131043                                                             |
| 20 | 34863128 | 34863376 | 5Y-H4K8ac_peak_11069 | 8.51022  |                                                                                  |
| 20 | 34893797 | 34894008 | 5Y-H4K8ac_peak_11070 | 4.50834  | DLGAP4_ENSG00000080845                                                           |
| 20 | 35064374 | 35064731 | 5Y-H4K8ac_peak_11071 | 6.34245  |                                                                                  |
| 20 | 35089122 | 35089534 | 5Y-H4K8ac_peak_11072 | 13.0168  |                                                                                  |
| 20 | 35090236 | 35090520 | 5Y-H4K8ac_peak_11073 | 16.01457 |                                                                                  |
| 20 | 35112075 | 35112432 | 5Y-H4K8ac_peak_11074 | 6.77436  |                                                                                  |
| 20 | 35201335 | 35201736 | 5Y-H4K8ac_peak_11075 | 8.27643  | RP5-977B1.7_ENSG00000232907;TGIF2_ENSG00000118707                                |
| 20 | 35202317 | 35203340 | 5Y-H4K8ac_peak_11076 | 11.12751 | RP5-977B1.7_ENSG00000232907;TGIF2_ENSG00000118707;TGIF2-C20orf24_ENSG00000259399 |
| 20 | 35233578 | 35233849 | 5Y-H4K8ac_peak_11077 | 8.24461  | RP5-977B1.11_ENSG00000259716;C20orf24_ENSG00000101084                            |
| 20 | 35401832 | 35402051 | 5Y-H4K8ac_peak_11078 | 8.16382  | DSN1_ENSG00000149636                                                             |
| 20 | 35402402 | 35402617 | 5Y-H4K8ac_peak_11079 | 9.89244  | DSN1_ENSG00000149636                                                             |
| 20 | 35492396 | 35492691 | 5Y-H4K8ac_peak_11080 | 4.95697  | SOGA1_ENSG00000149639                                                            |
| 20 | 35849692 | 35849912 | 5Y-H4K8ac_peak_11081 | 4.64156  |                                                                                  |
| 20 | 35860555 | 35860805 | 5Y-H4K8ac_peak_11082 | 9.05168  |                                                                                  |
| 20 | 35863119 | 35863334 | 5Y-H4K8ac_peak_11083 | 7.11863  |                                                                                  |
| 20 | 35864112 | 35864322 | 5Y-H4K8ac_peak_11084 | 6.78128  |                                                                                  |

|    |          |          |                      |          |                                                 |
|----|----------|----------|----------------------|----------|-------------------------------------------------|
| 20 | 35865928 | 35866383 | 5Y-H4K8ac_peak_11085 | 10.19948 |                                                 |
| 20 | 35871665 | 35872580 | 5Y-H4K8ac_peak_11086 | 12.05638 |                                                 |
| 20 | 35896343 | 35896851 | 5Y-H4K8ac_peak_11087 | 7.07936  |                                                 |
| 20 | 35904789 | 35905209 | 5Y-H4K8ac_peak_11088 | 5.98695  |                                                 |
| 20 | 35908293 | 35908858 | 5Y-H4K8ac_peak_11089 | 8.43011  |                                                 |
| 20 | 35918223 | 35918473 | 5Y-H4K8ac_peak_11090 | 10.11191 | MANBAL_ENSG00000101363                          |
| 20 | 35942591 | 35942904 | 5Y-H4K8ac_peak_11091 | 7.87406  |                                                 |
| 20 | 35944070 | 35944566 | 5Y-H4K8ac_peak_11092 | 6.34245  |                                                 |
| 20 | 35946608 | 35947067 | 5Y-H4K8ac_peak_11093 | 6.4472   |                                                 |
| 20 | 35954557 | 35954831 | 5Y-H4K8ac_peak_11094 | 11.46984 |                                                 |
| 20 | 35956981 | 35957202 | 5Y-H4K8ac_peak_11095 | 4.50834  |                                                 |
| 20 | 35959676 | 35960581 | 5Y-H4K8ac_peak_11096 | 8.69112  |                                                 |
| 20 | 35960877 | 35961270 | 5Y-H4K8ac_peak_11097 | 14.16341 |                                                 |
| 20 | 35962153 | 35962498 | 5Y-H4K8ac_peak_11098 | 5.77617  |                                                 |
| 20 | 35964638 | 35964895 | 5Y-H4K8ac_peak_11099 | 11.86504 |                                                 |
| 20 | 35974328 | 35974729 | 5Y-H4K8ac_peak_11100 | 16.49371 |                                                 |
| 20 | 35974938 | 35975369 | 5Y-H4K8ac_peak_11101 | 8.31764  |                                                 |
| 20 | 35984457 | 35984774 | 5Y-H4K8ac_peak_11102 | 4.15658  |                                                 |
| 20 | 36013358 | 36013748 | 5Y-H4K8ac_peak_11103 | 5.75508  |                                                 |
| 20 | 36021156 | 36021686 | 5Y-H4K8ac_peak_11104 | 10.0695  |                                                 |
| 20 | 36022080 | 36022995 | 5Y-H4K8ac_peak_11105 | 11.69482 |                                                 |
| 20 | 36023644 | 36024747 | 5Y-H4K8ac_peak_11106 | 20.99383 |                                                 |
| 20 | 36024950 | 36025648 | 5Y-H4K8ac_peak_11107 | 13.12848 |                                                 |
| 20 | 36034786 | 36035089 | 5Y-H4K8ac_peak_11108 | 8.09118  |                                                 |
| 20 | 36036254 | 36036517 | 5Y-H4K8ac_peak_11109 | 5.18558  |                                                 |
| 20 | 36037114 | 36037699 | 5Y-H4K8ac_peak_11110 | 13.81774 |                                                 |
| 20 | 36041916 | 36042179 | 5Y-H4K8ac_peak_11111 | 5.39991  |                                                 |
| 20 | 36226376 | 36226769 | 5Y-H4K8ac_peak_11112 | 12.81408 |                                                 |
| 20 | 36298225 | 36298426 | 5Y-H4K8ac_peak_11113 | 5.65584  |                                                 |
| 20 | 36340375 | 36340594 | 5Y-H4K8ac_peak_11114 | 8.33296  |                                                 |
| 20 | 36497903 | 36498105 | 5Y-H4K8ac_peak_11115 | 7.89273  |                                                 |
| 20 | 36510038 | 36510247 | 5Y-H4K8ac_peak_11116 | 4.36976  |                                                 |
| 20 | 36510594 | 36510983 | 5Y-H4K8ac_peak_11117 | 5.67588  |                                                 |
| 20 | 36531532 | 36531792 | 5Y-H4K8ac_peak_11118 | 11.01067 | VSTM2L_ENSG00000132821                          |
| 20 | 36540794 | 36541211 | 5Y-H4K8ac_peak_11119 | 4.642    |                                                 |
| 20 | 36543564 | 36543988 | 5Y-H4K8ac_peak_11120 | 11.60073 |                                                 |
| 20 | 36661928 | 36662325 | 5Y-H4K8ac_peak_11121 | 15.75437 | TTI1_ENSG00000101407;RPRD1B_ENSG00000101413     |
| 20 | 36736330 | 36736589 | 5Y-H4K8ac_peak_11122 | 4.84727  |                                                 |
| 20 | 36772310 | 36772504 | 5Y-H4K8ac_peak_11123 | 6.38173  |                                                 |
| 20 | 36780965 | 36781301 | 5Y-H4K8ac_peak_11124 | 7.38046  |                                                 |
| 20 | 36888705 | 36889028 | 5Y-H4K8ac_peak_11125 | 4.50834  | KIAA1755_ENSG00000149633;BPI_ENSG00000101425    |
| 20 | 36927056 | 36927377 | 5Y-H4K8ac_peak_11126 | 7.3889   |                                                 |
| 20 | 37063584 | 37063791 | 5Y-H4K8ac_peak_11127 | 6.53157  | SNHG17_ENSG00000196756;SNORA71D_ENSG00000200354 |
| 20 | 37075342 | 37075710 | 5Y-H4K8ac_peak_11128 | 15.40182 | SNHG11_ENSG00000174365                          |
| 20 | 37258167 | 37258412 | 5Y-H4K8ac_peak_11129 | 4.95697  |                                                 |
| 20 | 37287380 | 37288141 | 5Y-H4K8ac_peak_11130 | 5.718    |                                                 |

|    |          |          |                      |          |                                                 |
|----|----------|----------|----------------------|----------|-------------------------------------------------|
| 20 | 37302753 | 37302998 | 5Y-H4K8ac_peak_11131 | 7.50148  |                                                 |
| 20 | 37495085 | 37495370 | 5Y-H4K8ac_peak_11132 | 9.30505  |                                                 |
| 20 | 37495831 | 37496090 | 5Y-H4K8ac_peak_11133 | 6.08523  |                                                 |
| 20 | 37501175 | 37501433 | 5Y-H4K8ac_peak_11134 | 5.87725  | RN7SL116P_ENSG00000240474                       |
| 20 | 37502758 | 37503475 | 5Y-H4K8ac_peak_11135 | 14.25523 |                                                 |
| 20 | 37504255 | 37504911 | 5Y-H4K8ac_peak_11136 | 7.59101  |                                                 |
| 20 | 37509662 | 37510081 | 5Y-H4K8ac_peak_11137 | 4.77126  |                                                 |
| 20 | 37510773 | 37511972 | 5Y-H4K8ac_peak_11138 | 9.79526  |                                                 |
| 20 | 37512698 | 37512945 | 5Y-H4K8ac_peak_11139 | 12.45737 |                                                 |
| 20 | 37513182 | 37513401 | 5Y-H4K8ac_peak_11140 | 8.43511  |                                                 |
| 20 | 37516966 | 37517309 | 5Y-H4K8ac_peak_11141 | 5.64909  |                                                 |
| 20 | 37522288 | 37522646 | 5Y-H4K8ac_peak_11142 | 11.19336 |                                                 |
| 20 | 37677910 | 37678814 | 5Y-H4K8ac_peak_11143 | 16.1136  |                                                 |
| 20 | 39525331 | 39525628 | 5Y-H4K8ac_peak_11144 | 6.73047  |                                                 |
| 20 | 39620326 | 39620619 | 5Y-H4K8ac_peak_11145 | 4.84727  |                                                 |
| 20 | 39658227 | 39658425 | 5Y-H4K8ac_peak_11146 | 10.79655 | TOP1_ENSG00000198900                            |
| 20 | 39765636 | 39766541 | 5Y-H4K8ac_peak_11147 | 22.46875 | RP1-1J6.2_ENSG00000226648;PLCG1_ENSG00000124181 |
| 20 | 40016068 | 40016372 | 5Y-H4K8ac_peak_11148 | 8.2913   |                                                 |
| 20 | 40321271 | 40321500 | 5Y-H4K8ac_peak_11149 | 8.4454   |                                                 |
| 20 | 40680766 | 40681353 | 5Y-H4K8ac_peak_11150 | 7.64675  |                                                 |
| 20 | 40753412 | 40753675 | 5Y-H4K8ac_peak_11151 | 6.00388  |                                                 |
| 20 | 42018764 | 42019023 | 5Y-H4K8ac_peak_11152 | 5.40331  |                                                 |
| 20 | 42070911 | 42071203 | 5Y-H4K8ac_peak_11153 | 4.79585  |                                                 |
| 20 | 42073866 | 42075143 | 5Y-H4K8ac_peak_11154 | 4.77126  |                                                 |
| 20 | 42075577 | 42075970 | 5Y-H4K8ac_peak_11155 | 9.15007  |                                                 |
| 20 | 42086573 | 42086894 | 5Y-H4K8ac_peak_11156 | 25.09495 | SRSF6_ENSG00000124193                           |
| 20 | 42285916 | 42286141 | 5Y-H4K8ac_peak_11157 | 12.2918  |                                                 |
| 20 | 42296016 | 42296215 | 5Y-H4K8ac_peak_11158 | 5.98695  | MYBL2_ENSG00000101057                           |
| 20 | 42395355 | 42395831 | 5Y-H4K8ac_peak_11159 | 6.20875  |                                                 |
| 20 | 42542937 | 42543221 | 5Y-H4K8ac_peak_11160 | 9.30338  | TOX2_ENSG00000124191                            |
| 20 | 42587164 | 42587992 | 5Y-H4K8ac_peak_11161 | 8.00339  |                                                 |
| 20 | 42590013 | 42590427 | 5Y-H4K8ac_peak_11162 | 7.76232  |                                                 |
| 20 | 42590912 | 42591400 | 5Y-H4K8ac_peak_11163 | 7.59101  |                                                 |
| 20 | 42611068 | 42611310 | 5Y-H4K8ac_peak_11164 | 5.98695  |                                                 |
| 20 | 42623440 | 42623662 | 5Y-H4K8ac_peak_11165 | 8.88899  |                                                 |
| 20 | 42637570 | 42637856 | 5Y-H4K8ac_peak_11166 | 7.87406  |                                                 |
| 20 | 42638315 | 42638607 | 5Y-H4K8ac_peak_11167 | 8.43511  |                                                 |
| 20 | 42641485 | 42641774 | 5Y-H4K8ac_peak_11168 | 8.62703  |                                                 |
| 20 | 42642305 | 42642653 | 5Y-H4K8ac_peak_11169 | 7.15925  |                                                 |
| 20 | 42643287 | 42643815 | 5Y-H4K8ac_peak_11170 | 9.22312  |                                                 |
| 20 | 42644746 | 42645291 | 5Y-H4K8ac_peak_11171 | 14.87721 |                                                 |
| 20 | 42645679 | 42646351 | 5Y-H4K8ac_peak_11172 | 12.21176 |                                                 |
| 20 | 42647262 | 42647618 | 5Y-H4K8ac_peak_11173 | 11.9478  |                                                 |
| 20 | 42648567 | 42648996 | 5Y-H4K8ac_peak_11174 | 7.30348  |                                                 |
| 20 | 42649283 | 42649583 | 5Y-H4K8ac_peak_11175 | 5.18558  |                                                 |
| 20 | 42655310 | 42655525 | 5Y-H4K8ac_peak_11176 | 8.11614  |                                                 |

|    |          |          |                      |          |                                                        |
|----|----------|----------|----------------------|----------|--------------------------------------------------------|
| 20 | 42657553 | 42657788 | 5Y-H4K8ac_peak_11177 | 8.79957  |                                                        |
| 20 | 42658524 | 42658797 | 5Y-H4K8ac_peak_11178 | 4.04213  |                                                        |
| 20 | 42660791 | 42661066 | 5Y-H4K8ac_peak_11179 | 9.21468  |                                                        |
| 20 | 42662543 | 42662979 | 5Y-H4K8ac_peak_11180 | 8.37729  |                                                        |
| 20 | 42663907 | 42664403 | 5Y-H4K8ac_peak_11181 | 5.23083  |                                                        |
| 20 | 42667792 | 42668260 | 5Y-H4K8ac_peak_11182 | 6.95541  |                                                        |
| 20 | 42703641 | 42704218 | 5Y-H4K8ac_peak_11183 | 13.33225 |                                                        |
| 20 | 42710159 | 42710490 | 5Y-H4K8ac_peak_11184 | 4.29586  |                                                        |
| 20 | 42810942 | 42811145 | 5Y-H4K8ac_peak_11185 | 6.34046  |                                                        |
| 20 | 42839029 | 42839342 | 5Y-H4K8ac_peak_11186 | 10.12234 | OSER1_ENSG00000132823;OSER1-AS1_ENSG00000223891        |
| 20 | 42875405 | 42876199 | 5Y-H4K8ac_peak_11187 | 7.11863  | GDAP1L1_ENSG00000124194                                |
| 20 | 43104554 | 43104860 | 5Y-H4K8ac_peak_11188 | 6.53157  | TTPAL_ENSG00000124120                                  |
| 20 | 43160191 | 43160767 | 5Y-H4K8ac_peak_11189 | 23.17788 | PKIG_ENSG00000168734                                   |
| 20 | 43237834 | 43238318 | 5Y-H4K8ac_peak_11190 | 5.23083  |                                                        |
| 20 | 43280104 | 43280304 | 5Y-H4K8ac_peak_11191 | 9.05168  | ADA_ENSG00000196839                                    |
| 20 | 43374450 | 43375018 | 5Y-H4K8ac_peak_11192 | 7.89273  | RP11-445H22.4_ENSG00000244558;KCNK15_ENSG00000124249   |
| 20 | 43390040 | 43390251 | 5Y-H4K8ac_peak_11193 | 6.13919  |                                                        |
| 20 | 43390789 | 43390993 | 5Y-H4K8ac_peak_11194 | 5.41472  |                                                        |
| 20 | 43439300 | 43439705 | 5Y-H4K8ac_peak_11195 | 6.50117  | RIMS4_ENSG00000101098                                  |
| 20 | 43514425 | 43514698 | 5Y-H4K8ac_peak_11196 | 9.51254  | YWHAB_ENSG00000166913                                  |
| 20 | 44034724 | 44035134 | 5Y-H4K8ac_peak_11197 | 10.11191 | DBNDD2_ENSG00000244274                                 |
| 20 | 44035366 | 44035794 | 5Y-H4K8ac_peak_11198 | 7.3565   | TP53TG5_ENSG00000124251;DBNDD2_ENSG00000244274         |
| 20 | 44044396 | 44044589 | 5Y-H4K8ac_peak_11199 | 6.50117  | PIGT_ENSG00000124155                                   |
| 20 | 44400120 | 44400747 | 5Y-H4K8ac_peak_11200 | 11.1169  |                                                        |
| 20 | 44420646 | 44420836 | 5Y-H4K8ac_peak_11201 | 6.22904  | WFDC3_ENSG00000124116;DNNTIP1_ENSG00000101457          |
| 20 | 44462191 | 44463058 | 5Y-H4K8ac_peak_11202 | 9.89244  | TNNC2_ENSG00000101470;SNX21_ENSG00000124104            |
| 20 | 44470250 | 44470456 | 5Y-H4K8ac_peak_11203 | 6.34046  |                                                        |
| 20 | 44519029 | 44519844 | 5Y-H4K8ac_peak_11204 | 5.72233  | NEURL2_ENSG00000124257;CTSA_ENSG00000064601            |
| 20 | 44546754 | 44546949 | 5Y-H4K8ac_peak_11205 | 5.68769  |                                                        |
| 20 | 44563379 | 44563642 | 5Y-H4K8ac_peak_11206 | 16.33454 | PCIF1_ENSG00000100982                                  |
| 20 | 44600633 | 44600941 | 5Y-H4K8ac_peak_11207 | 7.27671  | ZNF335_ENSG00000198026                                 |
| 20 | 44650325 | 44650529 | 5Y-H4K8ac_peak_11208 | 11.53136 | RP11-465L10.10_ENSG00000204044;SLC12A5_ENSG00000124140 |
| 20 | 44718323 | 44718578 | 5Y-H4K8ac_peak_11209 | 13.85283 | NCOA5_ENSG00000124160                                  |
| 20 | 44757519 | 44757910 | 5Y-H4K8ac_peak_11210 | 5.59843  |                                                        |
| 20 | 44767723 | 44768388 | 5Y-H4K8ac_peak_11211 | 15.40182 |                                                        |
| 20 | 44768656 | 44768878 | 5Y-H4K8ac_peak_11212 | 8.2913   |                                                        |
| 20 | 44844361 | 44844581 | 5Y-H4K8ac_peak_11213 | 8.24461  |                                                        |
| 20 | 44844898 | 44845228 | 5Y-H4K8ac_peak_11214 | 11.48691 |                                                        |
| 20 | 44960722 | 44961174 | 5Y-H4K8ac_peak_11215 | 7.52971  |                                                        |
| 20 | 44961676 | 44961950 | 5Y-H4K8ac_peak_11216 | 5.81394  |                                                        |
| 20 | 44992709 | 44993000 | 5Y-H4K8ac_peak_11217 | 14.89891 | SLC35C2_ENSG00000080189                                |
| 20 | 45141863 | 45142142 | 5Y-H4K8ac_peak_11218 | 12.10416 | ZNF334_ENSG00000198185                                 |
| 20 | 45337988 | 45338719 | 5Y-H4K8ac_peak_11219 | 16.01457 | SLC2A10_ENSG00000197496                                |
| 20 | 45440124 | 45440320 | 5Y-H4K8ac_peak_11220 | 7.31815  | AL031055.1_ENSG00000266136                             |
| 20 | 45523246 | 45523487 | 5Y-H4K8ac_peak_11221 | 10.27264 | EYA2_ENSG00000064655                                   |
| 20 | 45592320 | 45592529 | 5Y-H4K8ac_peak_11222 | 5.64909  |                                                        |



|    |          |          |                      |          |                                                                      |
|----|----------|----------|----------------------|----------|----------------------------------------------------------------------|
| 20 | 45659051 | 45660154 | 5Y-H4K8ac_peak_11223 | 10.19948 |                                                                      |
| 20 | 45770813 | 45771022 | 5Y-H4K8ac_peak_11224 | 11.53521 |                                                                      |
| 20 | 45897232 | 45897446 | 5Y-H4K8ac_peak_11225 | 5.23083  |                                                                      |
| 20 | 45985819 | 45986863 | 5Y-H4K8ac_peak_11226 | 14.89891 | ZMYND8_ENSG00000101040                                               |
| 20 | 45987467 | 45987682 | 5Y-H4K8ac_peak_11227 | 7.03573  |                                                                      |
| 20 | 46130725 | 46130980 | 5Y-H4K8ac_peak_11228 | 9.06776  | NCOA3_ENSG00000124151                                                |
| 20 | 46335330 | 46335521 | 5Y-H4K8ac_peak_11229 | 8.49231  |                                                                      |
| 20 | 46336979 | 46337180 | 5Y-H4K8ac_peak_11230 | 6.31818  |                                                                      |
| 20 | 46338120 | 46339631 | 5Y-H4K8ac_peak_11231 | 11.99586 |                                                                      |
| 20 | 46339980 | 46340315 | 5Y-H4K8ac_peak_11232 | 6.77436  |                                                                      |
| 20 | 46340886 | 46341146 | 5Y-H4K8ac_peak_11233 | 10.19948 |                                                                      |
| 20 | 46342659 | 46342954 | 5Y-H4K8ac_peak_11234 | 7.31815  |                                                                      |
| 20 | 46586423 | 46586705 | 5Y-H4K8ac_peak_11235 | 7.59101  | RP11-347D21.2_ENSG00000228503                                        |
| 20 | 46591376 | 46591732 | 5Y-H4K8ac_peak_11236 | 11.62149 |                                                                      |
| 20 | 46653658 | 46654040 | 5Y-H4K8ac_peak_11237 | 7.31815  |                                                                      |
| 20 | 46680226 | 46680578 | 5Y-H4K8ac_peak_11238 | 4.9885   |                                                                      |
| 20 | 46725020 | 46725253 | 5Y-H4K8ac_peak_11239 | 5.81062  |                                                                      |
| 20 | 46823605 | 46823802 | 5Y-H4K8ac_peak_11240 | 7.31807  |                                                                      |
| 20 | 46928625 | 46928846 | 5Y-H4K8ac_peak_11241 | 7.53429  |                                                                      |
| 20 | 46996420 | 46996635 | 5Y-H4K8ac_peak_11242 | 9.84749  |                                                                      |
| 20 | 47026513 | 47026842 | 5Y-H4K8ac_peak_11243 | 12.52787 |                                                                      |
| 20 | 47029404 | 47029754 | 5Y-H4K8ac_peak_11244 | 6.46606  |                                                                      |
| 20 | 47236602 | 47236975 | 5Y-H4K8ac_peak_11245 | 10.79063 |                                                                      |
| 20 | 47319036 | 47319239 | 5Y-H4K8ac_peak_11246 | 8.86184  |                                                                      |
| 20 | 47538337 | 47538932 | 5Y-H4K8ac_peak_11247 | 8.62703  | ARFGEF2_ENSG00000124198                                              |
| 20 | 47835985 | 47836432 | 5Y-H4K8ac_peak_11248 | 9.97632  | DDX27_ENSG00000124228                                                |
| 20 | 47894393 | 47894973 | 5Y-H4K8ac_peak_11249 | 10.99773 | ZNFX1_ENSG00000124201;ZFAS1_ENSG00000177410;SNORD12C_ENSG00000209042 |
| 20 | 47996830 | 47997034 | 5Y-H4K8ac_peak_11250 | 4.77126  |                                                                      |
| 20 | 48100377 | 48100604 | 5Y-H4K8ac_peak_11251 | 5.23083  |                                                                      |
| 20 | 48125368 | 48125671 | 5Y-H4K8ac_peak_11252 | 8.43511  |                                                                      |
| 20 | 48184068 | 48184659 | 5Y-H4K8ac_peak_11253 | 18.77281 | PTGIS_ENSG00000124212                                                |
| 20 | 48364509 | 48364739 | 5Y-H4K8ac_peak_11254 | 7.89142  |                                                                      |
| 20 | 48531569 | 48532601 | 5Y-H4K8ac_peak_11255 | 13.2534  | SPATA2_ENSG00000158480                                               |
| 20 | 48605582 | 48606070 | 5Y-H4K8ac_peak_11256 | 5.98695  |                                                                      |
| 20 | 48606698 | 48607174 | 5Y-H4K8ac_peak_11257 | 12.61054 |                                                                      |
| 20 | 48630930 | 48631160 | 5Y-H4K8ac_peak_11258 | 6.77436  |                                                                      |
| 20 | 48631659 | 48631970 | 5Y-H4K8ac_peak_11259 | 5.98695  |                                                                      |
| 20 | 48632242 | 48633013 | 5Y-H4K8ac_peak_11260 | 9.7353   |                                                                      |
| 20 | 48646513 | 48646703 | 5Y-H4K8ac_peak_11261 | 5.44849  |                                                                      |
| 20 | 48729217 | 48729628 | 5Y-H4K8ac_peak_11262 | 18.22239 |                                                                      |
| 20 | 48769770 | 48770212 | 5Y-H4K8ac_peak_11263 | 14.1808  | TMEM189-UBE2V1_ENSG00000124208;TMEM189_ENSG00000240849               |
| 20 | 48770427 | 48770840 | 5Y-H4K8ac_peak_11264 | 16.01457 | TMEM189-UBE2V1_ENSG00000124208;TMEM189_ENSG00000240849               |
| 20 | 48775303 | 48775517 | 5Y-H4K8ac_peak_11265 | 7.21406  |                                                                      |
| 20 | 48808013 | 48808415 | 5Y-H4K8ac_peak_11266 | 5.23083  | CEBPB_ENSG00000172216                                                |
| 20 | 48859779 | 48859987 | 5Y-H4K8ac_peak_11267 | 4.84727  |                                                                      |
| 20 | 48901785 | 48902055 | 5Y-H4K8ac_peak_11268 | 4.15658  |                                                                      |

|    |          |          |                      |          |                                                   |
|----|----------|----------|----------------------|----------|---------------------------------------------------|
| 20 | 48920687 | 48921274 | 5Y-H4K8ac_peak_11269 | 8.28346  |                                                   |
| 20 | 48921853 | 48922192 | 5Y-H4K8ac_peak_11270 | 7.30348  |                                                   |
| 20 | 48923013 | 48923243 | 5Y-H4K8ac_peak_11271 | 4.95697  |                                                   |
| 20 | 48925521 | 48925844 | 5Y-H4K8ac_peak_11272 | 7.11863  |                                                   |
| 20 | 48962452 | 48962654 | 5Y-H4K8ac_peak_11273 | 7.89273  |                                                   |
| 20 | 49032138 | 49032332 | 5Y-H4K8ac_peak_11274 | 8.59175  |                                                   |
| 20 | 49233388 | 49233608 | 5Y-H4K8ac_peak_11275 | 5.16353  |                                                   |
| 20 | 49244543 | 49245008 | 5Y-H4K8ac_peak_11276 | 5.91107  |                                                   |
| 20 | 49245407 | 49245615 | 5Y-H4K8ac_peak_11277 | 7.50148  |                                                   |
| 20 | 49347161 | 49347500 | 5Y-H4K8ac_peak_11278 | 5.51759  | PARD6B_ENSG00000124171                            |
| 20 | 49406973 | 49407650 | 5Y-H4K8ac_peak_11279 | 13.0168  |                                                   |
| 20 | 49435017 | 49435241 | 5Y-H4K8ac_peak_11280 | 5.22422  |                                                   |
| 20 | 49462067 | 49462502 | 5Y-H4K8ac_peak_11281 | 8.748    |                                                   |
| 20 | 49546968 | 49547754 | 5Y-H4K8ac_peak_11282 | 19.90109 | ADNP_ENSG00000101126;RP5-914P20.5_ENSG00000259456 |
| 20 | 49548394 | 49548779 | 5Y-H4K8ac_peak_11283 | 5.41472  | ADNP_ENSG00000101126;RP5-914P20.5_ENSG00000259456 |
| 20 | 49575414 | 49575725 | 5Y-H4K8ac_peak_11284 | 8.21582  | DPM1_ENSG00000000419;MOCS3_ENSG00000124217        |
| 20 | 49639150 | 49639444 | 5Y-H4K8ac_peak_11285 | 6.10343  | KCNG1_ENSG00000026559                             |
| 20 | 49742557 | 49743037 | 5Y-H4K8ac_peak_11286 | 7.68492  |                                                   |
| 20 | 49747442 | 49748000 | 5Y-H4K8ac_peak_11287 | 11.18077 | RPSAP1_ENSG00000228820                            |
| 20 | 50028682 | 50029344 | 5Y-H4K8ac_peak_11288 | 8.2913   |                                                   |
| 20 | 50073163 | 50073404 | 5Y-H4K8ac_peak_11289 | 7.90236  |                                                   |
| 20 | 50529262 | 50529681 | 5Y-H4K8ac_peak_11290 | 14.30317 |                                                   |
| 20 | 50807782 | 50809200 | 5Y-H4K8ac_peak_11291 | 24.88295 |                                                   |
| 20 | 51791841 | 51792067 | 5Y-H4K8ac_peak_11292 | 6.34046  |                                                   |
| 20 | 52209567 | 52209871 | 5Y-H4K8ac_peak_11293 | 9.38203  |                                                   |
| 20 | 52240220 | 52240577 | 5Y-H4K8ac_peak_11294 | 9.13822  |                                                   |
| 20 | 52532112 | 52532321 | 5Y-H4K8ac_peak_11295 | 5.03335  |                                                   |
| 20 | 52824633 | 52824850 | 5Y-H4K8ac_peak_11296 | 6.98416  | PFDN4_ENSG00000101132                             |
| 20 | 54096819 | 54097442 | 5Y-H4K8ac_peak_11297 | 13.60015 |                                                   |
| 20 | 54580219 | 54580607 | 5Y-H4K8ac_peak_11298 | 10.11191 | CBLN4_ENSG00000054803                             |
| 20 | 54736234 | 54736465 | 5Y-H4K8ac_peak_11299 | 5.25503  |                                                   |
| 20 | 54741331 | 54741540 | 5Y-H4K8ac_peak_11300 | 5.40331  |                                                   |
| 20 | 54934126 | 54934335 | 5Y-H4K8ac_peak_11301 | 5.35202  | FAM210B_ENSG00000124098                           |
| 20 | 55717085 | 55717640 | 5Y-H4K8ac_peak_11302 | 7.73231  |                                                   |
| 20 | 55717895 | 55718112 | 5Y-H4K8ac_peak_11303 | 10.69698 |                                                   |
| 20 | 55799561 | 55799753 | 5Y-H4K8ac_peak_11304 | 8.21582  |                                                   |
| 20 | 55817166 | 55817556 | 5Y-H4K8ac_peak_11305 | 9.96543  |                                                   |
| 20 | 55817871 | 55818250 | 5Y-H4K8ac_peak_11306 | 6.76091  |                                                   |
| 20 | 55818694 | 55819028 | 5Y-H4K8ac_peak_11307 | 7.30348  |                                                   |
| 20 | 55819225 | 55819715 | 5Y-H4K8ac_peak_11308 | 5.41472  |                                                   |
| 20 | 55826585 | 55826797 | 5Y-H4K8ac_peak_11309 | 5.91107  |                                                   |
| 20 | 55840399 | 55841068 | 5Y-H4K8ac_peak_11310 | 9.3149   | BMP7_ENSG00000101144;RP4-813D12.3_ENSG00000226308 |
| 20 | 55841508 | 55841721 | 5Y-H4K8ac_peak_11311 | 12.06963 | BMP7_ENSG00000101144;RP4-813D12.3_ENSG00000226308 |
| 20 | 55926370 | 55926840 | 5Y-H4K8ac_peak_11312 | 14.31711 | RAE1_ENSG00000101146                              |
| 20 | 55965640 | 55965857 | 5Y-H4K8ac_peak_11313 | 4.50834  | RBM38_ENSG00000132819                             |
| 20 | 55983891 | 55984174 | 5Y-H4K8ac_peak_11314 | 7.21932  |                                                   |

|    |          |          |                      |          |                                                    |
|----|----------|----------|----------------------|----------|----------------------------------------------------|
| 20 | 56015770 | 56016585 | 5Y-H4K8ac_peak_11315 | 10.35586 |                                                    |
| 20 | 56045623 | 56046296 | 5Y-H4K8ac_peak_11316 | 6.62622  |                                                    |
| 20 | 56171821 | 56172044 | 5Y-H4K8ac_peak_11317 | 5.35202  |                                                    |
| 20 | 56228327 | 56228518 | 5Y-H4K8ac_peak_11318 | 6.77436  |                                                    |
| 20 | 56241586 | 56241827 | 5Y-H4K8ac_peak_11319 | 5.79005  |                                                    |
| 20 | 56247321 | 56247823 | 5Y-H4K8ac_peak_11320 | 9.01966  |                                                    |
| 20 | 56257444 | 56257652 | 5Y-H4K8ac_peak_11321 | 6.31818  |                                                    |
| 20 | 56258770 | 56259211 | 5Y-H4K8ac_peak_11322 | 6.77436  |                                                    |
| 20 | 56260959 | 56261347 | 5Y-H4K8ac_peak_11323 | 7.12953  |                                                    |
| 20 | 56323127 | 56323378 | 5Y-H4K8ac_peak_11324 | 6.73047  |                                                    |
| 20 | 56323970 | 56324455 | 5Y-H4K8ac_peak_11325 | 15.28394 |                                                    |
| 20 | 56378279 | 56378479 | 5Y-H4K8ac_peak_11326 | 5.24695  |                                                    |
| 20 | 56412359 | 56412990 | 5Y-H4K8ac_peak_11327 | 8.41685  |                                                    |
| 20 | 56414427 | 56415144 | 5Y-H4K8ac_peak_11328 | 11.01067 |                                                    |
| 20 | 56457646 | 56458088 | 5Y-H4K8ac_peak_11329 | 7.09658  |                                                    |
| 20 | 56483333 | 56483725 | 5Y-H4K8ac_peak_11330 | 7.59101  |                                                    |
| 20 | 56568884 | 56569287 | 5Y-H4K8ac_peak_11331 | 8.43511  |                                                    |
| 20 | 56573818 | 56574306 | 5Y-H4K8ac_peak_11332 | 6.77436  |                                                    |
| 20 | 56574524 | 56574855 | 5Y-H4K8ac_peak_11333 | 7.59101  |                                                    |
| 20 | 56575316 | 56575594 | 5Y-H4K8ac_peak_11334 | 5.52265  |                                                    |
| 20 | 56575842 | 56576170 | 5Y-H4K8ac_peak_11335 | 9.01738  |                                                    |
| 20 | 56576857 | 56577423 | 5Y-H4K8ac_peak_11336 | 7.09658  |                                                    |
| 20 | 56578614 | 56578828 | 5Y-H4K8ac_peak_11337 | 6.73385  |                                                    |
| 20 | 56594865 | 56595064 | 5Y-H4K8ac_peak_11338 | 6.27097  |                                                    |
| 20 | 56595301 | 56595521 | 5Y-H4K8ac_peak_11339 | 5.65584  |                                                    |
| 20 | 56596577 | 56596834 | 5Y-H4K8ac_peak_11340 | 7.83553  |                                                    |
| 20 | 56612738 | 56613306 | 5Y-H4K8ac_peak_11341 | 7.59832  |                                                    |
| 20 | 56615163 | 56616358 | 5Y-H4K8ac_peak_11342 | 13.00733 |                                                    |
| 20 | 56618095 | 56618441 | 5Y-H4K8ac_peak_11343 | 7.14092  |                                                    |
| 20 | 56622646 | 56623206 | 5Y-H4K8ac_peak_11344 | 9.22312  |                                                    |
| 20 | 56650803 | 56651386 | 5Y-H4K8ac_peak_11345 | 10.1994  |                                                    |
| 20 | 56749599 | 56750197 | 5Y-H4K8ac_peak_11346 | 10.54321 |                                                    |
| 20 | 56751966 | 56752193 | 5Y-H4K8ac_peak_11347 | 6.21836  |                                                    |
| 20 | 56754548 | 56755097 | 5Y-H4K8ac_peak_11348 | 10.21117 |                                                    |
| 20 | 56964434 | 56964804 | 5Y-H4K8ac_peak_11349 | 16.52279 | VAPB_ENSG00000124164                               |
| 20 | 57046213 | 57046456 | 5Y-H4K8ac_peak_11350 | 5.98695  |                                                    |
| 20 | 57225935 | 57226669 | 5Y-H4K8ac_peak_11351 | 20.83544 | STX16_ENSG00000124222;STX16-NPEPL1_ENSG00000254995 |
| 20 | 57273655 | 57273975 | 5Y-H4K8ac_peak_11352 | 4.84727  |                                                    |
| 20 | 57292063 | 57292268 | 5Y-H4K8ac_peak_11353 | 6.55841  |                                                    |
| 20 | 57607057 | 57607340 | 5Y-H4K8ac_peak_11354 | 15.92074 | ATP5E_ENSG00000124172                              |
| 20 | 57618172 | 57618684 | 5Y-H4K8ac_peak_11355 | 8.43511  | SLMO2_ENSG00000101166                              |
| 20 | 57797268 | 57797608 | 5Y-H4K8ac_peak_11356 | 7.59101  |                                                    |
| 20 | 57978428 | 57978816 | 5Y-H4K8ac_peak_11357 | 8.20773  |                                                    |
| 20 | 58152227 | 58152730 | 5Y-H4K8ac_peak_11358 | 5.23083  | PHACTR3_ENSG00000087495                            |
| 20 | 58178879 | 58179287 | 5Y-H4K8ac_peak_11359 | 4.95697  |                                                    |
| 20 | 58180326 | 58180705 | 5Y-H4K8ac_peak_11360 | 4.0639   |                                                    |

|    |          |          |                      |          |                                                      |
|----|----------|----------|----------------------|----------|------------------------------------------------------|
| 20 | 58508286 | 58508690 | 5Y-H4K8ac_peak_11361 | 12.10416 | SYCP2_ENSG00000196074;FAM217B_ENSG00000196227        |
| 20 | 58508992 | 58509282 | 5Y-H4K8ac_peak_11362 | 15.3483  | SYCP2_ENSG00000196074;FAM217B_ENSG00000196227        |
| 20 | 60717633 | 60717872 | 5Y-H4K8ac_peak_11363 | 5.41472  | PSMA7_ENSG00000101182;SS18L1_ENSG00000184402         |
| 20 | 60718141 | 60718360 | 5Y-H4K8ac_peak_11364 | 7.89273  | PSMA7_ENSG00000101182;SS18L1_ENSG00000184402         |
| 20 | 60718564 | 60718770 | 5Y-H4K8ac_peak_11365 | 16.01457 | PSMA7_ENSG00000101182;SS18L1_ENSG00000184402         |
| 20 | 60751502 | 60751823 | 5Y-H4K8ac_peak_11366 | 9.23159  |                                                      |
| 20 | 60752131 | 60752390 | 5Y-H4K8ac_peak_11367 | 7.97699  |                                                      |
| 20 | 60758150 | 60758345 | 5Y-H4K8ac_peak_11368 | 6.78128  | MTG2_ENSG00000101181                                 |
| 20 | 60785833 | 60786051 | 5Y-H4K8ac_peak_11369 | 7.31102  |                                                      |
| 20 | 60787508 | 60787767 | 5Y-H4K8ac_peak_11370 | 8.24952  |                                                      |
| 20 | 60878263 | 60878517 | 5Y-H4K8ac_peak_11371 | 10.69698 |                                                      |
| 20 | 60927356 | 60927555 | 5Y-H4K8ac_peak_11372 | 10.15788 | RP11-157P1.5_ENSG00000228812                         |
| 20 | 60928062 | 60928938 | 5Y-H4K8ac_peak_11373 | 10.54764 | RP11-157P1.5_ENSG00000228812                         |
| 20 | 60930175 | 60931122 | 5Y-H4K8ac_peak_11374 | 16.49365 |                                                      |
| 20 | 60931660 | 60932099 | 5Y-H4K8ac_peak_11375 | 9.51254  |                                                      |
| 20 | 60932863 | 60933645 | 5Y-H4K8ac_peak_11376 | 9.02782  |                                                      |
| 20 | 60938143 | 60938342 | 5Y-H4K8ac_peak_11377 | 5.75508  |                                                      |
| 20 | 60942089 | 60942319 | 5Y-H4K8ac_peak_11378 | 7.89273  | LAMA5_ENSG00000130702                                |
| 20 | 60942514 | 60942778 | 5Y-H4K8ac_peak_11379 | 11.60073 | LAMA5_ENSG00000130702                                |
| 20 | 60942981 | 60943189 | 5Y-H4K8ac_peak_11380 | 4.00285  | LAMA5_ENSG00000130702                                |
| 20 | 60943472 | 60943938 | 5Y-H4K8ac_peak_11381 | 6.78318  |                                                      |
| 20 | 60945091 | 60945851 | 5Y-H4K8ac_peak_11382 | 7.59101  |                                                      |
| 20 | 60946108 | 60946492 | 5Y-H4K8ac_peak_11383 | 7.60057  |                                                      |
| 20 | 60961656 | 60961936 | 5Y-H4K8ac_peak_11384 | 9.45199  | RPS21_ENSG00000171858                                |
| 20 | 60982528 | 60983450 | 5Y-H4K8ac_peak_11385 | 7.50148  | CABLES2_ENSG00000149679                              |
| 20 | 60985226 | 60985652 | 5Y-H4K8ac_peak_11386 | 11.68317 |                                                      |
| 20 | 61068392 | 61068649 | 5Y-H4K8ac_peak_11387 | 4.07874  |                                                      |
| 20 | 61264419 | 61264665 | 5Y-H4K8ac_peak_11388 | 4.50834  | RP13-30A9.2_ENSG00000229882                          |
| 20 | 61273234 | 61273669 | 5Y-H4K8ac_peak_11389 | 9.45199  | RP11-93B14.6_ENSG00000167046;SLCO4A1_ENSG00000101187 |
| 20 | 61274175 | 61274393 | 5Y-H4K8ac_peak_11390 | 5.67283  | RP11-93B14.6_ENSG00000167046;SLCO4A1_ENSG00000101187 |
| 20 | 61279832 | 61280221 | 5Y-H4K8ac_peak_11391 | 6.37023  |                                                      |
| 20 | 61281380 | 61281589 | 5Y-H4K8ac_peak_11392 | 5.07797  |                                                      |
| 20 | 61281811 | 61282035 | 5Y-H4K8ac_peak_11393 | 4.0639   |                                                      |
| 20 | 61283198 | 61283904 | 5Y-H4K8ac_peak_11394 | 11.82624 |                                                      |
| 20 | 61306565 | 61307122 | 5Y-H4K8ac_peak_11395 | 6.46053  |                                                      |
| 20 | 61323341 | 61323764 | 5Y-H4K8ac_peak_11396 | 7.11262  |                                                      |
| 20 | 61343056 | 61343287 | 5Y-H4K8ac_peak_11397 | 6.54441  |                                                      |
| 20 | 61392025 | 61392355 | 5Y-H4K8ac_peak_11398 | 11.08752 |                                                      |
| 20 | 61397358 | 61397560 | 5Y-H4K8ac_peak_11399 | 4.728    |                                                      |
| 20 | 61408033 | 61408268 | 5Y-H4K8ac_peak_11400 | 11.1169  |                                                      |
| 20 | 61425199 | 61425488 | 5Y-H4K8ac_peak_11401 | 4.0639   |                                                      |
| 20 | 61426846 | 61427078 | 5Y-H4K8ac_peak_11402 | 6.34245  | MRGBP_ENSG00000101189                                |
| 20 | 61435547 | 61435763 | 5Y-H4K8ac_peak_11403 | 7.83553  | OGFR_ENSG00000060491                                 |
| 20 | 61449529 | 61449829 | 5Y-H4K8ac_peak_11404 | 6.19716  |                                                      |
| 20 | 61450094 | 61451763 | 5Y-H4K8ac_peak_11405 | 13.86751 |                                                      |
| 20 | 61455760 | 61456359 | 5Y-H4K8ac_peak_11406 | 9.05168  |                                                      |

|    |          |          |                      |          |                                                                            |
|----|----------|----------|----------------------|----------|----------------------------------------------------------------------------|
| 20 | 61456588 | 61457017 | 5Y-H4K8ac_peak_11407 | 12.30751 |                                                                            |
| 20 | 61461567 | 61461757 | 5Y-H4K8ac_peak_11408 | 3.93411  |                                                                            |
| 20 | 61464479 | 61464700 | 5Y-H4K8ac_peak_11409 | 4.77126  |                                                                            |
| 20 | 61505725 | 61505992 | 5Y-H4K8ac_peak_11410 | 6.66026  |                                                                            |
| 20 | 61557242 | 61557840 | 5Y-H4K8ac_peak_11411 | 9.30505  |                                                                            |
| 20 | 61568853 | 61569097 | 5Y-H4K8ac_peak_11412 | 12.05638 | DIDO1_ENSG00000101191;GID8_ENSG00000101193                                 |
| 20 | 61847112 | 61847305 | 5Y-H4K8ac_peak_11413 | 6.77436  | YTHDF1_ENSG00000149658                                                     |
| 20 | 61847838 | 61848047 | 5Y-H4K8ac_peak_11414 | 11.08964 | YTHDF1_ENSG00000149658                                                     |
| 20 | 62041056 | 62041298 | 5Y-H4K8ac_peak_11415 | 5.45466  |                                                                            |
| 20 | 62047636 | 62047847 | 5Y-H4K8ac_peak_11416 | 4.6766   |                                                                            |
| 20 | 62048425 | 62048783 | 5Y-H4K8ac_peak_11417 | 8.5915   |                                                                            |
| 20 | 62049283 | 62049550 | 5Y-H4K8ac_peak_11418 | 5.67517  |                                                                            |
| 20 | 62083144 | 62083380 | 5Y-H4K8ac_peak_11419 | 6.54441  |                                                                            |
| 20 | 62083902 | 62084165 | 5Y-H4K8ac_peak_11420 | 6.37023  |                                                                            |
| 20 | 62084911 | 62085367 | 5Y-H4K8ac_peak_11421 | 7.72887  |                                                                            |
| 20 | 62085579 | 62086501 | 5Y-H4K8ac_peak_11422 | 20.32089 |                                                                            |
| 20 | 62086699 | 62087820 | 5Y-H4K8ac_peak_11423 | 16.01457 |                                                                            |
| 20 | 62088621 | 62089364 | 5Y-H4K8ac_peak_11424 | 13.38311 |                                                                            |
| 20 | 62089577 | 62089847 | 5Y-H4K8ac_peak_11425 | 15.17389 |                                                                            |
| 20 | 62095693 | 62095954 | 5Y-H4K8ac_peak_11426 | 4.55128  |                                                                            |
| 20 | 62099792 | 62100057 | 5Y-H4K8ac_peak_11427 | 9.50323  |                                                                            |
| 20 | 62102648 | 62102987 | 5Y-H4K8ac_peak_11428 | 6.27467  |                                                                            |
| 20 | 62103212 | 62103766 | 5Y-H4K8ac_peak_11429 | 11.22005 | KCNQ2_ENSG00000075043                                                      |
| 20 | 62104448 | 62105030 | 5Y-H4K8ac_peak_11430 | 6.59112  | KCNQ2_ENSG00000075043                                                      |
| 20 | 62113658 | 62114580 | 5Y-H4K8ac_peak_11431 | 14.15571 |                                                                            |
| 20 | 62114868 | 62115305 | 5Y-H4K8ac_peak_11432 | 5.35202  |                                                                            |
| 20 | 62130070 | 62130362 | 5Y-H4K8ac_peak_11433 | 7.89273  | EEF1A2_ENSG00000101210                                                     |
| 20 | 62133481 | 62134865 | 5Y-H4K8ac_peak_11434 | 12.11208 | RP4-697K14.3_ENSG00000230226                                               |
| 20 | 62149808 | 62150088 | 5Y-H4K8ac_peak_11435 | 8.51022  |                                                                            |
| 20 | 62151109 | 62151520 | 5Y-H4K8ac_peak_11436 | 8.78565  | PPDPF_ENSG00000125534                                                      |
| 20 | 62168118 | 62169367 | 5Y-H4K8ac_peak_11437 | 13.99721 | PTK6_ENSG00000101213                                                       |
| 20 | 62205701 | 62206215 | 5Y-H4K8ac_peak_11438 | 15.08825 | HELZ2_ENSG00000130589                                                      |
| 20 | 62257759 | 62258050 | 5Y-H4K8ac_peak_11439 | 14.99673 | GMEB2_ENSG00000101216;CTD-3184A7.4_ENSG00000232442                         |
| 20 | 62258700 | 62258950 | 5Y-H4K8ac_peak_11440 | 5.98695  | GMEB2_ENSG00000101216;CTD-3184A7.4_ENSG00000232442                         |
| 20 | 62284405 | 62284641 | 5Y-H4K8ac_peak_11441 | 5.64909  | STMN3_ENSG00000197457                                                      |
| 20 | 62285304 | 62285583 | 5Y-H4K8ac_peak_11442 | 10.16277 | STMN3_ENSG00000197457                                                      |
| 20 | 62288909 | 62289489 | 5Y-H4K8ac_peak_11443 | 13.00733 | RTEL1_ENSG00000258366                                                      |
| 20 | 62338877 | 62339263 | 5Y-H4K8ac_peak_11444 | 10.54764 | ARFRP1_ENSG00000101246;ZGPAT_ENSG00000197114;RP4-583P15.15_ENSG00000273154 |
| 20 | 62486078 | 62486746 | 5Y-H4K8ac_peak_11445 | 7.50044  |                                                                            |
| 20 | 62496707 | 62496921 | 5Y-H4K8ac_peak_11446 | 4.50834  | TPD52L2_ENSG00000101150                                                    |
| 20 | 62600639 | 62600948 | 5Y-H4K8ac_peak_11447 | 9.23159  |                                                                            |
| 20 | 62609867 | 62610379 | 5Y-H4K8ac_peak_11448 | 5.52265  | SAMD10_ENSG00000130590                                                     |
| 20 | 62610762 | 62611654 | 5Y-H4K8ac_peak_11449 | 7.31102  | SAMD10_ENSG00000130590;PRPF6_ENSG00000101161                               |
| 20 | 62669857 | 62670145 | 5Y-H4K8ac_peak_11450 | 4.50834  |                                                                            |
| 20 | 62670710 | 62670990 | 5Y-H4K8ac_peak_11451 | 9.31608  |                                                                            |
| 20 | 62673431 | 62674007 | 5Y-H4K8ac_peak_11452 | 13.00733 |                                                                            |

|    |          |          |                      |          |                                                    |
|----|----------|----------|----------------------|----------|----------------------------------------------------|
| 20 | 62684197 | 62684388 | 5Y-H4K8ac_peak_11453 | 6.52593  |                                                    |
| 20 | 62693668 | 62694282 | 5Y-H4K8ac_peak_11454 | 13.0168  |                                                    |
| 20 | 62710936 | 62711209 | 5Y-H4K8ac_peak_11455 | 7.64648  | RGS19_ENSG00000171700;OPRL1_ENSG00000125510        |
| 20 | 62711588 | 62711818 | 5Y-H4K8ac_peak_11456 | 7.89273  | RGS19_ENSG00000171700;OPRL1_ENSG00000125510        |
| 20 | 62715218 | 62715613 | 5Y-H4K8ac_peak_11457 | 9.22312  | C20orf201_ENSG00000171695                          |
| 20 | 62733649 | 62733910 | 5Y-H4K8ac_peak_11458 | 4.77126  |                                                    |
| 20 | 62786977 | 62787293 | 5Y-H4K8ac_peak_11459 | 5.91107  |                                                    |
| 20 | 62787670 | 62787993 | 5Y-H4K8ac_peak_11460 | 6.08523  |                                                    |
| 20 | 62886551 | 62886934 | 5Y-H4K8ac_peak_11461 | 9.00954  | PCMTD2_ENSG00000203880                             |
| 21 | 9882115  | 9882318  | 5Y-H4K8ac_peak_11462 | 11.22005 |                                                    |
| 21 | 10597416 | 10598403 | 5Y-H4K8ac_peak_11463 | 8.82355  |                                                    |
| 21 | 10602286 | 10602741 | 5Y-H4K8ac_peak_11464 | 9.14624  |                                                    |
| 21 | 18885383 | 18885718 | 5Y-H4K8ac_peak_11465 | 9.37812  | CXADR_ENSG00000154639                              |
| 21 | 18985405 | 18985674 | 5Y-H4K8ac_peak_11466 | 15.40182 | BTG3_ENSG00000154640                               |
| 21 | 22370087 | 22370545 | 5Y-H4K8ac_peak_11467 | 21.90754 | NCAM2_ENSG00000154654                              |
| 21 | 27011690 | 27012101 | 5Y-H4K8ac_peak_11468 | 7.09658  | JAM2_ENSG00000154721                               |
| 21 | 27107496 | 27107963 | 5Y-H4K8ac_peak_11469 | 27.2273  | ATP5J_ENSG00000154723;GABPA_ENSG00000154727        |
| 21 | 27542393 | 27542720 | 5Y-H4K8ac_peak_11470 | 6.43068  | APP_ENSG00000142192;AP000230.1_ENSG00000273492     |
| 21 | 27760857 | 27761052 | 5Y-H4K8ac_peak_11471 | 11.57334 |                                                    |
| 21 | 27961072 | 27961299 | 5Y-H4K8ac_peak_11472 | 5.54013  |                                                    |
| 21 | 28216734 | 28216984 | 5Y-H4K8ac_peak_11473 | 4.95697  | ADAMTS1_ENSG00000154734                            |
| 21 | 28218157 | 28218349 | 5Y-H4K8ac_peak_11474 | 6.31818  | ADAMTS1_ENSG00000154734                            |
| 21 | 28337899 | 28338403 | 5Y-H4K8ac_peak_11475 | 5.87382  | ADAMTS5_ENSG00000154736                            |
| 21 | 30391242 | 30391535 | 5Y-H4K8ac_peak_11476 | 9.38203  | RWDD2B_ENSG00000156253                             |
| 21 | 30391735 | 30392341 | 5Y-H4K8ac_peak_11477 | 8.33296  | RWDD2B_ENSG00000156253                             |
| 21 | 30396287 | 30396544 | 5Y-H4K8ac_peak_11478 | 7.38046  | RP1-100J12.1_ENSG00000273254;USP16_ENSG00000156256 |
| 21 | 30670650 | 30671023 | 5Y-H4K8ac_peak_11479 | 10.36926 |                                                    |
| 21 | 32546326 | 32546602 | 5Y-H4K8ac_peak_11480 | 9.23159  |                                                    |
| 21 | 32547017 | 32547347 | 5Y-H4K8ac_peak_11481 | 8.47164  |                                                    |
| 21 | 32931098 | 32931330 | 5Y-H4K8ac_peak_11482 | 12.21176 | TIAM1_ENSG00000156299;AP000251.3_ENSG00000237594   |
| 21 | 32932081 | 32932325 | 5Y-H4K8ac_peak_11483 | 7.31102  | TIAM1_ENSG00000156299;AP000251.3_ENSG00000237594   |
| 21 | 33104624 | 33105035 | 5Y-H4K8ac_peak_11484 | 7.90236  | SCAF4_ENSG00000156304                              |
| 21 | 33246093 | 33246443 | 5Y-H4K8ac_peak_11485 | 5.67283  | HUNK_ENSG00000142149                               |
| 21 | 33247256 | 33247490 | 5Y-H4K8ac_peak_11486 | 6.55906  |                                                    |
| 21 | 33448752 | 33449409 | 5Y-H4K8ac_peak_11487 | 12.98738 |                                                    |
| 21 | 33472641 | 33472881 | 5Y-H4K8ac_peak_11488 | 5.84208  |                                                    |
| 21 | 33764930 | 33765138 | 5Y-H4K8ac_peak_11489 | 6.77436  | URB1_ENSG00000142207;C21orf119_ENSG00000256073     |
| 21 | 33765448 | 33766014 | 5Y-H4K8ac_peak_11490 | 7.59101  | URB1_ENSG00000142207;C21orf119_ENSG00000256073     |
| 21 | 33784772 | 33785320 | 5Y-H4K8ac_peak_11491 | 8.69112  | EVA1C_ENSG00000166979                              |
| 21 | 33848869 | 33849111 | 5Y-H4K8ac_peak_11492 | 5.28616  |                                                    |
| 21 | 33894327 | 33894683 | 5Y-H4K8ac_peak_11493 | 6.59249  |                                                    |
| 21 | 33986016 | 33986414 | 5Y-H4K8ac_peak_11494 | 10.54764 | C21orf59_ENSG00000159079                           |
| 21 | 34143741 | 34143991 | 5Y-H4K8ac_peak_11495 | 12.10416 | PAXBP1_ENSG00000159086;C21orf49_ENSG00000205930    |
| 21 | 34696638 | 34697014 | 5Y-H4K8ac_peak_11496 | 10.46287 | IFNAR1_ENSG00000142166                             |
| 21 | 34697386 | 34697720 | 5Y-H4K8ac_peak_11497 | 10.46287 | IFNAR1_ENSG00000142166                             |
| 21 | 34775806 | 34776340 | 5Y-H4K8ac_peak_11498 | 4.15658  | IFNGR2_ENSG00000159128                             |

|    |          |          |                      |          |                                                   |
|----|----------|----------|----------------------|----------|---------------------------------------------------|
| 21 | 34914599 | 34915021 | 5Y-H4K8ac_peak_11499 | 9.51254  | GART_ENSG00000159131;SON_ENSG00000159140          |
| 21 | 35267270 | 35267572 | 5Y-H4K8ac_peak_11500 | 6.90749  |                                                   |
| 21 | 35287705 | 35287957 | 5Y-H4K8ac_peak_11501 | 7.65114  | ATP5O_ENSG00000241837;LINC00649_ENSG00000237945   |
| 21 | 35288526 | 35288787 | 5Y-H4K8ac_peak_11502 | 4.1776   | ATP5O_ENSG00000241837;LINC00649_ENSG00000237945   |
| 21 | 35573609 | 35573897 | 5Y-H4K8ac_peak_11503 | 5.56912  |                                                   |
| 21 | 35747135 | 35747652 | 5Y-H4K8ac_peak_11504 | 12.49811 | AP000320.6_ENSG00000225555;SMIM11_ENSG00000205670 |
| 21 | 37407376 | 37407688 | 5Y-H4K8ac_peak_11505 | 5.65584  |                                                   |
| 21 | 37485580 | 37485864 | 5Y-H4K8ac_peak_11506 | 15.87386 |                                                   |
| 21 | 37691548 | 37691982 | 5Y-H4K8ac_peak_11507 | 7.34185  | AP000692.10_ENSG00000273199;MORC3_ENSG00000159256 |
| 21 | 37692775 | 37693097 | 5Y-H4K8ac_peak_11508 | 5.37237  | AP000692.10_ENSG00000273199;MORC3_ENSG00000159256 |
| 21 | 38120350 | 38120764 | 5Y-H4K8ac_peak_11509 | 4.50834  |                                                   |
| 21 | 38338289 | 38338732 | 5Y-H4K8ac_peak_11510 | 11.57334 | AP000704.5_ENSG00000224790                        |
| 21 | 38361790 | 38362854 | 5Y-H4K8ac_peak_11511 | 14.05114 | HLCS_ENSG00000159267                              |
| 21 | 38444850 | 38445292 | 5Y-H4K8ac_peak_11512 | 7.11863  | PIGP_ENSG00000185808;TTC3_ENSG00000182670         |
| 21 | 38593100 | 38593536 | 5Y-H4K8ac_peak_11513 | 6.37023  | AP001432.14_ENSG00000242553                       |
| 21 | 38640175 | 38640408 | 5Y-H4K8ac_peak_11514 | 9.00954  | DSCR3_ENSG00000157538;AP001412.1_ENSG00000272948  |
| 21 | 38738053 | 38738550 | 5Y-H4K8ac_peak_11515 | 9.65108  | AP001437.1_ENSG00000273210;DYRK1A_ENSG00000157540 |
| 21 | 38739179 | 38739600 | 5Y-H4K8ac_peak_11516 | 15.82359 | AP001437.1_ENSG00000273210                        |
| 21 | 38903845 | 38904042 | 5Y-H4K8ac_peak_11517 | 9.52603  |                                                   |
| 21 | 38936876 | 38937306 | 5Y-H4K8ac_peak_11518 | 6.50117  |                                                   |
| 21 | 39083410 | 39083710 | 5Y-H4K8ac_peak_11519 | 6.50117  |                                                   |
| 21 | 40124654 | 40124948 | 5Y-H4K8ac_peak_11520 | 5.28616  |                                                   |
| 21 | 40170402 | 40170592 | 5Y-H4K8ac_peak_11521 | 6.35402  |                                                   |
| 21 | 40177988 | 40178188 | 5Y-H4K8ac_peak_11522 | 5.65584  | ETS2_ENSG00000157557                              |
| 21 | 40376614 | 40376920 | 5Y-H4K8ac_peak_11523 | 8.67475  |                                                   |
| 21 | 40554986 | 40555260 | 5Y-H4K8ac_peak_11524 | 5.41472  | PSMG1_ENSG00000183527                             |
| 21 | 40720622 | 40720965 | 5Y-H4K8ac_peak_11525 | 13.0168  | HMG1_ENSG00000205581                              |
| 21 | 40721541 | 40721960 | 5Y-H4K8ac_peak_11526 | 7.97699  | HMG1_ENSG00000205581                              |
| 21 | 43242549 | 43242836 | 5Y-H4K8ac_peak_11527 | 4.69231  |                                                   |
| 21 | 43298569 | 43298870 | 5Y-H4K8ac_peak_11528 | 8.04493  | PRDM15_ENSG00000141956;AP001619.2_ENSG00000227698 |
| 21 | 43299530 | 43299916 | 5Y-H4K8ac_peak_11529 | 9.30505  | PRDM15_ENSG00000141956                            |
| 21 | 43373555 | 43373912 | 5Y-H4K8ac_peak_11530 | 7.31102  | C2CD2_ENSG00000157617                             |
| 21 | 43374327 | 43374626 | 5Y-H4K8ac_peak_11531 | 6.22669  | C2CD2_ENSG00000157617                             |
| 21 | 43430707 | 43431283 | 5Y-H4K8ac_peak_11532 | 8.73985  | ZBTB21_ENSG00000173276                            |
| 21 | 43576931 | 43577223 | 5Y-H4K8ac_peak_11533 | 4.07874  |                                                   |
| 21 | 43655113 | 43655455 | 5Y-H4K8ac_peak_11534 | 4.95697  |                                                   |
| 21 | 44072941 | 44073545 | 5Y-H4K8ac_peak_11535 | 8.69112  | PDE9A_ENSG00000160191                             |
| 21 | 44201492 | 44202031 | 5Y-H4K8ac_peak_11536 | 7.59101  | AP001628.7_ENSG00000233754                        |
| 21 | 44299122 | 44299562 | 5Y-H4K8ac_peak_11537 | 13.60015 | WDR4_ENSG00000160193;NDUFV3_ENSG00000160194       |
| 21 | 44311961 | 44312241 | 5Y-H4K8ac_peak_11538 | 7.88114  |                                                   |
| 21 | 44344258 | 44344724 | 5Y-H4K8ac_peak_11539 | 8.75926  |                                                   |
| 21 | 44393808 | 44394258 | 5Y-H4K8ac_peak_11540 | 11.90011 | PKNOX1_ENSG00000160199                            |
| 21 | 44394817 | 44395030 | 5Y-H4K8ac_peak_11541 | 11.19336 | PKNOX1_ENSG00000160199                            |
| 21 | 44478760 | 44478983 | 5Y-H4K8ac_peak_11542 | 6.00382  |                                                   |
| 21 | 44496441 | 44497084 | 5Y-H4K8ac_peak_11543 | 7.59101  | CBS_ENSG00000160200                               |
| 21 | 44527315 | 44527548 | 5Y-H4K8ac_peak_11544 | 7.01266  | U2AF1_ENSG00000160201                             |

|    |          |          |                      |          |                                                    |
|----|----------|----------|----------------------|----------|----------------------------------------------------|
| 21 | 44527884 | 44528441 | 5Y-H4K8ac_peak_11545 | 9.30505  | U2AF1_ENSG00000160201                              |
| 21 | 44598860 | 44599251 | 5Y-H4K8ac_peak_11546 | 9.05766  |                                                    |
| 21 | 44781453 | 44781769 | 5Y-H4K8ac_peak_11547 | 7.01266  | AP001046.5_ENSG00000237989                         |
| 21 | 44783496 | 44783805 | 5Y-H4K8ac_peak_11548 | 10.72893 | AP001046.6_ENSG00000225637                         |
| 21 | 44786590 | 44787293 | 5Y-H4K8ac_peak_11549 | 11.31171 |                                                    |
| 21 | 44787507 | 44787890 | 5Y-H4K8ac_peak_11550 | 5.64909  |                                                    |
| 21 | 44847442 | 44847960 | 5Y-H4K8ac_peak_11551 | 11.93212 | SIK1_ENSG00000142178                               |
| 21 | 44870654 | 44871726 | 5Y-H4K8ac_peak_11552 | 9.30505  |                                                    |
| 21 | 45023106 | 45023513 | 5Y-H4K8ac_peak_11553 | 4.95697  |                                                    |
| 21 | 45023769 | 45024004 | 5Y-H4K8ac_peak_11554 | 7.01266  |                                                    |
| 21 | 45149325 | 45149536 | 5Y-H4K8ac_peak_11555 | 5.67283  |                                                    |
| 21 | 45195881 | 45196212 | 5Y-H4K8ac_peak_11556 | 9.56187  | CSTB_ENSG00000160213                               |
| 21 | 45209577 | 45209795 | 5Y-H4K8ac_peak_11557 | 8.2913   | RRP1_ENSG00000160214                               |
| 21 | 45284297 | 45284621 | 5Y-H4K8ac_peak_11558 | 9.38203  | AGPAT3_ENSG00000160216                             |
| 21 | 45285137 | 45285679 | 5Y-H4K8ac_peak_11559 | 13.00733 | AGPAT3_ENSG00000160216                             |
| 21 | 45431672 | 45432057 | 5Y-H4K8ac_peak_11560 | 9.30505  | TRAPPC10_ENSG00000160218                           |
| 21 | 45553558 | 45553887 | 5Y-H4K8ac_peak_11561 | 10.15788 | C21orf33_ENSG00000160221                           |
| 21 | 45758998 | 45759571 | 5Y-H4K8ac_peak_11562 | 17.15915 | C21orf2_ENSG00000160226;AP001062.9_ENSG00000232969 |
| 21 | 45856856 | 45857140 | 5Y-H4K8ac_peak_11563 | 5.15917  | snoZ6_ENSG00000266692                              |
| 21 | 45857891 | 45858321 | 5Y-H4K8ac_peak_11564 | 8.69112  | snoZ6_ENSG00000266692;snoZ6_ENSG00000264452        |
| 21 | 45875587 | 45875802 | 5Y-H4K8ac_peak_11565 | 5.03917  | LRRC3-AS1_ENSG00000229356;LRRC3_ENSG00000160233    |
| 21 | 46221347 | 46222442 | 5Y-H4K8ac_peak_11566 | 8.43511  | UBE2G2_ENSG00000184787;AL773604.8_ENSG00000236519  |
| 21 | 46237861 | 46238547 | 5Y-H4K8ac_peak_11567 | 6.53157  | SUMO3_ENSG00000184900                              |
| 21 | 46331578 | 46331844 | 5Y-H4K8ac_peak_11568 | 15.3483  |                                                    |
| 21 | 46352542 | 46352997 | 5Y-H4K8ac_peak_11569 | 6.82266  | ITGB2_ENSG00000160255                              |
| 21 | 46359986 | 46360355 | 5Y-H4K8ac_peak_11570 | 11.22005 | C21orf67_ENSG00000183250;FAM207A_ENSG00000160256   |
| 21 | 46404516 | 46404784 | 5Y-H4K8ac_peak_11571 | 8.69112  |                                                    |
| 21 | 46404986 | 46405566 | 5Y-H4K8ac_peak_11572 | 14.00559 |                                                    |
| 21 | 46406474 | 46406898 | 5Y-H4K8ac_peak_11573 | 5.18947  |                                                    |
| 21 | 46408712 | 46409219 | 5Y-H4K8ac_peak_11574 | 8.5159   |                                                    |
| 21 | 46410029 | 46411417 | 5Y-H4K8ac_peak_11575 | 11.09472 |                                                    |
| 21 | 46413207 | 46413406 | 5Y-H4K8ac_peak_11576 | 6.04031  | LINC00163_ENSG00000234880                          |
| 21 | 46438197 | 46439303 | 5Y-H4K8ac_peak_11577 | 9.52107  |                                                    |
| 21 | 46494090 | 46494334 | 5Y-H4K8ac_peak_11578 | 10.79655 | SSR4P1_ENSG00000235374;ADARB1_ENSG00000197381      |
| 21 | 46494662 | 46495003 | 5Y-H4K8ac_peak_11579 | 8.8021   | SSR4P1_ENSG00000235374;ADARB1_ENSG00000197381      |
| 21 | 46572378 | 46572574 | 5Y-H4K8ac_peak_11580 | 4.84193  |                                                    |
| 21 | 46575236 | 46575444 | 5Y-H4K8ac_peak_11581 | 7.11863  |                                                    |
| 21 | 46677095 | 46677289 | 5Y-H4K8ac_peak_11582 | 7.87048  |                                                    |
| 21 | 46712142 | 46712386 | 5Y-H4K8ac_peak_11583 | 9.15007  | LINC00205_ENSG00000223768                          |
| 21 | 46745827 | 46746298 | 5Y-H4K8ac_peak_11584 | 5.64988  |                                                    |
| 21 | 46773253 | 46773656 | 5Y-H4K8ac_peak_11585 | 10.11377 |                                                    |
| 21 | 46779757 | 46780011 | 5Y-H4K8ac_peak_11586 | 11.24252 |                                                    |
| 21 | 46787105 | 46787326 | 5Y-H4K8ac_peak_11587 | 7.80086  |                                                    |
| 21 | 46828702 | 46828922 | 5Y-H4K8ac_peak_11588 | 6.40964  |                                                    |
| 21 | 46885518 | 46885897 | 5Y-H4K8ac_peak_11589 | 5.74859  |                                                    |
| 21 | 46886350 | 46886615 | 5Y-H4K8ac_peak_11590 | 5.65584  |                                                    |



|    |          |          |                      |          |                                                   |
|----|----------|----------|----------------------|----------|---------------------------------------------------|
| 21 | 46886963 | 46887598 | 5Y-H4K8ac_peak_11591 | 12.86367 |                                                   |
| 21 | 46897783 | 46898105 | 5Y-H4K8ac_peak_11592 | 6.78128  |                                                   |
| 21 | 46898609 | 46898941 | 5Y-H4K8ac_peak_11593 | 5.65584  |                                                   |
| 21 | 46962799 | 46963258 | 5Y-H4K8ac_peak_11594 | 10.07308 |                                                   |
| 21 | 47059712 | 47060119 | 5Y-H4K8ac_peak_11595 | 8.24461  |                                                   |
| 21 | 47060343 | 47061519 | 5Y-H4K8ac_peak_11596 | 10.31981 |                                                   |
| 21 | 47062323 | 47062605 | 5Y-H4K8ac_peak_11597 | 5.64988  |                                                   |
| 21 | 47123998 | 47124363 | 5Y-H4K8ac_peak_11598 | 5.44849  |                                                   |
| 21 | 47125095 | 47125439 | 5Y-H4K8ac_peak_11599 | 9.68742  |                                                   |
| 21 | 47126107 | 47126349 | 5Y-H4K8ac_peak_11600 | 4.0639   |                                                   |
| 21 | 47145849 | 47146183 | 5Y-H4K8ac_peak_11601 | 6.73047  |                                                   |
| 21 | 47183429 | 47183650 | 5Y-H4K8ac_peak_11602 | 8.4454   |                                                   |
| 21 | 47239914 | 47240450 | 5Y-H4K8ac_peak_11603 | 5.12488  |                                                   |
| 21 | 47308294 | 47308509 | 5Y-H4K8ac_peak_11604 | 8.564    |                                                   |
| 21 | 47311972 | 47312549 | 5Y-H4K8ac_peak_11605 | 6.98118  |                                                   |
| 21 | 47312793 | 47313026 | 5Y-H4K8ac_peak_11606 | 5.35202  |                                                   |
| 21 | 47313790 | 47314064 | 5Y-H4K8ac_peak_11607 | 9.179    |                                                   |
| 21 | 47314408 | 47314598 | 5Y-H4K8ac_peak_11608 | 5.51139  |                                                   |
| 21 | 47390285 | 47390657 | 5Y-H4K8ac_peak_11609 | 7.89273  |                                                   |
| 21 | 47390948 | 47391586 | 5Y-H4K8ac_peak_11610 | 8.3285   |                                                   |
| 21 | 47392109 | 47392953 | 5Y-H4K8ac_peak_11611 | 14.19462 |                                                   |
| 21 | 47393237 | 47393491 | 5Y-H4K8ac_peak_11612 | 9.32595  |                                                   |
| 21 | 47393819 | 47394301 | 5Y-H4K8ac_peak_11613 | 8.5159   |                                                   |
| 21 | 47394534 | 47394739 | 5Y-H4K8ac_peak_11614 | 6.55841  |                                                   |
| 21 | 47401777 | 47402061 | 5Y-H4K8ac_peak_11615 | 7.11863  | COL6A1_ENSG00000142156                            |
| 21 | 47475720 | 47476100 | 5Y-H4K8ac_peak_11616 | 6.07082  | AP001476.3_ENSG00000226115                        |
| 21 | 47499603 | 47500417 | 5Y-H4K8ac_peak_11617 | 10.73603 |                                                   |
| 21 | 47518177 | 47518522 | 5Y-H4K8ac_peak_11618 | 5.91107  | AP001471.1_ENSG00000227438;COL6A2_ENSG00000142173 |
| 21 | 47573525 | 47573746 | 5Y-H4K8ac_peak_11619 | 4.15658  |                                                   |
| 21 | 47614301 | 47614746 | 5Y-H4K8ac_peak_11620 | 5.64909  | AP001468.1_ENSG00000235878                        |
| 21 | 47715063 | 47715429 | 5Y-H4K8ac_peak_11621 | 6.00388  |                                                   |
| 21 | 47744070 | 47744343 | 5Y-H4K8ac_peak_11622 | 14.26354 | PCNT_ENSG00000160299;C21orf58_ENSG00000160298     |
| 21 | 47744653 | 47745121 | 5Y-H4K8ac_peak_11623 | 7.59832  | PCNT_ENSG00000160299;C21orf58_ENSG00000160298     |
| 21 | 47813508 | 47813749 | 5Y-H4K8ac_peak_11624 | 4.29586  |                                                   |
| 21 | 48055616 | 48055846 | 5Y-H4K8ac_peak_11625 | 10.4495  | PRMT2_ENSG00000160310                             |
| 22 | 16201894 | 16202092 | 5Y-H4K8ac_peak_11626 | 8.24461  |                                                   |
| 22 | 17601784 | 17602180 | 5Y-H4K8ac_peak_11627 | 7.11863  | CECR6_ENSG00000183307;AC006946.15_ENSG00000235478 |
| 22 | 17602459 | 17602996 | 5Y-H4K8ac_peak_11628 | 13.60015 | CECR6_ENSG00000183307;AC006946.15_ENSG00000235478 |
| 22 | 17639540 | 17640127 | 5Y-H4K8ac_peak_11629 | 8.2913   | CECR5-AS1_ENSG00000185837                         |
| 22 | 17640319 | 17640590 | 5Y-H4K8ac_peak_11630 | 7.76232  | CECR5-AS1_ENSG00000185837                         |
| 22 | 17652247 | 17652709 | 5Y-H4K8ac_peak_11631 | 11.01067 |                                                   |
| 22 | 17653022 | 17653353 | 5Y-H4K8ac_peak_11632 | 6.77436  |                                                   |
| 22 | 17679957 | 17680177 | 5Y-H4K8ac_peak_11633 | 11.42066 |                                                   |
| 22 | 17739433 | 17739675 | 5Y-H4K8ac_peak_11634 | 4.59169  |                                                   |
| 22 | 18120999 | 18121375 | 5Y-H4K8ac_peak_11635 | 5.23083  |                                                   |
| 22 | 18121597 | 18121900 | 5Y-H4K8ac_peak_11636 | 13.72401 |                                                   |

|    |          |          |                      |          |                                                         |
|----|----------|----------|----------------------|----------|---------------------------------------------------------|
| 22 | 18256978 | 18257203 | 5Y-H4K8ac_peak_11637 | 9.15007  | BID_ENSG00000015475                                     |
| 22 | 18560855 | 18561300 | 5Y-H4K8ac_peak_11638 | 7.31102  | XXbac-B476C20.9_ENSG00000225335;PEX26_ENSG00000215193   |
| 22 | 18632232 | 18632558 | 5Y-H4K8ac_peak_11639 | 6.34046  | USP18_ENSG00000184979                                   |
| 22 | 18893290 | 18893564 | 5Y-H4K8ac_peak_11640 | 6.34245  | DGCR6_ENSG00000183628                                   |
| 22 | 18954373 | 18955020 | 5Y-H4K8ac_peak_11641 | 13.43531 |                                                         |
| 22 | 18955631 | 18955937 | 5Y-H4K8ac_peak_11642 | 11.1169  |                                                         |
| 22 | 18957190 | 18957513 | 5Y-H4K8ac_peak_11643 | 5.08308  | DGCR5_ENSG00000237517                                   |
| 22 | 18958024 | 18958703 | 5Y-H4K8ac_peak_11644 | 13.16935 | DGCR5_ENSG00000237517                                   |
| 22 | 19158710 | 19159075 | 5Y-H4K8ac_peak_11645 | 14.60852 | AC004463.6_ENSG00000260924                              |
| 22 | 19159269 | 19159631 | 5Y-H4K8ac_peak_11646 | 12.21176 | AC004463.6_ENSG00000260924                              |
| 22 | 19279546 | 19279848 | 5Y-H4K8ac_peak_11647 | 6.46053  | CLTCL1_ENSG00000070371                                  |
| 22 | 19419456 | 19419824 | 5Y-H4K8ac_peak_11648 | 7.87406  | MRPL40_ENSG00000185608                                  |
| 22 | 19650717 | 19650959 | 5Y-H4K8ac_peak_11649 | 6.46053  |                                                         |
| 22 | 19700846 | 19701286 | 5Y-H4K8ac_peak_11650 | 9.21468  | SEPT5_ENSG00000184702                                   |
| 22 | 19701554 | 19701906 | 5Y-H4K8ac_peak_11651 | 6.77436  | SEPT5_ENSG00000184702                                   |
| 22 | 19702154 | 19702658 | 5Y-H4K8ac_peak_11652 | 4.95697  | SEPT5_ENSG00000184702                                   |
| 22 | 19733134 | 19733395 | 5Y-H4K8ac_peak_11653 | 6.22904  |                                                         |
| 22 | 19842607 | 19843142 | 5Y-H4K8ac_peak_11654 | 12.19856 | GNB1L_ENSG00000185838;C22orf29_ENSG00000215012          |
| 22 | 19879849 | 19880236 | 5Y-H4K8ac_peak_11655 | 7.27671  |                                                         |
| 22 | 19892950 | 19893273 | 5Y-H4K8ac_peak_11656 | 9.23159  |                                                         |
| 22 | 19928989 | 19929861 | 5Y-H4K8ac_peak_11657 | 19.17092 | TXNRD2_ENSG00000184470;COMT_ENSG00000093010             |
| 22 | 19974448 | 19974645 | 5Y-H4K8ac_peak_11658 | 7.11863  |                                                         |
| 22 | 19983432 | 19983769 | 5Y-H4K8ac_peak_11659 | 8.86184  |                                                         |
| 22 | 19985936 | 19986657 | 5Y-H4K8ac_peak_11660 | 11.04542 |                                                         |
| 22 | 19987694 | 19987894 | 5Y-H4K8ac_peak_11661 | 7.59101  |                                                         |
| 22 | 19995974 | 19996213 | 5Y-H4K8ac_peak_11662 | 6.89892  |                                                         |
| 22 | 19998399 | 19998602 | 5Y-H4K8ac_peak_11663 | 8.4454   |                                                         |
| 22 | 20008170 | 20008380 | 5Y-H4K8ac_peak_11664 | 8.69112  |                                                         |
| 22 | 20008776 | 20008991 | 5Y-H4K8ac_peak_11665 | 6.89892  |                                                         |
| 22 | 20066692 | 20067344 | 5Y-H4K8ac_peak_11666 | 15.12815 | DGCR8_ENSG00000128191                                   |
| 22 | 20067841 | 20068250 | 5Y-H4K8ac_peak_11667 | 9.51254  | DGCR8_ENSG00000128191                                   |
| 22 | 20105134 | 20105506 | 5Y-H4K8ac_peak_11668 | 13.00733 | TRMT2A_ENSG00000099899                                  |
| 22 | 20118177 | 20118476 | 5Y-H4K8ac_peak_11669 | 7.59101  |                                                         |
| 22 | 20118828 | 20119142 | 5Y-H4K8ac_peak_11670 | 8.24461  |                                                         |
| 22 | 20142455 | 20142656 | 5Y-H4K8ac_peak_11671 | 8.76608  |                                                         |
| 22 | 20143664 | 20143878 | 5Y-H4K8ac_peak_11672 | 11.51936 |                                                         |
| 22 | 20218418 | 20218640 | 5Y-H4K8ac_peak_11673 | 4.07874  |                                                         |
| 22 | 20226518 | 20226802 | 5Y-H4K8ac_peak_11674 | 4.95697  |                                                         |
| 22 | 20236085 | 20236391 | 5Y-H4K8ac_peak_11675 | 5.62696  | MIR1286_ENSG00000221039                                 |
| 22 | 20255277 | 20255522 | 5Y-H4K8ac_peak_11676 | 8.24952  |                                                         |
| 22 | 20256119 | 20256726 | 5Y-H4K8ac_peak_11677 | 7.34202  |                                                         |
| 22 | 20257861 | 20258460 | 5Y-H4K8ac_peak_11678 | 13.99721 |                                                         |
| 22 | 20307818 | 20308231 | 5Y-H4K8ac_peak_11679 | 10.19948 | DGCR6L_ENSG00000128185;XXbac-B444P24.14_ENSG00000273139 |
| 22 | 20747692 | 20748143 | 5Y-H4K8ac_peak_11680 | 15.27452 | ZNF74_ENSG00000185252                                   |
| 22 | 20772691 | 20772995 | 5Y-H4K8ac_peak_11681 | 7.24864  |                                                         |
| 22 | 20777237 | 20777667 | 5Y-H4K8ac_peak_11682 | 4.87387  |                                                         |

|    |          |          |                      |          |                                                                                |
|----|----------|----------|----------------------|----------|--------------------------------------------------------------------------------|
| 22 | 20778054 | 20778515 | 5Y-H4K8ac_peak_11683 | 5.69598  |                                                                                |
| 22 | 20791724 | 20791927 | 5Y-H4K8ac_peak_11684 | 10.31981 | SCARF2_ENSG00000244486                                                         |
| 22 | 20849521 | 20849803 | 5Y-H4K8ac_peak_11685 | 5.84816  | KLHL22_ENSG00000099910;MED15_ENSG00000099917                                   |
| 22 | 20861971 | 20862304 | 5Y-H4K8ac_peak_11686 | 8.69112  |                                                                                |
| 22 | 20886934 | 20887462 | 5Y-H4K8ac_peak_11687 | 7.03573  |                                                                                |
| 22 | 20888620 | 20889054 | 5Y-H4K8ac_peak_11688 | 6.35402  |                                                                                |
| 22 | 20889257 | 20889475 | 5Y-H4K8ac_peak_11689 | 6.40964  |                                                                                |
| 22 | 20890348 | 20890558 | 5Y-H4K8ac_peak_11690 | 10.77539 |                                                                                |
| 22 | 21322565 | 21322788 | 5Y-H4K8ac_peak_11691 | 5.42666  |                                                                                |
| 22 | 21335311 | 21335546 | 5Y-H4K8ac_peak_11692 | 5.64909  | XXbac-B135H6.18_ENSG00000272829                                                |
| 22 | 21355612 | 21356367 | 5Y-H4K8ac_peak_11693 | 13.12848 | THAP7_ENSG00000184436;THAP7-AS1_ENSG00000230513                                |
| 22 | 21357042 | 21357377 | 5Y-H4K8ac_peak_11694 | 5.90587  | THAP7_ENSG00000184436;THAP7-AS1_ENSG00000230513                                |
| 22 | 21368200 | 21368495 | 5Y-H4K8ac_peak_11695 | 12.11208 | TUBA3FP_ENSG00000161149                                                        |
| 22 | 21369778 | 21370100 | 5Y-H4K8ac_peak_11696 | 10.1994  |                                                                                |
| 22 | 21921695 | 21922483 | 5Y-H4K8ac_peak_11697 | 9.51254  |                                                                                |
| 22 | 21984002 | 21984274 | 5Y-H4K8ac_peak_11698 | 11.22005 | YDJC_ENSG00000161179                                                           |
| 22 | 22005966 | 22006175 | 5Y-H4K8ac_peak_11699 | 9.34873  | PPIL2_ENSG00000100023                                                          |
| 22 | 22006853 | 22007350 | 5Y-H4K8ac_peak_11700 | 8.73392  | PPIL2_ENSG00000100023;MIR301B_ENSG00000212102;MIR130B_ENSG00000207751          |
| 22 | 22019723 | 22020187 | 5Y-H4K8ac_peak_11701 | 6.54441  |                                                                                |
| 22 | 22292737 | 22292954 | 5Y-H4K8ac_peak_11702 | 6.78128  | LL22NC03-86G7.1_ENSG00000224086                                                |
| 22 | 23411777 | 23412237 | 5Y-H4K8ac_peak_11703 | 7.89273  | GNAZ_ENSG00000128266                                                           |
| 22 | 23483854 | 23484069 | 5Y-H4K8ac_peak_11704 | 7.53283  |                                                                                |
| 22 | 23647829 | 23648071 | 5Y-H4K8ac_peak_11705 | 7.57144  |                                                                                |
| 22 | 23725672 | 23726354 | 5Y-H4K8ac_peak_11706 | 8.51022  |                                                                                |
| 22 | 23744501 | 23744804 | 5Y-H4K8ac_peak_11707 | 10.60083 | ZDHHC8P1_ENSG00000133519                                                       |
| 22 | 23745027 | 23745763 | 5Y-H4K8ac_peak_11708 | 22.46875 | ZDHHC8P1_ENSG00000133519                                                       |
| 22 | 23760382 | 23760670 | 5Y-H4K8ac_peak_11709 | 6.50117  |                                                                                |
| 22 | 23778208 | 23778595 | 5Y-H4K8ac_peak_11710 | 10.50538 |                                                                                |
| 22 | 23779066 | 23779304 | 5Y-H4K8ac_peak_11711 | 11.94897 |                                                                                |
| 22 | 23799068 | 23799407 | 5Y-H4K8ac_peak_11712 | 10.4326  |                                                                                |
| 22 | 23800202 | 23800677 | 5Y-H4K8ac_peak_11713 | 7.59101  |                                                                                |
| 22 | 23861052 | 23861414 | 5Y-H4K8ac_peak_11714 | 6.47245  |                                                                                |
| 22 | 23862142 | 23862332 | 5Y-H4K8ac_peak_11715 | 6.77436  |                                                                                |
| 22 | 23862707 | 23863960 | 5Y-H4K8ac_peak_11716 | 14.6127  |                                                                                |
| 22 | 23864784 | 23865562 | 5Y-H4K8ac_peak_11717 | 16.62144 |                                                                                |
| 22 | 24059684 | 24060042 | 5Y-H4K8ac_peak_11718 | 10.44054 | GUSBP11_ENSG00000228315;KB-1572G7.2_ENSG00000273000;AP000347.2_ENSG00000272578 |
| 22 | 24114602 | 24114902 | 5Y-H4K8ac_peak_11719 | 8.43511  |                                                                                |
| 22 | 24115098 | 24115442 | 5Y-H4K8ac_peak_11720 | 6.34245  |                                                                                |
| 22 | 24128693 | 24129451 | 5Y-H4K8ac_peak_11721 | 12.45737 | SMARCB1_ENSG00000099956                                                        |
| 22 | 24187813 | 24188068 | 5Y-H4K8ac_peak_11722 | 6.61077  |                                                                                |
| 22 | 24191383 | 24192112 | 5Y-H4K8ac_peak_11723 | 7.64648  |                                                                                |
| 22 | 24199388 | 24199770 | 5Y-H4K8ac_peak_11724 | 9.93099  | KB-1125A3.11_ENSG00000272973;SLC2A11_ENSG00000133460                           |
| 22 | 24236274 | 24236543 | 5Y-H4K8ac_peak_11725 | 9.63153  | MIF_ENSG00000240972                                                            |
| 22 | 24255672 | 24256123 | 5Y-H4K8ac_peak_11726 | 9.79526  |                                                                                |
| 22 | 24359608 | 24359961 | 5Y-H4K8ac_peak_11727 | 8.33296  |                                                                                |
| 22 | 24360432 | 24360753 | 5Y-H4K8ac_peak_11728 | 4.51076  |                                                                                |

|    |          |          |                      |          |                                                                                    |
|----|----------|----------|----------------------|----------|------------------------------------------------------------------------------------|
| 22 | 24407287 | 24407483 | 5Y-H4K8ac_peak_11729 | 7.35333  | CABIN1_ENSG00000099991                                                             |
| 22 | 24638627 | 24638883 | 5Y-H4K8ac_peak_11730 | 11.1169  |                                                                                    |
| 22 | 24639510 | 24640177 | 5Y-H4K8ac_peak_11731 | 11.1169  | GGT5_ENSG00000099998                                                               |
| 22 | 24640449 | 24640724 | 5Y-H4K8ac_peak_11732 | 9.92042  | GGT5_ENSG00000099998                                                               |
| 22 | 24641857 | 24642201 | 5Y-H4K8ac_peak_11733 | 8.43511  | GGT5_ENSG00000099998                                                               |
| 22 | 24643142 | 24643394 | 5Y-H4K8ac_peak_11734 | 6.08523  |                                                                                    |
| 22 | 24665792 | 24666074 | 5Y-H4K8ac_peak_11735 | 9.23159  | AP000354.2_ENSG00000215464;SPECC1L_ENSG00000100014;SPECC1L-ADORA2A_ENSG00000258555 |
| 22 | 24666851 | 24667403 | 5Y-H4K8ac_peak_11736 | 9.00954  | AP000354.2_ENSG00000215464;SPECC1L_ENSG00000100014;SPECC1L-ADORA2A_ENSG00000258555 |
| 22 | 24789231 | 24789442 | 5Y-H4K8ac_peak_11737 | 3.97985  |                                                                                    |
| 22 | 24802341 | 24802737 | 5Y-H4K8ac_peak_11738 | 6.3265   |                                                                                    |
| 22 | 24812609 | 24812824 | 5Y-H4K8ac_peak_11739 | 5.98695  |                                                                                    |
| 22 | 24820073 | 24820764 | 5Y-H4K8ac_peak_11740 | 9.30206  |                                                                                    |
| 22 | 24837563 | 24837864 | 5Y-H4K8ac_peak_11741 | 7.81811  |                                                                                    |
| 22 | 24840303 | 24840966 | 5Y-H4K8ac_peak_11742 | 6.54441  |                                                                                    |
| 22 | 24847040 | 24847329 | 5Y-H4K8ac_peak_11743 | 4.07874  |                                                                                    |
| 22 | 24918012 | 24918418 | 5Y-H4K8ac_peak_11744 | 6.64195  |                                                                                    |
| 22 | 24919029 | 24919382 | 5Y-H4K8ac_peak_11745 | 5.47303  |                                                                                    |
| 22 | 24920281 | 24920504 | 5Y-H4K8ac_peak_11746 | 5.64909  |                                                                                    |
| 22 | 24951466 | 24951812 | 5Y-H4K8ac_peak_11747 | 12.05638 | SNRPD3_ENSG00000100028;GUCD1_ENSG00000138867                                       |
| 22 | 24988646 | 24989371 | 5Y-H4K8ac_peak_11748 | 7.89273  | FAM211B_ENSG00000178026                                                            |
| 22 | 25028400 | 25028661 | 5Y-H4K8ac_peak_11749 | 4.95697  | BCRP3_ENSG00000215481                                                              |
| 22 | 25081812 | 25082051 | 5Y-H4K8ac_peak_11750 | 9.00954  | ARL5AP4_ENSG00000224806;AP000357.4_ENSG00000224334                                 |
| 22 | 25290959 | 25291373 | 5Y-H4K8ac_peak_11751 | 5.67588  |                                                                                    |
| 22 | 25348238 | 25348521 | 5Y-H4K8ac_peak_11752 | 11.22005 | KIAA1671_ENSG00000197077                                                           |
| 22 | 25365039 | 25365275 | 5Y-H4K8ac_peak_11753 | 4.71803  |                                                                                    |
| 22 | 25365697 | 25366324 | 5Y-H4K8ac_peak_11754 | 9.23159  |                                                                                    |
| 22 | 25371891 | 25372177 | 5Y-H4K8ac_peak_11755 | 5.59843  |                                                                                    |
| 22 | 25466023 | 25466214 | 5Y-H4K8ac_peak_11756 | 8.16382  |                                                                                    |
| 22 | 25888621 | 25889009 | 5Y-H4K8ac_peak_11757 | 5.40331  |                                                                                    |
| 22 | 25890022 | 25890659 | 5Y-H4K8ac_peak_11758 | 8.33296  |                                                                                    |
| 22 | 25961011 | 25961410 | 5Y-H4K8ac_peak_11759 | 8.2913   | CTA-407F11.8_ENSG00000234884;ADRBK2_ENSG00000100077                                |
| 22 | 26091997 | 26092228 | 5Y-H4K8ac_peak_11760 | 8.42168  |                                                                                    |
| 22 | 26093315 | 26093676 | 5Y-H4K8ac_peak_11761 | 6.85387  |                                                                                    |
| 22 | 26142774 | 26143114 | 5Y-H4K8ac_peak_11762 | 5.65584  |                                                                                    |
| 22 | 26157132 | 26157349 | 5Y-H4K8ac_peak_11763 | 6.73047  |                                                                                    |
| 22 | 26175972 | 26176436 | 5Y-H4K8ac_peak_11764 | 11.22005 |                                                                                    |
| 22 | 26177750 | 26177968 | 5Y-H4K8ac_peak_11765 | 6.77436  |                                                                                    |
| 22 | 26339187 | 26339462 | 5Y-H4K8ac_peak_11766 | 6.50117  |                                                                                    |
| 22 | 26565438 | 26565779 | 5Y-H4K8ac_peak_11767 | 13.2534  | SEZ6L_ENSG00000100095                                                              |
| 22 | 26801592 | 26801787 | 5Y-H4K8ac_peak_11768 | 5.28616  |                                                                                    |
| 22 | 26824390 | 26824633 | 5Y-H4K8ac_peak_11769 | 7.29055  | ASPHD2_ENSG00000128203                                                             |
| 22 | 26825350 | 26825680 | 5Y-H4K8ac_peak_11770 | 11.72217 | ASPHD2_ENSG00000128203                                                             |
| 22 | 26879412 | 26879710 | 5Y-H4K8ac_peak_11771 | 5.77617  | HPS4_ENSG00000100099;SRRD_ENSG00000100104                                          |
| 22 | 27041052 | 27041284 | 5Y-H4K8ac_peak_11772 | 7.3889   | ISCA2P1_ENSG00000226912                                                            |
| 22 | 27042006 | 27042334 | 5Y-H4K8ac_peak_11773 | 6.07082  | ISCA2P1_ENSG00000226912;MIAT_ENSG00000225783                                       |
| 22 | 27053544 | 27053825 | 5Y-H4K8ac_peak_11774 | 9.92856  |                                                                                    |

|    |          |          |                      |          |                                                                                 |
|----|----------|----------|----------------------|----------|---------------------------------------------------------------------------------|
| 22 | 27068168 | 27068513 | 5Y-H4K8ac_peak_11775 | 10.99576 | CTA-373H7.7_ENSG00000206028;CTA-211A9.5_ENSG00000244625                         |
| 22 | 27069080 | 27069455 | 5Y-H4K8ac_peak_11776 | 26.15879 | CTA-373H7.7_ENSG00000206028;CTA-211A9.5_ENSG00000244625                         |
| 22 | 27428188 | 27428743 | 5Y-H4K8ac_peak_11777 | 11.68317 |                                                                                 |
| 22 | 27504520 | 27504750 | 5Y-H4K8ac_peak_11778 | 8.75926  |                                                                                 |
| 22 | 27507144 | 27507496 | 5Y-H4K8ac_peak_11779 | 13.2534  |                                                                                 |
| 22 | 27533774 | 27534015 | 5Y-H4K8ac_peak_11780 | 7.50044  |                                                                                 |
| 22 | 27582139 | 27582335 | 5Y-H4K8ac_peak_11781 | 5.98695  |                                                                                 |
| 22 | 27637996 | 27638300 | 5Y-H4K8ac_peak_11782 | 8.2913   |                                                                                 |
| 22 | 27655282 | 27655895 | 5Y-H4K8ac_peak_11783 | 8.43511  |                                                                                 |
| 22 | 27831663 | 27831856 | 5Y-H4K8ac_peak_11784 | 5.87725  |                                                                                 |
| 22 | 28010466 | 28010826 | 5Y-H4K8ac_peak_11785 | 9.88908  |                                                                                 |
| 22 | 28197870 | 28198419 | 5Y-H4K8ac_peak_11786 | 8.5915   | MN1_ENSG00000169184                                                             |
| 22 | 28412491 | 28412955 | 5Y-H4K8ac_peak_11787 | 4.642    |                                                                                 |
| 22 | 28416881 | 28417268 | 5Y-H4K8ac_peak_11788 | 7.58806  |                                                                                 |
| 22 | 28420677 | 28421033 | 5Y-H4K8ac_peak_11789 | 8.21582  |                                                                                 |
| 22 | 28423594 | 28423826 | 5Y-H4K8ac_peak_11790 | 4.84727  |                                                                                 |
| 22 | 28425383 | 28425902 | 5Y-H4K8ac_peak_11791 | 6.77436  |                                                                                 |
| 22 | 28838088 | 28838621 | 5Y-H4K8ac_peak_11792 | 8.33296  |                                                                                 |
| 22 | 29076153 | 29076377 | 5Y-H4K8ac_peak_11793 | 8.43511  | TTC28_ENSG00000100154                                                           |
| 22 | 29168738 | 29168958 | 5Y-H4K8ac_peak_11794 | 15.01219 | CCDC117_ENSG00000159873                                                         |
| 22 | 29196269 | 29196469 | 5Y-H4K8ac_peak_11795 | 8.4454   | XBP1_ENSG00000100219;CTA-292E10.6_ENSG00000226471                               |
| 22 | 29426855 | 29427168 | 5Y-H4K8ac_peak_11796 | 6.3019   | ZNRF3-AS1_ENSG00000177993                                                       |
| 22 | 29427467 | 29427659 | 5Y-H4K8ac_peak_11797 | 4.29586  | ZNRF3-AS1_ENSG00000177993                                                       |
| 22 | 29601558 | 29601755 | 5Y-H4K8ac_peak_11798 | 7.90236  | EMID1_ENSG00000186998                                                           |
| 22 | 29601999 | 29602320 | 5Y-H4K8ac_peak_11799 | 6.1654   | EMID1_ENSG00000186998                                                           |
| 22 | 29621681 | 29621947 | 5Y-H4K8ac_peak_11800 | 4.77016  |                                                                                 |
| 22 | 29664438 | 29664907 | 5Y-H4K8ac_peak_11801 | 6.19716  | RHBDD3_ENSG00000100263;EWSR1_ENSG00000182944                                    |
| 22 | 29702450 | 29702950 | 5Y-H4K8ac_peak_11802 | 7.20869  | GAS2L1_ENSG00000185340                                                          |
| 22 | 29784054 | 29784439 | 5Y-H4K8ac_peak_11803 | 14.42778 |                                                                                 |
| 22 | 29787778 | 29787987 | 5Y-H4K8ac_peak_11804 | 6.87117  |                                                                                 |
| 22 | 29876610 | 29876931 | 5Y-H4K8ac_peak_11805 | 9.15007  | NEFH_ENSG00000100285                                                            |
| 22 | 29948223 | 29948740 | 5Y-H4K8ac_peak_11806 | 10.79655 |                                                                                 |
| 22 | 29949326 | 29949580 | 5Y-H4K8ac_peak_11807 | 8.2913   |                                                                                 |
| 22 | 29976577 | 29977057 | 5Y-H4K8ac_peak_11808 | 8.564    | NIPSNAP1_ENSG00000184117                                                        |
| 22 | 30106387 | 30106957 | 5Y-H4K8ac_peak_11809 | 10.60083 |                                                                                 |
| 22 | 30107590 | 30107816 | 5Y-H4K8ac_peak_11810 | 8.89349  |                                                                                 |
| 22 | 30116412 | 30116795 | 5Y-H4K8ac_peak_11811 | 6.73047  | RP1-76B20.11_ENSG00000232396;RP1-76B20.12_ENSG00000239446;CABP7_ENSG00000100314 |
| 22 | 30130374 | 30130587 | 5Y-H4K8ac_peak_11812 | 5.17251  |                                                                                 |
| 22 | 30162643 | 30162872 | 5Y-H4K8ac_peak_11813 | 7.31102  | ZMAT5_ENSG00000100319;UQCR10_ENSG00000184076                                    |
| 22 | 30600205 | 30600438 | 5Y-H4K8ac_peak_11814 | 10.11191 |                                                                                 |
| 22 | 30601228 | 30601559 | 5Y-H4K8ac_peak_11815 | 6.77436  |                                                                                 |
| 22 | 30604938 | 30605132 | 5Y-H4K8ac_peak_11816 | 7.89142  |                                                                                 |
| 22 | 30641975 | 30642624 | 5Y-H4K8ac_peak_11817 | 13.12848 | LIF_ENSG00000128342;RP1-102K2.8_ENSG00000268812                                 |
| 22 | 30643270 | 30643467 | 5Y-H4K8ac_peak_11818 | 5.57299  | LIF_ENSG00000128342                                                             |
| 22 | 30648673 | 30649191 | 5Y-H4K8ac_peak_11819 | 7.89273  |                                                                                 |
| 22 | 30686962 | 30687190 | 5Y-H4K8ac_peak_11820 | 4.95697  |                                                                                 |

|    |          |          |                      |          |                                                  |
|----|----------|----------|----------------------|----------|--------------------------------------------------|
| 22 | 30819423 | 30819763 | 5Y-H4K8ac_peak_11821 | 8.24461  |                                                  |
| 22 | 31001202 | 31001486 | 5Y-H4K8ac_peak_11822 | 6.1654   |                                                  |
| 22 | 31002211 | 31002593 | 5Y-H4K8ac_peak_11823 | 9.30338  | PES1_ENSG00000100029;TCN2_ENSG00000185339        |
| 22 | 31002925 | 31003204 | 5Y-H4K8ac_peak_11824 | 4.77126  | PES1_ENSG00000100029;TCN2_ENSG00000185339        |
| 22 | 31030789 | 31031385 | 5Y-H4K8ac_peak_11825 | 18.09952 | SLC35E4_ENSG00000100036                          |
| 22 | 31064130 | 31064370 | 5Y-H4K8ac_peak_11826 | 9.7353   | DUSP18_ENSG00000167065                           |
| 22 | 31090225 | 31090561 | 5Y-H4K8ac_peak_11827 | 8.21582  | OSBP2_ENSG00000184792                            |
| 22 | 31091017 | 31091266 | 5Y-H4K8ac_peak_11828 | 7.11863  |                                                  |
| 22 | 31199303 | 31199502 | 5Y-H4K8ac_peak_11829 | 4.79585  |                                                  |
| 22 | 31273949 | 31274953 | 5Y-H4K8ac_peak_11830 | 5.72233  |                                                  |
| 22 | 31364514 | 31364998 | 5Y-H4K8ac_peak_11831 | 10.36926 | MORC2_ENSG00000133422                            |
| 22 | 31518325 | 31518862 | 5Y-H4K8ac_peak_11832 | 8.69112  | INPP5J_ENSG00000185133                           |
| 22 | 31555621 | 31556043 | 5Y-H4K8ac_peak_11833 | 7.97699  | MIR3928_ENSG00000264141;RNF185_ENSG00000138942   |
| 22 | 31625496 | 31625779 | 5Y-H4K8ac_peak_11834 | 10.41511 | Y_RNA_ENSG00000202019                            |
| 22 | 31639551 | 31640152 | 5Y-H4K8ac_peak_11835 | 8.84534  |                                                  |
| 22 | 31641144 | 31641335 | 5Y-H4K8ac_peak_11836 | 5.8635   |                                                  |
| 22 | 31742910 | 31743506 | 5Y-H4K8ac_peak_11837 | 16.79568 | PATZ1_ENSG00000100105;AC005003.1_ENSG00000213888 |
| 22 | 31892539 | 31892963 | 5Y-H4K8ac_peak_11838 | 10.5157  | EIF4ENIF1_ENSG00000184708                        |
| 22 | 32148358 | 32148560 | 5Y-H4K8ac_peak_11839 | 5.83608  |                                                  |
| 22 | 32149991 | 32150267 | 5Y-H4K8ac_peak_11840 | 9.8829   | DEPDC5_ENSG00000100150                           |
| 22 | 32325269 | 32326062 | 5Y-H4K8ac_peak_11841 | 7.46096  |                                                  |
| 22 | 32339398 | 32339672 | 5Y-H4K8ac_peak_11842 | 4.77126  | YWHAH_ENSG00000128245                            |
| 22 | 32340582 | 32341016 | 5Y-H4K8ac_peak_11843 | 6.53157  | YWHAH_ENSG00000128245;C22orf24_ENSG00000128254   |
| 22 | 32870769 | 32871154 | 5Y-H4K8ac_peak_11844 | 7.58806  | FBXO7_ENSG00000100225                            |
| 22 | 32928199 | 32928803 | 5Y-H4K8ac_peak_11845 | 11.71297 |                                                  |
| 22 | 32973164 | 32973404 | 5Y-H4K8ac_peak_11846 | 4.50834  |                                                  |
| 22 | 33276177 | 33276949 | 5Y-H4K8ac_peak_11847 | 7.11863  |                                                  |
| 22 | 33277502 | 33277952 | 5Y-H4K8ac_peak_11848 | 6.78128  |                                                  |
| 22 | 33279489 | 33279980 | 5Y-H4K8ac_peak_11849 | 9.07803  |                                                  |
| 22 | 33307466 | 33307760 | 5Y-H4K8ac_peak_11850 | 7.34185  |                                                  |
| 22 | 33313841 | 33314050 | 5Y-H4K8ac_peak_11851 | 11.68317 |                                                  |
| 22 | 33346608 | 33347447 | 5Y-H4K8ac_peak_11852 | 22.31349 |                                                  |
| 22 | 33353115 | 33353376 | 5Y-H4K8ac_peak_11853 | 4.95697  |                                                  |
| 22 | 33353792 | 33353991 | 5Y-H4K8ac_peak_11854 | 6.79955  |                                                  |
| 22 | 33387756 | 33387979 | 5Y-H4K8ac_peak_11855 | 4.40052  |                                                  |
| 22 | 33606603 | 33606903 | 5Y-H4K8ac_peak_11856 | 4.07874  |                                                  |
| 22 | 35747243 | 35747645 | 5Y-H4K8ac_peak_11857 | 6.64195  |                                                  |
| 22 | 35777124 | 35777344 | 5Y-H4K8ac_peak_11858 | 4.642    | HMOX1_ENSG00000100292                            |
| 22 | 35794882 | 35795855 | 5Y-H4K8ac_peak_11859 | 9.15007  | MCM5_ENSG00000100297                             |
| 22 | 35863663 | 35864179 | 5Y-H4K8ac_peak_11860 | 14.49096 |                                                  |
| 22 | 35936163 | 35936392 | 5Y-H4K8ac_peak_11861 | 4.55128  | RASD2_ENSG00000100302                            |
| 22 | 35988521 | 35988876 | 5Y-H4K8ac_peak_11862 | 6.77436  |                                                  |
| 22 | 36001840 | 36002126 | 5Y-H4K8ac_peak_11863 | 12.65187 |                                                  |
| 22 | 36002428 | 36002880 | 5Y-H4K8ac_peak_11864 | 9.05168  |                                                  |
| 22 | 36003222 | 36003466 | 5Y-H4K8ac_peak_11865 | 7.21932  |                                                  |
| 22 | 36018919 | 36019151 | 5Y-H4K8ac_peak_11866 | 7.12953  |                                                  |

|    |          |          |                      |          |                                                    |
|----|----------|----------|----------------------|----------|----------------------------------------------------|
| 22 | 36433327 | 36433776 | 5Y-H4K8ac_peak_11867 | 8.4454   |                                                    |
| 22 | 36456328 | 36456535 | 5Y-H4K8ac_peak_11868 | 4.90471  |                                                    |
| 22 | 36506375 | 36506619 | 5Y-H4K8ac_peak_11869 | 5.64909  |                                                    |
| 22 | 36633831 | 36634081 | 5Y-H4K8ac_peak_11870 | 5.74859  |                                                    |
| 22 | 36635167 | 36635389 | 5Y-H4K8ac_peak_11871 | 5.8635   | APOL2_ENSG00000128335                              |
| 22 | 36850834 | 36851163 | 5Y-H4K8ac_peak_11872 | 16.94054 | RP5-1119A7.14_ENSG00000228719                      |
| 22 | 36851402 | 36851916 | 5Y-H4K8ac_peak_11873 | 5.87725  | RP5-1119A7.14_ENSG00000228719                      |
| 22 | 36877452 | 36877645 | 5Y-H4K8ac_peak_11874 | 14.2053  | TXN2_ENSG00000100348                               |
| 22 | 36902359 | 36903515 | 5Y-H4K8ac_peak_11875 | 11.12941 | FOXRED2_ENSG00000100350                            |
| 22 | 36925669 | 36926136 | 5Y-H4K8ac_peak_11876 | 8.21582  | EIF3D_ENSG00000100353                              |
| 22 | 36944747 | 36945040 | 5Y-H4K8ac_peak_11877 | 4.84727  |                                                    |
| 22 | 36965974 | 36966615 | 5Y-H4K8ac_peak_11878 | 6.50117  |                                                    |
| 22 | 37056194 | 37056511 | 5Y-H4K8ac_peak_11879 | 10.36926 |                                                    |
| 22 | 37099404 | 37099719 | 5Y-H4K8ac_peak_11880 | 10.11191 | CACNG2_ENSG00000166862;RP1-293L6.1_ENSG00000234688 |
| 22 | 37153437 | 37153700 | 5Y-H4K8ac_peak_11881 | 5.28616  |                                                    |
| 22 | 37172944 | 37173218 | 5Y-H4K8ac_peak_11882 | 7.63144  | IFT27_ENSG00000100360                              |
| 22 | 37242606 | 37242827 | 5Y-H4K8ac_peak_11883 | 7.38046  |                                                    |
| 22 | 37373519 | 37373928 | 5Y-H4K8ac_peak_11884 | 7.89273  |                                                    |
| 22 | 37415512 | 37415763 | 5Y-H4K8ac_peak_11885 | 12.65187 | TST_ENSG00000128311;MPST_ENSG00000128309           |
| 22 | 37562840 | 37563308 | 5Y-H4K8ac_peak_11886 | 9.84749  | RP1-151B14.6_ENSG00000235237                       |
| 22 | 37584516 | 37584892 | 5Y-H4K8ac_peak_11887 | 8.1667   |                                                    |
| 22 | 37594897 | 37595372 | 5Y-H4K8ac_peak_11888 | 13.0168  | C1QTNF6_ENSG00000133466                            |
| 22 | 37595705 | 37596126 | 5Y-H4K8ac_peak_11889 | 8.36588  | C1QTNF6_ENSG00000133466                            |
| 22 | 37703298 | 37703504 | 5Y-H4K8ac_peak_11890 | 10.26997 |                                                    |
| 22 | 37705444 | 37705697 | 5Y-H4K8ac_peak_11891 | 5.57299  |                                                    |
| 22 | 37705948 | 37706200 | 5Y-H4K8ac_peak_11892 | 5.98695  |                                                    |
| 22 | 37707099 | 37707339 | 5Y-H4K8ac_peak_11893 | 4.79585  |                                                    |
| 22 | 37740790 | 37741213 | 5Y-H4K8ac_peak_11894 | 9.96543  |                                                    |
| 22 | 37741519 | 37741846 | 5Y-H4K8ac_peak_11895 | 9.23159  |                                                    |
| 22 | 37816472 | 37816672 | 5Y-H4K8ac_peak_11896 | 5.67283  |                                                    |
| 22 | 37823687 | 37823990 | 5Y-H4K8ac_peak_11897 | 4.84727  | RP1-63G5.5_ENSG00000243902;ELFN2_ENSG00000166897   |
| 22 | 37857831 | 37858134 | 5Y-H4K8ac_peak_11898 | 5.59843  |                                                    |
| 22 | 37858877 | 37859161 | 5Y-H4K8ac_peak_11899 | 8.47164  |                                                    |
| 22 | 37882549 | 37882896 | 5Y-H4K8ac_peak_11900 | 6.06152  | MFNG_ENSG00000100060                               |
| 22 | 37904479 | 37905667 | 5Y-H4K8ac_peak_11901 | 6.77436  |                                                    |
| 22 | 37915098 | 37915354 | 5Y-H4K8ac_peak_11902 | 10.15788 | CARD10_ENSG00000100065                             |
| 22 | 37934593 | 37934853 | 5Y-H4K8ac_peak_11903 | 9.78792  |                                                    |
| 22 | 37935047 | 37935267 | 5Y-H4K8ac_peak_11904 | 10.74739 |                                                    |
| 22 | 37956178 | 37956373 | 5Y-H4K8ac_peak_11905 | 5.98695  | CDC42EP1_ENSG00000128283                           |
| 22 | 37956683 | 37957121 | 5Y-H4K8ac_peak_11906 | 5.03611  | CDC42EP1_ENSG00000128283                           |
| 22 | 38029676 | 38030065 | 5Y-H4K8ac_peak_11907 | 10.16277 | SH3BP1_ENSG00000100092                             |
| 22 | 38030455 | 38030804 | 5Y-H4K8ac_peak_11908 | 8.13965  | SH3BP1_ENSG00000100092                             |
| 22 | 38053846 | 38054236 | 5Y-H4K8ac_peak_11909 | 4.79585  | Z83844.1_ENSG00000233360;PDXP_ENSG00000241360      |
| 22 | 38070573 | 38071360 | 5Y-H4K8ac_peak_11910 | 11.1169  | LGALS1_ENSG00000100097                             |
| 22 | 38142366 | 38142820 | 5Y-H4K8ac_peak_11911 | 8.69112  |                                                    |
| 22 | 38147550 | 38147822 | 5Y-H4K8ac_peak_11912 | 6.75784  |                                                    |

|    |          |          |                      |          |                                                     |
|----|----------|----------|----------------------|----------|-----------------------------------------------------|
| 22 | 38198164 | 38198683 | 5Y-H4K8ac_peak_11913 | 8.4454   |                                                     |
| 22 | 38200057 | 38200418 | 5Y-H4K8ac_peak_11914 | 11.1169  | H1F0_ENSG00000189060                                |
| 22 | 38200670 | 38201133 | 5Y-H4K8ac_peak_11915 | 8.73392  | H1F0_ENSG00000189060                                |
| 22 | 38301251 | 38301645 | 5Y-H4K8ac_peak_11916 | 4.95697  | MICALL1_ENSG00000100139                             |
| 22 | 38301848 | 38302817 | 5Y-H4K8ac_peak_11917 | 11.28133 | MICALL1_ENSG00000100139                             |
| 22 | 38577238 | 38577451 | 5Y-H4K8ac_peak_11918 | 5.40331  |                                                     |
| 22 | 38712817 | 38713234 | 5Y-H4K8ac_peak_11919 | 6.34046  |                                                     |
| 22 | 38902036 | 38902247 | 5Y-H4K8ac_peak_11920 | 6.50117  |                                                     |
| 22 | 39078008 | 39078218 | 5Y-H4K8ac_peak_11921 | 6.50117  | RP3-508I15.9_ENSG00000228274;TOMM22_ENSG00000100216 |
| 22 | 39268875 | 39269085 | 5Y-H4K8ac_peak_11922 | 6.43775  | CBX6_ENSG00000183741                                |
| 22 | 39853505 | 39854067 | 5Y-H4K8ac_peak_11923 | 6.34046  | MGAT3_ENSG00000128268                               |
| 22 | 39867025 | 39867237 | 5Y-H4K8ac_peak_11924 | 6.50117  |                                                     |
| 22 | 40355454 | 40355661 | 5Y-H4K8ac_peak_11925 | 8.33296  | RP3-370M22.8_ENSG00000225528                        |
| 22 | 41417624 | 41417933 | 5Y-H4K8ac_peak_11926 | 9.38203  |                                                     |
| 22 | 41487996 | 41488406 | 5Y-H4K8ac_peak_11927 | 5.65584  | EP300_ENSG00000100393;MIR1281_ENSG00000221160       |
| 22 | 41843716 | 41844115 | 5Y-H4K8ac_peak_11928 | 6.37023  | TOB2_ENSG00000183864                                |
| 22 | 41865182 | 41865385 | 5Y-H4K8ac_peak_11929 | 10.46287 | PHF5A_ENSG00000100410;ACO2_ENSG00000100412          |
| 22 | 41951589 | 41951819 | 5Y-H4K8ac_peak_11930 | 6.34046  |                                                     |
| 22 | 42469872 | 42470126 | 5Y-H4K8ac_peak_11931 | 8.43511  | FAM109B_ENSG00000177096                             |
| 22 | 42470367 | 42470687 | 5Y-H4K8ac_peak_11932 | 8.21525  | FAM109B_ENSG00000177096                             |
| 22 | 42740591 | 42740905 | 5Y-H4K8ac_peak_11933 | 6.34046  | TCF20_ENSG00000100207                               |
| 22 | 42772075 | 42772269 | 5Y-H4K8ac_peak_11934 | 6.34046  |                                                     |
| 22 | 42934888 | 42935323 | 5Y-H4K8ac_peak_11935 | 8.33296  |                                                     |
| 22 | 42949290 | 42949724 | 5Y-H4K8ac_peak_11936 | 10.46287 | SERHL2_ENSG00000183569                              |
| 22 | 43010639 | 43010831 | 5Y-H4K8ac_peak_11937 | 6.79955  | POLDIP3_ENSG00000100227;RNU12_ENSG00000270022       |
| 22 | 44350872 | 44351080 | 5Y-H4K8ac_peak_11938 | 6.53157  | SAMM50_ENSG00000100347                              |
| 22 | 44419491 | 44419990 | 5Y-H4K8ac_peak_11939 | 9.30505  |                                                     |
| 22 | 44420194 | 44420756 | 5Y-H4K8ac_peak_11940 | 15.87289 |                                                     |
| 22 | 44421016 | 44421337 | 5Y-H4K8ac_peak_11941 | 6.46053  |                                                     |
| 22 | 44893522 | 44894007 | 5Y-H4K8ac_peak_11942 | 9.01738  | LDOC1L_ENSG00000188636                              |
| 22 | 45016226 | 45016689 | 5Y-H4K8ac_peak_11943 | 6.77436  |                                                     |
| 22 | 45045010 | 45045331 | 5Y-H4K8ac_peak_11944 | 5.90587  |                                                     |
| 22 | 45072770 | 45073096 | 5Y-H4K8ac_peak_11945 | 5.12213  |                                                     |
| 22 | 45081609 | 45081825 | 5Y-H4K8ac_peak_11946 | 5.64909  |                                                     |
| 22 | 45125056 | 45126414 | 5Y-H4K8ac_peak_11947 | 10.12457 |                                                     |
| 22 | 45244988 | 45245180 | 5Y-H4K8ac_peak_11948 | 4.64156  |                                                     |
| 22 | 45404933 | 45405282 | 5Y-H4K8ac_peak_11949 | 6.54441  | PHF21B_ENSG00000056487                              |
| 22 | 45559945 | 45560212 | 5Y-H4K8ac_peak_11950 | 9.96543  | CTA-217C2.1_ENSG00000226328;NUP50_ENSG00000093000   |
| 22 | 45607830 | 45608490 | 5Y-H4K8ac_peak_11951 | 8.50349  |                                                     |
| 22 | 45681223 | 45681499 | 5Y-H4K8ac_peak_11952 | 5.25503  | UPK3A_ENSG00000100373                               |
| 22 | 45705190 | 45705418 | 5Y-H4K8ac_peak_11953 | 8.24461  | FAM118A_ENSG00000100376                             |
| 22 | 45705969 | 45706210 | 5Y-H4K8ac_peak_11954 | 8.47164  |                                                     |
| 22 | 45709979 | 45710440 | 5Y-H4K8ac_peak_11955 | 6.79169  |                                                     |
| 22 | 45724356 | 45724656 | 5Y-H4K8ac_peak_11956 | 5.96059  |                                                     |
| 22 | 45733577 | 45733773 | 5Y-H4K8ac_peak_11957 | 6.14981  |                                                     |
| 22 | 45856423 | 45856744 | 5Y-H4K8ac_peak_11958 | 4.84727  |                                                     |



|    |          |          |                      |          |                                                                                                           |
|----|----------|----------|----------------------|----------|-----------------------------------------------------------------------------------------------------------|
| 22 | 45898199 | 45898935 | 5Y-H4K8ac_peak_11959 | 9.79526  | FBLN1_ENSG00000077942                                                                                     |
| 22 | 45900824 | 45901379 | 5Y-H4K8ac_peak_11960 | 4.29586  |                                                                                                           |
| 22 | 46067230 | 46068558 | 5Y-H4K8ac_peak_11961 | 18.36893 | ATXN10_ENSG00000130638                                                                                    |
| 22 | 46281181 | 46281503 | 5Y-H4K8ac_peak_11962 | 10.23004 |                                                                                                           |
| 22 | 46281737 | 46281987 | 5Y-H4K8ac_peak_11963 | 6.7002   |                                                                                                           |
| 22 | 46390995 | 46391455 | 5Y-H4K8ac_peak_11964 | 8.69112  |                                                                                                           |
| 22 | 46393028 | 46393241 | 5Y-H4K8ac_peak_11965 | 8.73392  |                                                                                                           |
| 22 | 46402704 | 46403074 | 5Y-H4K8ac_peak_11966 | 5.60566  |                                                                                                           |
| 22 | 46403356 | 46403818 | 5Y-H4K8ac_peak_11967 | 13.12848 |                                                                                                           |
| 22 | 46404015 | 46404405 | 5Y-H4K8ac_peak_11968 | 7.62723  |                                                                                                           |
| 22 | 46409683 | 46410145 | 5Y-H4K8ac_peak_11969 | 6.78128  | CITF22-92A6.1_ENSG00000273145                                                                             |
| 22 | 46410710 | 46411039 | 5Y-H4K8ac_peak_11970 | 4.8188   |                                                                                                           |
| 22 | 46432872 | 46433126 | 5Y-H4K8ac_peak_11971 | 5.01024  |                                                                                                           |
| 22 | 46439792 | 46440377 | 5Y-H4K8ac_peak_11972 | 8.93923  | LINC00899_ENSG00000231711                                                                                 |
| 22 | 46448767 | 46448983 | 5Y-H4K8ac_peak_11973 | 6.78128  | FLJ27365_ENSG00000197182;RP6-109B7.5_ENSG00000273289;RP6-109B7.3_ENSG00000241990                          |
| 22 | 46449404 | 46450886 | 5Y-H4K8ac_peak_11974 | 12.82593 | C22orf26_ENSG00000182257;FLJ27365_ENSG00000197182;RP6-109B7.5_ENSG00000273289;RP6-109B7.3_ENSG00000241990 |
| 22 | 46454750 | 46455098 | 5Y-H4K8ac_peak_11975 | 6.77436  | RP6-109B7.2_ENSG00000231010                                                                               |
| 22 | 46460319 | 46460514 | 5Y-H4K8ac_peak_11976 | 12.44818 |                                                                                                           |
| 22 | 46463657 | 46463900 | 5Y-H4K8ac_peak_11977 | 8.49231  |                                                                                                           |
| 22 | 46465988 | 46466736 | 5Y-H4K8ac_peak_11978 | 12.72376 | RP6-109B7.4_ENSG00000235159                                                                               |
| 22 | 46467351 | 46468529 | 5Y-H4K8ac_peak_11979 | 15.01219 |                                                                                                           |
| 22 | 46474257 | 46474666 | 5Y-H4K8ac_peak_11980 | 7.58806  |                                                                                                           |
| 22 | 46475483 | 46475899 | 5Y-H4K8ac_peak_11981 | 11.1169  |                                                                                                           |
| 22 | 46481062 | 46481522 | 5Y-H4K8ac_peak_11982 | 6.57504  |                                                                                                           |
| 22 | 46481772 | 46482326 | 5Y-H4K8ac_peak_11983 | 7.87406  |                                                                                                           |
| 22 | 46482934 | 46483655 | 5Y-H4K8ac_peak_11984 | 8.62703  |                                                                                                           |
| 22 | 46485042 | 46485511 | 5Y-H4K8ac_peak_11985 | 5.41472  |                                                                                                           |
| 22 | 46489729 | 46489974 | 5Y-H4K8ac_peak_11986 | 5.88655  |                                                                                                           |
| 22 | 46518617 | 46518818 | 5Y-H4K8ac_peak_11987 | 7.03573  |                                                                                                           |
| 22 | 46545956 | 46546176 | 5Y-H4K8ac_peak_11988 | 8.28346  | PPARA_ENSG00000186951                                                                                     |
| 22 | 46625229 | 46625456 | 5Y-H4K8ac_peak_11989 | 6.50117  |                                                                                                           |
| 22 | 46638040 | 46638265 | 5Y-H4K8ac_peak_11990 | 11.26871 |                                                                                                           |
| 22 | 46640615 | 46641025 | 5Y-H4K8ac_peak_11991 | 5.98695  |                                                                                                           |
| 22 | 46641480 | 46641839 | 5Y-H4K8ac_peak_11992 | 9.89244  |                                                                                                           |
| 22 | 46645709 | 46646030 | 5Y-H4K8ac_peak_11993 | 4.77126  | CDPF1_ENSG00000205643                                                                                     |
| 22 | 46646398 | 46647070 | 5Y-H4K8ac_peak_11994 | 9.74838  | CDPF1_ENSG00000205643                                                                                     |
| 22 | 46664018 | 46664242 | 5Y-H4K8ac_peak_11995 | 8.4454   | TTC38_ENSG00000075234                                                                                     |
| 22 | 46691845 | 46692500 | 5Y-H4K8ac_peak_11996 | 15.45397 | GTSE1_ENSG00000075218                                                                                     |
| 22 | 46731201 | 46732083 | 5Y-H4K8ac_peak_11997 | 7.97699  |                                                                                                           |
| 22 | 46906408 | 46906650 | 5Y-H4K8ac_peak_11998 | 4.9885   |                                                                                                           |
| 22 | 46959479 | 46959883 | 5Y-H4K8ac_peak_11999 | 10.32379 |                                                                                                           |
| 22 | 46971014 | 46971324 | 5Y-H4K8ac_peak_12000 | 6.22669  | GRAMD4_ENSG00000075240                                                                                    |
| 22 | 46972345 | 46972802 | 5Y-H4K8ac_peak_12001 | 15.84891 | GRAMD4_ENSG00000075240                                                                                    |
| 22 | 46985593 | 46985884 | 5Y-H4K8ac_peak_12002 | 7.01364  |                                                                                                           |
| 22 | 46991556 | 46991913 | 5Y-H4K8ac_peak_12003 | 5.23083  |                                                                                                           |
| 22 | 47008680 | 47008925 | 5Y-H4K8ac_peak_12004 | 7.31807  |                                                                                                           |

|    |          |          |                      |          |                                                        |
|----|----------|----------|----------------------|----------|--------------------------------------------------------|
| 22 | 47014670 | 47015074 | 5Y-H4K8ac_peak_12005 | 6.22669  |                                                        |
| 22 | 47015293 | 47015485 | 5Y-H4K8ac_peak_12006 | 5.41472  |                                                        |
| 22 | 47016143 | 47016351 | 5Y-H4K8ac_peak_12007 | 10.1994  |                                                        |
| 22 | 47057318 | 47057541 | 5Y-H4K8ac_peak_12008 | 5.47303  |                                                        |
| 22 | 47124783 | 47124979 | 5Y-H4K8ac_peak_12009 | 10.95042 |                                                        |
| 22 | 47127039 | 47127632 | 5Y-H4K8ac_peak_12010 | 8.49231  |                                                        |
| 22 | 47133615 | 47133932 | 5Y-H4K8ac_peak_12011 | 4.99136  | CERK_ENSG00000100422                                   |
| 22 | 47158577 | 47158793 | 5Y-H4K8ac_peak_12012 | 9.30505  | CTA-29F11.1_ENSG00000260708;TBC1D22A_ENSG00000054611   |
| 22 | 48027567 | 48027759 | 5Y-H4K8ac_peak_12013 | 5.87382  | LINC00898_ENSG00000205634;RP11-191L9.4_ENSG00000224271 |
| 22 | 49408135 | 49408437 | 5Y-H4K8ac_peak_12014 | 5.41472  |                                                        |
| 22 | 49411243 | 49411451 | 5Y-H4K8ac_peak_12015 | 11.56948 |                                                        |
| 22 | 49442663 | 49442936 | 5Y-H4K8ac_peak_12016 | 6.73385  |                                                        |
| 22 | 49472983 | 49473196 | 5Y-H4K8ac_peak_12017 | 6.22669  |                                                        |
| 22 | 49546872 | 49547137 | 5Y-H4K8ac_peak_12018 | 4.6766   |                                                        |
| 22 | 49547336 | 49547688 | 5Y-H4K8ac_peak_12019 | 11.01699 |                                                        |
| 22 | 50051387 | 50051665 | 5Y-H4K8ac_peak_12020 | 4.07874  | C22orf34_ENSG00000188511                               |
| 22 | 50221590 | 50221916 | 5Y-H4K8ac_peak_12021 | 7.89273  | BRD1_ENSG00000100425                                   |
| 22 | 50328554 | 50328979 | 5Y-H4K8ac_peak_12022 | 7.90751  |                                                        |
| 22 | 50329738 | 50330189 | 5Y-H4K8ac_peak_12023 | 5.23083  |                                                        |
| 22 | 50353538 | 50353781 | 5Y-H4K8ac_peak_12024 | 6.88736  | PIM3_ENSG00000198355                                   |
| 22 | 50354163 | 50354617 | 5Y-H4K8ac_peak_12025 | 14.97676 | PIM3_ENSG00000198355                                   |
| 22 | 50438328 | 50438544 | 5Y-H4K8ac_peak_12026 | 5.65584  |                                                        |
| 22 | 50497065 | 50497261 | 5Y-H4K8ac_peak_12027 | 7.84116  |                                                        |
| 22 | 50553078 | 50553384 | 5Y-H4K8ac_peak_12028 | 5.29015  |                                                        |
| 22 | 50553884 | 50554243 | 5Y-H4K8ac_peak_12029 | 5.68769  |                                                        |
| 22 | 50607860 | 50608410 | 5Y-H4K8ac_peak_12030 | 11.13396 | PANX2_ENSG00000073150                                  |
| 22 | 50707441 | 50708740 | 5Y-H4K8ac_peak_12031 | 11.61993 | MAPK11_ENSG00000185386                                 |
| 22 | 50708992 | 50710107 | 5Y-H4K8ac_peak_12032 | 12.26819 | MAPK11_ENSG00000185386                                 |
| 22 | 50745728 | 50745943 | 5Y-H4K8ac_peak_12033 | 9.30206  | PLXNB2_ENSG00000196576                                 |
| 22 | 50746396 | 50746685 | 5Y-H4K8ac_peak_12034 | 10.1994  | PLXNB2_ENSG00000196576                                 |
| 22 | 50765660 | 50766425 | 5Y-H4K8ac_peak_12035 | 13.92877 | DENND6B_ENSG00000205593                                |
| 22 | 50780410 | 50780769 | 5Y-H4K8ac_peak_12036 | 4.50834  | PPP6R2_ENSG00000100239                                 |
| 22 | 50781828 | 50782022 | 5Y-H4K8ac_peak_12037 | 10.21117 | PPP6R2_ENSG00000100239                                 |
| 22 | 50913679 | 50914001 | 5Y-H4K8ac_peak_12038 | 5.98695  | SBF1_ENSG00000100241                                   |
| 22 | 50919561 | 50919939 | 5Y-H4K8ac_peak_12039 | 6.53157  | ADM2_ENSG00000128165                                   |
| 22 | 50946874 | 50947071 | 5Y-H4K8ac_peak_12040 | 5.32832  | LMF2_ENSG00000100258;NCAPH2_ENSG00000025770            |
| 22 | 50963494 | 50963941 | 5Y-H4K8ac_peak_12041 | 9.30505  | SCO2_ENSG00000130489                                   |
| 22 | 50964314 | 50964888 | 5Y-H4K8ac_peak_12042 | 13.00733 | SCO2_ENSG00000130489                                   |
| 22 | 50965163 | 50965433 | 5Y-H4K8ac_peak_12043 | 9.51254  | SCO2_ENSG00000130489                                   |
| 22 | 51020442 | 51021233 | 5Y-H4K8ac_peak_12044 | 13.81505 | CHKB-CPT1B_ENSG00000254413;CHKB-AS1_ENSG00000205559    |
| 3  | 2140570  | 2140954  | 5Y-H4K8ac_peak_12045 | 13.61292 | CNTN4_ENSG00000144619                                  |
| 3  | 2339442  | 2339688  | 5Y-H4K8ac_peak_12046 | 5.28616  |                                                        |
| 3  | 3167616  | 3167810  | 5Y-H4K8ac_peak_12047 | 7.03573  | IL5RA_ENSG00000091181;TRNT1_ENSG00000072756            |
| 3  | 3168719  | 3169239  | 5Y-H4K8ac_peak_12048 | 4.642    | IL5RA_ENSG00000091181;TRNT1_ENSG00000072756            |
| 3  | 3221069  | 3221339  | 5Y-H4K8ac_peak_12049 | 12.05638 | CRBN_ENSG00000113851                                   |
| 3  | 4345225  | 4345613  | 5Y-H4K8ac_peak_12050 | 9.78792  | SETMAR_ENSG00000170364                                 |

|   |          |          |                      |          |                                                                              |
|---|----------|----------|----------------------|----------|------------------------------------------------------------------------------|
| 3 | 4508557  | 4508777  | 5Y-H4K8ac_peak_12051 | 8.76608  | SUMF1_ENSG00000144455                                                        |
| 3 | 4546750  | 4547077  | 5Y-H4K8ac_peak_12052 | 8.564    |                                                                              |
| 3 | 4553110  | 4553300  | 5Y-H4K8ac_peak_12053 | 6.27097  |                                                                              |
| 3 | 4574992  | 4575210  | 5Y-H4K8ac_peak_12054 | 8.69112  |                                                                              |
| 3 | 5019966  | 5020357  | 5Y-H4K8ac_peak_12055 | 9.30124  | BHLHE40_ENSG00000134107                                                      |
| 3 | 5068303  | 5068646  | 5Y-H4K8ac_peak_12056 | 7.89142  |                                                                              |
| 3 | 5069301  | 5069703  | 5Y-H4K8ac_peak_12057 | 6.6946   |                                                                              |
| 3 | 5164022  | 5164472  | 5Y-H4K8ac_peak_12058 | 12.71156 | ARL8B_ENSG00000134108                                                        |
| 3 | 5229544  | 5229745  | 5Y-H4K8ac_peak_12059 | 6.77436  | AC026202.3_ENSG00000233912;AC026202.1_ENSG00000268509;EDEM1_ENSG00000134109  |
| 3 | 8664957  | 8665362  | 5Y-H4K8ac_peak_12060 | 7.53283  |                                                                              |
| 3 | 8690477  | 8690720  | 5Y-H4K8ac_peak_12061 | 7.08486  |                                                                              |
| 3 | 8691369  | 8691730  | 5Y-H4K8ac_peak_12062 | 7.89142  |                                                                              |
| 3 | 8693046  | 8693715  | 5Y-H4K8ac_peak_12063 | 5.64909  |                                                                              |
| 3 | 8700004  | 8700232  | 5Y-H4K8ac_peak_12064 | 8.2913   |                                                                              |
| 3 | 8705513  | 8706023  | 5Y-H4K8ac_peak_12065 | 13.51759 |                                                                              |
| 3 | 8834352  | 8834984  | 5Y-H4K8ac_peak_12066 | 11.1169  |                                                                              |
| 3 | 9004880  | 9005075  | 5Y-H4K8ac_peak_12067 | 8.35138  | RAD18_ENSG00000070950                                                        |
| 3 | 9177651  | 9177924  | 5Y-H4K8ac_peak_12068 | 4.84727  |                                                                              |
| 3 | 9356872  | 9357200  | 5Y-H4K8ac_peak_12069 | 9.52603  |                                                                              |
| 3 | 9404499  | 9405005  | 5Y-H4K8ac_peak_12070 | 4.50834  | SRGAP3_ENSG00000196220;RP11-380O24.1_ENSG00000254485;THUMPD3_ENSG00000134077 |
| 3 | 9595593  | 9595822  | 5Y-H4K8ac_peak_12071 | 9.43096  | LHFPL4_ENSG00000156959                                                       |
| 3 | 9791053  | 9791289  | 5Y-H4K8ac_peak_12072 | 10.21117 | OGG1_ENSG00000114026                                                         |
| 3 | 9811935  | 9812180  | 5Y-H4K8ac_peak_12073 | 5.41472  | CAMK1_ENSG00000134072                                                        |
| 3 | 9833664  | 9834598  | 5Y-H4K8ac_peak_12074 | 8.69112  | TADA3_ENSG00000171148;ARPC4_ENSG00000241553;ARPC4-TTLL3_ENSG00000250151      |
| 3 | 9905933  | 9906235  | 5Y-H4K8ac_peak_12075 | 4.69231  |                                                                              |
| 3 | 9929947  | 9930151  | 5Y-H4K8ac_peak_12076 | 6.73047  |                                                                              |
| 3 | 9932350  | 9932732  | 5Y-H4K8ac_peak_12077 | 15.40182 | JAGN1_ENSG00000171135                                                        |
| 3 | 9957075  | 9957556  | 5Y-H4K8ac_peak_12078 | 4.97086  |                                                                              |
| 3 | 9993645  | 9994050  | 5Y-H4K8ac_peak_12079 | 6.37023  | PRRT3_ENSG00000163704                                                        |
| 3 | 10028267 | 10028457 | 5Y-H4K8ac_peak_12080 | 4.95697  | EMC3-AS1_ENSG00000180385                                                     |
| 3 | 10183560 | 10183801 | 5Y-H4K8ac_peak_12081 | 8.79957  | VHL_ENSG00000134086;snoU13_ENSG00000238345                                   |
| 3 | 10206711 | 10206926 | 5Y-H4K8ac_peak_12082 | 5.64909  | IRAK2_ENSG00000134070                                                        |
| 3 | 10474372 | 10474682 | 5Y-H4K8ac_peak_12083 | 7.66481  |                                                                              |
| 3 | 10642269 | 10643094 | 5Y-H4K8ac_peak_12084 | 6.37023  |                                                                              |
| 3 | 10857284 | 10858110 | 5Y-H4K8ac_peak_12085 | 11.99586 | SLC6A11_ENSG00000132164                                                      |
| 3 | 10968976 | 10969367 | 5Y-H4K8ac_peak_12086 | 6.1654   |                                                                              |
| 3 | 10969960 | 10970349 | 5Y-H4K8ac_peak_12087 | 5.77617  |                                                                              |
| 3 | 10970728 | 10970994 | 5Y-H4K8ac_peak_12088 | 6.88532  |                                                                              |
| 3 | 11133914 | 11134166 | 5Y-H4K8ac_peak_12089 | 5.26353  |                                                                              |
| 3 | 11138516 | 11138852 | 5Y-H4K8ac_peak_12090 | 11.86504 |                                                                              |
| 3 | 11760559 | 11760937 | 5Y-H4K8ac_peak_12091 | 4.95697  |                                                                              |
| 3 | 11762145 | 11762397 | 5Y-H4K8ac_peak_12092 | 8.75926  |                                                                              |
| 3 | 11812673 | 11812872 | 5Y-H4K8ac_peak_12093 | 7.17184  |                                                                              |
| 3 | 11887974 | 11888252 | 5Y-H4K8ac_peak_12094 | 5.99504  | TAMM41_ENSG00000144559                                                       |
| 3 | 12521644 | 12521882 | 5Y-H4K8ac_peak_12095 | 7.59832  |                                                                              |
| 3 | 12526053 | 12526338 | 5Y-H4K8ac_peak_12096 | 8.69112  | TSEN2_ENSG00000154743                                                        |

|   |          |          |                      |          |                                                |
|---|----------|----------|----------------------|----------|------------------------------------------------|
| 3 | 12595458 | 12595906 | 5Y-H4K8ac_peak_12097 | 8.43511  |                                                |
| 3 | 12705200 | 12705555 | 5Y-H4K8ac_peak_12098 | 12.10416 | RAF1_ENSG00000132155                           |
| 3 | 12835734 | 12835993 | 5Y-H4K8ac_peak_12099 | 6.79955  |                                                |
| 3 | 12837864 | 12838550 | 5Y-H4K8ac_peak_12100 | 13.72401 | CAND2_ENSG00000144712                          |
| 3 | 12883551 | 12883948 | 5Y-H4K8ac_peak_12101 | 7.53429  | RPL32_ENSG00000144713                          |
| 3 | 12884321 | 12884627 | 5Y-H4K8ac_peak_12102 | 4.07874  |                                                |
| 3 | 12917202 | 12917772 | 5Y-H4K8ac_peak_12103 | 12.05638 |                                                |
| 3 | 12985970 | 12986254 | 5Y-H4K8ac_peak_12104 | 4.79585  |                                                |
| 3 | 12987698 | 12987909 | 5Y-H4K8ac_peak_12105 | 5.13364  |                                                |
| 3 | 12988945 | 12989280 | 5Y-H4K8ac_peak_12106 | 8.97752  |                                                |
| 3 | 13063666 | 13063881 | 5Y-H4K8ac_peak_12107 | 6.64195  |                                                |
| 3 | 13083744 | 13084082 | 5Y-H4K8ac_peak_12108 | 6.10343  |                                                |
| 3 | 13084823 | 13085016 | 5Y-H4K8ac_peak_12109 | 5.37237  |                                                |
| 3 | 13235600 | 13236046 | 5Y-H4K8ac_peak_12110 | 7.14616  |                                                |
| 3 | 13461956 | 13462307 | 5Y-H4K8ac_peak_12111 | 11.94897 | NUP210_ENSG00000132182                         |
| 3 | 13468167 | 13468399 | 5Y-H4K8ac_peak_12112 | 4.9885   |                                                |
| 3 | 13560883 | 13561196 | 5Y-H4K8ac_peak_12113 | 5.65584  |                                                |
| 3 | 13566318 | 13566645 | 5Y-H4K8ac_peak_12114 | 4.64156  |                                                |
| 3 | 13567432 | 13567736 | 5Y-H4K8ac_peak_12115 | 9.31608  |                                                |
| 3 | 13577718 | 13577986 | 5Y-H4K8ac_peak_12116 | 4.24332  |                                                |
| 3 | 13590287 | 13591008 | 5Y-H4K8ac_peak_12117 | 6.77436  |                                                |
| 3 | 13607168 | 13607647 | 5Y-H4K8ac_peak_12118 | 7.38046  |                                                |
| 3 | 13608021 | 13608227 | 5Y-H4K8ac_peak_12119 | 4.15658  |                                                |
| 3 | 13614930 | 13615160 | 5Y-H4K8ac_peak_12120 | 9.24789  |                                                |
| 3 | 13615626 | 13615902 | 5Y-H4K8ac_peak_12121 | 13.92877 |                                                |
| 3 | 13616121 | 13616688 | 5Y-H4K8ac_peak_12122 | 13.61292 |                                                |
| 3 | 13696696 | 13697225 | 5Y-H4K8ac_peak_12123 | 5.98695  |                                                |
| 3 | 13824061 | 13824506 | 5Y-H4K8ac_peak_12124 | 5.23083  |                                                |
| 3 | 13864625 | 13864829 | 5Y-H4K8ac_peak_12125 | 4.82324  |                                                |
| 3 | 13936388 | 13936916 | 5Y-H4K8ac_peak_12126 | 5.41472  |                                                |
| 3 | 14165913 | 14166120 | 5Y-H4K8ac_peak_12127 | 6.78128  | CHCHD4_ENSG00000163528;TMEM43_ENSG00000170876  |
| 3 | 14361398 | 14361950 | 5Y-H4K8ac_peak_12128 | 6.46053  |                                                |
| 3 | 14383030 | 14383346 | 5Y-H4K8ac_peak_12129 | 8.69112  |                                                |
| 3 | 14443531 | 14443944 | 5Y-H4K8ac_peak_12130 | 14.89891 | SLC6A6_ENSG00000131389                         |
| 3 | 14493870 | 14494060 | 5Y-H4K8ac_peak_12131 | 4.03329  |                                                |
| 3 | 14644060 | 14644436 | 5Y-H4K8ac_peak_12132 | 9.13822  |                                                |
| 3 | 14832787 | 14833214 | 5Y-H4K8ac_peak_12133 | 7.49746  |                                                |
| 3 | 14845794 | 14846266 | 5Y-H4K8ac_peak_12134 | 7.60893  |                                                |
| 3 | 14879536 | 14879730 | 5Y-H4K8ac_peak_12135 | 6.43775  |                                                |
| 3 | 14889549 | 14889842 | 5Y-H4K8ac_peak_12136 | 5.75508  |                                                |
| 3 | 14920846 | 14921093 | 5Y-H4K8ac_peak_12137 | 5.51139  |                                                |
| 3 | 14989251 | 14989523 | 5Y-H4K8ac_peak_12138 | 6.88736  | FGD5-AS1_ENSG00000225733;NR2C2_ENSG00000177463 |
| 3 | 15106557 | 15106755 | 5Y-H4K8ac_peak_12139 | 8.73392  | MRPS25_ENSG00000131368                         |
| 3 | 15141268 | 15141466 | 5Y-H4K8ac_peak_12140 | 5.65584  | ZFYVE20_ENSG00000131381                        |
| 3 | 15468620 | 15468810 | 5Y-H4K8ac_peak_12141 | 6.64195  | EAF1_ENSG00000144597                           |
| 3 | 15469222 | 15469441 | 5Y-H4K8ac_peak_12142 | 4.95697  | EAF1_ENSG00000144597                           |

|   |          |          |                      |          |                                                   |
|---|----------|----------|----------------------|----------|---------------------------------------------------|
| 3 | 15688548 | 15688753 | 5Y-H4K8ac_peak_12143 | 7.59101  |                                                   |
| 3 | 16554382 | 16554621 | 5Y-H4K8ac_peak_12144 | 11.09973 | RFTN1_ENSG00000131378                             |
| 3 | 16554831 | 16555546 | 5Y-H4K8ac_peak_12145 | 8.16031  | RFTN1_ENSG00000131378                             |
| 3 | 16557860 | 16558051 | 5Y-H4K8ac_peak_12146 | 5.24695  |                                                   |
| 3 | 16591946 | 16592155 | 5Y-H4K8ac_peak_12147 | 8.43511  |                                                   |
| 3 | 16592555 | 16592891 | 5Y-H4K8ac_peak_12148 | 12.21176 |                                                   |
| 3 | 16925840 | 16926271 | 5Y-H4K8ac_peak_12149 | 14.30055 |                                                   |
| 3 | 17783485 | 17783992 | 5Y-H4K8ac_peak_12150 | 6.80915  |                                                   |
| 3 | 18167308 | 18167691 | 5Y-H4K8ac_peak_12151 | 14.55472 |                                                   |
| 3 | 18170013 | 18170226 | 5Y-H4K8ac_peak_12152 | 5.40331  |                                                   |
| 3 | 18180622 | 18180853 | 5Y-H4K8ac_peak_12153 | 9.20645  |                                                   |
| 3 | 18466615 | 18466826 | 5Y-H4K8ac_peak_12154 | 6.20875  |                                                   |
| 3 | 18467417 | 18467749 | 5Y-H4K8ac_peak_12155 | 11.93212 |                                                   |
| 3 | 19188761 | 19188986 | 5Y-H4K8ac_peak_12156 | 4.5753   | KCNH8_ENSG00000183960                             |
| 3 | 19189315 | 19189807 | 5Y-H4K8ac_peak_12157 | 6.08523  | KCNH8_ENSG00000183960                             |
| 3 | 20082001 | 20082340 | 5Y-H4K8ac_peak_12158 | 6.50117  | KAT2B_ENSG00000114166                             |
| 3 | 20227284 | 20227665 | 5Y-H4K8ac_peak_12159 | 11.19336 | SGOL1_ENSG00000129810                             |
| 3 | 23154247 | 23154475 | 5Y-H4K8ac_peak_12160 | 10.46287 |                                                   |
| 3 | 23753122 | 23753317 | 5Y-H4K8ac_peak_12161 | 5.23083  |                                                   |
| 3 | 23802435 | 23802734 | 5Y-H4K8ac_peak_12162 | 5.07473  |                                                   |
| 3 | 23816837 | 23817031 | 5Y-H4K8ac_peak_12163 | 6.50117  |                                                   |
| 3 | 23847472 | 23847812 | 5Y-H4K8ac_peak_12164 | 5.59837  | UBE2E1-AS1_ENSG00000223791;UBE2E1_ENSG00000170142 |
| 3 | 23851892 | 23852309 | 5Y-H4K8ac_peak_12165 | 11.30958 |                                                   |
| 3 | 23958825 | 23959065 | 5Y-H4K8ac_peak_12166 | 6.64195  | RPL15_ENSG00000174748                             |
| 3 | 23986911 | 23987152 | 5Y-H4K8ac_peak_12167 | 6.50117  | NKIRAS1_ENSG00000197885;NR1D2_ENSG00000174738     |
| 3 | 23987651 | 23987880 | 5Y-H4K8ac_peak_12168 | 11.19336 | NKIRAS1_ENSG00000197885;NR1D2_ENSG00000174738     |
| 3 | 24563028 | 24563733 | 5Y-H4K8ac_peak_12169 | 10.46287 | MIR4792_ENSG00000265028                           |
| 3 | 24870323 | 24870751 | 5Y-H4K8ac_peak_12170 | 8.2589   |                                                   |
| 3 | 27524743 | 27525090 | 5Y-H4K8ac_peak_12171 | 4.77126  | SLC4A7_ENSG00000033867                            |
| 3 | 27609398 | 27609616 | 5Y-H4K8ac_peak_12172 | 5.01697  |                                                   |
| 3 | 27673974 | 27674305 | 5Y-H4K8ac_peak_12173 | 6.46053  | AC098614.2_ENSG00000213846                        |
| 3 | 28283234 | 28283456 | 5Y-H4K8ac_peak_12174 | 9.23159  | CMC1_ENSG00000187118                              |
| 3 | 28390035 | 28390446 | 5Y-H4K8ac_peak_12175 | 6.08523  | AZI2_ENSG00000163512;ZCWPW2_ENSG00000206559       |
| 3 | 30648059 | 30648544 | 5Y-H4K8ac_peak_12176 | 8.35139  | TGFBR2_ENSG00000163513                            |
| 3 | 30732807 | 30733213 | 5Y-H4K8ac_peak_12177 | 5.65584  |                                                   |
| 3 | 31465922 | 31466121 | 5Y-H4K8ac_peak_12178 | 5.65584  |                                                   |
| 3 | 31574189 | 31574627 | 5Y-H4K8ac_peak_12179 | 4.77126  | STT3B_ENSG00000163527                             |
| 3 | 32147197 | 32147436 | 5Y-H4K8ac_peak_12180 | 5.04571  | GPD1L_ENSG00000152642                             |
| 3 | 32147657 | 32147874 | 5Y-H4K8ac_peak_12181 | 12.26606 | GPD1L_ENSG00000152642                             |
| 3 | 32148199 | 32148396 | 5Y-H4K8ac_peak_12182 | 9.30505  |                                                   |
| 3 | 32362745 | 32362935 | 5Y-H4K8ac_peak_12183 | 7.38046  |                                                   |
| 3 | 32443451 | 32443672 | 5Y-H4K8ac_peak_12184 | 5.99504  |                                                   |
| 3 | 32611834 | 32612230 | 5Y-H4K8ac_peak_12185 | 13.60015 | DYNC1LI1_ENSG00000144635                          |
| 3 | 32858132 | 32858521 | 5Y-H4K8ac_peak_12186 | 10.19948 | TRIM71_ENSG00000206557                            |
| 3 | 33138315 | 33138561 | 5Y-H4K8ac_peak_12187 | 7.50148  | TMPPE_ENSG00000188167                             |
| 3 | 33155519 | 33155869 | 5Y-H4K8ac_peak_12188 | 6.54441  | CRTAP_ENSG00000170275                             |

|   |          |          |                      |          |                                                     |
|---|----------|----------|----------------------|----------|-----------------------------------------------------|
| 3 | 33482573 | 33483189 | 5Y-H4K8ac_peak_12189 | 10.2787  | UBP1_ENSG00000153560                                |
| 3 | 37034087 | 37034462 | 5Y-H4K8ac_peak_12190 | 6.20875  | EPM2AIP1_ENSG00000178567;MLH1_ENSG00000076242       |
| 3 | 37217909 | 37218144 | 5Y-H4K8ac_peak_12191 | 10.1994  |                                                     |
| 3 | 37284202 | 37284669 | 5Y-H4K8ac_peak_12192 | 15.93543 | RP11-259K5.2_ENSG00000270194;GOLGA4_ENSG00000144674 |
| 3 | 37562127 | 37562456 | 5Y-H4K8ac_peak_12193 | 11.71078 |                                                     |
| 3 | 37579133 | 37579671 | 5Y-H4K8ac_peak_12194 | 5.91107  |                                                     |
| 3 | 37743023 | 37743274 | 5Y-H4K8ac_peak_12195 | 5.98695  |                                                     |
| 3 | 37962338 | 37962607 | 5Y-H4K8ac_peak_12196 | 9.33466  |                                                     |
| 3 | 37963494 | 37963992 | 5Y-H4K8ac_peak_12197 | 5.23083  |                                                     |
| 3 | 38035679 | 38036048 | 5Y-H4K8ac_peak_12198 | 8.24461  |                                                     |
| 3 | 38180306 | 38180654 | 5Y-H4K8ac_peak_12199 | 5.24695  | MYD88_ENSG00000172936                               |
| 3 | 38355871 | 38356126 | 5Y-H4K8ac_peak_12200 | 9.23159  |                                                     |
| 3 | 38495630 | 38496161 | 5Y-H4K8ac_peak_12201 | 11.22005 | ACVR2B-AS1_ENSG00000229589;ACVR2B_ENSG00000114739   |
| 3 | 38496613 | 38496810 | 5Y-H4K8ac_peak_12202 | 7.87406  | ACVR2B-AS1_ENSG00000229589                          |
| 3 | 38620970 | 38621667 | 5Y-H4K8ac_peak_12203 | 12.2918  |                                                     |
| 3 | 38622187 | 38622421 | 5Y-H4K8ac_peak_12204 | 11.1169  |                                                     |
| 3 | 39092881 | 39093740 | 5Y-H4K8ac_peak_12205 | 5.12488  | WDR48_ENSG00000114742                               |
| 3 | 39188942 | 39189360 | 5Y-H4K8ac_peak_12206 | 7.64675  |                                                     |
| 3 | 39543737 | 39544381 | 5Y-H4K8ac_peak_12207 | 10.37534 |                                                     |
| 3 | 39851267 | 39851626 | 5Y-H4K8ac_peak_12208 | 6.77436  | MYRIP_ENSG00000170011                               |
| 3 | 40351281 | 40351611 | 5Y-H4K8ac_peak_12209 | 7.72887  | EIF1B_ENSG00000114784                               |
| 3 | 40494197 | 40494556 | 5Y-H4K8ac_peak_12210 | 7.76232  | ENTPD3-AS1_ENSG00000223797                          |
| 3 | 40518383 | 40518891 | 5Y-H4K8ac_peak_12211 | 13.60015 | ZNF619_ENSG00000177873                              |
| 3 | 40566554 | 40566969 | 5Y-H4K8ac_peak_12212 | 5.41472  | ZNF621_ENSG00000172888                              |
| 3 | 40656686 | 40657073 | 5Y-H4K8ac_peak_12213 | 5.23083  |                                                     |
| 3 | 41240318 | 41240730 | 5Y-H4K8ac_peak_12214 | 7.30348  |                                                     |
| 3 | 41241067 | 41241301 | 5Y-H4K8ac_peak_12215 | 8.43511  |                                                     |
| 3 | 42054615 | 42054936 | 5Y-H4K8ac_peak_12216 | 9.30505  | TRAK1_ENSG00000182606                               |
| 3 | 42623200 | 42623413 | 5Y-H4K8ac_peak_12217 | 7.89273  | SS18L2_ENSG00000008324                              |
| 3 | 42632613 | 42632836 | 5Y-H4K8ac_peak_12218 | 4.77126  |                                                     |
| 3 | 42642242 | 42642669 | 5Y-H4K8ac_peak_12219 | 7.50148  | SEC22C_ENSG00000093183;NKTR_ENSG00000114857         |
| 3 | 42696069 | 42696342 | 5Y-H4K8ac_peak_12220 | 13.00733 | ZBTB47_ENSG00000114853;RP4-613B23.1_ENSG00000230084 |
| 3 | 42888393 | 42888645 | 5Y-H4K8ac_peak_12221 | 7.29091  |                                                     |
| 3 | 42922021 | 42923015 | 5Y-H4K8ac_peak_12222 | 18.10232 |                                                     |
| 3 | 42947434 | 42947719 | 5Y-H4K8ac_peak_12223 | 5.23083  | ZNF662_ENSG00000182983                              |
| 3 | 43327097 | 43327363 | 5Y-H4K8ac_peak_12224 | 4.24332  | SNRK_ENSG00000163788                                |
| 3 | 43731807 | 43732027 | 5Y-H4K8ac_peak_12225 | 7.90236  | ABHD5_ENSG00000011198                               |
| 3 | 43732587 | 43732968 | 5Y-H4K8ac_peak_12226 | 13.2534  | ANO10_ENSG00000160746;ABHD5_ENSG00000011198         |
| 3 | 43811136 | 43811359 | 5Y-H4K8ac_peak_12227 | 12.05638 |                                                     |
| 3 | 43811560 | 43812099 | 5Y-H4K8ac_peak_12228 | 10.15788 |                                                     |
| 3 | 43812775 | 43813133 | 5Y-H4K8ac_peak_12229 | 6.53157  |                                                     |
| 3 | 43814971 | 43815181 | 5Y-H4K8ac_peak_12230 | 12.10416 |                                                     |
| 3 | 44001097 | 44001547 | 5Y-H4K8ac_peak_12231 | 6.36454  |                                                     |
| 3 | 44036739 | 44037257 | 5Y-H4K8ac_peak_12232 | 7.11863  |                                                     |
| 3 | 44040004 | 44040587 | 5Y-H4K8ac_peak_12233 | 12.10416 | RP4-555D20.4_ENSG00000272121                        |
| 3 | 44063022 | 44063546 | 5Y-H4K8ac_peak_12234 | 6.34046  |                                                     |

|   |          |          |                      |          |                                                     |
|---|----------|----------|----------------------|----------|-----------------------------------------------------|
| 3 | 44379683 | 44380161 | 5Y-H4K8ac_peak_12235 | 6.53157  | RP11-424N24.2_ENSG00000271937;TCAIM_ENSG00000179152 |
| 3 | 44519197 | 44519840 | 5Y-H4K8ac_peak_12236 | 19.2548  | ZNF445_ENSG00000185219                              |
| 3 | 44596340 | 44596603 | 5Y-H4K8ac_peak_12237 | 8.24461  | ZKSCAN7_ENSG00000196345                             |
| 3 | 44625888 | 44626148 | 5Y-H4K8ac_peak_12238 | 6.17374  | ZNF197_ENSG00000186448                              |
| 3 | 44626427 | 44626643 | 5Y-H4K8ac_peak_12239 | 11.1169  | ZNF197_ENSG00000186448                              |
| 3 | 44690360 | 44690584 | 5Y-H4K8ac_peak_12240 | 5.98695  | ZNF35_ENSG00000169981                               |
| 3 | 44726855 | 44727049 | 5Y-H4K8ac_peak_12241 | 5.64909  | RP11-944L7.4_ENSG00000236869                        |
| 3 | 44770561 | 44770955 | 5Y-H4K8ac_peak_12242 | 9.20645  | ZNF501_ENSG00000186446                              |
| 3 | 45208825 | 45209099 | 5Y-H4K8ac_peak_12243 | 8.21525  |                                                     |
| 3 | 45589213 | 45589565 | 5Y-H4K8ac_peak_12244 | 5.98695  |                                                     |
| 3 | 45624631 | 45624849 | 5Y-H4K8ac_peak_12245 | 4.29586  |                                                     |
| 3 | 45635300 | 45635493 | 5Y-H4K8ac_peak_12246 | 7.17527  |                                                     |
| 3 | 45883777 | 45884119 | 5Y-H4K8ac_peak_12247 | 7.76232  |                                                     |
| 3 | 46599553 | 46599748 | 5Y-H4K8ac_peak_12248 | 4.07874  | LUZPP1_ENSG00000268324                              |
| 3 | 46607454 | 46607789 | 5Y-H4K8ac_peak_12249 | 9.30206  |                                                     |
| 3 | 46701686 | 46701883 | 5Y-H4K8ac_peak_12250 | 5.94703  |                                                     |
| 3 | 46703981 | 46704399 | 5Y-H4K8ac_peak_12251 | 8.31252  |                                                     |
| 3 | 46704662 | 46705013 | 5Y-H4K8ac_peak_12252 | 4.74398  |                                                     |
| 3 | 46735347 | 46735567 | 5Y-H4K8ac_peak_12253 | 5.98695  | ALS2CL_ENSG00000178038                              |
| 3 | 46741690 | 46742145 | 5Y-H4K8ac_peak_12254 | 4.52203  | TMIE_ENSG00000181585                                |
| 3 | 46742931 | 46743190 | 5Y-H4K8ac_peak_12255 | 10.21117 | TMIE_ENSG00000181585                                |
| 3 | 46886582 | 46887416 | 5Y-H4K8ac_peak_12256 | 7.90751  |                                                     |
| 3 | 46887719 | 46888105 | 5Y-H4K8ac_peak_12257 | 12.84845 |                                                     |
| 3 | 46906406 | 46906617 | 5Y-H4K8ac_peak_12258 | 5.78188  |                                                     |
| 3 | 46951406 | 46951654 | 5Y-H4K8ac_peak_12259 | 7.31102  |                                                     |
| 3 | 46989837 | 46990265 | 5Y-H4K8ac_peak_12260 | 7.24844  |                                                     |
| 3 | 47021589 | 47021813 | 5Y-H4K8ac_peak_12261 | 8.2913   | NBEAL2_ENSG00000160796                              |
| 3 | 47412258 | 47412623 | 5Y-H4K8ac_peak_12262 | 5.77946  |                                                     |
| 3 | 47421155 | 47421491 | 5Y-H4K8ac_peak_12263 | 6.73385  | RP11-708J19.1_ENSG00000260236                       |
| 3 | 47554534 | 47554770 | 5Y-H4K8ac_peak_12264 | 4.70501  | ELP6_ENSG00000163832                                |
| 3 | 47555747 | 47556202 | 5Y-H4K8ac_peak_12265 | 4.95697  | ELP6_ENSG00000163832                                |
| 3 | 47563899 | 47564109 | 5Y-H4K8ac_peak_12266 | 5.64909  |                                                     |
| 3 | 47620504 | 47620792 | 5Y-H4K8ac_peak_12267 | 5.65584  |                                                     |
| 3 | 47621088 | 47621296 | 5Y-H4K8ac_peak_12268 | 5.23083  | CSPG5_ENSG00000114646                               |
| 3 | 47822906 | 47823341 | 5Y-H4K8ac_peak_12269 | 21.37039 | SMARCC1_ENSG00000173473                             |
| 3 | 47823544 | 47823983 | 5Y-H4K8ac_peak_12270 | 10.6025  | SMARCC1_ENSG00000173473                             |
| 3 | 47844209 | 47845172 | 5Y-H4K8ac_peak_12271 | 12.26606 | DHX30_ENSG00000132153                               |
| 3 | 48130658 | 48130874 | 5Y-H4K8ac_peak_12272 | 4.07874  | MAP4_ENSG00000047849                                |
| 3 | 48230221 | 48230573 | 5Y-H4K8ac_peak_12273 | 20.25522 | CDC25A_ENSG00000164045                              |
| 3 | 48282727 | 48282935 | 5Y-H4K8ac_peak_12274 | 6.73385  | ZNF589_ENSG00000164048                              |
| 3 | 48342637 | 48342863 | 5Y-H4K8ac_peak_12275 | 9.00954  | NME6_ENSG00000172113                                |
| 3 | 48470280 | 48471370 | 5Y-H4K8ac_peak_12276 | 12.10416 | PLXNB1_ENSG00000164050                              |
| 3 | 48507274 | 48507740 | 5Y-H4K8ac_peak_12277 | 7.58806  | TREX1_ENSG00000213689                               |
| 3 | 48540484 | 48540730 | 5Y-H4K8ac_peak_12278 | 4.29586  |                                                     |
| 3 | 48540922 | 48541514 | 5Y-H4K8ac_peak_12279 | 15.40182 | SHISA5_ENSG00000164054                              |
| 3 | 48632489 | 48632691 | 5Y-H4K8ac_peak_12280 | 7.38046  | COL7A1_ENSG00000114270                              |

|   |          |          |                      |          |                                                      |
|---|----------|----------|----------------------|----------|------------------------------------------------------|
| 3 | 48647230 | 48647939 | 5Y-H4K8ac_peak_12281 | 9.63153  | UQCRC1_ENSG00000010256                               |
| 3 | 48672386 | 48672591 | 5Y-H4K8ac_peak_12282 | 6.22669  | SLC26A6_ENSG00000225697                              |
| 3 | 48700590 | 48701071 | 5Y-H4K8ac_peak_12283 | 13.12848 | CELSR3_ENSG00000008300;RP11-148G20.1_ENSG00000228350 |
| 3 | 48754120 | 48754487 | 5Y-H4K8ac_peak_12284 | 13.2534  |                                                      |
| 3 | 48777750 | 48777993 | 5Y-H4K8ac_peak_12285 | 7.64648  | IP6K2_ENSG00000068745                                |
| 3 | 49035994 | 49036313 | 5Y-H4K8ac_peak_12286 | 7.50501  |                                                      |
| 3 | 49044113 | 49044348 | 5Y-H4K8ac_peak_12287 | 5.87725  | WDR6_ENSG00000178252                                 |
| 3 | 49044855 | 49045252 | 5Y-H4K8ac_peak_12288 | 14.43262 | WDR6_ENSG00000178252                                 |
| 3 | 49059129 | 49059387 | 5Y-H4K8ac_peak_12289 | 9.68742  | DALRD3_ENSG00000178149;MIR191_ENSG00000207605        |
| 3 | 49059667 | 49060117 | 5Y-H4K8ac_peak_12290 | 5.23083  | DALRD3_ENSG00000178149                               |
| 3 | 49131110 | 49131423 | 5Y-H4K8ac_peak_12291 | 5.35202  | QRICH1_ENSG00000198218                               |
| 3 | 49141944 | 49142144 | 5Y-H4K8ac_peak_12292 | 9.00954  | QARS_ENSG00000172053                                 |
| 3 | 49157844 | 49158818 | 5Y-H4K8ac_peak_12293 | 18.62509 | USP19_ENSG00000172046                                |
| 3 | 49169633 | 49170086 | 5Y-H4K8ac_peak_12294 | 4.29586  | LAMB2_ENSG00000172037                                |
| 3 | 49203139 | 49204465 | 5Y-H4K8ac_peak_12295 | 13.92877 | CCDC71_ENSG00000177352                               |
| 3 | 49208520 | 49208812 | 5Y-H4K8ac_peak_12296 | 4.0639   | KLHDC8B_ENSG00000185909                              |
| 3 | 49210152 | 49210609 | 5Y-H4K8ac_peak_12297 | 10.24719 |                                                      |
| 3 | 49377804 | 49378782 | 5Y-H4K8ac_peak_12298 | 6.08523  | USP4_ENSG00000114316                                 |
| 3 | 49395275 | 49396361 | 5Y-H4K8ac_peak_12299 | 8.69112  | GPX1_ENSG00000233276                                 |
| 3 | 49449827 | 49450060 | 5Y-H4K8ac_peak_12300 | 10.19948 | RHOA_ENSG00000067560;TCTA_ENSG00000145022            |
| 3 | 49459413 | 49459617 | 5Y-H4K8ac_peak_12301 | 6.50117  | AMT_ENSG00000145020;NICN1-AS1_ENSG00000235261        |
| 3 | 49576976 | 49577197 | 5Y-H4K8ac_peak_12302 | 6.14981  |                                                      |
| 3 | 49577574 | 49577810 | 5Y-H4K8ac_peak_12303 | 6.78128  |                                                      |
| 3 | 49591446 | 49591739 | 5Y-H4K8ac_peak_12304 | 6.37023  | BSN-AS2_ENSG00000226913;BSN_ENSG00000164061          |
| 3 | 49710743 | 49711111 | 5Y-H4K8ac_peak_12305 | 6.37023  | APEH_ENSG00000164062                                 |
| 3 | 49711457 | 49711656 | 5Y-H4K8ac_peak_12306 | 9.02782  | APEH_ENSG00000164062                                 |
| 3 | 49724379 | 49724586 | 5Y-H4K8ac_peak_12307 | 4.77126  |                                                      |
| 3 | 49726313 | 49726707 | 5Y-H4K8ac_peak_12308 | 7.61515  | MST1_ENSG00000173531;RNF123_ENSG00000164068          |
| 3 | 49824252 | 49824857 | 5Y-H4K8ac_peak_12309 | 17.18444 | IP6K1_ENSG00000176095                                |
| 3 | 49843091 | 49843513 | 5Y-H4K8ac_peak_12310 | 15.82359 | MIR5193_ENSG00000263506                              |
| 3 | 49843944 | 49844473 | 5Y-H4K8ac_peak_12311 | 7.89273  | MIR5193_ENSG00000263506                              |
| 3 | 49844827 | 49845989 | 5Y-H4K8ac_peak_12312 | 8.00646  |                                                      |
| 3 | 49907016 | 49907305 | 5Y-H4K8ac_peak_12313 | 10.31019 | CAMKV_ENSG00000164076                                |
| 3 | 49910923 | 49911154 | 5Y-H4K8ac_peak_12314 | 9.23159  |                                                      |
| 3 | 49976988 | 49977278 | 5Y-H4K8ac_peak_12315 | 8.33296  | RBM6_ENSG00000004534                                 |
| 3 | 50126421 | 50126726 | 5Y-H4K8ac_peak_12316 | 7.18391  | RBM5_ENSG00000003756                                 |
| 3 | 50175748 | 50176339 | 5Y-H4K8ac_peak_12317 | 5.37137  |                                                      |
| 3 | 50188693 | 50188891 | 5Y-H4K8ac_peak_12318 | 4.29586  |                                                      |
| 3 | 50242169 | 50242476 | 5Y-H4K8ac_peak_12319 | 5.83797  | SLC38A3_ENSG00000188338                              |
| 3 | 50263862 | 50264265 | 5Y-H4K8ac_peak_12320 | 5.75508  | GNAI2_ENSG00000114353                                |
| 3 | 50265151 | 50265391 | 5Y-H4K8ac_peak_12321 | 10.16277 |                                                      |
| 3 | 50283218 | 50283731 | 5Y-H4K8ac_peak_12322 | 15.82359 |                                                      |
| 3 | 50283925 | 50284127 | 5Y-H4K8ac_peak_12323 | 4.77126  |                                                      |
| 3 | 50297739 | 50298542 | 5Y-H4K8ac_peak_12324 | 22.46875 | U73166.2_ENSG00000230454                             |
| 3 | 50330280 | 50330590 | 5Y-H4K8ac_peak_12325 | 11.48691 | IFRD2_ENSG00000214706                                |
| 3 | 50340870 | 50341075 | 5Y-H4K8ac_peak_12326 | 8.43511  |                                                      |



|   |          |          |                      |          |                          |
|---|----------|----------|----------------------|----------|--------------------------|
| 3 | 50358629 | 50359684 | 5Y-H4K8ac_peak_12327 | 14.99673 | HYAL2_ENSG00000068001    |
| 3 | 50375153 | 50375429 | 5Y-H4K8ac_peak_12328 | 8.46442  |                          |
| 3 | 50375818 | 50376020 | 5Y-H4K8ac_peak_12329 | 8.38675  |                          |
| 3 | 50396651 | 50396927 | 5Y-H4K8ac_peak_12330 | 5.56894  | TMEM115_ENSG00000126062  |
| 3 | 50408359 | 50408740 | 5Y-H4K8ac_peak_12331 | 10.69698 |                          |
| 3 | 50413716 | 50413970 | 5Y-H4K8ac_peak_12332 | 6.19178  |                          |
| 3 | 50415101 | 50415602 | 5Y-H4K8ac_peak_12333 | 5.12213  |                          |
| 3 | 50416495 | 50417441 | 5Y-H4K8ac_peak_12334 | 10.31981 |                          |
| 3 | 50418114 | 50418855 | 5Y-H4K8ac_peak_12335 | 13.35169 |                          |
| 3 | 50419529 | 50419917 | 5Y-H4K8ac_peak_12336 | 7.89273  |                          |
| 3 | 50422757 | 50423209 | 5Y-H4K8ac_peak_12337 | 7.50148  |                          |
| 3 | 50423522 | 50424110 | 5Y-H4K8ac_peak_12338 | 12.05638 |                          |
| 3 | 50424714 | 50425414 | 5Y-H4K8ac_peak_12339 | 19.26009 |                          |
| 3 | 50425783 | 50426626 | 5Y-H4K8ac_peak_12340 | 10.35586 |                          |
| 3 | 50426956 | 50427196 | 5Y-H4K8ac_peak_12341 | 9.51254  |                          |
| 3 | 50427797 | 50428255 | 5Y-H4K8ac_peak_12342 | 15.25579 |                          |
| 3 | 50428699 | 50429581 | 5Y-H4K8ac_peak_12343 | 11.30958 |                          |
| 3 | 50449195 | 50449492 | 5Y-H4K8ac_peak_12344 | 6.1654   |                          |
| 3 | 50463333 | 50463527 | 5Y-H4K8ac_peak_12345 | 5.87725  |                          |
| 3 | 50463752 | 50464845 | 5Y-H4K8ac_peak_12346 | 12.1432  |                          |
| 3 | 50465061 | 50465691 | 5Y-H4K8ac_peak_12347 | 16.56941 |                          |
| 3 | 50466113 | 50466640 | 5Y-H4K8ac_peak_12348 | 11.94897 |                          |
| 3 | 50467391 | 50468259 | 5Y-H4K8ac_peak_12349 | 12.79198 |                          |
| 3 | 50468931 | 50469291 | 5Y-H4K8ac_peak_12350 | 8.31536  |                          |
| 3 | 50469739 | 50470393 | 5Y-H4K8ac_peak_12351 | 16.41521 |                          |
| 3 | 50470833 | 50471039 | 5Y-H4K8ac_peak_12352 | 6.00747  |                          |
| 3 | 50472010 | 50472819 | 5Y-H4K8ac_peak_12353 | 7.54769  |                          |
| 3 | 50473281 | 50473488 | 5Y-H4K8ac_peak_12354 | 8.73392  |                          |
| 3 | 50475539 | 50475885 | 5Y-H4K8ac_peak_12355 | 6.03632  |                          |
| 3 | 50540487 | 50540681 | 5Y-H4K8ac_peak_12356 | 6.31818  | CACNA2D2_ENSG00000007402 |
| 3 | 50541234 | 50541673 | 5Y-H4K8ac_peak_12357 | 6.43775  | CACNA2D2_ENSG00000007402 |
| 3 | 50551864 | 50552987 | 5Y-H4K8ac_peak_12358 | 7.59101  |                          |
| 3 | 50553692 | 50553907 | 5Y-H4K8ac_peak_12359 | 5.41472  |                          |
| 3 | 50554180 | 50554541 | 5Y-H4K8ac_peak_12360 | 11.09973 |                          |
| 3 | 50554864 | 50555127 | 5Y-H4K8ac_peak_12361 | 10.35586 |                          |
| 3 | 50563483 | 50563806 | 5Y-H4K8ac_peak_12362 | 4.36976  |                          |
| 3 | 50571349 | 50571712 | 5Y-H4K8ac_peak_12363 | 6.00382  |                          |
| 3 | 50579621 | 50579839 | 5Y-H4K8ac_peak_12364 | 10.31981 |                          |
| 3 | 50605369 | 50605739 | 5Y-H4K8ac_peak_12365 | 4.5753   | HEMK1_ENSG00000114735    |
| 3 | 50606633 | 50607068 | 5Y-H4K8ac_peak_12366 | 7.90236  | HEMK1_ENSG00000114735    |
| 3 | 50638494 | 50639254 | 5Y-H4K8ac_peak_12367 | 10.54764 |                          |
| 3 | 51421734 | 51422372 | 5Y-H4K8ac_peak_12368 | 15.92074 | MANF_ENSG00000145050     |
| 3 | 51428852 | 51429417 | 5Y-H4K8ac_peak_12369 | 7.90751  | RBM15B_ENSG00000179837   |
| 3 | 51571662 | 51572214 | 5Y-H4K8ac_peak_12370 | 6.55906  |                          |
| 3 | 51572831 | 51573161 | 5Y-H4K8ac_peak_12371 | 7.59101  |                          |
| 3 | 51705233 | 51705913 | 5Y-H4K8ac_peak_12372 | 7.11863  |                          |

|   |          |          |                      |          |                                                                         |
|---|----------|----------|----------------------|----------|-------------------------------------------------------------------------|
| 3 | 51846492 | 51846682 | 5Y-H4K8ac_peak_12373 | 4.84727  |                                                                         |
| 3 | 51848239 | 51848529 | 5Y-H4K8ac_peak_12374 | 5.5192   |                                                                         |
| 3 | 51976490 | 51977221 | 5Y-H4K8ac_peak_12375 | 9.36633  | RRP9_ENSG00000114767;PARP3_ENSG00000041880                              |
| 3 | 51990078 | 51990374 | 5Y-H4K8ac_peak_12376 | 5.98695  | GPR62_ENSG00000180929                                                   |
| 3 | 52000121 | 52000531 | 5Y-H4K8ac_peak_12377 | 8.12305  |                                                                         |
| 3 | 52000954 | 52001357 | 5Y-H4K8ac_peak_12378 | 5.87725  |                                                                         |
| 3 | 52001661 | 52002319 | 5Y-H4K8ac_peak_12379 | 17.97634 | PCBP4_ENSG00000090097                                                   |
| 3 | 52009090 | 52009345 | 5Y-H4K8ac_peak_12380 | 4.67245  | ACY1_ENSG00000243989;ABHD14A-ACY1_ENSG00000114786                       |
| 3 | 52017230 | 52017714 | 5Y-H4K8ac_peak_12381 | 5.0789   | ABHD14B_ENSG00000114779                                                 |
| 3 | 52029361 | 52029856 | 5Y-H4K8ac_peak_12382 | 9.179    | RPL29_ENSG00000162244                                                   |
| 3 | 52030148 | 52030349 | 5Y-H4K8ac_peak_12383 | 6.50117  | RPL29_ENSG00000162244                                                   |
| 3 | 52040575 | 52040968 | 5Y-H4K8ac_peak_12384 | 8.82628  |                                                                         |
| 3 | 52049385 | 52049584 | 5Y-H4K8ac_peak_12385 | 5.87725  |                                                                         |
| 3 | 52050074 | 52050469 | 5Y-H4K8ac_peak_12386 | 4.0639   |                                                                         |
| 3 | 52053170 | 52053385 | 5Y-H4K8ac_peak_12387 | 6.59112  |                                                                         |
| 3 | 52056435 | 52056645 | 5Y-H4K8ac_peak_12388 | 7.59101  |                                                                         |
| 3 | 52058143 | 52058357 | 5Y-H4K8ac_peak_12389 | 4.88619  |                                                                         |
| 3 | 52059086 | 52059587 | 5Y-H4K8ac_peak_12390 | 8.19376  |                                                                         |
| 3 | 52062203 | 52063184 | 5Y-H4K8ac_peak_12391 | 18.78631 |                                                                         |
| 3 | 52063526 | 52064951 | 5Y-H4K8ac_peak_12392 | 16.79568 |                                                                         |
| 3 | 52065713 | 52066175 | 5Y-H4K8ac_peak_12393 | 8.62703  |                                                                         |
| 3 | 52068524 | 52068789 | 5Y-H4K8ac_peak_12394 | 6.2526   |                                                                         |
| 3 | 52070015 | 52070370 | 5Y-H4K8ac_peak_12395 | 11.17333 |                                                                         |
| 3 | 52072154 | 52072393 | 5Y-H4K8ac_peak_12396 | 6.37023  |                                                                         |
| 3 | 52075824 | 52076088 | 5Y-H4K8ac_peak_12397 | 11.1169  |                                                                         |
| 3 | 52078298 | 52078524 | 5Y-H4K8ac_peak_12398 | 7.37325  |                                                                         |
| 3 | 52079279 | 52079557 | 5Y-H4K8ac_peak_12399 | 7.73231  |                                                                         |
| 3 | 52090691 | 52090932 | 5Y-H4K8ac_peak_12400 | 9.92042  | DUSP7_ENSG00000164086                                                   |
| 3 | 52091687 | 52091910 | 5Y-H4K8ac_peak_12401 | 9.36633  |                                                                         |
| 3 | 52100920 | 52101537 | 5Y-H4K8ac_peak_12402 | 16.51777 |                                                                         |
| 3 | 52102462 | 52103261 | 5Y-H4K8ac_peak_12403 | 15.82359 |                                                                         |
| 3 | 52231667 | 52231896 | 5Y-H4K8ac_peak_12404 | 5.51759  | ALAS1_ENSG00000023330                                                   |
| 3 | 52273346 | 52274153 | 5Y-H4K8ac_peak_12405 | 13.4304  | TLR9_ENSG00000239732;TWF2_ENSG00000247596;RP5-1157M23.2_ENSG00000243224 |
| 3 | 52274391 | 52274583 | 5Y-H4K8ac_peak_12406 | 8.43999  |                                                                         |
| 3 | 52312298 | 52312620 | 5Y-H4K8ac_peak_12407 | 9.00954  |                                                                         |
| 3 | 52312902 | 52313286 | 5Y-H4K8ac_peak_12408 | 6.73047  |                                                                         |
| 3 | 52320698 | 52320928 | 5Y-H4K8ac_peak_12409 | 6.22669  |                                                                         |
| 3 | 52321771 | 52322110 | 5Y-H4K8ac_peak_12410 | 24.73897 | WDR82_ENSG00000164091                                                   |
| 3 | 52333206 | 52333713 | 5Y-H4K8ac_peak_12411 | 10.1994  |                                                                         |
| 3 | 52342062 | 52342512 | 5Y-H4K8ac_peak_12412 | 7.38046  |                                                                         |
| 3 | 52345077 | 52346350 | 5Y-H4K8ac_peak_12413 | 16.50659 |                                                                         |
| 3 | 52347820 | 52348021 | 5Y-H4K8ac_peak_12414 | 4.96019  |                                                                         |
| 3 | 52443580 | 52443922 | 5Y-H4K8ac_peak_12415 | 7.38046  | BAP1_ENSG00000163930;PHF7_ENSG0000010318                                |
| 3 | 52444642 | 52444851 | 5Y-H4K8ac_peak_12416 | 7.9412   | BAP1_ENSG00000163930;PHF7_ENSG0000010318                                |
| 3 | 52489193 | 52489464 | 5Y-H4K8ac_peak_12417 | 8.62703  | NISCH_ENSG0000010322                                                    |
| 3 | 52568085 | 52568322 | 5Y-H4K8ac_peak_12418 | 9.58986  | NT5DC2_ENSG00000168268;SMIM4_ENSG00000168273                            |

|   |          |          |                      |          |                                                     |
|---|----------|----------|----------------------|----------|-----------------------------------------------------|
| 3 | 52740222 | 52740440 | 5Y-H4K8ac_peak_12419 | 6.43775  |                                                     |
| 3 | 53079055 | 53079250 | 5Y-H4K8ac_peak_12420 | 8.43511  |                                                     |
| 3 | 53079694 | 53079980 | 5Y-H4K8ac_peak_12421 | 9.60627  | SFMBT1_ENSG00000163935                              |
| 3 | 53080187 | 53080579 | 5Y-H4K8ac_peak_12422 | 8.2913   | SFMBT1_ENSG00000163935                              |
| 3 | 53164136 | 53164383 | 5Y-H4K8ac_peak_12423 | 10.12457 | RFT1_ENSG00000163933                                |
| 3 | 53229829 | 53230031 | 5Y-H4K8ac_peak_12424 | 4.77126  |                                                     |
| 3 | 53304225 | 53304553 | 5Y-H4K8ac_peak_12425 | 10.11191 |                                                     |
| 3 | 53381802 | 53382003 | 5Y-H4K8ac_peak_12426 | 11.48691 | DCP1A_ENSG00000162290                               |
| 3 | 53528188 | 53528532 | 5Y-H4K8ac_peak_12427 | 5.23083  | CACNA1D_ENSG00000157388                             |
| 3 | 53568415 | 53568675 | 5Y-H4K8ac_peak_12428 | 5.8635   |                                                     |
| 3 | 53584115 | 53584393 | 5Y-H4K8ac_peak_12429 | 5.93823  |                                                     |
| 3 | 53807407 | 53807602 | 5Y-H4K8ac_peak_12430 | 10.10203 |                                                     |
| 3 | 53879950 | 53880835 | 5Y-H4K8ac_peak_12431 | 17.56739 | CHDH_ENSG00000016391;IL17RB_ENSG00000056736         |
| 3 | 53915910 | 53916100 | 5Y-H4K8ac_peak_12432 | 11.88337 | ACTR8_ENSG00000113812;AC012467.1_ENSG00000222888    |
| 3 | 55634852 | 55635055 | 5Y-H4K8ac_peak_12433 | 7.34185  |                                                     |
| 3 | 56716678 | 56717669 | 5Y-H4K8ac_peak_12434 | 11.69482 | FAM208A_ENSG00000163946                             |
| 3 | 56840154 | 56840460 | 5Y-H4K8ac_peak_12435 | 5.23083  |                                                     |
| 3 | 57010803 | 57011010 | 5Y-H4K8ac_peak_12436 | 8.2913   |                                                     |
| 3 | 57011950 | 57012160 | 5Y-H4K8ac_peak_12437 | 7.46096  |                                                     |
| 3 | 57019759 | 57020138 | 5Y-H4K8ac_peak_12438 | 7.64675  |                                                     |
| 3 | 57153824 | 57154071 | 5Y-H4K8ac_peak_12439 | 9.34555  |                                                     |
| 3 | 57155567 | 57155880 | 5Y-H4K8ac_peak_12440 | 5.00877  |                                                     |
| 3 | 57157132 | 57157333 | 5Y-H4K8ac_peak_12441 | 7.30348  |                                                     |
| 3 | 57158939 | 57159234 | 5Y-H4K8ac_peak_12442 | 6.7002   |                                                     |
| 3 | 57161615 | 57161842 | 5Y-H4K8ac_peak_12443 | 6.19178  |                                                     |
| 3 | 57163449 | 57164028 | 5Y-H4K8ac_peak_12444 | 19.11901 |                                                     |
| 3 | 57164223 | 57164721 | 5Y-H4K8ac_peak_12445 | 12.19856 |                                                     |
| 3 | 57165317 | 57165510 | 5Y-H4K8ac_peak_12446 | 8.4454   |                                                     |
| 3 | 57166086 | 57166416 | 5Y-H4K8ac_peak_12447 | 4.50834  |                                                     |
| 3 | 57169072 | 57169398 | 5Y-H4K8ac_peak_12448 | 4.77126  | RP11-157F20.1_ENSG00000229863                       |
| 3 | 57177190 | 57177566 | 5Y-H4K8ac_peak_12449 | 6.50117  |                                                     |
| 3 | 57180422 | 57180614 | 5Y-H4K8ac_peak_12450 | 6.98118  |                                                     |
| 3 | 57186179 | 57186407 | 5Y-H4K8ac_peak_12451 | 7.3889   |                                                     |
| 3 | 57191215 | 57191681 | 5Y-H4K8ac_peak_12452 | 4.15658  |                                                     |
| 3 | 57198464 | 57199302 | 5Y-H4K8ac_peak_12453 | 12.76485 |                                                     |
| 3 | 57203934 | 57204229 | 5Y-H4K8ac_peak_12454 | 10.46287 | IL17RD_ENSG00000144730                              |
| 3 | 57542072 | 57542370 | 5Y-H4K8ac_peak_12455 | 9.02782  | PDE12_ENSG00000174840                               |
| 3 | 58000252 | 58000887 | 5Y-H4K8ac_peak_12456 | 8.21582  |                                                     |
| 3 | 58163486 | 58163787 | 5Y-H4K8ac_peak_12457 | 7.11863  |                                                     |
| 3 | 58222835 | 58223079 | 5Y-H4K8ac_peak_12458 | 8.01306  | ABHD6_ENSG00000163686                               |
| 3 | 58318087 | 58318491 | 5Y-H4K8ac_peak_12459 | 11.53136 | PXK_ENSG00000168297                                 |
| 3 | 58477010 | 58477466 | 5Y-H4K8ac_peak_12460 | 8.35139  | RP11-359I18.5_ENSG00000272360;KCTD6_ENSG00000168301 |
| 3 | 58542410 | 58542623 | 5Y-H4K8ac_peak_12461 | 4.84727  |                                                     |
| 3 | 58566780 | 58567065 | 5Y-H4K8ac_peak_12462 | 9.93099  |                                                     |
| 3 | 59035359 | 59035686 | 5Y-H4K8ac_peak_12463 | 9.79526  | C3orf67_ENSG00000163689                             |
| 3 | 61235820 | 61236084 | 5Y-H4K8ac_peak_12464 | 4.8773   |                                                     |

|   |          |          |                      |          |                                                     |
|---|----------|----------|----------------------|----------|-----------------------------------------------------|
| 3 | 62174815 | 62175097 | 5Y-H4K8ac_peak_12465 | 8.17203  |                                                     |
| 3 | 62573297 | 62573776 | 5Y-H4K8ac_peak_12466 | 5.65584  |                                                     |
| 3 | 63848902 | 63849458 | 5Y-H4K8ac_peak_12467 | 9.01738  | THOC7_ENSG00000163634;ATXN7_ENSG00000163635         |
| 3 | 63849770 | 63849997 | 5Y-H4K8ac_peak_12468 | 7.58806  | THOC7_ENSG00000163634;ATXN7_ENSG00000163635         |
| 3 | 64008694 | 64009016 | 5Y-H4K8ac_peak_12469 | 5.99504  | PSMD6_ENSG00000163636                               |
| 3 | 64661046 | 64661318 | 5Y-H4K8ac_peak_12470 | 12.21176 |                                                     |
| 3 | 64662496 | 64662910 | 5Y-H4K8ac_peak_12471 | 10.32373 |                                                     |
| 3 | 64673034 | 64673323 | 5Y-H4K8ac_peak_12472 | 8.43511  | ADAMTS9_ENSG00000163638                             |
| 3 | 64841422 | 64841622 | 5Y-H4K8ac_peak_12473 | 10.46287 |                                                     |
| 3 | 64842175 | 64842411 | 5Y-H4K8ac_peak_12474 | 6.20875  |                                                     |
| 3 | 64843302 | 64843512 | 5Y-H4K8ac_peak_12475 | 9.30505  |                                                     |
| 3 | 65221045 | 65221264 | 5Y-H4K8ac_peak_12476 | 5.98695  |                                                     |
| 3 | 65551231 | 65551457 | 5Y-H4K8ac_peak_12477 | 7.72345  |                                                     |
| 3 | 66025002 | 66025556 | 5Y-H4K8ac_peak_12478 | 12.21176 | MAGI1_ENSG00000151276                               |
| 3 | 66093397 | 66093671 | 5Y-H4K8ac_peak_12479 | 9.13822  |                                                     |
| 3 | 67704751 | 67705545 | 5Y-H4K8ac_peak_12480 | 15.80786 | SUCLG2_ENSG00000172340;RP11-81N13.1_ENSG00000241316 |
| 3 | 68981404 | 68981645 | 5Y-H4K8ac_peak_12481 | 8.17203  | FAM19A4_ENSG00000163377                             |
| 3 | 69062385 | 69062804 | 5Y-H4K8ac_peak_12482 | 13.00733 | EOGT_ENSG00000163378;CTD-2013N24.2_ENSG00000244513  |
| 3 | 69134550 | 69134977 | 5Y-H4K8ac_peak_12483 | 6.50117  | ARL6IP5_ENSG00000144746                             |
| 3 | 71114420 | 71114676 | 5Y-H4K8ac_peak_12484 | 7.59101  |                                                     |
| 3 | 71632877 | 71633095 | 5Y-H4K8ac_peak_12485 | 9.56187  | FOXP1_ENSG00000114861;RP11-154H23.3_ENSG00000270562 |
| 3 | 71774665 | 71775043 | 5Y-H4K8ac_peak_12486 | 13.2534  |                                                     |
| 3 | 71802945 | 71803152 | 5Y-H4K8ac_peak_12487 | 4.29586  | EIF4E3_ENSG00000163412;GPR27_ENSG00000170837        |
| 3 | 71834307 | 71834614 | 5Y-H4K8ac_peak_12488 | 8.00339  | PROK2_ENSG00000163421                               |
| 3 | 72005666 | 72005857 | 5Y-H4K8ac_peak_12489 | 4.84727  |                                                     |
| 3 | 72294119 | 72294314 | 5Y-H4K8ac_peak_12490 | 7.01266  |                                                     |
| 3 | 72304622 | 72305130 | 5Y-H4K8ac_peak_12491 | 7.04637  |                                                     |
| 3 | 72307881 | 72308296 | 5Y-H4K8ac_peak_12492 | 6.49308  |                                                     |
| 3 | 72338037 | 72338841 | 5Y-H4K8ac_peak_12493 | 8.90038  |                                                     |
| 3 | 72353180 | 72353378 | 5Y-H4K8ac_peak_12494 | 6.77436  |                                                     |
| 3 | 72378421 | 72378709 | 5Y-H4K8ac_peak_12495 | 5.67283  |                                                     |
| 3 | 72496566 | 72496927 | 5Y-H4K8ac_peak_12496 | 5.41472  | RYBP_ENSG00000163602                                |
| 3 | 72787623 | 72787892 | 5Y-H4K8ac_peak_12497 | 6.79955  |                                                     |
| 3 | 72788101 | 72788823 | 5Y-H4K8ac_peak_12498 | 10.46287 |                                                     |
| 3 | 72846253 | 72846670 | 5Y-H4K8ac_peak_12499 | 5.40331  |                                                     |
| 3 | 73045382 | 73045775 | 5Y-H4K8ac_peak_12500 | 5.91107  | PPP4R2_ENSG00000163605                              |
| 3 | 73321782 | 73321991 | 5Y-H4K8ac_peak_12501 | 6.98118  |                                                     |
| 3 | 73402770 | 73403061 | 5Y-H4K8ac_peak_12502 | 4.9885   |                                                     |
| 3 | 73673520 | 73674127 | 5Y-H4K8ac_peak_12503 | 14.31711 | PDZRN3_ENSG00000121440                              |
| 3 | 75834365 | 75834649 | 5Y-H4K8ac_peak_12504 | 11.57334 | ZNF717_ENSG00000227124                              |
| 3 | 85553763 | 85554118 | 5Y-H4K8ac_peak_12505 | 12.49811 |                                                     |
| 3 | 93560343 | 93560558 | 5Y-H4K8ac_peak_12506 | 8.33296  |                                                     |
| 3 | 93781267 | 93781480 | 5Y-H4K8ac_peak_12507 | 4.24869  | DHFRL1_ENSG00000178700;NSUN3_ENSG00000178694        |
| 3 | 93781913 | 93782121 | 5Y-H4K8ac_peak_12508 | 10.1994  | DHFRL1_ENSG00000178700;NSUN3_ENSG00000178694        |
| 3 | 94131927 | 94132119 | 5Y-H4K8ac_peak_12509 | 6.50117  |                                                     |
| 3 | 96532252 | 96532661 | 5Y-H4K8ac_peak_12510 | 5.12488  | EPHA6_ENSG00000080224                               |

|   |           |           |                      |          |                                                       |
|---|-----------|-----------|----------------------|----------|-------------------------------------------------------|
| 3 | 97540865  | 97541187  | 5Y-H4K8ac_peak_12511 | 10.95042 | CRYBG3_ENSG00000233280                                |
| 3 | 98241388  | 98241705  | 5Y-H4K8ac_peak_12512 | 6.50117  | CLDND1_ENSG00000080822;RP11-227H4.5_ENSG00000248839   |
| 3 | 98312119  | 98312724  | 5Y-H4K8ac_peak_12513 | 8.4454   | CPOX_ENSG00000080819                                  |
| 3 | 98451376  | 98451579  | 5Y-H4K8ac_peak_12514 | 7.01266  | ST3GAL6-AS1_ENSG00000239445;ST3GAL6_ENSG00000064225   |
| 3 | 99979897  | 99980238  | 5Y-H4K8ac_peak_12515 | 10.35586 | TBC1D23_ENSG00000036054                               |
| 3 | 100119487 | 100119819 | 5Y-H4K8ac_peak_12516 | 6.54441  | TOMM70A_ENSG00000154174;LNP1_ENSG00000206535          |
| 3 | 100122407 | 100122599 | 5Y-H4K8ac_peak_12517 | 8.93304  |                                                       |
| 3 | 100210881 | 100211218 | 5Y-H4K8ac_peak_12518 | 5.23083  | TMEM45A_ENSG00000181458                               |
| 3 | 101231665 | 101231986 | 5Y-H4K8ac_peak_12519 | 9.38203  | SENP7_ENSG00000138468                                 |
| 3 | 101280308 | 101280560 | 5Y-H4K8ac_peak_12520 | 12.21176 | TRMT10C_ENSG00000174173                               |
| 3 | 101293187 | 101293454 | 5Y-H4K8ac_peak_12521 | 11.36989 | PCNP_ENSG00000081154                                  |
| 3 | 101405143 | 101405373 | 5Y-H4K8ac_peak_12522 | 4.9885   | RPL24_ENSG00000114391                                 |
| 3 | 101405887 | 101406133 | 5Y-H4K8ac_peak_12523 | 8.79957  | RPL24_ENSG00000114391                                 |
| 3 | 101567723 | 101568117 | 5Y-H4K8ac_peak_12524 | 11.19336 |                                                       |
| 3 | 105072616 | 105072853 | 5Y-H4K8ac_peak_12525 | 6.94416  |                                                       |
| 3 | 105223428 | 105223684 | 5Y-H4K8ac_peak_12526 | 7.31815  |                                                       |
| 3 | 107149819 | 107150823 | 5Y-H4K8ac_peak_12527 | 14.99673 | RP11-115H18.1_ENSG00000273125                         |
| 3 | 107700609 | 107700911 | 5Y-H4K8ac_peak_12528 | 6.34046  |                                                       |
| 3 | 107809975 | 107810591 | 5Y-H4K8ac_peak_12529 | 15.82713 | CD47_ENSG00000196776                                  |
| 3 | 107940814 | 107941038 | 5Y-H4K8ac_peak_12530 | 10.46287 | IFT57_ENSG00000114446                                 |
| 3 | 111697941 | 111698206 | 5Y-H4K8ac_peak_12531 | 4.642    | ABHD10_ENSG00000144827                                |
| 3 | 112280491 | 112280711 | 5Y-H4K8ac_peak_12532 | 7.76232  | ATG3_ENSG00000144848;SLC35A5_ENSG00000138459          |
| 3 | 112738122 | 112738500 | 5Y-H4K8ac_peak_12533 | 14.43262 | C3orf17_ENSG00000163608;RP11-572M11.4_ENSG00000240057 |
| 3 | 112866820 | 112867082 | 5Y-H4K8ac_peak_12534 | 7.11863  |                                                       |
| 3 | 112930461 | 112931210 | 5Y-H4K8ac_peak_12535 | 9.93099  | BOC_ENSG00000144857                                   |
| 3 | 112940695 | 112940953 | 5Y-H4K8ac_peak_12536 | 9.30505  |                                                       |
| 3 | 113008450 | 113008721 | 5Y-H4K8ac_peak_12537 | 10.12234 |                                                       |
| 3 | 113234179 | 113234379 | 5Y-H4K8ac_peak_12538 | 5.8635   | SPICE1_ENSG00000163611                                |
| 3 | 113464504 | 113464919 | 5Y-H4K8ac_peak_12539 | 6.73385  | NAA50_ENSG00000121579;ATP6V1A_ENSG00000114573         |
| 3 | 113666456 | 113666830 | 5Y-H4K8ac_peak_12540 | 7.3889   | RP11-255E6.6_ENSG00000273394;ZDHHC23_ENSG00000184307  |
| 3 | 114958557 | 114958823 | 5Y-H4K8ac_peak_12541 | 7.31815  |                                                       |
| 3 | 115231459 | 115231782 | 5Y-H4K8ac_peak_12542 | 5.56912  |                                                       |
| 3 | 115237843 | 115238070 | 5Y-H4K8ac_peak_12543 | 4.84727  |                                                       |
| 3 | 115377126 | 115377930 | 5Y-H4K8ac_peak_12544 | 21.28918 | RP11-326J18.1_ENSG00000241596                         |
| 3 | 115503003 | 115503264 | 5Y-H4K8ac_peak_12545 | 14.30055 |                                                       |
| 3 | 116163793 | 116164008 | 5Y-H4K8ac_peak_12546 | 9.38203  |                                                       |
| 3 | 116193384 | 116193601 | 5Y-H4K8ac_peak_12547 | 4.9885   |                                                       |
| 3 | 117345057 | 117345291 | 5Y-H4K8ac_peak_12548 | 6.50117  |                                                       |
| 3 | 117632670 | 117632903 | 5Y-H4K8ac_peak_12549 | 9.20645  |                                                       |
| 3 | 117635035 | 117635239 | 5Y-H4K8ac_peak_12550 | 8.2913   |                                                       |
| 3 | 119011675 | 119011895 | 5Y-H4K8ac_peak_12551 | 7.21112  |                                                       |
| 3 | 119013220 | 119013867 | 5Y-H4K8ac_peak_12552 | 7.89273  | ARHGAP31_ENSG00000031081                              |
| 3 | 119016367 | 119016563 | 5Y-H4K8ac_peak_12553 | 5.62788  | RPS26P21_ENSG00000242829                              |
| 3 | 119041369 | 119042321 | 5Y-H4K8ac_peak_12554 | 15.84891 | ARHGAP31-AS1_ENSG00000241155                          |
| 3 | 119050995 | 119051321 | 5Y-H4K8ac_peak_12555 | 7.11863  |                                                       |
| 3 | 119052783 | 119053501 | 5Y-H4K8ac_peak_12556 | 14.99673 |                                                       |

|   |           |           |                      |          |                                                       |
|---|-----------|-----------|----------------------|----------|-------------------------------------------------------|
| 3 | 119182152 | 119182490 | 5Y-H4K8ac_peak_12557 | 7.59101  |                                                       |
| 3 | 119187657 | 119188059 | 5Y-H4K8ac_peak_12558 | 7.89273  | TMEM39A_ENSG00000176142                               |
| 3 | 119217499 | 119217704 | 5Y-H4K8ac_peak_12559 | 5.70472  | RP11-190C22.8_ENSG00000272662;TIMMDC1_ENSG00000113845 |
| 3 | 119218190 | 119218418 | 5Y-H4K8ac_peak_12560 | 5.77946  | TIMMDC1_ENSG00000113845                               |
| 3 | 119298284 | 119298781 | 5Y-H4K8ac_peak_12561 | 3.93327  | RP11-190C22.9_ENSG00000272967;ADPRH_ENSG00000144843   |
| 3 | 119352058 | 119352250 | 5Y-H4K8ac_peak_12562 | 5.26353  |                                                       |
| 3 | 119356522 | 119356739 | 5Y-H4K8ac_peak_12563 | 10.69698 |                                                       |
| 3 | 119357286 | 119357670 | 5Y-H4K8ac_peak_12564 | 6.50117  |                                                       |
| 3 | 119378724 | 119379267 | 5Y-H4K8ac_peak_12565 | 16.59095 |                                                       |
| 3 | 119396006 | 119396241 | 5Y-H4K8ac_peak_12566 | 5.77946  | COX17_ENSG00000138495                                 |
| 3 | 119814112 | 119814589 | 5Y-H4K8ac_peak_12567 | 18.06205 | GSK3B_ENSG00000082701;RP11-18H7.1_ENSG00000242622     |
| 3 | 120003987 | 120004378 | 5Y-H4K8ac_peak_12568 | 16.52279 | GPR156_ENSG00000175697                                |
| 3 | 120067782 | 120068152 | 5Y-H4K8ac_peak_12569 | 4.95697  | LRRC58_ENSG00000163428;RP11-174O3.3_ENSG00000240661   |
| 3 | 120170016 | 120170476 | 5Y-H4K8ac_peak_12570 | 7.89273  | FSTL1_ENSG00000163430                                 |
| 3 | 120278001 | 120278330 | 5Y-H4K8ac_peak_12571 | 9.38203  |                                                       |
| 3 | 120315360 | 120315565 | 5Y-H4K8ac_peak_12572 | 5.87725  | NDUFB4_ENSG00000065518                                |
| 3 | 121264403 | 121264760 | 5Y-H4K8ac_peak_12573 | 5.65584  | POLQ_ENSG00000051341                                  |
| 3 | 122282970 | 122283183 | 5Y-H4K8ac_peak_12574 | 7.20869  | PARP9_ENSG00000138496;DTX3L_ENSG00000163840           |
| 3 | 122283378 | 122283604 | 5Y-H4K8ac_peak_12575 | 11.62198 | PARP9_ENSG00000138496;DTX3L_ENSG00000163840           |
| 3 | 122656223 | 122656501 | 5Y-H4K8ac_peak_12576 | 8.73985  |                                                       |
| 3 | 122656776 | 122656977 | 5Y-H4K8ac_peak_12577 | 7.11863  |                                                       |
| 3 | 122660065 | 122660318 | 5Y-H4K8ac_peak_12578 | 10.31019 |                                                       |
| 3 | 122662146 | 122662538 | 5Y-H4K8ac_peak_12579 | 10.69698 |                                                       |
| 3 | 122693269 | 122693513 | 5Y-H4K8ac_peak_12580 | 10.1994  |                                                       |
| 3 | 122693863 | 122694193 | 5Y-H4K8ac_peak_12581 | 13.99721 |                                                       |
| 3 | 122695031 | 122695328 | 5Y-H4K8ac_peak_12582 | 7.59101  |                                                       |
| 3 | 122711712 | 122712056 | 5Y-H4K8ac_peak_12583 | 10.1994  |                                                       |
| 3 | 122714822 | 122715056 | 5Y-H4K8ac_peak_12584 | 4.728    |                                                       |
| 3 | 122744908 | 122745175 | 5Y-H4K8ac_peak_12585 | 5.35202  |                                                       |
| 3 | 122745981 | 122746276 | 5Y-H4K8ac_peak_12586 | 7.50148  |                                                       |
| 3 | 122746864 | 122747282 | 5Y-H4K8ac_peak_12587 | 7.01266  | SEMA5B_ENSG00000082684                                |
| 3 | 122765620 | 122765826 | 5Y-H4K8ac_peak_12588 | 4.50834  |                                                       |
| 3 | 122804433 | 122804648 | 5Y-H4K8ac_peak_12589 | 4.95697  |                                                       |
| 3 | 122859453 | 122859749 | 5Y-H4K8ac_peak_12590 | 4.00285  |                                                       |
| 3 | 123064020 | 123064246 | 5Y-H4K8ac_peak_12591 | 4.95697  |                                                       |
| 3 | 123602805 | 123603015 | 5Y-H4K8ac_peak_12592 | 7.17184  | MYLK_ENSG00000065534                                  |
| 3 | 123751527 | 123751983 | 5Y-H4K8ac_peak_12593 | 9.63153  |                                                       |
| 3 | 123752223 | 123752645 | 5Y-H4K8ac_peak_12594 | 10.64267 |                                                       |
| 3 | 123892458 | 123892859 | 5Y-H4K8ac_peak_12595 | 8.2913   |                                                       |
| 3 | 123893938 | 123894496 | 5Y-H4K8ac_peak_12596 | 7.46829  |                                                       |
| 3 | 123921103 | 123921522 | 5Y-H4K8ac_peak_12597 | 11.9858  |                                                       |
| 3 | 123967047 | 123967256 | 5Y-H4K8ac_peak_12598 | 5.91107  |                                                       |
| 3 | 124001444 | 124001966 | 5Y-H4K8ac_peak_12599 | 10.21117 |                                                       |
| 3 | 124017789 | 124018156 | 5Y-H4K8ac_peak_12600 | 7.01266  |                                                       |
| 3 | 124133912 | 124134113 | 5Y-H4K8ac_peak_12601 | 4.84727  |                                                       |
| 3 | 124490228 | 124490541 | 5Y-H4K8ac_peak_12602 | 7.34185  |                                                       |

|   |           |           |                      |          |                                            |
|---|-----------|-----------|----------------------|----------|--------------------------------------------|
| 3 | 124553675 | 124554031 | 5Y-H4K8ac_peak_12603 | 4.29586  |                                            |
| 3 | 124554258 | 124554462 | 5Y-H4K8ac_peak_12604 | 7.60057  |                                            |
| 3 | 124554713 | 124555244 | 5Y-H4K8ac_peak_12605 | 7.31102  |                                            |
| 3 | 124556011 | 124556303 | 5Y-H4K8ac_peak_12606 | 5.77946  |                                            |
| 3 | 124604766 | 124605081 | 5Y-H4K8ac_peak_12607 | 7.57144  |                                            |
| 3 | 124606080 | 124606508 | 5Y-H4K8ac_peak_12608 | 6.00388  |                                            |
| 3 | 124620010 | 124620226 | 5Y-H4K8ac_peak_12609 | 5.84208  | ITGB5_ENSG00000082781                      |
| 3 | 124839569 | 124839903 | 5Y-H4K8ac_peak_12610 | 11.09973 |                                            |
| 3 | 124849688 | 124850027 | 5Y-H4K8ac_peak_12611 | 5.40331  |                                            |
| 3 | 124860264 | 124860677 | 5Y-H4K8ac_peak_12612 | 7.11863  |                                            |
| 3 | 124931737 | 124932205 | 5Y-H4K8ac_peak_12613 | 6.79955  |                                            |
| 3 | 124938269 | 124938495 | 5Y-H4K8ac_peak_12614 | 6.03718  |                                            |
| 3 | 125094287 | 125094493 | 5Y-H4K8ac_peak_12615 | 11.62198 | ZNF148_ENSG00000163848                     |
| 3 | 125314046 | 125314262 | 5Y-H4K8ac_peak_12616 | 9.05168  | OSBPL11_ENSG00000144909                    |
| 3 | 125314600 | 125314853 | 5Y-H4K8ac_peak_12617 | 4.71803  | OSBPL11_ENSG00000144909                    |
| 3 | 125679472 | 125679668 | 5Y-H4K8ac_peak_12618 | 4.9885   |                                            |
| 3 | 125931540 | 125932695 | 5Y-H4K8ac_peak_12619 | 10.17195 |                                            |
| 3 | 126074265 | 126074721 | 5Y-H4K8ac_peak_12620 | 7.63144  |                                            |
| 3 | 126194413 | 126194641 | 5Y-H4K8ac_peak_12621 | 7.89273  | ZXDC_ENSG00000070476                       |
| 3 | 126200200 | 126200790 | 5Y-H4K8ac_peak_12622 | 11.37188 |                                            |
| 3 | 126248665 | 126248949 | 5Y-H4K8ac_peak_12623 | 5.98695  |                                            |
| 3 | 126398402 | 126399103 | 5Y-H4K8ac_peak_12624 | 7.59101  |                                            |
| 3 | 126400969 | 126401232 | 5Y-H4K8ac_peak_12625 | 6.78128  |                                            |
| 3 | 126646031 | 126646231 | 5Y-H4K8ac_peak_12626 | 6.38173  |                                            |
| 3 | 126701090 | 126701307 | 5Y-H4K8ac_peak_12627 | 7.19446  |                                            |
| 3 | 126701556 | 126701759 | 5Y-H4K8ac_peak_12628 | 8.92475  |                                            |
| 3 | 126720402 | 126720601 | 5Y-H4K8ac_peak_12629 | 7.90236  |                                            |
| 3 | 126729863 | 126730178 | 5Y-H4K8ac_peak_12630 | 8.22388  |                                            |
| 3 | 126733667 | 126733967 | 5Y-H4K8ac_peak_12631 | 6.77436  |                                            |
| 3 | 126734881 | 126735093 | 5Y-H4K8ac_peak_12632 | 7.59101  |                                            |
| 3 | 126852966 | 126853685 | 5Y-H4K8ac_peak_12633 | 9.51254  |                                            |
| 3 | 126875852 | 126876358 | 5Y-H4K8ac_peak_12634 | 9.31608  |                                            |
| 3 | 126878019 | 126878421 | 5Y-H4K8ac_peak_12635 | 5.8635   |                                            |
| 3 | 126890008 | 126891250 | 5Y-H4K8ac_peak_12636 | 7.50148  |                                            |
| 3 | 126891561 | 126891892 | 5Y-H4K8ac_peak_12637 | 7.00004  |                                            |
| 3 | 126892429 | 126892979 | 5Y-H4K8ac_peak_12638 | 6.08523  |                                            |
| 3 | 126893600 | 126893826 | 5Y-H4K8ac_peak_12639 | 8.43511  |                                            |
| 3 | 126927527 | 126927753 | 5Y-H4K8ac_peak_12640 | 4.50834  |                                            |
| 3 | 127090719 | 127091269 | 5Y-H4K8ac_peak_12641 | 4.07874  |                                            |
| 3 | 127173885 | 127174484 | 5Y-H4K8ac_peak_12642 | 9.30505  |                                            |
| 3 | 127174682 | 127175009 | 5Y-H4K8ac_peak_12643 | 13.92877 |                                            |
| 3 | 127266107 | 127266526 | 5Y-H4K8ac_peak_12644 | 8.05083  |                                            |
| 3 | 127309976 | 127310259 | 5Y-H4K8ac_peak_12645 | 9.05766  |                                            |
| 3 | 127316752 | 127317005 | 5Y-H4K8ac_peak_12646 | 9.58986  | TPRA1_ENSG00000163870;MCM2_ENSG00000073111 |
| 3 | 127317354 | 127317628 | 5Y-H4K8ac_peak_12647 | 10.4495  | TPRA1_ENSG00000163870;MCM2_ENSG00000073111 |
| 3 | 127347528 | 127347775 | 5Y-H4K8ac_peak_12648 | 8.84534  | PODXL2_ENSG00000114631                     |

|   |           |           |                      |          |                               |
|---|-----------|-----------|----------------------|----------|-------------------------------|
| 3 | 127348046 | 127348543 | 5Y-H4K8ac_peak_12649 | 25.5258  | PODXL2_ENSG00000114631        |
| 3 | 127407492 | 127408410 | 5Y-H4K8ac_peak_12650 | 10.36926 |                               |
| 3 | 127409303 | 127409972 | 5Y-H4K8ac_peak_12651 | 7.87406  |                               |
| 3 | 127415467 | 127416358 | 5Y-H4K8ac_peak_12652 | 12.57157 |                               |
| 3 | 127416652 | 127417201 | 5Y-H4K8ac_peak_12653 | 7.89273  |                               |
| 3 | 127462636 | 127462835 | 5Y-H4K8ac_peak_12654 | 8.39058  |                               |
| 3 | 127473056 | 127473274 | 5Y-H4K8ac_peak_12655 | 4.71803  |                               |
| 3 | 127505618 | 127506146 | 5Y-H4K8ac_peak_12656 | 7.20869  |                               |
| 3 | 127508066 | 127508335 | 5Y-H4K8ac_peak_12657 | 5.86219  |                               |
| 3 | 127680060 | 127680280 | 5Y-H4K8ac_peak_12658 | 6.34046  |                               |
| 3 | 127892822 | 127893028 | 5Y-H4K8ac_peak_12659 | 7.31815  |                               |
| 3 | 127955554 | 127955834 | 5Y-H4K8ac_peak_12660 | 6.0873   |                               |
| 3 | 127957338 | 127957611 | 5Y-H4K8ac_peak_12661 | 5.449    |                               |
| 3 | 127957912 | 127958352 | 5Y-H4K8ac_peak_12662 | 8.43511  |                               |
| 3 | 127995771 | 127995992 | 5Y-H4K8ac_peak_12663 | 7.50148  |                               |
| 3 | 127997425 | 127997687 | 5Y-H4K8ac_peak_12664 | 7.64648  |                               |
| 3 | 127998303 | 127998643 | 5Y-H4K8ac_peak_12665 | 11.41382 |                               |
| 3 | 127999279 | 127999679 | 5Y-H4K8ac_peak_12666 | 13.0168  |                               |
| 3 | 128001000 | 128001204 | 5Y-H4K8ac_peak_12667 | 6.77436  |                               |
| 3 | 128001600 | 128002059 | 5Y-H4K8ac_peak_12668 | 8.69112  |                               |
| 3 | 128036639 | 128036987 | 5Y-H4K8ac_peak_12669 | 8.62703  |                               |
| 3 | 128037195 | 128037971 | 5Y-H4K8ac_peak_12670 | 9.38276  |                               |
| 3 | 128040175 | 128040383 | 5Y-H4K8ac_peak_12671 | 5.51472  |                               |
| 3 | 128048441 | 128048631 | 5Y-H4K8ac_peak_12672 | 4.77126  |                               |
| 3 | 128090493 | 128090732 | 5Y-H4K8ac_peak_12673 | 6.29918  |                               |
| 3 | 128113519 | 128113972 | 5Y-H4K8ac_peak_12674 | 7.50148  |                               |
| 3 | 128116684 | 128116964 | 5Y-H4K8ac_peak_12675 | 8.82628  |                               |
| 3 | 128126135 | 128126425 | 5Y-H4K8ac_peak_12676 | 7.98023  |                               |
| 3 | 128126736 | 128127889 | 5Y-H4K8ac_peak_12677 | 14.40573 |                               |
| 3 | 128128347 | 128130425 | 5Y-H4K8ac_peak_12678 | 14.97676 |                               |
| 3 | 128130960 | 128131931 | 5Y-H4K8ac_peak_12679 | 24.04427 |                               |
| 3 | 128132186 | 128132989 | 5Y-H4K8ac_peak_12680 | 8.20773  |                               |
| 3 | 128134452 | 128135469 | 5Y-H4K8ac_peak_12681 | 10.58233 |                               |
| 3 | 128144964 | 128145255 | 5Y-H4K8ac_peak_12682 | 13.03079 |                               |
| 3 | 128145459 | 128145732 | 5Y-H4K8ac_peak_12683 | 5.64909  |                               |
| 3 | 128154141 | 128154385 | 5Y-H4K8ac_peak_12684 | 6.54441  |                               |
| 3 | 128172465 | 128172976 | 5Y-H4K8ac_peak_12685 | 6.2403   |                               |
| 3 | 128173379 | 128173695 | 5Y-H4K8ac_peak_12686 | 6.88532  |                               |
| 3 | 128174072 | 128174264 | 5Y-H4K8ac_peak_12687 | 7.63144  |                               |
| 3 | 128174681 | 128175965 | 5Y-H4K8ac_peak_12688 | 16.79568 |                               |
| 3 | 128176428 | 128178979 | 5Y-H4K8ac_peak_12689 | 18.10232 |                               |
| 3 | 128186552 | 128187148 | 5Y-H4K8ac_peak_12690 | 12.79198 | DNAJB8_ENSG00000179407        |
| 3 | 128187551 | 128188518 | 5Y-H4K8ac_peak_12691 | 13.4304  |                               |
| 3 | 128189639 | 128190090 | 5Y-H4K8ac_peak_12692 | 9.30206  |                               |
| 3 | 128207784 | 128208304 | 5Y-H4K8ac_peak_12693 | 7.50148  | RP11-475N22.4_ENSG00000244300 |
| 3 | 128208689 | 128208891 | 5Y-H4K8ac_peak_12694 | 6.64195  | RP11-475N22.4_ENSG00000244300 |



|   |           |           |                      |          |                                                     |
|---|-----------|-----------|----------------------|----------|-----------------------------------------------------|
| 3 | 128210930 | 128211453 | 5Y-H4K8ac_peak_12695 | 9.36633  | GATA2_ENSG00000179348                               |
| 3 | 128211649 | 128211888 | 5Y-H4K8ac_peak_12696 | 8.27643  | GATA2_ENSG00000179348                               |
| 3 | 128212439 | 128212793 | 5Y-H4K8ac_peak_12697 | 5.36319  | GATA2_ENSG00000179348                               |
| 3 | 128215090 | 128215384 | 5Y-H4K8ac_peak_12698 | 19.17092 |                                                     |
| 3 | 128215667 | 128216492 | 5Y-H4K8ac_peak_12699 | 13.85283 |                                                     |
| 3 | 128256069 | 128256303 | 5Y-H4K8ac_peak_12700 | 4.14761  | TMED10P2_ENSG00000239405                            |
| 3 | 128302898 | 128303278 | 5Y-H4K8ac_peak_12701 | 5.87725  |                                                     |
| 3 | 128370420 | 128370636 | 5Y-H4K8ac_peak_12702 | 6.43775  |                                                     |
| 3 | 128398909 | 128399105 | 5Y-H4K8ac_peak_12703 | 7.30348  | RPN1_ENSG00000163902                                |
| 3 | 128419956 | 128420575 | 5Y-H4K8ac_peak_12704 | 7.59101  |                                                     |
| 3 | 128444304 | 128444766 | 5Y-H4K8ac_peak_12705 | 8.33296  | RAB7A_ENSG00000075785                               |
| 3 | 128445076 | 128445658 | 5Y-H4K8ac_peak_12706 | 6.46053  | RAB7A_ENSG00000075785                               |
| 3 | 128492171 | 128492366 | 5Y-H4K8ac_peak_12707 | 6.49308  |                                                     |
| 3 | 128568627 | 128569105 | 5Y-H4K8ac_peak_12708 | 5.23083  | RP11-221E20.4_ENSG00000243022                       |
| 3 | 128583858 | 128584127 | 5Y-H4K8ac_peak_12709 | 6.09071  |                                                     |
| 3 | 128746252 | 128746534 | 5Y-H4K8ac_peak_12710 | 7.90236  |                                                     |
| 3 | 128758254 | 128758773 | 5Y-H4K8ac_peak_12711 | 6.66026  |                                                     |
| 3 | 128771764 | 128771959 | 5Y-H4K8ac_peak_12712 | 6.34046  |                                                     |
| 3 | 128780290 | 128781015 | 5Y-H4K8ac_peak_12713 | 8.51022  | GP9_ENSG00000169704                                 |
| 3 | 128880392 | 128880898 | 5Y-H4K8ac_peak_12714 | 4.8509   | ISY1-RAB43_ENSG00000261796;ISY1_ENSG00000240682     |
| 3 | 128902232 | 128902693 | 5Y-H4K8ac_peak_12715 | 11.29141 | CNBP_ENSG00000169714                                |
| 3 | 128943927 | 128944119 | 5Y-H4K8ac_peak_12716 | 5.97089  |                                                     |
| 3 | 128998053 | 128998289 | 5Y-H4K8ac_peak_12717 | 6.46053  | HMCES_ENSG00000183624                               |
| 3 | 129036006 | 129036308 | 5Y-H4K8ac_peak_12718 | 5.64909  | H1FX_ENSG00000184897                                |
| 3 | 129066317 | 129066635 | 5Y-H4K8ac_peak_12719 | 11.19336 |                                                     |
| 3 | 129118014 | 129118411 | 5Y-H4K8ac_peak_12720 | 5.23083  | RPL32P3_ENSG00000251474                             |
| 3 | 129148158 | 129148616 | 5Y-H4K8ac_peak_12721 | 7.42477  | EFCAB12_ENSG00000172771                             |
| 3 | 129232547 | 129232783 | 5Y-H4K8ac_peak_12722 | 4.07874  |                                                     |
| 3 | 129277091 | 129277291 | 5Y-H4K8ac_peak_12723 | 4.5753   |                                                     |
| 3 | 129277734 | 129277987 | 5Y-H4K8ac_peak_12724 | 7.11863  |                                                     |
| 3 | 129279144 | 129279594 | 5Y-H4K8ac_peak_12725 | 6.29888  |                                                     |
| 3 | 129280055 | 129280512 | 5Y-H4K8ac_peak_12726 | 7.50148  |                                                     |
| 3 | 129295846 | 129296099 | 5Y-H4K8ac_peak_12727 | 7.38046  |                                                     |
| 3 | 129315355 | 129315626 | 5Y-H4K8ac_peak_12728 | 4.90696  |                                                     |
| 3 | 129325824 | 129326031 | 5Y-H4K8ac_peak_12729 | 7.38046  | PLXND1_ENSG00000004399                              |
| 3 | 129721616 | 129721927 | 5Y-H4K8ac_peak_12730 | 6.73385  |                                                     |
| 3 | 131100787 | 131101158 | 5Y-H4K8ac_peak_12731 | 5.41472  | RP11-933H2.4_ENSG00000250608;NUDT16_ENSG00000198585 |
| 3 | 131222090 | 131222343 | 5Y-H4K8ac_peak_12732 | 5.40331  | MRPL3_ENSG00000114686                               |
| 3 | 132136401 | 132136634 | 5Y-H4K8ac_peak_12733 | 9.79526  | DNAJC13_ENSG00000138246                             |
| 3 | 132379058 | 132379423 | 5Y-H4K8ac_peak_12734 | 7.59101  | ACAD11_ENSG00000240303                              |
| 3 | 132757285 | 132757543 | 5Y-H4K8ac_peak_12735 | 9.30505  | TMEM108_ENSG00000144868                             |
| 3 | 132986617 | 132986891 | 5Y-H4K8ac_peak_12736 | 4.02665  |                                                     |
| 3 | 133292697 | 133293093 | 5Y-H4K8ac_peak_12737 | 8.43511  | CDV3_ENSG00000091527                                |
| 3 | 133380374 | 133380680 | 5Y-H4K8ac_peak_12738 | 16.95374 | TOPBP1_ENSG00000163781;TFP1_ENSG00000242337         |
| 3 | 133465296 | 133465486 | 5Y-H4K8ac_peak_12739 | 10.84616 | TF_ENSG00000091513                                  |
| 3 | 133614346 | 133614666 | 5Y-H4K8ac_peak_12740 | 12.11208 | RAB6B_ENSG00000154917                               |

|   |           |           |                      |          |                                                     |
|---|-----------|-----------|----------------------|----------|-----------------------------------------------------|
| 3 | 133614987 | 133615250 | 5Y-H4K8ac_peak_12741 | 8.69112  | RAB6B_ENSG00000154917                               |
| 3 | 133646143 | 133646352 | 5Y-H4K8ac_peak_12742 | 4.50834  |                                                     |
| 3 | 133675079 | 133675335 | 5Y-H4K8ac_peak_12743 | 7.97699  |                                                     |
| 3 | 134010475 | 134010779 | 5Y-H4K8ac_peak_12744 | 6.79955  |                                                     |
| 3 | 134082578 | 134082898 | 5Y-H4K8ac_peak_12745 | 14.00559 |                                                     |
| 3 | 134093039 | 134093643 | 5Y-H4K8ac_peak_12746 | 6.08523  | AMOTL2_ENSG00000114019                              |
| 3 | 134125196 | 134125486 | 5Y-H4K8ac_peak_12747 | 12.21176 |                                                     |
| 3 | 134125791 | 134126194 | 5Y-H4K8ac_peak_12748 | 9.05168  |                                                     |
| 3 | 134205095 | 134205494 | 5Y-H4K8ac_peak_12749 | 7.90751  | ANAPC13_ENSG00000129055;CEP63_ENSG00000182923       |
| 3 | 134321402 | 134321666 | 5Y-H4K8ac_peak_12750 | 5.98695  |                                                     |
| 3 | 134337851 | 134338350 | 5Y-H4K8ac_peak_12751 | 6.49308  |                                                     |
| 3 | 135914905 | 135915132 | 5Y-H4K8ac_peak_12752 | 9.07085  | MSL2_ENSG00000174579                                |
| 3 | 135915532 | 135916224 | 5Y-H4K8ac_peak_12753 | 12.11208 | MSL2_ENSG00000174579                                |
| 3 | 136470486 | 136471159 | 5Y-H4K8ac_peak_12754 | 13.60015 | STAG1_ENSG00000118007;RP11-102M11.2_ENSG00000261758 |
| 3 | 136537025 | 136537417 | 5Y-H4K8ac_peak_12755 | 9.34555  | SLC35G2_ENSG00000168917                             |
| 3 | 136538152 | 136538347 | 5Y-H4K8ac_peak_12756 | 8.2913   | SLC35G2_ENSG00000168917                             |
| 3 | 136581102 | 136581368 | 5Y-H4K8ac_peak_12757 | 8.2913   | RP11-85F14.5_ENSG00000239213;NCK1_ENSG00000158092   |
| 3 | 137906293 | 137906768 | 5Y-H4K8ac_peak_12758 | 13.45283 | ARMC8_ENSG00000114098                               |
| 3 | 138067015 | 138067868 | 5Y-H4K8ac_peak_12759 | 10.36926 | MRAS_ENSG00000158186                                |
| 3 | 138068151 | 138068489 | 5Y-H4K8ac_peak_12760 | 8.17203  |                                                     |
| 3 | 138327308 | 138328245 | 5Y-H4K8ac_peak_12761 | 9.79526  | FAIM_ENSG00000158234                                |
| 3 | 138553347 | 138553550 | 5Y-H4K8ac_peak_12762 | 3.99744  | PIK3CB_ENSG00000051382                              |
| 3 | 139047871 | 139048282 | 5Y-H4K8ac_peak_12763 | 6.79955  |                                                     |
| 3 | 139062228 | 139062655 | 5Y-H4K8ac_peak_12764 | 7.31807  |                                                     |
| 3 | 139108839 | 139109063 | 5Y-H4K8ac_peak_12765 | 10.31981 | COPB2_ENSG00000184432;RP11-319G6.1_ENSG00000248932  |
| 3 | 139252919 | 139253170 | 5Y-H4K8ac_peak_12766 | 10.1994  |                                                     |
| 3 | 139253410 | 139253635 | 5Y-H4K8ac_peak_12767 | 6.77436  |                                                     |
| 3 | 139258688 | 139259168 | 5Y-H4K8ac_peak_12768 | 6.77436  | RBP1_ENSG00000114115                                |
| 3 | 139260085 | 139260428 | 5Y-H4K8ac_peak_12769 | 9.38276  |                                                     |
| 3 | 139392780 | 139393006 | 5Y-H4K8ac_peak_12770 | 5.98695  |                                                     |
| 3 | 139740872 | 139741475 | 5Y-H4K8ac_peak_12771 | 8.51022  |                                                     |
| 3 | 140769625 | 140769921 | 5Y-H4K8ac_peak_12772 | 6.37023  | SPSB4_ENSG00000175093                               |
| 3 | 140802729 | 140803033 | 5Y-H4K8ac_peak_12773 | 5.91897  |                                                     |
| 3 | 140950239 | 140950463 | 5Y-H4K8ac_peak_12774 | 5.98695  |                                                     |
| 3 | 140950716 | 140950998 | 5Y-H4K8ac_peak_12775 | 9.30505  |                                                     |
| 3 | 141030132 | 141030530 | 5Y-H4K8ac_peak_12776 | 10.21117 |                                                     |
| 3 | 141112304 | 141112822 | 5Y-H4K8ac_peak_12777 | 11.19336 |                                                     |
| 3 | 141120727 | 141121198 | 5Y-H4K8ac_peak_12778 | 8.43511  |                                                     |
| 3 | 141121449 | 141121743 | 5Y-H4K8ac_peak_12779 | 9.15007  |                                                     |
| 3 | 141205992 | 141206329 | 5Y-H4K8ac_peak_12780 | 7.18391  | RASA2_ENSG00000155903                               |
| 3 | 141378925 | 141379320 | 5Y-H4K8ac_peak_12781 | 4.77126  |                                                     |
| 3 | 141450911 | 141451116 | 5Y-H4K8ac_peak_12782 | 5.40331  |                                                     |
| 3 | 141595663 | 141595854 | 5Y-H4K8ac_peak_12783 | 5.18558  | ATP1B3_ENSG00000069849                              |
| 3 | 141944617 | 141944880 | 5Y-H4K8ac_peak_12784 | 12.05638 | GK5_ENSG00000175066                                 |
| 3 | 142297245 | 142297471 | 5Y-H4K8ac_peak_12785 | 7.58806  | ATR_ENSG00000175054                                 |
| 3 | 142442965 | 142443228 | 5Y-H4K8ac_peak_12786 | 9.23159  | TRPC1_ENSG00000144935                               |

|   |           |           |                      |          |                                                                            |
|---|-----------|-----------|----------------------|----------|----------------------------------------------------------------------------|
| 3 | 142443507 | 142443784 | 5Y-H4K8ac_peak_12787 | 5.01697  | TRPC1_ENSG00000144935                                                      |
| 3 | 142682460 | 142682791 | 5Y-H4K8ac_peak_12788 | 9.38203  | PAQR9_ENSG00000188582;RP11-372E1.6_ENSG00000241570;U2SURP_ENSG00000163714  |
| 3 | 142720660 | 142720867 | 5Y-H4K8ac_peak_12789 | 8.21582  | RP11-91G21.1_ENSG00000268129                                               |
| 3 | 147111229 | 147111652 | 5Y-H4K8ac_peak_12790 | 13.00733 | ZIC1_ENSG00000152977                                                       |
| 3 | 147127699 | 147128082 | 5Y-H4K8ac_peak_12791 | 6.34046  |                                                                            |
| 3 | 149470036 | 149470234 | 5Y-H4K8ac_peak_12792 | 10.46287 | COMMD2_ENSG00000114744                                                     |
| 3 | 149530406 | 149530886 | 5Y-H4K8ac_peak_12793 | 8.62703  | RNF13_ENSG00000082996                                                      |
| 3 | 149688375 | 149688566 | 5Y-H4K8ac_peak_12794 | 5.98695  | AC117395.1_ENSG00000268175                                                 |
| 3 | 149689139 | 149689333 | 5Y-H4K8ac_peak_12795 | 10.1994  | AC117395.1_ENSG00000268175                                                 |
| 3 | 149865174 | 149865364 | 5Y-H4K8ac_peak_12796 | 4.51076  |                                                                            |
| 3 | 150126281 | 150126711 | 5Y-H4K8ac_peak_12797 | 4.0639   | TSC22D2_ENSG00000196428                                                    |
| 3 | 150321197 | 150321443 | 5Y-H4K8ac_peak_12798 | 5.98695  | SERP1_ENSG00000120742;SELT_ENSG00000198843                                 |
| 3 | 150329647 | 150329845 | 5Y-H4K8ac_peak_12799 | 4.07874  | RP11-392O18.2_ENSG00000271711                                              |
| 3 | 150480641 | 150480868 | 5Y-H4K8ac_peak_12800 | 7.05631  | SIAH2_ENSG00000181788;SIAH2-AS1_ENSG00000244265                            |
| 3 | 150481639 | 150481866 | 5Y-H4K8ac_peak_12801 | 8.17203  | SIAH2_ENSG00000181788                                                      |
| 3 | 150803069 | 150803385 | 5Y-H4K8ac_peak_12802 | 12.09463 | MED12L_ENSG00000144893                                                     |
| 3 | 150803650 | 150804025 | 5Y-H4K8ac_peak_12803 | 7.80156  | MED12L_ENSG00000144893                                                     |
| 3 | 151986159 | 151986508 | 5Y-H4K8ac_peak_12804 | 5.8635   | MBNL1-AS1_ENSG00000229619                                                  |
| 3 | 151987090 | 151987285 | 5Y-H4K8ac_peak_12805 | 4.84727  | MBNL1-AS1_ENSG00000229619                                                  |
| 3 | 154041812 | 154042225 | 5Y-H4K8ac_peak_12806 | 9.15007  | DHX36_ENSG00000174953                                                      |
| 3 | 155523615 | 155524026 | 5Y-H4K8ac_peak_12807 | 7.50148  | C3orf33_ENSG00000174928                                                    |
| 3 | 155588539 | 155589135 | 5Y-H4K8ac_peak_12808 | 17.63051 | GMPS_ENSG00000163655                                                       |
| 3 | 156534207 | 156534528 | 5Y-H4K8ac_peak_12809 | 6.98416  | LINC00886_ENSG00000240875                                                  |
| 3 | 156544312 | 156544502 | 5Y-H4K8ac_peak_12810 | 7.41197  |                                                                            |
| 3 | 156799780 | 156799975 | 5Y-H4K8ac_peak_12811 | 9.02242  | RP11-6F2.5_ENSG00000241544                                                 |
| 3 | 156807615 | 156807807 | 5Y-H4K8ac_peak_12812 | 4.0639   | LINC00881_ENSG00000241135                                                  |
| 3 | 156878153 | 156878630 | 5Y-H4K8ac_peak_12813 | 9.34555  | CCNL1_ENSG00000163660                                                      |
| 3 | 157155370 | 157155734 | 5Y-H4K8ac_peak_12814 | 5.64909  | PTX3_ENSG00000163661                                                       |
| 3 | 157350996 | 157351192 | 5Y-H4K8ac_peak_12815 | 4.35388  |                                                                            |
| 3 | 158362315 | 158362641 | 5Y-H4K8ac_peak_12816 | 13.2534  | GFM1_ENSG00000168827                                                       |
| 3 | 158450088 | 158450392 | 5Y-H4K8ac_peak_12817 | 5.12488  | RARRES1_ENSG00000118849;MFSD1_ENSG00000118855;RP11-379F4.4_ENSG00000240207 |
| 3 | 158450612 | 158450817 | 5Y-H4K8ac_peak_12818 | 5.64909  | RARRES1_ENSG00000118849;MFSD1_ENSG00000118855;RP11-379F4.4_ENSG00000240207 |
| 3 | 159482403 | 159482951 | 5Y-H4K8ac_peak_12819 | 7.97699  |                                                                            |
| 3 | 159570722 | 159570979 | 5Y-H4K8ac_peak_12820 | 4.50834  |                                                                            |
| 3 | 160472376 | 160472637 | 5Y-H4K8ac_peak_12821 | 5.98695  | RP11-16N11.2_ENSG00000260572;PPM1L_ENSG00000163590                         |
| 3 | 161090469 | 161091150 | 5Y-H4K8ac_peak_12822 | 8.73985  | SPTSSB_ENSG00000196542                                                     |
| 3 | 169530217 | 169530728 | 5Y-H4K8ac_peak_12823 | 7.59101  | LRRC34_ENSG00000171757                                                     |
| 3 | 169683978 | 169684408 | 5Y-H4K8ac_peak_12824 | 5.64909  | RP11-379K17.4_ENSG00000239219;SEC62_ENSG00000008952                        |
| 3 | 169939886 | 169940117 | 5Y-H4K8ac_peak_12825 | 9.11354  | PRKCI_ENSG00000163558                                                      |
| 3 | 170074275 | 170074817 | 5Y-H4K8ac_peak_12826 | 7.38046  | SKIL_ENSG00000136603                                                       |
| 3 | 170075672 | 170076063 | 5Y-H4K8ac_peak_12827 | 9.96543  | SKIL_ENSG00000136603                                                       |
| 3 | 174158785 | 174159008 | 5Y-H4K8ac_peak_12828 | 6.1654   |                                                                            |
| 3 | 176914482 | 176914692 | 5Y-H4K8ac_peak_12829 | 4.84727  | TBL1XR1_ENSG00000177565                                                    |
| 3 | 176915523 | 176915840 | 5Y-H4K8ac_peak_12830 | 22.30274 | TBL1XR1_ENSG00000177565                                                    |
| 3 | 177076790 | 177077667 | 5Y-H4K8ac_peak_12831 | 11.71078 |                                                                            |
| 3 | 177208427 | 177208636 | 5Y-H4K8ac_peak_12832 | 6.20875  |                                                                            |

|   |           |           |                      |          |                                                      |
|---|-----------|-----------|----------------------|----------|------------------------------------------------------|
| 3 | 177471467 | 177471749 | 5Y-H4K8ac_peak_12833 | 5.87382  |                                                      |
| 3 | 178011509 | 178011837 | 5Y-H4K8ac_peak_12834 | 9.83437  |                                                      |
| 3 | 178363116 | 178363454 | 5Y-H4K8ac_peak_12835 | 4.84727  |                                                      |
| 3 | 178789711 | 178790301 | 5Y-H4K8ac_peak_12836 | 11.1169  | ZMAT3_ENSG00000172667                                |
| 3 | 178866287 | 178866689 | 5Y-H4K8ac_peak_12837 | 5.23083  | RP11-360P21.2_ENSG00000229102;PIK3CA_ENSG00000121879 |
| 3 | 178978902 | 178979193 | 5Y-H4K8ac_peak_12838 | 5.64909  | LRRFIP1P1_ENSG00000240429                            |
| 3 | 179040277 | 179040619 | 5Y-H4K8ac_peak_12839 | 4.00285  | ZNF639_ENSG00000121864                               |
| 3 | 179041294 | 179041534 | 5Y-H4K8ac_peak_12840 | 6.50117  | ZNF639_ENSG00000121864                               |
| 3 | 179322051 | 179322337 | 5Y-H4K8ac_peak_12841 | 8.73985  | MRPL47_ENSG00000136522;NDUFB5_ENSG00000136521        |
| 3 | 180319423 | 180319659 | 5Y-H4K8ac_peak_12842 | 9.20645  | RP11-496B10.3_ENSG00000239774;TTC14_ENSG00000163728  |
| 3 | 180320034 | 180320258 | 5Y-H4K8ac_peak_12843 | 5.56894  | RP11-496B10.3_ENSG00000239774;TTC14_ENSG00000163728  |
| 3 | 180630526 | 180630731 | 5Y-H4K8ac_peak_12844 | 8.2913   |                                                      |
| 3 | 180707111 | 180707474 | 5Y-H4K8ac_peak_12845 | 6.77436  | DNAJC19_ENSG00000205981;SOX2-OT_ENSG00000242808      |
| 3 | 182400429 | 182400772 | 5Y-H4K8ac_peak_12846 | 9.7353   |                                                      |
| 3 | 182443784 | 182444077 | 5Y-H4K8ac_peak_12847 | 6.52593  |                                                      |
| 3 | 182510906 | 182511165 | 5Y-H4K8ac_peak_12848 | 13.88421 | RP11-225N10.1_ENSG00000240063;ATP11B_ENSG00000058063 |
| 3 | 182698626 | 182699126 | 5Y-H4K8ac_peak_12849 | 8.564    |                                                      |
| 3 | 182880272 | 182880995 | 5Y-H4K8ac_peak_12850 | 8.43511  | LAMP3_ENSG00000078081                                |
| 3 | 182971991 | 182972574 | 5Y-H4K8ac_peak_12851 | 9.36633  | B3GNT5_ENSG00000176597                               |
| 3 | 183301576 | 183301968 | 5Y-H4K8ac_peak_12852 | 5.65584  |                                                      |
| 3 | 183622091 | 183622370 | 5Y-H4K8ac_peak_12853 | 5.29015  |                                                      |
| 3 | 183735415 | 183735626 | 5Y-H4K8ac_peak_12854 | 10.79063 | ABCC5_ENSG00000114770                                |
| 3 | 183853194 | 183853540 | 5Y-H4K8ac_peak_12855 | 11.09973 | RP11-778D9.12_ENSG00000272721;EIF2B5_ENSG00000145191 |
| 3 | 183862695 | 183862933 | 5Y-H4K8ac_peak_12856 | 4.84727  |                                                      |
| 3 | 183903365 | 183903593 | 5Y-H4K8ac_peak_12857 | 7.20869  | ABCF3_ENSG00000161204                                |
| 3 | 183966849 | 183967157 | 5Y-H4K8ac_peak_12858 | 6.37023  | ALG3_ENSG00000214160;ECE2_ENSG00000145194            |
| 3 | 184032610 | 184033149 | 5Y-H4K8ac_peak_12859 | 11.1169  | EIF4G1_ENSG00000114867                               |
| 3 | 184080592 | 184080961 | 5Y-H4K8ac_peak_12860 | 14.00559 |                                                      |
| 3 | 184081438 | 184081772 | 5Y-H4K8ac_peak_12861 | 5.65765  |                                                      |
| 3 | 184243124 | 184243948 | 5Y-H4K8ac_peak_12862 | 12.05638 |                                                      |
| 3 | 184286069 | 184286496 | 5Y-H4K8ac_peak_12863 | 4.55128  |                                                      |
| 3 | 184286985 | 184287738 | 5Y-H4K8ac_peak_12864 | 13.00733 |                                                      |
| 3 | 184292879 | 184293221 | 5Y-H4K8ac_peak_12865 | 5.72233  |                                                      |
| 3 | 184308538 | 184308995 | 5Y-H4K8ac_peak_12866 | 10.77254 |                                                      |
| 3 | 184309720 | 184310034 | 5Y-H4K8ac_peak_12867 | 9.60458  |                                                      |
| 3 | 184310304 | 184310656 | 5Y-H4K8ac_peak_12868 | 4.3419   |                                                      |
| 3 | 184311456 | 184311793 | 5Y-H4K8ac_peak_12869 | 7.30348  |                                                      |
| 3 | 184315516 | 184315814 | 5Y-H4K8ac_peak_12870 | 8.27643  |                                                      |
| 3 | 184352814 | 184353390 | 5Y-H4K8ac_peak_12871 | 6.08523  |                                                      |
| 3 | 184353583 | 184353827 | 5Y-H4K8ac_peak_12872 | 9.51254  |                                                      |
| 3 | 184376372 | 184376568 | 5Y-H4K8ac_peak_12873 | 7.72345  |                                                      |
| 3 | 184396560 | 184397335 | 5Y-H4K8ac_peak_12874 | 13.99721 |                                                      |
| 3 | 184409184 | 184409799 | 5Y-H4K8ac_peak_12875 | 6.06152  |                                                      |
| 3 | 184429118 | 184429717 | 5Y-H4K8ac_peak_12876 | 7.20869  | MAGEF1_ENSG00000177383                               |
| 3 | 184491187 | 184491598 | 5Y-H4K8ac_peak_12877 | 4.95697  | RP11-329B9.1_ENSG00000229433                         |
| 3 | 184513190 | 184513423 | 5Y-H4K8ac_peak_12878 | 10.1994  |                                                      |

|   |           |           |                      |          |                                                                             |
|---|-----------|-----------|----------------------|----------|-----------------------------------------------------------------------------|
| 3 | 184893477 | 184893686 | 5Y-H4K8ac_peak_12879 | 9.38203  |                                                                             |
| 3 | 184971601 | 184971810 | 5Y-H4K8ac_peak_12880 | 5.29015  | MIR5588_ENSG00000264614                                                     |
| 3 | 185216173 | 185216490 | 5Y-H4K8ac_peak_12881 | 5.449    | TMEM41A_ENSG00000163900                                                     |
| 3 | 185277106 | 185277310 | 5Y-H4K8ac_peak_12882 | 5.59843  |                                                                             |
| 3 | 185304169 | 185304432 | 5Y-H4K8ac_peak_12883 | 9.30505  |                                                                             |
| 3 | 185655360 | 185655682 | 5Y-H4K8ac_peak_12884 | 10.27264 | TRA2B_ENSG00000136527                                                       |
| 3 | 185661187 | 185661397 | 5Y-H4K8ac_peak_12885 | 6.54441  |                                                                             |
| 3 | 185826552 | 185826742 | 5Y-H4K8ac_peak_12886 | 5.91107  |                                                                             |
| 3 | 185927890 | 185928370 | 5Y-H4K8ac_peak_12887 | 7.01266  |                                                                             |
| 3 | 186250245 | 186250585 | 5Y-H4K8ac_peak_12888 | 8.33296  |                                                                             |
| 3 | 186501122 | 186501863 | 5Y-H4K8ac_peak_12889 | 7.66481  | RP11-573D15.9_ENSG00000263826;EIF4A2_ENSG00000156976;SNORD2_ENSG00000238942 |
| 3 | 186524405 | 186524661 | 5Y-H4K8ac_peak_12890 | 7.90751  | RFC4_ENSG00000163918;RP11-573D15.3_ENSG00000231724                          |
| 3 | 186648416 | 186648624 | 5Y-H4K8ac_peak_12891 | 6.14981  | ST6GAL1_ENSG00000073849                                                     |
| 3 | 186856985 | 186857595 | 5Y-H4K8ac_peak_12892 | 7.38046  |                                                                             |
| 3 | 191046888 | 191047401 | 5Y-H4K8ac_peak_12893 | 11.99586 | UTS2B_ENSG00000188958;CCDC50_ENSG00000152492                                |
| 3 | 193462281 | 193462504 | 5Y-H4K8ac_peak_12894 | 4.5753   |                                                                             |
| 3 | 193534581 | 193535253 | 5Y-H4K8ac_peak_12895 | 8.2913   |                                                                             |
| 3 | 193720625 | 193721605 | 5Y-H4K8ac_peak_12896 | 13.0168  | RP11-699L21.1_ENSG00000214146                                               |
| 3 | 193787969 | 193788962 | 5Y-H4K8ac_peak_12897 | 12.26606 | RP11-407B7.1_ENSG00000230102                                                |
| 3 | 193851606 | 193851870 | 5Y-H4K8ac_peak_12898 | 9.23159  |                                                                             |
| 3 | 193852183 | 193852635 | 5Y-H4K8ac_peak_12899 | 11.19336 |                                                                             |
| 3 | 193855281 | 193855529 | 5Y-H4K8ac_peak_12900 | 4.642    |                                                                             |
| 3 | 193858534 | 193859158 | 5Y-H4K8ac_peak_12901 | 6.78128  |                                                                             |
| 3 | 193859517 | 193859986 | 5Y-H4K8ac_peak_12902 | 7.44077  |                                                                             |
| 3 | 193923461 | 193923669 | 5Y-H4K8ac_peak_12903 | 5.97532  |                                                                             |
| 3 | 193967269 | 193967566 | 5Y-H4K8ac_peak_12904 | 4.77126  | RP11-513G11.4_ENSG00000225742                                               |
| 3 | 193982965 | 193983466 | 5Y-H4K8ac_peak_12905 | 11.19336 |                                                                             |
| 3 | 193985733 | 193985983 | 5Y-H4K8ac_peak_12906 | 7.21932  |                                                                             |
| 3 | 193987541 | 193987734 | 5Y-H4K8ac_peak_12907 | 5.12488  |                                                                             |
| 3 | 193988348 | 193989102 | 5Y-H4K8ac_peak_12908 | 13.0168  |                                                                             |
| 3 | 193989351 | 193989639 | 5Y-H4K8ac_peak_12909 | 4.29586  |                                                                             |
| 3 | 193990056 | 193990388 | 5Y-H4K8ac_peak_12910 | 9.58986  |                                                                             |
| 3 | 193991108 | 193991365 | 5Y-H4K8ac_peak_12911 | 13.12848 |                                                                             |
| 3 | 193991750 | 193992102 | 5Y-H4K8ac_peak_12912 | 6.47245  |                                                                             |
| 3 | 193995141 | 193995503 | 5Y-H4K8ac_peak_12913 | 5.87725  | RP11-513G11.2_ENSG00000228271                                               |
| 3 | 194016524 | 194016939 | 5Y-H4K8ac_peak_12914 | 5.23083  |                                                                             |
| 3 | 194018080 | 194018282 | 5Y-H4K8ac_peak_12915 | 5.65584  |                                                                             |
| 3 | 194208136 | 194208447 | 5Y-H4K8ac_peak_12916 | 6.47245  | LINC00884_ENSG00000233058                                                   |
| 3 | 194353598 | 194354163 | 5Y-H4K8ac_peak_12917 | 6.50117  | TMEM44_ENSG00000145014;AC046143.3_ENSG00000229334                           |
| 3 | 194408754 | 194409016 | 5Y-H4K8ac_peak_12918 | 8.71064  |                                                                             |
| 3 | 194574149 | 194574339 | 5Y-H4K8ac_peak_12919 | 6.17973  |                                                                             |
| 3 | 194592406 | 194593238 | 5Y-H4K8ac_peak_12920 | 5.41472  |                                                                             |
| 3 | 194629268 | 194629472 | 5Y-H4K8ac_peak_12921 | 4.84727  |                                                                             |
| 3 | 194796252 | 194796688 | 5Y-H4K8ac_peak_12922 | 7.59101  |                                                                             |
| 3 | 194821754 | 194821971 | 5Y-H4K8ac_peak_12923 | 7.80156  |                                                                             |
| 3 | 194873676 | 194873880 | 5Y-H4K8ac_peak_12924 | 4.50834  |                                                                             |

|   |           |           |                      |          |                                                                                    |
|---|-----------|-----------|----------------------|----------|------------------------------------------------------------------------------------|
| 3 | 194882535 | 194882768 | 5Y-H4K8ac_peak_12925 | 8.47164  |                                                                                    |
| 3 | 194899087 | 194899897 | 5Y-H4K8ac_peak_12926 | 6.77436  |                                                                                    |
| 3 | 194900762 | 194901583 | 5Y-H4K8ac_peak_12927 | 9.63153  |                                                                                    |
| 3 | 194930208 | 194930456 | 5Y-H4K8ac_peak_12928 | 5.64909  |                                                                                    |
| 3 | 194980383 | 194980821 | 5Y-H4K8ac_peak_12929 | 10.31981 |                                                                                    |
| 3 | 195139280 | 195139473 | 5Y-H4K8ac_peak_12930 | 6.98118  | Y_RNA_ENSG00000207368                                                              |
| 3 | 195164390 | 195164680 | 5Y-H4K8ac_peak_12931 | 4.22304  | ACAP2_ENSG00000114331                                                              |
| 3 | 195270917 | 195271140 | 5Y-H4K8ac_peak_12932 | 4.5753   | PPP1R2_ENSG00000184203;AC091633.3_ENSG00000223711                                  |
| 3 | 195384528 | 195384723 | 5Y-H4K8ac_peak_12933 | 4.84727  | AC069513.4_ENSG00000229178;LINC00969_ENSG00000242086;SDHAP2_ENSG00000215837        |
| 3 | 195474452 | 195474759 | 5Y-H4K8ac_peak_12934 | 5.41472  |                                                                                    |
| 3 | 195474967 | 195475250 | 5Y-H4K8ac_peak_12935 | 11.1169  |                                                                                    |
| 3 | 195618949 | 195619179 | 5Y-H4K8ac_peak_12936 | 7.07069  |                                                                                    |
| 3 | 195622058 | 195622252 | 5Y-H4K8ac_peak_12937 | 6.49458  |                                                                                    |
| 3 | 195622958 | 195623169 | 5Y-H4K8ac_peak_12938 | 4.40362  |                                                                                    |
| 3 | 195636959 | 195637319 | 5Y-H4K8ac_peak_12939 | 5.23083  |                                                                                    |
| 3 | 195808550 | 195808905 | 5Y-H4K8ac_peak_12940 | 19.26368 | TFRC_ENSG00000072274                                                               |
| 3 | 195913966 | 195914426 | 5Y-H4K8ac_peak_12941 | 5.91107  |                                                                                    |
| 3 | 195920614 | 195921110 | 5Y-H4K8ac_peak_12942 | 8.21582  |                                                                                    |
| 3 | 195921320 | 195921549 | 5Y-H4K8ac_peak_12943 | 7.89273  |                                                                                    |
| 3 | 195934047 | 195934309 | 5Y-H4K8ac_peak_12944 | 7.13294  |                                                                                    |
| 3 | 195946865 | 195947058 | 5Y-H4K8ac_peak_12945 | 5.41472  |                                                                                    |
| 3 | 196014713 | 196015176 | 5Y-H4K8ac_peak_12946 | 16.01349 | PCYT1A_ENSG00000161217                                                             |
| 3 | 196044662 | 196044853 | 5Y-H4K8ac_peak_12947 | 5.98695  | RP11-447L10.1_ENSG00000272741;TCTEX1D2_ENSG00000213123;TM4SF19-AS1_ENSG00000235897 |
| 3 | 196045274 | 196045536 | 5Y-H4K8ac_peak_12948 | 10.5157  | RP11-447L10.1_ENSG00000272741;TCTEX1D2_ENSG00000213123;TM4SF19-AS1_ENSG00000235897 |
| 3 | 196046131 | 196046389 | 5Y-H4K8ac_peak_12949 | 6.43775  | TCTEX1D2_ENSG00000213123;TM4SF19-AS1_ENSG00000235897                               |
| 3 | 196159029 | 196159221 | 5Y-H4K8ac_peak_12950 | 5.65584  | UBXN7_ENSG00000163960;UBXN7-AS1_ENSG00000225822                                    |
| 3 | 196359087 | 196359452 | 5Y-H4K8ac_peak_12951 | 9.78792  | LINC01063_ENSG00000232065                                                          |
| 3 | 196359678 | 196360260 | 5Y-H4K8ac_peak_12952 | 10.12234 | LINC01063_ENSG00000232065                                                          |
| 3 | 196366681 | 196367006 | 5Y-H4K8ac_peak_12953 | 7.11863  | NRROS_ENSG00000174004;PIGX_ENSG00000163964                                         |
| 3 | 196594866 | 196595467 | 5Y-H4K8ac_peak_12954 | 7.38046  | SENP5_ENSG00000119231                                                              |
| 3 | 196668860 | 196669261 | 5Y-H4K8ac_peak_12955 | 9.30505  | NCBP2_ENSG00000114503;NCBP2-AS2_ENSG00000270170                                    |
| 3 | 196729410 | 196730220 | 5Y-H4K8ac_peak_12956 | 11.88337 |                                                                                    |
| 3 | 196730439 | 196730924 | 5Y-H4K8ac_peak_12957 | 10.1994  |                                                                                    |
| 3 | 196756181 | 196756670 | 5Y-H4K8ac_peak_12958 | 10.35586 | MFI2_ENSG00000163975                                                               |
| 3 | 197024574 | 197024941 | 5Y-H4K8ac_peak_12959 | 14.43262 | DLG1-AS1_ENSG00000227375                                                           |
| 3 | 197066564 | 197066755 | 5Y-H4K8ac_peak_12960 | 6.77436  | snoU13_ENSG00000238491                                                             |
| 3 | 197067172 | 197067416 | 5Y-H4K8ac_peak_12961 | 4.95697  | snoU13_ENSG00000238491                                                             |
| 3 | 197081592 | 197082169 | 5Y-H4K8ac_peak_12962 | 9.20645  |                                                                                    |
| 3 | 197096958 | 197097170 | 5Y-H4K8ac_peak_12963 | 5.29015  |                                                                                    |
| 3 | 197151347 | 197151569 | 5Y-H4K8ac_peak_12964 | 4.64156  |                                                                                    |
| 3 | 197191512 | 197191905 | 5Y-H4K8ac_peak_12965 | 5.718    |                                                                                    |
| 3 | 197194480 | 197195219 | 5Y-H4K8ac_peak_12966 | 7.01266  |                                                                                    |
| 3 | 197211621 | 197212059 | 5Y-H4K8ac_peak_12967 | 8.62703  |                                                                                    |
| 3 | 197214285 | 197214544 | 5Y-H4K8ac_peak_12968 | 7.35899  |                                                                                    |
| 3 | 197217036 | 197217466 | 5Y-H4K8ac_peak_12969 | 8.60027  |                                                                                    |
| 3 | 197219298 | 197219570 | 5Y-H4K8ac_peak_12970 | 3.9664   |                                                                                    |

|   |           |           |                      |          |                                                     |
|---|-----------|-----------|----------------------|----------|-----------------------------------------------------|
| 3 | 197220025 | 197220236 | 5Y-H4K8ac_peak_12971 | 8.69112  |                                                     |
| 3 | 197230664 | 197230945 | 5Y-H4K8ac_peak_12972 | 5.41472  |                                                     |
| 3 | 197282586 | 197283463 | 5Y-H4K8ac_peak_12973 | 10.4495  |                                                     |
| 3 | 197355049 | 197355258 | 5Y-H4K8ac_peak_12974 | 7.38046  | AC024560.3_ENSG00000214135                          |
| 3 | 197476154 | 197476511 | 5Y-H4K8ac_peak_12975 | 4.84727  | KIAA0226_ENSG00000145016                            |
| 4 | 52182     | 52468     | 5Y-H4K8ac_peak_12976 | 7.11613  | ZNF595_ENSG00000197701                              |
| 4 | 53395     | 53621     | 5Y-H4K8ac_peak_12977 | 6.35775  | ZNF595_ENSG00000197701                              |
| 4 | 206467    | 206843    | 5Y-H4K8ac_peak_12978 | 4.642    | ZNF876P_ENSG00000198155                             |
| 4 | 330197    | 330388    | 5Y-H4K8ac_peak_12979 | 5.37237  | RP11-478C6.1_ENSG00000251535                        |
| 4 | 330925    | 331145    | 5Y-H4K8ac_peak_12980 | 10.3507  | RP11-478C6.1_ENSG00000251535;ZNF141_ENSG00000131127 |
| 4 | 467421    | 467899    | 5Y-H4K8ac_peak_12981 | 12.21176 | ABCA11P_ENSG00000251595                             |
| 4 | 493103    | 493401    | 5Y-H4K8ac_peak_12982 | 9.51254  | ZNF721_ENSG00000182903;PIGG_ENSG00000174227         |
| 4 | 657207    | 658759    | 5Y-H4K8ac_peak_12983 | 11.22005 |                                                     |
| 4 | 668346    | 668649    | 5Y-H4K8ac_peak_12984 | 15.45397 | ATP5I_ENSG00000169020;MYL5_ENSG00000215375          |
| 4 | 675588    | 675814    | 5Y-H4K8ac_peak_12985 | 5.64909  |                                                     |
| 4 | 678020    | 678514    | 5Y-H4K8ac_peak_12986 | 8.69112  |                                                     |
| 4 | 699672    | 700259    | 5Y-H4K8ac_peak_12987 | 9.30505  | PCGF3_ENSG00000185619                               |
| 4 | 775329    | 775552    | 5Y-H4K8ac_peak_12988 | 10.11191 | RP11-440L14.1_ENSG00000249592                       |
| 4 | 829401    | 829720    | 5Y-H4K8ac_peak_12989 | 13.00733 |                                                     |
| 4 | 967606    | 968013    | 5Y-H4K8ac_peak_12990 | 13.2534  |                                                     |
| 4 | 1161215   | 1161408   | 5Y-H4K8ac_peak_12991 | 6.73047  | RP11-20I20.4_ENSG00000273179                        |
| 4 | 1187738   | 1188726   | 5Y-H4K8ac_peak_12992 | 16.79568 |                                                     |
| 4 | 1188934   | 1189166   | 5Y-H4K8ac_peak_12993 | 6.62622  |                                                     |
| 4 | 1194988   | 1195230   | 5Y-H4K8ac_peak_12994 | 6.50117  |                                                     |
| 4 | 1199092   | 1200267   | 5Y-H4K8ac_peak_12995 | 7.69843  |                                                     |
| 4 | 1201551   | 1201841   | 5Y-H4K8ac_peak_12996 | 10.95042 | SPON2_ENSG00000159674                               |
| 4 | 1241717   | 1242470   | 5Y-H4K8ac_peak_12997 | 11.01699 | CTBP1-AS2_ENSG00000196810                           |
| 4 | 1243202   | 1244286   | 5Y-H4K8ac_peak_12998 | 11.1169  | CTBP1_ENSG00000159692;CTBP1-AS2_ENSG00000196810     |
| 4 | 1283760   | 1284023   | 5Y-H4K8ac_peak_12999 | 7.50148  | MAEA_ENSG00000090316                                |
| 4 | 1341116   | 1341445   | 5Y-H4K8ac_peak_13000 | 13.0168  | UVSSA_ENSG00000163945                               |
| 4 | 1345536   | 1345774   | 5Y-H4K8ac_peak_13001 | 8.47164  |                                                     |
| 4 | 1594700   | 1595061   | 5Y-H4K8ac_peak_13002 | 6.37023  |                                                     |
| 4 | 1646646   | 1647002   | 5Y-H4K8ac_peak_13003 | 5.23083  |                                                     |
| 4 | 1685456   | 1685902   | 5Y-H4K8ac_peak_13004 | 10.90365 | FAM53A_ENSG00000174137;Y_RNA_ENSG00000207009        |
| 4 | 1686310   | 1686922   | 5Y-H4K8ac_peak_13005 | 15.28394 | FAM53A_ENSG00000174137                              |
| 4 | 1713828   | 1714362   | 5Y-H4K8ac_peak_13006 | 23.27921 | SLBP_ENSG00000163950;RP11-572O17.1_ENSG00000270195  |
| 4 | 1721819   | 1722529   | 5Y-H4K8ac_peak_13007 | 8.21582  | TMEM129_ENSG00000168936;TACC3_ENSG00000013810       |
| 4 | 1755811   | 1756260   | 5Y-H4K8ac_peak_13008 | 8.49231  |                                                     |
| 4 | 1767844   | 1768100   | 5Y-H4K8ac_peak_13009 | 4.05358  |                                                     |
| 4 | 1858243   | 1858771   | 5Y-H4K8ac_peak_13010 | 11.1169  | LETM1_ENSG00000168924                               |
| 4 | 1873201   | 1873521   | 5Y-H4K8ac_peak_13011 | 12.11208 | WHSC1_ENSG00000109685                               |
| 4 | 2061525   | 2061785   | 5Y-H4K8ac_peak_13012 | 7.07936  | NAT8L_ENSG00000185818                               |
| 4 | 2264312   | 2264593   | 5Y-H4K8ac_peak_13013 | 6.19716  | MXD4_ENSG00000123933                                |
| 4 | 2415327   | 2415634   | 5Y-H4K8ac_peak_13014 | 8.73392  |                                                     |
| 4 | 2469902   | 2470508   | 5Y-H4K8ac_peak_13015 | 6.86362  |                                                     |
| 4 | 2536954   | 2537627   | 5Y-H4K8ac_peak_13016 | 5.24695  |                                                     |

|   |         |         |                      |          |                                                          |
|---|---------|---------|----------------------|----------|----------------------------------------------------------|
| 4 | 2789625 | 2790045 | 5Y-H4K8ac_peak_13017 | 9.23159  |                                                          |
| 4 | 2790240 | 2790574 | 5Y-H4K8ac_peak_13018 | 7.38046  |                                                          |
| 4 | 2800487 | 2800894 | 5Y-H4K8ac_peak_13019 | 10.4689  |                                                          |
| 4 | 2802853 | 2803084 | 5Y-H4K8ac_peak_13020 | 6.4221   |                                                          |
| 4 | 2808471 | 2808737 | 5Y-H4K8ac_peak_13021 | 5.96059  |                                                          |
| 4 | 2813825 | 2814087 | 5Y-H4K8ac_peak_13022 | 4.55128  |                                                          |
| 4 | 2819358 | 2819713 | 5Y-H4K8ac_peak_13023 | 8.24461  |                                                          |
| 4 | 2820088 | 2820510 | 5Y-H4K8ac_peak_13024 | 12.10416 |                                                          |
| 4 | 2936732 | 2936943 | 5Y-H4K8ac_peak_13025 | 5.60566  | MFSD10_ENSG00000109736;NOP14-AS1_ENSG00000249673         |
| 4 | 3278655 | 3278893 | 5Y-H4K8ac_peak_13026 | 4.51076  |                                                          |
| 4 | 3494843 | 3495499 | 5Y-H4K8ac_peak_13027 | 9.51254  |                                                          |
| 4 | 3587068 | 3587261 | 5Y-H4K8ac_peak_13028 | 6.36723  |                                                          |
| 4 | 3590533 | 3590725 | 5Y-H4K8ac_peak_13029 | 6.10343  |                                                          |
| 4 | 3616165 | 3616560 | 5Y-H4K8ac_peak_13030 | 5.03564  |                                                          |
| 4 | 3617112 | 3617370 | 5Y-H4K8ac_peak_13031 | 8.73227  |                                                          |
| 4 | 3659793 | 3660269 | 5Y-H4K8ac_peak_13032 | 8.2913   |                                                          |
| 4 | 3708772 | 3709395 | 5Y-H4K8ac_peak_13033 | 7.11863  |                                                          |
| 4 | 3709862 | 3710061 | 5Y-H4K8ac_peak_13034 | 9.7353   |                                                          |
| 4 | 3710348 | 3710576 | 5Y-H4K8ac_peak_13035 | 6.1654   |                                                          |
| 4 | 3781887 | 3782403 | 5Y-H4K8ac_peak_13036 | 4.50834  |                                                          |
| 4 | 3787542 | 3788059 | 5Y-H4K8ac_peak_13037 | 13.23366 |                                                          |
| 4 | 3829476 | 3829667 | 5Y-H4K8ac_peak_13038 | 6.53157  |                                                          |
| 4 | 3829877 | 3830172 | 5Y-H4K8ac_peak_13039 | 4.67245  |                                                          |
| 4 | 3832531 | 3833044 | 5Y-H4K8ac_peak_13040 | 6.7002   |                                                          |
| 4 | 3956838 | 3957111 | 5Y-H4K8ac_peak_13041 | 7.11863  | AC226119.5_ENSG00000253917;FAM86EP_ENSG00000251669       |
| 4 | 4329447 | 4329638 | 5Y-H4K8ac_peak_13042 | 6.98118  |                                                          |
| 4 | 4388236 | 4388591 | 5Y-H4K8ac_peak_13043 | 13.2534  |                                                          |
| 4 | 4388889 | 4389097 | 5Y-H4K8ac_peak_13044 | 9.23159  |                                                          |
| 4 | 4407793 | 4408021 | 5Y-H4K8ac_peak_13045 | 4.77126  |                                                          |
| 4 | 4408898 | 4409218 | 5Y-H4K8ac_peak_13046 | 9.51254  |                                                          |
| 4 | 4543354 | 4543608 | 5Y-H4K8ac_peak_13047 | 7.87192  | STX18_ENSG00000168818;STX18-AS1_ENSG00000247708          |
| 4 | 4765775 | 4765981 | 5Y-H4K8ac_peak_13048 | 6.09071  |                                                          |
| 4 | 4785823 | 4786308 | 5Y-H4K8ac_peak_13049 | 4.642    |                                                          |
| 4 | 5710506 | 5710891 | 5Y-H4K8ac_peak_13050 | 6.37023  | EVC2_ENSG00000173040                                     |
| 4 | 5889599 | 5890168 | 5Y-H4K8ac_peak_13051 | 10.1994  |                                                          |
| 4 | 5957990 | 5958223 | 5Y-H4K8ac_peak_13052 | 9.23159  |                                                          |
| 4 | 5958486 | 5958794 | 5Y-H4K8ac_peak_13053 | 5.62406  |                                                          |
| 4 | 6173418 | 6173621 | 5Y-H4K8ac_peak_13054 | 8.2913   |                                                          |
| 4 | 6202400 | 6202679 | 5Y-H4K8ac_peak_13055 | 16.50659 | JAKMIP1_ENSG00000152969;RP11-586D19.1_ENSG00000249896    |
| 4 | 6223920 | 6224181 | 5Y-H4K8ac_peak_13056 | 4.15658  |                                                          |
| 4 | 6472513 | 6472956 | 5Y-H4K8ac_peak_13057 | 7.11863  |                                                          |
| 4 | 6577057 | 6577405 | 5Y-H4K8ac_peak_13058 | 11.53136 | MAN2B2_ENSG00000013288                                   |
| 4 | 6641918 | 6642188 | 5Y-H4K8ac_peak_13059 | 4.29586  | MRFAP1_ENSG00000179010                                   |
| 4 | 6675857 | 6676360 | 5Y-H4K8ac_peak_13060 | 4.77126  | RP11-539L10.3_ENSG00000251580;AC093323.3_ENSG00000170846 |
| 4 | 6717943 | 6718322 | 5Y-H4K8ac_peak_13061 | 7.20869  | BLOC1S4_ENSG00000186222                                  |
| 4 | 6763103 | 6763872 | 5Y-H4K8ac_peak_13062 | 6.08523  |                                                          |



|   |         |         |                      |          |                                                  |
|---|---------|---------|----------------------|----------|--------------------------------------------------|
| 4 | 6783928 | 6784200 | 5Y-H4K8ac_peak_13063 | 4.55128  | KIAA0232_ENSG00000170871                         |
| 4 | 6784492 | 6785290 | 5Y-H4K8ac_peak_13064 | 8.93923  |                                                  |
| 4 | 6911199 | 6911395 | 5Y-H4K8ac_peak_13065 | 9.51254  | TBC1D14_ENSG00000132405                          |
| 4 | 7103479 | 7103799 | 5Y-H4K8ac_peak_13066 | 10.4689  |                                                  |
| 4 | 7105404 | 7105612 | 5Y-H4K8ac_peak_13067 | 6.17973  | RP11-367J11.3_ENSG00000245468                    |
| 4 | 7208959 | 7209237 | 5Y-H4K8ac_peak_13068 | 7.01266  |                                                  |
| 4 | 7227225 | 7228624 | 5Y-H4K8ac_peak_13069 | 12.69256 |                                                  |
| 4 | 7253737 | 7254134 | 5Y-H4K8ac_peak_13070 | 4.77126  |                                                  |
| 4 | 7287606 | 7287797 | 5Y-H4K8ac_peak_13071 | 5.37588  |                                                  |
| 4 | 7414353 | 7414545 | 5Y-H4K8ac_peak_13072 | 6.77436  |                                                  |
| 4 | 7517269 | 7517605 | 5Y-H4K8ac_peak_13073 | 10.69698 |                                                  |
| 4 | 7540977 | 7541212 | 5Y-H4K8ac_peak_13074 | 7.01266  |                                                  |
| 4 | 7542077 | 7542346 | 5Y-H4K8ac_peak_13075 | 6.77436  |                                                  |
| 4 | 7693646 | 7693972 | 5Y-H4K8ac_peak_13076 | 4.15658  |                                                  |
| 4 | 7888838 | 7889067 | 5Y-H4K8ac_peak_13077 | 5.65584  |                                                  |
| 4 | 7889592 | 7889831 | 5Y-H4K8ac_peak_13078 | 4.14761  |                                                  |
| 4 | 7893576 | 7894210 | 5Y-H4K8ac_peak_13079 | 6.94416  |                                                  |
| 4 | 7896175 | 7896448 | 5Y-H4K8ac_peak_13080 | 6.78128  |                                                  |
| 4 | 7902816 | 7903366 | 5Y-H4K8ac_peak_13081 | 6.50117  |                                                  |
| 4 | 7904298 | 7904570 | 5Y-H4K8ac_peak_13082 | 6.12014  |                                                  |
| 4 | 7904997 | 7905366 | 5Y-H4K8ac_peak_13083 | 9.23159  |                                                  |
| 4 | 7912254 | 7912741 | 5Y-H4K8ac_peak_13084 | 6.78128  |                                                  |
| 4 | 7912997 | 7913249 | 5Y-H4K8ac_peak_13085 | 6.1654   |                                                  |
| 4 | 7941042 | 7941447 | 5Y-H4K8ac_peak_13086 | 7.50148  | AFAP1_ENSG00000196526;AC097381.1_ENSG00000228919 |
| 4 | 7950285 | 7950567 | 5Y-H4K8ac_peak_13087 | 8.79957  |                                                  |
| 4 | 8052135 | 8052381 | 5Y-H4K8ac_peak_13088 | 10.1994  |                                                  |
| 4 | 8052664 | 8052965 | 5Y-H4K8ac_peak_13089 | 10.35586 |                                                  |
| 4 | 8122821 | 8123248 | 5Y-H4K8ac_peak_13090 | 9.13822  |                                                  |
| 4 | 8160946 | 8161158 | 5Y-H4K8ac_peak_13091 | 8.1667   | ABLIM2_ENSG00000163995                           |
| 4 | 8200132 | 8200689 | 5Y-H4K8ac_peak_13092 | 12.06963 |                                                  |
| 4 | 8201080 | 8202301 | 5Y-H4K8ac_peak_13093 | 9.51254  |                                                  |
| 4 | 8202889 | 8203308 | 5Y-H4K8ac_peak_13094 | 7.15925  |                                                  |
| 4 | 8207619 | 8208269 | 5Y-H4K8ac_peak_13095 | 7.60893  |                                                  |
| 4 | 8230266 | 8230531 | 5Y-H4K8ac_peak_13096 | 4.79585  |                                                  |
| 4 | 8244245 | 8244648 | 5Y-H4K8ac_peak_13097 | 9.05168  |                                                  |
| 4 | 8264585 | 8264941 | 5Y-H4K8ac_peak_13098 | 5.00877  |                                                  |
| 4 | 8274706 | 8275108 | 5Y-H4K8ac_peak_13099 | 8.47164  |                                                  |
| 4 | 8276914 | 8277332 | 5Y-H4K8ac_peak_13100 | 6.34245  |                                                  |
| 4 | 8429811 | 8430038 | 5Y-H4K8ac_peak_13101 | 4.84727  |                                                  |
| 4 | 8442603 | 8442794 | 5Y-H4K8ac_peak_13102 | 6.77436  | ACOX3_ENSG00000087008                            |
| 4 | 8599746 | 8600187 | 5Y-H4K8ac_peak_13103 | 5.23083  |                                                  |
| 4 | 8781902 | 8782281 | 5Y-H4K8ac_peak_13104 | 5.87382  |                                                  |
| 4 | 8795535 | 8795869 | 5Y-H4K8ac_peak_13105 | 10.19948 |                                                  |
| 4 | 8913112 | 8913594 | 5Y-H4K8ac_peak_13106 | 10.1994  |                                                  |
| 4 | 8913785 | 8914163 | 5Y-H4K8ac_peak_13107 | 6.78128  |                                                  |
| 4 | 9155095 | 9155311 | 5Y-H4K8ac_peak_13108 | 8.24461  | FAM86KP_ENSG00000163612                          |

|   |          |          |                      |          |                                                                               |
|---|----------|----------|----------------------|----------|-------------------------------------------------------------------------------|
| 4 | 9382734  | 9383064  | 5Y-H4K8ac_peak_13109 | 17.63051 |                                                                               |
| 4 | 10010744 | 10010934 | 5Y-H4K8ac_peak_13110 | 8.55081  |                                                                               |
| 4 | 10118079 | 10118351 | 5Y-H4K8ac_peak_13111 | 6.50117  | WDR1_ENSG00000071127;RNA5SP155_ENSG00000223086                                |
| 4 | 13485531 | 13485764 | 5Y-H4K8ac_peak_13112 | 10.19948 | RAB28_ENSG00000157869                                                         |
| 4 | 13629204 | 13629959 | 5Y-H4K8ac_peak_13113 | 11.19336 | BOD1L1_ENSG00000038219;MIR5091_ENSG00000266240                                |
| 4 | 15657231 | 15657693 | 5Y-H4K8ac_peak_13114 | 11.36989 |                                                                               |
| 4 | 16227733 | 16227982 | 5Y-H4K8ac_peak_13115 | 7.38046  | TAPT1-AS1_ENSG00000263327                                                     |
| 4 | 16228291 | 16228930 | 5Y-H4K8ac_peak_13116 | 13.2534  | TAPT1_ENSG00000169762;TAPT1-AS1_ENSG00000263327                               |
| 4 | 17491524 | 17492256 | 5Y-H4K8ac_peak_13117 | 9.56516  |                                                                               |
| 4 | 17579205 | 17579490 | 5Y-H4K8ac_peak_13118 | 7.38046  | LAP3_ENSG00000002549                                                          |
| 4 | 17616318 | 17616515 | 5Y-H4K8ac_peak_13119 | 5.84208  | AC006160.5_ENSG00000249502;MED28_ENSG00000118579                              |
| 4 | 17672749 | 17673143 | 5Y-H4K8ac_peak_13120 | 7.38046  |                                                                               |
| 4 | 17812078 | 17812288 | 5Y-H4K8ac_peak_13121 | 11.57334 | DCAF16_ENSG00000163257;NCAPG_ENSG00000109805                                  |
| 4 | 18022704 | 18023144 | 5Y-H4K8ac_peak_13122 | 8.17203  | LCORL_ENSG00000178177                                                         |
| 4 | 22517201 | 22517648 | 5Y-H4K8ac_peak_13123 | 6.50117  | GPR125_ENSG00000152990                                                        |
| 4 | 24585684 | 24585974 | 5Y-H4K8ac_peak_13124 | 5.37237  | DHX15_ENSG00000109606                                                         |
| 4 | 24586648 | 24586877 | 5Y-H4K8ac_peak_13125 | 5.03917  | DHX15_ENSG00000109606                                                         |
| 4 | 25161763 | 25162011 | 5Y-H4K8ac_peak_13126 | 8.564    | SEPSECS_ENSG00000109618;PI4K2B_ENSG00000038210                                |
| 4 | 25378346 | 25378537 | 5Y-H4K8ac_peak_13127 | 9.02242  | ANAPC4_ENSG00000053900                                                        |
| 4 | 25378986 | 25379286 | 5Y-H4K8ac_peak_13128 | 4.50834  | ANAPC4_ENSG00000053900                                                        |
| 4 | 26320798 | 26320998 | 5Y-H4K8ac_peak_13129 | 6.73047  |                                                                               |
| 4 | 26859428 | 26859735 | 5Y-H4K8ac_peak_13130 | 4.50834  | STIM2_ENSG00000109689                                                         |
| 4 | 37664545 | 37664839 | 5Y-H4K8ac_peak_13131 | 5.40331  |                                                                               |
| 4 | 37892509 | 37893036 | 5Y-H4K8ac_peak_13132 | 8.33296  | TBC1D1_ENSG00000065882                                                        |
| 4 | 37978538 | 37978800 | 5Y-H4K8ac_peak_13133 | 13.06587 |                                                                               |
| 4 | 37979066 | 37979497 | 5Y-H4K8ac_peak_13134 | 5.41472  |                                                                               |
| 4 | 38664649 | 38664990 | 5Y-H4K8ac_peak_13135 | 5.98695  | KLF3_ENSG00000109787                                                          |
| 4 | 38665895 | 38666122 | 5Y-H4K8ac_peak_13136 | 7.31815  | RP11-617D20.1_ENSG00000231160;AC021860.1_ENSG00000196355;KLF3_ENSG00000109787 |
| 4 | 38869556 | 38869906 | 5Y-H4K8ac_peak_13137 | 7.04637  | FAM114A1_ENSG00000197712;MIR574_ENSG00000207944                               |
| 4 | 39460192 | 39460398 | 5Y-H4K8ac_peak_13138 | 6.43068  | RPL9_ENSG00000163682;LIAS_ENSG00000121897                                     |
| 4 | 39528637 | 39529028 | 5Y-H4K8ac_peak_13139 | 11.42066 | UGDH_ENSG00000109814;UGDH-AS1_ENSG00000249348                                 |
| 4 | 39529359 | 39529853 | 5Y-H4K8ac_peak_13140 | 13.0168  | UGDH_ENSG00000109814;UGDH-AS1_ENSG00000249348                                 |
| 4 | 39699832 | 39700421 | 5Y-H4K8ac_peak_13141 | 7.97699  | UBE2K_ENSG00000078140                                                         |
| 4 | 39817060 | 39817404 | 5Y-H4K8ac_peak_13142 | 8.1667   |                                                                               |
| 4 | 39978361 | 39978811 | 5Y-H4K8ac_peak_13143 | 8.69112  | PDS5A_ENSG00000121892                                                         |
| 4 | 39979104 | 39979498 | 5Y-H4K8ac_peak_13144 | 15.93543 | PDS5A_ENSG00000121892                                                         |
| 4 | 39979758 | 39980028 | 5Y-H4K8ac_peak_13145 | 8.2913   | PDS5A_ENSG00000121892                                                         |
| 4 | 40057665 | 40058933 | 5Y-H4K8ac_peak_13146 | 14.99673 | RP11-333E13.4_ENSG00000205794;N4BP2_ENSG00000078177                           |
| 4 | 40267284 | 40267560 | 5Y-H4K8ac_peak_13147 | 9.23159  | RP11-39516.2_ENSG00000250338                                                  |
| 4 | 40321959 | 40322347 | 5Y-H4K8ac_peak_13148 | 4.84727  |                                                                               |
| 4 | 40752039 | 40752323 | 5Y-H4K8ac_peak_13149 | 7.87406  | NSUN7_ENSG00000179299                                                         |
| 4 | 41218541 | 41218733 | 5Y-H4K8ac_peak_13150 | 10.55771 | APBB2_ENSG00000163697                                                         |
| 4 | 41361162 | 41361403 | 5Y-H4K8ac_peak_13151 | 8.21582  | LIMCH1_ENSG00000064042                                                        |
| 4 | 41362393 | 41362684 | 5Y-H4K8ac_peak_13152 | 8.564    | LIMCH1_ENSG00000064042                                                        |
| 4 | 41748083 | 41748368 | 5Y-H4K8ac_peak_13153 | 7.55879  |                                                                               |
| 4 | 41752287 | 41752520 | 5Y-H4K8ac_peak_13154 | 9.00699  | RP11-227F19.2_ENSG00000249122                                                 |

|   |          |          |                      |          |                                                       |
|---|----------|----------|----------------------|----------|-------------------------------------------------------|
| 4 | 41752745 | 41753718 | 5Y-H4K8ac_peak_13155 | 9.8829   | RP11-227F19.2_ENSG00000249122                         |
| 4 | 41836771 | 41836970 | 5Y-H4K8ac_peak_13156 | 6.50117  |                                                       |
| 4 | 41875411 | 41875804 | 5Y-H4K8ac_peak_13157 | 9.30505  |                                                       |
| 4 | 41876499 | 41876776 | 5Y-H4K8ac_peak_13158 | 9.63153  |                                                       |
| 4 | 41879709 | 41880019 | 5Y-H4K8ac_peak_13159 | 6.55841  |                                                       |
| 4 | 41880263 | 41880841 | 5Y-H4K8ac_peak_13160 | 13.4304  |                                                       |
| 4 | 41882097 | 41883247 | 5Y-H4K8ac_peak_13161 | 13.33225 |                                                       |
| 4 | 41883454 | 41884601 | 5Y-H4K8ac_peak_13162 | 28.14579 | LINC00682_ENSG00000245870                             |
| 4 | 41885406 | 41885650 | 5Y-H4K8ac_peak_13163 | 6.7002   | LINC00682_ENSG00000245870                             |
| 4 | 41888280 | 41888566 | 5Y-H4K8ac_peak_13164 | 6.42825  |                                                       |
| 4 | 42307970 | 42308463 | 5Y-H4K8ac_peak_13165 | 6.42825  |                                                       |
| 4 | 42309749 | 42310036 | 5Y-H4K8ac_peak_13166 | 9.78792  |                                                       |
| 4 | 42310841 | 42311354 | 5Y-H4K8ac_peak_13167 | 5.77946  |                                                       |
| 4 | 42312541 | 42313134 | 5Y-H4K8ac_peak_13168 | 5.0078   |                                                       |
| 4 | 44680552 | 44680849 | 5Y-H4K8ac_peak_13169 | 4.95697  | YIPF7_ENSG00000177752;GUF1_ENSG00000151806            |
| 4 | 44728236 | 44728497 | 5Y-H4K8ac_peak_13170 | 8.21582  | GNPDA2_ENSG00000163281                                |
| 4 | 48343794 | 48344177 | 5Y-H4K8ac_peak_13171 | 7.09658  | SLAIN2_ENSG00000109171                                |
| 4 | 48485354 | 48485979 | 5Y-H4K8ac_peak_13172 | 7.90751  | SLC10A4_ENSG00000145248                               |
| 4 | 48833158 | 48833531 | 5Y-H4K8ac_peak_13173 | 12.52787 |                                                       |
| 4 | 48908224 | 48909229 | 5Y-H4K8ac_peak_13174 | 15.87289 | OCIAD2_ENSG00000145247                                |
| 4 | 52904543 | 52904836 | 5Y-H4K8ac_peak_13175 | 10.21117 | SGCB_ENSG00000163069                                  |
| 4 | 53126872 | 53127107 | 5Y-H4K8ac_peak_13176 | 7.31815  |                                                       |
| 4 | 53525027 | 53525338 | 5Y-H4K8ac_peak_13177 | 13.88421 | USP46_ENSG00000109189;USP46-AS1_ENSG00000248866       |
| 4 | 53578055 | 53578304 | 5Y-H4K8ac_peak_13178 | 8.93923  | DANCR_ENSG00000226950;MIR4449_ENSG00000264585         |
| 4 | 53617221 | 53617517 | 5Y-H4K8ac_peak_13179 | 8.21582  | ERVMER34-1_ENSG00000226887;AC104066.1_ENSG00000266656 |
| 4 | 53706793 | 53707016 | 5Y-H4K8ac_peak_13180 | 10.94674 |                                                       |
| 4 | 53736422 | 53736713 | 5Y-H4K8ac_peak_13181 | 11.46984 |                                                       |
| 4 | 53878297 | 53878499 | 5Y-H4K8ac_peak_13182 | 7.80156  |                                                       |
| 4 | 53880662 | 53880947 | 5Y-H4K8ac_peak_13183 | 11.31394 |                                                       |
| 4 | 53912963 | 53913164 | 5Y-H4K8ac_peak_13184 | 8.21525  |                                                       |
| 4 | 53914680 | 53914991 | 5Y-H4K8ac_peak_13185 | 6.31818  |                                                       |
| 4 | 53915401 | 53915769 | 5Y-H4K8ac_peak_13186 | 8.2589   |                                                       |
| 4 | 53917253 | 53917723 | 5Y-H4K8ac_peak_13187 | 7.04637  |                                                       |
| 4 | 53920622 | 53920884 | 5Y-H4K8ac_peak_13188 | 4.07874  |                                                       |
| 4 | 53921484 | 53922110 | 5Y-H4K8ac_peak_13189 | 6.59249  |                                                       |
| 4 | 54568665 | 54569359 | 5Y-H4K8ac_peak_13190 | 13.99721 |                                                       |
| 4 | 54958174 | 54958555 | 5Y-H4K8ac_peak_13191 | 8.17203  |                                                       |
| 4 | 56212564 | 56213199 | 5Y-H4K8ac_peak_13192 | 13.4304  | SRD5A3_ENSG00000128039                                |
| 4 | 56719897 | 56720127 | 5Y-H4K8ac_peak_13193 | 8.43511  | EXOC1_ENSG00000090989                                 |
| 4 | 56915410 | 56915946 | 5Y-H4K8ac_peak_13194 | 10.19948 |                                                       |
| 4 | 57108780 | 57109122 | 5Y-H4K8ac_peak_13195 | 5.40331  |                                                       |
| 4 | 57687577 | 57687870 | 5Y-H4K8ac_peak_13196 | 7.59101  | SPINK2_ENSG00000128040                                |
| 4 | 57737781 | 57738212 | 5Y-H4K8ac_peak_13197 | 4.50834  |                                                       |
| 4 | 57774605 | 57775287 | 5Y-H4K8ac_peak_13198 | 7.38046  | REST_ENSG00000084093                                  |
| 4 | 57921865 | 57922183 | 5Y-H4K8ac_peak_13199 | 12.49199 |                                                       |
| 4 | 58030003 | 58030587 | 5Y-H4K8ac_peak_13200 | 8.43511  |                                                       |

|   |          |          |                      |          |                                                                              |
|---|----------|----------|----------------------|----------|------------------------------------------------------------------------------|
| 4 | 62065745 | 62065976 | 5Y-H4K8ac_peak_13201 | 7.63144  |                                                                              |
| 4 | 69216121 | 69216403 | 5Y-H4K8ac_peak_13202 | 5.40331  | YTHDC1_ENSG00000083896                                                       |
| 4 | 71569743 | 71569985 | 5Y-H4K8ac_peak_13203 | 5.718    | RNU6-784P_ENSG00000207058;RP11-46J23.1_ENSG00000272986;RUFY3_ENSG00000018189 |
| 4 | 71859519 | 71859709 | 5Y-H4K8ac_peak_13204 | 4.8547   |                                                                              |
| 4 | 71925205 | 71925479 | 5Y-H4K8ac_peak_13205 | 5.65584  |                                                                              |
| 4 | 73295663 | 73296050 | 5Y-H4K8ac_peak_13206 | 5.40331  |                                                                              |
| 4 | 73434764 | 73434969 | 5Y-H4K8ac_peak_13207 | 5.93823  | ADAMTS3_ENSG00000156140                                                      |
| 4 | 74124619 | 74125163 | 5Y-H4K8ac_peak_13208 | 12.71156 | ANKRD17_ENSG00000132466;RP11-692D12.1_ENSG00000250220                        |
| 4 | 75023967 | 75024181 | 5Y-H4K8ac_peak_13209 | 9.64738  | AC093677.1_ENSG00000269559                                                   |
| 4 | 76373322 | 76373520 | 5Y-H4K8ac_peak_13210 | 7.31815  |                                                                              |
| 4 | 76598127 | 76598371 | 5Y-H4K8ac_peak_13211 | 4.29586  |                                                                              |
| 4 | 76598991 | 76599252 | 5Y-H4K8ac_peak_13212 | 7.18391  |                                                                              |
| 4 | 76650057 | 76650305 | 5Y-H4K8ac_peak_13213 | 6.77436  | G3BP2_ENSG00000138757;USO1_ENSG00000138768                                   |
| 4 | 76912349 | 76912637 | 5Y-H4K8ac_peak_13214 | 16.52279 | SDAD1_ENSG00000198301                                                        |
| 4 | 77135159 | 77135792 | 5Y-H4K8ac_peak_13215 | 8.43511  | SCARB2_ENSG00000138760;FAM47E_ENSG00000189157                                |
| 4 | 77155161 | 77155406 | 5Y-H4K8ac_peak_13216 | 9.34555  |                                                                              |
| 4 | 77172864 | 77173063 | 5Y-H4K8ac_peak_13217 | 6.22669  | FAM47E-STBD1_ENSG00000272414;FAM47E-STBD1_ENSG00000118804                    |
| 4 | 77342035 | 77342734 | 5Y-H4K8ac_peak_13218 | 8.43511  | CCDC158_ENSG00000163749                                                      |
| 4 | 77610442 | 77610994 | 5Y-H4K8ac_peak_13219 | 13.72401 |                                                                              |
| 4 | 77996675 | 77996915 | 5Y-H4K8ac_peak_13220 | 11.87893 | CCNI_ENSG00000118816                                                         |
| 4 | 78740471 | 78740709 | 5Y-H4K8ac_peak_13221 | 5.98695  | CNOT6L_ENSG00000138767                                                       |
| 4 | 78952174 | 78952525 | 5Y-H4K8ac_peak_13222 | 5.65584  |                                                                              |
| 4 | 78953414 | 78953629 | 5Y-H4K8ac_peak_13223 | 5.56912  |                                                                              |
| 4 | 78980144 | 78980453 | 5Y-H4K8ac_peak_13224 | 8.21582  |                                                                              |
| 4 | 79696550 | 79697045 | 5Y-H4K8ac_peak_13225 | 8.69112  | RP11-109G23.3_ENSG00000260278;BMP2K_ENSG00000138756                          |
| 4 | 79860123 | 79860512 | 5Y-H4K8ac_peak_13226 | 8.88899  | PAQR3_ENSG00000163291                                                        |
| 4 | 80644728 | 80645042 | 5Y-H4K8ac_peak_13227 | 7.31815  |                                                                              |
| 4 | 80993584 | 80993799 | 5Y-H4K8ac_peak_13228 | 5.89922  |                                                                              |
| 4 | 81187368 | 81187634 | 5Y-H4K8ac_peak_13229 | 4.36976  | FGF5_ENSG00000138675                                                         |
| 4 | 81187887 | 81188098 | 5Y-H4K8ac_peak_13230 | 4.77126  | FGF5_ENSG00000138675                                                         |
| 4 | 83294298 | 83295076 | 5Y-H4K8ac_peak_13231 | 7.89142  | HNRNPD_ENSG00000138668;RP11-127B20.3_ENSG00000272677                         |
| 4 | 83350850 | 83351352 | 5Y-H4K8ac_peak_13232 | 12.21176 | HNRNPDL_ENSG00000152795;ENOPH1_ENSG00000145293                               |
| 4 | 83483198 | 83483525 | 5Y-H4K8ac_peak_13233 | 11.71297 | TMEM150C_ENSG00000249242                                                     |
| 4 | 83719616 | 83720237 | 5Y-H4K8ac_peak_13234 | 7.20869  | SCD5_ENSG00000145284                                                         |
| 4 | 83955528 | 83955833 | 5Y-H4K8ac_peak_13235 | 5.23083  | COPS4_ENSG00000138663                                                        |
| 4 | 85887274 | 85887466 | 5Y-H4K8ac_peak_13236 | 8.82628  | WDFY3_ENSG00000163625;WDFY3-AS2_ENSG00000180769                              |
| 4 | 86049048 | 86049312 | 5Y-H4K8ac_peak_13237 | 7.31815  |                                                                              |
| 4 | 87515568 | 87515825 | 5Y-H4K8ac_peak_13238 | 5.23083  | MAPK10_ENSG00000109339;PTPN13_ENSG00000163629                                |
| 4 | 87813175 | 87813914 | 5Y-H4K8ac_peak_13239 | 10.54764 |                                                                              |
| 4 | 87856334 | 87856606 | 5Y-H4K8ac_peak_13240 | 7.76232  | C4orf36_ENSG00000163633;AFF1_ENSG00000172493                                 |
| 4 | 87990066 | 87990287 | 5Y-H4K8ac_peak_13241 | 5.98695  |                                                                              |
| 4 | 88142127 | 88142335 | 5Y-H4K8ac_peak_13242 | 5.40331  |                                                                              |
| 4 | 88928435 | 88928684 | 5Y-H4K8ac_peak_13243 | 4.95697  | PKD2_ENSG00000118762                                                         |
| 4 | 89300114 | 89300351 | 5Y-H4K8ac_peak_13244 | 5.98695  | HERC6_ENSG00000138642                                                        |
| 4 | 89444579 | 89444841 | 5Y-H4K8ac_peak_13245 | 5.34294  | PYURF_ENSG00000145337                                                        |
| 4 | 90032736 | 90032936 | 5Y-H4K8ac_peak_13246 | 8.24461  | FAM13A_ENSG00000138640;RP11-84C13.1_ENSG00000271359                          |

|   |           |           |                      |          |                                                          |
|---|-----------|-----------|----------------------|----------|----------------------------------------------------------|
| 4 | 91049500  | 91049874  | 5Y-H4K8ac_peak_13247 | 7.3889   | CCSER1_ENSG00000184305                                   |
| 4 | 95128859  | 95129231  | 5Y-H4K8ac_peak_13248 | 6.46053  | RP11-363G15.2_ENSG00000246541;SMARCD1_ENSG00000163104    |
| 4 | 95570131  | 95570496  | 5Y-H4K8ac_peak_13249 | 4.50834  |                                                          |
| 4 | 95602707  | 95603191  | 5Y-H4K8ac_peak_13250 | 7.31815  |                                                          |
| 4 | 95678733  | 95678934  | 5Y-H4K8ac_peak_13251 | 9.15977  | RP11-168E14.1_ENSG00000249599;BMPR1B_ENSG00000138696     |
| 4 | 95679126  | 95679843  | 5Y-H4K8ac_peak_13252 | 19.41185 | RP11-168E14.1_ENSG00000249599;BMPR1B_ENSG00000138696     |
| 4 | 95680134  | 95680357  | 5Y-H4K8ac_peak_13253 | 4.95697  |                                                          |
| 4 | 95681652  | 95681915  | 5Y-H4K8ac_peak_13254 | 7.80156  |                                                          |
| 4 | 95728900  | 95729095  | 5Y-H4K8ac_peak_13255 | 8.33296  |                                                          |
| 4 | 96080747  | 96080967  | 5Y-H4K8ac_peak_13256 | 6.50117  |                                                          |
| 4 | 96435930  | 96436129  | 5Y-H4K8ac_peak_13257 | 7.31815  |                                                          |
| 4 | 96438683  | 96438899  | 5Y-H4K8ac_peak_13258 | 5.40331  |                                                          |
| 4 | 96468644  | 96468918  | 5Y-H4K8ac_peak_13259 | 5.03917  |                                                          |
| 4 | 96469176  | 96469510  | 5Y-H4K8ac_peak_13260 | 5.12213  | UNC5C_ENSG00000182168;RP11-710C12.1_ENSG00000271474      |
| 4 | 96469719  | 96470113  | 5Y-H4K8ac_peak_13261 | 7.57144  | UNC5C_ENSG00000182168;RP11-710C12.1_ENSG00000271474      |
| 4 | 96470527  | 96471019  | 5Y-H4K8ac_peak_13262 | 12.10416 | UNC5C_ENSG00000182168;RP11-710C12.1_ENSG00000271474      |
| 4 | 99181455  | 99181747  | 5Y-H4K8ac_peak_13263 | 6.1654   | RAP1GDS1_ENSG00000138698                                 |
| 4 | 99580079  | 99580401  | 5Y-H4K8ac_peak_13264 | 9.38203  | TSPAN5_ENSG00000168785;RP11-1299A16.3_ENSG00000260641    |
| 4 | 99590488  | 99590682  | 5Y-H4K8ac_peak_13265 | 3.9339   |                                                          |
| 4 | 99850010  | 99850226  | 5Y-H4K8ac_peak_13266 | 12.84845 | RP11-571L19.7_ENSG00000263923;AC019131.1_ENSG00000238449 |
| 4 | 99916917  | 99917576  | 5Y-H4K8ac_peak_13267 | 6.34245  | METAP1_ENSG00000164024;MIR3684_ENSG00000265213           |
| 4 | 100457432 | 100457665 | 5Y-H4K8ac_peak_13268 | 5.87382  |                                                          |
| 4 | 100484052 | 100484346 | 5Y-H4K8ac_peak_13269 | 7.97699  | TRMT10A_ENSG00000145331;MTTP_ENSG00000138823             |
| 4 | 100484567 | 100484764 | 5Y-H4K8ac_peak_13270 | 9.23159  | TRMT10A_ENSG00000145331;MTTP_ENSG00000138823             |
| 4 | 100867398 | 100867800 | 5Y-H4K8ac_peak_13271 | 6.96612  | DNAJB14_ENSG00000164031                                  |
| 4 | 102826379 | 102826575 | 5Y-H4K8ac_peak_13272 | 10.36926 |                                                          |
| 4 | 103265653 | 103266153 | 5Y-H4K8ac_peak_13273 | 7.03573  |                                                          |
| 4 | 103422988 | 103423283 | 5Y-H4K8ac_peak_13274 | 7.38046  | AF213884.2_ENSG00000260651;NFKB1_ENSG00000109320         |
| 4 | 103748402 | 103748652 | 5Y-H4K8ac_peak_13275 | 9.51254  | RP11-10L12.4_ENSG00000246560                             |
| 4 | 103997593 | 103997935 | 5Y-H4K8ac_peak_13276 | 10.35586 |                                                          |
| 4 | 106067701 | 106068011 | 5Y-H4K8ac_peak_13277 | 4.84727  | TET2_ENSG00000168769                                     |
| 4 | 106394726 | 106395208 | 5Y-H4K8ac_peak_13278 | 11.68317 | PPA2_ENSG00000138777                                     |
| 4 | 107236996 | 107237218 | 5Y-H4K8ac_peak_13279 | 5.449    | AIMP1_ENSG00000164022                                    |
| 4 | 107446404 | 107446820 | 5Y-H4K8ac_peak_13280 | 6.20875  |                                                          |
| 4 | 108393258 | 108393708 | 5Y-H4K8ac_peak_13281 | 9.34555  |                                                          |
| 4 | 109093836 | 109094111 | 5Y-H4K8ac_peak_13282 | 5.5192   |                                                          |
| 4 | 109541921 | 109542136 | 5Y-H4K8ac_peak_13283 | 7.17184  | RPL34-AS1_ENSG00000234492;RPL34_ENSG00000109475          |
| 4 | 110480756 | 110481166 | 5Y-H4K8ac_peak_13284 | 23.98158 | CCDC109B_ENSG00000005059                                 |
| 4 | 110624116 | 110624954 | 5Y-H4K8ac_peak_13285 | 7.3889   | CASP6_ENSG00000138794                                    |
| 4 | 111117807 | 111118400 | 5Y-H4K8ac_peak_13286 | 8.69112  |                                                          |
| 4 | 113431033 | 113431286 | 5Y-H4K8ac_peak_13287 | 6.08523  |                                                          |
| 4 | 113431921 | 113432332 | 5Y-H4K8ac_peak_13288 | 7.90751  |                                                          |
| 4 | 113436042 | 113436528 | 5Y-H4K8ac_peak_13289 | 5.67283  | NEUROG2_ENSG00000178403;RP11-402J6.1_ENSG00000249509     |
| 4 | 113436779 | 113437263 | 5Y-H4K8ac_peak_13290 | 7.59101  | NEUROG2_ENSG00000178403;RP11-402J6.1_ENSG00000249509     |
| 4 | 113438359 | 113438751 | 5Y-H4K8ac_peak_13291 | 8.43511  |                                                          |
| 4 | 113451087 | 113451277 | 5Y-H4K8ac_peak_13292 | 5.23083  | RP11-402J6.2_ENSG00000248439                             |

|   |           |           |                      |          |                                                 |
|---|-----------|-----------|----------------------|----------|-------------------------------------------------|
| 4 | 113483164 | 113483359 | 5Y-H4K8ac_peak_13293 | 8.27399  |                                                 |
| 4 | 113814939 | 113815410 | 5Y-H4K8ac_peak_13294 | 4.07874  |                                                 |
| 4 | 113817035 | 113817538 | 5Y-H4K8ac_peak_13295 | 7.31815  |                                                 |
| 4 | 114683351 | 114683615 | 5Y-H4K8ac_peak_13296 | 10.54764 | CAMK2D_ENSG00000145349                          |
| 4 | 117847036 | 117847516 | 5Y-H4K8ac_peak_13297 | 11.19336 |                                                 |
| 4 | 118006324 | 118006593 | 5Y-H4K8ac_peak_13298 | 5.23083  | TRAM1L1_ENSG00000174599                         |
| 4 | 118006979 | 118007299 | 5Y-H4K8ac_peak_13299 | 8.33296  | TRAM1L1_ENSG00000174599                         |
| 4 | 118954484 | 118954997 | 5Y-H4K8ac_peak_13300 | 4.15658  | NDST3_ENSG00000164100                           |
| 4 | 119186617 | 119187041 | 5Y-H4K8ac_peak_13301 | 4.24332  |                                                 |
| 4 | 119248427 | 119248634 | 5Y-H4K8ac_peak_13302 | 7.31815  |                                                 |
| 4 | 119273237 | 119273791 | 5Y-H4K8ac_peak_13303 | 8.2913   | PRSS12_ENSG00000164099                          |
| 4 | 119824922 | 119825128 | 5Y-H4K8ac_peak_13304 | 7.38046  |                                                 |
| 4 | 119828056 | 119828262 | 5Y-H4K8ac_peak_13305 | 5.87382  |                                                 |
| 4 | 120548653 | 120548862 | 5Y-H4K8ac_peak_13306 | 5.23819  |                                                 |
| 4 | 121843454 | 121844267 | 5Y-H4K8ac_peak_13307 | 8.20773  | PRDM5_ENSG00000138738                           |
| 4 | 122617559 | 122618072 | 5Y-H4K8ac_peak_13308 | 4.84727  | ANXA5_ENSG00000164111                           |
| 4 | 122632847 | 122633344 | 5Y-H4K8ac_peak_13309 | 5.23083  |                                                 |
| 4 | 122744615 | 122744955 | 5Y-H4K8ac_peak_13310 | 5.98695  | CCNA2_ENSG00000145386                           |
| 4 | 123748016 | 123748416 | 5Y-H4K8ac_peak_13311 | 6.33308  | FGF2_ENSG00000138685;AC021205.1_ENSG00000253069 |
| 4 | 123843324 | 123843748 | 5Y-H4K8ac_peak_13312 | 7.80156  | NUDT6_ENSG00000170917;SPATA5_ENSG00000145375    |
| 4 | 124318746 | 124319255 | 5Y-H4K8ac_peak_13313 | 8.00339  | SPRY1_ENSG00000164056                           |
| 4 | 124319631 | 124319902 | 5Y-H4K8ac_peak_13314 | 6.54441  |                                                 |
| 4 | 124521154 | 124521407 | 5Y-H4K8ac_peak_13315 | 7.76232  |                                                 |
| 4 | 125633333 | 125633653 | 5Y-H4K8ac_peak_13316 | 5.97089  | ANKRD50_ENSG00000151458                         |
| 4 | 128543849 | 128544058 | 5Y-H4K8ac_peak_13317 | 5.23083  | INTU_ENSG00000164066                            |
| 4 | 128702763 | 128703177 | 5Y-H4K8ac_peak_13318 | 6.37023  | HSPA4L_ENSG00000164070                          |
| 4 | 128801077 | 128801290 | 5Y-H4K8ac_peak_13319 | 5.40331  | PLK4_ENSG00000142731                            |
| 4 | 128802105 | 128802443 | 5Y-H4K8ac_peak_13320 | 10.35586 | PLK4_ENSG00000142731                            |
| 4 | 128981787 | 128982171 | 5Y-H4K8ac_peak_13321 | 9.02938  | LARP1B_ENSG00000138709                          |
| 4 | 128982952 | 128983251 | 5Y-H4K8ac_peak_13322 | 5.12213  | LARP1B_ENSG00000138709                          |
| 4 | 129474418 | 129474620 | 5Y-H4K8ac_peak_13323 | 8.2913   | RP11-130C6.1_ENSG00000273077                    |
| 4 | 130014301 | 130014582 | 5Y-H4K8ac_peak_13324 | 8.33296  | SCLT1_ENSG00000151466;C4orf33_ENSG00000151470   |
| 4 | 135122580 | 135122843 | 5Y-H4K8ac_peak_13325 | 6.34046  | PABPC4L_ENSG00000254535                         |
| 4 | 139832375 | 139833058 | 5Y-H4K8ac_peak_13326 | 11.1169  |                                                 |
| 4 | 139836412 | 139836668 | 5Y-H4K8ac_peak_13327 | 6.50117  |                                                 |
| 4 | 139837476 | 139837798 | 5Y-H4K8ac_peak_13328 | 8.78565  |                                                 |
| 4 | 139940179 | 139940448 | 5Y-H4K8ac_peak_13329 | 4.50834  |                                                 |
| 4 | 140216732 | 140216922 | 5Y-H4K8ac_peak_13330 | 8.62703  |                                                 |
| 4 | 140222930 | 140223263 | 5Y-H4K8ac_peak_13331 | 9.79526  | NDUFC1_ENSG00000109390;NAA15_ENSG00000164134    |
| 4 | 140476567 | 140477458 | 5Y-H4K8ac_peak_13332 | 7.90236  | RP11-342I1.2_ENSG00000272717                    |
| 4 | 140478086 | 140478305 | 5Y-H4K8ac_peak_13333 | 7.30348  | RP11-342I1.2_ENSG00000272717                    |
| 4 | 140656968 | 140657190 | 5Y-H4K8ac_peak_13334 | 10.35586 |                                                 |
| 4 | 140661934 | 140662184 | 5Y-H4K8ac_peak_13335 | 11.28133 |                                                 |
| 4 | 140704730 | 140704985 | 5Y-H4K8ac_peak_13336 | 14.2053  |                                                 |
| 4 | 140747145 | 140747392 | 5Y-H4K8ac_peak_13337 | 5.65584  |                                                 |
| 4 | 140767540 | 140767826 | 5Y-H4K8ac_peak_13338 | 5.87382  |                                                 |

|   |           |           |                      |          |                                                        |
|---|-----------|-----------|----------------------|----------|--------------------------------------------------------|
| 4 | 140786875 | 140787323 | 5Y-H4K8ac_peak_13339 | 11.19336 |                                                        |
| 4 | 140787537 | 140787770 | 5Y-H4K8ac_peak_13340 | 8.2913   |                                                        |
| 4 | 140810473 | 140810701 | 5Y-H4K8ac_peak_13341 | 8.43511  |                                                        |
| 4 | 140811341 | 140811615 | 5Y-H4K8ac_peak_13342 | 11.57334 |                                                        |
| 4 | 140823472 | 140823854 | 5Y-H4K8ac_peak_13343 | 4.12295  |                                                        |
| 4 | 140824266 | 140824503 | 5Y-H4K8ac_peak_13344 | 6.07082  |                                                        |
| 4 | 140842505 | 140843065 | 5Y-H4K8ac_peak_13345 | 6.1654   |                                                        |
| 4 | 140862862 | 140863169 | 5Y-H4K8ac_peak_13346 | 6.77436  |                                                        |
| 4 | 140925771 | 140925996 | 5Y-H4K8ac_peak_13347 | 5.98695  |                                                        |
| 4 | 140970172 | 140970416 | 5Y-H4K8ac_peak_13348 | 5.65584  |                                                        |
| 4 | 141016072 | 141016323 | 5Y-H4K8ac_peak_13349 | 7.42477  |                                                        |
| 4 | 141072245 | 141072765 | 5Y-H4K8ac_peak_13350 | 11.04542 |                                                        |
| 4 | 141073799 | 141074314 | 5Y-H4K8ac_peak_13351 | 9.52603  |                                                        |
| 4 | 141157780 | 141158056 | 5Y-H4K8ac_peak_13352 | 8.27399  |                                                        |
| 4 | 141158608 | 141158829 | 5Y-H4K8ac_peak_13353 | 6.50117  |                                                        |
| 4 | 141159798 | 141160106 | 5Y-H4K8ac_peak_13354 | 11.71078 |                                                        |
| 4 | 141173328 | 141173542 | 5Y-H4K8ac_peak_13355 | 6.12014  |                                                        |
| 4 | 141173785 | 141174362 | 5Y-H4K8ac_peak_13356 | 27.2273  |                                                        |
| 4 | 141348541 | 141348737 | 5Y-H4K8ac_peak_13357 | 5.91107  | CLGN_ENSG00000153132                                   |
| 4 | 141445387 | 141445630 | 5Y-H4K8ac_peak_13358 | 7.90751  | ELMOD2_ENSG00000179387                                 |
| 4 | 141609301 | 141609641 | 5Y-H4K8ac_peak_13359 | 4.50834  |                                                        |
| 4 | 141677242 | 141677780 | 5Y-H4K8ac_peak_13360 | 7.65114  | TBC1D9_ENSG00000109436;RP11-102N12.3_ENSG00000273472   |
| 4 | 141823912 | 141824223 | 5Y-H4K8ac_peak_13361 | 6.77436  |                                                        |
| 4 | 141826576 | 141826777 | 5Y-H4K8ac_peak_13362 | 5.65584  |                                                        |
| 4 | 142526674 | 142526942 | 5Y-H4K8ac_peak_13363 | 7.31815  |                                                        |
| 4 | 144434688 | 144434937 | 5Y-H4K8ac_peak_13364 | 9.15007  | SMARCA5_ENSG00000153147;SMARCA5-AS1_ENSG00000245112    |
| 4 | 144480357 | 144480715 | 5Y-H4K8ac_peak_13365 | 7.35333  | GUSBP5_ENSG00000236296                                 |
| 4 | 146403493 | 146403851 | 5Y-H4K8ac_peak_13366 | 9.38203  |                                                        |
| 4 | 146539817 | 146540466 | 5Y-H4K8ac_peak_13367 | 8.33296  | MMAA_ENSG00000151611                                   |
| 4 | 146654353 | 146654627 | 5Y-H4K8ac_peak_13368 | 16.50659 |                                                        |
| 4 | 146856933 | 146857448 | 5Y-H4K8ac_peak_13369 | 7.76232  |                                                        |
| 4 | 147096930 | 147097464 | 5Y-H4K8ac_peak_13370 | 11.19336 | LSM6_ENSG00000164167                                   |
| 4 | 147163441 | 147163723 | 5Y-H4K8ac_peak_13371 | 7.89273  | RP11-6L6.7_ENSG00000251010                             |
| 4 | 148538642 | 148539003 | 5Y-H4K8ac_peak_13372 | 6.34046  | RP11-425A23.1_ENSG00000251298;TMEM184C_ENSG00000164168 |
| 4 | 148652654 | 148653063 | 5Y-H4K8ac_peak_13373 | 9.51254  | ARHGAP10_ENSG00000071205                               |
| 4 | 150999856 | 151000561 | 5Y-H4K8ac_peak_13374 | 9.60627  | DCLK2_ENSG00000170390                                  |
| 4 | 151789853 | 151790113 | 5Y-H4K8ac_peak_13375 | 4.07874  |                                                        |
| 4 | 151936231 | 151936798 | 5Y-H4K8ac_peak_13376 | 12.05638 | LRBA_ENSG00000198589                                   |
| 4 | 152089967 | 152090172 | 5Y-H4K8ac_peak_13377 | 5.65584  |                                                        |
| 4 | 152246266 | 152246644 | 5Y-H4K8ac_peak_13378 | 9.30505  | SH3D19_ENSG00000109686                                 |
| 4 | 152329880 | 152330161 | 5Y-H4K8ac_peak_13379 | 5.35202  | RP11-610P16.1_ENSG00000251611;FAM160A1_ENSG00000164142 |
| 4 | 152681884 | 152682093 | 5Y-H4K8ac_peak_13380 | 7.59101  | PET112_ENSG00000059691                                 |
| 4 | 153456882 | 153457093 | 5Y-H4K8ac_peak_13381 | 6.94416  | FBXW7_ENSG00000109670;MIR4453_ENSG00000268471          |
| 4 | 154074182 | 154074969 | 5Y-H4K8ac_peak_13382 | 7.11863  | TRIM2_ENSG00000109654                                  |
| 4 | 154076032 | 154076288 | 5Y-H4K8ac_peak_13383 | 8.43511  |                                                        |
| 4 | 154265984 | 154266256 | 5Y-H4K8ac_peak_13384 | 5.72233  | MND1_ENSG00000121211                                   |

|   |           |           |                      |          |                                                                               |
|---|-----------|-----------|----------------------|----------|-------------------------------------------------------------------------------|
| 4 | 154386931 | 154387246 | 5Y-H4K8ac_peak_13385 | 5.65584  | KIAA0922_ENSG00000121210                                                      |
| 4 | 154387564 | 154388106 | 5Y-H4K8ac_peak_13386 | 12.87532 | KIAA0922_ENSG00000121210                                                      |
| 4 | 154680805 | 154681125 | 5Y-H4K8ac_peak_13387 | 6.78128  | RNF175_ENSG00000145428                                                        |
| 4 | 156588345 | 156588725 | 5Y-H4K8ac_peak_13388 | 4.00285  | GUCY1A3_ENSG00000164116                                                       |
| 4 | 156874558 | 156875584 | 5Y-H4K8ac_peak_13389 | 11.57334 | CTSO_ENSG00000256043                                                          |
| 4 | 159644137 | 159644414 | 5Y-H4K8ac_peak_13390 | 6.79955  | PPID_ENSG00000171497                                                          |
| 4 | 159645024 | 159645328 | 5Y-H4K8ac_peak_13391 | 7.38046  | PPID_ENSG00000171497                                                          |
| 4 | 159689671 | 159689908 | 5Y-H4K8ac_peak_13392 | 4.84727  | FNIP2_ENSG00000052795                                                         |
| 4 | 159791250 | 159791512 | 5Y-H4K8ac_peak_13393 | 6.46053  |                                                                               |
| 4 | 160023703 | 160024035 | 5Y-H4K8ac_peak_13394 | 5.64909  |                                                                               |
| 4 | 164088269 | 164088493 | 5Y-H4K8ac_peak_13395 | 4.50834  | NAF1_ENSG00000145414                                                          |
| 4 | 165878005 | 165878324 | 5Y-H4K8ac_peak_13396 | 8.33296  | FAM218A_ENSG00000250486                                                       |
| 4 | 166033537 | 166034010 | 5Y-H4K8ac_peak_13397 | 8.33296  |                                                                               |
| 4 | 166128791 | 166129092 | 5Y-H4K8ac_peak_13398 | 12.71156 | TMEM192_ENSG00000170088;KLHL2_ENSG00000109466                                 |
| 4 | 169239507 | 169239973 | 5Y-H4K8ac_peak_13399 | 12.10416 | DDX60_ENSG00000137628                                                         |
| 4 | 169753397 | 169753637 | 5Y-H4K8ac_peak_13400 | 7.04637  | RP11-635L1.3_ENSG00000249609                                                  |
| 4 | 169840413 | 169840671 | 5Y-H4K8ac_peak_13401 | 9.34555  |                                                                               |
| 4 | 169930588 | 169931026 | 5Y-H4K8ac_peak_13402 | 8.2913   | CBR4_ENSG00000145439;RP11-483A20.3_ENSG00000251445                            |
| 4 | 170192312 | 170192852 | 5Y-H4K8ac_peak_13403 | 14.00559 | SH3RF1_ENSG00000154447                                                        |
| 4 | 170678733 | 170679011 | 5Y-H4K8ac_peak_13404 | 8.93923  | C4orf27_ENSG00000056050                                                       |
| 4 | 170947002 | 170947485 | 5Y-H4K8ac_peak_13405 | 10.36926 |                                                                               |
| 4 | 171010904 | 171011396 | 5Y-H4K8ac_peak_13406 | 11.22005 |                                                                               |
| 4 | 174090034 | 174090840 | 5Y-H4K8ac_peak_13407 | 5.98695  | RP11-10K16.1_ENSG00000245213;GALNT7_ENSG00000109586                           |
| 4 | 174255088 | 174255392 | 5Y-H4K8ac_peak_13408 | 9.34555  | HMGB2_ENSG00000164104                                                         |
| 4 | 174255981 | 174256250 | 5Y-H4K8ac_peak_13409 | 8.24461  | HMGB2_ENSG00000164104                                                         |
| 4 | 174427862 | 174428218 | 5Y-H4K8ac_peak_13410 | 6.09071  |                                                                               |
| 4 | 174428506 | 174428732 | 5Y-H4K8ac_peak_13411 | 5.65584  |                                                                               |
| 4 | 174430347 | 174431033 | 5Y-H4K8ac_peak_13412 | 13.85283 |                                                                               |
| 4 | 174438073 | 174438400 | 5Y-H4K8ac_peak_13413 | 12.11208 |                                                                               |
| 4 | 174438962 | 174439268 | 5Y-H4K8ac_peak_13414 | 9.52603  |                                                                               |
| 4 | 174439600 | 174440237 | 5Y-H4K8ac_peak_13415 | 15.40182 |                                                                               |
| 4 | 174442629 | 174442896 | 5Y-H4K8ac_peak_13416 | 8.20773  |                                                                               |
| 4 | 174443768 | 174444259 | 5Y-H4K8ac_peak_13417 | 9.30505  |                                                                               |
| 4 | 174448574 | 174448788 | 5Y-H4K8ac_peak_13418 | 5.23083  | HAND2-AS1_ENSG00000237125                                                     |
| 4 | 174450640 | 174450889 | 5Y-H4K8ac_peak_13419 | 5.65584  | HAND2_ENSG00000164107                                                         |
| 4 | 174452402 | 174453008 | 5Y-H4K8ac_peak_13420 | 11.99586 |                                                                               |
| 4 | 174458862 | 174460110 | 5Y-H4K8ac_peak_13421 | 12.69256 |                                                                               |
| 4 | 174757264 | 174757456 | 5Y-H4K8ac_peak_13422 | 8.17203  |                                                                               |
| 4 | 174990020 | 174990275 | 5Y-H4K8ac_peak_13423 | 5.98695  |                                                                               |
| 4 | 178363179 | 178363570 | 5Y-H4K8ac_peak_13424 | 13.8759  | AGA_ENSG00000038002                                                           |
| 4 | 178364174 | 178364405 | 5Y-H4K8ac_peak_13425 | 4.84727  | AGA_ENSG00000038002                                                           |
| 4 | 183065435 | 183066351 | 5Y-H4K8ac_peak_13426 | 7.50148  | AC108142.1_ENSG00000177822;TENM3_ENSG00000218336;RP11-402C9.1_ENSG00000248266 |
| 4 | 183369354 | 183369860 | 5Y-H4K8ac_peak_13427 | 7.89273  |                                                                               |
| 4 | 183497934 | 183498210 | 5Y-H4K8ac_peak_13428 | 4.95697  |                                                                               |
| 4 | 183515927 | 183516153 | 5Y-H4K8ac_peak_13429 | 6.13909  |                                                                               |
| 4 | 183708503 | 183708718 | 5Y-H4K8ac_peak_13430 | 4.07874  |                                                                               |



|   |           |           |                      |          |                                                           |
|---|-----------|-----------|----------------------|----------|-----------------------------------------------------------|
| 4 | 183801238 | 183801471 | 5Y-H4K8ac_peak_13431 | 8.04943  |                                                           |
| 4 | 183801690 | 183802537 | 5Y-H4K8ac_peak_13432 | 6.77436  | RP11-188P17.2_ENSG00000272646                             |
| 4 | 183837735 | 183838471 | 5Y-H4K8ac_peak_13433 | 9.30505  | DCTD_ENSG00000129187                                      |
| 4 | 183838679 | 183839176 | 5Y-H4K8ac_peak_13434 | 14.72547 | DCTD_ENSG00000129187                                      |
| 4 | 184318977 | 184319906 | 5Y-H4K8ac_peak_13435 | 18.78631 |                                                           |
| 4 | 184320453 | 184320671 | 5Y-H4K8ac_peak_13436 | 10.6025  |                                                           |
| 4 | 184365077 | 184365604 | 5Y-H4K8ac_peak_13437 | 4.0639   | CDKN2AIP_ENSG00000168564                                  |
| 4 | 184366011 | 184366363 | 5Y-H4K8ac_peak_13438 | 6.47245  | CDKN2AIP_ENSG00000168564                                  |
| 4 | 184642281 | 184642480 | 5Y-H4K8ac_peak_13439 | 5.13361  |                                                           |
| 4 | 184643982 | 184644403 | 5Y-H4K8ac_peak_13440 | 6.53157  |                                                           |
| 4 | 184718356 | 184718848 | 5Y-H4K8ac_peak_13441 | 6.90749  |                                                           |
| 4 | 184780293 | 184780651 | 5Y-H4K8ac_peak_13442 | 6.34046  |                                                           |
| 4 | 184797770 | 184798061 | 5Y-H4K8ac_peak_13443 | 6.78128  |                                                           |
| 4 | 185025468 | 185025726 | 5Y-H4K8ac_peak_13444 | 5.70209  |                                                           |
| 4 | 185393929 | 185394131 | 5Y-H4K8ac_peak_13445 | 6.78318  | RP11-326I11.5_ENSG00000270426                             |
| 4 | 185468316 | 185468585 | 5Y-H4K8ac_peak_13446 | 11.19336 |                                                           |
| 4 | 185470118 | 185470318 | 5Y-H4K8ac_peak_13447 | 4.84727  |                                                           |
| 4 | 185571040 | 185571327 | 5Y-H4K8ac_peak_13448 | 7.38046  | CASP3_ENSG00000164305;PRIMPOL_ENSG00000164306             |
| 4 | 185704183 | 185704578 | 5Y-H4K8ac_peak_13449 | 4.5753   |                                                           |
| 4 | 185747396 | 185747783 | 5Y-H4K8ac_peak_13450 | 7.03573  | ACSL1_ENSG00000151726                                     |
| 4 | 186023105 | 186023309 | 5Y-H4K8ac_peak_13451 | 6.94416  |                                                           |
| 4 | 186039559 | 186039867 | 5Y-H4K8ac_peak_13452 | 5.3176   |                                                           |
| 4 | 186048607 | 186049159 | 5Y-H4K8ac_peak_13453 | 14.01193 |                                                           |
| 4 | 186049411 | 186049730 | 5Y-H4K8ac_peak_13454 | 5.12213  |                                                           |
| 4 | 186123378 | 186123603 | 5Y-H4K8ac_peak_13455 | 5.65584  |                                                           |
| 4 | 186124692 | 186125430 | 5Y-H4K8ac_peak_13456 | 8.69112  | SNX25_ENSG00000109762                                     |
| 4 | 186317219 | 186317560 | 5Y-H4K8ac_peak_13457 | 11.23789 | LRP2BP_ENSG00000109771;ANKRD37_ENSG00000186352            |
| 4 | 186392860 | 186393053 | 5Y-H4K8ac_peak_13458 | 8.35139  | CCDC110_ENSG00000168491;RP11-279O9.4_ENSG00000249679      |
| 4 | 186456284 | 186456528 | 5Y-H4K8ac_peak_13459 | 6.31818  | PDLIM3_ENSG00000154553                                    |
| 4 | 186491592 | 186491834 | 5Y-H4K8ac_peak_13460 | 5.98695  |                                                           |
| 4 | 186494792 | 186495223 | 5Y-H4K8ac_peak_13461 | 10.0732  |                                                           |
| 4 | 186759300 | 186759548 | 5Y-H4K8ac_peak_13462 | 5.40331  |                                                           |
| 4 | 187026025 | 187026516 | 5Y-H4K8ac_peak_13463 | 9.51254  | FAM149A_ENSG00000109794                                   |
| 4 | 187112443 | 187113238 | 5Y-H4K8ac_peak_13464 | 13.99721 | AC110771.1_ENSG00000269302;CYP4V2_ENSG00000145476         |
| 4 | 190642607 | 190642818 | 5Y-H4K8ac_peak_13465 | 6.0552   |                                                           |
| 4 | 190861400 | 190861757 | 5Y-H4K8ac_peak_13466 | 10.15788 | AF146191.4_ENSG00000245685;FRG1_ENSG00000109536           |
| 5 | 90865     | 92367     | 5Y-H4K8ac_peak_13467 | 19.79054 | CTD-2231H16.1_ENSG00000249430                             |
| 5 | 190926    | 191705    | 5Y-H4K8ac_peak_13468 | 8.2913   | LRRC14B_ENSG00000185028                                   |
| 5 | 373790    | 374476    | 5Y-H4K8ac_peak_13469 | 11.36989 |                                                           |
| 5 | 442708    | 443168    | 5Y-H4K8ac_peak_13470 | 7.59101  | C5orf55_ENSG00000221990;EXOC3_ENSG00000180104             |
| 5 | 472239    | 473104    | 5Y-H4K8ac_peak_13471 | 24.88223 | CTD-2228K2.5_ENSG00000188242;CTD-2228K2.7_ENSG00000225138 |
| 5 | 473413    | 473772    | 5Y-H4K8ac_peak_13472 | 10.19948 | CTD-2228K2.5_ENSG00000188242;CTD-2228K2.7_ENSG00000225138 |
| 5 | 784389    | 784651    | 5Y-H4K8ac_peak_13473 | 6.86362  |                                                           |
| 5 | 784991    | 785375    | 5Y-H4K8ac_peak_13474 | 7.89273  |                                                           |
| 5 | 892122    | 892897    | 5Y-H4K8ac_peak_13475 | 11.1169  | BRD9_ENSG00000028310;TRIP13_ENSG00000071539               |
| 5 | 1345573   | 1345801   | 5Y-H4K8ac_peak_13476 | 6.78128  | CLPTM1L_ENSG00000049656                                   |

|   |          |          |                      |          |                                                                                    |
|---|----------|----------|----------------------|----------|------------------------------------------------------------------------------------|
| 5 | 1524220  | 1524949  | 5Y-H4K8ac_peak_13477 | 11.4254  | LPCAT1_ENSG00000153395                                                             |
| 5 | 1594850  | 1595261  | 5Y-H4K8ac_peak_13478 | 9.52603  | SDHAP3_ENSG00000185986;CTD-2012J19.3_ENSG00000271119                               |
| 5 | 1633494  | 1634024  | 5Y-H4K8ac_peak_13479 | 10.74739 | RP11-43F13.1_ENSG00000188002                                                       |
| 5 | 1635138  | 1635340  | 5Y-H4K8ac_peak_13480 | 6.72926  |                                                                                    |
| 5 | 1799336  | 1799603  | 5Y-H4K8ac_peak_13481 | 5.68769  |                                                                                    |
| 5 | 1801446  | 1801866  | 5Y-H4K8ac_peak_13482 | 10.79063 | MRPL36_ENSG00000171421;NDUFS6_ENSG00000145494                                      |
| 5 | 4912421  | 4912674  | 5Y-H4K8ac_peak_13483 | 8.08688  |                                                                                    |
| 5 | 5026274  | 5026529  | 5Y-H4K8ac_peak_13484 | 8.16382  |                                                                                    |
| 5 | 5318142  | 5318350  | 5Y-H4K8ac_peak_13485 | 4.84727  |                                                                                    |
| 5 | 5319524  | 5319852  | 5Y-H4K8ac_peak_13486 | 6.43775  |                                                                                    |
| 5 | 5712799  | 5713352  | 5Y-H4K8ac_peak_13487 | 7.50148  |                                                                                    |
| 5 | 6202463  | 6202653  | 5Y-H4K8ac_peak_13488 | 6.46053  |                                                                                    |
| 5 | 6359632  | 6359879  | 5Y-H4K8ac_peak_13489 | 4.07874  |                                                                                    |
| 5 | 6378996  | 6379225  | 5Y-H4K8ac_peak_13490 | 10.19948 | MED10_ENSG00000133398                                                              |
| 5 | 6632957  | 6633392  | 5Y-H4K8ac_peak_13491 | 7.65114  | NSUN2_ENSG00000037474;SRD5A1_ENSG00000145545                                       |
| 5 | 6712648  | 6712918  | 5Y-H4K8ac_peak_13492 | 7.30348  |                                                                                    |
| 5 | 9715415  | 9715622  | 5Y-H4K8ac_peak_13493 | 5.8635   |                                                                                    |
| 5 | 10248997 | 10249330 | 5Y-H4K8ac_peak_13494 | 9.23159  | FAM173B_ENSG00000150756;CTD-2256P15.1_ENSG00000248968;CCT5_ENSG00000150753         |
| 5 | 10249721 | 10249911 | 5Y-H4K8ac_peak_13495 | 8.2913   | FAM173B_ENSG00000150756;CCT5_ENSG00000150753                                       |
| 5 | 10250478 | 10250919 | 5Y-H4K8ac_peak_13496 | 9.02938  | FAM173B_ENSG00000150756;CCT5_ENSG00000150753                                       |
| 5 | 10353300 | 10353646 | 5Y-H4K8ac_peak_13497 | 14.99673 | CTD-2256P15.2_ENSG00000259802;MARCH6_ENSG00000145495                               |
| 5 | 10353854 | 10354421 | 5Y-H4K8ac_peak_13498 | 12.05638 | CTD-2256P15.2_ENSG00000259802;MARCH6_ENSG00000145495                               |
| 5 | 10501647 | 10501842 | 5Y-H4K8ac_peak_13499 | 6.20875  | RP11-1C1.4_ENSG00000249396                                                         |
| 5 | 10655435 | 10655661 | 5Y-H4K8ac_peak_13500 | 7.38046  | RP11-54F2.1_ENSG00000251196                                                        |
| 5 | 10761599 | 10762014 | 5Y-H4K8ac_peak_13501 | 9.30505  | DAP_ENSG00000112977;CTD-2154B17.4_ENSG00000272324                                  |
| 5 | 14251569 | 14251896 | 5Y-H4K8ac_peak_13502 | 4.95697  |                                                                                    |
| 5 | 14418114 | 14418456 | 5Y-H4K8ac_peak_13503 | 13.14766 |                                                                                    |
| 5 | 14419860 | 14420052 | 5Y-H4K8ac_peak_13504 | 4.95697  |                                                                                    |
| 5 | 14441156 | 14441692 | 5Y-H4K8ac_peak_13505 | 5.98695  |                                                                                    |
| 5 | 14443679 | 14443886 | 5Y-H4K8ac_peak_13506 | 7.38046  |                                                                                    |
| 5 | 14445914 | 14446516 | 5Y-H4K8ac_peak_13507 | 6.77436  |                                                                                    |
| 5 | 14448460 | 14448799 | 5Y-H4K8ac_peak_13508 | 11.19336 |                                                                                    |
| 5 | 14581561 | 14581761 | 5Y-H4K8ac_peak_13509 | 13.0168  | FAM105A_ENSG00000145569                                                            |
| 5 | 14591476 | 14591699 | 5Y-H4K8ac_peak_13510 | 7.09658  |                                                                                    |
| 5 | 14871380 | 14871734 | 5Y-H4K8ac_peak_13511 | 6.10478  | ANKH_ENSG00000154122;CTB-40H15.4_ENSG00000272057                                   |
| 5 | 14872277 | 14872683 | 5Y-H4K8ac_peak_13512 | 6.50117  | ANKH_ENSG00000154122;CTB-40H15.4_ENSG00000272057                                   |
| 5 | 15500478 | 15500837 | 5Y-H4K8ac_peak_13513 | 9.38807  | FBXL7_ENSG00000183580                                                              |
| 5 | 15580302 | 15580650 | 5Y-H4K8ac_peak_13514 | 8.46999  |                                                                                    |
| 5 | 16179242 | 16179559 | 5Y-H4K8ac_peak_13515 | 7.01266  | RP11-19O2.2_ENSG00000250448                                                        |
| 5 | 16180085 | 16180523 | 5Y-H4K8ac_peak_13516 | 10.19948 | MARCH11_ENSG00000183654;RP11-19O2.2_ENSG00000250448                                |
| 5 | 16420394 | 16420597 | 5Y-H4K8ac_peak_13517 | 9.23159  |                                                                                    |
| 5 | 16420830 | 16421034 | 5Y-H4K8ac_peak_13518 | 7.01364  |                                                                                    |
| 5 | 16616605 | 16617677 | 5Y-H4K8ac_peak_13519 | 7.31102  | FAM134B_ENSG00000154153;RP11-260E18.1_ENSG00000246214;CTC-461F20.1_ENSG00000250415 |
| 5 | 16866902 | 16867179 | 5Y-H4K8ac_peak_13520 | 8.93923  |                                                                                    |
| 5 | 21481731 | 21482207 | 5Y-H4K8ac_peak_13521 | 6.75261  |                                                                                    |
| 5 | 21482609 | 21482822 | 5Y-H4K8ac_peak_13522 | 10.66356 |                                                                                    |

|   |          |          |                      |          |                                                           |
|---|----------|----------|----------------------|----------|-----------------------------------------------------------|
| 5 | 31700981 | 31701698 | 5Y-H4K8ac_peak_13523 | 8.93923  |                                                           |
| 5 | 32174033 | 32174372 | 5Y-H4K8ac_peak_13524 | 13.85283 | GOLPH3_ENSG00000113384;CTD-2186M15.3_ENSG00000272086      |
| 5 | 32174601 | 32174964 | 5Y-H4K8ac_peak_13525 | 11.19336 | GOLPH3_ENSG00000113384;CTD-2186M15.3_ENSG00000272086      |
| 5 | 32444461 | 32444738 | 5Y-H4K8ac_peak_13526 | 5.91107  | ZFR_ENSG00000056097                                       |
| 5 | 32444966 | 32445370 | 5Y-H4K8ac_peak_13527 | 5.64909  | ZFR_ENSG00000056097                                       |
| 5 | 34008378 | 34008609 | 5Y-H4K8ac_peak_13528 | 8.75926  | AMACR_ENSG00000242110                                     |
| 5 | 34047301 | 34047507 | 5Y-H4K8ac_peak_13529 | 6.46053  |                                                           |
| 5 | 34054186 | 34054482 | 5Y-H4K8ac_peak_13530 | 5.90587  |                                                           |
| 5 | 34191394 | 34192074 | 5Y-H4K8ac_peak_13531 | 20.39519 |                                                           |
| 5 | 34192285 | 34193721 | 5Y-H4K8ac_peak_13532 | 36.69449 |                                                           |
| 5 | 34838707 | 34839239 | 5Y-H4K8ac_peak_13533 | 4.90696  | CTD-2517O10.6_ENSG00000272323;TTC23L_ENSG00000205838      |
| 5 | 36690190 | 36690505 | 5Y-H4K8ac_peak_13534 | 11.82621 |                                                           |
| 5 | 37249639 | 37249949 | 5Y-H4K8ac_peak_13535 | 5.85188  | C5orf42_ENSG00000197603                                   |
| 5 | 37371643 | 37371841 | 5Y-H4K8ac_peak_13536 | 7.04637  | NUP155_ENSG00000113569                                    |
| 5 | 39074145 | 39074430 | 5Y-H4K8ac_peak_13537 | 9.34555  | RICTOR_ENSG00000164327                                    |
| 5 | 40798525 | 40798736 | 5Y-H4K8ac_peak_13538 | 11.48691 | PRKAA1_ENSG00000132356                                    |
| 5 | 40834901 | 40835262 | 5Y-H4K8ac_peak_13539 | 9.51254  | RPL37_ENSG00000145592                                     |
| 5 | 40835633 | 40835851 | 5Y-H4K8ac_peak_13540 | 10.11191 | RPL37_ENSG00000145592                                     |
| 5 | 40975580 | 40975803 | 5Y-H4K8ac_peak_13541 | 7.68492  |                                                           |
| 5 | 41263481 | 41264041 | 5Y-H4K8ac_peak_13542 | 6.62622  |                                                           |
| 5 | 41287322 | 41287662 | 5Y-H4K8ac_peak_13543 | 4.29586  |                                                           |
| 5 | 41791835 | 41792134 | 5Y-H4K8ac_peak_13544 | 8.33296  |                                                           |
| 5 | 41925392 | 41925868 | 5Y-H4K8ac_peak_13545 | 8.73392  | FBXO4_ENSG00000151876                                     |
| 5 | 43066221 | 43067023 | 5Y-H4K8ac_peak_13546 | 5.64909  | CTD-2201E18.3_ENSG00000177738;ZNF131_ENSG00000172262      |
| 5 | 43067397 | 43067613 | 5Y-H4K8ac_peak_13547 | 7.64648  | CTD-2201E18.3_ENSG00000177738                             |
| 5 | 43556482 | 43556721 | 5Y-H4K8ac_peak_13548 | 6.53157  |                                                           |
| 5 | 43557059 | 43557621 | 5Y-H4K8ac_peak_13549 | 5.98695  | PAIP1_ENSG00000172239                                     |
| 5 | 43602844 | 43603078 | 5Y-H4K8ac_peak_13550 | 14.12043 | NNT-AS1_ENSG00000248092;NNT_ENSG00000112992               |
| 5 | 49736929 | 49737461 | 5Y-H4K8ac_peak_13551 | 8.43511  |                                                           |
| 5 | 49962225 | 49962614 | 5Y-H4K8ac_peak_13552 | 9.34555  | PARP8_ENSG00000151883                                     |
| 5 | 49963317 | 49963599 | 5Y-H4K8ac_peak_13553 | 8.79957  |                                                           |
| 5 | 50259074 | 50259476 | 5Y-H4K8ac_peak_13554 | 8.79957  |                                                           |
| 5 | 50259813 | 50260190 | 5Y-H4K8ac_peak_13555 | 10.74739 |                                                           |
| 5 | 50261445 | 50261765 | 5Y-H4K8ac_peak_13556 | 6.50117  |                                                           |
| 5 | 50264333 | 50264604 | 5Y-H4K8ac_peak_13557 | 8.33296  | CTD-2089N3.3_ENSG00000248918                              |
| 5 | 50265114 | 50265894 | 5Y-H4K8ac_peak_13558 | 11.22005 | CTD-2089N3.2_ENSG00000251573;CTD-2089N3.3_ENSG00000248918 |
| 5 | 50673494 | 50673828 | 5Y-H4K8ac_peak_13559 | 6.34046  |                                                           |
| 5 | 50678576 | 50679064 | 5Y-H4K8ac_peak_13560 | 20.04267 | CTD-2314G24.2_ENSG00000259663;ISL1_ENSG00000016082        |
| 5 | 50686159 | 50686359 | 5Y-H4K8ac_peak_13561 | 4.1776   |                                                           |
| 5 | 50694782 | 50695026 | 5Y-H4K8ac_peak_13562 | 8.79957  |                                                           |
| 5 | 51118930 | 51119123 | 5Y-H4K8ac_peak_13563 | 5.65584  |                                                           |
| 5 | 51283556 | 51283919 | 5Y-H4K8ac_peak_13564 | 5.65584  |                                                           |
| 5 | 51288338 | 51288587 | 5Y-H4K8ac_peak_13565 | 8.17203  |                                                           |
| 5 | 51291059 | 51291323 | 5Y-H4K8ac_peak_13566 | 11.32351 |                                                           |
| 5 | 52405998 | 52406238 | 5Y-H4K8ac_peak_13567 | 5.65584  | MOCS2_ENSG00000164172;CTD-2366F13.1_ENSG00000247796       |
| 5 | 55117582 | 55117975 | 5Y-H4K8ac_peak_13568 | 7.80156  |                                                           |

|   |          |          |                      |          |                                                       |
|---|----------|----------|----------------------|----------|-------------------------------------------------------|
| 5 | 55291160 | 55291444 | 5Y-H4K8ac_peak_13569 | 10.11191 | IL6ST_ENSG00000134352;CTD-2031P19.3_ENSG00000227908   |
| 5 | 55566992 | 55567399 | 5Y-H4K8ac_peak_13570 | 11.42066 |                                                       |
| 5 | 55604179 | 55604472 | 5Y-H4K8ac_peak_13571 | 5.29015  |                                                       |
| 5 | 55606213 | 55606486 | 5Y-H4K8ac_peak_13572 | 7.89142  |                                                       |
| 5 | 55622704 | 55622994 | 5Y-H4K8ac_peak_13573 | 7.31815  |                                                       |
| 5 | 55775803 | 55776352 | 5Y-H4K8ac_peak_13574 | 6.94897  |                                                       |
| 5 | 55777515 | 55777709 | 5Y-H4K8ac_peak_13575 | 8.1667   | CTC-236F12.4_ENSG00000248727                          |
| 5 | 55793335 | 55793604 | 5Y-H4K8ac_peak_13576 | 8.47164  |                                                       |
| 5 | 55794450 | 55794832 | 5Y-H4K8ac_peak_13577 | 10.1994  |                                                       |
| 5 | 56011151 | 56011368 | 5Y-H4K8ac_peak_13578 | 6.98118  |                                                       |
| 5 | 56058774 | 56059096 | 5Y-H4K8ac_peak_13579 | 7.31815  |                                                       |
| 5 | 56111424 | 56111692 | 5Y-H4K8ac_peak_13580 | 9.62747  | MAP3K1_ENSG00000095015                                |
| 5 | 56118760 | 56119146 | 5Y-H4K8ac_peak_13581 | 5.40331  |                                                       |
| 5 | 56247517 | 56247878 | 5Y-H4K8ac_peak_13582 | 9.93175  |                                                       |
| 5 | 56248173 | 56248383 | 5Y-H4K8ac_peak_13583 | 8.43511  |                                                       |
| 5 | 57877897 | 57878193 | 5Y-H4K8ac_peak_13584 | 9.38276  | RAB3C_ENSG00000152932                                 |
| 5 | 60241360 | 60241550 | 5Y-H4K8ac_peak_13585 | 6.34046  | ERCC8_ENSG0000049167;NDUFAF2_ENSG00000164182          |
| 5 | 60458455 | 60458816 | 5Y-H4K8ac_peak_13586 | 11.30958 | SMIM15_ENSG00000188725;CTC-436P18.1_ENSG00000251279   |
| 5 | 60626452 | 60626725 | 5Y-H4K8ac_peak_13587 | 7.59101  |                                                       |
| 5 | 61601267 | 61601720 | 5Y-H4K8ac_peak_13588 | 7.04637  | KIF2A_ENSG00000068796                                 |
| 5 | 61602375 | 61602598 | 5Y-H4K8ac_peak_13589 | 7.59101  | KIF2A_ENSG00000068796                                 |
| 5 | 64331472 | 64331824 | 5Y-H4K8ac_peak_13590 | 4.91235  |                                                       |
| 5 | 64398607 | 64399230 | 5Y-H4K8ac_peak_13591 | 5.65584  |                                                       |
| 5 | 65220893 | 65221221 | 5Y-H4K8ac_peak_13592 | 4.642    | CTD-2033C11.1_ENSG00000269961                         |
| 5 | 65221917 | 65222187 | 5Y-H4K8ac_peak_13593 | 4.15658  | CTD-2033C11.1_ENSG00000269961;ERBB2IP_ENSG00000112851 |
| 5 | 65440128 | 65440578 | 5Y-H4K8ac_peak_13594 | 10.35586 | AC025442.3_ENSG00000253744                            |
| 5 | 66412048 | 66412479 | 5Y-H4K8ac_peak_13595 | 5.65584  |                                                       |
| 5 | 66499586 | 66499797 | 5Y-H4K8ac_peak_13596 | 5.8635   |                                                       |
| 5 | 66504141 | 66504338 | 5Y-H4K8ac_peak_13597 | 5.23083  |                                                       |
| 5 | 66511634 | 66511948 | 5Y-H4K8ac_peak_13598 | 13.8759  |                                                       |
| 5 | 66563629 | 66564023 | 5Y-H4K8ac_peak_13599 | 8.51022  | CTD-2187J20.1_ENSG00000251206                         |
| 5 | 66565187 | 66565482 | 5Y-H4K8ac_peak_13600 | 7.59101  |                                                       |
| 5 | 67294667 | 67294935 | 5Y-H4K8ac_peak_13601 | 5.40331  |                                                       |
| 5 | 67511014 | 67511313 | 5Y-H4K8ac_peak_13602 | 7.14616  | PIK3R1_ENSG00000145675                                |
| 5 | 67552773 | 67553261 | 5Y-H4K8ac_peak_13603 | 14.15915 |                                                       |
| 5 | 67583835 | 67584039 | 5Y-H4K8ac_peak_13604 | 11.19336 |                                                       |
| 5 | 67584682 | 67584881 | 5Y-H4K8ac_peak_13605 | 4.50834  |                                                       |
| 5 | 67702698 | 67702947 | 5Y-H4K8ac_peak_13606 | 4.84727  |                                                       |
| 5 | 67731319 | 67731517 | 5Y-H4K8ac_peak_13607 | 4.85014  |                                                       |
| 5 | 67830263 | 67831172 | 5Y-H4K8ac_peak_13608 | 21.01499 | CTC-537E7.2_ENSG00000248359                           |
| 5 | 67953011 | 67953226 | 5Y-H4K8ac_peak_13609 | 6.50117  |                                                       |
| 5 | 68332000 | 68332212 | 5Y-H4K8ac_peak_13610 | 6.43775  |                                                       |
| 5 | 68389953 | 68390362 | 5Y-H4K8ac_peak_13611 | 7.41197  | SLC30A5_ENSG00000145740                               |
| 5 | 68628369 | 68628612 | 5Y-H4K8ac_peak_13612 | 11.12941 | CCDC125_ENSG00000183323                               |
| 5 | 68665311 | 68665596 | 5Y-H4K8ac_peak_13613 | 19.93272 | TAF9_ENSG00000085231;RAD17_ENSG00000152942            |
| 5 | 68855285 | 68855853 | 5Y-H4K8ac_peak_13614 | 8.75926  | GTF2H2C_ENSG00000183474                               |

|   |          |          |                      |          |                                                       |
|---|----------|----------|----------------------|----------|-------------------------------------------------------|
| 5 | 69785868 | 69786150 | 5Y-H4K8ac_peak_13615 | 16.50659 |                                                       |
| 5 | 70882018 | 70882432 | 5Y-H4K8ac_peak_13616 | 8.00339  | MCCC2_ENSG00000131844                                 |
| 5 | 71078137 | 71078664 | 5Y-H4K8ac_peak_13617 | 6.34046  |                                                       |
| 5 | 71402617 | 71402935 | 5Y-H4K8ac_peak_13618 | 7.38046  | MAP1B_ENSG00000131711                                 |
| 5 | 71403273 | 71403500 | 5Y-H4K8ac_peak_13619 | 5.99504  | MAP1B_ENSG00000131711                                 |
| 5 | 71403819 | 71404021 | 5Y-H4K8ac_peak_13620 | 6.73385  | MAP1B_ENSG00000131711                                 |
| 5 | 71404337 | 71404745 | 5Y-H4K8ac_peak_13621 | 10.31981 |                                                       |
| 5 | 71482312 | 71482511 | 5Y-H4K8ac_peak_13622 | 6.88532  |                                                       |
| 5 | 71487254 | 71487465 | 5Y-H4K8ac_peak_13623 | 7.38046  |                                                       |
| 5 | 71615596 | 71616020 | 5Y-H4K8ac_peak_13624 | 6.79955  | MRPS27_ENSG00000113048;PTCD2_ENSG00000049883          |
| 5 | 72112081 | 72112287 | 5Y-H4K8ac_peak_13625 | 10.31981 | CTD-2631K10.1_ENSG00000249085;TNPO1_ENSG00000083312   |
| 5 | 72251249 | 72251607 | 5Y-H4K8ac_peak_13626 | 10.1994  | CTD-2376I4.2_ENSG00000272081;FCHO2_ENSG00000157107    |
| 5 | 72793849 | 72794104 | 5Y-H4K8ac_peak_13627 | 7.11863  | RP11-79P5.9_ENSG00000272525;BTF3_ENSG00000145741      |
| 5 | 72794371 | 72794860 | 5Y-H4K8ac_peak_13628 | 9.79526  | RP11-79P5.9_ENSG00000272525;BTF3_ENSG00000145741      |
| 5 | 72861713 | 72861970 | 5Y-H4K8ac_peak_13629 | 5.91107  | ANKRA2_ENSG00000164331;UTP15_ENSG00000164338          |
| 5 | 73685724 | 73685946 | 5Y-H4K8ac_peak_13630 | 4.50834  |                                                       |
| 5 | 73936785 | 73937055 | 5Y-H4K8ac_peak_13631 | 8.24461  | ENC1_ENSG00000171617;HEXB_ENSG00000049860             |
| 5 | 73980624 | 73981294 | 5Y-H4K8ac_peak_13632 | 8.2913   |                                                       |
| 5 | 74162338 | 74162744 | 5Y-H4K8ac_peak_13633 | 12.21176 | FAM169A_ENSG00000198780;CTD-2377O17.1_ENSG00000271714 |
| 5 | 74532013 | 74532598 | 5Y-H4K8ac_peak_13634 | 7.3889   | ANKRD31_ENSG00000145700                               |
| 5 | 75379246 | 75379555 | 5Y-H4K8ac_peak_13635 | 7.38046  | CTC-235G5.3_ENSG00000248127;SV2C_ENSG00000122012      |
| 5 | 75380686 | 75380959 | 5Y-H4K8ac_peak_13636 | 5.65584  | CTC-235G5.3_ENSG00000248127                           |
| 5 | 76012049 | 76012290 | 5Y-H4K8ac_peak_13637 | 6.37023  | CTD-2384B11.2_ENSG00000225407;F2R_ENSG00000181104     |
| 5 | 76326357 | 76326570 | 5Y-H4K8ac_peak_13638 | 6.14981  |                                                       |
| 5 | 76373132 | 76373544 | 5Y-H4K8ac_peak_13639 | 9.93099  |                                                       |
| 5 | 76382792 | 76383177 | 5Y-H4K8ac_peak_13640 | 8.69112  | ZBED3_ENSG00000132846;ZBED3-AS1_ENSG00000250802       |
| 5 | 76476143 | 76476386 | 5Y-H4K8ac_peak_13641 | 8.24461  |                                                       |
| 5 | 77147161 | 77147563 | 5Y-H4K8ac_peak_13642 | 9.00954  |                                                       |
| 5 | 77148411 | 77148672 | 5Y-H4K8ac_peak_13643 | 7.57144  |                                                       |
| 5 | 77655953 | 77656174 | 5Y-H4K8ac_peak_13644 | 6.13909  | CTD-2037K23.2_ENSG00000245556;SCAMP1_ENSG00000085365  |
| 5 | 77944174 | 77944449 | 5Y-H4K8ac_peak_13645 | 11.12941 |                                                       |
| 5 | 77944717 | 77945130 | 5Y-H4K8ac_peak_13646 | 13.27281 |                                                       |
| 5 | 77974605 | 77974921 | 5Y-H4K8ac_peak_13647 | 9.25361  |                                                       |
| 5 | 78101531 | 78101724 | 5Y-H4K8ac_peak_13648 | 5.98695  |                                                       |
| 5 | 78104383 | 78104726 | 5Y-H4K8ac_peak_13649 | 10.43045 |                                                       |
| 5 | 78105677 | 78106078 | 5Y-H4K8ac_peak_13650 | 8.14913  |                                                       |
| 5 | 78205428 | 78205644 | 5Y-H4K8ac_peak_13651 | 6.34046  |                                                       |
| 5 | 78208488 | 78208706 | 5Y-H4K8ac_peak_13652 | 8.30301  |                                                       |
| 5 | 78280693 | 78281260 | 5Y-H4K8ac_peak_13653 | 8.69112  | ARSB_ENSG00000113273                                  |
| 5 | 78443861 | 78444082 | 5Y-H4K8ac_peak_13654 | 7.31815  |                                                       |
| 5 | 78531551 | 78531781 | 5Y-H4K8ac_peak_13655 | 9.52603  | DMGDH_ENSG00000132837;JMY_ENSG00000152409             |
| 5 | 78556233 | 78556468 | 5Y-H4K8ac_peak_13656 | 4.24332  |                                                       |
| 5 | 78810251 | 78810632 | 5Y-H4K8ac_peak_13657 | 5.35202  | HOMER1_ENSG00000152413                                |
| 5 | 78907820 | 78908058 | 5Y-H4K8ac_peak_13658 | 7.31102  | PAPD4_ENSG00000164329                                 |
| 5 | 79286622 | 79286913 | 5Y-H4K8ac_peak_13659 | 7.59101  | MTX3_ENSG00000177034;THBS4_ENSG00000113296            |
| 5 | 79330823 | 79331548 | 5Y-H4K8ac_peak_13660 | 11.1169  |                                                       |

|   |           |           |                      |          |                                                                              |
|---|-----------|-----------|----------------------|----------|------------------------------------------------------------------------------|
| 5 | 79465169  | 79465372  | 5Y-H4K8ac_peak_13661 | 8.17203  |                                                                              |
| 5 | 79703437  | 79703647  | 5Y-H4K8ac_peak_13662 | 11.19336 | ZFYVE16_ENSG00000039319                                                      |
| 5 | 80256489  | 80256780  | 5Y-H4K8ac_peak_13663 | 7.59101  | CTC-459I6.1_ENSG00000251450;RASGRF2_ENSG00000113319                          |
| 5 | 80318230  | 80318695  | 5Y-H4K8ac_peak_13664 | 5.03335  |                                                                              |
| 5 | 80320680  | 80320981  | 5Y-H4K8ac_peak_13665 | 9.15007  |                                                                              |
| 5 | 80436512  | 80436752  | 5Y-H4K8ac_peak_13666 | 5.40331  |                                                                              |
| 5 | 80506621  | 80506822  | 5Y-H4K8ac_peak_13667 | 6.31594  |                                                                              |
| 5 | 80597485  | 80597846  | 5Y-H4K8ac_peak_13668 | 8.69112  | CKMT2-AS1_ENSG00000247572;ZCCHC9_ENSG00000131732                             |
| 5 | 80689660  | 80689899  | 5Y-H4K8ac_peak_13669 | 7.97699  | ACOT12_ENSG00000172497                                                       |
| 5 | 81047409  | 81048251  | 5Y-H4K8ac_peak_13670 | 23.16826 | SSBP2_ENSG00000145687                                                        |
| 5 | 81146774  | 81146964  | 5Y-H4K8ac_peak_13671 | 5.64909  | CTD-2249K22.1_ENSG00000249483                                                |
| 5 | 81148222  | 81148457  | 5Y-H4K8ac_peak_13672 | 5.718    | CTD-2249K22.1_ENSG00000249483                                                |
| 5 | 81267911  | 81268439  | 5Y-H4K8ac_peak_13673 | 9.51254  | ATG10_ENSG00000152348                                                        |
| 5 | 81684223  | 81684417  | 5Y-H4K8ac_peak_13674 | 5.65584  |                                                                              |
| 5 | 82768347  | 82768610  | 5Y-H4K8ac_peak_13675 | 4.29586  |                                                                              |
| 5 | 86806949  | 86807190  | 5Y-H4K8ac_peak_13676 | 4.84727  |                                                                              |
| 5 | 87564208  | 87564618  | 5Y-H4K8ac_peak_13677 | 13.8759  | TMEM161B_ENSG00000164180;TMEM161B-AS1_ENSG00000247828                        |
| 5 | 87970131  | 87970981  | 5Y-H4K8ac_peak_13678 | 7.89273  |                                                                              |
| 5 | 90650367  | 90650642  | 5Y-H4K8ac_peak_13679 | 4.95697  | CTD-2061E19.1_ENSG00000240388;CTD-2061E19.6_ENSG00000241059                  |
| 5 | 90676321  | 90676623  | 5Y-H4K8ac_peak_13680 | 7.59101  |                                                                              |
| 5 | 90987942  | 90988138  | 5Y-H4K8ac_peak_13681 | 5.65584  |                                                                              |
| 5 | 91970997  | 91971195  | 5Y-H4K8ac_peak_13682 | 6.14981  |                                                                              |
| 5 | 92585472  | 92585690  | 5Y-H4K8ac_peak_13683 | 7.90751  |                                                                              |
| 5 | 92905892  | 92906593  | 5Y-H4K8ac_peak_13684 | 7.76232  |                                                                              |
| 5 | 92914963  | 92915208  | 5Y-H4K8ac_peak_13685 | 8.97839  |                                                                              |
| 5 | 92915708  | 92916108  | 5Y-H4K8ac_peak_13686 | 5.34199  |                                                                              |
| 5 | 92956549  | 92956821  | 5Y-H4K8ac_peak_13687 | 17.23322 | MIR2277_ENSG00000251725                                                      |
| 5 | 93954415  | 93954748  | 5Y-H4K8ac_peak_13688 | 6.08523  | KIAA0825_ENSG00000185261;CTC-303L1.2_ENSG00000270133;ANKRD32_ENSG00000133302 |
| 5 | 94955823  | 94957147  | 5Y-H4K8ac_peak_13689 | 10.90097 | GPR150_ENSG00000178015                                                       |
| 5 | 94981875  | 94982091  | 5Y-H4K8ac_peak_13690 | 5.68769  | RFESD_ENSG00000175449                                                        |
| 5 | 96142857  | 96143724  | 5Y-H4K8ac_peak_13691 | 22.31046 | ERAP1_ENSG00000164307                                                        |
| 5 | 96271849  | 96272204  | 5Y-H4K8ac_peak_13692 | 4.9885   | LNPEP_ENSG00000113441;CTD-2260A17.2_ENSG00000247121                          |
| 5 | 98264046  | 98264444  | 5Y-H4K8ac_peak_13693 | 4.0639   | CTD-2007H13.3_ENSG00000248489                                                |
| 5 | 101631420 | 101631889 | 5Y-H4K8ac_peak_13694 | 7.38046  | SLCO4C1_ENSG00000173930                                                      |
| 5 | 102089972 | 102090789 | 5Y-H4K8ac_peak_13695 | 6.77436  | PAM_ENSG00000145730                                                          |
| 5 | 102594557 | 102595377 | 5Y-H4K8ac_peak_13696 | 4.95697  | C5orf30_ENSG00000181751                                                      |
| 5 | 106851051 | 106851254 | 5Y-H4K8ac_peak_13697 | 6.14981  |                                                                              |
| 5 | 107006739 | 107006966 | 5Y-H4K8ac_peak_13698 | 7.01266  | EFNA5_ENSG00000184349                                                        |
| 5 | 107009130 | 107009353 | 5Y-H4K8ac_peak_13699 | 9.51254  |                                                                              |
| 5 | 107717396 | 107718022 | 5Y-H4K8ac_peak_13700 | 10.54764 | FBXL17_ENSG00000145743                                                       |
| 5 | 108063221 | 108063932 | 5Y-H4K8ac_peak_13701 | 10.19948 | LINC01023_ENSG00000272523                                                    |
| 5 | 108083989 | 108084229 | 5Y-H4K8ac_peak_13702 | 5.64909  | FER_ENSG00000151422                                                          |
| 5 | 109025201 | 109025448 | 5Y-H4K8ac_peak_13703 | 9.51254  | MAN2A1_ENSG00000112893                                                       |
| 5 | 110074928 | 110075169 | 5Y-H4K8ac_peak_13704 | 8.2913   | TMEM232_ENSG00000186952                                                      |
| 5 | 110427702 | 110428214 | 5Y-H4K8ac_peak_13705 | 7.31102  | CTC-551A13.2_ENSG00000253613;WDR36_ENSG00000134987                           |
| 5 | 110559601 | 110559873 | 5Y-H4K8ac_peak_13706 | 4.77126  | CAMK4_ENSG00000152495                                                        |

|   |           |           |                      |          |                                                           |
|---|-----------|-----------|----------------------|----------|-----------------------------------------------------------|
| 5 | 110721311 | 110721669 | 5Y-H4K8ac_peak_13707 | 8.33296  |                                                           |
| 5 | 111093166 | 111093915 | 5Y-H4K8ac_peak_13708 | 14.1808  |                                                           |
| 5 | 111874824 | 111875225 | 5Y-H4K8ac_peak_13709 | 5.56912  |                                                           |
| 5 | 112043308 | 112043721 | 5Y-H4K8ac_peak_13710 | 5.23083  | APC_ENSG00000134982                                       |
| 5 | 112196129 | 112196784 | 5Y-H4K8ac_peak_13711 | 13.51759 | CTC-487M23.8_ENSG00000272869;SRP19_ENSG00000153037        |
| 5 | 112379064 | 112379574 | 5Y-H4K8ac_peak_13712 | 5.07473  |                                                           |
| 5 | 112394500 | 112394740 | 5Y-H4K8ac_peak_13713 | 4.50834  |                                                           |
| 5 | 112395367 | 112395685 | 5Y-H4K8ac_peak_13714 | 13.24242 |                                                           |
| 5 | 112824244 | 112824785 | 5Y-H4K8ac_peak_13715 | 10.36926 | MCC_ENSG00000171444                                       |
| 5 | 114515099 | 114515543 | 5Y-H4K8ac_peak_13716 | 8.16382  | TRIM36_ENSG00000152503                                    |
| 5 | 114961274 | 114961615 | 5Y-H4K8ac_peak_13717 | 7.97699  | TICAM2_ENSG00000243414;TMED7-TICAM2_ENSG00000251201       |
| 5 | 115152507 | 115152749 | 5Y-H4K8ac_peak_13718 | 6.10343  | CDO1_ENSG00000129596                                      |
| 5 | 115420209 | 115420553 | 5Y-H4K8ac_peak_13719 | 7.76232  | CTD-2287O16.5_ENSG00000271918;COMMD10_ENSG00000145781     |
| 5 | 115697158 | 115697413 | 5Y-H4K8ac_peak_13720 | 5.29015  |                                                           |
| 5 | 115697639 | 115697832 | 5Y-H4K8ac_peak_13721 | 7.38046  |                                                           |
| 5 | 115908162 | 115908360 | 5Y-H4K8ac_peak_13722 | 7.9215   |                                                           |
| 5 | 115908572 | 115909459 | 5Y-H4K8ac_peak_13723 | 5.37237  | CTB-118N6.2_ENSG00000249167                               |
| 5 | 118405426 | 118405618 | 5Y-H4K8ac_peak_13724 | 8.2589   | snoU13_ENSG00000239011;CTB-161M19.4_ENSG00000249494       |
| 5 | 118787853 | 118788079 | 5Y-H4K8ac_peak_13725 | 7.03573  | HSD17B4_ENSG00000133835                                   |
| 5 | 121412876 | 121413226 | 5Y-H4K8ac_peak_13726 | 7.63144  | LOX_ENSG00000113083                                       |
| 5 | 122180894 | 122181718 | 5Y-H4K8ac_peak_13727 | 14.99673 |                                                           |
| 5 | 122848127 | 122848326 | 5Y-H4K8ac_peak_13728 | 9.89244  | CSNK1G3_ENSG00000151292                                   |
| 5 | 123121509 | 123121917 | 5Y-H4K8ac_peak_13729 | 6.34046  |                                                           |
| 5 | 123211349 | 123211618 | 5Y-H4K8ac_peak_13730 | 3.88879  |                                                           |
| 5 | 123392397 | 123392613 | 5Y-H4K8ac_peak_13731 | 6.77436  |                                                           |
| 5 | 123461159 | 123461392 | 5Y-H4K8ac_peak_13732 | 5.98695  |                                                           |
| 5 | 123471669 | 123471919 | 5Y-H4K8ac_peak_13733 | 7.38046  |                                                           |
| 5 | 123730451 | 123730657 | 5Y-H4K8ac_peak_13734 | 7.38046  | CTC-369A16.2_ENSG00000251421;CTC-369A16.3_ENSG00000251662 |
| 5 | 123984513 | 123984885 | 5Y-H4K8ac_peak_13735 | 10.1994  |                                                           |
| 5 | 123987514 | 123987817 | 5Y-H4K8ac_peak_13736 | 13.27446 |                                                           |
| 5 | 123993771 | 123994063 | 5Y-H4K8ac_peak_13737 | 9.22011  |                                                           |
| 5 | 124042850 | 124043192 | 5Y-H4K8ac_peak_13738 | 5.98695  | RP11-43D2.2_ENSG00000249112                               |
| 5 | 124747063 | 124747397 | 5Y-H4K8ac_peak_13739 | 5.22422  |                                                           |
| 5 | 124886790 | 124886992 | 5Y-H4K8ac_peak_13740 | 6.98118  |                                                           |
| 5 | 125434948 | 125435145 | 5Y-H4K8ac_peak_13741 | 7.64675  |                                                           |
| 5 | 126014888 | 126015329 | 5Y-H4K8ac_peak_13742 | 7.38046  |                                                           |
| 5 | 126016182 | 126016484 | 5Y-H4K8ac_peak_13743 | 7.3889   |                                                           |
| 5 | 126113011 | 126113829 | 5Y-H4K8ac_peak_13744 | 10.1994  | RP11-434D11.4_ENSG00000251072;LMNB1_ENSG00000113368       |
| 5 | 126255333 | 126255591 | 5Y-H4K8ac_peak_13745 | 7.53283  |                                                           |
| 5 | 127419045 | 127419289 | 5Y-H4K8ac_peak_13746 | 8.43511  | SLC12A2_ENSG00000064651;CTC-228N24.3_ENSG00000245937      |
| 5 | 128430723 | 128430949 | 5Y-H4K8ac_peak_13747 | 5.23083  | ISOC1_ENSG00000066583                                     |
| 5 | 130496950 | 130497149 | 5Y-H4K8ac_peak_13748 | 6.34046  |                                                           |
| 5 | 130500320 | 130500787 | 5Y-H4K8ac_peak_13749 | 8.43511  |                                                           |
| 5 | 130505977 | 130506197 | 5Y-H4K8ac_peak_13750 | 6.87117  | LYRM7_ENSG00000186687                                     |
| 5 | 131132318 | 131132600 | 5Y-H4K8ac_peak_13751 | 6.64195  | CTC-432M15.3_ENSG00000273217;FNIP1_ENSG00000217128        |
| 5 | 131335233 | 131335906 | 5Y-H4K8ac_peak_13752 | 7.60893  |                                                           |

|   |           |           |                      |          |                                                                           |
|---|-----------|-----------|----------------------|----------|---------------------------------------------------------------------------|
| 5 | 131346917 | 131347146 | 5Y-H4K8ac_peak_13753 | 9.52603  | ACSL6_ENSG00000164398;AC034228.2_ENSG00000231585                          |
| 5 | 131347348 | 131347583 | 5Y-H4K8ac_peak_13754 | 6.43775  | ACSL6_ENSG00000164398;AC034228.2_ENSG00000231585                          |
| 5 | 131563219 | 131563477 | 5Y-H4K8ac_peak_13755 | 6.47245  |                                                                           |
| 5 | 131563801 | 131564010 | 5Y-H4K8ac_peak_13756 | 5.24695  |                                                                           |
| 5 | 131592693 | 131592919 | 5Y-H4K8ac_peak_13757 | 6.78128  | PDLIM4_ENSG00000131435                                                    |
| 5 | 131595764 | 131595967 | 5Y-H4K8ac_peak_13758 | 7.87406  |                                                                           |
| 5 | 131629100 | 131629963 | 5Y-H4K8ac_peak_13759 | 5.12488  | SLC22A4_ENSG00000197208                                                   |
| 5 | 131705183 | 131705439 | 5Y-H4K8ac_peak_13760 | 4.00285  | AC034220.3_ENSG00000233006;SLC22A5_ENSG00000197375                        |
| 5 | 131705759 | 131706100 | 5Y-H4K8ac_peak_13761 | 9.15007  | AC034220.3_ENSG00000233006;SLC22A5_ENSG00000197375                        |
| 5 | 131746127 | 131747314 | 5Y-H4K8ac_peak_13762 | 7.96285  | C5orf56_ENSG00000197536                                                   |
| 5 | 131800180 | 131800598 | 5Y-H4K8ac_peak_13763 | 7.31102  |                                                                           |
| 5 | 131832698 | 131832903 | 5Y-H4K8ac_peak_13764 | 7.50148  |                                                                           |
| 5 | 131991759 | 131992668 | 5Y-H4K8ac_peak_13765 | 16.52279 | IL13_ENSG00000169194                                                      |
| 5 | 132072817 | 132073107 | 5Y-H4K8ac_peak_13766 | 9.30206  | KIF3A_ENSG00000131437                                                     |
| 5 | 132082937 | 132083708 | 5Y-H4K8ac_peak_13767 | 5.64909  | CCNI2_ENSG00000205089                                                     |
| 5 | 132112927 | 132113335 | 5Y-H4K8ac_peak_13768 | 6.78128  |                                                                           |
| 5 | 132149036 | 132149226 | 5Y-H4K8ac_peak_13769 | 6.43775  | SOWAHA_ENSG00000198944                                                    |
| 5 | 132149479 | 132149712 | 5Y-H4K8ac_peak_13770 | 11.72217 | SOWAHA_ENSG00000198944                                                    |
| 5 | 132165482 | 132166266 | 5Y-H4K8ac_peak_13771 | 8.24461  | SHROOM1_ENSG00000164403                                                   |
| 5 | 132201795 | 132202016 | 5Y-H4K8ac_peak_13772 | 8.43511  | GDF9_ENSG00000164404;UQCRQ_ENSG00000164405                                |
| 5 | 132202426 | 132202829 | 5Y-H4K8ac_peak_13773 | 7.11863  | GDF9_ENSG00000164404;UQCRQ_ENSG00000164405                                |
| 5 | 132299461 | 132300029 | 5Y-H4K8ac_peak_13774 | 13.4304  | AFF4_ENSG00000072364;CTC-350I8.1_ENSG00000272023                          |
| 5 | 132361767 | 132362197 | 5Y-H4K8ac_peak_13775 | 12.20548 | ZCCHC10_ENSG00000155329                                                   |
| 5 | 132386849 | 132387494 | 5Y-H4K8ac_peak_13776 | 10.16277 | HSPA4_ENSG00000170606                                                     |
| 5 | 132846830 | 132847189 | 5Y-H4K8ac_peak_13777 | 6.20875  |                                                                           |
| 5 | 132947716 | 132948029 | 5Y-H4K8ac_peak_13778 | 7.89142  | FSTL4_ENSG00000053108                                                     |
| 5 | 133016606 | 133016816 | 5Y-H4K8ac_peak_13779 | 8.69112  |                                                                           |
| 5 | 133039341 | 133039579 | 5Y-H4K8ac_peak_13780 | 8.2913   |                                                                           |
| 5 | 133040381 | 133040711 | 5Y-H4K8ac_peak_13781 | 4.29586  |                                                                           |
| 5 | 133045639 | 133046101 | 5Y-H4K8ac_peak_13782 | 4.07874  |                                                                           |
| 5 | 133236737 | 133237221 | 5Y-H4K8ac_peak_13783 | 4.50834  |                                                                           |
| 5 | 133242770 | 133243023 | 5Y-H4K8ac_peak_13784 | 8.93691  |                                                                           |
| 5 | 133260151 | 133260484 | 5Y-H4K8ac_peak_13785 | 9.36633  |                                                                           |
| 5 | 133261813 | 133262599 | 5Y-H4K8ac_peak_13786 | 13.00733 |                                                                           |
| 5 | 133339845 | 133340368 | 5Y-H4K8ac_peak_13787 | 9.96543  | VDAC1_ENSG00000213585;CTB-113I20.2_ENSG00000271737                        |
| 5 | 133423959 | 133424180 | 5Y-H4K8ac_peak_13788 | 7.89273  |                                                                           |
| 5 | 133439834 | 133440033 | 5Y-H4K8ac_peak_13789 | 5.37588  |                                                                           |
| 5 | 133442463 | 133442993 | 5Y-H4K8ac_peak_13790 | 16.01457 |                                                                           |
| 5 | 133443409 | 133443890 | 5Y-H4K8ac_peak_13791 | 7.89142  |                                                                           |
| 5 | 133448794 | 133449010 | 5Y-H4K8ac_peak_13792 | 5.94703  |                                                                           |
| 5 | 133449880 | 133450228 | 5Y-H4K8ac_peak_13793 | 11.1169  | TCF7_ENSG00000081059                                                      |
| 5 | 133450987 | 133451267 | 5Y-H4K8ac_peak_13794 | 4.77126  | TCF7_ENSG00000081059                                                      |
| 5 | 133460264 | 133460864 | 5Y-H4K8ac_peak_13795 | 6.77436  |                                                                           |
| 5 | 133706879 | 133707122 | 5Y-H4K8ac_peak_13796 | 14.88279 | CDKL3_ENSG00000006837;CTD-2410N18.4_ENSG00000273345;UBE2B_ENSG00000119048 |
| 5 | 133707366 | 133707681 | 5Y-H4K8ac_peak_13797 | 8.17203  | CDKL3_ENSG00000006837;CTD-2410N18.4_ENSG00000273345;UBE2B_ENSG00000119048 |
| 5 | 133801670 | 133802215 | 5Y-H4K8ac_peak_13798 | 7.60057  |                                                                           |



|   |           |           |                      |          |                                                      |
|---|-----------|-----------|----------------------|----------|------------------------------------------------------|
| 5 | 133860278 | 133860561 | 5Y-H4K8ac_peak_13799 | 9.60627  | JADE2_ENSG00000043143                                |
| 5 | 133891010 | 133891331 | 5Y-H4K8ac_peak_13800 | 5.24695  |                                                      |
| 5 | 133891565 | 133891780 | 5Y-H4K8ac_peak_13801 | 11.12941 |                                                      |
| 5 | 133904703 | 133905044 | 5Y-H4K8ac_peak_13802 | 4.15658  |                                                      |
| 5 | 134181738 | 134182312 | 5Y-H4K8ac_peak_13803 | 12.21176 | C5orf24_ENSG00000181904                              |
| 5 | 134209367 | 134209895 | 5Y-H4K8ac_peak_13804 | 10.60083 | TXNDC15_ENSG00000113621                              |
| 5 | 134210107 | 134210433 | 5Y-H4K8ac_peak_13805 | 4.77126  | TXNDC15_ENSG00000113621                              |
| 5 | 134273607 | 134273980 | 5Y-H4K8ac_peak_13806 | 8.04493  |                                                      |
| 5 | 134734464 | 134735426 | 5Y-H4K8ac_peak_13807 | 15.84891 | H2AFY_ENSG00000113648;CTC-203F4.2_ENSG00000270021    |
| 5 | 135266136 | 135266397 | 5Y-H4K8ac_peak_13808 | 7.59101  | FBXL21_ENSG00000164616                               |
| 5 | 136733160 | 136733486 | 5Y-H4K8ac_peak_13809 | 5.29015  |                                                      |
| 5 | 136834593 | 136834963 | 5Y-H4K8ac_peak_13810 | 6.08523  |                                                      |
| 5 | 136900609 | 136900879 | 5Y-H4K8ac_peak_13811 | 6.49458  |                                                      |
| 5 | 136901352 | 136901605 | 5Y-H4K8ac_peak_13812 | 5.23083  |                                                      |
| 5 | 136901827 | 136902025 | 5Y-H4K8ac_peak_13813 | 6.08523  |                                                      |
| 5 | 136933852 | 136934069 | 5Y-H4K8ac_peak_13814 | 5.67283  | SPOCK1_ENSG00000152377                               |
| 5 | 137090577 | 137090973 | 5Y-H4K8ac_peak_13815 | 9.7353   | HNRNPA0_ENSG00000177733                              |
| 5 | 137224503 | 137224752 | 5Y-H4K8ac_peak_13816 | 6.47245  | RP11-381K20.2_ENSG00000250159;PKD2L2_ENSG00000078795 |
| 5 | 137225351 | 137225873 | 5Y-H4K8ac_peak_13817 | 6.03632  | RP11-381K20.2_ENSG00000250159                        |
| 5 | 137368403 | 137368681 | 5Y-H4K8ac_peak_13818 | 9.74838  | RP11-325L7.1_ENSG00000246323                         |
| 5 | 137577400 | 137577728 | 5Y-H4K8ac_peak_13819 | 13.72401 |                                                      |
| 5 | 137609864 | 137610486 | 5Y-H4K8ac_peak_13820 | 9.51254  | GFRA3_ENSG00000146013                                |
| 5 | 137610876 | 137611133 | 5Y-H4K8ac_peak_13821 | 5.23083  | GFRA3_ENSG00000146013                                |
| 5 | 137673455 | 137674211 | 5Y-H4K8ac_peak_13822 | 17.63051 | CDC25C_ENSG00000158402                               |
| 5 | 137775483 | 137775927 | 5Y-H4K8ac_peak_13823 | 4.95697  | REEP2_ENSG00000132563                                |
| 5 | 137785513 | 137785719 | 5Y-H4K8ac_peak_13824 | 9.59236  |                                                      |
| 5 | 137826994 | 137827187 | 5Y-H4K8ac_peak_13825 | 5.12488  |                                                      |
| 5 | 137827414 | 137827702 | 5Y-H4K8ac_peak_13826 | 8.27643  |                                                      |
| 5 | 137828026 | 137828315 | 5Y-H4K8ac_peak_13827 | 18.78851 |                                                      |
| 5 | 137828596 | 137828837 | 5Y-H4K8ac_peak_13828 | 8.24461  |                                                      |
| 5 | 137910890 | 137911355 | 5Y-H4K8ac_peak_13829 | 15.35687 | HSPA9_ENSG00000113013                                |
| 5 | 137911855 | 137912252 | 5Y-H4K8ac_peak_13830 | 13.27281 | HSPA9_ENSG00000113013                                |
| 5 | 137938828 | 137939040 | 5Y-H4K8ac_peak_13831 | 4.29586  |                                                      |
| 5 | 137945558 | 137945803 | 5Y-H4K8ac_peak_13832 | 5.56912  | CTNNA1_ENSG00000044115                               |
| 5 | 137946434 | 137946822 | 5Y-H4K8ac_peak_13833 | 8.97752  | CTNNA1_ENSG00000044115                               |
| 5 | 138088722 | 138088925 | 5Y-H4K8ac_peak_13834 | 7.60057  | AC034243.1_ENSG00000253404                           |
| 5 | 138279391 | 138279668 | 5Y-H4K8ac_peak_13835 | 6.64036  |                                                      |
| 5 | 138281488 | 138282319 | 5Y-H4K8ac_peak_13836 | 8.73227  |                                                      |
| 5 | 138284136 | 138284416 | 5Y-H4K8ac_peak_13837 | 5.60566  |                                                      |
| 5 | 138285023 | 138285254 | 5Y-H4K8ac_peak_13838 | 6.27467  |                                                      |
| 5 | 138286042 | 138286519 | 5Y-H4K8ac_peak_13839 | 11.56082 |                                                      |
| 5 | 138286856 | 138287167 | 5Y-H4K8ac_peak_13840 | 4.58963  |                                                      |
| 5 | 138288545 | 138289230 | 5Y-H4K8ac_peak_13841 | 10.90365 |                                                      |
| 5 | 138289459 | 138289839 | 5Y-H4K8ac_peak_13842 | 11.1169  |                                                      |
| 5 | 138290199 | 138290408 | 5Y-H4K8ac_peak_13843 | 7.03573  |                                                      |
| 5 | 138304441 | 138304655 | 5Y-H4K8ac_peak_13844 | 10.31981 |                                                      |

|   |           |           |                      |          |                                                   |
|---|-----------|-----------|----------------------|----------|---------------------------------------------------|
| 5 | 138533719 | 138533930 | 5Y-H4K8ac_peak_13845 | 7.50148  |                                                   |
| 5 | 138534300 | 138534536 | 5Y-H4K8ac_peak_13846 | 6.14981  |                                                   |
| 5 | 138629466 | 138630076 | 5Y-H4K8ac_peak_13847 | 12.11208 | SIL1_ENSG00000120725                              |
| 5 | 138861257 | 138861543 | 5Y-H4K8ac_peak_13848 | 4.95697  | TMEM173_ENSG00000184584                           |
| 5 | 138897266 | 138897926 | 5Y-H4K8ac_peak_13849 | 8.90774  |                                                   |
| 5 | 138940044 | 138940638 | 5Y-H4K8ac_peak_13850 | 11.68317 |                                                   |
| 5 | 139017204 | 139018185 | 5Y-H4K8ac_peak_13851 | 7.58806  |                                                   |
| 5 | 139018487 | 139019073 | 5Y-H4K8ac_peak_13852 | 13.0168  |                                                   |
| 5 | 139028065 | 139028351 | 5Y-H4K8ac_peak_13853 | 6.34772  | CTD-3224K15.2_ENSG00000250635                     |
| 5 | 139039061 | 139039523 | 5Y-H4K8ac_peak_13854 | 10.64597 |                                                   |
| 5 | 139047593 | 139048408 | 5Y-H4K8ac_peak_13855 | 9.76277  |                                                   |
| 5 | 139049862 | 139050123 | 5Y-H4K8ac_peak_13856 | 6.31818  |                                                   |
| 5 | 139055420 | 139055652 | 5Y-H4K8ac_peak_13857 | 6.13242  |                                                   |
| 5 | 139056267 | 139056738 | 5Y-H4K8ac_peak_13858 | 7.65114  |                                                   |
| 5 | 139069175 | 139069553 | 5Y-H4K8ac_peak_13859 | 10.1994  |                                                   |
| 5 | 139076621 | 139077014 | 5Y-H4K8ac_peak_13860 | 9.79526  |                                                   |
| 5 | 139077243 | 139077770 | 5Y-H4K8ac_peak_13861 | 6.37023  |                                                   |
| 5 | 139085315 | 139085709 | 5Y-H4K8ac_peak_13862 | 8.2913   |                                                   |
| 5 | 139088056 | 139088586 | 5Y-H4K8ac_peak_13863 | 6.08523  |                                                   |
| 5 | 139089176 | 139090869 | 5Y-H4K8ac_peak_13864 | 23.24344 |                                                   |
| 5 | 139091157 | 139091707 | 5Y-H4K8ac_peak_13865 | 9.30206  |                                                   |
| 5 | 139125440 | 139125744 | 5Y-H4K8ac_peak_13866 | 4.50834  | CTB-35F21.2_ENSG00000249131                       |
| 5 | 139126192 | 139126661 | 5Y-H4K8ac_peak_13867 | 13.0168  | CTB-35F21.2_ENSG00000249131                       |
| 5 | 139126873 | 139127971 | 5Y-H4K8ac_peak_13868 | 10.60083 |                                                   |
| 5 | 139138575 | 139138791 | 5Y-H4K8ac_peak_13869 | 6.54441  |                                                   |
| 5 | 139167924 | 139168292 | 5Y-H4K8ac_peak_13870 | 8.16031  |                                                   |
| 5 | 139273033 | 139273292 | 5Y-H4K8ac_peak_13871 | 7.35333  |                                                   |
| 5 | 139274365 | 139274871 | 5Y-H4K8ac_peak_13872 | 7.11863  |                                                   |
| 5 | 139362685 | 139362980 | 5Y-H4K8ac_peak_13873 | 10.36926 |                                                   |
| 5 | 139423032 | 139423619 | 5Y-H4K8ac_peak_13874 | 9.38807  | NRG2_ENSG00000158458                              |
| 5 | 139486783 | 139487121 | 5Y-H4K8ac_peak_13875 | 14.30055 | PURA_ENSG00000185129                              |
| 5 | 139494059 | 139494326 | 5Y-H4K8ac_peak_13876 | 7.59101  |                                                   |
| 5 | 139525258 | 139525838 | 5Y-H4K8ac_peak_13877 | 6.77436  |                                                   |
| 5 | 139536450 | 139536708 | 5Y-H4K8ac_peak_13878 | 4.47071  | CTB-131B5.5_ENSG00000254363                       |
| 5 | 139725615 | 139725837 | 5Y-H4K8ac_peak_13879 | 4.95697  | HBEGF_ENSG00000113070                             |
| 5 | 139937210 | 139937879 | 5Y-H4K8ac_peak_13880 | 8.35139  | SRA1_ENSG00000213523                              |
| 5 | 139943761 | 139944030 | 5Y-H4K8ac_peak_13881 | 6.77436  | SLC35A4_ENSG00000176087                           |
| 5 | 140043379 | 140043787 | 5Y-H4K8ac_peak_13882 | 6.79955  | WDR55_ENSG00000120314                             |
| 5 | 140700599 | 140701049 | 5Y-H4K8ac_peak_13883 | 9.65108  | TAF7_ENSG00000178913;AC005618.1_ENSG00000255729   |
| 5 | 140887324 | 140888006 | 5Y-H4K8ac_peak_13884 | 12.21176 |                                                   |
| 5 | 140892827 | 140893222 | 5Y-H4K8ac_peak_13885 | 9.30505  |                                                   |
| 5 | 140904590 | 140904890 | 5Y-H4K8ac_peak_13886 | 6.08523  |                                                   |
| 5 | 140905444 | 140905809 | 5Y-H4K8ac_peak_13887 | 5.23083  |                                                   |
| 5 | 140997999 | 140998382 | 5Y-H4K8ac_peak_13888 | 5.87382  | DIAPH1_ENSG00000131504;AC008781.7_ENSG00000228737 |
| 5 | 141017366 | 141017623 | 5Y-H4K8ac_peak_13889 | 11.48679 | HDAC3_ENSG00000171720;RELL2_ENSG00000164620       |
| 5 | 141059799 | 141060383 | 5Y-H4K8ac_peak_13890 | 4.95697  |                                                   |

|   |           |           |                      |          |                                                     |
|---|-----------|-----------|----------------------|----------|-----------------------------------------------------|
| 5 | 141060667 | 141061096 | 5Y-H4K8ac_peak_13891 | 8.75926  | ARAP3_ENSG00000120318                               |
| 5 | 141061962 | 141062628 | 5Y-H4K8ac_peak_13892 | 9.01738  | ARAP3_ENSG00000120318                               |
| 5 | 141108911 | 141109108 | 5Y-H4K8ac_peak_13893 | 9.23159  |                                                     |
| 5 | 141110072 | 141110444 | 5Y-H4K8ac_peak_13894 | 5.98695  |                                                     |
| 5 | 141111233 | 141111645 | 5Y-H4K8ac_peak_13895 | 6.64036  |                                                     |
| 5 | 141126413 | 141126747 | 5Y-H4K8ac_peak_13896 | 7.87406  |                                                     |
| 5 | 141191643 | 141191880 | 5Y-H4K8ac_peak_13897 | 9.96543  |                                                     |
| 5 | 141226023 | 141226249 | 5Y-H4K8ac_peak_13898 | 6.70695  |                                                     |
| 5 | 141229668 | 141229886 | 5Y-H4K8ac_peak_13899 | 6.22669  |                                                     |
| 5 | 141262648 | 141263201 | 5Y-H4K8ac_peak_13900 | 10.4689  |                                                     |
| 5 | 141404405 | 141404604 | 5Y-H4K8ac_peak_13901 | 10.46287 |                                                     |
| 5 | 141444538 | 141444736 | 5Y-H4K8ac_peak_13902 | 8.43511  |                                                     |
| 5 | 141445106 | 141445351 | 5Y-H4K8ac_peak_13903 | 10.95042 |                                                     |
| 5 | 141488468 | 141488790 | 5Y-H4K8ac_peak_13904 | 10.90365 | NDFIP1_ENSG00000131507                              |
| 5 | 141704839 | 141705145 | 5Y-H4K8ac_peak_13905 | 13.81505 | SPRY4_ENSG00000187678;AC005592.2_ENSG00000231185    |
| 5 | 141705487 | 141706281 | 5Y-H4K8ac_peak_13906 | 13.35169 | SPRY4_ENSG00000187678;AC005592.2_ENSG00000231185    |
| 5 | 141735649 | 141735911 | 5Y-H4K8ac_peak_13907 | 5.22422  |                                                     |
| 5 | 141736268 | 141737000 | 5Y-H4K8ac_peak_13908 | 16.50659 |                                                     |
| 5 | 141740442 | 141740735 | 5Y-H4K8ac_peak_13909 | 6.91702  |                                                     |
| 5 | 141742609 | 141742810 | 5Y-H4K8ac_peak_13910 | 4.29586  |                                                     |
| 5 | 141931319 | 141931570 | 5Y-H4K8ac_peak_13911 | 12.26606 |                                                     |
| 5 | 142065810 | 142066291 | 5Y-H4K8ac_peak_13912 | 5.24695  |                                                     |
| 5 | 142190547 | 142190845 | 5Y-H4K8ac_peak_13913 | 6.59249  |                                                     |
| 5 | 142251306 | 142251703 | 5Y-H4K8ac_peak_13914 | 8.27399  |                                                     |
| 5 | 142399681 | 142399923 | 5Y-H4K8ac_peak_13915 | 8.33296  |                                                     |
| 5 | 142784558 | 142785231 | 5Y-H4K8ac_peak_13916 | 10.3507  |                                                     |
| 5 | 143408845 | 143409050 | 5Y-H4K8ac_peak_13917 | 7.31815  |                                                     |
| 5 | 145826951 | 145827420 | 5Y-H4K8ac_peak_13918 | 16.38263 | TCERG1_ENSG00000113649                              |
| 5 | 146028261 | 146028454 | 5Y-H4K8ac_peak_13919 | 4.22304  |                                                     |
| 5 | 146258409 | 146258753 | 5Y-H4K8ac_peak_13920 | 5.29015  |                                                     |
| 5 | 146833752 | 146833947 | 5Y-H4K8ac_peak_13921 | 8.43511  |                                                     |
| 5 | 147699603 | 147699945 | 5Y-H4K8ac_peak_13922 | 9.38203  | SPINK9_ENSG00000204909                              |
| 5 | 148697219 | 148697536 | 5Y-H4K8ac_peak_13923 | 11.39862 |                                                     |
| 5 | 148700055 | 148700333 | 5Y-H4K8ac_peak_13924 | 4.77126  |                                                     |
| 5 | 148724022 | 148724227 | 5Y-H4K8ac_peak_13925 | 7.38046  | GRPEL2_ENSG00000164284                              |
| 5 | 148725138 | 148725550 | 5Y-H4K8ac_peak_13926 | 10.19948 | GRPEL2_ENSG00000164284                              |
| 5 | 148737646 | 148737851 | 5Y-H4K8ac_peak_13927 | 7.50148  | GRPEL2-AS1_ENSG00000253618;PCYOX1L_ENSG00000145882  |
| 5 | 148761022 | 148761547 | 5Y-H4K8ac_peak_13928 | 11.22005 |                                                     |
| 5 | 148786379 | 148786680 | 5Y-H4K8ac_peak_13929 | 5.98695  | MIR143HG_ENSG00000249669;AC131025.8_ENSG00000253864 |
| 5 | 148799427 | 148799748 | 5Y-H4K8ac_peak_13930 | 5.9726   |                                                     |
| 5 | 148802658 | 148802909 | 5Y-H4K8ac_peak_13931 | 4.89128  |                                                     |
| 5 | 148803313 | 148804101 | 5Y-H4K8ac_peak_13932 | 11.30958 |                                                     |
| 5 | 148808381 | 148808787 | 5Y-H4K8ac_peak_13933 | 9.38203  | MIR143_ENSG00000208035                              |
| 5 | 148821987 | 148822251 | 5Y-H4K8ac_peak_13934 | 6.1654   |                                                     |
| 5 | 148822516 | 148822729 | 5Y-H4K8ac_peak_13935 | 4.95697  |                                                     |
| 5 | 148928061 | 148928286 | 5Y-H4K8ac_peak_13936 | 6.55225  |                                                     |

|   |           |           |                      |          |                                                    |
|---|-----------|-----------|----------------------|----------|----------------------------------------------------|
| 5 | 148930654 | 148930897 | 5Y-H4K8ac_peak_13937 | 8.73985  | CSNK1A1_ENSG00000113712;ARHGEF37_ENSG00000183111   |
| 5 | 148960745 | 148961312 | 5Y-H4K8ac_peak_13938 | 13.0168  |                                                    |
| 5 | 148961691 | 148961973 | 5Y-H4K8ac_peak_13939 | 9.34555  |                                                    |
| 5 | 149340626 | 149340830 | 5Y-H4K8ac_peak_13940 | 7.11863  | SLC26A2_ENSG00000155850                            |
| 5 | 149380004 | 149380712 | 5Y-H4K8ac_peak_13941 | 10.32379 | TIGD6_ENSG00000164296;HMGXB3_ENSG00000113716       |
| 5 | 149438224 | 149438419 | 5Y-H4K8ac_peak_13942 | 4.02665  |                                                    |
| 5 | 149490825 | 149491031 | 5Y-H4K8ac_peak_13943 | 5.62788  |                                                    |
| 5 | 149524152 | 149524378 | 5Y-H4K8ac_peak_13944 | 9.14889  |                                                    |
| 5 | 149535146 | 149535336 | 5Y-H4K8ac_peak_13945 | 7.30348  | PDGFRB_ENSG00000113721                             |
| 5 | 149539452 | 149539839 | 5Y-H4K8ac_peak_13946 | 6.5677   |                                                    |
| 5 | 149737336 | 149737565 | 5Y-H4K8ac_peak_13947 | 10.16277 | TCOF1_ENSG00000070814                              |
| 5 | 149864569 | 149864762 | 5Y-H4K8ac_peak_13948 | 8.08337  | CTC-367J11.1_ENSG00000254333;NDST1_ENSG00000070614 |
| 5 | 149949821 | 149950368 | 5Y-H4K8ac_peak_13949 | 7.07936  |                                                    |
| 5 | 149953713 | 149954100 | 5Y-H4K8ac_peak_13950 | 5.87725  |                                                    |
| 5 | 149954623 | 149955094 | 5Y-H4K8ac_peak_13951 | 4.642    |                                                    |
| 5 | 149955293 | 149956107 | 5Y-H4K8ac_peak_13952 | 7.89273  |                                                    |
| 5 | 149961615 | 149962390 | 5Y-H4K8ac_peak_13953 | 7.89273  |                                                    |
| 5 | 149970700 | 149971113 | 5Y-H4K8ac_peak_13954 | 4.642    |                                                    |
| 5 | 149973740 | 149974114 | 5Y-H4K8ac_peak_13955 | 4.77126  |                                                    |
| 5 | 149977699 | 149978045 | 5Y-H4K8ac_peak_13956 | 6.08523  |                                                    |
| 5 | 149978924 | 149979603 | 5Y-H4K8ac_peak_13957 | 5.69598  |                                                    |
| 5 | 149979898 | 149980335 | 5Y-H4K8ac_peak_13958 | 12.93132 | SYNPO_ENSG00000171992                              |
| 5 | 149980529 | 149981749 | 5Y-H4K8ac_peak_13959 | 21.70076 | SYNPO_ENSG00000171992                              |
| 5 | 149994975 | 149995189 | 5Y-H4K8ac_peak_13960 | 5.23083  | CTB-140J7.2_ENSG00000253852                        |
| 5 | 150035775 | 150036167 | 5Y-H4K8ac_peak_13961 | 9.51254  |                                                    |
| 5 | 150051242 | 150051794 | 5Y-H4K8ac_peak_13962 | 9.79526  | CTC-345K18.2_ENSG00000250309                       |
| 5 | 150603489 | 150603702 | 5Y-H4K8ac_peak_13963 | 5.59843  | CCDC69_ENSG00000198624                             |
| 5 | 150632834 | 150633093 | 5Y-H4K8ac_peak_13964 | 5.35202  |                                                    |
| 5 | 151066273 | 151066474 | 5Y-H4K8ac_peak_13965 | 6.50117  | SPARC_ENSG00000113140                              |
| 5 | 151138596 | 151138854 | 5Y-H4K8ac_peak_13966 | 7.01266  |                                                    |
| 5 | 151150038 | 151150864 | 5Y-H4K8ac_peak_13967 | 13.10659 | G3BP1_ENSG00000145907                              |
| 5 | 153570006 | 153570540 | 5Y-H4K8ac_peak_13968 | 8.2913   | GALNT10_ENSG00000164574                            |
| 5 | 153857004 | 153857205 | 5Y-H4K8ac_peak_13969 | 9.07085  | HAND1_ENSG00000113196                              |
| 5 | 153858861 | 153859262 | 5Y-H4K8ac_peak_13970 | 7.677    |                                                    |
| 5 | 153862663 | 153862916 | 5Y-H4K8ac_peak_13971 | 5.87725  |                                                    |
| 5 | 153863449 | 153864533 | 5Y-H4K8ac_peak_13972 | 14.2053  |                                                    |
| 5 | 153864986 | 153865311 | 5Y-H4K8ac_peak_13973 | 4.84727  | CTB-158E9.1_ENSG00000254293                        |
| 5 | 153885397 | 153885919 | 5Y-H4K8ac_peak_13974 | 11.09973 |                                                    |
| 5 | 153896314 | 153896586 | 5Y-H4K8ac_peak_13975 | 15.63754 |                                                    |
| 5 | 153898615 | 153898979 | 5Y-H4K8ac_peak_13976 | 4.55128  |                                                    |
| 5 | 153901070 | 153901297 | 5Y-H4K8ac_peak_13977 | 5.64909  |                                                    |
| 5 | 153901522 | 153901713 | 5Y-H4K8ac_peak_13978 | 5.03917  |                                                    |
| 5 | 153903545 | 153903945 | 5Y-H4K8ac_peak_13979 | 8.43511  |                                                    |
| 5 | 153907114 | 153907716 | 5Y-H4K8ac_peak_13980 | 5.98695  |                                                    |
| 5 | 153948351 | 153948634 | 5Y-H4K8ac_peak_13981 | 11.80583 |                                                    |
| 5 | 153988041 | 153988320 | 5Y-H4K8ac_peak_13982 | 8.21582  |                                                    |

|   |           |           |                      |          |                                                     |
|---|-----------|-----------|----------------------|----------|-----------------------------------------------------|
| 5 | 153989275 | 153989695 | 5Y-H4K8ac_peak_13983 | 6.54441  |                                                     |
| 5 | 153990168 | 153990589 | 5Y-H4K8ac_peak_13984 | 10.1994  |                                                     |
| 5 | 154033498 | 154033798 | 5Y-H4K8ac_peak_13985 | 9.05168  |                                                     |
| 5 | 154134076 | 154134471 | 5Y-H4K8ac_peak_13986 | 17.78344 |                                                     |
| 5 | 154135092 | 154135320 | 5Y-H4K8ac_peak_13987 | 5.98695  |                                                     |
| 5 | 154135581 | 154135787 | 5Y-H4K8ac_peak_13988 | 6.78318  |                                                     |
| 5 | 154215508 | 154215883 | 5Y-H4K8ac_peak_13989 | 6.66026  |                                                     |
| 5 | 154236739 | 154237322 | 5Y-H4K8ac_peak_13990 | 14.30055 | CNOT8_ENSG00000155508                               |
| 5 | 154320432 | 154321208 | 5Y-H4K8ac_peak_13991 | 11.57334 | MRPL22_ENSG00000082515                              |
| 5 | 156787288 | 156787764 | 5Y-H4K8ac_peak_13992 | 6.43775  |                                                     |
| 5 | 156811604 | 156811853 | 5Y-H4K8ac_peak_13993 | 11.57334 | CTB-47B11.3_ENSG00000248544                         |
| 5 | 156813344 | 156813734 | 5Y-H4K8ac_peak_13994 | 5.29015  |                                                     |
| 5 | 156816233 | 156816520 | 5Y-H4K8ac_peak_13995 | 7.11863  |                                                     |
| 5 | 156874245 | 156874458 | 5Y-H4K8ac_peak_13996 | 7.31807  |                                                     |
| 5 | 156876532 | 156876738 | 5Y-H4K8ac_peak_13997 | 5.23083  |                                                     |
| 5 | 156886959 | 156887532 | 5Y-H4K8ac_peak_13998 | 10.12457 | CTB-109A12.1_ENSG00000251405;NIPAL4_ENSG00000172548 |
| 5 | 157098607 | 157098830 | 5Y-H4K8ac_peak_13999 | 9.38203  | SOX30_ENSG00000039600;C5orf52_ENSG00000187658       |
| 5 | 158522200 | 158522518 | 5Y-H4K8ac_peak_14000 | 5.65584  |                                                     |
| 5 | 158533688 | 158533945 | 5Y-H4K8ac_peak_14001 | 5.23083  |                                                     |
| 5 | 158689980 | 158690338 | 5Y-H4K8ac_peak_14002 | 7.59101  | UBLCP1_ENSG00000164332                              |
| 5 | 159435529 | 159435851 | 5Y-H4K8ac_peak_14003 | 16.01349 | Y_RNA_ENSG00000199398;TTC1_ENSG00000113312          |
| 5 | 159545914 | 159546308 | 5Y-H4K8ac_peak_14004 | 7.01266  | PWWP2A_ENSG00000170234                              |
| 5 | 159591593 | 159592174 | 5Y-H4K8ac_peak_14005 | 4.77126  |                                                     |
| 5 | 159602590 | 159602811 | 5Y-H4K8ac_peak_14006 | 4.95697  |                                                     |
| 5 | 159713041 | 159713342 | 5Y-H4K8ac_peak_14007 | 4.84727  |                                                     |
| 5 | 159714011 | 159714367 | 5Y-H4K8ac_peak_14008 | 8.43511  |                                                     |
| 5 | 159739694 | 159739928 | 5Y-H4K8ac_peak_14009 | 6.50117  |                                                     |
| 5 | 159771884 | 159772128 | 5Y-H4K8ac_peak_14010 | 7.01266  | CCNJL_ENSG00000135083                               |
| 5 | 159797426 | 159797793 | 5Y-H4K8ac_peak_14011 | 7.97699  | C1QTNF2_ENSG00000145861                             |
| 5 | 159826589 | 159827028 | 5Y-H4K8ac_peak_14012 | 8.43511  | C5orf54_ENSG00000221886                             |
| 5 | 162886854 | 162887191 | 5Y-H4K8ac_peak_14013 | 4.29586  | NUDCD2_ENSG00000170584;HMMR_ENSG00000072571         |
| 5 | 164006672 | 164006915 | 5Y-H4K8ac_peak_14014 | 8.2913   |                                                     |
| 5 | 166405226 | 166405851 | 5Y-H4K8ac_peak_14015 | 5.59843  |                                                     |
| 5 | 167343516 | 167343737 | 5Y-H4K8ac_peak_14016 | 4.24332  |                                                     |
| 5 | 167589369 | 167589617 | 5Y-H4K8ac_peak_14017 | 10.65037 |                                                     |
| 5 | 167718435 | 167718738 | 5Y-H4K8ac_peak_14018 | 8.33296  | WWC1_ENSG00000113645                                |
| 5 | 167718956 | 167719541 | 5Y-H4K8ac_peak_14019 | 6.79955  | WWC1_ENSG00000113645                                |
| 5 | 167955647 | 167955837 | 5Y-H4K8ac_peak_14020 | 9.89244  | FBLL1_ENSG00000188573                               |
| 5 | 167956120 | 167956433 | 5Y-H4K8ac_peak_14021 | 4.77126  | FBLL1_ENSG00000188573                               |
| 5 | 167956791 | 167957190 | 5Y-H4K8ac_peak_14022 | 4.95697  | FBLL1_ENSG00000188573                               |
| 5 | 168006140 | 168006349 | 5Y-H4K8ac_peak_14023 | 9.51254  | PANK3_ENSG00000120137                               |
| 5 | 168079669 | 168080247 | 5Y-H4K8ac_peak_14024 | 7.9215   |                                                     |
| 5 | 168085889 | 168086124 | 5Y-H4K8ac_peak_14025 | 7.3889   |                                                     |
| 5 | 168182503 | 168183472 | 5Y-H4K8ac_peak_14026 | 4.44548  |                                                     |
| 5 | 168194905 | 168195226 | 5Y-H4K8ac_peak_14027 | 8.79957  | MIR218-2_ENSG00000207739                            |
| 5 | 168196444 | 168196727 | 5Y-H4K8ac_peak_14028 | 5.64909  |                                                     |

|   |           |           |                      |          |                             |
|---|-----------|-----------|----------------------|----------|-----------------------------|
| 5 | 168198058 | 168198915 | 5Y-H4K8ac_peak_14029 | 11.1169  |                             |
| 5 | 168199153 | 168199369 | 5Y-H4K8ac_peak_14030 | 5.58165  |                             |
| 5 | 168199965 | 168200304 | 5Y-H4K8ac_peak_14031 | 10.18556 |                             |
| 5 | 168256822 | 168257129 | 5Y-H4K8ac_peak_14032 | 6.10343  |                             |
| 5 | 168266699 | 168266990 | 5Y-H4K8ac_peak_14033 | 4.84727  |                             |
| 5 | 168271538 | 168271819 | 5Y-H4K8ac_peak_14034 | 8.73392  |                             |
| 5 | 168309929 | 168310213 | 5Y-H4K8ac_peak_14035 | 5.67283  |                             |
| 5 | 168311860 | 168312217 | 5Y-H4K8ac_peak_14036 | 8.69112  |                             |
| 5 | 168314352 | 168314570 | 5Y-H4K8ac_peak_14037 | 6.3265   |                             |
| 5 | 168321500 | 168321699 | 5Y-H4K8ac_peak_14038 | 8.63306  |                             |
| 5 | 168323105 | 168323378 | 5Y-H4K8ac_peak_14039 | 4.07874  |                             |
| 5 | 168324768 | 168325086 | 5Y-H4K8ac_peak_14040 | 13.8759  |                             |
| 5 | 168343304 | 168343586 | 5Y-H4K8ac_peak_14041 | 4.51076  |                             |
| 5 | 168373344 | 168373818 | 5Y-H4K8ac_peak_14042 | 5.98695  |                             |
| 5 | 168526767 | 168526996 | 5Y-H4K8ac_peak_14043 | 6.27984  |                             |
| 5 | 168578617 | 168578839 | 5Y-H4K8ac_peak_14044 | 5.97532  |                             |
| 5 | 168727703 | 168727995 | 5Y-H4K8ac_peak_14045 | 6.08523  | SLIT3_ENSG00000184347       |
| 5 | 169581186 | 169581725 | 5Y-H4K8ac_peak_14046 | 5.40331  |                             |
| 5 | 169853850 | 169854080 | 5Y-H4K8ac_peak_14047 | 7.59101  |                             |
| 5 | 170011472 | 170011684 | 5Y-H4K8ac_peak_14048 | 6.34046  |                             |
| 5 | 170031698 | 170032020 | 5Y-H4K8ac_peak_14049 | 4.50834  |                             |
| 5 | 170173342 | 170173841 | 5Y-H4K8ac_peak_14050 | 9.58986  |                             |
| 5 | 170179607 | 170179802 | 5Y-H4K8ac_peak_14051 | 7.89273  |                             |
| 5 | 170735364 | 170735737 | 5Y-H4K8ac_peak_14052 | 5.65584  | TLX3_ENSG00000164438        |
| 5 | 170736453 | 170737077 | 5Y-H4K8ac_peak_14053 | 6.54441  | TLX3_ENSG00000164438        |
| 5 | 170815038 | 170815405 | 5Y-H4K8ac_peak_14054 | 8.33296  | NPM1_ENSG00000181163        |
| 5 | 171432837 | 171433038 | 5Y-H4K8ac_peak_14055 | 9.68432  | FBXW11_ENSG00000072803      |
| 5 | 171571739 | 171572068 | 5Y-H4K8ac_peak_14056 | 7.89142  |                             |
| 5 | 171671788 | 171672133 | 5Y-H4K8ac_peak_14057 | 5.29015  |                             |
| 5 | 171865064 | 171865419 | 5Y-H4K8ac_peak_14058 | 7.89273  |                             |
| 5 | 172139467 | 172139762 | 5Y-H4K8ac_peak_14059 | 5.65584  |                             |
| 5 | 172197940 | 172198138 | 5Y-H4K8ac_peak_14060 | 5.5192   | DUSP1_ENSG00000120129       |
| 5 | 172198505 | 172198705 | 5Y-H4K8ac_peak_14061 | 7.09658  | DUSP1_ENSG00000120129       |
| 5 | 172711062 | 172711388 | 5Y-H4K8ac_peak_14062 | 8.04493  |                             |
| 5 | 172716924 | 172717461 | 5Y-H4K8ac_peak_14063 | 6.50117  |                             |
| 5 | 172719254 | 172719575 | 5Y-H4K8ac_peak_14064 | 5.12213  | RNA5SP200_ENSG00000252169   |
| 5 | 172750553 | 172750770 | 5Y-H4K8ac_peak_14065 | 7.87406  |                             |
| 5 | 172756392 | 172756726 | 5Y-H4K8ac_peak_14066 | 8.20773  | STC2_ENSG00000113739        |
| 5 | 173070665 | 173070979 | 5Y-H4K8ac_peak_14067 | 5.26353  |                             |
| 5 | 173098095 | 173098806 | 5Y-H4K8ac_peak_14068 | 9.78792  |                             |
| 5 | 173116909 | 173117271 | 5Y-H4K8ac_peak_14069 | 7.13294  | CTB-43E15.2_ENSG00000253428 |
| 5 | 173125240 | 173125605 | 5Y-H4K8ac_peak_14070 | 8.47164  |                             |
| 5 | 173134615 | 173134808 | 5Y-H4K8ac_peak_14071 | 7.63144  |                             |
| 5 | 173147924 | 173148280 | 5Y-H4K8ac_peak_14072 | 4.95697  |                             |
| 5 | 173155815 | 173156213 | 5Y-H4K8ac_peak_14073 | 8.93923  | AC008674.1_ENSG00000263401  |
| 5 | 173180460 | 173180716 | 5Y-H4K8ac_peak_14074 | 3.96434  |                             |

|   |           |           |                      |          |                                                       |
|---|-----------|-----------|----------------------|----------|-------------------------------------------------------|
| 5 | 173314549 | 173315072 | 5Y-H4K8ac_peak_14075 | 13.2534  | CPEB4_ENSG00000113742                                 |
| 5 | 173510061 | 173511020 | 5Y-H4K8ac_peak_14076 | 10.19948 |                                                       |
| 5 | 173511387 | 173511700 | 5Y-H4K8ac_peak_14077 | 7.11863  |                                                       |
| 5 | 173572149 | 173572519 | 5Y-H4K8ac_peak_14078 | 8.04493  |                                                       |
| 5 | 173650090 | 173650412 | 5Y-H4K8ac_peak_14079 | 5.65584  |                                                       |
| 5 | 173660003 | 173660387 | 5Y-H4K8ac_peak_14080 | 7.31815  |                                                       |
| 5 | 173661563 | 173661786 | 5Y-H4K8ac_peak_14081 | 7.09444  |                                                       |
| 5 | 173663808 | 173664178 | 5Y-H4K8ac_peak_14082 | 7.3889   |                                                       |
| 5 | 173679912 | 173680104 | 5Y-H4K8ac_peak_14083 | 9.38203  |                                                       |
| 5 | 173736547 | 173736792 | 5Y-H4K8ac_peak_14084 | 7.50148  |                                                       |
| 5 | 173738452 | 173739065 | 5Y-H4K8ac_peak_14085 | 7.44077  |                                                       |
| 5 | 173739275 | 173739649 | 5Y-H4K8ac_peak_14086 | 5.24695  |                                                       |
| 5 | 173755920 | 173756155 | 5Y-H4K8ac_peak_14087 | 6.77436  | CTC-430J12.2_ENSG00000249722                          |
| 5 | 173763960 | 173764240 | 5Y-H4K8ac_peak_14088 | 6.77436  | RP11-267A15.1_ENSG00000249306                         |
| 5 | 174178199 | 174178497 | 5Y-H4K8ac_peak_14089 | 7.11863  | CTD-2532K18.1_ENSG00000251670;MIR4634_ENSG00000266890 |
| 5 | 174220502 | 174220837 | 5Y-H4K8ac_peak_14090 | 9.38203  |                                                       |
| 5 | 174905630 | 174906234 | 5Y-H4K8ac_peak_14091 | 10.5157  |                                                       |
| 5 | 175223645 | 175224474 | 5Y-H4K8ac_peak_14092 | 6.78128  | CPLX2_ENSG00000145920                                 |
| 5 | 175263822 | 175264266 | 5Y-H4K8ac_peak_14093 | 5.67283  |                                                       |
| 5 | 175287930 | 175288791 | 5Y-H4K8ac_peak_14094 | 8.93923  |                                                       |
| 5 | 175788271 | 175788714 | 5Y-H4K8ac_peak_14095 | 6.14981  | KIAA1191_ENSG00000122203                              |
| 5 | 175792607 | 175792988 | 5Y-H4K8ac_peak_14096 | 8.47164  | ARL10_ENSG00000175414                                 |
| 5 | 175843074 | 175843406 | 5Y-H4K8ac_peak_14097 | 4.90696  | CLTB_ENSG00000175416                                  |
| 5 | 175875429 | 175875621 | 5Y-H4K8ac_peak_14098 | 7.01266  | FAF2_ENSG00000113194                                  |
| 5 | 175963138 | 175964179 | 5Y-H4K8ac_peak_14099 | 23.71361 | RNF44_ENSG00000146083                                 |
| 5 | 176037282 | 176037475 | 5Y-H4K8ac_peak_14100 | 10.43045 | GPRIN1_ENSG00000169258                                |
| 5 | 176152820 | 176153130 | 5Y-H4K8ac_peak_14101 | 4.51497  | RP11-375B1.1_ENSG00000248484                          |
| 5 | 176220176 | 176220662 | 5Y-H4K8ac_peak_14102 | 10.11191 |                                                       |
| 5 | 176236997 | 176237411 | 5Y-H4K8ac_peak_14103 | 7.11863  | UNC5A_ENSG00000113763                                 |
| 5 | 176244775 | 176245238 | 5Y-H4K8ac_peak_14104 | 7.59101  |                                                       |
| 5 | 176249554 | 176249873 | 5Y-H4K8ac_peak_14105 | 6.08523  |                                                       |
| 5 | 176258471 | 176258696 | 5Y-H4K8ac_peak_14106 | 6.37023  |                                                       |
| 5 | 176261247 | 176261483 | 5Y-H4K8ac_peak_14107 | 5.08308  |                                                       |
| 5 | 176261877 | 176262211 | 5Y-H4K8ac_peak_14108 | 4.642    |                                                       |
| 5 | 176265995 | 176266185 | 5Y-H4K8ac_peak_14109 | 4.50834  |                                                       |
| 5 | 176267134 | 176267364 | 5Y-H4K8ac_peak_14110 | 6.37023  |                                                       |
| 5 | 176271752 | 176272140 | 5Y-H4K8ac_peak_14111 | 7.50148  |                                                       |
| 5 | 176289627 | 176289987 | 5Y-H4K8ac_peak_14112 | 7.70703  |                                                       |
| 5 | 176310885 | 176311089 | 5Y-H4K8ac_peak_14113 | 6.1654   |                                                       |
| 5 | 176433283 | 176433604 | 5Y-H4K8ac_peak_14114 | 8.2913   |                                                       |
| 5 | 176449789 | 176450053 | 5Y-H4K8ac_peak_14115 | 9.00954  | UIMC1_ENSG00000087206;ZNF346_ENSG00000113761          |
| 5 | 176514013 | 176514244 | 5Y-H4K8ac_peak_14116 | 4.77126  | FGFR4_ENSG00000160867                                 |
| 5 | 176525410 | 176526015 | 5Y-H4K8ac_peak_14117 | 9.23159  |                                                       |
| 5 | 176560068 | 176560982 | 5Y-H4K8ac_peak_14118 | 8.14883  | NSD1_ENSG00000165671                                  |
| 5 | 176779092 | 176779743 | 5Y-H4K8ac_peak_14119 | 8.69112  | LMAN2_ENSG00000169223                                 |
| 5 | 176829180 | 176829456 | 5Y-H4K8ac_peak_14120 | 5.12488  | GRK6_ENSG00000198055                                  |

|   |           |           |                      |          |                                                       |
|---|-----------|-----------|----------------------|----------|-------------------------------------------------------|
| 5 | 176830342 | 176830755 | 5Y-H4K8ac_peak_14121 | 9.15007  | GRK6_ENSG00000198055                                  |
| 5 | 176831121 | 176832001 | 5Y-H4K8ac_peak_14122 | 15.82713 | GRK6_ENSG00000198055                                  |
| 5 | 176873874 | 176874402 | 5Y-H4K8ac_peak_14123 | 13.10076 | PRR7-AS1_ENSG00000246334;PRR7_ENSG00000131188         |
| 5 | 176874943 | 176875289 | 5Y-H4K8ac_peak_14124 | 8.79957  | PRR7-AS1_ENSG00000246334                              |
| 5 | 176882772 | 176883046 | 5Y-H4K8ac_peak_14125 | 7.28023  |                                                       |
| 5 | 176899537 | 176899880 | 5Y-H4K8ac_peak_14126 | 8.37729  |                                                       |
| 5 | 176900117 | 176900577 | 5Y-H4K8ac_peak_14127 | 8.24461  | DBN1_ENSG00000113758                                  |
| 5 | 176905097 | 176905535 | 5Y-H4K8ac_peak_14128 | 7.89142  |                                                       |
| 5 | 176905917 | 176906349 | 5Y-H4K8ac_peak_14129 | 6.10343  |                                                       |
| 5 | 176906978 | 176907172 | 5Y-H4K8ac_peak_14130 | 4.77307  |                                                       |
| 5 | 176922398 | 176922588 | 5Y-H4K8ac_peak_14131 | 4.07402  | RP11-1334A24.6_ENSG00000248996                        |
| 5 | 176981786 | 176981993 | 5Y-H4K8ac_peak_14132 | 7.38046  | FAM193B_ENSG00000146067;RP11-1277A3.3_ENSG00000272459 |
| 5 | 177026629 | 177026970 | 5Y-H4K8ac_peak_14133 | 9.26157  | B4GALT7_ENSG00000027847                               |
| 5 | 177027185 | 177027413 | 5Y-H4K8ac_peak_14134 | 10.19948 | B4GALT7_ENSG00000027847                               |
| 5 | 177551116 | 177551527 | 5Y-H4K8ac_peak_14135 | 5.449    |                                                       |
| 5 | 177557536 | 177557821 | 5Y-H4K8ac_peak_14136 | 12.05638 | RMND5B_ENSG00000145916                                |
| 5 | 177631820 | 177632151 | 5Y-H4K8ac_peak_14137 | 7.09658  | HNRNPAB_ENSG00000197451                               |
| 5 | 177659213 | 177660178 | 5Y-H4K8ac_peak_14138 | 7.50148  | PHYKPL_ENSG00000175309                                |
| 5 | 177765525 | 177765755 | 5Y-H4K8ac_peak_14139 | 6.50117  |                                                       |
| 5 | 177775030 | 177776005 | 5Y-H4K8ac_peak_14140 | 10.19948 |                                                       |
| 5 | 177776673 | 177777024 | 5Y-H4K8ac_peak_14141 | 8.79957  | RP11-1259L22.1_ENSG00000253698                        |
| 5 | 177777973 | 177778169 | 5Y-H4K8ac_peak_14142 | 6.77436  | RP11-1259L22.1_ENSG00000253698                        |
| 5 | 177783598 | 177783816 | 5Y-H4K8ac_peak_14143 | 6.46053  |                                                       |
| 5 | 177845552 | 177845808 | 5Y-H4K8ac_peak_14144 | 4.9885   |                                                       |
| 5 | 177855497 | 177856626 | 5Y-H4K8ac_peak_14145 | 8.69112  |                                                       |
| 5 | 177861566 | 177861774 | 5Y-H4K8ac_peak_14146 | 8.24461  |                                                       |
| 5 | 177869519 | 177869907 | 5Y-H4K8ac_peak_14147 | 8.33296  | CTB-26E19.1_ENSG00000245688                           |
| 5 | 178054311 | 178054536 | 5Y-H4K8ac_peak_14148 | 7.11863  |                                                       |
| 5 | 178323060 | 178323352 | 5Y-H4K8ac_peak_14149 | 8.47164  | ZFP2_ENSG00000198939                                  |
| 5 | 178450920 | 178451257 | 5Y-H4K8ac_peak_14150 | 5.23083  | ZNF879_ENSG00000234284                                |
| 5 | 178487472 | 178488165 | 5Y-H4K8ac_peak_14151 | 13.0168  | ZNF354C_ENSG00000177932                               |
| 5 | 178593676 | 178594199 | 5Y-H4K8ac_peak_14152 | 7.59101  |                                                       |
| 5 | 178618748 | 178619419 | 5Y-H4K8ac_peak_14153 | 13.92877 |                                                       |
| 5 | 178688788 | 178689129 | 5Y-H4K8ac_peak_14154 | 7.30348  |                                                       |
| 5 | 178692133 | 178693063 | 5Y-H4K8ac_peak_14155 | 10.54764 |                                                       |
| 5 | 178693840 | 178694071 | 5Y-H4K8ac_peak_14156 | 6.47245  |                                                       |
| 5 | 178698210 | 178698669 | 5Y-H4K8ac_peak_14157 | 6.95844  |                                                       |
| 5 | 178714711 | 178715209 | 5Y-H4K8ac_peak_14158 | 6.00598  |                                                       |
| 5 | 178715743 | 178716234 | 5Y-H4K8ac_peak_14159 | 9.28129  |                                                       |
| 5 | 178720977 | 178721253 | 5Y-H4K8ac_peak_14160 | 6.73047  |                                                       |
| 5 | 178721607 | 178722067 | 5Y-H4K8ac_peak_14161 | 10.1994  |                                                       |
| 5 | 178722663 | 178723043 | 5Y-H4K8ac_peak_14162 | 5.24695  |                                                       |
| 5 | 178736042 | 178736344 | 5Y-H4K8ac_peak_14163 | 6.43068  |                                                       |
| 5 | 178736902 | 178737418 | 5Y-H4K8ac_peak_14164 | 8.79957  |                                                       |
| 5 | 178737676 | 178737991 | 5Y-H4K8ac_peak_14165 | 11.36989 |                                                       |
| 5 | 178740933 | 178741195 | 5Y-H4K8ac_peak_14166 | 6.75784  |                                                       |



|   |           |           |                      |          |                                                           |
|---|-----------|-----------|----------------------|----------|-----------------------------------------------------------|
| 5 | 178741487 | 178741927 | 5Y-H4K8ac_peak_14167 | 12.26819 |                                                           |
| 5 | 178749720 | 178750001 | 5Y-H4K8ac_peak_14168 | 7.50148  |                                                           |
| 5 | 178750329 | 178750555 | 5Y-H4K8ac_peak_14169 | 9.04239  |                                                           |
| 5 | 178752395 | 178753175 | 5Y-H4K8ac_peak_14170 | 6.64195  |                                                           |
| 5 | 178757630 | 178757865 | 5Y-H4K8ac_peak_14171 | 7.04637  |                                                           |
| 5 | 178862981 | 178863260 | 5Y-H4K8ac_peak_14172 | 7.90236  |                                                           |
| 5 | 178864145 | 178864946 | 5Y-H4K8ac_peak_14173 | 12.79198 |                                                           |
| 5 | 178865326 | 178866144 | 5Y-H4K8ac_peak_14174 | 17.67751 |                                                           |
| 5 | 178977269 | 178978204 | 5Y-H4K8ac_peak_14175 | 16.50659 | RUFY1_ENSG00000176783                                     |
| 5 | 179050119 | 179050599 | 5Y-H4K8ac_peak_14176 | 13.0168  |                                                           |
| 5 | 179051009 | 179051752 | 5Y-H4K8ac_peak_14177 | 19.52902 |                                                           |
| 5 | 179105187 | 179105490 | 5Y-H4K8ac_peak_14178 | 13.06587 | CANX_ENSG00000127022;HMGB3P22_ENSG00000225051             |
| 5 | 179105753 | 179106457 | 5Y-H4K8ac_peak_14179 | 7.90751  | CANX_ENSG00000127022;HMGB3P22_ENSG00000225051             |
| 5 | 179125344 | 179125559 | 5Y-H4K8ac_peak_14180 | 8.47164  |                                                           |
| 5 | 179159893 | 179160122 | 5Y-H4K8ac_peak_14181 | 8.75926  | MAML1_ENSG00000161021                                     |
| 5 | 179234165 | 179234357 | 5Y-H4K8ac_peak_14182 | 8.24461  | MGAT4B_ENSG00000161013;SQSTM1_ENSG00000161011             |
| 5 | 179247093 | 179247730 | 5Y-H4K8ac_peak_14183 | 13.85283 |                                                           |
| 5 | 179286131 | 179286423 | 5Y-H4K8ac_peak_14184 | 8.5915   | CTC-241N9.1_ENSG00000245317                               |
| 5 | 179498101 | 179499116 | 5Y-H4K8ac_peak_14185 | 9.31608  | RNF130_ENSG00000113269                                    |
| 5 | 179517186 | 179517376 | 5Y-H4K8ac_peak_14186 | 4.71803  |                                                           |
| 5 | 179588699 | 179588972 | 5Y-H4K8ac_peak_14187 | 7.50148  |                                                           |
| 5 | 179603856 | 179604560 | 5Y-H4K8ac_peak_14188 | 9.01738  |                                                           |
| 5 | 179719328 | 179719945 | 5Y-H4K8ac_peak_14189 | 8.43011  | MAPK9_ENSG00000050748;CTB-129O4.1_ENSG00000248367         |
| 5 | 179808369 | 179808580 | 5Y-H4K8ac_peak_14190 | 10.19948 |                                                           |
| 5 | 179808847 | 179809058 | 5Y-H4K8ac_peak_14191 | 7.58806  |                                                           |
| 5 | 179921436 | 179921916 | 5Y-H4K8ac_peak_14192 | 11.19336 | CNOT6_ENSG00000113300                                     |
| 5 | 180257758 | 180258408 | 5Y-H4K8ac_peak_14193 | 11.09973 | LINC00847_ENSG00000245060                                 |
| 5 | 180287887 | 180288750 | 5Y-H4K8ac_peak_14194 | 9.23159  | ZFP62_ENSG00000196670                                     |
| 5 | 180588323 | 180588629 | 5Y-H4K8ac_peak_14195 | 8.27399  |                                                           |
| 5 | 180618319 | 180618523 | 5Y-H4K8ac_peak_14196 | 6.06162  | CTC-338M12.2_ENSG00000248473;CTC-338M12.5_ENSG00000250222 |
| 5 | 180632056 | 180632311 | 5Y-H4K8ac_peak_14197 | 6.14981  | TRIM7_ENSG00000146054;CTC-338M12.1_ENSG00000248514        |
| 5 | 180670645 | 180670876 | 5Y-H4K8ac_peak_14198 | 5.24695  | SNORD95_ENSG00000264549                                   |
| 5 | 180688288 | 180688830 | 5Y-H4K8ac_peak_14199 | 12.26606 | TRIM52_ENSG00000183718;TRIM52-AS1_ENSG00000248275         |
| 6 | 291659    | 292341    | 5Y-H4K8ac_peak_14200 | 14.86775 | DUSP22_ENSG00000112679                                    |
| 6 | 1614211   | 1614740   | 5Y-H4K8ac_peak_14201 | 6.73047  |                                                           |
| 6 | 1904783   | 1905390   | 5Y-H4K8ac_peak_14202 | 11.09973 |                                                           |
| 6 | 2634330   | 2634689   | 5Y-H4K8ac_peak_14203 | 10.95042 | C6orf195_ENSG00000164385                                  |
| 6 | 2765801   | 2766093   | 5Y-H4K8ac_peak_14204 | 9.23159  | WRNIP1_ENSG00000124535                                    |
| 6 | 2903440   | 2903679   | 5Y-H4K8ac_peak_14205 | 5.23083  | SERPINB9_ENSG00000170542                                  |
| 6 | 2971194   | 2971578   | 5Y-H4K8ac_peak_14206 | 12.9311  | SERPINB6_ENSG00000124570                                  |
| 6 | 2971838   | 2972348   | 5Y-H4K8ac_peak_14207 | 6.37023  | SERPINB6_ENSG00000124570                                  |
| 6 | 2989038   | 2989260   | 5Y-H4K8ac_peak_14208 | 9.30505  | LINC01011_ENSG00000244041;NQO2_ENSG00000124588            |
| 6 | 3054151   | 3054361   | 5Y-H4K8ac_peak_14209 | 10.36926 |                                                           |
| 6 | 3063974   | 3064287   | 5Y-H4K8ac_peak_14210 | 4.32718  | RIPK1_ENSG00000137275                                     |
| 6 | 3068894   | 3069120   | 5Y-H4K8ac_peak_14211 | 6.64195  | RP1-40E16.12_ENSG00000272277                              |
| 6 | 3069355   | 3069566   | 5Y-H4K8ac_peak_14212 | 4.09853  | RP1-40E16.12_ENSG00000272277                              |

|   |          |          |                      |          |                                                        |
|---|----------|----------|----------------------|----------|--------------------------------------------------------|
| 6 | 3157988  | 3158199  | 5Y-H4K8ac_peak_14213 | 9.51254  | TUBB2A_ENSG00000137267                                 |
| 6 | 3163070  | 3163267  | 5Y-H4K8ac_peak_14214 | 6.77436  |                                                        |
| 6 | 3180498  | 3180793  | 5Y-H4K8ac_peak_14215 | 7.31815  | TUBB2BP1_ENSG00000216819                               |
| 6 | 3228308  | 3228733  | 5Y-H4K8ac_peak_14216 | 7.59101  |                                                        |
| 6 | 3229382  | 3230155  | 5Y-H4K8ac_peak_14217 | 9.30505  |                                                        |
| 6 | 3231452  | 3231692  | 5Y-H4K8ac_peak_14218 | 8.24461  | TUBB2B_ENSG00000137285;PSMG4_ENSG00000180822           |
| 6 | 3232158  | 3232371  | 5Y-H4K8ac_peak_14219 | 9.96543  | TUBB2B_ENSG00000137285;PSMG4_ENSG00000180822           |
| 6 | 3826633  | 3826836  | 5Y-H4K8ac_peak_14220 | 6.77436  |                                                        |
| 6 | 3849190  | 3849400  | 5Y-H4K8ac_peak_14221 | 6.50117  | FAM50B_ENSG00000145945                                 |
| 6 | 4018506  | 4018809  | 5Y-H4K8ac_peak_14222 | 7.11863  | RP3-406P24.4_ENSG00000272248                           |
| 6 | 4021679  | 4021899  | 5Y-H4K8ac_peak_14223 | 5.12213  | RP3-406P24.3_ENSG00000230648;PRPF4B_ENSG00000112739    |
| 6 | 4775290  | 4775487  | 5Y-H4K8ac_peak_14224 | 4.84727  | RP3-430A16.1_ENSG00000236336                           |
| 6 | 5261025  | 5261403  | 5Y-H4K8ac_peak_14225 | 10.90365 | LYRM4_ENSG00000214113;FARS2_ENSG00000145982            |
| 6 | 5261613  | 5261948  | 5Y-H4K8ac_peak_14226 | 8.75926  | LYRM4_ENSG00000214113;FARS2_ENSG00000145982            |
| 6 | 5664084  | 5664331  | 5Y-H4K8ac_peak_14227 | 10.46287 |                                                        |
| 6 | 5749258  | 5749463  | 5Y-H4K8ac_peak_14228 | 6.50117  |                                                        |
| 6 | 7313863  | 7314252  | 5Y-H4K8ac_peak_14229 | 8.84534  |                                                        |
| 6 | 7910288  | 7910806  | 5Y-H4K8ac_peak_14230 | 8.43011  |                                                        |
| 6 | 7911203  | 7911469  | 5Y-H4K8ac_peak_14231 | 12.05638 |                                                        |
| 6 | 8065020  | 8065226  | 5Y-H4K8ac_peak_14232 | 6.1654   | BLOC1S5-TXNDC5_ENSG00000259040;BLOC1S5_ENSG00000188428 |
| 6 | 8102521  | 8102724  | 5Y-H4K8ac_peak_14233 | 6.50117  | EEF1E1-BLOC1S5_ENSG00000265818;EEF1E1_ENSG00000124802  |
| 6 | 8278057  | 8278247  | 5Y-H4K8ac_peak_14234 | 7.72345  |                                                        |
| 6 | 8278501  | 8278715  | 5Y-H4K8ac_peak_14235 | 8.2913   |                                                        |
| 6 | 10404931 | 10405237 | 5Y-H4K8ac_peak_14236 | 7.50501  |                                                        |
| 6 | 10660050 | 10660339 | 5Y-H4K8ac_peak_14237 | 5.23083  |                                                        |
| 6 | 10720269 | 10720602 | 5Y-H4K8ac_peak_14238 | 9.30505  |                                                        |
| 6 | 10720864 | 10721198 | 5Y-H4K8ac_peak_14239 | 8.97752  |                                                        |
| 6 | 11094077 | 11094324 | 5Y-H4K8ac_peak_14240 | 11.1169  | SMIM13_ENSG00000224531                                 |
| 6 | 13558823 | 13559132 | 5Y-H4K8ac_peak_14241 | 4.84727  |                                                        |
| 6 | 13574903 | 13575461 | 5Y-H4K8ac_peak_14242 | 4.50834  | SIRT5_ENSG00000124523                                  |
| 6 | 13712211 | 13712528 | 5Y-H4K8ac_peak_14243 | 9.93099  | RANBP9_ENSG0000010017                                  |
| 6 | 13860043 | 13860288 | 5Y-H4K8ac_peak_14244 | 5.90587  |                                                        |
| 6 | 13873783 | 13874213 | 5Y-H4K8ac_peak_14245 | 11.1169  |                                                        |
| 6 | 15244975 | 15245337 | 5Y-H4K8ac_peak_14246 | 8.35139  | RP11-560J1.2_ENSG00000271888                           |
| 6 | 15245905 | 15246109 | 5Y-H4K8ac_peak_14247 | 7.59101  | RP11-560J1.2_ENSG00000271888;JARID2_ENSG00000008083    |
| 6 | 15444524 | 15444814 | 5Y-H4K8ac_peak_14248 | 11.19336 |                                                        |
| 6 | 15662909 | 15663120 | 5Y-H4K8ac_peak_14249 | 5.8635   | DTNBP1_ENSG00000047579                                 |
| 6 | 17580480 | 17580726 | 5Y-H4K8ac_peak_14250 | 7.38046  |                                                        |
| 6 | 17581077 | 17581332 | 5Y-H4K8ac_peak_14251 | 11.1169  | SUMO2P13_ENSG00000218359                               |
| 6 | 17706816 | 17707072 | 5Y-H4K8ac_peak_14252 | 8.79957  | NUP153_ENSG00000124789;RP11-500C11.3_ENSG00000272269   |
| 6 | 18264223 | 18264696 | 5Y-H4K8ac_peak_14253 | 4.29586  | DEK_ENSG00000124795                                    |
| 6 | 20127354 | 20127623 | 5Y-H4K8ac_peak_14254 | 8.17203  |                                                        |
| 6 | 20212327 | 20212655 | 5Y-H4K8ac_peak_14255 | 10.11191 | MBOAT1_ENSG00000172197;RP11-239H6.2_ENSG00000227803    |
| 6 | 20402748 | 20403027 | 5Y-H4K8ac_peak_14256 | 9.02782  | E2F3_ENSG00000112242                                   |
| 6 | 20403289 | 20403597 | 5Y-H4K8ac_peak_14257 | 6.73385  | E2F3_ENSG00000112242                                   |
| 6 | 21199645 | 21199914 | 5Y-H4K8ac_peak_14258 | 7.01266  |                                                        |

|   |          |          |                      |          |                                                                                |
|---|----------|----------|----------------------|----------|--------------------------------------------------------------------------------|
| 6 | 21207208 | 21207403 | 5Y-H4K8ac_peak_14259 | 6.52593  |                                                                                |
| 6 | 21223951 | 21224146 | 5Y-H4K8ac_peak_14260 | 6.90749  |                                                                                |
| 6 | 21244472 | 21244671 | 5Y-H4K8ac_peak_14261 | 5.98695  |                                                                                |
| 6 | 21383214 | 21383430 | 5Y-H4K8ac_peak_14262 | 9.15007  |                                                                                |
| 6 | 21523180 | 21524144 | 5Y-H4K8ac_peak_14263 | 9.78792  | RP11-204E9.1_ENSG00000231754                                                   |
| 6 | 21587787 | 21588219 | 5Y-H4K8ac_peak_14264 | 8.24461  |                                                                                |
| 6 | 21588500 | 21588948 | 5Y-H4K8ac_peak_14265 | 7.11863  |                                                                                |
| 6 | 21594543 | 21595288 | 5Y-H4K8ac_peak_14266 | 11.04919 | SOX4_ENSG00000124766                                                           |
| 6 | 21665891 | 21666440 | 5Y-H4K8ac_peak_14267 | 6.43775  | CASC15_ENSG00000272168                                                         |
| 6 | 22146846 | 22147311 | 5Y-H4K8ac_peak_14268 | 18.2299  | CASC14_ENSG00000260455                                                         |
| 6 | 22828588 | 22828997 | 5Y-H4K8ac_peak_14269 | 8.33296  |                                                                                |
| 6 | 23283261 | 23283459 | 5Y-H4K8ac_peak_14270 | 6.83519  |                                                                                |
| 6 | 23446957 | 23447166 | 5Y-H4K8ac_peak_14271 | 4.07874  |                                                                                |
| 6 | 23656715 | 23656928 | 5Y-H4K8ac_peak_14272 | 7.31807  |                                                                                |
| 6 | 24403335 | 24403561 | 5Y-H4K8ac_peak_14273 | 4.642    | MRS2_ENSG00000124532                                                           |
| 6 | 24495318 | 24495756 | 5Y-H4K8ac_peak_14274 | 8.47164  | GPLD1_ENSG00000112293;ALDH5A1_ENSG00000112294                                  |
| 6 | 24720800 | 24721020 | 5Y-H4K8ac_peak_14275 | 7.11863  | C6orf62_ENSG00000112308                                                        |
| 6 | 24775213 | 24775516 | 5Y-H4K8ac_peak_14276 | 13.0168  | GMNN_ENSG00000112312                                                           |
| 6 | 24855905 | 24856122 | 5Y-H4K8ac_peak_14277 | 5.98695  |                                                                                |
| 6 | 25218429 | 25218694 | 5Y-H4K8ac_peak_14278 | 6.20875  | RP11-191A15.4_ENSG00000219681                                                  |
| 6 | 26034214 | 26034566 | 5Y-H4K8ac_peak_14279 | 5.54013  | HIST1H2AB_ENSG00000137259                                                      |
| 6 | 26043231 | 26043651 | 5Y-H4K8ac_peak_14280 | 6.59249  | HIST1H2BB_ENSG00000196226;U91328.2_ENSG00000234816                             |
| 6 | 26184188 | 26184425 | 5Y-H4K8ac_peak_14281 | 11.19336 | HIST1H2BE_ENSG00000197697                                                      |
| 6 | 26271254 | 26271478 | 5Y-H4K8ac_peak_14282 | 8.33296  | HIST1H3G_ENSG00000256018                                                       |
| 6 | 26272523 | 26272754 | 5Y-H4K8ac_peak_14283 | 8.93923  | HIST1H3G_ENSG00000256018;HIST1H2APS4_ENSG00000218690;HIST1H2BI_ENSG00000168242 |
| 6 | 26383936 | 26384160 | 5Y-H4K8ac_peak_14284 | 8.564    | BTN2A2_ENSG00000124508                                                         |
| 6 | 26458395 | 26458614 | 5Y-H4K8ac_peak_14285 | 6.73047  | BTN2A1_ENSG00000112763                                                         |
| 6 | 26538388 | 26538696 | 5Y-H4K8ac_peak_14286 | 5.23083  | HMG4_ENSG00000182952                                                           |
| 6 | 26550851 | 26551151 | 5Y-H4K8ac_peak_14287 | 4.29586  |                                                                                |
| 6 | 27064571 | 27064791 | 5Y-H4K8ac_peak_14288 | 10.46287 |                                                                                |
| 6 | 27342673 | 27343023 | 5Y-H4K8ac_peak_14289 | 7.01266  | ZNF391_ENSG00000124613                                                         |
| 6 | 27440481 | 27440735 | 5Y-H4K8ac_peak_14290 | 11.57334 | ZNF184_ENSG00000096654                                                         |
| 6 | 27661968 | 27662348 | 5Y-H4K8ac_peak_14291 | 7.38046  |                                                                                |
| 6 | 27794414 | 27794789 | 5Y-H4K8ac_peak_14292 | 8.33296  |                                                                                |
| 6 | 27805584 | 27806022 | 5Y-H4K8ac_peak_14293 | 12.43358 | HIST1H2AK_ENSG00000184348;HIST1H2BN_ENSG00000233822                            |
| 6 | 27831778 | 27832151 | 5Y-H4K8ac_peak_14294 | 5.29015  | HIST1H2BPS2_ENSG00000217646;HIST1H2AL_ENSG00000198374                          |
| 6 | 27861484 | 27861706 | 5Y-H4K8ac_peak_14295 | 8.43011  | HIST1H3J_ENSG00000197153;HIST1H2AM_ENSG00000233224;HIST1H2BO_ENSG00000196331   |
| 6 | 28048773 | 28049335 | 5Y-H4K8ac_peak_14296 | 7.60893  | RP1-31316.12_ENSG00000272009;ZNF165_ENSG00000197279                            |
| 6 | 28059015 | 28059216 | 5Y-H4K8ac_peak_14297 | 7.17184  | ZSCAN12P1_ENSG00000219891                                                      |
| 6 | 28104715 | 28105160 | 5Y-H4K8ac_peak_14298 | 11.19336 | ZSCAN16-AS1_ENSG00000269293;RP1-265C24.8_ENSG00000261839                       |
| 6 | 28129381 | 28129846 | 5Y-H4K8ac_peak_14299 | 9.34555  | ZNF192P1_ENSG00000226314                                                       |
| 6 | 28185994 | 28186320 | 5Y-H4K8ac_peak_14300 | 6.73385  | TOB2P1_ENSG00000176933                                                         |
| 6 | 28187139 | 28187395 | 5Y-H4K8ac_peak_14301 | 6.24411  | TOB2P1_ENSG00000176933                                                         |
| 6 | 28220248 | 28220708 | 5Y-H4K8ac_peak_14302 | 5.64909  |                                                                                |
| 6 | 28367721 | 28367936 | 5Y-H4K8ac_peak_14303 | 9.23159  | ZSCAN12_ENSG00000158691                                                        |
| 6 | 28414375 | 28415151 | 5Y-H4K8ac_peak_14304 | 4.84727  | COX11P1_ENSG00000231162                                                        |

|   |          |          |                      |          |                                                                                  |
|---|----------|----------|----------------------|----------|----------------------------------------------------------------------------------|
| 6 | 28589605 | 28589857 | 5Y-H4K8ac_peak_14305 | 5.77617  |                                                                                  |
| 6 | 28805532 | 28805751 | 5Y-H4K8ac_peak_14306 | 4.9885   |                                                                                  |
| 6 | 28834401 | 28834724 | 5Y-H4K8ac_peak_14307 | 7.03573  |                                                                                  |
| 6 | 28862218 | 28862411 | 5Y-H4K8ac_peak_14308 | 5.40331  |                                                                                  |
| 6 | 28863635 | 28863904 | 5Y-H4K8ac_peak_14309 | 10.19948 | HCG14_ENSG00000224157                                                            |
| 6 | 28891370 | 28891617 | 5Y-H4K8ac_peak_14310 | 7.89273  | TRIM27_ENSG00000204713                                                           |
| 6 | 28953737 | 28954044 | 5Y-H4K8ac_peak_14311 | 6.34046  | HCG15_ENSG00000227214;HCG16_ENSG00000244349                                      |
| 6 | 29595543 | 29595751 | 5Y-H4K8ac_peak_14312 | 8.04943  |                                                                                  |
| 6 | 29618142 | 29618365 | 5Y-H4K8ac_peak_14313 | 4.07874  |                                                                                  |
| 6 | 30294256 | 30294624 | 5Y-H4K8ac_peak_14314 | 10.1994  | HCG17_ENSG00000270604;HCG18_ENSG00000231074;TRIM39_ENSG00000204599               |
| 6 | 30524164 | 30524622 | 5Y-H4K8ac_peak_14315 | 7.01266  | GNL1_ENSG00000204590;PRR3_ENSG00000204576                                        |
| 6 | 30525136 | 30525400 | 5Y-H4K8ac_peak_14316 | 6.78128  | GNL1_ENSG00000204590;PRR3_ENSG00000204576                                        |
| 6 | 30539236 | 30539446 | 5Y-H4K8ac_peak_14317 | 13.06587 | ABCF1_ENSG00000204574                                                            |
| 6 | 30583732 | 30584079 | 5Y-H4K8ac_peak_14318 | 6.76425  | AL662800.1_ENSG00000222894                                                       |
| 6 | 30594866 | 30595175 | 5Y-H4K8ac_peak_14319 | 5.65584  | ATAT1_ENSG00000137343                                                            |
| 6 | 30614925 | 30615536 | 5Y-H4K8ac_peak_14320 | 11.53136 | C6orf136_ENSG00000204564;AL662800.2_ENSG00000266183                              |
| 6 | 30655319 | 30655695 | 5Y-H4K8ac_peak_14321 | 5.98695  | PPP1R18_ENSG00000146112                                                          |
| 6 | 30684138 | 30684384 | 5Y-H4K8ac_peak_14322 | 4.50834  |                                                                                  |
| 6 | 30684597 | 30684889 | 5Y-H4K8ac_peak_14323 | 6.73385  | MDC1_ENSG00000137337                                                             |
| 6 | 30747517 | 30747844 | 5Y-H4K8ac_peak_14324 | 8.75926  |                                                                                  |
| 6 | 30845290 | 30845484 | 5Y-H4K8ac_peak_14325 | 4.50834  |                                                                                  |
| 6 | 30851612 | 30852029 | 5Y-H4K8ac_peak_14326 | 8.4454   |                                                                                  |
| 6 | 30852377 | 30852578 | 5Y-H4K8ac_peak_14327 | 6.03255  |                                                                                  |
| 6 | 30875410 | 30875669 | 5Y-H4K8ac_peak_14328 | 5.23083  | RN7SL175P_ENSG00000264731;GTF2H4_ENSG00000213780;VAR52_ENSG00000137411           |
| 6 | 30882649 | 30882898 | 5Y-H4K8ac_peak_14329 | 10.19948 |                                                                                  |
| 6 | 31105684 | 31106003 | 5Y-H4K8ac_peak_14330 | 8.2913   |                                                                                  |
| 6 | 31165083 | 31165308 | 5Y-H4K8ac_peak_14331 | 5.18558  | XXbac-BPG299F13.17_ENSG00000272501;HCG27_ENSG00000206344                         |
| 6 | 31509365 | 31509632 | 5Y-H4K8ac_peak_14332 | 6.73385  | DDX39B_ENSG00000198563;SNORD84_ENSG00000265236;DDX39B-AS1_ENSG00000234006        |
| 6 | 31515952 | 31516142 | 5Y-H4K8ac_peak_14333 | 7.89273  | ATP6V1G2_ENSG00000213760                                                         |
| 6 | 31548479 | 31549144 | 5Y-H4K8ac_peak_14334 | 11.1169  |                                                                                  |
| 6 | 31587245 | 31587489 | 5Y-H4K8ac_peak_14335 | 10.37534 |                                                                                  |
| 6 | 31588537 | 31588929 | 5Y-H4K8ac_peak_14336 | 12.06963 | PRRC2A_ENSG00000204469                                                           |
| 6 | 31620177 | 31620676 | 5Y-H4K8ac_peak_14337 | 11.46984 | BAG6_ENSG00000204463;APOM_ENSG00000204444                                        |
| 6 | 31632872 | 31633177 | 5Y-H4K8ac_peak_14338 | 6.73385  | GPANK1_ENSG00000204438;CSNK2B_ENSG00000204435;CSNK2B-LY6G5B-1181_ENSG00000263020 |
| 6 | 31648975 | 31649532 | 5Y-H4K8ac_peak_14339 | 8.2913   |                                                                                  |
| 6 | 31671408 | 31671606 | 5Y-H4K8ac_peak_14340 | 8.47164  | ABHD16A_ENSG00000204427                                                          |
| 6 | 31679062 | 31679261 | 5Y-H4K8ac_peak_14341 | 5.84208  |                                                                                  |
| 6 | 31704144 | 31704442 | 5Y-H4K8ac_peak_14342 | 6.14981  |                                                                                  |
| 6 | 31707834 | 31708542 | 5Y-H4K8ac_peak_14343 | 9.23159  | CLIC1_ENSG00000213719;MSH5_ENSG00000204410;MSH5-SAPCD1_ENSG00000255152           |
| 6 | 31762671 | 31762941 | 5Y-H4K8ac_peak_14344 | 9.48719  | VAR5_ENSG00000204394                                                             |
| 6 | 31763167 | 31763676 | 5Y-H4K8ac_peak_14345 | 4.44548  | VAR5_ENSG00000204394                                                             |
| 6 | 31763946 | 31764289 | 5Y-H4K8ac_peak_14346 | 10.4689  | VAR5_ENSG00000204394                                                             |
| 6 | 31940234 | 31940465 | 5Y-H4K8ac_peak_14347 | 4.5753   | DXO_ENSG00000204348                                                              |
| 6 | 32016205 | 32016479 | 5Y-H4K8ac_peak_14348 | 7.38046  |                                                                                  |
| 6 | 32121051 | 32121331 | 5Y-H4K8ac_peak_14349 | 8.12305  | PRRT1_ENSG00000204314;PPT2_ENSG00000221988;PPT2-EGFL8_ENSG00000258388            |
| 6 | 32157031 | 32157687 | 5Y-H4K8ac_peak_14350 | 10.99773 | PBX2_ENSG00000204304                                                             |

|   |          |          |                      |          |                                                                       |
|---|----------|----------|----------------------|----------|-----------------------------------------------------------------------|
| 6 | 32158105 | 32158506 | 5Y-H4K8ac_peak_14351 | 10.1994  | PBX2_ENSG00000204304                                                  |
| 6 | 32163821 | 32164246 | 5Y-H4K8ac_peak_14352 | 8.69112  | GPSM3_ENSG00000213654                                                 |
| 6 | 32164666 | 32165114 | 5Y-H4K8ac_peak_14353 | 5.449    |                                                                       |
| 6 | 32805766 | 32805990 | 5Y-H4K8ac_peak_14354 | 13.06587 | TAP2_ENSG00000250264;TAP2_ENSG00000204267                             |
| 6 | 32935870 | 32936132 | 5Y-H4K8ac_peak_14355 | 6.77436  | HLA-DMA_ENSG00000204257;BRD2_ENSG00000204256                          |
| 6 | 32937060 | 32938521 | 5Y-H4K8ac_peak_14356 | 8.43511  | HLA-DMA_ENSG00000204257;BRD2_ENSG00000204256;BRD2-IT1_ENSG00000223837 |
| 6 | 33129548 | 33129887 | 5Y-H4K8ac_peak_14357 | 7.11863  |                                                                       |
| 6 | 33159384 | 33159695 | 5Y-H4K8ac_peak_14358 | 4.71803  | COL11A2_ENSG00000204248                                               |
| 6 | 33168018 | 33168319 | 5Y-H4K8ac_peak_14359 | 6.53157  | RXRБ_ENSG00000204231;RNY4P10_ENSG00000202441;SLC39A7_ENSG00000112473  |
| 6 | 33175784 | 33176200 | 5Y-H4K8ac_peak_14360 | 4.50834  | MIR219-1_ENSG00000199036;RING1_ENSG00000204227                        |
| 6 | 33239143 | 33239618 | 5Y-H4K8ac_peak_14361 | 9.179    | VPS52_ENSG00000223501;RPS18_ENSG00000231500                           |
| 6 | 33291187 | 33291815 | 5Y-H4K8ac_peak_14362 | 11.61993 |                                                                       |
| 6 | 33332933 | 33333270 | 5Y-H4K8ac_peak_14363 | 6.76425  | LYPLA2P1_ENSG00000228285                                              |
| 6 | 33396060 | 33396311 | 5Y-H4K8ac_peak_14364 | 13.8759  |                                                                       |
| 6 | 33548293 | 33548513 | 5Y-H4K8ac_peak_14365 | 10.21117 | BAK1_ENSG00000030110                                                  |
| 6 | 33579029 | 33579266 | 5Y-H4K8ac_peak_14366 | 6.37023  |                                                                       |
| 6 | 33588655 | 33588883 | 5Y-H4K8ac_peak_14367 | 4.03329  | ITPR3_ENSG00000096433                                                 |
| 6 | 33636713 | 33636954 | 5Y-H4K8ac_peak_14368 | 5.19372  |                                                                       |
| 6 | 33678886 | 33679420 | 5Y-H4K8ac_peak_14369 | 7.89273  | UQCC2_ENSG00000137288                                                 |
| 6 | 33713986 | 33714194 | 5Y-H4K8ac_peak_14370 | 5.23083  | IP6K3_ENSG00000161896                                                 |
| 6 | 33756148 | 33756673 | 5Y-H4K8ac_peak_14371 | 12.05638 | LEMD2_ENSG00000161904                                                 |
| 6 | 33757264 | 33757679 | 5Y-H4K8ac_peak_14372 | 9.30505  | LEMD2_ENSG00000161904                                                 |
| 6 | 33772969 | 33773159 | 5Y-H4K8ac_peak_14373 | 5.29015  |                                                                       |
| 6 | 33783554 | 33783759 | 5Y-H4K8ac_peak_14374 | 11.71297 |                                                                       |
| 6 | 34163968 | 34164724 | 5Y-H4K8ac_peak_14375 | 9.34555  |                                                                       |
| 6 | 34205430 | 34205985 | 5Y-H4K8ac_peak_14376 | 8.24461  | HMGA1_ENSG00000137309                                                 |
| 6 | 34393437 | 34393671 | 5Y-H4K8ac_peak_14377 | 6.08523  | RPS10-NUDT3_ENSG00000270800;RPS10_ENSG00000124614                     |
| 6 | 34493190 | 34493816 | 5Y-H4K8ac_peak_14378 | 12.05638 |                                                                       |
| 6 | 34664796 | 34665113 | 5Y-H4K8ac_peak_14379 | 8.8021   | C6orf106_ENSG00000196821;RP11-140K17.3_ENSG00000272288                |
| 6 | 34724574 | 34724769 | 5Y-H4K8ac_peak_14380 | 5.41472  | SNRPC_ENSG00000124562                                                 |
| 6 | 34759343 | 34759568 | 5Y-H4K8ac_peak_14381 | 7.76232  | UHRF1BP1_ENSG00000065060                                              |
| 6 | 34760112 | 34760433 | 5Y-H4K8ac_peak_14382 | 4.29586  | UHRF1BP1_ENSG00000065060                                              |
| 6 | 34857105 | 34857331 | 5Y-H4K8ac_peak_14383 | 9.7353   | ANKS1A_ENSG00000064999                                                |
| 6 | 35149940 | 35150278 | 5Y-H4K8ac_peak_14384 | 7.42477  |                                                                       |
| 6 | 35331151 | 35331381 | 5Y-H4K8ac_peak_14385 | 7.59101  |                                                                       |
| 6 | 35436224 | 35436673 | 5Y-H4K8ac_peak_14386 | 12.99645 | RPL10A_ENSG00000198755                                                |
| 6 | 35656314 | 35656539 | 5Y-H4K8ac_peak_14387 | 8.35139  |                                                                       |
| 6 | 35656992 | 35657235 | 5Y-H4K8ac_peak_14388 | 8.35139  |                                                                       |
| 6 | 35695338 | 35696428 | 5Y-H4K8ac_peak_14389 | 14.86775 | FKBP5_ENSG00000096060                                                 |
| 6 | 35699354 | 35700081 | 5Y-H4K8ac_peak_14390 | 17.04963 |                                                                       |
| 6 | 35704620 | 35705109 | 5Y-H4K8ac_peak_14391 | 8.76608  | RP3-510O8.4_ENSG00000232909;ARMC12_ENSG00000157343                    |
| 6 | 35705738 | 35705942 | 5Y-H4K8ac_peak_14392 | 7.59101  | ARMC12_ENSG00000157343                                                |
| 6 | 35772988 | 35773447 | 5Y-H4K8ac_peak_14393 | 4.77126  | LHFPL5_ENSG00000197753                                                |
| 6 | 35994918 | 35995155 | 5Y-H4K8ac_peak_14394 | 6.37023  | MAPK14_ENSG00000112062                                                |
| 6 | 35995670 | 35995904 | 5Y-H4K8ac_peak_14395 | 5.5192   | MAPK14_ENSG00000112062                                                |
| 6 | 36067676 | 36068233 | 5Y-H4K8ac_peak_14396 | 6.39626  |                                                                       |

|   |          |          |                      |          |                                                     |
|---|----------|----------|----------------------|----------|-----------------------------------------------------|
| 6 | 36098927 | 36099365 | 5Y-H4K8ac_peak_14397 | 16.38263 |                                                     |
| 6 | 36099851 | 36100152 | 5Y-H4K8ac_peak_14398 | 13.45283 |                                                     |
| 6 | 36100345 | 36100558 | 5Y-H4K8ac_peak_14399 | 5.24695  |                                                     |
| 6 | 36164559 | 36164792 | 5Y-H4K8ac_peak_14400 | 11.1169  | RP1-179N16.6_ENSG00000246982;BRPF3_ENSG00000096070  |
| 6 | 36561119 | 36561447 | 5Y-H4K8ac_peak_14401 | 9.92042  | SRSF3_ENSG00000112081                               |
| 6 | 36562194 | 36562437 | 5Y-H4K8ac_peak_14402 | 7.89142  | SRSF3_ENSG00000112081                               |
| 6 | 36617554 | 36617773 | 5Y-H4K8ac_peak_14403 | 10.31981 |                                                     |
| 6 | 36643983 | 36644342 | 5Y-H4K8ac_peak_14404 | 10.12457 | CDKN1A_ENSG00000124762                              |
| 6 | 36761645 | 36761836 | 5Y-H4K8ac_peak_14405 | 6.31818  |                                                     |
| 6 | 36762116 | 36762778 | 5Y-H4K8ac_peak_14406 | 6.98416  |                                                     |
| 6 | 36853231 | 36853444 | 5Y-H4K8ac_peak_14407 | 7.58806  |                                                     |
| 6 | 36954092 | 36954455 | 5Y-H4K8ac_peak_14408 | 6.31818  | MTCH1_ENSG00000137409                               |
| 6 | 37060744 | 37061115 | 5Y-H4K8ac_peak_14409 | 7.05631  |                                                     |
| 6 | 37071861 | 37072132 | 5Y-H4K8ac_peak_14410 | 5.28616  |                                                     |
| 6 | 37189768 | 37190045 | 5Y-H4K8ac_peak_14411 | 8.4454   |                                                     |
| 6 | 37225610 | 37225850 | 5Y-H4K8ac_peak_14412 | 8.69112  | TMEM217_ENSG00000172738;TBC1D22B_ENSG00000065491    |
| 6 | 37401123 | 37401321 | 5Y-H4K8ac_peak_14413 | 6.34245  | CMTR1_ENSG00000137200                               |
| 6 | 37457043 | 37457409 | 5Y-H4K8ac_peak_14414 | 5.37237  |                                                     |
| 6 | 37484119 | 37484385 | 5Y-H4K8ac_peak_14415 | 9.62747  |                                                     |
| 6 | 37484581 | 37485127 | 5Y-H4K8ac_peak_14416 | 13.99721 |                                                     |
| 6 | 37504141 | 37504653 | 5Y-H4K8ac_peak_14417 | 7.93983  |                                                     |
| 6 | 37533685 | 37534135 | 5Y-H4K8ac_peak_14418 | 8.21582  |                                                     |
| 6 | 37543533 | 37543756 | 5Y-H4K8ac_peak_14419 | 5.64909  |                                                     |
| 6 | 37592344 | 37593340 | 5Y-H4K8ac_peak_14420 | 12.69256 |                                                     |
| 6 | 37786649 | 37787480 | 5Y-H4K8ac_peak_14421 | 16.50659 | RP3-441A12.1_ENSG00000225945;ZFAND3_ENSG00000156639 |
| 6 | 38137797 | 38138045 | 5Y-H4K8ac_peak_14422 | 4.07874  |                                                     |
| 6 | 38176765 | 38176964 | 5Y-H4K8ac_peak_14423 | 7.42477  |                                                     |
| 6 | 38235231 | 38235595 | 5Y-H4K8ac_peak_14424 | 9.15007  |                                                     |
| 6 | 38326835 | 38327226 | 5Y-H4K8ac_peak_14425 | 6.34046  | AL031905.1_ENSG00000238716                          |
| 6 | 38607297 | 38608245 | 5Y-H4K8ac_peak_14426 | 8.43511  | BTBD9_ENSG00000183826                               |
| 6 | 39016112 | 39016794 | 5Y-H4K8ac_peak_14427 | 9.89244  |                                                     |
| 6 | 39083105 | 39083330 | 5Y-H4K8ac_peak_14428 | 5.24695  | SAYSD1_ENSG00000112167                              |
| 6 | 39196990 | 39197185 | 5Y-H4K8ac_peak_14429 | 5.56912  | KCNK5_ENSG00000164626                               |
| 6 | 39399397 | 39399814 | 5Y-H4K8ac_peak_14430 | 8.23578  |                                                     |
| 6 | 39693431 | 39693786 | 5Y-H4K8ac_peak_14431 | 10.46287 | KIF6_ENSG00000164627                                |
| 6 | 39759764 | 39760232 | 5Y-H4K8ac_peak_14432 | 4.95697  | DAAM2_ENSG00000146122                               |
| 6 | 39901759 | 39902118 | 5Y-H4K8ac_peak_14433 | 9.15007  | MOCS1_ENSG00000124615                               |
| 6 | 40377414 | 40378016 | 5Y-H4K8ac_peak_14434 | 10.60003 |                                                     |
| 6 | 40379042 | 40379606 | 5Y-H4K8ac_peak_14435 | 9.74838  |                                                     |
| 6 | 40379854 | 40380259 | 5Y-H4K8ac_peak_14436 | 4.00285  |                                                     |
| 6 | 40380741 | 40381206 | 5Y-H4K8ac_peak_14437 | 9.23159  |                                                     |
| 6 | 40388387 | 40388612 | 5Y-H4K8ac_peak_14438 | 5.54773  |                                                     |
| 6 | 40392481 | 40393201 | 5Y-H4K8ac_peak_14439 | 7.89273  |                                                     |
| 6 | 40399582 | 40400049 | 5Y-H4K8ac_peak_14440 | 7.76645  |                                                     |
| 6 | 40405919 | 40406142 | 5Y-H4K8ac_peak_14441 | 4.36976  |                                                     |
| 6 | 40407295 | 40407564 | 5Y-H4K8ac_peak_14442 | 6.21836  |                                                     |

|   |          |          |                      |          |                          |
|---|----------|----------|----------------------|----------|--------------------------|
| 6 | 40409016 | 40409251 | 5Y-H4K8ac_peak_14443 | 6.0873   |                          |
| 6 | 40410230 | 40410440 | 5Y-H4K8ac_peak_14444 | 9.30505  |                          |
| 6 | 40452155 | 40452530 | 5Y-H4K8ac_peak_14445 | 10.35586 |                          |
| 6 | 40453473 | 40453817 | 5Y-H4K8ac_peak_14446 | 6.40964  |                          |
| 6 | 40457186 | 40458238 | 5Y-H4K8ac_peak_14447 | 13.03079 |                          |
| 6 | 40458745 | 40459296 | 5Y-H4K8ac_peak_14448 | 9.34555  |                          |
| 6 | 40460357 | 40461087 | 5Y-H4K8ac_peak_14449 | 12.14232 |                          |
| 6 | 40467586 | 40467955 | 5Y-H4K8ac_peak_14450 | 8.28346  |                          |
| 6 | 40504391 | 40504616 | 5Y-H4K8ac_peak_14451 | 7.31815  |                          |
| 6 | 40597556 | 40597840 | 5Y-H4K8ac_peak_14452 | 7.42477  |                          |
| 6 | 40677983 | 40678439 | 5Y-H4K8ac_peak_14453 | 10.69698 |                          |
| 6 | 40681379 | 40681703 | 5Y-H4K8ac_peak_14454 | 4.15658  |                          |
| 6 | 40686941 | 40687393 | 5Y-H4K8ac_peak_14455 | 7.38046  |                          |
| 6 | 40687748 | 40688049 | 5Y-H4K8ac_peak_14456 | 18.77281 |                          |
| 6 | 40688555 | 40689056 | 5Y-H4K8ac_peak_14457 | 11.75922 |                          |
| 6 | 40689470 | 40690294 | 5Y-H4K8ac_peak_14458 | 6.37023  |                          |
| 6 | 40691122 | 40691642 | 5Y-H4K8ac_peak_14459 | 11.1169  |                          |
| 6 | 40708741 | 40709406 | 5Y-H4K8ac_peak_14460 | 6.77436  |                          |
| 6 | 40764422 | 40764964 | 5Y-H4K8ac_peak_14461 | 5.98695  |                          |
| 6 | 40837055 | 40837309 | 5Y-H4K8ac_peak_14462 | 6.36454  |                          |
| 6 | 40879872 | 40880081 | 5Y-H4K8ac_peak_14463 | 9.43096  |                          |
| 6 | 40995908 | 40996329 | 5Y-H4K8ac_peak_14464 | 13.85283 |                          |
| 6 | 41040949 | 41041363 | 5Y-H4K8ac_peak_14465 | 11.09973 | NFYA_ENSG00000001167     |
| 6 | 41455772 | 41456006 | 5Y-H4K8ac_peak_14466 | 5.24695  |                          |
| 6 | 41471595 | 41472107 | 5Y-H4K8ac_peak_14467 | 9.96543  |                          |
| 6 | 41513428 | 41513706 | 5Y-H4K8ac_peak_14468 | 5.72233  | FOXP4_ENSG00000137166    |
| 6 | 41570136 | 41570496 | 5Y-H4K8ac_peak_14469 | 4.79585  |                          |
| 6 | 41602189 | 41602396 | 5Y-H4K8ac_peak_14470 | 7.80086  |                          |
| 6 | 41603029 | 41603227 | 5Y-H4K8ac_peak_14471 | 6.50117  |                          |
| 6 | 41604630 | 41604858 | 5Y-H4K8ac_peak_14472 | 4.77307  | MDFI_ENSG00000112559     |
| 6 | 41605193 | 41606028 | 5Y-H4K8ac_peak_14473 | 6.06162  | MDFI_ENSG00000112559     |
| 6 | 41641497 | 41641688 | 5Y-H4K8ac_peak_14474 | 7.35333  |                          |
| 6 | 41642548 | 41642977 | 5Y-H4K8ac_peak_14475 | 6.77436  |                          |
| 6 | 41701261 | 41701494 | 5Y-H4K8ac_peak_14476 | 6.7002   |                          |
| 6 | 41734477 | 41734856 | 5Y-H4K8ac_peak_14477 | 7.90236  |                          |
| 6 | 41754052 | 41754280 | 5Y-H4K8ac_peak_14478 | 6.08523  | FRS3_ENSG00000137218     |
| 6 | 42016393 | 42016694 | 5Y-H4K8ac_peak_14479 | 5.23083  |                          |
| 6 | 42104523 | 42104734 | 5Y-H4K8ac_peak_14480 | 7.89273  |                          |
| 6 | 42220052 | 42220365 | 5Y-H4K8ac_peak_14481 | 5.23083  |                          |
| 6 | 42420148 | 42420789 | 5Y-H4K8ac_peak_14482 | 12.05638 | TRERF1_ENSG00000124496   |
| 6 | 42515528 | 42516192 | 5Y-H4K8ac_peak_14483 | 8.2913   |                          |
| 6 | 42714206 | 42714441 | 5Y-H4K8ac_peak_14484 | 7.3889   | TBCC_ENSG00000124659     |
| 6 | 42750352 | 42751700 | 5Y-H4K8ac_peak_14485 | 13.46013 |                          |
| 6 | 42847781 | 42847978 | 5Y-H4K8ac_peak_14486 | 8.45687  | RPL7L1_ENSG00000146223   |
| 6 | 42848349 | 42848555 | 5Y-H4K8ac_peak_14487 | 5.89113  | RPL7L1_ENSG00000146223   |
| 6 | 42858241 | 42858523 | 5Y-H4K8ac_peak_14488 | 13.0168  | C6orf226_ENSG00000221821 |

|   |          |          |                      |          |                               |
|---|----------|----------|----------------------|----------|-------------------------------|
| 6 | 42928322 | 42928690 | 5Y-H4K8ac_peak_14489 | 4.79585  | GNMT_ENSG00000124713          |
| 6 | 42946480 | 42946844 | 5Y-H4K8ac_peak_14490 | 5.91897  | PEX6_ENSG00000124587          |
| 6 | 42988930 | 42989250 | 5Y-H4K8ac_peak_14491 | 6.08523  | RRP36_ENSG00000124541         |
| 6 | 43021281 | 43021571 | 5Y-H4K8ac_peak_14492 | 8.43511  | CUL7_ENSG00000044090          |
| 6 | 43081864 | 43082297 | 5Y-H4K8ac_peak_14493 | 5.19372  |                               |
| 6 | 43082537 | 43082778 | 5Y-H4K8ac_peak_14494 | 8.88899  |                               |
| 6 | 43089962 | 43090276 | 5Y-H4K8ac_peak_14495 | 6.77436  |                               |
| 6 | 43091575 | 43091912 | 5Y-H4K8ac_peak_14496 | 6.08523  |                               |
| 6 | 43110923 | 43111182 | 5Y-H4K8ac_peak_14497 | 6.50117  |                               |
| 6 | 43139190 | 43139460 | 5Y-H4K8ac_peak_14498 | 6.54441  | SRF_ENSG00000112658           |
| 6 | 43196808 | 43197124 | 5Y-H4K8ac_peak_14499 | 8.62703  | DNPH1_ENSG00000112667         |
| 6 | 43336983 | 43337222 | 5Y-H4K8ac_peak_14500 | 6.03632  | ZNF318_ENSG00000171467        |
| 6 | 43337719 | 43338061 | 5Y-H4K8ac_peak_14501 | 6.54441  | ZNF318_ENSG00000171467        |
| 6 | 43338411 | 43338628 | 5Y-H4K8ac_peak_14502 | 7.9412   |                               |
| 6 | 43359093 | 43359836 | 5Y-H4K8ac_peak_14503 | 11.77396 |                               |
| 6 | 43394869 | 43395188 | 5Y-H4K8ac_peak_14504 | 11.68317 | ABCC10_ENSG00000124574        |
| 6 | 43456546 | 43457343 | 5Y-H4K8ac_peak_14505 | 9.7353   |                               |
| 6 | 43457754 | 43457958 | 5Y-H4K8ac_peak_14506 | 5.18654  |                               |
| 6 | 43602839 | 43603406 | 5Y-H4K8ac_peak_14507 | 15.93543 |                               |
| 6 | 43603636 | 43603827 | 5Y-H4K8ac_peak_14508 | 9.15007  |                               |
| 6 | 43655139 | 43655946 | 5Y-H4K8ac_peak_14509 | 11.19336 | MRPS18A_ENSG00000096080       |
| 6 | 43739738 | 43740102 | 5Y-H4K8ac_peak_14510 | 13.99721 |                               |
| 6 | 43742885 | 43743174 | 5Y-H4K8ac_peak_14511 | 5.64909  |                               |
| 6 | 43868609 | 43868821 | 5Y-H4K8ac_peak_14512 | 9.95819  |                               |
| 6 | 43893885 | 43894245 | 5Y-H4K8ac_peak_14513 | 7.31102  |                               |
| 6 | 43895040 | 43895375 | 5Y-H4K8ac_peak_14514 | 4.29586  |                               |
| 6 | 43905494 | 43905830 | 5Y-H4K8ac_peak_14515 | 12.64868 |                               |
| 6 | 43907165 | 43907764 | 5Y-H4K8ac_peak_14516 | 6.37023  |                               |
| 6 | 43907981 | 43908219 | 5Y-H4K8ac_peak_14517 | 6.34772  |                               |
| 6 | 43908940 | 43909330 | 5Y-H4K8ac_peak_14518 | 7.59101  |                               |
| 6 | 43910070 | 43910551 | 5Y-H4K8ac_peak_14519 | 5.23083  |                               |
| 6 | 43921530 | 43921781 | 5Y-H4K8ac_peak_14520 | 7.01266  |                               |
| 6 | 43957660 | 43959067 | 5Y-H4K8ac_peak_14521 | 6.78128  |                               |
| 6 | 43970759 | 43971014 | 5Y-H4K8ac_peak_14522 | 6.5814   |                               |
| 6 | 44011516 | 44011744 | 5Y-H4K8ac_peak_14523 | 9.7353   |                               |
| 6 | 44019334 | 44019595 | 5Y-H4K8ac_peak_14524 | 6.96612  |                               |
| 6 | 44022420 | 44022863 | 5Y-H4K8ac_peak_14525 | 6.73437  |                               |
| 6 | 44024245 | 44025455 | 5Y-H4K8ac_peak_14526 | 11.36989 |                               |
| 6 | 44026753 | 44027039 | 5Y-H4K8ac_peak_14527 | 7.11863  |                               |
| 6 | 44043023 | 44043436 | 5Y-H4K8ac_peak_14528 | 6.13919  | RP5-1120P11.1_ENSG00000237686 |
| 6 | 44044733 | 44044962 | 5Y-H4K8ac_peak_14529 | 9.00954  |                               |
| 6 | 44134066 | 44134265 | 5Y-H4K8ac_peak_14530 | 6.00388  |                               |
| 6 | 44187023 | 44187243 | 5Y-H4K8ac_peak_14531 | 5.24695  | SLC29A1_ENSG00000112759       |
| 6 | 44189626 | 44189876 | 5Y-H4K8ac_peak_14532 | 8.69112  |                               |
| 6 | 44213806 | 44214008 | 5Y-H4K8ac_peak_14533 | 7.8267   | HSP90AB1_ENSG00000096384      |
| 6 | 44310254 | 44310749 | 5Y-H4K8ac_peak_14534 | 11.1169  | SPATS1_ENSG00000249481        |



|   |          |          |                      |          |                                                                                        |
|---|----------|----------|----------------------|----------|----------------------------------------------------------------------------------------|
| 6 | 44355426 | 44355630 | 5Y-H4K8ac_peak_14535 | 8.43511  | CDC5L_ENSG00000096401                                                                  |
| 6 | 44443730 | 44443960 | 5Y-H4K8ac_peak_14536 | 10.79063 |                                                                                        |
| 6 | 45345230 | 45345549 | 5Y-H4K8ac_peak_14537 | 8.17203  | SUPT3H_ENSG00000196284                                                                 |
| 6 | 45346017 | 45346367 | 5Y-H4K8ac_peak_14538 | 5.65584  | SUPT3H_ENSG00000196284                                                                 |
| 6 | 47445019 | 47445392 | 5Y-H4K8ac_peak_14539 | 8.17203  | RP11-385F7.1_ENSG00000270761;CD2AP_ENSG00000198087                                     |
| 6 | 49429038 | 49429316 | 5Y-H4K8ac_peak_14540 | 5.40331  |                                                                                        |
| 6 | 49431217 | 49431465 | 5Y-H4K8ac_peak_14541 | 5.29015  | MUT_ENSG00000146085;CENPQ_ENSG00000031691                                              |
| 6 | 50692179 | 50692545 | 5Y-H4K8ac_peak_14542 | 7.38046  |                                                                                        |
| 6 | 50787337 | 50788144 | 5Y-H4K8ac_peak_14543 | 8.3285   | TFAP2B_ENSG00000008196                                                                 |
| 6 | 51130294 | 51130521 | 5Y-H4K8ac_peak_14544 | 10.1994  |                                                                                        |
| 6 | 51418551 | 51418886 | 5Y-H4K8ac_peak_14545 | 9.38276  |                                                                                        |
| 6 | 51857847 | 51858080 | 5Y-H4K8ac_peak_14546 | 4.84727  |                                                                                        |
| 6 | 51873808 | 51874162 | 5Y-H4K8ac_peak_14547 | 7.13294  |                                                                                        |
| 6 | 51883979 | 51884269 | 5Y-H4K8ac_peak_14548 | 5.12213  |                                                                                        |
| 6 | 52227253 | 52227500 | 5Y-H4K8ac_peak_14549 | 7.50148  |                                                                                        |
| 6 | 52284630 | 52284885 | 5Y-H4K8ac_peak_14550 | 13.2534  | EFHC1_ENSG00000096093                                                                  |
| 6 | 52382816 | 52383064 | 5Y-H4K8ac_peak_14551 | 6.22669  |                                                                                        |
| 6 | 52441166 | 52441434 | 5Y-H4K8ac_peak_14552 | 4.95697  | TRAM2_ENSG00000065308;TRAM2-AS1_ENSG00000225791                                        |
| 6 | 52442013 | 52442455 | 5Y-H4K8ac_peak_14553 | 8.69112  | TRAM2_ENSG00000065308;TRAM2-AS1_ENSG00000225791                                        |
| 6 | 52529390 | 52529618 | 5Y-H4K8ac_peak_14554 | 6.73385  | RP1-152L7.5_ENSG00000216775                                                            |
| 6 | 52859565 | 52859920 | 5Y-H4K8ac_peak_14555 | 9.34935  | GSTA4_ENSG00000170899;RN7SK_ENSG00000202198                                            |
| 6 | 52930220 | 52930418 | 5Y-H4K8ac_peak_14556 | 5.24695  |                                                                                        |
| 6 | 53212866 | 53213613 | 5Y-H4K8ac_peak_14557 | 4.55128  | ELOVL5_ENSG00000012660                                                                 |
| 6 | 53223621 | 53224177 | 5Y-H4K8ac_peak_14558 | 9.79526  |                                                                                        |
| 6 | 53516500 | 53516707 | 5Y-H4K8ac_peak_14559 | 5.56894  |                                                                                        |
| 6 | 53658935 | 53659316 | 5Y-H4K8ac_peak_14560 | 7.31102  | RP13-476E20.1_ENSG00000228614;LRRC1_ENSG00000137269                                    |
| 6 | 56716128 | 56716346 | 5Y-H4K8ac_peak_14561 | 6.34046  |                                                                                        |
| 6 | 56819390 | 56819947 | 5Y-H4K8ac_peak_14562 | 10.95042 | DST_ENSG00000151914;BEND6_ENSG00000151917                                              |
| 6 | 57037243 | 57037771 | 5Y-H4K8ac_peak_14563 | 15.3483  | BAG2_ENSG00000112208                                                                   |
| 6 | 57086579 | 57087037 | 5Y-H4K8ac_peak_14564 | 5.99504  | RAB23_ENSG00000112210                                                                  |
| 6 | 58288110 | 58288383 | 5Y-H4K8ac_peak_14565 | 5.19372  | LINC00680_ENSG00000215190                                                              |
| 6 | 64346148 | 64346566 | 5Y-H4K8ac_peak_14566 | 13.60015 | PHF3_ENSG00000118482                                                                   |
| 6 | 70311203 | 70311405 | 5Y-H4K8ac_peak_14567 | 6.34046  |                                                                                        |
| 6 | 70577059 | 70577503 | 5Y-H4K8ac_peak_14568 | 9.30505  | COL19A1_ENSG00000082293                                                                |
| 6 | 70615435 | 70615658 | 5Y-H4K8ac_peak_14569 | 7.31815  |                                                                                        |
| 6 | 71121846 | 71122041 | 5Y-H4K8ac_peak_14570 | 4.84727  | FAM135A_ENSG00000082269                                                                |
| 6 | 71122615 | 71122846 | 5Y-H4K8ac_peak_14571 | 13.8759  | RP11-462G2.2_ENSG00000224349;FAM135A_ENSG00000082269                                   |
| 6 | 71276696 | 71277071 | 5Y-H4K8ac_peak_14572 | 9.78792  | C6orf57_ENSG00000154079                                                                |
| 6 | 73972967 | 73973372 | 5Y-H4K8ac_peak_14573 | 15.16038 | AC019205.1_ENSG00000263378;RP11-257K9.8_ENSG00000243501;RP11-398K22.12_ENSG00000229852 |
| 6 | 74230097 | 74230693 | 5Y-H4K8ac_peak_14574 | 9.96543  |                                                                                        |
| 6 | 74231131 | 74231575 | 5Y-H4K8ac_peak_14575 | 11.57334 |                                                                                        |
| 6 | 74289093 | 74289442 | 5Y-H4K8ac_peak_14576 | 5.65584  |                                                                                        |
| 6 | 75993988 | 75994446 | 5Y-H4K8ac_peak_14577 | 10.27264 | TMEM30A_ENSG00000112697;RP1-234P15.4_ENSG00000225793                                   |
| 6 | 76311674 | 76312215 | 5Y-H4K8ac_peak_14578 | 11.1169  | SENP6_ENSG00000112701                                                                  |
| 6 | 76459012 | 76459245 | 5Y-H4K8ac_peak_14579 | 14.15915 | MYO6_ENSG00000196586                                                                   |
| 6 | 80341051 | 80341252 | 5Y-H4K8ac_peak_14580 | 6.08523  | SH3BGRL2_ENSG00000198478                                                               |

|   |           |           |                      |          |                                                   |
|---|-----------|-----------|----------------------|----------|---------------------------------------------------|
| 6 | 80521873  | 80522312  | 5Y-H4K8ac_peak_14581 | 7.3889   |                                                   |
| 6 | 80531669  | 80531982  | 5Y-H4K8ac_peak_14582 | 8.33296  |                                                   |
| 6 | 80657440  | 80657684  | 5Y-H4K8ac_peak_14583 | 9.51254  | ELOVL4_ENSG00000118402                            |
| 6 | 83445680  | 83445885  | 5Y-H4K8ac_peak_14584 | 7.31815  |                                                   |
| 6 | 84140858  | 84141121  | 5Y-H4K8ac_peak_14585 | 9.07085  | ME1_ENSG00000065833                               |
| 6 | 84221787  | 84222122  | 5Y-H4K8ac_peak_14586 | 8.17203  | PRSS35_ENSG00000146250                            |
| 6 | 84562744  | 84562953  | 5Y-H4K8ac_peak_14587 | 6.78318  | RIPPLY2_ENSG00000203877                           |
| 6 | 84563427  | 84563719  | 5Y-H4K8ac_peak_14588 | 7.89273  | RIPPLY2_ENSG00000203877                           |
| 6 | 84742989  | 84743440  | 5Y-H4K8ac_peak_14589 | 10.01583 | MRAP2_ENSG00000135324                             |
| 6 | 86351978  | 86352585  | 5Y-H4K8ac_peak_14590 | 11.67083 | SYNCRIP_ENSG00000135316                           |
| 6 | 86352809  | 86352999  | 5Y-H4K8ac_peak_14591 | 9.65108  | SYNCRIP_ENSG00000135316                           |
| 6 | 87647047  | 87647237  | 5Y-H4K8ac_peak_14592 | 5.23083  | HTR1E_ENSG00000168830                             |
| 6 | 87861483  | 87862040  | 5Y-H4K8ac_peak_14593 | 13.92877 | ZNF292_ENSG00000188994                            |
| 6 | 87865328  | 87865740  | 5Y-H4K8ac_peak_14594 | 5.60566  | RP11-393I2.4_ENSG00000272008                      |
| 6 | 88181797  | 88182016  | 5Y-H4K8ac_peak_14595 | 7.31815  |                                                   |
| 6 | 88182428  | 88182623  | 5Y-H4K8ac_peak_14596 | 10.11191 |                                                   |
| 6 | 88876615  | 88876835  | 5Y-H4K8ac_peak_14597 | 5.65584  | CNR1_ENSG00000118432                              |
| 6 | 89790769  | 89791077  | 5Y-H4K8ac_peak_14598 | 8.43511  | RP11-63L7.5_ENSG00000271931;PNRC1_ENSG00000146278 |
| 6 | 89827246  | 89827595  | 5Y-H4K8ac_peak_14599 | 6.1654   | SRSF12_ENSG00000154548                            |
| 6 | 89855809  | 89856438  | 5Y-H4K8ac_peak_14600 | 7.34185  | PM20D2_ENSG00000146281                            |
| 6 | 90021560  | 90021915  | 5Y-H4K8ac_peak_14601 | 6.14981  |                                                   |
| 6 | 90240311  | 90240560  | 5Y-H4K8ac_peak_14602 | 6.50117  |                                                   |
| 6 | 90348261  | 90348457  | 5Y-H4K8ac_peak_14603 | 12.05638 | LYRM2_ENSG00000083099                             |
| 6 | 90679081  | 90679440  | 5Y-H4K8ac_peak_14604 | 4.71803  |                                                   |
| 6 | 90681552  | 90681954  | 5Y-H4K8ac_peak_14605 | 5.65584  |                                                   |
| 6 | 90688536  | 90688809  | 5Y-H4K8ac_peak_14606 | 4.79585  |                                                   |
| 6 | 90689751  | 90690043  | 5Y-H4K8ac_peak_14607 | 8.14913  |                                                   |
| 6 | 90695430  | 90695830  | 5Y-H4K8ac_peak_14608 | 15.94046 |                                                   |
| 6 | 90734400  | 90734967  | 5Y-H4K8ac_peak_14609 | 10.22205 |                                                   |
| 6 | 91006851  | 91007360  | 5Y-H4K8ac_peak_14610 | 10.35586 | BACH2_ENSG00000112182                             |
| 6 | 91149646  | 91149930  | 5Y-H4K8ac_peak_14611 | 4.50834  |                                                   |
| 6 | 91179255  | 91179475  | 5Y-H4K8ac_peak_14612 | 5.54013  |                                                   |
| 6 | 91296324  | 91297287  | 5Y-H4K8ac_peak_14613 | 7.59101  | MAP3K7_ENSG00000135341                            |
| 6 | 96025608  | 96026034  | 5Y-H4K8ac_peak_14614 | 6.1654   | MANEA-AS1_ENSG00000261366;MANEA_ENSG00000172469   |
| 6 | 96463333  | 96463686  | 5Y-H4K8ac_peak_14615 | 6.50117  | FUT9_ENSG00000172461                              |
| 6 | 96463946  | 96464214  | 5Y-H4K8ac_peak_14616 | 6.77436  | FUT9_ENSG00000172461                              |
| 6 | 96969770  | 96970022  | 5Y-H4K8ac_peak_14617 | 6.53157  | UFL1-AS1_ENSG00000233797;UFL1_ENSG00000014123     |
| 6 | 97285571  | 97285926  | 5Y-H4K8ac_peak_14618 | 13.00733 | GPR63_ENSG00000112218                             |
| 6 | 99272355  | 99272693  | 5Y-H4K8ac_peak_14619 | 7.31815  |                                                   |
| 6 | 99395508  | 99395761  | 5Y-H4K8ac_peak_14620 | 5.23083  | FBXL4_ENSG00000112234                             |
| 6 | 99797186  | 99797759  | 5Y-H4K8ac_peak_14621 | 5.64909  | FAXC_ENSG00000146267                              |
| 6 | 99872777  | 99873113  | 5Y-H4K8ac_peak_14622 | 8.75926  | PNISR_ENSG00000132424;RP11-98I9.4_ENSG00000228506 |
| 6 | 99968946  | 99969261  | 5Y-H4K8ac_peak_14623 | 5.72233  | USP45_ENSG00000123552;TSTD3_ENSG00000228439       |
| 6 | 100016259 | 100016531 | 5Y-H4K8ac_peak_14624 | 8.564    | CCNC_ENSG00000112237;RP1-199J3.7_ENSG00000272017  |
| 6 | 101849525 | 101849719 | 5Y-H4K8ac_peak_14625 | 8.97752  |                                                   |
| 6 | 101850311 | 101850530 | 5Y-H4K8ac_peak_14626 | 5.56912  |                                                   |

|   |           |           |                      |          |                                                      |
|---|-----------|-----------|----------------------|----------|------------------------------------------------------|
| 6 | 102838758 | 102839026 | 5Y-H4K8ac_peak_14627 | 9.93099  |                                                      |
| 6 | 103775068 | 103775273 | 5Y-H4K8ac_peak_14628 | 7.31815  |                                                      |
| 6 | 105307322 | 105307652 | 5Y-H4K8ac_peak_14629 | 8.2913   | HACE1_ENSG00000085382;RP11-809N15.3_ENSG00000271099  |
| 6 | 105388513 | 105389207 | 5Y-H4K8ac_peak_14630 | 7.90751  | LINC00577_ENSG00000203809                            |
| 6 | 105584616 | 105585024 | 5Y-H4K8ac_peak_14631 | 10.90365 | BVES_ENSG00000112276;BVES-AS1_ENSG00000203808        |
| 6 | 105585254 | 105585477 | 5Y-H4K8ac_peak_14632 | 4.84727  | BVES_ENSG00000112276                                 |
| 6 | 105627462 | 105627797 | 5Y-H4K8ac_peak_14633 | 6.73385  | POPDC3_ENSG00000132429                               |
| 6 | 105721600 | 105721829 | 5Y-H4K8ac_peak_14634 | 7.38046  | RP3-355L5.5_ENSG00000272102                          |
| 6 | 106773270 | 106773493 | 5Y-H4K8ac_peak_14635 | 7.63144  | ATG5_ENSG00000057663                                 |
| 6 | 106958199 | 106958425 | 5Y-H4K8ac_peak_14636 | 4.07874  |                                                      |
| 6 | 107349509 | 107349797 | 5Y-H4K8ac_peak_14637 | 5.29015  | C6orf203_ENSG00000130349                             |
| 6 | 107365069 | 107365411 | 5Y-H4K8ac_peak_14638 | 4.50834  |                                                      |
| 6 | 107366329 | 107366571 | 5Y-H4K8ac_peak_14639 | 5.23083  |                                                      |
| 6 | 107435448 | 107435817 | 5Y-H4K8ac_peak_14640 | 7.68492  | BEND3_ENSG00000178409                                |
| 6 | 107436009 | 107436569 | 5Y-H4K8ac_peak_14641 | 7.80156  | BEND3_ENSG00000178409                                |
| 6 | 107436822 | 107437432 | 5Y-H4K8ac_peak_14642 | 14.36519 | BEND3_ENSG00000178409                                |
| 6 | 107781087 | 107781304 | 5Y-H4K8ac_peak_14643 | 10.35586 | PDSS2_ENSG00000164494                                |
| 6 | 107937899 | 107938332 | 5Y-H4K8ac_peak_14644 | 8.43511  |                                                      |
| 6 | 107992337 | 107992595 | 5Y-H4K8ac_peak_14645 | 5.41472  |                                                      |
| 6 | 108033622 | 108033909 | 5Y-H4K8ac_peak_14646 | 8.33296  |                                                      |
| 6 | 108582885 | 108583376 | 5Y-H4K8ac_peak_14647 | 7.38046  | SNX3_ENSG00000112335                                 |
| 6 | 108616118 | 108616386 | 5Y-H4K8ac_peak_14648 | 6.43775  | LACE1_ENSG00000135537                                |
| 6 | 109103541 | 109103769 | 5Y-H4K8ac_peak_14649 | 4.51076  |                                                      |
| 6 | 109121865 | 109122272 | 5Y-H4K8ac_peak_14650 | 5.89113  |                                                      |
| 6 | 109264679 | 109264931 | 5Y-H4K8ac_peak_14651 | 4.50834  |                                                      |
| 6 | 109415826 | 109416159 | 5Y-H4K8ac_peak_14652 | 8.21582  | SESN1_ENSG00000080546;CEP57L1_ENSG00000183137        |
| 6 | 109548481 | 109548768 | 5Y-H4K8ac_peak_14653 | 4.84727  |                                                      |
| 6 | 109703209 | 109703962 | 5Y-H4K8ac_peak_14654 | 7.89273  | CD164_ENSG00000135535;RP11-425D10.10_ENSG00000260273 |
| 6 | 109776431 | 109776768 | 5Y-H4K8ac_peak_14655 | 5.12488  |                                                      |
| 6 | 110012723 | 110012915 | 5Y-H4K8ac_peak_14656 | 7.17184  | AK9_ENSG00000155085;FIG4_ENSG00000112367             |
| 6 | 110035053 | 110035592 | 5Y-H4K8ac_peak_14657 | 6.34046  |                                                      |
| 6 | 110500354 | 110500821 | 5Y-H4K8ac_peak_14658 | 7.46096  | WASF1_ENSG00000112290;CDC40_ENSG00000168438          |
| 6 | 110679076 | 110679862 | 5Y-H4K8ac_peak_14659 | 12.05638 | METTTL24_ENSG00000053328                             |
| 6 | 110864259 | 110864518 | 5Y-H4K8ac_peak_14660 | 11.57334 |                                                      |
| 6 | 111196577 | 111197018 | 5Y-H4K8ac_peak_14661 | 8.2913   | AMD1_ENSG00000123505                                 |
| 6 | 111254478 | 111254708 | 5Y-H4K8ac_peak_14662 | 4.50834  |                                                      |
| 6 | 111278819 | 111279093 | 5Y-H4K8ac_peak_14663 | 8.2913   | GTF3C6_ENSG00000155115                               |
| 6 | 111279553 | 111279776 | 5Y-H4K8ac_peak_14664 | 8.62703  | GTF3C6_ENSG00000155115                               |
| 6 | 111279986 | 111280383 | 5Y-H4K8ac_peak_14665 | 18.77281 | GTF3C6_ENSG00000155115                               |
| 6 | 111804157 | 111804376 | 5Y-H4K8ac_peak_14666 | 8.21582  | REV3L_ENSG00000009413;TRAF3IP2-AS1_ENSG00000231889   |
| 6 | 111805718 | 111805988 | 5Y-H4K8ac_peak_14667 | 4.84727  | REV3L_ENSG00000009413                                |
| 6 | 111875332 | 111875527 | 5Y-H4K8ac_peak_14668 | 7.63144  |                                                      |
| 6 | 111881358 | 111881574 | 5Y-H4K8ac_peak_14669 | 8.93923  |                                                      |
| 6 | 111882222 | 111882436 | 5Y-H4K8ac_peak_14670 | 6.77436  |                                                      |
| 6 | 111887312 | 111887624 | 5Y-H4K8ac_peak_14671 | 13.00733 |                                                      |
| 6 | 111887913 | 111888260 | 5Y-H4K8ac_peak_14672 | 11.18363 |                                                      |

|   |           |           |                      |          |                                                        |
|---|-----------|-----------|----------------------|----------|--------------------------------------------------------|
| 6 | 111982851 | 111983202 | 5Y-H4K8ac_peak_14673 | 5.23083  |                                                        |
| 6 | 112115105 | 112115372 | 5Y-H4K8ac_peak_14674 | 7.60057  |                                                        |
| 6 | 112194018 | 112194409 | 5Y-H4K8ac_peak_14675 | 9.34555  | FYN_ENSG00000010810                                    |
| 6 | 112575247 | 112575674 | 5Y-H4K8ac_peak_14676 | 7.30348  | LAMA4_ENSG000000112769                                 |
| 6 | 113885768 | 113885972 | 5Y-H4K8ac_peak_14677 | 5.65584  |                                                        |
| 6 | 114053633 | 114053981 | 5Y-H4K8ac_peak_14678 | 10.46287 |                                                        |
| 6 | 114291377 | 114292553 | 5Y-H4K8ac_peak_14679 | 11.93212 | RP3-399L15.3_ENSG000000228624                          |
| 6 | 116422089 | 116422291 | 5Y-H4K8ac_peak_14680 | 8.69112  | NT5DC1_ENSG000000178425                                |
| 6 | 116990183 | 116990391 | 5Y-H4K8ac_peak_14681 | 4.03329  | ZUFSP_ENSG000000153975                                 |
| 6 | 118973001 | 118973350 | 5Y-H4K8ac_peak_14682 | 7.31815  |                                                        |
| 6 | 119030274 | 119030503 | 5Y-H4K8ac_peak_14683 | 4.84727  | CEP85L_ENSG000000111860                                |
| 6 | 121655761 | 121656048 | 5Y-H4K8ac_peak_14684 | 5.41472  | TBC1D32_ENSG000000146350                               |
| 6 | 126111136 | 126111367 | 5Y-H4K8ac_peak_14685 | 7.09658  |                                                        |
| 6 | 126277949 | 126278254 | 5Y-H4K8ac_peak_14686 | 7.38046  | HINT3_ENSG000000111911                                 |
| 6 | 127588167 | 127588392 | 5Y-H4K8ac_peak_14687 | 4.07874  | RNF146_ENSG000000118518                                |
| 6 | 127664599 | 127665023 | 5Y-H4K8ac_peak_14688 | 5.98695  | ECHDC1_ENSG000000093144                                |
| 6 | 131456693 | 131457107 | 5Y-H4K8ac_peak_14689 | 7.31815  | AKAP7_ENSG000000118507                                 |
| 6 | 132833821 | 132834159 | 5Y-H4K8ac_peak_14690 | 5.3176   | STX7_ENSG000000079950                                  |
| 6 | 133134928 | 133135257 | 5Y-H4K8ac_peak_14691 | 12.65187 | RPS12_ENSG000000112306                                 |
| 6 | 133452675 | 133452869 | 5Y-H4K8ac_peak_14692 | 4.50834  |                                                        |
| 6 | 134273151 | 134273593 | 5Y-H4K8ac_peak_14693 | 16.52279 | TBPL1_ENSG000000028839                                 |
| 6 | 135051195 | 135051406 | 5Y-H4K8ac_peak_14694 | 5.23083  |                                                        |
| 6 | 135376187 | 135376683 | 5Y-H4K8ac_peak_14695 | 7.89273  | CTA-212D2.2_ENSG000000232876                           |
| 6 | 135502008 | 135502257 | 5Y-H4K8ac_peak_14696 | 9.63153  | MYB_ENSG000000118513                                   |
| 6 | 136433439 | 136433640 | 5Y-H4K8ac_peak_14697 | 4.9885   |                                                        |
| 6 | 136612897 | 136613119 | 5Y-H4K8ac_peak_14698 | 7.49746  |                                                        |
| 6 | 137143744 | 137143962 | 5Y-H4K8ac_peak_14699 | 13.33225 | PEX7_ENSG000000112357                                  |
| 6 | 137242514 | 137243526 | 5Y-H4K8ac_peak_14700 | 17.76126 | SLC35D3_ENSG000000182747                               |
| 6 | 137244013 | 137244276 | 5Y-H4K8ac_peak_14701 | 5.25819  | SLC35D3_ENSG000000182747                               |
| 6 | 137244496 | 137244757 | 5Y-H4K8ac_peak_14702 | 9.59156  |                                                        |
| 6 | 137283400 | 137283599 | 5Y-H4K8ac_peak_14703 | 7.63144  |                                                        |
| 6 | 137288526 | 137288809 | 5Y-H4K8ac_peak_14704 | 10.89497 |                                                        |
| 6 | 137289214 | 137289675 | 5Y-H4K8ac_peak_14705 | 7.41197  |                                                        |
| 6 | 137292540 | 137292818 | 5Y-H4K8ac_peak_14706 | 12.69256 |                                                        |
| 6 | 137301612 | 137301807 | 5Y-H4K8ac_peak_14707 | 6.34046  |                                                        |
| 6 | 137302033 | 137302642 | 5Y-H4K8ac_peak_14708 | 6.34046  |                                                        |
| 6 | 137303378 | 137303813 | 5Y-H4K8ac_peak_14709 | 10.84616 |                                                        |
| 6 | 137309792 | 137309995 | 5Y-H4K8ac_peak_14710 | 7.38046  |                                                        |
| 6 | 137310901 | 137311384 | 5Y-H4K8ac_peak_14711 | 9.51254  |                                                        |
| 6 | 137364289 | 137364480 | 5Y-H4K8ac_peak_14712 | 4.51076  |                                                        |
| 6 | 137365251 | 137366182 | 5Y-H4K8ac_peak_14713 | 16.03077 | IL20RA_ENSG00000016402                                 |
| 6 | 137540156 | 137540479 | 5Y-H4K8ac_peak_14714 | 11.19336 | IFNGR1_ENSG000000027697                                |
| 6 | 138188482 | 138188685 | 5Y-H4K8ac_peak_14715 | 4.84727  | RP11-356I2.4_ENSG000000237499;TNFAIP3_ENSG000000118503 |
| 6 | 139309009 | 139309375 | 5Y-H4K8ac_peak_14716 | 10.69698 | REPS1_ENSG000000135597                                 |
| 6 | 139309769 | 139310037 | 5Y-H4K8ac_peak_14717 | 7.31815  | REPS1_ENSG000000135597                                 |
| 6 | 139348631 | 139348841 | 5Y-H4K8ac_peak_14718 | 4.84727  | ABRACL_ENSG000000146386                                |

|   |           |           |                      |          |                                                      |
|---|-----------|-----------|----------------------|----------|------------------------------------------------------|
| 6 | 142468423 | 142468698 | 5Y-H4K8ac_peak_14719 | 6.34046  | VTA1_ENSG00000009844                                 |
| 6 | 142968836 | 142969031 | 5Y-H4K8ac_peak_14720 | 6.73385  |                                                      |
| 6 | 143247692 | 143247988 | 5Y-H4K8ac_peak_14721 | 10.21117 |                                                      |
| 6 | 143266505 | 143266772 | 5Y-H4K8ac_peak_14722 | 8.23578  | HIVEP2_ENSG00000010818                               |
| 6 | 143381539 | 143381747 | 5Y-H4K8ac_peak_14723 | 6.77436  | AIG1_ENSG00000146416                                 |
| 6 | 143832438 | 143832852 | 5Y-H4K8ac_peak_14724 | 15.87289 | FUCA2_ENSG00000001036                                |
| 6 | 143857687 | 143858330 | 5Y-H4K8ac_peak_14725 | 6.64195  | PHACTR2_ENSG00000112419                              |
| 6 | 144163890 | 144164219 | 5Y-H4K8ac_peak_14726 | 6.50117  | LTV1_ENSG00000135521                                 |
| 6 | 144164516 | 144164820 | 5Y-H4K8ac_peak_14727 | 8.43511  | LTV1_ENSG00000135521                                 |
| 6 | 144417065 | 144417729 | 5Y-H4K8ac_peak_14728 | 13.64163 | SF3B5_ENSG00000169976                                |
| 6 | 146056130 | 146056410 | 5Y-H4K8ac_peak_14729 | 15.06486 | EPM2A_ENSG00000112425;RP3-466P17.1_ENSG00000270638   |
| 6 | 146056613 | 146056988 | 5Y-H4K8ac_peak_14730 | 6.78128  | EPM2A_ENSG00000112425;RP3-466P17.1_ENSG00000270638   |
| 6 | 146135570 | 146135827 | 5Y-H4K8ac_peak_14731 | 6.50117  | FBXO30_ENSG00000118496;RP11-545I5.3_ENSG00000235652  |
| 6 | 146755322 | 146756029 | 5Y-H4K8ac_peak_14732 | 10.1994  |                                                      |
| 6 | 146864186 | 146864576 | 5Y-H4K8ac_peak_14733 | 13.99721 | RAB32_ENSG00000118508                                |
| 6 | 146864914 | 146865194 | 5Y-H4K8ac_peak_14734 | 6.1654   | RAB32_ENSG00000118508                                |
| 6 | 146972262 | 146972532 | 5Y-H4K8ac_peak_14735 | 7.89142  |                                                      |
| 6 | 149638225 | 149638590 | 5Y-H4K8ac_peak_14736 | 21.35466 |                                                      |
| 6 | 149638841 | 149639553 | 5Y-H4K8ac_peak_14737 | 11.57334 |                                                      |
| 6 | 149866799 | 149866990 | 5Y-H4K8ac_peak_14738 | 8.2913   | PPIL4_ENSG00000131013                                |
| 6 | 150038843 | 150039172 | 5Y-H4K8ac_peak_14739 | 15.80786 | LATS1_ENSG00000131023                                |
| 6 | 150067808 | 150068280 | 5Y-H4K8ac_peak_14740 | 5.65584  |                                                      |
| 6 | 151186901 | 151187398 | 5Y-H4K8ac_peak_14741 | 9.23159  | MTHFD1L_ENSG00000120254                              |
| 6 | 151378613 | 151378936 | 5Y-H4K8ac_peak_14742 | 7.12953  |                                                      |
| 6 | 151432675 | 151432874 | 5Y-H4K8ac_peak_14743 | 5.29015  |                                                      |
| 6 | 151562074 | 151562435 | 5Y-H4K8ac_peak_14744 | 13.06587 | AKAP12_ENSG00000131016                               |
| 6 | 151710861 | 151711329 | 5Y-H4K8ac_peak_14745 | 6.37023  |                                                      |
| 6 | 151711920 | 151712539 | 5Y-H4K8ac_peak_14746 | 21.14873 | ZBTB2_ENSG00000181472                                |
| 6 | 151771554 | 151771795 | 5Y-H4K8ac_peak_14747 | 8.33296  |                                                      |
| 6 | 153303313 | 153304081 | 5Y-H4K8ac_peak_14748 | 14.77644 | FBXO5_ENSG00000112029;RP1-101K10.6_ENSG00000227627   |
| 6 | 153471968 | 153472161 | 5Y-H4K8ac_peak_14749 | 10.31981 |                                                      |
| 6 | 154360399 | 154361034 | 5Y-H4K8ac_peak_14750 | 11.57334 |                                                      |
| 6 | 154415588 | 154415829 | 5Y-H4K8ac_peak_14751 | 8.43511  |                                                      |
| 6 | 154745079 | 154745269 | 5Y-H4K8ac_peak_14752 | 5.29015  |                                                      |
| 6 | 154778558 | 154778811 | 5Y-H4K8ac_peak_14753 | 8.93923  |                                                      |
| 6 | 154830591 | 154830906 | 5Y-H4K8ac_peak_14754 | 5.28616  | CNKSR3_ENSG00000153721                               |
| 6 | 154862895 | 154863101 | 5Y-H4K8ac_peak_14755 | 5.62788  |                                                      |
| 6 | 155054541 | 155055136 | 5Y-H4K8ac_peak_14756 | 9.179    | SCAF8_ENSG00000213079                                |
| 6 | 155316889 | 155317290 | 5Y-H4K8ac_peak_14757 | 5.64909  |                                                      |
| 6 | 156188028 | 156188322 | 5Y-H4K8ac_peak_14758 | 5.64909  |                                                      |
| 6 | 157099037 | 157099838 | 5Y-H4K8ac_peak_14759 | 12.10416 | RP11-230C9.2_ENSG00000271551;ARID1B_ENSG00000049618  |
| 6 | 157100140 | 157100767 | 5Y-H4K8ac_peak_14760 | 9.05168  | MIR4466_ENSG00000271899;RP11-230C9.3_ENSG00000270487 |
| 6 | 157269456 | 157269650 | 5Y-H4K8ac_peak_14761 | 6.34046  |                                                      |
| 6 | 157549941 | 157550299 | 5Y-H4K8ac_peak_14762 | 4.8509   |                                                      |
| 6 | 157629673 | 157629923 | 5Y-H4K8ac_peak_14763 | 5.29015  |                                                      |
| 6 | 157695406 | 157695738 | 5Y-H4K8ac_peak_14764 | 6.34046  |                                                      |

|   |           |           |                      |          |                                                     |
|---|-----------|-----------|----------------------|----------|-----------------------------------------------------|
| 6 | 157696001 | 157696451 | 5Y-H4K8ac_peak_14765 | 11.1169  |                                                     |
| 6 | 157801274 | 157801770 | 5Y-H4K8ac_peak_14766 | 6.03632  | ZDHHC14_ENSG00000175048                             |
| 6 | 157853928 | 157854142 | 5Y-H4K8ac_peak_14767 | 5.3176   |                                                     |
| 6 | 158070478 | 158070776 | 5Y-H4K8ac_peak_14768 | 10.31981 |                                                     |
| 6 | 158243606 | 158244054 | 5Y-H4K8ac_peak_14769 | 16.15586 | SNX9_ENSG00000130340                                |
| 6 | 158244356 | 158244933 | 5Y-H4K8ac_peak_14770 | 10.84616 | SNX9_ENSG00000130340                                |
| 6 | 158402940 | 158403370 | 5Y-H4K8ac_peak_14771 | 5.23083  | SYNJ2_ENSG00000078269                               |
| 6 | 158431334 | 158431562 | 5Y-H4K8ac_peak_14772 | 10.60003 |                                                     |
| 6 | 158589463 | 158590169 | 5Y-H4K8ac_peak_14773 | 10.36926 | SERAC1_ENSG00000122335;GTF2H5_ENSG00000272047       |
| 6 | 158653368 | 158653745 | 5Y-H4K8ac_peak_14774 | 6.47245  |                                                     |
| 6 | 158957527 | 158957855 | 5Y-H4K8ac_peak_14775 | 5.449    | TMEM181_ENSG00000146433                             |
| 6 | 158958154 | 158958494 | 5Y-H4K8ac_peak_14776 | 6.78128  | TMEM181_ENSG00000146433                             |
| 6 | 159041732 | 159042057 | 5Y-H4K8ac_peak_14777 | 6.34046  | TATDN2P2_ENSG00000218226                            |
| 6 | 159042361 | 159042816 | 5Y-H4K8ac_peak_14778 | 8.2913   | TATDN2P2_ENSG00000218226                            |
| 6 | 159064919 | 159065670 | 5Y-H4K8ac_peak_14779 | 7.31102  | DYNLT1_ENSG00000146425                              |
| 6 | 159125490 | 159125966 | 5Y-H4K8ac_peak_14780 | 11.36844 |                                                     |
| 6 | 159172908 | 159173122 | 5Y-H4K8ac_peak_14781 | 5.03335  |                                                     |
| 6 | 159174274 | 159174525 | 5Y-H4K8ac_peak_14782 | 4.9885   |                                                     |
| 6 | 159176518 | 159176896 | 5Y-H4K8ac_peak_14783 | 8.2913   |                                                     |
| 6 | 159177094 | 159177480 | 5Y-H4K8ac_peak_14784 | 8.59175  |                                                     |
| 6 | 159178724 | 159179254 | 5Y-H4K8ac_peak_14785 | 4.07874  |                                                     |
| 6 | 159240556 | 159240767 | 5Y-H4K8ac_peak_14786 | 5.24695  | EZR_ENSG00000092820                                 |
| 6 | 159525388 | 159525766 | 5Y-H4K8ac_peak_14787 | 9.31608  |                                                     |
| 6 | 160114458 | 160114667 | 5Y-H4K8ac_peak_14788 | 6.34046  |                                                     |
| 6 | 160148185 | 160148390 | 5Y-H4K8ac_peak_14789 | 10.72427 |                                                     |
| 6 | 160148749 | 160149009 | 5Y-H4K8ac_peak_14790 | 5.64909  |                                                     |
| 6 | 161412413 | 161412751 | 5Y-H4K8ac_peak_14791 | 8.33296  | RP3-428L16.2_ENSG00000272841;MAP3K4_ENSG00000085511 |
| 6 | 161412970 | 161413202 | 5Y-H4K8ac_peak_14792 | 7.31815  | RP3-428L16.2_ENSG00000272841;MAP3K4_ENSG00000085511 |
| 6 | 161462403 | 161462600 | 5Y-H4K8ac_peak_14793 | 5.81062  |                                                     |
| 6 | 161589246 | 161589577 | 5Y-H4K8ac_peak_14794 | 7.31815  |                                                     |
| 6 | 162043371 | 162043624 | 5Y-H4K8ac_peak_14795 | 5.40331  |                                                     |
| 6 | 163134222 | 163134423 | 5Y-H4K8ac_peak_14796 | 9.20645  |                                                     |
| 6 | 163148389 | 163148713 | 5Y-H4K8ac_peak_14797 | 6.43775  | PARK2_ENSG00000185345;PACRG_ENSG00000112530         |
| 6 | 163338181 | 163338494 | 5Y-H4K8ac_peak_14798 | 5.28616  |                                                     |
| 6 | 163776094 | 163776350 | 5Y-H4K8ac_peak_14799 | 5.98695  |                                                     |
| 6 | 163834427 | 163834898 | 5Y-H4K8ac_peak_14800 | 7.50148  | CAHM_ENSG00000270419;QKI_ENSG00000112531            |
| 6 | 164092265 | 164092550 | 5Y-H4K8ac_peak_14801 | 4.9885   |                                                     |
| 6 | 164134169 | 164134364 | 5Y-H4K8ac_peak_14802 | 6.50117  |                                                     |
| 6 | 164146342 | 164146573 | 5Y-H4K8ac_peak_14803 | 5.04571  |                                                     |
| 6 | 165346729 | 165347082 | 5Y-H4K8ac_peak_14804 | 5.28616  |                                                     |
| 6 | 166073951 | 166075466 | 5Y-H4K8ac_peak_14805 | 24.01091 |                                                     |
| 6 | 166314401 | 166314623 | 5Y-H4K8ac_peak_14806 | 7.96225  |                                                     |
| 6 | 166419210 | 166419535 | 5Y-H4K8ac_peak_14807 | 7.90751  |                                                     |
| 6 | 166720841 | 166721219 | 5Y-H4K8ac_peak_14808 | 11.1169  | PRR18_ENSG00000176381                               |
| 6 | 166756159 | 166756536 | 5Y-H4K8ac_peak_14809 | 14.50475 | SFT2D1_ENSG00000198818                              |
| 6 | 166817267 | 166817604 | 5Y-H4K8ac_peak_14810 | 7.59101  |                                                     |

|   |           |           |                      |          |                                                                                   |
|---|-----------|-----------|----------------------|----------|-----------------------------------------------------------------------------------|
| 6 | 166849252 | 166849443 | 5Y-H4K8ac_peak_14811 | 5.64909  |                                                                                   |
| 6 | 166849880 | 166850379 | 5Y-H4K8ac_peak_14812 | 6.82266  |                                                                                   |
| 6 | 166852633 | 166853194 | 5Y-H4K8ac_peak_14813 | 7.03573  |                                                                                   |
| 6 | 166854912 | 166855427 | 5Y-H4K8ac_peak_14814 | 6.08523  |                                                                                   |
| 6 | 166873681 | 166874221 | 5Y-H4K8ac_peak_14815 | 13.12848 |                                                                                   |
| 6 | 166875252 | 166875987 | 5Y-H4K8ac_peak_14816 | 20.07837 |                                                                                   |
| 6 | 166876280 | 166876504 | 5Y-H4K8ac_peak_14817 | 5.64909  |                                                                                   |
| 6 | 166881217 | 166881595 | 5Y-H4K8ac_peak_14818 | 5.57299  |                                                                                   |
| 6 | 166883583 | 166884217 | 5Y-H4K8ac_peak_14819 | 12.57157 |                                                                                   |
| 6 | 166884541 | 166884980 | 5Y-H4K8ac_peak_14820 | 13.00733 |                                                                                   |
| 6 | 166896268 | 166896477 | 5Y-H4K8ac_peak_14821 | 7.63144  |                                                                                   |
| 6 | 166903420 | 166904706 | 5Y-H4K8ac_peak_14822 | 9.72464  |                                                                                   |
| 6 | 166916693 | 166917020 | 5Y-H4K8ac_peak_14823 | 6.98394  |                                                                                   |
| 6 | 166946826 | 166947164 | 5Y-H4K8ac_peak_14824 | 3.91125  |                                                                                   |
| 6 | 167275718 | 167276006 | 5Y-H4K8ac_peak_14825 | 9.38203  |                                                                                   |
| 6 | 167276512 | 167276891 | 5Y-H4K8ac_peak_14826 | 7.38046  |                                                                                   |
| 6 | 167339699 | 167339940 | 5Y-H4K8ac_peak_14827 | 7.28311  |                                                                                   |
| 6 | 167412922 | 167413325 | 5Y-H4K8ac_peak_14828 | 10.4689  | RP11-517H2.6_ENSG00000272980;RP1-167A14.2_ENSG00000227598;FGFR1OP_ENSG00000213066 |
| 6 | 167440794 | 167441096 | 5Y-H4K8ac_peak_14829 | 6.50117  |                                                                                   |
| 6 | 167441502 | 167441857 | 5Y-H4K8ac_peak_14830 | 6.91702  |                                                                                   |
| 6 | 167445295 | 167445801 | 5Y-H4K8ac_peak_14831 | 11.28133 |                                                                                   |
| 6 | 167528012 | 167528217 | 5Y-H4K8ac_peak_14832 | 9.34555  |                                                                                   |
| 6 | 167555326 | 167555597 | 5Y-H4K8ac_peak_14833 | 9.51785  |                                                                                   |
| 6 | 167648813 | 167649034 | 5Y-H4K8ac_peak_14834 | 5.65584  |                                                                                   |
| 6 | 167649270 | 167649648 | 5Y-H4K8ac_peak_14835 | 6.1654   |                                                                                   |
| 6 | 167691625 | 167691969 | 5Y-H4K8ac_peak_14836 | 10.02453 |                                                                                   |
| 6 | 167764499 | 167764813 | 5Y-H4K8ac_peak_14837 | 10.31981 |                                                                                   |
| 6 | 168099686 | 168099886 | 5Y-H4K8ac_peak_14838 | 5.12213  |                                                                                   |
| 6 | 168196672 | 168197192 | 5Y-H4K8ac_peak_14839 | 12.57157 | AL009178.1_ENSG00000269155;C6orf123_ENSG00000146521                               |
| 6 | 168226260 | 168226647 | 5Y-H4K8ac_peak_14840 | 5.98695  | MLLT4-AS1_ENSG00000198221;MLLT4_ENSG00000130396                                   |
| 6 | 168396829 | 168397231 | 5Y-H4K8ac_peak_14841 | 4.84727  | KIF25-AS1_ENSG00000229921;KIF25_ENSG00000125337                                   |
| 6 | 168435762 | 168435982 | 5Y-H4K8ac_peak_14842 | 8.63306  |                                                                                   |
| 6 | 168496964 | 168497353 | 5Y-H4K8ac_peak_14843 | 6.77436  |                                                                                   |
| 6 | 168498796 | 168499571 | 5Y-H4K8ac_peak_14844 | 11.1169  |                                                                                   |
| 6 | 168653862 | 168654060 | 5Y-H4K8ac_peak_14845 | 7.72345  |                                                                                   |
| 6 | 168956927 | 168957202 | 5Y-H4K8ac_peak_14846 | 4.51076  |                                                                                   |
| 6 | 169003296 | 169003602 | 5Y-H4K8ac_peak_14847 | 9.38203  |                                                                                   |
| 6 | 169049636 | 169049982 | 5Y-H4K8ac_peak_14848 | 5.98695  |                                                                                   |
| 6 | 169424423 | 169424614 | 5Y-H4K8ac_peak_14849 | 7.05631  |                                                                                   |
| 6 | 169613477 | 169613801 | 5Y-H4K8ac_peak_14850 | 16.50659 | XXyac-YX65C7_A.2_ENSG00000226445                                                  |
| 6 | 169614052 | 169614319 | 5Y-H4K8ac_peak_14851 | 6.34046  | XXyac-YX65C7_A.2_ENSG00000226445                                                  |
| 6 | 170102363 | 170102742 | 5Y-H4K8ac_peak_14852 | 14.15915 | WDR27_ENSG00000184465;C6orf120_ENSG00000185127                                    |
| 6 | 170124917 | 170125580 | 5Y-H4K8ac_peak_14853 | 12.43358 | PHF10_ENSG00000130024;RP1-266L20.2_ENSG00000232640;RP1-266L20.4_ENSG00000227704   |
| 6 | 170151297 | 170152079 | 5Y-H4K8ac_peak_14854 | 10.35586 | TCTE3_ENSG00000184786;ERMARD_ENSG00000130023                                      |
| 6 | 170210541 | 170211038 | 5Y-H4K8ac_peak_14855 | 11.93212 | RP1-182D15.2_ENSG00000236173                                                      |
| 6 | 170340641 | 170340877 | 5Y-H4K8ac_peak_14856 | 9.52603  |                                                                                   |

|   |           |           |                      |          |                                                        |
|---|-----------|-----------|----------------------|----------|--------------------------------------------------------|
| 6 | 170341242 | 170341599 | 5Y-H4K8ac_peak_14857 | 5.29015  |                                                        |
| 6 | 170403242 | 170403517 | 5Y-H4K8ac_peak_14858 | 6.55906  |                                                        |
| 6 | 170533620 | 170534035 | 5Y-H4K8ac_peak_14859 | 6.37023  |                                                        |
| 6 | 170553181 | 170553547 | 5Y-H4K8ac_peak_14860 | 5.03335  |                                                        |
| 6 | 170553817 | 170554260 | 5Y-H4K8ac_peak_14861 | 5.41472  |                                                        |
| 6 | 170615885 | 170616198 | 5Y-H4K8ac_peak_14862 | 12.21176 |                                                        |
| 6 | 170748165 | 170748827 | 5Y-H4K8ac_peak_14863 | 8.51022  |                                                        |
| 7 | 57190     | 57758     | 5Y-H4K8ac_peak_14864 | 5.12488  |                                                        |
| 7 | 87185     | 87582     | 5Y-H4K8ac_peak_14865 | 6.06162  |                                                        |
| 7 | 148962    | 149177    | 5Y-H4K8ac_peak_14866 | 13.92877 | AC093627.9_ENSG00000242474;AC093627.10_ENSG00000240859 |
| 7 | 149481    | 150517    | 5Y-H4K8ac_peak_14867 | 24.01091 | AC093627.9_ENSG00000242474;AC093627.10_ENSG00000240859 |
| 7 | 372345    | 372818    | 5Y-H4K8ac_peak_14868 | 12.2918  |                                                        |
| 7 | 495017    | 495459    | 5Y-H4K8ac_peak_14869 | 10.1994  |                                                        |
| 7 | 533261    | 534145    | 5Y-H4K8ac_peak_14870 | 16.06604 |                                                        |
| 7 | 706286    | 706486    | 5Y-H4K8ac_peak_14871 | 5.88655  |                                                        |
| 7 | 751332    | 752137    | 5Y-H4K8ac_peak_14872 | 17.04999 |                                                        |
| 7 | 752429    | 752625    | 5Y-H4K8ac_peak_14873 | 5.24695  |                                                        |
| 7 | 765853    | 766226    | 5Y-H4K8ac_peak_14874 | 16.57163 | HEATR2_ENSG00000164818                                 |
| 7 | 808419    | 808917    | 5Y-H4K8ac_peak_14875 | 9.64738  |                                                        |
| 7 | 810058    | 810385    | 5Y-H4K8ac_peak_14876 | 10.48476 |                                                        |
| 7 | 818457    | 818712    | 5Y-H4K8ac_peak_14877 | 4.89128  |                                                        |
| 7 | 841672    | 841925    | 5Y-H4K8ac_peak_14878 | 6.08523  |                                                        |
| 7 | 855385    | 855644    | 5Y-H4K8ac_peak_14879 | 5.87725  | SUN1_ENSG00000164828                                   |
| 7 | 856357    | 856607    | 5Y-H4K8ac_peak_14880 | 6.52343  | SUN1_ENSG00000164828                                   |
| 7 | 915220    | 915943    | 5Y-H4K8ac_peak_14881 | 10.21117 | GET4_ENSG00000239857                                   |
| 7 | 941520    | 941812    | 5Y-H4K8ac_peak_14882 | 8.95951  |                                                        |
| 7 | 949064    | 949367    | 5Y-H4K8ac_peak_14883 | 3.94247  |                                                        |
| 7 | 956131    | 956329    | 5Y-H4K8ac_peak_14884 | 8.73227  |                                                        |
| 7 | 1014854   | 1015107   | 5Y-H4K8ac_peak_14885 | 10.48476 | COX19_ENSG00000240230                                  |
| 7 | 1067535   | 1067806   | 5Y-H4K8ac_peak_14886 | 4.642    | AC073957.15_ENSG00000225146                            |
| 7 | 1121237   | 1121565   | 5Y-H4K8ac_peak_14887 | 7.96285  | AC091729.8_ENSG00000226291;GPER1_ENSG00000164850       |
| 7 | 1121818   | 1122328   | 5Y-H4K8ac_peak_14888 | 6.78128  | GPER1_ENSG00000164850                                  |
| 7 | 1126180   | 1126452   | 5Y-H4K8ac_peak_14889 | 5.03564  |                                                        |
| 7 | 1178148   | 1178473   | 5Y-H4K8ac_peak_14890 | 4.55128  | C7orf50_ENSG00000146540                                |
| 7 | 1200139   | 1200652   | 5Y-H4K8ac_peak_14891 | 10.4495  | ZFAND2A_ENSG00000178381;AC091729.9_ENSG00000229043     |
| 7 | 1215451   | 1215827   | 5Y-H4K8ac_peak_14892 | 6.19716  |                                                        |
| 7 | 1543593   | 1543923   | 5Y-H4K8ac_peak_14893 | 12.50545 |                                                        |
| 7 | 1572943   | 1573273   | 5Y-H4K8ac_peak_14894 | 5.34294  |                                                        |
| 7 | 1594921   | 1595165   | 5Y-H4K8ac_peak_14895 | 5.87725  |                                                        |
| 7 | 1609115   | 1610397   | 5Y-H4K8ac_peak_14896 | 24.73897 | PSMG3_ENSG00000157778;PSMG3-AS1_ENSG00000230487        |
| 7 | 1625148   | 1626116   | 5Y-H4K8ac_peak_14897 | 12.50545 |                                                        |
| 7 | 1626388   | 1626895   | 5Y-H4K8ac_peak_14898 | 11.09673 |                                                        |
| 7 | 1678848   | 1679107   | 5Y-H4K8ac_peak_14899 | 7.1449   |                                                        |
| 7 | 1679586   | 1680030   | 5Y-H4K8ac_peak_14900 | 11.52237 |                                                        |
| 7 | 1680252   | 1680609   | 5Y-H4K8ac_peak_14901 | 7.50464  |                                                        |
| 7 | 1680856   | 1681107   | 5Y-H4K8ac_peak_14902 | 9.00574  |                                                        |



|   |         |         |                      |          |                                             |
|---|---------|---------|----------------------|----------|---------------------------------------------|
| 7 | 1681989 | 1682248 | 5Y-H4K8ac_peak_14903 | 10.48476 |                                             |
| 7 | 1684917 | 1685252 | 5Y-H4K8ac_peak_14904 | 10.12457 |                                             |
| 7 | 1686893 | 1688806 | 5Y-H4K8ac_peak_14905 | 18.60312 |                                             |
| 7 | 1693862 | 1694093 | 5Y-H4K8ac_peak_14906 | 7.59101  |                                             |
| 7 | 1703773 | 1704384 | 5Y-H4K8ac_peak_14907 | 7.41172  |                                             |
| 7 | 1704594 | 1705062 | 5Y-H4K8ac_peak_14908 | 7.59101  |                                             |
| 7 | 1707161 | 1707458 | 5Y-H4K8ac_peak_14909 | 4.04213  |                                             |
| 7 | 1716175 | 1716387 | 5Y-H4K8ac_peak_14910 | 6.77436  |                                             |
| 7 | 1753096 | 1753849 | 5Y-H4K8ac_peak_14911 | 3.93392  |                                             |
| 7 | 1756364 | 1757294 | 5Y-H4K8ac_peak_14912 | 7.20869  |                                             |
| 7 | 1764642 | 1764846 | 5Y-H4K8ac_peak_14913 | 5.88408  |                                             |
| 7 | 1782849 | 1783204 | 5Y-H4K8ac_peak_14914 | 7.50148  | AC074389.9_ENSG00000236081                  |
| 7 | 1878848 | 1879216 | 5Y-H4K8ac_peak_14915 | 11.95373 | AC110781.3_ENSG00000176349                  |
| 7 | 1879477 | 1879833 | 5Y-H4K8ac_peak_14916 | 16.57564 |                                             |
| 7 | 1893756 | 1893982 | 5Y-H4K8ac_peak_14917 | 8.3285   |                                             |
| 7 | 1895840 | 1896090 | 5Y-H4K8ac_peak_14918 | 6.67704  |                                             |
| 7 | 1896440 | 1897137 | 5Y-H4K8ac_peak_14919 | 9.02938  |                                             |
| 7 | 1923803 | 1924016 | 5Y-H4K8ac_peak_14920 | 4.29586  |                                             |
| 7 | 1939010 | 1939358 | 5Y-H4K8ac_peak_14921 | 4.77126  |                                             |
| 7 | 1949163 | 1949363 | 5Y-H4K8ac_peak_14922 | 6.88247  |                                             |
| 7 | 1989957 | 1990968 | 5Y-H4K8ac_peak_14923 | 6.08523  |                                             |
| 7 | 1992165 | 1992355 | 5Y-H4K8ac_peak_14924 | 5.21777  |                                             |
| 7 | 2041170 | 2041456 | 5Y-H4K8ac_peak_14925 | 4.67245  |                                             |
| 7 | 2053299 | 2053570 | 5Y-H4K8ac_peak_14926 | 9.68742  |                                             |
| 7 | 2106367 | 2106842 | 5Y-H4K8ac_peak_14927 | 10.56003 |                                             |
| 7 | 2121209 | 2121493 | 5Y-H4K8ac_peak_14928 | 7.20869  |                                             |
| 7 | 2142754 | 2142973 | 5Y-H4K8ac_peak_14929 | 6.40724  |                                             |
| 7 | 2143309 | 2144056 | 5Y-H4K8ac_peak_14930 | 8.75963  |                                             |
| 7 | 2144496 | 2144997 | 5Y-H4K8ac_peak_14931 | 16.73191 |                                             |
| 7 | 2145209 | 2145541 | 5Y-H4K8ac_peak_14932 | 8.69112  |                                             |
| 7 | 2146197 | 2146521 | 5Y-H4K8ac_peak_14933 | 7.50501  |                                             |
| 7 | 2147253 | 2147530 | 5Y-H4K8ac_peak_14934 | 4.32488  |                                             |
| 7 | 2148668 | 2149010 | 5Y-H4K8ac_peak_14935 | 6.80915  |                                             |
| 7 | 2150776 | 2151047 | 5Y-H4K8ac_peak_14936 | 13.81505 |                                             |
| 7 | 2160407 | 2160706 | 5Y-H4K8ac_peak_14937 | 6.88736  |                                             |
| 7 | 2165534 | 2165813 | 5Y-H4K8ac_peak_14938 | 6.86362  |                                             |
| 7 | 2177752 | 2177944 | 5Y-H4K8ac_peak_14939 | 4.18287  |                                             |
| 7 | 2178190 | 2178684 | 5Y-H4K8ac_peak_14940 | 5.72233  |                                             |
| 7 | 2191469 | 2192006 | 5Y-H4K8ac_peak_14941 | 9.51254  |                                             |
| 7 | 2200927 | 2201773 | 5Y-H4K8ac_peak_14942 | 11.22005 |                                             |
| 7 | 2241887 | 2242094 | 5Y-H4K8ac_peak_14943 | 7.09658  |                                             |
| 7 | 2281395 | 2282429 | 5Y-H4K8ac_peak_14944 | 16.30401 | FTSJ2_ENSG00000122687;NUDT1_ENSG00000106268 |
| 7 | 2321433 | 2322058 | 5Y-H4K8ac_peak_14945 | 11.4254  |                                             |
| 7 | 2353532 | 2353732 | 5Y-H4K8ac_peak_14946 | 5.24695  |                                             |
| 7 | 2393744 | 2395029 | 5Y-H4K8ac_peak_14947 | 13.12848 | SNX8_ENSG00000106266;EIF3B_ENSG00000106263  |
| 7 | 2439759 | 2440063 | 5Y-H4K8ac_peak_14948 | 6.69752  |                                             |

|   |         |         |                      |          |                                                 |
|---|---------|---------|----------------------|----------|-------------------------------------------------|
| 7 | 2443248 | 2443531 | 5Y-H4K8ac_peak_14949 | 9.89953  | CHST12_ENSG00000136213                          |
| 7 | 2491494 | 2492072 | 5Y-H4K8ac_peak_14950 | 8.7173   |                                                 |
| 7 | 2535283 | 2535636 | 5Y-H4K8ac_peak_14951 | 12.00715 |                                                 |
| 7 | 2553090 | 2553366 | 5Y-H4K8ac_peak_14952 | 10.12457 | LFNG_ENSG00000106003                            |
| 7 | 2553594 | 2554023 | 5Y-H4K8ac_peak_14953 | 6.53157  |                                                 |
| 7 | 2563569 | 2563856 | 5Y-H4K8ac_peak_14954 | 7.44077  |                                                 |
| 7 | 2594945 | 2595364 | 5Y-H4K8ac_peak_14955 | 14.89891 | BRAT1_ENSG00000106009                           |
| 7 | 2653402 | 2653642 | 5Y-H4K8ac_peak_14956 | 7.07275  |                                                 |
| 7 | 2661626 | 2662179 | 5Y-H4K8ac_peak_14957 | 8.62703  |                                                 |
| 7 | 2662784 | 2663250 | 5Y-H4K8ac_peak_14958 | 6.08523  |                                                 |
| 7 | 2670851 | 2671195 | 5Y-H4K8ac_peak_14959 | 5.29036  | TTYH3_ENSG00000136295                           |
| 7 | 2671678 | 2672068 | 5Y-H4K8ac_peak_14960 | 12.67841 | TTYH3_ENSG00000136295                           |
| 7 | 2677435 | 2677667 | 5Y-H4K8ac_peak_14961 | 4.642    |                                                 |
| 7 | 2678420 | 2679117 | 5Y-H4K8ac_peak_14962 | 10.48476 |                                                 |
| 7 | 2680344 | 2680855 | 5Y-H4K8ac_peak_14963 | 12.20135 |                                                 |
| 7 | 2683685 | 2684883 | 5Y-H4K8ac_peak_14964 | 6.85826  |                                                 |
| 7 | 2685352 | 2685674 | 5Y-H4K8ac_peak_14965 | 8.85352  |                                                 |
| 7 | 2702474 | 2702725 | 5Y-H4K8ac_peak_14966 | 5.67517  |                                                 |
| 7 | 2798102 | 2798401 | 5Y-H4K8ac_peak_14967 | 8.24461  |                                                 |
| 7 | 2903382 | 2903702 | 5Y-H4K8ac_peak_14968 | 9.31608  |                                                 |
| 7 | 2920378 | 2920576 | 5Y-H4K8ac_peak_14969 | 4.18845  |                                                 |
| 7 | 2926238 | 2926431 | 5Y-H4K8ac_peak_14970 | 7.89273  |                                                 |
| 7 | 2953264 | 2953578 | 5Y-H4K8ac_peak_14971 | 7.01266  |                                                 |
| 7 | 2961434 | 2961631 | 5Y-H4K8ac_peak_14972 | 7.90751  |                                                 |
| 7 | 2967944 | 2968382 | 5Y-H4K8ac_peak_14973 | 11.8592  |                                                 |
| 7 | 2969030 | 2969877 | 5Y-H4K8ac_peak_14974 | 12.50545 |                                                 |
| 7 | 2971897 | 2972777 | 5Y-H4K8ac_peak_14975 | 9.12101  |                                                 |
| 7 | 3036621 | 3036851 | 5Y-H4K8ac_peak_14976 | 5.35202  |                                                 |
| 7 | 3066238 | 3066438 | 5Y-H4K8ac_peak_14977 | 5.49775  |                                                 |
| 7 | 3067179 | 3068044 | 5Y-H4K8ac_peak_14978 | 4.92482  |                                                 |
| 7 | 3068841 | 3069090 | 5Y-H4K8ac_peak_14979 | 11.22005 |                                                 |
| 7 | 3073292 | 3073521 | 5Y-H4K8ac_peak_14980 | 4.50834  |                                                 |
| 7 | 3083809 | 3084040 | 5Y-H4K8ac_peak_14981 | 5.98695  | CARD11_ENSG00000198286                          |
| 7 | 3113384 | 3113740 | 5Y-H4K8ac_peak_14982 | 12.72596 |                                                 |
| 7 | 3179474 | 3179680 | 5Y-H4K8ac_peak_14983 | 5.52265  |                                                 |
| 7 | 3339510 | 3340146 | 5Y-H4K8ac_peak_14984 | 6.78128  | SDK1_ENSG00000146555                            |
| 7 | 3341554 | 3341752 | 5Y-H4K8ac_peak_14985 | 6.37023  | SDK1_ENSG00000146555;AC073316.1_ENSG00000236708 |
| 7 | 4046561 | 4047039 | 5Y-H4K8ac_peak_14986 | 4.642    |                                                 |
| 7 | 4091322 | 4091601 | 5Y-H4K8ac_peak_14987 | 6.37023  |                                                 |
| 7 | 4169409 | 4169764 | 5Y-H4K8ac_peak_14988 | 6.78128  |                                                 |
| 7 | 4183156 | 4183572 | 5Y-H4K8ac_peak_14989 | 6.08523  |                                                 |
| 7 | 4183781 | 4184503 | 5Y-H4K8ac_peak_14990 | 19.58975 |                                                 |
| 7 | 4184722 | 4185265 | 5Y-H4K8ac_peak_14991 | 17.09777 |                                                 |
| 7 | 4229096 | 4229513 | 5Y-H4K8ac_peak_14992 | 10.44473 |                                                 |
| 7 | 4230004 | 4230888 | 5Y-H4K8ac_peak_14993 | 13.00733 |                                                 |
| 7 | 4280468 | 4280670 | 5Y-H4K8ac_peak_14994 | 9.34684  |                                                 |

|   |         |         |                      |          |                                                               |
|---|---------|---------|----------------------|----------|---------------------------------------------------------------|
| 7 | 4366962 | 4367287 | 5Y-H4K8ac_peak_14995 | 4.50834  |                                                               |
| 7 | 4536643 | 4536839 | 5Y-H4K8ac_peak_14996 | 5.78188  |                                                               |
| 7 | 4564032 | 4564432 | 5Y-H4K8ac_peak_14997 | 6.06314  |                                                               |
| 7 | 4680578 | 4680804 | 5Y-H4K8ac_peak_14998 | 8.47411  |                                                               |
| 7 | 4681864 | 4682135 | 5Y-H4K8ac_peak_14999 | 8.3285   |                                                               |
| 7 | 4721212 | 4721690 | 5Y-H4K8ac_peak_15000 | 12.10416 |                                                               |
| 7 | 4765104 | 4765524 | 5Y-H4K8ac_peak_15001 | 6.78128  |                                                               |
| 7 | 4813813 | 4814052 | 5Y-H4K8ac_peak_15002 | 6.37023  |                                                               |
| 7 | 4814341 | 4815082 | 5Y-H4K8ac_peak_15003 | 12.05638 | AP5Z1_ENSG00000242802                                         |
| 7 | 4860430 | 4860643 | 5Y-H4K8ac_peak_15004 | 4.77126  |                                                               |
| 7 | 4911024 | 4912031 | 5Y-H4K8ac_peak_15005 | 7.64648  |                                                               |
| 7 | 4912392 | 4912753 | 5Y-H4K8ac_peak_15006 | 6.50031  |                                                               |
| 7 | 4913091 | 4913355 | 5Y-H4K8ac_peak_15007 | 4.55128  |                                                               |
| 7 | 4922750 | 4923224 | 5Y-H4K8ac_peak_15008 | 5.87725  | RADIL_ENSG00000157927                                         |
| 7 | 4998399 | 4998839 | 5Y-H4K8ac_peak_15009 | 8.43511  | MMD2_ENSG00000136297                                          |
| 7 | 5013140 | 5013413 | 5Y-H4K8ac_peak_15010 | 6.77436  | RNF216P1_ENSG00000196204                                      |
| 7 | 5085054 | 5085295 | 5Y-H4K8ac_peak_15011 | 5.73251  | RBAK_ENSG00000146587                                          |
| 7 | 5085553 | 5086135 | 5Y-H4K8ac_peak_15012 | 8.5159   | RBAK_ENSG00000146587                                          |
| 7 | 5111607 | 5112014 | 5Y-H4K8ac_peak_15013 | 7.89273  | RBAKDN_ENSG00000273313                                        |
| 7 | 5112320 | 5112560 | 5Y-H4K8ac_peak_15014 | 6.81557  | RBAKDN_ENSG00000273313                                        |
| 7 | 5184295 | 5184554 | 5Y-H4K8ac_peak_15015 | 5.52265  | ZNF890P_ENSG00000159904                                       |
| 7 | 5229147 | 5229657 | 5Y-H4K8ac_peak_15016 | 13.4304  | WIPI2_ENSG00000157954                                         |
| 7 | 5302670 | 5302877 | 5Y-H4K8ac_peak_15017 | 5.37237  |                                                               |
| 7 | 5314983 | 5315225 | 5Y-H4K8ac_peak_15018 | 4.81081  | SLC29A4_ENSG00000164638;AC093376.1_ENSG00000263808            |
| 7 | 5315877 | 5316204 | 5Y-H4K8ac_peak_15019 | 7.50501  | AC093376.1_ENSG00000263808                                    |
| 7 | 5322999 | 5323267 | 5Y-H4K8ac_peak_15020 | 4.95697  |                                                               |
| 7 | 5446698 | 5446961 | 5Y-H4K8ac_peak_15021 | 6.95844  |                                                               |
| 7 | 5462781 | 5463333 | 5Y-H4K8ac_peak_15022 | 9.48438  |                                                               |
| 7 | 5463883 | 5464103 | 5Y-H4K8ac_peak_15023 | 10.98149 | TNRC18_ENSG00000182095                                        |
| 7 | 5464628 | 5464987 | 5Y-H4K8ac_peak_15024 | 11.4254  | TNRC18_ENSG00000182095;RP11-1275H24.2_ENSG00000272953         |
| 7 | 5465358 | 5465821 | 5Y-H4K8ac_peak_15025 | 9.00954  | TNRC18_ENSG00000182095;RP11-1275H24.2_ENSG00000272953         |
| 7 | 5466051 | 5466624 | 5Y-H4K8ac_peak_15026 | 9.64145  | RP11-1275H24.2_ENSG00000272953                                |
| 7 | 5466949 | 5468235 | 5Y-H4K8ac_peak_15027 | 11.23789 | RP11-1275H24.1_ENSG00000234432;RP11-1275H24.3_ENSG00000273084 |
| 7 | 5468787 | 5469129 | 5Y-H4K8ac_peak_15028 | 15.90402 | RP11-1275H24.1_ENSG00000234432;RP11-1275H24.3_ENSG00000273084 |
| 7 | 5469458 | 5470008 | 5Y-H4K8ac_peak_15029 | 7.16882  | RP11-1275H24.1_ENSG00000234432                                |
| 7 | 5517445 | 5518172 | 5Y-H4K8ac_peak_15030 | 10.91993 |                                                               |
| 7 | 5519353 | 5519603 | 5Y-H4K8ac_peak_15031 | 5.54834  |                                                               |
| 7 | 5553003 | 5553760 | 5Y-H4K8ac_peak_15032 | 19.52902 | FBXL18_ENSG00000155034                                        |
| 7 | 5569725 | 5570197 | 5Y-H4K8ac_peak_15033 | 16.23405 |                                                               |
| 7 | 5570459 | 5570907 | 5Y-H4K8ac_peak_15034 | 13.60583 |                                                               |
| 7 | 5578750 | 5579002 | 5Y-H4K8ac_peak_15035 | 4.94375  |                                                               |
| 7 | 5594141 | 5596118 | 5Y-H4K8ac_peak_15036 | 15.03212 | CTB-161C1.1_ENSG00000272719                                   |
| 7 | 5601251 | 5601468 | 5Y-H4K8ac_peak_15037 | 4.95697  | AC006483.5_ENSG00000228974                                    |
| 7 | 5601871 | 5602255 | 5Y-H4K8ac_peak_15038 | 7.64648  |                                                               |
| 7 | 5609999 | 5610422 | 5Y-H4K8ac_peak_15039 | 8.3285   |                                                               |
| 7 | 5614610 | 5615243 | 5Y-H4K8ac_peak_15040 | 12.91503 |                                                               |

|   |          |          |                      |          |                                                                           |
|---|----------|----------|----------------------|----------|---------------------------------------------------------------------------|
| 7 | 5633732  | 5634621  | 5Y-H4K8ac_peak_15041 | 14.00559 |                                                                           |
| 7 | 5660423  | 5660739  | 5Y-H4K8ac_peak_15042 | 10.24399 |                                                                           |
| 7 | 5666737  | 5667147  | 5Y-H4K8ac_peak_15043 | 13.92877 |                                                                           |
| 7 | 5673051  | 5673456  | 5Y-H4K8ac_peak_15044 | 5.85957  |                                                                           |
| 7 | 5674293  | 5674632  | 5Y-H4K8ac_peak_15045 | 3.93392  |                                                                           |
| 7 | 5821597  | 5821837  | 5Y-H4K8ac_peak_15046 | 8.5159   | RNF216_ENSG00000011275                                                    |
| 7 | 5861702  | 5862528  | 5Y-H4K8ac_peak_15047 | 13.30822 | ZNF815P_ENSG00000235944                                                   |
| 7 | 5862857  | 5863237  | 5Y-H4K8ac_peak_15048 | 6.4759   | ZNF815P_ENSG00000235944                                                   |
| 7 | 5938027  | 5938343  | 5Y-H4K8ac_peak_15049 | 10.1994  | CCZ1_ENSG00000122674                                                      |
| 7 | 6048376  | 6048614  | 5Y-H4K8ac_peak_15050 | 7.64648  | PMS2_ENSG00000122512;AIMP2_ENSG00000106305                                |
| 7 | 6121404  | 6122125  | 5Y-H4K8ac_peak_15051 | 8.31536  | AC004895.4_ENSG00000231704;AC004895.1_ENSG00000264605                     |
| 7 | 6206708  | 6206991  | 5Y-H4K8ac_peak_15052 | 5.64879  |                                                                           |
| 7 | 6312413  | 6312676  | 5Y-H4K8ac_peak_15053 | 12.15235 | CYTH3_ENSG00000008256                                                     |
| 7 | 6413409  | 6413802  | 5Y-H4K8ac_peak_15054 | 8.07508  | RAC1_ENSG00000136238                                                      |
| 7 | 6414198  | 6414506  | 5Y-H4K8ac_peak_15055 | 8.62703  | RAC1_ENSG00000136238                                                      |
| 7 | 6543053  | 6543296  | 5Y-H4K8ac_peak_15056 | 7.87406  |                                                                           |
| 7 | 6566026  | 6566244  | 5Y-H4K8ac_peak_15057 | 7.50148  |                                                                           |
| 7 | 6576699  | 6576905  | 5Y-H4K8ac_peak_15058 | 8.69112  |                                                                           |
| 7 | 6615714  | 6616441  | 5Y-H4K8ac_peak_15059 | 10.1994  | ZDHHC4_ENSG00000136247                                                    |
| 7 | 6617099  | 6617954  | 5Y-H4K8ac_peak_15060 | 16.0768  | ZDHHC4_ENSG00000136247                                                    |
| 7 | 6629237  | 6629478  | 5Y-H4K8ac_peak_15061 | 10.08244 | AC079742.4_ENSG00000232581;C7orf26_ENSG00000146576                        |
| 7 | 6654585  | 6655072  | 5Y-H4K8ac_peak_15062 | 12.26819 | ZNF853_ENSG00000236609                                                    |
| 7 | 6655407  | 6655938  | 5Y-H4K8ac_peak_15063 | 17.78344 | ZNF853_ENSG00000236609                                                    |
| 7 | 6676098  | 6676876  | 5Y-H4K8ac_peak_15064 | 26.92846 | ZNF316_ENSG00000205903                                                    |
| 7 | 6677245  | 6677519  | 5Y-H4K8ac_peak_15065 | 10.1994  | ZNF316_ENSG00000205903                                                    |
| 7 | 6703687  | 6704322  | 5Y-H4K8ac_peak_15066 | 25.62564 | AC073343.13_ENSG00000228010                                               |
| 7 | 6746245  | 6746537  | 5Y-H4K8ac_peak_15067 | 6.80915  | ZNF12_ENSG00000164631                                                     |
| 7 | 6746894  | 6747099  | 5Y-H4K8ac_peak_15068 | 6.31818  | ZNF12_ENSG00000164631                                                     |
| 7 | 6768811  | 6769211  | 5Y-H4K8ac_peak_15069 | 8.3285   |                                                                           |
| 7 | 6866060  | 6866291  | 5Y-H4K8ac_peak_15070 | 11.82621 | CCZ1B_ENSG00000146574                                                     |
| 7 | 6894766  | 6895029  | 5Y-H4K8ac_peak_15071 | 9.19793  |                                                                           |
| 7 | 6895467  | 6895819  | 5Y-H4K8ac_peak_15072 | 7.50148  |                                                                           |
| 7 | 7222303  | 7222943  | 5Y-H4K8ac_peak_15073 | 13.14766 |                                                                           |
| 7 | 7606330  | 7607059  | 5Y-H4K8ac_peak_15074 | 14.89891 | RP5-1159O4.1_ENSG00000272894;MIOS_ENSG00000164654                         |
| 7 | 7680494  | 7680955  | 5Y-H4K8ac_peak_15075 | 6.31818  | RPA3-AS1_ENSG00000219545                                                  |
| 7 | 8008492  | 8008791  | 5Y-H4K8ac_peak_15076 | 11.04542 | AC006042.7_ENSG00000233108                                                |
| 7 | 8254711  | 8254904  | 5Y-H4K8ac_peak_15077 | 5.65584  |                                                                           |
| 7 | 8268974  | 8269295  | 5Y-H4K8ac_peak_15078 | 10.26997 |                                                                           |
| 7 | 8270660  | 8270993  | 5Y-H4K8ac_peak_15079 | 12.69256 |                                                                           |
| 7 | 8300753  | 8302324  | 5Y-H4K8ac_peak_15080 | 16.13719 | ICA1_ENSG0000003147;AC007009.1_ENSG00000244239;AC007128.1_ENSG00000229970 |
| 7 | 8329949  | 8330189  | 5Y-H4K8ac_peak_15081 | 6.00382  |                                                                           |
| 7 | 8331673  | 8332145  | 5Y-H4K8ac_peak_15082 | 7.20869  |                                                                           |
| 7 | 8473619  | 8474257  | 5Y-H4K8ac_peak_15083 | 16.13719 | NXPH1_ENSG00000122584                                                     |
| 7 | 9271412  | 9271625  | 5Y-H4K8ac_peak_15084 | 5.29015  |                                                                           |
| 7 | 11013615 | 11014283 | 5Y-H4K8ac_peak_15085 | 14.90456 | PHF14_ENSG00000106443                                                     |
| 7 | 11065496 | 11065713 | 5Y-H4K8ac_peak_15086 | 8.75926  |                                                                           |

|   |          |          |                      |          |                                                     |
|---|----------|----------|----------------------|----------|-----------------------------------------------------|
| 7 | 11232993 | 11233320 | 5Y-H4K8ac_peak_15087 | 4.6766   |                                                     |
| 7 | 11812951 | 11813152 | 5Y-H4K8ac_peak_15088 | 4.79585  |                                                     |
| 7 | 11871751 | 11872001 | 5Y-H4K8ac_peak_15089 | 6.53157  | THSD7A_ENSG00000005108                              |
| 7 | 12130159 | 12130876 | 5Y-H4K8ac_peak_15090 | 14.19462 |                                                     |
| 7 | 12131563 | 12131802 | 5Y-H4K8ac_peak_15091 | 7.89273  |                                                     |
| 7 | 12151520 | 12151804 | 5Y-H4K8ac_peak_15092 | 8.90774  |                                                     |
| 7 | 12251020 | 12251246 | 5Y-H4K8ac_peak_15093 | 12.10416 | TMEM106B_ENSG00000106460                            |
| 7 | 12443191 | 12443564 | 5Y-H4K8ac_peak_15094 | 8.3285   | VWDE_ENSG00000146530                                |
| 7 | 12726070 | 12726305 | 5Y-H4K8ac_peak_15095 | 5.98695  | CTD-2320J21.1_ENSG00000271253;ARL4A_ENSG00000122644 |
| 7 | 16460616 | 16461202 | 5Y-H4K8ac_peak_15096 | 8.20773  | ISPD_ENSG00000214960                                |
| 7 | 16685532 | 16686029 | 5Y-H4K8ac_peak_15097 | 10.11191 | ANKMY2_ENSG00000106524;BZW2_ENSG00000136261         |
| 7 | 17979711 | 17979949 | 5Y-H4K8ac_peak_15098 | 5.19944  | SNX13_ENSG00000071189                               |
| 7 | 18739607 | 18739801 | 5Y-H4K8ac_peak_15099 | 6.50117  |                                                     |
| 7 | 18741632 | 18741989 | 5Y-H4K8ac_peak_15100 | 6.76096  |                                                     |
| 7 | 18746564 | 18746757 | 5Y-H4K8ac_peak_15101 | 7.01266  |                                                     |
| 7 | 18868603 | 18868855 | 5Y-H4K8ac_peak_15102 | 5.98695  |                                                     |
| 7 | 19145805 | 19146124 | 5Y-H4K8ac_peak_15103 | 4.00285  |                                                     |
| 7 | 19146838 | 19147585 | 5Y-H4K8ac_peak_15104 | 10.77539 |                                                     |
| 7 | 19147997 | 19148263 | 5Y-H4K8ac_peak_15105 | 7.64648  |                                                     |
| 7 | 19152082 | 19152283 | 5Y-H4K8ac_peak_15106 | 7.20869  | AC003986.6_ENSG00000232821                          |
| 7 | 19156046 | 19156393 | 5Y-H4K8ac_peak_15107 | 4.642    | TWIST1_ENSG00000122691                              |
| 7 | 19156697 | 19157060 | 5Y-H4K8ac_peak_15108 | 13.60583 | TWIST1_ENSG00000122691                              |
| 7 | 19158635 | 19158944 | 5Y-H4K8ac_peak_15109 | 8.90223  | AC003986.7_ENSG00000236536                          |
| 7 | 20370996 | 20371453 | 5Y-H4K8ac_peak_15110 | 15.08122 | CTA-293F17.1_ENSG00000271133;ITGB8_ENSG00000105855  |
| 7 | 20600321 | 20600512 | 5Y-H4K8ac_peak_15111 | 7.11863  |                                                     |
| 7 | 22373490 | 22373728 | 5Y-H4K8ac_peak_15112 | 4.66683  |                                                     |
| 7 | 22396330 | 22396765 | 5Y-H4K8ac_peak_15113 | 14.01193 | RAPGEF5_ENSG00000136237                             |
| 7 | 22862076 | 22862346 | 5Y-H4K8ac_peak_15114 | 11.29141 | TOMM7_ENSG00000196683                               |
| 7 | 23145586 | 23145915 | 5Y-H4K8ac_peak_15115 | 4.55128  | KLHL7-AS1_ENSG00000230658;KLHL7_ENSG00000122550     |
| 7 | 23245692 | 23246040 | 5Y-H4K8ac_peak_15116 | 12.45737 | AC005082.12_ENSG00000226816                         |
| 7 | 23508338 | 23509072 | 5Y-H4K8ac_peak_15117 | 5.60566  |                                                     |
| 7 | 23509445 | 23509693 | 5Y-H4K8ac_peak_15118 | 6.02475  | IGF2BP3_ENSG00000136231                             |
| 7 | 23513492 | 23513811 | 5Y-H4K8ac_peak_15119 | 12.00715 |                                                     |
| 7 | 23529559 | 23529789 | 5Y-H4K8ac_peak_15120 | 4.97006  | RPS2P32_ENSG00000232818                             |
| 7 | 23530202 | 23530725 | 5Y-H4K8ac_peak_15121 | 8.82628  | RPS2P32_ENSG00000232818;Y_RNA_ENSG00000200847       |
| 7 | 23571851 | 23572242 | 5Y-H4K8ac_peak_15122 | 7.68528  | TRA2A_ENSG00000164548                               |
| 7 | 23610514 | 23610783 | 5Y-H4K8ac_peak_15123 | 13.27281 |                                                     |
| 7 | 23637243 | 23637445 | 5Y-H4K8ac_peak_15124 | 4.42435  | CCDC126_ENSG00000169193                             |
| 7 | 23719836 | 23720049 | 5Y-H4K8ac_peak_15125 | 13.33225 | FAM221A_ENSG00000188732;AC006026.13_ENSG00000234286 |
| 7 | 23944577 | 23944806 | 5Y-H4K8ac_peak_15126 | 8.67475  |                                                     |
| 7 | 23964237 | 23964721 | 5Y-H4K8ac_peak_15127 | 5.64909  |                                                     |
| 7 | 23966832 | 23967290 | 5Y-H4K8ac_peak_15128 | 7.50081  |                                                     |
| 7 | 24239015 | 24239210 | 5Y-H4K8ac_peak_15129 | 5.81394  |                                                     |
| 7 | 24250672 | 24250883 | 5Y-H4K8ac_peak_15130 | 7.29176  |                                                     |
| 7 | 24253008 | 24253495 | 5Y-H4K8ac_peak_15131 | 17.97359 |                                                     |
| 7 | 24255509 | 24255804 | 5Y-H4K8ac_peak_15132 | 8.28468  |                                                     |

|   |          |          |                      |          |                                                                            |
|---|----------|----------|----------------------|----------|----------------------------------------------------------------------------|
| 7 | 24256043 | 24256421 | 5Y-H4K8ac_peak_15133 | 8.73392  |                                                                            |
| 7 | 24257340 | 24257549 | 5Y-H4K8ac_peak_15134 | 4.642    |                                                                            |
| 7 | 24266506 | 24266755 | 5Y-H4K8ac_peak_15135 | 9.00954  |                                                                            |
| 7 | 24323481 | 24324164 | 5Y-H4K8ac_peak_15136 | 14.89891 | NPY_ENSG00000122585                                                        |
| 7 | 24795849 | 24796496 | 5Y-H4K8ac_peak_15137 | 9.51254  |                                                                            |
| 7 | 24796760 | 24797522 | 5Y-H4K8ac_peak_15138 | 10.12457 |                                                                            |
| 7 | 24962765 | 24963035 | 5Y-H4K8ac_peak_15139 | 6.77436  |                                                                            |
| 7 | 25137622 | 25137852 | 5Y-H4K8ac_peak_15140 | 6.36454  |                                                                            |
| 7 | 25584883 | 25585143 | 5Y-H4K8ac_peak_15141 | 12.21176 |                                                                            |
| 7 | 25891880 | 25892489 | 5Y-H4K8ac_peak_15142 | 11.01458 |                                                                            |
| 7 | 26118001 | 26118435 | 5Y-H4K8ac_peak_15143 | 14.99673 |                                                                            |
| 7 | 26118849 | 26119053 | 5Y-H4K8ac_peak_15144 | 5.08308  |                                                                            |
| 7 | 26191395 | 26191615 | 5Y-H4K8ac_peak_15145 | 6.98416  | NFE2L3_ENSG00000050344                                                     |
| 7 | 26192239 | 26192773 | 5Y-H4K8ac_peak_15146 | 4.0639   | NFE2L3_ENSG00000050344                                                     |
| 7 | 26239786 | 26240268 | 5Y-H4K8ac_peak_15147 | 6.19716  | HNRNPA2B1_ENSG00000122566;CBX3_ENSG00000122565                             |
| 7 | 26240719 | 26241175 | 5Y-H4K8ac_peak_15148 | 9.51254  | HNRNPA2B1_ENSG00000122566;CBX3_ENSG00000122565                             |
| 7 | 26241368 | 26241982 | 5Y-H4K8ac_peak_15149 | 14.89891 | HNRNPA2B1_ENSG00000122566;CBX3_ENSG00000122565                             |
| 7 | 26331550 | 26331876 | 5Y-H4K8ac_peak_15150 | 9.07085  | SNX10_ENSG00000086300                                                      |
| 7 | 26415794 | 26416581 | 5Y-H4K8ac_peak_15151 | 11.04356 | AC004540.4_ENSG00000225792                                                 |
| 7 | 26437642 | 26438032 | 5Y-H4K8ac_peak_15152 | 14.99673 | AC004540.5_ENSG00000214870                                                 |
| 7 | 26438299 | 26439046 | 5Y-H4K8ac_peak_15153 | 10.54764 | AC004540.5_ENSG00000214870                                                 |
| 7 | 27702296 | 27702557 | 5Y-H4K8ac_peak_15154 | 13.45283 | HIBADH_ENSG00000106049                                                     |
| 7 | 27779843 | 27780047 | 5Y-H4K8ac_peak_15155 | 7.93983  | AC004549.6_ENSG00000229893;TAX1BP1_ENSG00000106052                         |
| 7 | 28995938 | 28996233 | 5Y-H4K8ac_peak_15156 | 4.41844  |                                                                            |
| 7 | 28996616 | 28996880 | 5Y-H4K8ac_peak_15157 | 7.41172  | AC005013.5_ENSG00000228421                                                 |
| 7 | 28997603 | 28998251 | 5Y-H4K8ac_peak_15158 | 13.68515 | AC005013.1_ENSG00000255690;TRIL_ENSG00000176734;AC005013.5_ENSG00000228421 |
| 7 | 29234068 | 29234324 | 5Y-H4K8ac_peak_15159 | 15.17389 | CPVL_ENSG00000106066                                                       |
| 7 | 29525726 | 29526276 | 5Y-H4K8ac_peak_15160 | 7.31102  |                                                                            |
| 7 | 29724836 | 29725109 | 5Y-H4K8ac_peak_15161 | 9.79526  | ZNRF2P2_ENSG00000225264                                                    |
| 7 | 29742435 | 29742676 | 5Y-H4K8ac_peak_15162 | 5.81062  |                                                                            |
| 7 | 29810177 | 29810384 | 5Y-H4K8ac_peak_15163 | 5.98695  |                                                                            |
| 7 | 30028854 | 30029882 | 5Y-H4K8ac_peak_15164 | 6.56228  | SCRN1_ENSG00000136193;AC007285.6_ENSG00000227014                           |
| 7 | 30265566 | 30265756 | 5Y-H4K8ac_peak_15165 | 7.81811  |                                                                            |
| 7 | 30324776 | 30324986 | 5Y-H4K8ac_peak_15166 | 7.3565   | ZNRF2_ENSG00000180233                                                      |
| 7 | 30518481 | 30518723 | 5Y-H4K8ac_peak_15167 | 9.00954  | NOD1_ENSG00000106100                                                       |
| 7 | 30543961 | 30544370 | 5Y-H4K8ac_peak_15168 | 11.94897 |                                                                            |
| 7 | 30544847 | 30545160 | 5Y-H4K8ac_peak_15169 | 11.4254  |                                                                            |
| 7 | 30794960 | 30795337 | 5Y-H4K8ac_peak_15170 | 6.57751  |                                                                            |
| 7 | 30810321 | 30811342 | 5Y-H4K8ac_peak_15171 | 12.99645 | FAM188B_ENSG00000106125                                                    |
| 7 | 30910412 | 30910752 | 5Y-H4K8ac_peak_15172 | 6.55841  |                                                                            |
| 7 | 30925486 | 30926267 | 5Y-H4K8ac_peak_15173 | 9.56044  |                                                                            |
| 7 | 30926769 | 30927095 | 5Y-H4K8ac_peak_15174 | 13.33225 |                                                                            |
| 7 | 30927361 | 30927594 | 5Y-H4K8ac_peak_15175 | 6.36723  |                                                                            |
| 7 | 30945851 | 30946054 | 5Y-H4K8ac_peak_15176 | 6.34891  |                                                                            |
| 7 | 30950630 | 30950938 | 5Y-H4K8ac_peak_15177 | 7.43972  |                                                                            |
| 7 | 30953349 | 30953868 | 5Y-H4K8ac_peak_15178 | 8.24461  |                                                                            |

|   |          |          |                      |          |                                                       |
|---|----------|----------|----------------------|----------|-------------------------------------------------------|
| 7 | 30954368 | 30954625 | 5Y-H4K8ac_peak_15179 | 5.41472  |                                                       |
| 7 | 30978088 | 30978412 | 5Y-H4K8ac_peak_15180 | 13.1133  | GHRHR_ENSG00000106128                                 |
| 7 | 31068211 | 31068743 | 5Y-H4K8ac_peak_15181 | 7.72887  |                                                       |
| 7 | 31082624 | 31082915 | 5Y-H4K8ac_peak_15182 | 4.642    |                                                       |
| 7 | 31088192 | 31088466 | 5Y-H4K8ac_peak_15183 | 6.34245  |                                                       |
| 7 | 31089254 | 31089484 | 5Y-H4K8ac_peak_15184 | 8.39119  |                                                       |
| 7 | 31092200 | 31092606 | 5Y-H4K8ac_peak_15185 | 7.90751  | ADCYAP1R1_ENSG00000078549                             |
| 7 | 31094445 | 31094666 | 5Y-H4K8ac_peak_15186 | 4.47015  |                                                       |
| 7 | 32529670 | 32529867 | 5Y-H4K8ac_peak_15187 | 4.92482  |                                                       |
| 7 | 32535138 | 32535355 | 5Y-H4K8ac_peak_15188 | 7.64648  | LSM5_ENSG00000106355;AVL9_ENSG00000105778             |
| 7 | 32767546 | 32768341 | 5Y-H4K8ac_peak_15189 | 16.74969 | ZNRF2P1_ENSG00000237004                               |
| 7 | 32931058 | 32931395 | 5Y-H4K8ac_peak_15190 | 16.73191 |                                                       |
| 7 | 32931837 | 32932435 | 5Y-H4K8ac_peak_15191 | 16.79568 |                                                       |
| 7 | 32982273 | 32982525 | 5Y-H4K8ac_peak_15192 | 7.90751  | RP9P_ENSG00000205763                                  |
| 7 | 33038121 | 33038363 | 5Y-H4K8ac_peak_15193 | 7.87406  |                                                       |
| 7 | 33055723 | 33056041 | 5Y-H4K8ac_peak_15194 | 4.50834  |                                                       |
| 7 | 33148638 | 33148840 | 5Y-H4K8ac_peak_15195 | 6.37023  | RP9_ENSG00000164610                                   |
| 7 | 33258555 | 33258759 | 5Y-H4K8ac_peak_15196 | 5.65584  |                                                       |
| 7 | 35077519 | 35077713 | 5Y-H4K8ac_peak_15197 | 7.41197  | DPY19L1_ENSG00000173852                               |
| 7 | 35226499 | 35226717 | 5Y-H4K8ac_peak_15198 | 5.70472  | DPY19L2P1_ENSG00000189212                             |
| 7 | 35293407 | 35293693 | 5Y-H4K8ac_peak_15199 | 8.24461  | TBX20_ENSG00000164532                                 |
| 7 | 35505326 | 35505674 | 5Y-H4K8ac_peak_15200 | 15.82359 |                                                       |
| 7 | 35506291 | 35506510 | 5Y-H4K8ac_peak_15201 | 9.30206  |                                                       |
| 7 | 35734222 | 35734505 | 5Y-H4K8ac_peak_15202 | 4.48815  | HERPUD2_ENSG00000122557;RP11-379H18.1_ENSG00000271122 |
| 7 | 35795630 | 35795837 | 5Y-H4K8ac_peak_15203 | 4.50834  |                                                       |
| 7 | 36192020 | 36192228 | 5Y-H4K8ac_peak_15204 | 5.41472  | EEPD1_ENSG00000122547                                 |
| 7 | 36242556 | 36242998 | 5Y-H4K8ac_peak_15205 | 5.98695  |                                                       |
| 7 | 36428905 | 36429101 | 5Y-H4K8ac_peak_15206 | 6.339    | KIAA0895_ENSG00000164542;ANLN_ENSG00000011426         |
| 7 | 36429517 | 36429920 | 5Y-H4K8ac_peak_15207 | 9.32639  | KIAA0895_ENSG00000164542;ANLN_ENSG00000011426         |
| 7 | 36909689 | 36910134 | 5Y-H4K8ac_peak_15208 | 4.90696  |                                                       |
| 7 | 37371233 | 37371486 | 5Y-H4K8ac_peak_15209 | 9.07803  |                                                       |
| 7 | 37371984 | 37372209 | 5Y-H4K8ac_peak_15210 | 7.11863  |                                                       |
| 7 | 37412764 | 37413066 | 5Y-H4K8ac_peak_15211 | 5.41472  |                                                       |
| 7 | 37487498 | 37487823 | 5Y-H4K8ac_peak_15212 | 9.30206  |                                                       |
| 7 | 37488043 | 37488404 | 5Y-H4K8ac_peak_15213 | 6.53157  | ELMO1_ENSG00000155849                                 |
| 7 | 37960413 | 37961075 | 5Y-H4K8ac_peak_15214 | 9.74838  |                                                       |
| 7 | 38409867 | 38410147 | 5Y-H4K8ac_peak_15215 | 7.73231  |                                                       |
| 7 | 39662579 | 39663034 | 5Y-H4K8ac_peak_15216 | 18.62331 | RALA_ENSG00000006451                                  |
| 7 | 39663258 | 39663518 | 5Y-H4K8ac_peak_15217 | 9.36633  | RALA_ENSG00000006451                                  |
| 7 | 39772354 | 39772792 | 5Y-H4K8ac_peak_15218 | 11.12941 | LINC00265_ENSG00000188185                             |
| 7 | 39773011 | 39773257 | 5Y-H4K8ac_peak_15219 | 7.60057  | LINC00265_ENSG00000188185                             |
| 7 | 39988736 | 39988943 | 5Y-H4K8ac_peak_15220 | 5.5192   | RP11-467D6.1_ENSG00000259826;CDK13_ENSG00000065883    |
| 7 | 39989418 | 39990057 | 5Y-H4K8ac_peak_15221 | 6.31818  | RP11-467D6.1_ENSG00000259826;CDK13_ENSG00000065883    |
| 7 | 40173749 | 40174132 | 5Y-H4K8ac_peak_15222 | 11.01287 | SUGCT_ENSG00000175600;MPLKIP_ENSG00000168303          |
| 7 | 40291029 | 40291219 | 5Y-H4K8ac_peak_15223 | 5.65584  |                                                       |
| 7 | 40583551 | 40584023 | 5Y-H4K8ac_peak_15224 | 4.15658  |                                                       |

|   |          |          |                      |          |                                                                    |
|---|----------|----------|----------------------|----------|--------------------------------------------------------------------|
| 7 | 40585269 | 40585505 | 5Y-H4K8ac_peak_15225 | 4.96263  |                                                                    |
| 7 | 40590555 | 40590844 | 5Y-H4K8ac_peak_15226 | 12.10416 |                                                                    |
| 7 | 40591238 | 40591490 | 5Y-H4K8ac_peak_15227 | 9.79526  |                                                                    |
| 7 | 40660146 | 40660360 | 5Y-H4K8ac_peak_15228 | 6.77436  |                                                                    |
| 7 | 40660857 | 40661193 | 5Y-H4K8ac_peak_15229 | 7.11863  |                                                                    |
| 7 | 40665187 | 40665510 | 5Y-H4K8ac_peak_15230 | 4.7605   |                                                                    |
| 7 | 40684344 | 40685082 | 5Y-H4K8ac_peak_15231 | 15.65766 |                                                                    |
| 7 | 40753694 | 40753886 | 5Y-H4K8ac_peak_15232 | 7.05206  |                                                                    |
| 7 | 40763861 | 40764060 | 5Y-H4K8ac_peak_15233 | 7.89273  |                                                                    |
| 7 | 41744484 | 41744781 | 5Y-H4K8ac_peak_15234 | 10.60083 | AC005027.3_ENSG00000236310                                         |
| 7 | 42951178 | 42951417 | 5Y-H4K8ac_peak_15235 | 10.60083 | C7orf25_ENSG00000136197                                            |
| 7 | 42971988 | 42972189 | 5Y-H4K8ac_peak_15236 | 8.4454   | PSMA2_ENSG00000256646;PSMA2_ENSG00000106588;MRPL32_ENSG00000106591 |
| 7 | 43570801 | 43571226 | 5Y-H4K8ac_peak_15237 | 4.97086  |                                                                    |
| 7 | 43572099 | 43572347 | 5Y-H4K8ac_peak_15238 | 13.92877 |                                                                    |
| 7 | 43573157 | 43573619 | 5Y-H4K8ac_peak_15239 | 9.58986  |                                                                    |
| 7 | 43576550 | 43576755 | 5Y-H4K8ac_peak_15240 | 7.29055  |                                                                    |
| 7 | 43687107 | 43687666 | 5Y-H4K8ac_peak_15241 | 13.0168  |                                                                    |
| 7 | 43797834 | 43798787 | 5Y-H4K8ac_peak_15242 | 10.4689  | BLVRA_ENSG00000106605                                              |
| 7 | 43918283 | 43918503 | 5Y-H4K8ac_peak_15243 | 6.24511  |                                                                    |
| 7 | 43945989 | 43946550 | 5Y-H4K8ac_peak_15244 | 14.6127  | URGCP-MRPS24_ENSG00000270617                                       |
| 7 | 43965751 | 43966513 | 5Y-H4K8ac_peak_15245 | 15.90416 | URGCP_ENSG00000106608;UBE2D4_ENSG00000078967                       |
| 7 | 43975476 | 43975685 | 5Y-H4K8ac_peak_15246 | 7.11439  |                                                                    |
| 7 | 43977586 | 43977900 | 5Y-H4K8ac_peak_15247 | 11.82624 |                                                                    |
| 7 | 44105070 | 44105290 | 5Y-H4K8ac_peak_15248 | 5.36617  | AC017116.11_ENSG00000239775;PGAM2_ENSG00000164708                  |
| 7 | 44112268 | 44112882 | 5Y-H4K8ac_peak_15249 | 7.60057  |                                                                    |
| 7 | 44121690 | 44122011 | 5Y-H4K8ac_peak_15250 | 6.98416  | POLM_ENSG00000122678                                               |
| 7 | 44127467 | 44128408 | 5Y-H4K8ac_peak_15251 | 8.09118  |                                                                    |
| 7 | 44143384 | 44143700 | 5Y-H4K8ac_peak_15252 | 16.13719 | AEBP1_ENSG00000106624                                              |
| 7 | 44143917 | 44144576 | 5Y-H4K8ac_peak_15253 | 9.02938  | AEBP1_ENSG00000106624                                              |
| 7 | 44163460 | 44163831 | 5Y-H4K8ac_peak_15254 | 8.24461  | POLD2_ENSG00000106628                                              |
| 7 | 44184965 | 44185243 | 5Y-H4K8ac_peak_15255 | 6.78318  |                                                                    |
| 7 | 44240665 | 44240860 | 5Y-H4K8ac_peak_15256 | 9.15007  | YKT6_ENSG00000106636                                               |
| 7 | 44257583 | 44258084 | 5Y-H4K8ac_peak_15257 | 7.90005  |                                                                    |
| 7 | 44258344 | 44258738 | 5Y-H4K8ac_peak_15258 | 4.70545  |                                                                    |
| 7 | 44274794 | 44276719 | 5Y-H4K8ac_peak_15259 | 13.57316 |                                                                    |
| 7 | 44280807 | 44281105 | 5Y-H4K8ac_peak_15260 | 6.10343  |                                                                    |
| 7 | 44296985 | 44297254 | 5Y-H4K8ac_peak_15261 | 6.08523  |                                                                    |
| 7 | 44303114 | 44303321 | 5Y-H4K8ac_peak_15262 | 7.90751  |                                                                    |
| 7 | 44315335 | 44315652 | 5Y-H4K8ac_peak_15263 | 7.11863  |                                                                    |
| 7 | 44316031 | 44316578 | 5Y-H4K8ac_peak_15264 | 7.50148  |                                                                    |
| 7 | 44330880 | 44331096 | 5Y-H4K8ac_peak_15265 | 8.05932  |                                                                    |
| 7 | 44360323 | 44360523 | 5Y-H4K8ac_peak_15266 | 4.95697  |                                                                    |
| 7 | 44529885 | 44530574 | 5Y-H4K8ac_peak_15267 | 20.32089 | NUDCD3_ENSG00000015676                                             |
| 7 | 44580641 | 44581174 | 5Y-H4K8ac_peak_15268 | 4.67245  | NPC1L1_ENSG00000015520                                             |
| 7 | 44612961 | 44613455 | 5Y-H4K8ac_peak_15269 | 17.49408 |                                                                    |
| 7 | 44613831 | 44614068 | 5Y-H4K8ac_peak_15270 | 6.37023  | DDX56_ENSG00000136271                                              |



|   |          |          |                      |          |                                                   |
|---|----------|----------|----------------------|----------|---------------------------------------------------|
| 7 | 44621451 | 44621813 | 5Y-H4K8ac_peak_15271 | 9.00954  | TMED4_ENSG00000158604                             |
| 7 | 44622181 | 44622663 | 5Y-H4K8ac_peak_15272 | 7.87406  | TMED4_ENSG00000158604                             |
| 7 | 44788142 | 44788359 | 5Y-H4K8ac_peak_15273 | 13.00733 | ZMIZ2_ENSG00000122515                             |
| 7 | 44788575 | 44788841 | 5Y-H4K8ac_peak_15274 | 6.51488  | ZMIZ2_ENSG00000122515                             |
| 7 | 44836336 | 44836815 | 5Y-H4K8ac_peak_15275 | 11.9002  | PPIA_ENSG00000196262                              |
| 7 | 44887384 | 44887672 | 5Y-H4K8ac_peak_15276 | 8.3285   | H2AFV_ENSG00000105968;AC004854.4_ENSG00000234183  |
| 7 | 44888427 | 44888665 | 5Y-H4K8ac_peak_15277 | 10.1994  | H2AFV_ENSG00000105968;AC004854.4_ENSG00000234183  |
| 7 | 44896238 | 44896454 | 5Y-H4K8ac_peak_15278 | 5.69598  |                                                   |
| 7 | 44925375 | 44925806 | 5Y-H4K8ac_peak_15279 | 9.51254  | PURB_ENSG00000146676;RP4-673M15.1_ENSG00000272768 |
| 7 | 44951622 | 44951878 | 5Y-H4K8ac_peak_15280 | 5.41472  |                                                   |
| 7 | 45025790 | 45026193 | 5Y-H4K8ac_peak_15281 | 14.01193 | SNHG15_ENSG00000232956                            |
| 7 | 45026516 | 45027035 | 5Y-H4K8ac_peak_15282 | 5.24695  | SNHG15_ENSG00000232956                            |
| 7 | 45112473 | 45113036 | 5Y-H4K8ac_peak_15283 | 13.2814  |                                                   |
| 7 | 45121618 | 45122173 | 5Y-H4K8ac_peak_15284 | 6.14551  |                                                   |
| 7 | 45128495 | 45128894 | 5Y-H4K8ac_peak_15285 | 8.62703  | NACAD_ENSG00000136274                             |
| 7 | 45150897 | 45151199 | 5Y-H4K8ac_peak_15286 | 5.72233  | TBRG4_ENSG00000136270                             |
| 7 | 45613277 | 45613893 | 5Y-H4K8ac_peak_15287 | 15.82359 | ADCY1_ENSG00000164742                             |
| 7 | 45614387 | 45614739 | 5Y-H4K8ac_peak_15288 | 5.24695  | ADCY1_ENSG00000164742                             |
| 7 | 45614940 | 45615277 | 5Y-H4K8ac_peak_15289 | 6.53157  |                                                   |
| 7 | 45618200 | 45618415 | 5Y-H4K8ac_peak_15290 | 4.15658  |                                                   |
| 7 | 45618672 | 45619478 | 5Y-H4K8ac_peak_15291 | 7.90751  |                                                   |
| 7 | 45619782 | 45620472 | 5Y-H4K8ac_peak_15292 | 11.69482 |                                                   |
| 7 | 45631992 | 45632303 | 5Y-H4K8ac_peak_15293 | 4.95697  |                                                   |
| 7 | 45632912 | 45633138 | 5Y-H4K8ac_peak_15294 | 6.01761  |                                                   |
| 7 | 45808943 | 45809591 | 5Y-H4K8ac_peak_15295 | 9.32595  | SEPT7P2_ENSG00000214765                           |
| 7 | 46452048 | 46452287 | 5Y-H4K8ac_peak_15296 | 6.76425  |                                                   |
| 7 | 47293644 | 47294092 | 5Y-H4K8ac_peak_15297 | 9.99838  |                                                   |
| 7 | 47342603 | 47342889 | 5Y-H4K8ac_peak_15298 | 4.95697  |                                                   |
| 7 | 47367031 | 47367933 | 5Y-H4K8ac_peak_15299 | 6.19716  |                                                   |
| 7 | 47441197 | 47441428 | 5Y-H4K8ac_peak_15300 | 7.01266  |                                                   |
| 7 | 47493640 | 47494143 | 5Y-H4K8ac_peak_15301 | 8.5915   |                                                   |
| 7 | 47494644 | 47494891 | 5Y-H4K8ac_peak_15302 | 7.18391  |                                                   |
| 7 | 47517397 | 47517785 | 5Y-H4K8ac_peak_15303 | 7.89273  |                                                   |
| 7 | 47531821 | 47532023 | 5Y-H4K8ac_peak_15304 | 5.23819  |                                                   |
| 7 | 47534615 | 47535194 | 5Y-H4K8ac_peak_15305 | 6.34245  |                                                   |
| 7 | 47535415 | 47535722 | 5Y-H4K8ac_peak_15306 | 9.00954  |                                                   |
| 7 | 47536268 | 47536578 | 5Y-H4K8ac_peak_15307 | 9.22492  |                                                   |
| 7 | 47576159 | 47577169 | 5Y-H4K8ac_peak_15308 | 28.75038 |                                                   |
| 7 | 47607691 | 47607992 | 5Y-H4K8ac_peak_15309 | 7.64648  |                                                   |
| 7 | 47617069 | 47617474 | 5Y-H4K8ac_peak_15310 | 7.34185  |                                                   |
| 7 | 47621163 | 47622048 | 5Y-H4K8ac_peak_15311 | 12.99645 | TNS3_ENSG00000136205                              |
| 7 | 47674592 | 47675280 | 5Y-H4K8ac_peak_15312 | 15.73087 |                                                   |
| 7 | 47675476 | 47676031 | 5Y-H4K8ac_peak_15313 | 10.1994  |                                                   |
| 7 | 47677005 | 47677216 | 5Y-H4K8ac_peak_15314 | 6.78128  |                                                   |
| 7 | 47748319 | 47748766 | 5Y-H4K8ac_peak_15315 | 6.19178  |                                                   |
| 7 | 47760142 | 47761085 | 5Y-H4K8ac_peak_15316 | 9.48438  |                                                   |

|   |          |          |                      |          |                                                             |
|---|----------|----------|----------------------|----------|-------------------------------------------------------------|
| 7 | 47761400 | 47761605 | 5Y-H4K8ac_peak_15317 | 6.00598  |                                                             |
| 7 | 47764049 | 47764323 | 5Y-H4K8ac_peak_15318 | 6.19716  |                                                             |
| 7 | 47764734 | 47765241 | 5Y-H4K8ac_peak_15319 | 9.02938  |                                                             |
| 7 | 47766716 | 47767120 | 5Y-H4K8ac_peak_15320 | 6.31818  |                                                             |
| 7 | 47797547 | 47797755 | 5Y-H4K8ac_peak_15321 | 7.20869  |                                                             |
| 7 | 47802251 | 47803154 | 5Y-H4K8ac_peak_15322 | 14.89891 |                                                             |
| 7 | 47982446 | 47982638 | 5Y-H4K8ac_peak_15323 | 8.00646  |                                                             |
| 7 | 48129025 | 48129239 | 5Y-H4K8ac_peak_15324 | 7.90236  | UPP1_ENSG00000183696                                        |
| 7 | 50518245 | 50518710 | 5Y-H4K8ac_peak_15325 | 17.67055 | FIGNL1_ENSG00000132436                                      |
| 7 | 50573607 | 50573878 | 5Y-H4K8ac_peak_15326 | 5.56894  |                                                             |
| 7 | 50610110 | 50610355 | 5Y-H4K8ac_peak_15327 | 5.89922  |                                                             |
| 7 | 50626449 | 50626943 | 5Y-H4K8ac_peak_15328 | 7.00198  |                                                             |
| 7 | 50635757 | 50636126 | 5Y-H4K8ac_peak_15329 | 9.99623  |                                                             |
| 7 | 51715221 | 51715625 | 5Y-H4K8ac_peak_15330 | 8.93923  |                                                             |
| 7 | 54323766 | 54323965 | 5Y-H4K8ac_peak_15331 | 5.23083  |                                                             |
| 7 | 54612473 | 54612668 | 5Y-H4K8ac_peak_15332 | 6.03255  |                                                             |
| 7 | 54614459 | 54614747 | 5Y-H4K8ac_peak_15333 | 7.89273  |                                                             |
| 7 | 54907268 | 54907505 | 5Y-H4K8ac_peak_15334 | 8.1667   |                                                             |
| 7 | 55086446 | 55086769 | 5Y-H4K8ac_peak_15335 | 4.642    | EGFR_ENSG00000146648                                        |
| 7 | 55148948 | 55149289 | 5Y-H4K8ac_peak_15336 | 7.89273  |                                                             |
| 7 | 55201278 | 55202075 | 5Y-H4K8ac_peak_15337 | 7.00982  |                                                             |
| 7 | 55245177 | 55245605 | 5Y-H4K8ac_peak_15338 | 5.34199  |                                                             |
| 7 | 55247700 | 55247929 | 5Y-H4K8ac_peak_15339 | 5.5192   |                                                             |
| 7 | 55259874 | 55260342 | 5Y-H4K8ac_peak_15340 | 14.18025 |                                                             |
| 7 | 55261038 | 55261385 | 5Y-H4K8ac_peak_15341 | 10.1994  |                                                             |
| 7 | 55280908 | 55281841 | 5Y-H4K8ac_peak_15342 | 12.65187 |                                                             |
| 7 | 55322045 | 55322621 | 5Y-H4K8ac_peak_15343 | 9.86146  |                                                             |
| 7 | 55433206 | 55434274 | 5Y-H4K8ac_peak_15344 | 11.69482 | LANCL2_ENSG00000132434                                      |
| 7 | 55639746 | 55640068 | 5Y-H4K8ac_peak_15345 | 10.1994  | VOPP1_ENSG00000154978;RP11-310H4.1_ENSG00000223475          |
| 7 | 55640385 | 55640645 | 5Y-H4K8ac_peak_15346 | 8.19376  | VOPP1_ENSG00000154978;RP11-310H4.1_ENSG00000223475          |
| 7 | 55954931 | 55955332 | 5Y-H4K8ac_peak_15347 | 8.62703  | MRPS17_ENSG00000249773;ZNF713_ENSG00000178665               |
| 7 | 56032313 | 56032778 | 5Y-H4K8ac_peak_15348 | 26.96937 |                                                             |
| 7 | 56118744 | 56119140 | 5Y-H4K8ac_peak_15349 | 7.65114  | PSPH_ENSG00000146733;CCT6A_ENSG00000146731                  |
| 7 | 56119561 | 56119834 | 5Y-H4K8ac_peak_15350 | 13.92877 | PSPH_ENSG00000146733;CCT6A_ENSG00000146731                  |
| 7 | 56604917 | 56605601 | 5Y-H4K8ac_peak_15351 | 7.04637  | RP11-760D2.5_ENSG00000233288                                |
| 7 | 57710669 | 57711130 | 5Y-H4K8ac_peak_15352 | 6.62622  | RP11-368M16.9_ENSG00000230796;RP11-368M16.5_ENSG00000237639 |
| 7 | 57829691 | 57829888 | 5Y-H4K8ac_peak_15353 | 4.15658  | RP11-548K12.6_ENSG00000227015;RP11-548K12.7_ENSG00000232161 |
| 7 | 57835657 | 57835994 | 5Y-H4K8ac_peak_15354 | 4.79658  |                                                             |
| 7 | 63359991 | 63360366 | 5Y-H4K8ac_peak_15355 | 7.59101  | RP11-340I6.7_ENSG00000236299;RP11-340I6.8_ENSG00000226581   |
| 7 | 63385673 | 63385994 | 5Y-H4K8ac_peak_15356 | 9.30505  | RP11-73B2.6_ENSG00000227910                                 |
| 7 | 63386301 | 63386689 | 5Y-H4K8ac_peak_15357 | 7.89273  | RP11-73B2.6_ENSG00000227910;AC092634.2_ENSG00000265017      |
| 7 | 63387209 | 63387696 | 5Y-H4K8ac_peak_15358 | 11.16796 | RP11-73B2.6_ENSG00000227910;AC092634.2_ENSG00000265017      |
| 7 | 63766742 | 63767149 | 5Y-H4K8ac_peak_15359 | 4.642    | ZNF736_ENSG00000234444                                      |
| 7 | 63924275 | 63924505 | 5Y-H4K8ac_peak_15360 | 8.82628  |                                                             |
| 7 | 64022984 | 64023418 | 5Y-H4K8ac_peak_15361 | 8.18236  | ZNF680_ENSG00000173041                                      |
| 7 | 64035149 | 64035472 | 5Y-H4K8ac_peak_15362 | 9.79526  |                                                             |

|   |          |          |                      |          |                                                         |
|---|----------|----------|----------------------|----------|---------------------------------------------------------|
| 7 | 64126597 | 64126956 | 5Y-H4K8ac_peak_15363 | 9.93099  | ZNF107_ENSG00000196247                                  |
| 7 | 64253929 | 64254404 | 5Y-H4K8ac_peak_15364 | 6.08523  | ZNF138_ENSG00000197008                                  |
| 7 | 64337984 | 64338345 | 5Y-H4K8ac_peak_15365 | 11.71078 |                                                         |
| 7 | 64362850 | 64363140 | 5Y-H4K8ac_peak_15366 | 7.34185  |                                                         |
| 7 | 64363732 | 64364100 | 5Y-H4K8ac_peak_15367 | 9.30505  |                                                         |
| 7 | 64466661 | 64466908 | 5Y-H4K8ac_peak_15368 | 6.19716  | ZNF117_ENSG00000152926;ERV3-1_ENSG00000213462           |
| 7 | 64467556 | 64467793 | 5Y-H4K8ac_peak_15369 | 5.64909  | ZNF117_ENSG00000152926;ERV3-1_ENSG00000213462           |
| 7 | 64541210 | 64541435 | 5Y-H4K8ac_peak_15370 | 8.73985  |                                                         |
| 7 | 64699762 | 64700044 | 5Y-H4K8ac_peak_15371 | 9.87097  |                                                         |
| 7 | 64700297 | 64700744 | 5Y-H4K8ac_peak_15372 | 13.00733 |                                                         |
| 7 | 64711374 | 64711925 | 5Y-H4K8ac_peak_15373 | 14.19462 |                                                         |
| 7 | 64712234 | 64712554 | 5Y-H4K8ac_peak_15374 | 7.7384   |                                                         |
| 7 | 64712827 | 64713018 | 5Y-H4K8ac_peak_15375 | 10.4689  |                                                         |
| 7 | 64734339 | 64734628 | 5Y-H4K8ac_peak_15376 | 8.69112  |                                                         |
| 7 | 64838091 | 64838306 | 5Y-H4K8ac_peak_15377 | 8.16382  | ZNF92_ENSG00000146757                                   |
| 7 | 64838881 | 64839176 | 5Y-H4K8ac_peak_15378 | 9.36633  | ZNF92_ENSG00000146757                                   |
| 7 | 65216376 | 65216570 | 5Y-H4K8ac_peak_15379 | 5.36617  | CCT6P1_ENSG00000228409                                  |
| 7 | 65235944 | 65236442 | 5Y-H4K8ac_peak_15380 | 9.32595  |                                                         |
| 7 | 65446901 | 65447732 | 5Y-H4K8ac_peak_15381 | 21.45803 | GUSB_ENSG00000169919                                    |
| 7 | 65579341 | 65580225 | 5Y-H4K8ac_peak_15382 | 8.24461  | CRCP_ENSG00000241258                                    |
| 7 | 65604917 | 65605163 | 5Y-H4K8ac_peak_15383 | 5.12488  |                                                         |
| 7 | 65610657 | 65610864 | 5Y-H4K8ac_peak_15384 | 5.77617  |                                                         |
| 7 | 65617878 | 65618074 | 5Y-H4K8ac_peak_15385 | 4.0861   |                                                         |
| 7 | 65669856 | 65670056 | 5Y-H4K8ac_peak_15386 | 5.72233  | TPST1_ENSG00000169902                                   |
| 7 | 65958741 | 65959128 | 5Y-H4K8ac_peak_15387 | 12.99645 | GS1-124K5.3_ENSG00000223473;GS1-124K5.4_ENSG00000237310 |
| 7 | 66056550 | 66056957 | 5Y-H4K8ac_peak_15388 | 5.41472  | GS1-124K5.12_ENSG00000232559                            |
| 7 | 66057851 | 66058121 | 5Y-H4K8ac_peak_15389 | 6.78128  | GS1-124K5.12_ENSG00000232559                            |
| 7 | 66093154 | 66093544 | 5Y-H4K8ac_peak_15390 | 7.22147  | KCTD7_ENSG00000243335                                   |
| 7 | 66118861 | 66119419 | 5Y-H4K8ac_peak_15391 | 11.88337 | RP4-756H11.3_ENSG00000226824                            |
| 7 | 66205325 | 66205559 | 5Y-H4K8ac_peak_15392 | 12.79198 | RP11-792A8.4_ENSG00000272831                            |
| 7 | 66309383 | 66309601 | 5Y-H4K8ac_peak_15393 | 7.87406  | GTF2IRD1P1_ENSG00000230583                              |
| 7 | 66310531 | 66311200 | 5Y-H4K8ac_peak_15394 | 9.51254  | GTF2IRD1P1_ENSG00000230583                              |
| 7 | 66386261 | 66386661 | 5Y-H4K8ac_peak_15395 | 9.74838  | TMEM248_ENSG00000106609                                 |
| 7 | 67084933 | 67085142 | 5Y-H4K8ac_peak_15396 | 8.66584  |                                                         |
| 7 | 67688830 | 67689158 | 5Y-H4K8ac_peak_15397 | 9.7353   |                                                         |
| 7 | 68178737 | 68178988 | 5Y-H4K8ac_peak_15398 | 6.77436  |                                                         |
| 7 | 68455058 | 68455276 | 5Y-H4K8ac_peak_15399 | 5.10825  |                                                         |
| 7 | 68677042 | 68677268 | 5Y-H4K8ac_peak_15400 | 8.67475  |                                                         |
| 7 | 69289124 | 69289343 | 5Y-H4K8ac_peak_15401 | 8.28346  |                                                         |
| 7 | 69290745 | 69290962 | 5Y-H4K8ac_peak_15402 | 10.19948 |                                                         |
| 7 | 69311646 | 69311860 | 5Y-H4K8ac_peak_15403 | 7.38046  |                                                         |
| 7 | 69328646 | 69328993 | 5Y-H4K8ac_peak_15404 | 7.59101  |                                                         |
| 7 | 69331723 | 69331935 | 5Y-H4K8ac_peak_15405 | 8.2913   |                                                         |
| 7 | 70083543 | 70083776 | 5Y-H4K8ac_peak_15406 | 4.6468   |                                                         |
| 7 | 70159102 | 70159456 | 5Y-H4K8ac_peak_15407 | 9.31608  |                                                         |
| 7 | 70159680 | 70160087 | 5Y-H4K8ac_peak_15408 | 8.76608  |                                                         |

|   |          |          |                      |          |                                                 |
|---|----------|----------|----------------------|----------|-------------------------------------------------|
| 7 | 70228028 | 70228346 | 5Y-H4K8ac_peak_15409 | 8.73392  |                                                 |
| 7 | 72349252 | 72349481 | 5Y-H4K8ac_peak_15410 | 7.90751  | POM121_ENSG00000196313                          |
| 7 | 72349958 | 72350344 | 5Y-H4K8ac_peak_15411 | 9.51254  | POM121_ENSG00000196313                          |
| 7 | 72395307 | 72395763 | 5Y-H4K8ac_peak_15412 | 5.41472  | RP11-313P13.5_ENSG00000272843                   |
| 7 | 72723221 | 72723806 | 5Y-H4K8ac_peak_15413 | 15.44596 | NSUN5_ENSG00000130305                           |
| 7 | 72814141 | 72814571 | 5Y-H4K8ac_peak_15414 | 7.50148  |                                                 |
| 7 | 72842888 | 72843984 | 5Y-H4K8ac_peak_15415 | 14.86775 |                                                 |
| 7 | 72940755 | 72940969 | 5Y-H4K8ac_peak_15416 | 4.29586  |                                                 |
| 7 | 72971752 | 72972473 | 5Y-H4K8ac_peak_15417 | 22.69022 | BCL7B_ENSG00000106635                           |
| 7 | 73062280 | 73062526 | 5Y-H4K8ac_peak_15418 | 6.34245  |                                                 |
| 7 | 73097347 | 73097707 | 5Y-H4K8ac_peak_15419 | 11.71078 | DNAJC30_ENSG00000176410;WBSCR22_ENSG00000071462 |
| 7 | 73152869 | 73153077 | 5Y-H4K8ac_peak_15420 | 5.24695  | ABHD11_ENSG00000106077                          |
| 7 | 73153378 | 73153714 | 5Y-H4K8ac_peak_15421 | 14.35165 | ABHD11_ENSG00000106077                          |
| 7 | 73240563 | 73240876 | 5Y-H4K8ac_peak_15422 | 4.8547   |                                                 |
| 7 | 73241984 | 73242241 | 5Y-H4K8ac_peak_15423 | 9.79526  |                                                 |
| 7 | 73247915 | 73248105 | 5Y-H4K8ac_peak_15424 | 5.64909  |                                                 |
| 7 | 73256380 | 73256724 | 5Y-H4K8ac_peak_15425 | 7.89273  | WBSCR27_ENSG00000165171                         |
| 7 | 73257047 | 73257408 | 5Y-H4K8ac_peak_15426 | 7.50148  | WBSCR27_ENSG00000165171                         |
| 7 | 73284127 | 73284532 | 5Y-H4K8ac_peak_15427 | 12.2918  |                                                 |
| 7 | 73300668 | 73300905 | 5Y-H4K8ac_peak_15428 | 5.87725  |                                                 |
| 7 | 73309340 | 73309697 | 5Y-H4K8ac_peak_15429 | 9.00954  |                                                 |
| 7 | 73333918 | 73334195 | 5Y-H4K8ac_peak_15430 | 7.73538  |                                                 |
| 7 | 73334408 | 73334987 | 5Y-H4K8ac_peak_15431 | 7.11863  |                                                 |
| 7 | 73385186 | 73385453 | 5Y-H4K8ac_peak_15432 | 5.24695  |                                                 |
| 7 | 73398093 | 73398572 | 5Y-H4K8ac_peak_15433 | 13.92823 |                                                 |
| 7 | 73399860 | 73400084 | 5Y-H4K8ac_peak_15434 | 4.83262  | RP11-731K22.1_ENSG00000261467                   |
| 7 | 73420846 | 73421053 | 5Y-H4K8ac_peak_15435 | 6.72932  |                                                 |
| 7 | 73436632 | 73437067 | 5Y-H4K8ac_peak_15436 | 5.2778   |                                                 |
| 7 | 73438268 | 73438766 | 5Y-H4K8ac_peak_15437 | 5.12488  |                                                 |
| 7 | 73441843 | 73442211 | 5Y-H4K8ac_peak_15438 | 8.62703  | ELN_ENSG00000049540                             |
| 7 | 73442588 | 73442973 | 5Y-H4K8ac_peak_15439 | 8.36116  | ELN_ENSG00000049540                             |
| 7 | 73447596 | 73447924 | 5Y-H4K8ac_peak_15440 | 12.99645 |                                                 |
| 7 | 73456837 | 73458325 | 5Y-H4K8ac_peak_15441 | 19.41527 |                                                 |
| 7 | 73458585 | 73459823 | 5Y-H4K8ac_peak_15442 | 14.18025 |                                                 |
| 7 | 73496775 | 73496980 | 5Y-H4K8ac_peak_15443 | 5.18558  | LIMK1_ENSG00000106683                           |
| 7 | 73497361 | 73497833 | 5Y-H4K8ac_peak_15444 | 9.74838  | LIMK1_ENSG00000106683                           |
| 7 | 73507072 | 73507997 | 5Y-H4K8ac_peak_15445 | 20.56946 |                                                 |
| 7 | 73508880 | 73509351 | 5Y-H4K8ac_peak_15446 | 8.21298  |                                                 |
| 7 | 73588085 | 73588427 | 5Y-H4K8ac_peak_15447 | 10.54669 | EIF4H_ENSG00000106682                           |
| 7 | 73588724 | 73589273 | 5Y-H4K8ac_peak_15448 | 22.9394  | EIF4H_ENSG00000106682                           |
| 7 | 73699230 | 73699439 | 5Y-H4K8ac_peak_15449 | 4.79585  |                                                 |
| 7 | 73703391 | 73703613 | 5Y-H4K8ac_peak_15450 | 12.65187 | CLIP2_ENSG00000106665                           |
| 7 | 73703822 | 73704076 | 5Y-H4K8ac_peak_15451 | 6.25061  | CLIP2_ENSG00000106665                           |
| 7 | 73721403 | 73721601 | 5Y-H4K8ac_peak_15452 | 5.13727  |                                                 |
| 7 | 73832006 | 73832548 | 5Y-H4K8ac_peak_15453 | 8.69112  |                                                 |
| 7 | 73845467 | 73845723 | 5Y-H4K8ac_peak_15454 | 6.46606  |                                                 |

|   |          |          |                      |          |                                                    |
|---|----------|----------|----------------------|----------|----------------------------------------------------|
| 7 | 73867726 | 73868172 | 5Y-H4K8ac_peak_15455 | 14.99099 | GTF2IRD1_ENSG00000006704                           |
| 7 | 73868391 | 73868782 | 5Y-H4K8ac_peak_15456 | 8.14883  | GTF2IRD1_ENSG00000006704                           |
| 7 | 73869054 | 73869451 | 5Y-H4K8ac_peak_15457 | 4.97086  | GTF2IRD1_ENSG00000006704                           |
| 7 | 73895153 | 73895370 | 5Y-H4K8ac_peak_15458 | 5.5192   |                                                    |
| 7 | 73920715 | 73920935 | 5Y-H4K8ac_peak_15459 | 5.60566  |                                                    |
| 7 | 74020779 | 74021553 | 5Y-H4K8ac_peak_15460 | 8.90774  | RP5-1186P10.2_ENSG00000273069                      |
| 7 | 74071369 | 74071719 | 5Y-H4K8ac_peak_15461 | 19.06379 | GTF2I_ENSG00000077809                              |
| 7 | 74072034 | 74072649 | 5Y-H4K8ac_peak_15462 | 33.23772 | GTF2I_ENSG00000077809                              |
| 7 | 74306296 | 74306588 | 5Y-H4K8ac_peak_15463 | 8.43511  | STAG3L2_ENSG00000160828;PMS2P5_ENSG00000123965     |
| 7 | 74489171 | 74489549 | 5Y-H4K8ac_peak_15464 | 9.64145  | WBSCR16_ENSG00000174374                            |
| 7 | 74489787 | 74489991 | 5Y-H4K8ac_peak_15465 | 11.12941 | WBSCR16_ENSG00000174374                            |
| 7 | 75115287 | 75115516 | 5Y-H4K8ac_peak_15466 | 10.60083 | POM121C_ENSG00000135213;AC006014.7_ENSG00000242073 |
| 7 | 75115806 | 75116084 | 5Y-H4K8ac_peak_15467 | 7.65114  | POM121C_ENSG00000135213;AC006014.7_ENSG00000242073 |
| 7 | 75156992 | 75157358 | 5Y-H4K8ac_peak_15468 | 8.24461  | PMS2P3_ENSG00000127957                             |
| 7 | 75267775 | 75268325 | 5Y-H4K8ac_peak_15469 | 9.76277  |                                                    |
| 7 | 75268693 | 75269828 | 5Y-H4K8ac_peak_15470 | 14.26354 |                                                    |
| 7 | 75368123 | 75368322 | 5Y-H4K8ac_peak_15471 | 7.50148  | HIP1_ENSG00000127946                               |
| 7 | 75368807 | 75369058 | 5Y-H4K8ac_peak_15472 | 8.43999  | HIP1_ENSG00000127946                               |
| 7 | 75507129 | 75507351 | 5Y-H4K8ac_peak_15473 | 7.77518  |                                                    |
| 7 | 75676744 | 75677222 | 5Y-H4K8ac_peak_15474 | 8.24461  | STYXL1_ENSG00000127952;MDH2_ENSG00000146701        |
| 7 | 75677434 | 75677772 | 5Y-H4K8ac_peak_15475 | 17.13377 | STYXL1_ENSG00000127952;MDH2_ENSG00000146701        |
| 7 | 75794890 | 75795099 | 5Y-H4K8ac_peak_15476 | 6.08523  |                                                    |
| 7 | 75795549 | 75795796 | 5Y-H4K8ac_peak_15477 | 8.19942  |                                                    |
| 7 | 75796127 | 75796586 | 5Y-H4K8ac_peak_15478 | 11.88337 |                                                    |
| 7 | 75807775 | 75808078 | 5Y-H4K8ac_peak_15479 | 6.80915  |                                                    |
| 7 | 75814464 | 75815400 | 5Y-H4K8ac_peak_15480 | 14.68695 |                                                    |
| 7 | 75827619 | 75827811 | 5Y-H4K8ac_peak_15481 | 4.728    |                                                    |
| 7 | 75830484 | 75830829 | 5Y-H4K8ac_peak_15482 | 6.37023  | SRRM3_ENSG00000177679                              |
| 7 | 75831229 | 75831620 | 5Y-H4K8ac_peak_15483 | 11.22005 | SRRM3_ENSG00000177679                              |
| 7 | 75878587 | 75878807 | 5Y-H4K8ac_peak_15484 | 8.13965  |                                                    |
| 7 | 75879652 | 75879928 | 5Y-H4K8ac_peak_15485 | 5.21777  |                                                    |
| 7 | 75880682 | 75881196 | 5Y-H4K8ac_peak_15486 | 17.29652 |                                                    |
| 7 | 75910685 | 75911144 | 5Y-H4K8ac_peak_15487 | 6.55225  |                                                    |
| 7 | 75921358 | 75921560 | 5Y-H4K8ac_peak_15488 | 9.61965  |                                                    |
| 7 | 75923757 | 75924406 | 5Y-H4K8ac_peak_15489 | 14.6127  |                                                    |
| 7 | 75933262 | 75933479 | 5Y-H4K8ac_peak_15490 | 7.72519  |                                                    |
| 7 | 75936418 | 75937076 | 5Y-H4K8ac_peak_15491 | 9.14624  |                                                    |
| 7 | 75946674 | 75947240 | 5Y-H4K8ac_peak_15492 | 8.3285   |                                                    |
| 7 | 75947710 | 75948070 | 5Y-H4K8ac_peak_15493 | 13.86751 |                                                    |
| 7 | 75987687 | 75988627 | 5Y-H4K8ac_peak_15494 | 11.69482 | YWHAG_ENSG00000170027                              |
| 7 | 75988861 | 75989229 | 5Y-H4K8ac_peak_15495 | 6.86362  | YWHAG_ENSG00000170027                              |
| 7 | 76018832 | 76019031 | 5Y-H4K8ac_peak_15496 | 6.18374  |                                                    |
| 7 | 76022128 | 76022439 | 5Y-H4K8ac_peak_15497 | 8.27643  |                                                    |
| 7 | 76022723 | 76022992 | 5Y-H4K8ac_peak_15498 | 7.90751  |                                                    |
| 7 | 76026844 | 76027235 | 5Y-H4K8ac_peak_15499 | 11.40439 | ZP3_ENSG00000188372                                |
| 7 | 76177916 | 76178323 | 5Y-H4K8ac_peak_15500 | 12.10416 | AC004980.7_ENSG00000205485                         |

|   |          |          |                      |          |                                                  |
|---|----------|----------|----------------------|----------|--------------------------------------------------|
| 7 | 76178732 | 76179214 | 5Y-H4K8ac_peak_15501 | 12.00715 | AC004980.7_ENSG00000205485                       |
| 7 | 76256456 | 76256874 | 5Y-H4K8ac_peak_15502 | 9.15007  | POMZP3_ENSG00000146707                           |
| 7 | 77044826 | 77046182 | 5Y-H4K8ac_peak_15503 | 22.9394  | GSAP_ENSG00000186088;RP5-899E9.1_ENSG00000273341 |
| 7 | 77166986 | 77167289 | 5Y-H4K8ac_peak_15504 | 4.48815  | PTPN12_ENSG00000127947                           |
| 7 | 77395529 | 77395759 | 5Y-H4K8ac_peak_15505 | 7.09444  |                                                  |
| 7 | 79083242 | 79083543 | 5Y-H4K8ac_peak_15506 | 13.12848 | MAGI2_ENSG00000187391                            |
| 7 | 81897061 | 81897276 | 5Y-H4K8ac_peak_15507 | 12.05638 |                                                  |
| 7 | 82072383 | 82073116 | 5Y-H4K8ac_peak_15508 | 28.78021 | CACNA2D1_ENSG00000153956                         |
| 7 | 83207573 | 83207781 | 5Y-H4K8ac_peak_15509 | 7.31815  |                                                  |
| 7 | 86274213 | 86274403 | 5Y-H4K8ac_peak_15510 | 5.23819  | GRM3_ENSG00000198822                             |
| 7 | 86688524 | 86688851 | 5Y-H4K8ac_peak_15511 | 9.00954  | KIAA1324L_ENSG00000164659                        |
| 7 | 86781898 | 86782507 | 5Y-H4K8ac_peak_15512 | 14.26354 | AC005076.5_ENSG00000224046;DMTF1_ENSG00000135164 |
| 7 | 86849411 | 86849780 | 5Y-H4K8ac_peak_15513 | 7.89273  | TMEM243_ENSG00000135185                          |
| 7 | 86940292 | 86940503 | 5Y-H4K8ac_peak_15514 | 8.51022  |                                                  |
| 7 | 87104614 | 87104947 | 5Y-H4K8ac_peak_15515 | 8.26455  |                                                  |
| 7 | 87105170 | 87105374 | 5Y-H4K8ac_peak_15516 | 9.02938  |                                                  |
| 7 | 87505185 | 87505486 | 5Y-H4K8ac_peak_15517 | 7.64648  | SLC25A40_ENSG00000075303;DBF4_ENSG00000006634    |
| 7 | 87563650 | 87563845 | 5Y-H4K8ac_peak_15518 | 8.91395  | ADAM22_ENSG00000008277                           |
| 7 | 87646143 | 87646453 | 5Y-H4K8ac_peak_15519 | 10.27264 |                                                  |
| 7 | 87674065 | 87674323 | 5Y-H4K8ac_peak_15520 | 7.21591  |                                                  |
| 7 | 87849065 | 87849273 | 5Y-H4K8ac_peak_15521 | 9.45199  | AC003991.3_ENSG00000228113                       |
| 7 | 89748301 | 89748518 | 5Y-H4K8ac_peak_15522 | 10.35586 | DPY19L2P4_ENSG00000235436                        |
| 7 | 89748713 | 89749170 | 5Y-H4K8ac_peak_15523 | 8.2913   | DPY19L2P4_ENSG00000235436                        |
| 7 | 89950633 | 89950831 | 5Y-H4K8ac_peak_15524 | 6.75784  |                                                  |
| 7 | 90225122 | 90225325 | 5Y-H4K8ac_peak_15525 | 4.44548  |                                                  |
| 7 | 90225701 | 90225982 | 5Y-H4K8ac_peak_15526 | 4.55128  | AC002456.2_ENSG00000223969                       |
| 7 | 90798534 | 90798749 | 5Y-H4K8ac_peak_15527 | 8.04943  |                                                  |
| 7 | 91195241 | 91195475 | 5Y-H4K8ac_peak_15528 | 11.28133 |                                                  |
| 7 | 91570321 | 91570554 | 5Y-H4K8ac_peak_15529 | 9.32595  | AKAP9_ENSG00000127914                            |
| 7 | 91763410 | 91763614 | 5Y-H4K8ac_peak_15530 | 10.31072 | CTB-161K23.1_ENSG00000188693                     |
| 7 | 91763881 | 91764366 | 5Y-H4K8ac_peak_15531 | 10.48695 | CTB-161K23.1_ENSG00000188693                     |
| 7 | 91808408 | 91809006 | 5Y-H4K8ac_peak_15532 | 9.80622  | LRRD1_ENSG00000240720                            |
| 7 | 91874771 | 91875702 | 5Y-H4K8ac_peak_15533 | 12.00715 | KRIT1_ENSG0000001631;ANKIB1_ENSG00000001629      |
| 7 | 92076258 | 92076514 | 5Y-H4K8ac_peak_15534 | 7.8267   | GATAD1_ENSG00000157259                           |
| 7 | 92076867 | 92077306 | 5Y-H4K8ac_peak_15535 | 5.32952  | GATAD1_ENSG00000157259                           |
| 7 | 92219093 | 92219669 | 5Y-H4K8ac_peak_15536 | 9.36633  | FAM133B_ENSG00000234545                          |
| 7 | 92329133 | 92329323 | 5Y-H4K8ac_peak_15537 | 5.65584  |                                                  |
| 7 | 92400296 | 92400488 | 5Y-H4K8ac_peak_15538 | 5.41472  |                                                  |
| 7 | 92464153 | 92464649 | 5Y-H4K8ac_peak_15539 | 10.54764 |                                                  |
| 7 | 92861946 | 92862288 | 5Y-H4K8ac_peak_15540 | 5.85188  | CCDC132_ENSG00000004766                          |
| 7 | 93551114 | 93551352 | 5Y-H4K8ac_peak_15541 | 3.94241  | GNG11_ENSG00000127920                            |
| 7 | 93595139 | 93595406 | 5Y-H4K8ac_peak_15542 | 5.23083  |                                                  |
| 7 | 93997336 | 93997550 | 5Y-H4K8ac_peak_15543 | 5.59843  |                                                  |
| 7 | 94138403 | 94140000 | 5Y-H4K8ac_peak_15544 | 25.2532  | CASD1_ENSG00000127995                            |
| 7 | 94284882 | 94285453 | 5Y-H4K8ac_peak_15545 | 14.31711 | SGCE_ENSG00000127990;PEG10_ENSG00000242265       |
| 7 | 94536707 | 94537423 | 5Y-H4K8ac_peak_15546 | 8.3285   | PPP1R9A_ENSG00000158528                          |

|   |          |          |                      |          |                                                                              |
|---|----------|----------|----------------------|----------|------------------------------------------------------------------------------|
| 7 | 95064072 | 95065109 | 5Y-H4K8ac_peak_15547 | 12.00715 | PON2_ENSG00000105854                                                         |
| 7 | 95402176 | 95402399 | 5Y-H4K8ac_peak_15548 | 4.79585  | DYNC1H1_ENSG00000158560                                                      |
| 7 | 95441677 | 95441870 | 5Y-H4K8ac_peak_15549 | 5.65584  |                                                                              |
| 7 | 95557774 | 95557982 | 5Y-H4K8ac_peak_15550 | 6.50117  |                                                                              |
| 7 | 95950979 | 95951379 | 5Y-H4K8ac_peak_15551 | 12.00715 | SLC25A13_ENSG00000004864                                                     |
| 7 | 96338771 | 96339006 | 5Y-H4K8ac_peak_15552 | 8.24461  | SHFM1_ENSG00000127922                                                        |
| 7 | 96635274 | 96636508 | 5Y-H4K8ac_peak_15553 | 20.40213 | DLX6_ENSG00000006377;DLX6-AS2_ENSG00000271956                                |
| 7 | 96645739 | 96646994 | 5Y-H4K8ac_peak_15554 | 13.86751 |                                                                              |
| 7 | 97557409 | 97558082 | 5Y-H4K8ac_peak_15555 | 8.24461  |                                                                              |
| 7 | 97601309 | 97602187 | 5Y-H4K8ac_peak_15556 | 17.49408 | AC004967.7_ENSG00000243554                                                   |
| 7 | 97736273 | 97736605 | 5Y-H4K8ac_peak_15557 | 9.62747  | LMTK2_ENSG00000164715                                                        |
| 7 | 97840862 | 97841077 | 5Y-H4K8ac_peak_15558 | 7.20869  | BHLHA15_ENSG00000180535                                                      |
| 7 | 97907995 | 97908297 | 5Y-H4K8ac_peak_15559 | 7.50148  |                                                                              |
| 7 | 97910101 | 97910459 | 5Y-H4K8ac_peak_15560 | 9.93116  |                                                                              |
| 7 | 97911076 | 97911267 | 5Y-H4K8ac_peak_15561 | 8.1667   |                                                                              |
| 7 | 98184181 | 98184371 | 5Y-H4K8ac_peak_15562 | 5.24695  |                                                                              |
| 7 | 98188291 | 98188481 | 5Y-H4K8ac_peak_15563 | 6.20944  |                                                                              |
| 7 | 98199211 | 98199496 | 5Y-H4K8ac_peak_15564 | 6.37023  |                                                                              |
| 7 | 98245869 | 98246355 | 5Y-H4K8ac_peak_15565 | 20.32089 | NPTX2_ENSG00000106236                                                        |
| 7 | 98423890 | 98424761 | 5Y-H4K8ac_peak_15566 | 10.16277 |                                                                              |
| 7 | 98465420 | 98465864 | 5Y-H4K8ac_peak_15567 | 6.53157  |                                                                              |
| 7 | 98466979 | 98467212 | 5Y-H4K8ac_peak_15568 | 6.03632  |                                                                              |
| 7 | 98467430 | 98468114 | 5Y-H4K8ac_peak_15569 | 11.48691 | TMEM130_ENSG00000166448                                                      |
| 7 | 98476163 | 98476552 | 5Y-H4K8ac_peak_15570 | 15.90402 | TRRAP_ENSG00000196367                                                        |
| 7 | 98741268 | 98741568 | 5Y-H4K8ac_peak_15571 | 19.35769 | SMURF1_ENSG00000198742                                                       |
| 7 | 98741902 | 98742097 | 5Y-H4K8ac_peak_15572 | 8.3285   | SMURF1_ENSG00000198742                                                       |
| 7 | 98922956 | 98923337 | 5Y-H4K8ac_peak_15573 | 6.67135  | ARPC1A_ENSG00000241685                                                       |
| 7 | 98923613 | 98923919 | 5Y-H4K8ac_peak_15574 | 10.54764 | ARPC1A_ENSG00000241685                                                       |
| 7 | 98990025 | 98990690 | 5Y-H4K8ac_peak_15575 | 10.35586 |                                                                              |
| 7 | 99005711 | 99006512 | 5Y-H4K8ac_peak_15576 | 22.56714 | PDAP1_ENSG00000106244;BUD31_ENSG00000106245                                  |
| 7 | 99036621 | 99036891 | 5Y-H4K8ac_peak_15577 | 13.68515 | CPSF4_ENSG00000160917                                                        |
| 7 | 99063386 | 99064187 | 5Y-H4K8ac_peak_15578 | 16.79568 | PTCD1_ENSG00000106246;ATP5J2-PTCD1_ENSG00000248919;ATP5J2_ENSG00000241468    |
| 7 | 99068377 | 99068677 | 5Y-H4K8ac_peak_15579 | 6.08523  |                                                                              |
| 7 | 99068914 | 99069156 | 5Y-H4K8ac_peak_15580 | 6.31818  |                                                                              |
| 7 | 99069795 | 99070055 | 5Y-H4K8ac_peak_15581 | 9.3149   | ZNF789_ENSG00000198556                                                       |
| 7 | 99101773 | 99102068 | 5Y-H4K8ac_peak_15582 | 9.37812  | ZKSCAN5_ENSG00000196652                                                      |
| 7 | 99102330 | 99103150 | 5Y-H4K8ac_peak_15583 | 11.5813  | ZKSCAN5_ENSG00000196652                                                      |
| 7 | 99148517 | 99148817 | 5Y-H4K8ac_peak_15584 | 5.41472  |                                                                              |
| 7 | 99149412 | 99149666 | 5Y-H4K8ac_peak_15585 | 11.4254  |                                                                              |
| 7 | 99155705 | 99156065 | 5Y-H4K8ac_peak_15586 | 15.45397 | FAM200A_ENSG00000221909;ZNF655_ENSG00000197343;GS1-259H13.10_ENSG00000272647 |
| 7 | 99177464 | 99178498 | 5Y-H4K8ac_peak_15587 | 12.51872 |                                                                              |
| 7 | 99214201 | 99214402 | 5Y-H4K8ac_peak_15588 | 9.44542  | ZSCAN25_ENSG00000197037                                                      |
| 7 | 99214647 | 99214930 | 5Y-H4K8ac_peak_15589 | 13.29549 | ZSCAN25_ENSG00000197037                                                      |
| 7 | 99612992 | 99613776 | 5Y-H4K8ac_peak_15590 | 13.33225 | ZKSCAN1_ENSG00000106261                                                      |
| 7 | 99646983 | 99647268 | 5Y-H4K8ac_peak_15591 | 12.51536 | ZSCAN21_ENSG00000166529                                                      |
| 7 | 99678606 | 99679329 | 5Y-H4K8ac_peak_15592 | 11.98202 | ZNF3_ENSG00000166526                                                         |

|   |           |           |                      |          |                                                                                       |
|---|-----------|-----------|----------------------|----------|---------------------------------------------------------------------------------------|
| 7 | 99679904  | 99680159  | 5Y-H4K8ac_peak_15593 | 10.19272 | ZNF3_ENSG00000166526                                                                  |
| 7 | 99685976  | 99687119  | 5Y-H4K8ac_peak_15594 | 12.99645 | COPS6_ENSG00000168090                                                                 |
| 7 | 99698519  | 99698967  | 5Y-H4K8ac_peak_15595 | 24.53547 | MCM7_ENSG00000166508;AP4M1_ENSG00000221838                                            |
| 7 | 99699648  | 99700606  | 5Y-H4K8ac_peak_15596 | 11.27006 | MCM7_ENSG00000166508;AP4M1_ENSG00000221838                                            |
| 7 | 99723399  | 99724125  | 5Y-H4K8ac_peak_15597 | 3.93327  | RP11-506M12.1_ENSG00000242798;MBLAC1_ENSG00000214309                                  |
| 7 | 99724984  | 99726000  | 5Y-H4K8ac_peak_15598 | 6.95285  | RP11-506M12.1_ENSG00000242798;MBLAC1_ENSG00000214309                                  |
| 7 | 99745494  | 99746106  | 5Y-H4K8ac_peak_15599 | 12.5784  | LAMTOR4_ENSG00000188186                                                               |
| 7 | 99755763  | 99756248  | 5Y-H4K8ac_peak_15600 | 7.82121  | C7orf43_ENSG00000146826                                                               |
| 7 | 99774685  | 99774944  | 5Y-H4K8ac_peak_15601 | 11.23789 | GPC2_ENSG00000213420;STAG3_ENSG00000066923                                            |
| 7 | 99870026  | 99870269  | 5Y-H4K8ac_peak_15602 | 7.90005  | GATS_ENSG00000239521;GATS_ENSG00000160844                                             |
| 7 | 99933816  | 99934225  | 5Y-H4K8ac_peak_15603 | 6.66983  | STAG3L5P_ENSG00000242294;STAG3L5P-PVRIG2P-PILRB_ENSG00000272752;PILRB_ENSG00000121716 |
| 7 | 99979221  | 99979482  | 5Y-H4K8ac_peak_15604 | 4.29586  |                                                                                       |
| 7 | 100025499 | 100025848 | 5Y-H4K8ac_peak_15605 | 7.90005  | ZCWPW1_ENSG00000078487;MEPCE_ENSG00000146834                                          |
| 7 | 100027589 | 100028243 | 5Y-H4K8ac_peak_15606 | 13.1133  | ZCWPW1_ENSG00000078487                                                                |
| 7 | 100033480 | 100034063 | 5Y-H4K8ac_peak_15607 | 12.52787 | RP11-758P17.2_ENSG00000241357;PPP1R35_ENSG00000160813;RP11-758P17.3_ENSG00000240211   |
| 7 | 100034458 | 100034916 | 5Y-H4K8ac_peak_15608 | 6.67135  | PPP1R35_ENSG00000160813;RP11-758P17.3_ENSG00000240211                                 |
| 7 | 100047941 | 100048635 | 5Y-H4K8ac_peak_15609 | 14.50475 |                                                                                       |
| 7 | 100065313 | 100065554 | 5Y-H4K8ac_peak_15610 | 8.69112  |                                                                                       |
| 7 | 100081908 | 100082231 | 5Y-H4K8ac_peak_15611 | 7.29055  | AC092849.1_ENSG00000266372;NYAP1_ENSG00000166924                                      |
| 7 | 100113477 | 100113703 | 5Y-H4K8ac_peak_15612 | 4.95697  |                                                                                       |
| 7 | 100167533 | 100168281 | 5Y-H4K8ac_peak_15613 | 19.60376 | RP11-44M6.3_ENSG00000184414                                                           |
| 7 | 100183439 | 100183695 | 5Y-H4K8ac_peak_15614 | 18.60312 | LRCH4_ENSG00000077454                                                                 |
| 7 | 100197994 | 100198521 | 5Y-H4K8ac_peak_15615 | 9.13495  |                                                                                       |
| 7 | 100200056 | 100200641 | 5Y-H4K8ac_peak_15616 | 14.86775 | PCOLCE_ENSG00000106333                                                                |
| 7 | 100202115 | 100202345 | 5Y-H4K8ac_peak_15617 | 8.09118  | PCOLCE-AS1_ENSG00000224729                                                            |
| 7 | 100208977 | 100209468 | 5Y-H4K8ac_peak_15618 | 10.86711 | MOSPD3_ENSG00000106330                                                                |
| 7 | 100224459 | 100224826 | 5Y-H4K8ac_peak_15619 | 7.20869  |                                                                                       |
| 7 | 100230511 | 100231261 | 5Y-H4K8ac_peak_15620 | 19.58975 |                                                                                       |
| 7 | 100231474 | 100231693 | 5Y-H4K8ac_peak_15621 | 5.64909  |                                                                                       |
| 7 | 100254265 | 100254699 | 5Y-H4K8ac_peak_15622 | 6.37023  | ACTL6B_ENSG00000077080                                                                |
| 7 | 100271123 | 100271313 | 5Y-H4K8ac_peak_15623 | 12.19856 | GNB2_ENSG00000172354                                                                  |
| 7 | 100271545 | 100271811 | 5Y-H4K8ac_peak_15624 | 7.31947  | GNB2_ENSG00000172354                                                                  |
| 7 | 100273306 | 100273539 | 5Y-H4K8ac_peak_15625 | 6.79877  |                                                                                       |
| 7 | 100291138 | 100291594 | 5Y-H4K8ac_peak_15626 | 8.00646  |                                                                                       |
| 7 | 100292181 | 100292845 | 5Y-H4K8ac_peak_15627 | 11.71078 |                                                                                       |
| 7 | 100303137 | 100303506 | 5Y-H4K8ac_peak_15628 | 10.54669 | POP7_ENSG00000172336                                                                  |
| 7 | 100303762 | 100303954 | 5Y-H4K8ac_peak_15629 | 8.09118  | POP7_ENSG00000172336                                                                  |
| 7 | 100399553 | 100399986 | 5Y-H4K8ac_peak_15630 | 8.9308   |                                                                                       |
| 7 | 100471659 | 100472516 | 5Y-H4K8ac_peak_15631 | 13.12848 | SRRT_ENSG00000087087                                                                  |
| 7 | 100472931 | 100473230 | 5Y-H4K8ac_peak_15632 | 9.79526  | SRRT_ENSG00000087087                                                                  |
| 7 | 100486856 | 100487255 | 5Y-H4K8ac_peak_15633 | 10.48695 | UFSP1_ENSG00000176125                                                                 |
| 7 | 100488165 | 100488840 | 5Y-H4K8ac_peak_15634 | 16.93214 | UFSP1_ENSG00000176125                                                                 |
| 7 | 100494773 | 100495111 | 5Y-H4K8ac_peak_15635 | 4.36209  | ACHE_ENSG00000087085                                                                  |
| 7 | 100797072 | 100797264 | 5Y-H4K8ac_peak_15636 | 7.90751  | AP1S1_ENSG00000106367                                                                 |
| 7 | 100798041 | 100798337 | 5Y-H4K8ac_peak_15637 | 8.99358  | AP1S1_ENSG00000106367                                                                 |
| 7 | 100805877 | 100806467 | 5Y-H4K8ac_peak_15638 | 6.19716  |                                                                                       |



|   |           |           |                      |          |                                                                      |
|---|-----------|-----------|----------------------|----------|----------------------------------------------------------------------|
| 7 | 100806981 | 100807320 | 5Y-H4K8ac_peak_15639 | 5.41472  |                                                                      |
| 7 | 100809239 | 100809513 | 5Y-H4K8ac_peak_15640 | 8.52662  | VGF_ENSG00000128564                                                  |
| 7 | 100812083 | 100812521 | 5Y-H4K8ac_peak_15641 | 7.90751  |                                                                      |
| 7 | 100835625 | 100836308 | 5Y-H4K8ac_peak_15642 | 9.38276  |                                                                      |
| 7 | 100860968 | 100861227 | 5Y-H4K8ac_peak_15643 | 7.96285  | PLOD3_ENSG00000106397;ZNHIT1_ENSG00000106400                         |
| 7 | 100887763 | 100888842 | 5Y-H4K8ac_peak_15644 | 10.14791 |                                                                      |
| 7 | 100925958 | 100926276 | 5Y-H4K8ac_peak_15645 | 8.10449  |                                                                      |
| 7 | 100965207 | 100965641 | 5Y-H4K8ac_peak_15646 | 11.09673 | RABL5_ENSG00000128581                                                |
| 7 | 101006955 | 101007286 | 5Y-H4K8ac_peak_15647 | 5.12488  | COL26A1_ENSG00000160963                                              |
| 7 | 101007943 | 101008175 | 5Y-H4K8ac_peak_15648 | 9.51785  |                                                                      |
| 7 | 101130067 | 101130421 | 5Y-H4K8ac_peak_15649 | 8.09118  |                                                                      |
| 7 | 101130625 | 101131015 | 5Y-H4K8ac_peak_15650 | 4.44548  |                                                                      |
| 7 | 101386251 | 101386685 | 5Y-H4K8ac_peak_15651 | 11.27089 |                                                                      |
| 7 | 101398324 | 101398521 | 5Y-H4K8ac_peak_15652 | 11.27006 |                                                                      |
| 7 | 101457608 | 101457886 | 5Y-H4K8ac_peak_15653 | 5.23083  |                                                                      |
| 7 | 101458397 | 101458924 | 5Y-H4K8ac_peak_15654 | 7.44077  | CUX1_ENSG00000257923                                                 |
| 7 | 101687897 | 101688300 | 5Y-H4K8ac_peak_15655 | 5.98695  |                                                                      |
| 7 | 101708214 | 101708524 | 5Y-H4K8ac_peak_15656 | 6.31818  |                                                                      |
| 7 | 101754754 | 101754944 | 5Y-H4K8ac_peak_15657 | 7.18918  |                                                                      |
| 7 | 101902506 | 101902768 | 5Y-H4K8ac_peak_15658 | 6.13919  |                                                                      |
| 7 | 101914042 | 101914250 | 5Y-H4K8ac_peak_15659 | 8.36588  |                                                                      |
| 7 | 101929330 | 101929974 | 5Y-H4K8ac_peak_15660 | 16.29405 | SH2B2_ENSG00000160999                                                |
| 7 | 102003519 | 102004058 | 5Y-H4K8ac_peak_15661 | 10.31981 | PRKRIP1_ENSG00000128563;RP11-163E9.2_ENSG00000239969                 |
| 7 | 102004471 | 102004861 | 5Y-H4K8ac_peak_15662 | 6.80915  | PRKRIP1_ENSG00000128563;RP11-163E9.2_ENSG00000239969                 |
| 7 | 102023614 | 102023823 | 5Y-H4K8ac_peak_15663 | 4.8188   | RP11-163E9.1_ENSG00000239486                                         |
| 7 | 102074059 | 102074386 | 5Y-H4K8ac_peak_15664 | 10.60083 | RP11-514P8.2_ENSG00000239480;ORAI2_ENSG00000160991                   |
| 7 | 102081453 | 102081649 | 5Y-H4K8ac_peak_15665 | 6.78128  |                                                                      |
| 7 | 102082532 | 102082778 | 5Y-H4K8ac_peak_15666 | 5.60566  |                                                                      |
| 7 | 102104967 | 102105262 | 5Y-H4K8ac_peak_15667 | 9.02938  | MIR5090_ENSG00000266715;ALKBH4_ENSG00000160993;LRWD1_ENSG00000161036 |
| 7 | 102153354 | 102153735 | 5Y-H4K8ac_peak_15668 | 13.0168  |                                                                      |
| 7 | 102172629 | 102172822 | 5Y-H4K8ac_peak_15669 | 10.90097 |                                                                      |
| 7 | 102252509 | 102252727 | 5Y-H4K8ac_peak_15670 | 16.73191 |                                                                      |
| 7 | 102576570 | 102576880 | 5Y-H4K8ac_peak_15671 | 5.98695  |                                                                      |
| 7 | 102715661 | 102715978 | 5Y-H4K8ac_peak_15672 | 7.07617  | FBXL13_ENSG00000161040;ARMC10_ENSG00000170632                        |
| 7 | 102789801 | 102790073 | 5Y-H4K8ac_peak_15673 | 10.56003 | NAPEPLD_ENSG00000161048                                              |
| 7 | 102920393 | 102921164 | 5Y-H4K8ac_peak_15674 | 10.60083 | DPY19L2P2_ENSG00000170629                                            |
| 7 | 102937956 | 102938239 | 5Y-H4K8ac_peak_15675 | 13.03153 | PMPCB_ENSG00000105819                                                |
| 7 | 102984880 | 102985191 | 5Y-H4K8ac_peak_15676 | 12.10416 | DNAJC2_ENSG00000105821;PSMC2_ENSG00000161057                         |
| 7 | 103086432 | 103086781 | 5Y-H4K8ac_peak_15677 | 3.94247  | SLC26A5_ENSG00000170615;CTB-107G13.1_ENSG00000234715                 |
| 7 | 103165344 | 103165569 | 5Y-H4K8ac_peak_15678 | 7.87048  |                                                                      |
| 7 | 103355999 | 103356420 | 5Y-H4K8ac_peak_15679 | 5.98695  |                                                                      |
| 7 | 103456534 | 103456750 | 5Y-H4K8ac_peak_15680 | 6.50117  |                                                                      |
| 7 | 103629859 | 103630102 | 5Y-H4K8ac_peak_15681 | 11.64833 | RELN_ENSG00000189056                                                 |
| 7 | 103630301 | 103630813 | 5Y-H4K8ac_peak_15682 | 6.56228  | RELN_ENSG00000189056                                                 |
| 7 | 103848113 | 103848820 | 5Y-H4K8ac_peak_15683 | 17.04999 | ORC5_ENSG00000164815                                                 |
| 7 | 103968423 | 103970003 | 5Y-H4K8ac_peak_15684 | 11.22005 | LHFPL3_ENSG00000187416                                               |

|   |           |           |                      |          |                                                                           |
|---|-----------|-----------|----------------------|----------|---------------------------------------------------------------------------|
| 7 | 104580341 | 104580816 | 5Y-H4K8ac_peak_15685 | 6.66215  | RP11-325F22.2_ENSG00000237513                                             |
| 7 | 104585212 | 104585468 | 5Y-H4K8ac_peak_15686 | 6.78128  |                                                                           |
| 7 | 104624149 | 104624918 | 5Y-H4K8ac_peak_15687 | 7.50148  |                                                                           |
| 7 | 104653912 | 104654294 | 5Y-H4K8ac_peak_15688 | 9.36633  | LINC01004_ENSG00000228393;KMT2E-AS1_ENSG00000239569;KMT2E_ENSG00000005483 |
| 7 | 105028910 | 105029242 | 5Y-H4K8ac_peak_15689 | 6.10343  |                                                                           |
| 7 | 105041886 | 105042139 | 5Y-H4K8ac_peak_15690 | 5.24695  |                                                                           |
| 7 | 105162050 | 105162633 | 5Y-H4K8ac_peak_15691 | 9.69901  | PUS7_ENSG00000091127                                                      |
| 7 | 105172700 | 105172927 | 5Y-H4K8ac_peak_15692 | 14.77593 | RINT1_ENSG00000135249                                                     |
| 7 | 105252905 | 105253098 | 5Y-H4K8ac_peak_15693 | 7.18391  |                                                                           |
| 7 | 105262728 | 105262952 | 5Y-H4K8ac_peak_15694 | 5.62696  |                                                                           |
| 7 | 105283786 | 105284012 | 5Y-H4K8ac_peak_15695 | 7.418    |                                                                           |
| 7 | 105409771 | 105410131 | 5Y-H4K8ac_peak_15696 | 5.38445  |                                                                           |
| 7 | 105517270 | 105517501 | 5Y-H4K8ac_peak_15697 | 10.89497 | ATXN7L1_ENSG00000146776;CDHR3_ENSG00000128536                             |
| 7 | 105661058 | 105661304 | 5Y-H4K8ac_peak_15698 | 7.73538  |                                                                           |
| 7 | 105698445 | 105699339 | 5Y-H4K8ac_peak_15699 | 11.01067 |                                                                           |
| 7 | 105705217 | 105705475 | 5Y-H4K8ac_peak_15700 | 11.60058 |                                                                           |
| 7 | 105752355 | 105752578 | 5Y-H4K8ac_peak_15701 | 10.1994  | SYPL1_ENSG00000008282                                                     |
| 7 | 105817052 | 105817252 | 5Y-H4K8ac_peak_15702 | 7.38046  |                                                                           |
| 7 | 106209854 | 106210197 | 5Y-H4K8ac_peak_15703 | 5.67283  |                                                                           |
| 7 | 106300974 | 106301506 | 5Y-H4K8ac_peak_15704 | 17.78344 | CCDC71L_ENSG00000253276;AC004917.1_ENSG00000177820                        |
| 7 | 106301732 | 106302113 | 5Y-H4K8ac_peak_15705 | 11.86504 | CCDC71L_ENSG00000253276;AC004917.1_ENSG00000177820                        |
| 7 | 106484145 | 106484428 | 5Y-H4K8ac_peak_15706 | 10.1994  |                                                                           |
| 7 | 106744181 | 106744418 | 5Y-H4K8ac_peak_15707 | 5.03438  |                                                                           |
| 7 | 107204567 | 107204762 | 5Y-H4K8ac_peak_15708 | 6.37023  | COG5_ENSG00000164597;DUS4L_ENSG00000105865                                |
| 7 | 107220740 | 107220932 | 5Y-H4K8ac_peak_15709 | 8.79399  | RP4-593H12.1_ENSG00000272854;BCAP29_ENSG00000075790                       |
| 7 | 107384237 | 107384469 | 5Y-H4K8ac_peak_15710 | 9.36633  | AC002467.7_ENSG00000241764;CBL1_ENSG00000105879                           |
| 7 | 107642465 | 107644039 | 5Y-H4K8ac_peak_15711 | 18.78631 | LAMB1_ENSG00000091136                                                     |
| 7 | 107933269 | 107933683 | 5Y-H4K8ac_peak_15712 | 4.50834  |                                                                           |
| 7 | 108095260 | 108095759 | 5Y-H4K8ac_peak_15713 | 13.03079 |                                                                           |
| 7 | 108096275 | 108096813 | 5Y-H4K8ac_peak_15714 | 8.62703  | NRCAM_ENSG00000091129                                                     |
| 7 | 108166954 | 108167174 | 5Y-H4K8ac_peak_15715 | 9.79526  |                                                                           |
| 7 | 108210422 | 108210878 | 5Y-H4K8ac_peak_15716 | 9.99838  | PNPLA8_ENSG00000135241;THAP5_ENSG00000177683;DNAJB9_ENSG00000128590       |
| 7 | 110777881 | 110778099 | 5Y-H4K8ac_peak_15717 | 8.08688  |                                                                           |
| 7 | 112031765 | 112032077 | 5Y-H4K8ac_peak_15718 | 10.90365 |                                                                           |
| 7 | 112032525 | 112032855 | 5Y-H4K8ac_peak_15719 | 6.4472   |                                                                           |
| 7 | 112060351 | 112060701 | 5Y-H4K8ac_peak_15720 | 6.46053  |                                                                           |
| 7 | 112429997 | 112430815 | 5Y-H4K8ac_peak_15721 | 12.43028 | TMEM168_ENSG00000146802                                                   |
| 7 | 115850625 | 115851035 | 5Y-H4K8ac_peak_15722 | 8.82628  | TES_ENSG00000135269                                                       |
| 7 | 116501955 | 116502152 | 5Y-H4K8ac_peak_15723 | 7.76768  |                                                                           |
| 7 | 116502671 | 116503088 | 5Y-H4K8ac_peak_15724 | 15.99783 |                                                                           |
| 7 | 116593018 | 116593259 | 5Y-H4K8ac_peak_15725 | 8.11614  | ST7_ENSG00000004866;ST7-OT4_ENSG00000214188                               |
| 7 | 116593966 | 116594316 | 5Y-H4K8ac_peak_15726 | 8.24461  | ST7-AS1_ENSG00000227199;ST7_ENSG00000004866;ST7-OT4_ENSG00000214188       |
| 7 | 117824296 | 117824584 | 5Y-H4K8ac_peak_15727 | 7.59101  | NAA38_ENSG00000128534                                                     |
| 7 | 122676314 | 122676539 | 5Y-H4K8ac_peak_15728 | 5.40331  |                                                                           |
| 7 | 123388805 | 123389021 | 5Y-H4K8ac_peak_15729 | 7.21591  | WASL_ENSG00000106299;RP11-390E23.6_ENSG00000272686                        |
| 7 | 123672052 | 123673794 | 5Y-H4K8ac_peak_15730 | 18.08671 | TMEM229A_ENSG00000234224;RP5-921G16.1_ENSG00000242593                     |

|   |           |           |                      |          |                                                                                   |
|---|-----------|-----------|----------------------|----------|-----------------------------------------------------------------------------------|
| 7 | 123713747 | 123713958 | 5Y-H4K8ac_peak_15731 | 4.6766   |                                                                                   |
| 7 | 123724719 | 123724990 | 5Y-H4K8ac_peak_15732 | 9.89244  |                                                                                   |
| 7 | 123828092 | 123828323 | 5Y-H4K8ac_peak_15733 | 6.83519  |                                                                                   |
| 7 | 124497728 | 124498108 | 5Y-H4K8ac_peak_15734 | 4.51076  |                                                                                   |
| 7 | 125108367 | 125108595 | 5Y-H4K8ac_peak_15735 | 6.77436  |                                                                                   |
| 7 | 126886588 | 126886849 | 5Y-H4K8ac_peak_15736 | 8.49231  |                                                                                   |
| 7 | 126891098 | 126891327 | 5Y-H4K8ac_peak_15737 | 5.98695  |                                                                                   |
| 7 | 126891684 | 126892333 | 5Y-H4K8ac_peak_15738 | 7.70811  |                                                                                   |
| 7 | 126893726 | 126894039 | 5Y-H4K8ac_peak_15739 | 11.01067 | GRM8_ENSG00000179603                                                              |
| 7 | 127225415 | 127225634 | 5Y-H4K8ac_peak_15740 | 11.33673 |                                                                                   |
| 7 | 127227753 | 127228287 | 5Y-H4K8ac_peak_15741 | 17.67055 | ARF5_ENSG00000004059                                                              |
| 7 | 127228480 | 127228712 | 5Y-H4K8ac_peak_15742 | 8.46442  | ARF5_ENSG00000004059                                                              |
| 7 | 127291021 | 127291909 | 5Y-H4K8ac_peak_15743 | 10.16277 | AC073934.6_ENSG00000240790;SND1_ENSG00000197157                                   |
| 7 | 127663225 | 127663427 | 5Y-H4K8ac_peak_15744 | 9.30206  |                                                                                   |
| 7 | 127670745 | 127671007 | 5Y-H4K8ac_peak_15745 | 7.50081  |                                                                                   |
| 7 | 127671222 | 127671772 | 5Y-H4K8ac_peak_15746 | 12.97312 | LRR4_ENSG00000128594                                                              |
| 7 | 127672843 | 127673067 | 5Y-H4K8ac_peak_15747 | 5.60566  | LRR4_ENSG00000128594                                                              |
| 7 | 127717563 | 127717773 | 5Y-H4K8ac_peak_15748 | 5.68578  |                                                                                   |
| 7 | 127722106 | 127722582 | 5Y-H4K8ac_peak_15749 | 5.41472  | MIR593_ENSG00000207588                                                            |
| 7 | 127724359 | 127725267 | 5Y-H4K8ac_peak_15750 | 17.52337 |                                                                                   |
| 7 | 127736947 | 127737341 | 5Y-H4K8ac_peak_15751 | 5.41472  |                                                                                   |
| 7 | 127775509 | 127775866 | 5Y-H4K8ac_peak_15752 | 20.47833 |                                                                                   |
| 7 | 127806650 | 127808178 | 5Y-H4K8ac_peak_15753 | 15.63321 |                                                                                   |
| 7 | 127899327 | 127899582 | 5Y-H4K8ac_peak_15754 | 4.83834  |                                                                                   |
| 7 | 127904741 | 127905608 | 5Y-H4K8ac_peak_15755 | 17.37977 | RP11-62J1.4_ENSG00000272915                                                       |
| 7 | 127906078 | 127906441 | 5Y-H4K8ac_peak_15756 | 7.27671  |                                                                                   |
| 7 | 127907264 | 127907533 | 5Y-H4K8ac_peak_15757 | 11.16796 |                                                                                   |
| 7 | 127907826 | 127908512 | 5Y-H4K8ac_peak_15758 | 11.4254  |                                                                                   |
| 7 | 127988536 | 127988849 | 5Y-H4K8ac_peak_15759 | 4.92498  |                                                                                   |
| 7 | 127989043 | 127989450 | 5Y-H4K8ac_peak_15760 | 5.05857  |                                                                                   |
| 7 | 127989923 | 127991535 | 5Y-H4K8ac_peak_15761 | 10.35586 |                                                                                   |
| 7 | 127995711 | 127997127 | 5Y-H4K8ac_peak_15762 | 12.29582 |                                                                                   |
| 7 | 127998223 | 127998470 | 5Y-H4K8ac_peak_15763 | 10.35444 |                                                                                   |
| 7 | 127999352 | 128000952 | 5Y-H4K8ac_peak_15764 | 18.4549  | PRRT4_ENSG00000224940                                                             |
| 7 | 128001262 | 128002938 | 5Y-H4K8ac_peak_15765 | 25.33524 | PRRT4_ENSG00000224940                                                             |
| 7 | 128004196 | 128004416 | 5Y-H4K8ac_peak_15766 | 8.62703  |                                                                                   |
| 7 | 128018745 | 128019318 | 5Y-H4K8ac_peak_15767 | 10.16277 |                                                                                   |
| 7 | 128020220 | 128021014 | 5Y-H4K8ac_peak_15768 | 10.1994  |                                                                                   |
| 7 | 128022699 | 128022988 | 5Y-H4K8ac_peak_15769 | 7.90236  |                                                                                   |
| 7 | 128027225 | 128027627 | 5Y-H4K8ac_peak_15770 | 20.56946 |                                                                                   |
| 7 | 128045508 | 128045887 | 5Y-H4K8ac_peak_15771 | 6.38599  |                                                                                   |
| 7 | 128086506 | 128086769 | 5Y-H4K8ac_peak_15772 | 5.24695  |                                                                                   |
| 7 | 128094629 | 128094839 | 5Y-H4K8ac_peak_15773 | 7.20869  |                                                                                   |
| 7 | 128095283 | 128095671 | 5Y-H4K8ac_peak_15774 | 7.8511   | RP11-212P7.3_ENSG00000273184;HILPDA_ENSG00000135245;RP11-155G14.6_ENSG00000240758 |
| 7 | 128096040 | 128096308 | 5Y-H4K8ac_peak_15775 | 7.44077  | RP11-212P7.3_ENSG00000273184;HILPDA_ENSG00000135245;RP11-155G14.6_ENSG00000240758 |
| 7 | 128116381 | 128116669 | 5Y-H4K8ac_peak_15776 | 7.50501  | METTL2B_ENSG00000165055                                                           |

|   |           |           |                      |          |                                                            |
|---|-----------|-----------|----------------------|----------|------------------------------------------------------------|
| 7 | 128116896 | 128117428 | 5Y-H4K8ac_peak_15777 | 14.86775 | METTL2B_ENSG00000165055                                    |
| 7 | 128170794 | 128171119 | 5Y-H4K8ac_peak_15778 | 11.29141 | RP11-212P7.2_ENSG00000273270;RP11-274B21.1_ENSG00000242588 |
| 7 | 128171429 | 128172272 | 5Y-H4K8ac_peak_15779 | 13.59183 | RP11-212P7.2_ENSG00000273270;RP11-274B21.1_ENSG00000242588 |
| 7 | 128392729 | 128392940 | 5Y-H4K8ac_peak_15780 | 5.98695  |                                                            |
| 7 | 128430830 | 128431291 | 5Y-H4K8ac_peak_15781 | 8.26455  | CCDC136_ENSG00000128596                                    |
| 7 | 128470076 | 128471048 | 5Y-H4K8ac_peak_15782 | 12.40938 | FLNC_ENSG00000128591                                       |
| 7 | 128471498 | 128472441 | 5Y-H4K8ac_peak_15783 | 7.90751  |                                                            |
| 7 | 128472851 | 128473108 | 5Y-H4K8ac_peak_15784 | 5.50568  |                                                            |
| 7 | 128509500 | 128509869 | 5Y-H4K8ac_peak_15785 | 5.64909  | RP11-309L24.9_ENSG00000272899                              |
| 7 | 128514700 | 128514936 | 5Y-H4K8ac_peak_15786 | 5.34199  |                                                            |
| 7 | 128577541 | 128578484 | 5Y-H4K8ac_peak_15787 | 9.79526  | IRF5_ENSG00000128604                                       |
| 7 | 128694570 | 128695141 | 5Y-H4K8ac_peak_15788 | 17.29652 | TNPO3_ENSG00000064419;TPI1P2_ENSG00000230359               |
| 7 | 128828459 | 128829310 | 5Y-H4K8ac_peak_15789 | 12.52787 | SMO_ENSG00000128602                                        |
| 7 | 129251150 | 129251426 | 5Y-H4K8ac_peak_15790 | 11.16796 | RP11-448A19.1_ENSG00000273329;NRF1_ENSG00000106459         |
| 7 | 129387767 | 129387970 | 5Y-H4K8ac_peak_15791 | 7.92818  |                                                            |
| 7 | 129389864 | 129390115 | 5Y-H4K8ac_peak_15792 | 6.20292  |                                                            |
| 7 | 129419753 | 129419947 | 5Y-H4K8ac_peak_15793 | 5.7621   |                                                            |
| 7 | 129464630 | 129464832 | 5Y-H4K8ac_peak_15794 | 6.55841  |                                                            |
| 7 | 129473930 | 129474139 | 5Y-H4K8ac_peak_15795 | 8.4454   |                                                            |
| 7 | 129592174 | 129592369 | 5Y-H4K8ac_peak_15796 | 4.77126  | UBE2H_ENSG00000186591;RP11-306G20.1_ENSG00000244036        |
| 7 | 129690829 | 129691205 | 5Y-H4K8ac_peak_15797 | 15.87286 | ZC3HC1_ENSG00000091732                                     |
| 7 | 129780976 | 129781435 | 5Y-H4K8ac_peak_15798 | 5.60566  | RP11-775D22.2_ENSG00000229196                              |
| 7 | 129793128 | 129793408 | 5Y-H4K8ac_peak_15799 | 5.85188  |                                                            |
| 7 | 129793687 | 129794135 | 5Y-H4K8ac_peak_15800 | 6.51488  |                                                            |
| 7 | 129794777 | 129795253 | 5Y-H4K8ac_peak_15801 | 7.44077  |                                                            |
| 7 | 129844977 | 129845183 | 5Y-H4K8ac_peak_15802 | 9.74838  |                                                            |
| 7 | 129845724 | 129846282 | 5Y-H4K8ac_peak_15803 | 6.78128  |                                                            |
| 7 | 130004451 | 130004885 | 5Y-H4K8ac_peak_15804 | 7.55879  |                                                            |
| 7 | 130005122 | 130005328 | 5Y-H4K8ac_peak_15805 | 4.51215  |                                                            |
| 7 | 130005760 | 130006096 | 5Y-H4K8ac_peak_15806 | 7.11863  |                                                            |
| 7 | 130013573 | 130013919 | 5Y-H4K8ac_peak_15807 | 13.0168  |                                                            |
| 7 | 130019635 | 130020338 | 5Y-H4K8ac_peak_15808 | 7.44077  | CPA1_ENSG00000091704                                       |
| 7 | 130020623 | 130020845 | 5Y-H4K8ac_peak_15809 | 6.84536  | CPA1_ENSG00000091704                                       |
| 7 | 130080236 | 130080901 | 5Y-H4K8ac_peak_15810 | 14.17466 |                                                            |
| 7 | 130353302 | 130353494 | 5Y-H4K8ac_peak_15811 | 9.02938  | COPG2_ENSG00000158623                                      |
| 7 | 130794481 | 130795303 | 5Y-H4K8ac_peak_15812 | 19.17092 | LINC-PINT_ENSG00000231721;MKLN1_ENSG00000128585            |
| 7 | 130921126 | 130921406 | 5Y-H4K8ac_peak_15813 | 6.64036  |                                                            |
| 7 | 131187948 | 131188211 | 5Y-H4K8ac_peak_15814 | 6.64195  |                                                            |
| 7 | 131206377 | 131206624 | 5Y-H4K8ac_peak_15815 | 7.35333  |                                                            |
| 7 | 131221999 | 131222198 | 5Y-H4K8ac_peak_15816 | 5.73383  |                                                            |
| 7 | 131222838 | 131223189 | 5Y-H4K8ac_peak_15817 | 9.88714  |                                                            |
| 7 | 131242678 | 131243031 | 5Y-H4K8ac_peak_15818 | 15.19225 | PODXL_ENSG00000128567                                      |
| 7 | 131304485 | 131304892 | 5Y-H4K8ac_peak_15819 | 4.50834  |                                                            |
| 7 | 131305540 | 131305776 | 5Y-H4K8ac_peak_15820 | 7.64648  |                                                            |
| 7 | 131306892 | 131307115 | 5Y-H4K8ac_peak_15821 | 5.99504  |                                                            |
| 7 | 131339715 | 131340037 | 5Y-H4K8ac_peak_15822 | 5.98695  |                                                            |

|   |           |           |                      |          |                                           |
|---|-----------|-----------|----------------------|----------|-------------------------------------------|
| 7 | 131377141 | 131377518 | 5Y-H4K8ac_peak_15823 | 6.66983  |                                           |
| 7 | 131593958 | 131594573 | 5Y-H4K8ac_peak_15824 | 9.7353   |                                           |
| 7 | 131845880 | 131846628 | 5Y-H4K8ac_peak_15825 | 8.26455  |                                           |
| 7 | 132120175 | 132120685 | 5Y-H4K8ac_peak_15826 | 15.93748 |                                           |
| 7 | 132159829 | 132160069 | 5Y-H4K8ac_peak_15827 | 12.50545 |                                           |
| 7 | 132160823 | 132161068 | 5Y-H4K8ac_peak_15828 | 5.47303  |                                           |
| 7 | 132165404 | 132165597 | 5Y-H4K8ac_peak_15829 | 3.93411  |                                           |
| 7 | 132342090 | 132342333 | 5Y-H4K8ac_peak_15830 | 9.30338  |                                           |
| 7 | 132766412 | 132766763 | 5Y-H4K8ac_peak_15831 | 12.26819 | CHCHD3_ENSG00000106554;U6_ENSG00000272393 |
| 7 | 132937897 | 132938088 | 5Y-H4K8ac_peak_15832 | 10.23828 | EXOC4_ENSG00000131558                     |
| 7 | 133241600 | 133241869 | 5Y-H4K8ac_peak_15833 | 8.43011  |                                           |
| 7 | 133426743 | 133427057 | 5Y-H4K8ac_peak_15834 | 9.00954  |                                           |
| 7 | 133428447 | 133428667 | 5Y-H4K8ac_peak_15835 | 11.09673 |                                           |
| 7 | 133432825 | 133433486 | 5Y-H4K8ac_peak_15836 | 10.0861  |                                           |
| 7 | 133434240 | 133434494 | 5Y-H4K8ac_peak_15837 | 8.80171  |                                           |
| 7 | 133465302 | 133465570 | 5Y-H4K8ac_peak_15838 | 12.6937  |                                           |
| 7 | 133465954 | 133466531 | 5Y-H4K8ac_peak_15839 | 13.59183 |                                           |
| 7 | 133478073 | 133478448 | 5Y-H4K8ac_peak_15840 | 8.62044  |                                           |
| 7 | 133481098 | 133481473 | 5Y-H4K8ac_peak_15841 | 8.09118  |                                           |
| 7 | 133482457 | 133482764 | 5Y-H4K8ac_peak_15842 | 11.64833 |                                           |
| 7 | 133491354 | 133491577 | 5Y-H4K8ac_peak_15843 | 5.51759  |                                           |
| 7 | 133491821 | 133492067 | 5Y-H4K8ac_peak_15844 | 5.87725  |                                           |
| 7 | 133495501 | 133495883 | 5Y-H4K8ac_peak_15845 | 8.3285   |                                           |
| 7 | 133531119 | 133531595 | 5Y-H4K8ac_peak_15846 | 6.56228  |                                           |
| 7 | 133544810 | 133545005 | 5Y-H4K8ac_peak_15847 | 5.72233  |                                           |
| 7 | 133631770 | 133632236 | 5Y-H4K8ac_peak_15848 | 4.8887   |                                           |
| 7 | 133861224 | 133861433 | 5Y-H4K8ac_peak_15849 | 4.03329  |                                           |
| 7 | 134001252 | 134001559 | 5Y-H4K8ac_peak_15850 | 5.60566  | SLC35B4_ENSG00000205060                   |
| 7 | 134143542 | 134143783 | 5Y-H4K8ac_peak_15851 | 5.41472  | AKR1B1_ENSG00000085662                    |
| 7 | 134671586 | 134671935 | 5Y-H4K8ac_peak_15852 | 7.03573  | AGBL3_ENSG00000146856                     |
| 7 | 134854905 | 134855477 | 5Y-H4K8ac_peak_15853 | 22.69022 | C7orf49_ENSG00000122783                   |
| 7 | 134895871 | 134896156 | 5Y-H4K8ac_peak_15854 | 6.49458  | WDR91_ENSG00000105875                     |
| 7 | 135005764 | 135005964 | 5Y-H4K8ac_peak_15855 | 9.14889  |                                           |
| 7 | 135006850 | 135007230 | 5Y-H4K8ac_peak_15856 | 8.24461  |                                           |
| 7 | 135242495 | 135243200 | 5Y-H4K8ac_peak_15857 | 10.21117 | NUP205_ENSG00000155561                    |
| 7 | 135346375 | 135347024 | 5Y-H4K8ac_peak_15858 | 8.39119  | C7orf73_ENSG00000243317                   |
| 7 | 135396399 | 135396607 | 5Y-H4K8ac_peak_15859 | 5.64909  |                                           |
| 7 | 135398907 | 135399712 | 5Y-H4K8ac_peak_15860 | 15.71541 |                                           |
| 7 | 135486565 | 135486835 | 5Y-H4K8ac_peak_15861 | 6.96612  |                                           |
| 7 | 135662544 | 135662755 | 5Y-H4K8ac_peak_15862 | 7.15925  | MTPN_ENSG00000105887                      |
| 7 | 136553814 | 136554392 | 5Y-H4K8ac_peak_15863 | 8.24461  | CHRM2_ENSG00000181072                     |
| 7 | 136623298 | 136623492 | 5Y-H4K8ac_peak_15864 | 8.2913   | KRT8P51_ENSG00000223657                   |
| 7 | 137693345 | 137693626 | 5Y-H4K8ac_peak_15865 | 9.59236  |                                           |
| 7 | 137837922 | 137838204 | 5Y-H4K8ac_peak_15866 | 7.11863  |                                           |
| 7 | 137838951 | 137839232 | 5Y-H4K8ac_peak_15867 | 12.2918  |                                           |
| 7 | 137937563 | 137937771 | 5Y-H4K8ac_peak_15868 | 4.98439  |                                           |

|   |           |           |                      |          |                                                        |
|---|-----------|-----------|----------------------|----------|--------------------------------------------------------|
| 7 | 138145299 | 138145599 | 5Y-H4K8ac_peak_15869 | 9.68742  | TRIM24_ENSG00000122779                                 |
| 7 | 138258379 | 138258646 | 5Y-H4K8ac_peak_15870 | 5.87382  |                                                        |
| 7 | 138304595 | 138304827 | 5Y-H4K8ac_peak_15871 | 8.2913   |                                                        |
| 7 | 138349105 | 138349453 | 5Y-H4K8ac_peak_15872 | 5.70209  |                                                        |
| 7 | 138365052 | 138365459 | 5Y-H4K8ac_peak_15873 | 4.0639   |                                                        |
| 7 | 138621062 | 138621269 | 5Y-H4K8ac_peak_15874 | 6.78318  |                                                        |
| 7 | 138665691 | 138665960 | 5Y-H4K8ac_peak_15875 | 12.52642 | KIAA1549_ENSG00000122778                               |
| 7 | 138666361 | 138666958 | 5Y-H4K8ac_peak_15876 | 12.26819 | KIAA1549_ENSG00000122778                               |
| 7 | 138720231 | 138720719 | 5Y-H4K8ac_peak_15877 | 8.39119  | ZC3HAV1L_ENSG00000146858                               |
| 7 | 138721040 | 138721403 | 5Y-H4K8ac_peak_15878 | 5.54834  | ZC3HAV1L_ENSG00000146858                               |
| 7 | 138793578 | 138794133 | 5Y-H4K8ac_peak_15879 | 10.14791 | ZC3HAV1_ENSG00000105939                                |
| 7 | 139024306 | 139024785 | 5Y-H4K8ac_peak_15880 | 5.87918  | C7orf55_ENSG00000164898;C7orf55-LUC7L2_ENSG00000146963 |
| 7 | 139025626 | 139026398 | 5Y-H4K8ac_peak_15881 | 13.59183 | C7orf55-LUC7L2_ENSG00000146963;LUC7L2_ENSG00000269955  |
| 7 | 139043646 | 139044350 | 5Y-H4K8ac_peak_15882 | 10.60083 | RP11-634H22.1_ENSG00000273391                          |
| 7 | 139044778 | 139044969 | 5Y-H4K8ac_peak_15883 | 7.61781  | RP11-634H22.1_ENSG00000273391                          |
| 7 | 139477974 | 139478510 | 5Y-H4K8ac_peak_15884 | 7.50148  | HIPK2_ENSG00000064393                                  |
| 7 | 139691837 | 139692030 | 5Y-H4K8ac_peak_15885 | 5.23083  |                                                        |
| 7 | 139762685 | 139763052 | 5Y-H4K8ac_peak_15886 | 4.18845  | PARP12_ENSG00000059378                                 |
| 7 | 139930021 | 139930463 | 5Y-H4K8ac_peak_15887 | 8.58926  |                                                        |
| 7 | 140046443 | 140046817 | 5Y-H4K8ac_peak_15888 | 4.15658  |                                                        |
| 7 | 140098701 | 140099076 | 5Y-H4K8ac_peak_15889 | 12.2918  |                                                        |
| 7 | 140340035 | 140341268 | 5Y-H4K8ac_peak_15890 | 12.26819 |                                                        |
| 7 | 140341552 | 140341748 | 5Y-H4K8ac_peak_15891 | 5.22219  |                                                        |
| 7 | 140346708 | 140346953 | 5Y-H4K8ac_peak_15892 | 7.09658  |                                                        |
| 7 | 140372797 | 140373677 | 5Y-H4K8ac_peak_15893 | 5.03564  | DENND2A_ENSG00000146966;ADCK2_ENSG00000133597          |
| 7 | 140395803 | 140396149 | 5Y-H4K8ac_peak_15894 | 9.37778  | NDUFB2-AS1_ENSG00000240889                             |
| 7 | 140624134 | 140624474 | 5Y-H4K8ac_peak_15895 | 11.4254  | BRAF_ENSG00000157764                                   |
| 7 | 140624925 | 140625143 | 5Y-H4K8ac_peak_15896 | 8.43511  | BRAF_ENSG00000157764                                   |
| 7 | 140714511 | 140714739 | 5Y-H4K8ac_peak_15897 | 11.1169  | MRPS33_ENSG00000090263                                 |
| 7 | 140714964 | 140715365 | 5Y-H4K8ac_peak_15898 | 10.1994  | MRPS33_ENSG00000090263                                 |
| 7 | 140773827 | 140774600 | 5Y-H4K8ac_peak_15899 | 6.43068  | TMEM178B_ENSG00000261115                               |
| 7 | 141250494 | 141250863 | 5Y-H4K8ac_peak_15900 | 9.58986  | RP11-744I24.2_ENSG00000261570;AGK_ENSG00000006530      |
| 7 | 141251281 | 141251497 | 5Y-H4K8ac_peak_15901 | 8.99358  | RP11-744I24.2_ENSG00000261570;AGK_ENSG00000006530      |
| 7 | 141401433 | 141401832 | 5Y-H4K8ac_peak_15902 | 6.98416  | KIAA1147_ENSG00000257093                               |
| 7 | 142960621 | 142960846 | 5Y-H4K8ac_peak_15903 | 7.89273  |                                                        |
| 7 | 142984625 | 142985064 | 5Y-H4K8ac_peak_15904 | 6.53157  | AC073342.12_ENSG00000231840;CASP2_ENSG00000106144      |
| 7 | 142985522 | 142985843 | 5Y-H4K8ac_peak_15905 | 13.33225 | CASP2_ENSG00000106144                                  |
| 7 | 143042434 | 143042658 | 5Y-H4K8ac_peak_15906 | 7.31815  |                                                        |
| 7 | 143077526 | 143078174 | 5Y-H4K8ac_peak_15907 | 14.25523 | AC093673.5_ENSG00000232533;ZYG10A1B1_ENSG00000159840   |
| 7 | 143078380 | 143078980 | 5Y-H4K8ac_peak_15908 | 16.54982 | AC093673.5_ENSG00000232533;ZYG10A1B1_ENSG00000159840   |
| 7 | 143599738 | 143600067 | 5Y-H4K8ac_peak_15909 | 10.1994  | FAM115A_ENSG00000198420                                |
| 7 | 144533232 | 144533677 | 5Y-H4K8ac_peak_15910 | 7.11863  | TPK1_ENSG00000196511                                   |
| 7 | 145942500 | 145942717 | 5Y-H4K8ac_peak_15911 | 8.33296  |                                                        |
| 7 | 147281776 | 147282093 | 5Y-H4K8ac_peak_15912 | 13.06587 |                                                        |
| 7 | 147501641 | 147501993 | 5Y-H4K8ac_peak_15913 | 6.47245  |                                                        |
| 7 | 148395217 | 148396478 | 5Y-H4K8ac_peak_15914 | 10.86648 | RP5-1136G13.2_ENSG00000273314;CUL1_ENSG00000055130     |

|   |           |           |                      |          |                                                                         |
|---|-----------|-----------|----------------------|----------|-------------------------------------------------------------------------|
| 7 | 148582005 | 148582671 | 5Y-H4K8ac_peak_15915 | 11.29141 | EZH2_ENSG00000106462                                                    |
| 7 | 148638174 | 148638365 | 5Y-H4K8ac_peak_15916 | 6.22669  | RNY5_ENSG00000252310                                                    |
| 7 | 148725095 | 148725498 | 5Y-H4K8ac_peak_15917 | 17.67055 | PDIA4_ENSG00000155660                                                   |
| 7 | 148762446 | 148762942 | 5Y-H4K8ac_peak_15918 | 9.37812  |                                                                         |
| 7 | 148787504 | 148787708 | 5Y-H4K8ac_peak_15919 | 5.45148  | ZNF786_ENSG00000197362                                                  |
| 7 | 148788076 | 148788654 | 5Y-H4K8ac_peak_15920 | 15.2347  | ZNF786_ENSG00000197362                                                  |
| 7 | 148822960 | 148823315 | 5Y-H4K8ac_peak_15921 | 10.60083 | ZNF425_ENSG00000204947;RN7SL521P_ENSG00000240877;ZNF398_ENSG00000197024 |
| 7 | 148823763 | 148824309 | 5Y-H4K8ac_peak_15922 | 8.62703  | ZNF425_ENSG00000204947;RN7SL521P_ENSG00000240877;ZNF398_ENSG00000197024 |
| 7 | 148936871 | 148937135 | 5Y-H4K8ac_peak_15923 | 15.10927 | ZNF212_ENSG00000170260                                                  |
| 7 | 148958519 | 148959155 | 5Y-H4K8ac_peak_15924 | 12.72376 | ZNF783_ENSG00000204946                                                  |
| 7 | 148959353 | 148960150 | 5Y-H4K8ac_peak_15925 | 9.74838  | ZNF783_ENSG00000204946                                                  |
| 7 | 149119039 | 149119527 | 5Y-H4K8ac_peak_15926 | 10.35586 | RP11-143I21.1_ENSG00000261842                                           |
| 7 | 149119842 | 149120152 | 5Y-H4K8ac_peak_15927 | 12.44818 | RP11-143I21.1_ENSG00000261842                                           |
| 7 | 149157858 | 149158340 | 5Y-H4K8ac_peak_15928 | 6.56228  | ZNF777_ENSG00000196453                                                  |
| 7 | 149195115 | 149195383 | 5Y-H4K8ac_peak_15929 | 10.54764 | ZNF746_ENSG00000181220                                                  |
| 7 | 149321456 | 149321753 | 5Y-H4K8ac_peak_15930 | 11.4254  | ZNF767_ENSG00000133624                                                  |
| 7 | 149321961 | 149322298 | 5Y-H4K8ac_peak_15931 | 16.93214 | ZNF767_ENSG00000133624                                                  |
| 7 | 149411186 | 149411688 | 5Y-H4K8ac_peak_15932 | 9.51254  | KRBA1_ENSG00000133619                                                   |
| 7 | 149412106 | 149412303 | 5Y-H4K8ac_peak_15933 | 6.34245  | KRBA1_ENSG00000133619                                                   |
| 7 | 149439634 | 149439835 | 5Y-H4K8ac_peak_15934 | 9.62747  |                                                                         |
| 7 | 149468404 | 149468634 | 5Y-H4K8ac_peak_15935 | 6.53157  |                                                                         |
| 7 | 149472934 | 149473630 | 5Y-H4K8ac_peak_15936 | 9.79526  | SSPO_ENSG00000197558                                                    |
| 7 | 149474111 | 149474404 | 5Y-H4K8ac_peak_15937 | 6.47245  | SSPO_ENSG00000197558                                                    |
| 7 | 150020422 | 150020660 | 5Y-H4K8ac_peak_15938 | 12.56588 | ACTR3C_ENSG00000106526;LRRC61_ENSG00000127399                           |
| 7 | 150065168 | 150066086 | 5Y-H4K8ac_peak_15939 | 22.56714 | REPIN1_ENSG00000214022;ZNF775_ENSG00000196456                           |
| 7 | 150075737 | 150076045 | 5Y-H4K8ac_peak_15940 | 7.50464  |                                                                         |
| 7 | 150101937 | 150102326 | 5Y-H4K8ac_peak_15941 | 16.73191 |                                                                         |
| 7 | 150485108 | 150485616 | 5Y-H4K8ac_peak_15942 | 6.98416  |                                                                         |
| 7 | 150518185 | 150518574 | 5Y-H4K8ac_peak_15943 | 6.37023  |                                                                         |
| 7 | 150595893 | 150596262 | 5Y-H4K8ac_peak_15944 | 9.00954  |                                                                         |
| 7 | 150597983 | 150598330 | 5Y-H4K8ac_peak_15945 | 7.8267   |                                                                         |
| 7 | 150599222 | 150599475 | 5Y-H4K8ac_peak_15946 | 7.89273  |                                                                         |
| 7 | 150651419 | 150651632 | 5Y-H4K8ac_peak_15947 | 5.87725  |                                                                         |
| 7 | 150651967 | 150652858 | 5Y-H4K8ac_peak_15948 | 13.82621 |                                                                         |
| 7 | 150653198 | 150653442 | 5Y-H4K8ac_peak_15949 | 7.20869  |                                                                         |
| 7 | 150653707 | 150654203 | 5Y-H4K8ac_peak_15950 | 11.97508 |                                                                         |
| 7 | 150659094 | 150659302 | 5Y-H4K8ac_peak_15951 | 6.92623  |                                                                         |
| 7 | 150660433 | 150660629 | 5Y-H4K8ac_peak_15952 | 6.69752  |                                                                         |
| 7 | 150661428 | 150661699 | 5Y-H4K8ac_peak_15953 | 11.8865  |                                                                         |
| 7 | 150662186 | 150662652 | 5Y-H4K8ac_peak_15954 | 11.09899 |                                                                         |
| 7 | 150667637 | 150669168 | 5Y-H4K8ac_peak_15955 | 21.95299 |                                                                         |
| 7 | 150669430 | 150669685 | 5Y-H4K8ac_peak_15956 | 10.90097 |                                                                         |
| 7 | 150671917 | 150673005 | 5Y-H4K8ac_peak_15957 | 11.6706  |                                                                         |
| 7 | 150674996 | 150675300 | 5Y-H4K8ac_peak_15958 | 13.00733 | KCNH2_ENSG00000055118                                                   |
| 7 | 150676172 | 150676425 | 5Y-H4K8ac_peak_15959 | 5.37237  | KCNH2_ENSG00000055118                                                   |
| 7 | 150676842 | 150677105 | 5Y-H4K8ac_peak_15960 | 11.33673 |                                                                         |

|   |           |           |                      |          |                                                   |
|---|-----------|-----------|----------------------|----------|---------------------------------------------------|
| 7 | 150677469 | 150677685 | 5Y-H4K8ac_peak_15961 | 4.83834  |                                                   |
| 7 | 150685073 | 150685427 | 5Y-H4K8ac_peak_15962 | 6.95844  |                                                   |
| 7 | 150686221 | 150686477 | 5Y-H4K8ac_peak_15963 | 7.61515  |                                                   |
| 7 | 150690362 | 150690565 | 5Y-H4K8ac_peak_15964 | 6.22904  |                                                   |
| 7 | 150691706 | 150692360 | 5Y-H4K8ac_peak_15965 | 6.53157  |                                                   |
| 7 | 150710990 | 150711487 | 5Y-H4K8ac_peak_15966 | 7.90005  |                                                   |
| 7 | 150714557 | 150715847 | 5Y-H4K8ac_peak_15967 | 13.89096 |                                                   |
| 7 | 150735713 | 150736292 | 5Y-H4K8ac_peak_15968 | 10.60083 |                                                   |
| 7 | 150755395 | 150755854 | 5Y-H4K8ac_peak_15969 | 8.69112  | CDK5_ENSG00000164885                              |
| 7 | 150777409 | 150777821 | 5Y-H4K8ac_peak_15970 | 9.79526  | FASTK_ENSG00000164896                             |
| 7 | 150778142 | 150779163 | 5Y-H4K8ac_peak_15971 | 6.98416  | FASTK_ENSG00000164896                             |
| 7 | 150779676 | 150779869 | 5Y-H4K8ac_peak_15972 | 11.01067 | TMUB1_ENSG00000164897                             |
| 7 | 150780223 | 150780626 | 5Y-H4K8ac_peak_15973 | 12.45737 | TMUB1_ENSG00000164897                             |
| 7 | 150782827 | 150783201 | 5Y-H4K8ac_peak_15974 | 6.37023  | AGAP3_ENSG00000133612                             |
| 7 | 150929042 | 150929448 | 5Y-H4K8ac_peak_15975 | 12.06963 | CHPF2_ENSG00000033100                             |
| 7 | 150929658 | 150929885 | 5Y-H4K8ac_peak_15976 | 11.22005 | CHPF2_ENSG00000033100                             |
| 7 | 150942383 | 150942935 | 5Y-H4K8ac_peak_15977 | 8.09118  |                                                   |
| 7 | 150946169 | 150946421 | 5Y-H4K8ac_peak_15978 | 7.11863  | RP5-1070G24.2_ENSG00000243018                     |
| 7 | 150948514 | 150948901 | 5Y-H4K8ac_peak_15979 | 15.17389 |                                                   |
| 7 | 150949128 | 150949925 | 5Y-H4K8ac_peak_15980 | 12.91503 |                                                   |
| 7 | 150974034 | 150974655 | 5Y-H4K8ac_peak_15981 | 14.86775 | SMARCD3_ENSG00000082014                           |
| 7 | 151104417 | 151104609 | 5Y-H4K8ac_peak_15982 | 4.55294  |                                                   |
| 7 | 151106733 | 151107695 | 5Y-H4K8ac_peak_15983 | 11.67272 | WDR86_ENSG00000187260;WDR86-AS1_ENSG00000243836   |
| 7 | 151136911 | 151137168 | 5Y-H4K8ac_peak_15984 | 4.0639   | CRYGN_ENSG00000127377                             |
| 7 | 151217451 | 151217926 | 5Y-H4K8ac_peak_15985 | 10.86648 | RHEB_ENSG00000106615                              |
| 7 | 151236390 | 151236636 | 5Y-H4K8ac_peak_15986 | 7.61752  |                                                   |
| 7 | 151329038 | 151329237 | 5Y-H4K8ac_peak_15987 | 4.52203  |                                                   |
| 7 | 151329604 | 151329849 | 5Y-H4K8ac_peak_15988 | 9.54288  |                                                   |
| 7 | 151409489 | 151409719 | 5Y-H4K8ac_peak_15989 | 5.30014  |                                                   |
| 7 | 151574252 | 151574852 | 5Y-H4K8ac_peak_15990 | 14.75477 | PRKAG2_ENSG00000106617;PRKAG2-AS1_ENSG00000239911 |
| 7 | 151575066 | 151575511 | 5Y-H4K8ac_peak_15991 | 6.55841  | PRKAG2_ENSG00000106617;PRKAG2-AS1_ENSG00000239911 |
| 7 | 151622461 | 151622756 | 5Y-H4K8ac_peak_15992 | 5.23083  |                                                   |
| 7 | 151630050 | 151630411 | 5Y-H4K8ac_peak_15993 | 5.76631  |                                                   |
| 7 | 151722325 | 151722594 | 5Y-H4K8ac_peak_15994 | 5.99756  | GALNT11_ENSG00000178234                           |
| 7 | 151722921 | 151723162 | 5Y-H4K8ac_peak_15995 | 7.48932  | GALNT11_ENSG00000178234                           |
| 7 | 152132706 | 152132990 | 5Y-H4K8ac_peak_15996 | 11.19336 | KMT2C_ENSG00000055609;FABP5P3_ENSG00000241735     |
| 7 | 152133404 | 152133644 | 5Y-H4K8ac_peak_15997 | 11.22005 | KMT2C_ENSG00000055609;FABP5P3_ENSG00000241735     |
| 7 | 152161322 | 152162090 | 5Y-H4K8ac_peak_15998 | 16.0768  | LINC01003_ENSG00000261455                         |
| 7 | 152240944 | 152241145 | 5Y-H4K8ac_peak_15999 | 6.3265   |                                                   |
| 7 | 152311873 | 152312072 | 5Y-H4K8ac_peak_16000 | 6.22904  |                                                   |
| 7 | 152372838 | 152373067 | 5Y-H4K8ac_peak_16001 | 4.8547   | XRCC2_ENSG00000196584                             |
| 7 | 152433385 | 152433596 | 5Y-H4K8ac_peak_16002 | 6.78128  |                                                   |
| 7 | 152456971 | 152457191 | 5Y-H4K8ac_peak_16003 | 6.40778  | ACTR3B_ENSG00000133627                            |
| 7 | 152463318 | 152463517 | 5Y-H4K8ac_peak_16004 | 6.77436  |                                                   |
| 7 | 153631964 | 153632380 | 5Y-H4K8ac_peak_16005 | 9.87097  |                                                   |
| 7 | 153863315 | 153863536 | 5Y-H4K8ac_peak_16006 | 6.37023  |                                                   |



|   |           |           |                      |          |                                                                               |
|---|-----------|-----------|----------------------|----------|-------------------------------------------------------------------------------|
| 7 | 154001876 | 154002107 | 5Y-H4K8ac_peak_16007 | 16.74969 |                                                                               |
| 7 | 154662830 | 154663066 | 5Y-H4K8ac_peak_16008 | 4.77126  |                                                                               |
| 7 | 154794868 | 154795504 | 5Y-H4K8ac_peak_16009 | 19.99409 | PAXIP1_ENSG00000157212;PAXIP1-AS1_ENSG00000273344                             |
| 7 | 155029373 | 155029626 | 5Y-H4K8ac_peak_16010 | 5.0078   |                                                                               |
| 7 | 155049360 | 155049894 | 5Y-H4K8ac_peak_16011 | 7.20869  |                                                                               |
| 7 | 155088802 | 155089372 | 5Y-H4K8ac_peak_16012 | 17.3057  | AC144652.1_ENSG00000273117;INSIG1_ENSG00000186480                             |
| 7 | 155089762 | 155090019 | 5Y-H4K8ac_peak_16013 | 6.67135  | AC144652.1_ENSG00000273117;INSIG1_ENSG00000186480                             |
| 7 | 155137354 | 155137704 | 5Y-H4K8ac_peak_16014 | 18.10232 |                                                                               |
| 7 | 155436342 | 155437841 | 5Y-H4K8ac_peak_16015 | 12.37752 | AC009403.2_ENSG00000216895;RBM33_ENSG00000184863                              |
| 7 | 156400004 | 156400638 | 5Y-H4K8ac_peak_16016 | 9.30206  |                                                                               |
| 7 | 156432804 | 156433721 | 5Y-H4K8ac_peak_16017 | 13.33225 | LINC01006_ENSG00000182648;C7orf13_ENSG00000244291;RNF32_ENSG00000105982       |
| 7 | 156577056 | 156577273 | 5Y-H4K8ac_peak_16018 | 9.13822  |                                                                               |
| 7 | 156685081 | 156685293 | 5Y-H4K8ac_peak_16019 | 5.64982  | LMBR1_ENSG00000105983                                                         |
| 7 | 156686039 | 156686466 | 5Y-H4K8ac_peak_16020 | 8.69112  | LMBR1_ENSG00000105983                                                         |
| 7 | 156741748 | 156741945 | 5Y-H4K8ac_peak_16021 | 8.5915   | NOM1_ENSG00000146909                                                          |
| 7 | 156742479 | 156742935 | 5Y-H4K8ac_peak_16022 | 8.04693  | NOM1_ENSG00000146909                                                          |
| 7 | 157069681 | 157069956 | 5Y-H4K8ac_peak_16023 | 8.5915   |                                                                               |
| 7 | 157071082 | 157071300 | 5Y-H4K8ac_peak_16024 | 4.0639   |                                                                               |
| 7 | 157129155 | 157129514 | 5Y-H4K8ac_peak_16025 | 13.1133  |                                                                               |
| 7 | 157190659 | 157190952 | 5Y-H4K8ac_peak_16026 | 4.725    |                                                                               |
| 7 | 157257439 | 157257758 | 5Y-H4K8ac_peak_16027 | 5.67283  |                                                                               |
| 7 | 157483348 | 157483563 | 5Y-H4K8ac_peak_16028 | 7.41197  |                                                                               |
| 7 | 157544979 | 157546851 | 5Y-H4K8ac_peak_16029 | 9.88714  |                                                                               |
| 7 | 157547064 | 157547375 | 5Y-H4K8ac_peak_16030 | 6.43068  |                                                                               |
| 7 | 157698622 | 157698867 | 5Y-H4K8ac_peak_16031 | 5.59843  |                                                                               |
| 7 | 157719534 | 157719759 | 5Y-H4K8ac_peak_16032 | 4.95697  |                                                                               |
| 7 | 157784427 | 157785073 | 5Y-H4K8ac_peak_16033 | 9.51254  |                                                                               |
| 7 | 157890602 | 157891352 | 5Y-H4K8ac_peak_16034 | 10.64267 |                                                                               |
| 7 | 157903447 | 157903805 | 5Y-H4K8ac_peak_16035 | 21.37457 |                                                                               |
| 7 | 157904261 | 157904475 | 5Y-H4K8ac_peak_16036 | 6.86362  |                                                                               |
| 7 | 157904823 | 157905198 | 5Y-H4K8ac_peak_16037 | 5.23083  |                                                                               |
| 7 | 158066389 | 158067511 | 5Y-H4K8ac_peak_16038 | 5.72233  |                                                                               |
| 7 | 158221865 | 158222218 | 5Y-H4K8ac_peak_16039 | 7.50148  |                                                                               |
| 7 | 158380858 | 158381400 | 5Y-H4K8ac_peak_16040 | 25.34984 | PTPRN2_ENSG00000155093                                                        |
| 7 | 158497868 | 158498233 | 5Y-H4K8ac_peak_16041 | 11.30548 | NCAPG2_ENSG00000146918                                                        |
| 7 | 158622464 | 158622759 | 5Y-H4K8ac_peak_16042 | 6.80915  | ESYT2_ENSG00000117868                                                         |
| 7 | 158648697 | 158648915 | 5Y-H4K8ac_peak_16043 | 9.38276  | WDR60_ENSG00000126870                                                         |
| 7 | 158768777 | 158769065 | 5Y-H4K8ac_peak_16044 | 5.57299  |                                                                               |
| 7 | 158823250 | 158823783 | 5Y-H4K8ac_peak_16045 | 7.74473  |                                                                               |
| 7 | 158896939 | 158897142 | 5Y-H4K8ac_peak_16046 | 3.94555  |                                                                               |
| 7 | 158899851 | 158900407 | 5Y-H4K8ac_peak_16047 | 6.37023  |                                                                               |
| 8 | 182479    | 183022    | 5Y-H4K8ac_peak_16048 | 10.19948 | RPL23AP53_ENSG00000223508;ZNF596_ENSG00000172748;RP5-855D21.3_ENSG00000272812 |
| 8 | 340844    | 341401    | 5Y-H4K8ac_peak_16049 | 5.65584  |                                                                               |
| 8 | 356975    | 357227    | 5Y-H4K8ac_peak_16050 | 9.23159  | FBXO25_ENSG00000147364                                                        |
| 8 | 681446    | 681784    | 5Y-H4K8ac_peak_16051 | 6.08523  |                                                                               |
| 8 | 1145135   | 1145345   | 5Y-H4K8ac_peak_16052 | 7.37325  |                                                                               |

|   |          |          |                      |          |                                                                                     |
|---|----------|----------|----------------------|----------|-------------------------------------------------------------------------------------|
| 8 | 1203151  | 1203342  | 5Y-H4K8ac_peak_16053 | 6.54441  |                                                                                     |
| 8 | 1287457  | 1287660  | 5Y-H4K8ac_peak_16054 | 8.33296  |                                                                                     |
| 8 | 1321242  | 1321916  | 5Y-H4K8ac_peak_16055 | 17.51434 |                                                                                     |
| 8 | 1426725  | 1427060  | 5Y-H4K8ac_peak_16056 | 4.728    |                                                                                     |
| 8 | 1431412  | 1431666  | 5Y-H4K8ac_peak_16057 | 5.51139  |                                                                                     |
| 8 | 1472227  | 1472489  | 5Y-H4K8ac_peak_16058 | 5.40331  |                                                                                     |
| 8 | 1474984  | 1475192  | 5Y-H4K8ac_peak_16059 | 8.75926  |                                                                                     |
| 8 | 1476468  | 1476697  | 5Y-H4K8ac_peak_16060 | 4.95697  |                                                                                     |
| 8 | 1922475  | 1922675  | 5Y-H4K8ac_peak_16061 | 7.50148  | RP11-439C15.4_ENSG00000253764;KBTBD11_ENSG00000176595;RP11-439C15.5_ENSG00000270988 |
| 8 | 1949357  | 1949868  | 5Y-H4K8ac_peak_16062 | 10.19948 |                                                                                     |
| 8 | 6264605  | 6264831  | 5Y-H4K8ac_peak_16063 | 8.33296  | RP11-115C21.2_ENSG00000246089;MCPH1_ENSG00000147316                                 |
| 8 | 6320465  | 6321128  | 5Y-H4K8ac_peak_16064 | 6.50117  |                                                                                     |
| 8 | 6322071  | 6322429  | 5Y-H4K8ac_peak_16065 | 9.15007  |                                                                                     |
| 8 | 6565943  | 6566541  | 5Y-H4K8ac_peak_16066 | 11.19336 | CTD-2541M15.1_ENSG00000249898;AGPAT5_ENSG00000155189                                |
| 8 | 7212401  | 7212811  | 5Y-H4K8ac_peak_16067 | 18.82931 | FAM66B_ENSG00000215374                                                              |
| 8 | 8243630  | 8243845  | 5Y-H4K8ac_peak_16068 | 5.65584  | SGK223_ENSG00000182319                                                              |
| 8 | 8244334  | 8244546  | 5Y-H4K8ac_peak_16069 | 8.33296  | SGK223_ENSG00000182319                                                              |
| 8 | 8267344  | 8267674  | 5Y-H4K8ac_peak_16070 | 6.34046  |                                                                                     |
| 8 | 8506909  | 8507105  | 5Y-H4K8ac_peak_16071 | 9.30505  |                                                                                     |
| 8 | 8559408  | 8559928  | 5Y-H4K8ac_peak_16072 | 10.79063 | CLDN23_ENSG00000253958;AC087269.1_ENSG00000176305                                   |
| 8 | 9007913  | 9009056  | 5Y-H4K8ac_peak_16073 | 10.19948 | PPP1R3B_ENSG00000173281;RP11-10A14.4_ENSG00000253426                                |
| 8 | 9031908  | 9032280  | 5Y-H4K8ac_peak_16074 | 5.718    |                                                                                     |
| 8 | 9035382  | 9035724  | 5Y-H4K8ac_peak_16075 | 8.43511  |                                                                                     |
| 8 | 9037760  | 9037970  | 5Y-H4K8ac_peak_16076 | 6.17374  |                                                                                     |
| 8 | 9041409  | 9041661  | 5Y-H4K8ac_peak_16077 | 9.74189  |                                                                                     |
| 8 | 9048789  | 9048993  | 5Y-H4K8ac_peak_16078 | 4.74398  |                                                                                     |
| 8 | 9056214  | 9056436  | 5Y-H4K8ac_peak_16079 | 9.30505  |                                                                                     |
| 8 | 9056919  | 9057810  | 5Y-H4K8ac_peak_16080 | 5.64909  |                                                                                     |
| 8 | 9110683  | 9111030  | 5Y-H4K8ac_peak_16081 | 6.20875  |                                                                                     |
| 8 | 9763876  | 9764251  | 5Y-H4K8ac_peak_16082 | 4.44548  |                                                                                     |
| 8 | 9791589  | 9791962  | 5Y-H4K8ac_peak_16083 | 7.31815  |                                                                                     |
| 8 | 9912362  | 9912726  | 5Y-H4K8ac_peak_16084 | 10.69698 | RP11-1E4.1_ENSG00000260093;MSRA_ENSG00000175806                                     |
| 8 | 10190919 | 10191489 | 5Y-H4K8ac_peak_16085 | 5.98695  |                                                                                     |
| 8 | 10235117 | 10235686 | 5Y-H4K8ac_peak_16086 | 5.98695  |                                                                                     |
| 8 | 10501815 | 10502075 | 5Y-H4K8ac_peak_16087 | 8.04493  |                                                                                     |
| 8 | 10588480 | 10588754 | 5Y-H4K8ac_peak_16088 | 8.73985  |                                                                                     |
| 8 | 10635166 | 10635546 | 5Y-H4K8ac_peak_16089 | 13.2534  |                                                                                     |
| 8 | 10851071 | 10851294 | 5Y-H4K8ac_peak_16090 | 4.74398  |                                                                                     |
| 8 | 10910356 | 10910735 | 5Y-H4K8ac_peak_16091 | 8.49231  |                                                                                     |
| 8 | 11058620 | 11058822 | 5Y-H4K8ac_peak_16092 | 9.01738  | XKR6_ENSG00000171044                                                                |
| 8 | 11059121 | 11059323 | 5Y-H4K8ac_peak_16093 | 14.99673 | XKR6_ENSG00000171044                                                                |
| 8 | 11141322 | 11141824 | 5Y-H4K8ac_peak_16094 | 15.06486 | MTMR9_ENSG00000104643                                                               |
| 8 | 11142053 | 11142459 | 5Y-H4K8ac_peak_16095 | 12.05638 | MTMR9_ENSG00000104643                                                               |
| 8 | 11269563 | 11269858 | 5Y-H4K8ac_peak_16096 | 13.19488 |                                                                                     |
| 8 | 11306656 | 11307201 | 5Y-H4K8ac_peak_16097 | 7.60057  |                                                                                     |
| 8 | 11311746 | 11312026 | 5Y-H4K8ac_peak_16098 | 8.43511  |                                                                                     |

|   |          |          |                      |          |                                                     |
|---|----------|----------|----------------------|----------|-----------------------------------------------------|
| 8 | 11317890 | 11318290 | 5Y-H4K8ac_peak_16099 | 4.90696  |                                                     |
| 8 | 11318560 | 11318951 | 5Y-H4K8ac_peak_16100 | 10.14606 |                                                     |
| 8 | 11322670 | 11322862 | 5Y-H4K8ac_peak_16101 | 6.95844  |                                                     |
| 8 | 11324888 | 11325135 | 5Y-H4K8ac_peak_16102 | 8.69112  |                                                     |
| 8 | 11376044 | 11376518 | 5Y-H4K8ac_peak_16103 | 6.52593  |                                                     |
| 8 | 11450904 | 11451147 | 5Y-H4K8ac_peak_16104 | 5.23083  |                                                     |
| 8 | 11451778 | 11452193 | 5Y-H4K8ac_peak_16105 | 6.77436  |                                                     |
| 8 | 11466281 | 11466471 | 5Y-H4K8ac_peak_16106 | 5.10825  |                                                     |
| 8 | 11469606 | 11469934 | 5Y-H4K8ac_peak_16107 | 11.19336 |                                                     |
| 8 | 11470204 | 11470525 | 5Y-H4K8ac_peak_16108 | 9.05168  |                                                     |
| 8 | 11470791 | 11471626 | 5Y-H4K8ac_peak_16109 | 17.50045 |                                                     |
| 8 | 11489196 | 11489398 | 5Y-H4K8ac_peak_16110 | 5.41472  |                                                     |
| 8 | 11490167 | 11490373 | 5Y-H4K8ac_peak_16111 | 5.68769  |                                                     |
| 8 | 11498508 | 11498954 | 5Y-H4K8ac_peak_16112 | 8.21582  |                                                     |
| 8 | 11499800 | 11500027 | 5Y-H4K8ac_peak_16113 | 6.34046  |                                                     |
| 8 | 11501199 | 11501817 | 5Y-H4K8ac_peak_16114 | 12.20548 |                                                     |
| 8 | 11599340 | 11599746 | 5Y-H4K8ac_peak_16115 | 8.59175  |                                                     |
| 8 | 11599981 | 11601095 | 5Y-H4K8ac_peak_16116 | 14.49096 |                                                     |
| 8 | 11725747 | 11725994 | 5Y-H4K8ac_peak_16117 | 13.2534  | CTSB_ENSG00000164733                                |
| 8 | 11759932 | 11760372 | 5Y-H4K8ac_peak_16118 | 6.77436  |                                                     |
| 8 | 11807404 | 11807778 | 5Y-H4K8ac_peak_16119 | 12.05638 |                                                     |
| 8 | 11814996 | 11815296 | 5Y-H4K8ac_peak_16120 | 11.14154 |                                                     |
| 8 | 11843775 | 11843978 | 5Y-H4K8ac_peak_16121 | 5.65584  |                                                     |
| 8 | 11973441 | 11973727 | 5Y-H4K8ac_peak_16122 | 6.34046  | FAM66D_ENSG00000255052                              |
| 8 | 12052413 | 12052616 | 5Y-H4K8ac_peak_16123 | 12.71156 | FAM86B1_ENSG00000186523;FAM85A_ENSG00000255495      |
| 8 | 12219735 | 12219962 | 5Y-H4K8ac_peak_16124 | 7.31815  | FAM66A_ENSG00000227888                              |
| 8 | 12293415 | 12293611 | 5Y-H4K8ac_peak_16125 | 6.78128  | FAM86B2_ENSG00000145002                             |
| 8 | 12611222 | 12611426 | 5Y-H4K8ac_peak_16126 | 11.19336 |                                                     |
| 8 | 12613193 | 12613484 | 5Y-H4K8ac_peak_16127 | 6.37023  | LONRF1_ENSG00000154359                              |
| 8 | 13133706 | 13133981 | 5Y-H4K8ac_peak_16128 | 8.33296  |                                                     |
| 8 | 15397807 | 15398164 | 5Y-H4K8ac_peak_16129 | 15.84891 |                                                     |
| 8 | 16884859 | 16885184 | 5Y-H4K8ac_peak_16130 | 11.57334 | MICU3_ENSG00000155970                               |
| 8 | 17014242 | 17014596 | 5Y-H4K8ac_peak_16131 | 7.31815  | ZDHHC2_ENSG00000104219                              |
| 8 | 17151454 | 17151651 | 5Y-H4K8ac_peak_16132 | 4.9885   |                                                     |
| 8 | 17271168 | 17271556 | 5Y-H4K8ac_peak_16133 | 7.58806  | MTMR7_ENSG00000003987                               |
| 8 | 17484470 | 17484663 | 5Y-H4K8ac_peak_16134 | 6.62622  |                                                     |
| 8 | 17527287 | 17527546 | 5Y-H4K8ac_peak_16135 | 5.59837  |                                                     |
| 8 | 17538173 | 17538434 | 5Y-H4K8ac_peak_16136 | 4.40812  | MIR548V_ENSG00000265520                             |
| 8 | 17780600 | 17780800 | 5Y-H4K8ac_peak_16137 | 8.46442  | PCM1_ENSG00000078674                                |
| 8 | 17941664 | 17942047 | 5Y-H4K8ac_peak_16138 | 9.15007  | ASAHI_ENSG00000104763;CTD-2547L16.1_ENSG00000245281 |
| 8 | 18525408 | 18525627 | 5Y-H4K8ac_peak_16139 | 5.19372  |                                                     |
| 8 | 19050944 | 19051335 | 5Y-H4K8ac_peak_16140 | 8.35139  |                                                     |
| 8 | 20038235 | 20038449 | 5Y-H4K8ac_peak_16141 | 5.13364  |                                                     |
| 8 | 20092258 | 20092617 | 5Y-H4K8ac_peak_16142 | 5.03917  |                                                     |
| 8 | 20125909 | 20126141 | 5Y-H4K8ac_peak_16143 | 5.10825  |                                                     |
| 8 | 20126443 | 20126797 | 5Y-H4K8ac_peak_16144 | 8.04943  |                                                     |

|   |          |          |                      |          |                                                         |
|---|----------|----------|----------------------|----------|---------------------------------------------------------|
| 8 | 20161681 | 20161878 | 5Y-H4K8ac_peak_16145 | 8.16031  | LZTS1_ENSG00000061337                                   |
| 8 | 21867230 | 21867521 | 5Y-H4K8ac_peak_16146 | 7.31102  |                                                         |
| 8 | 21867952 | 21868590 | 5Y-H4K8ac_peak_16147 | 14.6127  |                                                         |
| 8 | 21910964 | 21911367 | 5Y-H4K8ac_peak_16148 | 8.90223  |                                                         |
| 8 | 21912397 | 21913020 | 5Y-H4K8ac_peak_16149 | 7.19446  |                                                         |
| 8 | 21913294 | 21914048 | 5Y-H4K8ac_peak_16150 | 8.04586  |                                                         |
| 8 | 21914648 | 21914894 | 5Y-H4K8ac_peak_16151 | 5.24695  |                                                         |
| 8 | 21915128 | 21915730 | 5Y-H4K8ac_peak_16152 | 7.59101  |                                                         |
| 8 | 21916184 | 21916462 | 5Y-H4K8ac_peak_16153 | 11.4254  |                                                         |
| 8 | 21923685 | 21924325 | 5Y-H4K8ac_peak_16154 | 9.00954  |                                                         |
| 8 | 21990686 | 21991113 | 5Y-H4K8ac_peak_16155 | 10.1994  | HR_ENSG00000168453                                      |
| 8 | 22021980 | 22022177 | 5Y-H4K8ac_peak_16156 | 8.43511  | BMP1_ENSG00000168487                                    |
| 8 | 22068817 | 22069686 | 5Y-H4K8ac_peak_16157 | 7.89273  |                                                         |
| 8 | 22070171 | 22070731 | 5Y-H4K8ac_peak_16158 | 7.89273  |                                                         |
| 8 | 22089181 | 22089423 | 5Y-H4K8ac_peak_16159 | 4.61816  | PHYHIP_ENSG00000168490                                  |
| 8 | 22297896 | 22298464 | 5Y-H4K8ac_peak_16160 | 12.77513 | PPP3CC_ENSG00000120910                                  |
| 8 | 22422494 | 22422693 | 5Y-H4K8ac_peak_16161 | 9.05168  |                                                         |
| 8 | 22423676 | 22423899 | 5Y-H4K8ac_peak_16162 | 8.26455  | RP11-582J16.3_ENSG00000254230                           |
| 8 | 22457100 | 22457428 | 5Y-H4K8ac_peak_16163 | 13.3385  | C8orf58_ENSG00000241852                                 |
| 8 | 22461690 | 22461966 | 5Y-H4K8ac_peak_16164 | 10.35586 | CCAR2_ENSG00000158941                                   |
| 8 | 22462356 | 22462619 | 5Y-H4K8ac_peak_16165 | 9.30206  | CCAR2_ENSG00000158941                                   |
| 8 | 22551965 | 22552286 | 5Y-H4K8ac_peak_16166 | 4.15658  |                                                         |
| 8 | 22553143 | 22553542 | 5Y-H4K8ac_peak_16167 | 8.16382  |                                                         |
| 8 | 22722524 | 22723579 | 5Y-H4K8ac_peak_16168 | 15.44294 |                                                         |
| 8 | 22726392 | 22726640 | 5Y-H4K8ac_peak_16169 | 5.65584  |                                                         |
| 8 | 22768844 | 22769115 | 5Y-H4K8ac_peak_16170 | 4.79658  |                                                         |
| 8 | 22853286 | 22853775 | 5Y-H4K8ac_peak_16171 | 9.76527  |                                                         |
| 8 | 22925749 | 22926323 | 5Y-H4K8ac_peak_16172 | 5.98695  | TNFRSF10B_ENSG00000120889;RP11-875O11.2_ENSG00000246130 |
| 8 | 23145658 | 23145957 | 5Y-H4K8ac_peak_16173 | 14.19462 |                                                         |
| 8 | 23193036 | 23193349 | 5Y-H4K8ac_peak_16174 | 12.44602 | RP11-177H13.2_ENSG00000253837                           |
| 8 | 23193803 | 23194159 | 5Y-H4K8ac_peak_16175 | 7.59101  | RP11-177H13.2_ENSG00000253837                           |
| 8 | 23224988 | 23225213 | 5Y-H4K8ac_peak_16176 | 6.22669  |                                                         |
| 8 | 23315457 | 23315860 | 5Y-H4K8ac_peak_16177 | 8.33296  | CTC-756D1.2_ENSG00000253390;ENTPD4_ENSG00000197217      |
| 8 | 23385990 | 23386206 | 5Y-H4K8ac_peak_16178 | 7.96225  | SLC25A37_ENSG00000147454                                |
| 8 | 24799764 | 24800204 | 5Y-H4K8ac_peak_16179 | 9.30505  |                                                         |
| 8 | 24813412 | 24813789 | 5Y-H4K8ac_peak_16180 | 5.59843  | NEFL_ENSG00000104725;CTD-2168K21.2_ENSG00000272157      |
| 8 | 24858122 | 24858500 | 5Y-H4K8ac_peak_16181 | 4.77126  |                                                         |
| 8 | 24858695 | 24859011 | 5Y-H4K8ac_peak_16182 | 4.9885   |                                                         |
| 8 | 24866807 | 24867150 | 5Y-H4K8ac_peak_16183 | 6.34046  |                                                         |
| 8 | 24921764 | 24922011 | 5Y-H4K8ac_peak_16184 | 5.8635   |                                                         |
| 8 | 26307193 | 26307558 | 5Y-H4K8ac_peak_16185 | 12.14232 |                                                         |
| 8 | 26429089 | 26429290 | 5Y-H4K8ac_peak_16186 | 5.56912  |                                                         |
| 8 | 26434424 | 26435157 | 5Y-H4K8ac_peak_16187 | 11.22005 |                                                         |
| 8 | 26920716 | 26921391 | 5Y-H4K8ac_peak_16188 | 10.31981 |                                                         |
| 8 | 27116305 | 27116582 | 5Y-H4K8ac_peak_16189 | 8.21582  | STMN4_ENSG00000015592                                   |
| 8 | 27169199 | 27169463 | 5Y-H4K8ac_peak_16190 | 8.2913   | TRIM35_ENSG00000104228;PTK2B_ENSG00000120899            |

|   |          |          |                      |          |                                                   |
|---|----------|----------|----------------------|----------|---------------------------------------------------|
| 8 | 27450031 | 27450292 | 5Y-H4K8ac_peak_16191 | 6.14981  |                                                   |
| 8 | 27491110 | 27491826 | 5Y-H4K8ac_peak_16192 | 8.21582  | SCARA3_ENSG00000168077                            |
| 8 | 27629854 | 27630104 | 5Y-H4K8ac_peak_16193 | 8.69112  | CCDC25_ENSG00000147419;ESCO2_ENSG00000171320      |
| 8 | 27695476 | 27696026 | 5Y-H4K8ac_peak_16194 | 5.23083  | PBK_ENSG00000168078;RP11-1149M3.2_ENSG00000253176 |
| 8 | 27749696 | 27749893 | 5Y-H4K8ac_peak_16195 | 4.77126  |                                                   |
| 8 | 27752094 | 27752336 | 5Y-H4K8ac_peak_16196 | 4.95697  |                                                   |
| 8 | 28190304 | 28190528 | 5Y-H4K8ac_peak_16197 | 10.42746 |                                                   |
| 8 | 28269173 | 28270264 | 5Y-H4K8ac_peak_16198 | 11.1169  |                                                   |
| 8 | 28351283 | 28351571 | 5Y-H4K8ac_peak_16199 | 8.2913   | FZD3_ENSG00000104290                              |
| 8 | 28558623 | 28558833 | 5Y-H4K8ac_peak_16200 | 7.89273  | EXTL3-AS1_ENSG00000246339                         |
| 8 | 28559237 | 28559618 | 5Y-H4K8ac_peak_16201 | 8.16382  | EXTL3-AS1_ENSG00000246339                         |
| 8 | 28748211 | 28748445 | 5Y-H4K8ac_peak_16202 | 6.78318  | INTS9_ENSG00000104299;HMBOX1_ENSG00000147421      |
| 8 | 29208563 | 29208754 | 5Y-H4K8ac_peak_16203 | 7.11863  | DUSP4_ENSG00000120875                             |
| 8 | 29209375 | 29209761 | 5Y-H4K8ac_peak_16204 | 8.24461  | RP4-676L2.1_ENSG00000260253                       |
| 8 | 29210057 | 29210400 | 5Y-H4K8ac_peak_16205 | 6.18374  | RP4-676L2.1_ENSG00000260253                       |
| 8 | 29230458 | 29231122 | 5Y-H4K8ac_peak_16206 | 9.74189  |                                                   |
| 8 | 29629924 | 29630124 | 5Y-H4K8ac_peak_16207 | 5.85188  |                                                   |
| 8 | 29632226 | 29632420 | 5Y-H4K8ac_peak_16208 | 7.59101  |                                                   |
| 8 | 29655410 | 29655647 | 5Y-H4K8ac_peak_16209 | 4.50834  |                                                   |
| 8 | 29662230 | 29662907 | 5Y-H4K8ac_peak_16210 | 9.52603  |                                                   |
| 8 | 29738082 | 29738278 | 5Y-H4K8ac_peak_16211 | 6.53157  |                                                   |
| 8 | 29952246 | 29953089 | 5Y-H4K8ac_peak_16212 | 14.01193 | LEPROTL1_ENSG00000104660                          |
| 8 | 30013933 | 30014537 | 5Y-H4K8ac_peak_16213 | 9.23159  | RP11-51J9.5_ENSG00000271869;DCTN6_ENSG00000104671 |
| 8 | 30241666 | 30241983 | 5Y-H4K8ac_peak_16214 | 4.95697  | RBPMS-AS1_ENSG00000254109;RBPMS_ENSG00000157110   |
| 8 | 30242488 | 30242851 | 5Y-H4K8ac_peak_16215 | 7.72345  | RBPMS-AS1_ENSG00000254109;RBPMS_ENSG00000157110   |
| 8 | 30280518 | 30280732 | 5Y-H4K8ac_peak_16216 | 8.79957  |                                                   |
| 8 | 30458732 | 30459011 | 5Y-H4K8ac_peak_16217 | 7.31815  |                                                   |
| 8 | 30601048 | 30601810 | 5Y-H4K8ac_peak_16218 | 9.96543  |                                                   |
| 8 | 30602030 | 30602306 | 5Y-H4K8ac_peak_16219 | 7.59101  |                                                   |
| 8 | 30611470 | 30611661 | 5Y-H4K8ac_peak_16220 | 5.40331  | RP11-465K4.4_ENSG00000271081                      |
| 8 | 30670046 | 30670318 | 5Y-H4K8ac_peak_16221 | 14.15915 |                                                   |
| 8 | 31497858 | 31498282 | 5Y-H4K8ac_peak_16222 | 5.59843  | NRG1_ENSG00000157168                              |
| 8 | 32504545 | 32504755 | 5Y-H4K8ac_peak_16223 | 4.07874  |                                                   |
| 8 | 33371819 | 33372363 | 5Y-H4K8ac_peak_16224 | 6.50117  | TTI2_ENSG00000129696;SNORD13_ENSG00000239039      |
| 8 | 33457812 | 33458282 | 5Y-H4K8ac_peak_16225 | 4.95697  | DUSP26_ENSG00000133878                            |
| 8 | 35764041 | 35764317 | 5Y-H4K8ac_peak_16226 | 7.31102  |                                                   |
| 8 | 36931364 | 36931567 | 5Y-H4K8ac_peak_16227 | 12.49811 |                                                   |
| 8 | 37105094 | 37105333 | 5Y-H4K8ac_peak_16228 | 5.64909  |                                                   |
| 8 | 37105561 | 37105861 | 5Y-H4K8ac_peak_16229 | 7.76232  |                                                   |
| 8 | 37182837 | 37183161 | 5Y-H4K8ac_peak_16230 | 5.48291  |                                                   |
| 8 | 37376744 | 37376956 | 5Y-H4K8ac_peak_16231 | 7.07936  |                                                   |
| 8 | 37549046 | 37549267 | 5Y-H4K8ac_peak_16232 | 6.46053  |                                                   |
| 8 | 37593494 | 37593926 | 5Y-H4K8ac_peak_16233 | 9.51254  | ERLIN2_ENSG00000147475                            |
| 8 | 37641518 | 37641726 | 5Y-H4K8ac_peak_16234 | 6.14981  | GPR124_ENSG0000020181                             |
| 8 | 37654006 | 37654237 | 5Y-H4K8ac_peak_16235 | 4.642    |                                                   |
| 8 | 37660009 | 37660569 | 5Y-H4K8ac_peak_16236 | 13.12848 |                                                   |

|   |          |          |                      |          |                                                                      |
|---|----------|----------|----------------------|----------|----------------------------------------------------------------------|
| 8 | 37660975 | 37661470 | 5Y-H4K8ac_peak_16237 | 9.00954  |                                                                      |
| 8 | 37683362 | 37684090 | 5Y-H4K8ac_peak_16238 | 6.37023  |                                                                      |
| 8 | 37684634 | 37684882 | 5Y-H4K8ac_peak_16239 | 5.59843  |                                                                      |
| 8 | 37887468 | 37887690 | 5Y-H4K8ac_peak_16240 | 5.70472  | EIF4EBP1_ENSG00000187840                                             |
| 8 | 37888123 | 37888797 | 5Y-H4K8ac_peak_16241 | 6.37023  | EIF4EBP1_ENSG00000187840                                             |
| 8 | 37889182 | 37889376 | 5Y-H4K8ac_peak_16242 | 7.60057  |                                                                      |
| 8 | 38034404 | 38034673 | 5Y-H4K8ac_peak_16243 | 6.50117  | LSM1_ENSG00000175324;BAG4_ENSG00000156735                            |
| 8 | 38239460 | 38239724 | 5Y-H4K8ac_peak_16244 | 7.50148  | WHSC1L1_ENSG00000147548;RP11-350N15.5_ENSG00000272092                |
| 8 | 38240048 | 38240374 | 5Y-H4K8ac_peak_16245 | 7.21591  | WHSC1L1_ENSG00000147548;RP11-350N15.5_ENSG00000272092                |
| 8 | 38242978 | 38243184 | 5Y-H4K8ac_peak_16246 | 7.55879  | LETM2_ENSG00000165046                                                |
| 8 | 38329478 | 38329999 | 5Y-H4K8ac_peak_16247 | 13.3959  |                                                                      |
| 8 | 38422495 | 38422733 | 5Y-H4K8ac_peak_16248 | 6.24411  |                                                                      |
| 8 | 38577565 | 38577794 | 5Y-H4K8ac_peak_16249 | 9.47421  |                                                                      |
| 8 | 38591748 | 38591963 | 5Y-H4K8ac_peak_16250 | 8.47164  |                                                                      |
| 8 | 38592907 | 38593185 | 5Y-H4K8ac_peak_16251 | 9.15007  |                                                                      |
| 8 | 38758775 | 38759075 | 5Y-H4K8ac_peak_16252 | 7.53429  | PLEKHA2_ENSG00000169499                                              |
| 8 | 38782020 | 38782217 | 5Y-H4K8ac_peak_16253 | 6.50117  |                                                                      |
| 8 | 38793717 | 38794684 | 5Y-H4K8ac_peak_16254 | 13.2534  |                                                                      |
| 8 | 38854653 | 38855077 | 5Y-H4K8ac_peak_16255 | 11.68317 | TM2D2_ENSG00000169490;ADAM9_ENSG00000168615                          |
| 8 | 40790777 | 40791096 | 5Y-H4K8ac_peak_16256 | 4.07874  |                                                                      |
| 8 | 41324646 | 41325221 | 5Y-H4K8ac_peak_16257 | 6.14981  |                                                                      |
| 8 | 41347371 | 41347759 | 5Y-H4K8ac_peak_16258 | 8.75926  | GOLGA7_ENSG00000147533                                               |
| 8 | 41427119 | 41427406 | 5Y-H4K8ac_peak_16259 | 5.8635   |                                                                      |
| 8 | 41435783 | 41436062 | 5Y-H4K8ac_peak_16260 | 12.82003 | RP11-360L9.4_ENSG00000253133                                         |
| 8 | 41753416 | 41753606 | 5Y-H4K8ac_peak_16261 | 8.748    | ANK1_ENSG00000029534                                                 |
| 8 | 41754017 | 41754212 | 5Y-H4K8ac_peak_16262 | 5.8635   | ANK1_ENSG00000029534                                                 |
| 8 | 41754491 | 41754769 | 5Y-H4K8ac_peak_16263 | 6.2403   | ANK1_ENSG00000029534                                                 |
| 8 | 41909319 | 41909511 | 5Y-H4K8ac_peak_16264 | 11.53521 | KAT6A_ENSG00000083168                                                |
| 8 | 41909795 | 41910180 | 5Y-H4K8ac_peak_16265 | 14.68407 | KAT6A_ENSG00000083168                                                |
| 8 | 42009782 | 42010129 | 5Y-H4K8ac_peak_16266 | 12.71088 | RP11-589C21.5_ENSG00000261449;AP3M2_ENSG00000070718                  |
| 8 | 42072451 | 42072707 | 5Y-H4K8ac_peak_16267 | 6.47245  |                                                                      |
| 8 | 42081513 | 42081790 | 5Y-H4K8ac_peak_16268 | 6.13909  |                                                                      |
| 8 | 42396302 | 42397333 | 5Y-H4K8ac_peak_16269 | 10.19948 | SLC20A2_ENSG00000168575;SMIM19_ENSG00000176209                       |
| 8 | 42597031 | 42597253 | 5Y-H4K8ac_peak_16270 | 6.03255  |                                                                      |
| 8 | 42698156 | 42698415 | 5Y-H4K8ac_peak_16271 | 9.30505  | THAP1_ENSG00000131931                                                |
| 8 | 42751332 | 42751712 | 5Y-H4K8ac_peak_16272 | 8.35138  | RNF170_ENSG00000120925;MIR4469_ENSG00000266044;HOOK3_ENSG00000168172 |
| 8 | 42752183 | 42752820 | 5Y-H4K8ac_peak_16273 | 6.77436  | RNF170_ENSG00000120925;MIR4469_ENSG00000266044;HOOK3_ENSG00000168172 |
| 8 | 42948793 | 42948993 | 5Y-H4K8ac_peak_16274 | 5.87725  | POMK_ENSG00000185900                                                 |
| 8 | 42996183 | 42996695 | 5Y-H4K8ac_peak_16275 | 6.47245  | HGSNAT_ENSG00000165102                                               |
| 8 | 48100369 | 48100727 | 5Y-H4K8ac_peak_16276 | 6.43775  | RP11-1134I14.4_ENSG00000254348                                       |
| 8 | 48172722 | 48173343 | 5Y-H4K8ac_peak_16277 | 8.43511  | SPIDR_ENSG00000164808                                                |
| 8 | 48920275 | 48920786 | 5Y-H4K8ac_peak_16278 | 17.56739 | UBE2V2_ENSG00000169139                                               |
| 8 | 49291982 | 49292196 | 5Y-H4K8ac_peak_16279 | 4.84727  |                                                                      |
| 8 | 49292547 | 49292992 | 5Y-H4K8ac_peak_16280 | 8.33296  |                                                                      |
| 8 | 49342609 | 49342903 | 5Y-H4K8ac_peak_16281 | 8.93923  |                                                                      |
| 8 | 49468676 | 49468983 | 5Y-H4K8ac_peak_16282 | 6.1654   | RP11-567J20.2_ENSG00000253688                                        |

|   |          |          |                      |          |                                                     |
|---|----------|----------|----------------------|----------|-----------------------------------------------------|
| 8 | 49494617 | 49494841 | 5Y-H4K8ac_peak_16283 | 7.89273  |                                                     |
| 8 | 49782592 | 49783044 | 5Y-H4K8ac_peak_16284 | 11.28133 |                                                     |
| 8 | 54569699 | 54569976 | 5Y-H4K8ac_peak_16285 | 14.00129 |                                                     |
| 8 | 54570972 | 54571791 | 5Y-H4K8ac_peak_16286 | 13.57931 |                                                     |
| 8 | 54792283 | 54793401 | 5Y-H4K8ac_peak_16287 | 11.1169  |                                                     |
| 8 | 54818485 | 54818885 | 5Y-H4K8ac_peak_16288 | 6.00388  |                                                     |
| 8 | 54935742 | 54935968 | 5Y-H4K8ac_peak_16289 | 6.79955  | TCEA1_ENSG00000187735                               |
| 8 | 55014031 | 55014332 | 5Y-H4K8ac_peak_16290 | 6.98118  | LYPLA1_ENSG00000120992                              |
| 8 | 56792539 | 56793148 | 5Y-H4K8ac_peak_16291 | 5.24695  | LYN_ENSG00000254087                                 |
| 8 | 56826327 | 56826584 | 5Y-H4K8ac_peak_16292 | 5.65584  |                                                     |
| 8 | 56826778 | 56827248 | 5Y-H4K8ac_peak_16293 | 10.69866 |                                                     |
| 8 | 56828022 | 56828261 | 5Y-H4K8ac_peak_16294 | 6.50117  |                                                     |
| 8 | 56829535 | 56830124 | 5Y-H4K8ac_peak_16295 | 8.93923  |                                                     |
| 8 | 56830607 | 56830827 | 5Y-H4K8ac_peak_16296 | 4.50834  |                                                     |
| 8 | 56831754 | 56832038 | 5Y-H4K8ac_peak_16297 | 4.03329  |                                                     |
| 8 | 56835134 | 56835340 | 5Y-H4K8ac_peak_16298 | 9.23159  |                                                     |
| 8 | 56838060 | 56838313 | 5Y-H4K8ac_peak_16299 | 6.77436  |                                                     |
| 8 | 57124409 | 57124709 | 5Y-H4K8ac_peak_16300 | 4.48815  | PLAG1_ENSG00000181690;CHCHD7_ENSG00000170791        |
| 8 | 59571861 | 59572300 | 5Y-H4K8ac_peak_16301 | 9.30505  | NSMAF_ENSG00000035681                               |
| 8 | 60031290 | 60031667 | 5Y-H4K8ac_peak_16302 | 10.19948 | TOX_ENSG00000198846;RP11-25K19.1_ENSG00000167912    |
| 8 | 60032493 | 60032738 | 5Y-H4K8ac_peak_16303 | 7.65114  | TOX_ENSG00000198846;RP11-25K19.1_ENSG00000167912    |
| 8 | 61564371 | 61564699 | 5Y-H4K8ac_peak_16304 | 6.78318  |                                                     |
| 8 | 61591450 | 61591742 | 5Y-H4K8ac_peak_16305 | 10.46287 | CHD7_ENSG00000171316                                |
| 8 | 61706339 | 61706547 | 5Y-H4K8ac_peak_16306 | 5.98695  |                                                     |
| 8 | 61822260 | 61822972 | 5Y-H4K8ac_peak_16307 | 25.55525 | AC022182.1_ENSG00000254777                          |
| 8 | 61918903 | 61919093 | 5Y-H4K8ac_peak_16308 | 5.97089  |                                                     |
| 8 | 61925465 | 61925891 | 5Y-H4K8ac_peak_16309 | 4.90471  |                                                     |
| 8 | 61930248 | 61930534 | 5Y-H4K8ac_peak_16310 | 5.65584  |                                                     |
| 8 | 62052078 | 62052389 | 5Y-H4K8ac_peak_16311 | 7.11863  |                                                     |
| 8 | 62200602 | 62200859 | 5Y-H4K8ac_peak_16312 | 7.31102  |                                                     |
| 8 | 62627567 | 62627757 | 5Y-H4K8ac_peak_16313 | 6.20875  | ASPH_ENSG00000198363;MIR4470_ENSG00000264408        |
| 8 | 64081175 | 64081527 | 5Y-H4K8ac_peak_16314 | 17.63051 | YTHDF3-AS1_ENSG00000270673;YTHDF3_ENSG00000185728   |
| 8 | 65711040 | 65711674 | 5Y-H4K8ac_peak_16315 | 11.19336 | CYP7B1_ENSG00000172817                              |
| 8 | 66056933 | 66057347 | 5Y-H4K8ac_peak_16316 | 12.49199 |                                                     |
| 8 | 66753153 | 66753681 | 5Y-H4K8ac_peak_16317 | 9.20645  | PDE7A_ENSG00000205268                               |
| 8 | 66754476 | 66754784 | 5Y-H4K8ac_peak_16318 | 14.89891 | PDE7A_ENSG00000205268;CTD-2532N20.1_ENSG00000272192 |
| 8 | 67435131 | 67435455 | 5Y-H4K8ac_peak_16319 | 8.67475  |                                                     |
| 8 | 67624891 | 67625401 | 5Y-H4K8ac_peak_16320 | 8.24461  | SGK3_ENSG00000104205                                |
| 8 | 67838072 | 67838420 | 5Y-H4K8ac_peak_16321 | 8.93923  | SNHG6_ENSG00000245910                               |
| 8 | 71314603 | 71315012 | 5Y-H4K8ac_peak_16322 | 4.15658  |                                                     |
| 8 | 71315307 | 71316390 | 5Y-H4K8ac_peak_16323 | 9.23159  | NCOA2_ENSG00000140396                               |
| 8 | 71316600 | 71316851 | 5Y-H4K8ac_peak_16324 | 5.65584  | NCOA2_ENSG00000140396                               |
| 8 | 71520026 | 71520382 | 5Y-H4K8ac_peak_16325 | 10.5157  | TRAM1_ENSG00000067167;RP11-382J12.1_ENSG00000246366 |
| 8 | 71581017 | 71581295 | 5Y-H4K8ac_peak_16326 | 6.08523  | LACTB2_ENSG00000147592;XKR9_ENSG00000221947         |
| 8 | 71964792 | 71965129 | 5Y-H4K8ac_peak_16327 | 4.50834  |                                                     |
| 8 | 73163579 | 73164100 | 5Y-H4K8ac_peak_16328 | 7.76232  | RP11-656G20.1_ENSG00000250979                       |

|   |          |          |                      |          |                                                                                |
|---|----------|----------|----------------------|----------|--------------------------------------------------------------------------------|
| 8 | 74004999 | 74005830 | 5Y-H4K8ac_peak_16329 | 11.28133 |                                                                                |
| 8 | 74068878 | 74069147 | 5Y-H4K8ac_peak_16330 | 5.65584  |                                                                                |
| 8 | 74658848 | 74659052 | 5Y-H4K8ac_peak_16331 | 7.09444  | STAU2_ENSG00000040341                                                          |
| 8 | 74659317 | 74659929 | 5Y-H4K8ac_peak_16332 | 8.69112  | STAU2_ENSG00000040341                                                          |
| 8 | 74790395 | 74790686 | 5Y-H4K8ac_peak_16333 | 5.87382  | RP11-463D19.2_ENSG00000258677;UBE2W_ENSG00000104343                            |
| 8 | 74883972 | 74884389 | 5Y-H4K8ac_peak_16334 | 7.31815  | TCEB1_ENSG00000154582;TMEM70_ENSG00000175606                                   |
| 8 | 75233278 | 75233756 | 5Y-H4K8ac_peak_16335 | 7.38046  | JPH1_ENSG00000104369;GDAP1_ENSG00000104381                                     |
| 8 | 75262712 | 75262942 | 5Y-H4K8ac_peak_16336 | 4.97086  | CTD-2320G14.2_ENSG00000253596                                                  |
| 8 | 76236565 | 76236893 | 5Y-H4K8ac_peak_16337 | 7.31815  | CASC9_ENSG00000249395                                                          |
| 8 | 76319382 | 76319821 | 5Y-H4K8ac_peak_16338 | 9.00954  | HNF4G_ENSG00000164749                                                          |
| 8 | 77590330 | 77590541 | 5Y-H4K8ac_peak_16339 | 6.37023  |                                                                                |
| 8 | 77912681 | 77913158 | 5Y-H4K8ac_peak_16340 | 15.82359 | PEX2_ENSG00000164751                                                           |
| 8 | 79428273 | 79428523 | 5Y-H4K8ac_peak_16341 | 16.27715 | PKIA_ENSG00000171033                                                           |
| 8 | 79894919 | 79895125 | 5Y-H4K8ac_peak_16342 | 5.65584  |                                                                                |
| 8 | 80211724 | 80211916 | 5Y-H4K8ac_peak_16343 | 6.14981  |                                                                                |
| 8 | 80524814 | 80525024 | 5Y-H4K8ac_peak_16344 | 5.64909  |                                                                                |
| 8 | 80680659 | 80681108 | 5Y-H4K8ac_peak_16345 | 12.05638 | HEY1_ENSG00000164683;RP11-27N21.3_ENSG00000272138                              |
| 8 | 80682082 | 80682386 | 5Y-H4K8ac_peak_16346 | 4.50834  |                                                                                |
| 8 | 80696035 | 80696404 | 5Y-H4K8ac_peak_16347 | 6.54441  |                                                                                |
| 8 | 80739502 | 80740198 | 5Y-H4K8ac_peak_16348 | 6.77436  |                                                                                |
| 8 | 81142661 | 81143045 | 5Y-H4K8ac_peak_16349 | 5.449    | TPD52_ENSG00000076554                                                          |
| 8 | 81398498 | 81398842 | 5Y-H4K8ac_peak_16350 | 10.89622 | Y_RNA_ENSG00000251867;ZBTB10_ENSG00000205189                                   |
| 8 | 81490242 | 81490693 | 5Y-H4K8ac_peak_16351 | 10.19948 |                                                                                |
| 8 | 81785632 | 81785856 | 5Y-H4K8ac_peak_16352 | 8.2913   |                                                                                |
| 8 | 81786247 | 81786447 | 5Y-H4K8ac_peak_16353 | 11.27554 | ZNF704_ENSG00000164684                                                         |
| 8 | 82192865 | 82193534 | 5Y-H4K8ac_peak_16354 | 12.87247 | RP11-363E6.3_ENSG00000254027;FABP5_ENSG00000164687                             |
| 8 | 82633722 | 82633916 | 5Y-H4K8ac_peak_16355 | 5.64909  |                                                                                |
| 8 | 86089433 | 86090056 | 5Y-H4K8ac_peak_16356 | 7.59101  | RP11-219B4.7_ENSG00000260493;E2F5_ENSG00000133740;RP11-219B4.3_ENSG00000254208 |
| 8 | 87355016 | 87355377 | 5Y-H4K8ac_peak_16357 | 10.46287 | CTD-2284J15.1_ENSG00000254231;WWP1_ENSG00000123124                             |
| 8 | 87520441 | 87520700 | 5Y-H4K8ac_peak_16358 | 6.73385  |                                                                                |
| 8 | 90770271 | 90770585 | 5Y-H4K8ac_peak_16359 | 4.79585  | RP11-37B2.1_ENSG00000251136;RIPK2_ENSG00000104312                              |
| 8 | 90996568 | 90996835 | 5Y-H4K8ac_peak_16360 | 14.30055 |                                                                                |
| 8 | 91658116 | 91658586 | 5Y-H4K8ac_peak_16361 | 9.60627  | RP11-68L18.1_ENSG00000246792                                                   |
| 8 | 91803688 | 91804162 | 5Y-H4K8ac_peak_16362 | 5.23083  | TMEM64_ENSG00000180694;NECAB1_ENSG00000123119                                  |
| 8 | 91997025 | 91997294 | 5Y-H4K8ac_peak_16363 | 4.95697  | C8orf88_ENSG00000253250                                                        |
| 8 | 91997645 | 91997839 | 5Y-H4K8ac_peak_16364 | 9.20645  | C8orf88_ENSG00000253250                                                        |
| 8 | 92897640 | 92897935 | 5Y-H4K8ac_peak_16365 | 5.40331  |                                                                                |
| 8 | 93114239 | 93114561 | 5Y-H4K8ac_peak_16366 | 8.62703  | RUNX1T1_ENSG00000079102                                                        |
| 8 | 93115092 | 93115739 | 5Y-H4K8ac_peak_16367 | 13.92877 | RUNX1T1_ENSG00000079102                                                        |
| 8 | 94637281 | 94637510 | 5Y-H4K8ac_peak_16368 | 5.23083  |                                                                                |
| 8 | 94928436 | 94928813 | 5Y-H4K8ac_peak_16369 | 9.15007  | MIR378D2_ENSG00000264448                                                       |
| 8 | 94929288 | 94929653 | 5Y-H4K8ac_peak_16370 | 5.59843  | MIR378D2_ENSG00000264448                                                       |
| 8 | 95237879 | 95238072 | 5Y-H4K8ac_peak_16371 | 4.95697  |                                                                                |
| 8 | 95274328 | 95274527 | 5Y-H4K8ac_peak_16372 | 5.98695  | GEM_ENSG00000164949                                                            |
| 8 | 95835777 | 95835994 | 5Y-H4K8ac_peak_16373 | 4.71803  |                                                                                |
| 8 | 95961849 | 95962523 | 5Y-H4K8ac_peak_16374 | 12.21176 | RP11-347C18.3_ENSG00000253878;TP53INP1_ENSG00000164938                         |



|   |           |           |                      |          |                                                   |
|---|-----------|-----------|----------------------|----------|---------------------------------------------------|
| 8 | 96036734  | 96036952  | 5Y-H4K8ac_peak_16375 | 5.56894  |                                                   |
| 8 | 97247485  | 97247701  | 5Y-H4K8ac_peak_16376 | 8.2589   | UQCRB_ENSG00000156467;KB-1043D8.6_ENSG00000254224 |
| 8 | 97273516  | 97273728  | 5Y-H4K8ac_peak_16377 | 7.38046  | MTERFD1_ENSG00000156469;PTDSS1_ENSG00000156471    |
| 8 | 97512172  | 97512444  | 5Y-H4K8ac_peak_16378 | 4.9603   |                                                   |
| 8 | 97537336  | 97537653  | 5Y-H4K8ac_peak_16379 | 6.94416  |                                                   |
| 8 | 97840466  | 97841004  | 5Y-H4K8ac_peak_16380 | 8.2589   |                                                   |
| 8 | 97844855  | 97845080  | 5Y-H4K8ac_peak_16381 | 8.2913   |                                                   |
| 8 | 97939419  | 97939875  | 5Y-H4K8ac_peak_16382 | 6.46053  |                                                   |
| 8 | 98289729  | 98290049  | 5Y-H4K8ac_peak_16383 | 5.50568  | TSPYL5_ENSG00000180543                            |
| 8 | 98305862  | 98306210  | 5Y-H4K8ac_peak_16384 | 7.31815  |                                                   |
| 8 | 98306477  | 98306710  | 5Y-H4K8ac_peak_16385 | 6.34046  |                                                   |
| 8 | 98347248  | 98347479  | 5Y-H4K8ac_peak_16386 | 5.67283  |                                                   |
| 8 | 99057376  | 99057698  | 5Y-H4K8ac_peak_16387 | 10.23399 | RPL30_ENSG00000156482                             |
| 8 | 99306073  | 99306845  | 5Y-H4K8ac_peak_16388 | 15.06486 | NIPAL2_ENSG00000104361                            |
| 8 | 99952476  | 99953250  | 5Y-H4K8ac_peak_16389 | 7.11863  |                                                   |
| 8 | 101322529 | 101322921 | 5Y-H4K8ac_peak_16390 | 7.09658  |                                                   |
| 8 | 101429220 | 101429465 | 5Y-H4K8ac_peak_16391 | 6.34046  |                                                   |
| 8 | 101506323 | 101506708 | 5Y-H4K8ac_peak_16392 | 9.43096  |                                                   |
| 8 | 101507035 | 101507461 | 5Y-H4K8ac_peak_16393 | 10.19948 |                                                   |
| 8 | 101521322 | 101521698 | 5Y-H4K8ac_peak_16394 | 9.43096  |                                                   |
| 8 | 101571642 | 101571973 | 5Y-H4K8ac_peak_16395 | 14.88279 | ANKRD46_ENSG00000186106                           |
| 8 | 101859626 | 101860471 | 5Y-H4K8ac_peak_16396 | 4.642    |                                                   |
| 8 | 101964537 | 101965127 | 5Y-H4K8ac_peak_16397 | 11.22005 | YWHAZ_ENSG00000164924                             |
| 8 | 102038138 | 102038559 | 5Y-H4K8ac_peak_16398 | 4.84727  |                                                   |
| 8 | 102064184 | 102064649 | 5Y-H4K8ac_peak_16399 | 9.15007  | RP11-302J23.1_ENSG00000248599                     |
| 8 | 102092597 | 102093290 | 5Y-H4K8ac_peak_16400 | 9.30505  |                                                   |
| 8 | 102138345 | 102138681 | 5Y-H4K8ac_peak_16401 | 11.4254  | KB-1460A1.1_ENSG00000253395                       |
| 8 | 102660765 | 102661169 | 5Y-H4K8ac_peak_16402 | 8.33296  |                                                   |
| 8 | 102669860 | 102670099 | 5Y-H4K8ac_peak_16403 | 4.51076  |                                                   |
| 8 | 102703084 | 102703292 | 5Y-H4K8ac_peak_16404 | 7.97699  |                                                   |
| 8 | 102717904 | 102718095 | 5Y-H4K8ac_peak_16405 | 7.97699  |                                                   |
| 8 | 103612838 | 103613085 | 5Y-H4K8ac_peak_16406 | 6.1654   |                                                   |
| 8 | 103668538 | 103669202 | 5Y-H4K8ac_peak_16407 | 13.06587 | KLF10_ENSG00000155090                             |
| 8 | 103669735 | 103670037 | 5Y-H4K8ac_peak_16408 | 12.24192 |                                                   |
| 8 | 103732857 | 103733221 | 5Y-H4K8ac_peak_16409 | 6.50117  |                                                   |
| 8 | 103818408 | 103818610 | 5Y-H4K8ac_peak_16410 | 5.72233  | KB-1732A1.1_ENSG00000253669                       |
| 8 | 103818993 | 103819773 | 5Y-H4K8ac_peak_16411 | 12.10416 |                                                   |
| 8 | 103822588 | 103822811 | 5Y-H4K8ac_peak_16412 | 5.99504  |                                                   |
| 8 | 103876550 | 103876953 | 5Y-H4K8ac_peak_16413 | 16.2188  | KB-1507C5.2_ENSG00000253320                       |
| 8 | 104152800 | 104152995 | 5Y-H4K8ac_peak_16414 | 4.42435  | C8orf56_ENSG00000236939;BAALC_ENSG00000164929     |
| 8 | 104311174 | 104311521 | 5Y-H4K8ac_peak_16415 | 6.77436  | RP11-318M2.2_ENSG00000247081;FZD6_ENSG00000164930 |
| 8 | 104383331 | 104383575 | 5Y-H4K8ac_peak_16416 | 6.77436  | CTHRC1_ENSG00000164932                            |
| 8 | 104511190 | 104511667 | 5Y-H4K8ac_peak_16417 | 5.23083  |                                                   |
| 8 | 104511921 | 104512137 | 5Y-H4K8ac_peak_16418 | 8.33296  | RIMS2_ENSG00000176406                             |
| 8 | 104513258 | 104513801 | 5Y-H4K8ac_peak_16419 | 8.3285   | RP11-1C8.4_ENSG00000253477;RIMS2_ENSG00000176406  |
| 8 | 105424765 | 105425005 | 5Y-H4K8ac_peak_16420 | 4.50834  |                                                   |

|   |           |           |                      |          |                                                                         |
|---|-----------|-----------|----------------------|----------|-------------------------------------------------------------------------|
| 8 | 105600872 | 105601089 | 5Y-H4K8ac_peak_16421 | 9.56187  | LRP12_ENSG00000147650                                                   |
| 8 | 110552047 | 110552616 | 5Y-H4K8ac_peak_16422 | 7.38046  | EBAG9_ENSG00000147654                                                   |
| 8 | 117886462 | 117886843 | 5Y-H4K8ac_peak_16423 | 8.2913   | RAD21_ENSG00000164754;RAD21-AS1_ENSG00000253327;MIR3610_ENSG00000264875 |
| 8 | 119634530 | 119634832 | 5Y-H4K8ac_peak_16424 | 5.98695  | SAMD12_ENSG00000177570                                                  |
| 8 | 120868283 | 120868561 | 5Y-H4K8ac_peak_16425 | 5.29015  | DSCC1_ENSG00000136982                                                   |
| 8 | 121457444 | 121457787 | 5Y-H4K8ac_peak_16426 | 5.65584  | MRPL13_ENSG00000172172;MTBP_ENSG00000172167                             |
| 8 | 123256881 | 123257210 | 5Y-H4K8ac_peak_16427 | 6.34046  |                                                                         |
| 8 | 123692136 | 123692358 | 5Y-H4K8ac_peak_16428 | 5.10825  |                                                                         |
| 8 | 123693007 | 123693504 | 5Y-H4K8ac_peak_16429 | 4.55128  |                                                                         |
| 8 | 124037586 | 124037851 | 5Y-H4K8ac_peak_16430 | 6.94416  |                                                                         |
| 8 | 124055322 | 124055581 | 5Y-H4K8ac_peak_16431 | 4.50834  | DERL1_ENSG00000136986                                                   |
| 8 | 124085010 | 124085239 | 5Y-H4K8ac_peak_16432 | 9.51254  |                                                                         |
| 8 | 124245400 | 124245601 | 5Y-H4K8ac_peak_16433 | 6.1654   |                                                                         |
| 8 | 124253330 | 124253546 | 5Y-H4K8ac_peak_16434 | 8.35139  | C8orf76_ENSG00000189376                                                 |
| 8 | 124286309 | 124286591 | 5Y-H4K8ac_peak_16435 | 5.98695  |                                                                         |
| 8 | 124720581 | 124720811 | 5Y-H4K8ac_peak_16436 | 6.20875  |                                                                         |
| 8 | 124934616 | 124934806 | 5Y-H4K8ac_peak_16437 | 6.13909  |                                                                         |
| 8 | 125551429 | 125551660 | 5Y-H4K8ac_peak_16438 | 10.1994  | TATDN1_ENSG00000147687;NDUFB9_ENSG00000147684                           |
| 8 | 125739696 | 125739981 | 5Y-H4K8ac_peak_16439 | 7.59101  | MTSS1_ENSG00000170873                                                   |
| 8 | 125740847 | 125741196 | 5Y-H4K8ac_peak_16440 | 11.19336 | MTSS1_ENSG00000170873                                                   |
| 8 | 126010125 | 126010454 | 5Y-H4K8ac_peak_16441 | 8.31252  | RP11-6D1.3_ENSG00000253513;SQLE_ENSG00000104549                         |
| 8 | 126440762 | 126440979 | 5Y-H4K8ac_peak_16442 | 8.78565  |                                                                         |
| 8 | 126441768 | 126442020 | 5Y-H4K8ac_peak_16443 | 12.05638 | TRIB1_ENSG00000173334                                                   |
| 8 | 128806295 | 128806588 | 5Y-H4K8ac_peak_16444 | 9.87097  | PVT1_ENSG00000249859                                                    |
| 8 | 128858206 | 128858399 | 5Y-H4K8ac_peak_16445 | 5.04571  |                                                                         |
| 8 | 130472208 | 130472430 | 5Y-H4K8ac_peak_16446 | 8.27643  |                                                                         |
| 8 | 130951602 | 130951954 | 5Y-H4K8ac_peak_16447 | 7.11863  | RP11-473O4.3_ENSG00000253720                                            |
| 8 | 131028168 | 131028516 | 5Y-H4K8ac_peak_16448 | 6.17374  | FAM49B_ENSG00000153310                                                  |
| 8 | 131028835 | 131029162 | 5Y-H4K8ac_peak_16449 | 6.37023  | FAM49B_ENSG00000153310                                                  |
| 8 | 131309816 | 131310055 | 5Y-H4K8ac_peak_16450 | 5.12213  |                                                                         |
| 8 | 131455486 | 131455852 | 5Y-H4K8ac_peak_16451 | 5.72233  | ASAP1_ENSG00000153317                                                   |
| 8 | 131651566 | 131651782 | 5Y-H4K8ac_peak_16452 | 5.59843  |                                                                         |
| 8 | 131653466 | 131654118 | 5Y-H4K8ac_peak_16453 | 8.21582  |                                                                         |
| 8 | 132922577 | 132922775 | 5Y-H4K8ac_peak_16454 | 5.8635   |                                                                         |
| 8 | 134038717 | 134038927 | 5Y-H4K8ac_peak_16455 | 8.33296  |                                                                         |
| 8 | 134284713 | 134284920 | 5Y-H4K8ac_peak_16456 | 10.46287 |                                                                         |
| 8 | 134415927 | 134416458 | 5Y-H4K8ac_peak_16457 | 6.50117  |                                                                         |
| 8 | 135470499 | 135470785 | 5Y-H4K8ac_peak_16458 | 11.31394 |                                                                         |
| 8 | 135673155 | 135673369 | 5Y-H4K8ac_peak_16459 | 4.66683  |                                                                         |
| 8 | 135725458 | 135725770 | 5Y-H4K8ac_peak_16460 | 5.12488  | ZFAT_ENSG00000066827                                                    |
| 8 | 136469213 | 136469477 | 5Y-H4K8ac_peak_16461 | 12.21176 | RP11-343P9.1_ENSG00000254372;KHDRBS3_ENSG00000131773                    |
| 8 | 136737184 | 136737522 | 5Y-H4K8ac_peak_16462 | 9.38203  |                                                                         |
| 8 | 139206043 | 139206299 | 5Y-H4K8ac_peak_16463 | 5.29015  |                                                                         |
| 8 | 139509225 | 139509533 | 5Y-H4K8ac_peak_16464 | 5.99504  | FAM135B_ENSG00000147724                                                 |
| 8 | 139555908 | 139556134 | 5Y-H4K8ac_peak_16465 | 6.50117  |                                                                         |
| 8 | 139685614 | 139685852 | 5Y-H4K8ac_peak_16466 | 6.72926  |                                                                         |

|   |           |           |                      |          |                                                     |
|---|-----------|-----------|----------------------|----------|-----------------------------------------------------|
| 8 | 139780230 | 139780611 | 5Y-H4K8ac_peak_16467 | 6.73385  |                                                     |
| 8 | 139828319 | 139828569 | 5Y-H4K8ac_peak_16468 | 4.79585  |                                                     |
| 8 | 139948270 | 139948497 | 5Y-H4K8ac_peak_16469 | 13.06587 |                                                     |
| 8 | 140643505 | 140643814 | 5Y-H4K8ac_peak_16470 | 8.93923  |                                                     |
| 8 | 140770039 | 140770254 | 5Y-H4K8ac_peak_16471 | 5.35202  |                                                     |
| 8 | 140801936 | 140802135 | 5Y-H4K8ac_peak_16472 | 8.05083  |                                                     |
| 8 | 140802706 | 140802947 | 5Y-H4K8ac_peak_16473 | 5.87725  |                                                     |
| 8 | 140875100 | 140876151 | 5Y-H4K8ac_peak_16474 | 13.2534  |                                                     |
| 8 | 140991905 | 140992182 | 5Y-H4K8ac_peak_16475 | 9.05766  |                                                     |
| 8 | 140993157 | 140993395 | 5Y-H4K8ac_peak_16476 | 4.77016  |                                                     |
| 8 | 141018356 | 141018554 | 5Y-H4K8ac_peak_16477 | 4.84727  |                                                     |
| 8 | 141468348 | 141468748 | 5Y-H4K8ac_peak_16478 | 14.99673 | TRAPPC9_ENSG00000167632                             |
| 8 | 141489218 | 141489485 | 5Y-H4K8ac_peak_16479 | 5.23083  |                                                     |
| 8 | 141490268 | 141490964 | 5Y-H4K8ac_peak_16480 | 7.8267   |                                                     |
| 8 | 141521520 | 141521927 | 5Y-H4K8ac_peak_16481 | 11.60058 | CHRAC1_ENSG00000104472                              |
| 8 | 141600412 | 141600868 | 5Y-H4K8ac_peak_16482 | 4.29586  |                                                     |
| 8 | 141645125 | 141645353 | 5Y-H4K8ac_peak_16483 | 4.55128  | AGO2_ENSG00000123908                                |
| 8 | 142010944 | 142011134 | 5Y-H4K8ac_peak_16484 | 7.28311  |                                                     |
| 8 | 142011583 | 142011830 | 5Y-H4K8ac_peak_16485 | 13.94477 | PTK2_ENSG00000169398                                |
| 8 | 142032025 | 142033019 | 5Y-H4K8ac_peak_16486 | 8.2913   |                                                     |
| 8 | 142094726 | 142094986 | 5Y-H4K8ac_peak_16487 | 4.95697  |                                                     |
| 8 | 142114792 | 142115181 | 5Y-H4K8ac_peak_16488 | 6.43775  |                                                     |
| 8 | 142125526 | 142125778 | 5Y-H4K8ac_peak_16489 | 5.39991  |                                                     |
| 8 | 142137813 | 142138009 | 5Y-H4K8ac_peak_16490 | 6.08523  |                                                     |
| 8 | 142174428 | 142174901 | 5Y-H4K8ac_peak_16491 | 10.79063 |                                                     |
| 8 | 142215416 | 142216424 | 5Y-H4K8ac_peak_16492 | 13.27281 |                                                     |
| 8 | 142288954 | 142289295 | 5Y-H4K8ac_peak_16493 | 5.12213  | RP11-10J21.5_ENSG00000254197                        |
| 8 | 142339976 | 142340321 | 5Y-H4K8ac_peak_16494 | 4.75045  |                                                     |
| 8 | 142364897 | 142365107 | 5Y-H4K8ac_peak_16495 | 5.23083  | CTD-3064M3.3_ENSG00000261655                        |
| 8 | 142386364 | 142386647 | 5Y-H4K8ac_peak_16496 | 8.79957  |                                                     |
| 8 | 142387762 | 142387965 | 5Y-H4K8ac_peak_16497 | 6.5814   |                                                     |
| 8 | 142401154 | 142401355 | 5Y-H4K8ac_peak_16498 | 4.29586  | PTP4A3_ENSG00000184489                              |
| 8 | 142401654 | 142402646 | 5Y-H4K8ac_peak_16499 | 12.10416 | CTD-3064M3.4_ENSG00000244998;PTP4A3_ENSG00000184489 |
| 8 | 142409053 | 142409396 | 5Y-H4K8ac_peak_16500 | 6.55841  |                                                     |
| 8 | 142410181 | 142410424 | 5Y-H4K8ac_peak_16501 | 8.43511  |                                                     |
| 8 | 142410864 | 142411243 | 5Y-H4K8ac_peak_16502 | 8.43511  |                                                     |
| 8 | 142411456 | 142412655 | 5Y-H4K8ac_peak_16503 | 15.40871 |                                                     |
| 8 | 142422292 | 142422633 | 5Y-H4K8ac_peak_16504 | 6.08523  |                                                     |
| 8 | 142423112 | 142423358 | 5Y-H4K8ac_peak_16505 | 10.16277 |                                                     |
| 8 | 142425131 | 142425436 | 5Y-H4K8ac_peak_16506 | 9.22312  |                                                     |
| 8 | 142432408 | 142432603 | 5Y-H4K8ac_peak_16507 | 7.09658  |                                                     |
| 8 | 142517761 | 142517978 | 5Y-H4K8ac_peak_16508 | 8.28346  | MROH5_ENSG00000226807                               |
| 8 | 142518291 | 142518595 | 5Y-H4K8ac_peak_16509 | 6.77436  | MROH5_ENSG00000226807                               |
| 8 | 142867126 | 142867478 | 5Y-H4K8ac_peak_16510 | 7.24844  |                                                     |
| 8 | 142869403 | 142869801 | 5Y-H4K8ac_peak_16511 | 5.23083  |                                                     |
| 8 | 142877149 | 142877593 | 5Y-H4K8ac_peak_16512 | 13.61292 |                                                     |

|   |           |           |                      |          |                                                                                   |
|---|-----------|-----------|----------------------|----------|-----------------------------------------------------------------------------------|
| 8 | 142878397 | 142879240 | 5Y-H4K8ac_peak_16513 | 9.30505  |                                                                                   |
| 8 | 143001005 | 143001416 | 5Y-H4K8ac_peak_16514 | 11.22005 |                                                                                   |
| 8 | 143182318 | 143182591 | 5Y-H4K8ac_peak_16515 | 5.57299  |                                                                                   |
| 8 | 143211166 | 143211402 | 5Y-H4K8ac_peak_16516 | 6.03611  |                                                                                   |
| 8 | 143211811 | 143212066 | 5Y-H4K8ac_peak_16517 | 8.86778  |                                                                                   |
| 8 | 143330598 | 143331356 | 5Y-H4K8ac_peak_16518 | 14.99673 |                                                                                   |
| 8 | 143331703 | 143331895 | 5Y-H4K8ac_peak_16519 | 4.52203  |                                                                                   |
| 8 | 143462764 | 143462974 | 5Y-H4K8ac_peak_16520 | 6.77436  |                                                                                   |
| 8 | 143484726 | 143485216 | 5Y-H4K8ac_peak_16521 | 17.18444 | TSNARE1_ENSG00000171045;RP13-467H17.1_ENSG00000261693                             |
| 8 | 143534454 | 143534692 | 5Y-H4K8ac_peak_16522 | 7.89273  |                                                                                   |
| 8 | 143556223 | 143556443 | 5Y-H4K8ac_peak_16523 | 3.99744  |                                                                                   |
| 8 | 143556648 | 143556895 | 5Y-H4K8ac_peak_16524 | 7.31102  |                                                                                   |
| 8 | 143557581 | 143557923 | 5Y-H4K8ac_peak_16525 | 5.98695  |                                                                                   |
| 8 | 143591684 | 143591982 | 5Y-H4K8ac_peak_16526 | 9.05168  |                                                                                   |
| 8 | 143592412 | 143592869 | 5Y-H4K8ac_peak_16527 | 7.59101  |                                                                                   |
| 8 | 143609771 | 143610256 | 5Y-H4K8ac_peak_16528 | 4.95697  |                                                                                   |
| 8 | 143611813 | 143612151 | 5Y-H4K8ac_peak_16529 | 5.9726   |                                                                                   |
| 8 | 143613616 | 143613866 | 5Y-H4K8ac_peak_16530 | 11.22005 |                                                                                   |
| 8 | 143614298 | 143614739 | 5Y-H4K8ac_peak_16531 | 5.98695  |                                                                                   |
| 8 | 143630950 | 143631243 | 5Y-H4K8ac_peak_16532 | 4.84727  |                                                                                   |
| 8 | 143632388 | 143632603 | 5Y-H4K8ac_peak_16533 | 5.25503  |                                                                                   |
| 8 | 143694525 | 143694755 | 5Y-H4K8ac_peak_16534 | 5.03917  |                                                                                   |
| 8 | 143696401 | 143696618 | 5Y-H4K8ac_peak_16535 | 4.33574  | ARC_ENSG00000198576                                                               |
| 8 | 143697547 | 143698051 | 5Y-H4K8ac_peak_16536 | 6.77436  | ARC_ENSG00000198576                                                               |
| 8 | 143704515 | 143704945 | 5Y-H4K8ac_peak_16537 | 5.23083  |                                                                                   |
| 8 | 143716360 | 143716583 | 5Y-H4K8ac_peak_16538 | 5.24695  |                                                                                   |
| 8 | 143750929 | 143751384 | 5Y-H4K8ac_peak_16539 | 12.69256 | PSCA_ENSG00000167653                                                              |
| 8 | 143754975 | 143755177 | 5Y-H4K8ac_peak_16540 | 7.59101  |                                                                                   |
| 8 | 143807784 | 143808421 | 5Y-H4K8ac_peak_16541 | 12.11208 | CTD-2292P10.4_ENSG00000253741;THEM6_ENSG00000130193;CTD-2292P10.2_ENSG00000253806 |
| 8 | 143820619 | 143820842 | 5Y-H4K8ac_peak_16542 | 6.66641  |                                                                                   |
| 8 | 143897101 | 143897308 | 5Y-H4K8ac_peak_16543 | 8.20773  |                                                                                   |
| 8 | 144099304 | 144100375 | 5Y-H4K8ac_peak_16544 | 17.8549  | RP11-273G15.2_ENSG00000247317;LY6E_ENSG00000160932                                |
| 8 | 144120729 | 144121391 | 5Y-H4K8ac_peak_16545 | 8.24461  | C8orf31_ENSG00000177335                                                           |
| 8 | 144301269 | 144301469 | 5Y-H4K8ac_peak_16546 | 7.38046  |                                                                                   |
| 8 | 144329192 | 144329504 | 5Y-H4K8ac_peak_16547 | 9.30206  | ZFP41_ENSG00000181638;ZFP41_ENSG00000264668                                       |
| 8 | 144427370 | 144427704 | 5Y-H4K8ac_peak_16548 | 6.6946   |                                                                                   |
| 8 | 144597918 | 144598148 | 5Y-H4K8ac_peak_16549 | 6.64195  |                                                                                   |
| 8 | 144717798 | 144718746 | 5Y-H4K8ac_peak_16550 | 9.11392  | ZNF623_ENSG00000183309                                                            |
| 8 | 144910945 | 144911465 | 5Y-H4K8ac_peak_16551 | 10.48476 | PUF60_ENSG00000179950                                                             |
| 8 | 144922956 | 144923150 | 5Y-H4K8ac_peak_16552 | 4.15658  |                                                                                   |
| 8 | 144976926 | 144977206 | 5Y-H4K8ac_peak_16553 | 7.89273  |                                                                                   |
| 8 | 145025476 | 145025686 | 5Y-H4K8ac_peak_16554 | 7.90236  |                                                                                   |
| 8 | 145028413 | 145028632 | 5Y-H4K8ac_peak_16555 | 10.1994  |                                                                                   |
| 8 | 145103971 | 145104575 | 5Y-H4K8ac_peak_16556 | 6.64036  | CTD-3065J16.6_ENSG00000204791                                                     |
| 8 | 145132969 | 145133369 | 5Y-H4K8ac_peak_16557 | 11.68317 | CTD-3065J16.9_ENSG00000255224;EXOSC4_ENSG00000178896                              |
| 8 | 145150039 | 145150342 | 5Y-H4K8ac_peak_16558 | 10.69698 | CYC1_ENSG00000179091                                                              |

|   |           |           |                      |          |                                                       |
|---|-----------|-----------|----------------------|----------|-------------------------------------------------------|
| 8 | 145158825 | 145159046 | 5Y-H4K8ac_peak_16559 | 4.0639   | MAF1_ENSG00000179632                                  |
| 8 | 145330319 | 145330584 | 5Y-H4K8ac_peak_16560 | 13.8759  | KM-PA-2_ENSG00000204775                               |
| 8 | 145560864 | 145561688 | 5Y-H4K8ac_peak_16561 | 10.4689  | SCRT1_ENSG00000170616                                 |
| 8 | 145562532 | 145562778 | 5Y-H4K8ac_peak_16562 | 8.46442  |                                                       |
| 8 | 145596888 | 145597435 | 5Y-H4K8ac_peak_16563 | 11.82621 | ADCK5_ENSG00000173137                                 |
| 8 | 145635038 | 145635500 | 5Y-H4K8ac_peak_16564 | 7.59101  | CPSF1_ENSG00000071894;GS1-393G12.14_ENSG00000272115   |
| 8 | 145638689 | 145638985 | 5Y-H4K8ac_peak_16565 | 12.81408 |                                                       |
| 8 | 145639212 | 145639597 | 5Y-H4K8ac_peak_16566 | 12.76485 |                                                       |
| 8 | 145654529 | 145654757 | 5Y-H4K8ac_peak_16567 | 4.642    | VPS28_ENSG00000160948                                 |
| 8 | 145670045 | 145670298 | 5Y-H4K8ac_peak_16568 | 10.19948 | TONSL_ENSG00000160949                                 |
| 8 | 145690529 | 145690723 | 5Y-H4K8ac_peak_16569 | 10.0695  | CYHR1_ENSG00000187954;KIFC2_ENSG00000167702           |
| 8 | 145702687 | 145703090 | 5Y-H4K8ac_peak_16570 | 4.5541   | FOXH1_ENSG00000160973;PPP1R16A_ENSG00000160972        |
| 8 | 145728381 | 145728667 | 5Y-H4K8ac_peak_16571 | 8.69112  | GPT_ENSG00000167701                                   |
| 8 | 145733480 | 145734018 | 5Y-H4K8ac_peak_16572 | 13.68515 | MFSD3_ENSG00000167700                                 |
| 8 | 145734398 | 145735017 | 5Y-H4K8ac_peak_16573 | 16.33454 | MFSD3_ENSG00000167700                                 |
| 8 | 145752229 | 145752948 | 5Y-H4K8ac_peak_16574 | 7.82914  | LRRC24_ENSG00000254402                                |
| 8 | 145754149 | 145754433 | 5Y-H4K8ac_peak_16575 | 13.92877 | C8orf82_ENSG00000213563                               |
| 8 | 145754693 | 145754992 | 5Y-H4K8ac_peak_16576 | 4.96019  | C8orf82_ENSG00000213563                               |
| 8 | 145925201 | 145925473 | 5Y-H4K8ac_peak_16577 | 4.8509   | AF186192.1_ENSG00000254533;AF186192.5_ENSG00000255085 |
| 8 | 146017267 | 146017612 | 5Y-H4K8ac_peak_16578 | 4.00285  | RPL8_ENSG00000161016                                  |
| 8 | 146023700 | 146024134 | 5Y-H4K8ac_peak_16579 | 8.69112  | ZNF517_ENSG00000197363                                |
| 8 | 146051896 | 146052145 | 5Y-H4K8ac_peak_16580 | 8.93923  | ZNF7_ENSG00000147789                                  |
| 8 | 146052987 | 146053548 | 5Y-H4K8ac_peak_16581 | 16.50659 | ZNF7_ENSG00000147789                                  |
| 8 | 146078008 | 146078219 | 5Y-H4K8ac_peak_16582 | 6.37023  | COMMD5_ENSG00000170619;AF235103.1_ENSG00000263640     |
| 8 | 146078630 | 146078853 | 5Y-H4K8ac_peak_16583 | 9.30505  | COMMD5_ENSG00000170619;AF235103.1_ENSG00000263640     |
| 8 | 146175769 | 146176297 | 5Y-H4K8ac_peak_16584 | 7.90751  | ZNF16_ENSG00000170631                                 |
| 8 | 146278073 | 146278374 | 5Y-H4K8ac_peak_16585 | 5.70472  | C8orf33_ENSG00000182307                               |
| 9 | 469719    | 469912    | 5Y-H4K8ac_peak_16586 | 5.87382  | KANK1_ENSG00000107104                                 |
| 9 | 2620988   | 2621677   | 5Y-H4K8ac_peak_16587 | 7.31815  | VLDLR_ENSG00000147852                                 |
| 9 | 2622624   | 2622973   | 5Y-H4K8ac_peak_16588 | 7.59101  | VLDLR_ENSG00000147852                                 |
| 9 | 2843744   | 2843949   | 5Y-H4K8ac_peak_16589 | 5.65584  | KIAA0020_ENSG00000080608                              |
| 9 | 3526066   | 3527206   | 5Y-H4K8ac_peak_16590 | 21.10958 | RFX3_ENSG00000080298;RP11-509J21.1_ENSG00000232104    |
| 9 | 3825878   | 3826096   | 5Y-H4K8ac_peak_16591 | 6.77436  |                                                       |
| 9 | 4792982   | 4793281   | 5Y-H4K8ac_peak_16592 | 10.31981 | RCL1_ENSG00000120158                                  |
| 9 | 4985461   | 4985654   | 5Y-H4K8ac_peak_16593 | 4.29586  | JAK2_ENSG00000096968                                  |
| 9 | 5304513   | 5304726   | 5Y-H4K8ac_peak_16594 | 7.31815  | RLN2_ENSG00000107014                                  |
| 9 | 5628722   | 5628920   | 5Y-H4K8ac_peak_16595 | 10.54764 | KIAA1432_ENSG00000107036                              |
| 9 | 5832738   | 5832952   | 5Y-H4K8ac_peak_16596 | 4.95697  | ERMP1_ENSG00000099219                                 |
| 9 | 6007783   | 6008204   | 5Y-H4K8ac_peak_16597 | 8.17203  | KIAA2026_ENSG00000183354;MIR4665_ENSG00000263575      |
| 9 | 6015891   | 6016172   | 5Y-H4K8ac_peak_16598 | 15.60239 | RANBP6_ENSG00000137040                                |
| 9 | 6412470   | 6413012   | 5Y-H4K8ac_peak_16599 | 17.04136 | UHRF2_ENSG00000147854                                 |
| 9 | 6680865   | 6681220   | 5Y-H4K8ac_peak_16600 | 13.10145 |                                                       |
| 9 | 6681445   | 6681765   | 5Y-H4K8ac_peak_16601 | 12.05638 |                                                       |
| 9 | 6681986   | 6682448   | 5Y-H4K8ac_peak_16602 | 6.14981  |                                                       |
| 9 | 6704384   | 6704817   | 5Y-H4K8ac_peak_16603 | 13.72401 | RP11-390F4.10_ENSG00000229611                         |
| 9 | 6925431   | 6925627   | 5Y-H4K8ac_peak_16604 | 6.20875  |                                                       |

|   |          |          |                      |          |                                                    |
|---|----------|----------|----------------------|----------|----------------------------------------------------|
| 9 | 7224743  | 7225021  | 5Y-H4K8ac_peak_16605 | 6.34046  |                                                    |
| 9 | 7799516  | 7799734  | 5Y-H4K8ac_peak_16606 | 7.89273  |                                                    |
| 9 | 12658496 | 12658760 | 5Y-H4K8ac_peak_16607 | 4.47071  |                                                    |
| 9 | 13278756 | 13279119 | 5Y-H4K8ac_peak_16608 | 6.78128  | MPDZ_ENSG00000107186;RP11-272P10.2_ENSG00000234740 |
| 9 | 13279438 | 13279674 | 5Y-H4K8ac_peak_16609 | 4.29586  | MPDZ_ENSG00000107186;RP11-272P10.2_ENSG00000234740 |
| 9 | 13431054 | 13431254 | 5Y-H4K8ac_peak_16610 | 9.38203  |                                                    |
| 9 | 14313159 | 14313360 | 5Y-H4K8ac_peak_16611 | 5.41472  |                                                    |
| 9 | 14314231 | 14314464 | 5Y-H4K8ac_peak_16612 | 11.20652 |                                                    |
| 9 | 14314827 | 14315375 | 5Y-H4K8ac_peak_16613 | 11.19336 |                                                    |
| 9 | 14315745 | 14316071 | 5Y-H4K8ac_peak_16614 | 12.87247 |                                                    |
| 9 | 14322280 | 14322476 | 5Y-H4K8ac_peak_16615 | 4.07874  |                                                    |
| 9 | 14322672 | 14323080 | 5Y-H4K8ac_peak_16616 | 12.71156 |                                                    |
| 9 | 14370645 | 14370874 | 5Y-H4K8ac_peak_16617 | 6.07082  |                                                    |
| 9 | 14374199 | 14374741 | 5Y-H4K8ac_peak_16618 | 6.34046  |                                                    |
| 9 | 14403148 | 14403400 | 5Y-H4K8ac_peak_16619 | 8.8236   |                                                    |
| 9 | 14419366 | 14419809 | 5Y-H4K8ac_peak_16620 | 6.66026  |                                                    |
| 9 | 14515141 | 14515897 | 5Y-H4K8ac_peak_16621 | 8.35139  |                                                    |
| 9 | 14517771 | 14517978 | 5Y-H4K8ac_peak_16622 | 6.27984  |                                                    |
| 9 | 14533627 | 14534159 | 5Y-H4K8ac_peak_16623 | 4.50834  |                                                    |
| 9 | 14693131 | 14694161 | 5Y-H4K8ac_peak_16624 | 19.17092 | ZDHHC21_ENSG00000175893                            |
| 9 | 14993481 | 14994026 | 5Y-H4K8ac_peak_16625 | 9.30505  | RP11-54D18.2_ENSG00000215237                       |
| 9 | 15085246 | 15085472 | 5Y-H4K8ac_peak_16626 | 8.35139  |                                                    |
| 9 | 16726927 | 16727162 | 5Y-H4K8ac_peak_16627 | 7.59101  | RP11-62F24.2_ENSG00000234779                       |
| 9 | 16870338 | 16870566 | 5Y-H4K8ac_peak_16628 | 5.40331  | BNC2_ENSG00000173068                               |
| 9 | 17059889 | 17060172 | 5Y-H4K8ac_peak_16629 | 4.50834  |                                                    |
| 9 | 17134577 | 17134843 | 5Y-H4K8ac_peak_16630 | 14.72057 | CNTLN_ENSG00000044459                              |
| 9 | 17135085 | 17135330 | 5Y-H4K8ac_peak_16631 | 10.35586 | CNTLN_ENSG00000044459                              |
| 9 | 19048255 | 19048475 | 5Y-H4K8ac_peak_16632 | 5.04571  | RRAGA_ENSG00000155876                              |
| 9 | 19048924 | 19049141 | 5Y-H4K8ac_peak_16633 | 4.15658  | RRAGA_ENSG00000155876                              |
| 9 | 19102589 | 19102858 | 5Y-H4K8ac_peak_16634 | 7.04637  | HAUS6_ENSG00000147874                              |
| 9 | 19127229 | 19127426 | 5Y-H4K8ac_peak_16635 | 11.86504 |                                                    |
| 9 | 19129114 | 19129420 | 5Y-H4K8ac_peak_16636 | 5.40331  |                                                    |
| 9 | 19229847 | 19230316 | 5Y-H4K8ac_peak_16637 | 12.21176 | DENND4C_ENSG00000137145                            |
| 9 | 19230915 | 19231241 | 5Y-H4K8ac_peak_16638 | 6.77436  | DENND4C_ENSG00000137145                            |
| 9 | 19408434 | 19408681 | 5Y-H4K8ac_peak_16639 | 4.95697  | ACER2_ENSG00000177076                              |
| 9 | 20243912 | 20244157 | 5Y-H4K8ac_peak_16640 | 9.51254  |                                                    |
| 9 | 23820842 | 23821423 | 5Y-H4K8ac_peak_16641 | 5.81062  |                                                    |
| 9 | 25677434 | 25678806 | 5Y-H4K8ac_peak_16642 | 7.89142  | TUSC1_ENSG00000198680                              |
| 9 | 26946864 | 26947056 | 5Y-H4K8ac_peak_16643 | 7.90236  | PLAA_ENSG00000137055;IFT74_ENSG00000096872         |
| 9 | 26947263 | 26947469 | 5Y-H4K8ac_peak_16644 | 6.37023  | PLAA_ENSG00000137055;IFT74_ENSG00000096872         |
| 9 | 27529413 | 27529815 | 5Y-H4K8ac_peak_16645 | 9.23159  | MOB3B_ENSG00000120162                              |
| 9 | 27572830 | 27573398 | 5Y-H4K8ac_peak_16646 | 8.84534  | C9orf72_ENSG00000147894                            |
| 9 | 29213034 | 29213234 | 5Y-H4K8ac_peak_16647 | 6.17374  |                                                    |
| 9 | 32573279 | 32573667 | 5Y-H4K8ac_peak_16648 | 5.65584  | NDUFB6_ENSG00000165264                             |
| 9 | 32782824 | 32783179 | 5Y-H4K8ac_peak_16649 | 4.95697  | TMEM215_ENSG00000188133                            |
| 9 | 33025320 | 33025585 | 5Y-H4K8ac_peak_16650 | 17.67751 | APTX_ENSG00000137074;DNAJA1_ENSG00000086061        |

|   |          |          |                      |          |                                                      |
|---|----------|----------|----------------------|----------|------------------------------------------------------|
| 9 | 33076336 | 33076597 | 5Y-H4K8ac_peak_16651 | 9.65108  | SMU1_ENSG00000122692                                 |
| 9 | 33159307 | 33159756 | 5Y-H4K8ac_peak_16652 | 5.87382  |                                                      |
| 9 | 33290570 | 33290760 | 5Y-H4K8ac_peak_16653 | 6.73385  | NFX1_ENSG00000086102                                 |
| 9 | 33403191 | 33403411 | 5Y-H4K8ac_peak_16654 | 7.57144  | AQP7_ENSG00000165269;RP11-311H10.4_ENSG00000223678   |
| 9 | 33510885 | 33511245 | 5Y-H4K8ac_peak_16655 | 13.92877 | SUGT1P_ENSG00000226823                               |
| 9 | 33511648 | 33511868 | 5Y-H4K8ac_peak_16656 | 6.20875  | SUGT1P_ENSG00000226823                               |
| 9 | 33523582 | 33523897 | 5Y-H4K8ac_peak_16657 | 9.07085  | ANKRD18B_ENSG00000230453                             |
| 9 | 33721800 | 33722153 | 5Y-H4K8ac_peak_16658 | 11.1169  |                                                      |
| 9 | 33750747 | 33751022 | 5Y-H4K8ac_peak_16659 | 9.01738  | PRSS3_ENSG00000010438                                |
| 9 | 33816642 | 33816933 | 5Y-H4K8ac_peak_16660 | 13.70457 | UBE2R2_ENSG00000107341                               |
| 9 | 33817430 | 33818022 | 5Y-H4K8ac_peak_16661 | 17.50049 | RP11-133O22.6_ENSG00000235481;UBE2R2_ENSG00000107341 |
| 9 | 34048976 | 34049489 | 5Y-H4K8ac_peak_16662 | 9.36633  | UBAP2_ENSG00000137073;RN7SKP114_ENSG00000222259      |
| 9 | 34178583 | 34178790 | 5Y-H4K8ac_peak_16663 | 5.35202  | UBAP1_ENSG00000165006                                |
| 9 | 34553949 | 34554697 | 5Y-H4K8ac_peak_16664 | 5.83799  |                                                      |
| 9 | 34555626 | 34555832 | 5Y-H4K8ac_peak_16665 | 7.60057  |                                                      |
| 9 | 34557803 | 34557997 | 5Y-H4K8ac_peak_16666 | 4.59665  |                                                      |
| 9 | 34558859 | 34559061 | 5Y-H4K8ac_peak_16667 | 8.20773  |                                                      |
| 9 | 34559271 | 34559491 | 5Y-H4K8ac_peak_16668 | 10.35586 |                                                      |
| 9 | 34559726 | 34560531 | 5Y-H4K8ac_peak_16669 | 7.10001  |                                                      |
| 9 | 34566420 | 34566613 | 5Y-H4K8ac_peak_16670 | 5.12488  |                                                      |
| 9 | 34570947 | 34571458 | 5Y-H4K8ac_peak_16671 | 9.51254  |                                                      |
| 9 | 34574312 | 34574505 | 5Y-H4K8ac_peak_16672 | 4.38969  |                                                      |
| 9 | 34577984 | 34578652 | 5Y-H4K8ac_peak_16673 | 15.73087 |                                                      |
| 9 | 34580364 | 34580567 | 5Y-H4K8ac_peak_16674 | 7.89273  |                                                      |
| 9 | 34583800 | 34584078 | 5Y-H4K8ac_peak_16675 | 5.21222  |                                                      |
| 9 | 34589911 | 34590142 | 5Y-H4K8ac_peak_16676 | 11.04542 | CNTFR_ENSG00000122756                                |
| 9 | 34591395 | 34591598 | 5Y-H4K8ac_peak_16677 | 6.50117  |                                                      |
| 9 | 34611678 | 34612018 | 5Y-H4K8ac_peak_16678 | 6.08523  | RPP25L_ENSG00000164967                               |
| 9 | 34612265 | 34612625 | 5Y-H4K8ac_peak_16679 | 4.50834  | RPP25L_ENSG00000164967                               |
| 9 | 34620101 | 34620403 | 5Y-H4K8ac_peak_16680 | 5.91107  | DCTN3_ENSG00000137100                                |
| 9 | 34637190 | 34637695 | 5Y-H4K8ac_peak_16681 | 10.69698 | SIGMAR1_ENSG00000147955;GALT_ENSG00000213930         |
| 9 | 34638008 | 34638307 | 5Y-H4K8ac_peak_16682 | 7.58806  | SIGMAR1_ENSG00000147955;GALT_ENSG00000213930         |
| 9 | 34651937 | 34652215 | 5Y-H4K8ac_peak_16683 | 5.2814   |                                                      |
| 9 | 34653918 | 34654246 | 5Y-H4K8ac_peak_16684 | 8.69895  |                                                      |
| 9 | 34957652 | 34958051 | 5Y-H4K8ac_peak_16685 | 7.31815  | KIAA1045_ENSG00000122733                             |
| 9 | 34988489 | 34988695 | 5Y-H4K8ac_peak_16686 | 4.59169  | DNAJB5_ENSG00000137094                               |
| 9 | 34993519 | 34993770 | 5Y-H4K8ac_peak_16687 | 4.50834  |                                                      |
| 9 | 34994663 | 34994884 | 5Y-H4K8ac_peak_16688 | 7.38046  |                                                      |
| 9 | 35095676 | 35096038 | 5Y-H4K8ac_peak_16689 | 9.74189  | PIGO_ENSG00000165282;RP11-182N22.8_ENSG00000234181   |
| 9 | 35096244 | 35096577 | 5Y-H4K8ac_peak_16690 | 23.5028  | PIGO_ENSG00000165282;RP11-182N22.8_ENSG00000234181   |
| 9 | 35162054 | 35162337 | 5Y-H4K8ac_peak_16691 | 7.31102  | UNC13B_ENSG00000198722                               |
| 9 | 35489436 | 35490567 | 5Y-H4K8ac_peak_16692 | 10.16277 | RUSC2_ENSG00000198853                                |
| 9 | 35617039 | 35617313 | 5Y-H4K8ac_peak_16693 | 6.37023  |                                                      |
| 9 | 35647061 | 35647308 | 5Y-H4K8ac_peak_16694 | 6.08523  | CD72_ENSG00000137101;RP11-331F9.4_ENSG00000227933    |
| 9 | 35664467 | 35664665 | 5Y-H4K8ac_peak_16695 | 3.99744  |                                                      |
| 9 | 35675810 | 35676417 | 5Y-H4K8ac_peak_16696 | 18.10232 | ARHGEF39_ENSG00000137135                             |

|   |          |          |                      |          |                                                           |
|---|----------|----------|----------------------|----------|-----------------------------------------------------------|
| 9 | 35749408 | 35749599 | 5Y-H4K8ac_peak_16697 | 7.09658  | GBA2_ENSG00000070610;RGP1_ENSG00000107185                 |
| 9 | 35756544 | 35757395 | 5Y-H4K8ac_peak_16698 | 7.38046  | MSMP_ENSG00000215183;RP11-112J3.15_ENSG00000228843        |
| 9 | 36023307 | 36023519 | 5Y-H4K8ac_peak_16699 | 5.28616  |                                                           |
| 9 | 36036399 | 36036704 | 5Y-H4K8ac_peak_16700 | 5.54013  | RECK_ENSG00000122707                                      |
| 9 | 36136230 | 36136572 | 5Y-H4K8ac_peak_16701 | 7.89273  |                                                           |
| 9 | 36137269 | 36137468 | 5Y-H4K8ac_peak_16702 | 6.37023  |                                                           |
| 9 | 36148417 | 36148642 | 5Y-H4K8ac_peak_16703 | 5.23083  |                                                           |
| 9 | 36166281 | 36166496 | 5Y-H4K8ac_peak_16704 | 6.51488  |                                                           |
| 9 | 36191018 | 36191278 | 5Y-H4K8ac_peak_16705 | 11.09973 | CLTA_ENSG00000122705                                      |
| 9 | 36258214 | 36258410 | 5Y-H4K8ac_peak_16706 | 5.12488  |                                                           |
| 9 | 36400461 | 36400681 | 5Y-H4K8ac_peak_16707 | 7.11863  |                                                           |
| 9 | 36486805 | 36487543 | 5Y-H4K8ac_peak_16708 | 8.21525  | RNF38_ENSG00000137075                                     |
| 9 | 36766290 | 36766742 | 5Y-H4K8ac_peak_16709 | 8.2913   |                                                           |
| 9 | 36842249 | 36842455 | 5Y-H4K8ac_peak_16710 | 6.1654   |                                                           |
| 9 | 36986492 | 36987145 | 5Y-H4K8ac_peak_16711 | 5.98695  |                                                           |
| 9 | 37036526 | 37036788 | 5Y-H4K8ac_peak_16712 | 7.89142  |                                                           |
| 9 | 37037318 | 37038261 | 5Y-H4K8ac_peak_16713 | 5.41472  |                                                           |
| 9 | 37080120 | 37080362 | 5Y-H4K8ac_peak_16714 | 5.77617  | RP11-220I1.5_ENSG00000260100;RP11-220I1.1_ENSG00000233137 |
| 9 | 37120649 | 37120864 | 5Y-H4K8ac_peak_16715 | 9.15007  | ZCCHC7_ENSG00000147905                                    |
| 9 | 37415531 | 37415769 | 5Y-H4K8ac_peak_16716 | 7.59101  |                                                           |
| 9 | 37422202 | 37422514 | 5Y-H4K8ac_peak_16717 | 7.30348  | GRHPR_ENSG00000137106                                     |
| 9 | 37464996 | 37465290 | 5Y-H4K8ac_peak_16718 | 10.69698 | ZBTB5_ENSG00000168795                                     |
| 9 | 37466380 | 37466953 | 5Y-H4K8ac_peak_16719 | 10.60083 | ZBTB5_ENSG00000168795                                     |
| 9 | 37482056 | 37482275 | 5Y-H4K8ac_peak_16720 | 9.88125  |                                                           |
| 9 | 37575959 | 37576202 | 5Y-H4K8ac_peak_16721 | 6.73385  |                                                           |
| 9 | 37678770 | 37678992 | 5Y-H4K8ac_peak_16722 | 6.94416  |                                                           |
| 9 | 37753872 | 37754188 | 5Y-H4K8ac_peak_16723 | 9.23159  | TRMT10B_ENSG00000165275                                   |
| 9 | 37784696 | 37784914 | 5Y-H4K8ac_peak_16724 | 8.69112  |                                                           |
| 9 | 37904900 | 37905144 | 5Y-H4K8ac_peak_16725 | 9.56516  | SLC25A51_ENSG00000122696                                  |
| 9 | 37937678 | 37937980 | 5Y-H4K8ac_peak_16726 | 8.4454   | RNU7-124P_ENSG00000251745                                 |
| 9 | 37977200 | 37977531 | 5Y-H4K8ac_peak_16727 | 5.23083  |                                                           |
| 9 | 37978534 | 37978789 | 5Y-H4K8ac_peak_16728 | 7.35333  |                                                           |
| 9 | 37997203 | 37997482 | 5Y-H4K8ac_peak_16729 | 7.55879  |                                                           |
| 9 | 38019083 | 38019671 | 5Y-H4K8ac_peak_16730 | 7.59101  |                                                           |
| 9 | 38068207 | 38068519 | 5Y-H4K8ac_peak_16731 | 9.63153  | RP11-613M10.9_ENSG00000255872;SHB_ENSG00000107338         |
| 9 | 38154089 | 38154405 | 5Y-H4K8ac_peak_16732 | 5.77617  |                                                           |
| 9 | 38154898 | 38155112 | 5Y-H4K8ac_peak_16733 | 7.59101  |                                                           |
| 9 | 38155669 | 38155967 | 5Y-H4K8ac_peak_16734 | 5.8635   |                                                           |
| 9 | 38214608 | 38214924 | 5Y-H4K8ac_peak_16735 | 9.30505  |                                                           |
| 9 | 38225034 | 38225314 | 5Y-H4K8ac_peak_16736 | 12.49199 |                                                           |
| 9 | 38226019 | 38226219 | 5Y-H4K8ac_peak_16737 | 8.17203  |                                                           |
| 9 | 38226434 | 38226826 | 5Y-H4K8ac_peak_16738 | 12.09463 |                                                           |
| 9 | 38228160 | 38228597 | 5Y-H4K8ac_peak_16739 | 8.1667   |                                                           |
| 9 | 38229471 | 38229767 | 5Y-H4K8ac_peak_16740 | 6.61077  |                                                           |
| 9 | 38232676 | 38233343 | 5Y-H4K8ac_peak_16741 | 19.72309 |                                                           |
| 9 | 38234603 | 38235577 | 5Y-H4K8ac_peak_16742 | 11.1169  |                                                           |



|   |          |          |                      |          |                                                         |
|---|----------|----------|----------------------|----------|---------------------------------------------------------|
| 9 | 38284771 | 38285002 | 5Y-H4K8ac_peak_16743 | 7.90751  |                                                         |
| 9 | 38308847 | 38309039 | 5Y-H4K8ac_peak_16744 | 7.01266  |                                                         |
| 9 | 38345251 | 38345544 | 5Y-H4K8ac_peak_16745 | 4.07874  |                                                         |
| 9 | 38361509 | 38361825 | 5Y-H4K8ac_peak_16746 | 8.43011  |                                                         |
| 9 | 38372268 | 38372695 | 5Y-H4K8ac_peak_16747 | 10.19948 |                                                         |
| 9 | 38422467 | 38422719 | 5Y-H4K8ac_peak_16748 | 7.59101  |                                                         |
| 9 | 38424029 | 38424451 | 5Y-H4K8ac_peak_16749 | 9.02782  | IGFBPL1_ENSG00000137142                                 |
| 9 | 38620806 | 38621649 | 5Y-H4K8ac_peak_16750 | 10.1994  | ANKRD18A_ENSG00000180071;FAM201A_ENSG00000204860        |
| 9 | 38762555 | 38762877 | 5Y-H4K8ac_peak_16751 | 5.12213  |                                                         |
| 9 | 39078644 | 39079012 | 5Y-H4K8ac_peak_16752 | 9.20645  |                                                         |
| 9 | 41954471 | 41954952 | 5Y-H4K8ac_peak_16753 | 5.40265  | RP11-104G3.2_ENSG00000229273                            |
| 9 | 45356002 | 45356231 | 5Y-H4K8ac_peak_16754 | 16.30401 |                                                         |
| 9 | 45440965 | 45441217 | 5Y-H4K8ac_peak_16755 | 9.38203  | AL354718.1_ENSG00000268578                              |
| 9 | 66455548 | 66456075 | 5Y-H4K8ac_peak_16756 | 13.1986  |                                                         |
| 9 | 66457333 | 66458530 | 5Y-H4K8ac_peak_16757 | 15.41202 | RP11-262H14.1_ENSG00000238113;RNA5SP283_ENSG00000202474 |
| 9 | 66489234 | 66489457 | 5Y-H4K8ac_peak_16758 | 7.11863  |                                                         |
| 9 | 66493232 | 66494136 | 5Y-H4K8ac_peak_16759 | 19.06379 | RP11-262H14.5_ENSG00000229422                           |
| 9 | 66519817 | 66520023 | 5Y-H4K8ac_peak_16760 | 9.02938  | RP11-262H14.7_ENSG00000227582                           |
| 9 | 66520405 | 66520806 | 5Y-H4K8ac_peak_16761 | 8.98784  | RP11-262H14.7_ENSG00000227582                           |
| 9 | 67339616 | 67339891 | 5Y-H4K8ac_peak_16762 | 7.11863  |                                                         |
| 9 | 68412891 | 68413153 | 5Y-H4K8ac_peak_16763 | 6.08471  |                                                         |
| 9 | 68413565 | 68413823 | 5Y-H4K8ac_peak_16764 | 9.87124  | LINC00537_ENSG00000232815                               |
| 9 | 71394366 | 71394713 | 5Y-H4K8ac_peak_16765 | 8.79957  | FAM122A_ENSG00000187866                                 |
| 9 | 71736023 | 71736257 | 5Y-H4K8ac_peak_16766 | 8.33296  | TJP2_ENSG00000119139                                    |
| 9 | 71762045 | 71762248 | 5Y-H4K8ac_peak_16767 | 7.76232  |                                                         |
| 9 | 72628049 | 72628259 | 5Y-H4K8ac_peak_16768 | 7.38046  |                                                         |
| 9 | 73034799 | 73034995 | 5Y-H4K8ac_peak_16769 | 6.78318  |                                                         |
| 9 | 73035415 | 73035719 | 5Y-H4K8ac_peak_16770 | 10.1994  |                                                         |
| 9 | 73035923 | 73036210 | 5Y-H4K8ac_peak_16771 | 8.21582  |                                                         |
| 9 | 76975019 | 76975323 | 5Y-H4K8ac_peak_16772 | 5.23083  |                                                         |
| 9 | 77567321 | 77567740 | 5Y-H4K8ac_peak_16773 | 17.50049 | C9orf40_ENSG00000135045;RP11-197P3.4_ENSG00000203321    |
| 9 | 77643865 | 77644058 | 5Y-H4K8ac_peak_16774 | 7.17184  | C9orf41_ENSG00000156017                                 |
| 9 | 79008900 | 79009247 | 5Y-H4K8ac_peak_16775 | 4.90696  | RFK_ENSG00000135002                                     |
| 9 | 80247491 | 80247699 | 5Y-H4K8ac_peak_16776 | 6.34046  |                                                         |
| 9 | 80512466 | 80512730 | 5Y-H4K8ac_peak_16777 | 4.50834  |                                                         |
| 9 | 80604392 | 80604656 | 5Y-H4K8ac_peak_16778 | 6.6946   |                                                         |
| 9 | 80646026 | 80646405 | 5Y-H4K8ac_peak_16779 | 8.73985  | GNAQ_ENSG00000156052                                    |
| 9 | 80646992 | 80647185 | 5Y-H4K8ac_peak_16780 | 5.67283  | GNAQ_ENSG00000156052                                    |
| 9 | 80850540 | 80850823 | 5Y-H4K8ac_peak_16781 | 7.59101  | CEP78_ENSG00000148019                                   |
| 9 | 80851234 | 80851425 | 5Y-H4K8ac_peak_16782 | 7.30348  | CEP78_ENSG00000148019                                   |
| 9 | 80911557 | 80911754 | 5Y-H4K8ac_peak_16783 | 6.10343  | PSAT1_ENSG00000135069                                   |
| 9 | 82185420 | 82185811 | 5Y-H4K8ac_peak_16784 | 8.2913   | TLE4_ENSG00000106829                                    |
| 9 | 82846472 | 82847449 | 5Y-H4K8ac_peak_16785 | 5.87725  |                                                         |
| 9 | 84303376 | 84303747 | 5Y-H4K8ac_peak_16786 | 4.0639   | TLE1_ENSG00000196781;RP11-154D17.1_ENSG00000233926      |
| 9 | 84731052 | 84731306 | 5Y-H4K8ac_peak_16787 | 6.20875  |                                                         |
| 9 | 85294511 | 85294869 | 5Y-H4K8ac_peak_16788 | 6.17374  |                                                         |

|   |          |          |                      |          |                                                   |
|---|----------|----------|----------------------|----------|---------------------------------------------------|
| 9 | 85573269 | 85573615 | 5Y-H4K8ac_peak_16789 | 9.6443   |                                                   |
| 9 | 85677196 | 85677968 | 5Y-H4K8ac_peak_16790 | 9.30505  | RASEF_ENSG00000165105                             |
| 9 | 85834364 | 85834559 | 5Y-H4K8ac_peak_16791 | 5.07473  | RP11-439K3.1_ENSG00000229109                      |
| 9 | 86065612 | 86065870 | 5Y-H4K8ac_peak_16792 | 4.50834  |                                                   |
| 9 | 86571072 | 86571933 | 5Y-H4K8ac_peak_16793 | 5.98695  | C9orf64_ENSG00000165118                           |
| 9 | 86594724 | 86595101 | 5Y-H4K8ac_peak_16794 | 8.04693  | HNRNPK_ENSG00000165119;RMI1_ENSG00000178966       |
| 9 | 86595815 | 86596206 | 5Y-H4K8ac_peak_16795 | 7.83553  | HNRNPK_ENSG00000165119;RMI1_ENSG00000178966       |
| 9 | 88420368 | 88420875 | 5Y-H4K8ac_peak_16796 | 9.52603  |                                                   |
| 9 | 88556204 | 88556578 | 5Y-H4K8ac_peak_16797 | 12.06963 | NAA35_ENSG00000135040                             |
| 9 | 88713890 | 88714820 | 5Y-H4K8ac_peak_16798 | 15.01219 | GOLM1_ENSG00000135052                             |
| 9 | 88968975 | 88969250 | 5Y-H4K8ac_peak_16799 | 4.29586  | ZCCHC6_ENSG00000083223                            |
| 9 | 88969563 | 88969804 | 5Y-H4K8ac_peak_16800 | 13.0168  | ZCCHC6_ENSG00000083223                            |
| 9 | 89517628 | 89517831 | 5Y-H4K8ac_peak_16801 | 6.83519  |                                                   |
| 9 | 89763409 | 89764045 | 5Y-H4K8ac_peak_16802 | 10.1994  | C9orf170_ENSG00000204446                          |
| 9 | 90112909 | 90113424 | 5Y-H4K8ac_peak_16803 | 13.14766 | DAPK1_ENSG00000196730                             |
| 9 | 90326996 | 90327367 | 5Y-H4K8ac_peak_16804 | 6.07082  |                                                   |
| 9 | 90341552 | 90341861 | 5Y-H4K8ac_peak_16805 | 10.84616 |                                                   |
| 9 | 90691206 | 90691626 | 5Y-H4K8ac_peak_16806 | 10.19948 |                                                   |
| 9 | 90692140 | 90692402 | 5Y-H4K8ac_peak_16807 | 7.01266  |                                                   |
| 9 | 91358957 | 91359206 | 5Y-H4K8ac_peak_16808 | 5.23083  |                                                   |
| 9 | 91361900 | 91362131 | 5Y-H4K8ac_peak_16809 | 6.2403   |                                                   |
| 9 | 91442512 | 91442707 | 5Y-H4K8ac_peak_16810 | 5.91107  |                                                   |
| 9 | 91503780 | 91503978 | 5Y-H4K8ac_peak_16811 | 7.3889   |                                                   |
| 9 | 91625299 | 91625672 | 5Y-H4K8ac_peak_16812 | 9.99623  | RP11-82L18.4_ENSG00000231632                      |
| 9 | 91849411 | 91849653 | 5Y-H4K8ac_peak_16813 | 5.40331  |                                                   |
| 9 | 91925127 | 91925628 | 5Y-H4K8ac_peak_16814 | 19.10058 | CKS2_ENSG00000123975                              |
| 9 | 91933025 | 91933647 | 5Y-H4K8ac_peak_16815 | 19.17092 | SECISBP2_ENSG00000187742                          |
| 9 | 92068326 | 92068567 | 5Y-H4K8ac_peak_16816 | 9.97632  |                                                   |
| 9 | 92112463 | 92112863 | 5Y-H4K8ac_peak_16817 | 6.50117  | SEMA4D_ENSG00000187764;AL590233.1_ENSG00000264913 |
| 9 | 92113308 | 92113683 | 5Y-H4K8ac_peak_16818 | 5.41472  | SEMA4D_ENSG00000187764;AL590233.1_ENSG00000264913 |
| 9 | 92152771 | 92152974 | 5Y-H4K8ac_peak_16819 | 5.35202  |                                                   |
| 9 | 92156786 | 92156991 | 5Y-H4K8ac_peak_16820 | 6.67017  |                                                   |
| 9 | 92157744 | 92157988 | 5Y-H4K8ac_peak_16821 | 5.35202  |                                                   |
| 9 | 92219023 | 92219227 | 5Y-H4K8ac_peak_16822 | 4.50834  | GADD45G_ENSG00000130222                           |
| 9 | 92277678 | 92278072 | 5Y-H4K8ac_peak_16823 | 11.08964 |                                                   |
| 9 | 92290302 | 92290932 | 5Y-H4K8ac_peak_16824 | 15.59156 |                                                   |
| 9 | 92292229 | 92292437 | 5Y-H4K8ac_peak_16825 | 5.98695  |                                                   |
| 9 | 92293233 | 92293582 | 5Y-H4K8ac_peak_16826 | 6.96612  |                                                   |
| 9 | 92337015 | 92337221 | 5Y-H4K8ac_peak_16827 | 5.87382  |                                                   |
| 9 | 92447341 | 92447552 | 5Y-H4K8ac_peak_16828 | 8.79957  |                                                   |
| 9 | 92447901 | 92448194 | 5Y-H4K8ac_peak_16829 | 9.30505  |                                                   |
| 9 | 92451387 | 92452065 | 5Y-H4K8ac_peak_16830 | 9.6443   |                                                   |
| 9 | 92685165 | 92685635 | 5Y-H4K8ac_peak_16831 | 5.65584  |                                                   |
| 9 | 92716087 | 92716732 | 5Y-H4K8ac_peak_16832 | 14.72547 |                                                   |
| 9 | 92717239 | 92717520 | 5Y-H4K8ac_peak_16833 | 6.17374  |                                                   |
| 9 | 92761732 | 92762004 | 5Y-H4K8ac_peak_16834 | 5.98695  |                                                   |

|   |          |          |                      |          |                                            |
|---|----------|----------|----------------------|----------|--------------------------------------------|
| 9 | 93563669 | 93564524 | 5Y-H4K8ac_peak_16835 | 5.72233  | SYK_ENSG00000165025                        |
| 9 | 93955567 | 93955931 | 5Y-H4K8ac_peak_16836 | 6.50117  |                                            |
| 9 | 94183538 | 94183834 | 5Y-H4K8ac_peak_16837 | 10.6025  |                                            |
| 9 | 94619866 | 94620058 | 5Y-H4K8ac_peak_16838 | 7.4047   |                                            |
| 9 | 94662455 | 94662882 | 5Y-H4K8ac_peak_16839 | 6.37023  |                                            |
| 9 | 94878142 | 94878344 | 5Y-H4K8ac_peak_16840 | 5.28616  | SPTLC1_ENSG00000090054                     |
| 9 | 95087974 | 95088195 | 5Y-H4K8ac_peak_16841 | 13.12848 | NOL8_ENSG00000198000;CENPP_ENSG00000188312 |
| 9 | 95121347 | 95121658 | 5Y-H4K8ac_peak_16842 | 6.20875  |                                            |
| 9 | 95123061 | 95123265 | 5Y-H4K8ac_peak_16843 | 5.65584  |                                            |
| 9 | 95255028 | 95255314 | 5Y-H4K8ac_peak_16844 | 6.37023  |                                            |
| 9 | 95413740 | 95413997 | 5Y-H4K8ac_peak_16845 | 6.77436  |                                            |
| 9 | 95527532 | 95527752 | 5Y-H4K8ac_peak_16846 | 13.45283 | BICD2_ENSG00000185963                      |
| 9 | 95709683 | 95709995 | 5Y-H4K8ac_peak_16847 | 5.77617  | FGD3_ENSG00000127084                       |
| 9 | 95896477 | 95896687 | 5Y-H4K8ac_peak_16848 | 4.18845  | NINJ1_ENSG00000131669                      |
| 9 | 95896977 | 95897173 | 5Y-H4K8ac_peak_16849 | 6.22669  | NINJ1_ENSG00000131669                      |
| 9 | 95946614 | 95947226 | 5Y-H4K8ac_peak_16850 | 7.15925  | WNK2_ENSG00000165238                       |
| 9 | 95963497 | 95963851 | 5Y-H4K8ac_peak_16851 | 11.1169  |                                            |
| 9 | 95965399 | 95965615 | 5Y-H4K8ac_peak_16852 | 6.34772  |                                            |
| 9 | 95968342 | 95968625 | 5Y-H4K8ac_peak_16853 | 4.29586  |                                            |
| 9 | 95985911 | 95986262 | 5Y-H4K8ac_peak_16854 | 9.77183  |                                            |
| 9 | 96082368 | 96082615 | 5Y-H4K8ac_peak_16855 | 6.6946   |                                            |
| 9 | 96108414 | 96108980 | 5Y-H4K8ac_peak_16856 | 8.2913   | C9orf129_ENSG00000204352                   |
| 9 | 96329067 | 96329567 | 5Y-H4K8ac_peak_16857 | 13.00733 | AL353629.1_ENSG00000263875                 |
| 9 | 96337666 | 96337972 | 5Y-H4K8ac_peak_16858 | 8.63676  | PHF2_ENSG00000197724                       |
| 9 | 96338292 | 96338735 | 5Y-H4K8ac_peak_16859 | 5.98695  | PHF2_ENSG00000197724                       |
| 9 | 96339309 | 96339718 | 5Y-H4K8ac_peak_16860 | 10.77539 | PHF2_ENSG00000197724                       |
| 9 | 96589999 | 96590204 | 5Y-H4K8ac_peak_16861 | 6.50117  |                                            |
| 9 | 96590466 | 96590659 | 5Y-H4K8ac_peak_16862 | 5.59843  |                                            |
| 9 | 96793141 | 96793394 | 5Y-H4K8ac_peak_16863 | 14.43262 | PTPDC1_ENSG00000158079                     |
| 9 | 96928671 | 96928938 | 5Y-H4K8ac_peak_16864 | 14.43262 | RP11-2B6.3_ENSG00000269946                 |
| 9 | 97020795 | 97021088 | 5Y-H4K8ac_peak_16865 | 5.64909  | ZNF169_ENSG00000175787                     |
| 9 | 97371902 | 97372201 | 5Y-H4K8ac_peak_16866 | 6.06162  |                                            |
| 9 | 97373042 | 97373401 | 5Y-H4K8ac_peak_16867 | 7.28023  |                                            |
| 9 | 97385585 | 97385949 | 5Y-H4K8ac_peak_16868 | 6.14981  |                                            |
| 9 | 97466426 | 97466625 | 5Y-H4K8ac_peak_16869 | 6.79955  |                                            |
| 9 | 97467117 | 97467620 | 5Y-H4K8ac_peak_16870 | 10.12234 |                                            |
| 9 | 97476400 | 97476644 | 5Y-H4K8ac_peak_16871 | 7.31815  |                                            |
| 9 | 97488339 | 97488663 | 5Y-H4K8ac_peak_16872 | 6.86362  | C9orf3_ENSG00000148120                     |
| 9 | 97628270 | 97628542 | 5Y-H4K8ac_peak_16873 | 6.59249  |                                            |
| 9 | 97631247 | 97631457 | 5Y-H4K8ac_peak_16874 | 7.89273  |                                            |
| 9 | 97689755 | 97690157 | 5Y-H4K8ac_peak_16875 | 7.72887  |                                            |
| 9 | 97690361 | 97690825 | 5Y-H4K8ac_peak_16876 | 15.82359 |                                            |
| 9 | 97766560 | 97767054 | 5Y-H4K8ac_peak_16877 | 14.55472 |                                            |
| 9 | 97767517 | 97767757 | 5Y-H4K8ac_peak_16878 | 5.98695  |                                            |
| 9 | 97853998 | 97854216 | 5Y-H4K8ac_peak_16879 | 7.03573  |                                            |
| 9 | 97858717 | 97858998 | 5Y-H4K8ac_peak_16880 | 11.28133 |                                            |

|   |           |           |                      |          |                                                                                                                                           |
|---|-----------|-----------|----------------------|----------|-------------------------------------------------------------------------------------------------------------------------------------------|
| 9 | 97865939  | 97866131  | 5Y-H4K8ac_peak_16881 | 8.24461  |                                                                                                                                           |
| 9 | 97889690  | 97889949  | 5Y-H4K8ac_peak_16882 | 8.69112  |                                                                                                                                           |
| 9 | 98079807  | 98080361  | 5Y-H4K8ac_peak_16883 | 6.08523  | FANCC_ENSG00000158169                                                                                                                     |
| 9 | 98213699  | 98213898  | 5Y-H4K8ac_peak_16884 | 8.21582  |                                                                                                                                           |
| 9 | 98268520  | 98269109  | 5Y-H4K8ac_peak_16885 | 8.62703  | RP11-435O5.5_ENSG00000271155                                                                                                              |
| 9 | 98273594  | 98273803  | 5Y-H4K8ac_peak_16886 | 9.05766  |                                                                                                                                           |
| 9 | 98278658  | 98278850  | 5Y-H4K8ac_peak_16887 | 8.35139  | PTCH1_ENSG00000185920                                                                                                                     |
| 9 | 98343906  | 98344134  | 5Y-H4K8ac_peak_16888 | 9.63153  |                                                                                                                                           |
| 9 | 98637974  | 98638198  | 5Y-H4K8ac_peak_16889 | 11.71078 | LINC00476_ENSG00000175611;ERCC6L2_ENSG00000182150                                                                                         |
| 9 | 98965759  | 98966018  | 5Y-H4K8ac_peak_16890 | 5.83608  |                                                                                                                                           |
| 9 | 98981131  | 98981458  | 5Y-H4K8ac_peak_16891 | 7.64675  |                                                                                                                                           |
| 9 | 99179218  | 99179617  | 5Y-H4K8ac_peak_16892 | 4.66683  | ZNF367_ENSG00000165244                                                                                                                    |
| 9 | 99179865  | 99180570  | 5Y-H4K8ac_peak_16893 | 8.51022  | ZNF367_ENSG00000165244                                                                                                                    |
| 9 | 99329276  | 99329494  | 5Y-H4K8ac_peak_16894 | 8.75926  |                                                                                                                                           |
| 9 | 99381902  | 99382104  | 5Y-H4K8ac_peak_16895 | 10.11191 | CDC14B_ENSG00000081377                                                                                                                    |
| 9 | 99800898  | 99801090  | 5Y-H4K8ac_peak_16896 | 6.47245  | CTSV_ENSG00000136943                                                                                                                      |
| 9 | 99801648  | 99801856  | 5Y-H4K8ac_peak_16897 | 5.87382  | CTSV_ENSG00000136943                                                                                                                      |
| 9 | 100000122 | 100000548 | 5Y-H4K8ac_peak_16898 | 7.03573  | RP11-498P14.5_ENSG00000203279;RP11-23J9.5_ENSG00000254876;CCDC180_ENSG00000197816;RP11-23J9.4_ENSG00000255036;RP11-23J9.6_ENSG00000254483 |
| 9 | 100264132 | 100264560 | 5Y-H4K8ac_peak_16899 | 7.60057  | TMOD1_ENSG00000136842                                                                                                                     |
| 9 | 100265957 | 100266218 | 5Y-H4K8ac_peak_16900 | 8.79957  |                                                                                                                                           |
| 9 | 100267581 | 100268147 | 5Y-H4K8ac_peak_16901 | 11.35968 |                                                                                                                                           |
| 9 | 100280102 | 100280342 | 5Y-H4K8ac_peak_16902 | 4.77126  | RP11-244N9.6_ENSG00000228174                                                                                                              |
| 9 | 100683596 | 100684014 | 5Y-H4K8ac_peak_16903 | 5.23083  | C9orf156_ENSG00000136932                                                                                                                  |
| 9 | 100744903 | 100745317 | 5Y-H4K8ac_peak_16904 | 15.82713 | ANP32B_ENSG00000136938                                                                                                                    |
| 9 | 100745685 | 100747465 | 5Y-H4K8ac_peak_16905 | 12.26819 | ANP32B_ENSG00000136938                                                                                                                    |
| 9 | 100881153 | 100881607 | 5Y-H4K8ac_peak_16906 | 8.55081  | TRIM14_ENSG00000106785                                                                                                                    |
| 9 | 101018260 | 101018502 | 5Y-H4K8ac_peak_16907 | 4.90696  | TBC1D2_ENSG00000095383                                                                                                                    |
| 9 | 101559010 | 101559297 | 5Y-H4K8ac_peak_16908 | 6.37023  | ANKS6_ENSG00000165138                                                                                                                     |
| 9 | 101866577 | 101866960 | 5Y-H4K8ac_peak_16909 | 6.34046  | TGFBR1_ENSG00000106799                                                                                                                    |
| 9 | 101867732 | 101868067 | 5Y-H4K8ac_peak_16910 | 7.31102  |                                                                                                                                           |
| 9 | 101946806 | 101947219 | 5Y-H4K8ac_peak_16911 | 11.93212 | RN7SL794P_ENSG00000240235                                                                                                                 |
| 9 | 102180621 | 102180922 | 5Y-H4K8ac_peak_16912 | 5.40331  |                                                                                                                                           |
| 9 | 102227054 | 102227510 | 5Y-H4K8ac_peak_16913 | 9.15007  |                                                                                                                                           |
| 9 | 102581916 | 102582180 | 5Y-H4K8ac_peak_16914 | 12.05638 | RP11-554F20.1_ENSG00000237461                                                                                                             |
| 9 | 102669005 | 102669361 | 5Y-H4K8ac_peak_16915 | 5.64909  | RP11-60I3.5_ENSG00000255145;STX17_ENSG00000136874                                                                                         |
| 9 | 102861565 | 102861801 | 5Y-H4K8ac_peak_16916 | 6.77436  | ERP44_ENSG0000023318;INVS_ENSG00000119509                                                                                                 |
| 9 | 103114895 | 103115179 | 5Y-H4K8ac_peak_16917 | 6.78128  | TEX10_ENSG00000136891                                                                                                                     |
| 9 | 103173601 | 103173806 | 5Y-H4K8ac_peak_16918 | 8.43511  |                                                                                                                                           |
| 9 | 103189700 | 103190081 | 5Y-H4K8ac_peak_16919 | 13.54475 | MSANTD3_ENSG00000066697                                                                                                                   |
| 9 | 104248769 | 104249344 | 5Y-H4K8ac_peak_16920 | 13.4304  |                                                                                                                                           |
| 9 | 107526539 | 107527003 | 5Y-H4K8ac_peak_16921 | 9.02782  | NIPSNAP3B_ENSG00000165028                                                                                                                 |
| 9 | 107730650 | 107731018 | 5Y-H4K8ac_peak_16922 | 7.80156  |                                                                                                                                           |
| 9 | 108007001 | 108007684 | 5Y-H4K8ac_peak_16923 | 5.23083  | SLC44A1_ENSG00000070214                                                                                                                   |
| 9 | 108209840 | 108210202 | 5Y-H4K8ac_peak_16924 | 7.84116  | FSD1L_ENSG00000106701                                                                                                                     |
| 9 | 108418263 | 108418465 | 5Y-H4K8ac_peak_16925 | 9.15007  |                                                                                                                                           |
| 9 | 109622928 | 109623221 | 5Y-H4K8ac_peak_16926 | 9.7353   |                                                                                                                                           |

|   |           |           |                      |          |                                                     |
|---|-----------|-----------|----------------------|----------|-----------------------------------------------------|
| 9 | 109625507 | 109625697 | 5Y-H4K8ac_peak_16927 | 6.76425  | ZNF462_ENSG00000148143                              |
| 9 | 110045681 | 110046005 | 5Y-H4K8ac_peak_16928 | 5.18654  | RAD23B_ENSG00000119318                              |
| 9 | 110125964 | 110126289 | 5Y-H4K8ac_peak_16929 | 6.46053  |                                                     |
| 9 | 110187355 | 110187648 | 5Y-H4K8ac_peak_16930 | 11.42066 |                                                     |
| 9 | 111929210 | 111929447 | 5Y-H4K8ac_peak_16931 | 9.30505  | FRRS1L_ENSG00000260230                              |
| 9 | 113017882 | 113018337 | 5Y-H4K8ac_peak_16932 | 5.23083  | TXN_ENSG00000136810                                 |
| 9 | 113799951 | 113800981 | 5Y-H4K8ac_peak_16933 | 13.2534  | LPAR1_ENSG00000198121                               |
| 9 | 114245384 | 114245574 | 5Y-H4K8ac_peak_16934 | 6.46053  |                                                     |
| 9 | 114246243 | 114246884 | 5Y-H4K8ac_peak_16935 | 6.34046  | KIAA0368_ENSG00000136813                            |
| 9 | 114659135 | 114659582 | 5Y-H4K8ac_peak_16936 | 6.43775  | UGCG_ENSG00000148154                                |
| 9 | 114859921 | 114860120 | 5Y-H4K8ac_peak_16937 | 7.17184  |                                                     |
| 9 | 114937025 | 114938058 | 5Y-H4K8ac_peak_16938 | 15.28394 | SUSD1_ENSG00000106868;RP11-165N19.2_ENSG00000225513 |
| 9 | 115512485 | 115512703 | 5Y-H4K8ac_peak_16939 | 6.73047  | RP11-276E15.4_ENSG00000226609;SNX30_ENSG00000148158 |
| 9 | 115774081 | 115774422 | 5Y-H4K8ac_peak_16940 | 4.642    | ZNF883_ENSG00000228623                              |
| 9 | 116111857 | 116112126 | 5Y-H4K8ac_peak_16941 | 9.52603  | BSPRY_ENSG00000119411                               |
| 9 | 116139449 | 116139739 | 5Y-H4K8ac_peak_16942 | 7.89273  | HDHD3_ENSG00000119431                               |
| 9 | 116356643 | 116357301 | 5Y-H4K8ac_peak_16943 | 5.23083  |                                                     |
| 9 | 116413008 | 116413277 | 5Y-H4K8ac_peak_16944 | 6.00382  | RP11-18B16.2_ENSG00000227482                        |
| 9 | 116638671 | 116638979 | 5Y-H4K8ac_peak_16945 | 7.59101  | ZNF618_ENSG00000157657                              |
| 9 | 116918126 | 116918340 | 5Y-H4K8ac_peak_16946 | 3.88879  | COL27A1_ENSG00000196739                             |
| 9 | 117045215 | 117045415 | 5Y-H4K8ac_peak_16947 | 7.38046  |                                                     |
| 9 | 117049472 | 117049663 | 5Y-H4K8ac_peak_16948 | 5.70209  |                                                     |
| 9 | 117049978 | 117050252 | 5Y-H4K8ac_peak_16949 | 6.43775  |                                                     |
| 9 | 117157105 | 117157435 | 5Y-H4K8ac_peak_16950 | 5.03917  | AKNA_ENSG00000106948                                |
| 9 | 117373149 | 117374176 | 5Y-H4K8ac_peak_16951 | 19.17092 | C9orf91_ENSG00000157693                             |
| 9 | 117534621 | 117534846 | 5Y-H4K8ac_peak_16952 | 6.34046  |                                                     |
| 9 | 119898899 | 119899099 | 5Y-H4K8ac_peak_16953 | 5.03335  |                                                     |
| 9 | 120039244 | 120039471 | 5Y-H4K8ac_peak_16954 | 6.47245  | RN7SKP125_ENSG00000222413                           |
| 9 | 120044001 | 120044191 | 5Y-H4K8ac_peak_16955 | 4.29586  |                                                     |
| 9 | 120082923 | 120083120 | 5Y-H4K8ac_peak_16956 | 5.59843  |                                                     |
| 9 | 120117844 | 120118124 | 5Y-H4K8ac_peak_16957 | 4.14761  |                                                     |
| 9 | 120165309 | 120165540 | 5Y-H4K8ac_peak_16958 | 6.79955  |                                                     |
| 9 | 120165934 | 120166132 | 5Y-H4K8ac_peak_16959 | 8.35139  |                                                     |
| 9 | 120681717 | 120681970 | 5Y-H4K8ac_peak_16960 | 8.04493  |                                                     |
| 9 | 122318678 | 122318875 | 5Y-H4K8ac_peak_16961 | 4.29586  |                                                     |
| 9 | 123341849 | 123342251 | 5Y-H4K8ac_peak_16962 | 5.65584  | CDK5RAP2_ENSG00000136861                            |
| 9 | 123477059 | 123477351 | 5Y-H4K8ac_peak_16963 | 14.00559 | MEGF9_ENSG00000106780                               |
| 9 | 123555422 | 123555622 | 5Y-H4K8ac_peak_16964 | 4.77126  | FBXW2_ENSG00000119402;RP11-271I.4_ENSG00000214654   |
| 9 | 123638058 | 123638657 | 5Y-H4K8ac_peak_16965 | 6.53157  | PHF19_ENSG00000119403                               |
| 9 | 123638986 | 123639219 | 5Y-H4K8ac_peak_16966 | 9.36633  | PHF19_ENSG00000119403                               |
| 9 | 123682022 | 123682490 | 5Y-H4K8ac_peak_16967 | 5.44849  |                                                     |
| 9 | 123698486 | 123698775 | 5Y-H4K8ac_peak_16968 | 6.73047  |                                                     |
| 9 | 123837280 | 123837470 | 5Y-H4K8ac_peak_16969 | 11.09973 | CNTRL_ENSG00000119397                               |
| 9 | 124221700 | 124221894 | 5Y-H4K8ac_peak_16970 | 6.00388  |                                                     |
| 9 | 124270317 | 124270782 | 5Y-H4K8ac_peak_16971 | 7.38046  |                                                     |
| 9 | 124272790 | 124272981 | 5Y-H4K8ac_peak_16972 | 7.90236  |                                                     |

|   |           |           |                      |          |                                                    |
|---|-----------|-----------|----------------------|----------|----------------------------------------------------|
| 9 | 124273671 | 124273877 | 5Y-H4K8ac_peak_16973 | 6.50117  |                                                    |
| 9 | 124274167 | 124274358 | 5Y-H4K8ac_peak_16974 | 7.63144  |                                                    |
| 9 | 124289677 | 124290376 | 5Y-H4K8ac_peak_16975 | 9.15007  |                                                    |
| 9 | 124291228 | 124291501 | 5Y-H4K8ac_peak_16976 | 9.74189  |                                                    |
| 9 | 124308020 | 124308255 | 5Y-H4K8ac_peak_16977 | 8.43511  |                                                    |
| 9 | 124308553 | 124308962 | 5Y-H4K8ac_peak_16978 | 10.24719 |                                                    |
| 9 | 124327051 | 124327264 | 5Y-H4K8ac_peak_16979 | 5.07797  |                                                    |
| 9 | 124328856 | 124329736 | 5Y-H4K8ac_peak_16980 | 15.25183 | DAB2IP_ENSG00000136848                             |
| 9 | 124361385 | 124361709 | 5Y-H4K8ac_peak_16981 | 7.89142  |                                                    |
| 9 | 124407000 | 124407874 | 5Y-H4K8ac_peak_16982 | 8.79957  |                                                    |
| 9 | 124411837 | 124412111 | 5Y-H4K8ac_peak_16983 | 10.50538 |                                                    |
| 9 | 124461752 | 124462385 | 5Y-H4K8ac_peak_16984 | 5.41472  |                                                    |
| 9 | 124542888 | 124543082 | 5Y-H4K8ac_peak_16985 | 5.29015  |                                                    |
| 9 | 125109049 | 125109731 | 5Y-H4K8ac_peak_16986 | 7.49746  |                                                    |
| 9 | 125168488 | 125168961 | 5Y-H4K8ac_peak_16987 | 6.50117  |                                                    |
| 9 | 125590527 | 125590733 | 5Y-H4K8ac_peak_16988 | 8.69112  | PDCL_ENSG00000136940                               |
| 9 | 125591154 | 125591732 | 5Y-H4K8ac_peak_16989 | 13.60015 | PDCL_ENSG00000136940                               |
| 9 | 125667281 | 125667544 | 5Y-H4K8ac_peak_16990 | 6.75784  | RC3H2_ENSG00000056586                              |
| 9 | 125675706 | 125676053 | 5Y-H4K8ac_peak_16991 | 7.89142  | ZBTB6_ENSG00000186130                              |
| 9 | 125693428 | 125693778 | 5Y-H4K8ac_peak_16992 | 12.10416 | ZBTB26_ENSG00000171448                             |
| 9 | 126062728 | 126063199 | 5Y-H4K8ac_peak_16993 | 4.95697  |                                                    |
| 9 | 126106430 | 126106624 | 5Y-H4K8ac_peak_16994 | 4.24332  |                                                    |
| 9 | 126691967 | 126692361 | 5Y-H4K8ac_peak_16995 | 15.06486 | DENND1A_ENSG00000119522                            |
| 9 | 126692553 | 126693155 | 5Y-H4K8ac_peak_16996 | 9.34555  | DENND1A_ENSG00000119522                            |
| 9 | 127020895 | 127021185 | 5Y-H4K8ac_peak_16997 | 5.64909  |                                                    |
| 9 | 127082327 | 127082627 | 5Y-H4K8ac_peak_16998 | 10.1994  |                                                    |
| 9 | 127182071 | 127182274 | 5Y-H4K8ac_peak_16999 | 10.35586 |                                                    |
| 9 | 127213023 | 127213214 | 5Y-H4K8ac_peak_17000 | 5.98695  | GPR144_ENSG00000180264                             |
| 9 | 127239328 | 127240772 | 5Y-H4K8ac_peak_17001 | 9.79526  |                                                    |
| 9 | 127274601 | 127274810 | 5Y-H4K8ac_peak_17002 | 5.12488  |                                                    |
| 9 | 127275076 | 127275359 | 5Y-H4K8ac_peak_17003 | 11.09973 |                                                    |
| 9 | 127275801 | 127276050 | 5Y-H4K8ac_peak_17004 | 6.14981  |                                                    |
| 9 | 127539221 | 127540052 | 5Y-H4K8ac_peak_17005 | 8.46999  | OLFML2A_ENSG00000185585                            |
| 9 | 127623899 | 127624177 | 5Y-H4K8ac_peak_17006 | 11.30958 | RPL35_ENSG00000136942;ARPC5L_ENSG00000136950       |
| 9 | 127630968 | 127631243 | 5Y-H4K8ac_peak_17007 | 8.58926  |                                                    |
| 9 | 128023444 | 128023794 | 5Y-H4K8ac_peak_17008 | 7.57144  | GAPVD1_ENSG00000165219                             |
| 9 | 128102412 | 128102614 | 5Y-H4K8ac_peak_17009 | 4.51076  |                                                    |
| 9 | 128170112 | 128171584 | 5Y-H4K8ac_peak_17010 | 15.03212 |                                                    |
| 9 | 128469008 | 128469390 | 5Y-H4K8ac_peak_17011 | 10.44054 | MAPKAP1_ENSG00000119487                            |
| 9 | 128509480 | 128509911 | 5Y-H4K8ac_peak_17012 | 7.31102  | RP11-423C15.3_ENSG00000229582;PBX3_ENSG00000167081 |
| 9 | 128510114 | 128510315 | 5Y-H4K8ac_peak_17013 | 5.64909  | PBX3_ENSG00000167081                               |
| 9 | 128753114 | 128753331 | 5Y-H4K8ac_peak_17014 | 5.23083  |                                                    |
| 9 | 128756366 | 128756762 | 5Y-H4K8ac_peak_17015 | 5.97532  |                                                    |
| 9 | 128821404 | 128821645 | 5Y-H4K8ac_peak_17016 | 6.73385  |                                                    |
| 9 | 129088536 | 129088839 | 5Y-H4K8ac_peak_17017 | 11.53136 | MVB12B_ENSG00000196814                             |
| 9 | 129089471 | 129089683 | 5Y-H4K8ac_peak_17018 | 7.69843  | MVB12B_ENSG00000196814                             |

|   |           |           |                      |          |                                              |
|---|-----------|-----------|----------------------|----------|----------------------------------------------|
| 9 | 129201385 | 129201576 | 5Y-H4K8ac_peak_17019 | 7.35333  |                                              |
| 9 | 129202375 | 129202608 | 5Y-H4K8ac_peak_17020 | 10.32379 |                                              |
| 9 | 129268767 | 129269188 | 5Y-H4K8ac_peak_17021 | 5.24695  |                                              |
| 9 | 129269490 | 129269720 | 5Y-H4K8ac_peak_17022 | 12.44818 |                                              |
| 9 | 129270416 | 129270628 | 5Y-H4K8ac_peak_17023 | 5.41472  |                                              |
| 9 | 129272694 | 129273504 | 5Y-H4K8ac_peak_17024 | 9.22312  |                                              |
| 9 | 129275651 | 129277025 | 5Y-H4K8ac_peak_17025 | 10.1994  |                                              |
| 9 | 129277238 | 129277511 | 5Y-H4K8ac_peak_17026 | 8.43511  |                                              |
| 9 | 129277762 | 129278021 | 5Y-H4K8ac_peak_17027 | 10.69698 | RP11-205K6.1_ENSG00000233721                 |
| 9 | 129279235 | 129279540 | 5Y-H4K8ac_peak_17028 | 6.22669  | RP11-205K6.1_ENSG00000233721                 |
| 9 | 129282105 | 129282718 | 5Y-H4K8ac_peak_17029 | 6.53157  |                                              |
| 9 | 129283879 | 129285124 | 5Y-H4K8ac_peak_17030 | 9.7353   |                                              |
| 9 | 129286678 | 129287270 | 5Y-H4K8ac_peak_17031 | 6.95541  |                                              |
| 9 | 129288695 | 129289375 | 5Y-H4K8ac_peak_17032 | 4.0639   | RP11-205K6.2_ENSG00000226078                 |
| 9 | 129293343 | 129293654 | 5Y-H4K8ac_peak_17033 | 7.79831  | AL356309.1_ENSG00000221768                   |
| 9 | 129293851 | 129294091 | 5Y-H4K8ac_peak_17034 | 8.73985  | AL356309.1_ENSG00000221768                   |
| 9 | 129294384 | 129294823 | 5Y-H4K8ac_peak_17035 | 7.89142  |                                              |
| 9 | 129295186 | 129295764 | 5Y-H4K8ac_peak_17036 | 13.53477 |                                              |
| 9 | 129296136 | 129296418 | 5Y-H4K8ac_peak_17037 | 18.10232 |                                              |
| 9 | 129296624 | 129296878 | 5Y-H4K8ac_peak_17038 | 11.22005 |                                              |
| 9 | 129299123 | 129299703 | 5Y-H4K8ac_peak_17039 | 9.37238  |                                              |
| 9 | 129300500 | 129300709 | 5Y-H4K8ac_peak_17040 | 6.76096  |                                              |
| 9 | 129309891 | 129310199 | 5Y-H4K8ac_peak_17041 | 7.27597  |                                              |
| 9 | 129310649 | 129311711 | 5Y-H4K8ac_peak_17042 | 11.69482 |                                              |
| 9 | 129312184 | 129312463 | 5Y-H4K8ac_peak_17043 | 12.10416 |                                              |
| 9 | 129312739 | 129313846 | 5Y-H4K8ac_peak_17044 | 18.10232 |                                              |
| 9 | 129319912 | 129320133 | 5Y-H4K8ac_peak_17045 | 8.2913   |                                              |
| 9 | 129326712 | 129327010 | 5Y-H4K8ac_peak_17046 | 6.54441  |                                              |
| 9 | 129424982 | 129425187 | 5Y-H4K8ac_peak_17047 | 4.84727  |                                              |
| 9 | 129433272 | 129433980 | 5Y-H4K8ac_peak_17048 | 7.50501  |                                              |
| 9 | 129434228 | 129434452 | 5Y-H4K8ac_peak_17049 | 5.03564  |                                              |
| 9 | 129434678 | 129435240 | 5Y-H4K8ac_peak_17050 | 13.86507 |                                              |
| 9 | 129467897 | 129468098 | 5Y-H4K8ac_peak_17051 | 5.64909  |                                              |
| 9 | 129484496 | 129485659 | 5Y-H4K8ac_peak_17052 | 15.23166 |                                              |
| 9 | 129485896 | 129486187 | 5Y-H4K8ac_peak_17053 | 13.48518 |                                              |
| 9 | 129486574 | 129486804 | 5Y-H4K8ac_peak_17054 | 6.53157  |                                              |
| 9 | 129508145 | 129508387 | 5Y-H4K8ac_peak_17055 | 6.87117  |                                              |
| 9 | 129566796 | 129567101 | 5Y-H4K8ac_peak_17056 | 6.73385  | ZBTB43_ENSG00000169155                       |
| 9 | 129622643 | 129622869 | 5Y-H4K8ac_peak_17057 | 11.1169  | ZBTB34_ENSG00000177125                       |
| 9 | 129798521 | 129799046 | 5Y-H4K8ac_peak_17058 | 8.04943  |                                              |
| 9 | 129885318 | 129885547 | 5Y-H4K8ac_peak_17059 | 6.34245  | ANGPTL2_ENSG00000136859                      |
| 9 | 129987656 | 129987874 | 5Y-H4K8ac_peak_17060 | 6.09071  |                                              |
| 9 | 130007154 | 130007398 | 5Y-H4K8ac_peak_17061 | 7.04637  |                                              |
| 9 | 130213213 | 130213622 | 5Y-H4K8ac_peak_17062 | 6.78318  | RPL12_ENSG00000197958;LRSAM1_ENSG00000148356 |
| 9 | 130319805 | 130320448 | 5Y-H4K8ac_peak_17063 | 8.21582  |                                              |
| 9 | 130331648 | 130332146 | 5Y-H4K8ac_peak_17064 | 5.41472  |                                              |

|   |           |           |                      |          |                                                 |
|---|-----------|-----------|----------------------|----------|-------------------------------------------------|
| 9 | 130333275 | 130333894 | 5Y-H4K8ac_peak_17065 | 5.65584  |                                                 |
| 9 | 130370535 | 130371067 | 5Y-H4K8ac_peak_17066 | 4.55128  |                                                 |
| 9 | 130423021 | 130423223 | 5Y-H4K8ac_peak_17067 | 7.30348  |                                                 |
| 9 | 130426409 | 130427187 | 5Y-H4K8ac_peak_17068 | 11.62198 |                                                 |
| 9 | 130427615 | 130428462 | 5Y-H4K8ac_peak_17069 | 8.4454   |                                                 |
| 9 | 130429036 | 130429337 | 5Y-H4K8ac_peak_17070 | 5.35202  |                                                 |
| 9 | 130497135 | 130497568 | 5Y-H4K8ac_peak_17071 | 16.79568 | TOR2A_ENSG00000160404                           |
| 9 | 130515997 | 130516382 | 5Y-H4K8ac_peak_17072 | 6.37023  |                                                 |
| 9 | 130541348 | 130541547 | 5Y-H4K8ac_peak_17073 | 5.99504  | SH2D3C_ENSG00000095370                          |
| 9 | 130547530 | 130548008 | 5Y-H4K8ac_peak_17074 | 3.96434  | CDK9_ENSG00000136807;MIR3960_ENSG00000266070    |
| 9 | 130576000 | 130576363 | 5Y-H4K8ac_peak_17075 | 5.23083  |                                                 |
| 9 | 130616464 | 130616973 | 5Y-H4K8ac_peak_17076 | 12.60508 | ENG_ENSG00000106991                             |
| 9 | 130617210 | 130617616 | 5Y-H4K8ac_peak_17077 | 5.23083  | ENG_ENSG00000106991                             |
| 9 | 130620076 | 130620493 | 5Y-H4K8ac_peak_17078 | 10.35586 |                                                 |
| 9 | 130640120 | 130640468 | 5Y-H4K8ac_peak_17079 | 9.34555  | AK1_ENSG00000106992                             |
| 9 | 130661421 | 130661637 | 5Y-H4K8ac_peak_17080 | 7.64648  |                                                 |
| 9 | 130666018 | 130666256 | 5Y-H4K8ac_peak_17081 | 4.82324  |                                                 |
| 9 | 130678717 | 130679227 | 5Y-H4K8ac_peak_17082 | 10.18964 | ST6GALNAC4_ENSG00000136840                      |
| 9 | 130699705 | 130700027 | 5Y-H4K8ac_peak_17083 | 5.59843  | DPM2_ENSG00000136908                            |
| 9 | 130725895 | 130726442 | 5Y-H4K8ac_peak_17084 | 5.03564  |                                                 |
| 9 | 130727059 | 130727286 | 5Y-H4K8ac_peak_17085 | 5.47078  |                                                 |
| 9 | 130728088 | 130728597 | 5Y-H4K8ac_peak_17086 | 6.98416  |                                                 |
| 9 | 130729004 | 130729212 | 5Y-H4K8ac_peak_17087 | 6.96612  |                                                 |
| 9 | 130729452 | 130730012 | 5Y-H4K8ac_peak_17088 | 6.77436  |                                                 |
| 9 | 130730369 | 130730578 | 5Y-H4K8ac_peak_17089 | 7.89273  |                                                 |
| 9 | 130732428 | 130732708 | 5Y-H4K8ac_peak_17090 | 4.77126  |                                                 |
| 9 | 130733963 | 130734682 | 5Y-H4K8ac_peak_17091 | 7.59101  |                                                 |
| 9 | 130734928 | 130735283 | 5Y-H4K8ac_peak_17092 | 9.89244  |                                                 |
| 9 | 130735518 | 130736034 | 5Y-H4K8ac_peak_17093 | 10.60083 |                                                 |
| 9 | 130736571 | 130737636 | 5Y-H4K8ac_peak_17094 | 10.16277 |                                                 |
| 9 | 130828849 | 130829325 | 5Y-H4K8ac_peak_17095 | 8.73392  |                                                 |
| 9 | 130830700 | 130831012 | 5Y-H4K8ac_peak_17096 | 6.73385  | NAIF1_ENSG00000171169;SLC25A25_ENSG00000148339  |
| 9 | 130852996 | 130853359 | 5Y-H4K8ac_peak_17097 | 9.30505  |                                                 |
| 9 | 130921637 | 130921906 | 5Y-H4K8ac_peak_17098 | 9.15007  | C9orf16_ENSG00000171159                         |
| 9 | 130953413 | 130954146 | 5Y-H4K8ac_peak_17099 | 7.50148  |                                                 |
| 9 | 131005181 | 131005410 | 5Y-H4K8ac_peak_17100 | 5.91107  |                                                 |
| 9 | 131005629 | 131006111 | 5Y-H4K8ac_peak_17101 | 12.87247 | MIR199B_ENSG00000207581                         |
| 9 | 131006962 | 131007181 | 5Y-H4K8ac_peak_17102 | 5.96059  | MIR199B_ENSG00000207581;MIR3154_ENSG00000264823 |
| 9 | 131007529 | 131008057 | 5Y-H4K8ac_peak_17103 | 18.78631 | MIR199B_ENSG00000207581;MIR3154_ENSG00000264823 |
| 9 | 131038623 | 131038983 | 5Y-H4K8ac_peak_17104 | 7.38046  | SWI5_ENSG00000175854;GOLGA2_ENSG00000167110     |
| 9 | 131102475 | 131102669 | 5Y-H4K8ac_peak_17105 | 6.78128  | SLC27A4_ENSG00000167114                         |
| 9 | 131124234 | 131124482 | 5Y-H4K8ac_peak_17106 | 6.78128  |                                                 |
| 9 | 131181911 | 131182658 | 5Y-H4K8ac_peak_17107 | 6.43775  |                                                 |
| 9 | 131201199 | 131201459 | 5Y-H4K8ac_peak_17108 | 10.35586 |                                                 |
| 9 | 131285517 | 131285767 | 5Y-H4K8ac_peak_17109 | 5.40331  |                                                 |
| 9 | 131419177 | 131419612 | 5Y-H4K8ac_peak_17110 | 9.52603  | WDR34_ENSG00000119333                           |



|   |           |           |                      |          |                                                        |
|---|-----------|-----------|----------------------|----------|--------------------------------------------------------|
| 9 | 131419893 | 131420166 | 5Y-H4K8ac_peak_17111 | 8.69112  | WDR34_ENSG00000119333                                  |
| 9 | 131450965 | 131451159 | 5Y-H4K8ac_peak_17112 | 9.51254  |                                                        |
| 9 | 131452319 | 131452667 | 5Y-H4K8ac_peak_17113 | 15.06486 |                                                        |
| 9 | 131465375 | 131465693 | 5Y-H4K8ac_peak_17114 | 4.0639   | PKN3_ENSG00000160447                                   |
| 9 | 131486148 | 131486407 | 5Y-H4K8ac_peak_17115 | 11.1169  | ZDHHC12_ENSG00000160446;RP11-545E17.3_ENSG00000223478  |
| 9 | 131534387 | 131534779 | 5Y-H4K8ac_peak_17116 | 9.01738  | ZER1_ENSG00000160445                                   |
| 9 | 131549177 | 131549373 | 5Y-H4K8ac_peak_17117 | 8.73392  | TBC1D13_ENSG00000107021                                |
| 9 | 131607908 | 131608378 | 5Y-H4K8ac_peak_17118 | 4.84727  |                                                        |
| 9 | 131709465 | 131709799 | 5Y-H4K8ac_peak_17119 | 4.15658  | DOLK_ENSG00000175283;NUP188_ENSG00000095319            |
| 9 | 131832416 | 131832739 | 5Y-H4K8ac_peak_17120 | 4.24332  |                                                        |
| 9 | 131901730 | 131902266 | 5Y-H4K8ac_peak_17121 | 7.11863  |                                                        |
| 9 | 131902507 | 131902935 | 5Y-H4K8ac_peak_17122 | 9.38276  |                                                        |
| 9 | 131936171 | 131936362 | 5Y-H4K8ac_peak_17123 | 7.72887  |                                                        |
| 9 | 131936627 | 131937121 | 5Y-H4K8ac_peak_17124 | 5.18558  | RP11-247A12.8_ENSG00000268050                          |
| 9 | 131940758 | 131941104 | 5Y-H4K8ac_peak_17125 | 7.30348  | IER5L_ENSG00000188483                                  |
| 9 | 131986563 | 131987023 | 5Y-H4K8ac_peak_17126 | 4.35469  |                                                        |
| 9 | 132080738 | 132080937 | 5Y-H4K8ac_peak_17127 | 8.1667   |                                                        |
| 9 | 132082396 | 132083082 | 5Y-H4K8ac_peak_17128 | 9.01738  | C9orf106_ENSG00000179082                               |
| 9 | 132096531 | 132097003 | 5Y-H4K8ac_peak_17129 | 12.19856 |                                                        |
| 9 | 132114153 | 132114576 | 5Y-H4K8ac_peak_17130 | 8.14913  |                                                        |
| 9 | 132114798 | 132115432 | 5Y-H4K8ac_peak_17131 | 9.51254  |                                                        |
| 9 | 132154561 | 132154771 | 5Y-H4K8ac_peak_17132 | 4.8887   |                                                        |
| 9 | 132156250 | 132156676 | 5Y-H4K8ac_peak_17133 | 9.59236  |                                                        |
| 9 | 132157015 | 132157342 | 5Y-H4K8ac_peak_17134 | 10.60083 |                                                        |
| 9 | 132164711 | 132164905 | 5Y-H4K8ac_peak_17135 | 10.1994  |                                                        |
| 9 | 132170870 | 132171188 | 5Y-H4K8ac_peak_17136 | 4.15658  |                                                        |
| 9 | 132175179 | 132175965 | 5Y-H4K8ac_peak_17137 | 9.30206  |                                                        |
| 9 | 132176275 | 132177367 | 5Y-H4K8ac_peak_17138 | 9.74838  |                                                        |
| 9 | 132177690 | 132178044 | 5Y-H4K8ac_peak_17139 | 4.15658  |                                                        |
| 9 | 132200089 | 132200291 | 5Y-H4K8ac_peak_17140 | 5.03564  | RP11-65J3.2_ENSG00000226355                            |
| 9 | 132220625 | 132222466 | 5Y-H4K8ac_peak_17141 | 22.07994 |                                                        |
| 9 | 132222877 | 132223411 | 5Y-H4K8ac_peak_17142 | 13.55689 |                                                        |
| 9 | 132229298 | 132229800 | 5Y-H4K8ac_peak_17143 | 7.59101  |                                                        |
| 9 | 132244248 | 132244683 | 5Y-H4K8ac_peak_17144 | 22.9394  | RP11-65J3.14_ENSG00000261334                           |
| 9 | 132245028 | 132246325 | 5Y-H4K8ac_peak_17145 | 20.83544 | RP11-65J3.14_ENSG00000261334;LINC00963_ENSG00000204054 |
| 9 | 132249838 | 132250701 | 5Y-H4K8ac_peak_17146 | 7.50148  |                                                        |
| 9 | 132252103 | 132252358 | 5Y-H4K8ac_peak_17147 | 5.81394  |                                                        |
| 9 | 132253747 | 132253991 | 5Y-H4K8ac_peak_17148 | 8.9562   |                                                        |
| 9 | 132255925 | 132256120 | 5Y-H4K8ac_peak_17149 | 8.05083  |                                                        |
| 9 | 132257395 | 132257645 | 5Y-H4K8ac_peak_17150 | 5.56894  |                                                        |
| 9 | 132258586 | 132258951 | 5Y-H4K8ac_peak_17151 | 8.43511  |                                                        |
| 9 | 132262292 | 132262613 | 5Y-H4K8ac_peak_17152 | 5.64909  |                                                        |
| 9 | 132262836 | 132263045 | 5Y-H4K8ac_peak_17153 | 9.15007  |                                                        |
| 9 | 132312806 | 132313085 | 5Y-H4K8ac_peak_17154 | 11.09973 |                                                        |
| 9 | 132319467 | 132320213 | 5Y-H4K8ac_peak_17155 | 10.01583 |                                                        |
| 9 | 132320620 | 132320964 | 5Y-H4K8ac_peak_17156 | 12.05638 |                                                        |

|   |           |           |                      |          |                                                      |
|---|-----------|-----------|----------------------|----------|------------------------------------------------------|
| 9 | 132321432 | 132321680 | 5Y-H4K8ac_peak_17157 | 6.77436  |                                                      |
| 9 | 132331224 | 132331425 | 5Y-H4K8ac_peak_17158 | 9.7353   |                                                      |
| 9 | 132370050 | 132370365 | 5Y-H4K8ac_peak_17159 | 5.41472  | NTMT1_ENSG00000148335                                |
| 9 | 132373106 | 132373443 | 5Y-H4K8ac_peak_17160 | 4.33574  |                                                      |
| 9 | 132382103 | 132382597 | 5Y-H4K8ac_peak_17161 | 11.1169  | C9orf50_ENSG00000179058                              |
| 9 | 132387866 | 132388262 | 5Y-H4K8ac_peak_17162 | 7.38046  |                                                      |
| 9 | 132388502 | 132388706 | 5Y-H4K8ac_peak_17163 | 9.23159  |                                                      |
| 9 | 132401897 | 132402210 | 5Y-H4K8ac_peak_17164 | 7.08802  | RP11-483H20.4_ENSG00000234789                        |
| 9 | 132404841 | 132405285 | 5Y-H4K8ac_peak_17165 | 13.99721 | ASB6_ENSG00000148331                                 |
| 9 | 132411492 | 132412325 | 5Y-H4K8ac_peak_17166 | 18.33806 |                                                      |
| 9 | 132413175 | 132413791 | 5Y-H4K8ac_peak_17167 | 5.64909  |                                                      |
| 9 | 132438300 | 132438546 | 5Y-H4K8ac_peak_17168 | 5.98695  |                                                      |
| 9 | 132459173 | 132460455 | 5Y-H4K8ac_peak_17169 | 19.71555 |                                                      |
| 9 | 132489096 | 132489307 | 5Y-H4K8ac_peak_17170 | 5.51139  |                                                      |
| 9 | 132499837 | 132500538 | 5Y-H4K8ac_peak_17171 | 16.27715 |                                                      |
| 9 | 132514968 | 132515183 | 5Y-H4K8ac_peak_17172 | 7.18391  | PTGES_ENSG00000148344                                |
| 9 | 132563781 | 132564262 | 5Y-H4K8ac_peak_17173 | 5.8635   |                                                      |
| 9 | 132564864 | 132565093 | 5Y-H4K8ac_peak_17174 | 7.07936  | TOR1B_ENSG00000136816                                |
| 9 | 132624936 | 132625145 | 5Y-H4K8ac_peak_17175 | 8.04493  |                                                      |
| 9 | 132626317 | 132626580 | 5Y-H4K8ac_peak_17176 | 6.17374  |                                                      |
| 9 | 132647436 | 132647931 | 5Y-H4K8ac_peak_17177 | 12.84845 | RP11-409K20.7_ENSG00000224988                        |
| 9 | 132805791 | 132805986 | 5Y-H4K8ac_peak_17178 | 5.18494  | FNBP1_ENSG00000187239                                |
| 9 | 132815894 | 132816639 | 5Y-H4K8ac_peak_17179 | 15.40526 | GPR107_ENSG00000148358                               |
| 9 | 132962706 | 132962967 | 5Y-H4K8ac_peak_17180 | 11.43902 |                                                      |
| 9 | 133003318 | 133003564 | 5Y-H4K8ac_peak_17181 | 5.9856   |                                                      |
| 9 | 133051752 | 133052158 | 5Y-H4K8ac_peak_17182 | 5.65584  |                                                      |
| 9 | 133274822 | 133275112 | 5Y-H4K8ac_peak_17183 | 5.03917  | AL354898.1_ENSG00000215428;RN7SL665P_ENSG00000264169 |
| 9 | 133281551 | 133281855 | 5Y-H4K8ac_peak_17184 | 5.25819  |                                                      |
| 9 | 133289554 | 133289801 | 5Y-H4K8ac_peak_17185 | 9.23159  |                                                      |
| 9 | 133292508 | 133292703 | 5Y-H4K8ac_peak_17186 | 5.15917  |                                                      |
| 9 | 133294254 | 133294732 | 5Y-H4K8ac_peak_17187 | 7.04158  |                                                      |
| 9 | 133295106 | 133295333 | 5Y-H4K8ac_peak_17188 | 7.04158  |                                                      |
| 9 | 133295961 | 133296288 | 5Y-H4K8ac_peak_17189 | 7.04158  |                                                      |
| 9 | 133296655 | 133296939 | 5Y-H4K8ac_peak_17190 | 8.5159   |                                                      |
| 9 | 133297663 | 133298287 | 5Y-H4K8ac_peak_17191 | 9.36633  |                                                      |
| 9 | 133300035 | 133300952 | 5Y-H4K8ac_peak_17192 | 10.21121 |                                                      |
| 9 | 133301314 | 133301686 | 5Y-H4K8ac_peak_17193 | 7.681    |                                                      |
| 9 | 133302237 | 133302430 | 5Y-H4K8ac_peak_17194 | 7.87406  |                                                      |
| 9 | 133304705 | 133305111 | 5Y-H4K8ac_peak_17195 | 5.99504  |                                                      |
| 9 | 133307371 | 133307652 | 5Y-H4K8ac_peak_17196 | 9.51254  |                                                      |
| 9 | 133308444 | 133309250 | 5Y-H4K8ac_peak_17197 | 13.38945 |                                                      |
| 9 | 133319800 | 133320432 | 5Y-H4K8ac_peak_17198 | 7.30348  | ASS1_ENSG00000130707                                 |
| 9 | 133320914 | 133321409 | 5Y-H4K8ac_peak_17199 | 9.79526  | ASS1_ENSG00000130707                                 |
| 9 | 133321770 | 133322202 | 5Y-H4K8ac_peak_17200 | 9.89244  |                                                      |
| 9 | 133322399 | 133323955 | 5Y-H4K8ac_peak_17201 | 14.39608 |                                                      |
| 9 | 133324217 | 133324504 | 5Y-H4K8ac_peak_17202 | 6.13242  | snoU13_ENSG00000238298                               |

|   |           |           |                      |          |                                              |
|---|-----------|-----------|----------------------|----------|----------------------------------------------|
| 9 | 133325535 | 133327710 | 5Y-H4K8ac_peak_17203 | 10.35586 | snoU13_ENSG00000238298                       |
| 9 | 133328580 | 133328784 | 5Y-H4K8ac_peak_17204 | 4.42435  |                                              |
| 9 | 133329322 | 133329798 | 5Y-H4K8ac_peak_17205 | 9.79526  |                                              |
| 9 | 133412625 | 133412969 | 5Y-H4K8ac_peak_17206 | 5.98695  |                                              |
| 9 | 133455015 | 133455457 | 5Y-H4K8ac_peak_17207 | 9.11354  | FUBP3_ENSG00000107164                        |
| 9 | 133557163 | 133557368 | 5Y-H4K8ac_peak_17208 | 11.48691 |                                              |
| 9 | 133568349 | 133568732 | 5Y-H4K8ac_peak_17209 | 4.50834  | EXOSC2_ENSG00000130713                       |
| 9 | 133587661 | 133587890 | 5Y-H4K8ac_peak_17210 | 5.91107  |                                              |
| 9 | 133588250 | 133588635 | 5Y-H4K8ac_peak_17211 | 6.08523  | ABL1_ENSG00000097007                         |
| 9 | 133804155 | 133804372 | 5Y-H4K8ac_peak_17212 | 5.37588  |                                              |
| 9 | 133938546 | 133938999 | 5Y-H4K8ac_peak_17213 | 8.14913  |                                              |
| 9 | 133976476 | 133976672 | 5Y-H4K8ac_peak_17214 | 5.13361  |                                              |
| 9 | 134000050 | 134000401 | 5Y-H4K8ac_peak_17215 | 7.18918  | NUP214_ENSG00000126883                       |
| 9 | 134153679 | 134154065 | 5Y-H4K8ac_peak_17216 | 11.60073 |                                              |
| 9 | 134164724 | 134164982 | 5Y-H4K8ac_peak_17217 | 7.89273  | PPAPDC3_ENSG00000160539                      |
| 9 | 134193171 | 134193547 | 5Y-H4K8ac_peak_17218 | 6.78318  |                                              |
| 9 | 134225102 | 134225558 | 5Y-H4K8ac_peak_17219 | 7.59101  |                                              |
| 9 | 134269512 | 134270159 | 5Y-H4K8ac_peak_17220 | 14.31711 | PRRC2B_ENSG00000130723                       |
| 9 | 134377843 | 134378104 | 5Y-H4K8ac_peak_17221 | 6.37023  | POMT1_ENSG00000130714                        |
| 9 | 134378469 | 134378758 | 5Y-H4K8ac_peak_17222 | 6.78128  | POMT1_ENSG00000130714                        |
| 9 | 134399239 | 134399621 | 5Y-H4K8ac_peak_17223 | 5.29015  |                                              |
| 9 | 134406826 | 134407424 | 5Y-H4K8ac_peak_17224 | 13.63503 | UCK1_ENSG00000130717                         |
| 9 | 134743932 | 134744192 | 5Y-H4K8ac_peak_17225 | 7.43638  |                                              |
| 9 | 134954940 | 134955211 | 5Y-H4K8ac_peak_17226 | 7.63144  | MED27_ENSG00000160563                        |
| 9 | 135107124 | 135107511 | 5Y-H4K8ac_peak_17227 | 5.07797  |                                              |
| 9 | 135281810 | 135282091 | 5Y-H4K8ac_peak_17228 | 6.22669  | TTF1_ENSG00000125482                         |
| 9 | 135374551 | 135374781 | 5Y-H4K8ac_peak_17229 | 6.35402  |                                              |
| 9 | 135378317 | 135378683 | 5Y-H4K8ac_peak_17230 | 6.40964  |                                              |
| 9 | 135381403 | 135381620 | 5Y-H4K8ac_peak_17231 | 4.50834  |                                              |
| 9 | 135383823 | 135384036 | 5Y-H4K8ac_peak_17232 | 8.43511  |                                              |
| 9 | 135385475 | 135385676 | 5Y-H4K8ac_peak_17233 | 9.66296  |                                              |
| 9 | 135419353 | 135419645 | 5Y-H4K8ac_peak_17234 | 5.98695  |                                              |
| 9 | 135420656 | 135421373 | 5Y-H4K8ac_peak_17235 | 7.11863  |                                              |
| 9 | 135422387 | 135422695 | 5Y-H4K8ac_peak_17236 | 7.96285  |                                              |
| 9 | 135545169 | 135545675 | 5Y-H4K8ac_peak_17237 | 6.37023  | DDX31_ENSG00000125485;GTF3C4_ENSG00000125484 |
| 9 | 135709210 | 135709490 | 5Y-H4K8ac_peak_17238 | 4.0639   |                                              |
| 9 | 135722138 | 135722516 | 5Y-H4K8ac_peak_17239 | 5.23083  |                                              |
| 9 | 135723911 | 135724408 | 5Y-H4K8ac_peak_17240 | 7.38046  |                                              |
| 9 | 135753845 | 135754195 | 5Y-H4K8ac_peak_17241 | 10.93537 | AK8_ENSG00000165695;C9orf9_ENSG00000165698   |
| 9 | 135819608 | 135820011 | 5Y-H4K8ac_peak_17242 | 5.87725  | TSC1_ENSG00000165699;GFI1B_ENSG00000165702   |
| 9 | 135905175 | 135905740 | 5Y-H4K8ac_peak_17243 | 9.30505  | GTF3C5_ENSG00000148308                       |
| 9 | 135906186 | 135906763 | 5Y-H4K8ac_peak_17244 | 10.5157  | GTF3C5_ENSG00000148308                       |
| 9 | 135989264 | 135989501 | 5Y-H4K8ac_peak_17245 | 4.50834  |                                              |
| 9 | 135989724 | 135990072 | 5Y-H4K8ac_peak_17246 | 5.9856   |                                              |
| 9 | 135992942 | 135993172 | 5Y-H4K8ac_peak_17247 | 6.4221   |                                              |
| 9 | 135995229 | 135995626 | 5Y-H4K8ac_peak_17248 | 7.90005  |                                              |

|   |           |           |                      |          |                                                                     |
|---|-----------|-----------|----------------------|----------|---------------------------------------------------------------------|
| 9 | 135996100 | 135996471 | 5Y-H4K8ac_peak_17249 | 6.27205  |                                                                     |
| 9 | 136008344 | 136008675 | 5Y-H4K8ac_peak_17250 | 7.18391  |                                                                     |
| 9 | 136024130 | 136024505 | 5Y-H4K8ac_peak_17251 | 6.54441  |                                                                     |
| 9 | 136038620 | 136039071 | 5Y-H4K8ac_peak_17252 | 6.67017  | RALGDS_ENSG00000160271;GBGT1_ENSG00000148288                        |
| 9 | 136215124 | 136215407 | 5Y-H4K8ac_peak_17253 | 10.16277 | MED22_ENSG00000148297;RPL7A_ENSG00000148303;SNORD24_ENSG00000206611 |
| 9 | 136242366 | 136242677 | 5Y-H4K8ac_peak_17254 | 10.19038 | SURF4_ENSG00000148248;C9orf96_ENSG00000198870                       |
| 9 | 136243270 | 136243691 | 5Y-H4K8ac_peak_17255 | 10.1994  | SURF4_ENSG00000148248;C9orf96_ENSG00000198870                       |
| 9 | 136283050 | 136283598 | 5Y-H4K8ac_peak_17256 | 6.80915  | REXO4_ENSG00000148300                                               |
| 9 | 136313911 | 136314258 | 5Y-H4K8ac_peak_17257 | 17.04999 |                                                                     |
| 9 | 136325157 | 136325454 | 5Y-H4K8ac_peak_17258 | 7.90751  | CACFD1_ENSG00000160325                                              |
| 9 | 136334821 | 136335154 | 5Y-H4K8ac_peak_17259 | 5.12213  |                                                                     |
| 9 | 136349761 | 136350303 | 5Y-H4K8ac_peak_17260 | 5.64988  |                                                                     |
| 9 | 136350839 | 136351252 | 5Y-H4K8ac_peak_17261 | 5.98695  |                                                                     |
| 9 | 136357972 | 136358311 | 5Y-H4K8ac_peak_17262 | 4.00285  |                                                                     |
| 9 | 136359055 | 136359447 | 5Y-H4K8ac_peak_17263 | 5.59843  |                                                                     |
| 9 | 136370755 | 136370976 | 5Y-H4K8ac_peak_17264 | 7.11863  |                                                                     |
| 9 | 136374297 | 136374542 | 5Y-H4K8ac_peak_17265 | 5.24695  |                                                                     |
| 9 | 136374744 | 136375068 | 5Y-H4K8ac_peak_17266 | 12.65187 |                                                                     |
| 9 | 136377981 | 136378767 | 5Y-H4K8ac_peak_17267 | 14.00559 |                                                                     |
| 9 | 136379711 | 136381050 | 5Y-H4K8ac_peak_17268 | 18.06205 |                                                                     |
| 9 | 136387149 | 136387447 | 5Y-H4K8ac_peak_17269 | 7.00982  |                                                                     |
| 9 | 136387661 | 136387977 | 5Y-H4K8ac_peak_17270 | 10.72308 |                                                                     |
| 9 | 136391540 | 136393573 | 5Y-H4K8ac_peak_17271 | 11.1169  | TMEM8C_ENSG00000187616                                              |
| 9 | 136398716 | 136399012 | 5Y-H4K8ac_peak_17272 | 10.35586 |                                                                     |
| 9 | 136399302 | 136399660 | 5Y-H4K8ac_peak_17273 | 7.64648  |                                                                     |
| 9 | 136399894 | 136400145 | 5Y-H4K8ac_peak_17274 | 8.54067  |                                                                     |
| 9 | 136400831 | 136401051 | 5Y-H4K8ac_peak_17275 | 9.13495  |                                                                     |
| 9 | 136457274 | 136457469 | 5Y-H4K8ac_peak_17276 | 4.79585  |                                                                     |
| 9 | 136469968 | 136470280 | 5Y-H4K8ac_peak_17277 | 5.62406  |                                                                     |
| 9 | 136470476 | 136470775 | 5Y-H4K8ac_peak_17278 | 13.72401 |                                                                     |
| 9 | 136473992 | 136474472 | 5Y-H4K8ac_peak_17279 | 6.64195  |                                                                     |
| 9 | 136479989 | 136480265 | 5Y-H4K8ac_peak_17280 | 8.63676  |                                                                     |
| 9 | 136496934 | 136497409 | 5Y-H4K8ac_peak_17281 | 10.1994  | LL09NC01-254D11.1_ENSG00000261018                                   |
| 9 | 136497702 | 136497986 | 5Y-H4K8ac_peak_17282 | 11.28133 | LL09NC01-254D11.1_ENSG00000261018                                   |
| 9 | 136498776 | 136499009 | 5Y-H4K8ac_peak_17283 | 11.05199 | LL09NC01-254D11.1_ENSG00000261018                                   |
| 9 | 136499212 | 136501131 | 5Y-H4K8ac_peak_17284 | 17.08376 | LL09NC01-254D11.1_ENSG00000261018;DBH_ENSG00000123454               |
| 9 | 136501573 | 136502864 | 5Y-H4K8ac_peak_17285 | 5.72233  | DBH_ENSG00000123454                                                 |
| 9 | 136527292 | 136527558 | 5Y-H4K8ac_peak_17286 | 5.77617  |                                                                     |
| 9 | 136544244 | 136544770 | 5Y-H4K8ac_peak_17287 | 10.73606 |                                                                     |
| 9 | 136547579 | 136547850 | 5Y-H4K8ac_peak_17288 | 6.49786  |                                                                     |
| 9 | 136548151 | 136548636 | 5Y-H4K8ac_peak_17289 | 16.01457 |                                                                     |
| 9 | 136548927 | 136549400 | 5Y-H4K8ac_peak_17290 | 10.15788 |                                                                     |
| 9 | 136549719 | 136549961 | 5Y-H4K8ac_peak_17291 | 6.80915  |                                                                     |
| 9 | 136569271 | 136569600 | 5Y-H4K8ac_peak_17292 | 5.23083  |                                                                     |
| 9 | 136580645 | 136580840 | 5Y-H4K8ac_peak_17293 | 5.41472  |                                                                     |
| 9 | 136602201 | 136602448 | 5Y-H4K8ac_peak_17294 | 11.52376 |                                                                     |

|   |           |           |                      |          |
|---|-----------|-----------|----------------------|----------|
| 9 | 136603763 | 136603977 | 5Y-H4K8ac_peak_17295 | 4.55128  |
| 9 | 136734397 | 136734630 | 5Y-H4K8ac_peak_17296 | 7.89142  |
| 9 | 136735321 | 136735551 | 5Y-H4K8ac_peak_17297 | 6.95541  |
| 9 | 136738605 | 136738806 | 5Y-H4K8ac_peak_17298 | 9.38276  |
| 9 | 136740257 | 136740540 | 5Y-H4K8ac_peak_17299 | 10.90365 |
| 9 | 136740845 | 136741288 | 5Y-H4K8ac_peak_17300 | 7.41197  |
| 9 | 136742060 | 136742468 | 5Y-H4K8ac_peak_17301 | 5.18558  |
| 9 | 136746513 | 136746777 | 5Y-H4K8ac_peak_17302 | 8.20773  |
| 9 | 136747322 | 136747706 | 5Y-H4K8ac_peak_17303 | 6.86362  |
| 9 | 136748044 | 136748331 | 5Y-H4K8ac_peak_17304 | 8.18236  |
| 9 | 136784417 | 136784632 | 5Y-H4K8ac_peak_17305 | 8.39058  |
| 9 | 136794106 | 136794364 | 5Y-H4K8ac_peak_17306 | 9.22312  |
| 9 | 136809338 | 136809825 | 5Y-H4K8ac_peak_17307 | 4.642    |
| 9 | 136820235 | 136820426 | 5Y-H4K8ac_peak_17308 | 9.68432  |
| 9 | 136821020 | 136821502 | 5Y-H4K8ac_peak_17309 | 10.19948 |
| 9 | 137000297 | 137000937 | 5Y-H4K8ac_peak_17310 | 6.80915  |
| 9 | 137028474 | 137028843 | 5Y-H4K8ac_peak_17311 | 5.89922  |
| 9 | 137030254 | 137030691 | 5Y-H4K8ac_peak_17312 | 11.48691 |
| 9 | 137030965 | 137031219 | 5Y-H4K8ac_peak_17313 | 6.15578  |
| 9 | 137184204 | 137184701 | 5Y-H4K8ac_peak_17314 | 12.73673 |
| 9 | 137184953 | 137186141 | 5Y-H4K8ac_peak_17315 | 18.10232 |
| 9 | 137186644 | 137186860 | 5Y-H4K8ac_peak_17316 | 7.09658  |
| 9 | 137212316 | 137212523 | 5Y-H4K8ac_peak_17317 | 6.46053  |
| 9 | 137217119 | 137217953 | 5Y-H4K8ac_peak_17318 | 14.31711 |
| 9 | 137239352 | 137239780 | 5Y-H4K8ac_peak_17319 | 10.6523  |
| 9 | 137240907 | 137241554 | 5Y-H4K8ac_peak_17320 | 10.31017 |
| 9 | 137242255 | 137242530 | 5Y-H4K8ac_peak_17321 | 6.34245  |
| 9 | 137248456 | 137248873 | 5Y-H4K8ac_peak_17322 | 6.25061  |
| 9 | 137253706 | 137253912 | 5Y-H4K8ac_peak_17323 | 5.64982  |
| 9 | 137258958 | 137259606 | 5Y-H4K8ac_peak_17324 | 7.90751  |
| 9 | 137334086 | 137334430 | 5Y-H4K8ac_peak_17325 | 6.22669  |
| 9 | 137334667 | 137335117 | 5Y-H4K8ac_peak_17326 | 7.89273  |
| 9 | 137347661 | 137348183 | 5Y-H4K8ac_peak_17327 | 15.77107 |
| 9 | 137348568 | 137349032 | 5Y-H4K8ac_peak_17328 | 8.69112  |
| 9 | 137409202 | 137409494 | 5Y-H4K8ac_peak_17329 | 7.29055  |
| 9 | 137598562 | 137598972 | 5Y-H4K8ac_peak_17330 | 5.0078   |
| 9 | 137599492 | 137599976 | 5Y-H4K8ac_peak_17331 | 11.19336 |
| 9 | 137600478 | 137600882 | 5Y-H4K8ac_peak_17332 | 8.2913   |
| 9 | 137966690 | 137967027 | 5Y-H4K8ac_peak_17333 | 7.69843  |
| 9 | 137967377 | 137967660 | 5Y-H4K8ac_peak_17334 | 7.97699  |
| 9 | 138025900 | 138026338 | 5Y-H4K8ac_peak_17335 | 4.50834  |
| 9 | 138037574 | 138037864 | 5Y-H4K8ac_peak_17336 | 9.63153  |
| 9 | 138038632 | 138040308 | 5Y-H4K8ac_peak_17337 | 14.86775 |
| 9 | 138059698 | 138059908 | 5Y-H4K8ac_peak_17338 | 6.47245  |
| 9 | 138107751 | 138108089 | 5Y-H4K8ac_peak_17339 | 5.23083  |
| 9 | 138116294 | 138117202 | 5Y-H4K8ac_peak_17340 | 11.19336 |

LL09NC01-251B2.3\_ENSG00000273249;WDR5\_ENSG00000196363

RNU6ATAC\_ENSG00000221676

RNU6ATAC\_ENSG00000221676

RP11-145E17.2\_ENSG00000223729

OLFM1\_ENSG00000130558

OLFM1\_ENSG00000130558

|   |           |           |                      |          |                                                       |
|---|-----------|-----------|----------------------|----------|-------------------------------------------------------|
| 9 | 138142769 | 138142959 | 5Y-H4K8ac_peak_17341 | 5.62406  |                                                       |
| 9 | 138174753 | 138175043 | 5Y-H4K8ac_peak_17342 | 4.29586  |                                                       |
| 9 | 138241518 | 138241953 | 5Y-H4K8ac_peak_17343 | 6.54441  |                                                       |
| 9 | 138348789 | 138349025 | 5Y-H4K8ac_peak_17344 | 5.65584  |                                                       |
| 9 | 138370729 | 138371387 | 5Y-H4K8ac_peak_17345 | 9.30505  | PPP1R26_ENSG00000196422                               |
| 9 | 138392720 | 138392924 | 5Y-H4K8ac_peak_17346 | 6.96612  | C9orf116_ENSG00000160345;MRPS2_ENSG00000122140        |
| 9 | 138554980 | 138555179 | 5Y-H4K8ac_peak_17347 | 6.50117  | LCN9_ENSG00000148386                                  |
| 9 | 138594032 | 138594251 | 5Y-H4K8ac_peak_17348 | 10.11191 | KCNT1_ENSG00000107147                                 |
| 9 | 138799740 | 138800244 | 5Y-H4K8ac_peak_17349 | 5.98695  | CAMSAP1_ENSG00000130559;RP11-432J22.2_ENSG00000238058 |
| 9 | 138870796 | 138871553 | 5Y-H4K8ac_peak_17350 | 14.72057 |                                                       |
| 9 | 138884273 | 138885533 | 5Y-H4K8ac_peak_17351 | 11.41382 |                                                       |
| 9 | 138903798 | 138904460 | 5Y-H4K8ac_peak_17352 | 11.22005 |                                                       |
| 9 | 139001094 | 139001377 | 5Y-H4K8ac_peak_17353 | 5.34199  | RP11-83N9.5_ENSG00000260193                           |
| 9 | 139009911 | 139010672 | 5Y-H4K8ac_peak_17354 | 11.8513  | C9orf69_ENSG00000238227                               |
| 9 | 139010953 | 139011341 | 5Y-H4K8ac_peak_17355 | 6.46606  | C9orf69_ENSG00000238227                               |
| 9 | 139159308 | 139159694 | 5Y-H4K8ac_peak_17356 | 6.37023  |                                                       |
| 9 | 139219795 | 139220667 | 5Y-H4K8ac_peak_17357 | 17.18444 | DKFZP434A062_ENSG00000267845                          |
| 9 | 139220948 | 139221726 | 5Y-H4K8ac_peak_17358 | 15.84891 | GPSM1_ENSG00000160360                                 |
| 9 | 139221949 | 139222411 | 5Y-H4K8ac_peak_17359 | 10.43045 | GPSM1_ENSG00000160360                                 |
| 9 | 139240980 | 139241307 | 5Y-H4K8ac_peak_17360 | 6.29918  |                                                       |
| 9 | 139242441 | 139243150 | 5Y-H4K8ac_peak_17361 | 11.71078 |                                                       |
| 9 | 139243945 | 139244461 | 5Y-H4K8ac_peak_17362 | 6.60109  |                                                       |
| 9 | 139245524 | 139246209 | 5Y-H4K8ac_peak_17363 | 7.18918  |                                                       |
| 9 | 139254702 | 139255154 | 5Y-H4K8ac_peak_17364 | 5.23083  |                                                       |
| 9 | 139255365 | 139256100 | 5Y-H4K8ac_peak_17365 | 12.60556 |                                                       |
| 9 | 139256479 | 139257189 | 5Y-H4K8ac_peak_17366 | 6.78128  |                                                       |
| 9 | 139257907 | 139258127 | 5Y-H4K8ac_peak_17367 | 11.1169  | DNLZ_ENSG00000213221                                  |
| 9 | 139258521 | 139259044 | 5Y-H4K8ac_peak_17368 | 12.65187 | DNLZ_ENSG00000213221                                  |
| 9 | 139259260 | 139259854 | 5Y-H4K8ac_peak_17369 | 7.89273  |                                                       |
| 9 | 139260102 | 139260506 | 5Y-H4K8ac_peak_17370 | 7.89273  |                                                       |
| 9 | 139268241 | 139268865 | 5Y-H4K8ac_peak_17371 | 13.27281 | CARD9_ENSG00000187796                                 |
| 9 | 139269640 | 139269830 | 5Y-H4K8ac_peak_17372 | 9.63153  |                                                       |
| 9 | 139270148 | 139270349 | 5Y-H4K8ac_peak_17373 | 5.98695  |                                                       |
| 9 | 139294266 | 139294544 | 5Y-H4K8ac_peak_17374 | 9.01738  |                                                       |
| 9 | 139294822 | 139295154 | 5Y-H4K8ac_peak_17375 | 6.98416  |                                                       |
| 9 | 139305232 | 139305456 | 5Y-H4K8ac_peak_17376 | 4.642    | SDCCAG3_ENSG00000165689;PMPCA_ENSG00000165688         |
| 9 | 139333785 | 139334227 | 5Y-H4K8ac_peak_17377 | 6.77436  | INPP5E_ENSG00000148384                                |
| 9 | 139378473 | 139378686 | 5Y-H4K8ac_peak_17378 | 7.50501  | C9orf163_ENSG00000196366                              |
| 9 | 139497044 | 139497251 | 5Y-H4K8ac_peak_17379 | 4.50834  | U3_ENSG00000252440                                    |
| 9 | 139540476 | 139541202 | 5Y-H4K8ac_peak_17380 | 7.89273  |                                                       |
| 9 | 139541616 | 139542004 | 5Y-H4K8ac_peak_17381 | 7.01266  |                                                       |
| 9 | 139550785 | 139551106 | 5Y-H4K8ac_peak_17382 | 7.21932  |                                                       |
| 9 | 139559539 | 139560011 | 5Y-H4K8ac_peak_17383 | 7.59101  |                                                       |
| 9 | 139582241 | 139582671 | 5Y-H4K8ac_peak_17384 | 9.51254  | AGPAT2_ENSG00000169692                                |
| 9 | 139607147 | 139607406 | 5Y-H4K8ac_peak_17385 | 7.38046  | FAM69B_ENSG00000165716                                |
| 9 | 139622802 | 139622998 | 5Y-H4K8ac_peak_17386 | 4.642    | SNHG7_ENSG00000233016                                 |

|    |           |           |                      |          |                                                   |
|----|-----------|-----------|----------------------|----------|---------------------------------------------------|
| 9  | 139701764 | 139703070 | 5Y-H4K8ac_peak_17387 | 10.54764 | CCDC183-AS1_ENSG00000228544;RABL6_ENSG00000196642 |
| 9  | 139760970 | 139761698 | 5Y-H4K8ac_peak_17388 | 23.64521 | EDF1_ENSG00000107223                              |
| 9  | 139839398 | 139839882 | 5Y-H4K8ac_peak_17389 | 7.01266  | FBXW5_ENSG00000159069;C8G_ENSG00000176919         |
| 9  | 139844722 | 139845313 | 5Y-H4K8ac_peak_17390 | 15.44907 | LCN12_ENSG00000184925                             |
| 9  | 139845881 | 139846171 | 5Y-H4K8ac_peak_17391 | 8.2913   |                                                   |
| 9  | 139846887 | 139847106 | 5Y-H4K8ac_peak_17392 | 5.65584  |                                                   |
| 9  | 139872229 | 139872654 | 5Y-H4K8ac_peak_17393 | 8.21582  | PTGDS_ENSG00000107317                             |
| 9  | 139948656 | 139950035 | 5Y-H4K8ac_peak_17394 | 17.80031 | ENTPD2_ENSG00000054179                            |
| 9  | 139965257 | 139966161 | 5Y-H4K8ac_peak_17395 | 9.01738  | SAPCD2_ENSG00000186193                            |
| 9  | 139966794 | 139967184 | 5Y-H4K8ac_peak_17396 | 5.64988  |                                                   |
| 9  | 139971266 | 139971633 | 5Y-H4K8ac_peak_17397 | 7.59101  | UAP1L1_ENSG00000197355                            |
| 9  | 139971977 | 139972265 | 5Y-H4K8ac_peak_17398 | 6.1654   | UAP1L1_ENSG00000197355                            |
| 9  | 139981788 | 139982059 | 5Y-H4K8ac_peak_17399 | 6.37023  | AL807752.1_ENSG00000268996;MAN1B1_ENSG00000177239 |
| 9  | 140009410 | 140009904 | 5Y-H4K8ac_peak_17400 | 7.54409  | DPP7_ENSG00000176978                              |
| 9  | 140024539 | 140024958 | 5Y-H4K8ac_peak_17401 | 7.09658  |                                                   |
| 9  | 140032851 | 140034072 | 5Y-H4K8ac_peak_17402 | 11.19336 | GRIN1_ENSG00000176884                             |
| 9  | 140053083 | 140053298 | 5Y-H4K8ac_peak_17403 | 4.84727  |                                                   |
| 9  | 140079013 | 140079685 | 5Y-H4K8ac_peak_17404 | 11.68317 |                                                   |
| 9  | 140080244 | 140080493 | 5Y-H4K8ac_peak_17405 | 7.38046  |                                                   |
| 9  | 140099745 | 140100333 | 5Y-H4K8ac_peak_17406 | 13.83999 | TMEM203_ENSG00000187713;NDOR1_ENSG00000188566     |
| 9  | 140116096 | 140116469 | 5Y-H4K8ac_peak_17407 | 7.70703  | RNF208_ENSG00000212864                            |
| 9  | 140134905 | 140135157 | 5Y-H4K8ac_peak_17408 | 8.62703  | TUBB4B_ENSG00000188229                            |
| 9  | 140135820 | 140136021 | 5Y-H4K8ac_peak_17409 | 9.31608  | TUBB4B_ENSG00000188229                            |
| 9  | 140149215 | 140149528 | 5Y-H4K8ac_peak_17410 | 7.18391  | NELFB_ENSG00000188986                             |
| 9  | 140149831 | 140150297 | 5Y-H4K8ac_peak_17411 | 8.08337  | NELFB_ENSG00000188986                             |
| 9  | 140174920 | 140175322 | 5Y-H4K8ac_peak_17412 | 8.73985  |                                                   |
| 9  | 140175548 | 140175961 | 5Y-H4K8ac_peak_17413 | 8.75963  |                                                   |
| 9  | 140190093 | 140190624 | 5Y-H4K8ac_peak_17414 | 4.29586  | RP13-122B23.8_ENSG00000260996                     |
| 9  | 140197033 | 140197626 | 5Y-H4K8ac_peak_17415 | 7.95453  | NRARP_ENSG00000198435                             |
| 9  | 140210708 | 140211268 | 5Y-H4K8ac_peak_17416 | 10.35586 |                                                   |
| 9  | 140310749 | 140311119 | 5Y-H4K8ac_peak_17417 | 6.50117  |                                                   |
| 9  | 140317019 | 140317587 | 5Y-H4K8ac_peak_17418 | 13.99721 | EXD3_ENSG00000187609;NOXA1_ENSG00000188747        |
| 9  | 140317981 | 140318542 | 5Y-H4K8ac_peak_17419 | 11.68317 | EXD3_ENSG00000187609;NOXA1_ENSG00000188747        |
| 9  | 140348833 | 140349238 | 5Y-H4K8ac_peak_17420 | 4.29586  |                                                   |
| 9  | 140353307 | 140353714 | 5Y-H4K8ac_peak_17421 | 8.21582  | NSMF_ENSG00000165802                              |
| 9  | 140353961 | 140354315 | 5Y-H4K8ac_peak_17422 | 10.35586 | NSMF_ENSG00000165802                              |
| 9  | 140373620 | 140373904 | 5Y-H4K8ac_peak_17423 | 8.79957  |                                                   |
| 9  | 140375130 | 140375473 | 5Y-H4K8ac_peak_17424 | 8.24461  |                                                   |
| 9  | 140429941 | 140430182 | 5Y-H4K8ac_peak_17425 | 6.50117  |                                                   |
| 9  | 140445649 | 140445922 | 5Y-H4K8ac_peak_17426 | 9.56187  | PNPLA7_ENSG00000130653;MRPL41_ENSG00000182154     |
| 9  | 140473623 | 140473960 | 5Y-H4K8ac_peak_17427 | 10.19948 | DPH7_ENSG00000148399                              |
| 9  | 140512914 | 140513315 | 5Y-H4K8ac_peak_17428 | 10.35586 | C9orf37_ENSG00000203993;EHMT1_ENSG00000181090     |
| 9  | 140771668 | 140772028 | 5Y-H4K8ac_peak_17429 | 9.79526  | CACNA1B_ENSG00000148408                           |
| 9  | 140772350 | 140772605 | 5Y-H4K8ac_peak_17430 | 12.10416 | CACNA1B_ENSG00000148408                           |
| GL | 482278    | 482680    | 5Y-H4K8ac_peak_17431 | 4.55128  |                                                   |
| GL | 114680    | 115008    | 5Y-H4K8ac_peak_17432 | 6.75261  |                                                   |

|    |         |         |                      |          |                                               |
|----|---------|---------|----------------------|----------|-----------------------------------------------|
| GL | 30143   | 30602   | 5Y-H4K8ac_peak_17433 | 16.15299 |                                               |
| GL | 30938   | 31187   | 5Y-H4K8ac_peak_17434 | 18.07863 |                                               |
| GL | 31539   | 31767   | 5Y-H4K8ac_peak_17435 | 18.07722 |                                               |
| GL | 32144   | 32341   | 5Y-H4K8ac_peak_17436 | 9.05607  |                                               |
| GL | 33026   | 33959   | 5Y-H4K8ac_peak_17437 | 5.62377  |                                               |
| GL | 75039   | 75263   | 5Y-H4K8ac_peak_17438 | 6.9958   |                                               |
| GL | 75900   | 76168   | 5Y-H4K8ac_peak_17439 | 11.09839 |                                               |
| GL | 86201   | 86620   | 5Y-H4K8ac_peak_17440 | 8.46152  |                                               |
| GL | 102538  | 102998  | 5Y-H4K8ac_peak_17441 | 6.67135  |                                               |
| GL | 138051  | 138394  | 5Y-H4K8ac_peak_17442 | 19.58975 |                                               |
| GL | 7195    | 7907    | 5Y-H4K8ac_peak_17443 | 7.04637  |                                               |
| GL | 12984   | 13429   | 5Y-H4K8ac_peak_17444 | 4.9885   |                                               |
| GL | 23301   | 23875   | 5Y-H4K8ac_peak_17445 | 8.2913   |                                               |
| GL | 34066   | 34379   | 5Y-H4K8ac_peak_17446 | 9.02938  |                                               |
| GL | 85749   | 86109   | 5Y-H4K8ac_peak_17447 | 33.81227 |                                               |
| GL | 86905   | 87223   | 5Y-H4K8ac_peak_17448 | 25.63391 |                                               |
| GL | 87849   | 88364   | 5Y-H4K8ac_peak_17449 | 7.1739   |                                               |
| GL | 110220  | 111908  | 5Y-H4K8ac_peak_17450 | 14.70433 |                                               |
| GL | 47398   | 47960   | 5Y-H4K8ac_peak_17451 | 9.23159  |                                               |
| GL | 29116   | 29344   | 5Y-H4K8ac_peak_17452 | 7.74473  |                                               |
| GL | 29708   | 30087   | 5Y-H4K8ac_peak_17453 | 10.56003 |                                               |
| GL | 30341   | 30833   | 5Y-H4K8ac_peak_17454 | 39.07868 |                                               |
| GL | 41914   | 42242   | 5Y-H4K8ac_peak_17455 | 9.74838  |                                               |
| GL | 44246   | 44958   | 5Y-H4K8ac_peak_17456 | 7.90751  |                                               |
| GL | 45217   | 45721   | 5Y-H4K8ac_peak_17457 | 12.79198 |                                               |
| GL | 99132   | 99524   | 5Y-H4K8ac_peak_17458 | 7.90751  |                                               |
| GL | 99838   | 100401  | 5Y-H4K8ac_peak_17459 | 37.25819 |                                               |
| GL | 6826    | 7187    | 5Y-H4K8ac_peak_17460 | 12.70589 |                                               |
| GL | 7481    | 7690    | 5Y-H4K8ac_peak_17461 | 10.34857 |                                               |
| GL | 7931    | 8184    | 5Y-H4K8ac_peak_17462 | 8.77912  |                                               |
| GL | 30947   | 31438   | 5Y-H4K8ac_peak_17463 | 10.19323 |                                               |
| X  | 64607   | 64915   | 5Y-H4K8ac_peak_17464 | 7.31815  |                                               |
| X  | 347254  | 347948  | 5Y-H4K8ac_peak_17465 | 17.56739 | PPP2R3B_ENSG00000167393                       |
| X  | 1510679 | 1510961 | 5Y-H4K8ac_peak_17466 | 23.03824 | SLC25A6_ENSG00000169100                       |
| X  | 1511339 | 1511764 | 5Y-H4K8ac_peak_17467 | 7.89273  | SLC25A6_ENSG00000169100                       |
| X  | 2170939 | 2171259 | 5Y-H4K8ac_peak_17468 | 7.17184  |                                               |
| X  | 2418305 | 2418583 | 5Y-H4K8ac_peak_17469 | 8.43511  | ZBED1_ENSG00000214717                         |
| X  | 2418817 | 2419100 | 5Y-H4K8ac_peak_17470 | 9.38203  | ZBED1_ENSG00000214717                         |
| X  | 2419412 | 2419664 | 5Y-H4K8ac_peak_17471 | 7.31815  | ZBED1_ENSG00000214717                         |
| X  | 2812488 | 2812934 | 5Y-H4K8ac_peak_17472 | 8.84534  |                                               |
| X  | 2847088 | 2847414 | 5Y-H4K8ac_peak_17473 | 12.71156 | ARSD_ENSG00000006756                          |
| X  | 3733271 | 3733527 | 5Y-H4K8ac_peak_17474 | 11.04542 |                                               |
| X  | 3733876 | 3734089 | 5Y-H4K8ac_peak_17475 | 6.00747  |                                               |
| X  | 7065576 | 7065939 | 5Y-H4K8ac_peak_17476 | 11.09973 | HDHD1_ENSG00000130021;MIR4767_ENSG00000264268 |
| X  | 7895176 | 7895406 | 5Y-H4K8ac_peak_17477 | 10.46287 | PNPLA4_ENSG00000006757                        |
| X  | 9157910 | 9158110 | 5Y-H4K8ac_peak_17478 | 4.84727  |                                               |



|   |          |          |                      |          |                                                   |
|---|----------|----------|----------------------|----------|---------------------------------------------------|
| X | 9982453  | 9982798  | 5Y-H4K8ac_peak_17479 | 4.51076  | WWC3_ENSG00000047644                              |
| X | 10126546 | 10126833 | 5Y-H4K8ac_peak_17480 | 5.19372  |                                                   |
| X | 11129581 | 11129813 | 5Y-H4K8ac_peak_17481 | 4.77126  | RP11-120D5.1_ENSG00000234129;HCCS_ENSG00000004961 |
| X | 13753106 | 13753320 | 5Y-H4K8ac_peak_17482 | 5.91107  | TRAPPC2_ENSG00000196459;OFD1_ENSG00000046651      |
| X | 15693600 | 15694046 | 5Y-H4K8ac_peak_17483 | 11.93212 | CASBP1_ENSG00000186312                            |
| X | 16730206 | 16730770 | 5Y-H4K8ac_peak_17484 | 10.86079 | CTPS2_ENSG00000047230                             |
| X | 16805142 | 16805364 | 5Y-H4K8ac_peak_17485 | 6.77436  | TXLNG_ENSG00000086712                             |
| X | 17555850 | 17556063 | 5Y-H4K8ac_peak_17486 | 6.79955  |                                                   |
| X | 18693167 | 18693778 | 5Y-H4K8ac_peak_17487 | 6.37023  | PPEF1_ENSG00000086717                             |
| X | 18782027 | 18782279 | 5Y-H4K8ac_peak_17488 | 6.47245  |                                                   |
| X | 19533053 | 19533258 | 5Y-H4K8ac_peak_17489 | 5.40331  | MAP3K15_ENSG00000180815                           |
| X | 20134613 | 20134924 | 5Y-H4K8ac_peak_17490 | 7.3889   | MAP7D2_ENSG00000184368                            |
| X | 20285387 | 20285620 | 5Y-H4K8ac_peak_17491 | 6.50117  | RPS6KA3_ENSG00000177189                           |
| X | 21857866 | 21858067 | 5Y-H4K8ac_peak_17492 | 4.15658  | MBTPS2_ENSG00000012174                            |
| X | 24167151 | 24168138 | 5Y-H4K8ac_peak_17493 | 17.51157 | ZFX-AS1_ENSG00000234230;ZFX_ENSG00000005889       |
| X | 24168531 | 24168814 | 5Y-H4K8ac_peak_17494 | 12.71156 | ZFX-AS1_ENSG00000234230                           |
| X | 24483528 | 24483870 | 5Y-H4K8ac_peak_17495 | 4.79585  | PDK3_ENSG00000067992                              |
| X | 24712119 | 24712322 | 5Y-H4K8ac_peak_17496 | 5.65584  | POLA1_ENSG00000101868                             |
| X | 30906952 | 30907284 | 5Y-H4K8ac_peak_17497 | 8.33296  |                                                   |
| X | 38663963 | 38664194 | 5Y-H4K8ac_peak_17498 | 7.63144  | MID1IP1-AS1_ENSG00000238123                       |
| X | 39278393 | 39278629 | 5Y-H4K8ac_peak_17499 | 8.08688  |                                                   |
| X | 39378165 | 39378359 | 5Y-H4K8ac_peak_17500 | 6.31818  |                                                   |
| X | 39378932 | 39379123 | 5Y-H4K8ac_peak_17501 | 5.56912  |                                                   |
| X | 39547832 | 39548028 | 5Y-H4K8ac_peak_17502 | 4.77126  |                                                   |
| X | 39548316 | 39548606 | 5Y-H4K8ac_peak_17503 | 8.43511  |                                                   |
| X | 39574880 | 39575519 | 5Y-H4K8ac_peak_17504 | 10.84616 |                                                   |
| X | 39594799 | 39595127 | 5Y-H4K8ac_peak_17505 | 9.26157  |                                                   |
| X | 39618839 | 39619085 | 5Y-H4K8ac_peak_17506 | 8.35139  |                                                   |
| X | 39754989 | 39755349 | 5Y-H4K8ac_peak_17507 | 6.34046  |                                                   |
| X | 39867427 | 39867903 | 5Y-H4K8ac_peak_17508 | 8.93923  | AC092198.1_ENSG00000223486                        |
| X | 39868681 | 39868940 | 5Y-H4K8ac_peak_17509 | 10.01583 | AC092198.1_ENSG00000223486                        |
| X | 39872913 | 39873917 | 5Y-H4K8ac_peak_17510 | 12.05638 |                                                   |
| X | 39874308 | 39874570 | 5Y-H4K8ac_peak_17511 | 5.10825  |                                                   |
| X | 39967582 | 39967876 | 5Y-H4K8ac_peak_17512 | 8.2913   |                                                   |
| X | 39968671 | 39969224 | 5Y-H4K8ac_peak_17513 | 8.55081  |                                                   |
| X | 40005457 | 40005799 | 5Y-H4K8ac_peak_17514 | 7.59101  |                                                   |
| X | 40006041 | 40006345 | 5Y-H4K8ac_peak_17515 | 10.19948 |                                                   |
| X | 40011154 | 40011473 | 5Y-H4K8ac_peak_17516 | 8.28346  |                                                   |
| X | 40011734 | 40012024 | 5Y-H4K8ac_peak_17517 | 7.56545  |                                                   |
| X | 40012303 | 40012542 | 5Y-H4K8ac_peak_17518 | 5.98695  |                                                   |
| X | 40012803 | 40013143 | 5Y-H4K8ac_peak_17519 | 4.50834  |                                                   |
| X | 40027938 | 40028296 | 5Y-H4K8ac_peak_17520 | 8.90038  |                                                   |
| X | 40029445 | 40029668 | 5Y-H4K8ac_peak_17521 | 4.50834  |                                                   |
| X | 40035430 | 40035634 | 5Y-H4K8ac_peak_17522 | 9.15007  | BCOR_ENSG00000183337                              |
| X | 40169378 | 40169587 | 5Y-H4K8ac_peak_17523 | 5.64909  |                                                   |
| X | 40944121 | 40944366 | 5Y-H4K8ac_peak_17524 | 12.84845 | USP9X_ENSG00000124486                             |

|   |           |           |                      |          |                                                     |
|---|-----------|-----------|----------------------|----------|-----------------------------------------------------|
| X | 41192167  | 41192425  | 5Y-H4K8ac_peak_17525 | 10.35586 | DDX3X_ENSG00000215301                               |
| X | 44731563  | 44731993  | 5Y-H4K8ac_peak_17526 | 7.38046  | KDM6A_ENSG00000147050                               |
| X | 46461778  | 46461991  | 5Y-H4K8ac_peak_17527 | 4.07874  |                                                     |
| X | 47053297  | 47053533  | 5Y-H4K8ac_peak_17528 | 8.47164  |                                                     |
| X | 47383215  | 47383664  | 5Y-H4K8ac_peak_17529 | 6.47245  |                                                     |
| X | 48432962  | 48433154  | 5Y-H4K8ac_peak_17530 | 10.19948 | AC115618.1_ENSG00000204620;RBM3_ENSG00000102317     |
| X | 48768639  | 48769128  | 5Y-H4K8ac_peak_17531 | 5.81062  | SLC35A2_ENSG00000102100                             |
| X | 48769505  | 48769752  | 5Y-H4K8ac_peak_17532 | 4.95697  | SLC35A2_ENSG00000102100                             |
| X | 48814256  | 48815060  | 5Y-H4K8ac_peak_17533 | 8.59175  | OTUD5_ENSG00000068308                               |
| X | 48911270  | 48911484  | 5Y-H4K8ac_peak_17534 | 7.31815  | CCDC120_ENSG00000147144                             |
| X | 48932023  | 48932281  | 5Y-H4K8ac_peak_17535 | 7.11262  | PRAF2_ENSG00000243279                               |
| X | 48958550  | 48958986  | 5Y-H4K8ac_peak_17536 | 5.29015  | WDR45_ENSG00000196998                               |
| X | 48980324  | 48980518  | 5Y-H4K8ac_peak_17537 | 8.2913   | GPKOW_ENSG00000068394                               |
| X | 49126311  | 49127290  | 5Y-H4K8ac_peak_17538 | 11.09973 | PPP1R3F_ENSG00000049769                             |
| X | 52005126  | 52005427  | 5Y-H4K8ac_peak_17539 | 12.77513 |                                                     |
| X | 52964193  | 52964859  | 5Y-H4K8ac_peak_17540 | 9.30505  |                                                     |
| X | 53253986  | 53254580  | 5Y-H4K8ac_peak_17541 | 10.4495  | KDM5C_ENSG00000126012                               |
| X | 53461528  | 53461828  | 5Y-H4K8ac_peak_17542 | 7.60893  | HSD17B10_ENSG00000072506                            |
| X | 53468992  | 53469425  | 5Y-H4K8ac_peak_17543 | 5.23083  |                                                     |
| X | 54209300  | 54209582  | 5Y-H4K8ac_peak_17544 | 7.3889   | FAM120C_ENSG00000184083                             |
| X | 54384889  | 54385402  | 5Y-H4K8ac_peak_17545 | 5.65584  | WNK3_ENSG00000196632                                |
| X | 56809641  | 56810101  | 5Y-H4K8ac_peak_17546 | 4.50834  |                                                     |
| X | 63004360  | 63004835  | 5Y-H4K8ac_peak_17547 | 7.31815  | ARHGEF9_ENSG00000131089                             |
| X | 64754308  | 64754520  | 5Y-H4K8ac_peak_17548 | 5.29015  | LAS1L_ENSG00000001497                               |
| X | 67718367  | 67718969  | 5Y-H4K8ac_peak_17549 | 18.74304 | YIPF6_ENSG00000181704                               |
| X | 68114088  | 68114713  | 5Y-H4K8ac_peak_17550 | 10.19948 |                                                     |
| X | 68165781  | 68166112  | 5Y-H4K8ac_peak_17551 | 5.16353  |                                                     |
| X | 68399383  | 68399709  | 5Y-H4K8ac_peak_17552 | 6.34046  | LINC00269_ENSG00000215162                           |
| X | 69653938  | 69654305  | 5Y-H4K8ac_peak_17553 | 13.14766 |                                                     |
| X | 70339224  | 70339417  | 5Y-H4K8ac_peak_17554 | 4.84727  | MED12_ENSG00000184634                               |
| X | 70503518  | 70503951  | 5Y-H4K8ac_peak_17555 | 9.23159  | NONO_ENSG00000147140                                |
| X | 70585356  | 70585571  | 5Y-H4K8ac_peak_17556 | 8.17203  | TAF1_ENSG00000147133                                |
| X | 71261877  | 71262234  | 5Y-H4K8ac_peak_17557 | 5.64909  |                                                     |
| X | 71334387  | 71334676  | 5Y-H4K8ac_peak_17558 | 5.77946  |                                                     |
| X | 71351348  | 71351545  | 5Y-H4K8ac_peak_17559 | 5.98695  | RGAG4_ENSG00000242732;RP11-262D11.1_ENSG00000248345 |
| X | 71400945  | 71401206  | 5Y-H4K8ac_peak_17560 | 8.35139  | PIN4_ENSG00000102309                                |
| X | 71496728  | 71496925  | 5Y-H4K8ac_peak_17561 | 6.73385  | RPS4X_ENSG00000198034                               |
| X | 71497494  | 71497686  | 5Y-H4K8ac_peak_17562 | 7.87048  | RPS4X_ENSG00000198034                               |
| X | 71526920  | 71527315  | 5Y-H4K8ac_peak_17563 | 7.89142  | CITED1_ENSG00000125931                              |
| X | 73640415  | 73640843  | 5Y-H4K8ac_peak_17564 | 9.38203  | SLC16A2_ENSG00000147100                             |
| X | 74375677  | 74376008  | 5Y-H4K8ac_peak_17565 | 7.38046  | ABCB7_ENSG00000131269                               |
| X | 74408574  | 74408772  | 5Y-H4K8ac_peak_17566 | 4.50834  |                                                     |
| X | 77041397  | 77041656  | 5Y-H4K8ac_peak_17567 | 11.9858  | ATRX_ENSG00000085224                                |
| X | 77155572  | 77155782  | 5Y-H4K8ac_peak_17568 | 6.13909  | COX7B_ENSG00000131174                               |
| X | 98627247  | 98627438  | 5Y-H4K8ac_peak_17569 | 4.71803  |                                                     |
| X | 101186646 | 101186917 | 5Y-H4K8ac_peak_17570 | 6.00388  | ZMAT1_ENSG00000166432                               |

|   |           |           |                      |           |                                             |
|---|-----------|-----------|----------------------|-----------|---------------------------------------------|
| X | 101771380 | 101771582 | 5Y-H4K8ac_peak_17571 | 6.34046   | TMSB15A_ENSG00000158164                     |
| X | 101966851 | 101967124 | 5Y-H4K8ac_peak_17572 | 6.79955   | GPRASP2_ENSG00000158301                     |
| X | 102001023 | 102001337 | 5Y-H4K8ac_peak_17573 | 4.84727   |                                             |
| X | 102863478 | 102863854 | 5Y-H4K8ac_peak_17574 | 9.78792   |                                             |
| X | 103357290 | 103357506 | 5Y-H4K8ac_peak_17575 | 5.64909   | ZCCHC18_ENSG00000166707                     |
| X | 110924429 | 110924741 | 5Y-H4K8ac_peak_17576 | 16.79568  |                                             |
| X | 115004497 | 115005222 | 5Y-H4K8ac_peak_17577 | 111.43083 |                                             |
| X | 115084718 | 115084989 | 5Y-H4K8ac_peak_17578 | 6.76425   | RP11-761E20.1_ENSG00000235244               |
| X | 117973173 | 117973365 | 5Y-H4K8ac_peak_17579 | 9.38203   | RP4-562J12.2_ENSG00000203650                |
| X | 118805871 | 118806093 | 5Y-H4K8ac_peak_17580 | 8.00339   |                                             |
| X | 118893140 | 118893353 | 5Y-H4K8ac_peak_17581 | 4.84727   | SOWAHD_ENSG00000187808                      |
| X | 118925140 | 118925518 | 5Y-H4K8ac_peak_17582 | 6.77436   | RPL39_ENSG00000198918                       |
| X | 119077329 | 119077579 | 5Y-H4K8ac_peak_17583 | 10.95042  | NKAP_ENSG00000101882                        |
| X | 119384909 | 119385125 | 5Y-H4K8ac_peak_17584 | 5.59843   | ZBTB33_ENSG00000177485                      |
| X | 119695085 | 119695288 | 5Y-H4K8ac_peak_17585 | 7.31815   |                                             |
| X | 129040210 | 129040463 | 5Y-H4K8ac_peak_17586 | 7.38046   | UTP14A_ENSG00000156697                      |
| X | 129116063 | 129116291 | 5Y-H4K8ac_peak_17587 | 7.63144   | BCORL1_ENSG00000085185                      |
| X | 129194840 | 129195108 | 5Y-H4K8ac_peak_17588 | 10.69866  |                                             |
| X | 129244235 | 129244504 | 5Y-H4K8ac_peak_17589 | 6.1654    | ELF4_ENSG00000102034                        |
| X | 129305322 | 129305952 | 5Y-H4K8ac_peak_17590 | 10.46287  | RAB33A_ENSG00000134594                      |
| X | 129402467 | 129402762 | 5Y-H4K8ac_peak_17591 | 9.30505   | ZNF280C_ENSG00000056277                     |
| X | 129853377 | 129853569 | 5Y-H4K8ac_peak_17592 | 4.51076   |                                             |
| X | 130170062 | 130170331 | 5Y-H4K8ac_peak_17593 | 6.34046   |                                             |
| X | 131623623 | 131623936 | 5Y-H4K8ac_peak_17594 | 4.84727   | MBNL3_ENSG00000076770                       |
| X | 132091620 | 132092005 | 5Y-H4K8ac_peak_17595 | 9.23159   |                                             |
| X | 133371053 | 133371303 | 5Y-H4K8ac_peak_17596 | 6.50117   | CCDC160_ENSG00000203952                     |
| X | 133507427 | 133507621 | 5Y-H4K8ac_peak_17597 | 8.21582   | PHF6_ENSG00000156531                        |
| X | 133594374 | 133594576 | 5Y-H4K8ac_peak_17598 | 7.59101   | HPRT1_ENSG00000165704                       |
| X | 134048842 | 134049068 | 5Y-H4K8ac_peak_17599 | 8.2913    | MOSPD1_ENSG00000101928                      |
| X | 135229715 | 135229998 | 5Y-H4K8ac_peak_17600 | 5.87382   | FHL1_ENSG00000022267                        |
| X | 135824878 | 135825091 | 5Y-H4K8ac_peak_17601 | 6.34046   |                                             |
| X | 151999862 | 152000128 | 5Y-H4K8ac_peak_17602 | 4.90696   | CETN2_ENSG00000147400;NSDHL_ENSG00000147383 |
| X | 152109796 | 152110124 | 5Y-H4K8ac_peak_17603 | 6.06152   |                                             |
| X | 152110438 | 152110667 | 5Y-H4K8ac_peak_17604 | 7.87406   |                                             |
| X | 152742382 | 152742581 | 5Y-H4K8ac_peak_17605 | 7.41197   |                                             |
| X | 152743425 | 152743619 | 5Y-H4K8ac_peak_17606 | 6.73385   |                                             |
| X | 152753140 | 152753336 | 5Y-H4K8ac_peak_17607 | 6.50117   |                                             |
| X | 152757053 | 152757474 | 5Y-H4K8ac_peak_17608 | 9.74189   |                                             |
| X | 152791280 | 152791558 | 5Y-H4K8ac_peak_17609 | 10.35586  |                                             |
| X | 152802395 | 152802630 | 5Y-H4K8ac_peak_17610 | 8.69112   |                                             |
| X | 152843948 | 152844209 | 5Y-H4K8ac_peak_17611 | 4.29586   |                                             |
| X | 153031552 | 153031779 | 5Y-H4K8ac_peak_17612 | 4.5753    | U52111.14_ENSG00000232725                   |
| X | 153084277 | 153084484 | 5Y-H4K8ac_peak_17613 | 5.77946   |                                             |
| X | 153143955 | 153144204 | 5Y-H4K8ac_peak_17614 | 8.78565   |                                             |
| X | 153145477 | 153145894 | 5Y-H4K8ac_peak_17615 | 6.39626   | LCA10_ENSG00000196987                       |
| X | 153167524 | 153167966 | 5Y-H4K8ac_peak_17616 | 5.59843   | AVPR2_ENSG00000126895                       |

|   |           |           |                      |          |                                               |
|---|-----------|-----------|----------------------|----------|-----------------------------------------------|
| X | 153171138 | 153171388 | 5Y-H4K8ac_peak_17617 | 6.2403   |                                               |
| X | 153191844 | 153192533 | 5Y-H4K8ac_peak_17618 | 4.77126  |                                               |
| X | 153193076 | 153193592 | 5Y-H4K8ac_peak_17619 | 7.87406  |                                               |
| X | 153236091 | 153236308 | 5Y-H4K8ac_peak_17620 | 8.1667   | HCFC1_ENSG00000172534                         |
| X | 153236785 | 153237563 | 5Y-H4K8ac_peak_17621 | 12.65187 | HCFC1_ENSG00000172534;TMEM187_ENSG00000177854 |
| X | 153284625 | 153285201 | 5Y-H4K8ac_peak_17622 | 7.11863  | IRAK1_ENSG00000184216;MIR718_ENSG00000211524  |
| X | 153285557 | 153285822 | 5Y-H4K8ac_peak_17623 | 10.1994  | IRAK1_ENSG00000184216;MIR718_ENSG00000211524  |
| X | 153603405 | 153603627 | 5Y-H4K8ac_peak_17624 | 6.50117  | FLNA_ENSG00000196924                          |
| X | 153625839 | 153626449 | 5Y-H4K8ac_peak_17625 | 11.53136 |                                               |
| X | 153640604 | 153640832 | 5Y-H4K8ac_peak_17626 | 9.23159  | DNASE1L1_ENSG00000013563;TAZ_ENSG00000102125  |
| X | 154299862 | 154300079 | 5Y-H4K8ac_peak_17627 | 7.31815  | CMC4_ENSG00000182712;BRCC3_ENSG00000185515    |
| X | 154841960 | 154842807 | 5Y-H4K8ac_peak_17628 | 9.38203  |                                               |
| Y | 21154810  | 21155002  | 5Y-H4K8ac_peak_17629 | 8.33296  | CD24P4_ENSG00000185275                        |



































10000200913







00116783
